# Supplementary material
Source: PubMed Central journal article supplement (PMC5083106)

**Supplementary Figure 1 (next page):** OpenMS workflow for peptide identification and relative quantification. The workflow requires the MS data of six fractions in mzML format (1) and a protein search database (2) as input. In a first step, peptide features are detected and quantified (3-5). After a correction of the precursor masses (6), six MS-GF+ searches each with a different fixed modification (7-12) are performed. The results of the searches are combined and filtered for a 95% confidence level (13-18). The sequence information is mapped to the quantified peptide features (19-21), the fractions combined (22-23) and exported to mzTab (24-25).

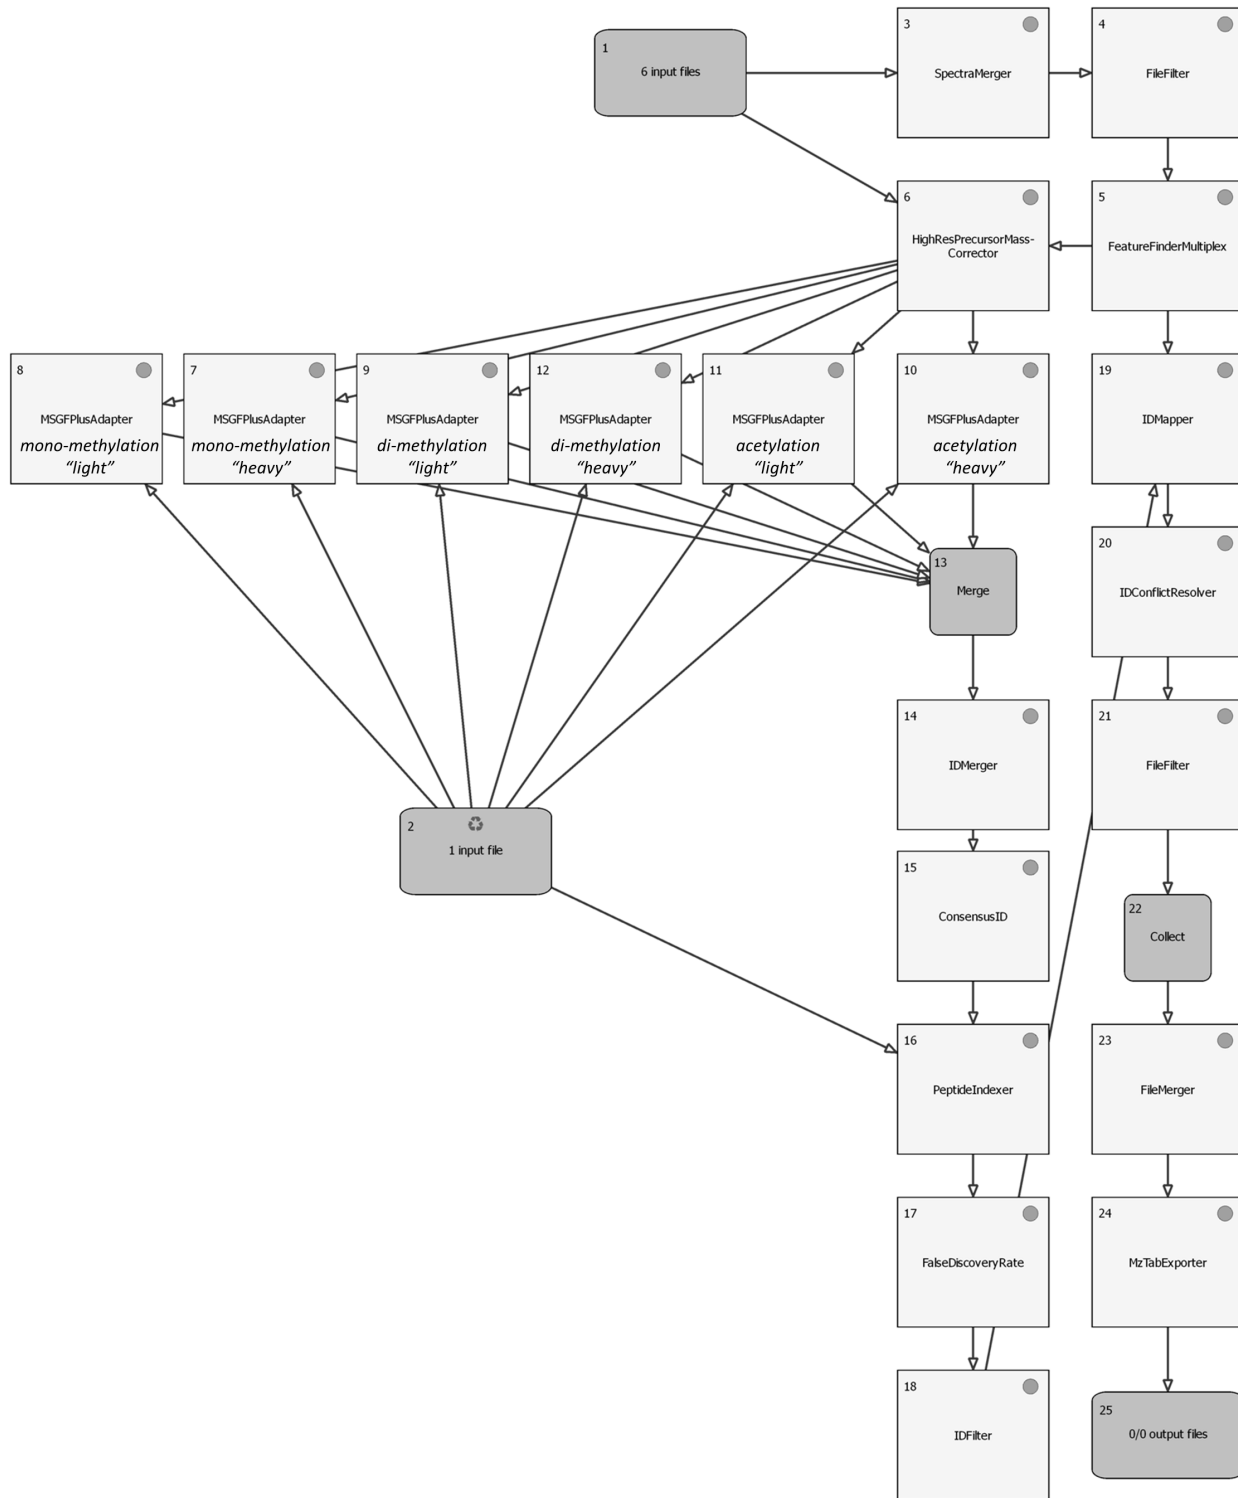

Supplement: 10.1074_O115.056515_mcp.O115.056515-1.pdf [file 10.1074_O115.056515_mcp.O115.056515-1.pdf]
