# Supplementary material
Source: PubMed Central journal article supplement (PMC5083106)
Supplement: 10.1074_O115.056515_mcp.O115.056515-2.pdf [file 10.1074_O115.056515_mcp.O115.056515-2.pdf]

Sup. Table 1

## Supplementary Table 1: Access to annotated spectra

## Information about columns in MS-Viewer:

|          |                  |
|----------|------------------|
| Column 1 | m/z              |
| Column 2 | charge (z)       |
| Column 3 | mzML filename    |
| Column 4 | running number   |
| Column 5 | scan number      |
| Column 6 | peptide sequence |

| Sup. Table for peptide information | Name of pepXML file deposited in PRIDE (see also data availability section of manuscript) | URL address to view annotated spectra in MS-Viewer                                                                                                                                                                                                                                          |
|------------------------------------|-------------------------------------------------------------------------------------------|---------------------------------------------------------------------------------------------------------------------------------------------------------------------------------------------------------------------------------------------------------------------------------------------|
| 2                                  | cryo1_acetyl.pepXML                                                                       | <a href="http://prospector2.ucsf.edu/prospector/cgi-bin/mssearch.cgi?report_title=MS-Viewer&amp;search_key=d0qyxdbqm&amp;search_name=msviewer">http://prospector2.ucsf.edu/prospector/cgi-bin/mssearch.cgi?report_title=MS-Viewer&amp;search_key=d0qyxdbqm&amp;search_name=msviewer</a>     |
| 2                                  | cryo1_dimethyl.pepXML                                                                     | <a href="http://prospector2.ucsf.edu/prospector/cgi-bin/mssearch.cgi?report_title=MS-Viewer&amp;search_key=ndkd509mw&amp;search_name=msviewer">http://prospector2.ucsf.edu/prospector/cgi-bin/mssearch.cgi?report_title=MS-Viewer&amp;search_key=ndkd509mw&amp;search_name=msviewer</a>     |
| 2                                  | cryo1_monomethyl.pepXML                                                                   | <a href="http://prospector2.ucsf.edu/prospector/cgi-bin/mssearch.cgi?report_title=MS-Viewer&amp;search_key=b1s053npsc&amp;search_name=msviewer">http://prospector2.ucsf.edu/prospector/cgi-bin/mssearch.cgi?report_title=MS-Viewer&amp;search_key=b1s053npsc&amp;search_name=msviewer</a>   |
| 2                                  | cryo1_unmod.pepXML                                                                        | <a href="http://prospector2.ucsf.edu/prospector/cgi-bin/mssearch.cgi?report_title=MS-Viewer&amp;search_key=y63vlwfu5e&amp;search_name=msviewer">http://prospector2.ucsf.edu/prospector/cgi-bin/mssearch.cgi?report_title=MS-Viewer&amp;search_key=y63vlwfu5e&amp;search_name=msviewer</a>   |
| 3                                  | cryo2_acetyl.pepXML                                                                       | <a href="http://prospector2.ucsf.edu/prospector/cgi-bin/mssearch.cgi?report_title=MS-Viewer&amp;search_key=1is7yesdfv&amp;search_name=msviewer">http://prospector2.ucsf.edu/prospector/cgi-bin/mssearch.cgi?report_title=MS-Viewer&amp;search_key=1is7yesdfv&amp;search_name=msviewer</a>   |
| 3                                  | cryo2_dimethyl.pepXML                                                                     | <a href="http://prospector2.ucsf.edu/prospector/cgi-bin/mssearch.cgi?report_title=MS-Viewer&amp;search_key=6ekmbpp3&amp;search_name=msviewer">http://prospector2.ucsf.edu/prospector/cgi-bin/mssearch.cgi?report_title=MS-Viewer&amp;search_key=6ekmbpp3&amp;search_name=msviewer</a>       |
| 3                                  | cryo2_monomethyl.pepXML                                                                   | <a href="http://prospector2.ucsf.edu/prospector/cgi-bin/mssearch.cgi?report_title=MS-Viewer&amp;search_key=iovog9lr73&amp;search_name=msviewer">http://prospector2.ucsf.edu/prospector/cgi-bin/mssearch.cgi?report_title=MS-Viewer&amp;search_key=iovog9lr73&amp;search_name=msviewer</a>   |
| 3                                  | cryo2_unmod.pepXML                                                                        | <a href="http://prospector2.ucsf.edu/prospector/cgi-bin/mssearch.cgi?report_title=MS-Viewer&amp;search_key=5wva7mlldk&amp;search_name=msviewer">http://prospector2.ucsf.edu/prospector/cgi-bin/mssearch.cgi?report_title=MS-Viewer&amp;search_key=5wva7mlldk&amp;search_name=msviewer</a>   |
| 4                                  | cryo3_acetyl.pepXML                                                                       | <a href="http://prospector2.ucsf.edu/prospector/cgi-bin/mssearch.cgi?report_title=MS-Viewer&amp;search_key=i0ftw90ac&amp;search_name=msviewer">http://prospector2.ucsf.edu/prospector/cgi-bin/mssearch.cgi?report_title=MS-Viewer&amp;search_key=i0ftw90ac&amp;search_name=msviewer</a>     |
| 4                                  | cryo3_dimethyl.pepXML                                                                     | <a href="http://prospector2.ucsf.edu/prospector/cgi-bin/mssearch.cgi?report_title=MS-Viewer&amp;search_key=vpav8plrqu&amp;search_name=msviewer">http://prospector2.ucsf.edu/prospector/cgi-bin/mssearch.cgi?report_title=MS-Viewer&amp;search_key=vpav8plrqu&amp;search_name=msviewer</a>   |
| 4                                  | cryo3_monomethyl.pepXML                                                                   | <a href="http://prospector2.ucsf.edu/prospector/cgi-bin/mssearch.cgi?report_title=MS-Viewer&amp;search_key=0pp3lmgm4&amp;search_name=msviewer">http://prospector2.ucsf.edu/prospector/cgi-bin/mssearch.cgi?report_title=MS-Viewer&amp;search_key=0pp3lmgm4&amp;search_name=msviewer</a>     |
| 4                                  | cryo3_unmod.pepXML                                                                        | <a href="http://prospector2.ucsf.edu/prospector/cgi-bin/mssearch.cgi?report_title=MS-Viewer&amp;search_key=0a8aput5u4&amp;search_name=msviewer">http://prospector2.ucsf.edu/prospector/cgi-bin/mssearch.cgi?report_title=MS-Viewer&amp;search_key=0a8aput5u4&amp;search_name=msviewer</a>   |
| 9                                  | ctsl_vs_wt1_01.pepXML                                                                     | <a href="http://prospector2.ucsf.edu/prospector/cgi-bin/mssearch.cgi?report_title=MS-Viewer&amp;search_key=10bq mouecr&amp;search_name=msviewer">http://prospector2.ucsf.edu/prospector/cgi-bin/mssearch.cgi?report_title=MS-Viewer&amp;search_key=10bq mouecr&amp;search_name=msviewer</a> |
| 9                                  | ctsl_vs_wt1_02.pepXML                                                                     | <a href="http://prospector2.ucsf.edu/prospector/cgi-bin/mssearch.cgi?report_title=MS-Viewer&amp;search_key=cpyexjs1td&amp;search_name=msviewer">http://prospector2.ucsf.edu/prospector/cgi-bin/mssearch.cgi?report_title=MS-Viewer&amp;search_key=cpyexjs1td&amp;search_name=msviewer</a>   |
| 9                                  | ctsl_vs_wt1_03.pepXML                                                                     | <a href="http://prospector2.ucsf.edu/prospector/cgi-bin/mssearch.cgi?report_title=MS-Viewer&amp;search_key=jcgua4xzw0&amp;search_name=msviewer">http://prospector2.ucsf.edu/prospector/cgi-bin/mssearch.cgi?report_title=MS-Viewer&amp;search_key=jcgua4xzw0&amp;search_name=msviewer</a>   |
| 9                                  | ctsl_vs_wt1_04.pepXML                                                                     | <a href="http://prospector2.ucsf.edu/prospector/cgi-bin/mssearch.cgi?report_title=MS-Viewer&amp;search_key=zoht1xy7sx&amp;search_name=msviewer">http://prospector2.ucsf.edu/prospector/cgi-bin/mssearch.cgi?report_title=MS-Viewer&amp;search_key=zoht1xy7sx&amp;search_name=msviewer</a>   |
| 9                                  | ctsl_vs_wt1_05.pepXML                                                                     | <a href="http://prospector2.ucsf.edu/prospector/cgi-bin/mssearch.cgi?report_title=MS-Viewer&amp;search_key=qq9ul6rgzs&amp;search_name=msviewer">http://prospector2.ucsf.edu/prospector/cgi-bin/mssearch.cgi?report_title=MS-Viewer&amp;search_key=qq9ul6rgzs&amp;search_name=msviewer</a>   |
| 9                                  | ctsl_vs_wt1_06.pepXML                                                                     | <a href="http://prospector2.ucsf.edu/prospector/cgi-bin/mssearch.cgi?report_title=MS-Viewer&amp;search_key=xcict9gxp&amp;search_name=msviewer">http://prospector2.ucsf.edu/prospector/cgi-bin/mssearch.cgi?report_title=MS-Viewer&amp;search_key=xcict9gxp&amp;search_name=msviewer</a>     |
| 10                                 | ctsl_vs_wt2_01.pepXML                                                                     | <a href="http://prospector2.ucsf.edu/prospector/cgi-bin/mssearch.cgi?report_title=MS-Viewer&amp;search_key=dtzskhgqqf&amp;search_name=msviewer">http://prospector2.ucsf.edu/prospector/cgi-bin/mssearch.cgi?report_title=MS-Viewer&amp;search_key=dtzskhgqqf&amp;search_name=msviewer</a>   |
| 10                                 | ctsl_vs_wt2_02.pepXML                                                                     | <a href="http://prospector2.ucsf.edu/prospector/cgi-bin/mssearch.cgi?report_title=MS-Viewer&amp;search_key=mxbxmqub5g&amp;search_name=msviewer">http://prospector2.ucsf.edu/prospector/cgi-bin/mssearch.cgi?report_title=MS-Viewer&amp;search_key=mxbxmqub5g&amp;search_name=msviewer</a>   |
| 10                                 | ctsl_vs_wt2_03.pepXML                                                                     | <a href="http://prospector2.ucsf.edu/prospector/cgi-bin/mssearch.cgi?report_title=MS-Viewer&amp;search_key=saxvjalqws&amp;search_name=msviewer">http://prospector2.ucsf.edu/prospector/cgi-bin/mssearch.cgi?report_title=MS-Viewer&amp;search_key=saxvjalqws&amp;search_name=msviewer</a>   |
| 10                                 | ctsl_vs_wt2_04.pepXML                                                                     | <a href="http://prospector2.ucsf.edu/prospector/cgi-bin/mssearch.cgi?report_title=MS-Viewer&amp;search_key=gaxcsqujgr&amp;search_name=msviewer">http://prospector2.ucsf.edu/prospector/cgi-bin/mssearch.cgi?report_title=MS-Viewer&amp;search_key=gaxcsqujgr&amp;search_name=msviewer</a>   |
| 10                                 | ctsl_vs_wt2_05.pepXML                                                                     | <a href="http://prospector2.ucsf.edu/prospector/cgi-bin/mssearch.cgi?report_title=MS-Viewer&amp;search_key=hqql2xf4ci&amp;search_name=msviewer">http://prospector2.ucsf.edu/prospector/cgi-bin/mssearch.cgi?report_title=MS-Viewer&amp;search_key=hqql2xf4ci&amp;search_name=msviewer</a>   |
| 10                                 | ctsl_vs_wt2_06.pepXML                                                                     | <a href="http://prospector2.ucsf.edu/prospector/cgi-bin/mssearch.cgi?report_title=MS-Viewer&amp;search_key=l8itjlnud&amp;search_name=msviewer">http://prospector2.ucsf.edu/prospector/cgi-bin/mssearch.cgi?report_title=MS-Viewer&amp;search_key=l8itjlnud&amp;search_name=msviewer</a>     |
| 11                                 | ctsl_vs_wt3_01.pepXML                                                                     | <a href="http://prospector2.ucsf.edu/prospector/cgi-bin/mssearch.cgi?report_title=MS-Viewer&amp;search_key=melu0jvp5s&amp;search_name=msviewer">http://prospector2.ucsf.edu/prospector/cgi-bin/mssearch.cgi?report_title=MS-Viewer&amp;search_key=melu0jvp5s&amp;search_name=msviewer</a>   |
| 11                                 | ctsl_vs_wt3_02.pepXML                                                                     | <a href="http://prospector2.ucsf.edu/prospector/cgi-bin/mssearch.cgi?report_title=MS-Viewer&amp;search_key=dt4cwssmlu&amp;search_name=msviewer">http://prospector2.ucsf.edu/prospector/cgi-bin/mssearch.cgi?report_title=MS-Viewer&amp;search_key=dt4cwssmlu&amp;search_name=msviewer</a>   |
| 11                                 | ctsl_vs_wt3_03.pepXML                                                                     | <a href="http://prospector2.ucsf.edu/prospector/cgi-bin/mssearch.cgi?report_title=MS-Viewer&amp;search_key=9awgmtcxhu&amp;search_name=msviewer">http://prospector2.ucsf.edu/prospector/cgi-bin/mssearch.cgi?report_title=MS-Viewer&amp;search_key=9awgmtcxhu&amp;search_name=msviewer</a>   |
| 11                                 | ctsl_vs_wt3_04.pepXML                                                                     | <a href="http://prospector2.ucsf.edu/prospector/cgi-bin/mssearch.cgi?report_title=MS-Viewer&amp;search_key=lnlmyhlp5&amp;search_name=msviewer">http://prospector2.ucsf.edu/prospector/cgi-bin/mssearch.cgi?report_title=MS-Viewer&amp;search_key=lnlmyhlp5&amp;search_name=msviewer</a>     |
| 11                                 | ctsl_vs_wt3_05.pepXML                                                                     | <a href="http://prospector2.ucsf.edu/prospector/cgi-bin/mssearch.cgi?report_title=MS-Viewer&amp;search_key=bsnc7ykvxw&amp;search_name=msviewer">http://prospector2.ucsf.edu/prospector/cgi-bin/mssearch.cgi?report_title=MS-Viewer&amp;search_key=bsnc7ykvxw&amp;search_name=msviewer</a>   |
| 11                                 | ctsl_vs_wt3_06.pepXML                                                                     | <a href="http://prospector2.ucsf.edu/prospector/cgi-bin/mssearch.cgi?report_title=MS-Viewer&amp;search_key=r6y6juv3u&amp;search_name=msviewer">http://prospector2.ucsf.edu/prospector/cgi-bin/mssearch.cgi?report_title=MS-Viewer&amp;search_key=r6y6juv3u&amp;search_name=msviewer</a>     |
| 5                                  | ffpe1_acetyl.pepXML                                                                       | <a href="http://prospector2.ucsf.edu/prospector/cgi-bin/mssearch.cgi?report_title=MS-Viewer&amp;search_key=mbvehvjs7a&amp;search_name=msviewer">http://prospector2.ucsf.edu/prospector/cgi-bin/mssearch.cgi?report_title=MS-Viewer&amp;search_key=mbvehvjs7a&amp;search_name=msviewer</a>   |
| 5                                  | ffpe1_dimethyl.pepXML                                                                     | <a href="http://prospector2.ucsf.edu/prospector/cgi-bin/mssearch.cgi?report_title=MS-Viewer&amp;search_key=ldqw2usmjn&amp;search_name=msviewer">http://prospector2.ucsf.edu/prospector/cgi-bin/mssearch.cgi?report_title=MS-Viewer&amp;search_key=ldqw2usmjn&amp;search_name=msviewer</a>   |

Sup. Table 1

|   |                                                  |                                                                                                                                                                                                                                                                                             |
|---|--------------------------------------------------|---------------------------------------------------------------------------------------------------------------------------------------------------------------------------------------------------------------------------------------------------------------------------------------------|
| 5 | ffpe1_monomethyl.pepXML                          | <a href="http://prospector2.ucsf.edu/prospector/cgi-bin/mssearch.cgi?report_title=MS-Viewer&amp;search_key=yxhhxaw1i&amp;search_name=msviewer">http://prospector2.ucsf.edu/prospector/cgi-bin/mssearch.cgi?report_title=MS-Viewer&amp;search_key=yxhhxaw1i&amp;search_name=msviewer</a>     |
| 5 | ffpe1_unmod.pepXML                               | <a href="http://prospector2.ucsf.edu/prospector/cgi-bin/mssearch.cgi?report_title=MS-Viewer&amp;search_key=fpjsvwfdhf&amp;search_name=msviewer">http://prospector2.ucsf.edu/prospector/cgi-bin/mssearch.cgi?report_title=MS-Viewer&amp;search_key=fpjsvwfdhf&amp;search_name=msviewer</a>   |
| 6 | ffpe2_acetyl.pepXML                              | <a href="http://prospector2.ucsf.edu/prospector/cgi-bin/mssearch.cgi?report_title=MS-Viewer&amp;search_key=spbctohfmx&amp;search_name=msviewer">http://prospector2.ucsf.edu/prospector/cgi-bin/mssearch.cgi?report_title=MS-Viewer&amp;search_key=spbctohfmx&amp;search_name=msviewer</a>   |
| 6 | ffpe2_dimethyl.pepXML                            | <a href="http://prospector2.ucsf.edu/prospector/cgi-bin/mssearch.cgi?report_title=MS-Viewer&amp;search_key=cehjkdzcr&amp;search_name=msviewer">http://prospector2.ucsf.edu/prospector/cgi-bin/mssearch.cgi?report_title=MS-Viewer&amp;search_key=cehjkdzcr&amp;search_name=msviewer</a>     |
| 6 | ffpe2_monomethyl.pepXML                          | <a href="http://prospector2.ucsf.edu/prospector/cgi-bin/mssearch.cgi?report_title=MS-Viewer&amp;search_key=hwfukod1n3&amp;search_name=msviewer">http://prospector2.ucsf.edu/prospector/cgi-bin/mssearch.cgi?report_title=MS-Viewer&amp;search_key=hwfukod1n3&amp;search_name=msviewer</a>   |
| 6 | ffpe2_unmod.pepXML                               | <a href="http://prospector2.ucsf.edu/prospector/cgi-bin/mssearch.cgi?report_title=MS-Viewer&amp;search_key=pbd5ac5bnl&amp;search_name=msviewer">http://prospector2.ucsf.edu/prospector/cgi-bin/mssearch.cgi?report_title=MS-Viewer&amp;search_key=pbd5ac5bnl&amp;search_name=msviewer</a>   |
| 7 | ffpe3_acetyl.pepXML                              | <a href="http://prospector2.ucsf.edu/prospector/cgi-bin/mssearch.cgi?report_title=MS-Viewer&amp;search_key=spbctohfmx&amp;search_name=msviewer">http://prospector2.ucsf.edu/prospector/cgi-bin/mssearch.cgi?report_title=MS-Viewer&amp;search_key=spbctohfmx&amp;search_name=msviewer</a>   |
| 7 | ffpe3_dimethyl.pepXML                            | <a href="http://prospector2.ucsf.edu/prospector/cgi-bin/mssearch.cgi?report_title=MS-Viewer&amp;search_key=7rpyekhs0f&amp;search_name=msviewer">http://prospector2.ucsf.edu/prospector/cgi-bin/mssearch.cgi?report_title=MS-Viewer&amp;search_key=7rpyekhs0f&amp;search_name=msviewer</a>   |
| 7 | ffpe3_monomethyl.pepXML                          | <a href="http://prospector2.ucsf.edu/prospector/cgi-bin/mssearch.cgi?report_title=MS-Viewer&amp;search_key=3glfa2potq&amp;search_name=msviewer">http://prospector2.ucsf.edu/prospector/cgi-bin/mssearch.cgi?report_title=MS-Viewer&amp;search_key=3glfa2potq&amp;search_name=msviewer</a>   |
| 7 | ffpe3_unmod.pepXML                               | <a href="http://prospector2.ucsf.edu/prospector/cgi-bin/mssearch.cgi?report_title=MS-Viewer&amp;search_key=5grodyders&amp;search_name=msviewer">http://prospector2.ucsf.edu/prospector/cgi-bin/mssearch.cgi?report_title=MS-Viewer&amp;search_key=5grodyders&amp;search_name=msviewer</a>   |
| 8 | ffpe_heavy_acetyl_heavy_K01.pepXML               | <a href="http://prospector2.ucsf.edu/prospector/cgi-bin/mssearch.cgi?report_title=MS-Viewer&amp;search_key=7imoheat8c&amp;search_name=msviewer">http://prospector2.ucsf.edu/prospector/cgi-bin/mssearch.cgi?report_title=MS-Viewer&amp;search_key=7imoheat8c&amp;search_name=msviewer</a>   |
| 8 | ffpe_heavy_acetyl_heavy_K02.pepXML               | <a href="http://prospector2.ucsf.edu/prospector/cgi-bin/mssearch.cgi?report_title=MS-Viewer&amp;search_key=emmpwhzscj&amp;search_name=msviewer">http://prospector2.ucsf.edu/prospector/cgi-bin/mssearch.cgi?report_title=MS-Viewer&amp;search_key=emmpwhzscj&amp;search_name=msviewer</a>   |
| 8 | ffpe_heavy_acetyl_heavy_K03.pepXML               | <a href="http://prospector2.ucsf.edu/prospector/cgi-bin/mssearch.cgi?report_title=MS-Viewer&amp;search_key=aaxbjsodmy&amp;search_name=msviewer">http://prospector2.ucsf.edu/prospector/cgi-bin/mssearch.cgi?report_title=MS-Viewer&amp;search_key=aaxbjsodmy&amp;search_name=msviewer</a>   |
| 8 | ffpe_heavy_acetyl_heavy_K04.pepXML               | <a href="http://prospector2.ucsf.edu/prospector/cgi-bin/mssearch.cgi?report_title=MS-Viewer&amp;search_key=dk90qtdz1r&amp;search_name=msviewer">http://prospector2.ucsf.edu/prospector/cgi-bin/mssearch.cgi?report_title=MS-Viewer&amp;search_key=dk90qtdz1r&amp;search_name=msviewer</a>   |
| 8 | ffpe_heavy_acetyl_heavy_K05.pepXML               | <a href="http://prospector2.ucsf.edu/prospector/cgi-bin/mssearch.cgi?report_title=MS-Viewer&amp;search_key=zvqsoryojg&amp;search_name=msviewer">http://prospector2.ucsf.edu/prospector/cgi-bin/mssearch.cgi?report_title=MS-Viewer&amp;search_key=zvqsoryojg&amp;search_name=msviewer</a>   |
| 8 | ffpe_heavy_acetyl_heavy_K06.pepXML               | <a href="http://prospector2.ucsf.edu/prospector/cgi-bin/mssearch.cgi?report_title=MS-Viewer&amp;search_key=daw2xdwzag&amp;search_name=msviewer">http://prospector2.ucsf.edu/prospector/cgi-bin/mssearch.cgi?report_title=MS-Viewer&amp;search_key=daw2xdwzag&amp;search_name=msviewer</a>   |
| 8 | ffpe_heavy_acetyl_light_K01.pepXML               | <a href="http://prospector2.ucsf.edu/prospector/cgi-bin/mssearch.cgi?report_title=MS-Viewer&amp;search_key=f2pb5cuxja&amp;search_name=msviewer">http://prospector2.ucsf.edu/prospector/cgi-bin/mssearch.cgi?report_title=MS-Viewer&amp;search_key=f2pb5cuxja&amp;search_name=msviewer</a>   |
| 8 | ffpe_heavy_acetyl_light_K02.pepXML               | <a href="http://prospector2.ucsf.edu/prospector/cgi-bin/mssearch.cgi?report_title=MS-Viewer&amp;search_key=wkhxhxgwb&amp;search_name=msviewer">http://prospector2.ucsf.edu/prospector/cgi-bin/mssearch.cgi?report_title=MS-Viewer&amp;search_key=wkhxhxgwb&amp;search_name=msviewer</a>     |
| 8 | ffpe_heavy_acetyl_light_K03.pepXML               | <a href="http://prospector2.ucsf.edu/prospector/cgi-bin/mssearch.cgi?report_title=MS-Viewer&amp;search_key=inkmypy4xxo&amp;search_name=msviewer">http://prospector2.ucsf.edu/prospector/cgi-bin/mssearch.cgi?report_title=MS-Viewer&amp;search_key=inkmypy4xxo&amp;search_name=msviewer</a> |
| 8 | ffpe_heavy_acetyl_light_K04.pepXML               | <a href="http://prospector2.ucsf.edu/prospector/cgi-bin/mssearch.cgi?report_title=MS-Viewer&amp;search_key=uwthj8wkt&amp;search_name=msviewer">http://prospector2.ucsf.edu/prospector/cgi-bin/mssearch.cgi?report_title=MS-Viewer&amp;search_key=uwthj8wkt&amp;search_name=msviewer</a>     |
| 8 | ffpe_heavy_acetyl_light_K05.pepXML               | <a href="http://prospector2.ucsf.edu/prospector/cgi-bin/mssearch.cgi?report_title=MS-Viewer&amp;search_key=msujyebang&amp;search_name=msviewer">http://prospector2.ucsf.edu/prospector/cgi-bin/mssearch.cgi?report_title=MS-Viewer&amp;search_key=msujyebang&amp;search_name=msviewer</a>   |
| 8 | ffpe_heavy_acetyl_light_K06.pepXML               | <a href="http://prospector2.ucsf.edu/prospector/cgi-bin/mssearch.cgi?report_title=MS-Viewer&amp;search_key=jslpsdqnsx&amp;search_name=msviewer">http://prospector2.ucsf.edu/prospector/cgi-bin/mssearch.cgi?report_title=MS-Viewer&amp;search_key=jslpsdqnsx&amp;search_name=msviewer</a>   |
| 8 | ffpe_heavy_dimethyl_heavy_K01.pepXML             | <a href="http://prospector2.ucsf.edu/prospector/cgi-bin/mssearch.cgi?report_title=MS-Viewer&amp;search_key=r8yvkjkw0q&amp;search_name=msviewer">http://prospector2.ucsf.edu/prospector/cgi-bin/mssearch.cgi?report_title=MS-Viewer&amp;search_key=r8yvkjkw0q&amp;search_name=msviewer</a>   |
| 8 | ffpe_heavy_dimethyl_heavy_K02.pepXML             | <a href="http://prospector2.ucsf.edu/prospector/cgi-bin/mssearch.cgi?report_title=MS-Viewer&amp;search_key=cqblnz7r03&amp;search_name=msviewer">http://prospector2.ucsf.edu/prospector/cgi-bin/mssearch.cgi?report_title=MS-Viewer&amp;search_key=cqblnz7r03&amp;search_name=msviewer</a>   |
| 8 | ffpe_heavy_dimethyl_heavy_K03.pepXML             | <a href="http://prospector2.ucsf.edu/prospector/cgi-bin/mssearch.cgi?report_title=MS-Viewer&amp;search_key=dryla7dkmu&amp;search_name=msviewer">http://prospector2.ucsf.edu/prospector/cgi-bin/mssearch.cgi?report_title=MS-Viewer&amp;search_key=dryla7dkmu&amp;search_name=msviewer</a>   |
| 8 | ffpe_heavy_dimethyl_heavy_K04.pepXML             | <a href="http://prospector2.ucsf.edu/prospector/cgi-bin/mssearch.cgi?report_title=MS-Viewer&amp;search_key=8f5iajqn2x&amp;search_name=msviewer">http://prospector2.ucsf.edu/prospector/cgi-bin/mssearch.cgi?report_title=MS-Viewer&amp;search_key=8f5iajqn2x&amp;search_name=msviewer</a>   |
| 8 | ffpe_heavy_dimethyl_heavy_K05.pepXML             | <a href="http://prospector2.ucsf.edu/prospector/cgi-bin/mssearch.cgi?report_title=MS-Viewer&amp;search_key=zsyf8nnsb8&amp;search_name=msviewer">http://prospector2.ucsf.edu/prospector/cgi-bin/mssearch.cgi?report_title=MS-Viewer&amp;search_key=zsyf8nnsb8&amp;search_name=msviewer</a>   |
| 8 | ffpe_heavy_dimethyl_heavy_K06.pepXML             | <a href="http://prospector2.ucsf.edu/prospector/cgi-bin/mssearch.cgi?report_title=MS-Viewer&amp;search_key=od4vimtzol&amp;search_name=msviewer">http://prospector2.ucsf.edu/prospector/cgi-bin/mssearch.cgi?report_title=MS-Viewer&amp;search_key=od4vimtzol&amp;search_name=msviewer</a>   |
| 8 | ffpe_heavy_dimethyl_heavy_nterm01.pepXML         | <a href="http://prospector2.ucsf.edu/prospector/cgi-bin/mssearch.cgi?report_title=MS-Viewer&amp;search_key=hec2p4mls2&amp;search_name=msviewer">http://prospector2.ucsf.edu/prospector/cgi-bin/mssearch.cgi?report_title=MS-Viewer&amp;search_key=hec2p4mls2&amp;search_name=msviewer</a>   |
| 8 | ffpe_heavy_dimethyl_heavy_nterm02.pepXML         | <a href="http://prospector2.ucsf.edu/prospector/cgi-bin/mssearch.cgi?report_title=MS-Viewer&amp;search_key=ksthidpek&amp;search_name=msviewer">http://prospector2.ucsf.edu/prospector/cgi-bin/mssearch.cgi?report_title=MS-Viewer&amp;search_key=ksthidpek&amp;search_name=msviewer</a>     |
| 8 | ffpe_heavy_dimethyl_heavy_nterm03.pepXML         | <a href="http://prospector2.ucsf.edu/prospector/cgi-bin/mssearch.cgi?report_title=MS-Viewer&amp;search_key=txpnwvsp0p&amp;search_name=msviewer">http://prospector2.ucsf.edu/prospector/cgi-bin/mssearch.cgi?report_title=MS-Viewer&amp;search_key=txpnwvsp0p&amp;search_name=msviewer</a>   |
| 8 | ffpe_heavy_dimethyl_heavy_nterm04.pepXML         | <a href="http://prospector2.ucsf.edu/prospector/cgi-bin/mssearch.cgi?report_title=MS-Viewer&amp;search_key=yb0f82dmov&amp;search_name=msviewer">http://prospector2.ucsf.edu/prospector/cgi-bin/mssearch.cgi?report_title=MS-Viewer&amp;search_key=yb0f82dmov&amp;search_name=msviewer</a>   |
| 8 | ffpe_heavy_dimethyl_heavy_nterm05.pepXML         | <a href="http://prospector2.ucsf.edu/prospector/cgi-bin/mssearch.cgi?report_title=MS-Viewer&amp;search_key=iedlqcbxkl&amp;search_name=msviewer">http://prospector2.ucsf.edu/prospector/cgi-bin/mssearch.cgi?report_title=MS-Viewer&amp;search_key=iedlqcbxkl&amp;search_name=msviewer</a>   |
| 8 | ffpe_heavy_dimethyl_heavy_nterm06.pepXML         | <a href="http://prospector2.ucsf.edu/prospector/cgi-bin/mssearch.cgi?report_title=MS-Viewer&amp;search_key=apnrcde11x&amp;search_name=msviewer">http://prospector2.ucsf.edu/prospector/cgi-bin/mssearch.cgi?report_title=MS-Viewer&amp;search_key=apnrcde11x&amp;search_name=msviewer</a>   |
| 8 | ffpe_heavy_dimethyl_heavy_nterm_heavy_K01.pepXML | <a href="http://prospector2.ucsf.edu/prospector/cgi-bin/mssearch.cgi?report_title=MS-Viewer&amp;search_key=rjq1izcl5k&amp;search_name=msviewer">http://prospector2.ucsf.edu/prospector/cgi-bin/mssearch.cgi?report_title=MS-Viewer&amp;search_key=rjq1izcl5k&amp;search_name=msviewer</a>   |
| 8 | ffpe_heavy_dimethyl_heavy_nterm_heavy_K02.pepXML | <a href="http://prospector2.ucsf.edu/prospector/cgi-bin/mssearch.cgi?report_title=MS-Viewer&amp;search_key=hf2papd9jd&amp;search_name=msviewer">http://prospector2.ucsf.edu/prospector/cgi-bin/mssearch.cgi?report_title=MS-Viewer&amp;search_key=hf2papd9jd&amp;search_name=msviewer</a>   |
| 8 | ffpe_heavy_dimethyl_heavy_nterm_heavy_K03.pepXML | <a href="http://prospector2.ucsf.edu/prospector/cgi-bin/mssearch.cgi?report_title=MS-Viewer&amp;search_key=2ktsgpagrr&amp;search_name=msviewer">http://prospector2.ucsf.edu/prospector/cgi-bin/mssearch.cgi?report_title=MS-Viewer&amp;search_key=2ktsgpagrr&amp;search_name=msviewer</a>   |
| 8 | ffpe_heavy_dimethyl_heavy_nterm_heavy_K04.pepXML | <a href="http://prospector2.ucsf.edu/prospector/cgi-bin/mssearch.cgi?report_title=MS-Viewer&amp;search_key=ookco5zjwf&amp;search_name=msviewer">http://prospector2.ucsf.edu/prospector/cgi-bin/mssearch.cgi?report_title=MS-Viewer&amp;search_key=ookco5zjwf&amp;search_name=msviewer</a>   |
| 8 | ffpe_heavy_dimethyl_heavy_nterm_heavy_K05.pepXML | <a href="http://prospector2.ucsf.edu/prospector/cgi-bin/mssearch.cgi?report_title=MS-Viewer&amp;search_key=ndeofpluo&amp;search_name=msviewer">http://prospector2.ucsf.edu/prospector/cgi-bin/mssearch.cgi?report_title=MS-Viewer&amp;search_key=ndeofpluo&amp;search_name=msviewer</a>     |
| 8 | ffpe_heavy_dimethyl_heavy_nterm_heavy_K06.pepXML | <a href="http://prospector2.ucsf.edu/prospector/cgi-bin/mssearch.cgi?report_title=MS-Viewer&amp;search_key=md5bdzrqi&amp;search_name=msviewer">http://prospector2.ucsf.edu/prospector/cgi-bin/mssearch.cgi?report_title=MS-Viewer&amp;search_key=md5bdzrqi&amp;search_name=msviewer</a>     |
| 8 | ffpe_heavy_dimethyl_light_nterm_light_K01.pepXML | <a href="http://prospector2.ucsf.edu/prospector/cgi-bin/mssearch.cgi?report_title=MS-Viewer&amp;search_key=bmtu2vrsxl&amp;search_name=msviewer">http://prospector2.ucsf.edu/prospector/cgi-bin/mssearch.cgi?report_title=MS-Viewer&amp;search_key=bmtu2vrsxl&amp;search_name=msviewer</a>   |
| 8 | ffpe_heavy_dimethyl_light_nterm_light_K02.pepXML | <a href="http://prospector2.ucsf.edu/prospector/cgi-bin/mssearch.cgi?report_title=MS-Viewer&amp;search_key=h9lklz17b0s&amp;search_name=msviewer">http://prospector2.ucsf.edu/prospector/cgi-bin/mssearch.cgi?report_title=MS-Viewer&amp;search_key=h9lklz17b0s&amp;search_name=msviewer</a> |
| 8 | ffpe_heavy_dimethyl_light_nterm_light_K03.pepXML | <a href="http://prospector2.ucsf.edu/prospector/cgi-bin/mssearch.cgi?report_title=MS-Viewer&amp;search_key=xb4ggn6gtk&amp;search_name=msviewer">http://prospector2.ucsf.edu/prospector/cgi-bin/mssearch.cgi?report_title=MS-Viewer&amp;search_key=xb4ggn6gtk&amp;search_name=msviewer</a>   |
| 8 | ffpe_heavy_dimethyl_light_nterm_light_K04.pepXML | <a href="http://prospector2.ucsf.edu/prospector/cgi-bin/mssearch.cgi?report_title=MS-Viewer&amp;search_key=7rxsjsvdu&amp;search_name=msviewer">http://prospector2.ucsf.edu/prospector/cgi-bin/mssearch.cgi?report_title=MS-Viewer&amp;search_key=7rxsjsvdu&amp;search_name=msviewer</a>     |

Sup. Table 1

|   |                                                  |                                                                                                                                                                                                                                                                                           |
|---|--------------------------------------------------|-------------------------------------------------------------------------------------------------------------------------------------------------------------------------------------------------------------------------------------------------------------------------------------------|
| 8 | ffpe_heavy_dimethyl_light_nterm_light_K05.pepXML | <a href="http://prospector2.ucsf.edu/prospector/cgi-bin/mssearch.cgi?report_title=MS-Viewer&amp;search_key=g06strwtcz&amp;search_name=msviewer">http://prospector2.ucsf.edu/prospector/cgi-bin/mssearch.cgi?report_title=MS-Viewer&amp;search_key=g06strwtcz&amp;search_name=msviewer</a> |
| 8 | ffpe_heavy_dimethyl_light_nterm_light_K06.pepXML | <a href="http://prospector2.ucsf.edu/prospector/cgi-bin/mssearch.cgi?report_title=MS-Viewer&amp;search_key=y4b2e2pwo&amp;search_name=msviewer">http://prospector2.ucsf.edu/prospector/cgi-bin/mssearch.cgi?report_title=MS-Viewer&amp;search_key=y4b2e2pwo&amp;search_name=msviewer</a>   |
| 8 | ffpe_heavy_monomethyl_heavy_nterm01.pepXML       | <a href="http://prospector2.ucsf.edu/prospector/cgi-bin/mssearch.cgi?report_title=MS-Viewer&amp;search_key=ubyofd4e9b&amp;search_name=msviewer">http://prospector2.ucsf.edu/prospector/cgi-bin/mssearch.cgi?report_title=MS-Viewer&amp;search_key=ubyofd4e9b&amp;search_name=msviewer</a> |
| 8 | ffpe_heavy_monomethyl_heavy_nterm02.pepXML       | <a href="http://prospector2.ucsf.edu/prospector/cgi-bin/mssearch.cgi?report_title=MS-Viewer&amp;search_key=sapbkcx0d&amp;search_name=msviewer">http://prospector2.ucsf.edu/prospector/cgi-bin/mssearch.cgi?report_title=MS-Viewer&amp;search_key=sapbkcx0d&amp;search_name=msviewer</a>   |
| 8 | ffpe_heavy_monomethyl_heavy_nterm03.pepXML       | <a href="http://prospector2.ucsf.edu/prospector/cgi-bin/mssearch.cgi?report_title=MS-Viewer&amp;search_key=izyxcec9pv&amp;search_name=msviewer">http://prospector2.ucsf.edu/prospector/cgi-bin/mssearch.cgi?report_title=MS-Viewer&amp;search_key=izyxcec9pv&amp;search_name=msviewer</a> |
| 8 | ffpe_heavy_monomethyl_heavy_nterm04.pepXML       | <a href="http://prospector2.ucsf.edu/prospector/cgi-bin/mssearch.cgi?report_title=MS-Viewer&amp;search_key=zepmpp1hzk&amp;search_name=msviewer">http://prospector2.ucsf.edu/prospector/cgi-bin/mssearch.cgi?report_title=MS-Viewer&amp;search_key=zepmpp1hzk&amp;search_name=msviewer</a> |
| 8 | ffpe_heavy_monomethyl_heavy_nterm05.pepXML       | <a href="http://prospector2.ucsf.edu/prospector/cgi-bin/mssearch.cgi?report_title=MS-Viewer&amp;search_key=qs14ml18zo&amp;search_name=msviewer">http://prospector2.ucsf.edu/prospector/cgi-bin/mssearch.cgi?report_title=MS-Viewer&amp;search_key=qs14ml18zo&amp;search_name=msviewer</a> |
| 8 | ffpe_heavy_monomethyl_heavy_nterm06.pepXML       | <a href="http://prospector2.ucsf.edu/prospector/cgi-bin/mssearch.cgi?report_title=MS-Viewer&amp;search_key=cwniiyikxe&amp;search_name=msviewer">http://prospector2.ucsf.edu/prospector/cgi-bin/mssearch.cgi?report_title=MS-Viewer&amp;search_key=cwniiyikxe&amp;search_name=msviewer</a> |
| 8 | ffpe_heavy_monomethyl_light_nterm01.pepXML       | <a href="http://prospector2.ucsf.edu/prospector/cgi-bin/mssearch.cgi?report_title=MS-Viewer&amp;search_key=icdsgbccz&amp;search_name=msviewer">http://prospector2.ucsf.edu/prospector/cgi-bin/mssearch.cgi?report_title=MS-Viewer&amp;search_key=icdsgbccz&amp;search_name=msviewer</a>   |
| 8 | ffpe_heavy_monomethyl_light_nterm02.pepXML       | <a href="http://prospector2.ucsf.edu/prospector/cgi-bin/mssearch.cgi?report_title=MS-Viewer&amp;search_key=jx2v2ccdmy&amp;search_name=msviewer">http://prospector2.ucsf.edu/prospector/cgi-bin/mssearch.cgi?report_title=MS-Viewer&amp;search_key=jx2v2ccdmy&amp;search_name=msviewer</a> |
| 8 | ffpe_heavy_monomethyl_light_nterm03.pepXML       | <a href="http://prospector2.ucsf.edu/prospector/cgi-bin/mssearch.cgi?report_title=MS-Viewer&amp;search_key=4ablufjts&amp;search_name=msviewer">http://prospector2.ucsf.edu/prospector/cgi-bin/mssearch.cgi?report_title=MS-Viewer&amp;search_key=4ablufjts&amp;search_name=msviewer</a>   |
| 8 | ffpe_heavy_monomethyl_light_nterm04.pepXML       | <a href="http://prospector2.ucsf.edu/prospector/cgi-bin/mssearch.cgi?report_title=MS-Viewer&amp;search_key=m4s2kl5rib&amp;search_name=msviewer">http://prospector2.ucsf.edu/prospector/cgi-bin/mssearch.cgi?report_title=MS-Viewer&amp;search_key=m4s2kl5rib&amp;search_name=msviewer</a> |
| 8 | ffpe_heavy_monomethyl_light_nterm05.pepXML       | <a href="http://prospector2.ucsf.edu/prospector/cgi-bin/mssearch.cgi?report_title=MS-Viewer&amp;search_key=hlg0tr8uzh&amp;search_name=msviewer">http://prospector2.ucsf.edu/prospector/cgi-bin/mssearch.cgi?report_title=MS-Viewer&amp;search_key=hlg0tr8uzh&amp;search_name=msviewer</a> |
| 8 | ffpe_heavy_monomethyl_light_nterm06.pepXML       | <a href="http://prospector2.ucsf.edu/prospector/cgi-bin/mssearch.cgi?report_title=MS-Viewer&amp;search_key=bsi2dvbrgz&amp;search_name=msviewer">http://prospector2.ucsf.edu/prospector/cgi-bin/mssearch.cgi?report_title=MS-Viewer&amp;search_key=bsi2dvbrgz&amp;search_name=msviewer</a> |
