# Supplementary material
Source: PubMed Central journal article supplement (PMC5083106)
Supplement: 10.1074_O115.056515_mcp.O115.056515-3.pdf [file 10.1074_O115.056515_mcp.O115.056515-3.pdf]

**Supplementary Table 2:** List of N-termini identified in cryopreserved liver tissue of C57BL/6 wild type mouse (replicate 1) after chemical labeling using  $^{12}\text{COH}_2$  formaldehyde. This is a comprehensive listing of all identified peptides.

| Peptide Sequence      | UniProt ID | MSGF+ score (E-value) | Modification                   | Retention Time (s) | Charge | Measured m/z | Theoretical m/z |
|-----------------------|------------|-----------------------|--------------------------------|--------------------|--------|--------------|-----------------|
| ADKTPGGSQKASSKNR      | Q6NV83     | 0.00096712            | N-term +42.01 Da, K +28.03 Da, | 995.0065308        | 4      | 440.2441406  | 440.243069      |
| SHASPAAKPSNSKNPR      | Q9CR16     | 0                     | N-term +42.01 Da, K +28.03 Da, | 996.6129761        | 4      | 437.4873047  | 437.4865987     |
| SHASPAAKPSNSKNPR      | Q9CR16     | 0                     | N-term +42.01 Da, K +28.03 Da, | 1007.26239         | 3      | 582.9794922  | 582.9797061     |
| APVAGKKAK             | O35490     | 0.00051867            | N-term +42.01 Da, K +28.03 Da, | 1038.540527        | 3      | 332.55896    | 332.5585784     |
| ADGEEPEKRR            | Q8C878     | 0                     | N-term +42.01 Da, K +28.03 Da, | 1042.422363        | 3      | 419.5499878  | 419.5542224     |
| SASAGGSHQPSQSR        | P70445     | 0                     | N-term +42.01 Da,              | 1044.339722        | 2      | 699.8221436  | 699.8214648     |
| SHASPAAKPSNSKNPR      | Q9CR16     | 0                     | N-term +42.01 Da, K +28.03 Da, | 1046.342041        | 4      | 437.980011   | 437.4865987     |
| GVEAKLHLRR            | Q8BID8     | 0.00277649            | N-term +42.01 Da, K +28.03 Da, | 1051.367432        | 3      | 416.9273682  | 416.9226911     |
| AEPSAPESKHKS          | Q3TDQ1     | 0.00097135            | N-term +42.01 Da, K +28.03 Da, | 1061.059692        | 3      | 484.9164124  | 484.9158202     |
| AEPSAPESKHKS          | Q3TDQ1     | 0.01994184            | N-term +42.01 Da, K +28.03 Da, | 1061.4375          | 3      | 455.9100037  | 455.9051438     |
| AYHSAYGVHGSKHR        | Q91XB7     | 0                     | N-term +42.01 Da, K +28.03 Da, | 1063.452026        | 4      | 410.7099915  | 410.7076588     |
| TAEEDPADPKR           | Q9D0J8     | 0                     | N-term +42.01 Da, K +28.03 Da, | 1067.917603        | 3      | 487.8943481  | 487.2230904     |
| SESGSKSQPLASKQEKGTEKR | P17095     | 0                     | N-term +42.01 Da, K +28.03 Da, | 1070.907959        | 4      | 655.3463745  | 655.3462525     |
| TENSTSAPAAKPKR        | P10922     | 0                     | N-term +42.01 Da, K +28.03 Da, | 1076.458984        | 2      | 778.4256592  | 778.4255658     |
| ADGKAGEEKPEKPKR       | Q6P8I4     | 0                     | N-term +42.01 Da, K +28.03 Da, | 1076.928589        | 3      | 589.3200684  | 589.3196171     |
| SSSPLSKKR             | Q02053     | 0.01646959            | N-term +42.01 Da, K +28.03 Da, | 1079.151855        | 3      | 363.2201538  | 363.2205144     |
| SSSPLSKKR             | Q02053     | 0.03843137            | N-term +42.01 Da, K +28.03 Da, | 1079.824097        | 2      | 544.3300171  | 544.3271333     |
| SAGSATHPAAGGR         | Q3TCX3     | 0                     | N-term +42.01 Da,              | 1090.457397        | 2      | 591.2870483  | 591.2865286     |
| RRDSFSENEKQR          | Q8C5N3     | 0.04894837            | N-term +42.01 Da, K +28.03 Da, | 1090.613525        | 3      | 541.6176147  | 541.2728896     |
| ADGKAGEEKPEKPKR       | Q6P8I4     | 0                     | N-term +42.01 Da, K +28.03 Da, | 1095.037354        | 4      | 442.2416077  | 442.241532      |
| TENSTSAPAAKPKR        | P10922     | 0                     | N-term +42.01 Da, K +28.03 Da, | 1098.499268        | 3      | 519.2860718  | 519.286136      |
| APVAGKK               | O35490     | 0.02592143            | N-term +42.01 Da, K +28.03 Da, | 1106.4375          | 2      | 384.7523499  | 384.7525405     |
| TENSTSAPAAKPKR        | P10922     | 0                     | N-term +42.01 Da, K +28.03 Da, | 1109.700073        | 2      | 778.9199829  | 778.4255658     |
| KMKDSEEEIR            | P62204     | 0.0049239             | N-term +42.01 Da, K +28.03 Da, | 1110.611206        | 3      | 527.5999756  | 526.9275089     |
| VSHGATGKNDQVR         | P16460     | 0                     | N-term +42.01 Da, K +28.03 Da, | 1117.855225        | 3      | 499.9182434  | 499.2585802     |
| GMGQKDSYVGDEAQSQR     | P60710     | 0                     | N-term +42.01 Da, K +28.03 Da, | 1121.625           | 3      | 652.6555176  | 651.9826768     |
| TENSTSAPAAKPKR        | P10922     | 0                     | N-term +42.01 Da, K +28.03 Da, | 1130.444458        | 3      | 519.6149292  | 519.286136      |
| MEHSKQIR              | E0CX86     | 0.00406504            | N-term +42.01 Da, K +28.03 Da, | 1139.429932        | 3      | 366.8617249  | 366.8623325     |
| MEAVPEKKKK            | P14148     | 0.03202562            | N-term +42.01 Da, K +28.03 Da, | 1149.062134        | 3      | 447.9441833  | 447.9439932     |
| ADEGKSYNEHDDR         | Q99JX7     | 0                     | N-term +42.01 Da, K +28.03 Da, | 1159.57666         | 3      | 535.8981934  | 535.8973775     |
| TTYNKGPKPER           | P49429     | 0.0325526             | N-term +42.01 Da, K +28.03 Da, | 1168.695679        | 3      | 501.6035767  | 501.6035762     |
| TTYNKGPKPER           | P49429     | 0.01446193            | N-term +42.01 Da, K +28.03 Da, | 1179.758667        | 2      | 752.4000244  | 751.9017261     |
| AVQISKRR              | P62908     | 0.01321398            | N-term +42.01 Da, K +28.03 Da, | 1183.302002        | 2      | 514.3349609  | 514.3347608     |

|                           |        |            |                                           |             |   |             |             |
|---------------------------|--------|------------|-------------------------------------------|-------------|---|-------------|-------------|
| SAGSSCSQTPSR              | Q60876 | 0          | N-term +42.01 Da, C +57.02Da,             | 1188.972412 | 2 | 633.7700195 | 633.7725946 |
| VNFTVDQIR                 | P58252 | 0.04643131 | N-term +42.01 Da,                         | 1197.624023 | 3 | 379.2124939 | 378.5365026 |
| AAADEPKPK                 | P55264 | 0.00051151 | N-term +42.01 Da, K +28.03 Da,            | 1199.242065 | 2 | 512.7875977 | 512.7873097 |
| TTYNKGPKPER               | P49429 | 0          | N-term +42.01 Da, K +28.03 Da,            | 1200.653687 | 3 | 501.6036072 | 501.6035762 |
| SFVTHAVHDMRMTLNDEERRLLSNK | Q9JJN2 | 0.03216839 | N-term +42.01 Da, K +28.03 Da,            | 1202.442383 | 4 | 769.3900146 | 769.6439888 |
| AVQISKKR                  | P62908 | 0.02376075 | N-term +42.01 Da, K +28.03 Da,            | 1202.829346 | 3 | 343.2255859 | 343.2255994 |
| AVEEPPQK                  | Q8BGC0 | 0.01882845 | N-term +42.01 Da, K +28.03 Da,            | 1202.904785 | 2 | 485.2535095 | 484.2583851 |
| AAADEPKPK                 | P55264 | 0          | N-term +42.01 Da, K +28.03 Da,            | 1230.216064 | 2 | 512.7880249 | 512.7873097 |
| SCQISCRSR                 | Q3TTY5 | 0.00189934 | N-term +42.01 Da, C +57.02Da,             | 1234.280884 | 2 | 598.2794189 | 598.2689669 |
| ALKFKNAKR                 | Q71RI9 | 0          | N-term +42.01 Da, K +28.03 Da,            | 1235.680664 | 4 | 301.4500122 | 301.1999432 |
| SQAGASHRVLQRALECLPAK      | Q6NS46 | 0.04515631 | N-term +42.01 Da, K +28.03 Da,C +57.02Da, | 1235.888794 | 4 | 566.8099976 | 566.3088462 |
| AWPSLVHR                  | Q91V83 | 0.01644182 | N-term +42.01 Da,                         | 1241.872681 | 3 | 337.1854248 | 336.5188942 |
| STAGKVIKCK                | P00329 | 0          | N-term +42.01 Da, K +28.03 Da,C +57.02Da, | 1246.864746 | 2 | 609.3675537 | 609.3679439 |
| AKPLTDQEKR                | Q9ET01 | 0.00098571 | N-term +42.01 Da, K +28.03 Da,            | 1249.015137 | 3 | 428.5822144 | 428.5821122 |
| AKPLTDQEKR                | Q9ET01 | 0.00050891 | N-term +42.01 Da, K +28.03 Da,            | 1250.301758 | 2 | 642.3693237 | 642.36953   |
| TTYNKGPKPER               | P49429 | 0.0009542  | N-term +42.01 Da, K +28.03 Da,            | 1252.339844 | 3 | 501.9317017 | 501.6035762 |
| SGEDVPHR                  | Q9CR00 | 0.00099404 | N-term +42.01 Da,                         | 1262.258057 | 2 | 469.7202148 | 469.7199584 |
| SQPGPKPAASPR              | P51125 | 0          | N-term +42.01 Da, K +28.03 Da,            | 1265.083374 | 2 | 631.8463135 | 631.8462219 |
| MESNKDEAER                | Q9QYI4 | 0.00099354 | N-term +42.01 Da, K +28.03 Da,            | 1265.581055 | 2 | 639.789978  | 639.7851706 |
| TKEMTENQR                 | P30204 | 0.00836268 | N-term +42.01 Da, K +28.03 Da,            | 1270.634888 | 2 | 603.7913818 | 603.7927981 |
| SYQGKKNIPR                | O08553 | 0.03877791 | N-term +42.01 Da, K +28.03 Da,            | 1270.710327 | 3 | 430.2511597 | 430.2505851 |
| KESEELQKR                 | Q99PL5 | 0.03971963 | N-term +42.01 Da, K +28.03 Da,            | 1280.793701 | 3 | 439.9100037 | 439.2453888 |
| TTYNKGPKPER               | P49429 | 0.0031746  | N-term +42.01 Da, K +28.03 Da,            | 1283.24231  | 3 | 501.9315796 | 501.6035762 |
| EGAKYVSHGATGKGNDQVR       | P16460 | 0          | N-term +42.01 Da, K +28.03 Da,            | 1283.928223 | 4 | 518.5200195 | 518.7684456 |
| AMVDEDKNNR                | Q64374 | 0.00051948 | N-term +42.01 Da, K +28.03 Da,            | 1284.260376 | 3 | 473.9021912 | 473.2416501 |
| AEAEDCHSDADR              | Q8BK06 | 0          | N-term +42.01 Da, C +57.02Da,             | 1295.436401 | 2 | 773.7887573 | 773.7891712 |
| TTYNKGPKPER               | P49429 | 0.00050251 | N-term +42.01 Da, K +28.03 Da,            | 1304.247681 | 2 | 752.3932495 | 751.9017261 |
| MDSKQQTVR                 | P70694 | 0.00321101 | N-term +42.01 Da, K +28.03 Da,            | 1304.623657 | 2 | 581.7977295 | 581.7978831 |
| MSSATAFQR                 | Q91VS7 | 0.01208459 | N-term +42.01 Da,                         | 1304.789795 | 2 | 521.7522583 | 520.7451189 |
| ATKIDKEACR                | Q9CQI6 | 0.00450653 | N-term +42.01 Da, K +28.03 Da,C +57.02Da, | 1307.029297 | 2 | 645.8499756 | 645.3477403 |
| TTYNKGPKPER               | P49429 | 0.04084014 | N-term +42.01 Da, K +28.03 Da,            | 1313.755249 | 3 | 501.9312744 | 501.6035762 |
| AKPAGDAAVGSR              | Q80UU1 | 0          | N-term +42.01 Da, K +28.03 Da,            | 1314.269287 | 2 | 585.317627  | 585.3172973 |
| AATASPGAGR                | Q9CR62 | 0.02774427 | N-term +42.01 Da,                         | 1318.127563 | 2 | 450.730011  | 450.7303259 |
| MDSKQQTVR                 | P70694 | 0.01607445 | N-term +42.01 Da, K +28.03 Da,            | 1336.158813 | 2 | 581.7972412 | 581.7978831 |
| AAPSMKER                  | Q8BGD8 | 0.03220676 | N-term +42.01 Da, K +28.03 Da,            | 1347.812744 | 2 | 480.7600098 | 480.2525794 |
| AEPSAPESKHSSLN            | Q3TDQ1 | 0.01322526 | N-term +42.01 Da, K +28.03 Da,            | 1351.692383 | 3 | 560.960022  | 560.6248177 |
| MKHYEVEIR                 | Q9CY27 | 0.00448833 | N-term +42.01 Da, K +28.03 Da,            | 1359.554565 | 3 | 426.2285767 | 425.5569093 |
| SACTYLASHLRQLGCSPDLR      | Q60806 | 0.032      | N-term +42.01 Da, C +57.02Da,             | 1362.247681 | 4 | 587.7800293 | 587.5375003 |
| GGTSDVEVNEKKDR            | P63038 | 0.03841631 | N-term +42.01 Da, K +28.03 Da,            | 1363.171143 | 3 | 545.2767944 | 544.6126893 |
| MDSKQQTVR                 | P70694 | 0.01283697 | N-term +42.01 Da, K +28.03 Da,            | 1366.582642 | 2 | 581.7977905 | 581.7978831 |

|                           |        |            |                                           |             |   |             |             |
|---------------------------|--------|------------|-------------------------------------------|-------------|---|-------------|-------------|
| AEDIKTK                   | P56391 | 0.03937622 | N-term +42.01 Da, K +28.03 Da,            | 1369.272461 | 2 | 451.7632446 | 451.7633031 |
| ASASGAMAKHEQ              | Q9WV55 | 0          | N-term +42.01 Da, K +28.03 Da,            | 1372.07312  | 2 | 629.2977905 | 629.2982476 |
| APVAGKAKKILER             | O35490 | 0.00187003 | N-term +42.01 Da, K +28.03 Da,            | 1381.278564 | 4 | 430.7855835 | 430.7856434 |
| AEASPQGR                  | Q91YL2 | 0.00052056 | N-term +42.01 Da,                         | 1384.498535 | 2 | 477.730011  | 477.7356084 |
| ANKAPSQMER                | P31725 | 0.00623886 | N-term +42.01 Da, K +28.03 Da,            | 1388.076294 | 2 | 601.3031006 | 601.3033326 |
| MDSKQQTVR                 | P70694 | 0.0005291  | N-term +42.01 Da, K +28.03 Da,            | 1396.981323 | 2 | 581.7987061 | 581.7978831 |
| AEDIKTK                   | P56391 | 0.03937622 | N-term +42.01 Da, K +28.03 Da,            | 1399.694702 | 2 | 451.7631531 | 451.7633031 |
| SHGSHETDEEFDAR            | P12787 | 0          | N-term +42.01 Da,                         | 1401.351929 | 3 | 553.5599976 | 553.5607655 |
| SSSPVNVKK                 | Q8VEK3 | 0.00051177 | N-term +42.01 Da, K +28.03 Da,            | 1407.790161 | 2 | 522.3091431 | 522.3084092 |
| APVAGKAKKILER             | O35490 | 0.02408163 | N-term +42.01 Da, K +28.03 Da,            | 1411.983521 | 4 | 430.7859192 | 430.7856434 |
| DFLPVEIR                  | E9Q309 | 0.00920649 | N-term +42.01 Da,                         | 1414.192139 | 2 | 515.2836914 | 515.7820271 |
| GNTQKATCMK                | Q3UCV8 | 0.03289734 | N-term +42.01 Da, K +28.03 Da,C +57.02Da, | 1416.501221 | 2 | 618.8146973 | 618.8073936 |
| ASCDIKEHPR                | Q8C650 | 0          | N-term +42.01 Da, K +28.03 Da,C +57.02Da, | 1416.7323   | 3 | 471.2261658 | 471.226     |
| ANKAPSQMER                | P31725 | 0.00051387 | N-term +42.01 Da, K +28.03 Da,            | 1419.073853 | 2 | 601.3030396 | 601.3033326 |
| PDPAKSAPAK                | Q64525 | 0          | N-term +42.01 Da, K +28.03 Da,            | 1419.784424 | 2 | 588.8354492 | 588.8347914 |
| AAQASAAPKAGTATGR          | P56480 | 0.04580446 | N-term +42.01 Da, K +28.03 Da,            | 1422.638794 | 2 | 750.9000244 | 749.9022576 |
| MEKEEETTR                 | E9Q616 | 0          | N-term +42.01 Da, K +28.03 Da,            | 1422.830688 | 2 | 611.7800293 | 611.7846391 |
| MDSKQQTVR                 | P70694 | 0          | N-term +42.01 Da, K +28.03 Da,            | 1431.138306 | 2 | 581.7999878 | 581.7978831 |
| SHGSHETDEEFDAR            | P12787 | 0          | N-term +42.01 Da,                         | 1432.799805 | 3 | 553.9000244 | 553.5607655 |
| AAKGAHGTHLKVSEVER         | Q8BGB2 | 0          | N-term +42.01 Da, K +28.03 Da,            | 1448.283447 | 4 | 505.0270386 | 505.0260884 |
| TAEEDADPKR                | Q9D0J8 | 0          | N-term +42.01 Da, K +28.03 Da,            | 1448.497437 | 2 | 730.8300171 | 730.3309974 |
| MNKDAQMR                  | Q9IIX0 | 0.0009995  | N-term +42.01 Da, K +28.03 Da,            | 1453.51416  | 2 | 532.2546387 | 532.2547963 |
| SQEKASSPSGKMDGEKVPDASEEKR | Q9D0R2 | 0.02       | N-term +42.01 Da, K +28.03 Da,            | 1455.091553 | 4 | 708.8599854 | 708.6077437 |
| SSNECFKCGR                | P53996 | 0          | N-term +42.01 Da, K +28.03 Da,C +57.02Da, | 1457.079346 | 2 | 657.7805176 | 657.7819075 |
| MEQAVHGESKR               | Q9R1J0 | 0          | N-term +42.01 Da, K +28.03 Da,            | 1457.483154 | 3 | 447.8900146 | 447.89084   |
| SQEKASSPSGKMDGEKVPDASEEKR | Q9D0R2 | 0          | N-term +42.01 Da, K +28.03 Da,            | 1478.340942 | 3 | 945.1400146 | 944.4745661 |
| AKPLTDSER                 | Q8CI94 | 0.00318037 | N-term +42.01 Da, K +28.03 Da,            | 1485.268188 | 2 | 543.7930298 | 543.7931237 |
| SSKASTNSIAQAR             | Q9DAS9 | 0.01086012 | N-term +42.01 Da, K +28.03 Da,            | 1486.333008 | 2 | 746.3900146 | 746.3917231 |
| SQEKASSPSGKMDGEKVPDASEEKR | Q9D0R2 | 0          | N-term +42.01 Da, K +28.03 Da,            | 1486.947754 | 4 | 708.6072388 | 708.6077437 |
| SSNECFKCGR                | P53996 | 0          | N-term +42.01 Da, K +28.03 Da,C +57.02Da, | 1488.603149 | 2 | 657.7808838 | 657.7819075 |
| SQEKASSPSGKMDGEKVPDASEEKR | Q9D0R2 | 0.03225806 | N-term +42.01 Da, K +28.03 Da,            | 1490.940063 | 3 | 944.4799805 | 944.4745661 |
| AAQASAAPKAGTATGR          | P56480 | 0          | N-term +42.01 Da, K +28.03 Da,            | 1492.694458 | 2 | 749.9000244 | 749.9022576 |
| QCAVDVKKR                 | P24270 | 0.04787438 | N-term +42.01 Da, K +28.03 Da,C +57.02Da, | 1500.319946 | 2 | 524.2700195 | 523.276586  |
| SGGGTETPVACDAAQGGKKR      | Q8R015 | 0.02401302 | N-term +42.01 Da, K +28.03 Da,C +57.02Da, | 1505.947754 | 3 | 682.6799927 | 682.3408642 |
| AAADEPKPKL                | P55264 | 0.01882058 | N-term +42.01 Da, K +28.03 Da,            | 1506.752808 | 3 | 431.9306641 | 431.9307412 |
| SKSESPKEPEQLR             | P49312 | 0.00918233 | N-term +42.01 Da, K +28.03 Da,            | 1508.147339 | 3 | 538.2896729 | 538.2895464 |
| ASGNAQIGK                 | Q61171 | 0.0005277  | N-term +42.01 Da, K +28.03 Da,            | 1510.233276 | 2 | 458.2488403 | 458.2483515 |
| TTASPSQVR                 | P09528 | 0          | N-term +42.01 Da,                         | 1511.609375 | 2 | 494.7600098 | 494.756541  |
| SIIDQYELR                 | Q8VBT1 | 0.04543704 | N-term +42.01 Da,                         | 1513.902222 | 2 | 590.2999878 | 589.8062313 |
| PTNTVFDAKR                | P63017 | 0          | N-term +42.01 Da, K +28.03 Da,            | 1515.656006 | 2 | 609.8300171 | 609.8274978 |

|                             |        |            |                                           |             |   |             |             |
|-----------------------------|--------|------------|-------------------------------------------|-------------|---|-------------|-------------|
| SSKTASTNSIAQAR              | Q9DAS9 | 0          | N-term +42.01 Da, K +28.03 Da,            | 1520.317749 | 2 | 746.8900146 | 746.3917231 |
| STPGKENFR                   | Q60960 | 0.00052715 | N-term +42.01 Da, K +28.03 Da,            | 1521.545898 | 2 | 553.2861328 | 553.2854656 |
| AAVTVNSAKR                  | Q9D110 | 0          | N-term +42.01 Da, K +28.03 Da,            | 1528.424683 | 2 | 543.8172607 | 543.8169328 |
| EEAEYLRLTLR                 | Q14B48 | 0.00751215 | N-term +42.01 Da,                         | 1543.272339 | 2 | 660.8400269 | 661.3409699 |
| PTNTVFDADR                  | P63017 | 0.0237413  | N-term +42.01 Da, K +28.03 Da,            | 1545.28064  | 3 | 406.8900146 | 406.887424  |
| SSKTASTNSIAQAR              | Q9DAS9 | 0          | N-term +42.01 Da, K +28.03 Da,            | 1551.75769  | 2 | 746.3920898 | 746.3917231 |
| AEKQIPGGGSGGGGSGGGGGGGGGGR  | Q8BMA6 | 0          | N-term +42.01 Da, K +28.03 Da,            | 1553.685303 | 3 | 744.0200195 | 743.6794853 |
| ATTAQQSQPQPVAGKR            | Q99J36 | 0          | N-term +42.01 Da, K +28.03 Da,            | 1569.010498 | 2 | 805.4400024 | 805.4364648 |
| AANPSGQGFQNKNR              | Q3TXT3 | 0.00097609 | N-term +42.01 Da, K +28.03 Da,            | 1573.352417 | 2 | 780.3900146 | 779.8896816 |
| CSQPVSVKER                  | Q99MN9 | 0.01202749 | N-term +42.01 Da, K +28.03 Da,C +57.02Da, | 1576.2323   | 2 | 630.3200073 | 630.3242652 |
| AQDQGEKENPMR                | Q9CXW4 | 0          | N-term +42.01 Da, K +28.03 Da,            | 1581.586426 | 2 | 736.8499756 | 736.8435513 |
| TTASPSQVR                   | P09528 | 0          | N-term +42.01 Da,                         | 1584.60437  | 2 | 494.7563171 | 494.756541  |
| AAAAAGPASSQR                | Q9CX34 | 0          | N-term +42.01 Da,                         | 1585.811401 | 2 | 550.2781372 | 550.2781721 |
| MDAQSSAKVNSR                | P49586 | 0          | N-term +42.01 Da, K +28.03 Da,            | 1588.408569 | 2 | 682.8400269 | 682.3353618 |
| PQREQQKER                   | E9PUZ0 | 0.00753546 | N-term +42.01 Da, K +28.03 Da,            | 1595.940796 | 3 | 423.230011  | 423.5617111 |
| AQYKGAASEAGR                | Q9WV03 | 0          | N-term +42.01 Da, K +28.03 Da,            | 1609.232422 | 2 | 639.8200073 | 639.8254868 |
| AQDQGEKENPMR                | Q9CXW4 | 0          | N-term +42.01 Da, K +28.03 Da,            | 1612.192139 | 2 | 736.8427734 | 736.8435513 |
| HGSHTDEEFDAR                | P12787 | 0.02153209 | N-term +42.01 Da,                         | 1615.916992 | 3 | 525.210022  | 524.5500891 |
| TTASPSQVR                   | P09528 | 0.00052938 | N-term +42.01 Da,                         | 1616.325562 | 2 | 494.7563171 | 494.756541  |
| SETAAPAAPAPAEKTPVKKKAR      | P43274 | 0          | N-term +42.01 Da, K +28.03 Da,            | 1616.559937 | 4 | 636.6300049 | 636.1245315 |
| SETPAQSSIKQER               | P97360 | 0.00098863 | N-term +42.01 Da, K +28.03 Da,            | 1616.818726 | 2 | 766.3900146 | 765.8915561 |
| AAAGGAAAAAGR                | P35282 | 0          | N-term +42.01 Da,                         | 1619.928345 | 2 | 507.2600098 | 507.259782  |
| SETAAPAAPAPAEKTPVKKKAR      | P43274 | 0          | N-term +42.01 Da, K +28.03 Da,            | 1620.877075 | 3 | 847.8300171 | 847.8302832 |
| AAEKQIPGGGSGGGGSGGGGGGGGGGR | Q8BMA6 | 0          | N-term +42.01 Da, K +28.03 Da,            | 1631.894165 | 3 | 767.6900024 | 767.3585233 |
| AAEKQIPGGGSGGGGSGGGGGGGGGGR | Q8BMA6 | 0.00187529 | N-term +42.01 Da, K +28.03 Da,            | 1632.146362 | 2 | 1150.530029 | 1150.534147 |
| SKQEYDEAGPSIVHR             | P62737 | 0.00920245 | N-term +42.01 Da, K +28.03 Da,            | 1637.429077 | 3 | 596.6400146 | 595.9637221 |
| AEEEVGNSQR                  | O55091 | 0          | N-term +42.01 Da,                         | 1641.302856 | 2 | 581.2600098 | 580.7625526 |
| AQDQGEKENPMR                | Q9CXW4 | 0          | N-term +42.01 Da, K +28.03 Da,            | 1643.20459  | 2 | 736.8400269 | 736.8435513 |
| SETAAPAAPAPAEKTPVKKKAR      | P43274 | 0          | N-term +42.01 Da, K +28.03 Da,            | 1647.165771 | 4 | 636.1242065 | 636.1245315 |
| TTASPSQVR                   | P09528 | 0.00052938 | N-term +42.01 Da,                         | 1647.31665  | 2 | 494.7566223 | 494.756541  |
| SETAAPAAPAPAEKTPVKKKAR      | P43274 | 0          | N-term +42.01 Da, K +28.03 Da,            | 1651.858643 | 3 | 847.8300171 | 847.8302832 |
| AAQASAAPKAGTATGR            | P56480 | 0.00051706 | N-term +42.01 Da, K +28.03 Da,            | 1657.557617 | 2 | 750.3900146 | 749.9022576 |
| SEAAPAAPAAAPAEKAPAKKAA      | P15864 | 0          | N-term +42.01 Da, K +28.03 Da,            | 1661.920166 | 4 | 593.0999756 | 592.8454247 |
| SEAAPAAPAAAPAEKAPAKK        | P15864 | 0          | N-term +42.01 Da, K +28.03 Da,            | 1662.038452 | 3 | 742.7700195 | 742.7667313 |
| QKEATTEQQLR                 | O35490 | 0.00098328 | N-term +42.01 Da, K +28.03 Da,            | 1668.710205 | 2 | 702.3599854 | 701.370259  |
| SEAAPAAPAAAPAEKAPAKKAA      | P15864 | 0          | N-term +42.01 Da, K +28.03 Da,            | 1670.343384 | 3 | 790.460022  | 790.1248074 |
| TTASPSQVR                   | P09528 | 0.00051282 | N-term +42.01 Da,                         | 1681.988281 | 2 | 494.75      | 494.756541  |
| SSPPEGKLETK                 | Q91XC8 | 0          | N-term +42.01 Da, K +28.03 Da,            | 1683.62854  | 2 | 635.8479614 | 635.8480965 |
| SDTAVADTR                   | O70493 | 0.02031509 | N-term +42.01 Da,                         | 1687.459839 | 2 | 489.2302551 | 489.2303565 |
| SETAAPAAPAPAEKTPVKKKAR      | P43274 | 0          | N-term +42.01 Da, K +28.03 Da,            | 1690.306152 | 3 | 848.5       | 847.8302832 |

|                            |        |            |                                           |             |   |             |             |
|----------------------------|--------|------------|-------------------------------------------|-------------|---|-------------|-------------|
| MEKPAASTEPOGSR             | Q9JMD3 | 0          | N-term +42.01 Da, K +28.03 Da,            | 1691.515869 | 2 | 779.8800049 | 779.880134  |
| ATATPVQQQR                 | P14733 | 0          | N-term +42.01 Da,                         | 1692.962402 | 2 | 571.302002  | 571.3016472 |
| QTMQVDEHAR                 | Q8BWT1 | 0          | N-term +42.01 Da,                         | 1696.696045 | 2 | 629.7800293 | 628.7880471 |
| AAVQRTL                    | A1L1B4 | 0.01170351 | N-term +42.01 Da,                         | 1701.81665  | 2 | 478.7799988 | 478.7854351 |
| SETAPAAPAAPAPAEKTPVKKKAR   | P43274 | 0.00450248 | N-term +42.01 Da, K +28.03 Da,            | 1703.617676 | 3 | 847.8300171 | 847.8302832 |
| AAAKVALTKR                 | Q9QXX4 | 0          | N-term +42.01 Da, K +28.03 Da,            | 1704.422485 | 3 | 376.2483521 | 376.2484041 |
| AQEEEDVR                   | Q505B7 | 0.00096061 | N-term +42.01 Da,                         | 1711.907471 | 2 | 509.230011  | 509.227814  |
| SSPPEGKLETK                | Q91XC8 | 0          | N-term +42.01 Da, K +28.03 Da,            | 1715.214478 | 2 | 635.8480835 | 635.8480965 |
| AAAVPQR                    | Q62446 | 0.02406199 | N-term +42.01 Da,                         | 1716.86499  | 2 | 378.2099915 | 377.7139468 |
| MEKPAASTEPOGSR             | Q9JMD3 | 0.00051073 | N-term +42.01 Da, K +28.03 Da,            | 1721.984375 | 2 | 779.8799438 | 779.880134  |
| GEIEQKPTPASR               | F8VPV2 | 0.00052854 | N-term +42.01 Da, K +28.03 Da,            | 1724.200806 | 2 | 691.8699951 | 691.867352  |
| ATATPVQQQR                 | P14733 | 0.00097752 | N-term +42.01 Da,                         | 1728.579956 | 2 | 571.2999878 | 571.3016472 |
| AAAKVALTKR                 | Q9QXX4 | 0.00317029 | N-term +42.01 Da, K +28.03 Da,            | 1734.763672 | 3 | 376.2485657 | 376.2484041 |
| MDGKPVDASEEKR              | Q9D0R2 | 0          | N-term +42.01 Da, K +28.03 Da,            | 1743.928711 | 3 | 563.6096802 | 563.6101799 |
| MEKPAASTEPOGSR             | Q9JMD3 | 0.00051125 | N-term +42.01 Da, K +28.03 Da,            | 1753.363525 | 2 | 779.8800049 | 779.880134  |
| ADTAPQLKR                  | Q9DAR7 | 0.03325416 | N-term +42.01 Da, K +28.03 Da,            | 1764.439575 | 2 | 535.303894  | 535.3036582 |
| MDQQTQHPSKAAQPLR           | Q9JL3  | 0          | N-term +42.01 Da, K +28.03 Da,            | 1780.021851 | 3 | 593.2999878 | 593.3053133 |
| SSSPVNVKCLK                | Q8VEK3 | 0.00319781 | N-term +42.01 Da, K +28.03 Da,            | 1784.710815 | 3 | 438.278656  | 438.2781409 |
| AGQEDPVQR                  | Q91VR8 | 0.02183766 | N-term +42.01 Da,                         | 1784.861694 | 2 | 521.2511597 | 521.251623  |
| ADEGEGIHPSAPHR             | Q3UHD6 | 0          | N-term +42.01 Da,                         | 1786.404419 | 3 | 543.9099731 | 543.9132502 |
| MDQQTQHPSKAAQPLR           | Q9JL3  | 0          | N-term +42.01 Da, K +28.03 Da,            | 1787.192505 | 2 | 889.960022  | 889.4543318 |
| SSSPVNVKCLK                | Q8VEK3 | 0.00666963 | N-term +42.01 Da, K +28.03 Da,            | 1788.241333 | 2 | 656.9143066 | 656.9135732 |
| ATNDAVLKR                  | P31230 | 0          | N-term +42.01 Da, K +28.03 Da,            | 1793.077637 | 2 | 529.3034668 | 529.3036582 |
| ADTAPQLKR                  | Q9DAR7 | 0.00232234 | N-term +42.01 Da, K +28.03 Da,            | 1795.042603 | 2 | 535.3040161 | 535.3036582 |
| SQSLKSQNTNMSDSGCR          | Q8BYU6 | 0.02410131 | N-term +42.01 Da, K +28.03 Da,C +57.02Da, | 1799.842407 | 2 | 985.4400024 | 985.4387512 |
| AAPQDVHVR                  | Q6QD59 | 0          | N-term +42.01 Da,                         | 1804.530029 | 2 | 517.7700195 | 517.7725251 |
| SEAGTPEGPIKK               | Q99J1  | 0          | N-term +42.01 Da, K +28.03 Da,            | 1808.415527 | 2 | 656.8599854 | 656.361371  |
| AQERPSCAVEPEHVQR           | P56389 | 0.0032066  | N-term +42.01 Da, C +57.02Da,             | 1810.288086 | 3 | 646.3099976 | 645.6427657 |
| MDQQTQHPSKAAQPLR           | Q9JL3  | 0          | N-term +42.01 Da, K +28.03 Da,            | 1811.167114 | 3 | 593.3099976 | 593.3053133 |
| DKGALAKLLEAIR              | F6TIC7 | 0.03196165 | N-term +42.01 Da, K +28.03 Da,            | 1811.896606 | 2 | 748.960022  | 748.4639619 |
| AQERPSCAVEPEHVQR           | P56389 | 0          | N-term +42.01 Da, C +57.02Da,             | 1813.511719 | 3 | 645.6400146 | 645.6427657 |
| TMVVHEKQDDLGGNEESTKTGNAGSR | P08228 | 0          | N-term +42.01 Da, K +28.03 Da,            | 1820.325073 | 4 | 768.3800049 | 768.6320161 |
| KEVKCDMEVSCPEGYTCCR        | P28798 | 0.00051203 | N-term +42.01 Da, K +28.03 Da,C +57.02Da, | 1820.460083 | 3 | 836.6900024 | 836.0228334 |
| SETAPAAPAAPAPVEKTPVKKKAK   | P43277 | 0          | N-term +42.01 Da, K +28.03 Da,            | 1822.587646 | 4 | 643.3900146 | 643.1386446 |
| ASNFKKTTMASSAQR            | Q9R1K9 | 0          | N-term +42.01 Da, K +28.03 Da,            | 1824.37854  | 3 | 575.9694214 | 575.9699307 |
| ADEVGGEALGR                | A8DUK4 | 0          | N-term +42.01 Da,                         | 1831.973022 | 2 | 559.2800293 | 558.2700131 |
| SETAPAAPAAPAPAEKTPVKKK     | P43274 | 0          | N-term +42.01 Da, K +28.03 Da,            | 1847.449829 | 4 | 579.5900269 | 579.3399751 |
| SETAPAAPAAPAPAEKTPVKKK     | P43274 | 0          | N-term +42.01 Da, K +28.03 Da,            | 1847.877197 | 3 | 772.1199951 | 772.1175414 |
| SETAPAAPAAPAPVEKTPVKKKAK   | P43277 | 0          | N-term +42.01 Da, K +28.03 Da,            | 1857.088745 | 4 | 643.6400146 | 643.1386446 |
| ADEVGGEALGR                | A8DUK4 | 0.00051653 | N-term +42.01 Da,                         | 1862.733643 | 2 | 559.2784424 | 558.2700131 |

|                           |        |            |                                           |             |   |             |             |
|---------------------------|--------|------------|-------------------------------------------|-------------|---|-------------|-------------|
| ATDISESSGADCKGDTKN        | Q9CQJ6 | 0          | N-term +42.01 Da, K +28.03 Da,C +57.02Da, | 1863.702637 | 2 | 977.9400024 | 977.4389403 |
| SETAPAAPAAPAPAEKTPVKKK    | P43274 | 0          | N-term +42.01 Da, K +28.03 Da,            | 1866.690796 | 2 | 1157.670044 | 1157.672674 |
| MEEASGSAGNDR              | O70404 | 0          | N-term +42.01 Da,                         | 1870.406006 | 2 | 633.2575073 | 633.2567775 |
| AASTASHRPIKGLK            | Q9DCL8 | 0.00189753 | N-term +42.01 Da, K +28.03 Da,            | 1876.420776 | 4 | 412.75      | 412.753072  |
| SETAPAAPAAPAPAEKTPVKKK    | P43274 | 0          | N-term +42.01 Da, K +28.03 Da,            | 1878.397827 | 4 | 579.3405762 | 579.3399751 |
| SETAPAAPAAPAPAEKTPVKKK    | P43274 | 0          | N-term +42.01 Da, K +28.03 Da,            | 1878.476685 | 3 | 772.1182251 | 772.1175414 |
| VTGKPISQGGIHGR            | P26443 | 0          | N-term +42.01 Da, K +28.03 Da,            | 1881.291504 | 3 | 493.6072388 | 492.9475656 |
| ASGSMATSEER               | Q9DBC7 | 0          | N-term +42.01 Da,                         | 1892.758545 | 2 | 648.7700195 | 648.7722606 |
| SGFSSEER                  | Q9D819 | 0.00277778 | N-term +42.01 Da,                         | 1896.271118 | 2 | 470.7033997 | 470.7039743 |
| MDFQHRPQGGKTGSGGVASSSESNR | Q62203 | 0          | N-term +42.01 Da, K +28.03 Da,            | 1899.715576 | 4 | 630.7999878 | 630.5477542 |
| AETVADTR                  | O70492 | 0.00097087 | N-term +42.01 Da,                         | 1902.715332 | 2 | 452.7220764 | 452.7221669 |
| SSPPEGKLETKAGHPPAVK       | Q91XC8 | 0.00095602 | N-term +42.01 Da, K +28.03 Da,            | 1906.765747 | 4 | 514.7922363 | 514.7913892 |
| SETAPAAPAAPAPAEKTPVKKK    | P43274 | 0          | N-term +42.01 Da, K +28.03 Da,            | 1909.214111 | 4 | 579.5900269 | 579.3399751 |
| ALKQISSNR                 | Q9R0P3 | 0.0005184  | N-term +42.01 Da, K +28.03 Da,            | 1910.983032 | 2 | 543.8165283 | 543.8169328 |
| ADADKSEAAAGDDGSQQQPAEPR   | Q8C854 | 0          | N-term +42.01 Da, K +28.03 Da,            | 1912.020386 | 3 | 795.3599854 | 795.358078  |
| SKPPPKPVKPGQVKVFR         | Q62422 | 0.01202233 | N-term +42.01 Da, K +28.03 Da,            | 1912.938354 | 4 | 511.5799866 | 511.5764878 |
| DSYVGDEAQSKR              | P60710 | 0          | N-term +42.01 Da, K +28.03 Da,            | 1913.057739 | 2 | 713.8300171 | 712.8362494 |
| ADADKSEAAAGDDGSQQQPAEPR   | Q8C854 | 0          | N-term +42.01 Da, K +28.03 Da,            | 1913.417603 | 3 | 795.6900024 | 795.358078  |
| SQTKEDKQLQDKPDLEER        | Q8K1N1 | 0.00961538 | N-term +42.01 Da, K +28.03 Da,            | 1921.433594 | 4 | 579.0499878 | 579.0537723 |
| QQIQEHEEEAR               | F6U775 | 0          | N-term +42.01 Da,                         | 1923.277588 | 2 | 783.8592529 | 783.8607875 |
| SETAPAAPAAPAPAEKTPVKKK    | P43274 | 0.00096479 | N-term +42.01 Da, K +28.03 Da,            | 1923.518555 | 3 | 772.4500122 | 772.1175414 |
| RPAPPRER                  | Q8BHC9 | 0.00097182 | N-term +42.01 Da,                         | 1925.628906 | 2 | 559.3213501 | 559.3148912 |
| DSTVYKCVK                 | A2AVM0 | 0.00958606 | N-term +42.01 Da, K +28.03 Da,C +57.02Da, | 1929.427734 | 2 | 599.3153687 | 599.3128347 |
| GKEKTHINIVVIGHVDSGKSTTTGH | P10126 | 0          | N-term +42.01 Da, K +28.03 Da,            | 1937.143188 | 4 | 686.1400146 | 686.1290743 |
| SSPPEGKLETKAGHPPAVK       | Q91XC8 | 0.00186829 | N-term +42.01 Da, K +28.03 Da,            | 1937.751465 | 4 | 515.039978  | 514.7913892 |
| GKEKTHINIVVIGHVDSGKSTTTGH | P10126 | 0.00794001 | N-term +42.01 Da, K +28.03 Da,            | 1943.752319 | 4 | 686.6400146 | 686.1290743 |
| AAAAAAPGGGGGEPR           | Q63844 | 0.0018797  | N-term +42.01 Da,                         | 1951.271606 | 2 | 626.3060913 | 626.3074612 |
| ADPGVPGR                  | Q5EBG8 | 0.01205338 | N-term +42.01 Da,                         | 1958.096436 | 2 | 405.7082825 | 405.7088618 |
| RAQYEALAQKNR              | P05784 | 0          | N-term +42.01 Da, K +28.03 Da,            | 1963.90271  | 3 | 507.2700806 | 506.6109536 |
| AEDIKTIK                  | P56391 | 0.00624164 | N-term +42.01 Da, K +28.03 Da,            | 1965.464355 | 3 | 391.25      | 391.2480702 |
| AQQAADKY                  | Q8VDD5 | 0.04192547 | N-term +42.01 Da, K +28.03 Da,            | 1970.540039 | 2 | 482.7394409 | 482.7403595 |
| AATMSEPR                  | Q9DCC4 | 0.00098765 | N-term +42.01 Da,                         | 1974.125122 | 2 | 452.7131653 | 452.7132873 |
| SKSFQQSSLGR               | Q8K310 | 0.00053079 | N-term +42.01 Da, K +28.03 Da,            | 1991.033081 | 2 | 647.840271  | 647.8411369 |
| AATTGSGVKVPR              | Q9CZY3 | 0          | N-term +42.01 Da, K +28.03 Da,            | 1994.639282 | 2 | 607.3470459 | 607.3485974 |
| AAAMDVDTPSGTNSGAGKKR      | P62878 | 0          | N-term +42.01 Da, K +28.03 Da,            | 2001.196167 | 3 | 678.0079956 | 678.0091145 |
| MQTAHTGLSHTADGADGQTSR     | Q9CR70 | 0          | N-term +42.01 Da,                         | 2001.479614 | 3 | 729         | 728.6626665 |
| MQTAHTGLSHTADGADGQTSR     | Q9CR70 | 0          | N-term +42.01 Da,                         | 2002.111694 | 3 | 728.6599731 | 728.6626665 |
| SEDVEVQFSAGR              | Q80UY1 | 0.03437377 | N-term +42.01 Da,                         | 2004.079102 | 2 | 682.8099976 | 683.3176923 |
| ASSHTVLMR                 | Q9Z0S1 | 0.02585859 | N-term +42.01 Da,                         | 2006.69104  | 2 | 522.2663574 | 522.268761  |
| ALKQISSNR                 | Q9R0P3 | 0.01802179 | N-term +42.01 Da, K +28.03 Da,            | 2009.814087 | 2 | 543.8169556 | 543.8169328 |

|                            |        |            |                                           |             |   |             |             |
|----------------------------|--------|------------|-------------------------------------------|-------------|---|-------------|-------------|
| ASEAGGIGGGGGGKIR           | E9Q3G8 | 0          | N-term +42.01 Da, K +28.03 Da,            | 2010.546509 | 2 | 736.3900146 | 735.8866076 |
| AEESSSSSSSPTAATSQQQQQQLKTK | A2A432 | 0          | N-term +42.01 Da, K +28.03 Da,            | 2010.750977 | 3 | 1042.829956 | 1042.167408 |
| SSPPEGKLETKAGHPPAVKAGGMR   | Q91XC8 | 0          | N-term +42.01 Da, K +28.03 Da,            | 2014.074707 | 4 | 633.0999756 | 632.8467989 |
| AATTGSGVKVPR               | Q9CZY3 | 0          | N-term +42.01 Da, K +28.03 Da,            | 2025.908691 | 2 | 607.3480225 | 607.3485974 |
| SKSFQQSSLGR                | Q8K310 | 0          | N-term +42.01 Da, K +28.03 Da,            | 2029.622192 | 2 | 647.840271  | 647.8411369 |
| MQTAHTGLSHTADGADGQTSR      | Q9CR70 | 0          | N-term +42.01 Da,                         | 2032.107666 | 3 | 729         | 728.6626665 |
| SSPPEGKLETKAGHPPAVKAGGMR   | Q91XC8 | 0.03232243 | N-term +42.01 Da, K +28.03 Da,            | 2033.026367 | 3 | 843.789978  | 843.459973  |
| ALKQISSNR                  | Q9R0P3 | 0.03474141 | N-term +42.01 Da, K +28.03 Da,            | 2040.720215 | 2 | 543.8167114 | 543.8169328 |
| SSPPEGKLETKAGHPPAVKAGGMR   | Q91XC8 | 0          | N-term +42.01 Da, K +28.03 Da,            | 2045.16272  | 4 | 632.8465576 | 632.8467989 |
| MDADKDNKQACDER             | O35309 | 0.00186393 | N-term +42.01 Da, K +28.03 Da,C +57.02Da, | 2047.76355  | 3 | 636.2918701 | 636.2926339 |
| AELYVKPGNKER               | Q80VJ2 | 0.02185567 | N-term +42.01 Da, K +28.03 Da,            | 2054.041016 | 3 | 501.2840576 | 501.283955  |
| MDADKDNKQACDER             | O35309 | 0          | N-term +42.01 Da, K +28.03 Da,C +57.02Da, | 2054.78125  | 2 | 954.4400024 | 953.9353127 |
| AAGPISER                   | Q8QZY9 | 0.00752545 | N-term +42.01 Da,                         | 2057.390869 | 2 | 421.721405  | 421.7219694 |
| AELYVKPGNKER               | Q80VJ2 | 0.0009574  | N-term +42.01 Da, K +28.03 Da,            | 2057.554199 | 2 | 751.4199829 | 751.4222942 |
| SETAPAAPAAPAPVEKTPVKKK     | P43277 | 0          | N-term +42.01 Da, K +28.03 Da,            | 2058.734131 | 4 | 586.5999756 | 586.3478002 |
| SETAPAAPAAPAPVEKTPVKKK     | P43277 | 0          | N-term +42.01 Da, K +28.03 Da,            | 2059.440186 | 3 | 781.789978  | 781.4613081 |
| SKSFQQSSLGR                | Q8K310 | 0.00492832 | N-term +42.01 Da, K +28.03 Da,            | 2061.622559 | 2 | 648.3400269 | 647.8411369 |
| DGKTVEAAAHGTVTR            | O88844 | 0.00050736 | N-term +42.01 Da, K +28.03 Da,            | 2066.768311 | 3 | 571.9500122 | 571.2918387 |
| SETAPAAPAAPAPVEKTPVKKK     | P43277 | 0          | N-term +42.01 Da, K +28.03 Da,            | 2066.946533 | 3 | 781.460022  | 781.4613081 |
| GMGQKDSYVGDEAQSQR          | P60710 | 0          | N-term +42.01 Da, K +28.03 Da,            | 2072.341797 | 3 | 652.6400146 | 651.9826768 |
| DEEEEEEEDEGPVR             | Q9D0J8 | 0          | N-term +42.01 Da,                         | 2075.124512 | 2 | 988.8900146 | 988.8718087 |
| SSPPEGKLETKAGHPPAVKAGGMR   | Q91XC8 | 0          | N-term +42.01 Da, K +28.03 Da,            | 2076.311523 | 4 | 633.0999756 | 632.8467989 |
| ALKQISSNR                  | Q9R0P3 | 0.03221957 | N-term +42.01 Da, K +28.03 Da,            | 2076.866943 | 2 | 543.8171997 | 543.8169328 |
| AAAAEEEDGGPEGPNR           | O35445 | 0          | N-term +42.01 Da,                         | 2080.13623  | 2 | 770.8300171 | 770.8291534 |
| SAPEGLGDAHGDADR            | P58137 | 0          | N-term +42.01 Da,                         | 2080.239014 | 2 | 755.8300171 | 755.3318629 |
| SKSFQQSSLGR                | Q8K310 | 0          | N-term +42.01 Da, K +28.03 Da,            | 2092.142822 | 2 | 648.3400269 | 647.8411369 |
| AGTTTIEAVKR                | D3Z2H9 | 0.00050176 | N-term +42.01 Da, K +28.03 Da,            | 2093.441162 | 2 | 608.8499756 | 608.8484304 |
| SETAPAAPAAPAPVEKTPVKKK     | P43277 | 0          | N-term +42.01 Da, K +28.03 Da,            | 2094.148438 | 4 | 586.5999756 | 586.3478002 |
| PVPGSIGVAGR                | Q80U78 | 0.00407056 | N-term +42.01 Da,                         | 2098.707764 | 2 | 526.2999878 | 526.2983757 |
| ATPAAPASGVR                | Q3UDR8 | 0.00098135 | N-term +42.01 Da,                         | 2104.762207 | 2 | 520.2786255 | 520.2801831 |
| MDKNELVQKAK                | P63101 | 0.00449236 | N-term +42.01 Da, K +28.03 Da,            | 2121.393799 | 3 | 477.2738953 | 477.2742909 |
| MNSVSPR                    | Q91WT7 | 0.01087429 | N-term +42.01 Da,                         | 2121.699951 | 2 | 416.7020264 | 416.7027222 |
| TMDKSELVQKAK               | Q9CQV8 | 0.02032352 | N-term +42.01 Da, K +28.03 Da,            | 2122.491455 | 3 | 501.9524231 | 501.9532176 |
| MEVKPPPGRPQPDGSR           | Q8BG05 | 0.00052165 | N-term +42.01 Da, K +28.03 Da,            | 2124.564941 | 3 | 606.9799805 | 606.64908   |
| TSDQDAKVVAEPQAQR           | Q6A0A2 | 0.01281504 | N-term +42.01 Da, K +28.03 Da,            | 2125.091064 | 2 | 907.460022  | 906.9579594 |
| MEGHDPKEPEQLR              | B2RXM2 | 0          | N-term +42.01 Da, K +28.03 Da,            | 2126.124756 | 3 | 545.9324951 | 545.9313645 |
| MEGHDPKEPEQLR              | B2RXM2 | 0.00096665 | N-term +42.01 Da, K +28.03 Da,            | 2126.465088 | 2 | 818.3900146 | 818.3934086 |
| MQSAPLEQPAKRPR             | Q60710 | 0.0461361  | N-term +42.01 Da, K +28.03 Da,            | 2128.16626  | 3 | 560.3099976 | 560.3067653 |
| MESNHKSGDGLSGTQKEAALR      | Q5YD48 | 0.00276243 | N-term +42.01 Da, K +28.03 Da,            | 2132.595459 | 4 | 579.539978  | 579.2918567 |
| MYKSVSETR                  | Q80XQ2 | 0.00050201 | N-term +42.01 Da, K +28.03 Da,            | 2134.038818 | 2 | 585.7946777 | 585.7948091 |

|                        |        |            |                                           |             |   |             |             |
|------------------------|--------|------------|-------------------------------------------|-------------|---|-------------|-------------|
| ATEGASSELIEKKR         | D3YYK3 | 0          | N-term +42.01 Da, K +28.03 Da,            | 2134.426025 | 3 | 539.6300049 | 539.6333131 |
| MDTALKR                | _sp Q6 | 0.01567133 | N-term +42.01 Da, K +28.03 Da,            | 2138.670654 | 2 | 452.7504272 | 452.7496724 |
| MNKAPQQTGPPPAR         | Q6NZJ6 | 0.00098039 | N-term +42.01 Da, K +28.03 Da,            | 2145.143311 | 2 | 766.9099731 | 766.4061211 |
| MLSGSGSQGR             | D3Z6I7 | 0          | N-term +42.01 Da,                         | 2153.761719 | 2 | 511.2407837 | 511.2402009 |
| CTALSPKVR              | P11862 | 0.01682086 | N-term +42.01 Da, K +28.03 Da,C +57.02Da, | 2155.422119 | 2 | 551.3086548 | 551.3078861 |
| ATSPQKSPLVPKSPTPKSPPSR | Q9EPC1 | 0          | N-term +42.01 Da, K +28.03 Da,            | 2155.574219 | 4 | 604.3499756 | 604.1007907 |
| ARDEDGRAETFPQQHYAKETPR | Q0P5V2 | 0.03227092 | N-term +42.01 Da, K +28.03 Da,            | 2155.991943 | 4 | 668.8300171 | 668.8257526 |
| MEGHDPKEPEQLR          | B2RXM2 | 0          | N-term +42.01 Da, K +28.03 Da,            | 2156.433838 | 3 | 545.9314575 | 545.9313645 |
| MEVKPPPGRPQPDSDGR      | Q8BG05 | 0          | N-term +42.01 Da, K +28.03 Da,            | 2156.509277 | 3 | 606.6495972 | 606.64908   |
| SQAEFDKAAEEVKR         | P31786 | 0          | N-term +42.01 Da, K +28.03 Da,            | 2156.660156 | 3 | 569.2999878 | 569.2967011 |
| MEGHDPKEPEQLR          | B2RXM2 | 0.00187091 | N-term +42.01 Da, K +28.03 Da,            | 2157.898193 | 2 | 818.3900146 | 818.3934086 |
| ATSPQKSPLVPKSPTPKSPPSR | Q9EPC1 | 0.04184425 | N-term +42.01 Da, K +28.03 Da,            | 2160.952393 | 3 | 805.4699707 | 805.1319621 |
| AAPGTPPPSASGGGGGEPR    | Q99N42 | 0.04552469 | N-term +42.01 Da,                         | 2161.613525 | 2 | 831.3961792 | 831.3975372 |
| ATSPQKSPLVPKSPTPKSPPSR | Q9EPC1 | 0          | N-term +42.01 Da, K +28.03 Da,            | 2168.59375  | 3 | 805.7999878 | 805.1319621 |
| SNGYEDHMAEDCR          | P70372 | 0          | N-term +42.01 Da, C +57.02Da,             | 2173.147217 | 2 | 813.789978  | 813.3013911 |
| SQAEFDKAAEEVKR         | P31786 | 0          | N-term +42.01 Da, K +28.03 Da,            | 2174.904541 | 2 | 853.4400635 | 853.4414133 |
| SETAAPAAPAPAAEKTPVKK   | P43274 | 0.00095557 | N-term +42.01 Da, K +28.03 Da,            | 2175.533936 | 3 | 720.4099731 | 720.0754535 |
| AGTTTIEAVKR            | D3Z2H9 | 0.014862   | N-term +42.01 Da, K +28.03 Da,            | 2178.994873 | 2 | 608.8499756 | 608.8484304 |
| ATSPQKSPLVPKSPTPKSPPSR | Q9EPC1 | 0          | N-term +42.01 Da, K +28.03 Da,            | 2186.258301 | 4 | 604.1009521 | 604.1007907 |
| ADEDEGEGIHPSAPH        | Q3UHD6 | 0          | N-term +42.01 Da,                         | 2186.993408 | 2 | 737.3200073 | 737.3156813 |
| SQAEFDKAAEEVKR         | P31786 | 0          | N-term +42.01 Da, K +28.03 Da,            | 2187.431396 | 3 | 569.2965698 | 569.2967011 |
| MEETEKKVATQEGR         | Q9QXZ6 | 0          | N-term +42.01 Da, K +28.03 Da,            | 2198.561523 | 3 | 578.6300049 | 578.629463  |
| MEVKPPPGRPQPDSDGR      | Q8BG05 | 0          | N-term +42.01 Da, K +28.03 Da,            | 2198.946045 | 3 | 606.9799805 | 606.64908   |
| MEETEKKVATQEGR         | Q9QXZ6 | 0.00052994 | N-term +42.01 Da, K +28.03 Da,            | 2199.237061 | 2 | 867.9400024 | 867.4405563 |
| MEEAPHGCPGADSAQAGR     | Q9R060 | 0          | N-term +42.01 Da, C +57.02Da,             | 2201.698975 | 2 | 941.9000244 | 941.893979  |
| ATSASSHLNKGIKQM        | P15105 | 0.02403259 | N-term +42.01 Da, K +28.03 Da,            | 2202.543457 | 3 | 557.6300049 | 557.6346593 |
| SQAEFDKAAEEVKR         | P31786 | 0          | N-term +42.01 Da, K +28.03 Da,            | 2205.761475 | 2 | 853.4400024 | 853.4414133 |
| AGTTTIEAVKR            | D3Z2H9 | 0          | N-term +42.01 Da, K +28.03 Da,            | 2210.746582 | 2 | 608.8485718 | 608.8484304 |
| SDSRDPASDQMKQWKEQR     | P24270 | 0          | N-term +42.01 Da, K +28.03 Da,            | 2212.316895 | 4 | 573.2800293 | 573.2774778 |
| SDSRDPASDQMKQWKEQR     | P24270 | 0          | N-term +42.01 Da, K +28.03 Da,            | 2212.87207  | 3 | 764.0300293 | 764.0342116 |
| AENNAQNKAKLISETR       | Q9CWP6 | 0          | N-term +42.01 Da, K +28.03 Da,            | 2216.477295 | 3 | 629.0100098 | 629.0094429 |
| ATSPQKSPLVPKSPTPKSPPSR | Q9EPC1 | 0          | N-term +42.01 Da, K +28.03 Da,            | 2216.875977 | 4 | 604.0999756 | 604.1007907 |
| MEGYHKPDQQKL           | P40142 | 0.00097324 | N-term +42.01 Da, K +28.03 Da,            | 2222.062012 | 3 | 524.6016235 | 524.6010669 |
| STSVPGHWNWTR           | Q8BT51 | 0.00318327 | N-term +42.01 Da,                         | 2222.408936 | 2 | 706.8400269 | 706.3392929 |
| EVKCDMEVSCPEGYTCCR     | P28798 | 0          | N-term +42.01 Da, K +28.03 Da,C +57.02Da, | 2225.42749  | 3 | 784.6523438 | 783.9807456 |
| AVAGAAAYR              | Q9QXN3 | 0.00580876 | N-term +42.01 Da,                         | 2229.033203 | 2 | 410.7191467 | 410.7192293 |
| EEKEASLAKIKEQTR        | P30115 | 0.00232126 | N-term +42.01 Da, K +28.03 Da,            | 2243.087891 | 4 | 472.76474   | 472.2702896 |
| MEKPAASTEPPQSRPALGR    | Q9JMD3 | 0.04048268 | N-term +42.01 Da, K +28.03 Da,            | 2248.25708  | 3 | 685.0209351 | 685.0213542 |
| SDSRDPASDQMKQWKEQR     | P24270 | 0          | N-term +42.01 Da, K +28.03 Da,            | 2251.644043 | 4 | 573.5300293 | 573.2774778 |
| SDSRDPASDQMKQWKEQR     | P24270 | 0          | N-term +42.01 Da, K +28.03 Da,            | 2256.554688 | 3 | 764.3699951 | 764.0342116 |



|                        |        |            |                                |             |   |             |             |
|------------------------|--------|------------|--------------------------------|-------------|---|-------------|-------------|
| AEMKSPTKAEPATPAEAAQSDR | Q7TPV4 | 0          | N-term +42.01 Da, K +28.03 Da, | 2260.150146 | 3 | 795.3900146 | 795.3969275 |
| SKSLKKLVEESR           | Q01730 | 0.01169844 | N-term +42.01 Da, K +28.03 Da, | 2260.584473 | 3 | 510.6499939 | 510.6468934 |
| SAEGSQLAAPR            | Q925E0 | 0          | N-term +42.01 Da,              | 2265.771973 | 2 | 608.3099976 | 608.3018447 |
| AGTTTIEAVKR            | D3Z2H9 | 0          | N-term +42.01 Da, K +28.03 Da, | 2277.716797 | 2 | 608.8482666 | 608.8484304 |
| AETAESGGGGDSDGVGACER   | Q91X11 | 0          | N-term +42.01 Da, C +57.02Da,  | 2280.79541  | 2 | 940.3900146 | 940.3897816 |
| AGNFDSEER              | Q64010 | 0.04548959 | N-term +42.01 Da,              | 2283.235596 | 2 | 533.7261353 | 533.7254384 |
| SGYTPDEKLR             | Q3UIU2 | 0.00275735 | N-term +42.01 Da, K +28.03 Da, | 2292.105469 | 2 | 618.8200073 | 618.3169633 |
| MFQGADSQAGKSGSR        | Q6PGH2 | 0          | N-term +42.01 Da, K +28.03 Da, | 2294.985596 | 2 | 798.8736572 | 798.875383  |
| SGYTPDEKLR             | Q3UIU2 | 0.00051256 | N-term +42.01 Da, K +28.03 Da, | 2298.695068 | 2 | 618.3162842 | 618.3169633 |
| AVSTGVKVR              | Q9D2M8 | 0          | N-term +42.01 Da, K +28.03 Da, | 2307.793213 | 2 | 542.3299561 | 542.3296758 |
| ALLAGKDSETGENIR        | P38647 | 0.00188679 | N-term +42.01 Da, K +28.03 Da, | 2308.132813 | 3 | 549.2999878 | 548.6248177 |
| AGTTTIEAVKR            | D3Z2H9 | 0          | N-term +42.01 Da, K +28.03 Da, | 2308.642334 | 2 | 608.8476563 | 608.8484304 |
| SLDMKEHPDAEVQKN        | O55060 | 0          | N-term +42.01 Da, K +28.03 Da, | 2311.427246 | 3 | 614.3099976 | 613.6366177 |
| AGSSAEQAADYR           | Q9ER72 | 0          | N-term +42.01 Da,              | 2315.655762 | 2 | 634.2800293 | 634.2811097 |
| ASTFNPR                | Q9JIL4 | 0.01205857 | N-term +42.01 Da,              | 2321.76709  | 2 | 417.7085876 | 417.7088618 |
| SLKPQPQPAPATGR         | O70305 | 0.00142857 | N-term +42.01 Da, K +28.03 Da, | 2325.037598 | 2 | 807.9500122 | 807.9517503 |
| MFQGADSQAGKSGSR        | Q6PGH2 | 0          | N-term +42.01 Da, K +28.03 Da, | 2333.80835  | 2 | 798.8800049 | 798.875383  |
| DQDLDSLK               | Q9EQG3 | 0.0045106  | N-term +42.01 Da, K +28.03 Da, | 2335.261963 | 2 | 558.7865601 | 558.7927897 |
| AGTTTIEAVKR            | D3Z2H9 | 0.00052002 | N-term +42.01 Da, K +28.03 Da, | 2339.088135 | 2 | 608.8486328 | 608.8484304 |
| MEKPAASTEPPQSRPALGR    | Q9JMD3 | 0.00921053 | N-term +42.01 Da, K +28.03 Da, | 2340.041016 | 3 | 685.3500366 | 685.0213542 |
| ASSVGNVADSTEPTKR       | Q8CGY8 | 0.01995012 | N-term +42.01 Da, K +28.03 Da, | 2342.567871 | 2 | 844.9199829 | 844.9261278 |
| SDSRDPASDQMKQWKEQR     | P24270 | 0.00449035 | N-term +42.01 Da, K +28.03 Da, | 2347.412842 | 3 | 764.3699951 | 764.0342116 |
| DEGDEEEEEDEGPVR        | Q9D0J8 | 0          | N-term +42.01 Da,              | 2348.997803 | 2 | 1139.939941 | 1139.41731  |
| DEGDEEEEEDEGPVR        | Q9D0J8 | 0          | N-term +42.01 Da,              | 2349.470703 | 2 | 1139.430054 | 1139.41731  |
| AVSTGVKVR              | Q9D2M8 | 0          | N-term +42.01 Da, K +28.03 Da, | 2354.450439 | 2 | 542.3312378 | 542.3296758 |
| SLKPQPQPAPATGR         | O70305 | 0.00276116 | N-term +42.01 Da, K +28.03 Da, | 2355.626221 | 2 | 807.9519043 | 807.9517503 |
| MEVGQYGKNASR           | Q6PD10 | 0          | N-term +42.01 Da, K +28.03 Da, | 2365.703125 | 2 | 705.8499756 | 705.3457293 |
| DTVWEKPLR              | Q8BVD2 | 0.01721966 | N-term +42.01 Da, K +28.03 Da, | 2365.96582  | 3 | 405.8999939 | 405.224036  |
| AGTTTIEAVKR            | D3Z2H9 | 0          | N-term +42.01 Da, K +28.03 Da, | 2369.734863 | 2 | 608.8499756 | 608.8484304 |
| ADTYAVVQKR             | Q61152 | 0          | N-term +42.01 Da, K +28.03 Da, | 2370.1875   | 2 | 610.835022  | 610.8353229 |
| QNSSLEDSQIEKER         | Q9CZ13 | 0.00051787 | N-term +42.01 Da, K +28.03 Da, | 2375.23584  | 2 | 867.9099731 | 866.9210428 |
| SHTILLVQPTKRPEGR       | P84089 | 0          | N-term +42.01 Da, K +28.03 Da, | 2380.140625 | 4 | 476.2799988 | 476.2784486 |
| SEPKAIDPKLSTTDR        | P63328 | 0.00097513 | N-term +42.01 Da, K +28.03 Da, | 2380.366943 | 3 | 585.9892578 | 585.9877562 |
| ATPGEQCAGLR            | Q9R1S7 | 0          | N-term +42.01 Da, C +57.02Da,  | 2380.78418  | 2 | 601.2848511 | 601.2851401 |
| SHTILLVQPTKRPEGR       | P84089 | 0          | N-term +42.01 Da, K +28.03 Da, | 2382.922119 | 3 | 635.039978  | 634.7021726 |
| AAVKTLNPKAEVAR         | P80317 | 0.00096108 | N-term +42.01 Da, K +28.03 Da, | 2383.475342 | 3 | 522.9799805 | 522.6506378 |
| AVSTGVKVR              | Q9D2M8 | 0.01606765 | N-term +42.01 Da, K +28.03 Da, | 2385.207031 | 2 | 542.3304443 | 542.3296758 |
| SHTILLVQPTKRPEGR       | P84089 | 0          | N-term +42.01 Da, K +28.03 Da, | 2385.784912 | 3 | 634.7020264 | 634.7021726 |
| AAPAAPAAGETGPDAR       | Q9D6Y9 | 0          | N-term +42.01 Da,              | 2388.070068 | 2 | 733.3599854 | 732.857516  |
| AKIAKTHEDIEAQIR        | Q99NB9 | 0          | N-term +42.01 Da, K +28.03 Da, | 2389.164307 | 3 | 607.6785278 | 607.6791452 |

|                          |        |            |                                            |             |   |             |             |
|--------------------------|--------|------------|--------------------------------------------|-------------|---|-------------|-------------|
| SHTILLVQPTKRPEGR         | P84089 | 0.00536913 | N-term +42.01 Da, K +28.03 Da,             | 2391.507568 | 2 | 951.5499878 | 951.5496207 |
| AKIAKTHEDIEAQIR          | Q99NB9 | 0          | N-term +42.01 Da, K +28.03 Da,             | 2392.88916  | 2 | 911.0100098 | 911.0150796 |
| SETAAPAAPAPVEKTPVKK      | P43277 | 0          | N-term +42.01 Da, K +28.03 Da,             | 2394.353271 | 3 | 729.4199829 | 729.4192202 |
| AAVKTLNPKAEVAR           | P80317 | 0.000998   | N-term +42.01 Da, K +28.03 Da,             | 2394.522461 | 2 | 783.4699707 | 783.4723184 |
| DKAIVQEATR               | Q8CHT0 | 0.01684211 | N-term +42.01 Da, K +28.03 Da,             | 2403.561523 | 2 | 601.8252563 | 600.8327804 |
| AAVKTLNPKAEVAR           | P80317 | 0          | N-term +42.01 Da, K +28.03 Da,             | 2414.056885 | 3 | 522.651001  | 522.6506378 |
| ATTLDLKSKEEKDAELDKR      | Q8VC31 | 0          | N-term +42.01 Da, K +28.03 Da,             | 2417.086914 | 4 | 586.8302612 | 586.8297064 |
| SEGDSVGSVHGKPSVVYR       | Q9CQU3 | 0          | N-term +42.01 Da, K +28.03 Da,             | 2419.043945 | 3 | 682.3300171 | 682.3359962 |
| AAPAAPAAGETGPDAR         | Q9D6Y9 | 0          | N-term +42.01 Da,                          | 2419.605225 | 2 | 732.8599854 | 732.857516  |
| SSMTQNLR                 | Q9CQR4 | 0.00098619 | N-term +42.01 Da,                          | 2419.769775 | 2 | 489.7376099 | 489.7372939 |
| AGTTTIEAVKR              | D3Z2H9 | 0          | N-term +42.01 Da, K +28.03 Da,             | 2419.929443 | 2 | 608.8499756 | 608.8484304 |
| MNVGTAHSEVNPNTNR         | Q9CPZ6 | 0          | N-term +42.01 Da,                          | 2421.17334  | 2 | 834.8900146 | 834.8915645 |
| AKIAKTHEDIEAQIR          | Q99NB9 | 0          | N-term +42.01 Da, K +28.03 Da,             | 2422.411621 | 3 | 607.6791992 | 607.6791452 |
| DEPPQHALR                | P70296 | 0.00623608 | N-term +42.01 Da,                          | 2424.840576 | 2 | 553.2841797 | 552.7752651 |
| AIAEELAPER               | Q35490 | 0.00096805 | N-term +42.01 Da,                          | 2431.092773 | 2 | 571.8099976 | 570.7984062 |
| GEVAGGAAPGPPR            | Q61210 | 0          | N-term +42.01 Da,                          | 2432.363525 | 2 | 589.2999878 | 589.3016472 |
| MQSAPLEQPAKR             | Q60710 | 0          | N-term +42.01 Da, K +28.03 Da,             | 2433.308838 | 2 | 713.3803101 | 713.379572  |
| GQKVNAAACDIAR            | Q35490 | 0          | N-term +42.01 Da, K +28.03 Da, C +57.02Da, | 2434.697021 | 2 | 752.364563  | 751.3750185 |
| MQSAPLEQPAKR             | Q60710 | 0          | N-term +42.01 Da, K +28.03 Da,             | 2436.29541  | 2 | 713.8800049 | 713.379572  |
| ATSASSHLNKGKIQMY         | P15105 | 0.00052882 | N-term +42.01 Da, K +28.03 Da,             | 2441.300537 | 3 | 612.3200073 | 611.9891024 |
| MIRNGHGAASAAGLKGPGDQR    | Q922E4 | 0.00624721 | N-term +42.01 Da, K +28.03 Da,             | 2446.42334  | 4 | 534.7800293 | 534.2788173 |
| SQAEFDKAAEEVKR           | P31786 | 0          | N-term +42.01 Da, K +28.03 Da,             | 2449.628418 | 3 | 569.2961426 | 569.2967011 |
| AGTTTIEAVKR              | D3Z2H9 | 0.00317316 | N-term +42.01 Da, K +28.03 Da,             | 2450.620361 | 2 | 608.8499756 | 608.8484304 |
| MEDPGEDTSIHR             | Q80X98 | 0          | N-term +42.01 Da,                          | 2451.256592 | 2 | 714.8099976 | 714.8066347 |
| ASGADSKGDDLSTAILKQKNRPNR | Q01853 | 0.00836636 | N-term +42.01 Da, K +28.03 Da,             | 2454.111328 | 4 | 667.8699951 | 667.8648777 |
| AHYHDNYGKNDEVEFVR        | P25688 | 0          | N-term +42.01 Da, K +28.03 Da,             | 2470.22583  | 3 | 722         | 721.6678572 |
| AHYHDNYGKNDEVEFVR        | P25688 | 0          | N-term +42.01 Da, K +28.03 Da,             | 2471.126465 | 4 | 541.75      | 541.502712  |
| AAQESLHVKTPLR            | Q8VBT2 | 0          | N-term +42.01 Da, K +28.03 Da,             | 2471.201904 | 3 | 507.2900085 | 507.291221  |
| ATSASSHLNKGKIQMY         | P15105 | 0          | N-term +42.01 Da, K +28.03 Da,             | 2472.200439 | 3 | 611.9888306 | 611.9891024 |
| SSSPVNVKLL               | Q8VEK3 | 0.01284797 | N-term +42.01 Da, K +28.03 Da,             | 2472.608398 | 2 | 578.850769  | 578.8504414 |
| ATSASSHLNKGKIQMY         | P15105 | 0.00099256 | N-term +42.01 Da, K +28.03 Da,             | 2478.368896 | 2 | 917.4799805 | 917.4800154 |
| AADTQVSETLKR             | E9PVA8 | 0          | N-term +42.01 Da, K +28.03 Da,             | 2479.038574 | 2 | 694.8699951 | 694.8726345 |
| AAETVELHKLK              | Q9D1J3 | 0          | N-term +42.01 Da, K +28.03 Da,             | 2481.296143 | 3 | 446.2663574 | 446.2660126 |
| ASGADSKGDDLSTAILKQKNRPNR | Q01853 | 0          | N-term +42.01 Da, K +28.03 Da,             | 2485.576904 | 4 | 668.1199951 | 667.8648777 |
| MKHYEVEIR                | Q9CY27 | 0.03201281 | N-term +42.01 Da, K +28.03 Da,             | 2488.93335  | 3 | 425.5599976 | 425.5569093 |
| AHYHDNYGKNDEVEFVR        | P25688 | 0          | N-term +42.01 Da, K +28.03 Da,             | 2492.026855 | 2 | 1082.5      | 1081.998148 |
| AEASAAGADAGSAVAHR        | Q9D0C1 | 0          | N-term +42.01 Da,                          | 2492.649658 | 2 | 812.8900146 | 812.8873366 |
| LPAEFDKAAEEVKR           | Q4VWZ5 | 0          | N-term +42.01 Da, K +28.03 Da,             | 2496.199951 | 3 | 567.3005981 | 567.6454414 |
| AHYHDNYGKNDEVEFVR        | P25688 | 0          | N-term +42.01 Da, K +28.03 Da,             | 2501.692139 | 4 | 541.5021973 | 541.502712  |
| AHYHDNYGKNDEVEFVR        | P25688 | 0          | N-term +42.01 Da, K +28.03 Da,             | 2501.767578 | 3 | 721.6669312 | 721.6678572 |

|                       |        |            |                                           |             |   |             |             |
|-----------------------|--------|------------|-------------------------------------------|-------------|---|-------------|-------------|
| ATSASSHLNKGIKQMY      | P15105 | 0          | N-term +42.01 Da, K +28.03 Da,            | 2502.920654 | 3 | 611.987854  | 611.9891024 |
| GVNKMDSSTEPYSQKR      | P10126 | 0.04258614 | N-term +42.01 Da, K +28.03 Da,            | 2503.169189 | 3 | 646.3200073 | 645.6595338 |
| AEVQQLR               | Q9CR98 | 0.03844645 | N-term +42.01 Da,                         | 2514.004639 | 2 | 443.2424622 | 443.243069  |
| AHYHDNYGKNDEVEFVR     | P25688 | 0          | N-term +42.01 Da, K +28.03 Da,            | 2522.511719 | 2 | 1082.5      | 1081.998148 |
| SSKVSRTLYEAVR         | P53026 | 0          | N-term +42.01 Da, K +28.03 Da,            | 2522.662842 | 3 | 561.2999878 | 560.9686957 |
| LGPVSDICKN            | Q61207 | 0.04578684 | N-term +42.01 Da, K +28.03 Da,C +57.02Da, | 2528.071045 | 2 | 615.8112793 | 615.3133662 |
| AHYHDNYGKNDEVEFVR     | P25688 | 0          | N-term +42.01 Da, K +28.03 Da,            | 2532.328613 | 4 | 541.5       | 541.502712  |
| AHYHDNYGKNDEVEFVR     | P25688 | 0          | N-term +42.01 Da, K +28.03 Da,            | 2532.946777 | 3 | 722         | 721.6678572 |
| AGSSSLEAVR            | E9Q453 | 0          | N-term +42.01 Da,                         | 2533.887939 | 2 | 509.7600098 | 509.7618236 |
| MASGGGVPTDEEQATGLER   | P19536 | 0          | N-term +42.01 Da,                         | 2536.389893 | 2 | 974.9492188 | 973.9416498 |
| YPELSDHEFIEEK         | P53995 | 0.02375102 | N-term +42.01 Da, K +28.03 Da,            | 2537.574707 | 2 | 853.9154663 | 853.4014227 |
| KEDQTEYLEER           | P07901 | 0.04189294 | N-term +42.01 Da, K +28.03 Da,            | 2538.315674 | 2 | 756.3459473 | 755.357015  |
| AEVQQLR               | Q9CR98 | 0.03844645 | N-term +42.01 Da,                         | 2545.583252 | 2 | 443.2434082 | 443.243069  |
| AKIAQGAMYR            | P14824 | 0.02404238 | N-term +42.01 Da, K +28.03 Da,            | 2551.453369 | 2 | 589.8212891 | 589.8211607 |
| ATSASSHLNKGIKQMY      | P15105 | 0.02186469 | N-term +42.01 Da, K +28.03 Da,            | 2556.519043 | 3 | 612.3200073 | 611.9891024 |
| SQAEFDKAAEEVKKR       | P31786 | 0.00278035 | N-term +42.01 Da, K +28.03 Da,            | 2560.459717 | 3 | 569.2999878 | 569.2967011 |
| HGDLLECADDR           | P07724 | 0.0005102  | N-term +42.01 Da, C +57.02Da,             | 2560.622803 | 2 | 672.2800293 | 671.7882446 |
| VHTEYSSLR             | P49429 | 0.00919842 | N-term +42.01 Da,                         | 2562.120605 | 2 | 567.289978  | 567.2829231 |
| ASSDIQVKELEKR         | P54227 | 0          | N-term +42.01 Da, K +28.03 Da,            | 2563.474854 | 3 | 534.3018188 | 534.3016747 |
| ALSDADVQKQIKH         | P50518 | 0.00098425 | N-term +42.01 Da, K +28.03 Da,            | 2564.195068 | 2 | 775.9299927 | 775.9304838 |
| ALSDADVQKQIKH         | P50518 | 0.00051813 | N-term +42.01 Da, K +28.03 Da,            | 2565.113525 | 3 | 517.6221924 | 517.622748  |
| ASSDIQVKELEKR         | P54227 | 0.00050403 | N-term +42.01 Da, K +28.03 Da,            | 2565.270752 | 2 | 800.9500122 | 800.9488739 |
| AGTMAEETAPAVLER       | Q64374 | 0.00099305 | N-term +42.01 Da,                         | 2572.162109 | 2 | 795.3900146 | 794.3877921 |
| AAQESLHVKTPLR         | Q8VBT2 | 0          | N-term +42.01 Da, K +28.03 Da,            | 2578.131836 | 2 | 760.4313965 | 760.4331933 |
| AGLGHPSAFGR           | Q9CWS0 | 0          | N-term +42.01 Da,                         | 2587.372559 | 2 | 556.2861938 | 556.2857996 |
| ATSASSHLNKGIKQMY      | P15105 | 0          | N-term +42.01 Da, K +28.03 Da,            | 2587.447998 | 3 | 611.9890747 | 611.9891024 |
| ATSASSHLNKGIKQMY      | P15105 | 0          | N-term +42.01 Da, K +28.03 Da,            | 2589.52832  | 2 | 917.9799805 | 917.4800154 |
| MEGYHKPDQQLQALKDTANR  | P40142 | 0          | N-term +42.01 Da, K +28.03 Da,            | 2591.189697 | 3 | 866.789978  | 866.4549993 |
| MEGYHKPDQQLQALKDTANR  | P40142 | 0          | N-term +42.01 Da, K +28.03 Da,            | 2592.112061 | 4 | 650.0900269 | 650.0930686 |
| SQAEFDKAAEEVKKR       | P31786 | 0.00099059 | N-term +42.01 Da, K +28.03 Da,            | 2593.989502 | 3 | 569.2999878 | 569.2967011 |
| EASLAKIKEQTR          | P30115 | 0          | N-term +42.01 Da, K +28.03 Da,            | 2594.065186 | 3 | 491.9474792 | 491.2874767 |
| ASSDIQVKELEKR         | P54227 | 0          | N-term +42.01 Da, K +28.03 Da,            | 2595.315674 | 3 | 534.3009033 | 534.3016747 |
| AHYHDNYGKNDEVEFVR     | P25688 | 0          | N-term +42.01 Da, K +28.03 Da,            | 2597.708252 | 4 | 542         | 541.502712  |
| AAQESLHVKTPLR         | Q8VBT2 | 0          | N-term +42.01 Da, K +28.03 Da,            | 2601.938721 | 3 | 507.2907715 | 507.291221  |
| AAQESLHVKTPLR         | Q8VBT2 | 0          | N-term +42.01 Da, K +28.03 Da,            | 2608.357422 | 2 | 760.4320679 | 760.4331933 |
| AHYHDNYGKNDEVEFVR     | P25688 | 0          | N-term +42.01 Da, K +28.03 Da,            | 2609.643066 | 3 | 722         | 721.6678572 |
| ATKCTKCGPGYSTPLEAMKGP | P17563 | 0          | N-term +42.01 Da, K +28.03 Da,C +57.02Da, | 2612.506348 | 4 | 635.0700073 | 634.8234722 |
| VVFDPTYDR             | P16015 | 0.00276498 | N-term +42.01 Da,                         | 2612.657471 | 2 | 587.2700195 | 586.2669391 |
| ASESGKLWGGGR          | Q91YI0 | 0.00275862 | N-term +42.01 Da, K +28.03 Da,            | 2616.965088 | 2 | 609.3162842 | 609.3172973 |
| KSEVEVKKIFR           | O35490 | 0          | N-term +42.01 Da, K +28.03 Da,            | 2618.514648 | 4 | 373.480011  | 372.9841657 |

|                              |        |            |                                           |             |   |             |             |
|------------------------------|--------|------------|-------------------------------------------|-------------|---|-------------|-------------|
| MEEEQDLPEQPVKKAK             | A2A953 | 0.0010005  | N-term +42.01 Da, K +28.03 Da,            | 2620.335938 | 3 | 675.6900024 | 675.6906113 |
| AGLGHPSAFGR                  | Q9CWS0 | 0          | N-term +42.01 Da,                         | 2626.881348 | 2 | 556.2854004 | 556.2857996 |
| STAGVAAQDIR                  | Q99JZ7 | 0          | N-term +42.01 Da,                         | 2627.032227 | 2 | 566.2999878 | 565.7936552 |
| AGSSSLEAVR                   | E9Q453 | 0          | N-term +42.01 Da,                         | 2629.39917  | 2 | 509.7613525 | 509.7618236 |
| AHYHDNYGKNDEVEFVR            | P25688 | 0          | N-term +42.01 Da, K +28.03 Da,            | 2629.722412 | 4 | 541.7476196 | 541.502712  |
| DDEGDEEDEEEEEDEGPVR          | Q9D0J8 | 0          | N-term +42.01 Da,                         | 2636.865479 | 2 | 1196.949951 | 1196.930782 |
| ATSASSHLNKGIKQMY             | P15105 | 0.00793651 | N-term +42.01 Da, K +28.03 Da,            | 2638.950439 | 3 | 611.9899902 | 611.9891024 |
| AMNYSAKDEVGGPAGPPGGAATR      | Q8VEK0 | 0          | N-term +42.01 Da, K +28.03 Da,            | 2639.2771   | 3 | 839.4099731 | 839.0797098 |
| ASESGKLWGGR                  | Q91Y10 | 0          | N-term +42.01 Da, K +28.03 Da,            | 2648.225098 | 2 | 609.3164673 | 609.3172973 |
| DGEDDDEGDEEDEEEEEDEGPVR      | Q9D0J8 | 0          | N-term +42.01 Da,                         | 2652.741943 | 2 | 1406.01001  | 1404.989755 |
| MDMGNQHPSISR                 | Q8CI32 | 0          | N-term +42.01 Da,                         | 2655.77832  | 2 | 707.8115845 | 707.8137391 |
| AGLGHPSAFGR                  | Q9CWS0 | 0.00095831 | N-term +42.01 Da,                         | 2658.082275 | 2 | 556.2850342 | 556.2857996 |
| KISGQKVNEAACDIAR             | Q35490 | 0          | N-term +42.01 Da, K +28.03 Da,C +57.02Da, | 2658.843506 | 3 | 620.6599731 | 619.9998901 |
| AHYHDNYGKNDEVEFVR            | P25688 | 0          | N-term +42.01 Da, K +28.03 Da,            | 2659.483154 | 2 | 1082.48999  | 1081.998148 |
| AHYHDNYGKNDEVEFVR            | P25688 | 0          | N-term +42.01 Da, K +28.03 Da,            | 2660.073242 | 4 | 541.7486572 | 541.502712  |
| AGSSSLEAVR                   | E9Q453 | 0          | N-term +42.01 Da,                         | 2660.155762 | 2 | 509.7600098 | 509.7618236 |
| GKDGVANVSIEDR                | P08228 | 0.00142586 | N-term +42.01 Da, K +28.03 Da,            | 2660.561035 | 2 | 716.3599854 | 715.3677165 |
| AHYHDNYGKNDEVEFVR            | P25688 | 0          | N-term +42.01 Da, K +28.03 Da,            | 2661.337158 | 2 | 1082.98999  | 1081.998148 |
| ATKCTKCGPGYSTPLEAMKGPR       | P17563 | 0          | N-term +42.01 Da, K +28.03 Da,C +57.02Da, | 2668.252686 | 4 | 635.0700073 | 634.8234722 |
| ATSASSHLNKGIKQMY             | P15105 | 0          | N-term +42.01 Da, K +28.03 Da,            | 2670.512939 | 3 | 611.9888306 | 611.9891024 |
| AHYHDNYGKNDEVEFVR            | P25688 | 0.00051467 | N-term +42.01 Da, K +28.03 Da,            | 2672.638428 | 3 | 721.994812  | 721.6678572 |
| ATSASSHLNKGIKQMY             | P15105 | 0          | N-term +42.01 Da, K +28.03 Da,            | 2675.837402 | 2 | 917.4794922 | 917.4800154 |
| ASESGKLWGGR                  | Q91Y10 | 0          | N-term +42.01 Da, K +28.03 Da,            | 2678.834961 | 2 | 609.3167114 | 609.3172973 |
| ATQKTVDGPGSGKLWR             | P16858 | 0          | N-term +42.01 Da, K +28.03 Da,            | 2679.223877 | 3 | 581.9847412 | 581.3247021 |
| ATKCTKCGPGYSTPLEAMKGPR       | P17563 | 0          | N-term +42.01 Da, K +28.03 Da,C +57.02Da, | 2682.208984 | 3 | 846.4299927 | 846.0955374 |
| ADEEKLPPGWEKR                | Q9QUR7 | 0          | N-term +42.01 Da, K +28.03 Da,            | 2684.288086 | 3 | 551.6240234 | 551.6262697 |
| AESAESGGPPGAQDSAADGGPAEPK    | Q8R317 | 0.00189304 | N-term +42.01 Da, K +28.03 Da,            | 2685.39624  | 3 | 775.0100098 | 775.0155407 |
| AHYHDNYGKNDEVEFVR            | P25688 | 0          | N-term +42.01 Da, K +28.03 Da,            | 2691.994385 | 4 | 542         | 541.502712  |
| ATSASSHLNKGIKQMY             | P15105 | 0          | N-term +42.01 Da, K +28.03 Da,            | 2701.316895 | 3 | 611.9889526 | 611.9891024 |
| ESTTVVTTKSAEIR               | P05784 | 0.02377049 | N-term +42.01 Da, K +28.03 Da,            | 2702.616211 | 2 | 797.4199829 | 796.4305143 |
| DDDEGDEEDEEEEEDEGPVR         | Q9D0J8 | 0          | N-term +42.01 Da,                         | 2703.437988 | 2 | 1254.959961 | 1254.444254 |
| ATGANATPLDFPSKRR             | Q64213 | 0          | N-term +42.01 Da, K +28.03 Da,            | 2706.272461 | 3 | 591.3300171 | 591.3282238 |
| EHIRQNEEELSTVR               | E9Q512 | 0.03945313 | N-term +42.01 Da,                         | 2707.943848 | 3 | 594.9699707 | 594.6307431 |
| ASSKVTLSVLSR                 | Q9D711 | 0          | N-term +42.01 Da, K +28.03 Da,            | 2708.019287 | 3 | 491.9714966 | 491.9714884 |
| SQAEFDKAAEEVKR               | P31786 | 0          | N-term +42.01 Da, K +28.03 Da,            | 2709.951416 | 3 | 569.289978  | 569.2967011 |
| AMNYSAKDEVGGPAGPPGGAATR      | Q8VEK0 | 0          | N-term +42.01 Da, K +28.03 Da,            | 2710.701172 | 3 | 839.0800171 | 839.0797098 |
| ALDPAEQHLR                   | Q9CPZ8 | 0          | N-term +42.01 Da,                         | 2715.044922 | 2 | 596.3103638 | 596.3094722 |
| AGKPVLHYFDGRGR               | P30115 | 0          | N-term +42.01 Da, K +28.03 Da,            | 2715.611816 | 4 | 411.480011  | 411.4757679 |
| ADEEKLPPGWEKR                | Q9QUR7 | 0          | N-term +42.01 Da, K +28.03 Da,            | 2716.622559 | 3 | 551.6259766 | 551.6262697 |
| SEKSVEAAAELSAKDLKEKDKVEEKAGR | Q9D0J8 | 0.00187441 | N-term +42.01 Da, K +28.03 Da,            | 2716.802734 | 4 | 854.2399902 | 853.7381813 |

|                      |        |            |                                           |             |   |             |             |
|----------------------|--------|------------|-------------------------------------------|-------------|---|-------------|-------------|
| MDGEDDSNLVIKRR       | Q91WE2 | 0          | N-term +42.01 Da, K +28.03 Da,            | 2720.44165  | 3 | 573.2999878 | 573.2978247 |
| FITGETKDVANSFAVFR    | P07901 | 0.01646264 | N-term +42.01 Da, K +28.03 Da,            | 2720.707275 | 3 | 695.3599854 | 694.6882583 |
| ATGANATPLDFPSKRR     | Q64213 | 0          | N-term +42.01 Da, K +28.03 Da,            | 2721.573975 | 2 | 886.9899902 | 886.4886975 |
| AWKSGGASHSELIHNLR    | P23506 | 0          | N-term +42.01 Da, K +28.03 Da,            | 2721.649414 | 4 | 484.0064087 | 484.006427  |
| SALLEKKEQQR          | Q55UE8 | 0          | N-term +42.01 Da, K +28.03 Da,            | 2722.317871 | 2 | 764.9000244 | 764.9019237 |
| AWKSGGASHSELIHNLR    | P23506 | 0          | N-term +42.01 Da, K +28.03 Da,            | 2723.72876  | 3 | 645.3300171 | 645.0061439 |
| MDGEDDSNLVIKRR       | Q91WE2 | 0.00096246 | N-term +42.01 Da, K +28.03 Da,            | 2730.068604 | 2 | 859.4400024 | 859.4430988 |
| ASSAQSSGSSGGPAVPTVQR | Q78PY7 | 0          | N-term +42.01 Da,                         | 2734.439453 | 2 | 937.460022  | 936.9559484 |
| ATSASSHLNKGIKQMY     | P15105 | 0          | N-term +42.01 Da, K +28.03 Da,            | 2734.67041  | 3 | 611.9859009 | 611.9891024 |
| TMTLGDIVYKR          | P12710 | 0.00096572 | N-term +42.01 Da, K +28.03 Da,            | 2736.071045 | 3 | 456.9200134 | 456.2514861 |
| SADAAAGEPLPR         | P70441 | 0          | N-term +42.01 Da,                         | 2736.42041  | 2 | 598.7973633 | 598.7989377 |
| METMASPGKDNRYR       | O35345 | 0          | N-term +42.01 Da, K +28.03 Da,            | 2736.761719 | 2 | 785.3539429 | 785.3554373 |
| ASSAQSSGSSGGPAVPTVQR | Q78PY7 | 0          | N-term +42.01 Da,                         | 2739.52417  | 2 | 937.9500122 | 936.9559484 |
| ASESGKLWGGR          | Q91Y10 | 0.01643489 | N-term +42.01 Da, K +28.03 Da,            | 2740.424561 | 2 | 609.3164063 | 609.3172973 |
| AELTNYKDAASNR        | Q8R4U7 | 0          | N-term +42.01 Da, K +28.03 Da,            | 2744.885986 | 2 | 761.8800049 | 761.8784486 |
| ALDPAEQHLR           | Q9CPZ8 | 0          | N-term +42.01 Da,                         | 2746.821777 | 2 | 596.3078003 | 596.3094722 |
| AHYHDNYGKNDEVEFVR    | P25688 | 0          | N-term +42.01 Da, K +28.03 Da,            | 2748.842041 | 4 | 541.75      | 541.502712  |
| ADTPSVYETR           | Q5XG73 | 0          | N-term +42.01 Da,                         | 2748.919678 | 2 | 590.7766113 | 590.7776712 |
| AEVEETLKR            | P62627 | 0          | N-term +42.01 Da, K +28.03 Da,            | 2750.865479 | 2 | 572.8140259 | 572.8140563 |
| AGKPVLYHFDGR         | P30115 | 0.01881271 | N-term +42.01 Da, K +28.03 Da,            | 2751.95752  | 3 | 477.2600098 | 477.2577398 |
| MNSVGEACTDMKR        | Q9D822 | 0          | N-term +42.01 Da, K +28.03 Da,C +57.02Da, | 2756.397461 | 2 | 784.8499756 | 784.8469222 |
| VEMDAVGKEGR          | Q8C196 | 0.00097229 | N-term +42.01 Da, K +28.03 Da,            | 2759.619873 | 2 | 631.8081665 | 630.8162732 |
| KVSDYDGLSSFKR        | P09103 | 0.00837373 | N-term +42.01 Da, K +28.03 Da,            | 2765.643555 | 4 | 462         | 461.5044573 |
| MHATGLAAPAGTPR       | Q9CX30 | 0          | N-term +42.01 Da,                         | 2765.799805 | 2 | 696.8587646 | 696.8562638 |
| AQDGVELEKSVR         | Q8CAK3 | 0.04119705 | N-term +42.01 Da, K +28.03 Da,            | 2768.834961 | 2 | 700.8699951 | 700.8726345 |
| AALGEPVR             | _sp Q6 | 0.01884422 | N-term +42.01 Da,                         | 2770.134766 | 2 | 427.7399902 | 427.7401619 |
| SGDHLHNSQIEADFR      | Q04750 | 0          | N-term +42.01 Da,                         | 2771.515381 | 3 | 628.2819214 | 628.2820027 |
| MKVFTVGLPAEGR        | Q91Z53 | 0          | N-term +42.01 Da, K +28.03 Da,            | 2773.621094 | 2 | 787.4400024 | 786.4343472 |
| SASNVSLHETSR         | Q8BZ09 | 0          | N-term +42.01 Da,                         | 2777.265869 | 2 | 721.8631592 | 721.865341  |
| AEVEETLKR            | P62627 | 0.0009901  | N-term +42.01 Da, K +28.03 Da,            | 2781.352051 | 2 | 572.8134155 | 572.8140563 |
| AHYHDNYGKNDEVEFVR    | P25688 | 0.00096154 | N-term +42.01 Da, K +28.03 Da,            | 2781.577148 | 4 | 542         | 541.502712  |
| VGVNKMDSPEPPYSQKR    | P10126 | 0.01210026 | N-term +42.01 Da, K +28.03 Da,            | 2784.932129 | 3 | 679.3400269 | 678.6823386 |
| MEMTSTSLKR           | Q91VU7 | 0          | N-term +42.01 Da, K +28.03 Da,            | 2787.911621 | 2 | 627.3099976 | 627.3150516 |
| MQVLTKR              | Q62264 | 0.01447424 | N-term +42.01 Da, K +28.03 Da,            | 2790.069336 | 2 | 473.2791138 | 473.2811395 |
| LCAATATILDKPEDR      | O35215 | 0          | N-term +42.01 Da, K +28.03 Da,C +57.02Da, | 2793.218994 | 3 | 582.6411743 | 581.969708  |
| SQAEFDKAAEEVKKR      | P31786 | 0          | N-term +42.01 Da, K +28.03 Da,            | 2797.931885 | 3 | 569.2954712 | 569.2967011 |
| ADIVENQVMDTR         | P10649 | 0          | N-term +42.01 Da,                         | 2798.18335  | 2 | 717.8499756 | 716.8404773 |
| SADAAAGEPLPR         | P70441 | 0          | N-term +42.01 Da,                         | 2800.408691 | 2 | 598.7982178 | 598.7989377 |
| AQDGVELEKSVR         | Q8CAK3 | 0          | N-term +42.01 Da, K +28.03 Da,            | 2800.484131 | 2 | 700.8722534 | 700.8726345 |
| MKVFTVGLPAEGR        | Q91Z53 | 0          | N-term +42.01 Da, K +28.03 Da,            | 2803.724121 | 3 | 525.2975464 | 524.6253236 |

|                          |        |            |                                |             |   |             |             |
|--------------------------|--------|------------|--------------------------------|-------------|---|-------------|-------------|
| AGKPVLYHFDGR             | P30115 | 0          | N-term +42.01 Da, K +28.03 Da, | 2803.950439 | 3 | 477.256958  | 477.2577398 |
| DNIQGITKPAIR             | P62806 | 0          | N-term +42.01 Da, K +28.03 Da, | 2806.693115 | 2 | 698.4000244 | 698.4013616 |
| ATDELASKLSR              | Q9D8Y0 | 0.03291039 | N-term +42.01 Da, K +28.03 Da, | 2807.023682 | 2 | 631.3400269 | 630.8433454 |
| AGKPVLYHFDGR             | P30115 | 0.00277393 | N-term +42.01 Da, K +28.03 Da, | 2807.425781 | 2 | 715.3804321 | 715.3829715 |
| GYEPQNSGDGVQNSEFK        | Q8R0T2 | 0.0009828  | N-term +42.01 Da, K +28.03 Da, | 2808.617676 | 2 | 963.4199829 | 963.4292323 |
| EAVEAKQVAQQAER           | P67778 | 0          | N-term +42.01 Da, K +28.03 Da, | 2809.868896 | 2 | 879.43573   | 878.4472274 |
| ASFGWKR                  | Q9D6K7 | 0.00958188 | N-term +42.01 Da, K +28.03 Da, | 2810.666504 | 2 | 461.25      | 461.2506965 |
| EESTTVVTTKSAEIR          | P05784 | 0.01167315 | N-term +42.01 Da, K +28.03 Da, | 2810.760254 | 2 | 861.9400024 | 860.9518114 |
| SDNGELEDKPPAPPVR         | Q8CIN4 | 0.0005152  | N-term +42.01 Da, K +28.03 Da, | 2812.054932 | 2 | 896.4500122 | 895.9496029 |
| SDNGELEDKPPAPPVR         | Q8CIN4 | 0          | N-term +42.01 Da, K +28.03 Da, | 2814.539063 | 2 | 895.9500122 | 895.9496029 |
| MQVLTQR                  | Q62264 | 0.01282599 | N-term +42.01 Da, K +28.03 Da, | 2821.012695 | 2 | 473.2806091 | 473.2811395 |
| MMGHRPVLVLSQNTKR         | P80318 | 0.03203845 | N-term +42.01 Da, K +28.03 Da, | 2821.272949 | 4 | 485.019989  | 485.0197512 |
| SSSPVNVKCLKVSELKEELKQR   | Q8VEK3 | 0          | N-term +42.01 Da, K +28.03 Da, | 2822.681885 | 4 | 684.9299927 | 684.929489  |
| MEKTELIQKAKLAEQAER       | P68254 | 0.02151427 | N-term +42.01 Da, K +28.03 Da, | 2824.461182 | 3 | 748.4099731 | 748.0873649 |
| SSSPVNVKCLKVSELKEELKQR   | Q8VEK3 | 0          | N-term +42.01 Da, K +28.03 Da, | 2824.940674 | 3 | 913.5700073 | 912.9035598 |
| SQAQFDKAAAEVQR           | P31786 | 0          | N-term +42.01 Da, K +28.03 Da, | 2829.532959 | 3 | 569.6300049 | 569.2967011 |
| SQAQFDKAAAEVQR           | P31786 | 0          | N-term +42.01 Da, K +28.03 Da, | 2843.573242 | 2 | 853.9400024 | 853.4414133 |
| ATLQSEVQVDGGEQKLSKNELKQR | Q99MN1 | 0          | N-term +42.01 Da, K +28.03 Da, | 2845.429688 | 4 | 697.1400146 | 696.6432861 |
| EESTTVVTTKSAEIR          | P05784 | 0.03512234 | N-term +42.01 Da, K +28.03 Da, | 2845.864258 | 2 | 861.9400024 | 860.9518114 |
| TFEESFQKALR              | Q8C196 | 0          | N-term +42.01 Da, K +28.03 Da, | 2852.414307 | 3 | 476.5899963 | 475.9172722 |
| SSSPVNVKCLKVSELKEELKQR   | Q8VEK3 | 0.00051335 | N-term +42.01 Da, K +28.03 Da, | 2853.525391 | 4 | 685.4299927 | 684.929489  |
| MMAAAAER                 | Q9DCS2 | 0.01644876 | N-term +42.01 Da,              | 2860.560303 | 2 | 446.7043152 | 446.7044076 |
| SQAQFDKAAAEVQR           | P31786 | 0          | N-term +42.01 Da, K +28.03 Da, | 2861.695801 | 3 | 569.2966309 | 569.2967011 |
| ASQPPPPKPVWESR           | Q9D0K1 | 0.00052383 | N-term +42.01 Da, K +28.03 Da, | 2869.305664 | 2 | 822.4199829 | 822.4306508 |
| AGQSDKDKVYTLLEIQKHKDSK   | P56395 | 0.0148368  | N-term +42.01 Da, K +28.03 Da, | 2873.261719 | 4 | 724.1400146 | 723.8892901 |
| SQAQFDKAAAEVQR           | P31786 | 0          | N-term +42.01 Da, K +28.03 Da, | 2874.147949 | 2 | 853.4399414 | 853.4414133 |
| AGSEEQWPR                | Q8VE09 | 0          | N-term +42.01 Da,              | 2874.946533 | 2 | 551.2509766 | 551.251623  |
| GAGGALFVHR               | Q9D6J6 | 0.00406688 | N-term +42.01 Da,              | 2883.276123 | 2 | 513.7800293 | 513.7776101 |
| MEDDQELER                | P97304 | 0          | N-term +42.01 Da,              | 2885.270264 | 2 | 603.7497559 | 603.7507965 |
| SEAAPAAPAAAPAEKAPA       | P15864 | 0          | N-term +42.01 Da, K +28.03 Da, | 2889.608154 | 2 | 880.4500122 | 879.4570634 |
| MEDEVVR                  | P10711 | 0.00919037 | N-term +42.01 Da,              | 2890.525391 | 2 | 460.212677  | 460.2131203 |
| SQAQFDKAAAEVQR           | P31786 | 0          | N-term +42.01 Da, K +28.03 Da, | 2894.056641 | 3 | 569.2958984 | 569.2967011 |
| MVPSQEPPAAER             | Q3U9N9 | 0          | N-term +42.01 Da,              | 2905.799561 | 2 | 693.3200073 | 693.3219203 |
| ATEGMILTNHDHQIR          | Q8BUV3 | 0          | N-term +42.01 Da,              | 2910.462158 | 3 | 593.2920532 | 593.293185  |
| ATEGMILTNHDHQIR          | Q8BUV3 | 0          | N-term +42.01 Da,              | 2911.723877 | 2 | 889.4299927 | 889.4361392 |
| AFKDTGKTPVEPEVAIHR       | P60867 | 0          | N-term +42.01 Da, K +28.03 Da, | 2912.061035 | 3 | 698.3852539 | 698.3845097 |
| SQAQFDKAAAEVQR           | P31786 | 0          | N-term +42.01 Da, K +28.03 Da, | 2912.600342 | 2 | 853.9400024 | 853.4414133 |
| SDNGELEDKPPAPPVR         | Q8CIN4 | 0          | N-term +42.01 Da, K +28.03 Da, | 2916.031494 | 2 | 896.4400024 | 895.9496029 |
| AGKPVLYHFNAR             | P10648 | 0          | N-term +42.01 Da, K +28.03 Da, | 2917.572754 | 3 | 481.6000061 | 481.6016179 |
| AEGGQAQQPPQLGPGAAAR      | Q8BP71 | 0          | N-term +42.01 Da,              | 2918.529541 | 2 | 988         | 987.493032  |

|                        |        |            |                                           |             |   |             |             |
|------------------------|--------|------------|-------------------------------------------|-------------|---|-------------|-------------|
| SSTQFNKGPSYGLSAEVKNR   | Q08093 | 0          | N-term +42.01 Da, K +28.03 Da,            | 2920.696289 | 3 | 757.0599976 | 756.7254838 |
| AFKDTGKTPVEPEVAIHR     | P60867 | 0          | N-term +42.01 Da, K +28.03 Da,            | 2922.394287 | 2 | 1047.069946 | 1047.073126 |
| AQNLKDLAGR             | O35129 | 0          | N-term +42.01 Da, K +28.03 Da,            | 2922.469727 | 2 | 578.3269043 | 578.3276648 |
| SLSNKLTLDKLDVKGKR      | P09411 | 0.03006012 | N-term +42.01 Da, K +28.03 Da,            | 2922.62085  | 3 | 690.4299927 | 690.4279382 |
| SDNGELEDKPPAPPVR       | Q8CIN4 | 0          | N-term +42.01 Da, K +28.03 Da,            | 2922.878662 | 3 | 597.960022  | 597.6354941 |
| SQAEFDKAAEEVKR         | P31786 | 0          | N-term +42.01 Da, K +28.03 Da,            | 2924.633057 | 3 | 569.2957153 | 569.2967011 |
| MNSVGEACTDMKR          | Q9D8Z2 | 0          | N-term +42.01 Da, K +28.03 Da,C +57.02Da, | 2926.546631 | 2 | 785.3400269 | 784.8469222 |
| SLSNKLTLDKLDVKGKR      | P09411 | 0          | N-term +42.01 Da, K +28.03 Da,            | 2927.228516 | 2 | 1035.140015 | 1035.138269 |
| QNYSTEVEAAVNR          | P29391 | 0          | N-term +42.01 Da,                         | 2934.186523 | 2 | 762.8699951 | 761.860256  |
| SLSNKLTLDKLDVKGKR      | P09411 | 0.02407181 | N-term +42.01 Da, K +28.03 Da,            | 2934.624023 | 4 | 518.0726318 | 518.0727728 |
| SLSNKLTLDKLDVKGKR      | P09411 | 0          | N-term +42.01 Da, K +28.03 Da,            | 2936.768066 | 2 | 1036.140015 | 1035.138269 |
| SLLNPKSEMTPPEELQKR     | P62317 | 0          | N-term +42.01 Da, K +28.03 Da,            | 2940.704346 | 4 | 564.3200073 | 564.3173428 |
| AFKDTGKTPVEPEVAIHR     | P60867 | 0.03912363 | N-term +42.01 Da, K +28.03 Da,            | 2941.76001  | 4 | 524.289978  | 524.0402014 |
| AQNPSNMEPLR            | Q91W19 | 0          | N-term +42.01 Da,                         | 2943.943604 | 2 | 649.8099976 | 649.8115222 |
| SLLNPKSEMTPPEELQKR     | P62317 | 0          | N-term +42.01 Da, K +28.03 Da,            | 2944.965088 | 3 | 752.4199829 | 752.0873649 |
| AGKPVLYHFNAR           | P10648 | 0          | N-term +42.01 Da, K +28.03 Da,            | 2945.300781 | 2 | 721.8983154 | 721.8987886 |
| SLLNPKSEMTPPEELQKR     | P62317 | 0          | N-term +42.01 Da, K +28.03 Da,            | 2946.578125 | 3 | 752.75      | 752.0873649 |
| SDNGELEDKPPAPPVR       | Q8CIN4 | 0.00050454 | N-term +42.01 Da, K +28.03 Da,            | 2947.587646 | 2 | 896.4400024 | 895.9496029 |
| AGKPVLYHFNAR           | P10648 | 0          | N-term +42.01 Da, K +28.03 Da,            | 2949.003418 | 3 | 481.6010742 | 481.6016179 |
| GQAEFDKAAEEVKR         | F6WUQ1 | 0.00187266 | N-term +42.01 Da, K +28.03 Da,            | 2951.282471 | 3 | 559.289978  | 559.2931794 |
| AQNLKDLAGR             | O35129 | 0          | N-term +42.01 Da, K +28.03 Da,            | 2953.554932 | 2 | 578.3275146 | 578.3276648 |
| SLSNKLTLDKLDVKGKR      | P09411 | 0.0045045  | N-term +42.01 Da, K +28.03 Da,            | 2953.630371 | 3 | 690.7600098 | 690.4279382 |
| SQAEFDKAAEEVKR         | P31786 | 0          | N-term +42.01 Da, K +28.03 Da,            | 2954.873047 | 3 | 569.2965088 | 569.2967011 |
| SQAEFDKAAEEVKR         | P31786 | 0          | N-term +42.01 Da, K +28.03 Da,            | 2955.652832 | 2 | 853.9400024 | 853.4414133 |
| KNYTDNELEKITR          | P26443 | 0          | N-term +42.01 Da, K +28.03 Da,            | 2956.723633 | 3 | 575.2994995 | 574.6404678 |
| NCLSGQAEFDKAAEEVKR     | F6WUQ1 | 0          | N-term +42.01 Da, K +28.03 Da,C +57.02Da, | 2970.318359 | 3 | 717.6900024 | 717.3564029 |
| NCLSGQAEFDKAAEEVKR     | F6WUQ1 | 0          | N-term +42.01 Da, K +28.03 Da,C +57.02Da, | 2971.464111 | 3 | 717.3499756 | 717.3564029 |
| SQAEFDKAAEEVKR         | P31786 | 0          | N-term +42.01 Da, K +28.03 Da,            | 2974.855713 | 3 | 568.960022  | 569.2967011 |
| AGLNSLEAVKR            | Q6IRU2 | 0.00921861 | N-term +42.01 Da, K +28.03 Da,            | 2974.931152 | 2 | 614.8499756 | 614.3564224 |
| AELIEDYRIK             | Q8BRH4 | 0.02851406 | N-term +42.01 Da, K +28.03 Da,            | 2976.351074 | 3 | 440.25      | 440.5783678 |
| MENQLTKSVEER           | Q9DC50 | 0          | N-term +42.01 Da, K +28.03 Da,            | 2980.338867 | 2 | 767.3800049 | 767.3825095 |
| SVKEAEDNIREMLMAR       | Q9CWM4 | 0.01608125 | N-term +42.01 Da, K +28.03 Da,            | 2983.202637 | 3 | 655.3400269 | 654.6642904 |
| AGKPVLYHFNAR           | P10648 | 0.01993355 | N-term +42.01 Da, K +28.03 Da,            | 2984.863037 | 3 | 481.6000061 | 481.6016179 |
| SQAEFDKAAEEVKR         | P31786 | 0          | N-term +42.01 Da, K +28.03 Da,            | 2986.736084 | 2 | 853.43927   | 853.4414133 |
| AGKPVLYHFDGR           | P30115 | 0          | N-term +42.01 Da, K +28.03 Da,            | 2989.086182 | 3 | 477.5899963 | 477.2577398 |
| EAILAIHKEAQR           | P57780 | 0.00050505 | N-term +42.01 Da, K +28.03 Da,            | 2991.114014 | 3 | 483.6099854 | 483.6121829 |
| AGKPVLYHFDGR           | P30115 | 0          | N-term +42.01 Da, K +28.03 Da,            | 2992.093994 | 2 | 715.3800049 | 715.3829715 |
| AEDIKTIKIKNYKTAPFDSR   | P56391 | 0          | N-term +42.01 Da, K +28.03 Da,            | 2992.246338 | 4 | 595.5900269 | 595.5875161 |
| GKAFIFPQESSTAYVSLIPKVR | Q8R1M8 | 0.02741935 | N-term +42.01 Da, K +28.03 Da,            | 3002.808594 | 3 | 846.1300049 | 846.1439791 |
| ELETMTGEKVK            | P12710 | 0          | N-term +42.01 Da, K +28.03 Da,            | 3004.456299 | 2 | 682.3599854 | 681.8628894 |

|                             |        |            |                                           |             |   |             |             |
|-----------------------------|--------|------------|-------------------------------------------|-------------|---|-------------|-------------|
| SQAEFDKAAEEVKR              | P31786 | 0          | N-term +42.01 Da, K +28.03 Da,            | 3005.832764 | 3 | 569.2956543 | 569.2967011 |
| AGGEGGVTLGQPHLSR            | Q9Z0N1 | 0          | N-term +42.01 Da,                         | 3007.930908 | 2 | 789.9099731 | 789.4051647 |
| AGGEGGVTLGQPHLSR            | Q9Z0N1 | 0          | N-term +42.01 Da,                         | 3008.889893 | 2 | 789.4000244 | 789.4051647 |
| SQAEFDKAAEEVKR              | P31786 | 0          | N-term +42.01 Da, K +28.03 Da,            | 3017.150879 | 2 | 853.4394531 | 853.4414133 |
| VISLSGEHSIIGR               | P08228 | 0          | N-term +42.01 Da,                         | 3017.226318 | 3 | 471.2685242 | 470.5964216 |
| AGKPVLYHYFDGR               | P30115 | 0          | N-term +42.01 Da, K +28.03 Da,            | 3020.459717 | 3 | 477.257019  | 477.2577398 |
| AGKPVLYHYFDGR               | P30115 | 0          | N-term +42.01 Da, K +28.03 Da,            | 3023.544678 | 2 | 715.3817749 | 715.3829715 |
| HAITATQKTVDGPSGKLWR         | P16858 | 0          | N-term +42.01 Da, K +28.03 Da,            | 3025.826904 | 4 | 542.2966309 | 541.8022882 |
| SASPDDIKKAYR                | Q9QYI5 | 0.00449438 | N-term +42.01 Da, K +28.03 Da,            | 3032.80127  | 3 | 483.9299927 | 483.5963102 |
| CRWLFENQPIDMIK              | Q4U4S6 | 0.02702703 | N-term +42.01 Da, K +28.03 Da,C +57.02Da, | 3035.036865 | 3 | 641.3300171 | 640.655066  |
| VLSIGDGIAR                  | Q03265 | 0.02703793 | N-term +42.01 Da,                         | 3036.202637 | 2 | 522.8068848 | 521.7982087 |
| SQAEFDKAAEEVKR              | P31786 | 0          | N-term +42.01 Da, K +28.03 Da,            | 3036.883301 | 3 | 569.296936  | 569.2967011 |
| AASSLEQKLSR                 | Q8CE90 | 0          | N-term +42.01 Da, K +28.03 Da,            | 3039.386719 | 2 | 630.3499756 | 630.3513374 |
| AGGEGGVTLGQPHLSR            | Q9Z0N1 | 0          | N-term +42.01 Da,                         | 3040.615723 | 2 | 789.4099731 | 789.4051647 |
| AGLNSLEAVKR                 | Q6IRU2 | 0.00052247 | N-term +42.01 Da, K +28.03 Da,            | 3046.436523 | 2 | 614.3560181 | 614.3564224 |
| SQAEFDKAAEEVKR              | P31786 | 0          | N-term +42.01 Da, K +28.03 Da,            | 3047.58252  | 2 | 853.4424438 | 853.4414133 |
| AGKPVLYHYFDGR               | P30115 | 0          | N-term +42.01 Da, K +28.03 Da,            | 3050.710693 | 3 | 477.2579956 | 477.2577398 |
| ATDMSQGELIHPK               | Q3TEA8 | 0          | N-term +42.01 Da, K +28.03 Da,            | 3057.424316 | 2 | 749.3699951 | 748.87432   |
| AQNPSNMEPLR                 | Q91W19 | 0          | N-term +42.01 Da,                         | 3061.946533 | 2 | 649.8116455 | 649.8115222 |
| MQPKVPQLR                   | Q88908 | 0.00099552 | N-term +42.01 Da, K +28.03 Da,            | 3066.944824 | 2 | 583.8406982 | 583.8393533 |
| SQAEFDKAAEEVKR              | P31786 | 0          | N-term +42.01 Da, K +28.03 Da,            | 3068.16626  | 3 | 569.2961426 | 569.2967011 |
| AEYDLTTR                    | P60229 | 0.00097704 | N-term +42.01 Da,                         | 3070.0896   | 2 | 506.2399902 | 505.7430995 |
| AGKPVLYHYFDGR               | P30115 | 0.02113552 | N-term +42.01 Da, K +28.03 Da,            | 3071.545898 | 2 | 715.3800049 | 715.3829715 |
| ATEEAHR                     | Q9EQK5 | 0.01203783 | N-term +42.01 Da,                         | 3078.188965 | 2 | 473.2600098 | 472.7560095 |
| SQAEFDKAAEEVKR              | P31786 | 0          | N-term +42.01 Da, K +28.03 Da,            | 3079.083496 | 2 | 853.4400024 | 853.4414133 |
| AGKPVLYHYFDGR               | P30115 | 0          | N-term +42.01 Da, K +28.03 Da,            | 3081.478516 | 3 | 477.2572327 | 477.2577398 |
| SSGALLPKPQMR                | Q9CPQ1 | 0.01959967 | N-term +42.01 Da, K +28.03 Da,            | 3084.959717 | 2 | 677.878479  | 677.8792074 |
| ATEGMILTNDHQIR              | Q8BUV3 | 0          | N-term +42.01 Da,                         | 3085.721191 | 3 | 593.6199951 | 593.293185  |
| SEKSVEAAAELSAK              | Q9D0J8 | 0          | N-term +42.01 Da, K +28.03 Da,            | 3086.14624  | 2 | 759.9099731 | 759.4065077 |
| TSPEGAQNKEIDCLSPEAQR        | Q3UZ39 | 0          | N-term +42.01 Da, K +28.03 Da,C +57.02Da, | 3087.832031 | 2 | 1151.050049 | 1150.544803 |
| MELEEGKAGSGLR               | P62196 | 0.0095986  | N-term +42.01 Da, K +28.03 Da,            | 3089.069092 | 2 | 724.3699951 | 723.8664949 |
| AQNPSNMEPLR                 | Q91W19 | 0          | N-term +42.01 Da,                         | 3093.003662 | 2 | 649.8112183 | 649.8115222 |
| TSPEGAQNKEIDCLSPEAQR        | Q3UZ39 | 0          | N-term +42.01 Da, K +28.03 Da,C +57.02Da, | 3093.697266 | 3 | 767.3599854 | 767.3656273 |
| ATDISSGADCKGDTKNSAKLDADYPLR | Q9CQJ6 | 0          | N-term +42.01 Da, K +28.03 Da,C +57.02Da, | 3093.889893 | 4 | 804.1400146 | 803.6410441 |
| TSPEGAQNKEIDCLSPEAQR        | Q3UZ39 | 0          | N-term +42.01 Da, K +28.03 Da,C +57.02Da, | 3094.038818 | 2 | 1151.550049 | 1150.544803 |
| MNQEKLAKLQAQVR              | Q64152 | 0          | N-term +42.01 Da, K +28.03 Da,            | 3096.345947 | 3 | 585.6704102 | 585.6697038 |
| MQPKVPQLR                   | Q88908 | 0.01608806 | N-term +42.01 Da, K +28.03 Da,            | 3097.625977 | 2 | 583.8393555 | 583.8393533 |
| ENIIDLSNANR                 | B5X0G2 | 0.00318616 | N-term +42.01 Da,                         | 3097.94165  | 2 | 651.8360596 | 650.8282269 |
| SQAEFDKAAEEVKR              | P31786 | 0          | N-term +42.01 Da, K +28.03 Da,            | 3099.030518 | 3 | 569.2966919 | 569.2967011 |
| MNQEKLAKLQAQVR              | Q64152 | 0          | N-term +42.01 Da, K +28.03 Da,            | 3100.651367 | 2 | 878.0005493 | 878.0009175 |



|                         |        |            |                                |             |   |             |             |
|-------------------------|--------|------------|--------------------------------|-------------|---|-------------|-------------|
| MESPAASPPASLPQTKGK      | O09110 | 0          | N-term +42.01 Da, K +28.03 Da, | 3101.414551 | 2 | 948.5       | 948.000781  |
| AASKVKQDMPPPGGYGPIDYKR  | Q9ERS2 | 0          | N-term +42.01 Da, K +28.03 Da, | 3102.265381 | 4 | 626.0873413 | 626.0859833 |
| VDMLSEINIAPR            | Q6ZQ08 | 0.03401899 | N-term +42.01 Da,              | 3104.78418  | 2 | 699.8699951 | 700.3661304 |
| AASKVKQDMPPPGGYGPIDYKR  | Q9ERS2 | 0.00317749 | N-term +42.01 Da, K +28.03 Da, | 3107.171631 | 3 | 834.7800293 | 834.4455523 |
| AAAAAAGPEMVR            | P63085 | 0          | N-term +42.01 Da,              | 3108.28418  | 2 | 578.7930298 | 578.7926006 |
| MHHQSVLHSGYFHPLLR       | P10518 | 0          | N-term +42.01 Da,              | 3110.652588 | 4 | 526.0200195 | 526.0191743 |
| SQAEFDKAAEEVKR          | P31786 | 0          | N-term +42.01 Da, K +28.03 Da, | 3110.750244 | 2 | 853.9400024 | 853.4414133 |
| SSGALLPKPQMR            | Q9CPQ1 | 0.03253968 | N-term +42.01 Da, K +28.03 Da, | 3115.421631 | 2 | 677.8791504 | 677.8792074 |
| ATEGMILTNDHQJR          | Q8BUV3 | 0          | N-term +42.01 Da,              | 3116.855713 | 3 | 593.6199951 | 593.293185  |
| SEKSVEAAAELSAK          | Q9D0J8 | 0          | N-term +42.01 Da, K +28.03 Da, | 3116.936768 | 2 | 759.4000244 | 759.4065077 |
| SDKPDMAEIEKFDKSK        | P20065 | 0          | N-term +42.01 Da, K +28.03 Da, | 3118.556396 | 4 | 506.2674561 | 506.2670528 |
| SDKPDMAEIEKFDKSK        | P20065 | 0          | N-term +42.01 Da, K +28.03 Da, | 3120.841309 | 2 | 1012.030029 | 1011.526829 |
| SDKPDMAEIEKFDKSK        | P20065 | 0          | N-term +42.01 Da, K +28.03 Da, | 3121.80249  | 3 | 674.6873779 | 674.6869783 |
| ATPEASGSGEKVEGSEPSVTYYR | Q9CQX2 | 0          | N-term +42.01 Da, K +28.03 Da, | 3122.803955 | 2 | 1236.079956 | 1236.082273 |
| SDKPDMAEIEKFDKSK        | P20065 | 0          | N-term +42.01 Da, K +28.03 Da, | 3125.382568 | 2 | 1012.530029 | 1011.526829 |
| ATPEASGSGEKVEGSEPSVTYYR | Q9CQX2 | 0          | N-term +42.01 Da, K +28.03 Da, | 3125.549316 | 3 | 824.7199707 | 824.3906075 |
| TTKDPESEHPSVTLFR        | Q99JW2 | 0          | N-term +42.01 Da, K +28.03 Da, | 3126.795654 | 3 | 638.6589966 | 638.6582988 |
| ATPEASGSGEKVEGSEPSVTYYR | Q9CQX2 | 0          | N-term +42.01 Da, K +28.03 Da, | 3126.883789 | 3 | 825.0599976 | 824.3906075 |
| MNQEKLAKLQAQVR          | Q64152 | 0.00099502 | N-term +42.01 Da, K +28.03 Da, | 3128.146729 | 3 | 585.6693726 | 585.6697038 |
| SQAEFDKAAEEVKR          | P31786 | 0          | N-term +42.01 Da, K +28.03 Da, | 3129.498535 | 3 | 569.2977295 | 569.2967011 |
| SQAEFDKAAEEVKR          | P31786 | 0          | N-term +42.01 Da, K +28.03 Da, | 3131.377197 | 3 | 569.2974243 | 569.2967011 |
| MLGSGFKAER              | Q9CX00 | 0.04046693 | N-term +42.01 Da, K +28.03 Da, | 3131.452637 | 2 | 583.305542  | 583.3053436 |
| AAAATMAAAAR             | Q8C754 | 0.00320073 | N-term +42.01 Da,              | 3131.679932 | 2 | 509.2600098 | 509.2609359 |
| ATDELASKLSR             | Q9D8Y0 | 0          | N-term +42.01 Da, K +28.03 Da, | 3132.577148 | 2 | 630.8400269 | 630.8433454 |
| MEEAELVKGR              | Q9JHU2 | 0          | N-term +42.01 Da, K +28.03 Da, | 3133.840088 | 2 | 616.3206177 | 616.3211912 |
| AASKVKQDMPPPGGYGPIDYKR  | Q9ERS2 | 0          | N-term +42.01 Da, K +28.03 Da, | 3133.915527 | 4 | 626.3400269 | 626.0859833 |
| AAAGSAVSGAGTPVAGPTGR    | Q9Z266 | 0          | N-term +42.01 Da,              | 3139.394531 | 2 | 884.4500122 | 884.4528439 |
| LGLTEAQTR               | Q8C196 | 0.01995842 | N-term +42.01 Da,              | 3140.201172 | 2 | 516.277771  | 515.7800161 |
| KLTIYGPVKVVR            | P12710 | 0.00051099 | N-term +42.01 Da, K +28.03 Da, | 3144.681396 | 3 | 492.304657  | 491.6448237 |
| AGKPVLYHFDGR            | P30115 | 0          | N-term +42.01 Da, K +28.03 Da, | 3144.83252  | 3 | 477.2600098 | 477.2577398 |
| MDATLTAR                | Q8BGQ7 | 0.00098668 | N-term +42.01 Da,              | 3144.907959 | 2 | 460.728302  | 460.7289373 |
| ASLVPLKEK               | P56135 | 0.02595296 | N-term +42.01 Da, K +28.03 Da, | 3147.80249  | 2 | 541.8439941 | 541.8446274 |
| ATPEASGSGEKVEGSEPSVTYYR | Q9CQX2 | 0          | N-term +42.01 Da, K +28.03 Da, | 3153.657227 | 2 | 1236.081787 | 1236.082273 |
| SSKPKSLEIIGAPFSKGQPR    | Q61176 | 0          | N-term +42.01 Da, K +28.03 Da, | 3155.400146 | 4 | 564.3300171 | 564.0795923 |
| AEDIKTIKINYKTAPFDSR     | P56391 | 0.00096386 | N-term +42.01 Da, K +28.03 Da, | 3157.260498 | 4 | 596.0900269 | 595.5875161 |
| ATPEASGSGEKVEGSEPSVTYYR | Q9CQX2 | 0          | N-term +42.01 Da, K +28.03 Da, | 3158.539063 | 3 | 824.7299805 | 824.3906075 |
| GNVTAGKDGVANVSIEDR      | P08228 | 0          | N-term +42.01 Da, K +28.03 Da, | 3160.180908 | 2 | 937.46521   | 936.4765165 |
| AEDIKTIKINYKTAPFDSR     | P56391 | 0.00050378 | N-term +42.01 Da, K +28.03 Da, | 3161.806152 | 3 | 794.1099854 | 793.7809293 |
| ATDELASKLSR             | Q9D8Y0 | 0          | N-term +42.01 Da, K +28.03 Da, | 3164.067139 | 2 | 630.8429565 | 630.8433454 |
| SSKPKSLEIIGAPFSKGQPR    | Q61176 | 0          | N-term +42.01 Da, K +28.03 Da, | 3164.67749  | 3 | 752.0999756 | 751.7703643 |

|                                |        |            |                                           |             |   |             |             |
|--------------------------------|--------|------------|-------------------------------------------|-------------|---|-------------|-------------|
| DSRPESIIYR                     | Q8BG50 | 0.03193613 | N-term +42.01 Da,                         | 3165.149414 | 2 | 695.3599854 | 695.8698945 |
| AAKPKLYYFNGR                   | P24472 | 0.04608295 | N-term +42.01 Da, K +28.03 Da,            | 3166.13623  | 3 | 509.6174927 | 509.28904   |
| SHPSWLPPKSTGEPLGHVPAR          | Q8BFW7 | 0          | N-term +42.01 Da, K +28.03 Da,            | 3168.031738 | 4 | 580.8102417 | 580.810379  |
| SEKSVEAAAELSAKDLKEKK           | Q9D0J8 | 0          | N-term +42.01 Da, K +28.03 Da,            | 3168.182617 | 4 | 586.5888672 | 586.5899904 |
| AEDIKTKIKNYKTAPFDSR            | P56391 | 0          | N-term +42.01 Da, K +28.03 Da,            | 3169.521484 | 2 | 1191.170044 | 1190.167756 |
| AGKPVLYHYFDGR                  | P30115 | 0          | N-term +42.01 Da, K +28.03 Da,            | 3170.79834  | 2 | 715.3826904 | 715.3829715 |
| MEQVNELKEKGN                   | Q60864 | 0.00751547 | N-term +42.01 Da, K +28.03 Da,            | 3173.169189 | 2 | 758.8866577 | 758.8874275 |
| SQAEFDKAAEEVKR                 | P31786 | 0          | N-term +42.01 Da, K +28.03 Da,            | 3173.512207 | 2 | 853.9332886 | 853.4414133 |
| AEDIKTKIKNYKTAPFDSR            | P56391 | 0          | N-term +42.01 Da, K +28.03 Da,            | 3174.069092 | 2 | 1190.160034 | 1190.167756 |
| AGKPVLYHYFDGR                  | P30115 | 0          | N-term +42.01 Da, K +28.03 Da,            | 3175.562012 | 3 | 477.2570801 | 477.2577398 |
| SQAEFDKAAEEVKR                 | P31786 | 0          | N-term +42.01 Da, K +28.03 Da,            | 3175.78833  | 3 | 569.6243286 | 569.2967011 |
| AAAAYEHLKLH                    | Q9EP69 | 0          | N-term +42.01 Da, K +28.03 Da,            | 3176.014893 | 3 | 431.8999939 | 431.9031854 |
| AAAAYEHLKLH                    | Q9EP69 | 0.0005048  | N-term +42.01 Da, K +28.03 Da,            | 3178.978027 | 2 | 647.8499756 | 647.3511399 |
| KEYWQNLR                       | Q35490 | 0.03194888 | N-term +42.01 Da, K +28.03 Da,            | 3180.339355 | 2 | 603.3200073 | 603.8169328 |
| METASTPEATGTGKY                | Q8CHP5 | 0          | N-term +42.01 Da, K +28.03 Da,            | 3181.297852 | 2 | 807.3699951 | 807.371808  |
| ASGADSKGDDLSTAILKQK            | Q01853 | 0          | N-term +42.01 Da, K +28.03 Da,            | 3185.404541 | 3 | 677.7000122 | 677.7037971 |
| ALKNVNPF                       | Q60787 | 0.00185874 | N-term +42.01 Da, K +28.03 Da,            | 3185.47998  | 2 | 507.8099976 | 507.8083787 |
| SSKPKSLEIIGAPFSKGQPR           | Q61176 | 0          | N-term +42.01 Da, K +28.03 Da,            | 3186.767334 | 4 | 564.3300171 | 564.0795923 |
| ASGADSKGDDLSTAILKQK            | Q01853 | 0.00051493 | N-term +42.01 Da, K +28.03 Da,            | 3187.838135 | 2 | 1016.549988 | 1016.052057 |
| AEDIKTKIKNYKTAPFDSR            | P56391 | 0          | N-term +42.01 Da, K +28.03 Da,            | 3188.495361 | 4 | 595.5900269 | 595.5875161 |
| AGLNSLEAVKR                    | Q6IRU2 | 0          | N-term +42.01 Da, K +28.03 Da,            | 3189.148438 | 2 | 614.3562622 | 614.3564224 |
| RVGLKAPGIIPR                   | Q03265 | 0.00096899 | N-term +42.01 Da, K +28.03 Da,            | 3191.229004 | 3 | 450.2900085 | 449.6258746 |
| SSIKVECVLR                     | Q64374 | 0          | N-term +42.01 Da, K +28.03 Da,C +57.02Da, | 3194.467773 | 2 | 631.3499756 | 630.8526583 |
| SSKPKSLEIIGAPFSKGQPR           | Q61176 | 0          | N-term +42.01 Da, K +28.03 Da,            | 3194.810791 | 3 | 752.0999756 | 751.7703643 |
| SSKPKSLEIIGAPFSKGQPR           | Q61176 | 0          | N-term +42.01 Da, K +28.03 Da,            | 3196.87915  | 2 | 1127.650024 | 1127.151908 |
| SEKSVEAAAELSAKDLKEKKDKVVEEKAGR | Q9D0J8 | 0          | N-term +42.01 Da, K +28.03 Da,            | 3198.123535 | 4 | 853.9899902 | 853.7381813 |
| SHPSWLPPKSTGEPLGHVPAR          | Q8BFW7 | 0          | N-term +42.01 Da, K +28.03 Da,            | 3199.252686 | 4 | 581.3099976 | 580.810379  |
| AGKPVLYHYFDGR                  | P30115 | 0          | N-term +42.01 Da, K +28.03 Da,            | 3201.244873 | 2 | 715.3817749 | 715.3829715 |
| SEKSVEAAAELSAKD                | Q9D0J8 | 0          | N-term +42.01 Da, K +28.03 Da,            | 3203.181885 | 2 | 816.9177246 | 816.9199798 |
| SEKSVEAAAELSAKDLKEKKDKVVEEKAGR | Q9D0J8 | 0          | N-term +42.01 Da, K +28.03 Da,            | 3203.849609 | 3 | 1138.650024 | 1137.981816 |
| SDKPDMAEIEKFDKSKLK             | P20065 | 0          | N-term +42.01 Da, K +28.03 Da,            | 3206.073486 | 3 | 764.7600098 | 764.4237542 |
| SSGNAKIGYPAPNFK                | P35700 | 0          | N-term +42.01 Da, K +28.03 Da,            | 3206.587891 | 2 | 825.4400024 | 824.9383088 |
| AGKPVLYHYFDGR                  | P30115 | 0          | N-term +42.01 Da, K +28.03 Da,            | 3207.149902 | 3 | 477.2572021 | 477.2577398 |
| ADKEAAFDDAVEER                 | Q60972 | 0          | N-term +42.01 Da, K +28.03 Da,            | 3207.478271 | 2 | 818.37854   | 818.3784791 |
| VISLSGEHSIIGR                  | P08228 | 0          | N-term +42.01 Da,                         | 3209.786865 | 3 | 470.2600098 | 470.5964216 |
| SSKPKSLEIIGAPFSKGQPR           | Q61176 | 0          | N-term +42.01 Da, K +28.03 Da,            | 3217.557129 | 4 | 564.0792236 | 564.0795923 |
| MQPASAKWYDR                    | Q9R0Q7 | 0          | N-term +42.01 Da, K +28.03 Da,            | 3218.167725 | 2 | 711.8400269 | 711.8453648 |
| MESAIIEGGASR                   | Q62448 | 0          | N-term +42.01 Da,                         | 3218.319092 | 2 | 610.7818604 | 610.7824306 |
| MNDTVTIR                       | P62849 | 0.00052029 | N-term +42.01 Da,                         | 3219.636475 | 2 | 496.25      | 496.2474944 |
| AGLNSLEAVKR                    | Q6IRU2 | 0          | N-term +42.01 Da, K +28.03 Da,            | 3220.885254 | 2 | 614.3552246 | 614.3564224 |

|                                |        |            |                                           |             |   |             |             |
|--------------------------------|--------|------------|-------------------------------------------|-------------|---|-------------|-------------|
| MDLEAVCKR                      | Q9CYR6 | 0          | N-term +42.01 Da, K +28.03 Da,C +57.02Da, | 3221.327637 | 2 | 596.2999878 | 596.2966615 |
| MEAKGGTVKAASGFNATEDAQLR        | P97429 | 0          | N-term +42.01 Da, K +28.03 Da,            | 3223.761719 | 3 | 851.4299927 | 851.0988816 |
| SSGALLPKPQ                     | Q9CPQ1 | 0          | N-term +42.01 Da, K +28.03 Da,            | 3228.406738 | 2 | 534.309082  | 534.3084092 |
| AVSVTPIR                       | Q9JKP5 | 0.00317173 | N-term +42.01 Da,                         | 3228.837402 | 2 | 443.2646179 | 442.763637  |
| SEKSVEAAAELSAKDLKEKKDKVVEEKAGR | Q9D0J8 | 0          | N-term +42.01 Da, K +28.03 Da,            | 3229.341064 | 4 | 853.9899902 | 853.7381813 |
| AKNGSEADIDESLYSR               | Q02053 | 0          | N-term +42.01 Da, K +28.03 Da,            | 3230.032227 | 2 | 913.9199829 | 912.9341504 |
| AGKPVLYHYFDGR                  | P30115 | 0          | N-term +42.01 Da, K +28.03 Da,            | 3233.575195 | 2 | 715.3800049 | 715.3829715 |
| RTKLPWDAVGR                    | P54869 | 0.02409147 | N-term +42.01 Da, K +28.03 Da,            | 3236.716309 | 3 | 457.5899963 | 456.9297345 |
| SEPELKLVAR                     | P08030 | 0.000999   | N-term +42.01 Da, K +28.03 Da,            | 3236.792725 | 2 | 606.354248  | 606.3533484 |
| AGKPVLYHYFDGR                  | P30115 | 0          | N-term +42.01 Da, K +28.03 Da,            | 3237.778076 | 3 | 477.2568359 | 477.2577398 |
| ASGVQVADEVCR                   | Q9R0P5 | 0          | N-term +42.01 Da, C +57.02Da,             | 3238.835693 | 2 | 666.8099976 | 666.8142622 |
| ADKEAAFDDAVEER                 | Q60972 | 0          | N-term +42.01 Da, K +28.03 Da,            | 3240.546631 | 2 | 818.3800049 | 818.3784791 |
| GTPKQPSLAPAHALGLR              | Q61337 | 0          | N-term +42.01 Da, K +28.03 Da,            | 3245.615234 | 3 | 595.3400269 | 595.3440965 |
| MENQLTKSVEER                   | Q9DC50 | 0          | N-term +42.01 Da, K +28.03 Da,            | 3246.973877 | 2 | 767.3828125 | 767.3825095 |
| MQPASAKWYDR                    | Q9R0Q7 | 0          | N-term +42.01 Da, K +28.03 Da,            | 3248.963379 | 2 | 712.3400269 | 711.8453648 |
| GDAPSPEEKHLITR                 | Q91WQ3 | 0          | N-term +42.01 Da, K +28.03 Da,            | 3250.296631 | 3 | 578.3099976 | 578.3124624 |
| AGLNSLEAVKR                    | Q61RU2 | 0          | N-term +42.01 Da, K +28.03 Da,            | 3251.367432 | 2 | 614.3561401 | 614.3564224 |
| AKTEEMVQTEEMETPR               | Q60739 | 0          | N-term +42.01 Da, K +28.03 Da,            | 3252.326416 | 2 | 990.460022  | 989.9584538 |
| SQGDSNPAAIPHAIEDIQGDDR         | Q61206 | 0          | N-term +42.01 Da,                         | 3258.351074 | 2 | 1153.51001  | 1153.517631 |
| ATAVVVNIKK                     | Q9DCL9 | 0          | N-term +42.01 Da, K +28.03 Da,            | 3258.434326 | 2 | 599.3796997 | 599.3819085 |
| MEAKGGTVKAASGFNATEDAQLR        | P97429 | 0          | N-term +42.01 Da, K +28.03 Da,            | 3258.522949 | 3 | 851.4299927 | 851.0988816 |
| SQGDSNPAAIPHAIEDIQGDDR         | Q61206 | 0          | N-term +42.01 Da,                         | 3258.832275 | 2 | 1154.02002  | 1153.517631 |
| SEKSVEAAAELSAKDLKEKKDKVVEEKAGR | Q9D0J8 | 0          | N-term +42.01 Da, K +28.03 Da,            | 3259.710205 | 4 | 853.9899902 | 853.7381813 |
| AKTEEMVQTEEMETPR               | Q60739 | 0          | N-term +42.01 Da, K +28.03 Da,            | 3265.407227 | 3 | 660.3078003 | 660.3080614 |
| AGKPVLYHYFDGR                  | P30115 | 0          | N-term +42.01 Da, K +28.03 Da,            | 3268.204346 | 3 | 477.2574158 | 477.2577398 |
| SEPELKLVAR                     | P08030 | 0.00050352 | N-term +42.01 Da, K +28.03 Da,            | 3268.290527 | 2 | 606.3551025 | 606.3533484 |
| ASGVQVADEVCR                   | Q9R0P5 | 0          | N-term +42.01 Da, C +57.02Da,             | 3269.633301 | 2 | 666.8137817 | 666.8142622 |
| MDDREDLVYQAK                   | P62259 | 0.00098474 | N-term +42.01 Da, K +28.03 Da,            | 3269.859863 | 2 | 776.8699951 | 776.869235  |
| SSKPKSLEIIGAPFSKGQPR           | Q61176 | 0          | N-term +42.01 Da, K +28.03 Da,            | 3269.935303 | 4 | 564.5800171 | 564.0795923 |
| ATVAATTKVPEIR                  | Q9WTM5 | 0          | N-term +42.01 Da, K +28.03 Da,            | 3273.374268 | 2 | 713.9199829 | 713.9168447 |
| AKTEEMVQTEEMETPR               | Q60739 | 0          | N-term +42.01 Da, K +28.03 Da,            | 3276.708008 | 2 | 990.960022  | 989.9584538 |
| KTLKGLNSDSVTEETLR              | Q8C196 | 0          | N-term +42.01 Da, K +28.03 Da,            | 3286.149414 | 3 | 664.3599854 | 663.7002754 |
| MESAIAEGGASR                   | Q62448 | 0          | N-term +42.01 Da,                         | 3286.311768 | 2 | 610.7800293 | 610.7824306 |
| MEAKGGTVKAASGFNATEDAQLR        | P97429 | 0          | N-term +42.01 Da, K +28.03 Da,            | 3289.179443 | 3 | 851.4299927 | 851.0988816 |
| AVAAAAVAAPAGGGGAR              | Q99L88 | 0.00232019 | N-term +42.01 Da,                         | 3290.127686 | 2 | 690.3699951 | 690.3731355 |
| AAPSEPAFFPR                    | P56213 | 0          | N-term +42.01 Da,                         | 3291.814697 | 2 | 571.2853394 | 571.2854656 |
| ASASAAASTLSEPPR                | E9PVP0 | 0          | N-term +42.01 Da,                         | 3292.050049 | 2 | 729.8699951 | 729.365174  |
| TMDKSELVQKAKLAEQAER            | Q9CQV8 | 0          | N-term +42.01 Da, K +28.03 Da,            | 3293.367432 | 4 | 576.0700073 | 576.067525  |
| MENQLTKSVEER                   | Q9DC50 | 0          | N-term +42.01 Da, K +28.03 Da,            | 3294.735596 | 2 | 767.8800049 | 767.3825095 |
| ASLPPHAGPATPLSPTR              | P21619 | 0          | N-term +42.01 Da,                         | 3295.01001  | 2 | 856.960022  | 856.4599399 |

|                               |        |            |                                           |             |   |             |             |
|-------------------------------|--------|------------|-------------------------------------------|-------------|---|-------------|-------------|
| KGAAELMQQKEATTEQQLR           | O35490 | 0.02154101 | N-term +42.01 Da, K +28.03 Da,            | 3298.022461 | 3 | 754.0599976 | 753.3984908 |
| AGKPVLYHFDGR                  | P30115 | 0          | N-term +42.01 Da, K +28.03 Da,            | 3299.239014 | 3 | 477.5899963 | 477.2577398 |
| ATVAATTKVPEIR                 | Q9WTM5 | 0          | N-term +42.01 Da, K +28.03 Da,            | 3303.921631 | 2 | 713.9157715 | 713.9168447 |
| TMDKSELVQKAKLAEQAER           | Q9CQV8 | 0          | N-term +42.01 Da, K +28.03 Da,            | 3306.891357 | 2 | 1152.130005 | 1151.127774 |
| SDAAVDTSEITTKDLKEKKEVVEEAENGR | P26350 | 0.0419092  | N-term +42.01 Da, K +28.03 Da,            | 3308.234131 | 4 | 859.4400024 | 858.9452577 |
| TMDKSELVQKAKLAEQAER           | Q9CQV8 | 0          | N-term +42.01 Da, K +28.03 Da,            | 3308.654053 | 2 | 1151.130005 | 1151.127774 |
| SNIKIFSGSSHQDLSQKIADR         | G3UXL2 | 0.00186306 | N-term +42.01 Da, K +28.03 Da,            | 3310.003418 | 4 | 608.3300171 | 608.0750388 |
| AQPGPAPQPDVSLQQR              | O35551 | 0          | N-term +42.01 Da,                         | 3312.994385 | 2 | 865.9400024 | 865.9446543 |
| AKNGSEADIDESLYSR              | Q02053 | 0          | N-term +42.01 Da, K +28.03 Da,            | 3313.084473 | 2 | 913.4251709 | 912.9341504 |
| AVPPTYADLGKSAR                | Q60932 | 0          | N-term +42.01 Da, K +28.03 Da,            | 3317.869385 | 2 | 758.4099731 | 758.4119267 |
| AVTLDKDAYYR                   | Q920B9 | 0.01285347 | N-term +42.01 Da, K +28.03 Da,            | 3319.245605 | 2 | 692.8599854 | 692.8589955 |
| MEAKGGTVKAASGFNATEDAQTLR      | P97429 | 0.00277264 | N-term +42.01 Da, K +28.03 Da,            | 3319.974854 | 3 | 851.7600098 | 851.0988816 |
| SDKQISKCLGLTEAQTR             | Q8C196 | 0.04677914 | N-term +42.01 Da, K +28.03 Da,C +57.02Da, | 3320.317871 | 4 | 508.769989  | 509.0228516 |
| AVAAAAPAAGGGGAR               | Q99L88 | 0.03229665 | N-term +42.01 Da,                         | 3321.349854 | 2 | 690.8800049 | 690.3731355 |
| AVPPTYADLGKSAR                | Q60932 | 0          | N-term +42.01 Da, K +28.03 Da,            | 3321.764893 | 2 | 758.9099731 | 758.4119267 |
| TMDKSELVQKAKLAEQAER           | Q9CQV8 | 0          | N-term +42.01 Da, K +28.03 Da,            | 3324.107666 | 4 | 576.0671387 | 576.067525  |
| SSKPKSLEIIGAPFSKGQPR          | Q61176 | 0          | N-term +42.01 Da, K +28.03 Da,            | 3324.183105 | 4 | 564.3300171 | 564.0795923 |
| SRSHERARYEDPTLR               | Q8CGN4 | 0.01283148 | N-term +42.01 Da,                         | 3324.589844 | 3 | 639.3300171 | 638.9891531 |
| ASLPPHAGPATPLSPTR             | P21619 | 0          | N-term +42.01 Da,                         | 3326.132813 | 2 | 856.960022  | 856.4599399 |
| SDAAVDTSEITTKDLK              | P26350 | 0          | N-term +42.01 Da, K +28.03 Da,            | 3326.746338 | 2 | 940.4799805 | 939.9807666 |
| KLMKEGLEAAR                   | O35490 | 0.00142653 | N-term +42.01 Da, K +28.03 Da,            | 3327.424561 | 3 | 449.2600098 | 448.5953641 |
| AGQSDKDKVYYTLEEIQKH           | P56395 | 0.04892966 | N-term +42.01 Da, K +28.03 Da,            | 3330.404297 | 4 | 595.3106689 | 595.311415  |
| AGIAIKLAKDR                   | O08529 | 0          | N-term +42.01 Da, K +28.03 Da,            | 3334.49292  | 3 | 418.9400024 | 418.6028472 |
| SQAEFDKAAEEVKR                | P31786 | 0          | N-term +42.01 Da, K +28.03 Da,            | 3337.45166  | 3 | 569.296814  | 569.2967011 |
| RVVFDPTYDR                    | P16015 | 0.03548896 | N-term +42.01 Da,                         | 3338.845947 | 2 | 665.3099976 | 664.3174948 |
| ASLKDLEGKWR                   | Q05816 | 0          | N-term +42.01 Da, K +28.03 Da,            | 3339.285889 | 3 | 467.6000061 | 467.6013952 |
| MEELGAAASGAGGGGGGEEHGGGR      | O70566 | 0          | N-term +42.01 Da,                         | 3342.842773 | 2 | 1085.959961 | 1085.464344 |
| SGLVLGQR                      | Q9DBS5 | 0.00959024 | N-term +42.01 Da,                         | 3345.559082 | 2 | 436.25      | 436.2534365 |
| AGIAIKLAKDR                   | O08529 | 0.0075188  | N-term +42.01 Da, K +28.03 Da,            | 3345.634277 | 2 | 627.4002075 | 627.4006326 |
| AHGSVVKSEDYAFPTYADR           | P19783 | 0          | N-term +42.01 Da, K +28.03 Da,            | 3346.309082 | 3 | 728.6900024 | 728.3516463 |
| ADVSDQSKLPGVKEVCR             | Q810U5 | 0          | N-term +42.01 Da, K +28.03 Da,C +57.02Da, | 3347.087158 | 3 | 696.039978  | 695.7051433 |
| SDAAVDTSEITTKDLK              | P26350 | 0          | N-term +42.01 Da, K +28.03 Da,            | 3347.742676 | 2 | 940.9799805 | 939.9807666 |
| QNYSTEVEAAVNR                 | P29391 | 0          | N-term +42.01 Da,                         | 3352.671387 | 2 | 761.8613892 | 761.860256  |
| AVPPTYADLGKSAR                | Q60932 | 0          | N-term +42.01 Da, K +28.03 Da,            | 3353.057373 | 2 | 758.411377  | 758.4119267 |
| ATCADILR                      | Q8K268 | 0.0018648  | N-term +42.01 Da, C +57.02Da,             | 3353.328125 | 2 | 481.2427673 | 481.2422119 |
| AAAAASGAGGVAVAGAGGAGPAGR      | E9PU87 | 0          | N-term +42.01 Da,                         | 3355.543457 | 2 | 919.4699707 | 918.9691924 |
| ASLPPHAGPATPLSPTR             | P21619 | 0          | N-term +42.01 Da,                         | 3357.021973 | 2 | 856.4631958 | 856.4599399 |
| RPEEEVLTLR                    | Q05D44 | 0.04712644 | N-term +42.01 Da,                         | 3358.278564 | 2 | 641.8400269 | 642.3513374 |
| SQAEFDKAAEEVKR                | P31786 | 0          | N-term +42.01 Da, K +28.03 Da,            | 3359.817627 | 3 | 569.2974243 | 569.2967011 |
| KIQVLQQADDAEER                | D3Z2H9 | 0.02591093 | N-term +42.01 Da, K +28.03 Da,            | 3360.148682 | 2 | 920.4799805 | 920.9736095 |

|                               |        |            |                                           |             |   |             |             |
|-------------------------------|--------|------------|-------------------------------------------|-------------|---|-------------|-------------|
| SSIKVECVLR                    | Q64374 | 0.00752212 | N-term +42.01 Da, K +28.03 Da,C +57.02Da, | 3360.8396   | 2 | 630.8519897 | 630.8526583 |
| AWDLKVK                       | Q64339 | 0.00961118 | N-term +42.01 Da, K +28.03 Da,            | 3368.096191 | 2 | 479.2911072 | 479.2920301 |
| SQAEFDKAAEEVKR                | P31786 | 0          | N-term +42.01 Da, K +28.03 Da,            | 3368.171875 | 3 | 569.2999878 | 569.2967011 |
| MEKTELIQKAKLAEQAER            | P68254 | 0          | N-term +42.01 Da, K +28.03 Da,            | 3368.253418 | 3 | 748.0900269 | 748.0873649 |
| MEKTELIQKAKLAEQAER            | P68254 | 0          | N-term +42.01 Da, K +28.03 Da,            | 3369.953613 | 4 | 561.317749  | 561.3173428 |
| SASSLLEQR                     | E9PW90 | 0.00096293 | N-term +42.01 Da,                         | 3371.476807 | 2 | 516.7700195 | 516.7696486 |
| MYTITKGPSKLVQR                | Q9CQB2 | 0          | N-term +42.01 Da, K +28.03 Da,            | 3374.409912 | 3 | 598.0100098 | 597.6780878 |
| ADFDTYDDR                     | Q9WUK2 | 0          | N-term +42.01 Da,                         | 3376.200439 | 2 | 580.2298584 | 580.230554  |
| MEKTELIQKAKLAEQAER            | P68254 | 0          | N-term +42.01 Da, K +28.03 Da,            | 3378.124268 | 2 | 1122.130005 | 1121.627409 |
| MDKNELVQKAKLAEQAER            | P63101 | 0          | N-term +42.01 Da, K +28.03 Da,            | 3378.621826 | 2 | 1115.109985 | 1114.109383 |
| AVPPTYADLGKSAR                | Q60932 | 0          | N-term +42.01 Da, K +28.03 Da,            | 3383.929199 | 2 | 758.4109497 | 758.4119267 |
| KASALALGENNEVLKSGR            | P05202 | 0.00098814 | N-term +42.01 Da, K +28.03 Da,            | 3386.358643 | 3 | 696.039978  | 695.3830577 |
| ASLPPHAGPATPLSPTR             | P21619 | 0          | N-term +42.01 Da,                         | 3388.148926 | 2 | 856.460022  | 856.4599399 |
| MDKNELVQKAKLAEQAER            | P63101 | 0          | N-term +42.01 Da, K +28.03 Da,            | 3391.089844 | 4 | 557.5581055 | 557.55833   |
| SSIKVECVLR                    | Q64374 | 0.02344714 | N-term +42.01 Da, K +28.03 Da,C +57.02Da, | 3391.165283 | 2 | 630.8519897 | 630.8526583 |
| AAVPSAVHLPR                   | Q3UFF7 | 0          | N-term +42.01 Da,                         | 3391.337891 | 2 | 580.3322144 | 580.3327498 |
| MEKTELIQKAKLAEQAER            | P68254 | 0          | N-term +42.01 Da, K +28.03 Da,            | 3398.762939 | 3 | 748.4199829 | 748.0873649 |
| SSAPTPPSVDKVDGFSR             | Q61151 | 0          | N-term +42.01 Da, K +28.03 Da,            | 3399.381348 | 2 | 959.4799805 | 959.4812675 |
| MEKTELIQKAKLAEQAER            | P68254 | 0          | N-term +42.01 Da, K +28.03 Da,            | 3400.442871 | 4 | 561.3173828 | 561.3173428 |
| SDAAVDTSEITTKDLKEKKEVVEEAENGR | P26350 | 0.02384868 | N-term +42.01 Da, K +28.03 Da,            | 3400.61377  | 3 | 1145.25     | 1144.924585 |
| MDKNELVQKAKLAEQAER            | P63101 | 0          | N-term +42.01 Da, K +28.03 Da,            | 3401.899658 | 3 | 743.0755005 | 743.0753478 |
| SGGKYVDSEGHLYTVPIR            | P49817 | 0.00096618 | N-term +42.01 Da, K +28.03 Da,            | 3404.131592 | 3 | 683.3599854 | 683.3530983 |
| DKTLKGLNSDSVTTEELR            | Q8C196 | 0.00581395 | N-term +42.01 Da, K +28.03 Da,            | 3405.873291 | 3 | 702.7000122 | 702.0425901 |
| SQAEFDKAAEEVKR                | P31786 | 0          | N-term +42.01 Da, K +28.03 Da,            | 3407.004883 | 3 | 569.289978  | 569.2967011 |
| ASSSGNDDLTIPR                 | Q91WV0 | 0          | N-term +42.01 Da,                         | 3415.411621 | 2 | 745.3400269 | 745.3418965 |
| AVPPTYADLGKSAR                | Q60932 | 0          | N-term +42.01 Da, K +28.03 Da,            | 3416.945068 | 2 | 758.4124756 | 758.4119267 |
| AHIFVYGTLLR                   | Q923B0 | 0          | N-term +42.01 Da, K +28.03 Da,            | 3420.891846 | 3 | 458.9299927 | 458.9345969 |
| MDKNELVQKAKLAEQAER            | P63101 | 0.00187354 | N-term +42.01 Da, K +28.03 Da,            | 3422.27124  | 4 | 557.5579224 | 557.55833   |
| ANLDLKKELSEPSSTR              | Q8C196 | 0          | N-term +42.01 Da, K +28.03 Da,            | 3422.422363 | 3 | 630.0057373 | 629.3458323 |
| ALETVPKDLR                    | P63271 | 0.00095923 | N-term +42.01 Da, K +28.03 Da,            | 3423.850342 | 2 | 606.8499756 | 606.3533484 |
| AASPSKTEIQTIFKR               | Q99K28 | 0          | N-term +42.01 Da, K +28.03 Da,            | 3427.358643 | 3 | 592.3400269 | 592.3402409 |
| SDAAVDTSEITTKDLKEKKEVVEEAENGR | P26350 | 0.04082426 | N-term +42.01 Da, K +28.03 Da,            | 3428.249023 | 4 | 859.4400024 | 858.9452577 |
| MLAAGVGGQGER                  | D3YY55 | 0          | N-term +42.01 Da,                         | 3428.667725 | 2 | 594.2943726 | 594.2955076 |
| ASLVPLKEKKLMEVK               | P56135 | 0          | N-term +42.01 Da, K +28.03 Da,            | 3429.913574 | 4 | 467.5499878 | 467.5479732 |
| ASLVPLKEKKLMEVK               | P56135 | 0          | N-term +42.01 Da, K +28.03 Da,            | 3431.696045 | 3 | 623.0609741 | 623.0615387 |
| ASLVPLKEKKLMEVK               | P56135 | 0          | N-term +42.01 Da, K +28.03 Da,            | 3441.549316 | 2 | 934.5900269 | 934.0886698 |
| ASKEMFEDTVEER                 | Q60973 | 0          | N-term +42.01 Da, K +28.03 Da,            | 3442.316162 | 2 | 821.3800049 | 820.8772575 |
| SDAAVDTSEITTKDLKEKKEVVEEAENGR | P26350 | 0          | N-term +42.01 Da, K +28.03 Da,            | 3443.888916 | 3 | 1145.589966 | 1144.924585 |
| QGFNGVGLHSMR                  | P26443 | 0          | N-term +42.01 Da,                         | 3445.81665  | 2 | 673.8200073 | 672.8275062 |
| AVPPTYADLGKSAR                | Q60932 | 0          | N-term +42.01 Da, K +28.03 Da,            | 3448.476807 | 2 | 758.4116821 | 758.4119267 |

|                               |        |            |                                           |             |   |             |             |
|-------------------------------|--------|------------|-------------------------------------------|-------------|---|-------------|-------------|
| AQDLSEKELLR                   | Q61017 | 0.00052604 | N-term +42.01 Da, K +28.03 Da,            | 3453.778076 | 2 | 686.3800049 | 686.3775526 |
| LPAEFDKAAEEVKR                | Q4VWZ5 | 0.0187813  | N-term +42.01 Da, K +28.03 Da,            | 3454.104736 | 3 | 567.3212891 | 567.6454414 |
| MNFAEEEPSKKY                  | P16406 | 0.00188058 | N-term +42.01 Da, K +28.03 Da,            | 3455.189697 | 2 | 785.8800049 | 785.8765285 |
| AGLNSLEAVKR                   | Q6IRU2 | 0.02373159 | N-term +42.01 Da, K +28.03 Da,            | 3456.824463 | 2 | 614.8468018 | 614.3564224 |
| SDAAVDTSEITTKDLKEKKEVVEEAENGR | P26350 | 0          | N-term +42.01 Da, K +28.03 Da,            | 3458.493164 | 4 | 859.4400024 | 858.9452577 |
| LKEDQTEYLEER                  | P07901 | 0          | N-term +42.01 Da, K +28.03 Da,            | 3458.975342 | 2 | 812.8883057 | 811.8990472 |
| LYKPPETIFQHWRSNR              | Q3TTN6 | 0.00750221 | N-term +42.01 Da, K +28.03 Da,            | 3460.499756 | 3 | 752.3900146 | 752.7272697 |
| ALTPELSR                      | Q9D939 | 0.01244101 | N-term +42.01 Da,                         | 3460.618164 | 2 | 464.7600098 | 464.758552  |
| DAETTLTELK                    | P05784 | 0.00097418 | N-term +42.01 Da,                         | 3461.929932 | 2 | 595.7999878 | 595.7986038 |
| DAETTLTELK                    | P05784 | 0.00052301 | N-term +42.01 Da,                         | 3469.72168  | 2 | 596.2999878 | 595.7986038 |
| MENQLTKSVEER                  | Q9DC50 | 0          | N-term +42.01 Da, K +28.03 Da,            | 3471.013672 | 2 | 767.8699951 | 767.3825095 |
| SSIKVECVLR                    | Q64374 | 0.00918635 | N-term +42.01 Da, K +28.03 Da,C +57.02Da, | 3472.042969 | 2 | 630.8499756 | 630.8526583 |
| AAAAATAAAAAAPSGGGGGGEEER      | D3Z7U4 | 0          | N-term +42.01 Da,                         | 3472.160645 | 2 | 1006.969971 | 1006.967045 |
| ANEDQKIGIEIKR                 | P63038 | 0.00321248 | N-term +42.01 Da, K +28.03 Da,            | 3473.891357 | 3 | 576.3300171 | 575.6683575 |
| MLGAADSSVR                    | Q9QXL2 | 0          | N-term +42.01 Da,                         | 3474.309082 | 2 | 589.7800293 | 589.2795236 |
| ADKPDMEIASFDKAK               | Q6ZWY8 | 0          | N-term +42.01 Da, K +28.03 Da,            | 3476.789795 | 3 | 616.9899902 | 616.9852468 |
| SDAAVDTSEITTKDLKEKKEVVEEAENGR | P26350 | 0          | N-term +42.01 Da, K +28.03 Da,            | 3476.90625  | 3 | 1145.589966 | 1144.924585 |
| SAAEEVDGLGVVRPH               | Q9JKF1 | 0.02147873 | N-term +42.01 Da,                         | 3477.282471 | 2 | 789.4099731 | 789.3995482 |
| SEKSVEAAAELSAKDLKEK           | Q9D0J8 | 0          | N-term +42.01 Da, K +28.03 Da,            | 3478.597168 | 4 | 547.8099976 | 547.5584245 |
| AVPPTYADLGKSAR                | Q60932 | 0          | N-term +42.01 Da, K +28.03 Da,            | 3479.849854 | 2 | 758.9199829 | 758.4119267 |
| STSSSFASFIVQLFQVVLMMK         | Q9D666 | 0.04485692 | N-term +42.01 Da, K +28.03 Da,            | 3484.214111 | 3 | 763.7399902 | 763.7448275 |
| SQAEFDKAAEEVKR                | P31786 | 0          | N-term +42.01 Da, K +28.03 Da,            | 3485.125488 | 3 | 569.6300049 | 569.2967011 |
| ATVDLEKLR                     | P12382 | 0.00189125 | N-term +42.01 Da, K +28.03 Da,            | 3485.295898 | 2 | 557.8265381 | 557.8269663 |
| ADKPDMEIASFDKAK               | Q6ZWY8 | 0          | N-term +42.01 Da, K +28.03 Da,            | 3487.687256 | 2 | 924.9770508 | 924.9742319 |
| SDAAVDTSEITTKDLKEKKEVVEEAENGR | P26350 | 0          | N-term +42.01 Da, K +28.03 Da,            | 3488.971436 | 4 | 859.4400024 | 858.9452577 |
| AGQSDKDKVYYTLEEIQKHKDKSTW     | P56395 | 0          | N-term +42.01 Da, K +28.03 Da,            | 3489.122314 | 4 | 817.6799927 | 817.4290456 |
| AAAPATLALDPQPQEKQKDASESSELSR  | Q91WG2 | 0          | N-term +42.01 Da, K +28.03 Da,            | 3489.387207 | 3 | 1013.179993 | 1012.854323 |
| MNFSGKYQ                      | P12710 | 0.00319197 | N-term +42.01 Da, K +28.03 Da,            | 3492.102295 | 2 | 522.7439575 | 522.7445874 |
| MEKPSPLLVGR                   | P97379 | 0.00752879 | N-term +42.01 Da, K +28.03 Da,            | 3492.253174 | 2 | 648.869812  | 648.8708509 |
| SDKPDMAEIEKFDK                | P20065 | 0          | N-term +42.01 Da, K +28.03 Da,            | 3495.147705 | 3 | 593.9699707 | 593.634214  |
| AAPAKGENLSLVVHGPDIR           | Q64442 | 0.03942233 | N-term +42.01 Da, K +28.03 Da,            | 3495.223389 | 3 | 691.0499878 | 691.0480091 |
| AGQSDKDKVYYTLEEIQKHKDKSTW     | P56395 | 0.00052576 | N-term +42.01 Da, K +28.03 Da,            | 3495.323975 | 3 | 1089.900024 | 1089.569635 |
| NYVAEKISGQKVNAAACDIAR         | Q35490 | 0          | N-term +42.01 Da, K +28.03 Da,C +57.02Da, | 3495.894287 | 3 | 811.75      | 812.0846835 |
| NYVAEKISGQKVNAAACDIAR         | Q35490 | 0          | N-term +42.01 Da, K +28.03 Da,C +57.02Da, | 3496.728271 | 3 | 812.0800171 | 812.0846835 |
| MDKNELVQKAKLAQAER             | P63101 | 0.04186047 | N-term +42.01 Da, K +28.03 Da,            | 3497.895752 | 3 | 743.7299805 | 743.0753478 |
| MLSVAAR                       | Q9CR68 | 0.03198721 | N-term +42.01 Da,                         | 3497.971191 | 2 | 395.2174072 | 395.2180078 |
| AALYGGVEGGGTR                 | Q9QZ08 | 0          | N-term +42.01 Da,                         | 3503.705811 | 2 | 625.3099976 | 625.3122123 |
| ADKPDMEIASFDKAK               | Q6ZWY8 | 0          | N-term +42.01 Da, K +28.03 Da,            | 3508.164063 | 3 | 617.3200073 | 616.9852468 |
| AGQSDKDKVYYTLEEIQKHKDKSTW     | P56395 | 0          | N-term +42.01 Da, K +28.03 Da,            | 3520.122803 | 4 | 817.6799927 | 817.4290456 |
| SQAEFDKAAEEVKR                | P31786 | 0          | N-term +42.01 Da, K +28.03 Da,            | 3530.748535 | 3 | 569.6300049 | 569.2967011 |

|                                      |        |            |                                |             |   |             |             |
|--------------------------------------|--------|------------|--------------------------------|-------------|---|-------------|-------------|
| LKEDQTEYLEER                         | P07901 | 0          | N-term +42.01 Da, K +28.03 Da, | 3535.665039 | 2 | 812.8900146 | 811.8990472 |
| LIQKAAGESNLKR                        | Q9CZS1 | 0.0009985  | N-term +42.01 Da, K +28.03 Da, | 3536.906494 | 3 | 509.9700012 | 509.3068711 |
| ASLPPHAGPATPLSPTR                    | P21619 | 0.04550713 | N-term +42.01 Da,              | 3539.194092 | 2 | 855.9500122 | 856.4599399 |
| KGKGTITTSVLKPKPALVASR                | Q8C196 | 0          | N-term +42.01 Da, K +28.03 Da, | 3543.243652 | 4 | 538.8300171 | 538.3372351 |
| ADKPDMGEIASFDKAKLK                   | Q6ZWY8 | 0          | N-term +42.01 Da, K +28.03 Da, | 3543.797119 | 4 | 530.789978  | 530.2933362 |
| MDKNELVQKAKLAEQAER                   | P63101 | 0.04611837 | N-term +42.01 Da, K +28.03 Da, | 3544.125732 | 3 | 743.0700073 | 743.0753478 |
| AISQHQFYLDLR                         | Q8BIE6 | 0.02594244 | N-term +42.01 Da,              | 3545.326416 | 2 | 710.3599854 | 710.3544114 |
| MMLSTEGR                             | P70333 | 0.00050582 | N-term +42.01 Da,              | 3548.450439 | 2 | 483.7200012 | 483.7227977 |
| SDAAVDTSEITTKDLKEKKEVVEEAEN          | P26350 | 0          | N-term +42.01 Da, K +28.03 Da, | 3548.64502  | 3 | 1074.209961 | 1073.883726 |
| SDAAVDTSEITTKDLKEKKEVVEEAENGR        | P26350 | 0.00450857 | N-term +42.01 Da, K +28.03 Da, | 3550.799072 | 4 | 859.4400024 | 858.9452577 |
| VGVPTEGALTLNR                        | Q8BWT1 | 0          | N-term +42.01 Da,              | 3551.574707 | 2 | 734.897522  | 735.4015592 |
| SDYNTGGPPGPPPPAGGGGAAGAGGGPPGPPGAGDR | Q3U0V1 | 0          | N-term +42.01 Da,              | 3553.648682 | 3 | 1096.839966 | 1096.508209 |
| ASLKDLGKWR                           | Q05816 | 0          | N-term +42.01 Da, K +28.03 Da, | 3555.346924 | 3 | 467.6000061 | 467.6013952 |
| GQNQPVLNITNR                         | Q8C196 | 0          | N-term +42.01 Da,              | 3556.985596 | 2 | 698.862915  | 698.370593  |
| SAEVPEAASAEQKEMEDKVTSPKAEAAKLKAR     | P56212 | 0.0091944  | N-term +42.01 Da, K +28.03 Da, | 3560.692139 | 4 | 975.5       | 975.2555019 |
| SQAEFDKAAEEVKR                       | P31786 | 0          | N-term +42.01 Da, K +28.03 Da, | 3561.557861 | 3 | 569.6300049 | 569.2967011 |
| AAAAAAAAGAAGGR                       | Q8CCS6 | 0          | N-term +42.01 Da,              | 3565.514648 | 2 | 585.3037109 | 585.3047212 |
| ASLKDLGKWR                           | Q05816 | 0.01171875 | N-term +42.01 Da, K +28.03 Da, | 3566.196289 | 2 | 701.3900146 | 700.8984546 |
| MEKVPDMEIER                          | Q9CX80 | 0          | N-term +42.01 Da, K +28.03 Da, | 3569.989014 | 2 | 752.3637085 | 752.3627309 |
| AQQAADKYLVDKN                        | Q8VDD5 | 0          | N-term +42.01 Da, K +28.03 Da, | 3572.645264 | 2 | 862.9400024 | 862.9463314 |
| PPKFDPNVKKVYLR                       | P35979 | 0.01919065 | N-term +42.01 Da, K +28.03 Da, | 3574.38501  | 4 | 476.0299988 | 475.5239211 |
| EQLDITSEYEKELNER                     | P63038 | 0          | N-term +42.01 Da, K +28.03 Da, | 3574.570557 | 3 | 775.7199707 | 775.0603098 |
| AQQAADKYLVDKN                        | Q8VDD5 | 0          | N-term +42.01 Da, K +28.03 Da, | 3577.125732 | 2 | 863.4500122 | 862.9463314 |
| SDAAVDTSEITTKDLKEKKEVVEEAEN          | P26350 | 0          | N-term +42.01 Da, K +28.03 Da, | 3579.841797 | 3 | 1074.550049 | 1073.883726 |
| AAPAKGENLSLVVHGPGDIR                 | Q64442 | 0.03326733 | N-term +42.01 Da, K +28.03 Da, | 3582.065918 | 3 | 691.3800049 | 691.0480091 |
| RVSQEHVVLTKFVEGAR                    | Q8C196 | 0          | N-term +42.01 Da, K +28.03 Da, | 3589.255859 | 4 | 531.7935181 | 531.2996469 |
| SQAEFDKAAEEVKR                       | P31786 | 0          | N-term +42.01 Da, K +28.03 Da, | 3592.947754 | 3 | 569.960022  | 569.2967011 |
| SDAAVDTSEITTKDLKEKKEVVEEAENGR        | P26350 | 0          | N-term +42.01 Da, K +28.03 Da, | 3595.98291  | 4 | 859.1900024 | 858.9452577 |
| AAPAKGENLSLVVHGPGDIR                 | Q64442 | 0          | N-term +42.01 Da, K +28.03 Da, | 3599.470459 | 2 | 1036.069946 | 1036.068375 |
| SDAAVDTSEITTKDLKEKKEVVEEAENGR        | P26350 | 0          | N-term +42.01 Da, K +28.03 Da, | 3599.826904 | 3 | 1145.589966 | 1144.924585 |
| AAPAKGENLSLVVHGPGDIR                 | Q64442 | 0.02439024 | N-term +42.01 Da, K +28.03 Da, | 3613.585938 | 3 | 691.0465698 | 691.0480091 |
| SDAAVDTSEITTKDLKEKKEVVEEAENGR        | P26350 | 0          | N-term +42.01 Da, K +28.03 Da, | 3615.989258 | 3 | 1144.920044 | 1144.924585 |
| MEQVNELKEKGNKAL                      | Q60864 | 0.00275989 | N-term +42.01 Da, K +28.03 Da, | 3620.780762 | 3 | 620.0100098 | 619.6765245 |
| EEHPTLLTEAPLNPKANR                   | P62737 | 0.01204301 | N-term +42.01 Da, K +28.03 Da, | 3620.937744 | 3 | 700.7000122 | 700.7076527 |
| METASTPEATGTGKYIASTQRPDGTWR          | Q8CHP5 | 0          | N-term +42.01 Da, K +28.03 Da, | 3621.030762 | 3 | 995.1400146 | 994.8135818 |
| METASTPEATGTGKYIASTQRPDGTWR          | Q8CHP5 | 0          | N-term +42.01 Da, K +28.03 Da, | 3624.564697 | 3 | 995.4799805 | 994.8135818 |
| HVGDLGNVTAGKDGVANVSIEDR              | P08228 | 0          | N-term +42.01 Da, K +28.03 Da, | 3626.830078 | 3 | 798.7399902 | 798.4067029 |
| SDAAVDTSEITTKDLKEKKEVVEEAENGR        | P26350 | 0          | N-term +42.01 Da, K +28.03 Da, | 3627.668213 | 4 | 859.1900024 | 858.9452577 |
| MEQVNELKEKGNKAL                      | Q60864 | 0.03738686 | N-term +42.01 Da, K +28.03 Da, | 3629.63916  | 2 | 929.0100098 | 929.0111485 |
| AAPAKGENLSLVVHGPGDIR                 | Q64442 | 0          | N-term +42.01 Da, K +28.03 Da, | 3630.50293  | 2 | 1036.068359 | 1036.068375 |

|                                 |        |            |                                           |             |   |             |             |
|---------------------------------|--------|------------|-------------------------------------------|-------------|---|-------------|-------------|
| SQAEFDKAAEEVKR                  | P31786 | 0          | N-term +42.01 Da, K +28.03 Da,            | 3632.708984 | 3 | 569.6300049 | 569.2967011 |
| MEDSAPDAVAAAAPSGTPKSKLETLP      | Q8CHG3 | 0          | N-term +42.01 Da, K +28.03 Da,            | 3636.618652 | 3 | 913.4799805 | 913.1407468 |
| MEAADVFHR                       | Q8BFS6 | 0          | N-term +42.01 Da,                         | 3642.868408 | 2 | 559.2600098 | 559.2583934 |
| MEQVNELKEKGNKAL                 | Q60864 | 0          | N-term +42.01 Da, K +28.03 Da,            | 3643.027832 | 3 | 620.3400269 | 619.6765245 |
| AAPAKGENLSLVVHGPDIR             | Q64442 | 0.02584814 | N-term +42.01 Da, K +28.03 Da,            | 3644.237793 | 3 | 691.0462646 | 691.0480091 |
| GTLRTSNLPEELR                   | Q8N7N6 | 0.02400325 | N-term +42.01 Da,                         | 3651.880859 | 2 | 765.4000244 | 764.4099157 |
| SSNLHRHER                       | Q80XR7 | 0.00667557 | N-term +42.01 Da,                         | 3652.320068 | 2 | 590.289978  | 589.2946876 |
| QTAPVIQTLRKTGIR                 | Q9CTG6 | 0.02596349 | N-term +42.01 Da, K +28.03 Da,            | 3658.986572 | 2 | 877.5300293 | 876.5281566 |
| SQAEFDKAAEEVKR                  | P31786 | 0          | N-term +42.01 Da, K +28.03 Da,            | 3664.284912 | 3 | 569.2999878 | 569.2967011 |
| AFDGTWKVDR                      | P55050 | 0          | N-term +42.01 Da, K +28.03 Da,            | 3666.13208  | 2 | 632.8189697 | 632.8196728 |
| SDAAVDTSSSEITTKDLKEKKEVVEEAENGR | P26350 | 0          | N-term +42.01 Da, K +28.03 Da,            | 3670.268555 | 3 | 1145.25     | 1144.924585 |
| NKELDPVQKLFVDKIR                | P97450 | 0          | N-term +42.01 Da, K +28.03 Da,            | 3671.298828 | 4 | 517.8187256 | 517.8095817 |
| GLLDAQSGPSLGR                   | Q3UE11 | 0.03840125 | N-term +42.01 Da,                         | 3672.725342 | 2 | 657.3599854 | 656.8464194 |
| AAPAKGENLSLVVHGPDIR             | Q64442 | 0.00750883 | N-term +42.01 Da, K +28.03 Da,            | 3675.298584 | 3 | 691.0499878 | 691.0480091 |
| ASESGKLW                        | Q91Y10 | 0.01243568 | N-term +42.01 Da, K +28.03 Da,            | 3676.912109 | 2 | 474.2453613 | 474.2452775 |
| SSSPVNVKCLKVSELKEEL             | Q8VEK3 | 0          | N-term +42.01 Da, K +28.03 Da,            | 3681.403564 | 4 | 567.8406372 | 567.8410794 |
| RLNDFASAVR                      | P12787 | 0.01044841 | N-term +42.01 Da,                         | 3681.577393 | 2 | 596.8099976 | 595.8174643 |
| SSSPVNVKCLKVSELKEEL             | Q8VEK3 | 0          | N-term +42.01 Da, K +28.03 Da,            | 3681.945801 | 3 | 757.4500122 | 756.7856804 |
| AHRFPALTPEQKKEELSEIAQR          | Q91Y97 | 0          | N-term +42.01 Da, K +28.03 Da,            | 3683.176514 | 4 | 637.8599854 | 637.6065059 |
| LHLESELAQTR                     | P05784 | 0          | N-term +42.01 Da,                         | 3683.381836 | 2 | 670.8499756 | 669.8542445 |
| MKETIMNQEKLAKLQAQVR             | Q64152 | 0          | N-term +42.01 Da, K +28.03 Da,            | 3690.740479 | 4 | 597.3400269 | 597.0893685 |
| SQAEFDKAAEEVKR                  | P31786 | 0          | N-term +42.01 Da, K +28.03 Da,            | 3690.916016 | 2 | 852.9400024 | 853.4414133 |
| ASLKDLEGKWR                     | Q05816 | 0          | N-term +42.01 Da, K +28.03 Da,            | 3692.991943 | 3 | 467.6000061 | 467.6013952 |
| MKETIMNQEKLAKLQAQVR             | Q64152 | 0.00190024 | N-term +42.01 Da, K +28.03 Da,            | 3695.099121 | 3 | 796.4500122 | 795.7833992 |
| AFDGTWKVDR                      | P55050 | 0          | N-term +42.01 Da, K +28.03 Da,            | 3697.683105 | 2 | 632.8187866 | 632.8196728 |
| QEHPVVLTKFVEGAR                 | Q8C196 | 0          | N-term +42.01 Da, K +28.03 Da,            | 3700.565674 | 3 | 594.6557007 | 593.9965855 |
| MSTGTFVVSQPLNYR                 | Q9JLJ2 | 0          | N-term +42.01 Da,                         | 3701.548584 | 2 | 872.4400024 | 871.4325337 |
| ASLKDLEGKWR                     | Q05816 | 0.00277521 | N-term +42.01 Da, K +28.03 Da,            | 3701.717041 | 2 | 700.8979492 | 700.8984546 |
| TFEESFQKALR                     | Q8C196 | 0.01448041 | N-term +42.01 Da, K +28.03 Da,            | 3703.642822 | 2 | 713.8699951 | 713.37227   |
| AAETVELHKLKLAELKQECLAR          | Q9D1J3 | 0          | N-term +42.01 Da, K +28.03 Da,C +57.02Da, | 3704.755859 | 4 | 670.3900146 | 669.8833815 |
| SEKSVEAAAELSAKDLK               | Q9D0J8 | 0.00448632 | N-term +42.01 Da, K +28.03 Da,            | 3704.833252 | 3 | 635.0200195 | 634.6858546 |
| AAPAKGENLSLVVHGPDIR             | Q64442 | 0.00666075 | N-term +42.01 Da, K +28.03 Da,            | 3706.284912 | 3 | 691.3800049 | 691.0480091 |
| AMAQSTRGGVVLR                   | Q4KWH5 | 0.0273752  | N-term +42.01 Da,                         | 3707.399414 | 3 | 463.2600098 | 463.2540011 |
| AAETVELHKLKLAELKQECLAR          | Q9D1J3 | 0          | N-term +42.01 Da, K +28.03 Da,C +57.02Da, | 3709.171631 | 4 | 669.8800049 | 669.8833815 |
| AAETVELHKLKLAELKQECLAR          | Q9D1J3 | 0          | N-term +42.01 Da, K +28.03 Da,C +57.02Da, | 3709.410156 | 3 | 893.1699829 | 892.8420832 |
| AGTNKETTIQGLDGLSER              | Q91Y97 | 0.00189484 | N-term +42.01 Da, K +28.03 Da,            | 3711.214111 | 2 | 981.4899902 | 980.5027316 |
| SQAEFDKAAEEVKR                  | P31786 | 0          | N-term +42.01 Da, K +28.03 Da,            | 3713.461426 | 3 | 569.960022  | 569.2967011 |
| AAETVELHKLKLAELKQEC             | Q9D1J3 | 0          | N-term +42.01 Da, K +28.03 Da,C +57.02Da, | 3715.980713 | 4 | 584.8300171 | 584.8278091 |
| ASLKDLEGKWR                     | Q05816 | 0          | N-term +42.01 Da, K +28.03 Da,            | 3723.273438 | 3 | 467.6009216 | 467.6013952 |
| AAPAKGENLSLVVHGPDIR             | Q64442 | 0.02382909 | N-term +42.01 Da, K +28.03 Da,            | 3723.610107 | 3 | 691.710022  | 691.0480091 |



|                         |        |            |                                |             |   |             |             |
|-------------------------|--------|------------|--------------------------------|-------------|---|-------------|-------------|
| AFDGTWKVDR              | P55050 | 0          | N-term +42.01 Da, K +28.03 Da, | 3728.003906 | 2 | 632.8197632 | 632.8196728 |
| AELGEADEAELQR           | P62077 | 0          | N-term +42.01 Da,              | 3737.130615 | 2 | 736.8464355 | 736.8468145 |
| DILIPAASEKQLTKSNAPR     | P26443 | 0          | N-term +42.01 Da, K +28.03 Da, | 3740.686523 | 3 | 718.0700073 | 717.4108362 |
| ATNFLAH                 | P57776 | 0.0144435  | N-term +42.01 Da,              | 3744.622314 | 2 | 408.2099915 | 408.2059548 |
| ADPKYADLPGIAR           | Q99KJ8 | 0          | N-term +42.01 Da, K +28.03 Da, | 3745.796143 | 2 | 729.3900146 | 728.8933696 |
| LDITTSEYEKEKLNER        | P63038 | 0          | N-term +42.01 Da, K +28.03 Da, | 3750.860596 | 3 | 690.0200195 | 689.359919  |
| SAMEAADVFHR             | Q8BFS6 | 0          | N-term +42.01 Da,              | 3752.75     | 2 | 638.2930298 | 638.2929651 |
| ADPKYADLPGIAR           | Q99KJ8 | 0.00099157 | N-term +42.01 Da, K +28.03 Da, | 3753.716309 | 3 | 486.269989  | 486.2646719 |
| ASLKDLEGKWR             | Q05816 | 0          | N-term +42.01 Da, K +28.03 Da, | 3754.102051 | 3 | 467.6000061 | 467.6013952 |
| SYTPGQPVTAVVQR          | Q9DBG9 | 0          | N-term +42.01 Da,              | 3760.963379 | 2 | 773.4099731 | 772.9070087 |
| SQAEFDKAAEEVKR          | P31786 | 0          | N-term +42.01 Da, K +28.03 Da, | 3762.701172 | 3 | 569.2999878 | 569.2967011 |
| MNFSGKY                 | P12710 | 0.02265239 | N-term +42.01 Da, K +28.03 Da, | 3765.720459 | 2 | 459.2200012 | 458.7152983 |
| SAPMPAVVPAAR            | P97823 | 0          | N-term +42.01 Da,              | 3768.368164 | 2 | 604.8256226 | 604.8264432 |
| EQVLENLQSKR             | P52196 | 0.0258795  | N-term +42.01 Da, K +28.03 Da, | 3769.967285 | 2 | 708.3800049 | 707.3884516 |
| AELGEADEAELQR           | P62077 | 0          | N-term +42.01 Da,              | 3773.391113 | 2 | 736.8499756 | 736.8468145 |
| LVLKFHTVR               | P02762 | 0.0397351  | N-term +42.01 Da, K +28.03 Da, | 3773.807861 | 3 | 395.5799866 | 394.9167658 |
| ADPKYADLPGIAR           | Q99KJ8 | 0          | N-term +42.01 Da, K +28.03 Da, | 3777.541504 | 2 | 728.8917847 | 728.8933696 |
| AAPAKGENLSLVVHGPDIR     | Q64442 | 0.001001   | N-term +42.01 Da, K +28.03 Da, | 3778.051514 | 3 | 691.0499878 | 691.0480091 |
| ADMQNLVER               | P40124 | 0          | N-term +42.01 Da,              | 3781.103271 | 2 | 559.2684326 | 559.2689585 |
| SAMEAADVFHR             | Q8BFS6 | 0          | N-term +42.01 Da,              | 3783.648682 | 2 | 638.289978  | 638.2929651 |
| HVGDGLNVTAGKDGVANVSIEDR | P08228 | 0.00095465 | N-term +42.01 Da, K +28.03 Da, | 3788.444824 | 3 | 798.4099731 | 798.4067029 |
| AAPAKGENLSLVVHGPDIR     | Q64442 | 0          | N-term +42.01 Da, K +28.03 Da, | 3788.687012 | 2 | 1036.060059 | 1036.068375 |
| ASLKDLEGKWR             | Q05816 | 0          | N-term +42.01 Da, K +28.03 Da, | 3789.416748 | 3 | 467.6000061 | 467.6013952 |
| AFDGTWKVDR              | P55050 | 0.0238193  | N-term +42.01 Da, K +28.03 Da, | 3792.118408 | 2 | 632.8200073 | 632.8196728 |
| MFESLDSSTATKSGR         | Q8BS39 | 0          | N-term +42.01 Da, K +28.03 Da, | 3796.273926 | 2 | 793.3800049 | 793.379967  |
| MDASPEPQQKGGTLVLVR      | P58735 | 0          | N-term +42.01 Da, K +28.03 Da, | 3800.793457 | 2 | 998.5300293 | 998.5302371 |
| GDSASKVISAEALPGR        | Q9D6Y7 | 0.00666371 | N-term +42.01 Da, K +28.03 Da, | 3802.606445 | 2 | 879.460022  | 878.9574279 |
| QIKYEELQTLAGKHGDDLRL    | P11679 | 0.00186654 | N-term +42.01 Da, K +28.03 Da, | 3807.067383 | 4 | 579.3099976 | 578.811582  |
| AAPAKGENLSLVVHGPDIR     | Q64442 | 0.01207417 | N-term +42.01 Da, K +28.03 Da, | 3809.397217 | 3 | 691.0499878 | 691.0480091 |
| AQALSEEEFQR             | Q8VD04 | 0          | N-term +42.01 Da,              | 3812.992432 | 2 | 675.3189697 | 675.3202348 |
| MKLELAQYR               | Q03265 | 0.01804448 | N-term +42.01 Da, K +28.03 Da, | 3814.513672 | 2 | 612.3300171 | 611.3366438 |
| SAAEVDGLGVVRPH          | Q9JKF1 | 0          | N-term +42.01 Da,              | 3815.872314 | 2 | 789.9000244 | 789.3995482 |
| LGEKLTDEEVDIMIR         | P62204 | 0.00449843 | N-term +42.01 Da, K +28.03 Da, | 3818.598877 | 3 | 616.3200073 | 616.3082784 |
| IVVLAKPEHENR            | Q9ES52 | 0.01997503 | N-term +42.01 Da, K +28.03 Da, | 3825.221436 | 3 | 492.9599915 | 492.2840663 |
| MNFSGKY                 | P12710 | 0.04260263 | N-term +42.01 Da, K +28.03 Da, | 3827.492432 | 2 | 458.7142639 | 458.7152983 |
| SQAEFDKAAEEVKR          | P31786 | 0          | N-term +42.01 Da, K +28.03 Da, | 3829.368164 | 3 | 569.289978  | 569.2967011 |
| VKAGPWTPEAAVEHPEAVR     | Q35490 | 0          | N-term +42.01 Da, K +28.03 Da, | 3830.25     | 3 | 706.0300293 | 705.3724927 |
| MLTLASKLKR              | Q9CY34 | 0          | N-term +42.01 Da, K +28.03 Da, | 3834.449707 | 3 | 420.6000061 | 420.2686995 |
| MDFSKLPK                | P50516 | 0.00099701 | N-term +42.01 Da, K +28.03 Da, | 3837.231445 | 2 | 532.2954712 | 532.2964556 |
| AAPAKGENLSLVVHGPDIR     | Q64442 | 0.01284247 | N-term +42.01 Da, K +28.03 Da, | 3840.290283 | 3 | 691.3755493 | 691.0480091 |

|                           |        |            |                                           |             |   |             |             |
|---------------------------|--------|------------|-------------------------------------------|-------------|---|-------------|-------------|
| AAPQLFR                   | Q99J99 | 0.03007217 | N-term +42.01 Da,                         | 3840.858643 | 2 | 423.2399902 | 422.7374219 |
| VTKLFAEAVQKSR             | Q8C196 | 0.01168831 | N-term +42.01 Da, K +28.03 Da,            | 3854.048096 | 3 | 526.3099976 | 525.6470048 |
| MDKTLKGLNSDSVTEETLR       | Q8C196 | 0.02411116 | N-term +42.01 Da, K +28.03 Da,            | 3856.030029 | 3 | 746.3800049 | 745.7227518 |
| ADTELTRIRAGDDR            | O88472 | 0.04517375 | N-term +42.01 Da,                         | 3865.322266 | 2 | 815.9099731 | 815.9108117 |
| AAPQLFR                   | Q99J99 | 0.03007217 | N-term +42.01 Da,                         | 3871.348145 | 2 | 422.7366333 | 422.7374219 |
| SDAPPLTLDGIKDR            | Q9CR21 | 0.00095969 | N-term +42.01 Da, K +28.03 Da,            | 3877.514893 | 2 | 785.4199829 | 784.4199493 |
| EFEKFLKTR                 | P30115 | 0.04520866 | N-term +42.01 Da, K +28.03 Da,            | 3880.022949 | 3 | 476.2600098 | 475.5976509 |
| MDMVKVN                   | Q283N4 | 0.01128962 | N-term +42.01 Da, K +28.03 Da,            | 3884.798584 | 2 | 453.7238159 | 453.7248087 |
| AQGLIEVER                 | Q8JZL3 | 0.00050994 | N-term +42.01 Da,                         | 3887.023193 | 2 | 529.289978  | 528.7878412 |
| VMLGETNPADSKPGTIR         | P15532 | 0          | N-term +42.01 Da, K +28.03 Da,            | 3887.294922 | 2 | 927.9799805 | 928.4827554 |
| GEECELETMTGEKVK           | P12710 | 0          | N-term +42.01 Da, K +28.03 Da,C +57.02Da, | 3899.119141 | 2 | 920.4199829 | 919.4315402 |
| NFDEILR                   | O08709 | 0.03665747 | N-term +42.01 Da,                         | 3901.969238 | 2 | 474.25      | 474.742902  |
| LKGLNSDSVTEETLR           | Q8C196 | 0.0066726  | N-term +42.01 Da, K +28.03 Da,            | 3902.809814 | 2 | 867.4500122 | 866.4598034 |
| RVISLSGEHSIIGR            | P08228 | 0          | N-term +42.01 Da,                         | 3905.213379 | 3 | 523.2894287 | 522.6301253 |
| MELEEDLKGR                | P21447 | 0          | N-term +42.01 Da, K +28.03 Da,            | 3906.832031 | 2 | 645.3300171 | 645.3239313 |
| IITVGTGQGSLLFYDIR         | Q8BGZ3 | 0.0240228  | N-term +42.01 Da,                         | 3907.444336 | 2 | 947.5300293 | 948.0172882 |
| MMNGRPGHEPLKFLPDEAR       | Q9CQ54 | 0          | N-term +42.01 Da, K +28.03 Da,            | 3908.574463 | 4 | 567.2800293 | 567.0371358 |
| MMNGRPGHEPLKFLPDEAR       | Q9CQ54 | 0.00096993 | N-term +42.01 Da, K +28.03 Da,            | 3910.010986 | 3 | 756.3699951 | 755.7137556 |
| SQAEFDKAAEEVKR            | P31786 | 0.00450045 | N-term +42.01 Da, K +28.03 Da,            | 3920.381836 | 3 | 569.6300049 | 569.2967011 |
| HVGDLGNVTAGKDGVANVSIEDR   | P08228 | 0          | N-term +42.01 Da, K +28.03 Da,            | 3925.200195 | 3 | 799.0599976 | 798.4067029 |
| SDFDEFER                  | P26369 | 0.00050968 | N-term +42.01 Da,                         | 3925.581299 | 2 | 543.7199707 | 543.7223644 |
| SHQTGIQASEDVKEIFAR        | Q91YR1 | 0          | N-term +42.01 Da, K +28.03 Da,            | 3926.712891 | 2 | 1043.530029 | 1043.531823 |
| SHQTGIQASEDVKEIFAR        | Q91YR1 | 0          | N-term +42.01 Da, K +28.03 Da,            | 3928.307373 | 3 | 696.3599854 | 696.023641  |
| ASFTVKAY                  | Q64337 | 0.01209503 | N-term +42.01 Da, K +28.03 Da,            | 3930.610596 | 2 | 478.7600098 | 478.7580205 |
| ANHAPFETDISTLTR           | Q9QXD6 | 0          | N-term +42.01 Da,                         | 3934.075195 | 2 | 857.9199829 | 857.9233878 |
| LPTQTISQGAIEKVKDATR       | Q8C196 | 0.03740157 | N-term +42.01 Da, K +28.03 Da,            | 3934.527344 | 4 | 539.3099976 | 539.308675  |
| AAAAAAAAAAGAAGGR          | Q8CCS6 | 0          | N-term +42.01 Da,                         | 3936.22876  | 2 | 620.8234863 | 620.8232783 |
| MMMMAAAER                 | Q9DCS2 | 0          | N-term +42.01 Da,                         | 3938.580078 | 2 | 512.2199707 | 512.2246501 |
| ATEGDVELELETETSGPERPPEKPR | Q9CR41 | 0          | N-term +42.01 Da, K +28.03 Da,            | 3938.674805 | 3 | 946.4699707 | 946.1330862 |
| AITATQKTVDGSPGKLR         | P16858 | 0.00320807 | N-term +42.01 Da, K +28.03 Da,            | 3946.055664 | 3 | 677.039978  | 676.3809881 |
| TEKDAQPQLEEADDDLDKLN      | Q61599 | 0          | N-term +42.01 Da, K +28.03 Da,            | 3946.466553 | 2 | 1237.089966 | 1236.584846 |
| PFVELETNLPASR             | O35215 | 0.0005071  | N-term +42.01 Da,                         | 3949.936523 | 2 | 758.9000244 | 757.8961096 |
| TEPGASPDPWVKASFADAHAGEGR  | O08609 | 0          | N-term +42.01 Da, K +28.03 Da,            | 3952.202881 | 3 | 885.0800171 | 884.7490176 |
| ASEVEEQIPVR               | Q8BVA5 | 0          | N-term +42.01 Da,                         | 3952.922852 | 2 | 649.8353271 | 649.8329779 |
| TEPGASPDPWVKASFADAHAGEGR  | O08609 | 0          | N-term +42.01 Da, K +28.03 Da,            | 3953.133057 | 3 | 884.75      | 884.7490176 |
| TEKDAQPQLEEADDDLDKLN      | Q61599 | 0.00050075 | N-term +42.01 Da, K +28.03 Da,            | 3955.486816 | 2 | 1237.589966 | 1236.584846 |
| AAAVVEFQR                 | Q8BG32 | 0.00095648 | N-term +42.01 Da,                         | 3958.264893 | 2 | 516.777771  | 516.7772761 |
| MKKKVAIIGAGVSGLAAIR       | P97501 | 0.00188947 | N-term +42.01 Da, K +28.03 Da,            | 3958.779541 | 3 | 670.4299927 | 670.4271035 |
| MQNVINTVKGK               | Q9CPX6 | 0          | N-term +42.01 Da, K +28.03 Da,            | 3960.429199 | 2 | 665.3817139 | 665.381583  |
| GDLGNVTAGKDGVANVSIEDR     | P08228 | 0          | N-term +42.01 Da, K +28.03 Da,            | 3965.000488 | 2 | 1080.030029 | 1079.042753 |

|                         |        |            |                                           |             |   |             |             |
|-------------------------|--------|------------|-------------------------------------------|-------------|---|-------------|-------------|
| AAAAAAAAAAGAAGGR        | Q8CCS6 | 0          | N-term +42.01 Da,                         | 3966.669434 | 2 | 620.8217163 | 620.8232783 |
| AAIPSSGSLVATHDYR        | Q9CR37 | 0          | N-term +42.01 Da,                         | 3970.325195 | 2 | 925.460022  | 925.4575949 |
| SSVSPIQIPSR             | Q9DBN5 | 0.01642797 | N-term +42.01 Da,                         | 3973.231689 | 2 | 606.8300171 | 606.8327804 |
| MNQEKLAKLQAQVR          | Q64152 | 0.01484309 | N-term +42.01 Da, K +28.03 Da,            | 3981.155762 | 3 | 586.3300171 | 585.6697038 |
| MDEPSPLAKTLELNQHSR      | Q5SWU9 | 0          | N-term +42.01 Da, K +28.03 Da,            | 3987.294189 | 3 | 712.6900024 | 712.696648  |
| CLLFSESAGLR             | Q3UQS8 | 0.01567797 | N-term +42.01 Da, C +57.02Da,             | 3990.268555 | 2 | 647.8300171 | 647.8266408 |
| MDNKLDVFR               | Q3UZZ6 | 0.04545455 | N-term +42.01 Da, K +28.03 Da,            | 3991.47168  | 2 | 604.3099976 | 604.3106262 |
| GTQPEPDIVGLDSGHIR       | P52196 | 0.02146986 | N-term +42.01 Da,                         | 3993.467773 | 2 | 917.9799805 | 916.9605019 |
| SSVAVLTKESFAEHR         | Q8VDJ3 | 0          | N-term +42.01 Da,                         | 3994.689209 | 2 | 852.4199829 | 851.9233878 |
| ADLEEQLSDEEKVR          | P47754 | 0          | N-term +42.01 Da, K +28.03 Da,            | 3997.891357 | 2 | 865.9229736 | 865.9257938 |
| MEIGTEISR               | Q8BJ05 | 0          | N-term +42.01 Da,                         | 3999.369873 | 2 | 539.2657471 | 539.2658845 |
| SSVAVLTKESFAEHR         | Q8VDJ3 | 0          | N-term +42.01 Da,                         | 4006.556641 | 2 | 852.9199829 | 851.9233878 |
| SMHTEAAEVLLER           | Q8QZS1 | 0          | N-term +42.01 Da,                         | 4008.281494 | 2 | 764.3699951 | 764.377227  |
| AKCLLTSSLSVR            | Q9D9V3 | 0.03915427 | N-term +42.01 Da, K +28.03 Da,C +57.02Da, | 4009.543457 | 2 | 702.9000244 | 702.8975975 |
| AMKAVCVLKGDPVQ          | P08228 | 0.00753212 | N-term +42.01 Da, K +28.03 Da,C +57.02Da, | 4009.744873 | 2 | 835.9500122 | 835.9520472 |
| MDNKLDVFR               | Q3UZZ6 | 0.0005123  | N-term +42.01 Da, K +28.03 Da,            | 4022.11792  | 2 | 604.3099976 | 604.3106262 |
| AAAKAVLGPLVGAVDQGTSTR   | Q64516 | 0          | N-term +42.01 Da, K +28.03 Da,            | 4022.28833  | 3 | 766.0999756 | 765.7725453 |
| IQALPEFDGKR             | P08113 | 0.02371218 | N-term +42.01 Da, K +28.03 Da,            | 4025.372559 | 2 | 673.3699951 | 672.36953   |
| MQDAENVAVPEAAEER        | Q8JZQ9 | 0          | N-term +42.01 Da,                         | 4028.474365 | 2 | 901.4099731 | 900.9070782 |
| ADLEEQLSDEEKVR          | P47754 | 0          | N-term +42.01 Da, K +28.03 Da,            | 4028.860352 | 2 | 865.9234619 | 865.9257938 |
| SSPAQPAVPAPLADLKIHTK    | P24549 | 0          | N-term +42.01 Da, K +28.03 Da,            | 4029.183594 | 3 | 756.7600098 | 756.4301193 |
| SASVVSISR               | P61804 | 0          | N-term +42.01 Da,                         | 4034.084229 | 2 | 523.7999878 | 523.7956662 |
| KAGLLEKLEKETEYDVR       | Q61176 | 0.01321962 | N-term +42.01 Da, K +28.03 Da,            | 4036.27832  | 3 | 674.0499878 | 673.3892608 |
| MDFSKLPKIR              | P50516 | 0          | N-term +42.01 Da, K +28.03 Da,            | 4036.484619 | 3 | 445.2600098 | 444.9284545 |
| AKYGDLEARPDDGQNEFSDIKSR | E9Q6R7 | 0          | N-term +42.01 Da, K +28.03 Da,            | 4038.09668  | 4 | 706.5999756 | 706.3543432 |
| AMKAVCVLKGDPVQGT        | P08228 | 0          | N-term +42.01 Da, K +28.03 Da,C +57.02Da, | 4039.64502  | 2 | 914.9829102 | 914.9866189 |
| ADEELEALR               | P56812 | 0.00050277 | N-term +42.01 Da,                         | 4041.178711 | 2 | 544.2700195 | 544.2669391 |
| MEVHELFR                | P41216 | 0.00052192 | N-term +42.01 Da,                         | 4045.787842 | 2 | 551.7702637 | 551.7711365 |
| ASDTPGFYMDKLNKYR        | Q03963 | 0          | N-term +42.01 Da, K +28.03 Da,            | 4045.866943 | 3 | 668.6677246 | 668.6680292 |
| SSPAQPAVPAPLADLKIHTK    | P24549 | 0          | N-term +42.01 Da, K +28.03 Da,            | 4046.19165  | 2 | 1135.150024 | 1134.141541 |
| ASQSQGIQQLQAEKR         | Q9CR51 | 0          | N-term +42.01 Da, K +28.03 Da,            | 4046.4104   | 2 | 929         | 928.0052436 |
| SLDIQCEQLSDAR           | Q91VI7 | 0          | N-term +42.01 Da, C +57.02Da,             | 4046.519287 | 2 | 788.8699951 | 788.867224  |
| AAVVDPPQSSVVMR          | P43883 | 0          | N-term +42.01 Da,                         | 4049.427979 | 2 | 721.8699951 | 721.3770295 |
| MSPEIALNR               | Q8K3W0 | 0.00052743 | N-term +42.01 Da,                         | 4051.279297 | 2 | 536.7800293 | 536.776419  |
| AAAKAVLGPLVGAVDQGTSTR   | Q64516 | 0          | N-term +42.01 Da, K +28.03 Da,            | 4053.586914 | 3 | 765.7714844 | 765.7725453 |
| AMKAVCVLKGDPVQGTIHFEQK  | P08228 | 0.0009704  | N-term +42.01 Da, K +28.03 Da,C +57.02Da, | 4054.516602 | 4 | 660.6065063 | 660.6066544 |
| AAAKAVLGPLVGAVDQGTSTR   | Q64516 | 0          | N-term +42.01 Da, K +28.03 Da,            | 4056.68335  | 2 | 1148.650024 | 1148.15518  |
| MDDREDLVYQAKLAEQAER     | P62259 | 0          | N-term +42.01 Da, K +28.03 Da,            | 4057.840088 | 3 | 784.3800049 | 784.0496391 |
| SSVAVLTKESFAEHR         | Q8VDJ3 | 0          | N-term +42.01 Da,                         | 4059.847412 | 2 | 852.4199829 | 851.9233878 |
| SSPAQPAVPAPLADLKIHTK    | P24549 | 0          | N-term +42.01 Da, K +28.03 Da,            | 4060.566162 | 3 | 756.4292603 | 756.4301193 |

|                           |        |            |                                           |             |   |             |             |
|---------------------------|--------|------------|-------------------------------------------|-------------|---|-------------|-------------|
| MDDREDLVYQAKLAEQAER       | P62259 | 0          | N-term +42.01 Da, K +28.03 Da,            | 4066.477783 | 2 | 1176.069946 | 1175.57082  |
| MDFSKLPKIR                | P50516 | 0          | N-term +42.01 Da, K +28.03 Da,            | 4067.809326 | 3 | 444.9275818 | 444.9284545 |
| ALDGPEQMELEEGKAGSGLR      | P62196 | 0          | N-term +42.01 Da, K +28.03 Da,            | 4068.294922 | 2 | 1079.530029 | 1079.028257 |
| QEDLSIWLSGLLGVDIKAER      | Q3UWW6 | 0.02739726 | N-term +42.01 Da, K +28.03 Da,            | 4070.067139 | 3 | 771.75      | 771.4214013 |
| METEQPEETFPNTETNGEFGKR    | P61979 | 0          | N-term +42.01 Da, K +28.03 Da,            | 4070.662354 | 2 | 1321.579956 | 1321.089772 |
| SVFGKLFAGGGKAGKGGPTPQEAIR | Q9D8B3 | 0          | N-term +42.01 Da, K +28.03 Da,            | 4073.316162 | 4 | 686.1300049 | 686.1328881 |
| SSDAQWLTAER               | Q9CZL5 | 0          | N-term +42.01 Da,                         | 4073.401123 | 2 | 717.8276367 | 717.8284244 |
| MEVHELFR                  | P41216 | 0.00052192 | N-term +42.01 Da,                         | 4076.18335  | 2 | 551.7702637 | 551.7711365 |
| LGNVTAGKDGVANVSIEDR       | P08228 | 0.00099453 | N-term +42.01 Da, K +28.03 Da,            | 4077.402588 | 2 | 994.0100098 | 993.0185487 |
| SLDIQCEQLSDAR             | Q91VI7 | 0.00095877 | N-term +42.01 Da, C +57.02Da,             | 4081.919189 | 2 | 789.3800049 | 788.867224  |
| AAQKINEGLEHLAKAEKY        | Q9CWZ7 | 0          | N-term +42.01 Da, K +28.03 Da,            | 4081.994629 | 4 | 535.5499878 | 535.5506677 |
| LMKEGLEAAR                | Q35490 | 0          | N-term +42.01 Da, K +28.03 Da,            | 4082.070068 | 2 | 595.3200073 | 594.3262762 |
| ASQSQGIQQLLQAEKR          | Q9CR51 | 0          | N-term +42.01 Da, K +28.03 Da,            | 4082.247803 | 2 | 928.0100098 | 928.0052436 |
| MDLYKTLR                  | P06537 | 0.02184666 | N-term +42.01 Da, K +28.03 Da,            | 4083.588135 | 2 | 555.3051147 | 555.3048121 |
| AAAKKAVLGPLVGAVDQGTSSSTR  | Q64516 | 0          | N-term +42.01 Da, K +28.03 Da,            | 4084.778564 | 3 | 765.7712402 | 765.7725453 |
| SVFGKLFAGGGKAGKGGPTPQEAIR | Q9D8B3 | 0          | N-term +42.01 Da, K +28.03 Da,            | 4085.440674 | 3 | 914.5       | 914.5080919 |
| AMKAVCVLKGDPVQGTIHFEQK    | P08228 | 0.02440016 | N-term +42.01 Da, K +28.03 Da,C +57.02Da, | 4088.543945 | 4 | 661.1099854 | 660.6066544 |
| MDDREDLVYQAKLAEQAER       | P62259 | 0          | N-term +42.01 Da, K +28.03 Da,            | 4089.578613 | 3 | 784.3800049 | 784.0496391 |
| AAQALAAQAVASR             | Q8BLY2 | 0          | N-term +42.01 Da,                         | 4092.79541  | 2 | 635.3499756 | 635.3491289 |
| AMKAVCVLKGDPVQGTIHFEQK    | P08228 | 0          | N-term +42.01 Da, K +28.03 Da,C +57.02Da, | 4095.310547 | 3 | 880.7999878 | 880.4731137 |
| MEKTLETVPLER              | Q88569 | 0          | N-term +42.01 Da, K +28.03 Da,            | 4100.265625 | 2 | 758.4061279 | 758.4079956 |
| PPKRVSLVGADDLR            | Q80U72 | 0.03737215 | N-term +42.01 Da, K +28.03 Da,            | 4101.883301 | 3 | 531.9699707 | 531.6421424 |
| ATDELASKL                 | Q9D8Y0 | 0.01446809 | N-term +42.01 Da, K +28.03 Da,            | 4102.319824 | 2 | 509.2799988 | 509.2767751 |
| MEGPAGYLR                 | E9Q509 | 0          | N-term +42.01 Da,                         | 4103.844238 | 2 | 518.25      | 518.2500369 |
| MEKTLETVPLER              | Q88569 | 0.00096339 | N-term +42.01 Da, K +28.03 Da,            | 4105.535645 | 3 | 505.9400024 | 505.9410892 |
| MELEAMSR                  | P61166 | 0.00098912 | N-term +42.01 Da,                         | 4107.336914 | 2 | 504.7270203 | 504.7280803 |
| ASQSQGIQQLLQAEKR          | Q9CR51 | 0          | N-term +42.01 Da, K +28.03 Da,            | 4110.13623  | 3 | 619.3400269 | 619.0059212 |
| ALDGPEQMELEEGKAGSGLR      | P62196 | 0          | N-term +42.01 Da, K +28.03 Da,            | 4111.671387 | 2 | 1079.530029 | 1079.028257 |
| ASQSQGIQQLLQAEKR          | Q9CR51 | 0          | N-term +42.01 Da, K +28.03 Da,            | 4113.096191 | 2 | 928.0049438 | 928.0052436 |
| AAPAKGENLSLVVHGPDIR       | Q64442 | 0.00095511 | N-term +42.01 Da, K +28.03 Da,            | 4114.949219 | 3 | 691.3800049 | 691.0480091 |
| AMKAVCVLKGDPVQGTIHFEQK    | P08228 | 0          | N-term +42.01 Da, K +28.03 Da,C +57.02Da, | 4119.899414 | 4 | 660.6060181 | 660.6066544 |
| ANHAPFETDISTLTR           | Q9QXD6 | 0          | N-term +42.01 Da,                         | 4120.560547 | 2 | 858.4158325 | 857.9233878 |
| MDDREDLVYQAKLAEQAER       | P62259 | 0          | N-term +42.01 Da, K +28.03 Da,            | 4122.453613 | 3 | 784.3800049 | 784.0496391 |
| SAHLQWMVVR                | P41105 | 0          | N-term +42.01 Da,                         | 4130.276855 | 2 | 634.8301392 | 634.8320597 |
| MEKTLETVPLER              | Q88569 | 0          | N-term +42.01 Da, K +28.03 Da,            | 4131.639648 | 2 | 758.4099731 | 758.4079956 |
| MEGPAGYLR                 | E9Q509 | 0          | N-term +42.01 Da,                         | 4135.199707 | 2 | 518.25      | 518.2500369 |
| MDSKESLAPPGRDEVPSLLGR     | P06537 | 0          | N-term +42.01 Da, K +28.03 Da,            | 4136.960938 | 3 | 804.75      | 804.4126888 |
| AAAKKAVLGPLVGAVDQGTSSSTR  | Q64516 | 0          | N-term +42.01 Da, K +28.03 Da,            | 4137.137695 | 3 | 766.1099854 | 765.7725453 |
| AMKAVCVLKGDPVQGTIHFEQKA   | P08228 | 0          | N-term +42.01 Da, K +28.03 Da,C +57.02Da, | 4138.930664 | 3 | 904.4799805 | 904.1521517 |
| ISLSGEHSIIGR              | P08228 | 0          | N-term +42.01 Da,                         | 4142.072266 | 2 | 656.8656616 | 655.856787  |

|                                   |        |            |                                |             |   |             |             |
|-----------------------------------|--------|------------|--------------------------------|-------------|---|-------------|-------------|
| AAATLSFGPER                       | Q80TM9 | 0          | N-term +42.01 Da,              | 4142.301758 | 2 | 581.2999878 | 581.2985732 |
| AATMKKAAAEVDNVTFEDQQKINKF         | E9Q6U4 | 0          | N-term +42.01 Da, K +28.03 Da, | 4147.078613 | 4 | 739.1400146 | 738.6441288 |
| AKEWGYASHNGPDHWHELYPIAKGDNQSPIELH | P16015 | 0          | N-term +42.01 Da, K +28.03 Da, | 4147.372559 | 4 | 974.4699707 | 974.4710365 |
| ALDGPEQMELEEGKAGSGLR              | P62196 | 0          | N-term +42.01 Da, K +28.03 Da, | 4147.572266 | 2 | 1079.530029 | 1079.028257 |
| AATMKKAAAEVDNVTFEDQQKINKF         | E9Q6U4 | 0.0116782  | N-term +42.01 Da, K +28.03 Da, | 4148.118164 | 3 | 984.8599854 | 984.5230796 |
| DNNLELVQEILR                      | Q9WV34 | 0.02383888 | N-term +42.01 Da,              | 4150.212891 | 3 | 499.9400024 | 499.9351033 |
| ALDGPEQMELEEGKAGSGLR              | P62196 | 0          | N-term +42.01 Da, K +28.03 Da, | 4150.377441 | 3 | 719.6900024 | 719.6879299 |
| LGNVNTAGKDGVANVSIEDR              | P08228 | 0.02736419 | N-term +42.01 Da, K +28.03 Da, | 4150.813965 | 2 | 994.0100098 | 993.0185487 |
| AAAAVVEFQR                        | Q8BG32 | 0          | N-term +42.01 Da,              | 4153.49707  | 2 | 552.295105  | 552.2958332 |
| MDSKESLAPPGRDEVPSLLGR             | P06537 | 0          | N-term +42.01 Da, K +28.03 Da, | 4153.891602 | 3 | 804.4099731 | 804.4126888 |
| AEGQVLVLDGR                       | P19253 | 0          | N-term +42.01 Da,              | 4155.779785 | 2 | 599.8200073 | 599.8249553 |
| LKGLNSDSVTEETLR                   | Q8C196 | 0          | N-term +42.01 Da, K +28.03 Da, | 4159.172852 | 2 | 867.4471436 | 866.4598034 |
| LAGTNKETTIQGLDGLSER               | Q91Y97 | 0.00277906 | N-term +42.01 Da, K +28.03 Da, | 4160.858398 | 2 | 1038.030029 | 1037.044764 |
| QVAMATVTALHR                      | Q91Y97 | 0          | N-term +42.01 Da,              | 4161.802734 | 2 | 671.3599854 | 670.3611819 |
| AAAVVDPQQSVVMR                    | P43883 | 0          | N-term +42.01 Da,              | 4162.960938 | 2 | 756.9000244 | 756.8955865 |
| SSVAVLTQESFAEHR                   | Q8VDJ3 | 0          | N-term +42.01 Da,              | 4163.489746 | 2 | 852.9299927 | 851.9233878 |
| MDNKLDFR                          | Q3UZ26 | 0.02970695 | N-term +42.01 Da, K +28.03 Da, | 4168.76709  | 2 | 604.8099976 | 604.3106262 |
| MEANVTIPIWQNKPHGAAR               | Q9CWE0 | 0          | N-term +42.01 Da, K +28.03 Da, | 4171.404785 | 3 | 735.3900146 | 735.052877  |
| MDDREDLVYQAKLAEQAER               | P62259 | 0          | N-term +42.01 Da, K +28.03 Da, | 4172.100586 | 3 | 784.3800049 | 784.0496391 |
| VAPEEHPVLLTEAPLNPKANR             | P60710 | 0          | N-term +42.01 Da, K +28.03 Da, | 4172.708008 | 3 | 788.7700195 | 789.100662  |
| ANHAPFETDISTLTR                   | Q9QXD6 | 0          | N-term +42.01 Da,              | 4172.798828 | 2 | 858.4099731 | 857.9233878 |
| MESGFTSKDTYLSHFNPR                | Q55239 | 0          | N-term +42.01 Da, K +28.03 Da, | 4172.985352 | 3 | 730.3499756 | 729.6773649 |
| ALDGPEQMELEEGKAGSGLR              | P62196 | 0          | N-term +42.01 Da, K +28.03 Da, | 4179.186035 | 2 | 1079.030029 | 1079.028257 |
| AASAIKGLSALR                      | Q9D8T7 | 0          | N-term +42.01 Da, K +28.03 Da, | 4182.030762 | 2 | 614.3699951 | 614.374615  |
| ASSPQGLDNPALLR                    | A2ADY9 | 0          | N-term +42.01 Da,              | 4184.813477 | 2 | 741.3900146 | 740.8913586 |
| TTNTVPLPHYWPR                     | P70245 | 0          | N-term +42.01 Da,              | 4188.147461 | 2 | 813.4199829 | 812.4175432 |
| MDLGLAGR                          | Q91X52 | 0.0018622  | N-term +42.01 Da,              | 4190.527344 | 2 | 437.730011  | 437.7261973 |
| AAAVVDPQQSVVMR                    | P43883 | 0          | N-term +42.01 Da,              | 4193.9375   | 2 | 756.8939819 | 756.8955865 |
| NMNKEDEGEITKSLR                   | Q80YX1 | 0.04679708 | N-term +42.01 Da, K +28.03 Da, | 4194.476074 | 2 | 932.460022  | 931.4698454 |
| ATIATMPVPETR                      | Q62189 | 0          | N-term +42.01 Da,              | 4194.600098 | 2 | 665.8499756 | 664.8475733 |
| SSVAVLTQESFAEHR                   | Q8VDJ3 | 0          | N-term +42.01 Da,              | 4195.112793 | 2 | 851.9227905 | 851.9233878 |
| ATIATMPVPETR                      | Q62189 | 0          | N-term +42.01 Da,              | 4195.979004 | 2 | 664.8499756 | 664.8475733 |
| MESHKPKSTKDDLILNIISR              | Q9D8Y1 | 0.02378024 | N-term +42.01 Da, K +28.03 Da, | 4196.173828 | 4 | 596.5700073 | 596.322891  |
| AEGQVLVLDGR                       | P19253 | 0          | N-term +42.01 Da,              | 4201.290039 | 2 | 600.3300171 | 599.8249553 |
| MDDREDLVYQAKLAEQAER               | P62259 | 0          | N-term +42.01 Da, K +28.03 Da, | 4202.433105 | 3 | 784.3800049 | 784.0496391 |
| AERPEDLNLNAVITR                   | Q9JKP7 | 0          | N-term +42.01 Da,              | 4203.221191 | 2 | 925.4899902 | 925.491969  |
| MKSVGEMVMAIGR                     | Q8C196 | 0.00187617 | N-term +42.01 Da, K +28.03 Da, | 4204.36377  | 2 | 675.3499756 | 674.3597933 |
| SSVAVLTQESFAEHR                   | Q8VDJ3 | 0          | N-term +42.01 Da,              | 4204.463867 | 3 | 568.2839966 | 568.284684  |
| AAAAVVEFQR                        | Q8BG32 | 0.00050327 | N-term +42.01 Da,              | 4206.322754 | 2 | 552.2958374 | 552.2958332 |
| DFLESHYLDKEVK                     | P29391 | 0          | N-term +42.01 Da, K +28.03 Da, | 4209.95752  | 3 | 574.960022  | 574.2979304 |

|                                   |        |            |                                           |             |   |             |             |
|-----------------------------------|--------|------------|-------------------------------------------|-------------|---|-------------|-------------|
| MEEKAVASAGCWEPGPPR                | A7MCT6 | 0          | N-term +42.01 Da, K +28.03 Da,C +57.02Da, | 4213.050781 | 3 | 713.6699829 | 713.6714451 |
| SSSRPVALVTGANKGIGFAITR            | P48758 | 0.01802935 | N-term +42.01 Da, K +28.03 Da,            | 4213.154785 | 3 | 758.4299927 | 758.0972516 |
| ACGLVASNLNLKPGECKLVR              | P16045 | 0          | N-term +42.01 Da, K +28.03 Da,C +57.02Da, | 4214.67627  | 3 | 766.75      | 766.4204608 |
| KKHSQFIGYPITLYLEKER               | P11499 | 0.00319052 | N-term +42.01 Da, K +28.03 Da,            | 4215.863281 | 4 | 619.6021118 | 619.8545209 |
| AAAAGAVVASAASGPAEGKKITELR         | Q8CH25 | 0          | N-term +42.01 Da, K +28.03 Da,            | 4215.945801 | 3 | 799.1199951 | 798.7832217 |
| TTNTVPLHPYWPR                     | P70245 | 0          | N-term +42.01 Da,                         | 4218.952637 | 2 | 812.4163818 | 812.4175432 |
| SSSRPVALVTGANKGIGFAITR            | P48758 | 0          | N-term +42.01 Da, K +28.03 Da,            | 4219.749512 | 3 | 758.0900269 | 758.0972516 |
| SAKS AISKEIFAPLDER                | Q8R3T5 | 0.00624442 | N-term +42.01 Da, K +28.03 Da,            | 4220.24707  | 3 | 654.3599854 | 654.029844  |
| ADKPDMGEIASFDKAKL                 | Q6ZWY8 | 0          | N-term +42.01 Da, K +28.03 Da,            | 4221.962891 | 3 | 654.6799927 | 654.6799349 |
| SSVAVLTSQESFAEHR                  | Q8VDJ3 | 0          | N-term +42.01 Da,                         | 4226.175781 | 2 | 851.9224854 | 851.9233878 |
| ATIATMPVPETR                      | Q62189 | 0.00098717 | N-term +42.01 Da,                         | 4228.05127  | 2 | 664.8474731 | 664.8475733 |
| AMFEQMR                           | Q9DBZ5 | 0.00189843 | N-term +42.01 Da,                         | 4229.308594 | 2 | 477.7099915 | 477.7122327 |
| AEGQVLVLDGR                       | P19253 | 0          | N-term +42.01 Da,                         | 4232.083008 | 2 | 599.8300171 | 599.8249553 |
| IKLTIYGPVVR                       | P12710 | 0          | N-term +42.01 Da, K +28.03 Da,            | 4232.353516 | 3 | 529.9994507 | 529.3395118 |
| DYFLQELQQLCK                      | Q9CWRO | 0.01992528 | N-term +42.01 Da, K +28.03 Da,C +57.02Da, | 4234.793945 | 2 | 828.4099731 | 827.9109026 |
| STNTDLSLSSYDEGQGSKFIR             | Q9JLR9 | 0          | N-term +42.01 Da, K +28.03 Da,            | 4236.767578 | 2 | 1188.569946 | 1188.071708 |
| MNKEWPANLCLKKELSEPSSTR            | Q8C196 | 0          | N-term +42.01 Da, K +28.03 Da,            | 4241.266113 | 4 | 676.0999756 | 675.6072804 |
| NKELDPVQKLFVDKIR                  | P97450 | 0          | N-term +42.01 Da, K +28.03 Da,            | 4242.934082 | 4 | 518.3099976 | 517.8095817 |
| VISLSGEHSIIGR                     | P08228 | 0          | N-term +42.01 Da,                         | 4243.185547 | 3 | 470.6000061 | 470.5964216 |
| ANHAPFETDISTLTR                   | Q9QXD6 | 0          | N-term +42.01 Da,                         | 4244.764648 | 2 | 857.9230957 | 857.9233878 |
| STNTDLSLSSYDEGQGSKFIR             | Q9JLR9 | 0          | N-term +42.01 Da, K +28.03 Da,            | 4247.505371 | 3 | 793.0499878 | 792.3835641 |
| AAAAGAVVASAASGPAEGKKITELR         | Q8CH25 | 0          | N-term +42.01 Da, K +28.03 Da,            | 4247.891602 | 3 | 799.1199951 | 798.7832217 |
| EIAQDFKTDLR                       | P02301 | 0.03440095 | N-term +42.01 Da, K +28.03 Da,            | 4249.025879 | 2 | 704.3599854 | 703.3697275 |
| DTLLPKLPR                         | P49429 | 0.01170859 | N-term +42.01 Da, K +28.03 Da,            | 4249.277344 | 2 | 562.8400269 | 561.8477014 |
| MATKLIR                           | Q8CG73 | 0.03847664 | N-term +42.01 Da, K +28.03 Da,            | 4249.413574 | 2 | 452.2880554 | 451.7782325 |
| EESVYDEFVKR                       | P24549 | 0.0005015  | N-term +42.01 Da, K +28.03 Da,            | 4254.007813 | 2 | 736.8499756 | 735.859193  |
| ANHAPFETDISTLTR                   | Q9QXD6 | 0          | N-term +42.01 Da,                         | 4255.395508 | 3 | 572.2800293 | 572.284684  |
| NKELDPVQKLFVDKIR                  | P97450 | 0.03165064 | N-term +42.01 Da, K +28.03 Da,            | 4255.499023 | 3 | 690.4099731 | 690.0770168 |
| SGYPKSYNPFDDVEEEDTRPAPWKDVR       | Q9ER80 | 0          | N-term +42.01 Da, K +28.03 Da,            | 4261.492676 | 4 | 853.9000244 | 853.4007512 |
| AKVEQVLSLEPQHELKFR                | Q9QY76 | 0          | N-term +42.01 Da, K +28.03 Da,            | 4264.040527 | 4 | 563.0705566 | 563.0717673 |
| ACGLVASNLNLKPGECKLVR              | P16045 | 0          | N-term +42.01 Da, K +28.03 Da,C +57.02Da, | 4266.580078 | 3 | 766.7600098 | 766.4204608 |
| AKVEQVLSLEPQHELKFR                | Q9QY76 | 0          | N-term +42.01 Da, K +28.03 Da,            | 4266.769043 | 3 | 750.7600098 | 750.4265976 |
| TASSVLLHTGQKMPL                   | Q9JII6 | 0.00878349 | N-term +42.01 Da, K +28.03 Da,            | 4267.676758 | 2 | 826.9500122 | 826.9556443 |
| AKEWGYASHNGPDHWHELYPIAKGDNQSPIELH | P16015 | 0          | N-term +42.01 Da, K +28.03 Da,            | 4268.672852 | 4 | 974.710022  | 974.4710365 |
| AEPDYIEDDNP ELIRPQKLINPVKSSR      | Q3TGF2 | 0          | N-term +42.01 Da, K +28.03 Da,            | 4269.619141 | 4 | 809.9299927 | 809.4305826 |
| ANHAPFETDISTLTR                   | Q9QXD6 | 0          | N-term +42.01 Da,                         | 4275.557617 | 2 | 857.9212646 | 857.9233878 |
| AEPDYIEDDNP ELIRPQKLINPVKSSR      | Q3TGF2 | 0          | N-term +42.01 Da, K +28.03 Da,            | 4276.433594 | 4 | 809.6799927 | 809.4305826 |
| AAVTEVVVPADGAEAR                  | Q9D198 | 0          | N-term +42.01 Da,                         | 4280.908203 | 2 | 799.4099731 | 798.9150312 |
| AEPDYIEDDNP ELIRPQKLINPVKSSR      | Q3TGF2 | 0          | N-term +42.01 Da, K +28.03 Da,            | 4284.203125 | 3 | 1079.569946 | 1078.905018 |
| ANHAPFETDISTLTR                   | Q9QXD6 | 0          | N-term +42.01 Da,                         | 4286.716309 | 3 | 572.2800293 | 572.284684  |

|                              |        |            |                                           |             |   |             |             |
|------------------------------|--------|------------|-------------------------------------------|-------------|---|-------------|-------------|
| AKVEQVLSLEPQHELKFR           | Q9QY76 | 0          | N-term +42.01 Da, K +28.03 Da,            | 4286.917969 | 3 | 751.0900269 | 750.4265976 |
| SSVAVLTQESFAEHR              | Q8VDJ3 | 0          | N-term +42.01 Da,                         | 4288.27002  | 2 | 851.4099731 | 851.9233878 |
| SIGVPIKVLHEAEGH              | P62320 | 0.00142993 | N-term +42.01 Da, K +28.03 Da,            | 4291.60791  | 3 | 552.6400146 | 552.6420311 |
| KTYEQVLENLQSKR               | P52196 | 0.01208981 | N-term +42.01 Da, K +28.03 Da,            | 4292.250488 | 3 | 612.3400269 | 612.0071506 |
| AAVTEVVVPADGAEAR             | Q9D198 | 0          | N-term +42.01 Da,                         | 4293.262207 | 2 | 799.9199829 | 798.9150312 |
| AKVEQVLSLEPQHELKFR           | Q9QY76 | 0          | N-term +42.01 Da, K +28.03 Da,            | 4294.474121 | 4 | 563.5700073 | 563.0717673 |
| AGAGPTMLLR                   | Q9D2U5 | 0          | N-term +42.01 Da,                         | 4297.538574 | 2 | 514.7800293 | 514.781504  |
| ACGLVASNLNLKPGECKLVR         | P16045 | 0          | N-term +42.01 Da, K +28.03 Da,C +57.02Da, | 4298.008301 | 3 | 766.75      | 766.4204608 |
| MDKVCVAVFGGSR                | Q91VT4 | 0          | N-term +42.01 Da, K +28.03 Da,C +57.02Da, | 4300.464844 | 2 | 698.8380737 | 698.8392252 |
| MELSGEYVGCDEPQR              | P0C8B4 | 0          | N-term +42.01 Da, C +57.02Da,             | 4300.714844 | 2 | 934.8900146 | 934.8931135 |
| NKELDPVQKLFVDKIR             | P97450 | 0.00050813 | N-term +42.01 Da, K +28.03 Da,            | 4302.105469 | 4 | 517.8099976 | 517.8095817 |
| ANHAPFETDISTLTR              | Q9QXD6 | 0          | N-term +42.01 Da,                         | 4306.429199 | 2 | 858.4199829 | 857.9233878 |
| MQPASAKWY                    | Q9RQ07 | 0.00188235 | N-term +42.01 Da, K +28.03 Da,            | 4306.772461 | 2 | 576.2788086 | 576.281337  |
| MELSGEYVGCDEPQR              | P0C8B4 | 0          | N-term +42.01 Da, C +57.02Da,             | 4312.478516 | 2 | 935.8900146 | 934.8931135 |
| AAALGAGGGAGAGDDDFDQDKPGAER   | Q9CXK9 | 0          | N-term +42.01 Da, K +28.03 Da,            | 4315.624512 | 3 | 869.7299805 | 869.3966442 |
| METGPAPLVAPPR                | Q8BHL3 | 0          | N-term +42.01 Da,                         | 4315.871582 | 2 | 689.3599854 | 689.3633904 |
| SSVAVLTQESFAEHR              | Q8VDJ3 | 0          | N-term +42.01 Da,                         | 4321.140625 | 2 | 851.9199829 | 851.9233878 |
| NWGHLDQVAALR                 | Q8VCT4 | 0          | N-term +42.01 Da,                         | 4325.339355 | 2 | 710.8599854 | 711.367853  |
| SDEFSLADALPEQSSAKPPAVTNTKAGH | Q8BH93 | 0          | N-term +42.01 Da, K +28.03 Da,            | 4328.75     | 3 | 989.8300171 | 989.4962473 |
| ASIVVVGPR                    | O35639 | 0.00098232 | N-term +42.01 Da,                         | 4332.013184 | 2 | 464.2600098 | 464.255979  |
| AAYKLVLR                     | Q9DBJ1 | 0.00278293 | N-term +42.01 Da, K +28.03 Da,            | 4333.039063 | 2 | 558.8599854 | 558.8606114 |
| SSVAVLTQESFAEHR              | Q8VDJ3 | 0.00099206 | N-term +42.01 Da,                         | 4335.95752  | 2 | 852.9299927 | 851.9233878 |
| QTFFFYASEDKLENR              | O35490 | 0          | N-term +42.01 Da, K +28.03 Da,            | 4338.183594 | 2 | 960.9515381 | 959.9627105 |
| MDHYDSQQTNDYMQPEEDWDR        | Q7TPR4 | 0          | N-term +42.01 Da,                         | 4338.378418 | 2 | 1373.530029 | 1373.026847 |
| MNHDFQALALESR                | Q80U58 | 0          | N-term +42.01 Da,                         | 4339.801758 | 2 | 787.3739014 | 787.3750185 |
| GGAPLAGTNKETTIQGLDGLSER      | Q91Y97 | 0.00051308 | N-term +42.01 Da, K +28.03 Da,            | 4339.967773 | 2 | 1179.099976 | 1178.111167 |
| MDNKDEDIFKFKGY               | G5E904 | 0          | N-term +42.01 Da, K +28.03 Da,            | 4341.632324 | 3 | 625.9758301 | 625.9780921 |
| ASWAEPSEPAALR                | O35465 | 0          | N-term +42.01 Da,                         | 4346.507813 | 2 | 714.3499756 | 713.851702  |
| ASIVVVGPR                    | O35639 | 0.00096525 | N-term +42.01 Da,                         | 4347.4375   | 2 | 464.7600098 | 464.255979  |
| SSSRPVALVTGANKGIGF           | P48758 | 0.00493052 | N-term +42.01 Da, K +28.03 Da,            | 4359.82666  | 2 | 916.0056763 | 916.0072546 |
| GTSVESIMATEDR                | Q8C196 | 0          | N-term +42.01 Da,                         | 4367.458496 | 2 | 720.3200073 | 719.3299428 |
| RLKLPVAVTADLR                | Q9DCW4 | 0.03438735 | N-term +42.01 Da, K +28.03 Da,            | 4372.298828 | 3 | 508.6499939 | 507.9873611 |
| VISLSGEHSIIGR                | P08228 | 0          | N-term +42.01 Da,                         | 4373.23877  | 2 | 705.8900146 | 705.3909941 |
| TASSVLLHTGQKMPL              | Q9JII6 | 0          | N-term +42.01 Da, K +28.03 Da,            | 4373.811035 | 2 | 827.4500122 | 826.9556443 |
| GEETALIESIEGKQGKPR           | Q91YT0 | 0.00187793 | N-term +42.01 Da, K +28.03 Da,            | 4375.752441 | 3 | 681.3599854 | 680.7039084 |
| MEPLYQQTNKQVQEIQSH           | O35166 | 0.00318182 | N-term +42.01 Da, K +28.03 Da,            | 4384.086914 | 2 | 1136.550049 | 1136.057348 |
| MEELSADEIR                   | Q9ES00 | 0          | N-term +42.01 Da,                         | 4391.812988 | 2 | 617.7800293 | 617.7846391 |
| KVHSFPTLKFFPASADR            | P09103 | 0          | N-term +42.01 Da, K +28.03 Da,            | 4391.927734 | 4 | 512.7800293 | 512.2847366 |
| HSQAVEELADQLEQTKR            | Q8VDD5 | 0.00276753 | N-term +42.01 Da, K +28.03 Da,            | 4393.817871 | 3 | 685.3400269 | 684.683396  |
| SSEPPPPPLQPPTHQTSVGLLDTPR    | Q9CR86 | 0          | N-term +42.01 Da,                         | 4394.36377  | 3 | 897.7999878 | 897.4643294 |

|                                 |        |            |                                           |             |   |             |             |
|---------------------------------|--------|------------|-------------------------------------------|-------------|---|-------------|-------------|
| TASSVLLHTGQKMPL                 | Q9JII6 | 0.02593193 | N-term +42.01 Da, K +28.03 Da,            | 4398.645508 | 2 | 827.4553833 | 826.9556443 |
| SGVDIQIVGDDLTVTNPKR             | P21550 | 0.00052438 | N-term +42.01 Da, K +28.03 Da,            | 4401.364746 | 2 | 1048.560059 | 1049.062956 |
| SSEPPPPPLQPPTHQTSVGLLDTPR       | Q9CR86 | 0          | N-term +42.01 Da,                         | 4404.556641 | 2 | 1345.689941 | 1345.692856 |
| LAGTNKETTIIQGLDGLSER            | Q91Y97 | 0.00051046 | N-term +42.01 Da, K +28.03 Da,            | 4411.683105 | 2 | 1038.030029 | 1037.044764 |
| MNFSGKYQLQ                      | P12710 | 0.03252678 | N-term +42.01 Da, K +28.03 Da,            | 4417.972656 | 2 | 643.3135986 | 643.3159087 |
| SYGRPPDVEGMTSLKVDNLTYR          | Q62093 | 0          | N-term +42.01 Da, K +28.03 Da,            | 4420.87793  | 3 | 889.7800293 | 889.1145317 |
| MQAALEVTR                       | Q9CQP3 | 0          | N-term +42.01 Da,                         | 4422.26416  | 2 | 566.2949829 | 566.2949761 |
| AEQEPTAEQLAQIAAENEDEHSVNYKPPAQK | Q99PT1 | 0          | N-term +42.01 Da, K +28.03 Da,            | 4422.470215 | 4 | 916.4299927 | 916.4418766 |
| MEAAALVTR                       | Q9CXA2 | 0          | N-term +42.01 Da,                         | 4425.222656 | 2 | 502.264801  | 502.265687  |
| AEQEPTAEQLAQIAAENEDEHSVNYKPPAQK | Q99PT1 | 0          | N-term +42.01 Da, K +28.03 Da,            | 4425.538086 | 3 | 1222.25     | 1221.586743 |
| EALDCILPPTRPTDKPLR              | P10126 | 0.00096946 | N-term +42.01 Da, K +28.03 Da,C +57.02Da, | 4428.811035 | 3 | 722.0499878 | 721.3927881 |
| AELKYISGFGNECASEDPR             | O09173 | 0          | N-term +42.01 Da, K +28.03 Da,C +57.02Da, | 4430.359863 | 2 | 1107.52002  | 1107.012607 |
| SSEPPPPPLQPPTHQTSVGLLDTPR       | Q9CR86 | 0          | N-term +42.01 Da,                         | 4435.996582 | 2 | 1346.189941 | 1345.692856 |
| ANHAPFETDISTLTR                 | Q9QXD6 | 0          | N-term +42.01 Da,                         | 4439.966309 | 2 | 858.9099731 | 857.9233878 |
| SSEPPPPPLQPPTHQTSVGLLDTPR       | Q9CR86 | 0          | N-term +42.01 Da,                         | 4440.452148 | 2 | 1346.689941 | 1345.692856 |
| SYGRPPDVEGMTSLKVDNLTYR          | Q62093 | 0          | N-term +42.01 Da, K +28.03 Da,            | 4443.253418 | 3 | 889.4400024 | 889.1145317 |
| NEFTLGEECELETMTGEKVK            | P12710 | 0          | N-term +42.01 Da, K +28.03 Da,C +57.02Da, | 4443.589844 | 3 | 815.0599976 | 814.7186791 |
| SSPAQPAVPAPLAN                  | O35945 | 0.03363672 | N-term +42.01 Da,                         | 4445.276855 | 2 | 681.3599854 | 681.35662   |
| MDHTGAIDTEELGPLAH               | G3X8R8 | 0          | N-term +42.01 Da,                         | 4445.372559 | 2 | 989.9400024 | 989.4465678 |
| RSVTGWKEIEYEVVR                 | Q8C196 | 0          | N-term +42.01 Da, K +28.03 Da,            | 4450.784668 | 3 | 641.6699829 | 641.0107836 |
| VTNYEESIKMPINEPAPGR             | P49429 | 0.04822044 | N-term +42.01 Da, K +28.03 Da,            | 4461.188477 | 2 | 1109.050049 | 1108.056817 |
| ADEIAKAQVAQPGGDTIFGK            | P70349 | 0          | N-term +42.01 Da, K +28.03 Da,            | 4461.319824 | 2 | 1057.556641 | 1057.560049 |
| ADEIAKAQVAQPGGDTIFGK            | P70349 | 0          | N-term +42.01 Da, K +28.03 Da,            | 4464.352539 | 3 | 705.3800049 | 705.3757917 |
| TASSVLLHTGQKMPL                 | Q9JII6 | 0          | N-term +42.01 Da, K +28.03 Da,            | 4470.279297 | 2 | 826.9545288 | 826.9556443 |
| LKFKTIEEVVGR                    | P47738 | 0.03230953 | N-term +42.01 Da, K +28.03 Da,            | 4470.47168  | 3 | 506.9678955 | 506.3081004 |
| ANHAPFETDISTLTR                 | Q9QXD6 | 0          | N-term +42.01 Da,                         | 4471.728027 | 2 | 858.4138184 | 857.9233878 |
| ASCASIDIEDATQHRLR               | Q3UJB9 | 0          | N-term +42.01 Da, C +57.02Da,             | 4472.262695 | 2 | 915.4299927 | 914.9283447 |
| MDAIKKMQML                      | P58771 | 0.01206897 | N-term +42.01 Da, K +28.03 Da,            | 4472.495117 | 3 | 488.6099854 | 488.2779901 |
| SYGRPPDVEGMTSLKVDNLTYR          | Q62093 | 0          | N-term +42.01 Da, K +28.03 Da,            | 4475.497559 | 3 | 889.4400024 | 889.1145317 |
| ASCASIDIEDATQHRLR               | Q3UJB9 | 0          | N-term +42.01 Da, C +57.02Da,             | 4477.810547 | 2 | 914.9299927 | 914.9283447 |
| SSVAVLQESFAEHR                  | Q8VDJ3 | 0.01998335 | N-term +42.01 Da,                         | 4478.279297 | 2 | 852.4199829 | 851.9233878 |
| TASSVLLHTGQKMPL                 | Q9JII6 | 0.00099602 | N-term +42.01 Da, K +28.03 Da,            | 4480.175781 | 3 | 551.6400146 | 551.6395217 |
| IGLLGYNATTENVDR                 | O35423 | 0.04610065 | N-term +42.01 Da,                         | 4483.455566 | 2 | 839.4299927 | 839.4257633 |
| MLGPEGGEGYVVK                   | Q9Z2X1 | 0          | N-term +42.01 Da, K +28.03 Da,            | 4490.728027 | 2 | 703.3499756 | 703.3552314 |
| ADEIAKAQVAQPGGDTIFGK            | P70349 | 0.00050787 | N-term +42.01 Da, K +28.03 Da,            | 4492.533691 | 2 | 1058.060059 | 1057.560049 |
| FTFYASEDKLENR                   | O35490 | 0          | N-term +42.01 Da, K +28.03 Da,            | 4498.987305 | 2 | 846.4000244 | 845.4095817 |
| MDSSAVITQISKEEAR                | P58466 | 0          | N-term +42.01 Da, K +28.03 Da,            | 4500.705078 | 2 | 917.9612427 | 917.9643959 |
| TASSVLLHTGQKMPL                 | Q9JII6 | 0.03009631 | N-term +42.01 Da, K +28.03 Da,            | 4501.665527 | 2 | 826.954834  | 826.9556443 |
| TTRTPEVSGYTYEKTERRRLLDDISNGYDDT | P14873 | 0.01883633 | N-term +42.01 Da, K +28.03 Da,            | 4501.875488 | 4 | 952.710022  | 952.9619707 |
| MEATLNLEPSGR                    | O55137 | 0.00099108 | N-term +42.01 Da,                         | 4502.269531 | 2 | 681.3400269 | 680.3322878 |



|                                   |        |            |                                           |             |   |             |             |
|-----------------------------------|--------|------------|-------------------------------------------|-------------|---|-------------|-------------|
| VGVKPVGSDPDFQPELSGAGSR            | Q8CDN6 | 0.02405218 | N-term +42.01 Da, K +28.03 Da,            | 4502.832031 | 2 | 1134.579956 | 1135.076595 |
| ANHAPFETDISTLTR                   | Q9QXD6 | 0          | N-term +42.01 Da,                         | 4503.217773 | 2 | 858.4117432 | 857.9233878 |
| GSEAAQLLEAADFAAHKHR               | Q9D114 | 0          | N-term +42.01 Da, K +28.03 Da,            | 4505.989746 | 3 | 698.3599854 | 698.0238636 |
| VAILDYIHNGLK                      | Q8BW70 | 0.03946854 | N-term +42.01 Da, K +28.03 Da,            | 4507.683594 | 2 | 713.4000244 | 713.4086552 |
| GSEAAQLLEAADFAAHKHR               | Q9D114 | 0          | N-term +42.01 Da, K +28.03 Da,            | 4509.750488 | 4 | 524.0200195 | 523.7697168 |
| METILEQQR                         | Q9D554 | 0.000501   | N-term +42.01 Da,                         | 4511.161621 | 2 | 595.2999878 | 595.2977161 |
| AAQAVSLLR                         | Q8BJY1 | 0.00050125 | N-term +42.01 Da,                         | 4514.881836 | 2 | 485.7868042 | 485.7876436 |
| ANHAPFETDISTLTR                   | Q9QXD6 | 0          | N-term +42.01 Da,                         | 4518.931641 | 3 | 572.9500122 | 572.284684  |
| AALGSSSQNVTEYVVR                  | Q3THK3 | 0          | N-term +42.01 Da,                         | 4522.36377  | 2 | 862.4299927 | 861.9364953 |
| VGD LGNVTAGKDG VANVSIEDR          | P08228 | 0          | N-term +42.01 Da, K +28.03 Da,            | 4523.629395 | 2 | 1129.569946 | 1128.57696  |
| AAVVLGGDTMGPFR                    | Q64327 | 0          | N-term +42.01 Da,                         | 4532.211426 | 2 | 708.3499756 | 707.8533874 |
| ANHAPFETDISTLTR                   | Q9QXD6 | 0          | N-term +42.01 Da,                         | 4533.663086 | 2 | 858.4099731 | 857.9233878 |
| SLDMKEHPDAEVQKNQVLTLEDWKEKWVTR    | O55060 | 0.00051546 | N-term +42.01 Da, K +28.03 Da,            | 4539.76123  | 4 | 953         | 952.5001053 |
| MNAGSDPVVIVSAAR                   | Q8CAY6 | 0          | N-term +42.01 Da,                         | 4539.870117 | 2 | 764.8900146 | 764.893044  |
| LQEEKVPAIYGVDTR                   | Q8C196 | 0.001      | N-term +42.01 Da, K +28.03 Da,            | 4543.473145 | 2 | 895.4678955 | 894.4805385 |
| AAGFKTVEPLEYYR                    | Q9D753 | 0          | N-term +42.01 Da, K +28.03 Da,            | 4545.38916  | 2 | 857.4431152 | 857.4459668 |
| TSALENYINR                        | Q6ZWM4 | 0          | N-term +42.01 Da,                         | 4557.35498  | 2 | 611.8056641 | 611.8067628 |
| MKVFTGPLPAEGR                     | Q91Z53 | 0          | N-term +42.01 Da, K +28.03 Da,            | 4561.301758 | 2 | 786.4400024 | 786.4343472 |
| RLEEECKQREARVLSLELLETKV           | Q80YS6 | 0.02437043 | N-term +42.01 Da, K +28.03 Da,C +57.02Da, | 4568.222168 | 4 | 768.6599731 | 768.6564967 |
| MEGKVIYGGEDYEKEFTPKDY             | P40936 | 0.000516   | N-term +42.01 Da, K +28.03 Da,            | 4579.863281 | 3 | 875.75      | 875.4207389 |
| GAVFAQDKAIVQEATR                  | Q8CHT0 | 0          | N-term +42.01 Da, K +28.03 Da,            | 4583        | 2 | 888.4678345 | 887.47833   |
| KGIKSVTELNGDTITNTMTLGDIVYKR       | P12710 | 0          | N-term +42.01 Da, K +28.03 Da,            | 4585.168457 | 4 | 774.4299927 | 774.1770647 |
| PEFTLPVHFYGR                      | Q9WUB3 | 0          | N-term +42.01 Da,                         | 4585.244141 | 3 | 502.9236755 | 502.2576285 |
| MEGKVIYGGEDYEKEFTPKDY             | P40936 | 0.02557856 | N-term +42.01 Da, K +28.03 Da,            | 4588.131836 | 3 | 875.4199829 | 875.4207389 |
| DDIVNWLKRR                        | P09103 | 0.02150538 | N-term +42.01 Da, K +28.03 Da,            | 4589.983887 | 3 | 462.9299927 | 462.2697569 |
| GVVLFKKFDEGR                      | P09103 | 0          | N-term +42.01 Da, K +28.03 Da,            | 4590.206543 | 3 | 498.9500122 | 498.2889286 |
| SAGGAVPPPPNPAVSFPAPR              | Q8BI08 | 0          | N-term +42.01 Da,                         | 4591.18457  | 2 | 964.5100098 | 964.5048791 |
| SAGGAVPPPPNPAVSFPAPR              | Q8BI08 | 0          | N-term +42.01 Da,                         | 4591.378906 | 3 | 643.3400269 | 643.3390115 |
| MLGPEGGEGYVVKLR                   | Q9Z2X1 | 0          | N-term +42.01 Da, K +28.03 Da,            | 4591.796875 | 2 | 838.4500122 | 837.9478193 |
| LCAATATILDKPEDR                   | O35215 | 0.00052798 | N-term +42.01 Da, K +28.03 Da,C +57.02Da, | 4598.094727 | 2 | 872.9500122 | 872.4509238 |
| AAGTSNYWEDLR                      | Q88630 | 0          | N-term +42.01 Da,                         | 4610.822754 | 2 | 713.3300171 | 712.8256844 |
| AGLSDLELR                         | Q6DVA0 | 0.00095694 | N-term +42.01 Da,                         | 4612.612793 | 2 | 508.2744751 | 508.2745666 |
| QSIVPALEIANHR                     | P63038 | 0          | N-term +42.01 Da,                         | 4618.378906 | 2 | 781.9161987 | 780.9282752 |
| AAEHPEPPKGELQLPPPPPGHYGAWAAQELQAR | Q3UJB0 | 0          | N-term +42.01 Da, K +28.03 Da,            | 4618.598145 | 4 | 927.9699707 | 927.4745845 |
| MLGPEGGEGYVVKLR                   | Q9Z2X1 | 0          | N-term +42.01 Da, K +28.03 Da,            | 4623.060547 | 2 | 837.9458618 | 837.9478193 |
| AELKYISGFGNECASEDPR               | O09173 | 0.03224522 | N-term +42.01 Da, K +28.03 Da,C +57.02Da, | 4624.595703 | 2 | 1107.51001  | 1107.012607 |
| MDGIVPDIAVGTKR                    | P17225 | 0          | N-term +42.01 Da, K +28.03 Da,            | 4628.109375 | 2 | 771.4205322 | 771.4214372 |
| AELKYISGFGNECASEDPR               | O09173 | 0          | N-term +42.01 Da, K +28.03 Da,C +57.02Da, | 4628.757324 | 3 | 738.3400269 | 738.3441632 |
| NTRSDPVVIVSAAR                    | F2Z459 | 0.02583771 | N-term +42.01 Da,                         | 4631.365723 | 2 | 764.9199829 | 763.9179077 |
| ADDIVNWLKRR                       | P09103 | 0          | N-term +42.01 Da, K +28.03 Da,            | 4631.628418 | 3 | 486.6099854 | 485.9487949 |

|                               |        |            |                                           |             |   |             |             |
|-------------------------------|--------|------------|-------------------------------------------|-------------|---|-------------|-------------|
| VGDLGNVNTAGKDGVANVSIEDR       | P08228 | 0          | N-term +42.01 Da, K +28.03 Da,            | 4631.756348 | 2 | 1129.569946 | 1128.57696  |
| AELKYISGFGNECASEDPR           | O09173 | 0          | N-term +42.01 Da, K +28.03 Da,C +57.02Da, | 4632.646973 | 2 | 1108.02002  | 1107.012607 |
| SSPAQPAVPAPLANLKIQH           | O35945 | 0.0032022  | N-term +42.01 Da, K +28.03 Da,            | 4633.989258 | 2 | 1006.059998 | 1005.062561 |
| LGEECELETMTGEKVK              | P12710 | 0          | N-term +42.01 Da, K +28.03 Da,C +57.02Da, | 4635.632324 | 2 | 976.9627075 | 975.9735724 |
| SSPAQPAVPAPLANLKIQH           | O35945 | 0          | N-term +42.01 Da, K +28.03 Da,            | 4636.322266 | 2 | 1005.059998 | 1005.062561 |
| MNAGSDPVVIVSAAR               | Q8CAY6 | 0          | N-term +42.01 Da,                         | 4642.128906 | 2 | 764.8900146 | 764.893044  |
| STGTFVVSQPLNYR                | Q9JLJ2 | 0          | N-term +42.01 Da,                         | 4643.405762 | 2 | 805.9109497 | 805.9122912 |
| AASEDELLPR                    | Q61249 | 0          | N-term +42.01 Da,                         | 4645.857422 | 2 | 628.3293457 | 628.3300709 |
| AELKYISGFGNECASEDPR           | O09173 | 0          | N-term +42.01 Da, K +28.03 Da,C +57.02Da, | 4655.119141 | 2 | 1107.011353 | 1107.012607 |
| RDILNMDKTLKGLNSDSVTEETLR      | Q8C196 | 0          | N-term +42.01 Da, K +28.03 Da,            | 4658.362793 | 4 | 712.8699951 | 712.378661  |
| DIVNWLKKR                     | P09103 | 0.0128041  | N-term +42.01 Da, K +28.03 Da,            | 4658.777344 | 3 | 424.5899963 | 423.9274422 |
| AELKYISGFGNECASEDPR           | O09173 | 0          | N-term +42.01 Da, K +28.03 Da,C +57.02Da, | 4659.335938 | 3 | 738.3429565 | 738.3441632 |
| MGMTAENLAAKYNISR              | Q8BWT1 | 0          | N-term +42.01 Da, K +28.03 Da,            | 4663.8125   | 2 | 921.4500122 | 920.4582257 |
| AQEVSEYLSQNPR                 | Q8BI72 | 0          | N-term +42.01 Da,                         | 4670.18457  | 2 | 781.8699951 | 781.8759061 |
| ALKTEIITAIR                   | P49429 | 0.00835165 | N-term +42.01 Da, K +28.03 Da,            | 4670.414551 | 2 | 708.4099731 | 707.4192202 |
| IRREVQSAPFKRRVRTLLSVLKDPIAKMR | Q8QZY3 | 0.0214876  | N-term +42.01 Da, K +28.03 Da,            | 4674.178223 | 4 | 898.8099976 | 898.2974424 |
| AASEDELLPR                    | Q61249 | 0          | N-term +42.01 Da,                         | 4677.265137 | 2 | 628.3300171 | 628.3300709 |
| MNAGSDPVVIVSAAR               | Q8CAY6 | 0          | N-term +42.01 Da,                         | 4677.340332 | 2 | 764.8911743 | 764.893044  |
| MDNLSPEEVQLR                  | O09044 | 0          | N-term +42.01 Da,                         | 4680.491699 | 2 | 736.8499756 | 736.8561274 |
| YYVKTYRVDISSNGEDWISLKEGK      | P97333 | 0.01606086 | N-term +42.01 Da, K +28.03 Da,            | 4684.035156 | 2 | 1545.319946 | 1545.792768 |
| VAGPQPAQTGAPQGLGEYLFER        | P29391 | 0          | N-term +42.01 Da,                         | 4692.742188 | 2 | 1208.609985 | 1208.100602 |
| MFSWVSKDAR                    | Q9WVK4 | 0          | N-term +42.01 Da, K +28.03 Da,            | 4694.773926 | 2 | 649.8200073 | 648.8239007 |
| MQAIKCVVVDGAVGKTC             | P60764 | 0          | N-term +42.01 Da, K +28.03 Da,C +57.02Da, | 4696.726074 | 2 | 996.0100098 | 996.0097684 |
| MFSWVSKDAR                    | Q9WVK4 | 0          | N-term +42.01 Da, K +28.03 Da,            | 4697.933105 | 2 | 649.3300171 | 648.8239007 |
| METDVTSDTVEVLPQHKFDLR         | Q80XL6 | 0          | N-term +42.01 Da, K +28.03 Da,            | 4703.008789 | 3 | 844.4199829 | 844.0879826 |
| METDVTSDTVEVLPQHKFDLR         | Q80XL6 | 0          | N-term +42.01 Da, K +28.03 Da,            | 4704.30957  | 3 | 844.75      | 844.0879826 |
| ERHQDVLQRKLFK                 | Q9CS00 | 0.02379975 | N-term +42.01 Da, K +28.03 Da,            | 4713.819824 | 3 | 688.7399902 | 688.7528672 |
| FTFYASEDKLENR                 | O35490 | 0          | N-term +42.01 Da, K +28.03 Da,            | 4714.772949 | 2 | 846.4000244 | 845.4095817 |
| STIPTKQTQTFTTYSNQPGLIQQVYEGER | P17879 | 0          | N-term +42.01 Da, K +28.03 Da,            | 4718.395508 | 3 | 1158.26001  | 1157.914131 |
| MDGIVPDIAGVTKR                | P17225 | 0          | N-term +42.01 Da, K +28.03 Da,            | 4725.267578 | 2 | 771.9199829 | 771.4214372 |
| AGVDQHEGTIQVQGQNLFFR          | Q8VCR7 | 0          | N-term +42.01 Da,                         | 4736.258301 | 2 | 1144.569946 | 1143.566729 |
| MLNMWVKVR                     | Q5SUH6 | 0          | N-term +42.01 Da, K +28.03 Da,            | 4743.502441 | 2 | 574.3082275 | 574.309374  |
| SGEDEQQEQTIAEDLVVTKYK         | P50580 | 0          | N-term +42.01 Da, K +28.03 Da,            | 4744.166016 | 2 | 1255.619995 | 1254.621231 |
| AGVDQHEGTIQVQGQNLFFR          | Q8VCR7 | 0          | N-term +42.01 Da,                         | 4745.119629 | 3 | 762.7112427 | 762.7135781 |
| SGEDEQQEQTIAEDLVVTKYK         | P50580 | 0          | N-term +42.01 Da, K +28.03 Da,            | 4745.241211 | 2 | 1254.619995 | 1254.621231 |
| AELQEVQITEKPLPGQTPETAKEAELAAR | Q9QYG0 | 0          | N-term +42.01 Da, K +28.03 Da,            | 4745.439453 | 3 | 1163.959961 | 1163.289198 |
| HVMTNLGKLTDEEVDDEMIR          | P62204 | 0.00097847 | N-term +42.01 Da, K +28.03 Da,            | 4747.241699 | 3 | 810.0700073 | 810.3944181 |
| HVMTNLGKLTDEEVDDEMIR          | P62204 | 0.01204819 | N-term +42.01 Da, K +28.03 Da,            | 4747.358398 | 2 | 1214.599976 | 1215.087989 |
| SGEDEQQEQTIAEDLVVTKYK         | P50580 | 0          | N-term +42.01 Da, K +28.03 Da,            | 4747.463379 | 3 | 837.0800171 | 836.749913  |
| YAWVLDKKAER                   | P10126 | 0.02149649 | N-term +42.01 Da, K +28.03 Da,            | 4748.379883 | 3 | 531.3099976 | 530.6398501 |

|                                  |        |            |                                           |             |   |             |             |
|----------------------------------|--------|------------|-------------------------------------------|-------------|---|-------------|-------------|
| AELQEVQITEEKPLLPGQTPETAKEAELAAR  | Q9QYGO | 0          | N-term +42.01 Da, K +28.03 Da,            | 4749.849609 | 4 | 872.9699707 | 872.7187175 |
| GDPKEEEEEELVDPLTTVR              | P99028 | 0.02438033 | N-term +42.01 Da, K +28.03 Da,            | 4751.944824 | 3 | 752.7000122 | 752.3690321 |
| MDGIVPDIAVGTKR                   | P17225 | 0          | N-term +42.01 Da, K +28.03 Da,            | 4756.425781 | 2 | 771.4199219 | 771.4214372 |
| DNPASVSDLLSFSLK                  | Q91WU4 | 0.03510848 | N-term +42.01 Da, K +28.03 Da,            | 4759.31543  | 3 | 597.3099976 | 597.6438781 |
| MNFSGKYQL                        | P12710 | 0.04156954 | N-term +42.01 Da, K +28.03 Da,            | 4761.016113 | 2 | 579.2855225 | 579.2866196 |
| AGLLKTTGLVGLAVCDTPHER            | Q9CPP6 | 0.03219396 | N-term +42.01 Da, K +28.03 Da,C +57.02Da, | 4761.380859 | 4 | 609.3421021 | 609.3426206 |
| LEEETGQVVGFFHQPGSIR              | Q9DBT9 | 0.00052138 | N-term +42.01 Da,                         | 4764.924316 | 2 | 1014.01001  | 1013.005441 |
| METDVTSDTVEVLPQHKF               | Q80XL6 | 0          | N-term +42.01 Da, K +28.03 Da,            | 4766.530273 | 2 | 1074.02002  | 1073.522276 |
| AGVDQHEGTIQVQGNLFFR              | Q8VCR7 | 0          | N-term +42.01 Da,                         | 4768.145996 | 2 | 1144.069946 | 1143.566729 |
| AGLLKTTGLVGLAVCDTPHER            | Q9CPP6 | 0          | N-term +42.01 Da, K +28.03 Da,C +57.02Da, | 4768.756348 | 3 | 812.460022  | 812.1210686 |
| AEELLER                          | P21981 | 0.02812374 | N-term +42.01 Da,                         | 4772.867676 | 2 | 507.776123  | 507.7769421 |
| ATTF AHL DATTVLSR                | P56480 | 0          | N-term +42.01 Da,                         | 4775.443359 | 2 | 824.4199829 | 823.4308483 |
| AEPWGNELASAAAR                   | Q60772 | 0          | N-term +42.01 Da,                         | 4775.544922 | 2 | 743.3599854 | 742.8600585 |
| ALEQTLKGDWY                      | A2A4A1 | 0.01203266 | N-term +42.01 Da, K +28.03 Da,            | 4775.991699 | 2 | 746.9099731 | 746.9059457 |
| AELQEVQITEEKPLLPGQTPETAKEAELAAR  | Q9QYGO | 0          | N-term +42.01 Da, K +28.03 Da,            | 4778.108887 | 3 | 1163.287231 | 1163.289198 |
| ADEIAKAQVAQPGGDTIFGKIIR          | P70349 | 0          | N-term +42.01 Da, K +28.03 Da,            | 4778.571289 | 3 | 833.1300049 | 832.7988718 |
| SSPAQPAVPAPLADLKIQH              | P24549 | 0          | N-term +42.01 Da, K +28.03 Da,            | 4778.67334  | 2 | 1006.049988 | 1005.554569 |
| GDPKEEEEEELVDPLTTVR              | P99028 | 0.00186047 | N-term +42.01 Da, K +28.03 Da,            | 4780.113281 | 2 | 1128.050049 | 1128.04991  |
| AELQEVQITEEKPLLPGQTPETAKEAELAAR  | Q9QYGO | 0          | N-term +42.01 Da, K +28.03 Da,            | 4781.523438 | 4 | 873.2199707 | 872.7187175 |
| GLQVVAVKAPGFGDNR                 | P63038 | 0.00052521 | N-term +42.01 Da, K +28.03 Da,            | 4783.438965 | 2 | 850.4611206 | 849.4703074 |
| GDPKEEEEEELVDPLTTVR              | P99028 | 0.00097561 | N-term +42.01 Da, K +28.03 Da,            | 4783.533691 | 3 | 752.7000122 | 752.3690321 |
| LIFAGKQLEDGR                     | POCG49 | 0.00052274 | N-term +42.01 Da, K +28.03 Da,            | 4784.327637 | 2 | 708.4000244 | 708.8959121 |
| SSPAQPAVPAPLADLKIQH              | P24549 | 0          | N-term +42.01 Da, K +28.03 Da,            | 4784.713379 | 3 | 671.039978  | 670.7054717 |
| AELKYISGFGNECASEDPR              | O09173 | 0.01803691 | N-term +42.01 Da, K +28.03 Da,C +57.02Da, | 4785.095215 | 2 | 1108        | 1107.012607 |
| AGKKVICVSGSNWGSIAKIVGSNAGR       | P13707 | 0          | N-term +42.01 Da, K +28.03 Da,C +57.02Da, | 4785.409668 | 4 | 696.8900146 | 696.6391803 |
| LFKSTTKDLLFR                     | Q92111 | 0.01878914 | N-term +42.01 Da, K +28.03 Da,            | 4785.550781 | 3 | 523.6400146 | 522.9799838 |
| MPPYTIVYFPVR                     | P19157 | 0.00960279 | N-term +42.01 Da,                         | 4788.434082 | 2 | 763.9000244 | 762.8996085 |
| GLQVVAVKAPGFGDNR                 | P63038 | 0          | N-term +42.01 Da, K +28.03 Da,            | 4789.058105 | 3 | 567.3099976 | 566.6492971 |
| MLNMWVKVR                        | Q5SUH6 | 0.008359   | N-term +42.01 Da, K +28.03 Da,            | 4789.334473 | 2 | 574.8099976 | 574.309374  |
| KFLPLFDR                         | Q64433 | 0.00318907 | N-term +42.01 Da, K +28.03 Da,            | 4791.799805 | 2 | 553.3236084 | 553.3238618 |
| GTKAFAMTNQILVER                  | Q8C196 | 0.00052466 | N-term +42.01 Da, K +28.03 Da,            | 4792.276855 | 2 | 875.960022  | 874.9718259 |
| AGLLKTTGLVGLAVCDTPHER            | Q9CPP6 | 0.0044843  | N-term +42.01 Da, K +28.03 Da,C +57.02Da, | 4792.855957 | 4 | 609.5900269 | 609.3426206 |
| AQAPTIVITQPGFVR                  | Q9JI48 | 0          | N-term +42.01 Da,                         | 4793.284668 | 2 | 812.9500122 | 813.4541258 |
| ASGVAVSDGVIKVFNDMKVR             | P18760 | 0          | N-term +42.01 Da, K +28.03 Da,            | 4797.429688 | 3 | 731.0599976 | 730.7365548 |
| SKGPAVGIDLGTYSVGVFQHGKVEIANDQGNR | P63017 | 0          | N-term +42.01 Da, K +28.03 Da,C +57.02Da, | 4803.86084  | 4 | 947.4899902 | 947.2374457 |
| AEELLER                          | P21981 | 0.02812374 | N-term +42.01 Da,                         | 4804.630371 | 2 | 507.7765198 | 507.7769421 |
| AEGEDVGWWR                       | Q80Y55 | 0          | N-term +42.01 Da,                         | 4804.931641 | 2 | 623.7800293 | 623.7780051 |
| SGSKYKPAPLATLPSTLDPAEYDVSPETR    | Q9CQC7 | 0          | N-term +42.01 Da, K +28.03 Da,            | 4806.367188 | 3 | 1063.560059 | 1063.550241 |
| MESDFYLR                         | P61327 | 0.00052411 | N-term +42.01 Da,                         | 4808.375    | 2 | 551.25      | 551.7473274 |
| SSPAQPAVPAPLADLKIQH              | P24549 | 0          | N-term +42.01 Da, K +28.03 Da,            | 4809.935059 | 2 | 1005.55365  | 1005.554569 |

|                                         |        |            |                                           |             |   |             |             |
|-----------------------------------------|--------|------------|-------------------------------------------|-------------|---|-------------|-------------|
| SKGPAVGIDLGTTCVGVFQHGKVEIANDQGNR        | P63017 | 0          | N-term +42.01 Da, K +28.03 Da,C +57.02Da, | 4810.729004 | 3 | 1263.310059 | 1262.647502 |
| AELQEVQITEEKPLLPQTPETAKEAELAAR          | Q9QYGO | 0          | N-term +42.01 Da, K +28.03 Da,            | 4811.00293  | 3 | 1163.949951 | 1163.289198 |
| SSPAQPAVPAPLADLKIQH                     | P24549 | 0          | N-term +42.01 Da, K +28.03 Da,            | 4815.568359 | 3 | 670.7050171 | 670.7054717 |
| MDNKDEDIFKFKGYNFLR                      | G5E904 | 0          | N-term +42.01 Da, K +28.03 Da,            | 4816.161133 | 4 | 602.8099976 | 602.3095177 |
| MDDIFTQCR                               | O55222 | 0          | N-term +42.01 Da, C +57.02Da,             | 4816.288086 | 2 | 614.7600098 | 614.2602764 |
| SGSKYKPAPLATLPSTLDPAEYDVPETR            | Q9CQC7 | 0          | N-term +42.01 Da, K +28.03 Da,            | 4818.231445 | 3 | 1064.219971 | 1063.550241 |
| VRNEFTLGECELETMTGEKVK                   | P12710 | 0.01206377 | N-term +42.01 Da, K +28.03 Da,C +57.02Da, | 4819.191406 | 3 | 900.4400024 | 899.7751876 |
| KGFIGPGIDVPAPDMSTGER                    | P26443 | 0          | N-term +42.01 Da, K +28.03 Da,            | 4819.370605 | 2 | 1058.52124  | 1057.532977 |
| AIDAALAAR                               | Q8CHT0 | 0.03943772 | N-term +42.01 Da,                         | 4819.756836 | 2 | 457.2640686 | 457.258719  |
| AASKPIEAMAAAAAPGSGNGVGGGGGTAGPGSGAGTLPR | Q9CZW5 | 0          | N-term +42.01 Da, K +28.03 Da,            | 4822.166504 | 4 | 848.6699829 | 848.1771222 |
| LEFFGLKKEECPAVR                         | P09103 | 0.04522613 | N-term +42.01 Da, K +28.03 Da,C +57.02Da, | 4824.815918 | 3 | 641.3400269 | 641.0132479 |
| KGFIGPGIDVPAPDMSTGER                    | P26443 | 0          | N-term +42.01 Da, K +28.03 Da,            | 4828.396973 | 2 | 1058.52002  | 1057.532977 |
| AGVDQHEGTIQVQGNLFFR                     | Q8VCR7 | 0          | N-term +42.01 Da,                         | 4831.18457  | 2 | 1144.569946 | 1143.566729 |
| MEIAIKYDFKATADDELSFKR                   | Q60631 | 0          | N-term +42.01 Da, K +28.03 Da,            | 4831.381348 | 4 | 644.5800171 | 644.5832738 |
| AGVDQHEGTIQVQGNLFFR                     | Q8VCR7 | 0          | N-term +42.01 Da,                         | 4831.85791  | 2 | 1143.560059 | 1143.566729 |
| ASGNAQIGKSAPDFTATAVVDGAFKEIKLSDYR       | Q61171 | 0          | N-term +42.01 Da, K +28.03 Da,            | 4832.833984 | 4 | 889.7199707 | 889.2188845 |
| SKGPAVGIDLGTTCVGVFQHGKVEIANDQGNR        | P63017 | 0          | N-term +42.01 Da, K +28.03 Da,C +57.02Da, | 4834.482422 | 4 | 947.2371216 | 947.2374457 |
| ASGNAQIGKSAPDFTATAVVDGAFKEIKLSDYR       | Q61171 | 0          | N-term +42.01 Da, K +28.03 Da,            | 4835.99707  | 3 | 1185.619995 | 1185.28942  |
| PEFTLPVHFYGR                            | Q9WUB3 | 0.00318761 | N-term +42.01 Da,                         | 4839.310547 | 3 | 502.25      | 502.2576285 |
| SSPAQPAVPAPLADLKIQH                     | P24549 | 0          | N-term +42.01 Da, K +28.03 Da,            | 4841.299316 | 2 | 1005.549988 | 1005.554569 |
| SKGPAVGIDLGTTCVGVFQHGKVEIANDQGNR        | P63017 | 0          | N-term +42.01 Da, K +28.03 Da,C +57.02Da, | 4843.346191 | 3 | 1262.97998  | 1262.647502 |
| MEPLYQQTNKQVQEIQSHMGR                   | O35166 | 0          | N-term +42.01 Da, K +28.03 Da,            | 4843.548828 | 3 | 873.0900269 | 872.4283445 |
| MEPLYQQTNKQVQEIQSHMGR                   | O35166 | 0          | N-term +42.01 Da, K +28.03 Da,            | 4848.188477 | 3 | 872.4299927 | 872.4283445 |
| MEIAIKYDFKATADDELSFKR                   | Q60631 | 0.00186916 | N-term +42.01 Da, K +28.03 Da,            | 4849.89502  | 4 | 644.3200073 | 644.5832738 |
| MNAGSDPVVIVSAAR                         | Q8CAY6 | 0          | N-term +42.01 Da,                         | 4850.387207 | 2 | 765.397644  | 764.893044  |
| MQETSLTPAHLLSAAQQR                      | P54869 | 0          | N-term +42.01 Da,                         | 4854.765137 | 2 | 1013.02002  | 1012.515119 |
| MDWLMGKSK                               | Q8VI63 | 0          | N-term +42.01 Da, K +28.03 Da,            | 4855.320801 | 2 | 597.3099976 | 597.3064976 |
| AEEQPQVELFVKAGSDGAKIGNCPFSQR            | Q9Z1Q5 | 0          | N-term +42.01 Da, K +28.03 Da,C +57.02Da, | 4856.252441 | 3 | 1054.540039 | 1054.195915 |
| ASGNAQIGKSAPDFTATAVVDGAFKEIKLSDYR       | Q61171 | 0          | N-term +42.01 Da, K +28.03 Da,            | 4863.415527 | 4 | 889.7199707 | 889.2188845 |
| MNFSGKYQL                               | P12710 | 0.00277136 | N-term +42.01 Da, K +28.03 Da,            | 4863.758301 | 2 | 579.2860718 | 579.2866196 |
| SKGPAVGIDLGTTCVGVFQHGKVEIANDQGNR        | P63017 | 0          | N-term +42.01 Da, K +28.03 Da,C +57.02Da, | 4865.36377  | 4 | 947.4899902 | 947.2374457 |
| SYPADYSEEAAYDPYAYPGDYDMHTGDPKQLAYER     | Q8QZY1 | 0          | N-term +42.01 Da, K +28.03 Da,            | 4875.803223 | 3 | 1450.939941 | 1450.274455 |
| IGNIISDAMKKVGR                          | P63038 | 0          | N-term +42.01 Da, K +28.03 Da,            | 4884.805664 | 3 | 534.6400146 | 533.979878  |
| AELQEVQITEEKPLLPQTPETAKEAELAAR          | Q9QYGO | 0          | N-term +42.01 Da, K +28.03 Da,            | 4887.151855 | 3 | 1163.949951 | 1163.289198 |
| SSNGTDAPAEQAAMEEPPVQPSVVDR              | Q9DBG5 | 0          | N-term +42.01 Da,                         | 4887.595215 | 2 | 1400.140015 | 1399.150893 |
| GSTEVGHLIQAAGSSNLKR                     | P47738 | 0          | N-term +42.01 Da, K +28.03 Da,            | 4896.488281 | 3 | 699.3699951 | 698.7149187 |
| SKGPAVGIDLGTTCVGVFQHGKVEIANDQGNR        | P63017 | 0          | N-term +42.01 Da, K +28.03 Da,C +57.02Da, | 4897.352051 | 4 | 947.7399902 | 947.2374457 |
| KDAQTKLAELEAALQR                        | P11679 | 0          | N-term +42.01 Da, K +28.03 Da,            | 4898.243652 | 3 | 629.015686  | 628.358072  |
| GSGMGTLLISKIR                           | P68372 | 0.0005176  | N-term +42.01 Da, K +28.03 Da,            | 4907.409668 | 2 | 702.9000244 | 701.9079651 |
| SLASDPFADASKGDDLLPAGTEDYIHIR            | J3QPZ8 | 0          | N-term +42.01 Da, K +28.03 Da,            | 4914.143066 | 4 | 761.8699951 | 761.8766458 |

|                                    |        |            |                                           |             |   |             |             |
|------------------------------------|--------|------------|-------------------------------------------|-------------|---|-------------|-------------|
| ADEIAKAQVAQPGGDTIFGKIIR            | P70349 | 0          | N-term +42.01 Da, K +28.03 Da,            | 4915.361328 | 3 | 832.7999878 | 832.7988718 |
| LEGVGHFFR                          | P29391 | 0.01244635 | N-term +42.01 Da,                         | 4921.445801 | 2 | 553.2800293 | 552.2852681 |
| ANVADTKLYDILGVPPGASENELKKAYR       | Q9QYJ0 | 0          | N-term +42.01 Da, K +28.03 Da,            | 4925.947266 | 3 | 1054.23999  | 1053.57472  |
| PGGLLLGEEAPDFEANTTIGR              | Q8BG37 | 0.02590045 | N-term +42.01 Da,                         | 4927.075684 | 2 | 1100.060059 | 1100.050046 |
| SKGPAVGIDLGTYSVGVFQHGKVEIANDQGGR   | P63017 | 0          | N-term +42.01 Da, K +28.03 Da,C +57.02Da, | 4928.467773 | 4 | 947.4899902 | 947.2374457 |
| ALKAADTIGYPVMIR                    | Q8C196 | 0          | N-term +42.01 Da, K +28.03 Da,            | 4930.842285 | 2 | 845.9628906 | 844.9738369 |
| ASASYHISNLEKMTSSDKDFR              | Q6ZQ38 | 0          | N-term +42.01 Da, K +28.03 Da,            | 4932.36084  | 4 | 650.8300171 | 650.3271681 |
| ANVADTKLYDILGVPPGASENELKKAYR       | Q9QYJ0 | 0          | N-term +42.01 Da, K +28.03 Da,            | 4936.87207  | 4 | 790.6799927 | 790.4328593 |
| ADEIAKAQVAQPGGDTIFGKIIR            | P70349 | 0          | N-term +42.01 Da, K +28.03 Da,            | 4937.789551 | 4 | 624.8503418 | 624.8509729 |
| MDVNLAPLR                          | Q8R5J9 | 0          | N-term +42.01 Da,                         | 4947.116699 | 2 | 535.7855225 | 535.7867866 |
| MDNLSDTLKKLITAADR                  | E9Q6Q4 | 0          | N-term +42.01 Da, K +28.03 Da,            | 4947.243164 | 4 | 540.8099976 | 540.5580642 |
| ADEIAKAQVAQPGGDTIFGKIIR            | P70349 | 0          | N-term +42.01 Da, K +28.03 Da,            | 4947.470215 | 3 | 833.1300049 | 832.7988718 |
| RNIRYGLYHSLLEWFHPLYLDDKKNKFQKQHFVR | Q99L11 | 0.01999167 | N-term +42.01 Da, K +28.03 Da,            | 4949.779297 | 4 | 1104.839966 | 1104.60747  |
| AELVQGSAPVGMKAEGFVDALHR            | A2AJ71 | 0          | N-term +42.01 Da, K +28.03 Da,            | 4963.062012 | 3 | 861.1099854 | 860.779483  |
| DKLYFEELSLE                        | Q8C196 | 0          | N-term +42.01 Da, K +28.03 Da,            | 4963.137695 | 2 | 807.4050903 | 806.4168753 |
| ADEIAKAQVAQPGGDTIFGKIIR            | P70349 | 0          | N-term +42.01 Da, K +28.03 Da,            | 4963.26416  | 2 | 1249.199951 | 1248.694669 |
| ASVGTlafDEYGR                      | P80316 | 0          | N-term +42.01 Da,                         | 4963.830566 | 2 | 714.8400269 | 714.3437099 |
| KGIKSVTELNGDTITNTMTLGDIVYKR        | P12710 | 0          | N-term +42.01 Da, K +28.03 Da,            | 4965.10791  | 4 | 774.1799927 | 774.1770647 |
| GFWHSPECFVR                        | P16460 | 0.0274083  | N-term +42.01 Da, C +57.02Da,             | 4965.365723 | 2 | 797.8400269 | 796.8511788 |
| SFLKSFPPGSGADGLR                   | Q61189 | 0.02586904 | N-term +42.01 Da, K +28.03 Da,            | 4967.163574 | 2 | 873.460022  | 873.4646909 |
| ANVADTKLYDILGVPPGASENELKKAYR       | Q9QYJ0 | 0          | N-term +42.01 Da, K +28.03 Da,            | 4967.81543  | 4 | 790.4329224 | 790.4328593 |
| ADEIAKAQVAQPGGDTIFGKIIR            | P70349 | 0          | N-term +42.01 Da, K +28.03 Da,            | 4968.158203 | 4 | 624.8499756 | 624.8509729 |
| ADEIAKAQVAQPGGDTIFGKIIR            | P70349 | 0          | N-term +42.01 Da, K +28.03 Da,            | 4968.241699 | 2 | 1248.689941 | 1248.694669 |
| SKGPAVGIDLGTYSVGVFQHGKVEIANDQGGR   | P63017 | 0          | N-term +42.01 Da, K +28.03 Da,C +57.02Da, | 4974.048828 | 4 | 947.7299805 | 947.2374457 |
| MGMTAENLAAKYNISR                   | Q8BWT1 | 0          | N-term +42.01 Da, K +28.03 Da,            | 4978.617188 | 2 | 921.4500122 | 920.4582257 |
| AAGTLYTYPENWR                      | Q9D8N0 | 0          | N-term +42.01 Da,                         | 4978.69873  | 2 | 792.3800049 | 792.3780841 |
| SSIGTGYDLSASTFSPDGR                | O70435 | 0          | N-term +42.01 Da,                         | 4979.155762 | 2 | 980.4500122 | 980.4501649 |
| ADEIAKAQVAQPGGDTIFGKIIR            | P70349 | 0          | N-term +42.01 Da, K +28.03 Da,            | 4980.13916  | 3 | 832.7971191 | 832.7988718 |
| ASLLKVDQEVKLVDSFR                  | P61290 | 0          | N-term +42.01 Da, K +28.03 Da,            | 4983.851563 | 4 | 551.3300171 | 551.0780553 |
| ASLLKVDQEVKLVDSFR                  | P61290 | 0          | N-term +42.01 Da, K +28.03 Da,            | 4984.289063 | 3 | 734.4299927 | 734.4349816 |
| VSMVNTVDTSHEDMIHDAQMDYYGTR         | Q9D1M0 | 0          | N-term +42.01 Da,                         | 4984.387695 | 3 | 1020.440002 | 1019.772289 |
| DKLYFEELSLE                        | Q8C196 | 0          | N-term +42.01 Da, K +28.03 Da,            | 4994.730957 | 2 | 807.4099731 | 806.4168753 |
| PATTFahLDATTVLSR                   | P56480 | 0.01207938 | N-term +42.01 Da,                         | 4995.13623  | 2 | 871.4500122 | 871.9572304 |
| KDASPGSPLEKLVSSVSDLPKR             | P54869 | 0          | N-term +42.01 Da, K +28.03 Da,            | 4997.275391 | 4 | 610.3400269 | 609.8481647 |
| AGQAFRKFPLFDR                      | Q64433 | 0          | N-term +42.01 Da, K +28.03 Da,            | 4999.455078 | 3 | 579.326355  | 579.3262655 |
| MELSADYLR                          | Q8BGS2 | 0          | N-term +42.01 Da,                         | 5004.729004 | 2 | 570.2700195 | 570.2737095 |
| LQTVKLMKEGLEAAR                    | Q35490 | 0          | N-term +42.01 Da, K +28.03 Da,            | 5004.967773 | 3 | 596.3400269 | 595.6816095 |
| MDPSGVKLETAEDIQER                  | P16546 | 0          | N-term +42.01 Da, K +28.03 Da,            | 5010.384766 | 2 | 1044.02002  | 1044.0199   |
| ADEIAKAQVAQPGGDTIFGKIIR            | P70349 | 0          | N-term +42.01 Da, K +28.03 Da,            | 5011.515137 | 3 | 833.1300049 | 832.7988718 |
| AGVPTVSFSLEL                       | E9PY03 | 0.00492611 | N-term +42.01 Da,                         | 5013.461914 | 2 | 653.3499756 | 652.8458879 |

|                                  |        |            |                                           |             |   |             |             |
|----------------------------------|--------|------------|-------------------------------------------|-------------|---|-------------|-------------|
| TASSVLLHTGQKMPILGLGTWKSEPGQVKAA  | Q9JII6 | 0          | N-term +42.01 Da, K +28.03 Da,            | 5014.11377  | 4 | 833.9699707 | 833.7166226 |
| SKGPAVGIDLGTYSVGVFQHGKVEIANDQGNR | P63017 | 0          | N-term +42.01 Da, K +28.03 Da,C +57.02Da, | 5016.023438 | 4 | 947.7399902 | 947.2374457 |
| AQEFVNCKIQSGKVVVF                | Q9QUH0 | 0          | N-term +42.01 Da, K +28.03 Da,C +57.02Da, | 5017.749023 | 3 | 684.710022  | 684.371324  |
| ALLAEHLLKPLPADR                  | Q9JL62 | 0          | N-term +42.01 Da, K +28.03 Da,            | 5019.391113 | 3 | 576.6799927 | 576.3453259 |
| VGLQVVAVKAPGFGDNR                | P63038 | 0          | N-term +42.01 Da, K +28.03 Da,            | 5019.887207 | 2 | 900         | 899.0045146 |
| MDPSGVKVLTAEDIQER                | P16546 | 0          | N-term +42.01 Da, K +28.03 Da,            | 5021.491699 | 3 | 696.3480225 | 696.3490256 |
| AQEFVNCKIQSGKVVVF                | Q9QUH0 | 0          | N-term +42.01 Da, K +28.03 Da,C +57.02Da, | 5023.644043 | 2 | 1026.051392 | 1026.053348 |
| ASGVAVSDGVIKVFNDMKVR             | P18760 | 0          | N-term +42.01 Da, K +28.03 Da,            | 5026.437988 | 3 | 730.734375  | 730.7365548 |
| SGQLKQASLVYA AVLHSLRAGPR         | Q8C6W7 | 0.00406321 | N-term +42.01 Da, K +28.03 Da,            | 5029.641602 | 4 | 624.3599854 | 623.8578607 |
| SIGVPIKVLHEAEGHIVTCETNTGEVYR     | P62320 | 0          | N-term +42.01 Da, K +28.03 Da,C +57.02Da, | 5034.562012 | 4 | 795.9099731 | 795.4104927 |
| EVGHLIQVAAGSSNLKR                | P47738 | 0          | N-term +42.01 Da, K +28.03 Da,            | 5035.22998  | 3 | 617.3400269 | 617.0145279 |
| ASLLKVDQEVKLVKVDSEFR             | P61290 | 0.00837004 | N-term +42.01 Da, K +28.03 Da,            | 5035.394531 | 4 | 551.5800171 | 551.0780553 |
| MDPSGVKVLTAEDIQER                | P16546 | 0          | N-term +42.01 Da, K +28.03 Da,            | 5041.408691 | 2 | 1044.018921 | 1044.0199   |
| SKGPAVGIDLGTYSVGVFQHGKVEIANDQGNR | P63017 | 0          | N-term +42.01 Da, K +28.03 Da,C +57.02Da, | 5047.61377  | 4 | 947.7399902 | 947.2374457 |
| AAVPELLEQQEEDR                   | Q9D8U8 | 0          | N-term +42.01 Da,                         | 5050.270508 | 2 | 834.9075317 | 834.9074037 |
| AKDILGEAGLHFDLNLKR               | Q61025 | 0          | N-term +42.01 Da, K +28.03 Da,            | 5051.859863 | 4 | 560.0599976 | 560.062671  |
| AESPAFLSAKDEGSFAYLTIKDR          | A6H630 | 0          | N-term +42.01 Da, K +28.03 Da,            | 5055.216797 | 3 | 872.4500122 | 872.1181591 |
| MMLGPEGGEGYVVKLR                 | Q9Z2X1 | 0          | N-term +42.01 Da, K +28.03 Da,            | 5057.203613 | 2 | 903.4699707 | 903.4680618 |
| EADDIVNWLKRR                     | P09103 | 0          | N-term +42.01 Da, K +28.03 Da,            | 5059.123535 | 3 | 529.62323   | 528.962993  |
| ASGVAVSDGVIKVFNDMKVR             | P18760 | 0          | N-term +42.01 Da, K +28.03 Da,            | 5060.861328 | 3 | 731.0700073 | 730.7365548 |
| EGDVLTLLESER                     | P62858 | 0.00097371 | N-term +42.01 Da,                         | 5064.751953 | 2 | 701.8499756 | 701.8566505 |
| SIGVPIKVLHEAEGHIVTCETNTGEVYR     | P62320 | 0          | N-term +42.01 Da, K +28.03 Da,C +57.02Da, | 5065.268066 | 4 | 795.9099731 | 795.4104927 |
| TEGLQPASVVVLP                    | Q8BH86 | 0.00320513 | N-term +42.01 Da,                         | 5065.687012 | 2 | 754.4299927 | 754.4275768 |
| AMVSEFLKQAR                      | P10107 | 0          | N-term +42.01 Da, K +28.03 Da,            | 5070.29541  | 2 | 675.3699951 | 675.3659329 |
| AATFFGEVVKAPCR                   | Q9JK23 | 0          | N-term +42.01 Da, K +28.03 Da,C +57.02Da, | 5070.508301 | 2 | 812.4199829 | 811.9216041 |
| AGVPTVSFSELR                     | E9PY03 | 0.00188147 | N-term +42.01 Da,                         | 5072.777344 | 2 | 652.8499756 | 652.8458879 |
| HALIYDDLKQAVAYR                  | Q03265 | 0          | N-term +42.01 Da, K +28.03 Da,            | 5073.272461 | 3 | 683.3699951 | 682.7054717 |
| ATNFLAHEKIWFDFKFKYDDAER          | P57776 | 0          | N-term +42.01 Da, K +28.03 Da,            | 5074.541016 | 4 | 718.366394  | 718.3682588 |
| SSPAQPAVPAPLADLKIQHTKIFINNEWHN   | P24549 | 0          | N-term +42.01 Da, K +28.03 Da,            | 5075.306152 | 3 | 1146.280029 | 1145.612168 |
| ATNFLAHEKIWFDFKFKYDDAER          | P57776 | 0          | N-term +42.01 Da, K +28.03 Da,            | 5076.47998  | 3 | 957.4899902 | 957.4885862 |
| KVLGTSVESIMATEDR                 | Q8C196 | 0          | N-term +42.01 Da, K +28.03 Da,            | 5079.713867 | 3 | 603.3099976 | 602.6486348 |
| AAVPELLEQQEEDR                   | Q9D8U8 | 0          | N-term +42.01 Da,                         | 5080.894043 | 2 | 834.9050293 | 834.9074037 |
| KVLGTSVESIMATEDR                 | Q8C196 | 0          | N-term +42.01 Da, K +28.03 Da,            | 5081.090332 | 2 | 904.4588013 | 903.4693139 |
| ADEIAKAQVAQPGDITFGKIIR           | P70349 | 0          | N-term +42.01 Da, K +28.03 Da,            | 5088.436523 | 3 | 833.1300049 | 832.7988718 |
| ASGVAVSDGVIKVFNDMKVR             | P18760 | 0          | N-term +42.01 Da, K +28.03 Da,            | 5091.543457 | 3 | 731.0700073 | 730.7365548 |
| SGEDEQQEQTIAEDLVVTKYKMGGDIANR    | P50580 | 0          | N-term +42.01 Da, K +28.03 Da,            | 5096.102051 | 3 | 1108.540039 | 1108.208438 |
| AMVSEFLKQAR                      | P10107 | 0          | N-term +42.01 Da, K +28.03 Da,            | 5101.644043 | 2 | 675.3651123 | 675.3659329 |
| AGVPTVSFSELR                     | E9PY03 | 0.00095785 | N-term +42.01 Da,                         | 5103.42334  | 2 | 652.8457031 | 652.8458879 |
| MDNSGKQAEAMALLAEAER              | Q9DB05 | 0          | N-term +42.01 Da, K +28.03 Da,            | 5105.382813 | 2 | 1053.5      | 1053.003727 |
| MDNKDEYLLNFKGY                   | O35403 | 0.00098377 | N-term +42.01 Da, K +28.03 Da,            | 5109.370117 | 2 | 924.9500122 | 924.4478498 |

|                                    |        |            |                                           |             |   |             |             |
|------------------------------------|--------|------------|-------------------------------------------|-------------|---|-------------|-------------|
| ASAMAGAGPAPGLPVAGGPVPGVGPVPGKSGEER | D3YYW8 | 0          | N-term +42.01 Da, K +28.03 Da,            | 5110.285156 | 3 | 1079.560059 | 1078.902842 |
| ATAVVVNIKKLY                       | Q9DCL9 | 0.00050226 | N-term +42.01 Da, K +28.03 Da,            | 5114.135254 | 2 | 737.9500122 | 737.4556053 |
| MDNSGKQAEAMALLAEER                 | Q9DB05 | 0          | N-term +42.01 Da, K +28.03 Da,            | 5115.197754 | 3 | 702.3396606 | 702.3382435 |
| ADQLTEEQIAEFKEA                    | P62204 | 0          | N-term +42.01 Da, K +28.03 Da,            | 5116.826172 | 2 | 896.4299927 | 896.4359944 |
| ASGVAVSDGVKVFNDMKVR                | P18760 | 0          | N-term +42.01 Da, K +28.03 Da,            | 5121.705078 | 3 | 731.0700073 | 730.7365548 |
| LEALDCILPPRPTDKPLR                 | P10126 | 0.00750552 | N-term +42.01 Da, K +28.03 Da,C +57.02Da, | 5124.318359 | 3 | 759.4099731 | 759.0874762 |
| SDSLVVCEVDPELKETLR                 | Q9ERL7 | 0          | N-term +42.01 Da, K +28.03 Da,C +57.02Da, | 5130.486328 | 2 | 1080.050049 | 1080.048658 |
| EFQTNLVPYPR                        | P05213 | 0.02588997 | N-term +42.01 Da,                         | 5131.236816 | 2 | 704.3499756 | 703.3591625 |
| AESDWDTVTVLR                       | Q9JMG1 | 0          | N-term +42.01 Da,                         | 5132.192383 | 2 | 717.3482056 | 717.3489925 |
| SSSAASPLFAPGEDCGPAWR               | O35969 | 0          | N-term +42.01 Da, C +57.02Da,             | 5136.20166  | 2 | 1052.969971 | 1052.973284 |
| VSGKTSACFEPSLDYMVTKIPR             | Q8C196 | 0.00097943 | N-term +42.01 Da, K +28.03 Da,C +57.02Da, | 5136.452148 | 3 | 862.7700195 | 862.1098412 |
| AAVVLNGLVLSR                       | P16331 | 0          | N-term +42.01 Da,                         | 5136.532227 | 2 | 635.3599854 | 635.361705  |
| AELEEVTLDGKPLQALR                  | Q9JIX8 | 0.04576923 | N-term +42.01 Da, K +28.03 Da,            | 5140.686035 | 2 | 976.539978  | 976.5385853 |
| SSPAQPAVPAPLADLKIQHTKIF            | P24549 | 0.00319635 | N-term +42.01 Da, K +28.03 Da,            | 5146.633301 | 3 | 843.4799805 | 843.1476121 |
| LEKLVSSVSDLPKR                     | P54869 | 0.03735745 | N-term +42.01 Da, K +28.03 Da,            | 5148.475098 | 3 | 557.6599731 | 557.0013365 |
| VAAHITGITRR                        | P50592 | 0.01280956 | N-term +42.01 Da,                         | 5154.869141 | 2 | 619.8599854 | 618.8622059 |
| MMLGAEGGEGFVVKVR                   | O35737 | 0          | N-term +42.01 Da, K +28.03 Da,            | 5157.651855 | 2 | 875.9500122 | 875.4549542 |
| MMLGAEGGEGFVVKVR                   | O35737 | 0.00189036 | N-term +42.01 Da, K +28.03 Da,            | 5159.479492 | 2 | 875.4500122 | 875.4549542 |
| SSPAQPAVPAPLADLKIQHTKIF            | P24549 | 0.00096852 | N-term +42.01 Da, K +28.03 Da,            | 5159.76123  | 2 | 1264.209961 | 1264.21778  |
| LSGSAMNVVSEDEMCR                   | Q8C196 | 0          | N-term +42.01 Da, K +28.03 Da,            | 5161.119141 | 2 | 986.460022  | 985.4715308 |
| AESDWDTVTVLR                       | Q9JMG1 | 0          | N-term +42.01 Da,                         | 5164.575684 | 2 | 717.3499756 | 717.3489925 |
| SKGPAVGIDLGTYSVGVFQH               | P63017 | 0          | N-term +42.01 Da, K +28.03 Da,C +57.02Da, | 5164.919922 | 3 | 788.4000244 | 788.3948578 |
| SKGPAVGIDLGTYSVGVFQH               | P63017 | 0          | N-term +42.01 Da, K +28.03 Da,C +57.02Da, | 5165.224121 | 2 | 1182.589966 | 1182.088648 |
| SDKLPYKVADIGLAAWGR                 | P50247 | 0          | N-term +42.01 Da, K +28.03 Da,            | 5165.710449 | 3 | 687.0499878 | 686.7176001 |
| GSWKTQSYLAAGLLKNQVAVVTGGGTGIGKAVSR | Q99M27 | 0          | N-term +42.01 Da, K +28.03 Da,            | 5171.523926 | 4 | 890.75      | 890.2505186 |
| AADIEQVFR                          | Q9QX47 | 0          | N-term +42.01 Da,                         | 5175.752441 | 2 | 545.7797852 | 545.7800161 |
| SKGPAVGIDLGTYSVGVFQH               | P63017 | 0          | N-term +42.01 Da, K +28.03 Da,C +57.02Da, | 5177.321289 | 2 | 1182.089966 | 1182.088648 |
| MEPDGTYEPGFVGIR                    | P60898 | 0          | N-term +42.01 Da,                         | 5186.480469 | 2 | 855.4000244 | 855.3956171 |
| ADKMDMSLDDIIKLNK                   | O08583 | 0          | N-term +42.01 Da, K +28.03 Da,            | 5188.189941 | 3 | 659.6799927 | 659.3445578 |
| MLGGLGKLAEEGLAHR                   | Q8CF02 | 0          | N-term +42.01 Da, K +28.03 Da,            | 5192.211914 | 3 | 555.3145142 | 555.3152607 |
| ASGNAQIGKSAPDFTATAVVDGAFKEIK       | Q61171 | 0.03811395 | N-term +42.01 Da, K +28.03 Da,            | 5195.353516 | 3 | 974.5200195 | 973.8535944 |
| ASVALSEAEKVY                       | Q9DOM0 | 0.00317893 | N-term +42.01 Da, K +28.03 Da,            | 5195.645508 | 2 | 668.8499756 | 668.853379  |
| SKGPAVGIDLGTYSVGVFQH               | P63017 | 0          | N-term +42.01 Da, K +28.03 Da,C +57.02Da, | 5196.747559 | 3 | 789.0599976 | 788.3948578 |
| MLGGLGKLAEEGLAHR                   | Q8CF02 | 0.00052826 | N-term +42.01 Da, K +28.03 Da,            | 5197.741211 | 2 | 832.460022  | 832.4692528 |
| PGSISWDGLDPGKLY                    | Q8VIN1 | 0          | N-term +42.01 Da, K +28.03 Da,            | 5203.159668 | 2 | 838.4199829 | 837.9223248 |
| SSLQELCSGLPLRPLPENR                | Q8VC12 | 0          | N-term +42.01 Da, C +57.02Da,             | 5208.159668 | 3 | 737.0499878 | 736.719564  |
| AAVVLNGLVLSR                       | P16331 | 0          | N-term +42.01 Da,                         | 5214.793945 | 2 | 635.361145  | 635.361705  |
| ADKMDMSLDDIIKLNK                   | O08583 | 0          | N-term +42.01 Da, K +28.03 Da,            | 5218.709473 | 2 | 988.5125122 | 988.5131985 |
| ADKMDMSLDDIIKLNK                   | O08583 | 0          | N-term +42.01 Da, K +28.03 Da,            | 5220.489258 | 3 | 659.3439941 | 659.3445578 |
| GDIKNFLYAWCGKR                     | O70133 | 0.00098087 | N-term +42.01 Da, K +28.03 Da,C +57.02Da, | 5222.102539 | 3 | 609.3182373 | 609.3187824 |

|                                    |        |            |                                           |             |   |             |             |
|------------------------------------|--------|------------|-------------------------------------------|-------------|---|-------------|-------------|
| IVANGKILAADESVGTMGNR               | Q91Y97 | 0          | N-term +42.01 Da, K +28.03 Da,            | 5223.457031 | 2 | 1071.550049 | 1072.062433 |
| IVANGKILAADESVGTMGNR               | Q91Y97 | 0          | N-term +42.01 Da, K +28.03 Da,            | 5224.041016 | 3 | 715.3800049 | 715.0440477 |
| MLGGLGKLAEEGLAHR                   | Q8CF02 | 0          | N-term +42.01 Da, K +28.03 Da,            | 5224.506348 | 3 | 555.315918  | 555.3152607 |
| AESTEQLPSAPKAEEDGR                 | Q9EPU4 | 0.03940694 | N-term +42.01 Da, K +28.03 Da,            | 5240.760254 | 3 | 667.3080444 | 667.6396335 |
| AAVLENGVLSR                        | P16331 | 0          | N-term +42.01 Da,                         | 5246.158691 | 2 | 635.8531494 | 635.361705  |
| LQDVYKIGGIGTPVGR                   | P10126 | 0.0005305  | N-term +42.01 Da, K +28.03 Da,            | 5251.396484 | 2 | 922.5200195 | 921.5278227 |
| AGLELLSDQGYR                       | Q92119 | 0          | N-term +42.01 Da,                         | 5253.977051 | 2 | 682.8499756 | 682.3462524 |
| AAKVFESIGKF                        | P67778 | 0          | N-term +42.01 Da, K +28.03 Da,            | 5268.895508 | 2 | 647.874939  | 647.8739165 |
| ADGELNVDSLITR                      | P62141 | 0          | N-term +42.01 Da,                         | 5271.121582 | 2 | 723.3699951 | 722.8675495 |
| PYNPSMSRPDAWGVTKGAAELMQQKEATTEQQLR | O35490 | 0          | N-term +42.01 Da, K +28.03 Da,            | 5273.045898 | 4 | 979.7399902 | 979.9884707 |
| MDNKDEYLLNFKGY                     | O35403 | 0.00099751 | N-term +42.01 Da, K +28.03 Da,            | 5275.041504 | 2 | 924.4400024 | 924.4478498 |
| AEELEVTLDGKPLQALR                  | Q9JIX8 | 0          | N-term +42.01 Da, K +28.03 Da,            | 5279.617188 | 2 | 977.039978  | 976.5385853 |
| FDRDDVALEGVGHFFR                   | P29391 | 0.00050761 | N-term +42.01 Da,                         | 5280.446777 | 3 | 641.9695435 | 641.3112331 |
| AEDEVAKLEKHLMLLR                   | Q810B6 | 0          | N-term +42.01 Da, K +28.03 Da,            | 5284.963867 | 4 | 502.537262  | 502.5381371 |
| AEELEVTLDGKPLQALR                  | Q9JIX8 | 0          | N-term +42.01 Da, K +28.03 Da,            | 5290.293945 | 3 | 651.3602905 | 651.3614823 |
| EDALKAADTIGYPVMIR                  | Q8C196 | 0.00142925 | N-term +42.01 Da, K +28.03 Da,            | 5290.436035 | 2 | 968         | 967.008606  |
| ASLSLAPVNIKAGADEER                 | P80314 | 0          | N-term +42.01 Da, K +28.03 Da,            | 5300.562988 | 2 | 1030.550049 | 1029.546942 |
| LATALQKLEEAKEKADESER               | P21107 | 0          | N-term +42.01 Da, K +28.03 Da,            | 5300.726074 | 3 | 767.4000244 | 767.4041879 |
| PGSISWDGLDPGKLY                    | Q8VIN1 | 0          | N-term +42.01 Da, K +28.03 Da,            | 5303.151367 | 2 | 837.9204102 | 837.9223248 |
| DDDIAALVVDNGSGMCKAGFAGDDAPR        | P60710 | 0          | N-term +42.01 Da, K +28.03 Da,C +57.02Da, | 5303.783691 | 3 | 937.0900269 | 936.4252179 |
| AFPSLSAGQNPWR                      | Q8K4H1 | 0          | N-term +42.01 Da,                         | 5306.319336 | 2 | 737.3699951 | 736.867686  |
| ASGVTVNDEVIKVFNDMKVR               | P45591 | 0          | N-term +42.01 Da, K +28.03 Da,            | 5307.647461 | 3 | 773.7399902 | 773.7507528 |
| KDGKTLNDELEIIEGMKFDR               | P63038 | 0          | N-term +42.01 Da, K +28.03 Da,            | 5307.821289 | 4 | 620.5700073 | 620.0793613 |
| DDDIAALVVDNGSGMCKAGFAGDDAPR        | P60710 | 0          | N-term +42.01 Da, K +28.03 Da,C +57.02Da, | 5308.044922 | 2 | 1405.130005 | 1404.134189 |
| AVTITLKTLLQQTFKIR                  | P54726 | 0          | N-term +42.01 Da, K +28.03 Da,            | 5309.713867 | 3 | 696.4199829 | 696.4244166 |
| SEPGGEDGSAGLEVSQVAVLQKHLR          | Q9JHU4 | 0          | N-term +42.01 Da, K +28.03 Da,            | 5310.699707 | 3 | 1087.900024 | 1087.223299 |
| MDNKDEYLLNFKGYNFQKTL               | O35403 | 0.00050607 | N-term +42.01 Da, K +28.03 Da,            | 5311.617188 | 3 | 870.4400024 | 869.776968  |
| MELVEVLKR                          | Q7TMF3 | 0          | N-term +42.01 Da, K +28.03 Da,            | 5312.371582 | 2 | 593.8476563 | 593.8468443 |
| MFVQEEKIFAGKVLK                    | Q8VDI7 | 0          | N-term +42.01 Da, K +28.03 Da,            | 5319.228516 | 3 | 632.0300293 | 631.6937379 |
| AAVLQQLRPELNKLPKSTQN               | Q7M739 | 0          | N-term +42.01 Da, K +28.03 Da,            | 5321.225586 | 3 | 858.8200073 | 858.8253095 |
| MEAQAQGLLETEPLQGR                  | O54818 | 0          | N-term +42.01 Da,                         | 5321.519043 | 2 | 956.9699707 | 956.9752949 |
| CDKEFMWALKNGDLDEVKDYVAKGEDVNR      | P62774 | 0          | N-term +42.01 Da, K +28.03 Da,C +57.02Da, | 5322.580078 | 4 | 900.9400024 | 900.44437   |
| ELISNASDALDKIR                     | P08113 | 0          | N-term +42.01 Da, K +28.03 Da,            | 5322.824707 | 2 | 808.9280396 | 807.9385063 |
| AVAAAAAATAMSAAGGGGASAAR            | Q8CG72 | 0          | N-term +42.01 Da,                         | 5324.944824 | 2 | 938.460022  | 937.4628858 |
| AGWIQAQQLQGDALR                    | P42230 | 0          | N-term +42.01 Da,                         | 5328.569336 | 2 | 848.9464722 | 848.9419143 |
| YFPAFEKVLKSHGQDYLVGNR              | P30115 | 0.03812893 | N-term +42.01 Da, K +28.03 Da,            | 5331.155273 | 4 | 642.0900269 | 642.3417779 |
| AGWIQAQQLQGDALR                    | P42230 | 0          | N-term +42.01 Da,                         | 5336.75     | 2 | 848.4400024 | 848.9419143 |
| AFPSLSAGQNPWR                      | Q8K4H1 | 0          | N-term +42.01 Da,                         | 5343.084961 | 2 | 737.3699951 | 736.867686  |
| MELVEVLKR                          | Q7TMF3 | 0          | N-term +42.01 Da, K +28.03 Da,            | 5344.378906 | 2 | 593.8460693 | 593.8468443 |
| MNEVSVIKEGWLH                      | Q60823 | 0.00051733 | N-term +42.01 Da, K +28.03 Da,            | 5346.581543 | 2 | 806.9099731 | 806.4136121 |



|                                   |        |            |                                           |             |   |             |             |
|-----------------------------------|--------|------------|-------------------------------------------|-------------|---|-------------|-------------|
| MNFSGKYQLQSQENFEPFMK              | P12710 | 0          | N-term +42.01 Da, K +28.03 Da,            | 5348.993164 | 3 | 851.7399902 | 851.0713864 |
| SVWKYLCHVCFPPLK                   | P33896 | 0.03197442 | N-term +42.01 Da, K +28.03 Da,C +57.02Da, | 5351.232422 | 2 | 1017.530029 | 1016.530996 |
| ASGNAQIGKSAPDFTATAVVDGAFKEIKLSDYR | Q61171 | 0          | N-term +42.01 Da, K +28.03 Da,            | 5353.181152 | 4 | 889.7199707 | 889.2188845 |
| MNFSGKYQLQSQENFEPFMK              | P12710 | 0          | N-term +42.01 Da, K +28.03 Da,            | 5354.436523 | 2 | 1276.599976 | 1276.103441 |
| ASVALSEAEKVYIVHGVQEDLR            | Q9DOM0 | 0          | N-term +42.01 Da, K +28.03 Da,            | 5363.15625  | 3 | 828.7800293 | 828.4428653 |
| DGIDPKELEDFKLQHGSIILGFPK          | P26443 | 0          | N-term +42.01 Da, K +28.03 Da,            | 5365.374512 | 4 | 678.6099854 | 678.1179095 |
| FVNMVEKGIIDPTKVVR                 | P63038 | 0.01444964 | N-term +42.01 Da, K +28.03 Da,            | 5373.987305 | 3 | 682.3900146 | 681.727219  |
| MWIDENAVTEDQLIKR                  | A2A8R0 | 0          | N-term +42.01 Da, K +28.03 Da,            | 5375.816895 | 2 | 1016        | 1016.01442  |
| AQTLNAEFQMLR                      | Q8C196 | 0          | N-term +42.01 Da,                         | 5375.937988 | 2 | 776.8743286 | 775.885219  |
| AAPEDVAALQAEITR                   | A2BDX3 | 0          | N-term +42.01 Da,                         | 5383.437012 | 2 | 798.9199829 | 798.9150312 |
| SILYVSPHPDAFPSLR                  | Q9Z1Q9 | 0          | N-term +42.01 Da,                         | 5385.572266 | 2 | 920.9899902 | 920.983248  |
| MNFSGKYQLQSQENFEPFMK              | P12710 | 0          | N-term +42.01 Da, K +28.03 Da,            | 5397.682617 | 2 | 1276.609985 | 1276.103441 |
| ADDIDIEAMLEAPYKKDENKLSAN          | Q8VH51 | 0          | N-term +42.01 Da, K +28.03 Da,            | 5397.807617 | 3 | 978.8200073 | 978.4864719 |
| LETELFYKGIR                       | Q03265 | 0.00319343 | N-term +42.01 Da, K +28.03 Da,            | 5398.291504 | 2 | 720.8900146 | 719.9006631 |
| DALKAADTIGYPMIR                   | Q8C196 | 0          | N-term +42.01 Da, K +28.03 Da,            | 5401.169434 | 2 | 903.4799805 | 902.4873089 |
| DDDIAALVVDNGSGMCKAGFAGDDAPR       | P60710 | 0          | N-term +42.01 Da, K +28.03 Da,C +57.02Da, | 5402.853516 | 2 | 1405.119995 | 1404.134189 |
| ASGVAVSDGVIKVFNDMKVR              | P18760 | 0          | N-term +42.01 Da, K +28.03 Da,            | 5403.899902 | 3 | 730.7299805 | 730.7365548 |
| SVPLLTDAATVSGAER                  | Q9WTL7 | 0          | N-term +42.01 Da,                         | 5407.392578 | 2 | 814.9272461 | 814.9281388 |
| MNFSGKYQLQSQENFEPFMK              | P12710 | 0          | N-term +42.01 Da, K +28.03 Da,            | 5409.057129 | 3 | 851.0700073 | 851.0713864 |
| AASTDIAGLEESFR                    | Q9CRB6 | 0          | N-term +42.01 Da,                         | 5413.678223 | 2 | 754.8654175 | 754.865007  |
| MDAATLTYYDTLR                     | Q8BGE6 | 0          | N-term +42.01 Da,                         | 5419.994141 | 2 | 706.8400269 | 706.8399458 |
| LSSAMSAAKAIADHIR                  | P14152 | 0          | N-term +42.01 Da, K +28.03 Da,            | 5426.123047 | 3 | 571.9699707 | 571.3101757 |
| MNFSGKYQLQSQENFEPFMK              | P12710 | 0          | N-term +42.01 Da, K +28.03 Da,            | 5428.27002  | 2 | 1276.104004 | 1276.103441 |
| MEALGKLLKQFDAYPKTLEDFR            | Q9CQE7 | 0          | N-term +42.01 Da, K +28.03 Da,            | 5430.078613 | 4 | 657.8499756 | 657.3541912 |
| TELQSALLR                         | P62254 | 0          | N-term +42.01 Da,                         | 5432.833496 | 2 | 593.3400269 | 593.3455234 |
| DDDIAALVVDNGSGMCKAGFAGDDAPR       | P60710 | 0          | N-term +42.01 Da, K +28.03 Da,C +57.02Da, | 5435.087402 | 3 | 936.75      | 936.4252179 |
| VLSGSAMNVVFEDEMCR                 | Q8C196 | 0          | N-term +42.01 Da, K +28.03 Da,            | 5436.835449 | 2 | 1036        | 1035.005738 |
| SVPLLTDAATVSGAER                  | Q9WTL7 | 0          | N-term +42.01 Da,                         | 5437.917969 | 2 | 815.4299927 | 814.9281388 |
| MNFSGKYQLQSQENFEPFMK              | P12710 | 0          | N-term +42.01 Da, K +28.03 Da,            | 5439.400879 | 3 | 851.0700073 | 851.0713864 |
| ASPAAGGVVIVGSLIGR                 | Q99KP3 | 0          | N-term +42.01 Da,                         | 5446.587402 | 2 | 811.960022  | 811.9648579 |
| DNFPLLKALR                        | P30115 | 0.01282051 | N-term +42.01 Da, K +28.03 Da,            | 5450.19873  | 2 | 628.8800049 | 628.871708  |
| ATNFLAHEKIWFDFKFKY                | P57776 | 0          | N-term +42.01 Da, K +28.03 Da,            | 5455.860352 | 4 | 571.8099976 | 571.8095817 |
| KVLGTSVESIMATEDR                  | Q8C196 | 0          | N-term +42.01 Da, K +28.03 Da,            | 5458.920898 | 3 | 603.3099976 | 602.6486348 |
| LGTSVESIMATEDR                    | Q8C196 | 0          | N-term +42.01 Da,                         | 5461.592773 | 2 | 776.8600464 | 775.871975  |
| MNFSGKYQLQSQENFEPFMK              | P12710 | 0          | N-term +42.01 Da, K +28.03 Da,            | 5462.494629 | 2 | 1276.599976 | 1276.103441 |
| KSLGQWLQEEKVPAYIGVDTR             | Q8C196 | 0          | N-term +42.01 Da, K +28.03 Da,            | 5463.662109 | 3 | 839.7800293 | 839.1233554 |
| MNLSAAHHQISLSDGNIPLIGLGTYSDDR     | Q8VCX1 | 0.00276625 | N-term +42.01 Da,                         | 5463.790039 | 3 | 1078.869995 | 1078.538452 |
| TELQSALLR                         | P62254 | 0          | N-term +42.01 Da,                         | 5465.583008 | 2 | 593.3499756 | 593.3455234 |
| DDDIAALVVDNGSGMCKAGFAGDDAPR       | P60710 | 0          | N-term +42.01 Da, K +28.03 Da,C +57.02Da, | 5467.487305 | 3 | 936.7520752 | 936.4252179 |
| DDDIAALVVDNGSGMCKAGFAGDDAPR       | P60710 | 0          | N-term +42.01 Da, K +28.03 Da,C +57.02Da, | 5467.563477 | 2 | 1404.624756 | 1404.134189 |

|                                   |        |            |                                           |             |   |             |             |
|-----------------------------------|--------|------------|-------------------------------------------|-------------|---|-------------|-------------|
| TGAIVDVPVGEELLGR                  | Q03265 | 0          | N-term +42.01 Da,                         | 5472.130371 | 2 | 833.460022  | 833.9541564 |
| FTASAGIQVVGDDLTVTNPKR             | P17182 | 0.00096015 | N-term +42.01 Da, K +28.03 Da,            | 5472.806641 | 2 | 1131.089966 | 1130.102613 |
| PKNVVGDHADDVSVFGAPILR             | Q91WU0 | 0          | N-term +42.01 Da, K +28.03 Da,            | 5478.697266 | 3 | 813.4299927 | 813.7604169 |
| AAGVEAAAEVAATEPKMEEESGAPCVPSGN    | Q9D0E1 | 0.00096432 | N-term +42.01 Da, K +28.03 Da,C +57.02Da, | 5482.326172 | 3 | 1000.460022 | 1000.458476 |
| CRNHGVT AHLKGHK                   | Q8CGW9 | 0.03948397 | N-term +42.01 Da, K +28.03 Da,C +57.02Da, | 5482.540039 | 2 | 856.4500122 | 856.9599177 |
| AAGVEAAAEVAATEPKMEEESGAPCVPSGN    | Q9D0E1 | 0.00317604 | N-term +42.01 Da, K +28.03 Da,C +57.02Da, | 5484.960938 | 3 | 1001.130005 | 1000.458476 |
| ATESSPLTTHVLDTASGLPAQGLCLR        | Q9CRB3 | 0          | N-term +42.01 Da, C +57.02Da,             | 5487.268555 | 3 | 913.460022  | 913.1323627 |
| ATESSPLTTHVLDTASGLPAQGLCLR        | Q9CRB3 | 0          | N-term +42.01 Da, C +57.02Da,             | 5489.407227 | 2 | 1369.699951 | 1369.194906 |
| ASGVAVSDGVIKVFNDMKVR              | P18760 | 0          | N-term +42.01 Da, K +28.03 Da,            | 5491.246582 | 3 | 731.4099731 | 730.7365548 |
| LMLPTQTISQGAIEKVKDATR             | Q8C196 | 0.00051414 | N-term +42.01 Da, K +28.03 Da,            | 5497.936523 | 3 | 800.7800293 | 800.1173243 |
| DDDIAALVVDNGSGMCKAGFAGDDAPR       | P60710 | 0          | N-term +42.01 Da, K +28.03 Da,C +57.02Da, | 5498.65625  | 3 | 936.4220581 | 936.4252179 |
| DDDIAALVVDNGSGMCKAGFAGDDAPR       | P60710 | 0          | N-term +42.01 Da, K +28.03 Da,C +57.02Da, | 5498.742188 | 2 | 1405.130005 | 1404.134189 |
| CDFTEDQTAEFKEAF                   | Q60605 | 0          | N-term +42.01 Da, K +28.03 Da,C +57.02Da, | 5499.137695 | 2 | 954.9039307 | 954.4038372 |
| MNFSGKYQLQSQENFEPFMK              | P12710 | 0          | N-term +42.01 Da, K +28.03 Da,            | 5499.541992 | 3 | 851.7399902 | 851.0713864 |
| ASGVAVSDGVIKVFNDMKVR              | P18760 | 0          | N-term +42.01 Da, K +28.03 Da,            | 5501.732422 | 2 | 1095.5979   | 1095.601194 |
| CDFTEDQTAEFKEAF                   | Q60605 | 0.0482389  | N-term +42.01 Da, K +28.03 Da,C +57.02Da, | 5505.374512 | 2 | 954.4000244 | 954.4038372 |
| FAGTMAEETAPAVLER                  | Q64374 | 0          | N-term +42.01 Da,                         | 5505.494629 | 2 | 868.9099731 | 867.9219992 |
| RGVLKEYGVKVLGTSVESIMATEDR         | Q8C196 | 0.0018859  | N-term +42.01 Da, K +28.03 Da,            | 5507.702148 | 4 | 710.1329956 | 709.6375751 |
| ATESSPLTTHVLDTASGLPAQGLCLR        | Q9CRB3 | 0          | N-term +42.01 Da, C +57.02Da,             | 5518.904785 | 3 | 913.1306763 | 913.1323627 |
| ATLTVVQPLTLDR                     | Q8JZ50 | 0          | N-term +42.01 Da,                         | 5519.71582  | 2 | 734.9199829 | 734.9221272 |
| ATESSPLTTHVLDTASGLPAQGLCLR        | Q9CRB3 | 0          | N-term +42.01 Da, C +57.02Da,             | 5520.609863 | 2 | 1369.193604 | 1369.194906 |
| FGVPSVIVSR                        | Q64176 | 0.00189573 | N-term +42.01 Da,                         | 5522.434082 | 2 | 552.8099976 | 551.8164013 |
| ASGVAVSDGVIKVFNDMKVR              | P18760 | 0          | N-term +42.01 Da, K +28.03 Da,            | 5523.298828 | 3 | 730.7352905 | 730.7365548 |
| AKFEELNMDLFR                      | P20029 | 0          | N-term +42.01 Da, K +28.03 Da,            | 5524.297852 | 2 | 791.4000244 | 791.9003376 |
| AAVLQQVLERPELNKLPK                | F6ZDS4 | 0          | N-term +42.01 Da, K +28.03 Da,            | 5527.657715 | 3 | 715.4299927 | 715.4315713 |
| DDDIAALVVDNGSGMCKAGFAGDDAPR       | P60710 | 0          | N-term +42.01 Da, K +28.03 Da,C +57.02Da, | 5530.780762 | 3 | 937.0900269 | 936.4252179 |
| DDDIAALVVDNGSGMCKAGFAGDDAPR       | P60710 | 0          | N-term +42.01 Da, K +28.03 Da,C +57.02Da, | 5530.955078 | 2 | 1405.130005 | 1404.134189 |
| EDALKAADTIGYPVMIR                 | Q8C196 | 0.01723413 | N-term +42.01 Da, K +28.03 Da,            | 5532.841309 | 3 | 645.6699829 | 645.0081629 |
| ASGVAVSDGVIKVFNDMKVR              | P18760 | 0          | N-term +42.01 Da, K +28.03 Da,            | 5533.85498  | 2 | 1096.589966 | 1095.601194 |
| AIAELGIYPAVDPLDSTSR               | P56480 | 0          | N-term +42.01 Da,                         | 5548.085449 | 2 | 1016.539978 | 1015.525675 |
| EEDSTALVCDNGSLCKAGFAGDDAPR        | P62737 | 0.01485569 | N-term +42.01 Da, K +28.03 Da,C +57.02Da, | 5548.434082 | 2 | 1441.650024 | 1441.632011 |
| MESELEALAPR                       | Q9CYS6 | 0          | N-term +42.01 Da,                         | 5549.44873  | 2 | 644.3200073 | 644.3161062 |
| EEDSTALVCDNGSLCKAGFAGDDAPR        | P62737 | 0.03809898 | N-term +42.01 Da, K +28.03 Da,C +57.02Da, | 5549.695801 | 2 | 1441.150024 | 1441.632011 |
| VDYYEVLGVQR                       | O54946 | 0          | N-term +42.01 Da,                         | 5552.313477 | 2 | 691.8494263 | 691.8511705 |
| YELPDGQVITIGNER                   | P60710 | 0          | N-term +42.01 Da,                         | 5553.23584  | 2 | 873.9500122 | 873.4388708 |
| MNFSGKYQLQSQENFEPFMK              | P12710 | 0          | N-term +42.01 Da, K +28.03 Da,            | 5553.579102 | 3 | 851.4000244 | 851.0713864 |
| ASGVAVSDGVIKVFNDMKVR              | P18760 | 0          | N-term +42.01 Da, K +28.03 Da,            | 5553.987305 | 3 | 731.0700073 | 730.7365548 |
| MNFSGKYQLQSQENFEPFMK              | P12710 | 0.00050556 | N-term +42.01 Da, K +28.03 Da,            | 5556.438477 | 2 | 1277.099976 | 1276.103441 |
| ATDSWALAVDEQEAAVKSMSLLQIKEKVKADTN | Q61655 | 0.00187178 | N-term +42.01 Da, K +28.03 Da,            | 5558.330078 | 4 | 962.5       | 962.4974946 |
| DDDIAALVVDNGSGMCKAGFAGDDAPR       | P60710 | 0          | N-term +42.01 Da, K +28.03 Da,C +57.02Da, | 5561.550293 | 3 | 936.75      | 936.4252179 |

|                                   |        |            |                                           |             |   |             |             |
|-----------------------------------|--------|------------|-------------------------------------------|-------------|---|-------------|-------------|
| MEGKVIYGEDYEKEFTPDKYLTTY          | P40936 | 0.00406872 | N-term +42.01 Da, K +28.03 Da,            | 5561.663574 | 3 | 1089.52002  | 1089.189433 |
| AAESALQVVEKLQAR                   | Q8CB77 | 0          | N-term +42.01 Da, K +28.03 Da,            | 5561.769043 | 2 | 842.4799805 | 841.975423  |
| DDDIAALVVDNGSGMCK                 | P60710 | 0          | N-term +42.01 Da, K +28.03 Da,C +57.02Da, | 5562.04834  | 2 | 925.9099731 | 925.4189641 |
| VEGLMTTVHAIATATQKTVDGPSGKLWR      | P16858 | 0.03288431 | N-term +42.01 Da, K +28.03 Da,            | 5563.997559 | 4 | 749.9199829 | 749.4074869 |
| TDPAPATTF AHL DATTVLSR            | P56480 | 0.00050302 | N-term +42.01 Da,                         | 5564.574219 | 2 | 1065.060059 | 1064.039481 |
| SGEDEQQEQTIAEDLVVTKY              | P50580 | 0          | N-term +42.01 Da, K +28.03 Da,            | 5566.802734 | 2 | 1177.060059 | 1176.558099 |
| SGEDEQQEQTIAEDLVVTKY              | P50580 | 0          | N-term +42.01 Da, K +28.03 Da,            | 5571.925293 | 3 | 785.039978  | 784.7078251 |
| MEDSMDMDMSPLRPQNYLFGCELKADKDYH    | Q61937 | 0          | N-term +42.01 Da, K +28.03 Da,C +57.02Da, | 5573.785156 | 4 | 934.9099731 | 934.4130556 |
| ADDVDQQQTNTVVEEPLDLIR             | P62311 | 0          | N-term +42.01 Da,                         | 5574.25293  | 2 | 1221.589966 | 1221.58518  |
| ELISNASDALDKIR                    | P08113 | 0          | N-term +42.01 Da, K +28.03 Da,            | 5575.776367 | 2 | 808.9299927 | 807.9385063 |
| ADDVDQQQTNTVVEEPLDLIR             | P62311 | 0          | N-term +42.01 Da,                         | 5575.933594 | 2 | 1222.589966 | 1221.58518  |
| MENSQQLKLF                        | Q9CX86 | 0          | N-term +42.01 Da, K +28.03 Da,C +57.02Da, | 5577.786621 | 2 | 670.8200073 | 670.3228767 |
| AETLSGLGDASAAGAAAVSSAASETGTR      | D3YXK2 | 0          | N-term +42.01 Da,                         | 5577.931152 | 2 | 1261.609985 | 1261.104269 |
| KDPYALDVPNTAFGR                   | Q8R311 | 0          | N-term +42.01 Da, K +28.03 Da,            | 5578.857422 | 2 | 867.460022  | 867.4464983 |
| ASGNAIQKSAPDF TATAVVDGAFKEIKLSDYR | Q61171 | 0          | N-term +42.01 Da, K +28.03 Da,            | 5579.035156 | 3 | 1185.619995 | 1185.28942  |
| DDDIAALVVDNGSGMCKAGFAGDDAPR       | P60710 | 0          | N-term +42.01 Da, K +28.03 Da,C +57.02Da, | 5580.558105 | 2 | 1405.119995 | 1404.134189 |
| MNLSAAHHQISLSDGNINPLIGLGTYS DPR   | Q8VCX1 | 0.00321396 | N-term +42.01 Da,                         | 5581.038574 | 3 | 1078.869995 | 1078.538452 |
| MESELEALAPR                       | Q9CYS6 | 0          | N-term +42.01 Da,                         | 5581.706543 | 2 | 644.3148193 | 644.3161062 |
| AETLSGLGDASAAGAAAVSSAASETGTR      | D3YXK2 | 0          | N-term +42.01 Da,                         | 5581.930176 | 3 | 841.069458  | 841.0719379 |
| DDDIAALVVDNGSGMCK                 | P60710 | 0          | N-term +42.01 Da, K +28.03 Da,C +57.02Da, | 5583.092773 | 2 | 925.4199829 | 925.4189641 |
| ASLSLAPVNIKAGADEER                | P80314 | 0          | N-term +42.01 Da, K +28.03 Da,            | 5585.89209  | 2 | 1030.050049 | 1029.546942 |
| VSDIIEKSPDTFVR                    | Q99LC5 | 0.04410058 | N-term +42.01 Da, K +28.03 Da,            | 5586.929688 | 2 | 896         | 894.9907391 |
| ASGNAIQKSAPDF TATAVVDGAFKEIKLSDYR | Q61171 | 0          | N-term +42.01 Da, K +28.03 Da,            | 5589.325684 | 4 | 889.2175293 | 889.2188845 |
| TTS GALFP SLVPGSR                 | Q9JKV1 | 0          | N-term +42.01 Da,                         | 5593.730957 | 2 | 766.9099731 | 766.4093842 |
| MNFSGKYQLQSQENFEPFMK              | P12710 | 0          | N-term +42.01 Da, K +28.03 Da,            | 5594.630859 | 3 | 851.7299805 | 851.0713864 |
| AALTAEHFVALQSLKASSKDVVR           | Q8K2Q0 | 0          | N-term +42.01 Da, K +28.03 Da,            | 5595.742676 | 4 | 664.1300049 | 663.8825388 |
| DASPGSPLEKLVSSVSDLPKR             | P54869 | 0          | N-term +42.01 Da, K +28.03 Da,            | 5597.73877  | 3 | 761.4199829 | 760.7530396 |
| ASGVAVSDGVIKVFNDMKVR              | P18760 | 0          | N-term +42.01 Da, K +28.03 Da,            | 5598.191895 | 3 | 731.0700073 | 730.7365548 |
| ADHVQSLAQLNLCKQLYETD TTTR         | Q9EPK7 | 0          | N-term +42.01 Da, K +28.03 Da,C +57.02Da, | 5599.469238 | 3 | 1036.180054 | 1035.84343  |
| MLTGS G DPKEEEEEELVDPLTTVR        | P99028 | 0          | N-term +42.01 Da, K +28.03 Da,            | 5599.877441 | 3 | 916.1099854 | 915.4442727 |
| ASGSGGVSVPALWSEVNR                | E9Q740 | 0          | N-term +42.01 Da,                         | 5600.62207  | 2 | 936.9699707 | 936.4659514 |
| MESSTSSSGSALGAVDPQLQH FIEVETQKQR  | Q9WVA2 | 0          | N-term +42.01 Da, K +28.03 Da,            | 5601.937988 | 3 | 1140.219971 | 1139.89122  |
| MLTGS G DPKEEEEEELVDPLTTVR        | P99028 | 0          | N-term +42.01 Da, K +28.03 Da,            | 5604.459961 | 2 | 1373.160034 | 1372.662771 |
| ASLSLAPVNIKAGADEER                | P80314 | 0          | N-term +42.01 Da, K +28.03 Da,            | 5618.169922 | 2 | 1030.050049 | 1029.546942 |
| MESSTSSSGSALGAVDPQLQH FIEVETQKQR  | Q9WVA2 | 0          | N-term +42.01 Da, K +28.03 Da,            | 5618.739258 | 4 | 855.6699829 | 855.1702345 |
| ASGNAIQKSAPDF TATAVVDGAFKEIKLSDYR | Q61171 | 0          | N-term +42.01 Da, K +28.03 Da,            | 5619.537109 | 4 | 889.2183838 | 889.2188845 |
| ASYEILDVPR                        | Q9QYI5 | 0          | N-term +42.01 Da,                         | 5619.871094 | 2 | 684.3499756 | 684.3457209 |
| KTFSHELSDFGLESTTGEVPPVAIR         | P27773 | 0          | N-term +42.01 Da, K +28.03 Da,            | 5622.162109 | 3 | 931.1400146 | 930.4833899 |
| LKDFSATDLTEFAAR                   | Q8BWT1 | 0          | N-term +42.01 Da, K +28.03 Da,            | 5625.867676 | 2 | 878.4400024 | 877.9516139 |
| AALTAEHFVALQSLKASSKDVVR           | Q8K2Q0 | 0          | N-term +42.01 Da, K +28.03 Da,            | 5627.216797 | 4 | 664.3800049 | 663.8825388 |

|                                   |        |            |                                           |             |   |             |             |
|-----------------------------------|--------|------------|-------------------------------------------|-------------|---|-------------|-------------|
| AADISQWAGPLCLQEVEPPQHALR          | P70296 | 0          | N-term +42.01 Da, C +57.02Da,             | 5628.212891 | 3 | 949.1300049 | 948.4642237 |
| ASLSLAPVNIKAGADEER                | P80314 | 0          | N-term +42.01 Da, K +28.03 Da,            | 5630.868164 | 3 | 686.7000122 | 686.7003867 |
| AADISQWAGPLCLQEVEPPQHALR          | P70296 | 0          | N-term +42.01 Da, C +57.02Da,             | 5632.914063 | 2 | 1422.689941 | 1422.192697 |
| MESSTSSSGSALGAVDPQLQHFIEVETQKQR   | Q9WVA2 | 0          | N-term +42.01 Da, K +28.03 Da,            | 5634.305176 | 3 | 1140.219971 | 1139.89122  |
| ASGCKIGPSILNSDLANLGAECLR          | Q8VEE0 | 0          | N-term +42.01 Da, K +28.03 Da,C +57.02Da, | 5637.537109 | 3 | 863.1099854 | 862.7719999 |
| AQQAADKYLVDKNFINNPLAQADWAAK       | Q8VDD5 | 0          | N-term +42.01 Da, K +28.03 Da,            | 5637.818848 | 3 | 1098.569946 | 1098.23822  |
| GSYQLLVPPPEALS KPLSVPTR           | O35423 | 0.01605408 | N-term +42.01 Da, K +28.03 Da,            | 5643.352051 | 3 | 807.789978  | 807.1246961 |
| DDDIAALVVDNGSGMCKAGFAGDDAPR       | P60710 | 0          | N-term +42.01 Da, K +28.03 Da,C +57.02Da, | 5644.194824 | 2 | 1404.624023 | 1404.134189 |
| ASGCKIGPSILNSDLANLGAECLR          | Q8VEE0 | 0          | N-term +42.01 Da, K +28.03 Da,C +57.02Da, | 5645.455078 | 2 | 1294.660034 | 1293.654362 |
| GSYQLLVPPPEALS KPLSVPTR           | O35423 | 0.00959442 | N-term +42.01 Da, K +28.03 Da,            | 5647.28125  | 2 | 1211.180054 | 1210.183406 |
| ASGCKIGPSILNSDLANLGAECLR          | Q8VEE0 | 0          | N-term +42.01 Da, K +28.03 Da,C +57.02Da, | 5648.594727 | 2 | 1293.650024 | 1293.654362 |
| LISNASDALDKIR                     | P08113 | 0.00098522 | N-term +42.01 Da, K +28.03 Da,            | 5648.900879 | 2 | 744.4099731 | 743.4172092 |
| GSYQLLVPPPEALS KPLSVPTR           | O35423 | 0.0018596  | N-term +42.01 Da, K +28.03 Da,            | 5649.519043 | 2 | 1210.180054 | 1210.183406 |
| ASLSLAPVNIKAGADEER                | P80314 | 0          | N-term +42.01 Da, K +28.03 Da,            | 5650.374023 | 2 | 1029.545288 | 1029.546942 |
| GSYQLLVPPPEALS KPLSVPTR           | O35423 | 0          | N-term +42.01 Da, K +28.03 Da,            | 5651.127441 | 3 | 807.460022  | 807.1246961 |
| ASGNAQIGKSAPDFTATAVVDGAFKEIKLSDYR | Q61171 | 0          | N-term +42.01 Da, K +28.03 Da,            | 5654.256348 | 4 | 889.4699707 | 889.2188845 |
| LLCLADFKAQAQKQL                   | Q9NYQ2 | 0          | N-term +42.01 Da, K +28.03 Da,C +57.02Da, | 5656.086914 | 2 | 967.039978  | 966.5347906 |
| LKEYGVKVLGTSVESIMATEDR            | Q8C196 | 0.02775543 | N-term +42.01 Da, K +28.03 Da,            | 5656.479492 | 3 | 842.4400024 | 841.7840113 |
| LLCLADFKAQAQKQL                   | Q9NYQ2 | 0          | N-term +42.01 Da, K +28.03 Da,C +57.02Da, | 5659.64209  | 3 | 645.3599854 | 644.6922859 |
| AGPEWQSLEQCLEKHLPPDLAQVKR         | Q8VC97 | 0          | N-term +42.01 Da, K +28.03 Da,C +57.02Da, | 5660.466797 | 4 | 786.4099731 | 786.4052101 |
| LRVIFLENYR                        | Q8CI94 | 0          | N-term +42.01 Da,                         | 5665.53125  | 2 | 683.8900146 | 682.8878895 |
| SWLFGIKGPKGEGTGPPLPPAQPAGAEAGGDR  | Q92511 | 0          | N-term +42.01 Da, K +28.03 Da,            | 5666.094727 | 3 | 1113.920044 | 1113.589252 |
| SWLFGIKGPKGEGTGPPLPPAQPAGAEAGGDR  | Q92511 | 0          | N-term +42.01 Da, K +28.03 Da,            | 5669.941406 | 3 | 1114.26001  | 1113.589252 |
| DDDIAALVVDNGSGMCKAGFAGDDAPR       | P60710 | 0          | N-term +42.01 Da, K +28.03 Da,C +57.02Da, | 5671.452148 | 3 | 936.7525024 | 936.4252179 |
| MNLSAAHQISLSDGNNIPLIGLGTYS DPR    | Q8VCX1 | 0          | N-term +42.01 Da,                         | 5673.001465 | 3 | 1079.199951 | 1078.538452 |
| DNWNYTPLHEAAIKGK                  | Q3UES3 | 0.00921457 | N-term +42.01 Da, K +28.03 Da,            | 5676.002441 | 2 | 977.4899902 | 978.0047121 |
| DDDIAALVVDNGSGMCKAGFAGDDAPR       | P60710 | 0          | N-term +42.01 Da, K +28.03 Da,C +57.02Da, | 5676.766602 | 2 | 1404.626587 | 1404.134189 |
| SDQQLDCALDLMR                     | P47757 | 0          | N-term +42.01 Da, C +57.02Da,             | 5681.826172 | 2 | 803.8638916 | 803.8636269 |
| GKTLNDELEIIEGMKFD R               | P63038 | 0          | N-term +42.01 Da, K +28.03 Da,            | 5684.850586 | 3 | 736.7127686 | 736.0523204 |
| ASGNAQIGKSAPDFTATAVVDGAFKEIKLSDYR | Q61171 | 0          | N-term +42.01 Da, K +28.03 Da,            | 5687.166016 | 4 | 889.7199707 | 889.2188845 |
| MNFSGKYQLQSQENFEFPMK              | P12710 | 0          | N-term +42.01 Da, K +28.03 Da,            | 5687.564941 | 3 | 851.7299805 | 851.0713864 |
| HELSDFLESTTGEVVPVAIR              | P27773 | 0          | N-term +42.01 Da,                         | 5688.003906 | 2 | 1150.579956 | 1149.584253 |
| MIEMA AEKEPF                      | Q8K3A9 | 0.00051894 | N-term +42.01 Da, K +28.03 Da,            | 5689.484863 | 2 | 683.3262939 | 683.3250852 |
| EQFLQEYFDGNLKR                    | P27773 | 0          | N-term +42.01 Da, K +28.03 Da,            | 5690.277832 | 2 | 929.9500122 | 928.9625129 |
| AGPEWQSLEQCLEKHLPPDLAQVKR         | Q8VC97 | 0          | N-term +42.01 Da, K +28.03 Da,C +57.02Da, | 5691.888184 | 4 | 786.4046021 | 786.4052101 |
| MNEEPDALSVVNQLR                   | Q9D7A8 | 0          | N-term +42.01 Da,                         | 5697.928711 | 2 | 878.9299927 | 878.9303557 |
| ASGVAVSDGVKVFNDMKVR               | P18760 | 0          | N-term +42.01 Da, K +28.03 Da,            | 5700.610352 | 3 | 731.4000244 | 730.7365548 |
| AFTPATGTPVLGGLSYR                 | Q61176 | 0.00451264 | N-term +42.01 Da,                         | 5701.541992 | 2 | 875.9699707 | 875.4621484 |
| SWLFGIKGPKGEGTGPPLPPAQPAGAEAGGDR  | Q92511 | 0          | N-term +42.01 Da, K +28.03 Da,            | 5702.8125   | 3 | 1113.589966 | 1113.589252 |
| LMLPTQTISQGAIEKVKDATR             | Q8C196 | 0          | N-term +42.01 Da, K +28.03 Da,            | 5702.97168  | 3 | 800.7788696 | 800.1173243 |

|                               |         |            |                                           |             |   |             |             |
|-------------------------------|---------|------------|-------------------------------------------|-------------|---|-------------|-------------|
| DALKAADTIGYVPMIR              | Q8C196  | 0          | N-term +42.01 Da, K +28.03 Da,            | 5705.380859 | 2 | 903.4799805 | 902.4873089 |
| DDDIAALVVDNGSGMKACKAGFAGDDAPR | P60710  | 0          | N-term +42.01 Da, K +28.03 Da,C +57.02Da, | 5708.954102 | 2 | 1405.130005 | 1404.134189 |
| SDQQLDLDCALDLMR               | P47757  | 0          | N-term +42.01 Da, C +57.02Da,             | 5712.817871 | 2 | 803.8627319 | 803.8636269 |
| MQEMNLLPTPESPVTR              | Q88685  | 0          | N-term +42.01 Da,                         | 5713.322754 | 2 | 942.9606934 | 942.9633413 |
| ASGVTVNDEVIKVFNDMKVR          | P45591  | 0          | N-term +42.01 Da, K +28.03 Da,            | 5713.983398 | 3 | 774.4199829 | 773.7507528 |
| QFLQEYFDGNLKR                 | P27773  | 0.00052659 | N-term +42.01 Da, K +28.03 Da,            | 5716.16748  | 2 | 865.4299927 | 864.4412158 |
| ADLSLVDALTEPPPEIEGEIKR        | P27546  | 0          | N-term +42.01 Da, K +28.03 Da,            | 5720.276367 | 3 | 821.7700195 | 821.4390097 |
| HTGDSVVVAPAQTLNSAEFQMLR       | Q8C196  | 0          | N-term +42.01 Da,                         | 5721.754883 | 2 | 1258.119995 | 1257.126294 |
| AVDSLVIPIGR                   | Q03265  | 0.00099651 | N-term +42.01 Da,                         | 5727.962402 | 2 | 535.7999878 | 534.8060337 |
| GSPLEKLVSSVSDLPKR             | P54869  | 0          | N-term +42.01 Da, K +28.03 Da,            | 5728.969238 | 3 | 638.0300293 | 637.370089  |
| MEDSMDMDMSPLRPQNY             | Q61937  | 0          | N-term +42.01 Da,                         | 5729.384277 | 2 | 1051.422974 | 1051.420324 |
| AEMDLVAELPR                   | Q8VDG5  | 0          | N-term +42.01 Da,                         | 5729.758301 | 2 | 643.8300171 | 643.3264738 |
| SWLFGIKGPKGEGTGPPLPPAQAEGGGDR | Q92511  | 0          | N-term +42.01 Da, K +28.03 Da,            | 5734.167969 | 3 | 1114.26001  | 1113.589252 |
| TEWEAATPAVAETPDIKLFGK         | P97461  | 0          | N-term +42.01 Da, K +28.03 Da,            | 5735.310547 | 2 | 1187.119995 | 1186.622847 |
| DILNMDKTLKGLNSDSVTEETLR       | Q8C196  | 0          | N-term +42.01 Da, K +28.03 Da,            | 5737.027344 | 3 | 898.1300049 | 897.4687521 |
| GIVLGGGCALLR                  | P63038  | 0.01879699 | N-term +42.01 Da, C +57.02Da,             | 5741.685547 | 2 | 615.3400269 | 614.3475428 |
| ASGVTVNDEVIKVFNDMKVR          | P45591  | 0          | N-term +42.01 Da, K +28.03 Da,            | 5745.358398 | 3 | 773.7508545 | 773.7507528 |
| IGNIISDAMKKVGR                | P63038  | 0          | N-term +42.01 Da, K +28.03 Da,            | 5756.529297 | 3 | 534.6400146 | 533.979878  |
| AASAALILPESPSMKKAVPLINAIDTGR  | Q8JZY2  | 0          | N-term +42.01 Da, K +28.03 Da,            | 5757.081543 | 3 | 978.5599976 | 978.2228528 |
| AALVLEDGSLVQGR                | B2LRQC6 | 0          | N-term +42.01 Da,                         | 5760.555664 | 2 | 735.4013672 | 735.4015592 |
| PFVELETNLPASR                 | Q35215  | 0          | N-term +42.01 Da,                         | 5765.960449 | 2 | 757.8900146 | 757.8961096 |
| AASAALILPESPSMKKAVPLINAIDTGR  | Q8JZY2  | 0          | N-term +42.01 Da, K +28.03 Da,            | 5772.715332 | 3 | 978.2199707 | 978.2228528 |
| TTYLEFIQQNEER                 | Q01405  | 0          | N-term +42.01 Da,                         | 5774.122559 | 2 | 856.9102173 | 856.9099462 |
| AAATAAAPQQLSDEELFSQLR         | Q9WU40  | 0          | N-term +42.01 Da,                         | 5780.847168 | 2 | 1166.079956 | 1165.584785 |
| AAATAAAPQQLSDEELFSQLR         | Q9WU40  | 0          | N-term +42.01 Da,                         | 5783.069824 | 3 | 778.0599976 | 777.3922821 |
| ITVKDGTKLNDELEIIEGMKFDR       | P63038  | 0          | N-term +42.01 Da, K +28.03 Da,            | 5787.320313 | 4 | 698.8699951 | 698.3794008 |
| ADISQWAGPLCLQEVDPPQHALR       | P70296  | 0          | N-term +42.01 Da, C +57.02Da,             | 5787.99707  | 3 | 924.789978  | 924.7851857 |
| TTQQIVLQGGPGPWGFR             | O70400  | 0          | N-term +42.01 Da,                         | 5788.92627  | 2 | 913.9799805 | 913.9810395 |
| ATNFLAHEKIWFDFK               | P57776  | 0          | N-term +42.01 Da, K +28.03 Da,            | 5791.29248  | 3 | 655.680481  | 655.6804859 |
| SDFDSNPFADPDLNPFKDPSTQVTR     | Q8K021  | 0          | N-term +42.01 Da, K +28.03 Da,            | 5796.503418 | 3 | 1031.819946 | 1031.81939  |
| AAQEWDFWQFR                   | Q8C5W0  | 0          | N-term +42.01 Da,                         | 5796.927734 | 2 | 690.3200073 | 689.8123793 |
| PGGLLLGEEAPDFEANTTIGR         | Q8BG37  | 0          | N-term +42.01 Da,                         | 5800.807129 | 2 | 1099.550049 | 1100.050046 |
| SDFDSNPFADPDLNPFKDPSTQVTR     | Q8K021  | 0          | N-term +42.01 Da, K +28.03 Da,            | 5803.087402 | 3 | 1032.48999  | 1031.81939  |
| KKRPNWSNSK                    | Q8BVK9  | 0.01168325 | N-term +42.01 Da, K +28.03 Da,            | 5808.031738 | 2 | 685.9096069 | 685.8987886 |
| LINEKDGETFQLMGLYGR            | B5X0G2  | 0          | N-term +42.01 Da, K +28.03 Da,            | 5813.218262 | 2 | 1078.550049 | 1077.548627 |
| ATQVEPLLPAAGAPLLQAEHGLAR      | Q6ZQ58  | 0          | N-term +42.01 Da,                         | 5813.988281 | 2 | 1263.180054 | 1262.181926 |
| VAGPQAQTGAPQGSGLGEYLFER       | P29391  | 0          | N-term +42.01 Da,                         | 5815.323242 | 2 | 1207.599976 | 1208.100602 |
| SDFDSNPFADPDLNPFKDPSTQVTR     | Q8K021  | 0.00097276 | N-term +42.01 Da, K +28.03 Da,            | 5816.210449 | 2 | 1547.719971 | 1547.225447 |
| AADISQWAGPLCLQEVDPPQHALR      | P70296  | 0          | N-term +42.01 Da, C +57.02Da,             | 5819.857422 | 2 | 1423.199951 | 1422.192697 |
| KGSASSALELTEEELATAEAVR        | Q8R0Y6  | 0          | N-term +42.01 Da, K +28.03 Da,            | 5820.058594 | 2 | 1167.579956 | 1166.597559 |

|                                     |        |            |                                           |             |   |             |             |
|-------------------------------------|--------|------------|-------------------------------------------|-------------|---|-------------|-------------|
| TTQQIVLQGGPWGFR                     | O70400 | 0          | N-term +42.01 Da,                         | 5820.967285 | 2 | 913.9810791 | 913.9810395 |
| AADISQWAGPLCLQEVDEPPQHALR           | P70296 | 0          | N-term +42.01 Da, C +57.02Da,             | 5821.286621 | 3 | 948.7999878 | 948.4642237 |
| AEPQPASSGLTDEAFSCCSDPDSTKDFLLQQTMLR | Q9CPU0 | 0          | N-term +42.01 Da, K +28.03 Da,C +57.02Da, | 5826.194824 | 3 | 1391.640015 | 1390.969543 |
| MEPSPLELPVDAVR                      | Q9CXF0 | 0          | N-term +42.01 Da,                         | 5828.729492 | 2 | 798.4099731 | 797.9109026 |
| DFDECCLKYFEELSLE                    | Q8C196 | 0.01171367 | N-term +42.01 Da, K +28.03 Da,C +57.02Da, | 5829.149902 | 2 | 1140.51001  | 1139.514648 |
| PFVELETNLPASR                       | O35215 | 0          | N-term +42.01 Da,                         | 5838.793457 | 2 | 758.9099731 | 757.8961096 |
| STLLIHPQYAWLQDLGLR                  | Q9DBF1 | 0          | N-term +42.01 Da,                         | 5840.744141 | 3 | 769.0800171 | 768.4146918 |
| ATQVEPLLAPAGAPLLQAEHGLAR            | Q6ZQ58 | 0          | N-term +42.01 Da,                         | 5840.849121 | 2 | 1262.189941 | 1262.181926 |
| STLLIHPQYAWLQDLGLR                  | Q9DBF1 | 0          | N-term +42.01 Da,                         | 5845.12207  | 3 | 768.75      | 768.4146918 |
| PFVELETNLPASR                       | O35215 | 0          | N-term +42.01 Da,                         | 5848.373535 | 2 | 758.4000244 | 757.8961096 |
| ATQVEPLLAPAGAPLLQAEHGLAR            | Q6ZQ58 | 0          | N-term +42.01 Da,                         | 5849.14209  | 3 | 842.460022  | 841.7903764 |
| AADISQWAGPLCLQEVDEPPQHALR           | P70296 | 0          | N-term +42.01 Da, C +57.02Da,             | 5851.080078 | 2 | 1422.192749 | 1422.192697 |
| GAGIAQVSVDKGLKTLTKDTTVTGLGR         | Q8BMS1 | 0          | N-term +42.01 Da, K +28.03 Da,            | 5852.17041  | 4 | 707.4099731 | 706.918116  |
| AADISQWAGPLCLQEVDEPPQHALR           | P70296 | 0          | N-term +42.01 Da, C +57.02Da,             | 5853.268555 | 3 | 948.4642944 | 948.4642237 |
| AEPQPASSGLTDEAFSCCSDPDSTKDFLLQQTMLR | Q9CPU0 | 0          | N-term +42.01 Da, K +28.03 Da,C +57.02Da, | 5857.318359 | 3 | 1390.97229  | 1390.969543 |
| ASVGTlafDEYGRPFLLIKDQDR             | P80316 | 0          | N-term +42.01 Da, K +28.03 Da,            | 5857.901367 | 3 | 894.4799805 | 894.4693031 |
| MEPSPLELPVDAVR                      | Q9CXF0 | 0          | N-term +42.01 Da,                         | 5859.814941 | 2 | 797.9113159 | 797.9109026 |
| SSKMMVNSVEGCADDALAGLVASNPDLQLLQGHR  | Q8VC30 | 0          | N-term +42.01 Da, K +28.03 Da,C +57.02Da, | 5860.42041  | 4 | 920.7199707 | 920.4699136 |
| ADDLDFETGDAGASATFPMQCSALR           | P63242 | 0          | N-term +42.01 Da, C +57.02Da,             | 5866.575684 | 2 | 1345.089966 | 1344.581257 |
| AETGAGISETVTETTETTTTETTEPENQSLIMKLR | Q8K1L5 | 0          | N-term +42.01 Da, K +28.03 Da,            | 5871.472656 | 3 | 1347.339966 | 1346.670145 |
| ASLVPLKEKKLMEVKLGELPSWIMMR          | P56135 | 0          | N-term +42.01 Da, K +28.03 Da,            | 5878.249512 | 4 | 796.460022  | 795.963583  |
| AAAQSLSTQLSSGNPVYKEY                | P42567 | 0          | N-term +42.01 Da, K +28.03 Da,            | 5880.569824 | 2 | 1141.589966 | 1141.089172 |
| MEATGVLFPVR                         | Q9JJ28 | 0          | N-term +42.01 Da,                         | 5880.660156 | 2 | 631.3300781 | 631.3341013 |
| MEGPLSVFGDR                         | P11983 | 0          | N-term +42.01 Da,                         | 5883.07373  | 2 | 625.2988892 | 625.2977161 |
| AADISQWAGPLCLQEVDEPPQHALR           | P70296 | 0          | N-term +42.01 Da, C +57.02Da,             | 5883.793945 | 2 | 1422.689941 | 1422.192697 |
| AADISQWAGPLCLQEVDEPPQHALR           | P70296 | 0          | N-term +42.01 Da, C +57.02Da,             | 5885.42627  | 3 | 949.1300049 | 948.4642237 |
| AGLLDWPQGTAFASQVTLLEGDKVKVER        | Q9DCW4 | 0          | N-term +42.01 Da, K +28.03 Da,            | 5885.594238 | 3 | 982.1900024 | 981.525589  |
| AETGAGISETVTETTETTTTETTEPENQSLIMKLR | Q8K1L5 | 0          | N-term +42.01 Da, K +28.03 Da,            | 5886.060547 | 4 | 1010.5      | 1010.254428 |
| ATYLEFIQQNEER                       | Q9D662 | 0          | N-term +42.01 Da,                         | 5886.443359 | 2 | 841.9099731 | 841.9046637 |
| ASVGTlafDEYGRPFLLIKDQDR             | P80316 | 0          | N-term +42.01 Da, K +28.03 Da,            | 5889.211426 | 3 | 894.4699707 | 894.4693031 |
| DAQTKLAELEAALQR                     | P11679 | 0          | N-term +42.01 Da, K +28.03 Da,            | 5892.50293  | 3 | 576.9799805 | 576.3159841 |
| MDAGVTESGLNVTLTIR                   | P60335 | 0          | N-term +42.01 Da,                         | 5892.678711 | 2 | 910.960022  | 909.9669384 |
| MDLVAELPR                           | Q8VDG5 | 0.00188501 | N-term +42.01 Da,                         | 5892.907227 | 2 | 543.289978  | 543.2866196 |
| MDAGVTESGLNVTLTIR                   | P60335 | 0          | N-term +42.01 Da,                         | 5896.753418 | 2 | 909.960022  | 909.9669384 |
| ADSVKTLFLQDLGR                      | Q61070 | 0          | N-term +42.01 Da, K +28.03 Da,            | 5900.047363 | 2 | 760.4099731 | 760.4093842 |
| LGQWLQEEKVPPIYGVDR                  | Q8C196 | 0          | N-term +42.01 Da, K +28.03 Da,            | 5919.807129 | 2 | 1137.589966 | 1136.602249 |
| MEGPLSVFGDR                         | P11983 | 0          | N-term +42.01 Da,                         | 5921.461426 | 2 | 625.2976074 | 625.2977161 |
| AADISQWAGPLCLQEVDEPPQHALR           | P70296 | 0          | N-term +42.01 Da, C +57.02Da,             | 5925.262695 | 2 | 1422.689941 | 1422.192697 |
| MDAGVTESGLNVTLTIR                   | P60335 | 0          | N-term +42.01 Da,                         | 5928.86084  | 2 | 909.9699707 | 909.9669384 |
| SAIQNLHSFDPFADASKGDDLLPAGTEDIHIR    | P48024 | 0          | N-term +42.01 Da, K +28.03 Da,            | 5929.057617 | 4 | 922.210022  | 921.7048702 |

|                                     |        |            |                                           |             |   |             |             |
|-------------------------------------|--------|------------|-------------------------------------------|-------------|---|-------------|-------------|
| GLFIIDDKGILR                        | P35700 | 0          | N-term +42.01 Da, K +28.03 Da,            | 5931.800781 | 2 | 716.4407349 | 715.4243052 |
| MDSASQDINLNSPNKGVLSDFMTDVPDGPVVHR   | Q9CYZ2 | 0          | N-term +42.01 Da, K +28.03 Da,            | 5934.05957  | 3 | 1242.949951 | 1242.269703 |
| SSKMKMNSVEGCADDALAGLVASNPDLQLLQGHHR | Q8VC30 | 0.00277008 | N-term +42.01 Da, K +28.03 Da,C +57.02Da, | 5935.270996 | 4 | 920.4699707 | 920.4699136 |
| VNPTVFFDITADDEPLGR                  | P17742 | 0          | N-term +42.01 Da,                         | 5937.537109 | 2 | 1024.52002  | 1024.5022   |
| FFDRDDVALEGVGHFFR                   | P29391 | 0          | N-term +42.01 Da,                         | 5939.566895 | 3 | 690.9899902 | 690.3340379 |
| MDSASQDINLNSPNKGVLSDFMTDVPDGPVVHR   | Q9CYZ2 | 0          | N-term +42.01 Da, K +28.03 Da,            | 5950.770508 | 3 | 1242.268921 | 1242.269703 |
| NGVLLHLESELAQTR                     | P05784 | 0.00278164 | N-term +42.01 Da,                         | 5951.126465 | 2 | 862.4500122 | 861.4626799 |
| DGETFQLMGLYGR                       | B5X0G2 | 0          | N-term +42.01 Da,                         | 5952.943359 | 2 | 765.8499756 | 764.8586699 |
| MESMVAPGEVLMSEQAIQPAHADSR           | Q9DBK0 | 0          | N-term +42.01 Da,                         | 5953.73291  | 2 | 1299.609985 | 1299.111472 |
| AILGMDDELSEEDKLTVSR                 | P56480 | 0          | N-term +42.01 Da, K +28.03 Da,            | 5956.086914 | 2 | 1039.52002  | 1038.530101 |
| MVGGEASAAVEKLVSGVR                  | Q9D211 | 0          | N-term +42.01 Da, K +28.03 Da,            | 5956.740723 | 2 | 915.9899902 | 915.493123  |
| ISSVQSIVPALEIANHR                   | P63038 | 0          | N-term +42.01 Da,                         | 5956.976563 | 2 | 975.0300293 | 974.0365437 |
| SLWGLISKMSPEKLQR                    | P52633 | 0.00835532 | N-term +42.01 Da, K +28.03 Da,            | 5958.068359 | 3 | 658.039978  | 657.7080473 |
| MESMVAPGEVLMSEQAIQPAHADSR           | Q9DBK0 | 0          | N-term +42.01 Da,                         | 5959.242676 | 3 | 866.7399902 | 866.4100737 |
| SGTLAKIAEIEAEMAR                    | P32233 | 0          | N-term +42.01 Da, K +28.03 Da,            | 5962.037109 | 2 | 880.4673462 | 880.4665739 |
| ATAVVVNIGKKLYEGKTKKEYELLDTPGR       | Q9DCL9 | 0          | N-term +42.01 Da, K +28.03 Da,            | 5968.103027 | 4 | 837.2299805 | 837.231263  |
| LGKDLLFKDSAFGLLR                    | Q92111 | 0.0164557  | N-term +42.01 Da, K +28.03 Da,            | 5968.624023 | 3 | 631.7000122 | 631.0399027 |
| MNVEHEVNLLVEEIHRR                   | Q4KML4 | 0          | N-term +42.01 Da,                         | 5970.320313 | 3 | 668.3389282 | 668.3386832 |
| AQPPPVEGDDCLPEYHHLFCPDLLODKVAF      | Q9WV68 | 0          | N-term +42.01 Da, K +28.03 Da,C +57.02Da, | 5971.961914 | 3 | 1231.910034 | 1231.572723 |
| ASFVTEVLAHSGSLEKEDLGR               | O54692 | 0          | N-term +42.01 Da, K +28.03 Da,            | 5973.340332 | 3 | 806.4199829 | 806.0833373 |
| ATPDSLALFTGLGLENKAR                 | D3Z158 | 0          | N-term +42.01 Da, K +28.03 Da,            | 5976.660645 | 2 | 1066.569946 | 1066.073324 |
| MLSFAQYDPDVYR                       | Q9QUR6 | 0          | N-term +42.01 Da,                         | 5979.08252  | 2 | 730.8499756 | 730.8475733 |
| ASGRPEELWEAVVGAER                   | Q9D1F4 | 0          | N-term +42.01 Da,                         | 5981.276367 | 2 | 984.9899902 | 984.9923336 |
| ACFEPSLDYMVTKIPR                    | Q8C196 | 0          | N-term +42.01 Da, K +28.03 Da,C +57.02Da, | 5982.20166  | 2 | 999.9899902 | 998.9971839 |
| AAMLGDAIMVAK                        | Q60936 | 0          | N-term +42.01 Da, K +28.03 Da,            | 5982.984375 | 2 | 630.8383179 | 630.8381622 |
| PFVELETNLPASR                       | O35215 | 0          | N-term +42.01 Da,                         | 5983.852539 | 2 | 758.4000244 | 757.8961096 |
| SSWVTHVEMGPPDPILGVTEAFKR            | P05202 | 0          | N-term +42.01 Da, K +28.03 Da,            | 5984.56543  | 4 | 703.6099854 | 703.3547227 |
| LFMYLNEVAGKHGVR                     | P16460 | 0          | N-term +42.01 Da, K +28.03 Da,            | 5985.831543 | 3 | 621.6599731 | 620.9978204 |
| SCTIEKALADAKALVER                   | Q9CRA9 | 0          | N-term +42.01 Da, K +28.03 Da,C +57.02Da, | 5986.548828 | 3 | 658.3634033 | 658.3627173 |
| VDGEALSTLVNLR                       | P63038 | 0.0044964  | N-term +42.01 Da,                         | 5989.251953 | 2 | 715.8800049 | 714.8882846 |
| ATAVVVNIGKKLYEGKTKKEYELLDTPGR       | Q9DCL9 | 0          | N-term +42.01 Da, K +28.03 Da,            | 5990.007324 | 3 | 1116.650024 | 1115.972592 |
| ADLSDELIR                           | Q8BG81 | 0          | N-term +42.01 Da,                         | 5992.844727 | 2 | 593.819397  | 593.8193388 |
| ASGRPEELWEAVVGAER                   | Q9D1F4 | 0          | N-term +42.01 Da,                         | 5995.308594 | 3 | 656.9976807 | 656.9973145 |
| SWFADLAGR                           | Q9QYE6 | 0          | N-term +42.01 Da,                         | 5997.326172 | 2 | 532.7615967 | 532.761626  |
| MNYMPGTASLIEDIDKHLVLLR              | Q8VC85 | 0          | N-term +42.01 Da, K +28.03 Da,            | 5997.462402 | 4 | 689.8800049 | 689.627587  |
| ATAVVVNIGKKLYEGKTKKEYELLDTPGR       | Q9DCL9 | 0          | N-term +42.01 Da, K +28.03 Da,            | 5999.479004 | 4 | 837.2315063 | 837.231263  |
| SAIQNLHSFDPFADASKGDDLLPAGTEDYIHIR   | P48024 | 0          | N-term +42.01 Da, K +28.03 Da,            | 6000.107422 | 4 | 921.960022  | 921.7048702 |
| ASGVTVNDEVIKVFNDMKVR                | P45591 | 0          | N-term +42.01 Da, K +28.03 Da,            | 6006.611816 | 3 | 774.0800171 | 773.7507528 |
| ATPDSLALFTGLGLENKAR                 | D3Z158 | 0          | N-term +42.01 Da, K +28.03 Da,            | 6008.680176 | 2 | 1066.069946 | 1066.073324 |
| EEEIAALVIDNGSGMCKAGFAGDDAPR         | P63260 | 0          | N-term +42.01 Da, K +28.03 Da,C +57.02Da, | 6008.969238 | 2 | 1433.160034 | 1432.165489 |

|                                     |        |            |                                           |             |   |             |             |
|-------------------------------------|--------|------------|-------------------------------------------|-------------|---|-------------|-------------|
| AFTPATGTPVLGGLSYR                   | Q61176 | 0          | N-term +42.01 Da,                         | 6009.398926 | 2 | 876.4519653 | 875.4621484 |
| FVQKVVEEVGKMKIGNPLDR                | Q8R0Y6 | 0          | N-term +42.01 Da, K +28.03 Da,            | 6013.394043 | 4 | 604.3425903 | 603.8475386 |
| PFVELETNLPASR                       | O35215 | 0          | N-term +42.01 Da,                         | 6016.578125 | 2 | 757.8967896 | 757.8961096 |
| ALDFENEMATAASSSSLEKSYELPDGQVITIGNER | P62737 | 0          | N-term +42.01 Da, K +28.03 Da,            | 6017.121582 | 3 | 1282.290039 | 1281.614082 |
| DLGTFKAFAMTNQLVER                   | Q8C196 | 0          | N-term +42.01 Da, K +28.03 Da,            | 6022.432129 | 2 | 990.0200195 | 989.0273301 |
| AAAAPGPVELGFAEAPAWR                 | P46718 | 0          | N-term +42.01 Da,                         | 6025.875977 | 2 | 1026.015869 | 1026.512902 |
| SDVVIKDETETMKDLEAEMR                | E9Q9Q2 | 0          | N-term +42.01 Da, K +28.03 Da,            | 6031.5625   | 3 | 855.7600098 | 855.4326502 |
| SAIQNLHSFDPFADASKGDDLLPAGTEDYIHIR   | P48024 | 0          | N-term +42.01 Da, K +28.03 Da,            | 6032.577148 | 4 | 922.210022  | 921.7048702 |
| LAFVDVPNDSSFQIVKNPR                 | Q61176 | 0          | N-term +42.01 Da, K +28.03 Da,            | 6042.348145 | 2 | 1109.579956 | 1108.589141 |
| MQNDAGEFVDLYVPR                     | Q9CQR2 | 0          | N-term +42.01 Da,                         | 6046.622559 | 2 | 898.4099731 | 898.4196237 |
| MEPQSQSMTLEVPLSLGR                  | A4UHF3 | 0          | N-term +42.01 Da,                         | 6047.049805 | 2 | 1023.002319 | 1023.005738 |
| PFVELETNLPASRIPAGLENR               | O35215 | 0          | N-term +42.01 Da,                         | 6047.257813 | 3 | 789.4199829 | 789.0885336 |
| PFVELETNLPASR                       | O35215 | 0          | N-term +42.01 Da,                         | 6048.888184 | 2 | 757.8952026 | 757.8961096 |
| AEFSAQLDPSFIKTHEDILENLDR            | Q99J99 | 0          | N-term +42.01 Da, K +28.03 Da,            | 6049.212402 | 3 | 977.8099976 | 977.1574542 |
| VLSGSAMNVVVFSEDEMKR                 | Q8C196 | 0          | N-term +42.01 Da, K +28.03 Da,            | 6049.819824 | 2 | 1035.98999  | 1035.005738 |
| MEEKALEVYDLIR                       | Q9DCL2 | 0          | N-term +42.01 Da, K +28.03 Da,            | 6050.030273 | 2 | 839.9383545 | 839.9396603 |
| AADISQWAGPLCLQEVDEPPQHALR           | P70296 | 0          | N-term +42.01 Da, C +57.02Da,             | 6052.945313 | 3 | 948.1300049 | 948.4642237 |
| PFVELETNLPASRIPAGLENR               | O35215 | 0.00321543 | N-term +42.01 Da,                         | 6056.158691 | 2 | 1184.140015 | 1183.129162 |
| EEEIAALVIDNGSGMCKAGFAGDDAPR         | P63260 | 0          | N-term +42.01 Da, K +28.03 Da,C +57.02Da, | 6056.369629 | 3 | 955.7800293 | 955.1127513 |
| FLETELFYKGR                         | Q03265 | 0.00051626 | N-term +42.01 Da, K +28.03 Da,            | 6057.603027 | 2 | 794.4259644 | 793.4348703 |
| MDPSWATQESEAVAQVLR                  | Q9EPQ7 | 0          | N-term +42.01 Da, K +28.03 Da,            | 6062.144043 | 2 | 1109.550049 | 1109.046449 |
| MQNDAGEFVDLYVPR                     | Q9CQR2 | 0.00097466 | N-term +42.01 Da,                         | 6064.221191 | 3 | 599.6199951 | 599.2821746 |
| AAETQTLNFGPEWLR                     | Q6Y7W8 | 0          | N-term +42.01 Da,                         | 6068.158203 | 2 | 887.9400024 | 887.9415803 |
| DIGNIISDAMKKVGR                     | P63038 | 0          | N-term +42.01 Da, K +28.03 Da,            | 6072.436035 | 3 | 572.9828491 | 572.3221927 |
| EEEIAALVIDNGSGMCKAGFAGDDAPR         | P63260 | 0          | N-term +42.01 Da, K +28.03 Da,C +57.02Da, | 6074.532715 | 3 | 955.4500122 | 955.1127513 |
| GVKVLGTSVESIMATEDR                  | Q8C196 | 0.00050865 | N-term +42.01 Da, K +28.03 Da,            | 6076.413086 | 3 | 655.3400269 | 654.6785942 |
| EEEIAALVIDNGSGMCKAGFAGDDAPR         | P63260 | 0          | N-term +42.01 Da, K +28.03 Da,C +57.02Da, | 6077.56543  | 2 | 1432.169312 | 1432.165489 |
| MQNDAGEFVDLYVPR                     | Q9CQR2 | 0          | N-term +42.01 Da,                         | 6077.952148 | 2 | 898.4196167 | 898.4196237 |
| EEASDYLELDTIKNLVR                   | P08113 | 0          | N-term +42.01 Da, K +28.03 Da,            | 6078.132813 | 2 | 1040.540039 | 1039.53624  |
| PFVELETNLPASRIPAGLENR               | O35215 | 0          | N-term +42.01 Da,                         | 6079.163574 | 3 | 789.4299927 | 789.0885336 |
| PFVELETNLPASR                       | O35215 | 0          | N-term +42.01 Da,                         | 6080.299316 | 2 | 757.8964233 | 757.8961096 |
| LNLKELEKDLIDR                       | Q05920 | 0.00188413 | N-term +42.01 Da, K +28.03 Da,            | 6081.870605 | 3 | 566.992981  | 566.3329749 |
| ASVGTLAFDEYGRPF                     | P80316 | 0          | N-term +42.01 Da,                         | 6085.537109 | 2 | 836.4055786 | 836.4042992 |
| SSLSGKVQTVLGLVPSQLGR                | Q60866 | 0          | N-term +42.01 Da, K +28.03 Da,            | 6088.61377  | 2 | 1113.630005 | 1113.128631 |
| EISGIINAQASPKEECALEIIKGTALR         | P50172 | 0.02378999 | N-term +42.01 Da, K +28.03 Da,C +57.02Da, | 6089.615234 | 3 | 1004.22998  | 1003.881156 |
| SSLSGKVQTVLGLVPSQLGR                | Q60866 | 0          | N-term +42.01 Da, K +28.03 Da,            | 6090.938965 | 3 | 742.4199829 | 742.4215126 |
| ATQADLMELDMAMEPDR                   | Q02248 | 0          | N-term +42.01 Da,                         | 6091.253418 | 2 | 989.9345703 | 989.9313816 |
| VLGTSVESIMATEDR                     | Q8C196 | 0          | N-term +42.01 Da,                         | 6093.376953 | 2 | 826.3942261 | 825.4061822 |
| AASGESGASGGGGSTEEAFMTFYSEVKQIEKR    | Q6NZB0 | 0          | N-term +42.01 Da, K +28.03 Da,            | 6093.55957  | 3 | 1123.540039 | 1122.864671 |
| LCLQEVDEPPQHALR                     | P70296 | 0.03949941 | N-term +42.01 Da, C +57.02Da,             | 6101.277832 | 2 | 924.960022  | 923.9594473 |



|                                    |        |            |                                           |             |   |             |             |
|------------------------------------|--------|------------|-------------------------------------------|-------------|---|-------------|-------------|
| GVKVLGTSVESIMATEDR                 | Q8C196 | 0.00052493 | N-term +42.01 Da, K +28.03 Da,            | 6108.345215 | 3 | 655.3400269 | 654.6785942 |
| MQNDAGEFVDLYVPR                    | Q9CQR2 | 0          | N-term +42.01 Da,                         | 6110.192383 | 2 | 898.4199829 | 898.4196237 |
| MEAGGLGCAVCVLTGASR                 | G3UXX3 | 0          | N-term +42.01 Da, C +57.02Da,             | 6113.360352 | 2 | 925.9299927 | 925.9315181 |
| ASVGTLAFDEYGRPF                    | P80316 | 0          | N-term +42.01 Da,                         | 6118.495117 | 2 | 836.4000244 | 836.4042992 |
| MQKDASLSGFLPSFQHF                  | Q8VCN5 | 0          | N-term +42.01 Da, K +28.03 Da,            | 6121.39209  | 2 | 1005.48999  | 1005.493123 |
| ASPGEPQPPAPDTSFDFYLVIGGGSGGLASAR   | P47791 | 0          | N-term +42.01 Da,                         | 6121.810059 | 3 | 1034.5      | 1034.16679  |
| MQKDASLSGFLPSFQHF                  | Q8VCN5 | 0          | N-term +42.01 Da, K +28.03 Da,            | 6123.015625 | 3 | 671         | 670.6645075 |
| ATQADLMELDMAMEPDR                  | Q02248 | 0          | N-term +42.01 Da,                         | 6124.560547 | 2 | 989.9299927 | 989.9313816 |
| GMIKDLGATWVVLGHSER                 | P17751 | 0.04547206 | N-term +42.01 Da, K +28.03 Da,            | 6124.999023 | 3 | 681.024292  | 680.3629399 |
| FGVTTLDIVR                         | P08249 | 0.00052356 | N-term +42.01 Da,                         | 6128.020996 | 2 | 582.8200073 | 581.8269663 |
| MEAGGLGCAVCVLTGASR                 | G3UXX3 | 0          | N-term +42.01 Da, C +57.02Da,             | 6131.312988 | 3 | 617.6226196 | 617.6234375 |
| AANATTNPSQLLPLELVDKCIGSR           | P62322 | 0          | N-term +42.01 Da, K +28.03 Da,C +57.02Da, | 6134.022461 | 3 | 880.1346436 | 880.1338147 |
| FVNMVEKGIIDPTKVVR                  | P63038 | 0          | N-term +42.01 Da, K +28.03 Da,            | 6135.476563 | 3 | 682.3900146 | 681.727219  |
| AELQMLLEEEIPSGKR                   | Q8CBW3 | 0          | N-term +42.01 Da, K +28.03 Da,            | 6136.352539 | 2 | 957.0100098 | 957.0060635 |
| AANATTNPSQLLPLELVDKCIGSR           | P62322 | 0          | N-term +42.01 Da, K +28.03 Da,C +57.02Da, | 6137.19043  | 2 | 1320.199951 | 1319.697084 |
| YGKVLGTSVESIMATEDR                 | Q8C196 | 0.00878735 | N-term +42.01 Da, K +28.03 Da,            | 6137.400391 | 3 | 709.6900024 | 709.0330373 |
| SNKSDVIVVGGGISMMAAKLLHDCGLSVVVLEAR | Q8BW75 | 0          | N-term +42.01 Da, K +28.03 Da,C +57.02Da, | 6139.479492 | 4 | 906.25      | 905.9930242 |
| MQNDAGEFVDLYVPR                    | Q9CQR2 | 0          | N-term +42.01 Da,                         | 6141.392578 | 2 | 898.4199219 | 898.4196237 |
| AELQMLLEEEIPSGKR                   | Q8CBW3 | 0          | N-term +42.01 Da, K +28.03 Da,            | 6141.864746 | 2 | 958.0100098 | 957.0060635 |
| MEAGGLGCAVCVLTGASR                 | G3UXX3 | 0          | N-term +42.01 Da, C +57.02Da,             | 6144.18457  | 2 | 925.9314575 | 925.9315181 |
| EDYLSAILNR                         | P07724 | 0.01880485 | N-term +42.01 Da,                         | 6145.680176 | 2 | 619.3099976 | 618.3169633 |
| ASEDIAKLAETLAKTQVAGGQLSFKGKGL      | P46061 | 0          | N-term +42.01 Da, K +28.03 Da,            | 6150.215332 | 4 | 772.4400024 | 772.1931433 |
| SQLVECPNPFSEGNQVEIDAISR            | Q91XD4 | 0          | N-term +42.01 Da, C +57.02Da,             | 6153.239258 | 3 | 916.7700195 | 916.4362226 |
| SQLVECPNPFSEGNQVEIDAISR            | Q91XD4 | 0          | N-term +42.01 Da, C +57.02Da,             | 6153.500977 | 2 | 1374.14917  | 1374.150696 |
| AEPQPASSGLTDEAFSCSDPDSTKDFLLQTM    | Q9CPU0 | 0.00318471 | N-term +42.01 Da, K +28.03 Da,C +57.02Da, | 6159.435547 | 3 | 1301.910034 | 1301.241151 |
| VHLTDAEKAASVSLWGKVNSEVGGGEALGR     | P02088 | 0          | N-term +42.01 Da, K +28.03 Da,C +57.02Da, | 6162.136719 | 4 | 817.1699829 | 817.4173122 |
| YGKVLGTSVESIMATEDR                 | Q8C196 | 0.01445578 | N-term +42.01 Da, K +28.03 Da,            | 6165.913574 | 2 | 1064.030029 | 1063.045918 |
| AANATTNPSQLLPLELVDKCIGSR           | P62322 | 0          | N-term +42.01 Da, K +28.03 Da,C +57.02Da, | 6166.585938 | 3 | 880.1353149 | 880.1338147 |
| FVQENVYDEFVER                      | P47738 | 0          | N-term +42.01 Da,                         | 6167.438477 | 2 | 859.3894653 | 858.3992142 |
| ESFGPIMIISR                        | Q8R0Y6 | 0.00052549 | N-term +42.01 Da,                         | 6168.763184 | 2 | 647.3300171 | 646.3393838 |
| VHLTDAEKAASVSLWGKVNSEVGGGEALGR     | P02088 | 0          | N-term +42.01 Da, K +28.03 Da,C +57.02Da, | 6170.13623  | 3 | 1089.569946 | 1089.553991 |
| FQVTKLFAEAVQKSR                    | Q8C196 | 0          | N-term +42.01 Da, K +28.03 Da,            | 6170.255371 | 3 | 618.0169067 | 617.3560023 |
| SNKSDVIVVGGGISMMAAKLLHDCGLSVVVLEAR | Q8BW75 | 0          | N-term +42.01 Da, K +28.03 Da,C +57.02Da, | 6172.327637 | 4 | 906.5       | 905.9930242 |
| AEYLASIFGTEKDKVN                   | Q8BGJ9 | 0          | N-term +42.01 Da, K +28.03 Da,            | 6173.139648 | 2 | 942.4967041 | 941.9934791 |
| AAKVFEISIGKFGL                     | P67778 | 0.03913894 | N-term +42.01 Da, K +28.03 Da,            | 6175.483398 | 2 | 732.9299927 | 732.9266807 |
| SLVDLGGKLLAAR                      | Q00420 | 0          | N-term +42.01 Da, K +28.03 Da,            | 6176.291504 | 3 | 537.6655884 | 537.6661765 |
| MQNDAGEFVDLYVPR                    | Q9CQR2 | 0          | N-term +42.01 Da,                         | 6177.842773 | 2 | 899.4099731 | 898.4196237 |
| MQKDASLSGFLPSFQHFATQAIHVGQEPEQWNSR | Q8VCN5 | 0          | N-term +42.01 Da, K +28.03 Da,            | 6183.812988 | 4 | 986.7399902 | 986.2311577 |
| PFVELETNLPASR                      | O35215 | 0          | N-term +42.01 Da,                         | 6184.032227 | 2 | 758.4000244 | 757.8961096 |
| SQLVECPNPFSEGNQVEIDAISR            | Q91XD4 | 0          | N-term +42.01 Da, C +57.02Da,             | 6185.244141 | 3 | 916.4367676 | 916.4362226 |

|                                    |        |            |                                           |             |   |             |             |
|------------------------------------|--------|------------|-------------------------------------------|-------------|---|-------------|-------------|
| SQLVECVPNFSEGNNQEVIDAISR           | Q91XD4 | 0          | N-term +42.01 Da, C +57.02Da,             | 6185.475098 | 2 | 1374.650024 | 1374.150696 |
| MMEGLDDGPDFLSEEDR                  | Q6P8X1 | 0          | N-term +42.01 Da,                         | 6185.811523 | 2 | 999.4093018 | 999.4087941 |
| SVPAFIDISEEDQAAELR                 | Q99JX4 | 0          | N-term +42.01 Da,                         | 6187.956055 | 2 | 1016.497925 | 1016.497115 |
| ADNAFMLLTQAR                       | P58544 | 0.03218117 | N-term +42.01 Da,                         | 6203.752441 | 2 | 696.3599854 | 696.8506473 |
| MDQVMQFVEPSR                       | P60060 | 0          | N-term +42.01 Da,                         | 6207.815918 | 2 | 754.8461914 | 754.8472478 |
| MQNDAGEFVDLYVPR                    | Q9CQR2 | 0          | N-term +42.01 Da,                         | 6209.604004 | 2 | 898.9105225 | 898.4196237 |
| LKEYGVKVLGTSVESIMATEDR             | Q8C196 | 0          | N-term +42.01 Da, K +28.03 Da,            | 6209.738281 | 3 | 842.4400024 | 841.7840113 |
| MDIEAYFER                          | P50294 | 0          | N-term +42.01 Da,                         | 6215.804199 | 2 | 608.2700195 | 608.271167  |
| SDILPLDVIGR                        | Q8CIV8 | 0.00051975 | N-term +42.01 Da,                         | 6225.847656 | 2 | 620.3508911 | 620.3508059 |
| LEIHGKMFDR                         | P63038 | 0.04606526 | N-term +42.01 Da, K +28.03 Da,            | 6228.674316 | 2 | 711.8682861 | 710.8788735 |
| MAPEEDAGGEVLGGSFWEAGNYR            | Q99JB8 | 0          | N-term +42.01 Da,                         | 6238.157227 | 2 | 1243.050049 | 1242.54226  |
| ATQVEPLLPAGAPLLQAEH                | Q6ZQ58 | 0.00050531 | N-term +42.01 Da,                         | 6238.350586 | 2 | 1064.060059 | 1063.560049 |
| MQNDAGEFVDLYVPR                    | Q9CQR2 | 0          | N-term +42.01 Da,                         | 6244.90918  | 2 | 898.9199829 | 898.4196237 |
| EEEIAALVIDNGSGMCKAGFAGDDAPR        | P63260 | 0          | N-term +42.01 Da, K +28.03 Da,C +57.02Da, | 6247.158203 | 2 | 1433.160034 | 1432.165489 |
| NALKLWLMER                         | A3KGB4 | 0.03702245 | N-term +42.01 Da, K +28.03 Da,            | 6251.535645 | 2 | 672.8811035 | 672.3788429 |
| VHLTDAEKSAVSLWAKVNPDEVGGEALGR      | P02089 | 0          | N-term +42.01 Da, K +28.03 Da,C +57.02Da, | 6254.79834  | 4 | 827.1799927 | 827.4251372 |
| FVEESVYDEFVKR                      | P24549 | 0          | N-term +42.01 Da, K +28.03 Da,            | 6259.075195 | 2 | 859.9199829 | 858.9276073 |
| AANATTNPSQLLPLELVDKICGSR           | P62322 | 0.00320954 | N-term +42.01 Da, K +28.03 Da,C +57.02Da, | 6262.11084  | 3 | 880.460022  | 880.1338147 |
| SAIQNLHSHFDPFADASKGDDLLPAGTEDYIHIR | P48024 | 0.02738623 | N-term +42.01 Da, K +28.03 Da,            | 6264.871094 | 4 | 922.2000122 | 921.7048702 |
| SEAAADREDDPNFFKMVEGFFDR            | P26443 | 0          | N-term +42.01 Da, K +28.03 Da,            | 6266.452637 | 4 | 691.5700073 | 691.5643415 |
| LDDGGDLTNLIHTKYPQLLSGIR            | P50247 | 0          | N-term +42.01 Da, K +28.03 Da,            | 6268.390137 | 3 | 871.1300049 | 870.4693031 |
| LGIYPAVDPLDSTSR                    | P56480 | 0.01805206 | N-term +42.01 Da,                         | 6268.891602 | 2 | 824.4199829 | 823.4252318 |
| MDSAEELLAPLR                       | Q9CZD3 | 0          | N-term +42.01 Da,                         | 6273.816406 | 2 | 693.8492432 | 693.8503134 |
| FTQAGSEVSALLGR                     | P56480 | 0          | N-term +42.01 Da,                         | 6275.72998  | 2 | 740.3800049 | 739.3859091 |
| ADKMDMSLDDIIKL                     | O08583 | 0          | N-term +42.01 Da, K +28.03 Da,            | 6276.346191 | 2 | 853.4400024 | 853.4411787 |
| AGKVPPETIDSVIVGNVMQSSSDAAYLAR      | Q8BWT1 | 0.00098184 | N-term +42.01 Da, K +28.03 Da,            | 6278.069336 | 3 | 1016.52002  | 1015.856899 |
| LGQWLQEEKVPPIYGVDR                 | Q8C196 | 0.00142721 | N-term +42.01 Da, K +28.03 Da,            | 6278.759766 | 2 | 1137.589966 | 1136.602249 |
| ELLADIVQNSLEDSQIEKER               | Q9CZ13 | 0          | N-term +42.01 Da, K +28.03 Da,            | 6278.970703 | 3 | 830.0900269 | 829.4255407 |
| MQNDAGEFVDLYVPR                    | Q9CQR2 | 0          | N-term +42.01 Da,                         | 6284.144043 | 2 | 898.9199829 | 898.4196237 |
| SQLVECVPNFSEGNNQEVIDAISR           | Q91XD4 | 0          | N-term +42.01 Da, C +57.02Da,             | 6286.116699 | 3 | 917.0900269 | 916.4362226 |
| MEHAFTPLEPLPTGNLKY                 | Q9R0M5 | 0.0471445  | N-term +42.01 Da, K +28.03 Da,            | 6287.313965 | 2 | 1122.079956 | 1121.084845 |
| AAETLNFGEWLR                       | Q99MR1 | 0          | N-term +42.01 Da,                         | 6287.863281 | 2 | 773.8900146 | 773.3884516 |
| GLTDEINFLR                         | P11679 | 0.00709849 | N-term +42.01 Da,                         | 6288.719238 | 2 | 611.317749  | 610.3195058 |
| DYLMKILTER                         | P60710 | 0.00050942 | N-term +42.01 Da, K +28.03 Da,            | 6289.521484 | 2 | 677.3600464 | 676.3681414 |
| DAFDKDVTLGSLGR                     | Q9R0H0 | 0.01086957 | N-term +42.01 Da, K +28.03 Da,            | 6290.367676 | 2 | 906.460022  | 905.4727135 |
| AGVLSRDAPDIESILALNPR               | Q8CHR6 | 0.00051921 | N-term +42.01 Da,                         | 6291.046387 | 2 | 1075.589966 | 1075.084223 |
| AMEKNLNQALLDLHALGSAR               | P29391 | 0          | N-term +42.01 Da, K +28.03 Da,            | 6292.760254 | 3 | 746.3900146 | 745.7353254 |
| SMPDAMPLPGVGEELKQAKEIEDAEKYSF      | Q80SW1 | 0          | N-term +42.01 Da, K +28.03 Da,            | 6295.386719 | 3 | 1113.219971 | 1112.552377 |
| QGELEAALQK                         | Q9DCV7 | 0.01086484 | N-term +42.01 Da, K +28.03 Da,            | 6298.744629 | 2 | 579.3099976 | 578.8140563 |
| MDSAEELLAPLR                       | Q9CZD3 | 0          | N-term +42.01 Da,                         | 6306.397949 | 2 | 693.8496094 | 693.8503134 |

|                                  |        |            |                                           |             |   |             |             |
|----------------------------------|--------|------------|-------------------------------------------|-------------|---|-------------|-------------|
| MQNDAGEFVDLYVPR                  | Q9CQR2 | 0          | N-term +42.01 Da,                         | 6313.971191 | 2 | 898.4180908 | 898.4196237 |
| SALKAVFQYIDENQDR                 | Q9D1A2 | 0          | N-term +42.01 Da, K +28.03 Da,            | 6317.426758 | 2 | 984         | 983.9970846 |
| AGDLEGGKSLGSLGLAQNAFHGH          | Q8K4M5 | 0          | N-term +42.01 Da, K +28.03 Da,            | 6318.70459  | 3 | 836.4199829 | 836.0943476 |
| EISGIINAQASPKEECALEIHKGTALR      | P50172 | 0          | N-term +42.01 Da, K +28.03 Da,C +57.02Da, | 6319.275391 | 3 | 1004.549988 | 1003.881156 |
| AAPEEQDLTQEQTCLKLQFQDLTGIESMEQCR | Q3TDN2 | 0          | N-term +42.01 Da, K +28.03 Da,C +57.02Da, | 6322.423828 | 3 | 1279.599976 | 1279.27155  |
| MDPSWATQESEAVAQKVLRL             | Q9EPQ7 | 0          | N-term +42.01 Da, K +28.03 Da,            | 6327.196777 | 2 | 1109.550049 | 1109.046449 |
| KLLYDLADQLHAAVVGASR              | Q99LC5 | 0          | N-term +42.01 Da, K +28.03 Da,            | 6327.678711 | 3 | 671.6970825 | 671.0372213 |
| SALKAVFQYIDENQDR                 | Q9D1A2 | 0          | N-term +42.01 Da, K +28.03 Da,            | 6333.230957 | 3 | 656.3337402 | 656.3338152 |
| SQLVECPNPFSEGNQVEIDAISR          | Q91XD4 | 0          | N-term +42.01 Da, C +57.02Da,             | 6336.413574 | 3 | 916.7700195 | 916.4362226 |
| MDPSWATQESEAVAQKVLRL             | Q9EPQ7 | 0          | N-term +42.01 Da, K +28.03 Da,            | 6339.621094 | 3 | 739.7009888 | 739.7000583 |
| MDLFGDLPEPER                     | Q8R0F6 | 0          | N-term +42.01 Da,                         | 6339.75293  | 2 | 730.8406372 | 730.8399458 |
| TTQIVLQGGPGPW                    | O70400 | 0.02264306 | N-term +42.01 Da,                         | 6339.999023 | 2 | 733.8800049 | 733.8855446 |
| SGALDVLQMKKEEDVLKF               | P14206 | 0          | N-term +42.01 Da, K +28.03 Da,            | 6341.141602 | 2 | 1010.539978 | 1010.537197 |
| SQLVECPNPFSEGNQVEIDAISR          | Q91XD4 | 0          | N-term +42.01 Da, C +57.02Da,             | 6342.131836 | 2 | 1374.650024 | 1374.150696 |
| PSITTEILKSVVAR                   | P67778 | 0.00188324 | N-term +42.01 Da, K +28.03 Da,            | 6342.499023 | 2 | 793.4637451 | 792.4719844 |
| AANATTNPSQLLPLELVDKICGSR         | P62322 | 0          | N-term +42.01 Da, K +28.03 Da,C +57.02Da, | 6343.269043 | 3 | 880.460022  | 880.1338147 |
| FEPSLDYMVTKIPR                   | Q8C196 | 0          | N-term +42.01 Da, K +28.03 Da,            | 6343.521973 | 2 | 884.4500122 | 883.4633023 |
| SGALDVLQMKKEEDVLKF               | P14206 | 0          | N-term +42.01 Da, K +28.03 Da,            | 6343.667969 | 3 | 674.3599854 | 674.0272233 |
| ASFVTEVLAH                       | O54692 | 0          | N-term +42.01 Da,                         | 6345.394043 | 2 | 558.2913818 | 558.2902167 |
| ATDSWALAVDEQEAQVSM               | Q61655 | 0          | N-term +42.01 Da, K +28.03 Da,            | 6346.57959  | 2 | 1046.48999  | 1046.498801 |
| DPAIYFKEQFLDGDWNTNR              | P14211 | 0          | N-term +42.01 Da, K +28.03 Da,            | 6347.140625 | 3 | 786.710022  | 786.0463344 |
| SALKAVFQYIDENQDR                 | Q9D1A2 | 0          | N-term +42.01 Da, K +28.03 Da,            | 6348.817871 | 2 | 984.5       | 983.9970846 |
| MESALDQLKQF                      | Q93092 | 0          | N-term +42.01 Da, K +28.03 Da,            | 6349.339844 | 2 | 690.3475342 | 690.3474064 |
| SQLVECPNPFSEGNQVEIDAISR          | Q91XD4 | 0          | N-term +42.01 Da, C +57.02Da,             | 6349.589355 | 2 | 1374.640869 | 1374.150696 |
| MFSWLGNDDR                       | Q9QXY6 | 0          | N-term +42.01 Da,                         | 6355.1875   | 2 | 641.7800293 | 641.7796906 |
| MDPSWATQESEAVAQKVLRL             | Q9EPQ7 | 0          | N-term +42.01 Da, K +28.03 Da,            | 6360.240234 | 2 | 1109.046021 | 1109.046449 |
| AQFEGIVTDLIKR                    | P38647 | 0          | N-term +42.01 Da, K +28.03 Da,            | 6360.583984 | 2 | 781.4360962 | 780.4432268 |
| ALQVELIPTGEIIR                   | Q9WTI7 | 0          | N-term +42.01 Da,                         | 6361.883301 | 2 | 797.460022  | 797.4641594 |
| MDLFGDLPEPER                     | Q8R0F6 | 0          | N-term +42.01 Da,                         | 6372.149902 | 2 | 730.8400269 | 730.8399458 |
| FEPSLDYMVTKIPR                   | Q8C196 | 0          | N-term +42.01 Da, K +28.03 Da,            | 6375.671387 | 2 | 884.4500122 | 883.4633023 |
| GNPALAQPLIQNVKKILESDR            | Q8C196 | 0          | N-term +42.01 Da, K +28.03 Da,            | 6383.047363 | 3 | 802.1199951 | 801.4637117 |
| ADLSLVDALTEPPPEIEGEIKR           | P27546 | 0          | N-term +42.01 Da, K +28.03 Da,            | 6385.075684 | 3 | 821.7700195 | 821.4390097 |
| ADLSLVDALTEPPPEIEGEIKR           | P27546 | 0          | N-term +42.01 Da, K +28.03 Da,            | 6402.662598 | 2 | 1232.160034 | 1231.654876 |
| AALSGVFWWDEER                    | Q8R1R3 | 0          | N-term +42.01 Da,                         | 6404.777344 | 2 | 761.3699951 | 760.8726345 |
| ADLSLVDALTEPPPEIEGEIKR           | P27546 | 0          | N-term +42.01 Da, K +28.03 Da,            | 6406.207031 | 2 | 1232.660034 | 1231.654876 |
| ESMEDALKAADTIGYPVMIR             | Q8C196 | 0          | N-term +42.01 Da, K +28.03 Da,            | 6406.403809 | 2 | 1141.560059 | 1140.56616  |
| ADQLTEEQIAEFKEAF                 | P62204 | 0          | N-term +42.01 Da, K +28.03 Da,            | 6406.960938 | 2 | 969.9699707 | 969.9702015 |
| DDDIAALVVDNGSGMCKAGF             | P60710 | 0          | N-term +42.01 Da, K +28.03 Da,C +57.02Da, | 6409.23584  | 2 | 1063.469971 | 1062.98246  |
| GQPQKLAQENLKGSEQDLYNMNNYLEKGLPLR | Q8C7G5 | 0          | N-term +42.01 Da, K +28.03 Da,            | 6413.483398 | 4 | 991.5200195 | 991.2674746 |
| ADLSLVDALTEPPPEIEGEIKR           | P27546 | 0          | N-term +42.01 Da, K +28.03 Da,            | 6418.185059 | 3 | 821.4394531 | 821.4390097 |

|                                  |        |            |                                           |             |   |             |             |
|----------------------------------|--------|------------|-------------------------------------------|-------------|---|-------------|-------------|
| AGKELKQCQQQADEVTEIMLNNFDKVLER    | Q9Z2P8 | 0          | N-term +42.01 Da, K +28.03 Da,C +57.02Da, | 6419.496582 | 4 | 891.460022  | 890.9576446 |
| TEWEAATPAVAETPDIKLFGKW           | P97461 | 0          | N-term +42.01 Da, K +28.03 Da,            | 6423.754395 | 3 | 853.4500122 | 853.4440947 |
| SGGTVLSPRELR                     | Q8VIM6 | 0.03223239 | N-term +42.01 Da,                         | 6424.667969 | 2 | 657.3743286 | 657.3622365 |
| MDDSEVESTASILASVKEQEAQFEKLTR     | P30999 | 0          | N-term +42.01 Da, K +28.03 Da,            | 6426.097168 | 3 | 1080.869995 | 1080.537784 |
| TEWEAATPAVAETPDIKLFGKW           | P97461 | 0          | N-term +42.01 Da, K +28.03 Da,            | 6428.727051 | 2 | 1280.170044 | 1279.662504 |
| ATALSEEELDNEDYYSLLNVR            | Q5U458 | 0          | N-term +42.01 Da,                         | 6432.32959  | 2 | 1244.079956 | 1243.582106 |
| ADLSLVDALTEPPPEIEGEIKR           | P27546 | 0          | N-term +42.01 Da, K +28.03 Da,            | 6437.158691 | 2 | 1231.654419 | 1231.654876 |
| ADQLTEEQIAEFKEAF                 | P62204 | 0          | N-term +42.01 Da, K +28.03 Da,            | 6439.929199 | 2 | 969.9688721 | 969.9702015 |
| DDDIAALVVDNGSGMCKAGF             | P60710 | 0          | N-term +42.01 Da, K +28.03 Da,C +57.02Da, | 6440.366211 | 2 | 1063.47998  | 1062.98246  |
| MNFSGKYQLQSQENFEPFMAIGLPEDLIQKGG | P12710 | 0          | N-term +42.01 Da, K +28.03 Da,            | 6440.735352 | 4 | 993.7700195 | 993.2677858 |
| TDAAVSFAKDFLAGGVAAAISKTAVAPIER   | P51881 | 0          | N-term +42.01 Da, K +28.03 Da,            | 6443.630371 | 3 | 1016.559998 | 1015.892161 |
| FGSDLDAATQQLLSR                  | Q3265  | 0          | N-term +42.01 Da,                         | 6444.367188 | 2 | 833.4067993 | 832.4179383 |
| ATALSEEELDNEDYYSLLNVR            | Q5U458 | 0          | N-term +42.01 Da,                         | 6446.487793 | 3 | 829.7199707 | 829.3904962 |
| MEEGMNHLHDFGIQSTR                | P35576 | 0          | N-term +42.01 Da,                         | 6448.816895 | 2 | 1010.469971 | 1010.46678  |
| ADLSLVDALTEPPPEIEGEIKR           | P27546 | 0          | N-term +42.01 Da, K +28.03 Da,            | 6451.226563 | 3 | 821.4395142 | 821.4390097 |
| MEANGFGLQNFPELKNDFLR             | P70697 | 0          | N-term +42.01 Da, K +28.03 Da,            | 6451.648438 | 3 | 838.0800171 | 837.7494122 |
| DDDIAALVVDNGSGMCKAGF             | P60710 | 0          | N-term +42.01 Da, K +28.03 Da,C +57.02Da, | 6454.935547 | 2 | 1062.982056 | 1062.98246  |
| AAGVDFGDLLEFAFDPEESTPKPVHTR      | Q9CYA6 | 0.00709534 | N-term +42.01 Da, K +28.03 Da,            | 6457.357422 | 3 | 1081.530029 | 1081.194457 |
| AAGTVILLENLR                     | P09411 | 0.01683502 | N-term +42.01 Da,                         | 6457.641602 | 2 | 657.3757935 | 656.3851801 |
| FTQNLGLEELGIELDPKGR              | O08749 | 0          | N-term +42.01 Da, K +28.03 Da,            | 6463.662109 | 2 | 1101.079956 | 1100.086431 |
| MNSSDEEKQLQITSLKEQAIGEYEDLR      | Q8K2Q9 | 0          | N-term +42.01 Da, K +28.03 Da,            | 6466        | 3 | 1122.900024 | 1122.564222 |
| MEEGMNHLHDFGIQSTR                | P35576 | 0          | N-term +42.01 Da,                         | 6466.691406 | 3 | 673.9799805 | 673.9802787 |
| ADLSLVDALTEPPPEIEGEIKR           | P27546 | 0          | N-term +42.01 Da, K +28.03 Da,            | 6468.47168  | 2 | 1231.656128 | 1231.654876 |
| AALTAEHFVALQSLLKAS               | Q8K2Q0 | 0          | N-term +42.01 Da, K +28.03 Da,            | 6474.34082  | 2 | 971.0599976 | 970.5462128 |
| AADISQWAGPLCLQEVDEPPQH           | P70296 | 0          | N-term +42.01 Da, C +57.02Da,             | 6475.129883 | 3 | 835.3900146 | 835.0567938 |
| SDTSEEIPNFEEMFASR                | Q9CQY2 | 0          | N-term +42.01 Da,                         | 6475.76416  | 2 | 1015.934875 | 1015.936033 |
| DDDIAALVVDNGSGMCKAGF             | P60710 | 0.00050684 | N-term +42.01 Da, K +28.03 Da,C +57.02Da, | 6476.789551 | 3 | 709.6599731 | 708.9907324 |
| AADISQWAGPLCLQEVDEPPQH           | P70296 | 0          | N-term +42.01 Da, C +57.02Da,             | 6478.043457 | 2 | 1252.079956 | 1252.081552 |
| AALTAEHFVALQSLLKAS               | Q8K2Q0 | 0          | N-term +42.01 Da, K +28.03 Da,            | 6478.642578 | 3 | 647.3699951 | 647.3665673 |
| GVLLHLESELAQTR                   | P05784 | 0.00580616 | N-term +42.01 Da,                         | 6479.905762 | 2 | 805.4345093 | 804.4412158 |
| MDDSEVESTASILASVKEQEAQFEKLTR     | P30999 | 0.00052632 | N-term +42.01 Da, K +28.03 Da,            | 6482.25     | 3 | 1080.869995 | 1080.537784 |
| ADLSLVDALTEPPPEIEGEIKR           | P27546 | 0          | N-term +42.01 Da, K +28.03 Da,            | 6484.180664 | 3 | 821.4399414 | 821.4390097 |
| MEANGFGLQNFPELKNDFLR             | P70697 | 0          | N-term +42.01 Da, K +28.03 Da,            | 6484.428711 | 2 | 1257.119995 | 1256.12048  |
| DDDIAALVVDNGSGMCKAGF             | P60710 | 0.00095374 | N-term +42.01 Da, K +28.03 Da,C +57.02Da, | 6487.129883 | 2 | 1063.475708 | 1062.98246  |
| MDEMATTQISKDELDELKEAF            | Q99K51 | 0          | N-term +42.01 Da, K +28.03 Da,            | 6505.876953 | 2 | 1272.599976 | 1271.600595 |
| LAYHTPCGKQGFIDLPEFPFGLPR         | O35490 | 0          | N-term +42.01 Da, K +28.03 Da,C +57.02Da, | 6512.858887 | 3 | 1026.160034 | 1025.507541 |
| MKGALGSPVAAAGAAMQETFGCVVANR      | Q9JKS5 | 0          | N-term +42.01 Da, K +28.03 Da,C +57.02Da, | 6513.429199 | 3 | 912.460022  | 912.1206346 |
| GIETVGGVMTKLIPR                  | P20029 | 0          | N-term +42.01 Da, K +28.03 Da,            | 6514.974609 | 2 | 821.9699707 | 820.9738369 |
| GKQGFIDLPEFPFGLPR                | O35490 | 0.0418767  | N-term +42.01 Da, K +28.03 Da,            | 6516.942383 | 2 | 1059.560059 | 1059.056945 |
| KEPLFGISTGNIITGLAAGAKSY          | Q8C196 | 0.01285898 | N-term +42.01 Da, K +28.03 Da,            | 6518.380859 | 3 | 802.4500122 | 802.780818  |

|                                           |        |            |                                |             |   |             |             |
|-------------------------------------------|--------|------------|--------------------------------|-------------|---|-------------|-------------|
| MDEMATTQISKDELDELKEAF                     | Q99K51 | 0          | N-term +42.01 Da, K +28.03 Da, | 6521.06543  | 3 | 848.0696411 | 848.0694891 |
| AVTLDMDLGAAR                              | Q9D3D9 | 0          | N-term +42.01 Da,              | 6522.403809 | 2 | 695.3599854 | 694.3661304 |
| SSEEGKLFVGGLNFNNTDEQALEDHFSSFGPISEVVVVKDR | Q89086 | 0          | N-term +42.01 Da, K +28.03 Da, | 6524.850586 | 4 | 1121.560059 | 1121.059143 |
| LLAAAGVEFEEKFLKTR                         | P30115 | 0          | N-term +42.01 Da, K +28.03 Da, | 6525.942383 | 3 | 674.710022  | 674.0541007 |
| SPDRLADINYEGRLEAVSRK                      | Q6PFD9 | 0.04295666 | N-term +42.01 Da, K +28.03 Da, | 6529.228027 | 2 | 1180.640015 | 1180.121869 |
| WKFVEGLPINDFSR                            | P14152 | 0          | N-term +42.01 Da, K +28.03 Da, | 6534.275879 | 2 | 890.4580688 | 889.4672334 |
| MDEMATTQISKDELDELKEAF                     | Q99K51 | 0          | N-term +42.01 Da, K +28.03 Da, | 6539.132324 | 2 | 1271.60083  | 1271.600595 |
| ADQLTEEQIAEFKEAF                          | P62204 | 0          | N-term +42.01 Da, K +28.03 Da, | 6548.729492 | 2 | 969.9682617 | 969.9702015 |
| MILGYWNVNVR                               | P10649 | 0          | N-term +42.01 Da,              | 6549.936035 | 2 | 597.3099976 | 597.3104286 |
| AFPAWADTSILSR                             | Q9EQ20 | 0.0027637  | N-term +42.01 Da,              | 6550.507813 | 2 | 738.3900146 | 738.8777195 |
| AGILFEDIFDVKIDIDPEGKKFDR                  | Q923G2 | 0          | N-term +42.01 Da, K +28.03 Da, | 6553.120117 | 4 | 699.3800049 | 699.1231921 |
| MDGVVTDLIAVGLKR                           | G3UXA6 | 0          | N-term +42.01 Da, K +28.03 Da, | 6553.36377  | 2 | 828.9699707 | 828.9712944 |
| GLVTKAGLILFGNDDR                          | Q8R0Y6 | 0          | N-term +42.01 Da, K +28.03 Da, | 6555.013184 | 2 | 880.9822388 | 879.991073  |
| ADQLTEEQIAEFKEAF                          | P62204 | 0          | N-term +42.01 Da, K +28.03 Da, | 6555.463379 | 3 | 646.9829102 | 646.9825598 |
| MDDSEVESTASILASVKEQEAQFEKLTR              | P30999 | 0          | N-term +42.01 Da, K +28.03 Da, | 6555.694824 | 3 | 1080.869995 | 1080.537784 |
| HNQLPLVIEFTEQTAPKIFGGEIKTH                | P09103 | 0          | N-term +42.01 Da, K +28.03 Da, | 6557.428223 | 4 | 762.4099731 | 762.165657  |
| ASGVAVSDGVKIVFNNDM                        | P18760 | 0          | N-term +42.01 Da, K +28.03 Da, | 6557.759766 | 2 | 889.9520264 | 889.9532993 |
| AAGAAAALAFLNQESR                          | Q9CPP0 | 0          | N-term +42.01 Da,              | 6560.412109 | 2 | 801.9147339 | 801.9153652 |
| PGASLPLNLKELEKDLDR                        | Q05920 | 0          | N-term +42.01 Da, K +28.03 Da, | 6565.637207 | 3 | 772.4500122 | 772.7772963 |
| ALTSFLPAPTQLSQDQLEAEER                    | Q9CSN1 | 0          | N-term +42.01 Da,              | 6566.915527 | 2 | 1243.630005 | 1243.624108 |
| ALTSFLPAPTQLSQDQLEAEER                    | Q9CSN1 | 0          | N-term +42.01 Da,              | 6569.34375  | 3 | 830.0900269 | 829.4184973 |
| ALTSFLPAPTQLSQDQLEAEER                    | Q9CSN1 | 0          | N-term +42.01 Da,              | 6574.61377  | 2 | 1244.630005 | 1243.624108 |
| GIQDGYLSLLQDSGEVR                         | P63242 | 0.00186567 | N-term +42.01 Da,              | 6578.464355 | 2 | 947.460022  | 946.4734425 |
| ADQLTEEQIAEFKEAF                          | P62204 | 0          | N-term +42.01 Da, K +28.03 Da, | 6579.512207 | 2 | 969.96875   | 969.9702015 |
| ADQLTEEQIAEFKEAF                          | P62204 | 0.00050916 | N-term +42.01 Da, K +28.03 Da, | 6586.042969 | 3 | 646.9821167 | 646.9825598 |
| MDDSEVESTASILASVKEQEAQFEKLTR              | P30999 | 0          | N-term +42.01 Da, K +28.03 Da, | 6586.19873  | 3 | 1080.535278 | 1080.537784 |
| AILVGEAKKWLPELVDR                         | Q9EQ20 | 0          | N-term +42.01 Da, K +28.03 Da, | 6590.384277 | 3 | 679.7299805 | 679.0698621 |
| AADLGQIPDVIDSDGVFKY                       | Q9DAK9 | 0          | N-term +42.01 Da, K +28.03 Da, | 6596.331543 | 2 | 1105.540039 | 1104.53898  |
| STIQNLQSFDPFADATKGDLLPAGTEDYIHIR          | Q9CXU9 | 0          | N-term +42.01 Da, K +28.03 Da, | 6601.18457  | 3 | 1240.290039 | 1240.279362 |
| ADDLDFETGDAGASATFPMQC                     | P63242 | 0          | N-term +42.01 Da, C +57.02Da,  | 6603.692383 | 2 | 1130.953979 | 1130.954098 |
| AADLGQIPDVIDSDGVFKY                       | Q9DAK9 | 0          | N-term +42.01 Da, K +28.03 Da, | 6603.798828 | 2 | 1104.538208 | 1104.53898  |
| ASALEQFVNSVR                              | Q88543 | 0          | N-term +42.01 Da,              | 6603.873535 | 2 | 681.8532715 | 681.8542445 |
| SSEEGKLFVGGLNFNNTDEQALEDHFSSFGPISEVVVVKDR | Q89086 | 0          | N-term +42.01 Da, K +28.03 Da, | 6604.056152 | 4 | 1121.560059 | 1121.059143 |
| AADLGQIPDVIDSDGVFKY                       | Q9DAK9 | 0          | N-term +42.01 Da, K +28.03 Da, | 6604.224609 | 3 | 737.0300293 | 736.695079  |
| STIQNLQSFDPFADATKGDLLPAGTEDYIHIR          | Q9CXU9 | 0          | N-term +42.01 Da, K +28.03 Da, | 6605.69873  | 3 | 1240.619995 | 1240.279362 |
| TLWKDDSTNVKEVTKTLR                        | Q3KNJ6 | 0.0489671  | N-term +42.01 Da, K +28.03 Da, | 6609.384766 | 3 | 783.0999756 | 783.1004393 |
| ADQLTEEQIAEFKEAF                          | P62204 | 0          | N-term +42.01 Da, K +28.03 Da, | 6611.160156 | 2 | 969.9706421 | 969.9702015 |
| IAILGMDLSEEDKLTVSR                        | P56480 | 0          | N-term +42.01 Da, K +28.03 Da, | 6611.491211 | 2 | 1096.060059 | 1095.072133 |
| MEANGFGLQNFPELKNDFLRL                     | P70697 | 0.00186741 | N-term +42.01 Da, K +28.03 Da, | 6613.431152 | 2 | 1257.109985 | 1256.12048  |
| ATLCLFMDGTLTAPR                           | Q9Z2M7 | 0          | N-term +42.01 Da, C +57.02Da,  | 6614.867188 | 2 | 912.4386597 | 912.4369592 |

|                                         |        |            |                                           |             |   |             |             |
|-----------------------------------------|--------|------------|-------------------------------------------|-------------|---|-------------|-------------|
| ADQLTEEQIAEFKEAF                        | P62204 | 0          | N-term +42.01 Da, K +28.03 Da,            | 6617.849609 | 3 | 646.9822998 | 646.9825598 |
| DVDGLDPAFTPATGTPVLGGLSYR                | Q61176 | 0          | N-term +42.01 Da,                         | 6618.621582 | 2 | 1232.109985 | 1231.115918 |
| GKVMEEFVSYLLGR                          | Q61176 | 0          | N-term +42.01 Da, K +28.03 Da,            | 6620.794922 | 2 | 851.4274292 | 850.4398272 |
| ASALEQVNSVR                             | Q88543 | 0          | N-term +42.01 Da,                         | 6624.416504 | 2 | 682.8583984 | 681.8542445 |
| RTILAEETGMLKDLQKSVVEEER                 | Q99PL5 | 0          | N-term +42.01 Da, K +28.03 Da,            | 6631.97168  | 4 | 701.3699951 | 701.369299  |
| DDIAALVVDNGSGMCKAGF                     | P60710 | 0.00665779 | N-term +42.01 Da, K +28.03 Da,C +57.02Da, | 6635.15332  | 2 | 1063.472656 | 1062.98246  |
| MKIAVIGQSLFGQEVYQCLR                    | Q8R0Y6 | 0          | N-term +42.01 Da, K +28.03 Da,C +57.02Da, | 6635.438965 | 3 | 804.0900269 | 804.0922328 |
| ADDLDFETGDAGASATFPMQC                   | P63242 | 0.00189215 | N-term +42.01 Da, C +57.02Da,             | 6636.895996 | 2 | 1130.954346 | 1130.954098 |
| AADLGQIPDVVIDSDGVFKY                    | Q9DAK9 | 0          | N-term +42.01 Da, K +28.03 Da,            | 6637.108887 | 2 | 1104.541138 | 1104.53898  |
| SSEEGKLVGGLNFNTDEQALEDHFSSFGPISEVVVVKDR | O89086 | 0          | N-term +42.01 Da, K +28.03 Da,            | 6640.295898 | 4 | 1121.560059 | 1121.059143 |
| ADQLTEEQIAEFKEAF                        | P62204 | 0          | N-term +42.01 Da, K +28.03 Da,            | 6643.019043 | 2 | 969.9708252 | 969.9702015 |
| ALTGLTVAEYFR                            | P56480 | 0.00051573 | N-term +42.01 Da,                         | 6644.496582 | 2 | 692.8599854 | 691.869363  |
| GKQGFDLPEFPFGLPEPR                      | Q35490 | 0.01801424 | N-term +42.01 Da, K +28.03 Da,            | 6646.773438 | 3 | 707.0333252 | 706.373722  |
| AAAAAAAAAAAAAGSDSDWDADTFMEDPVR          | Q66JS6 | 0          | N-term +42.01 Da,                         | 6648.775879 | 3 | 975.7600098 | 975.426164  |
| AASWEGIAQGHIMITVASPAETELHSGAEHTSTVK     | Q9WTZ2 | 0.01991701 | N-term +42.01 Da, K +28.03 Da,            | 6650.383301 | 4 | 922.460022  | 922.4584376 |
| LDIEAFTMDR                              | P16460 | 0.00188768 | N-term +42.01 Da,                         | 6652.135742 | 2 | 627.789978  | 626.7975492 |
| GGAGAVAMLIQPKAPLVLEQGLR                 | P54869 | 0          | N-term +42.01 Da, K +28.03 Da,            | 6653.704102 | 3 | 764.0999756 | 763.4434826 |
| AGLVDFQDEEQVKSFLNMEVECHYQCYR            | Q921H9 | 0          | N-term +42.01 Da, K +28.03 Da,C +57.02Da, | 6660.256348 | 3 | 1232.550049 | 1231.881339 |
| MDAVLSDFVR                              | B2RUR8 | 0          | N-term +42.01 Da,                         | 6664.505371 | 2 | 597.7949219 | 597.7948091 |
| DDIAALVVDNGSGMCKAGF                     | P60710 | 0.0005168  | N-term +42.01 Da, K +28.03 Da,C +57.02Da, | 6668.491699 | 2 | 1063.474854 | 1062.98246  |
| ATLCLFDMDGTLTAPR                        | Q9Z2M7 | 0          | N-term +42.01 Da, C +57.02Da,             | 6670.027832 | 2 | 912.4299927 | 912.4369592 |
| GKQGFDLPEFPFGLPEPR                      | Q35490 | 0          | N-term +42.01 Da, K +28.03 Da,            | 6671.250977 | 2 | 1060.047241 | 1059.056945 |
| ADQLTEEQIAEFKEAFSLFDKDGDTITTKELGTVMR    | P62204 | 0          | N-term +42.01 Da, K +28.03 Da,            | 6672.891602 | 4 | 1066.290039 | 1065.787167 |
| ADQLTEEQIAEFKEAF                        | P62204 | 0          | N-term +42.01 Da, K +28.03 Da,            | 6674.279785 | 2 | 969.9702759 | 969.9702015 |
| AADLGQIPDVVIDSDGVFKY                    | Q9DAK9 | 0          | N-term +42.01 Da, K +28.03 Da,            | 6676.522949 | 2 | 1104.540039 | 1104.53898  |
| MDSYVIQTNVNDLPSVLDVR                    | Q8QZR1 | 0          | N-term +42.01 Da,                         | 6686.964844 | 2 | 1204.589966 | 1204.094128 |
| ELSDFGLESTTGEVPPVAIR                    | P27773 | 0          | N-term +42.01 Da,                         | 6687.196777 | 2 | 1082.050049 | 1081.054797 |
| GVVDNFPLLKALR                           | P30115 | 0          | N-term +42.01 Da, K +28.03 Da,            | 6693.703613 | 2 | 757.4400024 | 756.4508543 |
| AADISQWAGPLCLQEVEPPQHAL                 | P70296 | 0          | N-term +42.01 Da, C +57.02Da,             | 6694.217773 | 3 | 897.0999756 | 896.4305199 |
| MDAVLSDFVR                              | B2RUR8 | 0          | N-term +42.01 Da,                         | 6695.620117 | 2 | 597.7945557 | 597.7948091 |
| AADISQWAGPLCLQEVEPPQHAL                 | P70296 | 0          | N-term +42.01 Da, C +57.02Da,             | 6700.877441 | 2 | 1344.650024 | 1344.142142 |
| ATLCLFDMDGTLTAPR                        | Q9Z2M7 | 0          | N-term +42.01 Da, C +57.02Da,             | 6702.248535 | 2 | 912.4400024 | 912.4369592 |
| ATFEESVVLGFEEFDKAVKEHEGKTIF             | Q9CQM5 | 0          | N-term +42.01 Da, K +28.03 Da,            | 6703.520508 | 4 | 804.4199829 | 803.9155053 |
| ADQLTEEQIAEFKEAF                        | P62204 | 0          | N-term +42.01 Da, K +28.03 Da,            | 6705.120605 | 2 | 969.9697266 | 969.9702015 |
| MLGTGPAVATASAATSSNVSLVQQFASGLKSR        | Q9JLN9 | 0          | N-term +42.01 Da, K +28.03 Da,            | 6706.206543 | 3 | 1060.560059 | 1059.890603 |
| MEATLEQHLEDTMKNPSIVGLCTDSQGLNLGCR       | Q9D1L9 | 0          | N-term +42.01 Da, K +28.03 Da,C +57.02Da, | 6713.105469 | 3 | 1296.949951 | 1296.28626  |
| AAAAAAAAAAAAAGSDSDWDADTFMEDPVR          | Q66JS6 | 0          | N-term +42.01 Da,                         | 6713.371582 | 3 | 976.0900269 | 975.426164  |
| AAAAAAAAAAAAAGSDSDWDADTFMEDPVR          | Q66JS6 | 0          | N-term +42.01 Da,                         | 6716.298828 | 2 | 1463.630005 | 1462.635608 |
| MEATLEQHLEDTMKNPSIVGLCTDSQGLNLGCR       | Q9D1L9 | 0          | N-term +42.01 Da, K +28.03 Da,C +57.02Da, | 6719.199219 | 4 | 972.9699707 | 972.4665141 |
| CDFTEDQTAEFKEAFQLFDR                    | Q60605 | 0          | N-term +42.01 Da, K +28.03 Da,C +57.02Da, | 6723.739746 | 2 | 1284.069946 | 1284.073393 |

|                                           |        |            |                                           |             |   |             |             |
|-------------------------------------------|--------|------------|-------------------------------------------|-------------|---|-------------|-------------|
| IAGGPGNPALAQPLIQNVKKILES DR               | Q8C196 | 0          | N-term +42.01 Da, K +28.03 Da,            | 6724.537109 | 3 | 933.8599854 | 933.2026687 |
| GVVDNFPLLKALR                             | P30115 | 0          | N-term +42.01 Da, K +28.03 Da,            | 6725.481445 | 2 | 757.4411621 | 756.4508543 |
| ADPWQECMDYAVILAR                          | O55023 | 0          | N-term +42.01 Da, C +57.02Da,             | 6727.246094 | 2 | 990.4500122 | 990.4531407 |
| ALAQPLIQNVKKILES DR                       | Q8C196 | 0          | N-term +42.01 Da, K +28.03 Da,            | 6727.782715 | 3 | 712.75      | 712.0913262 |
| CDFTEDQTAEFKEAFQLFDR                      | Q60605 | 0          | N-term +42.01 Da, K +28.03 Da,C +57.02Da, | 6734.111328 | 3 | 856.3900146 | 856.3846878 |
| AALAMEKNLNQALLDLHALGSAR                   | P29391 | 0          | N-term +42.01 Da, K +28.03 Da,            | 6734.27832  | 3 | 831.4500122 | 830.7880896 |
| ADQLTEEQIAEFKEAF                          | P62204 | 0          | N-term +42.01 Da, K +28.03 Da,            | 6736.588867 | 2 | 969.9699707 | 969.9702015 |
| AAAAAAAAAAAAAGSDSWDADTFMEDPVR             | Q66JS6 | 0          | N-term +42.01 Da,                         | 6743.733398 | 3 | 975.7600098 | 975.426164  |
| MEATLEQHLEDTMKNPSIVGVLTDSQGLNLGCR         | Q9D1L9 | 0          | N-term +42.01 Da, K +28.03 Da,C +57.02Da, | 6744.602539 | 3 | 1296.619995 | 1296.28626  |
| ADPWQECMDYAVILAR                          | O55023 | 0          | N-term +42.01 Da, C +57.02Da,             | 6746.34375  | 2 | 991.4500122 | 990.4531407 |
| AAAAAAAAAAAAAGSDSWDADTFMEDPVR             | Q66JS6 | 0          | N-term +42.01 Da,                         | 6746.853516 | 2 | 1463.140015 | 1462.635608 |
| CDFTEDQTAEFKEAFQLFDR                      | Q60605 | 0          | N-term +42.01 Da, K +28.03 Da,C +57.02Da, | 6754.817383 | 2 | 1284.074951 | 1284.073393 |
| GVVDNFPLLKALR                             | P30115 | 0          | N-term +42.01 Da, K +28.03 Da,            | 6757.109863 | 2 | 757.4400024 | 756.4508543 |
| CDFTEDQTAEFKEAFQLFDR                      | Q60605 | 0          | N-term +42.01 Da, K +28.03 Da,C +57.02Da, | 6764.495605 | 3 | 856.3847046 | 856.3846878 |
| TEWEAATPAVAETPDIKLF                       | P97461 | 0          | N-term +42.01 Da, K +28.03 Da,            | 6764.698242 | 2 | 1080.050049 | 1080.048983 |
| AKDLDELLDEVETKFCR                         | Q3UJP5 | 0          | N-term +42.01 Da, K +28.03 Da,C +57.02Da, | 6765.988281 | 3 | 727.7000122 | 727.036559  |
| ADQLTEEQIAEFKEAF                          | P62204 | 0          | N-term +42.01 Da, K +28.03 Da,            | 6767.038574 | 2 | 969.9694824 | 969.9702015 |
| ALPIIVKWGGQEQY                            | Q8BGR9 | 0.00189394 | N-term +42.01 Da, K +28.03 Da,            | 6769.112793 | 2 | 772.9299927 | 772.4295878 |
| VLGTSVESIMATEDR                           | Q8C196 | 0          | N-term +42.01 Da,                         | 6771.09375  | 2 | 826.4000244 | 825.4061822 |
| ALPIIVKWGGQEQY                            | Q8BGR9 | 0.0195915  | N-term +42.01 Da, K +28.03 Da,            | 6771.190918 | 2 | 773.4299927 | 772.4295878 |
| MPRQGYQFEQACFVNPSFQWGLLNRRRWKPLMGQR       | Q80UG8 | 0.01722689 | N-term +42.01 Da, K +28.03 Da,C +57.02Da, | 6784.845703 | 4 | 1135.589966 | 1135.57167  |
| CDFTEDQTAEFKEAFQLFDR                      | Q60605 | 0          | N-term +42.01 Da, K +28.03 Da,C +57.02Da, | 6785.387207 | 2 | 1284.078369 | 1284.073393 |
| CDFTEDQTAEFKEAFQLFDR                      | Q60605 | 0          | N-term +42.01 Da, K +28.03 Da,C +57.02Da, | 6786.088867 | 2 | 1285.079956 | 1284.073393 |
| SFIPVAEDSDFPIQNLPHYGVFSTQSNPKPR           | P35505 | 0          | N-term +42.01 Da, K +28.03 Da,            | 6791.191895 | 3 | 1141.23999  | 1140.90854  |
| CDFTEDQTAEFKEAFQLFDR                      | Q60605 | 0          | N-term +42.01 Da, K +28.03 Da,C +57.02Da, | 6795.794434 | 3 | 856.3900146 | 856.3846878 |
| TEWEAATPAVAETPDIKLF                       | P97461 | 0          | N-term +42.01 Da, K +28.03 Da,            | 6796.137695 | 2 | 1080.048218 | 1080.048983 |
| CDFTEDQTAEFKEAFQLFDR                      | Q60605 | 0          | N-term +42.01 Da, K +28.03 Da,C +57.02Da, | 6796.947754 | 3 | 856.7199707 | 856.3846878 |
| ADQLTEEQIAEFKEAFSLFDKDGDTITTKELGTVMR      | P62204 | 0          | N-term +42.01 Da, K +28.03 Da,            | 6797.158203 | 4 | 1066.040039 | 1065.787167 |
| ADQLTEEQIAEFKEAF                          | P62204 | 0          | N-term +42.01 Da, K +28.03 Da,            | 6798.209473 | 2 | 969.9699707 | 969.9702015 |
| LLYDLADQLHAAV GASR                        | Q99LC5 | 0          | N-term +42.01 Da,                         | 6800.697754 | 2 | 928.9799805 | 927.989062  |
| MENLFLQVLR                                | Q9CZ42 | 0.00050839 | N-term +42.01 Da,                         | 6810.066406 | 2 | 596.3099976 | 596.3131687 |
| GEMAIKDAQTKLAELEAALQR                     | P11679 | 0          | N-term +42.01 Da, K +28.03 Da,            | 6815.760742 | 3 | 796.0999756 | 795.4333126 |
| CDFTEDQTAEFKEAFQLFDR                      | Q60605 | 0          | N-term +42.01 Da, K +28.03 Da,C +57.02Da, | 6817.912598 | 2 | 1284.079956 | 1284.073393 |
| VSKTLGVDFIDVATKVMIGESIDEKR                | Q8C196 | 0          | N-term +42.01 Da, K +28.03 Da,            | 6821.039551 | 4 | 745.4099731 | 744.9136079 |
| SFIPVAEDSDFPIQNLPHYGVFSTQSNPKPR           | P35505 | 0          | N-term +42.01 Da, K +28.03 Da,            | 6821.65625  | 3 | 1140.910645 | 1140.90854  |
| MKPAVDEMFPPEGAGPYVDLDEAGGSTGLLMDLAANEKAVH | Q3U898 | 0          | N-term +42.01 Da, K +28.03 Da,            | 6822.848633 | 4 | 1062.26001  | 1061.761366 |
| EVGVDVAQHVAEDLGKAFGER                     | Q8BMS1 | 0          | N-term +42.01 Da, K +28.03 Da,            | 6829.18457  | 3 | 766.7199707 | 766.0571221 |
| ADQLTEEQIAEFKEAFSLFDKDGDTITTKELGTVMR      | P62204 | 0          | N-term +42.01 Da, K +28.03 Da,            | 6829.830566 | 4 | 1066.290039 | 1065.787167 |
| ADQLTEEQIAEFKEAF                          | P62204 | 0          | N-term +42.01 Da, K +28.03 Da,            | 6829.980469 | 2 | 969.9712524 | 969.9702015 |
| MKPAVDEMFPPEGAGPYVDLDEAGGSTGLLMDLAANEKAVH | Q3U898 | 0          | N-term +42.01 Da, K +28.03 Da,            | 6830.310547 | 4 | 1062.01001  | 1061.761366 |

|                                      |        |            |                                           |             |   |             |             |
|--------------------------------------|--------|------------|-------------------------------------------|-------------|---|-------------|-------------|
| MEPSDSASTAMEEPDSLEVLVKTLDQSQR        | Q9Z1R2 | 0          | N-term +42.01 Da, K +28.03 Da,            | 6840.251953 | 3 | 1079.839966 | 1079.511018 |
| MQGLPAGLSLDDFIPGHLR                  | Q9R1Z8 | 0          | N-term +42.01 Da,                         | 6841.683105 | 2 | 1040.530029 | 1040.038229 |
| SFIPVAEDSDFPIQNLPGYGFSTQSNPKPR       | P35505 | 0          | N-term +42.01 Da, K +28.03 Da,            | 6842.695801 | 4 | 856.4400024 | 855.9332238 |
| ADQLTEEQIAEFKEAFSLFDKDGDTITTKELGTVMR | P62204 | 0          | N-term +42.01 Da, K +28.03 Da,            | 6843.441406 | 3 | 1421.380005 | 1420.713797 |
| MNAAAEAEFNILLATDSYKVT                | Q99KQ4 | 0          | N-term +42.01 Da, K +28.03 Da,            | 6846.291504 | 2 | 1240.609985 | 1240.112321 |
| MNAAAEAEFNILLATDSYKVT                | Q99KQ4 | 0          | N-term +42.01 Da, K +28.03 Da,            | 6849.370605 | 2 | 1240.119995 | 1240.112321 |
| CDFTEDQTAEFKEAFQLFDR                 | Q60605 | 0          | N-term +42.01 Da, K +28.03 Da,C +57.02Da, | 6849.658691 | 2 | 1284.569946 | 1284.073393 |
| SFIPVAEDSDFPIQNLPGYGFSTQSNPKPR       | P35505 | 0          | N-term +42.01 Da, K +28.03 Da,            | 6855.578613 | 3 | 1140.908813 | 1140.90854  |
| ANPAAGTVILLENLR                      | P09411 | 0          | N-term +42.01 Da,                         | 6856.777344 | 2 | 798.4500122 | 797.4515833 |
| MEPSDSASTAMEEPDSLEVLVKTLDQSQR        | Q9Z1R2 | 0          | N-term +42.01 Da, K +28.03 Da,            | 6857.059082 | 3 | 1079.51001  | 1079.511018 |
| MNFSGKYQLQSQENFEPFMKAIGLPEDLIQK      | P12710 | 0          | N-term +42.01 Da, K +28.03 Da,            | 6858.207031 | 3 | 1253.640015 | 1252.972046 |
| LTAEILELAGNAAR                       | P22752 | 0.00319927 | N-term +42.01 Da,                         | 6861.070313 | 2 | 743.4000244 | 742.4093842 |
| ADQLTEEQIAEFKEAFSLFDKDGDTITTKELGTVMR | P62204 | 0          | N-term +42.01 Da, K +28.03 Da,            | 6862.717285 | 4 | 1065.787598 | 1065.787167 |
| ADQLTEEQIAEFKEAF                     | P62204 | 0          | N-term +42.01 Da, K +28.03 Da,            | 6863.092773 | 2 | 969.9716797 | 969.9702015 |
| MFGGLSSWLGLKPPGAAAEGEPPSR            | Q9D5V6 | 0          | N-term +42.01 Da, K +28.03 Da,            | 6864.146484 | 3 | 947.7999878 | 947.4689748 |
| MEPAAEILVDSPDVVYSPETIEAR             | Q9JHU9 | 0          | N-term +42.01 Da,                         | 6868.627441 | 2 | 1337.650024 | 1337.151841 |
| SEAAADREDDPNFFKMVEGFFDR              | P26443 | 0          | N-term +42.01 Da, K +28.03 Da,            | 6876.671875 | 3 | 922.0800171 | 921.7500299 |
| AAKVFESIGKFLAL                       | P67778 | 0.01087903 | N-term +42.01 Da, K +28.03 Da,            | 6880.154785 | 2 | 825.4899902 | 824.98727   |
| CDFTEDQTAEFKEAFQLFDR                 | Q60605 | 0          | N-term +42.01 Da, K +28.03 Da,C +57.02Da, | 6882.552734 | 2 | 1284.569946 | 1284.073393 |
| EELDPGVVDNFPLLKALR                   | P30115 | 0          | N-term +42.01 Da, K +28.03 Da,            | 6883.459961 | 2 | 1049.063843 | 1048.075335 |
| SFIPVAEDSDFPIQNLPGYGFSTQSNPKPR       | P35505 | 0          | N-term +42.01 Da, K +28.03 Da,            | 6888.550781 | 3 | 1141.23999  | 1140.90854  |
| CDFTEDQTAEFKEAFQLFDR                 | Q60605 | 0          | N-term +42.01 Da, K +28.03 Da,C +57.02Da, | 6889.427246 | 3 | 856.7199707 | 856.3846878 |
| LTAEILELAGNAAR                       | P22752 | 0          | N-term +42.01 Da,                         | 6892.040039 | 2 | 743.399353  | 742.4093842 |
| ADQLTEEQIAEFKEAFSLFDKDGDTITTKELGTVMR | P62204 | 0          | N-term +42.01 Da, K +28.03 Da,            | 6895.365234 | 4 | 1066.290039 | 1065.787167 |
| ADQLTEEQIAEFKEAF                     | P62204 | 0          | N-term +42.01 Da, K +28.03 Da,            | 6895.560059 | 2 | 970.4699707 | 969.9702015 |
| MNAAAEAEFNILLATDSYKVT                | Q99KQ4 | 0          | N-term +42.01 Da, K +28.03 Da,            | 6901.51416  | 2 | 1240.109985 | 1240.112321 |
| LGIETVGGVMTKLIPR                     | P20029 | 0          | N-term +42.01 Da, K +28.03 Da,            | 6902.202637 | 2 | 878.5065308 | 877.515869  |
| EELDPGVVDNFPLLKALR                   | P30115 | 0          | N-term +42.01 Da, K +28.03 Da,            | 6902.899902 | 3 | 699.710022  | 699.0526488 |
| MDGVVTDLIAVGLKR                      | G3UXA6 | 0          | N-term +42.01 Da, K +28.03 Da,            | 6905.307129 | 2 | 828.97229   | 828.9712944 |
| AAPSGSVNCEEFQELLKVMR                 | Q8R3Q6 | 0          | N-term +42.01 Da, K +28.03 Da,C +57.02Da, | 6908.040527 | 3 | 894.7697144 | 894.7682556 |
| AAPSGSVNCEEFQELLKVMR                 | Q8R3Q6 | 0          | N-term +42.01 Da, K +28.03 Da,C +57.02Da, | 6908.28125  | 2 | 1341.64917  | 1341.648745 |
| AAKVFESIGKFLAL                       | P67778 | 0.00188857 | N-term +42.01 Da, K +28.03 Da,            | 6910.80957  | 2 | 824.9876709 | 824.98727   |
| MLAELGFIR                            | Q921N6 | 0.00053022 | N-term +42.01 Da,                         | 6913.54248  | 2 | 546.2999878 | 546.2995296 |
| EELDPGVVDNFPLLKALR                   | P30115 | 0          | N-term +42.01 Da, K +28.03 Da,            | 6914.464355 | 2 | 1049.066162 | 1048.075335 |
| CDFTEDQTAEFKEAFQLFDR                 | Q60605 | 0          | N-term +42.01 Da, K +28.03 Da,C +57.02Da, | 6914.955078 | 2 | 1284.569946 | 1284.073393 |
| ALHVRPESGRSPQECCLRVSLMPLR            | Q80XK6 | 0.02372188 | N-term +42.01 Da, C +57.02Da,             | 6916.536133 | 3 | 997.8300171 | 997.5126371 |
| SFIPVAEDSDFPIQNLPGYGFSTQSNPKPR       | P35505 | 0          | N-term +42.01 Da, K +28.03 Da,            | 6921.181152 | 3 | 1141.569946 | 1140.90854  |
| ADTFLEHLCLLDIDSEPVAAR                | P53657 | 0          | N-term +42.01 Da, C +57.02Da,             | 6921.88623  | 2 | 1214.599976 | 1214.096671 |
| CDFTEDQTAEFKEAFQLFDR                 | Q60605 | 0          | N-term +42.01 Da, K +28.03 Da,C +57.02Da, | 6922.147949 | 3 | 856.7199707 | 856.3846878 |
| ADQLTEEQIAEFKEAFSLFDKDGDTITTKELGTVMR | P62204 | 0          | N-term +42.01 Da, K +28.03 Da,            | 6924.495117 | 3 | 1421.390015 | 1420.713797 |



|                                       |        |            |                                           |             |   |             |             |
|---------------------------------------|--------|------------|-------------------------------------------|-------------|---|-------------|-------------|
| ADQLTEEQIAEFKEAFSLFDKDKDGTITTKELGTVMR | P62204 | 0          | N-term +42.01 Da, K +28.03 Da,            | 6927.637207 | 4 | 1065.788452 | 1065.787167 |
| ADQLTEEQIAEFKEAF                      | P62204 | 0          | N-term +42.01 Da, K +28.03 Da,            | 6927.873047 | 2 | 970.4699707 | 969.9702015 |
| ADTFLEHLCLLDIDSEPVAAR                 | P53657 | 0          | N-term +42.01 Da, C +57.02Da,             | 6928.646484 | 3 | 810.0700073 | 809.7335395 |
| AEEAAAGASGETMAALVAAEGLSPAGWSAGR       | P97364 | 0          | N-term +42.01 Da,                         | 6933.249512 | 3 | 967.460022  | 967.4662934 |
| AAPSGSVNCEEFAEFQELLKVMR               | Q8R3Q6 | 0          | N-term +42.01 Da, K +28.03 Da,C +57.02Da, | 6939.624512 | 3 | 894.7683716 | 894.7682556 |
| AAPSGSVNCEEFAEFQELLKVMR               | Q8R3Q6 | 0          | N-term +42.01 Da, K +28.03 Da,C +57.02Da, | 6939.76123  | 2 | 1341.651123 | 1341.648745 |
| MEEVVAEELDDEEQLVR                     | Q8K2H2 | 0          | N-term +42.01 Da,                         | 6940.087891 | 2 | 1037.97998  | 1037.977899 |
| ALAQPLIQNVKKILES DR                   | Q8C196 | 0          | N-term +42.01 Da, K +28.03 Da,            | 6941.19043  | 3 | 712.75      | 712.0913262 |
| MLAELGFIR                             | Q921N6 | 0.00052083 | N-term +42.01 Da,                         | 6945.340332 | 2 | 546.7999878 | 546.2995296 |
| ADQLTEEQIAEFKEAFSLFDKDKDGTITTKELGTVMR | P62204 | 0          | N-term +42.01 Da, K +28.03 Da,            | 6956.575195 | 3 | 1420.713867 | 1420.713797 |
| ADQLTEEQIAEFKEAFSLFDKDKDGTITTKELGTVMR | P62204 | 0          | N-term +42.01 Da, K +28.03 Da,            | 6958.664551 | 4 | 1065.786377 | 1065.787167 |
| LVLEVAQHLGESTVR                       | P56480 | 0          | N-term +42.01 Da,                         | 6961.444336 | 2 | 847.9573364 | 846.9675979 |
| TDAAVSFAKDFL                          | P51881 | 0.00187882 | N-term +42.01 Da, K +28.03 Da,            | 6963.870605 | 2 | 677.8482666 | 677.8480965 |
| ASQFFKGSASSALELTEEELATAEAVR           | Q8R0Y6 | 0          | N-term +42.01 Da, K +28.03 Da,            | 6967.411621 | 2 | 1457.709961 | 1456.729834 |
| ATFEESVVLGFEEFDKAVKEH                 | Q9CQM5 | 0          | N-term +42.01 Da, K +28.03 Da,            | 6967.691406 | 3 | 837.4199829 | 837.0880883 |
| KDLGTQLAPIIQEFFHSEQYR                 | Q78JT3 | 0          | N-term +42.01 Da, K +28.03 Da,            | 6970.660156 | 3 | 864.7800293 | 864.11486   |
| MEEVVAEELDDEEQLVR                     | Q8K2H2 | 0          | N-term +42.01 Da,                         | 6971.398926 | 2 | 1037.97998  | 1037.977899 |
| ATFEESVVLGFEEFDKAVKEH                 | Q9CQM5 | 0          | N-term +42.01 Da, K +28.03 Da,            | 6975.670898 | 3 | 836.7700195 | 837.0880883 |
| CDFTEDQTAEFKEAFQLFDR                  | Q60605 | 0          | N-term +42.01 Da, K +28.03 Da,C +57.02Da, | 6975.958008 | 2 | 1285.079956 | 1284.073393 |
| ATVWDEAEQDGIGEEVLK MSTEEIVQR          | O88685 | 0          | N-term +42.01 Da, K +28.03 Da,            | 6977.511719 | 3 | 1045.51001  | 1044.839574 |
| MEGEAVEAIVEESETFIK GKER               | Q61164 | 0          | N-term +42.01 Da, K +28.03 Da,            | 6977.756836 | 3 | 860.7700195 | 860.4351596 |
| LDIVEDSIYIAYGPNKATGEGFVEFR            | Q8R4X3 | 0.00625    | N-term +42.01 Da, K +28.03 Da,            | 6981.351563 | 3 | 1011.530029 | 1010.841355 |
| ADQLTEEQIAEFKEAF                      | P62204 | 0          | N-term +42.01 Da, K +28.03 Da,            | 6983.354492 | 2 | 970.4699707 | 969.9702015 |
| AAAVEPEVEDPLWSFVR                     | Q8C436 | 0          | N-term +42.01 Da,                         | 6987.487305 | 2 | 979.9899902 | 978.9887281 |
| ADQLTEEQIAEFKEAFSLFDKDKDGTITTKELGTVMR | P62204 | 0          | N-term +42.01 Da, K +28.03 Da,            | 6991.611816 | 4 | 1065.788086 | 1065.787167 |
| ADQLTEEQIAEFKEAFSLFDKDKDGTITTK        | P62204 | 0          | N-term +42.01 Da, K +28.03 Da,            | 6991.959961 | 3 | 1159.25     | 1158.578526 |
| EEEIAALVIDNGSGMCKAGF                  | P63260 | 0.00319489 | N-term +42.01 Da, K +28.03 Da,C +57.02Da, | 7000.828613 | 2 | 1092.01001  | 1091.013761 |
| KEFVEEIIWPAVQSSALYEDR                 | P16460 | 0          | N-term +42.01 Da, K +28.03 Da,            | 7008.976074 | 3 | 872.4199829 | 871.7672377 |
| MEGEAVEAIVEESETFIK GKER               | Q61164 | 0          | N-term +42.01 Da, K +28.03 Da,            | 7009.445313 | 3 | 860.4351807 | 860.4351596 |
| ASVLEELQKDL EEVKV LLEKSTR             | Q9CXW3 | 0          | N-term +42.01 Da, K +28.03 Da,            | 7010.43457  | 4 | 696.6500244 | 696.4007619 |
| EEEIAALVIDNGSGMCKAGF                  | P63260 | 0          | N-term +42.01 Da, K +28.03 Da,C +57.02Da, | 7010.952637 | 3 | 728.0100098 | 727.6782658 |
| LKTVLELQYVLDKLGDDDDR                  | Q60865 | 0.021461   | N-term +42.01 Da, K +28.03 Da,            | 7011.492188 | 3 | 810.4500122 | 810.7878614 |
| LPEPQDVTQCLEVRVFD T                   | P07147 | 0.00361991 | N-term +42.01 Da, C +57.02Da,             | 7014.493164 | 2 | 1095.530029 | 1094.533175 |
| ADQLTEEQIAEFKEAF                      | P62204 | 0          | N-term +42.01 Da, K +28.03 Da,            | 7015.772949 | 2 | 970.4699707 | 969.9702015 |
| ADQLTEEQIAEFKEAFSLFDKDKDGTITTK        | P62204 | 0.00050633 | N-term +42.01 Da, K +28.03 Da,            | 7020.10498  | 4 | 869.6799927 | 869.1857134 |
| ADQLTEEQIAEFKEAFSLFDKDKDGTITTKELGTVMR | P62204 | 0          | N-term +42.01 Da, K +28.03 Da,            | 7021.610352 | 3 | 1420.713379 | 1420.713797 |
| GSELESAMETLINVFHAHSGKEGDKY            | D3YUT6 | 0          | N-term +42.01 Da, K +28.03 Da,            | 7022.095215 | 4 | 737.8599854 | 737.609015  |
| ADQLTEEQIAEFKEAFSLFDKDKDGTITTKELGTVMR | P62204 | 0          | N-term +42.01 Da, K +28.03 Da,            | 7024.91748  | 4 | 1065.787231 | 1065.787167 |
| ADQLTEEQIAEFKEAFSLFDKDKDGTITTK        | P62204 | 0          | N-term +42.01 Da, K +28.03 Da,            | 7025.194824 | 3 | 1159.25     | 1158.578526 |
| LLGTFDLTGIPPAPR                       | P20029 | 0          | N-term +42.01 Da,                         | 7025.675781 | 2 | 806.4400024 | 805.4510518 |

|                                          |        |            |                                           |             |   |             |             |
|------------------------------------------|--------|------------|-------------------------------------------|-------------|---|-------------|-------------|
| KDLGTQLAPIIQEFFHSEQYR                    | Q78JT3 | 0          | N-term +42.01 Da, K +28.03 Da,            | 7025.950684 | 3 | 864.7700195 | 864.11486   |
| EEEIAALVIDNGSGMCKAGF                     | P63260 | 0          | N-term +42.01 Da, K +28.03 Da,C +57.02Da, | 7031.633789 | 2 | 1091.5      | 1091.013761 |
| DDDIAALVVDNGSGM                          | P60710 | 0.000962   | N-term +42.01 Da,                         | 7034.760742 | 2 | 767.3410034 | 767.3405079 |
| KETLIDLGTAKAFAMTNQILVER                  | Q8C196 | 0          | N-term +42.01 Da, K +28.03 Da,            | 7036.964844 | 3 | 864.4799805 | 863.8155341 |
| CDFTEDQTAEFKEAFQLFDR                     | Q60605 | 0          | N-term +42.01 Da, K +28.03 Da,C +57.02Da, | 7037.252441 | 2 | 1284.579956 | 1284.073393 |
| AEAAAAGASGETMAALVAAEGLSPAGWSAGR          | P97364 | 0          | N-term +42.01 Da,                         | 7042.830078 | 3 | 967.7999878 | 967.4662934 |
| AEAAAAGASGETMAALVAAEGLSPAGWSAGR          | P97364 | 0          | N-term +42.01 Da,                         | 7043.405273 | 2 | 1451.199951 | 1450.695802 |
| FGSDLDAATQQLLSR                          | Q03265 | 0          | N-term +42.01 Da,                         | 7046.297363 | 2 | 833.4099731 | 832.4179383 |
| AAMLGDAIMVAKGLAK                         | Q60936 | 0          | N-term +42.01 Da, K +28.03 Da,            | 7048.285645 | 2 | 829.4699707 | 829.4726153 |
| ADQLTEEQIAEFKEAF                         | P62204 | 0          | N-term +42.01 Da, K +28.03 Da,            | 7049.085449 | 2 | 970.4699707 | 969.9702015 |
| ASDEGKLFVGGLSFDTNEQALEQVFSKYQIASEVVVVKDR | P60824 | 0          | N-term +42.01 Da, K +28.03 Da,            | 7052.583496 | 4 | 1129.839966 | 1129.587802 |
| ADQLTEEQIAEFKEAFSLFDKDGDTITTKELGTVMR     | P62204 | 0          | N-term +42.01 Da, K +28.03 Da,            | 7056.569336 | 3 | 1421.040039 | 1420.713797 |
| DLTDYLMKILTER                            | P60710 | 0          | N-term +42.01 Da, K +28.03 Da,            | 7058.285156 | 3 | 561.6400146 | 560.9674157 |
| ADQLTEEQIAEFKEAFSLFDKDGDTITTKELGTVMR     | P62204 | 0          | N-term +42.01 Da, K +28.03 Da,            | 7058.75293  | 4 | 1065.786499 | 1065.787167 |
| ELDPGVVDNFPLLKALR                        | P30115 | 0          | N-term +42.01 Da, K +28.03 Da,            | 7058.960449 | 2 | 984.543396  | 983.5540378 |
| ADQLTEEQIAEFKEAFSLFDKDGDTITTK            | P62204 | 0          | N-term +42.01 Da, K +28.03 Da,            | 7059.205566 | 3 | 1158.910034 | 1158.578526 |
| AAPSGSVNCEEFAEFQELLKVMR                  | Q8R3Q6 | 0          | N-term +42.01 Da, K +28.03 Da,C +57.02Da, | 7060.638184 | 2 | 1342.660034 | 1341.648745 |
| MNAAAEAEFNILLATDSYKVTHY                  | Q99KQ4 | 0          | N-term +42.01 Da, K +28.03 Da,            | 7061.210938 | 2 | 1322.650024 | 1321.643986 |
| IGIQDGYLSLLQDSGEVR                       | P63242 | 0          | N-term +42.01 Da,                         | 7064.528809 | 2 | 1004        | 1003.015475 |
| AAPSGSVNCEEFAEFQELLKVMR                  | Q8R3Q6 | 0          | N-term +42.01 Da, K +28.03 Da,C +57.02Da, | 7066.329102 | 3 | 895.4400024 | 894.7682556 |
| MNAAAEAEFNILLATDSYKVTHY                  | Q99KQ4 | 0          | N-term +42.01 Da, K +28.03 Da,            | 7066.83252  | 3 | 881.7600098 | 881.4317493 |
| MLSPAMSFKSFPPPGSADGLR                    | Q923F1 | 0          | N-term +42.01 Da, K +28.03 Da,            | 7070.93457  | 2 | 1189.619995 | 1188.608162 |
| LVMLETLSQSPQGR                           | P60335 | 0          | N-term +42.01 Da,                         | 7071.202637 | 2 | 801.9136353 | 800.9218017 |
| ADEVALALQAAGSPSAAAAMEAASQPADEPLR         | Q923E4 | 0          | N-term +42.01 Da,                         | 7071.489746 | 3 | 1041.849976 | 1041.175068 |
| MDDTLFQLKF                               | Q921W0 | 0          | N-term +42.01 Da, K +28.03 Da,            | 7072.347656 | 2 | 664.333313  | 664.3337673 |
| NFKLLYDLADQLHAAVGASR                     | Q99LC5 | 0          | N-term +42.01 Da, K +28.03 Da,            | 7074.097656 | 3 | 758.7299805 | 758.0743355 |
| GDFIQLLVR                                | Q8R0Y6 | 0.0415534  | N-term +42.01 Da,                         | 7075.467773 | 2 | 552.8099976 | 551.8164013 |
| AAMLGDAIMVAKGLAK                         | Q60936 | 0          | N-term +42.01 Da, K +28.03 Da,            | 7079.109375 | 2 | 829.4727783 | 829.4726153 |
| MEALILEPSLYTVK                           | P61924 | 0          | N-term +42.01 Da, K +28.03 Da,            | 7079.283203 | 2 | 838.961853  | 838.9626039 |
| EEEIAALVIDNGSGMCKAGF                     | P63260 | 0          | N-term +42.01 Da, K +28.03 Da,C +57.02Da, | 7082.527832 | 2 | 1091.02002  | 1091.013761 |
| MLSPAMSFKSFPPPGSADGLR                    | Q923F1 | 0          | N-term +42.01 Da, K +28.03 Da,            | 7084.825684 | 3 | 793.4099731 | 792.7412001 |
| ADQLTEEQIAEFKEAF                         | P62204 | 0          | N-term +42.01 Da, K +28.03 Da,            | 7085.827637 | 2 | 970.4699707 | 969.9702015 |
| MNIMDFNVKLAADAGTFLSR                     | Q9JK48 | 0          | N-term +42.01 Da, K +28.03 Da,            | 7087.095703 | 3 | 814.4299927 | 814.0957545 |
| ADQLTEEQIAEFKEAFSLFDKDGDTITTKELGTVMR     | P62204 | 0          | N-term +42.01 Da, K +28.03 Da,            | 7088.759766 | 3 | 1421.380005 | 1420.713797 |
| ADQLTEEQIAEFKEAFSLFDKDGDTITTKELGTVMR     | P62204 | 0          | N-term +42.01 Da, K +28.03 Da,            | 7091.499023 | 4 | 1065.787476 | 1065.787167 |
| MEDSMDMDMSPLRPQNYLFGC                    | Q61937 | 0          | N-term +42.01 Da, C +57.02Da,             | 7091.969238 | 2 | 1290.030029 | 1290.02262  |
| KETLIDLGTAKAFAMTNQILVER                  | Q8C196 | 0.00581135 | N-term +42.01 Da, K +28.03 Da,            | 7092.187012 | 3 | 864.4699707 | 863.8155341 |
| AKALDYLAIGVHELAAISER                     | P35492 | 0.02597403 | N-term +42.01 Da, K +28.03 Da,            | 7094.27002  | 3 | 738.0700073 | 737.4108362 |
| GS GPIDPKELKGLD SFLTR                    | Q80W00 | 0          | N-term +42.01 Da, K +28.03 Da,            | 7095.772949 | 3 | 747.75      | 747.7544916 |
| AIQAVLSLYASGR                            | P60710 | 0.00052687 | N-term +42.01 Da,                         | 7097.322754 | 2 | 696.8800049 | 695.8880871 |

|                                      |        |            |                                           |             |   |             |             |
|--------------------------------------|--------|------------|-------------------------------------------|-------------|---|-------------|-------------|
| SCTIEKILDAKTLER                      | Q9CPR7 | 0          | N-term +42.01 Da, K +28.03 Da,C +57.02Da, | 7109.978516 | 3 | 697.7299805 | 697.0572941 |
| ALTGLTVAEYFR                         | P56480 | 0.00098961 | N-term +42.01 Da,                         | 7110.833496 | 2 | 692.8599854 | 691.869363  |
| TDAAVSFAKDFLAGVAAAISKTAVAPIER        | P51881 | 0          | N-term +42.01 Da, K +28.03 Da,            | 7112.933594 | 3 | 1016.549988 | 1015.892161 |
| AGVCDMAPNFLSPSEDQALGLALGR            | Q9JLZ8 | 0          | N-term +42.01 Da, C +57.02Da,             | 7116.047852 | 3 | 878.4199829 | 877.7562385 |
| AGVCDMAPNFLSPSEDQALGLALGR            | Q9JLZ8 | 0          | N-term +42.01 Da, C +57.02Da,             | 7117.266113 | 2 | 1317.130005 | 1316.13072  |
| ADQLTEEQIAEFKEAF                     | P62204 | 0          | N-term +42.01 Da, K +28.03 Da,            | 7118.51416  | 2 | 969.9699707 | 969.9702015 |
| ADQLTEEQIAEFKEAFSLFDKDGDTITTKELGTVMR | P62204 | 0.02263374 | N-term +42.01 Da, K +28.03 Da,            | 7122.425781 | 3 | 1421.380005 | 1420.713797 |
| ADQLTEEQIAEFKEAFSLFDKDGDTITTKELGTVMR | P62204 | 0          | N-term +42.01 Da, K +28.03 Da,            | 7125.613281 | 4 | 1065.785767 | 1065.787167 |
| SVTLQTVLYSLQEEQAR                    | Q9D8C4 | 0          | N-term +42.01 Da,                         | 7129.248535 | 2 | 1004.02002  | 1004.0233   |
| ATVWDEAEQDGIGEEVLKMSTEEIVQR          | O88685 | 0          | N-term +42.01 Da, K +28.03 Da,            | 7132.249023 | 3 | 1045.5      | 1044.839574 |
| VNPTVFFDITADDEPLGR                   | P17742 | 0          | N-term +42.01 Da,                         | 7135.124023 | 2 | 1025        | 1024.5022   |
| MNSAGADEIGKLFVGGLDWSTTQETLR          | Q9JII5 | 0          | N-term +42.01 Da, K +28.03 Da,            | 7136.812988 | 3 | 989.8200073 | 989.4903275 |
| MNSAGADEIGKLFVGGLDWSTTQETLR          | Q9JII5 | 0          | N-term +42.01 Da, K +28.03 Da,            | 7140.203613 | 2 | 1484.22998  | 1483.731853 |
| ADQLTEEQIAEFKEAFSLFDKDGDTITTKELG     | P62204 | 0          | N-term +42.01 Da, K +28.03 Da,            | 7140.829102 | 3 | 1258.630005 | 1258.294567 |
| SCTIEKILDAKTLER                      | Q9CPR7 | 0.00960699 | N-term +42.01 Da, K +28.03 Da,C +57.02Da, | 7142.479004 | 3 | 697.3900146 | 697.0572941 |
| ATVWDEAEQDGIGEEVLKMSTEEIVQR          | O88685 | 0          | N-term +42.01 Da, K +28.03 Da,            | 7142.80957  | 2 | 1567.75     | 1566.755723 |
| ADQLTEEQIAEFKEAF                     | P62204 | 0          | N-term +42.01 Da, K +28.03 Da,            | 7150.60498  | 2 | 970.4699707 | 969.9702015 |
| AEAAAAGASGETMAALVAAEGSLGPAGWSAGR     | P97364 | 0          | N-term +42.01 Da,                         | 7152.806641 | 3 | 967.4699707 | 967.4662934 |
| ADQLTEEQIAEFKEAFSLFDKDGDTITTKELGTVMR | P62204 | 0          | N-term +42.01 Da, K +28.03 Da,            | 7158.797363 | 4 | 1066.290039 | 1065.787167 |
| LEEVAVNFAGLADR                       | Q8BMS1 | 0          | N-term +42.01 Da, K +28.03 Da,            | 7160.020996 | 2 | 852.4523315 | 851.4621484 |
| AEAAAAGASGETMAALVAAEGSLGPAGWSAGR     | P97364 | 0          | N-term +42.01 Da,                         | 7162.76709  | 2 | 1451.189941 | 1450.695802 |
| ATVWDEAEQDGIGEEVLKMSTEEIVQR          | O88685 | 0          | N-term +42.01 Da, K +28.03 Da,            | 7165.143555 | 3 | 1045.180054 | 1044.839574 |
| VWRNECLRVFHDLRINEVDKELVQNH           | D3YYQ8 | 0.00667854 | N-term +42.01 Da, K +28.03 Da,C +57.02Da, | 7165.740723 | 3 | 1130.599976 | 1130.249236 |
| EAALAMEKNLNQALLDLHALGSAR             | P29391 | 0          | N-term +42.01 Da, K +28.03 Da,            | 7168.05127  | 3 | 874.4611206 | 873.8022877 |
| LEGLTDEINFLR                         | P11679 | 0          | N-term +42.01 Da,                         | 7178.582031 | 2 | 732.3718872 | 731.3828351 |
| VEDYLSAILNR                          | P07724 | 0          | N-term +42.01 Da,                         | 7178.953613 | 2 | 668.3477173 | 667.8511705 |
| ALSMPNLNGKKEEDKEPLIELF               | Q9QYB1 | 0.03664303 | N-term +42.01 Da, K +28.03 Da,            | 7179.241699 | 2 | 1243.660034 | 1242.66894  |
| AEAAAAGASGETMAALVAAEGSLGPAGWSAGR     | P97364 | 0          | N-term +42.01 Da,                         | 7179.788574 | 4 | 726.0999756 | 725.8515392 |
| AEAAAAGASGETMAALVAAEGSLGPAGWSAGR     | P97364 | 0          | N-term +42.01 Da,                         | 7184.336914 | 3 | 967.4654541 | 967.4662934 |
| ADQLTEEQIAEFKEAFSLFDKDGDTITTKELGTVMR | P62204 | 0          | N-term +42.01 Da, K +28.03 Da,            | 7191.234375 | 4 | 1066.040039 | 1065.787167 |
| AEAAAAGASGETMAALVAAEGSLGPAGWSAGR     | P97364 | 0          | N-term +42.01 Da,                         | 7195.003906 | 2 | 1451.199951 | 1450.695802 |
| NKETLIDLGTKAFAMTNQLVER               | Q8C196 | 0.01484938 | N-term +42.01 Da, K +28.03 Da,            | 7196.080078 | 3 | 902.4899902 | 901.8298435 |
| SESLVCDVAEDLVEKLR                    | Q9CQI3 | 0          | N-term +42.01 Da, K +28.03 Da,C +57.02Da, | 7199.529785 | 3 | 711.038269  | 711.036559  |
| ADQLTEEQIAEFKEAFSLFDKDGDTITTKEL      | P62204 | 0          | N-term +42.01 Da, K +28.03 Da,            | 7201.974121 | 3 | 1239.630005 | 1239.287412 |
| MDDLADLADLESTTSHISKR                 | Q8VI36 | 0          | N-term +42.01 Da, K +28.03 Da,            | 7205.748047 | 3 | 801.4000244 | 801.0686995 |
| MDVNTALQEVKLTALIHDLGLAR              | P63323 | 0          | N-term +42.01 Da, K +28.03 Da,            | 7213.027344 | 3 | 827.1300049 | 826.7843453 |
| AEAAAAGASGETMAALVAAEGSLGPAGWSAGR     | P97364 | 0          | N-term +42.01 Da,                         | 7215.423828 | 3 | 967.7999878 | 967.4662934 |
| AAAAMAVSEAWPELELAER                  | Q505F5 | 0          | N-term +42.01 Da,                         | 7223.31543  | 2 | 1030.01001  | 1029.004053 |
| ADQLTEEQIAEFKEAF                     | P62204 | 0          | N-term +42.01 Da, K +28.03 Da,            | 7226.058105 | 2 | 969.9699707 | 969.9702015 |
| MDVFLMIR                             | P62869 | 0.00051361 | N-term +42.01 Da,                         | 7226.163574 | 2 | 533.7747803 | 533.7748329 |

|                                      |        |            |                                           |             |   |             |             |
|--------------------------------------|--------|------------|-------------------------------------------|-------------|---|-------------|-------------|
| MIGVGDMLLEPLNEETFIDNLKRR             | P46735 | 0          | N-term +42.01 Da, K +28.03 Da,            | 7227.007324 | 3 | 991.8699951 | 991.5326986 |
| AAAAMAVSEAWPELELAER                  | Q505F5 | 0          | N-term +42.01 Da,                         | 7230.230957 | 3 | 686.6699829 | 686.3384605 |
| VNPTVFFDITADDEPLGR                   | P17742 | 0          | N-term +42.01 Da,                         | 7230.801758 | 2 | 1024.5      | 1024.5022   |
| AAAAMAVSEAWPELELAER                  | Q505F5 | 0          | N-term +42.01 Da,                         | 7233.349609 | 2 | 1029        | 1029.004053 |
| ADQLTEEQIAEFKEAFSLFDKDGDTITTKEL      | P62204 | 0          | N-term +42.01 Da, K +28.03 Da,            | 7234.584961 | 3 | 1239.619995 | 1239.287412 |
| MEYEWKPDQGLQQLQLLKESQSPDTTIQR        | Q8BFY9 | 0          | N-term +42.01 Da, K +28.03 Da,            | 7236.199219 | 3 | 1277.97998  | 1277.315419 |
| MEYEWKPDQGLQQLQLLKESQSPDTTIQR        | Q8BFY9 | 0          | N-term +42.01 Da, K +28.03 Da,            | 7240.859863 | 3 | 1277.660034 | 1277.315419 |
| RGVMLAVDAVIAELKKQ                    | P63038 | 0          | N-term +42.01 Da, K +28.03 Da,            | 7242.651367 | 3 | 647.710022  | 647.051814  |
| ATFEEVSVLGFEEFDKAVKEHEGKTIF          | Q9CQM5 | 0          | N-term +42.01 Da, K +28.03 Da,            | 7246.507324 | 4 | 804.1699829 | 803.9155053 |
| TELLKSVDYEVFGTVQGVCFR                | P56375 | 0          | N-term +42.01 Da, K +28.03 Da,C +57.02Da, | 7247.357422 | 3 | 839.7592163 | 839.7613179 |
| AALAMEKNLNQALLDLHALGSAR              | P29391 | 0.00316885 | N-term +42.01 Da, K +28.03 Da,            | 7252.080078 | 3 | 831.1099854 | 830.7880896 |
| MDVNTALQEVLTALIHDLGLAR               | P63323 | 0          | N-term +42.01 Da, K +28.03 Da,            | 7252.650391 | 3 | 827.1199951 | 826.7843453 |
| SGALDVLQMKEEDVLKFLAAGTH              | P14206 | 0          | N-term +42.01 Da, K +28.03 Da,            | 7252.862793 | 3 | 857.789978  | 857.456006  |
| TDAAVSFAKDFLAGGVAASIKTAVAPIER        | P51881 | 0          | N-term +42.01 Da, K +28.03 Da,            | 7254.875488 | 3 | 1016.559998 | 1015.892161 |
| TELLKSVDYEVFGTVQGVCFR                | P56375 | 0.01996672 | N-term +42.01 Da, K +28.03 Da,C +57.02Da, | 7264.127441 | 2 | 1259.640015 | 1259.138339 |
| ADQLTEEQIAEFKEAFSLFDKDGDTITTKELGTVMR | P62204 | 0          | N-term +42.01 Da, K +28.03 Da,            | 7266.426758 | 4 | 1066.290039 | 1065.787167 |
| ATFEEVSVLGFEEFDKAVKEHEGKTIF          | Q9CQM5 | 0          | N-term +42.01 Da, K +28.03 Da,            | 7277.184082 | 4 | 803.914917  | 803.9155053 |
| ALHNPQYIFGDFSPDEFNQFFVTPR            | P52479 | 0          | N-term +42.01 Da,                         | 7277.89502  | 3 | 1010.150024 | 1010.147001 |
| EEEIAALVIDNGSGMCKAGF                 | P63260 | 0          | N-term +42.01 Da, K +28.03 Da,C +57.02Da, | 7278.8125   | 2 | 1091.51001  | 1091.013761 |
| MDDYAVLSDELAAVLR                     | O08579 | 0          | N-term +42.01 Da,                         | 7283.390625 | 2 | 962.9699707 | 962.4720539 |
| DLSVGLFLVTEPEEEVLPAPHR               | F6YH28 | 0.03936087 | N-term +42.01 Da,                         | 7283.80127  | 3 | 831.1099854 | 830.4355993 |
| TDAAVSFAKDFLAGGVAASIKTAVAPIER        | P51881 | 0          | N-term +42.01 Da, K +28.03 Da,            | 7285.701172 | 3 | 1015.892761 | 1015.892161 |
| MDVNTALQEVLTALIHDLGLAR               | P63323 | 0          | N-term +42.01 Da, K +28.03 Da,            | 7285.801758 | 3 | 826.7841187 | 826.7843453 |
| ALHNPQYIFGDFSPDEFNQFFVTPR            | P52479 | 0          | N-term +42.01 Da,                         | 7290.787598 | 2 | 1515.719971 | 1514.716863 |
| TDAAVSFAKDFLAGGVAASIKTAVAPIER        | P51881 | 0          | N-term +42.01 Da, K +28.03 Da,            | 7293.459961 | 4 | 762.6699829 | 762.1709395 |
| ADQLTEEQIAEFKEAFSLFDKDGDTITTKELGTVMR | P62204 | 0          | N-term +42.01 Da, K +28.03 Da,            | 7299.950195 | 4 | 1066.290039 | 1065.787167 |
| ATFEEVSVLGFEEFDKAVKEHEGKTIF          | Q9CQM5 | 0          | N-term +42.01 Da, K +28.03 Da,            | 7310.401855 | 4 | 803.9163208 | 803.9155053 |
| MDKYDDLGLLEASKFIEDLNMYEASKDGLFR      | Q9QXD8 | 0          | N-term +42.01 Da, K +28.03 Da,            | 7311.79541  | 4 | 911.2000122 | 910.6953908 |
| ATSWGSIQDEKQLEELAKQAIDR              | P51855 | 0          | N-term +42.01 Da, K +28.03 Da,            | 7314.213379 | 3 | 943.8400269 | 943.1660609 |
| LNDGAAALVLMTAEAAQR                   | Q8QZT1 | 0          | N-term +42.01 Da,                         | 7322.445801 | 2 | 929.968689  | 928.9803799 |
| MNSAGADEIGKLFVGGLDWSTTQETLR          | Q9JII5 | 0          | N-term +42.01 Da, K +28.03 Da,            | 7323.415039 | 3 | 990.1500244 | 989.4903275 |
| ADQLTEEQIAEFKEAF                     | P62204 | 0          | N-term +42.01 Da, K +28.03 Da,            | 7327.016602 | 2 | 970.4699707 | 969.9702015 |
| VDSLTDINFLR                          | Q3UV17 | 0.0005144  | N-term +42.01 Da,                         | 7330.966797 | 2 | 732.3699951 | 732.3724676 |
| ALSTAILVGEAKKWLPELVDR                | Q9EQ20 | 0          | N-term +42.01 Da, K +28.03 Da,            | 7333.730469 | 3 | 803.7990112 | 803.1368244 |
| RGVMLAVDAVIAELKKQ                    | P63038 | 0          | N-term +42.01 Da, K +28.03 Da,            | 7339.324219 | 3 | 647.710022  | 647.051814  |
| VEELDPGVVDNFPLLKALR                  | P30115 | 0          | N-term +42.01 Da, K +28.03 Da,            | 7341.498535 | 2 | 1098.599976 | 1097.609542 |
| ATSWGSIQDEKQLEELAKQAIDR              | P51855 | 0          | N-term +42.01 Da, K +28.03 Da,            | 7342.720703 | 4 | 707.8800049 | 707.6263648 |
| AKLTAVPLSALVDEPVHIQVTGLAPF           | Q91X34 | 0.02152318 | N-term +42.01 Da, K +28.03 Da,            | 7344.963379 | 2 | 1379.280029 | 1378.783485 |
| ATSWGSIQDEKQLEELAKQAIDR              | P51855 | 0          | N-term +42.01 Da, K +28.03 Da,            | 7346.496582 | 3 | 943.1657715 | 943.1660609 |
| AWVPAESAVEELMPR                      | Q9CQQ4 | 0          | N-term +42.01 Da,                         | 7347.078613 | 2 | 863.9291992 | 863.9270842 |

|                                      |        |            |                                           |             |   |             |             |
|--------------------------------------|--------|------------|-------------------------------------------|-------------|---|-------------|-------------|
| CQVWRHHAHQIALQQHCLAPPHLAATRK         | Q6YNI2 | 0.04519119 | N-term +42.01 Da, K +28.03 Da,C +57.02Da, | 7351.898438 | 4 | 850.1900024 | 849.95029   |
| DAIAELDTLSEESYKDSTLIMQLLR            | P62259 | 0          | N-term +42.01 Da, K +28.03 Da,            | 7353.624512 | 3 | 975.8400269 | 975.4984889 |
| ADQLTEEQIAEFKEAF                     | P62204 | 0          | N-term +42.01 Da, K +28.03 Da,            | 7362.407227 | 2 | 969.9699707 | 969.9702015 |
| ACISADRYVAIAR                        | Q9JL21 | 0.01169337 | N-term +42.01 Da, C +57.02Da,             | 7364.658691 | 2 | 753.8800049 | 754.3879285 |
| ATFEEVSVLGFEEFDKAVKEHEGKTIFAY        | Q9CQM5 | 0          | N-term +42.01 Da, K +28.03 Da,            | 7366.690918 | 4 | 862.9400024 | 862.4406161 |
| ATFEEVSVLGFEEFDKAVKEHEGKTIFAY        | Q9CQM5 | 0          | N-term +42.01 Da, K +28.03 Da,            | 7370.671387 | 3 | 1150.25     | 1149.585063 |
| DELIPEYLNFR                          | P11499 | 0.02380952 | N-term +42.01 Da,                         | 7383.095215 | 2 | 783.3956909 | 782.4063102 |
| ADQLTEEQIAEFKEAFSLFDKDGDTITTKELGTVMR | P62204 | 0          | N-term +42.01 Da, K +28.03 Da,            | 7392.634277 | 4 | 1066.290039 | 1065.787167 |
| TDAAVSFAKDFLAGGVAAAISKTAVAPIER       | P51881 | 0          | N-term +42.01 Da, K +28.03 Da,            | 7392.883789 | 3 | 1016.22998  | 1015.892161 |
| LSTAILVGEAKKWLPELVDR                 | Q9EQ20 | 0          | N-term +42.01 Da, K +28.03 Da,            | 7393.16748  | 3 | 780.1199951 | 779.4577864 |
| ATFEEVSVLGFEEFDKAVKEHEGKTIFAY        | Q9CQM5 | 0          | N-term +42.01 Da, K +28.03 Da,            | 7398.349121 | 4 | 862.4403076 | 862.4406161 |
| AEEGIAAGGVMDVNTALQEVLLK              | P63323 | 0          | N-term +42.01 Da, K +28.03 Da,            | 7399.504395 | 2 | 1143.589966 | 1143.088314 |
| ATFEEVSVLGFEEFDKAVKEHEGKTIFAY        | Q9CQM5 | 0          | N-term +42.01 Da, K +28.03 Da,            | 7401.560547 | 3 | 1149.920044 | 1149.585063 |
| REVAFAAQFGSDLDAAATQQLSR              | Q03265 | 0.00666667 | N-term +42.01 Da,                         | 7405.19043  | 2 | 1269.630005 | 1268.643166 |
| AEEGIAAGGVMDVNTALQEVLLK              | P63323 | 0          | N-term +42.01 Da, K +28.03 Da,            | 7412.444824 | 2 | 1143.089966 | 1143.088314 |
| VNPTVFFDITADDEPLGR                   | P17742 | 0          | N-term +42.01 Da,                         | 7412.841797 | 2 | 1024.503418 | 1024.5022   |
| IDLPEFPFGLPR                         | O35490 | 0.00097991 | N-term +42.01 Da,                         | 7423.305664 | 2 | 787.4000244 | 786.4088527 |
| ADSAQVPTLVYLVLTGGCGFLGEHIVR          | Q9EQC1 | 0          | N-term +42.01 Da, C +57.02Da,             | 7428.618164 | 3 | 935.1500244 | 934.4812145 |
| ADQLTEEQIAEFKEAFSLFDKDGDTITTKELGTVMR | P62204 | 0          | N-term +42.01 Da, K +28.03 Da,            | 7430.030273 | 4 | 1066.290039 | 1065.787167 |
| ADSAQVPTLVYLVLTGGCGFLGEHIVR          | Q9EQC1 | 0          | N-term +42.01 Da, C +57.02Da,             | 7438.405273 | 3 | 934.4799805 | 934.4812145 |
| ASVSELACIYSALILHDDEVTVTDEKIN         | P47955 | 0          | N-term +42.01 Da, K +28.03 Da,C +57.02Da, | 7438.770996 | 3 | 1059.869995 | 1059.195358 |
| ADQLTEEQIAEFKEAF                     | P62204 | 0          | N-term +42.01 Da, K +28.03 Da,            | 7439.482422 | 2 | 970.4699707 | 969.9702015 |
| ADSAQVPTLVYLVLTGGCGFLGEHIVR          | Q9EQC1 | 0          | N-term +42.01 Da, C +57.02Da,             | 7442.080078 | 2 | 1402.219971 | 1401.218183 |
| VNPTVFFDITADDEPLGR                   | P17742 | 0          | N-term +42.01 Da,                         | 7443.296875 | 2 | 1024.500977 | 1024.5022   |
| MDFLGPNPSSPVGQR                      | O88746 | 0          | N-term +42.01 Da,                         | 7459.23291  | 2 | 903.9441528 | 903.9458083 |
| TDAAVSFAKDFLAGGVAAAISKTAVAPIER       | P51881 | 0          | N-term +42.01 Da, K +28.03 Da,            | 7462.911133 | 3 | 1016.22998  | 1015.892161 |
| VNPTVFFDITADDEPLGR                   | P17742 | 0          | N-term +42.01 Da,                         | 7463.494141 | 3 | 683.6699829 | 683.3372256 |
| ADQLTEEQIAEFKEAFSLFDKDGDTITTKELGTVMR | P62204 | 0          | N-term +42.01 Da, K +28.03 Da,            | 7474.849121 | 4 | 1066.290039 | 1065.787167 |
| VNPTVFFDITADDEPLGR                   | P17742 | 0          | N-term +42.01 Da,                         | 7477.483887 | 2 | 1024.502197 | 1024.5022   |
| LAEEAVTLDMLDLGAAR                    | Q9D3D9 | 0          | N-term +42.01 Da,                         | 7478.096191 | 2 | 916.460022  | 915.4693139 |
| TDAAVSFAKDFLAGGVAAAISKTAVAPIER       | P51881 | 0          | N-term +42.01 Da, K +28.03 Da,            | 7478.473145 | 4 | 762.4199829 | 762.1709395 |
| KVVELLADIVQNSSLEDSQIEKER             | Q9CZ13 | 0          | N-term +42.01 Da, K +28.03 Da,            | 7485.996094 | 4 | 711.3800049 | 710.8867476 |
| KVVELLADIVQNSSLEDSQIEKER             | Q9CZ13 | 0          | N-term +42.01 Da, K +28.03 Da,            | 7487.848633 | 3 | 948.1699829 | 947.513238  |
| TDAAVSFAKDFLAGGVAAAISKTAVAPIER       | P51881 | 0          | N-term +42.01 Da, K +28.03 Da,            | 7494.519531 | 3 | 1015.891602 | 1015.892161 |
| MEDSMDMDMSPLRPQNYLFGCEL              | Q61937 | 0          | N-term +42.01 Da, C +57.02Da,             | 7495.200684 | 2 | 1411.589966 | 1411.085949 |
| LGVDIFIDVATKVMIGESIDEKR              | Q8C196 | 0          | N-term +42.01 Da, K +28.03 Da,            | 7496.771973 | 3 | 845.7856445 | 845.1242564 |
| MDDLADLADLESTTSHISKR                 | Q8VI36 | 0          | N-term +42.01 Da, K +28.03 Da,            | 7498.048828 | 3 | 801.0689087 | 801.0686995 |
| VNPTVFFDITADDEPLGR                   | P17742 | 0          | N-term +42.01 Da,                         | 7498.305664 | 3 | 683.3400269 | 683.3372256 |
| AELVDSVLDVVR                         | P68372 | 0          | N-term +42.01 Da,                         | 7498.553223 | 2 | 679.3699951 | 678.872103  |
| MELITILEK                            | P70168 | 0.000978   | N-term +42.01 Da, K +28.03 Da,            | 7501.209961 | 2 | 580.3357544 | 580.3357783 |

|                                      |        |            |                                           |             |   |             |             |
|--------------------------------------|--------|------------|-------------------------------------------|-------------|---|-------------|-------------|
| MEYLIQGPDPYVLVASDR                   | Q9R1P3 | 0          | N-term +42.01 Da,                         | 7505.751465 | 2 | 1091.056885 | 1091.04846  |
| ASTIKEALSVVSEDQSLFECAYGTPH           | D3YU51 | 0          | N-term +42.01 Da, K +28.03 Da,C +57.02Da, | 7506.72998  | 3 | 970.460022  | 970.4673001 |
| AEEGIAAGGVMDVNTALQEVLTALIHDLGR       | P63323 | 0          | N-term +42.01 Da, K +28.03 Da,            | 7507.01709  | 3 | 1111.920044 | 1111.588813 |
| ADQLTEEQIAEFKEAFSLFDKDGDDG           | P62204 | 0          | N-term +42.01 Da, K +28.03 Da,            | 7507.443359 | 3 | 968.1300049 | 967.7940705 |
| VNPTVFFDITADDEPLGR                   | P17742 | 0          | N-term +42.01 Da,                         | 7509.98877  | 2 | 1024.503662 | 1024.5022   |
| MEYLIQGPDPYVLVASDR                   | Q9R1P3 | 0          | N-term +42.01 Da,                         | 7511.037598 | 3 | 728.3699951 | 727.701399  |
| TDAAVSFAKDFLAGGVAIAISKTAVAPIER       | P51881 | 0          | N-term +42.01 Da, K +28.03 Da,            | 7511.319824 | 4 | 762.4199829 | 762.1709395 |
| MDDLADLADLESTTSHISKR                 | Q8VI36 | 0.00189663 | N-term +42.01 Da, K +28.03 Da,            | 7515.577637 | 2 | 1201.599976 | 1201.099411 |
| VSKEFVEEVIWPAVQSSALYEDR              | P16460 | 0          | N-term +42.01 Da, K +28.03 Da,            | 7520.734863 | 3 | 934.460022  | 933.8007188 |
| NEKIAPSFAVESMEDALKAADTIGYPMIR        | Q8C196 | 0          | N-term +42.01 Da, K +28.03 Da,            | 7524.482422 | 3 | 1122.900024 | 1122.243766 |
| TDAAVSFAKDFLAGGVAIAISKTAVAPIER       | P51881 | 0          | N-term +42.01 Da, K +28.03 Da,            | 7527.108398 | 3 | 1016.559998 | 1015.892161 |
| SGGVYGGDEVGALVFDIGSYTVR              | Q9Z2N8 | 0          | N-term +42.01 Da,                         | 7530.04541  | 2 | 1181.579956 | 1180.573886 |
| AAADELAFHEFEATNLLAETPDAAATTSQSDELTSR | Q99LP8 | 0          | N-term +42.01 Da,                         | 7530.333496 | 3 | 1298.939941 | 1298.599378 |
| AGELSQEALLDFLCQAGGR                  | Q8BZW2 | 0          | N-term +42.01 Da, C +57.02Da,             | 7535.583496 | 2 | 1039.01001  | 1039.004584 |
| MEYLIQGPDPYVLVASDR                   | Q9R1P3 | 0          | N-term +42.01 Da,                         | 7538.322754 | 2 | 1091.050049 | 1091.04846  |
| VNPTVFFDITADDEPLGR                   | P17742 | 0          | N-term +42.01 Da,                         | 7542.073242 | 2 | 1024.501587 | 1024.5022   |
| ADQLTEEQIAEFKEAFSLFDKDGDTITTKELGTVMR | P62204 | 0          | N-term +42.01 Da, K +28.03 Da,            | 7542.634766 | 4 | 1066.290039 | 1065.787167 |
| AEEGIAAGGVMDVNTALQEVLTALIHDLGR       | P63323 | 0          | N-term +42.01 Da, K +28.03 Da,            | 7542.920898 | 3 | 1112.26001  | 1111.588813 |
| EKIAPSFAVESMEDALKAADTIGYPMIR         | Q8C196 | 0          | N-term +42.01 Da, K +28.03 Da,            | 7545.521973 | 3 | 1084.890869 | 1084.229456 |
| TDAAVSFAKDFLAGGVAIAISK               | P51881 | 0          | N-term +42.01 Da, K +28.03 Da,            | 7546.019043 | 3 | 737.0700073 | 736.7352085 |
| LGIETLGGVFTKLINR                     | P38647 | 0          | N-term +42.01 Da, K +28.03 Da,            | 7546.301758 | 2 | 902.0200195 | 901.0327407 |
| LVKEAIDKAGYTEKVMIGMDVAASEFYR         | P17183 | 0.0027688  | N-term +42.01 Da, K +28.03 Da,            | 7546.588379 | 3 | 1087.900024 | 1087.569701 |
| MELSDANLQTLTEYLKKTLDPPPAIR           | Q9ERK4 | 0          | N-term +42.01 Da, K +28.03 Da,            | 7549.397949 | 3 | 1025.880005 | 1025.20905  |
| TDAAVSFAKDFLAGGVAIAISK               | P51881 | 0          | N-term +42.01 Da, K +28.03 Da,            | 7549.865234 | 2 | 1105.099976 | 1104.599175 |
| FAQFGSLLDAATQQLLSR                   | Q03265 | 0          | N-term +42.01 Da,                         | 7563.217773 | 2 | 1006.48999  | 1005.499992 |
| TDAAVSFAKDFLAGGVAIAISKTAVAPIER       | P51881 | 0          | N-term +42.01 Da, K +28.03 Da,            | 7567.515137 | 3 | 1016.219971 | 1015.892161 |
| AEEGIAAGGVMDVNTALQEVLTALIHDLGR       | P63323 | 0          | N-term +42.01 Da, K +28.03 Da,            | 7574.725586 | 3 | 1112.25     | 1111.588813 |
| VNPTVFFDITADDEPLGR                   | P17742 | 0          | N-term +42.01 Da,                         | 7574.893066 | 2 | 1024.5      | 1024.5022   |
| ADMPSGESCTSPLELFNSIATQGELVR          | P32921 | 0          | N-term +42.01 Da, C +57.02Da,             | 7575.665039 | 2 | 1476.199951 | 1476.191704 |
| TDAAVSFAKDFLAGGVAIAISK               | P51881 | 0          | N-term +42.01 Da, K +28.03 Da,            | 7576.353027 | 3 | 736.7341919 | 736.7352085 |
| TDAAVSFAKDFLAGGVAIAISKTAVAPIER       | P51881 | 0          | N-term +42.01 Da, K +28.03 Da,            | 7577.293945 | 4 | 762.1705322 | 762.1709395 |
| ADLLGSILSSMEKPPSLGDQESR              | Q7TNE3 | 0          | N-term +42.01 Da, K +28.03 Da,            | 7579.302734 | 3 | 834.4299927 | 834.0915042 |
| TDAAVSFAKDFLAGGVAIAISK               | P51881 | 0          | N-term +42.01 Da, K +28.03 Da,            | 7580.787598 | 2 | 1105.099976 | 1104.599175 |
| SHIQIPAGLTELQGYTVEVLR                | Q8K1M3 | 0          | N-term +42.01 Da,                         | 7583.542969 | 2 | 1240.689941 | 1240.181395 |
| TDAAVSFAKDFLAGGVAIAISKTAVAPIER       | P51881 | 0          | N-term +42.01 Da, K +28.03 Da,            | 7584.510742 | 2 | 1523.829956 | 1523.334603 |
| ADQLTEEQIAEFKEAFSLFDKDGDTITTKELGTVMR | P62204 | 0          | N-term +42.01 Da, K +28.03 Da,            | 7586.446777 | 4 | 1066.290039 | 1065.787167 |
| ADQLTEEQIAEFKEAFSLFDKDGDDG           | P62204 | 0          | N-term +42.01 Da, K +28.03 Da,            | 7586.836914 | 3 | 949.1199951 | 948.7869158 |
| SHIQIPAGLTELQGYTVEVLR                | Q8K1M3 | 0          | N-term +42.01 Da,                         | 7588.558594 | 3 | 827.1207275 | 827.1233554 |
| ADLLGSILSSMEKPPSLGDQESR              | Q7TNE3 | 0          | N-term +42.01 Da, K +28.03 Da,            | 7592.709961 | 2 | 1251.630005 | 1250.633618 |
| LGIETLGGVFTKLINR                     | P38647 | 0          | N-term +42.01 Da, K +28.03 Da,            | 7593.154785 | 2 | 902.0200195 | 901.0327407 |

|                                      |        |            |                                |             |   |             |             |
|--------------------------------------|--------|------------|--------------------------------|-------------|---|-------------|-------------|
| TDAAVSFAKDFLAGGVAAAISKTAVAPIER       | P51881 | 0          | N-term +42.01 Da, K +28.03 Da, | 7597.84375  | 3 | 1015.890381 | 1015.892161 |
| ADLLGSILSSMEKPPSLGDQESR              | Q7TNE3 | 0          | N-term +42.01 Da, K +28.03 Da, | 7598.00293  | 3 | 834.0896606 | 834.0915042 |
| AGTGLVAGEVVVDALPYFDQGYEAPGVR         | Q9D287 | 0          | N-term +42.01 Da,              | 7598.575684 | 3 | 965.4899902 | 964.8186612 |
| TDAAVSFAKDFLAGGVAAAISKTAVAPIER       | P51881 | 0          | N-term +42.01 Da, K +28.03 Da, | 7598.864258 | 2 | 1523.329956 | 1523.334603 |
| AGTGLVAGEVVVDALPYFDQGYEAPGVR         | Q9D287 | 0          | N-term +42.01 Da,              | 7602.844238 | 2 | 1447.22998  | 1446.724354 |
| AEEGIAAGGVMDVNTALQEVLTALIHDLGLAR     | P63323 | 0          | N-term +42.01 Da, K +28.03 Da, | 7607.183594 | 3 | 1112.26001  | 1111.588813 |
| KIAPSFVAVESMEDALKAADTIGYPVMIR        | Q8C196 | 0          | N-term +42.01 Da, K +28.03 Da, | 7607.770996 | 3 | 1041.880005 | 1041.215258 |
| TDAAVSFAKDFLAGGVAAAISKTAVAPIER       | P51881 | 0          | N-term +42.01 Da, K +28.03 Da, | 7610.433594 | 4 | 762.171936  | 762.1709395 |
| TQEAMEAALAMEKNLNQALLDLHALGSAR        | P29391 | 0          | N-term +42.01 Da, K +28.03 Da, | 7611.324707 | 3 | 1060.869995 | 1060.544438 |
| VNPTVFFDITADDEPLGR                   | P17742 | 0          | N-term +42.01 Da,              | 7612.378418 | 2 | 1024.51001  | 1024.5022   |
| ADNPVLELLLR                          | Q8C0C7 | 0.00052329 | N-term +42.01 Da,              | 7617.201172 | 2 | 647.8731079 | 647.8719055 |
| SHIQIPAGLTPELLQGYTVEVLR              | Q8K1M3 | 0          | N-term +42.01 Da,              | 7619.725586 | 3 | 827.460022  | 827.1233554 |
| ADQLTEEQIAEFKEAFSLFDKDGDTITTKELGTVMR | P62204 | 0          | N-term +42.01 Da, K +28.03 Da, | 7620.275391 | 4 | 1066.040039 | 1065.787167 |
| MEEFGISPGQLVAVFWDKSSPEEALKLVAR       | Q8WTY4 | 0          | N-term +42.01 Da, K +28.03 Da, | 7623.583984 | 4 | 898.2399902 | 897.7350127 |
| ADQLTEEQIAEFKEAFSLFDKDGDTITTKELGTVMR | P62204 | 0          | N-term +42.01 Da, K +28.03 Da, | 7624.5625   | 4 | 1066.290039 | 1065.787167 |
| AAPQPLALQLEQLLNPR                    | Q9JKX4 | 0          | N-term +42.01 Da,              | 7627.408691 | 2 | 957.539978  | 957.5440042 |
| ADLLGSILSSMEKPPSLGDQESR              | Q7TNE3 | 0.0005211  | N-term +42.01 Da, K +28.03 Da, | 7628.266602 | 2 | 1250.640015 | 1250.633618 |
| TDAAVSFAKDFLAGGVAAAISKTAVAPIER       | P51881 | 0          | N-term +42.01 Da, K +28.03 Da, | 7629.797852 | 3 | 1015.890869 | 1015.892161 |
| AGTGLVAGEVVVDALPYFDQGYEAPGVR         | Q9D287 | 0          | N-term +42.01 Da,              | 7630.001465 | 3 | 964.8172607 | 964.8186612 |
| MEEFGISPGQLVAVFWDKSSPEEALKLVAR       | Q8WTY4 | 0          | N-term +42.01 Da, K +28.03 Da, | 7631.23877  | 3 | 1196.97998  | 1196.644258 |
| VGDPLDLVALAEQVQKADEFIR               | Q5EBG8 | 0          | N-term +42.01 Da, K +28.03 Da, | 7633.395508 | 3 | 832.460022  | 832.782999  |
| AEEGIAAGGVMDVNTALQEVLT               | P63323 | 0          | N-term +42.01 Da, K +28.03 Da, | 7634.245605 | 2 | 1194.109985 | 1193.612154 |
| AELMLLSEIADPTR                       | Q35451 | 0          | N-term +42.01 Da,              | 7638.401367 | 2 | 801.4199829 | 800.9161852 |
| TDAAVSFAKDFLAGGVAAAISKTAVAPIER       | P51881 | 0          | N-term +42.01 Da, K +28.03 Da, | 7643.072266 | 4 | 762.4199829 | 762.1709395 |
| AEEGIAAGGVMDVNTALQEVLTALIHDLGLAR     | P63323 | 0          | N-term +42.01 Da, K +28.03 Da, | 7644.47168  | 4 | 833.9400024 | 833.9434286 |
| VLFFDELDSIAKAR                       | Q01853 | 0          | N-term +42.01 Da, K +28.03 Da, | 7649.228516 | 2 | 848.4500122 | 847.4616169 |
| ADNPVLELLLR                          | Q8C0C7 | 0          | N-term +42.01 Da,              | 7650        | 2 | 647.8722534 | 647.8719055 |
| AEEGIAAGGVMDVNTALQEVLT               | P63323 | 0          | N-term +42.01 Da, K +28.03 Da, | 7651.714844 | 3 | 796.4099731 | 796.0771949 |
| VNPTVFFDITADDEPLGR                   | P17742 | 0          | N-term +42.01 Da,              | 7652.859375 | 2 | 1025.5      | 1024.5022   |
| ADQLTEEQIAEFKEAF                     | P62204 | 0          | N-term +42.01 Da, K +28.03 Da, | 7655.844727 | 2 | 970.4699707 | 969.9702015 |
| MEEFGISPGQLVAVFWDKSSPEEALKLVAR       | Q8WTY4 | 0          | N-term +42.01 Da, K +28.03 Da, | 7657.432617 | 4 | 898.2299805 | 897.7350127 |
| AAPSEVAAAVLGEEDGGAFGSWLDGR           | Q9CR29 | 0          | N-term +42.01 Da,              | 7659.151855 | 2 | 1252.099976 | 1251.598424 |
| DIILGMDLSEEDKLTCSR                   | P56480 | 0          | N-term +42.01 Da, K +28.03 Da, | 7659.439941 | 2 | 1210.119995 | 1209.127637 |
| TDAAVSFAKDFLAGGVAAAISKTAVAPIER       | P51881 | 0          | N-term +42.01 Da, K +28.03 Da, | 7660.89502  | 3 | 1015.89209  | 1015.892161 |
| AEEGIAAGGVMDVNTALQEVLT               | P63323 | 0          | N-term +42.01 Da, K +28.03 Da, | 7667.839355 | 2 | 1193.609985 | 1193.612154 |
| AAAAAAGGAALAVSTGLETATLQKLALR         | Q9CQ25 | 0          | N-term +42.01 Da, K +28.03 Da, | 7668.812988 | 3 | 904.1799927 | 903.515024  |
| AAPSEVAAAVLGEEDGGAFGSWLDGR           | Q9CR29 | 0          | N-term +42.01 Da,              | 7671.817383 | 3 | 834.7340088 | 834.7347082 |
| AEEGIAAGGVMDVNTALQEVLTALIHDLGLAR     | P63323 | 0          | N-term +42.01 Da, K +28.03 Da, | 7673.090332 | 3 | 1112.25     | 1111.588813 |
| SFAVESMEDALKAADTIGYPVMIR             | Q8C196 | 0          | N-term +42.01 Da, K +28.03 Da, | 7673.73877  | 3 | 895.7800293 | 895.448523  |
| MDGSGEQLGSGGPTSEQIMKTGAFLLQGFQDR     | Q07813 | 0          | N-term +42.01 Da, K +28.03 Da, | 7675.47168  | 3 | 1205.25     | 1204.915149 |

|                                   |        |            |                                           |             |   |             |             |
|-----------------------------------|--------|------------|-------------------------------------------|-------------|---|-------------|-------------|
| ADNPVLELLLR                       | Q8C0C7 | 0          | N-term +42.01 Da,                         | 7682.281738 | 2 | 647.8720093 | 647.8719055 |
| MEAVLNELVSVEDLKNFER               | Q9CQ92 | 0          | N-term +42.01 Da, K +28.03 Da,            | 7682.711426 | 2 | 1154.089966 | 1153.090857 |
| MDDLFLPIFPSEPAQASGPVVEIIQPKQR     | Q04207 | 0          | N-term +42.01 Da, K +28.03 Da,            | 7682.94043  | 3 | 1162.930054 | 1162.593564 |
| VNPTVFFDITADDEPLGR                | P17742 | 0          | N-term +42.01 Da,                         | 7684.468262 | 2 | 1025        | 1024.5022   |
| TDAAVSFAKDFLAGGVAAAISKTAVAPIER    | P51881 | 0          | N-term +42.01 Da, K +28.03 Da,            | 7687.630371 | 4 | 762.6699829 | 762.1709395 |
| ADQLTEEQIAEFKEAF                  | P62204 | 0          | N-term +42.01 Da, K +28.03 Da,            | 7689.416504 | 2 | 969.9699707 | 969.9702015 |
| TDAAVSFAKDFLAGGVAAAISKTAVAPIER    | P51881 | 0          | N-term +42.01 Da, K +28.03 Da,            | 7691.455078 | 3 | 1016.559998 | 1015.892161 |
| AELSEEALLSVLPTIR                  | P56399 | 0          | N-term +42.01 Da,                         | 7692.295898 | 2 | 891.9938965 | 891.9960216 |
| MLGDFVNMVEKGIIDPTKVVR             | P63038 | 0          | N-term +42.01 Da, K +28.03 Da,            | 7697.208984 | 3 | 821.1107178 | 820.4515383 |
| VELLYHVEELDPGVVDNFPLLKALR         | P30115 | 0.01363443 | N-term +42.01 Da, K +28.03 Da,            | 7704.312012 | 3 | 984.2000122 | 983.5425798 |
| SFAVESMEDALKAADTIGYPVMIR          | Q8C196 | 0          | N-term +42.01 Da, K +28.03 Da,            | 7706.44873  | 3 | 896.1099854 | 895.448523  |
| MEAVLNELVSVEDLKNFER               | Q9CQ92 | 0          | N-term +42.01 Da, K +28.03 Da,            | 7713.849609 | 3 | 769.0599976 | 769.0629968 |
| MEAVLNELVSVEDLKNFER               | Q9CQ92 | 0          | N-term +42.01 Da, K +28.03 Da,            | 7716.27002  | 2 | 1153.589966 | 1153.090857 |
| VNPTVFFDITADDEPLGR                | P17742 | 0          | N-term +42.01 Da,                         | 7716.556641 | 2 | 1025.48999  | 1024.5022   |
| AAPSEVAAAVLGEEDGGAFGSWLDGR        | Q9CR29 | 0          | N-term +42.01 Da,                         | 7716.844238 | 2 | 1252.099976 | 1251.598424 |
| AAPSEVAAAVLGEEDGGAFGSWLDGR        | Q9CR29 | 0          | N-term +42.01 Da,                         | 7720.202637 | 3 | 835.0700073 | 834.7347082 |
| AELSEEALLSVLPTIR                  | P56399 | 0          | N-term +42.01 Da,                         | 7723.141602 | 2 | 891.9951782 | 891.9960216 |
| AIGSAVLEVIEEENLQR                 | Q3UEG6 | 0.00097656 | N-term +42.01 Da,                         | 7725.911621 | 2 | 957.4899902 | 956.5047426 |
| LTLGIETVGGVMTKLIPR                | P20029 | 0          | N-term +42.01 Da, K +28.03 Da,            | 7726.858887 | 2 | 985.5700073 | 984.5817408 |
| AADLGQIPDVIDSDGVFKYVL             | Q9DAK9 | 0.00320366 | N-term +42.01 Da, K +28.03 Da,            | 7729.862305 | 2 | 1211.119995 | 1210.61522  |
| INEKIAPSFAVESMEDALKAADTIGYPVMIR   | Q8C196 | 0          | N-term +42.01 Da, K +28.03 Da,            | 7730.072266 | 3 | 1160.599976 | 1159.938454 |
| AAGVAGWGVEAEFEEDAPDVEPLEPTLSNIEQR | O54984 | 0          | N-term +42.01 Da,                         | 7738.961426 | 3 | 1227.920044 | 1227.591606 |
| AEEGIAAGGVMDVNTALQEVKTKALIHDLGLAR | P63323 | 0          | N-term +42.01 Da, K +28.03 Da,            | 7740.734863 | 3 | 1111.589966 | 1111.588813 |
| AEEGIAAGGVMDVNTALQEVKTKALIHDLGLAR | P63323 | 0          | N-term +42.01 Da, K +28.03 Da,            | 7743.016602 | 3 | 1112.25     | 1111.588813 |
| MEAVLNELVSVEDLKNFER               | Q9CQ92 | 0          | N-term +42.01 Da, K +28.03 Da,            | 7744.749023 | 3 | 769.0599976 | 769.0629968 |
| MEAVLNELVSVEDLKNFER               | Q9CQ92 | 0          | N-term +42.01 Da, K +28.03 Da,            | 7746.748047 | 2 | 1153.589966 | 1153.090857 |
| AAPSEVAAAVLGEEDGGAFGSWLDGR        | Q9CR29 | 0          | N-term +42.01 Da,                         | 7747.09082  | 2 | 1251.597168 | 1251.598424 |
| AAGVAGWGVEAEFEEDAPDVEPLEPTLSNIEQR | O54984 | 0          | N-term +42.01 Da,                         | 7750.54248  | 3 | 1227.589966 | 1227.591606 |
| AAPSEVAAAVLGEEDGGAFGSWLDGR        | Q9CR29 | 0          | N-term +42.01 Da,                         | 7750.684082 | 3 | 835.0700073 | 834.7347082 |
| DAMLGDFVNMVEKGIIDPTKVVR           | P63038 | 0          | N-term +42.01 Da, K +28.03 Da,            | 7754.144531 | 3 | 883.1300049 | 882.472891  |
| TDAAVSFAKDFLAGGVAAAISKTAVAPIER    | P51881 | 0          | N-term +42.01 Da, K +28.03 Da,            | 7757.924316 | 3 | 1016.219971 | 1015.892161 |
| MEAALAMEKNLNQALLDLHALGSAR         | P29391 | 0          | N-term +42.01 Da, K +28.03 Da,            | 7759.539063 | 3 | 918.1400146 | 917.4824494 |
| MEYPWDLLTLAFSR                    | Q9DAV9 | 0          | N-term +42.01 Da,                         | 7762.86084  | 2 | 893.9099731 | 893.4112672 |
| MALSTAILVGEAKKWLPELVDR            | Q9EQ20 | 0          | N-term +42.01 Da, K +28.03 Da,            | 7763.023926 | 3 | 847.4799805 | 846.8169861 |
| EINEKIAPSFAVESMEDALKAADTIGYPVMIR  | Q8C196 | 0          | N-term +42.01 Da, K +28.03 Da,            | 7764.905273 | 3 | 1203.609985 | 1202.952652 |
| AAPSEVAAAVLGEEDGGAFGSWLDGR        | Q9CR29 | 0          | N-term +42.01 Da,                         | 7770.834961 | 3 | 835.4099731 | 834.7347082 |
| QGFIDLPEFPFGLPR                   | O35490 | 0          | N-term +42.01 Da,                         | 7771.169434 | 2 | 953.4699707 | 952.483081  |
| AEEGIAAGGVMDVNTALQEVKTKALIHDLGLAR | P63323 | 0          | N-term +42.01 Da, K +28.03 Da,            | 7780.321777 | 3 | 1112.26001  | 1111.588813 |
| ASVSELACIYSALILHDDEVTVTDEKIN      | P47955 | 0          | N-term +42.01 Da, K +28.03 Da,C +57.02Da, | 7780.547852 | 3 | 1059.530029 | 1059.195358 |
| AEEGIAAGGVMDVNTALQEVKTKALIHDLGLAR | P63323 | 0          | N-term +42.01 Da, K +28.03 Da,            | 7786.38916  | 3 | 1111.920044 | 1111.588813 |



|                                       |        |            |                                           |             |   |             |             |
|---------------------------------------|--------|------------|-------------------------------------------|-------------|---|-------------|-------------|
| ASVSELACIYSALILHDDEVTVTEDKIN          | P47955 | 0          | N-term +42.01 Da, K +28.03 Da,C +57.02Da, | 7789.445801 | 3 | 1059.199951 | 1059.195358 |
| AAPSEVAAAVLGEEDGGAFSGSWLDGR           | Q9CR29 | 0          | N-term +42.01 Da,                         | 7789.77832  | 2 | 1251.599976 | 1251.598424 |
| TDAAVSFAKDFLAGGVAAAISKT               | P51881 | 0          | N-term +42.01 Da, K +28.03 Da,            | 7799.504395 | 3 | 770.75      | 770.4177682 |
| AAPSEVAAAVLGEEDGGAFSGSWLDGR           | Q9CR29 | 0          | N-term +42.01 Da,                         | 7800.534668 | 2 | 1252.599976 | 1251.598424 |
| FGDMQEIIQNFVR                         | Q9QYGO | 0          | N-term +42.01 Da,                         | 7800.677246 | 2 | 819.4099731 | 819.9008691 |
| TDAAVSFAKDFLAGGVAAAISKT               | P51881 | 0          | N-term +42.01 Da, K +28.03 Da,            | 7803.454102 | 3 | 771.0900269 | 770.4177682 |
| AEEGIAAGGVMDVNTALQEVLTALIHDLGLAR      | P63323 | 0          | N-term +42.01 Da, K +28.03 Da,            | 7811.578613 | 3 | 1111.589844 | 1111.588813 |
| ELLYHVEELDPGVVDNFPLLKALR              | P30115 | 0          | N-term +42.01 Da, K +28.03 Da,            | 7812.215332 | 3 | 951.1799927 | 950.519775  |
| AEEGIAAGGVMDVNTALQEVLTALIHDLGLAR      | P63323 | 0          | N-term +42.01 Da, K +28.03 Da,            | 7814.771973 | 4 | 834.1900024 | 833.9434286 |
| MEAVLNELVSVEDLKNFER                   | Q9CQ92 | 0          | N-term +42.01 Da, K +28.03 Da,            | 7821.393555 | 2 | 1153.589966 | 1153.090857 |
| MFLQSSQALQVLENSLR                     | Q9DCY0 | 0          | N-term +42.01 Da, C +57.02Da,             | 7828.412598 | 2 | 1084.540039 | 1083.537737 |
| GLSVADLAESIMKNLR                      | P06151 | 0          | N-term +42.01 Da, K +28.03 Da,            | 7829.231445 | 2 | 894.9799805 | 893.990216  |
| MVNPTVFFDITADDEPLGR                   | P17742 | 0          | N-term +42.01 Da,                         | 7830.152344 | 2 | 1090.52002  | 1090.022443 |
| SSVPDLIPALTAEEQRAAASLK                | Q8C0Y0 | 0.03436019 | N-term +42.01 Da, K +28.03 Da,            | 7832.51123  | 3 | 760.4199829 | 760.4250343 |
| ADQLTEEQIAEFKEAFSLFDKDGDTITTKELGTVMR  | P62204 | 0          | N-term +42.01 Da, K +28.03 Da,            | 7837.498047 | 4 | 1066.290039 | 1065.787167 |
| AEEGIAAGGVMDVNTALQEVLTALIHDLGLAR      | P63323 | 0          | N-term +42.01 Da, K +28.03 Da,            | 7843.916016 | 3 | 1111.588501 | 1111.588813 |
| ELLYHVEELDPGVVDNFPLLKALR              | P30115 | 0          | N-term +42.01 Da, K +28.03 Da,            | 7844.458984 | 3 | 951.1799927 | 950.519775  |
| SKGPAVGIDLGTYSVGVFQHGKVEIHANDQGNR     | P63017 | 0          | N-term +42.01 Da, K +28.03 Da,C +57.02Da, | 7846.158691 | 4 | 947.4899902 | 947.2374457 |
| TDAAVSFAKDFLAGGVAAAISKTA              | P51881 | 0          | N-term +42.01 Da, K +28.03 Da,            | 7846.444336 | 3 | 794.0999756 | 794.0968063 |
| MDPFLVLLH                             | Q61160 | 0          | N-term +42.01 Da,                         | 7846.729004 | 2 | 563.7999878 | 563.8019051 |
| AEEGIAAGGVMDVNTALQEVLTALIHDLGLAR      | P63323 | 0          | N-term +42.01 Da, K +28.03 Da,            | 7847.433105 | 4 | 834.4500122 | 833.9434286 |
| AAMLGDAIMVAKGL                        | Q60936 | 0          | N-term +42.01 Da, K +28.03 Da,            | 7850.664063 | 2 | 715.890686  | 715.8909264 |
| GADQLTEEQIAEFKEAFSLFDKDGDTITTKELGTVMR | Q3UKW2 | 0          | N-term +42.01 Da, K +28.03 Da,            | 7855.123047 | 4 | 1080.290039 | 1080.042533 |
| AFAQFGSDLAATQQLLSR                    | Q03265 | 0          | N-term +42.01 Da,                         | 7859.128418 | 2 | 1042.01001  | 1041.018549 |
| AAMLGDAIMVAKGL                        | Q60936 | 0          | N-term +42.01 Da, K +28.03 Da,            | 7860.27002  | 2 | 715.8902588 | 715.8909264 |
| CDFTEDQTAEFKEAFQLFDR                  | Q60605 | 0          | N-term +42.01 Da, K +28.03 Da,C +57.02Da, | 7864.458008 | 3 | 856.3800049 | 856.3846878 |
| MDSEVNSGSLGAEHITDLLVFGFLQSSGCTR       | P70444 | 0          | N-term +42.01 Da, C +57.02Da,             | 7864.745605 | 3 | 1143.530029 | 1142.869539 |
| GADQLTEEQIAEFKEAFSLFDKDGDTITTKELGTVMR | Q3UKW2 | 0          | N-term +42.01 Da, K +28.03 Da,            | 7865.032227 | 4 | 1079.800049 | 1080.042533 |
| CDFTEDQTAEFKEAFQLFDR                  | Q60605 | 0          | N-term +42.01 Da, K +28.03 Da,C +57.02Da, | 7865.319824 | 2 | 1284.072754 | 1284.073393 |
| NGPVFAKAIQKRVPCAYDKTALALEVGDIVKVTR    | P47941 | 0.01682793 | N-term +42.01 Da, K +28.03 Da,C +57.02Da, | 7865.890625 | 4 | 971.289978  | 971.3064023 |
| VDYIVEYDYDAVHDDDELDIR                 | Q9JLQ0 | 0          | N-term +42.01 Da,                         | 7867.455566 | 2 | 1243.579956 | 1243.073917 |
| ADQLTEEQIAEFKEAFSLFDKDGDTITTKELGTVMR  | P62204 | 0          | N-term +42.01 Da, K +28.03 Da,            | 7870.883301 | 4 | 1065.786377 | 1065.787167 |
| LGVDFIDVATKVMIGESIDEKR                | Q8C196 | 0          | N-term +42.01 Da, K +28.03 Da,            | 7871.568359 | 3 | 845.7842407 | 845.1242564 |
| ADQLTEEQIAEFKEAF                      | P62204 | 0          | N-term +42.01 Da, K +28.03 Da,            | 7874.787109 | 2 | 969.9702759 | 969.9702015 |
| ASVSELACIYSALILHDDEVTVTEDKINALIK      | P47955 | 0          | N-term +42.01 Da, K +28.03 Da,C +57.02Da, | 7875.786621 | 3 | 1210.640015 | 1210.30586  |
| AEEGIAAGGVMDVNTALQEVLTALIHDLGLAR      | P63323 | 0          | N-term +42.01 Da, K +28.03 Da,            | 7877.695801 | 3 | 1111.588623 | 1111.588813 |
| MELITILEKTVSPDRLEEAQKFLER             | P70168 | 0          | N-term +42.01 Da, K +28.03 Da,            | 7878.058105 | 4 | 818.4567871 | 818.4559059 |
| LNEINEKIAPSAVESMEDALKAADTIGYPVMIR     | Q8C196 | 0          | N-term +42.01 Da, K +28.03 Da,            | 7878.169922 | 3 | 1279.322021 | 1278.66165  |
| QEAMEAALAMEKNLQALLDLHALGSAR           | P29391 | 0          | N-term +42.01 Da, K +28.03 Da,            | 7878.282715 | 3 | 1027.522705 | 1026.861878 |
| ASVLEELQKDLVEEVKVLLEKSTR              | Q9CXW3 | 0          | N-term +42.01 Da, K +28.03 Da,            | 7878.385254 | 4 | 696.4014893 | 696.4007619 |

|                                      |        |            |                                           |             |   |             |             |
|--------------------------------------|--------|------------|-------------------------------------------|-------------|---|-------------|-------------|
| EAMEAALAMEKNLNQALLDLHALGSAR          | P29391 | 0          | N-term +42.01 Da, K +28.03 Da,            | 7878.623535 | 3 | 984.8353882 | 984.1756855 |
| AELTALESLEMGFPR                      | Q922Y1 | 0          | N-term +42.01 Da,                         | 7880.047852 | 2 | 909.9674683 | 909.9689494 |
| AEEGIAAGGVMDVNTALQEVLTAL             | P63323 | 0          | N-term +42.01 Da, K +28.03 Da,            | 7880.123535 | 2 | 1285.671631 | 1285.672743 |
| AAGAAEAGEAAVAVVEVGSAAQQFEELLR        | Q9CQM9 | 0          | N-term +42.01 Da,                         | 7880.199707 | 2 | 1393.202026 | 1393.203786 |
| AAGAAEAGEAAVAVVEVGSAAQQFEELLR        | Q9CQM9 | 0          | N-term +42.01 Da,                         | 7880.350098 | 3 | 929.1369019 | 929.1382825 |
| AEEGIAAGGVMDVNTALQEVLTAL             | P63323 | 0          | N-term +42.01 Da, K +28.03 Da,            | 7880.963867 | 3 | 857.4500122 | 857.450921  |
| AEEAAAGASGETMAALVAAEGLSPAGW          | P97364 | 0          | N-term +42.01 Da,                         | 7881.377441 | 3 | 843.7318115 | 843.7357205 |
| AEEAAAGASGETMAALVAAEGLSPAGW          | P97364 | 0          | N-term +42.01 Da,                         | 7881.495605 | 2 | 1265.092041 | 1265.099942 |
| SFIPVAEDSDFPIQNLPGYGVF               | P35505 | 0.00142789 | N-term +42.01 Da,                         | 7888.599121 | 2 | 1199.078491 | 1199.086098 |
| ADQLTEEQIAEFKEAF                     | P62204 | 0          | N-term +42.01 Da, K +28.03 Da,            | 8008.792969 | 2 | 969.9699707 | 969.9702015 |
| AEEGIAAGGVMDVNTALQEVLTALIHDLGLAR     | P63323 | 0          | N-term +42.01 Da, K +28.03 Da,            | 8045.367676 | 3 | 1112.26001  | 1111.588813 |
| ADQLTEEQIAEFKEAF                     | P62204 | 0.00050429 | N-term +42.01 Da, K +28.03 Da,            | 8046.817383 | 2 | 969.9699707 | 969.9702015 |
| ADQLTEEQIAEFKEAF                     | P62204 | 0.00187705 | N-term +42.01 Da, K +28.03 Da,            | 8078.05957  | 2 | 969.9699707 | 969.9702015 |
| ADQLTEEQIAEFKEAF                     | P62204 | 0.00050659 | N-term +42.01 Da, K +28.03 Da,            | 8080.037598 | 2 | 970.4799805 | 969.9702015 |
| AEEGIAAGGVMDVNTALQEVLTALIHDLGLAR     | P63323 | 0.00097895 | N-term +42.01 Da, K +28.03 Da,            | 8095.187012 | 3 | 1112.27002  | 1111.588813 |
| ADQLTEEQIAEFKEAF                     | P62204 | 0          | N-term +42.01 Da, K +28.03 Da,            | 8143.830078 | 2 | 970.4699707 | 969.9702015 |
| ADQLTEEQIAEFKEAF                     | P62204 | 0          | N-term +42.01 Da, K +28.03 Da,            | 8174.119141 | 2 | 970.4699707 | 969.9702015 |
| ADQLTEEQIAEFKEAFSLFDKDGDTITTKELGTVMR | P62204 | 0.00096759 | N-term +42.01 Da, K +28.03 Da,            | 8176.666016 | 4 | 1066.290039 | 1065.787167 |
| AEEGIAAGGVMDVNTALQEVLTALIHDLGLAR     | P63323 | 0          | N-term +42.01 Da, K +28.03 Da,            | 8188.966797 | 3 | 1112.26001  | 1111.588813 |
| SQAEFDKAAEEVKR                       | P31786 | 0          | N-term +42.01 Da, K +28.03 Da,            | 8189.310059 | 3 | 569.2966309 | 569.2967011 |
| SKGPAVGIDLGTYSVGVFQHGKVEIANDQGNR     | P63017 | 0          | N-term +42.01 Da, K +28.03 Da,C +57.02Da, | 8193.40918  | 4 | 947.7399902 | 947.2374457 |
| ADQLTEEQIAEFKEAFSLFDKDGDTITTKELGTVMR | P62204 | 0.00186133 | N-term +42.01 Da, K +28.03 Da,            | 8208.941406 | 4 | 1066.040039 | 1065.787167 |
| REAEEMRAKREEERKRQEELRRQQEEI          | Q6Y7W8 | 0.03228378 | N-term +42.01 Da, K +28.03 Da,            | 8219.203125 | 3 | 1213.97998  | 1213.962595 |
| MTAERIRALGSQHQRNVQ                   | Q61092 | 0.03669432 | N-term +28.03 Da,                         | 957.4269409 | 4 | 531.539978  | 531.5367258 |
| EGSGSSGTGEQKEDQKEEKQ                 | P38647 | 0          | N-term +28.03 Da, K +28.03 Da,            | 959.3251953 | 4 | 563.2741089 | 563.2737586 |
| SSAAAHTKTKQIRPAKSSR                  | Q60759 | 0.0017301  | N-term +28.03 Da, K +28.03 Da,            | 961.8826294 | 4 | 528.2996216 | 528.2986414 |
| TENSTSAPAAKPKR                       | P10922 | 0          | N-term +28.03 Da, K +28.03 Da,            | 961.9581299 | 3 | 514.6265259 | 514.626381  |
| TENSTSAPAAKPKR                       | P10922 | 0          | N-term +28.03 Da, K +28.03 Da,            | 963.8479004 | 4 | 386.2214966 | 386.2216049 |
| PDPAKSAPAPKKGSK                      | Q64525 | 0          | N-term +28.03 Da, K +28.03 Da,            | 965.8769531 | 4 | 405.502594  | 405.5027227 |
| PDPKSAPAPKKGSK                       | Q8CGP0 | 0.00142248 | N-term +28.03 Da, K +28.03 Da,            | 966.1430664 | 4 | 409.5       | 409.5014515 |
| APVKKLVAKGGK                         | P67984 | 0.00101061 | N-term +28.03 Da, K +28.03 Da,            | 972.236084  | 4 | 334.7416077 | 334.7417097 |
| SSAAAHTKTKQIRPAKSSR                  | Q60759 | 0.00063012 | N-term +28.03 Da, K +28.03 Da,            | 993.0131226 | 4 | 528.2989502 | 528.2986414 |
| TENSTSAPAAKPKR                       | P10922 | 0          | N-term +28.03 Da, K +28.03 Da,            | 995.7609253 | 3 | 514.6265869 | 514.626381  |
| PDPAKSAPAPKKGSK                      | Q64525 | 0.00062578 | N-term +28.03 Da, K +28.03 Da,            | 997.1124878 | 4 | 405.5023193 | 405.5027227 |
| PDPAKSAPAPKKG                        | Q64525 | 0.00132861 | N-term +28.03 Da, K +28.03 Da,            | 998.7683716 | 4 | 344.7128601 | 344.7131496 |
| PDPAKSAPAPKKG                        | Q64525 | 0.0013363  | N-term +28.03 Da, K +28.03 Da,            | 999.1898804 | 3 | 488.29245   | 488.2924503 |
| APVKKLVAKGGK                         | P67984 | 0.00052329 | N-term +28.03 Da, K +28.03 Da,            | 1003.815186 | 4 | 334.7414246 | 334.7417097 |
| LHHAVIPHGKGG                         | Q9DC69 | 0.00144509 | N-term +28.03 Da, K +28.03 Da,            | 1004.950928 | 4 | 359.7200012 | 359.466474  |
| SRPQAEAAPGTR                         | Q6NZF1 | 0.00172786 | N-term +28.03 Da, K +28.03 Da,            | 1008.754028 | 4 | 356.9500122 | 356.9546683 |
| VQSQAEPKQDAPAKK                      | Q99PL5 | 0.00329489 | N-term +28.03 Da, K +28.03 Da,            | 1013.450134 | 4 | 474.2900085 | 474.0346531 |

|                         |        |            |                                            |             |   |             |             |
|-------------------------|--------|------------|--------------------------------------------|-------------|---|-------------|-------------|
| KIEGAQNQGKKPEGTSNQGK    | Q99PL5 | 0.02957608 | N-term +28.03 Da, K +28.03 Da,             | 1013.98114  | 4 | 560.5700073 | 560.565578  |
| EGSGSSGTGEQKEDQKEEKQ    | P38647 | 0          | N-term +28.03 Da, K +28.03 Da,             | 1014.923401 | 3 | 750.3599854 | 750.6959194 |
| TENSTSAPAAKPKR          | P10922 | 0.00097704 | N-term +28.03 Da, K +28.03 Da,             | 1014.99884  | 4 | 386.4673157 | 386.2216049 |
| VEKGPEVSGKR             | Q8CFE3 | 0          | N-term +28.03 Da, K +28.03 Da,             | 1018.459534 | 4 | 318.1930847 | 318.193587  |
| YIKSSPSQKR              | O54774 | 0.00142113 | N-term +28.03 Da, K +28.03 Da,             | 1021.625427 | 3 | 458.9400024 | 458.9416402 |
| SAPSTGGVKKPHR           | P02301 | 0.00329354 | N-term +28.03 Da, K +28.03 Da,             | 1023.048889 | 4 | 352.4599915 | 352.212311  |
| VAGADSPQSSSKGGR         | Q8BIJ6 | 0          | N-term +28.03 Da, K +28.03 Da,             | 1023.96814  | 3 | 487.2549133 | 487.2548358 |
| YVSHGATGKGNQVQR         | P16460 | 0          | N-term +28.03 Da, K +28.03 Da,             | 1024.119141 | 4 | 411.9665527 | 411.9667703 |
| GAPGPKGEERPTQNEKR       | Q9D0E1 | 0.03561116 | N-term +28.03 Da, K +28.03 Da,             | 1024.416504 | 4 | 484.5162048 | 484.515622  |
| SEQLTKSNAPR             | P26443 | 0.01494662 | N-term +28.03 Da, K +28.03 Da,             | 1025.737305 | 4 | 361.4634705 | 361.4635976 |
| QASAAPKAGTATGR          | P56480 | 0.00053908 | N-term +28.03 Da, K +28.03 Da,             | 1025.812622 | 3 | 448.252594  | 448.2527661 |
| AAAAAATKPAR             | Q99N96 | 0.00059988 | N-term +28.03 Da, K +28.03 Da,             | 1025.963745 | 3 | 375.8960266 | 375.896142  |
| KQIPGGSGGGSGSGGGGGSGGGR | Q8BMA6 | 0          | N-term +28.03 Da,                          | 1029.699341 | 3 | 672.3300171 | 672.3264942 |
| PDPAKSAPAPKKS           | Q64525 | 0.00982615 | N-term +28.03 Da, K +28.03 Da,             | 1031.679443 | 3 | 488.2900085 | 488.2924503 |
| CALNLMVEKHLNAQLWK       | Q8R411 | 0.02984585 | N-term +28.03 Da, K +28.03 Da,C +57.02 Da, | 1031.894897 | 3 | 717.7434082 | 718.0638366 |
| APVAGKKAKKGILR          | O35490 | 0          | N-term +28.03 Da, K +28.03 Da,             | 1031.970337 | 4 | 427.2909546 | 427.2908271 |
| TDQAQKAEGAGDAK          | P09602 | 0.00058173 | N-term +28.03 Da, K +28.03 Da,             | 1032.19104  | 3 | 491.9200134 | 491.9229749 |
| AQASAAPKAGTATGR         | P56480 | 0          | N-term +28.03 Da, K +28.03 Da,             | 1032.675781 | 3 | 471.9299927 | 471.9318042 |
| APVAGKKAKKGILR          | O35490 | 0          | N-term +28.03 Da, K +28.03 Da,             | 1033.977539 | 3 | 569.3853149 | 569.385344  |
| KESVSGSKAVPR            | Q9JII6 | 0.02478232 | N-term +28.03 Da, K +28.03 Da,             | 1034.168213 | 3 | 433.6000061 | 433.5978735 |
| VAAKTKKSLESINSR         | P62889 | 0.0039984  | N-term +28.03 Da, K +28.03 Da,             | 1036.279785 | 4 | 476.0599976 | 475.8042992 |
| YHKKVVDHYENPR           | Q9D7P6 | 0.01753771 | N-term +28.03 Da, K +28.03 Da,             | 1038.256348 | 4 | 442.9935303 | 442.9927879 |
| KMKDTSDEEIR             | P62204 | 0          | N-term +28.03 Da, K +28.03 Da,             | 1038.665039 | 3 | 522.9282227 | 522.2677539 |
| PDPAKSAPAPK             | Q64525 | 0          | N-term +28.03 Da, K +28.03 Da,             | 1039.838013 | 3 | 388.2324524 | 388.2325314 |
| APVKKLVAK               | P67984 | 0.00100604 | N-term +28.03 Da, K +28.03 Da,             | 1039.988892 | 3 | 355.9299622 | 355.9301235 |
| GKELFGHYHR              | Q9DA62 | 0.00103573 | N-term +28.03 Da, K +28.03 Da,             | 1040.064331 | 4 | 326.1799927 | 325.6793752 |
| ESAAADKRPTVR            | Q9DCT2 | 0.02931489 | N-term +28.03 Da, K +28.03 Da,             | 1040.65271  | 3 | 452.9251404 | 452.9246495 |
| HSIGKIGGAQNR            | P34884 | 0.0014437  | N-term +28.03 Da, K +28.03 Da,             | 1041.868652 | 3 | 431.9187317 | 431.9177174 |
| QASAAPKAGTATGR          | P56480 | 0.00053505 | N-term +28.03 Da, K +28.03 Da,             | 1042.14978  | 2 | 672.3682251 | 671.875511  |
| STESGSESATHDSSAPR       | Q9CY16 | 0          | N-term +28.03 Da,                          | 1042.703125 | 3 | 578.9299927 | 578.5906136 |
| ESAAADKRPTVRPR          | Q9DCT2 | 0.00055249 | N-term +28.03 Da, K +28.03 Da,             | 1043.623901 | 4 | 403.2341614 | 403.2337751 |
| AQASAAPKAGTATGR         | P56480 | 0.0013471  | N-term +28.03 Da, K +28.03 Da,             | 1044.04248  | 2 | 707.3900146 | 707.3940681 |
| PDPAKSAPAPK             | Q64525 | 0          | N-term +28.03 Da, K +28.03 Da,             | 1044.17749  | 2 | 582.3499756 | 581.8451589 |
| AVESKTSASGEEANSR        | O70400 | 0          | N-term +28.03 Da, K +28.03 Da,             | 1045.000122 | 3 | 560.2800293 | 560.279599  |
| AAQASAAPKAGTATGR        | P56480 | 0          | N-term +28.03 Da, K +28.03 Da,             | 1046.08667  | 3 | 495.6107788 | 495.6108422 |
| DEEPKDEAR               | O55022 | 0.00054915 | N-term +28.03 Da, K +28.03 Da,             | 1048.246094 | 3 | 415.8699951 | 415.8700993 |
| AAQASAAPKAGTATGR        | P56480 | 0.00098571 | N-term +28.03 Da, K +28.03 Da,             | 1048.529053 | 2 | 743.4099731 | 742.9126251 |
| VAAKTKKSLESINSR         | P62889 | 0.0010005  | N-term +28.03 Da, K +28.03 Da,             | 1048.666748 | 3 | 634.0696411 | 634.0699734 |
| MVQSQEAPKQDAPAKKK       | Q99PL5 | 0.00053163 | N-term +28.03 Da, K +28.03 Da,             | 1049.326782 | 4 | 506.7999878 | 506.7947744 |
| DEEPKDEAR               | O55022 | 0.00248963 | N-term +28.03 Da, K +28.03 Da,             | 1050.071289 | 2 | 623.3027954 | 623.3015107 |

|                        |        |            |                                            |             |   |             |             |
|------------------------|--------|------------|--------------------------------------------|-------------|---|-------------|-------------|
| AVEAKKTYVR             | Q8BFR5 | 0.02139219 | N-term +28.03 Da, K +28.03 Da,             | 1051.29187  | 4 | 312.947113  | 312.9473172 |
| AVEAKKTYVR             | Q8BFR5 | 0.00098814 | N-term +28.03 Da, K +28.03 Da,             | 1051.367432 | 3 | 416.9273682 | 416.9273308 |
| TSDEVNEKKDR            | P63038 | 0.00055279 | N-term +28.03 Da, K +28.03 Da,             | 1051.669312 | 4 | 376.7055664 | 376.7057878 |
| ASTESGESATHDSSAPR      | Q9CY16 | 0          | N-term +28.03 Da,                          | 1052.137451 | 3 | 602.5999756 | 602.2696516 |
| HRCDKKR                | _sp P2 | 0.03320438 | N-term +28.03 Da, K +28.03 Da,C +57.02 Da, | 1052.674927 | 2 | 542.3133545 | 542.3138366 |
| GKDLKPSTPR             | Q61937 | 0.03670603 | N-term +28.03 Da, K +28.03 Da,             | 1052.950317 | 3 | 394.9116211 | 394.9116808 |
| GDAKTDQAQKAEGAGDAK     | P09602 | 0          | N-term +28.03 Da, K +28.03 Da,             | 1053.101196 | 4 | 468.9970093 | 468.9969967 |
| ALASQQAASAQSR          | Q8VCHO | 0.0009704  | N-term +28.03 Da, K +28.03 Da,             | 1053.176636 | 3 | 491.6099854 | 491.6108422 |
| YEDMKENPKR             | P52840 | 0.00097609 | N-term +28.03 Da, K +28.03 Da,             | 1053.252197 | 3 | 465.2420349 | 465.2429907 |
| TSDEVNEKKDR            | P63038 | 0.0366242  | N-term +28.03 Da, K +28.03 Da,             | 1053.327515 | 3 | 501.9385986 | 501.9386249 |
| GDAKTDQAQKAEGAGDAK     | P09602 | 0.00057208 | N-term +28.03 Da, K +28.03 Da,             | 1053.456055 | 3 | 624.9899902 | 624.9935702 |
| VKPLVTHR               | Q64442 | 0.01329023 | N-term +28.03 Da, K +28.03 Da,             | 1055.355591 | 3 | 335.8902588 | 335.8904393 |
| GIVHVSADKDKGTGR        | P38647 | 0.00057904 | N-term +28.03 Da, K +28.03 Da,             | 1056.131836 | 4 | 377.9780579 | 377.9781434 |
| RASDQLGEQQGR           | E9Q7G0 | 0.02387357 | N-term +28.03 Da,                          | 1056.609741 | 3 | 458.230011  | 458.2357754 |
| EKQDDLKGGNEESTKTGNAGSR | P08228 | 0          | N-term +28.03 Da, K +28.03 Da,             | 1058.556152 | 4 | 623.5700073 | 623.3162236 |
| SAPKEDDASASTSQSSR      | Q8BGD9 | 0          | N-term +28.03 Da, K +28.03 Da,             | 1060.083008 | 3 | 593.9500122 | 593.9500303 |
| EPPQHALR               | P70296 | 0.01631206 | N-term +28.03 Da,                          | 1061.512939 | 3 | 325.8500061 | 325.8505325 |
| TTKAVVVK               | P11679 | 0.00330033 | N-term +28.03 Da, K +28.03 Da,             | 1061.915405 | 3 | 310.5515442 | 310.5513123 |
| APVAGKKAKKGILR         | O35490 | 0          | N-term +28.03 Da, K +28.03 Da,             | 1062.302124 | 4 | 427.2912903 | 427.2908271 |
| SQVQLKGR               | P11725 | 0.03039216 | N-term +28.03 Da, K +28.03 Da,             | 1062.712402 | 3 | 324.5380859 | 324.5380659 |
| KAVVVKKIETR            | P11679 | 0.00064641 | N-term +28.03 Da, K +28.03 Da,             | 1062.787964 | 4 | 346.4919434 | 346.4918919 |
| KAVVVKKIETR            | P11679 | 0.03439409 | N-term +28.03 Da, K +28.03 Da,             | 1064.162842 | 3 | 461.6534424 | 461.6534304 |
| KNKITITNDQNR           | P20029 | 0.00143335 | N-term +28.03 Da, K +28.03 Da,             | 1064.313721 | 3 | 510.2984314 | 510.2983757 |
| ETQVIAHGQGSKGPGR       | Q78JT3 | 0.00064309 | N-term +28.03 Da, K +28.03 Da,             | 1066.060547 | 3 | 569.9765015 | 569.9760731 |
| SAEQPYKNAAR            | Q99LY9 | 0.0013587  | N-term +28.03 Da, K +28.03 Da,             | 1067.578247 | 3 | 430.8982849 | 430.8982117 |
| GLGEEQEKGAR            | O88908 | 0.0006079  | N-term +28.03 Da, K +28.03 Da,             | 1067.804565 | 3 | 410.8900146 | 410.5543337 |
| EIEHVIGKHR             | P56654 | 0.00401284 | N-term +28.03 Da, K +28.03 Da,             | 1068.278198 | 4 | 319.1900024 | 319.1898415 |
| VVHEQIQSR              | Q91WT9 | 0.00139082 | N-term +28.03 Da,                          | 1068.970581 | 3 | 375.2124634 | 375.2121303 |
| FENKVPKQK              | P48771 | 0.00289855 | N-term +28.03 Da, K +28.03 Da,             | 1069.859009 | 3 | 453.6056824 | 453.6062576 |
| PDPAKSAPAPK            | Q64525 | 0.00057571 | N-term +28.03 Da, K +28.03 Da,             | 1070.493164 | 3 | 388.2324829 | 388.2325314 |
| AVGSISGHAR             | Q61176 | 0.00141376 | N-term +28.03 Da,                          | 1070.568604 | 3 | 328.1900024 | 328.1858038 |
| AKQLPQKVR              | P97328 | 0.02386555 | N-term +28.03 Da, K +28.03 Da,             | 1071.058838 | 4 | 312.9599915 | 312.9592218 |
| MLMPKKNR               | P63325 | 0.04972205 | N-term +28.03 Da, K +28.03 Da,             | 1072.719849 | 3 | 367.8928528 | 367.8926866 |
| LLENEKAR               | Q8VCHO | 0.01074472 | N-term +28.03 Da, K +28.03 Da,             | 1073.172729 | 3 | 343.5400085 | 343.5414763 |
| GQKLQGPQTAR            | P13707 | 0          | N-term +28.03 Da, K +28.03 Da,             | 1073.248169 | 3 | 413.9106445 | 413.9104514 |
| TITKADDAEGR            | Q3UZ39 | 0.0013292  | N-term +28.03 Da, K +28.03 Da,             | 1075.019531 | 2 | 616.8300171 | 616.8276953 |
| TAEEDADPKR             | Q9D0J8 | 0          | N-term +28.03 Da,                          | 1076.767456 | 3 | 482.5629883 | 482.5633354 |
| AAQASAAPKAGTATGR       | P56480 | 0.00102041 | N-term +28.03 Da, K +28.03 Da,             | 1077.671997 | 3 | 495.93927   | 495.6108422 |
| AAQASAAPKAGTATGR       | P56480 | 0.00134771 | N-term +28.03 Da, K +28.03 Da,             | 1077.909424 | 2 | 743.4046021 | 742.9126251 |
| RSAAEEGVTESKSSQKESVQR  | P58871 | 0.00056497 | N-term +28.03 Da, K +28.03 Da,             | 1078.213745 | 4 | 631.3230591 | 631.3227773 |

|                             |         |            |                                            |             |   |             |             |
|-----------------------------|---------|------------|--------------------------------------------|-------------|---|-------------|-------------|
| KVGGTSDVEVNEKKDR            | P63038  | 0.00102722 | N-term +28.03 Da, K +28.03 Da,             | 1079.619751 | 4 | 469.019989  | 469.0151893 |
| TAKEALEAAKR                 | Q9Z2I8  | 0.00143541 | N-term +28.03 Da, K +28.03 Da,             | 1079.906616 | 4 | 318.7000122 | 318.6974995 |
| VVLGHSER                    | P17751  | 0.01926385 | N-term +28.03 Da,                          | 1080.724731 | 3 | 308.8500061 | 308.8468995 |
| SESGEKNEGSESAPEGQAQQR       | P62960  | 0          | N-term +28.03 Da, K +28.03 Da,             | 1081.197266 | 3 | 754.3499756 | 754.3474016 |
| LDHQMNTER                   | Q8R311  | 0.00174064 | N-term +28.03 Da,                          | 1081.348145 | 3 | 391.1885376 | 391.1889972 |
| AGNKYVPR                    | Q7TMM9  | 0.03579418 | N-term +28.03 Da, K +28.03 Da,             | 1081.756836 | 3 | 320.8599854 | 320.8590279 |
| GDPGPQGPR                   | P11087  | 0.00060096 | N-term +28.03 Da,                          | 1083.032349 | 2 | 454.7326965 | 454.7328684 |
| TAEEDPADPKR                 | Q9D0J8  | 0          | N-term +28.03 Da,                          | 1083.493774 | 2 | 723.3400269 | 723.3413649 |
| HLDGETEER                   | P10649  | 0.00058207 | N-term +28.03 Da,                          | 1083.6427   | 2 | 621.7834473 | 621.7834852 |
| DLKGGNEESTKTGNAGSR          | P08228  | 0          | N-term +28.03 Da, K +28.03 Da,             | 1083.867676 | 4 | 491.2527771 | 491.2526285 |
| LDPETGKR                    | Q64374  | 0.02570952 | N-term +28.03 Da, K +28.03 Da,             | 1084.480469 | 3 | 324.519989  | 324.5221932 |
| SESGEKNEGSESAPEGQAQQR       | P62960  | 0          | N-term +28.03 Da, K +28.03 Da,             | 1084.71814  | 3 | 755.0200195 | 754.3474016 |
| KVEEIAAGKCR                 | P62717  | 0.01236364 | N-term +28.03 Da, K +28.03 Da,C +57.02 Da, | 1085.506226 | 3 | 448.9299927 | 448.9271138 |
| TVVCKDAEEAKR                | P05202  | 0.02719735 | N-term +28.03 Da, K +28.03 Da,C +57.02 Da, | 1088.274414 | 4 | 373.206665  | 373.2065318 |
| TIVCAHQDR                   | Q5XG73  | 0.01529705 | N-term +28.03 Da, C +57.02 Da,             | 1088.645996 | 3 | 376.5259705 | 376.5257205 |
| SAPAVQTK                    | Q99JY0  | 0.01263538 | N-term +28.03 Da, K +28.03 Da,             | 1089.995361 | 2 | 429.2579651 | 429.2581875 |
| RKTDTVANQGTKQEGVSNQVK       | Q99PL5  | 0          | N-term +28.03 Da, K +28.03 Da,             | 1090.216553 | 4 | 601.0900269 | 600.8355886 |
| SPSNVSKQPSR                 | O09044  | 0.02598268 | N-term +28.03 Da, K +28.03 Da,             | 1090.707275 | 3 | 447.92099   | 447.9210165 |
| SKTSEVNCYR                  | P53996  | 0.04443054 | N-term +28.03 Da, K +28.03 Da,C +57.02 Da, | 1091.536621 | 3 | 433.8830872 | 433.883574  |
| KMKDTSDEEIR                 | P62204  | 0.00209908 | N-term +28.03 Da, K +28.03 Da,             | 1093.161621 | 3 | 522.2600098 | 522.2677539 |
| SHGSHETDEEFDAR              | P12787  | 0          | N-term +28.03 Da,                          | 1095.112915 | 3 | 548.9014893 | 548.9010105 |
| GAESEALKQR                  | Q9CWD8  | 0.00102407 | N-term +28.03 Da, K +28.03 Da,             | 1095.580811 | 2 | 572.8193359 | 572.8196728 |
| EGSESAPEGQAQQR              | P62960  | 0          | N-term +28.03 Da,                          | 1095.931885 | 2 | 751.3499756 | 751.3475129 |
| EISQKAAESQGR                | Q61733  | 0.00100553 | N-term +28.03 Da, K +28.03 Da,             | 1097.42334  | 3 | 453.9100037 | 453.9124098 |
| EDKENQGDETTGQQPPQR          | P62960  | 0.00063898 | N-term +28.03 Da, K +28.03 Da,             | 1098.007813 | 3 | 714.3400269 | 714.0015652 |
| GEAGPEDPSR                  | Q61074  | 0.01428571 | N-term +28.03 Da,                          | 1099.373901 | 2 | 521.7399902 | 521.743631  |
| TTASPSQVR                   | P09528  | 0.0014111  | N-term +28.03 Da,                          | 1099.786987 | 2 | 487.769989  | 487.7669085 |
| KVLEEEQR                    | D3Z6I7  | 0.04385965 | N-term +28.03 Da,                          | 1100.091919 | 3 | 406.2200012 | 405.8908344 |
| GALEKKVCQGTSNR              | Q01279  | 0.04607721 | N-term +28.03 Da, K +28.03 Da,C +57.02 Da, | 1101.104248 | 3 | 587.6490479 | 587.6489687 |
| SMQTVQKTTTR                 | PM05784 | 0.00055066 | N-term +28.03 Da, K +28.03 Da,             | 1101.17981  | 3 | 446.2464294 | 446.2466237 |
| GQKDSYVGDEAQSKR             | P60710  | 0          | N-term +28.03 Da, K +28.03 Da,             | 1102.116699 | 3 | 584.6367798 | 584.6356054 |
| GGNEKSQKFIER                | Q9DCY0  | 0.03668262 | N-term +28.03 Da, K +28.03 Da,             | 1102.595093 | 3 | 492.9432373 | 492.9438212 |
| GQKDSYVGDEAQSKR             | P60710  | 0          | N-term +28.03 Da, K +28.03 Da,             | 1103.025146 | 4 | 438.7283325 | 438.7285232 |
| ATTENKTLPR                  | Q8BKX1  | 0.01817546 | N-term +28.03 Da, K +28.03 Da,             | 1103.23877  | 3 | 396.230011  | 396.2311907 |
| TLPSDAPKKR                  | Q3UMF0  | 0.01081686 | N-term +28.03 Da, K +28.03 Da,             | 1103.602051 | 3 | 399.5828857 | 399.5835641 |
| ENGDAKTDAQKAEGAGDAK         | P09602  | 0.00132802 | N-term +28.03 Da, K +28.03 Da,             | 1103.87085  | 3 | 706.3499756 | 706.0220776 |
| GVTKAAEQMKDKQDEEQR          | P14211  | 0          | N-term +28.03 Da, K +28.03 Da,             | 1104.333496 | 4 | 590.5700073 | 590.5717033 |
| TTPQEATR                    | Q8BMS1  | 0.03717827 | N-term +28.03 Da,                          | 1104.548706 | 2 | 466.2459717 | 466.245809  |
| AAEKQIPGGGSGGGGSGGGGGGGGGGR | Q8BMA6  | 0          | N-term +28.03 Da, K +28.03 Da,             | 1105.307739 | 3 | 763.0300293 | 762.6987683 |
| ESSKKYAEAVGR                | P09411  | 0.00174672 | N-term +28.03 Da, K +28.03 Da,             | 1105.740356 | 3 | 470.2643433 | 470.2646719 |

|                             |        |            |                                             |             |   |             |             |
|-----------------------------|--------|------------|---------------------------------------------|-------------|---|-------------|-------------|
| AAQASAAPKAGTATGR            | P56480 | 0          | N-term +28.03 Da, K +28.03 Da,              | 1109.17627  | 3 | 495.9387207 | 495.6108422 |
| EYEKEKLNER                  | P63038 | 0.00100806 | N-term +28.03 Da, K +28.03 Da,              | 1110.177368 | 3 | 474.5929871 | 474.5926772 |
| VELAAECCR                   | Q61210 | 0.03321509 | N-term +28.03 Da, C +57.02 Da,              | 1112.847656 | 2 | 568.2700195 | 568.2653614 |
| SLEDPQTHSNR                 | P11499 | 0.000999   | N-term +28.03 Da,                           | 1113.549072 | 3 | 437.8800049 | 437.8811097 |
| DSAENETAEGEEKR              | D3Z617 | 0          | N-term +28.03 Da, K +28.03 Da,              | 1113.875732 | 3 | 540.9199829 | 540.9164379 |
| KVSPESQEEGTSDDKVD           | Q8BYI6 | 0.00098377 | N-term +28.03 Da, K +28.03 Da,              | 1114.465332 | 3 | 659.0100098 | 659.0125193 |
| KPVQSQVQLKGR                | P11725 | 0          | N-term +28.03 Da, K +28.03 Da,              | 1115.838623 | 3 | 484.6400146 | 484.6400727 |
| SSSEDKITVH                  | P46656 | 0.02953725 | N-term +28.03 Da, K +28.03 Da,              | 1117.69458  | 3 | 386.8715515 | 386.8715513 |
| SLEAASSSR                   | Q9EQI8 | 0.00138058 | N-term +28.03 Da,                           | 1118.315186 | 2 | 511.7600098 | 511.759281  |
| SVTVQETKEGR                 | O08677 | 0          | N-term +28.03 Da, K +28.03 Da,              | 1119.673462 | 3 | 430.5735474 | 430.5735054 |
| SHGSHETDEEFDAR              | P12787 | 0          | N-term +28.03 Da,                           | 1120.092041 | 2 | 822.8481445 | 822.8478775 |
| EEDKENQGDDETQGGQPPQR        | P62960 | 0          | N-term +28.03 Da, K +28.03 Da,              | 1120.442383 | 3 | 757.3499756 | 757.0157633 |
| AYKDLQSR                    | O55125 | 0.01659019 | N-term +28.03 Da, K +28.03 Da,              | 1120.828735 | 3 | 346.1980896 | 346.1977096 |
| YTDSSYDEKR                  | P10649 | 0          | N-term +28.03 Da, K +28.03 Da,              | 1121.286011 | 3 | 440.5415955 | 440.5419827 |
| AGGGVHIQPR                  | Q9CPU2 | 0.0005698  | N-term +28.03 Da,                           | 1121.36145  | 3 | 340.5295105 | 340.5296819 |
| MGQKDCYVGDQAQSKR            | Q8BFZ3 | 0.01901798 | N-term +28.03 Da, K +28.03 Da, C +57.02 Da, | 1121.625    | 3 | 652.6555176 | 652.6486403 |
| YEDEINKR                    | P04104 | 0.00143198 | N-term +28.03 Da, K +28.03 Da,              | 1121.733887 | 3 | 375.2000122 | 374.8645079 |
| SLEDPQTHSNR                 | P11499 | 0.00138568 | N-term +28.03 Da,                           | 1123.82251  | 2 | 656.3200073 | 656.3180263 |
| SVTVQETKEGR                 | O08677 | 0          | N-term +28.03 Da, K +28.03 Da,              | 1124.387085 | 2 | 645.3599854 | 645.3566199 |
| NGDAKTDQAQKAEGAGDAK         | P09602 | 0.01690736 | N-term +28.03 Da, K +28.03 Da,              | 1124.745117 | 3 | 663.6699829 | 663.0078796 |
| SHGSHETDEEFDAR              | P12787 | 0          | N-term +28.03 Da,                           | 1126.180542 | 3 | 548.9016724 | 548.9010105 |
| KAPQPTGPPPAR                | Q6NZJ6 | 0.00100908 | N-term +28.03 Da,                           | 1128.718994 | 3 | 424.9200134 | 424.9189468 |
| AGGGVHIQPR                  | Q9CPU2 | 0.01076067 | N-term +28.03 Da,                           | 1128.859741 | 2 | 510.2900085 | 510.2908846 |
| AKDVKFGADAR                 | P63038 | 0.00329218 | N-term +28.03 Da, K +28.03 Da,              | 1130.8479   | 2 | 631.3665771 | 631.3667899 |
| KMKDTSDEEIR                 | P62204 | 0.04090623 | N-term +28.03 Da, K +28.03 Da,              | 1131.052856 | 3 | 522.2683105 | 522.2677539 |
| VTGKPISQGGIHGR              | P26443 | 0.00097276 | N-term +28.03 Da, K +28.03 Da,              | 1133.011841 | 4 | 366.4674683 | 366.4676771 |
| MKEAELNR                    | P70194 | 0.00435127 | N-term +28.03 Da, K +28.03 Da,              | 1139.580811 | 3 | 349.5256653 | 349.5269498 |
| APSTMKIK                    | P60710 | 0.01818182 | N-term +28.03 Da, K +28.03 Da,              | 1140.24353  | 3 | 320.5400085 | 320.5367859 |
| TMVVHEKQDDLKGGNEESTKTGNAGSR | P08228 | 0.0006169  | N-term +28.03 Da, K +28.03 Da,              | 1140.558228 | 4 | 765.6300049 | 765.1371998 |
| FAEAVQKSR                   | Q8C196 | 0.00141243 | N-term +28.03 Da, K +28.03 Da,              | 1141.880981 | 3 | 364.5450439 | 364.5451093 |
| AVLHEVQR                    | E9PZ31 | 0.00135808 | N-term +28.03 Da,                           | 1143.363281 | 3 | 327.194519  | 327.1942992 |
| DEDDVDTKKQKTEEDD            | P26350 | 0.00174749 | N-term +28.03 Da, K +28.03 Da,              | 1144.01355  | 3 | 713.3300171 | 712.9937426 |
| SYVGDEAQSKR                 | P60710 | 0.00174902 | N-term +28.03 Da, K +28.03 Da,              | 1145.442749 | 3 | 432.5581665 | 432.5578554 |
| FAEAVQKSR                   | Q8C196 | 0.00399521 | N-term +28.03 Da, K +28.03 Da,              | 1149.177612 | 2 | 546.3144531 | 546.3140257 |
| AKDVKFGADAR                 | P63038 | 0.00210526 | N-term +28.03 Da, K +28.03 Da,              | 1154.952637 | 4 | 316.1870728 | 316.1870332 |
| TKVLNEEER                   | P24270 | 0.02901418 | N-term +28.03 Da, K +28.03 Da,              | 1155.56311  | 3 | 391.887085  | 391.8873127 |
| AAQASAAPKAGTATGR            | P56480 | 0.00063211 | N-term +28.03 Da, K +28.03 Da,              | 1156.668701 | 3 | 495.6078796 | 495.6108422 |
| TKVLNEEER                   | P24270 | 0.04445836 | N-term +28.03 Da, K +28.03 Da,              | 1156.871948 | 2 | 587.3300171 | 587.3273308 |
| TVPISKGSR                   | Q6NZJ6 | 0.02599134 | N-term +28.03 Da, K +28.03 Da,              | 1157.462524 | 3 | 334.2097778 | 334.209838  |
| SHGSHETDEEFDAR              | P12787 | 0          | N-term +28.03 Da,                           | 1157.537964 | 3 | 548.9011841 | 548.9010105 |

|                       |        |            |                                |             |   |             |             |
|-----------------------|--------|------------|--------------------------------|-------------|---|-------------|-------------|
| SSSEDKITVH            | P46656 | 0.04089336 | N-term +28.03 Da, K +28.03 Da, | 1158.28064  | 2 | 579.8035278 | 579.8036887 |
| TKFVEGAR              | Q8C196 | 0.02477402 | N-term +28.03 Da, K +28.03 Da, | 1159.390503 | 3 | 321.8589783 | 321.8589165 |
| EEEEEEAGEEEGSQKR      | O35381 | 0          | N-term +28.03 Da, K +28.03 Da, | 1159.799805 | 3 | 636.6099854 | 636.2764724 |
| HDSPETSPIR            | E9PV38 | 0.00053533 | N-term +28.03 Da,              | 1160.374268 | 2 | 583.789978  | 583.7936552 |
| SGKGDSTLQVSSR         | Q80WJ7 | 0          | N-term +28.03 Da, K +28.03 Da, | 1161.01355  | 2 | 689.3699951 | 689.370259  |
| AKDVKFGADAR           | P63038 | 0.00100452 | N-term +28.03 Da, K +28.03 Da, | 1161.655518 | 2 | 631.3672485 | 631.3667899 |
| KNVSMEDNEEDR          | P48776 | 0.00808003 | N-term +28.03 Da,              | 1165.496216 | 3 | 507.8999939 | 507.8998417 |
| GPISQTTSQTR           | Q6A0A2 | 0.00054945 | N-term +28.03 Da,              | 1165.883545 | 2 | 602.8200073 | 602.3200373 |
| SGKGDSTLQVSSR         | Q80WJ7 | 0.02136317 | N-term +28.03 Da, K +28.03 Da, | 1168.620117 | 3 | 459.9158936 | 459.9159315 |
| KMKDTSDEEIEIR         | P62204 | 0.00103413 | N-term +28.03 Da, K +28.03 Da, | 1169.023804 | 3 | 522.269165  | 522.2677539 |
| AKDVKFGADAR           | P63038 | 0.01599147 | N-term +28.03 Da, K +28.03 Da, | 1172.251831 | 3 | 421.2468567 | 421.2469521 |
| FAEAVQKSR             | Q8C196 | 0.00140252 | N-term +28.03 Da, K +28.03 Da, | 1173.522339 | 3 | 364.5450745 | 364.5451093 |
| SLEDPQTHANR           | P07901 | 0.02048481 | N-term +28.03 Da,              | 1183.167969 | 3 | 432.8800049 | 432.5494713 |
| SAQELAGSR             | P54869 | 0.01362496 | N-term +28.03 Da,              | 1183.447632 | 2 | 473.7511902 | 473.7512585 |
| GHGEQQSQPPAAAAQQPSQQR | Q8VEK3 | 0          | N-term +28.03 Da,              | 1184.30835  | 3 | 786.3800049 | 786.3828914 |
| SSSEDKITVH            | P46656 | 0.01657848 | N-term +28.03 Da, K +28.03 Da, | 1184.918945 | 3 | 386.8714294 | 386.8715513 |
| GDEDEAEAPTGKR         | P26350 | 0          | N-term +28.03 Da, K +28.03 Da, | 1185.456421 | 3 | 520.5776367 | 520.5776448 |
| AKDVKFGADAR           | P63038 | 0.00289975 | N-term +28.03 Da, K +28.03 Da, | 1185.53186  | 4 | 316.1870422 | 316.1870332 |
| VVHSQDQIMTKR          | Q91XE0 | 0          | N-term +28.03 Da,              | 1188.538818 | 4 | 375.2099915 | 375.2106113 |
| SHGSHETDEEFDAR        | P12787 | 0          | N-term +28.03 Da,              | 1190.224487 | 3 | 548.9012451 | 548.9010105 |
| SSSEDKITVH            | P46656 | 0.00099354 | N-term +28.03 Da, K +28.03 Da, | 1190.367432 | 2 | 579.8039551 | 579.8036887 |
| GPSQCQETIR            | Q9DCW4 | 0.00061387 | N-term +28.03 Da, C +57.02 Da, | 1194.716187 | 2 | 602.289978  | 602.2929651 |
| QSPGSHGGEWR           | Q8C7E7 | 0.0010142  | N-term +28.03 Da,              | 1197.857544 | 3 | 409.5228882 | 409.1951396 |
| AQQPVNEVEHR           | P52503 | 0.00054496 | N-term +28.03 Da,              | 1201.141846 | 3 | 445.5651855 | 445.5652327 |
| EEEIKAEQEER           | Q9D8Y0 | 0.03688394 | N-term +28.03 Da, K +28.03 Da, | 1201.655396 | 3 | 482.9100037 | 482.5754638 |
| SVEEPPQR              | Q9DCW4 | 0.03319368 | N-term +28.03 Da,              | 1202.904785 | 2 | 485.2535095 | 485.253634  |
| EGAKYVSHGATGKGNQVQR   | P16460 | 0.0483571  | N-term +28.03 Da, K +28.03 Da, | 1208.064941 | 3 | 686.3599854 | 686.695747  |
| SPEELEQQKR            | P70460 | 0.00436162 | N-term +28.03 Da, K +28.03 Da, | 1208.987305 | 3 | 433.9017029 | 433.9016221 |
| MKEGLEAAR             | O35490 | 0.0113387  | N-term +28.03 Da, K +28.03 Da, | 1209.062866 | 3 | 354.2000122 | 354.1988332 |
| SHTQDTEDELEKDTR       | Q80WJ7 | 0          | N-term +28.03 Da,              | 1209.616455 | 3 | 577.6112671 | 577.6112373 |
| KTDTVANQGTKQEGVSNQVK  | Q99PL5 | 0          | N-term +28.03 Da, K +28.03 Da, | 1210.108765 | 4 | 562.0599976 | 561.8103108 |
| VKADELDKPR            | Q88271 | 0.01427042 | N-term +28.03 Da, K +28.03 Da, | 1214.454224 | 3 | 418.9180908 | 418.9187241 |
| REAPETGEETQNEEPR      | Q8CHT1 | 0          | N-term +28.03 Da,              | 1219.85437  | 3 | 633.9597778 | 633.9608181 |
| SHTQDTEDELEKDTR       | Q80WJ7 | 0.00770713 | N-term +28.03 Da,              | 1220.005493 | 4 | 433.4602966 | 433.4602471 |
| AVVVKIETR             | P11679 | 0          | N-term +28.03 Da, K +28.03 Da, | 1220.210571 | 4 | 307.4600525 | 307.460326  |
| SNVNDGVAQSTR          | P17751 | 0          | N-term +28.03 Da,              | 1220.487549 | 2 | 638.8200073 | 638.3180263 |
| SHGSHETDEEFDAR        | P12787 | 0          | N-term +28.03 Da,              | 1222.054077 | 3 | 548.9011841 | 548.9010105 |
| DIDTAAK               | P56383 | 0.02596538 | N-term +28.03 Da, K +28.03 Da, | 1236.957642 | 2 | 395.2211609 | 395.2212709 |
| SHTQDTEDELEKDTR       | Q80WJ7 | 0.00175516 | N-term +28.03 Da,              | 1241.303345 | 3 | 577.6102905 | 577.6112373 |
| ESGPSIVHR             | P60710 | 0.00625244 | N-term +28.03 Da,              | 1241.872681 | 3 | 337.1854248 | 337.1856925 |

|                          |        |            |                                             |             |   |             |             |
|--------------------------|--------|------------|---------------------------------------------|-------------|---|-------------|-------------|
| VHQVLYR                  | P52196 | 0.00735864 | N-term +28.03 Da,                           | 1241.948242 | 3 | 314.8553162 | 314.8555062 |
| SSDLQPQAGR               | O89090 | 0.00135135 | N-term +28.03 Da,                           | 1243.246582 | 2 | 543.7800293 | 543.7805476 |
| VLSGEDKSNIK              | P01942 | 0.01332373 | N-term +28.03 Da, K +28.03 Da,              | 1244.052368 | 3 | 425.2500916 | 425.2502512 |
| TTKAVVVKKIETR            | P11679 | 0.0054902  | N-term +28.03 Da, K +28.03 Da,              | 1244.12793  | 4 | 397.0160217 | 397.0157315 |
| TTKAVVVKKIETR            | P11679 | 0          | N-term +28.03 Da, K +28.03 Da,              | 1244.70459  | 3 | 529.0186768 | 529.0185499 |
| DTVSNQVQR                | Q64374 | 0.00210172 | N-term +28.03 Da,                           | 1244.905884 | 2 | 537.7793579 | 537.7805476 |
| TDDEVVQR                 | P08113 | 0.00329897 | N-term +28.03 Da,                           | 1246.689819 | 2 | 495.25      | 495.248549  |
| VLSGEDKSNIK              | P01942 | 0.0005385  | N-term +28.03 Da, K +28.03 Da,              | 1248.939575 | 2 | 637.3724365 | 637.3717385 |
| VCVHAEASSTGR             | B5X0G2 | 0          | N-term +28.03 Da, C +57.02 Da,              | 1249.628906 | 3 | 477.5599976 | 477.5612713 |
| SYAIKKKDELER             | P97461 | 0.00437028 | N-term +28.03 Da, K +28.03 Da,              | 1250.997803 | 3 | 531.6500244 | 531.3187768 |
| MQNDSAENETAEGEEKR        | D3Z6I7 | 0          | N-term +28.03 Da, K +28.03 Da,              | 1251.769165 | 3 | 665.6300049 | 665.2971017 |
| SEASQTDPSGPPPR           | Q9CQV4 | 0          | N-term +28.03 Da,                           | 1252.113403 | 2 | 727.3499756 | 727.3495239 |
| SDVVVVHGR                | Q8VCH0 | 0.04887102 | N-term +28.03 Da,                           | 1252.733521 | 3 | 332.5299988 | 332.5259375 |
| AVPGTSNPQQR              | A2ADY9 | 0.00061501 | N-term +28.03 Da,                           | 1253.037842 | 2 | 591.8200073 | 591.8149217 |
| MQNDSAENETAEGEEKR        | D3Z6I7 | 0          | N-term +28.03 Da, K +28.03 Da,              | 1257.384888 | 3 | 665.9699707 | 665.2971017 |
| TPSGTAEPYDGTKAR          | Q80Y55 | 0          | N-term +28.03 Da, K +28.03 Da,              | 1260.842041 | 3 | 536.2745361 | 536.2738963 |
| VHLTQHHR                 | Q9Z1D8 | 0.04942848 | N-term +28.03 Da,                           | 1262.411743 | 2 | 528.2907104 | 528.2965011 |
| GAEASAELR                | P26041 | 0.01328069 | N-term +28.03 Da,                           | 1264.918213 | 2 | 466.25      | 466.245809  |
| MQQKEATTEQQLR            | O35490 | 0          | N-term +28.03 Da, K +28.03 Da,              | 1265.396118 | 3 | 549.960022  | 549.6225309 |
| SVGAEACTDMKR             | Q9D8Z2 | 0.00878198 | N-term +28.03 Da, K +28.03 Da, C +57.02 Da, | 1265.924194 | 3 | 437.2113342 | 437.2128142 |
| GDTASPKKEYTAGR           | P09103 | 0.00141911 | N-term +28.03 Da, K +28.03 Da,              | 1266.187988 | 2 | 704.8599854 | 704.8569845 |
| YQNSESGEKNEGSESAPEGQAQQR | P62960 | 0.01753156 | N-term +28.03 Da, K +28.03 Da,              | 1270.026001 | 3 | 889.4000244 | 889.4023469 |
| FEDVGHSTDAR              | P56395 | 0.03501446 | N-term +28.03 Da,                           | 1272.140625 | 3 | 421.1984558 | 421.1984386 |
| MVQEAKEYKAEDEKQR         | P63017 | 0          | N-term +28.03 Da, K +28.03 Da,              | 1274.727905 | 4 | 524.5300293 | 524.2779518 |
| FREPTEER                 | Q9WUK2 | 0.01069322 | N-term +28.03 Da,                           | 1279.664917 | 3 | 407.5349731 | 407.5350506 |
| EEQATGLER                | P19536 | 0.01426534 | N-term +28.03 Da,                           | 1284.12793  | 2 | 530.7667847 | 530.7671061 |
| APTQCDVPPSSR             | P70699 | 0.00213311 | N-term +28.03 Da, C +57.02 Da,              | 1284.595337 | 2 | 671.8200073 | 671.8246297 |
| GTPPAGTPPGAR             | Q8K0L9 | 0          | N-term +28.03 Da,                           | 1284.827515 | 2 | 553.8016968 | 553.8012827 |
| AAQASAAPKAGTATGR         | P56480 | 0.00249066 | N-term +28.03 Da, K +28.03 Da,              | 1285.071167 | 2 | 742.9000244 | 742.9126251 |
| GVEKGPAALR               | Q61176 | 0.01807438 | N-term +28.03 Da, K +28.03 Da,              | 1287.355591 | 3 | 351.8852844 | 351.8853543 |
| GGFCEVCKK                | Q61207 | 0.00102354 | N-term +28.03 Da, K +28.03 Da, C +57.02 Da, | 1287.908936 | 3 | 390.1987915 | 390.1999568 |
| GTCALCR                  | Q8BTE6 | 0.01074074 | N-term +28.03 Da, C +57.02 Da,              | 1288.930054 | 2 | 497.7254333 | 497.7258717 |
| HETDEEFDAR               | P12787 | 0.00136302 | N-term +28.03 Da,                           | 1296.180054 | 2 | 638.7758789 | 638.7756601 |
| GGFCEVCKK                | Q61207 | 0.00052882 | N-term +28.03 Da, K +28.03 Da, C +57.02 Da, | 1298.212158 | 2 | 584.7961426 | 584.796297  |
| GAVEPCAQPR               | Q9JIL4 | 0.00361736 | N-term +28.03 Da, C +57.02 Da,              | 1300.008545 | 2 | 556.7800293 | 556.779493  |
| EARPTTEKSVPYQR           | Q99LB7 | 0.00978916 | N-term +28.03 Da, K +28.03 Da,              | 1300.361816 | 3 | 573.3099976 | 573.3125737 |
| TEAPLNPKANR              | P60710 | 0.00053476 | N-term +28.03 Da, K +28.03 Da,              | 1302.013306 | 3 | 422.9103699 | 422.9103401 |
| GGVEKGPAALR              | Q61176 | 0.0005685  | N-term +28.03 Da, K +28.03 Da,              | 1304.473999 | 3 | 370.8922729 | 370.892509  |
| TPSGTAEPYDGTKAR          | Q80Y55 | 0.01075269 | N-term +28.03 Da, K +28.03 Da,              | 1305.247192 | 3 | 536.2734985 | 536.2738963 |
| TVEEDLGKSR               | P08113 | 0.01785089 | N-term +28.03 Da, K +28.03 Da,              | 1310.478149 | 3 | 397.2189636 | 397.218951  |



|                        |        |            |                                            |             |   |             |             |
|------------------------|--------|------------|--------------------------------------------|-------------|---|-------------|-------------|
| DGDEDEEAAPTGR          | P26350 | 0          | N-term +28.03 Da, K +28.03 Da,             | 1310.787109 | 3 | 558.9199829 | 558.9199596 |
| ELSEPSSTR              | Q8C196 | 0.02715232 | N-term +28.03 Da,                          | 1310.94812  | 2 | 517.2600098 | 517.2616566 |
| TVSTVEEER              | Q9DCM0 | 0.01077666 | N-term +28.03 Da,                          | 1314.662842 | 2 | 539.276001  | 539.2747641 |
| APTQCDVPPSSR           | P70699 | 0.00289256 | N-term +28.03 Da, C +57.02 Da,             | 1315.653809 | 2 | 671.8253784 | 671.8246297 |
| GTPPAGTPPGAR           | Q8K0L9 | 0          | N-term +28.03 Da,                          | 1316.114014 | 2 | 553.8017578 | 553.8012827 |
| ILGGQEAHAHAR           | P03953 | 0.00363636 | N-term +28.03 Da,                          | 1318.354126 | 3 | 407.8948364 | 407.8948014 |
| DEEESSEAKLR            | O70251 | 0.0021322  | N-term +28.03 Da, K +28.03 Da,             | 1318.594116 | 3 | 516.2694702 | 516.2701519 |
| GGFCEVCKK              | Q61207 | 0.00097561 | N-term +28.03 Da, K +28.03 Da,C +57.02 Da, | 1319.320679 | 3 | 390.1998291 | 390.1999568 |
| EIGGAFGGKHTGGGR        | Q9DBF1 | 0.02717031 | N-term +28.03 Da, K +28.03 Da,             | 1322.135498 | 3 | 529.2800293 | 529.2742302 |
| TTGTIVSSQR             | Q9D379 | 0.00398883 | N-term +28.03 Da,                          | 1324.483154 | 2 | 539.2999878 | 539.2985732 |
| VAGETAEEVR             | Q8VCZ9 | 0.00103627 | N-term +28.03 Da,                          | 1326.109009 | 2 | 544.7825928 | 544.7827561 |
| GSHETDEEFDAR           | P12787 | 0          | N-term +28.03 Da,                          | 1327.752563 | 2 | 710.8015137 | 710.8024068 |
| GSHETDEEFDAR           | P12787 | 0.01633523 | N-term +28.03 Da,                          | 1328.328003 | 3 | 474.2038879 | 474.20403   |
| ELQGCKYEFVTR           | A2A7F4 | 0.00098668 | N-term +28.03 Da, K +28.03 Da,C +57.02 Da, | 1328.630005 | 4 | 397.2099915 | 397.2065318 |
| ADPGGQEAEPFR           | Q8BVZ1 | 0.02775025 | N-term +28.03 Da,                          | 1331.952637 | 2 | 627.2999878 | 626.3018447 |
| GETENQSPASEEEKAKSD     | P18608 | 0.0005787  | N-term +28.03 Da, K +28.03 Da,             | 1333.612549 | 3 | 717         | 716.9974869 |
| TEAPLNPKANR            | P60710 | 0.00698487 | N-term +28.03 Da, K +28.03 Da,             | 1334.160767 | 3 | 422.9103088 | 422.9103401 |
| DLGGDAAGR              | Q8VEK3 | 0.01632943 | N-term +28.03 Da,                          | 1334.860962 | 2 | 430.2168579 | 430.2170513 |
| FKSGKGDSTLQVSSR        | Q80WJ7 | 0.00214316 | N-term +28.03 Da, K +28.03 Da,             | 1336.710571 | 3 | 560.9799805 | 560.9808241 |
| GETENQSPASEEEKAKSD     | P18608 | 0          | N-term +28.03 Da, K +28.03 Da,             | 1336.999268 | 3 | 717.6699829 | 716.9974869 |
| SSEVKTEDELK            | Q9JLZ3 | 0.00249169 | N-term +28.03 Da, K +28.03 Da,             | 1338.485107 | 2 | 674.8499756 | 674.851368  |
| SHETDEEFDAR            | P12787 | 0          | N-term +28.03 Da,                          | 1339.101074 | 2 | 682.789978  | 682.2916747 |
| FKSGKGDSTLQVSSR        | Q80WJ7 | 0.00100857 | N-term +28.03 Da, K +28.03 Da,             | 1339.25415  | 3 | 561.6500244 | 560.9808241 |
| SHGSHETDEEFDAR         | P12787 | 0.01084923 | N-term +28.03 Da,                          | 1341.127075 | 3 | 548.9000244 | 548.9010105 |
| KPKSVPSQAEIAR          | Q9DAZ9 | 0.00055928 | N-term +28.03 Da, K +28.03 Da,             | 1343.191772 | 3 | 541.9799805 | 541.9857978 |
| EQLEEEEAAR             | Q8VDD5 | 0.00062933 | N-term +28.03 Da, K +28.03 Da,             | 1344.112671 | 3 | 482.5799866 | 482.5754638 |
| GMGQKDSYVGDQAQSKR      | P60710 | 0.00699844 | N-term +28.03 Da, K +28.03 Da,             | 1344.18811  | 4 | 485.7437439 | 485.7440104 |
| SHETDEEFDAR            | P12787 | 0          | N-term +28.03 Da,                          | 1344.387695 | 2 | 682.289978  | 682.2916747 |
| TNPADSKPGTIR           | P15532 | 0.003256   | N-term +28.03 Da, K +28.03 Da,             | 1345.868896 | 3 | 438.25      | 438.2455001 |
| YLNEVAGKHGVR           | P16460 | 0          | N-term +28.03 Da, K +28.03 Da,             | 1346.057007 | 4 | 364.7099915 | 364.7071273 |
| GETNPADSKPGTIR         | P15532 | 0.00099701 | N-term +28.03 Da, K +28.03 Da,             | 1347.711182 | 3 | 500.6000061 | 500.2668529 |
| VAEDEDDEDDVDTKKQKTEEDD | P26350 | 0          | N-term +28.03 Da, K +28.03 Da,             | 1348.099365 | 4 | 638.789978  | 638.5408928 |
| GKVFVTKGR              | O55022 | 0.00053996 | N-term +28.03 Da, K +28.03 Da,             | 1348.977295 | 3 | 397.5800171 | 397.5800424 |
| YSHGSHETDEEFDAR        | P12787 | 0          | N-term +28.03 Da,                          | 1351.5802   | 3 | 603.255188  | 603.2554536 |
| VAEDEDDEDDVDTKKQKTEEDD | P26350 | 0          | N-term +28.03 Da, K +28.03 Da,             | 1351.970459 | 4 | 639.039978  | 638.5408928 |
| SRPPVTLR               | P57724 | 0.02978723 | N-term +28.03 Da,                          | 1354.141724 | 3 | 318.8699951 | 318.5345442 |
| TYGPKVVR               | P12710 | 0.01687764 | N-term +28.03 Da, K +28.03 Da,             | 1360.710693 | 3 | 325.8709717 | 325.8710449 |
| VAEDEDDEDDVDTKKQKTEEDD | P26350 | 0.00330442 | N-term +28.03 Da, K +28.03 Da,             | 1362.03833  | 3 | 851.7199707 | 851.0520982 |
| ELQGQIEEKR             | E9PX29 | 0.01397349 | N-term +28.03 Da, K +28.03 Da,             | 1363.608398 | 3 | 428.9113159 | 429.2418671 |
| VAEDEDDEDDVDTKKQKTEEDD | P26350 | 0.00056211 | N-term +28.03 Da, K +28.03 Da,             | 1364.566528 | 3 | 851.0499878 | 851.0520982 |

|                        |        |            |                                            |             |   |             |             |
|------------------------|--------|------------|--------------------------------------------|-------------|---|-------------|-------------|
| VTAEDKGTGNKNKITITNDQNR | P20029 | 0          | N-term +28.03 Da, K +28.03 Da,             | 1369.94519  | 4 | 633.0999756 | 633.0962372 |
| SFTTTAER               | P60710 | 0.01839639 | N-term +28.03 Da,                          | 1372.708618 | 2 | 470.7403259 | 470.7403594 |
| VAEDDEDVDTKKQKTEEDD    | P26350 | 0          | N-term +28.03 Da, K +28.03 Da,             | 1382.988037 | 4 | 638.789978  | 638.5408928 |
| TVAQLVKR               | Q03265 | 0.04748603 | N-term +28.03 Da, K +28.03 Da,             | 1386.293457 | 3 | 324.2200012 | 324.2184446 |
| EAPMLFIQPR             | Q61003 | 0.00362903 | N-term +28.03 Da,                          | 1388.453613 | 3 | 410.2200012 | 410.561883  |
| DEEDEEEGEEEGSQKR       | Q35381 | 0          | N-term +28.03 Da, K +28.03 Da,             | 1389.81958  | 3 | 674.6188965 | 674.6187871 |
| SANEDNVTQVR            | P24270 | 0.0006105  | N-term +28.03 Da,                          | 1389.97583  | 2 | 631.3099976 | 630.8125768 |
| FYEDMKENPKR            | P52840 | 0.00056022 | N-term +28.03 Da, K +28.03 Da,             | 1393.041504 | 4 | 385.9512634 | 385.9511657 |
| LPPTRPDKPLR            | P10126 | 0.01904432 | N-term +28.03 Da, K +28.03 Da,             | 1394.97522  | 4 | 362.4751587 | 362.4752364 |
| VDEPPQHALR             | P70296 | 0.01068927 | N-term +28.03 Da,                          | 1397.132202 | 3 | 397.2099915 | 397.215652  |
| LGTTAKEEMER            | Q9CZ80 | 0.00058962 | N-term +28.03 Da, K +28.03 Da,             | 1402.579102 | 2 | 660.8452148 | 660.8450308 |
| EREMERRER              | Q9JIX8 | 0.01808067 | N-term +28.03 Da,                          | 1404.023193 | 3 | 440.8993225 | 440.226334  |
| YALQSQQR               | Q8BWT1 | 0.00172563 | N-term +28.03 Da,                          | 1406.116455 | 2 | 511.276001  | 511.2749006 |
| GSEPAPGSVAQPKKIR       | Q9JLQ0 | 0.00143062 | N-term +28.03 Da, K +28.03 Da,             | 1408.016602 | 4 | 427.2552185 | 427.254442  |
| SSGTTAPKKTSGSLKDEDR    | Q91YT0 | 0.0006215  | N-term +28.03 Da, K +28.03 Da,             | 1414.358643 | 4 | 556.7999878 | 556.8009487 |
| GSEPAPGSVAQPKKIR       | Q9JLQ0 | 0.0036305  | N-term +28.03 Da, K +28.03 Da,             | 1414.985352 | 3 | 569.3395386 | 569.3368305 |
| QQSELQSQVR             | Q61792 | 0.00053305 | N-term +28.03 Da,                          | 1415.607178 | 2 | 615.3300171 | 615.8254868 |
| SEEDKLTVSR             | P56480 | 0.00985969 | N-term +28.03 Da, K +28.03 Da,             | 1415.994263 | 3 | 407.2221069 | 407.2224727 |
| ADTPGEATPPPR           | Q9ERE7 | 0          | N-term +28.03 Da,                          | 1416.501221 | 2 | 618.8146973 | 618.8145878 |
| NSANEDNVTQVR           | P24270 | 0.00136116 | N-term +28.03 Da,                          | 1417.394043 | 2 | 687.8300171 | 687.8340409 |
| ADKVPKTAENFR           | P17742 | 0.0268835  | N-term +28.03 Da, K +28.03 Da,             | 1419.300293 | 4 | 365.7124023 | 365.7121441 |
| SANEDNVTQVR            | P24270 | 0          | N-term +28.03 Da,                          | 1420.687012 | 2 | 630.8125    | 630.8125768 |
| ADKVPKTAENFR           | P17742 | 0.00436681 | N-term +28.03 Da, K +28.03 Da,             | 1420.987549 | 3 | 487.280365  | 487.2804333 |
| ADESVGTMGNR            | Q91Y97 | 0.00143266 | N-term +28.03 Da,                          | 1424.310181 | 2 | 582.7695313 | 582.769323  |
| SVQCAVDVKR             | P24270 | 0.00060827 | N-term +28.03 Da, K +28.03 Da,C +57.02 Da, | 1424.38562  | 3 | 406.5599976 | 406.5605423 |
| GEEEDGDEEEAEAPTGKR     | P26350 | 0          | N-term +28.03 Da, K +28.03 Da,             | 1425.109741 | 3 | 707.2999878 | 706.9697085 |
| IMDEALR                | Q6RT24 | 0.03132137 | N-term +28.03 Da,                          | 1430.080688 | 2 | 437.7399902 | 438.2363978 |
| SFQPDTGR               | Q05920 | 0.01986301 | N-term +28.03 Da,                          | 1431.58252  | 2 | 467.7281189 | 468.2327014 |
| AQDKAIVQEATR           | Q8CHT0 | 0.01397849 | N-term +28.03 Da, K +28.03 Da,             | 1439.682251 | 3 | 462.9299927 | 462.5964215 |
| TQDTELEKDTR            | Q80WJ7 | 0.0006135  | N-term +28.03 Da, K +28.03 Da,             | 1439.78772  | 3 | 502.9200134 | 502.9142569 |
| IVQEVETQR              | Q8BWP5 | 0.00213858 | N-term +28.03 Da,                          | 1441.346069 | 2 | 565.3148193 | 565.3142232 |
| TGKPAVNVPR             | Q8CI51 | 0.02112436 | N-term +28.03 Da, K +28.03 Da,             | 1443.01062  | 3 | 365.5608215 | 365.5608707 |
| KGASQAGMLAPGTR         | Q9DAW9 | 0.00212134 | N-term +28.03 Da,                          | 1443.332031 | 3 | 467.5941772 | 467.5941348 |
| AQDKAIVQEATR           | Q8CHT0 | 0.00433241 | N-term +28.03 Da, K +28.03 Da,             | 1446.105225 | 2 | 693.8900146 | 693.3909941 |
| ADTPGEATPPPR           | Q9ERE7 | 0          | N-term +28.03 Da,                          | 1447.121094 | 2 | 618.8149414 | 618.8145878 |
| AQYEALAQKNR            | P05784 | 0          | N-term +28.03 Da, K +28.03 Da,             | 1447.529907 | 3 | 449.9200134 | 449.9174948 |
| SSSEDKITVHFKNR         | P46656 | 0.00173837 | N-term +28.03 Da, K +28.03 Da,             | 1449.574341 | 4 | 433.7399902 | 433.7401619 |
| DAAETEEAEEDR           | Q62264 | 0          | N-term +28.03 Da,                          | 1451.889404 | 2 | 696.2999878 | 696.7917053 |
| GEEEDGDEEEAEAPTGKR     | P26350 | 0          | N-term +28.03 Da, K +28.03 Da,             | 1460.412964 | 3 | 706.9699707 | 706.9697085 |
| SASATPLSGNSSR          | E9QN52 | 0.0024948  | N-term +28.03 Da,                          | 1462.530396 | 2 | 682.3478394 | 682.3442414 |

|                        |        |            |                                            |             |   |             |             |
|------------------------|--------|------------|--------------------------------------------|-------------|---|-------------|-------------|
| LEEYQKEQAVNR           | D3Z7Q2 | 0.00135379 | N-term +28.03 Da, K +28.03 Da,             | 1464.55127  | 3 | 521.9500122 | 521.6106196 |
| GLPAEQGSPR             | Q62261 | 0.00804598 | N-term +28.03 Da,                          | 1465.892212 | 2 | 520.2787476 | 520.2801831 |
| EKIEDNGNFR             | P02762 | 0.00103252 | N-term +28.03 Da, K +28.03 Da,             | 1466.36377  | 3 | 426.5543213 | 426.5543337 |
| ATLKDITR               | Q91VR2 | 0.01692525 | N-term +28.03 Da, K +28.03 Da,             | 1468.192139 | 3 | 325.2058105 | 325.2062049 |
| GQKVNEAACDIAR          | Q35490 | 0.00054377 | N-term +28.03 Da, K +28.03 Da,C +57.02 Da, | 1469.174438 | 2 | 744.3800049 | 744.385386  |
| GAEIGGAFGGEKHTGGGR     | Q9DBF1 | 0.00063735 | N-term +28.03 Da, K +28.03 Da,             | 1472.781982 | 3 | 571.960022  | 571.960423  |
| TKELGTVMR              | P62204 | 0.01429593 | N-term +28.03 Da, K +28.03 Da,             | 1475.484131 | 3 | 364.2145081 | 364.2144833 |
| TVVTSTTEPSR            | O08795 | 0.00770416 | N-term +28.03 Da,                          | 1481.085938 | 2 | 603.3200073 | 603.3222458 |
| GFAGDDAPR              | P60710 | 0.03189066 | N-term +28.03 Da,                          | 1484.197266 | 2 | 467.2250366 | 467.2248764 |
| TILDKPEDR              | O35215 | 0.00662252 | N-term +28.03 Da, K +28.03 Da,             | 1484.572998 | 2 | 571.8244019 | 571.8244238 |
| TAGAQPQDDSIGGR         | G5E870 | 0.00141978 | N-term +28.03 Da,                          | 1487.085205 | 2 | 700.8400269 | 700.8418659 |
| TKVKAAPPEESEAQAEGCSEER | Q9CRB2 | 0          | N-term +28.03 Da, K +28.03 Da,C +57.02 Da, | 1487.255859 | 3 | 797.3900146 | 797.3883207 |
| TKVKAAPPEESEAQAEGCSEER | Q9CRB2 | 0.02385753 | N-term +28.03 Da, K +28.03 Da,C +57.02 Da, | 1487.684204 | 4 | 598.539978  | 598.2930597 |
| GEEAGAYDGPR            | P27773 | 0.04003783 | N-term +28.03 Da,                          | 1488.724854 | 2 | 575.2600098 | 575.2621881 |
| VAGEMGQNEPDQGGQR       | O08756 | 0          | N-term +28.03 Da,                          | 1490.250244 | 2 | 851.3900146 | 850.8864795 |
| SSPTIPSR               | Q8R1I1 | 0.03713107 | N-term +28.03 Da,                          | 1495.138428 | 2 | 436.7455139 | 436.7454444 |
| TKVKAAPPEESEAQAEGCSEER | Q9CRB2 | 0.00211327 | N-term +28.03 Da, K +28.03 Da,C +57.02 Da, | 1499.933594 | 3 | 798.0599976 | 797.3883207 |
| DESGPSIVHR             | P60710 | 0.00209996 | N-term +28.03 Da,                          | 1501.072021 | 2 | 562.2800293 | 562.7883726 |
| TVQTSEGVPRPTAASEAR     | Q3V384 | 0.00137174 | N-term +28.03 Da,                          | 1505.322388 | 3 | 596.6500244 | 596.6463931 |
| EDVCQDCMK              | Q61207 | 0.000612   | N-term +28.03 Da, K +28.03 Da,C +57.02 Da, | 1509.200684 | 2 | 620.7541504 | 620.7539698 |
| EMDEQIR                | D3Z2H9 | 0.01331893 | N-term +28.03 Da,                          | 1509.392578 | 2 | 474.730011  | 474.7263948 |
| GSEPAPGSVAQPK          | Q9JLQ0 | 0          | N-term +28.03 Da, K +28.03 Da,             | 1510.157837 | 2 | 640.8499756 | 640.8458879 |
| TDKPVDEALR             | Q9R257 | 0.01816277 | N-term +28.03 Da, K +28.03 Da,             | 1516.237793 | 2 | 600.8300171 | 600.3351558 |
| AVAVTMGPKGR            | P63038 | 0.00174292 | N-term +28.03 Da, K +28.03 Da,             | 1517.909546 | 3 | 381.5618896 | 381.5619943 |
| TEVEAAVNR              | P29391 | 0.00988969 | N-term +28.03 Da,                          | 1519.626343 | 2 | 508.7722778 | 508.7721911 |
| GDGEEEDGDEDEEAAPTGR    | P26350 | 0          | N-term +28.03 Da, K +28.03 Da,             | 1520.176392 | 3 | 764.3200073 | 764.3191779 |
| HSPECFVVR              | P16460 | 0.00133511 | N-term +28.03 Da, C +57.02 Da,             | 1521.194946 | 2 | 594.7787476 | 594.7769505 |
| EHEESLDVTNPR           | P56657 | 0.04006309 | N-term +28.03 Da,                          | 1523.621094 | 3 | 485.8999939 | 485.2354414 |
| HLNKIQGYR              | Q8BNX1 | 0.02956636 | N-term +28.03 Da, K +28.03 Da,             | 1524.651611 | 3 | 396.2399902 | 395.5681367 |
| MDTGAGSIR              | O35143 | 0.01066961 | N-term +28.03 Da,                          | 1529.487915 | 2 | 468.2347412 | 468.2343868 |
| AEFASEACR              | Q9ERR7 | 0.00142721 | N-term +28.03 Da, C +57.02 Da,             | 1529.831177 | 2 | 534.7431641 | 534.7425764 |
| SFSAPEQQR              | P24270 | 0.01268576 | N-term +28.03 Da,                          | 1529.906494 | 2 | 539.2700195 | 539.2698156 |
| GQPQQTGAASGGYIKR       | O09044 | 0          | N-term +28.03 Da, K +28.03 Da,             | 1533.312622 | 3 | 592.3099976 | 592.6514781 |
| GQPQQTGAASGGYIKR       | O09044 | 0.00212585 | N-term +28.03 Da, K +28.03 Da,             | 1538.715698 | 3 | 592.9899902 | 592.6514781 |
| ASEGQPGKVIEVQAKR       | Q91V76 | 0.01815009 | N-term +28.03 Da, K +28.03 Da,             | 1542.686279 | 4 | 446.0100098 | 446.0124493 |
| TPTHYLTKQDVER          | Q9DBG6 | 0.02046385 | N-term +28.03 Da, K +28.03 Da,             | 1542.837402 | 3 | 548.6300049 | 548.6299027 |
| TPTHYLTKQDVER          | Q9DBG6 | 0.00063613 | N-term +28.03 Da, K +28.03 Da,             | 1543.977417 | 4 | 411.7200012 | 411.7242461 |
| SSSEDKITVHFKNR         | P46656 | 0          | N-term +28.03 Da, K +28.03 Da,             | 1545.083862 | 3 | 577.9899902 | 577.9844571 |
| SSSEDKITVHFKNR         | P46656 | 0          | N-term +28.03 Da, K +28.03 Da,             | 1546.999878 | 4 | 433.7402344 | 433.7401619 |
| DEEEEEEPVKAAPGKR       | P09405 | 0          | N-term +28.03 Da, K +28.03 Da,             | 1547.941284 | 3 | 676.0032349 | 676.0040239 |

|                       |        |            |                                             |             |   |             |             |
|-----------------------|--------|------------|---------------------------------------------|-------------|---|-------------|-------------|
| AVQPPEEGPSR           | Q8BGD9 | 0.00174596 | N-term +28.03 Da,                           | 1549.067627 | 2 | 597.809082  | 597.8093052 |
| SLGLYGKNQR            | P19157 | 0.00054289 | N-term +28.03 Da, K +28.03 Da,              | 1549.218506 | 3 | 397.9004822 | 397.8996637 |
| SAASVYAGAGGSGSR       | P05784 | 0.0017234  | N-term +28.03 Da,                           | 1549.900391 | 2 | 663.3200073 | 663.3258513 |
| GDGEEEDGDEDEEAEAPTGR  | P26350 | 0          | N-term +28.03 Da, K +28.03 Da,              | 1552.115234 | 3 | 764.3195801 | 764.3191779 |
| SSAPVASPNVR           | Q05920 | 0.00099502 | N-term +28.03 Da,                           | 1555.665039 | 2 | 556.8060303 | 556.8065652 |
| SAPVASPNVR            | Q05920 | 0.00471513 | N-term +28.03 Da,                           | 1556.083496 | 2 | 513.2904053 | 513.2905506 |
| TLTPEEEAR             | P06151 | 0.00327332 | N-term +28.03 Da,                           | 1556.478394 | 2 | 537.2774048 | 537.2773066 |
| EKIEDNGNFR            | P02762 | 0.00251362 | N-term +28.03 Da, K +28.03 Da,              | 1558.047852 | 3 | 426.8829346 | 426.5543337 |
| RDGKLVSESDVVSK        | P11679 | 0.00058005 | N-term +28.03 Da, K +28.03 Da,              | 1563.16748  | 3 | 563.984314  | 563.9842345 |
| SSSAPVASPNVR          | Q05920 | 0          | N-term +28.03 Da,                           | 1564.730103 | 2 | 600.3231201 | 600.3225798 |
| LIAEGTAPR             | Q8R0Y6 | 0.04241282 | N-term +28.03 Da,                           | 1565.058594 | 2 | 478.2799988 | 478.2821941 |
| STEVEAAVNR            | P29391 | 0.00134892 | N-term +28.03 Da,                           | 1566.626099 | 2 | 552.2879028 | 552.2882056 |
| SSSEDKITVHFKNR        | P46656 | 0.03530167 | N-term +28.03 Da, K +28.03 Da,              | 1567.338257 | 2 | 866.4699707 | 866.4730474 |
| GSPEGSSQLCSPR         | D3Z6Q9 | 0          | N-term +28.03 Da, C +57.02 Da,              | 1568.853882 | 2 | 695.3200073 | 695.3249942 |
| SELSNPSETESER         | Q61584 | 0.03206997 | N-term +28.03 Da,                           | 1569.331421 | 2 | 746.8400269 | 746.8417295 |
| TGQVYDEKDYR           | P52503 | 0.00059737 | N-term +28.03 Da, K +28.03 Da,              | 1573.172974 | 2 | 715.3499756 | 715.3515349 |
| IVHGEKDPLVPR          | Q8R164 | 0.03202847 | N-term +28.03 Da, K +28.03 Da,              | 1574.157471 | 3 | 472.6172485 | 472.6171566 |
| SSSEDKITVHFKNR        | P46656 | 0          | N-term +28.03 Da, K +28.03 Da,              | 1575.408203 | 3 | 577.9846802 | 577.9844571 |
| GGGPTTTGGPPAGAEAAQRPR | Q8R1S4 | 0          | N-term +28.03 Da,                           | 1576.11377  | 3 | 665         | 664.6679685 |
| SSSEDKITVHFKNR        | P46656 | 0          | N-term +28.03 Da, K +28.03 Da,              | 1577.614014 | 4 | 433.7405396 | 433.7401619 |
| WRPPQPVKGR            | P16015 | 0.01630627 | N-term +28.03 Da, K +28.03 Da,              | 1578.257446 | 4 | 319.9500122 | 319.94638   |
| TDDPPTTNPPTAR         | Q7TMF3 | 0.03210117 | N-term +28.03 Da,                           | 1579.235229 | 2 | 706.3499756 | 705.8466169 |
| AVQPPEEGPSR           | Q8BGD9 | 0.00363196 | N-term +28.03 Da,                           | 1580.763184 | 2 | 597.809021  | 597.8093052 |
| TTATVLAR              | P63038 | 0.03216374 | N-term +28.03 Da,                           | 1583.071655 | 2 | 430.7636719 | 430.763637  |
| SEFGDSSSPATR          | E9PV24 | 0.00055036 | N-term +28.03 Da,                           | 1586.166748 | 2 | 634.789978  | 634.7913102 |
| SFSAPEQQR             | P24270 | 0.00141443 | N-term +28.03 Da,                           | 1586.889282 | 2 | 539.2695313 | 539.2698156 |
| SAPVASPNVR            | Q05920 | 0.00211864 | N-term +28.03 Da,                           | 1586.978516 | 2 | 513.2908936 | 513.2905506 |
| SMDTGAGSIR            | O35143 | 0.01083302 | N-term +28.03 Da,                           | 1587.213989 | 2 | 511.7504272 | 511.7504014 |
| VDDEEDEEEAGEEEGSQKR   | O35381 | 0          | N-term +28.03 Da, K +28.03 Da,              | 1587.905396 | 3 | 745.9799805 | 745.9839066 |
| TPEQKKELSEIAQR        | Q91Y97 | 0.00363489 | N-term +28.03 Da, K +28.03 Da,              | 1591.512451 | 3 | 581         | 580.9999958 |
| ATTVQEQLR             | Q88G07 | 0.00132685 | N-term +28.03 Da,                           | 1592.863647 | 2 | 537.2999878 | 537.3011157 |
| APKQELALR             | P46938 | 0.01395848 | N-term +28.03 Da, K +28.03 Da, C +57.02 Da, | 1594.321655 | 3 | 414.5715942 | 414.5726707 |
| SSSAPVASPNVR          | Q05920 | 0          | N-term +28.03 Da,                           | 1595.0979   | 2 | 600.3214111 | 600.3225798 |
| TPEAAVEHPEAVR         | O35490 | 0          | N-term +28.03 Da,                           | 1597.21167  | 3 | 478.5829773 | 478.5842932 |
| SELSNPSETESER         | Q61584 | 0          | N-term +28.03 Da,                           | 1599.784058 | 2 | 746.8400269 | 746.8417295 |
| TVHVLAKLR             | P25688 | 0.00773694 | N-term +28.03 Da, K +28.03 Da,              | 1603.483398 | 3 | 364.9130859 | 364.9132441 |
| TDMGMTMQER            | P56480 | 0.03159609 | N-term +28.03 Da,                           | 1606.97583  | 2 | 548.7399902 | 548.7417193 |
| TPEQKKELSEIAQR        | Q91Y97 | 0.03042198 | N-term +28.03 Da, K +28.03 Da,              | 1607.287109 | 3 | 581.6699829 | 580.9999958 |
| YLAEVATGEKR           | P61982 | 0          | N-term +28.03 Da, K +28.03 Da,              | 1615.304077 | 3 | 431.5783997 | 431.5784791 |
| TPCDDFTR              | P28798 | 0.01809955 | N-term +28.03 Da, C +57.02 Da,              | 1616.400879 | 2 | 520.229187  | 520.2293018 |

|                    |        |            |                                |             |   |             |             |
|--------------------|--------|------------|--------------------------------|-------------|---|-------------|-------------|
| MKHYEVEIR          | Q9CY27 | 0.0014313  | N-term +28.03 Da, K +28.03 Da, | 1617.753174 | 3 | 420.8971252 | 420.8971543 |
| KVDVVGATQGQAGSCSR  | Q8BGD9 | 0          | N-term +28.03 Da, C +57.02 Da, | 1620.079224 | 3 | 592.6398926 | 592.6404733 |
| KVDVVGATQGQAGSCSR  | Q8BGD9 | 0.0010015  | N-term +28.03 Da, C +57.02 Da, | 1622.001709 | 2 | 888.460022  | 888.4570718 |
| GTESDLTVSR         | Q99LB7 | 0.00102512 | N-term +28.03 Da,              | 1625.12439  | 2 | 546.7800293 | 546.7802136 |
| KQEYDESGPSIVHR     | P60710 | 0.00059453 | N-term +28.03 Da,              | 1627.313232 | 3 | 567.6199951 | 567.624929  |
| KQEYDESGPSIVHR     | P60710 | 0          | N-term +28.03 Da,              | 1628.296021 | 4 | 425.9700317 | 425.9705159 |
| QRPAEDLTVR         | Q8VCH8 | 0.02592223 | N-term +28.03 Da,              | 1631.439575 | 3 | 405.2223816 | 404.89469   |
| SELIQKYR           | Q9QYGO | 0.03558833 | N-term +28.03 Da, K +28.03 Da, | 1633.448364 | 3 | 364.8900146 | 364.885243  |
| SVVPGAEDQR         | Q6P6J9 | 0.00056338 | N-term +28.03 Da,              | 1633.700684 | 2 | 578.8015747 | 578.8014802 |
| IQDGSQNTNVDKPLR    | Q3U0V1 | 0.01235914 | N-term +28.03 Da, K +28.03 Da, | 1633.808228 | 3 | 580.9799805 | 580.9794834 |
| KQEYDESGPSIVHR     | P60710 | 0.04061713 | N-term +28.03 Da,              | 1635.737915 | 2 | 850.9299927 | 850.9337553 |
| SEPAQPAVQQAPAR     | Q7TNL9 | 0          | N-term +28.03 Da,              | 1636.051025 | 2 | 739.8900146 | 739.3915256 |
| SEPAQPAVQQAPAR     | Q7TNL9 | 0          | N-term +28.03 Da,              | 1636.903442 | 2 | 739.3905029 | 739.3915256 |
| SKQEYDESGPSIVHR    | P60710 | 0.00211416 | N-term +28.03 Da, K +28.03 Da, | 1637.429077 | 3 | 596.6400146 | 596.6356054 |
| IVGNEHYDVAR        | P56480 | 0.00097752 | N-term +28.03 Da,              | 1637.910889 | 3 | 434.2262268 | 434.2263284 |
| SELSGAADEAAR       | Q9D3D9 | 0.00056054 | N-term +28.03 Da,              | 1638.61145  | 2 | 602.7930298 | 602.7938527 |
| ATLKDITR           | Q91VR2 | 0.00400962 | N-term +28.03 Da, K +28.03 Da, | 1640.934692 | 3 | 325.2063904 | 325.2062049 |
| VNEAACDIAR         | O35490 | 0.00132979 | N-term +28.03 Da, C +57.02 Da, | 1641.112671 | 2 | 573.7800293 | 573.782233  |
| ATLKDITR           | Q91VR2 | 0.00400962 | N-term +28.03 Da, K +28.03 Da, | 1645.781372 | 2 | 487.3057251 | 487.3056692 |
| DAPVSGGVGAAR       | Q99L13 | 0.03742467 | N-term +28.03 Da,              | 1646.553101 | 2 | 542.789978  | 542.7909151 |
| DEPILSNKSGDNR      | P70296 | 0.00052604 | N-term +28.03 Da, K +28.03 Da, | 1647.447876 | 2 | 751.3900146 | 750.8862736 |
| DEPILSNKSGDNR      | P70296 | 0.00211775 | N-term +28.03 Da, K +28.03 Da, | 1649.151001 | 3 | 500.9265442 | 500.9266079 |
| SGGNSEPAQPAVQQAPAR | Q7TNL9 | 0          | N-term +28.03 Da,              | 1650.077271 | 2 | 897.4500122 | 896.9504683 |
| ASDALDKIR          | P08113 | 0.03208036 | N-term +28.03 Da, K +28.03 Da, | 1650.943359 | 3 | 348.8729858 | 348.8731146 |
| TEATLEAEQTR        | Q99PL5 | 0.01067747 | N-term +28.03 Da,              | 1651.14978  | 2 | 639.3200073 | 638.8226103 |
| SGGNSEPAQPAVQQAPAR | Q7TNL9 | 0          | N-term +28.03 Da,              | 1653.129028 | 2 | 896.9500122 | 896.9504683 |
| QLEEAEEEAQR        | Q8VDD5 | 0.00133215 | N-term +28.03 Da,              | 1653.245605 | 2 | 680.8300171 | 680.3229748 |
| SSDALDKIR          | P07901 | 0.02017094 | N-term +28.03 Da, K +28.03 Da, | 1654.892334 | 3 | 354.2000122 | 354.204753  |
| SWVEENR            | Q78JT3 | 0.00362611 | N-term +28.03 Da,              | 1655.055176 | 2 | 474.230011  | 474.2327014 |
| HPSVDGFTPR         | Q8C196 | 0.03378378 | N-term +28.03 Da,              | 1657.767456 | 2 | 570.789978  | 570.7934576 |
| DDEEEEEEPVKAAPGKR  | P09405 | 0.00062344 | N-term +28.03 Da, K +28.03 Da, | 1659.491211 | 3 | 714.6799927 | 714.3463386 |
| DVKFGADAR          | P63038 | 0.00062383 | N-term +28.03 Da, K +28.03 Da, | 1661.071655 | 3 | 345.5256042 | 345.5258262 |
| VEVMPQNQK          | Q9DCX2 | 0.00326531 | N-term +28.03 Da, K +28.03 Da, | 1661.248535 | 2 | 564.8099976 | 564.8077191 |
| ATPPDDGNLCR        | Q64442 | 0.00803674 | N-term +28.03 Da, C +57.02 Da, | 1664.3927   | 2 | 622.2906494 | 622.2904226 |
| SSLEDSQIEKER       | Q9CZ13 | 0          | N-term +28.03 Da, K +28.03 Da, | 1665.789795 | 3 | 492.9200134 | 492.9228635 |
| SEPAQPAVQQAPAR     | Q7TNL9 | 0          | N-term +28.03 Da,              | 1668.241577 | 2 | 739.3929443 | 739.3915256 |
| EVFQVSHPR          | Q9WVLO | 0.0195809  | N-term +28.03 Da,              | 1669.832764 | 3 | 376.2039795 | 376.2049756 |
| GKLVSESSDVVSK      | P11679 | 0          | N-term +28.03 Da, K +28.03 Da, | 1671.753906 | 2 | 709.9099731 | 709.9086857 |
| ATLKDITR           | Q91VR2 | 0.02903332 | N-term +28.03 Da, K +28.03 Da, | 1672.240479 | 3 | 325.2062988 | 325.2062049 |
| TKVSSLIER          | Q921X9 | 0.01816911 | N-term +28.03 Da, K +28.03 Da, | 1672.31604  | 3 | 363.5600891 | 363.560648  |

|                          |        |            |                                             |             |   |             |             |
|--------------------------|--------|------------|---------------------------------------------|-------------|---|-------------|-------------|
| GATTVQEQLR               | Q8BG07 | 0.00056883 | N-term +28.03 Da,                           | 1672.658936 | 2 | 565.8099976 | 565.8118477 |
| GATEEDGIPSKVQR           | P49586 | 0.00064516 | N-term +28.03 Da,                           | 1673.133423 | 3 | 514.9400024 | 514.9422579 |
| GTQANVTKELER             | Q9DBC0 | 0.01100514 | N-term +28.03 Da, K +28.03 Da,              | 1676.02832  | 3 | 467.928009  | 467.9280599 |
| LNVKPLAR                 | Q8QZT1 | 0.01628895 | N-term +28.03 Da, K +28.03 Da,              | 1678.292725 | 3 | 322.8900146 | 322.8868063 |
| SKDPGLDLR                | Q91V76 | 0.04888614 | N-term +28.03 Da, K +28.03 Da,              | 1680.274536 | 3 | 352.8731079 | 352.8731146 |
| NLESEPHQESSVR            | P42567 | 0.03577132 | N-term +28.03 Da,                           | 1684.311401 | 3 | 548.2600098 | 547.6006722 |
| AQPSPLAAKGYR             | Q62417 | 0.00097371 | N-term +28.03 Da, K +28.03 Da,              | 1686.048096 | 3 | 438.9219971 | 438.9224685 |
| FKNGDTASPKEYTAGR         | P09103 | 0.00435299 | N-term +28.03 Da, K +28.03 Da,              | 1687.761597 | 4 | 457.4899902 | 457.241532  |
| GDAPDFDR                 | P10649 | 0.01815642 | N-term +28.03 Da,                           | 1693.113403 | 2 | 460.709259  | 460.7090593 |
| GTTTATVLAR               | P63038 | 0.00055127 | N-term +28.03 Da,                           | 1694.655518 | 2 | 509.7983398 | 509.7982087 |
| SSESEFIAR                | Q3TLH4 | 0.00053079 | N-term +28.03 Da,                           | 1694.88208  | 3 | 397.5316162 | 397.5315289 |
| TKDGFEEKSPEELR           | P52196 | 0.00103306 | N-term +28.03 Da, K +28.03 Da,              | 1695.800781 | 3 | 540.62677   | 540.6261583 |
| VFSEDEMCR                | Q8C196 | 0.01086142 | N-term +28.03 Da, K +28.03 Da,              | 1695.876343 | 3 | 399.5400085 | 399.5375149 |
| VADTPENLR                | Q61792 | 0.0180681  | N-term +28.03 Da,                           | 1697.651611 | 2 | 521.7808228 | 521.7800161 |
| IGGPQGDAGVTGR            | Q91X83 | 0.00982244 | N-term +28.03 Da,                           | 1699.072876 | 2 | 606.8203735 | 606.8202043 |
| ATLKDITR                 | Q91VR2 | 0.01298233 | N-term +28.03 Da, K +28.03 Da,              | 1702.546021 | 3 | 325.2055054 | 325.2062049 |
| ENGESEEE                 | P21619 | 0.03741281 | N-term +28.03 Da,                           | 1702.62146  | 2 | 496.6828308 | 496.6881878 |
| ITYGPKVVR                | P12710 | 0.00362173 | N-term +28.03 Da, K +28.03 Da,              | 1704.004028 | 3 | 363.5655212 | 363.565733  |
| AEFDKAAEEVKR             | P31786 | 0.01087364 | N-term +28.03 Da, K +28.03 Da,              | 1704.648804 | 4 | 369.9599915 | 369.9568768 |
| ALTVQADQNNPR             | Q9D0G0 | 0          | N-term +28.03 Da,                           | 1707.632813 | 2 | 677.8599854 | 677.8573184 |
| GGFCEVCK                 | Q61207 | 0.00133038 | N-term +28.03 Da, K +28.03 Da, C +57.02 Da, | 1713.676514 | 2 | 506.7331848 | 506.7331652 |
| SSPGMSQELR               | P46938 | 0.00173686 | N-term +28.03 Da,                           | 1715.888428 | 2 | 560.2770996 | 560.2767835 |
| EEEGDGEEDGDEDEAEAPTGR    | P26350 | 0          | N-term +28.03 Da, K +28.03 Da,              | 1716.789429 | 3 | 894.0300293 | 893.3617721 |
| SSDSMDTGAGSIR            | Q35143 | 0.00058038 | N-term +28.03 Da,                           | 1720.729248 | 2 | 656.2957764 | 656.2959026 |
| SVEKLGSLR                | Q922Q1 | 0.01079271 | N-term +28.03 Da, K +28.03 Da,              | 1728.108643 | 3 | 348.8861389 | 348.885243  |
| SDSMDTGAGSIR             | Q35143 | 0.00101163 | N-term +28.03 Da,                           | 1728.456787 | 2 | 612.7810669 | 612.7798881 |
| TTTATVLAR                | P63038 | 0.04504223 | N-term +28.03 Da,                           | 1732.974487 | 2 | 481.288147  | 481.2874766 |
| MIPPQEASAR               | Q35250 | 0.04635968 | N-term +28.03 Da,                           | 1733.380615 | 2 | 564.8049316 | 564.2975186 |
| FLEEATR                  | Q8C196 | 0.04696734 | N-term +28.03 Da,                           | 1735.920044 | 2 | 447.2400818 | 447.2399949 |
| HQGVVMVGMGKQDSYVGDEAQSQR | P60710 | 0.02169492 | N-term +28.03 Da, K +28.03 Da,              | 1736.984375 | 4 | 648.8200073 | 648.5730775 |
| SESAQELAEQQR             | Q8CI51 | 0          | N-term +28.03 Da,                           | 1742.17627  | 2 | 666.8200073 | 666.8231418 |
| MSSATAFQR                | Q91VS7 | 0.021414   | N-term +28.03 Da,                           | 1744.079468 | 2 | 513.7554932 | 513.7554864 |
| GKVNSEVGGGEALGR          | P02088 | 0          | N-term +28.03 Da, K +28.03 Da,              | 1751.30542  | 2 | 772.4057007 | 772.4073732 |
| VLTPDPAPSR               | P70296 | 0.02389768 | N-term +28.03 Da,                           | 1751.811279 | 2 | 549.7924805 | 549.7931237 |
| SSDSMDTGAGSIR            | Q35143 | 0.00058685 | N-term +28.03 Da,                           | 1751.904297 | 2 | 656.2936401 | 656.2959026 |
| TAIDEGYR                 | Q8VEX1 | 0.0315858  | N-term +28.03 Da,                           | 1754.878052 | 2 | 476.7420654 | 476.7403594 |
| ARRDEEAVRLAQTR           | Q8C2K1 | 0.00662768 | N-term +28.03 Da,                           | 1758.426758 | 4 | 425.2366943 | 425.4894069 |
| SDSMDTGAGSIR             | Q35143 | 0.00064475 | N-term +28.03 Da,                           | 1759.615112 | 2 | 612.7790527 | 612.7798881 |
| ALGENNEVLKSGR            | P05202 | 0.00101729 | N-term +28.03 Da, K +28.03 Da,              | 1763.481323 | 2 | 721.9000244 | 721.9017261 |
| ALGENNEVLKSGR            | P05202 | 0          | N-term +28.03 Da, K +28.03 Da,              | 1764.364136 | 3 | 481.6033325 | 481.6035762 |

|                          |        |            |                                            |             |   |             |             |
|--------------------------|--------|------------|--------------------------------------------|-------------|---|-------------|-------------|
| SGMCKAGFAGDDAPR          | P60710 | 0          | N-term +28.03 Da, K +28.03 Da,C +57.02 Da, | 1768.478638 | 3 | 532.5827026 | 532.581678  |
| GETVVVGGGTPSR            | Q99LB2 | 0.01099304 | N-term +28.03 Da,                          | 1769.504395 | 2 | 622.3338623 | 622.3356873 |
| EEEEGDGEEEDGDEDEEEAAPTGR | P26350 | 0          | N-term +28.03 Da, K +28.03 Da,             | 1771.418823 | 3 | 936.710022  | 936.3759702 |
| YQKDSQGNLFR              | Q91Y97 | 0.0036393  | N-term +28.03 Da, K +28.03 Da,             | 1772.824097 | 3 | 471.2492371 | 471.2491331 |
| HPSVDGFTPR               | Q8C196 | 0.00140713 | N-term +28.03 Da,                          | 1774.963379 | 2 | 570.7932739 | 570.7934576 |
| SSGRFLSLEKCWR            | D3YVY7 | 0.04271357 | N-term +28.03 Da, K +28.03 Da,C +57.02 Da, | 1775.55896  | 3 | 561.6400146 | 561.2996106 |
| EEEEGDGEEEDGDEDEEEAAPTGR | P26350 | 0          | N-term +28.03 Da, K +28.03 Da,             | 1776.271606 | 3 | 936.3800049 | 936.3759702 |
| EFMDDTSR                 | P62858 | 0.00328677 | N-term +28.03 Da,                          | 1778.067627 | 2 | 514.7211304 | 514.7213098 |
| GDHIKHYKIR               | P14234 | 0.03499197 | N-term +28.03 Da, K +28.03 Da,             | 1778.293945 | 3 | 451.2762146 | 450.9383412 |
| KKTGQGEDPSSDELKQHDVTNATR | Q8CCJ3 | 0          | N-term +28.03 Da, K +28.03 Da,             | 1780.681885 | 4 | 750.3800049 | 750.1244526 |
| MNTVLSR                  | Q6ZWQ7 | 0.01102536 | N-term +28.03 Da,                          | 1781.711792 | 2 | 424.7362671 | 424.7365648 |
| SDSVTEETLR               | Q8C196 | 0.01895898 | N-term +28.03 Da,                          | 1782.113281 | 2 | 582.7909546 | 582.7907787 |
| ATPLDFPSKKR              | Q64213 | 0.00140187 | N-term +28.03 Da, K +28.03 Da,             | 1784.786377 | 4 | 336.7061768 | 336.7065958 |
| ATPLDFPSKKR              | Q64213 | 0.02261985 | N-term +28.03 Da, K +28.03 Da,             | 1788.978027 | 2 | 672.4099731 | 672.4059151 |
| MKPILLQGHER              | Q9QZD9 | 0          | N-term +28.03 Da, K +28.03 Da,             | 1791.53064  | 4 | 345.2060852 | 345.2063342 |
| PMGITSENVAER             | Q8VCHO | 0.0497067  | N-term +28.03 Da,                          | 1792.703735 | 2 | 667.3258057 | 666.3348303 |
| GEVDDEEEEEEAGEEEGSQKR    | O35381 | 0          | N-term +28.03 Da, K +28.03 Da,             | 1792.926636 | 3 | 808.3400269 | 808.0052593 |
| TDPPTAPTTAER             | Q8VDJ3 | 0.00141509 | N-term +28.03 Da,                          | 1794.553955 | 2 | 642.8269043 | 642.8251528 |
| GAGGALFVHR               | Q9D6J6 | 0.00057637 | N-term +28.03 Da,                          | 1795.536499 | 2 | 506.7879944 | 506.7879776 |
| SETIIITGKR               | Q8VDJ3 | 0.00133393 | N-term +28.03 Da, K +28.03 Da,             | 1795.838379 | 3 | 391.9110718 | 391.9115694 |
| SMDVAAGAASGAK            | Q9R1C7 | 0.00103681 | N-term +28.03 Da, K +28.03 Da,             | 1797.320435 | 2 | 596.3074341 | 596.3055411 |
| KISGQKVNEAACDIAR         | O35490 | 0.00098184 | N-term +28.03 Da, K +28.03 Da,C +57.02 Da, | 1798.827881 | 3 | 615.3400879 | 615.3401351 |
| GEVDDEEEEEEAGEEEGSQKR    | O35381 | 0          | N-term +28.03 Da, K +28.03 Da,             | 1799.612305 | 3 | 808.6699829 | 808.0052593 |
| EVEMDAVGKEGR             | Q8C196 | 0          | N-term +28.03 Da, K +28.03 Da,             | 1800.705078 | 3 | 459.234375  | 459.234384  |
| SETIIITGKR               | Q8VDJ3 | 0.00173913 | N-term +28.03 Da, K +28.03 Da,             | 1801.026367 | 2 | 587.3649902 | 587.3637159 |
| VEPASESPRPALAR           | P70441 | 0.00251678 | N-term +28.03 Da,                          | 1801.207397 | 3 | 503.2790222 | 503.2790926 |
| RFGIVTSSAGTGTTEDEAKKR    | Q9D1J3 | 0.0005618  | N-term +28.03 Da, K +28.03 Da,             | 1801.313965 | 4 | 599.8200073 | 599.8249553 |
| SVTTSSVPSPR              | Q8VCF0 | 0.00055006 | N-term +28.03 Da,                          | 1801.732544 | 2 | 573.3131104 | 573.3116807 |
| AAPTAASTTTSASSSGEPEVKR   | P42128 | 0          | N-term +28.03 Da, K +28.03 Da,             | 1803.154785 | 3 | 753.7199707 | 753.7202874 |
| DGEEAGAYDGPR             | P27773 | 0.00103788 | N-term +28.03 Da,                          | 1803.27478  | 2 | 632.7751465 | 632.7756601 |
| HPSVDGFTPR               | Q8C196 | 0.00135563 | N-term +28.03 Da,                          | 1805.414429 | 2 | 570.7937012 | 570.7934576 |
| SSSARAKWLK               | Q7TME0 | 0.04060434 | N-term +28.03 Da, K +28.03 Da,             | 1805.489746 | 3 | 406.5876465 | 406.5836754 |
| AAPTAASTTTSASSSGEPEVKR   | P42128 | 0          | N-term +28.03 Da, K +28.03 Da,             | 1806.432373 | 3 | 754.0499878 | 753.7202874 |
| AAPTAASTTTSASSSGEPEVKR   | P42128 | 0          | N-term +28.03 Da, K +28.03 Da,             | 1807.249146 | 3 | 754.3900146 | 753.7202874 |
| EAKLELQLR                | P39655 | 0.02196688 | N-term +28.03 Da, K +28.03 Da,             | 1808.085815 | 3 | 386.2399902 | 385.9080478 |
| LVSESSDVVSK              | P11679 | 0.02955665 | N-term +28.03 Da,                          | 1809.936401 | 2 | 603.3300171 | 603.3348219 |
| GEAGGESAKGYTSEQVAAVKR    | Q9QYI4 | 0.00052219 | N-term +28.03 Da, K +28.03 Da,             | 1810.03064  | 4 | 560.0499878 | 559.7946607 |
| DAEDAVYGR                | Q6PDM2 | 0.00212314 | N-term +28.03 Da,                          | 1810.535034 | 2 | 512.75      | 512.240724  |
| ATPLDFPSKKR              | Q64213 | 0.00773096 | N-term +28.03 Da, K +28.03 Da,             | 1812.384888 | 3 | 448.6065674 | 448.6063689 |
| ELETMTGEKVK              | P12710 | 0.00176445 | N-term +28.03 Da, K +28.03 Da,             | 1812.460327 | 3 | 450.25      | 450.2512635 |

|                          |        |            |                                |             |   |             |             |
|--------------------------|--------|------------|--------------------------------|-------------|---|-------------|-------------|
| ELETMTGEKVK              | P12710 | 0.00061275 | N-term +28.03 Da, K +28.03 Da, | 1813.40686  | 2 | 674.8699951 | 674.8732569 |
| TATILDKPEDR              | O35215 | 0.00134348 | N-term +28.03 Da, K +28.03 Da, | 1814.089478 | 3 | 438.9137878 | 438.9136391 |
| STSSMGLTPKQVK            | P38060 | 0          | N-term +28.03 Da, K +28.03 Da, | 1815.001709 | 3 | 483.27771   | 483.2778125 |
| GNETEATFAR               | P55264 | 0.01068534 | N-term +28.03 Da,              | 1819.886963 | 2 | 598.289978  | 597.7911127 |
| GQPPPEPSAPAKVVR          | Q6ZQ58 | 0.00663027 | N-term +28.03 Da, K +28.03 Da, | 1823.87793  | 3 | 529.3052368 | 529.306871  |
| ADAVAVTMGPKGR            | P63038 | 0          | N-term +28.03 Da,              | 1825.869507 | 3 | 443.5834961 | 443.5833471 |
| GAGGALFVHR               | Q9D6J6 | 0.00053419 | N-term +28.03 Da,              | 1827.067261 | 2 | 506.7885132 | 506.7879776 |
| DPEATSHSTQDPLEAQAKSR     | P97290 | 0          | N-term +28.03 Da, K +28.03 Da, | 1827.447021 | 3 | 742.0319214 | 742.0328654 |
| DSMDTGAGSIR              | O35143 | 0.00063816 | N-term +28.03 Da,              | 1830.676514 | 2 | 569.2629395 | 569.2638735 |
| SDEVGGEALGR              | P02088 | 0.00058997 | N-term +28.03 Da,              | 1831.973022 | 2 | 559.2800293 | 559.2778381 |
| SDSVTEETLR               | Q8C196 | 0.00053022 | N-term +28.03 Da,              | 1833.494141 | 2 | 582.7907715 | 582.7907787 |
| IIGELHPDDR               | P56395 | 0.001001   | N-term +28.03 Da,              | 1834.255493 | 3 | 398.2154846 | 398.2155407 |
| TVSSDQMAKLR              | P16015 | 0.01076866 | N-term +28.03 Da, K +28.03 Da, | 1837.473389 | 2 | 646.3499756 | 646.3555653 |
| SDPVVSYR                 | P58252 | 0.00470958 | N-term +28.03 Da,              | 1839.297241 | 2 | 475.75      | 475.750727  |
| AADLGTEAGVQR             | Q64105 | 0.01897206 | N-term +28.03 Da,              | 1842.213257 | 2 | 608.321167  | 608.3200373 |
| THLGGEDFDQR              | P20029 | 0.02143586 | N-term +28.03 Da,              | 1844.172729 | 3 | 434.8739624 | 434.873955  |
| TEPELSETQR               | Q9DD06 | 0.00101215 | N-term +28.03 Da,              | 1845.412842 | 2 | 609.3021851 | 609.3040532 |
| KPQAQEQPPASPEALR         | Q9WU79 | 0.00140581 | N-term +28.03 Da,              | 1846.787842 | 3 | 602         | 601.6634952 |
| YGDLEKDKGLQTSQDAR        | P14211 | 0.00250417 | N-term +28.03 Da, K +28.03 Da, | 1850.077759 | 3 | 670.3499756 | 670.0163749 |
| SLQAECQYR                | Q99PL5 | 0.00055679 | N-term +28.03 Da, C +57.02 Da, | 1858.355713 | 2 | 649.2941895 | 649.2957051 |
| EEEEEGDGEEDGDEDEAEAPTGKR | P26350 | 0          | N-term +28.03 Da, K +28.03 Da, | 1860.991821 | 3 | 1023.070007 | 1022.404366 |
| SDEVGGEALGR              | P02088 | 0.0010101  | N-term +28.03 Da,              | 1862.733643 | 2 | 559.2784424 | 559.2778381 |
| TAPTSSPSVTAPR            | Q9QXC1 | 0.00142383 | N-term +28.03 Da,              | 1863.350342 | 2 | 650.3484497 | 650.3487949 |
| GDSYETQVIAHGQGSKGR       | Q78JT3 | 0          | N-term +28.03 Da, K +28.03 Da, | 1864.741089 | 4 | 533.5200195 | 533.2698156 |
| TQKTVDGSPGKLWR           | P16858 | 0.00329083 | N-term +28.03 Da, K +28.03 Da, | 1865.906616 | 4 | 414.991333  | 414.9912509 |
| DEIQAVR                  | P28271 | 0.00988217 | N-term +28.03 Da,              | 1868.529663 | 2 | 494.769989  | 494.2589165 |
| LVDPPDAEEQR              | Q7TNG8 | 0.00250836 | N-term +28.03 Da,              | 1868.830566 | 2 | 657.8118286 | 657.8122428 |
| LGETNPADSKPGTIR          | P15532 | 0.00102302 | N-term +28.03 Da, K +28.03 Da, | 1870.29834  | 3 | 537.9610596 | 537.961541  |
| SVDLEETGR                | Q03265 | 0.00330169 | N-term +28.03 Da,              | 1873.307251 | 2 | 517.2617798 | 517.2616566 |
| AIGTGKTATPQQAQEVHEKLR    | P17751 | 0          | N-term +28.03 Da, K +28.03 Da, | 1873.392822 | 4 | 587.5830688 | 587.5827651 |
| SKKVDQSVPAEISQKAESQGR    | Q61733 | 0          | N-term +28.03 Da, K +28.03 Da, | 1874.469849 | 4 | 643.3599854 | 643.1040622 |
| SDSVTEETLR               | Q8C196 | 0.00053191 | N-term +28.03 Da,              | 1876.043457 | 2 | 582.7900391 | 582.7907787 |
| FYASEDKLENR              | O35490 | 0.00054825 | N-term +28.03 Da, K +28.03 Da, | 1878.970459 | 3 | 476.5770264 | 476.5770271 |
| NDFASAVR                 | P12787 | 0.03318299 | N-term +28.03 Da,              | 1886.297119 | 2 | 454.2347717 | 454.2352439 |
| FYASEDKLENR              | O35490 | 0.00099751 | N-term +28.03 Da, K +28.03 Da, | 1888.030762 | 2 | 714.3699951 | 714.3619025 |
| VEIIANDQGNR              | P16627 | 0.00062189 | N-term +28.03 Da,              | 1888.347168 | 2 | 628.8300171 | 628.8333118 |
| SDSSDSMDTGAGSIR          | O35143 | 0          | N-term +28.03 Da,              | 1891.79126  | 2 | 757.8300171 | 757.3253893 |
| AGKDGVANVSIEDR           | P08228 | 0.00398565 | N-term +28.03 Da, K +28.03 Da, | 1893.882324 | 3 | 496.2668762 | 496.2668529 |
| SNSETHITGKR              | Q8VDJ3 | 0.00060277 | N-term +28.03 Da,              | 1896.0448   | 3 | 458.9361572 | 458.9365552 |
| ANIGQKEDFEAR             | P16460 | 0.03578275 | N-term +28.03 Da, K +28.03 Da, | 1896.120117 | 3 | 521.5999756 | 521.5984912 |



|                            |        |            |                                            |             |   |             |             |
|----------------------------|--------|------------|--------------------------------------------|-------------|---|-------------|-------------|
| LEYTDSSYDEKR               | P10649 | 0          | N-term +28.03 Da,                          | 1897.369873 | 3 | 521.25      | 521.2508689 |
| TVVTEEKTYVTIR              | A2ASS6 | 0.01906412 | N-term +28.03 Da, K +28.03 Da,             | 1898.894897 | 4 | 399.9833069 | 399.4817219 |
| LEYTDSSYDEKR               | P10649 | 0.01082493 | N-term +28.03 Da,                          | 1899.390137 | 2 | 781.3699951 | 781.3726651 |
| SNSETIIITGKR               | Q8VDJ3 | 0.00052192 | N-term +28.03 Da,                          | 1901.103027 | 2 | 687.9030151 | 687.9011946 |
| EEEEEEGDGEEEDGDEDEEAAPTGKR | P26350 | 0          | N-term +28.03 Da, K +28.03 Da,             | 1901.65625  | 3 | 1022.73999  | 1022.404366 |
| TENFEDVGHSTDAR             | P56395 | 0.00098474 | N-term +28.03 Da,                          | 1904.161743 | 3 | 535.9095459 | 535.9095058 |
| SKKVDQSVPANIEISQKAAESQGR   | Q61733 | 0          | N-term +28.03 Da, K +28.03 Da,             | 1905.522339 | 4 | 643.3599854 | 643.1040622 |
| ATQTPESPKLSQPR             | Q80XI9 | 0.02899506 | N-term +28.03 Da, K +28.03 Da,             | 1905.992065 | 4 | 400.2200012 | 399.7242461 |
| SDSVTEETLR                 | Q8C196 | 0.00103199 | N-term +28.03 Da,                          | 1907.302979 | 2 | 582.7906494 | 582.7907787 |
| VAVYSEQDTGQMHR             | Q05920 | 0          | N-term +28.03 Da,                          | 1911.166992 | 3 | 550.263855  | 550.2631142 |
| SGNQPPAMVPR                | Q9DCM2 | 0.04118202 | N-term +28.03 Da,                          | 1911.598511 | 2 | 591.3092651 | 591.3084176 |
| TENFEDVGHSTDAR             | P56395 | 0.03041203 | N-term +28.03 Da,                          | 1911.733765 | 2 | 803.8599854 | 803.3606205 |
| TPPPPPPPR                  | Q9WU42 | 0.0238415  | N-term +28.03 Da,                          | 1914.638672 | 2 | 492.2800598 | 492.2872791 |
| KIGGGHGAEYGAEALER          | P01942 | 0.01327116 | N-term +28.03 Da,                          | 1915.674927 | 3 | 571.9699707 | 571.968807  |
| TKVSSLIER                  | Q921X9 | 0.01785714 | N-term +28.03 Da, K +28.03 Da,             | 1919.820435 | 3 | 363.5603943 | 363.560648  |
| SDSSDSMDTGAGSIR            | O35143 | 0          | N-term +28.03 Da,                          | 1922.618652 | 2 | 757.8300171 | 757.3253893 |
| SSFQIVKNPR                 | Q61176 | 0.00058617 | N-term +28.03 Da, K +28.03 Da,             | 1924.457764 | 3 | 411.2425842 | 411.2434304 |
| SDSSDSMDTGAGSIR            | O35143 | 0          | N-term +28.03 Da,                          | 1925.167236 | 2 | 757.3300171 | 757.3253893 |
| AVPAPPPTSPR                | Q9JIY5 | 0.00054318 | N-term +28.03 Da,                          | 1925.628906 | 2 | 559.3213501 | 559.3218507 |
| GKIGGGHGAEYGAEALER         | P01942 | 0          | N-term +28.03 Da, K +28.03 Da,             | 1928.398926 | 3 | 590.9799805 | 590.9759617 |
| EHLKEDLSLR                 | Q9CQM9 | 0.00289495 | N-term +28.03 Da, K +28.03 Da,             | 1930.802002 | 3 | 432.5799866 | 432.5821121 |
| SSFQIVKNPR                 | Q61176 | 0.00058582 | N-term +28.03 Da, K +28.03 Da,             | 1932.828003 | 2 | 616.3599854 | 616.3615074 |
| VPAPDMSTGER                | P26443 | 0.00138185 | N-term +28.03 Da,                          | 1933.960938 | 2 | 594.289978  | 594.2898911 |
| GPAGAGESKCLPMVK            | P07309 | 0.00398089 | N-term +28.03 Da, K +28.03 Da,C +57.02 Da, | 1934.036377 | 3 | 529.2857056 | 529.2862022 |
| SNPENTVFDAKR               | P20029 | 0.0452277  | N-term +28.03 Da,                          | 1934.544312 | 3 | 478.5825806 | 478.5842932 |
| GGPLSGPYR                  | P16015 | 0.0039968  | N-term +28.03 Da,                          | 1937.245728 | 2 | 466.7600098 | 466.2534365 |
| GGPLSGPYR                  | P16015 | 0.00437376 | N-term +28.03 Da,                          | 1938.245239 | 2 | 466.25      | 466.2534365 |
| PPPPPPPPR                  | A2AQ25 | 0.00102881 | N-term +28.03 Da,                          | 1945.743042 | 2 | 491.296875  | 490.2898216 |
| SRPALPVKSLAQR              | Q6NXN1 | 0          | N-term +28.03 Da, K +28.03 Da,             | 1945.893677 | 4 | 370.7399902 | 370.4845984 |
| HLKEDQTEYLEER              | P07901 | 0.00057837 | N-term +28.03 Da, K +28.03 Da,             | 1946.267334 | 3 | 582.6300049 | 582.6283394 |
| SFQIVKNPR                  | Q61176 | 0.00661221 | N-term +28.03 Da, K +28.03 Da,             | 1947.025024 | 3 | 382.2303772 | 382.232754  |
| TITYGPKVVVR                | P12710 | 0.00510004 | N-term +28.03 Da, K +28.03 Da,             | 1951.602783 | 3 | 397.2470703 | 397.2482928 |
| AVGSAFTQDTR                | Q8K2F8 | 0          | N-term +28.03 Da,                          | 1952.764526 | 2 | 590.8015747 | 590.8014802 |
| EKEEDEESPGQAKDEL           | P14211 | 0.02505847 | N-term +28.03 Da, K +28.03 Da,             | 1953.672363 | 2 | 1023.969971 | 1023.473504 |
| SSGPTNASAFTR               | P27546 | 0          | N-term +28.03 Da,                          | 1955.225952 | 2 | 676.8200073 | 676.8256843 |
| TEAVEAKVAQQEAER            | P67778 | 0          | N-term +28.03 Da, K +28.03 Da,             | 1955.532959 | 3 | 615.3200073 | 614.9900485 |
| TEAVEAKVAQQEAER            | P67778 | 0          | N-term +28.03 Da, K +28.03 Da,             | 1956.788452 | 3 | 615.6599731 | 614.9900485 |
| STKPQAQEQPPASPEALR         | Q9WU79 | 0.00915681 | N-term +28.03 Da, K +28.03 Da,             | 1958.421753 | 3 | 664.6900024 | 664.3567313 |
| VSDVETIKNPR                | P80313 | 0          | N-term +28.03 Da, K +28.03 Da,             | 1959.715454 | 3 | 438.5849304 | 438.5856338 |
| SRPALPVKSLAQR              | Q6NXN1 | 0.00099651 | N-term +28.03 Da, K +28.03 Da,             | 1959.866333 | 3 | 493.6433411 | 493.6437057 |

|                             |        |            |                                            |             |   |             |             |
|-----------------------------|--------|------------|--------------------------------------------|-------------|---|-------------|-------------|
| SDSVTEETLR                  | Q8C196 | 0.00980023 | N-term +28.03 Da,                          | 1960.263794 | 2 | 582.789978  | 582.7907787 |
| GIQPEEISR                   | Q9Z120 | 0.01133455 | N-term +28.03 Da,                          | 1961.869873 | 2 | 528.7867432 | 528.7878411 |
| AVGSAFTQDTR                 | Q8K2F8 | 0.00175901 | N-term +28.03 Da,                          | 1963.751587 | 2 | 590.289978  | 590.8014802 |
| YVHNDIFR                    | P97855 | 0.00175824 | N-term +28.03 Da,                          | 1968.888794 | 3 | 364.5256653 | 364.5259375 |
| TAGKDGVANVSIEDR             | P08228 | 0          | N-term +28.03 Da, K +28.03 Da,             | 1970.690918 | 3 | 530.6199951 | 529.9494126 |
| EEEEEEEGDGEEDGDEDEEAEAPTGKR | P26350 | 0          | N-term +28.03 Da, K +28.03 Da,             | 1971.464233 | 3 | 1065.75     | 1065.418564 |
| RGQNQPVLNITNR               | Q8C196 | 0.01903114 | N-term +28.03 Da,                          | 1974.200562 | 3 | 513.2906494 | 513.2901029 |
| AGEGLGQQGASATAAPETR         | Q9CZE3 | 0          | N-term +28.03 Da,                          | 1974.855103 | 2 | 900.4500122 | 900.4477588 |
| EEEEEEEGDGEEDGDEDEEAEAPTGKR | P26350 | 0          | N-term +28.03 Da, K +28.03 Da,             | 1975.248047 | 3 | 1065.420044 | 1065.418564 |
| PPPPPPPPR                   | A2AQ25 | 0.00098087 | N-term +28.03 Da,                          | 1975.977417 | 2 | 491.2974243 | 490.2898216 |
| IPKSVDWDR                   | P06797 | 0.01067354 | N-term +28.03 Da, K +28.03 Da,             | 1976.052856 | 3 | 352.8779907 | 352.8781996 |
| AIQENANALAR                 | Q91Y97 | 0.00060132 | N-term +28.03 Da,                          | 1977.990601 | 2 | 599.8317261 | 599.8305718 |
| SGSAGTAVGAYDAPR             | Q9QZQ1 | 0          | N-term +28.03 Da,                          | 1978.304199 | 2 | 704.8499756 | 704.3467839 |
| DGEVDDEEDEEEAGEEEGSQKR      | Q35381 | 0          | N-term +28.03 Da,                          | 1985.33606  | 3 | 846.6799927 | 846.3475741 |
| STKPQAQEQPPASPEALR          | Q9WU79 | 0.01959436 | N-term +28.03 Da, K +28.03 Da,             | 1989.72998  | 3 | 664.3556519 | 664.3567313 |
| EVEMDAVGKEGR                | Q8C196 | 0          | N-term +28.03 Da, K +28.03 Da,             | 1990.415771 | 3 | 459.230011  | 459.234384  |
| GPAVEAQEEEEQDHGVGR          | Q5F2E8 | 0.00135501 | N-term +28.03 Da,                          | 1992.650635 | 3 | 698.9799805 | 698.6505325 |
| STKPQAQEQPPASPEALR          | Q9WU79 | 0          | N-term +28.03 Da, K +28.03 Da,             | 1995.253906 | 2 | 996.5300293 | 996.0314587 |
| VEIIANDQGNR                 | P16627 | 0.00136737 | N-term +28.03 Da,                          | 2003.752808 | 2 | 628.8300171 | 628.8333118 |
| PPPPPPGHK                   | Q9QWY8 | 0.00134048 | N-term +28.03 Da, K +28.03 Da,             | 2006.540161 | 2 | 491.2967529 | 490.2898216 |
| ALDSSNSMQTVQKTTTR           | P05784 | 0.00057307 | N-term +28.03 Da, K +28.03 Da,             | 2008.817383 | 3 | 641.9985962 | 641.9983268 |
| DEAIHCPPCSEEKLAR            | P47879 | 0          | N-term +28.03 Da, K +28.03 Da,C +57.02 Da, | 2010.327759 | 3 | 657.3099976 | 656.6486403 |
| EQFVQQK                     | P55937 | 0.03233107 | N-term +28.03 Da, K +28.03 Da,             | 2011.421021 | 2 | 481.2600098 | 481.7689195 |
| DEAIHCPPCSEEKLAR            | P47879 | 0.00772499 | N-term +28.03 Da, K +28.03 Da,C +57.02 Da, | 2017.906006 | 4 | 492.7382813 | 492.7382994 |
| SDTPCDDFTR                  | P28798 | 0          | N-term +28.03 Da, C +57.02 Da,             | 2019.008789 | 2 | 621.2583008 | 621.2587885 |
| VPIDVDKTKVHNTEPVENAR        | P81117 | 0          | N-term +28.03 Da, K +28.03 Da,             | 2021.989014 | 4 | 587.0800171 | 587.0760443 |
| ASQVTLEGDKVKVER             | Q9DCW4 | 0.02593085 | N-term +28.03 Da, K +28.03 Da,             | 2023.213867 | 4 | 436.7600098 | 436.5057285 |
| SKDSEGSWFR                  | O55125 | 0.03043194 | N-term +28.03 Da, K +28.03 Da,             | 2023.364746 | 3 | 418.8748169 | 418.8752956 |
| EPDLSSDIKER                 | B5X0G2 | 0.00053333 | N-term +28.03 Da, K +28.03 Da,             | 2023.440186 | 3 | 448.9047546 | 448.9050325 |
| TKFVHDNYVIR                 | Q8C196 | 0.00097656 | N-term +28.03 Da, K +28.03 Da,             | 2024.097168 | 2 | 724.4000244 | 724.4064466 |
| DSVTEETLR                   | Q8C196 | 0.00434955 | N-term +28.03 Da,                          | 2026.734253 | 2 | 539.2700195 | 539.2747641 |
| EPDLSSDIKER                 | B5X0G2 | 0.00059067 | N-term +28.03 Da, K +28.03 Da,             | 2026.819824 | 2 | 672.8562622 | 672.8539105 |
| LPKPALVASR                  | Q8C196 | 0.01131387 | N-term +28.03 Da, K +28.03 Da,             | 2027.596924 | 3 | 369.9129028 | 369.9131328 |
| ISKQEYDESGPSIVHR            | P60710 | 0          | N-term +28.03 Da, K +28.03 Da,             | 2027.766113 | 2 | 950.9899902 | 950.991802  |
| ISKQEYDESGPSIVHR            | P60710 | 0          | N-term +28.03 Da, K +28.03 Da,             | 2028.109009 | 3 | 634.3300781 | 634.3302935 |
| ISKQEYDESGPSIVHR            | P60710 | 0          | N-term +28.03 Da, K +28.03 Da,             | 2029.979004 | 2 | 951.4899902 | 950.991802  |
| SGQQQSNYGPMMKGGSGGGR        | Q8BG05 | 0.00139795 | N-term +28.03 Da, K +28.03 Da,             | 2031.194092 | 3 | 667.3200073 | 666.9865324 |
| TKFVHDNYVIR                 | Q8C196 | 0.00134953 | N-term +28.03 Da, K +28.03 Da,             | 2031.472656 | 2 | 724.9099731 | 724.4064466 |
| EDEEEEEDEGPVR               | Q9D0J8 | 0          | N-term +28.03 Da,                          | 2031.592651 | 2 | 859.8499756 | 859.847407  |
| DSSDSMDTGAGSIR              | O35143 | 0          | N-term +28.03 Da,                          | 2034.641479 | 2 | 713.8099976 | 713.8093747 |

|                           |        |            |                                            |             |   |             |             |
|---------------------------|--------|------------|--------------------------------------------|-------------|---|-------------|-------------|
| GISGNVTPDQDPAR            | Q9D281 | 0          | N-term +28.03 Da,                          | 2041.791138 | 2 | 727.8699951 | 727.865341  |
| FQESDDADEDYGR             | Q80XU3 | 0          | N-term +28.03 Da,                          | 2041.887939 | 2 | 787.8200073 | 787.8157119 |
| ISKQEYDESGPSIVHR          | P60710 | 0.01237714 | N-term +28.03 Da, K +28.03 Da,             | 2043.790283 | 4 | 475.9995117 | 475.9995392 |
| RVEFMDDTSR                | P62858 | 0.01895245 | N-term +28.03 Da,                          | 2046.011963 | 3 | 428.5395508 | 428.5398072 |
| GISGNVTPDQDPAR            | Q9D281 | 0          | N-term +28.03 Da,                          | 2046.623657 | 2 | 728.3699951 | 727.865341  |
| VAVPEAAEER                | Q8JZQ9 | 0.03740095 | N-term +28.03 Da,                          | 2047.839111 | 2 | 549.7937622 | 549.7931237 |
| SDTPCDDFTR                | P28798 | 0          | N-term +28.03 Da, C +57.02 Da,             | 2049.445557 | 2 | 621.2584839 | 621.2587885 |
| PPPPPPPPR                 | A2AQ25 | 0.00625    | N-term +28.03 Da,                          | 2049.900391 | 2 | 491.2999878 | 490.2898216 |
| TFFSETGAGKHVPR            | P05213 | 0.00052301 | N-term +28.03 Da, K +28.03 Da,             | 2049.97583  | 4 | 398.2160645 | 398.2163223 |
| GYSFTTTAER                | P60710 | 0          | N-term +28.03 Da,                          | 2050.230469 | 2 | 581.289978  | 580.7827561 |
| GYSFTTTAER                | P60710 | 0.01661364 | N-term +28.03 Da,                          | 2050.991211 | 2 | 581.789978  | 580.7827561 |
| SSEAPLVNEDVKR             | Q91YQ5 | 0          | N-term +28.03 Da, K +28.03 Da,             | 2052.803467 | 3 | 533.289978  | 532.957908  |
| SKDSEGSWFR                | O55125 | 0.00249273 | N-term +28.03 Da, K +28.03 Da,             | 2053.965332 | 3 | 418.874939  | 418.8752956 |
| EPDLSSDIKER               | B5X0G2 | 0.00054054 | N-term +28.03 Da, K +28.03 Da,             | 2054.116455 | 3 | 448.9050293 | 448.9050325 |
| ILPPTRPDKPLR              | P10126 | 0.02601734 | N-term +28.03 Da, K +28.03 Da,             | 2055.812988 | 4 | 390.745697  | 390.7462524 |
| SVDGFTPR                  | Q8C196 | 0.01688951 | N-term +28.03 Da,                          | 2059.826172 | 2 | 453.7373352 | 453.7376194 |
| DSSDSMDTGAGSIR            | O35143 | 0          | N-term +28.03 Da,                          | 2065.24292  | 2 | 713.8099976 | 713.8093747 |
| GIGTVPVGR                 | P10126 | 0.01266281 | N-term +28.03 Da,                          | 2065.393799 | 2 | 442.2712402 | 442.271629  |
| LREGQESPASPEWKDR          | Q9DBT9 | 0.00097513 | N-term +28.03 Da, K +28.03 Da,             | 2068.601563 | 4 | 510.2645569 | 510.2642673 |
| TSNPENTVFDAGR             | P20029 | 0          | N-term +28.03 Da, K +28.03 Da,             | 2070.199463 | 3 | 512.2700195 | 512.2668529 |
| HQGVVMVGMGQKDSYVVGDEAQSQR | P60710 | 0          | N-term +28.03 Da, K +28.03 Da,             | 2071.907471 | 4 | 648.5700073 | 648.5730775 |
| MGQKDCYVVGDEAQSQR         | Q8BFZ3 | 0.00327869 | N-term +28.03 Da, K +28.03 Da,C +57.02 Da, | 2072.341797 | 3 | 652.6400146 | 652.6486403 |
| YPSPPVVNTVKGK             | Q8VCT4 | 0.0036452  | N-term +28.03 Da, K +28.03 Da,             | 2072.44043  | 3 | 519.6390991 | 519.6397387 |
| TDNELEKTR                 | P26443 | 0.0013973  | N-term +28.03 Da, K +28.03 Da,             | 2073.585205 | 3 | 425.5700073 | 425.5698724 |
| GQSETGISSATLR             | Q91VA0 | 0.04297365 | N-term +28.03 Da,                          | 2073.8479   | 2 | 667.8499756 | 667.8491594 |
| ADAEGDVFR                 | Q9EQ20 | 0.01070506 | N-term +28.03 Da,                          | 2075.501953 | 2 | 504.2399902 | 504.2432665 |
| TGGDAAAPGAAGTQAELPHR      | Q9D0F3 | 0          | N-term +28.03 Da,                          | 2078.693848 | 3 | 625.9817505 | 625.9817758 |
| SDTPCDDFTR                | P28798 | 0.00052466 | N-term +28.03 Da, C +57.02 Da,             | 2081.013184 | 2 | 621.7600098 | 621.2587885 |
| SMPPAQQQITSGQMHR          | P26039 | 0.00054855 | N-term +28.03 Da,                          | 2082.515625 | 3 | 609.2999878 | 608.9663032 |
| EPDLSSDIKER               | B5X0G2 | 0.04       | N-term +28.03 Da, K +28.03 Da,             | 2084.884766 | 3 | 448.9052124 | 448.9050325 |
| YSQSQFTAPR                | Q60865 | 0.00057971 | N-term +28.03 Da,                          | 2085.207764 | 2 | 606.8034668 | 606.8040227 |
| TGGDAAAPGAAGTQAELPHR      | Q9D0F3 | 0          | N-term +28.03 Da,                          | 2087.703369 | 2 | 938.4699707 | 938.4690254 |
| GAFLAEESR                 | P10518 | 0.02388964 | N-term +28.03 Da,                          | 2087.854248 | 2 | 504.261261  | 504.261459  |
| SQAEFDKAAEEVKR            | P31786 | 0.04695274 | N-term +28.03 Da, K +28.03 Da,             | 2088.171387 | 3 | 564.6355591 | 564.6369461 |
| ALLAGKDSSETGENIR          | P38647 | 0.01237263 | N-term +28.03 Da, K +28.03 Da,             | 2088.962158 | 2 | 815.9400024 | 815.4439558 |
| WQGEVPR                   | Q9ERG0 | 0.00101781 | N-term +28.03 Da,                          | 2091.420898 | 2 | 514.7609253 | 514.761626  |
| SDYVGSPPSGTGLHR           | P70296 | 0.00144439 | N-term +28.03 Da,                          | 2093.669189 | 3 | 539.5999756 | 538.9338739 |
| VDDICIAKPR                | P32261 | 0.00101989 | N-term +28.03 Da, K +28.03 Da,C +57.02 Da, | 2096.412354 | 3 | 415.230011  | 414.900676  |
| GGGPGGGNFGGSPGYGGGR       | O88569 | 0          | N-term +28.03 Da,                          | 2097.120361 | 2 | 796.8599854 | 796.863664  |
| TSQSYLTNEQRYNYTTPK        | B1AR51 | 0.01085329 | N-term +28.03 Da, K +28.03 Da,             | 2100.501221 | 2 | 1125.050049 | 1125.555496 |

|                       |        |            |                                |             |   |             |             |
|-----------------------|--------|------------|--------------------------------|-------------|---|-------------|-------------|
| APKVTSELLR            | Q6P1B1 | 0.00056148 | N-term +28.03 Da, K +28.03 Da, | 2101.509033 | 3 | 390.5799866 | 390.5799311 |
| GVANVSIEDR            | P08228 | 0.00548804 | N-term +28.03 Da,              | 2102.844482 | 2 | 544.2907715 | 544.2907481 |
| VKVGVNGFGR            | P16858 | 0.00054555 | N-term +28.03 Da, K +28.03 Da, | 2103.070801 | 3 | 363.5599976 | 363.557349  |
| SNCPITIGQIR           | P10605 | 0.01691928 | N-term +28.03 Da, C +57.02 Da, | 2103.221924 | 2 | 587.2999878 | 587.3058751 |
| ERTLQSLR              | Q6P4S6 | 0.02902375 | N-term +28.03 Da,              | 2107.776855 | 2 | 516.2999878 | 515.8038252 |
| TVIKEVLQR             | Q8CAY6 | 0.01626591 | N-term +28.03 Da, K +28.03 Da, | 2108.003418 | 3 | 381.2481384 | 381.2482928 |
| TGGDAAAPGAAGTQAELEPHR | Q9D0F3 | 0          | N-term +28.03 Da,              | 2109.289795 | 3 | 625.9799805 | 625.9817758 |
| ANFENLAKER            | Q60598 | 0.00063532 | N-term +28.03 Da, K +28.03 Da, | 2109.708008 | 3 | 416.5599976 | 416.5629404 |
| VSDSDSDMDTGAGSIR      | O35143 | 0.00100402 | N-term +28.03 Da,              | 2112.34668  | 2 | 806.8599854 | 806.8595964 |
| SPPAPSDSESVKIEER      | Q9R257 | 0.025092   | N-term +28.03 Da,              | 2112.426758 | 3 | 566.289978  | 566.2965897 |
| VPNPVIGVVKR           | Q61183 | 0.0017331  | N-term +28.03 Da, K +28.03 Da, | 2115.574219 | 3 | 378.9161377 | 378.9167658 |
| SDYPPPLGR             | P10126 | 0.04863693 | N-term +28.03 Da,              | 2116.699463 | 2 | 466.7449646 | 466.7454444 |
| TEEEEEETEKESTEKDEL    | P08113 | 0.02602603 | N-term +28.03 Da, K +28.03 Da, | 2119.015137 | 3 | 756.6799927 | 756.6760797 |
| GKPVLYHYFDGR          | P30115 | 0.00134831 | N-term +28.03 Da, K +28.03 Da, | 2119.357422 | 4 | 337.1900024 | 336.9410292 |
| MYLNEVAGKHGVGR        | P16460 | 0          | N-term +28.03 Da, K +28.03 Da, | 2120.387207 | 4 | 397.4667358 | 397.4672485 |
| IVGLDSGHIR            | P52196 | 0.00361882 | N-term +28.03 Da,              | 2123.253906 | 3 | 365.5499878 | 365.5487423 |
| FNSANEDNVTQVR         | P24270 | 0.00138504 | N-term +28.03 Da,              | 2123.349609 | 2 | 761.3693848 | 761.368248  |
| SEAPPLVNEDVVKR        | Q91YQ5 | 0          | N-term +28.03 Da, K +28.03 Da, | 2124.487305 | 3 | 503.9461975 | 503.9472316 |
| SEINVEGPPR            | P18572 | 0.00064433 | N-term +28.03 Da,              | 2126.200195 | 2 | 563.2999878 | 563.2985732 |
| NQQPSNYGPMKSGNFGGSR   | O88569 | 0.01902456 | N-term +28.03 Da,              | 2129.953125 | 3 | 694.6599731 | 694.6655704 |
| TFAEDKTYKY            | Q8VCF0 | 0.03891174 | N-term +28.03 Da, K +28.03 Da, | 2131.225098 | 2 | 675.3499756 | 675.3530144 |
| SSEAPPLVNEDVVKR       | Q91YQ5 | 0          | N-term +28.03 Da, K +28.03 Da, | 2132.363037 | 3 | 532.9580688 | 532.957908  |
| TSVDLEETGR            | Q03265 | 0.00052356 | N-term +28.03 Da,              | 2132.51416  | 2 | 567.784729  | 567.7854962 |
| GELSKEELIR            | Q9DBG7 | 0.04751553 | N-term +28.03 Da, K +28.03 Da, | 2133.887939 | 3 | 410.5747986 | 410.5748461 |
| YPSPPVNTVKKGK         | Q8VCT4 | 0          | N-term +28.03 Da, K +28.03 Da, | 2133.963379 | 3 | 519.6394653 | 519.6397387 |
| LYQKDSQGNLFR          | Q91Y97 | 0.00055096 | N-term +28.03 Da, K +28.03 Da, | 2134.189697 | 3 | 508.9439087 | 508.9438212 |
| SSEAPPLVNEDVVKR       | Q91YQ5 | 0          | N-term +28.03 Da, K +28.03 Da, | 2135.37915  | 2 | 798.9299927 | 798.9332238 |
| GGIGTPVVGGR           | P10126 | 0.00143403 | N-term +28.03 Da,              | 2135.45459  | 2 | 470.7799988 | 470.7823611 |
| GELSKEELIR            | Q9DBG7 | 0.00362319 | N-term +28.03 Da, K +28.03 Da, | 2135.760498 | 2 | 615.3575439 | 615.3586309 |
| ALVNDPQPEHPLR         | P68037 | 0.00213767 | N-term +28.03 Da,              | 2138.915283 | 3 | 505.2770081 | 505.2755709 |
| FTKEDLHLR             | Q9CQ01 | 0.00135685 | N-term +28.03 Da, K +28.03 Da, | 2139.931152 | 3 | 405.5675659 | 405.5679141 |
| SSGALLPKPQ            | Q9CPQ1 | 0.03186992 | N-term +28.03 Da, K +28.03 Da, | 2141.568115 | 2 | 527.3200073 | 527.3187767 |
| MDVPNIKR              | P63242 | 0.00249896 | N-term +28.03 Da, K +28.03 Da, | 2141.643555 | 3 | 343.5400085 | 343.5355565 |
| VSDSDSDMDTGAGSIR      | O35143 | 0.04750078 | N-term +28.03 Da,              | 2142.913086 | 2 | 806.8599854 | 806.8595964 |
| TRSDPVVIVSAAR         | F2Z459 | 0.02714333 | N-term +28.03 Da,              | 2143.523682 | 3 | 467.6099854 | 466.9402996 |
| VKVGVNGFGR            | P16858 | 0.00173989 | N-term +28.03 Da, K +28.03 Da, | 2144.00415  | 3 | 364.230011  | 363.557349  |
| EALVEPASESPR          | P70441 | 0.00100654 | N-term +28.03 Da,              | 2145.307861 | 2 | 656.8400269 | 656.8408029 |
| LEKAQSELSGADEAAR      | Q9D3D9 | 0          | N-term +28.03 Da, K +28.03 Da, | 2148.312012 | 3 | 601.3099976 | 601.3145321 |
| TRTHINYGVKGDVAVIR     | Q8BMS1 | 0          | N-term +28.03 Da, K +28.03 Da, | 2149.439697 | 4 | 489.535614  | 489.5350859 |
| YSTEVEAAVNR           | P29391 | 0          | N-term +28.03 Da,              | 2149.529785 | 2 | 633.8200073 | 633.8198703 |

|                     |        |            |                                            |             |   |             |             |
|---------------------|--------|------------|--------------------------------------------|-------------|---|-------------|-------------|
| ISGQKVNEAACDIAR     | O35490 | 0.01784465 | N-term +28.03 Da, K +28.03 Da,C +57.02 Da, | 2151.096924 | 3 | 563.6300049 | 563.2980473 |
| EAVSPDISTTER        | Q02788 | 0.00212404 | N-term +28.03 Da,                          | 2153.052734 | 2 | 666.8400269 | 666.8357179 |
| GAQKVSNSQSFTEIER    | Q99K28 | 0.00144161 | N-term +28.03 Da, K +28.03 Da,             | 2158.457275 | 3 | 584.3099976 | 583.9758504 |
| EEMAPIEVKTK         | Q8BWT1 | 0.04270016 | N-term +28.03 Da, K +28.03 Da,             | 2158.532715 | 3 | 453.9299927 | 453.5915085 |
| SSEAPPLVNEDVKKR     | Q91YQ5 | 0          | N-term +28.03 Da, K +28.03 Da,             | 2162.719482 | 3 | 532.958313  | 532.957908  |
| TSGMALAEQAR         | Q8QZY2 | 0.00055835 | N-term +28.03 Da,                          | 2163.021484 | 2 | 581.7984009 | 581.7978831 |
| SSIPEAGEGQIR        | Q9DCB8 | 0.01752541 | N-term +28.03 Da,                          | 2164.900635 | 2 | 636.3300171 | 636.3331448 |
| SSEAPPLVNEDVKKR     | Q91YQ5 | 0          | N-term +28.03 Da, K +28.03 Da,             | 2167.004639 | 2 | 798.9400024 | 798.9332238 |
| PMEPDHPFYSNISKDR    | Q9DBJ1 | 0.00133274 | N-term +28.03 Da, K +28.03 Da,             | 2167.544189 | 4 | 498.489624  | 497.9938282 |
| FSGGNSEPAQPAVQQAPAR | Q7TNL9 | 0          | N-term +28.03 Da,                          | 2170.670166 | 2 | 970.4835205 | 970.4846755 |
| VKVGVNGFGR          | P16858 | 0.00055157 | N-term +28.03 Da, K +28.03 Da,             | 2174.488525 | 3 | 363.557251  | 363.557349  |
| SLTSAASIDGSR        | Q9QYGO | 0.00053735 | N-term +28.03 Da,                          | 2174.64917  | 2 | 596.8117065 | 596.8120453 |
| DFSAGVANR           | P15105 | 0.00249377 | N-term +28.03 Da,                          | 2176.849854 | 2 | 482.7458801 | 482.7459759 |
| VSDSSDSMDTGAGSIR    | O35143 | 0.01264451 | N-term +28.03 Da,                          | 2177.46582  | 2 | 806.8601685 | 806.8595964 |
| MGNVIQGGEGQAPTR     | Q8QZT1 | 0.00061237 | N-term +28.03 Da,                          | 2177.954834 | 2 | 771.8900146 | 771.888293  |
| VLENDPSINSQTQDTR    | Q8BYU6 | 0.00142857 | N-term +28.03 Da,                          | 2179.896973 | 2 | 922.9500122 | 922.9528744 |
| YSTEVEAAVNR         | P29391 | 0.00098912 | N-term +28.03 Da,                          | 2180.390869 | 2 | 633.8200073 | 633.8198703 |
| SQFQESDDADEDYGR     | Q80XU3 | 0          | N-term +28.03 Da,                          | 2181.72998  | 2 | 895.8599854 | 895.3610156 |
| NQLFAPGGR           | Q6NZJ6 | 0.01202186 | N-term +28.03 Da,                          | 2182.885254 | 2 | 494.2711182 | 494.2721605 |
| GNPSSPPVDTAHGKVLGK  | Q91WU0 | 0.001443   | N-term +28.03 Da, K +28.03 Da,             | 2183.530273 | 4 | 486.7799988 | 486.7782816 |
| EPDLSSDIKER         | B5X0G2 | 0.00547731 | N-term +28.03 Da, K +28.03 Da,             | 2183.764648 | 3 | 448.9100037 | 448.9050325 |
| ADTSVDLEETGR        | Q03265 | 0          | N-term +28.03 Da,                          | 2186.411133 | 2 | 660.8200073 | 660.8175253 |
| SKDSEGSWFR          | O55125 | 0.02017784 | N-term +28.03 Da, K +28.03 Da,             | 2186.719482 | 3 | 418.8800049 | 418.8752956 |
| MQPASAKWYDR         | Q9R0Q7 | 0.001396   | N-term +28.03 Da, K +28.03 Da,             | 2188.192627 | 3 | 470.2399902 | 470.2395804 |
| RMPEFYNR            | P16460 | 0.04005046 | N-term +28.03 Da,                          | 2189.875    | 3 | 380.8583374 | 380.8588108 |
| SEPEIPKGIR          | Q9WTP6 | 0.00804906 | N-term +28.03 Da, K +28.03 Da,             | 2190.636475 | 3 | 394.5676575 | 394.5678027 |
| LFAYPDTHR           | P24270 | 0.03102547 | N-term +28.03 Da,                          | 2191.557373 | 3 | 383.5400085 | 383.2013426 |
| AIDAALAAR           | Q8CHT0 | 0.01014275 | N-term +28.03 Da,                          | 2192.313721 | 2 | 450.2697449 | 450.2690865 |
| AGEEAADSPELPR       | Q9CPW2 | 0          | N-term +28.03 Da,                          | 2192.566162 | 2 | 685.3300171 | 685.3333424 |
| SGYSQSQFTAPR        | Q60865 | 0          | N-term +28.03 Da,                          | 2193.229004 | 2 | 678.8300171 | 678.8307693 |
| TNAIIIPEKR          | Q9QXD6 | 0.00661736 | N-term +28.03 Da, K +28.03 Da,             | 2193.79834  | 3 | 447.269989  | 447.2696456 |
| SSEAPPLVNEDVKKR     | Q91YQ5 | 0.00059701 | N-term +28.03 Da, K +28.03 Da,             | 2195.337158 | 3 | 533.289978  | 532.957908  |
| GAIALGHPLGGSGSR     | Q8BWT1 | 0.01013894 | N-term +28.03 Da,                          | 2196.796875 | 3 | 459.9254761 | 459.9247608 |
| NSGYSQSQFTAPR       | Q60865 | 0          | N-term +28.03 Da,                          | 2197.293457 | 2 | 735.8499756 | 735.8522334 |
| TNAIIIPEKR          | Q9QXD6 | 0.00251256 | N-term +28.03 Da, K +28.03 Da,             | 2197.992432 | 2 | 670.9000244 | 670.4008301 |
| AAPEEESAYVAGER      | Q9CZ44 | 0          | N-term +28.03 Da,                          | 2199.725098 | 2 | 753.8599854 | 753.857182  |
| TNAIIIPEKR          | Q9QXD6 | 0.00140449 | N-term +28.03 Da, K +28.03 Da,             | 2200.182129 | 2 | 670.4000244 | 670.4008301 |
| KGLNSDSVTEETLR      | Q8C196 | 0.00214408 | N-term +28.03 Da,                          | 2200.352783 | 3 | 535.6199951 | 535.6211847 |
| TETGALTLNR          | Q8BWT1 | 0.00398248 | N-term +28.03 Da,                          | 2201.313232 | 2 | 552.3099976 | 552.3063982 |
| KGLNSDSVTEETLR      | Q8C196 | 0.00145068 | N-term +28.03 Da,                          | 2202.714844 | 3 | 535.2800293 | 535.6211847 |

|                        |        |            |                                             |             |   |             |             |
|------------------------|--------|------------|---------------------------------------------|-------------|---|-------------|-------------|
| SVNDLPVGR              | P20108 | 0.02900461 | N-term +28.03 Da,                           | 2203.016113 | 2 | 492.7799988 | 492.7772761 |
| EVPALVHKDVTVK          | Q61838 | 0.00987467 | N-term +28.03 Da, K +28.03 Da,              | 2203.178223 | 4 | 380.7399902 | 380.4868069 |
| GQVITIGNER             | P60710 | 0.02113156 | N-term +28.03 Da,                           | 2204.082275 | 2 | 557.8099976 | 557.8143902 |
| GTSPLQIDR              | Q8C196 | 0.01264908 | N-term +28.03 Da,                           | 2206.007568 | 2 | 507.2799988 | 507.7825586 |
| LELQQKFR               | P48758 | 0.00735294 | N-term +28.03 Da, K +28.03 Da,              | 2208.30957  | 3 | 373.5599976 | 373.229121  |
| TKDYQDFQHLDNDNDHHQLR   | P34927 | 0.00134228 | N-term +28.03 Da, K +28.03 Da,              | 2208.410645 | 4 | 650.0499878 | 649.5547365 |
| SEPEEVIPSR             | Q91WQ3 | 0.00175131 | N-term +28.03 Da,                           | 2209.406982 | 2 | 585.8099976 | 585.8036887 |
| NLGEKFDETTADGR         | Q05816 | 0.00052383 | N-term +28.03 Da, K +28.03 Da,              | 2209.741211 | 3 | 536.9342041 | 536.9336512 |
| VSDSSDSMDTGAGSIR       | O35143 | 0.01634103 | N-term +28.03 Da,                           | 2209.845703 | 2 | 806.8599854 | 806.8595964 |
| TKDYQDFQHLDNDNDHHQLR   | P34927 | 0          | N-term +28.03 Da, K +28.03 Da,              | 2210.183594 | 4 | 649.7999878 | 649.5547365 |
| LTPTHYLTKQDVER         | Q9DBG6 | 0.00437724 | N-term +28.03 Da, K +28.03 Da,              | 2212.618896 | 4 | 440.25      | 439.9952622 |
| TTVDPDTGISDR           | Q9CW42 | 0.00054407 | N-term +28.03 Da,                           | 2214.052979 | 2 | 652.8186646 | 652.8200678 |
| SQFQESDDADEDYGR        | Q80XU3 | 0          | N-term +28.03 Da,                           | 2214.386963 | 2 | 895.3599854 | 895.3610156 |
| IVGVNKMDSTEPYQKR       | P10126 | 0.03040209 | N-term +28.03 Da, K +28.03 Da,              | 2216.789551 | 4 | 534.039978  | 534.0397729 |
| EEDEKEEDEEESPGQAKDEL   | P14211 | 0.00401606 | N-term +28.03 Da, K +28.03 Da,              | 2220.268799 | 3 | 807.0200195 | 807.0221387 |
| SEPEIPKGR              | Q9WTP6 | 0.026      | N-term +28.03 Da, K +28.03 Da,              | 2221.133301 | 3 | 394.567688  | 394.5678027 |
| GSLDLGGDAAGR           | Q8VEK3 | 0.00139991 | N-term +28.03 Da,                           | 2221.821777 | 2 | 558.789978  | 558.7858301 |
| AGEEAADSPELPR          | Q9CPW2 | 0          | N-term +28.03 Da,                           | 2223.130371 | 2 | 685.3300171 | 685.3333424 |
| DTPCDDFTR              | P28798 | 0.00057176 | N-term +28.03 Da, C +57.02 Da,              | 2229.116943 | 2 | 577.7416382 | 577.7427739 |
| TTPTGAAPPAGMTSTR       | P27546 | 0.00144231 | N-term +28.03 Da,                           | 2229.210449 | 2 | 772.8900146 | 772.8905015 |
| LTPTHYLTKQDVER         | Q9DBG6 | 0          | N-term +28.03 Da, K +28.03 Da,              | 2230.64209  | 2 | 879.9799805 | 878.983248  |
| MIEVVCNDR              | Q9EPV8 | 0.004      | N-term +28.03 Da, C +57.02 Da,              | 2232.209717 | 2 | 582.2814941 | 582.2810114 |
| TFAEDKTYKYIR           | Q8VCF0 | 0.0139485  | N-term +28.03 Da, K +28.03 Da,              | 2237.626709 | 3 | 540.2999878 | 540.2994937 |
| AEQVQKADEFIR           | Q5EBG8 | 0.00057803 | N-term +28.03 Da, K +28.03 Da,              | 2238.77417  | 3 | 497.6099854 | 497.2718266 |
| EETAPAVLER             | Q64374 | 0.00735579 | N-term +28.03 Da,                           | 2238.849365 | 2 | 571.8043823 | 571.8062312 |
| SEPEEVIPSR             | Q91WQ3 | 0.00364816 | N-term +28.03 Da,                           | 2240.054688 | 2 | 585.8026733 | 585.8036887 |
| LTPTHYLTKQDVER         | Q9DBG6 | 0.00138696 | N-term +28.03 Da, K +28.03 Da,              | 2241.65332  | 3 | 586.6599731 | 586.3245908 |
| GTANPLDR               | Q9D4C5 | 0.01810585 | N-term +28.03 Da,                           | 2241.733643 | 2 | 492.7799988 | 492.7772761 |
| LFAYPDTHR              | P24270 | 0.00057537 | N-term +28.03 Da,                           | 2241.979492 | 3 | 383.2000122 | 383.2013426 |
| SSGALLPKPQMR           | Q9CPQ1 | 0.00171895 | N-term +28.03 Da, K +28.03 Da,              | 2243.012695 | 3 | 447.5949707 | 447.5954755 |
| ETWGVTKAAEKQMKDKQDEEQR | P14211 | 0.00059242 | N-term +28.03 Da, K +28.03 Da,              | 2243.527588 | 4 | 695.1099854 | 694.6141    |
| LTPTHYLTKQDVER         | Q9DBG6 | 0.00055556 | N-term +28.03 Da, K +28.03 Da,              | 2243.946045 | 4 | 439.9941711 | 439.9952622 |
| LPCPGKVGSAALR          | O08784 | 0.00436508 | N-term +28.03 Da, K +28.03 Da, C +57.02 Da, | 2244.021484 | 3 | 461.2694702 | 461.2709918 |
| IQEYEQLEKMR            | Q9DCX2 | 0.00100959 | N-term +28.03 Da, K +28.03 Da,              | 2244.183594 | 4 | 420.4844971 | 420.4853729 |
| IGTQANVTKELER          | Q9DBC0 | 0          | N-term +28.03 Da, K +28.03 Da,              | 2245.470947 | 3 | 505.6199951 | 505.622748  |
| SSEIFTPAHEENV          | Q3UGS4 | 0          | N-term +28.03 Da,                           | 2246.077637 | 3 | 548.9400024 | 548.6056459 |
| CLGLTEAQTR             | Q8C196 | 0.00699301 | N-term +28.03 Da, C +57.02 Da,              | 2246.154053 | 2 | 589.3099976 | 588.8057081 |
| TDRPGLLDLKGK           | P31786 | 0.02413678 | N-term +28.03 Da, K +28.03 Da,              | 2248.181641 | 3 | 466.2900085 | 466.2889286 |
| DGKLVSESSDVVSK         | P11679 | 0          | N-term +28.03 Da, K +28.03 Da,              | 2248.900146 | 2 | 767.9199829 | 767.4221578 |
| ETWGVTKAAEKQMKDKQDEEQR | P14211 | 0.00133869 | N-term +28.03 Da, K +28.03 Da,              | 2249.778076 | 4 | 694.8599854 | 694.6141    |

|                       |        |            |                                            |             |   |             |             |
|-----------------------|--------|------------|--------------------------------------------|-------------|---|-------------|-------------|
| IVSVDETIKNPR          | P80313 | 0          | N-term +28.03 Da, K +28.03 Da,             | 2249.929199 | 3 | 476.6099854 | 476.2803219 |
| DGKLVSESSDVVSK        | P11679 | 0.00098232 | N-term +28.03 Da, K +28.03 Da,             | 2250.159668 | 2 | 767.4199829 | 767.4221578 |
| SIKYDEQIR             | B1AY13 | 0.04967603 | N-term +28.03 Da, K +28.03 Da,             | 2250.338867 | 3 | 403.8999939 | 403.2275577 |
| SEPEIPKGIIR           | Q9WTP6 | 0.00139147 | N-term +28.03 Da, K +28.03 Da,             | 2251.413818 | 3 | 394.5675964 | 394.5678027 |
| LKEDQTEYLEER          | P07901 | 0.01084112 | N-term +28.03 Da, K +28.03 Da,             | 2251.972412 | 3 | 536.9412842 | 536.9420353 |
| GSLDLGGDAAGR          | Q8VEK3 | 0.00137363 | N-term +28.03 Da,                          | 2252.694824 | 2 | 558.7854614 | 558.7858301 |
| GDIADVPSGNAR          | P54869 | 0.00176211 | N-term +28.03 Da,                          | 2253.682861 | 2 | 624.3200073 | 624.3225798 |
| LKEDQTEYLEER          | P07901 | 0.00058377 | N-term +28.03 Da, K +28.03 Da,             | 2254.574707 | 2 | 804.9099731 | 804.9094147 |
| TVKKIAIFGATGR         | Q923D2 | 0.00135993 | N-term +28.03 Da, K +28.03 Da,             | 2254.72583  | 3 | 482.6444092 | 482.644935  |
| TANLGAGAAQPLR         | P08226 | 0.00056657 | N-term +28.03 Da,                          | 2257.801514 | 2 | 634.3588257 | 634.3594964 |
| VAEKISGQKVNEAACDIAR   | O35490 | 0          | N-term +28.03 Da, K +28.03 Da,C +57.02 Da, | 2258.028076 | 4 | 536.5427246 | 536.5439511 |
| TVKKIAIFGATGR         | Q923D2 | 0.00212044 | N-term +28.03 Da, K +28.03 Da,             | 2259.213135 | 2 | 723.460022  | 723.4637643 |
| DTPCDDFTR             | P28798 | 0.00056689 | N-term +28.03 Da, C +57.02 Da,             | 2260.050537 | 2 | 577.7423096 | 577.7427739 |
| TVKKIAIFGATGR         | Q923D2 | 0.0168717  | N-term +28.03 Da, K +28.03 Da,             | 2260.357422 | 4 | 362.2351685 | 362.2355204 |
| EDQTEYLEER            | P07901 | 0.00134409 | N-term +28.03 Da,                          | 2260.937256 | 2 | 670.8099976 | 670.3042508 |
| HTEEDFIITTKTGR        | Q03311 | 0.00174444 | N-term +28.03 Da,                          | 2266.772705 | 3 | 568.6400146 | 568.6369461 |
| GDEVIITGHCQGDGYR      | P35505 | 0          | N-term +28.03 Da, C +57.02 Da,             | 2267.079834 | 3 | 602.2800293 | 602.2809452 |
| GGPYGGGNYPGGSGGGYGGGR | O88569 | 0          | N-term +28.03 Da,                          | 2267.960693 | 2 | 986.9299927 | 986.9302648 |
| AENVAVPEAAEER         | Q8JZQ9 | 0.01956746 | N-term +28.03 Da,                          | 2269.2771   | 2 | 707.3599854 | 706.854442  |
| CGVELFKR              | Q8C196 | 0.03714286 | N-term +28.03 Da, K +28.03 Da,C +57.02 Da, | 2273.956787 | 3 | 355.5400085 | 355.5355565 |
| AGYLTEPVNR            | Q64521 | 0.00326664 | N-term +28.03 Da,                          | 2274.108398 | 2 | 574.3086548 | 574.3089407 |
| VLSGEDKSNIKAAWGK      | P01942 | 0          | N-term +28.03 Da, K +28.03 Da,             | 2275.767578 | 4 | 454.769989  | 454.5148248 |
| ENYGELADCCTKQEPER     | P07724 | 0          | N-term +28.03 Da, K +28.03 Da,C +57.02 Da, | 2276.878174 | 3 | 719.3200073 | 718.9858701 |
| TFYASEDKLENR          | O35490 | 0          | N-term +28.03 Da, K +28.03 Da,             | 2277.490479 | 3 | 510.2600098 | 510.2595869 |
| HETLYQKDSQGNLFR       | Q91Y97 | 0          | N-term +28.03 Da, K +28.03 Da,             | 2277.641357 | 3 | 631.3268433 | 631.3268831 |
| VLSGEDKSNIKAAWGK      | P01942 | 0          | N-term +28.03 Da, K +28.03 Da,             | 2277.79248  | 3 | 605.6846924 | 605.6840076 |
| TRSDPVVIVSAAR         | F2Z459 | 0.01688357 | N-term +28.03 Da,                          | 2278.499268 | 3 | 466.940155  | 466.9402996 |
| PEQVAMATVTALHR        | Q91Y97 | 0.02392183 | N-term +28.03 Da,                          | 2280.350342 | 3 | 518.6099854 | 517.9485779 |
| TFYASEDKLENR          | O35490 | 0.00144023 | N-term +28.03 Da, K +28.03 Da,             | 2280.598877 | 2 | 764.8900146 | 764.8857421 |
| ENYGELADCCTKQEPER     | P07724 | 0.00978547 | N-term +28.03 Da, K +28.03 Da,C +57.02 Da, | 2280.95874  | 3 | 719.6500244 | 718.9858701 |
| DEPPPLPR              | O55022 | 0.03292447 | N-term +28.03 Da,                          | 2281.42041  | 2 | 474.7610474 | 474.7610945 |
| VLSGEDKSNIKAAWGK      | P01942 | 0          | N-term +28.03 Da, K +28.03 Da,             | 2284.249512 | 2 | 908.0200195 | 908.0223731 |
| TLGDIVYKR             | P12710 | 0.01078468 | N-term +28.03 Da, K +28.03 Da,             | 2285.128906 | 3 | 374.5599976 | 374.2290097 |
| VTAGKDGVANVSIEDR      | P08228 | 0          | N-term +28.03 Da, K +28.03 Da,             | 2286.643555 | 3 | 562.9699707 | 562.9722174 |
| TDISHLVR              | Q99MD9 | 0.048652   | N-term +28.03 Da,                          | 2286.945557 | 2 | 484.7806091 | 484.7798186 |
| VPALAEIANAHR          | P63038 | 0          | N-term +28.03 Da,                          | 2293.182861 | 3 | 406.902832  | 406.9032967 |
| VLSGEDKSNIKAAWGK      | P01942 | 0.00061843 | N-term +28.03 Da, K +28.03 Da,             | 2294.107666 | 2 | 909.0200195 | 908.0223731 |
| EQAEAEVASLNR          | D3Z6I8 | 0          | N-term +28.03 Da,                          | 2295.061035 | 2 | 672.8400269 | 672.8413344 |
| YFQGSPLPAR            | P52760 | 0.00625489 | N-term +28.03 Da,                          | 2297.586182 | 2 | 533.7861328 | 533.7876436 |
| ALAEHPVAEASAVVSSPKDR  | Q91VA0 | 0          | N-term +28.03 Da, K +28.03 Da,             | 2299.223389 | 4 | 552.039978  | 552.0432072 |

|                          |        |            |                                            |             |   |             |             |
|--------------------------|--------|------------|--------------------------------------------|-------------|---|-------------|-------------|
| SLPCDICK                 | Q61207 | 0.0025     | N-term +28.03 Da, K +28.03 Da,C +57.02 Da, | 2300.252197 | 2 | 524.7600098 | 524.7619229 |
| QEILESDGKDPNPKPSGFR      | O70400 | 0.0013544  | N-term +28.03 Da, K +28.03 Da,             | 2300.403076 | 4 | 540.5300293 | 540.2839286 |
| GDDVINASGYR              | Q91VA0 | 0.01166606 | N-term +28.03 Da,                          | 2300.629395 | 2 | 597.789978  | 597.7911127 |
| VVFESEDEMKR              | Q8C196 | 0.00052743 | N-term +28.03 Da, K +28.03 Da,             | 2300.898193 | 3 | 432.5599976 | 432.5603197 |
| TVIFTQGR                 | P55264 | 0.00327735 | N-term +28.03 Da,                          | 2304.644531 | 2 | 475.2799988 | 475.2769116 |
| KLITYGPKVVR              | P12710 | 0.0006398  | N-term +28.03 Da, K +28.03 Da,             | 2306.281738 | 3 | 486.9846802 | 486.9850687 |
| VLSGEDKSNIAAWGK          | P01942 | 0          | N-term +28.03 Da, K +28.03 Da,             | 2307.107422 | 4 | 454.514801  | 454.5148248 |
| VVFESEDEMKR              | Q8C196 | 0.03161669 | N-term +28.03 Da, K +28.03 Da,             | 2308.211426 | 2 | 648.8400269 | 648.3368413 |
| GYSFTTTAER               | P60710 | 0          | N-term +28.03 Da,                          | 2309.822266 | 2 | 580.7800293 | 580.7827561 |
| DFDEEETEEKVPVKKSVR       | Q61937 | 0.01086549 | N-term +28.03 Da, K +28.03 Da,             | 2311.275635 | 4 | 570.0599976 | 569.8059655 |
| TLGDIVYKR                | P12710 | 0.00363343 | N-term +28.03 Da, K +28.03 Da,             | 2315.427246 | 2 | 560.8404541 | 560.8398763 |
| TLGDIVYKR                | P12710 | 0.00210349 | N-term +28.03 Da, K +28.03 Da,             | 2316.271124 | 3 | 374.230011  | 374.2290097 |
| SVAMVDYQR                | Q91X83 | 0.0021395  | N-term +28.03 Da,                          | 2316.363525 | 2 | 548.7800293 | 548.776419  |
| DEPPPLPR                 | O55022 | 0.04890127 | N-term +28.03 Da,                          | 2316.781982 | 2 | 474.7610779 | 474.7610945 |
| TVDGSPGKLWR              | P16858 | 0          | N-term +28.03 Da, K +28.03 Da,             | 2318.282471 | 3 | 424.5700073 | 424.5750688 |
| VTAGKDGVANVSIEDR         | P08228 | 0.01238165 | N-term +28.03 Da, K +28.03 Da,             | 2318.679443 | 3 | 563.2999878 | 562.9722174 |
| TDAEADVASLNR             | P58771 | 0.00060459 | N-term +28.03 Da,                          | 2329.307129 | 2 | 645.8200073 | 645.3202348 |
| EEAGDGTTTATVLAR          | P63038 | 0          | N-term +28.03 Da,                          | 2331.80249  | 2 | 761.3800049 | 760.3835641 |
| EEAGDGTTTATVLAR          | P63038 | 0          | N-term +28.03 Da,                          | 2333.040283 | 2 | 760.8900146 | 760.3835641 |
| VLSGEDKSNIAAWGK          | P01942 | 0.01167031 | N-term +28.03 Da, K +28.03 Da,             | 2337.646729 | 4 | 454.5151062 | 454.5148248 |
| ADNMTLTVSR               | O70400 | 0.00059137 | N-term +28.03 Da,                          | 2343.296875 | 2 | 568.289978  | 568.2924336 |
| GVQVSPSGEKITHTGQVYDEKDYR | P52503 | 0.0020982  | N-term +28.03 Da, K +28.03 Da,             | 2344.114014 | 4 | 695.3599854 | 695.1080735 |
| SGGPPPTGEEDTSEKDEL       | P20029 | 0          | N-term +28.03 Da, K +28.03 Da,             | 2344.733887 | 2 | 950.9400024 | 950.9365564 |
| GDVDAVLSR                | Q8R0Y6 | 0.00290216 | N-term +28.03 Da,                          | 2346.218506 | 2 | 480.262146  | 480.261459  |
| TLVEKINYTGR              | P49429 | 0.00139405 | N-term +28.03 Da, K +28.03 Da,             | 2346.444824 | 3 | 450.9299927 | 450.5977622 |
| DGKLVSSESDVVSX           | P11679 | 0.01267657 | N-term +28.03 Da, K +28.03 Da,             | 2348.293945 | 2 | 766.9199829 | 767.4221578 |
| SSAAAEEASAALKVRPER       | Q8BGT5 | 0.00365408 | N-term +28.03 Da, K +28.03 Da,             | 2349.073242 | 4 | 443.25      | 443.2521652 |
| FSPGVEAPESR              | E9Q394 | 0.00137426 | N-term +28.03 Da,                          | 2350.696777 | 2 | 602.3034668 | 602.3038557 |
| AHTEFTPTETDTYACR         | P01887 | 0          | N-term +28.03 Da, C +57.02 Da,             | 2352.522217 | 3 | 643.289978  | 643.2878773 |
| GVQVSPSGEKITHTGQVYDEKDYR | P52503 | 0          | N-term +28.03 Da, K +28.03 Da,             | 2353.584717 | 3 | 926.8099976 | 926.4750058 |
| TPTGTHFCEVEQMR           | P25688 | 0          | N-term +28.03 Da, C +57.02 Da,             | 2355.240234 | 3 | 574.2600098 | 574.2642378 |
| HGNPVDDICIAKPR           | P32261 | 0          | N-term +28.03 Da, K +28.03 Da,C +57.02 Da, | 2355.940918 | 3 | 549.960022  | 549.9593656 |
| DKSTGSVVQQPFGGAR         | Q8CHT0 | 0.01134285 | N-term +28.03 Da, K +28.03 Da,             | 2356.52417  | 2 | 874.460022  | 873.9603044 |
| LLEYTDSSYDEKR            | P10649 | 0          | N-term +28.03 Da, K +28.03 Da,             | 2357.445068 | 3 | 558.9450073 | 558.945557  |
| TAEENLEYVR               | P47941 | 0.00133809 | N-term +28.03 Da,                          | 2357.685547 | 2 | 626.3099976 | 626.3144208 |
| LLEYTDSSYDEKR            | P10649 | 0.00142518 | N-term +28.03 Da, K +28.03 Da,             | 2359.900391 | 2 | 837.9099731 | 837.9146972 |
| GVQVSPSGEKITHTGQVYDEKDYR | P52503 | 0.00057703 | N-term +28.03 Da, K +28.03 Da,             | 2361.446045 | 2 | 1389.719971 | 1389.20887  |
| DSSFQIVKNPR              | Q61176 | 0          | N-term +28.03 Da, K +28.03 Da,             | 2361.526367 | 2 | 673.8699951 | 673.8749795 |
| ETVWEKPLR                | P24456 | 0.01331414 | N-term +28.03 Da, K +28.03 Da,             | 2365.96582  | 3 | 405.8999939 | 405.2361644 |
| AHTEFTPTETDTYACR         | P01887 | 0.00143816 | N-term +28.03 Da, C +57.02 Da,             | 2366.108398 | 2 | 964.9299927 | 964.4281777 |



|                          |        |            |                                             |             |   |             |             |
|--------------------------|--------|------------|---------------------------------------------|-------------|---|-------------|-------------|
| TAENLAAKYNISR            | Q8BWT1 | 0.00054083 | N-term +28.03 Da, K +28.03 Da,              | 2366.869629 | 3 | 502.9468384 | 502.9473429 |
| SAKLDADYPLR              | Q9CQJ6 | 0.00062814 | N-term +28.03 Da, K +28.03 Da,              | 2368.419189 | 3 | 435.5799866 | 435.5784791 |
| EAAVGKDLFR               | Q64471 | 0.03716645 | N-term +28.03 Da, K +28.03 Da,              | 2370.263184 | 2 | 581.8400269 | 581.3349583 |
| ASGGGVPTDEEQATGLER       | P19536 | 0          | N-term +28.03 Da,                           | 2372.103271 | 2 | 901.9299927 | 901.4317748 |
| HTVLPEALER               | Q8CI94 | 0.0408805  | N-term +28.03 Da,                           | 2372.353516 | 3 | 398.230011  | 398.227669  |
| YVTIIDAPGHR              | P10126 | 0.00055648 | N-term +28.03 Da,                           | 2373.634766 | 3 | 423.8999939 | 423.9031854 |
| GVQVSPSGEKITHTGQVYDEKDYR | P52503 | 0          | N-term +28.03 Da, K +28.03 Da,              | 2374.651123 | 4 | 695.1075439 | 695.1080735 |
| VKIVTVKTQAYPDQKPGTSGLR   | Q9D0F9 | 0.00054795 | N-term +28.03 Da, K +28.03 Da,              | 2376.467285 | 4 | 625.6199951 | 625.373078  |
| GNVTAGKDGVANVSIEDR       | P08228 | 0          | N-term +28.03 Da, K +28.03 Da,              | 2376.693604 | 3 | 619.9899902 | 619.9936815 |
| TVAEENQVPLAK             | P15116 | 0.00548589 | N-term +28.03 Da, K +28.03 Da,              | 2378.166992 | 2 | 648.8800049 | 648.8797305 |
| EVGTETIIDKSKAVK          | P54869 | 0.00060938 | N-term +28.03 Da, K +28.03 Da,              | 2378.46875  | 4 | 433.2629089 | 433.2632043 |
| VKIVTVKTQAYPDQKPGTSGLR   | Q9D0F9 | 0.00055866 | N-term +28.03 Da, K +28.03 Da,              | 2380.449951 | 3 | 833.8300171 | 833.4950118 |
| GSAAGPVAAIR              | Q9D8S9 | 0.00057045 | N-term +28.03 Da,                           | 2381.596924 | 2 | 599.3300171 | 599.3329473 |
| TNEEAGDGTTTATVLAR        | P63038 | 0          | N-term +28.03 Da,                           | 2384.537109 | 2 | 868.4299927 | 867.9288678 |
| NGSGMCKAGFAGDDAPR        | P60710 | 0          | N-term +28.03 Da, K +28.03 Da, C +57.02 Da, | 2385.709473 | 3 | 589.9299927 | 589.6031421 |
| GVMVMGMGQKDSYVGDEAQSQR   | P60710 | 0          | N-term +28.03 Da, K +28.03 Da,              | 2387.485352 | 4 | 582.289978  | 582.2937049 |
| EVDPNIQAVR               | P11679 | 0.00137615 | N-term +28.03 Da,                           | 2387.561279 | 2 | 584.8193359 | 584.8196728 |
| GKPITIFQER               | P16858 | 0.00136178 | N-term +28.03 Da, K +28.03 Da,              | 2387.64209  | 2 | 622.87146   | 622.871708  |
| GVQVETISPGDGR            | P26883 | 0          | N-term +28.03 Da,                           | 2387.725342 | 2 | 671.8499756 | 671.8517019 |
| FQGEETENEENLSSEKAGLDR    | A2AIX1 | 0.00061538 | N-term +28.03 Da, K +28.03 Da,              | 2387.810547 | 4 | 649.5700073 | 649.3199691 |
| SSLPSSEHQVVAAR           | Q9DBB8 | 0          | N-term +28.03 Da,                           | 2389.32666  | 3 | 555.9690552 | 555.968807  |
| SKVSVISVEEPPQR           | Q9DCW4 | 0.01897861 | N-term +28.03 Da, K +28.03 Da,              | 2391.390625 | 3 | 537.3099976 | 537.6419197 |
| SPGLARFPSLALHPSSR        | P59644 | 0.00807382 | N-term +28.03 Da,                           | 2392.88916  | 2 | 911.0100098 | 911.010131  |
| TAMDAQEALAR              | A2RTL5 | 0.00138953 | N-term +28.03 Da,                           | 2394.434326 | 2 | 603.2999878 | 602.8031656 |
| ANPIIGNGGAPDPTAR         | Q8C196 | 0.00062073 | N-term +28.03 Da,                           | 2395.041504 | 2 | 776.9099731 | 776.9075401 |
| GISDEYHVIR               | Q60759 | 0.00058754 | N-term +28.03 Da,                           | 2397.701172 | 3 | 406.2158203 | 406.2155407 |
| TNEEAGDGTTTATVLAR        | P63038 | 0.01050263 | N-term +28.03 Da,                           | 2400.137939 | 3 | 578.9562988 | 578.955004  |
| GVQVETISPGDGR            | P26883 | 0.02928595 | N-term +28.03 Da,                           | 2401.027344 | 3 | 448.2374268 | 448.2368934 |
| SGPPPADLCHALR            | O70251 | 0.00661994 | N-term +28.03 Da, C +57.02 Da,              | 2401.44751  | 3 | 473.5799866 | 473.5784847 |
| AGTEEEEEETEKESTEKDEL     | P08113 | 0.0005305  | N-term +28.03 Da, K +28.03 Da,              | 2402.844238 | 3 | 799.7000122 | 799.3622724 |
| ETTSSIEPAGEGQIR          | Q9DCB8 | 0.00145138 | N-term +28.03 Da,                           | 2403.909912 | 2 | 802.4000244 | 801.9021212 |
| DALDSSNSMQTVQKTTTR       | P05784 | 0          | N-term +28.03 Da, K +28.03 Da,              | 2407.206787 | 3 | 680.6699829 | 680.3406415 |
| VLTPDLYNK                | P07310 | 0.03379466 | N-term +28.03 Da, K +28.03 Da,              | 2408.273682 | 3 | 373.8900146 | 373.553382  |
| DGTT PVCEDIGR            | Q9CZ13 | 0.01927047 | N-term +28.03 Da, C +57.02 Da,              | 2409.772705 | 2 | 674.3099976 | 674.3140952 |
| VMQSSDAAYLAR             | Q8BWT1 | 0.00061958 | N-term +28.03 Da,                           | 2409.864014 | 2 | 713.8533936 | 713.8533873 |
| NTNEEAGDGTTTATVLAR       | P63038 | 0          | N-term +28.03 Da,                           | 2410.462402 | 2 | 924.9500122 | 924.9503319 |
| SLVLKFTVTR               | P02762 | 0.00058824 | N-term +28.03 Da, K +28.03 Da,              | 2410.903809 | 4 | 314.7030029 | 314.7025845 |
| EDEEDEKEEESPGQAKDEL      | P14211 | 0.00054645 | N-term +28.03 Da, K +28.03 Da,              | 2411.02002  | 3 | 888.3800049 | 888.3786515 |
| MVNDGVEDLR               | P19157 | 0.0106814  | N-term +28.03 Da,                           | 2411.252197 | 2 | 588.2891846 | 588.2898911 |
| TSAAESFSQEVAR            | F6ZDS4 | 0.00771903 | N-term +28.03 Da,                           | 2417.32959  | 2 | 749.3699951 | 749.3626315 |

|                            |         |            |                                |             |   |             |             |
|----------------------------|---------|------------|--------------------------------|-------------|---|-------------|-------------|
| GVQVETISPGDGR              | P26883  | 0          | N-term +28.03 Da,              | 2418.271729 | 2 | 671.8518066 | 671.8517019 |
| AHGSVVKSEDYAFPTYADRR       | P19783  | 0          | N-term +28.03 Da, K +28.03 Da, | 2418.347168 | 4 | 582.0457153 | 582.0460154 |
| GAAAVLLAR                  | Q8AVCH0 | 0.00989346 | N-term +28.03 Da,              | 2420.669189 | 2 | 435.2826538 | 435.2819966 |
| VATKKTEQGGPPSSEYIFER       | P29758  | 0.00139665 | N-term +28.03 Da, K +28.03 Da, | 2422.869873 | 3 | 751.7399902 | 751.0704798 |
| AAPTVQEEKQGPTPAGLPR        | Q7TT50  | 0          | N-term +28.03 Da, K +28.03 Da, | 2424.651611 | 3 | 668.3699951 | 668.3688597 |
| EQAGGDATENFEDVGHSTDR       | P56395  | 0          | N-term +28.03 Da,              | 2427.950928 | 3 | 745.6599731 | 745.3245969 |
| SSTSAVPQITTHYTVHPR         | Q921G7  | 0.00101471 | N-term +28.03 Da,              | 2428.17749  | 4 | 503.2655029 | 503.2655386 |
| LYFHIGETEKR                | Q8R1V4  | 0.00210084 | N-term +28.03 Da, K +28.03 Da, | 2428.334717 | 3 | 483.6000061 | 483.6013952 |
| VATKKTEQGGPPSSEYIFER       | P29758  | 0.02145777 | N-term +28.03 Da, K +28.03 Da, | 2428.427734 | 3 | 751.0700073 | 751.0704798 |
| TNEEAGDGTATVLAR            | P63038  | 0          | N-term +28.03 Da,              | 2428.540771 | 2 | 867.9299927 | 867.9288678 |
| NATLSVEPEGR                | Q9QYR9  | 0.00986343 | N-term +28.03 Da,              | 2429.595215 | 2 | 601.305481  | 600.8145878 |
| SSTSAVPQITTHYTVHPR         | Q921G7  | 0          | N-term +28.03 Da,              | 2432.516602 | 3 | 670.6848145 | 670.6849592 |
| FGDSYETQVIAHGQSSKGR        | Q78JT3  | 0          | N-term +28.03 Da, K +28.03 Da, | 2435.028809 | 4 | 570.039978  | 570.0369192 |
| AVDPDSPAASGLR              | P70441  | 0.00053447 | N-term +28.03 Da,              | 2435.798096 | 2 | 706.8547974 | 706.854442  |
| GVQVSPSGEKITHTGQVYDEKDYR   | P52503  | 0.01686578 | N-term +28.03 Da, K +28.03 Da, | 2436.937988 | 4 | 695.3599854 | 695.1080735 |
| KYEELQTLAGKHGDDLRL         | P11679  | 0.02929559 | N-term +28.03 Da,              | 2438.093506 | 4 | 515.0319824 | 515.0311051 |
| ETTSSPEAGEGQIR             | Q9DCB8  | 0          | N-term +28.03 Da,              | 2438.193604 | 2 | 801.9000244 | 801.9021212 |
| NVTAGKDGVANVSIEDR          | P08228  | 0.00064599 | N-term +28.03 Da, K +28.03 Da, | 2439.401855 | 3 | 600.9899902 | 600.9865268 |
| AHGSVVKSEDYAFPTYADRR       | P19783  | 0.01627167 | N-term +28.03 Da, K +28.03 Da, | 2439.669678 | 3 | 776.0599976 | 775.7255951 |
| TEEELATAEAVR               | Q8R0Y6  | 0.00140318 | N-term +28.03 Da,              | 2441.392578 | 2 | 673.8499756 | 673.8435429 |
| ASGGGVPTDEEQATGLER         | P19536  | 0          | N-term +28.03 Da,              | 2441.846924 | 2 | 901.9299927 | 901.4317748 |
| ASGGGVPTDEEQATGLER         | P19536  | 0.00055402 | N-term +28.03 Da,              | 2444.802734 | 2 | 901.4299927 | 901.4317748 |
| SSTSAVPQITTHYTVHPR         | Q921G7  | 0.00055188 | N-term +28.03 Da,              | 2445.132813 | 2 | 1005.52002  | 1005.523801 |
| DRDEDEDEDEKEEDEEESPGQAKDEL | P14211  | 0.04387339 | N-term +28.03 Da, K +28.03 Da, | 2447.93042  | 4 | 824.5900269 | 824.0919423 |
| GVQVETISPGDGR              | P26883  | 0          | N-term +28.03 Da,              | 2449.362793 | 2 | 671.8511353 | 671.8517019 |
| AHGSVVKSEDYAFPTYADRR       | P19783  | 0.01424501 | N-term +28.03 Da, K +28.03 Da, | 2449.445801 | 4 | 582.2999878 | 582.0460154 |
| STIPPAPLAK                 | P54869  | 0.02139946 | N-term +28.03 Da, K +28.03 Da, | 2449.5354   | 2 | 525.8300171 | 525.8315198 |
| TMGDAPDFDR                 | P10649  | 0.02201897 | N-term +28.03 Da,              | 2451.0896   | 2 | 576.75      | 576.7531414 |
| KATIPAALQAQESTEGPGTGQDRPR  | Q9DBG1  | 0          | N-term +28.03 Da,              | 2457.729736 | 4 | 659.8499756 | 659.6004154 |
| GLKAPGIIPR                 | Q03265  | 0.0036526  | N-term +28.03 Da, K +28.03 Da, | 2457.80542  | 3 | 359.9100037 | 359.9096111 |
| SSTSAVPQITTHYTVHPR         | Q921G7  | 0          | N-term +28.03 Da,              | 2458.56543  | 4 | 503.2654114 | 503.2655386 |
| EQAGGDATENFEDVGHSTDR       | P56395  | 0          | N-term +28.03 Da,              | 2458.734131 | 3 | 745.3200073 | 745.3245969 |
| ESLIDGIKR                  | P50247  | 0.03665923 | N-term +28.03 Da, K +28.03 Da, | 2458.80957  | 3 | 362.8900146 | 362.8887647 |
| EEAGDGTATVLAR              | P63038  | 0.00172712 | N-term +28.03 Da,              | 2459.135498 | 2 | 760.3800049 | 760.3835641 |
| TSKVSISVEEPPQR             | Q9DCW4  | 0.00328947 | N-term +28.03 Da, K +28.03 Da, | 2459.484619 | 3 | 571.3242188 | 571.3244795 |
| KATIPAALQAQESTEGPGTGQDRPR  | Q9DBG1  | 0.01395349 | N-term +28.03 Da,              | 2459.983154 | 3 | 879.7999878 | 879.1314617 |
| SQQSASGAPVLLR              | Q9DCM0  | 0.00144788 | N-term +28.03 Da,              | 2460.162354 | 2 | 671.3770752 | 671.3778865 |
| TDTEDKGEFLSEGGGVR          | E9PV24  | 0.00144092 | N-term +28.03 Da, K +28.03 Da, | 2460.314453 | 3 | 618.2999878 | 618.3022924 |
| VLSGEDKSNIAAWGK            | P01942  | 0.04357367 | N-term +28.03 Da, K +28.03 Da, | 2460.389648 | 4 | 454.5100098 | 454.5148248 |
| KFKTIEEVVGR                | P47738  | 0.00054705 | N-term +28.03 Da, K +28.03 Da, | 2460.465332 | 3 | 463.9533997 | 463.9536573 |

|                                   |        |            |                                            |             |   |             |             |
|-----------------------------------|--------|------------|--------------------------------------------|-------------|---|-------------|-------------|
| AVNQENEHLMEDYER                   | P57780 | 0          | N-term +28.03 Da,                          | 2461.661865 | 3 | 635.9500122 | 635.619627  |
| LANIGQKEDFEEAR                    | P16460 | 0.00137994 | N-term +28.03 Da, K +28.03 Da,             | 2463.179932 | 3 | 559.2930908 | 559.2931793 |
| DNIQGITKPAIR                      | P62806 | 0          | N-term +28.03 Da, K +28.03 Da,             | 2463.668945 | 3 | 461.6099854 | 461.2769116 |
| SEHGTEAGQISEPGTATGEAGPSCSSASDKLPR | Q61074 | 0          | N-term +28.03 Da, K +28.03 Da,C +57.02 Da, | 2463.841797 | 4 | 833.1400146 | 832.6403044 |
| AIAEELAPER                        | O35490 | 0.00250104 | N-term +28.03 Da,                          | 2466.434326 | 2 | 563.8086548 | 563.8087737 |
| YTDNELEKITR                       | P26443 | 0.01658433 | N-term +28.03 Da, K +28.03 Da,             | 2466.660645 | 3 | 479.9238892 | 479.9243155 |
| ASDPYADDPPIR                      | Q8R086 | 0.00064144 | N-term +28.03 Da,                          | 2468.396729 | 2 | 624.7999878 | 624.2987707 |
| DAGELITQR                         | P67778 | 0.00981132 | N-term +28.03 Da,                          | 2468.875    | 2 | 515.7811279 | 515.7800161 |
| ETTSSIPEAGEGQIR                   | Q9DCB8 | 0          | N-term +28.03 Da,                          | 2469.057373 | 2 | 801.9024048 | 801.9021212 |
| NVVFSEDEMCR                       | Q8C196 | 0.00097087 | N-term +28.03 Da, K +28.03 Da,             | 2469.400391 | 3 | 470.5744934 | 470.5746291 |
| HTEAAEVLLER                       | Q8QZS1 | 0.00805215 | N-term +28.03 Da,                          | 2469.861328 | 2 | 648.3499756 | 648.3513374 |
| DNIQGITKPAIR                      | P62806 | 0.00063857 | N-term +28.03 Da, K +28.03 Da,             | 2470.782227 | 2 | 691.4099731 | 691.4117291 |
| SGGGVPTDEEQATGLER                 | P19536 | 0          | N-term +28.03 Da,                          | 2470.900146 | 2 | 865.9099731 | 865.9132177 |
| DDEPPPLPR                         | O55022 | 0.00135074 | N-term +28.03 Da,                          | 2470.975586 | 2 | 532.2740479 | 532.2745666 |
| LANIGQKEDFEEAR                    | P16460 | 0.00143885 | N-term +28.03 Da, K +28.03 Da,             | 2473.57373  | 2 | 838.4299927 | 838.4361308 |
| IFLQDIKKPDR                       | P09528 | 0.02982629 | N-term +28.03 Da, K +28.03 Da,             | 2475.632324 | 4 | 364.980011  | 364.9776119 |
| SVISVEEPPQR                       | Q9DCW4 | 0.03214286 | N-term +28.03 Da,                          | 2475.969238 | 2 | 635.3499756 | 634.8458879 |
| GGGVPTDEEQATGLER                  | P19536 | 0          | N-term +28.03 Da,                          | 2480.03418  | 2 | 822.3965454 | 822.3972032 |
| GTAVTSAKVAVNGVHLHYQR              | Q8R164 | 0.00325336 | N-term +28.03 Da, K +28.03 Da,             | 2480.424316 | 4 | 542.0499878 | 541.8050964 |
| LPTVKKFLQPGSQR                    | P30115 | 0.00142789 | N-term +28.03 Da, K +28.03 Da,             | 2481.535889 | 3 | 561.682373  | 561.6820492 |
| GGVPTDEEQATGLER                   | P19536 | 0          | N-term +28.03 Da,                          | 2482.575439 | 2 | 794.3800049 | 793.8864711 |
| GTAVTSAKVAVNGVHLHYQR              | Q8R164 | 0.00061425 | N-term +28.03 Da, K +28.03 Da,             | 2483.240723 | 3 | 722.7299805 | 722.0710364 |
| KATIPAALQAQESTEGPGTGQDRPR         | Q9DBG1 | 0          | N-term +28.03 Da,                          | 2484.425293 | 4 | 659.5999756 | 659.6004154 |
| TVLQDQEFR                         | Q99LB7 | 0.00437202 | N-term +28.03 Da,                          | 2484.874023 | 2 | 582.3099976 | 582.3063982 |
| DAANYKDISDVER                     | Q9D819 | 0          | N-term +28.03 Da, K +28.03 Da,             | 2485.962646 | 3 | 517.9299927 | 517.9264966 |
| ASGGGVPTDEEQATGLER                | P19536 | 0          | N-term +28.03 Da,                          | 2486.414063 | 2 | 901.9299927 | 901.4317748 |
| GVPTDEEQATGLER                    | P19536 | 0          | N-term +28.03 Da,                          | 2486.670898 | 2 | 765.8699951 | 765.3757391 |
| ECELETMTGEKVK                     | P12710 | 0.00059844 | N-term +28.03 Da, K +28.03 Da,C +57.02 Da, | 2489.017334 | 3 | 546.9500122 | 546.6090112 |
| TASLTSAA SIDGSR                   | Q9QYGO | 0.00144928 | N-term +28.03 Da,                          | 2489.644287 | 2 | 682.8599854 | 682.854442  |
| SQQSASGAPVLLR                     | Q9DCM0 | 0          | N-term +28.03 Da,                          | 2490.83252  | 2 | 671.3778076 | 671.3778865 |
| ASGGGVPTDEEQATGLER                | P19536 | 0.02954695 | N-term +28.03 Da,                          | 2491.640869 | 3 | 601.2858276 | 601.2902754 |
| VLSGVDKMIR                        | Q8C0D5 | 0.02137042 | N-term +28.03 Da, K +28.03 Da,             | 2492.4021   | 3 | 391.9050598 | 391.9056497 |
| LEVAEDSGHPWR                      | Q6P6J9 | 0          | N-term +28.03 Da,                          | 2495.949951 | 3 | 475.2363281 | 475.2370048 |
| ALNEDTQDELGDPR                    | P55302 | 0.00172414 | N-term +28.03 Da,                          | 2496.366943 | 2 | 800.8800049 | 800.8761036 |
| TDTEKGEFLSEGGGVR                  | E9PV24 | 0          | N-term +28.03 Da, K +28.03 Da,             | 2497.424561 | 3 | 618.3009644 | 618.3022924 |
| MGESDSDILR                        | Q9CQR2 | 0.00102934 | N-term +28.03 Da,                          | 2499.0354   | 2 | 575.7728882 | 575.774074  |
| LEVAEDSGHPWR                      | Q6P6J9 | 0.00058789 | N-term +28.03 Da,                          | 2499.613281 | 2 | 712.8599854 | 712.3518689 |
| TDTEKGEFLSEGGGVR                  | E9PV24 | 0          | N-term +28.03 Da, K +28.03 Da,             | 2499.717773 | 2 | 926.9500122 | 926.9498004 |
| SGGGVPTDEEQATGLER                 | P19536 | 0          | N-term +28.03 Da,                          | 2501.843262 | 2 | 865.9118652 | 865.9132177 |
| GESSFDLADR                        | O09164 | 0.00398406 | N-term +28.03 Da,                          | 2503.001221 | 2 | 562.7651367 | 562.7645636 |

|                                  |        |            |                                            |             |   |             |             |
|----------------------------------|--------|------------|--------------------------------------------|-------------|---|-------------|-------------|
| TDEKFVEGVYR                      | P07309 | 0.00981502 | N-term +28.03 Da, K +28.03 Da,             | 2503.09375  | 3 | 466.9100037 | 466.9136391 |
| YDLQTGQISNR                      | Q64374 | 0.00055525 | N-term +28.03 Da,                          | 2503.248291 | 2 | 661.8357544 | 661.8385944 |
| EEVDEMIR                         | P62204 | 0.01893939 | N-term +28.03 Da,                          | 2504.865479 | 2 | 524.7520142 | 524.7526099 |
| TSSPDLSSSEELR                    | Q9CVD2 | 0.01070901 | N-term +28.03 Da,                          | 2506.013428 | 2 | 674.8300171 | 674.8331754 |
| DDEPPPLPR                        | O55022 | 0.00840979 | N-term +28.03 Da,                          | 2506.088867 | 2 | 532.2700195 | 532.2745666 |
| SVVEMQGDDEMTR                    | O88844 | 0          | N-term +28.03 Da,                          | 2506.397705 | 2 | 705.3200073 | 705.3236057 |
| TLDPVEKALR                       | P63017 | 0.00097847 | N-term +28.03 Da, K +28.03 Da,             | 2507.816162 | 3 | 399.9111023 | 399.9115694 |
| SIKELGDHVTNLR                    | P09528 | 0          | N-term +28.03 Da, K +28.03 Da,             | 2507.899414 | 3 | 513.289978  | 513.2947427 |
| TAHIVLEDGTKMKGY                  | Q8C196 | 0.01837725 | N-term +28.03 Da, K +28.03 Da,             | 2509.292236 | 4 | 437.4899902 | 437.4919267 |
| GGGVPTDEEQATGLER                 | P19536 | 0          | N-term +28.03 Da,                          | 2510.500488 | 2 | 822.9000244 | 822.3972032 |
| GLVGEIIR                         | P15532 | 0.00328272 | N-term +28.03 Da, K +28.03 Da,             | 2510.756348 | 3 | 347.5599976 | 347.565733  |
| TAHIVLEDGTKMKGY                  | Q8C196 | 0.00052247 | N-term +28.03 Da, K +28.03 Da,             | 2512.076416 | 3 | 582.9862671 | 582.9868101 |
| GGVPTDEEQATGLER                  | P19536 | 0          | N-term +28.03 Da,                          | 2513.318848 | 2 | 794.3900146 | 793.8864711 |
| SGPGGLHADLLR                     | Q8BWF0 | 0.00054113 | N-term +28.03 Da,                          | 2514.155762 | 3 | 407.5639954 | 407.5630517 |
| VKCDMEVSCPEGYTCCR                | P28798 | 0          | N-term +28.03 Da, K +28.03 Da,C +57.02 Da, | 2514.310303 | 3 | 736.9699707 | 736.3067925 |
| ASGGGVPTDEEQATGLER               | P19536 | 0          | N-term +28.03 Da,                          | 2516.739502 | 2 | 901.4298096 | 901.4317748 |
| GVPTDEEQATGLER                   | P19536 | 0          | N-term +28.03 Da,                          | 2517.082275 | 2 | 765.3741455 | 765.3757391 |
| VKCDMEVSCPEGYTCCR                | P28798 | 0          | N-term +28.03 Da, K +28.03 Da,C +57.02 Da, | 2517.80542  | 2 | 1103.949951 | 1103.956551 |
| GVQVETISPGDGR                    | P26883 | 0          | N-term +28.03 Da,                          | 2518.911377 | 2 | 672.3499756 | 671.8517019 |
| TIEDIEVAPKAHEVR                  | P00329 | 0.00985222 | N-term +28.03 Da,                          | 2520.936768 | 4 | 465.7592773 | 465.7610945 |
| ASGGGVPTDEEQATGLER               | P19536 | 0.00056593 | N-term +28.03 Da,                          | 2522.291748 | 3 | 601.2896729 | 601.2902754 |
| LNFASAVR                         | P12787 | 0.00399202 | N-term +28.03 Da,                          | 2522.367188 | 2 | 510.7748108 | 510.7772761 |
| FEESFQKALR                       | Q8C196 | 0.00361591 | N-term +28.03 Da, K +28.03 Da,             | 2524.211426 | 3 | 437.5700073 | 437.5749574 |
| ELAPGLHLR                        | Q99JR5 | 0.01076466 | N-term +28.03 Da,                          | 2524.517578 | 3 | 345.2090759 | 345.2099493 |
| YGQSETGISSATLR                   | Q91VA0 | 0.00101937 | N-term +28.03 Da,                          | 2524.723389 | 2 | 749.3800049 | 749.3808241 |
| YVNFQQPADAER                     | P29341 | 0.0013655  | N-term +28.03 Da,                          | 2525.299072 | 2 | 733.3569946 | 733.3571514 |
| TIEDIEVAPKAHEVR                  | P00329 | 0          | N-term +28.03 Da,                          | 2526.829834 | 3 | 621.0100098 | 620.6790339 |
| SLSGMGNPGNISSR                   | Q921H8 | 0.00059488 | N-term +28.03 Da,                          | 2527.660156 | 2 | 702.8499756 | 702.8486363 |
| KASAEALALGENNEVLKSGR             | P05202 | 0          | N-term +28.03 Da, K +28.03 Da,             | 2530.850098 | 3 | 690.7199707 | 690.7233027 |
| LAQEDPDYGLR                      | P24270 | 0          | N-term +28.03 Da,                          | 2531.114502 | 2 | 652.8300171 | 652.8276953 |
| YLEKLGPLR                        | Q8C7G5 | 0.00661479 | N-term +28.03 Da, K +28.03 Da,             | 2533.097656 | 3 | 382.2399902 | 382.2411381 |
| TDTEKGEFLSEGQVVR                 | E9PV24 | 0.0005423  | N-term +28.03 Da, K +28.03 Da,             | 2533.642822 | 3 | 618.6400146 | 618.3022924 |
| KASAEALALGENNEVLKSGR             | P05202 | 0.00056786 | N-term +28.03 Da, K +28.03 Da,             | 2538.230713 | 4 | 518.2935181 | 518.2942962 |
| DGVANVSIEDR                      | P08228 | 0.00057013 | N-term +28.03 Da,                          | 2539.852051 | 2 | 602.3099976 | 601.8042202 |
| SAGSAAAGPVEAAIR                  | Q9D8S9 | 0          | N-term +28.03 Da,                          | 2542.158691 | 2 | 678.3671265 | 678.367519  |
| VKCDMEVSCPEGYTCCR                | P28798 | 0.00099453 | N-term +28.03 Da, K +28.03 Da,C +57.02 Da, | 2545.686768 | 3 | 736.6400146 | 736.3067925 |
| ASGGGVPTDEEQATGLER               | P19536 | 0          | N-term +28.03 Da,                          | 2547.546631 | 2 | 901.4307861 | 901.4317748 |
| SMTNDPLEAAR                      | P11725 | 0.02774108 | N-term +28.03 Da,                          | 2548.143311 | 2 | 616.7999878 | 616.8006231 |
| GQPADKAAGGAGAQQVGGSSISSASSSVTVTR | P48678 | 0          | N-term +28.03 Da, K +28.03 Da,             | 2550.599121 | 3 | 959.1599731 | 958.8232459 |
| AMTEPGAGSDLQGVVR                 | P51174 | 0.03667092 | N-term +28.03 Da,                          | 2551.110352 | 2 | 759.3829956 | 758.8748514 |

|                       |        |            |                                            |             |   |             |             |
|-----------------------|--------|------------|--------------------------------------------|-------------|---|-------------|-------------|
| FVTYEELHQEPR          | D3Z6D1 | 0.02981651 | N-term +28.03 Da,                          | 2551.604248 | 3 | 526.2700195 | 525.9315816 |
| LPEEYEQWKQR           | Q91VA0 | 0.01751313 | N-term +28.03 Da, K +28.03 Da,             | 2551.679932 | 3 | 521.2700195 | 521.2718266 |
| VKVGVNGFGRIGR         | P16858 | 0.01808696 | N-term +28.03 Da, K +28.03 Da,             | 2552.141113 | 4 | 354.9700012 | 354.4714908 |
| YVAEKISGQKVNEAACDIAR  | Q35490 | 0          | N-term +28.03 Da, K +28.03 Da,C +57.02 Da, | 2553.254395 | 4 | 577.5599976 | 577.3097835 |
| TLYQKDSQGNLFR         | Q91Y97 | 0.02199662 | N-term +28.03 Da, K +28.03 Da,             | 2553.329834 | 3 | 542.6263428 | 542.626381  |
| GVKLEVFR              | PODJE0 | 0.00172861 | N-term +28.03 Da, K +28.03 Da,             | 2554.550293 | 3 | 335.2099915 | 335.2148116 |
| VPNDSSFQIVKNPR        | Q61176 | 0.00058411 | N-term +28.03 Da,                          | 2554.625732 | 3 | 552.9741211 | 552.9737807 |
| SGGGVPTDEEQATGLER     | P19536 | 0.00100351 | N-term +28.03 Da,                          | 2555.368896 | 2 | 866.4099731 | 865.9132177 |
| TLYQKDSQGNLFR         | Q91Y97 | 0.00100301 | N-term +28.03 Da, K +28.03 Da,             | 2555.949951 | 2 | 813.9299927 | 813.4359333 |
| YVAEKISGQKVNEAACDIAR  | Q35490 | 0          | N-term +28.03 Da, K +28.03 Da,C +57.02 Da, | 2556.180664 | 3 | 769.4102783 | 769.4106191 |
| TLYQKDSQGNLFR         | Q91Y97 | 0.01955403 | N-term +28.03 Da, K +28.03 Da,             | 2558.069824 | 2 | 813.4400024 | 813.4359333 |
| TSVATKKTEQGPPSSEYIFER | P29758 | 0.0238255  | N-term +28.03 Da, K +28.03 Da,             | 2561.166016 | 4 | 610.5800171 | 610.5746061 |
| YVAEKISGQKVNEAACDIAR  | Q35490 | 0.0005277  | N-term +28.03 Da, K +28.03 Da,C +57.02 Da, | 2562.306641 | 2 | 1154.109985 | 1153.61229  |
| TPEAAVEHPEAVR         | Q35490 | 0.0021106  | N-term +28.03 Da,                          | 2570.704102 | 2 | 717.3671875 | 717.3728015 |
| DAATQQLLSR            | Q03265 | 0.0013465  | N-term +28.03 Da,                          | 2572.657227 | 2 | 565.8099976 | 565.8118477 |
| KTGTAEMSSILEER        | Q03265 | 0.04534084 | N-term +28.03 Da,                          | 2573.73291  | 3 | 537.2800293 | 536.6151536 |
| GEFMTHKQKQENAFSPSR    | E9QA16 | 0.01066569 | N-term +28.03 Da, K +28.03 Da,             | 2573.967529 | 4 | 574.0499878 | 573.8005884 |
| ASGGGVPTDEEQATGLER    | P19536 | 0          | N-term +28.03 Da,                          | 2578.518066 | 2 | 901.4301758 | 901.4317748 |
| WISKQEYDESGPSIVHR     | P60710 | 0          | N-term +28.03 Da, K +28.03 Da,             | 2579.426514 | 3 | 696.3499756 | 696.3567313 |
| TMVADTPENLR           | Q61792 | 0.00053277 | N-term +28.03 Da,                          | 2579.586182 | 2 | 637.8233032 | 637.8240982 |
| YSQFQESDDADEDYGR      | Q80XU3 | 0          | N-term +28.03 Da,                          | 2581.208496 | 2 | 977.3900146 | 976.8926802 |
| VMLGETNPADSKPGTIR     | P15532 | 0          | N-term +28.03 Da, K +28.03 Da,             | 2588.257568 | 3 | 615         | 614.6645074 |
| ALWGGLR               | _sp P0 | 0.02446381 | N-term +28.03 Da,                          | 2588.523438 | 2 | 400.7417908 | 400.7425069 |
| DLAQQYGVR             | P09103 | 0.00771307 | N-term +28.03 Da,                          | 2589.412109 | 2 | 539.289978  | 539.2880081 |
| TSVATKKTEQGPPSSEYIFER | P29758 | 0          | N-term +28.03 Da, K +28.03 Da,             | 2589.627441 | 3 | 814.4299927 | 813.763716  |
| WISKQEYDESGPSIVHR     | P60710 | 0.01328546 | N-term +28.03 Da, K +28.03 Da,             | 2590.368408 | 4 | 522.5197754 | 522.5193676 |
| SCAEFVSGSQLR          | Q9DCX2 | 0.00176757 | N-term +28.03 Da, C +57.02 Da,             | 2594.499756 | 2 | 684.8300171 | 684.8324548 |
| EEMAPIEVK             | Q8BWT1 | 0.01685393 | N-term +28.03 Da, K +28.03 Da,             | 2599.350586 | 2 | 551.2979126 | 551.2966531 |
| LDLKKELSEPSSTR        | Q8C196 | 0          | N-term +28.03 Da, K +28.03 Da,             | 2602.549316 | 3 | 562.9926147 | 562.9927298 |
| TSVATKKTEQGPPSSEYIFER | P29758 | 0.0259481  | N-term +28.03 Da, K +28.03 Da,             | 2602.624756 | 4 | 610.5742798 | 610.5746061 |
| SGGTTMYPGIADR         | P60710 | 0          | N-term +28.03 Da,                          | 2604.135986 | 2 | 677.8300171 | 677.3270052 |
| GMEDPPVSLPKSK         | Q9D6Z1 | 0.00056402 | N-term +28.03 Da, K +28.03 Da,             | 2605.582031 | 3 | 490.269989  | 490.2741795 |
| ELEDATETADAMNR        | Q8VDD5 | 0          | N-term +28.03 Da,                          | 2606.296387 | 2 | 797.3599854 | 797.3566894 |
| ASGPGGLHADLLR         | Q8BWF0 | 0          | N-term +28.03 Da,                          | 2607.174316 | 3 | 431.2416382 | 431.2420898 |
| TLATDMGTMQER          | P56480 | 0.02508361 | N-term +28.03 Da,                          | 2608.014404 | 2 | 691.8300171 | 691.3261482 |
| ASGGGVPTDEEQATGLER    | P19536 | 0.00059382 | N-term +28.03 Da,                          | 2608.700195 | 2 | 901.4299927 | 901.4317748 |
| YSPIENIQR             | Q02248 | 0.00212766 | N-term +28.03 Da,                          | 2611.057617 | 2 | 574.3082886 | 574.3089407 |
| LNLQEYQSK             | Q9Z2I8 | 0.01632363 | N-term +28.03 Da, K +28.03 Da,             | 2612.355713 | 2 | 589.8230591 | 589.8244238 |
| SAGSAAAGPVEAAIR       | Q9D8S9 | 0          | N-term +28.03 Da,                          | 2612.582031 | 2 | 678.3693237 | 678.367519  |
| TLATDMGTMQER          | P56480 | 0.01927711 | N-term +28.03 Da,                          | 2612.734131 | 2 | 691.3200073 | 691.3261482 |

|                         |        |            |                                            |             |   |             |             |
|-------------------------|--------|------------|--------------------------------------------|-------------|---|-------------|-------------|
| ASGPGGLHADLLR           | Q8BWF0 | 0          | N-term +28.03 Da,                          | 2613.49292  | 2 | 646.3599854 | 646.3594964 |
| GKGILAADESIGSMGNR       | A6ZI46 | 0.00289735 | N-term +28.03 Da, K +28.03 Da,             | 2614.270264 | 2 | 866.4500122 | 866.4565403 |
| VMLGETNPADSKPGTIR       | P15532 | 0          | N-term +28.03 Da, K +28.03 Da,             | 2614.421143 | 3 | 615.3300171 | 614.6645074 |
| GLASGVFTR               | Q8K009 | 0.03133159 | N-term +28.03 Da,                          | 2617.115967 | 2 | 468.2678528 | 468.2690865 |
| HQDQSSVGGGLTAEDIEKAR    | Q60936 | 0          | N-term +28.03 Da, K +28.03 Da,             | 2622.500732 | 3 | 699.6920166 | 699.6905506 |
| SEEVEKAVETIR            | Q80XN0 | 0.00062461 | N-term +28.03 Da, K +28.03 Da,             | 2627.18335  | 3 | 482.9299927 | 482.5997206 |
| VMLGETNPADSKPGTIR       | P15532 | 0.00175285 | N-term +28.03 Da, K +28.03 Da,             | 2628.570801 | 3 | 614.3300171 | 614.6645074 |
| EATQAVLDKPETLSSDASTR    | P50544 | 0          | N-term +28.03 Da, K +28.03 Da,             | 2633.106934 | 3 | 725.710022  | 725.7094997 |
| VMEKPSPLLVGR            | P97379 | 0          | N-term +28.03 Da, K +28.03 Da,             | 2636.036865 | 3 | 461.2785339 | 461.2793759 |
| IVLAESDPGFKR            | Q9D281 | 0.00053248 | N-term +28.03 Da,                          | 2637.503906 | 3 | 463.269989  | 463.2696456 |
| ASGPGGLHADLLR           | Q8BWF0 | 0          | N-term +28.03 Da,                          | 2637.57959  | 3 | 431.240509  | 431.2420898 |
| VMEKPSPLLVGR            | P97379 | 0.00173085 | N-term +28.03 Da, K +28.03 Da,             | 2640.981689 | 2 | 691.4099731 | 691.4154256 |
| SAGSAAAGPVEAAIR         | Q9D859 | 0          | N-term +28.03 Da,                          | 2643.15625  | 2 | 678.369812  | 678.367519  |
| APSTMKIKIAPPER          | P60710 | 0.00172117 | N-term +28.03 Da, K +28.03 Da,             | 2649.610107 | 4 | 435.019989  | 434.7680277 |
| TTMYPGIADR              | P60710 | 0.01267198 | N-term +28.03 Da,                          | 2655.543945 | 2 | 576.789978  | 576.7895266 |
| ASGGGVPTDEEQATGLER      | P19536 | 0.003276   | N-term +28.03 Da,                          | 2656.04248  | 2 | 901.9199829 | 901.4317748 |
| NATLSVEPEGR             | Q9QYR9 | 0.01691332 | N-term +28.03 Da,                          | 2656.996582 | 2 | 601.3071289 | 600.8145878 |
| SLILGQDNAADQSR          | Q99KI3 | 0          | N-term +28.03 Da,                          | 2660.881348 | 2 | 758.3925781 | 758.3917231 |
| AAEGLPDQYADGEAAR        | Q9QXF8 | 0          | N-term +28.03 Da,                          | 2662.168701 | 2 | 831.8900146 | 831.3919206 |
| SPVERPSPDLEEGEASVQTER   | Q9R049 | 0          | N-term +28.03 Da,                          | 2662.248535 | 3 | 781.3900146 | 780.7153138 |
| EKVPAIYGVDTR            | Q8C196 | 0.01900484 | N-term +28.03 Da, K +28.03 Da,             | 2665.311523 | 3 | 468.6000061 | 468.6012839 |
| ADGDVDAVLSR             | Q8R0Y6 | 0.00213584 | N-term +28.03 Da,                          | 2665.386963 | 2 | 573.2926636 | 573.2934882 |
| EATQAVLDKPETLSSDASTR    | P50544 | 0          | N-term +28.03 Da, K +28.03 Da,             | 2665.701172 | 3 | 726.039978  | 725.7094997 |
| AGAVAADSPGFVEDR         | Q8BUY5 | 0          | N-term +28.03 Da,                          | 2666.993408 | 2 | 745.3699951 | 745.3677165 |
| LLHVTDTGVMTR            | P08113 | 0          | N-term +28.03 Da,                          | 2667.095703 | 3 | 476.5938416 | 476.5940235 |
| EATQAVLDKPETLSSDASTR    | P50544 | 0          | N-term +28.03 Da, K +28.03 Da,             | 2669.724365 | 3 | 725.3800049 | 725.7094997 |
| EDAVPGLTPCR             | Q9CZ13 | 0.02142857 | N-term +28.03 Da, C +57.02 Da,             | 2671.010254 | 2 | 621.8116455 | 621.8109907 |
| ENEKSLREEKVK            | G5E893 | 0.01814375 | N-term +28.03 Da, K +28.03 Da,             | 2671.085938 | 3 | 534.6400146 | 534.3138031 |
| EVKCDMEVSCPEGYTCCR      | P28798 | 0          | N-term +28.03 Da, K +28.03 Da,C +57.02 Da, | 2672.559326 | 3 | 779.3197021 | 779.3209906 |
| EIEYEVVR                | Q8C196 | 0.04527006 | N-term +28.03 Da,                          | 2674.04541  | 2 | 532.789978  | 532.7847671 |
| RKVVDYSQFQESDDADEDYGR   | Q80XU3 | 0          | N-term +28.03 Da, K +28.03 Da,             | 2674.874512 | 3 | 860.4000244 | 860.0612615 |
| EVKCDMEVSCPEGYTCCR      | P28798 | 0          | N-term +28.03 Da, K +28.03 Da,C +57.02 Da, | 2675.338379 | 2 | 1168.97998  | 1168.477848 |
| TQKAPQVSTPTLVEAAR       | P07724 | 0.02200406 | N-term +28.03 Da, K +28.03 Da,             | 2677.907715 | 3 | 618.6900024 | 618.3545503 |
| FVSDSSDSMDTGAGSIR       | O35143 | 0.00057604 | N-term +28.03 Da,                          | 2678.099854 | 2 | 880.3900146 | 880.3938036 |
| NIPTSGAEIGGAFGGEKHTGGGR | Q9DBF1 | 0.00061576 | N-term +28.03 Da, K +28.03 Da,             | 2680.73584  | 4 | 557.789978  | 557.2870026 |
| RKVVDYSQFQESDDADEDYGR   | Q80XU3 | 0          | N-term +28.03 Da, K +28.03 Da,             | 2680.82251  | 4 | 645.5499878 | 645.2977652 |
| LNLQEYQSKMLMSEHGVR      | Q9Z2I8 | 0.00172191 | N-term +28.03 Da, K +28.03 Da,             | 2681.283691 | 3 | 749.0800171 | 748.7438208 |
| AMTNQILVER              | Q8C196 | 0.01459594 | N-term +28.03 Da,                          | 2682.642334 | 2 | 601.831543  | 601.8317257 |
| NIPTSGAEIGGAFGGEKHTGGGR | Q9DBF1 | 0.0005291  | N-term +28.03 Da, K +28.03 Da,             | 2684.912354 | 3 | 743.0499878 | 742.713578  |
| LNLQEYQSKMLMSEHGVR      | Q9Z2I8 | 0          | N-term +28.03 Da, K +28.03 Da,             | 2686.328369 | 4 | 561.8099976 | 561.8096847 |

|                          |        |            |                                            |             |   |             |             |
|--------------------------|--------|------------|--------------------------------------------|-------------|---|-------------|-------------|
| LNLQEYQSKKLMSEHGVR       | Q9Z2I8 | 0.00137552 | N-term +28.03 Da, K +28.03 Da,             | 2687.395264 | 2 | 1122.609985 | 1122.612093 |
| LNLQEYQSKKLMSEHGVR       | Q9Z2I8 | 0.01082898 | N-term +28.03 Da, K +28.03 Da,             | 2693.049561 | 2 | 1123.619995 | 1122.612093 |
| KFAEDSAEAAVSVPEsr        | Q80WR5 | 0.00806452 | N-term +28.03 Da,                          | 2694.487305 | 2 | 925.4699707 | 924.9705355 |
| KDDYCEAGTKK              | Q8BLU0 | 0.01085736 | N-term +28.03 Da, K +28.03 Da,C +57.02 Da, | 2699.122803 | 2 | 713.3615112 | 713.8659634 |
| EVKCDMEVSCPEGYTCR        | P28798 | 0          | N-term +28.03 Da, K +28.03 Da,C +57.02 Da, | 2704.120117 | 3 | 779.6500244 | 779.3209906 |
| EVKCDMEVSCPEGYTCR        | P28798 | 0          | N-term +28.03 Da, K +28.03 Da,C +57.02 Da, | 2707.287842 | 2 | 1168.47998  | 1168.477848 |
| THISRSQNQQYLVR           | O35066 | 0.03209076 | N-term +28.03 Da,                          | 2710.135742 | 3 | 586.6578369 | 586.6517007 |
| RTLPTVDWR                | O70370 | 0.00805833 | N-term +28.03 Da,                          | 2712.136475 | 3 | 429.5662842 | 429.5665734 |
| ADDDYDEPTDSLDR           | Q8K0E8 | 0          | N-term +28.03 Da,                          | 2713.401123 | 2 | 863.3599854 | 863.3579416 |
| EATQAVLDKPELSSDASTR      | P50544 | 0          | N-term +28.03 Da, K +28.03 Da,             | 2716.366699 | 3 | 725.710022  | 725.7094997 |
| DEVFYSR                  | P11725 | 0.01297765 | N-term +28.03 Da,                          | 2719.585449 | 2 | 520.7600098 | 520.7560095 |
| YITGESKEQVANSFAVER       | P11499 | 0.00172488 | N-term +28.03 Da, K +28.03 Da,             | 2720.707275 | 3 | 695.3599854 | 695.3601416 |
| SVVCPDAKTQCPDDSTCCLEPTGK | P28798 | 0          | N-term +28.03 Da, K +28.03 Da,C +57.02 Da, | 2722.703857 | 3 | 937.7600098 | 937.0885607 |
| GDVCYADVYR               | Q6PDM2 | 0.00063251 | N-term +28.03 Da, C +57.02 Da,             | 2724.288574 | 2 | 623.2800293 | 623.282066  |
| EATQAVLDKPELSSDASTR      | P50544 | 0          | N-term +28.03 Da, K +28.03 Da,             | 2725.229736 | 2 | 1088.060059 | 1088.060611 |
| AHGSVVKSEDYAFPTYADR      | P19783 | 0          | N-term +28.03 Da, K +28.03 Da,             | 2731.872559 | 2 | 1085.540039 | 1085.034199 |
| FPDEKAAAYFR              | Q2MHE5 | 0.01101322 | N-term +28.03 Da, K +28.03 Da,             | 2733.746582 | 2 | 650.3300171 | 650.3402408 |
| AHGSVVKSEDYAFPTYADR      | P19783 | 0          | N-term +28.03 Da, K +28.03 Da,             | 2734.594971 | 3 | 723.690918  | 723.6918913 |
| GEECELETMTGEKVK          | P12710 | 0.00101266 | N-term +28.03 Da, K +28.03 Da,C +57.02 Da, | 2736.146484 | 3 | 608.6300049 | 608.630364  |
| AHGSVVKSEDYAFPTYADR      | P19783 | 0          | N-term +28.03 Da, K +28.03 Da,             | 2736.338867 | 2 | 1086.030029 | 1085.034199 |
| EIAQDFKTDLR              | P02301 | 0.00052521 | N-term +28.03 Da, K +28.03 Da,             | 2737.751953 | 3 | 464.5885315 | 464.5891555 |
| GYISAAELR                | P62204 | 0.03232062 | N-term +28.03 Da,                          | 2738.430664 | 2 | 504.2786865 | 504.2796516 |
| GQVGDLSPQQQEALAR         | Q8R0F9 | 0          | N-term +28.03 Da,                          | 2739.200684 | 2 | 862.9500122 | 862.9499368 |
| THISRSQNQQYLVR           | O35066 | 0.02959553 | N-term +28.03 Da,                          | 2740.870117 | 3 | 586.6557007 | 586.6517007 |
| YLAEFATGNDR              | P62259 | 0.0107487  | N-term +28.03 Da,                          | 2743.250977 | 2 | 642.8099976 | 642.8145878 |
| IGIEIKR                  | P63038 | 0.03190104 | N-term +28.03 Da, K +28.03 Da,             | 2744.085938 | 3 | 333.230011  | 333.2304617 |
| TWVVLGHSER               | P17751 | 0.00053821 | N-term +28.03 Da,                          | 2744.281738 | 3 | 404.5559692 | 404.555897  |
| EATQAVLDKPELSSDASTR      | P50544 | 0          | N-term +28.03 Da, K +28.03 Da,             | 2746.905029 | 3 | 726.3800049 | 725.7094997 |
| TFYTKVLNEEER             | P24270 | 0.03588593 | N-term +28.03 Da, K +28.03 Da,             | 2747.003906 | 3 | 528.9500122 | 528.9471203 |
| YLAEFATGNDR              | P62259 | 0.00841622 | N-term +28.03 Da,                          | 2747.561523 | 2 | 642.3123169 | 642.8145878 |
| TWVVLGHSER               | P17751 | 0.00210704 | N-term +28.03 Da,                          | 2748.995117 | 3 | 404.2207947 | 404.555897  |
| TRVSQEHPPVLTKEVEGAR      | Q8C196 | 0.01986982 | N-term +28.03 Da, K +28.03 Da,             | 2751.016602 | 4 | 553.0700073 | 553.0667505 |
| WGKVNSEVGGGEALGR         | P02088 | 0.02506684 | N-term +28.03 Da, K +28.03 Da,             | 2752.108398 | 3 | 577.2997437 | 577.3004454 |
| NPVDDICIAKPR             | P32261 | 0          | N-term +28.03 Da, K +28.03 Da,C +57.02 Da, | 2752.183838 | 3 | 485.2662964 | 485.2659068 |
| DPDAANYKDISDVER          | Q9D819 | 0          | N-term +28.03 Da, K +28.03 Da,             | 2754.040039 | 2 | 882.9299927 | 882.4259608 |
| QKTGTAEMSSILEER          | Q03265 | 0.03205959 | N-term +28.03 Da, K +28.03 Da,             | 2755.165039 | 3 | 579.6299438 | 579.3013463 |
| TELFYKGIR                | Q03265 | 0.02142129 | N-term +28.03 Da, K +28.03 Da,             | 2756.912598 | 3 | 394.8999939 | 394.9008931 |
| VAGGPEVTLTPER            | Q8CIM3 | 0.00364078 | N-term +28.03 Da,                          | 2758.719238 | 2 | 677.3721924 | 677.37227   |
| YYPNSFSAPEQQR            | P24270 | 0          | N-term +28.03 Da,                          | 2758.970459 | 2 | 807.8800049 | 807.880991  |
| VLSGEDKSNKAAW            | P01942 | 0.01234568 | N-term +28.03 Da, K +28.03 Da,             | 2760.951904 | 3 | 534.6346436 | 534.634765  |

|                        |        |            |                                            |             |   |             |             |
|------------------------|--------|------------|--------------------------------------------|-------------|---|-------------|-------------|
| FYDIKLR                | Q9Z0X1 | 0.04860681 | N-term +28.03 Da, K +28.03 Da,             | 2761.404785 | 3 | 356.5461121 | 356.54645   |
| IIAVDINKDKFAK          | P00329 | 0.00052493 | N-term +28.03 Da, K +28.03 Da,             | 2761.586426 | 4 | 397.75      | 397.502457  |
| TLPKQVKIVEVGPR         | P38060 | 0.04637411 | N-term +28.03 Da, K +28.03 Da,             | 2763.529053 | 4 | 412.769989  | 412.7684563 |
| ALEYGASCEDIAR          | O08749 | 0          | N-term +28.03 Da, C +57.02 Da,             | 2764.115234 | 2 | 741.8499756 | 741.8483023 |
| AHGSVVKSEDYAFPTYADR    | P19783 | 0          | N-term +28.03 Da, K +28.03 Da,             | 2765.389404 | 3 | 723.6904297 | 723.6918913 |
| ALEVFQVSHPR            | Q9WVLO | 0.00145208 | N-term +28.03 Da,                          | 2768.255859 | 3 | 437.5785522 | 437.5787018 |
| EPPVIQNPEYKGEWKPR      | P14211 | 0          | N-term +28.03 Da, K +28.03 Da,             | 2768.504639 | 4 | 538.539978  | 538.5453852 |
| TITTKELGTVMR           | P62204 | 0.00698216 | N-term +28.03 Da, K +28.03 Da,             | 2768.666992 | 3 | 469.2799988 | 469.2742909 |
| EQEQPLSCDEPILSNKSGDNR  | P70296 | 0          | N-term +28.03 Da, K +28.03 Da,C +57.02 Da, | 2771.935059 | 3 | 824.7299805 | 824.7272251 |
| VSDENDAKILNDVQDR       | Q8VDW0 | 0.00102145 | N-term +28.03 Da, K +28.03 Da,             | 2773.123779 | 3 | 629.6547241 | 629.6533252 |
| PKVTQPEVDTPLGR         | Q63880 | 0.00142586 | N-term +28.03 Da, K +28.03 Da,             | 2774.435791 | 3 | 531.3099976 | 531.638398  |
| NPVDDICIAKPR           | P32261 | 0          | N-term +28.03 Da, K +28.03 Da,C +57.02 Da, | 2774.592529 | 2 | 727.9000244 | 727.395222  |
| TITTKELGTVMR           | P62204 | 0.00138122 | N-term +28.03 Da, K +28.03 Da,             | 2774.847412 | 2 | 703.4074097 | 703.4077981 |
| ALEVFQVSHPR            | Q9WVLO | 0          | N-term +28.03 Da,                          | 2775.029785 | 2 | 655.8644409 | 655.8644144 |
| YKDTLLPKLPR            | P49429 | 0.00055432 | N-term +28.03 Da, K +28.03 Da,             | 2775.584717 | 4 | 357.730011  | 357.7300709 |
| MASGGGVPTDEEQATGLER    | P19536 | 0          | N-term +28.03 Da,                          | 2776.102539 | 2 | 966.9508057 | 966.9520173 |
| VEAAVGKDLFR            | Q64471 | 0.00058445 | N-term +28.03 Da, K +28.03 Da,             | 2776.253174 | 3 | 420.9144897 | 420.9152025 |
| VTQPEVDTPLGR           | Q63880 | 0          | N-term +28.03 Da,                          | 2776.89624  | 2 | 670.3599854 | 670.364445  |
| WEAADLGNEER            | Q9R0P4 | 0.00064558 | N-term +28.03 Da,                          | 2778.993652 | 2 | 659.3049316 | 659.3071272 |
| MASGGGVPTDEEQATGLER    | P19536 | 0          | N-term +28.03 Da,                          | 2780.529541 | 3 | 644.9699707 | 644.970437  |
| MEVHELFR               | P41216 | 0.00101833 | N-term +28.03 Da,                          | 2786.588379 | 3 | 363.519989  | 363.5234282 |
| GTLDPVEKALR            | P63017 | 0          | N-term +28.03 Da, K +28.03 Da,             | 2790.144531 | 3 | 418.9200134 | 418.9187241 |
| YIIGELHPDDR            | P56395 | 0.00101626 | N-term +28.03 Da,                          | 2798.418945 | 3 | 452.8999939 | 452.5699838 |
| GPVPGYQQAPPQGVPR       | G3X972 | 0          | N-term +28.03 Da,                          | 2799.071045 | 2 | 838.4500122 | 838.4493748 |
| AMTNQILVER             | Q8C196 | 0.00133571 | N-term +28.03 Da,                          | 2802.459961 | 2 | 601.8300171 | 601.8317257 |
| EYWQNL                 | O35490 | 0.00213402 | N-term +28.03 Da,                          | 2803.799805 | 2 | 518.7631226 | 518.7641685 |
| MASGGGVPTDEEQATGLER    | P19536 | 0          | N-term +28.03 Da,                          | 2806.605957 | 2 | 966.9495239 | 966.9520173 |
| SMEQPEMLEKVS           | Q9DCM2 | 0.00173235 | N-term +28.03 Da, K +28.03 Da,             | 2806.862549 | 3 | 540.6099854 | 540.6092338 |
| SYDLGIENR              | O88844 | 0.02327935 | N-term +28.03 Da,                          | 2806.945068 | 2 | 547.7800293 | 547.7774736 |
| AYEPQGGSGYDYSYAGGR     | P61979 | 0          | N-term +28.03 Da,                          | 2808.617676 | 2 | 963.4199829 | 963.4186673 |
| IVTNNWLDDGDKR          | P34914 | 0.00098961 | N-term +28.03 Da, K +28.03 Da,             | 2810.591064 | 3 | 534.6134644 | 534.6142526 |
| SCVAVMEGKQAKVLENAEGAR  | P38647 | 0.0005596  | N-term +28.03 Da, K +28.03 Da,C +57.02 Da, | 2811.605469 | 3 | 777.7399902 | 777.7434924 |
| MQLTVKALQGR            | P21126 | 0.00062267 | N-term +28.03 Da, K +28.03 Da,             | 2815.164795 | 3 | 434.2650146 | 434.2638371 |
| RVAPEEHPVLLTEAPLNPKANR | P60710 | 0          | N-term +28.03 Da, K +28.03 Da,             | 2815.466553 | 4 | 627.8599854 | 627.6077772 |
| TNKETTIQGLDGLSER       | Q91Y97 | 0.00137489 | N-term +28.03 Da, K +28.03 Da,             | 2815.699951 | 3 | 606.9899902 | 606.6582988 |
| LVEPGSPAESGLLAGDR      | P70441 | 0.00142925 | N-term +28.03 Da, K +28.03 Da,             | 2820.084229 | 3 | 618.0100098 | 618.0106722 |
| GIAFEDVR               | P45952 | 0.0017414  | N-term +28.03 Da,                          | 2821.423828 | 2 | 467.75      | 467.7532695 |
| DYMTKIPR               | Q8C196 | 0.00138889 | N-term +28.03 Da, K +28.03 Da,             | 2821.87793  | 3 | 393.5599976 | 393.55825   |
| EHPVVLTKFVEGAR         | Q8C196 | 0          | N-term +28.03 Da, K +28.03 Da,             | 2821.953369 | 4 | 410.2391357 | 410.2397974 |
| KTGTAEMSSILEER         | Q03265 | 0.00133333 | N-term +28.03 Da,                          | 2822.606445 | 3 | 536.614502  | 536.6151536 |



|                             |        |            |                                            |             |   |             |             |
|-----------------------------|--------|------------|--------------------------------------------|-------------|---|-------------|-------------|
| KTGTAEMSSILEER              | Q03265 | 0.00139211 | N-term +28.03 Da,                          | 2824.381104 | 3 | 536.6144409 | 536.6151536 |
| IEEKSCDLVGEKDKESKNEVALLER   | P24668 | 0          | N-term +28.03 Da, K +28.03 Da,C +57.02 Da, | 2826.424316 | 4 | 765.6599731 | 765.4139724 |
| YVDFGGVKKPVGSEPVPKSR        | Q9QXX4 | 0.04612029 | N-term +28.03 Da, K +28.03 Da,             | 2827.814453 | 4 | 526.5499878 | 526.2965729 |
| FVEDLNESEKDNDR              | Q8BXZ1 | 0.00052938 | N-term +28.03 Da, K +28.03 Da,             | 2830.966064 | 3 | 556.9400024 | 556.9457796 |
| SQEHVVLTKFVEGAR             | Q8C196 | 0          | N-term +28.03 Da, K +28.03 Da,             | 2831.306885 | 4 | 464.2600098 | 464.0124493 |
| IEEKSCDLVGEKDKESKNEVALLER   | P24668 | 0.00327065 | N-term +28.03 Da, K +28.03 Da,C +57.02 Da, | 2832.224854 | 3 | 1020.549988 | 1020.216204 |
| TAPSPSSPTSPDGTASSEMNPHAIPIR | Q9QZS3 | 0          | N-term +28.03 Da,                          | 2832.369141 | 3 | 978.460022  | 978.1295701 |
| ISLSGEHSIIGR                | P08228 | 0.00057405 | N-term +28.03 Da,                          | 2832.542236 | 3 | 432.9130249 | 432.9138618 |
| LIFAGKQLEDGR                | P0CG49 | 0          | N-term +28.03 Da, K +28.03 Da,             | 2834.068115 | 3 | 468.269989  | 468.2732786 |
| GASAFGNLLPR                 | Q99LC5 | 0.00877863 | N-term +28.03 Da, K +28.03 Da,             | 2836.493896 | 3 | 429.5899963 | 429.5908301 |
| MASGGGVPTDEEQATGLER         | P19536 | 0          | N-term +28.03 Da,                          | 2837.068359 | 2 | 966.9517822 | 966.9520173 |
| TAWTFSR                     | Q9CPU0 | 0.00249792 | N-term +28.03 Da,                          | 2837.201416 | 2 | 448.730011  | 448.7348794 |
| SNPVSNAQPAGAEKPEAKVLFDR     | Q8CGC7 | 0.00471328 | N-term +28.03 Da, K +28.03 Da,             | 2841.756348 | 4 | 628.0900269 | 628.0906889 |
| SQEHVVLTKFVEGAR             | Q8C196 | 0.00059666 | N-term +28.03 Da, K +28.03 Da,             | 2842.179443 | 2 | 927.5200195 | 927.0176221 |
| LCAATATILDKPEDR             | O35215 | 0          | N-term +28.03 Da, C +57.02 Da,             | 2843.660889 | 3 | 577.3101196 | 577.309953  |
| ADIVENQVMDTR                | P10649 | 0          | N-term +28.03 Da,                          | 2848.435303 | 2 | 710.3499756 | 709.8508448 |
| SNPVSNAQPAGAEKPEAKVLFDR     | Q8CGC7 | 0.00471143 | N-term +28.03 Da, K +28.03 Da,             | 2850.99585  | 3 | 837.1199951 | 837.118493  |
| SQEHVVLTKFVEGAR             | Q8C196 | 0.00697404 | N-term +28.03 Da, K +28.03 Da,             | 2852.501221 | 3 | 618.6799927 | 618.3475069 |
| EIPPLEGDEDASR               | P11499 | 0.00807692 | N-term +28.03 Da,                          | 2854.4104   | 2 | 728.3499756 | 728.3517325 |
| VVDALGNAIDGKGPISKTR         | Q03265 | 0          | N-term +28.03 Da, K +28.03 Da,             | 2855.686523 | 4 | 514.0499878 | 513.8007512 |
| GTKLSMTNDPLEAAR             | P11725 | 0.02079782 | N-term +28.03 Da, K +28.03 Da,             | 2856.000244 | 3 | 553.960022  | 553.9626646 |
| TEESDLAQQYGVRR              | P09103 | 0          | N-term +28.03 Da,                          | 2857.258545 | 2 | 762.8699951 | 762.3704565 |
| VVLTKFVEGAR                 | Q8C196 | 0.0013876  | N-term +28.03 Da, K +28.03 Da,             | 2858.165527 | 3 | 425.5988464 | 425.5992142 |
| VISLSGEHSIIGR               | P08228 | 0          | N-term +28.03 Da,                          | 2858.626953 | 3 | 465.9367065 | 465.9366666 |
| MKETIMNQEKLAKLQAQVRR        | Q64152 | 0          | N-term +28.03 Da, K +28.03 Da,             | 2860.333984 | 4 | 593.5957642 | 593.5945523 |
| TFASQVTLEGDKVKVER           | Q9DCW4 | 0.00133452 | N-term +28.03 Da, K +28.03 Da,             | 2860.485107 | 4 | 498.5299988 | 498.5347519 |
| SHTDVKVPDFSDYR              | Q9CR68 | 0.02201151 | N-term +28.03 Da, K +28.03 Da,             | 2861.620361 | 2 | 861.4299927 | 861.4283058 |
| GEVPVVAIR                   | P27773 | 0.00327198 | N-term +28.03 Da,                          | 2861.77124  | 2 | 484.2999878 | 484.3003866 |
| GVTKGAAELMQQKEATTEQQLR      | O35490 | 0.00773395 | N-term +28.03 Da, K +28.03 Da,             | 2862.317627 | 3 | 835.1199951 | 834.451255  |
| GVTKGAAELMQQKEATTEQQLR      | O35490 | 0          | N-term +28.03 Da, K +28.03 Da,             | 2863.308105 | 4 | 626.0900269 | 626.0902603 |
| DITADDEPLGR                 | P17742 | 0.00176678 | N-term +28.03 Da,                          | 2863.383545 | 2 | 615.3015137 | 615.3040532 |
| MKETIMNQEKLAKLQAQVRR        | Q64152 | 0.00051948 | N-term +28.03 Da, K +28.03 Da,             | 2863.567627 | 3 | 791.460022  | 791.1236442 |
| LTITYGPKVVR                 | P12710 | 0.00062696 | N-term +28.03 Da, K +28.03 Da,             | 2863.792236 | 3 | 434.9400024 | 434.9429809 |
| TFEESFQKALR                 | Q8C196 | 0.00054735 | N-term +28.03 Da, K +28.03 Da,             | 2865.953369 | 3 | 471.2600098 | 471.2575172 |
| EGLEQAALPAEESR              | Q8C0L0 | 0.00054348 | N-term +28.03 Da,                          | 2866.893555 | 2 | 765.3900146 | 764.3861066 |
| RPPLGFLNPR                  | O89023 | 0.00134469 | N-term +28.03 Da,                          | 2869.212891 | 3 | 398.9080505 | 398.9083817 |
| SHTDVKVPDFSDYR              | Q9CR68 | 0.00062735 | N-term +28.03 Da, K +28.03 Da,             | 2870.369873 | 2 | 862.4199829 | 861.4283058 |
| SHTDVKVPDFSDYR              | Q9CR68 | 0          | N-term +28.03 Da, K +28.03 Da,             | 2873.035156 | 3 | 574.6204224 | 574.621296  |
| LCAATATILDKPEDR             | O35215 | 0          | N-term +28.03 Da, C +57.02 Da,             | 2877.996094 | 3 | 577.3099976 | 577.309953  |
| LNETHGDEPFQYKN              | P15105 | 0.0006006  | N-term +28.03 Da, K +28.03 Da,             | 2878.491699 | 2 | 805.8900146 | 805.8884821 |

|                          |        |            |                                |             |   |             |             |
|--------------------------|--------|------------|--------------------------------|-------------|---|-------------|-------------|
| SHYEEGPGKNLPP            | P17665 | 0.01425009 | N-term +28.03 Da, K +28.03 Da, | 2882.746826 | 2 | 765.8840332 | 765.883002  |
| VGLKAPGIIPR              | Q03265 | 0.00063291 | N-term +28.03 Da, K +28.03 Da, | 2882.938721 | 3 | 392.9299927 | 392.9324158 |
| GDSASKVISAEEALPGR        | Q9D6Y7 | 0.00056948 | N-term +28.03 Da, K +28.03 Da, | 2884.965576 | 3 | 581.3200073 | 581.6476224 |
| GKDYQTLGLLAR             | Q9QYJ3 | 0.01956074 | N-term +28.03 Da, K +28.03 Da, | 2885.174561 | 3 | 480.9299927 | 480.9330335 |
| SEVPGAAAEGPGGSGVGLGDR    | Q9EP72 | 0          | N-term +28.03 Da,              | 2888.91626  | 2 | 934.960022  | 934.4608664 |
| GALGSVESLPDR             | Q9JLI6 | 0.0163005  | N-term +28.03 Da,              | 2889.506836 | 2 | 614.8300171 | 614.8302378 |
| AEGQVLVLDGR              | P19253 | 0          | N-term +28.03 Da,              | 2890.92334  | 2 | 592.8343506 | 592.8353228 |
| RGDLPFVVTR               | Q8VDD5 | 0.00985595 | N-term +28.03 Da,              | 2891.12085  | 3 | 396.5700073 | 396.5680254 |
| EAPNFEANTTIGR            | O08709 | 0.02015716 | N-term +28.03 Da,              | 2891.41748  | 2 | 723.8699951 | 724.362434  |
| GKDYQTLGLLAR             | Q9QYJ3 | 0          | N-term +28.03 Da, K +28.03 Da, | 2892.556641 | 2 | 720.8953247 | 720.8959121 |
| GDSNPFDEDTTSGTEVR        | Q9WVE8 | 0          | N-term +28.03 Da,              | 2892.92041  | 2 | 928.4000244 | 927.9030477 |
| TTKAPAAIGPYSQAVQVDR      | P52760 | 0          | N-term +28.03 Da, K +28.03 Da, | 2894.298096 | 3 | 677.039978  | 677.040743  |
| VSEGSAAAMAAGESMAQR       | Q9D854 | 0          | N-term +28.03 Da,              | 2894.385986 | 2 | 841.3900146 | 840.8876334 |
| QKTGTAEMSSILEER          | Q03265 | 0.00100251 | N-term +28.03 Da, K +28.03 Da, | 2894.477539 | 2 | 868.4400024 | 868.4483813 |
| LTITYGPKVVR              | P12710 | 0.00141176 | N-term +28.03 Da, K +28.03 Da, | 2895.343262 | 3 | 434.9400024 | 434.9429809 |
| FAQLCEEHGILR             | B5X0G2 | 0          | N-term +28.03 Da, C +57.02 Da, | 2896.029297 | 3 | 500.9254456 | 500.9257731 |
| QKTGTAEMSSILEER          | Q03265 | 0.00211685 | N-term +28.03 Da, K +28.03 Da, | 2897.557129 | 3 | 579.2993774 | 579.3013463 |
| SPESTSEVECGDFYNSGDR      | Q91VA0 | 0          | N-term +28.03 Da, C +57.02 Da, | 2899.58667  | 2 | 1082.949951 | 1082.442212 |
| ATIPAALQAQESTEGPGTGQDRPR | Q9DBG1 | 0          | N-term +28.03 Da,              | 2899.673828 | 3 | 827.4299927 | 827.0893739 |
| RPPLGFLNPR               | O89023 | 0.00097182 | N-term +28.03 Da,              | 2900.556885 | 3 | 398.9100037 | 398.9083817 |
| GEPVSLGSLR               | P11352 | 0.00171821 | N-term +28.03 Da,              | 2901.20166  | 2 | 521.7991943 | 521.7982087 |
| SHTDVKVPDFSDYR           | Q9CR68 | 0          | N-term +28.03 Da, K +28.03 Da, | 2903.610596 | 3 | 574.6199951 | 574.621296  |
| FAQLCEEHGILR             | B5X0G2 | 0.00174825 | N-term +28.03 Da, C +57.02 Da, | 2903.836914 | 2 | 751.8800049 | 750.8850214 |
| EIPPLEGDEDASR            | P11499 | 0.02927632 | N-term +28.03 Da,              | 2904.473389 | 2 | 728.3499756 | 728.3517325 |
| SEVPGAAAEGPGGSGVGLGDR    | Q9EP72 | 0          | N-term +28.03 Da,              | 2906.50708  | 2 | 934.460022  | 934.4608664 |
| PGVTVKDVNQEFVR           | Q9CZX8 | 0          | N-term +28.03 Da, K +28.03 Da, | 2907.079102 | 2 | 885.9799805 | 886.4886975 |
| GESPQVAVIIRPDDR          | Q6NZJ6 | 0.00140384 | N-term +28.03 Da,              | 2907.154541 | 3 | 560.6398926 | 560.6406904 |
| TEFTPTETDTYACR           | P01887 | 0          | N-term +28.03 Da, C +57.02 Da, | 2910.774414 | 2 | 860.3800049 | 860.3801645 |
| LPLPPPPPPR               | P61979 | 0.00101112 | N-term +28.03 Da,              | 2914.79541  | 2 | 554.8470459 | 554.8475038 |
| RVGVPTETGALTNR           | Q8BWT1 | 0.00138825 | N-term +28.03 Da,              | 2917.648193 | 3 | 537.9764404 | 537.9774137 |
| LGNVTAGKDGVANVSIEDR      | P08228 | 0          | N-term +28.03 Da, K +28.03 Da, | 2917.883789 | 3 | 658.0200195 | 657.6883696 |
| VLAASEPIPKGIR            | Q9WTP6 | 0.0006068  | N-term +28.03 Da, K +28.03 Da, | 2919.333984 | 3 | 488.9599915 | 488.9643337 |
| SAGVSVPGPMGPGSPR         | P11087 | 0.01690141 | N-term +28.03 Da,              | 2919.73999  | 2 | 741.3800049 | 740.8824789 |
| SEVPGAAAEGPGGSGVGLGDR    | Q9EP72 | 0.00251046 | N-term +28.03 Da,              | 2921.126465 | 3 | 623.6400146 | 623.3096698 |
| ANLEKAQSELSGAADEAAR      | Q9D3D9 | 0          | N-term +28.03 Da, K +28.03 Da, | 2931.829102 | 2 | 994.5100098 | 994.0081811 |
| SVVFPHDEPLAGR            | Q99LB7 | 0.00061728 | N-term +28.03 Da,              | 2932.695557 | 3 | 484.9299927 | 484.5928998 |
| SQGSPLSWEETQR            | P97494 | 0          | N-term +28.03 Da,              | 2933.602539 | 2 | 767.3699951 | 766.8706235 |
| ANLEKAQSELSGAADEAAR      | Q9D3D9 | 0          | N-term +28.03 Da, K +28.03 Da, | 2935.545898 | 2 | 994.0100098 | 994.0081811 |
| MIAPAVLR                 | Q9CR63 | 0.00330306 | N-term +28.03 Da,              | 2938.337158 | 2 | 449.7799988 | 449.780775  |
| VLSGEDKSNIAAWGKIGGH      | P01942 | 0.0005988  | N-term +28.03 Da, K +28.03 Da, | 2939.496826 | 4 | 545.5599976 | 545.561301  |

|                         |        |            |                                             |             |   |             |             |
|-------------------------|--------|------------|---------------------------------------------|-------------|---|-------------|-------------|
| KVISTTKAPAAIGPYSQAVQVDR | P52760 | 0.00289615 | N-term +28.03 Da, K +28.03 Da,              | 2939.731201 | 4 | 622.1099854 | 621.8600692 |
| ATEESDLAQQYGVR          | P09103 | 0          | N-term +28.03 Da,                           | 2940.438965 | 2 | 797.8900146 | 797.8890136 |
| ANLEKAQSELSGAADEAAR     | Q9D3D9 | 0          | N-term +28.03 Da, K +28.03 Da,              | 2941.835449 | 3 | 663.005249  | 663.0078796 |
| GFPEAASSFR              | P32020 | 0.00435989 | N-term +28.03 Da,                           | 2941.910889 | 2 | 548.7741089 | 548.7747336 |
| AVDAPVSSVALR            | Q64374 | 0.00141777 | N-term +28.03 Da,                           | 2942.298584 | 2 | 607.3643188 | 606.8509729 |
| LEEEDNVLVLKK            | P09103 | 0.01783841 | N-term +28.03 Da, K +28.03 Da,              | 2943.5625   | 3 | 504.9671326 | 504.9676327 |
| IYTWGNQEFEQSKR          | Q9CQ69 | 0.00248859 | N-term +28.03 Da, K +28.03 Da,              | 2945.225342 | 3 | 614.9799805 | 614.6442121 |
| LEEEDNVLVLKK            | P09103 | 0.01078067 | N-term +28.03 Da, K +28.03 Da,              | 2945.378662 | 2 | 756.9500122 | 756.9478108 |
| LPLPPPPPPR              | P61979 | 0.00135747 | N-term +28.03 Da,                           | 2946.260986 | 2 | 554.8466797 | 554.8475038 |
| DIDTAAKF                | P56383 | 0.0129917  | N-term +28.03 Da, K +28.03 Da,              | 2949.61377  | 2 | 468.7549744 | 468.755478  |
| APPLTLDGIKDR            | Q9CR21 | 0.00697945 | N-term +28.03 Da, K +28.03 Da,              | 2949.689209 | 3 | 451.269989  | 451.2696456 |
| SAELALGENNEVLKSGR       | P05202 | 0          | N-term +28.03 Da, K +28.03 Da,              | 2949.915771 | 3 | 615         | 615.0021769 |
| YTQKAPQVSTPTLVVEAAR     | P07724 | 0          | N-term +28.03 Da, K +28.03 Da,              | 2950.31543  | 3 | 672.710022  | 672.7089934 |
| TLKGLNSDSVTEETLR        | Q8C196 | 0          | N-term +28.03 Da, K +28.03 Da,              | 2952.311523 | 3 | 607         | 606.9984325 |
| QNYSTEVEAAVNR           | P29391 | 0          | N-term +28.03 Da,                           | 2952.386719 | 2 | 754.8696899 | 754.8706235 |
| EYGFNQKIR               | Q9ET01 | 0.01631784 | N-term +28.03 Da, K +28.03 Da,              | 2954.198975 | 3 | 441.9200134 | 441.9188355 |
| VSQEHPPVLTKFVEGAR       | Q8C196 | 0          | N-term +28.03 Da,                           | 2955.345703 | 4 | 489.0299988 | 488.7795528 |
| QQQQIQLQLQMEKER         | P46938 | 0          | N-term +28.03 Da, K +28.03 Da,              | 2955.803711 | 3 | 705.3699951 | 704.7125206 |
| TMAEETAPAVLER           | Q64374 | 0          | N-term +28.03 Da,                           | 2956.648193 | 2 | 723.3687134 | 723.3688704 |
| MIPTNDLKPGEELR          | P00405 | 0.00364372 | N-term +28.03 Da, K +28.03 Da,              | 2956.799072 | 3 | 514.289978  | 513.9569619 |
| FKPLLDAGDPRGR           | Q8BLS7 | 0.02294971 | N-term +28.03 Da, K +28.03 Da,              | 2956.874756 | 2 | 750.4199829 | 749.4304532 |
| SSMKSVGEVMAIGR          | Q8C196 | 0          | N-term +28.03 Da, K +28.03 Da,              | 2957.656006 | 3 | 503.6000061 | 503.2705521 |
| IKVIAPWR                | P16460 | 0.02015027 | N-term +28.03 Da, K +28.03 Da,              | 2957.960449 | 3 | 346.8981628 | 346.8989347 |
| EINPDHPIVETLR           | P11499 | 0.00211506 | N-term +28.03 Da,                           | 2959.07959  | 3 | 520.9500122 | 520.9508646 |
| MHTEAAEVLLER            | Q8QZS1 | 0.00140056 | N-term +28.03 Da,                           | 2960.635254 | 2 | 713.8706665 | 713.8715799 |
| VNFTVDQIR               | P58252 | 0.0005814  | N-term +28.03 Da,                           | 2962.883057 | 2 | 561.3099976 | 560.3114832 |
| SSMKSVGEVMAIGR          | Q8C196 | 0.00173536 | N-term +28.03 Da, K +28.03 Da,              | 2962.958496 | 2 | 754.4000244 | 754.40219   |
| NCLSGQAEFDKAAEEVKR      | F6WUQ1 | 0          | N-term +28.03 Da, K +28.03 Da, C +57.02 Da, | 2968.717285 | 3 | 712.7000122 | 712.6966479 |
| SLLSHAWRGAGLR           | Q8CHT0 | 0.03661254 | N-term +28.03 Da,                           | 2968.868164 | 3 | 484.9500122 | 484.6125169 |
| QPTLATDMGTMQER          | P56480 | 0          | N-term +28.03 Da,                           | 2969.063232 | 2 | 804.3800049 | 803.8818194 |
| GDGTITTKELGTVMR         | P62204 | 0          | N-term +28.03 Da, K +28.03 Da,              | 2971.61499  | 3 | 545.960022  | 545.630915  |
| GDEAPNFEANTTIGR         | O08709 | 0          | N-term +28.03 Da,                           | 2972.644043 | 2 | 810.8900146 | 810.3866381 |
| TTAIAEAWAR              | P05213 | 0.00175593 | N-term +28.03 Da,                           | 2973.751221 | 2 | 559.7999878 | 559.3036582 |
| SDAPPLTLDGIKDR          | Q9CR21 | 0          | N-term +28.03 Da, K +28.03 Da,              | 2974.780029 | 3 | 518.6199951 | 518.6226367 |
| SDAPPLTLDGIKDR          | Q9CR21 | 0          | N-term +28.03 Da, K +28.03 Da,              | 2976.11084  | 2 | 777.4299927 | 777.4303168 |
| LPLPPPPPPR              | P61979 | 0.00139018 | N-term +28.03 Da,                           | 2979.009766 | 2 | 554.8457642 | 554.8475038 |
| SVESIMATEDR             | Q8C196 | 0          | N-term +28.03 Da,                           | 2980.414307 | 2 | 633.3099976 | 633.3057387 |
| SMKSVGEVMAIGR           | Q8C196 | 0.00064185 | N-term +28.03 Da, K +28.03 Da,              | 2982.644531 | 3 | 474.5899963 | 474.2598757 |
| VVAGGPEVTLTPER          | Q8CIM3 | 0          | N-term +28.03 Da,                           | 2985.89209  | 2 | 726.9099731 | 726.9064771 |
| SEVASSLVLER             | Q9CYR0 | 0.00099404 | N-term +28.03 Da,                           | 2986.303467 | 2 | 609.3400269 | 609.3404384 |

|                           |        |            |                                |             |   |             |             |
|---------------------------|--------|------------|--------------------------------|-------------|---|-------------|-------------|
| SSDAQWLTAEER              | Q9CZL5 | 0          | N-term +28.03 Da,              | 2992.169434 | 2 | 710.8400269 | 710.8387919 |
| LEGVGHFFR                 | P29391 | 0.00212947 | N-term +28.03 Da,              | 2994.798096 | 3 | 363.8699951 | 363.8661826 |
| SDAPPLTLDGIKDR            | Q9CR21 | 0          | N-term +28.03 Da, K +28.03 Da, | 3005.240479 | 3 | 518.6217651 | 518.6226367 |
| SDAPPLTLDGIKDR            | Q9CR21 | 0          | N-term +28.03 Da, K +28.03 Da, | 3006.443115 | 2 | 777.4299927 | 777.4303168 |
| AGGEAGVTLGQPHLSR          | Q9Z0N2 | 0          | N-term +28.03 Da,              | 3007.930908 | 2 | 789.9099731 | 789.4233572 |
| QKTGTAEMSSILEER           | Q03265 | 0          | N-term +28.03 Da, K +28.03 Da, | 3009.04126  | 2 | 868.940918  | 868.4483813 |
| LPLPPPPPPR                | P61979 | 0.00102459 | N-term +28.03 Da,              | 3009.66748  | 2 | 554.8499756 | 554.8475038 |
| VSQEHPPVLTKEFEGAR         | Q8C196 | 0          | N-term +28.03 Da,              | 3011.541016 | 4 | 488.7799988 | 488.7795528 |
| GLPKGPEGQGLPEVETR         | Q7TQK5 | 0.00057274 | N-term +28.03 Da, K +28.03 Da, | 3012.924805 | 3 | 607.6699829 | 607.3352672 |
| AGEMVEVLPSQR              | Q8R0F9 | 0          | N-term +28.03 Da,              | 3013.000244 | 2 | 672.3499756 | 672.3530228 |
| VISLSGEHSIIGR             | P08228 | 0          | N-term +28.03 Da,              | 3015.87793  | 3 | 465.9360046 | 465.9366666 |
| QIKVIAPWR                 | P16460 | 0.00172637 | N-term +28.03 Da, K +28.03 Da, | 3018.010986 | 3 | 389.5799866 | 389.5851274 |
| GDFCIQVGR                 | P15532 | 0.00063776 | N-term +28.03 Da, C +57.02 Da, | 3018.101807 | 2 | 540.7800293 | 540.2687609 |
| APDPVPTPGPASAQLR          | Q920L1 | 0.01080477 | N-term +28.03 Da,              | 3023.158936 | 2 | 801.9299927 | 801.4359333 |
| SSDAQWLTAEER              | Q9CZL5 | 0          | N-term +28.03 Da,              | 3023.621338 | 2 | 710.8400269 | 710.8387919 |
| SSSLPDICYR                | P53996 | 0.00137868 | N-term +28.03 Da, C +57.02 Da, | 3025.903564 | 2 | 613.2972412 | 613.2977161 |
| TVGDVNTDRPGLLDLKGK        | P31786 | 0.00060205 | N-term +28.03 Da, K +28.03 Da, | 3029.698242 | 4 | 496.2900085 | 496.2874766 |
| VISLSGEHSIIGR             | P08228 | 0.00326131 | N-term +28.03 Da,              | 3031.438965 | 2 | 698.3901978 | 698.4013616 |
| GVPTETGALTNR              | Q8BWT1 | 0          | N-term +28.03 Da,              | 3034.638916 | 2 | 678.8800049 | 678.8777195 |
| TVGDVNTDRPGLLDLKGK        | P31786 | 0.01015038 | N-term +28.03 Da, K +28.03 Da, | 3034.714844 | 3 | 661.3800049 | 661.3808767 |
| SIAKEGFEEKSKGANPVEIR      | P63038 | 0.00172043 | N-term +28.03 Da, K +28.03 Da, | 3036.001953 | 4 | 572.5900269 | 572.0861461 |
| IKLTITYGPKVVR             | P12710 | 0          | N-term +28.03 Da, K +28.03 Da, | 3037.656738 | 4 | 393.7600098 | 393.7616368 |
| QKTGTAEMSSILEER           | Q03265 | 0.03664755 | N-term +28.03 Da, K +28.03 Da, | 3038.374268 | 3 | 579.6291504 | 579.3013463 |
| QKTGTAEMSSILEER           | Q03265 | 0          | N-term +28.03 Da, K +28.03 Da, | 3040.526611 | 2 | 869.4400024 | 868.4483813 |
| AGGEAGVTLGQPHLSR          | Q9Z0N2 | 0          | N-term +28.03 Da,              | 3040.615723 | 2 | 789.4099731 | 789.4233572 |
| EVDIKGVFR                 | Q64442 | 0.0005711  | N-term +28.03 Da, K +28.03 Da, | 3041.062012 | 3 | 373.557251  | 373.5571263 |
| MKKKVAIIGAGVSGLAAIR       | P97501 | 0.03213242 | N-term +28.03 Da, K +28.03 Da, | 3043.110107 | 3 | 666.0999756 | 665.7673485 |
| AGTMAEETAPAVLER           | Q64374 | 0          | N-term +28.03 Da,              | 3045.108887 | 2 | 787.4000244 | 787.3981596 |
| SLGMIFEKR                 | P11725 | 0.00052083 | N-term +28.03 Da, K +28.03 Da, | 3046.261719 | 3 | 379.5599976 | 379.5547283 |
| ETIMNQEKLAKLQAQVR         | Q64152 | 0.0013947  | N-term +28.03 Da, K +28.03 Da, | 3049.457275 | 4 | 522.0499878 | 521.8028652 |
| ETIMNQEKLAKLQAQVR         | Q64152 | 0          | N-term +28.03 Da, K +28.03 Da, | 3050.797119 | 3 | 695.4000244 | 695.4013947 |
| ESTPTGITDTHIAQGPENLEESPKR | Q9CRD0 | 0          | N-term +28.03 Da, K +28.03 Da, | 3054.290771 | 4 | 690.8499756 | 690.6016185 |
| LEEETGQVVGFGHQPGRSIR      | Q9DBT9 | 0.00135196 | N-term +28.03 Da,              | 3059.338867 | 3 | 671.3499756 | 671.0129646 |
| MLLEYTDSSYDEKR            | P10649 | 0          | N-term +28.03 Da, K +28.03 Da, | 3059.535889 | 3 | 602.960022  | 602.6257187 |
| PSNMPPGIEPSDKMLQGR        | P24270 | 0.01015419 | N-term +28.03 Da, K +28.03 Da, | 3063.325439 | 3 | 703.6900024 | 703.0273402 |
| APLDTINVHLR               | P70699 | 0.00064226 | N-term +28.03 Da,              | 3073.084717 | 3 | 426.5899963 | 426.2505851 |
| YVGEEMEEGFSEAR            | P05213 | 0          | N-term +28.03 Da,              | 3074.937012 | 2 | 859.8699951 | 859.3723395 |
| ELFADKVPKTAENFR           | P17742 | 0.00058514 | N-term +28.03 Da, K +28.03 Da, | 3075.167969 | 3 | 617.0119629 | 617.0121242 |
| FVFALEKR                  | O35490 | 0.02047083 | N-term +28.03 Da, K +28.03 Da, | 3075.584717 | 3 | 355.8900146 | 355.886695  |
| TKLPWDVAVGR               | P54869 | 0.00699029 | N-term +28.03 Da, K +28.03 Da, | 3076.349609 | 3 | 400.2357178 | 400.2362757 |

|                         |        |            |                                             |             |   |             |             |
|-------------------------|--------|------------|---------------------------------------------|-------------|---|-------------|-------------|
| ELFADKVPKTAENFR         | P17742 | 0.00056721 | N-term +28.03 Da, K +28.03 Da,              | 3080.610107 | 4 | 463.0100098 | 463.0109123 |
| FHMTKDMLPGSYPR          | Q9D6J5 | 0          | N-term +28.03 Da, K +28.03 Da,              | 3080.685547 | 3 | 579.6300049 | 579.2934682 |
| YVGEGMEEGEFSEAR         | P05213 | 0          | N-term +28.03 Da,                           | 3085.645752 | 2 | 859.3710327 | 859.3723395 |
| DGVDFGKWR               | Q91Y97 | 0.00176134 | N-term +28.03 Da, K +28.03 Da,              | 3087.679199 | 3 | 379.5400085 | 379.2013426 |
| GVAAEGLPDQYADGEAAR      | Q9QXF8 | 0.00053591 | N-term +28.03 Da,                           | 3088.561523 | 2 | 909.9299927 | 909.4368598 |
| DSEGSWFR                | O55125 | 0.00051975 | N-term +28.03 Da,                           | 3089.307861 | 2 | 506.2311096 | 506.2301589 |
| FHMTKDMLPGSYPR          | Q9D6J5 | 0.00062617 | N-term +28.03 Da, K +28.03 Da,              | 3089.40625  | 2 | 868.4329224 | 868.4365641 |
| ALDLTMR                 | Q9D855 | 0.02476573 | N-term +28.03 Da,                           | 3091.136963 | 2 | 424.2399902 | 424.2389403 |
| VYVEEVPWKR              | P25688 | 0.00058106 | N-term +28.03 Da, K +28.03 Da,              | 3091.213379 | 3 | 454.258606  | 454.2589692 |
| TIQGLDGLSER             | Q91Y97 | 0.01903773 | N-term +28.03 Da,                           | 3091.868164 | 2 | 608.8300171 | 608.8302378 |
| MHAGKDMTPRTGR           | Q7TNC6 | 0.0373891  | N-term +28.03 Da, K +28.03 Da,              | 3093.41748  | 2 | 801.9199829 | 800.9059624 |
| AGVEFEFKLTR             | P30115 | 0          | N-term +28.03 Da, K +28.03 Da,              | 3098.01709  | 4 | 410.2369995 | 410.2369892 |
| ALIGTQANVTKELER         | Q9DBC0 | 0.01073676 | N-term +28.03 Da,                           | 3102.340576 | 3 | 567         | 566.9964742 |
| GTSVESIMATEDR           | Q8C196 | 0          | N-term +28.03 Da,                           | 3103.545654 | 2 | 712.3397217 | 712.3403103 |
| DYTVQVPGTGR             | Q9QXF8 | 0.00914286 | N-term +28.03 Da,                           | 3105.343018 | 2 | 611.3099976 | 610.8171303 |
| DYTVQVPGTGR             | Q9QXF8 | 0.00173385 | N-term +28.03 Da,                           | 3113.849121 | 2 | 610.8200073 | 610.8171303 |
| HTVYQSVELPETHQMLR       | Q07417 | 0          | N-term +28.03 Da,                           | 3115.581543 | 3 | 699.6900024 | 699.3579662 |
| AFPGTEEEVPILR           | Q6ZWR6 | 0.03978529 | N-term +28.03 Da,                           | 3116.087402 | 4 | 372.4599915 | 372.204152  |
| FRISKSRYDSIDSYLSKCGEK   | P97494 | 0.01898516 | N-term +28.03 Da, K +28.03 Da, C +57.02 Da, | 3118.35791  | 3 | 884.1300049 | 884.466905  |
| SSMGTLPKQVKIVEVGPR      | P38060 | 0.00213493 | N-term +28.03 Da, K +28.03 Da,              | 3120.176025 | 4 | 503.2999878 | 503.2999581 |
| GSEVSALLGR              | P56480 | 0.0398356  | N-term +28.03 Da,                           | 3120.327148 | 2 | 508.7900696 | 508.7903836 |
| KKTLEAEFNNPCPLTPEPGEGPR | Q8K2Q9 | 0.04753029 | N-term +28.03 Da, K +28.03 Da, C +57.02 Da, | 3124.356934 | 4 | 667.3400269 | 667.0968141 |
| FSVEKLGSLR              | Q922Q1 | 0.00211954 | N-term +28.03 Da, K +28.03 Da,              | 3124.490723 | 3 | 397.9081421 | 397.9080478 |
| SMGTLPKQVKIVEVGPR       | P38060 | 0.00399042 | N-term +28.03 Da, K +28.03 Da,              | 3126.137939 | 4 | 481.5400085 | 481.5419509 |
| GDLSSASAIMGNAK          | P02088 | 0.00144998 | N-term +28.03 Da, K +28.03 Da,              | 3128.734619 | 2 | 689.8599854 | 689.3557629 |
| EDQMAVEKLSDGIR          | Q93092 | 0          | N-term +28.03 Da, K +28.03 Da,              | 3129.112549 | 3 | 549.289978  | 549.6187866 |
| HVGDLGNVTAGKDGVANVSIEDR | P08228 | 0.00059524 | N-term +28.03 Da, K +28.03 Da,              | 3129.836426 | 4 | 595.8099976 | 595.56203   |
| GESSELDLQGIR            | Q9QXT0 | 0          | N-term +28.03 Da,                           | 3129.92334  | 2 | 666.3400269 | 666.3437099 |
| HVGDLGNVTAGKDGVANVSIEDR | P08228 | 0          | N-term +28.03 Da, K +28.03 Da,              | 3131.604492 | 3 | 794.0800171 | 793.7469479 |
| GPTDSYAAISEVDR          | O08585 | 0.00060976 | N-term +28.03 Da,                           | 3131.765137 | 2 | 755.3599854 | 754.865007  |
| ENIIDLSNANR             | B5X0G2 | 0.00054615 | N-term +28.03 Da,                           | 3134.708252 | 2 | 644.8300171 | 643.8385944 |
| MSFEDMKDLR              | G5E904 | 0.00052002 | N-term +28.03 Da, K +28.03 Da,              | 3138.659424 | 4 | 372.2000122 | 371.6966424 |
| SHYEEGPGKNLPFSVENKWR    | P17665 | 0          | N-term +28.03 Da, K +28.03 Da,              | 3141.674561 | 4 | 615.5700073 | 615.3183028 |
| ENIIDLSNANR             | B5X0G2 | 0.0005637  | N-term +28.03 Da,                           | 3142.47583  | 2 | 643.836853  | 643.8385944 |
| HVGDLGNVTAGKDGVANVSIEDR | P08228 | 0.00325733 | N-term +28.03 Da, K +28.03 Da,              | 3142.62915  | 2 | 1190.619995 | 1190.116784 |
| SSVEYEPKEKTFDKILIANR    | Q91ZA3 | 0.00327466 | N-term +28.03 Da, K +28.03 Da,              | 3144.530518 | 4 | 621.0999756 | 620.6006237 |
| YDLDFKSPDDPSR           | P17182 | 0.02047782 | N-term +28.03 Da, K +28.03 Da,              | 3146.477295 | 3 | 537.9299927 | 537.5947469 |
| HTVYQSVELPETHQMLR       | Q07417 | 0          | N-term +28.03 Da,                           | 3147.143555 | 3 | 699.3599854 | 699.3579662 |
| TSSMGTLPKQVKIVEVGPR     | P38060 | 0.00175362 | N-term +28.03 Da, K +28.03 Da,              | 3148.412842 | 4 | 529.0599976 | 528.5618779 |
| SATDLTEFAAR             | Q8BWT1 | 0.00052966 | N-term +28.03 Da,                           | 3149.623291 | 2 | 605.8099976 | 605.3091382 |

|                        |        |            |                                             |             |   |             |             |
|------------------------|--------|------------|---------------------------------------------|-------------|---|-------------|-------------|
| HLYPGEVCPGMDIR         | P15208 | 0.01132213 | N-term +28.03 Da, C +57.02 Da,              | 3152.56958  | 3 | 557.9359741 | 557.9375731 |
| SSVEYEPKEKTFDKILIANR   | Q91ZA3 | 0.00062035 | N-term +28.03 Da, K +28.03 Da,              | 3152.73291  | 3 | 827.460022  | 827.1317394 |
| TPALIALR               | P70694 | 0.0238816  | N-term +28.03 Da,                           | 3154.362305 | 2 | 441.7914429 | 441.7921971 |
| FSVEKLGSLR             | Q922Q1 | 0.00140515 | N-term +28.03 Da, K +28.03 Da,              | 3154.90625  | 3 | 397.9077454 | 397.9080478 |
| SAMNVVFESEDMKR         | Q8C196 | 0.00140977 | N-term +28.03 Da, K +28.03 Da,              | 3155.554932 | 3 | 567.2800293 | 566.9445052 |
| STSSMGTLPKQVKIVEVGPR   | P38060 | 0.00061767 | N-term +28.03 Da, K +28.03 Da,              | 3155.641357 | 4 | 550.5700073 | 550.3198852 |
| AMPVPFTPELKPKR         | Q9JL35 | 0          | N-term +28.03 Da, K +28.03 Da,              | 3161.630615 | 4 | 424.5100098 | 424.5061079 |
| SDAPPLTLDGIKDR         | Q9CR21 | 0          | N-term +28.03 Da, K +28.03 Da,              | 3162.127441 | 2 | 777.9299927 | 777.4303168 |
| SICEEFSQADDKGCFR       | Q61838 | 0          | N-term +28.03 Da, K +28.03 Da, C +57.02 Da, | 3163.223145 | 3 | 711.6500244 | 711.65071   |
| VYEQEQLSCDEPILSNKSGDNR | P70296 | 0          | N-term +28.03 Da, K +28.03 Da, C +57.02 Da, | 3166.566162 | 3 | 912.7700195 | 912.104473  |
| SDAPPLTLDGIKDR         | Q9CR21 | 0          | N-term +28.03 Da, K +28.03 Da,              | 3170.873779 | 3 | 518.6224365 | 518.6226367 |
| GTPPGGSITKVLIANR       | Q99MR8 | 0          | N-term +28.03 Da, K +28.03 Da,              | 3170.949219 | 3 | 547.6610718 | 547.6613141 |
| VYEQEQLSCDEPILSNKSGDNR | P70296 | 0          | N-term +28.03 Da, K +28.03 Da, C +57.02 Da, | 3171.504639 | 3 | 912.4400024 | 912.104473  |
| ENIDLSNANR             | B5X0G2 | 0.00140121 | N-term +28.03 Da,                           | 3173.09375  | 2 | 643.8375244 | 643.8385944 |
| EAEKDGVPVFKFPR         | Q8R0Y6 | 0          | N-term +28.03 Da, K +28.03 Da,              | 3173.837402 | 4 | 426.7399902 | 426.4936264 |
| ESEVASSLVLER           | Q9CYR0 | 0.00063371 | N-term +28.03 Da,                           | 3175.637695 | 2 | 673.8581543 | 673.8617355 |
| TSSMGTLPKQVKIVEVGPR    | P38060 | 0          | N-term +28.03 Da, K +28.03 Da,              | 3179.491211 | 4 | 528.5616455 | 528.5618779 |
| STSSMGTLPKQVKIVEVGPR   | P38060 | 0.00435471 | N-term +28.03 Da, K +28.03 Da,              | 3181.44873  | 3 | 733.7600098 | 733.4240882 |
| GTLDNPSLDETAYER        | O35943 | 0          | N-term +28.03 Da,                           | 3184.437256 | 2 | 898.4199829 | 898.4208758 |
| GLNAEGLLR              | Q64374 | 0.0108209  | N-term +28.03 Da,                           | 3184.526611 | 2 | 485.7864685 | 485.7876436 |
| STSSMGTLPKQVKIVEVGPR   | P38060 | 0          | N-term +28.03 Da, K +28.03 Da,              | 3186.842773 | 4 | 550.3196411 | 550.3198852 |
| MKFNPFVTSR             | P61255 | 0          | N-term +28.03 Da, K +28.03 Da,              | 3188.021973 | 3 | 466.5799866 | 466.5797141 |
| KAGLLEKLEKETEYDVR      | Q61176 | 0.01332853 | N-term +28.03 Da, K +28.03 Da,              | 3188.812256 | 3 | 668.7299805 | 668.7295058 |
| TTFNVQDGPDPFQDR        | P97493 | 0          | N-term +28.03 Da,                           | 3190.283936 | 2 | 834.3800049 | 834.3866381 |
| AVVDVPFGGAKAGVKINPK    | P26443 | 0.00172936 | N-term +28.03 Da, K +28.03 Da,              | 3190.371094 | 4 | 496.0599976 | 495.5567582 |
| LQEEKVPAIYGVDTR        | Q8C196 | 0.00057339 | N-term +28.03 Da, K +28.03 Da,              | 3193.867188 | 3 | 592         | 591.9963628 |
| AGLQFPVGR              | P0C0S6 | 0.00056433 | N-term +28.03 Da,                           | 3195.114746 | 2 | 486.7843933 | 486.7849036 |
| VAPEEHPVLLTEAPLNPKANR  | P60710 | 0          | N-term +28.03 Da, K +28.03 Da,              | 3203.031006 | 4 | 588.8300171 | 588.5824993 |
| ISFHLPVNSR             | Q9D1D4 | 0.00173762 | N-term +28.03 Da,                           | 3204.966797 | 3 | 399.8953857 | 399.896142  |
| GSVVKSEDYAFPTYADR      | P19783 | 0.00329761 | N-term +28.03 Da, K +28.03 Da,              | 3205.99585  | 3 | 654.3256836 | 654.3265492 |
| GSVVKSEDYAFPTYADR      | P19783 | 0          | N-term +28.03 Da, K +28.03 Da,              | 3207.568604 | 2 | 980.9799805 | 980.9861855 |
| ISFHLPVNSR             | Q9D1D4 | 0.00471698 | N-term +28.03 Da,                           | 3208.067871 | 3 | 400.5599976 | 399.896142  |
| KGSFVQDIQSDIHTDSSR     | Q5XG73 | 0          | N-term +28.03 Da,                           | 3209.085693 | 3 | 692.6821899 | 692.6833959 |
| VDLEPGTMDSVR           | P68372 | 0.00808625 | N-term +28.03 Da,                           | 3209.161377 | 2 | 673.8300171 | 673.8346633 |
| LHLGVTPSVLR            | O89023 | 0.0232715  | N-term +28.03 Da,                           | 3209.469971 | 3 | 407.2600098 | 407.2555588 |
| IGLEEHLNALDR           | Q8VC30 | 0.01957418 | N-term +28.03 Da,                           | 3209.786865 | 3 | 470.2600098 | 469.9245382 |
| KGSFVQDIQSDIHTDSSR     | Q5XG73 | 0          | N-term +28.03 Da,                           | 3211.068359 | 3 | 692.3499756 | 692.6833959 |
| SVVAGGPEVTLTPER        | Q8CIM3 | 0.0005848  | N-term +28.03 Da,                           | 3211.242676 | 2 | 770.9199829 | 770.4224917 |
| SDAPPLTLDGIKDR         | Q9CR21 | 0          | N-term +28.03 Da, K +28.03 Da,              | 3211.398682 | 3 | 518.960022  | 518.6226367 |
| GPTTPEADKIFLER         | P26443 | 0.00053619 | N-term +28.03 Da, K +28.03 Da,              | 3211.474121 | 3 | 544.2999878 | 543.9664034 |

|                         |        |            |                                            |             |   |             |             |
|-------------------------|--------|------------|--------------------------------------------|-------------|---|-------------|-------------|
| IENPADVSVISSR           | P14206 | 0.0043273  | N-term +28.03 Da,                          | 3212.579346 | 2 | 708.3800049 | 707.8804595 |
| MGDSASKVISAEALPGR       | Q9D6Y7 | 0          | N-term +28.03 Da, K +28.03 Da,             | 3212.731934 | 3 | 625.3300171 | 625.3277841 |
| IGLEEHLNALDR            | Q8VC30 | 0.03234153 | N-term +28.03 Da,                          | 3213.017578 | 3 | 469.9200134 | 469.9245382 |
| MLQMLEKSLR              | Q91XE0 | 0.00213129 | N-term +28.03 Da, K +28.03 Da,             | 3214.232178 | 3 | 435.9200134 | 435.5858114 |
| ALEGVGHFFR              | P29391 | 0.00097135 | N-term +28.03 Da,                          | 3214.531006 | 3 | 387.5449829 | 387.5452206 |
| HKCQNRGVVHDFELPDEDFGLLK | Q3U0P1 | 0.02195946 | N-term +28.03 Da, K +28.03 Da,C +57.02 Da, | 3214.61499  | 4 | 738.8800049 | 738.3865543 |
| MGDSASKVISAEALPGR       | Q9D6Y7 | 0          | N-term +28.03 Da, K +28.03 Da,             | 3214.811768 | 2 | 937.9799805 | 937.4880379 |
| GTLDNPSSLDETAYER        | O35943 | 0          | N-term +28.03 Da,                          | 3215.337646 | 2 | 898.4199829 | 898.4208758 |
| SDAPPLTLGDIKDR          | Q9CR21 | 0          | N-term +28.03 Da, K +28.03 Da,             | 3216.137451 | 2 | 777.4307861 | 777.4303168 |
| TAEMSSILEER             | Q03265 | 0.00064267 | N-term +28.03 Da,                          | 3216.365723 | 2 | 647.319397  | 647.3213887 |
| GQAISLLPDR              | Q8VBW8 | 0.04969136 | N-term +28.03 Da,                          | 3216.978271 | 2 | 549.8200073 | 549.3193082 |
| MKFNPFVTSDR             | P61255 | 0.00103359 | N-term +28.03 Da, K +28.03 Da,             | 3219.561035 | 3 | 466.9200134 | 466.5797141 |
| GQAISLLPDR              | Q8VBW8 | 0.02597403 | N-term +28.03 Da,                          | 3222.453125 | 2 | 549.3200073 | 549.3193082 |
| GPPTPEADKIFLER          | P26443 | 0.00054675 | N-term +28.03 Da, K +28.03 Da,             | 3225.214111 | 2 | 815.9400024 | 815.4459668 |
| GPEGPYGVFAGR            | O55022 | 0.02228977 | N-term +28.03 Da,                          | 3226.790283 | 2 | 617.8145142 | 617.8143902 |
| VGSNQAGEYIFER           | Q9EQ20 | 0.00052549 | N-term +28.03 Da,                          | 3230.107666 | 2 | 749.3699951 | 749.370259  |
| MKFNPFVTSDR             | P61255 | 0.00052576 | N-term +28.03 Da, K +28.03 Da,             | 3231.414063 | 2 | 699.8699951 | 699.3659329 |
| VYKIGGIGTVPVGR          | P10126 | 0          | N-term +28.03 Da, K +28.03 Da,             | 3231.496338 | 3 | 491.3043518 | 491.30469   |
| SDAPPLTLGDIKDR          | Q9CR21 | 0          | N-term +28.03 Da, K +28.03 Da,             | 3243.000244 | 3 | 518.6222534 | 518.6226367 |
| GPPTPEADKIFLER          | P26443 | 0.00058309 | N-term +28.03 Da, K +28.03 Da,             | 3243.226563 | 3 | 544.2999878 | 543.9664034 |
| AAGVEFEFKTR             | P30115 | 0          | N-term +28.03 Da, K +28.03 Da,             | 3243.377686 | 4 | 427.9968567 | 427.9962677 |
| SVVAGGPEVTLTPER         | Q8CIM3 | 0          | N-term +28.03 Da,                          | 3243.45752  | 2 | 770.4199829 | 770.4224917 |
| DLPETFDAR               | P10605 | 0.00175439 | N-term +28.03 Da,                          | 3244.899658 | 2 | 546.2700195 | 546.2720241 |
| NKPDIDAWELR             | P12787 | 0.00062422 | N-term +28.03 Da, K +28.03 Da,             | 3245.286133 | 3 | 471.5899963 | 471.5892668 |
| SDAPPLTLGDIKDR          | Q9CR21 | 0          | N-term +28.03 Da, K +28.03 Da,             | 3246.747559 | 2 | 777.4291382 | 777.4303168 |
| GFVFALEKR               | O35490 | 0.00176367 | N-term +28.03 Da, K +28.03 Da,             | 3247.655762 | 3 | 374.8900146 | 374.8938497 |
| STAIQELFKR              | P68372 | 0.00137112 | N-term +28.03 Da, K +28.03 Da,             | 3247.782715 | 3 | 416.9200134 | 416.9152025 |
| TVESTSLYNKVAQAQGEVVR    | Q8CGC7 | 0          | N-term +28.03 Da, K +28.03 Da,             | 3248.642578 | 3 | 703.3900146 | 703.0513081 |
| AVPIAQKSEPOSLSNEALMR    | Q9JIQ3 | 0          | N-term +28.03 Da, K +28.03 Da,             | 3249.045166 | 3 | 742.4000244 | 742.4034644 |
| MKFNPFVTSDR             | P61255 | 0.00055463 | N-term +28.03 Da, K +28.03 Da,             | 3249.948486 | 3 | 466.5792236 | 466.5797141 |
| PVAVALDTKGPEIR          | P52480 | 0.00139535 | N-term +28.03 Da, K +28.03 Da,             | 3251.892334 | 3 | 507.9709167 | 507.9714884 |
| TEDIITAIR               | P49429 | 0.00141844 | N-term +28.03 Da,                          | 3252.434814 | 2 | 530.8099976 | 530.3058667 |
| IMDPNIVGNEHYDVAR        | P56480 | 0          | N-term +28.03 Da,                          | 3253.939453 | 3 | 624.3082275 | 624.3087237 |
| NKPDIDAWELR             | P12787 | 0.02138493 | N-term +28.03 Da, K +28.03 Da,             | 3254.648682 | 2 | 706.8800049 | 706.880262  |
| EVDVDGTVEEDLGKSR        | P08113 | 0          | N-term +28.03 Da, K +28.03 Da,             | 3257.02417  | 3 | 602.3099976 | 601.9705428 |
| ISFHLPVNSR              | Q9D1D4 | 0.00099602 | N-term +28.03 Da,                          | 3257.126953 | 3 | 399.8999939 | 399.896142  |
| ASPHQECEYLQMIKQR        | P97751 | 0.00058893 | N-term +28.03 Da, K +28.03 Da,C +57.02 Da, | 3259.79834  | 4 | 552.0200195 | 551.5213188 |
| SAMNVVFESEDMKR          | Q8C196 | 0          | N-term +28.03 Da, K +28.03 Da,             | 3261.574707 | 3 | 566.944397  | 566.9445052 |
| PVDLSHYPRMLHEYANGLLDHR  | E9Q414 | 0.00364225 | N-term +28.03 Da,                          | 3263.736572 | 3 | 888.4500122 | 887.7833386 |
| AHGSVVKSEDYAFPTYADR     | P19783 | 0          | N-term +28.03 Da, K +28.03 Da,             | 3265.49585  | 3 | 723.3499756 | 723.6918913 |

|                         |        |            |                                |             |   |             |             |
|-------------------------|--------|------------|--------------------------------|-------------|---|-------------|-------------|
| NLPLPPPPPR              | P61979 | 0.00987092 | N-term +28.03 Da,              | 3271.208008 | 2 | 611.8699951 | 611.8689679 |
| EDTQVADVTTSR            | P19096 | 0.01265823 | N-term +28.03 Da,              | 3271.465088 | 2 | 675.3200073 | 675.3307999 |
| AYQGFASGDGDKDAWAVR      | P05202 | 0          | N-term +28.03 Da, K +28.03 Da, | 3273.109619 | 3 | 657.3200073 | 657.3182765 |
| SDAPPLTLDGIKDR          | Q9CR21 | 0          | N-term +28.03 Da, K +28.03 Da, | 3273.851318 | 3 | 518.6223145 | 518.6226367 |
| PMGMTAENLAAKYNISR       | Q8BWT1 | 0          | N-term +28.03 Da, K +28.03 Da, | 3273.926758 | 3 | 642.3245239 | 641.6657424 |
| AHGSVVKSEDYAFPTYADR     | P19783 | 0          | N-term +28.03 Da, K +28.03 Da, | 3276.225586 | 3 | 723.6851807 | 723.6918913 |
| QDVEFDVFIIMDFQK         | E9PW21 | 0.03979785 | N-term +28.03 Da, K +28.03 Da, | 3276.708008 | 2 | 990.960022  | 990.4766074 |
| SKVPEIEVTVEGPNSSPQTSAVR | Q9ESZ8 | 0          | N-term +28.03 Da, K +28.03 Da, | 3282.571533 | 3 | 861.4500122 | 861.1204514 |
| NLYKGLEAFR              | P54869 | 0.03438303 | N-term +28.03 Da, K +28.03 Da, | 3283.94873  | 3 | 422.9100037 | 422.9116808 |
| ISFHLPVNSR              | Q9D1D4 | 0.01987663 | N-term +28.03 Da,              | 3287.893555 | 3 | 399.8955078 | 399.896142  |
| SDAPPLTLDGIKDR          | Q9CR21 | 0.00213675 | N-term +28.03 Da, K +28.03 Da, | 3289.865234 | 2 | 777.4299927 | 777.4303168 |
| FDEIDAIGGAR             | P46471 | 0.00171969 | N-term +28.03 Da,              | 3290.713867 | 2 | 596.2999878 | 596.3038557 |
| NVLASEPEIPK GIR         | Q9WTP6 | 0          | N-term +28.03 Da,              | 3293.291992 | 3 | 527.3099976 | 526.9786431 |
| VLAELYVSDR              | Q8BP47 | 0.01086957 | N-term +28.03 Da,              | 3293.525879 | 2 | 596.8324585 | 596.8322488 |
| TTNFSELQSQMQR           | Q8R317 | 0          | N-term +28.03 Da,              | 3295.114502 | 2 | 799.3800049 | 799.3855835 |
| YVDFGGVKPVGSEPVPK       | Q9QXX4 | 0.01072485 | N-term +28.03 Da, K +28.03 Da, | 3298.362549 | 3 | 620.6799927 | 620.3486249 |
| LPDGQVITIGNER           | P60710 | 0.0066251  | N-term +28.03 Da,              | 3299.088135 | 2 | 720.3979492 | 720.3962766 |
| FNVQDGPDPFQDR           | P97493 | 0          | N-term +28.03 Da,              | 3300.664551 | 2 | 733.8400269 | 733.3389589 |
| SDAPPLTLDGIKDR          | Q9CR21 | 0.0006435  | N-term +28.03 Da, K +28.03 Da, | 3304.340088 | 3 | 518.6226196 | 518.6226367 |
| VFDKDGNGYISAAELR        | P62204 | 0          | N-term +28.03 Da, K +28.03 Da, | 3308.331299 | 3 | 604.31604   | 604.3159841 |
| TIVYFPSR                | F6RWRS | 0.02198917 | N-term +28.03 Da,              | 3311.303467 | 2 | 505.787323  | 505.7871121 |
| VGVKPVGSDPDFQPELSGAGSR  | Q8CDN6 | 0          | N-term +28.03 Da, K +28.03 Da, | 3313.166748 | 3 | 752.7299805 | 752.3937341 |
| SIYHPSLLPR              | Q8K009 | 0.00102669 | N-term +28.03 Da,              | 3317.088867 | 3 | 441.9299927 | 441.9309638 |
| TQVEGDEEAALLER          | D3Z6I7 | 0.00100756 | N-term +28.03 Da,              | 3317.349365 | 2 | 795.4099731 | 794.3966717 |
| TQVEGDEEAALLER          | D3Z6I7 | 0          | N-term +28.03 Da,              | 3318.776123 | 2 | 794.3900146 | 794.3966717 |
| TIAMDGTEGLVR            | P56480 | 0.011347   | N-term +28.03 Da,              | 3318.851563 | 2 | 646.3400269 | 645.8397483 |
| AGAESDGGQFQFTGIKKY      | Q78IK2 | 0          | N-term +28.03 Da, K +28.03 Da, | 3320.231201 | 3 | 644.3347778 | 644.3351559 |
| GGFVFALEKR              | O35490 | 0.00056085 | N-term +28.03 Da, K +28.03 Da, | 3321.890869 | 3 | 393.8999939 | 393.9010044 |
| TGPNLHGLFGR             | P62897 | 0          | N-term +28.03 Da,              | 3332.781982 | 3 | 399.5599976 | 399.5560083 |
| GPISIETAQLQSQEER        | A2ATU0 | 0.0005767  | N-term +28.03 Da,              | 3332.964355 | 2 | 907.4699707 | 907.4681599 |
| GVKIMGTSPLQIDR          | Q8C196 | 0.03228931 | N-term +28.03 Da, K +28.03 Da, | 3334.030273 | 2 | 785.9500122 | 785.9529042 |
| GPISIETAQLQSQEER        | A2ATU0 | 0.01235465 | N-term +28.03 Da,              | 3334.202637 | 2 | 908.4699707 | 907.4681599 |
| SDAPPLTLDGIKDR          | Q9CR21 | 0.00878533 | N-term +28.03 Da, K +28.03 Da, | 3339.0896   | 3 | 518.960022  | 518.6226367 |
| EIYKTYFQGSLPAR          | P52760 | 0.00064061 | N-term +28.03 Da, K +28.03 Da, | 3340.711182 | 3 | 577.3200073 | 576.9821648 |
| APNVLASEPEIPK GIR       | Q9WTP6 | 0          | N-term +28.03 Da, K +28.03 Da, | 3343.642334 | 3 | 583.0100098 | 583.0086025 |
| VGVKPVGSDPDFQPELSGAGSR  | Q8CDN6 | 0          | N-term +28.03 Da, K +28.03 Da, | 3344.873047 | 3 | 752.3900146 | 752.3937341 |
| SDAPPLTLDGIKDR          | Q9CR21 | 0.00138249 | N-term +28.03 Da, K +28.03 Da, | 3345.941895 | 3 | 518.289978  | 518.6226367 |
| LIGDAAKNQLTSNPENTVFDKR  | P20029 | 0          | N-term +28.03 Da, K +28.03 Da, | 3348.71875  | 4 | 647.3599854 | 647.3526087 |
| TQVEGDEEAALLER          | D3Z6I7 | 0          | N-term +28.03 Da,              | 3349.70752  | 2 | 794.3973389 | 794.3966717 |
| TSVESIMATEDR            | Q8C196 | 0          | N-term +28.03 Da,              | 3350.432861 | 2 | 683.8267212 | 683.8295783 |



|                              |        |            |                                            |             |   |             |             |
|------------------------------|--------|------------|--------------------------------------------|-------------|---|-------------|-------------|
| NDEELNKLGR                   | P22752 | 0.00060386 | N-term +28.03 Da, K +28.03 Da,             | 3350.594482 | 3 | 453.2600098 | 452.9209052 |
| TVPLHPYWPR                   | P70245 | 0          | N-term +28.03 Da,                          | 3351.060059 | 3 | 431.9084778 | 431.9082704 |
| LPGDNVGFNVKNSVSKDIR          | P62631 | 0.04551122 | N-term +28.03 Da, K +28.03 Da,             | 3352.315186 | 4 | 539.5599976 | 539.561301  |
| DDEVVDVDTVEEDLGKSR           | P08113 | 0          | N-term +28.03 Da, K +28.03 Da,             | 3352.496582 | 3 | 678.6544189 | 678.6551722 |
| TGPNLHGLFGR                  | P62897 | 0          | N-term +28.03 Da,                          | 3352.572021 | 3 | 399.2200012 | 399.5560083 |
| TINEVENQILTR                 | P57780 | 0.00061652 | N-term +28.03 Da,                          | 3353.704102 | 2 | 729.9000244 | 729.4015591 |
| ADVDSVVSGLTR                 | Q8CHT0 | 0.00054526 | N-term +28.03 Da,                          | 3355.071289 | 2 | 623.8372803 | 623.8355204 |
| SADVDSVVSGLTR                | Q8CHT0 | 0          | N-term +28.03 Da,                          | 3356.757568 | 2 | 667.3521729 | 667.3515349 |
| RPLQLLGTCAELCR               | Q8BTE6 | 0.00364964 | N-term +28.03 Da, C +57.02 Da,             | 3357.123779 | 3 | 572.2999878 | 572.3078889 |
| DDEVVDVDTVEEDLGKSR           | P08113 | 0          | N-term +28.03 Da, K +28.03 Da,             | 3357.679688 | 2 | 1017.97998  | 1017.47912  |
| GTAEMSSILEER                 | Q03265 | 0          | N-term +28.03 Da,                          | 3358.511475 | 2 | 675.8300171 | 675.8321208 |
| FNPDVSWDR                    | Q62425 | 0.00362027 | N-term +28.03 Da,                          | 3359.742188 | 2 | 582.2759399 | 582.2776406 |
| EDATLNLNAINR                 | Q91Y97 | 0.00325468 | N-term +28.03 Da,                          | 3360.238281 | 2 | 686.3599854 | 686.3649765 |
| EIQPPFKPKVCGKGAENFDKFFTR     | P20444 | 0.02930524 | N-term +28.03 Da, K +28.03 Da,C +57.02 Da, | 3360.955566 | 3 | 994.1900024 | 994.208766  |
| WLAENQAQPMRLR                | Q80U72 | 0.03557692 | N-term +28.03 Da,                          | 3361.565186 | 2 | 743.3900146 | 742.8875639 |
| SSADVDSVVSGLTR               | Q8CHT0 | 0.00055586 | N-term +28.03 Da,                          | 3363.772949 | 2 | 710.8699951 | 710.8675495 |
| MPPGIEPSDKMLQGR              | P24270 | 0.02414487 | N-term +28.03 Da,                          | 3364.577148 | 3 | 603.3099976 | 603.651433  |
| MKVFTGPLPAEGR                | Q91Z53 | 0          | N-term +28.03 Da, K +28.03 Da,             | 3365.884521 | 3 | 519.9656372 | 519.9655686 |
| SSADVDSVVSGLTR               | Q8CHT0 | 0.0005339  | N-term +28.03 Da,                          | 3366.771729 | 2 | 711.3699951 | 710.8675495 |
| EQEVDNELQELSTQGSR            | Q06890 | 0          | N-term +28.03 Da,                          | 3368.521973 | 2 | 1039.48999  | 1038.987644 |
| EQEVDNELQELSTQGSR            | Q06890 | 0          | N-term +28.03 Da,                          | 3371.77832  | 2 | 1039.98999  | 1038.987644 |
| VFVTGPLPAEGR                 | Q91Z53 | 0.00056243 | N-term +28.03 Da,                          | 3374.334473 | 2 | 635.8604126 | 635.8613404 |
| HVFGESDELIGQKVSH             | P17751 | 0.02952756 | N-term +28.03 Da, K +28.03 Da,             | 3376.963135 | 3 | 612.9799805 | 613.3196171 |
| STVAAASPSHEAKGGLVISPEGLSPAVR | Q8K370 | 0.011318   | N-term +28.03 Da, K +28.03 Da,             | 3377.15625  | 4 | 687.3800049 | 686.8789908 |
| VKETYYDVLGVKPNATQEELKAYR     | P63037 | 0.0006192  | N-term +28.03 Da, K +28.03 Da,             | 3377.256348 | 4 | 797.2000122 | 796.6970558 |
| AISPTVITEVR                  | Q9DBM2 | 0.01132627 | N-term +28.03 Da,                          | 3379.103271 | 2 | 607.3599854 | 607.3611734 |
| SLHLGVTPSVLR                 | O89023 | 0.01297297 | N-term +28.03 Da,                          | 3380.177002 | 2 | 653.8900146 | 653.8957145 |
| DDEVVDVDTVEEDLGKSR           | P08113 | 0          | N-term +28.03 Da, K +28.03 Da,             | 3384.004883 | 3 | 678.6500244 | 678.6551722 |
| ELQQAVLQMEQR                 | Q02819 | 0.000998   | N-term +28.03 Da,                          | 3384.824707 | 2 | 750.3800049 | 750.8955865 |
| DDEVVDVDTVEEDLGKSR           | P08113 | 0          | N-term +28.03 Da, K +28.03 Da,             | 3388.267578 | 2 | 1017.47998  | 1017.47912  |
| VDVPPNDSSFQIVKNPR            | Q61176 | 0          | N-term +28.03 Da, K +28.03 Da,             | 3390.697266 | 3 | 624.3400269 | 624.3389002 |
| VSTSSMGTLPKQVKIVEVGPR        | P38060 | 0          | N-term +28.03 Da, K +28.03 Da,             | 3392.91333  | 4 | 575.3400269 | 575.0869888 |
| LPTQTISQGAIEKVKDATR          | Q8C196 | 0          | N-term +28.03 Da, K +28.03 Da,             | 3394.717285 | 4 | 536.3200073 | 535.8138588 |
| AAAGVEFEKFLKTR               | P30115 | 0          | N-term +28.03 Da, K +28.03 Da,             | 3395.830322 | 4 | 445.7553711 | 445.7555463 |
| MKVFTGPLPAEGR                | Q91Z53 | 0          | N-term +28.03 Da, K +28.03 Da,             | 3397.341553 | 3 | 519.9653931 | 519.9655686 |
| ELLIGDVEMKR                  | Q922Q1 | 0.00059172 | N-term +28.03 Da, K +28.03 Da,             | 3400.037842 | 3 | 453.6000061 | 453.5952528 |
| HAPFETDISTLTR                | Q9QXD6 | 0.00176056 | N-term +28.03 Da,                          | 3402.318115 | 3 | 505.933136  | 505.9315816 |
| SGDLLMIDR                    | O35488 | 0.0488408  | N-term +28.03 Da,                          | 3402.679443 | 2 | 524.2805176 | 524.2787945 |
| AWPSQEQGNPSLSSIR             | Q8C196 | 0.02018474 | N-term +28.03 Da,                          | 3403.796875 | 2 | 893.460022  | 892.9499368 |
| LLNETGDEPFQYKN               | P15105 | 0.00210615 | N-term +28.03 Da, K +28.03 Da,             | 3404.311035 | 2 | 862.9315796 | 862.4305143 |

|                             |        |            |                                            |             |   |             |             |
|-----------------------------|--------|------------|--------------------------------------------|-------------|---|-------------|-------------|
| STGTFVVSQPLNYR              | Q9JLJ2 | 0          | N-term +28.03 Da,                          | 3404.705078 | 2 | 798.9199829 | 798.9226587 |
| SVPDEESKPASSNTQVEGDEEAALLER | D3Z6I7 | 0          | N-term +28.03 Da, K +28.03 Da,             | 3407.296387 | 3 | 982.4699707 | 981.8070392 |
| IIAVDINKDKF                 | P00329 | 0.00135318 | N-term +28.03 Da, K +28.03 Da,             | 3408.658447 | 3 | 453.9500122 | 453.9463913 |
| APQIKVIAPWR                 | P16460 | 0.00137237 | N-term +28.03 Da, K +28.03 Da,             | 3409.959229 | 3 | 445.6147766 | 445.6150869 |
| TTIQGLDGLSER                | Q91Y97 | 0.00139276 | N-term +28.03 Da,                          | 3411.493652 | 2 | 659.8599854 | 659.3540774 |
| GVDVHPGYGFLSER              | Q05920 | 0          | N-term +28.03 Da,                          | 3411.667725 | 3 | 544.6099854 | 544.6107309 |
| FDLRPGVIVR                  | Q3THS6 | 0.00328542 | N-term +28.03 Da,                          | 3415.998291 | 3 | 400.9100037 | 400.5801538 |
| GVPVFKFPR                   | Q8R0Y6 | 0.00101885 | N-term +28.03 Da, K +28.03 Da,             | 3416.753906 | 3 | 368.2305298 | 368.230573  |
| GDTIFGKIIR                  | P70349 | 0.001373   | N-term +28.03 Da, K +28.03 Da,             | 3417.871826 | 3 | 392.5799866 | 392.5764094 |
| TLGEECELETMTGEKVK           | P12710 | 0          | N-term +28.03 Da, K +28.03 Da,C +57.02 Da, | 3419.449219 | 3 | 680.0100098 | 680.0076118 |
| ILGADTSVDLEETGR             | Q03265 | 0          | N-term +28.03 Da,                          | 3422.506104 | 2 | 802.411499  | 802.4123217 |
| NFDEILR                     | O08709 | 0.02712537 | N-term +28.03 Da,                          | 3422.687012 | 2 | 467.75      | 467.7532695 |
| SAGFLQASASDVVVVHGR          | Q8VCHO | 0          | N-term +28.03 Da,                          | 3422.762695 | 3 | 609.9899902 | 609.9952448 |
| VSTSSMGTLPKQVKIVEVGPR       | P38060 | 0          | N-term +28.03 Da, K +28.03 Da,             | 3423.473877 | 4 | 575.3400269 | 575.0869888 |
| VSTSSMGTLPKQVKIVEVGPR       | P38060 | 0.01077266 | N-term +28.03 Da, K +28.03 Da,             | 3424.138916 | 3 | 767.1099854 | 766.4468929 |
| TAFHPEEFPHMR                | Q8BH97 | 0.0452842  | N-term +28.03 Da,                          | 3426.374756 | 2 | 820.4199829 | 820.406121  |
| TLGEECELETMTGEKVK           | P12710 | 0          | N-term +28.03 Da, K +28.03 Da,C +57.02 Da, | 3426.977783 | 2 | 1019.51001  | 1019.507779 |
| VAVDAPVSSVALR               | Q64374 | 0          | N-term +28.03 Da,                          | 3427.056885 | 2 | 656.3849487 | 656.38518   |
| MQIFVKTLTGK                 | P0CG49 | 0.00054466 | N-term +28.03 Da, K +28.03 Da,             | 3428.947754 | 3 | 450.6099854 | 450.6123549 |
| TLGEECELETMTGEKVK           | P12710 | 0          | N-term +28.03 Da, K +28.03 Da,C +57.02 Da, | 3429.151367 | 2 | 1020.51001  | 1019.507779 |
| GAKLVQDVANNTNEEAGDGTATVLR   | P63038 | 0          | N-term +28.03 Da, K +28.03 Da,             | 3433.981689 | 3 | 958.4899902 | 958.1597466 |
| APAGILNGKLVSAQIR            | Q922D8 | 0          | N-term +28.03 Da, K +28.03 Da,             | 3434.774902 | 3 | 555.6799927 | 555.3454372 |
| SDVYQEMPAQLR                | P50136 | 0          | N-term +28.03 Da,                          | 3437.847656 | 2 | 733.3599854 | 732.8612124 |
| TMTLGDIVYKR                 | P12710 | 0          | N-term +28.03 Da, K +28.03 Da,             | 3439.298096 | 3 | 451.5899963 | 451.5917311 |
| TFNVQDGPDPFQDR              | P97493 | 0          | N-term +28.03 Da,                          | 3441.147949 | 2 | 835.3900146 | 834.3866381 |
| TFNVQDGPDPFQDR              | P97493 | 0          | N-term +28.03 Da,                          | 3442.405029 | 2 | 834.3864136 | 834.3866381 |
| TIAMDGTEGLVR                | P56480 | 0.01269496 | N-term +28.03 Da,                          | 3443.418213 | 2 | 645.8499756 | 645.8397483 |
| TMTLGDIVYKR                 | P12710 | 0          | N-term +28.03 Da, K +28.03 Da,             | 3444.735596 | 2 | 676.8842163 | 676.8839584 |
| SLNMLNVDPRAARTQLSTR         | D3Z710 | 0.02689243 | N-term +28.03 Da,                          | 3446.291992 | 3 | 743.7399902 | 743.4024577 |
| TIAMDGTEGLVR                | P56480 | 0.01327592 | N-term +28.03 Da,                          | 3446.396729 | 2 | 645.8400269 | 645.8397483 |
| ETTIQGLDGLSER               | Q91Y97 | 0.00052165 | N-term +28.03 Da,                          | 3447.388184 | 2 | 723.8699951 | 723.8753745 |
| VDQTEDILAKSKKGIEESLKR       | Q61425 | 0.03103561 | N-term +28.03 Da, K +28.03 Da,             | 3447.757324 | 4 | 632.6199951 | 632.6230933 |
| AVELEGEQPISVPPSTNHTVYR      | Q8CHT0 | 0.00249584 | N-term +28.03 Da,                          | 3448.796875 | 3 | 818.4199829 | 817.7553319 |
| TLGEECELETMTGEKVK           | P12710 | 0          | N-term +28.03 Da, K +28.03 Da,C +57.02 Da, | 3450.07959  | 3 | 680.0078735 | 680.0076118 |
| DAPPLTDGIKDR                | Q9CR21 | 0.00142045 | N-term +28.03 Da,                          | 3453.85376  | 3 | 489.6124573 | 489.6119603 |
| SAGFLQASASDVVVVHGR          | Q8VCHO | 0.00058275 | N-term +28.03 Da,                          | 3454.180176 | 3 | 610         | 609.9952448 |
| AVELEGEQPISVPPSTNHTVYR      | Q8CHT0 | 0.03585147 | N-term +28.03 Da,                          | 3454.589844 | 3 | 817.4199829 | 817.7553319 |
| ETTIQGLDGLSER               | Q91Y97 | 0.01081283 | N-term +28.03 Da,                          | 3455.712402 | 2 | 723.3800049 | 723.8753745 |
| SIVPALEIANAHR               | P63038 | 0.00136674 | N-term +28.03 Da,                          | 3458.650879 | 3 | 473.9442444 | 473.6086612 |
| TAGSPTDFLEER                | P27546 | 0.00057471 | N-term +28.03 Da,                          | 3458.726563 | 2 | 675.8300171 | 675.8304354 |

|                        |        |            |                                |             |   |             |             |
|------------------------|--------|------------|--------------------------------|-------------|---|-------------|-------------|
| ASQTEGELKVTQVLKEKFP    | Q8CEI1 | 0.00803982 | N-term +28.03 Da, K +28.03 Da, | 3459.151123 | 4 | 601.3499756 | 600.8519784 |
| KDENATLDGGDVLFTGR      | Q9CWS0 | 0.00056561 | N-term +28.03 Da,              | 3459.37793  | 3 | 622.3200073 | 621.9864155 |
| TFTFYASEDKLENR         | O35490 | 0          | N-term +28.03 Da, K +28.03 Da, | 3460.141113 | 3 | 592.9641724 | 592.9649514 |
| DALEEDNVLVLKK          | P09103 | 0.00137931 | N-term +28.03 Da, K +28.03 Da, | 3461.485107 | 3 | 567.3200073 | 566.9889855 |
| VFDKDGNGYISAAELR       | P62204 | 0.00624756 | N-term +28.03 Da, K +28.03 Da, | 3462.977539 | 3 | 604.6442261 | 604.3159841 |
| TGTPVLGGLSYR           | Q61176 | 0.00210793 | N-term +28.03 Da,              | 3463.068115 | 2 | 624.848877  | 624.8509729 |
| FAKLVRPPVQVYIGIEGR     | Q9DB20 | 0.00053135 | N-term +28.03 Da, K +28.03 Da, | 3463.312012 | 3 | 662.3900146 | 662.3946797 |
| SIVEDKLVEDLKTR         | P26443 | 0          | N-term +28.03 Da, K +28.03 Da, | 3463.387451 | 3 | 577.0097656 | 577.0083799 |
| GMGTLISKIR             | P68372 | 0.00056529 | N-term +28.03 Da, K +28.03 Da, | 3463.771729 | 3 | 415.6000061 | 415.5968161 |
| GMDVAASEFYR            | P17182 | 0.00214133 | N-term +28.03 Da,              | 3465.858154 | 2 | 637.2963867 | 637.2977161 |
| LHTVYQSVLELPETHQMLR    | Q07417 | 0          | N-term +28.03 Da,              | 3466.051758 | 4 | 553.0404053 | 553.0413099 |
| LHTVYQSVLELPETHQMLR    | Q07417 | 0          | N-term +28.03 Da,              | 3467.527588 | 3 | 737.0521851 | 737.0526543 |
| TVGLGLPMSR             | Q99KN9 | 0.01628319 | N-term +28.03 Da,              | 3469.081543 | 2 | 529.7999878 | 529.8049791 |
| TMTLGDIVYKR            | P12710 | 0          | N-term +28.03 Da, K +28.03 Da, | 3470.335449 | 3 | 451.9299927 | 451.5917311 |
| VGDLGNVTAGKDGVANVSIEDR | P08228 | 0          | N-term +28.03 Da,              | 3471.457275 | 3 | 748.3900146 | 748.0606438 |
| TNTMTLGDIVYKR          | P12710 | 0          | N-term +28.03 Da, K +28.03 Da, | 3472.329834 | 3 | 523.289978  | 523.2886003 |
| TTFNVQDGPDPFQDR        | P97493 | 0          | N-term +28.03 Da,              | 3473.129883 | 2 | 834.8900146 | 834.3866381 |
| KELDPVQKLFVDKIR        | P97450 | 0          | N-term +28.03 Da, K +28.03 Da, | 3473.966797 | 4 | 485.8039246 | 485.8040334 |
| DLGNVTAGKDGVANVSIEDR   | P08228 | 0          | N-term +28.03 Da, K +28.03 Da, | 3475.659424 | 3 | 696.0300293 | 696.0306843 |
| KELDPVQKLFVDKIR        | P97450 | 0.00060168 | N-term +28.03 Da, K +28.03 Da, | 3476.709961 | 3 | 647.7399902 | 647.4029524 |
| SGIPETVPLSTVNR         | Q8VCHO | 0.00173611 | N-term +28.03 Da,              | 3478.681641 | 2 | 749.4199829 | 749.4172092 |
| FVELETNLPASR           | O35215 | 0.00101523 | N-term +28.03 Da,              | 3481.875488 | 2 | 702.3771973 | 702.380095  |
| APNVLASEPEIPKIR        | Q9WTP6 | 0          | N-term +28.03 Da, K +28.03 Da, | 3482.270508 | 3 | 583.0100098 | 583.0086025 |
| LAKVDATEESDLAQYGVGR    | P09103 | 0          | N-term +28.03 Da, K +28.03 Da, | 3483.678955 | 3 | 717.3699951 | 717.0427014 |
| HSLPPVVDTTQGKVLGK      | P23953 | 0.00055804 | N-term +28.03 Da, K +28.03 Da, | 3483.843994 | 3 | 658.4000244 | 658.3979788 |
| FIAATSLYSER            | Q80XN0 | 0.02983607 | N-term +28.03 Da,              | 3484.018311 | 2 | 692.3699951 | 691.869363  |
| KELDPVQKLFVDKIR        | P97450 | 0.00362757 | N-term +28.03 Da, K +28.03 Da, | 3485.927002 | 2 | 971.0999756 | 970.6007904 |
| KELDPVQKLFVDKIR        | P97450 | 0.03690741 | N-term +28.03 Da, K +28.03 Da, | 3487.377441 | 2 | 970.5999756 | 970.6007904 |
| QFFSNCTVDR             | Q9WUP1 | 0.01905092 | N-term +28.03 Da, C +57.02 Da, | 3492.177734 | 2 | 651.3121948 | 651.3007901 |
| DMLDLGAAR              | Q9D3D9 | 0.0040032  | N-term +28.03 Da,              | 3492.583008 | 2 | 495.2580261 | 495.2578619 |
| KFLVPDYNDIEIRQEQLR     | Q9WU01 | 0.00979284 | N-term +28.03 Da,              | 3492.785645 | 4 | 555.5499878 | 555.5509335 |
| VGVPTETGALTLNR         | Q8BWT1 | 0          | N-term +28.03 Da,              | 3495.584473 | 2 | 728.4099731 | 728.4119267 |
| TTFNVQDGPDPFQDR        | P97493 | 0.04862186 | N-term +28.03 Da,              | 3495.782715 | 2 | 835.3900146 | 834.3866381 |
| ADTMTLEEKSEFKQR        | Q9Z1S5 | 0.03660089 | N-term +28.03 Da, K +28.03 Da, | 3496.533203 | 3 | 633.6599731 | 632.9960345 |
| VQAWYMDDESTADPR        | Q99JT9 | 0          | N-term +28.03 Da,              | 3498.21582  | 2 | 848.8852539 | 848.8854165 |
| APNVLASEPEIPKIR        | Q9WTP6 | 0          | N-term +28.03 Da, K +28.03 Da, | 3500.241455 | 4 | 437.7600098 | 437.508271  |
| TANALALAMER            | Q60692 | 0.00251467 | N-term +28.03 Da,              | 3503.533691 | 2 | 594.8236694 | 594.8239007 |
| AGPLCLQEVDPEPPQHALR    | P70296 | 0          | N-term +28.03 Da, C +57.02 Da, | 3504.062012 | 3 | 687.3499756 | 686.6860829 |
| KELDPVQKLFVDKIR        | P97450 | 0          | N-term +28.03 Da, K +28.03 Da, | 3504.819092 | 4 | 485.8033752 | 485.8040334 |
| APAGILNGKLVSAQIR       | Q922D8 | 0.0014218  | N-term +28.03 Da, K +28.03 Da, | 3506.765625 | 3 | 556.0100098 | 555.3454372 |

|                            |        |            |                                |             |   |             |             |
|----------------------------|--------|------------|--------------------------------|-------------|---|-------------|-------------|
| MILLEVNNR                  | Q9CVB6 | 0.03203883 | N-term +28.03 Da,              | 3507.9375   | 2 | 565.3225708 | 565.3235362 |
| GPVDIGPEYQQDLDR            | P97450 | 0          | N-term +28.03 Da,              | 3511.563477 | 2 | 865.9199829 | 865.4232208 |
| APNVLASEPEIPKGR            | Q9WTP6 | 0          | N-term +28.03 Da, K +28.03 Da, | 3513.945801 | 3 | 583.0077515 | 583.0086025 |
| TFNVQDGPDPFQDR             | P97493 | 0          | N-term +28.03 Da,              | 3514.556396 | 3 | 556.5900269 | 556.5935176 |
| IQLVEEELDR                 | P21107 | 0.01135531 | N-term +28.03 Da,              | 3514.718994 | 2 | 636.3447266 | 636.3457209 |
| GDIAPLNLR                  | P24456 | 0.00212857 | N-term +28.03 Da,              | 3518.326172 | 2 | 547.8200073 | 547.3218507 |
| TFNVQDGPDPFQDR             | P97493 | 0          | N-term +28.03 Da,              | 3527.05835  | 2 | 834.385498  | 834.3866381 |
| IDVPVPEVQSR                | Q99LC3 | 0.0009901  | N-term +28.03 Da,              | 3527.344482 | 2 | 633.8499756 | 633.8562554 |
| AVFPSIVGR                  | P60710 | 0.00098863 | N-term +28.03 Da,              | 3529.101074 | 2 | 487.2900085 | 487.2951041 |
| EIEPPPEMPPWQKR             | Q3TJZ6 | 0.00433412 | N-term +28.03 Da, K +28.03 Da, | 3532.507813 | 3 | 630         | 629.6659594 |
| GEDFDQALLR                 | P38647 | 0.00053107 | N-term +28.03 Da,              | 3532.748779 | 2 | 596.8099976 | 596.3038557 |
| GGAPLAGTNKETTIQGLDGLSER    | Q91Y97 | 0          | N-term +28.03 Da, K +28.03 Da, | 3538.778076 | 3 | 781.0900269 | 781.0834486 |
| SEKPPAIDWAYR               | Q9DCX2 | 0          | N-term +28.03 Da, K +28.03 Da, | 3548.119385 | 3 | 551.289978  | 551.2874766 |
| TGTAEMSSILEER              | Q03265 | 0          | N-term +28.03 Da,              | 3548.29248  | 2 | 726.3499756 | 726.3559604 |
| NVLASEPEIPKGR              | Q9WTP6 | 0          | N-term +28.03 Da,              | 3549.719238 | 3 | 527.3058472 | 526.9786431 |
| TSEDMKVLDDLKNR             | P70694 | 0.00914634 | N-term +28.03 Da, K +28.03 Da, | 3550.905762 | 4 | 495.019989  | 494.5186733 |
| LRPGDCEVCISYLGR            | Q9CXI5 | 0.00061805 | N-term +28.03 Da, C +57.02 Da, | 3551.248535 | 3 | 608.3022461 | 608.3028039 |
| SGGPVDIGPEYQQDLDR          | P97450 | 0          | N-term +28.03 Da,              | 3552.729004 | 2 | 937.9500122 | 937.4499674 |
| VSEPTVPFDVR                | Q9CPT4 | 0.00808314 | N-term +28.03 Da,              | 3552.904053 | 2 | 687.8658447 | 687.8668205 |
| SDAPPLTLGDIKDR             | Q9CR21 | 0.00434096 | N-term +28.03 Da, K +28.03 Da, | 3552.993164 | 2 | 776.9199829 | 777.4303168 |
| SGGPVDIGPEYQQDLDR          | P97450 | 0          | N-term +28.03 Da,              | 3553.290771 | 2 | 937.4500122 | 937.4499674 |
| GGEDFDQALLR                | P38647 | 0.00138632 | N-term +28.03 Da,              | 3554.739502 | 2 | 624.8129272 | 624.8145878 |
| FPEGIKGMVQAVR              | Q8R0Y6 | 0.01071297 | N-term +28.03 Da, K +28.03 Da, | 3556.407959 | 3 | 496.9500122 | 496.6182802 |
| TFNVQDGPDPFQDR             | P97493 | 0          | N-term +28.03 Da,              | 3557.575684 | 2 | 834.8900146 | 834.3866381 |
| DQLLPNLR                   | P61458 | 0.00547945 | N-term +28.03 Da,              | 3557.682617 | 2 | 498.2999878 | 498.7954686 |
| APAGILNGKLVSAQIR           | Q922D8 | 0.00100503 | N-term +28.03 Da, K +28.03 Da, | 3558.932129 | 3 | 555.6699829 | 555.3454372 |
| TDVKVPDFSDYR               | Q9CR68 | 0.00625733 | N-term +28.03 Da, K +28.03 Da, | 3559.4646   | 3 | 499.9240723 | 499.9243155 |
| QASGGPVDIGPEYQQDLDR        | P97450 | 0          | N-term +28.03 Da,              | 3559.715332 | 2 | 1037.5      | 1036.997814 |
| EISPPHAVEEEEDDDWGEDTTEEAQR | P59325 | 0          | N-term +28.03 Da,              | 3560.569336 | 3 | 1014.429993 | 1014.430409 |
| ASGGPVDIGPEYQQDLDR         | P97450 | 0          | N-term +28.03 Da,              | 3565.895752 | 2 | 973.4699707 | 972.9685245 |
| SDLELHPPSPYWSHR            | Q9D0M3 | 0.00471884 | N-term +28.03 Da,              | 3566.69458  | 4 | 462.980011  | 462.9811491 |
| KGNDISSGTVLSDYVSGPPSGTGLHR | P70296 | 0          | N-term +28.03 Da,              | 3567.450195 | 3 | 906.1300049 | 905.4629888 |
| GASIVEDKLVEDLKTR           | P26443 | 0          | N-term +28.03 Da, K +28.03 Da, | 3568.836182 | 4 | 465.269989  | 465.0227486 |
| VALEQQSPDIAQCVHLDR         | Q91X83 | 0          | N-term +28.03 Da, C +57.02 Da, | 3572.855957 | 3 | 703.3499756 | 703.0248759 |
| TGSTQVGKEVALMVQER          | Q9DBF1 | 0          | N-term +28.03 Da, K +28.03 Da, | 3573.354004 | 3 | 630.3499756 | 630.3435455 |
| SRPIKIATLPDDIITQR          | Q61712 | 0.00053677 | N-term +28.03 Da, K +28.03 Da, | 3574.190918 | 3 | 688.7417603 | 688.7440378 |
| SAGFLQASASDVVVVHGR         | Q8VCH0 | 0          | N-term +28.03 Da,              | 3577.201416 | 3 | 609.9899902 | 609.9952448 |
| TGTAEMSSILEER              | Q03265 | 0          | N-term +28.03 Da,              | 3578.801758 | 2 | 726.3540039 | 726.3559604 |
| VALEQQSPDIAQCVHLDR         | Q91X83 | 0          | N-term +28.03 Da, C +57.02 Da, | 3578.967285 | 3 | 703.0300293 | 703.0248759 |
| TFGKFEAVEAKVAQQAER         | P67778 | 0          | N-term +28.03 Da, K +28.03 Da, | 3579.128174 | 4 | 646.0900269 | 645.8380629 |

|                                |        |            |                                            |             |   |             |             |
|--------------------------------|--------|------------|--------------------------------------------|-------------|---|-------------|-------------|
| TAPVGGGSFPTIPR                 | Q922R8 | 0.00052798 | N-term +28.03 Da,                          | 3579.952393 | 2 | 743.4000244 | 743.4066441 |
| GAPIKIPVGPETLGR                | P56480 | 0          | N-term +28.03 Da, K +28.03 Da,             | 3587.914795 | 3 | 520.9899902 | 520.9872498 |
| DDEVVDVDTVEEDLGKSR             | P08113 | 0          | N-term +28.03 Da, K +28.03 Da,             | 3588.095459 | 3 | 678.9899902 | 678.6551722 |
| GPTPASPAAEVGSQEALSSAQSPGR      | D3Z6Q9 | 0          | N-term +28.03 Da,                          | 3590.111084 | 3 | 922.789978  | 922.1176587 |
| APAGILNGKLVSAQIR               | Q922D8 | 0.00250731 | N-term +28.03 Da, K +28.03 Da,             | 3590.606445 | 3 | 555.6728516 | 555.3454372 |
| GWKEIEYEVVR                    | Q8C196 | 0          | N-term +28.03 Da, K +28.03 Da,             | 3592.507813 | 3 | 488.9400024 | 488.6012839 |
| IIQDSNKVNPKDLDPK               | Q8BZN6 | 0.00326397 | N-term +28.03 Da, K +28.03 Da,             | 3593.037598 | 3 | 646.0300293 | 646.0419724 |
| SAGFLQASASDVVVHGR              | Q8VCHO | 0          | N-term +28.03 Da,                          | 3594.496826 | 2 | 914.4799805 | 914.489229  |
| NKELDPVQKLFVDKIR               | P97450 | 0.00096946 | N-term +28.03 Da, K +28.03 Da,             | 3596.05835  | 4 | 514.5599976 | 514.3147655 |
| GWKEIEYEVVR                    | Q8C196 | 0          | N-term +28.03 Da, K +28.03 Da,             | 3596.564941 | 2 | 732.3900146 | 732.3982876 |
| EALSTLVLNR                     | P63038 | 0.03229974 | N-term +28.03 Da,                          | 3597.947266 | 2 | 572.8400269 | 572.3402408 |
| VLSGEDKSNIAAWGKIGGHGAIEYGAELER | P01942 | 0          | N-term +28.03 Da, K +28.03 Da,             | 3599.282715 | 4 | 832.4400024 | 832.1939406 |
| DDEVVDVDTVEEDLGKSR             | P08113 | 0          | N-term +28.03 Da, K +28.03 Da,             | 3599.945801 | 2 | 1017.47998  | 1017.47912  |
| VLSGEDKSNIAAWGKIGGHGAIEYGAELER | P01942 | 0          | N-term +28.03 Da, K +28.03 Da,             | 3603.041748 | 3 | 1109.579956 | 1109.256162 |
| DEELNKLLGR                     | P22752 | 0.01627742 | N-term +28.03 Da, K +28.03 Da,             | 3604.781494 | 2 | 621.8555908 | 621.8562554 |
| IMNVIGEPIDER                   | P56480 | 0          | N-term +28.03 Da,                          | 3604.862305 | 2 | 707.3699951 | 707.3739554 |
| GAVFMDAPVSGGVAAR               | Q99L13 | 0.00060496 | N-term +28.03 Da,                          | 3605.998047 | 2 | 795.4099731 | 795.4088611 |
| DDEVVDVDTVEEDLGKSR             | P08113 | 0          | N-term +28.03 Da, K +28.03 Da,             | 3606.335205 | 2 | 1018.47998  | 1017.47912  |
| SAGFLQASASDVVVHGR              | Q8VCHO | 0          | N-term +28.03 Da,                          | 3607.57666  | 3 | 609.9941406 | 609.9952448 |
| NKELDPVQKLFVDKIR               | P97450 | 0          | N-term +28.03 Da, K +28.03 Da,             | 3607.823486 | 3 | 685.416748  | 685.4172618 |
| VLSGEDKSNIAAWGKIGGHGAIEYGAELER | P01942 | 0          | N-term +28.03 Da, K +28.03 Da,             | 3609.463379 | 3 | 1109.920044 | 1109.256162 |
| TQAGSEVSALLGR                  | P56480 | 0          | N-term +28.03 Da,                          | 3611.004639 | 2 | 658.8615112 | 658.8620695 |
| LVYEQEQLSCDEPILSNKSGDNR        | P70296 | 0          | N-term +28.03 Da, K +28.03 Da,C +57.02 Da, | 3613.015869 | 3 | 949.7999878 | 949.7991611 |
| HVGDLGNVTAGKDGVANVSIEDR        | P08228 | 0          | N-term +28.03 Da, K +28.03 Da,             | 3614.271729 | 4 | 595.3099976 | 595.56203   |
| DDEVVDVDTVEEDLGKSR             | P08113 | 0          | N-term +28.03 Da, K +28.03 Da,             | 3618.652832 | 3 | 678.6500244 | 678.6551722 |
| HVGDLGNVTAGKDGVANVSIEDR        | P08228 | 0          | N-term +28.03 Da, K +28.03 Da,             | 3618.728271 | 3 | 793.4099731 | 793.7469479 |
| LVYEQEQLSCDEPILSNKSGDNR        | P70296 | 0          | N-term +28.03 Da, K +28.03 Da,C +57.02 Da, | 3620.13208  | 3 | 950.4699707 | 949.7991611 |
| NFDEILR                        | O08709 | 0.02712537 | N-term +28.03 Da,                          | 3620.216064 | 2 | 467.75      | 467.7532695 |
| SGAPIKIPVGPETLGR               | P56480 | 0.00064103 | N-term +28.03 Da, K +28.03 Da,             | 3620.297607 | 3 | 550         | 549.9979261 |
| HVGDLGNVTAGKDGVANVSIEDR        | P08228 | 0          | N-term +28.03 Da, K +28.03 Da,             | 3621.500244 | 2 | 1189.609985 | 1190.116784 |
| LVLEVAQHLGESTVR                | P56480 | 0.01754386 | N-term +28.03 Da,                          | 3622.86499  | 3 | 560.3300171 | 560.3210691 |
| TIIAMKIMEKIR                   | B1ARD6 | 0.04298714 | N-term +28.03 Da, K +28.03 Da,             | 3623.213135 | 3 | 511.6499939 | 510.987316  |
| VESFSDYPLGR                    | P10126 | 0.00053879 | N-term +28.03 Da,                          | 3624.719482 | 2 | 697.8499756 | 697.8511704 |
| ELISNASDALDKIR                 | P08113 | 0          | N-term +28.03 Da, K +28.03 Da,             | 3626.484863 | 3 | 534.6300049 | 534.3016747 |
| NKELDPVQKLFVDKIR               | P97450 | 0          | N-term +28.03 Da, K +28.03 Da,             | 3627.592773 | 4 | 514.3144531 | 514.3147655 |
| NKELDPVQKLFVDKIR               | P97450 | 0          | N-term +28.03 Da, K +28.03 Da,             | 3627.840332 | 2 | 1027.619995 | 1027.622255 |
| STPQSQFQESSPVWKLGR             | Q9D115 | 0          | N-term +28.03 Da, K +28.03 Da,             | 3629.05127  | 3 | 707.039978  | 706.704131  |
| NYLEKLGPLR                     | Q8C7G5 | 0.01135115 | N-term +28.03 Da, K +28.03 Da,             | 3629.930908 | 3 | 420.9200134 | 420.2554475 |
| VLSGEDKSNIAAWGKIGGHGAIEYGAELER | P01942 | 0          | N-term +28.03 Da, K +28.03 Da,             | 3630.42749  | 4 | 832.4400024 | 832.1939406 |
| STPQSQFQESSPVWKLGR             | Q9D115 | 0          | N-term +28.03 Da, K +28.03 Da,             | 3630.775635 | 2 | 1060.560059 | 1059.552558 |

|                          |        |            |                                             |             |   |             |             |
|--------------------------|--------|------------|---------------------------------------------|-------------|---|-------------|-------------|
| GEALSTLVLNR              | P63038 | 0.00056754 | N-term +28.03 Da,                           | 3632.177734 | 2 | 600.8496704 | 600.8509729 |
| VESFSDYPPPLGR            | P10126 | 0.00140845 | N-term +28.03 Da,                           | 3632.616943 | 2 | 698.8499756 | 697.8511704 |
| VESFSDYPPPLGR            | P10126 | 0.00099206 | N-term +28.03 Da,                           | 3632.954102 | 2 | 698.3499756 | 697.8511704 |
| SPLKLEVDPNIQAVR          | P11679 | 0          | N-term +28.03 Da, K +28.03 Da,              | 3635.556641 | 3 | 579.3400269 | 579.0086025 |
| TLPDTVDWR                | O70370 | 0.0295858  | N-term +28.03 Da,                           | 3635.710205 | 2 | 566.289978  | 565.7956662 |
| GKLVINGKPIFIQER          | P16858 | 0.00174978 | N-term +28.03 Da, K +28.03 Da,              | 3636.185547 | 4 | 475.5400085 | 475.0462919 |
| TVLSGGTTMYPGIADR         | P60710 | 0          | N-term +28.03 Da,                           | 3636.854736 | 2 | 833.9246826 | 833.9270842 |
| DDEVVDVDTVEEDLGKSR       | P08113 | 0          | N-term +28.03 Da, K +28.03 Da,              | 3637.865967 | 2 | 1017.47998  | 1017.47912  |
| SLLPEEYEQWKQR            | Q91VA0 | 0.03101534 | N-term +28.03 Da,                           | 3638.446777 | 3 | 587.9699707 | 587.9771911 |
| NKELDPVQKLFVDKIR         | P97450 | 0          | N-term +28.03 Da, K +28.03 Da,              | 3638.789551 | 3 | 685.4161987 | 685.4172618 |
| ILEFFGLKKEECPAVR         | P09103 | 0.00699572 | N-term +28.03 Da, K +28.03 Da, C +57.02 Da, | 3641.402832 | 4 | 505.7869568 | 505.7879548 |
| AFKRNKSLMQHQK            | Q3UVF6 | 0.04008838 | N-term +28.03 Da, K +28.03 Da,              | 3642.490967 | 3 | 576.6799927 | 576.6749001 |
| SPLKLEVDPNIQAVR          | P11679 | 0.001002   | N-term +28.03 Da, K +28.03 Da,              | 3645.892334 | 3 | 579.6799927 | 579.0086025 |
| KDDYYQILGVPR             | Q99M87 | 0          | N-term +28.03 Da,                           | 3647.266602 | 2 | 761.9171143 | 761.9168447 |
| YLQIPVNCYPYR             | P24270 | 0.0271164  | N-term +28.03 Da, C +57.02 Da,              | 3648.812744 | 2 | 726.8800049 | 725.8792074 |
| HVGDGLGNVTAGKDGVANVSIEDR | P08228 | 0          | N-term +28.03 Da, K +28.03 Da,              | 3649.797119 | 3 | 793.4099731 | 793.7469479 |
| SSQVSDGAAAVLLAR          | Q8VCH0 | 0          | N-term +28.03 Da,                           | 3650.140137 | 2 | 736.9099731 | 736.9070086 |
| RDDVALEGVGHFFR           | P29391 | 0.00548374 | N-term +28.03 Da,                           | 3650.414063 | 3 | 549.289978  | 549.2863586 |
| GMNIVEAMER               | P17742 | 0.03440514 | N-term +28.03 Da,                           | 3652.320068 | 2 | 590.289978  | 589.2888365 |
| ASKPTLNEVVIVSAIR         | Q8QZT1 | 0.00133156 | N-term +28.03 Da, K +28.03 Da,              | 3653.355713 | 3 | 585.0200195 | 585.0242526 |
| VVYGEPIAAGLGTDGR         | Q9EQF5 | 0.00212495 | N-term +28.03 Da,                           | 3654.109619 | 2 | 801.9199829 | 801.9279412 |
| DDEVVDVDTVEEDLGKSR       | P08113 | 0          | N-term +28.03 Da, K +28.03 Da,              | 3655.235107 | 3 | 678.6539307 | 678.6551722 |
| STGTFVVSQPLNYR           | Q9JLJ2 | 0          | N-term +28.03 Da,                           | 3655.847168 | 2 | 798.4099731 | 798.9226587 |
| NKELDPVQKLFVDKIR         | P97450 | 0          | N-term +28.03 Da, K +28.03 Da,              | 3658.109619 | 4 | 514.3145142 | 514.3147655 |
| HSILPVDDINGLNEEQKQLR     | Q9JHI5 | 0          | N-term +28.03 Da, K +28.03 Da,              | 3658.439941 | 4 | 623.5800171 | 623.0803213 |
| ASKPTLNEVVIVSAIR         | Q8QZT1 | 0.02720637 | N-term +28.03 Da, K +28.03 Da,              | 3658.986572 | 2 | 877.5300293 | 877.0327407 |
| NKELDPVQKLFVDKIR         | P97450 | 0          | N-term +28.03 Da, K +28.03 Da,              | 3659.469971 | 2 | 1027.620728 | 1027.622255 |
| STGTFVVSQPLNYR           | Q9JLJ2 | 0          | N-term +28.03 Da,                           | 3661.069336 | 2 | 799.4299927 | 798.9226587 |
| TFVAELKGLDPAAR           | P08249 | 0.0040016  | N-term +28.03 Da, K +28.03 Da,              | 3663.209229 | 3 | 491.6210632 | 491.620567  |
| EIEYFWSNIEQVVEIK         | Q8CHI8 | 0.01083707 | N-term +28.03 Da, K +28.03 Da,              | 3666.599365 | 3 | 695.3800049 | 694.697983  |
| NKELDPVQKLFVDKIR         | P97450 | 0          | N-term +28.03 Da, K +28.03 Da,              | 3669.452637 | 3 | 685.4171143 | 685.4172618 |
| AGNFYINDKSTGSVVGQQPFGGAR | Q8CHT0 | 0          | N-term +28.03 Da, K +28.03 Da,              | 3671.664063 | 3 | 843.0999756 | 842.7627093 |
| AIIDPGDSDIIR             | P62889 | 0.00324939 | N-term +28.03 Da,                           | 3672.725342 | 2 | 657.3599854 | 656.8589955 |
| QNYSTEVEAAVNR            | P29391 | 0          | N-term +28.03 Da,                           | 3674.025146 | 2 | 754.3699951 | 754.8706235 |
| WPAVQSSALYEDR            | P16460 | 0          | N-term +28.03 Da,                           | 3674.346191 | 2 | 775.8900146 | 775.3859091 |
| MNNWNFQIFELVEKMGEKSGR    | Q61409 | 0.04007573 | N-term +28.03 Da, K +28.03 Da,              | 3677.546387 | 4 | 661.0999756 | 661.0870918 |
| LKELPFPLNTR              | Q78JT3 | 0.03185956 | N-term +28.03 Da, K +28.03 Da,              | 3678.956787 | 3 | 461.9500122 | 461.9501356 |
| KEEVLLPLDNPYGKITGTVKR    | P25688 | 0          | N-term +28.03 Da, K +28.03 Da,              | 3681.669434 | 4 | 621.3699951 | 621.371541  |
| GALFVEKFIKPR             | Q05920 | 0          | N-term +28.03 Da, K +28.03 Da,              | 3683.658447 | 4 | 405.25      | 405.248628  |
| DDEVVDVDTVEEDLGKSR       | P08113 | 0          | N-term +28.03 Da, K +28.03 Da,              | 3685.824707 | 3 | 678.6599731 | 678.6551722 |

|                             |        |            |                                |             |   |             |             |
|-----------------------------|--------|------------|--------------------------------|-------------|---|-------------|-------------|
| FDAGELITQR                  | P67778 | 0.00211238 | N-term +28.03 Da,              | 3687.248779 | 2 | 589.3099976 | 589.3142232 |
| SLQPEIQFPQTASR              | Q9ESB3 | 0          | N-term +28.03 Da,              | 3687.520752 | 2 | 863.960022  | 863.9597729 |
| DDEVVDVDTVEEDLGKSR          | P08113 | 0          | N-term +28.03 Da, K +28.03 Da, | 3687.846436 | 2 | 1017.47998  | 1017.47912  |
| NKELDPVQKLFVDKIR            | P97450 | 0          | N-term +28.03 Da, K +28.03 Da, | 3688.611572 | 4 | 514.3140869 | 514.3147655 |
| SLQPEIQFPQTASR              | Q9ESB3 | 0          | N-term +28.03 Da,              | 3691.095703 | 2 | 863.4500122 | 863.9597729 |
| STGTFVVSQPLNYR              | Q9JLJ2 | 0          | N-term +28.03 Da,              | 3691.627441 | 2 | 798.921814  | 798.9226587 |
| HVGD LGNV TAGK DGVANV SIEDR | P08228 | 0          | N-term +28.03 Da, K +28.03 Da, | 3692.817383 | 3 | 793.4099731 | 793.7469479 |
| SLDSLTEAYKLR                | Q9R0H0 | 0          | N-term +28.03 Da, K +28.03 Da, | 3696.703369 | 3 | 484.6099854 | 484.6083273 |
| ALGPDGQLLHSDAFPPPR          | P97328 | 0          | N-term +28.03 Da,              | 3697.175537 | 3 | 639.3400269 | 639.3390115 |
| DALEEDNVLVLKK               | P09103 | 0          | N-term +28.03 Da, K +28.03 Da, | 3698.485596 | 3 | 567.3200073 | 566.9889855 |
| DKDYFLFR                    | Q64433 | 0.01166181 | N-term +28.03 Da, K +28.03 Da, | 3700.339111 | 3 | 387.2099915 | 387.2097266 |
| DALEEDNVLVLKK               | P09103 | 0.00137049 | N-term +28.03 Da, K +28.03 Da, | 3700.48999  | 2 | 850.4699707 | 849.97984   |
| GKIPEHDLDPNVITILKEPVR       | Q99PL5 | 0          | N-term +28.03 Da, K +28.03 Da, | 3700.979248 | 4 | 618.1099854 | 617.6125282 |
| AFDYDLQTGQISNR              | Q64374 | 0          | N-term +28.03 Da,              | 3701.86792  | 2 | 828.4093628 | 828.4048307 |
| AIIDPGDSDIIR                | P62889 | 0.00433071 | N-term +28.03 Da,              | 3704.322998 | 2 | 656.8587036 | 656.8589955 |
| TVLSGGTTMYPGIADR            | P60710 | 0          | N-term +28.03 Da,              | 3704.996582 | 2 | 834.4299927 | 833.9270842 |
| DALEEDNVLVLKK               | P09103 | 0          | N-term +28.03 Da, K +28.03 Da, | 3706.054688 | 2 | 849.9799805 | 849.97984   |
| GSWEIEGYR                   | P26443 | 0.00102828 | N-term +28.03 Da,              | 3707.474854 | 2 | 612.2999878 | 612.3063982 |
| TGTFVVSQPLNYR               | Q9JLJ2 | 0.00878869 | N-term +28.03 Da,              | 3707.640381 | 2 | 756.4000244 | 755.4066441 |
| GETPTEKLPFPIIDDKGR          | O08709 | 0          | N-term +28.03 Da, K +28.03 Da, | 3707.79126  | 4 | 525.2999878 | 525.0452182 |
| HSILPVDDINGLNNEEQKQLR       | Q9JHI5 | 0.00214592 | N-term +28.03 Da, K +28.03 Da, | 3709.951904 | 3 | 830.7700195 | 830.438003  |
| ALLDLHALGSAR                | P29391 | 0.00063654 | N-term +28.03 Da,              | 3714.161621 | 3 | 422.5799866 | 422.2505851 |
| ELTEEELATAEAVR              | Q8R0Y6 | 0.02140673 | N-term +28.03 Da,              | 3716.512939 | 2 | 795.9099731 | 794.9068722 |
| DDEVVDVDTVEEDLGKSR          | P08113 | 0          | N-term +28.03 Da, K +28.03 Da, | 3716.967041 | 3 | 678.6500244 | 678.6551722 |
| MVWEGLNVVKTGR               | P15532 | 0          | N-term +28.03 Da, K +28.03 Da, | 3717.469727 | 3 | 515.6199951 | 515.6254349 |
| ALLDLHALGSAR                | P29391 | 0          | N-term +28.03 Da,              | 3719.241211 | 3 | 422.25      | 422.2505851 |
| NKELDPVQKLFVDKIR            | P97450 | 0          | N-term +28.03 Da, K +28.03 Da, | 3720.469727 | 4 | 514.5599976 | 514.3147655 |
| QALLDLHALGSAR               | P29391 | 0.00057937 | N-term +28.03 Da,              | 3720.545166 | 3 | 464.9363708 | 464.9367779 |
| SGGSGAPGLAAAIAAGAKLR        | P70460 | 0          | N-term +28.03 Da, K +28.03 Da, | 3720.716064 | 3 | 561         | 560.9966968 |
| DLPKNWDWR                   | Q9WUU7 | 0.00052659 | N-term +28.03 Da, K +28.03 Da, | 3720.88501  | 3 | 429.2275696 | 429.2277804 |
| DFTPVCTTELGR                | O08709 | 0          | N-term +28.03 Da, C +57.02 Da, | 3722.437744 | 2 | 712.3499756 | 712.3479378 |
| LPDVS AKDFEKVDLTR           | P97328 | 0.00210261 | N-term +28.03 Da, K +28.03 Da, | 3723.519775 | 4 | 480.269989  | 480.0227486 |
| ERDSKMNFDHVDITREEKGR        | Q80W32 | 0.00436335 | N-term +28.03 Da, K +28.03 Da, | 3723.702881 | 3 | 811.7600098 | 811.0885392 |
| ANQDTIFEGIGGPR              | O88207 | 0.00060901 | N-term +28.03 Da,              | 3724.020264 | 2 | 751.3856201 | 751.8835335 |
| VVTNGLGVNVFKDPVADPNKR       | Q99KQ4 | 0          | N-term +28.03 Da, K +28.03 Da, | 3725.652588 | 4 | 581.8300171 | 581.5837706 |
| DGLNAEGLLR                  | Q64374 | 0.00061614 | N-term +28.03 Da,              | 3726.548828 | 2 | 543.2990112 | 543.3011157 |
| LGTLDNPSSLDETAYER           | O35943 | 0          | N-term +28.03 Da,              | 3726.755859 | 2 | 955.460022  | 954.962908  |
| SWEIEGYR                    | P26443 | 0.00144578 | N-term +28.03 Da,              | 3726.916748 | 2 | 583.7978516 | 583.7956662 |
| STQAAEDKEEESLHSISNTEAVR     | Q9CQN1 | 0.0009828  | N-term +28.03 Da, K +28.03 Da, | 3727.011963 | 4 | 676.0900269 | 675.8385262 |
| HSILPVDDINGLNNEEQKQLR       | Q9JHI5 | 0          | N-term +28.03 Da, K +28.03 Da, | 3727.111572 | 4 | 623.5800171 | 623.0803213 |

|                            |        |            |                                             |             |   |             |             |
|----------------------------|--------|------------|---------------------------------------------|-------------|---|-------------|-------------|
| STQAAEDKEEESLHSISNTEAVR    | Q9CQN1 | 0          | N-term +28.03 Da, K +28.03 Da,              | 3728.802002 | 3 | 901.1199951 | 900.7822761 |
| DALEEEDNVLVLKK             | P09103 | 0          | N-term +28.03 Da, K +28.03 Da,              | 3729.679688 | 3 | 566.9891357 | 566.9889855 |
| AIDLPLGLGR                 | Q8VCR7 | 0.00982987 | N-term +28.03 Da,                           | 3730.019287 | 2 | 470.2799988 | 470.2847366 |
| LLNKLADLMER                | Q35945 | 0          | N-term +28.03 Da, K +28.03 Da,              | 3733.500977 | 3 | 457.9387207 | 457.9391308 |
| SYMIPTNDLKPGE LR           | P00405 | 0.02415297 | N-term +28.03 Da, K +28.03 Da,              | 3735.208252 | 3 | 597.9899902 | 597.3220814 |
| MAVEEPAAITSDIR             | Q8CCJ3 | 0.0239299  | N-term +28.03 Da,                           | 3735.349121 | 2 | 766.9000244 | 765.8952525 |
| HSILPVDDINGLNEEQKQLR       | Q9JHI5 | 0          | N-term +28.03 Da, K +28.03 Da,              | 3737.281738 | 3 | 830.4400024 | 830.438003  |
| EADDIVNWLKKR               | P09103 | 0          | N-term +28.03 Da, K +28.03 Da,              | 3737.724854 | 3 | 524.6400146 | 524.303238  |
| ELPDGQVITIGNER             | P60710 | 0          | N-term +28.03 Da,                           | 3739.012695 | 2 | 784.9199829 | 784.9175737 |
| EADDIVNWLKKR               | P09103 | 0          | N-term +28.03 Da, K +28.03 Da,              | 3740.069824 | 4 | 393.480011  | 393.4792476 |
| LALEVFQVSHPR               | Q9WVLO | 0          | N-term +28.03 Da,                           | 3740.761963 | 3 | 475.269989  | 475.2733899 |
| IADQCPSSLAIQENANALAR       | Q91Y97 | 0          | N-term +28.03 Da, C +57.02 Da,              | 3740.982422 | 3 | 724.7000122 | 724.0355523 |
| IADQCPSSLAIQENANALAR       | Q91Y97 | 0          | N-term +28.03 Da, C +57.02 Da,              | 3741.940186 | 2 | 1086.050049 | 1085.54969  |
| LVYDQELLGSPDKSEAA LR       | Q8R404 | 0.00060864 | N-term +28.03 Da, K +28.03 Da,              | 3742.151611 | 3 | 720.7199707 | 720.7230801 |
| SLPPHQVPLPSLSPTMQAGTIAR    | Q8BMF4 | 0.00134168 | N-term +28.03 Da, K +28.03 Da,              | 3743.611816 | 4 | 646.8699951 | 646.3676327 |
| AYDILDQYR                  | P10649 | 0.00988593 | N-term +28.03 Da,                           | 3744.044434 | 2 | 592.8027344 | 592.8009487 |
| EANIHQFIDSLPDKYNTR         | P06795 | 0.03582853 | N-term +28.03 Da, K +28.03 Da,              | 3745.589111 | 3 | 740.3900146 | 739.7148074 |
| ASGANFQYIITEKKGKNSVGLIQLNR | Q8BH95 | 0          | N-term +28.03 Da, K +28.03 Da,              | 3749.244873 | 4 | 763.1900024 | 762.9355688 |
| TVEQIENLR                  | Q8QZS1 | 0.001766   | N-term +28.03 Da,                           | 3749.698975 | 2 | 622.3599854 | 621.8562554 |
| KFLPLFDR                   | Q64433 | 0.00772798 | N-term +28.03 Da,                           | 3749.958008 | 3 | 364.5599976 | 364.5585783 |
| NKELDPVQKLFVDKIR           | P97450 | 0.01396848 | N-term +28.03 Da, K +28.03 Da,              | 3752.108398 | 4 | 514.3148193 | 514.3147655 |
| GEWEPPIQNPEYKGEWKPR        | P14211 | 0          | N-term +28.03 Da, K +28.03 Da,              | 3759.318115 | 4 | 631.5800171 | 631.5812281 |
| APAGILNGKLVSAQIR           | Q922D8 | 0.00063452 | N-term +28.03 Da, K +28.03 Da,              | 3760.645508 | 3 | 555.6699829 | 555.3454372 |
| TAWEEKLSKYEFSEIR           | Q9CYA0 | 0.01989026 | N-term +28.03 Da, K +28.03 Da,              | 3762.503906 | 4 | 551.2999878 | 551.0426757 |
| GEWEPPIQNPEYKGEWKPR        | P14211 | 0.01079672 | N-term +28.03 Da, K +28.03 Da,              | 3762.874512 | 3 | 841.7700195 | 841.7725453 |
| YIDVPVPEVQSR               | Q99LC3 | 0.0080429  | N-term +28.03 Da,                           | 3762.970947 | 2 | 715.8900146 | 715.3879201 |
| GEWEPPIQNPEYKGEWKPR        | P14211 | 0.01985621 | N-term +28.03 Da, K +28.03 Da,              | 3765.500977 | 3 | 842.4299927 | 841.7725453 |
| DVYKIGGIGTVPVGR            | P10126 | 0          | N-term +28.03 Da, K +28.03 Da,              | 3765.837646 | 3 | 529.9799805 | 529.6470047 |
| LGTSVESIMATEDR             | Q8C196 | 0          | N-term +28.03 Da,                           | 3767.906982 | 2 | 768.8800049 | 768.8823425 |
| VALEGVGHFFR                | P29391 | 0          | N-term +28.03 Da,                           | 3770.443359 | 3 | 420.5675659 | 420.5680254 |
| IIGGSMDAKGSFPWQAK          | Q61646 | 0          | N-term +28.03 Da, K +28.03 Da,              | 3771.337402 | 3 | 626.338562  | 626.3378428 |
| LVGLFEDTNLCAIHA KR         | P02301 | 0          | N-term +28.03 Da, K +28.03 Da, C +57.02 Da, | 3771.488281 | 4 | 504.0299988 | 504.0292078 |
| TLAVLALR                   | Q8C6B0 | 0.01599716 | N-term +28.03 Da,                           | 3774.158691 | 2 | 442.7999878 | 442.8000221 |
| TLGTEITVEDQLAR             | Q60932 | 0.00250522 | N-term +28.03 Da,                           | 3774.640381 | 2 | 787.4199829 | 787.4252318 |
| DGLNAEGLLR                 | Q64374 | 0.00434268 | N-term +28.03 Da,                           | 3775.035645 | 2 | 543.2999878 | 543.3011157 |
| SLPPHQVPLPSLSPTMQAGTIAR    | Q8BMF4 | 0          | N-term +28.03 Da, K +28.03 Da,              | 3779.489258 | 3 | 861.8200073 | 861.4877514 |
| TFSYLLGR                   | Q61176 | 0.03981043 | N-term +28.03 Da,                           | 3779.710205 | 2 | 492.7795105 | 492.7792871 |
| SLPPHQVPLPSLSPTMQAGTIAR    | Q8BMF4 | 0.02743802 | N-term +28.03 Da, K +28.03 Da,              | 3788.366211 | 4 | 646.3699951 | 646.3676327 |
| SGGMSEEDATLNLNAINR         | Q91Y97 | 0          | N-term +28.03 Da,                           | 3791.665039 | 2 | 960.460022  | 960.4600093 |
| STQAAEDKEEESLHSISNTEAVR    | Q9CQN1 | 0.00098619 | N-term +28.03 Da, K +28.03 Da,              | 3791.767578 | 3 | 901.4500122 | 900.7822761 |



|                             |        |            |                                            |             |   |             |             |
|-----------------------------|--------|------------|--------------------------------------------|-------------|---|-------------|-------------|
| STQAAEDKEEESLHSISNTEAVR     | Q9CQN1 | 0.00060569 | N-term +28.03 Da, K +28.03 Da,             | 3792.02832  | 4 | 675.8400269 | 675.8385262 |
| GTTITSVLPKPAVSR             | Q8C196 | 0          | N-term +28.03 Da, K +28.03 Da,             | 3792.609131 | 3 | 590.0300293 | 589.6961359 |
| DDEVVDVGTVEEDLGKSR          | P08113 | 0          | N-term +28.03 Da, K +28.03 Da,             | 3798.569824 | 3 | 679.3200073 | 678.6551722 |
| STQAAEDKEEESLHSISNTEAVR     | Q9CQN1 | 0          | N-term +28.03 Da, K +28.03 Da,             | 3799.253174 | 3 | 900.7800293 | 900.7822761 |
| MKDVP AFLQQSQSSGPGQAAVWHR   | Q9WVJ2 | 0          | N-term +28.03 Da, K +28.03 Da,             | 3802.145996 | 4 | 671.3499756 | 671.0958768 |
| MKDVP AFLQQSQSSGPGQAAVWHR   | Q9WVJ2 | 0          | N-term +28.03 Da, K +28.03 Da,             | 3803.569092 | 3 | 894.789978  | 894.4587436 |
| LTVSPESVLKVAR               | P55264 | 0          | N-term +28.03 Da, K +28.03 Da,             | 3803.913086 | 3 | 485.9700012 | 485.636217  |
| ASLEAAIADAEQR               | P11679 | 0          | N-term +28.03 Da,                          | 3807.14917  | 2 | 687.3599854 | 686.8569845 |
| LFCEDKSSHLVFINSR            | Q8K4Q8 | 0.03188029 | N-term +28.03 Da, K +28.03 Da,C +57.02 Da, | 3808.695557 | 4 | 503.0100098 | 502.7634742 |
| VQENVYDEFVER                | P47738 | 0.04610592 | N-term +28.03 Da,                          | 3810.216064 | 2 | 778.3800049 | 777.8753745 |
| TAESGELHGLTTDEKFEVGVYR      | P07309 | 0          | N-term +28.03 Da, K +28.03 Da,             | 3810.9375   | 4 | 624.8200073 | 624.3169633 |
| VSLHLGVTSPVLR               | Q89023 | 0.00250941 | N-term +28.03 Da,                          | 3811.112793 | 3 | 469.6199951 | 469.2890399 |
| VGVPTETGALTLNR              | Q8BWT1 | 0          | N-term +28.03 Da,                          | 3813.251465 | 2 | 727.9000244 | 728.4119267 |
| GQKVLDSGAPIKIPVGPETLGR      | P56480 | 0          | N-term +28.03 Da, K +28.03 Da,             | 3814.758545 | 4 | 579.8400269 | 579.8466959 |
| NEEEVEKRFEGR                | Q08943 | 0.01070111 | N-term +28.03 Da, K +28.03 Da,             | 3815.872314 | 2 | 789.9000244 | 789.3995481 |
| DDEVVDVGTVEEDLGKSR          | P08113 | 0          | N-term +28.03 Da, K +28.03 Da,             | 3815.957031 | 3 | 678.6500244 | 678.6551722 |
| FIIDDKGILR                  | P35700 | 0.00914983 | N-term +28.03 Da, K +28.03 Da,             | 3816.26001  | 3 | 416.2600098 | 415.9236978 |
| YGLHAFVVPPIR                | Q9R0H0 | 0.00062539 | N-term +28.03 Da,                          | 3816.961426 | 3 | 433.9230652 | 433.9239205 |
| ANTVLSGGTMMYPGIADR          | P60710 | 0.00173461 | N-term +28.03 Da,                          | 3817.301758 | 2 | 926.4699707 | 926.4671053 |
| SLGVAAEGLPDQYADGEAAR        | Q9QXF8 | 0          | N-term +28.03 Da,                          | 3819.035889 | 2 | 1009.490234 | 1009.494907 |
| LATALQKLEEAKEKADESER        | P21107 | 0.00099552 | N-term +28.03 Da, K +28.03 Da,             | 3819.217285 | 4 | 572.5599976 | 572.3101438 |
| DDEVVDVGTVEEDLGKSR          | P08113 | 0.00772201 | N-term +28.03 Da, K +28.03 Da,             | 3819.325928 | 2 | 1017.97998  | 1017.47912  |
| SLPPHQKVP LPSLSPTMQAGTIAR   | Q8BMF4 | 0.00055991 | N-term +28.03 Da, K +28.03 Da,             | 3819.816162 | 4 | 646.6199951 | 646.3676327 |
| AWGVTKGAAELMQQKEATTEQQLR    | O35490 | 0.00102775 | N-term +28.03 Da, K +28.03 Da,             | 3821.247559 | 4 | 690.6199951 | 690.3693672 |
| AAHKQEPGLGFSFELTEQQKEFQATAR | P45952 | 0          | N-term +28.03 Da, K +28.03 Da,             | 3822.155762 | 4 | 784.1599731 | 783.9082799 |
| ASKPTLNEVVIVSAIR            | Q8QZT1 | 0.00053937 | N-term +28.03 Da, K +28.03 Da,             | 3829.623779 | 3 | 585.0200195 | 585.0242526 |
| LATALQKLEEAKEKADESER        | P21107 | 0          | N-term +28.03 Da, K +28.03 Da,             | 3829.875977 | 3 | 763.0800171 | 762.7444329 |
| ADTIGYPMIR                  | Q8C196 | 0.00141576 | N-term +28.03 Da,                          | 3829.96582  | 2 | 632.8400269 | 632.3419263 |
| MSTGTFVVSQPLNYR             | Q9JLJ2 | 0          | N-term +28.03 Da,                          | 3833.428711 | 2 | 864.4400024 | 864.4429012 |
| ASKPTLNEVVIVSAIR            | Q8QZT1 | 0.00062228 | N-term +28.03 Da, K +28.03 Da,             | 3836.718018 | 2 | 877.0300293 | 877.0327407 |
| VLESTMVCVDNSEYMR            | O35226 | 0          | N-term +28.03 Da, C +57.02 Da,             | 3838.525391 | 2 | 981.4400024 | 980.9442916 |
| KALDIAENEMPGLMR             | P50247 | 0.00098717 | N-term +28.03 Da,                          | 3839.455078 | 3 | 582.6400146 | 581.9759166 |
| VVAGDVPFQLR                 | F7BJK1 | 0.01100917 | N-term +28.03 Da,                          | 3840.55249  | 2 | 614.8599854 | 614.8560579 |
| DQGGAPLAGTNKETTIQGLDGLSER   | Q91Y97 | 0          | N-term +28.03 Da, K +28.03 Da,             | 3842.001709 | 3 | 862.4400024 | 862.111956  |
| VLESTMVCVDNSEYMR            | O35226 | 0          | N-term +28.03 Da, C +57.02 Da,             | 3843.798828 | 2 | 980.9400024 | 980.9442916 |
| DQGGAPLAGTNKETTIQGLDGLSER   | Q91Y97 | 0          | N-term +28.03 Da, K +28.03 Da,             | 3844.833496 | 3 | 862.7800293 | 862.111956  |
| WDDLPEVVR                   | Q80XN0 | 0.0013624  | N-term +28.03 Da,                          | 3848.667969 | 2 | 578.7999878 | 578.8034912 |
| HSILPVD D DINGLNEEQKQLR     | Q9JHI5 | 0          | N-term +28.03 Da, K +28.03 Da,             | 3853.452393 | 3 | 831.0999756 | 830.438003  |
| SLPPHQKVP LPSLSPTMQAGTIAR   | Q8BMF4 | 0.0108088  | N-term +28.03 Da, K +28.03 Da,             | 3853.70166  | 4 | 646.6199951 | 646.3676327 |
| MKPLVVFLGGPGAGKTQCAR        | Q9DBP5 | 0          | N-term +28.03 Da, K +28.03 Da,C +57.02 Da, | 3853.79126  | 4 | 582.5800171 | 582.582716  |

|                        |        |            |                                            |             |   |             |             |
|------------------------|--------|------------|--------------------------------------------|-------------|---|-------------|-------------|
| PMQTGIKAVDSLPIGR       | Q03265 | 0          | N-term +28.03 Da, K +28.03 Da,             | 3853.880615 | 3 | 614.0200195 | 613.3571259 |
| HSILPVDDINGLNEEQKQLR   | Q9JHI5 | 0          | N-term +28.03 Da, K +28.03 Da,             | 3856.107666 | 4 | 623.5800171 | 623.0803213 |
| IVGDQISFADYR           | F6RWRS | 0.04532666 | N-term +28.03 Da,                          | 3860.927002 | 2 | 706.3626099 | 706.364445  |
| SPEEFTEIMNQR           | P54869 | 0.00056306 | N-term +28.03 Da,                          | 3861.636719 | 2 | 755.3599854 | 754.8561274 |
| TIVYFPVR               | P19157 | 0.04525593 | N-term +28.03 Da,                          | 3864.203369 | 2 | 511.8099976 | 511.8053047 |
| VHLTDAEKSAVSLWAK       | P02089 | 0          | N-term +28.03 Da, K +28.03 Da,C +57.02 Da, | 3864.693115 | 3 | 667.3499756 | 667.0275572 |
| YLGTPPEPDIIVGLDSGHIR   | P52196 | 0          | N-term +28.03 Da,                          | 3871.74585  | 3 | 699.7000122 | 699.0321363 |
| AVVTVPAYFNDSQR         | P63017 | 0.01899827 | N-term +28.03 Da,                          | 3873.52832  | 2 | 798.4099731 | 797.9148337 |
| ASNQPEQFDWAINDR        | Q92511 | 0          | N-term +28.03 Da,                          | 3877.952881 | 2 | 910.4199829 | 909.9239192 |
| LQDVYKIGGIGTVPVGR      | P10126 | 0.00400481 | N-term +28.03 Da, K +28.03 Da,             | 3878.04834  | 3 | 610.3599854 | 610.0278856 |
| TVSLHLGVTPSVLR         | O89023 | 0.00059277 | N-term +28.03 Da,                          | 3881.189209 | 3 | 502.9694824 | 502.9715997 |
| FDITADDEPLGR           | P17742 | 0.00401445 | N-term +28.03 Da,                          | 3883.844971 | 2 | 689.3400269 | 688.8382604 |
| HSILPVDDINGLNEEQKQLR   | Q9JHI5 | 0          | N-term +28.03 Da, K +28.03 Da,             | 3884.7229   | 3 | 830.7600098 | 830.438003  |
| DDEVVDVGTVEEDLGKSR     | P08113 | 0          | N-term +28.03 Da, K +28.03 Da,             | 3885.862305 | 3 | 678.6599731 | 678.6551722 |
| ASNQPEQFDWAINDR        | Q92511 | 0.0474713  | N-term +28.03 Da,                          | 3887.192871 | 2 | 910.9299927 | 909.9239192 |
| DVLPDDTVSTLYNRFLFPEGIK | Q8R0Y6 | 0.03832753 | N-term +28.03 Da, K +28.03 Da,             | 3887.594727 | 3 | 866.1199951 | 865.7950161 |
| ASKPTLNEVVIVSAIR       | Q8QZT1 | 0.00136799 | N-term +28.03 Da, K +28.03 Da,             | 3888.732422 | 3 | 585.0232544 | 585.0242526 |
| HVLSLSFPIR             | P26443 | 0.0017316  | N-term +28.03 Da,                          | 3890.289063 | 2 | 598.8599854 | 598.8611429 |
| SFVNDIFER              | P10853 | 0.00143609 | N-term +28.03 Da,                          | 3892.324219 | 2 | 577.7947998 | 577.7956662 |
| WLQEEKVPAIYGVDR        | Q8C196 | 0.00136612 | N-term +28.03 Da, K +28.03 Da,             | 3892.417236 | 3 | 654.3599854 | 654.0228006 |
| SVDIPLDKTVVVKDVFR      | P61358 | 0.02742895 | N-term +28.03 Da, K +28.03 Da,             | 3894.01709  | 4 | 508.2999878 | 508.0477607 |
| TTITSVLPKALVASR        | Q8C196 | 0.0010352  | N-term +28.03 Da, K +28.03 Da,             | 3895.344971 | 3 | 570.6900024 | 570.6889812 |
| GIYPAVDPLDSTSR         | P56480 | 0.00056915 | N-term +28.03 Da,                          | 3897.527832 | 2 | 760.3900146 | 759.8935671 |
| DDEVVDVGTVEEDLGKSR     | P08113 | 0          | N-term +28.03 Da, K +28.03 Da,             | 3900.759033 | 3 | 678.9899902 | 678.6551722 |
| AQTLNSNAEFQMLR         | Q8C196 | 0          | N-term +28.03 Da,                          | 3905.422363 | 2 | 768.8900146 | 768.8955865 |
| SGAPLRPATVLGTMEMGR     | Q8CG76 | 0.031627   | N-term +28.03 Da,                          | 3909.199463 | 3 | 625.3300171 | 624.6658537 |
| ASKPTLNEVVIVSAIR       | Q8QZT1 | 0          | N-term +28.03 Da, K +28.03 Da,             | 3913.706787 | 2 | 877.0320435 | 877.0327407 |
| FDITADDEPLGR           | P17742 | 0          | N-term +28.03 Da,                          | 3915.282471 | 2 | 688.8374634 | 688.8382604 |
| YFQEPGVAEAELEKNMSR     | P34914 | 0          | N-term +28.03 Da, K +28.03 Da,             | 3916.339844 | 3 | 719.0200195 | 718.6893819 |
| TITNTMTLGDIVYKR        | P12710 | 0.00052411 | N-term +28.03 Da, K +28.03 Da,             | 3916.596924 | 3 | 595         | 594.6658481 |
| DLPNWWDWR              | Q9WUU7 | 0.00134288 | N-term +28.03 Da, K +28.03 Da,             | 3916.846191 | 3 | 429.5599976 | 429.2277804 |
| LAAAGVEFEKFLKTR        | P30115 | 0          | N-term +28.03 Da, K +28.03 Da,             | 3918.538818 | 4 | 474.2799988 | 474.0265623 |
| ASKPTLNEVVIVSAIR       | Q8QZT1 | 0.00056117 | N-term +28.03 Da, K +28.03 Da,             | 3919.352783 | 3 | 585.0237427 | 585.0242526 |
| AVSCLWGKVNDSVEVGGEALGR | P02088 | 0          | N-term +28.03 Da, K +28.03 Da,C +57.02 Da, | 3919.451172 | 3 | 754.3900146 | 754.0512023 |
| TITNTMTLGDIVYKR        | P12710 | 0          | N-term +28.03 Da, K +28.03 Da,             | 3919.869629 | 3 | 594.6599731 | 594.6658481 |
| EPEGKEVWDYVTVR         | Q920A5 | 0          | N-term +28.03 Da, K +28.03 Da,             | 3919.96582  | 2 | 881.9500122 | 881.9541564 |
| FVDEADAFLR             | Q92511 | 0.03291384 | N-term +28.03 Da,                          | 3920.13208  | 2 | 605.8079224 | 605.8087737 |
| SDMYLHPVAMFR           | P15105 | 0.00142315 | N-term +28.03 Da,                          | 3923.148926 | 3 | 499.25      | 498.9125873 |
| IDLPETF DAR            | P10605 | 0.00981873 | N-term +28.03 Da,                          | 3924.765137 | 2 | 602.8099976 | 602.8140563 |
| FYIGEIIIGKR            | Q9CPQ8 | 0.00325071 | N-term +28.03 Da, K +28.03 Da,             | 3927.256348 | 3 | 417.9200134 | 417.9201761 |

|                                |        |            |                                |             |   |             |             |
|--------------------------------|--------|------------|--------------------------------|-------------|---|-------------|-------------|
| TITNTMTLGDIVYKR                | P12710 | 0          | N-term +28.03 Da, K +28.03 Da, | 3932.52002  | 2 | 891.9899902 | 891.4951339 |
| LEEALPDMEEEDDQKAVKDEL          | P09103 | 0.00172265 | N-term +28.03 Da, K +28.03 Da, | 3933.782227 | 3 | 883.0800171 | 882.4177236 |
| DVVVIPAGVPR                    | P08249 | 0.00771605 | N-term +28.03 Da,              | 3934.186035 | 2 | 575.3522949 | 575.3531509 |
| EPEGKEVWDYVTVR                 | Q920A5 | 0          | N-term +28.03 Da, K +28.03 Da, | 3935.847168 | 3 | 588.3041382 | 588.3051964 |
| ALDLDPskTNVSGGAIAlGHPLGGSGSR   | Q8BWT1 | 0.03204921 | N-term +28.03 Da, K +28.03 Da, | 3937.538818 | 4 | 677.1199951 | 676.6160655 |
| IYEKQPTEAPQVTGPIEVPVVR         | Q9DCT8 | 0          | N-term +28.03 Da, K +28.03 Da, | 3940.004883 | 3 | 836.4699707 | 836.1353724 |
| IGAKLVQDVANNTNEEAGDGTtATVLAR   | P63038 | 0          | N-term +28.03 Da, K +28.03 Da, | 3940.794678 | 3 | 996.1900024 | 995.8544347 |
| SGNLLNDMTPPVNPSR               | P35564 | 0.0238335  | N-term +28.03 Da,              | 3942.796387 | 2 | 871.4500122 | 870.4408902 |
| ASKPTLNEVVIVSAIR               | Q8QZT1 | 0          | N-term +28.03 Da, K +28.03 Da, | 3944.370361 | 2 | 877.0317383 | 877.0327407 |
| IKLDQGGAPLAGTnkETTlQGLDGLSER   | Q91Y97 | 0          | N-term +28.03 Da, K +28.03 Da, | 3944.786133 | 4 | 742.6599731 | 742.4093842 |
| SSAPLAEDIDPELAR                | Q99LI8 | 0.0043755  | N-term +28.03 Da,              | 3947.125732 | 2 | 807.4199829 | 806.4148642 |
| YFQEPGVAEAELEKNMSR             | P34914 | 0          | N-term +28.03 Da, K +28.03 Da, | 3947.511475 | 3 | 719.0200195 | 718.6893819 |
| NLYKGLEAFR                     | P54869 | 0.00096993 | N-term +28.03 Da, K +28.03 Da, | 3947.934814 | 3 | 423.2394714 | 422.9116808 |
| FNKPDIDAWELR                   | P12787 | 0          | N-term +28.03 Da, K +28.03 Da, | 3948.240479 | 3 | 520.9500122 | 520.6120716 |
| ASKPTLNEVVIVSAIR               | Q8QZT1 | 0.00052826 | N-term +28.03 Da, K +28.03 Da, | 3949.687988 | 3 | 585.0236816 | 585.0242526 |
| NLYKGLEAFR                     | P54869 | 0.01564723 | N-term +28.03 Da, K +28.03 Da, | 3950.015381 | 3 | 423.2399902 | 422.9116808 |
| VKVLGTSVESIMATEDR              | Q8C196 | 0.02570093 | N-term +28.03 Da, K +28.03 Da, | 3950.449707 | 3 | 631.0100098 | 631.0116845 |
| TITNTMTLGDIVYKR                | P12710 | 0          | N-term +28.03 Da, K +28.03 Da, | 3950.924561 | 3 | 595         | 594.6658481 |
| TITNTMTLGDIVYKR                | P12710 | 0          | N-term +28.03 Da, K +28.03 Da, | 3951.0625   | 3 | 595.3300171 | 594.6658481 |
| PSYVLSGSAMNVVfSEDEMkR          | Q8C196 | 0          | N-term +28.03 Da, K +28.03 Da, | 3954.83252  | 3 | 802.0499878 | 801.39587   |
| NKELDPVQKLFVDKIR               | P97450 | 0          | N-term +28.03 Da, K +28.03 Da, | 3955.169189 | 4 | 514.5599976 | 514.3147655 |
| IDLPETFDAR                     | P10605 | 0.00098328 | N-term +28.03 Da,              | 3956.312012 | 2 | 602.8129272 | 602.8140563 |
| HSILPVDDdinglNEEQKQLR          | Q9JHI5 | 0.01329501 | N-term +28.03 Da, K +28.03 Da, | 3956.732422 | 3 | 830.7600098 | 830.438003  |
| SSAPLAEDIDPELAR                | Q99LI8 | 0          | N-term +28.03 Da,              | 3958.168457 | 2 | 806.4099731 | 806.4148642 |
| SLFKAFEEEEQALR                 | P49429 | 0          | N-term +28.03 Da, K +28.03 Da, | 3959.599121 | 2 | 812.4400024 | 812.4406843 |
| NKELDPVQKLFVDKIR               | P97450 | 0.00103734 | N-term +28.03 Da, K +28.03 Da, | 3960.35376  | 3 | 686.0800171 | 685.4172618 |
| EDVQETDTSQKdQSPASHEIATnlGDFALR | Q00897 | 0          | N-term +28.03 Da,              | 3961.35791  | 4 | 840.9000244 | 840.4062995 |
| EDVQETDTSQKdQSPASHEIATnlGDFALR | Q00897 | 0          | N-term +28.03 Da,              | 3964.201904 | 4 | 840.6599731 | 840.4062995 |
| DSDILGKYVD                     | Q64433 | 0.01329978 | N-term +28.03 Da, K +28.03 Da, | 3964.434814 | 2 | 590.8061523 | 590.8084398 |
| SPWEAFPAYR                     | Q9DCT2 | 0.0077101  | N-term +28.03 Da,              | 3965.740967 | 2 | 626.3096313 | 626.3114832 |
| TAEILELAGNAAR                  | P22752 | 0.00052056 | N-term +28.03 Da,              | 3968.398193 | 2 | 678.8699951 | 678.8777195 |
| EDVQETDTSQKdQSPASHEIATnlGDFALR | Q00897 | 0          | N-term +28.03 Da,              | 3970.11084  | 3 | 1120.869995 | 1120.205974 |
| QILPGDPFDnSSRPQVVAETR          | P58252 | 0.01429082 | N-term +28.03 Da,              | 3975.614258 | 3 | 814.4199829 | 814.4188312 |
| GLTVAEYFR                      | P56480 | 0.00134108 | N-term +28.03 Da,              | 3976.783936 | 2 | 542.289978  | 542.2953016 |
| TVNEIKTYFQGS�PAR               | P52760 | 0          | N-term +28.03 Da, K +28.03 Da, | 3986.185547 | 3 | 681.7000122 | 681.7018387 |
| NKELDPVQKLFVDKIR               | P97450 | 0          | N-term +28.03 Da, K +28.03 Da, | 3986.743408 | 4 | 514.5603638 | 514.3147655 |
| TITNTMTLGDIVYKR                | P12710 | 0          | N-term +28.03 Da, K +28.03 Da, | 3987.685059 | 3 | 595         | 594.6658481 |
| HAPFETDISTLTR                  | Q9QXD6 | 0.00211149 | N-term +28.03 Da,              | 3990.582764 | 2 | 758.3900146 | 758.3937341 |
| NKELDPVQKLFVDKIR               | P97450 | 0.00097418 | N-term +28.03 Da, K +28.03 Da, | 3991.395996 | 3 | 685.744751  | 685.4172618 |
| VQEEAQCLVEELR                  | P56656 | 0          | N-term +28.03 Da, C +57.02 Da, | 3992.035645 | 2 | 815.9099731 | 815.9088916 |

|                         |         |            |                                |             |   |             |             |
|-------------------------|---------|------------|--------------------------------|-------------|---|-------------|-------------|
| ASKPTLNEVVIVSAIR        | Q8QZT1  | 0.00102987 | N-term +28.03 Da, K +28.03 Da, | 3992.997803 | 3 | 585.6900024 | 585.0242526 |
| ANLEKAQSELSGAADEAAR     | Q9D3D9  | 0          | N-term +28.03 Da, K +28.03 Da, | 3993.172119 | 2 | 993.4899902 | 994.0081811 |
| AGVPTVSFSELR            | E9PY03  | 0.00141044 | N-term +28.03 Da,              | 3994.512695 | 2 | 646.3599854 | 645.8562554 |
| TPVAWPSQEGQNPSLSSIR     | Q8C196  | 0          | N-term +28.03 Da,              | 3995.448975 | 2 | 1042.030029 | 1041.534366 |
| SFIKQYLEKQQLLR          | Q9JIX8  | 0.00061881 | N-term +28.03 Da, K +28.03 Da, | 3996.341797 | 3 | 670.0599976 | 669.7260954 |
| ANLEKAQSELSGAADEAAR     | Q9D3D9  | 0          | N-term +28.03 Da, K +28.03 Da, | 3996.448242 | 2 | 994         | 994.0081811 |
| IQEITEQLDITTSYEYEKELNER | P63038  | 0          | N-term +28.03 Da, K +28.03 Da, | 3997.966797 | 4 | 724.6300049 | 724.1314804 |
| TPVAWPSQEGQNPSLSSIR     | Q8C196  | 0          | N-term +28.03 Da,              | 3999.730469 | 2 | 1041.530029 | 1041.534366 |
| GVLHLESELAQTR           | P05784  | 0.00140911 | N-term +28.03 Da,              | 4003.438232 | 2 | 797.4500122 | 797.4515833 |
| EPSLDYMTVKIPR           | Q8C196  | 0.00135931 | N-term +28.03 Da, K +28.03 Da, | 4005.063232 | 3 | 535.960022  | 535.628734  |
| DTIGYPMIR               | Q8C196  | 0.01263994 | N-term +28.03 Da,              | 4005.173828 | 2 | 596.3099976 | 596.8233692 |
| TPVAWPSQEGQNPSLSSIR     | Q8C196  | 0.00054171 | N-term +28.03 Da,              | 4006.997314 | 3 | 694.6900024 | 694.6920026 |
| EAHYNKNMQFLFNRR         | Q68FG1  | 0.01659605 | N-term +28.03 Da, K +28.03 Da, | 4009.642578 | 3 | 708.3599854 | 708.3704286 |
| FPALTPEQKELSEIAQR       | Q91Y97  | 0          | N-term +28.03 Da, K +28.03 Da, | 4010.341797 | 4 | 543.5599976 | 543.0624053 |
| ADVVDWIR                | P21981  | 0.01270417 | N-term +28.03 Da,              | 4010.421631 | 2 | 501.269989  | 501.2743691 |
| LCAATATILDKPEDR         | O35215  | 0          | N-term +28.03 Da, C +57.02 Da, | 4011.03418  | 3 | 576.9699707 | 577.309953  |
| EPSLDYMTVKIPR           | Q8C196  | 0          | N-term +28.03 Da, K +28.03 Da, | 4011.331787 | 3 | 535.6300049 | 535.628734  |
| SLFDKDGDTITTKELGTVMR    | P62204  | 0          | N-term +28.03 Da, K +28.03 Da, | 4013.48877  | 4 | 593.3200073 | 592.8161703 |
| FSDVYQEMPAQLR           | P50136  | 0          | N-term +28.03 Da,              | 4015.487061 | 2 | 806.9000244 | 806.3954195 |
| SLFDKDGDTITTKELGTVMR    | P62204  | 0          | N-term +28.03 Da, K +28.03 Da, | 4017.192871 | 4 | 592.8200073 | 592.8161703 |
| SLFDKDGDTITTKELGTVMR    | P62204  | 0.03349436 | N-term +28.03 Da, K +28.03 Da, | 4017.476318 | 3 | 790.4199829 | 790.0858015 |
| SLFDKDGDTITTKELGTVMR    | P62204  | 0.00101368 | N-term +28.03 Da, K +28.03 Da, | 4018.652588 | 3 | 790.75      | 790.0858015 |
| GFGDLKTPAGL             | O70251  | 0.00142993 | N-term +28.03 Da, K +28.03 Da, | 4019.133301 | 2 | 566.3237915 | 566.3240593 |
| DDKDYFLFR               | Q64433  | 0.00212675 | N-term +28.03 Da, K +28.03 Da, | 4019.615723 | 3 | 425.5499878 | 425.5520413 |
| GSDLDAATQQLLSR          | Q03265  | 0          | N-term +28.03 Da,              | 4019.72168  | 2 | 751.8900146 | 751.8940986 |
| LKLPAVVADLR             | Q9DCW4  | 0.00054765 | N-term +28.03 Da, K +28.03 Da, | 4019.907471 | 3 | 451.2937012 | 451.2939023 |
| AGPELLDSNIR             | Q99KI3  | 0          | N-term +28.03 Da,              | 4020.026367 | 2 | 663.3800049 | 663.3748125 |
| DAFDYDLQTGQISNR         | Q64374  | 0          | N-term +28.03 Da,              | 4024.37207  | 2 | 885.9199829 | 885.9183027 |
| GISDVVKVTLTPEEAR        | P06151  | 0.00060314 | N-term +28.03 Da, K +28.03 Da, | 4024.491699 | 2 | 950.0300293 | 950.0253107 |
| AIMEYLEETRPIPR          | Q9WVVL0 | 0.00062305 | N-term +28.03 Da,              | 4025.682861 | 3 | 582.6468506 | 582.6466764 |
| SPLKLVSSVSDLPKR         | P54869  | 0          | N-term +28.03 Da, K +28.03 Da, | 4025.921387 | 4 | 460.7799988 | 460.5292036 |
| VLSGSAMNVVSEDEMKR       | Q8C196  | 0          | N-term +28.03 Da, K +28.03 Da, | 4027.950928 | 3 | 686.0100098 | 685.6798291 |
| SPLKLVSSVSDLPKR         | P54869  | 0          | N-term +28.03 Da, K +28.03 Da, | 4029.784668 | 4 | 460.5299988 | 460.5292036 |
| GVKVLGTSVESIMATEDR      | Q8C196  | 0          | N-term +28.03 Da, K +28.03 Da, | 4031.116943 | 3 | 650.0200195 | 650.0188392 |
| IGSSMKSVEVMAIGR         | Q8C196  | 0          | N-term +28.03 Da, K +28.03 Da, | 4031.324219 | 3 | 559.6300049 | 559.9723949 |
| VTGWKEIEYEVVR           | Q8C196  | 0          | N-term +28.03 Da, K +28.03 Da, | 4034.159668 | 3 | 555.3049927 | 555.3066484 |
| SHTSAAAGTMAGVPTVSFSELR  | E9PY03  | 0          | N-term +28.03 Da,              | 4034.241699 | 3 | 736.039978  | 735.7038026 |
| THILLFLPK               | P09103  | 0.00325866 | N-term +28.03 Da, K +28.03 Da, | 4035.914307 | 3 | 379.9200134 | 379.9179951 |
| FALIGTQANVTKELER        | Q9DBC0  | 0.01130974 | N-term +28.03 Da, K +28.03 Da, | 4037.640625 | 3 | 616.3499756 | 616.0192789 |
| NKELDPVQKLFVDKIR        | P97450  | 0.00100705 | N-term +28.03 Da, K +28.03 Da, | 4037.999268 | 4 | 514.5599976 | 514.3147655 |

|                                |        |            |                                             |             |   |             |             |
|--------------------------------|--------|------------|---------------------------------------------|-------------|---|-------------|-------------|
| MSTGTFVVSQPLNYR                | Q9JLJ2 | 0.00175979 | N-term +28.03 Da,                           | 4043.021973 | 2 | 864.4400024 | 864.4429012 |
| FANQSEKIDILLRPELEELR           | Q9DCN2 | 0.00058928 | N-term +28.03 Da, K +28.03 Da,              | 4044.445801 | 4 | 590.0800171 | 589.8272321 |
| GAYKYIQELWR                    | Q9CZM2 | 0          | N-term +28.03 Da, K +28.03 Da,              | 4048.569336 | 3 | 494.9400024 | 494.9416402 |
| GFGDLKTPAGL                    | O70251 | 0.00433754 | N-term +28.03 Da, K +28.03 Da,              | 4050.274902 | 2 | 566.322937  | 566.3240593 |
| VPPVQVSPLIKFGR                 | Q06185 | 0          | N-term +28.03 Da,                           | 4050.703369 | 3 | 531.6699829 | 531.6677398 |
| VTSVQVFK                       | Q99LF7 | 0.02979699 | N-term +28.03 Da, K +28.03 Da,              | 4052.251953 | 2 | 482.2967834 | 482.2973126 |
| VLGTSVESIMATEDR                | Q8C196 | 0          | N-term +28.03 Da,                           | 4055.121094 | 2 | 818.4099731 | 818.4165497 |
| AVRPLQLLGTCAELCR               | Q8BTE6 | 0          | N-term +28.03 Da, C +57.02 Da,              | 4057.679443 | 3 | 629.0100098 | 629.0097317 |
| ASEAIKGAVVGIDLGTNSCVAVMEGKQAK  | P38647 | 0          | N-term +28.03 Da, K +28.03 Da, C +57.02 Da, | 4058.010498 | 4 | 780.4199829 | 779.9228072 |
| KALEQLQEQYFDGNLKR              | P27773 | 0.01958763 | N-term +28.03 Da, K +28.03 Da,              | 4058.108643 | 3 | 728.3900146 | 728.4001598 |
| LHTKGALPLDVTVFYKVIK            | P57759 | 0          | N-term +28.03 Da, K +28.03 Da,              | 4059.398438 | 4 | 589.6099854 | 589.1118979 |
| PAPATTFAHLDTTVLSR              | P56480 | 0.01266739 | N-term +28.03 Da,                           | 4061.043213 | 3 | 633         | 633.0107835 |
| ADPHLCDFLESHYLDKEVK            | Q9CPX4 | 0          | N-term +28.03 Da, K +28.03 Da, C +57.02 Da, | 4062.717041 | 4 | 601.0499878 | 600.8030627 |
| GLLSQGSPLSWEETQR               | P97494 | 0          | N-term +28.03 Da,                           | 4062.820557 | 2 | 909.4699707 | 908.4654199 |
| SPVLLNDPVLCDVAKR               | Q9JLI0 | 0          | N-term +28.03 Da, K +28.03 Da, C +57.02 Da, | 4063.949219 | 3 | 618.0169067 | 618.0168808 |
| KTITSQWKEEDATLSSPAVVMPTMGR     | Q9EQ20 | 0.0110011  | N-term +28.03 Da, K +28.03 Da,              | 4064.267578 | 4 | 737.8900146 | 737.6371465 |
| FSVSDLPKLPK                    | Q9EST5 | 0.00133988 | N-term +28.03 Da, K +28.03 Da,              | 4064.799316 | 3 | 439.269989  | 438.9392366 |
| EKDGETFQLMGLYGR                | B5X0G2 | 0.00054437 | N-term +28.03 Da, K +28.03 Da,              | 4070.737793 | 3 | 600.6373901 | 600.6380697 |
| SVQ3IVPALEIANAHR               | P63038 | 0.00059595 | N-term +28.03 Da,                           | 4072.054199 | 3 | 578.6599731 | 578.3283351 |
| LRMRTLARALQELR                 | O08574 | 0.00176835 | N-term +28.03 Da,                           | 4073.658691 | 3 | 585.3499756 | 585.6893208 |
| ASEAIKGAVVGIDLGTNSCVAVMEGKQAK  | P38647 | 0          | N-term +28.03 Da, K +28.03 Da, C +57.02 Da, | 4073.993652 | 3 | 1039.550049 | 1039.561317 |
| KTITSQWKEEDATLSSPAVVMPTMGR     | Q9EQ20 | 0.01428061 | N-term +28.03 Da, K +28.03 Da,              | 4074.379639 | 3 | 983.8400269 | 983.1804365 |
| AVVDVPFGGAKAGVKINPKNYTDNELEKTR | P26443 | 0.00097895 | N-term +28.03 Da, K +28.03 Da,              | 4074.766113 | 4 | 872.2399902 | 871.7448033 |
| FQVTKLFAEAVQKSR                | Q8C196 | 0.04529834 | N-term +28.03 Da, K +28.03 Da,              | 4076.635986 | 3 | 613.0300293 | 612.6962473 |
| TGTEAPDYLATVDVDPKSPQYSQVIHR    | P17563 | 0          | N-term +28.03 Da, K +28.03 Da,              | 4078.195313 | 4 | 762.1400146 | 761.6397381 |
| EKDGETFQLMGLYGR                | B5X0G2 | 0          | N-term +28.03 Da, K +28.03 Da,              | 4078.392822 | 2 | 900.453125  | 900.4534663 |
| MSTGTFVVSQPLNYR                | Q9JLJ2 | 0          | N-term +28.03 Da,                           | 4078.792236 | 2 | 864.4400024 | 864.4429012 |
| GIESEIVAGIPR                   | P10605 | 0.02145046 | N-term +28.03 Da,                           | 4079.035889 | 2 | 634.8599854 | 634.8640805 |
| ASQTQGIQQLLQAEKR               | Q9WTT4 | 0          | N-term +28.03 Da, K +28.03 Da,              | 4082.247803 | 2 | 928.0100098 | 928.0234361 |
| SFVNDIFER                      | P10853 | 0.00135014 | N-term +28.03 Da,                           | 4085.13501  | 2 | 577.7943115 | 577.7956662 |
| GEDFSLNDALDSSNSMQTVQKTTTR      | P05784 | 0          | N-term +28.03 Da,                           | 4087.325928 | 3 | 935.1099854 | 934.4467877 |
| NKELDPVQKLFVDKIR               | P97450 | 0.00055494 | N-term +28.03 Da, K +28.03 Da,              | 4088.352539 | 4 | 514.8099976 | 514.3147655 |
| VPPVQVSPLIKFGR                 | Q06185 | 0          | N-term +28.03 Da,                           | 4089.937744 | 3 | 531.6699829 | 531.6677398 |
| NKELDPVQKLFVDKIR               | P97450 | 0.00102249 | N-term +28.03 Da, K +28.03 Da,              | 4095.223877 | 3 | 685.7445068 | 685.4172618 |
| SRPDAWGVTKGAAELMQKEATTEQQLR    | O35490 | 0          | N-term +28.03 Da, K +28.03 Da,              | 4095.507324 | 4 | 804.4199829 | 804.1725794 |
| ADLVQDLISICTR                  | Q8BHC0 | 0.00133929 | N-term +28.03 Da, C +57.02 Da,              | 4095.939697 | 2 | 753.8900146 | 753.385052  |
| GGLVPLHNACSYGHYEVTELLLK        | Q6PFX9 | 0.00433583 | N-term +28.03 Da, K +28.03 Da, C +57.02 Da, | 4096.046875 | 3 | 876.1300049 | 876.128112  |
| DGLNAEGLLR                     | Q64374 | 0.00362465 | N-term +28.03 Da,                           | 4097.037109 | 2 | 543.2999878 | 543.3011157 |
| TGSGDPKEEEEEELVDPLTTVR         | P99028 | 0          | N-term +28.03 Da, K +28.03 Da,              | 4099.129883 | 3 | 830.0800171 | 829.4096679 |
| GVVSEDLPPLNISR                 | P07901 | 0          | N-term +28.03 Da,                           | 4100.99707  | 2 | 771.4099731 | 771.4121242 |

|                                |        |            |                                            |             |   |             |             |
|--------------------------------|--------|------------|--------------------------------------------|-------------|---|-------------|-------------|
| PFVELETNLPASR                  | O35215 | 0          | N-term +28.03 Da,                          | 4101.420898 | 2 | 750.9000244 | 750.9064771 |
| GLTGAVFAQDKAIVQEATR            | Q8CHT0 | 0          | N-term +28.03 Da,                          | 4101.605469 | 3 | 678.0499878 | 677.7126264 |
| EEEAQLDGLNASQIR                | P08113 | 0          | N-term +28.03 Da,                          | 4103.487305 | 2 | 907.4799805 | 907.4681599 |
| NKELDPVQKLFVDKIR               | P97450 | 0          | N-term +28.03 Da, K +28.03 Da,             | 4104.764648 | 3 | 685.0800171 | 685.4172618 |
| GLTGAVFAQDKAIVQEATR            | Q8CHT0 | 0          | N-term +28.03 Da,                          | 4104.847656 | 3 | 677.710022  | 677.7126264 |
| TGSGDPKEEEEEELVDPLTTVR         | P99028 | 0          | N-term +28.03 Da, K +28.03 Da,             | 4105.072266 | 2 | 1244.609985 | 1243.610864 |
| TKVVLDDKDYFLFR                 | Q64433 | 0          | N-term +28.03 Da, K +28.03 Da,             | 4105.260254 | 4 | 461.769989  | 461.514559  |
| NKELDPVQKLFVDKIR               | P97450 | 0          | N-term +28.03 Da, K +28.03 Da,             | 4106.957031 | 4 | 514.0599976 | 514.3147655 |
| SDVLELTDENFESR                 | P27773 | 0          | N-term +28.03 Da,                          | 4107.121094 | 2 | 841.3966675 | 841.3994117 |
| APAQTLNAEFQMLR                 | Q8C196 | 0.03131115 | N-term +28.03 Da,                          | 4107.638184 | 2 | 852.9400024 | 852.9405257 |
| TKVVLDDKDYFLFR                 | Q64433 | 0.00103093 | N-term +28.03 Da, K +28.03 Da,             | 4110.287109 | 3 | 615.0167236 | 615.0169866 |
| ASEAIKGAVVGIDLGTNTNSCAVMEGKQAK | P38647 | 0          | N-term +28.03 Da, K +28.03 Da,C +57.02 Da, | 4110.537109 | 4 | 780.1699829 | 779.9228072 |
| TKVVLDDKDYFLFR                 | Q64433 | 0.00365112 | N-term +28.03 Da, K +28.03 Da,             | 4114.108398 | 2 | 922.0200195 | 922.0218416 |
| PFVELETNLPASR                  | O35215 | 0.01426025 | N-term +28.03 Da,                          | 4115.124512 | 3 | 500.9400024 | 500.9400769 |
| TIAQDYGVLKADEGISFR             | P35700 | 0          | N-term +28.03 Da, K +28.03 Da,             | 4115.678711 | 3 | 680.3599854 | 680.3651153 |
| YFAGTMAEETAPAVLER              | Q64374 | 0          | N-term +28.03 Da,                          | 4115.873047 | 2 | 942.460022  | 942.4640313 |
| NKELDPVQKLFVDKIR               | P97450 | 0          | N-term +28.03 Da, K +28.03 Da,             | 4116.840332 | 2 | 1028.11377  | 1027.622255 |
| GSGDPKEEEEEELVDPLTTVR          | P99028 | 0.00624512 | N-term +28.03 Da, K +28.03 Da,             | 4116.918457 | 3 | 796.0599976 | 795.7271082 |
| SGDPKEEEEEELVDPLTTVR           | P99028 | 0.01080074 | N-term +28.03 Da, K +28.03 Da,             | 4117.605469 | 3 | 777.0599976 | 776.7199535 |
| GQVVQFKLSDIGEGIR               | P53395 | 0          | N-term +28.03 Da, K +28.03 Da,             | 4118.563477 | 3 | 601.3400269 | 601.3438739 |
| VPPVQVSPLIKFR                  | Q06185 | 0          | N-term +28.03 Da,                          | 4120.242188 | 3 | 531.6699829 | 531.6677398 |
| SGDPKEEEEEELVDPLTTVR           | P99028 | 0.01988344 | N-term +28.03 Da, K +28.03 Da,             | 4120.32373  | 3 | 777.3900146 | 776.7199535 |
| SLAPQKVIAPWR                   | P16460 | 0          | N-term +28.03 Da, K +28.03 Da,             | 4122.103516 | 3 | 512.3199463 | 512.3204514 |
| PSYVLSGSAMNVVVFSEDEMKR         | Q8C196 | 0.00097466 | N-term +28.03 Da, K +28.03 Da,             | 4127.712891 | 3 | 802.0499878 | 801.39587   |
| TGSGDPKEEEEEELVDPLTTVR         | P99028 | 0          | N-term +28.03 Da, K +28.03 Da,             | 4129.591309 | 3 | 829.7399902 | 829.4096679 |
| LTCNPACLEAFVR                  | Q5EBP3 | 0.03587444 | N-term +28.03 Da, C +57.02 Da,             | 4130.674316 | 2 | 789.4000244 | 789.8919894 |
| SDNQPGVLIQVYEGER               | P16627 | 0          | N-term +28.03 Da,                          | 4131.762207 | 2 | 916.9699707 | 916.4628774 |
| LSGGMSEEDATLNLNAINR            | Q91Y97 | 0          | N-term +28.03 Da,                          | 4132.273926 | 2 | 1017.5      | 1017.002042 |
| TIPVPTAEFQDR                   | P26443 | 0.0009995  | N-term +28.03 Da,                          | 4133.010742 | 2 | 751.4099731 | 750.9064771 |
| NKELDPVQKLFVDKIR               | P97450 | 0.00098135 | N-term +28.03 Da, K +28.03 Da,             | 4135.124512 | 3 | 685.7442017 | 685.4172618 |
| RPSYVLSGSAMNVVVFSEDEMKR        | Q8C196 | 0          | N-term +28.03 Da,                          | 4135.568359 | 4 | 640.8200073 | 640.3239995 |
| NKELDPVQKLFVDKIR               | P97450 | 0          | N-term +28.03 Da, K +28.03 Da,             | 4138.147949 | 4 | 514.5602417 | 514.3147655 |
| DPNPDDPLVPEIAR                 | P61079 | 0          | N-term +28.03 Da,                          | 4140.914063 | 2 | 788.4000244 | 788.4042992 |
| GDPKEEEEEELVDPLTTVR            | P99028 | 0.00983731 | N-term +28.03 Da, K +28.03 Da,             | 4143.77832  | 3 | 748.039978  | 747.7092771 |
| HHHNHRGGGGGQQSASLR             | E9QMD2 | 0.02656925 | N-term +28.03 Da,                          | 4143.881348 | 2 | 960.9799805 | 960.9734658 |
| VAEPVELAQEFR                   | Q9DCT2 | 0.01394351 | N-term +28.03 Da,                          | 4144.058594 | 2 | 708.3800049 | 708.380095  |
| APDQDEIDCLPGLAKQPSFR           | P16675 | 0          | N-term +28.03 Da, K +28.03 Da,C +57.02 Da, | 4147        | 3 | 772.0499878 | 771.7229744 |
| GDPKEEEEEELVDPLTTVR            | P99028 | 0          | N-term +28.03 Da, K +28.03 Da,             | 4147.265137 | 2 | 1121.560059 | 1121.060277 |
| QGSGLGEYLFER                   | P29391 | 0.00058651 | N-term +28.03 Da,                          | 4149.382813 | 2 | 664.3400269 | 663.8380629 |
| FTQAGSEVSALLGR                 | P56480 | 0.00057372 | N-term +28.03 Da,                          | 4152.23877  | 2 | 732.3983765 | 732.3962766 |

|                             |        |            |                                             |             |   |             |             |
|-----------------------------|--------|------------|---------------------------------------------|-------------|---|-------------|-------------|
| VPPVQVSPLIKFR               | Q06185 | 0.0009985  | N-term +28.03 Da,                           | 4152.829102 | 3 | 531.6699829 | 531.6677398 |
| DVLVIECNLR                  | Q8C196 | 0.00133097 | N-term +28.03 Da, C +57.02 Da,              | 4152.904785 | 2 | 629.8400269 | 629.8448333 |
| ELDPVQKLFVDKIR              | P97450 | 0          | N-term +28.03 Da, K +28.03 Da,              | 4153.679688 | 4 | 446.7720337 | 446.7724676 |
| ELDPVQKLFVDKIR              | P97450 | 0          | N-term +28.03 Da, K +28.03 Da,              | 4157.270996 | 3 | 595.3599854 | 595.3608646 |
| WLQEEKVPPIYGVDR             | Q8C196 | 0.0005322  | N-term +28.03 Da, K +28.03 Da,              | 4159.546387 | 3 | 654.0200195 | 654.0228006 |
| NKELDPVQKLFVDKIR            | P97450 | 0.00137678 | N-term +28.03 Da, K +28.03 Da,              | 4163.389648 | 3 | 685.0800171 | 685.4172618 |
| AWITAPVALR                  | O55111 | 0          | N-term +28.03 Da,                           | 4167.607422 | 2 | 563.3418579 | 563.3425858 |
| AWITAPVALR                  | O55111 | 0.0005777  | N-term +28.03 Da,                           | 4170.850098 | 2 | 563.3406372 | 563.3425858 |
| SLATAGDGLIELR               | P67778 | 0.00174216 | N-term +28.03 Da,                           | 4171.016113 | 2 | 673.3800049 | 672.380095  |
| GDPKEEEEEELVDPLTTVR         | P99028 | 0.00328138 | N-term +28.03 Da, K +28.03 Da,              | 4174.347656 | 3 | 747.7076416 | 747.7092771 |
| VQLSDAYSTGSSLMPOKKNPDSLELIR | Q91YI0 | 0.00433925 | N-term +28.03 Da, K +28.03 Da,              | 4176.806641 | 4 | 766.4099731 | 766.1614147 |
| GDPKEEEEEELVDPLTTVR         | P99028 | 0          | N-term +28.03 Da, K +28.03 Da,              | 4177.836426 | 2 | 1121.058472 | 1121.060277 |
| NLQLEEEENEAELKER            | P54729 | 0.04882571 | N-term +28.03 Da, K +28.03 Da,              | 4179.186035 | 2 | 1079.030029 | 1079.037136 |
| TFDLTGPPAPR                 | P20029 | 0.00290095 | N-term +28.03 Da,                           | 4180.160645 | 2 | 657.3699951 | 656.866623  |
| TVDAFDYDLQTGGQISNR          | Q64374 | 0          | N-term +28.03 Da,                           | 4183.054199 | 2 | 986.9699707 | 985.9763495 |
| TVMPAWVIDKYGKNEVLR          | Q924D0 | 0          | N-term +28.03 Da, K +28.03 Da,              | 4184.613281 | 4 | 552.0599976 | 551.5631492 |
| SLGEYLFER                   | P29391 | 0.01330935 | N-term +28.03 Da,                           | 4186.324219 | 2 | 571.2981567 | 571.2980417 |
| TVDAFDYDLQTGGQISNR          | Q64374 | 0          | N-term +28.03 Da,                           | 4186.896484 | 2 | 985.9799805 | 985.9763495 |
| VDAFDYDLQTGGQISNR           | Q64374 | 0          | N-term +28.03 Da,                           | 4187.099121 | 2 | 935.9500122 | 935.4525099 |
| NLPESWDWR                   | P97821 | 0.04242615 | N-term +28.03 Da,                           | 4188.623535 | 2 | 616.2999878 | 615.7987402 |
| TLVGYDLVPEPK                | P12787 | 0.00136426 | N-term +28.03 Da, K +28.03 Da,              | 4190.432617 | 2 | 693.8977661 | 693.8975891 |
| ASQQDFENALNQVLLKKDPGNEVKLR  | Q9WUR2 | 0.00979653 | N-term +28.03 Da, K +28.03 Da,              | 4191.91748  | 4 | 806.960022  | 806.4606796 |
| SDVLELTDENFESR              | P27773 | 0          | N-term +28.03 Da,                           | 4192.037598 | 2 | 841.3988647 | 841.3994117 |
| ATSPAAELSPTELTEMR           | Q9JKF7 | 0          | N-term +28.03 Da,                           | 4195.90332  | 2 | 916.4699707 | 916.4589463 |
| SVTGWKEIEYEVVR              | Q8C196 | 0          | N-term +28.03 Da, K +28.03 Da,              | 4196.098633 | 3 | 584.3182983 | 584.3173248 |
| TVDAFDYDLQTGGQISNR          | Q64374 | 0          | N-term +28.03 Da,                           | 4196.404297 | 3 | 657.6500244 | 657.6533252 |
| TIAQDYGVKKADEGISFR          | P35700 | 0.00052994 | N-term +28.03 Da, K +28.03 Da,              | 4196.759277 | 3 | 680.3599854 | 680.3651153 |
| TVPVHEMGTTVIKEVLQR          | Q8CAY6 | 0.01984942 | N-term +28.03 Da, K +28.03 Da,              | 4197.765137 | 4 | 524.039978  | 524.0501404 |
| WPIAPFPR                    | P61922 | 0.03687222 | N-term +28.03 Da,                           | 4197.996582 | 2 | 506.2933044 | 506.2923641 |
| FYVDFGGVQKPGSEVPK           | Q9QXX4 | 0          | N-term +28.03 Da, K +28.03 Da,              | 4201.04248  | 3 | 669.3704834 | 669.3714297 |
| VMMQDSSPDFEDTWR             | Q8K120 | 0          | N-term +28.03 Da,                           | 4202.890625 | 2 | 936.4000244 | 936.400574  |
| SDVLELTDENFESR              | P27773 | 0.01896552 | N-term +28.03 Da,                           | 4203.115234 | 3 | 561.5999756 | 561.2686999 |
| GDPKEEEEEELVDPLTTVR         | P99028 | 0.00140647 | N-term +28.03 Da, K +28.03 Da,              | 4204.905762 | 3 | 747.7076416 | 747.7092771 |
| VDYYEVLGVQR                 | O54946 | 0.00052438 | N-term +28.03 Da,                           | 4205.516602 | 2 | 684.3699951 | 684.861538  |
| ECDKLYFEELSLR               | Q8C196 | 0.00053967 | N-term +28.03 Da, K +28.03 Da, C +57.02 Da, | 4207.745605 | 3 | 629.6400146 | 629.6450017 |
| GDPKEEEEEELVDPLTTVR         | P99028 | 0.00054142 | N-term +28.03 Da, K +28.03 Da,              | 4209.032715 | 2 | 1121.060059 | 1121.060277 |
| HGDLAFVDVPNDSSFQIVKNPR      | Q61176 | 0.04447228 | N-term +28.03 Da, K +28.03 Da,              | 4211.407715 | 4 | 628.5800171 | 628.5802226 |
| VQFDIETAEPLR                | Q4LDG0 | 0.00059418 | N-term +28.03 Da,                           | 4211.60791  | 2 | 723.8900146 | 723.3853776 |
| HGDLAFVDVPNDSSFQIVKNPR      | Q61176 | 0.0005872  | N-term +28.03 Da, K +28.03 Da,              | 4213.373535 | 3 | 838.4400024 | 837.7712046 |
| TTIAGVVYKDGIVLGADTR         | P70195 | 0          | N-term +28.03 Da, K +28.03 Da,              | 4214.414063 | 3 | 669.0499878 | 669.0491271 |

|                             |        |            |                                            |             |   |             |             |
|-----------------------------|--------|------------|--------------------------------------------|-------------|---|-------------|-------------|
| ELELKVPLVVR                 | Q9Z2I8 | 0.01427552 | N-term +28.03 Da, K +28.03 Da,             | 4214.866699 | 3 | 450.9599915 | 450.9621526 |
| GPAGAGESKCPLMVKVLDAVR       | P07309 | 0          | N-term +28.03 Da, K +28.03 Da,C +57.02 Da, | 4217.847168 | 4 | 560.5599976 | 560.5629864 |
| VSITPAEVGVLVGKDR            | P62962 | 0          | N-term +28.03 Da, K +28.03 Da,             | 4218.061523 | 3 | 566         | 566.0049695 |
| FLDFQGSaipr                 | Q8BGC4 | 0.00137804 | N-term +28.03 Da,                          | 4219.660156 | 2 | 640.3499756 | 639.8456904 |
| DALEEEEDNVLVLK              | P09103 | 0          | N-term +28.03 Da, K +28.03 Da,             | 4220.029785 | 2 | 772.4199829 | 771.9167082 |
| GQWLQEEKVPaiygvDTR          | Q8C196 | 0          | N-term +28.03 Da, K +28.03 Da,             | 4220.703613 | 3 | 715.7199707 | 715.7161481 |
| TLVGYDLVPEPK                | P12787 | 0          | N-term +28.03 Da, K +28.03 Da,             | 4221.182129 | 2 | 693.8970947 | 693.8975891 |
| YSSSDDVIELTPSNFNR           | Q922R8 | 0          | N-term +28.03 Da,                          | 4221.391113 | 2 | 986.4699707 | 986.4683575 |
| SDVLELTDENFESR              | P27773 | 0          | N-term +28.03 Da,                          | 4222.713867 | 2 | 841.3984375 | 841.3994117 |
| VLDDKDYFLFR                 | Q64433 | 0.00145278 | N-term +28.03 Da, K +28.03 Da,             | 4224.870117 | 3 | 496.2683105 | 496.2695342 |
| NKELDPVQKLFVDKIR            | P97450 | 0          | N-term +28.03 Da, K +28.03 Da,             | 4225.55127  | 4 | 514.0599976 | 514.3147655 |
| YLEFADTGSVKDFGIQPVEDKGACR   | Q3UD01 | 0          | N-term +28.03 Da, C +57.02 Da,             | 4227.001953 | 4 | 722.3599854 | 722.3640165 |
| YSSSDDVIELTPSNFNR           | Q922R8 | 0.0017567  | N-term +28.03 Da,                          | 4228.153809 | 3 | 657.9799805 | 657.9813305 |
| ELEIEGMKFDR                 | P63038 | 0.00399361 | N-term +28.03 Da, K +28.03 Da,             | 4230.389648 | 3 | 512.6099854 | 512.6094509 |
| LELDTIKNLVR                 | P08113 | 0.00054975 | N-term +28.03 Da, K +28.03 Da,             | 4233.067383 | 3 | 457.6199951 | 457.2852956 |
| IGPVEVENALAEHPVAESAVVSSPKDR | Q91VA0 | 0          | N-term +28.03 Da, K +28.03 Da,             | 4234.355957 | 4 | 761.6500244 | 761.3990167 |
| NGETPTEKLPFPIIDDKGR         | O08709 | 0.00062657 | N-term +28.03 Da, K +28.03 Da,             | 4234.549805 | 3 | 738.4000244 | 737.7388415 |
| AGYFNEEMAPIEVK              | Q8BWT1 | 0          | N-term +28.03 Da, K +28.03 Da,             | 4234.793945 | 2 | 828.4099731 | 827.4132781 |
| GDPKEEEEEELVDPLTTVR         | P99028 | 0.01084518 | N-term +28.03 Da, K +28.03 Da,             | 4235.43457  | 3 | 748.039978  | 747.7092771 |
| GQVVQFKLSDIGEGIR            | P53395 | 0          | N-term +28.03 Da, K +28.03 Da,             | 4235.769043 | 3 | 601.3428345 | 601.3438739 |
| SLGGGTGSGMGTLLISKIR         | P68372 | 0          | N-term +28.03 Da, K +28.03 Da,             | 4237.730469 | 3 | 621.3599854 | 621.0240355 |
| GQVVQFKLSDIGEGIR            | P53395 | 0          | N-term +28.03 Da, K +28.03 Da,             | 4239.402832 | 2 | 901.5120239 | 901.5121726 |
| MDLPLSAAPTVQEEKQGPTPAGLPR   | Q7TT50 | 0          | N-term +28.03 Da, K +28.03 Da,             | 4239.523438 | 3 | 887.4799805 | 887.1423101 |
| AGYFNEEMAPIEVK              | Q8BWT1 | 0          | N-term +28.03 Da, K +28.03 Da,             | 4241.147949 | 2 | 827.4099731 | 827.4132781 |
| LDLTEEEELKR                 | Q8QZR3 | 0.00099157 | N-term +28.03 Da,                          | 4241.668457 | 3 | 515.2896118 | 515.2907757 |
| TQVNSEDKGALAKLVEAIR         | P12970 | 0          | N-term +28.03 Da, K +28.03 Da,             | 4245.313965 | 4 | 532.5599976 | 532.3099462 |
| DLNLDLSKFR                  | Q8BK30 | 0.00098522 | N-term +28.03 Da, K +28.03 Da,             | 4245.413086 | 3 | 426.25      | 426.2468408 |
| GPAGAGESKCPLMVKVLDAVR       | P07309 | 0          | N-term +28.03 Da, K +28.03 Da,C +57.02 Da, | 4248.234375 | 4 | 560.5623169 | 560.5629864 |
| SDVLELTDENFESR              | P27773 | 0          | N-term +28.03 Da,                          | 4253.122559 | 2 | 841.3978271 | 841.3994117 |
| YSSSDDVIELTPSNFNR           | Q922R8 | 0          | N-term +28.03 Da,                          | 4253.235352 | 2 | 987.4699707 | 986.4683575 |
| VHLTDAEKSAVSVCLW            | P02089 | 0.02168756 | N-term +28.03 Da, K +28.03 Da,C +57.02 Da, | 4253.424805 | 2 | 886.4545898 | 886.4560088 |
| SSGLQAVANIAGGIR             | Q8VCHO | 0          | N-term +28.03 Da,                          | 4255.319824 | 2 | 721.9099731 | 721.4097181 |
| GDTITNTMTLGDIVYKR           | P12710 | 0          | N-term +28.03 Da, K +28.03 Da,             | 4261.568359 | 3 | 652.013855  | 652.0153175 |
| GPAGAGESKCPLMVKVLDAVR       | P07309 | 0          | N-term +28.03 Da, K +28.03 Da,C +57.02 Da, | 4263.772949 | 3 | 747.0800171 | 747.0815564 |
| TGIYEALER                   | P17182 | 0.0013934  | N-term +28.03 Da,                          | 4264.115723 | 2 | 596.833252  | 596.8322488 |
| TVILLENLR                   | P09411 | 0.02718833 | N-term +28.03 Da,                          | 4264.875    | 2 | 549.8474731 | 549.8477014 |
| GDTITNTMTLGDIVYKR           | P12710 | 0          | N-term +28.03 Da, K +28.03 Da,             | 4270.887695 | 2 | 978.0200195 | 977.5193381 |
| AGEFVDLYVPR                 | Q9CQR2 | 0          | N-term +28.03 Da,                          | 4276.167969 | 2 | 647.3447876 | 647.3455234 |
| FDRDDVALEGVGHFFR            | P29391 | 0          | N-term +28.03 Da,                          | 4277.039551 | 4 | 477.7399902 | 477.7404277 |
| APQGSGLGEYLFER              | P29391 | 0.01425517 | N-term +28.03 Da,                          | 4279.348633 | 3 | 499.2600098 | 498.9244269 |



|                              |        |            |                                            |             |   |             |             |
|------------------------------|--------|------------|--------------------------------------------|-------------|---|-------------|-------------|
| GPAGAGESKCPLMVKVLDAVR        | P07309 | 0          | N-term +28.03 Da, K +28.03 Da,C +57.02 Da, | 4279.958008 | 4 | 560.5626221 | 560.5629864 |
| LCDPNPDDPLVPEIAR             | P61079 | 0          | N-term +28.03 Da, C +57.02 Da,             | 4280.408691 | 2 | 924.9577026 | 924.9616558 |
| SDVLELTDENFESR               | P27773 | 0          | N-term +28.03 Da,                          | 4283.522461 | 2 | 841.3973389 | 841.3994117 |
| LGIPEEELLR                   | Q91WV0 | 0.00212224 | N-term +28.03 Da,                          | 4283.67334  | 2 | 598.8464966 | 598.8478989 |
| FVQENVYDEFVER                | P47738 | 0.02593947 | N-term +28.03 Da,                          | 4288.27002  | 2 | 851.4099731 | 851.4095817 |
| GYSLLQDSGEVR                 | P63242 | 0          | N-term +28.03 Da,                          | 4290.407715 | 2 | 732.8900146 | 732.8882846 |
| ALFNPDVSWDR                  | Q62425 | 0.00098425 | N-term +28.03 Da,                          | 4298.694336 | 2 | 674.3354492 | 674.3382298 |
| APQGSLSGEYLFER               | P29391 | 0.00057737 | N-term +28.03 Da,                          | 4304.99707  | 2 | 747.8817749 | 747.883002  |
| DKLYFEELSLE                  | Q8C196 | 0.0290429  | N-term +28.03 Da, K +28.03 Da,             | 4305.416504 | 3 | 533.6199951 | 533.287254  |
| FSLGFDEPAEQPVR               | P97825 | 0          | N-term +28.03 Da,                          | 4305.512695 | 2 | 810.9000244 | 810.4068417 |
| VEVMPQNKQKIGNALKSWNETFHAR    | Q9DCX2 | 0.00400802 | N-term +28.03 Da, K +28.03 Da,             | 4307.831543 | 4 | 739.3900146 | 738.893275  |
| TTIAGVVYKDGIVLGADTR          | P70195 | 0          | N-term +28.03 Da, K +28.03 Da,             | 4309.395508 | 2 | 1003.070007 | 1003.070052 |
| ASKTPVGFIGNMGNPMAK           | Q99L13 | 0.00060753 | N-term +28.03 Da, K +28.03 Da,             | 4310.036621 | 2 | 1038.060059 | 1037.563025 |
| DKLYFEELSLE                  | Q8C196 | 0          | N-term +28.03 Da, K +28.03 Da,             | 4311.995605 | 2 | 799.4274292 | 799.4272428 |
| VEVMPQNKQKIGNALKSWNETFHAR    | Q9DCX2 | 0          | N-term +28.03 Da, K +28.03 Da,             | 4312.25     | 4 | 738.8900146 | 738.893275  |
| GLLSQGSPLSWEETQR             | P97494 | 0          | N-term +28.03 Da,                          | 4314.286133 | 2 | 908.960022  | 908.4654199 |
| EAGYFNEEMAPIEVK              | Q8BWT1 | 0          | N-term +28.03 Da, K +28.03 Da,             | 4314.864746 | 2 | 892.4400024 | 891.9345752 |
| SDVLELTDENFESR               | P27773 | 0          | N-term +28.03 Da,                          | 4315.51709  | 2 | 841.3973999 | 841.3994117 |
| TLFGDKLCAIPNLR               | P07724 | 0.000625   | N-term +28.03 Da, K +28.03 Da,C +57.02 Da, | 4315.775391 | 3 | 558.6500244 | 558.6517614 |
| APIIQEFFHSEQYR               | Q78JT3 | 0          | N-term +28.03 Da,                          | 4317.533691 | 3 | 598.6400146 | 598.305419  |
| VDVPVGEELLGR                 | Q03265 | 0.0005534  | N-term +28.03 Da,                          | 4319.627441 | 2 | 655.8699951 | 655.869363  |
| ISAKDIVYIGLR                 | Q61176 | 0          | N-term +28.03 Da, K +28.03 Da,             | 4319.738281 | 3 | 468.6199951 | 468.6255406 |
| TISPLDLAKLNQVAR              | P60335 | 0.00145349 | N-term +28.03 Da, K +28.03 Da,             | 4319.986328 | 3 | 565.6799927 | 565.6769642 |
| EAGYFNEEMAPIEVK              | Q8BWT1 | 0          | N-term +28.03 Da, K +28.03 Da,             | 4320.098633 | 2 | 892.9299927 | 891.9345752 |
| TTIAGVVYKDGIVLGADTR          | P70195 | 0          | N-term +28.03 Da, K +28.03 Da,             | 4323.282715 | 3 | 669.7199707 | 669.0491271 |
| TEFGLASGVFTR                 | Q8R0Y6 | 0.00400641 | N-term +28.03 Da,                          | 4326.361816 | 2 | 656.8499756 | 656.8484304 |
| GLLSQGSPLSWEETQR             | P97494 | 0          | N-term +28.03 Da,                          | 4327.280273 | 3 | 606.3099976 | 605.9793721 |
| GGGGASALLIEKL                | Q8QZT1 | 0.00806142 | N-term +28.03 Da, K +28.03 Da,             | 4327.385742 | 2 | 621.3800049 | 621.3768235 |
| EFVPSFLR                     | Q8R050 | 0.02197431 | N-term +28.03 Da,                          | 4329.167969 | 2 | 512.289978  | 511.7871121 |
| EELITNWEQIR                  | P16546 | 0          | N-term +28.03 Da,                          | 4331.419434 | 2 | 729.8800049 | 729.883002  |
| NGGFCEVCCKLVL                | Q61207 | 0.00175747 | N-term +28.03 Da, K +28.03 Da,C +57.02 Da, | 4335.074219 | 3 | 537.289978  | 536.6264472 |
| APLDLDKYVEIAR                | Q9CQR6 | 0          | N-term +28.03 Da, K +28.03 Da,             | 4336.084473 | 3 | 520.6300049 | 520.2994937 |
| TTIAGLVFR                    | Q35955 | 0.02393796 | N-term +28.03 Da,                          | 4336.541992 | 2 | 503.3099976 | 503.3082117 |
| EDALKAADTIGYPMVIR            | Q8C196 | 0.00053362 | N-term +28.03 Da, K +28.03 Da,             | 4338.060547 | 3 | 640.6799927 | 640.3484079 |
| WVDGPLR                      | Q7TNC6 | 0.01684802 | N-term +28.03 Da,                          | 4340.148926 | 2 | 435.25      | 435.7452469 |
| VQLSDAYSTGSSLMPQKKNPDSLELIR  | Q91YI0 | 0          | N-term +28.03 Da, K +28.03 Da,             | 4341.280762 | 4 | 766.1633911 | 766.1614147 |
| TDAEKAASVSLWGKVNDSDEVGGEALGR | P02088 | 0          | N-term +28.03 Da, K +28.03 Da,C +57.02 Da, | 4341.750977 | 4 | 726.6199951 | 726.6196482 |
| IPSAVGYQPTLATDMGTMQER        | P56480 | 0          | N-term +28.03 Da,                          | 4341.909668 | 2 | 1148.060059 | 1147.561409 |
| DVALEGVGHFFR                 | P29391 | 0          | N-term +28.03 Da,                          | 4342.228516 | 3 | 458.9096375 | 458.9103401 |
| IGYPITLYLEKER                | P11499 | 0          | N-term +28.03 Da,                          | 4343.371582 | 3 | 551.3200073 | 550.9870271 |

|                              |        |            |                                            |             |   |             |             |
|------------------------------|--------|------------|--------------------------------------------|-------------|---|-------------|-------------|
| GAPQGSLSGEYLFER              | P29391 | 0          | N-term +28.03 Da,                          | 4344.759766 | 2 | 776.3900146 | 776.3937341 |
| IPSAVGYQPTLATDMGTMQER        | P56480 | 0.01269956 | N-term +28.03 Da,                          | 4345.580078 | 2 | 1148.560059 | 1147.561409 |
| GLLSQGSPLSWEETQR             | P97494 | 0          | N-term +28.03 Da,                          | 4346.15332  | 2 | 908.460022  | 908.4654199 |
| TDAEKAASVSLWGKVNDSDEVGGEALGR | P02088 | 0          | N-term +28.03 Da, K +28.03 Da,C +57.02 Da, | 4346.826172 | 3 | 969.1599731 | 968.4904388 |
| TDPAPATTFAHLDAATTVLSR        | P56480 | 0          | N-term +28.03 Da,                          | 4348.447266 | 3 | 705.0300293 | 705.035658  |
| VPATPVAWPSQEGQNPSLSSIR       | Q8C196 | 0.03559974 | N-term +28.03 Da,                          | 4349.914551 | 3 | 783.7399902 | 783.7447668 |
| APTIVILEPAGGCLCDQPVHIAVR     | Q9QYR7 | 0          | N-term +28.03 Da, C +57.02 Da,             | 4350.669922 | 3 | 835.0999756 | 834.4382918 |
| DVALEGVGHFFR                 | P29391 | 0          | N-term +28.03 Da,                          | 4351.915527 | 2 | 687.8599243 | 687.8618719 |
| GVLKYDLSSPIQTTSTLYER         | Q8BM55 | 0          | N-term +28.03 Da, K +28.03 Da,             | 4353.980957 | 3 | 776.75      | 776.4212899 |
| TDPAPATTFAHLDAATTVLSR        | P56480 | 0          | N-term +28.03 Da,                          | 4357.489258 | 3 | 705.7000122 | 705.035658  |
| VVVPDVESLPSWAQKR             | P41216 | 0          | N-term +28.03 Da, K +28.03 Da,             | 4358.593262 | 3 | 622.6864014 | 622.6876406 |
| APLDLDKYVEIAR                | Q9CQR6 | 0          | N-term +28.03 Da, K +28.03 Da,             | 4366.837891 | 3 | 520.6300049 | 520.2994937 |
| VSFELFADKVPKTAENFR           | P17742 | 0          | N-term +28.03 Da, K +28.03 Da,             | 4373.342285 | 4 | 546.5499878 | 546.3031267 |
| GAPQGSLSGEYLFER              | P29391 | 0.00176523 | N-term +28.03 Da,                          | 4373.70752  | 3 | 518.2600098 | 517.9315816 |
| WLPELVDR                     | Q9EQ20 | 0.00328812 | N-term +28.03 Da,                          | 4375.897461 | 2 | 528.7999878 | 528.2978441 |
| GAPQGSLSGEYLFER              | P29391 | 0          | N-term +28.03 Da,                          | 4376.55957  | 2 | 776.3921509 | 776.3937341 |
| TLNQLVGAAGAAGQR              | Q9EQ20 | 0          | N-term +28.03 Da,                          | 4377.675293 | 2 | 801.9400024 | 801.4415498 |
| GGAGSYIEKPKQTEAPQVTGPIEVPVVR | Q9DCT8 | 0          | N-term +28.03 Da, K +28.03 Da,             | 4379.195313 | 3 | 1000.530029 | 1000.200994 |
| TLNQLVGAAGAAGQR              | Q9EQ20 | 0.0006402  | N-term +28.03 Da,                          | 4379.424805 | 3 | 534.6300049 | 534.6301253 |
| KELDPVQKLFVDKIR              | P97450 | 0.00061996 | N-term +28.03 Da, K +28.03 Da,             | 4381.063477 | 4 | 485.5499878 | 485.8040334 |
| SDVLELTDENFESR               | P27773 | 0.00063492 | N-term +28.03 Da,                          | 4386.361328 | 2 | 841.8900146 | 841.3994117 |
| AGAESDGGQFQFTGIKKYFN         | Q78IK2 | 0.00136924 | N-term +28.03 Da, K +28.03 Da,             | 4386.924316 | 3 | 731.3699951 | 731.37227   |
| GGLGPMNIPLISDPKR             | P35700 | 0.00214225 | N-term +28.03 Da, K +28.03 Da,             | 4387.304688 | 3 | 574.3273926 | 574.3307994 |
| VVVPDVESLPSWAQKR             | P41216 | 0          | N-term +28.03 Da, K +28.03 Da,             | 4389.475098 | 3 | 623.0200195 | 622.6876406 |
| EFTLGEECELETMTGEKVK          | P12710 | 0          | N-term +28.03 Da, K +28.03 Da,C +57.02 Da, | 4390.25293  | 3 | 772.710022  | 772.0446147 |
| NDGLEDLFR                    | F6RWR5 | 0.00328407 | N-term +28.03 Da,                          | 4392.161133 | 2 | 553.7800293 | 553.7774736 |
| DFISYLQR                     | P27773 | 0.0181311  | N-term +28.03 Da,                          | 4393.504395 | 2 | 535.2871704 | 535.2874766 |
| NEFTLGEECELETMTGEKVK         | P12710 | 0          | N-term +28.03 Da, K +28.03 Da,C +57.02 Da, | 4398.446289 | 3 | 810.3900146 | 810.0589241 |
| GPPDPILGVTEAFKR              | P05202 | 0          | N-term +28.03 Da, K +28.03 Da,             | 4400.929688 | 3 | 551.9799805 | 551.6505264 |
| TYFNKPDIDAWELR               | P12787 | 0.00053792 | N-term +28.03 Da, K +28.03 Da,             | 4401.037109 | 3 | 608.6500244 | 608.6490744 |
| YTIVYFPVR                    | P19157 | 0.032122   | N-term +28.03 Da,                          | 4401.439941 | 2 | 593.3400269 | 593.3369693 |
| SQAAAKVDIEFDYDGLPMKTEVPGPR   | P61922 | 0          | N-term +28.03 Da, K +28.03 Da,             | 4404.217773 | 4 | 730.3770142 | 730.3796665 |
| SDPDPSTKDFLLQQTMLR           | Q9CPU0 | 0.00063052 | N-term +28.03 Da, K +28.03 Da,             | 4404.305176 | 3 | 716.7000122 | 716.705032  |
| LYSSDDVIELTPSNFNR            | Q922R8 | 0          | N-term +28.03 Da,                          | 4405.096191 | 2 | 1044.01001  | 1043.01039  |
| SFPTLKFFPASADR               | P09103 | 0          | N-term +28.03 Da, K +28.03 Da,             | 4406.34668  | 3 | 547.6300049 | 547.299605  |
| GAPQGSLSGEYLFER              | P29391 | 0          | N-term +28.03 Da,                          | 4406.90918  | 2 | 776.3900146 | 776.3937341 |
| LAYDILDQYR                   | P10649 | 0.00057241 | N-term +28.03 Da,                          | 4407.595215 | 2 | 649.3406982 | 649.3429809 |
| FLTVSPESVLKVAR               | P55264 | 0.00055371 | N-term +28.03 Da,                          | 4408.67334  | 3 | 534.9899902 | 534.6590218 |
| SSSLEKSYELPDGQVITIGNER       | P60710 | 0          | N-term +28.03 Da, K +28.03 Da,             | 4409.94043  | 3 | 856.1099854 | 855.7729403 |
| SQAAAKVDIEFDYDGLPMKTEVPGPR   | P61922 | 0          | N-term +28.03 Da, K +28.03 Da,             | 4411.475098 | 3 | 973.8400269 | 973.5037965 |

|                                         |        |            |                                            |             |   |             |             |
|-----------------------------------------|--------|------------|--------------------------------------------|-------------|---|-------------|-------------|
| DPKEEEEEELVDPLTTVR                      | P99028 | 0          | N-term +28.03 Da, K +28.03 Da,             | 4411.575195 | 2 | 1093.050049 | 1092.549545 |
| AKVDIEFDYDGLMKTEVPGPR                   | P61922 | 0          | N-term +28.03 Da, K +28.03 Da,             | 4411.885254 | 4 | 641.5900269 | 641.0884576 |
| ASSSSLEKSYELPDGQVITIGNER                | P60710 | 0          | N-term +28.03 Da, K +28.03 Da,             | 4413.521973 | 3 | 879.789978  | 879.4519784 |
| MFEPKCLDAFPNLR                          | P10649 | 0          | N-term +28.03 Da, K +28.03 Da,C +57.02 Da, | 4413.730469 | 3 | 598.9699707 | 598.6407566 |
| ASSSSLEKSYELPDGQVITIGNER                | P60710 | 0.00059773 | N-term +28.03 Da, K +28.03 Da,             | 4415.552734 | 3 | 880.1199951 | 879.4519784 |
| YELPDGQVITIGNER                         | P60710 | 0          | N-term +28.03 Da,                          | 4425.320313 | 2 | 866.4500122 | 866.4492383 |
| YRDLISHDELFSDIYKIR                      | P63028 | 0          | N-term +28.03 Da, K +28.03 Da,             | 4425.648926 | 4 | 586.0700073 | 585.5653123 |
| DVPAFLQQSQSSGPGQAAVWHR                  | Q9WVJ2 | 0.008413   | N-term +28.03 Da,                          | 4428.566406 | 3 | 799.4099731 | 798.7364941 |
| TAASSSSLEKSYELPDGQVITIGNER              | P60710 | 0          | N-term +28.03 Da, K +28.03 Da,             | 4431.091309 | 3 | 937.1500244 | 936.8135762 |
| TGAPQGSGLGEYLFER                        | P29391 | 0          | N-term +28.03 Da,                          | 4432.440918 | 2 | 826.9199829 | 826.9175737 |
| TAASSSSLEKSYELPDGQVITIGNER              | P60710 | 0          | N-term +28.03 Da, K +28.03 Da,             | 4432.739258 | 3 | 937.4799805 | 936.8135762 |
| SQAAAKVDIEFDYDGLMKTEVPGPR               | P61922 | 0          | N-term +28.03 Da, K +28.03 Da,             | 4434.57373  | 4 | 730.3803101 | 730.3796665 |
| LYSSDDVIELTPSNFNFR                      | Q922R8 | 0          | N-term +28.03 Da,                          | 4435.781738 | 2 | 1044.01001  | 1043.01039  |
| SFPTLKFFPASADR                          | P09103 | 0          | N-term +28.03 Da, K +28.03 Da,             | 4437.179199 | 3 | 547.2992554 | 547.299605  |
| LYSSDDVIELTPSNFNFR                      | Q922R8 | 0          | N-term +28.03 Da,                          | 4440.049805 | 2 | 1043.01001  | 1043.01039  |
| DPAPATTFAHLDATTVLSR                     | P56480 | 0          | N-term +28.03 Da,                          | 4441.546387 | 3 | 671.6900024 | 671.3530983 |
| SQAAAKVDIEFDYDGLMKTEVPGPR               | P61922 | 0          | N-term +28.03 Da, K +28.03 Da,             | 4443.921387 | 3 | 973.8400269 | 973.5037965 |
| EEEDKKEDVGTVVGDIGLTTYSCVGVFKNGR         | P20029 | 0.00325203 | N-term +28.03 Da, K +28.03 Da,C +57.02 Da, | 4445.035156 | 4 | 879.6900024 | 879.1999976 |
| PKTVTGDHGDDEVYVFGAPILR                  | D3Z298 | 0.00101574 | N-term +28.03 Da, K +28.03 Da,             | 4447.081055 | 4 | 604.0700073 | 604.3233196 |
| LYSSDDVIELTPSNFNFR                      | Q922R8 | 0          | N-term +28.03 Da,                          | 4447.156738 | 3 | 695.6748047 | 695.6760186 |
| DPAPATTFAHLDATTVLSR                     | P56480 | 0          | N-term +28.03 Da,                          | 4448.817383 | 3 | 671.3499756 | 671.3530983 |
| PKTVTGDHGDDEVYVFGAPILR                  | D3Z298 | 0.0357599  | N-term +28.03 Da, K +28.03 Da,             | 4450.620117 | 4 | 604.3200073 | 604.3233196 |
| SQAAAKVDIEFDYDGLMKTEVPGPR               | P61922 | 0.01685985 | N-term +28.03 Da, K +28.03 Da,             | 4451.165039 | 3 | 973.5       | 973.5037965 |
| DALEEEEDNVLVLK                          | P09103 | 0          | N-term +28.03 Da, K +28.03 Da,             | 4452.60498  | 2 | 771.9199829 | 771.9167082 |
| FIPLSQKDLENLKAEEVAR                     | Q5SW19 | 0.00102617 | N-term +28.03 Da, K +28.03 Da,             | 4456.479004 | 3 | 719.0881348 | 719.0876932 |
| FIPLSQKDLENLKAEEVAR                     | Q5SW19 | 0          | N-term +28.03 Da, K +28.03 Da,             | 4460.650391 | 4 | 539.5670776 | 539.567589  |
| LINEKDGTFQLMGLYGR                       | B5X0G2 | 0          | N-term +28.03 Da, K +28.03 Da,             | 4460.738281 | 3 | 714.3800049 | 714.0417553 |
| FIPLSQKDLENLKAEEVAR                     | Q5SW19 | 0          | N-term +28.03 Da, K +28.03 Da,             | 4462.61084  | 4 | 539.5670776 | 539.567589  |
| ASEAIKGAVVGDIGLTTNSCVAVMEGKQAKVLENAEGAR | P38647 | 0          | N-term +28.03 Da, K +28.03 Da,C +57.02 Da, | 4465.13916  | 4 | 1015.289978 | 1014.792157 |
| LINEKDGTFQLMGLYGR                       | B5X0G2 | 0.00055741 | N-term +28.03 Da, K +28.03 Da,             | 4465.413086 | 2 | 1070.550049 | 1070.558995 |
| TSSMTEGLQPASVVVLP                       | Q8BH86 | 0          | N-term +28.03 Da,                          | 4466.638672 | 2 | 950.5100098 | 950.5140555 |
| SQAAAKVDIEFDYDGLMKTEVPGPR               | P61922 | 0          | N-term +28.03 Da, K +28.03 Da,             | 4466.755371 | 4 | 730.8800049 | 730.3796665 |
| SFPTLKFFPASADR                          | P09103 | 0.01811847 | N-term +28.03 Da, K +28.03 Da,             | 4468.376953 | 3 | 547.6300049 | 547.299605  |
| ASKTPVGFIGNMGNPMAKNLTK                  | Q99L13 | 0          | N-term +28.03 Da, K +28.03 Da,             | 4472.746582 | 4 | 648.1099854 | 647.8585861 |
| GLLSQGSPLSWEETQR                        | P97494 | 0.0196011  | N-term +28.03 Da,                          | 4473.518066 | 3 | 605.9899902 | 605.9793721 |
| AKFEELNMDLFR                            | P20029 | 0.0014245  | N-term +28.03 Da, K +28.03 Da,             | 4474.345703 | 3 | 523.6095581 | 523.6095622 |
| GLLSQGSPLSWEETQR                        | P97494 | 0          | N-term +28.03 Da,                          | 4475.898438 | 2 | 908.460022  | 908.4654199 |
| DALEEEEDNVLVLK                          | P09103 | 0          | N-term +28.03 Da, K +28.03 Da,             | 4483.325684 | 2 | 771.9099731 | 771.9167082 |
| TEKLTQVMQNPQVLAALQER                    | Q78ZA7 | 0.00060241 | N-term +28.03 Da, K +28.03 Da,             | 4495.401855 | 3 | 823.7800293 | 823.4441003 |
| EEEDKKEDVGTVVGDIGLTTYSCVGVFKNGR         | P20029 | 0          | N-term +28.03 Da, K +28.03 Da,C +57.02 Da, | 4496.989746 | 4 | 879.7000122 | 879.1999976 |

|                                         |        |            |                                            |             |   |             |             |
|-----------------------------------------|--------|------------|--------------------------------------------|-------------|---|-------------|-------------|
| SQAAAKVDIEFDYDGLMKTEVPGPR               | P61922 | 0          | N-term +28.03 Da, K +28.03 Da,             | 4497.90625  | 4 | 730.3800049 | 730.3796665 |
| SIVVSPILIPENQR                          | Q9WTR5 | 0          | N-term +28.03 Da,                          | 4498.177734 | 2 | 796.9699707 | 796.9721514 |
| EERVLQLLR                               | Q80YV3 | 0.02657807 | N-term +28.03 Da,                          | 4498.289551 | 2 | 591.8525391 | 592.3615074 |
| AGAGEAGLKEEVMQELR                       | Q9WUM3 | 0          | N-term +28.03 Da, K +28.03 Da,             | 4500.224609 | 3 | 615.6599731 | 615.3242624 |
| DDVALEGVGHFFR                           | P29391 | 0          | N-term +28.03 Da,                          | 4500.571289 | 3 | 497.25      | 497.2526548 |
| SAAATSAVPAPNHQPEVFCNQIFINNEWHDAVSR      | P47738 | 0          | N-term +28.03 Da, C +57.02 Da,             | 4501.875488 | 4 | 952.710022  | 952.2089539 |
| SIPFPTPTPLTGR                           | Q80X50 | 0.00063412 | N-term +28.03 Da,                          | 4504.097168 | 2 | 756.9299927 | 756.9246697 |
| DHGDLAFVDVDPNDSSFIQVKNPR                | Q61176 | 0          | N-term +28.03 Da, K +28.03 Da,             | 4504.424805 | 3 | 876.1199951 | 876.1135193 |
| FTQVNSEDKGALAKLVEAIR                    | P12970 | 0          | N-term +28.03 Da, K +28.03 Da,             | 4506.361816 | 4 | 569.0800171 | 569.0770498 |
| LAIDPGDSDIIR                            | P62889 | 0          | N-term +28.03 Da,                          | 4507.683594 | 2 | 713.4000244 | 713.4010276 |
| SPGSPLKLVSSVSDLPKR                      | P54869 | 0          | N-term +28.03 Da, K +28.03 Da,             | 4509.538086 | 4 | 520.8099976 | 520.805768  |
| MFIQTQDTPNPNSLKFIPGKPVLETR              | Q9QZ23 | 0          | N-term +28.03 Da, K +28.03 Da,             | 4510.047852 | 4 | 764.9199829 | 764.6716834 |
| APGPSGKTADYAFEMAVSNIR                   | Q8R0N6 | 0          | N-term +28.03 Da, K +28.03 Da,             | 4511.615723 | 3 | 747.039978  | 746.712298  |
| EWPANLDLKKELSEPSSTR                     | Q8C196 | 0          | N-term +28.03 Da, K +28.03 Da,             | 4512.87207  | 3 | 761.7299805 | 762.0776345 |
| THVEMGPPDPILGVTEAFKR                    | P05202 | 0.00059207 | N-term +28.03 Da, K +28.03 Da,             | 4515.160645 | 3 | 750.7399902 | 750.7365547 |
| FLPLFDR                                 | Q64433 | 0.02507523 | N-term +28.03 Da,                          | 4515.306152 | 2 | 468.269989  | 468.2710975 |
| KGIKSVTELNGDTITNTMTLGDIVYKR             | P12710 | 0.00062893 | N-term +28.03 Da, K +28.03 Da,             | 4521.770508 | 4 | 771.1799927 | 770.6822485 |
| SEAIKGAUVGIDLGTTNSCVAVMEGKQAKVLENAEGAR  | P38647 | 0          | N-term +28.03 Da, K +28.03 Da,C +57.02 Da, | 4523.834961 | 4 | 997.2800293 | 997.0328784 |
| ASEAIKGAUVGIDLGTTNSCVAVMEGKQAKVLENAEGAR | P38647 | 0          | N-term +28.03 Da, K +28.03 Da,C +57.02 Da, | 4523.945313 | 4 | 1015.039978 | 1014.792157 |
| TFQLMGLYGR                              | B5X0G2 | 0.00060643 | N-term +28.03 Da,                          | 4526.708984 | 2 | 607.322876  | 607.3235362 |
| AGTMAGVPTVSFSELR                        | E9PY03 | 0.00807071 | N-term +28.03 Da,                          | 4527.153809 | 2 | 826.4299927 | 825.9296267 |
| SEAIKGAUVGIDLGTTNSCVAVMEGKQAKVLENAEGAR  | P38647 | 0          | N-term +28.03 Da, K +28.03 Da,C +57.02 Da, | 4527.661133 | 4 | 997.0300293 | 997.0328784 |
| LQGDVAGALEDLER                          | Q8VBW8 | 0.00138313 | N-term +28.03 Da,                          | 4528.961914 | 2 | 757.3900146 | 757.3964741 |
| GDTITNTMTLGDIVYKR                       | P12710 | 0.00135257 | N-term +28.03 Da, K +28.03 Da,             | 4529.526855 | 3 | 652.6799927 | 652.0153175 |
| LINEKDGETFQLMGLYGR                      | B5X0G2 | 0          | N-term +28.03 Da, K +28.03 Da,             | 4534.337891 | 3 | 714.3800049 | 714.0417553 |
| SFPTLKFPPASADR                          | P09103 | 0.02390572 | N-term +28.03 Da, K +28.03 Da,             | 4534.938965 | 3 | 547.9699707 | 547.299605  |
| EPMQTGIKAVDSLPIGR                       | Q03265 | 0.00061463 | N-term +28.03 Da, K +28.03 Da,             | 4537.702148 | 3 | 656.3699951 | 656.3713239 |
| YSLAPQIKVIAPWR                          | P16460 | 0          | N-term +28.03 Da, K +28.03 Da,             | 4538.472656 | 3 | 567.0100098 | 566.6748945 |
| YSLAPQIKVIAPWR                          | P16460 | 0          | N-term +28.03 Da, K +28.03 Da,             | 4540.126465 | 3 | 566.6699829 | 566.6748945 |
| SQAPGPSGKTADYAFEMAVSNIR                 | Q8R0N6 | 0          | N-term +28.03 Da, K +28.03 Da,             | 4541.821777 | 3 | 818.7399902 | 818.4091671 |
| TLMLPTQTISQGAIEKVKDATR                  | Q8C196 | 0          | N-term +28.03 Da, K +28.03 Da,             | 4542.050293 | 4 | 622.6099854 | 622.1069159 |
| EEEDKEDVGTVVGDILGTTYSCVGVFKNGR          | P20029 | 0.00289376 | N-term +28.03 Da, K +28.03 Da,C +57.02 Da, | 4543.388184 | 4 | 879.7000122 | 879.1999976 |
| DTITNTMTLGDIVYKR                        | P12710 | 0          | N-term +28.03 Da, K +28.03 Da,             | 4544.94043  | 3 | 633.0100098 | 633.0081628 |
| SAAATSAVPAPNHQPEVFCNQIFINNEWHDAVSR      | P47738 | 0          | N-term +28.03 Da, C +57.02 Da,             | 4545.59375  | 4 | 952.710022  | 952.2089539 |
| ASEAIKGAUVGIDLGTTNSCVAVMEGKQAKVLENAEGAR | P38647 | 0          | N-term +28.03 Da, K +28.03 Da,C +57.02 Da, | 4546.973633 | 3 | 1353.380005 | 1352.72045  |
| AAATSAVPAPNHQPEVFCNQIFINNEWHDAVSR       | P47738 | 0          | N-term +28.03 Da, C +57.02 Da,             | 4547.177246 | 4 | 930.9500122 | 930.4509466 |
| ISQAAAKVDIEFDYDGLMKTEVPGPR              | P61922 | 0          | N-term +28.03 Da, K +28.03 Da,             | 4548.896484 | 4 | 758.6500244 | 758.6506826 |
| SAAATSAVPAPNHQPEVFCNQIFINNEWHDAVSR      | P47738 | 0          | N-term +28.03 Da, C +57.02 Da,             | 4549.039063 | 3 | 1269.609985 | 1269.27618  |
| YSLAPQIKVIAPWR                          | P16460 | 0.03715465 | N-term +28.03 Da, K +28.03 Da,             | 4549.150879 | 2 | 850.0100098 | 849.5087035 |
| MLEADLVSKMLR                            | Q8K1H1 | 0.00059916 | N-term +28.03 Da, K +28.03 Da,             | 4549.450195 | 3 | 488.6099854 | 487.9437761 |

|                                         |         |            |                                            |             |   |             |             |
|-----------------------------------------|---------|------------|--------------------------------------------|-------------|---|-------------|-------------|
| SAAATSAVPAPNHQPEVFCNQIFINNEWHDAVSR      | P47738  | 0          | N-term +28.03 Da, C +57.02 Da,             | 4552.50293  | 4 | 952.460022  | 952.2089539 |
| ASEAIKGAVVGIDLGTTNSCVAVMEGKQAKVLENAEGAR | P38647  | 0          | N-term +28.03 Da, K +28.03 Da,C +57.02 Da, | 4555.685547 | 4 | 1014.789795 | 1014.792157 |
| AGAESDGGQFQFTGIKKYF                     | Q78IK2  | 0.00806761 | N-term +28.03 Da, K +28.03 Da,             | 4558.192871 | 3 | 693.6900024 | 693.3579606 |
| MVPPVQVSPLIKFGR                         | Q06185  | 0          | N-term +28.03 Da, K +28.03 Da,             | 4558.471191 | 3 | 575.6799927 | 575.3479015 |
| MVPPVQVSPLIKFGR                         | Q06185  | 0          | N-term +28.03 Da, K +28.03 Da,             | 4559.468262 | 3 | 575.3499756 | 575.3479015 |
| YLELDTIKNLVR                            | P08113  | 0          | N-term +28.03 Da, K +28.03 Da,             | 4562.549316 | 3 | 511.6400146 | 511.6397387 |
| LTDPAATTFAHLDAATVLSR                    | P56480  | 0          | N-term +28.03 Da,                          | 4564.725586 | 3 | 743.0599976 | 742.7303461 |
| AAEFVPSFLR                              | Q8R050  | 0.00328003 | N-term +28.03 Da,                          | 4565.388184 | 2 | 582.8200073 | 582.8242263 |
| VGGGGSGGGLLENANPLIYER                   | Q9D187  | 0          | N-term +28.03 Da,                          | 4567.708008 | 2 | 1030.030029 | 1029.534366 |
| HLLGTFDLTGIPPAPR                        | P20029  | 0.0013986  | N-term +28.03 Da,                          | 4568.380371 | 3 | 578.6599731 | 578.3296758 |
| SAAATSAVPAPNHQPEVFCNQIFINNEWHDAVSR      | P47738  | 0          | N-term +28.03 Da, C +57.02 Da,             | 4571.726563 | 3 | 1269.280029 | 1269.27618  |
| VGGGGSGGGLLENANPLIYER                   | Q9D187  | 0.00140779 | N-term +28.03 Da,                          | 4571.989258 | 2 | 1030.540039 | 1029.534366 |
| ASPGSPLEKLVSSVSDLPKR                    | P54869  | 0          | N-term +28.03 Da, K +28.03 Da,             | 4574.42334  | 4 | 538.8099976 | 538.5650465 |
| RLEGLTDEINFLR                           | P11679  | 0.01806183 | N-term +28.03 Da,                          | 4574.75293  | 3 | 534.9699707 | 535.2982643 |
| GLFIIDDKGILR                            | P35700  | 0          | N-term +28.03 Da, K +28.03 Da,             | 4579.160645 | 3 | 472.625     | 472.6255406 |
| ISQAAAKVDIEFDYDGLPMKTEVPGPR             | P61922  | 0          | N-term +28.03 Da, K +28.03 Da,             | 4579.666992 | 4 | 758.9000244 | 758.6506826 |
| ISYCHETMTGWVHDVLR                       | P97821  | 0          | N-term +28.03 Da, C +57.02 Da,             | 4580.045898 | 4 | 548.2600098 | 548.0121237 |
| GETFQLMGLYGR                            | B5X0G2  | 0          | N-term +28.03 Da,                          | 4582.799316 | 2 | 700.354187  | 700.3555653 |
| SAAATSAVPAPNHQPEVFCNQIFINNEWHDAVSR      | P47738  | 0          | N-term +28.03 Da, C +57.02 Da,             | 4584.520996 | 4 | 952.460022  | 952.2089539 |
| SQAAAKVDIEFDYDGLPMKTEVPGPR              | P61922  | 0          | N-term +28.03 Da, K +28.03 Da,             | 4585.472656 | 4 | 730.8800049 | 730.3796665 |
| SGDSAPLQEAAMAVLQHHDAVSGTAR              | O09159  | 0          | N-term +28.03 Da,                          | 4588.001953 | 4 | 645.0700073 | 644.8185045 |
| ELNGDTITNTMTLGDIVYKR                    | P12710  | 0          | N-term +28.03 Da, K +28.03 Da,             | 4589.328125 | 3 | 770.4099731 | 770.7385131 |
| MKTILSNQTVDIPENVEITLKGR                 | P51410  | 0          | N-term +28.03 Da, K +28.03 Da,             | 4589.606934 | 4 | 671.8800049 | 671.6320268 |
| ASEAIKGAVVGIDLGTTNSCVAVMEGKQAKVLENAEGAR | P38647  | 0          | N-term +28.03 Da, K +28.03 Da,C +57.02 Da, | 4590.109375 | 4 | 1015.039978 | 1014.792157 |
| ELLEVVNKNFDLRPGVIVR                     | Q91X83  | 0          | N-term +28.03 Da, K +28.03 Da,             | 4591.591797 | 4 | 567.3400269 | 567.3375008 |
| VAPVSDIIEIKSPDTFVR                      | Q99LC5  | 0          | N-term +28.03 Da,                          | 4591.695801 | 3 | 681.3875732 | 681.3892607 |
| TEELFDLHAR                              | P99028  | 0.00057438 | N-term +28.03 Da,                          | 4591.930176 | 3 | 469.2399902 | 469.2418671 |
| MKTILSNQTVDIPENVEITLKGR                 | P51410  | 0          | N-term +28.03 Da, K +28.03 Da,             | 4595.313965 | 3 | 895.5100098 | 895.1736102 |
| DLVPEPKIIDAALR                          | P12787  | 0          | N-term +28.03 Da, K +28.03 Da,             | 4597.658203 | 3 | 536.3200073 | 535.9906601 |
| FVLDEADEMLSR                            | P10630  | 0          | N-term +28.03 Da,                          | 4600.724609 | 2 | 727.3599854 | 726.8555959 |
| SVQTVGQIELCFTKEDLHLR                    | SV9CQ01 | 0          | N-term +28.03 Da, K +28.03 Da,C +57.02 Da, | 4601.445313 | 4 | 608.5800171 | 608.076887  |
| GDLVEELKLGIR                            | Q80Y14  | 0          | N-term +28.03 Da, K +28.03 Da,             | 4605.258301 | 4 | 389.5       | 389.2460855 |
| ASPGSPLEKLVSSVSDLPKR                    | P54869  | 0          | N-term +28.03 Da, K +28.03 Da,             | 4605.77002  | 4 | 538.5599976 | 538.5650465 |
| VHLTDAEKAASCLWGKVNDSDEVGGEALGR          | P02088  | 0          | N-term +28.03 Da, K +28.03 Da,C +57.02 Da, | 4607.402832 | 4 | 814.1699829 | 813.922496  |
| ISQAAAKVDIEFDYDGLPMKTEVPGPR             | P61922  | 0          | N-term +28.03 Da, K +28.03 Da,             | 4610.367188 | 4 | 759.1500244 | 758.6506826 |
| HLLGTFDLTGIPPAPR                        | P20029  | 0.01330457 | N-term +28.03 Da,                          | 4613.305664 | 3 | 578.6599731 | 578.3296758 |
| SSPSAKDIKILDSVGIEADDDR                  | P99027  | 0          | N-term +28.03 Da, K +28.03 Da,             | 4617.019531 | 4 | 643.5999756 | 643.6023582 |
| SAAATSAVPAPNHQPEVFCNQIFINNEWHDAVSR      | P47738  | 0          | N-term +28.03 Da, C +57.02 Da,             | 4617.897461 | 4 | 952.4500122 | 952.2089539 |
| LGQWLQEEKVPAIYGVDR                      | Q8C196  | 0          | N-term +28.03 Da, K +28.03 Da,             | 4619.498535 | 3 | 753.7399902 | 753.4108362 |
| TTLIGLEEHLNALDR                         | Q8VC30  | 0          | N-term +28.03 Da,                          | 4619.671387 | 3 | 575.3200073 | 574.9843458 |

|                                        |        |            |                                            |             |   |             |             |
|----------------------------------------|--------|------------|--------------------------------------------|-------------|---|-------------|-------------|
| EEEDKKEDVGTVVGDILGTTYSCVGVFKNGR        | P20029 | 0.03586295 | N-term +28.03 Da, K +28.03 Da,C +57.02 Da, | 4626.197754 | 4 | 879.7000122 | 879.1999976 |
| AIYFKEQFLDGDWATNR                      | P14211 | 0.01901141 | N-term +28.03 Da, K +28.03 Da,             | 4626.925293 | 3 | 710.3499756 | 710.6933433 |
| VAGPQPAQTGAPQGSGLGEYLFER               | P29391 | 0          | N-term +28.03 Da,                          | 4628.193848 | 3 | 801.4099731 | 801.0764052 |
| VAGPQPAQTGAPQGSGLGEYLFER               | P29391 | 0          | N-term +28.03 Da,                          | 4628.661133 | 2 | 1201.599976 | 1201.11097  |
| VAGPQPAQTGAPQGSGLGEYLFER               | P29391 | 0          | N-term +28.03 Da,                          | 4633.467773 | 2 | 1202.109985 | 1201.11097  |
| SSSSVPTVKLFIDGKFVESKSDKWIDIHNPATNEVVGR | Q9EQ20 | 0          | N-term +28.03 Da, K +28.03 Da,             | 4633.655273 | 4 | 1083.089966 | 1082.588875 |
| ALLKGSFSEQGINEFLR                      | Q922R8 | 0.00136488 | N-term +28.03 Da, K +28.03 Da,             | 4635.739258 | 3 | 655.7000122 | 655.698317  |
| LGDFAIISLYR                            | P07758 | 0.00099059 | N-term +28.03 Da,                          | 4639.848145 | 2 | 591.8300171 | 591.8295088 |
| FEPSLDYMVTKIPR                         | Q8C196 | 0          | N-term +28.03 Da,                          | 4643.685059 | 3 | 584.6508789 | 584.6515387 |
| VHLTDAEKAASVCLWGKVNSEVGGGEALGR         | P02088 | 0          | N-term +28.03 Da, K +28.03 Da,C +57.02 Da, | 4649.439453 | 3 | 1085.219971 | 1084.894236 |
| ADNLVNLNQDESFTR                        | O35129 | 0.00251151 | N-term +28.03 Da,                          | 4649.882324 | 2 | 882.4526367 | 881.9521454 |
| ASASSTNLKDVLSNLIPEQAR                  | Q9CZU6 | 0          | N-term +28.03 Da, K +28.03 Da,             | 4652.491211 | 4 | 607.3456421 | 607.3457892 |
| SAAATSAVPAPNHNQPEVFCNQIFINNEWHDAVSR    | P47738 | 0          | N-term +28.03 Da, C +57.02 Da,             | 4653.546875 | 4 | 952.4500122 | 952.2089539 |
| YLGSKPTVILHGYEAVKEALIDR                | Q64458 | 0.01813743 | N-term +28.03 Da, K +28.03 Da,             | 4653.880371 | 4 | 665.1300049 | 664.882273  |
| AAVEEGIVLGGGCALLR                      | P63038 | 0          | N-term +28.03 Da, C +57.02 Da,             | 4659.687012 | 3 | 571.9799805 | 571.6503094 |
| AAVEEGIVLGGGCALLR                      | P63038 | 0          | N-term +28.03 Da, C +57.02 Da,             | 4666.30957  | 2 | 856.9699707 | 856.9718258 |
| TSAAAGTMAGVPTVSFSELR                   | E9PY03 | 0          | N-term +28.03 Da,                          | 4668.787598 | 2 | 991.0100098 | 991.006595  |
| ASASSTNLKDVLSNLIPEQAR                  | Q9CZU6 | 0.00436855 | N-term +28.03 Da, K +28.03 Da,             | 4670.089844 | 3 | 809.789978  | 809.4586267 |
| AFSIPDHDNWPVGAGDLSIVKR                 | Q99M27 | 0          | N-term +28.03 Da,                          | 4672.246094 | 4 | 613.5800171 | 613.3261278 |
| VGSLNLEELSEMR                          | Q8K2C7 | 0          | N-term +28.03 Da,                          | 4673.277344 | 2 | 752.8900146 | 752.8874275 |
| FEPSLDYMVTKIPR                         | Q8C196 | 0          | N-term +28.03 Da,                          | 4674.976563 | 3 | 584.6513062 | 584.6515387 |
| ESVQTVGQIELCFTKEDLHLR                  | Q9CQ01 | 0          | N-term +28.03 Da, K +28.03 Da,C +57.02 Da, | 4677.416016 | 4 | 640.5900269 | 640.3375356 |
| MVGPIEAVAKADKLAEEHGS                   | P56480 | 0.00434611 | N-term +28.03 Da, K +28.03 Da,             | 4683.430664 | 4 | 567.2999878 | 567.0503379 |
| ASASSTNLKDVLSNLIPEQAR                  | Q9CZU6 | 0.00055772 | N-term +28.03 Da, K +28.03 Da,             | 4683.816895 | 4 | 607.5999756 | 607.3457892 |
| GFILDGFPR                              | G3UYQ4 | 0.00211595 | N-term +28.03 Da,                          | 4684.324219 | 2 | 525.2919922 | 525.2925616 |
| LYFEELSRLR                             | Q8C196 | 0.00098039 | N-term +28.03 Da,                          | 4688.049805 | 2 | 663.8486328 | 663.8506389 |
| SAAATSAVPAPNHNQPEVFCNQIFINNEWHDAVSR    | P47738 | 0          | N-term +28.03 Da, C +57.02 Da,             | 4692.075195 | 4 | 952.7000122 | 952.2089539 |
| AIYFKEQFLDGDWATNR                      | P14211 | 0          | N-term +28.03 Da, K +28.03 Da,             | 4704.226563 | 3 | 710.6898804 | 710.6933433 |
| FNSLFKAFEEEEQALR                       | P49429 | 0          | N-term +28.03 Da, K +28.03 Da,             | 4705.777832 | 3 | 629         | 628.9999958 |
| SGDATLMLPTQTISQGAIEKVKDATR             | Q8C196 | 0          | N-term +28.03 Da, K +28.03 Da,             | 4707.112793 | 4 | 704.8900146 | 704.6363038 |
| MPFVELETNLPASR                         | O35215 | 0          | N-term +28.03 Da,                          | 4710.029297 | 2 | 816.4299927 | 816.4267197 |
| VEPLLLKAAALILQTCQR                     | Q99KG7 | 0.00250313 | N-term +28.03 Da, K +28.03 Da,C +57.02 Da, | 4710.114258 | 3 | 712.7700195 | 712.4376685 |
| MPFVELETNLPASR                         | O35215 | 0.02137767 | N-term +28.03 Da,                          | 4718.046387 | 3 | 544.6199951 | 544.6202386 |
| TTIPTKQTFTTYSDNQPGVLIQVYEGER           | P63017 | 0          | N-term +28.03 Da, K +28.03 Da,             | 4718.395508 | 3 | 1158.26001  | 1157.926259 |
| SEMDNILANLR                            | Q8BMS1 | 0          | N-term +28.03 Da,                          | 4720.177246 | 2 | 652.3300171 | 652.3373728 |
| LPLQDVYKIGGIGTVPVGR                    | P10126 | 0          | N-term +28.03 Da, K +28.03 Da,             | 4728.750488 | 3 | 680.4000244 | 680.0734951 |
| VASVGKDEYTFVVVGAGSAGCVLASR             | Q8BJ64 | 0.0005963  | N-term +28.03 Da, K +28.03 Da,C +57.02 Da, | 4733.09375  | 3 | 886.1300049 | 885.7985434 |
| NDVITVQTPAFAESVTEGDVR                  | Q9D2G2 | 0          | N-term +28.03 Da,                          | 4737.587891 | 2 | 1139.069946 | 1138.573886 |
| SSFVVRKLRREGQNFIFR                     | Q69ZR2 | 0.01809325 | N-term +28.03 Da, K +28.03 Da,             | 4741.342285 | 3 | 763.4299927 | 762.7671765 |
| SYTVDAFDYDLQGTQGISNR                   | Q64374 | 0          | N-term +28.03 Da,                          | 4741.453613 | 2 | 1112.030029 | 1111.024029 |

|                                |        |            |                                            |             |   |             |             |
|--------------------------------|--------|------------|--------------------------------------------|-------------|---|-------------|-------------|
| KVGDKVLLPEYGGTKVVLDDKDYFLFR    | Q64433 | 0          | N-term +28.03 Da, K +28.03 Da,             | 4741.53125  | 4 | 814.7199707 | 814.4664362 |
| NDVITVQTPAFAESVTEGDVR          | Q9D2G2 | 0          | N-term +28.03 Da,                          | 4741.633301 | 3 | 759.3800049 | 759.3850161 |
| DILNMDKTLKGLNSDSVTEETLR        | Q8C196 | 0.00249688 | N-term +28.03 Da, K +28.03 Da,             | 4741.744141 | 4 | 669.8599854 | 669.8585669 |
| SYTVDAFDYDLQGTQISNR            | Q64374 | 0          | N-term +28.03 Da,                          | 4741.973633 | 2 | 1111.02002  | 1111.024029 |
| MKTILSNQTVDIPENVEITLKGR        | P51410 | 0          | N-term +28.03 Da, K +28.03 Da,             | 4747.761719 | 4 | 671.8800049 | 671.6320268 |
| NDVITVQTPAFAESVTEGDVR          | Q9D2G2 | 0          | N-term +28.03 Da,                          | 4749.554688 | 3 | 760.0499878 | 759.3850161 |
| AFQDLLNLVGSBGR                 | E9Q6M5 | 0          | N-term +28.03 Da,                          | 4750.598145 | 3 | 519.2800293 | 518.9510873 |
| AALPADPPASVVVGPVVVPR           | P29699 | 0          | N-term +28.03 Da,                          | 4753.078613 | 3 | 647.0499878 | 647.0506904 |
| AALPADPPASVVVGPVVVPR           | P29699 | 0          | N-term +28.03 Da,                          | 4755.69043  | 2 | 970.0700073 | 970.0723973 |
| AFQDLLNLVGSBGR                 | E9Q6M5 | 0.01689546 | N-term +28.03 Da,                          | 4757.447754 | 2 | 777.425293  | 777.9229927 |
| LDLNLDSLKFR                    | Q8BK30 | 0.00058858 | N-term +28.03 Da, K +28.03 Da,             | 4758.443848 | 3 | 463.9400024 | 463.9415289 |
| AALPADPPASVVVGPVVVPR           | P29699 | 0.0005211  | N-term +28.03 Da,                          | 4762.500488 | 2 | 971.0700073 | 970.0723973 |
| VAAKLNVAAPVSDIIEIKSPDTFVR      | Q99LC5 | 0          | N-term +28.03 Da, K +28.03 Da,             | 4764.200195 | 4 | 667.6400146 | 667.3927393 |
| AILVGEAKKWLPELVDR              | Q9EQ20 | 0          | N-term +28.03 Da, K +28.03 Da,             | 4764.791504 | 4 | 506.3099976 | 506.0593995 |
| NDVITVQTPAFAESVTEGDVR          | Q9D2G2 | 0          | N-term +28.03 Da,                          | 4770.09375  | 2 | 1139.079956 | 1138.573886 |
| GDPKEEEEEELVDPLTTVR            | P99028 | 0.01071693 | N-term +28.03 Da, K +28.03 Da,             | 4771.132324 | 3 | 748.3699951 | 747.7092771 |
| DGSFLELFKR                     | Q9D735 | 0.00052687 | N-term +28.03 Da, K +28.03 Da,             | 4776.644531 | 3 | 423.5700073 | 423.2396861 |
| TQPTDEEMLFYSH                  | P31786 | 0.01069716 | N-term +28.03 Da,                          | 4776.936035 | 2 | 870.4000244 | 869.9032751 |
| EVVIGDGGFVFALEKR               | O35490 | 0.00250627 | N-term +28.03 Da, K +28.03 Da,             | 4777.723145 | 3 | 598.3300171 | 598.0049695 |
| SPVTFMNFPEDTLEQKAGSVGR         | Q8VCW8 | 0          | N-term +28.03 Da, K +28.03 Da,             | 4778.479004 | 3 | 822.4199829 | 822.7493008 |
| LAVPLYKNGVKIMGTSPLQIDR         | Q8C196 | 0.04524181 | N-term +28.03 Da, K +28.03 Da,             | 4786.744141 | 4 | 625.3648682 | 625.1198259 |
| GLLLGDEAPNFEANTTIGR            | Q08709 | 0          | N-term +28.03 Da,                          | 4797.757813 | 2 | 1009.52002  | 1008.523467 |
| SACFEPSLDYMVTKIPR              | Q8C196 | 0          | N-term +28.03 Da, K +28.03 Da,C +57.02 Da, | 4801.874023 | 3 | 691.3499756 | 690.6848028 |
| FDEEAIGTIQEDYLR                | Q6ZWQ9 | 0.00099256 | N-term +28.03 Da,                          | 4803.169922 | 2 | 914.4500122 | 913.9439864 |
| TALQEVLKTAIHGDGLAR             | P63323 | 0          | N-term +28.03 Da, K +28.03 Da,             | 4807.413086 | 4 | 502.0499878 | 502.0505689 |
| NLAVPLYKNGVKIMGTSPLQIDR        | Q8C196 | 0.00144648 | N-term +28.03 Da, K +28.03 Da,             | 4807.771484 | 4 | 653.8699951 | 653.630558  |
| LLRPSYVLSGSAMNVVFESEDMKR       | Q8C196 | 0          | N-term +28.03 Da, K +28.03 Da,             | 4808.69873  | 4 | 697.3599854 | 696.8660317 |
| TQSGFEGFLKDQFTTLPEVKDR         | P25688 | 0.02716131 | N-term +28.03 Da, K +28.03 Da,             | 4812.234375 | 4 | 657.8499756 | 657.5983469 |
| WGYLDQVAALR                    | Q8BK48 | 0.00064392 | N-term +28.03 Da,                          | 4821.010742 | 2 | 660.8599854 | 660.3589649 |
| VFTGTGNVSKGAQEVFNELPCEYVEPHELK | Q99K67 | 0.00363783 | N-term +28.03 Da, K +28.03 Da,C +57.02 Da, | 4822.464844 | 4 | 866.4299927 | 866.4304197 |
| SGIASAAATAVEVAR                | Q91X91 | 0.00175208 | N-term +28.03 Da,                          | 4823.290039 | 2 | 701.3900146 | 701.3884516 |
| VNHPQVSALLGEEDEEALHYLTR        | Q9EQU5 | 0          | N-term +28.03 Da,                          | 4823.900391 | 4 | 663.0900269 | 662.8383286 |
| DVSLTHLTFGKEFTEAVEAKQVAQQAER   | P67778 | 0.00063171 | N-term +28.03 Da, K +28.03 Da,             | 4824.339844 | 4 | 837.6900024 | 837.1885898 |
| VHLTDAEKAASVCLWGKVNSEVGGGEALGR | P02088 | 0.00174368 | N-term +28.03 Da, K +28.03 Da,C +57.02 Da, | 4831.283691 | 3 | 1085.560059 | 1084.894236 |
| EGDVLTLLESER                   | P62858 | 0          | N-term +28.03 Da,                          | 4848.099609 | 2 | 694.8599854 | 694.867018  |
| AAVPSGASTGIYEALER              | P17182 | 0          | N-term +28.03 Da,                          | 4849.553223 | 2 | 916.9799805 | 916.9912705 |
| KGIKSVTELNGDTITNTMTLGDIVYKR    | P12710 | 0          | N-term +28.03 Da, K +28.03 Da,             | 4849.986816 | 4 | 770.6799927 | 770.6822485 |
| AAVPSGASTGIYEALER              | P17182 | 0.00984848 | N-term +28.03 Da,                          | 4850.490723 | 2 | 916.4799805 | 916.9912705 |
| VLKEEASDYLELDTIKNLVR           | P08113 | 0          | N-term +28.03 Da, K +28.03 Da,             | 4854.416992 | 4 | 609.0999756 | 608.8466277 |
| TSACFEPSLDYMVTKIPR             | Q8C196 | 0          | N-term +28.03 Da, K +28.03 Da,C +57.02 Da, | 4855.739258 | 3 | 724.3599854 | 724.3673626 |

|                                       |        |            |                                            |             |   |             |             |
|---------------------------------------|--------|------------|--------------------------------------------|-------------|---|-------------|-------------|
| SDGAGAVIIASEDAVKKHNFTPLAR             | Q8BWT1 | 0          | N-term +28.03 Da, K +28.03 Da,             | 4857.224121 | 4 | 663.6099854 | 663.6183422 |
| PGGLLLGDEAPNFEANTTIGR                 | O08709 | 0          | N-term +28.03 Da,                          | 4857.794922 | 2 | 1086.060059 | 1085.560581 |
| LTDAEKAASVSLWGKVNSEVGGGEALGR          | P02088 | 0          | N-term +28.03 Da, K +28.03 Da,C +57.02 Da, | 4858.251953 | 4 | 754.8900146 | 754.8906643 |
| LLPPDLPDLEPECR                        | Q8BGT0 | 0          | N-term +28.03 Da, C +57.02 Da,             | 4858.523438 | 2 | 846.4371948 | 846.4372847 |
| LLPPDLPDLEPECR                        | Q8BGT0 | 0.00052854 | N-term +28.03 Da, C +57.02 Da,             | 4858.919922 | 3 | 564.6300049 | 564.627282  |
| KVLLPEYGGTKVVLDDKDYFLFR               | Q64433 | 0.03380554 | N-term +28.03 Da, K +28.03 Da,             | 4860.366699 | 4 | 707.6599731 | 707.6556646 |
| VHLTDAEKAASVSLWGKVNSEVGGGEALGR        | P02088 | 0.01102131 | N-term +28.03 Da, K +28.03 Da,C +57.02 Da, | 4863.884766 | 4 | 814.4099731 | 813.922496  |
| DELEIIEGMKFDR                         | P63038 | 0.00059102 | N-term +28.03 Da, K +28.03 Da,             | 4864.132324 | 3 | 551.289978  | 550.9517656 |
| MLIKVKTLTGKEIEIDIEPTDKVER             | P29595 | 0          | N-term +28.03 Da, K +28.03 Da,             | 4869.658691 | 4 | 760.7000122 | 760.4500918 |
| AALGGNSSPSAKDIKKILDSVIGIEADDDR        | P99027 | 0.00176289 | N-term +28.03 Da, K +28.03 Da,             | 4872.396484 | 4 | 764.6599731 | 764.4133955 |
| MLIKVKTLTGKEIEIDIEPTDKVER             | P29595 | 0.00143472 | N-term +28.03 Da, K +28.03 Da,             | 4874.896973 | 3 | 1013.929993 | 1013.597697 |
| LAGAGEAGKLEEVMLQELR                   | Q9WUM3 | 0          | N-term +28.03 Da, K +28.03 Da,             | 4876.458008 | 3 | 653.0200195 | 653.0189505 |
| ASEAIKGAVVGIDLGTNSCAVMEGKQAKVLENAEGAR | P38647 | 0          | N-term +28.03 Da, K +28.03 Da,C +57.02 Da, | 4879.373047 | 4 | 1014.780029 | 1014.792157 |
| KGKSVTELANGDITNTMTLGDIVYKR            | P12710 | 0          | N-term +28.03 Da, K +28.03 Da,             | 4880.660156 | 4 | 770.9299927 | 770.6822485 |
| AGEVVIGDGGFVFALEKR                    | O35490 | 0          | N-term +28.03 Da, K +28.03 Da,             | 4882.596191 | 3 | 640.6900024 | 640.6911623 |
| GSYQLLVPPPEALSKPLSVPTR                | O35423 | 0.00144718 | N-term +28.03 Da, K +28.03 Da,             | 4884.490234 | 3 | 802.460022  | 802.4649411 |
| PGGLLLGDEAPNFEANTTIGR                 | O08709 | 0          | N-term +28.03 Da,                          | 4886.487305 | 3 | 724.039978  | 724.0428127 |
| PGGLLLGDEAPNFEANTTIGR                 | O08709 | 0          | N-term +28.03 Da,                          | 4888.708984 | 2 | 1085.55957  | 1085.560581 |
| GVLKEYGVKVLGTSVESIMATEDR              | Q8C196 | 0.0010304  | N-term +28.03 Da, K +28.03 Da,             | 4889.332031 | 3 | 889.4799805 | 889.1542158 |
| GVLKEYGVKVLGTSVESIMATEDR              | Q8C196 | 0.00326931 | N-term +28.03 Da, K +28.03 Da,             | 4889.670898 | 4 | 667.3699951 | 667.117481  |
| VELGNDAMDFFEDDSCPKPPEIANGYVEHLVR      | Q61646 | 0.00061087 | N-term +28.03 Da, K +28.03 Da,C +57.02 Da, | 4890.021973 | 3 | 1192.219971 | 1191.560594 |
| EMGPPDPILGVTEAFKR                     | P05202 | 0          | N-term +28.03 Da, K +28.03 Da,             | 4891.283691 | 3 | 638.3446045 | 638.3448862 |
| WALGELLPDSGR                          | P70671 | 0.01236813 | N-term +28.03 Da,                          | 4891.628418 | 2 | 736.3900146 | 735.883002  |
| MQGALEKQVIELGRRRSEIAGLK               | Q8CDI7 | 0.00980762 | N-term +28.03 Da, K +28.03 Da,             | 4895.487793 | 4 | 657.1199951 | 657.1243687 |
| KGSASSALELTHEELATAEAVR                | Q8R0Y6 | 0.00097229 | N-term +28.03 Da,                          | 4897.695313 | 3 | 773.0719604 | 773.4077095 |
| TVINLNPFEVIKQR                        | Q9WTP7 | 0.00134529 | N-term +28.03 Da, K +28.03 Da,             | 4911.885742 | 3 | 610.039978  | 609.3681306 |
| NGDTITNTMTLGDIVYKR                    | P12710 | 0          | N-term +28.03 Da, K +28.03 Da,             | 4913.468262 | 3 | 690.3567505 | 690.0296269 |
| HSFDPFADASKGDDLLPAGTEDYIHIR           | P48024 | 0          | N-term +28.03 Da,                          | 4914.143066 | 4 | 761.8699951 | 761.6253593 |
| DFTPSGIAGAFR                          | P56135 | 0.03231018 | N-term +28.03 Da,                          | 4917.21582  | 2 | 633.8300171 | 633.8274978 |
| VDIEFDYDGPLMKTEVPGPR                  | P61922 | 0          | N-term +28.03 Da, K +28.03 Da,             | 4917.46875  | 3 | 779.0599976 | 778.7277254 |
| LGLEELGIELDPKGR                       | O08749 | 0          | N-term +28.03 Da, K +28.03 Da,             | 4918.328613 | 3 | 565.6599731 | 565.6610915 |
| NGDTITNTMTLGDIVYKR                    | P12710 | 0          | N-term +28.03 Da, K +28.03 Da,             | 4919.314453 | 2 | 1035.530029 | 1034.540802 |
| DGSIDLVINLPNNNTKFVHDNYVIR             | Q8C196 | 0          | N-term +28.03 Da, K +28.03 Da,             | 4919.581055 | 4 | 732.8900146 | 732.3909941 |
| GAIVDVPVGEELLGR                       | Q03265 | 0          | N-term +28.03 Da,                          | 4925.8125   | 2 | 776.4400024 | 776.4406843 |
| PGGLLLGDEAPNFEANTTIGR                 | O08709 | 0          | N-term +28.03 Da,                          | 4926.379883 | 2 | 1086.069946 | 1085.560581 |
| SRGPLLVQDVVFTDEMAHFDR                 | P24270 | 0          | N-term +28.03 Da,                          | 4928.750977 | 4 | 616.3099976 | 615.8139617 |
| DPAFTPATGTPVLGGLSYR                   | Q61176 | 0          | N-term +28.03 Da,                          | 4932.163574 | 2 | 975.0100098 | 974.5123701 |
| APVIEPSGPELVVPEGETVTLR                | P09581 | 0          | N-term +28.03 Da,                          | 4934.631348 | 2 | 1159.640015 | 1159.136122 |
| STLIMQLLR                             | O70456 | 0.00989722 | N-term +28.03 Da,                          | 4937.348145 | 2 | 551.8361206 | 551.8362792 |
| PGGLLLGDEAPNFEANTTIGR                 | O08709 | 0          | N-term +28.03 Da,                          | 4939.083008 | 2 | 1085.560059 | 1085.560581 |



|                                  |        |            |                                            |             |   |             |             |
|----------------------------------|--------|------------|--------------------------------------------|-------------|---|-------------|-------------|
| ARPTGGAGAVAMLIQPKAPLVLEQGLR      | P54869 | 0          | N-term +28.03 Da, K +28.03 Da,             | 4939.947754 | 4 | 676.1500244 | 675.6492821 |
| VHLTDAEKAAVSCLWGKVNSEVGGGALGR    | P02088 | 0          | N-term +28.03 Da, K +28.03 Da,C +57.02 Da, | 4941.044922 | 4 | 814.1699829 | 813.922496  |
| SAKVSDAISTQYPVVDHEFDVAVVGGAGGLR  | Q8K2B3 | 0          | N-term +28.03 Da, K +28.03 Da,             | 4943.459961 | 3 | 1091.569946 | 1091.236768 |
| VHLTDAEKAAVSCLWGKVNSEVGGGALGR    | P02088 | 0          | N-term +28.03 Da, K +28.03 Da,C +57.02 Da, | 4944.651367 | 3 | 1085.22998  | 1084.894236 |
| VVLPMELEPIR                      | P00405 | 0.0006035  | N-term +28.03 Da,                          | 4948.841309 | 2 | 597.8699951 | 597.8675793 |
| GLLKDFSATDLTEFAAR                | Q8BWT1 | 0          | N-term +28.03 Da, K +28.03 Da,             | 4948.97168  | 3 | 638.0100098 | 637.6789226 |
| SAKVSDAISTQYPVVDHEFDVAVVGGAGGLR  | Q8K2B3 | 0.00062972 | N-term +28.03 Da, K +28.03 Da,             | 4955.257324 | 4 | 818.9400024 | 818.6793948 |
| DVITVQTPAFAESVTEGDVR             | Q9D2G2 | 0          | N-term +28.03 Da,                          | 4955.968262 | 2 | 1081.550049 | 1081.552422 |
| GLLKDFSATDLTEFAAR                | Q8BWT1 | 0          | N-term +28.03 Da, K +28.03 Da,             | 4956.411621 | 3 | 637.6799927 | 637.6789226 |
| SAKVSDAISTQYPVVDHEFDVAVVGGAGGLR  | Q8K2B3 | 0          | N-term +28.03 Da, K +28.03 Da,             | 4960.041504 | 3 | 1091.900024 | 1091.236768 |
| ASAKVSDAISTQYPVVDHEFDVAVVGGAGGLR | Q8K2B3 | 0.00062112 | N-term +28.03 Da, K +28.03 Da,             | 4961.98291  | 4 | 836.2000122 | 836.4386733 |
| SLDMDGIIAEVR                     | P11679 | 0          | N-term +28.03 Da,                          | 4965.532227 | 2 | 673.8499756 | 673.8528558 |
| SMNPFCEIAVEEAVR                  | Q9DCW4 | 0          | N-term +28.03 Da, C +57.02 Da,             | 4969.013184 | 2 | 890.9299927 | 890.4238516 |
| VHLTDAEKAAVSCLWGKVNSEVGGGALGR    | P02088 | 0          | N-term +28.03 Da, K +28.03 Da,C +57.02 Da, | 4971.634766 | 4 | 813.9207764 | 813.922496  |
| VHLTDAEKAAVSCLWGKVNSEVGGGALGR    | P02088 | 0          | N-term +28.03 Da, K +28.03 Da,C +57.02 Da, | 4976.188477 | 3 | 1085.22998  | 1084.894236 |
| DVITVQTPAFAESVTEGDVR             | Q9D2G2 | 0          | N-term +28.03 Da,                          | 4979.753418 | 2 | 1082.550049 | 1081.552422 |
| TGAIVDVVPVGEELLGR                | Q03265 | 0          | N-term +28.03 Da,                          | 4980.835938 | 2 | 826.960022  | 826.9645239 |
| GDKVLLPEYGGTKVVLDDKDYFLFR        | Q64433 | 0.00135624 | N-term +28.03 Da, K +28.03 Da,             | 4984.015625 | 4 | 751.1699829 | 750.6677667 |
| VELGNDAMDFEDDSCPKPEIANGYVEHLVR   | Q61646 | 0          | N-term +28.03 Da, K +28.03 Da,C +57.02 Da, | 4984.10498  | 4 | 894.4199829 | 893.9222649 |
| SAKVSDAISTQYPVVDHEFDVAVVGGAGGLR  | Q8K2B3 | 0          | N-term +28.03 Da, K +28.03 Da,             | 4985.405273 | 4 | 818.9299927 | 818.6793948 |
| AGEVVIGDGGFVFALEKR               | Q35490 | 0          | N-term +28.03 Da, K +28.03 Da,             | 4987.411621 | 3 | 641.0300293 | 640.6911623 |
| ASAKVSDAISTQYPVVDHEFDVAVVGGAGGLR | Q8K2B3 | 0          | N-term +28.03 Da, K +28.03 Da,             | 4988.975098 | 3 | 1115.579956 | 1114.915806 |
| SAKVSDAISTQYPVVDHEFDVAVVGGAGGLR  | Q8K2B3 | 0          | N-term +28.03 Da, K +28.03 Da,             | 4991.349121 | 3 | 1091.569946 | 1091.236768 |
| ASAKVSDAISTQYPVVDHEFDVAVVGGAGGLR | Q8K2B3 | 0          | N-term +28.03 Da, K +28.03 Da,             | 4992.341797 | 4 | 836.9400024 | 836.4386733 |
| VPADDLTPAPATTF AHL DATTVLSR      | P56480 | 0.00062775 | N-term +28.03 Da,                          | 4992.952148 | 3 | 908.7999878 | 908.4677398 |
| SAKVSDAISTQYPVVDHEFDVAVVGGAGGLR  | Q8K2B3 | 0          | N-term +28.03 Da, K +28.03 Da,             | 4994.918945 | 3 | 1091.22998  | 1091.236768 |
| ILGQNGISDVVKVTLTPEEEAR           | P06151 | 0.00063939 | N-term +28.03 Da, K +28.03 Da,             | 4996.812012 | 3 | 809.1099854 | 808.782999  |
| ASQQDFENALNQVKL                  | Q9WUR2 | 0.00698758 | N-term +28.03 Da, K +28.03 Da,             | 4998.777832 | 3 | 587.9799805 | 587.6441008 |
| SDYLELDTIKNLVR                   | P08113 | 0.04885591 | N-term +28.03 Da, K +28.03 Da,             | 4999.455078 | 3 | 579.326355  | 578.9927298 |
| VAGPQPAQTGAPQGSLEGEYLFER         | P29391 | 0.00329625 | N-term +28.03 Da,                          | 4999.82373  | 2 | 1201.599976 | 1201.11097  |
| ASQQDFENALNQVKL                  | Q9WUR2 | 0          | N-term +28.03 Da, K +28.03 Da,             | 5002.346191 | 2 | 880.9638062 | 880.9625129 |
| KFLPLFDR                         | Q64433 | 0.00624268 | N-term +28.03 Da,                          | 5006.998535 | 2 | 545.8300171 | 546.3342293 |
| TGAIVDVVPVGEELLGR                | Q03265 | 0          | N-term +28.03 Da,                          | 5011.43457  | 2 | 826.960022  | 826.9645239 |
| FLFPEGIKGMVQAVR                  | Q8R0Y6 | 0.00142653 | N-term +28.03 Da, K +28.03 Da,             | 5012.504395 | 3 | 583.3400269 | 583.3357731 |
| VHLTDAEKAAVSCLWGKVNSEVGGGALGR    | P02088 | 0.00056818 | N-term +28.03 Da, K +28.03 Da,C +57.02 Da, | 5014.21582  | 4 | 814.4199829 | 813.922496  |
| SLLKTYEQVLENLQSKR                | P52196 | 0          | N-term +28.03 Da, K +28.03 Da,             | 5020.269531 | 4 | 534.3099976 | 534.0624053 |
| TELNGDTITNTMTLGDIVYKR            | P12710 | 0          | N-term +28.03 Da, K +28.03 Da,             | 5026.038574 | 3 | 805.0800171 | 804.4210729 |
| NDVITVQTPAFAESVTEGDVR            | Q9D2G2 | 0          | N-term +28.03 Da,                          | 5026.246582 | 2 | 1139.560059 | 1138.573886 |
| TWKVFEGLPINDFSR                  | P14152 | 0          | N-term +28.03 Da, K +28.03 Da,             | 5027.202148 | 3 | 622.3300171 | 622.3367192 |
| VLDLDFLR                         | P26638 | 0.01899171 | N-term +28.03 Da,                          | 5031.155273 | 2 | 509.8004456 | 509.8002197 |

|                                    |        |            |                                            |             |   |             |             |
|------------------------------------|--------|------------|--------------------------------------------|-------------|---|-------------|-------------|
| VHLTDAEKSAVSLWAKVNPDEVGGEALGR      | P02089 | 0          | N-term +28.03 Da, K +28.03 Da,C +57.02 Da, | 5038.010742 | 4 | 824.1799927 | 823.930321  |
| APDDSLVLPAGTSYVWVER                | Q78JT3 | 0.01099707 | N-term +28.03 Da,                          | 5046.53418  | 2 | 1003.51001  | 1002.507285 |
| PGGLLLGDEAPNFEANTTIGR              | O08709 | 0          | N-term +28.03 Da,                          | 5051.966797 | 3 | 723.7000122 | 724.0428127 |
| EFQLTSEDMKVLDDLKNKIR               | P70694 | 0.00097991 | N-term +28.03 Da, K +28.03 Da,             | 5052.078125 | 3 | 831.4400024 | 831.4403559 |
| DAGEFVDLYVPR                       | Q9CQR2 | 0          | N-term +28.03 Da,                          | 5052.15332  | 2 | 704.8578491 | 704.8589955 |
| EFQLTSEDMKVLDDLKNKIR               | P70694 | 0          | N-term +28.03 Da, K +28.03 Da,             | 5052.283203 | 4 | 624.0800171 | 623.8320861 |
| APDDSLVLPAGTSYVWVER                | Q78JT3 | 0          | N-term +28.03 Da,                          | 5052.658691 | 3 | 669.0100098 | 668.6739489 |
| SVTELNGDTITNTMTLGDIVYKR            | P12710 | 0.01265365 | N-term +28.03 Da, K +28.03 Da,             | 5053.860352 | 3 | 867.1300049 | 866.454554  |
| NDVITVQTPAFAESVTEGDVR              | Q9D2G2 | 0          | N-term +28.03 Da,                          | 5056.910156 | 2 | 1139.569946 | 1138.573886 |
| SLAPGHVADFLVADFR                   | P97328 | 0.00210438 | N-term +28.03 Da,                          | 5060.442383 | 3 | 581.9799805 | 581.6456641 |
| SLAPGHVADFLVADFR                   | P97328 | 0          | N-term +28.03 Da,                          | 5063.151367 | 3 | 581.3200073 | 581.6456641 |
| SLDMDGIIAEVR                       | P11679 | 0          | N-term +28.03 Da,                          | 5063.676758 | 2 | 674.3499756 | 673.8528558 |
| AIKFLEVIKPF                        | P61620 | 0.000978   | N-term +28.03 Da, K +28.03 Da,             | 5064.133789 | 3 | 463.9700012 | 463.6353767 |
| DGSIDLVINLPNNNTKFVHDNYVIR          | Q8C196 | 0          | N-term +28.03 Da, K +28.03 Da,             | 5068.972656 | 3 | 976.1799927 | 976.1855666 |
| SSSGNPLVYLDVGDGQPLGR               | Q99KR7 | 0          | N-term +28.03 Da,                          | 5069.340332 | 2 | 1066.050049 | 1065.544931 |
| VHLTDAEKSAVSLWAKVNPDEVGGEALGR      | P02089 | 0          | N-term +28.03 Da, K +28.03 Da,C +57.02 Da, | 5069.912598 | 4 | 823.9294434 | 823.930321  |
| EPIDATGFININSLR                    | P16460 | 0.00052138 | N-term +28.03 Da,                          | 5070.621582 | 2 | 844.960022  | 844.4543233 |
| VHLTDAEKSAVSLWAKVNPDEVGGEALGR      | P02089 | 0          | N-term +28.03 Da, K +28.03 Da,C +57.02 Da, | 5071.114258 | 3 | 1098.910034 | 1098.238002 |
| DLTDPAPATTFAHLDAITVLSR             | P56480 | 0          | N-term +28.03 Da,                          | 5074.628418 | 3 | 781.4099731 | 781.0726608 |
| YMIGEQQFSSPLGWETVR                 | O55239 | 0          | N-term +28.03 Da, K +28.03 Da,             | 5074.9375   | 3 | 766.7399902 | 766.4048051 |
| EANLAAAFGKPIINF                    | O08749 | 0.04693814 | N-term +28.03 Da, K +28.03 Da,             | 5081.889648 | 2 | 759.9099731 | 759.9193872 |
| EDVQETDTSQKDQSPASHEIATNLGDFAIISLYR | P07758 | 0          | N-term +28.03 Da,                          | 5084.688477 | 4 | 931.7000122 | 931.2011552 |
| DLTDPAPATTFAHLDAITVLSR             | P56480 | 0          | N-term +28.03 Da,                          | 5087.404297 | 2 | 1171.599976 | 1171.105353 |
| EDVQETDTSQKDQSPASHEIATNLGDFAIISLYR | P07758 | 0          | N-term +28.03 Da,                          | 5090.388672 | 3 | 1241.930054 | 1241.265781 |
| AIKFLEVIKPF                        | P61620 | 0.00063131 | N-term +28.03 Da, K +28.03 Da,             | 5095.143066 | 3 | 463.6347351 | 463.6353767 |
| VELGNDAMDFEDDSCPKPPEIANGYVEHLVR    | Q61646 | 0          | N-term +28.03 Da, K +28.03 Da,C +57.02 Da, | 5097.658203 | 4 | 894.4199829 | 893.9222649 |
| KSPIFGPQEVSSIEGDSVSITCYYPDTSVNR    | O70570 | 0          | N-term +28.03 Da, C +57.02 Da,             | 5102.594727 | 3 | 1164.22998  | 1163.567855 |
| ADQPIEADVTVIGSGPGGYVAAIK           | O08749 | 0          | N-term +28.03 Da, K +28.03 Da,             | 5102.771973 | 2 | 1192.630005 | 1192.639029 |
| GILEKISEIEKEIAR                    | Q9QXB9 | 0          | N-term +28.03 Da, K +28.03 Da,             | 5103.880371 | 3 | 604.6992798 | 604.6995463 |
| GILEKISEIEKEIAR                    | Q9QXB9 | 0          | N-term +28.03 Da, K +28.03 Da,             | 5104.322754 | 4 | 453.7799988 | 453.7764788 |
| SVLSEMQMIEQETPLSAKSSR              | Q99K28 | 0          | N-term +28.03 Da, K +28.03 Da,             | 5113.221191 | 3 | 803.4099731 | 803.0784298 |
| EDVQETDTSQKDQSPASHEIATNLGDFAIISLYR | P07758 | 0          | N-term +28.03 Da,                          | 5114.939453 | 4 | 931.2007446 | 931.2011552 |
| SVPIATYGPVSPVTSFQPLPR              | Q8VCF0 | 0          | N-term +28.03 Da,                          | 5133.157227 | 3 | 748.4099731 | 747.7474482 |
| SQSLFVDIPSKIICR                    | Q64374 | 0.00059032 | N-term +28.03 Da, K +28.03 Da,C +57.02 Da, | 5133.599121 | 3 | 645.039978  | 644.7044143 |
| VVVAPAQTLNAEFQMLR                  | Q8C196 | 0          | N-term +28.03 Da,                          | 5136.961426 | 3 | 668.3699951 | 668.0311902 |
| SVPIATYGPVSPVTSFQPLPR              | Q8VCF0 | 0          | N-term +28.03 Da,                          | 5140.500488 | 2 | 1121.619995 | 1121.117534 |
| IAELGIYPAVDPLDSTSR                 | P56480 | 0.02144316 | N-term +28.03 Da,                          | 5141.229004 | 2 | 973.0200195 | 973.0174857 |
| SKAEELGLPILGVLR                    | Q8VCHO | 0.01839001 | N-term +28.03 Da, K +28.03 Da,             | 5143.184082 | 3 | 551.3400269 | 551.0099432 |
| SVPIATYGPVSPVTSFQPLPR              | Q8VCF0 | 0          | N-term +28.03 Da,                          | 5144.959473 | 3 | 747.75      | 747.7474482 |
| AELIDFFR                           | Q8CHT0 | 0.02384951 | N-term +28.03 Da,                          | 5148.839355 | 2 | 519.7800293 | 519.7845696 |

|                            |        |            |                                            |             |   |             |             |
|----------------------------|--------|------------|--------------------------------------------|-------------|---|-------------|-------------|
| VKLTAEIEQAAQYTNVAVR        | P57784 | 0          | N-term +28.03 Da, K +28.03 Da,             | 5163.140137 | 3 | 725.4099731 | 725.4108362 |
| SPASHEIATNLGDFAISLYR       | P07758 | 0          | N-term +28.03 Da,                          | 5165.37793  | 3 | 731.3800049 | 730.7111744 |
| WAKGHYTEGAELVDSVLDVVR      | P68372 | 0.00061162 | N-term +28.03 Da, K +28.03 Da,             | 5172.070801 | 3 | 801.0900269 | 800.7567839 |
| WAKGHYTEGAELVDSVLDVVR      | P68372 | 0.00059809 | N-term +28.03 Da, K +28.03 Da,             | 5172.236328 | 4 | 601.0700073 | 600.819407  |
| SVTELNGDTITNTMTLGDIVYKR    | P12710 | 0.00054885 | N-term +28.03 Da, K +28.03 Da,             | 5173.615234 | 3 | 866.4400024 | 866.454554  |
| SQLLQEDSLNVADLSSLR         | P97372 | 0          | N-term +28.03 Da,                          | 5178.896484 | 2 | 1009.539978 | 1008.534032 |
| LEGLTDEINFLR               | P11679 | 0          | N-term +28.03 Da,                          | 5182.020508 | 2 | 724.3900146 | 724.3932026 |
| GVQPPNFVWVLPGR             | Q6NT99 | 0.004329   | N-term +28.03 Da,                          | 5186.603516 | 2 | 792.4299927 | 791.4304532 |
| GLDPAFTPATGTPVLGGLSYR      | Q61176 | 0          | N-term +28.03 Da,                          | 5197.113281 | 2 | 1060.069946 | 1059.565134 |
| GVQPPNFVWVLPGR             | Q6NT99 | 0          | N-term +28.03 Da,                          | 5197.612793 | 2 | 791.4299927 | 791.4304532 |
| GLDPAFTPATGTPVLGGLSYR      | Q61176 | 0          | N-term +28.03 Da,                          | 5199.162598 | 3 | 706.710022  | 706.712515  |
| SLLFVDIPSKIICR             | Q64374 | 0.00059952 | N-term +28.03 Da, K +28.03 Da,C +57.02 Da, | 5204.242676 | 3 | 573.0100098 | 573.0075451 |
| SLGQWLQEEKVPAIYGVDR        | Q8C196 | 0          | N-term +28.03 Da, K +28.03 Da,             | 5207.903809 | 3 | 782.7600098 | 782.4215126 |
| SEFPWEVPPKLVF              | Q91X83 | 0.00053706 | N-term +28.03 Da, K +28.03 Da,             | 5213.088379 | 3 | 564.3300171 | 563.9920008 |
| LEGLTDEINFLR               | P11679 | 0          | N-term +28.03 Da,                          | 5214.874023 | 2 | 724.3911133 | 724.3932026 |
| AFDFKDVTLGSLVGR            | Q9R0H0 | 0          | N-term +28.03 Da, K +28.03 Da,             | 5215.890137 | 3 | 561.3099976 | 560.9821648 |
| APSQLALFSVSDKTGLVEFAR      | Q9CWJ9 | 0          | N-term +28.03 Da, K +28.03 Da,             | 5225.834473 | 3 | 765.0900269 | 764.7581246 |
| GVDLLADAVAVTMGPKGR         | P63038 | 0          | N-term +28.03 Da, K +28.03 Da,             | 5226.109863 | 3 | 609.6799927 | 609.3449975 |
| SVVVAPAQTLNAEFQMLR         | Q8C196 | 0          | N-term +28.03 Da,                          | 5228.733887 | 2 | 1045.560059 | 1045.059162 |
| TEEDCTEELDFLHAR            | P99028 | 0          | N-term +28.03 Da, C +57.02 Da,             | 5233.773438 | 3 | 681.3099976 | 680.6386874 |
| GVDLLADAVAVTMGPKGR         | P63038 | 0          | N-term +28.03 Da, K +28.03 Da,             | 5234.027832 | 3 | 610.0100098 | 609.3449975 |
| VSPSPVDPVAVPVVPIGPPAGFR    | Q05920 | 0          | N-term +28.03 Da,                          | 5236.824219 | 3 | 760.7600098 | 760.7632096 |
| YVPADDLTDPAATTFAHLDTTVLSR  | P56480 | 0          | N-term +28.03 Da,                          | 5240.643066 | 3 | 963.4899902 | 962.8221829 |
| PTGGAGAVAMLIQPKAPLVLEQGLR  | P54869 | 0          | N-term +28.03 Da, K +28.03 Da,             | 5242.733398 | 2 | 1236.699951 | 1236.722175 |
| TFVCPTEIIAFSDR             | P35700 | 0          | N-term +28.03 Da, C +57.02 Da,             | 5243.421387 | 2 | 842.9199829 | 842.4241772 |
| VSPSPVDPVAVPVVPIGPPAGFR    | Q05920 | 0          | N-term +28.03 Da,                          | 5246.626953 | 3 | 761.4299927 | 760.7632096 |
| DEPQSQWDKVKDFANVYVDAVKDSGR | Q00623 | 0          | N-term +28.03 Da, K +28.03 Da,             | 5247.159668 | 4 | 777.8900146 | 777.8963754 |
| EGEPEVTDQLEWQSNQPWEQALNR   | P08226 | 0          | N-term +28.03 Da,                          | 5259.271484 | 3 | 971.460022  | 971.1212917 |
| EGEPEVTDQLEWQSNQPWEQALNR   | P08226 | 0          | N-term +28.03 Da,                          | 5263.289551 | 2 | 1456.680054 | 1456.178299 |
| NWAKGHYTEGAELVDSVLDVVR     | P68372 | 0.04300063 | N-term +28.03 Da, K +28.03 Da,             | 5265.573242 | 3 | 838.4400024 | 838.7710933 |
| YHVEELDPGVVDNFPLK          | P30115 | 0          | N-term +28.03 Da, K +28.03 Da,             | 5267.010254 | 3 | 714.0499878 | 714.0490157 |
| GNPALAQPLIQNVKKILESDR      | Q8C196 | 0          | N-term +28.03 Da, K +28.03 Da,             | 5267.506348 | 4 | 598.0999756 | 597.8547867 |
| SLKDLDPVQELITQVR           | Q8BMA6 | 0.01013133 | N-term +28.03 Da, K +28.03 Da,             | 5270.041504 | 3 | 637.7000122 | 637.370089  |
| EGEPEVTDQLEWQSNQPWEQALNR   | P08226 | 0          | N-term +28.03 Da,                          | 5274.764648 | 2 | 1456.176758 | 1456.178299 |
| GPSQMALEDLAMFR             | P40142 | 0          | N-term +28.03 Da,                          | 5274.89502  | 2 | 797.3898315 | 797.3918224 |
| AAAELIDFFR                 | Q8CHT0 | 0.00053648 | N-term +28.03 Da,                          | 5278.055664 | 2 | 590.8232422 | 590.8216838 |
| DEPQSQWDKVKDFANVYVDAVKDSGR | Q00623 | 0          | N-term +28.03 Da, K +28.03 Da,             | 5279.715332 | 4 | 778.4000244 | 777.8963754 |
| SCQSDLYWTIHGLWPDPR         | Q9CQ01 | 0.00060533 | N-term +28.03 Da, C +57.02 Da,             | 5281.643555 | 3 | 760.0200195 | 759.6846309 |
| GDTFLGGEDFDQALLR           | P38647 | 0          | N-term +28.03 Da,                          | 5281.755859 | 2 | 891.4366455 | 891.4388708 |
| EGEPEVTDQLEWQSNQPWEQALNR   | P08226 | 0          | N-term +28.03 Da,                          | 5283.874512 | 3 | 971.1199951 | 971.1212917 |

|                                |        |            |                                            |             |   |             |             |
|--------------------------------|--------|------------|--------------------------------------------|-------------|---|-------------|-------------|
| DKLLVVPQDGSHWLSMKEIVEHLSE      | Q64435 | 0          | N-term +28.03 Da, K +28.03 Da,             | 5284.628418 | 4 | 783.4199829 | 783.1745904 |
| FFSVFYTFVLVPMNLPLIYSLR         | Q7TRD6 | 0.03290323 | N-term +28.03 Da,                          | 5285.277344 | 4 | 650.1199951 | 649.6075569 |
| ILNLPESWDWR                    | P97821 | 0.00059559 | N-term +28.03 Da,                          | 5287.850098 | 2 | 728.882019  | 728.8828045 |
| DIVLTQSPASLAVSLGQR             | P01654 | 0          | N-term +28.03 Da,                          | 5291.000488 | 2 | 942.0300293 | 942.0334697 |
| VSDAISTQYPVVDHEFDVAVVVGAGGAGLR | Q8K2B3 | 0          | N-term +28.03 Da,                          | 5293.539063 | 3 | 987.1799927 | 986.5049653 |
| GAGAVAMLIGPKAPLVLEQGLR         | P54869 | 0          | N-term +28.03 Da, K +28.03 Da,             | 5296.6875   | 3 | 739.7800293 | 739.7765729 |
| AKVAVLGASGGIGQPLSLLKNSPLVSR    | P08249 | 0          | N-term +28.03 Da, K +28.03 Da,             | 5297.056641 | 4 | 708.6900024 | 708.1876633 |
| QQQRDFIETQMENYDK               | P58390 | 0.04552541 | N-term +28.03 Da, K +28.03 Da,             | 5302.406738 | 2 | 1065.01001  | 1065.002042 |
| AIAELGIYPAVDPLDSTSR            | P56480 | 0          | N-term +28.03 Da,                          | 5305.132324 | 2 | 1008.530029 | 1008.536043 |
| AIAELGIYPAVDPLDSTSR            | P56480 | 0          | N-term +28.03 Da,                          | 5309.87207  | 3 | 673.0200195 | 672.6931206 |
| ATTNPSQLLPLELVDKCIGSR          | P62322 | 0          | N-term +28.03 Da, K +28.03 Da,C +57.02 Da, | 5311.377441 | 3 | 790.1017456 | 790.1016742 |
| VSDAISTQYPVVDHEFDVAVVVGAGGAGLR | Q8K2B3 | 0          | N-term +28.03 Da,                          | 5318.442383 | 3 | 986.5       | 986.5049653 |
| MKIAVIGQSLFGQEVYCCQLR          | Q8R0Y6 | 0          | N-term +28.03 Da, K +28.03 Da,C +57.02 Da, | 5320.949707 | 3 | 799.4299927 | 799.4324778 |
| NDVITVQTPAFAESVTEGDVR          | Q9D2G2 | 0          | N-term +28.03 Da,                          | 5329.200195 | 2 | 1139.060059 | 1138.573886 |
| NDVITVQTPAFAESVTEGDVR          | Q9D2G2 | 0          | N-term +28.03 Da,                          | 5330.885254 | 3 | 760.0499878 | 759.3850161 |
| FDPFADASKGDDLLPAGTEDYIHIR      | P48024 | 0.0005531  | N-term +28.03 Da, K +28.03 Da,             | 5337.176758 | 4 | 705.8499756 | 705.602624  |
| VKDGTKLNDELEIIEGMKFDR          | P63038 | 0.00987842 | N-term +28.03 Da, K +28.03 Da,             | 5341.053223 | 4 | 641.0900269 | 641.3516486 |
| SGDATLMLPTQTISQGAIEKVKDATR     | Q8C196 | 0          | N-term +28.03 Da, K +28.03 Da,             | 5343.384766 | 3 | 938.8300171 | 939.1793129 |
| GLFIHDDKILR                    | P35700 | 0.01751927 | N-term +28.03 Da, K +28.03 Da,             | 5345.499023 | 2 | 708.4299927 | 708.4346727 |
| TGAIVDVPVGEELLGR               | Q03265 | 0.00058072 | N-term +28.03 Da,                          | 5349.322754 | 2 | 826.460022  | 826.9645239 |
| SDFPFADASKGDDLLPAGTEDYIHIR     | P48024 | 0.00056625 | N-term +28.03 Da, K +28.03 Da,             | 5349.459473 | 4 | 727.8599854 | 727.3606312 |
| LENYPIELGPNVDVLLKMH            | Q64442 | 0.02905249 | N-term +28.03 Da, K +28.03 Da,             | 5351.488281 | 3 | 750.4099731 | 750.0730554 |
| FDPFADASKGDDLLPAGTEDYIHIR      | P48024 | 0.01073279 | N-term +28.03 Da, K +28.03 Da,             | 5351.626465 | 3 | 941.1400146 | 940.4677398 |
| VALTGLTVAEYFR                  | P56480 | 0          | N-term +28.03 Da,                          | 5356.289551 | 2 | 734.4099731 | 734.4139377 |
| SPPGDTSNLFPGTWYLER             | P54869 | 0          | N-term +28.03 Da,                          | 5360.041992 | 2 | 1033.004517 | 1033.00491  |
| TNPSQLLPLELVDKCIGSR            | P62322 | 0.00141643 | N-term +28.03 Da, K +28.03 Da,C +57.02 Da, | 5360.147949 | 3 | 733.0700073 | 732.7400764 |
| NDVITVQTPAFAESVTEGDVR          | Q9D2G2 | 0          | N-term +28.03 Da,                          | 5361.499023 | 2 | 1139.065308 | 1138.573886 |
| NDVITVQTPAFAESVTEGDVR          | Q9D2G2 | 0          | N-term +28.03 Da,                          | 5361.677246 | 3 | 760.0499878 | 759.3850161 |
| DYLELDTIKNLVR                  | P08113 | 0.00063331 | N-term +28.03 Da, K +28.03 Da,             | 5370.265137 | 3 | 549.9799805 | 549.9820534 |
| GLDFSAKVIQGSLSLSPQAVR          | Q9Z2V4 | 0          | N-term +28.03 Da, K +28.03 Da,             | 5371.185547 | 3 | 753.4199829 | 753.0898742 |
| GPGNPALAQPLIQNVKKILESDR        | Q8C196 | 0.03743655 | N-term +28.03 Da, K +28.03 Da,             | 5376.208984 | 4 | 636.8800049 | 636.3733437 |
| RVAGPQPVTGVAQASLGEYLFER        | P49945 | 0.0054816  | N-term +28.03 Da,                          | 5376.644043 | 3 | 868.460022  | 867.7976424 |
| SSALELTEEELATAEAVR             | Q8R0Y6 | 0.00097943 | N-term +28.03 Da,                          | 5382.663086 | 2 | 973.5100098 | 973.9994906 |
| DPAIYFKEQFLDGDWATNR            | P14211 | 0          | N-term +28.03 Da, K +28.03 Da,             | 5389.250977 | 3 | 781.7199707 | 781.3865794 |
| SPTNCDASEPLAEKVLDLINKGR        | Q9ESB3 | 0          | N-term +28.03 Da, K +28.03 Da,C +57.02 Da, | 5390.709473 | 4 | 653.8499756 | 653.5994554 |
| NDVITVQTPAFAESVTEGDVR          | Q9D2G2 | 0          | N-term +28.03 Da,                          | 5392.814941 | 2 | 1139.560059 | 1138.573886 |
| ADLPALPGGPAGGTGELAKYGLPGVAQLR  | O08600 | 0          | N-term +28.03 Da, K +28.03 Da,             | 5393.180664 | 3 | 935.5200195 | 934.855269  |
| DPAIYFKEQFLDGDWATNR            | P14211 | 0          | N-term +28.03 Da, K +28.03 Da,             | 5393.801758 | 2 | 1171.579956 | 1171.576231 |
| ADLPALPGGPAGGTGELAKYGLPGVAQLR  | O08600 | 0.0014171  | N-term +28.03 Da, K +28.03 Da,             | 5399.460938 | 4 | 701.3900146 | 701.3932708 |
| DEDLDLEEALPEMDEDDQKAVKDEL      | P09103 | 0.00055897 | N-term +28.03 Da, K +28.03 Da,             | 5401.655762 | 3 | 1078.819946 | 1078.153554 |

|                              |        |            |                                             |             |   |             |             |
|------------------------------|--------|------------|---------------------------------------------|-------------|---|-------------|-------------|
| DPAIYFKEQFLDGDWNTNR          | P14211 | 0          | N-term +28.03 Da, K +28.03 Da,              | 5403.473633 | 2 | 1172.579956 | 1171.576231 |
| TGDSVVVAPAQTLNAEFQMLR        | Q8C196 | 0          | N-term +28.03 Da,                           | 5415.628418 | 2 | 1182.099976 | 1181.607205 |
| GEMAIKDAQTKLAELEAALQR        | P11679 | 0          | N-term +28.03 Da, K +28.03 Da,              | 5416.633789 | 3 | 791.1099854 | 790.7735576 |
| TGDSVVVAPAQTLNAEFQMLR        | Q8C196 | 0          | N-term +28.03 Da,                           | 5420.121094 | 2 | 1181.609985 | 1181.607205 |
| DPAIYFKEQFLDGDWNTNR          | P14211 | 0          | N-term +28.03 Da, K +28.03 Da,              | 5420.967285 | 3 | 781.385437  | 781.3865794 |
| TLVGYDLVPEPKIIDAALR          | P12787 | 0          | N-term +28.03 Da, K +28.03 Da,              | 5425.362793 | 3 | 713.4099731 | 713.7523105 |
| DPAIYFKEQFLDGDWNTNR          | P14211 | 0          | N-term +28.03 Da, K +28.03 Da,              | 5434.647461 | 2 | 1171.575073 | 1171.576231 |
| ALAPDSSLVPAGTSYVWER          | Q78JT3 | 0          | N-term +28.03 Da,                           | 5435.441406 | 2 | 1095.069946 | 1094.567874 |
| YEPIDATGFININSLR             | P16460 | 0.00099305 | N-term +28.03 Da,                           | 5437.223633 | 3 | 617.6599731 | 617.6597508 |
| YEPIDATGFININSLR             | P16460 | 0          | N-term +28.03 Da,                           | 5438.260742 | 2 | 926.4899902 | 925.985988  |
| ALAPDSSLVPAGTSYVWER          | Q78JT3 | 0          | N-term +28.03 Da,                           | 5438.375977 | 2 | 1094.560059 | 1094.567874 |
| ALAPDSSLVPAGTSYVWER          | Q78JT3 | 0          | N-term +28.03 Da,                           | 5438.484863 | 3 | 730.0456543 | 730.0476751 |
| DWVIPPINLPENSR               | P15116 | 0.00980392 | N-term +28.03 Da,                           | 5440.486816 | 2 | 840.4500122 | 839.4515833 |
| GPEAIECWFVEDAGGGGLSKKPATLLLR | Q9R233 | 0          | N-term +28.03 Da, K +28.03 Da, C +57.02 Da, | 5442.700195 | 4 | 765.1599731 | 764.6625871 |
| DPAIYFKEQFLDGDWNTNR          | P14211 | 0          | N-term +28.03 Da, K +28.03 Da,              | 5452.620117 | 3 | 781.7199707 | 781.3865794 |
| TLGIETVGGVMTKLIPR            | P20029 | 0          | N-term +28.03 Da, K +28.03 Da,              | 5452.867188 | 3 | 614.7000122 | 614.3691429 |
| TLVGYDLVPEPKIIDAALR          | P12787 | 0          | N-term +28.03 Da, K +28.03 Da,              | 5456.902344 | 3 | 714.0900269 | 713.7523105 |
| DPAIYFKEQFLDGDWNTNR          | P14211 | 0          | N-term +28.03 Da, K +28.03 Da,              | 5465.29834  | 2 | 1171.569946 | 1171.576231 |
| TLGIETVGGVMTKLIPR            | P20029 | 0          | N-term +28.03 Da, K +28.03 Da,              | 5472.369629 | 3 | 614.3699951 | 614.3691429 |
| NPTVFFDITADDEPLGR            | P17742 | 0          | N-term +28.03 Da,                           | 5473.292969 | 2 | 967.9799805 | 967.9783605 |
| DPAIYFKEQFLDGDWNTNR          | P14211 | 0          | N-term +28.03 Da, K +28.03 Da,              | 5474.438965 | 3 | 782.0700073 | 781.3865794 |
| DPAIYFKEQFLDGDWNTNR          | P14211 | 0          | N-term +28.03 Da, K +28.03 Da,              | 5485.067871 | 3 | 782.0499878 | 781.3865794 |
| GPFTPDLAHPVADVTVAEKEGWPLDIR  | Q99K10 | 0          | N-term +28.03 Da, K +28.03 Da,              | 5486.902832 | 4 | 761.9000244 | 761.6526481 |
| VDGLDPAFTPATGTPVLGGLSYR      | Q61176 | 0          | N-term +28.03 Da,                           | 5487.145996 | 2 | 1167.119995 | 1166.612814 |
| VDGLDPAFTPATGTPVLGGLSYR      | Q61176 | 0          | N-term +28.03 Da,                           | 5491.394531 | 2 | 1166.619995 | 1166.612814 |
| ITFDEIVNIAR                  | P35979 | 0.03160639 | N-term +28.03 Da,                           | 5498.087402 | 2 | 659.8699951 | 659.8719055 |
| PMFIVNTNVPR                  | P34884 | 0.00063091 | N-term +28.03 Da,                           | 5499.27002  | 2 | 658.3699951 | 658.3631928 |
| DWVIPPINLPENSR               | P15116 | 0          | N-term +28.03 Da,                           | 5503.621094 | 2 | 839.4500122 | 839.4515833 |
| PTGGAGAVAMLIQKAPLVLEQGLR     | P54869 | 0.00133749 | N-term +28.03 Da, K +28.03 Da,              | 5512.120605 | 3 | 825.4799805 | 824.8172087 |
| VNPTVFFDITADDEPLGR           | P17742 | 0          | N-term +28.03 Da,                           | 5515.318848 | 2 | 1018.02002  | 1017.512568 |
| EGTLESIVEKKVKELLANR          | Q8K426 | 0          | N-term +28.03 Da, K +28.03 Da,              | 5519.323242 | 4 | 568.0900269 | 567.8438876 |
| GPLLVDVVFTEDEMAHFDR          | P24270 | 0          | N-term +28.03 Da,                           | 5527.78125  | 3 | 740.3699951 | 739.7051433 |
| DWVIPPINLPENSR               | P15116 | 0.00061013 | N-term +28.03 Da,                           | 5527.862793 | 3 | 559.9699707 | 559.9701477 |
| EGLPILNALEVQGR               | P56480 | 0          | N-term +28.03 Da,                           | 5529.241211 | 2 | 817.9699707 | 817.4672334 |
| KEPLFGISTGNIITGLAAGAKSY      | Q8C196 | 0          | N-term +28.03 Da,                           | 5529.930176 | 3 | 798.1199951 | 798.121063  |
| DWVIPPINLPENSR               | P15116 | 0          | N-term +28.03 Da,                           | 5534.487305 | 2 | 839.4500732 | 839.4515833 |
| EGATAAPELSALEEAFR            | Q7TQD2 | 0          | N-term +28.03 Da,                           | 5535.153809 | 2 | 895.9500122 | 895.4519784 |
| YDLLRPDVVLETAWR              | Q68FD5 | 0          | N-term +28.03 Da,                           | 5537.030273 | 3 | 625.6699829 | 625.3438739 |
| LYSSDDVIELTPSNFNR            | Q922R8 | 0.04776675 | N-term +28.03 Da,                           | 5541.674805 | 2 | 1042.51001  | 1043.01039  |
| VDMVNDGLEDLFR                | F6RWRS | 0          | N-term +28.03 Da,                           | 5542.103516 | 2 | 776.3800049 | 775.8796025 |

|                                           |        |            |                                            |             |   |             |             |
|-------------------------------------------|--------|------------|--------------------------------------------|-------------|---|-------------|-------------|
| VQGDYEPIDATGFININSLR                      | P16460 | 0          | N-term +28.03 Da,                          | 5545.537109 | 2 | 1126.079956 | 1125.573688 |
| DDDIAALVVDNGSGMCKAGFAGDDAPR               | P60710 | 0.0453125  | N-term +28.03 Da, K +28.03 Da,C +57.02 Da, | 5546.76709  | 2 | 1396.630005 | 1397.144556 |
| LSPTNCDASEPLAEKVLDLINKGR                  | Q9ESB3 | 0          | N-term +28.03 Da, K +28.03 Da,C +57.02 Da, | 5547.178223 | 4 | 681.8696899 | 681.8704715 |
| VNPTVFFDITADDEPLGR                        | P17742 | 0.00326264 | N-term +28.03 Da,                          | 5547.321777 | 2 | 1018.52002  | 1017.512568 |
| VQGDYEPIDATGFININSLR                      | P16460 | 0          | N-term +28.03 Da,                          | 5547.781738 | 3 | 751.0499878 | 750.7182177 |
| HVEELDPGVVDNFPLLKALR                      | P30115 | 0          | N-term +28.03 Da, K +28.03 Da,             | 5550.062988 | 3 | 773.4400024 | 773.1020026 |
| DPAIYFKEQFLDGDAWTNR                       | P14211 | 0          | N-term +28.03 Da, K +28.03 Da,             | 5554.23877  | 3 | 782.0499878 | 781.3865794 |
| FGSVETWPWQVLSTGGKEDVSYEER                 | Q9R257 | 0          | N-term +28.03 Da, K +28.03 Da,             | 5554.996582 | 3 | 981.8099976 | 981.4784162 |
| VLLESEQFLTELTR                            | P16254 | 0          | N-term +28.03 Da,                          | 5560.281738 | 2 | 854.4699707 | 853.4721819 |
| EGAELVDSVLDVVR                            | P68372 | 0.00059347 | N-term +28.03 Da,                          | 5561.90332  | 2 | 765.4199829 | 764.9144997 |
| YAEELSEDLKQLLALKGSSYGLLER                 | Q8C5H8 | 0.00136364 | N-term +28.03 Da, K +28.03 Da,             | 5563.997559 | 4 | 749.9199829 | 749.9102227 |
| GDYEPIDATGFININSLR                        | P16460 | 0          | N-term +28.03 Da,                          | 5565.526855 | 2 | 1012        | 1012.010192 |
| DWVIPPINLPENSR                            | P15116 | 0          | N-term +28.03 Da,                          | 5565.942383 | 2 | 839.4519043 | 839.4515833 |
| DPAIYFKEQFLDGDAWTNR                       | P14211 | 0          | N-term +28.03 Da, K +28.03 Da,             | 5567.441895 | 2 | 1172.579956 | 1171.576231 |
| GSASGTTLEALDCILPPTRPDKPLR                 | P10126 | 0          | N-term +28.03 Da, K +28.03 Da,C +57.02 Da, | 5571.78418  | 4 | 735.1500244 | 734.6534909 |
| TKKGSITSVQAIYVPADDLTDPAPATTF AHL DATTVLSR | P56480 | 0          | N-term +28.03 Da, K +28.03 Da,             | 5572.082031 | 4 | 1039.800049 | 1039.809867 |
| IYVPADDLTDPAPATTF AHL DATTVLSR            | P56480 | 0          | N-term +28.03 Da,                          | 5572.237793 | 3 | 1000.849976 | 1000.516871 |
| DPGVVDNFPLLKALR                           | P30115 | 0          | N-term +28.03 Da, K +28.03 Da,             | 5572.412598 | 3 | 570.6699829 | 570.6698095 |
| DPAIYFKEQFLDGDAWTNR                       | P14211 | 0          | N-term +28.03 Da, K +28.03 Da,             | 5572.775391 | 2 | 1171.569946 | 1171.576231 |
| TTKKSITSVQAIYVPADDLTDPAPATTF AHL DATTVLSR | P56480 | 0          | N-term +28.03 Da, K +28.03 Da,             | 5574.079102 | 4 | 1065.310059 | 1065.071787 |
| WLQEEKVPAIYGVDR                           | Q8C196 | 0.00055218 | N-term +28.03 Da, K +28.03 Da,             | 5576.516602 | 2 | 980.0100098 | 980.5305627 |
| GQWLTLEAPLDTINVHLR                        | P70699 | 0          | N-term +28.03 Da,                          | 5579.195313 | 3 | 702.0499878 | 702.0565044 |
| LSPTNCDASEPLAEKVLDLINKGR                  | Q9ESB3 | 0          | N-term +28.03 Da, K +28.03 Da,C +57.02 Da, | 5579.809082 | 4 | 682.1199951 | 681.8704715 |
| SASGTTLEALDCILPPTRPDKPLR                  | P10126 | 0          | N-term +28.03 Da, K +28.03 Da,C +57.02 Da, | 5580.097168 | 4 | 720.6500244 | 720.3981248 |
| GQWLTLEAPLDTINVHLR                        | P70699 | 0          | N-term +28.03 Da,                          | 5581.838379 | 3 | 702.3900146 | 702.0565044 |
| IGIQDGYLSLLQDSGEVR                        | P63242 | 0          | N-term +28.03 Da,                          | 5584.023438 | 2 | 996.0300293 | 996.0258422 |
| DPAIYFKEQFLDGDAWTNR                       | P14211 | 0          | N-term +28.03 Da, K +28.03 Da,             | 5585.43457  | 3 | 781.3849487 | 781.3865794 |
| IGIQDGYLSLLQDSGEVR                        | P63242 | 0          | N-term +28.03 Da,                          | 5586.174316 | 2 | 996.5200195 | 996.0258422 |
| TFCIDPSLGLNEEQKGFQKVAFDFAAR               | Q9D7B6 | 0          | N-term +28.03 Da, K +28.03 Da,C +57.02 Da, | 5590.122559 | 4 | 794.4099731 | 793.9088569 |
| GIMNSFVNDIFER                             | P10853 | 0          | N-term +28.03 Da,                          | 5590.602539 | 2 | 785.8900146 | 785.390137  |
| VLLESEQFLTELTR                            | P16254 | 0          | N-term +28.03 Da,                          | 5591.322754 | 2 | 853.4708862 | 853.4721819 |
| SASSALELTEEELATAEAVR                      | Q8R0Y6 | 0          | N-term +28.03 Da,                          | 5591.661133 | 3 | 702.3599854 | 702.358467  |
| FTPSLSDFTFTLPAGR                          | Q9CXE7 | 0          | N-term +28.03 Da,                          | 5592.116699 | 2 | 951.4799805 | 950.477996  |
| IYVPADDLTDPAPATTF AHL DATTVLSR            | P56480 | 0          | N-term +28.03 Da,                          | 5593.600586 | 3 | 1000.52002  | 1000.516871 |
| AELDGCLQVLEDKFLR                          | G3UX05 | 0          | N-term +28.03 Da, K +28.03 Da,C +57.02 Da, | 5596.031738 | 3 | 655.0200195 | 654.6836792 |
| SASSALELTEEELATAEAVR                      | Q8R0Y6 | 0          | N-term +28.03 Da,                          | 5597.511719 | 2 | 1053.530029 | 1053.034062 |
| FTPSLSDFTFTLPAGR                          | Q9CXE7 | 0          | N-term +28.03 Da,                          | 5597.597656 | 2 | 950.4799805 | 950.477996  |
| AKVAVLGASGGIGQPLSLLKNSPLVSR               | P08249 | 0          | N-term +28.03 Da, K +28.03 Da,             | 5602.25293  | 4 | 708.4400024 | 708.1876633 |
| VESMEDALKAADTIGYPVMIR                     | Q8C196 | 0          | N-term +28.03 Da, K +28.03 Da,             | 5602.391113 | 3 | 789.0800171 | 789.0762488 |
| DPAIYFKEQFLDGDAWTNR                       | P14211 | 0          | N-term +28.03 Da, K +28.03 Da,             | 5603.609863 | 2 | 1171.574829 | 1171.576231 |

|                                 |        |            |                                            |             |   |             |             |
|---------------------------------|--------|------------|--------------------------------------------|-------------|---|-------------|-------------|
| VESMEDALKAADTIGYPMIR            | Q8C196 | 0          | N-term +28.03 Da, K +28.03 Da,             | 5606.01709  | 3 | 789.7399902 | 789.0762488 |
| GPPPIQDGEFTFLPAGR               | Q3V009 | 0          | N-term +28.03 Da,                          | 5612.530273 | 3 | 647.3499756 | 647.3473956 |
| EIENLILNDPDFQHEDYNFLTR          | Q9R0H0 | 0          | N-term +28.03 Da,                          | 5612.661133 | 3 | 922.4500122 | 921.7802064 |
| ALFPQKSSMSVTSLEDELQASIQR        | Q99JR1 | 0          | N-term +28.03 Da, K +28.03 Da,             | 5614.173828 | 3 | 908.4799805 | 907.8091084 |
| DPAIYFKEQFLDGDWNTNR             | P14211 | 0          | N-term +28.03 Da, K +28.03 Da,             | 5616.211914 | 3 | 781.385437  | 781.3865794 |
| GPPPIQDGEFTFLPAGR               | Q3V009 | 0          | N-term +28.03 Da,                          | 5616.995605 | 2 | 971.5200195 | 970.5174551 |
| PSFAVESMEDALKAADTIGYPMIR        | Q8C196 | 0          | N-term +28.03 Da, K +28.03 Da,             | 5619.647461 | 3 | 923.7976685 | 923.1396894 |
| NTSAIQDYLLQLTGAR                | Q9QUH0 | 0          | N-term +28.03 Da,                          | 5619.993652 | 2 | 903.9699707 | 903.9708694 |
| GPPPIQDGEFTFLPAGR               | Q3V009 | 0.00058241 | N-term +28.03 Da,                          | 5620.28125  | 3 | 648.0100098 | 647.3473956 |
| TTFKGKISVTELANGDTITNTMTLGDIVYKR | P12710 | 0          | N-term +28.03 Da, K +28.03 Da,             | 5625.741211 | 4 | 857.960022  | 857.9731917 |
| DLPALPGGPAGGTGELAKYGLPGVAQLR    | O08600 | 0          | N-term +28.03 Da, K +28.03 Da,             | 5628.34668  | 3 | 911.1699829 | 911.1762309 |
| VDILNQPDFSSYDFTSIR              | Q8VCW8 | 0          | N-term +28.03 Da,                          | 5628.943359 | 2 | 1074.030029 | 1073.028582 |
| DPAIYFKEQFLDGDWNTNR             | P14211 | 0.00103466 | N-term +28.03 Da, K +28.03 Da,             | 5629.143555 | 4 | 586.539978  | 586.2917537 |
| DLDFFIGDEAIEKPTYATKWPIR         | Q99JY9 | 0.01298701 | N-term +28.03 Da, K +28.03 Da,             | 5632.613281 | 3 | 937.8200073 | 937.1652206 |
| DPAIYFKEQFLDGDWNTNR             | P14211 | 0          | N-term +28.03 Da, K +28.03 Da,             | 5634.229492 | 2 | 1171.575195 | 1171.576231 |
| TTFKGKISVTELANGDTITNTMTLGDIVYKR | P12710 | 0          | N-term +28.03 Da, K +28.03 Da,             | 5639.183594 | 4 | 858.460022  | 857.9731917 |
| VNPTVFFDITADDEPLGR              | P17742 | 0          | N-term +28.03 Da,                          | 5645.015137 | 2 | 1017.51001  | 1017.512568 |
| AIYVPADLTDPAAPATTFHAHLDTTVLSR   | P56480 | 0          | N-term +28.03 Da,                          | 5645.77002  | 3 | 1024.540039 | 1024.195909 |
| DPAIYFKEQFLDGDWNTNR             | P14211 | 0          | N-term +28.03 Da, K +28.03 Da,             | 5646.69043  | 3 | 781.3852539 | 781.3865794 |
| GPPPIQDGEFTFLPAGR               | Q3V009 | 0.03211158 | N-term +28.03 Da,                          | 5649.661621 | 2 | 970.5100098 | 970.5174551 |
| GPPPIQDGEFTFLPAGR               | Q3V009 | 0.00143954 | N-term +28.03 Da,                          | 5651.978516 | 3 | 647.3499756 | 647.3473956 |
| SSWWTHVEMGPPDPILGVTEAFKR        | P05202 | 0          | N-term +28.03 Da, K +28.03 Da,             | 5653.824707 | 4 | 700.3599854 | 699.8599064 |
| SSWWTHVEMGPPDPILGVTEAFKR        | P05202 | 0          | N-term +28.03 Da, K +28.03 Da,             | 5654.409668 | 4 | 699.8599854 | 699.8599064 |
| VIQELRPTLNELGISTPEELGLDKV       | P12787 | 0          | N-term +28.03 Da, K +28.03 Da,             | 5656.353516 | 3 | 941.2000122 | 940.53034   |
| SSWWTHVEMGPPDPILGVTEAFKR        | P05202 | 0          | N-term +28.03 Da, K +28.03 Da,             | 5656.895508 | 3 | 933.4799805 | 932.8107831 |
| MLDPSIGEFIMVDR                  | Q9QXD6 | 0.00057078 | N-term +28.03 Da,                          | 5658.398438 | 2 | 826.4199829 | 825.9151305 |
| SLDKFLASVSTVLTSKYR              | P01942 | 0          | N-term +28.03 Da, K +28.03 Da,             | 5658.976563 | 4 | 525.8099976 | 525.558227  |
| VIQELRPTLNELGISTPEELGLDKV       | P12787 | 0.03982301 | N-term +28.03 Da, K +28.03 Da,             | 5659.288086 | 4 | 705.9000244 | 705.6495741 |
| TVQGDIDAIFKDLSIR                | Q9WUK2 | 0          | N-term +28.03 Da,                          | 5664.585938 | 3 | 616.3499756 | 616.3472842 |
| DPAIYFKEQFLDGDWNTNR             | P14211 | 0          | N-term +28.03 Da, K +28.03 Da,             | 5666.979004 | 2 | 1171.574341 | 1171.576231 |
| ASQQDFENALNQVKLL                | Q9WUR2 | 0          | N-term +28.03 Da, K +28.03 Da,             | 5667.270508 | 3 | 625.3400269 | 625.3387889 |
| VRPLNCIVAVSQNMGIGKNGDLPWPPLR    | P00375 | 0          | N-term +28.03 Da, K +28.03 Da,C +57.02 Da, | 5667.583984 | 4 | 790.6799927 | 790.1835922 |
| ELIPEYLNfir                     | P07901 | 0.04692356 | N-term +28.03 Da,                          | 5675.222656 | 2 | 717.9000244 | 717.9032056 |
| AKVAVLGASGGIGQPLSLLKNSPLVSR     | P08249 | 0          | N-term +28.03 Da, K +28.03 Da,             | 5676.974609 | 4 | 708.1881714 | 708.1876633 |
| DPAIYFKEQFLDGDWNTNR             | P14211 | 0          | N-term +28.03 Da, K +28.03 Da,             | 5679.1875   | 3 | 781.3855591 | 781.3865794 |
| AKVAVLGASGGIGQPLSLLKNSPLVSR     | P08249 | 0          | N-term +28.03 Da, K +28.03 Da,             | 5681.725586 | 3 | 943.9135132 | 943.9144589 |
| DYTCWKLIQECLAKEHTLR             | Q8BIA4 | 0.02600867 | N-term +28.03 Da, K +28.03 Da,C +57.02 Da, | 5682.830566 | 4 | 666.3499756 | 666.1027418 |
| GLEYLDLMSQPCR                   | G3UX05 | 0          | N-term +28.03 Da, C +57.02 Da,             | 5684.493652 | 2 | 862.4299927 | 861.9313121 |
| TEVIKAERPDLILGMGGQTALNCGVELFKR  | Q8C196 | 0.00101317 | N-term +28.03 Da, K +28.03 Da,C +57.02 Da, | 5687.003418 | 4 | 864.710022  | 864.9730971 |
| YHVEELDPGVVDNFLLKALR            | P30115 | 0          | N-term +28.03 Da, K +28.03 Da,             | 5687.364258 | 3 | 827.4500122 | 827.4564457 |

|                                        |        |            |                                             |             |   |             |             |
|----------------------------------------|--------|------------|---------------------------------------------|-------------|---|-------------|-------------|
| AKVAVLGASGGIGQPLSLLKNSPLVSR            | P08249 | 0          | N-term +28.03 Da, K +28.03 Da,              | 5697.289063 | 2 | 1415.869995 | 1415.36805  |
| LPPLESLATVEETVVR                       | Q76MZ3 | 0.0005571  | N-term +28.03 Da,                           | 5698.167969 | 3 | 594.6699829 | 594.3400182 |
| DPAIYFKEQFLDGDWNTNR                    | P14211 | 0          | N-term +28.03 Da, K +28.03 Da,              | 5700.454102 | 2 | 1172.069946 | 1171.576231 |
| FIGENMNPDMVALLDYR                      | P63028 | 0          | N-term +28.03 Da,                           | 5703.143066 | 2 | 1042.5      | 1042.002998 |
| GDGQVNYEEFVQMMMTAK                     | P62204 | 0          | N-term +28.03 Da, K +28.03 Da,              | 5708.214355 | 2 | 1001.969971 | 1001.966081 |
| AKVAVLGASGGIGQPLSLLKNSPLVSR            | P08249 | 0          | N-term +28.03 Da, K +28.03 Da,              | 5710.272461 | 4 | 708.1878052 | 708.1876633 |
| DPAIYFKEQFLDGDWNTNR                    | P14211 | 0          | N-term +28.03 Da, K +28.03 Da,              | 5710.493652 | 3 | 781.7199707 | 781.3865794 |
| LLNKLADLMER                            | O35945 | 0.00060024 | N-term +28.03 Da, K +28.03 Da,              | 5714.756348 | 2 | 685.9000244 | 686.405058  |
| GAAGATSLCFVYPLDFAR                     | P48962 | 0          | N-term +28.03 Da, C +57.02 Da,              | 5715.376953 | 2 | 972.4799805 | 972.4878404 |
| YHVEELDPGVVDNFPLLKALR                  | P30115 | 0          | N-term +28.03 Da, K +28.03 Da,              | 5718.406738 | 3 | 827.789978  | 827.4564457 |
| VFDNGSIYNPEVL DITEQALHSR               | P14869 | 0          | N-term +28.03 Da,                           | 5721.973145 | 3 | 883.1099854 | 882.4450463 |
| SSWWTHVEMGPPDPILGVTEAFKR               | S05202 | 0          | N-term +28.03 Da, K +28.03 Da,              | 5729.298828 | 4 | 699.8609009 | 699.8599064 |
| DPAIYFKEQFLDGDWNTNR                    | P14211 | 0          | N-term +28.03 Da, K +28.03 Da,              | 5731.33252  | 2 | 1172.079956 | 1171.576231 |
| GLGGYPEALTDPAYKGQILTMANPIIGNGGAPDPTAR  | Q8C196 | 0.00103842 | N-term +28.03 Da, K +28.03 Da,              | 5732.387695 | 3 | 1253.640015 | 1252.98037  |
| SGPVVAMVWEGLVVKTGR                     | P15532 | 0          | N-term +28.03 Da, K +28.03 Da,              | 5734.662109 | 3 | 685.7199707 | 685.718835  |
| DLSGTLESIPDKLKEFGNTLEDKAR              | P34928 | 0.00102093 | N-term +28.03 Da, K +28.03 Da,              | 5735.954102 | 4 | 723.4000244 | 722.8958439 |
| SQFFKGSASSALEL TEEELATAEAVR            | Q8R0Y6 | 0          | N-term +28.03 Da, K +28.03 Da,              | 5736.871582 | 3 | 943.4899902 | 943.1501882 |
| SSWWTHVEMGPPDPILGVTEAFKR               | P05202 | 0          | N-term +28.03 Da, K +28.03 Da,              | 5741.014648 | 3 | 933.1500244 | 932.8107831 |
| VLSLFLVDQNDNAPEILYPSFPTD GSTGVELAPR    | Q91XY0 | 0.00434783 | N-term +28.03 Da,                           | 5741.59082  | 4 | 948.7299805 | 948.2360033 |
| DPAIYFKEQFLDGDWNTNR                    | P14211 | 0          | N-term +28.03 Da, K +28.03 Da,              | 5743.052246 | 3 | 781.3864746 | 781.3865794 |
| VIQELRPTLNELGISTPEELGLDKV              | P12787 | 0.01268116 | N-term +28.03 Da, K +28.03 Da,              | 5752.20166  | 3 | 940.8599854 | 940.53034   |
| GQWLTLEAPLDTINVH                       | P70699 | 0.00326797 | N-term +28.03 Da,                           | 5752.496094 | 2 | 918.4899902 | 917.9885305 |
| NLDWGDNGFFKILR                         | P10605 | 0.00978179 | N-term +28.03 Da,                           | 5764.014648 | 3 | 584.6400146 | 584.3140257 |
| FEPSLDYMVTKIPR                         | Q8C196 | 0          | N-term +28.03 Da,                           | 5766.70166  | 2 | 876.460022  | 876.4736698 |
| SQFFKGSASSALEL TEEELATAEAVR            | Q8R0Y6 | 0          | N-term +28.03 Da, K +28.03 Da,              | 5769.437012 | 3 | 943.4799805 | 943.1501882 |
| DPAIYFKEQFLDGDWNTNR                    | P14211 | 0.00052274 | N-term +28.03 Da, K +28.03 Da,              | 5774.404785 | 3 | 781.3800049 | 781.3865794 |
| APAIIFIDELDAIAPKR                      | Q01853 | 0          | N-term +28.03 Da, K +28.03 Da,              | 5775.193848 | 3 | 637.3800049 | 637.0434243 |
| SQFFKGSASSALEL TEEELATAEAVR            | Q8R0Y6 | 0          | N-term +28.03 Da, K +28.03 Da,              | 5776.692383 | 3 | 943.8200073 | 943.1501882 |
| DPAIYFKEQFLDGDWNTNR                    | P14211 | 0          | N-term +28.03 Da, K +28.03 Da,              | 5787.657715 | 2 | 1171.579956 | 1171.576231 |
| ADNVIVPGTPDFLAYVR                      | O88587 | 0.00141309 | N-term +28.03 Da,                           | 5788.165527 | 2 | 938.5       | 938.0041806 |
| TGLGGYPEALTDPAYKGQILTMANPIIGNGGAPDPTAR | Q8C196 | 0.00097324 | N-term +28.03 Da, K +28.03 Da,              | 5789.557617 | 3 | 1287.319946 | 1286.66293  |
| SVQAIYVPADDLTD PAPATTF AHL DATTVLSR    | P56480 | 0          | N-term +28.03 Da,                           | 5790.060059 | 3 | 1129.25     | 1128.915583 |
| ADNVIVPGTPDFLAYVR                      | O88587 | 0          | N-term +28.03 Da,                           | 5791.916504 | 2 | 939         | 938.0041806 |
| AKVAVLGASGGIGQPLSLLKNSPLVSR            | P08249 | 0          | N-term +28.03 Da, K +28.03 Da,              | 5792.627441 | 4 | 708.4299927 | 708.1876633 |
| GKQGFIDLPEFPFGLLEPR                    | O35490 | 0.01013514 | N-term +28.03 Da, K +28.03 Da,              | 5793.733398 | 3 | 702.0499878 | 701.713967  |
| LSPTNCDASEPLAEKVL DLINKGR              | Q9ESB3 | 0          | N-term +28.03 Da, K +28.03 Da, C +57.02 Da, | 5796.682129 | 4 | 682.3699951 | 681.8704715 |
| TATFAQALQSV PETQVSILDNGLR              | Q9CZ13 | 0.0013369  | N-term +28.03 Da,                           | 5797.316895 | 2 | 1294.680054 | 1294.189949 |
| APDLSGTLESIPDKLKEFGNTLEDKAR            | P34928 | 0.00054201 | N-term +28.03 Da, K +28.03 Da,              | 5798.418945 | 4 | 764.9190063 | 764.9183135 |
| MLSDFLDDVR                             | Q9R0P6 | 0          | N-term +28.03 Da,                           | 5798.621582 | 2 | 676.3519287 | 676.3499488 |
| TATFAQALQSV PETQVSILDNGLR              | Q9CZ13 | 0          | N-term +28.03 Da,                           | 5800.939453 | 3 | 863.789978  | 863.1290581 |



|                                       |        |            |                                            |             |   |             |             |
|---------------------------------------|--------|------------|--------------------------------------------|-------------|---|-------------|-------------|
| ADQPIEADVTIGSGPGGYVAAIKSAQLGFK        | O08749 | 0          | N-term +28.03 Da, K +28.03 Da,             | 5801.414551 | 3 | 1049.23999  | 1048.571087 |
| TTLLEALDCILPPTRPDKPLR                 | P10126 | 0          | N-term +28.03 Da, K +28.03 Da,C +57.02 Da, | 5803.480957 | 4 | 645.3699951 | 644.8674657 |
| DPAIYFKEQFLDGDWATNR                   | P14211 | 0          | N-term +28.03 Da, K +28.03 Da,             | 5804.954102 | 3 | 781.387207  | 781.3865794 |
| DPAIYFKEQFLDGDWATNR                   | P14211 | 0          | N-term +28.03 Da, K +28.03 Da,             | 5808.949707 | 2 | 1172.579956 | 1171.576231 |
| LDPGVVDNFPLLKALR                      | P30115 | 0          | N-term +28.03 Da, K +28.03 Da,             | 5822.054688 | 3 | 608.7000122 | 608.3644976 |
| EEVEGSLLLGSVQGYMEQASK                 | P33622 | 0.00056465 | N-term +28.03 Da,                          | 5833.818359 | 2 | 1155.589966 | 1155.580322 |
| DPAIYFKEQFLDGDWATNR                   | P14211 | 0          | N-term +28.03 Da, K +28.03 Da,             | 5836.626953 | 3 | 782.0499878 | 781.3865794 |
| ADPIKVLMPSLSPTEQGNIVKWLR              | Q8BKZ9 | 0          | N-term +28.03 Da, K +28.03 Da,             | 5849.557129 | 4 | 727.9099731 | 727.6604241 |
| IDLSDVELDDLEKDEL                      | Q922R8 | 0.00060716 | N-term +28.03 Da, K +28.03 Da,             | 5852.339355 | 2 | 959.4799805 | 958.9829751 |
| VNPTVFFDITADDEPLGR                    | P17742 | 0          | N-term +28.03 Da,                          | 5853.766113 | 2 | 1017.514038 | 1017.512568 |
| IDLSDVELDDLEKDEL                      | Q922R8 | 0.00139925 | N-term +28.03 Da, K +28.03 Da,             | 5856.089355 | 2 | 959.9899902 | 958.9829751 |
| TPDCGKQGFIDLPEFPFGLEPR                | O35490 | 0          | N-term +28.03 Da, K +28.03 Da,C +57.02 Da, | 5858.282227 | 3 | 859.7700195 | 859.4333126 |
| APPVPGAVSGGSGEVDELFDVKNAP             | O89079 | 0          | N-term +28.03 Da, K +28.03 Da,             | 5858.758789 | 3 | 839.4299927 | 839.0953543 |
| TEGAELVDSVLDVVR                       | P68372 | 0          | N-term +28.03 Da,                          | 5863.771484 | 2 | 815.9400024 | 815.4383393 |
| TAGLLDWPQGTAFASQVTLEGDKVKVER          | Q9DCW4 | 0          | N-term +28.03 Da, K +28.03 Da,             | 5863.984863 | 3 | 1010.530029 | 1010.548394 |
| TATFAQALQSVPETQVSILDNGLR              | Q9CZ13 | 0          | N-term +28.03 Da,                          | 5864.549805 | 3 | 863.460022  | 863.1290581 |
| VNPTVFFDITADDEPLGR                    | P17742 | 0          | N-term +28.03 Da,                          | 5869.996582 | 3 | 678.6781006 | 678.6774706 |
| EYLEEVAVNFAKGLADR                     | Q8BMS1 | 0          | N-term +28.03 Da, K +28.03 Da,             | 5870.834961 | 3 | 660.6867065 | 660.6860773 |
| APPVPGAVSGGSGEVDELFDVKNAP             | O89079 | 0          | N-term +28.03 Da, K +28.03 Da,             | 5871.19873  | 2 | 1259.150024 | 1258.139393 |
| TLNEALEFANSVGYPCLLR                   | Q8C196 | 0          | N-term +28.03 Da, C +57.02 Da,             | 5873.196777 | 2 | 1098.569946 | 1098.061902 |
| FATEATSDWLNANNVPATPVAVWPSQEQGNPSLSSIR | Q8C196 | 0.00435644 | N-term +28.03 Da,                          | 5874.847168 | 4 | 971.9799805 | 971.7276055 |
| TEGAELVDSVLDVVR                       | P68372 | 0.00213038 | N-term +28.03 Da,                          | 5876.260254 | 3 | 543.960022  | 543.9613184 |
| ADPIKVLMPSLSPTEQGNIVKWLR              | Q8BKZ9 | 0          | N-term +28.03 Da, K +28.03 Da,             | 5878.138672 | 4 | 727.6599731 | 727.6604241 |
| LPTLEQPIIPSDYVAIKAPM                  | Q8C196 | 0          | N-term +28.03 Da, K +28.03 Da,             | 5878.40332  | 3 | 751.7600098 | 751.4252062 |
| LYHVEELDPGVVDNFPLLKALR                | P30115 | 0          | N-term +28.03 Da, K +28.03 Da,             | 5878.657227 | 4 | 649.1099854 | 649.1151695 |
| FATEATSDWLNANNVPATPVAVWPSQEQGNPSLSSIR | Q8C196 | 0          | N-term +28.03 Da,                          | 5881.544922 | 3 | 1295.97998  | 1295.301049 |
| DVDGLDPAFTPATGTPVLGGLSYR              | Q61176 | 0          | N-term +28.03 Da,                          | 5883.505371 | 2 | 1224.619995 | 1224.126286 |
| VNPTVFFDITADDEPLGR                    | P17742 | 0          | N-term +28.03 Da,                          | 5884.88916  | 2 | 1017.513794 | 1017.512568 |
| SSAGDGFKANLVFKEIEKKLEEEGEQFVK         | P32020 | 0          | N-term +28.03 Da, K +28.03 Da,             | 5887.582031 | 4 | 857.2199707 | 856.970812  |
| DFIETYLLSEQVKSIELGDHVTNLR             | P09528 | 0          | N-term +28.03 Da, K +28.03 Da,             | 5889.766113 | 4 | 796.4299927 | 796.1749508 |
| TKDSPVLLDFFEDSELYR                    | Q9ESB3 | 0          | N-term +28.03 Da, K +28.03 Da,             | 5890.524414 | 3 | 744.0499878 | 744.0474524 |
| APPVPGAVSGGSGEVDELFDVKNAP             | O89079 | 0          | N-term +28.03 Da, K +28.03 Da,             | 5891.462402 | 3 | 839.4299927 | 839.0953543 |
| DLSGTLESIPDKLKEFGNTLEDKAR             | P34928 | 0          | N-term +28.03 Da, K +28.03 Da,             | 5898.841309 | 4 | 723.1500244 | 722.8958439 |
| VNPTVFFDITADDEPLGR                    | P17742 | 0          | N-term +28.03 Da,                          | 5902.072266 | 3 | 678.6778564 | 678.6774706 |
| DLSGTLESIPDKLKEFGNTLEDKAR             | P34928 | 0          | N-term +28.03 Da, K +28.03 Da,             | 5903.079102 | 4 | 722.9000244 | 722.8958439 |
| LYHVEELDPGVVDNFPLLKALR                | P30115 | 0          | N-term +28.03 Da, K +28.03 Da,             | 5909.54834  | 4 | 649.1161499 | 649.1151695 |
| LINEKGETFQLMGLYGR                     | B5X0G2 | 0.01235016 | N-term +28.03 Da, K +28.03 Da,             | 5914.234375 | 2 | 1070.060059 | 1070.558995 |
| DLSGTLESIPDKLKEFGNTLEDKAR             | P34928 | 0          | N-term +28.03 Da, K +28.03 Da,             | 5914.920898 | 3 | 964.2000122 | 963.5253664 |
| DYEPIDATGFININSLR                     | P16460 | 0          | N-term +28.03 Da,                          | 5915.265625 | 2 | 983.4899902 | 983.4994601 |
| VNPTVFFDITADDEPLGR                    | P17742 | 0          | N-term +28.03 Da,                          | 5916.457031 | 2 | 1017.513611 | 1017.512568 |

|                                     |        |            |                                            |             |   |             |             |
|-------------------------------------|--------|------------|--------------------------------------------|-------------|---|-------------|-------------|
| DLSGTLESIPDKLKEFGNTLEDKAR           | P34928 | 0          | N-term +28.03 Da, K +28.03 Da,             | 5922.170898 | 3 | 963.8599854 | 963.5253664 |
| AAEAGDLHTALEKFGQAISLLPDR            | Q8VBW8 | 0          | N-term +28.03 Da, K +28.03 Da,             | 5922.379395 | 4 | 645.8499756 | 645.6011552 |
| NLLENWDTLGGSTVSQLQER                | Q00623 | 0          | N-term +28.03 Da,                          | 5923.060059 | 2 | 1116.569946 | 1116.06877  |
| VHLTDAEKAASVSLWGVNSDEVGGALGR        | P02088 | 0          | N-term +28.03 Da, K +28.03 Da,C +57.02 Da, | 5923.790039 | 4 | 813.6699829 | 813.922496  |
| AAEAGDLHTALEKFGQAISLLPDR            | Q8VBW8 | 0          | N-term +28.03 Da, K +28.03 Da,             | 5924.720215 | 4 | 645.5999756 | 645.6011552 |
| VLELYDLLSQPCR                       | Q64471 | 0          | N-term +28.03 Da, C +57.02 Da,             | 5927.069824 | 2 | 874.4799805 | 873.9765769 |
| VHLTDAEKAASVSLWGVNSDEVGGALGR        | P02088 | 0          | N-term +28.03 Da, K +28.03 Da,C +57.02 Da, | 5929.518066 | 3 | 1084.560059 | 1084.894236 |
| VLELYDLLSQPCR                       | Q64471 | 0          | N-term +28.03 Da, C +57.02 Da,             | 5932.231445 | 3 | 582.9872437 | 582.9868101 |
| DLSGTLESIPDKLKEFGNTLEDKAR           | P34928 | 0          | N-term +28.03 Da, K +28.03 Da,             | 5933.720215 | 4 | 722.897522  | 722.8958439 |
| VNPTVFFDITADDEPLGR                  | P17742 | 0          | N-term +28.03 Da,                          | 5933.838867 | 3 | 678.6787109 | 678.6774706 |
| SAGADEIGKLFVGGDLWSTTQETLR           | Q9JII5 | 0          | N-term +28.03 Da, K +28.03 Da,             | 5940.274902 | 3 | 903.1400146 | 903.1361015 |
| LYHVEELDPGVVDNFPLLKALR              | P30115 | 0          | N-term +28.03 Da, K +28.03 Da,             | 5944.141602 | 4 | 649.3699951 | 649.1151695 |
| MASGPYLDEIAELVDAGKIR                | Q924D0 | 0.00986717 | N-term +28.03 Da, K +28.03 Da,             | 5945.611816 | 3 | 735.3900146 | 735.3925654 |
| VNPTVFFDITADDEPLGR                  | P17742 | 0          | N-term +28.03 Da,                          | 5947.54834  | 2 | 1017.512329 | 1017.512568 |
| SEAAADREDDPNPFKMEVGGFFDR            | P26443 | 0.01838363 | N-term +28.03 Da, K +28.03 Da,             | 5949.36377  | 3 | 917.4299927 | 917.0902749 |
| SEAAADREDDPNPFKMEVGGFFDR            | P26443 | 0          | N-term +28.03 Da, K +28.03 Da,             | 5950.930664 | 4 | 688.3200073 | 688.0695253 |
| DLSGTLESIPDKLKEFGNTLEDKAR           | P34928 | 0          | N-term +28.03 Da, K +28.03 Da,             | 5952.857422 | 3 | 963.8599854 | 963.5253664 |
| VHLTDAEKAASVSLWGVNSDEVGGALGR        | P02088 | 0          | N-term +28.03 Da, K +28.03 Da,C +57.02 Da, | 5955.625    | 4 | 813.6699829 | 813.922496  |
| VLELYDLLSQPCR                       | Q64471 | 0          | N-term +28.03 Da, C +57.02 Da,             | 5958.622559 | 2 | 873.9789429 | 873.9765769 |
| FIGENMNPDMVALLDYR                   | P63028 | 0          | N-term +28.03 Da,                          | 5961.872559 | 2 | 1042.003662 | 1042.002998 |
| ETADAIKSEVKK                        | Q60870 | 0.01102941 | N-term +28.03 Da, K +28.03 Da,             | 5964.041504 | 2 | 716.4400024 | 715.9268782 |
| DLSGTLESIPDKLKEFGNTLEDKAR           | P34928 | 0          | N-term +28.03 Da, K +28.03 Da,             | 5966.931641 | 4 | 723.1500244 | 722.8958439 |
| EPSAPKLEGQMGEDGNSIKVNLIK            | P13595 | 0.02391378 | N-term +28.03 Da, K +28.03 Da,             | 5968.869141 | 3 | 889.5       | 889.4859655 |
| ELDPGVVDNFPLLKALR                   | P30115 | 0          | N-term +28.03 Da, K +28.03 Da,             | 5972.239746 | 3 | 651.378418  | 651.3786957 |
| ILDVPTIHHQKAPVVMGSSSEDVQEFLEIYR     | Q9QXD6 | 0.00060423 | N-term +28.03 Da, K +28.03 Da,             | 5976.182617 | 4 | 903.9799805 | 903.731199  |
| VNPTVFFDITADDEPLGR                  | P17742 | 0          | N-term +28.03 Da,                          | 5978.737793 | 2 | 1018.02002  | 1017.512568 |
| TECPQFVQININLENFR                   | P27005 | 0          | N-term +28.03 Da, C +57.02 Da,             | 5989.162109 | 2 | 1076.040039 | 1075.538594 |
| EEIIPVAPEYDKSGEYFPFL                | P45952 | 0.002145   | N-term +28.03 Da, K +28.03 Da,             | 5992.02832  | 2 | 1175.589966 | 1175.098674 |
| SLLDLVVFR                           | Q8K2B3 | 0.001      | N-term +28.03 Da,                          | 5995.634277 | 2 | 573.8482666 | 573.8477014 |
| EEIIPVAPEYDKSGEYFPFL                | P45952 | 0.00143747 | N-term +28.03 Da, K +28.03 Da,             | 5998.65332  | 2 | 1176.099976 | 1175.098674 |
| KDLGTQLAPIIQEFFHSEQYR               | Q78JT3 | 0          | N-term +28.03 Da,                          | 6009.626465 | 3 | 859.789978  | 859.455105  |
| VNPTVFFDITADDEPLGR                  | P17742 | 0          | N-term +28.03 Da,                          | 6012.732422 | 2 | 1018.52002  | 1017.512568 |
| VHLTDAEKASVSLWAKVNPDEVGGALGR        | P02089 | 0          | N-term +28.03 Da, K +28.03 Da,C +57.02 Da, | 6013.827148 | 4 | 823.9299927 | 823.930321  |
| HYTEAIKRNPR                         | Q60864 | 0.03409456 | N-term +28.03 Da, K +28.03 Da,             | 6014.649414 | 2 | 721.4226074 | 720.9071451 |
| ALDFEQEMATAASSSSLEKSYELPDGQVITIGNER | P60710 | 0          | N-term +28.03 Da, K +28.03 Da,             | 6017.121582 | 3 | 1282.290039 | 1281.62621  |
| GLELYDLLSQPSR                       | Q61133 | 0          | N-term +28.03 Da,                          | 6019.75     | 2 | 816.460022  | 816.4537918 |
| NVASELIQTIPLELPQVKPR                | Q9D9K3 | 0          | N-term +28.03 Da, K +28.03 Da,             | 6020.267578 | 3 | 802.1400146 | 801.4720958 |
| VHLTDAEKASVSLWAKVNPDEVGGALGR        | P02089 | 0.00136861 | N-term +28.03 Da, K +28.03 Da,C +57.02 Da, | 6020.688477 | 3 | 1097.900024 | 1098.238002 |
| LADNVIVPGTPDFLAYVR                  | Q88587 | 0          | N-term +28.03 Da,                          | 6027.952637 | 2 | 995.0499878 | 994.5462127 |
| DWVIPPINLPENSRRGPPQELVR             | P15116 | 0.00054585 | N-term +28.03 Da,                          | 6028.330566 | 3 | 901.4899902 | 901.1535375 |

|                                      |        |            |                                             |             |   |             |             |
|--------------------------------------|--------|------------|---------------------------------------------|-------------|---|-------------|-------------|
| MGPGDGMQVLMIDLPLSAAPTQVEEKQGPTPAGLPR | Q7TT50 | 0          | N-term +28.03 Da, K +28.03 Da,              | 6030.912109 | 3 | 1215.949951 | 1215.621019 |
| TATFAQALQSVPETQVSILDNGLR             | Q9CZ13 | 0.00434439 | N-term +28.03 Da,                           | 6038.461426 | 3 | 863.789978  | 863.1290581 |
| SLGQWLQEEKVPAIYGVDR                  | Q8C196 | 0          | N-term +28.03 Da, K +28.03 Da,              | 6040.39502  | 2 | 1172.609985 | 1173.128631 |
| TATFAQALQSVPETQVSILDNGLR             | Q9CZ13 | 0.03584    | N-term +28.03 Da,                           | 6041.333008 | 2 | 1295.180054 | 1294.189949 |
| APSPLYSEFSEEPFGVIVR                  | P70699 | 0          | N-term +28.03 Da,                           | 6046.420898 | 2 | 1126.589966 | 1126.0859   |
| DFFLEGPFMPPR                         | Q62448 | 0          | N-term +28.03 Da,                           | 6047.494629 | 2 | 740.8599854 | 740.8683084 |
| SMEDALKAADTIGYVMIR                   | Q8C196 | 0          | N-term +28.03 Da, K +28.03 Da,              | 6048.501465 | 2 | 1068.540039 | 1069.055231 |
| VNPTVFFDITADDEPLGR                   | P17742 | 0          | N-term +28.03 Da,                           | 6050.979004 | 2 | 1018.02002  | 1017.512568 |
| DVDFAIWGAVR                          | P25688 | 0          | N-term +28.03 Da,                           | 6056.945801 | 2 | 703.3599854 | 703.3591624 |
| VEELDPGVVDNFPKLLKALR                 | P30115 | 0          | N-term +28.03 Da, K +28.03 Da,              | 6058.301758 | 3 | 727.75      | 727.4156985 |
| DPHLCDFIETYYLSEQVKSIELGDHVTNLR       | P09528 | 0          | N-term +28.03 Da, K +28.03 Da, C +57.02 Da, | 6059.820801 | 4 | 952.2399902 | 951.7382842 |
| TGAIVDVPVGEELLGR                     | Q03265 | 0.01660777 | N-term +28.03 Da,                           | 6060.01416  | 2 | 826.9500122 | 826.9645239 |
| SEAAADREDDPNFFKMVEGFFDR              | P26443 | 0          | N-term +28.03 Da, K +28.03 Da,              | 6061.777832 | 4 | 688.3200073 | 688.0695253 |
| ALVDAFDFKDVTLGSLVGR                  | Q9R0H0 | 0          | N-term +28.03 Da, K +28.03 Da,              | 6067.291016 | 3 | 694.0599976 | 693.7210104 |
| TATFAQALQSVPETQVSILDNGLR             | Q9CZ13 | 0          | N-term +28.03 Da,                           | 6071.167969 | 3 | 863.4580078 | 863.1290581 |
| TATFAQALQSVPETQVSILDNGLR             | Q9CZ13 | 0          | N-term +28.03 Da,                           | 6073.429199 | 2 | 1294.689941 | 1294.189949 |
| VNPTVFFDITADDEPLGR                   | P17742 | 0          | N-term +28.03 Da,                           | 6088.993164 | 2 | 1017.51001  | 1017.512568 |
| SLGIETLGGVFTKLINR                    | P38647 | 0          | N-term +28.03 Da, K +28.03 Da,              | 6100.491211 | 3 | 625.3800049 | 625.375174  |
| TATFAQALQSVPETQVSILDNGLR             | Q9CZ13 | 0          | N-term +28.03 Da,                           | 6102.609375 | 3 | 863.1283569 | 863.1290581 |
| TATFAQALQSVPETQVSILDNGLR             | Q9CZ13 | 0          | N-term +28.03 Da,                           | 6105.543457 | 2 | 1294.689941 | 1294.189949 |
| AVAKYLRFNCPKSTNMMGHR                 | Q8BU14 | 0.03663587 | N-term +28.03 Da, K +28.03 Da, C +57.02 Da, | 6107.233398 | 3 | 856.1199951 | 856.1116328 |
| APPVPGAVSGGSGEVDLFDVKNAFY            | Q89079 | 0.01812478 | N-term +28.03 Da, K +28.03 Da,              | 6108.762695 | 3 | 893.4500122 | 893.4497974 |
| PGLLLLGDEAPNFEANTTIGR                | O08709 | 0          | N-term +28.03 Da,                           | 6112.290039 | 2 | 1085.040039 | 1085.560581 |
| GGHEADAQILELNQQLLDLKLTVDGLEKER       | Q6PER3 | 0          | N-term +28.03 Da, K +28.03 Da,              | 6115.985352 | 4 | 858.7199707 | 858.2201557 |
| YTEGAELVDSVLDVVR                     | P68372 | 0          | N-term +28.03 Da,                           | 6116.110352 | 3 | 598.3099976 | 598.3157615 |
| TWNPSVQQDIKFLPF                      | P20029 | 0.00057504 | N-term +28.03 Da, K +28.03 Da,              | 6119.187012 | 2 | 996.0200195 | 996.0172881 |
| AIPENTNIGSLFPIPLATDR                 | E0CXD4 | 0          | N-term +28.03 Da,                           | 6119.992188 | 2 | 1084.599976 | 1084.091516 |
| SQESKTTYLEDLPLPEYELSPSKLGDEVDDVYLIR  | Q8C5Q4 | 0          | N-term +28.03 Da, K +28.03 Da,              | 6122.04248  | 4 | 1056.790039 | 1056.5438   |
| YGEMGQTLFEMAFDSIPAKR                 | Q99M27 | 0          | N-term +28.03 Da, K +28.03 Da,              | 6122.276367 | 3 | 783.0499878 | 783.0535553 |
| AIPENTNIGSLFPIPLATDR                 | E0CXD4 | 0          | N-term +28.03 Da,                           | 6126.523438 | 2 | 1085.089966 | 1084.091516 |
| YTEGAELVDSVLDVVR                     | P68372 | 0.00056275 | N-term +28.03 Da,                           | 6129.002441 | 2 | 897.4699707 | 896.970004  |
| IDLPEFPFGLPR                         | O35490 | 0.00137741 | N-term +28.03 Da,                           | 6132.283203 | 2 | 779.4199829 | 779.4192202 |
| EADIDGDGQVNYEEFVQMMTAK               | P62204 | 0          | N-term +28.03 Da, K +28.03 Da,              | 6134.421387 | 2 | 1274.079956 | 1273.574912 |
| EADIDGDGQVNYEEFVQMMTAK               | P62204 | 0          | N-term +28.03 Da, K +28.03 Da,              | 6140.115723 | 3 | 849.7199707 | 849.3857    |
| TATFAQALQSVPETQVSILDNGLR             | Q9CZ13 | 0          | N-term +28.03 Da,                           | 6142.447266 | 3 | 863.789978  | 863.1290581 |
| KETLIDLGTKAFAMTNQILVER               | Q8C196 | 0.01660191 | N-term +28.03 Da, K +28.03 Da,              | 6143.722656 | 4 | 644.6199951 | 644.6186535 |
| AVWPTLVLDINSLDLTEAYKLR               | Q9R0H0 | 0.01101726 | N-term +28.03 Da, K +28.03 Da,              | 6148.043945 | 3 | 854.4699707 | 854.1388941 |
| DIDLSDELDDLEKDEL                     | Q922R8 | 0          | N-term +28.03 Da, K +28.03 Da,              | 6156.449219 | 2 | 1016.49585  | 1016.496447 |
| EADIDGDGQVNYEEFVQMMTAK               | P62204 | 0          | N-term +28.03 Da, K +28.03 Da,              | 6167.042969 | 2 | 1274.579956 | 1273.574912 |
| YIDSLSYTVDAFDYDLQTGQISNR             | Q64374 | 0          | N-term +28.03 Da,                           | 6170.739746 | 3 | 938.4400024 | 938.1152551 |

|                                     |        |            |                                            |             |   |             |             |
|-------------------------------------|--------|------------|--------------------------------------------|-------------|---|-------------|-------------|
| SEVGQQVEVELLGKNYPATIOEPLVLTEPAR     | Q9DBT9 | 0          | N-term +28.03 Da, K +28.03 Da,             | 6171.020508 | 3 | 1193.670044 | 1192.988971 |
| MKSNPAIQAAIDLTAGAAGGTACVLGQPFDTMKVK | Q9WVD5 | 0          | N-term +28.03 Da, K +28.03 Da,C +57.02 Da, | 6181.195313 | 4 | 937.5       | 937.2476959 |
| SVSKELAKEVEKMGAVFMDAPVSGGVGAAR      | Q99L13 | 0.01894592 | N-term +28.03 Da, K +28.03 Da,             | 6183.605469 | 4 | 783.9099731 | 783.9253497 |
| SGLASPASFQPEQFYTLDNNVLTLEQR         | Q35386 | 0          | N-term +28.03 Da,                          | 6184.857422 | 3 | 1061.880005 | 1061.198201 |
| AAFAQFGSDLDAATQQLSR                 | Q03265 | 0          | N-term +28.03 Da,                          | 6195.508789 | 2 | 1070.540039 | 1069.547473 |
| AAFAQFGSDLDAATQQLSR                 | Q03265 | 0          | N-term +28.03 Da,                          | 6197.355469 | 3 | 713.7000122 | 713.3674077 |
| SFDVDGLDPAFTPATGTPVLGGLSYR          | Q61176 | 0          | N-term +28.03 Da,                          | 6198.378418 | 2 | 1341.689941 | 1341.176507 |
| EADIDGDGQVNYEEFVQMMTAK              | P62204 | 0          | N-term +28.03 Da, K +28.03 Da,             | 6199.297852 | 2 | 1274.079956 | 1273.574912 |
| SGLASPASFQPEQFYTLDNNVLTLEQR         | O35386 | 0          | N-term +28.03 Da,                          | 6200.173828 | 3 | 1061.540039 | 1061.198201 |
| SFDVDGLDPAFTPATGTPVLGGLSYR          | Q61176 | 0          | N-term +28.03 Da,                          | 6204.198242 | 3 | 895.1300049 | 894.4534304 |
| VDFLAYDILDQYR                       | P10649 | 0          | N-term +28.03 Da,                          | 6208.791016 | 2 | 830.4299927 | 829.9248672 |
| EYLTAIEILELAGNAAR                   | P22752 | 0          | N-term +28.03 Da,                          | 6213.066406 | 2 | 881.4699707 | 881.4727134 |
| DELIPYLNFR                          | P11499 | 0.00132743 | N-term +28.03 Da,                          | 6215.724121 | 2 | 775.4199829 | 775.4166777 |
| LQFWTETLPR                          | Q63880 | 0          | N-term +28.03 Da,                          | 6216.936523 | 2 | 659.3499756 | 659.8613404 |
| VNPTVFFDITADDEPLGR                  | P17742 | 0          | N-term +28.03 Da,                          | 6221.044922 | 2 | 1018        | 1017.512568 |
| SEAAADREDDPNFFKMVEGFFDR             | P26443 | 0.0321742  | N-term +28.03 Da, K +28.03 Da,             | 6223.411621 | 3 | 917.7600098 | 917.0902749 |
| VNPTVFFDITADDEPLGR                  | P17742 | 0          | N-term +28.03 Da,                          | 6225.665527 | 2 | 1018.003479 | 1017.512568 |
| SEAAADREDDPNFFKMVEGFFDR             | P26443 | 0          | N-term +28.03 Da, K +28.03 Da,             | 6227.708496 | 4 | 688.0690918 | 688.0695253 |
| EADIDGDGQVNYEEFVQMMTAK              | P62204 | 0          | N-term +28.03 Da, K +28.03 Da,             | 6230.165039 | 2 | 1274.579956 | 1273.574912 |
| AAADREDDPNFFKMVEGFFDR               | P26443 | 0          | N-term +28.03 Da, K +28.03 Da,             | 6234.257813 | 4 | 634.5499878 | 634.0508694 |
| SIREDLPIINSFFK                      | Q8BI84 | 0.01811216 | N-term +28.03 Da, K +28.03 Da,             | 6239.818359 | 2 | 867.4799805 | 867.993084  |
| AEAAAAPAPAAGPGQMSFTFASPTQVFFDSANVK  | Q9D3D9 | 0          | N-term +28.03 Da, K +28.03 Da,             | 6249.855957 | 3 | 1138.219971 | 1137.562375 |
| TLGVDFIDVATKVM                      | Q8C196 | 0.00058548 | N-term +28.03 Da, K +28.03 Da,             | 6252.647949 | 2 | 783.4400024 | 782.9363887 |
| SEAAADREDDPNFFKMVEGFFDR             | P26443 | 0          | N-term +28.03 Da, K +28.03 Da,             | 6253.887207 | 3 | 917.0888672 | 917.0902749 |
| TLGVDFIDVATKVM                      | Q8C196 | 0.00058343 | N-term +28.03 Da, K +28.03 Da,             | 6254.359863 | 2 | 782.9299927 | 782.9363887 |
| SEAAADREDDPNFFKMVEGFFDR             | P26443 | 0          | N-term +28.03 Da, K +28.03 Da,             | 6258.513672 | 4 | 688.0687256 | 688.0695253 |
| AAADREDDPNFFKMVEGFFDR               | P26443 | 0          | N-term +28.03 Da, K +28.03 Da,             | 6265.947754 | 4 | 634.2999878 | 634.0508694 |
| VLKEEASDYLELDTIKNLVR                | P08113 | 0          | N-term +28.03 Da, K +28.03 Da,             | 6278.331543 | 3 | 811.1099854 | 811.4597447 |
| SASFFKFLTEELSLDQDR                  | O35215 | 0          | N-term +28.03 Da, K +28.03 Da,             | 6284.368652 | 3 | 730.710022  | 730.3756804 |
| NEELVSMNVQGDYEPIDATGFININSLR        | P16460 | 0          | N-term +28.03 Da,                          | 6284.835449 | 3 | 1056.849976 | 1056.183564 |
| SEAAADREDDPNFFKMVEGFFDR             | P26443 | 0.01014656 | N-term +28.03 Da, K +28.03 Da,             | 6286.116699 | 3 | 917.0900269 | 917.0902749 |
| TLGVDFIDVATKVMIGESIDEKR             | Q8C196 | 0          | N-term +28.03 Da, K +28.03 Da,             | 6287.027344 | 4 | 656.3699951 | 655.8621149 |
| SSWVTHVEMGPPDPILGVTEAFKR            | P05202 | 0          | N-term +28.03 Da, K +28.03 Da,             | 6289.714844 | 3 | 932.4799805 | 932.8107831 |
| SEAAADREDDPNFFKMVEGFFDR             | P26443 | 0          | N-term +28.03 Da, K +28.03 Da,             | 6291.720215 | 4 | 688.0697021 | 688.0695253 |
| SDASPLVLSEASLEDLNSR                 | Q9CW42 | 0          | N-term +28.03 Da,                          | 6292.190918 | 2 | 1090.550049 | 1089.549879 |
| TPFGAYGGLLKDFSATDLTEFAAR            | Q8BWT1 | 0          | N-term +28.03 Da,                          | 6295.726074 | 3 | 869.460022  | 868.782999  |
| QAELEAAIQR                          | Q8VC34 | 0.00214684 | N-term +28.03 Da,                          | 6298.744629 | 2 | 579.3099976 | 578.8196728 |
| MVNPTVFFDITADDEPLGR                 | P17742 | 0          | N-term +28.03 Da,                          | 6304.548828 | 2 | 1083.530029 | 1083.03281  |
| TLGVDFIDVATKVMIGESIDEKR             | Q8C196 | 0          | N-term +28.03 Da, K +28.03 Da,             | 6320.520996 | 4 | 656.3699951 | 655.8621149 |
| DIAWNFEKFLVGPDPVPR                  | P11352 | 0          | N-term +28.03 Da, K +28.03 Da,             | 6324.799805 | 3 | 739.0689087 | 739.0685214 |

|                                          |        |            |                                            |             |   |             |             |
|------------------------------------------|--------|------------|--------------------------------------------|-------------|---|-------------|-------------|
| VKLIESKEAFQEALAAAGDKLVVDFSATWCGPCKM      | P10639 | 0          | N-term +28.03 Da, K +28.03 Da,C +57.02 Da, | 6333.001953 | 4 | 1028.550049 | 1028.043557 |
| EELVSMNVQGDYEPIDATGFININSLR              | P16460 | 0          | N-term +28.03 Da,                          | 6338.800293 | 3 | 1018.51001  | 1018.169254 |
| SAAIASERHNLSNGSALVVQEPFR                 | Q9QUQ5 | 0.03892405 | N-term +28.03 Da,                          | 6346.867188 | 2 | 1266.689941 | 1266.169882 |
| TLADEVGVDAQHVADLKGAFGER                  | Q8BMS1 | 0          | N-term +28.03 Da, K +28.03 Da,             | 6350.000977 | 4 | 671.3499756 | 671.3487949 |
| IVPLQGAQMLQMLEKSLR                       | Q91XE0 | 0          | N-term +28.03 Da, K +28.03 Da,             | 6352.790527 | 3 | 704.4099731 | 704.407492  |
| EPLFGISTGNIITGLAAGAKSY                   | Q8C196 | 0.00063573 | N-term +28.03 Da, K +28.03 Da,             | 6359.213379 | 3 | 746.4199829 | 746.0789752 |
| SEAAADREDDPNFFKMVEGFFDR                  | P26443 | 0          | N-term +28.03 Da, K +28.03 Da,             | 6361.103516 | 4 | 688.0700073 | 688.0695253 |
| FLIEEGSKPEDVDGVLEEFGR                    | Q9DBM2 | 0          | N-term +28.03 Da, K +28.03 Da,             | 6361.352539 | 3 | 856.7700195 | 856.7671263 |
| AKVAVLGASGGIGQPLSLLKNSPLVSR              | P08249 | 0.04002521 | N-term +28.03 Da, K +28.03 Da,             | 6370.39209  | 3 | 943.9099731 | 943.9144589 |
| SEAAADREDDPNFFKMVEGFFDR                  | P26443 | 0.00210881 | N-term +28.03 Da, K +28.03 Da,             | 6372.984375 | 3 | 917.4299927 | 917.0902749 |
| KIISLSQLQEDSLNVADLSLR                    | P97372 | 0.00364668 | N-term +28.03 Da,                          | 6376.164551 | 3 | 866.4799805 | 866.8286086 |
| VELLYHVEELDPGVVDNFPLLK                   | P30115 | 0          | N-term +28.03 Da, K +28.03 Da,             | 6379.074707 | 3 | 865.4799805 | 865.4753948 |
| IVPLQGAQMLQMLEKSLR                       | Q91XE0 | 0          | N-term +28.03 Da, K +28.03 Da,             | 6384.366211 | 3 | 704.4099731 | 704.407492  |
| YVDFLAYDILDQYR                           | P10649 | 0          | N-term +28.03 Da,                          | 6385.570313 | 2 | 911.4500122 | 911.4565319 |
| SEAAADREDDPNFFKMVEGFFDR                  | P26443 | 0          | N-term +28.03 Da, K +28.03 Da,             | 6393.141113 | 4 | 688.0684204 | 688.0695253 |
| DPFNPFLTINHAVLLVGYGR                     | P97821 | 0          | N-term +28.03 Da,                          | 6394.867188 | 3 | 763.0700073 | 763.0671808 |
| LGASDFEFGVDPSADPELALALR                  | O35226 | 0          | N-term +28.03 Da,                          | 6399.130859 | 2 | 1209.609985 | 1209.613011 |
| AVWPTLVDINSLDSLTEAYKLR                   | Q9R0H0 | 0          | N-term +28.03 Da, K +28.03 Da,             | 6401.497559 | 3 | 854.4699707 | 854.1388941 |
| AVALVDAFDFKDVTLGSLVGR                    | Q9R0H0 | 0          | N-term +28.03 Da,                          | 6407.596191 | 3 | 750.7600098 | 750.4228532 |
| ELLYHVEELDPGVVDNFPLLKALR                 | P30115 | 0          | N-term +28.03 Da,                          | 6410.520508 | 4 | 710.1500244 | 709.6468341 |
| AMLGDFVNMVEKGIIDPTKVVR                   | P63038 | 0          | N-term +28.03 Da, K +28.03 Da,             | 6415.834961 | 4 | 629.8599854 | 629.8549351 |
| GLLIAGGPGNPALAQPLIQNVKIKILES DR          | Q8C196 | 0          | N-term +28.03 Da, K +28.03 Da,             | 6422.457031 | 4 | 767.710022  | 767.4564026 |
| SEAAADREDDPNFFKMVEGFFDR                  | P26443 | 0          | N-term +28.03 Da, K +28.03 Da,             | 6425.239258 | 4 | 688.0700073 | 688.0695253 |
| TLVLKEEASDYLEDTIKNLVR                    | P08113 | 0          | N-term +28.03 Da, K +28.03 Da,             | 6425.524902 | 3 | 882.8200073 | 882.8369926 |
| SEDVTISGPQAAVNEFVEQLKQEGVFAKEVR          | P19096 | 0          | N-term +28.03 Da, K +28.03 Da,             | 6429.382813 | 4 | 898.4799805 | 898.224167  |
| LLPEEFTVDHPFIFIR                         | Q9D154 | 0          | N-term +28.03 Da,                          | 6431.312012 | 3 | 759.7362671 | 759.7366605 |
| FAVESMEDALKAADTIGYPMIR                   | Q8C196 | 0          | N-term +28.03 Da,                          | 6431.785645 | 3 | 862.4500122 | 861.7780916 |
| DAAAEIDFFR                               | Q8CHT0 | 0.00101678 | N-term +28.03 Da,                          | 6437.551758 | 2 | 647.829834  | 648.3351558 |
| AITGHAEAKPITEMPLGILSQLGADSLTSLR          | Q9CQH7 | 0          | N-term +28.03 Da, K +28.03 Da,             | 6458.978516 | 4 | 812.7000122 | 812.4496178 |
| TGTAASNLIIEFVDGQSVMEVPGTTVLQACEKVGMIQIPR | Q91VD9 | 0          | N-term +28.03 Da, K +28.03 Da,C +57.02 Da, | 6460.087891 | 4 | 1048.540039 | 1048.039004 |
| EVYMGNNVIQGGEGQAPTR                      | Q8QZT1 | 0.00052715 | N-term +28.03 Da,                          | 6460.308105 | 2 | 968.4799805 | 967.4754619 |
| SKTLGVDFIDVATKVMIGESIDEKR                | Q8C196 | 0          | N-term +28.03 Da, K +28.03 Da,             | 6472.946289 | 4 | 716.3900146 | 716.6516881 |
| SPVWEEASQSLLFVDIPSKIICR                  | Q64374 | 0          | N-term +28.03 Da, K +28.03 Da,C +57.02 Da, | 6481.738281 | 3 | 911.1599731 | 910.8226888 |
| CPVWEQELANKYSCK                          | D3YU81 | 0.01072882 | N-term +28.03 Da, K +28.03 Da,C +57.02 Da, | 6483.666016 | 2 | 998.9799805 | 998.4869833 |
| AVWPTLVDINSLDSLTEAYKLR                   | Q9R0H0 | 0          | N-term +28.03 Da, K +28.03 Da,             | 6484.647461 | 3 | 854.1400146 | 854.1388941 |
| MKLPIFIADAFTATAFR                        | Q9CXN7 | 0          | N-term +28.03 Da, K +28.03 Da,             | 6489.707031 | 3 | 657.0371704 | 657.0375046 |
| MKLPIFIADAFTATAFR                        | Q9CXN7 | 0          | N-term +28.03 Da, K +28.03 Da,             | 6491.973633 | 2 | 985.5499878 | 985.0526186 |
| FIDLPEFPFGLPR                            | O35490 | 0          | N-term +28.03 Da,                          | 6502.59375  | 2 | 852.9533691 | 852.9534273 |
| APPSVFAQVPQAPPVLVFKL                     | P05201 | 0          | N-term +28.03 Da, K +28.03 Da,             | 6506.675293 | 3 | 721.0999756 | 721.0976406 |
| EGESLEDLMKLSPEELLR                       | Q61233 | 0.00214041 | N-term +28.03 Da, K +28.03 Da,             | 6515.834961 | 3 | 753.4099731 | 753.0713808 |

|                                          |        |            |                                            |             |   |             |             |
|------------------------------------------|--------|------------|--------------------------------------------|-------------|---|-------------|-------------|
| TGGAGAVAMLIGPKAPLVLEQGLR                 | P54869 | 0.00054025 | N-term +28.03 Da, K +28.03 Da,             | 6517.900391 | 3 | 792.789978  | 792.4662873 |
| GKTQEAMEAALAMEKNLNQALLDLHALGSAR          | P29391 | 0          | N-term +28.03 Da, K +28.03 Da,             | 6533.25293  | 4 | 845.7000122 | 845.4522633 |
| TTPPCEECIVWLLLEKPMVTSSDQMAKLR            | P16015 | 0.00052632 | N-term +28.03 Da, K +28.03 Da,C +57.02 Da, | 6534.545898 | 4 | 880.4500122 | 879.9547872 |
| GSKTKHFHKKAANRDLFLYDTLGEEGREGGGVREDEEQLK | A2AWL7 | 0.03500321 | N-term +28.03 Da, K +28.03 Da,             | 6539.399902 | 4 | 1174.859985 | 1175.11632  |
| TLQPLVDPEDIDLTPSSSGLGNLPR                | P33267 | 0          | N-term +28.03 Da,                          | 6546.138672 | 3 | 897.1599731 | 896.8200019 |
| TLQPLVDPEDIDLTPSSSGLGNLPR                | P33267 | 0          | N-term +28.03 Da,                          | 6547.021973 | 2 | 1344.727295 | 1344.726365 |
| VLDELTLRADLEMQIENLR                      | Q9Z2K1 | 0.01396348 | N-term +28.03 Da,                          | 6558.393066 | 2 | 1193.619995 | 1193.635963 |
| GKTQEAMEAALAMEKNLNQALLDLHALGSAR          | P29391 | 0.00251572 | N-term +28.03 Da, K +28.03 Da,             | 6564.321777 | 4 | 845.9500122 | 845.4522633 |
| AVWPTLVDINSLDSLTEAYKLR                   | Q9R0H0 | 0          | N-term +28.03 Da, K +28.03 Da,             | 6601.402344 | 3 | 854.1400146 | 854.1388941 |
| ENVQDVLPTLPNPDYFLLR                      | Q99J08 | 0          | N-term +28.03 Da,                          | 6605.918457 | 2 | 1194.119995 | 1193.618096 |
| APPSVFAQVPQAPPVLVFKL                     | P05201 | 0          | N-term +28.03 Da, K +28.03 Da,             | 6609.150391 | 3 | 721.4299927 | 721.0976406 |
| ALMLQGVDLLADAVAVTMGPKGR                  | P63038 | 0          | N-term +28.03 Da,                          | 6610.705078 | 3 | 795.4400024 | 794.7797662 |
| APPSVFAQVPQAPPVLVFKL                     | P05201 | 0          | N-term +28.03 Da, K +28.03 Da,             | 6615.108398 | 2 | 1081.650024 | 1081.142823 |
| APPSVFAQVPQAPPVLVFKLTADFR                | P05201 | 0          | N-term +28.03 Da, K +28.03 Da,             | 6615.603027 | 3 | 918.1900024 | 917.8580616 |
| SPVLLDFFEDSELYR                          | Q9ESB3 | 0          | N-term +28.03 Da,                          | 6615.858398 | 2 | 930.460022  | 929.4670969 |
| SPVLLDFFEDSELYR                          | Q9ESB3 | 0          | N-term +28.03 Da,                          | 6618.09082  | 2 | 929.460022  | 929.4670969 |
| SEAAADREDDPNFFKMVEGFFDR                  | P26443 | 0          | N-term +28.03 Da, K +28.03 Da,             | 6618.335449 | 3 | 916.75      | 917.0902749 |
| ASSWVTHVEMGPPDPILGVTEAFKR                | P05202 | 0          | N-term +28.03 Da, K +28.03 Da,             | 6622.353027 | 3 | 957.1400146 | 956.4898211 |
| TAVDSGIALLTNFQVTKLFAEAVQKSR              | Q8C196 | 0          | N-term +28.03 Da, K +28.03 Da,             | 6628.02832  | 4 | 748.4299927 | 748.6773945 |
| LEYLTAEILELAGNAAR                        | P22752 | 0.01075668 | N-term +28.03 Da,                          | 6632.380371 | 3 | 625.6799927 | 625.6789226 |
| AVWPTLVDINSLDSLTEAYKLR                   | Q9R0H0 | 0          | N-term +28.03 Da, K +28.03 Da,             | 6633.40332  | 3 | 854.1403198 | 854.1388941 |
| GPLNMILDDGGDLTNLIHTKYPQLLSGIR            | P50247 | 0          | N-term +28.03 Da, K +28.03 Da,             | 6634.866699 | 4 | 806.4400024 | 805.9404228 |
| DSTQNLIPAPSLTVPQPDR                      | P11672 | 0          | N-term +28.03 Da,                          | 6636.30127  | 2 | 1225.670044 | 1225.66812  |
| VELLYHVEELDPGVVDNFPLLKALR                | P30115 | 0          | N-term +28.03 Da, K +28.03 Da,             | 6637.295898 | 4 | 734.6699829 | 734.4139377 |
| DSTQNLIPAPSLTVPQPDR                      | P11672 | 0.01072089 | N-term +28.03 Da,                          | 6637.506836 | 3 | 817.7800293 | 817.447839  |
| GESPVWEEASQSLLFVDIPSKIICR                | Q64374 | 0          | N-term +28.03 Da, C +57.02 Da,             | 6638.305176 | 3 | 972.8483887 | 972.8440416 |
| APPSVFAQVPQAPPVLVFKL                     | P05201 | 0          | N-term +28.03 Da, K +28.03 Da,             | 6640.19873  | 3 | 721.0983276 | 721.0976406 |
| TYVDFLAYDILDQYR                          | P10649 | 0          | N-term +28.03 Da,                          | 6641.771973 | 2 | 962.4799805 | 961.9803715 |
| APPSVFAQVPQAPPVLVFKL                     | P05201 | 0          | N-term +28.03 Da, K +28.03 Da,             | 6646.276367 | 2 | 1081.143433 | 1081.142823 |
| AIAELDTLNEDSYKDISTLIMQLLR                | P61982 | 0          | N-term +28.03 Da, K +28.03 Da,             | 6646.523438 | 3 | 936.8292236 | 936.8281689 |
| YDGLLIAGGPGNPALAQPLIQNVKKILESDR          | Q8C196 | 0.01269036 | N-term +28.03 Da, K +28.03 Da,             | 6647.059082 | 4 | 837.2299805 | 836.978971  |
| VELLYHVEELDPGVVDNFPLLKALR                | P30115 | 0          | N-term +28.03 Da, K +28.03 Da,             | 6647.34668  | 3 | 979.2199707 | 978.8828248 |
| APPSVFAQVPQAPPVLVFKLTADFR                | P05201 | 0          | N-term +28.03 Da, K +28.03 Da,             | 6650.020996 | 3 | 918.1900024 | 917.8580616 |
| TAVDSGIALLTNFQVTKLFAEAVQKSR              | Q8C196 | 0          | N-term +28.03 Da, K +28.03 Da,             | 6659.063965 | 4 | 748.9299927 | 748.6773945 |
| GTIDFPEFLTMAR                            | P62204 | 0          | N-term +28.03 Da,                          | 6662.777832 | 2 | 828.9099731 | 828.909848  |
| VELLYHVEELDPGVVDNFPLLKALR                | P30115 | 0          | N-term +28.03 Da, K +28.03 Da,             | 6668.567383 | 4 | 734.4145508 | 734.4139377 |
| SFAVESMEDALKAADTIGYPMIR                  | Q8C196 | 0          | N-term +28.03 Da, K +28.03 Da,             | 6669.488281 | 3 | 891.1199951 | 890.788768  |
| IAILGMDLSEEDKLTISR                       | P56480 | 0          | N-term +28.03 Da, K +28.03 Da,             | 6678.07666  | 2 | 1087.560059 | 1088.0825   |
| VELLYHVEELDPGVVDNFPLLKALR                | P30115 | 0          | N-term +28.03 Da, K +28.03 Da,             | 6680.328613 | 3 | 979.2199707 | 978.8828248 |
| GTIDFPEFLTMAR                            | P62204 | 0          | N-term +28.03 Da,                          | 6695.427734 | 2 | 828.9089355 | 828.909848  |

|                                          |        |            |                                             |             |   |             |             |
|------------------------------------------|--------|------------|---------------------------------------------|-------------|---|-------------|-------------|
| IHTQPPPPPIPEVVATWEAISLGR                 | Q8BGA8 | 0          | N-term +28.03 Da,                           | 6696.817871 | 3 | 879.1599731 | 878.4865165 |
| GFIDLPEFPFGLLEPR                         | O35490 | 0.00143678 | N-term +28.03 Da,                           | 6700.301758 | 2 | 881.960022  | 881.4641594 |
| VELLYHVEELDPOGVVDFNPLKALR                | P30115 | 0          | N-term +28.03 Da, K +28.03 Da,              | 6702.143555 | 4 | 734.414917  | 734.4139377 |
| TIDFPEFLTMMAR                            | P62204 | 0.00060606 | N-term +28.03 Da,                           | 6709.458496 | 2 | 800.9000244 | 800.399116  |
| EAMEAALAMEKNLNQALLDLHALGSAR              | P29391 | 0          | N-term +28.03 Da,                           | 6714.5      | 4 | 735.3900146 | 734.888767  |
| ALVDMVNDGLEDLFR                          | F6RWR5 | 0          | N-term +28.03 Da,                           | 6727.016602 | 2 | 867.9428711 | 867.9401917 |
| IHTQPPPPPIPEVVATWEAISLGR                 | Q8BGA8 | 0          | N-term +28.03 Da,                           | 6728.652832 | 3 | 878.4899902 | 878.4865165 |
| GFIDLPEFPFGLLEPR                         | O35490 | 0          | N-term +28.03 Da,                           | 6730.859375 | 2 | 881.460022  | 881.4641594 |
| MLLPEEEFTVDHPFFIFIR                      | Q9D154 | 0          | N-term +28.03 Da,                           | 6760.90625  | 3 | 804.0900269 | 803.4168221 |
| EKIAPSFAVESMEDALKAADTIGYPVMIR            | Q8C196 | 0.03581708 | N-term +28.03 Da, K +28.03 Da,              | 6761.019043 | 3 | 1080.23999  | 1079.569701 |
| EKIAPSFAVESMEDALKAADTIGYPVMIR            | Q8C196 | 0          | N-term +28.03 Da, K +28.03 Da,              | 6764.583984 | 4 | 810.4299927 | 809.9290952 |
| MIVPLQGAQMLQMLEKSLR                      | Q91XE0 | 0          | N-term +28.03 Da, K +28.03 Da,              | 6783.719238 | 3 | 748.4199829 | 748.0876537 |
| SDKLNEINEKIAPSFAVESMEDALKAADTIGYPVMIR    | Q8C196 | 0.00136986 | N-term +28.03 Da, K +28.03 Da,              | 6812.71875  | 4 | 1045.800049 | 1045.299549 |
| TGTAASNLIIEVFDGQSVMEVPGTTVLQACEKVGMIQIPR | Q91VD9 | 0          | N-term +28.03 Da, K +28.03 Da, C +57.02 Da, | 6832.540039 | 3 | 1397.719971 | 1397.049579 |
| HDPQFEPVLSLPEQEIKTLEEDEEELFKMR           | P34022 | 0.02595674 | N-term +28.03 Da, K +28.03 Da,              | 6836.533203 | 4 | 936.2299805 | 935.7248427 |
| HDFTQMEYDGLLIAGGPGNPALAQPLIQNVKILESDR    | Q8C196 | 0.00062854 | N-term +28.03 Da, K +28.03 Da,              | 6840.537598 | 4 | 1059.569946 | 1059.064873 |
| RFEAGEALRTLRLGLQR                        | Q8CHW5 | 0.01133041 | N-term +28.03 Da,                           | 6848.922363 | 3 | 634.3604736 | 634.3657833 |
| TIEYLEEVAVNFAKGLADR                      | Q8BMS1 | 0          | N-term +28.03 Da, K +28.03 Da,              | 6866.908691 | 3 | 732.4000244 | 732.0633251 |
| PVFDWKDPLILEEQLTADEKLIR                  | Q60759 | 0          | N-term +28.03 Da, K +28.03 Da,              | 6867.480469 | 4 | 713.9000244 | 713.9006631 |
| INEKIAPSFAVESMEDALKAADTIGYPVMIR          | Q8C196 | 0          | N-term +28.03 Da, K +28.03 Da,              | 6877.239746 | 4 | 867.210022  | 866.7108433 |
| DVLCGYLLCTNIGNIPR                        | Q9R1V6 | 0.02445561 | N-term +28.03 Da, C +57.02 Da,              | 6881.273438 | 2 | 1003.52002  | 1003.513532 |
| VVAPAQTLNSNAEFQMLR                       | Q8C196 | 0          | N-term +28.03 Da,                           | 6883.936035 | 2 | 951.4899902 | 952.00894   |
| EGESLEDLMKLSPEELLR                       | Q61233 | 0.02980675 | N-term +28.03 Da, K +28.03 Da,              | 6885.364746 | 3 | 753.4099731 | 753.0713808 |
| LQDYKLSQDIIALGMDLSEEDKLTVSR              | P56480 | 0          | N-term +28.03 Da, K +28.03 Da,              | 6895.833984 | 4 | 852.460022  | 852.4561034 |
| ITSAAGIISLLDEEEPQLKEF                    | Q3TXS7 | 0          | N-term +28.03 Da, K +28.03 Da,              | 6897.070313 | 2 | 1180.640015 | 1180.135788 |
| LSGLLVLDVMPPLTLHACMHQKQRLRNLEQFAR        | Q9ESV0 | 0.02717932 | N-term +28.03 Da, K +28.03 Da, C +57.02 Da, | 6902.437988 | 3 | 1334.410034 | 1334.081041 |
| GQNDLMGTAEDFADQFLR                       | Q64310 | 0          | N-term +28.03 Da,                           | 6903.134766 | 2 | 1028.474365 | 1028.475659 |
| GQNDLMGTAEDFADQFLR                       | Q64310 | 0          | N-term +28.03 Da,                           | 6903.650391 | 3 | 686.6599731 | 685.9861984 |
| ITSAAGIISLLDEEEPQLKEF                    | Q3TXS7 | 0          | N-term +28.03 Da, K +28.03 Da,              | 6905.231934 | 3 | 787.4299927 | 787.0929506 |
| SGNFKLLYDLADQLHAAVGASR                   | Q99LC5 | 0          | N-term +28.03 Da, K +28.03 Da,              | 6909.023438 | 3 | 844.0999756 | 844.4466097 |
| EINEKIAPSFAVESMEDALKAADTIGYPVMIR         | Q8C196 | 0.00055617 | N-term +28.03 Da, K +28.03 Da,              | 6928.074219 | 4 | 898.9699707 | 898.9714919 |
| DTVLLLEELGQASGLVLER                      | Q9DCS2 | 0.00805524 | N-term +28.03 Da,                           | 6928.924316 | 2 | 985.539978  | 985.5438678 |
| GESPVWEEASQSLFVDIPSKIICR                 | Q64374 | 0          | N-term +28.03 Da, C +57.02 Da,              | 6930.050293 | 3 | 972.5       | 972.8440416 |
| SPQGGVDIEEVAASSPELIFKEQIDIFEGIKDSQAQR    | Q9Z2I8 | 0.0013459  | N-term +28.03 Da,                           | 6936.400391 | 4 | 1030.030029 | 1029.535037 |
| DLTDYLMKILTER                            | P60710 | 0          | N-term +28.03 Da, K +28.03 Da,              | 6946.273438 | 3 | 556.3095703 | 556.3076607 |
| APSFVAVESMEDALKAADTIGYPVMIR              | Q8C196 | 0.00057143 | N-term +28.03 Da, K +28.03 Da,              | 6951.26709  | 4 | 710.6199951 | 710.3658647 |
| DLTDYLMKILTER                            | P60710 | 0          | N-term +28.03 Da, K +28.03 Da,              | 6951.65625  | 2 | 833.4400024 | 833.9578528 |
| DLTDYLMKILTER                            | P60710 | 0          | N-term +28.03 Da, K +28.03 Da,              | 6982.79834  | 3 | 556.6400146 | 556.3076607 |
| GNGTIDFPEFLTMMAR                         | P62204 | 0.00061312 | N-term +28.03 Da,                           | 6983.180176 | 2 | 914.9362793 | 914.4420441 |
| DEKCLIEILASR                             | P14824 | 0.04609156 | N-term +28.03 Da, K +28.03 Da, C +57.02 Da, | 6983.916504 | 2 | 751.9099731 | 751.9159876 |

|                                     |        |            |                                             |             |   |             |             |
|-------------------------------------|--------|------------|---------------------------------------------|-------------|---|-------------|-------------|
| TQEAMEAALAMEKNLNQALLDLHALGSAR       | P29391 | 0          | N-term +28.03 Da, K +28.03 Da,              | 6984.104492 | 4 | 792.6699829 | 792.1653314 |
| EVAFAQFGSDLAATQQLLSR                | Q03265 | 0          | N-term +28.03 Da,                           | 6988.348145 | 3 | 790.0800171 | 789.4044105 |
| APPSVFAQVPQAPPVLF                   | P05201 | 0.03831539 | N-term +28.03 Da,                           | 6996.754883 | 2 | 946.5383301 | 946.5376587 |
| VGDPLDLVALAEQVQKADEFIR              | Q5EBG8 | 0          | N-term +28.03 Da, K +28.03 Da,              | 7006.654785 | 3 | 828.460022  | 828.123244  |
| TQEAMEAALAMEKNLNQALLDLHALGSAR       | P29391 | 0          | N-term +28.03 Da, K +28.03 Da,              | 7015.288574 | 4 | 792.1655273 | 792.1653314 |
| TEVDKLGIGKVMEEFTSYLLGR              | Q61176 | 0          | N-term +28.03 Da, K +28.03 Da,              | 7016.239746 | 4 | 643.3599854 | 643.1041077 |
| EINEKIAPSFVAVESMEDALKAADTIGYPVMIR   | Q8C196 | 0          | N-term +28.03 Da, K +28.03 Da,              | 7028.633789 | 4 | 899.2199707 | 898.9714919 |
| NPDNGSIILLENLR                      | P09041 | 0.03689567 | N-term +28.03 Da,                           | 7032.102539 | 2 | 798.9400024 | 798.4412158 |
| EINEKIAPSFVAVESMEDALKAADTIGYPVMIR   | Q8C196 | 0          | N-term +28.03 Da, K +28.03 Da,              | 7035.535156 | 3 | 1198.619995 | 1198.292897 |
| KAPPTYDTVMEMEYLDMLVNETLR            | Q64459 | 0.00175055 | N-term +28.03 Da,                           | 7041.627441 | 3 | 973.1500244 | 972.4794947 |
| TLNKEVQSEFIEVMNEIWANDQJR            | Q8BMS1 | 0          | N-term +28.03 Da, K +28.03 Da,              | 7042.357422 | 3 | 988.5100098 | 988.1708175 |
| RLNTASEDNLTSLKQDSDASSELDPR          | Q9ER47 | 0.03580563 | N-term +28.03 Da, K +28.03 Da,              | 7047.146484 | 3 | 1011.51001  | 1011.177466 |
| TQEAMEAALAMEKNLNQALLDLHALGSAR       | P29391 | 0          | N-term +28.03 Da, K +28.03 Da,              | 7048.826172 | 4 | 792.4199829 | 792.1653314 |
| NSSCVLLQSIHSFASK                    | E9Q419 | 0.0017452  | N-term +28.03 Da, K +28.03 Da, C +57.02 Da, | 7052.811523 | 2 | 916.9776611 | 917.4800154 |
| EINEKIAPSFVAVESMEDALKAADTIGYPVMIR   | Q8C196 | 0          | N-term +28.03 Da, K +28.03 Da,              | 7062.169922 | 4 | 899.4699707 | 898.9714919 |
| PSETQELVQQVLSLATQSDNPDLR            | Q9DBG3 | 0          | N-term +28.03 Da,                           | 7067.118164 | 3 | 938.1400146 | 937.8050808 |
| AINLPLSPISFELDPEDTLLLENEVR          | Q9EPC1 | 0          | N-term +28.03 Da,                           | 7086.015625 | 3 | 994.8499756 | 994.5166484 |
| AINLPLSPISFELDPEDTLLLENEVR          | Q9EPC1 | 0          | N-term +28.03 Da,                           | 7086.274902 | 2 | 1491.780029 | 1491.271334 |
| SKEFVEEFIWPAVQSSALYEDR              | P16460 | 0.00103146 | N-term +28.03 Da, K +28.03 Da,              | 7098.001953 | 3 | 895.7700195 | 896.118159  |
| ALMLQGVLLADAVAVTMGPKGR              | P63038 | 0          | N-term +28.03 Da,                           | 7102.449219 | 3 | 795.1099854 | 794.7797662 |
| VPAGPGGSQQVDLASVLTPEIMAPILANADVQER  | Q9JKV1 | 0          | N-term +28.03 Da,                           | 7105.126953 | 3 | 1158.280029 | 1157.943256 |
| VVDNPIYLSDMGAALTGAESHLEQDVLEETNILKR | Q8CGK3 | 0.0013844  | N-term +28.03 Da, K +28.03 Da,              | 7105.94873  | 4 | 975.5       | 975.0042153 |
| VPAGPGGSQQVDLASVLTPEIMAPILANADVQER  | Q9JKV1 | 0          | N-term +28.03 Da,                           | 7108.583984 | 4 | 868.7088013 | 868.7092609 |
| VPAGPGGSQQVDLASVLTPEIMAPILANADVQER  | Q9JKV1 | 0          | N-term +28.03 Da,                           | 7112.222168 | 3 | 1157.939941 | 1157.943256 |
| DFQLIGIQDGYLSLLQDSGEVR              | P63242 | 0.00136054 | N-term +28.03 Da,                           | 7121.143066 | 3 | 832.7600098 | 832.0989873 |
| EWGKTQEAMEAALAMEKNLNQALLDLHALGSAR   | P29391 | 0          | N-term +28.03 Da, K +28.03 Da,              | 7122.918457 | 4 | 924.7299805 | 924.2327402 |
| DFQLIGIQDGYLSLLQDSGEVR              | P63242 | 0          | N-term +28.03 Da,                           | 7124.05127  | 2 | 1248.640015 | 1247.644843 |
| SSAGLPPLSATSFLEDLMDR                | Q75N73 | 0          | N-term +28.03 Da,                           | 7125.900391 | 2 | 1068.530029 | 1068.038093 |
| FTLQPLVDPEDIDLTPSSGLGNLPR           | P33267 | 0          | N-term +28.03 Da,                           | 7130.472168 | 3 | 946.1799927 | 945.8428066 |
| ALMLQGVLLADAVAVTMGPKGR              | P63038 | 0          | N-term +28.03 Da,                           | 7134.538086 | 3 | 794.7775879 | 794.7797662 |
| VPAGPGGSQQVDLASVLTPEIMAPILANADVQER  | Q9JKV1 | 0          | N-term +28.03 Da,                           | 7139.320313 | 4 | 868.7072754 | 868.7092609 |
| FTLQPLVDPEDIDLTPSSGLGNLPR           | P33267 | 0          | N-term +28.03 Da,                           | 7139.773438 | 3 | 945.8400269 | 945.8428066 |
| DLAILLGMLDPVEKDANNMPVTAR            | D3Z0Y2 | 0          | N-term +28.03 Da, K +28.03 Da,              | 7151.644043 | 3 | 885.4799805 | 884.8081623 |
| AIAELDTLSEESYKDSTLIMQLLR            | P62259 | 0          | N-term +28.03 Da, K +28.03 Da,              | 7154.250488 | 3 | 933.1599731 | 932.4964192 |
| AAFDLGVLALPSIAGAFR                  | P34914 | 0.00053562 | N-term +28.03 Da,                           | 7154.51416  | 3 | 644.6900024 | 644.6911623 |
| SSAGLPPLSATSFLEDLMDR                | Q75N73 | 0          | N-term +28.03 Da,                           | 7158.962402 | 2 | 1068.040039 | 1068.038093 |
| VNPTVFFDITADDEPLGR                  | P17742 | 0          | N-term +28.03 Da,                           | 7163.897949 | 2 | 1017.530029 | 1017.512568 |
| SLQDIIAILGMDLSEEDKLTVSR             | P56480 | 0.00054259 | N-term +28.03 Da, K +28.03 Da,              | 7167.09082  | 3 | 911.8200073 | 911.1526525 |
| DLAILLGMLDPVEKDANNMPVTAR            | D3Z0Y2 | 0          | N-term +28.03 Da, K +28.03 Da,              | 7168.491211 | 3 | 884.8099976 | 884.8081623 |
| DPNFFKMVEGFFDR                      | P26443 | 0          | N-term +28.03 Da, K +28.03 Da,              | 7176.383789 | 3 | 602.6300049 | 602.295755  |



|                                         |        |            |                                            |             |   |             |             |
|-----------------------------------------|--------|------------|--------------------------------------------|-------------|---|-------------|-------------|
| ALMLQGVDLLADAVAVTMGPKGR                 | P63038 | 0          | N-term +28.03 Da,                          | 7178.253418 | 3 | 795.4500122 | 794.7797662 |
| TTEPVSELLKNYLDAQYGDIGITPPQCF            | P18242 | 0.00983359 | N-term +28.03 Da, K +28.03 Da,C +57.02 Da, | 7188.550781 | 3 | 1149.569946 | 1149.233924 |
| HTVVVWLGRR                              | Q3V0D6 | 0.00697674 | N-term +28.03 Da,                          | 7190.245117 | 2 | 657.3699951 | 657.8751159 |
| EFGEIPDIDAELKLMCPQEIVDYADKKDVYE         | Q9CR21 | 0.03861982 | N-term +28.03 Da, K +28.03 Da,C +57.02 Da, | 7193.125    | 4 | 983.9899902 | 983.737256  |
| TTFGDFIQLLVR                            | Q8R0Y6 | 0          | N-term +28.03 Da,                          | 7193.410645 | 2 | 719.4099731 | 719.4086551 |
| AGLPPLSATSFLLEDLMDR                     | Q75N73 | 0          | N-term +28.03 Da,                          | 7203.026367 | 2 | 981.0100098 | 981.0060635 |
| AVWPTLVDINSLDSLTEAYKLR                  | Q9R0H0 | 0          | N-term +28.03 Da, K +28.03 Da,             | 7204.038574 | 3 | 854.4699707 | 854.1388941 |
| AGLPPLSATSFLLEDLMDR                     | Q75N73 | 0          | N-term +28.03 Da,                          | 7204.323242 | 3 | 654.3400269 | 654.3398012 |
| DYKSLQDIIAILGMDELSEEDKLTVSR             | P56480 | 0          | N-term +28.03 Da, K +28.03 Da,             | 7208.569824 | 3 | 1056.560059 | 1055.891498 |
| SSVQLLAAEEAVTLDMDLGAAR                  | Q9D3D9 | 0.00915332 | N-term +28.03 Da,                          | 7210.482422 | 2 | 1166.609985 | 1165.617239 |
| DYKSLQDIIAILGMDELSEEDKLTVSR             | P56480 | 0          | N-term +28.03 Da, K +28.03 Da,             | 7211.126953 | 4 | 792.6699829 | 792.1704427 |
| TLLEGSGLESIINIIHSSLAEP                  | P19096 | 0          | N-term +28.03 Da,                          | 7213.027344 | 3 | 827.1300049 | 826.4585154 |
| QLFSDKLEINEIKIAPSFAYESMEDALKAADTIGYPMIR | Q8C196 | 0.00138376 | N-term +28.03 Da, K +28.03 Da,             | 7237.286621 | 4 | 1142.599976 | 1142.352313 |
| MITSAAGIISLLDEEEPQLKEF                  | Q3TXS7 | 0.00250209 | N-term +28.03 Da, K +28.03 Da,             | 7243.066895 | 3 | 831.4400024 | 830.7731123 |
| MITSAAGIISLLDEEEPQLKEF                  | Q3TXS7 | 0          | N-term +28.03 Da, K +28.03 Da,             | 7250.126465 | 2 | 1246.660034 | 1245.65603  |
| MITSAAGIISLLDEEEPQLKEF                  | Q3TXS7 | 0          | N-term +28.03 Da, K +28.03 Da,             | 7252.080078 | 3 | 831.1099854 | 830.7731123 |
| SFDVDGLDPAFTPATGTPVLGGLSYR              | Q61176 | 0          | N-term +28.03 Da,                          | 7256.34082  | 2 | 1340.650024 | 1341.176507 |
| MNVDPAGPGGSQQVDLASVLTPEIMAPILANADVQER   | Q9JKV1 | 0          | N-term +28.03 Da,                          | 7266.083496 | 3 | 1239.949951 | 1239.637727 |
| DMFVRKNR                                | Q76KF0 | 0.02198174 | N-term +28.03 Da, K +28.03 Da,             | 7267.225098 | 2 | 562.3099976 | 561.3160451 |
| SDKLNEINEKIAPSFAYESMEDALKAADTIGYPMIR    | Q8C196 | 0          | N-term +28.03 Da, K +28.03 Da,             | 7267.42041  | 4 | 1045.290039 | 1045.299549 |
| SDKLNEINEKIAPSFAYESMEDALKAADTIGYPMIR    | Q8C196 | 0          | N-term +28.03 Da, K +28.03 Da,             | 7280.527832 | 4 | 1045.040039 | 1045.299549 |
| SLGIETLGGVFTKLINR                       | P38647 | 0.00098765 | N-term +28.03 Da, K +28.03 Da,             | 7281.138672 | 2 | 937.039978  | 937.5591228 |
| MITSAAGIISLLDEEEPQLKEF                  | Q3TXS7 | 0          | N-term +28.03 Da, K +28.03 Da,             | 7283.80127  | 3 | 831.1099854 | 830.7731123 |
| MNVDPAGPGGSQQVDLASVLTPEIMAPILANADVQER   | Q9JKV1 | 0          | N-term +28.03 Da,                          | 7284.48877  | 4 | 929.9799805 | 929.9801142 |
| MITSAAGIISLLDEEEPQLKEF                  | Q3TXS7 | 0          | N-term +28.03 Da, K +28.03 Da,             | 7286.28418  | 2 | 1245.660034 | 1245.65603  |
| MNVDPAGPGGSQQVDLASVLTPEIMAPILANADVQER   | Q9JKV1 | 0          | N-term +28.03 Da,                          | 7299.681152 | 3 | 1239.969971 | 1239.637727 |
| VEELDPGVVDNFPLLKALR                     | P30115 | 0          | N-term +28.03 Da, K +28.03 Da,             | 7303.774902 | 2 | 1090.099976 | 1090.61991  |
| SDKLNEINEKIAPSFAYESMEDALKAADTIGYPMIR    | Q8C196 | 0.0321533  | N-term +28.03 Da, K +28.03 Da,             | 7313.937988 | 4 | 1045.790039 | 1045.299549 |
| IKVGDPAEDFGTFFSAVIDAKAF                 | Q8CHT0 | 0.04444444 | N-term +28.03 Da, K +28.03 Da,             | 7325.166504 | 3 | 844.4500122 | 843.7807067 |
| EGQDVLLFIDNIFR                          | P56480 | 0          | N-term +28.03 Da,                          | 7340.016113 | 2 | 853.960022  | 853.9592414 |
| EAIALDRTLSEESYKDSTLIMQLLR               | P63101 | 0          | N-term +28.03 Da, K +28.03 Da,             | 7353.624512 | 3 | 975.8400269 | 975.5106173 |
| TLIDLGTAKAFAMTNQILVER                   | Q8C196 | 0          | N-term +28.03 Da, K +28.03 Da,             | 7354.48584  | 3 | 763.75      | 764.0994932 |
| IAPSFAYESMEDALKAADTIGYPMIR              | Q8C196 | 0          | N-term +28.03 Da, K +28.03 Da,             | 7355.992188 | 3 | 985.1699829 | 984.5134155 |
| IAPSFAYESMEDALKAADTIGYPMIR              | Q8C196 | 0          | N-term +28.03 Da, K +28.03 Da,             | 7363.875    | 3 | 984.5100098 | 984.5134155 |
| IKEDDDKTVMDLAVVLFETATLR                 | P08113 | 0.00984476 | N-term +28.03 Da, K +28.03 Da,             | 7374.437012 | 3 | 946.5100098 | 945.8401859 |
| IKEDDDKTVMDLAVVLFETATLR                 | P08113 | 0.00398724 | N-term +28.03 Da, K +28.03 Da,             | 7377.582031 | 4 | 710.1300049 | 709.6319586 |
| SSSEVGYDAMLGDFVNMVEKGIIDPTKVVR          | P63038 | 0          | N-term +28.03 Da, K +28.03 Da,             | 7377.819824 | 3 | 1114.569946 | 1114.243766 |
| TQPPPPPIPEVVATWEAISLGR                  | Q8BGA8 | 0          | N-term +28.03 Da,                          | 7378.070801 | 3 | 795.4400024 | 795.1055243 |
| SSEVGYDAMLGDFVNMVEKGIIDPTKVVR           | P63038 | 0          | N-term +28.03 Da, K +28.03 Da,             | 7382.984375 | 4 | 814.4199829 | 814.1766362 |
| LEEERQQQEEAEKKR                         | E9Q295 | 0.01078869 | N-term +28.03 Da, K +28.03 Da,             | 7388.772461 | 2 | 1007.518677 | 1007.531823 |

|                                         |        |            |                                            |             |   |             |             |
|-----------------------------------------|--------|------------|--------------------------------------------|-------------|---|-------------|-------------|
| IKEDDDKTVMDLAVVLFETATLR                 | P08113 | 0.00059312 | N-term +28.03 Da, K +28.03 Da,             | 7389.28418  | 4 | 709.6300049 | 709.6319586 |
| DDVDDLKSQLRQAEQVNDLKERLKTSTSNVEQYR      | F6ZDS4 | 0.01805556 | N-term +28.03 Da, K +28.03 Da,             | 7392.634277 | 4 | 1066.290039 | 1066.302938 |
| ADSSVQLLAEEAVTLDMLDLGAAR                | Q9D3D9 | 0          | N-term +28.03 Da,                          | 7399.786621 | 3 | 839.7700195 | 839.4352709 |
| SSSEVGYDAMLGDFVNMVEKGIIDPTKVVR          | P63038 | 0          | N-term +28.03 Da, K +28.03 Da,             | 7401.319336 | 4 | 836.1900024 | 835.9346435 |
| ETNEIKTHFTTREGLYR                       | Q9D5R2 | 0.04327375 | N-term +28.03 Da, K +28.03 Da,             | 7401.926758 | 3 | 717.7247314 | 717.7112857 |
| SEVGYDAMLGDFVNMVEKGIIDPTKVVR            | P63038 | 0          | N-term +28.03 Da, K +28.03 Da,             | 7403.995605 | 4 | 792.9199829 | 792.4186289 |
| ADSSVQLLAEEAVTLDMLDLGAAR                | Q9D3D9 | 0          | N-term +28.03 Da,                          | 7404.402832 | 2 | 1259.650024 | 1258.649268 |
| AYVPVQLSEVGGQVEVELLGNYPATIIQEPLVLTEPAR  | Q9DBT9 | 0          | N-term +28.03 Da,                          | 7409.686035 | 4 | 1088.099976 | 1087.601717 |
| ADSSVQLLAEEAVTLDMLDLGAAR                | Q9D3D9 | 0          | N-term +28.03 Da,                          | 7409.973633 | 2 | 1258.650024 | 1258.649268 |
| TQPPPPPIPEVVATWEAISLGR                  | Q8BGA8 | 0          | N-term +28.03 Da,                          | 7411.556641 | 3 | 795.4400024 | 795.1055243 |
| AAPPQLQALLQAVNKLLR                      | Q9JJW0 | 0          | N-term +28.03 Da, K +28.03 Da,             | 7416.464844 | 3 | 667.75      | 667.4174845 |
| AYVPVQLSEVGGQVEVELLGNYPATIIQEPLVLTEPAR  | Q9DBT9 | 0.00063694 | N-term +28.03 Da,                          | 7422.515625 | 3 | 1450.459961 | 1449.799864 |
| DDVDDLKSQLRQAEQVNDLKERLKTSTSNVEQYR      | F6ZDS4 | 0.0400126  | N-term +28.03 Da, K +28.03 Da,             | 7430.030273 | 4 | 1066.290039 | 1066.302938 |
| ADSSVQLLAEEAVTLDMLDLGAAR                | Q9D3D9 | 0          | N-term +28.03 Da,                          | 7432.46875  | 3 | 839.7700195 | 839.4352709 |
| SEVGYDAMLGDFVNMVEKGIIDPTKVVR            | P63038 | 0          | N-term +28.03 Da, K +28.03 Da,             | 7434.769043 | 4 | 792.6699829 | 792.4186289 |
| ADSSVQLLAEEAVTLDMLDLGAAR                | Q9D3D9 | 0          | N-term +28.03 Da,                          | 7442.349609 | 2 | 1259.630005 | 1258.649268 |
| TQPPPPPIPEVVATWEAISLGR                  | Q8BGA8 | 0          | N-term +28.03 Da,                          | 7447.151367 | 3 | 795.4400024 | 795.1055243 |
| LMAYGGKLYAIYFEAR                        | Q60675 | 0.03889943 | N-term +28.03 Da, K +28.03 Da,             | 7459.149414 | 2 | 1039.060059 | 1039.579001 |
| TQPPPPPIPEVVATWEAISLGR                  | Q8BGA8 | 0          | N-term +28.03 Da,                          | 7471.279297 | 3 | 795.1099854 | 795.1055243 |
| NEKIAPSFAVESMEDALKAADTIGYPMIR           | Q8C196 | 0.0021097  | N-term +28.03 Da, K +28.03 Da,             | 7475.673828 | 3 | 1117.22998  | 1117.584011 |
| DAIAELDTLNEDSYKDSLIMQLLR                | P61982 | 0          | N-term +28.03 Da, K +28.03 Da,             | 7481.77002  | 3 | 975.5100098 | 975.1704836 |
| TQMEYDGLLIAGGGPNPALAQLIQNVKIKLES DR     | Q8C196 | 0          | N-term +28.03 Da, K +28.03 Da,             | 7485.160645 | 3 | 1278.689941 | 1278.699315 |
| SEQAPVMSEDELVSIIIDGVL R                 | Q8K5B2 | 0          | N-term +28.03 Da,                          | 7486.283203 | 2 | 1158.089966 | 1158.093597 |
| AGGVQVTVLIPGDGIGPEISASVMKIFDAAKAPIQWEER | Q9D6R2 | 0          | N-term +28.03 Da, K +28.03 Da,             | 7501.070801 | 4 | 1035.310059 | 1034.80797  |
| NEKIAPSFAVESMEDALKAADTIGYPMIR           | Q8C196 | 0.00061125 | N-term +28.03 Da, K +28.03 Da,             | 7507.72998  | 3 | 1117.579956 | 1117.584011 |
| GQPVPPPEMLASTLAELDGCLQVLEDKFL R         | G3UX05 | 0          | N-term +28.03 Da, K +28.03 Da,C +57.02 Da, | 7527.680176 | 3 | 1095.579956 | 1094.908606 |
| ENVQDVLPTLPNPDYFLLR                     | Q99J08 | 0.00325998 | N-term +28.03 Da,                          | 7532.603516 | 2 | 1193.109985 | 1193.618096 |
| AGGVQVTVLIPGDGIGPEISASVMKIFDAAKAPIQWEER | Q9D6R2 | 0          | N-term +28.03 Da, K +28.03 Da,             | 7535.009766 | 4 | 1035.310059 | 1034.80797  |
| VGNLPFNTVQGGDIDAIFKDL SIR               | Q9WUK2 | 0          | N-term +28.03 Da, K +28.03 Da,             | 7548.018555 | 3 | 863.7999878 | 863.4742768 |
| ILNPDNSFEILVDQSVVNSGNLLNDMTPPVNP SR     | P35564 | 0          | N-term +28.03 Da,                          | 7564.977539 | 3 | 1246.969971 | 1246.29988  |
| TLGVDFIDVATKVMIGESIDEKR                 | Q8C196 | 0          | N-term +28.03 Da, K +28.03 Da,             | 7565.257813 | 3 | 873.7999878 | 874.1470611 |
| ILNPDNSFEILVDQSVVNSGNLLNDMTPPVNP SR     | P35564 | 0          | N-term +28.03 Da,                          | 7565.782715 | 4 | 935.4799805 | 934.976729  |
| HIEQSEFSLENLASTINDLFGAGTETTSTTL R       | Q64458 | 0          | N-term +28.03 Da,                          | 7577.024902 | 3 | 1171.579956 | 1170.912679 |
| ILNPDNSFEILVDQSVVNSGNLLNDMTPPVNP SR     | P35564 | 0          | N-term +28.03 Da,                          | 7579.65918  | 3 | 1246.630005 | 1246.29988  |
| DQALSFLKDFLAGGIAAAVSKTAVAPIER           | P48962 | 0.00102564 | N-term +28.03 Da, K +28.03 Da,             | 7610.433594 | 4 | 762.171936  | 761.6852195 |
| NKSLELVKEAIDKAGYTEKVMVIGMDVAASEFYR      | D3Z6E4 | 0.00099108 | N-term +28.03 Da, K +28.03 Da,             | 7649.589844 | 4 | 962.2700195 | 962.2662488 |
| IRDWGS SGTLRCLALATRDTPPR                | Q64518 | 0.01629472 | N-term +28.03 Da, C +57.02 Da,             | 7665.411133 | 2 | 1371.72998  | 1371.708848 |
| SFAVESMEDALKAADTIGYPMIR                 | Q8C196 | 0          | N-term +28.03 Da, K +28.03 Da,             | 7668.333496 | 3 | 890.4400024 | 890.788768  |
| SFAVESMEDALKAADTIGYPMIR                 | Q8C196 | 0          | N-term +28.03 Da, K +28.03 Da,             | 7672.101563 | 2 | 1335.160034 | 1335.679514 |
| KIAPSFAVESMEDALKAADTIGYPMIR             | Q8C196 | 0          | N-term +28.03 Da, K +28.03 Da,             | 7674.37793  | 3 | 1036.209961 | 1036.555503 |

|                                          |        |            |                                             |             |   |             |             |
|------------------------------------------|--------|------------|---------------------------------------------|-------------|---|-------------|-------------|
| SGPLPEPVVEAITQGDLVAVGVLSG NR             | P28271 | 0          | N-term +28.03 Da,                           | 7683.142578 | 3 | 901.8300171 | 901.4956296 |
| KIAPSF AVESMEDALKAADTIGY PVMIR           | Q8C196 | 0.0250501  | N-term +28.03 Da, K +28.03 Da,              | 7687.345703 | 4 | 777.6599731 | 777.6684466 |
| SFAVESMEDALKAADTIGY PVMIR                | Q8C196 | 0          | N-term +28.03 Da, K +28.03 Da,              | 7700.39209  | 3 | 890.4400024 | 890.788768  |
| SQDEWGKTQEAMEAALAMEKNLNQALLDLHALGSAR     | P29391 | 0          | N-term +28.03 Da, K +28.03 Da,              | 7706.532227 | 4 | 1006.75     | 1006.762128 |
| EINEKIAPSF AVESMEDALKAADTIGY PVMIR       | Q8C196 | 0          | N-term +28.03 Da, K +28.03 Da,              | 7722.109375 | 3 | 1197.949951 | 1198.292897 |
| SQDEWGKTQEAMEAALAMEKNLNQALLDLHALGSAR     | P29391 | 0          | N-term +28.03 Da, K +28.03 Da,              | 7730.26416  | 4 | 1007.25     | 1006.762128 |
| LNEINEKIAPSF AVESMEDALKAADTIGY PVMIR     | Q8C196 | 0          | N-term +28.03 Da, K +28.03 Da,              | 7741.686523 | 3 | 1273.97998  | 1274.001895 |
| VNPTVFFDITADDEPLGR                       | P17742 | 0          | N-term +28.03 Da,                           | 7793.196777 | 2 | 1017.51001  | 1017.512568 |
| VNPTVFFDITADDEPLGR                       | P17742 | 0.00052029 | N-term +28.03 Da,                           | 7816.895508 | 3 | 678.3400269 | 678.6774706 |
| VLAQAELPALHYRFNAPIAR                     | P58459 | 0.00952018 | N-term +28.03 Da,                           | 7824.031738 | 2 | 1140.130005 | 1139.644584 |
| VLAQAELPALHYRFNAPIAR                     | P58459 | 0.02016405 | N-term +28.03 Da,                           | 7830.298828 | 2 | 1140.630005 | 1139.644584 |
| VLAQAELPALHYRFNAPIAR                     | P58459 | 0.00984103 | N-term +28.03 Da,                           | 7832.51123  | 3 | 760.4199829 | 760.0988149 |
| TEVDKLGIGKVMEEFTSYLLGR                   | Q61176 | 0.00102197 | N-term +28.03 Da, K +28.03 Da,              | 7834.933105 | 3 | 857.1199951 | 857.1363847 |
| VELLYHVEELDPGVVDNFLLKALR                 | P30115 | 0          | N-term +28.03 Da, K +28.03 Da,              | 7838.641602 | 3 | 978.5300293 | 978.8828248 |
| VEKILQSSSEVGYDAMLGDFVNMVEKIIDPTKVVR      | P63038 | 0          | N-term +28.03 Da, K +28.03 Da,              | 7841.005371 | 4 | 1020.539978 | 1020.550638 |
| EDQVVCQQLGCGKSLHPSPK                     | Q9QWK4 | 0.04837209 | N-term +28.03 Da, K +28.03 Da, C +57.02 Da, | 7846.444336 | 3 | 794.0999756 | 793.7556208 |
| DKTVMDLAVVLFETATLR                       | P08113 | 0          | N-term +28.03 Da, K +28.03 Da,              | 7848.182617 | 3 | 693.3900146 | 693.3903844 |
| MKIAVIGQSLFGQEVYQCRLR                    | Q8R0Y6 | 0          | N-term +28.03 Da, K +28.03 Da, C +57.02 Da, | 7851.736328 | 3 | 800.0999756 | 799.4324778 |
| DVLLFDNIFR                               | P56480 | 0.00144858 | N-term +28.03 Da,                           | 7866.461426 | 2 | 696.9000244 | 696.8979231 |
| EDDKTVMDLAVVLFETATLR                     | P08113 | 0.00053763 | N-term +28.03 Da, K +28.03 Da,              | 7868.459473 | 3 | 775.0800171 | 774.7468972 |
| EEVEGSLLLGSVQGYMEQASKTVQDALSSVQESDIAVVAR | P33622 | 0          | N-term +28.03 Da,                           | 7878.501465 | 4 | 1070.54895  | 1070.546711 |
| WKKFVVVVK                                | Q5DU31 | 0.00435816 | N-term +28.03 Da, K +28.03 Da,              | 8050.084961 | 2 | 673.4400024 | 673.4415712 |
| RRKEKLLGR                                | Q9JIS7 | 0.01905752 | N-term +28.03 Da, K +28.03 Da,              | 8162.85791  | 2 | 648.4299927 | 648.9329651 |
| NKELDPVQKLFVDKIR                         | P97450 | 0          | N-term +28.03 Da, K +28.03 Da,              | 8195.853516 | 4 | 514.5700073 | 514.3147655 |
| ASGDKEAEGAPQEAGKR                        | D3Z617 | 0          | N-term +14.02 Da, K +28.03 Da,              | 955.9832153 | 4 | 563.2700195 | 563.2737586 |
| AAKLAPEFAKR                              | O08709 | 0.02830189 | N-term +14.02 Da, K +28.03 Da,              | 1008.15979  | 4 | 386.2200012 | 386.2216049 |
| PQDQGEKENPMR                             | A2BH06 | 0          | N-term +14.02 Da, K +28.03 Da,              | 1010.81073  | 3 | 514.6257935 | 514.626381  |
| PDEVGGEALGR                              | P02089 | 0          | N-term +14.02 Da,                           | 1015.394165 | 4 | 343.2000122 | 342.9453062 |
| PNDSSFQIVKNPR                            | Q61176 | 0.01010101 | N-term +14.02 Da, K +28.03 Da,              | 1021.591858 | 3 | 487.2600098 | 487.2548358 |
| VPKDEQGSAADESPTSIEAVR                    | P10518 | 0          | N-term +14.02 Da, K +28.03 Da,              | 1021.876648 | 3 | 689         | 688.6745666 |
| PTAAPPLAEAGA AKGLR                       | Q9D2G2 | 0          | N-term +14.02 Da, K +28.03 Da,              | 1025.057495 | 3 | 707.6696777 | 707.6817213 |
| PSKGPLQSVQVFGR                           | P14131 | 0.01030928 | N-term +14.02 Da, K +28.03 Da,              | 1031.47583  | 3 | 381.8715515 | 381.8716626 |
| PHPYPALTPPEKKELSDIAHR                    | P05064 | 0          | N-term +14.02 Da, K +28.03 Da,              | 1031.660889 | 3 | 375.8960876 | 375.896142  |
| SLFGDSYETQVIAHQGSSKGR                    | Q78JT3 | 0          | N-term +14.02 Da, K +28.03 Da,              | 1034.060181 | 3 | 485.9356995 | 485.9353259 |
| PLAGTNKETTIGLDGLSER                      | Q91Y97 | 0.04504505 | N-term +14.02 Da, K +28.03 Da,              | 1034.490845 | 3 | 491.9200134 | 491.9229749 |
| SDAAYLARHVGLRVGPTETGALT LNR              | Q8BWT1 | 0.01923077 | N-term +14.02 Da,                           | 1038.35498  | 3 | 407.5599976 | 407.226217  |
| PAINVNSVTKSKFDNLYGCR                     | P50247 | 0          | N-term +14.02 Da, K +28.03 Da, C +57.02 Da, | 1040.820557 | 3 | 463.8999939 | 463.9038031 |
| ILGADTSVDLEETGR                          | Q03265 | 0          | N-term +14.02 Da,                           | 1043.764526 | 4 | 364.7000122 | 364.7033135 |
| PTPNVSVVDLTCR                            | P16858 | 0          | N-term +14.02 Da, C +57.02 Da,              | 1045.531982 | 3 | 472.269989  | 471.9318042 |
| PALDSLKPANEDQKIGIEIKR                    | P63038 | 0          | N-term +14.02 Da, K +28.03 Da,              | 1046.639771 | 3 | 415.8700562 | 415.8700993 |

|                                        |        |            |                                            |             |   |             |             |
|----------------------------------------|--------|------------|--------------------------------------------|-------------|---|-------------|-------------|
| PLENLEEEGLPKNPDLR                      | Q99JI4 | 0          | N-term +14.02 Da, K +28.03 Da,             | 1046.735718 | 2 | 623.3013916 | 623.3015107 |
| NVLSGGTTMYPGIADR                       | P62737 | 0          | N-term +14.02 Da,                          | 1046.943115 | 3 | 326.5281372 | 326.5281792 |
| PAFKDGGSTTAGNSSQVSDGAAAVLLAR           | Q8VCH0 | 0          | N-term +14.02 Da, K +28.03 Da,             | 1047.511841 | 3 | 751.0200195 | 750.6959194 |
| PDSGPEQSLDLTSLR                        | Q91XD4 | 0.03669725 | N-term +14.02 Da,                          | 1047.796509 | 3 | 578.5900269 | 578.5906136 |
| NKCPCITYGLR                            | Q9D1A2 | 0.01052632 | N-term +14.02 Da, K +28.03 Da,C +57.02 Da, | 1048.010498 | 4 | 412.4700012 | 412.4731571 |
| IQEITEQLDITTEYEKEKLNER                 | P63038 | 0          | N-term +14.02 Da, K +28.03 Da,             | 1050.092041 | 3 | 468.5899963 | 468.2560652 |
| PFDPGLAEDIDKGEV SAR                    | P58252 | 0          | N-term +14.02 Da, K +28.03 Da,             | 1053.01416  | 3 | 478.5899963 | 478.2512028 |
| PAPATTF AHL DATTVLSR                   | P56480 | 0          | N-term +14.02 Da,                          | 1054.712524 | 3 | 388.2322388 | 388.2325314 |
| PYLPNVDEEVQIGHVPR                      | P11276 | 0          | N-term +14.02 Da,                          | 1055.50708  | 3 | 393.5639954 | 393.5641697 |
| PGFEAPTYKDTLLPKLPR                     | P49429 | 0          | N-term +14.02 Da, K +28.03 Da,             | 1057.974609 | 3 | 406.8900146 | 406.8911683 |
| PVQKVL ESD LKKS DIDEIVLVGGSTR          | P20029 | 0          | N-term +14.02 Da, K +28.03 Da,             | 1058.406128 | 3 | 602.2700195 | 602.2696516 |
| TIAQDYGV LK ADEGISFR                   | P35700 | 0          | N-term +14.02 Da, K +28.03 Da,             | 1060.041138 | 3 | 495.6106873 | 495.6108422 |
| YFAGTMAETAPAVLER                       | Q64374 | 0          | N-term +14.02 Da,                          | 1063.530273 | 4 | 469         | 468.9969967 |
| PLGLEAEKDGVPVFKFPR                     | Q8R0Y6 | 0          | N-term +14.02 Da, K +28.03 Da,             | 1065.19043  | 3 | 483.2200012 | 483.2230904 |
| IPSAVGYQPTLATDMGTMQER                  | P56480 | 0          | N-term +14.02 Da,                          | 1069.454224 | 2 | 478.269928  | 478.269618  |
| PLGLEAEKDGVPVFKFPR                     | Q8R0Y6 | 0.01041667 | N-term +14.02 Da, K +28.03 Da,             | 1069.539063 | 2 | 742.9127197 | 742.9126251 |
| NEFTLGEECELETMTGEKVK                   | P12710 | 0          | N-term +14.02 Da, K +28.03 Da,C +57.02 Da, | 1071.658081 | 3 | 411.5599976 | 411.8948014 |
| PSGASTGIYEALER                         | P17182 | 0          | N-term +14.02 Da,                          | 1076.268921 | 3 | 472.2597351 | 471.9318042 |
| PKNVVGDHADDVYSVFGAPILR                 | Q91WU0 | 0.03738318 | N-term +14.02 Da, K +28.03 Da,             | 1077.334106 | 3 | 401.5499878 | 401.2205199 |
| KGIKSVTE L N GDTITNTMTLGDIVYKR         | P12710 | 0          | N-term +14.02 Da, K +28.03 Da,             | 1078.989136 | 2 | 704.3400269 | 704.3391564 |
| PLVYLDVVGADGQPLGR                      | Q99KR7 | 0          | N-term +14.02 Da,                          | 1083.108032 | 3 | 454.2099915 | 454.212414  |
| PVADVGTVAEKEGWPLDIR                    | Q99KI0 | 0          | N-term +14.02 Da, K +28.03 Da,             | 1085.548706 | 3 | 388.230011  | 388.2325314 |
| MVHLTDAEKA AVSCLWGK VNSDEVGGEALGR      | P02088 | 0.03703704 | N-term +14.02 Da, K +28.03 Da,C +57.02 Da, | 1086.443848 | 2 | 680.8156128 | 680.8149828 |
| LITLEQGKTLDAEGDVFR                     | Q9EQ20 | 0          | N-term +14.02 Da, K +28.03 Da,             | 1086.542358 | 4 | 376.7099915 | 376.7057878 |
| QFTSAGESFNKLVSGKLR                     | Q9CPY7 | 0          | N-term +14.02 Da, K +28.03 Da,             | 1091.562866 | 3 | 495.6106567 | 495.6108422 |
| PGLLLLGDEAPNFEANTTIGR                  | O08709 | 0          | N-term +14.02 Da,                          | 1095.678955 | 4 | 438.2200012 | 438.2218024 |
| PEFLEDPSVLT KDKLSELVAN NVTLPAGEQR      | Q61029 | 0          | N-term +14.02 Da, K +28.03 Da,             | 1099.016357 | 2 | 429.2583618 | 429.2581875 |
| PNNLAVPLYKNGVKIMGTSP LQIDR             | Q8C196 | 0          | N-term +14.02 Da, K +28.03 Da,             | 1099.91272  | 3 | 522.9276733 | 522.2677539 |
| QFTSAGESFNKLVSGKLR                     | Q9CPY7 | 0          | N-term +14.02 Da, K +28.03 Da,             | 1101.663452 | 3 | 482.5599976 | 482.5633354 |
| ANKGMAIGIDL GTTYSCVGVFQHGKVEI IANDQGNR | P16627 | 0          | N-term +14.02 Da, K +28.03 Da,C +57.02 Da, | 1102.232788 | 3 | 578.9299927 | 578.9391313 |
| EFNTQLAQKEQELER                        | Q91VW5 | 0.01       | N-term +14.02 Da, K +28.03 Da,             | 1106.025146 | 3 | 550.25      | 550.2480762 |
| PGLLLLGDEAPNFEANTTIGR                  | O08709 | 0.0106383  | N-term +14.02 Da,                          | 1109.617554 | 2 | 723.3400269 | 723.3413649 |
| PLGKDLLFKDSAFGLLR                      | Q92111 | 0          | N-term +14.02 Da, K +28.03 Da,             | 1116.556641 | 2 | 743.4039307 | 742.9126251 |
| PGLLLLGEEAPDFEANTTIGR                  | Q8BG37 | 0          | N-term +14.02 Da,                          | 1118.688965 | 3 | 373.211792  | 373.2119077 |
| QFTSAGESFNKLVSGKLR                     | Q9CPY7 | 0          | N-term +14.02 Da, K +28.03 Da,             | 1119.778564 | 2 | 629.8200073 | 629.8173278 |
| PLAEALLSGDLEKFSR                       | A2ADY9 | 0.01904762 | N-term +14.02 Da, K +28.03 Da,             | 1119.93042  | 3 | 388.2318115 | 388.2325314 |
| PADDLTD PAPATTF AHL DATTVLSR           | P56480 | 0          | N-term +14.02 Da,                          | 1123.012451 | 3 | 495.9388428 | 495.6108422 |
| PDQLLKELPFPLNTR                        | Q78JT3 | 0          | N-term +14.02 Da, K +28.03 Da,             | 1124.178955 | 3 | 463.230011  | 463.2281754 |
| PNALFPPVEFPAPR                         | P19096 | 0          | N-term +14.02 Da,                          | 1125.602051 | 4 | 395.4700012 | 395.4732254 |
| PCLLRPSYVLSGSAMNVV FSEDEMKR            | Q8C196 | 0          | N-term +14.02 Da, K +28.03 Da,C +57.02 Da, | 1126.749023 | 3 | 324.5222168 | 324.5221932 |

|                                          |        |            |                                            |             |   |             |             |
|------------------------------------------|--------|------------|--------------------------------------------|-------------|---|-------------|-------------|
| VGADALEEEDNVLVKKSNFEEALAAHKYL            | P09103 | 0          | N-term +14.02 Da, K +28.03 Da,             | 1132.927124 | 3 | 482.5635681 | 482.5633354 |
| PGSVNIPFTEFLTNEGLEKSPEEIKR               | Q99J99 | 0          | N-term +14.02 Da, K +28.03 Da,             | 1133.801758 | 2 | 621.7800293 | 621.7834852 |
| PGSVNIPFTEFLTNEGLEKSPEEIKR               | Q99J99 | 0          | N-term +14.02 Da, K +28.03 Da,             | 1136.36145  | 2 | 680.8157349 | 680.8149828 |
| PNFLVDFGKEPLGPAALAEHLR                   | P17563 | 0          | N-term +14.02 Da, K +28.03 Da,             | 1136.518921 | 3 | 454.2099915 | 454.212414  |
| QHSKVAQTQAGEAAGGWTGQESLSDSPPEMWELLQR     | Q9CZN7 | 0          | N-term +14.02 Da, K +28.03 Da,             | 1138.028931 | 2 | 511.7598877 | 511.759281  |
| PETVSTDFDECDKLYFEELSLER                  | Q8C196 | 0          | N-term +14.02 Da, K +28.03 Da,C +57.02 Da, | 1139.27478  | 2 | 548.2199707 | 548.2149039 |
| SQTEEDCTEELDFDLHAR                       | P99028 | 0          | N-term +14.02 Da, C +57.02 Da,             | 1143.570679 | 3 | 485.6000061 | 485.9353259 |
| PFTQLNGLEELGIELDPKGR                     | O08749 | 0          | N-term +14.02 Da, K +28.03 Da,             | 1148.178711 | 2 | 639.2767334 | 639.2782332 |
| ASDPFADASKGDDLLPAGTEDYIHIR               | J3QPZ8 | 0          | N-term +14.02 Da, K +28.03 Da,             | 1155.186401 | 3 | 495.9389954 | 495.6108422 |
| TGEAIVDAALSALR                           | Q922R8 | 0          | N-term +14.02 Da,                          | 1165.228638 | 3 | 514.6199951 | 514.626381  |
| NSEGLPYWVPMMDHDEQYLQLDTPAVGR             | Q6PDB7 | 0          | N-term +14.02 Da,                          | 1179.831421 | 2 | 572.819397  | 572.8196728 |
| PEDAIAVAIEKYLR                           | Q64176 | 0          | N-term +14.02 Da, K +28.03 Da,             | 1181.671265 | 3 | 763.0300293 | 762.6987683 |
| PNPDQLKLELPPFLNTR                        | Q97JT3 | 0          | N-term +14.02 Da, K +28.03 Da,             | 1186.700195 | 3 | 486.5652161 | 486.5649044 |
| PPQLHNGLDLSAKVIQGSLSLDPQAVR              | Q9Z2V4 | 0          | N-term +14.02 Da, K +28.03 Da,             | 1189.399414 | 3 | 311.8599854 | 311.8553949 |
| PPQLHNGLDLSAKVIQGSLSLDPQAVR              | Q9Z2V4 | 0.00990099 | N-term +14.02 Da, K +28.03 Da,             | 1194.608032 | 3 | 446.2467346 | 446.2466237 |
| PPQLHNGLDLSAKVIQGSLSLDPQAVR              | Q9Z2V4 | 0          | N-term +14.02 Da, K +28.03 Da,             | 1208.475342 | 3 | 396.2000122 | 396.2073793 |
| PPQLHNGLDLSAKVIQGSLSLDPQAVR              | Q9Z2V4 | 0          | N-term +14.02 Da, K +28.03 Da,             | 1210.658813 | 3 | 430.5736389 | 430.5735054 |
| SDGSLMFQVQPMVEIDGMKLVQTK                 | P30115 | 0.01020408 | N-term +14.02 Da, K +28.03 Da,             | 1211.453979 | 3 | 636.2758179 | 636.2764724 |
| PASQFFKGSASSALELTHEELATAEAVR             | Q8R0Y6 | 0.01960784 | N-term +14.02 Da, K +28.03 Da,             | 1213.884399 | 3 | 437.8808594 | 437.8811097 |
| PASQFFKGSASSALELTHEELATAEAVR             | Q8R0Y6 | 0          | N-term +14.02 Da, K +28.03 Da,             | 1218.792114 | 2 | 559.7700195 | 559.7698461 |
| PIEQKFVVISDLFVPKDLGTDSQIFISR             | Q61598 | 0          | N-term +14.02 Da, K +28.03 Da,             | 1219.529419 | 2 | 686.8200073 | 686.8205993 |
| PGLVQEGEPFSEATLFTKELVLQR                 | Q78PY7 | 0          | N-term +14.02 Da, K +28.03 Da,             | 1226.604248 | 3 | 585.2999878 | 584.6309657 |
| AADISQWAGPLCLQEVDEPPQHALLR               | P70296 | 0          | N-term +14.02 Da, C +57.02 Da,             | 1226.888794 | 3 | 660.6199951 | 660.2956441 |
| PIHLSFDVDGLDPAFTPATGTPVLGGLSYR           | Q61176 | 0          | N-term +14.02 Da,                          | 1230.904907 | 2 | 767.3400269 | 767.355004  |
| PFVSKTLGVDLFDVATKVMIGESIDEKR             | Q8C196 | 0          | N-term +14.02 Da, K +28.03 Da,             | 1240.301514 | 3 | 520.5776367 | 520.5776448 |
| PVDETLIPTGVIAPEVGTAFDLR                  | Q8K157 | 0          | N-term +14.02 Da,                          | 1241.883179 | 3 | 432.5599976 | 432.5578554 |
| PFVSKTLGVDLFDVATKVMIGESIDEKR             | Q8C196 | 0          | N-term +14.02 Da, K +28.03 Da,             | 1247.451172 | 2 | 780.3599854 | 780.362829  |
| PVDFNGYWKMLSNENFEEYLR                    | Q00915 | 0          | N-term +14.02 Da, K +28.03 Da,             | 1250.619385 | 2 | 648.3300171 | 648.3331448 |
| PLVIAEDVDGEALSTLVNLR                     | P63038 | 0          | N-term +14.02 Da,                          | 1260.179565 | 2 | 553.2539063 | 553.2540291 |
| PVDFNGYWKMLSNENFEEYLR                    | Q00915 | 0          | N-term +14.02 Da, K +28.03 Da,             | 1265.730713 | 3 | 340.5296631 | 340.5296819 |
| EINEKIAPSFAVESMEDALKAAADTIGYPVMIR        | Q8C196 | 0          | N-term +14.02 Da, K +28.03 Da,             | 1265.962158 | 3 | 412.8905945 | 412.8909457 |
| PLDFTFVCPTEIIAFSDR                       | P35700 | 0          | N-term +14.02 Da, C +57.02 Da,             | 1268.939087 | 3 | 364.5499878 | 364.5451093 |
| MPFVELETNLPASR                           | O35215 | 0          | N-term +14.02 Da,                          | 1273.035522 | 2 | 510.2900085 | 510.2908846 |
| PVVSIEDPFDQDDWGAWQKFTASAGIQVVGDDLTVTNPKR | P17182 | 0          | N-term +14.02 Da, K +28.03 Da,             | 1276.635742 | 3 | 548.9000244 | 548.9010105 |
| MPFVELETNLPASR                           | O35215 | 0          | N-term +14.02 Da,                          | 1278.916016 | 2 | 638.3200073 | 638.3180263 |
| AIAELGIYPVDPDLDSTSR                      | P56480 | 0          | N-term +14.02 Da,                          | 1293.727173 | 2 | 552.289978  | 552.2882056 |
| PQGGVDIEEVAASSPELIFKEQIDIFEGIKDSQAQR     | Q9Z2I8 | 0          | N-term +14.02 Da, K +28.03 Da,             | 1296.106201 | 3 | 327.1900024 | 327.1942992 |
| VGDPLDLVALAEQVQKADEFIR                   | Q5EBG8 | 0          | N-term +14.02 Da, K +28.03 Da,             | 1301.425415 | 2 | 495.24823   | 495.248549  |
| TIEYLEEVAVNFAKGLADR                      | Q8BMS1 | 0          | N-term +14.02 Da, K +28.03 Da,             | 1304.043457 | 3 | 649.6522827 | 649.6641129 |
| PAGPGGSQQVDLASVLTPEIMAPILANADVQER        | Q9JKV1 | 0          | N-term +14.02 Da,                          | 1308.049561 | 2 | 555.7800293 | 555.7805476 |

|                                     |        |            |                                            |             |   |             |             |
|-------------------------------------|--------|------------|--------------------------------------------|-------------|---|-------------|-------------|
| ALMLQGVDLLADAVAVTMGPKGR             | P63038 | 0          | N-term +14.02 Da, K +28.03 Da,             | 1309.802856 | 4 | 427.2900085 | 427.2908271 |
| PAWPGGSQQVDLASVLTPEIMAPILANADVQER   | D3YUD8 | 0          | N-term +14.02 Da,                          | 1313.103149 | 2 | 742.4099731 | 742.9126251 |
| PAWPGGSQQVDLASVLTPEIMAPILANADVQER   | D3YUD8 | 0          | N-term +14.02 Da,                          | 1313.748047 | 3 | 391.8873596 | 391.8873127 |
| PAWPGGSQQVDLASVLTPEIMAPILANADVQER   | D3YUD8 | 0          | N-term +14.02 Da,                          | 1320.114746 | 2 | 631.3699951 | 631.3667899 |
| PALGILPPENFVDKQLQESLSMVAPR          | P61922 | 0          | N-term +14.02 Da, K +28.03 Da,             | 1328.429565 | 4 | 316.1872253 | 316.1870332 |
| PQDFHEVEDLIKAAIGDTLVQDIR            | Q9CXN7 | 0          | N-term +14.02 Da, K +28.03 Da,             | 1332.148315 | 3 | 332.8800049 | 332.8781996 |
| MPFVELETNLPASR                      | O35215 | 0          | N-term +14.02 Da,                          | 1333.387329 | 2 | 706.8900146 | 707.3940681 |
| PQDYSKPIQEVLEMTDGGVDFSEVIGR         | P00329 | 0          | N-term +14.02 Da, K +28.03 Da,             | 1334.606445 | 2 | 494.7600098 | 494.756541  |
| PDLTTVISVDAPLPGTLLDDIVAAGGKEQNLAQLR | Q8VCW8 | 0          | N-term +14.02 Da, K +28.03 Da,             | 1338.550049 | 3 | 495.2680054 | 495.6108422 |
| PNGKGLPPWPQLNQLQEQYLEIGLEPR         | Q63880 | 0          | N-term +14.02 Da, K +28.03 Da,             | 1341.793701 | 2 | 603.7925415 | 603.2885396 |
| PTDDSAPLPAGTLDQPLFEVIQAMQR          | F6XXE6 | 0          | N-term +14.02 Da,                          | 1344.875854 | 2 | 500.2587891 | 500.2589165 |
| PNGKGLPPWPQLNQLQEQYLEIGLEPR         | Q63880 | 0          | N-term +14.02 Da, K +28.03 Da,             | 1345.949463 | 3 | 548.9006958 | 548.9010105 |
| QRYWILNPR                           | E9Q264 | 0.04545455 | N-term +14.02 Da,                          | 1353.359131 | 2 | 822.8499756 | 822.8478775 |
| GARARVALTGLTVAEYFRDQEGQDVLFFIDNIFR  | P56480 | 0          | N-term +14.02 Da,                          | 1354.255737 | 2 | 575.2600098 | 575.2621881 |
| VNIFGGIMRCDVIAQGIVMAVKDLEIR         | Q9Z219 | 0.01941748 | N-term +14.02 Da, K +28.03 Da,C +57.02 Da, | 1354.525024 | 3 | 425.2500305 | 425.2502512 |
| EGSGSSGTGEQKEDQKEEKQ                | P38647 | 0          | K +28.03 Da,                               | 1044.678711 | 3 | 742.0100098 | 741.3521527 |
| KHHLDGETEER                         | P10649 | 0          | K +28.03 Da,                               | 1049.726929 | 3 | 503.5708923 | 503.2427075 |
| TAEEDADPKR                          | Q9D0J8 | 0          | K +28.03 Da,                               | 1063.362427 | 2 | 709.3255005 | 709.3257149 |
| TAEEDADPKR                          | Q9D0J8 | 0          | K +28.03 Da,                               | 1064.238281 | 3 | 473.2195435 | 473.2195688 |
| PEPAKSAPAPK                         | P10853 | 0          | K +28.03 Da,                               | 1077.747314 | 3 | 383.5605469 | 383.5606481 |
| KMKDTSSEEEIR                        | P62204 | 0.03754266 | K +28.03 Da,                               | 1092.972778 | 3 | 512.9199829 | 512.9239872 |
| PEPAKSAPAPK                         | P10853 | 0.01587302 | K +28.03 Da,                               | 1121.902466 | 2 | 574.3300171 | 574.8373339 |
| EQREAQEACAR                         | Q7TS75 | 0.03728814 | C +57.02 Da,                               | 1126.772705 | 2 | 674.3099976 | 674.3071357 |
| TDDEVVQR                            | P08113 | 0.00904977 |                                            | 1164.318481 | 2 | 481.2328186 | 481.232899  |
| GGVEKGPAALR                         | Q61176 | 0          | K +28.03 Da,                               | 1269.739502 | 3 | 361.5478821 | 361.5487423 |
| TMVVHEKQDDLKGGNEESTKTGNAGSR         | P08228 | 0          | K +28.03 Da,                               | 1303.075439 | 4 | 758.1300049 | 758.1293748 |
| EGAKYVSHGATGKGNQDQVR                | P16460 | 0.00854701 | K +28.03 Da,                               | 1320.196289 | 3 | 678.0100098 | 677.3519803 |
| EGAKYVSHGATGKGNQDQVR                | P16460 | 0          | K +28.03 Da,                               | 1357.305908 | 4 | 508.5100098 | 508.2658043 |
| MGNHLTLNR                           | P29391 | 0.01219512 |                                            | 1424.46106  | 3 | 352.5184326 | 352.5186772 |
| VTDALNATR                           | P63038 | 0.00490196 |                                            | 1449.494751 | 2 | 480.7680969 | 480.7590836 |
| ETMTGEKVK                           | P12710 | 0.04934211 | K +28.03 Da,                               | 1505.154175 | 2 | 540.2869873 | 539.7942777 |
| TEATLEAEQTR                         | Q99PL5 | 0          |                                            | 1506.085938 | 2 | 625.3200073 | 624.8069603 |
| KMKDTSSEEEIR                        | P62204 | 0          | K +28.03 Da,                               | 1541.321289 | 2 | 769.8800049 | 768.8823426 |
| KMKDTSSEEEIR                        | P62204 | 0.00520833 | K +28.03 Da,                               | 1547.441772 | 2 | 769.3699951 | 768.8823426 |
| ISSTKSLSIKQEPK                      | Q9D168 | 0.015625   | K +28.03 Da,                               | 1567.115234 | 3 | 543.6699829 | 543.9977035 |
| PDGKTIEAAAHGTVTR                    | P54071 | 0.0097561  | K +28.03 Da,                               | 1587.300781 | 3 | 594.6400146 | 594.3111218 |
| RDYAAQASAAPKAGTATGR                 | P56480 | 0.00970874 | K +28.03 Da,                               | 1615.048218 | 3 | 630.9899902 | 630.9975372 |
| PDGKTIEAAAHGTVTR                    | P54071 | 0.00943396 | K +28.03 Da,                               | 1649.694458 | 3 | 593.9699707 | 594.3111218 |
| DGEEAGAYDGPR                        | P27773 | 0          |                                            | 1717.382568 | 2 | 618.7597046 | 618.7600101 |
| TITYGPKVVR                          | P12710 | 0.0323741  | K +28.03 Da,                               | 1788.057495 | 2 | 581.3536377 | 581.3531509 |

|                         |        |            |              |             |   |             |             |
|-------------------------|--------|------------|--------------|-------------|---|-------------|-------------|
| GSHETDEEFDAR            | P12787 | 0          |              | 1818.717407 | 2 | 697.2800293 | 696.7867568 |
| GMGQKDSYVGDEAQSKR       | P60710 | 0.03793103 | K +28.03 Da, | 1859.562012 | 3 | 638.3076782 | 637.9791551 |
| PAAPAAPAPAEKTPVKKK      | P43274 | 0.01234568 | K +28.03 Da, | 1863.531372 | 3 | 628.7299805 | 628.7275474 |
| DGEEAGAYDGPR            | P27773 | 0          |              | 1904.933105 | 2 | 618.7600098 | 618.7600101 |
| AGELTEDEVER             | P62270 | 0.02930403 |              | 1920.208862 | 2 | 624.289978  | 624.2911433 |
| EAAVEHPEAVR             | O35490 | 0.02255639 |              | 1964.446899 | 2 | 604.798584  | 604.3069298 |
| FNSANEDNVTVQR           | P24270 | 0          |              | 2022.335938 | 2 | 747.3499756 | 747.352598  |
| EAYNLGVR                | O35490 | 0.00858369 |              | 2139.855713 | 2 | 460.75      | 461.243069  |
| AQYEALAQKNR             | P05784 | 0.00925926 | K +28.03 Da, | 2292.180908 | 2 | 660.8499756 | 660.356954  |
| GPDADCFEKASK            | O09173 | 0.01214575 | K +28.03 Da, | 2336.931885 | 2 | 691.3200073 | 690.8268383 |
| TLGDIVYKR               | P12710 | 0.04318937 | K +28.03 Da, | 2349.241455 | 2 | 546.8240967 | 546.8242263 |
| NVVFSEDEMCR             | Q8C196 | 0          | K +28.03 Da, | 2357.864258 | 2 | 691.3499756 | 691.3426554 |
| PVQKLFVDKIR             | P97450 | 0          | K +28.03 Da, | 2364.180908 | 4 | 350.4756775 | 350.4762419 |
| PVQKLFVDKIR             | P97450 | 0          | K +28.03 Da, | 2366.945068 | 3 | 467.2999878 | 466.965897  |
| PVQKLFVDKIR             | P97450 | 0.03225806 | K +28.03 Da, | 2373.867432 | 2 | 700.4500122 | 699.9452073 |
| PKVIQPEVDTPLGR          | Q8VCU1 | 0          | K +28.03 Da, | 2376.391846 | 3 | 526.9661255 | 526.3067598 |
| PKVIQPEVDTPLGR          | Q8VCU1 | 0.00518135 | K +28.03 Da, | 2408.0979   | 3 | 526.9664917 | 526.3067598 |
| PGLLVIDHR               | Q9QXF8 | 0.03202847 |              | 2454.291016 | 3 | 359.5400085 | 359.5452207 |
| RKLEEVQQLR              | Q8BMK0 | 0.02230483 | K +28.03 Da, | 2571.282471 | 3 | 442.6000061 | 442.9332562 |
| AMTNQILVER              | Q8C196 | 0.01538462 |              | 2624.307617 | 2 | 587.81427   | 587.8160757 |
| LTITYGPKVVR             | P12710 | 0.0125523  | K +28.03 Da, | 2682.717773 | 3 | 425.5982971 | 425.5992142 |
| NDPYGPLPPGWEKR          | Q8BZZ3 | 0.0155642  | K +28.03 Da, | 2684.288086 | 3 | 551.6240234 | 551.950976  |
| AAVQVAALPR              | P52760 | 0.02919708 |              | 2688.957031 | 2 | 530.7999878 | 530.3009182 |
| EVEMDAVGKEGR            | Q8C196 | 0          | K +28.03 Da, | 2692.442139 | 2 | 674.8225098 | 674.3322878 |
| ADIVENQVMDTR            | P10649 | 0          |              | 2775.921387 | 2 | 695.8300171 | 695.8351948 |
| LIFAGKQLEDGR            | P0CG49 | 0          | K +28.03 Da, | 2794.880127 | 3 | 458.9299927 | 458.9295119 |
| FAQLCEEHGILR            | B5X0G2 | 0.00507614 | C +57.02 Da, | 2847.390869 | 2 | 736.8699951 | 736.8693714 |
| EVEMDAVGKEGR            | Q8C196 | 0          | K +28.03 Da, | 2855.592041 | 2 | 674.8232422 | 674.3322878 |
| KHTSSLKVTNEPILAFSQGSPER | Q8CHT0 | 0.00881057 | K +28.03 Da, | 2899.149658 | 3 | 861.1400146 | 861.4694145 |
| VISLSGEHSIIGR           | P08228 | 0          |              | 2957.025635 | 2 | 684.8800049 | 684.3857116 |
| KHTSSLKVTNEPILAFSQGSPER | Q8CHT0 | 0          | K +28.03 Da, | 2960.786133 | 3 | 861.4799805 | 861.4694145 |
| AQLCEEHGILR             | B5X0G2 | 0.00843882 | C +57.02 Da, | 2990.740723 | 2 | 663.8300171 | 663.3351643 |
| AGEEAADSPELPR           | Q9CPW2 | 0.00888889 |              | 3049.553223 | 2 | 671.8118286 | 671.3176924 |
| ALLAGKDESETGENIR        | P38647 | 0          | K +28.03 Da, | 3093.41748  | 2 | 801.9199829 | 801.4283058 |
| QMSGAQIKIANPVEGSSGR     | P60335 | 0.01574803 | K +28.03 Da, | 3112.371582 | 2 | 978.9899902 | 979.5098361 |
| QMSGAQIKIANPVEGSSGR     | P60335 | 0          | K +28.03 Da, | 3117.768555 | 2 | 980         | 979.5098361 |
| AGLQFPVGR               | P0C0S6 | 0.01239669 |              | 3126.997559 | 2 | 472.769989  | 472.7692536 |
| KLITYGPKVVR             | P12710 | 0.00961538 | K +28.03 Da, | 3131.52832  | 3 | 477.9693604 | 477.6413021 |
| QVAMNPTNTVFDKR          | P63017 | 0.00869565 | K +28.03 Da, | 3176.176025 | 2 | 860.4400024 | 860.4459753 |
| ALLAGKDESETGENIR        | P38647 | 0          | K +28.03 Da, | 3176.259033 | 2 | 802.4199829 | 801.4283058 |

|                         |        |            |              |             |   |             |             |
|-------------------------|--------|------------|--------------|-------------|---|-------------|-------------|
| PILGVTEAFKR             | P05202 | 0.03214286 | K +28.03 Da, | 3176.931152 | 3 | 420.2544861 | 420.2554475 |
| ASGGGVPTDEEQATGLER      | P19536 | 0.005      |              | 3211.776611 | 2 | 887.9099731 | 887.4161248 |
| SGQAEFDKAAEEVKR         | F6WUQ1 | 0          | K +28.03 Da, | 3268.77832  | 3 | 573.9699707 | 574.3003341 |
| MTLGDIVYKR              | P12710 | 0          | K +28.03 Da, | 3311.831299 | 3 | 408.8999939 | 408.5654047 |
| MTLGDIVYKR              | P12710 | 0          | K +28.03 Da, | 3313.618652 | 3 | 408.5649109 | 408.5654047 |
| AWPSQEGQNPSLSSIR        | Q8C196 | 0          |              | 3355.436035 | 2 | 879.9400024 | 878.9342868 |
| KIQVLQQQADDAEER         | D3Z2H9 | 0.01229508 | K +28.03 Da, | 3365.809082 | 2 | 900.460022  | 899.968327  |
| GWLKSNVNDGVAQSTR        | P17751 | 0          | K +28.03 Da, | 3395.925537 | 2 | 880.9500122 | 880.4579289 |
| VGVPPTETGALTLNR         | Q8BWT1 | 0          |              | 3399.039063 | 2 | 714.9000244 | 714.3962767 |
| GQNQPVLNITNR            | Q8C196 | 0          |              | 3405.688965 | 2 | 677.857666  | 677.3653105 |
| AAKVELNDTQKQEIK         | Q8K4K1 | 0.00921659 | K +28.03 Da, | 3503.866699 | 4 | 451.019989  | 450.5122823 |
| LMELISLVQEVERNVEAVR     | Q6PCX9 | 0.0326087  |              | 3506.453369 | 4 | 557.7999878 | 557.55833   |
| KELDPVQKLFVDKIR         | P97450 | 0          | K +28.03 Da, | 3515.363281 | 4 | 478.7999878 | 478.7962084 |
| SCLWGKVNNSDEVGGEALGR    | P02088 | 0          | K +28.03 Da, | 3566.102295 | 2 | 1032        | 1031.504751 |
| SCLWGKVNNSDEVGGEALGR    | P02088 | 0          | K +28.03 Da, | 3570.285645 | 3 | 688.0100098 | 688.0055929 |
| GEECELETMTGEKVK         | P12710 | 0          | K +28.03 Da, | 3594.307617 | 2 | 898.9199829 | 898.4262577 |
| NKELDPVQKLFVDKIR        | P97450 | 0.01581028 | K +28.03 Da, | 3604.625732 | 4 | 507.5599976 | 507.3069405 |
| HERTLYTDIAIGLLKK        | A2ACQ1 | 0.03767123 | K +28.03 Da, | 3647.342041 | 3 | 642.704834  | 643.0506904 |
| KVISTTKAPAAIGPYSQAVQVDR | P52760 | 0          | K +28.03 Da, | 3665.11084  | 3 | 819.7999878 | 819.4672334 |
| KGLTEVKIDFPR            | Q8CAY6 | 0.01915709 | K +28.03 Da, | 3689.684082 | 3 | 530.6400146 | 529.9750101 |
| KGLTEVKIDFPR            | Q8CAY6 | 0.04290429 | K +28.03 Da, | 3692.705322 | 3 | 530.2999878 | 529.9750101 |
| GTLDPVEKALR             | P63017 | 0.00952381 | K +28.03 Da, | 3728.287109 | 2 | 614.3510132 | 613.858798  |
| NGESSELDLQGITR          | Q9QXT0 | 0          |              | 3747.456299 | 2 | 709.8400269 | 709.349524  |
| PKEEEEEELVDPLTTVR       | P99028 | 0.03249097 | K +28.03 Da, | 3757.643555 | 2 | 1021.52002  | 1021.020423 |
| LTITYGPKVVR             | P12710 | 0          | K +28.03 Da, | 3809.936523 | 2 | 638.3900146 | 637.8951831 |
| SIEDRVISLSGEHSIIGR      | P08228 | 0          |              | 3826.174805 | 3 | 656.6799927 | 656.688481  |
| TLSDYNIQKESTLHLVLR      | P0CG49 | 0          | K +28.03 Da, | 3838.421631 | 4 | 540.5499878 | 540.3021212 |
| VLLWHMEQAIHSR           | Q80T85 | 0.04013378 |              | 3873.249023 | 3 | 541.2886963 | 540.6206839 |
| SSLKVTNEPILAFSQGSPER    | Q8CHT0 | 0.02222222 | K +28.03 Da, | 3881.990723 | 3 | 729.7299805 | 730.0584628 |
| LIGPKAPLVLEQGLR         | P54869 | 0          | K +28.03 Da, | 3908.905273 | 3 | 544.6799927 | 544.6784162 |
| GYVKAGPWTPAAAVEHPEAVR   | O35490 | 0          | K +28.03 Da, | 3912.242432 | 3 | 765.0585938 | 764.7305688 |
| DELADEIANSSGKGALALEEKR  | Q8VDD5 | 0          | K +28.03 Da, | 3927.099121 | 3 | 791.4099731 | 791.4149756 |
| TSSLKVTNEPILAFSQGSPER   | Q8CHT0 | 0.02205882 | K +28.03 Da, | 3937.44165  | 3 | 763.4099731 | 763.7410226 |
| IQEEAQCCLVEELR          | P12791 | 0          | C +57.02 Da, | 3954.999512 | 2 | 809.4000244 | 808.9010666 |
| NDEELNKLGGV             | P27661 | 0          | K +28.03 Da, | 3957.334473 | 3 | 443.8999939 | 443.5733942 |
| PFVELETNLPASR           | O35215 | 0          |              | 3964.277344 | 2 | 737.3900146 | 736.8908271 |
| LTITYGPKVVR             | P12710 | 0.00510204 | K +28.03 Da, | 3969.93042  | 2 | 638.8900146 | 637.8951831 |
| SCLWAKVNPDEVGGEALGR     | P02089 | 0          | K +28.03 Da, | 3985.642578 | 3 | 696.3499756 | 696.0177212 |
| QGTPLAQAVEGPPSENVNR     | Q9CZ13 | 0.00884956 |              | 3991.939697 | 2 | 876.9400024 | 876.9473944 |
| VREEAQCCLVEELR          | P56655 | 0.00497512 | C +57.02 Da, | 3992.035645 | 2 | 815.9099731 | 815.9145082 |



|                            |        |            |              |             |   |             |             |
|----------------------------|--------|------------|--------------|-------------|---|-------------|-------------|
| GPWTPAAVEHPEAVR            | O35490 | 0          |              | 3999.190918 | 2 | 873.4500122 | 873.4339223 |
| IKLTITYGPKVVR              | P12710 | 0          | K +28.03 Da, | 4029.390381 | 3 | 515.6638794 | 515.3359902 |
| CPLLKPWALTFSYGR            | P05064 | 0.02272727 | K +28.03 Da, | 4058.3125   | 2 | 919.4799805 | 918.9951035 |
| TDPHLCDFLESHYLDKEVK        | P29391 | 0          | K +28.03 Da, | 4062.717041 | 4 | 601.0499878 | 601.297879  |
| SFVGSNQAGEYIFER            | Q9EQ20 | 0          |              | 4073.583252 | 2 | 852.4000244 | 852.4048307 |
| ANLEKAQSELSGAADAAAR        | Q9D3D9 | 0          | K +28.03 Da, | 4085.331787 | 2 | 980.4811401 | 979.9925311 |
| AAYDKVR                    | _tr E9 | 0.04918033 | K +28.03 Da, | 4148.814453 | 2 | 425.2399902 | 425.7427045 |
| NKELDPVQKLFVDKIR           | P97450 | 0          | K +28.03 Da, | 4209.84082  | 4 | 507.7999878 | 507.3069405 |
| NKELDPVQKLFVDKIR           | P97450 | 0.04040404 | K +28.03 Da, | 4240.828613 | 4 | 507.5499878 | 507.3069405 |
| ALNCGVELFKR                | Q8C196 | 0.03484321 | K +28.03 Da, | 4269.383301 | 2 | 668.3599854 | 667.8660999 |
| NKELDPVQKLFVDKIR           | P97450 | 0          | K +28.03 Da, | 4271.871582 | 4 | 507.5499878 | 507.3069405 |
| GSAMNVVFEDEMCCR            | Q8C196 | 0.01260504 | K +28.03 Da, | 4286.027344 | 2 | 865.4000244 | 864.4082016 |
| NKELDPVQKLFVDKIR           | P97450 | 0.00913242 | K +28.03 Da, | 4303.850586 | 4 | 507.5526733 | 507.3069405 |
| GNWGHLDQVAALR              | Q8VCT4 | 0          |              | 4321.629883 | 2 | 719.8699951 | 718.8733025 |
| NEFTLGEECELETMTGEKVK       | P12710 | 0          | K +28.03 Da, | 4331.63623  | 3 | 801.039978  | 800.7151574 |
| NEFTLGEECELETMTGEKVK       | P12710 | 0          | K +28.03 Da, | 4334.273926 | 3 | 801.3800049 | 800.7151574 |
| LGEECELETMTGEKVK           | P12710 | 0          | K +28.03 Da, | 4334.693848 | 2 | 955.460022  | 954.9682899 |
| QASGGPVDIGPEYQQDLDR        | P97450 | 0          |              | 4342.049316 | 2 | 1023.47998  | 1022.982164 |
| SFPTLKFFPASADR             | P09103 | 0          | K +28.03 Da, | 4344.645996 | 3 | 537.960022  | 537.9558383 |
| NEFTLGEECELETMTGEKVK       | P12710 | 0          | K +28.03 Da, | 4348.159668 | 2 | 1201.069946 | 1200.569098 |
| AILVDLEPGTMDSVR            | P99024 | 0          |              | 4362.622559 | 2 | 808.4199829 | 808.4216347 |
| KTSGPPVSELITKAVAASKER      | P43274 | 0          | K +28.03 Da, | 4370.019043 | 4 | 564.5800171 | 564.0848749 |
| QASGGPVDIGPEYQQDLDR        | P97450 | 0          |              | 4372.841309 | 2 | 1022.979248 | 1022.982164 |
| LGEECELETMTGEKVK           | P12710 | 0          | K +28.03 Da, | 4375.015137 | 2 | 955.4588013 | 954.9682899 |
| KASGPPVSELITKAVAASKER      | P15864 | 0.02214022 | K +28.03 Da, | 4384.494629 | 4 | 557.0800171 | 556.5822336 |
| FAQLCEEHGILR               | B5X0G2 | 0          | C +57.02 Da, | 4407.9375   | 2 | 737.8599854 | 736.8693714 |
| KLVIIEGDLER                | P21107 | 0.02264151 | K +28.03 Da, | 4422.364746 | 2 | 657.8900146 | 656.8953806 |
| QKAMQDAEVSKSDIGEVLVGGMTR   | P38647 | 0          | K +28.03 Da, | 4430.04834  | 3 | 907.4699707 | 906.8103434 |
| GQKVLDSGAPIKIPVGPETLGR     | P56480 | 0          | K +28.03 Da, | 4437.865234 | 3 | 763.7767944 | 763.4494024 |
| KGIKSVTELNQDITNTMTLGDIVYKR | P12710 | 0          | K +28.03 Da, | 4548.698242 | 4 | 764.1699829 | 763.6744235 |
| PAFTPATGTPVLGGLSYR         | Q61176 | 0          |              | 4550.925781 | 2 | 903.4799805 | 902.983248  |
| NQALLDLHALGSAR             | P29391 | 0.00917431 |              | 4551.040039 | 2 | 740.4000244 | 739.9073427 |
| DATGFININSLR               | P16460 | 0          |              | 4553.037109 | 2 | 660.8509521 | 660.848962  |
| VISLSGEHSIIGR              | P08228 | 0.00865801 |              | 4578.297852 | 2 | 685.3900146 | 684.3857116 |
| FAQLCEEHGILR               | B5X0G2 | 0          | C +57.02 Da, | 4579.938477 | 2 | 737.3599854 | 736.8693714 |
| VAGPQPAQTGAPQGSGLGEYLFER   | P29391 | 0          |              | 4590.361816 | 2 | 1187.089966 | 1187.09532  |
| ALEGVGHFFR                 | P29391 | 0.01568627 |              | 4628.42041  | 2 | 567.289978  | 566.7985427 |
| KLSSAMSAAKAIADHIR          | P14152 | 0          | K +28.03 Da, | 4645.932617 | 4 | 457.2600098 | 457.2633755 |
| KFYGPEGYPYGVFAGR           | O55022 | 0          | K +28.03 Da, | 4653.661621 | 2 | 837.9199829 | 836.9277438 |
| GKPLSIEIEVAPPKAHEVR        | P28474 | 0.0125     | K +28.03 Da, | 4668.326172 | 4 | 564.3200073 | 564.5744086 |

|                          |        |            |              |             |   |             |             |
|--------------------------|--------|------------|--------------|-------------|---|-------------|-------------|
| GASIVEDKLVEDLKTR         | P26443 | 0          | K +28.03 Da, | 4673.505371 | 3 | 610.6785889 | 610.350806  |
| KFYGPEGPYGVFAGR          | O55022 | 0          | K +28.03 Da, | 4684.935547 | 2 | 837.9199829 | 836.9277438 |
| ASKPTLNEVVIVSAIR         | Q8QZT1 | 0.04054054 | K +28.03 Da, | 4743.410645 | 2 | 864.0100098 | 863.0170907 |
| QTNPSAMEVEEDDPVPEIR      | Q01853 | 0          |              | 4769.114258 | 2 | 1078.5      | 1078.494247 |
| EADDIVNWLKKR             | P09103 | 0          | K +28.03 Da, | 4769.299316 | 3 | 515.289978  | 514.9594714 |
| EKNLNQALLDLHALGSAR       | P29391 | 0.01593625 | K +28.03 Da, | 4771.63916  | 3 | 664.7000122 | 664.372604  |
| EKNLNQALLDLHALGSAR       | P29391 | 0.03508772 | K +28.03 Da, | 4773.453613 | 3 | 665.0300293 | 664.372604  |
| GDPKEEEEEELVDPLTTVR      | P99028 | 0          | K +28.03 Da, | 4775.151367 | 2 | 1107.530029 | 1107.044627 |
| PGGLLLGEAAPDFEANTTIGR    | Q8BG37 | 0          |              | 4792.064941 | 3 | 719.7000122 | 719.6989347 |
| AALAVLDAESEKKAVLPRSEESSK | Q9WTR2 | 0.03191489 | K +28.03 Da, | 4807.771484 | 4 | 653.8699951 | 653.8680918 |
| ALEGVGHFFR               | P29391 | 0.00930233 |              | 4808.776855 | 2 | 567.2901001 | 566.7985427 |
| NEFTLGEECELETMTGEKVK     | P12710 | 0          | K +28.03 Da, | 4813.668457 | 3 | 801.0413818 | 800.7151574 |
| NEFTLGEECELETMTGEKVK     | P12710 | 0          | K +28.03 Da, | 4814.984863 | 2 | 1201.560059 | 1200.569098 |
| PGGLLLGEAAPDFEANTTIGR    | Q8BG37 | 0          |              | 4820.307129 | 3 | 720.039978  | 719.6989347 |
| PGGLLLGEAAPDFEANTTIGR    | Q8BG37 | 0.03180212 |              | 4826.179688 | 2 | 1078.550049 | 1079.044764 |
| PGGLLLGEAAPDFEANTTIGR    | Q8BG37 | 0          |              | 4851.216797 | 3 | 719.3701782 | 719.6989347 |
| ELISNASDALDKIR           | P08113 | 0.00956938 | K +28.03 Da, | 4859.645996 | 2 | 787.4299927 | 786.9332238 |
| PGGLLLGEAAPDFEANTTIGR    | Q8BG37 | 0          |              | 4881.381348 | 3 | 719.369812  | 719.6989347 |
| PGGLLLGEAAPDFEANTTIGR    | Q8BG37 | 0.01244813 |              | 4887.980957 | 2 | 1078.551392 | 1079.044764 |
| FTMELAKKGF               | P26443 | 0.01544402 | K +28.03 Da, | 4903.888184 | 2 | 614.8377075 | 614.3439373 |
| PGGLLLGEAAPDFEANTTIGR    | Q8BG37 | 0.01908397 |              | 4918.87207  | 2 | 1079.050049 | 1079.044764 |
| ALLDLHALGSAR             | P29391 | 0.01550388 |              | 4924.686035 | 2 | 619.8499756 | 618.8565895 |
| TGAIVDPVVGEEELLGR        | Q03265 | 0.00862069 |              | 4934.746094 | 2 | 813.4400024 | 812.9488739 |
| PGGLLLGEAAPDFEANTTIGR    | Q8BG37 | 0.0049505  |              | 4949.314941 | 2 | 1079.043213 | 1079.044764 |
| ELISNASDALDKIR           | P08113 | 0          | K +28.03 Da, | 4949.987793 | 2 | 787.4199829 | 786.9332238 |
| PGGLLLGEAAPDFEANTTIGR    | Q8BG37 | 0          |              | 4950.478027 | 3 | 719.3652954 | 719.6989347 |
| PGGLLLGEAAPDFEANTTIGR    | Q8BG37 | 0          |              | 4980.245605 | 2 | 1079.040039 | 1079.044764 |
| QITINDLPVGR              | P35700 | 0          |              | 4980.741211 | 2 | 613.3499756 | 613.3485974 |
| PGGLLLGEAAPDFEANTTIGR    | Q8BG37 | 0.00909091 |              | 4981.044922 | 2 | 1078.540039 | 1079.044764 |
| VISLSGEHSIIGR            | P08228 | 0          |              | 5015.588379 | 2 | 684.8800049 | 684.3857116 |
| PGGLLLGEAAPDFEANTTIGR    | Q8BG37 | 0          |              | 5033.249512 | 3 | 719.6972046 | 719.6989347 |
| PGGLLLGEAAPDFEANTTIGR    | Q8BG37 | 0.03806228 |              | 5044.014648 | 2 | 1079.043091 | 1079.044764 |
| PGGLLLGEAAPDFEANTTIGR    | Q8BG37 | 0          |              | 5080.486816 | 2 | 1078.530029 | 1079.044764 |
| LEGLTDEINFLR             | P11679 | 0          |              | 5120.402344 | 2 | 710.3800049 | 710.3775526 |
| PGGLLLGEAAPDFEANTTIGR    | Q8BG37 | 0.02238806 |              | 5120.65918  | 2 | 1078.540039 | 1079.044764 |
| NEFTLGEECELETMTGEKVK     | P12710 | 0          | K +28.03 Da, | 5176.341309 | 2 | 1201.579956 | 1200.569098 |
| KLEAAEDIAYQLSR           | P67778 | 0          | K +28.03 Da, | 5180.935547 | 2 | 818.9299927 | 817.9410489 |
| LLLPGELAKHAVSEGTKAVTKY   | P10853 | 0          | K +28.03 Da, | 5196.555664 | 4 | 603.3499756 | 603.10835   |
| YYWEVDLKDYRR             | P86448 | 0.03741497 | K +28.03 Da, | 5208.782227 | 2 | 866.9500122 | 867.4359333 |
| QLIMANPQMQLIQR           | Q8R317 | 0.00896861 |              | 5219.045898 | 2 | 905.9699707 | 906.4845773 |

|                              |        |            |              |             |   |             |             |
|------------------------------|--------|------------|--------------|-------------|---|-------------|-------------|
| SQTEEDCTEELFDLHAR            | P99028 | 0          | C +57.02 Da, | 5233.428223 | 3 | 743.3200073 | 742.9917899 |
| GVKVLGTSVESIMATEDR           | Q8C196 | 0.04304636 | K +28.03 Da, | 5258.943848 | 3 | 641         | 640.6750726 |
| PYHMALEDLAMFR                | Q99MX0 | 0          |              | 5274.89502  | 2 | 797.3898315 | 797.3812574 |
| CVESFSDYPPLGR                | P10126 | 0          | C +57.02 Da, | 5340.789063 | 2 | 763.8498535 | 763.8508449 |
| GIHVEIPGAQAESLGPLQVAR        | Q9DCW4 | 0          |              | 5341.193848 | 2 | 1072.579956 | 1071.586932 |
| QLLQEEVGPVGVETMR             | Q7TNG8 | 0          |              | 5342.692871 | 2 | 893.4699707 | 892.9641984 |
| CVESFSDYPPLGR                | P10126 | 0          | C +57.02 Da, | 5371.276855 | 2 | 763.8499756 | 763.8508449 |
| AKFEELNMDLFR                 | P20029 | 0.0122449  | K +28.03 Da, | 5396.027344 | 2 | 771.3864136 | 770.8950551 |
| CLLTTVDPDTGISDR              | Q9CW42 | 0          | C +57.02 Da, | 5455.242188 | 2 | 831.9000244 | 831.9038067 |
| MEADGLGCAVCVLTGASR           | Q64105 | 0          | C +57.02 Da, | 5459.303223 | 2 | 933.9263306 | 933.9289756 |
| PTGGAGAVAMLIGPKAPLVLEQGLR    | P54869 | 0          | K +28.03 Da, | 5476.669922 | 3 | 815.4799805 | 815.4734421 |
| CHAPLAQAQALVTSELER           | Q9CR98 | 0          | C +57.02 Da, | 5562.494629 | 3 | 666.0100098 | 665.3423162 |
| NLNQALLDLHALGSAR             | P29391 | 0          |              | 5640.962402 | 2 | 854.460022  | 853.4708389 |
| AQVFLKAADMMSGPR              | Q8CHT0 | 0.00938967 | K +28.03 Da, | 5727.677734 | 2 | 816.9500122 | 816.4505288 |
| QSTLVIAEHANDSLAPITLNTITAAGR  | Q99LC5 | 0          |              | 5815.483887 | 3 | 926.8400269 | 926.4979219 |
| GIMNSFVNDIFER                | P10853 | 0          |              | 5817.853516 | 2 | 771.3699951 | 771.374487  |
| AQFEGIVTDLIKR                | P38647 | 0          | K +28.03 Da, | 5821.361816 | 2 | 760.4299927 | 759.4379443 |
| AQFEGIVTDLIKR                | P38647 | 0          | K +28.03 Da, | 5872.40918  | 2 | 760.4299927 | 759.4379443 |
| LVLEVAQHLGESTVR              | P56480 | 0          |              | 5880.400879 | 2 | 826.960022  | 825.9623154 |
| TRIHNCNINSQGVICLDILK         | P52482 | 0.00851064 | K +28.03 Da, | 5889.412109 | 3 | 816.4299927 | 815.7628868 |
| AAVEEGIVLGGGCALLR            | P63038 | 0          | C +57.02 Da, | 5903.346191 | 2 | 843.4500122 | 842.9561758 |
| CEMASTGEVACFGEGIHAF          | Q8C196 | 0.00512821 | C +57.02 Da, | 5939.327148 | 2 | 1087.959961 | 1087.453013 |
| AAVEEGIVLGGGCALLR            | P63038 | 0          | C +57.02 Da, | 5939.780762 | 2 | 843.4500122 | 842.9561758 |
| QIADDELCEPELLGSGFR           | P97494 | 0          | C +57.02 Da, | 6026.868652 | 2 | 1047.98999  | 1047.48517  |
| KGLKEGIPALDNFLDKL            | P58252 | 0.00966184 | K +28.03 Da, | 6041.856445 | 3 | 652.7190552 | 652.3907128 |
| MPFVELETNLPASR               | O35215 | 0          |              | 6043.437988 | 2 | 802.4199829 | 802.4110697 |
| CEMASTGEVACFGEGIHAFKAM       | Q8C196 | 0          | K +28.03 Da, | 6045.193848 | 2 | 1323.079956 | 1323.096976 |
| NLNQALLDLHALGSAR             | P29391 | 0          |              | 6068.76123  | 2 | 854.4699707 | 853.4708389 |
| GVLKEYGVKVLGTSVESIMATEDR     | Q8C196 | 0          | K +28.03 Da, | 6071.767578 | 3 | 880.1400146 | 879.8104491 |
| MEADGLGCAVCVLTGASR           | Q64105 | 0          | C +57.02 Da, | 6123.829102 | 2 | 934.4430542 | 933.9289756 |
| GFGFVTFDDHDPVDKIVLQKY        | Q88569 | 0          | K +28.03 Da, | 6124.347656 | 3 | 833.4299927 | 832.765168  |
| LVLEVAQHLGESTVR              | P56480 | 0          |              | 6156.541016 | 2 | 826.4541016 | 825.9623154 |
| MPFVELETNLPASR               | O35215 | 0.03521127 |              | 6178.407715 | 2 | 803.4299927 | 802.4110697 |
| GGLLKDFSATDLTEFAAR           | Q8BWT1 | 0.016      | K +28.03 Da, | 6180.563477 | 2 | 971.000061  | 970.5098277 |
| CSQFIPMEVINAPR               | Q8R0Y6 | 0          | C +57.02 Da, | 6191.242676 | 2 | 831.4099731 | 831.4105465 |
| LINEKDGETFQLMGLYGR           | B5X0G2 | 0.00502513 | K +28.03 Da, | 6247.310547 | 2 | 1057.530029 | 1056.543345 |
| LLNKLADLMER                  | O35945 | 0.01606426 | K +28.03 Da, | 6251.535645 | 2 | 672.8811035 | 672.389408  |
| ARRHYSEAAADREDDPNFFKMVEGFFDR | P26443 | 0          | K +28.03 Da, | 6252.986816 | 4 | 851.8900146 | 851.9020949 |
| VELSEINGDAGSTYINASYIDGFKPRK  | P06800 | 0          | K +28.03 Da, | 6264.421387 | 3 | 1043.52002  | 1043.862819 |
| FTQAGSEVSALLGR               | P56480 | 0          |              | 6404.22998  | 2 | 718.8731079 | 718.3806266 |

|                                   |        |            |              |             |   |             |             |
|-----------------------------------|--------|------------|--------------|-------------|---|-------------|-------------|
| DILFQLADLYEPR                     | Q9QXX4 | 0          |              | 6468.757324 | 2 | 796.9099731 | 796.9195848 |
| KEPLFGISTGNIITGLAAGAKSY           | Q8C196 | 0          | K +28.03 Da, | 6469.586914 | 3 | 789.1099854 | 788.7772964 |
| AALSAGKVPPEITDSVIVGNVMQSSSDAAYLAR | Q8BWT1 | 0          | K +28.03 Da, | 6476.542969 | 3 | 1116.579956 | 1115.916818 |
| GEMAIKDAQTKLAELEAALQR             | P11679 | 0          | K +28.03 Da, | 6508.071777 | 3 | 782.0900269 | 781.4297909 |
| TFGDFIQLLVR                       | Q8R0Y6 | 0.00892857 |              | 6511.68457  | 2 | 654.3699951 | 654.8691655 |
| PNFFKMVEGFFDR                     | P26443 | 0          | K +28.03 Da, | 6527.959961 | 3 | 554.6102295 | 554.6096736 |
| GKQGFDLPEFPFGLPR                  | O35490 | 0.01612903 | K +28.03 Da, | 6540.202637 | 2 | 1038.550049 | 1038.051662 |
| LLNKLADLMER                       | O35945 | 0.01901141 | K +28.03 Da, | 6552.061035 | 2 | 672.8828735 | 672.389408  |
| AALAMEKNLNQALLDLHALGSAR           | P29391 | 0.03496503 | K +28.03 Da, | 6596.794922 | 3 | 817.4500122 | 816.784568  |
| QKENGITITANASTLNDGAAALVLMTAEAAQR  | Q8QZT1 | 0          | K +28.03 Da, | 6653.991211 | 3 | 1077.540039 | 1077.2209   |
| CAFMGSLAPGHVADFLVADFR             | P97328 | 0.00505051 | C +57.02 Da, | 6661.904785 | 2 | 1142.040039 | 1141.048271 |
| QKENGITITANASTLNDGAAALVLMTAEAAQR  | Q8QZT1 | 0          | K +28.03 Da, | 6667.387207 | 3 | 1077.890015 | 1077.2209   |
| AALAMEKNLNQALLDLHALGSAR           | P29391 | 0.03780069 | K +28.03 Da, | 6685.398438 | 3 | 817.1099854 | 816.784568  |
| AIAELGIYPAVDPLDSTSR               | P56480 | 0.00492611 |              | 6774.396484 | 2 | 995.5100098 | 994.5203927 |
| HRKLRQLYCR                        | Q3V061 | 0.04       | C +57.02 Da, | 6806.558594 | 2 | 729.4099731 | 729.4171566 |
| LPEIKNVVSGKTSACFESLDYMTKIPR       | Q8C196 | 0.00900901 | K +28.03 Da, | 6811.610352 | 3 | 1121.920044 | 1121.940017 |
| EELDPGVVDNFPLLKALR                | P30115 | 0          | K +28.03 Da, | 6834.085938 | 2 | 1028.069946 | 1027.070052 |
| EALAMEKNLNQALLDLHALGSAR           | P29391 | 0          | K +28.03 Da, | 6842.90918  | 3 | 860.1199951 | 859.7987661 |
| KGLKESPVVPLAESELLAEILEEAR         | Q9DBB8 | 0          | K +28.03 Da, | 6856.529297 | 3 | 926.8599854 | 926.1950687 |
| AVFVDLEPTVIDEVR                   | P05213 | 0          |              | 6861.928711 | 2 | 851.9500122 | 851.4565319 |
| CFIEIPDETMVIGNYR                  | Q8R1V4 | 0          | C +57.02 Da, | 6874.662109 | 2 | 1043.98999  | 1043.484638 |
| AIAELGIYPAVDPLDSTSR               | P56480 | 0          |              | 6885.602539 | 2 | 995.0100098 | 994.5203927 |
| GVLVFLENVIR                       | P62806 | 0.02247191 | K +28.03 Da, | 6978.075684 | 2 | 708.4400024 | 707.9426648 |
| QNMLQGTGTEIGVLAKTFIDQGKLIIPDDVMTR | Q9WTP7 | 0          | K +28.03 Da, | 6983.736816 | 3 | 1130.27002  | 1129.938677 |
| QNMLQGTGTEIGVLAKTFIDQGKLIIPDDVMTR | Q9WTP7 | 0          | K +28.03 Da, | 6989.656738 | 3 | 1129.930054 | 1129.938677 |
| CGESPVWEEASQSLLFVDIPSKIICR        | Q64374 | 0          | C +57.02 Da, | 7008.408203 | 3 | 1017.190002 | 1016.843825 |
| GPLLVDVVFTEMAHFDR                 | P24270 | 0          |              | 7014.493164 | 2 | 1095.530029 | 1095.038427 |
| LEGLTDEINFLR                      | P11679 | 0          |              | 7020.936035 | 2 | 710.8699951 | 710.3775526 |
| QPGLMAQMATTAAAGVAVGSVAVGHTLGH     | Q9D1L0 | 0          |              | 7028.830566 | 3 | 845.0900269 | 845.0931845 |
| KLELAQYREVAFAQFGSDLDAATQQLSR      | Q03265 | 0.04026846 | K +28.03 Da, | 7047.429199 | 4 | 842.4400024 | 842.6965819 |
| PAWPGGSQQVDLASVLTPEIMAPILANADVQER | D3YUD8 | 0          |              | 7105.126953 | 3 | 1158.280029 | 1158.595967 |
| GFLDVVAALR                        | Q63880 | 0          |              | 7117.836426 | 2 | 531.3029175 | 530.8111188 |
| QALQDLLSEYMGNAGR                  | P26231 | 0          |              | 7143.625977 | 2 | 883.9299927 | 883.4305227 |
| PAWPGGSQQVDLASVLTPEIMAPILANADVQER | D3YUD8 | 0          |              | 7145.026367 | 3 | 1158.939941 | 1158.595967 |
| ASSWVTHVEMGPPDPILGVTEAFKR         | P05202 | 0          | K +28.03 Da, | 7157.009766 | 3 | 947.1400146 | 947.1460545 |
| CAGLLMTLKGLPSTY                   | Q91YI0 | 0.00934579 | K +28.03 Da, | 7170.236328 | 2 | 827.4400024 | 826.9411482 |
| REVAFAQFGSDLDAATQQLSR             | Q03265 | 0          |              | 7180.632813 | 3 | 832.75      | 832.0943476 |
| GKTQEAMEAALAMEKNLNQALLDLHALGSAR   | P29391 | 0.00847458 | K +28.03 Da, | 7195.222656 | 4 | 838.9299927 | 838.4444383 |
| CMALSTAILVGEAKKWLPELVDR           | Q9EQ20 | 0          | K +28.03 Da, | 7201.724609 | 3 | 886.1500244 | 886.1570141 |
| CMALSTAILVGEAKKWLPELVDR           | Q9EQ20 | 0          | K +28.03 Da, | 7232.647949 | 3 | 885.8128662 | 886.1570141 |

|                                          |        |            |              |             |   |             |             |
|------------------------------------------|--------|------------|--------------|-------------|---|-------------|-------------|
| KIISLQQLQEDSLNVADLSSLR                   | P97372 | 0          | K +28.03 Da, | 7284.970703 | 3 | 858.1500244 | 857.4848419 |
| CPEALFQPSFLGMESCBIHETTFN                 | P60710 | 0          | C +57.02 Da, | 7289.373535 | 2 | 1386.607056 | 1386.608763 |
| CPEALFQPSFLGMESCBIHETTFN                 | P60710 | 0          | C +57.02 Da, | 7293.203613 | 3 | 925.0800171 | 924.7416008 |
| KIISLQQLQEDSLNVADLSSLR                   | P97372 | 0          | K +28.03 Da, | 7295.464844 | 2 | 1286.719971 | 1285.723625 |
| QHSQDLAFVSMNLNDIAATPTAAMPFR              | P19096 | 0          |              | 7304.043457 | 3 | 945.4699707 | 944.7984377 |
| LCVLSAMKMETVVTSPMEGTIR                   | Q05920 | 0          | K +28.03 Da, | 7353.912109 | 2 | 1240.609985 | 1241.13283  |
| QAASSLQQASLKLFEEMAY                      | P38647 | 0.03472222 | K +28.03 Da, | 7357.066406 | 2 | 1008.02002  | 1007.519338 |
| NEKIAPSFAVESMEDALKAADTIGYPMIR            | Q8C196 | 0          | K +28.03 Da, | 7364.136719 | 3 | 1108.900024 | 1108.240244 |
| CEYLMELMTPAACPEPPPEAPSDGDHDEL            | O08795 | 0.00947867 | C +57.02 Da, | 7379.733398 | 3 | 1091.449951 | 1091.124    |
| CYVALDFENEMATAASSSSLEKSYELPDGQVITIGNER   | P62737 | 0          | K +28.03 Da, | 7381.083984 | 3 | 1408.329956 | 1408.331358 |
| NEKIAPSFAVESMEDALKAADTIGYPMIR            | Q8C196 | 0.00515464 | K +28.03 Da, | 7387.208496 | 3 | 1108.569946 | 1108.240244 |
| CYVALDFENEMATAASSSSLEKSYELPDGQVITIGNER   | P62737 | 0          | K +28.03 Da, | 7388.313965 | 3 | 1408        | 1408.331358 |
| QIIQQNPSLLPALLQQIGR                      | P54728 | 0          |              | 7402.30957  | 2 | 1065.621826 | 1065.623318 |
| QIIQQNPSLLPALLQQIGR                      | P54728 | 0          |              | 7415.92334  | 3 | 710.75      | 710.7513039 |
| LCVLSAMKMETVVTSPMEGTIR                   | Q05920 | 0          | K +28.03 Da, | 7427.837402 | 2 | 1240.609985 | 1241.13283  |
| ENVQDVLPTLPNPDYFLLR                      | Q99J08 | 0          |              | 7428.365234 | 2 | 1180.109985 | 1179.602446 |
| ENVQDVLPTLPNPDYFLLR                      | Q99J08 | 0          |              | 7433.807617 | 2 | 1179.109985 | 1179.602446 |
| ELLYHVEELDPGVVDNFPLLKALR                 | P30115 | 0.00877193 | K +28.03 Da, | 7503.033203 | 3 | 937.1799927 | 936.5162533 |
| PFVELETNLPASR                            | O35215 | 0          |              | 7504.192871 | 2 | 736.8917847 | 736.8908271 |
| CMTEEIFGPVTCVVPFDSEEEVITR                | Q8BH00 | 0          | C +57.02 Da, | 7505.178223 | 2 | 1473.180054 | 1472.674301 |
| CMTEEIFGPVTCVVPFDSEEEVITR                | Q8BH00 | 0          | C +57.02 Da, | 7509.152344 | 3 | 982.460022  | 982.118626  |
| CLYSLINEAFR                              | Q9DBM2 | 0          | C +57.02 Da, | 7512.463379 | 2 | 693.3499756 | 693.3477404 |
| KIAPSFAVESMEDALKAADTIGYPMIR              | Q8C196 | 0.03272727 | K +28.03 Da, | 7527.966797 | 3 | 1027.880005 | 1027.211737 |
| QVGVVVKFVEFFGPGVAQLSIADR                 | P28271 | 0          | K +28.03 Da, | 7537.30127  | 3 | 850.4699707 | 850.1355951 |
| CMPPPVSMAETSAVCAASVLR                    | Q9QXE0 | 0          | C +57.02 Da, | 7600.266113 | 2 | 1152.540039 | 1153.044014 |
| CMPPPVSMAETSAVCAASVLR                    | Q9QXE0 | 0          | C +57.02 Da, | 7606.390137 | 2 | 1153.550049 | 1153.044014 |
| EINEKIAPSFAVESMEDALKAADTIGYPMIR          | Q8C196 | 0.00873362 | K +28.03 Da, | 7644.758301 | 3 | 1189.619995 | 1188.94913  |
| SFAVESMEDALKAADTIGYPMIR                  | Q8C196 | 0          | K +28.03 Da, | 7667.184082 | 2 | 1322.660034 | 1321.663864 |
| AMEAALAMEKNLNQALLDLHALGSAR               | P29391 | 0          | K +28.03 Da, | 7674.125488 | 3 | 927.4799805 | 927.1579658 |
| CGESPVVWEEASQSLFVDIPSKIICR               | Q64374 | 0          | C +57.02 Da, | 7701.140625 | 3 | 1016.51001  | 1016.843825 |
| AAFAQFGSDLDAATQQLSR                      | Q03265 | 0          |              | 7719.403809 | 2 | 1056.02002  | 1055.531823 |
| AAFAQFGSDLDAATQQLSR                      | Q03265 | 0          |              | 7750.199219 | 2 | 1056.530029 | 1055.531823 |
| QLFSDKLINEINEKIAPSFAVESMEDALKAADTIGYPMIR | Q8C196 | 0          | K +28.03 Da, | 7780.743652 | 4 | 1135.339966 | 1135.344488 |
| GQRCMALSTAILVGEAKKWLPELVDR               | Q9EQ20 | 0          | K +28.03 Da, | 7802.396973 | 3 | 1000.200012 | 999.8840653 |
| VEVTEEFDRTPLRVLELADQLETQR                | P13597 | 0          | C +57.02 Da, | 7822.677734 | 4 | 844.4400024 | 843.9421573 |
| CDVTKTPPLGSAQVPLADCVLTFAMECACPDIDTYR     | P40936 | 0          | C +57.02 Da, | 7838.35498  | 3 | 1405.660034 | 1404.99761  |
| QMVELTELKICCDILDVLDKH                    | P62259 | 0          | K +28.03 Da, | 7855.695801 | 3 | 876.7700195 | 876.7863699 |
| SFAVESMEDALKAADTIGYPMIR                  | Q8C196 | 0          | K +28.03 Da, | 7858.326172 | 3 | 882.0999756 | 881.4450013 |
| NADSSVQLLAEAEVTLDMLDLGAAR                | Q9D3D9 | 0          |              | 7864.047363 | 2 | 1302.150024 | 1301.655082 |
| NADSSVQLLAEAEVTLDMLDLGAAR                | Q9D3D9 | 0          |              | 7872.328125 | 2 | 1302.670044 | 1301.655082 |
