# Supplementary material
Source: PubMed Central journal article supplement (PMC5083106)
Supplement: 10.1074_O115.056515_mcp.O115.056515-4.pdf [file 10.1074_O115.056515_mcp.O115.056515-4.pdf]

**Supplementary Table 3:** List of N-termini identified in cryopreserved liver tissue of C57BL/6 wild type mouse (replicate 2) after chemical labeling using  $^{12}\text{COH}_2$  formaldehyde. This is a comprehensive listing of all identified peptides.

| Peptide Sequence     | UniProt ID | MSGF+ score (E-value) | Modification                   | Retention Time (s) | Charge | Measured m/z | Theoretical m/z |
|----------------------|------------|-----------------------|--------------------------------|--------------------|--------|--------------|-----------------|
| GDVEKGKK             | P62897     | 0.03371344            | N-term +42.01 Da, K +28.03 Da, | 995.0065308        | 4      | 440.2441406  | 440.243069      |
| GDVEKGKK             | P62897     | 0.03855539            | N-term +42.01 Da, K +28.03 Da, | 996.6129761        | 4      | 437.4873047  | 437.4865987     |
| GDVEKGKK             | P62897     | 0.02534212            | N-term +42.01 Da, K +28.03 Da, | 1007.26239         | 3      | 582.9794922  | 582.9797061     |
| GSSQGS AKAR          | Q8VID5     | 0.00278087            | N-term +42.01 Da, K +28.03 Da, | 1038.540527        | 3      | 332.55896    | 332.5585784     |
| AASSSGEKEKER         | Q9CQA5     | 0                     | N-term +42.01 Da, K +28.03 Da, | 1042.422363        | 3      | 419.5499878  | 419.5542224     |
| SKKHGGPADEER         | P08228     | 0.00383982            | N-term +42.01 Da, K +28.03 Da, | 1044.339722        | 2      | 699.8221436  | 699.8214648     |
| EGSGSSGTGEQKEDQKEEKQ | P38647     | 0                     | N-term +42.01 Da, K +28.03 Da, | 1046.342041        | 4      | 437.980011   | 437.4865987     |
| EGSGSSGTGEQKEDQKEEKQ | P38647     | 0                     | N-term +42.01 Da, K +28.03 Da, | 1051.367432        | 3      | 416.9273682  | 416.9226911     |
| ADKTPGGSQKASSKNR     | Q6NV83     | 0                     | N-term +42.01 Da, K +28.03 Da, | 1061.059692        | 3      | 484.9164124  | 484.9158202     |
| ADKTPGGSQKASSKNR     | Q6NV83     | 0.01892583            | N-term +42.01 Da, K +28.03 Da, | 1061.4375          | 3      | 455.9100037  | 455.9051438     |
| SASAGGSHQPSQSR       | P70445     | 0                     | N-term +42.01 Da,              | 1063.452026        | 4      | 410.7099915  | 410.7076588     |
| EGSGSSGTGEQKEDQKEEKQ | P38647     | 0                     | N-term +42.01 Da, K +28.03 Da, | 1067.917603        | 3      | 487.8943481  | 487.2230904     |
| SGSPVKR              | Q93092     | 0.03808594            | N-term +42.01 Da, K +28.03 Da, | 1070.907959        | 4      | 655.3463745  | 655.3462525     |
| SHASPAAKPSN          | Q9CR16     | 0.00280584            | N-term +42.01 Da, K +28.03 Da, | 1076.458984        | 2      | 778.4256592  | 778.4255658     |
| SHASPAAKPSNSKNPR     | Q9CR16     | 0                     | N-term +42.01 Da, K +28.03 Da, | 1076.928589        | 3      | 589.3200684  | 589.3196171     |
| SASAGGSHQPSQSR       | P70445     | 0                     | N-term +42.01 Da,              | 1079.151855        | 3      | 363.2201538  | 363.2205144     |
| SHASPAAKPSNSKNPR     | Q9CR16     | 0                     | N-term +42.01 Da, K +28.03 Da, | 1079.824097        | 2      | 544.3300171  | 544.3271333     |
| SKNTVSSAR            | Q9CPW4     | 0.00538793            | N-term +42.01 Da, K +28.03 Da, | 1090.457397        | 2      | 591.2870483  | 591.2865286     |
| AEVEQKKKR            | P62843     | 0.01593011            | N-term +42.01 Da, K +28.03 Da, | 1090.613525        | 3      | 541.6176147  | 541.2728896     |
| ASGGGCSASER          | Q9WV80     | 0                     | N-term +42.01 Da, C +57.02Da,  | 1095.037354        | 4      | 442.2416077  | 442.241532      |
| GMKVIENR             | P21107     | 0.00276855            | N-term +42.01 Da, K +28.03 Da, | 1098.499268        | 3      | 519.2860718  | 519.286136      |
| SHASPAAKPSNSKNPR     | Q9CR16     | 0                     | N-term +42.01 Da, K +28.03 Da, | 1106.4375          | 2      | 384.7523499  | 384.7525405     |
| SASAGGSHQPSQSR       | P70445     | 0                     | N-term +42.01 Da,              | 1109.700073        | 2      | 778.9199829  | 778.4255658     |
| ATSSHQGAAGSQAEHR     | Q75N62     | 0                     | N-term +42.01 Da,              | 1110.611206        | 3      | 527.5999756  | 526.9275089     |
| AHYKAADSKR           | Q9EQS3     | 0.0011422             | N-term +42.01 Da, K +28.03 Da, | 1117.855225        | 3      | 499.9182434  | 499.2585802     |
| TAEEDPADPKR          | Q9D0J8     | 0                     | N-term +42.01 Da, K +28.03 Da, | 1121.625           | 3      | 652.6555176  | 651.9826768     |
| TAEEDPADPKR          | Q9D0J8     | 0                     | N-term +42.01 Da, K +28.03 Da, | 1130.444458        | 3      | 519.6149292  | 519.286136      |
| TENSTSAPAAKPKR       | P10922     | 0                     | N-term +42.01 Da, K +28.03 Da, | 1139.429932        | 3      | 366.8617249  | 366.8623325     |
| SAGSSCSQTPSR         | Q60876     | 0                     | N-term +42.01 Da, C +57.02Da,  | 1149.062134        | 3      | 447.9441833  | 447.9439932     |
| TENSTSAPAAKPKR       | P10922     | 0                     | N-term +42.01 Da, K +28.03 Da, | 1159.57666         | 3      | 535.8981934  | 535.8973775     |
| ADGKAGEEKPEKPKR      | Q6P8I4     | 0.00637959            | N-term +42.01 Da, K +28.03 Da, | 1168.695679        | 3      | 501.6035767  | 501.6035762     |
| ADGKAGEEKPEKPKR      | Q6P8I4     | 0                     | N-term +42.01 Da, K +28.03 Da, | 1179.758667        | 2      | 752.4000244  | 751.9017261     |
| AATGGGADDESR         | Q91WK7     | 0                     | N-term +42.01 Da,              | 1183.302002        | 2      | 514.3349609  | 514.3347608     |

|                        |        |            |                                           |             |   |             |             |
|------------------------|--------|------------|-------------------------------------------|-------------|---|-------------|-------------|
| TENSTSAPAAKPKR         | P10922 | 0          | N-term +42.01 Da, K +28.03 Da,            | 1188.972412 | 2 | 633.7700195 | 633.7725946 |
| MDTGAGSIR              | O35143 | 0.00279174 | N-term +42.01 Da,                         | 1197.624023 | 3 | 379.2124939 | 378.5365026 |
| TENSTSAPAAKPKR         | P10922 | 0          | N-term +42.01 Da, K +28.03 Da,            | 1199.242065 | 2 | 512.7875977 | 512.7873097 |
| ADGKAGEEKPEKPQR        | Q6P8I4 | 0.00169875 | N-term +42.01 Da, K +28.03 Da,            | 1200.653687 | 3 | 501.6036072 | 501.6035762 |
| HQLSYSGR               | Q5S006 | 0.03840544 | N-term +42.01 Da,                         | 1202.442383 | 4 | 769.3900146 | 769.6439888 |
| ADGKAGEEKPEKPQR        | Q6P8I4 | 0          | N-term +42.01 Da, K +28.03 Da,            | 1202.829346 | 3 | 343.2255859 | 343.2255994 |
| KMKDTSDEEIR            | P62204 | 0.00114025 | N-term +42.01 Da, K +28.03 Da,            | 1202.904785 | 2 | 485.2535095 | 484.2583851 |
| ADGKAGEEKPEKPQR        | Q6P8I4 | 0          | N-term +42.01 Da, K +28.03 Da,            | 1230.216064 | 2 | 512.7880249 | 512.7873097 |
| ADGKAGEEKPEKPQR        | Q6P8I4 | 0          | N-term +42.01 Da, K +28.03 Da,            | 1234.280884 | 2 | 598.2794189 | 598.2689669 |
| TENSTSAPAAKPKR         | P10922 | 0          | N-term +42.01 Da, K +28.03 Da,            | 1235.680664 | 4 | 301.4500122 | 301.1999432 |
| SSAAPAKKPYR            | Q9DCD5 | 0          | N-term +42.01 Da, K +28.03 Da,            | 1235.888794 | 4 | 566.8099976 | 566.3088462 |
| TAEEDADPKR             | Q9D0J8 | 0          | N-term +42.01 Da, K +28.03 Da,            | 1241.872681 | 3 | 337.1854248 | 336.5188942 |
| SESGKSSQPLASKQEKGTEKR  | P17095 | 0          | N-term +42.01 Da, K +28.03 Da,            | 1246.864746 | 2 | 609.3675537 | 609.3679439 |
| SESGKSSQPLASKQEKGTEKR  | P17095 | 0          | N-term +42.01 Da, K +28.03 Da,            | 1249.015137 | 3 | 428.5822144 | 428.5821122 |
| TTASPSQVR              | P09528 | 0.00114351 | N-term +42.01 Da,                         | 1250.301758 | 2 | 642.3693237 | 642.36953   |
| SGEDVPHR               | Q9CR00 | 0.00058858 | N-term +42.01 Da,                         | 1252.339844 | 3 | 501.9317017 | 501.6035762 |
| SEATLIKRFKGGVRYK       | P97318 | 0.00638978 | N-term +42.01 Da, K +28.03 Da,            | 1262.258057 | 2 | 469.7202148 | 469.7199584 |
| SQPGPKPAASPR           | P51125 | 0.00486224 | N-term +42.01 Da, K +28.03 Da,            | 1265.083374 | 2 | 631.8463135 | 631.8462219 |
| SGEDVPHR               | Q9CR00 | 0.00058858 | N-term +42.01 Da,                         | 1265.581055 | 2 | 639.789978  | 639.7851706 |
| IKGVTCEDVNECEVFPVCPNGR | Q61555 | 0.04693487 | N-term +42.01 Da, K +28.03 Da,C +57.02Da, | 1270.634888 | 2 | 603.7913818 | 603.7927981 |
| TKEMTENQR              | P30204 | 0          | N-term +42.01 Da, K +28.03 Da,            | 1270.710327 | 3 | 430.2511597 | 430.2505851 |
| SYEKEKAR               | G3UX43 | 0.0089192  | N-term +42.01 Da, K +28.03 Da,            | 1280.793701 | 3 | 439.9100037 | 439.2453888 |
| AEAVKPR                | Q80TA9 | 0.03007519 | N-term +42.01 Da, K +28.03 Da,            | 1283.24231  | 3 | 501.9315796 | 501.6035762 |
| AKPLTDQEKR             | Q9ET01 | 0.00169587 | N-term +42.01 Da, K +28.03 Da,            | 1283.928223 | 4 | 518.5200195 | 518.7684456 |
| AANVGQQR               | Q8CBY3 | 0.00059418 | N-term +42.01 Da,                         | 1284.260376 | 3 | 473.9021912 | 473.2416501 |
| KMKDTSDEEIR            | P62204 | 0.00170068 | N-term +42.01 Da, K +28.03 Da,            | 1295.436401 | 2 | 773.7887573 | 773.7891712 |
| MDSKQQTVR              | P70694 | 0          | N-term +42.01 Da, K +28.03 Da,            | 1304.247681 | 2 | 752.3932495 | 751.9017261 |
| AGTALKR                | P60605 | 0.05       | N-term +42.01 Da, K +28.03 Da,            | 1304.623657 | 2 | 581.7977295 | 581.7978831 |
| STAGKVIKCK             | P00329 | 0.03293413 | N-term +42.01 Da, K +28.03 Da,C +57.02Da, | 1304.789795 | 2 | 521.7522583 | 520.7451189 |
| STAGKVIKCK             | P00329 | 0.03009027 | N-term +42.01 Da, K +28.03 Da,C +57.02Da, | 1307.029297 | 2 | 645.8499756 | 645.3477403 |
| MDSKQQTVR              | P70694 | 0.03932039 | N-term +42.01 Da, K +28.03 Da,            | 1313.755249 | 3 | 501.9312744 | 501.6035762 |
| AAPSMKER               | Q8BGD8 | 0.00058309 | N-term +42.01 Da, K +28.03 Da,            | 1314.269287 | 2 | 585.317627  | 585.3172973 |
| TAEEDADPKR             | Q9D0J8 | 0          | N-term +42.01 Da, K +28.03 Da,            | 1318.127563 | 2 | 450.730011  | 450.7303259 |
| ANKAPSQMER             | P31725 | 0.04023267 | N-term +42.01 Da, K +28.03 Da,            | 1336.158813 | 2 | 581.7972412 | 581.7978831 |
| ATKIDKEACR             | Q9CQI6 | 0.00059032 | N-term +42.01 Da, K +28.03 Da,C +57.02Da, | 1347.812744 | 2 | 480.7600098 | 480.2525794 |
| MDSKQQTVR              | P70694 | 0          | N-term +42.01 Da, K +28.03 Da,            | 1351.692383 | 3 | 560.960022  | 560.6248177 |
| AAPSMKER               | Q8BGD8 | 0.00224972 | N-term +42.01 Da, K +28.03 Da,            | 1359.554565 | 3 | 426.2285767 | 425.5569093 |
| PDPAKSAPAPK            | Q64525 | 0          | N-term +42.01 Da, K +28.03 Da,            | 1362.247681 | 4 | 587.7800293 | 587.5375003 |
| TTASPSQVR              | P09528 | 0.00058928 | N-term +42.01 Da,                         | 1363.171143 | 3 | 545.2767944 | 544.6126893 |
| SSSPVNVKK              | Q8VEK3 | 0          | N-term +42.01 Da, K +28.03 Da,            | 1366.582642 | 2 | 581.7977905 | 581.7978831 |

|                           |        |            |                                           |             |   |             |             |
|---------------------------|--------|------------|-------------------------------------------|-------------|---|-------------|-------------|
| MEKEEETTR                 | E9Q616 | 0          | N-term +42.01 Da, K +28.03 Da,            | 1369.272461 | 2 | 451.7632446 | 451.7633031 |
| QCAVDVKRFNSANEDNVTQVR     | P24270 | 0          | N-term +42.01 Da, K +28.03 Da,C +57.02Da, | 1372.07312  | 2 | 629.2977905 | 629.2982476 |
| TTASPSQVR                 | P09528 | 0          | N-term +42.01 Da,                         | 1381.278564 | 4 | 430.7855835 | 430.7856434 |
| SSNECFKCGR                | P53996 | 0          | N-term +42.01 Da, K +28.03 Da,C +57.02Da, | 1384.498535 | 2 | 477.730011  | 477.7356084 |
| ATKCTKCGPGY               | P17563 | 0.00382096 | N-term +42.01 Da, K +28.03 Da,C +57.02Da, | 1388.076294 | 2 | 601.3031006 | 601.3033326 |
| AAAAAGPASSQR              | Q9CX34 | 0          | N-term +42.01 Da,                         | 1396.981323 | 2 | 581.7987061 | 581.7978831 |
| MNKDAQMR                  | Q9JIX0 | 0.03552047 | N-term +42.01 Da, K +28.03 Da,            | 1399.694702 | 2 | 451.7631531 | 451.7633031 |
| AAAVQDSR                  | Q9CYX7 | 0.00276243 | N-term +42.01 Da,                         | 1401.351929 | 3 | 553.5599976 | 553.5607655 |
| TTASPSQVR                 | P09528 | 0          | N-term +42.01 Da,                         | 1407.790161 | 2 | 522.3091431 | 522.3084092 |
| SSNECFKCGR                | P53996 | 0          | N-term +42.01 Da, K +28.03 Da,C +57.02Da, | 1411.983521 | 4 | 430.7859192 | 430.7856434 |
| TTASPSQVR                 | P09528 | 0          | N-term +42.01 Da,                         | 1414.192139 | 2 | 515.2836914 | 515.7820271 |
| TTASPSQVR                 | P09528 | 0.00277162 | N-term +42.01 Da,                         | 1416.501221 | 2 | 618.8146973 | 618.8073936 |
| AENPGLNHR                 | O35344 | 0          | N-term +42.01 Da,                         | 1416.7323   | 3 | 471.2261658 | 471.226     |
| SHGSHETDEEFDAR            | P12787 | 0          | N-term +42.01 Da,                         | 1419.073853 | 2 | 601.3030396 | 601.3033326 |
| SSNECFKCGR                | P53996 | 0          | N-term +42.01 Da, K +28.03 Da,C +57.02Da, | 1419.784424 | 2 | 588.8354492 | 588.8347914 |
| AEEVGNLSQR                | O55091 | 0          | N-term +42.01 Da,                         | 1422.638794 | 2 | 750.9000244 | 749.9022576 |
| ATTAQQSPQPVAGKR           | Q99J36 | 0          | N-term +42.01 Da, K +28.03 Da,            | 1422.830688 | 2 | 611.7800293 | 611.7846391 |
| TTASPSQVR                 | P09528 | 0          | N-term +42.01 Da,                         | 1431.138306 | 2 | 581.7999878 | 581.7978831 |
| STPGKENFR                 | Q60960 | 0          | N-term +42.01 Da, K +28.03 Da,            | 1432.799805 | 3 | 553.9000244 | 553.5607655 |
| MDAQSSAKVNSR              | P49586 | 0          | N-term +42.01 Da, K +28.03 Da,            | 1448.283447 | 4 | 505.0270386 | 505.0260884 |
| TTASPSQVR                 | P09528 | 0          | N-term +42.01 Da,                         | 1448.497437 | 2 | 730.8300171 | 730.3309974 |
| AQDQGEKENPMR              | Q9CXW4 | 0          | N-term +42.01 Da, K +28.03 Da,            | 1453.51416  | 2 | 532.2546387 | 532.2547963 |
| ATATPVQQQR                | P14733 | 0          | N-term +42.01 Da,                         | 1455.091553 | 4 | 708.8599854 | 708.6077437 |
| MEQAVHGESKR               | Q9R1J0 | 0          | N-term +42.01 Da, K +28.03 Da,            | 1457.079346 | 2 | 657.7805176 | 657.7819075 |
| KMKDTSDEEIR               | P62204 | 0.00589812 | N-term +42.01 Da, K +28.03 Da,            | 1457.483154 | 3 | 447.8900146 | 447.89084   |
| AAEQIPGGGSGGGSGGGGGGGGGGR | Q8BMA6 | 0          | N-term +42.01 Da, K +28.03 Da,            | 1478.340942 | 3 | 945.1400146 | 944.4745661 |
| AAGESMAQR                 | Q9D8S4 | 0.00058962 | N-term +42.01 Da,                         | 1485.268188 | 2 | 543.7930298 | 543.7931237 |
| AQDQGEKENPMR              | Q9CXW4 | 0.03253253 | N-term +42.01 Da, K +28.03 Da,            | 1486.333008 | 2 | 746.3900146 | 746.3917231 |
| AQYKGAASEAGR              | Q9WV03 | 0          | N-term +42.01 Da, K +28.03 Da,            | 1486.947754 | 4 | 708.6072388 | 708.6077437 |
| AAAVPQR                   | Q62446 | 0.02435312 | N-term +42.01 Da,                         | 1488.603149 | 2 | 657.7808838 | 657.7819075 |
| TTASPSQVR                 | P09528 | 0          | N-term +42.01 Da,                         | 1490.940063 | 3 | 944.4799805 | 944.4745661 |
| SATSVDPQR                 | P59326 | 0          | N-term +42.01 Da,                         | 1492.694458 | 2 | 749.9000244 | 749.9022576 |
| TTASPSQVR                 | P09528 | 0.03412463 | N-term +42.01 Da,                         | 1500.319946 | 2 | 524.2700195 | 523.276586  |
| AAAVPQR                   | Q62446 | 0.0267812  | N-term +42.01 Da,                         | 1505.947754 | 3 | 682.6799927 | 682.3408642 |
| TTASPSQVR                 | P09528 | 0.00114482 | N-term +42.01 Da,                         | 1506.752808 | 3 | 431.9306641 | 431.9307412 |
| SSPPEGKLETK               | Q91XC8 | 0          | N-term +42.01 Da, K +28.03 Da,            | 1508.147339 | 3 | 538.2896729 | 538.2895464 |
| VPPPPPPK                  | B2RY04 | 0.03887269 | N-term +42.01 Da, K +28.03 Da,            | 1510.233276 | 2 | 458.2488403 | 458.2483515 |
| AGAAEDVR                  | Q8C8T8 | 0.00169014 | N-term +42.01 Da,                         | 1511.609375 | 2 | 494.7600098 | 494.756541  |
| ATGQKLMR                  | P47199 | 0.0377451  | N-term +42.01 Da, K +28.03 Da,            | 1513.902222 | 2 | 590.2999878 | 589.8062313 |
| TTASPSQVR                 | P09528 | 0          | N-term +42.01 Da,                         | 1515.656006 | 2 | 609.8300171 | 609.8274978 |

|                           |        |            |                                           |             |   |             |             |
|---------------------------|--------|------------|-------------------------------------------|-------------|---|-------------|-------------|
| SSPEGKLETK                | Q91XC8 | 0.00115207 | N-term +42.01 Da, K +28.03 Da,            | 1520.317749 | 2 | 746.8900146 | 746.3917231 |
| STGVPSGSSAATGSNR          | P63024 | 0          | N-term +42.01 Da,                         | 1521.545898 | 2 | 553.2861328 | 553.2854656 |
| AAAPAGVGR                 | Q8R344 | 0          | N-term +42.01 Da,                         | 1528.424683 | 2 | 543.8172607 | 543.8169328 |
| KEQEAQEEER                | E9PYF4 | 0.03555556 | N-term +42.01 Da, K +28.03 Da,            | 1543.272339 | 2 | 660.8400269 | 661.3409699 |
| CRPREISDHENNVILLESDLR     | Q61687 | 0.04682274 | N-term +42.01 Da, C +57.02Da,             | 1545.28064  | 3 | 406.8900146 | 406.887424  |
| WSMDRNTDR                 | Q3UVV9 | 0.01290656 | N-term +42.01 Da,                         | 1551.75769  | 2 | 746.3920898 | 746.3917231 |
| ADTAPQLKR                 | Q9DAR7 | 0          | N-term +42.01 Da, K +28.03 Da,            | 1553.685303 | 3 | 744.0200195 | 743.6794853 |
| MDPNCSCASDGSCSCAGACKCKQCK | P02798 | 0          | N-term +42.01 Da, K +28.03 Da,C +57.02Da, | 1569.010498 | 2 | 805.4400024 | 805.4364648 |
| ATDISSSGADCKGDTKN         | Q9CQJ6 | 0          | N-term +42.01 Da, K +28.03 Da,C +57.02Da, | 1573.352417 | 2 | 780.3900146 | 779.8896816 |
| MNTPSQPR                  | Q6NZJ6 | 0          | N-term +42.01 Da,                         | 1576.2323   | 2 | 630.3200073 | 630.3242652 |
| AETVADTR                  | O70492 | 0.01141671 | N-term +42.01 Da,                         | 1581.586426 | 2 | 736.8499756 | 736.8435513 |
| SGFSSEER                  | Q9D819 | 0.00277778 | N-term +42.01 Da,                         | 1584.60437  | 2 | 494.7563171 | 494.756541  |
| ADADKSEAAAGDDGSQQQPAEPR   | Q8C854 | 0          | N-term +42.01 Da, K +28.03 Da,            | 1585.811401 | 2 | 550.2781372 | 550.2781721 |
| ADADKSEAAAGDDGSQQQPAEPR   | Q8C854 | 0          | N-term +42.01 Da, K +28.03 Da,            | 1588.408569 | 2 | 682.8400269 | 682.3353618 |
| ADPGVPGR                  | Q5EBG8 | 0.01092044 | N-term +42.01 Da,                         | 1595.940796 | 3 | 423.230011  | 423.5617111 |
| SEAAPAAPAAAPPAEKAPAKKAA   | P15864 | 0          | N-term +42.01 Da, K +28.03 Da,            | 1609.232422 | 2 | 639.8200073 | 639.8254868 |
| AETVADTR                  | O70492 | 0.00115009 | N-term +42.01 Da,                         | 1612.192139 | 2 | 736.8427734 | 736.8435513 |
| SSSPVNVK                  | Q8VEK3 | 0.00280426 | N-term +42.01 Da, K +28.03 Da,            | 1615.916992 | 3 | 525.210022  | 524.5500891 |
| ADEVGGEALGR               | A8DUK4 | 0.02138493 | N-term +42.01 Da,                         | 1616.325562 | 2 | 494.7563171 | 494.756541  |
| SKQEYDEAGPSIVHR           | P62737 | 0.02580972 | N-term +42.01 Da, K +28.03 Da,            | 1616.559937 | 4 | 636.6300049 | 636.1245315 |
| AAAAAAPGGGGGEPR           | Q63844 | 0.03285217 | N-term +42.01 Da,                         | 1616.818726 | 2 | 766.3900146 | 765.8915561 |
| ADPGVPGR                  | Q5EBG8 | 0.00485699 | N-term +42.01 Da,                         | 1619.928345 | 2 | 507.2600098 | 507.259782  |
| SETAAPAAPAPAEKTPVKKKAR    | P43274 | 0          | N-term +42.01 Da, K +28.03 Da,            | 1620.877075 | 3 | 847.8300171 | 847.8302832 |
| SETAAPAAPAPAEKTPVKKKAR    | P43274 | 0          | N-term +42.01 Da, K +28.03 Da,            | 1631.894165 | 3 | 767.6900024 | 767.3585233 |
| ADPGVPGR                  | Q5EBG8 | 0.03366337 | N-term +42.01 Da,                         | 1632.146362 | 2 | 1150.530029 | 1150.534147 |
| SSNECFKC                  | P53996 | 0.00384193 | N-term +42.01 Da, K +28.03 Da,C +57.02Da, | 1637.429077 | 3 | 596.6400146 | 595.9637221 |
| MEQCKPQVTR                | P29788 | 0.00639318 | N-term +42.01 Da, K +28.03 Da,C +57.02Da, | 1641.302856 | 2 | 581.2600098 | 580.7625526 |
| SETAAPAAPAPAEKTPVKKKAR    | P43274 | 0          | N-term +42.01 Da, K +28.03 Da,            | 1643.20459  | 2 | 736.8400269 | 736.8435513 |
| MDSEVQR                   | Q8R034 | 0.00636267 | N-term +42.01 Da,                         | 1647.165771 | 4 | 636.1242065 | 636.1245315 |
| TTASPSQVR                 | P09528 | 0.0119171  | N-term +42.01 Da,                         | 1647.31665  | 2 | 494.7566223 | 494.756541  |
| AESSSSSSSPTAATSQQQQQQLKTK | A2A432 | 0          | N-term +42.01 Da, K +28.03 Da,            | 1651.858643 | 3 | 847.8300171 | 847.8302832 |
| MDPNCSCASDGSCSCAGACKCKQ   | P02798 | 0          | N-term +42.01 Da, K +28.03 Da,C +57.02Da, | 1657.557617 | 2 | 750.3900146 | 749.9022576 |
| SETAAPAAPAPAEKTPVKKKAR    | P43274 | 0.04680038 | N-term +42.01 Da, K +28.03 Da,            | 1661.920166 | 4 | 593.0999756 | 592.8454247 |
| SETAAPAAPAPAEKTPVKKKAR    | P43274 | 0          | N-term +42.01 Da, K +28.03 Da,            | 1662.038452 | 3 | 742.7700195 | 742.7667313 |
| SETAAPAAPAPAEKTPVKKKAR    | P43274 | 0          | N-term +42.01 Da, K +28.03 Da,            | 1668.710205 | 2 | 702.3599854 | 701.370259  |
| TVIDYNGER                 | P09103 | 0          | N-term +42.01 Da,                         | 1670.343384 | 3 | 790.460022  | 790.1248074 |
| SSSPVNVKCLK               | Q8VEK3 | 0.00115274 | N-term +42.01 Da, K +28.03 Da,            | 1681.988281 | 2 | 494.75      | 494.756541  |
| PTLQSLQER                 | Q8QZW8 | 0.01893552 | N-term +42.01 Da,                         | 1683.62854  | 2 | 635.8479614 | 635.8480965 |
| MDPNCSCASDGSCSCAGACKCK    | P02798 | 0          | N-term +42.01 Da, K +28.03 Da,C +57.02Da, | 1687.459839 | 2 | 489.2302551 | 489.2303565 |
| AAGPISER                  | Q8QZY9 | 0.00591716 | N-term +42.01 Da,                         | 1690.306152 | 3 | 848.5       | 847.8302832 |

|                          |        |            |                                            |             |   |             |             |
|--------------------------|--------|------------|--------------------------------------------|-------------|---|-------------|-------------|
| MQTAHTGLSHTADGADGQTSR    | Q9CR70 | 0.00057971 | N-term +42.01 Da,                          | 1691.515869 | 2 | 779.880049  | 779.880134  |
| SETAAPAAPAPAEKTPVKKK     | P43274 | 0          | N-term +42.01 Da, K +28.03 Da,             | 1692.962402 | 2 | 571.302002  | 571.3016472 |
| IFDLGPRPGHPLR            | Q3TT99 | 0.01391753 | N-term +42.01 Da,                          | 1696.696045 | 2 | 629.7800293 | 628.7880471 |
| SETAAPAAPAPAEKTPVKKK     | P43274 | 0          | N-term +42.01 Da, K +28.03 Da,             | 1701.81665  | 2 | 478.7799988 | 478.7854351 |
| SSSPVNVKKLK              | Q8VEK3 | 0          | N-term +42.01 Da, K +28.03 Da,             | 1703.617676 | 3 | 847.8300171 | 847.8302832 |
| DEEDEEEEEDEGPVR          | Q9D0J8 | 0          | N-term +42.01 Da,                          | 1704.422485 | 3 | 376.2483521 | 376.2484041 |
| AGVSFSGHR                | Q9QXS6 | 0          | N-term +42.01 Da,                          | 1711.907471 | 2 | 509.230011  | 509.227814  |
| AATTGSGVKVPR             | Q9CZY3 | 0          | N-term +42.01 Da, K +28.03 Da,             | 1715.214478 | 2 | 635.8480835 | 635.8480965 |
| SSPPEGKLETKAGHPPAVK      | Q91XC8 | 0          | N-term +42.01 Da, K +28.03 Da,             | 1716.86499  | 2 | 378.2099915 | 377.7139468 |
| SKSFQSSSLGR              | Q8K310 | 0          | N-term +42.01 Da, K +28.03 Da,             | 1721.984375 | 2 | 779.8799438 | 779.880134  |
| MQTAHTGLSHTADGADGQTSR    | Q9CR70 | 0.00058275 | N-term +42.01 Da,                          | 1724.200806 | 2 | 691.8699951 | 691.867352  |
| VKCDMEVSCPEGYTCCR        | P28798 | 0          | N-term +42.01 Da, K +28.03 Da, C +57.02Da, | 1728.579956 | 2 | 571.2999878 | 571.3016472 |
| SSPPEGKLETKAGHPPAVK      | Q91XC8 | 0.00685654 | N-term +42.01 Da, K +28.03 Da,             | 1734.763672 | 3 | 376.2485657 | 376.2484041 |
| ENGEEREE                 | P21619 | 0.03379722 | N-term +42.01 Da,                          | 1743.928711 | 3 | 563.6096802 | 563.6101799 |
| MEEESIKEGSEKPR           | Q8K124 | 0          | N-term +42.01 Da, K +28.03 Da,             | 1753.363525 | 2 | 779.8800049 | 779.880134  |
| SSPPEGKLETKAGHPPAVK      | Q91XC8 | 0          | N-term +42.01 Da, K +28.03 Da,             | 1764.439575 | 2 | 535.303894  | 535.3036582 |
| MLSGSGSQGR               | D3Z6I7 | 0          | N-term +42.01 Da,                          | 1780.021851 | 3 | 593.2999878 | 593.3053133 |
| MEEESIKEGSEKPR           | Q8K124 | 0          | N-term +42.01 Da, K +28.03 Da,             | 1784.710815 | 3 | 438.278656  | 438.2781409 |
| MQTAHTGLSHTADGADGQTSR    | Q9CR70 | 0.04602109 | N-term +42.01 Da,                          | 1784.861694 | 2 | 521.2511597 | 521.251623  |
| AGTTTIEAVKR              | D3Z2H9 | 0.00058789 | N-term +42.01 Da, K +28.03 Da,             | 1786.404419 | 3 | 543.9099731 | 543.9132502 |
| ALKQISSNR                | Q9R0P3 | 0.03810454 | N-term +42.01 Da, K +28.03 Da,             | 1787.192505 | 2 | 889.960022  | 889.4543318 |
| MLSGSGSQGR               | D3Z6I7 | 0          | N-term +42.01 Da,                          | 1788.241333 | 2 | 656.9143066 | 656.9135732 |
| GTTTIEAVKR               | D3Z2H9 | 0.00788644 | N-term +42.01 Da, K +28.03 Da,             | 1793.077637 | 2 | 529.3034668 | 529.3036582 |
| MNKAPQPTGPPPAR           | Q6NZJ6 | 0          | N-term +42.01 Da, K +28.03 Da,             | 1795.042603 | 2 | 535.3040161 | 535.3036582 |
| MEEAPHGCPGADSAQAGR       | Q9R060 | 0          | N-term +42.01 Da, C +57.02Da,              | 1799.842407 | 2 | 985.4400024 | 985.4387512 |
| AETAESGGGGDSGVGACER      | Q91XI1 | 0          | N-term +42.01 Da, C +57.02Da,              | 1804.530029 | 2 | 517.7700195 | 517.7725251 |
| SSPPEGKLETKAGHPPAVKAGGMR | Q91XC8 | 0          | N-term +42.01 Da, K +28.03 Da,             | 1808.415527 | 2 | 656.8599854 | 656.361371  |
| MDTALKR                  | _sp Q6 | 0.01094891 | N-term +42.01 Da, K +28.03 Da,             | 1810.288086 | 3 | 646.3099976 | 645.6427657 |
| GDVEKGKKIFVQK            | P62897 | 0          | N-term +42.01 Da, K +28.03 Da,             | 1811.167114 | 3 | 593.3099976 | 593.3053133 |
| MEGHDPKEPEQLR            | B2RXM2 | 0          | N-term +42.01 Da, K +28.03 Da,             | 1811.896606 | 2 | 748.960022  | 748.4639619 |
| AVAGAAAYR                | Q9QXN3 | 0.00224845 | N-term +42.01 Da,                          | 1813.511719 | 3 | 645.6400146 | 645.6427657 |
| EHCEQLEKCVK              | P99028 | 0          | N-term +42.01 Da, K +28.03 Da, C +57.02Da, | 1820.325073 | 4 | 768.3800049 | 768.6320161 |
| SQAEFDKAAEEVKR           | P31786 | 0.00059242 | N-term +42.01 Da, K +28.03 Da,             | 1820.460083 | 3 | 836.6900024 | 836.0228334 |
| AAAATGLR                 | Q9CQZ5 | 0.00381264 | N-term +42.01 Da,                          | 1822.587646 | 4 | 643.3900146 | 643.1386446 |
| MDPNCSCSTGGSCCTSSACKN    | P02802 | 0          | N-term +42.01 Da, K +28.03 Da, C +57.02Da, | 1824.37854  | 3 | 575.9694214 | 575.9699307 |
| AELYVKPGNKER             | Q80VJ2 | 0.04464714 | N-term +42.01 Da, K +28.03 Da,             | 1831.973022 | 2 | 559.2800293 | 558.2700131 |
| MYKSVSETR                | Q80XQ2 | 0.03928225 | N-term +42.01 Da, K +28.03 Da,             | 1847.449829 | 4 | 579.5900269 | 579.3399751 |
| MDPNCSCSTGGSCCTSSACKN    | P02802 | 0          | N-term +42.01 Da, K +28.03 Da, C +57.02Da, | 1847.877197 | 3 | 772.1199951 | 772.1175414 |
| SQAEFDKAAEEVKR           | P31786 | 0          | N-term +42.01 Da, K +28.03 Da,             | 1857.088745 | 4 | 643.6400146 | 643.1386446 |
| SSPPEGKLETKAGHPPAVKAGGMR | Q91XC8 | 0          | N-term +42.01 Da, K +28.03 Da,             | 1862.733643 | 2 | 559.2784424 | 558.2700131 |

|                            |        |            |                                           |             |   |             |             |
|----------------------------|--------|------------|-------------------------------------------|-------------|---|-------------|-------------|
| MDPNCSCSTGGSCCTCTSSCACKN   | P02802 | 0          | N-term +42.01 Da, K +28.03 Da,C +57.02Da, | 1863.702637 | 2 | 977.9400024 | 977.4389403 |
| AGNFDSEER                  | Q64010 | 0.00485961 | N-term +42.01 Da,                         | 1866.690796 | 2 | 1157.670044 | 1157.672674 |
| MDKNELVQKAK                | P63101 | 0          | N-term +42.01 Da, K +28.03 Da,            | 1870.406006 | 2 | 633.2575073 | 633.2567775 |
| SETAPVAQAASTATEKPAAAKTKKPA | P43275 | 0.0401937  | N-term +42.01 Da, K +28.03 Da,            | 1876.420776 | 4 | 412.75      | 412.753072  |
| AGTTTIEAVKR                | D3Z2H9 | 0.00941915 | N-term +42.01 Da, K +28.03 Da,            | 1878.397827 | 4 | 579.3405762 | 579.3399751 |
| MQSAPLEQPAKRPR             | Q60710 | 0          | N-term +42.01 Da, K +28.03 Da,            | 1878.476685 | 3 | 772.1182251 | 772.1175414 |
| GDVEKGKKIFVQK              | P62897 | 0          | N-term +42.01 Da, K +28.03 Da,            | 1881.291504 | 3 | 493.6072388 | 492.9475656 |
| SSPPEGKLETKAGHPPAVKAGGMR   | Q91XC8 | 0          | N-term +42.01 Da, K +28.03 Da,            | 1892.758545 | 2 | 648.7700195 | 648.7722606 |
| SQAEFDKAAEEVKR             | P31786 | 0          | N-term +42.01 Da, K +28.03 Da,            | 1896.271118 | 2 | 470.7033997 | 470.7039743 |
| AAAATGLR                   | Q9CQZ5 | 0.00381264 | N-term +42.01 Da,                         | 1899.715576 | 4 | 630.7999878 | 630.5477542 |
| EVKCDMEVSCPEGYTCCR         | P28798 | 0          | N-term +42.01 Da, K +28.03 Da,C +57.02Da, | 1902.715332 | 2 | 452.7220764 | 452.7221669 |
| MDPNCSCSTGGSCCTCTSSCACKN   | P02802 | 0          | N-term +42.01 Da, K +28.03 Da,C +57.02Da, | 1906.765747 | 4 | 514.7922363 | 514.7913892 |
| SSPPEGKLETKAGHPPAVKAGGMR   | Q91XC8 | 0          | N-term +42.01 Da, K +28.03 Da,            | 1909.214111 | 4 | 579.5900269 | 579.3399751 |
| STSVPQGHNWTR               | Q8BT51 | 0          | N-term +42.01 Da,                         | 1910.983032 | 2 | 543.8165283 | 543.8169328 |
| AAAATEGVPATR               | Q9CWG9 | 0          | N-term +42.01 Da,                         | 1912.020386 | 3 | 795.3599854 | 795.358078  |
| MEETEKKVATQEGR             | Q9QXZ6 | 0          | N-term +42.01 Da, K +28.03 Da,            | 1912.938354 | 4 | 511.5799866 | 511.5764878 |
| EVKCDMEVSCPEGYTCCR         | P28798 | 0          | N-term +42.01 Da, K +28.03 Da,C +57.02Da, | 1913.057739 | 2 | 713.8300171 | 712.8362494 |
| AGTTTIEAVKR                | D3Z2H9 | 0          | N-term +42.01 Da, K +28.03 Da,            | 1913.417603 | 3 | 795.6900024 | 795.358078  |
| SDSRDPASDQMKQWKEQR         | P24270 | 0          | N-term +42.01 Da, K +28.03 Da,            | 1921.433594 | 4 | 579.0499878 | 579.0537723 |
| FGREPDLSDDIKEK             | P11591 | 0.00057737 | N-term +42.01 Da, K +28.03 Da,            | 1923.277588 | 2 | 783.8592529 | 783.8607875 |
| DEGDEEDEEEEEDEGPVR         | Q9D0J8 | 0          | N-term +42.01 Da,                         | 1923.518555 | 3 | 772.4500122 | 772.1175414 |
| FGREPDLSDDIKEK             | P11591 | 0.00586667 | N-term +42.01 Da, K +28.03 Da,            | 1925.628906 | 2 | 559.3213501 | 559.3148912 |
| ASTFNPR                    | Q9JIL4 | 0.00736842 | N-term +42.01 Da,                         | 1929.427734 | 2 | 599.3153687 | 599.3128347 |
| AAPAAPAAGETGPDAR           | Q9D6Y9 | 0          | N-term +42.01 Da,                         | 1937.143188 | 4 | 686.1400146 | 686.1290743 |
| ENYGELADCCTKQEPER          | P07724 | 0          | N-term +42.01 Da, K +28.03 Da,C +57.02Da, | 1937.751465 | 4 | 515.039978  | 514.7913892 |
| SGYTPDEKLR                 | Q3UIU2 | 0          | N-term +42.01 Da, K +28.03 Da,            | 1943.752319 | 4 | 686.6400146 | 686.1290743 |
| AGTTTIEAVKR                | D3Z2H9 | 0          | N-term +42.01 Da, K +28.03 Da,            | 1951.271606 | 2 | 626.3060913 | 626.3074612 |
| MFQGADSQAGKSGSR            | Q6PGH2 | 0          | N-term +42.01 Da, K +28.03 Da,            | 1958.096436 | 2 | 405.7082825 | 405.7088618 |
| MDPNCSCASDGCSCAGACK        | P02798 | 0          | N-term +42.01 Da, K +28.03 Da,C +57.02Da, | 1963.90271  | 3 | 507.2700806 | 506.6109536 |
| SLKPQPQPAPATGR             | O70305 | 0.01192328 | N-term +42.01 Da, K +28.03 Da,            | 1965.464355 | 3 | 391.25      | 391.2480702 |
| EPDLSSDIKEK                | P11591 | 0          | N-term +42.01 Da, K +28.03 Da,            | 1970.540039 | 2 | 482.7394409 | 482.7403595 |
| AGTTTIEAVKR                | D3Z2H9 | 0          | N-term +42.01 Da, K +28.03 Da,            | 1974.125122 | 2 | 452.7131653 | 452.7132873 |
| MFQGADSQAGKSGSR            | Q6PGH2 | 0          | N-term +42.01 Da, K +28.03 Da,            | 1991.033081 | 2 | 647.840271  | 647.8411369 |
| SSSSSSPKEETYEDREFESQAKR    | Q921F4 | 0          | N-term +42.01 Da, K +28.03 Da,            | 1994.639282 | 2 | 607.3470459 | 607.3485974 |
| AGTTTIEAVKR                | D3Z2H9 | 0          | N-term +42.01 Da, K +28.03 Da,            | 2001.196167 | 3 | 678.0079956 | 678.0091145 |
| AVSTGVKVPTR                | Q9D2M8 | 0.00280112 | N-term +42.01 Da, K +28.03 Da,            | 2001.479614 | 3 | 729         | 728.6626665 |
| EPDLSSDIKEK                | P11591 | 0          | N-term +42.01 Da, K +28.03 Da,            | 2002.111694 | 3 | 728.6599731 | 728.6626665 |
| ADTYAVVQKR                 | Q61152 | 0          | N-term +42.01 Da, K +28.03 Da,            | 2004.079102 | 2 | 682.8099976 | 683.3176923 |
| SETAAPAAPAPVEKTPVKK        | P43277 | 0          | N-term +42.01 Da, K +28.03 Da,            | 2006.69104  | 2 | 522.2663574 | 522.268761  |
| AGTTTIEAVKR                | D3Z2H9 | 0          | N-term +42.01 Da, K +28.03 Da,            | 2009.814087 | 2 | 543.8169556 | 543.8169328 |

|                           |        |            |                                            |             |   |             |             |
|---------------------------|--------|------------|--------------------------------------------|-------------|---|-------------|-------------|
| MEDPGEDTSIHR              | Q80X98 | 0          | N-term +42.01 Da,                          | 2010.546509 | 2 | 736.3900146 | 735.8866076 |
| AGTTTIEAVKR               | D3Z2H9 | 0          | N-term +42.01 Da, K +28.03 Da,             | 2010.750977 | 3 | 1042.829956 | 1042.167408 |
| AEASAAGADAGSAVAHR         | Q9D0C1 | 0          | N-term +42.01 Da,                          | 2014.074707 | 4 | 633.0999756 | 632.8467989 |
| AEAIDPR                   | P19973 | 0.04770992 | N-term +42.01 Da,                          | 2025.908691 | 2 | 607.3480225 | 607.3485974 |
| SESDLEEAEVPIPRDSSLR       | Q64511 | 0.03765281 | N-term +42.01 Da,                          | 2029.622192 | 2 | 647.840271  | 647.8411369 |
| AAVKTLNPKAEVAR            | P80317 | 0.00590763 | N-term +42.01 Da, K +28.03 Da,             | 2032.107666 | 3 | 729         | 728.6626665 |
| PRNVPEVNGVYR              | Q3UFM5 | 0.03692762 | N-term +42.01 Da,                          | 2033.026367 | 3 | 843.789978  | 843.459973  |
| AEVQQLR                   | Q9CR98 | 0.03767123 | N-term +42.01 Da,                          | 2040.720215 | 2 | 543.8167114 | 543.8169328 |
| AGTTTIEAVKR               | D3Z2H9 | 0.00277316 | N-term +42.01 Da, K +28.03 Da,             | 2045.16272  | 4 | 632.8465576 | 632.8467989 |
| AATAAVPGAAAGR             | Q8CHW4 | 0          | N-term +42.01 Da,                          | 2047.76355  | 3 | 636.2918701 | 636.2926339 |
| ATTLDLKSKEEKDAELDKR       | Q8VC31 | 0          | N-term +42.01 Da, K +28.03 Da,             | 2054.041016 | 3 | 501.2840576 | 501.283955  |
| AATAAVPGAAAGR             | Q8CHW4 | 0          | N-term +42.01 Da,                          | 2054.78125  | 2 | 954.4400024 | 953.9353127 |
| AKIAKTHEDIEAQIR           | Q99NB9 | 0.00635593 | N-term +42.01 Da, K +28.03 Da,             | 2057.390869 | 2 | 421.721405  | 421.7219694 |
| AEVQQLR                   | Q9CR98 | 0.03767123 | N-term +42.01 Da,                          | 2057.554199 | 2 | 751.4199829 | 751.4222942 |
| AKIAKTHEDIEAQIR           | Q99NB9 | 0          | N-term +42.01 Da, K +28.03 Da,             | 2058.734131 | 4 | 586.5999756 | 586.3478002 |
| AGSSSLEAVR                | E9Q453 | 0          | N-term +42.01 Da,                          | 2059.440186 | 3 | 781.789978  | 781.4613081 |
| AKIAKTHEDIEAQIR           | Q99NB9 | 0          | N-term +42.01 Da, K +28.03 Da,             | 2061.622559 | 2 | 648.3400269 | 647.8411369 |
| DDEGDDEDEEEEEDEGPVR       | Q9D0J8 | 0          | N-term +42.01 Da,                          | 2066.768311 | 3 | 571.9500122 | 571.2918387 |
| SHTILLVQPTKRPEGR          | P84089 | 0          | N-term +42.01 Da, K +28.03 Da,             | 2066.946533 | 3 | 781.460022  | 781.4613081 |
| SHTILLVQPTKRPEGR          | P84089 | 0          | N-term +42.01 Da, K +28.03 Da,             | 2072.341797 | 3 | 652.6400146 | 651.9826768 |
| DGEDDDEGDDEEEEEDEGPVR     | Q9D0J8 | 0          | N-term +42.01 Da,                          | 2075.124512 | 2 | 988.8900146 | 988.8718087 |
| SSSPVNVKKL                | Q8VEK3 | 0.03283582 | N-term +42.01 Da, K +28.03 Da,             | 2076.311523 | 4 | 633.0999756 | 632.8467989 |
| AGTTTIEAVKR               | D3Z2H9 | 0.004329   | N-term +42.01 Da, K +28.03 Da,             | 2076.866943 | 2 | 543.8171997 | 543.8169328 |
| KIQVLQQADDAEER            | D3Z2H9 | 0          | N-term +42.01 Da, K +28.03 Da,             | 2080.13623  | 2 | 770.8300171 | 770.8291534 |
| AEVQQLR                   | Q9CR98 | 0.03767123 | N-term +42.01 Da,                          | 2080.239014 | 2 | 755.8300171 | 755.3318629 |
| ALQEAKQMERER              | G3X9K3 | 0.04188734 | N-term +42.01 Da, K +28.03 Da,             | 2092.142822 | 2 | 648.3400269 | 647.8411369 |
| AEVQQLR                   | Q9CR98 | 0.03767123 | N-term +42.01 Da,                          | 2093.441162 | 2 | 608.8499756 | 608.8484304 |
| EVKCDMEVSCPEGYTCCR        | P28798 | 0          | N-term +42.01 Da, K +28.03 Da, C +57.02Da, | 2094.148438 | 4 | 586.5999756 | 586.3478002 |
| ALSDADVQKQIKH             | P50518 | 0.00589496 | N-term +42.01 Da, K +28.03 Da,             | 2098.707764 | 2 | 526.2999878 | 526.2983757 |
| AGSSSLEAVR                | E9Q453 | 0          | N-term +42.01 Da,                          | 2104.762207 | 2 | 520.2786255 | 520.2801831 |
| STAGVAAQDIR               | Q99JZ7 | 0          | N-term +42.01 Da,                          | 2121.393799 | 3 | 477.2738953 | 477.2742909 |
| ASGADSKGDDLSTAILKQKNRPNR  | Q81853 | 0          | N-term +42.01 Da, K +28.03 Da,             | 2121.699951 | 2 | 416.7020264 | 416.7027222 |
| AAAEEGCGVGVEDDR           | Q8VC15 | 0          | N-term +42.01 Da, C +57.02Da,              | 2122.491455 | 3 | 501.9524231 | 501.9532176 |
| ATSASSHLNKGIKQMY          | P15105 | 0.00633245 | N-term +42.01 Da, K +28.03 Da,             | 2124.564941 | 3 | 606.9799805 | 606.64908   |
| AESAESGGPPGAQDSAADGGPAEPK | Q8R317 | 0          | N-term +42.01 Da, K +28.03 Da,             | 2125.091064 | 2 | 907.460022  | 906.9579594 |
| AAETVELHKLK               | Q9D1J3 | 0          | N-term +42.01 Da, K +28.03 Da,             | 2126.124756 | 3 | 545.9324951 | 545.9313645 |
| AQQQMTSSQKAL              | Q6ZWZ2 | 0          | N-term +42.01 Da, K +28.03 Da,             | 2126.465088 | 2 | 818.3900146 | 818.3934086 |
| RSSTVLRHIK                | G3UVV3 | 0.03730977 | N-term +42.01 Da, K +28.03 Da,             | 2128.16626  | 3 | 560.3099976 | 560.3067653 |
| AESAESGGPPGAQDSAADGGPAEPK | Q8R317 | 0          | N-term +42.01 Da, K +28.03 Da,             | 2132.595459 | 4 | 579.539978  | 579.2918567 |
| DDDEGDDEEEEEDEGPVR        | Q9D0J8 | 0          | N-term +42.01 Da,                          | 2134.038818 | 2 | 585.7946777 | 585.7948091 |

|                            |        |            |                                           |             |   |             |             |
|----------------------------|--------|------------|-------------------------------------------|-------------|---|-------------|-------------|
| LLEFQNDR                   | P29391 | 0.01093181 | N-term +42.01 Da,                         | 2134.426025 | 3 | 539.6300049 | 539.6333131 |
| DDDEGEDEEEEEDEGPVR         | Q9D0J8 | 0          | N-term +42.01 Da,                         | 2138.670654 | 2 | 452.7504272 | 452.7496724 |
| AKIAQGAMYR                 | P14824 | 0.00634585 | N-term +42.01 Da, K +28.03 Da,            | 2145.143311 | 2 | 766.9099731 | 766.4061211 |
| LYRHYQR                    | _tr E9 | 0.03248376 | N-term +42.01 Da,                         | 2153.761719 | 2 | 511.2407837 | 511.2402009 |
| AGSSSLEAVR                 | E9Q453 | 0          | N-term +42.01 Da,                         | 2155.422119 | 2 | 551.3086548 | 551.3078861 |
| AHYHDNYGKNDEVEFVR          | P25688 | 0          | N-term +42.01 Da, K +28.03 Da,            | 2155.574219 | 4 | 604.3499756 | 604.1007907 |
| PMVLREFLRLASPLNCGAWDKK     | Q6VNB8 | 0.04957102 | N-term +42.01 Da, K +28.03 Da,C +57.02Da, | 2155.991943 | 4 | 668.8300171 | 668.8257526 |
| ASSDIQVKELEKR              | P54227 | 0          | N-term +42.01 Da, K +28.03 Da,            | 2156.433838 | 3 | 545.9314575 | 545.9313645 |
| AHYHDNYGKNDEVEFVR          | P25688 | 0          | N-term +42.01 Da, K +28.03 Da,            | 2156.509277 | 3 | 606.6495972 | 606.64908   |
| AAAEEGCGVGVEDDR            | Q8VCI5 | 0          | N-term +42.01 Da, C +57.02Da,             | 2156.660156 | 3 | 569.2999878 | 569.2967011 |
| AATEPPSLR                  | Q61136 | 0          | N-term +42.01 Da,                         | 2157.898193 | 2 | 818.3900146 | 818.3934086 |
| ASSDIQVKELEKR              | P54227 | 0.01239669 | N-term +42.01 Da, K +28.03 Da,            | 2160.952393 | 3 | 805.4699707 | 805.1319621 |
| MEPGPAAPSSGAPR             | E9QM38 | 0          | N-term +42.01 Da,                         | 2161.613525 | 2 | 831.3961792 | 831.3975372 |
| AMNYSAKDEV DGGPAGPPGGAAKTR | Q8VEK0 | 0          | N-term +42.01 Da, K +28.03 Da,            | 2168.59375  | 3 | 805.7999878 | 805.1319621 |
| MEEEQDLPEQPVKKAK           | A2A953 | 0          | N-term +42.01 Da, K +28.03 Da,            | 2173.147217 | 2 | 813.789978  | 813.3013911 |
| AEMGSKGVTAGKIASNVQK        | O08539 | 0          | N-term +42.01 Da, K +28.03 Da,            | 2174.904541 | 2 | 853.4400635 | 853.4414133 |
| AVRENATLTELRL              | Q9JLH8 | 0.04192771 | N-term +42.01 Da,                         | 2175.533936 | 3 | 720.4099731 | 720.0754535 |
| SADAAAGEPLPR               | P70441 | 0.00279486 | N-term +42.01 Da,                         | 2178.994873 | 2 | 608.8499756 | 608.8484304 |
| AGSSSLEAVR                 | E9Q453 | 0          | N-term +42.01 Da,                         | 2186.258301 | 4 | 604.1009521 | 604.1007907 |
| AASTASHRPIKGIL             | Q9DCL8 | 0.03295057 | N-term +42.01 Da, K +28.03 Da,            | 2186.993408 | 2 | 737.3200073 | 737.3156813 |
| ASSDIQVKELEKR              | P54227 | 0          | N-term +42.01 Da, K +28.03 Da,            | 2187.431396 | 3 | 569.2965698 | 569.2967011 |
| AAQESLHVKTPLR              | Q8VBT2 | 0          | N-term +42.01 Da, K +28.03 Da,            | 2198.561523 | 3 | 578.6300049 | 578.629463  |
| AAQESLHVKTPLR              | Q8VBT2 | 0          | N-term +42.01 Da, K +28.03 Da,            | 2198.946045 | 3 | 606.9799805 | 606.64908   |
| MDMGNQHPSISR               | Q8CI32 | 0          | N-term +42.01 Da,                         | 2199.237061 | 2 | 867.9400024 | 867.4405563 |
| AGLGHPSAFGR                | Q9CWS0 | 0          | N-term +42.01 Da,                         | 2201.698975 | 2 | 941.9000244 | 941.893979  |
| SADAAAGEPLPR               | P70441 | 0          | N-term +42.01 Da,                         | 2202.543457 | 3 | 557.6300049 | 557.6346593 |
| SQAEFDKAAEEVKR             | P31786 | 0          | N-term +42.01 Da, K +28.03 Da,            | 2205.761475 | 2 | 853.4400024 | 853.4414133 |
| TEQMTLR                    | P68040 | 0.02822581 | N-term +42.01 Da,                         | 2210.746582 | 2 | 608.8485718 | 608.8484304 |
| AGSSSLEAVR                 | E9Q453 | 0.00485437 | N-term +42.01 Da,                         | 2212.316895 | 4 | 573.2800293 | 573.2774778 |
| AAQESLHVKTPLR              | Q8VBT2 | 0          | N-term +42.01 Da, K +28.03 Da,            | 2212.87207  | 3 | 764.0300293 | 764.0342116 |
| ATSASSHLNKGIKQMY           | P15105 | 0          | N-term +42.01 Da, K +28.03 Da,            | 2216.477295 | 3 | 629.0100098 | 629.0094429 |
| ADTPSVYETR                 | Q5XG73 | 0          | N-term +42.01 Da,                         | 2216.875977 | 4 | 604.0999756 | 604.1007907 |
| TANLGAGAAQPLR              | P08226 | 0          | N-term +42.01 Da,                         | 2222.062012 | 3 | 524.6016235 | 524.6010669 |
| AMNYSAKDEV DGGPAGPPGGAAKTR | Q8VEK0 | 0          | N-term +42.01 Da, K +28.03 Da,            | 2222.408936 | 2 | 706.8400269 | 706.3392929 |
| AGLGHPSAFGR                | Q9CWS0 | 0          | N-term +42.01 Da,                         | 2225.42749  | 3 | 784.6523438 | 783.9807456 |
| MNYSAKDEV DGGPAGPPGGAAKTR  | Q8VEK0 | 0          | N-term +42.01 Da, K +28.03 Da,            | 2229.033203 | 2 | 410.7191467 | 410.7192293 |
| ADEEKLPPGWEKR              | Q9QUR7 | 0          | N-term +42.01 Da, K +28.03 Da,            | 2243.087891 | 4 | 472.76474   | 472.2702896 |
| SADAAAGEPLPR               | P70441 | 0.0063593  | N-term +42.01 Da,                         | 2248.25708  | 3 | 685.0209351 | 685.0213542 |
| ASESGKLWGGR                | Q91YI0 | 0          | N-term +42.01 Da, K +28.03 Da,            | 2251.644043 | 4 | 573.5300293 | 573.2774778 |
| AHYHDNYGKNDEVEFVR          | P25688 | 0          | N-term +42.01 Da, K +28.03 Da,            | 2256.554688 | 3 | 764.3699951 | 764.0342116 |



|                               |        |            |                                           |             |   |             |             |
|-------------------------------|--------|------------|-------------------------------------------|-------------|---|-------------|-------------|
| AELTNYKDAASNR                 | Q8R4U7 | 0          | N-term +42.01 Da, K +28.03 Da,            | 2260.150146 | 3 | 795.3900146 | 795.3969275 |
| MDGEDDSNLVIKRR                | Q91WE2 | 0          | N-term +42.01 Da, K +28.03 Da,            | 2260.584473 | 3 | 510.6499939 | 510.6468934 |
| SALLEKQEQQER                  | Q5SUE8 | 0          | N-term +42.01 Da, K +28.03 Da,            | 2265.771973 | 2 | 608.3099976 | 608.3018447 |
| EPDLSDDIKER                   | B5X0G2 | 0          | N-term +42.01 Da, K +28.03 Da,            | 2277.716797 | 2 | 608.8482666 | 608.8484304 |
| SLSHLYR                       | Q9ERA6 | 0.03930131 | N-term +42.01 Da,                         | 2280.79541  | 2 | 940.3900146 | 940.3897816 |
| SQAEFDKAAEEVKR                | P31786 | 0          | N-term +42.01 Da, K +28.03 Da,            | 2283.235596 | 2 | 533.7261353 | 533.7254384 |
| ADEEKLPPGWEKR                 | Q9QUR7 | 0          | N-term +42.01 Da, K +28.03 Da,            | 2292.105469 | 2 | 618.8200073 | 618.3169633 |
| SADAAAGEPLPR                  | P70441 | 0          | N-term +42.01 Da,                         | 2294.985596 | 2 | 798.8736572 | 798.8753383 |
| MQPASAKWYDRR                  | Q9R0Q7 | 0.00383772 | N-term +42.01 Da, K +28.03 Da,            | 2298.695068 | 2 | 618.3162842 | 618.3169633 |
| RSKEPAEKSTEELK                | Q8BM65 | 0.04198842 | N-term +42.01 Da, K +28.03 Da,            | 2307.793213 | 2 | 542.3299561 | 542.3296758 |
| ATKCTKCGPGYSTPLEAMKGR         | P17563 | 0          | N-term +42.01 Da, K +28.03 Da,C +57.02Da, | 2308.132813 | 3 | 549.2999878 | 548.6248177 |
| AALGEPVR                      | _sp Q6 | 0.00379816 | N-term +42.01 Da,                         | 2308.642334 | 2 | 608.8476563 | 608.8484304 |
| ATSASSHLNKGIKQMY              | P15105 | 0          | N-term +42.01 Da, K +28.03 Da,            | 2311.427246 | 3 | 614.3099976 | 613.6366177 |
| ATSASSHLNKGIKQMY              | P15105 | 0          | N-term +42.01 Da, K +28.03 Da,            | 2315.655762 | 2 | 634.2800293 | 634.2811097 |
| ATGANATPLDFPSKRR              | Q64213 | 0          | N-term +42.01 Da, K +28.03 Da,            | 2321.76709  | 2 | 417.7085876 | 417.7088618 |
| ALDPAEQHLR                    | Q9CPZ8 | 0          | N-term +42.01 Da,                         | 2325.037598 | 2 | 807.9500122 | 807.9517503 |
| AEVEETLKR                     | P62627 | 0          | N-term +42.01 Da, K +28.03 Da,            | 2333.80835  | 2 | 798.8800049 | 798.8753383 |
| GYEPQNSGDGVQNSEFK             | Q8R0T2 | 0          | N-term +42.01 Da, K +28.03 Da,            | 2335.261963 | 2 | 558.7865601 | 558.7927897 |
| SQAEFDKAAEEVKR                | P31786 | 0          | N-term +42.01 Da, K +28.03 Da,            | 2339.088135 | 2 | 608.8486328 | 608.8484304 |
| SDNGELEDKPPAPPVR              | Q8CIN4 | 0          | N-term +42.01 Da, K +28.03 Da,            | 2340.041016 | 3 | 685.3500366 | 685.0213542 |
| TKTYNDIDAVTR                  | Q6PD31 | 0.0128999  | N-term +42.01 Da, K +28.03 Da,            | 2342.567871 | 2 | 844.9199829 | 844.9261278 |
| SVSNEGLTLNNSRASKHIR           | Q8C1B1 | 0.0124031  | N-term +42.01 Da, K +28.03 Da,            | 2347.412842 | 3 | 764.3699951 | 764.0342116 |
| SSNISKASSPTTGTAPR             | Q6NZQ8 | 0.04202899 | N-term +42.01 Da, K +28.03 Da,            | 2348.997803 | 2 | 1139.939941 | 1139.41731  |
| ATSASSHLNKGIKQMY              | P15105 | 0          | N-term +42.01 Da, K +28.03 Da,            | 2349.470703 | 2 | 1139.430054 | 1139.41731  |
| NEVHTMLGQSTEIR                | P08226 | 0.00169779 | N-term +42.01 Da,                         | 2354.450439 | 2 | 542.3312378 | 542.3296758 |
| ATLQSEVKVDGEQKLSKNELKR        | Q99MN1 | 0.00114877 | N-term +42.01 Da, K +28.03 Da,            | 2355.626221 | 2 | 807.9519043 | 807.9517503 |
| MEMTSTSLKR                    | Q91VU7 | 0          | N-term +42.01 Da, K +28.03 Da,            | 2365.703125 | 2 | 705.8499756 | 705.3457293 |
| ADAAAGEPLPR                   | P70441 | 0.0073723  | N-term +42.01 Da,                         | 2365.96582  | 3 | 405.8999939 | 405.224036  |
| AQDGVLEKSVR                   | Q8CAK3 | 0          | N-term +42.01 Da, K +28.03 Da,            | 2369.734863 | 2 | 608.8499756 | 608.8484304 |
| SADAAAGEPLPR                  | P70441 | 0.00057803 | N-term +42.01 Da,                         | 2370.1875   | 2 | 610.835022  | 610.8353229 |
| AEVEETLKR                     | P62627 | 0          | N-term +42.01 Da, K +28.03 Da,            | 2375.23584  | 2 | 867.9099731 | 866.9210428 |
| SGDHLHNSQIEADFR               | Q04750 | 0          | N-term +42.01 Da,                         | 2380.140625 | 4 | 476.2799988 | 476.2784486 |
| SGDHLHNSQIEADFR               | Q04750 | 0          | N-term +42.01 Da,                         | 2380.366943 | 3 | 585.9892578 | 585.9877562 |
| SEKSVEAAAELSAKDLKEKKDKVEEKAGR | Q9D0J8 | 0          | N-term +42.01 Da, K +28.03 Da,            | 2380.78418  | 2 | 601.2848511 | 601.2851401 |
| ATDELASKLSR                   | Q9D8Y0 | 0          | N-term +42.01 Da, K +28.03 Da,            | 2382.922119 | 3 | 635.039978  | 634.7021726 |
| LPGVSDICKN                    | Q61207 | 0.00059312 | N-term +42.01 Da, K +28.03 Da,C +57.02Da, | 2383.475342 | 3 | 522.9799805 | 522.6506378 |
| SQAEFDKAAEEVKR                | P31786 | 0.03373016 | N-term +42.01 Da, K +28.03 Da,            | 2385.207031 | 2 | 542.3304443 | 542.3296758 |
| AGSEEQWPR                     | Q8VE09 | 0          | N-term +42.01 Da,                         | 2385.784912 | 3 | 634.7020264 | 634.7021726 |
| SQAEFDKAAEEVKR                | P31786 | 0          | N-term +42.01 Da, K +28.03 Da,            | 2388.070068 | 2 | 733.3599854 | 732.857516  |
| MEDEVVR                       | P10711 | 0.0058698  | N-term +42.01 Da,                         | 2389.164307 | 3 | 607.6785278 | 607.6791452 |

|                         |        |            |                                           |             |   |             |             |
|-------------------------|--------|------------|-------------------------------------------|-------------|---|-------------|-------------|
| AEGGQAQQPPQLGPGAAAR     | Q8BP71 | 0          | N-term +42.01 Da,                         | 2391.507568 | 2 | 951.5499878 | 951.5496207 |
| MQVLTKR                 | Q62264 | 0.00891453 | N-term +42.01 Da, K +28.03 Da,            | 2392.88916  | 2 | 911.0100098 | 911.0150796 |
| SDNGELEDKPPAPPVR        | Q8CIN4 | 0          | N-term +42.01 Da, K +28.03 Da,            | 2394.353271 | 3 | 729.4199829 | 729.4192202 |
| SDNGELEDKPPAPPVR        | Q8CIN4 | 0          | N-term +42.01 Da, K +28.03 Da,            | 2394.522461 | 2 | 783.4699707 | 783.4723184 |
| SQAEDKAAEEVKR           | P31786 | 0          | N-term +42.01 Da, K +28.03 Da,            | 2403.561523 | 2 | 601.8252563 | 600.8327804 |
| SDAAVDTSSSEITTK         | P26350 | 0          | N-term +42.01 Da, K +28.03 Da,            | 2414.056885 | 3 | 522.651001  | 522.6506378 |
| MMTSVGTNR               | Q80X50 | 0          | N-term +42.01 Da,                         | 2417.086914 | 4 | 586.8302612 | 586.8297064 |
| SQAEDKAAEEVKR           | P31786 | 0          | N-term +42.01 Da, K +28.03 Da,            | 2419.043945 | 3 | 682.3300171 | 682.3359962 |
| ANLEKAQSELGAADEAAR      | Q9D3D9 | 0          | N-term +42.01 Da, K +28.03 Da,            | 2419.605225 | 2 | 732.8599854 | 732.857516  |
| ATLQSEVVKVDGEQKLSKNELKR | Q99MN1 | 0          | N-term +42.01 Da, K +28.03 Da,            | 2419.769775 | 2 | 489.7376099 | 489.7372939 |
| MEPSGGGLGPR             | O08808 | 0.03648915 | N-term +42.01 Da,                         | 2419.929443 | 2 | 608.8499756 | 608.8484304 |
| SESPVGPKPTMLR           | Q5SSZ5 | 0          | N-term +42.01 Da, K +28.03 Da,            | 2421.17334  | 2 | 834.8900146 | 834.8915645 |
| QNYSTEVEAAVNR           | P29391 | 0          | N-term +42.01 Da,                         | 2422.411621 | 3 | 607.6791992 | 607.6791452 |
| SQAEDKAAEEVKR           | P31786 | 0          | N-term +42.01 Da, K +28.03 Da,            | 2424.840576 | 2 | 553.2841797 | 552.7752651 |
| ATLQSEVVKVDGEQKLSKN     | Q99MN1 | 0.00840778 | N-term +42.01 Da, K +28.03 Da,            | 2431.092773 | 2 | 571.8099976 | 570.7984062 |
| ALSDADVQKQIK            | P50518 | 0          | N-term +42.01 Da, K +28.03 Da,            | 2432.363525 | 2 | 589.2999878 | 589.3016472 |
| AFKDTGKTPVEPEVAIHR      | P60867 | 0.00636605 | N-term +42.01 Da, K +28.03 Da,            | 2433.308838 | 2 | 713.3803101 | 713.379572  |
| ATEGMILTNHDHQIR         | Q8BUV3 | 0          | N-term +42.01 Da,                         | 2434.697021 | 2 | 752.364563  | 751.3750185 |
| AGLNSLEAVKR             | Q6IRU2 | 0.00587607 | N-term +42.01 Da, K +28.03 Da,            | 2436.29541  | 2 | 713.8800049 | 713.379572  |
| MTSQIRQNYSTEVEAAVNR     | P29391 | 0          | N-term +42.01 Da,                         | 2441.300537 | 3 | 612.3200073 | 611.9891024 |
| LVEPGSPAESGLLAGDR       | P70441 | 0          | N-term +42.01 Da, K +28.03 Da,            | 2446.42334  | 4 | 534.7800293 | 534.2788173 |
| SQAEDKAAEEVKR           | P31786 | 0          | N-term +42.01 Da, K +28.03 Da,            | 2449.628418 | 3 | 569.2961426 | 569.2967011 |
| SQAEDKAAEEVKR           | P31786 | 0          | N-term +42.01 Da, K +28.03 Da,            | 2450.620361 | 2 | 608.8499756 | 608.8484304 |
| NCLSGQAEDKAAEEVKR       | F6WUQ1 | 0          | N-term +42.01 Da, K +28.03 Da,C +57.02Da, | 2451.256592 | 2 | 714.8099976 | 714.8066347 |
| ANLEKAQSELGAADEAAR      | Q9D3D9 | 0          | N-term +42.01 Da, K +28.03 Da,            | 2454.111328 | 4 | 667.8699951 | 667.8648777 |
| AGKPVLYFNAR             | P10648 | 0          | N-term +42.01 Da, K +28.03 Da,            | 2470.22583  | 3 | 722         | 721.6678572 |
| AGGEGVTLGQPHLSR         | Q9Z0N1 | 0          | N-term +42.01 Da,                         | 2471.126465 | 4 | 541.75      | 541.502712  |
| AGGEGVTLGQPHLSR         | Q9Z0N1 | 0.00278396 | N-term +42.01 Da,                         | 2471.201904 | 3 | 507.2900085 | 507.291221  |
| SQAEDKAAEEVKR           | P31786 | 0          | N-term +42.01 Da, K +28.03 Da,            | 2472.200439 | 3 | 611.9888306 | 611.9891024 |
| SQAEDKAAEEVKR           | P31786 | 0          | N-term +42.01 Da, K +28.03 Da,            | 2472.608398 | 2 | 578.850769  | 578.8504414 |
| SLLNKPKSEMTPPEELQKR     | P62317 | 0          | N-term +42.01 Da, K +28.03 Da,            | 2478.368896 | 2 | 917.4799805 | 917.4800154 |
| NCLSGQAEDKAAEEVKR       | F6WUQ1 | 0          | N-term +42.01 Da, K +28.03 Da,C +57.02Da, | 2479.038574 | 2 | 694.8699951 | 694.8726345 |
| ARELPAEDKAAEEVKR        | Q4VWZ5 | 0.00169683 | N-term +42.01 Da, K +28.03 Da,            | 2481.296143 | 3 | 446.2663574 | 446.2660126 |
| AQNPSNMEPLR             | Q91W19 | 0          | N-term +42.01 Da,                         | 2485.576904 | 4 | 668.1199951 | 667.8648777 |
| AAAVSGVVR               | Q8BR90 | 0          | N-term +42.01 Da,                         | 2488.93335  | 3 | 425.5599976 | 425.5569093 |
| AGKPVLYFDGR             | P30115 | 0          | N-term +42.01 Da, K +28.03 Da,            | 2492.026855 | 2 | 1082.5      | 1081.998148 |
| SQAEDKAAEEVKR           | P31786 | 0          | N-term +42.01 Da, K +28.03 Da,            | 2492.649658 | 2 | 812.8900146 | 812.8873366 |
| SQAEDKAAEEVKR           | P31786 | 0          | N-term +42.01 Da, K +28.03 Da,            | 2496.199951 | 3 | 567.3005981 | 567.6454414 |
| ATDMSQGELIHPK           | Q3TEA8 | 0          | N-term +42.01 Da, K +28.03 Da,            | 2501.692139 | 4 | 541.5021973 | 541.502712  |
| TSPEGAQNKEIDCLSPQAQR    | Q3UZ39 | 0          | N-term +42.01 Da, K +28.03 Da,C +57.02Da, | 2501.767578 | 3 | 721.6669312 | 721.6678572 |

|                               |        |            |                                           |             |   |             |             |
|-------------------------------|--------|------------|-------------------------------------------|-------------|---|-------------|-------------|
| SEKSVEAAAELSAK                | Q9D0J8 | 0          | N-term +42.01 Da, K +28.03 Da,            | 2502.920654 | 3 | 611.987854  | 611.9891024 |
| TSPEGAQNKEIDCLSPAQR           | Q3UZ39 | 0          | N-term +42.01 Da, K +28.03 Da,C +57.02Da, | 2503.169189 | 3 | 646.3200073 | 645.6595338 |
| TSPEGAQNKEIDCLSPAQR           | Q3UZ39 | 0          | N-term +42.01 Da, K +28.03 Da,C +57.02Da, | 2514.004639 | 2 | 443.2424622 | 443.243069  |
| AGLNSLEAVKR                   | Q6IRU2 | 0          | N-term +42.01 Da, K +28.03 Da,            | 2522.511719 | 2 | 1082.5      | 1081.998148 |
| AAAGSAAVSGAGTPVAGPTGR         | Q9Z266 | 0          | N-term +42.01 Da,                         | 2522.662842 | 3 | 561.2999878 | 560.9686957 |
| AAAGSAAVSGAGTPVAGPTGR         | Q9Z266 | 0          | N-term +42.01 Da,                         | 2528.071045 | 2 | 615.8112793 | 615.3133662 |
| SEKSVEAAAELSAK                | Q9D0J8 | 0.00275938 | N-term +42.01 Da, K +28.03 Da,            | 2532.328613 | 4 | 541.5       | 541.502712  |
| SSSPVNVKLLKLVSELKEELKRR       | Q8VEK3 | 0          | N-term +42.01 Da, K +28.03 Da,            | 2532.946777 | 3 | 722         | 721.6678572 |
| SQAEFDKAAEEVKR                | P31786 | 0          | N-term +42.01 Da, K +28.03 Da,            | 2533.887939 | 2 | 509.7600098 | 509.7618236 |
| AAAAAAGPEMVR                  | P63085 | 0          | N-term +42.01 Da,                         | 2536.389893 | 2 | 974.9492188 | 973.9416498 |
| ATDISESSGADCKGDTKNSAKLDADYPLR | Q9CQJ6 | 0          | N-term +42.01 Da, K +28.03 Da,C +57.02Da, | 2537.574707 | 2 | 853.9154663 | 853.4014227 |
| ATPEASGSSEKVEGSEPSVTYYR       | Q9CQX2 | 0          | N-term +42.01 Da, K +28.03 Da,            | 2538.315674 | 2 | 756.3459473 | 755.357015  |
| AGVGAADR                      | Q5F285 | 0.00114811 | N-term +42.01 Da,                         | 2545.583252 | 2 | 443.2434082 | 443.243069  |
| ATPEASGSSEKVEGSEPSVTYYR       | Q9CQX2 | 0          | N-term +42.01 Da, K +28.03 Da,            | 2551.453369 | 2 | 589.8212891 | 589.8211607 |
| SEKSVEAAAELSAK                | Q9D0J8 | 0          | N-term +42.01 Da, K +28.03 Da,            | 2556.519043 | 3 | 612.3200073 | 611.9891024 |
| MNQEKLAKLQAQVR                | Q64152 | 0          | N-term +42.01 Da, K +28.03 Da,            | 2560.459717 | 3 | 569.2999878 | 569.2967011 |
| ISVYYNEATGGKYVPR              | P99024 | 0          | N-term +42.01 Da, K +28.03 Da,            | 2560.622803 | 2 | 672.2800293 | 671.7882446 |
| SSGALLPKPQMR                  | Q9CPQ1 | 0.02434077 | N-term +42.01 Da, K +28.03 Da,            | 2562.120605 | 2 | 567.289978  | 567.2829231 |
| AAAATMAAAAR                   | Q8C754 | 0          | N-term +42.01 Da,                         | 2563.474854 | 3 | 534.3018188 | 534.3016747 |
| MEEAELVKGR                    | Q9JHU2 | 0          | N-term +42.01 Da, K +28.03 Da,            | 2564.195068 | 2 | 775.9299927 | 775.9304838 |
| ENIIDLSNANR                   | B5X0G2 | 0          | N-term +42.01 Da,                         | 2565.113525 | 3 | 517.6221924 | 517.622748  |
| ENYGELADCCTKQEPER             | P07724 | 0          | N-term +42.01 Da, K +28.03 Da,C +57.02Da, | 2565.270752 | 2 | 800.9500122 | 800.9488739 |
| ASGADSKGDDLSTAILKQKN          | Q01853 | 0          | N-term +42.01 Da, K +28.03 Da,            | 2572.162109 | 2 | 795.3900146 | 794.3877921 |
| MEEAELVKGR                    | Q9JHU2 | 0          | N-term +42.01 Da, K +28.03 Da,            | 2578.131836 | 2 | 760.4313965 | 760.4331933 |
| VISLSGEHSIIGR                 | P08228 | 0          | N-term +42.01 Da,                         | 2587.372559 | 2 | 556.2861938 | 556.2857996 |
| AASKVKQDMPPPGGYGPIDYKR        | Q9ERS2 | 0          | N-term +42.01 Da, K +28.03 Da,            | 2587.447998 | 3 | 611.9890747 | 611.9891024 |
| ENYGELADCCTKQEPER             | P07724 | 0          | N-term +42.01 Da, K +28.03 Da,C +57.02Da, | 2589.52832  | 2 | 917.9799805 | 917.4800154 |
| SQAEFDKAAEEVKR                | P31786 | 0          | N-term +42.01 Da, K +28.03 Da,            | 2591.189697 | 3 | 866.789978  | 866.4549993 |
| MQPKVPQLR                     | Q88908 | 0          | N-term +42.01 Da, K +28.03 Da,            | 2592.112061 | 4 | 650.0900269 | 650.0930686 |
| ATPEASGSSEKVEGSEPSVTYYR       | Q9CQX2 | 0          | N-term +42.01 Da, K +28.03 Da,            | 2593.989502 | 3 | 569.2999878 | 569.2967011 |
| ATPEASGSSEKVEGSEPSVTYYR       | Q9CQX2 | 0          | N-term +42.01 Da, K +28.03 Da,            | 2594.065186 | 3 | 491.9474792 | 491.2874767 |
| AAAAAAVAGAGR                  | E9QNR6 | 0.00114416 | N-term +42.01 Da,                         | 2595.315674 | 3 | 534.3009033 | 534.3016747 |
| ATDELASKLSR                   | Q9D8Y0 | 0          | N-term +42.01 Da, K +28.03 Da,            | 2597.708252 | 4 | 542         | 541.502712  |
| METASTPEATGTGKY               | Q8CHP5 | 0          | N-term +42.01 Da, K +28.03 Da,            | 2601.938721 | 3 | 507.2907715 | 507.291221  |
| MNQEKLAKLQAQVR                | Q64152 | 0          | N-term +42.01 Da, K +28.03 Da,            | 2608.357422 | 2 | 760.4320679 | 760.4331933 |
| SDKPDMAEIEKFDKSK              | P20065 | 0          | N-term +42.01 Da, K +28.03 Da,            | 2609.643066 | 3 | 722         | 721.6678572 |
| MNQEKLAKLQAQVR                | Q64152 | 0          | N-term +42.01 Da, K +28.03 Da,            | 2612.506348 | 4 | 635.0700073 | 634.8234722 |
| SDKPDMAEIEKFDKSK              | P20065 | 0          | N-term +42.01 Da, K +28.03 Da,            | 2612.657471 | 2 | 587.2700195 | 586.2669391 |
| SDKPDMAEIEKFDKSK              | P20065 | 0          | N-term +42.01 Da, K +28.03 Da,            | 2616.965088 | 2 | 609.3162842 | 609.3172973 |
| MEVSQLAASGTDGVR               | Q99M08 | 0          | N-term +42.01 Da,                         | 2618.514648 | 4 | 373.480011  | 372.9841657 |

|                         |        |            |                                           |             |   |             |             |
|-------------------------|--------|------------|-------------------------------------------|-------------|---|-------------|-------------|
| AASKVKQDMPPPGGYGPIDYKR  | Q9ERS2 | 0          | N-term +42.01 Da, K +28.03 Da,            | 2620.335938 | 3 | 675.6900024 | 675.6906113 |
| HVGDLGNVTAGKDGVANVSIEDR | P08228 | 0          | N-term +42.01 Da, K +28.03 Da,            | 2626.881348 | 2 | 556.2854004 | 556.2857996 |
| MEEAELVKGR              | Q9JHU2 | 0          | N-term +42.01 Da, K +28.03 Da,            | 2627.032227 | 2 | 566.2999878 | 565.7936552 |
| TTKDPSEHPSVTLFR         | Q99JW2 | 0          | N-term +42.01 Da, K +28.03 Da,            | 2629.39917  | 2 | 509.7613525 | 509.7618236 |
| ATDELASKLSR             | Q9D8Y0 | 0          | N-term +42.01 Da, K +28.03 Da,            | 2629.722412 | 4 | 541.7476196 | 541.502712  |
| MNQEKLAKLQAQVR          | Q64152 | 0          | N-term +42.01 Da, K +28.03 Da,            | 2636.865479 | 2 | 1196.949951 | 1196.930782 |
| ATSASSHLNKGIKQMYM       | P15105 | 0          | N-term +42.01 Da, K +28.03 Da,            | 2638.950439 | 3 | 611.9899902 | 611.9891024 |
| ASLVPLKEK               | P56135 | 0.00058824 | N-term +42.01 Da, K +28.03 Da,            | 2639.2771   | 3 | 839.4099731 | 839.0797098 |
| MESAIAEGGASR            | Q62448 | 0          | N-term +42.01 Da,                         | 2648.225098 | 2 | 609.3164673 | 609.3172973 |
| ATSASSHLNKGIKQMYM       | P15105 | 0.00634921 | N-term +42.01 Da, K +28.03 Da,            | 2652.741943 | 2 | 1406.01001  | 1404.989755 |
| ADKEAAFDDAVEER          | Q60972 | 0          | N-term +42.01 Da, K +28.03 Da,            | 2655.77832  | 2 | 707.8115845 | 707.8137391 |
| HGNPVDICIAKPR           | P32261 | 0          | N-term +42.01 Da, K +28.03 Da,C +57.02Da, | 2658.082275 | 2 | 556.2850342 | 556.2857996 |
| SQAEFDKAAEEVKR          | P31786 | 0          | N-term +42.01 Da, K +28.03 Da,            | 2658.843506 | 3 | 620.6599731 | 619.9998901 |
| AEMGSKGVTAGKIASNVQKLLTR | O08539 | 0          | N-term +42.01 Da, K +28.03 Da,            | 2659.483154 | 2 | 1082.48999  | 1081.998148 |
| AATLSVEPTGR             | Q8BWN8 | 0          | N-term +42.01 Da,                         | 2660.073242 | 4 | 541.7486572 | 541.502712  |
| ASGADSKGDDLSTAILKQK     | Q01853 | 0          | N-term +42.01 Da, K +28.03 Da,            | 2660.155762 | 2 | 509.7600098 | 509.7618236 |
| ADKEAAFDDAVEER          | Q60972 | 0          | N-term +42.01 Da, K +28.03 Da,            | 2660.561035 | 2 | 716.3599854 | 715.3677165 |
| AGKPVLYHFDGR            | P30115 | 0          | N-term +42.01 Da, K +28.03 Da,            | 2661.337158 | 2 | 1082.98999  | 1081.998148 |
| AEPGTGSGDPAFGPGASESGTR  | Q80YR5 | 0          | N-term +42.01 Da,                         | 2668.252686 | 4 | 635.0700073 | 634.8234722 |
| MESAIAEGGASR            | Q62448 | 0          | N-term +42.01 Da,                         | 2670.512939 | 3 | 611.9888306 | 611.9891024 |
| ADKEAAFDDAVEER          | Q60972 | 0          | N-term +42.01 Da, K +28.03 Da,            | 2672.638428 | 3 | 721.994812  | 721.6678572 |
| SHPSWLPKSTGEPLGHVPAR    | Q8BFW7 | 0          | N-term +42.01 Da, K +28.03 Da,            | 2675.837402 | 2 | 917.4794922 | 917.4800154 |
| SQAEFDKAAEEVKR          | P31786 | 0          | N-term +42.01 Da, K +28.03 Da,            | 2678.834961 | 2 | 609.3167114 | 609.3172973 |
| AEDIKTKIKNYKTAPFDSR     | P56391 | 0          | N-term +42.01 Da, K +28.03 Da,            | 2679.223877 | 3 | 581.9847412 | 581.3247021 |
| AGLNSLEAVKR             | Q6IRU2 | 0          | N-term +42.01 Da, K +28.03 Da,            | 2682.208984 | 3 | 846.4299927 | 846.0955374 |
| SHPSWLPKSTGEPLGHVPAR    | Q8BFW7 | 0          | N-term +42.01 Da, K +28.03 Da,            | 2684.288086 | 3 | 551.6240234 | 551.6262697 |
| SQGDNSNPAIPHAAEDIQGDDR  | Q61206 | 0          | N-term +42.01 Da,                         | 2685.39624  | 3 | 775.0100098 | 775.0155407 |
| ASGVQVADEVCR            | Q9R0P5 | 0          | N-term +42.01 Da, C +57.02Da,             | 2691.994385 | 4 | 542         | 541.502712  |
| SEKSVEAAAELSAKDLKEKK    | Q9D0J8 | 0          | N-term +42.01 Da, K +28.03 Da,            | 2701.316895 | 3 | 611.9889526 | 611.9891024 |
| AEDIKTKIKNYKTAPFDSR     | P56391 | 0          | N-term +42.01 Da, K +28.03 Da,            | 2702.616211 | 2 | 797.4199829 | 796.4305143 |
| AGKPVLYHFDGR            | P30115 | 0          | N-term +42.01 Da, K +28.03 Da,            | 2703.437988 | 2 | 1254.959961 | 1254.444254 |
| MQPASAKWYDR             | Q9R0Q7 | 0          | N-term +42.01 Da, K +28.03 Da,            | 2706.272461 | 3 | 591.3300171 | 591.3282238 |
| ALKNVVPR                | Q60787 | 0.04599904 | N-term +42.01 Da, K +28.03 Da,            | 2707.943848 | 3 | 594.9699707 | 594.6307431 |
| AGKPVLYHFDGR            | P30115 | 0          | N-term +42.01 Da, K +28.03 Da,            | 2708.019287 | 3 | 491.9714966 | 491.9714884 |
| AKTEEMVQTEEMETPR        | Q60739 | 0          | N-term +42.01 Da, K +28.03 Da,            | 2709.951416 | 3 | 569.289978  | 569.2967011 |
| AGLNSLEAVKR             | Q6IRU2 | 0          | N-term +42.01 Da, K +28.03 Da,            | 2710.701172 | 3 | 839.0800171 | 839.0797098 |
| ENIIDLSNANR             | B5X0G2 | 0.01895492 | N-term +42.01 Da,                         | 2715.044922 | 2 | 596.3103638 | 596.3094722 |
| SSKPKSLEIIGAPFSKGQPR    | Q61176 | 0          | N-term +42.01 Da, K +28.03 Da,            | 2715.611816 | 4 | 411.480011  | 411.4757679 |
| AAPSEPAGFPR             | P56213 | 0          | N-term +42.01 Da,                         | 2716.622559 | 3 | 551.6259766 | 551.6262697 |
| SDKPDMAEIEKFDKSKLK      | P20065 | 0          | N-term +42.01 Da, K +28.03 Da,            | 2716.802734 | 4 | 854.2399902 | 853.7381813 |

|                               |        |            |                                            |             |   |             |             |
|-------------------------------|--------|------------|--------------------------------------------|-------------|---|-------------|-------------|
| SHPSWLPPKSTGEPLGHVPAR         | Q8BFW7 | 0          | N-term +42.01 Da, K +28.03 Da,             | 2720.44165  | 3 | 573.2999878 | 573.2978247 |
| AQPGPAPQPDVSLQQR              | Q35551 | 0          | N-term +42.01 Da,                          | 2720.707275 | 3 | 695.3599854 | 694.6882583 |
| AVAAAAVAAPAGGGGAR             | Q99L88 | 0          | N-term +42.01 Da,                          | 2721.573975 | 2 | 886.9899902 | 886.4886975 |
| MQPASAKWYDR                   | Q9R0Q7 | 0          | N-term +42.01 Da, K +28.03 Da,             | 2721.649414 | 4 | 484.0064087 | 484.006427  |
| AAAAAMAEQEGAR                 | Q9D1H7 | 0          | N-term +42.01 Da,                          | 2722.317871 | 2 | 764.9000244 | 764.9019237 |
| SGEVPPNINIKEPR                | Q99JR1 | 0.00384827 | N-term +42.01 Da, K +28.03 Da,             | 2723.72876  | 3 | 645.3300171 | 645.0061439 |
| MEAKGGTVKAASGFNATEDAQTLR      | P97429 | 0          | N-term +42.01 Da, K +28.03 Da,             | 2730.068604 | 2 | 859.4400024 | 859.4430988 |
| GDAPSPEEKHLHLITR              | Q91WQ3 | 0          | N-term +42.01 Da, K +28.03 Da,             | 2734.439453 | 2 | 937.460022  | 936.9559484 |
| AGLNSLEAVKR                   | Q6IRU2 | 0          | N-term +42.01 Da, K +28.03 Da,             | 2734.67041  | 3 | 611.9859009 | 611.9891024 |
| SQAEFDKAAEEVKR                | P31786 | 0          | N-term +42.01 Da, K +28.03 Da,             | 2736.071045 | 3 | 456.9200134 | 456.2514861 |
| ASLKGDIVELNKR                 | E9PW13 | 0          | N-term +42.01 Da, K +28.03 Da,             | 2736.42041  | 2 | 598.7973633 | 598.7989377 |
| SVAFAPR                       | Q62280 | 0.01391036 | N-term +42.01 Da,                          | 2736.761719 | 2 | 785.3539429 | 785.3554373 |
| SHPSWLPPKSTGEPLGHVPAR         | Q8BFW7 | 0          | N-term +42.01 Da, K +28.03 Da,             | 2739.52417  | 2 | 937.9500122 | 936.9559484 |
| GTPKQPSLAPAHALGLR             | Q61337 | 0          | N-term +42.01 Da, K +28.03 Da,             | 2740.424561 | 2 | 609.3164063 | 609.3172973 |
| ATVAATTKVPEIR                 | Q9WTM5 | 0          | N-term +42.01 Da, K +28.03 Da,             | 2744.885986 | 2 | 761.8800049 | 761.8784486 |
| MENQLTKSVEER                  | Q9DC50 | 0          | N-term +42.01 Da, K +28.03 Da,             | 2746.821777 | 2 | 596.3078003 | 596.3094722 |
| MVWEGLNVVKTGR                 | P15532 | 0.02139582 | N-term +42.01 Da, K +28.03 Da,             | 2748.842041 | 4 | 541.75      | 541.502712  |
| SDAAVDTSEITTKDLK              | P26350 | 0          | N-term +42.01 Da, K +28.03 Da,             | 2748.919678 | 2 | 590.7766113 | 590.7776712 |
| ADFDTYDDR                     | Q9WUK2 | 0          | N-term +42.01 Da,                          | 2750.865479 | 2 | 572.8140259 | 572.8140563 |
| QNYSTEVEAAVNR                 | P29391 | 0          | N-term +42.01 Da,                          | 2751.95752  | 3 | 477.2600098 | 477.2577398 |
| MEELGAAASGAGGGGGGEEHGGGR      | O70566 | 0          | N-term +42.01 Da,                          | 2756.397461 | 2 | 784.8499756 | 784.8469222 |
| ADVSVDQSKLPGVKEVCR            | Q810U5 | 0          | N-term +42.01 Da, K +28.03 Da, C +57.02Da, | 2759.619873 | 2 | 631.8081665 | 630.8162732 |
| ATCADILR                      | Q8K268 | 0.0027933  | N-term +42.01 Da, C +57.02Da,              | 2765.643555 | 4 | 462         | 461.5044573 |
| SGLVLGQR                      | Q9DB55 | 0.00638298 | N-term +42.01 Da,                          | 2765.799805 | 2 | 696.8587646 | 696.8562638 |
| SQAEFDKAAEEVK                 | P31786 | 0          | N-term +42.01 Da, K +28.03 Da,             | 2768.834961 | 2 | 700.8699951 | 700.8726345 |
| SDFMAYER                      | Q3TRM4 | 0.03364671 | N-term +42.01 Da,                          | 2770.134766 | 2 | 427.7399902 | 427.7401619 |
| AVPPTYADLGKSAR                | Q60932 | 0          | N-term +42.01 Da, K +28.03 Da,             | 2771.515381 | 3 | 628.2819214 | 628.2820027 |
| MEELGAAASGAGGGGGGEEHGGGR      | O70566 | 0          | N-term +42.01 Da,                          | 2773.621094 | 2 | 787.4400024 | 786.4343472 |
| MEELGAAASGAGGGGGGEEHGGGR      | O70566 | 0          | N-term +42.01 Da,                          | 2777.265869 | 2 | 721.8631592 | 721.865341  |
| ASLPPHAGPATPLSPTR             | P21619 | 0          | N-term +42.01 Da,                          | 2781.352051 | 2 | 572.8134155 | 572.8140563 |
| PFKCSVCEKTYK                  | Q9JLZ6 | 0.03727317 | N-term +42.01 Da, K +28.03 Da, C +57.02Da, | 2781.577148 | 4 | 542         | 541.502712  |
| ADFDTYDDR                     | Q9WUK2 | 0          | N-term +42.01 Da,                          | 2784.932129 | 3 | 679.3400269 | 678.6823386 |
| SEKSVEAAAELSAKDLKEKKDKVEEKAGR | Q9D0J8 | 0          | N-term +42.01 Da, K +28.03 Da,             | 2787.911621 | 2 | 627.3099976 | 627.3150516 |
| TMDKSELVQAKLAEQAER            | Q9CQV8 | 0          | N-term +42.01 Da, K +28.03 Da,             | 2790.069336 | 2 | 473.2791138 | 473.2811395 |
| TMDKSELVQAKLAEQAER            | Q9CQV8 | 0          | N-term +42.01 Da, K +28.03 Da,             | 2793.218994 | 3 | 582.6411743 | 581.969708  |
| SEKSVEAAAELSAKDLKEKKDKVEEKAGR | Q9D0J8 | 0          | N-term +42.01 Da, K +28.03 Da,             | 2797.931885 | 3 | 569.2954712 | 569.2967011 |
| SASSLLEQR                     | E9PW90 | 0.00114745 | N-term +42.01 Da,                          | 2798.18335  | 2 | 717.8499756 | 716.8404773 |
| SEKSVEAAAELSAKDLKEKKDKVEEKAGR | Q9D0J8 | 0          | N-term +42.01 Da, K +28.03 Da,             | 2800.408691 | 2 | 598.7982178 | 598.7989377 |
| HVGDLGNVTAGKDGVANVSIEDR       | P08228 | 0          | N-term +42.01 Da, K +28.03 Da,             | 2800.484131 | 2 | 700.8722534 | 700.8726345 |
| ADVSVDQSKLPGVKEVCR            | Q810U5 | 0          | N-term +42.01 Da, K +28.03 Da, C +57.02Da, | 2803.724121 | 3 | 525.2975464 | 524.6253236 |

|                                     |        |            |                                           |             |   |             |             |
|-------------------------------------|--------|------------|-------------------------------------------|-------------|---|-------------|-------------|
| SQAEFDKAAEEVK                       | P31786 | 0          | N-term +42.01 Da, K +28.03 Da,            | 2803.950439 | 3 | 477.256958  | 477.2577398 |
| SGLVLGQR                            | Q9DBS5 | 0.00638298 | N-term +42.01 Da,                         | 2806.693115 | 2 | 698.4000244 | 698.4013616 |
| AVPPTYADLGKSAR                      | Q60932 | 0          | N-term +42.01 Da, K +28.03 Da,            | 2807.023682 | 2 | 631.3400269 | 630.8433454 |
| SEKSVEAAAELSAKDLKEKKDKVEEKAGR       | Q9D0J8 | 0          | N-term +42.01 Da, K +28.03 Da,            | 2807.425781 | 2 | 715.3804321 | 715.3829715 |
| SEKSVEAAAELSAKDLKEKKDKVEEKAGR       | Q9D0J8 | 0          | N-term +42.01 Da, K +28.03 Da,            | 2808.617676 | 2 | 963.4199829 | 963.4292323 |
| SEKSVEAAAELSAKDLKEKKDKVEEKAGR       | Q9D0J8 | 0          | N-term +42.01 Da, K +28.03 Da,            | 2809.868896 | 2 | 879.43573   | 878.4472274 |
| SSIKVECVLR                          | Q64374 | 0          | N-term +42.01 Da, K +28.03 Da,C +57.02Da, | 2810.666504 | 2 | 461.25      | 461.2506965 |
| AVPPTYADLGKSAR                      | Q60932 | 0          | N-term +42.01 Da, K +28.03 Da,            | 2810.760254 | 2 | 861.9400024 | 860.9518114 |
| LPGTCLQTELER                        | Q9WV07 | 0.03844282 | N-term +42.01 Da, C +57.02Da,             | 2812.054932 | 2 | 896.4500122 | 895.9496029 |
| SEKSVEAAAELSAKDLKEKKDKVEEKAGR       | Q9D0J8 | 0          | N-term +42.01 Da, K +28.03 Da,            | 2814.539063 | 2 | 895.9500122 | 895.9496029 |
| MDKNELVQKAKLAEQAER                  | P63101 | 0          | N-term +42.01 Da, K +28.03 Da,            | 2821.012695 | 2 | 473.2806091 | 473.2811395 |
| MDKNELVQKAKLAEQAER                  | P63101 | 0          | N-term +42.01 Da, K +28.03 Da,            | 2821.272949 | 4 | 485.019989  | 485.0197512 |
| AGIAIKLAKDR                         | O08529 | 0          | N-term +42.01 Da, K +28.03 Da,            | 2822.681885 | 4 | 684.9299927 | 684.929489  |
| SEKSVEAAAELSAKDLKEKKDKVEEKAGR       | Q9D0J8 | 0          | N-term +42.01 Da, K +28.03 Da,            | 2824.461182 | 3 | 748.4099731 | 748.0873649 |
| AAAAATAAAAAAPSGGGGGGEEER            | D3Z7U4 | 0          | N-term +42.01 Da,                         | 2824.940674 | 3 | 913.5700073 | 912.9035598 |
| MYTITGPKSLVAQR                      | Q9CQB2 | 0          | N-term +42.01 Da, K +28.03 Da,            | 2829.532959 | 3 | 569.6300049 | 569.2967011 |
| MESTPFNR                            | Q9ERGO | 0          | N-term +42.01 Da,                         | 2843.573242 | 2 | 853.9400024 | 853.4414133 |
| AAAAATAAAAAAPSGGGGGGEEER            | D3Z7U4 | 0          | N-term +42.01 Da,                         | 2845.429688 | 4 | 697.1400146 | 696.6432861 |
| SDAAVDTSEITTKDLKEKKEVVEEAENGR       | P26350 | 0          | N-term +42.01 Da, K +28.03 Da,            | 2845.864258 | 2 | 861.9400024 | 860.9518114 |
| SEAFDCAKCNESLYGR                    | Q9R059 | 0          | N-term +42.01 Da, K +28.03 Da,C +57.02Da, | 2852.414307 | 3 | 476.5899963 | 475.9172722 |
| SSIKVECVLR                          | Q64374 | 0.00635257 | N-term +42.01 Da, K +28.03 Da,C +57.02Da, | 2853.525391 | 4 | 685.4299927 | 684.929489  |
| AVPPTYADLGKSAR                      | Q60932 | 0          | N-term +42.01 Da, K +28.03 Da,            | 2860.560303 | 2 | 446.7043152 | 446.7044076 |
| AGLNSLEAVKR                         | Q6IRU2 | 0.00586354 | N-term +42.01 Da, K +28.03 Da,            | 2861.695801 | 3 | 569.2966309 | 569.2967011 |
| SEKSVEAAAELSAKDLKEKKDKVEEKAGR       | Q9D0J8 | 0          | N-term +42.01 Da, K +28.03 Da,            | 2869.305664 | 2 | 822.4199829 | 822.4306508 |
| ALETVPKDLR                          | P63271 | 0          | N-term +42.01 Da, K +28.03 Da,            | 2873.261719 | 4 | 724.1400146 | 723.8892901 |
| SGVDIQIVGDDLTVTNPKR                 | P21550 | 0.01043297 | N-term +42.01 Da, K +28.03 Da,            | 2874.147949 | 2 | 853.4399414 | 853.4414133 |
| ASKEMFEDTVEER                       | Q60973 | 0          | N-term +42.01 Da, K +28.03 Da,            | 2874.946533 | 2 | 551.2509766 | 551.251623  |
| MEKTELIQKAKLAEQAER                  | P68254 | 0          | N-term +42.01 Da, K +28.03 Da,            | 2883.276123 | 2 | 513.7800293 | 513.7776101 |
| HVGDLGNVTAGKDGVANVSIEDR             | P08228 | 0.00276702 | N-term +42.01 Da, K +28.03 Da,            | 2885.270264 | 2 | 603.7497559 | 603.7507965 |
| ASKEMFEDTVEER                       | Q60973 | 0          | N-term +42.01 Da, K +28.03 Da,            | 2889.608154 | 2 | 880.4500122 | 879.4570634 |
| QNYSTEVEAAVNR                       | P29391 | 0          | N-term +42.01 Da,                         | 2890.525391 | 2 | 460.212677  | 460.2131203 |
| SDYNTGGPPPPPPAGGGGGAAGAGGGPPPPGAGDR | Q3U0V1 | 0          | N-term +42.01 Da,                         | 2894.056641 | 3 | 569.2958984 | 569.2967011 |
| SDAAVDTSEITTKDLKEKKEVVEEAENGR       | P26350 | 0.0005848  | N-term +42.01 Da, K +28.03 Da,            | 2905.799561 | 2 | 693.3200073 | 693.3219203 |
| MNFSGKYQ                            | P12710 | 0.00383562 | N-term +42.01 Da, K +28.03 Da,            | 2910.462158 | 3 | 593.2920532 | 593.293185  |
| AGLNSLEAVKR                         | Q6IRU2 | 0.00736454 | N-term +42.01 Da, K +28.03 Da,            | 2911.723877 | 2 | 889.4299927 | 889.4361392 |
| MESEQLFHR                           | P51791 | 0          | N-term +42.01 Da,                         | 2912.061035 | 3 | 698.3852539 | 698.3845097 |
| AALYGGVEGGGTR                       | Q9QZ08 | 0          | N-term +42.01 Da,                         | 2912.600342 | 2 | 853.9400024 | 853.4414133 |
| SDYNTGGPPPPPPAGGGGGAAGAGGGPPPPGAGDR | Q3U0V1 | 0          | N-term +42.01 Da,                         | 2916.031494 | 2 | 896.4400024 | 895.9496029 |
| VLSGEDKSNIKAAWGWK                   | P01942 | 0.00058685 | N-term +42.01 Da, K +28.03 Da,            | 2917.572754 | 3 | 481.6000061 | 481.6016179 |
| ASKEMFEDTVEER                       | Q60973 | 0          | N-term +42.01 Da, K +28.03 Da,            | 2918.529541 | 2 | 988         | 987.493032  |

|                                     |        |            |                                           |             |   |             |             |
|-------------------------------------|--------|------------|-------------------------------------------|-------------|---|-------------|-------------|
| ADKPDMGEIASFDKAK                    | Q6ZWY8 | 0          | N-term +42.01 Da, K +28.03 Da,            | 2920.696289 | 3 | 757.0599976 | 756.7254838 |
| QKVAPLGAELQESAR                     | Q00623 | 0          | N-term +42.01 Da, K +28.03 Da,            | 2922.394287 | 2 | 1047.069946 | 1047.073126 |
| SDYNTGGPPPPPPAGGGGGAAGAGGGPPPPGAGDR | Q3U0V1 | 0          | N-term +42.01 Da,                         | 2922.469727 | 2 | 578.3269043 | 578.3276648 |
| RVCLTTFNVQDGPDPQDR                  | P97493 | 0          | N-term +42.01 Da, C +57.02Da,             | 2922.62085  | 3 | 690.4299927 | 690.4279382 |
| SDKPDMAEIEKFDK                      | P20065 | 0          | N-term +42.01 Da, K +28.03 Da,            | 2922.878662 | 3 | 597.960022  | 597.6354941 |
| SDAAVDTSEITTKDLKEKKEVVEEAENGR       | P26350 | 0.00940439 | N-term +42.01 Da, K +28.03 Da,            | 2924.633057 | 3 | 569.2957153 | 569.2967011 |
| AAAPATLALDPQPQEKQKDASESSELSR        | Q91WG2 | 0          | N-term +42.01 Da, K +28.03 Da,            | 2926.546631 | 2 | 785.3400269 | 784.8469222 |
| MKKAADVNVTFEDQQKINKFAR              | E9Q6U4 | 0.00382723 | N-term +42.01 Da, K +28.03 Da,            | 2927.228516 | 2 | 1035.140015 | 1035.138269 |
| ADKPDMGEIASFDKAK                    | Q6ZWY8 | 0          | N-term +42.01 Da, K +28.03 Da,            | 2934.186523 | 2 | 762.8699951 | 761.860256  |
| HVGDLGNVTAGKDGVANVSIEDR             | P08228 | 0          | N-term +42.01 Da, K +28.03 Da,            | 2934.624023 | 4 | 518.0726318 | 518.0727728 |
| SEKSVEAAAELSAKDLKEK                 | Q9D0J8 | 0          | N-term +42.01 Da, K +28.03 Da,            | 2936.768066 | 2 | 1036.140015 | 1035.138269 |
| PFHERMEACFKQLK                      | Q8BUR4 | 0.03853659 | N-term +42.01 Da, K +28.03 Da,C +57.02Da, | 2940.704346 | 4 | 564.3200073 | 564.3173428 |
| SEKSVEAAAELSAKDLKEK                 | Q9D0J8 | 0          | N-term +42.01 Da, K +28.03 Da,            | 2941.76001  | 4 | 524.289978  | 524.0402014 |
| SEKSVEAAAELSAKDLKEK                 | Q9D0J8 | 0.00380642 | N-term +42.01 Da, K +28.03 Da,            | 2943.943604 | 2 | 649.8099976 | 649.8115222 |
| SSEEGKLF                            | O89086 | 0.03291771 | N-term +42.01 Da, K +28.03 Da,            | 2944.965088 | 3 | 752.4199829 | 752.0873649 |
| HVGDLGNVTAGKDGVANVSIEDR             | P08228 | 0          | N-term +42.01 Da, K +28.03 Da,            | 2945.300781 | 2 | 721.8983154 | 721.8987886 |
| SDAAVDTSEITTKDLKEKKEVVEEAENGR       | P26350 | 0.00279955 | N-term +42.01 Da, K +28.03 Da,            | 2946.578125 | 3 | 752.75      | 752.0873649 |
| TSQIRQNYSTEVEAAVNR                  | P29391 | 0          | N-term +42.01 Da,                         | 2947.587646 | 2 | 896.4400024 | 895.9496029 |
| ASLVPLKEKKLMEVK                     | P56135 | 0          | N-term +42.01 Da, K +28.03 Da,            | 2949.003418 | 3 | 481.6010742 | 481.6016179 |
| PRNLNPEKDRVETLR                     | F6UY70 | 0.02679474 | N-term +42.01 Da, K +28.03 Da,            | 2951.282471 | 3 | 559.289978  | 559.2931794 |
| LAELKSNPTLNEYHTR                    | Q00623 | 0          | N-term +42.01 Da, K +28.03 Da,            | 2953.554932 | 2 | 578.3275146 | 578.3276648 |
| TFNVQDGPDPQDR                       | P97493 | 0          | N-term +42.01 Da,                         | 2953.630371 | 3 | 690.7600098 | 690.4279382 |
| SDAAVDTSEITTKDLKEKKEVVEEAEN         | P26350 | 0          | N-term +42.01 Da, K +28.03 Da,            | 2954.873047 | 3 | 569.2965088 | 569.2967011 |
| AQQAADKYLVDKN                       | Q8VDD5 | 0          | N-term +42.01 Da, K +28.03 Da,            | 2955.652832 | 2 | 853.9400024 | 853.4414133 |
| LAKVDATEESDLAQYQYGVNR               | P09103 | 0          | N-term +42.01 Da, K +28.03 Da,            | 2956.723633 | 3 | 575.2994995 | 574.6404678 |
| METLLKR                             | Q8K274 | 0.0385178  | N-term +42.01 Da, K +28.03 Da,            | 2970.318359 | 3 | 717.6900024 | 717.3564029 |
| SDAAVDTSEITTKDLKEKKEVVEEAENGR       | P26350 | 0          | N-term +42.01 Da, K +28.03 Da,            | 2971.464111 | 3 | 717.3499756 | 717.3564029 |
| SDAAVDTSEITTKDLKEKKEVVEEAENGR       | P26350 | 0.00057937 | N-term +42.01 Da, K +28.03 Da,            | 2974.855713 | 3 | 568.960022  | 569.2967011 |
| SGGLLKALR                           | Q9CQ49 | 0.001693   | N-term +42.01 Da, K +28.03 Da,            | 2974.931152 | 2 | 614.8499756 | 614.3564224 |
| ADKPDMGEIASFDKAKLK                  | Q6ZWY8 | 0          | N-term +42.01 Da, K +28.03 Da,            | 2976.351074 | 3 | 440.25      | 440.5783678 |
| SDAAVDTSEITTKDLKEKKEVVEEAEN         | P26350 | 0.00939948 | N-term +42.01 Da, K +28.03 Da,            | 2980.338867 | 2 | 767.3800049 | 767.3825095 |
| SQAIEFDKAAEEVNR                     | P31786 | 0          | N-term +42.01 Da, K +28.03 Da,            | 2983.202637 | 3 | 655.3400269 | 654.6642904 |
| AGQSDKDKVYYTLEIEIQKHKDKSKSTW        | P56395 | 0          | N-term +42.01 Da, K +28.03 Da,            | 2984.863037 | 3 | 481.6000061 | 481.6016179 |
| SDAAVDTSEITTKDLKEKKEVVEEAEN         | P26350 | 0.00115407 | N-term +42.01 Da, K +28.03 Da,            | 2986.736084 | 2 | 853.43927   | 853.4414133 |
| AGQSDKDKVYYTLEIEIQKHKDKSKSTW        | P56395 | 0.00059347 | N-term +42.01 Da, K +28.03 Da,            | 2989.086182 | 3 | 477.5899963 | 477.2577398 |
| HVGDLGNVTAGKDGVANVSIEDR             | P08228 | 0          | N-term +42.01 Da, K +28.03 Da,            | 2991.114014 | 3 | 483.6099854 | 483.6121829 |
| SDAAVDTSEITTKDLKEKKEVVEEAENGR       | P26350 | 0          | N-term +42.01 Da, K +28.03 Da,            | 2992.093994 | 2 | 715.3800049 | 715.3829715 |
| HVGDLGNVTAGKDGVANVSIEDR             | P08228 | 0          | N-term +42.01 Da, K +28.03 Da,            | 2992.246338 | 4 | 595.5900269 | 595.5875161 |
| HVGDLGNVTAGKDGVANVSIEDR             | P08228 | 0          | N-term +42.01 Da, K +28.03 Da,            | 3002.808594 | 3 | 846.1300049 | 846.1439791 |
| METASTPEATGTGKYIASTQRPDGTWR         | Q8CHP5 | 0          | N-term +42.01 Da, K +28.03 Da,            | 3004.456299 | 2 | 682.3599854 | 681.8628894 |

|                                |        |            |                                           |             |   |             |             |
|--------------------------------|--------|------------|-------------------------------------------|-------------|---|-------------|-------------|
| AFLERYLAAGPTIQYHK              | Q91ZD4 | 0.01142264 | N-term +42.01 Da, K +28.03 Da,            | 3005.832764 | 3 | 569.2956543 | 569.2967011 |
| AAQVAPAAASSLGNPPPPSELKKAEEQQQR | A2BH40 | 0          | N-term +42.01 Da, K +28.03 Da,            | 3007.930908 | 2 | 789.9099731 | 789.4051647 |
| SYTPGIGGDSAQLAQR               | O70439 | 0          | N-term +42.01 Da,                         | 3008.889893 | 2 | 789.4000244 | 789.4051647 |
| AAPAKGENLSLVVHGPDIR            | Q64442 | 0.00113636 | N-term +42.01 Da, K +28.03 Da,            | 3017.150879 | 2 | 853.4394531 | 853.4414133 |
| NGESSELDLQIR                   | Q9QXT0 | 0.03738318 | N-term +42.01 Da,                         | 3017.226318 | 3 | 471.2685242 | 470.5964216 |
| SDAAVDTSEITTKDLKEKKEVVEEAENGR  | P26350 | 0          | N-term +42.01 Da, K +28.03 Da,            | 3020.459717 | 3 | 477.257019  | 477.2577398 |
| AAPAKGENLSLVVHGPDIR            | Q64442 | 0          | N-term +42.01 Da, K +28.03 Da,            | 3023.544678 | 2 | 715.3817749 | 715.3829715 |
| AAPAKGENLSLVVHGPDIR            | Q64442 | 0          | N-term +42.01 Da, K +28.03 Da,            | 3025.826904 | 4 | 542.2966309 | 541.8022882 |
| HVGDLDGNVTAGKDGVANVSIEDR       | P08228 | 0          | N-term +42.01 Da, K +28.03 Da,            | 3032.80127  | 3 | 483.9299927 | 483.5963102 |
| LRPGDCEVCISYLGR                | Q9CXI5 | 0          | N-term +42.01 Da, C +57.02Da,             | 3035.036865 | 3 | 641.3300171 | 640.655066  |
| SLIQUHERIHTGEKPFQCTECGKAFLSK   | Q7TNU6 | 0.01241593 | N-term +42.01 Da, K +28.03 Da,C +57.02Da, | 3036.202637 | 2 | 522.8068848 | 521.7982087 |
| MEDSAPDAVAAPSGTPKSKLETLPR      | Q8CHG3 | 0          | N-term +42.01 Da, K +28.03 Da,            | 3036.883301 | 3 | 569.296936  | 569.2967011 |
| SDAAVDTSEITTKDLKEKKEVVEEAENGR  | P26350 | 0          | N-term +42.01 Da, K +28.03 Da,            | 3039.386719 | 2 | 630.3499756 | 630.3513374 |
| AAQVAPAAASSLGNPPPPSELKKAEEQQQR | A2BH40 | 0          | N-term +42.01 Da, K +28.03 Da,            | 3040.615723 | 2 | 789.4099731 | 789.4051647 |
| AYNLNSPAQEHLTVGCAAR            | Q99JZ7 | 0          | N-term +42.01 Da, C +57.02Da,             | 3046.436523 | 2 | 614.3560181 | 614.3564224 |
| MEAADV FHR                     | Q8BFS6 | 0.00224719 | N-term +42.01 Da,                         | 3047.58252  | 2 | 853.4424438 | 853.4414133 |
| METASTPEATGTGKYIASTQRPDGTWR    | Q8CHP5 | 0          | N-term +42.01 Da, K +28.03 Da,            | 3050.710693 | 3 | 477.2579956 | 477.2577398 |
| MEQVNELKEKGNKAL                | Q60864 | 0.00330579 | N-term +42.01 Da, K +28.03 Da,            | 3057.424316 | 2 | 749.3699951 | 748.87432   |
| MEEGPAVGTLSR                   | Q8VED2 | 0          | N-term +42.01 Da,                         | 3061.946533 | 2 | 649.8116455 | 649.8115222 |
| ACEGGKFATVEVTDKPVDEALR         | Q9R257 | 0          | N-term +42.01 Da, K +28.03 Da,C +57.02Da, | 3066.944824 | 2 | 583.8406982 | 583.8393533 |
| VPALAIANAHR                    | P63038 | 0          | N-term +42.01 Da,                         | 3068.16626  | 3 | 569.2961426 | 569.2967011 |
| AYLQYMRS GELPIK                | F8VPU6 | 0.00590446 | N-term +42.01 Da, K +28.03 Da,            | 3070.0896   | 2 | 506.2399902 | 505.7430995 |
| AFDGTWKVDR                     | P55050 | 0          | N-term +42.01 Da, K +28.03 Da,            | 3071.545898 | 2 | 715.3800049 | 715.3829715 |
| KVISTTKAPAAIGPYSQAVQVDR        | P52760 | 0          | N-term +42.01 Da, K +28.03 Da,            | 3078.188965 | 2 | 473.2600098 | 472.7560095 |
| SDAAVDTSEITTKDLKEKKEVVEEAENGR  | P26350 | 0.00058445 | N-term +42.01 Da, K +28.03 Da,            | 3079.083496 | 2 | 853.4400024 | 853.4414133 |
| AAQVAPAAASSLGNPPPPSELKKAEEQQQR | A2BH40 | 0          | N-term +42.01 Da, K +28.03 Da,            | 3081.478516 | 3 | 477.2572327 | 477.2577398 |
| SDAAVDTSEITTKDLKEKKEVVEEAENGR  | P26350 | 0          | N-term +42.01 Da, K +28.03 Da,            | 3084.959717 | 2 | 677.878479  | 677.8792074 |
| ASESGKLW                       | Q91YI0 | 0.00169492 | N-term +42.01 Da, K +28.03 Da,            | 3085.721191 | 3 | 593.6199951 | 593.293185  |
| LSPVAEEFR                      | Q00623 | 0          | N-term +42.01 Da,                         | 3086.14624  | 2 | 759.9099731 | 759.4065077 |
| AELGEADEAELQR                  | P62077 | 0          | N-term +42.01 Da,                         | 3087.832031 | 2 | 1151.050049 | 1150.544803 |
| AMKAVCVLKGD                    | P08228 | 0.0329013  | N-term +42.01 Da, K +28.03 Da,C +57.02Da, | 3089.069092 | 2 | 724.3699951 | 723.8664949 |
| AASAASSEHFELHEIFR              | O88384 | 0          | N-term +42.01 Da, K +28.03 Da,            | 3093.003662 | 2 | 649.8112183 | 649.8115222 |
| AFDGTWKVDR                     | P55050 | 0          | N-term +42.01 Da, K +28.03 Da,            | 3093.697266 | 3 | 767.3599854 | 767.3656273 |
| LHAMFDQGEIVEKR                 | Q8VI59 | 0.03015075 | N-term +42.01 Da, K +28.03 Da,            | 3093.889893 | 4 | 804.1400146 | 803.6410441 |
| ATNFLAH                        | P57776 | 0.03013561 | N-term +42.01 Da,                         | 3094.038818 | 2 | 1151.550049 | 1150.544803 |
| AELGEADEAELQR                  | P62077 | 0          | N-term +42.01 Da,                         | 3096.345947 | 3 | 585.6704102 | 585.6697038 |
| SEKSVEAAAELSAKDLK              | Q9D0J8 | 0          | N-term +42.01 Da, K +28.03 Da,            | 3097.625977 | 2 | 583.8393555 | 583.8393533 |
| AAPAKGENLSLVVHGPDIR            | Q64442 | 0.0218607  | N-term +42.01 Da, K +28.03 Da,            | 3097.94165  | 2 | 651.8360596 | 650.8282269 |
| DFAALQSRLDENQLRR               | Q9D2Y5 | 0.02724521 | N-term +42.01 Da,                         | 3099.030518 | 3 | 569.2966919 | 569.2967011 |
| SEKSVEAAAELSAKDLK              | Q9D0J8 | 0          | N-term +42.01 Da, K +28.03 Da,            | 3100.651367 | 2 | 878.0005493 | 878.0009175 |



|                               |        |            |                                           |             |   |             |             |
|-------------------------------|--------|------------|-------------------------------------------|-------------|---|-------------|-------------|
| ADPKYADLPGIAR                 | Q99KJ8 | 0.00225098 | N-term +42.01 Da, K +28.03 Da,            | 3101.414551 | 2 | 948.5       | 948.000781  |
| ISGDLEVLAEKCPN                | O35381 | 0.04418828 | N-term +42.01 Da, K +28.03 Da,C +57.02Da, | 3102.265381 | 4 | 626.0873413 | 626.0859833 |
| ASLKDLEGKWR                   | Q05816 | 0          | N-term +42.01 Da, K +28.03 Da,            | 3104.78418  | 2 | 699.8699951 | 700.3661304 |
| ADPKYADLPGIAR                 | Q99KJ8 | 0.0005777  | N-term +42.01 Da, K +28.03 Da,            | 3107.171631 | 3 | 834.7800293 | 834.4455523 |
| ADPKYADLPGIAR                 | Q99KJ8 | 0          | N-term +42.01 Da, K +28.03 Da,            | 3108.28418  | 2 | 578.7930298 | 578.7926006 |
| LWKTAFSAMTQNPR                | Q61493 | 0.00170164 | N-term +42.01 Da, K +28.03 Da,            | 3110.652588 | 4 | 526.0200195 | 526.0191743 |
| ADMQNLVER                     | P40124 | 0          | N-term +42.01 Da,                         | 3110.750244 | 2 | 853.9400024 | 853.4414133 |
| ASLKDLEGKWR                   | Q05816 | 0          | N-term +42.01 Da, K +28.03 Da,            | 3115.421631 | 2 | 677.8791504 | 677.8792074 |
| HVGDLGNVTAGKDGVANVSIEDR       | P08228 | 0          | N-term +42.01 Da, K +28.03 Da,            | 3116.855713 | 3 | 593.6199951 | 593.293185  |
| SAMEAADVFHR                   | Q8BFS6 | 0          | N-term +42.01 Da,                         | 3116.936768 | 2 | 759.4000244 | 759.4065077 |
| MKETIMNQEKLAKLQAQVR           | Q64152 | 0          | N-term +42.01 Da, K +28.03 Da,            | 3118.556396 | 4 | 506.2674561 | 506.2670528 |
| SDAAVDTSEITTKDLKEKKEVVEEAENGR | P26350 | 0.0174538  | N-term +42.01 Da, K +28.03 Da,            | 3120.841309 | 2 | 1012.030029 | 1011.526829 |
| AQALSEEEFQR                   | Q8VD04 | 0          | N-term +42.01 Da,                         | 3121.80249  | 3 | 674.6873779 | 674.6869783 |
| ADPKYADLPGIAR                 | Q99KJ8 | 0          | N-term +42.01 Da, K +28.03 Da,            | 3122.803955 | 2 | 1236.079956 | 1236.082273 |
| ASLKDLEGKWR                   | Q05816 | 0          | N-term +42.01 Da, K +28.03 Da,            | 3125.382568 | 2 | 1012.530029 | 1011.526829 |
| MNFSGKY                       | P12710 | 0.02184959 | N-term +42.01 Da, K +28.03 Da,            | 3125.549316 | 3 | 824.7199707 | 824.3906075 |
| SSSPVNVKCLKVSELKEEL           | Q8VEK3 | 0.01441813 | N-term +42.01 Da, K +28.03 Da,            | 3126.795654 | 3 | 638.6589966 | 638.6582988 |
| SDAAVDTSEITTKDLKEKKEVVEEAENGR | P26350 | 0.00587293 | N-term +42.01 Da, K +28.03 Da,            | 3126.883789 | 3 | 825.0599976 | 824.3906075 |
| SSSPVNVKCLKVSELKEEL           | Q8VEK3 | 0          | N-term +42.01 Da, K +28.03 Da,            | 3128.146729 | 3 | 585.6693726 | 585.6697038 |
| HVGDLGNVTAGKDGVANVSIEDR       | P08228 | 0          | N-term +42.01 Da, K +28.03 Da,            | 3129.498535 | 3 | 569.2977295 | 569.2967011 |
| NKELDPVQKLFVDKIR              | P97450 | 0          | N-term +42.01 Da, K +28.03 Da,            | 3131.377197 | 3 | 569.2974243 | 569.2967011 |
| MNFSGKY                       | P12710 | 0.02725896 | N-term +42.01 Da, K +28.03 Da,            | 3131.452637 | 2 | 583.305542  | 583.3053436 |
| AAETVELHKLKLAELKQECLAR        | Q9D1J3 | 0          | N-term +42.01 Da, K +28.03 Da,C +57.02Da, | 3131.679932 | 2 | 509.2600098 | 509.2609359 |
| AAEGFKGKILF                   | P09103 | 0.03016591 | N-term +42.01 Da, K +28.03 Da,            | 3132.577148 | 2 | 630.8400269 | 630.8433454 |
| LLETQYKSLHDPHLRYYK            | A2ARZ3 | 0.01744484 | N-term +42.01 Da, K +28.03 Da,            | 3133.840088 | 2 | 616.3206177 | 616.3211912 |
| AAPQLFR                       | Q99J99 | 0.0325     | N-term +42.01 Da,                         | 3133.915527 | 4 | 626.3400269 | 626.0859833 |
| ASPGVFSEGEVPSPK               | Q8BWS5 | 0.00633914 | N-term +42.01 Da, K +28.03 Da,            | 3139.394531 | 2 | 884.4500122 | 884.4528439 |
| MDMVKVN                       | Q283N4 | 0.00634249 | N-term +42.01 Da, K +28.03 Da,            | 3140.201172 | 2 | 516.277771  | 515.7800161 |
| MNRPAVPEISYENMR               | O70274 | 0.03842412 | N-term +42.01 Da,                         | 3144.681396 | 3 | 492.304657  | 491.6448237 |
| AQEFVNCKIQ                    | Q9QUH0 | 0          | N-term +42.01 Da, K +28.03 Da,C +57.02Da, | 3144.83252  | 3 | 477.2600098 | 477.2577398 |
| AQGLIEVER                     | Q8JZL3 | 0          | N-term +42.01 Da,                         | 3144.907959 | 2 | 460.728302  | 460.7289373 |
| SDAPPLTLDGIKDR                | Q9CR21 | 0.0038525  | N-term +42.01 Da, K +28.03 Da,            | 3147.80249  | 2 | 541.8439941 | 541.8446274 |
| LGEKLTDEEVDIMIR               | P62204 | 0.00278242 | N-term +42.01 Da, K +28.03 Da,            | 3153.657227 | 2 | 1236.081787 | 1236.082273 |
| HVGDLGNVTAGKDGVANVSIEDR       | P08228 | 0          | N-term +42.01 Da, K +28.03 Da,            | 3155.400146 | 4 | 564.3300171 | 564.0795923 |
| AQGLIEVER                     | Q8JZL3 | 0          | N-term +42.01 Da,                         | 3157.260498 | 4 | 596.0900269 | 595.5875161 |
| ADKLQRELEDTRVATVSEK           | D3Z2Z1 | 0.04021318 | N-term +42.01 Da, K +28.03 Da,            | 3158.539063 | 3 | 824.7299805 | 824.3906075 |
| AAAAAAAAAAGAAGGR              | Q8CCS6 | 0          | N-term +42.01 Da,                         | 3160.180908 | 2 | 937.46521   | 936.4765165 |
| AESAESGGPPGAQDSAADGGPAEPKIM   | Q8R317 | 0          | N-term +42.01 Da, K +28.03 Da,            | 3161.806152 | 3 | 794.1099854 | 793.7809293 |
| MEPDIIR                       | Q80WT5 | 0.03732809 | N-term +42.01 Da,                         | 3164.067139 | 2 | 630.8429565 | 630.8433454 |
| LAKVDATEESDLAQQYGVR           | P09103 | 0          | N-term +42.01 Da, K +28.03 Da,            | 3164.67749  | 3 | 752.0999756 | 751.7703643 |

|                            |        |            |                                            |             |   |             |             |
|----------------------------|--------|------------|--------------------------------------------|-------------|---|-------------|-------------|
| MMMAAAER                   | Q9DCS2 | 0          | N-term +42.01 Da,                          | 3165.149414 | 2 | 695.3599854 | 695.8698945 |
| AATMKKAAAEVNVTFEDQQKINKFAR | E9Q6U4 | 0          | N-term +42.01 Da, K +28.03 Da,             | 3166.13623  | 3 | 509.6174927 | 509.28904   |
| SQAEFDKAAEEVKR             | P31786 | 0          | N-term +42.01 Da, K +28.03 Da,             | 3168.031738 | 4 | 580.8102417 | 580.810379  |
| ADNAFSFR                   | Q8VBV7 | 0.0063358  | N-term +42.01 Da,                          | 3168.182617 | 4 | 586.5888672 | 586.5899904 |
| LAKVDATEESDLAQYQYGV        | P09103 | 0          | N-term +42.01 Da, K +28.03 Da,             | 3169.521484 | 2 | 1191.170044 | 1190.167756 |
| VGVP TETGALTLNR            | Q8BWT1 | 0          | N-term +42.01 Da,                          | 3170.79834  | 2 | 715.3826904 | 715.3829715 |
| AAAAAAAAAAGAAGGR           | Q8CCS6 | 0          | N-term +42.01 Da,                          | 3173.169189 | 2 | 758.8866577 | 758.8874275 |
| ATEGDVELELETETSGPERPPEKPR  | Q9CR41 | 0          | N-term +42.01 Da, K +28.03 Da,             | 3173.512207 | 2 | 853.9332886 | 853.4414133 |
| TEPGASPEDPWVKASFADAHAGEGR  | O08609 | 0          | N-term +42.01 Da, K +28.03 Da,             | 3174.069092 | 2 | 1190.160034 | 1190.167756 |
| LAKVDATEESDLAQYQYGV        | P09103 | 0          | N-term +42.01 Da, K +28.03 Da,             | 3175.562012 | 3 | 477.2570801 | 477.2577398 |
| ANLEKAQSELSGAADEAAR        | Q9D3D9 | 0          | N-term +42.01 Da, K +28.03 Da,             | 3175.78833  | 3 | 569.6243286 | 569.2967011 |
| ANLEKAQSELSGAADEAAR        | Q9D3D9 | 0          | N-term +42.01 Da, K +28.03 Da,             | 3176.014893 | 3 | 431.8999939 | 431.9031854 |
| LAVVDPLFGMQPIR             | Q61024 | 0.01141079 | N-term +42.01 Da,                          | 3178.978027 | 2 | 647.8499756 | 647.3511399 |
| ATEGDVELELETETSGPERPPEKPR  | Q9CR41 | 0          | N-term +42.01 Da, K +28.03 Da,             | 3180.339355 | 2 | 603.3200073 | 603.8169328 |
| LAKVDATEESDLAQYQYGV        | P09103 | 0          | N-term +42.01 Da, K +28.03 Da,             | 3181.297852 | 2 | 807.3699951 | 807.371808  |
| MEIGTEISR                  | Q8BJ05 | 0          | N-term +42.01 Da,                          | 3185.404541 | 3 | 677.7000122 | 677.7037971 |
| MQNVINTVKGK                | Q9CPX6 | 0          | N-term +42.01 Da, K +28.03 Da,             | 3185.47998  | 2 | 507.8099976 | 507.8083787 |
| MDFEDDYVHSTCR              | O88291 | 0          | N-term +42.01 Da, C +57.02Da,              | 3186.767334 | 4 | 564.3300171 | 564.0795923 |
| ADLEEQLSDEEKVR             | P47754 | 0          | N-term +42.01 Da, K +28.03 Da,             | 3187.838135 | 2 | 1016.549988 | 1016.052057 |
| MQDAENVAVPEAAEER           | Q8JZQ9 | 0          | N-term +42.01 Da,                          | 3188.495361 | 4 | 595.5900269 | 595.5875161 |
| KGNDISSGTVLSDYVSGPPSGTGLHR | P70296 | 0          | N-term +42.01 Da, K +28.03 Da,             | 3189.148438 | 2 | 614.3562622 | 614.3564224 |
| ASYFDEHDCEPLNPER           | Q9CY62 | 0          | N-term +42.01 Da, C +57.02Da,              | 3191.229004 | 3 | 450.2900085 | 449.6258746 |
| ATEGDVELELETETSGPERPPEKPR  | Q9CR41 | 0          | N-term +42.01 Da, K +28.03 Da,             | 3194.467773 | 2 | 631.3499756 | 630.8526583 |
| SSVAVLTQESFAEHR            | Q8VDJ3 | 0          | N-term +42.01 Da,                          | 3194.810791 | 3 | 752.0999756 | 751.7703643 |
| LHAMFDQGEIVEKR             | Q8VI59 | 0.00637281 | N-term +42.01 Da, K +28.03 Da,             | 3196.87915  | 2 | 1127.650024 | 1127.151908 |
| KGNDISSGTVLSDYVSGPPSGTGLHR | P70296 | 0.00382932 | N-term +42.01 Da, K +28.03 Da,             | 3198.123535 | 4 | 853.9899902 | 853.7381813 |
| SLVIPEKFAQH                | P62270 | 0.00379404 | N-term +42.01 Da, K +28.03 Da,             | 3199.252686 | 4 | 581.3099976 | 580.810379  |
| AMKAVCVLKGDPVQ             | P08228 | 0          | N-term +42.01 Da, K +28.03 Da, C +57.02Da, | 3201.244873 | 2 | 715.3817749 | 715.3829715 |
| MDNKLDVFR                  | Q3UZZ6 | 0.00278862 | N-term +42.01 Da, K +28.03 Da,             | 3203.181885 | 2 | 816.9177246 | 816.9199798 |
| ADEELEALR                  | P56812 | 0.00277008 | N-term +42.01 Da,                          | 3203.849609 | 3 | 1138.650024 | 1137.981816 |
| SSVAVLTQESFAEHR            | Q8VDJ3 | 0          | N-term +42.01 Da,                          | 3206.073486 | 3 | 764.7600098 | 764.4237542 |
| VLSGEDKSNKAAWGKIGGH        | P01942 | 0.00890052 | N-term +42.01 Da, K +28.03 Da,             | 3206.587891 | 2 | 825.4400024 | 824.9383088 |
| HVMTNLGKLTDEEVDEMIR        | P62204 | 0.0469124  | N-term +42.01 Da, K +28.03 Da,             | 3207.149902 | 3 | 477.2572021 | 477.2577398 |
| SASVVSISR                  | P61804 | 0          | N-term +42.01 Da,                          | 3207.478271 | 2 | 818.37854   | 818.3784791 |
| SLDIQCEQLSDAR              | Q91VI7 | 0          | N-term +42.01 Da, C +57.02Da,              | 3209.786865 | 3 | 470.2600098 | 470.5964216 |
| AAVDPQQSVVMMR              | P43883 | 0          | N-term +42.01 Da,                          | 3217.557129 | 4 | 564.0792236 | 564.0795923 |
| AAVDPQQSVVMMR              | P43883 | 0          | N-term +42.01 Da,                          | 3218.167725 | 2 | 711.8400269 | 711.8453648 |
| ATEGDVELELETETSGPERPPEKPR  | Q9CR41 | 0          | N-term +42.01 Da, K +28.03 Da,             | 3218.319092 | 2 | 610.7818604 | 610.7824306 |
| KPLHYAADCGQLEIFLLLK        | P62774 | 0.03246753 | N-term +42.01 Da, K +28.03 Da, C +57.02Da, | 3219.636475 | 2 | 496.25      | 496.2474944 |
| AMKAVCVLKGDPVQ             | P08228 | 0          | N-term +42.01 Da, K +28.03 Da, C +57.02Da, | 3220.885254 | 2 | 614.3552246 | 614.3564224 |

|                                        |        |            |                                           |             |   |             |             |
|----------------------------------------|--------|------------|-------------------------------------------|-------------|---|-------------|-------------|
| ADEELEALR                              | P56812 | 0.00059102 | N-term +42.01 Da,                         | 3221.327637 | 2 | 596.2999878 | 596.2966615 |
| METEQEETFPNTETNGEFGKR                  | P61979 | 0.00433135 | N-term +42.01 Da, K +28.03 Da,            | 3223.761719 | 3 | 851.4299927 | 851.0988816 |
| METEQEETFPNTETNGEFGKR                  | P61979 | 0.00381888 | N-term +42.01 Da, K +28.03 Da,            | 3228.406738 | 2 | 534.309082  | 534.3084092 |
| SSDAQWLTAEEER                          | Q9CZL5 | 0          | N-term +42.01 Da,                         | 3228.837402 | 2 | 443.2646179 | 442.763637  |
| AYLSAHLKETAEQDR                        | Q80UK8 | 0.03812317 | N-term +42.01 Da, K +28.03 Da,            | 3229.341064 | 4 | 853.9899902 | 853.7381813 |
| ATEGDVELELETETSGPERPPEKPR              | Q9CR41 | 0          | N-term +42.01 Da, K +28.03 Da,            | 3230.032227 | 2 | 913.9199829 | 912.9341504 |
| AMKAVCVLKGDPVQGT                       | P08228 | 0.00114548 | N-term +42.01 Da, K +28.03 Da,C +57.02Da, | 3233.575195 | 2 | 715.3800049 | 715.3829715 |
| SSPAQPAVPAPLADLKIQHTK                  | P24549 | 0          | N-term +42.01 Da, K +28.03 Da,            | 3236.716309 | 3 | 457.5899963 | 456.9297345 |
| ATEGDVELELETETSGPERPPEKPR              | Q9CR41 | 0          | N-term +42.01 Da, K +28.03 Da,            | 3236.792725 | 2 | 606.354248  | 606.3533484 |
| MDDREDLVYQAKLAEQAER                    | P62259 | 0          | N-term +42.01 Da, K +28.03 Da,            | 3237.778076 | 3 | 477.2568359 | 477.2577398 |
| MDDREDLVYQAKLAEQAER                    | P62259 | 0          | N-term +42.01 Da, K +28.03 Da,            | 3238.835693 | 2 | 666.8099976 | 666.8142622 |
| AAQALAAQAVASR                          | Q8BLY2 | 0          | N-term +42.01 Da,                         | 3240.546631 | 2 | 818.3800049 | 818.3784791 |
| AAAKKAVLGPLVGAVDQGTSSSTR               | Q64516 | 0          | N-term +42.01 Da, K +28.03 Da,            | 3245.615234 | 3 | 595.3400269 | 595.3440965 |
| AAAKKAVLGPLVGAVDQGTSSSTR               | Q64516 | 0          | N-term +42.01 Da, K +28.03 Da,            | 3246.973877 | 2 | 767.3828125 | 767.3825095 |
| MPFVELETNLPASR                         | Q35215 | 0          | N-term +42.01 Da,                         | 3248.963379 | 2 | 712.3400269 | 711.8453648 |
| MEVHELFR                               | P41216 | 0          | N-term +42.01 Da,                         | 3250.296631 | 3 | 578.3099976 | 578.3124624 |
| FAQLCEEHGILR                           | B5X0G2 | 0          | N-term +42.01 Da, C +57.02Da,             | 3251.367432 | 2 | 614.3561401 | 614.3564224 |
| FAQLCEEHGILR                           | B5X0G2 | 0          | N-term +42.01 Da, C +57.02Da,             | 3252.326416 | 2 | 990.460022  | 989.9584538 |
| AMKAVCVLKGDPVQGTIHFEQK                 | P08228 | 0.00485175 | N-term +42.01 Da, K +28.03 Da,C +57.02Da, | 3258.351074 | 2 | 1153.51001  | 1153.517631 |
| MEGPAGYLR                              | E9Q509 | 0          | N-term +42.01 Da,                         | 3258.434326 | 2 | 599.3796997 | 599.3819085 |
| ATEGDVELELETETSGPERPPEKPR              | Q9CR41 | 0          | N-term +42.01 Da, K +28.03 Da,            | 3258.522949 | 3 | 851.4299927 | 851.0988816 |
| MELEAMSR                               | P61166 | 0.00058514 | N-term +42.01 Da,                         | 3258.832275 | 2 | 1154.02002  | 1153.517631 |
| ASQSQGIQQLLQAEKR                       | Q9CR51 | 0          | N-term +42.01 Da, K +28.03 Da,            | 3259.710205 | 4 | 853.9899902 | 853.7381813 |
| ASQSQGIQQLLQAEKR                       | Q9CR51 | 0          | N-term +42.01 Da, K +28.03 Da,            | 3265.407227 | 3 | 660.3078003 | 660.3080614 |
| DIQMTQSTSSLSASLGDR                     | P01646 | 0.00385039 | N-term +42.01 Da,                         | 3268.204346 | 3 | 477.2574158 | 477.2577398 |
| AAAKKAVLGPLVGAVDQGTSSSTR               | Q64516 | 0          | N-term +42.01 Da, K +28.03 Da,            | 3268.290527 | 2 | 606.3551025 | 606.3533484 |
| METPKETAVESSGPKVLETAEEIQHR             | P08032 | 0          | N-term +42.01 Da, K +28.03 Da,            | 3269.633301 | 2 | 666.8137817 | 666.8142622 |
| MEVHELFR                               | P41216 | 0.00057904 | N-term +42.01 Da,                         | 3269.859863 | 2 | 776.8699951 | 776.869235  |
| AAAAVVEFQR                             | Q8BG32 | 0          | N-term +42.01 Da,                         | 3269.935303 | 4 | 564.5800171 | 564.0795923 |
| AMKAVCVLKGDPVQGTIHFEQK                 | P08228 | 0.00588235 | N-term +42.01 Da, K +28.03 Da,C +57.02Da, | 3273.374268 | 2 | 713.9199829 | 713.9168447 |
| AFRRSSNLHKHER                          | L7N232 | 0.03690945 | N-term +42.01 Da, K +28.03 Da,            | 3276.708008 | 2 | 990.960022  | 989.9584538 |
| ANLEKAQSELSGADEAAR                     | Q9D3D9 | 0.02531646 | N-term +42.01 Da, K +28.03 Da,            | 3286.149414 | 3 | 664.3599854 | 663.7002754 |
| AMKAVCVLKGDPVQGTIHFEQK                 | P08228 | 0          | N-term +42.01 Da, K +28.03 Da,C +57.02Da, | 3286.311768 | 2 | 610.7800293 | 610.7824306 |
| AAAAVDPQQSVVMR                         | P43883 | 0          | N-term +42.01 Da,                         | 3289.179443 | 3 | 851.4299927 | 851.0988816 |
| AMKAVCVLKGDPVQGTIHFEQK                 | P08228 | 0          | N-term +42.01 Da, K +28.03 Da,C +57.02Da, | 3290.127686 | 2 | 690.3699951 | 690.3731355 |
| LLEFQNDR                               | P29391 | 0.00225225 | N-term +42.01 Da,                         | 3291.814697 | 2 | 571.2853394 | 571.2854656 |
| ASQSQGIQQLLQAEKR                       | Q9CR51 | 0          | N-term +42.01 Da, K +28.03 Da,            | 3292.050049 | 2 | 729.8699951 | 729.365174  |
| AAAAATAAAAAAPSGGGGGGEEERLEEKSEDDQLQGLR | D3Z7U4 | 0          | N-term +42.01 Da, K +28.03 Da,            | 3293.367432 | 4 | 576.0700073 | 576.067525  |
| ASQSQGIQQLLQAEKR                       | Q9CR51 | 0          | N-term +42.01 Da, K +28.03 Da,            | 3294.735596 | 2 | 767.8800049 | 767.3825095 |
| AAAKKAVLGPLVGAVDQGTSSSTR               | Q64516 | 0          | N-term +42.01 Da, K +28.03 Da,            | 3295.01001  | 2 | 856.960022  | 856.4599399 |

|                              |        |            |                                           |             |   |             |             |
|------------------------------|--------|------------|-------------------------------------------|-------------|---|-------------|-------------|
| MDSKESLAPPGRDEVPSLLGR        | P06537 | 0.00058343 | N-term +42.01 Da, K +28.03 Da,            | 3298.022461 | 3 | 754.0599976 | 753.3984908 |
| METPKETAVESSGPKVLETAEEIQHR   | P08032 | 0          | N-term +42.01 Da, K +28.03 Da,            | 3299.239014 | 3 | 477.5899963 | 477.2577398 |
| AAQKINEGLEHLAKAEKY           | Q9CWZ7 | 0          | N-term +42.01 Da, K +28.03 Da,            | 3303.921631 | 2 | 713.9157715 | 713.9168447 |
| AAAAVVEFQR                   | Q8BG32 | 0          | N-term +42.01 Da,                         | 3306.891357 | 2 | 1152.130005 | 1151.127774 |
| AMKAVCVLKGDPVQGTIHFEQK       | P08228 | 0.0011396  | N-term +42.01 Da, K +28.03 Da,C +57.02Da, | 3308.234131 | 4 | 859.4400024 | 858.9452577 |
| ALDGPEQMELEEGKAGSGLR         | P62196 | 0          | N-term +42.01 Da, K +28.03 Da,            | 3308.654053 | 2 | 1151.130005 | 1151.127774 |
| AMKAVCVLKGDPVQGTIHFEQKAS     | P08228 | 0.00280741 | N-term +42.01 Da, K +28.03 Da,C +57.02Da, | 3310.003418 | 4 | 608.3300171 | 608.0750388 |
| AMKAVCVLKGDPVQGTIHFEQK       | P08228 | 0          | N-term +42.01 Da, K +28.03 Da,C +57.02Da, | 3312.994385 | 2 | 865.9400024 | 865.9446543 |
| ATIATMPVPETR                 | Q62189 | 0.00059277 | N-term +42.01 Da,                         | 3313.084473 | 2 | 913.4251709 | 912.9341504 |
| SSVAVLTQESFAEHR              | Q8VDJ3 | 0          | N-term +42.01 Da,                         | 3317.869385 | 2 | 758.4099731 | 758.4119267 |
| AEGQVLVLDGR                  | P19253 | 0          | N-term +42.01 Da,                         | 3319.245605 | 2 | 692.8599854 | 692.8589955 |
| AMKAVCVLKGDPVQGTIHFEQKA      | P08228 | 0          | N-term +42.01 Da, K +28.03 Da,C +57.02Da, | 3319.974854 | 3 | 851.7600098 | 851.0988816 |
| SAHLQWMVVR                   | P41105 | 0          | N-term +42.01 Da,                         | 3320.317871 | 4 | 508.769989  | 509.0228516 |
| AERPDLNLPNAVITR              | Q9JKP7 | 0.00433369 | N-term +42.01 Da,                         | 3321.349854 | 2 | 690.8800049 | 690.3731355 |
| AATMKKAAAEDVNVTFEDQQKINKF    | E9Q6U4 | 0.00058241 | N-term +42.01 Da, K +28.03 Da,            | 3321.764893 | 2 | 758.9099731 | 758.4119267 |
| AMKAVCVLKGDPVQGTIHFEQK       | P08228 | 0          | N-term +42.01 Da, K +28.03 Da,C +57.02Da, | 3324.107666 | 4 | 576.0671387 | 576.067525  |
| AERPDLNLPNAVITR              | Q9JKP7 | 0          | N-term +42.01 Da,                         | 3324.183105 | 4 | 564.3300171 | 564.0795923 |
| LNDFASAVR                    | P12787 | 0          | N-term +42.01 Da,                         | 3324.589844 | 3 | 639.3300171 | 638.9891531 |
| ATIATMPVPETR                 | Q62189 | 0.00275786 | N-term +42.01 Da,                         | 3326.132813 | 2 | 856.960022  | 856.4599399 |
| AATMKKAAAEDVNVTFEDQQKINKF    | E9Q6U4 | 0          | N-term +42.01 Da, K +28.03 Da,            | 3326.746338 | 2 | 940.4799805 | 939.9807666 |
| AMKAVCVLKGDPVQGTIHFEQKA      | P08228 | 0.0005814  | N-term +42.01 Da, K +28.03 Da,C +57.02Da, | 3327.424561 | 3 | 449.2600098 | 448.5953641 |
| SSVAVLTQESFAEHR              | Q8VDJ3 | 0          | N-term +42.01 Da,                         | 3330.404297 | 4 | 595.3106689 | 595.311415  |
| AASAIKGLSALR                 | Q9D8T7 | 0          | N-term +42.01 Da, K +28.03 Da,            | 3334.49292  | 3 | 418.9400024 | 418.6028472 |
| ATEGDVELELETETSGPERPPEKPR    | Q9CR41 | 0          | N-term +42.01 Da, K +28.03 Da,            | 3337.45166  | 3 | 569.296814  | 569.2967011 |
| AMKAVCVLKGDPVQGTIHFEQKA      | P08228 | 0.00114679 | N-term +42.01 Da, K +28.03 Da,C +57.02Da, | 3338.845947 | 2 | 665.3099976 | 664.3174948 |
| SSVAVLTQESFAEHR              | Q8VDJ3 | 0          | N-term +42.01 Da,                         | 3339.285889 | 3 | 467.6000061 | 467.6013952 |
| AMKAVCVLKGDPVQGTIHFEQK       | P08228 | 0.00058377 | N-term +42.01 Da, K +28.03 Da,C +57.02Da, | 3342.842773 | 2 | 1085.959961 | 1085.464344 |
| TTNTVPLHPYWPR                | P70245 | 0.00381679 | N-term +42.01 Da,                         | 3345.559082 | 2 | 436.25      | 436.2534365 |
| AAAAGAVVASAASGPAEGKKITELR    | Q8CH25 | 0          | N-term +42.01 Da, K +28.03 Da,            | 3345.634277 | 2 | 627.4002075 | 627.4006326 |
| ACGLVASNLNLKPGECKLVR         | P16045 | 0          | N-term +42.01 Da, K +28.03 Da,C +57.02Da, | 3346.309082 | 3 | 728.6900024 | 728.3516463 |
| ACEIMPLR                     | Q8BG14 | 0.00114613 | N-term +42.01 Da, C +57.02Da,             | 3347.087158 | 3 | 696.039978  | 695.7051433 |
| SSVAVLTQESFAEHR              | Q8VDJ3 | 0          | N-term +42.01 Da,                         | 3347.742676 | 2 | 940.9799805 | 939.9807666 |
| MELSGEYVCGDGEPQR             | P0C8B4 | 0          | N-term +42.01 Da, C +57.02Da,             | 3352.671387 | 2 | 761.8613892 | 761.860256  |
| ADKPDMGEIASFDKAKL            | Q6ZWY8 | 0.00113701 | N-term +42.01 Da, K +28.03 Da,            | 3353.057373 | 2 | 758.411377  | 758.4119267 |
| VISLSGEHSIIGR                | P08228 | 0          | N-term +42.01 Da,                         | 3353.328125 | 2 | 481.2427673 | 481.2422119 |
| AAAAGAVVASAASGPAEGKKITELR    | Q8CH25 | 0          | N-term +42.01 Da, K +28.03 Da,            | 3355.543457 | 2 | 919.4699707 | 918.9691924 |
| MNPQGSSEQDVEYSVVQHADGEKSNVLR | P48437 | 0          | N-term +42.01 Da, K +28.03 Da,            | 3357.021973 | 2 | 856.4631958 | 856.4599399 |
| AMKAVCVLKGDPVQGTIHFEQK       | P08228 | 0.01091476 | N-term +42.01 Da, K +28.03 Da,C +57.02Da, | 3358.278564 | 2 | 641.8400269 | 642.3513374 |
| VISLSGEHSIIGR                | P08228 | 0          | N-term +42.01 Da,                         | 3359.817627 | 3 | 569.2974243 | 569.2967011 |
| MNPQGSSEQDVEYSVVQHADGEKSNVLR | P48437 | 0          | N-term +42.01 Da, K +28.03 Da,            | 3360.148682 | 2 | 920.4799805 | 920.9736095 |

|                                    |        |            |                                           |             |   |             |             |
|------------------------------------|--------|------------|-------------------------------------------|-------------|---|-------------|-------------|
| ANHAPFETDISTLTR                    | Q9QXD6 | 0          | N-term +42.01 Da,                         | 3360.8396   | 2 | 630.8519897 | 630.8526583 |
| MELSGEYVCGDGEPEQR                  | P0C8B4 | 0          | N-term +42.01 Da, C +57.02Da,             | 3368.096191 | 2 | 479.2911072 | 479.2920301 |
| AAAAGAVVASAASGPAEGKKITELR          | Q8CH25 | 0          | N-term +42.01 Da, K +28.03 Da,            | 3368.171875 | 3 | 569.2999878 | 569.2967011 |
| ANHAPFETDISTLTR                    | Q9QXD6 | 0          | N-term +42.01 Da,                         | 3368.253418 | 3 | 748.0900269 | 748.0873649 |
| AMKAVCVLKGDPVQGTIHFEQKASGE         | P08228 | 0.02723147 | N-term +42.01 Da, K +28.03 Da,C +57.02Da, | 3369.953613 | 4 | 561.317749  | 561.3173428 |
| SSSRPVALVTGANKGIGFAITR             | P48758 | 0.00279018 | N-term +42.01 Da, K +28.03 Da,            | 3371.476807 | 2 | 516.7700195 | 516.7696486 |
| ANHAPFETDISTLTR                    | Q9QXD6 | 0          | N-term +42.01 Da,                         | 3374.409912 | 3 | 598.0100098 | 597.6780878 |
| SSVAVLTSQESFAEHR                   | Q8VDJ3 | 0          | N-term +42.01 Da,                         | 3376.200439 | 2 | 580.2298584 | 580.230554  |
| AMKAVCVLKGDPVQGTIHFEQKASGE         | P08228 | 0.01242236 | N-term +42.01 Da, K +28.03 Da,C +57.02Da, | 3378.124268 | 2 | 1122.130005 | 1121.627409 |
| AASAAATAAASATAAASASGSPGSGEGSAGGEKR | Q62318 | 0          | N-term +42.01 Da, K +28.03 Da,            | 3378.621826 | 2 | 1115.109985 | 1114.109383 |
| SGYPKSYNPFDDDDVEEEDTRPAPWKDVR      | Q9ERB0 | 0          | N-term +42.01 Da, K +28.03 Da,            | 3383.929199 | 2 | 758.4109497 | 758.4119267 |
| AAETVELHKLKLAELKQECL               | Q9D1J3 | 0          | N-term +42.01 Da, K +28.03 Da,C +57.02Da, | 3386.358643 | 3 | 696.039978  | 695.3830577 |
| AASAAATAAASATAAASASGSPGSGEGSAGGEKR | Q62318 | 0          | N-term +42.01 Da, K +28.03 Da,            | 3388.148926 | 2 | 856.460022  | 856.4599399 |
| AMKAVCVLKGDPVQGTIHFEQKASGE         | P08228 | 0.03376365 | N-term +42.01 Da, K +28.03 Da,C +57.02Da, | 3391.089844 | 4 | 557.5581055 | 557.55833   |
| AAALGAGGGAGAGDDDFDQFDKPGAER        | Q9CCK9 | 0          | N-term +42.01 Da, K +28.03 Da,            | 3391.165283 | 2 | 630.8519897 | 630.8526583 |
| AGAGPTMLLR                         | Q9D2U5 | 0          | N-term +42.01 Da,                         | 3391.337891 | 2 | 580.3322144 | 580.3327498 |
| SGYPKSYNPFDDDDVEEEDTRPAPWKDVR      | Q9ERB0 | 0          | N-term +42.01 Da, K +28.03 Da,            | 3398.762939 | 3 | 748.4199829 | 748.0873649 |
| ACGLVASNLNLKPGECKVVR               | P16045 | 0          | N-term +42.01 Da, K +28.03 Da,C +57.02Da, | 3399.381348 | 2 | 959.4799805 | 959.4812675 |
| MQPASAKWY                          | Q9R0Q7 | 0          | N-term +42.01 Da, K +28.03 Da,            | 3400.442871 | 4 | 561.3173828 | 561.3173428 |
| ANHAPFETDISTLTR                    | Q9QXD6 | 0          | N-term +42.01 Da,                         | 3400.61377  | 3 | 1145.25     | 1144.924585 |
| VISLSGEHSIIGR                      | P08228 | 0          | N-term +42.01 Da,                         | 3401.899658 | 3 | 743.0755005 | 743.0753478 |
| AAALGAGGGAGAGDDDFDQFDKPGAER        | Q9CCK9 | 0          | N-term +42.01 Da, K +28.03 Da,            | 3404.131592 | 3 | 683.3599854 | 683.3530983 |
| AAALGAGGGAGAGDDDFDQFDKPGAER        | Q9CCK9 | 0          | N-term +42.01 Da, K +28.03 Da,            | 3405.873291 | 3 | 702.7000122 | 702.0425901 |
| ACGLVASNLNLKPGECKVVR               | P16045 | 0          | N-term +42.01 Da, K +28.03 Da,C +57.02Da, | 3407.004883 | 3 | 569.289978  | 569.2967011 |
| ACGLVASNLNLKPGECKVVR               | P16045 | 0          | N-term +42.01 Da, K +28.03 Da,C +57.02Da, | 3415.411621 | 2 | 745.3400269 | 745.3418965 |
| SDVLELTDEFESR                      | P27773 | 0          | N-term +42.01 Da,                         | 3416.945068 | 2 | 758.4124756 | 758.4119267 |
| AEPDYIEDDNPQLIRPQKLNIPVKSSR        | Q3TGF2 | 0          | N-term +42.01 Da, K +28.03 Da,            | 3420.891846 | 3 | 458.9299927 | 458.9345969 |
| SSVAVLTSQESFAEHR                   | Q8VDJ3 | 0          | N-term +42.01 Da,                         | 3422.27124  | 4 | 557.5579224 | 557.55833   |
| SDVLELTDEFESR                      | P27773 | 0          | N-term +42.01 Da,                         | 3422.422363 | 3 | 630.0057373 | 629.3458323 |
| VFDKDGNGFVSAEELR                   | Q9D6P8 | 0.04462572 | N-term +42.01 Da, K +28.03 Da,            | 3423.850342 | 2 | 606.8499756 | 606.3533484 |
| ACGLVASNLNLKPGECKVVR               | P16045 | 0          | N-term +42.01 Da, K +28.03 Da,C +57.02Da, | 3427.358643 | 3 | 592.3400269 | 592.3402409 |
| ATEGDVELELETETSGPERPPEKPR          | Q9CR41 | 0          | N-term +42.01 Da, K +28.03 Da,            | 3428.249023 | 4 | 859.4400024 | 858.9452577 |
| NKELDPVQKLFVDKIR                   | P97450 | 0.00059172 | N-term +42.01 Da, K +28.03 Da,            | 3428.667725 | 2 | 594.2943726 | 594.2955076 |
| AMKAVCVLKGDPVQGTIHFEQK             | P08228 | 0.02870091 | N-term +42.01 Da, K +28.03 Da,C +57.02Da, | 3429.913574 | 4 | 467.5499878 | 467.5479732 |
| ASWAEPSEPAALR                      | Q35465 | 0.00892857 | N-term +42.01 Da,                         | 3431.696045 | 3 | 623.0609741 | 623.0615387 |
| AKVEQVLSLEPQHELKFR                 | Q9QY76 | 0          | N-term +42.01 Da, K +28.03 Da,            | 3441.549316 | 2 | 934.5900269 | 934.0886698 |
| ASIWVGPR                           | Q35639 | 0.00058038 | N-term +42.01 Da,                         | 3442.316162 | 2 | 821.3800049 | 820.8772575 |
| AEPDYIEDDNPQLIRPQKLNIPVKSSR        | Q3TGF2 | 0          | N-term +42.01 Da, K +28.03 Da,            | 3443.888916 | 3 | 1145.589966 | 1144.924585 |
| SDEFSLADALPEQSSAKPPAVTNTKAGH       | Q8BH93 | 0          | N-term +42.01 Da, K +28.03 Da,            | 3445.81665  | 2 | 673.8200073 | 672.8275062 |
| AKVEQVLSLEPQHELKFR                 | Q9QY76 | 0          | N-term +42.01 Da, K +28.03 Da,            | 3448.476807 | 2 | 758.4116821 | 758.4119267 |

|                                        |        |            |                                            |             |   |             |             |
|----------------------------------------|--------|------------|--------------------------------------------|-------------|---|-------------|-------------|
| LNDFASAVR                              | P12787 | 0.00114155 | N-term +42.01 Da,                          | 3453.778076 | 2 | 686.380049  | 686.377526  |
| SDVLELTDENFESR                         | P27773 | 0          | N-term +42.01 Da,                          | 3454.104736 | 3 | 567.3212891 | 567.6454414 |
| SDEFSLADALPEQSSAKPPAVTNTKAGH           | Q8BH93 | 0          | N-term +42.01 Da, K +28.03 Da,             | 3455.189697 | 2 | 785.8800049 | 785.8765285 |
| AAQGATAVAVAATTSVGTGEGEPGPGENAAVEGPAR   | Q9D1P2 | 0          | N-term +42.01 Da,                          | 3456.824463 | 2 | 614.8468018 | 614.3564224 |
| AAQGATAVAVAATTSVGTGEGEPGPGENAAVEGPAR   | Q9D1P2 | 0          | N-term +42.01 Da,                          | 3458.493164 | 4 | 859.4400024 | 858.9452577 |
| AAPRPPPAISVSVSAPAFYAPQKK               | Q62523 | 0          | N-term +42.01 Da, K +28.03 Da,             | 3458.975342 | 2 | 812.8883057 | 811.8990472 |
| ACGLVASNLNLKPGECKVR                    | P16045 | 0          | N-term +42.01 Da, K +28.03 Da, C +57.02Da, | 3460.499756 | 3 | 752.3900146 | 752.7272697 |
| GANEDQEMEALR                           | Q9CPR1 | 0          | N-term +42.01 Da,                          | 3460.618164 | 2 | 464.7600098 | 464.758552  |
| MNHDFQALAESR                           | Q80U58 | 0          | N-term +42.01 Da,                          | 3461.929932 | 2 | 595.7999878 | 595.7986038 |
| INVYYNEATGGKYVPR                       | P68372 | 0          | N-term +42.01 Da, K +28.03 Da,             | 3469.72168  | 2 | 596.2999878 | 595.7986038 |
| VGDLGNVTAGKDGVANVSIEDR                 | P08228 | 0          | N-term +42.01 Da, K +28.03 Da,             | 3471.013672 | 2 | 767.8699951 | 767.3825095 |
| MEELSADEIR                             | Q9ES00 | 0          | N-term +42.01 Da,                          | 3472.042969 | 2 | 630.8499756 | 630.8526583 |
| SSSRPVALVTGANKGIGF                     | P48758 | 0.0063762  | N-term +42.01 Da, K +28.03 Da,             | 3472.160645 | 2 | 1006.969971 | 1006.967045 |
| SLFDRATPGMLKIR                         | Q8CHI8 | 0.03846154 | N-term +42.01 Da, K +28.03 Da,             | 3473.891357 | 3 | 576.3300171 | 575.6683575 |
| VISLSGEHSIIGR                          | P08228 | 0          | N-term +42.01 Da,                          | 3474.309082 | 2 | 589.7800293 | 589.2795236 |
| SSEPPPPPLQPPTHQTSVGLLDTPR              | Q9CR86 | 0          | N-term +42.01 Da,                          | 3476.789795 | 3 | 616.9899902 | 616.9852468 |
| SSEPPPPPLQPPTHQTSVGLLDTPR              | Q9CR86 | 0          | N-term +42.01 Da,                          | 3476.90625  | 3 | 1145.589966 | 1144.924585 |
| SSEPPPPPLQPPTHQTSVGLLDTPR              | Q9CR86 | 0          | N-term +42.01 Da,                          | 3477.282471 | 2 | 789.4099731 | 789.3995482 |
| MQAALEV TAR                            | Q9CQP3 | 0          | N-term +42.01 Da,                          | 3478.597168 | 4 | 547.8099976 | 547.5584245 |
| SSEPPPPPLQPPTHQTSVGLLDTPR              | Q9CR86 | 0          | N-term +42.01 Da,                          | 3479.849854 | 2 | 758.9199829 | 758.4119267 |
| MNFSGKYQLQ                             | P12710 | 0.01990812 | N-term +42.01 Da, K +28.03 Da,             | 3484.214111 | 3 | 763.7399902 | 763.7448275 |
| SSEPPPPPLQPPTHQTSVGLLDTPR              | Q9CR86 | 0          | N-term +42.01 Da,                          | 3485.125488 | 3 | 569.6300049 | 569.2967011 |
| GAPQGSLSGEYLFER                        | P29391 | 0          | N-term +42.01 Da,                          | 3485.295898 | 2 | 557.8265381 | 557.8269663 |
| SSVAVLTQESFAEHR                        | Q8VDJ3 | 0          | N-term +42.01 Da,                          | 3487.687256 | 2 | 924.9770508 | 924.9742319 |
| SSEPPPPPLQPPTHQTSVGLLDTPR              | Q9CR86 | 0          | N-term +42.01 Da,                          | 3488.971436 | 4 | 859.4400024 | 858.9452577 |
| MQAALEV TAR                            | Q9CQP3 | 0          | N-term +42.01 Da,                          | 3489.122314 | 4 | 817.6799927 | 817.4290456 |
| GAPQGSLSGEYLFER                        | P29391 | 0          | N-term +42.01 Da,                          | 3489.387207 | 3 | 1013.179993 | 1012.854323 |
| MNFSGKYQLQ                             | P12710 | 0.00384404 | N-term +42.01 Da, K +28.03 Da,             | 3492.102295 | 2 | 522.7439575 | 522.7445874 |
| MQAALEV TAR                            | Q9CQP3 | 0          | N-term +42.01 Da,                          | 3492.253174 | 2 | 648.869812  | 648.8708509 |
| SSEPPPPPLQPPTHQTSVGLLDTPR              | Q9CR86 | 0          | N-term +42.01 Da,                          | 3495.147705 | 3 | 593.9699707 | 593.634214  |
| MESSTSSSGSALGAVDPQLQH                  | Q9WVA2 | 0          | N-term +42.01 Da,                          | 3495.223389 | 3 | 691.0499878 | 691.0480091 |
| ANHAPFETDISTLTR                        | Q9QXD6 | 0          | N-term +42.01 Da,                          | 3495.323975 | 3 | 1089.900024 | 1089.569635 |
| KLVIIEGDLER                            | P21107 | 0.03729146 | N-term +42.01 Da, K +28.03 Da,             | 3495.894287 | 3 | 811.75      | 812.0846835 |
| SSVAVLTQESFAEHR                        | Q8VDJ3 | 0          | N-term +42.01 Da,                          | 3496.728271 | 3 | 812.0800171 | 812.0846835 |
| ADEIAKAQVAQPGGDTIFGK                   | P70349 | 0          | N-term +42.01 Da, K +28.03 Da,             | 3497.895752 | 3 | 743.7299805 | 743.0753478 |
| ASGSPSPPPASGSGYVPGVSAAAFVTCPNEKVAKEIAR | Q9CQ89 | 0.00115075 | N-term +42.01 Da, K +28.03 Da, C +57.02Da, | 3497.971191 | 2 | 395.2174072 | 395.2180078 |
| ADEIAKAQVAQPGGDTIFGK                   | P70349 | 0          | N-term +42.01 Da, K +28.03 Da,             | 3503.705811 | 2 | 625.3099976 | 625.3122123 |
| ADEIAKAQVAQPGGDTIFGK                   | P70349 | 0          | N-term +42.01 Da, K +28.03 Da,             | 3508.164063 | 3 | 617.3200073 | 616.9852468 |
| MQAALEV TAR                            | Q9CQP3 | 0          | N-term +42.01 Da,                          | 3520.122803 | 4 | 817.6799927 | 817.4290456 |
| ASCASIDIEDATQHLLR                      | Q3UJB9 | 0          | N-term +42.01 Da, C +57.02Da,              | 3530.748535 | 3 | 569.6300049 | 569.2967011 |

|                              |        |            |                                           |             |   |             |             |
|------------------------------|--------|------------|-------------------------------------------|-------------|---|-------------|-------------|
| AMKAVCVLKGDPVQGTIHFEQK       | P08228 | 0          | N-term +42.01 Da, K +28.03 Da,C +57.02Da, | 3535.665039 | 2 | 812.8900146 | 811.8990472 |
| SSVAVLTSQESFAEHR             | Q8VDJ3 | 0          | N-term +42.01 Da,                         | 3536.906494 | 3 | 509.9700012 | 509.3068711 |
| AMKAVCVLKGDPVQGTIHFEQK       | P08228 | 0          | N-term +42.01 Da, K +28.03 Da,C +57.02Da, | 3539.194092 | 2 | 855.9500122 | 856.4599399 |
| SSVAVLTSQESFAEHR             | Q8VDJ3 | 0          | N-term +42.01 Da,                         | 3543.243652 | 4 | 538.8300171 | 538.3372351 |
| METILEQQR                    | Q9D554 | 0.00058617 | N-term +42.01 Da,                         | 3543.797119 | 4 | 530.789978  | 530.2933362 |
| LIGDAAKNQLTSNPENTVFDAKR      | P20029 | 0          | N-term +42.01 Da, K +28.03 Da,            | 3544.125732 | 3 | 743.0700073 | 743.0753478 |
| LIGDAAKNQLTSNPENTVFDAKR      | P20029 | 0          | N-term +42.01 Da, K +28.03 Da,            | 3545.326416 | 2 | 710.3599854 | 710.3544114 |
| LAKVDATEESDLAQYQYGV          | P09103 | 0          | N-term +42.01 Da, K +28.03 Da,            | 3548.450439 | 2 | 483.7200012 | 483.7227977 |
| ANHAPFETDISTLTR              | Q9QXD6 | 0          | N-term +42.01 Da,                         | 3548.64502  | 3 | 1074.209961 | 1073.883726 |
| MQAALEVTR                    | Q9CQP3 | 0          | N-term +42.01 Da,                         | 3550.799072 | 4 | 859.4400024 | 858.9452577 |
| TASSVLLHTGQKMPL              | Q9JII6 | 0.00113895 | N-term +42.01 Da, K +28.03 Da,            | 3551.574707 | 2 | 734.897522  | 735.4015592 |
| AAVVLGGDTMGPER               | Q64327 | 0          | N-term +42.01 Da,                         | 3553.648682 | 3 | 1096.839966 | 1096.508209 |
| LYSSDDVIELTPSNFNR            | Q922R8 | 0          | N-term +42.01 Da,                         | 3555.346924 | 3 | 467.6000061 | 467.6013952 |
| AAQAVSLLR                    | Q8BJY1 | 0.00059067 | N-term +42.01 Da,                         | 3556.985596 | 2 | 698.862915  | 698.370593  |
| SVPSALMKQPPIQSTAGAVPVR       | Q9CQU1 | 0          | N-term +42.01 Da, K +28.03 Da,            | 3560.692139 | 4 | 975.5       | 975.2555019 |
| METILEQQR                    | Q9D554 | 0          | N-term +42.01 Da,                         | 3561.557861 | 3 | 569.6300049 | 569.2967011 |
| TSALENYINR                   | Q6ZWM4 | 0          | N-term +42.01 Da,                         | 3565.514648 | 2 | 585.3037109 | 585.3047212 |
| MDAIKKMQML                   | P58771 | 0.00058548 | N-term +42.01 Da, K +28.03 Da,            | 3566.196289 | 2 | 701.3900146 | 700.8984546 |
| ATEGDVELELETETSGPERPPEKPR    | Q9CR41 | 0          | N-term +42.01 Da, K +28.03 Da,            | 3569.989014 | 2 | 752.3637085 | 752.3627309 |
| MENQVLVIR                    | Q9WVS7 | 0.00280269 | N-term +42.01 Da,                         | 3572.645264 | 2 | 862.9400024 | 862.9463314 |
| MENQVLVIR                    | Q9WVS7 | 0.00277932 | N-term +42.01 Da,                         | 3574.38501  | 4 | 476.0299988 | 475.5239211 |
| SAGGAVPPPPNPAVSFPAPR         | Q8BI08 | 0.00383352 | N-term +42.01 Da,                         | 3574.570557 | 3 | 775.7199707 | 775.0603098 |
| SAGGAVPPPPNPAVSFPAPR         | Q8BI08 | 0          | N-term +42.01 Da,                         | 3577.125732 | 2 | 863.4500122 | 862.9463314 |
| KLVIIESDLR                   | P58771 | 0.00059453 | N-term +42.01 Da, K +28.03 Da,            | 3579.841797 | 3 | 1074.550049 | 1073.883726 |
| KMGAPAEAGMAEYLFDKHTLGHGDES   | P09528 | 0          | N-term +42.01 Da, K +28.03 Da,            | 3582.065918 | 3 | 691.3800049 | 691.0480091 |
| AAGFKTVEPLEYYR               | Q9D753 | 0          | N-term +42.01 Da, K +28.03 Da,            | 3589.255859 | 4 | 531.7935181 | 531.2996469 |
| AAGFKTVEPLEYYR               | Q9D753 | 0.00591398 | N-term +42.01 Da, K +28.03 Da,            | 3592.947754 | 3 | 569.960022  | 569.2967011 |
| MQQVEASLQPETLR               | P07759 | 0.04684512 | N-term +42.01 Da,                         | 3595.98291  | 4 | 859.1900024 | 858.9452577 |
| VFDKDGNGYISAAELR             | P62204 | 0          | N-term +42.01 Da, K +28.03 Da,            | 3599.470459 | 2 | 1036.069946 | 1036.068375 |
| AAVTEVVVPADGAEARPLAAEELAAQKR | Q9D198 | 0          | N-term +42.01 Da, K +28.03 Da,            | 3599.826904 | 3 | 1145.589966 | 1144.924585 |
| SAGGAVPPPPNPAVSFPAPR         | Q8BI08 | 0          | N-term +42.01 Da,                         | 3613.585938 | 3 | 691.0465698 | 691.0480091 |
| TAVHAGNINFKWDPKSLEIR         | P26231 | 0          | N-term +42.01 Da, K +28.03 Da,            | 3615.989258 | 3 | 1144.920044 | 1144.924585 |
| AAVTEVVVPADGAEARPLAAEELAAQKR | Q9D198 | 0          | N-term +42.01 Da, K +28.03 Da,            | 3620.780762 | 3 | 620.0100098 | 619.6765245 |
| TGSGDPKEEEEEELVDPPLTTVR      | P99028 | 0.03734644 | N-term +42.01 Da, K +28.03 Da,            | 3620.937744 | 3 | 700.7000122 | 700.7076527 |
| GSEAAQLLEAADFAAHKHR          | Q9D114 | 0          | N-term +42.01 Da, K +28.03 Da,            | 3621.030762 | 3 | 995.1400146 | 994.8135818 |
| MKVFTGPLPAEGR                | Q91Z53 | 0          | N-term +42.01 Da, K +28.03 Da,            | 3624.564697 | 3 | 995.4799805 | 994.8135818 |
| AGLSDLELR                    | Q6DVA0 | 0.00113507 | N-term +42.01 Da,                         | 3626.830078 | 3 | 798.7399902 | 798.4067029 |
| MEGKVYIGGEDYEKEFTPDKY        | P40936 | 0          | N-term +42.01 Da, K +28.03 Da,            | 3627.668213 | 4 | 859.1900024 | 858.9452577 |
| AAGTSNYWEDLR                 | O88630 | 0          | N-term +42.01 Da,                         | 3629.63916  | 2 | 929.0100098 | 929.0111485 |
| VAGPQAQTGAPQGSGLGEYLFER      | P29391 | 0          | N-term +42.01 Da,                         | 3630.50293  | 2 | 1036.068359 | 1036.068375 |

|                                      |        |            |                                           |             |   |             |             |
|--------------------------------------|--------|------------|-------------------------------------------|-------------|---|-------------|-------------|
| MLGPEGGEGYVVKLR                      | Q9Z2X1 | 0          | N-term +42.01 Da, K +28.03 Da,            | 3632.708984 | 3 | 569.6300049 | 569.2967011 |
| AMKAVCVLKGDPVQGTIHFEQ                | P08228 | 0.00737619 | N-term +42.01 Da, K +28.03 Da,C +57.02Da, | 3636.618652 | 3 | 913.4799805 | 913.1407468 |
| MDGIVPDIAVGTKR                       | P17225 | 0          | N-term +42.01 Da, K +28.03 Da,            | 3642.868408 | 2 | 559.2600098 | 559.2583934 |
| MFNVESVER                            | Q8BUK6 | 0          | N-term +42.01 Da,                         | 3643.027832 | 3 | 620.3400269 | 619.6765245 |
| TAVHAGNINFKWDPKSLEIR                 | P26231 | 0.03507905 | N-term +42.01 Da, K +28.03 Da,            | 3644.237793 | 3 | 691.0462646 | 691.0480091 |
| STGTFVVSQPLNYR                       | Q9JLJ2 | 0          | N-term +42.01 Da,                         | 3651.880859 | 2 | 765.4000244 | 764.4099157 |
| MLGPEGGEGYVVKLR                      | Q9Z2X1 | 0          | N-term +42.01 Da, K +28.03 Da,            | 3652.320068 | 2 | 590.289978  | 589.2946876 |
| AASEDELLPR                           | Q61249 | 0          | N-term +42.01 Da,                         | 3658.986572 | 2 | 877.5300293 | 876.5281566 |
| AAEHPEPPKGELQLPPPPPGHYGAWAAQELQAR    | Q3UJB0 | 0          | N-term +42.01 Da, K +28.03 Da,            | 3664.284912 | 3 | 569.2999878 | 569.2967011 |
| AELKYISGFGNECASEDPR                  | O09173 | 0          | N-term +42.01 Da, K +28.03 Da,C +57.02Da, | 3666.13208  | 2 | 632.8189697 | 632.8196728 |
| AELKYISGFGNECASEDPR                  | O09173 | 0          | N-term +42.01 Da, K +28.03 Da,C +57.02Da, | 3670.268555 | 3 | 1145.25     | 1144.924585 |
| LAKVDATEESDLAQYQVGR                  | P09103 | 0          | N-term +42.01 Da, K +28.03 Da,            | 3671.298828 | 4 | 517.8187256 | 517.8095817 |
| AAEHPEPPKGELQLPPPPPGHYGAWAAQELQAR    | Q3UJB0 | 0          | N-term +42.01 Da, K +28.03 Da,            | 3672.725342 | 2 | 657.3599854 | 656.8464194 |
| AAEHPEPPKGELQLPPPPPGHYGAWAAQELQAR    | Q3UJB0 | 0          | N-term +42.01 Da, K +28.03 Da,            | 3675.298584 | 3 | 691.0499878 | 691.0480091 |
| LAKVDATEESDLAQYQVGR                  | P09103 | 0.0037961  | N-term +42.01 Da, K +28.03 Da,            | 3676.912109 | 2 | 474.2453613 | 474.2452775 |
| LIGDAAKNQVAMNPQNTVFDKR               | P16627 | 0.00685293 | N-term +42.01 Da, K +28.03 Da,            | 3681.403564 | 4 | 567.8406372 | 567.8410794 |
| LIGDAAKNQLTSNPENTVFDKR               | P20029 | 0          | N-term +42.01 Da, K +28.03 Da,            | 3681.577393 | 2 | 596.8099976 | 595.8174643 |
| RSQETALQEQLQR                        | Q5ND29 | 0.04326923 | N-term +42.01 Da,                         | 3681.945801 | 3 | 757.4500122 | 756.7856804 |
| LIGDAAKNQLTSNPENTVFDKR               | P20029 | 0          | N-term +42.01 Da, K +28.03 Da,            | 3683.176514 | 4 | 637.8599854 | 637.6065059 |
| AQWNQLQLDTR                          | P42227 | 0          | N-term +42.01 Da,                         | 3683.381836 | 2 | 670.8499756 | 669.8542445 |
| MDGIVPDIAVGTKR                       | P17225 | 0.00058072 | N-term +42.01 Da, K +28.03 Da,            | 3690.740479 | 4 | 597.3400269 | 597.0893685 |
| AELKYISGFGNECASEDPR                  | O09173 | 0.02141764 | N-term +42.01 Da, K +28.03 Da,C +57.02Da, | 3690.916016 | 2 | 852.9400024 | 853.4414133 |
| VAGPQPAQTGAPQGSGLGEYLFER             | P29391 | 0          | N-term +42.01 Da,                         | 3692.991943 | 3 | 467.6000061 | 467.6013952 |
| MFSWVSKDAR                           | Q9WVK4 | 0          | N-term +42.01 Da, K +28.03 Da,            | 3695.099121 | 3 | 796.4500122 | 795.7833992 |
| STIPTKQTFTTYSNQPGLIQVYEGER           | P17879 | 0          | N-term +42.01 Da, K +28.03 Da,            | 3697.683105 | 2 | 632.8187866 | 632.8196728 |
| MEIGVSAECKSVPGVTSTPH                 | O54931 | 0.00276396 | N-term +42.01 Da, K +28.03 Da,C +57.02Da, | 3700.565674 | 3 | 594.6557007 | 593.9965855 |
| KMGAPEAGMAEYLFDKH                    | P09528 | 0          | N-term +42.01 Da, K +28.03 Da,            | 3701.548584 | 2 | 872.4400024 | 871.4325337 |
| MEIGVSAECKSVPGVTSTPH                 | O54931 | 0.00382305 | N-term +42.01 Da, K +28.03 Da,C +57.02Da, | 3701.717041 | 2 | 700.8979492 | 700.8984546 |
| STIPTKQTFTTYSNQPGLIQVYEGER           | P17879 | 0          | N-term +42.01 Da, K +28.03 Da,            | 3703.642822 | 2 | 713.8699951 | 713.37227   |
| AGVDQHEGTIQVQGQNLFFR                 | Q8VCR7 | 0          | N-term +42.01 Da,                         | 3704.755859 | 4 | 670.3900146 | 669.8833815 |
| SGEDEQQEQTIAEDLVVTKYK                | P50580 | 0          | N-term +42.01 Da, K +28.03 Da,            | 3704.833252 | 3 | 635.0200195 | 634.6858546 |
| MDGIVPDIAVGTKR                       | P17225 | 0          | N-term +42.01 Da, K +28.03 Da,            | 3706.284912 | 3 | 691.3800049 | 691.0480091 |
| AGVDQHEGTIQVQGQNLFFR                 | Q8VCR7 | 0          | N-term +42.01 Da,                         | 3707.399414 | 3 | 463.2600098 | 463.2540011 |
| AEPWGNELASAAAR                       | Q60772 | 0          | N-term +42.01 Da,                         | 3709.171631 | 4 | 669.8800049 | 669.8833815 |
| MDGIVPDIAVGTKR                       | P17225 | 0.03848027 | N-term +42.01 Da, K +28.03 Da,            | 3709.410156 | 3 | 893.1699829 | 892.8420832 |
| AELQEVQITEEKPLLPQTPETAKEAELAAR       | Q9QYG0 | 0          | N-term +42.01 Da, K +28.03 Da,            | 3711.214111 | 2 | 981.4899902 | 980.5027316 |
| AELQEVQITEEKPLLPQTPETAKEAELAAR       | Q9QYG0 | 0          | N-term +42.01 Da, K +28.03 Da,            | 3713.461426 | 3 | 569.960022  | 569.2967011 |
| AGVDQHEGTIQVQGQNLFFR                 | Q8VCR7 | 0          | N-term +42.01 Da,                         | 3715.980713 | 4 | 584.8300171 | 584.8278091 |
| ASNDYTQQATQSYGAYPTQPGQGSYQSSQPYGQQSY | P56959 | 0          | N-term +42.01 Da,                         | 3723.273438 | 3 | 467.6009216 | 467.6013952 |
| SSNGTDAPAEAQAAMEEPPVQPSVWDR          | Q9DBG5 | 0          | N-term +42.01 Da,                         | 3723.610107 | 3 | 691.710022  | 691.0480091 |



|                                        |        |            |                                           |             |   |             |             |
|----------------------------------------|--------|------------|-------------------------------------------|-------------|---|-------------|-------------|
| AEELLER                                | P21981 | 0.03010537 | N-term +42.01 Da,                         | 3728.003906 | 2 | 632.8197632 | 632.8196728 |
| MLNMWVKR                               | Q5SUH6 | 0          | N-term +42.01 Da, K +28.03 Da,            | 3737.130615 | 2 | 736.8464355 | 736.8468145 |
| GDPKEEEEEELVDPLTTVR                    | P99028 | 0.02676768 | N-term +42.01 Da, K +28.03 Da,            | 3740.686523 | 3 | 718.0700073 | 717.4108362 |
| AEGEDVGVWWR                            | Q80Y55 | 0          | N-term +42.01 Da,                         | 3744.622314 | 2 | 408.2099915 | 408.2059548 |
| AELKYISGFGNECASEDPR                    | O09173 | 0.029693   | N-term +42.01 Da, K +28.03 Da,C +57.02Da, | 3745.796143 | 2 | 729.3900146 | 728.8933696 |
| CQKAMQDAEVSKSDIGEVILVGGMTR             | P38647 | 0          | N-term +42.01 Da, K +28.03 Da,C +57.02Da, | 3750.860596 | 3 | 690.0200195 | 689.359919  |
| SSPAQPAVPAPLADLKIQH                    | P24549 | 0          | N-term +42.01 Da, K +28.03 Da,            | 3752.75     | 2 | 638.2930298 | 638.2929651 |
| AELQEVQITEEKPLLPGQTPETAKEAELAAR        | Q9QYGO | 0          | N-term +42.01 Da, K +28.03 Da,            | 3753.716309 | 3 | 486.269989  | 486.2646719 |
| SSPAQPAVPAPLADLKIQH                    | P24549 | 0          | N-term +42.01 Da, K +28.03 Da,            | 3754.102051 | 3 | 467.6000061 | 467.6013952 |
| AELQEVQITEEKPLLPGQTPETAKEAELAAR        | Q9QYGO | 0          | N-term +42.01 Da, K +28.03 Da,            | 3760.963379 | 2 | 773.4099731 | 772.9070087 |
| LATALQKLEEAKAADER                      | P21107 | 0          | N-term +42.01 Da, K +28.03 Da,            | 3762.701172 | 3 | 569.2999878 | 569.2967011 |
| AEELLER                                | P21981 | 0.03010537 | N-term +42.01 Da,                         | 3765.720459 | 2 | 459.2200012 | 458.7152983 |
| MLNMWVKR                               | Q5SUH6 | 0          | N-term +42.01 Da, K +28.03 Da,            | 3768.368164 | 2 | 604.8256226 | 604.8264432 |
| FAQLCEEHGILR                           | B5X0G2 | 0          | N-term +42.01 Da, C +57.02Da,             | 3769.967285 | 2 | 708.3800049 | 707.3884516 |
| FAQLCEEHGILR                           | B5X0G2 | 0          | N-term +42.01 Da, C +57.02Da,             | 3773.391113 | 2 | 736.8499756 | 736.8468145 |
| FAQLCEEHGILR                           | B5X0G2 | 0          | N-term +42.01 Da, C +57.02Da,             | 3773.807861 | 3 | 395.5799866 | 394.9167658 |
| MEPEEGTPLWR                            | Q9CZG3 | 0          | N-term +42.01 Da,                         | 3777.541504 | 2 | 728.8917847 | 728.8933696 |
| EADDIVNWLKRR                           | P09103 | 0          | N-term +42.01 Da, K +28.03 Da,            | 3778.051514 | 3 | 691.0499878 | 691.0480091 |
| MELEAPLEESQSR                          | Q99MJ9 | 0          | N-term +42.01 Da,                         | 3781.103271 | 2 | 559.2684326 | 559.2689585 |
| ASGVAVSDGVIKVFNDMKVR                   | P18760 | 0.00278707 | N-term +42.01 Da, K +28.03 Da,            | 3783.648682 | 2 | 638.289978  | 638.2929651 |
| AELQEVQITEEKPLLPGQTPETAKEAELAAR        | Q9QYGO | 0          | N-term +42.01 Da, K +28.03 Da,            | 3788.444824 | 3 | 798.4099731 | 798.4067029 |
| LIFAGKQLEDGR                           | P0CG49 | 0          | N-term +42.01 Da, K +28.03 Da,            | 3788.687012 | 2 | 1036.060059 | 1036.068375 |
| AGLLKTTGLVGLAVCDTPHER                  | Q9CPP6 | 0          | N-term +42.01 Da, K +28.03 Da,C +57.02Da, | 3789.416748 | 3 | 467.6000061 | 467.6013952 |
| ACGLVASNLNLKPGEC                       | P16045 | 0          | N-term +42.01 Da, K +28.03 Da,C +57.02Da, | 3792.118408 | 2 | 632.8200073 | 632.8196728 |
| AGLLKTTGLVGLAVCDTPHER                  | Q9CPP6 | 0          | N-term +42.01 Da, K +28.03 Da,C +57.02Da, | 3796.273926 | 2 | 793.3800049 | 793.379967  |
| AFTENGEWAIR                            | P04760 | 0.04194793 | N-term +42.01 Da,                         | 3800.793457 | 2 | 998.5300293 | 998.5302371 |
| SSNGTDAPAEAQAAMEEPPVQPSVVDR            | Q9DBG5 | 0          | N-term +42.01 Da,                         | 3802.606445 | 2 | 879.460022  | 878.9574279 |
| SGSKYKPAPLATLPSTLDPAEYDVPETR           | Q9CQC7 | 0          | N-term +42.01 Da, K +28.03 Da,            | 3807.067383 | 4 | 579.3099976 | 578.811582  |
| SSNGTDAPAEAQAAMEEPPVQPSVVDR            | Q9DBG5 | 0          | N-term +42.01 Da,                         | 3809.397217 | 3 | 691.0499878 | 691.0480091 |
| ATDMSQGLIHPKALPL                       | Q3TEA8 | 0          | N-term +42.01 Da, K +28.03 Da,            | 3812.992432 | 2 | 675.3189697 | 675.3202348 |
| MNFSGKYQL                              | P12710 | 0.03251626 | N-term +42.01 Da, K +28.03 Da,            | 3814.513672 | 2 | 612.3300171 | 611.3366438 |
| AGLLKTTGLVGLAVCDTPHER                  | Q9CPP6 | 0.0109375  | N-term +42.01 Da, K +28.03 Da,C +57.02Da, | 3815.872314 | 2 | 789.9000244 | 789.3995482 |
| MEPLYQQTNKQVQEIQSHMGR                  | O35166 | 0          | N-term +42.01 Da, K +28.03 Da,            | 3818.598877 | 3 | 616.3200073 | 616.3082784 |
| MWKASAGHAVSITQDDGGADDWETDPDFVNDVSEKEQR | Q60598 | 0          | N-term +42.01 Da, K +28.03 Da,            | 3825.221436 | 3 | 492.9599915 | 492.2840663 |
| MEGYSEASLLR                            | Q8CC35 | 0          | N-term +42.01 Da,                         | 3827.492432 | 2 | 458.7142639 | 458.7152983 |
| AVQKDLPR                               | Q6A068 | 0.04232804 | N-term +42.01 Da, K +28.03 Da,            | 3829.368164 | 3 | 569.289978  | 569.2967011 |
| MWKASAGHAVSITQDDGGADDWETDPDFVNDVSEKEQR | Q60598 | 0          | N-term +42.01 Da, K +28.03 Da,            | 3830.25     | 3 | 706.0300293 | 705.3724927 |
| SFLKSFPPPGSADGLR                       | Q61189 | 0          | N-term +42.01 Da, K +28.03 Da,            | 3834.449707 | 3 | 420.6000061 | 420.2686995 |
| SFLKSFPPPGSADGLR                       | Q61189 | 0          | N-term +42.01 Da, K +28.03 Da,            | 3837.231445 | 2 | 532.2954712 | 532.2964556 |
| ADEIAKAQVAQPGGDTIFGKIIR                | P70349 | 0          | N-term +42.01 Da, K +28.03 Da,            | 3840.290283 | 3 | 691.3755493 | 691.0480091 |

|                                      |        |            |                                           |             |   |             |             |
|--------------------------------------|--------|------------|-------------------------------------------|-------------|---|-------------|-------------|
| ADEIAKAQVAQPGGDTIFGKIIR              | P70349 | 0          | N-term +42.01 Da, K +28.03 Da,            | 3840.858643 | 2 | 423.2399902 | 422.7374219 |
| SSIGTGYDLSASTFSPDGR                  | O70435 | 0          | N-term +42.01 Da,                         | 3854.048096 | 3 | 526.3099976 | 525.6470048 |
| GDVVFVGPVSVIVSR                      | Q64176 | 0          | N-term +42.01 Da,                         | 3856.030029 | 3 | 746.3800049 | 745.7227518 |
| SFLKSFPPGGSADGLR                     | Q61189 | 0          | N-term +42.01 Da, K +28.03 Da,            | 3865.322266 | 2 | 815.9099731 | 815.9108117 |
| ADEIAKAQVAQPGGDTIFGKIIR              | P70349 | 0          | N-term +42.01 Da, K +28.03 Da,            | 3871.348145 | 2 | 422.7366333 | 422.7374219 |
| ADEIAKAQVAQPGGDTIFGKIIR              | P70349 | 0          | N-term +42.01 Da, K +28.03 Da,            | 3877.514893 | 2 | 785.4199829 | 784.4199493 |
| ADEIAKAQVAQPGGDTIFGKIIR              | P70349 | 0          | N-term +42.01 Da, K +28.03 Da,            | 3880.022949 | 3 | 476.2600098 | 475.5976509 |
| MDGIVTEVAVGVKRR                      | Q91Z31 | 0          | N-term +42.01 Da, K +28.03 Da,            | 3884.798584 | 2 | 453.7238159 | 453.7248087 |
| AELVQGGQAPVGMKAEGFVDALHR             | A2AJ71 | 0          | N-term +42.01 Da, K +28.03 Da,            | 3887.023193 | 2 | 529.289978  | 528.7878412 |
| ANVADTKLYDILGPPGASENELKKAYR          | Q9QYJ0 | 0          | N-term +42.01 Da, K +28.03 Da,            | 3887.294922 | 2 | 927.9799805 | 928.4827554 |
| SHVAVENALGLDQQFAGLDLNSSDNQSGGSTASKGR | Q62167 | 0          | N-term +42.01 Da, K +28.03 Da,            | 3899.119141 | 2 | 920.4199829 | 919.4315402 |
| MELSADYLR                            | Q8BGS2 | 0          | N-term +42.01 Da,                         | 3901.969238 | 2 | 474.25      | 474.742902  |
| MDPSGVKLVLETAEDIQER                  | P16546 | 0          | N-term +42.01 Da, K +28.03 Da,            | 3902.809814 | 2 | 867.4500122 | 866.4598034 |
| ASASYHISNLEKMTSSDKDFR                | Q6ZQ38 | 0          | N-term +42.01 Da, K +28.03 Da,            | 3905.213379 | 3 | 523.2894287 | 522.6301253 |
| LATALQKLEEAKEKADESER                 | P21107 | 0          | N-term +42.01 Da, K +28.03 Da,            | 3906.832031 | 2 | 645.3300171 | 645.3239313 |
| ADEIAKAQVAQPGGDTIFGKIIR              | P70349 | 0          | N-term +42.01 Da, K +28.03 Da,            | 3907.444336 | 2 | 947.5300293 | 948.0172882 |
| LATALQKLEEAKEKADESER                 | P21107 | 0          | N-term +42.01 Da, K +28.03 Da,            | 3908.574463 | 4 | 567.2800293 | 567.0371358 |
| MDPSGVKLVLETAEDIQER                  | P16546 | 0          | N-term +42.01 Da, K +28.03 Da,            | 3910.010986 | 3 | 756.3699951 | 755.7137556 |
| KGIKSVTELNGDTITNTMTLGDIVYKR          | P12710 | 0          | N-term +42.01 Da, K +28.03 Da,            | 3920.381836 | 3 | 569.6300049 | 569.2967011 |
| ADEIAKAQVAQPGGDTIFGKIIR              | P70349 | 0          | N-term +42.01 Da, K +28.03 Da,            | 3925.200195 | 3 | 799.0599976 | 798.4067029 |
| MNNYLEKLGPLR                         | Q8C7G5 | 0          | N-term +42.01 Da, K +28.03 Da,            | 3925.581299 | 2 | 543.7199707 | 543.7223644 |
| AQEKMELDLELPAGASPAEGGGPGGGGLR        | Q9DB52 | 0          | N-term +42.01 Da, K +28.03 Da,            | 3926.712891 | 2 | 1043.530029 | 1043.531823 |
| NFNVEKINGEWHTIILASDKR                | B5X0G2 | 0          | N-term +42.01 Da, K +28.03 Da,            | 3928.307373 | 3 | 696.3599854 | 696.023641  |
| NFNVEKINGEWHTIILASDKR                | B5X0G2 | 0          | N-term +42.01 Da, K +28.03 Da,            | 3930.610596 | 2 | 478.7600098 | 478.7580205 |
| SHVAVENALGLDQQFAGLDLNSSDNQSGGSTASKGR | Q62167 | 0          | N-term +42.01 Da, K +28.03 Da,            | 3934.075195 | 2 | 857.9199829 | 857.9233878 |
| ANVADTKLYDILGPPGASENELKKAYR          | Q9QYJ0 | 0          | N-term +42.01 Da, K +28.03 Da,            | 3934.527344 | 4 | 539.3099976 | 539.308675  |
| MDPSGVKLVLETAEDIQER                  | P16546 | 0          | N-term +42.01 Da, K +28.03 Da,            | 3936.22876  | 2 | 620.8234863 | 620.8232783 |
| SHVAVENALGLDQQFAGLDLNSSDNQSGGSTASKGR | Q62167 | 0          | N-term +42.01 Da, K +28.03 Da,            | 3938.580078 | 2 | 512.2199707 | 512.2246501 |
| ASLLKVDQEVKLVDSFR                    | P61290 | 0          | N-term +42.01 Da, K +28.03 Da,            | 3938.674805 | 3 | 946.4699707 | 946.1330862 |
| AQEFVNCKIQSGKVVVF                    | Q9QUH0 | 0.02335025 | N-term +42.01 Da, K +28.03 Da,C +57.02Da, | 3946.055664 | 3 | 677.039978  | 676.3809881 |
| AAVPELLEQQEEDR                       | Q9D8U8 | 0          | N-term +42.01 Da,                         | 3946.466553 | 2 | 1237.089966 | 1236.584846 |
| AQEFVNCKIQSGKVVVF                    | Q9QUH0 | 0.01989796 | N-term +42.01 Da, K +28.03 Da,C +57.02Da, | 3949.936523 | 2 | 758.9000244 | 757.8961096 |
| MDPSGVKLVLETAEDIQER                  | P16546 | 0          | N-term +42.01 Da, K +28.03 Da,            | 3952.202881 | 3 | 885.0800171 | 884.7490176 |
| ASGVAVSDGVKIVFNDMKVRR                | P18760 | 0          | N-term +42.01 Da, K +28.03 Da,            | 3952.922852 | 2 | 649.8353271 | 649.8329779 |
| VFDKDGNGYISAAELR                     | P62204 | 0.00380435 | N-term +42.01 Da, K +28.03 Da,            | 3953.133057 | 3 | 884.75      | 884.7490176 |
| SRGHNLSREELRGLRHYEEATRAGIR           | Q8R1P5 | 0.01894521 | N-term +42.01 Da,                         | 3955.486816 | 2 | 1237.589966 | 1236.584846 |
| EGDVLTLLESER                         | P62858 | 0.00058754 | N-term +42.01 Da,                         | 3958.264893 | 2 | 516.777771  | 516.7772761 |
| AAVPELLEQQEEDR                       | Q9D8U8 | 0          | N-term +42.01 Da,                         | 3958.779541 | 3 | 670.4299927 | 670.4271035 |
| AGVPTVSFSELR                         | E9PY03 | 0.00058411 | N-term +42.01 Da,                         | 3960.429199 | 2 | 665.3817139 | 665.381583  |
| MDPSGVKLVLETAEDIQER                  | P16546 | 0          | N-term +42.01 Da, K +28.03 Da,            | 3965.000488 | 2 | 1080.030029 | 1079.042753 |

|                                      |        |            |                                           |             |   |             |             |
|--------------------------------------|--------|------------|-------------------------------------------|-------------|---|-------------|-------------|
| SHVAVENALGLDQQFAGLDLNSSDNQSGGSTASKGR | Q62167 | 0          | N-term +42.01 Da, K +28.03 Da,            | 3966.669434 | 2 | 620.8217163 | 620.8232783 |
| FPKSYRHPPEAR                         | Q99PW4 | 0.03281949 | N-term +42.01 Da, K +28.03 Da,            | 3970.325195 | 2 | 925.460022  | 925.4575949 |
| VAGPQAQTGAPQGSGLGEYLFER              | P29391 | 0          | N-term +42.01 Da,                         | 3973.231689 | 2 | 606.8300171 | 606.8327804 |
| AMVSEFLKQAR                          | P10107 | 0          | N-term +42.01 Da, K +28.03 Da,            | 3981.155762 | 3 | 586.3300171 | 585.6697038 |
| AKDILGEAGLHFDLNLKR                   | Q61025 | 0          | N-term +42.01 Da, K +28.03 Da,            | 3987.294189 | 3 | 712.6900024 | 712.696648  |
| VAGPQAQTGAPQGSGLGEYLFER              | P29391 | 0          | N-term +42.01 Da,                         | 3990.268555 | 2 | 647.8300171 | 647.8266408 |
| IEANEALVKALE                         | Q9D3D9 | 0          | N-term +42.01 Da, K +28.03 Da,            | 3991.47168  | 2 | 604.3099976 | 604.3106262 |
| YVLVNLATYEPR                         | Q3V1N1 | 0.04200869 | N-term +42.01 Da,                         | 3993.467773 | 2 | 917.9799805 | 916.9605019 |
| SGEDEQQEQTIAEDLVVTKYKMGDIANR         | P50580 | 0          | N-term +42.01 Da, K +28.03 Da,            | 3994.689209 | 2 | 852.4199829 | 851.9233878 |
| SSVAVLTQESFAEHR                      | Q8VDJ3 | 0.00382514 | N-term +42.01 Da,                         | 3997.891357 | 2 | 865.9229736 | 865.9257938 |
| ADQLTEEQIAEFKEA                      | P62204 | 0          | N-term +42.01 Da, K +28.03 Da,            | 3999.369873 | 2 | 539.2657471 | 539.2658845 |
| TEPGASPEDPWVVKVEY                    | A2BFB1 | 0.01043841 | N-term +42.01 Da, K +28.03 Da,            | 4006.556641 | 2 | 852.9199829 | 851.9233878 |
| AESDWDVTVTLR                         | Q9JMG1 | 0          | N-term +42.01 Da,                         | 4008.281494 | 2 | 764.3699951 | 764.377227  |
| SHVAVENALGLDQQFAGLDLNSSDNQSGGSTASKGR | Q62167 | 0.01240951 | N-term +42.01 Da, K +28.03 Da,            | 4009.543457 | 2 | 702.9000244 | 702.8975975 |
| MLLAQINR                             | O70230 | 0.00276091 | N-term +42.01 Da,                         | 4009.744873 | 2 | 835.9500122 | 835.9520472 |
| VISLSEHESIIGR                        | P08228 | 0          | N-term +42.01 Da,                         | 4022.11792  | 2 | 604.3099976 | 604.3106262 |
| MDNSGKQAEAMALLAEAER                  | Q9DB05 | 0.0094093  | N-term +42.01 Da, K +28.03 Da,            | 4022.28833  | 3 | 766.0999756 | 765.7725453 |
| SHVAVENALGLDQQFAGLDLNSSDNQSGGSTASKGR | Q62167 | 0          | N-term +42.01 Da, K +28.03 Da,            | 4025.372559 | 2 | 673.3699951 | 672.36953   |
| MDNKDEYLLNFKGY                       | O35403 | 0.03378043 | N-term +42.01 Da, K +28.03 Da,            | 4028.474365 | 2 | 901.4099731 | 900.9070782 |
| AEAPQVVETDPDFEPLPR                   | Q9R1E0 | 0          | N-term +42.01 Da,                         | 4028.860352 | 2 | 865.9234619 | 865.9257938 |
| ADKMDMSLDDIILNLR                     | O08583 | 0          | N-term +42.01 Da, K +28.03 Da,            | 4029.183594 | 3 | 756.7600098 | 756.4301193 |
| SSSAASPLFAPGEDCGPAWR                 | O35969 | 0          | N-term +42.01 Da, C +57.02Da,             | 4034.084229 | 2 | 523.7999878 | 523.7956662 |
| AEAPQVVETDPDFEPLPR                   | Q9R1E0 | 0          | N-term +42.01 Da,                         | 4036.27832  | 3 | 674.0499878 | 673.3892608 |
| SDSLVCEVDPKELKTLR                    | Q9ERL7 | 0          | N-term +42.01 Da, K +28.03 Da,C +57.02Da, | 4036.484619 | 3 | 445.2600098 | 444.9284545 |
| MEDIDQSSSLVSSADSPPRPPPAFKY           | Q99P72 | 0          | N-term +42.01 Da, K +28.03 Da,            | 4038.09668  | 4 | 706.5999756 | 706.3543432 |
| MEDIDQSSSLVSSADSPPRPPPAFKY           | Q99P72 | 0          | N-term +42.01 Da, K +28.03 Da,            | 4039.64502  | 2 | 914.9829102 | 914.9866189 |
| AELEEVTLDGKPLQALR                    | Q9JIX8 | 0          | N-term +42.01 Da, K +28.03 Da,            | 4041.178711 | 2 | 544.2700195 | 544.2669391 |
| AESDWDVTVTLR                         | Q9JMG1 | 0          | N-term +42.01 Da,                         | 4045.787842 | 2 | 551.7702637 | 551.7711365 |
| MEDIDQSSSLVSSADSPPRPPPAFKY           | Q99P72 | 0          | N-term +42.01 Da, K +28.03 Da,            | 4045.866943 | 3 | 668.6677246 | 668.6680292 |
| SKGPAVGIDLGTTCVGVFQH                 | P63017 | 0          | N-term +42.01 Da, K +28.03 Da,C +57.02Da, | 4046.19165  | 2 | 1135.150024 | 1134.141541 |
| MELEDGVVYQEEPGGSGAVMSER              | Q58A65 | 0          | N-term +42.01 Da,                         | 4046.4104   | 2 | 929         | 928.0052436 |
| AADIEQVFR                            | Q9QX47 | 0          | N-term +42.01 Da,                         | 4046.519287 | 2 | 788.8699951 | 788.867224  |
| MEPDGTYEPGFVGIR                      | P60898 | 0          | N-term +42.01 Da,                         | 4049.427979 | 2 | 721.8699951 | 721.3770295 |
| SKGPAVGIDLGTTCVGVFQH                 | P63017 | 0          | N-term +42.01 Da, K +28.03 Da,C +57.02Da, | 4051.279297 | 2 | 536.7800293 | 536.776419  |
| SKGPAVGIDLGTTCVGVFQH                 | P63017 | 0          | N-term +42.01 Da, K +28.03 Da,C +57.02Da, | 4053.586914 | 3 | 765.7714844 | 765.7725453 |
| ATNFLAHEKIWFDFKFKYDDAER              | P57776 | 0          | N-term +42.01 Da, K +28.03 Da,            | 4054.516602 | 4 | 660.6065063 | 660.6066544 |
| ATNFLAHEKIWFDFKFKYDDAER              | P57776 | 0          | N-term +42.01 Da, K +28.03 Da,            | 4056.68335  | 2 | 1148.650024 | 1148.15518  |
| SKGPAVGIDLGTTCVGVFQH                 | P63017 | 0          | N-term +42.01 Da, K +28.03 Da,C +57.02Da, | 4057.840088 | 3 | 784.3800049 | 784.0496391 |
| ILEFFGLKKEECPAVR                     | P09103 | 0          | N-term +42.01 Da, K +28.03 Da,C +57.02Da, | 4059.847412 | 2 | 852.4199829 | 851.9233878 |
| SKGPAVGIDLGTTCVGVFQH                 | P63017 | 0          | N-term +42.01 Da, K +28.03 Da,C +57.02Da, | 4060.566162 | 3 | 756.4292603 | 756.4301193 |

|                                     |        |            |                                           |             |   |             |             |
|-------------------------------------|--------|------------|-------------------------------------------|-------------|---|-------------|-------------|
| SSPAQPAVPAPLADLKIHTKIF              | P24549 | 0          | N-term +42.01 Da, K +28.03 Da,            | 4066.477783 | 2 | 1176.069946 | 1175.57082  |
| SSPAQPAVPAPLADLKIHTKIF              | P24549 | 0          | N-term +42.01 Da, K +28.03 Da,            | 4067.809326 | 3 | 444.9275818 | 444.9284545 |
| AEELEVTLDGKPLQALR                   | Q9JIX8 | 0          | N-term +42.01 Da, K +28.03 Da,            | 4068.294922 | 2 | 1079.530029 | 1079.028257 |
| PGSISWDGLDPGKLY                     | Q8VIN1 | 0          | N-term +42.01 Da, K +28.03 Da,            | 4070.067139 | 3 | 771.75      | 771.4214013 |
| AAAAATAVGPAGSAGVAGPGGAGPCATVSVFPGAR | Q9WVG6 | 0          | N-term +42.01 Da, C +57.02Da,             | 4070.662354 | 2 | 1321.579956 | 1321.089772 |
| VFDKDGNGYISAAELR                    | P62204 | 0          | N-term +42.01 Da, K +28.03 Da,            | 4073.316162 | 4 | 686.1300049 | 686.1328881 |
| AAVLENGVLSR                         | P16331 | 0          | N-term +42.01 Da,                         | 4073.401123 | 2 | 717.8276367 | 717.8284244 |
| ADKMDMSLDDIIKLNLR                   | O08583 | 0          | N-term +42.01 Da, K +28.03 Da,            | 4076.18335  | 2 | 551.7702637 | 551.7711365 |
| SSLQELCSGLPLRPLPENR                 | Q8VC12 | 0          | N-term +42.01 Da, C +57.02Da,             | 4077.402588 | 2 | 994.0100098 | 993.0185487 |
| SSVAVLTQESFAEHR                     | Q8VDJ3 | 0.0420493  | N-term +42.01 Da,                         | 4081.919189 | 2 | 789.3800049 | 788.867224  |
| VFDKDGNGYISAAELR                    | P62204 | 0          | N-term +42.01 Da, K +28.03 Da,            | 4081.994629 | 4 | 535.5499878 | 535.5506677 |
| AESDWDVTVTLR                        | Q9JMG1 | 0.01544004 | N-term +42.01 Da,                         | 4082.070068 | 2 | 595.3200073 | 594.3262762 |
| MLGGLGLAAEGLAHR                     | Q8CF02 | 0          | N-term +42.01 Da, K +28.03 Da,            | 4082.247803 | 2 | 928.0100098 | 928.0052436 |
| AAVLENGVLSR                         | P16331 | 0          | N-term +42.01 Da,                         | 4083.588135 | 2 | 555.3051147 | 555.3048121 |
| ADKMDMSLDDIIKLNLR                   | O08583 | 0          | N-term +42.01 Da, K +28.03 Da,            | 4084.778564 | 3 | 765.7712402 | 765.7725453 |
| MEATLEQHLEDTMKNPS                   | Q9D1L9 | 0          | N-term +42.01 Da, K +28.03 Da,            | 4085.440674 | 3 | 914.5       | 914.5080919 |
| MEATLEQHLEDTMKNPS                   | Q9D1L9 | 0          | N-term +42.01 Da, K +28.03 Da,            | 4088.543945 | 4 | 661.1099854 | 660.6066544 |
| MEATLEQHLEDTMKNPS                   | Q9D1L9 | 0          | N-term +42.01 Da, K +28.03 Da,            | 4089.578613 | 3 | 784.3800049 | 784.0496391 |
| WDDRSCTEETHGFICQK                   | Q64449 | 0.01090909 | N-term +42.01 Da, K +28.03 Da,C +57.02Da, | 4092.79541  | 2 | 635.3499756 | 635.3491289 |
| VFDKDGNGYISAAELR                    | P62204 | 0          | N-term +42.01 Da, K +28.03 Da,            | 4095.310547 | 3 | 880.7999878 | 880.4731137 |
| ADKMDMSLDDIIKLNLR                   | O08583 | 0          | N-term +42.01 Da, K +28.03 Da,            | 4100.265625 | 2 | 758.4061279 | 758.4079956 |
| ADKMDMSLDDIIKLNLR                   | O08583 | 0          | N-term +42.01 Da, K +28.03 Da,            | 4101.883301 | 3 | 531.9699707 | 531.6421424 |
| DDIAALVVDNGSGMCKAGFAGDDAPR          | P60710 | 0          | N-term +42.01 Da, K +28.03 Da,C +57.02Da, | 4102.319824 | 2 | 509.2799988 | 509.2767751 |
| AEELEVTLDGKPLQALR                   | Q9JIX8 | 0          | N-term +42.01 Da, K +28.03 Da,            | 4103.844238 | 2 | 518.25      | 518.2500369 |
| DDIAALVVDNGSGMCKAGFAGDDAPR          | P60710 | 0          | N-term +42.01 Da, K +28.03 Da,C +57.02Da, | 4105.535645 | 3 | 505.9400024 | 505.9410892 |
| MEAQAQGLLETEPLQGR                   | O54818 | 0          | N-term +42.01 Da,                         | 4107.336914 | 2 | 504.7270203 | 504.7280803 |
| AEELEVTLDGKPLQALR                   | Q9JIX8 | 0          | N-term +42.01 Da, K +28.03 Da,            | 4110.13623  | 3 | 619.3400269 | 619.0059212 |
| PGSISWDGLDPGKLY                     | Q8VIN1 | 0          | N-term +42.01 Da, K +28.03 Da,            | 4111.671387 | 2 | 1079.530029 | 1079.028257 |
| AAKFVFSIGKF                         | P67778 | 0.0011409  | N-term +42.01 Da, K +28.03 Da,            | 4113.096191 | 2 | 928.0049438 | 928.0052436 |
| ADKMDMSLDDIIKLNLR                   | O08583 | 0          | N-term +42.01 Da, K +28.03 Da,            | 4114.949219 | 3 | 691.3800049 | 691.0480091 |
| ADKMDMSLDDIIKLNLR                   | O08583 | 0          | N-term +42.01 Da, K +28.03 Da,            | 4119.899414 | 4 | 660.6060181 | 660.6066544 |
| SQTEEDCTEELFDLHAR                   | P99028 | 0          | N-term +42.01 Da, C +57.02Da,             | 4120.560547 | 2 | 858.4158325 | 857.9233878 |
| AEELEVTLDGKPLQALR                   | Q9JIX8 | 0          | N-term +42.01 Da, K +28.03 Da,            | 4122.453613 | 3 | 784.3800049 | 784.0496391 |
| MEAQAQGLLETEPLQGR                   | O54818 | 0          | N-term +42.01 Da,                         | 4130.276855 | 2 | 634.8301392 | 634.8320597 |
| KTFSHELSDFGLESTTGEVPPVVAR           | P27773 | 0          | N-term +42.01 Da, K +28.03 Da,            | 4131.639648 | 2 | 758.4099731 | 758.4079956 |
| PGSISWDGLDPGKLY                     | Q8VIN1 | 0          | N-term +42.01 Da, K +28.03 Da,            | 4135.199707 | 2 | 518.25      | 518.2500369 |
| LATALQKLEEAKEKADESER                | P21107 | 0          | N-term +42.01 Da, K +28.03 Da,            | 4136.960938 | 3 | 804.75      | 804.4126888 |
| FIGENMNPDGMVALLDYR                  | P63028 | 0          | N-term +42.01 Da,                         | 4137.137695 | 3 | 766.1099854 | 765.7725453 |
| FIGENMNPDGMVALLDYR                  | P63028 | 0          | N-term +42.01 Da,                         | 4138.930664 | 3 | 904.4799805 | 904.1521517 |
| CDKEFMWALKNGDLDEVKDYVAKGEDVNR       | P62774 | 0          | N-term +42.01 Da, K +28.03 Da,C +57.02Da, | 4142.072266 | 2 | 656.8656616 | 655.856787  |

|                                  |        |            |                                           |             |   |             |             |
|----------------------------------|--------|------------|-------------------------------------------|-------------|---|-------------|-------------|
| MELVEVLKR                        | Q7TMF3 | 0          | N-term +42.01 Da, K +28.03 Da,            | 4142.301758 | 2 | 581.2999878 | 581.2985732 |
| SKGPAVGIDLGTYSVGVFQHGKVEIANDQGNR | P63017 | 0.00169396 | N-term +42.01 Da, K +28.03 Da,C +57.02Da, | 4147.078613 | 4 | 739.1400146 | 738.6441288 |
| AFPSLSAGQNPWR                    | Q8K4H1 | 0          | N-term +42.01 Da,                         | 4147.372559 | 4 | 974.4699707 | 974.4710365 |
| MEDSMDMDMSPLRPQ                  | Q61937 | 0          | N-term +42.01 Da,                         | 4147.572266 | 2 | 1079.530029 | 1079.028257 |
| AAVLQQVLERPELNKLPKSTQN           | Q7M739 | 0          | N-term +42.01 Da, K +28.03 Da,            | 4148.118164 | 3 | 984.8599854 | 984.5230796 |
| AEAGVSVTEGSPGVVAALPEDMR          | H3BJ84 | 0          | N-term +42.01 Da,                         | 4150.212891 | 3 | 499.9400024 | 499.9351033 |
| AEAGVSVTEGSPGVVAALPEDMR          | H3BJ84 | 0          | N-term +42.01 Da,                         | 4150.377441 | 3 | 719.6900024 | 719.6879299 |
| AEAGVSVTEGSPGVVAALPEDMR          | H3BJ84 | 0          | N-term +42.01 Da,                         | 4150.813965 | 2 | 994.0100098 | 993.0185487 |
| MELVEVLKR                        | Q7TMF3 | 0          | N-term +42.01 Da, K +28.03 Da,            | 4153.49707  | 2 | 552.295105  | 552.2958332 |
| MEGKVYIGGEDYEKFTPKDYLTTY         | P40936 | 0.04190751 | N-term +42.01 Da, K +28.03 Da,            | 4153.891602 | 3 | 804.4099731 | 804.4126888 |
| ADKMDMSLDDIIKLNK                 | O08583 | 0          | N-term +42.01 Da, K +28.03 Da,            | 4155.779785 | 2 | 599.8200073 | 599.8249553 |
| LKTQPTDEEMLIYSH                  | P31786 | 0.01592193 | N-term +42.01 Da, K +28.03 Da,            | 4159.172852 | 2 | 867.4471436 | 866.4598034 |
| MWIDENAVTEDQLIKR                 | A2A8R0 | 0          | N-term +42.01 Da, K +28.03 Da,            | 4160.858398 | 2 | 1038.030029 | 1037.044764 |
| AETLSGLGDASAAGAAVSSAASETGTR      | D3YXK2 | 0          | N-term +42.01 Da,                         | 4161.802734 | 2 | 671.3599854 | 670.3611819 |
| DDIAALVVDNGSGMCKAGFAGDDAPR       | P60710 | 0          | N-term +42.01 Da, K +28.03 Da,C +57.02Da, | 4162.960938 | 2 | 756.9000244 | 756.8955865 |
| DDIAALVVDNGSGMCKAGFAGDDAPR       | P60710 | 0          | N-term +42.01 Da, K +28.03 Da,C +57.02Da, | 4163.489746 | 2 | 852.9299927 | 851.9233878 |
| SVPLLTDAATVSGAER                 | Q9WTL7 | 0          | N-term +42.01 Da,                         | 4168.76709  | 2 | 604.8099976 | 604.3106262 |
| AEAGVSVTEGSPGVVAALPEDMR          | H3BJ84 | 0          | N-term +42.01 Da,                         | 4171.404785 | 3 | 735.3900146 | 735.052877  |
| MFVQEEKIFAGKVLR                  | Q8VDI7 | 0          | N-term +42.01 Da, K +28.03 Da,            | 4172.100586 | 3 | 784.3800049 | 784.0496391 |
| AASTDIAGLEESFR                   | Q9CRB6 | 0          | N-term +42.01 Da,                         | 4172.708008 | 3 | 788.7700195 | 789.100662  |
| MEGKVYIGGEDYEKFTPKDYLTTY         | P40936 | 0.02871537 | N-term +42.01 Da, K +28.03 Da,            | 4172.798828 | 2 | 858.4099731 | 857.9233878 |
| ADKMDMSLDDIIKLNK                 | O08583 | 0.00385463 | N-term +42.01 Da, K +28.03 Da,            | 4172.985352 | 3 | 730.3499756 | 729.6773649 |
| AEAALLPPEAAAER                   | E9QL65 | 0.00277469 | N-term +42.01 Da,                         | 4179.186035 | 2 | 1079.030029 | 1079.028257 |
| MNFSGKYQLQSQENFEPFMK             | P12710 | 0          | N-term +42.01 Da, K +28.03 Da,            | 4182.030762 | 2 | 614.3699951 | 614.374615  |
| ASValseAEKVYIVHGVQEDLR           | Q9D0M0 | 0          | N-term +42.01 Da, K +28.03 Da,            | 4184.813477 | 2 | 741.3900146 | 740.8913586 |
| MNFSGKYQLQSQENFEPFMK             | P12710 | 0          | N-term +42.01 Da, K +28.03 Da,            | 4188.147461 | 2 | 813.4199829 | 812.4175432 |
| ADDIDIEAMLEAPYKDKENKLSAN         | Q8VH51 | 0          | N-term +42.01 Da, K +28.03 Da,            | 4190.527344 | 2 | 437.730011  | 437.7261973 |
| TELQSALLR                        | P62254 | 0          | N-term +42.01 Da,                         | 4193.9375   | 2 | 756.8939819 | 756.8955865 |
| ASValseAEKVYIVHGVQEDLR           | Q9D0M0 | 0          | N-term +42.01 Da, K +28.03 Da,            | 4194.476074 | 2 | 932.460022  | 931.4698454 |
| CDFTEDQTAEFKEAF                  | Q60605 | 0          | N-term +42.01 Da, K +28.03 Da,C +57.02Da, | 4194.600098 | 2 | 665.8499756 | 664.8475733 |
| MNFSGKYQLQSQENFEPFMK             | P12710 | 0          | N-term +42.01 Da, K +28.03 Da,            | 4195.112793 | 2 | 851.9227905 | 851.9233878 |
| DDIAALVVDNGSGMCKAGFAGDDAPR       | P60710 | 0          | N-term +42.01 Da, K +28.03 Da,C +57.02Da, | 4195.979004 | 2 | 664.8499756 | 664.8475733 |
| DDIAALVVDNGSGMCKAGFAGDDAPR       | P60710 | 0          | N-term +42.01 Da, K +28.03 Da,C +57.02Da, | 4196.173828 | 4 | 596.5700073 | 596.322891  |
| VMTWFKKR                         | Q2MDF7 | 0.04864092 | N-term +42.01 Da, K +28.03 Da,            | 4201.290039 | 2 | 600.3300171 | 599.8249553 |
| MNFSGKYQLQSQENFEPFMK             | P12710 | 0          | N-term +42.01 Da, K +28.03 Da,            | 4202.433105 | 3 | 784.3800049 | 784.0496391 |
| MNFSGKYQLQSQENFEPFMK             | P12710 | 0          | N-term +42.01 Da, K +28.03 Da,            | 4203.221191 | 2 | 925.4899902 | 925.491969  |
| TELQSALLR                        | P62254 | 0          | N-term +42.01 Da,                         | 4204.36377  | 2 | 675.3499756 | 674.3597933 |
| AAGVEAAAEEVAATEPKMEEESGAPCVPSGN  | Q9D0E1 | 0.00588865 | N-term +42.01 Da, K +28.03 Da,C +57.02Da, | 4204.463867 | 3 | 568.2839966 | 568.284684  |
| VHLTDAEKSAVSLWAKVNPDEVGGEALGR    | P02089 | 0.03286853 | N-term +42.01 Da, K +28.03 Da,C +57.02Da, | 4206.322754 | 2 | 552.2958374 | 552.2958332 |
| CDFTEDQTAEFKEAF                  | Q60605 | 0          | N-term +42.01 Da, K +28.03 Da,C +57.02Da, | 4209.95752  | 3 | 574.960022  | 574.2979304 |

|                                      |        |            |                                           |             |   |             |             |
|--------------------------------------|--------|------------|-------------------------------------------|-------------|---|-------------|-------------|
| DDIAALVVDNGSGMCKAGFAGDDAPR           | P60710 | 0          | N-term +42.01 Da, K +28.03 Da,C +57.02Da, | 4213.050781 | 3 | 713.6699829 | 713.6714451 |
| MNFSGKYQLQSQENFEPFMK                 | P12710 | 0          | N-term +42.01 Da, K +28.03 Da,            | 4213.154785 | 3 | 758.4299927 | 758.0972516 |
| DDIAALVVDNGSGMCKAGFAGDDAPR           | P60710 | 0          | N-term +42.01 Da, K +28.03 Da,C +57.02Da, | 4214.67627  | 3 | 766.75      | 766.4204608 |
| MDGASAKQDGLWESKSSSDVSSCPEASLEIVGSLAR | D3Z0Q8 | 0          | N-term +42.01 Da, K +28.03 Da,C +57.02Da, | 4215.863281 | 4 | 619.6021118 | 619.8545209 |
| MDILKSEILR                           | Q8BM39 | 0.01993865 | N-term +42.01 Da, K +28.03 Da,            | 4215.945801 | 3 | 799.1199951 | 798.7832217 |
| ACGLVASNLNLKPGECL                    | P16045 | 0.00380022 | N-term +42.01 Da, K +28.03 Da,C +57.02Da, | 4218.952637 | 2 | 812.4163818 | 812.4175432 |
| KTFSHLSDFGLESTTGEVPPVAIR             | P27773 | 0          | N-term +42.01 Da, K +28.03 Da,            | 4219.749512 | 3 | 758.0900269 | 758.0972516 |
| MNFSGKYQLQSQENFEPFMK                 | P12710 | 0          | N-term +42.01 Da, K +28.03 Da,            | 4220.24707  | 3 | 654.3599854 | 654.029844  |
| CDFTEDQTAEFKEAF                      | Q60605 | 0          | N-term +42.01 Da, K +28.03 Da,C +57.02Da, | 4221.962891 | 3 | 654.6799927 | 654.6799349 |
| DDIAALVVDNGSGMCKAGFAGDDAPR           | P60710 | 0          | N-term +42.01 Da, K +28.03 Da,C +57.02Da, | 4226.175781 | 2 | 851.9224854 | 851.9233878 |
| ATLTVVQPLTLDR                        | Q8JZ50 | 0          | N-term +42.01 Da,                         | 4228.05127  | 2 | 664.8474731 | 664.8475733 |
| VAGPQPAQTGAPQGSGLGEYLFER             | P29391 | 0          | N-term +42.01 Da,                         | 4229.308594 | 2 | 477.7099915 | 477.7122327 |
| DDIAALVVDNGSGMCKAGFAGDDAPR           | P60710 | 0          | N-term +42.01 Da, K +28.03 Da,C +57.02Da, | 4232.083008 | 2 | 599.8300171 | 599.8249553 |
| MQNDAGEFVDLYVPR                      | Q9CQR2 | 0          | N-term +42.01 Da,                         | 4232.353516 | 3 | 529.9994507 | 529.3395118 |
| ATESSPLTTHVLDTASGLPAQGLCLR           | Q9CRB3 | 0          | N-term +42.01 Da, C +57.02Da,             | 4234.793945 | 2 | 828.4099731 | 827.9109026 |
| ATESSPLTTHVLDTASGLPAQGLCLR           | Q9CRB3 | 0          | N-term +42.01 Da, C +57.02Da,             | 4236.767578 | 2 | 1188.569946 | 1188.071708 |
| WDRSCTEETHGFICQK                     | Q64449 | 0.04196816 | N-term +42.01 Da, K +28.03 Da,C +57.02Da, | 4241.266113 | 4 | 676.0999756 | 675.6072804 |
| ATESSPLTTHVLDTASGLPAQGLCLR           | Q9CRB3 | 0          | N-term +42.01 Da, C +57.02Da,             | 4242.934082 | 4 | 518.3099976 | 517.8095817 |
| MNFSGKYQLQSQENFEPFMK                 | P12710 | 0          | N-term +42.01 Da, K +28.03 Da,            | 4243.185547 | 3 | 470.6000061 | 470.5964216 |
| MEEKYLPPELMAEKSLDPSFTHALR            | Q9R226 | 0          | N-term +42.01 Da, K +28.03 Da,            | 4244.764648 | 2 | 857.9230957 | 857.9233878 |
| VDYYEVLGVQR                          | O54946 | 0          | N-term +42.01 Da,                         | 4247.505371 | 3 | 793.0499878 | 792.3835641 |
| CDFTEDQTAEFKEAF                      | Q60605 | 0          | N-term +42.01 Da, K +28.03 Da,C +57.02Da, | 4247.891602 | 3 | 799.1199951 | 798.7832217 |
| MESELEALAPR                          | Q9CYS6 | 0          | N-term +42.01 Da,                         | 4249.025879 | 2 | 704.3599854 | 703.3697275 |
| MNLSAAHHQISLSDGNNIPLIGLTYS DPR       | Q8VCX1 | 0.00169109 | N-term +42.01 Da,                         | 4249.277344 | 2 | 562.8400269 | 561.8477014 |
| DDIAALVVDNGSGMCKAGFAGDDAPR           | P60710 | 0          | N-term +42.01 Da, K +28.03 Da,C +57.02Da, | 4249.413574 | 2 | 452.2880554 | 451.7782325 |
| ADDVDQQQTNTNVEEPLDLIR                | P62311 | 0          | N-term +42.01 Da,                         | 4254.007813 | 2 | 736.8499756 | 735.859193  |
| ADDVDQQQTNTNVEEPLDLIR                | P62311 | 0          | N-term +42.01 Da,                         | 4255.395508 | 3 | 572.2800293 | 572.284684  |
| ASGVAVSDGVIKVFNDMKVR                 | P18760 | 0          | N-term +42.01 Da, K +28.03 Da,            | 4255.499023 | 3 | 690.4099731 | 690.0770168 |
| EGEPEVTDQLEWQSNQPWEQALNR             | P08226 | 0          | N-term +42.01 Da,                         | 4261.492676 | 4 | 853.9000244 | 853.4007512 |
| AETLSGLGDASAAGAAVSSAASETGTR          | D3YXK2 | 0          | N-term +42.01 Da,                         | 4264.040527 | 4 | 563.0705566 | 563.0717673 |
| EGEPEVTDQLEWQSNQPWEQALNR             | P08226 | 0          | N-term +42.01 Da,                         | 4266.580078 | 3 | 766.7600098 | 766.4204608 |
| AETLSGLGDASAAGAAVSSAASETGTR          | D3YXK2 | 0          | N-term +42.01 Da,                         | 4266.769043 | 3 | 750.7600098 | 750.4265976 |
| EGEPEVTDQLEWQSNQPWEQALNR             | P08226 | 0.00058106 | N-term +42.01 Da,                         | 4267.676758 | 2 | 826.9500122 | 826.9556443 |
| ADDVDQQQTNTNVEEPLDLIR                | P62311 | 0          | N-term +42.01 Da,                         | 4268.672852 | 4 | 974.710022  | 974.4710365 |
| MESELEALAPR                          | Q9CYS6 | 0          | N-term +42.01 Da,                         | 4269.619141 | 4 | 809.9299927 | 809.4305826 |
| QDEPQSQWDKVKDFANVYVDAVKDSGR          | Q00623 | 0.03206413 | N-term +42.01 Da, K +28.03 Da,            | 4275.557617 | 2 | 857.9212646 | 857.9233878 |
| TTS GALFPVSLVPGSR                    | Q9JKV1 | 0.00113766 | N-term +42.01 Da,                         | 4276.433594 | 4 | 809.6799927 | 809.4305826 |
| ASGVAVSDGVIKVFNDMKVR                 | P18760 | 0          | N-term +42.01 Da, K +28.03 Da,            | 4280.908203 | 2 | 799.4099731 | 798.9150312 |
| CDFTEDQTAEFKEAF                      | Q60605 | 0          | N-term +42.01 Da, K +28.03 Da,C +57.02Da, | 4284.203125 | 3 | 1079.569946 | 1078.905018 |
| VAGPQPAQTGAPQGSGLGEYLFER             | P29391 | 0          | N-term +42.01 Da,                         | 4286.716309 | 3 | 572.2800293 | 572.284684  |

|                                   |        |            |                                           |             |   |             |             |
|-----------------------------------|--------|------------|-------------------------------------------|-------------|---|-------------|-------------|
| MEAPAPSLTEEDLTEVKKDALENLR         | Q9Z0H7 | 0          | N-term +42.01 Da, K +28.03 Da,            | 4286.917969 | 3 | 751.0900269 | 750.4265976 |
| AETLSGLGDASAAGAAAVSSAASETGTR      | D3YXK2 | 0          | N-term +42.01 Da,                         | 4288.27002  | 2 | 851.4099731 | 851.9233878 |
| KAKEQEAPEEQEEDSSSDPRLR            | Q9CQU1 | 0.02967807 | N-term +42.01 Da, K +28.03 Da,            | 4291.60791  | 3 | 552.6400146 | 552.6420311 |
| AETLSGLGDASAAGAAAVSSAASETGTR      | D3YXK2 | 0          | N-term +42.01 Da,                         | 4292.250488 | 3 | 612.3400269 | 612.0071506 |
| LFQYASTDMDKVLLKYTEYNEPHESR        | Q60929 | 0.02532928 | N-term +42.01 Da, K +28.03 Da,            | 4293.262207 | 2 | 799.9199829 | 798.9150312 |
| AAVLQQLVLERPELNKLPK               | F6ZDS4 | 0          | N-term +42.01 Da, K +28.03 Da,            | 4294.474121 | 4 | 563.5700073 | 563.0717673 |
| DDIAALVVDNGSGMCKAGFAGDDAPR        | P60710 | 0          | N-term +42.01 Da, K +28.03 Da,C +57.02Da, | 4297.538574 | 2 | 514.7800293 | 514.781504  |
| MNFSGKYQLQSQENFEFPMK              | P12710 | 0          | N-term +42.01 Da, K +28.03 Da,            | 4298.008301 | 3 | 766.75      | 766.4204608 |
| ASYEILDVPR                        | Q9QYI5 | 0          | N-term +42.01 Da,                         | 4300.464844 | 2 | 698.8380737 | 698.8392252 |
| MLTSGSDPKEEEEELVDPLTTVR           | P99028 | 0          | N-term +42.01 Da, K +28.03 Da,            | 4300.714844 | 2 | 934.8900146 | 934.8931135 |
| ASGVAVSDGVIKVFNDMKVR              | P18760 | 0          | N-term +42.01 Da, K +28.03 Da,            | 4302.105469 | 4 | 517.8099976 | 517.8095817 |
| MLTSGSDPKEEEEELVDPLTTVR           | P99028 | 0          | N-term +42.01 Da, K +28.03 Da,            | 4306.429199 | 2 | 858.4199829 | 857.9233878 |
| AEVPPGPSLLPPAPAAPAAAEELR          | Q8CES0 | 0          | N-term +42.01 Da,                         | 4306.772461 | 2 | 576.2788086 | 576.281337  |
| MEEKYLPPELMAEKDSLDPSTFH           | Q9R226 | 0.04677804 | N-term +42.01 Da, K +28.03 Da,            | 4312.478516 | 2 | 935.8900146 | 934.8931135 |
| CDFTEDQTAEFKEAF                   | Q60605 | 0          | N-term +42.01 Da, K +28.03 Da,C +57.02Da, | 4315.624512 | 3 | 869.7299805 | 869.3966442 |
| DDIAALVVDNGSGMCKAGFAGDDAPR        | P60710 | 0          | N-term +42.01 Da, K +28.03 Da,C +57.02Da, | 4315.871582 | 2 | 689.3599854 | 689.3633904 |
| DDIAALVVDNGSGMCKAGFAGDDAPR        | P60710 | 0          | N-term +42.01 Da, K +28.03 Da,C +57.02Da, | 4321.140625 | 2 | 851.9199829 | 851.9233878 |
| ASYEILDVPR                        | Q9QYI5 | 0          | N-term +42.01 Da,                         | 4325.339355 | 2 | 710.8599854 | 711.367853  |
| MEEKYLPPELMAEKDSLDPSTFH           | Q9R226 | 0.00592034 | N-term +42.01 Da, K +28.03 Da,            | 4328.75     | 3 | 989.8300171 | 989.4962473 |
| ASLSLAPVNIKAGADEER                | P80314 | 0          | N-term +42.01 Da, K +28.03 Da,            | 4332.013184 | 2 | 464.2600098 | 464.255979  |
| AADISQWAGPLCLQEVDEPPQHALR         | P70296 | 0          | N-term +42.01 Da, C +57.02Da,             | 4333.039063 | 2 | 558.8599854 | 558.8606114 |
| AETLSGLGDASAAGAAAVSSAASETGTR      | D3YXK2 | 0          | N-term +42.01 Da,                         | 4335.95752  | 2 | 852.9299927 | 851.9233878 |
| AADISQWAGPLCLQEVDEPPQHALR         | P70296 | 0          | N-term +42.01 Da, C +57.02Da,             | 4338.183594 | 2 | 960.9515381 | 959.9627105 |
| ASGVAVSDGVIKVF                    | P18760 | 0          | N-term +42.01 Da, K +28.03 Da,            | 4338.378418 | 2 | 1373.530029 | 1373.026847 |
| MESSTSSSGSALGAVDPQLQHFIEVETQKQR   | Q9WVA2 | 0          | N-term +42.01 Da, K +28.03 Da,            | 4339.801758 | 2 | 787.3739014 | 787.3750185 |
| AADISQWAGPLCLQEVDEPPQHALR         | P70296 | 0          | N-term +42.01 Da, C +57.02Da,             | 4339.967773 | 2 | 1179.099976 | 1178.111167 |
| AADISQWAGPLCLQEVDEPPQHALR         | P70296 | 0          | N-term +42.01 Da, C +57.02Da,             | 4341.632324 | 3 | 625.9758301 | 625.9780921 |
| MEDSMDMDMSPLRPQNYLFGCELKADKDYH    | Q61937 | 0          | N-term +42.01 Da, K +28.03 Da,C +57.02Da, | 4346.507813 | 2 | 714.3499756 | 713.851702  |
| ASLSLAPVNIKAGADEER                | P80314 | 0          | N-term +42.01 Da, K +28.03 Da,            | 4347.4375   | 2 | 464.7600098 | 464.255979  |
| MESSTSSSGSALGAVDPQLQHFIEVETQKQR   | Q9WVA2 | 0          | N-term +42.01 Da, K +28.03 Da,            | 4359.82666  | 2 | 916.0056763 | 916.0072546 |
| ADIDNKEQSELDQLEDVEEVEEETGEETKIKAR | P28656 | 0          | N-term +42.01 Da, K +28.03 Da,            | 4367.458496 | 2 | 720.3200073 | 719.3299428 |
| MEDSMDMDMSPLRPQNYLFGCELKADKDYH    | Q61937 | 0          | N-term +42.01 Da, K +28.03 Da,C +57.02Da, | 4372.298828 | 3 | 508.6499939 | 507.9873611 |
| ASGCKIGPSILNSDLANLGAECLR          | Q8VEE0 | 0          | N-term +42.01 Da, K +28.03 Da,C +57.02Da, | 4373.23877  | 2 | 705.8900146 | 705.3909941 |
| MEDSMDMDMSPLRPQNYLFGCELKADKDYH    | Q61937 | 0          | N-term +42.01 Da, K +28.03 Da,C +57.02Da, | 4373.811035 | 2 | 827.4500122 | 826.9556443 |
| ASGCKIGPSILNSDLANLGAECLR          | Q8VEE0 | 0          | N-term +42.01 Da, K +28.03 Da,C +57.02Da, | 4375.752441 | 3 | 681.3599854 | 680.7039084 |
| SQTEEDCTEELDFLHAR                 | P99028 | 0          | N-term +42.01 Da, C +57.02Da,             | 4384.086914 | 2 | 1136.550049 | 1136.057348 |
| AEVPPGPSLLPPAPAAPAAAEELR          | Q8CES0 | 0          | N-term +42.01 Da,                         | 4391.812988 | 2 | 617.7800293 | 617.7846391 |
| VEADRPGLKFIGGLNTETNEKALEAVFGKYGR  | Q91VM5 | 0          | N-term +42.01 Da, K +28.03 Da,            | 4391.927734 | 4 | 512.7800293 | 512.2847366 |
| ASGNAIQKSAPDFTATAVVDGAFKEIKLSDYR  | Q61171 | 0          | N-term +42.01 Da, K +28.03 Da,            | 4393.817871 | 3 | 685.3400269 | 684.683396  |
| DDIAALVVDNGSGMCKAGFAGDDAPR        | P60710 | 0          | N-term +42.01 Da, K +28.03 Da,C +57.02Da, | 4394.36377  | 3 | 897.7999878 | 897.4643294 |

|                                   |        |            |                                           |             |   |             |             |
|-----------------------------------|--------|------------|-------------------------------------------|-------------|---|-------------|-------------|
| DDDIAALVVDNGSGMCKAGFAGDDAPR       | P60710 | 0          | N-term +42.01 Da, K +28.03 Da,C +57.02Da, | 4398.645508 | 2 | 827.4553833 | 826.9556443 |
| ASLSLAPVNIKAGADEER                | P80314 | 0          | N-term +42.01 Da, K +28.03 Da,            | 4401.364746 | 2 | 1048.560059 | 1049.062956 |
| MESSTSSSGSALGAVDPQLQHFIEVETQKQR   | Q9WVA2 | 0          | N-term +42.01 Da, K +28.03 Da,            | 4404.556641 | 2 | 1345.689941 | 1345.692856 |
| SDQQLDCALDLMR                     | P47757 | 0          | N-term +42.01 Da, C +57.02Da,             | 4411.683105 | 2 | 1038.030029 | 1037.044764 |
| KAKEQEAPEEQEEDSSSDPRLR            | Q9CQU1 | 0.0411224  | N-term +42.01 Da, K +28.03 Da,            | 4417.972656 | 2 | 643.3135986 | 643.3159087 |
| ADIDNKEQSELDQDLEDVEVEEETGEETKIKAR | P28656 | 0          | N-term +42.01 Da, K +28.03 Da,            | 4420.87793  | 3 | 889.7800293 | 889.1145317 |
| MESSTSSSGSALGAVDPQLQHFIEVETQKQR   | Q9WVA2 | 0          | N-term +42.01 Da, K +28.03 Da,            | 4422.26416  | 2 | 566.2949829 | 566.2949761 |
| SSPAQPAVPAPLADLKIQ                | P24549 | 0.01092612 | N-term +42.01 Da, K +28.03 Da,            | 4422.470215 | 4 | 916.4299927 | 916.4418766 |
| MIEMAAEKEPF                       | Q8K3A9 | 0          | N-term +42.01 Da, K +28.03 Da,            | 4425.222656 | 2 | 502.264801  | 502.265687  |
| LNQDQLDAVSKYQEVNTNNLEFAKELQR      | Q60865 | 0          | N-term +42.01 Da, K +28.03 Da,            | 4425.538086 | 3 | 1222.25     | 1221.586743 |
| AQQAADKYLVDKNFINNPLAQADWAAK       | Q8VDD5 | 0          | N-term +42.01 Da, K +28.03 Da,            | 4428.811035 | 3 | 722.0499878 | 721.3927881 |
| ASGNAQIGKSAPDFTATAVVDGAFKEIKLSDYR | Q61171 | 0          | N-term +42.01 Da, K +28.03 Da,            | 4430.359863 | 2 | 1107.52002  | 1107.012607 |
| SSPAQPAVPAPLADLKIQ                | P24549 | 0          | N-term +42.01 Da, K +28.03 Da,            | 4435.996582 | 2 | 1346.189941 | 1345.692856 |
| MEDSMDMDMSPLRPQNY                 | Q61937 | 0          | N-term +42.01 Da,                         | 4439.966309 | 2 | 858.9099731 | 857.9233878 |
| TGEAIVDAALSALR                    | Q922R8 | 0          | N-term +42.01 Da,                         | 4440.452148 | 2 | 1346.689941 | 1345.692856 |
| VHLTDAEKAASVSLWGKVNSEVGGGALGR     | P02088 | 0          | N-term +42.01 Da, K +28.03 Da,C +57.02Da, | 4443.253418 | 3 | 889.4400024 | 889.1145317 |
| MNFSGKYQLQSQENFEPFMK              | P12710 | 0          | N-term +42.01 Da, K +28.03 Da,            | 4443.589844 | 3 | 815.0599976 | 814.7186791 |
| SSPAQPAVPAPLADLKIQ                | P24549 | 0.00276549 | N-term +42.01 Da, K +28.03 Da,            | 4445.276855 | 2 | 681.3599854 | 681.35662   |
| SLLCCLADFKAAQAKQL                 | Q9NYQ2 | 0          | N-term +42.01 Da, K +28.03 Da,C +57.02Da, | 4445.372559 | 2 | 989.9400024 | 989.4465678 |
| MESSTSSSGSALGAVDPQLQHFIEVETQKQR   | Q9WVA2 | 0          | N-term +42.01 Da, K +28.03 Da,            | 4450.784668 | 3 | 641.6699829 | 641.0107836 |
| AANATTNPSQLLPLELVDKICIGSR         | P62322 | 0.02140673 | N-term +42.01 Da, K +28.03 Da,C +57.02Da, | 4461.188477 | 2 | 1109.050049 | 1108.056817 |
| MQEMNLLPTPESPVTR                  | Q88685 | 0.04017425 | N-term +42.01 Da,                         | 4461.319824 | 2 | 1057.556641 | 1057.560049 |
| ADLSLVDALTEPPPEIEGEIKR            | P27546 | 0          | N-term +42.01 Da, K +28.03 Da,            | 4464.352539 | 3 | 705.3800049 | 705.3757917 |
| SLLCCLADFKAAQAKQL                 | Q9NYQ2 | 0          | N-term +42.01 Da, K +28.03 Da,C +57.02Da, | 4470.279297 | 2 | 826.9545288 | 826.9556443 |
| MNFSGKYQLQSQENFEPFMK              | P12710 | 0          | N-term +42.01 Da, K +28.03 Da,            | 4470.47168  | 3 | 506.9678955 | 506.3081004 |
| ADLSLVDALTEPPPEIEGEIKR            | P27546 | 0          | N-term +42.01 Da, K +28.03 Da,            | 4471.728027 | 2 | 858.4138184 | 857.9233878 |
| GQPQKLAQENLKGSFEQDLYNMNNYLEKLGPLR | Q8C7G5 | 0          | N-term +42.01 Da, K +28.03 Da,            | 4472.262695 | 2 | 915.4299927 | 914.9283447 |
| LITLEEEMTKYPESDELTAEKITEFCHR      | P09103 | 0          | N-term +42.01 Da, K +28.03 Da,C +57.02Da, | 4472.495117 | 3 | 488.6099854 | 488.2779901 |
| MEDSMDMDMSPLRPQNY                 | Q61937 | 0          | N-term +42.01 Da,                         | 4475.497559 | 3 | 889.4400024 | 889.1145317 |
| TTYLEFIQQNEER                     | Q01405 | 0          | N-term +42.01 Da,                         | 4477.810547 | 2 | 914.9299927 | 914.9283447 |
| MESSTSSSGSALGAVDPQLQHFIEVETQKQR   | Q9WVA2 | 0          | N-term +42.01 Da, K +28.03 Da,            | 4478.279297 | 2 | 852.4199829 | 851.9233878 |
| AGPEWQSLEQCLEKHLPPDDLAQVKR        | Q8VC97 | 0          | N-term +42.01 Da, K +28.03 Da,C +57.02Da, | 4480.175781 | 3 | 551.6400146 | 551.6395217 |
| AAATAAAPQQLSDEELFSQLR             | Q9WU40 | 0          | N-term +42.01 Da,                         | 4483.455566 | 2 | 839.4299927 | 839.4257633 |
| PGGLLLGEEAPDFEANTTIGR             | Q8BG37 | 0          | N-term +42.01 Da,                         | 4490.728027 | 2 | 703.3499756 | 703.3552314 |
| TTQQIVLQGGPGPWGFR                 | O70400 | 0          | N-term +42.01 Da,                         | 4492.533691 | 2 | 1058.060059 | 1057.560049 |
| MESSTSSSGSALGAVDPQLQHFIEVETQKQR   | Q9WVA2 | 0          | N-term +42.01 Da, K +28.03 Da,            | 4498.987305 | 2 | 846.4000244 | 845.4095817 |
| ASGVTVNDEVIKVFNDMKVR              | P45591 | 0          | N-term +42.01 Da, K +28.03 Da,            | 4500.705078 | 2 | 917.9612427 | 917.9643959 |
| ADISQWAGPLCLQEVDPPQHALR           | P70296 | 0          | N-term +42.01 Da, C +57.02Da,             | 4501.665527 | 2 | 826.954834  | 826.9556443 |
| DFENEMATAASSSSLEKSYELPDGQVITIGNER | P62737 | 0          | N-term +42.01 Da, K +28.03 Da,            | 4501.875488 | 4 | 952.710022  | 952.9619707 |
| DFENEMATAASSSSLEKSYELPDGQVITIGNER | P62737 | 0          | N-term +42.01 Da, K +28.03 Da,            | 4502.269531 | 2 | 681.3400269 | 680.3322878 |



|                                       |        |            |                                           |             |   |             |             |
|---------------------------------------|--------|------------|-------------------------------------------|-------------|---|-------------|-------------|
| ADISQWAGPLCLQEVEPPQHALR               | P70296 | 0          | N-term +42.01 Da, C +57.02Da,             | 4502.832031 | 2 | 1134.579956 | 1135.076595 |
| TTSTLQKAIIDLVTKATEEDKAKNYEEALR        | Q8VEJ9 | 0          | N-term +42.01 Da, K +28.03 Da,            | 4503.217773 | 2 | 858.4117432 | 857.9233878 |
| AADISQWAGPLCLQEVEPPQHALR              | P70296 | 0          | N-term +42.01 Da, C +57.02Da,             | 4505.989746 | 3 | 698.3599854 | 698.0238636 |
| AKFVLNQNLPDLGGPPLYPGPTGSAR            | Q9Z1P7 | 0          | N-term +42.01 Da, K +28.03 Da,            | 4507.683594 | 2 | 713.4000244 | 713.4086552 |
| TTQQIVLQGGPGPWGFR                     | O70400 | 0          | N-term +42.01 Da,                         | 4509.750488 | 4 | 524.0200195 | 523.7697168 |
| MESSTSSSGSALGAVDPQLQHFIEVETQKQR       | Q9WVA2 | 0          | N-term +42.01 Da, K +28.03 Da,            | 4511.161621 | 2 | 595.2999878 | 595.2977161 |
| AEPQPASSGLTDETAFCSCSDPDPSTKDFLLQQTMLR | Q9CPU0 | 0          | N-term +42.01 Da, K +28.03 Da,C +57.02Da, | 4514.881836 | 2 | 485.7868042 | 485.7876436 |
| MEPSPLELPVDAVR                        | Q9CXF0 | 0          | N-term +42.01 Da,                         | 4518.931641 | 3 | 572.9500122 | 572.284684  |
| AADISQWAGPLCLQEVEPPQHALR              | P70296 | 0          | N-term +42.01 Da, C +57.02Da,             | 4522.36377  | 2 | 862.4299927 | 861.9364953 |
| ATQVEPLLAPAGAPLLQAEHGLAR              | Q6ZQ58 | 0          | N-term +42.01 Da,                         | 4523.629395 | 2 | 1129.569946 | 1128.57696  |
| ATQVEPLLAPAGAPLLQAEHGLAR              | Q6ZQ58 | 0          | N-term +42.01 Da,                         | 4532.211426 | 2 | 708.3499756 | 707.8533874 |
| AADISQWAGPLCLQEVEPPQHALR              | P70296 | 0          | N-term +42.01 Da, C +57.02Da,             | 4533.663086 | 2 | 858.4099731 | 857.9233878 |
| AADISQWAGPLCLQEVEPPQHALR              | P70296 | 0          | N-term +42.01 Da, C +57.02Da,             | 4539.76123  | 4 | 953         | 952.5001053 |
| AEPQPASSGLTDETAFCSCSDPDPSTKDFLLQQTMLR | Q9CPU0 | 0          | N-term +42.01 Da, K +28.03 Da,C +57.02Da, | 4539.870117 | 2 | 764.8900146 | 764.893044  |
| ALDFENEMATAAASSSSLEKSYELPDGQVITIGNER  | P62737 | 0          | N-term +42.01 Da, K +28.03 Da,            | 4543.473145 | 2 | 895.4678955 | 894.4805385 |
| LQGDVAGALEDLER                        | Q8VBW8 | 0          | N-term +42.01 Da,                         | 4545.38916  | 2 | 857.4431152 | 857.4459668 |
| MESSTSSSGSALGAVDPQLQHFIEVETQKQR       | Q9WVA2 | 0          | N-term +42.01 Da, K +28.03 Da,            | 4557.35498  | 2 | 611.8056641 | 611.8067628 |
| TEVMMNAPSMEIEGLSPR                    | Q9CX60 | 0          | N-term +42.01 Da,                         | 4561.301758 | 2 | 786.4400024 | 786.4343472 |
| AADISQWAGPLCLQEVEPPQHALR              | P70296 | 0          | N-term +42.01 Da, C +57.02Da,             | 4568.222168 | 4 | 768.6599731 | 768.6564967 |
| ATQVEPLLAPAGAPLLQAEHGLAR              | Q6ZQ58 | 0          | N-term +42.01 Da,                         | 4579.863281 | 3 | 875.75      | 875.4207389 |
| ATQVEPLLAPAGAPLLQAEHGLAR              | Q6ZQ58 | 0          | N-term +42.01 Da,                         | 4583        | 2 | 888.4678345 | 887.47833   |
| AADISQWAGPLCLQEVEPPQHALR              | P70296 | 0          | N-term +42.01 Da, C +57.02Da,             | 4585.168457 | 4 | 774.4299927 | 774.1770647 |
| AETGAGISETVTETTETTTTETTEPENQSLIMKLR   | Q8K1L5 | 0          | N-term +42.01 Da, K +28.03 Da,            | 4585.244141 | 3 | 502.9236755 | 502.2576285 |
| AETGAGISETVTETTETTTTETTEPENQSLIMKLR   | Q8K1L5 | 0          | N-term +42.01 Da, K +28.03 Da,            | 4588.131836 | 3 | 875.4199829 | 875.4207389 |
| AADISQWAGPLCLQEVEPPQHALR              | P70296 | 0          | N-term +42.01 Da, C +57.02Da,             | 4589.983887 | 3 | 462.9299927 | 462.2697569 |
| MEDEEVAESWEEAADSGEIDR                 | Q6NXN1 | 0          | N-term +42.01 Da,                         | 4590.206543 | 3 | 498.9500122 | 498.2889286 |
| PMFIVNTNVPR                           | P34884 | 0          | N-term +42.01 Da,                         | 4591.18457  | 2 | 964.5100098 | 964.5048791 |
| VHLTDAEKSAVSLWAKVNPDEVGGEALGR         | P02089 | 0          | N-term +42.01 Da, K +28.03 Da,C +57.02Da, | 4591.378906 | 3 | 643.3400269 | 643.3390115 |
| TQQGAALQNYNNELVKCIEELCQKR             | Q9JJ94 | 0          | N-term +42.01 Da, K +28.03 Da,C +57.02Da, | 4591.796875 | 2 | 838.4500122 | 837.9478193 |
| MEDEEVAESWEEAADSGEIDR                 | Q6NXN1 | 0          | N-term +42.01 Da,                         | 4598.094727 | 2 | 872.9500122 | 872.4509238 |
| MEGPLSVFGDR                           | P11983 | 0          | N-term +42.01 Da,                         | 4610.822754 | 2 | 713.3300171 | 712.8256844 |
| AADISQWAGPLCLQEVEPPQHALR              | P70296 | 0          | N-term +42.01 Da, C +57.02Da,             | 4612.612793 | 2 | 508.2744751 | 508.2745666 |
| LVLEVAQHLGESTVR                       | P56480 | 0          | N-term +42.01 Da,                         | 4618.378906 | 2 | 781.9161987 | 780.9282752 |
| ATQVEPLLAPAGAPLLQAEHGLAR              | Q6ZQ58 | 0.00058651 | N-term +42.01 Da,                         | 4618.598145 | 4 | 927.9699707 | 927.4745845 |
| AADISQWAGPLCLQEVEPPQHALR              | P70296 | 0          | N-term +42.01 Da, C +57.02Da,             | 4623.060547 | 2 | 837.9458618 | 837.9478193 |
| MEGLKDKTLQELEEMQNDPEAIAR              | Q8R105 | 0.00384615 | N-term +42.01 Da, K +28.03 Da,            | 4624.595703 | 2 | 1107.51001  | 1107.012607 |
| VIQLRPTLNELGISTPEELGLDKV              | P12787 | 0.00059137 | N-term +42.01 Da, K +28.03 Da,            | 4628.109375 | 2 | 771.4205322 | 771.4214372 |
| WYVPEQVKGPSYSK                        | Q80WC7 | 0.0159383  | N-term +42.01 Da, K +28.03 Da,            | 4628.757324 | 3 | 738.3400269 | 738.3441632 |
| ASVGTlafDEYGRPFLLIKDQDR               | P80316 | 0          | N-term +42.01 Da, K +28.03 Da,            | 4631.365723 | 2 | 764.9199829 | 763.9179077 |
| ASVGTlafDEYGRPFLLIKDQDR               | P80316 | 0          | N-term +42.01 Da, K +28.03 Da,            | 4631.628418 | 3 | 486.6099854 | 485.9487949 |

|                                     |        |            |                                           |             |   |             |             |
|-------------------------------------|--------|------------|-------------------------------------------|-------------|---|-------------|-------------|
| MEGPLSVFGDR                         | P11983 | 0          | N-term +42.01 Da,                         | 4631.756348 | 2 | 1129.569946 | 1128.57696  |
| MESSTSSSGSALGAVDPQLQHFIEVETQKQR     | Q9WVA2 | 0          | N-term +42.01 Da, K +28.03 Da,            | 4632.646973 | 2 | 1108.02002  | 1107.012607 |
| LNEAAAGLNQAATELVQASR                | P26039 | 0.02234637 | N-term +42.01 Da,                         | 4633.989258 | 2 | 1006.059998 | 1005.062561 |
| LNEAAAGLNQAATELVQASR                | P26039 | 0          | N-term +42.01 Da,                         | 4635.632324 | 2 | 976.9627075 | 975.9735724 |
| ATNFLAHEKIWFDFK                     | P57776 | 0          | N-term +42.01 Da, K +28.03 Da,            | 4636.322266 | 2 | 1005.059998 | 1005.062561 |
| MLTDSGGGTSFEEDLDSVAPR               | E9PUR0 | 0          | N-term +42.01 Da,                         | 4642.128906 | 2 | 764.8900146 | 764.893044  |
| AADISQWAGPLCLQEVEPPQHALR            | P70296 | 0          | N-term +42.01 Da, C +57.02Da,             | 4643.405762 | 2 | 805.9109497 | 805.9122912 |
| EGEPEVTDQLEWQSNQPWEQALNR            | P08226 | 0          | N-term +42.01 Da,                         | 4645.857422 | 2 | 628.3293457 | 628.3300709 |
| AQFEGIVTDLIKR                       | P38647 | 0          | N-term +42.01 Da, K +28.03 Da,            | 4655.119141 | 2 | 1107.011353 | 1107.012607 |
| EGEPEVTDQLEWQSNQPWEQALNR            | P08226 | 0          | N-term +42.01 Da,                         | 4658.362793 | 4 | 712.8699951 | 712.378661  |
| MDSASQDINLNSPNKGVLSDFMTDVPVDPGVVHR  | Q9CY22 | 0          | N-term +42.01 Da, K +28.03 Da,            | 4658.777344 | 3 | 424.5899963 | 423.9274422 |
| PFVELETNLPASR                       | O35215 | 0          | N-term +42.01 Da,                         | 4659.335938 | 3 | 738.3429565 | 738.3441632 |
| AADISQWAGPLCLQEVEPPQHALR            | P70296 | 0          | N-term +42.01 Da, C +57.02Da,             | 4663.8125   | 2 | 921.4500122 | 920.4582257 |
| SSKMMVNSVEGCADDALAGLVASNPDLQLLQGH   | Q8VC30 | 0          | N-term +42.01 Da, K +28.03 Da,C +57.02Da, | 4670.18457  | 2 | 781.8699951 | 781.8759061 |
| MDVGELLSYQPNR                       | Q9CWL8 | 0          | N-term +42.01 Da,                         | 4670.414551 | 2 | 708.4099731 | 707.4192202 |
| EEEIAALVIDNGSGMCKAGFAGDDAPR         | P63260 | 0          | N-term +42.01 Da, K +28.03 Da,C +57.02Da, | 4674.178223 | 4 | 898.8099976 | 898.2974424 |
| EEEIAALVIDNGSGMCKAGFAGDDAPR         | P63260 | 0          | N-term +42.01 Da, K +28.03 Da,C +57.02Da, | 4677.265137 | 2 | 628.3300171 | 628.3300709 |
| VNPTVFFDITADDEPLGR                  | P17742 | 0          | N-term +42.01 Da,                         | 4677.340332 | 2 | 764.8911743 | 764.893044  |
| EGEPEVTDQLEWQSNQPWEQALNR            | P08226 | 0          | N-term +42.01 Da,                         | 4680.491699 | 2 | 736.8499756 | 736.8561274 |
| IINEPTAAAIAYGLDKR                   | P20029 | 0          | N-term +42.01 Da, K +28.03 Da,            | 4684.035156 | 2 | 1545.319946 | 1545.792768 |
| AAMLGDAIMVAK                        | Q60936 | 0          | N-term +42.01 Da, K +28.03 Da,            | 4692.742188 | 2 | 1208.609985 | 1208.100602 |
| MESSTSSSGSALGAVDPQLQHFIEVETQKQR     | Q9WVA2 | 0          | N-term +42.01 Da, K +28.03 Da,            | 4694.773926 | 2 | 649.8200073 | 648.8239007 |
| MDSASQDINLNSPNKGVLSDFMTDVPVDPGVVHR  | Q9CY22 | 0          | N-term +42.01 Da, K +28.03 Da,            | 4696.726074 | 2 | 996.0100098 | 996.0097684 |
| AADISQWAGPLCLQEVEPPQHALR            | P70296 | 0          | N-term +42.01 Da, C +57.02Da,             | 4697.933105 | 2 | 649.3300171 | 648.8239007 |
| SWFADLAGR                           | Q9QYE6 | 0          | N-term +42.01 Da,                         | 4703.008789 | 3 | 844.4199829 | 844.0879826 |
| EEEIAALVIDNGSGMCKAGFAGDDAPR         | P63260 | 0          | N-term +42.01 Da, K +28.03 Da,C +57.02Da, | 4704.30957  | 3 | 844.75      | 844.0879826 |
| IINEPTAAAIAYGLDKR                   | P20029 | 0          | N-term +42.01 Da, K +28.03 Da,            | 4713.819824 | 3 | 688.7399902 | 688.7528672 |
| GVVQDLQQAISKLEAR                    | P57776 | 0          | N-term +42.01 Da, K +28.03 Da,            | 4714.772949 | 2 | 846.4000244 | 845.4095817 |
| PPSPWPEGIGSLR                       | Q9QZZ4 | 0.00587921 | N-term +42.01 Da,                         | 4718.395508 | 3 | 1158.26001  | 1157.914131 |
| AANATTNPSQLLPLELVDKCIGSR            | P62322 | 0          | N-term +42.01 Da, K +28.03 Da,C +57.02Da, | 4725.267578 | 2 | 771.9199829 | 771.4214372 |
| PFVELETNLPASR                       | O35215 | 0          | N-term +42.01 Da,                         | 4736.258301 | 2 | 1144.569946 | 1143.566729 |
| ATNFLAHEKIWF                        | P57776 | 0.00590129 | N-term +42.01 Da, K +28.03 Da,            | 4743.502441 | 2 | 574.3082275 | 574.309374  |
| AANATTNPSQLLPLELVDKCIGSR            | P62322 | 0          | N-term +42.01 Da, K +28.03 Da,C +57.02Da, | 4744.166016 | 2 | 1255.619995 | 1254.621231 |
| AADISQWAGPLCLQEVEPPQHALR            | P70296 | 0          | N-term +42.01 Da, C +57.02Da,             | 4745.119629 | 3 | 762.7112427 | 762.7135781 |
| AAAAPGPVELGFEEAPAWR                 | P46718 | 0          | N-term +42.01 Da,                         | 4745.241211 | 2 | 1254.619995 | 1254.621231 |
| SWFADLAGR                           | Q9QYE6 | 0          | N-term +42.01 Da,                         | 4745.439453 | 3 | 1163.959961 | 1163.289198 |
| ASGRPEELWEAVVGAER                   | Q9D1F4 | 0          | N-term +42.01 Da,                         | 4747.241699 | 3 | 810.0700073 | 810.3944181 |
| ALDFENEMATAASSSSLEKSYELPDGQVITIGNER | P62737 | 0          | N-term +42.01 Da, K +28.03 Da,            | 4747.358398 | 2 | 1214.599976 | 1215.087989 |
| ASGRPEELWEAVVGAER                   | Q9D1F4 | 0          | N-term +42.01 Da,                         | 4747.463379 | 3 | 837.0800171 | 836.749913  |
| MESSTSSSGSALGAVDPQLQHFIEVETQKQR     | Q9WVA2 | 0          | N-term +42.01 Da, K +28.03 Da,            | 4748.379883 | 3 | 531.3099976 | 530.6398501 |

|                                     |        |            |                                           |             |   |             |             |
|-------------------------------------|--------|------------|-------------------------------------------|-------------|---|-------------|-------------|
| ALDFENEMATAASSSSLEKSYELPDGQVITIGNER | P62737 | 0          | N-term +42.01 Da, K +28.03 Da,            | 4749.849609 | 4 | 872.9699707 | 872.7187175 |
| ATPDSLALFTGLGLENKAR                 | D3Z158 | 0.00059207 | N-term +42.01 Da, K +28.03 Da,            | 4751.944824 | 3 | 752.7000122 | 752.3690321 |
| MQNDAGEFVDLYVPR                     | Q9CQR2 | 0          | N-term +42.01 Da,                         | 4756.425781 | 2 | 771.4199219 | 771.4214372 |
| PFVELETNLPASR                       | O35215 | 0          | N-term +42.01 Da,                         | 4759.31543  | 3 | 597.3099976 | 597.6438781 |
| PGSISWDGLDPGKLYTL                   | Q8VIN1 | 0          | N-term +42.01 Da, K +28.03 Da,            | 4761.016113 | 2 | 579.2855225 | 579.2866196 |
| ALFQDVQKPSQDEWGKTQEAMEAALAMEKNLN    | P29391 | 0.03885381 | N-term +42.01 Da, K +28.03 Da,            | 4761.380859 | 4 | 609.3421021 | 609.3426206 |
| MDMSLDDIILNR                        | O08583 | 0          | N-term +42.01 Da, K +28.03 Da,            | 4764.924316 | 2 | 1014.01001  | 1013.005441 |
| MQNDAGEFVDLYVPR                     | Q9CQR2 | 0          | N-term +42.01 Da,                         | 4766.530273 | 2 | 1074.02002  | 1073.522276 |
| AADISQWAGPLCLQEVEPPQHALR            | P70296 | 0          | N-term +42.01 Da, C +57.02Da,             | 4768.145996 | 2 | 1144.069946 | 1143.566729 |
| ASGRPEELWEAVVGAER                   | Q9D1F4 | 0          | N-term +42.01 Da,                         | 4768.756348 | 3 | 812.460022  | 812.1210686 |
| AAETQTLNFGPEWLR                     | Q6Y7W8 | 0          | N-term +42.01 Da,                         | 4772.867676 | 2 | 507.776123  | 507.7769421 |
| SAIQNLHSFDPFADASKGDDLLPAGTEDYIHIR   | P48024 | 0          | N-term +42.01 Da, K +28.03 Da,            | 4775.443359 | 2 | 824.4199829 | 823.4308483 |
| MDSASQDINLNSPNKGVLSDFMTDVPVDPGVVHR  | Q9CY22 | 0          | N-term +42.01 Da, K +28.03 Da,            | 4775.544922 | 2 | 743.3599854 | 742.8600585 |
| AAETQTLNFGPEWLR                     | Q6Y7W8 | 0          | N-term +42.01 Da,                         | 4775.991699 | 2 | 746.9099731 | 746.9059457 |
| ASGRPEELWEAVVGAER                   | Q9D1F4 | 0          | N-term +42.01 Da,                         | 4778.108887 | 3 | 1163.287231 | 1163.289198 |
| ALDFENEMATAASSSSLEKSYELPDGQVITIGNER | P62737 | 0          | N-term +42.01 Da, K +28.03 Da,            | 4778.571289 | 3 | 833.1300049 | 832.7988718 |
| AADISQWAGPLCLQEVEPPQHALR            | P70296 | 0          | N-term +42.01 Da, C +57.02Da,             | 4778.67334  | 2 | 1006.049988 | 1005.554569 |
| MQNDAGEFVDLYVPR                     | Q9CQR2 | 0          | N-term +42.01 Da,                         | 4780.113281 | 2 | 1128.050049 | 1128.04991  |
| PFVELETNLPASR                       | O35215 | 0          | N-term +42.01 Da,                         | 4781.523438 | 4 | 873.2199707 | 872.7187175 |
| LVTEEDCTEELFDLHAR                   | Q9D2Q7 | 0.04688995 | N-term +42.01 Da, C +57.02Da,             | 4783.438965 | 2 | 850.4611206 | 849.4703074 |
| ATQADLMELDMAMEPDR                   | Q02248 | 0          | N-term +42.01 Da,                         | 4783.533691 | 3 | 752.7000122 | 752.3690321 |
| MNVEHEVNLLVEIHR                     | Q4KML4 | 0          | N-term +42.01 Da,                         | 4784.327637 | 2 | 708.4000244 | 708.8959121 |
| ASVGTLAFDEYGRPF                     | P80316 | 0          | N-term +42.01 Da,                         | 4784.713379 | 3 | 671.039978  | 670.7054717 |
| ASGNAQIGKSAPDFTATAVVDGAFKEIKL       | Q61171 | 0          | N-term +42.01 Da, K +28.03 Da,            | 4785.095215 | 2 | 1108        | 1107.012607 |
| MESSTSSSGSALGAVDPQLQHFIEVETQKQR     | Q9WVA2 | 0          | N-term +42.01 Da, K +28.03 Da,            | 4785.409668 | 4 | 696.8900146 | 696.6391803 |
| ASGNAQIGKSAPDFTATAVVDGAFKEIKL       | Q61171 | 0          | N-term +42.01 Da, K +28.03 Da,            | 4785.550781 | 3 | 523.6400146 | 522.9799838 |
| EEEIAALVIDNGSGMCKAGFAGDDAPR         | P63260 | 0          | N-term +42.01 Da, K +28.03 Da,C +57.02Da, | 4788.434082 | 2 | 763.9000244 | 762.8996085 |
| MDPSWATQESEAVAEKVLK                 | Q9EPQ7 | 0          | N-term +42.01 Da, K +28.03 Da,            | 4789.058105 | 3 | 567.3099976 | 566.6492971 |
| EEEIAALVIDNGSGMCKAGFAGDDAPR         | P63260 | 0          | N-term +42.01 Da, K +28.03 Da,C +57.02Da, | 4789.334473 | 2 | 574.8099976 | 574.309374  |
| MDSGFGSDFGGTGGGKLDPGAIMEQVKVQ       | P62075 | 0          | N-term +42.01 Da, K +28.03 Da,            | 4791.799805 | 2 | 553.3236084 | 553.3238618 |
| MDSGFGSDFGGTGGGKLDPGAIMEQVKVQ       | P62075 | 0.00279642 | N-term +42.01 Da, K +28.03 Da,            | 4792.276855 | 2 | 875.960022  | 874.9718259 |
| MDSGFGSDFGGTGGGKLDPGAIMEQVKVQ       | P62075 | 0          | N-term +42.01 Da, K +28.03 Da,            | 4792.855957 | 4 | 609.5900269 | 609.3426206 |
| MEEKALEVYDLIR                       | Q9DCL2 | 0          | N-term +42.01 Da, K +28.03 Da,            | 4793.284668 | 2 | 812.9500122 | 813.4541258 |
| ALDFENEMATAASSSSLEKSYELPDGQVITIGNER | P62737 | 0          | N-term +42.01 Da, K +28.03 Da,            | 4797.429688 | 3 | 731.0599976 | 730.7365548 |
| MEEIYAKFVSQKIS                      | P59235 | 0          | N-term +42.01 Da, K +28.03 Da,            | 4803.86084  | 4 | 947.4899902 | 947.2374457 |
| EEEIAALVIDNGSGMCKAGFAGDDAPR         | P63260 | 0          | N-term +42.01 Da, K +28.03 Da,C +57.02Da, | 4804.630371 | 2 | 507.7765198 | 507.7769421 |
| MQNDAGEFVDLYVPR                     | Q9CQR2 | 0          | N-term +42.01 Da,                         | 4804.931641 | 2 | 623.7800293 | 623.7780051 |
| KDEKKEESKK                          | E9Q9K5 | 0.03647117 | N-term +42.01 Da, K +28.03 Da,            | 4806.367188 | 3 | 1063.560059 | 1063.550241 |
| ASPGEPQPPAPDTSFDFYLVIGGGSSGLASAR    | P47791 | 0          | N-term +42.01 Da,                         | 4808.375    | 2 | 551.25      | 551.7473274 |
| PFVELETNLPASRIPAGLENR               | O35215 | 0          | N-term +42.01 Da,                         | 4809.935059 | 2 | 1005.55365  | 1005.554569 |

|                                        |        |            |                                           |             |   |             |             |
|----------------------------------------|--------|------------|-------------------------------------------|-------------|---|-------------|-------------|
| SDVIIKDETETMKDLEAEMR                   | E9Q9Q2 | 0          | N-term +42.01 Da, K +28.03 Da,            | 4810.729004 | 3 | 1263.310059 | 1262.647502 |
| SDVIIKDETETMKDLEAEMR                   | E9Q9Q2 | 0          | N-term +42.01 Da, K +28.03 Da,            | 4811.00293  | 3 | 1163.949951 | 1163.289198 |
| SQLVECPNPFSEGNQVEIDAISR                | Q91XD4 | 0          | N-term +42.01 Da, C +57.02Da,             | 4815.568359 | 3 | 670.7050171 | 670.7054717 |
| PFVELETNLPASR                          | Q35215 | 0          | N-term +42.01 Da,                         | 4816.161133 | 4 | 602.8099976 | 602.3095177 |
| SQLVECPNPFSEGNQVEIDAISR                | Q91XD4 | 0          | N-term +42.01 Da, C +57.02Da,             | 4816.288086 | 2 | 614.7600098 | 614.2602764 |
| SQLVECPNPFSEGNQVEIDAISR                | Q91XD4 | 0          | N-term +42.01 Da, C +57.02Da,             | 4818.231445 | 3 | 1064.219971 | 1063.550241 |
| MQNDAGEFVDLYVPR                        | Q9CQR2 | 0          | N-term +42.01 Da,                         | 4819.191406 | 3 | 900.4400024 | 899.7751876 |
| AASGESGASGGGGSTEEAFMTFYSEVKQIEKR       | Q6NZB0 | 0          | N-term +42.01 Da, K +28.03 Da,            | 4819.370605 | 2 | 1058.52124  | 1057.532977 |
| AANATTNPSQLLPLELVDKCIGSR               | P62322 | 0          | N-term +42.01 Da, K +28.03 Da,C +57.02Da, | 4819.756836 | 2 | 457.2640686 | 457.258719  |
| AANATTNPSQLLPLELVDKCIGSR               | P62322 | 0          | N-term +42.01 Da, K +28.03 Da,C +57.02Da, | 4822.166504 | 4 | 848.6699829 | 848.1771222 |
| AANATTNPSQLLPLELVDKCIGSR               | P62322 | 0          | N-term +42.01 Da, K +28.03 Da,C +57.02Da, | 4824.815918 | 3 | 641.3400269 | 641.0132479 |
| MQNDAGEFVDLYVPR                        | Q9CQR2 | 0          | N-term +42.01 Da,                         | 4828.396973 | 2 | 1058.52002  | 1057.532977 |
| AASGESGASGGGGSTEEAFMTFYSEVKQIEKR       | Q6NZB0 | 0          | N-term +42.01 Da, K +28.03 Da,            | 4831.18457  | 2 | 1144.569946 | 1143.566729 |
| AADLGQIPDVIDSDGVFK                     | Q9DAK9 | 0          | N-term +42.01 Da, K +28.03 Da,            | 4831.381348 | 4 | 644.5800171 | 644.5832738 |
| AANATTNPSQLLPLELVDKCIGSR               | P62322 | 0          | N-term +42.01 Da, K +28.03 Da,C +57.02Da, | 4831.85791  | 2 | 1143.560059 | 1143.566729 |
| SVPAFIDISEEDQAAELR                     | Q99JX4 | 0          | N-term +42.01 Da,                         | 4832.833984 | 4 | 889.7199707 | 889.2188845 |
| DGKALEQFLQEYFDGNLKR                    | P27773 | 0          | N-term +42.01 Da, K +28.03 Da,            | 4834.482422 | 4 | 947.2371216 | 947.2374457 |
| AANATTNPSQLLPLELVDKCIGSR               | P62322 | 0          | N-term +42.01 Da, K +28.03 Da,C +57.02Da, | 4835.99707  | 3 | 1185.619995 | 1185.28942  |
| MAPEEDAGGEVLGGSFWEAGNYR                | Q99JB8 | 0          | N-term +42.01 Da,                         | 4839.310547 | 3 | 502.25      | 502.2576285 |
| MAPEEDAGGEVLGGSFWEAGNYR                | Q99JB8 | 0          | N-term +42.01 Da,                         | 4841.299316 | 2 | 1005.549988 | 1005.554569 |
| MAPEEDAGGEVLGGSFWEAGNYR                | Q99JB8 | 0          | N-term +42.01 Da,                         | 4843.346191 | 3 | 1262.97998  | 1262.647502 |
| ATQVEPLLPGAPLLQAEEH                    | Q6ZQ58 | 0.00113572 | N-term +42.01 Da,                         | 4843.548828 | 3 | 873.0900269 | 872.4283445 |
| MQNDAGEFVDLYVPR                        | Q9CQR2 | 0          | N-term +42.01 Da,                         | 4848.188477 | 3 | 872.4299927 | 872.4283445 |
| SDILPLDVIGR                            | Q8CIV8 | 0.00059382 | N-term +42.01 Da,                         | 4849.89502  | 4 | 644.3200073 | 644.5832738 |
| ATQVEPLLPGAPLLQAEEH                    | Q6ZQ58 | 0          | N-term +42.01 Da,                         | 4850.387207 | 2 | 765.397644  | 764.893044  |
| ALDFENEMATAASSSSLEKSYELPDGQVITIGNER    | P62737 | 0          | N-term +42.01 Da, K +28.03 Da,            | 4854.765137 | 2 | 1013.02002  | 1012.515119 |
| AANATTNPSQLLPLELVDKCIGSR               | P62322 | 0          | N-term +42.01 Da, K +28.03 Da,C +57.02Da, | 4855.320801 | 2 | 597.3099976 | 597.3064976 |
| SSEEGKLFVGGLNFNTEQALEHDHSSFGPISEVVVKDR | O89086 | 0          | N-term +42.01 Da, K +28.03 Da,            | 4856.252441 | 3 | 1054.540039 | 1054.195915 |
| DGKALEQFLQEYFDGNLKR                    | P27773 | 0          | N-term +42.01 Da, K +28.03 Da,            | 4863.415527 | 4 | 889.7199707 | 889.2188845 |
| AEYLASIFGTEKDKNV                       | Q8BGJ9 | 0.00115141 | N-term +42.01 Da, K +28.03 Da,            | 4863.758301 | 2 | 579.2860718 | 579.2866196 |
| MAPEEDAGGEVLGGSFWEAGNYR                | Q99JB8 | 0          | N-term +42.01 Da,                         | 4865.36377  | 4 | 947.4899902 | 947.2374457 |
| MAPEEDAGGEVLGGSFWEAGNYR                | Q99JB8 | 0          | N-term +42.01 Da,                         | 4875.803223 | 3 | 1450.939941 | 1450.274455 |
| VHLTDAEKAAVSCLWGKVNDSDEVGGEALGR        | P02088 | 0          | N-term +42.01 Da, K +28.03 Da,C +57.02Da, | 4884.805664 | 3 | 534.6400146 | 533.979878  |
| MQNDAGEFVDLYVPR                        | Q9CQR2 | 0          | N-term +42.01 Da,                         | 4887.151855 | 3 | 1163.949951 | 1163.289198 |
| EEEIAALVIDNGSGMCKAGFAGDDAPR            | P63260 | 0          | N-term +42.01 Da, K +28.03 Da,C +57.02Da, | 4887.595215 | 2 | 1400.140015 | 1399.150893 |
| EEEIAALVIDNGSGMCKAGFAGDDAPR            | P63260 | 0          | N-term +42.01 Da, K +28.03 Da,C +57.02Da, | 4896.488281 | 3 | 699.3699951 | 698.7149187 |
| SQLVECPNPFSEGNQVEIDAISR                | Q91XD4 | 0          | N-term +42.01 Da, C +57.02Da,             | 4897.352051 | 4 | 947.7399902 | 947.2374457 |
| MQDQHVPIDIQTSKLLDWLVDR                 | Q99LM2 | 0          | N-term +42.01 Da, K +28.03 Da,            | 4898.243652 | 3 | 629.015686  | 628.358072  |
| MQNDAGEFVDLYVPR                        | Q9CQR2 | 0          | N-term +42.01 Da,                         | 4907.409668 | 2 | 702.9000244 | 701.9079651 |
| SSEEGKLFVGGLNFNTEQALEHDHSSFGPISEVVVKDR | O89086 | 0          | N-term +42.01 Da, K +28.03 Da,            | 4914.143066 | 4 | 761.8699951 | 761.8766458 |

|                                  |         |            |                                           |             |   |             |             |
|----------------------------------|---------|------------|-------------------------------------------|-------------|---|-------------|-------------|
| VHLTDAEKAASVSLWGKVNSEVGGALGR     | P02088  | 0          | N-term +42.01 Da, K +28.03 Da,C +57.02Da, | 4915.361328 | 3 | 832.7999878 | 832.7988718 |
| VHLTDAEKAASVSLWGKVNSEVGGALGR     | P02088  | 0          | N-term +42.01 Da, K +28.03 Da,C +57.02Da, | 4921.445801 | 2 | 553.2800293 | 552.2852681 |
| AANATTNPSQLLPLELVDKICIGSR        | P62322  | 0          | N-term +42.01 Da, K +28.03 Da,C +57.02Da, | 4925.947266 | 3 | 1054.23999  | 1053.57472  |
| SQLVECPNPFSEGNQVEIDAISR          | Q91XD4  | 0          | N-term +42.01 Da, C +57.02Da,             | 4927.075684 | 2 | 1100.060059 | 1100.050046 |
| EADIDGDGQVNYEEFVQMMTAK           | P62204  | 0          | N-term +42.01 Da, K +28.03 Da,            | 4928.467773 | 4 | 947.4899902 | 947.2374457 |
| MDSAEELLAPLR                     | Q9CZD3  | 0          | N-term +42.01 Da,                         | 4930.842285 | 2 | 845.9628906 | 844.9738369 |
| QMQENLKPQFRKMIQTFQQYASLR         | Q9QVP9  | 0.00636943 | N-term +42.01 Da, K +28.03 Da,            | 4932.36084  | 4 | 650.8300171 | 650.3271681 |
| MAPEEDAGGEVLGGSFWEAGNYR          | Q99JB8  | 0          | N-term +42.01 Da,                         | 4936.87207  | 4 | 790.6799927 | 790.4328593 |
| AANATTNPSQLLPLELVDKICIGSR        | P62322  | 0          | N-term +42.01 Da, K +28.03 Da,C +57.02Da, | 4937.789551 | 4 | 624.8503418 | 624.8509729 |
| EADIDGDGQVNYEEFVQMMTAK           | P62204  | 0          | N-term +42.01 Da, K +28.03 Da,            | 4947.116699 | 2 | 535.7855225 | 535.7867866 |
| EADIDGDGQVNYEEFVQMMTAK           | P62204  | 0          | N-term +42.01 Da, K +28.03 Da,            | 4947.243164 | 4 | 540.8099976 | 540.5580642 |
| EEEIAALVIDNGSGMCKAGFAGDDAPR      | P63260  | 0          | N-term +42.01 Da, K +28.03 Da,C +57.02Da, | 4947.470215 | 3 | 833.1300049 | 832.7988718 |
| EEEIAALVIDNGSGMCKAGFAGDDAPR      | P63260  | 0          | N-term +42.01 Da, K +28.03 Da,C +57.02Da, | 4949.779297 | 4 | 1104.839966 | 1104.60747  |
| AAKFVESIGKFGFL                   | A67778  | 0.0058855  | N-term +42.01 Da, K +28.03 Da,            | 4963.062012 | 3 | 861.1099854 | 860.779483  |
| MFQIPEFEPSEQEDASATDR             | QF61337 | 0          | N-term +42.01 Da,                         | 4963.137695 | 2 | 807.4050903 | 806.4168753 |
| ATAVVVNIGKKLYEGKTKVEYELLDTPGR    | Q9DCL9  | 0          | N-term +42.01 Da, K +28.03 Da,            | 4963.26416  | 2 | 1249.199951 | 1248.694669 |
| MQNDAGEFVDLYVPR                  | Q9CQR2  | 0          | N-term +42.01 Da,                         | 4963.830566 | 2 | 714.8400269 | 714.3437099 |
| LINEKGETFQLMGLYGR                | B5X0G2  | 0.0337469  | N-term +42.01 Da, K +28.03 Da,            | 4965.10791  | 4 | 774.1799927 | 774.1770647 |
| ADKMDMSLDDIIKL                   | O08583  | 0          | N-term +42.01 Da, K +28.03 Da,            | 4965.365723 | 2 | 797.8400269 | 796.8511788 |
| SQLVECPNPFSEGNQVEIDAISR          | Q91XD4  | 0          | N-term +42.01 Da, C +57.02Da,             | 4967.163574 | 2 | 873.460022  | 873.4646909 |
| EADIDGDGQVNYEEFVQMMTAK           | P62204  | 0          | N-term +42.01 Da, K +28.03 Da,            | 4967.81543  | 4 | 790.4329224 | 790.4328593 |
| ASPTDGTDLASLLSFEKLR              | Q8CD94  | 0          | N-term +42.01 Da, K +28.03 Da,            | 4968.158203 | 4 | 624.8499756 | 624.8509729 |
| EADIDGDGQVNYEEFVQMMTAK           | P62204  | 0          | N-term +42.01 Da, K +28.03 Da,            | 4968.241699 | 2 | 1248.689941 | 1248.694669 |
| AAPEEQDLTQEQTTEKLLQFDLTGIESMEQCR | Q3TDN2  | 0          | N-term +42.01 Da, K +28.03 Da,C +57.02Da, | 4974.048828 | 4 | 947.7299805 | 947.2374457 |
| DGKALEQLQEYFDGNLKR               | P27773  | 0          | N-term +42.01 Da, K +28.03 Da,            | 4978.617188 | 2 | 921.4500122 | 920.4582257 |
| ATAVVVNIGKKLYEGKTKVEYELLDTPGR    | Q9DCL9  | 0          | N-term +42.01 Da, K +28.03 Da,            | 4978.69873  | 2 | 792.3800049 | 792.3780841 |
| MDLFGDLPEPER                     | Q8R0F6  | 0          | N-term +42.01 Da,                         | 4979.155762 | 2 | 980.4500122 | 980.4501649 |
| AANATTNPSQLLPLELVDKICIGSR        | P62322  | 0          | N-term +42.01 Da, K +28.03 Da,C +57.02Da, | 4980.13916  | 3 | 832.7971191 | 832.7988718 |
| MDPSWATQESEAVAEKVLRL             | Q9EPQ7  | 0          | N-term +42.01 Da, K +28.03 Da,            | 4983.851563 | 4 | 551.3300171 | 551.0780553 |
| AAPPDLQDEPLSLGSPGSQWFGGR         | Q8K0T0  | 0          | N-term +42.01 Da,                         | 4984.289063 | 3 | 734.4299927 | 734.4349816 |
| MVHLTDAEKAASVSLWGKVNSEVGGALGR    | A8DUK4  | 0.01289324 | N-term +42.01 Da, K +28.03 Da,            | 4984.387695 | 3 | 1020.440002 | 1019.772289 |
| MDPSWATQESEAVAEKVLRL             | Q9EPQ7  | 0          | N-term +42.01 Da, K +28.03 Da,            | 4994.730957 | 2 | 807.4099731 | 806.4168753 |
| ADKMDMSLDDIIKL                   | O08583  | 0          | N-term +42.01 Da, K +28.03 Da,            | 4995.13623  | 2 | 871.4500122 | 871.9572304 |
| ASFVTEVLAH                       | O54692  | 0          | N-term +42.01 Da,                         | 4997.275391 | 4 | 610.3400269 | 609.8481647 |
| MDPSWATQESEAVAEKVLRL             | Q9EPQ7  | 0          | N-term +42.01 Da, K +28.03 Da,            | 4999.455078 | 3 | 579.326355  | 579.3262655 |
| ATDSWALAVDEQEAAVKSM              | Q61655  | 0          | N-term +42.01 Da, K +28.03 Da,            | 5004.729004 | 2 | 570.2700195 | 570.2737095 |
| VHLTDAEKSAVSLWAKVNPDEVGGALGR     | P02089  | 0          | N-term +42.01 Da, K +28.03 Da,C +57.02Da, | 5004.967773 | 3 | 596.3400269 | 595.6816095 |
| GLNYKSCFQPLFRFGDMQEIIQNFVR       | Q9QYGO  | 0.03368004 | N-term +42.01 Da, K +28.03 Da,C +57.02Da, | 5010.384766 | 2 | 1044.02002  | 1044.0199   |
| VHLTDAEKSAVSLWAKVNPDEVGGALGR     | P02089  | 0          | N-term +42.01 Da, K +28.03 Da,C +57.02Da, | 5011.515137 | 3 | 833.1300049 | 832.7988718 |
| EADIDGDGQVNYEEFVQMMTAK           | P62204  | 0          | N-term +42.01 Da, K +28.03 Da,            | 5013.461914 | 2 | 653.3499756 | 652.8458879 |

|                                   |        |            |                                           |             |   |             |             |
|-----------------------------------|--------|------------|-------------------------------------------|-------------|---|-------------|-------------|
| EADIDGDGQVNYEEFVQMMTAK            | P62204 | 0          | N-term +42.01 Da, K +28.03 Da,            | 5014.11377  | 4 | 833.9699707 | 833.7166226 |
| SMPDAMPLPGVGEEELKQAKEIEDAEKYSF    | Q80SW1 | 0          | N-term +42.01 Da, K +28.03 Da,            | 5016.023438 | 4 | 947.7399902 | 947.2374457 |
| MFSWLGNDDR                        | Q9QXY6 | 0          | N-term +42.01 Da,                         | 5017.749023 | 3 | 684.710022  | 684.371324  |
| MDPSWATQESEAVAQKVLRL              | Q9EPQ7 | 0          | N-term +42.01 Da, K +28.03 Da,            | 5019.391113 | 3 | 576.6799927 | 576.3453259 |
| ADQLTEEQIAEFKEAF                  | P62204 | 0          | N-term +42.01 Da, K +28.03 Da,            | 5019.887207 | 2 | 900         | 899.0045146 |
| ASFVTEVLAH                        | O54692 | 0          | N-term +42.01 Da,                         | 5021.491699 | 3 | 696.3480225 | 696.3490256 |
| MDPSWATQESEAVAQKVLRL              | Q9EPQ7 | 0          | N-term +42.01 Da, K +28.03 Da,            | 5023.644043 | 2 | 1026.051392 | 1026.053348 |
| ADLSLVDALTEPPPEIEGEIKR            | P27546 | 0          | N-term +42.01 Da, K +28.03 Da,            | 5026.437988 | 3 | 730.734375  | 730.7365548 |
| ADQLTEEQIAEFKEAF                  | P62204 | 0          | N-term +42.01 Da, K +28.03 Da,            | 5029.641602 | 4 | 624.3599854 | 623.8578607 |
| SALKAVFQYIDENQDR                  | Q9D1A2 | 0          | N-term +42.01 Da, K +28.03 Da,            | 5034.562012 | 4 | 795.9099731 | 795.4104927 |
| QNYSTEVEAAVNRLVNLHLR              | P29391 | 0          | N-term +42.01 Da,                         | 5035.22998  | 3 | 617.3400269 | 617.0145279 |
| ELPTAFDYVEFTR                     | P16546 | 0.00058005 | N-term +42.01 Da,                         | 5035.394531 | 4 | 551.5800171 | 551.0780553 |
| ADLSLVDALTEPPPEIEGEIKR            | P27546 | 0          | N-term +42.01 Da, K +28.03 Da,            | 5041.408691 | 2 | 1044.018921 | 1044.0199   |
| MQEPGQIVETYTEEDPEGAMSVSVVETDDGTTR | P30999 | 0          | N-term +42.01 Da,                         | 5047.61377  | 4 | 947.7399902 | 947.2374457 |
| AANATTNPSQLLPLELVDKC              | P62322 | 0          | N-term +42.01 Da, K +28.03 Da,C +57.02Da, | 5050.270508 | 2 | 834.9075317 | 834.9074037 |
| MQEPGQIVETYTEEDPEGAMSVSVVETDDGTTR | P30999 | 0          | N-term +42.01 Da,                         | 5051.859863 | 4 | 560.0599976 | 560.062671  |
| AANATTNPSQLLPLELVDKC              | P62322 | 0          | N-term +42.01 Da, K +28.03 Da,C +57.02Da, | 5055.216797 | 3 | 872.4500122 | 872.1181591 |
| AANATTNPSQLLPLELVDKC              | P62322 | 0          | N-term +42.01 Da, K +28.03 Da,C +57.02Da, | 5057.203613 | 2 | 903.4699707 | 903.4680618 |
| AALSGVFVWDEER                     | Q8R1R3 | 0          | N-term +42.01 Da,                         | 5059.123535 | 3 | 529.62323   | 528.962993  |
| ADQLTEEQIAEFKEAF                  | P62204 | 0          | N-term +42.01 Da, K +28.03 Da,            | 5060.861328 | 3 | 731.0700073 | 730.7365548 |
| ADLSLVDALTEPPPEIEGEIKR            | P27546 | 0          | N-term +42.01 Da, K +28.03 Da,            | 5064.751953 | 2 | 701.8499756 | 701.8566505 |
| ATALSEEELDNEDYSSLNVR              | Q5U458 | 0          | N-term +42.01 Da,                         | 5065.268066 | 4 | 795.9099731 | 795.4104927 |
| ATALSEEELDNEDYSSLNVR              | Q5U458 | 0          | N-term +42.01 Da,                         | 5065.687012 | 2 | 754.4299927 | 754.4275768 |
| DDDIAALVVDNGSGMCKAGF              | P60710 | 0          | N-term +42.01 Da, K +28.03 Da,C +57.02Da, | 5070.29541  | 2 | 675.3699951 | 675.3659329 |
| MVTEQEIEAIGKTLVDPKQLQAR           | Q99LN9 | 0          | N-term +42.01 Da, K +28.03 Da,            | 5070.508301 | 2 | 812.4199829 | 811.9216041 |
| ADLSLVDALTEPPPEIEGEIKR            | P27546 | 0          | N-term +42.01 Da, K +28.03 Da,            | 5072.777344 | 2 | 652.8499756 | 652.8458879 |
| ADLSLVDALTEPPPEIEGEIKR            | P27546 | 0          | N-term +42.01 Da, K +28.03 Da,            | 5073.272461 | 3 | 683.3699951 | 682.7054717 |
| AADISQWAGPLCLQEVDEPPQH            | P70296 | 0          | N-term +42.01 Da, C +57.02Da,             | 5074.541016 | 4 | 718.366394  | 718.3682588 |
| AAAAAAAAAAGDSDSWDADTFMEDPVR       | Q66J56 | 0          | N-term +42.01 Da,                         | 5075.306152 | 3 | 1146.280029 | 1145.612168 |
| AADISQWAGPLCLQEVDEPPQH            | P70296 | 0          | N-term +42.01 Da, C +57.02Da,             | 5076.47998  | 3 | 957.4899902 | 957.4885862 |
| AAAAAAAAAAGDSDSWDADTFMEDPVR       | Q66J56 | 0          | N-term +42.01 Da,                         | 5079.713867 | 3 | 603.3099976 | 602.6486348 |
| ADELIFCLEGVDGGR                   | O08796 | 0          | N-term +42.01 Da, C +57.02Da,             | 5080.894043 | 2 | 834.9050293 | 834.9074037 |
| AAAAAAAAAAGDSDSWDADTFMEDPVR       | Q66J56 | 0          | N-term +42.01 Da,                         | 5081.090332 | 2 | 904.4588013 | 903.4693139 |
| ADLSLVDALTEPPPEIEGEIKR            | P27546 | 0          | N-term +42.01 Da, K +28.03 Da,            | 5088.436523 | 3 | 833.1300049 | 832.7988718 |
| ADQLTEEQIAEFKEAF                  | P62204 | 0          | N-term +42.01 Da, K +28.03 Da,            | 5091.543457 | 3 | 731.0700073 | 730.7365548 |
| SDTSEEIPNFEEMFASR                 | Q9CQY2 | 0          | N-term +42.01 Da,                         | 5096.102051 | 3 | 1108.540039 | 1108.208438 |
| CDFTEDQTAEFKEAFQLFDR              | Q60605 | 0          | N-term +42.01 Da, K +28.03 Da,C +57.02Da, | 5101.644043 | 2 | 675.3651123 | 675.3659329 |
| DDDIAALVVDNGSGMCKAGF              | P60710 | 0          | N-term +42.01 Da, K +28.03 Da,C +57.02Da, | 5103.42334  | 2 | 652.8457031 | 652.8458879 |
| TEWEAATPAVAETPDIKLFGKW            | P97461 | 0          | N-term +42.01 Da, K +28.03 Da,            | 5105.382813 | 2 | 1053.5      | 1053.003727 |
| TEWEAATPAVAETPDIKLFGKW            | P97461 | 0          | N-term +42.01 Da, K +28.03 Da,            | 5109.370117 | 2 | 924.9500122 | 924.4478498 |

|                                   |        |            |                                           |             |   |             |             |
|-----------------------------------|--------|------------|-------------------------------------------|-------------|---|-------------|-------------|
| ADLSLVDALTEPPPEIEGEIKR            | P27546 | 0          | N-term +42.01 Da, K +28.03 Da,            | 5110.285156 | 3 | 1079.560059 | 1078.902842 |
| TEWEAATPAVAETPDIKLFGKW            | P97461 | 0          | N-term +42.01 Da, K +28.03 Da,            | 5114.135254 | 2 | 737.9500122 | 737.4556053 |
| ADLSLVDALTEPPPEIEGEIKR            | P27546 | 0          | N-term +42.01 Da, K +28.03 Da,            | 5115.197754 | 3 | 702.3396606 | 702.3382435 |
| AADISQWAGPLCLQEVDEPPQH            | P70296 | 0          | N-term +42.01 Da, C +57.02Da,             | 5116.826172 | 2 | 896.4299927 | 896.4359944 |
| CDFTEDQTAEFKEAFQLFDR              | Q60605 | 0          | N-term +42.01 Da, K +28.03 Da,C +57.02Da, | 5121.705078 | 3 | 731.0700073 | 730.7365548 |
| AADISQWAGPLCLQEVDEPPQH            | P70296 | 0          | N-term +42.01 Da, C +57.02Da,             | 5124.318359 | 3 | 759.4099731 | 759.0874762 |
| TEWEAATPAVAETPDIKLFGKW            | P97461 | 0          | N-term +42.01 Da, K +28.03 Da,            | 5130.486328 | 2 | 1080.050049 | 1080.048658 |
| CDFTEDQTAEFKEAFQLFDR              | Q60605 | 0          | N-term +42.01 Da, K +28.03 Da,C +57.02Da, | 5131.236816 | 2 | 704.3499756 | 703.3591625 |
| MEANGFGLQNFPELKNNDTLR             | P70697 | 0.0005787  | N-term +42.01 Da, K +28.03 Da,            | 5132.192383 | 2 | 717.3482056 | 717.3489925 |
| ADLSLVDALTEPPPEIEGEIKR            | P27546 | 0          | N-term +42.01 Da, K +28.03 Da,            | 5136.20166  | 2 | 1052.969971 | 1052.973284 |
| ADQLTEEQIAEFKEAF                  | P62204 | 0          | N-term +42.01 Da, K +28.03 Da,            | 5136.452148 | 3 | 862.7700195 | 862.1098412 |
| SDTSEEIPNFEEMFASR                 | Q9CQY2 | 0          | N-term +42.01 Da,                         | 5136.532227 | 2 | 635.3599854 | 635.361705  |
| AALTAEHFVALQSLKAS                 | Q8K2Q0 | 0          | N-term +42.01 Da, K +28.03 Da,            | 5140.686035 | 2 | 976.539978  | 976.5385853 |
| AAGVDFGDLELFEAFDPPEESTPKPVHTR     | Q9CYA6 | 0          | N-term +42.01 Da, K +28.03 Da,            | 5146.633301 | 3 | 843.4799805 | 843.1476121 |
| ADLSLVDALTEPPPEIEGEIKR            | P27546 | 0          | N-term +42.01 Da, K +28.03 Da,            | 5148.475098 | 3 | 557.6599731 | 557.0013365 |
| MNSSDEEKQLQLITSLKEQAIGYEDLR       | Q8K2Q9 | 0          | N-term +42.01 Da, K +28.03 Da,            | 5154.869141 | 2 | 619.8599854 | 618.8622059 |
| MNSSDEEKQLQLITSLKEQAIGYEDLR       | Q8K2Q9 | 0          | N-term +42.01 Da, K +28.03 Da,            | 5157.651855 | 2 | 875.9500122 | 875.4549542 |
| CDFTEDQTAEFKEAFQLFDR              | Q60605 | 0          | N-term +42.01 Da, K +28.03 Da,C +57.02Da, | 5159.479492 | 2 | 875.4500122 | 875.4549542 |
| ADLSLVDALTEPPPEIEGEIKR            | P27546 | 0          | N-term +42.01 Da, K +28.03 Da,            | 5159.76123  | 2 | 1264.209961 | 1264.21778  |
| ADQLTEEQIAEFKEAF                  | P62204 | 0          | N-term +42.01 Da, K +28.03 Da,            | 5161.119141 | 2 | 986.460022  | 985.4715308 |
| SPDRLADINYEGRLEAVSRK              | Q6PFD9 | 0.00892388 | N-term +42.01 Da, K +28.03 Da,            | 5164.575684 | 2 | 717.3499756 | 717.3489925 |
| ADDLDFETGDAGASATFPMQC             | P63242 | 0.00058173 | N-term +42.01 Da, C +57.02Da,             | 5164.919922 | 3 | 788.4000244 | 788.3948578 |
| AADISQWAGPLC                      | P70296 | 0.00330761 | N-term +42.01 Da, C +57.02Da,             | 5165.224121 | 2 | 1182.589966 | 1182.088648 |
| MDEMATTQISKDELDELKEAF             | Q99K51 | 0          | N-term +42.01 Da, K +28.03 Da,            | 5165.710449 | 3 | 687.0499878 | 686.7176001 |
| AAGVDFGDLELFEAFDPPEESTPKPVHTR     | Q9CYA6 | 0          | N-term +42.01 Da, K +28.03 Da,            | 5171.523926 | 4 | 890.75      | 890.2505186 |
| AAGVDFGDLELFEAFDPPEESTPKPVHTR     | Q9CYA6 | 0          | N-term +42.01 Da, K +28.03 Da,            | 5175.752441 | 2 | 545.7797852 | 545.7800161 |
| MDEMATTQISKDELDELKEAF             | Q99K51 | 0          | N-term +42.01 Da, K +28.03 Da,            | 5177.321289 | 2 | 1182.089966 | 1182.088648 |
| MDEMATTQISKDELDELKEAF             | Q99K51 | 0          | N-term +42.01 Da, K +28.03 Da,            | 5186.480469 | 2 | 855.4000244 | 855.3956171 |
| GQPQKLAQENLKGSFEQDLYNMNNYLEKLGPLR | Q8C7G5 | 0          | N-term +42.01 Da, K +28.03 Da,            | 5188.189941 | 3 | 659.6799927 | 659.3445578 |
| AAGVDFGDLELFEAFDPPEESTPKPVHTR     | Q9CYA6 | 0          | N-term +42.01 Da, K +28.03 Da,            | 5192.211914 | 3 | 555.3145142 | 555.3152607 |
| KLHRELWQIHRNAFR                   | Q8BLK9 | 0.01992846 | N-term +42.01 Da, K +28.03 Da,            | 5195.353516 | 3 | 974.5200195 | 973.8535944 |
| ADQLTEEQIAEFKEAF                  | P62204 | 0          | N-term +42.01 Da, K +28.03 Da,            | 5195.645508 | 2 | 668.8499756 | 668.853379  |
| MKGALGSPVAAAGAAMQETFGCVVANR       | Q9JKS5 | 0          | N-term +42.01 Da, K +28.03 Da,C +57.02Da, | 5196.747559 | 3 | 789.0599976 | 788.3948578 |
| ADQLTEEQIAEFKEAF                  | P62204 | 0          | N-term +42.01 Da, K +28.03 Da,            | 5197.741211 | 2 | 832.460022  | 832.4692528 |
| MEQASKTVQDALSSVQESDIAVVAR         | P33622 | 0          | N-term +42.01 Da, K +28.03 Da,            | 5203.159668 | 2 | 838.4199829 | 837.9223248 |
| SPDRLADINYEGRLEAVSRK              | Q6PFD9 | 0.00589181 | N-term +42.01 Da, K +28.03 Da,            | 5208.159668 | 3 | 737.0499878 | 736.719564  |
| ALTSFLPAPTQLSQDQLEAEER            | Q9CSN1 | 0          | N-term +42.01 Da,                         | 5214.793945 | 2 | 635.361145  | 635.361705  |
| MKGALGSPVAAAGAAMQETFGCVVANR       | Q9JKS5 | 0          | N-term +42.01 Da, K +28.03 Da,C +57.02Da, | 5218.709473 | 2 | 988.5125122 | 988.5131985 |
| ALTSFLPAPTQLSQDQLEAEER            | Q9CSN1 | 0          | N-term +42.01 Da,                         | 5220.489258 | 3 | 659.3439941 | 659.3445578 |
| AAGAAAALAFLNQESR                  | Q9CPP0 | 0          | N-term +42.01 Da,                         | 5222.102539 | 3 | 609.3182373 | 609.3187824 |

|                                   |        |            |                                           |             |   |             |             |
|-----------------------------------|--------|------------|-------------------------------------------|-------------|---|-------------|-------------|
| AKTLSITDMKEMELKVK                 | Q8R2Z3 | 0.03254882 | N-term +42.01 Da, K +28.03 Da,            | 5223.457031 | 2 | 1071.550049 | 1072.062433 |
| MDEMATTQISKDELDELKEAF             | Q99K51 | 0.00890985 | N-term +42.01 Da, K +28.03 Da,            | 5224.041016 | 3 | 715.3800049 | 715.0440477 |
| GQPQKLAQENLKGSFEQDLYNMNNYLEKLGPLR | Q8C7G5 | 0          | N-term +42.01 Da, K +28.03 Da,            | 5224.506348 | 3 | 555.315918  | 555.3152607 |
| AADLGQIPDVIDSDGVFKY               | Q9DAK9 | 0          | N-term +42.01 Da, K +28.03 Da,            | 5240.760254 | 3 | 667.3080444 | 667.6396335 |
| ADQLTEEQIAEFKEAF                  | P62204 | 0          | N-term +42.01 Da, K +28.03 Da,            | 5246.158691 | 2 | 635.8531494 | 635.361705  |
| MKGALGSPVAAAGAAMQETFGCVVANR       | Q9JKS5 | 0          | N-term +42.01 Da, K +28.03 Da,C +57.02Da, | 5251.396484 | 2 | 922.5200195 | 921.5278227 |
| AADLGQIPDVIDSDGVFKY               | Q9DAK9 | 0          | N-term +42.01 Da, K +28.03 Da,            | 5253.977051 | 2 | 682.8499756 | 682.3462524 |
| ADQLTEEQIAEFKEAF                  | P62204 | 0          | N-term +42.01 Da, K +28.03 Da,            | 5268.895508 | 2 | 647.874939  | 647.8739165 |
| AADLGQIPDVIDSDGVFKY               | Q9DAK9 | 0          | N-term +42.01 Da, K +28.03 Da,            | 5271.121582 | 2 | 723.3699951 | 722.8675495 |
| AKPPAVAAAAAASEELSQVPDEELLR        | E9Q6B2 | 0          | N-term +42.01 Da, K +28.03 Da,            | 5273.045898 | 4 | 979.7399902 | 979.9884707 |
| ALTSFLPAPTQLSQDQLEAEER            | Q9CSN1 | 0          | N-term +42.01 Da,                         | 5275.041504 | 2 | 924.4400024 | 924.4478498 |
| ALTSFLPAPTQLSQDQLEAEER            | Q9CSN1 | 0          | N-term +42.01 Da,                         | 5279.617188 | 2 | 977.039978  | 976.5385853 |
| AAGAAAALAFLNQESR                  | Q9CPP0 | 0          | N-term +42.01 Da,                         | 5280.446777 | 3 | 641.9695435 | 641.3112331 |
| ADLSLVDALTEPPPEIEGKIR             | P27546 | 0          | N-term +42.01 Da, K +28.03 Da,            | 5284.963867 | 4 | 502.537262  | 502.5381371 |
| AKPPAVAAAAAASEELSQVPDEELLR        | E9Q6B2 | 0          | N-term +42.01 Da, K +28.03 Da,            | 5290.293945 | 3 | 651.3602905 | 651.3614823 |
| AAAAAAAAAAAAAGSDSWDADTFMEDPVR     | Q66JS6 | 0          | N-term +42.01 Da,                         | 5290.436035 | 2 | 968         | 967.008606  |
| GQPQKLAQENLKGSFEQDLYNMNNYLEKLGPLR | Q8C7G5 | 0          | N-term +42.01 Da, K +28.03 Da,            | 5300.562988 | 2 | 1030.550049 | 1029.546942 |
| VDYIVEYDYDAVHDELDIR               | Q9JLQ0 | 0          | N-term +42.01 Da,                         | 5300.726074 | 3 | 767.4000244 | 767.4041879 |
| AAAAAAAAAAAAAGSDSWDADTFMEDPVR     | Q66JS6 | 0          | N-term +42.01 Da,                         | 5303.151367 | 2 | 837.9204102 | 837.9223248 |
| ADQLTEEQIAEFKEAF                  | P62204 | 0          | N-term +42.01 Da, K +28.03 Da,            | 5303.783691 | 3 | 937.0900269 | 936.4252179 |
| MKGALGSPVAAAGAAMQETFGCVVANR       | Q9JKS5 | 0          | N-term +42.01 Da, K +28.03 Da,C +57.02Da, | 5306.319336 | 2 | 737.3699951 | 736.867686  |
| ADQLTEEQIAEFKEAF                  | P62204 | 0          | N-term +42.01 Da, K +28.03 Da,            | 5307.647461 | 3 | 773.7399902 | 773.7507528 |
| AADLGQIPDVIDSDGVFKY               | Q9DAK9 | 0          | N-term +42.01 Da, K +28.03 Da,            | 5307.821289 | 4 | 620.5700073 | 620.0793613 |
| AADLGQIPDVIDSDGVFKY               | Q9DAK9 | 0          | N-term +42.01 Da, K +28.03 Da,            | 5308.044922 | 2 | 1405.130005 | 1404.134189 |
| ATLCLFDMDGTLTAPR                  | Q9Z2M7 | 0          | N-term +42.01 Da, C +57.02Da,             | 5309.713867 | 3 | 696.4199829 | 696.4244166 |
| CDFTEDQTAEFKEAFQLFDR              | Q60605 | 0          | N-term +42.01 Da, K +28.03 Da,C +57.02Da, | 5310.699707 | 3 | 1087.900024 | 1087.223299 |
| MDDSEVESTASILASVKEQEAQFEKTR       | P30999 | 0          | N-term +42.01 Da, K +28.03 Da,            | 5311.617188 | 3 | 870.4400024 | 869.776968  |
| DDDIAALVVDNGSGMCKAGF              | P60710 | 0.00277624 | N-term +42.01 Da, K +28.03 Da,C +57.02Da, | 5312.371582 | 2 | 593.8476563 | 593.8468443 |
| VDYIVEYDYDAVHDELDIR               | Q9JLQ0 | 0          | N-term +42.01 Da,                         | 5319.228516 | 3 | 632.0300293 | 631.6937379 |
| AKPPAVAAAAAASEELSQVPDEELLR        | E9Q6B2 | 0          | N-term +42.01 Da, K +28.03 Da,            | 5321.225586 | 3 | 858.8200073 | 858.8253095 |
| ASALEQFVNSVR                      | O88543 | 0          | N-term +42.01 Da,                         | 5321.519043 | 2 | 956.9699707 | 956.9752949 |
| AAAAAAAAAAAAAGSDSWDADTFMEDPVR     | Q66JS6 | 0          | N-term +42.01 Da,                         | 5322.580078 | 4 | 900.9400024 | 900.44437   |
| ADQLTEEQIAEFKEAF                  | P62204 | 0          | N-term +42.01 Da, K +28.03 Da,            | 5322.824707 | 2 | 808.9280396 | 807.9385063 |
| MEPETTATTILASVKEQELQFQR           | Q68FH0 | 0          | N-term +42.01 Da, K +28.03 Da,            | 5324.944824 | 2 | 938.460022  | 937.4628858 |
| ADQLTEEQIAEFKEAF                  | P62204 | 0          | N-term +42.01 Da, K +28.03 Da,            | 5328.569336 | 2 | 848.9464722 | 848.9419143 |
| AADLGQIPDVIDSDGVFKY               | Q9DAK9 | 0          | N-term +42.01 Da, K +28.03 Da,            | 5331.155273 | 4 | 642.0900269 | 642.3417779 |
| AADLGQIPDVIDSDGVFKY               | Q9DAK9 | 0          | N-term +42.01 Da, K +28.03 Da,            | 5336.75     | 2 | 848.4400024 | 848.9419143 |
| MEPETTATTILASVKEQELQFQR           | Q68FH0 | 0          | N-term +42.01 Da, K +28.03 Da,            | 5343.084961 | 2 | 737.3699951 | 736.867686  |
| RPTLHRRPTLPYR                     | F6TMC0 | 0.02187182 | N-term +42.01 Da,                         | 5344.378906 | 2 | 593.8460693 | 593.8468443 |
| DDDIAALVVDNGSGMCKAGF              | P60710 | 0.00432666 | N-term +42.01 Da, K +28.03 Da,C +57.02Da, | 5346.581543 | 2 | 806.9099731 | 806.4136121 |



|                                         |        |            |                                           |             |   |             |             |
|-----------------------------------------|--------|------------|-------------------------------------------|-------------|---|-------------|-------------|
| SSEEGKLFVGGNLFNTDEQALEDHFSSFGPISEVVVKDR | O89086 | 0          | N-term +42.01 Da, K +28.03 Da,            | 5348.993164 | 3 | 851.7399902 | 851.0713864 |
| AAVLQQVLERPELN                          | Q7M739 | 0          | N-term +42.01 Da,                         | 5351.232422 | 2 | 1017.530029 | 1016.530996 |
| VDYIVEYDYDAVHDELDIR                     | Q9JLQ0 | 0          | N-term +42.01 Da,                         | 5353.181152 | 4 | 889.7199707 | 889.2188845 |
| MDDSEVESTASILASVKEQEAQFEKLTR            | P30999 | 0          | N-term +42.01 Da, K +28.03 Da,            | 5354.436523 | 2 | 1276.599976 | 1276.103441 |
| ADQLTEEQIAEFKEAF                        | P62204 | 0          | N-term +42.01 Da, K +28.03 Da,            | 5363.15625  | 3 | 828.7800293 | 828.4428653 |
| AAAAAAAAAAAAAGSDSDWDADTFMEDPVR          | Q66JS6 | 0          | N-term +42.01 Da,                         | 5365.374512 | 4 | 678.6099854 | 678.1179095 |
| MEATLEQHLEDTMKNPSIVGLCTDSQGLNLGCR       | Q9D1L9 | 0          | N-term +42.01 Da, K +28.03 Da,C +57.02Da, | 5373.987305 | 3 | 682.3900146 | 681.727219  |
| ATLCLFDMDGTLTAPR                        | Q9Z2M7 | 0          | N-term +42.01 Da, C +57.02Da,             | 5375.816895 | 2 | 1016        | 1016.01442  |
| ADQLTEEQIAEFKEAF                        | P62204 | 0          | N-term +42.01 Da, K +28.03 Da,            | 5375.937988 | 2 | 776.8743286 | 775.885219  |
| AAAAAAAAAAAAAGSDSDWDADTFMEDPVR          | Q66JS6 | 0          | N-term +42.01 Da,                         | 5383.437012 | 2 | 798.9199829 | 798.9150312 |
| MDAVLSDFVR                              | B2RUR8 | 0          | N-term +42.01 Da,                         | 5385.572266 | 2 | 920.9899902 | 920.983248  |
| MDDSEVESTASILASVKEQEAQFEKLTR            | P30999 | 0          | N-term +42.01 Da, K +28.03 Da,            | 5397.682617 | 2 | 1276.609985 | 1276.103441 |
| AADISQWAGPLCLQEVDEPPQHAL                | P70296 | 0          | N-term +42.01 Da, C +57.02Da,             | 5397.807617 | 3 | 978.8200073 | 978.4864719 |
| AADISQWAGPLCLQEVDEPPQHAL                | P70296 | 0          | N-term +42.01 Da, C +57.02Da,             | 5398.291504 | 2 | 720.8900146 | 719.9006631 |
| ESPLACGPLLPPGGRGAGADQLTEEQIAEFKEAF      | Q3UKW2 | 0          | N-term +42.01 Da, K +28.03 Da,C +57.02Da, | 5401.169434 | 2 | 903.4799805 | 902.4873089 |
| AAAAAAAAAAAAAGSDSDWDADTFMEDPVR          | Q66JS6 | 0          | N-term +42.01 Da,                         | 5402.853516 | 2 | 1405.119995 | 1404.134189 |
| ADQLTEEQIAEFKEAF                        | P62204 | 0          | N-term +42.01 Da, K +28.03 Da,            | 5403.899902 | 3 | 730.7299805 | 730.7365548 |
| AAAAAAAAAAAAAGSDSDWDADTFMEDPVR          | Q66JS6 | 0          | N-term +42.01 Da,                         | 5407.392578 | 2 | 814.9272461 | 814.9281388 |
| VEAKFINYVKNCFRMTDQEAIQDLWQWR            | Q61937 | 0          | N-term +42.01 Da, K +28.03 Da,C +57.02Da, | 5409.057129 | 3 | 851.0700073 | 851.0713864 |
| AAAAAAAAAAAAAGSDSDWDADTFMEDPVR          | Q66JS6 | 0          | N-term +42.01 Da,                         | 5413.678223 | 2 | 754.8654175 | 754.865007  |
| SSEEGKLFVGGNLFNTDEQALEDHFSSFGPISEVVVKDR | O89086 | 0          | N-term +42.01 Da, K +28.03 Da,            | 5419.994141 | 2 | 706.8400269 | 706.8399458 |
| AADLGQIPDVIDSDGVFKY                     | Q9DAK9 | 0.00057837 | N-term +42.01 Da, K +28.03 Da,            | 5426.123047 | 3 | 571.9699707 | 571.3101757 |
| ADQLTEEQIAEFKEAF                        | P62204 | 0          | N-term +42.01 Da, K +28.03 Da,            | 5428.27002  | 2 | 1276.104004 | 1276.103441 |
| AAAAAAAAAAAAAGSDSDWDADTFMEDPVR          | Q66JS6 | 0          | N-term +42.01 Da,                         | 5430.078613 | 4 | 657.8499756 | 657.3541912 |
| ADQLTEEQIAEFKEAFS                       | P62204 | 0          | N-term +42.01 Da, K +28.03 Da,            | 5432.833496 | 2 | 593.3400269 | 593.3455234 |
| AAAAAAAAAAAAAGSDSDWDADTFMEDPVR          | Q66JS6 | 0          | N-term +42.01 Da,                         | 5435.087402 | 3 | 936.75      | 936.4252179 |
| SSEEGKLFVGGNLFNTDEQALEDHFSSFGPISEVVVKDR | O89086 | 0          | N-term +42.01 Da, K +28.03 Da,            | 5436.835449 | 2 | 1036        | 1035.005738 |
| ADQLTEEQIAEFKEAFS                       | P62204 | 0.00114286 | N-term +42.01 Da, K +28.03 Da,            | 5437.917969 | 2 | 815.4299927 | 814.9281388 |
| MEATLEQHLEDTMKNPSIVGLCTDSQGLNLGCR       | Q9D1L9 | 0          | N-term +42.01 Da, K +28.03 Da,C +57.02Da, | 5439.400879 | 3 | 851.0700073 | 851.0713864 |
| CDFTEDQTAEFKEAFQLFDR                    | Q60605 | 0          | N-term +42.01 Da, K +28.03 Da,C +57.02Da, | 5446.587402 | 2 | 811.960022  | 811.9648579 |
| CDFTEDQTAEFKEAFQLFDR                    | Q60605 | 0          | N-term +42.01 Da, K +28.03 Da,C +57.02Da, | 5450.19873  | 2 | 628.8800049 | 628.871708  |
| MEATLEQHLEDTMKNPSIVGLCTDSQGLNLGCR       | Q9D1L9 | 0          | N-term +42.01 Da, K +28.03 Da,C +57.02Da, | 5455.860352 | 4 | 571.8099976 | 571.8095817 |
| ADQLTEEQIAEFKEAF                        | P62204 | 0          | N-term +42.01 Da, K +28.03 Da,            | 5458.920898 | 3 | 603.3099976 | 602.6486348 |
| AAAAAAAAAAAAAGSDSDWDADTFMEDPVR          | Q66JS6 | 0          | N-term +42.01 Da,                         | 5461.592773 | 2 | 776.8600464 | 775.871975  |
| AGLVDFQDEEQVKSFLNMEVECHYQCYR            | Q921H9 | 0.03694581 | N-term +42.01 Da, K +28.03 Da,C +57.02Da, | 5462.494629 | 2 | 1276.599976 | 1276.103441 |
| SSEEGKLFVGGNLFNTDEQALEDHFSSFGPISEVVVKDR | O89086 | 0          | N-term +42.01 Da, K +28.03 Da,            | 5463.662109 | 3 | 839.7800293 | 839.1233554 |
| AAAAAAAAAAAAAGSDSDWDADTFMEDPVR          | Q66JS6 | 0          | N-term +42.01 Da,                         | 5463.790039 | 3 | 1078.869995 | 1078.538452 |
| TEWEAATPAVAETPDIKLF                     | P97461 | 0          | N-term +42.01 Da, K +28.03 Da,            | 5465.583008 | 2 | 593.3499756 | 593.3455234 |
| CDFTEDQTAEFKEAFQLFDR                    | Q60605 | 0          | N-term +42.01 Da, K +28.03 Da,C +57.02Da, | 5467.487305 | 3 | 936.7520752 | 936.4252179 |
| CDFTEDQTAEFKEAFQLFDR                    | Q60605 | 0          | N-term +42.01 Da, K +28.03 Da,C +57.02Da, | 5467.563477 | 2 | 1404.624756 | 1404.134189 |

|                                           |        |            |                                           |             |   |             |             |
|-------------------------------------------|--------|------------|-------------------------------------------|-------------|---|-------------|-------------|
| TEWEAATPAVAETPKILF                        | P97461 | 0          | N-term +42.01 Da, K +28.03 Da,            | 5472.130371 | 2 | 833.460022  | 833.9541564 |
| MEATLEQHLEDTMKNPSIVGLCTDSQGLNLGCR         | Q9D1L9 | 0          | N-term +42.01 Da, K +28.03 Da,C +57.02Da, | 5472.806641 | 2 | 1131.089966 | 1130.102613 |
| ADQLTEEQIAEFKEAFSLFDKDGDTITTKELGTVMR      | P62204 | 0          | N-term +42.01 Da, K +28.03 Da,            | 5478.697266 | 3 | 813.4299927 | 813.7604169 |
| ADQLTEEQIAEFKEAF                          | P62204 | 0          | N-term +42.01 Da, K +28.03 Da,            | 5482.326172 | 3 | 1000.460022 | 1000.458476 |
| SSEEGKLFVGGNLNFNTDEQALEDHFSSFGPISEVVVVKDR | Q89086 | 0          | N-term +42.01 Da, K +28.03 Da,            | 5482.540039 | 2 | 856.4500122 | 856.9599177 |
| MEELDCEPAVTWIPGVNSKKKQMCDFWGPGEML         | Q8R480 | 0.04372898 | N-term +42.01 Da, K +28.03 Da,C +57.02Da, | 5484.960938 | 3 | 1001.130005 | 1000.458476 |
| CDFTEDQTAEFKEAFQLFDR                      | Q60605 | 0          | N-term +42.01 Da, K +28.03 Da,C +57.02Da, | 5487.268555 | 3 | 913.460022  | 913.1323627 |
| ADQLTEEQIAEFKEAF                          | P62204 | 0          | N-term +42.01 Da, K +28.03 Da,            | 5489.407227 | 2 | 1369.699951 | 1369.194906 |
| CDFTEDQTAEFKEAFQLFDR                      | Q60605 | 0          | N-term +42.01 Da, K +28.03 Da,C +57.02Da, | 5491.246582 | 3 | 731.4099731 | 730.7365548 |
| MEATLEQHLEDTMKNPSIVGLCTDSQGLNLGCR         | Q9D1L9 | 0          | N-term +42.01 Da, K +28.03 Da,C +57.02Da, | 5497.936523 | 3 | 800.7800293 | 800.1173243 |
| ADQLTEEQIAEFKEAFSLFDKDGDTITTKELGTVMR      | P62204 | 0          | N-term +42.01 Da, K +28.03 Da,            | 5498.65625  | 3 | 936.4220581 | 936.4252179 |
| ADQLTEEQIAEFKEAF                          | P62204 | 0          | N-term +42.01 Da, K +28.03 Da,            | 5498.742188 | 2 | 1405.130005 | 1404.134189 |
| MEATLEQHLEDTMKNPSIVGLCTDSQGLNLGCR         | Q9D1L9 | 0          | N-term +42.01 Da, K +28.03 Da,C +57.02Da, | 5499.137695 | 2 | 954.9039307 | 954.4038372 |
| MTDQEAIQDLWQWR                            | Q61937 | 0          | N-term +42.01 Da,                         | 5499.541992 | 3 | 851.7399902 | 851.0713864 |
| ADQLTEEQIAEFKEAFSLFDKDGDSITTQELGTVMRS     | Q9D6P8 | 0          | N-term +42.01 Da, K +28.03 Da,            | 5501.732422 | 2 | 1095.5979   | 1095.601194 |
| CDFTEDQTAEFKEAFQLFDR                      | Q60605 | 0          | N-term +42.01 Da, K +28.03 Da,C +57.02Da, | 5505.374512 | 2 | 954.4000244 | 954.4038372 |
| CDFTEDQTAEFKEAFQLFDR                      | Q60605 | 0          | N-term +42.01 Da, K +28.03 Da,C +57.02Da, | 5505.494629 | 2 | 868.9099731 | 867.9219992 |
| MEATLEQHLEDTMKNPSIVGLCTDSQGLNLGCR         | Q9D1L9 | 0          | N-term +42.01 Da, K +28.03 Da,C +57.02Da, | 5507.702148 | 4 | 710.1329956 | 709.6375751 |
| ADQLTEEQIAEFKEAFSLFDKDGDTITTKELGTVMR      | P62204 | 0          | N-term +42.01 Da, K +28.03 Da,            | 5518.904785 | 3 | 913.1306763 | 913.1323627 |
| SFIPVAEDSDFPIQNLPLYGVFSTQSNPKPR           | P35505 | 0          | N-term +42.01 Da, K +28.03 Da,            | 5519.71582  | 2 | 734.9199829 | 734.9221272 |
| ADQLTEEQIAEFKEAF                          | P62204 | 0          | N-term +42.01 Da, K +28.03 Da,            | 5520.609863 | 2 | 1369.193604 | 1369.194906 |
| ADQLTEEQIAEFKEAF                          | P62204 | 0.00169205 | N-term +42.01 Da, K +28.03 Da,            | 5522.434082 | 2 | 552.8099976 | 551.8164013 |
| AKDLDELLDEVETKFCR                         | Q3UJP5 | 0          | N-term +42.01 Da, K +28.03 Da,C +57.02Da, | 5523.298828 | 3 | 730.7352905 | 730.7365548 |
| CDFTEDQTAEFKEAFQLFDR                      | Q60605 | 0          | N-term +42.01 Da, K +28.03 Da,C +57.02Da, | 5524.297852 | 2 | 791.4000244 | 791.9003376 |
| AAQLEEDVVTCSICLGR                         | Q8BFW4 | 0          | N-term +42.01 Da, C +57.02Da,             | 5527.657715 | 3 | 715.4299927 | 715.4315713 |
| AAALADMADLEELSR                           | Q9Z248 | 0          | N-term +42.01 Da,                         | 5530.780762 | 3 | 937.0900269 | 936.4252179 |
| CDFTEDQTAEFKEAFQLFDR                      | Q60605 | 0          | N-term +42.01 Da, K +28.03 Da,C +57.02Da, | 5530.955078 | 2 | 1405.130005 | 1404.134189 |
| SFIPVAEDSDFPIQNLPLYGVFSTQSNPKPR           | P35505 | 0          | N-term +42.01 Da, K +28.03 Da,            | 5532.841309 | 3 | 645.6699829 | 645.0081629 |
| ADQLTEEQIAEFKEAFSLFDKDGDTITTKELGTVMR      | P62204 | 0          | N-term +42.01 Da, K +28.03 Da,            | 5533.85498  | 2 | 1096.589966 | 1095.601194 |
| MDDLSEANGSFAISLLKILSEKDKSR                | O08800 | 0          | N-term +42.01 Da, K +28.03 Da,            | 5548.085449 | 2 | 1016.539978 | 1015.525675 |
| ADQLTEEQIAEFKEAF                          | P62204 | 0          | N-term +42.01 Da, K +28.03 Da,            | 5548.434082 | 2 | 1441.650024 | 1441.632011 |
| MKPAVDEMFPPEGAGPYVDLDEAGGSTGLLMDLAANEKAVH | Q3U898 | 0          | N-term +42.01 Da, K +28.03 Da,            | 5549.44873  | 2 | 644.3200073 | 644.3161062 |
| MEPDSASTAMEEPDSLEVLVKTLDLSQTR             | Q9Z1R2 | 0          | N-term +42.01 Da, K +28.03 Da,            | 5549.695801 | 2 | 1441.150024 | 1441.632011 |
| MKPAVDEMFPPEGAGPYVDLDEAGGSTGLLMDLAANEKAVH | Q3U898 | 0          | N-term +42.01 Da, K +28.03 Da,            | 5552.313477 | 2 | 691.8494263 | 691.8511705 |
| AAQLEEDVVTCSICLGR                         | Q8BFW4 | 0          | N-term +42.01 Da, C +57.02Da,             | 5553.23584  | 2 | 873.9500122 | 873.4388708 |
| MNAAAEAEFNILLATDSYKVTH                    | Q99KQ4 | 0          | N-term +42.01 Da, K +28.03 Da,            | 5553.579102 | 3 | 851.4000244 | 851.0713864 |
| LKDINKVAEDLESEGLMAEEVQAVQQQEVYGMMPR       | P16546 | 0          | N-term +42.01 Da, K +28.03 Da,            | 5553.987305 | 3 | 731.0700073 | 730.7365548 |
| AKDLDELLDEVETKFCR                         | Q3UJP5 | 0          | N-term +42.01 Da, K +28.03 Da,C +57.02Da, | 5556.438477 | 2 | 1277.099976 | 1276.103441 |
| EADIDGDGQVNYEEFVQMMTAK                    | P62204 | 0          | N-term +42.01 Da, K +28.03 Da,            | 5558.330078 | 4 | 962.5       | 962.4974946 |
| DSAVLEITREIR                              | Q9DA48 | 0.0328849  | N-term +42.01 Da,                         | 5561.550293 | 3 | 936.75      | 936.4252179 |

|                                            |        |            |                                           |             |   |             |             |
|--------------------------------------------|--------|------------|-------------------------------------------|-------------|---|-------------|-------------|
| MKPAVDEMFPPEGAGPYVDLDEAGGSTGLLLMDLAANEKAVH | Q3U898 | 0          | N-term +42.01 Da, K +28.03 Da,            | 5561.663574 | 3 | 1089.52002  | 1089.189433 |
| MNAAAEAEFNILLATDSYKVTH                     | Q99KQ4 | 0          | N-term +42.01 Da, K +28.03 Da,            | 5561.769043 | 2 | 842.4799805 | 841.975423  |
| FQLQYMGHYLIREERKDPDR                       | E9PZQ1 | 0.03553801 | N-term +42.01 Da, K +28.03 Da,            | 5562.04834  | 2 | 925.9099731 | 925.4189641 |
| EADIDGDGQVNYEEFVQMMTAK                     | P62204 | 0          | N-term +42.01 Da, K +28.03 Da,            | 5563.997559 | 4 | 749.9199829 | 749.4074869 |
| CDFTEDQTAEFKEAFQLFDR                       | Q60605 | 0          | N-term +42.01 Da, K +28.03 Da,C +57.02Da, | 5564.574219 | 2 | 1065.060059 | 1064.039481 |
| CDFTEDQTAEFKEAFQLFDR                       | Q60605 | 0          | N-term +42.01 Da, K +28.03 Da,C +57.02Da, | 5566.802734 | 2 | 1177.060059 | 1176.558099 |
| ADQLTEEQIAEFKEAFSLFDKDGDTITTKELGTVMR       | P62204 | 0          | N-term +42.01 Da, K +28.03 Da,            | 5571.925293 | 3 | 785.039978  | 784.7078251 |
| SFIPVAEDSDFPINLPYGVFSTQSNPKPR              | P35505 | 0          | N-term +42.01 Da, K +28.03 Da,            | 5573.785156 | 4 | 934.9099731 | 934.4130556 |
| MDDLSEANGSFAISLLKILSEKDKSR                 | O08800 | 0          | N-term +42.01 Da, K +28.03 Da,            | 5574.25293  | 2 | 1221.589966 | 1221.58518  |
| ADQLTEEQIAEFKEAF                           | P62204 | 0          | N-term +42.01 Da, K +28.03 Da,            | 5575.776367 | 2 | 808.9299927 | 807.9385063 |
| YDFQKDEPWRNGQGWCSCVRKGEPLLSRVNKK           | E9Q9W4 | 0.01991828 | N-term +42.01 Da, K +28.03 Da,C +57.02Da, | 5575.933594 | 2 | 1222.589966 | 1221.58518  |
| AKDLDELLDEVETKFCR                          | Q3UJP5 | 0          | N-term +42.01 Da, K +28.03 Da,C +57.02Da, | 5577.786621 | 2 | 670.8200073 | 670.3228767 |
| MNAAAEAEFNILLATDSYKVTH                     | Q99KQ4 | 0          | N-term +42.01 Da, K +28.03 Da,            | 5577.931152 | 2 | 1261.609985 | 1261.104269 |
| ADQLTEEQIAEFKEAFSLFDKDGDTITTKELGTVMR       | P62204 | 0          | N-term +42.01 Da, K +28.03 Da,            | 5578.857422 | 2 | 867.460022  | 867.4464983 |
| MEATLEQHLIEDTMKNPSIVGVLCTDSQGLNLGCR        | Q9D1L9 | 0.00380228 | N-term +42.01 Da, K +28.03 Da,C +57.02Da, | 5579.035156 | 3 | 1185.619995 | 1185.28942  |
| MNAAAEAEFNILLATDSYKVTH                     | Q99KQ4 | 0          | N-term +42.01 Da, K +28.03 Da,            | 5580.558105 | 2 | 1405.119995 | 1404.134189 |
| CDFTEDQTAEFKEAFQLFDR                       | Q60605 | 0          | N-term +42.01 Da, K +28.03 Da,C +57.02Da, | 5581.038574 | 3 | 1078.869995 | 1078.538452 |
| CDFTEDQTAEFKEAFQLFDR                       | Q60605 | 0          | N-term +42.01 Da, K +28.03 Da,C +57.02Da, | 5581.706543 | 2 | 644.3148193 | 644.3161062 |
| MNAAAEAEFNILLATDSYKVTH                     | Q99KQ4 | 0          | N-term +42.01 Da, K +28.03 Da,            | 5581.930176 | 3 | 841.069458  | 841.0719379 |
| MEEVVAEELDDEEQLVR                          | Q8K2H2 | 0          | N-term +42.01 Da,                         | 5583.092773 | 2 | 925.4199829 | 925.4189641 |
| ADQLTEEQIAEFKEAFSLFDKDGDTITTKELGTVMR       | P62204 | 0          | N-term +42.01 Da, K +28.03 Da,            | 5585.89209  | 2 | 1030.050049 | 1029.546942 |
| IAEVDFEKDRFRKVVFCMDR                       | Q9QYI3 | 0.04158607 | N-term +42.01 Da, K +28.03 Da,C +57.02Da, | 5586.929688 | 2 | 896         | 894.9907391 |
| ADQLTEEQIAEFKEAF                           | P62204 | 0          | N-term +42.01 Da, K +28.03 Da,            | 5589.325684 | 4 | 889.2175293 | 889.2188845 |
| MNAAAEAEFNILLATDSYKVTH                     | Q99KQ4 | 0          | N-term +42.01 Da, K +28.03 Da,            | 5593.730957 | 2 | 766.9099731 | 766.4093842 |
| SSEEGKLFVGGLNFNTEDEQALEDHFSSFGPISEVVVKDR   | Q89086 | 0          | N-term +42.01 Da, K +28.03 Da,            | 5594.630859 | 3 | 851.7299805 | 851.0713864 |
| MPRQGYQFEQACFVNPSFQWGLLNRRRWPPLMGQR        | Q80UG8 | 0.00169972 | N-term +42.01 Da, K +28.03 Da,C +57.02Da, | 5595.742676 | 4 | 664.1300049 | 663.8825388 |
| ADQLTEEQIAEFKEAFSLFDKDGDTITTKELGTVMR       | P62204 | 0          | N-term +42.01 Da, K +28.03 Da,            | 5597.73877  | 3 | 761.4199829 | 760.7530396 |
| LKTVLELQYVLDKLGDDVDR                       | Q60865 | 0          | N-term +42.01 Da, K +28.03 Da,            | 5598.191895 | 3 | 731.0700073 | 730.7365548 |
| CQPKVCGKLIESAHDNGLRMTAR                    | P51945 | 0.04460432 | N-term +42.01 Da, K +28.03 Da,C +57.02Da, | 5599.469238 | 3 | 1036.180054 | 1035.84343  |
| MEEVVAEELDDEEQLVR                          | Q8K2H2 | 0          | N-term +42.01 Da,                         | 5599.877441 | 3 | 916.1099854 | 915.4442727 |
| CDFTEDQTAEFKEAFQLFDR                       | Q60605 | 0          | N-term +42.01 Da, K +28.03 Da,C +57.02Da, | 5600.62207  | 2 | 936.9699707 | 936.4659514 |
| CDFTEDQTAEFKEAFQLFDR                       | Q60605 | 0          | N-term +42.01 Da, K +28.03 Da,C +57.02Da, | 5601.937988 | 3 | 1140.219971 | 1139.89122  |
| AAPSGSVNCEEFAEFQELLKVMR                    | Q8R3Q6 | 0          | N-term +42.01 Da, K +28.03 Da,C +57.02Da, | 5604.459961 | 2 | 1373.160034 | 1372.662771 |
| AAPSGSVNCEEFAEFQELLKVMR                    | Q8R3Q6 | 0          | N-term +42.01 Da, K +28.03 Da,C +57.02Da, | 5618.169922 | 2 | 1030.050049 | 1029.546942 |
| ADQLTEEQIAEFKEAFSLFDKDGDTITTKELGTVMR       | P62204 | 0          | N-term +42.01 Da, K +28.03 Da,            | 5618.739258 | 4 | 855.6699829 | 855.1702345 |
| MEEVVAEELDDEEQLVR                          | Q8K2H2 | 0          | N-term +42.01 Da,                         | 5619.537109 | 4 | 889.2183838 | 889.2188845 |
| MDGVVTDLIAVGLKR                            | G3UXA6 | 0          | N-term +42.01 Da, K +28.03 Da,            | 5619.871094 | 2 | 684.3499756 | 684.3457209 |
| ADQLTEEQIAEFKEAF                           | P62204 | 0          | N-term +42.01 Da, K +28.03 Da,            | 5622.162109 | 3 | 931.1400146 | 930.4833899 |
| ADQLTEEQIAEFKEAF                           | P62204 | 0.0059108  | N-term +42.01 Da, K +28.03 Da,            | 5625.867676 | 2 | 878.4400024 | 877.9516139 |
| ADTFLEHLCLLDIDSEPVAAR                      | P53657 | 0          | N-term +42.01 Da, C +57.02Da,             | 5627.216797 | 4 | 664.3800049 | 663.8825388 |

|                                       |        |            |                                           |             |   |             |             |
|---------------------------------------|--------|------------|-------------------------------------------|-------------|---|-------------|-------------|
| VNPTVFFDITADDEPLGR                    | P17742 | 0          | N-term +42.01 Da,                         | 5628.212891 | 3 | 949.1300049 | 948.4642237 |
| MNFSGKYQLQSQENFEPFMAIGLPEDLIQKG       | P12710 | 0          | N-term +42.01 Da, K +28.03 Da,            | 5630.868164 | 3 | 686.7000122 | 686.7003867 |
| ADQLTEEQIAEFKEAFSLFDKDKDGTITTKELGTVMR | P62204 | 0          | N-term +42.01 Da, K +28.03 Da,            | 5632.914063 | 2 | 1422.689941 | 1422.192697 |
| ADTFLEHLCLLDIDSEPVAAR                 | P53657 | 0          | N-term +42.01 Da, C +57.02Da,             | 5634.305176 | 3 | 1140.219971 | 1139.89122  |
| EEEIAALVIDNGSGMCKAGF                  | P63260 | 0          | N-term +42.01 Da, K +28.03 Da,C +57.02Da, | 5637.537109 | 3 | 863.1099854 | 862.7719999 |
| CDFTEDQTAEFKEAFQLFDR                  | Q60605 | 0          | N-term +42.01 Da, K +28.03 Da,C +57.02Da, | 5637.818848 | 3 | 1098.569946 | 1098.23822  |
| ADQLTEEQIAEFKEAFSLFDKDKDGTITTKELGTVMR | P62204 | 0          | N-term +42.01 Da, K +28.03 Da,            | 5643.352051 | 3 | 807.789978  | 807.1246961 |
| AAPSGSVNCEEFAEFQELLKVMR               | Q8R3Q6 | 0          | N-term +42.01 Da, K +28.03 Da,C +57.02Da, | 5644.194824 | 2 | 1404.624023 | 1404.134189 |
| AAPSGSVNCEEFAEFQELLKVMR               | Q8R3Q6 | 0          | N-term +42.01 Da, K +28.03 Da,C +57.02Da, | 5645.455078 | 2 | 1294.660034 | 1293.654362 |
| CDFTEDQTAEFKEAFQLFDR                  | Q60605 | 0          | N-term +42.01 Da, K +28.03 Da,C +57.02Da, | 5647.28125  | 2 | 1211.180054 | 1210.183406 |
| MDGVVTDLIAVGLKR                       | G3UXA6 | 0          | N-term +42.01 Da, K +28.03 Da,            | 5648.594727 | 2 | 1293.650024 | 1293.654362 |
| ADQLTEEQIAEFKEAF                      | P62204 | 0          | N-term +42.01 Da, K +28.03 Da,            | 5648.900879 | 2 | 744.4099731 | 743.4172092 |
| ADQLTEEQIAEFKEAFSLFDKDKDGTITTK        | P62204 | 0          | N-term +42.01 Da, K +28.03 Da,            | 5649.519043 | 2 | 1210.180054 | 1210.183406 |
| AAKVFESIGKFGAL                        | P67778 | 0.00114943 | N-term +42.01 Da, K +28.03 Da,            | 5650.374023 | 2 | 1029.545288 | 1029.546942 |
| ATVWDEAEQDGIIEVLKMSTEEIVQR            | Q88685 | 0          | N-term +42.01 Da, K +28.03 Da,            | 5651.127441 | 3 | 807.460022  | 807.1246961 |
| ATVWDEAEQDGIIEVLKMSTEEIVQR            | Q88685 | 0          | N-term +42.01 Da, K +28.03 Da,            | 5654.256348 | 4 | 889.4699707 | 889.2188845 |
| ADQLTEEQIAEFKEAFSLFDKDKDGTITTKELGTVMR | P62204 | 0.00278552 | N-term +42.01 Da, K +28.03 Da,            | 5656.086914 | 2 | 967.039978  | 966.5347906 |
| MNFSGKYQLQSQENFEPFMAIGLPEDLIQKG       | P12710 | 0          | N-term +42.01 Da, K +28.03 Da,            | 5656.479492 | 3 | 842.4400024 | 841.7840113 |
| ATFEEVSVLGFEFFDKAVKEHEGKTI            | Q9CQM5 | 0          | N-term +42.01 Da, K +28.03 Da,            | 5659.64209  | 3 | 645.3599854 | 644.6922859 |
| AADLGQIPDVDDSDGVFKYVLR                | Q9DAK9 | 0          | N-term +42.01 Da, K +28.03 Da,            | 5660.466797 | 4 | 786.4099731 | 786.4052101 |
| AAAVEPEVEDPLWSFVR                     | Q8C436 | 0          | N-term +42.01 Da,                         | 5665.53125  | 2 | 683.8900146 | 682.8878895 |
| AADLGQIPDVDDSDGVFKYVLR                | Q9DAK9 | 0          | N-term +42.01 Da, K +28.03 Da,            | 5666.094727 | 3 | 1113.920044 | 1113.589252 |
| CDFTEDQTAEFKEAFQLFDR                  | Q60605 | 0          | N-term +42.01 Da, K +28.03 Da,C +57.02Da, | 5669.941406 | 3 | 1114.26001  | 1113.589252 |
| CDFTEDQTAEFKEAFQLFDR                  | Q60605 | 0          | N-term +42.01 Da, K +28.03 Da,C +57.02Da, | 5671.452148 | 3 | 936.7525024 | 936.4252179 |
| ATFEEVSVLGFEFFDKAVKEH                 | Q9CQM5 | 0          | N-term +42.01 Da, K +28.03 Da,            | 5673.001465 | 3 | 1079.199951 | 1078.538452 |
| ATFEEVSVLGFEFFDKAVKEH                 | Q9CQM5 | 0          | N-term +42.01 Da, K +28.03 Da,            | 5676.002441 | 2 | 977.4899902 | 978.0047121 |
| ADQLTEEQIAEFKEAF                      | P62204 | 0          | N-term +42.01 Da, K +28.03 Da,            | 5676.766602 | 2 | 1404.626587 | 1404.134189 |
| AADLGQIPDVDDSDGVFKYVLR                | Q9DAK9 | 0          | N-term +42.01 Da, K +28.03 Da,            | 5681.826172 | 2 | 803.8638916 | 803.8636269 |
| ADQLTEEQIAEFKEAFSLFDKDKDGTITTK        | P62204 | 0          | N-term +42.01 Da, K +28.03 Da,            | 5684.850586 | 3 | 736.7127686 | 736.0523204 |
| AAKVFESIGKFGAL                        | P67778 | 0.00890519 | N-term +42.01 Da, K +28.03 Da,            | 5687.166016 | 4 | 889.7199707 | 889.2188845 |
| LLAALGGNSSPSAKDIKKILDSVGIADDDR        | P99027 | 0          | N-term +42.01 Da, K +28.03 Da,            | 5687.564941 | 3 | 851.7299805 | 851.0713864 |
| CDFTEDQTAEFKEAFQLFDR                  | Q60605 | 0          | N-term +42.01 Da, K +28.03 Da,C +57.02Da, | 5688.003906 | 2 | 1150.579956 | 1149.584253 |
| ADQLTEEQIAEFKEAFSLFDKDKDGTITTKELGTVMR | P62204 | 0          | N-term +42.01 Da, K +28.03 Da,            | 5689.484863 | 2 | 683.3262939 | 683.3250852 |
| ADQLTEEQIAEFKEAFSLFDKDKDGTITTKELGTVMR | P62204 | 0          | N-term +42.01 Da, K +28.03 Da,            | 5690.277832 | 2 | 929.9500122 | 928.9625129 |
| CDFTEDQTAEFKEAFQLFDR                  | Q60605 | 0          | N-term +42.01 Da, K +28.03 Da,C +57.02Da, | 5691.888184 | 4 | 786.4046021 | 786.4052101 |
| ADQLTEEQIAEFKEAF                      | P62204 | 0          | N-term +42.01 Da, K +28.03 Da,            | 5697.928711 | 2 | 878.9299927 | 878.9303557 |
| MEDSMDMDMSPLRPQNYLFGC                 | Q61937 | 0          | N-term +42.01 Da, C +57.02Da,             | 5700.610352 | 3 | 731.4000244 | 730.7365548 |
| ADEVALALQAAGSPSAAAAMEAASQPADEPLR      | Q923E4 | 0          | N-term +42.01 Da,                         | 5701.541992 | 2 | 875.9699707 | 875.4621484 |
| MLSPAMSFLKSFPPPGSADGLR                | Q923F1 | 0          | N-term +42.01 Da, K +28.03 Da,            | 5702.8125   | 3 | 1113.589966 | 1113.589252 |
| MLSPAMSFLKSFPPPGSADGLR                | Q923F1 | 0          | N-term +42.01 Da, K +28.03 Da,            | 5702.97168  | 3 | 800.7788696 | 800.1173243 |

|                                      |        |            |                                           |             |   |             |             |
|--------------------------------------|--------|------------|-------------------------------------------|-------------|---|-------------|-------------|
| ADQLTEEQIAEFKEAFSLFDKDGDTITTK        | P62204 | 0          | N-term +42.01 Da, K +28.03 Da,            | 5705.380859 | 2 | 903.4799805 | 902.4873089 |
| MEDSMDMDMSPLRPQNYLFGC                | Q61937 | 0          | N-term +42.01 Da, C +57.02Da,             | 5708.954102 | 2 | 1405.130005 | 1404.134189 |
| MLSPAMSFLKSFPPPGSADGLR               | Q923F1 | 0          | N-term +42.01 Da, K +28.03 Da,            | 5712.817871 | 2 | 803.8627319 | 803.8636269 |
| ADQLTEEQIAEFKEAFSLFDKDGDTITTK        | P62204 | 0          | N-term +42.01 Da, K +28.03 Da,            | 5713.322754 | 2 | 942.9606934 | 942.9633413 |
| ATFEESVVLGFEEFDKAVKEH                | Q9CQM5 | 0          | N-term +42.01 Da, K +28.03 Da,            | 5713.983398 | 3 | 774.4199829 | 773.7507528 |
| CDFTEDQTAEFKEAFQLFDR                 | Q60605 | 0          | N-term +42.01 Da, K +28.03 Da,C +57.02Da, | 5716.16748  | 2 | 865.4299927 | 864.4412158 |
| MDDTLFQLKF                           | Q921W0 | 0          | N-term +42.01 Da, K +28.03 Da,            | 5720.276367 | 3 | 821.7700195 | 821.4390097 |
| ADQLTEEQIAEFKEAFSLFDKDGDTITTKELGTVMR | P62204 | 0          | N-term +42.01 Da, K +28.03 Da,            | 5721.754883 | 2 | 1258.119995 | 1257.126294 |
| ADQLTEEQIAEFKEAFSLFDKDGDTITTKELGTVMR | P62204 | 0          | N-term +42.01 Da, K +28.03 Da,            | 5727.962402 | 2 | 535.7999878 | 534.8060337 |
| CDFTEDQTAEFKEAFQLFDR                 | Q60605 | 0          | N-term +42.01 Da, K +28.03 Da,C +57.02Da, | 5728.969238 | 3 | 638.0300293 | 637.370089  |
| ADQLTEEQIAEFKEAF                     | P62204 | 0          | N-term +42.01 Da, K +28.03 Da,            | 5729.384277 | 2 | 1051.422974 | 1051.420324 |
| EEEIAALVIDNGSGMCKAGF                 | P63260 | 0          | N-term +42.01 Da, K +28.03 Da,C +57.02Da, | 5729.758301 | 2 | 643.8300171 | 643.3264738 |
| MEGEAVEAIVEESETFIKGR                 | Q61164 | 0          | N-term +42.01 Da, K +28.03 Da,            | 5734.167969 | 3 | 1114.26001  | 1113.589252 |
| EEEIAALVIDNGSGMCKAGF                 | P63260 | 0          | N-term +42.01 Da, K +28.03 Da,C +57.02Da, | 5735.310547 | 2 | 1187.119995 | 1186.622847 |
| MLSPAMSFLKSFPPPGSADGLR               | Q923F1 | 0          | N-term +42.01 Da, K +28.03 Da,            | 5737.027344 | 3 | 898.1300049 | 897.4687521 |
| ADQLTEEQIAEFKEAFSLFDKDGDTITTK        | P62204 | 0          | N-term +42.01 Da, K +28.03 Da,            | 5741.685547 | 2 | 615.3400269 | 614.3475428 |
| MEDSMDMDMSPLRPQNYLFGC                | Q61937 | 0          | N-term +42.01 Da, C +57.02Da,             | 5745.358398 | 3 | 773.7508545 | 773.7507528 |
| AGVCDMAPNFLSPSEDQALGLALGR            | Q9JLZ8 | 0          | N-term +42.01 Da, C +57.02Da,             | 5756.529297 | 3 | 534.6400146 | 533.979878  |
| ADQLTEEQIAEFKEAFSLFDKDGDTITTK        | P62204 | 0          | N-term +42.01 Da, K +28.03 Da,            | 5757.081543 | 3 | 978.5599976 | 978.2228528 |
| CDFTEDQTAEFKEAFQLFDR                 | Q60605 | 0          | N-term +42.01 Da, K +28.03 Da,C +57.02Da, | 5760.555664 | 2 | 735.4013672 | 735.4015592 |
| MLSPAMSFLKSFPPPGSADGLR               | Q923F1 | 0          | N-term +42.01 Da, K +28.03 Da,            | 5765.960449 | 2 | 757.8900146 | 757.8961096 |
| AGVCDMAPNFLSPSEDQALGLALGR            | Q9JLZ8 | 0          | N-term +42.01 Da, C +57.02Da,             | 5772.715332 | 3 | 978.2199707 | 978.2228528 |
| MEALILEPSLYTVK                       | P61924 | 0.00058997 | N-term +42.01 Da, K +28.03 Da,            | 5774.122559 | 2 | 856.9102173 | 856.9099462 |
| ADQLTEEQIAEFKEAFSLFDKDGDTITTKELGTVMR | P62204 | 0          | N-term +42.01 Da, K +28.03 Da,            | 5780.847168 | 2 | 1166.079956 | 1165.584785 |
| AGVCDMAPNFLSPSEDQALGLALGR            | Q9JLZ8 | 0          | N-term +42.01 Da, C +57.02Da,             | 5783.069824 | 3 | 778.0599976 | 777.3922821 |
| ADQLTEEQIAEFKEAFSLFDKDGDTITTKELGTVMR | P62204 | 0          | N-term +42.01 Da, K +28.03 Da,            | 5787.320313 | 4 | 698.8699951 | 698.3794008 |
| AAMLGDAIMVAKGLAK                     | Q60936 | 0          | N-term +42.01 Da, K +28.03 Da,            | 5787.99707  | 3 | 924.789978  | 924.7851857 |
| DKVRIDDKEER                          | Q7TPD3 | 0.04686753 | N-term +42.01 Da, K +28.03 Da,            | 5788.92627  | 2 | 913.9799805 | 913.9810395 |
| ADQLTEEQIAEFKEAF                     | P62204 | 0          | N-term +42.01 Da, K +28.03 Da,            | 5791.29248  | 3 | 655.680481  | 655.6804859 |
| MLSPAMSFLKSFPPPGSADGLR               | Q923F1 | 0          | N-term +42.01 Da, K +28.03 Da,            | 5796.503418 | 3 | 1031.819946 | 1031.81939  |
| ADQLTEEQIAEFKEAFSLFDKDGDTITTK        | P62204 | 0.00486486 | N-term +42.01 Da, K +28.03 Da,            | 5796.927734 | 2 | 690.3200073 | 689.8123793 |
| AGVCDMAPNFLSPSEDQALGLALGR            | Q9JLZ8 | 0          | N-term +42.01 Da, C +57.02Da,             | 5800.807129 | 2 | 1099.550049 | 1100.050046 |
| VNPTVFFDITADDEPLGR                   | P17742 | 0          | N-term +42.01 Da,                         | 5803.087402 | 3 | 1032.48999  | 1031.81939  |
| SVTLQTVLYSLQEEQAR                    | Q9D8C4 | 0          | N-term +42.01 Da,                         | 5808.031738 | 2 | 685.9096069 | 685.8987886 |
| CDFTEDQTAEFKEAFQLFDR                 | Q60605 | 0          | N-term +42.01 Da, K +28.03 Da,C +57.02Da, | 5813.218262 | 2 | 1078.550049 | 1077.548627 |
| SVTLQTVLYSLQEEQAR                    | Q9D8C4 | 0          | N-term +42.01 Da,                         | 5813.988281 | 2 | 1263.180054 | 1262.181926 |
| ADQLTEEQIAEFKEAFSLFDKDGDTITTKELGTVMR | P62204 | 0          | N-term +42.01 Da, K +28.03 Da,            | 5815.323242 | 2 | 1207.599976 | 1208.100602 |
| ADQLTEEQIAEFKEAFSLFDKDGDTITTKELGTVMR | P62204 | 0          | N-term +42.01 Da, K +28.03 Da,            | 5816.210449 | 2 | 1547.719971 | 1547.225447 |
| ADQLTEEQIAEFKEAF                     | P62204 | 0          | N-term +42.01 Da, K +28.03 Da,            | 5819.857422 | 2 | 1423.199951 | 1422.192697 |
| AEAAAAGASGETMAALVAAEGLGPAGWSAGR      | P97364 | 0          | N-term +42.01 Da,                         | 5820.058594 | 2 | 1167.579956 | 1166.597559 |

|                                        |        |            |                                           |             |   |             |             |
|----------------------------------------|--------|------------|-------------------------------------------|-------------|---|-------------|-------------|
| AEAAAAGASGETMAALVAAEGLGPAGWSAGR        | P97364 | 0          | N-term +42.01 Da,                         | 5820.967285 | 2 | 913.9810791 | 913.9810395 |
| AAMLDGAIMVAKGLAK                       | Q60936 | 0          | N-term +42.01 Da, K +28.03 Da,            | 5821.286621 | 3 | 948.7999878 | 948.4642237 |
| AEAAAAGASGETMAALVAAEGLGPAGWSAGR        | P97364 | 0          | N-term +42.01 Da,                         | 5826.194824 | 3 | 1391.640015 | 1390.969543 |
| CDFTEDQTAEFKEAFQLFDR                   | Q60605 | 0          | N-term +42.01 Da, K +28.03 Da,C +57.02Da, | 5828.729492 | 2 | 798.4099731 | 797.9109026 |
| ATVWDEAEQDGIGEEVLKMSTEEIVQR            | Q88685 | 0          | N-term +42.01 Da, K +28.03 Da,            | 5829.149902 | 2 | 1140.51001  | 1139.514648 |
| SVTLQTVLYSLQEEQAR                      | Q9D8C4 | 0          | N-term +42.01 Da,                         | 5838.793457 | 2 | 758.9099731 | 757.8961096 |
| ADQLTEEQIAEFKEAFSLFDKDGDTITTKELGTVMR   | P62204 | 0          | N-term +42.01 Da, K +28.03 Da,            | 5840.744141 | 3 | 769.0800171 | 768.4146918 |
| AEEGIAAGGVMDVNTALQEVLKTALIHDLAR        | P63323 | 0          | N-term +42.01 Da, K +28.03 Da,            | 5840.849121 | 2 | 1262.189941 | 1262.181926 |
| ADQLTEEQIAEFKEAFSLFDKDGDTITTKELGTVMR   | P62204 | 0          | N-term +42.01 Da, K +28.03 Da,            | 5845.12207  | 3 | 768.75      | 768.4146918 |
| AEAAAAGASGETMAALVAAEGLGPAGWSAGR        | P97364 | 0          | N-term +42.01 Da,                         | 5848.373535 | 2 | 758.4000244 | 757.8961096 |
| GSGPIDPKELLKGLDSFLTR                   | Q80W00 | 0          | N-term +42.01 Da, K +28.03 Da,            | 5849.14209  | 3 | 842.460022  | 841.7903764 |
| MNSAGADEIGKLFVGGLDWSTTQETLR            | Q9JII5 | 0          | N-term +42.01 Da, K +28.03 Da,            | 5851.080078 | 2 | 1422.192749 | 1422.192697 |
| ATVWDEAEQDGIGEEVLKMSTEEIVQR            | Q88685 | 0          | N-term +42.01 Da, K +28.03 Da,            | 5852.17041  | 4 | 707.4099731 | 706.918116  |
| MNSAGADEIGKLFVGGLDWSTTQETLR            | Q9JII5 | 0          | N-term +42.01 Da, K +28.03 Da,            | 5853.268555 | 3 | 948.4642944 | 948.4642237 |
| CDFTEDQTAEFKEAFQLFDR                   | Q60605 | 0          | N-term +42.01 Da, K +28.03 Da,C +57.02Da, | 5857.318359 | 3 | 1390.97229  | 1390.969543 |
| ADQLTEEQIAEFKEAFSLFDKDGDTITTKELG       | P62204 | 0          | N-term +42.01 Da, K +28.03 Da,            | 5857.901367 | 3 | 894.4799805 | 894.4693031 |
| ADQLTEEQIAEFKEAFSLFDKDGDTITTKELGTVMR   | P62204 | 0          | N-term +42.01 Da, K +28.03 Da,            | 5859.814941 | 2 | 797.9113159 | 797.9109026 |
| ADQLTEEQIAEFKEAFSLFDKDGDTITTKELGTVMR   | P62204 | 0          | N-term +42.01 Da, K +28.03 Da,            | 5860.42041  | 4 | 920.7199707 | 920.4699136 |
| ADQLTEEQIAEFKEAF                       | P62204 | 0          | N-term +42.01 Da, K +28.03 Da,            | 5866.575684 | 2 | 1345.089966 | 1344.581257 |
| ASDEGKLFVGGLSFDTNEQALEQVFSKYQISEVVVKDR | P60824 | 0          | N-term +42.01 Da, K +28.03 Da,            | 5871.472656 | 3 | 1347.339966 | 1346.670145 |
| ATFEESVVLGFEEFDKAVK                    | Q9CQM5 | 0          | N-term +42.01 Da, K +28.03 Da,            | 5878.249512 | 4 | 796.460022  | 795.963583  |
| ASDEGKLFVGGLSFDTNEQALEQVFSKYQISEVVVKDR | P60824 | 0          | N-term +42.01 Da, K +28.03 Da,            | 5880.569824 | 2 | 1141.589966 | 1141.089172 |
| MEDSMDMDMSPLRPQNYLF                    | Q61937 | 0          | N-term +42.01 Da,                         | 5880.660156 | 2 | 631.3300781 | 631.3341013 |
| ATFEESVVLGFEEFDKAVK                    | Q9CQM5 | 0          | N-term +42.01 Da, K +28.03 Da,            | 5883.07373  | 2 | 625.2988892 | 625.2977161 |
| AAAAMAVSEAWPELELAER                    | Q505F5 | 0          | N-term +42.01 Da,                         | 5883.793945 | 2 | 1422.689941 | 1422.192697 |
| ADQLTEEQIAEFKEAFSLFDKDGDTITTKELG       | P62204 | 0          | N-term +42.01 Da, K +28.03 Da,            | 5885.42627  | 3 | 949.1300049 | 948.4642237 |
| CDFTEDQTAEFKEAFQLFDR                   | Q60605 | 0          | N-term +42.01 Da, K +28.03 Da,C +57.02Da, | 5885.594238 | 3 | 982.1900024 | 981.525589  |
| ADQLTEEQIAEFKEAFSLFDKDGDTITTKELGTVMR   | P62204 | 0          | N-term +42.01 Da, K +28.03 Da,            | 5886.060547 | 4 | 1010.5      | 1010.254428 |
| ADQLTEEQIAEFKEAFSLFDKDGDTITTKELGTVMR   | P62204 | 0          | N-term +42.01 Da, K +28.03 Da,            | 5886.443359 | 2 | 841.9099731 | 841.9046637 |
| ADQLTEEQIAEFKEAF                       | P62204 | 0          | N-term +42.01 Da, K +28.03 Da,            | 5889.211426 | 3 | 894.4699707 | 894.4693031 |
| AEAPVDLSTGDNLEQKILQVLSDDGGPVGKIGQLVKKC | Q9QY24 | 0          | N-term +42.01 Da, K +28.03 Da,C +57.02Da, | 5892.50293  | 3 | 576.9799805 | 576.3159841 |
| ASDEGKLFVGGLSFDTNEQALEQVFSKYQISEVVVKDR | P60824 | 0          | N-term +42.01 Da, K +28.03 Da,            | 5892.678711 | 2 | 910.960022  | 909.9669384 |
| AAAAMAVSEAWPELELAER                    | Q505F5 | 0          | N-term +42.01 Da,                         | 5892.907227 | 2 | 543.289978  | 543.2866196 |
| AEAPVDLSTGDNLEQKILQVLSDDGGPVGKIGQLVKKC | Q9QY24 | 0          | N-term +42.01 Da, K +28.03 Da,C +57.02Da, | 5896.753418 | 2 | 909.960022  | 909.9669384 |
| WHRRVNTTQKR                            | Q9D8E6 | 0.02188295 | N-term +42.01 Da, K +28.03 Da,            | 5900.047363 | 2 | 760.4099731 | 760.4093842 |
| CDFTEDQTAEFKEAFQLFDR                   | Q60605 | 0          | N-term +42.01 Da, K +28.03 Da,C +57.02Da, | 5919.807129 | 2 | 1137.589966 | 1136.602249 |
| ADQLTEEQIAEFKEAFSLFDKDGDTITTKELGTVMR   | P62204 | 0          | N-term +42.01 Da, K +28.03 Da,            | 5921.461426 | 2 | 625.2976074 | 625.2977161 |
| ADQLTEEQIAEFKEAFSLFDKDGDTITTKELGTVMR   | P62204 | 0          | N-term +42.01 Da, K +28.03 Da,            | 5925.262695 | 2 | 1422.689941 | 1422.192697 |
| ADQLTEEQIAEFKEAFSLFDKDGDTITTKELGT      | P62204 | 0.00279799 | N-term +42.01 Da, K +28.03 Da,            | 5928.86084  | 2 | 909.9699707 | 909.9669384 |
| CDFTEDQTAEFKEAFQLFDR                   | Q60605 | 0          | N-term +42.01 Da, K +28.03 Da,C +57.02Da, | 5929.057617 | 4 | 922.210022  | 921.7048702 |

|                                        |        |            |                                           |             |   |             |             |
|----------------------------------------|--------|------------|-------------------------------------------|-------------|---|-------------|-------------|
| ADQLTEEQIAEFKEAF                       | P62204 | 0          | N-term +42.01 Da, K +28.03 Da,            | 5931.800781 | 2 | 716.4407349 | 715.4243052 |
| SESLVCDVAEDLVEKLR                      | Q9CQI3 | 0          | N-term +42.01 Da, K +28.03 Da,C +57.02Da, | 5934.05957  | 3 | 1242.949951 | 1242.269703 |
| MDDYAVLSDELAVALR                       | O08579 | 0          | N-term +42.01 Da,                         | 5935.270996 | 4 | 920.4699707 | 920.4699136 |
| EEEEAALVIDNGSGMCKAGF                   | P63260 | 0.0005872  | N-term +42.01 Da, K +28.03 Da,C +57.02Da, | 5937.537109 | 2 | 1024.52002  | 1024.5022   |
| MDVFLMIR                               | P62869 | 0          | N-term +42.01 Da,                         | 5939.566895 | 3 | 690.9899902 | 690.3340379 |
| CDFTEDQTAEFKEAFQLFDR                   | Q60605 | 0          | N-term +42.01 Da, K +28.03 Da,C +57.02Da, | 5950.770508 | 3 | 1242.268921 | 1242.269703 |
| DVTFSPATIEEELIKFCR                     | Q9CXI5 | 0.01793952 | N-term +42.01 Da, K +28.03 Da,C +57.02Da, | 5951.126465 | 2 | 862.4500122 | 861.4626799 |
| ADQLTEEQIAEFKEAFSLFDKDGDTITTKELG       | P62204 | 0.02579666 | N-term +42.01 Da, K +28.03 Da,            | 5952.943359 | 2 | 765.8499756 | 764.8586699 |
| CDFTEDQTAEFKEAFQLFDR                   | Q60605 | 0          | N-term +42.01 Da, K +28.03 Da,C +57.02Da, | 5953.73291  | 2 | 1299.609985 | 1299.111472 |
| MDDL DALLADLESTTSHISKR                 | Q8VI36 | 0          | N-term +42.01 Da, K +28.03 Da,            | 5956.086914 | 2 | 1039.52002  | 1038.530101 |
| ADQLTEEQIAEFKEAFSLFDKDGDTITTKELGTVMR   | P62204 | 0          | N-term +42.01 Da, K +28.03 Da,            | 5956.740723 | 2 | 915.9899902 | 915.493123  |
| ADQLTEEQIAEFKEAFSLFDKDGDTITTKELGTVMR   | P62204 | 0          | N-term +42.01 Da, K +28.03 Da,            | 5956.976563 | 2 | 975.0300293 | 974.0365437 |
| TELLKSVDYEVFGTVQGVCFR                  | P56375 | 0          | N-term +42.01 Da, K +28.03 Da,C +57.02Da, | 5958.068359 | 3 | 658.039978  | 657.7080473 |
| MDDYAVLSDELAVALR                       | O08579 | 0          | N-term +42.01 Da,                         | 5959.242676 | 3 | 866.7399902 | 866.4100737 |
| METPFYGEEALSGLAAGASSVAGATGAPGGGGFAPPGR | P15066 | 0          | N-term +42.01 Da,                         | 5962.037109 | 2 | 880.4673462 | 880.4665739 |
| ADQLTEEQIAEFKEAFSLFDKDGDTITTKELGTVMR   | P62204 | 0          | N-term +42.01 Da, K +28.03 Da,            | 5968.103027 | 4 | 837.2299805 | 837.231263  |
| ALHNPQYIFGDFSPDEFNQFFVTPR              | P52479 | 0          | N-term +42.01 Da,                         | 5968.624023 | 3 | 631.7000122 | 631.0399027 |
| AHCLSEVEHDTMPADLPAIAADFVEDQEVCKN       | P07724 | 0          | N-term +42.01 Da, K +28.03 Da,C +57.02Da, | 5970.320313 | 3 | 668.3389282 | 668.3386832 |
| ADQLTEEQIAEFKEAF                       | P62204 | 0          | N-term +42.01 Da, K +28.03 Da,            | 5971.961914 | 3 | 1231.910034 | 1231.572723 |
| NLNQALLDLHALGSAR                       | P29391 | 0.0011383  | N-term +42.01 Da,                         | 5973.340332 | 3 | 806.4199829 | 806.0833373 |
| CDFTEDQTAEFKEAFQLFDR                   | Q60605 | 0          | N-term +42.01 Da, K +28.03 Da,C +57.02Da, | 5976.660645 | 2 | 1066.569946 | 1066.073324 |
| ADQLTEEQIAEFKEAFSLFDKDGDTITTKELGTVMR   | P62204 | 0          | N-term +42.01 Da, K +28.03 Da,            | 5979.08252  | 2 | 730.8499756 | 730.8475733 |
| CDFTEDQTAEFKEAFQLFDR                   | Q60605 | 0          | N-term +42.01 Da, K +28.03 Da,C +57.02Da, | 5981.276367 | 2 | 984.9899902 | 984.9923336 |
| QDGYLSLLQDSGEVR                        | P63242 | 0.0373648  | N-term +42.01 Da,                         | 5982.20166  | 2 | 999.9899902 | 998.9971839 |
| ADQLTEEQIAEFKEAFSLFDKDGDTITTKEL        | P62204 | 0          | N-term +42.01 Da, K +28.03 Da,            | 5982.984375 | 2 | 630.8383179 | 630.8381622 |
| ADQLTEEQIAEFKEAFSLFDKDGDTITTKEL        | P62204 | 0          | N-term +42.01 Da, K +28.03 Da,            | 5983.852539 | 2 | 758.4000244 | 757.8961096 |
| ADQLTEEQIAEFKEAFSLFDKDGDTITTKELGTVMR   | P62204 | 0          | N-term +42.01 Da, K +28.03 Da,            | 5984.56543  | 4 | 703.6099854 | 703.3547227 |
| MDVNTALQEVLTALIHDLGLAR                 | P63323 | 0          | N-term +42.01 Da, K +28.03 Da,            | 5985.831543 | 3 | 621.6599731 | 620.9978204 |
| AWVPAESAVEELMPR                        | Q9CQQ4 | 0          | N-term +42.01 Da,                         | 5986.548828 | 3 | 658.3634033 | 658.3627173 |
| AGLVDFQDEEQVKSFLNMEVECHY               | Q9L1H9 | 0          | N-term +42.01 Da, K +28.03 Da,C +57.02Da, | 5989.251953 | 2 | 715.8800049 | 714.8882846 |
| ADQLTEEQIAEFKEAF                       | P62204 | 0          | N-term +42.01 Da, K +28.03 Da,            | 5990.007324 | 3 | 1116.650024 | 1115.972592 |
| ADQLTEEQIAEFKEAFSLFDKDGDTITTKELGTVMR   | P62204 | 0          | N-term +42.01 Da, K +28.03 Da,            | 5992.844727 | 2 | 593.819397  | 593.8193388 |
| AYHNSPAYLAYINAKSRAEAALEESRQR           | O54941 | 0.04186718 | N-term +42.01 Da, K +28.03 Da,            | 5995.308594 | 3 | 656.9976807 | 656.9973145 |
| ADQLTEEQIAEFKEAFSLFDKDGDTITTKEL        | P62204 | 0          | N-term +42.01 Da, K +28.03 Da,            | 5997.326172 | 2 | 532.7615967 | 532.761626  |
| VIQLRPTLNELGISTPEELGLDKV               | P12787 | 0.00383142 | N-term +42.01 Da, K +28.03 Da,            | 5997.462402 | 4 | 689.8800049 | 689.627587  |
| CDFTEDQTAEFKEAFQLFDR                   | Q60605 | 0          | N-term +42.01 Da, K +28.03 Da,C +57.02Da, | 5999.479004 | 4 | 837.2315063 | 837.231263  |
| AWVPAESAVEELMPR                        | Q9CQQ4 | 0          | N-term +42.01 Da,                         | 6000.107422 | 4 | 921.960022  | 921.7048702 |
| CDFTEDQTAEFKEAFQLFDR                   | Q60605 | 0          | N-term +42.01 Da, K +28.03 Da,C +57.02Da, | 6006.611816 | 3 | 774.0800171 | 773.7507528 |
| CDFTEDQTAEFKEAFQLFDR                   | Q60605 | 0          | N-term +42.01 Da, K +28.03 Da,C +57.02Da, | 6008.680176 | 2 | 1066.069946 | 1066.073324 |
| VNPTVFFDITADDEPLGR                     | P17742 | 0          | N-term +42.01 Da,                         | 6008.969238 | 2 | 1433.160034 | 1432.165489 |

|                                        |        |            |                                           |             |   |             |             |
|----------------------------------------|--------|------------|-------------------------------------------|-------------|---|-------------|-------------|
| ADQLTEEQIAEFKEAF                       | P62204 | 0          | N-term +42.01 Da, K +28.03 Da,            | 6009.398926 | 2 | 876.4519653 | 875.4621484 |
| ADQLTEEQIAEFKEAFSLFDKDKDGGTITTKELGTVMR | P62204 | 0          | N-term +42.01 Da, K +28.03 Da,            | 6013.394043 | 4 | 604.3425903 | 603.8475386 |
| AEEGIAAGGVMDVNTALQEVLK                 | P63323 | 0          | N-term +42.01 Da, K +28.03 Da,            | 6016.578125 | 2 | 757.8967896 | 757.8961096 |
| ADQLTEEQIAEFKEAFSLFDKDKDGGTITTKEL      | P62204 | 0          | N-term +42.01 Da, K +28.03 Da,            | 6017.121582 | 3 | 1282.290039 | 1281.614082 |
| ADQLTEEQIAEFKEAFSLFDKDKDGGTITTKEL      | P62204 | 0.00058207 | N-term +42.01 Da, K +28.03 Da,            | 6022.432129 | 2 | 990.0200195 | 989.0273301 |
| ATFEEVSVLGFEEFDKAVKE                   | Q9CQM5 | 0          | N-term +42.01 Da, K +28.03 Da,            | 6025.875977 | 2 | 1026.015869 | 1026.512902 |
| ADQLTEEQIAEFKEAFSLFDKDKDGSITTKELGTVMRS | Q9D6P8 | 0          | N-term +42.01 Da, K +28.03 Da,            | 6031.5625   | 3 | 855.7600098 | 855.4326502 |
| VNPTVFFDITADDEPLGR                     | P17742 | 0          | N-term +42.01 Da,                         | 6032.577148 | 4 | 922.210022  | 921.7048702 |
| CDFTEDQTAEFKEAFQLFDR                   | Q60605 | 0          | N-term +42.01 Da, K +28.03 Da,C +57.02Da, | 6042.348145 | 2 | 1109.579956 | 1108.589141 |
| CDFTEDQTAEFKEAFQLFDR                   | Q60605 | 0          | N-term +42.01 Da, K +28.03 Da,C +57.02Da, | 6046.622559 | 2 | 898.4099731 | 898.4196237 |
| ADQLTEEQIAEFKEAF                       | P62204 | 0          | N-term +42.01 Da, K +28.03 Da,            | 6047.049805 | 2 | 1023.002319 | 1023.005738 |
| MDDYAVLSDTELAAVLR                      | O08579 | 0.0159465  | N-term +42.01 Da,                         | 6047.257813 | 3 | 789.4199829 | 789.0885336 |
| ADQLTEEQIAEFKEAFSLFDKDKDGGTITTKELGTVMR | P62204 | 0          | N-term +42.01 Da, K +28.03 Da,            | 6048.888184 | 2 | 757.8952026 | 757.8961096 |
| MDFLGPNPFSSPVGQR                       | O88746 | 0          | N-term +42.01 Da,                         | 6049.212402 | 3 | 977.8099976 | 977.1574542 |
| VNPTVFFDITADDEPLGR                     | P17742 | 0          | N-term +42.01 Da,                         | 6049.819824 | 2 | 1035.98999  | 1035.005738 |
| AGTGLVAGEVVVDALPYFDQGYEAPGVR           | Q9D287 | 0          | N-term +42.01 Da,                         | 6050.030273 | 2 | 839.9383545 | 839.9396603 |
| AAAAAAAAAAAAAGSDSDWADTFMEDPVR          | Q66JS6 | 0          | N-term +42.01 Da,                         | 6052.945313 | 3 | 948.1300049 | 948.4642237 |
| ADQLTEEQIAEFKEAFSLFDKDKDGSITTKELGTVMRS | Q9D6P8 | 0          | N-term +42.01 Da, K +28.03 Da,            | 6056.158691 | 2 | 1184.140015 | 1183.129162 |
| MDVNTALQEVLKTAIHDGLAR                  | P63323 | 0          | N-term +42.01 Da, K +28.03 Da,            | 6056.369629 | 3 | 955.7800293 | 955.1127513 |
| VNPTVFFDITADDEPLGR                     | P17742 | 0          | N-term +42.01 Da,                         | 6057.603027 | 2 | 794.4259644 | 793.4348703 |
| MFPVMETFEINDPVPK                       | Q60754 | 0          | N-term +42.01 Da, K +28.03 Da,            | 6062.144043 | 2 | 1109.550049 | 1109.046449 |
| ADQLTEEQIAEFKEAF                       | P62204 | 0          | N-term +42.01 Da, K +28.03 Da,            | 6064.221191 | 3 | 599.6199951 | 599.2821746 |
| CDFTEDQTAEFKEAFQLFDR                   | Q60605 | 0          | N-term +42.01 Da, K +28.03 Da,C +57.02Da, | 6068.158203 | 2 | 887.9400024 | 887.9415803 |
| CDFTEDQTAEFKEAFQLFDR                   | Q60605 | 0          | N-term +42.01 Da, K +28.03 Da,C +57.02Da, | 6072.436035 | 3 | 572.9828491 | 572.3221927 |
| ADQLTEEQIAEFKEAFSLFDKDKDGGTITTKELGTVMR | P62204 | 0          | N-term +42.01 Da, K +28.03 Da,            | 6074.532715 | 3 | 955.4500122 | 955.1127513 |
| NHNENWPSVSRKMQASPEYQDYVYLEGTQKAKK      | Q91YM2 | 0.03460208 | N-term +42.01 Da, K +28.03 Da,            | 6076.413086 | 3 | 655.3400269 | 654.6785942 |
| CDFTEDQTAEFKEAFQLFDR                   | Q60605 | 0          | N-term +42.01 Da, K +28.03 Da,C +57.02Da, | 6077.56543  | 2 | 1432.169312 | 1432.165489 |
| MEDSMDMDMSPLRPQNYLFGCEL                | Q61937 | 0          | N-term +42.01 Da, C +57.02Da,             | 6077.952148 | 2 | 898.4196167 | 898.4196237 |
| MDFLGPNPFSSPVGQR                       | O88746 | 0          | N-term +42.01 Da,                         | 6078.132813 | 2 | 1040.540039 | 1039.53624  |
| VNPTVFFDITADDEPLGR                     | P17742 | 0          | N-term +42.01 Da,                         | 6079.163574 | 3 | 789.4299927 | 789.0885336 |
| MDVNTALQEVLKTAIHDGLAR                  | P63323 | 0          | N-term +42.01 Da, K +28.03 Da,            | 6080.299316 | 2 | 757.8964233 | 757.8961096 |
| ADQLTEEQIAEFKEAFSLFDKDKDGSITTKELGTVMRS | Q9D6P8 | 0          | N-term +42.01 Da, K +28.03 Da,            | 6081.870605 | 3 | 566.992981  | 566.3329749 |
| VNPTVFFDITADDEPLGR                     | P17742 | 0          | N-term +42.01 Da,                         | 6085.537109 | 2 | 836.4055786 | 836.4042992 |
| ADQLTEEQIAEFKEAF                       | P62204 | 0          | N-term +42.01 Da, K +28.03 Da,            | 6088.61377  | 2 | 1113.630005 | 1113.128631 |
| ADQLTEEQIAEFKEAFSLFDKDKDGGTITTKELGTVMR | P62204 | 0          | N-term +42.01 Da, K +28.03 Da,            | 6089.615234 | 3 | 1004.22998  | 1003.881156 |
| CDFTEDQTAEFKEAFQLFDR                   | Q60605 | 0          | N-term +42.01 Da, K +28.03 Da,C +57.02Da, | 6090.938965 | 3 | 742.4199829 | 742.4215126 |
| ATSWGSIQDEKQLEELAKQAIDR                | P51855 | 0          | N-term +42.01 Da, K +28.03 Da,            | 6091.253418 | 2 | 989.9345703 | 989.9313816 |
| CDFTEDQTAEFKEAFQLFDR                   | Q60605 | 0          | N-term +42.01 Da, K +28.03 Da,C +57.02Da, | 6093.376953 | 2 | 826.3942261 | 825.4061822 |
| CDFTEDQTAEFKEAFQLFDR                   | Q60605 | 0          | N-term +42.01 Da, K +28.03 Da,C +57.02Da, | 6093.55957  | 3 | 1123.540039 | 1122.864671 |
| MEDSMDMDMSPLRPQNYLFGCEL                | Q61937 | 0          | N-term +42.01 Da, C +57.02Da,             | 6101.277832 | 2 | 924.960022  | 923.9594473 |



|                                       |        |   |                                           |             |   |             |             |
|---------------------------------------|--------|---|-------------------------------------------|-------------|---|-------------|-------------|
| VNPTVFFDITADDEPLGR                    | P17742 | 0 | N-term +42.01 Da,                         | 6108.345215 | 3 | 655.3400269 | 654.6785942 |
| ADQLTEEQIAEFKEAF                      | P62204 | 0 | N-term +42.01 Da, K +28.03 Da,            | 6110.192383 | 2 | 898.4199829 | 898.4196237 |
| MEYLIQIQPDYVLVASDR                    | Q9R1P3 | 0 | N-term +42.01 Da,                         | 6113.360352 | 2 | 925.9299927 | 925.9315181 |
| ADQLTEEQIAEFKEAFSLFDKDKDGTITTKELGTVMR | P62204 | 0 | N-term +42.01 Da, K +28.03 Da,            | 6118.495117 | 2 | 836.4000244 | 836.4042992 |
| AGELSQEALLDFLCQAGGR                   | Q8BZW2 | 0 | N-term +42.01 Da, C +57.02Da,             | 6121.39209  | 2 | 1005.48999  | 1005.493123 |
| ATSWGSIHQDEKQLEELAKQAIDR              | P51855 | 0 | N-term +42.01 Da, K +28.03 Da,            | 6121.810059 | 3 | 1034.5      | 1034.16679  |
| ATFEESVVLGFEEFDKAVKEHEGKTIF           | Q9CQM5 | 0 | N-term +42.01 Da, K +28.03 Da,            | 6123.015625 | 3 | 671         | 670.6645075 |
| ATFEESVVLGFEEFDKAVKEHEGKTIF           | Q9CQM5 | 0 | N-term +42.01 Da, K +28.03 Da,            | 6124.560547 | 2 | 989.9299927 | 989.9313816 |
| CDFTEDQTAEFKEAFQLFDR                  | Q60605 | 0 | N-term +42.01 Da, K +28.03 Da,C +57.02Da, | 6124.999023 | 3 | 681.024292  | 680.3629399 |
| ATFEESVVLGFEEFDKAVKEHEGKTIFA          | Q9CQM5 | 0 | N-term +42.01 Da, K +28.03 Da,            | 6128.020996 | 2 | 582.8200073 | 581.8269663 |
| CDFTEDQTAEFKEAFQLFDR                  | Q60605 | 0 | N-term +42.01 Da, K +28.03 Da,C +57.02Da, | 6131.312988 | 3 | 617.6226196 | 617.6234375 |
| AAAAEEGMSAAALVMSVPDSIGR               | Q3TYA6 | 0 | N-term +42.01 Da,                         | 6134.022461 | 3 | 880.1346436 | 880.1338147 |
| ATFEESVVLGFEEFDKAVKEHEGKTIF           | Q9CQM5 | 0 | N-term +42.01 Da, K +28.03 Da,            | 6135.476563 | 3 | 682.3900146 | 681.727219  |
| ASVSELACIYSALILHDDEVTVTEDIKIN         | P47955 | 0 | N-term +42.01 Da, K +28.03 Da,C +57.02Da, | 6136.352539 | 2 | 957.0100098 | 957.0060635 |
| AAAAEEGMSAAALVMSVPDSIGR               | Q3TYA6 | 0 | N-term +42.01 Da,                         | 6137.19043  | 2 | 1320.199951 | 1319.697084 |
| CDFTEDQTAEFKEAFQLFDR                  | Q60605 | 0 | N-term +42.01 Da, K +28.03 Da,C +57.02Da, | 6137.400391 | 3 | 709.6900024 | 709.0330373 |
| AAAAEEGMSAAALVMSVPDSIGR               | Q3TYA6 | 0 | N-term +42.01 Da,                         | 6139.479492 | 4 | 906.25      | 905.9930242 |
| ADQLTEEQIAEFKEAFSLFDKDKDGTITTKELGTVMR | P62204 | 0 | N-term +42.01 Da, K +28.03 Da,            | 6141.392578 | 2 | 898.4199219 | 898.4196237 |
| ATFEESVVLGFEEFDKA                     | Q9CQM5 | 0 | N-term +42.01 Da, K +28.03 Da,            | 6141.864746 | 2 | 958.0100098 | 957.0060635 |
| SGFSPELIDYLEGKISFEEFER                | Q3TMP1 | 0 | N-term +42.01 Da, K +28.03 Da,            | 6144.18457  | 2 | 925.9314575 | 925.9315181 |
| VNPTVFFDITADDEPLGR                    | P17742 | 0 | N-term +42.01 Da,                         | 6145.680176 | 2 | 619.3099976 | 618.3169633 |
| CDFTEDQTAEFKEAFQLFDR                  | Q60605 | 0 | N-term +42.01 Da, K +28.03 Da,C +57.02Da, | 6150.215332 | 4 | 772.4400024 | 772.1931433 |
| ADQLTEEQIAEFKEAF                      | P62204 | 0 | N-term +42.01 Da, K +28.03 Da,            | 6153.239258 | 3 | 916.7700195 | 916.4362226 |
| ADQLTEEQIAEFKEAFSLFDKDKDGTITTKELGTVMR | P62204 | 0 | N-term +42.01 Da, K +28.03 Da,            | 6153.500977 | 2 | 1374.14917  | 1374.150696 |
| AGELSQEALLDFLCQAGGR                   | Q8BZW2 | 0 | N-term +42.01 Da, C +57.02Da,             | 6159.435547 | 3 | 1301.910034 | 1301.241151 |
| ATFEESVVLGFEEFDKAVKEHEGKTIF           | Q9CQM5 | 0 | N-term +42.01 Da, K +28.03 Da,            | 6162.136719 | 4 | 817.1699829 | 817.4173122 |
| ADQLTEEQIAEFKEAFSLFDKDKDGTITTKELGTVMR | P62204 | 0 | N-term +42.01 Da, K +28.03 Da,            | 6165.913574 | 2 | 1064.030029 | 1063.045918 |
| ATFEESVVLGFEEFDKAVKEHEGKTIF           | Q9CQM5 | 0 | N-term +42.01 Da, K +28.03 Da,            | 6166.585938 | 3 | 880.1353149 | 880.1338147 |
| ADMPSGESCTSPLELFNSIATQGELVR           | P32921 | 0 | N-term +42.01 Da, C +57.02Da,             | 6167.438477 | 2 | 859.3894653 | 858.3992142 |
| ATFEESVVLGFEEFDKA                     | Q9CQM5 | 0 | N-term +42.01 Da, K +28.03 Da,            | 6168.763184 | 2 | 647.3300171 | 646.3393838 |
| VNPTVFFDITADDEPLGR                    | P17742 | 0 | N-term +42.01 Da,                         | 6170.13623  | 3 | 1089.569946 | 1089.553991 |
| CDFTEDQTAEFKEAFQLFDR                  | Q60605 | 0 | N-term +42.01 Da, K +28.03 Da,C +57.02Da, | 6170.255371 | 3 | 618.0169067 | 617.3560023 |
| CDFTEDQTAEFKEAFQLFDR                  | Q60605 | 0 | N-term +42.01 Da, K +28.03 Da,C +57.02Da, | 6172.327637 | 4 | 906.5       | 905.9930242 |
| CDFTEDQTAEFKEAFQLF                    | Q60605 | 0 | N-term +42.01 Da, K +28.03 Da,C +57.02Da, | 6173.139648 | 2 | 942.4967041 | 941.9934791 |
| ADQLTEEQIAEFKEAF                      | P62204 | 0 | N-term +42.01 Da, K +28.03 Da,            | 6175.483398 | 2 | 732.9299927 | 732.9266807 |
| ADQLTEEQIAEFKEAFSLFDKDKDGTITTKELGTVMR | P62204 | 0 | N-term +42.01 Da, K +28.03 Da,            | 6176.291504 | 3 | 537.6655884 | 537.6661765 |
| ADQLTEEQIAEFKEAFSLFDKDKDGD            | P62204 | 0 | N-term +42.01 Da, K +28.03 Da,            | 6177.842773 | 2 | 899.4099731 | 898.4196237 |
| AGTGLVAGEVVVDALPYFDQGYEAPGVR          | Q9D287 | 0 | N-term +42.01 Da,                         | 6183.812988 | 4 | 986.7399902 | 986.2311577 |
| ATFEESVVLGFEEFDKAVKEHEGKTIF           | Q9CQM5 | 0 | N-term +42.01 Da, K +28.03 Da,            | 6184.032227 | 2 | 758.4000244 | 757.8961096 |
| ADQLTEEQIAEFKEAFSLFDKDKDGD            | P62204 | 0 | N-term +42.01 Da, K +28.03 Da,            | 6185.244141 | 3 | 916.4367676 | 916.4362226 |

|                                      |        |            |                                           |             |   |             |             |
|--------------------------------------|--------|------------|-------------------------------------------|-------------|---|-------------|-------------|
| ADQLTEEQIAEFKEAFSLFDKDGDTITTKELGTVMR | P62204 | 0.00380849 | N-term +42.01 Da, K +28.03 Da,            | 6185.475098 | 2 | 1374.650024 | 1374.150696 |
| AAADELAFHEFEATNLLAETPDAATTSQSDELTSR  | Q99LP8 | 0          | N-term +42.01 Da,                         | 6185.811523 | 2 | 999.4093018 | 999.4087941 |
| AGTGLVAGEVVVDALPYFDQGYEAPGVR         | Q9D287 | 0          | N-term +42.01 Da,                         | 6187.956055 | 2 | 1016.497925 | 1016.497115 |
| ATFEEVSVLGFEEFDKAVKEHEGKTIFAY        | Q9CQM5 | 0          | N-term +42.01 Da, K +28.03 Da,            | 6203.752441 | 2 | 696.3599854 | 696.8506473 |
| ATFEEVSVLGFEEFDKA                    | Q9CQM5 | 0          | N-term +42.01 Da, K +28.03 Da,            | 6207.815918 | 2 | 754.8461914 | 754.8472478 |
| CDFTEDQTAEFKEAFQLFDR                 | Q60605 | 0          | N-term +42.01 Da, K +28.03 Da,C +57.02Da, | 6209.604004 | 2 | 898.9105225 | 898.4196237 |
| AELMLLSEIADPTR                       | Q35451 | 0          | N-term +42.01 Da,                         | 6209.738281 | 3 | 842.4400024 | 841.7840113 |
| CDFTEDQTAEFKEAFQLF                   | Q60605 | 0.0011534  | N-term +42.01 Da, K +28.03 Da,C +57.02Da, | 6215.804199 | 2 | 608.2700195 | 608.271167  |
| CDFTEDQTAEFKEAFQLFDR                 | Q60605 | 0          | N-term +42.01 Da, K +28.03 Da,C +57.02Da, | 6225.847656 | 2 | 620.3508911 | 620.3508059 |
| ADQLTEEQIAEFKEAF                     | P62204 | 0          | N-term +42.01 Da, K +28.03 Da,            | 6228.674316 | 2 | 711.8682861 | 710.8788735 |
| ADNPVLELLLR                          | Q8C0C7 | 0          | N-term +42.01 Da,                         | 6238.157227 | 2 | 1243.050049 | 1242.54226  |
| ADQLTEEQIAEFKEAFSLFDKDGDTITTKELGTVMR | P62204 | 0          | N-term +42.01 Da, K +28.03 Da,            | 6238.350586 | 2 | 1064.060059 | 1063.560049 |
| AAPQPLALQLEQLLNPR                    | Q9JKX4 | 0          | N-term +42.01 Da,                         | 6244.90918  | 2 | 898.9199829 | 898.4196237 |
| AAPQPLALQLEQLLNPR                    | Q9JKX4 | 0          | N-term +42.01 Da,                         | 6247.158203 | 2 | 1433.160034 | 1432.165489 |
| ATFEEVSVLGFEEFDKAVKEHEGKTIFAY        | Q9CQM5 | 0          | N-term +42.01 Da, K +28.03 Da,            | 6251.535645 | 2 | 672.8811035 | 672.3788429 |
| VNPTVFFDITADDEPLGR                   | P17742 | 0          | N-term +42.01 Da,                         | 6254.79834  | 4 | 827.1799927 | 827.4251372 |
| AGTGLVAGEVVVDALPYFDQGYEAPGVR         | Q9D287 | 0          | N-term +42.01 Da,                         | 6259.075195 | 2 | 859.9199829 | 858.9276073 |
| AEEGIAAGGVMDVNTALQEVLKT              | P63323 | 0          | N-term +42.01 Da, K +28.03 Da,            | 6262.11084  | 3 | 880.460022  | 880.1338147 |
| AAPSEVAAAVLGEVDGGGAFGSWLDGR          | Q9CR29 | 0          | N-term +42.01 Da,                         | 6264.871094 | 4 | 922.2000122 | 921.7048702 |
| AAPSEVAAAVLGEVDGGGAFGSWLDGR          | Q9CR29 | 0          | N-term +42.01 Da,                         | 6266.452637 | 4 | 691.5700073 | 691.5643415 |
| AAPSEVAAAVLGEVDGGGAFGSWLDGR          | Q9CR29 | 0          | N-term +42.01 Da,                         | 6268.390137 | 3 | 871.1300049 | 870.4693031 |
| AGTGLVAGEVVVDALPYFDQGYEAPGVR         | Q9D287 | 0          | N-term +42.01 Da,                         | 6268.891602 | 2 | 824.4199829 | 823.4252318 |
| AAPSEVAAAVLGEVDGGGAFGSWLDGR          | Q9CR29 | 0          | N-term +42.01 Da,                         | 6273.816406 | 2 | 693.8492432 | 693.8503134 |
| ATFEEVSVLGFEEFDKA                    | Q9CQM5 | 0          | N-term +42.01 Da, K +28.03 Da,            | 6275.72998  | 2 | 740.3800049 | 739.3859091 |
| MNAAAEAEFNILLATDSYKVT                | Q99KQ4 | 0.00058582 | N-term +42.01 Da, K +28.03 Da,            | 6276.346191 | 2 | 853.4400024 | 853.4411787 |
| ADQLTEEQIAEFKEAF                     | P62204 | 0          | N-term +42.01 Da, K +28.03 Da,            | 6278.069336 | 3 | 1016.52002  | 1015.856899 |
| ADQLTEEQIAEFKEAFSLFDKDG              | P62204 | 0          | N-term +42.01 Da, K +28.03 Da,            | 6278.759766 | 2 | 1137.589966 | 1136.602249 |
| ADNPVLELLLR                          | Q8C0C7 | 0          | N-term +42.01 Da,                         | 6278.970703 | 3 | 830.0900269 | 829.4255407 |
| ATFEEVSVLGFEEFDKAVKEHEGKTIFAY        | Q9CQM5 | 0          | N-term +42.01 Da, K +28.03 Da,            | 6284.144043 | 2 | 898.9199829 | 898.4196237 |
| CDFTEDQTAEFKEAFQLFDR                 | Q60605 | 0          | N-term +42.01 Da, K +28.03 Da,C +57.02Da, | 6286.116699 | 3 | 917.0900269 | 916.4362226 |
| ADQLTEEQIAEFKEAFSLFDKDGDTITTKELGTVMR | P62204 | 0          | N-term +42.01 Da, K +28.03 Da,            | 6287.313965 | 2 | 1122.079956 | 1121.084845 |
| ADQLTEEQIAEFKEAFSLFDKDG              | P62204 | 0          | N-term +42.01 Da, K +28.03 Da,            | 6287.863281 | 2 | 773.8900146 | 773.3884516 |
| AAPQPLALQLEQLLNPR                    | Q9JKX4 | 0          | N-term +42.01 Da,                         | 6288.719238 | 2 | 611.317749  | 610.3195058 |
| ADQLTEEQIAEFKEAFSLFDKDGDTITTKELGTVMR | P62204 | 0.01242879 | N-term +42.01 Da, K +28.03 Da,            | 6289.521484 | 2 | 677.3600464 | 676.3681414 |
| ADQLTEEQIAEFKEAFSLFDKD               | P62204 | 0          | N-term +42.01 Da, K +28.03 Da,            | 6290.367676 | 2 | 906.460022  | 905.4727135 |
| CDFTEDQTAEFKEAFQLFDR                 | Q60605 | 0          | N-term +42.01 Da, K +28.03 Da,C +57.02Da, | 6291.046387 | 2 | 1075.589966 | 1075.084223 |
| ADQLTEEQIAEFKEAFSLFDKDG              | P62204 | 0          | N-term +42.01 Da, K +28.03 Da,            | 6292.760254 | 3 | 746.3900146 | 745.7353254 |
| ATFEEVSVLGFEEFDKAVKEHEGKTIFAY        | Q9CQM5 | 0          | N-term +42.01 Da, K +28.03 Da,            | 6295.386719 | 3 | 1113.219971 | 1112.552377 |
| VNPTVFFDITADDEPLGR                   | P17742 | 0          | N-term +42.01 Da,                         | 6298.744629 | 2 | 579.3099976 | 578.8140563 |
| AGTGLVAGEVVVDALPYFDQGYEAPGVR         | Q9D287 | 0          | N-term +42.01 Da,                         | 6306.397949 | 2 | 693.8496094 | 693.8503134 |

|                                      |         |   |                                           |             |   |             |             |
|--------------------------------------|---------|---|-------------------------------------------|-------------|---|-------------|-------------|
| AEEGIAAGGVMDVNTALQEVLKT              | P63323  | 0 | N-term +42.01 Da, K +28.03 Da,            | 6313.971191 | 2 | 898.4180908 | 898.4196237 |
| MDDL DALLADLESTTSHISKR               | Q8VI36  | 0 | N-term +42.01 Da, K +28.03 Da,            | 6317.426758 | 2 | 984         | 983.9970846 |
| ADQLTEEQIAEFKEAFSLFDKD               | P62204  | 0 | N-term +42.01 Da, K +28.03 Da,            | 6318.70459  | 3 | 836.4199829 | 836.0943476 |
| AAPSEVAAAVLGE DGGAFG SWLDGR          | Q9CR29  | 0 | N-term +42.01 Da,                         | 6319.275391 | 3 | 1004.549988 | 1003.881156 |
| AAPSEVAAAVLGE DGGAFG SWLDGR          | Q9CR29  | 0 | N-term +42.01 Da,                         | 6322.423828 | 3 | 1279.599976 | 1279.27155  |
| ADLLGSILSSMEKPPSLGDQESR              | Q7TNE3  | 0 | N-term +42.01 Da, K +28.03 Da,            | 6327.196777 | 2 | 1109.550049 | 1109.046449 |
| ADQLTEEQIAEFKEAF                     | P62204  | 0 | N-term +42.01 Da, K +28.03 Da,            | 6327.678711 | 3 | 671.6970825 | 671.0372213 |
| ADLLGSILSSMEKPPSLGDQESR              | Q7TNE3  | 0 | N-term +42.01 Da, K +28.03 Da,            | 6333.230957 | 3 | 656.3337402 | 656.3338152 |
| MDDL DALLADLESTTSHISKR               | Q8VI36  | 0 | N-term +42.01 Da, K +28.03 Da,            | 6336.413574 | 3 | 916.7700195 | 916.4362226 |
| TDAAVSFAKDFLAGGVAAAISK               | P51881  | 0 | N-term +42.01 Da, K +28.03 Da,            | 6339.621094 | 3 | 739.7009888 | 739.7000583 |
| MDDL DALLADLESTTSHISKR               | Q8VI36  | 0 | N-term +42.01 Da, K +28.03 Da,            | 6339.75293  | 2 | 730.8406372 | 730.8399458 |
| MDDL DALLADLESTTSHISKR               | Q8VI36  | 0 | N-term +42.01 Da, K +28.03 Da,            | 6339.999023 | 2 | 733.8800049 | 733.8855446 |
| ADLLGSILSSMEKPPSLGDQESR              | Q7TNE3  | 0 | N-term +42.01 Da, K +28.03 Da,            | 6341.141602 | 2 | 1010.539978 | 1010.537197 |
| ADQLTEEQIAEFKEAF                     | P62204  | 0 | N-term +42.01 Da, K +28.03 Da,            | 6342.131836 | 2 | 1374.650024 | 1374.150696 |
| ADLLGSILSSMEKPPSLGDQESR              | Q7TNE3  | 0 | N-term +42.01 Da, K +28.03 Da,            | 6342.499023 | 2 | 793.4637451 | 792.4719844 |
| ADLLGSILSSMEKPPSLGDQESR              | Q7TNE3  | 0 | N-term +42.01 Da, K +28.03 Da,            | 6343.269043 | 3 | 880.460022  | 880.1338147 |
| AELSEEALLSVLPTIR                     | P56399  | 0 | N-term +42.01 Da,                         | 6343.521973 | 2 | 884.4500122 | 883.4633023 |
| ADQLTEEQIAEFKEAFSLFDKDGDTITTKELGTVMR | P62204  | 0 | N-term +42.01 Da, K +28.03 Da,            | 6343.667969 | 3 | 674.3599854 | 674.0272233 |
| AAPSEVAAAVLGE DGGAFG SWLDGR          | Q9CR29  | 0 | N-term +42.01 Da,                         | 6345.394043 | 2 | 558.2913818 | 558.2902167 |
| AADLGQIPDVIDSDGVFKYVL                | Q9DAK9  | 0 | N-term +42.01 Da, K +28.03 Da,            | 6346.57959  | 2 | 1046.48999  | 1046.498801 |
| SHIQIPAGLTEL LQG YTV E VLR           | Q8K1M3  | 0 | N-term +42.01 Da,                         | 6347.140625 | 3 | 786.710022  | 786.0463344 |
| SHIQIPAGLTEL LQG YTV E VLR           | Q8K1M3  | 0 | N-term +42.01 Da,                         | 6348.817871 | 2 | 984.5       | 983.9970846 |
| AADLGQIPDVIDSDGVFKYVL                | Q9DAK9  | 0 | N-term +42.01 Da, K +28.03 Da,            | 6349.339844 | 2 | 690.3475342 | 690.3474064 |
| SHIQIPAGLTEL LQG YTV E VLR           | Q8K1M3  | 0 | N-term +42.01 Da,                         | 6349.589355 | 2 | 1374.640869 | 1374.150696 |
| AAPSEVAAAVLGE DGGAFG SWLDGR          | Q9CR29  | 0 | N-term +42.01 Da,                         | 6355.1875   | 2 | 641.7800293 | 641.7796906 |
| SHIQIPAGLTEL LQG YTV E VLR           | Q8K1M3  | 0 | N-term +42.01 Da,                         | 6360.240234 | 2 | 1109.046021 | 1109.046449 |
| TDAAVSFAKDFLAGGVAAAISK TAVAPIER      | P51881  | 0 | N-term +42.01 Da, K +28.03 Da,            | 6360.583984 | 2 | 781.4360962 | 780.4432268 |
| AELSEEALLSVLPTIR                     | P56399  | 0 | N-term +42.01 Da,                         | 6361.883301 | 2 | 797.460022  | 797.4641594 |
| AELSEEALLSVLPTIR                     | P56399  | 0 | N-term +42.01 Da,                         | 6372.149902 | 2 | 730.8400269 | 730.8399458 |
| ADQLTEEQIAEFKEAF                     | P62204  | 0 | N-term +42.01 Da, K +28.03 Da,            | 6375.671387 | 2 | 884.4500122 | 883.4633023 |
| ADQLTEEQIAEFKEAFSLFDKDGDTITTKELGTVMR | P62204  | 0 | N-term +42.01 Da, K +28.03 Da,            | 6383.047363 | 3 | 802.1199951 | 801.4637117 |
| AAPSEVAAAVLGE DGGAFG SWLDGR          | Q9CR29  | 0 | N-term +42.01 Da,                         | 6385.075684 | 3 | 821.7700195 | 821.4390097 |
| AAGVAGWGVEAEFEFDAPDVEPLEPTLSNII EQR  | A054984 | 0 | N-term +42.01 Da,                         | 6402.662598 | 2 | 1232.160034 | 1231.654876 |
| SHIQIPAGLTEL LQG YTV E VLR           | Q8K1M3  | 0 | N-term +42.01 Da,                         | 6404.777344 | 2 | 761.3699951 | 760.8726345 |
| TDAAVSFAKDFLAGGVAAAISK TAVAPIER      | P51881  | 0 | N-term +42.01 Da, K +28.03 Da,            | 6406.207031 | 2 | 1232.660034 | 1231.654876 |
| AEEGIAAGGVMDVNTALQEVLK TALI HDGLAR   | P63323  | 0 | N-term +42.01 Da, K +28.03 Da,            | 6406.403809 | 2 | 1141.560059 | 1140.56616  |
| AAPSEVAAAVLGE DGGAFG SWLDGR          | Q9CR29  | 0 | N-term +42.01 Da,                         | 6406.960938 | 2 | 969.9699707 | 969.9702015 |
| CDFTEDQTAEFKEAFQLFDR                 | Q60605  | 0 | N-term +42.01 Da, K +28.03 Da,C +57.02Da, | 6409.23584  | 2 | 1063.469971 | 1062.98246  |
| CDFTEDQTAEFKEAFQLFDR                 | Q60605  | 0 | N-term +42.01 Da, K +28.03 Da,C +57.02Da, | 6413.483398 | 4 | 991.5200195 | 991.2674746 |
| AEEGIAAGGVMDVNTALQEVLK TALI HDGLAR   | P63323  | 0 | N-term +42.01 Da, K +28.03 Da,            | 6418.185059 | 3 | 821.4394531 | 821.4390097 |

|                                      |        |            |                                           |             |   |             |             |
|--------------------------------------|--------|------------|-------------------------------------------|-------------|---|-------------|-------------|
| TDAAVSFAKDFLAGGVAAAIKTAVAPIER        | P51881 | 0          | N-term +42.01 Da, K +28.03 Da,            | 6419.496582 | 4 | 891.460022  | 890.9576446 |
| ADQLTEEQIAEFKEAF                     | P62204 | 0          | N-term +42.01 Da, K +28.03 Da,            | 6423.754395 | 3 | 853.4500122 | 853.4440947 |
| ADQLTEEQIAEFKEAFSLFDKDGDTITTKELGTVMR | P62204 | 0          | N-term +42.01 Da, K +28.03 Da,            | 6424.667969 | 2 | 657.3743286 | 657.3622365 |
| AAPSEVAAAVLGEEDGGAFGSWLDGR           | Q9CR29 | 0          | N-term +42.01 Da,                         | 6426.097168 | 3 | 1080.869995 | 1080.537784 |
| YLQEVINVLETDGHFR                     | Q02819 | 0          | N-term +42.01 Da,                         | 6428.727051 | 2 | 1280.170044 | 1279.662504 |
| CDFTEDQTAEFKEAFQLFDR                 | Q60605 | 0          | N-term +42.01 Da, K +28.03 Da,C +57.02Da, | 6432.32959  | 2 | 1244.079956 | 1243.582106 |
| MEEIGILVEKI                          | P54775 | 0.0109432  | N-term +42.01 Da, K +28.03 Da,            | 6437.158691 | 2 | 1231.654419 | 1231.654876 |
| AAPSEVAAAVLGEEDGGAFGSWLDGR           | Q9CR29 | 0          | N-term +42.01 Da,                         | 6439.929199 | 2 | 969.9688721 | 969.9702015 |
| AELSEEALLSVLPTIR                     | P56399 | 0          | N-term +42.01 Da,                         | 6440.366211 | 2 | 1063.47998  | 1062.98246  |
| TDAAVSFAKDFLAGGVAAAIKTAVAPIER        | P51881 | 0          | N-term +42.01 Da, K +28.03 Da,            | 6440.735352 | 4 | 993.7700195 | 993.2677858 |
| WYRIIGLSGDT                          | Q8R5F7 | 0.03369673 | N-term +42.01 Da,                         | 6443.630371 | 3 | 1016.559998 | 1015.892161 |
| CDFTEDQTAEFKEAFQLFDR                 | Q60605 | 0          | N-term +42.01 Da, K +28.03 Da,C +57.02Da, | 6444.367188 | 2 | 833.4067993 | 832.4179383 |
| IINDLLQSLR                           | Q3U0V1 | 0          | N-term +42.01 Da,                         | 6446.487793 | 3 | 829.7199707 | 829.3904962 |
| MEEFGISPGQLVAVFWDKSSPEEALKKLVAR      | Q8WTY4 | 0          | N-term +42.01 Da, K +28.03 Da,            | 6448.816895 | 2 | 1010.469971 | 1010.46678  |
| TDAAVSFAKDFLAGGVAAAIKTAVAPIER        | P51881 | 0          | N-term +42.01 Da, K +28.03 Da,            | 6451.226563 | 3 | 821.4395142 | 821.4390097 |
| ADQLTEEQIAEFKEAF                     | P62204 | 0          | N-term +42.01 Da, K +28.03 Da,            | 6451.648438 | 3 | 838.0800171 | 837.7494122 |
| AAPSEVAAAVLGEEDGGAFGSWLDGR           | Q9CR29 | 0          | N-term +42.01 Da,                         | 6454.935547 | 2 | 1062.982056 | 1062.98246  |
| FGDMQEIIQNFVR                        | Q9QYG0 | 0          | N-term +42.01 Da,                         | 6457.357422 | 3 | 1081.530029 | 1081.194457 |
| MVNPTVFFDITADDEPLGR                  | P17742 | 0          | N-term +42.01 Da,                         | 6457.641602 | 2 | 657.3757935 | 656.3851801 |
| CDFTEDQTAEFKEAFQLFDR                 | Q60605 | 0          | N-term +42.01 Da, K +28.03 Da,C +57.02Da, | 6463.662109 | 2 | 1101.079956 | 1100.086431 |
| SMEDPFFVVKGEVQKAVNTAQGLFQR           | Q9JJK1 | 0          | N-term +42.01 Da, K +28.03 Da,            | 6466        | 3 | 1122.900024 | 1122.564222 |
| ADQLTEEQIAEFKEAF                     | P62204 | 0          | N-term +42.01 Da, K +28.03 Da,            | 6466.691406 | 3 | 673.9799805 | 673.9802787 |
| MEAVLNELVSVEDLKNFER                  | Q9CQ92 | 0          | N-term +42.01 Da, K +28.03 Da,            | 6468.47168  | 2 | 1231.656128 | 1231.654876 |
| MDPFLVLLH                            | Q61160 | 0          | N-term +42.01 Da,                         | 6474.34082  | 2 | 971.0599976 | 970.5462128 |
| AETGAGISETVTETTVTETTETTEPENQSLIMKLR  | Q8K1L5 | 0          | N-term +42.01 Da, K +28.03 Da,            | 6475.129883 | 3 | 835.3900146 | 835.0567938 |
| MEAVLNELVSVEDLKNFER                  | Q9CQ92 | 0          | N-term +42.01 Da, K +28.03 Da,            | 6475.76416  | 2 | 1015.934875 | 1015.936033 |
| AETGAGISETVTETTVTETTETTEPENQSLIMKLR  | Q8K1L5 | 0          | N-term +42.01 Da, K +28.03 Da,            | 6476.789551 | 3 | 709.6599731 | 708.9907324 |
| MEAVLNELVSVEDLKNFER                  | Q9CQ92 | 0          | N-term +42.01 Da, K +28.03 Da,            | 6478.043457 | 2 | 1252.079956 | 1252.081552 |
| ADQLTEEQIAEFKEAFSLFDKDGDTITTKELGTVMR | P62204 | 0          | N-term +42.01 Da, K +28.03 Da,            | 6478.642578 | 3 | 647.3699951 | 647.3665673 |
| AEEGIAAGGVMDVNTALQEVLKTALIHDLGLAR    | P63323 | 0          | N-term +42.01 Da, K +28.03 Da,            | 6479.905762 | 2 | 805.4345093 | 804.4412158 |
| CDFTEDQTAEFKEAFQLFDR                 | Q60605 | 0          | N-term +42.01 Da, K +28.03 Da,C +57.02Da, | 6482.25     | 3 | 1080.869995 | 1080.537784 |
| AAPSEVAAAVLGEEDGGAFGSWLDGR           | Q9CR29 | 0          | N-term +42.01 Da,                         | 6484.180664 | 3 | 821.4399414 | 821.4390097 |
| CDFTEDQTAEFKEAFQLFDR                 | Q60605 | 0          | N-term +42.01 Da, K +28.03 Da,C +57.02Da, | 6484.428711 | 2 | 1257.119995 | 1256.12048  |
| AEEGIAAGGVMDVNTALQEVLKTALIHDLGLAR    | P63323 | 0          | N-term +42.01 Da, K +28.03 Da,            | 6487.129883 | 2 | 1063.475708 | 1062.98246  |
| ASVSELACIYSALILHDDEVTVTEDKIN         | P47955 | 0          | N-term +42.01 Da, K +28.03 Da,C +57.02Da, | 6505.876953 | 2 | 1272.599976 | 1271.600595 |
| ADQLTEEQIAEFKEAF                     | P62204 | 0          | N-term +42.01 Da, K +28.03 Da,            | 6512.858887 | 3 | 1026.160034 | 1025.507541 |
| ADQLTEEQIAEFKEAFSLFDKDGDTITTKELGTVMR | P62204 | 0          | N-term +42.01 Da, K +28.03 Da,            | 6513.429199 | 3 | 912.460022  | 912.1206346 |
| ATFEESVVLGFEEFDKAVKEHEGKTIF          | Q9CQM5 | 0          | N-term +42.01 Da, K +28.03 Da,            | 6514.974609 | 2 | 821.9699707 | 820.9738369 |
| ASVSELACIYSALILHDDEVTVTEDKIN         | P47955 | 0          | N-term +42.01 Da, K +28.03 Da,C +57.02Da, | 6516.942383 | 2 | 1059.560059 | 1059.056945 |
| ASVSELACIYSALILHDDEVTVTEDKINAL       | P47955 | 0          | N-term +42.01 Da, K +28.03 Da,C +57.02Da, | 6518.380859 | 3 | 802.4500122 | 802.780818  |

|                                      |        |            |                                           |             |   |             |             |
|--------------------------------------|--------|------------|-------------------------------------------|-------------|---|-------------|-------------|
| ADQLTEEQIAEFKEAF                     | P62204 | 0.00381056 | N-term +42.01 Da, K +28.03 Da,            | 6521.06543  | 3 | 848.0696411 | 848.0694891 |
| AAAAAAAAAAGDSWDADTFMEDPVR            | Q66JS6 | 0          | N-term +42.01 Da,                         | 6522.403809 | 2 | 695.3599854 | 694.3661304 |
| AEEGIAAGGVMDVNTALQEVLTALIHDLGLAR     | P63323 | 0          | N-term +42.01 Da, K +28.03 Da,            | 6524.850586 | 4 | 1121.560059 | 1121.059143 |
| AELTALESLEMGFPR                      | Q922Y1 | 0          | N-term +42.01 Da,                         | 6525.942383 | 3 | 674.710022  | 674.0541007 |
| AEEGIAAGGVMDVNTALQEVLTAL             | P63323 | 0          | N-term +42.01 Da, K +28.03 Da,            | 6529.228027 | 2 | 1180.640015 | 1180.121869 |
| SSDFEGYEQDFAVLTAETISKIAR             | Q89116 | 0          | N-term +42.01 Da, K +28.03 Da,            | 6534.275879 | 2 | 890.4580688 | 889.4672334 |
| AAMLGDAIMVAKGL                       | Q60936 | 0          | N-term +42.01 Da, K +28.03 Da,            | 6539.132324 | 2 | 1271.60083  | 1271.600595 |
| AAGAAEAGEAAVAVVEVGSQAQQFEELLR        | Q9CQM9 | 0          | N-term +42.01 Da,                         | 6548.729492 | 2 | 969.9682617 | 969.9702015 |
| ADQLTEEQIAEFKEAFSLF                  | P62204 | 0          | N-term +42.01 Da, K +28.03 Da,            | 6549.936035 | 2 | 597.3099976 | 597.3104286 |
| AEEAAAGASGETMAALVAEGLPGAGW           | P97364 | 0          | N-term +42.01 Da,                         | 6550.507813 | 2 | 738.3900146 | 738.8777195 |
| RNAEVFLKYIHR                         | A2CG49 | 0.0174359  | N-term +42.01 Da, K +28.03 Da,            | 6553.120117 | 4 | 699.3800049 | 699.1231921 |
| MARKWNGRAVAR                         | O35622 | 0.03849903 | N-term +42.01 Da, K +28.03 Da,            | 6553.36377  | 2 | 828.9699707 | 828.9712944 |
| KREWEMLCRVK                          | Q9CYX7 | 0.00941423 | N-term +42.01 Da, K +28.03 Da,C +57.02Da, | 6555.013184 | 2 | 880.9822388 | 879.991073  |
| KVFLPVKNK                            | Q8C267 | 0.0495474  | N-term +42.01 Da, K +28.03 Da,            | 6555.463379 | 3 | 646.9829102 | 646.9825598 |
| ADQLTEEQIAEFKEAF                     | P62204 | 0          | N-term +42.01 Da, K +28.03 Da,            | 6555.694824 | 3 | 1080.869995 | 1080.537784 |
| ADQLTEEQIAEFKEAF                     | P62204 | 0          | N-term +42.01 Da, K +28.03 Da,            | 6557.428223 | 4 | 762.4099731 | 762.165657  |
| ADQLTEEQIAEFKEAF                     | P62204 | 0          | N-term +42.01 Da, K +28.03 Da,            | 6557.759766 | 2 | 889.9520264 | 889.9532993 |
| ADQLTEEQIAEFKEAFSLFDKDGDTITTKELGTVMR | P62204 | 0.00538503 | N-term +42.01 Da, K +28.03 Da,            | 6560.412109 | 2 | 801.9147339 | 801.9153652 |
| ADQLTEEQIAEFKEAF                     | P62204 | 0          | N-term +42.01 Da, K +28.03 Da,            | 6565.637207 | 3 | 772.4500122 | 772.7772963 |
| ADQLTEEQIAEFKEAF                     | P62204 | 0          | N-term +42.01 Da, K +28.03 Da,            | 6566.915527 | 2 | 1243.630005 | 1243.624108 |
| ADQLTEEQIAEFKEAF                     | P62204 | 0          | N-term +42.01 Da, K +28.03 Da,            | 6569.34375  | 3 | 830.0900269 | 829.4184973 |
| CDFTEDQTAEFKEAFQLFDR                 | Q60605 | 0          | N-term +42.01 Da, K +28.03 Da,C +57.02Da, | 6574.61377  | 2 | 1244.630005 | 1243.624108 |
| AEEGIAAGGVMDVNTALQEVLTALIHDLGLAR     | P63323 | 0          | N-term +42.01 Da, K +28.03 Da,            | 6578.464355 | 2 | 947.460022  | 946.4734425 |
| ADQLTEEQIAEFKEAF                     | P62204 | 0          | N-term +42.01 Da, K +28.03 Da,            | 6579.512207 | 2 | 969.96875   | 969.9702015 |
| CDFTEDQTAEFKEAFQLFDR                 | Q60605 | 0          | N-term +42.01 Da, K +28.03 Da,C +57.02Da, | 6586.042969 | 3 | 646.9821167 | 646.9825598 |
| ADQLTEEQIAEFKEAFSLFDKDGDTITTKELGTVMR | P62204 | 0          | N-term +42.01 Da, K +28.03 Da,            | 6586.19873  | 3 | 1080.535278 | 1080.537784 |
| ADQLTEEQIAEFKEAF                     | P62204 | 0          | N-term +42.01 Da, K +28.03 Da,            | 6590.384277 | 3 | 679.7299805 | 679.0698621 |
| AAQQQASGKEEKSSNR                     | Q9D5V6 | 0.00057971 | N-term +28.03 Da, K +28.03 Da,            | 954.5084229 | 4 | 451.4892273 | 451.4893387 |
| SRPVSCSGR                            | Q91YD9 | 0.03770558 | N-term +28.03 Da, C +57.02 Da,            | 981.3544312 | 3 | 345.1799927 | 345.1784321 |
| AAQQQASGKEEKSSNR                     | Q9D5V6 | 0          | N-term +28.03 Da, K +28.03 Da,            | 984.7651978 | 4 | 451.4893188 | 451.4893387 |
| ALSSQHQR                             | P20029 | 0.00057703 | N-term +28.03 Da,                         | 991.4509277 | 3 | 342.519989  | 342.5210752 |
| TKEEEDDTER                           | Q8BQ47 | 0.00054496 | N-term +28.03 Da, K +28.03 Da,            | 998.6444092 | 3 | 436.5371094 | 436.5368977 |
| TKEEEDDTER                           | Q8BQ47 | 0.00057803 | N-term +28.03 Da, K +28.03 Da,            | 999.625     | 2 | 654.2999878 | 654.3017083 |
| GAAASQPPSKR                          | Q99NB9 | 0.00352645 | N-term +28.03 Da, K +28.03 Da,            | 1009.945618 | 3 | 375.8838196 | 375.8840137 |
| ADAKAQEQQQR                          | Q99PL5 | 0          | N-term +28.03 Da, K +28.03 Da,            | 1012.288025 | 3 | 486.582489  | 486.5829525 |
| KSVQKSGVR                            | D3Z617 | 0.02373022 | N-term +28.03 Da, K +28.03 Da,            | 1012.855469 | 3 | 358.230011  | 358.232754  |
| ADDDRPPR                             | P23116 | 0.00913242 | N-term +28.03 Da,                         | 1015.288574 | 3 | 323.8299866 | 323.8297974 |
| TVQETKEGR                            | O08677 | 0.01968335 | N-term +28.03 Da, K +28.03 Da,            | 1017.48761  | 3 | 368.5400085 | 368.5400243 |
| EGSGSSGTGEQKEDQKEEKQ                 | P38647 | 0          | N-term +28.03 Da, K +28.03 Da,            | 1020.577942 | 4 | 563.2739258 | 563.2737586 |
| QTVQKTTTR                            | P05784 | 0.00155119 | N-term +28.03 Da, K +28.03 Da,            | 1021.566284 | 3 | 373.8840332 | 373.5557857 |

|                           |        |            |                                |             |   |             |             |
|---------------------------|--------|------------|--------------------------------|-------------|---|-------------|-------------|
| ASSQAVSNAR                | Q9CPV4 | 0.00056306 | N-term +28.03 Da,              | 1029.549316 | 2 | 509.7680969 | 509.76744   |
| SGAQAETAANR               | P57780 | 0.00068399 | N-term +28.03 Da, K +28.03 Da, | 1029.949585 | 3 | 420.5599976 | 420.5615997 |
| GEIQKESSR                 | P70441 | 0.00985222 | N-term +28.03 Da, K +28.03 Da, | 1031.949463 | 3 | 363.8676147 | 363.8681409 |
| STSAPAAKPKR               | P10922 | 0.0010661  | N-term +28.03 Da, K +28.03 Da, | 1032.342651 | 3 | 399.9147949 | 399.9153138 |
| AAPKAGTATGR               | P56480 | 0.00948081 | N-term +28.03 Da, K +28.03 Da, | 1033.675781 | 3 | 352.8800049 | 352.876859  |
| SAAPKAGTATGR              | P56480 | 0.02522746 | N-term +28.03 Da, K +28.03 Da, | 1036.377808 | 3 | 381.8879395 | 381.8875353 |
| SDPAKPGNER                | Q3UMU9 | 0.00570071 | N-term +28.03 Da, K +28.03 Da, | 1040.224487 | 3 | 376.1996765 | 376.1998906 |
| EEPKDETAR                 | O55022 | 0.00254582 | N-term +28.03 Da, K +28.03 Da, | 1042.387329 | 3 | 377.5277405 | 377.5277846 |
| SNAAGKQLR                 | Q9CY58 | 0.00485909 | N-term +28.03 Da, K +28.03 Da, | 1043.129517 | 3 | 334.2000122 | 334.2014539 |
| EEPKDETAR                 | O55022 | 0.02114165 | N-term +28.03 Da, K +28.03 Da, | 1045.747314 | 2 | 565.7889404 | 565.7880387 |
| KPSPDAGPHGQDR             | Q8BH97 | 0.00156331 | N-term +28.03 Da, K +28.03 Da, | 1047.52478  | 3 | 473.2446289 | 473.2442708 |
| TKEMTENQR                 | P30204 | 0.00067476 | N-term +28.03 Da, K +28.03 Da, | 1047.963135 | 3 | 398.5400085 | 398.2045359 |
| ASAAPKAGTATGR             | P56480 | 0.00065703 | N-term +28.03 Da, K +28.03 Da, | 1053.993774 | 3 | 405.5700073 | 405.5665734 |
| SKKHGGPADEER              | P08228 | 0          | N-term +28.03 Da, K +28.03 Da, | 1056.15564  | 3 | 465.5899963 | 465.5844045 |
| TAAAAAPR                  | Q9CQA3 | 0.02004264 | N-term +28.03 Da,              | 1058.783936 | 2 | 378.7217102 | 378.7217718 |
| STSQTTVDSR                | Q8BMS4 | 0.00068074 | N-term +28.03 Da,              | 1061.77124  | 2 | 555.2700195 | 555.2752956 |
| VAGADSPQSSSKGGR           | Q8BIJ6 | 0.00565771 | N-term +28.03 Da, K +28.03 Da, | 1063.103149 | 3 | 487.5899963 | 487.2548358 |
| TENSTSAPAAKPKR            | P10922 | 0          | N-term +28.03 Da, K +28.03 Da, | 1064.811523 | 3 | 514.6264648 | 514.626381  |
| EAHKSEIAHR                | P07724 | 0          | N-term +28.03 Da, K +28.03 Da, | 1068.145386 | 4 | 309.1728516 | 309.1729201 |
| TENSTSAPAAKPKR            | P10922 | 0          | N-term +28.03 Da, K +28.03 Da, | 1069.513306 | 4 | 386.2214966 | 386.2216049 |
| SNAAGKQLR                 | Q9CY58 | 0.0237599  | N-term +28.03 Da, K +28.03 Da, | 1075.277954 | 3 | 334.2012329 | 334.2014539 |
| ASQSQAQDVR                | Q91VA7 | 0.00155199 | N-term +28.03 Da,              | 1075.886597 | 2 | 559.2833862 | 559.2834546 |
| EEAEAPTGR                 | P26350 | 0.0044665  | N-term +28.03 Da, K +28.03 Da, | 1078.129883 | 3 | 382.2099915 | 381.8716626 |
| GAKPVDTAAR                | Q8BGD9 | 0.00067024 | N-term +28.03 Da, K +28.03 Da, | 1080.855713 | 3 | 347.8699951 | 347.8732259 |
| DEEPKDETAR                | O55022 | 0.02082448 | N-term +28.03 Da, K +28.03 Da, | 1085.034546 | 3 | 415.8699951 | 415.8700993 |
| TGSQGQCTQVR               | P62858 | 0          | N-term +28.03 Da, C +57.02 Da, | 1088.914551 | 2 | 625.2999878 | 625.3013216 |
| EAHKSEIAHR                | P07724 | 0.00055157 | N-term +28.03 Da, K +28.03 Da, | 1091.518066 | 3 | 411.8946228 | 411.8948014 |
| EGSGSSGTGEQKEDQKEEQ       | P38647 | 0.0056899  | N-term +28.03 Da, K +28.03 Da, | 1094.2323   | 3 | 750.3599854 | 750.6959194 |
| DDDEEEAAR                 | D3Z617 | 0.00054555 | N-term +28.03 Da,              | 1095.607544 | 2 | 539.2200928 | 539.2201864 |
| KQIPGGGSGGGSGSGGGGGGGGGGR | Q8BMA6 | 0          | N-term +28.03 Da, K +28.03 Da, | 1099.036621 | 3 | 672.6599731 | 672.3264942 |
| EAHKSEIAHR                | P07724 | 0          | N-term +28.03 Da, K +28.03 Da, | 1099.993652 | 4 | 309.1727905 | 309.1729201 |
| TENSTSAPAAKPKR            | P10922 | 0          | N-term +28.03 Da, K +28.03 Da, | 1100.069092 | 4 | 386.4670715 | 386.2216049 |
| VDAVKDSGR                 | Q00623 | 0.00354072 | N-term +28.03 Da, K +28.03 Da, | 1101.389771 | 3 | 334.8599854 | 334.8574646 |
| TENSTSAPAAKPKR            | P10922 | 0          | N-term +28.03 Da, K +28.03 Da, | 1103.261108 | 3 | 515.289978  | 514.626381  |
| QASAPKAGTATGR             | P56480 | 0.00947226 | N-term +28.03 Da, K +28.03 Da, | 1103.78479  | 3 | 448.5799866 | 448.2527661 |
| SNNDFQKR                  | Q56926 | 0.0114336  | N-term +28.03 Da, K +28.03 Da, | 1104.810181 | 3 | 355.519989  | 355.5209639 |
| AMVDEDKNNR                | Q64374 | 0.0087196  | N-term +28.03 Da, K +28.03 Da, | 1108.605591 | 4 | 351.6878052 | 351.6882404 |
| AVESKTSASGEEANSR          | O70400 | 0          | N-term +28.03 Da, K +28.03 Da, | 1111.646606 | 3 | 560.2800293 | 560.279599  |
| GQDLGESGR                 | Q8BHG1 | 0.04726563 | N-term +28.03 Da,              | 1113.205444 | 2 | 473.7331543 | 473.7330659 |
| AGHPLAQNER                | O70492 | 0.03633428 | N-term +28.03 Da,              | 1120.294067 | 3 | 374.2000122 | 374.2001132 |

|                      |        |            |                                             |             |   |             |             |
|----------------------|--------|------------|---------------------------------------------|-------------|---|-------------|-------------|
| TGSQGCTQVR           | P62858 | 0          | N-term +28.03 Da, C +57.02 Da,              | 1120.957275 | 2 | 625.2999878 | 625.3013216 |
| VSSSSAEGTQPSR        | Q8R317 | 0.00156495 | N-term +28.03 Da,                           | 1123.39624  | 2 | 704.3400269 | 704.3391564 |
| SGTVCENTCR           | O08795 | 0.00351936 | N-term +28.03 Da, C +57.02 Da,              | 1124.757324 | 2 | 606.2609863 | 606.2608079 |
| PDPAKSAPAPK          | Q64525 | 0          | N-term +28.03 Da, K +28.03 Da,              | 1125.598877 | 3 | 388.2323303 | 388.2325314 |
| ELEQEKAGR            | E9Q7G0 | 0.00055127 | N-term +28.03 Da, K +28.03 Da,              | 1125.754395 | 3 | 372.5400085 | 372.5400243 |
| PDPAKSAPAPK          | Q64525 | 0.00060606 | N-term +28.03 Da, K +28.03 Da,              | 1128.574585 | 2 | 581.8450317 | 581.8451589 |
| SAPKEDDASASTSQSSR    | Q8BGD9 | 0          | N-term +28.03 Da, K +28.03 Da,              | 1131.642456 | 3 | 593.9494019 | 593.9500303 |
| AQTA AAAAPR          | Q9CQA3 | 0.004004   | N-term +28.03 Da,                           | 1137.587891 | 2 | 478.2694092 | 478.269618  |
| QGKSEMAPAQGQK        | Q99PL5 | 0.00401606 | N-term +28.03 Da, K +28.03 Da,              | 1137.835571 | 3 | 534.2999878 | 533.9677496 |
| AMVDEDKNNR           | Q64374 | 0.00107239 | N-term +28.03 Da, K +28.03 Da,              | 1139.386841 | 4 | 352.1900024 | 351.6882404 |
| AAQASAAPKAGTATGR     | P56480 | 0          | N-term +28.03 Da, K +28.03 Da,              | 1142.469849 | 3 | 495.6106567 | 495.6108422 |
| THETGTTNTATTSNAGSAQR | Q61191 | 0.00056243 | N-term +28.03 Da,                           | 1145.667236 | 3 | 678.9899902 | 678.6542768 |
| AAQASAAPKAGTATGR     | P56480 | 0          | N-term +28.03 Da, K +28.03 Da,              | 1156.617676 | 2 | 742.9125366 | 742.9126251 |
| PDPAKSAPAPK          | Q64525 | 0.00070822 | N-term +28.03 Da, K +28.03 Da,              | 1157.587646 | 3 | 388.2323303 | 388.2325314 |
| PDPAKSAPAPK          | Q64525 | 0.0006689  | N-term +28.03 Da, K +28.03 Da,              | 1159.847534 | 2 | 581.8452759 | 581.8451589 |
| GEAGPEDPSR           | Q61074 | 0.00304878 | N-term +28.03 Da,                           | 1169.566895 | 2 | 521.7437744 | 521.743631  |
| GEATSQGENMEDR        | Q3UMU9 | 0.00157729 | N-term +28.03 Da, K +28.03 Da,              | 1170.898438 | 3 | 536.5831299 | 536.5825128 |
| ADAEKAQEQQQR         | Q99PL5 | 0.00574438 | N-term +28.03 Da, K +28.03 Da,              | 1174.126099 | 2 | 728.8599854 | 729.3707905 |
| AAQASAAPKAGTATGR     | P56480 | 0          | N-term +28.03 Da, K +28.03 Da,              | 1176.018677 | 3 | 495.6107178 | 495.6108422 |
| PDPAKSAPAPK          | Q64525 | 0          | N-term +28.03 Da, K +28.03 Da,              | 1189.381958 | 3 | 388.2321472 | 388.2325314 |
| TAE EDEADPKR         | Q9D0J8 | 0.00061087 | N-term +28.03 Da, K +28.03 Da,              | 1189.759033 | 3 | 482.5599976 | 482.5633354 |
| TSQIDTQR             | O08583 | 0.02001704 | N-term +28.03 Da,                           | 1197.119385 | 2 | 488.7562561 | 488.756541  |
| TAE EDEADPKR         | Q9D0J8 | 0          | N-term +28.03 Da, K +28.03 Da,              | 1200.351074 | 2 | 723.342041  | 723.3413649 |
| SAPAVQTK             | Q99JY0 | 0.03407708 | N-term +28.03 Da, K +28.03 Da,              | 1204.356689 | 2 | 429.2583618 | 429.2581875 |
| GIEADDDR             | P99027 | 0.02973523 | N-term +28.03 Da,                           | 1209.116821 | 2 | 459.711792  | 459.7117993 |
| TTASPSQVR            | P09528 | 0.02371048 | N-term +28.03 Da,                           | 1213.650024 | 2 | 487.769989  | 487.7669085 |
| KEAGSEAESSADPGPGR    | P56183 | 0.00575264 | N-term +28.03 Da, K +28.03 Da,              | 1216.1521   | 3 | 596.6199951 | 596.618392  |
| TAE EDEADPKR         | Q9D0J8 | 0          | N-term +28.03 Da, K +28.03 Da,              | 1220.460449 | 3 | 482.5635681 | 482.5633354 |
| AAQASAAPKAGTATGR     | P56480 | 0.00157563 | N-term +28.03 Da, K +28.03 Da,              | 1225.399902 | 2 | 743.9099731 | 742.9126251 |
| TITKADDAEGR          | Q3UZ39 | 0.00063694 | N-term +28.03 Da, K +28.03 Da,              | 1225.856689 | 2 | 616.8278809 | 616.8276953 |
| EDEEAEAPTGKR         | P26350 | 0.00071685 | N-term +28.03 Da, K +28.03 Da,              | 1227.859741 | 3 | 463.2281189 | 463.2281754 |
| LEEKKVCQGTSNR        | Q01279 | 0.0200341  | N-term +28.03 Da, K +28.03 Da, C +57.02 Da, | 1228.335815 | 3 | 544.960022  | 544.962776  |
| NEESLGNR             | Q8BGD9 | 0.0355412  | N-term +28.03 Da,                           | 1229.807495 | 2 | 473.7329712 | 473.7330659 |
| TAE EDEADPKR         | Q9D0J8 | 0          | N-term +28.03 Da, K +28.03 Da,              | 1231.549561 | 2 | 723.3400269 | 723.3413649 |
| LGGQEAAA HAR         | P03953 | 0.0118525  | N-term +28.03 Da,                           | 1231.625    | 3 | 370.2000122 | 370.2001132 |
| DSAENETAEGEEKR       | D3Z6I7 | 0          | N-term +28.03 Da, K +28.03 Da,              | 1232.096924 | 3 | 540.916748  | 540.9164379 |
| VVGATQGQAGSCSR       | Q8BGD9 | 0.00057637 | N-term +28.03 Da, C +57.02 Da,              | 1232.80542  | 2 | 703.3499756 | 703.3462608 |
| EPPQHALR             | P70296 | 0.04290822 | N-term +28.03 Da,                           | 1234.646606 | 3 | 325.8499146 | 325.8505325 |
| EDEEAEAPTGKR         | P26350 | 0.01069042 | N-term +28.03 Da, K +28.03 Da,              | 1235.195435 | 2 | 694.3400269 | 694.3386249 |
| DSAENETAEGEEKR       | D3Z6I7 | 0          | N-term +28.03 Da, K +28.03 Da,              | 1236.240356 | 2 | 810.8699951 | 810.8710186 |

|                            |         |            |                                |             |   |             |             |
|----------------------------|---------|------------|--------------------------------|-------------|---|-------------|-------------|
| LGGQEAAAHAR                | P03953  | 0          | N-term +28.03 Da,              | 1237.903809 | 2 | 554.7966919 | 554.7965316 |
| EEDKENQGDETQGQPPQR         | P62960  | 0          | N-term +28.03 Da, K +28.03 Da, | 1238.981079 | 3 | 757.6799927 | 757.0157633 |
| GIEADDDR                   | P99027  | 0.03996803 | N-term +28.03 Da,              | 1241.238525 | 2 | 459.7099915 | 459.7117993 |
| AAQASAAPKAGTATGR           | P56480  | 0.00063857 | N-term +28.03 Da, K +28.03 Da, | 1244.872681 | 3 | 495.9388428 | 495.6108422 |
| DLGKGGNEESTKTGNAGSR        | P08228  | 0.00067613 | N-term +28.03 Da, K +28.03 Da, | 1246.217285 | 3 | 654.6685791 | 654.6677459 |
| SQASTLQANR                 | Q7TMY8  | 0.01067141 | N-term +28.03 Da,              | 1252.627319 | 2 | 552.2945557 | 552.2938221 |
| SQVQLKGR                   | P11725  | 0.03703704 | N-term +28.03 Da, K +28.03 Da, | 1254.558105 | 3 | 324.5378113 | 324.5380659 |
| TQCDVPPSSR                 | P70699  | 0.00053908 | N-term +28.03 Da, C +57.02 Da, | 1262.84668  | 2 | 587.7802124 | 587.7796905 |
| DTGAGSIR                   | O35143  | 0.00444006 | N-term +28.03 Da,              | 1264.806641 | 2 | 402.7145386 | 402.7141443 |
| EECPAVR                    | P09103  | 0.02624026 | N-term +28.03 Da, C +57.02 Da, | 1265.18396  | 2 | 444.7161865 | 444.7158297 |
| VTPSPVKGK                  | Q80XU3  | 0.03516572 | N-term +28.03 Da, K +28.03 Da, | 1274.872314 | 3 | 332.8865662 | 332.8865837 |
| DTGAGSIR                   | O35143  | 0.00444006 | N-term +28.03 Da,              | 1279.70459  | 2 | 402.2099915 | 402.7141443 |
| SPAPADSTPGDSSR             | P54728  | 0.000612   | N-term +28.03 Da,              | 1282.625977 | 2 | 686.821167  | 686.8205993 |
| AAEKQIPGGGSGGGSGGGGGGGGGGR | Q8BMA6  | 0          | N-term +28.03 Da, K +28.03 Da, | 1285.849365 | 3 | 763.0300293 | 762.6987683 |
| SQVQLKGR                   | P11725  | 0.03739445 | N-term +28.03 Da, K +28.03 Da, | 1286.23645  | 3 | 324.5380554 | 324.5380659 |
| NVNDGVAQSTR                | P17751  | 0.00071788 | N-term +28.03 Da,              | 1287.215332 | 2 | 594.7999878 | 594.8020117 |
| KMKDTSDEEIR                | P62204  | 0.00055648 | N-term +28.03 Da, K +28.03 Da, | 1291.499756 | 3 | 522.9279785 | 522.2677539 |
| EHMEEVR                    | P08226  | 0.0057334  | N-term +28.03 Da,              | 1302.69519  | 3 | 319.8200378 | 319.8201333 |
| TTKAVVVK                   | P11679  | 0.00054201 | N-term +28.03 Da, K +28.03 Da, | 1307.588867 | 3 | 310.551239  | 310.5513123 |
| LRADAEKAQEQQQR             | Q99PL5  | 0.00061463 | N-term +28.03 Da, K +28.03 Da, | 1313.674805 | 3 | 576.3121338 | 576.3113444 |
| TQCDVPPSSR                 | P70699  | 0.00353714 | N-term +28.03 Da, C +57.02 Da, | 1320.98999  | 2 | 587.7799072 | 587.7796905 |
| ATITPDEKR                  | O88844  | 0.00401405 | N-term +28.03 Da, K +28.03 Da, | 1334.493042 | 3 | 362.8763428 | 362.8766363 |
| DVDAGPSTNR                 | Q91XD4  | 0.0055814  | N-term +28.03 Da,              | 1345.080933 | 2 | 530.7600098 | 530.2569055 |
| SMQTVQKTTTR                | P05784  | 0.00572246 | N-term +28.03 Da, K +28.03 Da, | 1346.210083 | 3 | 446.2458496 | 446.2466237 |
| AESDPGFKR                  | Q9D281  | 0.03093203 | N-term +28.03 Da, K +28.03 Da, | 1351.284424 | 3 | 354.8572998 | 354.8574646 |
| GDEDEAEAPTGKR              | P26350  | 0          | N-term +28.03 Da, K +28.03 Da, | 1352.337402 | 3 | 520.5774536 | 520.5776448 |
| AALGGNSSPSAK               | P99027  | 0.00353001 | N-term +28.03 Da, K +28.03 Da, | 1352.63501  | 2 | 558.3099976 | 558.3063982 |
| GDEDEAEAPTGKR              | P26350  | 0          | N-term +28.03 Da, K +28.03 Da, | 1353.111938 | 2 | 780.8599854 | 780.362829  |
| SMPEQTGEK                  | PM62889 | 0.00155039 | N-term +28.03 Da, K +28.03 Da, | 1354.347778 | 2 | 531.7600098 | 531.760435  |
| SVTVQETKEGR                | O08677  | 0          | N-term +28.03 Da, K +28.03 Da, | 1361.259766 | 3 | 430.5731201 | 430.5735054 |
| VVLGHSER                   | P17751  | 0.02589396 | N-term +28.03 Da,              | 1361.759521 | 3 | 308.8466187 | 308.8468995 |
| GLSSNSAVR                  | Q91WS0  | 0.00442913 | N-term +28.03 Da,              | 1367.489014 | 2 | 459.7536926 | 459.753801  |
| TGGKYVPR                   | P68372  | 0.04694836 | N-term +28.03 Da, K +28.03 Da, | 1369.338257 | 3 | 311.8550415 | 311.8553949 |
| SNVNDGVAQSTR               | P17751  | 0.00064767 | N-term +28.03 Da,              | 1380.414185 | 2 | 638.8200073 | 638.3180263 |
| GPSQCQETIR                 | Q9DCW4  | 0.00533463 | N-term +28.03 Da, C +57.02 Da, | 1382.860962 | 2 | 602.2940674 | 602.2929651 |
| KAPQPTGPPPAR               | Q6NZJ6  | 0.04625637 | N-term +28.03 Da, K +28.03 Da, | 1385.742432 | 3 | 424.9191895 | 424.9189468 |
| SVPGQGGKYR                 | Q7TQH0  | 0.00911577 | N-term +28.03 Da, K +28.03 Da, | 1398.52356  | 3 | 392.5556641 | 392.555897  |
| NVNDGVAQSTR                | P17751  | 0          | N-term +28.03 Da,              | 1398.736694 | 2 | 594.8010864 | 594.8020117 |
| TASPKEYTAGR                | P09103  | 0.0160312  | N-term +28.03 Da, K +28.03 Da, | 1412.543335 | 3 | 412.8907471 | 412.8909457 |
| FAEAVQKSR                  | Q8C196  | 0.00158228 | N-term +28.03 Da, K +28.03 Da, | 1413.949463 | 3 | 364.5455322 | 364.5451093 |



|                 |        |            |                                |             |   |             |             |
|-----------------|--------|------------|--------------------------------|-------------|---|-------------|-------------|
| FAEAVQKSR       | Q8C196 | 0.00400601 | N-term +28.03 Da, K +28.03 Da, | 1419.854248 | 2 | 546.3150635 | 546.3140257 |
| GGGYSGGGGGYGSR  | Q8BG05 | 0          | N-term +28.03 Da,              | 1420.656982 | 2 | 680.7999878 | 680.7974582 |
| GGGAAFSQTR      | O89090 | 0.00056754 | N-term +28.03 Da,              | 1427.093018 | 2 | 490.2510376 | 490.2514255 |
| APTQCDVPPSSR    | P70699 | 0.0057971  | N-term +28.03 Da, C +57.02 Da, | 1429.563721 | 2 | 671.826355  | 671.8246297 |
| TLPSDAPKKR      | Q3UMF0 | 0.04321967 | N-term +28.03 Da, K +28.03 Da, | 1432.300415 | 3 | 399.5837402 | 399.5835641 |
| GDSSDAPAYGAHPSR | Q921T2 | 0          | N-term +28.03 Da,              | 1434.803101 | 3 | 505.8998108 | 505.8989408 |
| TQDAPEEVR       | Q9JHS9 | 0.00487567 | N-term +28.03 Da,              | 1435.264526 | 2 | 536.767395  | 536.7671061 |
| TASPKEYTAGR     | P09103 | 0.00062383 | N-term +28.03 Da, K +28.03 Da, | 1443.043823 | 3 | 412.8900146 | 412.8909457 |
| EDNVTQVR        | P24270 | 0.00911162 | N-term +28.03 Da,              | 1443.388916 | 2 | 494.7600098 | 494.756541  |
| FAEAVQKSR       | Q8C196 | 0.00054705 | N-term +28.03 Da, K +28.03 Da, | 1444.599854 | 3 | 364.5447998 | 364.5451093 |
| GTPPAGTPPGAR    | Q8K0L9 | 0.00305188 | N-term +28.03 Da,              | 1445.871704 | 2 | 553.8005981 | 553.8012827 |
| SGKGDSTLQVSSR   | Q80WJ7 | 0.04340963 | N-term +28.03 Da, K +28.03 Da, | 1445.968384 | 2 | 689.3699951 | 689.370259  |
| TVVAVGSGGKKGK   | Q64433 | 0.00567913 | N-term +28.03 Da, K +28.03 Da, | 1446.198608 | 3 | 381.9077759 | 381.9080478 |
| KAPGFGDNR       | P63038 | 0.03327922 | N-term +28.03 Da, K +28.03 Da, | 1447.614624 | 3 | 340.1900024 | 339.8540542 |
| SGKGDSTLQVSSR   | Q80WJ7 | 0.02000851 | N-term +28.03 Da, K +28.03 Da, | 1451.414185 | 3 | 459.9200134 | 459.9159315 |
| DLGGDAAGR       | Q8VEK3 | 0.02372035 | N-term +28.03 Da,              | 1451.649292 | 2 | 430.2200012 | 430.2170513 |
| EDNVTQVR        | P24270 | 0.00556328 | N-term +28.03 Da,              | 1454.569702 | 2 | 494.2600098 | 494.756541  |
| AQQPVNEVEHR     | P52503 | 0.00067204 | N-term +28.03 Da,              | 1455.82312  | 3 | 445.5700073 | 445.5652327 |
| TVVAVGSGGKKGK   | Q64433 | 0.00256542 | N-term +28.03 Da, K +28.03 Da, | 1456.868408 | 2 | 572.3599854 | 572.3584334 |
| LGKEVQAAQAR     | P08226 | 0          | N-term +28.03 Da, K +28.03 Da, | 1460.123047 | 3 | 409.5783386 | 409.5787018 |
| KITITNDKGR      | P16627 | 0.00054645 | N-term +28.03 Da, K +28.03 Da, | 1461.121216 | 3 | 410.5899963 | 410.5907188 |
| TNPEHASDAMR     | O89086 | 0.01306051 | N-term +28.03 Da,              | 1465.512329 | 2 | 628.789978  | 628.7880471 |
| TNPEHASDAMR     | O89086 | 0          | N-term +28.03 Da,              | 1465.781982 | 3 | 419.8599854 | 419.5277902 |
| MLMPKKNR        | P63325 | 0.02621876 | N-term +28.03 Da, K +28.03 Da, | 1466.775879 | 3 | 367.8927002 | 367.8926866 |
| SSATAFQR        | Q91VS7 | 0.01107665 | N-term +28.03 Da,              | 1474.348267 | 2 | 448.230011  | 448.2352439 |
| TVVAVGSGGKKGK   | Q64433 | 0.01072865 | N-term +28.03 Da, K +28.03 Da, | 1476.712036 | 3 | 381.9100037 | 381.9080478 |
| GTPPAGTPPGAR    | Q8K0L9 | 0.00064516 | N-term +28.03 Da,              | 1476.791748 | 2 | 553.8000488 | 553.8012827 |
| FAEAVQKSR       | Q8C196 | 0.0015873  | N-term +28.03 Da, K +28.03 Da, | 1477.037109 | 3 | 364.5499878 | 364.5451093 |
| TAEEDPADPKR     | Q9D0J8 | 0.00107124 | N-term +28.03 Da, K +28.03 Da, | 1477.147095 | 2 | 722.8400269 | 723.3413649 |
| EQETPLSAKSSR    | Q99K28 | 0          | N-term +28.03 Da, K +28.03 Da, | 1480.935791 | 3 | 463.9200134 | 463.5841818 |
| TPSGTAEPYDGTKAR | Q80Y55 | 0          | N-term +28.03 Da, K +28.03 Da, | 1496.906616 | 3 | 536.2700195 | 536.2738963 |
| STGKEDVSYEER    | Q9R257 | 0.00065402 | N-term +28.03 Da, K +28.03 Da, | 1499.203369 | 3 | 504.9106445 | 504.9107352 |
| GDTASPKEYTAGR   | P09103 | 0          | N-term +28.03 Da, K +28.03 Da, | 1499.278809 | 3 | 470.240387  | 470.2404151 |
| NQPPQJAPKR      | Q6NZJ6 | 0.00159067 | N-term +28.03 Da, K +28.03 Da, | 1501.106445 | 3 | 402.5799866 | 402.2435417 |
| APTQCDVPPSSR    | P70699 | 0.00559441 | N-term +28.03 Da, C +57.02 Da, | 1502.378906 | 2 | 671.8242798 | 671.8246297 |
| VLSGEDKSNIK     | P01942 | 0.00951518 | N-term +28.03 Da, K +28.03 Da, | 1506.968384 | 2 | 637.8699951 | 637.3717385 |
| GTPPAGTPPGAR    | Q8K0L9 | 0.00206505 | N-term +28.03 Da,              | 1508.520996 | 2 | 553.7994995 | 553.8012827 |
| KMKDTSDEEIR     | P62204 | 0.00158395 | N-term +28.03 Da, K +28.03 Da, | 1510.761963 | 3 | 522.2681885 | 522.2677539 |
| TGGKEDVSYEER    | Q9R257 | 0          | N-term +28.03 Da, K +28.03 Da, | 1512.562012 | 3 | 475.8999939 | 475.9000588 |
| AKDVKFGADAR     | P63038 | 0.00578592 | N-term +28.03 Da, K +28.03 Da, | 1523.612427 | 4 | 316.1871948 | 316.1870332 |

|                       |        |            |                                            |             |   |             |             |
|-----------------------|--------|------------|--------------------------------------------|-------------|---|-------------|-------------|
| SGEHSIIGR             | P08228 | 0.0251962  | N-term +28.03 Da,                          | 1523.763306 | 3 | 328.5140381 | 328.5138092 |
| DEEDEEEAGEEGSQKR      | O35381 | 0          | N-term +28.03 Da, K +28.03 Da,             | 1525.887573 | 3 | 674.6199951 | 674.6187871 |
| GETENQSPASEEEKAKSD    | P18608 | 0.00060024 | N-term +28.03 Da, K +28.03 Da,             | 1529.969849 | 3 | 717.6699829 | 716.9974869 |
| VLSGEDKSNIK           | P01942 | 0.00944669 | N-term +28.03 Da, K +28.03 Da,             | 1531.273071 | 3 | 425.2505798 | 425.2502512 |
| TPSGTAEPYDGTKAR       | Q80Y55 | 0          | N-term +28.03 Da, K +28.03 Da,             | 1535.444214 | 3 | 536.2747192 | 536.2738963 |
| TEEDGSEQKVPEATNR      | P32261 | 0.00155521 | N-term +28.03 Da, K +28.03 Da,             | 1538.699341 | 3 | 616.2999878 | 615.9656804 |
| VAEDEDDEDVDTKKQKTEEDD | P26350 | 0          | N-term +28.03 Da, K +28.03 Da,             | 1542.088135 | 4 | 638.789978  | 638.5408928 |
| IVTSSAGTGTTEDEAKK     | Q9D1J3 | 0          | N-term +28.03 Da, K +28.03 Da,             | 1547.923706 | 3 | 627.3349609 | 627.3334812 |
| AKDVKFGADAR           | P63038 | 0.01305483 | N-term +28.03 Da, K +28.03 Da,             | 1554.043457 | 4 | 316.1870422 | 316.1870332 |
| SGEHSIIGR             | P08228 | 0.02379958 | N-term +28.03 Da,                          | 1554.537964 | 3 | 328.5135803 | 328.5138092 |
| SLENSVKPR             | Q8BHI7 | 0.01930502 | N-term +28.03 Da, K +28.03 Da,             | 1555.292603 | 3 | 362.5499878 | 362.548631  |
| YAGTVPSR              | Q8VCF0 | 0.01970021 | N-term +28.03 Da,                          | 1559.991821 | 2 | 439.7398071 | 439.7401619 |
| ADTPGEATPPPR          | Q9ERE7 | 0          | N-term +28.03 Da,                          | 1568.262451 | 2 | 618.8136597 | 618.8145878 |
| GEEEDGDEDEAEAPTGKR    | P26350 | 0          | N-term +28.03 Da, K +28.03 Da,             | 1568.708984 | 3 | 706.9699707 | 706.9697085 |
| SATYVNTTEGR           | Q91VD9 | 0.00070274 | N-term +28.03 Da,                          | 1569.994873 | 2 | 563.2800293 | 563.2803806 |
| GFCEVCKK              | Q61207 | 0.00439668 | N-term +28.03 Da, K +28.03 Da,C +57.02 Da, | 1571.491089 | 3 | 371.192688  | 371.1928021 |
| TVEEDLGKSR            | P08113 | 0.00561535 | N-term +28.03 Da, K +28.03 Da,             | 1574.036011 | 3 | 397.2182922 | 397.218951  |
| SHGSHETDEEFDAR        | P12787 | 0          | N-term +28.03 Da,                          | 1578.741455 | 3 | 548.9006958 | 548.9010105 |
| KITITNDQNR            | P20029 | 0.02731349 | N-term +28.03 Da, K +28.03 Da,             | 1581.577271 | 3 | 420.2420959 | 420.2419784 |
| SHGSHETDEEFDAR        | P12787 | 0          | N-term +28.03 Da,                          | 1585.456909 | 2 | 823.3499756 | 822.8478775 |
| ILGGQEAHAH            | P03953 | 0          | N-term +28.03 Da,                          | 1588.843018 | 2 | 497.7691956 | 497.769451  |
| VLSGEDKSNIK           | P01942 | 0.0025641  | N-term +28.03 Da, K +28.03 Da,             | 1591.086182 | 3 | 425.2505798 | 425.2502512 |
| ADESVGTMGNR           | Q91Y97 | 0.0005571  | N-term +28.03 Da,                          | 1591.807739 | 2 | 582.7700195 | 582.769323  |
| GGGWSEKSVK            | Q80WJ7 | 0.0006502  | N-term +28.03 Da, K +28.03 Da,             | 1592.792847 | 3 | 373.5400085 | 373.544998  |
| ILGGQEAHAHAR          | P03953 | 0          | N-term +28.03 Da,                          | 1593.80835  | 3 | 407.8900146 | 407.8948014 |
| QVETIRNLVDSYMSIINKCIR | Q8BZ98 | 0.00646353 | N-term +28.03 Da, K +28.03 Da,C +57.02 Da, | 1595.480957 | 3 | 870.1199951 | 870.1365016 |
| GGFCEVCKK             | Q61207 | 0.00064144 | N-term +28.03 Da, K +28.03 Da,C +57.02 Da, | 1597.228638 | 3 | 390.1998901 | 390.1999568 |
| SKESYELR              | P67984 | 0.03995206 | N-term +28.03 Da, K +28.03 Da,             | 1597.640137 | 3 | 356.5285034 | 356.5292366 |
| GGFCEVCKK             | Q61207 | 0.00065876 | N-term +28.03 Da, K +28.03 Da,C +57.02 Da, | 1597.785522 | 2 | 584.7954102 | 584.796297  |
| SCGPSQCQETIR          | Q9DCW4 | 0          | N-term +28.03 Da, C +57.02 Da,             | 1598.033569 | 2 | 725.8239136 | 725.8243041 |
| GEEEDGDEDEAEAPTGKR    | P26350 | 0          | N-term +28.03 Da, K +28.03 Da,             | 1599.474609 | 3 | 706.9699707 | 706.9697085 |
| NEATGGKYVPR           | P68372 | 0.02192243 | N-term +28.03 Da, K +28.03 Da,             | 1599.979492 | 3 | 416.8999939 | 416.5629404 |
| TTTIEAVKR             | D3Z2H9 | 0.04108496 | N-term +28.03 Da, K +28.03 Da,             | 1603.707153 | 3 | 358.8886414 | 358.8887647 |
| SHTQDTEDEKDTIR        | Q80WJ7 | 0.00444884 | N-term +28.03 Da, K +28.03 Da,             | 1608.435913 | 3 | 577.6099854 | 577.6112373 |
| SHGSHETDEEFDAR        | P12787 | 0          | N-term +28.03 Da,                          | 1609.451904 | 3 | 548.9008179 | 548.9010105 |
| ILGGQEAHAHAR          | P03953 | 0          | N-term +28.03 Da,                          | 1624.351807 | 3 | 407.8940125 | 407.8948014 |
| SHTQDTEDEKDTIR        | Q80WJ7 | 0.02370062 | N-term +28.03 Da, K +28.03 Da,             | 1625.840088 | 3 | 578.2800293 | 577.6112373 |
| GSHETDEEFDAR          | P12787 | 0.00070077 | N-term +28.03 Da,                          | 1628.910156 | 2 | 711.2999878 | 710.8024068 |
| GGFCEVCKK             | Q61207 | 0.00066357 | N-term +28.03 Da, K +28.03 Da,C +57.02 Da, | 1629.372681 | 3 | 390.1994934 | 390.1999568 |
| GGFCEVCKK             | Q61207 | 0.00158646 | N-term +28.03 Da, K +28.03 Da,C +57.02 Da, | 1629.528564 | 2 | 584.7955322 | 584.796297  |

|                     |        |            |                                             |             |   |             |             |
|---------------------|--------|------------|---------------------------------------------|-------------|---|-------------|-------------|
| IVQEVETQR           | Q8BWP5 | 0.00255493 | N-term +28.03 Da,                           | 1629.639282 | 2 | 565.3143921 | 565.3142232 |
| APVAGKKAKKGILER     | O35490 | 0.0106383  | N-term +28.03 Da, K +28.03 Da,              | 1630.498779 | 4 | 427.2900085 | 427.2908271 |
| GSHETDEEFDAR        | P12787 | 0.04912281 | N-term +28.03 Da,                           | 1632.05188  | 3 | 474.2040405 | 474.20403   |
| TAGAQPDSDSIGGR      | G5E870 | 0          | N-term +28.03 Da,                           | 1634.932007 | 2 | 700.8400269 | 700.8418659 |
| SHGSHETDEEFDAR      | P12787 | 0          | N-term +28.03 Da,                           | 1643.446533 | 3 | 549.2399902 | 548.9010105 |
| TVVTSTTEPSR         | O08795 | 0.0056101  | N-term +28.03 Da,                           | 1644.925293 | 2 | 603.3200073 | 603.3222458 |
| STVSQLQER           | Q00623 | 0.04254473 | N-term +28.03 Da,                           | 1649.001221 | 2 | 538.2894897 | 538.2907481 |
| SASATPLSGNSSR       | E9QN52 | 0.0006215  | N-term +28.03 Da,                           | 1653.528564 | 2 | 682.3400269 | 682.3442414 |
| EDVCQDCMK           | Q61207 | 0.00071327 | N-term +28.03 Da, K +28.03 Da, C +57.02 Da, | 1656.51416  | 2 | 620.7536011 | 620.7539698 |
| APVAGKKAKKGILER     | O35490 | 0.00065963 | N-term +28.03 Da, K +28.03 Da,              | 1661.060913 | 4 | 427.2911682 | 427.2908271 |
| SAPASMSPDGTR        | P59764 | 0.00059559 | N-term +28.03 Da,                           | 1662.429565 | 2 | 602.7849731 | 602.7849731 |
| ILGGQEAHAHAR        | P03953 | 0.00057274 | N-term +28.03 Da,                           | 1663.156372 | 3 | 407.8999939 | 407.8948014 |
| GEEAGAYDGPR         | P27773 | 0          | N-term +28.03 Da,                           | 1669.512573 | 2 | 575.2629395 | 575.2621881 |
| VDEPPQHALR          | P70296 | 0.00555556 | N-term +28.03 Da,                           | 1676.744873 | 3 | 397.2146301 | 397.215652  |
| GFAGDDAPR           | P60710 | 0.00942549 | N-term +28.03 Da,                           | 1682.430542 | 2 | 467.2240295 | 467.2248764 |
| TKLEECVR            | O70251 | 0.01682485 | N-term +28.03 Da, K +28.03 Da, C +57.02 Da, | 1691.600708 | 3 | 364.2018738 | 364.2023549 |
| AGDPVANVR           | Q76MZ3 | 0.00057438 | N-term +28.03 Da,                           | 1703.529297 | 2 | 463.7600098 | 463.7563435 |
| SDITKQISR           | P20108 | 0.01226994 | N-term +28.03 Da, K +28.03 Da,              | 1703.839966 | 3 | 368.5499878 | 368.5521527 |
| EMDEQIR             | D3Z2H9 | 0.01142857 | N-term +28.03 Da,                           | 1711.323853 | 2 | 474.7261658 | 474.7263948 |
| QQSELQSQVR          | Q61792 | 0.00566572 | N-term +28.03 Da,                           | 1712.032837 | 2 | 616.3179932 | 615.8254868 |
| VDEPPQHALR          | P70296 | 0.00060976 | N-term +28.03 Da,                           | 1716.357056 | 3 | 397.2158508 | 397.215652  |
| MDTGAGSIR           | O35143 | 0.00578871 | N-term +28.03 Da,                           | 1718.504028 | 2 | 468.2341919 | 468.2343868 |
| FENLAKER            | Q60598 | 0.02081563 | N-term +28.03 Da, K +28.03 Da,              | 1718.730347 | 3 | 354.8692932 | 354.8695929 |
| AVVVKKIETR          | P11679 | 0          | N-term +28.03 Da, K +28.03 Da,              | 1719.971558 | 4 | 307.7099915 | 307.460326  |
| AVQPPEEGPSR         | Q8BGD9 | 0.02079796 | N-term +28.03 Da,                           | 1721.017944 | 2 | 597.810791  | 597.8093052 |
| SELSNPSETESER       | Q61584 | 0.00055218 | N-term +28.03 Da,                           | 1721.683105 | 2 | 746.8411865 | 746.8417295 |
| VDDEEDEEEAGEEEGSQKR | O35381 | 0          | N-term +28.03 Da, K +28.03 Da,              | 1726.528198 | 3 | 745.9840698 | 745.9839066 |
| VNDPQPEHPLR         | P68037 | 0.00578313 | N-term +28.03 Da,                           | 1729.26001  | 3 | 443.9017944 | 443.9018447 |
| AEFASEACR           | Q9ERR7 | 0.00206292 | N-term +28.03 Da, C +57.02 Da,              | 1729.652954 | 2 | 534.7426147 | 534.7425764 |
| LLDHQMNTER          | Q8R311 | 0.00066181 | N-term +28.03 Da,                           | 1735.473511 | 3 | 428.8800049 | 428.8836853 |
| GSPGSSQLCSPR        | D3Z6Q9 | 0          | N-term +28.03 Da, C +57.02 Da,              | 1735.610107 | 2 | 695.3255615 | 695.3249942 |
| GAVEAISDR           | P10605 | 0.01224847 | N-term +28.03 Da,                           | 1737.247559 | 2 | 473.2539063 | 473.253634  |
| TQLAPHSEQMR         | Q00623 | 0.00254453 | N-term +28.03 Da,                           | 1741.172363 | 3 | 442.5599976 | 442.5592016 |
| SEFGDSSSPATR        | E9PV24 | 0.00061843 | N-term +28.03 Da,                           | 1746.675659 | 2 | 634.7912598 | 634.7913102 |
| TLTPEEAR            | P06151 | 0.01848667 | N-term +28.03 Da,                           | 1749.088501 | 2 | 537.2755127 | 537.2773066 |
| TYGPKVVR            | P12710 | 0.01101322 | N-term +28.03 Da, K +28.03 Da,              | 1750.482666 | 3 | 325.8709717 | 325.8710449 |
| SELSNPSETESER       | Q61584 | 0          | N-term +28.03 Da,                           | 1751.831299 | 2 | 746.8408813 | 746.8417295 |
| SSSAPVASPNVR        | Q05920 | 0          | N-term +28.03 Da,                           | 1753.434326 | 2 | 600.8200073 | 600.3225798 |
| TDMGTMQER           | P56480 | 0.00065488 | N-term +28.03 Da,                           | 1755.647217 | 2 | 548.7401123 | 548.7417193 |
| DAPVSGGVGAAR        | Q99L13 | 0.00055006 | N-term +28.03 Da,                           | 1756.112061 | 2 | 542.7912598 | 542.7909151 |

|                       |         |            |                                             |             |   |             |             |
|-----------------------|---------|------------|---------------------------------------------|-------------|---|-------------|-------------|
| STEVEAVNR             | P29391  | 0.00065147 | N-term +28.03 Da,                           | 1756.904053 | 2 | 552.2887573 | 552.2882056 |
| TPCDDFTR              | P28798  | 0.00444664 | N-term +28.03 Da, C +57.02 Da,              | 1762.931641 | 2 | 520.2294922 | 520.2293018 |
| TGKPAVNVPR            | Q8CI51  | 0.00057405 | N-term +28.03 Da, K +28.03 Da,              | 1763.11499  | 3 | 365.5609741 | 365.5608707 |
| EKIEDNGNFR            | P02762  | 0          | N-term +28.03 Da, K +28.03 Da,              | 1772.7146   | 3 | 426.8900146 | 426.5543337 |
| SEPAQPAVQQAPAR        | Q7TNL9  | 0          | N-term +28.03 Da,                           | 1775.713013 | 2 | 740.3900146 | 739.3915256 |
| GQPQQTGAASGGYIKR      | Q09044  | 0          | N-term +28.03 Da, K +28.03 Da,              | 1779.612915 | 3 | 592.6500244 | 592.6514781 |
| ASSPAEVAEKADR         | Q99L13  | 0.02344077 | N-term +28.03 Da, K +28.03 Da,              | 1779.779175 | 3 | 462.9100037 | 462.9122985 |
| ENGE EEEEE            | P21619  | 0.02491694 | N-term +28.03 Da,                           | 1781.333252 | 2 | 561.2047119 | 561.2094849 |
| FYEDMKENPKR           | P52840  | 0.00063211 | N-term +28.03 Da, K +28.03 Da,              | 1781.418823 | 4 | 385.9500122 | 385.9511657 |
| AQDKAIVQEATR          | Q8CHT0  | 0          | N-term +28.03 Da, K +28.03 Da,              | 1781.563843 | 3 | 462.6000061 | 462.5964215 |
| RQPDTPAELR            | Q9WVVL0 | 0.03807615 | N-term +28.03 Da,                           | 1787.012085 | 3 | 404.2200012 | 404.2228067 |
| GSNVPFKPR             | Q9ESZ8  | 0.00558919 | N-term +28.03 Da, K +28.03 Da,              | 1787.530396 | 3 | 353.2099915 | 353.2099493 |
| SGMGNPGNISSR          | Q921H8  | 0.00071994 | N-term +28.03 Da,                           | 1789.278809 | 2 | 603.289978  | 602.7905896 |
| SSSAPVASPNVR          | Q05920  | 0.00065746 | N-term +28.03 Da,                           | 1789.454956 | 2 | 600.8200073 | 600.3225798 |
| DAPVSGGVAAR           | Q99L13  | 0.01186292 | N-term +28.03 Da,                           | 1790.977539 | 2 | 542.7907104 | 542.7909151 |
| TPCDDFTR              | P28798  | 0.01029543 | N-term +28.03 Da, C +57.02 Da,              | 1793.458618 | 2 | 520.2293701 | 520.2293018 |
| SGGNSEPAQPAVQQAPAR    | Q7TNL9  | 0          | N-term +28.03 Da,                           | 1795.28125  | 2 | 897.4500122 | 896.9504683 |
| QSSVIPDR              | Q91XF0  | 0.0057943  | N-term +28.03 Da,                           | 1800.2854   | 2 | 466.2600098 | 465.2561765 |
| KGASQAGMLAPGTR        | Q9DAW9  | 0.00055402 | N-term +28.03 Da, K +28.03 Da,              | 1804.717651 | 3 | 467.5942993 | 467.5941348 |
| ELELQKEQR             | P16546  | 0.00057045 | N-term +28.03 Da, K +28.03 Da,              | 1808.147217 | 3 | 410.233429  | 410.2347124 |
| EKIEDNGNFR            | P02762  | 0.03740949 | N-term +28.03 Da, K +28.03 Da,              | 1809.88269  | 3 | 426.8829346 | 426.5543337 |
| TDKPVDEALR            | Q9R257  | 0.0005423  | N-term +28.03 Da, K +28.03 Da,              | 1812.565063 | 2 | 600.3356323 | 600.3351558 |
| SVVPGAEDQR            | Q6P6J9  | 0.00054113 | N-term +28.03 Da,                           | 1814.114746 | 2 | 578.8006592 | 578.8014802 |
| TGQVYDEKDYR           | P52503  | 0          | N-term +28.03 Da, K +28.03 Da,              | 1814.227417 | 3 | 477.236969  | 477.2367821 |
| VSSVSDLPKR            | P54869  | 0.02080679 | N-term +28.03 Da, K +28.03 Da,              | 1814.655884 | 3 | 381.8950195 | 381.8959194 |
| SELGAADEAAR           | Q9D3D9  | 0.00064392 | N-term +28.03 Da,                           | 1820.218384 | 2 | 602.789978  | 602.7938527 |
| SLGGAVGSASGGR         | Q71FD5  | 0.04696673 | N-term +28.03 Da,                           | 1821.422119 | 2 | 552.289978  | 552.2938221 |
| ETDEEFDAR             | P12787  | 0.00054855 | N-term +28.03 Da,                           | 1823.015869 | 2 | 570.25      | 570.246204  |
| SAPDLKSVR             | P27546  | 0.00945095 | N-term +28.03 Da, K +28.03 Da,              | 1827.373657 | 3 | 343.5400085 | 343.5414763 |
| GKVFVTKGR             | O55022  | 0.00447984 | N-term +28.03 Da, K +28.03 Da,              | 1831.56665  | 3 | 397.5794067 | 397.5800424 |
| AGSETVSSTLR           | P56593  | 0.00056529 | N-term +28.03 Da,                           | 1831.722168 | 2 | 568.3005371 | 568.3013132 |
| EEEGDGEEDGDEDEAEAPTGR | P26350  | 0          | N-term +28.03 Da, K +28.03 Da,              | 1834.407959 | 3 | 893.3599854 | 893.3617721 |
| KGASQAGMLAPGTR        | Q9DAW9  | 0.01808007 | N-term +28.03 Da, K +28.03 Da,              | 1835.848877 | 3 | 467.5899963 | 467.5941348 |
| LPPPPPPR              | P61979  | 0.03404945 | N-term +28.03 Da,                           | 1846.180786 | 2 | 449.7790527 | 449.7790895 |
| KVDVVGATQQAGSCSR      | Q8BGD9  | 0          | N-term +28.03 Da, K +28.03 Da, C +57.02 Da, | 1854.466797 | 3 | 592.6400146 | 592.6404733 |
| VEVMPQNQK             | Q9DCX2  | 0.00566038 | N-term +28.03 Da, K +28.03 Da,              | 1856.855713 | 2 | 564.8099976 | 564.8077191 |
| KVDVVGATQQAGSCSR      | Q8BGD9  | 0.02115059 | N-term +28.03 Da, K +28.03 Da, C +57.02 Da, | 1857.364136 | 2 | 888.4500122 | 888.4570718 |
| ADKVPKTAENFR          | P17742  | 0.01767241 | N-term +28.03 Da, K +28.03 Da,              | 1857.898315 | 4 | 365.7115784 | 365.7121441 |
| SVGIEADDDR            | P99027  | 0.0197171  | N-term +28.03 Da,                           | 1861.769043 | 2 | 552.7600098 | 552.7620211 |
| TTKAVVVKKIETR         | P11679  | 0          | N-term +28.03 Da, K +28.03 Da,              | 1867.342163 | 4 | 397.0152588 | 397.0157315 |

|                         |        |            |                                            |             |   |             |             |
|-------------------------|--------|------------|--------------------------------------------|-------------|---|-------------|-------------|
| EEEEGDGEEEDGDEDEEAAPTGR | P26350 | 0          | N-term +28.03 Da, K +28.03 Da,             | 1876.137085 | 3 | 936.710022  | 936.3759702 |
| TKELGTVMR               | P62204 | 0.00158562 | N-term +28.03 Da, K +28.03 Da,             | 1881.808716 | 3 | 364.2099915 | 364.2144833 |
| KVDVVGATQGAGSCSR        | Q8BGD9 | 0          | N-term +28.03 Da, K +28.03 Da,C +57.02 Da, | 1885.738892 | 3 | 592.6408081 | 592.6404733 |
| GATTVQEQLR              | Q8BG07 | 0.00064433 | N-term +28.03 Da,                          | 1887.436279 | 2 | 565.8121338 | 565.8118477 |
| SDSMDTGAGSIR            | O35143 | 0.00073153 | N-term +28.03 Da,                          | 1887.726074 | 2 | 612.7791138 | 612.7798881 |
| SSDSMDTGAGSIR           | O35143 | 0.00069204 | N-term +28.03 Da,                          | 1889.393677 | 2 | 656.2961426 | 656.2959026 |
| AEPQYPVR                | P15116 | 0.04320254 | N-term +28.03 Da,                          | 1897.187744 | 2 | 494.269989  | 494.266544  |
| DVKFGADAR               | P63038 | 0.00645161 | N-term +28.03 Da, K +28.03 Da,             | 1899.171631 | 3 | 345.5299988 | 345.5258262 |
| VLTPDPAPSR              | P70296 | 0.0056338  | N-term +28.03 Da,                          | 1906.300903 | 2 | 549.7929688 | 549.7931237 |
| SDTPCDDFTR              | P28798 | 0          | N-term +28.03 Da, C +57.02 Da,             | 1907.588989 | 2 | 621.2589722 | 621.2587885 |
| VKAPGFGDNR              | P63038 | 0.0044096  | N-term +28.03 Da, K +28.03 Da,             | 1908.661499 | 3 | 372.8764343 | 372.876859  |
| TKELGTVMR               | P62204 | 0.01603814 | N-term +28.03 Da, K +28.03 Da,             | 1913.633301 | 3 | 364.214386  | 364.2144833 |
| EGLNVVKTGR              | P15532 | 0.00064103 | N-term +28.03 Da, K +28.03 Da,             | 1914.179688 | 3 | 376.8962097 | 376.8960307 |
| SVTTSSVPSR              | Q8VCF0 | 0.00056022 | N-term +28.03 Da,                          | 1917.141724 | 2 | 573.3114014 | 573.3116807 |
| IVGNEHYDVAR             | P56480 | 0          | N-term +28.03 Da,                          | 1920.50293  | 3 | 434.227356  | 434.2263284 |
| SDSMDTGAGSIR            | O35143 | 0.0056444  | N-term +28.03 Da,                          | 1920.932861 | 2 | 612.7798462 | 612.7798881 |
| GGFCEVCK                | Q61207 | 0.00157233 | N-term +28.03 Da, K +28.03 Da,C +57.02 Da, | 1924.840942 | 2 | 506.7329712 | 506.7331652 |
| GATEEDGIPSKVQR          | P49586 | 0.00064185 | N-term +28.03 Da, K +28.03 Da,             | 1925.116821 | 3 | 514.9414063 | 514.9422579 |
| EQEIAAVQAR              | Q99PL5 | 0          | N-term +28.03 Da,                          | 1925.292603 | 2 | 571.8099976 | 571.8118477 |
| STGPGPMAPPR             | Q62318 | 0          | N-term +28.03 Da,                          | 1927.474731 | 2 | 548.2848511 | 548.284411  |
| AVKAPGFGDNR             | P63038 | 0          | N-term +28.03 Da, K +28.03 Da,             | 1928.089722 | 3 | 396.5566101 | 396.555897  |
| EFMDDTSR                | P62858 | 0.0056953  | N-term +28.03 Da,                          | 1931.320801 | 2 | 514.7210693 | 514.7213098 |
| GETVVVGGGTPSR           | Q99LB2 | 0.00061125 | N-term +28.03 Da,                          | 1931.828857 | 2 | 622.333252  | 622.3356873 |
| GSTPVGSGVYR             | Q64213 | 0.00256674 | N-term +28.03 Da,                          | 1933.636353 | 2 | 554.2927856 | 554.2932906 |
| AAGGTAVGTGLNTR          | P97807 | 0.00563116 | N-term +28.03 Da,                          | 1933.800415 | 2 | 637.8499756 | 637.3465864 |
| MIPPQEASAR              | O35250 | 0.00254712 | N-term +28.03 Da,                          | 1935.218994 | 2 | 564.7999878 | 564.2975186 |
| DSMDTGAGSIR             | O35143 | 0.00068966 | N-term +28.03 Da,                          | 1938.428101 | 2 | 569.2600098 | 569.2638735 |
| SLQEQADAAEER            | E9Q453 | 0          | N-term +28.03 Da,                          | 1946.816162 | 2 | 688.3300171 | 687.8284244 |
| SVTTSSVPSR              | Q8VCF0 | 0.00910747 | N-term +28.03 Da,                          | 1947.769287 | 2 | 573.3099976 | 573.3116807 |
| APGSPEGSSQLCSPR         | D3Z6Q9 | 0.00057937 | N-term +28.03 Da, C +57.02 Da,             | 1952.184692 | 2 | 779.369873  | 779.3699334 |
| SGQPGVPVPAGVR           | Q01149 | 0          | N-term +28.03 Da,                          | 1953.530518 | 2 | 603.3200073 | 603.8331143 |
| DCQDVAADCEVK            | P10639 | 0          | N-term +28.03 Da, K +28.03 Da,C +57.02 Da, | 1955.37439  | 2 | 733.3200073 | 733.3185207 |
| GGFCEVCK                | Q61207 | 0.00157233 | N-term +28.03 Da, K +28.03 Da,C +57.02 Da, | 1955.76123  | 2 | 506.7331848 | 506.7331652 |
| SILLASDKR               | P11590 | 0.03517994 | N-term +28.03 Da, K +28.03 Da,             | 1958.030396 | 3 | 353.557373  | 353.5571263 |
| SMDVAAGAASGAK           | Q9R1C7 | 0          | N-term +28.03 Da, K +28.03 Da,             | 1958.819336 | 2 | 596.8099976 | 596.3055411 |
| AVKAPGFGDNR             | P63038 | 0          | N-term +28.03 Da, K +28.03 Da,             | 1959.494019 | 3 | 396.5562439 | 396.555897  |
| FKNGDTASPKEYTAGR        | P09103 | 0.00557103 | N-term +28.03 Da, K +28.03 Da,             | 1960.140015 | 4 | 457.4875488 | 457.241532  |
| VADTPELQR               | Q61792 | 0.04289118 | N-term +28.03 Da,                          | 1962.474976 | 2 | 528.788269  | 528.7878411 |
| LVSESSDVVSK             | P11679 | 0.01226456 | N-term +28.03 Da, K +28.03 Da,             | 1962.630005 | 2 | 603.3369751 | 603.3348219 |
| IDESAVTESR              | Q9JMD3 | 0.00058005 | N-term +28.03 Da,                          | 1966.064819 | 2 | 567.7852783 | 567.7854962 |

|                         |         |            |                                            |             |   |             |             |
|-------------------------|---------|------------|--------------------------------------------|-------------|---|-------------|-------------|
| VYVDAVKDSGR             | Q00623  | 0.00066138 | N-term +28.03 Da, K +28.03 Da,             | 1968.945068 | 3 | 422.2346191 | 422.2347124 |
| NGGFCVCKK               | Q61207  | 0          | N-term +28.03 Da, K +28.03 Da,C +57.02 Da, | 1974.272461 | 3 | 428.5427856 | 428.2142662 |
| SDSSDSMDTGAGSIR         | O35143  | 0          | N-term +28.03 Da,                          | 1974.784302 | 2 | 757.3300171 | 757.3253893 |
| TIGQEEIQQR              | P16546  | 0.00058685 | N-term +28.03 Da,                          | 1977.793335 | 2 | 615.3293457 | 615.3278623 |
| SVTTSSVPSPR             | Q8VCF0  | 0.00062972 | N-term +28.03 Da,                          | 1978.710449 | 2 | 573.3129272 | 573.3116807 |
| ATLKDITR                | Q91VR2  | 0.00577756 | N-term +28.03 Da, K +28.03 Da,             | 1982.058716 | 3 | 325.2060547 | 325.2062049 |
| SAPPIPDSR               | Q8CGZ0  | 0.00398804 | N-term +28.03 Da,                          | 1982.523804 | 2 | 484.269989  | 484.2640015 |
| MIPPQEASAR              | O35250  | 0.03998401 | N-term +28.03 Da,                          | 1983.1604   | 2 | 564.2999878 | 564.2975186 |
| APKCQELALR              | P46938  | 0.00054825 | N-term +28.03 Da, K +28.03 Da,C +57.02 Da, | 1986.221191 | 3 | 414.5700073 | 414.5726707 |
| AAPTPAASTTSSASSSGEPEVKR | P42128  | 0          | N-term +28.03 Da, K +28.03 Da,             | 1986.757935 | 3 | 754.0599976 | 753.7202874 |
| SDEVGGEALGR             | P02088  | 0.02186712 | N-term +28.03 Da,                          | 1990.838623 | 2 | 559.27771   | 559.2778381 |
| AVKAPGFGDNR             | P63038  | 0          | N-term +28.03 Da, K +28.03 Da,             | 1991.18396  | 3 | 396.5557861 | 396.555897  |
| LVSESSDVVSK             | P11679  | 0.00068493 | N-term +28.03 Da, K +28.03 Da,             | 1993.074097 | 2 | 603.3300171 | 603.3348219 |
| DTPCDDFTR               | P28798  | 0.00060901 | N-term +28.03 Da, C +57.02 Da,             | 1993.583374 | 2 | 577.7399902 | 577.7427739 |
| SKQEYDESGPSIVHR         | P60710  | 0.00985663 | N-term +28.03 Da, K +28.03 Da,             | 1996.373535 | 3 | 596.6300049 | 596.6356054 |
| SNTQFIENR               | Q6PGL7  | 0.00107066 | N-term +28.03 Da,                          | 1996.904907 | 2 | 568.789978  | 568.7883726 |
| SKQEYDESGPSIVHR         | P60710  | 0.00441609 | N-term +28.03 Da, K +28.03 Da,             | 2001.325684 | 4 | 447.7287598 | 447.7285232 |
| SKQEYDESGPSIVHR         | P60710  | 0.00056465 | N-term +28.03 Da, K +28.03 Da,             | 2001.489868 | 3 | 596.9699707 | 596.6356054 |
| SDSSDSMDTGAGSIR         | O35143  | 0          | N-term +28.03 Da,                          | 2005.572632 | 2 | 757.8300171 | 757.3253893 |
| AADGDFKIK               | P16045  | 0.0087116  | N-term +28.03 Da, K +28.03 Da,             | 2006.435913 | 3 | 350.2099915 | 350.2060936 |
| SLNEESLGNR              | Q8BGD9  | 0.0005848  | N-term +28.03 Da,                          | 2008.689087 | 2 | 573.789978  | 573.7911127 |
| DLQTGQISNR              | Q64374  | 0.02617587 | N-term +28.03 Da,                          | 2008.961548 | 2 | 581.3099976 | 580.3069297 |
| SEVDYAPGPR              | Q6P549  | 0.04071856 | N-term +28.03 Da,                          | 2009.138428 | 2 | 588.2885742 | 588.2882056 |
| GKLVSSESSDVVSK          | P11679  | 0.00945946 | N-term +28.03 Da, K +28.03 Da,             | 2011.501587 | 2 | 709.9099731 | 709.9086857 |
| SAPPIPDSR               | Q8CGZ0  | 0.04327114 | N-term +28.03 Da,                          | 2014.704346 | 2 | 484.2641296 | 484.2640015 |
| SLQEQADAAEER            | E9Q453  | 0.00055525 | N-term +28.03 Da,                          | 2021.081177 | 2 | 687.3200073 | 687.8284244 |
| SDSSDSMDTGAGSIR         | O35143  | 0          | N-term +28.03 Da,                          | 2036.545532 | 2 | 757.3300171 | 757.3253893 |
| GKVNSDEVGGEALGR         | P02088  | 0.02485501 | N-term +28.03 Da, K +28.03 Da,             | 2037.112671 | 3 | 515.2800293 | 515.2740076 |
| SLQAECQYR               | Q99PL5  | 0.00057504 | N-term +28.03 Da, C +57.02 Da,             | 2037.302002 | 2 | 649.289978  | 649.2957051 |
| SLNEESLGNR              | Q8BGD9  | 0.00576646 | N-term +28.03 Da,                          | 2039.865356 | 2 | 573.789978  | 573.7911127 |
| EVFQVSHPR               | Q9VWVLO | 0.00353357 | N-term +28.03 Da,                          | 2041.002563 | 3 | 376.5400085 | 376.2049756 |
| SKDPGLDLR               | Q91V76  | 0.04730258 | N-term +28.03 Da, K +28.03 Da,             | 2042.449463 | 3 | 352.8729858 | 352.8731146 |
| ADMLSGPR                | Q8CHT0  | 0.04489957 | N-term +28.03 Da,                          | 2044.779541 | 2 | 438.230011  | 437.7261973 |
| DEVGGEALGR              | P02088  | 0.00056786 | N-term +28.03 Da,                          | 2050.029541 | 2 | 515.7600098 | 515.7618235 |
| SSEFEHIAR               | Q3TLH4  | 0.00059952 | N-term +28.03 Da,                          | 2054.369629 | 3 | 397.5318298 | 397.5315289 |
| SDSVTEETLR              | Q8C196  | 0.00440313 | N-term +28.03 Da,                          | 2058.080322 | 2 | 582.789978  | 582.7907787 |
| MGTPSGTAEPYDGTKAR       | Q80Y55  | 0          | N-term +28.03 Da, K +28.03 Da,             | 2059.34668  | 3 | 599.6300049 | 598.9612126 |
| TNSVTTSSVPSPR           | Q8VCF0  | 0.00942973 | N-term +28.03 Da,                          | 2067.35083  | 2 | 681.3599854 | 680.8569845 |
| DGEVDDEEEDDEEGEESQKR    | O35381  | 0          | N-term +28.03 Da, K +28.03 Da,             | 2068.054199 | 3 | 846.6799927 | 846.3475741 |
| SELIQKYR                | Q9QYGO  | 0.04318542 | N-term +28.03 Da, K +28.03 Da,             | 2069.593994 | 3 | 364.8842163 | 364.885243  |

|                    |        |            |                                |             |   |             |             |
|--------------------|--------|------------|--------------------------------|-------------|---|-------------|-------------|
| SLNEESLGNR         | Q8BGD9 | 0.00206612 | N-term +28.03 Da,              | 2071.212402 | 2 | 573.7907104 | 573.7911127 |
| ADAVAVTMGPKGR      | P63038 | 0.00058962 | N-term +28.03 Da, K +28.03 Da, | 2083.359131 | 3 | 443.9175415 | 443.5833471 |
| EDEEEEEDEGPVR      | Q9D0J8 | 0          | N-term +28.03 Da,              | 2084.352295 | 2 | 860.3487549 | 859.847407  |
| EDEEEEEDEGPVR      | Q9D0J8 | 0          | N-term +28.03 Da,              | 2085.814941 | 2 | 859.8499756 | 859.847407  |
| SSSEDKITVHFKNR     | P46656 | 0.00071633 | N-term +28.03 Da, K +28.03 Da, | 2087.391602 | 4 | 433.7404175 | 433.7401619 |
| DSSDSMDTGAGSIR     | O35143 | 0          | N-term +28.03 Da,              | 2092.145264 | 2 | 714.3099976 | 713.8093747 |
| IFIDSDHTDNQR       | P09103 | 0          | N-term +28.03 Da,              | 2093.098633 | 3 | 496.9100037 | 496.9074361 |
| SSSEDKITVHFKNR     | P46656 | 0          | N-term +28.03 Da, K +28.03 Da, | 2095.930908 | 3 | 577.9899902 | 577.9844571 |
| DSSDSMDTGAGSIR     | O35143 | 0          | N-term +28.03 Da,              | 2096.465576 | 2 | 713.8099976 | 713.8093747 |
| ELETMTGEKVK        | P12710 | 0.00062735 | N-term +28.03 Da, K +28.03 Da, | 2099.161865 | 3 | 450.2512207 | 450.2512635 |
| PPPPPPPPR          | A2AQ25 | 0.00556845 | N-term +28.03 Da,              | 2108.205078 | 2 | 491.2977295 | 490.2898216 |
| ELETMTGEKVK        | P12710 | 0.00063735 | N-term +28.03 Da, K +28.03 Da, | 2108.306641 | 2 | 674.8734741 | 674.8732569 |
| YVYPDDKYR          | Q8CHT0 | 0.00911993 | N-term +28.03 Da, K +28.03 Da, | 2110.157959 | 3 | 425.8900146 | 425.5520413 |
| ADAVAVTMGPKGR      | P63038 | 0          | N-term +28.03 Da, K +28.03 Da, | 2114.609619 | 3 | 443.5834045 | 443.5833471 |
| NDFASAVR           | P12787 | 0.01064302 | N-term +28.03 Da,              | 2116.395996 | 2 | 454.2350159 | 454.2352439 |
| SSSEDKITVHFKNR     | P46656 | 0          | N-term +28.03 Da, K +28.03 Da, | 2117.756836 | 4 | 433.7400513 | 433.7401619 |
| LEYTDSYDEKR        | P10649 | 0          | N-term +28.03 Da, K +28.03 Da, | 2118.466797 | 3 | 521.2519531 | 521.2508689 |
| LGETNPADSKPGTIR    | P15532 | 0.00069348 | N-term +28.03 Da, K +28.03 Da, | 2118.58374  | 3 | 537.960022  | 537.961541  |
| YRHQYPNFKDIR       | Q8VE52 | 0.04661183 | N-term +28.03 Da, K +28.03 Da, | 2118.836182 | 3 | 565.2999878 | 564.9704817 |
| TRDGKLVSESSDVVSK   | P11679 | 0          | N-term +28.03 Da, K +28.03 Da, | 2119.985107 | 3 | 597.6699829 | 597.6667942 |
| ATVEETVVR          | Q76M23 | 0.04595444 | N-term +28.03 Da,              | 2121.65918  | 2 | 516.289978  | 516.2902166 |
| ELETMTGEKVK        | P12710 | 0.00485673 | N-term +28.03 Da, K +28.03 Da, | 2124.915039 | 2 | 674.3800049 | 674.8732569 |
| ELETMTGEKVK        | P12710 | 0.00067295 | N-term +28.03 Da, K +28.03 Da, | 2129.905029 | 3 | 450.2509766 | 450.2512635 |
| GIQPEEISR          | Q9Z120 | 0.00870362 | N-term +28.03 Da,              | 2138.070801 | 2 | 528.789978  | 528.7878411 |
| FQESDDADEDYGR      | Q80XU3 | 0          | N-term +28.03 Da,              | 2138.203857 | 2 | 788.3200073 | 787.8157119 |
| YGGGNYGPGSGSGGYGGR | O88569 | 0.00067069 | N-term +28.03 Da,              | 2138.403564 | 2 | 881.3800049 | 881.3824186 |
| PPPPPPPPR          | A2AQ25 | 0.00056689 | N-term +28.03 Da,              | 2138.88623  | 2 | 491.2976379 | 490.2898216 |
| AGPASVPLR          | P27773 | 0.0483808  | N-term +28.03 Da,              | 2139.683105 | 2 | 448.269989  | 448.271629  |
| YGGGNYGPGSGSGGYGGR | O88569 | 0.00256148 | N-term +28.03 Da,              | 2140.969727 | 2 | 882.3900146 | 881.3824186 |
| SDTPCDDFTR         | P28798 | 0          | N-term +28.03 Da, C +57.02 Da, | 2142.482666 | 2 | 621.7600098 | 621.2587885 |
| DSSDSMDTGAGSIR     | O35143 | 0          | N-term +28.03 Da,              | 2143.625    | 2 | 713.8099976 | 713.8093747 |
| ADAVAVTMGPKGR      | P63038 | 0.00072254 | N-term +28.03 Da, K +28.03 Da, | 2148.634521 | 3 | 443.5799866 | 443.5833471 |
| SSSEDKITVHFKNR     | P46656 | 0          | N-term +28.03 Da, K +28.03 Da, | 2149.518555 | 4 | 433.7400208 | 433.7401619 |
| IIGELHPDDR         | P56395 | 0.00057241 | N-term +28.03 Da,              | 2151.529297 | 3 | 398.5499878 | 398.2155407 |
| AGKDGVANVSIEDR     | P08228 | 0.00563645 | N-term +28.03 Da, K +28.03 Da, | 2165.168213 | 3 | 496.269989  | 496.2668529 |
| PPPPPPPPR          | A2AQ25 | 0.00059172 | N-term +28.03 Da,              | 2169.001221 | 2 | 491.2972412 | 490.2898216 |
| SDTPCDDFTR         | P28798 | 0          | N-term +28.03 Da, C +57.02 Da, | 2173.085938 | 2 | 621.2584229 | 621.2587885 |
| SETIITGKR          | Q8VDJ3 | 0.01222707 | N-term +28.03 Da, K +28.03 Da, | 2174.128906 | 3 | 391.9100037 | 391.9115694 |
| VEIANDQGNR         | P16627 | 0.03519417 | N-term +28.03 Da,              | 2186.126221 | 2 | 629.3300171 | 628.8333118 |
| VEIANDQGNR         | P16627 | 0.01307759 | N-term +28.03 Da,              | 2187.214844 | 2 | 628.8313599 | 628.8333118 |

|                         |        |            |                                             |             |   |             |             |
|-------------------------|--------|------------|---------------------------------------------|-------------|---|-------------|-------------|
| GAGGALFVHR              | Q9D6J6 | 0.00063052 | N-term +28.03 Da,                           | 2195.803467 | 2 | 506.2799988 | 506.7879776 |
| PPPPPPPPR               | A2AQ25 | 0.00353179 | N-term +28.03 Da,                           | 2199.410156 | 2 | 491.297699  | 490.2898216 |
| GGPLSGPYR               | P16015 | 0.00255624 | N-term +28.03 Da,                           | 2200.719482 | 2 | 466.75      | 466.2534365 |
| SDTPCDDFTR              | P28798 | 0          | N-term +28.03 Da, C +57.02 Da,              | 2203.532715 | 2 | 621.258667  | 621.2587885 |
| NAQGPLYEQR              | Q80X50 | 0.00059666 | N-term +28.03 Da,                           | 2203.812744 | 2 | 602.7999878 | 602.3094722 |
| SGNSELIQKYR             | Q9QYGO | 0.00067797 | N-term +28.03 Da, K +28.03 Da,              | 2205.423584 | 3 | 450.9200134 | 450.9173835 |
| VSVDETINKNPR            | P80313 | 0          | N-term +28.03 Da, K +28.03 Da,              | 2206.965088 | 3 | 438.5899963 | 438.5856338 |
| GGPLSGPYR               | P16015 | 0.00107009 | N-term +28.03 Da,                           | 2207.216797 | 2 | 466.2520447 | 466.2534365 |
| EESEKER                 | E9Q401 | 0.04310004 | N-term +28.03 Da, K +28.03 Da,              | 2208.495117 | 2 | 482.25      | 481.7430995 |
| ALDSSNSMQTVQKTTTR       | P05784 | 0          | N-term +28.03 Da, K +28.03 Da,              | 2213.055176 | 3 | 642         | 641.9983268 |
| QGTGLGFR                | P29699 | 0.03094463 | N-term +28.03 Da,                           | 2213.353027 | 2 | 432.2399902 | 432.2403289 |
| FGPTEEPKNIPKR           | Q6PGH2 | 0.00063091 | N-term +28.03 Da, K +28.03 Da,              | 2214.892822 | 4 | 399.980011  | 399.9831601 |
| TAGKDGVANVSIEDR         | P08228 | 0.00059067 | N-term +28.03 Da, K +28.03 Da,              | 2218.199707 | 3 | 529.9500122 | 529.9494126 |
| ATPLDFPSKKR             | Q64213 | 0.00533981 | N-term +28.03 Da, K +28.03 Da,              | 2221.442871 | 3 | 448.9400024 | 448.6063689 |
| QGEEEEEEE               | G5E8J6 | 0.00062112 | N-term +28.03 Da,                           | 2222.950439 | 2 | 568.210022  | 568.21731   |
| SNSETIITGKR             | Q8VDJ3 | 0.00057471 | N-term +28.03 Da, K +28.03 Da,              | 2226.140625 | 3 | 459.269989  | 458.9365552 |
| SKKVDQSVPANEISQKAAESQGR | Q61733 | 0.00445104 | N-term +28.03 Da, K +28.03 Da,              | 2227.020996 | 4 | 643.0999756 | 643.1040622 |
| SADQCSSPNTGKPAVNVPR     | Q8CI51 | 0.0055607  | N-term +28.03 Da, K +28.03 Da, C +57.02 Da, | 2228.762207 | 3 | 713.6900024 | 713.3601472 |
| PPPPPPPPR               | A2AQ25 | 0.00059172 | N-term +28.03 Da,                           | 2229.774902 | 2 | 491.2976685 | 490.2898216 |
| EPDLSSDIKER             | B5X0G2 | 0.00072464 | N-term +28.03 Da, K +28.03 Da,              | 2229.966553 | 3 | 449.2399902 | 448.9050325 |
| SPVQDPKTCSSGSAVLCR      | Q61207 | 0          | N-term +28.03 Da, K +28.03 Da, C +57.02 Da, | 2235.782959 | 3 | 659         | 658.9960401 |
| VSDSSDSMDTGAGSIR        | O35143 | 0          | N-term +28.03 Da,                           | 2240.950195 | 2 | 806.8599854 | 806.8595964 |
| AEIGAPIQGSR             | Q3UJB0 | 0.00952813 | N-term +28.03 Da,                           | 2241.67749  | 2 | 563.8200073 | 563.8143902 |
| FEEEISELEPVFPR          | Q8VCU0 | 0.00644567 | N-term +28.03 Da,                           | 2244.015381 | 3 | 583.6300049 | 583.6295687 |
| GGGPGGGNFGGSPGYGGGR     | Q88569 | 0          | N-term +28.03 Da,                           | 2247.891846 | 2 | 797.3699951 | 796.863664  |
| GPAGAGESKCLPMVK         | P07309 | 0.00062854 | N-term +28.03 Da, K +28.03 Da, C +57.02 Da, | 2248.905273 | 3 | 529.2870483 | 529.2862022 |
| AGPSSGQIYGPGR           | Q8BFW7 | 0          | N-term +28.03 Da,                           | 2251.049561 | 2 | 686.3551025 | 686.3544114 |
| TGGDAAAPGAAGTQALPHR     | Q9D0F3 | 0          | N-term +28.03 Da,                           | 2253.244141 | 3 | 625.9799805 | 625.9817758 |
| SLSGEHSIIGR             | P08228 | 0.00303951 | N-term +28.03 Da,                           | 2253.470459 | 3 | 395.2189636 | 395.2191737 |
| EETDWVR                 | Q9DAU1 | 0.04183267 | N-term +28.03 Da,                           | 2261.414795 | 2 | 481.7325134 | 481.7325344 |
| EPDLSSDIKER             | B5X0G2 | 0          | N-term +28.03 Da, K +28.03 Da,              | 2261.490234 | 3 | 448.9048462 | 448.9050325 |
| SQGEVDFAR               | Q9CWS0 | 0          | N-term +28.03 Da,                           | 2261.676025 | 2 | 583.2769775 | 583.2778381 |
| TAGKDGVANVSIEDR         | P08228 | 0.00056433 | N-term +28.03 Da, K +28.03 Da,              | 2265.551514 | 3 | 530.2800293 | 529.9494126 |
| SDYVGSPPSGTGLHR         | P70296 | 0.0006566  | N-term +28.03 Da,                           | 2269.009521 | 3 | 538.9335938 | 538.9338739 |
| VSDSSDSMDTGAGSIR        | O35143 | 0          | N-term +28.03 Da,                           | 2273.345947 | 2 | 806.8599854 | 806.8595964 |
| TITYGPKVVR              | P12710 | 0.0005963  | N-term +28.03 Da, K +28.03 Da,              | 2274.279785 | 3 | 397.2485046 | 397.2482928 |
| DFSAGVANR               | P15105 | 0.00557621 | N-term +28.03 Da,                           | 2275.773193 | 2 | 482.7463074 | 482.7459759 |
| SDYVGSPPSGTGLHR         | P70296 | 0.00066225 | N-term +28.03 Da,                           | 2276.806152 | 2 | 807.9000244 | 807.8971726 |
| FSGGNSEPAQPAVQQAPAR     | Q7TNL9 | 0          | N-term +28.03 Da,                           | 2278.084229 | 2 | 970.9899902 | 970.4846755 |
| FSGGNSEPAQPAVQQAPAR     | Q7TNL9 | 0          | N-term +28.03 Da,                           | 2278.632324 | 2 | 970.4899902 | 970.4846755 |



|                                 |        |            |                                |             |   |             |             |
|---------------------------------|--------|------------|--------------------------------|-------------|---|-------------|-------------|
| NEVHTMLGQSTEEIR                 | P08226 | 0.00063613 | N-term +28.03 Da,              | 2280.363525 | 3 | 591.9536743 | 591.2929623 |
| SQFQESDDADEDYGR                 | Q80XU3 | 0          | N-term +28.03 Da,              | 2280.851563 | 2 | 895.8599854 | 895.3610156 |
| SANTNTVPKLYR                    | Q99PM3 | 0          | N-term +28.03 Da, K +28.03 Da, | 2281.970947 | 3 | 473.9400024 | 473.9366666 |
| SMPPAQQQITSGQMHR                | P26039 | 0.00070522 | N-term +28.03 Da,              | 2282.046387 | 3 | 608.9658813 | 608.9663032 |
| ISKQEYDESGPSIVHR                | P60710 | 0.00068918 | N-term +28.03 Da, K +28.03 Da, | 2282.175537 | 3 | 634.3300171 | 634.3302935 |
| DFGTQYR                         | Q9D6Y7 | 0.04591837 | N-term +28.03 Da,              | 2282.250977 | 2 | 457.7214355 | 457.7219693 |
| FSGGNSEPAQPAVQQAPAR             | Q7TNL9 | 0.00068213 | N-term +28.03 Da,              | 2284.090332 | 3 | 647.6599731 | 647.3255425 |
| AYEVLNPEKR                      | Q9QYJ0 | 0.00056625 | N-term +28.03 Da, K +28.03 Da, | 2284.178223 | 3 | 454.5799866 | 454.5856338 |
| IPKSDVWR                        | P06797 | 0.00351759 | N-term +28.03 Da, K +28.03 Da, | 2288.406982 | 3 | 352.8781433 | 352.8781996 |
| VPIDVDKTKVHNTEPVENAR            | P81117 | 0          | N-term +28.03 Da, K +28.03 Da, | 2292.099121 | 4 | 587.0800171 | 587.0760443 |
| EPDLSDDIKER                     | B5X0G2 | 0.00064599 | N-term +28.03 Da, K +28.03 Da, | 2293.979736 | 3 | 448.9046936 | 448.9050325 |
| TVIDYNGER                       | P09103 | 0.01143863 | N-term +28.03 Da,              | 2294.727539 | 2 | 547.7800293 | 547.7774736 |
| SPPAPSDSESVKIEER                | Q9R257 | 0.00564972 | N-term +28.03 Da, K +28.03 Da, | 2295.413333 | 3 | 566.2999878 | 566.2965897 |
| TSVDLEETGR                      | Q03265 | 0.00254842 | N-term +28.03 Da,              | 2297.030762 | 2 | 567.78479   | 567.7854962 |
| IVHNYSEAEIKVR                   | Q80VP1 | 0          | N-term +28.03 Da, K +28.03 Da, | 2297.426025 | 4 | 404.2319336 | 404.2307011 |
| SDYVGSPPSGTGLHR                 | P70296 | 0.0006993  | N-term +28.03 Da,              | 2300.578613 | 3 | 538.9337158 | 538.9338739 |
| FEELAAR                         | Q02819 | 0.00445765 | N-term +28.03 Da,              | 2303.950684 | 2 | 496.7551575 | 496.7560095 |
| VSDSSDSMDTGAGSIR                | O35143 | 0          | N-term +28.03 Da,              | 2305.162354 | 2 | 806.8599854 | 806.8595964 |
| SSSEDKITVHFK                    | P46656 | 0          | N-term +28.03 Da, K +28.03 Da, | 2306.093506 | 4 | 366.2000122 | 366.204152  |
| GVANVSIEDR                      | P08228 | 0.0005685  | N-term +28.03 Da,              | 2306.946289 | 2 | 544.2911987 | 544.2907481 |
| DFSAGVANR                       | P15105 | 0.0055918  | N-term +28.03 Da,              | 2307.556641 | 2 | 482.7469788 | 482.7459759 |
| DTPCDDFTR                       | P28798 | 0.00064893 | N-term +28.03 Da, C +57.02 Da, | 2308.961182 | 2 | 577.742981  | 577.7427739 |
| FYGEVPENR                       | P15116 | 0.00533721 | N-term +28.03 Da,              | 2309.664307 | 2 | 569.7807617 | 569.7800161 |
| EEGEEEEEEEEEGDGEEDGDEEEAEAPTGKR | P26350 | 0          | N-term +28.03 Da, K +28.03 Da, | 2310.719482 | 3 | 1233.140015 | 1232.475468 |
| SNCPITGQIR                      | P10605 | 0.00056915 | N-term +28.03 Da, C +57.02 Da, | 2310.955322 | 2 | 587.305603  | 587.3058751 |
| TSNPENTVFDAKR                   | P20029 | 0.000693   | N-term +28.03 Da, K +28.03 Da, | 2311.463135 | 3 | 512.2700195 | 512.2668529 |
| DFSAGVANR                       | P15105 | 0.01477618 | N-term +28.03 Da,              | 2311.836914 | 2 | 482.25      | 482.7459759 |
| ISKQEYDESGPSIVHR                | P60710 | 0.02       | N-term +28.03 Da, K +28.03 Da, | 2312.27124  | 4 | 475.9995117 | 475.9995392 |
| SQFQESDDADEDYGR                 | Q80XU3 | 0          | N-term +28.03 Da,              | 2312.39917  | 2 | 895.3595581 | 895.3610156 |
| SMPPAQQQITSGQMHR                | P26039 | 0          | N-term +28.03 Da,              | 2313.452637 | 3 | 608.9644775 | 608.9663032 |
| EGNKLIGKFTR                     | P55050 | 0.00948509 | N-term +28.03 Da, K +28.03 Da, | 2314.531982 | 4 | 337.4588623 | 337.4593205 |
| QGSPPAPSDSESVKIEER              | Q9R257 | 0          | N-term +28.03 Da, K +28.03 Da, | 2315.900635 | 3 | 627.9899902 | 627.9899372 |
| MDAPVSGGVAAR                    | Q99L13 | 0.01068566 | N-term +28.03 Da,              | 2317.601563 | 2 | 608.3112793 | 608.3111576 |
| NMDVPPNIKR                      | P63242 | 0.01970865 | N-term +28.03 Da, K +28.03 Da, | 2317.760254 | 3 | 381.5493469 | 381.5498659 |
| SAGIQTSFR                       | Q61656 | 0.04221426 | N-term +28.03 Da,              | 2334.845947 | 2 | 497.769989  | 497.769451  |
| SRPALPVKSLAQR                   | Q6NXN1 | 0.04414663 | N-term +28.03 Da, K +28.03 Da, | 2338.70752  | 4 | 370.4853821 | 370.4845984 |
| AGEEAADSPPELPR                  | Q9CPW2 | 0          | N-term +28.03 Da,              | 2339.026123 | 2 | 685.3300171 | 685.3333424 |
| SSIPEAGEGQIR                    | Q9DCB8 | 0.00401204 | N-term +28.03 Da,              | 2339.115967 | 2 | 636.3300171 | 636.3331448 |
| SRPALPVKSLAQR                   | Q6NXN1 | 0.00056561 | N-term +28.03 Da, K +28.03 Da, | 2339.460205 | 3 | 493.6400146 | 493.6437057 |
| DTPCDDFTR                       | P28798 | 0.00066007 | N-term +28.03 Da, C +57.02 Da, | 2340.048096 | 2 | 577.7424927 | 577.7427739 |

|                          |        |            |                                             |             |   |             |             |
|--------------------------|--------|------------|---------------------------------------------|-------------|---|-------------|-------------|
| AGTHSSVPGSIGVAGR         | Q80U78 | 0.01144366 | N-term +28.03 Da,                           | 2344.462402 | 3 | 526.9500122 | 526.6179969 |
| SSEAPLVNEDVKR            | Q91YQ5 | 0          | N-term +28.03 Da, K +28.03 Da,              | 2344.741211 | 3 | 532.9577637 | 532.957908  |
| ILGGQEAHAHARPY           | P03953 | 0.00061387 | N-term +28.03 Da,                           | 2345.009521 | 3 | 494.9299927 | 494.6001659 |
| AGTHSSVPGSIGVAGR         | Q80U78 | 0.00254972 | N-term +28.03 Da,                           | 2346.53125  | 3 | 526.2800293 | 526.6179969 |
| NQQPSNYGPMKSGNFGGSR      | Q88569 | 0.00058893 | N-term +28.03 Da, K +28.03 Da,              | 2346.652832 | 3 | 694.6699829 | 694.6655704 |
| ILGGQEAHAHARPY           | P03953 | 0.00069979 | N-term +28.03 Da,                           | 2347.859375 | 3 | 494.6000061 | 494.6001659 |
| TATHAGTARELPAEFDKAAEEVKR | Q4VWZ5 | 0.00914495 | N-term +28.03 Da, K +28.03 Da,              | 2349.240234 | 4 | 671.8499756 | 671.3606995 |
| NQQPSNYGPMKSGNFGGSR      | Q88569 | 0.04346108 | N-term +28.03 Da, K +28.03 Da,              | 2350.407715 | 3 | 695         | 694.6655704 |
| SLTSAASIDGSR             | Q9QYGO | 0.00069109 | N-term +28.03 Da,                           | 2353.568848 | 2 | 596.8139648 | 596.8120453 |
| SGYSQSQFTAPR             | Q60865 | 0          | N-term +28.03 Da,                           | 2354.759521 | 2 | 678.8302002 | 678.8307693 |
| NSGYSQSQFTAPR            | Q60865 | 0          | N-term +28.03 Da,                           | 2356.714355 | 2 | 735.8499756 | 735.8522334 |
| AGEEAADSPELPR            | Q9CPW2 | 0.00063171 | N-term +28.03 Da,                           | 2358.681641 | 3 | 457.2250061 | 457.2246537 |
| RFGIVTSSAGTGTTEDTEAKK    | Q9D1J3 | 0          | N-term +28.03 Da, K +28.03 Da,              | 2360.112305 | 4 | 561.0499878 | 560.7996775 |
| RVEFMDDTSR               | P62858 | 0.01519097 | N-term +28.03 Da,                           | 2360.417236 | 3 | 428.539856  | 428.5398072 |
| GPVQGTIHFEQK             | P08228 | 0          | N-term +28.03 Da, K +28.03 Da,              | 2360.638916 | 3 | 466.2587891 | 466.2576285 |
| NLGEKFDETTADGR           | Q05816 | 0.0006854  | N-term +28.03 Da, K +28.03 Da,              | 2362.631348 | 3 | 536.9299927 | 536.9336512 |
| GTDPEDEVIR               | Q3THE2 | 0.00645459 | N-term +28.03 Da,                           | 2364.351074 | 2 | 515.2700195 | 515.2641991 |
| SEPEEVIPSR               | Q91WQ3 | 0.01965812 | N-term +28.03 Da,                           | 2365.525635 | 2 | 585.803772  | 585.8036887 |
| KVNPDEVGGEALGR           | P02089 | 0.00106838 | N-term +28.03 Da, K +28.03 Da,              | 2367.503174 | 3 | 499.6069031 | 499.6070979 |
| GGPYGGGNYGPGSGGGSGGYGGR  | Q88569 | 0          | N-term +28.03 Da,                           | 2368.411133 | 2 | 987.4299927 | 986.9302648 |
| AGEEAADSPELPR            | Q9CPW2 | 0          | N-term +28.03 Da,                           | 2370.977783 | 2 | 685.3328247 | 685.3333424 |
| GSLDLGGDAAGR             | Q8VEK3 | 0.00056085 | N-term +28.03 Da,                           | 2372.896973 | 2 | 559.289978  | 558.7858301 |
| DTPCDDFTR                | P28798 | 0.01967494 | N-term +28.03 Da, C +57.02 Da,              | 2373.348633 | 2 | 577.7399902 | 577.7427739 |
| LAEHPAVALSVAVSSPDKDR     | Q91VA0 | 0          | N-term +28.03 Da, K +28.03 Da,              | 2375.163086 | 4 | 534.539978  | 534.2839286 |
| AQLCEEHGILR              | B5X0G2 | 0.00059488 | N-term +28.03 Da, C +57.02 Da,              | 2376.862061 | 3 | 451.9031677 | 451.9029684 |
| YVHNDIFR                 | P97855 | 0.01068091 | N-term +28.03 Da,                           | 2381.174805 | 3 | 364.5256348 | 364.5259375 |
| MGNHLTNLR                | P29391 | 0.03170732 | N-term +28.03 Da,                           | 2383.260498 | 2 | 541.7800293 | 542.2900275 |
| EAFESDLAAHQDR            | Q88990 | 0          | N-term +28.03 Da,                           | 2384.125    | 2 | 758.8499756 | 758.8549735 |
| EAFESDLAAHQDR            | Q88990 | 0          | N-term +28.03 Da,                           | 2386.906982 | 3 | 506.239624  | 506.2390745 |
| VPNPVGVKVR               | Q61183 | 0.00440098 | N-term +28.03 Da, K +28.03 Da,              | 2387.324707 | 3 | 379.25      | 378.9167658 |
| EVITDASVTKTPASSSETAR     | Q3UMY5 | 0          | N-term +28.03 Da, K +28.03 Da,              | 2390.680908 | 3 | 703.039978  | 702.702345  |
| MVADTPENLR               | Q61792 | 0.00067159 | N-term +28.03 Da,                           | 2391.716064 | 2 | 587.2999878 | 587.3002586 |
| GGPYGGGNYGPGSGGGSGGYGGR  | Q88569 | 0          | N-term +28.03 Da,                           | 2401.275146 | 2 | 987.4299927 | 986.9302648 |
| GSLDLGGDAAGR             | Q8VEK3 | 0          | N-term +28.03 Da,                           | 2403.37207  | 2 | 558.7859497 | 558.7858301 |
| SEPEIPK GIR              | Q9WTP6 | 0.00053937 | N-term +28.03 Da, K +28.03 Da,              | 2405.604248 | 3 | 394.8999939 | 394.5678027 |
| FPQKVMPPPQAR             | Q3U422 | 0.00069252 | N-term +28.03 Da, K +28.03 Da,              | 2405.743164 | 3 | 484.6099854 | 484.6112368 |
| YGREPDLSSDIKER           | B5X0G2 | 0.00068027 | N-term +28.03 Da, K +28.03 Da,              | 2408.269287 | 4 | 430.9762268 | 430.9770696 |
| TQPGVAMPTSGDSE           | Q8C0K8 | 0.01998299 | N-term +28.03 Da,                           | 2408.902832 | 2 | 780.8699951 | 780.8697664 |
| NLGEKFDETTADGR           | Q05816 | 0          | N-term +28.03 Da, K +28.03 Da,              | 2409.760498 | 3 | 536.9299927 | 536.9336512 |
| ENYGELADCCTKQEPER        | P07724 | 0.00067981 | N-term +28.03 Da, K +28.03 Da, C +57.02 Da, | 2410.407715 | 3 | 719.3200073 | 718.9858701 |

|                      |        |            |                                            |             |   |             |             |
|----------------------|--------|------------|--------------------------------------------|-------------|---|-------------|-------------|
| EVTNLNAYR            | O35381 | 0.00156006 | N-term +28.03 Da,                          | 2411.779541 | 2 | 554.2932129 | 554.2932906 |
| AEPKTVYWR            | P01887 | 0.04033546 | N-term +28.03 Da, K +28.03 Da,             | 2412.098633 | 3 | 440.9023132 | 440.9030741 |
| ENYGELADCCTKQEPER    | P07724 | 0.00107585 | N-term +28.03 Da, K +28.03 Da,C +57.02 Da, | 2412.42041  | 3 | 718.9799805 | 718.9858701 |
| YGREPDLSSDIKER       | B5X0G2 | 0.00059418 | N-term +28.03 Da, K +28.03 Da,             | 2413.568604 | 3 | 574.3010864 | 574.300334  |
| GELSKEELIR           | Q9DBG7 | 0.0057999  | N-term +28.03 Da, K +28.03 Da,             | 2415.612305 | 3 | 410.5748291 | 410.5748461 |
| PKHEFSVDMTCEGCAEAVSR | O08997 | 0          | N-term +28.03 Da, K +28.03 Da,C +57.02 Da, | 2415.723877 | 3 | 790.0200195 | 789.3573095 |
| ASEPQEVLHIGSAHNR     | O70400 | 0.00068776 | N-term +28.03 Da,                          | 2419.028076 | 4 | 443.9823914 | 443.9814149 |
| MVADTPENLR           | Q61792 | 0.00054054 | N-term +28.03 Da,                          | 2422.477783 | 2 | 587.3010254 | 587.3002586 |
| DITTSEYEKEKLNLR      | P63038 | 0.003998   | N-term +28.03 Da, K +28.03 Da,             | 2422.820557 | 3 | 647.6799927 | 647.0054759 |
| SSGFSLEDQPQTHSNR     | P11499 | 0          | N-term +28.03 Da,                          | 2424.897949 | 3 | 563.9299927 | 563.9324219 |
| EQAEAEVASLNR         | D3Z6I8 | 0          | N-term +28.03 Da,                          | 2426.541504 | 2 | 673.3400269 | 672.8413344 |
| TANLGAGAAQPLR        | P08226 | 0          | N-term +28.03 Da,                          | 2428.482422 | 2 | 634.3596802 | 634.3594964 |
| VKVGVNGFGR           | P16858 | 0.00065359 | N-term +28.03 Da, K +28.03 Da,             | 2433.789307 | 3 | 363.5570679 | 363.557349  |
| YLESLGEEQR           | Q02819 | 0.00068446 | N-term +28.03 Da,                          | 2435.909912 | 2 | 626.3200073 | 626.3144208 |
| SEPEIPKQIR           | Q9WTP6 | 0.02735811 | N-term +28.03 Da, K +28.03 Da,             | 2437.044434 | 3 | 394.5675049 | 394.5678027 |
| VTAGKDGVANVSIEDR     | P08228 | 0.00158144 | N-term +28.03 Da, K +28.03 Da,             | 2437.654541 | 3 | 562.9699707 | 562.9722174 |
| IVSVDETIKNPR         | P80313 | 0.00070972 | N-term +28.03 Da, K +28.03 Da,             | 2439.581299 | 3 | 476.2799988 | 476.2803219 |
| FTKEDLHLR            | Q9CQ01 | 0.00156904 | N-term +28.03 Da, K +28.03 Da,             | 2444.780273 | 3 | 405.5700073 | 405.5679141 |
| GGYKEPAAPVSIQR       | Q61792 | 0          | N-term +28.03 Da, K +28.03 Da,             | 2446.644287 | 3 | 510.2877197 | 510.287588  |
| KEAFNMIDQNR          | Q3THE2 | 0.0176648  | N-term +28.03 Da, K +28.03 Da,             | 2450.531738 | 3 | 474.5785828 | 474.5783734 |
| KEVKCDMEVSCPEGYTCCR  | P28798 | 0.00064683 | N-term +28.03 Da, K +28.03 Da,C +57.02 Da, | 2452.480225 | 3 | 831.3599854 | 831.3630784 |
| KEVKCDMEVSCPEGYTCCR  | P28798 | 0          | N-term +28.03 Da, K +28.03 Da,C +57.02 Da, | 2452.644043 | 4 | 624.2700195 | 623.7741279 |
| VTAGKDGVANVSIEDR     | P08228 | 0.02188552 | N-term +28.03 Da, K +28.03 Da,             | 2452.750488 | 2 | 843.9542236 | 843.9546879 |
| EEAGDGTTTATVLAR      | P63038 | 0.0005872  | N-term +28.03 Da,                          | 2454.585693 | 2 | 760.3855591 | 760.3835641 |
| AGQDGGQIDADELQR      | Q6P069 | 0          | N-term +28.03 Da,                          | 2454.825928 | 2 | 772.3699951 | 772.370988  |
| AKVNPDEVGGGEALGR     | P02089 | 0.02733578 | N-term +28.03 Da, K +28.03 Da,             | 2455.864502 | 3 | 523.2863159 | 523.286136  |
| AEVQKQADEFIR         | Q5EBG8 | 0          | N-term +28.03 Da, K +28.03 Da,             | 2456.115234 | 3 | 497.6099854 | 497.2718266 |
| SLPCDICK             | Q61207 | 0.00440529 | N-term +28.03 Da, K +28.03 Da,C +57.02 Da, | 2456.330078 | 2 | 524.7600098 | 524.7619229 |
| EHAEKLMKLNQR         | P09528 | 0          | N-term +28.03 Da, K +28.03 Da,             | 2457.956543 | 3 | 569.9799805 | 570.3224154 |
| FPQKVMPPPQAR         | Q3U422 | 0.00447539 | N-term +28.03 Da, K +28.03 Da,             | 2459.455078 | 3 | 484.9500122 | 484.6112368 |
| TEDKGEFLSEGGGVR      | E9PV24 | 0.00577201 | N-term +28.03 Da, K +28.03 Da,             | 2463.268555 | 3 | 546.2800293 | 546.277418  |
| SVTGEQYGNPIR         | Q9ESP1 | 0.00055741 | N-term +28.03 Da,                          | 2463.384766 | 2 | 674.8499756 | 674.8464194 |
| VTAGKDGVANVSIEDR     | P08228 | 0          | N-term +28.03 Da, K +28.03 Da,             | 2468.349121 | 3 | 562.9724121 | 562.9722174 |
| SSEIFTPAHEENVR       | Q3UG54 | 0          | N-term +28.03 Da,                          | 2470.350586 | 3 | 548.6099854 | 548.6056459 |
| QNLEEAKEKADESER      | Q6IRU2 | 0.00304569 | N-term +28.03 Da, K +28.03 Da,             | 2474.51416  | 2 | 887.4400024 | 887.9263253 |
| FSPGVEAPESR          | E9Q394 | 0.01227532 | N-term +28.03 Da,                          | 2477.715332 | 2 | 602.7999878 | 602.3038557 |
| CVEALLAR             | Q9Z205 | 0.03776617 | N-term +28.03 Da, C +57.02 Da,             | 2479.992432 | 2 | 481.269989  | 480.2707719 |
| QEILESDGKGDPNKPSGFR  | O70400 | 0.00573614 | N-term +28.03 Da, K +28.03 Da,             | 2481.508301 | 4 | 540.7800293 | 540.2839286 |
| ADNMTLTVSR           | O70400 | 0.00351582 | N-term +28.03 Da,                          | 2483.349121 | 2 | 568.2911377 | 568.2924336 |
| TANLGAGAAQPLR        | P08226 | 0          | N-term +28.03 Da,                          | 2484.597656 | 2 | 634.3582764 | 634.3594964 |

|                         |        |            |                                            |             |   |             |             |
|-------------------------|--------|------------|--------------------------------------------|-------------|---|-------------|-------------|
| FVGADLER                | P30999 | 0.00948938 | N-term +28.03 Da,                          | 2487.62915  | 2 | 525.2658081 | 525.2667416 |
| GDVDAVLSR               | Q8R0Y6 | 0.0015536  | N-term +28.03 Da,                          | 2488.003418 | 2 | 480.2600098 | 480.261459  |
| HEGSCYWFSESEKSWPEADKYCR | P49300 | 0.01100837 | N-term +28.03 Da, K +28.03 Da,C +57.02 Da, | 2488.158936 | 2 | 1512.680054 | 1511.660373 |
| ALAEHPAVAESAVVSSPDKDR   | Q91VA0 | 0          | N-term +28.03 Da, K +28.03 Da,             | 2491.202881 | 4 | 552.289978  | 552.0432072 |
| SSTLTLTKDEYER           | P01837 | 0          | N-term +28.03 Da, K +28.03 Da,             | 2497.250732 | 3 | 533.6099854 | 533.6139186 |
| IGHGAEYGAELER           | P01942 | 0.00062657 | N-term +28.03 Da,                          | 2498.644043 | 3 | 520.2600098 | 519.9267192 |
| VQLSEEQIR               | Q9JMH9 | 0.02189474 | N-term +28.03 Da,                          | 2502.263428 | 2 | 565.3139038 | 565.3142232 |
| TNEEAGDGTTTATVLR        | P63038 | 0          | N-term +28.03 Da,                          | 2504.900146 | 2 | 867.9299927 | 867.9288678 |
| ANPIIGNGGAPDPTAR        | Q8C196 | 0.00069881 | N-term +28.03 Da,                          | 2506.506348 | 2 | 776.9099731 | 776.9075401 |
| IQEYEQLEKMR             | Q9DCX2 | 0.00486145 | N-term +28.03 Da, K +28.03 Da,             | 2506.581787 | 4 | 420.7399902 | 420.4853729 |
| ETTSSIPEAGEGQIR         | Q9DCB8 | 0.00055928 | N-term +28.03 Da,                          | 2507.191895 | 2 | 801.9000244 | 801.9021212 |
| SAEASAELSSEGVMNHR       | P26043 | 0.00054795 | N-term +28.03 Da,                          | 2508.659912 | 3 | 601.6199951 | 601.6161053 |
| TAEENLEYVR              | P47941 | 0.00441176 | N-term +28.03 Da,                          | 2510.270996 | 2 | 626.3153076 | 626.3144208 |
| SLGYDVENDR              | P57780 | 0.00063776 | N-term +28.03 Da,                          | 2510.380859 | 2 | 598.2807617 | 598.2831206 |
| VLSGEDKSNIKAAWGWK       | P01942 | 0          | N-term +28.03 Da, K +28.03 Da,             | 2513.091797 | 4 | 454.5144348 | 454.5148248 |
| TDISHLVR                | Q99MD9 | 0.03666398 | N-term +28.03 Da,                          | 2513.440186 | 3 | 323.519989  | 323.5223045 |
| PKHEFSVDMTCEGCAEAVSR    | O08997 | 0          | N-term +28.03 Da, K +28.03 Da,C +57.02 Da, | 2514.273926 | 3 | 789.6799927 | 789.3573095 |
| HTEFTPTETDITYACR        | P01887 | 0.01070473 | N-term +28.03 Da, C +57.02 Da,             | 2514.943359 | 2 | 928.9099731 | 928.9096206 |
| YFAKSAEIAGVR            | Q9Z224 | 0.02190396 | N-term +28.03 Da, K +28.03 Da,             | 2515.512695 | 3 | 456.5899963 | 456.5942405 |
| VLSGEDKSNIKAAWGWK       | P01942 | 0          | N-term +28.03 Da, K +28.03 Da,             | 2515.596436 | 3 | 605.68396   | 605.6840076 |
| HTEFTPTETDITYACR        | P01887 | 0          | N-term +28.03 Da, C +57.02 Da,             | 2518.3479   | 3 | 619.5999756 | 619.6088392 |
| GVQVETISPGDGR           | P26883 | 0          | N-term +28.03 Da,                          | 2519.426025 | 2 | 671.8515015 | 671.8517019 |
| LLEYTDSSYDEKR           | P10649 | 0          | N-term +28.03 Da, K +28.03 Da,             | 2520.383301 | 3 | 558.9400024 | 558.945557  |
| HTEFTPTETDITYACR        | P01887 | 0.02224087 | N-term +28.03 Da, C +57.02 Da,             | 2522.67749  | 2 | 929.9099731 | 928.9096206 |
| SLVVHGPDIR              | Q64442 | 0.01103753 | N-term +28.03 Da,                          | 2523.095947 | 3 | 393.230011  | 393.2277804 |
| GNVTAGKDGVANVSIEDR      | P08228 | 0          | N-term +28.03 Da, K +28.03 Da,             | 2524.980225 | 3 | 619.9899902 | 619.9936815 |
| TRSDPVVIVSAAR           | F2Z459 | 0.02625103 | N-term +28.03 Da,                          | 2528.188721 | 3 | 466.940033  | 466.9402996 |
| AHTEFTPTETDITYACR       | P01887 | 0          | N-term +28.03 Da, C +57.02 Da,             | 2530.958008 | 3 | 643.2880249 | 643.2878773 |
| SISESAFSAR              | P51655 | 0.01597582 | N-term +28.03 Da,                          | 2534.160156 | 2 | 541.7770996 | 541.7774736 |
| AHTEFTPTETDITYACR       | P01887 | 0          | N-term +28.03 Da, C +57.02 Da,             | 2535.165771 | 2 | 964.9299927 | 964.4281777 |
| AVDPDSPAASGLR           | P70441 | 0.00067659 | N-term +28.03 Da,                          | 2536.531982 | 2 | 707.3599854 | 706.854442  |
| FQGEETENEENLSSEKAGLDKR  | A2AIX1 | 0.00946799 | N-term +28.03 Da, K +28.03 Da,             | 2539.542236 | 4 | 649.3200073 | 649.3199691 |
| AQPPAAAAPSAVGSPAAPR     | Q9D110 | 0.00571429 | N-term +28.03 Da,                          | 2540.908203 | 2 | 893.4699707 | 893.4839464 |
| KKELEEQLGPVAEETR        | P08226 | 0          | N-term +28.03 Da, K +28.03 Da,             | 2541.494873 | 3 | 647.3602905 | 647.3614823 |
| EQAGGDATENFEDVGHSTDR    | P56395 | 0          | N-term +28.03 Da,                          | 2541.606934 | 3 | 745.3256836 | 745.3245969 |
| TLGDIVYKR               | P12710 | 0.00352823 | N-term +28.03 Da, K +28.03 Da,             | 2543.119385 | 3 | 374.230011  | 374.2290097 |
| ETTSSIPEAGEGQIR         | Q9DCB8 | 0          | N-term +28.03 Da,                          | 2543.757324 | 2 | 802.4000244 | 801.9021212 |
| VLSGEDKSNIKAAWGWK       | P01942 | 0          | N-term +28.03 Da, K +28.03 Da,             | 2544.334229 | 4 | 454.5150146 | 454.5148248 |
| REAGDVCYADVYR           | Q6PDM2 | 0.00060168 | N-term +28.03 Da, C +57.02 Da,             | 2544.720459 | 3 | 534.5800171 | 534.5840761 |
| VLSGEDKSNIKAAWGWK       | P01942 | 0.00060496 | N-term +28.03 Da, K +28.03 Da,             | 2546.617676 | 3 | 605.6799927 | 605.6840076 |

|                                   |        |            |                                            |             |   |             |             |
|-----------------------------------|--------|------------|--------------------------------------------|-------------|---|-------------|-------------|
| DSSFQIVKNPR                       | Q61176 | 0.00059595 | N-term +28.03 Da, K +28.03 Da,             | 2546.776123 | 3 | 449.5899963 | 449.5857451 |
| SDLAQQYGV                         | P09103 | 0.00487092 | N-term +28.03 Da,                          | 2548.319824 | 2 | 582.8040161 | 582.8040227 |
| VQVSPSGEKITHGTQVYDEKDYR           | P52503 | 0.00304105 | N-term +28.03 Da, K +28.03 Da,             | 2548.602295 | 4 | 681.3499756 | 680.8527075 |
| ETTSSPEAGEGQIR                    | Q9DCB8 | 0.00059137 | N-term +28.03 Da,                          | 2551.667236 | 3 | 534.9376221 | 534.9371729 |
| WGGSDFER                          | Q8VC31 | 0.04839969 | N-term +28.03 Da,                          | 2552.279053 | 2 | 491.2247009 | 491.2248764 |
| GVQVSPSGEKITHGTQVYDEKDYR          | P52503 | 0.0130662  | N-term +28.03 Da, K +28.03 Da,             | 2552.667236 | 3 | 926.8099976 | 926.4750058 |
| ANYEFSQVSGDRPGCR                  | P56528 | 0.0044843  | N-term +28.03 Da, C +57.02 Da,             | 2555.404053 | 3 | 624.2875977 | 624.2882113 |
| AAPTQVEEKQGPTPAGLPR               | Q7TT50 | 0.00071276 | N-term +28.03 Da, K +28.03 Da,             | 2558.97876  | 3 | 668.3692627 | 668.3688597 |
| SGGGVPTDEEQATGLER                 | P19536 | 0          | N-term +28.03 Da,                          | 2559.376465 | 2 | 866.4199829 | 865.9132177 |
| EITGTYAQTEMGHGTHLR                | A2A848 | 0          | N-term +28.03 Da,                          | 2561.989502 | 4 | 508.5       | 508.24946   |
| EAEETQNSLQAECDQYR                 | Q99PL5 | 0          | N-term +28.03 Da, C +57.02 Da,             | 2565.093262 | 2 | 1049.949951 | 1049.952746 |
| KPANEDQKIGIEIHKR                  | P63038 | 0.00564706 | N-term +28.03 Da, K +28.03 Da,             | 2565.897949 | 4 | 491.8023682 | 491.8030279 |
| AEIITVSDGR                        | Q9CQ80 | 0.00055679 | N-term +28.03 Da,                          | 2566.214844 | 2 | 544.8016357 | 544.8009487 |
| GGGVPTDEEQATGLER                  | P19536 | 0          | N-term +28.03 Da,                          | 2567.792725 | 2 | 822.9000244 | 822.3972032 |
| SGPPPADLCHALR                     | O70251 | 0          | N-term +28.03 Da, C +57.02 Da,             | 2568.771484 | 3 | 473.5799866 | 473.5784847 |
| HQGVMMVGMGQKDSYVGDQAEQSKR         | P60710 | 0.0262618  | N-term +28.03 Da, K +28.03 Da,             | 2572.544434 | 4 | 648.3200073 | 648.5730775 |
| ASGGGVPTDEEQATGLER                | P19536 | 0          | N-term +28.03 Da,                          | 2572.816162 | 2 | 901.9299927 | 901.4317748 |
| GVQVSPSGEKITHGTQVYDEKDYR          | P52503 | 0          | N-term +28.03 Da, K +28.03 Da,             | 2573.577148 | 4 | 695.1068115 | 695.1080735 |
| ETTSSPEAGEGQIR                    | Q9DCB8 | 0          | N-term +28.03 Da,                          | 2574.735107 | 2 | 801.9002686 | 801.9021212 |
| VLSGEDKSNIKAAWVGK                 | P01942 | 0          | N-term +28.03 Da, K +28.03 Da,             | 2574.810547 | 4 | 454.5145874 | 454.5148248 |
| AGVPAHVVDLR                       | Q6XPS7 | 0.00557362 | N-term +28.03 Da,                          | 2575.548828 | 3 | 387.8999939 | 387.896142  |
| LSADQCSSPNTGKPAVNVPR              | Q8CI51 | 0          | N-term +28.03 Da, K +28.03 Da,C +57.02 Da, | 2581.364258 | 3 | 751.0599976 | 751.0548354 |
| GVQVSPSGEKITHGTQVYDEKDYR          | P52503 | 0          | N-term +28.03 Da, K +28.03 Da,             | 2584.291992 | 3 | 926.4733887 | 926.4750058 |
| LGPLVEQGR                         | P08226 | 0.00058343 | N-term +28.03 Da,                          | 2588.503662 | 2 | 498.7900085 | 498.7954686 |
| ALNEDTQDELGDPR                    | P55302 | 0.00063492 | N-term +28.03 Da,                          | 2588.829346 | 2 | 800.8699951 | 800.8761036 |
| SGADLTEICQR                       | Q01853 | 0.00056117 | N-term +28.03 Da, C +57.02 Da,             | 2589.184082 | 2 | 639.3099976 | 639.3113552 |
| SGGGVPTDEEQATGLER                 | P19536 | 0          | N-term +28.03 Da,                          | 2589.797607 | 2 | 865.9116821 | 865.9132177 |
| NSGYSQSQFTAPR                     | Q60865 | 0          | N-term +28.03 Da,                          | 2590.453369 | 2 | 736.3499756 | 735.8522334 |
| ASGGGVPTDEEQATGLER                | P19536 | 0.00158061 | N-term +28.03 Da,                          | 2591.619629 | 3 | 601.2892456 | 601.2902754 |
| SVVADTPQLR                        | Q61792 | 0.0015528  | N-term +28.03 Da,                          | 2591.963379 | 2 | 622.3391113 | 621.8380629 |
| SEHGTEAGQISEPGTATGEAGPSCSSASDKLPR | Q61074 | 0          | N-term +28.03 Da, K +28.03 Da,C +57.02 Da, | 2593.392334 | 4 | 832.8900146 | 832.6403044 |
| DPEPPLPR                          | O55022 | 0.00533204 | N-term +28.03 Da,                          | 2595.049805 | 2 | 532.2741089 | 532.2745666 |
| SGPPPADLCHALR                     | O70251 | 0          | N-term +28.03 Da, C +57.02 Da,             | 2599.813721 | 3 | 473.577301  | 473.5784847 |
| SKVLEPTLKLTR                      | P21614 | 0.00304723 | N-term +28.03 Da, K +28.03 Da,             | 2602.057373 | 4 | 367.7399902 | 367.9919907 |
| ASGGGVPTDEEQATGLER                | P19536 | 0          | N-term +28.03 Da,                          | 2604.15625  | 2 | 901.4293823 | 901.4317748 |
| TVVAVSGSGGKSGEIEPVSVK             | Q64433 | 0.00066094 | N-term +28.03 Da, K +28.03 Da,             | 2605.65332  | 4 | 550.5800171 | 550.0755128 |
| GVQVSPSGEKITHGTQVYDEKDYR          | P52503 | 0.03742455 | N-term +28.03 Da, K +28.03 Da,             | 2608.804199 | 4 | 695.6099854 | 695.1080735 |
| TEFEDIKSGYR                       | Q9EQU5 | 0.00072993 | N-term +28.03 Da, K +28.03 Da,             | 2609.757568 | 3 | 467.5700073 | 467.5733941 |
| SQGAYYIPGQGR                      | Q6NZJ6 | 0.00157978 | N-term +28.03 Da,                          | 2610.016602 | 2 | 663.3400269 | 662.8358543 |
| HGNPVDICIAKPR                     | P32261 | 0          | N-term +28.03 Da, K +28.03 Da,C +57.02 Da, | 2611.761719 | 3 | 549.958252  | 549.9593656 |

|                                   |        |            |                                            |             |   |             |             |
|-----------------------------------|--------|------------|--------------------------------------------|-------------|---|-------------|-------------|
| EGDNKMVTTFKGIK                    | P12710 | 0          | N-term +28.03 Da, K +28.03 Da,             | 2613.414795 | 4 | 420.7390137 | 420.7404732 |
| VDPVNFK                           | P01942 | 0.02376981 | N-term +28.03 Da, K +28.03 Da,             | 2613.931641 | 2 | 437.75      | 437.7552805 |
| EGDNKMVTTFKGIK                    | P12710 | 0          | N-term +28.03 Da, K +28.03 Da,             | 2615.632568 | 3 | 560.6500244 | 560.6515387 |
| NPVDDICIAKPR                      | P32261 | 0          | N-term +28.03 Da, K +28.03 Da,C +57.02 Da, | 2615.937012 | 3 | 485.2600098 | 485.2659068 |
| DGVANVSIEDR                       | P08228 | 0.00061162 | N-term +28.03 Da,                          | 2618.967041 | 2 | 601.7999878 | 601.8042202 |
| AVNQENEHLMEDYER                   | P57780 | 0.00073475 | N-term +28.03 Da,                          | 2619.187988 | 3 | 635.6199951 | 635.619627  |
| TASLTSAAASIDGSR                   | Q9QYGO | 0.00058038 | N-term +28.03 Da,                          | 2620.849854 | 2 | 682.3599854 | 682.854442  |
| TLGSTVSQLQER                      | Q00623 | 0.00061501 | N-term +28.03 Da,                          | 2620.945557 | 2 | 673.8699951 | 673.867352  |
| EKGIIDPTKVVR                      | P63038 | 0.00054915 | N-term +28.03 Da, K +28.03 Da,             | 2621.549805 | 3 | 480.2999878 | 480.3045787 |
| TRTHINYGKGDVAVIR                  | Q8BMS1 | 0          | N-term +28.03 Da, K +28.03 Da,             | 2623.660156 | 4 | 489.5299988 | 489.5350859 |
| VKCDMEVSCPEGYTCCR                 | P28798 | 0          | N-term +28.03 Da, K +28.03 Da,C +57.02 Da, | 2629.80957  | 3 | 736.3099976 | 736.3067925 |
| SGPPPADLCHALR                     | O70251 | 0          | N-term +28.03 Da, C +57.02 Da,             | 2630.718994 | 3 | 473.5799866 | 473.5784847 |
| ASGGGVPTDEEQATGLER                | P19536 | 0          | N-term +28.03 Da,                          | 2634.43042  | 2 | 901.4320679 | 901.4317748 |
| QPGASGDNDDEPPPLPR                 | O55022 | 0          | N-term +28.03 Da,                          | 2634.686523 | 2 | 953.4299927 | 952.9346818 |
| TDTEDKGEFLSEGGSVVR                | E9PV24 | 0          | N-term +28.03 Da, K +28.03 Da,             | 2636.412109 | 3 | 618.6300049 | 618.3022924 |
| VKCDMEVSCPEGYTCCR                 | P28798 | 0          | N-term +28.03 Da, K +28.03 Da,C +57.02 Da, | 2636.967041 | 2 | 1104.459961 | 1103.956551 |
| SVVEMQGDDEMTR                     | O88844 | 0.00069638 | N-term +28.03 Da,                          | 2637.739014 | 2 | 705.3200073 | 705.3236057 |
| SQQSASGAPVLLR                     | Q9DCM0 | 0          | N-term +28.03 Da,                          | 2639.520508 | 2 | 671.3771362 | 671.3778865 |
| MGESDDSILR                        | Q9CQR2 | 0.00061538 | N-term +28.03 Da,                          | 2639.671387 | 2 | 575.7735596 | 575.774074  |
| KLITYGPKVVR                       | P12710 | 0.00066934 | N-term +28.03 Da, K +28.03 Da,             | 2641.8479   | 4 | 365.4899902 | 365.4906207 |
| GQPADKAAGGAGAQVGGSSISSGSSASSVTVTR | P48678 | 0          | N-term +28.03 Da, K +28.03 Da,             | 2642.957275 | 3 | 958.8200073 | 958.8232459 |
| LADAVAVTMGPKGR                    | P63038 | 0.00060533 | N-term +28.03 Da, K +28.03 Da,             | 2643.287842 | 3 | 481.2779236 | 481.2780352 |
| TDTEDKGEFLSEGGSVVR                | E9PV24 | 0          | N-term +28.03 Da, K +28.03 Da,             | 2643.429688 | 2 | 926.9500122 | 926.9498004 |
| NVVFSEDEMRR                       | Q8C196 | 0          | N-term +28.03 Da, K +28.03 Da,             | 2643.929443 | 3 | 470.5752869 | 470.5746291 |
| GESSFLLADR                        | O09164 | 0.00159151 | N-term +28.03 Da,                          | 2645.08252  | 2 | 562.7600098 | 562.7645636 |
| EKKEWAWIDNGQSKLDMK                | Q60653 | 0.00156658 | N-term +28.03 Da, K +28.03 Da,             | 2645.220215 | 3 | 782.4099731 | 782.7557265 |
| FAKLCEEHGIIR                      | P04939 | 0.04627451 | N-term +28.03 Da, K +28.03 Da,C +57.02 Da, | 2645.347656 | 4 | 382.9599915 | 382.9630703 |
| GYGGGPGGGNFGGSPGYGGGR             | O88569 | 0          | N-term +28.03 Da,                          | 2646.987061 | 2 | 906.906189  | 906.9060606 |
| YSQFQESDDADEDYGR                  | Q80XU3 | 0          | N-term +28.03 Da,                          | 2647.829834 | 2 | 976.8900146 | 976.8926802 |
| TSKVSVISVEEPPQR                   | Q9DCW4 | 0.00055835 | N-term +28.03 Da, K +28.03 Da,             | 2648.808594 | 3 | 571.3200073 | 571.3244795 |
| KATIPAAALQAQESTEGPGTGQDRPR        | Q9DBG1 | 0          | N-term +28.03 Da, K +28.03 Da,             | 2650.703857 | 4 | 659.5999756 | 659.6004154 |
| SILPTAPR                          | Q8BGD9 | 0.04527559 | N-term +28.03 Da,                          | 2654.5979   | 2 | 441.7738647 | 441.7740045 |
| SLSGMGNPGNISSR                    | Q921H8 | 0.00071174 | N-term +28.03 Da,                          | 2658.374268 | 2 | 702.8499756 | 702.8486363 |
| VKCDMEVSCPEGYTCCR                 | P28798 | 0          | N-term +28.03 Da, K +28.03 Da,C +57.02 Da, | 2660.597168 | 3 | 736.3099976 | 736.3067925 |
| TDPEDEVIR                         | Q3THE2 | 0.03630496 | N-term +28.03 Da,                          | 2661.220947 | 2 | 486.75      | 486.753467  |
| GEIIAQGGGGAGGSVPGIER              | Q9D0E1 | 0          | N-term +28.03 Da, K +28.03 Da,             | 2662.776855 | 3 | 656.3599854 | 656.028726  |
| TMLGQSTEEIR                       | P08226 | 0.00951087 | N-term +28.03 Da,                          | 2664.954102 | 2 | 646.8283691 | 646.8293808 |
| SIQEPSAATVTS DAR                  | Q8C3W1 | 0.0380609  | N-term +28.03 Da,                          | 2665.450195 | 2 | 780.9000244 | 780.8968386 |
| TDTEDKGEFLSEGGSVVR                | E9PV24 | 0          | N-term +28.03 Da, K +28.03 Da,             | 2668.030762 | 3 | 618.6400146 | 618.3022924 |
| ASGGGVPTDEEQATGLER                | P19536 | 0          | N-term +28.03 Da,                          | 2668.764648 | 2 | 901.4290161 | 901.4317748 |

|                        |        |            |                                             |             |   |             |             |
|------------------------|--------|------------|---------------------------------------------|-------------|---|-------------|-------------|
| TDEKFVEGVYR            | P07309 | 0          | N-term +28.03 Da, K +28.03 Da,              | 2673.029541 | 3 | 466.9133911 | 466.9136391 |
| SGAQADLHIGEGDSIR       | Q9DCM0 | 0.04841859 | N-term +28.03 Da,                           | 2675.072266 | 3 | 551.9400024 | 551.9445503 |
| LEVAEDSGHPWR           | Q6P6J9 | 0          | N-term +28.03 Da,                           | 2676.063477 | 3 | 475.2367249 | 475.2370048 |
| SASQGAYYIPGQGR         | Q6NZJ6 | 0          | N-term +28.03 Da,                           | 2678.637695 | 2 | 741.8699951 | 741.870426  |
| MELEAMSR               | P61166 | 0.00055066 | N-term +28.03 Da,                           | 2680.696289 | 2 | 497.7377625 | 497.7384478 |
| QKVAPLGAELQESAR        | Q00623 | 0          | N-term +28.03 Da, K +28.03 Da,              | 2683.86377  | 3 | 551.649231  | 551.6491858 |
| GFEDGIVR               | Q9QZ23 | 0.02618658 | N-term +28.03 Da,                           | 2685.709961 | 2 | 460.7399902 | 460.7454444 |
| TQAIIDAAQEAR           | O08795 | 0.00580833 | N-term +28.03 Da,                           | 2692.846191 | 2 | 657.8531494 | 657.8542444 |
| AKGEKFMQEFSR           | P27773 | 0          | N-term +28.03 Da, K +28.03 Da,              | 2693.244629 | 3 | 590.6400146 | 590.6466764 |
| SAGSAAAGPVEAAIR        | Q9D8S9 | 0.0007148  | N-term +28.03 Da,                           | 2694.43042  | 2 | 678.3695068 | 678.367519  |
| TDPEDVIR               | Q3THE2 | 0.02516502 | N-term +28.03 Da,                           | 2694.679932 | 2 | 486.7526245 | 486.753467  |
| ASVSTVLTSKYR           | P01942 | 0          | N-term +28.03 Da, K +28.03 Da,              | 2696.141602 | 3 | 456.6005859 | 456.6012839 |
| EVKCDMEVSCPEGYTCCR     | P28798 | 0          | N-term +28.03 Da, K +28.03 Da, C +57.02 Da, | 2699.572998 | 3 | 779.6500244 | 779.3209906 |
| IFLQDIKKPDR            | P09528 | 0.00054675 | N-term +28.03 Da, K +28.03 Da,              | 2699.648682 | 4 | 364.980011  | 364.9776119 |
| YIQVTPQEKAIER          | P54726 | 0.00576369 | N-term +28.03 Da, K +28.03 Da,              | 2700.29834  | 3 | 587.3200073 | 587.3244795 |
| AHGSVVKSEYAFPTYADRR    | P19783 | 0.0006192  | N-term +28.03 Da, K +28.03 Da,              | 2703.401123 | 4 | 582.289978  | 582.0460154 |
| LPGVSDICKN             | Q61207 | 0.00054585 | N-term +28.03 Da, K +28.03 Da, C +57.02 Da, | 2710.78833  | 2 | 608.3213501 | 608.3237337 |
| IVPDIAVGTR             | P17225 | 0.00059916 | N-term +28.03 Da, K +28.03 Da,              | 2711.229248 | 3 | 408.9299927 | 408.9273308 |
| TAKGEKFMQEFSR          | P27773 | 0          | N-term +28.03 Da, K +28.03 Da,              | 2718.29834  | 3 | 624.3300171 | 624.3292361 |
| SLDEEAVKEDNSVHWTRAQKPR | Q6GQT1 | 0.04693    | N-term +28.03 Da, K +28.03 Da,              | 2719.150635 | 4 | 670.3499756 | 670.6016867 |
| TCCKAADKDTCFSTEGPNLVTR | P07724 | 0.02187631 | N-term +28.03 Da, K +28.03 Da, C +57.02 Da, | 2722.435059 | 4 | 654.8099976 | 654.5620157 |
| HLQEGFGCVVTNR          | Q9CY58 | 0.00070126 | N-term +28.03 Da, C +57.02 Da,              | 2724.54541  | 2 | 772.8831787 | 772.8855529 |
| SGGTTMYPGIADR          | P60710 | 0.00056883 | N-term +28.03 Da,                           | 2725.955811 | 2 | 677.8300171 | 677.3270052 |
| NCEVTNLNAYR            | O35381 | 0.00060386 | N-term +28.03 Da, C +57.02 Da,              | 2726.270996 | 2 | 691.8300171 | 691.3300792 |
| HLQEGFGCVVTNR          | Q9CY58 | 0.00059382 | N-term +28.03 Da, C +57.02 Da,              | 2727.973633 | 3 | 515.5923462 | 515.5927941 |
| VGTGDTTSTGSEQSDYSYR    | F7BJK1 | 0          | N-term +28.03 Da,                           | 2736.227783 | 2 | 1101.969971 | 1101.477109 |
| EVKCDMEVSCPEGYTCCR     | P28798 | 0          | N-term +28.03 Da, K +28.03 Da, C +57.02 Da, | 2737.677979 | 3 | 779.6500244 | 779.3209906 |
| TTDEKFVEGVYR           | P07309 | 0          | N-term +28.03 Da, K +28.03 Da,              | 2738.081299 | 3 | 500.6000061 | 500.5961989 |
| TTDEKFVEGVYR           | P07309 | 0          | N-term +28.03 Da, K +28.03 Da,              | 2738.494629 | 3 | 501.2600098 | 500.5961989 |
| GMEDPPVSLPKSK          | Q9D6Z1 | 0          | N-term +28.03 Da, K +28.03 Da,              | 2739.31665  | 3 | 490.2724304 | 490.2741795 |
| KDDYCEAGTKK            | Q8BLU0 | 0.04315123 | N-term +28.03 Da, K +28.03 Da, C +57.02 Da, | 2744.593506 | 2 | 713.3599854 | 713.8659634 |
| KASAELALGENNEVLKSGR    | P05202 | 0          | N-term +28.03 Da, K +28.03 Da,              | 2744.679932 | 3 | 691.0599976 | 690.7233027 |
| SAGSAAAGPVEAAIR        | Q9D8S9 | 0          | N-term +28.03 Da,                           | 2745.188232 | 2 | 678.3683472 | 678.367519  |
| YVAEKISGQKVNEAACDIAR   | O35490 | 0          | N-term +28.03 Da, K +28.03 Da, C +57.02 Da, | 2746.346191 | 4 | 577.5599976 | 577.3097835 |
| VMLGETNPADSKPGTIR      | P15532 | 0.00068729 | N-term +28.03 Da, K +28.03 Da,              | 2746.598389 | 3 | 614.3400269 | 614.6645074 |
| KASAELALGENNEVLKSGR    | P05202 | 0          | N-term +28.03 Da, K +28.03 Da,              | 2746.673828 | 4 | 518.7999878 | 518.2942962 |
| YSPIENIQR              | Q02248 | 0.0211685  | N-term +28.03 Da,                           | 2747.646973 | 2 | 574.3095703 | 574.3089407 |
| TAVSEKDNQEGTFVKWR      | Q8R016 | 0          | N-term +28.03 Da, K +28.03 Da,              | 2747.737061 | 4 | 520.7800293 | 520.5271926 |
| YVAEKISGQKVNEAACDIAR   | O35490 | 0.00066979 | N-term +28.03 Da, K +28.03 Da, C +57.02 Da, | 2749.469238 | 3 | 769.7399902 | 769.4106191 |
| FVSDSSDSMDTGAGSIR      | O35143 | 0          | N-term +28.03 Da,                           | 2751.245605 | 2 | 880.9000244 | 880.3938036 |

|                          |        |            |                                            |             |   |             |             |
|--------------------------|--------|------------|--------------------------------------------|-------------|---|-------------|-------------|
| AITATQKTVDGSPGKLR        | P16858 | 0.00445324 | N-term +28.03 Da, K +28.03 Da,             | 2752.712158 | 4 | 504.0418701 | 504.0427439 |
| FSDIYKIR                 | P63028 | 0.01999149 | N-term +28.03 Da, K +28.03 Da,             | 2753.039551 | 3 | 366.5499878 | 366.5499717 |
| SPVERPSPDLEEGEASVQTER    | Q9R049 | 0          | N-term +28.03 Da,                          | 2753.325684 | 3 | 780.710022  | 780.7153138 |
| TAHIVLEDGTMKMGY          | Q8C196 | 0.00071225 | N-term +28.03 Da, K +28.03 Da,             | 2755.094727 | 4 | 437.4912415 | 437.4919267 |
| ADDDYDEPTDSLDR           | Q8K0E8 | 0          | N-term +28.03 Da,                          | 2758.273193 | 2 | 863.3599854 | 863.3579416 |
| EVKCDMEVSCPEGYTCCR       | P28798 | 0          | N-term +28.03 Da, K +28.03 Da,C +57.02 Da, | 2759.908447 | 2 | 1168.475952 | 1168.477848 |
| NPVDDICIAKPR             | P32261 | 0.00058445 | N-term +28.03 Da, K +28.03 Da,C +57.02 Da, | 2764.327148 | 3 | 485.6000061 | 485.2659068 |
| SLVLKFHTVR               | P02762 | 0.00447316 | N-term +28.03 Da, K +28.03 Da,             | 2766.753174 | 3 | 419.2669373 | 419.2676872 |
| EVKCDMEVSCPEGYTCCR       | P28798 | 0          | N-term +28.03 Da, K +28.03 Da,C +57.02 Da, | 2767.977295 | 4 | 584.9899902 | 584.742562  |
| WISKQEYDESGPSIVHR        | P60710 | 0.00054615 | N-term +28.03 Da, K +28.03 Da,             | 2768.151611 | 4 | 522.5188599 | 522.5193676 |
| EVKCDMEVSCPEGYTCCR       | P28798 | 0          | N-term +28.03 Da, K +28.03 Da,C +57.02 Da, | 2769.48999  | 3 | 779.3197021 | 779.3209906 |
| GVTVKDVNQQEFVR           | Q9CZ8  | 0.00155682 | N-term +28.03 Da, K +28.03 Da,             | 2770.302979 | 3 | 559.6400146 | 558.9773024 |
| SEFTSSLTKESLR            | Q922D4 | 0.00057837 | N-term +28.03 Da, K +28.03 Da,             | 2772.395264 | 3 | 543.2800293 | 543.289435  |
| SLQQLAEER                | P16546 | 0.01889223 | N-term +28.03 Da,                          | 2775.608154 | 2 | 551.2999878 | 551.2985732 |
| SAGSAAAGPVEAAIR          | Q9D859 | 0          | N-term +28.03 Da,                          | 2776.245361 | 2 | 678.3674316 | 678.367519  |
| KDDYCEAGTKK              | Q8BLU0 | 0.04599057 | N-term +28.03 Da, K +28.03 Da,C +57.02 Da, | 2776.395996 | 2 | 713.3596802 | 713.8659634 |
| EDQKIGIEIKR              | P63038 | 0.00054765 | N-term +28.03 Da, K +28.03 Da,             | 2776.713379 | 4 | 382.2399902 | 382.2382604 |
| WISKQEYDESGPSIVHR        | P60710 | 0          | N-term +28.03 Da, K +28.03 Da,             | 2778.705322 | 3 | 696.3499756 | 696.3567313 |
| SVYYNEATGGKYVPR          | P99024 | 0          | N-term +28.03 Da, K +28.03 Da,             | 2780.573242 | 3 | 587.6400146 | 587.3053077 |
| HQDQSSVGGTLAEDIEKAR      | Q60936 | 0          | N-term +28.03 Da, K +28.03 Da,             | 2782.488281 | 3 | 699.6906128 | 699.6905506 |
| LQEYFDGNLKR              | P27773 | 0.00060643 | N-term +28.03 Da, K +28.03 Da,             | 2784.409424 | 3 | 480.2608337 | 480.2611502 |
| SVVCPDAKTQCPDDSTCCCLPTGK | P28798 | 0          | N-term +28.03 Da, K +28.03 Da,C +57.02 Da, | 2784.69458  | 3 | 937.0900269 | 937.0885607 |
| GELKVPTDKYYGAQTVR        | P97807 | 0          | N-term +28.03 Da, K +28.03 Da,             | 2789.017578 | 4 | 503.2799988 | 503.0321106 |
| NSGYSQSQFTAPR            | Q60865 | 0          | N-term +28.03 Da,                          | 2789.663086 | 2 | 736.3400269 | 735.8522334 |
| GLVGEIIR                 | P15532 | 0.00444444 | N-term +28.03 Da, K +28.03 Da,             | 2791.14209  | 3 | 347.8999939 | 347.565733  |
| EVKCDMEVSCPEGYTCCR       | P28798 | 0          | N-term +28.03 Da, K +28.03 Da,C +57.02 Da, | 2792.076904 | 2 | 1168.476929 | 1168.477848 |
| GLVVKEPSAEGKGTAVPVPR     | E9PVP1 | 0.00059242 | N-term +28.03 Da, K +28.03 Da,             | 2795.04126  | 4 | 519.8099976 | 519.5610352 |
| SLVLKFHTVR               | P02762 | 0          | N-term +28.03 Da, K +28.03 Da,             | 2796.211914 | 4 | 314.7021484 | 314.7025845 |
| NPVDDICIAKPR             | P32261 | 0.00155602 | N-term +28.03 Da, K +28.03 Da,C +57.02 Da, | 2796.28833  | 3 | 485.269989  | 485.2659068 |
| SLVLKFHTVR               | P02762 | 0.00063939 | N-term +28.03 Da, K +28.03 Da,             | 2798.451172 | 3 | 419.269989  | 419.2676872 |
| IRPTVQEDGGDVIYR          | Q9QZ23 | 0          | N-term +28.03 Da,                          | 2802.502441 | 3 | 582.3099976 | 582.6442121 |
| FMESPEPR                 | P48193 | 0.00941704 | N-term +28.03 Da,                          | 2802.72876  | 2 | 560.2764893 | 560.2787945 |
| SVVCPDAKTQCPDDSTCCCLPTGK | P28798 | 0          | N-term +28.03 Da, K +28.03 Da,C +57.02 Da, | 2802.870605 | 3 | 937.7600098 | 937.0885607 |
| AIQIGHGNVIVR             | Q9QY24 | 0.00062073 | N-term +28.03 Da,                          | 2803.022461 | 3 | 435.6000061 | 435.5980962 |
| TSPAADNIEKEALPR          | Q9CRD0 | 0          | N-term +28.03 Da, K +28.03 Da,             | 2804.821045 | 3 | 556.6400146 | 556.6369461 |
| PGHLQEGFGCVVTNR          | Q9CY58 | 0          | N-term +28.03 Da, C +57.02 Da,             | 2807.025146 | 3 | 566.9503174 | 566.9508702 |
| ASGPGGLHADLLR            | Q8BWF0 | 0          | N-term +28.03 Da,                          | 2808.422852 | 3 | 431.2415466 | 431.2420898 |
| GDVCYADVYR               | Q6PDM2 | 0          | N-term +28.03 Da, C +57.02 Da,             | 2810.61792  | 2 | 623.2808838 | 623.282066  |
| SVAFDLATHR               | P16332 | 0.00058548 | N-term +28.03 Da,                          | 2812.624268 | 3 | 382.2073669 | 382.2084973 |
| PGHLQEGFGCVVTNR          | Q9CY58 | 0          | N-term +28.03 Da, C +57.02 Da,             | 2813.260254 | 2 | 850.9400024 | 849.9226671 |



|                         |        |            |                                             |             |   |             |             |
|-------------------------|--------|------------|---------------------------------------------|-------------|---|-------------|-------------|
| EATQAVLDKPELSSDASTR     | P50544 | 0          | N-term +28.03 Da, K +28.03 Da,              | 2816.631104 | 3 | 725.710022  | 725.7094997 |
| VMEKPSPLLVR             | P97379 | 0.00063532 | N-term +28.03 Da, K +28.03 Da,              | 2816.828125 | 3 | 461.2799988 | 461.2793759 |
| GLAADVGTLQR             | O35459 | 0.00059701 | N-term +28.03 Da,                           | 2816.953613 | 2 | 564.8200073 | 564.8222153 |
| VTVKDVNQEFVR            | Q9CZ8  | 0          | N-term +28.03 Da, K +28.03 Da,              | 2817.991211 | 3 | 540.3099976 | 539.9701477 |
| DPDAANYKDISDVER         | Q9D819 | 0          | N-term +28.03 Da, K +28.03 Da,              | 2818.357178 | 3 | 588.6199951 | 588.6197327 |
| AGAYKEWLEKQG            | E9PY03 | 0.01890034 | N-term +28.03 Da, K +28.03 Da,              | 2820.242432 | 3 | 488.6000061 | 488.6012839 |
| SNINDFSAGVANR           | P15105 | 0          | N-term +28.03 Da,                           | 2821.770264 | 2 | 696.8453979 | 696.8469509 |
| TQKAPQVSTPTLVEAAR       | P07724 | 0          | N-term +28.03 Da, K +28.03 Da,              | 2823.804688 | 3 | 618.3499756 | 618.3545503 |
| TGTIQEDYLR              | Q3THE2 | 0.00057013 | N-term +28.03 Da,                           | 2825.575684 | 2 | 612.3156738 | 612.3169633 |
| TSPAADNIEKEALPR         | Q9CRD0 | 0.00069444 | N-term +28.03 Da, K +28.03 Da,              | 2827.220215 | 3 | 557.2999878 | 556.6369461 |
| SDGHSEFLKAASNLR         | P27773 | 0.0030426  | N-term +28.03 Da, K +28.03 Da,              | 2829.477051 | 3 | 563.6300049 | 563.2969237 |
| GQVGDLSPPQQEALAR        | Q8R0F9 | 0          | N-term +28.03 Da,                           | 2829.862305 | 2 | 862.9500122 | 862.9499368 |
| SRVDPDLSSFD SAPSEPKSR   | Q9R182 | 0.00061614 | N-term +28.03 Da, K +28.03 Da,              | 2830.946777 | 4 | 559.2800293 | 559.0328397 |
| RKVVDYSQFQESDDADEDYGR   | Q80XU3 | 0          | N-term +28.03 Da, K +28.03 Da,              | 2831.404785 | 3 | 860.3900146 | 860.0612615 |
| TKFLEHPGGEEVLR          | P56395 | 0.01476977 | N-term +28.03 Da, K +28.03 Da,              | 2835.289307 | 4 | 450.25      | 449.993991  |
| SYGGYKEPAAPVSIQR        | Q61792 | 0.00567644 | N-term +28.03 Da, K +28.03 Da,              | 2836.340576 | 3 | 593.6500244 | 593.6527074 |
| SSVQESDIAVVAR           | P33622 | 0.00068353 | N-term +28.03 Da,                           | 2836.731445 | 2 | 694.8740845 | 694.8726345 |
| GEKLNQDPEDEVIR          | Q3THE2 | 0.00056657 | N-term +28.03 Da, K +28.03 Da,              | 2837.404541 | 3 | 533.9454956 | 533.617663  |
| TAPSKLPSNSVYAGTVPSR     | Q8VCF0 | 0.00560224 | N-term +28.03 Da, K +28.03 Da,              | 2837.717041 | 3 | 663.7000122 | 663.3652266 |
| MASGGGVPTDEEQATGLER     | P19536 | 0          | N-term +28.03 Da,                           | 2838.271729 | 2 | 966.9500122 | 966.9520173 |
| LTEDEKQTMVDLHNQYR       | Q9ET66 | 0          | N-term +28.03 Da, K +28.03 Da,              | 2843.017578 | 4 | 544.7721558 | 544.7730338 |
| AMTNQILVER              | Q8C196 | 0.00946372 | N-term +28.03 Da,                           | 2844.750488 | 2 | 601.8300171 | 601.8317257 |
| GPVPGYQQAPPQGVPR        | G3X972 | 0          | N-term +28.03 Da,                           | 2847.246582 | 2 | 838.9500122 | 838.4493748 |
| LAHTEFTPTETDTYACR       | P01887 | 0          | N-term +28.03 Da, C +57.02 Da,              | 2847.357422 | 3 | 681.3099976 | 680.9825654 |
| ALEYGASCEDIAR           | O08749 | 0          | N-term +28.03 Da, C +57.02 Da,              | 2847.590088 | 2 | 741.8460693 | 741.8483023 |
| LTEDEKQTMVDLHNQYR       | Q9ET66 | 0          | N-term +28.03 Da, K +28.03 Da,              | 2849.436035 | 3 | 726.3599854 | 726.0282863 |
| NPVDDICIAKPR            | P32261 | 0          | N-term +28.03 Da, K +28.03 Da, C +57.02 Da, | 2852.782959 | 3 | 485.2649231 | 485.2659068 |
| TEFTPTETDTYACR          | P01887 | 0          | N-term +28.03 Da, C +57.02 Da,              | 2853.36499  | 2 | 860.8800049 | 860.3801645 |
| NIPTSGAEIGGAFGGEKHTGGGR | Q9DBF1 | 0          | N-term +28.03 Da, K +28.03 Da,              | 2854.154053 | 4 | 557.539978  | 557.2870026 |
| ADDLECTPGFQR            | Q9WTR5 | 0.00060827 | N-term +28.03 Da, C +57.02 Da,              | 2855.508301 | 2 | 718.8300171 | 718.8273698 |
| GPVPGYQQAPPQGVPR        | G3X972 | 0          | N-term +28.03 Da,                           | 2857.207031 | 2 | 839.4400024 | 838.4493748 |
| EQEQLSCDEPILSNKSGDNR    | P70296 | 0          | N-term +28.03 Da, K +28.03 Da, C +57.02 Da, | 2861.26416  | 3 | 824.7199707 | 824.7272251 |
| GYISAAELR               | P62204 | 0.00569801 | N-term +28.03 Da,                           | 2862.748291 | 2 | 504.2788696 | 504.2796516 |
| AYEPQGGSGDYDYSYAGGR     | P61979 | 0          | N-term +28.03 Da,                           | 2866.668701 | 2 | 963.9199829 | 963.4186673 |
| AAGPLESSGKEITQLKER      | Q99PL5 | 0.00056948 | N-term +28.03 Da, K +28.03 Da,              | 2868.869873 | 4 | 532.7999878 | 532.546854  |
| MASGGGVPTDEEQATGLER     | P19536 | 0          | N-term +28.03 Da,                           | 2869.600098 | 2 | 966.9500122 | 966.9520173 |
| KETIMNQEKLAKLQAQVR      | Q64152 | 0          | N-term +28.03 Da, K +28.03 Da,              | 2871.608887 | 4 | 560.8300171 | 560.834431  |
| EQEQLSCDEPILSNKSGDNR    | P70296 | 0          | N-term +28.03 Da, K +28.03 Da, C +57.02 Da, | 2872.21582  | 2 | 1236.579956 | 1236.587199 |
| THISRSQNQQYLVR          | O35066 | 0.02225021 | N-term +28.03 Da,                           | 2872.724854 | 3 | 586.6561279 | 586.6517007 |
| THISRSQNQQYLVR          | O35066 | 0.0056872  | N-term +28.03 Da,                           | 2873.026611 | 3 | 586.6553345 | 586.6517007 |

|                      |        |            |                                            |             |   |             |             |
|----------------------|--------|------------|--------------------------------------------|-------------|---|-------------|-------------|
| SMAEPKTVYWDR         | P01887 | 0          | N-term +28.03 Da, K +28.03 Da,             | 2874.704102 | 3 | 513.5900269 | 513.5939121 |
| YINDKSTGSVVGQQPFGGAR | Q8CHT0 | 0.00914077 | N-term +28.03 Da, K +28.03 Da,             | 2875.359863 | 3 | 713.3599854 | 713.0394023 |
| WEAADLGNEER          | Q9R0P4 | 0          | N-term +28.03 Da,                          | 2876.256836 | 2 | 659.3076172 | 659.3071272 |
| AYEPQGGSGYDYSYAGGR   | P61979 | 0          | N-term +28.03 Da,                          | 2876.450928 | 3 | 642.6141968 | 642.6148703 |
| EQEQLSCDEPILSNKSGDNR | P70296 | 0          | N-term +28.03 Da, K +28.03 Da,C +57.02 Da, | 2877.644775 | 2 | 1237.589966 | 1236.587199 |
| WGKVN SDEVGGEALGR    | P02088 | 0.00561798 | N-term +28.03 Da, K +28.03 Da,             | 2878.525635 | 3 | 577.2999878 | 577.3004454 |
| QFQGSPPAPSDSVKIEER   | Q9R257 | 0.02002556 | N-term +28.03 Da, K +28.03 Da,             | 2879.215576 | 3 | 719.7000122 | 719.6989347 |
| LAQIHFR              | P07758 | 0.00156413 | N-term +28.03 Da,                          | 2880.284668 | 3 | 337.2026978 | 337.2029059 |
| VSDENDAKILNDVQDR     | Q8VDW0 | 0.00071378 | N-term +28.03 Da, K +28.03 Da,             | 2881.911865 | 3 | 629.6500244 | 629.6533252 |
| NPVDDICIAKPR         | P32261 | 0          | N-term +28.03 Da, K +28.03 Da,C +57.02 Da, | 2884.758301 | 3 | 485.2651978 | 485.2659068 |
| EVKCDMEVSCPEGYTCCR   | P28798 | 0.00054975 | N-term +28.03 Da, K +28.03 Da,C +57.02 Da, | 2885.384521 | 3 | 779.6500244 | 779.3209906 |
| YLLPDTKAYGDR         | P08113 | 0.00256016 | N-term +28.03 Da, K +28.03 Da,             | 2885.59375  | 3 | 489.9324036 | 489.9329222 |
| NPVDDICIAKPR         | P32261 | 0          | N-term +28.03 Da, K +28.03 Da,C +57.02 Da, | 2886.463867 | 2 | 727.395813  | 727.395222  |
| KDGDGTITTKELGTVMR    | P62204 | 0.00570342 | N-term +28.03 Da, K +28.03 Da,             | 2887.55835  | 3 | 636.0200195 | 636.0153175 |
| EVKCDMEVSCPEGYTCCR   | P28798 | 0.01184211 | N-term +28.03 Da, K +28.03 Da,C +57.02 Da, | 2891.27002  | 2 | 1169.469971 | 1168.477848 |
| EQEQLSCDEPILSNKSGDNR | P70296 | 0          | N-term +28.03 Da, K +28.03 Da,C +57.02 Da, | 2892.621826 | 3 | 824.7299805 | 824.7272251 |
| ADTGIPESFR           | E9Q512 | 0.00559701 | N-term +28.03 Da,                          | 2897.716064 | 2 | 561.289978  | 560.7852986 |
| VSGPPPADLCHALR       | O70251 | 0          | N-term +28.03 Da, C +57.02 Da,             | 2898.587891 | 3 | 506.6000061 | 506.6012895 |
| CGQRFGQKGLMR         | E9Q3R6 | 0.03555556 | N-term +28.03 Da, K +28.03 Da,C +57.02 Da, | 2899.022217 | 3 | 532.2800293 | 532.2816738 |
| TDEEVDLYR            | Q3THE2 | 0.00056402 | N-term +28.03 Da,                          | 2900.17041  | 2 | 648.7999878 | 648.8013438 |
| ASSGGQAEQLDALVKK     | Q80Y14 | 0          | N-term +28.03 Da, K +28.03 Da,             | 2900.612061 | 3 | 562.9899902 | 562.6525961 |
| EVKCDMEVSCPEGYTCCR   | P28798 | 0.02622951 | N-term +28.03 Da, K +28.03 Da,C +57.02 Da, | 2902.061279 | 3 | 779.3200073 | 779.3209906 |
| AVDEILTAR            | Q3U1F9 | 0.00910332 | N-term +28.03 Da,                          | 2902.161377 | 2 | 508.7900085 | 508.2927591 |
| NVYYNEAAGNKYVPR      | Q7TMM9 | 0.00060753 | N-term +28.03 Da, K +28.03 Da,             | 2902.720215 | 3 | 605.3099976 | 605.3125737 |
| THISRSQNQQYLVR       | O35066 | 0.00062578 | N-term +28.03 Da,                          | 2903.611084 | 3 | 586.9840088 | 586.6517007 |
| GEWHTIILASDKR        | B5X0G2 | 0          | N-term +28.03 Da, K +28.03 Da,             | 2904.229736 | 4 | 396.4700012 | 396.2241474 |
| NGTDPEDVIR           | Q3THE2 | 0.00909918 | N-term +28.03 Da,                          | 2905.498779 | 2 | 572.7800293 | 572.2856631 |
| SYDLGIENR            | O88844 | 0.00562324 | N-term +28.03 Da,                          | 2905.995605 | 2 | 547.7800293 | 547.7774736 |
| AGDSSTGLHEPLSGTLSQPR | A2AIX1 | 0.00065833 | N-term +28.03 Da,                          | 2907.869629 | 3 | 680.3499756 | 680.0115126 |
| GEWHTIILASDKR        | B5X0G2 | 0          | N-term +28.03 Da, K +28.03 Da,             | 2908.51001  | 3 | 527.960022  | 527.9631043 |
| PGVTVKDVNQEFVR       | Q9CZX8 | 0          | N-term +28.03 Da, K +28.03 Da,             | 2908.738037 | 3 | 591.3273315 | 591.3282238 |
| ENSLVLKFHTVR         | P02762 | 0.0006105  | N-term +28.03 Da, K +28.03 Da,             | 2913.068604 | 3 | 500.6300049 | 500.2961946 |
| LEVSESPGSVQVAR       | P0C673 | 0.00565504 | N-term +28.03 Da,                          | 2913.393066 | 2 | 743.4000244 | 743.3990166 |
| TEESDLAQYGVV         | P09103 | 0          | N-term +28.03 Da,                          | 2914.831787 | 2 | 762.3699951 | 762.3704565 |
| NPVDDICIAKPR         | P32261 | 0          | N-term +28.03 Da, K +28.03 Da,C +57.02 Da, | 2916.277588 | 3 | 485.2650757 | 485.2659068 |
| SQIYADGPGEALR        | Q62167 | 0.00570613 | N-term +28.03 Da,                          | 2916.390381 | 2 | 703.3505249 | 702.859527  |
| NPVDDICIAKPR         | P32261 | 0          | N-term +28.03 Da, K +28.03 Da,C +57.02 Da, | 2916.733398 | 2 | 727.3944092 | 727.395222  |
| TVEVPEDEVVR          | Q80WJ7 | 0          | N-term +28.03 Da,                          | 2917.304932 | 2 | 651.3499756 | 650.3431784 |
| VLSGEDKSNKAAW        | P01942 | 0.00062617 | N-term +28.03 Da, K +28.03 Da,             | 2918.156738 | 3 | 534.6340332 | 534.634765  |
| AHGSVVKSEDYAFPTYADR  | P19783 | 0          | N-term +28.03 Da, K +28.03 Da,             | 2929.049561 | 3 | 723.6900024 | 723.6918913 |

|                           |         |            |                                            |             |   |             |             |
|---------------------------|---------|------------|--------------------------------------------|-------------|---|-------------|-------------|
| DLEPGTMDSVR               | P68372  | 0.00065232 | N-term +28.03 Da,                          | 2933.379883 | 2 | 624.298584  | 624.3004561 |
| TDEEVDEMIR                | P62204  | 0.00066489 | N-term +28.03 Da,                          | 2935.036621 | 2 | 632.7884521 | 632.7899216 |
| LVEPGSPAESGLLAGDR         | P70441  | 0.00067751 | N-term +28.03 Da, K +28.03 Da,             | 2936.676025 | 3 | 618.0100098 | 618.0106722 |
| HEYNFRICAINK              | A2ASS6  | 0.00054377 | N-term +28.03 Da, K +28.03 Da,C +57.02 Da, | 2936.77124  | 2 | 810.4199829 | 810.9193956 |
| THISRSQNNQQLVLR           | Q35066  | 0.02115954 | N-term +28.03 Da,                          | 2937.74292  | 3 | 586.6599731 | 586.6517007 |
| AVTGETSGSKSSFINTLR        | Q9QZ85  | 0.00061881 | N-term +28.03 Da, K +28.03 Da,             | 2941.894287 | 3 | 627.6699829 | 627.6740602 |
| AVTGETSGSKSSFINTLR        | Q9QZ85  | 0.00057176 | N-term +28.03 Da, K +28.03 Da,             | 2942.305176 | 3 | 628.3499756 | 627.6740602 |
| GTITTKELGTVMR             | P62204  | 0.00054407 | N-term +28.03 Da, K +28.03 Da,             | 2944.338379 | 3 | 488.2799988 | 488.2814456 |
| VEAAVGKDLFR               | Q64471  | 0          | N-term +28.03 Da, K +28.03 Da,             | 2946.195313 | 3 | 420.9100037 | 420.9152025 |
| FEQWGTLTDCVVMR            | P49312  | 0.04105221 | N-term +28.03 Da, C +57.02 Da,             | 2946.963379 | 3 | 590.960022  | 590.6164999 |
| TITTKELGTVMR              | P62204  | 0.00559963 | N-term +28.03 Da, K +28.03 Da,             | 2947.828125 | 3 | 469.6099854 | 469.2742909 |
| NGTDPEDVIR                | Q3THE2  | 0.00159236 | N-term +28.03 Da,                          | 2948.706055 | 2 | 572.7763672 | 572.2856631 |
| AKNKDQGTEDYVEGLR          | Q60605  | 0.00576092 | N-term +28.03 Da, K +28.03 Da,             | 2951.012695 | 3 | 691.0200195 | 690.6882583 |
| PGHLQEGFGCVVTNR           | Q9CY58  | 0.00058207 | N-term +28.03 Da, C +57.02 Da,             | 2957.076172 | 3 | 566.6099854 | 566.9508702 |
| SPESTSEVECGDFYNSGDR       | Q91VA0  | 0          | N-term +28.03 Da, C +57.02 Da,             | 2957.34082  | 2 | 1082.439941 | 1082.442212 |
| TKGTPLDTEVPLER            | Q05920  | 0.00560748 | N-term +28.03 Da, K +28.03 Da,             | 2960.102295 | 3 | 537.9699707 | 537.9699251 |
| TITTKELGTVMR              | P62204  | 0.04376972 | N-term +28.03 Da, K +28.03 Da,             | 2960.333496 | 2 | 703.4099731 | 703.4077981 |
| SIGTDNVCRDRLEK            | Q8K2V6  | 0.03131354 | N-term +28.03 Da, K +28.03 Da,C +57.02 Da, | 2966.396484 | 3 | 573.6300049 | 573.6333186 |
| TEFTPTETDTYACR            | P01887  | 0          | N-term +28.03 Da, C +57.02 Da,             | 2969.260498 | 2 | 860.8800049 | 860.3801645 |
| DDEATILADNKCMCTR          | P01592  | 0          | N-term +28.03 Da, K +28.03 Da,C +57.02 Da, | 2970.26001  | 3 | 656.960022  | 656.9656409 |
| EVKCDMEVSCPEGYTCCR        | P28798  | 0          | N-term +28.03 Da, K +28.03 Da,C +57.02 Da, | 2970.427246 | 3 | 779.9799805 | 779.3209906 |
| VSEGAAMAAGESMAQR          | Q9D8S4  | 0          | N-term +28.03 Da,                          | 2970.790527 | 2 | 840.8857422 | 840.8876334 |
| KNKDQGTEDYVEGLR           | Q60605  | 0.00399002 | N-term +28.03 Da, K +28.03 Da,             | 2971.329102 | 3 | 667.3400269 | 667.0092202 |
| VSEGAAMAAGESMAQR          | Q9D8S4  | 0          | N-term +28.03 Da,                          | 2973.084717 | 3 | 560.9299927 | 560.9275144 |
| DDEATILADNKCMCTR          | P01592  | 0          | N-term +28.03 Da, K +28.03 Da,C +57.02 Da, | 2973.72876  | 2 | 985.4400024 | 984.9448231 |
| TEFTPTETDTYACR            | P01887  | 0.00054142 | N-term +28.03 Da, C +57.02 Da,             | 2980.653809 | 3 | 574.2600098 | 573.9225352 |
| LEEEDNVLVLKK              | P09103  | 0.00067889 | N-term +28.03 Da, K +28.03 Da,             | 2984.530273 | 3 | 504.9700012 | 504.9676327 |
| LGADMEDLR                 | P08226  | 0.00567108 | N-term +28.03 Da,                          | 2986.015869 | 2 | 524.2600098 | 524.2606019 |
| KTGTAEMSSILEER            | Q03265  | 0.01104728 | N-term +28.03 Da, K +28.03 Da,             | 2987.091553 | 3 | 536.6099854 | 536.6151536 |
| IEEKSCDLVGEKDKESKNEVALLER | P24668  | 0.02374011 | N-term +28.03 Da, K +28.03 Da,C +57.02 Da, | 2992.116455 | 4 | 765.6599731 | 765.4139724 |
| EPRYQEEGVPVQPRTAPR        | Q9Z0U1  | 0.0238394  | N-term +28.03 Da,                          | 2996.175049 | 3 | 713.0360718 | 712.3712633 |
| PGVTVKDVNQEQEFVR          | Q9CZX8  | 0          | N-term +28.03 Da, K +28.03 Da,             | 2996.310547 | 2 | 885.9799805 | 886.4886975 |
| LIFAGKQLEDGR              | POCG49  | 0.00055036 | N-term +28.03 Da, K +28.03 Da,             | 2999.276367 | 3 | 468.2729187 | 468.2732786 |
| WEGLNVVKTGR               | P15532  | 0.00070671 | N-term +28.03 Da, K +28.03 Da,             | 2999.427246 | 3 | 438.9232788 | 438.9224685 |
| TEFTPTETDTYACR            | P01887  | 0          | N-term +28.03 Da, C +57.02 Da,             | 3000.275391 | 2 | 860.8800049 | 860.3801645 |
| LGNVTAGKDGVANVSIEDR       | P08228  | 0.00064977 | N-term +28.03 Da, K +28.03 Da,             | 3002.264893 | 3 | 658.0200195 | 657.6883696 |
| LGNVTAGKDGVANVSIEDR       | P08228  | 0.02183956 | N-term +28.03 Da, K +28.03 Da,             | 3003.205322 | 2 | 986.0300293 | 986.0289162 |
| VISLSGEHSIIGR             | P08228  | 0          | N-term +28.03 Da,                          | 3004.561523 | 3 | 465.9400024 | 465.9366666 |
| VQDVANNTNEEAGDGTATVLR     | P63038  | 0          | N-term +28.03 Da,                          | 3005.246094 | 3 | 826.0700073 | 825.7367779 |
| SGLVEIKELQR               | Q8LWTY4 | 0.00058824 | N-term +28.03 Da, K +28.03 Da,             | 3005.604492 | 3 | 443.2696838 | 443.2696456 |

|                           |        |            |                                             |             |   |             |             |
|---------------------------|--------|------------|---------------------------------------------|-------------|---|-------------|-------------|
| ATEESDLAQQYGVV            | P09103 | 0          | N-term +28.03 Da,                           | 3005.710205 | 2 | 797.8900146 | 797.8890136 |
| VTIILKEPVR                | Q99PL5 | 0.01972556 | N-term +28.03 Da, K +28.03 Da,              | 3007.557861 | 3 | 408.6099854 | 408.6077096 |
| DGLTTDDSERPQEGKDK         | Q5U3K5 | 0.02587269 | N-term +28.03 Da, K +28.03 Da,              | 3010.503418 | 3 | 658.6699829 | 658.9920069 |
| LPLPPPPPPR                | P61979 | 0.02118644 | N-term +28.03 Da,                           | 3012.003418 | 2 | 554.8469849 | 554.8475038 |
| ALDLTMR                   | Q9D855 | 0.03737942 | N-term +28.03 Da,                           | 3014.777832 | 2 | 424.2399902 | 424.2389403 |
| QNYSTEVEAAVNR             | P29391 | 0          | N-term +28.03 Da,                           | 3017.638672 | 2 | 754.8688354 | 754.8706235 |
| KKELEEQLGPVAEETR          | P08226 | 0.00573888 | N-term +28.03 Da, K +28.03 Da,              | 3018.556885 | 3 | 647.3499756 | 647.3614823 |
| QNYSTEVEAAVNR             | P29391 | 0          | N-term +28.03 Da,                           | 3018.837158 | 3 | 504.25      | 503.5828412 |
| IRQNYSTEVEAAVNR           | P29391 | 0.00157068 | N-term +28.03 Da,                           | 3022.619385 | 2 | 889.460022  | 889.4632114 |
| LTITYGPKVVR               | P12710 | 0.00059737 | N-term +28.03 Da, K +28.03 Da,              | 3022.694824 | 3 | 434.9400024 | 434.9429809 |
| TADGIVSHLKKQAGPASVPLR     | P27773 | 0          | N-term +28.03 Da, K +28.03 Da,              | 3023.641602 | 4 | 558.0800171 | 558.0824006 |
| ETGVDLTKDNMALQR           | P38647 | 0.02304147 | N-term +28.03 Da, K +28.03 Da,              | 3025.761963 | 3 | 583.3099976 | 582.973341  |
| AVDAPVSSVALR              | Q64374 | 0          | N-term +28.03 Da,                           | 3026.555908 | 2 | 606.8513184 | 606.8509729 |
| SEQKIWSPLVTEEGKR          | O70400 | 0          | N-term +28.03 Da, K +28.03 Da,              | 3027.397705 | 4 | 493.7799988 | 493.5281981 |
| EDDPTIFSAR                | Q8BP56 | 0.00057078 | N-term +28.03 Da,                           | 3029.180908 | 2 | 589.786377  | 589.7880387 |
| APPLVIKEDDIR              | P29758 | 0.00070771 | N-term +28.03 Da, K +28.03 Da,              | 3029.26001  | 3 | 479.6199951 | 479.2888173 |
| ESGASIKIDPLEGSEDR         | P61979 | 0.00059277 | N-term +28.03 Da, K +28.03 Da,              | 3029.772217 | 2 | 994.9899902 | 994.4945726 |
| WGVNSDEVGGGALGR           | P02088 | 0          | N-term +28.03 Da, K +28.03 Da,              | 3030.707031 | 3 | 577.6300049 | 577.3004454 |
| GVSDGSEVAKAQAAPGGASPTIFSR | Q9D0S9 | 0.00055096 | N-term +28.03 Da, K +28.03 Da,              | 3031.070557 | 4 | 643.8499756 | 643.8486962 |
| ESGASIKIDPLEGSEDR         | P61979 | 0.00054259 | N-term +28.03 Da, K +28.03 Da,              | 3032.78833  | 2 | 994.5100098 | 994.4945726 |
| RVAPEEHPVLLTEAPLNPKANR    | P60710 | 0          | N-term +28.03 Da, K +28.03 Da,              | 3032.897949 | 4 | 628.1099854 | 627.6077772 |
| LDNPSSLDETAYER            | O35943 | 0          | N-term +28.03 Da,                           | 3033.982422 | 2 | 819.3872681 | 819.3863041 |
| GNVTAGKDVANVSIEDR         | P08228 | 0          | N-term +28.03 Da, K +28.03 Da,              | 3034.478271 | 2 | 929.4699707 | 929.486884  |
| ANLEKAQSELSGAADAAAR       | Q9D3D9 | 0          | N-term +28.03 Da, K +28.03 Da,              | 3034.983154 | 3 | 663.3400269 | 663.0078796 |
| FAQLCEEHGILR              | B5X0G2 | 0          | N-term +28.03 Da, C +57.02 Da,              | 3035.806396 | 3 | 500.9299927 | 500.9257731 |
| GFPEAASSFR                | P32020 | 0.00069156 | N-term +28.03 Da,                           | 3037.17749  | 2 | 548.774231  | 548.7747336 |
| ENYGELADCCTKQEPER         | P07724 | 0          | N-term +28.03 Da, K +28.03 Da, C +57.02 Da, | 3039.192383 | 2 | 1077.469971 | 1077.975167 |
| GKDYQTLGLAR               | Q9QYJ3 | 0.00106553 | N-term +28.03 Da, K +28.03 Da,              | 3041.834961 | 2 | 720.8936157 | 720.8959121 |
| RVGVPTETGALTLNR           | Q8BWT1 | 0.00068681 | N-term +28.03 Da,                           | 3041.9104   | 3 | 537.9799805 | 537.9774137 |
| SGGSKDNLSPLGQCLTER        | P19221 | 0          | N-term +28.03 Da, K +28.03 Da, C +57.02 Da, | 3042.012939 | 3 | 691.3491821 | 691.3528812 |
| LPLPPPPPPR                | P61979 | 0.02223154 | N-term +28.03 Da,                           | 3042.77417  | 2 | 554.8469238 | 554.8475038 |
| QKTGTAEMSSILEER           | Q03265 | 0.01765719 | N-term +28.03 Da, K +28.03 Da,              | 3045.3396   | 3 | 579.300415  | 579.3013463 |
| QQQIQQLQLQMEKER           | P46938 | 0          | N-term +28.03 Da, K +28.03 Da,              | 3047.105225 | 3 | 705.3800049 | 704.7125206 |
| LEEDNVLVLKK               | P09103 | 0          | N-term +28.03 Da, K +28.03 Da,              | 3048.328613 | 3 | 504.9667969 | 504.9676327 |
| VGGKDFEQPLAISR            | O70400 | 0.00073314 | N-term +28.03 Da, K +28.03 Da,              | 3048.479492 | 3 | 524.963501  | 524.962993  |
| NPVDDICIAKPR              | P32261 | 0          | N-term +28.03 Da, K +28.03 Da, C +57.02 Da, | 3048.555176 | 3 | 485.9299927 | 485.2659068 |
| LEEDNVLVLKK               | P09103 | 0.00062344 | N-term +28.03 Da, K +28.03 Da,              | 3048.751709 | 2 | 756.9458008 | 756.9478108 |
| QKTGTAEMSSILEER           | Q03265 | 0          | N-term +28.03 Da, K +28.03 Da,              | 3050.036865 | 2 | 868.4467163 | 868.4483813 |
| QLMGLYGR                  | B5X0G2 | 0.0261973  | N-term +28.03 Da,                           | 3050.309326 | 2 | 483.2641296 | 483.2654894 |
| STPTGITDHAQGEPEPNLEESPKR  | Q9CRD0 | 0.00581114 | N-term +28.03 Da, K +28.03 Da,              | 3050.406494 | 4 | 658.5900269 | 658.3409699 |

|                           |        |            |                                            |             |   |             |             |
|---------------------------|--------|------------|--------------------------------------------|-------------|---|-------------|-------------|
| TLSKYEFSEIR               | Q9CYA0 | 0.01066193 | N-term +28.03 Da, K +28.03 Da,             | 3051.55835  | 3 | 477.269989  | 476.9292892 |
| SDAPPLTLDGIKDR            | Q9CR21 | 0          | N-term +28.03 Da, K +28.03 Da,             | 3051.644531 | 3 | 518.6199951 | 518.6226367 |
| APPLTLDGIKDR              | Q9CR21 | 0.00601017 | N-term +28.03 Da, K +28.03 Da,             | 3055.434814 | 3 | 451.269989  | 451.2696456 |
| SIQMNVAEVDR               | Q9CQR2 | 0          | N-term +28.03 Da,                          | 3055.513916 | 2 | 645.3300171 | 645.3295477 |
| TVQDLFGR                  | P38647 | 0.01107174 | N-term +28.03 Da,                          | 3058.291504 | 2 | 482.2600098 | 482.266544  |
| LSPVAEEFR                 | Q00623 | 0.00061013 | N-term +28.03 Da,                          | 3062.75293  | 2 | 538.789978  | 538.2927591 |
| VFDKEGNGTVMGAELR          | P05977 | 0.00064641 | N-term +28.03 Da, K +28.03 Da,             | 3063.363281 | 3 | 593.9699707 | 593.6417027 |
| SDAPPLTLDGIKDR            | Q9CR21 | 0          | N-term +28.03 Da, K +28.03 Da,             | 3063.750977 | 2 | 777.9299927 | 777.4303168 |
| YQVLAAEEPSVR              | Q64105 | 0.00061652 | N-term +28.03 Da,                          | 3070.262939 | 2 | 695.8699951 | 695.37227   |
| AWGKIGGGHGAEYGAEALER      | P01942 | 0.01600346 | N-term +28.03 Da, K +28.03 Da,             | 3071.922363 | 4 | 508.0100098 | 507.7628973 |
| AWGKIGGGHGAEYGAEALER      | P01942 | 0          | N-term +28.03 Da, K +28.03 Da,             | 3073.955811 | 3 | 676.6799927 | 676.6814376 |
| NCLSGQAEFDKAAEEVKR        | F6WUQ1 | 0          | N-term +28.03 Da, K +28.03 Da,C +57.02 Da, | 3074.122559 | 3 | 712.7000122 | 712.6966479 |
| ASEIAGVDDLGTTR            | Q91VD9 | 0.00577478 | N-term +28.03 Da,                          | 3075.767334 | 2 | 744.8800049 | 745.3782816 |
| RPPLGFLNPR                | Q89023 | 0.00055897 | N-term +28.03 Da,                          | 3077.364258 | 3 | 399.2399902 | 398.9083817 |
| EQFVEFR                   | Q35887 | 0.00827586 | N-term +28.03 Da,                          | 3081.371826 | 2 | 491.75      | 491.7532695 |
| RPPLGFLNPR                | Q89023 | 0.00058617 | N-term +28.03 Da,                          | 3081.544189 | 3 | 398.9100037 | 398.9083817 |
| SDAPPLTLDGIKDR            | Q9CR21 | 0          | N-term +28.03 Da, K +28.03 Da,             | 3082.22998  | 3 | 518.621521  | 518.6226367 |
| VMLETLSQSPQGR             | P60335 | 0.0252379  | N-term +28.03 Da,                          | 3084.064209 | 2 | 737.3900146 | 737.390137  |
| NCLSGQAEFDKAAEEVKR        | F6WUQ1 | 0.00059809 | N-term +28.03 Da, K +28.03 Da,C +57.02 Da, | 3084.362793 | 2 | 1068.050049 | 1068.541334 |
| GTMAEETAPAVLER            | Q64374 | 0.0006079  | N-term +28.03 Da,                          | 3089.794189 | 2 | 752.8900146 | 751.8796025 |
| GDGTITTKELGTVMR           | P62204 | 0.00062422 | N-term +28.03 Da, K +28.03 Da,             | 3090.827637 | 3 | 546.2999878 | 545.630915  |
| TLKFFPASADR               | P09103 | 0          | N-term +28.03 Da, K +28.03 Da,             | 3091.289795 | 3 | 437.25      | 436.9152025 |
| MEMTDFTR                  | P26231 | 0.00256279 | N-term +28.03 Da,                          | 3093.62207  | 2 | 529.736145  | 529.7359053 |
| SEVASSLVLER               | Q9CYR0 | 0.00066578 | N-term +28.03 Da,                          | 3095.237793 | 2 | 609.8400269 | 609.3404384 |
| MEMTDFTR                  | P26231 | 0.00106724 | N-term +28.03 Da,                          | 3096.894287 | 2 | 529.7355347 | 529.7359053 |
| MKETIMNQEKLAKLQAQVR       | Q64152 | 0          | N-term +28.03 Da, K +28.03 Da,             | 3097.278076 | 4 | 593.5900269 | 593.5945523 |
| TGEVPVVAIR                | P27773 | 0.0087156  | N-term +28.03 Da,                          | 3098.596436 | 2 | 534.8226929 | 534.8242263 |
| NCLSGQAEFDKAAEEVKR        | F6WUQ1 | 0          | N-term +28.03 Da, K +28.03 Da,C +57.02 Da, | 3098.69043  | 2 | 1068.560059 | 1068.541334 |
| DAWGDVPGTGTR              | A2AIX1 | 0.00159659 | N-term +28.03 Da,                          | 3098.765869 | 2 | 630.2999878 | 630.3043872 |
| ALGNMEEDNWR               | Q8K2B3 | 0          | N-term +28.03 Da,                          | 3102.040039 | 2 | 681.8076782 | 681.8089797 |
| VAPLGAELQESAR             | Q00623 | 0.00066445 | N-term +28.03 Da,                          | 3103.578125 | 2 | 684.8786621 | 684.8777195 |
| GVPTETGALTLNR             | Q8BWT1 | 0          | N-term +28.03 Da,                          | 3105.517334 | 2 | 678.8800049 | 678.8777195 |
| SSSLPDICYR                | P53996 | 0.00953246 | N-term +28.03 Da, C +57.02 Da,             | 3105.80127  | 2 | 613.2952271 | 613.2977161 |
| GKVKEGMNIVEAMER           | P17742 | 0.00071942 | N-term +28.03 Da, K +28.03 Da,             | 3113.674072 | 3 | 592.3213501 | 592.3233163 |
| VLSGEDKSNIAAWGKIGGH       | P01942 | 0.00058411 | N-term +28.03 Da, K +28.03 Da,             | 3113.93335  | 4 | 545.8099976 | 545.561301  |
| YVGEEMEEGFSEAR            | P05213 | 0          | N-term +28.03 Da,                          | 3115.492432 | 2 | 859.37146   | 859.3723395 |
| ESTPTGITDHAIQGPEPNLEESPKR | Q9CRD0 | 0.00063291 | N-term +28.03 Da, K +28.03 Da,             | 3116.200195 | 4 | 691.0999756 | 690.6016185 |
| TVGDVNTDRPGLLDLKGK        | P31786 | 0          | N-term +28.03 Da, K +28.03 Da,             | 3120.876709 | 4 | 496.2875671 | 496.2874766 |
| APEEHPVLLTEAPLNPKANR      | P60710 | 0          | N-term +28.03 Da, K +28.03 Da,             | 3121.755371 | 4 | 564.0599976 | 563.8153958 |
| GDLSSASAIMGNPK            | P02089 | 0          | N-term +28.03 Da, K +28.03 Da,             | 3124.353027 | 2 | 702.3599854 | 702.3635879 |

|                             |        |            |                                            |             |   |             |             |
|-----------------------------|--------|------------|--------------------------------------------|-------------|---|-------------|-------------|
| SVLICPDGKTVEAAHGTVTR        | O88844 | 0          | N-term +28.03 Da, K +28.03 Da,C +57.02 Da, | 3124.932373 | 4 | 592.8099976 | 592.5638782 |
| SSMAEVDAAMAAR               | O88569 | 0          | N-term +28.03 Da,                          | 3125.408936 | 2 | 669.3148193 | 669.3130406 |
| NGGFCEVCKKL                 | Q61207 | 0.00915751 | N-term +28.03 Da, K +28.03 Da,C +57.02 Da, | 3128.072998 | 3 | 466.2399902 | 465.9089543 |
| TVGDVNTDRPGLLDLKGK          | P31786 | 0.00059032 | N-term +28.03 Da, K +28.03 Da,             | 3129.797119 | 3 | 661.710022  | 661.3808767 |
| NESTPTGITDHAQQGPEPNLEESPKR  | Q9CRD0 | 0.00072674 | N-term +28.03 Da, K +28.03 Da,             | 3134.606934 | 4 | 719.6099854 | 719.1123505 |
| PPSPYCKAALGDCLRLAGLLGRESGK  | E9PUB6 | 0.01223776 | N-term +28.03 Da, K +28.03 Da,C +57.02 Da, | 3140.894043 | 3 | 957.5       | 957.5174938 |
| EVKCDMEVSCPEGYTCC           | P28798 | 0.00352113 | N-term +28.03 Da, K +28.03 Da,C +57.02 Da, | 3143.658691 | 2 | 1090.930054 | 1090.427292 |
| AFGAVEAISDR                 | P10605 | 0.00061237 | N-term +28.03 Da,                          | 3144.21875  | 2 | 582.3070679 | 582.3063982 |
| VEGDDEEAALLER               | D3Z617 | 0.0015544  | N-term +28.03 Da,                          | 3145.671143 | 2 | 680.3400269 | 679.8435429 |
| FFEAKVQAINVSSR              | Q9D8Y0 | 0          | N-term +28.03 Da, K +28.03 Da,             | 3145.851563 | 3 | 551.3106689 | 551.3103927 |
| YVGEEMEEGEFSEAR             | P05213 | 0          | N-term +28.03 Da,                          | 3147.000488 | 2 | 859.371521  | 859.3723395 |
| ILAHTFEPTTETDITYACR         | P01887 | 0          | N-term +28.03 Da, C +57.02 Da,             | 3149.387451 | 3 | 718.6799927 | 718.6772535 |
| SKGPPDFSSDEEREPTVPLGSGASVGR | Q61029 | 0.00573066 | N-term +28.03 Da, K +28.03 Da,             | 3159.877686 | 4 | 704.3499756 | 704.353072  |
| VISLSGEHSIIGR               | P08228 | 0          | N-term +28.03 Da,                          | 3160.556152 | 3 | 465.9400024 | 465.9366666 |
| SEVSALLGR                   | P56480 | 0.01185771 | N-term +28.03 Da,                          | 3161.753906 | 2 | 480.2799988 | 480.2796516 |
| GPTDSYAAISEVDR              | O08585 | 0          | N-term +28.03 Da,                          | 3161.859131 | 2 | 754.8599854 | 754.865007  |
| GIHETTFNSIMKC               | Q8BFZ3 | 0.00947653 | N-term +28.03 Da, K +28.03 Da,C +57.02 Da, | 3164.668701 | 3 | 531.9299927 | 531.9303071 |
| ETIMNQEKLAKLQAQVR           | Q64152 | 0          | N-term +28.03 Da, K +28.03 Da,             | 3165.409668 | 4 | 522.0499878 | 521.8028652 |
| GDLSSASAIMGNAK              | P02088 | 0          | N-term +28.03 Da, K +28.03 Da,             | 3165.580322 | 2 | 689.3599854 | 689.3557629 |
| TAKGEKFMQEEFSR              | P27773 | 0.00156169 | N-term +28.03 Da, K +28.03 Da,             | 3166.006348 | 3 | 624.3200073 | 624.3292361 |
| LGFDEPAEQPVR                | P97825 | 0.00058858 | N-term +28.03 Da,                          | 3166.91333  | 2 | 693.3599854 | 693.3566199 |
| APAPVLMNQPPQIAPKR           | Q6NZJ6 | 0          | N-term +28.03 Da, K +28.03 Da,             | 3167.658691 | 3 | 628.6998901 | 628.7011152 |
| VDVDGTVEEDLGKSR             | P08113 | 0          | N-term +28.03 Da, K +28.03 Da,             | 3169.342285 | 3 | 558.960022  | 558.9563447 |
| QKTGTAEMSSILEER             | Q03265 | 0.01348412 | N-term +28.03 Da, K +28.03 Da,             | 3170.147217 | 2 | 868.9400024 | 868.4483813 |
| ELFADKVPKTAENFR             | P17742 | 0          | N-term +28.03 Da, K +28.03 Da,             | 3172.03418  | 4 | 463.0104065 | 463.0109123 |
| ETIMNQEKLAKLQAQVR           | Q64152 | 0.00060314 | N-term +28.03 Da, K +28.03 Da,             | 3174.550537 | 3 | 695.4000244 | 695.4013947 |
| VISLSGEHSIIGR               | P08228 | 0          | N-term +28.03 Da,                          | 3175.687012 | 2 | 698.3994141 | 698.4013616 |
| WAKVNPDEVGGEALGR            | P02089 | 0          | N-term +28.03 Da, K +28.03 Da,             | 3176.918457 | 3 | 585.6500244 | 585.3125737 |
| AKVDATEESDLAQYQVGR          | P09103 | 0.00062933 | N-term +28.03 Da, K +28.03 Da,             | 3177.217041 | 3 | 679.6799927 | 679.3480133 |
| ANLFASEGQPGKVIQVQAKR        | Q91V76 | 0          | N-term +28.03 Da, K +28.03 Da,             | 3180.917725 | 4 | 557.5700073 | 557.3205795 |
| GESSELDLQGIR                | Q9QXT0 | 0.00570885 | N-term +28.03 Da,                          | 3187.331299 | 2 | 666.8400269 | 666.3437099 |
| ALIGTQANVTKELER             | Q9DBC0 | 0          | N-term +28.03 Da, K +28.03 Da,             | 3189.351074 | 3 | 567         | 566.9964742 |
| LEGVGHFFR                   | P29391 | 0.00055463 | N-term +28.03 Da,                          | 3189.554688 | 3 | 363.8699951 | 363.8661826 |
| VISLSGEHSIIGR               | P08228 | 0          | N-term +28.03 Da,                          | 3191.537109 | 3 | 465.9358521 | 465.9366666 |
| HVGDLGNVTAGKDGVANVSIEDR     | P08228 | 0          | N-term +28.03 Da, K +28.03 Da,             | 3198.695313 | 3 | 793.7399902 | 793.7469479 |
| HVGDLGNVTAGKDGVANVSIEDR     | P08228 | 0          | N-term +28.03 Da, K +28.03 Da,             | 3199.088379 | 3 | 794.0800171 | 793.7469479 |
| HVGDLGNVTAGKDGVANVSIEDR     | P08228 | 0          | N-term +28.03 Da, K +28.03 Da,             | 3200.74292  | 4 | 595.8099976 | 595.56203   |
| AGEDFSIVASDTR               | O09061 | 0          | N-term +28.03 Da,                          | 3201.270996 | 2 | 698.3400269 | 698.3411674 |
| GESSELDLQGIR                | Q9QXT0 | 0.00070872 | N-term +28.03 Da,                          | 3202.328369 | 2 | 666.3400269 | 666.3437099 |
| LWGVNSDEVGGEALGR            | P02088 | 0.00062305 | N-term +28.03 Da, K +28.03 Da,             | 3202.711426 | 3 | 614.9938965 | 614.9951335 |

|                               |        |            |                                             |             |   |             |             |
|-------------------------------|--------|------------|---------------------------------------------|-------------|---|-------------|-------------|
| TDNYGHDLASVQALQR              | P16546 | 0.02586207 | N-term +28.03 Da,                           | 3203.106201 | 3 | 605.9799805 | 605.9709881 |
| TTNSCVAVMEGKQAKVLENAEGAR      | P38647 | 0.00107354 | N-term +28.03 Da, K +28.03 Da, C +57.02 Da, | 3204.971924 | 4 | 662.8499756 | 662.5940101 |
| HVGDLGNVTAGKDGVANVSIEDR       | P08228 | 0          | N-term +28.03 Da, K +28.03 Da,              | 3206.620361 | 2 | 1190.109985 | 1190.116784 |
| VYEQEQLPLSCDEPILSNKSGDNR      | P70296 | 0          | N-term +28.03 Da, K +28.03 Da, C +57.02 Da, | 3210.128662 | 3 | 912.4400024 | 912.104473  |
| GSEVSALLGR                    | P56480 | 0.00401003 | N-term +28.03 Da,                           | 3210.611816 | 2 | 508.7900085 | 508.7903836 |
| GTLDNPSLDETAYER               | O35943 | 0          | N-term +28.03 Da,                           | 3211.761475 | 2 | 898.4199829 | 898.4208758 |
| ASGASDTPHHQSPSESPVQPVGVGVCMMR | A2AS89 | 0.00061996 | N-term +28.03 Da, C +57.02 Da,              | 3212.384766 | 4 | 803.1199951 | 802.6208597 |
| SICEEFSQQADDKGCFR             | Q61838 | 0          | N-term +28.03 Da, K +28.03 Da, C +57.02 Da, | 3213.491455 | 3 | 711.6500244 | 711.65071   |
| LASVSTVLTSKYR                 | P01942 | 0          | N-term +28.03 Da, K +28.03 Da,              | 3213.67334  | 3 | 494.6300049 | 494.295972  |
| TTYVTKELQAEIR                 | Q8WURO | 0.0005777  | N-term +28.03 Da, K +28.03 Da,              | 3214.782227 | 3 | 536.6375122 | 536.6382867 |
| MADEALDSGLVSR                 | O35459 | 0          | N-term +28.03 Da,                           | 3214.9729   | 2 | 696.34375   | 696.3453953 |
| VDPDLSSFDAPSEPKSR             | Q9R182 | 0          | N-term +28.03 Da, K +28.03 Da,              | 3215.062012 | 3 | 664.3300171 | 663.9969805 |
| TFNVQDGPDPFQDR                | P97493 | 0          | N-term +28.03 Da,                           | 3215.466309 | 2 | 834.383606  | 834.3866381 |
| SICEEFSQQADDKGCFR             | Q61838 | 0          | N-term +28.03 Da, K +28.03 Da, C +57.02 Da, | 3216.492676 | 3 | 712.3200073 | 711.65071   |
| ASGASDTPHHQSPSESPVQPVGVGVCMMR | A2AS89 | 0          | N-term +28.03 Da, C +57.02 Da,              | 3218.18335  | 4 | 802.6199951 | 802.6208597 |
| VLSGEDKSNIAAWGKIG             | P01942 | 0          | N-term +28.03 Da, K +28.03 Da,              | 3218.258789 | 4 | 497.0401306 | 497.0412069 |
| GTLDNPSLDETAYER               | O35943 | 0          | N-term +28.03 Da,                           | 3220.313965 | 3 | 599.2814941 | 599.2830093 |
| SDAPPLTDGIKDR                 | Q9CR21 | 0          | N-term +28.03 Da, K +28.03 Da,              | 3221.718506 | 3 | 518.6199951 | 518.6226367 |
| VWEGLNVVKTGR                  | P15532 | 0.00070721 | N-term +28.03 Da, K +28.03 Da,              | 3223.365479 | 3 | 471.9443359 | 471.9452732 |
| ENIIDLSNANR                   | B5X0G2 | 0.00056818 | N-term +28.03 Da,                           | 3224.586426 | 2 | 643.8371582 | 643.8385944 |
| GQMPGSGIGTGPGVIQDR            | Q62448 | 0.0056684  | N-term +28.03 Da,                           | 3227.339111 | 2 | 877.9400024 | 877.9463397 |
| HVGDLGNVTAGKDGVANVSIEDR       | P08228 | 0          | N-term +28.03 Da, K +28.03 Da,              | 3230.433838 | 3 | 794.0800171 | 793.7469479 |
| SLFGDSYETQVIAHQGSSKGR         | Q78JT3 | 0.00574163 | N-term +28.03 Da, K +28.03 Da,              | 3232.092041 | 4 | 620.3099976 | 620.0659425 |
| HVGDLGNVTAGKDGVANVSIEDR       | P08228 | 0          | N-term +28.03 Da, K +28.03 Da,              | 3232.579834 | 4 | 596.0599976 | 595.56203   |
| IPNQFQGSPPAPSDSVKIEER         | Q9R257 | 0          | N-term +28.03 Da, K +28.03 Da,              | 3233.000244 | 3 | 828.4299927 | 827.7588536 |
| HVGDLGNVTAGKDGVANVSIEDR       | P08228 | 0          | N-term +28.03 Da, K +28.03 Da,              | 3233.341309 | 3 | 793.4199829 | 793.7469479 |
| NALALAMER                     | Q60692 | 0.0035443  | N-term +28.03 Da,                           | 3241.056152 | 2 | 508.7808228 | 508.781504  |
| GTLDNPSLDETAYER               | O35943 | 0          | N-term +28.03 Da,                           | 3242.588379 | 2 | 898.4199829 | 898.4208758 |
| SSMGTLPKQVKIVEVGPR            | P38060 | 0.00443787 | N-term +28.03 Da, K +28.03 Da,              | 3243.536377 | 4 | 503.2999878 | 503.2999581 |
| SDAPPLTDGIKDR                 | Q9CR21 | 0.00106895 | N-term +28.03 Da, K +28.03 Da,              | 3245.201416 | 2 | 777.9299927 | 777.4303168 |
| LQEVDEPPQHALR                 | P70296 | 0.04311709 | N-term +28.03 Da,                           | 3246.977051 | 2 | 781.4099731 | 780.4124582 |
| KLVIIEGDLER                   | P21107 | 0.00065317 | N-term +28.03 Da, K +28.03 Da,              | 3248.843506 | 3 | 447.6099854 | 447.6097792 |
| KLVIIEGDLER                   | P21107 | 0.01065719 | N-term +28.03 Da, K +28.03 Da,              | 3250.760254 | 2 | 670.9100342 | 670.9110306 |
| KEALTYDGALLGDR                | Q9WUK2 | 0.0015949  | N-term +28.03 Da, K +28.03 Da,              | 3252.017578 | 3 | 526.6199951 | 526.6226367 |
| LQEVDEPPQHALR                 | P70296 | 0.02616517 | N-term +28.03 Da,                           | 3252.119629 | 2 | 780.4099731 | 780.4124582 |
| FHMTKDMLPGSYPR                | Q9D6J5 | 0.0015932  | N-term +28.03 Da, K +28.03 Da,              | 3252.227783 | 3 | 579.6300049 | 579.2934682 |
| SDAPPLTDGIKDR                 | Q9CR21 | 0.00440744 | N-term +28.03 Da, K +28.03 Da,              | 3253.042969 | 3 | 518.6221313 | 518.6226367 |
| SAAETVTKGGIMLPEKSQGVQLQA      | Q64433 | 0.00060241 | N-term +28.03 Da, K +28.03 Da,              | 3255.55835  | 4 | 639.8699951 | 639.6173822 |
| HLYPGEVCPGMDIR                | P15208 | 0.00560486 | N-term +28.03 Da, C +57.02 Da,              | 3256.048096 | 2 | 836.9000244 | 836.4027215 |
| TCFSTEGPNLVTR                 | P07724 | 0.00056338 | N-term +28.03 Da, C +57.02 Da,              | 3256.712158 | 2 | 755.8699951 | 755.3719444 |

|                          |        |            |                                            |             |   |             |             |
|--------------------------|--------|------------|--------------------------------------------|-------------|---|-------------|-------------|
| GDLGNVTAGKDGVANVSIEDR    | P08228 | 0          | N-term +28.03 Da, K +28.03 Da,             | 3257.076904 | 3 | 715.039978  | 715.037839  |
| ESEVASSLVLER             | Q9CYR0 | 0.0005618  | N-term +28.03 Da,                          | 3263.93335  | 2 | 673.861084  | 673.8617355 |
| DLPETFDAR                | P10605 | 0.00353893 | N-term +28.03 Da,                          | 3268.152344 | 2 | 546.7700195 | 546.2720241 |
| GSVVKSEDYAFPTYADR        | P19783 | 0.0130719  | N-term +28.03 Da, K +28.03 Da,             | 3269.675781 | 3 | 654.6599731 | 654.3265492 |
| TIAGLNVMR                | P20029 | 0.00441393 | N-term +28.03 Da,                          | 3273.1521   | 2 | 502.2900085 | 501.7918715 |
| GSVVKSEDYAFPTYADR        | P19783 | 0          | N-term +28.03 Da, K +28.03 Da,             | 3281.602539 | 3 | 655         | 654.3265492 |
| SDAPPLTLDGIKDR           | Q9CR21 | 0          | N-term +28.03 Da, K +28.03 Da,             | 3284.344238 | 3 | 518.6209106 | 518.6226367 |
| HVGDGLGNVTAGKDGVANVSIEDR | P08228 | 0.00070028 | N-term +28.03 Da, K +28.03 Da,             | 3285.572998 | 3 | 794.0800171 | 793.7469479 |
| FSVEKLGSLR               | Q922Q1 | 0.00399401 | N-term +28.03 Da, K +28.03 Da,             | 3285.77124  | 3 | 398.2399902 | 397.9080478 |
| SDAPPLTLDGIKDR           | Q9CR21 | 0          | N-term +28.03 Da, K +28.03 Da,             | 3286.285156 | 2 | 777.9299927 | 777.4303168 |
| AMPVPFTPELKPGR           | Q9JL35 | 0.00054466 | N-term +28.03 Da, K +28.03 Da,             | 3287.150879 | 4 | 425.0100098 | 424.5061079 |
| MGDSASKVISAEELPGR        | Q9D6Y7 | 0          | N-term +28.03 Da, K +28.03 Da,             | 3287.243408 | 3 | 625.6599731 | 625.3277841 |
| VLSGEDKSNIAAWGKIGG       | P01942 | 0.00059102 | N-term +28.03 Da, K +28.03 Da,             | 3287.493652 | 4 | 511.7999878 | 511.2965729 |
| SDAPPLTLDGIKDR           | Q9CR21 | 0          | N-term +28.03 Da, K +28.03 Da,             | 3289.117676 | 2 | 777.4278564 | 777.4303168 |
| VLSGEDKSNIAAWGKIGG       | P01942 | 0.00061767 | N-term +28.03 Da, K +28.03 Da,             | 3289.193115 | 4 | 511.5499878 | 511.2965729 |
| TSSMGTLPKQVKIVEVGPR      | P38060 | 0          | N-term +28.03 Da, K +28.03 Da,             | 3289.56665  | 4 | 528.8099976 | 528.5618779 |
| SAAETVTKGGIMLPEKSGKVL    | Q64433 | 0.03249391 | N-term +28.03 Da, K +28.03 Da,             | 3291.157227 | 4 | 590.3400269 | 589.8434591 |
| STSSMGTLPKQVKIVEVGPR     | P38060 | 0          | N-term +28.03 Da, K +28.03 Da,             | 3293.174316 | 4 | 550.3200073 | 550.3198852 |
| EVDVDGTVEEDLGKSR         | P08113 | 0          | N-term +28.03 Da, K +28.03 Da,             | 3296.22583  | 3 | 601.9699707 | 601.9705428 |
| IGLEEHLNALDR             | Q8VC30 | 0          | N-term +28.03 Da,                          | 3297.925049 | 3 | 469.9234009 | 469.9245382 |
| SVVAGGPEVTLTPER          | Q8CIM3 | 0          | N-term +28.03 Da,                          | 3298.102051 | 2 | 770.4199829 | 770.4224917 |
| TIPKDLAGSIIGKGGQR        | P61979 | 0          | N-term +28.03 Da, K +28.03 Da,             | 3300.438965 | 4 | 449.519989  | 449.5254581 |
| AVEEYSCFEGSMK            | Q8VEM8 | 0          | N-term +28.03 Da, K +28.03 Da,C +57.02 Da, | 3301.704102 | 2 | 796.8499756 | 796.8521963 |
| SLFGDSYETQVIAHQGGSSKGR   | Q78JT3 | 0          | N-term +28.03 Da, K +28.03 Da,             | 3302.897949 | 4 | 620.5700073 | 620.0659425 |
| VYDQELGSPDKSEALR         | Q8R404 | 0          | N-term +28.03 Da, K +28.03 Da,             | 3303.186523 | 3 | 683.7000122 | 683.028392  |
| SLFGDSYETQVIAHQGGSSKGR   | Q78JT3 | 0          | N-term +28.03 Da, K +28.03 Da,             | 3304.505371 | 4 | 620.065979  | 620.0659425 |
| LAELKSNPTLNEYHTR         | Q00623 | 0          | N-term +28.03 Da, K +28.03 Da,             | 3304.681885 | 3 | 647.6799927 | 648.0179382 |
| VFMDAPVSGGVAAR           | Q99L13 | 0.02151899 | N-term +28.03 Da,                          | 3306.31665  | 2 | 731.3800049 | 731.3795719 |
| KLDYDEDASAMLR            | Q99L47 | 0.02153716 | N-term +28.03 Da, K +28.03 Da,             | 3307.700684 | 3 | 528.2600098 | 528.2642322 |
| VAPEEHPVLLTEAPLNPKANR    | P60710 | 0          | N-term +28.03 Da, K +28.03 Da,             | 3307.80835  | 4 | 589.0800171 | 588.5824993 |
| GQAISLLPDR               | Q8VBW8 | 0.01222174 | N-term +28.03 Da,                          | 3311.682861 | 2 | 549.8200073 | 549.3193082 |
| SDAPPLTLDGIKDR           | Q9CR21 | 0          | N-term +28.03 Da, K +28.03 Da,             | 3315.391113 | 3 | 518.6220703 | 518.6226367 |
| SDAPPLTLDGIKDR           | Q9CR21 | 0          | N-term +28.03 Da, K +28.03 Da,             | 3319.478516 | 2 | 777.4294434 | 777.4303168 |
| AVPIAQSEPPQSLNEALMR      | Q9JIQ3 | 0.00068823 | N-term +28.03 Da, K +28.03 Da,             | 3320.025635 | 3 | 742.7399902 | 742.4034644 |
| IMDPNIVGNEHYDVAR         | P56480 | 0          | N-term +28.03 Da,                          | 3321.880127 | 3 | 624.3099976 | 624.3087237 |
| TIPKDLAGSIIGKGGQR        | P61979 | 0.00950656 | N-term +28.03 Da, K +28.03 Da,             | 3324.985352 | 3 | 599.3599854 | 599.0315186 |
| NLPLPPPPPPR              | P61979 | 0          | N-term +28.03 Da,                          | 3327.779785 | 2 | 611.8699951 | 611.8689679 |
| KDQGTIEDYVEGLR           | Q60605 | 0.00064267 | N-term +28.03 Da, K +28.03 Da,             | 3328.390625 | 3 | 576.9517212 | 576.952823  |
| TIPKDLAGSIIGKGGQR        | P61979 | 0          | N-term +28.03 Da, K +28.03 Da,             | 3330.732178 | 4 | 449.7799988 | 449.5254581 |
| FNVQDGPDPFQDR            | P97493 | 0          | N-term +28.03 Da,                          | 3331.321289 | 2 | 733.3400269 | 733.3389589 |



|                                  |        |            |                                            |             |   |             |             |
|----------------------------------|--------|------------|--------------------------------------------|-------------|---|-------------|-------------|
| VYDQELLGSPDKSEALR                | Q8R404 | 0.00055371 | N-term +28.03 Da, K +28.03 Da,             | 3333.844727 | 3 | 683.0300293 | 683.028392  |
| VISLSGEHSIIGR                    | P08228 | 0          | N-term +28.03 Da,                          | 3334.368896 | 3 | 465.9352722 | 465.9366666 |
| GPAD EERHVGDLGNVTAGKDG VANVSIEDR | P08228 | 0          | N-term +28.03 Da, K +28.03 Da,             | 3337.522217 | 3 | 1045.170044 | 1045.188477 |
| KGSFVQDIQSDIHTDSSR               | Q5XG73 | 0          | N-term +28.03 Da, K +28.03 Da,             | 3338.05835  | 3 | 693.0100098 | 692.6833959 |
| TTNFSELQSQMQR                    | Q8R317 | 0          | N-term +28.03 Da,                          | 3340.083252 | 2 | 799.3800049 | 799.3855835 |
| NKPDIDAWELR                      | P12787 | 0.00558399 | N-term +28.03 Da, K +28.03 Da,             | 3342.706055 | 3 | 471.5882568 | 471.5892668 |
| GDGTITTKELGTVMR                  | P62204 | 0          | N-term +28.03 Da, K +28.03 Da,             | 3343.655518 | 3 | 545.960022  | 545.630915  |
| SDAPPLTLDG IKDR                  | Q9CR21 | 0.00072516 | N-term +28.03 Da, K +28.03 Da,             | 3344.51123  | 3 | 518.2800293 | 518.6226367 |
| SAMNVVFSEDEM KR                  | Q8C196 | 0          | N-term +28.03 Da, K +28.03 Da,             | 3349.505371 | 3 | 566.9400024 | 566.9445052 |
| VSSSLPDICYR                      | P53996 | 0.004002   | N-term +28.03 Da, C +57.02 Da,             | 3350.467529 | 2 | 662.8303833 | 662.8319233 |
| NYLEKLGPLR                       | Q8C7G5 | 0.00159744 | N-term +28.03 Da, K +28.03 Da,             | 3353.525879 | 3 | 420.25      | 420.2554475 |
| TQVEGDEEAALLER                   | D3Z617 | 0          | N-term +28.03 Da,                          | 3356.328613 | 2 | 794.3900146 | 794.3966717 |
| VFDKDGNGYISAAELR                 | P62204 | 0          | N-term +28.03 Da, K +28.03 Da,             | 3357.381836 | 3 | 604.3200073 | 604.3159841 |
| VVENIENYEIR                      | O35403 | 0.00054289 | N-term +28.03 Da,                          | 3359.040527 | 2 | 703.3699951 | 703.3697275 |
| GPLGLDHMASSIER                   | Q9D0E1 | 0          | N-term +28.03 Da,                          | 3359.99707  | 3 | 504.2600098 | 504.2609331 |
| NLPLPPPPPPR                      | P61979 | 0.00912825 | N-term +28.03 Da,                          | 3362.794678 | 2 | 611.8699951 | 611.8689679 |
| LTISELKPTYQDR                    | P14094 | 0.00056593 | N-term +28.03 Da, K +28.03 Da,             | 3364.128174 | 3 | 540.6378784 | 540.6382867 |
| SLTPVAQSDPLVR                    | Q60865 | 0.00304414 | N-term +28.03 Da,                          | 3365.841309 | 2 | 705.9008789 | 705.9011946 |
| VLAELYVSDR                       | Q8BP47 | 0.00106952 | N-term +28.03 Da,                          | 3371.355469 | 2 | 596.8300171 | 596.8322488 |
| TYEDYVEGLR                       | Q60605 | 0.00069735 | N-term +28.03 Da,                          | 3372.902832 | 2 | 636.8074951 | 636.8089713 |
| AAGVEFE EKFLKTR                  | P30115 | 0          | N-term +28.03 Da, K +28.03 Da,             | 3374.006836 | 4 | 428         | 427.9962677 |
| TFNVQDGPDPFQDR                   | P97493 | 0          | N-term +28.03 Da,                          | 3374.653076 | 2 | 783.8599854 | 783.8627985 |
| DDEV DVDGTVEEDLGKSR              | P08113 | 0          | N-term +28.03 Da, K +28.03 Da,             | 3374.796875 | 2 | 1017.969971 | 1017.47912  |
| SDAPPLTLDG IKDR                  | Q9CR21 | 0.0160451  | N-term +28.03 Da, K +28.03 Da,             | 3375.435059 | 3 | 518.2800293 | 518.6226367 |
| DDEV DVDGTVEEDLGKSR              | P08113 | 0          | N-term +28.03 Da, K +28.03 Da,             | 3375.585938 | 3 | 678.6539307 | 678.6551722 |
| KVGLQVVAVKAPGFGDNR               | P63038 | 0          | N-term +28.03 Da, K +28.03 Da,             | 3376.366943 | 4 | 485.54245   | 485.5426451 |
| MKFNPFVTS DR                     | P61255 | 0          | N-term +28.03 Da, K +28.03 Da,             | 3377.621094 | 3 | 466.5790405 | 466.5797141 |
| STFQSPEFSVTR                     | Q9D8U8 | 0.04001601 | N-term +28.03 Da,                          | 3380.229492 | 2 | 707.3599854 | 707.3540774 |
| SASMN ESTPTGITD HIAQGPEPNLEESPKR | Q9CRD0 | 0          | N-term +28.03 Da, K +28.03 Da,             | 3383.211426 | 4 | 813.4000244 | 813.1477649 |
| AVDATVNQVLASR                    | Q922R8 | 0.00064935 | N-term +28.03 Da,                          | 3385.87915  | 2 | 686.3900146 | 686.383169  |
| TQVEGDEEAALLER                   | D3Z617 | 0          | N-term +28.03 Da,                          | 3386.814209 | 2 | 794.3900146 | 794.3966717 |
| EQEVSDNELQELSTQGSR               | Q06890 | 0          | N-term +28.03 Da,                          | 3387.282959 | 2 | 1038.97998  | 1038.987644 |
| VGVKPVGSDPDFQPELSGAGSR           | Q8CDN6 | 0          | N-term +28.03 Da, K +28.03 Da,             | 3390.238037 | 3 | 752.3900146 | 752.3937341 |
| DTLGSTVSQLQER                    | Q00623 | 0          | N-term +28.03 Da,                          | 3393.624268 | 2 | 731.8800049 | 731.3808241 |
| VNFTVDQIR                        | P58252 | 0.00071124 | N-term +28.03 Da,                          | 3394.234619 | 2 | 560.3076172 | 560.3114832 |
| EQEVSDNELQELSTQGSR               | Q06890 | 0          | N-term +28.03 Da,                          | 3394.327393 | 3 | 692.9899902 | 692.9941879 |
| ASPHQECEYLQMI EKQR               | P97751 | 0          | N-term +28.03 Da, K +28.03 Da,C +57.02 Da, | 3394.623779 | 4 | 552.0200195 | 551.5213188 |
| WDEANTEKQRLEEKQR                 | Q5QNQ6 | 0.04623824 | N-term +28.03 Da, K +28.03 Da,             | 3398.984375 | 3 | 716.0300293 | 715.3746737 |
| TINEVENQILTR                     | P57780 | 0          | N-term +28.03 Da,                          | 3405.65625  | 2 | 729.4000244 | 729.4015591 |
| LIGDAAKNQLTSNPENTV FDAKR         | P20029 | 0          | N-term +28.03 Da, K +28.03 Da,             | 3408.972168 | 4 | 647.5999756 | 647.3526087 |

|                               |        |            |                                            |             |   |             |             |
|-------------------------------|--------|------------|--------------------------------------------|-------------|---|-------------|-------------|
| VLSGEDKSNIAAWGKIGGHGAIEY      | P01942 | 0.03520842 | N-term +28.03 Da, K +28.03 Da,             | 3409.064209 | 3 | 867.4699707 | 867.1341431 |
| EQEVSDELQELSTQGSR             | Q06890 | 0          | N-term +28.03 Da,                          | 3409.547119 | 2 | 1039.98999  | 1038.987644 |
| FNPDVSWDR                     | Q62425 | 0.0015715  | N-term +28.03 Da,                          | 3411.012695 | 2 | 582.2800293 | 582.2776406 |
| SGEDKSNIAAWGKIGGHGAIEYGAEALER | P01942 | 0.00942127 | N-term +28.03 Da, K +28.03 Da,             | 3420.026123 | 4 | 779.1599731 | 779.1558209 |
| TNVEDVLNAR                    | Q9CR29 | 0.0006006  | N-term +28.03 Da,                          | 3421.52002  | 2 | 579.8099976 | 579.8093052 |
| VFVTGPLPAEGR                  | Q91Z53 | 0.0069029  | N-term +28.03 Da,                          | 3423.302979 | 2 | 635.8599854 | 635.8613404 |
| VFVTGPLPAEGR                  | Q91Z53 | 0.00107759 | N-term +28.03 Da,                          | 3427.700684 | 2 | 635.3599854 | 635.8613404 |
| DLSSSDLSTASKIVK               | Q61838 | 0          | N-term +28.03 Da, K +28.03 Da,             | 3430.68457  | 3 | 545.6400146 | 545.6452188 |
| SGSAMNVVSEDEMCR               | Q8C196 | 0.02382943 | N-term +28.03 Da, K +28.03 Da,             | 3431.359863 | 3 | 614.960022  | 614.9623363 |
| SVPDEESKPASSNTQVEGDEEAALLER   | D3Z617 | 0          | N-term +28.03 Da, K +28.03 Da,             | 3434.585449 | 3 | 982.1400146 | 981.8070392 |
| VVMNYSEIESKVR                 | Q99KN9 | 0          | N-term +28.03 Da, K +28.03 Da,             | 3437.826172 | 3 | 537.6300049 | 537.2921219 |
| DLSSSDLSTASKIVK               | Q61838 | 0          | N-term +28.03 Da, K +28.03 Da,             | 3439.894775 | 2 | 817.9639893 | 817.9641899 |
| TGEYNKLGSAIEEVSR              | Q8BNX1 | 0.02112379 | N-term +28.03 Da, K +28.03 Da,             | 3440.1604   | 3 | 604.3200073 | 603.6511441 |
| LLNETGDEPFQYKN                | P15105 | 0.01888412 | N-term +28.03 Da, K +28.03 Da,             | 3440.503174 | 2 | 862.9400024 | 862.4305143 |
| SVPDEESKPASSNTQVEGDEEAALLER   | D3Z617 | 0          | N-term +28.03 Da, K +28.03 Da,             | 3442.030762 | 3 | 982.4699707 | 981.8070392 |
| IELMKDPSVVVR                  | P70168 | 0.00062775 | N-term +28.03 Da, K +28.03 Da,             | 3442.5271   | 3 | 481.6199951 | 481.2864192 |
| NLIVEEEDLR                    | A2ASS6 | 0.02591526 | N-term +28.03 Da,                          | 3445.720947 | 2 | 629.336731  | 629.3378959 |
| QNYSTEVEAAVNR                 | P29391 | 0          | N-term +28.03 Da,                          | 3450.536133 | 2 | 754.3599854 | 754.8706235 |
| KTLEMNPCTPNNVEVLESR           | P42703 | 0.03772071 | N-term +28.03 Da, K +28.03 Da,C +57.02 Da, | 3451.042236 | 3 | 763.4000244 | 763.0522146 |
| SGEDKSNIAAWGKIGGHGAIEYGAEALER | P01942 | 0.00555813 | N-term +28.03 Da, K +28.03 Da,             | 3451.506592 | 4 | 779.6599731 | 779.1558209 |
| SGNELIQTYTYEGVEAKR            | P55050 | 0          | N-term +28.03 Da, K +28.03 Da,             | 3452.046631 | 3 | 705.7000122 | 705.3636633 |
| TGPNLHGLFGR                   | P62897 | 0          | N-term +28.03 Da,                          | 3452.458984 | 3 | 399.5550232 | 399.5560083 |
| FNPDVSWDR                     | Q62425 | 0.00055432 | N-term +28.03 Da,                          | 3452.581299 | 2 | 582.2758179 | 582.2776406 |
| SEMQMIEQETPLSAKSSR            | Q99K28 | 0          | N-term +28.03 Da, K +28.03 Da,             | 3455.502686 | 3 | 703.6799927 | 703.3502605 |
| DLSSSDLSTASKIVK               | Q61838 | 0          | N-term +28.03 Da, K +28.03 Da,             | 3461.046631 | 3 | 545.644043  | 545.6452188 |
| FGPITTDIR                     | Q9D6Y7 | 0.00442478 | N-term +28.03 Da,                          | 3463.077148 | 2 | 524.7999878 | 524.2953016 |
| TFNVQDGPDPFQDR                | P97493 | 0          | N-term +28.03 Da,                          | 3463.293213 | 2 | 834.8900146 | 834.3866381 |
| AEIDYTFHQAPEVVR               | F7BJK1 | 0          | N-term +28.03 Da,                          | 3465.006592 | 3 | 601.9799805 | 601.6405791 |
| AEIDYTFHQAPEVVR               | F7BJK1 | 0          | N-term +28.03 Da,                          | 3465.214111 | 3 | 602.3099976 | 601.6405791 |
| SGLPPSGSWQDLKDHMR             | Q6PDM2 | 0          | N-term +28.03 Da, K +28.03 Da,             | 3469.172119 | 4 | 493         | 492.5005489 |
| VEKINGEWHTIILASDKR            | B5X0G2 | 0          | N-term +28.03 Da, K +28.03 Da,             | 3470.903564 | 4 | 549.3099976 | 549.0652135 |
| SVFLPAPKANNVLR                | Q9CQW3 | 0.00071531 | N-term +28.03 Da, K +28.03 Da,             | 3473.358643 | 3 | 527.9899902 | 527.9873611 |
| KDENATLDGGDVLFTGR             | Q9CWS0 | 0          | N-term +28.03 Da, K +28.03 Da,             | 3477.105713 | 3 | 622.3200073 | 621.9864155 |
| IQLVEEELDR                    | P21107 | 0.00063131 | N-term +28.03 Da,                          | 3478.849854 | 2 | 636.3499756 | 636.3457209 |
| LHLGVTPSVLR                   | O89023 | 0.00562061 | N-term +28.03 Da,                          | 3479.106201 | 3 | 407.5899963 | 407.2555588 |
| NLIVEEEDLR                    | A2ASS6 | 0.01598963 | N-term +28.03 Da,                          | 3481.767578 | 2 | 629.3400269 | 629.3378959 |
| MKVFTGPLPAEGR                 | Q91Z53 | 0          | N-term +28.03 Da, K +28.03 Da,             | 3482.632568 | 3 | 519.965332  | 519.9655686 |
| GLTSISNLPKLNKLK               | O35381 | 0.00057904 | N-term +28.03 Da, K +28.03 Da,             | 3482.801514 | 4 | 435.284668  | 435.2854764 |
| TGPNLHGLFGR                   | P62897 | 0          | N-term +28.03 Da,                          | 3483.742432 | 3 | 399.8900146 | 399.5560083 |
| TLGEECELETMTGEKVK             | P12710 | 0          | N-term +28.03 Da, K +28.03 Da,C +57.02 Da, | 3485.888184 | 3 | 680.0078735 | 680.0076118 |

|                             |        |            |                                            |             |   |             |             |
|-----------------------------|--------|------------|--------------------------------------------|-------------|---|-------------|-------------|
| TASAGIQVVGDDLTVTNPKR        | P17182 | 0          | N-term +28.03 Da, K +28.03 Da,             | 3488.887207 | 3 | 700.3900146 | 700.0549411 |
| VFDKDGNGYISAAELR            | P62204 | 0          | N-term +28.03 Da, K +28.03 Da,             | 3489.32373  | 3 | 604.9799805 | 604.3159841 |
| GLTTDEKFVEGVYR              | P07309 | 0.0005534  | N-term +28.03 Da, K +28.03 Da,             | 3491.663086 | 2 | 835.4400024 | 835.4434243 |
| GLTTDEKFVEGVYR              | P07309 | 0          | N-term +28.03 Da, K +28.03 Da,             | 3492.630127 | 3 | 557.2979736 | 557.2980417 |
| TLGEECELETMTGEKVK           | P12710 | 0          | N-term +28.03 Da, K +28.03 Da,C +57.02 Da, | 3492.953369 | 2 | 1019.508423 | 1019.507779 |
| TAGSPTDFLEER                | P27546 | 0          | N-term +28.03 Da,                          | 3493.058594 | 2 | 675.8290405 | 675.8304354 |
| GLPPSGSWQDLKDHMR            | Q6PDM2 | 0          | N-term +28.03 Da, K +28.03 Da,             | 3496.008057 | 4 | 470.9899902 | 470.7425417 |
| TTFNVQDGPDPFQDR             | P97493 | 0          | N-term +28.03 Da,                          | 3496.188477 | 2 | 834.3900146 | 834.3866381 |
| NGEWHTIILASDKR              | B5X0G2 | 0.00107527 | N-term +28.03 Da, K +28.03 Da,             | 3496.416748 | 2 | 849.4500122 | 848.4624823 |
| DATEESDLAQYQYGV             | P09103 | 0          | N-term +28.03 Da,                          | 3497.864746 | 2 | 855.4000244 | 855.4024857 |
| HAPFETDISTLTR               | Q9QXD6 | 0.02113271 | N-term +28.03 Da,                          | 3504.914307 | 3 | 505.9299927 | 505.9315816 |
| DLGNVTAGKDGVANVSIEDR        | P08228 | 0          | N-term +28.03 Da, K +28.03 Da,             | 3505.133789 | 3 | 696.3599854 | 696.0306843 |
| HAPFETDISTLTR               | Q9QXD6 | 0.00943396 | N-term +28.03 Da,                          | 3508.737549 | 2 | 759.4000244 | 758.3937341 |
| TTFNVQDGPDPFQDR             | P97493 | 0          | N-term +28.03 Da,                          | 3509.123779 | 3 | 556.5900269 | 556.5935176 |
| DALNQATSQVESKQNTLAKLR       | Q99PL5 | 0          | N-term +28.03 Da, K +28.03 Da,             | 3509.603271 | 4 | 632.8499756 | 632.8474249 |
| DLGNVTAGKDGVANVSIEDR        | P08228 | 0          | N-term +28.03 Da, K +28.03 Da,             | 3509.989258 | 2 | 1043.540039 | 1043.542388 |
| AKDIAYLGITDVR               | P41317 | 0.00646054 | N-term +28.03 Da, K +28.03 Da,             | 3510.479736 | 3 | 497.6236572 | 497.6240886 |
| TVGGVMTKLIPR                | P20029 | 0.00065062 | N-term +28.03 Da, K +28.03 Da,             | 3512.324219 | 3 | 443.2757568 | 443.2758542 |
| LRPGDCEVCISYLGR             | Q9CXI5 | 0.00353535 | N-term +28.03 Da, C +57.02 Da,             | 3514.813965 | 3 | 608.2999878 | 608.3028039 |
| VGDNLGNVTAGKDGVANVSIEDR     | P08228 | 0          | N-term +28.03 Da, K +28.03 Da,             | 3517.943359 | 3 | 748.0616455 | 748.0606438 |
| TLGEECELETMTGEKVK           | P12710 | 0          | N-term +28.03 Da, K +28.03 Da,C +57.02 Da, | 3519.95166  | 3 | 680.3400269 | 680.0076118 |
| FVDIPSKIICR                 | Q64374 | 0.00058106 | N-term +28.03 Da, K +28.03 Da,C +57.02 Da, | 3520.231934 | 3 | 468.6099854 | 468.6074925 |
| VFDKDGNGYISAAELR            | P62204 | 0.00059453 | N-term +28.03 Da, K +28.03 Da,             | 3520.617676 | 3 | 604.6433716 | 604.3159841 |
| AAAGVEFEKFLKTR              | P30115 | 0          | N-term +28.03 Da, K +28.03 Da,             | 3523.457764 | 4 | 445.7550659 | 445.7555463 |
| AVELEGEQPISVPPSTNHTVYR      | Q8CHT0 | 0.02592593 | N-term +28.03 Da,                          | 3523.681396 | 3 | 817.75      | 817.7553319 |
| FVELETNLPASR                | O35215 | 0.04313415 | N-term +28.03 Da,                          | 3523.793701 | 2 | 702.3800049 | 702.380095  |
| KDENATLDGGDVLFTGR           | Q9CWS0 | 0          | N-term +28.03 Da, K +28.03 Da,             | 3526.341309 | 3 | 621.9899902 | 621.9864155 |
| DMLDLGAAR                   | Q9D3D9 | 0.0057554  | N-term +28.03 Da,                          | 3526.416504 | 2 | 495.2563171 | 495.2578619 |
| FVELETNLPASR                | O35215 | 0.00354251 | N-term +28.03 Da,                          | 3528.752686 | 2 | 701.8699951 | 702.380095  |
| KDENATLDGGDVLFTGR           | Q9CWS0 | 0          | N-term +28.03 Da, K +28.03 Da,             | 3531.132324 | 2 | 932.4699707 | 932.475985  |
| AIDLIAQQPVNEVEHR            | P52503 | 0          | N-term +28.03 Da,                          | 3532.133301 | 3 | 620.6697388 | 620.6706498 |
| AIGTIQEDYLR                 | Q6ZWQ9 | 0.00067568 | N-term +28.03 Da,                          | 3535.72168  | 2 | 653.8499756 | 653.8537129 |
| AEKVLKQALER                 | Q8C0S4 | 0.02078914 | N-term +28.03 Da, K +28.03 Da,             | 3536.246826 | 3 | 456.9500122 | 456.9572903 |
| MQIFVKTLTGK                 | P0CG49 | 0          | N-term +28.03 Da, K +28.03 Da,             | 3537.227051 | 3 | 450.6099854 | 450.6123549 |
| TTFNVQDGPDPFQDR             | P97493 | 0          | N-term +28.03 Da,                          | 3537.392578 | 2 | 834.3847656 | 834.3866381 |
| TGTPVLGGLSYR                | Q61176 | 0.00057571 | N-term +28.03 Da,                          | 3537.479248 | 2 | 624.848999  | 624.8509729 |
| LAKVDATEESDLAQYQYGV         | P09103 | 0          | N-term +28.03 Da, K +28.03 Da,             | 3539.483887 | 3 | 717.3699951 | 717.0427014 |
| AYEPVWAIGTGKTATPQQAQEVHEKLR | P17751 | 0          | N-term +28.03 Da, K +28.03 Da,             | 3539.577148 | 4 | 774.1699829 | 773.9186475 |
| MQIFVKTLTGK                 | P0CG49 | 0          | N-term +28.03 Da, K +28.03 Da,             | 3539.676514 | 2 | 675.9199829 | 675.4148941 |
| LGPLVEQGR                   | P08226 | 0.02555647 | N-term +28.03 Da,                          | 3541.146729 | 2 | 498.2900085 | 498.7954686 |

|                             |        |            |                                             |             |   |             |             |
|-----------------------------|--------|------------|---------------------------------------------|-------------|---|-------------|-------------|
| VSTSSMGTLPKQVKIVEVGPR       | P38060 | 0          | N-term +28.03 Da, K +28.03 Da,              | 3542.7146   | 4 | 575.3400269 | 575.0869888 |
| TTFNVQDGPDPFQDR             | P97493 | 0          | N-term +28.03 Da,                           | 3542.790283 | 3 | 556.9299927 | 556.5935176 |
| TMTLGDIVYKR                 | P12710 | 0          | N-term +28.03 Da, K +28.03 Da,              | 3546.888428 | 3 | 451.5899963 | 451.5917311 |
| GSTAPVGGGSFPTITPR           | Q922R8 | 0.00558659 | N-term +28.03 Da,                           | 3548.178223 | 2 | 816.4299927 | 815.4333908 |
| SGYPTLKIFR                  | P08003 | 0.00059988 | N-term +28.03 Da, K +28.03 Da,              | 3548.312012 | 3 | 413.25      | 413.2482928 |
| SFSGSLDELSER                | E9PV24 | 0.00445545 | N-term +28.03 Da,                           | 3548.581787 | 2 | 678.3400269 | 677.8278929 |
| VFDKDGNGYISAAELR            | P62204 | 0.00206186 | N-term +28.03 Da, K +28.03 Da,              | 3551.169922 | 3 | 604.9799805 | 604.3159841 |
| SQATDFGEALVR                | Q35887 | 0.00572519 | N-term +28.03 Da,                           | 3551.84082  | 2 | 661.3378906 | 661.3409699 |
| STNTVGLGLPMSR               | Q99KN9 | 0.0007326  | N-term +28.03 Da,                           | 3552.55127  | 2 | 680.8599854 | 680.8662974 |
| SSGTVLSDYVGGPPSGTGLHR       | P70296 | 0          | N-term +28.03 Da,                           | 3555.521729 | 3 | 720.7000122 | 720.362434  |
| LAKVDATEESDLAQYQYVGR        | P09103 | 0          | N-term +28.03 Da, K +28.03 Da,              | 3556.140381 | 2 | 1075.560059 | 1075.060414 |
| DIVNWLKKR                   | P09103 | 0.02006832 | N-term +28.03 Da, K +28.03 Da,              | 3557.659424 | 3 | 419.2667847 | 419.2676872 |
| NGESSELDLQGITR              | Q9QXT0 | 0          | N-term +28.03 Da,                           | 3559.002197 | 2 | 723.3699951 | 723.365174  |
| FGEKLNQDPELVIR              | Q3THE2 | 0.02152807 | N-term +28.03 Da, K +28.03 Da,              | 3566.176025 | 3 | 582.9699707 | 582.6404677 |
| VTPGELQKQSMQLQEMPER         | Q8K2T4 | 0          | N-term +28.03 Da, K +28.03 Da,              | 3566.261719 | 3 | 720.039978  | 719.7062669 |
| IQLVEEELDR                  | P21107 | 0.00565238 | N-term +28.03 Da,                           | 3568.056152 | 2 | 636.8499756 | 636.3457209 |
| TTFNVQDGPDPFQDR             | P97493 | 0          | N-term +28.03 Da,                           | 3568.707764 | 2 | 834.3842163 | 834.3866381 |
| LAKVDATEESDLAQYQYVGR        | P09103 | 0          | N-term +28.03 Da, K +28.03 Da,              | 3570.886963 | 3 | 717.3699951 | 717.0427014 |
| AGPLCLQEVDEPPQHALR          | P70296 | 0          | N-term +28.03 Da, C +57.02 Da,              | 3576.757813 | 3 | 686.684021  | 686.6860829 |
| APNVLASEPEIPKIGIR           | Q9WTP6 | 0.00068587 | N-term +28.03 Da, K +28.03 Da,              | 3576.922119 | 3 | 583.3400269 | 583.0086025 |
| TANALALAMER                 | Q60692 | 0.00064061 | N-term +28.03 Da,                           | 3577.000244 | 2 | 594.8200073 | 594.8239007 |
| AADISSKSPVAVQGSKINLIYSR     | Q35459 | 0          | N-term +28.03 Da, K +28.03 Da,              | 3577.533447 | 4 | 623.1099854 | 622.858798  |
| LAKVDATEESDLAQYQYVGR        | P09103 | 0          | N-term +28.03 Da, K +28.03 Da,              | 3584.549805 | 3 | 716.7000122 | 717.0427014 |
| VSGQSSFQTSAAADNIEKEALPR     | Q9CRD0 | 0          | N-term +28.03 Da, K +28.03 Da,              | 3585.797607 | 3 | 806.75      | 806.4150869 |
| SGGPVDIGPEYQQDLDR           | P97450 | 0          | N-term +28.03 Da,                           | 3586.075439 | 2 | 937.4500122 | 937.4499674 |
| HVGDLGNVTAGKDGVANVSIEDR     | P08228 | 0          | N-term +28.03 Da, K +28.03 Da,              | 3587.639404 | 3 | 794.0700073 | 793.7469479 |
| HLEATENPGALIKDIR            | Q8VEE0 | 0          | N-term +28.03 Da, K +28.03 Da,              | 3588.986084 | 3 | 611.6799927 | 611.6791452 |
| GAVSPGTLTASGVVSGPAAAPAAQHLR | P46938 | 0          | N-term +28.03 Da,                           | 3590.865723 | 3 | 824.4477539 | 824.450354  |
| ALEVGDIVKVTR                | P47941 | 0          | N-term +28.03 Da, K +28.03 Da,              | 3591.336426 | 3 | 452.6099854 | 452.6134123 |
| HVGDLGNVTAGKDGVANVSIEDR     | P08228 | 0          | N-term +28.03 Da, K +28.03 Da,              | 3591.467041 | 2 | 1191.099976 | 1190.116784 |
| EISPPHVEEEDDDWGEDTTEEAQR    | P59325 | 0          | N-term +28.03 Da,                           | 3592.050781 | 3 | 1014.76001  | 1014.430409 |
| VSGQSSFQTSAAADNIEKEALPR     | Q9CRD0 | 0          | N-term +28.03 Da, K +28.03 Da,              | 3593.017578 | 3 | 807.0800171 | 806.4150869 |
| ASGGPVDIGPEYQQDLDR          | P97450 | 0          | N-term +28.03 Da,                           | 3593.313477 | 2 | 972.9699707 | 972.9685245 |
| NKELDPVQKLFVDKIR            | P97450 | 0.00064475 | N-term +28.03 Da, K +28.03 Da,              | 3594.957275 | 4 | 514.5700073 | 514.3147655 |
| MILLEVNRR                   | Q9CVB6 | 0.00442696 | N-term +28.03 Da,                           | 3599.168701 | 2 | 565.3300171 | 565.3235362 |
| TTFNVQDGPDPFQDR             | P97493 | 0          | N-term +28.03 Da,                           | 3599.502441 | 2 | 834.3800049 | 834.3866381 |
| AQDFGVVEESCFPYTAKDSPCKPR    | P97821 | 0          | N-term +28.03 Da, K +28.03 Da, C +57.02 Da, | 3599.695068 | 4 | 719.3400269 | 718.8465678 |
| QASGGPVDIGPEYQQDLDR         | P97450 | 0          | N-term +28.03 Da,                           | 3601.469238 | 2 | 1036.98999  | 1036.997814 |
| NKELDPVQKLFVDKIR            | P97450 | 0.00257202 | N-term +28.03 Da, K +28.03 Da,              | 3603.151123 | 3 | 685.4199829 | 685.4172618 |
| LRPGDCEVCISYLGR             | Q9CXI5 | 0.00572792 | N-term +28.03 Da, C +57.02 Da,              | 3606.880127 | 3 | 608.2999878 | 608.3028039 |

|                               |        |            |                                             |             |   |             |             |
|-------------------------------|--------|------------|---------------------------------------------|-------------|---|-------------|-------------|
| AVFPSIVGR                     | P60710 | 0.00058241 | N-term +28.03 Da,                           | 3608.503418 | 2 | 487.2900085 | 487.2951041 |
| TGTAEMSSILEER                 | Q03265 | 0          | N-term +28.03 Da,                           | 3609.065186 | 2 | 726.3499756 | 726.3559604 |
| GPTPAPASPAAEVGSQEEALSSSAQSPGR | D3Z6Q9 | 0          | N-term +28.03 Da,                           | 3610.107178 | 3 | 922.4500122 | 922.1176587 |
| VEVTEFEDIKSGYR                | Q9EQU5 | 0          | N-term +28.03 Da, K +28.03 Da,              | 3610.434326 | 3 | 576.6326294 | 576.6332017 |
| EISPPHAVEEEEDDDWGEDTTEEAQR    | P59325 | 0          | N-term +28.03 Da,                           | 3618.07373  | 3 | 1014.429993 | 1014.430409 |
| GPTPAPASPAAEVGSQEEALSSSAQSPGR | D3Z6Q9 | 0          | N-term +28.03 Da,                           | 3618.718262 | 2 | 1382.680054 | 1382.67285  |
| GPTPAPASPAAEVGSQEEALSSSAQSPGR | D3Z6Q9 | 0          | N-term +28.03 Da,                           | 3619.708984 | 3 | 922.7800293 | 922.1176587 |
| LIYTWGNQFEFEQSKR              | Q9CQ69 | 0.0094382  | N-term +28.03 Da, K +28.03 Da,              | 3621.593506 | 3 | 652.0100098 | 652.3389002 |
| LHTVYQSVELPETHQMLR            | Q07417 | 0          | N-term +28.03 Da,                           | 3623.51416  | 4 | 553.039978  | 553.0413099 |
| EIEPPPEMPPWQKR                | Q3TJZ6 | 0.00056275 | N-term +28.03 Da, K +28.03 Da,              | 3623.641357 | 3 | 630.3300171 | 629.6659594 |
| DDEVDVDGTVVEEDLGKSR           | P08113 | 0          | N-term +28.03 Da, K +28.03 Da,              | 3629.868408 | 3 | 678.6532593 | 678.6551722 |
| SEKPPAIDWAYYR                 | Q9DCX2 | 0          | N-term +28.03 Da, K +28.03 Da,              | 3631.44165  | 3 | 551.2872925 | 551.2874766 |
| DDEVDVDGTVVEEDLGKSR           | P08113 | 0          | N-term +28.03 Da, K +28.03 Da,              | 3631.749756 | 2 | 1017.97998  | 1017.47912  |
| KGNDISSGTVLSDYVGSPPSGTGLHR    | P70296 | 0          | N-term +28.03 Da, K +28.03 Da,              | 3637.025879 | 3 | 905.7999878 | 905.4629888 |
| LRPGDCEVCISYLGR               | Q9CXI5 | 0          | N-term +28.03 Da, C +57.02 Da,              | 3638.484131 | 3 | 608.3018799 | 608.3028039 |
| APAGILNGKLVSAQIR              | Q922D8 | 0.00056211 | N-term +28.03 Da, K +28.03 Da,              | 3645.458008 | 3 | 555.6725464 | 555.3454372 |
| SEKPPAIDWAYYR                 | Q9DCX2 | 0          | N-term +28.03 Da, K +28.03 Da,              | 3651.061279 | 2 | 826.9299927 | 826.4275767 |
| MQTEIEEQDDILDR                | Q9ERB0 | 0          | N-term +28.03 Da,                           | 3651.679932 | 2 | 882.4099731 | 881.9118292 |
| EIEPPPEMPPWQKR                | Q3TJZ6 | 0.00067114 | N-term +28.03 Da, K +28.03 Da,              | 3652.395752 | 3 | 629.3300171 | 629.6659594 |
| TAKNAVITVPAYFNDSQR            | P38647 | 0.00061958 | N-term +28.03 Da, K +28.03 Da,              | 3656.903809 | 3 | 684.3673706 | 684.3688597 |
| GAVFMDAPVSGGVAAR              | Q99L13 | 0.02369077 | N-term +28.03 Da,                           | 3660.42041  | 3 | 530.9400024 | 530.6083329 |
| TTFNVQDGPDFQDR                | P97493 | 0.0005637  | N-term +28.03 Da,                           | 3660.879883 | 2 | 834.8800049 | 834.3866381 |
| DDEVDVDGTVVEEDLGKSR           | P08113 | 0          | N-term +28.03 Da, K +28.03 Da,              | 3661.64917  | 3 | 678.6535645 | 678.6551722 |
| NLSGNNLKDISTLEPLKR            | Q9EST5 | 0.00576923 | N-term +28.03 Da, K +28.03 Da,              | 3662.385742 | 3 | 699.7399902 | 699.4073145 |
| NLSGNNLKDISTLEPLKR            | Q9EST5 | 0          | N-term +28.03 Da, K +28.03 Da,              | 3662.625244 | 4 | 524.8068237 | 524.807305  |
| SEKPPAIDWAYYR                 | Q9DCX2 | 0          | N-term +28.03 Da, K +28.03 Da,              | 3663.143311 | 3 | 551.2869263 | 551.2874766 |
| DDEVDVDGTVVEEDLGKSR           | P08113 | 0          | N-term +28.03 Da, K +28.03 Da,              | 3663.222168 | 2 | 1017.47998  | 1017.47912  |
| TPYKTLPEVKPPTVPNDYMTSPAR      | Q8CBW3 | 0          | N-term +28.03 Da, K +28.03 Da,              | 3663.397217 | 4 | 697.8699951 | 697.3753895 |
| YTQKAPQVSTPTLVEAAR            | P07724 | 0.00556586 | N-term +28.03 Da, K +28.03 Da,              | 3663.616699 | 2 | 1008.049988 | 1008.559852 |
| SGPPKYKDNPFSLGETFGSR          | Q99K28 | 0.02893236 | N-term +28.03 Da, K +28.03 Da,              | 3663.7229   | 4 | 568.0499878 | 567.7969374 |
| LWAKVNPDEVGGEALGR             | P02089 | 0          | N-term +28.03 Da, K +28.03 Da,              | 3665.051758 | 3 | 623.0073242 | 623.0072619 |
| LVYEQEQLSCDEPILSNKSGDNR       | P70296 | 0          | N-term +28.03 Da, K +28.03 Da, C +57.02 Da, | 3665.585205 | 3 | 950.460022  | 949.7991611 |
| HVGDLGNVTAGKDGVANVSIEDR       | P08228 | 0          | N-term +28.03 Da, K +28.03 Da,              | 3666.773438 | 2 | 1189.609985 | 1190.116784 |
| ASGPPKYKDNPFSLGETFGSR         | Q99K28 | 0.01103266 | N-term +28.03 Da, K +28.03 Da,              | 3667.101563 | 4 | 585.8099976 | 585.556216  |
| GFSGADLTEICQR                 | Q01853 | 0          | N-term +28.03 Da, C +57.02 Da,              | 3667.329834 | 2 | 741.3599854 | 741.3562944 |
| KGNDISSGTVLSDYVGSPPSGTGLHR    | P70296 | 0          | N-term +28.03 Da, K +28.03 Da,              | 3667.972656 | 3 | 905.7999878 | 905.4629888 |
| LRPGDCEVCISYLGR               | Q9CXI5 | 0.00064851 | N-term +28.03 Da, C +57.02 Da,              | 3669.609375 | 3 | 608.2999878 | 608.3028039 |
| IMNVIGEPIDER                  | P56480 | 0.01598272 | N-term +28.03 Da,                           | 3670.903564 | 2 | 707.8699951 | 707.3739554 |
| LVYEQEQLSCDEPILSNKSGDNR       | P70296 | 0          | N-term +28.03 Da, K +28.03 Da, C +57.02 Da, | 3672.876221 | 4 | 712.8499756 | 712.6011899 |
| YLDNINKISNIPDEYFKR            | P51885 | 0.00058928 | N-term +28.03 Da, K +28.03 Da,              | 3675.953613 | 4 | 554.0431519 | 554.0454839 |

|                               |         |            |                                            |             |   |             |             |
|-------------------------------|---------|------------|--------------------------------------------|-------------|---|-------------|-------------|
| FGLTDDQVSGPPSAPTEDR           | B8JJG3  | 0          | N-term +28.03 Da,                          | 3676.377441 | 2 | 1009.47998  | 1008.97909  |
| FEGEDFSETLTR                  | P20029  | 0          | N-term +28.03 Da,                          | 3679.213135 | 2 | 729.8408203 | 729.8410004 |
| GPEPDWVLSER                   | Q05186  | 0.00446207 | N-term +28.03 Da,                          | 3679.925293 | 2 | 657.3300171 | 656.8302378 |
| QIPGTKPVSSSELAFPSSEPGR        | Q6PGL7  | 0.00056497 | N-term +28.03 Da, K +28.03 Da,             | 3680.896729 | 3 | 747.7299805 | 747.4022295 |
| KELDPVQKLFVDKIR               | P97450  | 0          | N-term +28.03 Da, K +28.03 Da,             | 3681.420898 | 4 | 486.0499878 | 485.8040334 |
| LSGEDKSNIAAWGKIGGHGAEYGAEALER | P01942  | 0.00058789 | N-term +28.03 Da, K +28.03 Da,             | 3682.73877  | 4 | 807.9299927 | 807.426837  |
| SAGFLQASASDVVVHGR             | Q8VCH0  | 0          | N-term +28.03 Da,                          | 3683.419922 | 3 | 610.3300171 | 609.9952448 |
| TQAGSEVSALLGR                 | P56480  | 0.00071582 | N-term +28.03 Da,                          | 3683.524902 | 2 | 658.8601685 | 658.8620695 |
| GTLEDQLSHLKQYER               | P57780  | 0          | N-term +28.03 Da, K +28.03 Da,             | 3683.601563 | 4 | 469.25      | 469.0008105 |
| ENREVDNRNEGLK                 | P35293  | 0.04259554 | N-term +28.03 Da, K +28.03 Da,             | 3684.23291  | 2 | 757.9000244 | 757.8997151 |
| GTLEDQLSHLKQYER               | P57780  | 0          | N-term +28.03 Da, K +28.03 Da,             | 3687.467041 | 3 | 625.3300171 | 624.9986552 |
| TGSTQVGKEVALMVQER             | Q9DBF1  | 0          | N-term +28.03 Da, K +28.03 Da,             | 3688.235596 | 3 | 630.3400269 | 630.3435455 |
| KELDPVQKLFVDKIR               | P97450  | 0.00106667 | N-term +28.03 Da, K +28.03 Da,             | 3690.509766 | 3 | 647.7399902 | 647.4029524 |
| KELDPVQKLFVDKIR               | P97450  | 0.00072886 | N-term +28.03 Da, K +28.03 Da,             | 3692.085938 | 3 | 647.4016113 | 647.4029524 |
| TLPDTVDWR                     | O70370  | 0.00062893 | N-term +28.03 Da,                          | 3696.7771   | 2 | 565.7947388 | 565.7956662 |
| DDEVVDVGTVEEDLGKSR            | P08113  | 0          | N-term +28.03 Da, K +28.03 Da,             | 3696.918457 | 2 | 1017.97998  | 1017.47912  |
| ELISNASDALDKIR                | P08113  | 0          | N-term +28.03 Da, K +28.03 Da,             | 3697.894287 | 3 | 534.6400146 | 534.3016747 |
| HVGD LGNV TAGK DGVANVSIEDR    | P08228  | 0          | N-term +28.03 Da, K +28.03 Da,             | 3698.283203 | 2 | 1189.609985 | 1190.116784 |
| TVLSGGTTMYPGIADR              | P60710  | 0          | N-term +28.03 Da,                          | 3700.334717 | 2 | 834.4299927 | 833.9270842 |
| LEEDNVLVLK                    | P09103  | 0.00066667 | N-term +28.03 Da, K +28.03 Da,             | 3701.599854 | 2 | 678.883606  | 678.8846791 |
| STPQSQFQESSPVWKLGR            | Q9D1I5  | 0          | N-term +28.03 Da, K +28.03 Da,             | 3704.262939 | 3 | 706.7000122 | 706.704131  |
| NYLEKLGPLR                    | Q8C7G5  | 0.00486855 | N-term +28.03 Da, K +28.03 Da,             | 3704.894287 | 3 | 420.9200134 | 420.2554475 |
| SVPLPAENVITTAGQR              | Q80X50  | 0          | N-term +28.03 Da,                          | 3705.828857 | 2 | 840.9699707 | 840.9675979 |
| LVDLEPGTMDSVR                 | P68372  | 0.00107296 | N-term +28.03 Da,                          | 3706.148926 | 2 | 730.3770142 | 730.3766955 |
| ESKPGPAGPDLPPGHIPIQVIR        | Q9JLV1  | 0          | N-term +28.03 Da, K +28.03 Da,             | 3706.385498 | 4 | 583.8400269 | 583.5850418 |
| GKEVWDYVTVR                   | Q920A5  | 0.04590035 | N-term +28.03 Da, K +28.03 Da,             | 3708.070557 | 3 | 470.2600098 | 469.9258788 |
| NYLEKLGPLR                    | Q8C7G5  | 0.00255102 | N-term +28.03 Da, K +28.03 Da,             | 3709.312256 | 3 | 420.5826416 | 420.2554475 |
| YFEELSLER                     | Q8C196  | 0.00566305 | N-term +28.03 Da,                          | 3711.433105 | 2 | 607.3068237 | 607.3086067 |
| TYFKLVEISR                    | P29699  | 0.0005711  | N-term +28.03 Da, K +28.03 Da,             | 3711.84082  | 3 | 437.9299927 | 437.9272195 |
| GASIVEDKLVEDLKTR              | P26443  | 0.00054171 | N-term +28.03 Da, K +28.03 Da,             | 3712.446777 | 4 | 465.519989  | 465.0227486 |
| MALKVPTTEKPTVTNVNFR           | Q6NZJ6  | 0          | N-term +28.03 Da, K +28.03 Da,             | 3713.110352 | 4 | 530.0599976 | 529.8104244 |
| ATLSIPITPER                   | P23116  | 0.01105705 | N-term +28.03 Da,                          | 3713.33667  | 2 | 613.3599854 | 613.3611734 |
| SAGFLQASASDVVVHGR             | Q8VCH0  | 0          | N-term +28.03 Da,                          | 3714.217773 | 3 | 609.9899902 | 609.9952448 |
| SEKKISSVQSIVPALEIANAH         | PE63038 | 0.0005767  | N-term +28.03 Da, K +28.03 Da,             | 3714.732178 | 4 | 616.3599854 | 616.1088814 |
| TCNKYGVSGYPTLKIFR             | P27773  | 0          | N-term +28.03 Da, K +28.03 Da,C +57.02 Da, | 3718.599365 | 4 | 522.7869873 | 522.7882206 |
| HVGD LGNV TAGK DGVANVSIEDR    | P08228  | 0          | N-term +28.03 Da, K +28.03 Da,             | 3720.358887 | 2 | 1191.099976 | 1190.116784 |
| IVTSTYGTWNTANMER              | P07901  | 0.01969178 | N-term +28.03 Da,                          | 3720.749023 | 2 | 829.4000244 | 828.9061516 |
| DDEVVDVGTVEEDLGKSR            | P08113  | 0          | N-term +28.03 Da, K +28.03 Da,             | 3726.481445 | 3 | 678.9899902 | 678.6551722 |
| AIIDPGDSDIIR                  | P62889  | 0.00064558 | N-term +28.03 Da,                          | 3729.897705 | 2 | 656.8573608 | 656.8589955 |
| SGELHGLTTDEKFEVGVYR           | P07309  | 0          | N-term +28.03 Da, K +28.03 Da,             | 3730.545898 | 3 | 732.039978  | 731.7110631 |

|                                |        |            |                                            |             |   |             |             |
|--------------------------------|--------|------------|--------------------------------------------|-------------|---|-------------|-------------|
| TANTNTCNKYGVSGYPTLKIFR         | P27773 | 0.00062228 | N-term +28.03 Da, K +28.03 Da,C +57.02 Da, | 3732.022217 | 4 | 648.0900269 | 648.0928028 |
| YSMPPIILR                      | Q00896 | 0.0362757  | N-term +28.03 Da,                          | 3734.122314 | 2 | 502.7819214 | 502.783515  |
| ALALEYGASCEDIAR                | O08749 | 0          | N-term +28.03 Da, C +57.02 Da,             | 3734.55127  | 2 | 833.9099731 | 833.9088916 |
| SGELHGLTTDEKFEVGVYR            | P07309 | 0          | N-term +28.03 Da, K +28.03 Da,             | 3736.377441 | 3 | 731.710022  | 731.7110631 |
| FTDEEVDELYR                    | Q3THE2 | 0          | N-term +28.03 Da,                          | 3736.60376  | 2 | 722.8400269 | 722.3355509 |
| STGTFVVSQPLNYR                 | Q9JLJ2 | 0          | N-term +28.03 Da,                          | 3738.772217 | 2 | 798.9199829 | 798.9226587 |
| KDDYYQILGVPR                   | Q99M87 | 0.01072386 | N-term +28.03 Da, K +28.03 Da,             | 3740.169434 | 2 | 761.9170532 | 761.9168447 |
| AFDYDLQTGQISNR                 | Q64374 | 0          | N-term +28.03 Da,                          | 3740.451172 | 2 | 828.4000244 | 828.4048307 |
| FDAGELITQR                     | P67778 | 0.000625   | N-term +28.03 Da,                          | 3741.382813 | 2 | 589.3099976 | 589.3142232 |
| KGNDISSGTVLSDYVSGSPSGTGLHR     | P70296 | 0          | N-term +28.03 Da, K +28.03 Da,             | 3741.630127 | 4 | 679.8499756 | 679.3490607 |
| HSILPVDLDDINGLNEEQKQLR         | Q9JHI5 | 0.00063452 | N-term +28.03 Da, K +28.03 Da,             | 3742.849121 | 3 | 830.7600098 | 830.438003  |
| ISGDLEVLAEKCPN                 | O35381 | 0.00914913 | N-term +28.03 Da, K +28.03 Da,C +57.02 Da, | 3745.00708  | 2 | 801.4199829 | 800.9161851 |
| FLDDYSR                        | Q6ZWQ0 | 0.02732463 | N-term +28.03 Da,                          | 3745.157959 | 2 | 472.237915  | 472.2296274 |
| STGTFVVSQPLNYR                 | Q9JLJ2 | 0          | N-term +28.03 Da,                          | 3745.80957  | 2 | 798.9212646 | 798.9226587 |
| DALEEEEDNVLVLKK                | P09103 | 0          | N-term +28.03 Da, K +28.03 Da,             | 3752.141113 | 2 | 850.4699707 | 849.97984   |
| LGTLDNPSSLDETAYER              | Q35943 | 0          | N-term +28.03 Da,                          | 3752.243408 | 2 | 955.460022  | 954.962908  |
| DALEEEEDNVLVLKK                | P09103 | 0          | N-term +28.03 Da, K +28.03 Da,             | 3755.735352 | 2 | 849.9799805 | 849.97984   |
| GDDEAAELMQQVK                  | Q61166 | 0.00571973 | N-term +28.03 Da, K +28.03 Da,             | 3755.832275 | 2 | 745.3599854 | 745.3637854 |
| VLTKCQEEVSHIPAVYPGAFR          | P04441 | 0.00443131 | N-term +28.03 Da, K +28.03 Da,C +57.02 Da, | 3756.51123  | 4 | 615.3300171 | 615.0794295 |
| DDEVVDVGTVEEDLGKSR             | P08113 | 0          | N-term +28.03 Da, K +28.03 Da,             | 3757.300537 | 3 | 678.6500244 | 678.6551722 |
| NKELDPVQKLFVDKIR               | P97450 | 0          | N-term +28.03 Da, K +28.03 Da,             | 3761.459717 | 4 | 514.5599976 | 514.3147655 |
| NKELDPVQKLFVDKIR               | P97450 | 0          | N-term +28.03 Da, K +28.03 Da,             | 3761.806885 | 3 | 685.4154663 | 685.4172618 |
| FEKFLVGPDPGVPVR                | P11352 | 0          | N-term +28.03 Da, K +28.03 Da,             | 3762.166748 | 3 | 539.6500244 | 539.3117334 |
| SKERHKSKEHRRKREKKKKHK          | Q9DBM1 | 0.00155925 | N-term +28.03 Da, K +28.03 Da,             | 3763.976807 | 3 | 1069.050049 | 1069.033118 |
| HVGDLGNVTAGKDGVANVSIEDR        | P08228 | 0          | N-term +28.03 Da, K +28.03 Da,             | 3764.5      | 3 | 793.4099731 | 793.7469479 |
| DDEVVDVGTVEEDLGKSR             | P08113 | 0          | N-term +28.03 Da, K +28.03 Da,             | 3765.427002 | 2 | 1017.969971 | 1017.47912  |
| KEEEEEELVDPLTTVR               | P99028 | 0.0251754  | N-term +28.03 Da, K +28.03 Da,             | 3767.858887 | 3 | 658.6699829 | 658.0088863 |
| SLFPDHPLLQER                   | Q9CQ60 | 0          | N-term +28.03 Da,                          | 3769.816406 | 3 | 493.9299927 | 493.9366666 |
| ILEFFGLKKEECPAVR               | P09103 | 0          | N-term +28.03 Da, K +28.03 Da,C +57.02 Da, | 3771.15332  | 4 | 505.7900085 | 505.7879548 |
| DALEEEEDNVLVLKK                | P09103 | 0          | N-term +28.03 Da, K +28.03 Da,             | 3773.817139 | 3 | 566.9874268 | 566.9889855 |
| DGLNAEGLLR                     | Q64374 | 0.00060569 | N-term +28.03 Da,                          | 3777.366943 | 2 | 543.2999878 | 543.3011157 |
| ANQDTIFEGIGGPR                 | O88207 | 0          | N-term +28.03 Da,                          | 3778.925293 | 2 | 751.8800049 | 751.8835335 |
| VLSGEDKSNIAAWGKIGGHGAEYGAEALER | P01942 | 0          | N-term +28.03 Da, K +28.03 Da,             | 3779.643555 | 4 | 832.1917114 | 832.1939406 |
| LGEKLTDEEVDEMIR                | P62204 | 0.00255885 | N-term +28.03 Da, K +28.03 Da,             | 3785.350098 | 3 | 612.3099976 | 611.6485234 |
| DLPKNWDWR                      | Q9WUU7 | 0.00065574 | N-term +28.03 Da, K +28.03 Da,             | 3787.258545 | 3 | 429.5599976 | 429.2277804 |
| DDEVVDVGTVEEDLGKSR             | P08113 | 0          | N-term +28.03 Da, K +28.03 Da,             | 3787.86377  | 3 | 678.9899902 | 678.6551722 |
| GVSGYPTLKIFR                   | P27773 | 0          | N-term +28.03 Da, K +28.03 Da,             | 3788.851563 | 3 | 465.2765503 | 465.2782522 |
| VVTNGLGVNVFKDPVADPNKR          | Q99KQ4 | 0.00070621 | N-term +28.03 Da, K +28.03 Da,             | 3793.158936 | 4 | 582.0800171 | 581.5837706 |
| EKDPYALDVPNTAFGR               | Q8R311 | 0          | N-term +28.03 Da, K +28.03 Da,             | 3794.450684 | 3 | 616.9899902 | 616.9878675 |
| HVGDLGNVTAGKDGVANVSIEDR        | P08228 | 0          | N-term +28.03 Da, K +28.03 Da,             | 3796.17334  | 3 | 793.4000244 | 793.7469479 |

|                                   |        |            |                                            |             |   |             |             |
|-----------------------------------|--------|------------|--------------------------------------------|-------------|---|-------------|-------------|
| SDAPPLTLDGIKDR                    | Q9CR21 | 0.00580271 | N-term +28.03 Da, K +28.03 Da,             | 3796.524902 | 2 | 776.9199829 | 777.4303168 |
| AIGDTLVQDIR                       | Q9CXN7 | 0.00072307 | N-term +28.03 Da,                          | 3797.99292  | 2 | 614.847168  | 614.8484304 |
| MVWEGLNVVKTGR                     | P15532 | 0          | N-term +28.03 Da, K +28.03 Da,             | 3798.068359 | 3 | 515.6199951 | 515.6254349 |
| CNSLEEIKALR                       | P16546 | 0.00571157 | N-term +28.03 Da, K +28.03 Da,C +57.02 Da, | 3798.539795 | 2 | 694.3699951 | 694.8819474 |
| AYDILDQYR                         | P10649 | 0.00158311 | N-term +28.03 Da,                          | 3800.069336 | 2 | 592.7999878 | 592.8009487 |
| AIDLPLGLR                         | Q8VCR7 | 0.01069996 | N-term +28.03 Da,                          | 3801.967041 | 2 | 470.2799988 | 470.2847366 |
| NKELDPVQKLFVDKIR                  | P97450 | 0          | N-term +28.03 Da, K +28.03 Da,             | 3803.204834 | 4 | 514.3135986 | 514.3147655 |
| NKELDPVQKLFVDKIR                  | P97450 | 0.04344392 | N-term +28.03 Da, K +28.03 Da,             | 3805.144287 | 3 | 685.4161987 | 685.4172618 |
| KGNDISSGTVLSDYVGSPPSGTGLHR        | P70296 | 0          | N-term +28.03 Da, K +28.03 Da,             | 3805.634033 | 3 | 905.789978  | 905.4629888 |
| ADEERHVGDLGNVTAGKDGVANVSIEDR      | P08228 | 0          | N-term +28.03 Da, K +28.03 Da,             | 3807.154785 | 3 | 993.5100098 | 993.8304006 |
| VLSGEDKSNIKAAWGKIGGHGAEYGAEALER   | P01942 | 0.00066756 | N-term +28.03 Da, K +28.03 Da,             | 3810.294678 | 4 | 832.4400024 | 832.1939406 |
| KGNDISSGTVLSDYVGSPPSGTGLHR        | P70296 | 0          | N-term +28.03 Da, K +28.03 Da,             | 3810.758789 | 4 | 679.8400269 | 679.3490607 |
| VLSGEDKSNIKAAWGKIGGHGAEYGAEALER   | P01942 | 0.00061425 | N-term +28.03 Da, K +28.03 Da,             | 3810.936279 | 4 | 832.1900024 | 832.1939406 |
| QPGVLQVYEGER                      | P16627 | 0          | N-term +28.03 Da,                          | 3811.011963 | 2 | 758.4099731 | 758.4119267 |
| QALLDLHALGSAR                     | P29391 | 0.00060864 | N-term +28.03 Da,                          | 3812.054199 | 3 | 464.9400024 | 464.9367779 |
| ADEERHVGDLGNVTAGKDGVANVSIEDR      | P08228 | 0          | N-term +28.03 Da, K +28.03 Da,             | 3812.799561 | 3 | 993.8499756 | 993.8304006 |
| LLLPGELAK                         | P10853 | 0.00951949 | N-term +28.03 Da, K +28.03 Da,             | 3814.070557 | 2 | 505.3299866 | 505.3364378 |
| YGPPEGPYGVFAGR                    | O55022 | 0.02488594 | N-term +28.03 Da,                          | 3814.534912 | 2 | 699.3400269 | 699.3460549 |
| VTAVAFNKELDPVQKLFVDKIR            | P97450 | 0          | N-term +28.03 Da, K +28.03 Da,             | 3815.986084 | 4 | 661.3900146 | 661.3965531 |
| SSIKTEPPVFTAASSNSELIR             | Q8CDG3 | 0          | N-term +28.03 Da, K +28.03 Da,             | 3819.549072 | 3 | 764.0800171 | 764.0811562 |
| LGTSVESIMATEDR                    | Q8C196 | 0          | N-term +28.03 Da,                          | 3819.905029 | 2 | 769.3900146 | 768.8823425 |
| HSFPTLKFFPASADR                   | P09103 | 0.02384937 | N-term +28.03 Da, K +28.03 Da,             | 3822.443848 | 3 | 592.9799805 | 592.9859091 |
| NKELDPVQKLFVDKIR                  | P97450 | 0.00870761 | N-term +28.03 Da, K +28.03 Da,             | 3826.07666  | 2 | 1028.119995 | 1027.622255 |
| VVTNGLGVNVFKDPVADPNKR             | Q99KQ4 | 0.00601295 | N-term +28.03 Da, K +28.03 Da,             | 3826.342529 | 4 | 582.0800171 | 581.5837706 |
| YVDVPQEEVPFR                      | Q8C5W3 | 0.00735971 | N-term +28.03 Da,                          | 3827.067139 | 2 | 753.8800049 | 753.3853776 |
| HVGDLGNVTAGKDGVANVSIEDR           | P08228 | 0          | N-term +28.03 Da, K +28.03 Da,             | 3827.551025 | 3 | 793.4000244 | 793.7469479 |
| KTAPVQAPPAPVTVTETPEPAMPSGVYRPPGAR | Q4VAA2 | 0          | N-term +28.03 Da, K +28.03 Da,             | 3829.320068 | 4 | 857.710022  | 857.2117046 |
| GLESTTGEVPVVAIR                   | P27773 | 0          | N-term +28.03 Da,                          | 3830.978271 | 2 | 778.4400024 | 778.4381418 |
| VDPVNFKLLSH                       | P01942 | 0.00072833 | N-term +28.03 Da, K +28.03 Da,             | 3831.753662 | 3 | 442.2600098 | 442.2589692 |
| AQEILPQAPIAVR                     | Q3TLP5 | 0.00057208 | N-term +28.03 Da,                          | 3832.941895 | 2 | 717.4299927 | 717.4273792 |
| NKELDPVQKLFVDKIR                  | P97450 | 0          | N-term +28.03 Da, K +28.03 Da,             | 3833.596924 | 4 | 514.3137817 | 514.3147655 |
| EADDIVNWLKKR                      | P09103 | 0          | N-term +28.03 Da, K +28.03 Da,             | 3834.300781 | 3 | 524.3022461 | 524.303238  |
| NKELDPVQKLFVDKIR                  | P97450 | 0.00055279 | N-term +28.03 Da, K +28.03 Da,             | 3835.59668  | 3 | 685.4152832 | 685.4172618 |
| EADDIVNWLKKR                      | P09103 | 0          | N-term +28.03 Da, K +28.03 Da,             | 3837.872803 | 4 | 393.4781494 | 393.4792476 |
| GEWEPPVIQNPEYKGEWKPR              | P14211 | 0          | N-term +28.03 Da, K +28.03 Da,             | 3841.993408 | 4 | 632.0800171 | 631.5812281 |
| NGESSELDLQ GIR                    | Q9QXT0 | 0          | N-term +28.03 Da,                          | 3849.727051 | 2 | 724.3599854 | 723.365174  |
| GKIPEHDLDPNVTHILKEPVR             | Q99PL5 | 0          | N-term +28.03 Da, K +28.03 Da,             | 3850.68042  | 4 | 618.1099854 | 617.6125282 |
| VLSGEDKSNIKAAWGKIGGHGAEYGAEALER   | P01942 | 0.02734694 | N-term +28.03 Da, K +28.03 Da,             | 3855.797607 | 4 | 832.6900024 | 832.1939406 |
| GKIPEHDLDPNVTHILKEPVR             | Q99PL5 | 0          | N-term +28.03 Da, K +28.03 Da,             | 3857.852539 | 3 | 823.4899902 | 823.1476121 |
| SYDVPPPPMEPDHPFYSNISKDR           | Q9DBJ1 | 0.00053996 | N-term +28.03 Da, K +28.03 Da,             | 3859.866455 | 4 | 687.3300171 | 686.8310806 |



|                              |        |            |                                             |             |   |             |             |
|------------------------------|--------|------------|---------------------------------------------|-------------|---|-------------|-------------|
| IIFEEHTQSPIFVGKVVDPHTK       | P22599 | 0          | N-term +28.03 Da, K +28.03 Da,              | 3859.955566 | 4 | 652.6199951 | 652.1151695 |
| LVYDQELLGSPDKSEAAALR         | Q8R404 | 0          | N-term +28.03 Da, K +28.03 Da,              | 3860.045166 | 3 | 721.0599976 | 720.7230801 |
| GDLGNVTAGKDGVANVSIEDR        | P08228 | 0          | N-term +28.03 Da, K +28.03 Da,              | 3861.144043 | 2 | 1072.540039 | 1072.05312  |
| NKELDPVQKLFVDKIR             | P97450 | 0.00071839 | N-term +28.03 Da, K +28.03 Da,              | 3864.181885 | 4 | 514.3099976 | 514.3147655 |
| SLPPHQKVPPLPSLPTMQAGTIAR     | Q8BMF4 | 0.00070423 | N-term +28.03 Da, K +28.03 Da,              | 3864.893799 | 4 | 646.3699951 | 646.3676327 |
| GDLGNVTAGKDGVANVSIEDR        | P08228 | 0          | N-term +28.03 Da, K +28.03 Da,              | 3865.257813 | 2 | 1073.040039 | 1072.05312  |
| LVYDQELLGSPDKSEAAALR         | Q8R404 | 0          | N-term +28.03 Da, K +28.03 Da,              | 3872.471924 | 2 | 1080.579956 | 1080.580982 |
| VALEGVGHFFR                  | P29391 | 0.00068259 | N-term +28.03 Da,                           | 3873.190918 | 3 | 420.8999939 | 420.5680254 |
| GEWEPPIQNPEYKGEWKPR          | P14211 | 0          | N-term +28.03 Da, K +28.03 Da,              | 3873.753174 | 4 | 631.8300171 | 631.5812281 |
| VLESTMVCDNSEYMR              | O35226 | 0.00439453 | N-term +28.03 Da, C +57.02 Da,              | 3877.864746 | 2 | 981.4400024 | 980.9442916 |
| GKIPEHDLDPNVTIILKEPVR        | Q99PL5 | 0          | N-term +28.03 Da, K +28.03 Da,              | 3881.245117 | 4 | 617.8599854 | 617.6125282 |
| TAWEEKLSKYEFSEIR             | Q9CYA0 | 0          | N-term +28.03 Da, K +28.03 Da,              | 3881.456543 | 4 | 551.289978  | 551.0426757 |
| GNVLPADIAQFKQGVK             | Q99K28 | 0.00952381 | N-term +28.03 Da, K +28.03 Da,              | 3882.207031 | 3 | 624.0300293 | 624.0314073 |
| DQGGAPLAGTNKETTIIQGLDGLSER   | Q91Y97 | 0          | N-term +28.03 Da, K +28.03 Da,              | 3883.286377 | 3 | 862.4500122 | 862.111956  |
| LRDLGARGLDPMMAATHWGRILSSYVLK | Q3UV16 | 0.02007689 | N-term +28.03 Da, K +28.03 Da,              | 3885.239502 | 4 | 763.6699829 | 763.9273834 |
| STQAAEDKEEESLHSISNTEAVR      | Q9CQN1 | 0.02524834 | N-term +28.03 Da, K +28.03 Da,              | 3887.195313 | 4 | 676.0900269 | 675.8385262 |
| STQAAEDKEEESLHSISNTEAVR      | Q9CQN1 | 0.00069686 | N-term +28.03 Da, K +28.03 Da,              | 3889.044189 | 3 | 901.1099854 | 900.7822761 |
| SLPPHQKVPPLPSLPTMQAGTIAR     | Q8BMF4 | 0          | N-term +28.03 Da, K +28.03 Da,              | 3896.710205 | 4 | 646.6199951 | 646.3676327 |
| TAESGELHGLTTDEKFEVGVYR       | P07309 | 0          | N-term +28.03 Da, K +28.03 Da,              | 3901.242188 | 4 | 624.3099976 | 624.3169633 |
| FREPATINYPFEKGPLSPR          | Q8K3J1 | 0          | N-term +28.03 Da, K +28.03 Da,              | 3901.496094 | 4 | 569.5610962 | 569.561301  |
| DVQLVESGGGLVQPGGSR           | P01783 | 0.00069541 | N-term +28.03 Da,                           | 3902.939941 | 2 | 892.4699707 | 891.9708694 |
| TAESGELHGLTTDEKFEVGVYR       | P07309 | 0          | N-term +28.03 Da, K +28.03 Da,              | 3906.73999  | 3 | 832.4199829 | 832.0868589 |
| LTVSPESVLKVAR                | P55264 | 0.00070225 | N-term +28.03 Da, K +28.03 Da,              | 3906.959473 | 3 | 485.6400146 | 485.636217  |
| TMFGKLNGLTDPEDVIR            | Q3THE2 | 0          | N-term +28.03 Da, K +28.03 Da,              | 3907.217041 | 3 | 660         | 660.0031892 |
| ILEFFGLKKEECPAVR             | P09103 | 0          | N-term +28.03 Da, K +28.03 Da, C +57.02 Da, | 3907.372559 | 4 | 506.0400085 | 505.7879548 |
| ADKLQRELEDTRVATVSEK          | D3Z2Z1 | 0.03403566 | N-term +28.03 Da, K +28.03 Da,              | 3908.56543  | 3 | 758.4099731 | 758.0884222 |
| FDITADDEPLGR                 | P17742 | 0          | N-term +28.03 Da,                           | 3909.172119 | 2 | 688.8400269 | 688.8382604 |
| FDEEATGTIQEDYLR              | Q3THE2 | 0          | N-term +28.03 Da,                           | 3912.078613 | 2 | 907.9299927 | 907.9257938 |
| HVGDLGNVTAGKDGVANVSIEDR      | P08228 | 0          | N-term +28.03 Da, K +28.03 Da,              | 3914.614502 | 3 | 793.4099731 | 793.7469479 |
| VSLHLGVTPSVLR                | O89023 | 0.00069832 | N-term +28.03 Da,                           | 3923.047852 | 3 | 469.6199951 | 469.2890399 |
| FDEEATGTIQEDYLR              | Q3THE2 | 0          | N-term +28.03 Da,                           | 3923.287598 | 2 | 908.9299927 | 907.9257938 |
| IPLSQKDLENLKAЕVAR            | Q5SW19 | 0.00206398 | N-term +28.03 Da, K +28.03 Da,              | 3926.867432 | 4 | 502.7999878 | 502.8004854 |
| KDIEDVFYKYGAIR               | Q6PDM2 | 0.000668   | N-term +28.03 Da, K +28.03 Da,              | 3927.031006 | 3 | 601.3300171 | 601.0013365 |
| SNVIQVDQSGGLPLSR             | Q4PZA2 | 0.0044335  | N-term +28.03 Da,                           | 3927.443848 | 2 | 849.460022  | 849.4626799 |
| LATALQKLEEAKAАDESER          | P21107 | 0          | N-term +28.03 Da, K +28.03 Da,              | 3931.358643 | 3 | 763.0800171 | 762.7444329 |
| EHDLPNVTIILKEPVR             | Q99PL5 | 0.00580552 | N-term +28.03 Da, K +28.03 Da,              | 3932.058105 | 3 | 682.3900146 | 682.0527601 |
| DDEVVDVGTVEEDLGKSR           | P08113 | 0          | N-term +28.03 Da, K +28.03 Da,              | 3933.036133 | 3 | 678.9899902 | 678.6551722 |
| HSILPVDDINGLNEEQKQLR         | Q9JHI5 | 0.00158814 | N-term +28.03 Da, K +28.03 Da,              | 3933.348389 | 3 | 830.7600098 | 830.438003  |
| NQPGVLIQVYEGER               | P16627 | 0.01601732 | N-term +28.03 Da,                           | 3933.979004 | 2 | 815.4299927 | 815.4333908 |
| FVSSSLPDCYR                  | P53996 | 0.00057372 | N-term +28.03 Da, C +57.02 Da,              | 3934.386719 | 2 | 736.3626709 | 736.3661304 |

|                                |        |            |                                            |             |   |             |             |
|--------------------------------|--------|------------|--------------------------------------------|-------------|---|-------------|-------------|
| WQSNQPWEQALNR                  | P08226 | 0          | N-term +28.03 Da,                          | 3936.692383 | 2 | 842.9099731 | 842.9131566 |
| LFCEKSSHLVFINSR                | Q8K4Q8 | 0.01890847 | N-term +28.03 Da, K +28.03 Da,C +57.02 Da, | 3940.814941 | 4 | 503.0100098 | 502.7634742 |
| DLGNVTAGKDGVANVSIEDR           | P08228 | 0          | N-term +28.03 Da, K +28.03 Da,             | 3944.325195 | 2 | 1044.530029 | 1043.542388 |
| AIAGEDFSIVASDTR                | O09061 | 0          | N-term +28.03 Da,                          | 3946.195801 | 2 | 790.4000244 | 790.4017567 |
| LGNVTAGKDGVANVSIEDR            | P08228 | 0          | N-term +28.03 Da, K +28.03 Da,             | 3947.004639 | 2 | 986.0100098 | 986.0289162 |
| EAICPAQAITIEAEPR               | Q8K3J1 | 0.01071429 | N-term +28.03 Da, C +57.02 Da,             | 3951.141357 | 2 | 898.9699707 | 898.9641983 |
| TTGGESLLPEEYEQWKQR             | Q91VA0 | 0          | N-term +28.03 Da, K +28.03 Da,             | 3952.092773 | 3 | 736.3665161 | 736.370818  |
| FDITADDEPLGR                   | P17742 | 0.00065189 | N-term +28.03 Da,                          | 3952.760498 | 2 | 688.3331299 | 688.8382604 |
| STQFGGYAKEADYVAHATQLR          | Q9R257 | 0          | N-term +28.03 Da, K +28.03 Da,             | 3954.483887 | 4 | 593.2999878 | 593.0525692 |
| LEEALEPDMEEEDDQKAVKDEL         | P09103 | 0          | N-term +28.03 Da, K +28.03 Da,             | 3963.576416 | 3 | 882.4199829 | 882.4177236 |
| SFAPEPCTDNSLSLIAKINQR          | Q9DBR0 | 0          | N-term +28.03 Da, K +28.03 Da,C +57.02 Da, | 3965.807861 | 3 | 807.0700073 | 807.0689221 |
| EPEGKEVWDYVTVR                 | Q920A5 | 0.00571701 | N-term +28.03 Da, K +28.03 Da,             | 3977.833252 | 2 | 881.9500122 | 881.9541564 |
| EPEGKEVWDYVTVR                 | Q920A5 | 0          | N-term +28.03 Da, K +28.03 Da,             | 3979.210205 | 3 | 588.3041382 | 588.3051964 |
| AVSCLWGKVNDSDEVGGEALGR         | P02088 | 0          | N-term +28.03 Da, K +28.03 Da,C +57.02 Da, | 3981.675781 | 3 | 754.0498657 | 754.0512023 |
| GNLPMATVDIKNPEITNTR            | Q91YD9 | 0.0006592  | N-term +28.03 Da, K +28.03 Da,             | 3982.095947 | 3 | 746.4099731 | 746.4034644 |
| NLEKAQSELSGADEAAR              | Q9D3D9 | 0.03522267 | N-term +28.03 Da, K +28.03 Da,             | 3983.364746 | 2 | 958.5       | 958.489624  |
| YFQEPGVAAEALEKNMSR             | P34914 | 0          | N-term +28.03 Da, K +28.03 Da,             | 3987.48291  | 3 | 718.6900024 | 718.6893819 |
| SSAPLAEDIDPELAR                | Q99L18 | 0          | N-term +28.03 Da,                          | 3987.596436 | 2 | 806.9199829 | 806.4148642 |
| QASGGPVDIGPEYQQDLDR            | P97450 | 0          | N-term +28.03 Da,                          | 3992.793457 | 2 | 1036.48999  | 1036.997814 |
| SGNLLNDMTPPVNPSR               | P35564 | 0.00058377 | N-term +28.03 Da,                          | 3993.616455 | 2 | 870.9400024 | 870.4408902 |
| FAMTNQILVER                    | Q8C196 | 0.01225383 | N-term +28.03 Da,                          | 3995.802002 | 2 | 675.3599854 | 675.3659329 |
| LDPTSVTLKPMER                  | O09159 | 0          | N-term +28.03 Da, K +28.03 Da,             | 3999.234619 | 3 | 552.6500244 | 552.6515387 |
| TITNTMTLGDIVYKR                | P12710 | 0          | N-term +28.03 Da, K +28.03 Da,             | 4003.27124  | 3 | 594.6656494 | 594.6658481 |
| DASSLTVDVTSKASKVPTTVEDR        | Q99JX3 | 0.01224311 | N-term +28.03 Da, K +28.03 Da,             | 4003.359863 | 3 | 811.4400024 | 811.0902693 |
| KMGAPAEAGMAEYLFDKHTLGHGDES     | P09528 | 0.00950226 | N-term +28.03 Da, K +28.03 Da,             | 4013.828125 | 4 | 695.0800171 | 694.5833768 |
| EDVQETDTSQKDQSPASHEIATNLGDFALR | Q00897 | 0          | N-term +28.03 Da, K +28.03 Da,             | 4015.906982 | 4 | 840.6500244 | 840.4062995 |
| SSSDDVIELTPSNFNR               | Q922R8 | 0.00055249 | N-term +28.03 Da,                          | 4017.734131 | 2 | 905.9299927 | 904.9366928 |
| ANLEKAQSELSGADEAAR             | Q9D3D9 | 0          | N-term +28.03 Da, K +28.03 Da,             | 4019.553223 | 3 | 662.6699829 | 663.0078796 |
| SSAPLAEDIDPELAR                | Q99L18 | 0          | N-term +28.03 Da,                          | 4022.46875  | 2 | 806.9199829 | 806.4148642 |
| SSDDVIELTPSNFNR                | Q922R8 | 0.04292528 | N-term +28.03 Da,                          | 4023.980713 | 2 | 862.4099731 | 861.4206783 |
| TTIFEVLPEKADR                  | Q92111 | 0.00061312 | N-term +28.03 Da, K +28.03 Da,             | 4024.306152 | 3 | 525.6300049 | 525.6311132 |
| DLAALGDKVNSLGETAQR             | P16546 | 0          | N-term +28.03 Da, K +28.03 Da,             | 4024.438965 | 3 | 639.0100098 | 638.6812149 |
| FNKPDIDAWELR                   | P12787 | 0.00070175 | N-term +28.03 Da, K +28.03 Da,             | 4025.911865 | 2 | 780.4099731 | 780.4144692 |
| FNKPDIDAWELR                   | P12787 | 0          | N-term +28.03 Da, K +28.03 Da,             | 4027.160645 | 3 | 520.6115112 | 520.6120716 |
| TTIFEVLPEKADR                  | Q92111 | 0          | N-term +28.03 Da, K +28.03 Da,             | 4029.34668  | 3 | 525.960022  | 525.6311132 |
| LKKILIEEWKTAR                  | O08795 | 0          | N-term +28.03 Da, K +28.03 Da,             | 4029.686523 | 4 | 435.5299988 | 435.7841063 |
| ASKPTLNEVVIVSAIR               | Q8QZT1 | 0.00055556 | N-term +28.03 Da, K +28.03 Da,             | 4033.904785 | 3 | 585.022644  | 585.0242526 |
| EDVQETDTSQKDQSPASHEIATNLGDFALR | Q00897 | 0          | N-term +28.03 Da, K +28.03 Da,             | 4035.463623 | 3 | 1120.199951 | 1120.205974 |
| MKPLVVFLVGGPGAGKGTQCAR         | Q9DBP5 | 0          | N-term +28.03 Da, K +28.03 Da,C +57.02 Da, | 4035.982422 | 3 | 777.1099854 | 776.4411958 |
| MKPLVVFLVGGPGAGKGTQCAR         | Q9DBP5 | 0          | N-term +28.03 Da, K +28.03 Da,C +57.02 Da, | 4036.249023 | 3 | 776.7700195 | 776.4411958 |

|                                  |        |            |                                |             |   |             |             |
|----------------------------------|--------|------------|--------------------------------|-------------|---|-------------|-------------|
| TPVAWPSQEGQNPSLSSIR              | Q8C196 | 0.03629032 | N-term +28.03 Da,              | 4040.77832  | 2 | 1042.040039 | 1041.534366 |
| VMGSALTSAFSGGNSEPAQPAVQQAPAR     | Q7TNL9 | 0          | N-term +28.03 Da,              | 4044.616943 | 3 | 920.4699707 | 919.7923403 |
| LEKEVLDKNDMVQLLQGR               | Q8JZQ2 | 0.00060096 | N-term +28.03 Da, K +28.03 Da, | 4045.351318 | 3 | 728.0800171 | 727.7485718 |
| ENLLEEQGSIALR                    | P16546 | 0.02077151 | N-term +28.03 Da,              | 4046.79834  | 2 | 751.4000244 | 750.4068417 |
| EDVQETDTSQKDQSPASHEIATNLGDFALR   | Q00897 | 0          | N-term +28.03 Da, K +28.03 Da, | 4047.241943 | 4 | 840.6500244 | 840.4062995 |
| KMGAPEAGMAEYLFDKH                | P09528 | 0.00157895 | N-term +28.03 Da, K +28.03 Da, | 4048.36377  | 3 | 660.3300171 | 660.3303597 |
| GDPKEEEEEELVDPLTTVR              | P99028 | 0.00949796 | N-term +28.03 Da, K +28.03 Da, | 4049.478027 | 3 | 747.710022  | 747.7092771 |
| ANLEKAQSELSGAADAAAR              | Q9D3D9 | 0          | N-term +28.03 Da, K +28.03 Da, | 4050.049072 | 2 | 993.5100098 | 994.0081811 |
| ILPPNTEGYIGIR                    | Q91VA0 | 0          | N-term +28.03 Da,              | 4055.628174 | 2 | 735.9199829 | 735.9193872 |
| SLSEKPPAIDWAYRR                  | Q9DCX2 | 0          | N-term +28.03 Da, K +28.03 Da, | 4057.034424 | 3 | 618.3300171 | 617.9928411 |
| FSDVYQEMPAQLR                    | P50136 | 0          | N-term +28.03 Da,              | 4063.588379 | 2 | 806.390564  | 806.3954195 |
| GTDAPEAQAAAMEEPVVQPSVVDR         | Q9DBG5 | 0          | N-term +28.03 Da,              | 4066.411377 | 3 | 833.0700073 | 832.4076038 |
| ADETDLDLEGDVSTTWHNSDDDDVYR       | Q8BGD9 | 0          | N-term +28.03 Da,              | 4066.595703 | 3 | 928.7199707 | 928.3898845 |
| GTDAPEAQAAAMEEPVVQPSVVDR         | Q9DBG5 | 0          | N-term +28.03 Da,              | 4066.735107 | 2 | 1248.599976 | 1248.107767 |
| IQLLEEELDR                       | Q6IRU2 | 0.00056054 | N-term +28.03 Da,              | 4071.597412 | 2 | 643.3499756 | 643.3535459 |
| AVAVPDLEKASSFYR                  | Q9D1I5 | 0          | N-term +28.03 Da, K +28.03 Da, | 4074.841064 | 3 | 570.3140259 | 570.3138031 |
| DWDFLPPKKIKDPDAAKPEDWDER         | P14211 | 0.0056391  | N-term +28.03 Da, K +28.03 Da, | 4078.091553 | 4 | 763.6500244 | 763.6511111 |
| EDVQETDTSQKDQSPASHEIATNLGDFALR   | Q00897 | 0          | N-term +28.03 Da, K +28.03 Da, | 4079.039795 | 4 | 840.6599731 | 840.4062995 |
| TMFGEKLNQDTPEDVIR                | Q3THE2 | 0.01225919 | N-term +28.03 Da, K +28.03 Da, | 4080.886475 | 2 | 990.4899902 | 989.5011455 |
| GFGDLKTPAGL                      | O70251 | 0.00060423 | N-term +28.03 Da, K +28.03 Da, | 4082.265381 | 2 | 566.322998  | 566.3240593 |
| NKELDPVQKLFVDKIR                 | P97450 | 0          | N-term +28.03 Da, K +28.03 Da, | 4082.361816 | 3 | 685.7437744 | 685.4172618 |
| WDTLGSSTVSQLQER                  | Q00623 | 0          | N-term +28.03 Da,              | 4082.66748  | 2 | 824.4199829 | 824.4204807 |
| NKELDPVQKLFVDKIR                 | P97450 | 0.0459725  | N-term +28.03 Da, K +28.03 Da, | 4085.840332 | 4 | 514.5600586 | 514.3147655 |
| ELEELSLEAQQGIR                   | Q05D44 | 0          | N-term +28.03 Da,              | 4086.502441 | 2 | 758.4000244 | 757.9066747 |
| ILMAINGKVFVDTKGR                 | O55022 | 0.00072569 | N-term +28.03 Da, K +28.03 Da, | 4086.856934 | 4 | 462.7799988 | 462.280031  |
| SLSEKPPAIDWAYRR                  | Q9DCX2 | 0          | N-term +28.03 Da, K +28.03 Da, | 4087.375977 | 3 | 617.9918213 | 617.9928411 |
| SLSEKPPAIDWAYRR                  | Q9DCX2 | 0.00827206 | N-term +28.03 Da, K +28.03 Da, | 4087.797363 | 2 | 926.4799805 | 926.4856235 |
| VTSVQVFK                         | Q99LF7 | 0.04378698 | N-term +28.03 Da, K +28.03 Da, | 4089.685059 | 2 | 482.2999878 | 482.2973126 |
| IINEPTAAAIYGLDKR                 | P20029 | 0          | N-term +28.03 Da, K +28.03 Da, | 4092.253174 | 3 | 624.6900024 | 624.6911623 |
| GISDVVKVTLTPPEEAR                | P06151 | 0.03406326 | N-term +28.03 Da, K +28.03 Da, | 4097.578613 | 2 | 950.0100098 | 950.0253107 |
| SLFKAFEEEEQALR                   | P49429 | 0          | N-term +28.03 Da, K +28.03 Da, | 4098.569336 | 3 | 541.960022  | 541.9628817 |
| YREVMLETYRHLR                    | A2A4U4 | 0.01519757 | N-term +28.03 Da,              | 4102.921387 | 3 | 599.3300171 | 598.654165  |
| GDPKEEEEEELVDPLTTVR              | P99028 | 0.00305033 | N-term +28.03 Da, K +28.03 Da, | 4104.775391 | 3 | 748.039978  | 747.7092771 |
| ALAADISSKSPVAVQGSKINLIYSR        | O35459 | 0          | N-term +28.03 Da, K +28.03 Da, | 4106.198242 | 4 | 669.1400146 | 668.8890926 |
| SLFDKDGDTITTKELGTVMR             | P62204 | 0.00055991 | N-term +28.03 Da, K +28.03 Da, | 4106.304688 | 3 | 790.4199829 | 790.0858015 |
| SLFDKDGDTITTKELGTVMR             | P62204 | 0          | N-term +28.03 Da, K +28.03 Da, | 4106.515625 | 3 | 790.0800171 | 790.0858015 |
| GLGGELLAAR                       | Q60936 | 0.00059773 | N-term +28.03 Da,              | 4106.977051 | 2 | 549.3361206 | 549.3375008 |
| SLFKAFEEEEQALR                   | P49429 | 0          | N-term +28.03 Da, K +28.03 Da, | 4108.580566 | 2 | 812.4400024 | 812.4406843 |
| DIQMTQSPSSLSASLGER               | P01639 | 0          | N-term +28.03 Da,              | 4108.779785 | 2 | 967.9799805 | 967.9780349 |
| RGADGKPPSLTAASTPGPEETLTAATVPPPPR | Q7TSC1 | 0          | N-term +28.03 Da, K +28.03 Da, | 4110.970703 | 4 | 828.2000122 | 827.9516821 |

|                               |        |            |                                             |             |   |             |             |
|-------------------------------|--------|------------|---------------------------------------------|-------------|---|-------------|-------------|
| NQALESSDLVAVQNQLR             | Q3UQ44 | 0          | N-term +28.03 Da,                           | 4111.868164 | 2 | 957.5       | 957.0079836 |
| AIMEYLEETRIPIR                | Q9WVLO | 0          | N-term +28.03 Da,                           | 4113.412598 | 3 | 582.6463013 | 582.6466764 |
| ASLSEKPPAIDWAYYR              | Q9DCX2 | 0          | N-term +28.03 Da, K +28.03 Da,              | 4114.575195 | 3 | 641.6699829 | 641.6718792 |
| DALEEDNVLVLKK                 | P09103 | 0          | N-term +28.03 Da, K +28.03 Da,              | 4114.939453 | 2 | 849.9813232 | 849.97984   |
| ANVAKPGLVDDFEKKYNAL           | Q9DCX2 | 0.04110136 | N-term +28.03 Da, K +28.03 Da,              | 4115.203613 | 4 | 552.3099976 | 551.813593  |
| LPPDLPDLEPECR                 | Q8BGT0 | 0.00159405 | N-term +28.03 Da, C +57.02 Da,              | 4116.484863 | 2 | 789.8900146 | 789.8952525 |
| NKELDPVQKLFVDKIR              | P97450 | 0          | N-term +28.03 Da, K +28.03 Da,              | 4117.612305 | 4 | 514.5601807 | 514.3147655 |
| SDVLELTDEFESR                 | P27773 | 0          | N-term +28.03 Da,                           | 4118.042969 | 2 | 841.4000244 | 841.3994117 |
| SCPQKELPDLEDLMKR              | Q9CPV4 | 0.00157398 | N-term +28.03 Da, K +28.03 Da, C +57.02 Da, | 4118.595703 | 4 | 511.769989  | 511.5207873 |
| TTFNVQDGPDPFQDR               | P97493 | 0.00069784 | N-term +28.03 Da,                           | 4119.868652 | 2 | 833.8800049 | 834.3866381 |
| LNQALLDLHALGSAR               | P29391 | 0          | N-term +28.03 Da,                           | 4121.572754 | 3 | 540.6455078 | 540.6457754 |
| SHTSAAAGTMAGVPTVSFSELR        | E9PY03 | 0          | N-term +28.03 Da,                           | 4121.699219 | 3 | 736.3699951 | 735.7038026 |
| FALIGTQANVTKELEKELR           | Q9DBC0 | 0          | N-term +28.03 Da, K +28.03 Da,              | 4123.749512 | 3 | 616.6900024 | 616.0192789 |
| FSVSDLPKLPK                   | Q9EST5 | 0.00065617 | N-term +28.03 Da, K +28.03 Da,              | 4125.836426 | 3 | 438.9400024 | 438.9392366 |
| ASLSEKPPAIDWAYYR              | Q9DCX2 | 0.00564175 | N-term +28.03 Da, K +28.03 Da,              | 4126.322266 | 2 | 962.5       | 962.0041806 |
| GEFSLNDALDSSNSMQTVQKTTTR      | P05784 | 0          | N-term +28.03 Da, K +28.03 Da,              | 4132.08252  | 2 | 1401.670044 | 1401.166543 |
| TLGGVFTKLINR                  | P38647 | 0          | N-term +28.03 Da, K +28.03 Da,              | 4132.188477 | 3 | 458.9500122 | 458.9537686 |
| ASEAIKGAVVGIDLGTTNSCAVMEGKQAK | P38647 | 0          | N-term +28.03 Da, K +28.03 Da, C +57.02 Da, | 4132.270508 | 4 | 779.9216919 | 779.9228072 |
| SDVLELTDEFESR                 | P27773 | 0          | N-term +28.03 Da,                           | 4132.351074 | 3 | 561.5999756 | 561.2686999 |
| RVAGPQPAQTGAPQGSLEGEYLFER     | P29391 | 0          | N-term +28.03 Da,                           | 4132.480957 | 3 | 853.4500122 | 853.110109  |
| ADLVQDLSISTCR                 | Q8BHC0 | 0          | N-term +28.03 Da, C +57.02 Da,              | 4134.504395 | 2 | 753.3800049 | 753.385052  |
| GISTPEELGLDKV                 | P12787 | 0.00069493 | N-term +28.03 Da, K +28.03 Da,              | 4136.271973 | 2 | 707.3951416 | 707.3954111 |
| ASEAIKGAVVGIDLGTTNSCAVMEGKQAK | P38647 | 0          | N-term +28.03 Da, K +28.03 Da, C +57.02 Da, | 4136.789063 | 3 | 1040.22998  | 1039.561317 |
| ASVYGNETEIGEALKESVGSKAVPR     | Q9JII6 | 0          | N-term +28.03 Da, K +28.03 Da,              | 4137.858887 | 4 | 684.1199951 | 683.8670863 |
| VPPVQVSPLIKFR                 | Q06185 | 0          | N-term +28.03 Da, K +28.03 Da,              | 4140.033203 | 3 | 531.6669312 | 531.6677398 |
| MSTGTFFVVSQPLNYR              | Q9JLJ2 | 0          | N-term +28.03 Da,                           | 4140.493164 | 2 | 864.9400024 | 864.4429012 |
| EEEAIQLDGLNASQIR              | P08113 | 0          | N-term +28.03 Da,                           | 4141.380859 | 2 | 907.9699707 | 907.4681599 |
| AIMEYLEETRIPIR                | Q9WVLO | 0.00063371 | N-term +28.03 Da,                           | 4145.133301 | 3 | 582.6469727 | 582.6466764 |
| GIESEIVAGIPR                  | P10605 | 0.0006035  | N-term +28.03 Da,                           | 4145.341797 | 2 | 634.8599854 | 634.8640805 |
| TGSGDPKEEEEEELVDPLTTVR        | P99028 | 0.00872761 | N-term +28.03 Da, K +28.03 Da,              | 4147.705078 | 3 | 829.4099731 | 829.4096679 |
| AVFEAVSGPPPADLCHALR           | O70251 | 0          | N-term +28.03 Da, C +57.02 Da,              | 4147.855957 | 3 | 679.0185547 | 679.0191732 |
| ASQTQGIQQLQAEKR               | Q9WTT4 | 0          | N-term +28.03 Da, K +28.03 Da,              | 4147.931152 | 3 | 619.0100098 | 619.0180496 |
| LPPDLPDLEPECR                 | Q8BGT0 | 0.0015748  | N-term +28.03 Da, C +57.02 Da,              | 4148.117676 | 2 | 789.8900146 | 789.8952525 |
| DIQMTQTTSSLSASLGDR            | P01643 | 0          | N-term +28.03 Da,                           | 4148.416016 | 2 | 969.9699707 | 969.9754924 |
| SDVLELTDEFESR                 | P27773 | 0          | N-term +28.03 Da,                           | 4149.082031 | 2 | 841.3977661 | 841.3994117 |
| YEEFVQMMTAK                   | P62204 | 0          | N-term +28.03 Da, K +28.03 Da,              | 4150.201172 | 2 | 717.3400269 | 716.8461847 |
| PFVELETNLPASR                 | O35215 | 0          | N-term +28.03 Da,                           | 4151.334473 | 2 | 750.9047241 | 750.9064771 |
| TGSGDPKEEEEEELVDPLTTVR        | P99028 | 0          | N-term +28.03 Da, K +28.03 Da,              | 4153.652832 | 2 | 1243.609985 | 1243.610864 |
| TAASSSLEKSYELPDGQVITIGNER     | P60710 | 0.0006398  | N-term +28.03 Da, K +28.03 Da,              | 4154.589355 | 3 | 937.4799805 | 936.8135762 |
| EKDGETFLMGLYGR                | B5X0G2 | 0.00054437 | N-term +28.03 Da, K +28.03 Da,              | 4155.487793 | 3 | 600.6365356 | 600.6380697 |

|                               |         |            |                                            |             |   |             |             |
|-------------------------------|---------|------------|--------------------------------------------|-------------|---|-------------|-------------|
| EKDGETFQLMGLYGR               | B5X0G2  | 0          | N-term +28.03 Da, K +28.03 Da,             | 4159.773926 | 2 | 900.460022  | 900.4534663 |
| AVRPLQLLGTCAELCR              | Q8BTE6  | 0          | N-term +28.03 Da, C +57.02 Da,             | 4161.278809 | 3 | 629.0084839 | 629.0097317 |
| ASEAIKGAVVGIDLGTNSCVAVMEGKQAK | P38647  | 0          | N-term +28.03 Da, K +28.03 Da,C +57.02 Da, | 4163.091309 | 4 | 779.9194946 | 779.9228072 |
| PFVELETNLPASR                 | O35215  | 0.00068871 | N-term +28.03 Da,                          | 4163.9375   | 3 | 500.9400024 | 500.9400769 |
| ADPPASVVVGPVVVPR              | P29699  | 0.00058754 | N-term +28.03 Da,                          | 4165.611816 | 3 | 530.3200073 | 529.6470047 |
| DQGTIEDYVEGLR                 | Q60605  | 0          | N-term +28.03 Da,                          | 4166.650391 | 2 | 786.8699951 | 786.8624645 |
| GISTPEELGLDKV                 | P12787  | 0.00072622 | N-term +28.03 Da, K +28.03 Da,             | 4167.036133 | 2 | 707.3937378 | 707.3954111 |
| SFPDVEPQLPQAPTR               | E9DQ0S6 | 0.00600462 | N-term +28.03 Da,                          | 4167.469238 | 2 | 855.4500122 | 855.4464983 |
| GSGDPKEEEEEELVDPLTTVR         | P99028  | 0.00072115 | N-term +28.03 Da, K +28.03 Da,             | 4168.05127  | 2 | 1193.089966 | 1193.087024 |
| GEFFNELVGGQR                  | P09055  | 0          | N-term +28.03 Da,                          | 4168.308105 | 2 | 727.3699951 | 726.367519  |
| SDNQPGVLIQVYEGER              | P16627  | 0          | N-term +28.03 Da,                          | 4169.293945 | 2 | 916.460022  | 916.4628774 |
| VLAPEGSVANKFYVHNDIFR          | P97855  | 0          | N-term +28.03 Da, K +28.03 Da,             | 4171.327148 | 4 | 584.0700073 | 583.816667  |
| SDNQPGVLIQVYEGER              | P16627  | 0          | N-term +28.03 Da,                          | 4173.410156 | 3 | 611.6500244 | 611.3110104 |
| ADPHLCDFLESHYLDKEVK           | Q9CPX4  | 0          | N-term +28.03 Da, K +28.03 Da,C +57.02 Da, | 4175.46582  | 4 | 601.0499878 | 600.8030627 |
| TGSGDPKEEEEEELVDPLTTVR        | P99028  | 0          | N-term +28.03 Da, K +28.03 Da,             | 4178.164063 | 3 | 829.7399902 | 829.4096679 |
| SGDPKEEEEEELVDPLTTVR          | P99028  | 0          | N-term +28.03 Da, K +28.03 Da,             | 4179.001465 | 2 | 1165.079956 | 1164.576292 |
| LGCQVCLTKAMDNMTVR             | P46656  | 0          | N-term +28.03 Da, K +28.03 Da,C +57.02 Da, | 4179.262695 | 3 | 684.6699829 | 685.006894  |
| SEDASYINGETVVVGGGTPSRL        | Q99LB2  | 0.00155763 | N-term +28.03 Da,                          | 4180.535645 | 2 | 1119.050049 | 1118.558236 |
| APDQDEIDCLPGLAKQPSFR          | P16675  | 0          | N-term +28.03 Da, K +28.03 Da,C +57.02 Da, | 4183.407715 | 3 | 771.7199707 | 771.7229744 |
| NKELDPVQKLFVDKIR              | P97450  | 0.00062189 | N-term +28.03 Da, K +28.03 Da,             | 4183.48291  | 4 | 514.5603027 | 514.3147655 |
| NMFERHLQIHLITR                | Q505G8  | 0.01029083 | N-term +28.03 Da,                          | 4186.495605 | 3 | 612.6799927 | 612.6735594 |
| GSGDPKEEEEEELVDPLTTVR         | P99028  | 0.00352467 | N-term +28.03 Da, K +28.03 Da,             | 4186.923828 | 3 | 796.3900146 | 795.7271082 |
| NKELDPVQKLFVDKIR              | P97450  | 0          | N-term +28.03 Da, K +28.03 Da,             | 4187.121094 | 3 | 685.7399902 | 685.4172618 |
| GDPKEEEEEELVDPLTTVR           | P99028  | 0          | N-term +28.03 Da, K +28.03 Da,             | 4187.394043 | 2 | 1121.560059 | 1121.060277 |
| GDPKEEEEEELVDPLTTVR           | P99028  | 0.00057143 | N-term +28.03 Da, K +28.03 Da,             | 4188.849121 | 3 | 747.7072754 | 747.7092771 |
| SDVLELTDENFESR                | P27773  | 0          | N-term +28.03 Da,                          | 4189.131836 | 2 | 841.9000244 | 841.3994117 |
| ASTFEEVVQVPSAYQK              | Q60598  | 0          | N-term +28.03 Da, K +28.03 Da,             | 4193.872559 | 2 | 919.9799805 | 919.9803715 |
| ASEAIKGAVVGIDLGTNSCVAVMEGKQAK | P38647  | 0          | N-term +28.03 Da, K +28.03 Da,C +57.02 Da, | 4194.771973 | 4 | 780.1699829 | 779.9228072 |
| EEMDGEWEPPIQNPEYKGEWKPR       | P14211  | 0          | N-term +28.03 Da, K +28.03 Da,             | 4195.05957  | 4 | 758.1199951 | 757.6193825 |
| ASTFEEVVQVPSAYQK              | Q60598  | 0.01850258 | N-term +28.03 Da, K +28.03 Da,             | 4195.16748  | 3 | 613.9899902 | 613.6560065 |
| EEMDGEWEPPIQNPEYKGEWKPR       | P14211  | 0          | N-term +28.03 Da, K +28.03 Da,             | 4198.208496 | 4 | 757.3699951 | 757.6193825 |
| KEESFGPIMIISR                 | Q8R0Y6  | 0.01265271 | N-term +28.03 Da, K +28.03 Da,             | 4198.599121 | 3 | 521.960022  | 521.6252123 |
| YSSDDVIELTPSNFNR              | Q922R8  | 0.00073421 | N-term +28.03 Da,                          | 4203.608887 | 2 | 987.4699707 | 986.4683575 |
| NKELDPVQKLFVDKIR              | P97450  | 0          | N-term +28.03 Da, K +28.03 Da,             | 4206.594238 | 4 | 514.0599976 | 514.3147655 |
| IEANEALVKALE                  | Q9D3D9  | 0.02005119 | N-term +28.03 Da, K +28.03 Da,             | 4207.156738 | 2 | 678.3902588 | 678.3926711 |
| LDDKDYFLFR                    | Q64433  | 0.00061805 | N-term +28.03 Da, K +28.03 Da,             | 4214.131836 | 3 | 463.25      | 463.2467295 |
| APDQDEIDCLPGLAKQPSFR          | P16675  | 0          | N-term +28.03 Da, K +28.03 Da,C +57.02 Da, | 4214.581055 | 3 | 771.7199707 | 771.7229744 |
| TVDAFDYDLQTGGQISNR            | Q64374  | 0          | N-term +28.03 Da,                          | 4215.349609 | 2 | 985.9727783 | 985.9763495 |
| VMMQDSSPDFEDTWR               | Q8K120  | 0          | N-term +28.03 Da,                          | 4215.858887 | 2 | 936.9000244 | 936.400574  |
| THILLFLPK                     | P09103  | 0.00441826 | N-term +28.03 Da, K +28.03 Da,             | 4215.973145 | 3 | 380.25      | 379.9179951 |

|                             |        |            |                                |             |   |             |             |
|-----------------------------|--------|------------|--------------------------------|-------------|---|-------------|-------------|
| GDPKEEEEEELVDPLTTVR         | P99028 | 0.00070472 | N-term +28.03 Da, K +28.03 Da, | 4218.388672 | 2 | 1121.057373 | 1121.060277 |
| NKELDPVQKLFVDKIR            | P97450 | 0          | N-term +28.03 Da, K +28.03 Da, | 4218.464355 | 3 | 685.7444458 | 685.4172618 |
| GDPKEEEEEELVDPLTTVR         | P99028 | 0.03631961 | N-term +28.03 Da, K +28.03 Da, | 4220.440918 | 3 | 747.7074585 | 747.7092771 |
| SDVLELTDENFESR              | P27773 | 0          | N-term +28.03 Da,              | 4221.291504 | 2 | 841.395874  | 841.3994117 |
| SLATAGDGLIELR               | P67778 | 0.00057604 | N-term +28.03 Da,              | 4224.009277 | 2 | 672.8800049 | 672.380095  |
| THILLFLPK                   | P09103 | 0.00107643 | N-term +28.03 Da, K +28.03 Da, | 4225.429199 | 2 | 569.3726196 | 569.3733544 |
| EVEAVKVHSFPTLKFFPASADR      | P09103 | 0          | N-term +28.03 Da, K +28.03 Da, | 4225.630371 | 4 | 640.5999756 | 640.6047032 |
| GDPKEEEEEELVDPLTTVR         | P99028 | 0.03288672 | N-term +28.03 Da, K +28.03 Da, | 4228.098145 | 4 | 561.289978  | 561.0337769 |
| AWITAPVALR                  | O55111 | 0.00066534 | N-term +28.03 Da,              | 4229.601074 | 2 | 563.3400269 | 563.3425858 |
| SFIKQYLEKQKELLR             | Q9JIX8 | 0          | N-term +28.03 Da, K +28.03 Da, | 4229.682129 | 4 | 502.7999878 | 502.5463907 |
| NLPESWDWR                   | P97821 | 0.00487329 | N-term +28.03 Da,              | 4231.807617 | 2 | 615.7962036 | 615.7987402 |
| DALEEDNVLVLK                | P09103 | 0          | N-term +28.03 Da, K +28.03 Da, | 4235.636719 | 2 | 771.9154053 | 771.9167082 |
| NKELDPVQKLFVDKIR            | P97450 | 0          | N-term +28.03 Da, K +28.03 Da, | 4237.872559 | 4 | 514.5601807 | 514.3147655 |
| EKDGTFQLMGLYGR              | B5X0G2 | 0.00071023 | N-term +28.03 Da, K +28.03 Da, | 4244.059082 | 3 | 601.2999878 | 600.6380697 |
| TLVGYDLVPEPK                | P12787 | 0.00073046 | N-term +28.03 Da, K +28.03 Da, | 4245.640137 | 2 | 693.9000244 | 693.8975891 |
| YSSDDVIELTPSNFNR            | Q922R8 | 0          | N-term +28.03 Da,              | 4247.470215 | 2 | 986.46698   | 986.4683575 |
| THILLFLPK                   | P09103 | 0.004      | N-term +28.03 Da, K +28.03 Da, | 4248.701172 | 3 | 380.25      | 379.9179951 |
| GDPKEEEEEELVDPLTTVR         | P99028 | 0          | N-term +28.03 Da, K +28.03 Da, | 4249.176758 | 2 | 1121.060059 | 1121.060277 |
| GDPKEEEEEELVDPLTTVR         | P99028 | 0.00056721 | N-term +28.03 Da, K +28.03 Da, | 4251.258789 | 3 | 747.7077026 | 747.7092771 |
| YSSDDVIELTPSNFNR            | Q922R8 | 0.00068166 | N-term +28.03 Da,              | 4251.491699 | 3 | 657.9813843 | 657.9813305 |
| AADTFSLDLPR                 | Q9DBE9 | 0.00057537 | N-term +28.03 Da,              | 4252.010254 | 2 | 617.3200073 | 617.3273308 |
| SDVLELTDENFESR              | P27773 | 0          | N-term +28.03 Da,              | 4252.789551 | 2 | 841.3972168 | 841.3994117 |
| GIQLPGTTHQQPSVGQMMIFEHGR    | P11276 | 0.0006169  | N-term +28.03 Da,              | 4253.208984 | 4 | 738.6199951 | 738.37117   |
| DLSSSDLSTASKIV              | Q61838 | 0.00068306 | N-term +28.03 Da, K +28.03 Da, | 4257.425293 | 2 | 740.4000244 | 739.9010582 |
| HVMTNLGEKLTDEEVDDEMIR       | P62204 | 0.02193167 | N-term +28.03 Da, K +28.03 Da, | 4263.666992 | 4 | 604.552002  | 604.5528164 |
| SDVLELTDENFESR              | P27773 | 0          | N-term +28.03 Da,              | 4269.007813 | 3 | 561.2700195 | 561.2686999 |
| FPASVAPVLMNQPPQIAPKR        | Q6NZJ6 | 0          | N-term +28.03 Da, K +28.03 Da, | 4271.412598 | 3 | 795.789978  | 795.7873606 |
| ELDPVQKLFVDKIR              | P97450 | 0          | N-term +28.03 Da, K +28.03 Da, | 4274.697266 | 4 | 446.769989  | 446.7724676 |
| SLGEYLFER                   | P29391 | 0.00255754 | N-term +28.03 Da,              | 4275.484375 | 2 | 571.2966919 | 571.2980417 |
| GEFVDLYVPR                  | Q9CQR2 | 0.00071891 | N-term +28.03 Da,              | 4277.839355 | 2 | 611.8200073 | 611.8269663 |
| YSSDDVIELTPSNFNR            | Q922R8 | 0          | N-term +28.03 Da,              | 4278.687012 | 2 | 986.460022  | 986.4683575 |
| VANQDFVENVLVR               | O88746 | 0          | N-term +28.03 Da,              | 4279.553711 | 2 | 765.9141846 | 765.9173762 |
| NKELDPVQKLFVDKIR            | P97450 | 0.0006402  | N-term +28.03 Da, K +28.03 Da, | 4280.10791  | 4 | 514.8099976 | 514.3147655 |
| LASARLAAASDVLELTDENFESR     | P27773 | 0.00060132 | N-term +28.03 Da,              | 4280.307617 | 2 | 1254.640015 | 1253.642832 |
| ELDPVQKLFVDKIR              | P97450 | 0          | N-term +28.03 Da, K +28.03 Da, | 4281.835449 | 3 | 595.6900024 | 595.3608646 |
| SDVLELTDENFESR              | P27773 | 0          | N-term +28.03 Da,              | 4283.181641 | 2 | 841.3964844 | 841.3994117 |
| FPASVAPVLMNQPPQIAPKR        | Q6NZJ6 | 0          | N-term +28.03 Da, K +28.03 Da, | 4283.430176 | 3 | 796.4500122 | 795.7873606 |
| VALLLASARLAAASDVLELTDENFESR | P27773 | 0.00063816 | N-term +28.03 Da,              | 4284.813477 | 3 | 968.1900024 | 968.1888657 |
| MDLPLSAAPTQEEKQGPTPAGLPR    | Q7TT50 | 0          | N-term +28.03 Da, K +28.03 Da, | 4287.54834  | 3 | 887.8099976 | 887.1423101 |
| VLDKDYFLFR                  | Q64433 | 0          | N-term +28.03 Da, K +28.03 Da, | 4287.733398 | 3 | 496.269989  | 496.2695342 |

|                             |        |            |                                            |             |   |             |             |
|-----------------------------|--------|------------|--------------------------------------------|-------------|---|-------------|-------------|
| DLNLDLSKFR                  | Q8BK30 | 0.00399202 | N-term +28.03 Da, K +28.03 Da,             | 4290.981445 | 3 | 426.25      | 426.2468408 |
| GSLGEYLFER                  | P29391 | 0.00055188 | N-term +28.03 Da,                          | 4294.410156 | 2 | 599.8099976 | 599.8087737 |
| MDLPLSAAPTQVEEKQGPTPAGLPR   | Q7TT50 | 0          | N-term +28.03 Da, K +28.03 Da,             | 4295.9375   | 4 | 665.8599854 | 665.6085517 |
| LAAASDVLELTDENFESR          | P27773 | 0.0006605  | N-term +28.03 Da,                          | 4297.948242 | 2 | 1004.5      | 1004.497115 |
| NGETPTEKLPFPPIHDDKGR        | O08709 | 0          | N-term +28.03 Da, K +28.03 Da,             | 4298.155273 | 4 | 554.0499878 | 553.5559502 |
| LHTKGALPLDVTVFYKVIK         | P57759 | 0          | N-term +28.03 Da, K +28.03 Da,             | 4299.948242 | 4 | 589.3599854 | 589.1118979 |
| SDVLELTDENFESR              | P27773 | 0          | N-term +28.03 Da,                          | 4300.977051 | 3 | 561.2675171 | 561.2686999 |
| SKTVQDALSSVQESDIAVVAR       | P33622 | 0          | N-term +28.03 Da, K +28.03 Da,             | 4301.851074 | 3 | 754.4199829 | 753.7445442 |
| NTVVPTKKSQIFSTASDNQPTVTIKVY | P20029 | 0.02345059 | N-term +28.03 Da, K +28.03 Da,             | 4302.78125  | 3 | 1026.900024 | 1026.907699 |
| RPANPNWGVFSEFGDSSSPATR      | E9PV24 | 0          | N-term +28.03 Da,                          | 4303.765625 | 3 | 803.0499878 | 803.0523711 |
| GQVVQFKLSDIGEGIR            | P53395 | 0          | N-term +28.03 Da, K +28.03 Da,             | 4311.137695 | 3 | 601.6799927 | 601.3438739 |
| LKTQPTDEEMLFYISH            | P31786 | 0.00107469 | N-term +28.03 Da, K +28.03 Da,             | 4311.243652 | 3 | 670.0060425 | 670.0080515 |
| DQDEIDCLPLAKQPSFR           | P16675 | 0          | N-term +28.03 Da, K +28.03 Da,C +57.02 Da, | 4311.455566 | 3 | 716.0300293 | 715.6930149 |
| ETCKLQQPNSLENGPR            | P48725 | 0.02381947 | N-term +28.03 Da, K +28.03 Da,C +57.02 Da, | 4312.277344 | 2 | 964.5       | 963.9887364 |
| SDVLELTDENFESR              | P27773 | 0          | N-term +28.03 Da,                          | 4314.481934 | 2 | 841.3974609 | 841.3994117 |
| AEAPGVDLGILPEGR             | Q3UW53 | 0.00206079 | N-term +28.03 Da,                          | 4315.388672 | 2 | 761.9199829 | 761.4172092 |
| SLGGGTGSGMGTLLISKIR         | P68372 | 0          | N-term +28.03 Da, K +28.03 Da,             | 4317.230469 | 3 | 621.0200195 | 621.0240355 |
| VLDDKDYFLFR                 | Q64433 | 0          | N-term +28.03 Da, K +28.03 Da,             | 4318.408691 | 3 | 496.6000061 | 496.2695342 |
| FNVEKINGEWHTIILASDKR        | B5X0G2 | 0.00447094 | N-term +28.03 Da, K +28.03 Da,             | 4319.240723 | 4 | 614.5900269 | 614.3430491 |
| EQWSNCTIGQIR                | P10605 | 0          | N-term +28.03 Da, C +57.02 Da,             | 4319.529297 | 2 | 808.3900146 | 808.896118  |
| SSFIQGFVDHVKEDCDR           | Q61207 | 0          | N-term +28.03 Da, K +28.03 Da,C +57.02 Da, | 4319.634277 | 4 | 524.5021973 | 524.503289  |
| SVTGWKEIEYEVVR              | Q8C196 | 0          | N-term +28.03 Da, K +28.03 Da,             | 4320.042969 | 3 | 584.6500244 | 584.3173248 |
| LLGEEDDEALHYLTR             | Q9EQU5 | 0          | N-term +28.03 Da,                          | 4320.75293  | 3 | 605.9752197 | 605.9756278 |
| SVTGWKEIEYEVVR              | Q8C196 | 0          | N-term +28.03 Da, K +28.03 Da,             | 4320.844727 | 3 | 584.3200073 | 584.3173248 |
| GQVVQFKLSDIGEGIR            | P53395 | 0          | N-term +28.03 Da, K +28.03 Da,             | 4321.03125  | 2 | 902.0100098 | 901.5121726 |
| GDTITNTMTLGDIVYKR           | P12710 | 0          | N-term +28.03 Da, K +28.03 Da,             | 4323.103516 | 2 | 978.0200195 | 977.5193381 |
| TANEVEAVKVHSFPTLKFPPASADR   | P09103 | 0.00062267 | N-term +28.03 Da, K +28.03 Da,             | 4324.072754 | 4 | 712.6400146 | 712.1366336 |
| TANEVEAVKVHSFPTLKFPPASADR   | P09103 | 0          | N-term +28.03 Da, K +28.03 Da,             | 4326.766602 | 4 | 712.3800049 | 712.1366336 |
| GPAGAGESKCLPMVKVLD AVR      | P07309 | 0          | N-term +28.03 Da, K +28.03 Da,C +57.02 Da, | 4330.004883 | 4 | 560.5599976 | 560.5629864 |
| APQGSGLGEYLFER              | P29391 | 0.00562852 | N-term +28.03 Da,                          | 4332.289063 | 3 | 499.2600098 | 498.9244269 |
| TLMNLGGLAVAR                | Q9WVA4 | 0.00446872 | N-term +28.03 Da,                          | 4334.29541  | 2 | 622.361084  | 622.3631928 |
| LGIPEEELLR                  | Q91WV0 | 0.00578035 | N-term +28.03 Da,                          | 4338.249512 | 2 | 598.8460083 | 598.8478989 |
| GYLSLLQDSGEVR               | P63242 | 0.00070373 | N-term +28.03 Da,                          | 4340.613281 | 2 | 733.3900146 | 732.8882846 |
| KTSGPPVSELITKAVAASKER       | P43274 | 0.0005814  | N-term +28.03 Da, K +28.03 Da,             | 4342.083984 | 4 | 570.8400269 | 571.0926999 |
| ALFNPDVSWDR                 | Q62425 | 0.02380952 | N-term +28.03 Da,                          | 4343.130371 | 2 | 674.3373413 | 674.3382298 |
| AAIAQELNELDYDSDHNVNTR       | P57780 | 0          | N-term +28.03 Da,                          | 4343.479004 | 3 | 822.3900146 | 822.0628248 |
| SDVLELTDENFESR              | P27773 | 0          | N-term +28.03 Da,                          | 4346.059082 | 2 | 841.397583  | 841.3994117 |
| SLGGGTGSGMGTLLISKIR         | P68372 | 0          | N-term +28.03 Da, K +28.03 Da,             | 4348.294434 | 3 | 621.0228882 | 621.0240355 |
| GYLSLLQDSGEVR               | P63242 | 0.00256937 | N-term +28.03 Da,                          | 4348.904785 | 2 | 732.8900146 | 732.8882846 |
| AGAGESKCLPMVKVLD AVR        | P07309 | 0          | N-term +28.03 Da, K +28.03 Da,C +57.02 Da, | 4349.131348 | 4 | 522.0437012 | 522.0444293 |

|                                   |        |            |                                            |             |   |             |             |
|-----------------------------------|--------|------------|--------------------------------------------|-------------|---|-------------|-------------|
| FFTPKQEGDVNFNLICNIK               | Q80W93 | 0.00445986 | N-term +28.03 Da, K +28.03 Da,C +57.02 Da, | 4349.70166  | 3 | 789.75      | 790.0838431 |
| FSVSDLPLKPLK                      | Q9EST5 | 0          | N-term +28.03 Da, K +28.03 Da,             | 4351.097656 | 4 | 397.0100098 | 396.7588285 |
| SAMTEEAAVAIAKAMAK                 | P63242 | 0          | N-term +28.03 Da, K +28.03 Da,             | 4353.283203 | 3 | 569.3120117 | 569.3124173 |
| APQGSLSGEYLFER                    | P29391 | 0.00059312 | N-term +28.03 Da,                          | 4355.972168 | 2 | 747.8817139 | 747.883002  |
| TFHLEATENPGALIKDIR                | Q8VEE0 | 0.00574988 | N-term +28.03 Da, K +28.03 Da,             | 4360.199219 | 4 | 521.289978  | 521.0402014 |
| GPAGAGESKCPLMVKVLDAVR             | P07309 | 0          | N-term +28.03 Da, K +28.03 Da,C +57.02 Da, | 4361.367188 | 4 | 560.5628052 | 560.5629864 |
| APQGSLSGEYLFER                    | P29391 | 0.00600739 | N-term +28.03 Da,                          | 4363.632324 | 3 | 498.9200134 | 498.9244269 |
| GLLSQGSPLSWEETQR                  | P97494 | 0          | N-term +28.03 Da,                          | 4364.465332 | 2 | 909.460022  | 908.4654199 |
| GPAGAGESKCPLMVKVLDAVR             | P07309 | 0.00054526 | N-term +28.03 Da, K +28.03 Da,C +57.02 Da, | 4365.367676 | 2 | 1120.619995 | 1120.118696 |
| GPAGAGESKCPLMVKVLDAVR             | P07309 | 0          | N-term +28.03 Da, K +28.03 Da,C +57.02 Da, | 4371.731445 | 3 | 747.0802002 | 747.0815564 |
| GSPAVDVAVKVF                      | P07309 | 0.00057737 | N-term +28.03 Da, K +28.03 Da,             | 4373.067383 | 2 | 622.8649902 | 622.8660915 |
| GDIEGEDAFLLGR                     | Q8R4U7 | 0.04257859 | N-term +28.03 Da,                          | 4374.330566 | 2 | 709.8499756 | 710.35936   |
| KIPVPEDKYTALVDQEEKEDVKSCAEFVSGSQR | Q9DCX2 | 0.00065445 | N-term +28.03 Da, K +28.03 Da,C +57.02 Da, | 4376.216309 | 4 | 1010.030029 | 1009.530332 |
| LAKVDATEESDLAQQYGV                | P09103 | 0          | N-term +28.03 Da, K +28.03 Da,             | 4376.503418 | 2 | 1074.560059 | 1075.060414 |
| GPAGAGESKCPLMVKVLDAVR             | P07309 | 0          | N-term +28.03 Da, K +28.03 Da,C +57.02 Da, | 4376.662109 | 2 | 1121.119995 | 1120.118696 |
| KIPVPEDKYTALVDQEEKEDVKSCAEFVSGSQR | Q9DCX2 | 0          | N-term +28.03 Da, K +28.03 Da,C +57.02 Da, | 4380.450195 | 4 | 1009.530029 | 1009.530332 |
| QAFIDFMSR                         | P57780 | 0.00055866 | N-term +28.03 Da,                          | 4382.708008 | 2 | 571.7848511 | 571.7867865 |
| DIDLPEFDAR                        | P10605 | 0.00073368 | N-term +28.03 Da,                          | 4384.591797 | 2 | 660.3200073 | 660.3275283 |
| PHQTLGFPCLRSRSLHGRPR              | Q2TV84 | 0.00568182 | N-term +28.03 Da, C +57.02 Da,             | 4384.961914 | 2 | 1200.640015 | 1200.65074  |
| NGGFCVCKKLV                       | Q61207 | 0          | N-term +28.03 Da, K +28.03 Da,C +57.02 Da, | 4386.368164 | 3 | 537.289978  | 536.6264472 |
| GAPQGSLSGEYLFER                   | P29391 | 0          | N-term +28.03 Da,                          | 4388.494141 | 2 | 776.3900146 | 776.3937341 |
| SDWGLATISTIKEVR                   | O88668 | 0.00156986 | N-term +28.03 Da, K +28.03 Da,             | 4390.894531 | 3 | 607.3400269 | 607.0035175 |
| GPAGAGESKCPLMVKVLDAVR             | P07309 | 0          | N-term +28.03 Da, K +28.03 Da,C +57.02 Da, | 4393.412109 | 4 | 560.5622559 | 560.5629864 |
| SDVLELTDENFESR                    | P27773 | 0          | N-term +28.03 Da,                          | 4395.519531 | 2 | 841.8925781 | 841.3994117 |
| TTIAGVVYKDGIVLGADTR               | P70195 | 0          | N-term +28.03 Da, K +28.03 Da,             | 4395.757813 | 2 | 1003.570007 | 1003.070052 |
| GGGGASALLIEKL                     | Q8QZT1 | 0.00060938 | N-term +28.03 Da, K +28.03 Da,             | 4396.412598 | 2 | 621.8800049 | 621.3768235 |
| TDAEKAAVSVCLWGKVNSEVGGREALGR      | P02088 | 0          | N-term +28.03 Da, K +28.03 Da,C +57.02 Da, | 4397.293945 | 4 | 726.6199951 | 726.6196482 |
| NFNVEKINGEWHTIILASDKR             | B5X0G2 | 0          | N-term +28.03 Da, K +28.03 Da,             | 4398.487305 | 4 | 643.0999756 | 642.8537812 |
| FLKAEQMKRQEKQRLE                  | P51954 | 0.02078032 | N-term +28.03 Da, K +28.03 Da,             | 4402.016113 | 4 | 583.8400269 | 583.3426888 |
| GPAGAGESKCPLMVKVLDAVR             | P07309 | 0          | N-term +28.03 Da, K +28.03 Da,C +57.02 Da, | 4402.907227 | 3 | 747.0802002 | 747.0815564 |
| TTIAGVVYKDGIVLGADTR               | P70195 | 0          | N-term +28.03 Da, K +28.03 Da,             | 4403.483887 | 3 | 669.0471802 | 669.0491271 |
| DVALEGVGHFFR                      | P29391 | 0          | N-term +28.03 Da,                          | 4404.393066 | 3 | 458.9098511 | 458.9103401 |
| EEEEELVDPLTTVR                    | P99028 | 0          | N-term +28.03 Da,                          | 4404.677734 | 2 | 908.9500122 | 908.4465594 |
| NLSSQLAGMNLGSR                    | O88746 | 0.00060459 | N-term +28.03 Da,                          | 4405.929688 | 2 | 739.3800049 | 738.385386  |
| EFVPSFLR                          | Q8R050 | 0.02409639 | N-term +28.03 Da,                          | 4406.083008 | 2 | 512.2800293 | 511.7871121 |
| GPAGAGESKCPLMVKVLDAVR             | P07309 | 0          | N-term +28.03 Da, K +28.03 Da,C +57.02 Da, | 4406.970215 | 2 | 1120.118408 | 1120.118696 |
| DVALEGVGHFFR                      | P29391 | 0          | N-term +28.03 Da,                          | 4407.344238 | 2 | 687.8603516 | 687.8618719 |
| SNLASVEELKEIDVEVR                 | P35486 | 0.00158983 | N-term +28.03 Da, K +28.03 Da,             | 4407.603516 | 3 | 663.3599854 | 662.6966423 |
| DFISYLQR                          | P27773 | 0.02305113 | N-term +28.03 Da,                          | 4409.962402 | 2 | 535.289978  | 535.2874766 |
| VVVPDVESLPSWAQKR                  | P41216 | 0          | N-term +28.03 Da, K +28.03 Da,             | 4411.628906 | 3 | 622.6900024 | 622.6876406 |



|                               |        |            |                                            |             |   |             |             |
|-------------------------------|--------|------------|--------------------------------------------|-------------|---|-------------|-------------|
| LIGDAAKNQLTSNPENTVFDAGR       | P20029 | 0          | N-term +28.03 Da, K +28.03 Da,             | 4412.194824 | 3 | 862.460022  | 862.8010528 |
| GAPQGSLSGEYLFER               | P29391 | 0.00061576 | N-term +28.03 Da,                          | 4415.554199 | 3 | 517.9310303 | 517.9315816 |
| LIGDAAKNQVAMNPQNTVFDAGR       | P16627 | 0.00063654 | N-term +28.03 Da, K +28.03 Da,             | 4415.65332  | 3 | 862.1300049 | 862.4671277 |
| LIGDAAKNQLTSNPENTVFDAGR       | P20029 | 0          | N-term +28.03 Da, K +28.03 Da,             | 4415.729004 | 4 | 647.0999756 | 647.3526087 |
| GGAGSYIYEKPKQTEAPQVTGPIEVPVVR | Q9DCT8 | 0          | N-term +28.03 Da, K +28.03 Da,             | 4415.959473 | 3 | 1000.869995 | 1000.200994 |
| DVSPFLDGLLEERPQR              | Q9R1P4 | 0          | N-term +28.03 Da,                          | 4416.902344 | 3 | 595.9699707 | 595.9758504 |
| GGAGSYIYEKPKQTEAPQVTGPIEVPVVR | Q9DCT8 | 0          | N-term +28.03 Da, K +28.03 Da,             | 4417.616211 | 3 | 1000.530029 | 1000.200994 |
| GAPQGSLSGEYLFER               | P29391 | 0          | N-term +28.03 Da,                          | 4419.853516 | 2 | 776.3919067 | 776.3937341 |
| EAGFMTKDLAACIKGLPNVQR         | O88844 | 0.00255363 | N-term +28.03 Da, K +28.03 Da,C +57.02 Da, | 4422.390625 | 3 | 802.4299927 | 801.7677491 |
| EAGFMTKDLAACIKGLPNVQR         | O88844 | 0.00065531 | N-term +28.03 Da, K +28.03 Da,C +57.02 Da, | 4422.516602 | 4 | 602.0800171 | 601.577631  |
| RDLISHDELFSDIYKIR             | P63028 | 0          | N-term +28.03 Da, K +28.03 Da,             | 4422.830566 | 4 | 544.7984009 | 544.7994799 |
| KGTPEQPQCGFSNAVQILR           | Q80Y14 | 0          | N-term +28.03 Da, K +28.03 Da,C +57.02 Da, | 4423.181641 | 3 | 762.0800171 | 762.4072088 |
| GPAGAGESKCLPMVKVLDVAVR        | P07309 | 0          | N-term +28.03 Da, K +28.03 Da,C +57.02 Da, | 4424.183594 | 4 | 560.5619507 | 560.5629864 |
| SGDWELEVNGTEAKLLR             | O35658 | 0.03483192 | N-term +28.03 Da, K +28.03 Da,             | 4426.954102 | 3 | 659.0100098 | 658.3494653 |
| SDVLELTDENFESR                | P27773 | 0          | N-term +28.03 Da,                          | 4430.171875 | 2 | 841.8893433 | 841.3994117 |
| LQELDAASKVTEQEWIR             | Q6IRU5 | 0          | N-term +28.03 Da, K +28.03 Da,             | 4430.263184 | 3 | 653.3400269 | 653.6775819 |
| EFTLGEECELETMTGEKVK           | P12710 | 0          | N-term +28.03 Da, K +28.03 Da,C +57.02 Da, | 4430.453613 | 3 | 772.3800049 | 772.0446147 |
| DPKEEEEEELVDPLTTVR            | P99028 | 0.00255232 | N-term +28.03 Da, K +28.03 Da,             | 4432.841797 | 3 | 728.7000122 | 728.7021224 |
| LYSSDDVIELTPSNFNR             | Q922R8 | 0          | N-term +28.03 Da,                          | 4434.897949 | 2 | 1043.01001  | 1043.01039  |
| DPKEEEEEELVDPLTTVR            | P99028 | 0.00057307 | N-term +28.03 Da, K +28.03 Da,             | 4435.032227 | 2 | 1093.050049 | 1092.549545 |
| EFTLGEECELETMTGEKVK           | P12710 | 0          | N-term +28.03 Da, K +28.03 Da,C +57.02 Da, | 4436.861816 | 2 | 1158.060059 | 1157.563284 |
| EIEAYGQQLR                    | Q9D952 | 0.00561272 | N-term +28.03 Da,                          | 4439.076172 | 2 | 618.3300171 | 617.8249553 |
| DPKEEEEEELVDPLTTVR            | P99028 | 0          | N-term +28.03 Da, K +28.03 Da,             | 4443.587891 | 2 | 1092.540039 | 1092.549545 |
| LYSSDDVIELTPSNFNR             | Q922R8 | 0.00066845 | N-term +28.03 Da,                          | 4445.930664 | 3 | 696.0100098 | 695.6760186 |
| NEFTLGEECELETMTGEKVK          | P12710 | 0          | N-term +28.03 Da, K +28.03 Da,C +57.02 Da, | 4448.119141 | 3 | 810.7199707 | 810.0589241 |
| NEFTLGEECELETMTGEKVK          | P12710 | 0          | N-term +28.03 Da, K +28.03 Da,C +57.02 Da, | 4450.01123  | 3 | 810.0599976 | 810.0589241 |
| GAPQGSLSGEYLFER               | P29391 | 0          | N-term +28.03 Da,                          | 4451.24707  | 2 | 776.3943481 | 776.3937341 |
| SSSSLEKSYELPDGQVITIGNER       | P60710 | 0          | N-term +28.03 Da, K +28.03 Da,             | 4454.169922 | 3 | 856.1099854 | 855.7729403 |
| ASSSSLEKSYELPDGQVITIGNER      | P60710 | 0          | N-term +28.03 Da, K +28.03 Da,             | 4459.289551 | 3 | 880.1199951 | 879.4519784 |
| ASSSSLEKSYELPDGQVITIGNER      | P60710 | 0          | N-term +28.03 Da, K +28.03 Da,             | 4460.445313 | 3 | 879.7800293 | 879.4519784 |
| SDVLELTDENFESR                | P27773 | 0.01028623 | N-term +28.03 Da,                          | 4461.213867 | 2 | 842.3900146 | 841.3994117 |
| DALEEDNVLVLK                  | P09103 | 0          | N-term +28.03 Da, K +28.03 Da,             | 4464.256836 | 2 | 771.9099731 | 771.9167082 |
| AVQEEWLDIPSKLDNR              | E9Q7D5 | 0.02377972 | N-term +28.03 Da, K +28.03 Da,             | 4464.984375 | 3 | 657.3499756 | 657.0178269 |
| LYSSDDVIELTPSNFNR             | Q922R8 | 0          | N-term +28.03 Da,                          | 4465.327148 | 2 | 1043.01001  | 1043.01039  |
| DEPQSQWDKVKDFANVYVDAVKDSGR    | Q00623 | 0          | N-term +28.03 Da, K +28.03 Da,             | 4467.628906 | 4 | 778.1400146 | 777.8963754 |
| LYSSDDVIELTPSNFNR             | Q922R8 | 0          | N-term +28.03 Da,                          | 4467.704102 | 3 | 695.6699829 | 695.6760186 |
| AEFKEAFQLFDR                  | Q60605 | 0          | N-term +28.03 Da, K +28.03 Da,             | 4472.773926 | 3 | 519.9400024 | 519.6084386 |
| DEPQSQWDKVKDFANVYVDAVKDSGR    | Q00623 | 0          | N-term +28.03 Da, K +28.03 Da,             | 4474.54541  | 3 | 1037.530029 | 1036.859408 |
| AEFKEAFQLFDR                  | Q60605 | 0          | N-term +28.03 Da, K +28.03 Da,             | 4477.523438 | 3 | 520.2700195 | 519.6084386 |
| TGAPQGSLSGEYLFER              | P29391 | 0          | N-term +28.03 Da,                          | 4479.869141 | 2 | 826.9199829 | 826.9175737 |

|                                    |        |            |                                            |             |   |             |             |
|------------------------------------|--------|------------|--------------------------------------------|-------------|---|-------------|-------------|
| TAASSSLEKSYELPDGQVITIGNER          | P60710 | 0          | N-term +28.03 Da, K +28.03 Da,             | 4481.959961 | 3 | 937.1400146 | 936.8135762 |
| SQAAAKVDIEFDYDGPLMKTEVPGPR         | P61922 | 0.02553542 | N-term +28.03 Da, K +28.03 Da,             | 4484.022461 | 3 | 973.8400269 | 973.5037965 |
| SFPTLKFFPASADR                     | P09103 | 0          | N-term +28.03 Da, K +28.03 Da,             | 4484.92041  | 3 | 547.2999878 | 547.299605  |
| ELWDKQQKEQKEKLR                    | Q80U87 | 0.00158898 | N-term +28.03 Da, K +28.03 Da,             | 4485.847168 | 3 | 709.7399902 | 709.4159212 |
| GPPDPILGVTEAFKR                    | P05202 | 0          | N-term +28.03 Da, K +28.03 Da,             | 4486.02002  | 3 | 551.9799805 | 551.6505264 |
| PYNPSMSRPDAWGVTKGAAELMQQKEATTEQQLR | O35490 | 0.00067431 | N-term +28.03 Da, K +28.03 Da,             | 4486.883301 | 4 | 976.7299805 | 976.4936545 |
| GPPDPILGVTEAFKR                    | P05202 | 0.00073584 | N-term +28.03 Da, K +28.03 Da,             | 4487.583984 | 3 | 551.6500244 | 551.6505264 |
| SFPTLKFFPASADR                     | P09103 | 0.00107181 | N-term +28.03 Da, K +28.03 Da,             | 4492.407715 | 2 | 820.4400024 | 820.4457693 |
| SDVLELTDENFESR                     | P27773 | 0          | N-term +28.03 Da,                          | 4492.51123  | 2 | 841.4000244 | 841.3994117 |
| ELISNASDALDKIR                     | P08113 | 0          | N-term +28.03 Da, K +28.03 Da,             | 4494.687988 | 2 | 800.4400024 | 800.9488738 |
| DALEEEEDNVLVLK                     | P09103 | 0          | N-term +28.03 Da, K +28.03 Da,             | 4495.442871 | 2 | 771.9199829 | 771.9167082 |
| EEEDKKEDVGTVVIGDLGTTYSCVGVFKNGR    | P20029 | 0.01640052 | N-term +28.03 Da, K +28.03 Da,C +57.02 Da, | 4497.623047 | 4 | 879.6900024 | 879.1999976 |
| LYSSDDVIELTPSNFNR                  | Q922R8 | 0          | N-term +28.03 Da,                          | 4499.754883 | 3 | 696.0100098 | 695.6760186 |
| DEPQSQWDKVKDFANVYVDAVKDSGR         | Q00623 | 0.00055617 | N-term +28.03 Da, K +28.03 Da,             | 4503.45166  | 4 | 778.4000244 | 777.8963754 |
| DAFFPPLHQFCINPK                    | P79457 | 0.03132628 | N-term +28.03 Da, K +28.03 Da,C +57.02 Da, | 4504.860352 | 2 | 944.9799805 | 943.9847359 |
| DALEEEEDNVLVLKSNFEEALAAHK          | P09103 | 0          | N-term +28.03 Da, K +28.03 Da,             | 4512.247559 | 4 | 732.4000244 | 731.8958439 |
| DALEEEEDNVLVLKSNFEEALAAHK          | P09103 | 0.00069589 | N-term +28.03 Da, K +28.03 Da,             | 4512.812988 | 3 | 975.8599854 | 975.5253664 |
| SFPTLKFFPASADR                     | P09103 | 0.00069061 | N-term +28.03 Da, K +28.03 Da,             | 4517.311523 | 3 | 547.2985229 | 547.299605  |
| KMGAPEAGMAEYLFDKHTLGHGDES          | P09528 | 0          | N-term +28.03 Da, K +28.03 Da,             | 4517.470215 | 4 | 694.3300171 | 694.5833768 |
| KVDIEFDYDGPLMKTEVPGPR              | P61922 | 0.01067616 | N-term +28.03 Da, K +28.03 Da,             | 4518.626953 | 3 | 831.0999756 | 830.7698132 |
| SFSEQGINEFLR                       | Q922R8 | 0          | N-term +28.03 Da,                          | 4520.980957 | 2 | 727.8699951 | 727.867352  |
| LINEKDGETFQLMGLYGR                 | B5X0G2 | 0          | N-term +28.03 Da, K +28.03 Da,             | 4521.415527 | 3 | 714.0413208 | 714.0417553 |
| GQGLFDDEDESDFKEAPR                 | Q6PGL7 | 0          | N-term +28.03 Da, K +28.03 Da,             | 4523.439941 | 3 | 742.0200195 | 742.0183333 |
| SDVLELTDENFESR                     | P27773 | 0          | N-term +28.03 Da,                          | 4526.435547 | 2 | 841.9000244 | 841.3994117 |
| LINEKDGETFQLMGLYGR                 | B5X0G2 | 0.00400802 | N-term +28.03 Da, K +28.03 Da,             | 4528.745117 | 2 | 1071.560059 | 1070.558995 |
| EEEDKKEDVGTVVIGDLGTTYSCVGVFKNGR    | P20029 | 0.00567376 | N-term +28.03 Da, K +28.03 Da,C +57.02 Da, | 4529.447266 | 4 | 879.4400024 | 879.1999976 |
| SIPFPTPTPLTGR                      | Q80X50 | 0.00072046 | N-term +28.03 Da,                          | 4536.261719 | 2 | 757.4199829 | 756.9246697 |
| TEKLTQVMQNPQVLAALQER               | Q78ZA7 | 0          | N-term +28.03 Da, K +28.03 Da,             | 4542.375977 | 3 | 823.7800293 | 823.4441003 |
| LYSSDDVIELTPSNFNR                  | Q922R8 | 0          | N-term +28.03 Da,                          | 4543.27832  | 2 | 1043.51001  | 1043.01039  |
| SAVGSNADLTIEDEEEEPVALQQAQQVR       | Q63918 | 0          | N-term +28.03 Da,                          | 4545.630371 | 3 | 1062.180054 | 1061.847786 |
| FIPLSQKDLENLKAЕVAR                 | Q5SW19 | 0          | N-term +28.03 Da, K +28.03 Da,             | 4546.359375 | 4 | 539.5671387 | 539.567589  |
| SAVGSNADLTIEDEEEEPVALQQAQQVR       | Q63918 | 0          | N-term +28.03 Da,                          | 4547.698242 | 3 | 1062.51001  | 1061.847786 |
| KSLDLFNCEVTNLNAYR                  | O35381 | 0          | N-term +28.03 Da, K +28.03 Da,C +57.02 Da, | 4548.234863 | 3 | 705.0286255 | 705.0297383 |
| SIVVSPILIPENQR                     | Q9WTR5 | 0.01601039 | N-term +28.03 Da,                          | 4549.105469 | 3 | 531.9799805 | 531.6505264 |
| KSLDLFNCEVTNLNAYR                  | O35381 | 0          | N-term +28.03 Da, K +28.03 Da,C +57.02 Da, | 4549.701172 | 2 | 1057.039551 | 1057.040969 |
| GVLNSWTDQDSKDYSTYMSSTLTLTKDEYER    | P01837 | 0          | N-term +28.03 Da, K +28.03 Da,             | 4553.313965 | 4 | 911.4400024 | 911.1845451 |
| LAIIDPGSDIIR                       | P62889 | 0.0005698  | N-term +28.03 Da,                          | 4553.416992 | 2 | 713.3999634 | 713.4010276 |
| FIPLSQKDLENLKAЕVAR                 | Q5SW19 | 0          | N-term +28.03 Da, K +28.03 Da,             | 4553.522949 | 3 | 719.0800171 | 719.0876932 |
| ASEAIKGAVVGIDLGTTNSCVAVMEGK        | P38647 | 0          | N-term +28.03 Da, K +28.03 Da,C +57.02 Da, | 4553.808105 | 3 | 921.4899902 | 921.1539988 |
| LYSSDDVIELTPSNFNR                  | Q922R8 | 0          | N-term +28.03 Da,                          | 4554.111816 | 2 | 1044.01001  | 1043.01039  |

|                                          |        |            |                                            |             |   |             |             |
|------------------------------------------|--------|------------|--------------------------------------------|-------------|---|-------------|-------------|
| QVLEHMPVGPDAILR                          | Q9Z1R2 | 0.04561541 | N-term +28.03 Da,                          | 4556.368652 | 3 | 602         | 601.3379541 |
| VQPSGGPAEDQDMLGEESSLGKPAMLHLPSEQGTPETLQR | O88522 | 0.00256805 | N-term +28.03 Da, K +28.03 Da,             | 4556.523926 | 4 | 1069.52002  | 1069.024245 |
| ASEAIKGAVVGIDLGTNSCVAVMEGKQAKVLENAEGAR   | P38647 | 0          | N-term +28.03 Da, K +28.03 Da,C +57.02 Da, | 4558.330078 | 4 | 1014.549988 | 1014.792157 |
| SQIFSTASDNQPTVTIKVY                      | P20029 | 0.00106781 | N-term +28.03 Da, K +28.03 Da,             | 4558.880371 | 2 | 1078.069946 | 1078.067707 |
| EDVCQDCMKLVSDVQTAVK                      | Q61207 | 0          | N-term +28.03 Da, K +28.03 Da,C +57.02 Da, | 4559.368164 | 3 | 770.3800049 | 770.3777106 |
| VNHPQVSALLGEEDEEALHYLTR                  | Q9EQU5 | 0          | N-term +28.03 Da,                          | 4559.516113 | 4 | 663.3400269 | 662.8383286 |
| DDVALEGVGHFFR                            | P29391 | 0          | N-term +28.03 Da,                          | 4559.744141 | 3 | 497.25      | 497.2526548 |
| EEEDKKEDVGTVVGIDLGTTYSCVGVFKNGR          | P20029 | 0          | N-term +28.03 Da, K +28.03 Da,C +57.02 Da, | 4561.604492 | 4 | 879.4500122 | 879.1999976 |
| AKFEELNMDLFR                             | P20029 | 0          | N-term +28.03 Da, K +28.03 Da,             | 4564.268555 | 3 | 523.6099854 | 523.6095622 |
| FLPLFDR                                  | Q64433 | 0.02554594 | N-term +28.03 Da,                          | 4567.150391 | 2 | 468.769989  | 468.2710975 |
| MFIQTQDTPNPNSLKFIPGKPVLETR               | Q9QZ23 | 0          | N-term +28.03 Da, K +28.03 Da,             | 4569.775391 | 4 | 764.9199829 | 764.6716834 |
| ASEAIKGAVVGIDLGTNSCVAVMEGK               | P38647 | 0          | N-term +28.03 Da, K +28.03 Da,C +57.02 Da, | 4571.833496 | 3 | 921.1500244 | 921.1539988 |
| AKFEELNMDLFR                             | P20029 | 0          | N-term +28.03 Da, K +28.03 Da,             | 4572.506836 | 2 | 785.4099731 | 784.9107051 |
| MFIQTQDTPNPNSLKFIPGKPVLETR               | Q9QZ23 | 0          | N-term +28.03 Da, K +28.03 Da,             | 4579.003906 | 3 | 1019.559998 | 1019.226486 |
| YRDLISHDELFSDIYKIR                       | P63028 | 0          | N-term +28.03 Da, K +28.03 Da,             | 4580.569824 | 4 | 585.5700073 | 585.5653123 |
| MFIQTQDTPNPNSLKFIPGKPVLETR               | Q9QZ23 | 0          | N-term +28.03 Da, K +28.03 Da,             | 4582.232422 | 3 | 1019.22998  | 1019.226486 |
| TFQLMGLYGR                               | B5X0G2 | 0.0006734  | N-term +28.03 Da,                          | 4582.34375  | 2 | 607.8200073 | 607.3235362 |
| AGAGEAGKLEEVMQELR                        | Q9WUM3 | 0          | N-term +28.03 Da, K +28.03 Da,             | 4585.22998  | 3 | 615.3200073 | 615.3242624 |
| LINEKGETFQLMGLYGR                        | B5X0G2 | 0          | N-term +28.03 Da, K +28.03 Da,             | 4586.688965 | 3 | 714.039978  | 714.0417553 |
| APGPSGKTADYAFEMAVSNIR                    | Q8R0N6 | 0          | N-term +28.03 Da, K +28.03 Da,             | 4590.901855 | 3 | 747.0499878 | 746.712298  |
| ASEAIKGAVVGIDLGTNSCVAVMEGKQAKVLENAEGAR   | P38647 | 0          | N-term +28.03 Da, K +28.03 Da,C +57.02 Da, | 4593.40625  | 4 | 1015.039978 | 1014.792157 |
| SEAHLTELEEVCDR                           | Q9QXT0 | 0          | N-term +28.03 Da, C +57.02 Da,             | 4595.05957  | 3 | 610.960022  | 610.2963727 |
| AVEEGIVLGGGCALLR                         | P63038 | 0          | N-term +28.03 Da, C +57.02 Da,             | 4600.57373  | 2 | 821.9500122 | 821.4532687 |
| DEPQSQWDKVKDFANVYVDAVKDSGR               | Q00623 | 0          | N-term +28.03 Da, K +28.03 Da,             | 4605.650391 | 4 | 778.1400146 | 777.8963754 |
| SAAATSAVPAPNHQPEVFCNQJFINNEWHDAVSR       | P47738 | 0          | N-term +28.03 Da, C +57.02 Da,             | 4609.01709  | 4 | 952.710022  | 952.2089539 |
| KGVLSDFMETDVPVDPGVVHR                    | Q9CY22 | 0.00066269 | N-term +28.03 Da, K +28.03 Da,             | 4609.823242 | 4 | 557.2999878 | 556.8003227 |
| LTDPAATTFAHLDATTVLSR                     | P56480 | 0          | N-term +28.03 Da,                          | 4611.242676 | 3 | 742.7299805 | 742.7303461 |
| AAEFVPSFLR                               | Q8R050 | 0.01101807 | N-term +28.03 Da,                          | 4613.13623  | 2 | 582.8239136 | 582.8242263 |
| EEEDKKEDVGTVVGIDLGTTYSCVGVFKNGR          | P20029 | 0.00156822 | N-term +28.03 Da, K +28.03 Da,C +57.02 Da, | 4616.773438 | 4 | 879.7000122 | 879.1999976 |
| DEPQSQWDKVKDFANVYVDAVKDSGR               | Q00623 | 0          | N-term +28.03 Da, K +28.03 Da,             | 4617.361816 | 3 | 1037.530029 | 1036.859408 |
| SQAPGPSGKTADYAFEMAVSNIR                  | Q8R0N6 | 0          | N-term +28.03 Da, K +28.03 Da,             | 4622.986816 | 3 | 818.4099731 | 818.4091671 |
| ALYDYAGQEADLSFR                          | Q99JB8 | 0          | N-term +28.03 Da,                          | 4623.418945 | 2 | 938.4400024 | 938.4416108 |
| ASEAIKGAVVGIDLGTNSCVAVMEGKQAKVLENAEGAR   | P38647 | 0          | N-term +28.03 Da, K +28.03 Da,C +57.02 Da, | 4624.155762 | 4 | 1014.7901   | 1014.792157 |
| EEEDKKEDVGTVVGIDLGTTYSCVGVFKNGR          | P20029 | 0.00055494 | N-term +28.03 Da, K +28.03 Da,C +57.02 Da, | 4628.980957 | 3 | 1172.26001  | 1171.930905 |
| GETFQLMGLYGR                             | B5X0G2 | 0          | N-term +28.03 Da,                          | 4631.445313 | 2 | 700.3539429 | 700.3555653 |
| DLVPEPKIDAALR                            | P12787 | 0          | N-term +28.03 Da, K +28.03 Da,             | 4632.133301 | 3 | 536.3200073 | 535.9906601 |
| AQFEGIVTDLIKR                            | P38647 | 0          | N-term +28.03 Da, K +28.03 Da,             | 4637.515137 | 3 | 515.9699707 | 515.9714884 |
| TAEFKEAFQLFDR                            | Q60605 | 0          | N-term +28.03 Da, K +28.03 Da,             | 4641.05957  | 3 | 553.6199951 | 553.2909983 |
| RNRRSGEVERLR                             | E9Q166 | 0.02117747 | N-term +28.03 Da,                          | 4648.225098 | 2 | 778.4400024 | 778.4480317 |
| GVEALQLLEHEQATTQDNLDKLR                  | Q6PAR5 | 0          | N-term +28.03 Da, K +28.03 Da,             | 4648.529785 | 4 | 699.1099854 | 698.8660808 |

|                                  |        |            |                                            |             |   |             |             |
|----------------------------------|--------|------------|--------------------------------------------|-------------|---|-------------|-------------|
| GYDLVPEPKIIDAAALR                | P12787 | 0          | N-term +28.03 Da, K +28.03 Da,             | 4650.162598 | 3 | 609.0100098 | 609.3522579 |
| EEEDKKEVDGTVVIGIDLGTTCVGVFKNGR   | P20029 | 0.01106195 | N-term +28.03 Da, K +28.03 Da,C +57.02 Da, | 4651.52832  | 4 | 879.7000122 | 879.1999976 |
| AVVIGIDLGTNSCVAVMEGKQAKVLENAEGAR | P38647 | 0          | N-term +28.03 Da, K +28.03 Da,C +57.02 Da, | 4652.943359 | 3 | 1124.27002  | 1124.593569 |
| MKPLVVFLVGGPGAGKGTQC             | Q9DBP5 | 0.00072727 | N-term +28.03 Da, K +28.03 Da,C +57.02 Da, | 4655.905273 | 3 | 701.4000244 | 700.728454  |
| NGDTITNTMTLGDIVYKR               | P12710 | 0          | N-term +28.03 Da, K +28.03 Da,             | 4657.800781 | 3 | 690.3599854 | 690.0296269 |
| SGDSAPLQEAMAVLQHHDVAVSGTAR       | O09159 | 0          | N-term +28.03 Da,                          | 4660.174316 | 4 | 645.0700073 | 644.8185045 |
| VAGPQPAQTGAPQGSGLGEYLFR          | P29391 | 0          | N-term +28.03 Da,                          | 4663.36084  | 2 | 1201.609985 | 1201.11097  |
| DLVPEPKIIDAAALR                  | P12787 | 0.00443568 | N-term +28.03 Da, K +28.03 Da,             | 4663.485352 | 3 | 536.3200073 | 535.9906601 |
| TEELDFLHAR                       | P99028 | 0.00068634 | N-term +28.03 Da,                          | 4666.096191 | 3 | 469.5799866 | 469.2418671 |
| KGIKSVTELNGDTITNTMTLGDIVYKR      | P12710 | 0.02489627 | N-term +28.03 Da, K +28.03 Da,             | 4667.458984 | 4 | 771.1699829 | 770.6822485 |
| VAGPQPAQTGAPQGSGLGEYLFR          | P29391 | 0          | N-term +28.03 Da,                          | 4669.088867 | 3 | 801.4099731 | 801.0764052 |
| MKTILSNQTVDIPENVEITLKGR          | P51410 | 0          | N-term +28.03 Da, K +28.03 Da,             | 4670.919434 | 4 | 671.6300049 | 671.6320268 |
| VHLTDAEKAASVCLWGKVNSEVGGGALGR    | P02088 | 0.00439239 | N-term +28.03 Da, K +28.03 Da,C +57.02 Da, | 4680.5625   | 3 | 1085.219971 | 1084.894236 |
| KMGAPAEAGMAEYLFDKH               | P09528 | 0.00568451 | N-term +28.03 Da, K +28.03 Da,             | 4683.306152 | 3 | 659.9899902 | 660.3303597 |
| LGDFAIPLYR                       | P07758 | 0.00058275 | N-term +28.03 Da,                          | 4685.202637 | 2 | 591.8278809 | 591.8295088 |
| PEANEALERGLL                     | Q9QYB1 | 0.01602425 | N-term +28.03 Da,                          | 4687.101074 | 2 | 670.3699951 | 670.364445  |
| LEFKCDYANTSNGEHR                 | F6TMC0 | 0.03773585 | N-term +28.03 Da, K +28.03 Da,C +57.02 Da, | 4689.177734 | 2 | 1077.52002  | 1077.025851 |
| LFHCSQYNGNLQDLKVGDDVEFEVSSDRR    | Q91W50 | 0.02736928 | N-term +28.03 Da, K +28.03 Da,C +57.02 Da, | 4701.369141 | 3 | 1211.579956 | 1210.914248 |
| SSPSAKDIKKILDSVIGIEADDDR         | P99027 | 0          | N-term +28.03 Da, K +28.03 Da,             | 4715.351563 | 4 | 643.5999756 | 643.6023582 |
| SYTVDAFDYDLQGTGQISNR             | Q64374 | 0          | N-term +28.03 Da,                          | 4716.370605 | 2 | 1111.52002  | 1111.024029 |
| LLVVYPWTQR                       | P02088 | 0.00065789 | N-term +28.03 Da,                          | 4720.539551 | 2 | 651.8803711 | 651.8820755 |
| DLFSDGHSEFLKAASNLR               | P27773 | 0          | N-term +28.03 Da, K +28.03 Da,             | 4721.786621 | 3 | 688.6900024 | 688.3567313 |
| MPSLSAATLASLGGTSSR               | Q3UZ39 | 0          | N-term +28.03 Da,                          | 4723.604492 | 2 | 868.960022  | 867.9563733 |
| MVGPIEEAVAKADKLAEEHGS            | P56480 | 0          | N-term +28.03 Da, K +28.03 Da,             | 4726.842285 | 4 | 567.2999878 | 567.0503379 |
| ESVQTVGQIELCFTKEDLHLR            | Q9CQ01 | 0          | N-term +28.03 Da, K +28.03 Da,C +57.02 Da, | 4729.932129 | 4 | 640.5900269 | 640.3375356 |
| DASVVGFRDLFSDGHSEFLKAASNLR       | P27773 | 0.02184874 | N-term +28.03 Da, K +28.03 Da,             | 4730.26709  | 4 | 761.3900146 | 761.1424476 |
| SQSLSLQMPTQQDWKGPPTASPMSPATPLVP  | O08739 | 0.01599654 | N-term +28.03 Da, K +28.03 Da,             | 4731.634766 | 4 | 852.4400024 | 851.9361805 |
| NPDGMVALLDYR                     | P63028 | 0.00053967 | N-term +28.03 Da,                          | 4732.591797 | 2 | 696.8499756 | 696.3530228 |
| SQWPLPVPTNAGDSSTGLHEPLSGTLSQPR   | A2AIX1 | 0          | N-term +28.03 Da,                          | 4737.718262 | 3 | 1106.560059 | 1105.89166  |
| TTIPTKQTQFTTYSNQPGVLIQVYEGER     | P63017 | 0          | N-term +28.03 Da, K +28.03 Da,             | 4741.464355 | 3 | 1158.26001  | 1157.926259 |
| WGVFSEFGDSSSPATR                 | E9PV24 | 0.00072411 | N-term +28.03 Da,                          | 4745.359375 | 2 | 879.4099731 | 879.4101132 |
| VHLTDAEKAASVCLWGKVNSEVGGGALGR    | P02088 | 0.00439024 | N-term +28.03 Da, K +28.03 Da,C +57.02 Da, | 4745.824219 | 3 | 1085.219971 | 1084.894236 |
| SYTVDAFDYDLQGTGQISNR             | Q64374 | 0          | N-term +28.03 Da,                          | 4746.848633 | 2 | 1111.52002  | 1111.024029 |
| ALPADPPASVVVGPVVVPR              | P29699 | 0          | N-term +28.03 Da,                          | 4747.027832 | 3 | 623.3699951 | 623.3716523 |
| NDVITVQTPAFAESVTEGDVR            | Q9D2G2 | 0          | N-term +28.03 Da,                          | 4747.453125 | 2 | 1138.569946 | 1138.573886 |
| VHLTDAEKAASVCLWGKVNSEVGGGALGR    | P02088 | 0          | N-term +28.03 Da, K +28.03 Da,C +57.02 Da, | 4748.699707 | 3 | 1085.560059 | 1084.894236 |
| NDVITVQTPAFAESVTEGDVR            | Q9D2G2 | 0          | N-term +28.03 Da,                          | 4750.019043 | 2 | 1139.579956 | 1138.573886 |
| TTIPTKQTQFTTYSNQPGVLIQVYEGER     | P63017 | 0.00062539 | N-term +28.03 Da, K +28.03 Da,             | 4750.511719 | 4 | 869.1900024 | 868.6965136 |
| VHLTDAEKAASVCLWGKVNSEVGGGALGR    | P02088 | 0          | N-term +28.03 Da, K +28.03 Da,C +57.02 Da, | 4750.851074 | 3 | 1084.890015 | 1084.894236 |
| NDVITVQTPAFAESVTEGDVR            | Q9D2G2 | 0          | N-term +28.03 Da,                          | 4756.198242 | 3 | 760.0499878 | 759.3850161 |

|                                 |        |            |                                            |             |   |             |             |
|---------------------------------|--------|------------|--------------------------------------------|-------------|---|-------------|-------------|
| ALPADPPASVVVGPVVVPR             | P29699 | 0          | N-term +28.03 Da,                          | 4757.34668  | 2 | 935.0499878 | 934.5538402 |
| ESVQTVGQIELCFTKEDLHLR           | Q9CQ01 | 0.04256165 | N-term +28.03 Da, K +28.03 Da,C +57.02 Da, | 4761.070313 | 4 | 640.5900269 | 640.3375356 |
| VDPVNFKLL                       | P01942 | 0.0044226  | N-term +28.03 Da, K +28.03 Da,             | 4761.593262 | 2 | 550.8400269 | 550.8393448 |
| GDPKEEEEEELVDPLTTVR             | P99028 | 0.0006435  | N-term +28.03 Da, K +28.03 Da,             | 4769.240234 | 3 | 748.0300293 | 747.7092771 |
| AALPADPPASVVVGPVVVPR            | P29699 | 0          | N-term +28.03 Da,                          | 4773.353027 | 2 | 970.5700073 | 970.0723973 |
| FNSLFKAFEEEEQALR                | P49429 | 0          | N-term +28.03 Da, K +28.03 Da,             | 4774.394043 | 3 | 629         | 628.9999958 |
| AALPADPPASVVVGPVVVPR            | P29699 | 0          | N-term +28.03 Da,                          | 4776.271973 | 3 | 647.0488281 | 647.0506904 |
| SVFYIEILNSPDR                   | P62259 | 0          | N-term +28.03 Da,                          | 4778.550293 | 2 | 816.9199829 | 815.9092172 |
| ITSLREQCYGERGGHYRIHVASRQDNRR    | Q8C8C1 | 0.04875195 | N-term +28.03 Da, C +57.02 Da,             | 4780.777832 | 3 | 1148.939941 | 1148.250521 |
| HLTDAEKAASVCLWGKVNSEVGGALGR     | P02088 | 0          | N-term +28.03 Da, K +28.03 Da,C +57.02 Da, | 4799.495117 | 4 | 789.4000244 | 789.1553924 |
| SHELSDFGLESTTGEVPVVAIR          | P27773 | 0          | N-term +28.03 Da,                          | 4801.138184 | 3 | 791.4099731 | 791.0761825 |
| SHELSDFGLESTTGEVPVVAIR          | P27773 | 0          | N-term +28.03 Da,                          | 4802.540039 | 2 | 1186.119995 | 1186.110636 |
| YVTFYGGDEAAGLEPDLECR            | Q8BGQ7 | 0          | N-term +28.03 Da, C +57.02 Da,             | 4803.161133 | 2 | 1146.02002  | 1145.520265 |
| ESVQTVGQIELCFTKEDLHLR           | Q9CQ01 | 0          | N-term +28.03 Da, K +28.03 Da,C +57.02 Da, | 4803.533691 | 4 | 640.3400269 | 640.3375356 |
| ESVQTVGQIELCFTKEDLHLR           | Q9CQ01 | 0          | N-term +28.03 Da, K +28.03 Da,C +57.02 Da, | 4809.803711 | 4 | 640.5900269 | 640.3375356 |
| RKGMNTLVGYDLVPEPKIDAALR         | P12787 | 0.00067843 | N-term +28.03 Da, K +28.03 Da,             | 4819.26416  | 4 | 689.4000244 | 689.1491151 |
| AAVLPVLDLAQR                    | Q9D6J6 | 0.0006068  | N-term +28.03 Da,                          | 4824.772461 | 2 | 647.4000244 | 647.3980901 |
| AVPSGASTGIYEALER                | P17182 | 0.00055804 | N-term +28.03 Da,                          | 4838.427246 | 2 | 882.4699707 | 881.4727134 |
| LPEYGGTKVVLDDKDYFLFR            | Q64433 | 0          | N-term +28.03 Da, K +28.03 Da,             | 4838.685059 | 4 | 615.5900269 | 615.5859791 |
| SDFGLESTTGEVPVVAIR              | P27773 | 0          | N-term +28.03 Da,                          | 4849.529785 | 2 | 953.001709  | 953.0018356 |
| LLPPDLPDLEPCR                   | Q8BGT0 | 0          | N-term +28.03 Da, C +57.02 Da,             | 4850.034668 | 2 | 846.9299927 | 846.4372847 |
| KVGDKVLPEYGGTKVVLDDKDYFLFR      | Q64433 | 0.00058514 | N-term +28.03 Da, K +28.03 Da,             | 4854.007324 | 4 | 814.7199707 | 814.4664362 |
| SDFGLESTTGEVPVVAIR              | P27773 | 0          | N-term +28.03 Da,                          | 4854.133789 | 3 | 635.6699829 | 635.6703159 |
| LLPPDLPDLEPCR                   | Q8BGT0 | 0.00060277 | N-term +28.03 Da, C +57.02 Da,             | 4856.193359 | 3 | 564.6300049 | 564.627282  |
| NGDKDIGNIISDAMKKVGR             | P63038 | 0          | N-term +28.03 Da, K +28.03 Da,             | 4859.419922 | 4 | 537.0499878 | 536.5530474 |
| NFNVEKINGEWHTIILASDKR           | B5X0G2 | 0          | N-term +28.03 Da, K +28.03 Da,             | 4861.247559 | 4 | 642.8499756 | 642.8537812 |
| KSTNGDFTLGGEDFDQALLR            | P38647 | 0.01106684 | N-term +28.03 Da, K +28.03 Da,             | 4863.645996 | 3 | 748.039978  | 747.3779727 |
| LLPPDLPDLEPCR                   | Q8BGT0 | 0.00066711 | N-term +28.03 Da, C +57.02 Da,             | 4874.114746 | 3 | 565.289978  | 564.627282  |
| RPTLNELGISTPEELGLDKV            | P12787 | 0.00055772 | N-term +28.03 Da, K +28.03 Da,             | 4874.684082 | 3 | 747.0800171 | 746.4177682 |
| RPTLNELGISTPEELGLDKV            | P12787 | 0.00072098 | N-term +28.03 Da, K +28.03 Da,             | 4876.529297 | 3 | 746.75      | 746.4177682 |
| SDFGLESTTGEVPVVAIR              | P27773 | 0          | N-term +28.03 Da,                          | 4880.442871 | 2 | 953.5       | 953.0018356 |
| LTDAEKAASVCLWGKVNSEVGGALGR      | P02088 | 0          | N-term +28.03 Da, K +28.03 Da,C +57.02 Da, | 4880.620605 | 4 | 755.1400146 | 754.8906643 |
| LLPPDLPDLEPCR                   | Q8BGT0 | 0          | N-term +28.03 Da, C +57.02 Da,             | 4881.287598 | 2 | 846.4354248 | 846.4372847 |
| AMLTTYVTKELQAEIR                | Q8WURO | 0          | N-term +28.03 Da, K +28.03 Da,             | 4884.145508 | 3 | 642.0200195 | 641.6921746 |
| KVGDKVLPEYGGTKVVLDDKDYFLFR      | Q64433 | 0.0055788  | N-term +28.03 Da, K +28.03 Da,             | 4885.272949 | 4 | 814.9699707 | 814.4664362 |
| AKPFVPNVHAAEFVPSFLR             | Q8R050 | 0.0056926  | N-term +28.03 Da, K +28.03 Da,             | 4885.600098 | 3 | 728.4000244 | 728.0772395 |
| PGLLLLGDEAPNFEANTTIGR           | O08709 | 0          | N-term +28.03 Da,                          | 4887.253906 | 2 | 1085.560059 | 1085.560581 |
| APEEDAGGEVLGGSFWEAGNYR          | Q99JB8 | 0          | N-term +28.03 Da,                          | 4887.870605 | 2 | 1170.030029 | 1170.032385 |
| VNHPQVSALLGEEDEEALHYLTR         | Q9EQU5 | 0          | N-term +28.03 Da,                          | 4889.354492 | 4 | 662.8369751 | 662.8383286 |
| VELGNDAMDVEDDSCPKPPEIANGYVEHLVR | Q61646 | 0          | N-term +28.03 Da, K +28.03 Da,C +57.02 Da, | 4890.188965 | 4 | 894.4099731 | 893.9222649 |

|                                          |        |            |                                             |             |   |             |             |
|------------------------------------------|--------|------------|---------------------------------------------|-------------|---|-------------|-------------|
| VNHPQVSALLGEEDEEALHYLTR                  | Q9EQU5 | 0          | N-term +28.03 Da,                           | 4891.509277 | 3 | 883.7800293 | 883.4486794 |
| KDQSPASHEIATNLGDFAIPLYR                  | P07758 | 0.01561822 | N-term +28.03 Da, K +28.03 Da,              | 4898.916016 | 4 | 648.3400269 | 648.0881464 |
| KDQSPASHEIATNLGDFAIPLYR                  | P07758 | 0.00953678 | N-term +28.03 Da, K +28.03 Da,              | 4902.054688 | 4 | 648.0900269 | 648.0881464 |
| VLKEEASDYLELDTIKNLVR                     | P08113 | 0          | N-term +28.03 Da, K +28.03 Da,              | 4905.960938 | 4 | 609.3499756 | 608.8466277 |
| RPTLNELGISTPEELGLDKV                     | P12787 | 0.00073099 | N-term +28.03 Da, K +28.03 Da,              | 4906.880859 | 3 | 746.75      | 746.4177682 |
| NGDTITNTMTLGDIVYKR                       | P12710 | 0          | N-term +28.03 Da, K +28.03 Da,              | 4906.986328 | 3 | 690.3599854 | 690.0296269 |
| VHLTDAEKA AVSCLWGK VNSDEVGG EALGR        | P02088 | 0.0005988  | N-term +28.03 Da, K +28.03 Da, C +57.02 Da, | 4912.392578 | 3 | 1085.219971 | 1084.894236 |
| ASEAIKGAVV GIDL GTTNSCAVMEGKQAKVLENAEGAR | P38647 | 0          | N-term +28.03 Da, K +28.03 Da, C +57.02 Da, | 4912.866211 | 4 | 1014.780029 | 1014.792157 |
| VHLTDAEKA AVSCLWGK VNSDEVGG EALGR        | P02088 | 0.00072359 | N-term +28.03 Da, K +28.03 Da, C +57.02 Da, | 4916.152344 | 4 | 814.4199829 | 813.922496  |
| VNHPQVSALLGEEDEEALHYLTR                  | Q9EQU5 | 0          | N-term +28.03 Da,                           | 4923.636719 | 4 | 663.3400269 | 662.8383286 |
| DVFPDVCKEFKEAGEQVASSPAEVAEKADR           | Q99L13 | 0          | N-term +28.03 Da, K +28.03 Da, C +57.02 Da, | 4927.529785 | 4 | 856.4299927 | 855.9302528 |
| AALGGNSSPSAKDIKKILDSV GIEADDDR           | P99027 | 0          | N-term +28.03 Da, K +28.03 Da,              | 4930.850098 | 4 | 764.6599731 | 764.4133955 |
| VDIEFDYDGPLMKTEVPGPR                     | P61922 | 0          | N-term +28.03 Da, K +28.03 Da,              | 4934.172852 | 3 | 779.3900146 | 778.7277254 |
| NGDTITNTMTLGDIVYKR                       | P12710 | 0          | N-term +28.03 Da, K +28.03 Da,              | 4937.60498  | 3 | 690.6900024 | 690.0296269 |
| RPTLNELGISTPEELGLDKV                     | P12787 | 0.00157812 | N-term +28.03 Da, K +28.03 Da,              | 4938.969727 | 3 | 746.75      | 746.4177682 |
| VGYDLVPEPKIIDAALR                        | P12787 | 0.00067385 | N-term +28.03 Da, K +28.03 Da,              | 4941.938477 | 3 | 642.3699951 | 642.3750627 |
| DVITVQTPAFAESVTEGDVR                     | Q9D2G2 | 0          | N-term +28.03 Da,                           | 4945.459961 | 2 | 1081.550049 | 1081.552422 |
| VADLVEEAQESVSKSENMSPLR                   | Q61160 | 0          | N-term +28.03 Da, K +28.03 Da,              | 4945.564941 | 3 | 858.7800293 | 858.4424256 |
| ANPNWGVFSEFGDSSSPATR                     | E9PV24 | 0          | N-term +28.03 Da,                           | 4951.95752  | 2 | 1078        | 1077.497981 |
| DEPQSQWDKVKDFANVYVDAVKDSGR               | Q00623 | 0          | N-term +28.03 Da, K +28.03 Da,              | 4953.233887 | 4 | 778.1400146 | 777.8963754 |
| ADVVFVGPSVIVSR                           | Q8VCT4 | 0          | N-term +28.03 Da,                           | 4954.224609 | 2 | 736.9199829 | 736.9272122 |
| ADVVFVGPSVIVSR                           | Q8VCT4 | 0.00069396 | N-term +28.03 Da,                           | 4957.595703 | 2 | 736.925415  | 736.9272122 |
| RMLAAA AERR                              | Q9R049 | 0.0107095  | N-term +28.03 Da,                           | 4958.990723 | 2 | 586.3400269 | 586.8376762 |
| DVITVQTPAFAESVTEGDVR                     | Q9D2G2 | 0.00562588 | N-term +28.03 Da,                           | 4959.294434 | 2 | 1082.540039 | 1081.552422 |
| AALGGNSSPSAKDIKKILDSV GIEADDDR           | P99027 | 0          | N-term +28.03 Da, K +28.03 Da,              | 4962.007813 | 4 | 764.6599731 | 764.4133955 |
| ANPNWGVFSEFGDSSSPATR                     | E9PV24 | 0          | N-term +28.03 Da,                           | 4962.483887 | 2 | 1078.5      | 1077.497981 |
| VAGPQAQTGAPQGSGLGEYLFER                  | P29391 | 0          | N-term +28.03 Da,                           | 4980.592285 | 2 | 1201.099976 | 1201.11097  |
| DEPQSQWDKVKDFANVYVDAVKDSGR               | Q00623 | 0          | N-term +28.03 Da, K +28.03 Da,              | 4983.688965 | 4 | 778.1500244 | 777.8963754 |
| SAKVSDAISTQYPVVDHEFD AVV GAGGAGLR        | Q8K2B3 | 0          | N-term +28.03 Da, K +28.03 Da,              | 4983.810059 | 3 | 1091.560059 | 1091.236768 |
| EPQSQWDKVKDFANVYVDAVKDSGR                | Q00623 | 0          | N-term +28.03 Da, K +28.03 Da,              | 4988.199707 | 4 | 749.3900146 | 749.1396394 |
| HSFDPFADASKGDDL PAGEDYIHIR               | P48024 | 0.02378965 | N-term +28.03 Da, K +28.03 Da,              | 4992.737793 | 4 | 762.1300049 | 761.6253593 |
| VFDKDGNGYISAAELR                         | P62204 | 0.03809142 | N-term +28.03 Da, K +28.03 Da,              | 4994.659668 | 3 | 603.9702759 | 604.3159841 |
| ANVPAGTEVVCAPPTAYIDFAR                   | P17751 | 0          | N-term +28.03 Da, C +57.02 Da,              | 4997.748535 | 3 | 783.3900146 | 783.0632194 |
| LNLPESWDWR                               | P97821 | 0.02484472 | N-term +28.03 Da,                           | 4998.444336 | 2 | 672.3397827 | 672.3407723 |
| TGAIVDVPVGEELLGR                         | Q03265 | 0.00257334 | N-term +28.03 Da,                           | 5000.20752  | 2 | 826.960022  | 826.9645239 |
| SAKVSDAISTQYPVVDHEFD AVV GAGGAGLR        | Q8K2B3 | 0          | N-term +28.03 Da, K +28.03 Da,              | 5000.456055 | 3 | 1091.910034 | 1091.236768 |
| ANVPAGTEVVCAPPTAYIDFAR                   | P17751 | 0          | N-term +28.03 Da, C +57.02 Da,              | 5002.398926 | 2 | 1174.589966 | 1174.091191 |
| ANVPAGTEVVCAPPTAYIDFAR                   | P17751 | 0          | N-term +28.03 Da, C +57.02 Da,              | 5008.978516 | 2 | 1174.089966 | 1174.091191 |
| YMVGPIEEAVAKADKLAEEHGS                   | P56480 | 0          | N-term +28.03 Da, K +28.03 Da,              | 5013.907715 | 4 | 607.8200073 | 607.8161703 |
| RSLEPLQLP DFPAAVSGPSAFAPGHNIPDHGLR       | Q8VCF0 | 0          | N-term +28.03 Da,                           | 5022.82959  | 4 | 874.210022  | 873.7100234 |

|                                         |        |            |                                            |             |   |             |             |
|-----------------------------------------|--------|------------|--------------------------------------------|-------------|---|-------------|-------------|
| DLISHDELFSDIYKIR                        | P63028 | 0          | N-term +28.03 Da, K +28.03 Da,             | 5023.175293 | 4 | 505.769989  | 505.7742021 |
| DLISHDELFSDIYKIR                        | P63028 | 0          | N-term +28.03 Da, K +28.03 Da,             | 5023.281738 | 3 | 674.3599854 | 674.029844  |
| DEPQSQWDKVKDFANVYVDAVKDSGR              | Q00623 | 0.0005531  | N-term +28.03 Da, K +28.03 Da,             | 5025.014648 | 4 | 778.3900146 | 777.8963754 |
| PGFLCRRR                                | B2RX70 | 0.0251858  | N-term +28.03 Da, C +57.02 Da,             | 5026.214355 | 2 | 545.3099976 | 545.308554  |
| VFDKDGNGYISAAELR                        | P62204 | 0.00067249 | N-term +28.03 Da, K +28.03 Da,             | 5026.289551 | 3 | 603.9714966 | 604.3159841 |
| VHLTDAEKAAVSCLWGKVNSEVGGALGR            | P02088 | 0          | N-term +28.03 Da, K +28.03 Da,C +57.02 Da, | 5026.622559 | 3 | 1085.560059 | 1084.894236 |
| VHLTDAEKAAVSCLWGKVNSEVGGALGR            | P02088 | 0          | N-term +28.03 Da, K +28.03 Da,C +57.02 Da, | 5027.837402 | 4 | 814.1699829 | 813.922496  |
| FSQLVMNR                                | Q8BKX6 | 0.02191319 | N-term +28.03 Da,                          | 5030.797363 | 2 | 512.2800293 | 511.7762215 |
| GDKVLLPEYGGTKVVLDDKDYFLFR               | Q64433 | 0          | N-term +28.03 Da, K +28.03 Da,             | 5035.503418 | 4 | 750.9199829 | 750.6677667 |
| DAGEFVDLYVPR                            | Q9CQR2 | 0          | N-term +28.03 Da,                          | 5039.00293  | 2 | 705.3599854 | 704.8589955 |
| LTADEKSAVSLWAKVNPDEVGGALGR              | P02089 | 0          | N-term +28.03 Da, K +28.03 Da,C +57.02 Da, | 5039.253418 | 4 | 765.1500244 | 764.8984894 |
| KGIKSVTELANGDTITNTMTLGDIVYKR            | P12710 | 0.0006135  | N-term +28.03 Da, K +28.03 Da,             | 5041.531738 | 4 | 770.4199829 | 770.6822485 |
| YMVGPiEEAVAKADKLAEEHGS                  | P56480 | 0          | N-term +28.03 Da, K +28.03 Da,             | 5044.792969 | 4 | 607.8099976 | 607.8161703 |
| APDSSLVPAAGTSYVWVER                     | Q8J7J3 | 0          | N-term +28.03 Da,                          | 5050.606445 | 3 | 669.3499756 | 668.6739489 |
| VHLTDAEKAAVSCLWGKVNSEVGGALGR            | P02088 | 0          | N-term +28.03 Da, K +28.03 Da,C +57.02 Da, | 5057.580566 | 3 | 1084.891357 | 1084.894236 |
| VFDKDGNGYISAAELR                        | P62204 | 0.0094552  | N-term +28.03 Da, K +28.03 Da,             | 5057.744629 | 3 | 603.9699707 | 604.3159841 |
| VHLTDAEKAAVSCLWGKVNSEVGGALGR            | P02088 | 0          | N-term +28.03 Da, K +28.03 Da,C +57.02 Da, | 5058.697754 | 4 | 813.9203491 | 813.922496  |
| DEPQSQWDKVKDFANVYVDAVKDSGR              | Q00623 | 0          | N-term +28.03 Da, K +28.03 Da,             | 5059.515625 | 4 | 777.8900146 | 777.8963754 |
| DIDISLYVPR                              | Q3TIV5 | 0.00058072 | N-term +28.03 Da,                          | 5061.564453 | 2 | 609.8400269 | 609.8400739 |
| ELNDFISYLQR                             | P27773 | 0          | N-term +28.03 Da,                          | 5062.186523 | 2 | 713.8699951 | 713.37227   |
| DLTDPAPATTFAHLDATTVLSR                  | P56480 | 0          | N-term +28.03 Da,                          | 5069.813477 | 3 | 781.4099731 | 781.0726608 |
| ADGTELTGAWTIEGNKLGKFTFR                 | P55050 | 0          | N-term +28.03 Da, K +28.03 Da,             | 5069.920898 | 4 | 641.5999756 | 641.3536142 |
| VGPYGSQDSAPLQEAQMAVLQHHDAVSGTAR         | O09159 | 0          | N-term +28.03 Da,                          | 5070.025391 | 4 | 763.3800049 | 763.1253635 |
| GDKVLLPEYGGTKVVLDDKDYFLFR               | Q64433 | 0          | N-term +28.03 Da, K +28.03 Da,             | 5072.984375 | 4 | 751.1699829 | 750.6677667 |
| DIELVSNSAALIQATTVKNKDIR                 | P51410 | 0          | N-term +28.03 Da, K +28.03 Da,             | 5073.202148 | 4 | 678.8900146 | 678.6380036 |
| DLTDPAPATTFAHLDATTVLSR                  | P56480 | 0          | N-term +28.03 Da,                          | 5077.034668 | 2 | 1171.099976 | 1171.105353 |
| ASAKVSDAISTQYPVVDHEFDVAVVGGAGGLR        | Q8K2B3 | 0.01966652 | N-term +28.03 Da, K +28.03 Da,             | 5082.723633 | 4 | 836.9299927 | 836.4386733 |
| AVQCQGSQFECQPSATCCIMVDGSGWCCPMPQASCCEDR | P28798 | 0          | N-term +28.03 Da, C +57.02 Da,             | 5083.942871 | 3 | 1534.25     | 1533.587977 |
| VHLTDAEKAAVSCLWGKVNSEVGGALGR            | P02088 | 0          | N-term +28.03 Da, K +28.03 Da,C +57.02 Da, | 5088.523438 | 3 | 1085.22998  | 1084.894236 |
| VHLTDAEKAAVSCLWGKVNSEVGGALGR            | P02088 | 0          | N-term +28.03 Da, K +28.03 Da,C +57.02 Da, | 5088.866211 | 4 | 814.4199829 | 813.922496  |
| EDVQETDTSQKQSPASHEIATNLGDFAIISLYR       | P07758 | 0.00059844 | N-term +28.03 Da, K +28.03 Da,             | 5095        | 4 | 931.7000122 | 931.2011552 |
| YMIGEQQFSSPLGWETVTR                     | O55239 | 0          | N-term +28.03 Da, K +28.03 Da,             | 5102.03418  | 3 | 767.0800171 | 766.4048051 |
| ESVQTVGQIELCFTKEDLHLR                   | Q9CQ01 | 0.00949367 | N-term +28.03 Da, K +28.03 Da,C +57.02 Da, | 5103.69043  | 4 | 640.8400269 | 640.3375356 |
| LNEQASEEILKVEQKY                        | Q9EQU5 | 0          | N-term +28.03 Da, K +28.03 Da,             | 5105.19043  | 3 | 669.0300293 | 669.0332543 |
| SDVLELTDENFESR                          | P27773 | 0          | N-term +28.03 Da,                          | 5106.144043 | 2 | 841.9000244 | 841.3994117 |
| KSPIFGPQEVSSIEGDSVSITCYPDTSVNR          | O70570 | 0          | N-term +28.03 Da, K +28.03 Da,C +57.02 Da, | 5110.890625 | 3 | 1164.23999  | 1163.567855 |
| DLAALEDKVKALCAEADR                      | P16546 | 0          | N-term +28.03 Da, K +28.03 Da,C +57.02 Da, | 5112.878906 | 3 | 691.710022  | 691.3733936 |
| EDVQETDTSQKQSPASHEIATNLGDFAIISLYR       | P07758 | 0          | N-term +28.03 Da, K +28.03 Da,             | 5115.34668  | 3 | 1241.930054 | 1241.265781 |
| KSPIFGPQEVSSIEGDSVSITCYPDTSVNR          | O70570 | 0          | N-term +28.03 Da, K +28.03 Da,C +57.02 Da, | 5115.623535 | 3 | 1163.900024 | 1163.567855 |
| EGEPEVTDQLEWQSNQPWEQALNR                | P08226 | 0          | N-term +28.03 Da,                          | 5118.091309 | 2 | 1456.680054 | 1456.178299 |

|                                     |        |            |                                            |             |   |             |             |
|-------------------------------------|--------|------------|--------------------------------------------|-------------|---|-------------|-------------|
| YMIGEQQFSSPLGWETVR                  | O55239 | 0          | N-term +28.03 Da, K +28.03 Da,             | 5119.984375 | 3 | 766.4000244 | 766.4048051 |
| VHLTDAEKAASVSLWGKVNSEVGGGALGR       | P02088 | 0.00054885 | N-term +28.03 Da, K +28.03 Da,C +57.02 Da, | 5123.149414 | 4 | 814.4199829 | 813.922496  |
| EDVQETDTSQKDQSPASHEIATNLGDFAIISLYR  | P07758 | 0          | N-term +28.03 Da, K +28.03 Da,             | 5125.628418 | 4 | 931.7000122 | 931.2011552 |
| AIKFLEVIKPF                         | P61620 | 0.00071073 | N-term +28.03 Da, K +28.03 Da,             | 5135.11377  | 3 | 463.6400146 | 463.6353767 |
| KSPIFGPQEVSSIEGDSVSITCYPDTSVNR      | O70570 | 0.00058582 | N-term +28.03 Da, K +28.03 Da,C +57.02 Da, | 5136.453125 | 4 | 873.4299927 | 872.9277103 |
| VHLTDAEKSAVSLWAKVNPDEVGGGALGR       | P02089 | 0.00062814 | N-term +28.03 Da, K +28.03 Da,C +57.02 Da, | 5139.47998  | 3 | 1098.22998  | 1098.238002 |
| AEEAVTLDMLDLGAAR                    | Q9D3D9 | 0          | N-term +28.03 Da,                          | 5139.822754 | 2 | 851.9400024 | 851.9376492 |
| VHLTDAEKSAVSLWAKVNPDEVGGGALGR       | P02089 | 0          | N-term +28.03 Da, K +28.03 Da,C +57.02 Da, | 5140.433594 | 4 | 824.1799927 | 823.930321  |
| ILLDVKPWDDTDMTKLEECVR               | O70251 | 0          | N-term +28.03 Da, K +28.03 Da,C +57.02 Da, | 5143.235352 | 4 | 698.1099854 | 698.1079562 |
| VLNDQSMFTGDALLIR                    | Q9DCM0 | 0          | N-term +28.03 Da,                          | 5143.354492 | 3 | 631.3400269 | 631.3363908 |
| VHLTDAEKSAVSLWAKVNPDEVGGGALGR       | P02089 | 0          | N-term +28.03 Da, K +28.03 Da,C +57.02 Da, | 5145.45752  | 3 | 1098.910034 | 1098.238002 |
| EDVQETDTSQKDQSPASHEIATNLGDFAIISLYR  | P07758 | 0          | N-term +28.03 Da, K +28.03 Da,             | 5146.67627  | 3 | 1241.930054 | 1241.265781 |
| EDVQETDTSQKDQSPASHEIATNLGDFAIISLYR  | P07758 | 0          | N-term +28.03 Da, K +28.03 Da,             | 5155.982422 | 4 | 931.7000122 | 931.2011552 |
| LLPEYGGTKVVLDDDKDYFLFR              | Q64433 | 0.00073529 | N-term +28.03 Da, K +28.03 Da,             | 5162.015137 | 4 | 644.3599854 | 643.8569952 |
| VHLTDAEKSAVSLWAKVNPDEVGGGALGR       | P02089 | 0          | N-term +28.03 Da, K +28.03 Da,C +57.02 Da, | 5171.462891 | 4 | 823.9287109 | 823.930321  |
| FLSPPTLLEGPLR                       | Q8R311 | 0          | N-term +28.03 Da,                          | 5174.526855 | 2 | 734.4299927 | 734.4321302 |
| VHLTDAEKSAVSLWAKVNPDEVGGGALGR       | P02089 | 0          | N-term +28.03 Da, K +28.03 Da,C +57.02 Da, | 5176.6875   | 3 | 1098.236694 | 1098.238002 |
| EDVQETDTSQKDQSPASHEIATNLGDFAIISLYR  | P07758 | 0          | N-term +28.03 Da, K +28.03 Da,             | 5180.724609 | 3 | 1241.609985 | 1241.265781 |
| SQLLQEDSLNVADLSSLR                  | P97372 | 0          | N-term +28.03 Da,                          | 5183.30127  | 2 | 1008.539978 | 1008.534032 |
| MKFLQNQGSNIVFYHSTLQWYFAVLFYFLQYKDTR | Q66X03 | 0.01064774 | N-term +28.03 Da, K +28.03 Da,             | 5183.645996 | 4 | 1121.089966 | 1120.830242 |
| EDVQETDTSQKDQSPASHEIATNLGDFAIISLYR  | P07758 | 0          | N-term +28.03 Da, K +28.03 Da,             | 5186.54834  | 4 | 931.7000122 | 931.2011552 |
| VHLTDAEKSAVSLWAKVNPDEVGGGALGR       | P02089 | 0          | N-term +28.03 Da, K +28.03 Da,C +57.02 Da, | 5201.806641 | 4 | 823.9293213 | 823.930321  |
| SPASHEIATNLGDFAIISLYR               | P07758 | 0          | N-term +28.03 Da,                          | 5202.008301 | 3 | 731.039978  | 730.7111744 |
| TFSHELSDFGLESTTGEVPPVAIR            | P27773 | 0          | N-term +28.03 Da,                          | 5206.972656 | 3 | 874.1099854 | 873.781547  |
| VHLTDAEKSAVSLWAKVNPDEVGGGALGR       | P02089 | 0          | N-term +28.03 Da, K +28.03 Da,C +57.02 Da, | 5208.424316 | 3 | 1098.569946 | 1098.238002 |
| EPEVTDQLEWQSNQPWEQALNR              | P08226 | 0          | N-term +28.03 Da,                          | 5212.078613 | 2 | 1363.650024 | 1363.14627  |
| SDVLELTDEFESR                       | P27773 | 0.00061275 | N-term +28.03 Da,                          | 5214.523926 | 2 | 840.8900146 | 841.3994117 |
| QGDIDAIFKDSIR                       | Q9WUK2 | 0          | N-term +28.03 Da, K +28.03 Da,             | 5214.801758 | 3 | 549.9699707 | 549.6419197 |
| QGDIDAIFKDSIR                       | Q9WUK2 | 0          | N-term +28.03 Da, K +28.03 Da,             | 5218.105957 | 3 | 550.3099976 | 549.6419197 |
| TNLGDFAIISLYR                       | P07758 | 0          | N-term +28.03 Da,                          | 5220.856934 | 2 | 699.3721924 | 699.3748125 |
| EGEPEVTDQLEWQSNQPWEQALNR            | P08226 | 0          | N-term +28.03 Da,                          | 5229.30957  | 2 | 1457.170044 | 1456.178299 |
| EGEPEVTDQLEWQSNQPWEQALNR            | P08226 | 0          | N-term +28.03 Da,                          | 5231.080566 | 2 | 1456.670044 | 1456.178299 |
| ISSDEVLHSAVPSLGLKTDIAPGR            | P00405 | 0          | N-term +28.03 Da, K +28.03 Da,             | 5232.06543  | 4 | 677.1199951 | 676.8721713 |
| EGEPEVTDQLEWQSNQPWEQALNR            | P08226 | 0          | N-term +28.03 Da,                          | 5232.180176 | 3 | 971.460022  | 971.1212917 |
| SPASHEIATNLGDFAIISLYR               | P07758 | 0          | N-term +28.03 Da,                          | 5233.65625  | 3 | 731.3800049 | 730.7111744 |
| ADVQSVVDCPDLTKEPFTFPVR              | Q91V76 | 0          | N-term +28.03 Da, K +28.03 Da,C +57.02 Da, | 5234.456543 | 3 | 892.8099976 | 892.4631607 |
| ADVQSVVDCPDLTKEPFTFPVR              | Q91V76 | 0          | N-term +28.03 Da, K +28.03 Da,C +57.02 Da, | 5237.785156 | 3 | 892.789978  | 892.4631607 |
| KGMNTLVGYDLVPEPKIIDAALR             | P12787 | 0          | N-term +28.03 Da, K +28.03 Da,             | 5238.557617 | 4 | 650.1199951 | 650.1238372 |
| DEPQSQWDKVKDFANVYVDAVKDSGR          | Q00623 | 0          | N-term +28.03 Da, K +28.03 Da,             | 5239.645508 | 4 | 778.4000244 | 777.8963754 |
| SAPPKLASLKGVPEDAVETLAGSLGTR         | P51125 | 0.04004806 | N-term +28.03 Da, K +28.03 Da,             | 5240.42041  | 4 | 712.9099731 | 712.6602074 |



|                                   |        |            |                                            |             |   |             |             |
|-----------------------------------|--------|------------|--------------------------------------------|-------------|---|-------------|-------------|
| WDDRSCTEETHGFCQK                  | Q64449 | 0.04342677 | N-term +28.03 Da, K +28.03 Da,C +57.02 Da, | 5241.998535 | 3 | 742.9899902 | 742.3298594 |
| KGMNTLVGYDLVPEPKIIDAALR           | P12787 | 0          | N-term +28.03 Da, K +28.03 Da,             | 5244.422852 | 4 | 649.8699951 | 650.1238372 |
| LLENWDTLGGTVSQLQER                | Q00623 | 0          | N-term +28.03 Da,                          | 5245.859863 | 2 | 1059.040039 | 1059.047306 |
| TEEDCTEELDFLHAR                   | P99028 | 0          | N-term +28.03 Da, C +57.02 Da,             | 5246.462402 | 3 | 680.9699707 | 680.6386874 |
| LLENWDTLGGTVSQLQER                | Q00623 | 0          | N-term +28.03 Da,                          | 5248.014648 | 3 | 706.7000122 | 706.3672963 |
| WDDRSCTEETHGFCQK                  | Q64449 | 0.02552491 | N-term +28.03 Da, K +28.03 Da,C +57.02 Da, | 5248.334961 | 2 | 1113.97998  | 1112.991151 |
| ADVQSVVDCPDLTKPEFTFPVR            | Q91V76 | 0          | N-term +28.03 Da, K +28.03 Da,C +57.02 Da, | 5248.847656 | 2 | 1339.199951 | 1338.191103 |
| DVQETDTSQKDQSPASHEIATNLGDFAIISLYR | P07758 | 0.003996   | N-term +28.03 Da, K +28.03 Da,             | 5249.955078 | 4 | 899.1900024 | 898.9405066 |
| KTFSHELSDFGLESTTGEVPVVAIR         | P27773 | 0.0005787  | N-term +28.03 Da, K +28.03 Da,             | 5250.773926 | 4 | 694.8699951 | 694.6195453 |
| KTFSHELSDFGLESTTGEVPVVAIR         | P27773 | 0          | N-term +28.03 Da, K +28.03 Da,             | 5252.965332 | 3 | 925.4799805 | 925.8236349 |
| DVQETDTSQKDQSPASHEIATNLGDFAIISLYR | P07758 | 0          | N-term +28.03 Da, K +28.03 Da,             | 5257.812988 | 3 | 1198.579956 | 1198.251583 |
| EDSYKSDTLIMQLLR                   | O70456 | 0.00065104 | N-term +28.03 Da, K +28.03 Da,             | 5258.181152 | 3 | 623.6699829 | 623.3326465 |
| DVQETDTSQKDQSPASHEIATNLGDFAIISLYR | P07758 | 0          | N-term +28.03 Da, K +28.03 Da,             | 5261.122559 | 3 | 1198.25     | 1198.251583 |
| EGEPEVTDQLEWQSNQPWEQALNR          | P08226 | 0          | N-term +28.03 Da,                          | 5261.905273 | 2 | 1456.17627  | 1456.178299 |
| EGEPEVTDQLEWQSNQPWEQALNR          | P08226 | 0          | N-term +28.03 Da,                          | 5262.300781 | 4 | 729.0900269 | 728.5927879 |
| EGEPEVTDQLEWQSNQPWEQALNR          | P08226 | 0          | N-term +28.03 Da,                          | 5263.500977 | 3 | 971.1181641 | 971.1212917 |
| TFVNHPQVSALLGEEDEALHYLTR          | Q9EQU5 | 0          | N-term +28.03 Da,                          | 5269.423828 | 4 | 725.1199951 | 724.867352  |
| DEPQSQWDKVKDFANVYVDAVKDSGR        | Q00623 | 0          | N-term +28.03 Da, K +28.03 Da,             | 5270.44043  | 4 | 778.1400146 | 777.8963754 |
| DIVLTQSPASLAVSLGQR                | P01654 | 0          | N-term +28.03 Da,                          | 5274.330078 | 2 | 942.0311279 | 942.0334697 |
| SAPPKLASLKGVPEDAVETLAGSLGTR       | P51125 | 0.01264719 | N-term +28.03 Da, K +28.03 Da,             | 5274.67627  | 4 | 712.9099731 | 712.6602074 |
| DIVLTQSPASLAVSLGQR                | P01654 | 0          | N-term +28.03 Da,                          | 5281.034668 | 3 | 628.3574219 | 628.3580719 |
| DVQETDTSQKDQSPASHEIATNLGDFAIISLYR | P07758 | 0          | N-term +28.03 Da, K +28.03 Da,             | 5281.126465 | 4 | 899.4400024 | 898.9405066 |
| GDTFLGGEDFDQALLR                  | P38647 | 0          | N-term +28.03 Da,                          | 5286.11377  | 2 | 891.43927   | 891.4388708 |
| DEPQSQWDKVKDFANVYVDAVKDSGR        | Q00623 | 0          | N-term +28.03 Da, K +28.03 Da,             | 5289.592773 | 3 | 1037.189941 | 1036.859408 |
| SQTEEDCTEELDFLHAR                 | P99028 | 0          | N-term +28.03 Da, C +57.02 Da,             | 5289.681152 | 3 | 752.6699829 | 752.3355565 |
| EGEPEVTDQLEWQSNQPWEQALNR          | P08226 | 0          | N-term +28.03 Da,                          | 5292.145996 | 2 | 1456.680054 | 1456.178299 |
| EGEPEVTDQLEWQSNQPWEQALNR          | P08226 | 0          | N-term +28.03 Da,                          | 5294.375488 | 3 | 971.1196289 | 971.1212917 |
| SSILLDVKPWDETDMAQLETQVRS          | P57776 | 0.00072939 | N-term +28.03 Da, K +28.03 Da,C +57.02 Da, | 5295.187012 | 4 | 742.3699951 | 741.8636867 |
| SGLSDGYGFTTDLFGR                  | Q9Z2X1 | 0          | N-term +28.03 Da,                          | 5295.29541  | 2 | 860.9129028 | 860.9124887 |
| TQEPLDPDGLVEISSLQTPAAPR           | Q91XT4 | 0          | N-term +28.03 Da,                          | 5295.978027 | 2 | 1296.160034 | 1296.163597 |
| TVGLAQQWDQLDQLGMR                 | P16546 | 0          | N-term +28.03 Da,                          | 5299.416016 | 2 | 994.5       | 994.006929  |
| SGLSDGYGFTTDLFGR                  | Q9Z2X1 | 0          | N-term +28.03 Da,                          | 5299.984863 | 2 | 860.4199829 | 860.9124887 |
| DEPQSQWDKVKDFANVYVDAVKDSGR        | Q00623 | 0          | N-term +28.03 Da, K +28.03 Da,             | 5300.879395 | 4 | 777.8948364 | 777.8963754 |
| DEPQSQWDKVKDFANVYVDAVKDSGR        | Q00623 | 0          | N-term +28.03 Da, K +28.03 Da,             | 5303.696289 | 2 | 1554.790039 | 1554.785474 |
| DEPQSQWDKVKDFANVYVDAVKDSGR        | Q00623 | 0          | N-term +28.03 Da, K +28.03 Da,             | 5304.977539 | 4 | 777.8945313 | 777.8963754 |
| SSILLDVKPWDETDMTKLEECVR           | O70251 | 0          | N-term +28.03 Da, K +28.03 Da,C +57.02 Da, | 5305.398926 | 3 | 988.4899902 | 988.4962022 |
| NDVITVQTPAFAESVTEGDVR             | Q9D2G2 | 0          | N-term +28.03 Da,                          | 5305.769531 | 3 | 760.0499878 | 759.3850161 |
| SLDLFNCEVTNLNAYR                  | O35381 | 0.01065246 | N-term +28.03 Da, C +57.02 Da,             | 5305.899414 | 2 | 978.9799805 | 978.9778374 |
| NDVITVQTPAFAESVTEGDVR             | Q9D2G2 | 0          | N-term +28.03 Da,                          | 5306.558594 | 2 | 1139.560059 | 1138.573886 |
| TLNELGISTPEELGLDKV                | P12787 | 0          | N-term +28.03 Da, K +28.03 Da,             | 5316.082031 | 2 | 993.0499878 | 992.5460763 |

|                                  |        |            |                                            |             |   |             |             |
|----------------------------------|--------|------------|--------------------------------------------|-------------|---|-------------|-------------|
| DEPQSQWDKVKDFANVYVDAVKDSGR       | Q00623 | 0          | N-term +28.03 Da, K +28.03 Da,             | 5319.987305 | 3 | 1036.856201 | 1036.859408 |
| AIAELGIYPAVDPLDSTSR              | P56480 | 0          | N-term +28.03 Da,                          | 5322.000977 | 2 | 1009.039978 | 1008.536043 |
| EWDDYVPKLYEQLSGK                 | P70296 | 0          | N-term +28.03 Da, K +28.03 Da,             | 5324.208008 | 3 | 685.6900024 | 685.3542163 |
| FSRNYQISK                        | E9Q414 | 0.03705195 | N-term +28.03 Da, K +28.03 Da,             | 5325.856934 | 2 | 600.3400269 | 599.8325828 |
| EGEPEVTDQLEWQSNQPWEQALNR         | P08226 | 0          | N-term +28.03 Da,                          | 5326.699219 | 2 | 1456.680054 | 1456.178299 |
| LPYDVTEDSIKDFFR                  | Q8BGD9 | 0          | N-term +28.03 Da, K +28.03 Da,             | 5326.890625 | 3 | 634.3300171 | 634.3278898 |
| EGEPEVTDQLEWQSNQPWEQALNR         | P08226 | 0          | N-term +28.03 Da,                          | 5329.561035 | 3 | 971.4500122 | 971.1212917 |
| KEVLDYSTPTTNGTPEAALSEDINLIR      | Q9DBG7 | 0          | N-term +28.03 Da, K +28.03 Da,             | 5333.428223 | 3 | 1002.51001  | 1001.855553 |
| EWDDYVPKLYEQLSGK                 | P70296 | 0.00067522 | N-term +28.03 Da, K +28.03 Da,             | 5335.134277 | 2 | 1027.530029 | 1027.527686 |
| NDVITVQTPAFAESVTEGDVR            | Q9D2G2 | 0          | N-term +28.03 Da,                          | 5338.552734 | 2 | 1139.060059 | 1138.573886 |
| ATTNPSQLLPLELVDKICIGSR           | P62322 | 0          | N-term +28.03 Da, K +28.03 Da,C +57.02 Da, | 5341.91748  | 3 | 790.7700195 | 790.1016742 |
| ATTNPSQLLPLELVDKICIGSR           | P62322 | 0          | N-term +28.03 Da, K +28.03 Da,C +57.02 Da, | 5348.356445 | 3 | 790.0999756 | 790.1016742 |
| DEPQSQWDKVKDFANVYVDAVKDSGR       | Q00623 | 0          | N-term +28.03 Da, K +28.03 Da,             | 5350.59082  | 3 | 1037.189941 | 1036.859408 |
| DEPQSQWDKVKDFANVYVDAVKDSGR       | Q00623 | 0          | N-term +28.03 Da, K +28.03 Da,             | 5351.842773 | 4 | 777.8947754 | 777.8963754 |
| EWDDYVPKLYEQLSGK                 | P70296 | 0          | N-term +28.03 Da, K +28.03 Da,             | 5355.405273 | 3 | 685.6900024 | 685.3542163 |
| EGEPEVTDQLEWQSNQPWEQALNR         | P08226 | 0          | N-term +28.03 Da,                          | 5362.047852 | 2 | 1457.170044 | 1456.178299 |
| EVYFPAQYVDQTDLEKFNNEAGKYTVGLGQTR | P54869 | 0          | N-term +28.03 Da, K +28.03 Da,             | 5364.483887 | 4 | 967.2399902 | 966.7427241 |
| EGEPEVTDQLEWQSNQPWEQALNR         | P08226 | 0          | N-term +28.03 Da,                          | 5371.935059 | 3 | 971.4500122 | 971.1212917 |
| VALTGLTVAEYFR                    | P56480 | 0          | N-term +28.03 Da,                          | 5376.416992 | 2 | 734.4099731 | 734.4139377 |
| DEPQSQWDKVKDFANVYVDAVKDSGR       | Q00623 | 0          | N-term +28.03 Da, K +28.03 Da,             | 5382.588867 | 4 | 778.1500244 | 777.8963754 |
| DEDLLEEALPDMEDDDQKAVKDEL         | P09103 | 0          | N-term +28.03 Da, K +28.03 Da,             | 5385.990234 | 3 | 1078.819946 | 1078.153554 |
| ELSDFGLESTTGEVPPVAIR             | P27773 | 0          | N-term +28.03 Da,                          | 5386.327637 | 2 | 1075.060059 | 1074.065165 |
| VDQEEKEDVKSCAEFVSGSQLR           | Q9DCX2 | 0.0249066  | N-term +28.03 Da, K +28.03 Da,C +57.02 Da, | 5387.599121 | 3 | 875.7600098 | 875.4339303 |
| TLVTEAVQAPQLAAEAVNVIKR           | Q9ESX5 | 0          | N-term +28.03 Da, K +28.03 Da,             | 5387.838867 | 3 | 793.4699707 | 793.1319621 |
| ELSDFGLESTTGEVPPVAIR             | P27773 | 0          | N-term +28.03 Da,                          | 5387.965332 | 2 | 1074.569946 | 1074.065165 |
| LITLEEEMTKYPESDELTAEKITEFCHR     | P09103 | 0.02588332 | N-term +28.03 Da, K +28.03 Da,C +57.02 Da, | 5388.084961 | 4 | 913.7000122 | 913.9676781 |
| VHLTDAEKSAVSLWAKVNPDEVGGEALGR    | P02089 | 0.0118473  | N-term +28.03 Da, K +28.03 Da,C +57.02 Da, | 5390.179199 | 4 | 824.1699829 | 823.930321  |
| VAGPQPAQTGAPQGSLGEYLFER          | P29391 | 0          | N-term +28.03 Da,                          | 5392.039063 | 3 | 801.0700073 | 801.0764052 |
| VAGPQPAQTGAPQGSLGEYLFER          | P29391 | 0          | N-term +28.03 Da,                          | 5392.825684 | 2 | 1200.599976 | 1201.11097  |
| FDPFADASKGDDLLPAGTEDYIHIR        | P48024 | 0.00070323 | N-term +28.03 Da, K +28.03 Da,             | 5394.233398 | 4 | 705.5999756 | 705.602624  |
| GLDFSAKVIQGSLSLSPQAVR            | Q9Z2V4 | 0.00058309 | N-term +28.03 Da, K +28.03 Da,             | 5397.185059 | 3 | 753.4199829 | 753.0898742 |
| DWVIPPINLPENSR                   | P15116 | 0.04316832 | N-term +28.03 Da,                          | 5410.066406 | 2 | 839.9500122 | 839.4515833 |
| EVGMVGVNEGLISSVECPFGGVKQSGLGR    | Q8BWF0 | 0          | N-term +28.03 Da, K +28.03 Da,C +57.02 Da, | 5411.899902 | 3 | 1007.179993 | 1006.851091 |
| DPAIYFKEQFLDGDWATNR              | P14211 | 0          | N-term +28.03 Da, K +28.03 Da,             | 5412.223145 | 2 | 1172.069946 | 1171.576231 |
| EGEPEVTDQLEWQSNQPWEQALNR         | P08226 | 0          | N-term +28.03 Da,                          | 5414.914063 | 3 | 971.460022  | 971.1212917 |
| RSPNDFALWKASKPGEPSWPCPWGK        | Q9ER72 | 0.04525777 | N-term +28.03 Da, K +28.03 Da,C +57.02 Da, | 5417.297363 | 3 | 1004.51001  | 1004.184732 |
| TLVTEAVQAPQLAAEAVNVIKR           | Q9ESX5 | 0          | N-term +28.03 Da, K +28.03 Da,             | 5419.973633 | 3 | 793.1300049 | 793.1319621 |
| LITLEEEMTKYPESDELTAEKITEFCHR     | P09103 | 0.00155844 | N-term +28.03 Da, K +28.03 Da,C +57.02 Da, | 5420.355469 | 4 | 914.210022  | 913.9676781 |
| TNPSQLLPLELVDKICIGSR             | P62322 | 0.00056148 | N-term +28.03 Da, K +28.03 Da,C +57.02 Da, | 5422.733398 | 3 | 733.4099731 | 732.7400764 |
| SPTNCDASEPLAEKVLDLINKGR          | Q9ESB3 | 0          | N-term +28.03 Da, K +28.03 Da,C +57.02 Da, | 5431.622559 | 4 | 653.8499756 | 653.5994554 |

|                               |        |            |                                |             |   |             |             |
|-------------------------------|--------|------------|--------------------------------|-------------|---|-------------|-------------|
| GKVPETIDSVIVGNVMQSSSDAAYLAR   | Q8BWT1 | 0          | N-term +28.03 Da, K +28.03 Da, | 5434.01709  | 3 | 988.1900024 | 987.5181059 |
| GPVGVFEWEAFAR                 | P09411 | 0.0007278  | N-term +28.03 Da,              | 5435.04834  | 2 | 746.8800049 | 746.8828045 |
| DEPQSQWDKVKDFANVYVDAVKDSGR    | Q00623 | 0          | N-term +28.03 Da, K +28.03 Da, | 5436.24707  | 4 | 778.1500244 | 777.8963754 |
| DPAIYFKEQFLDGDWATNR           | P14211 | 0          | N-term +28.03 Da, K +28.03 Da, | 5436.446289 | 2 | 1171.569946 | 1171.576231 |
| GPVGVFEWEAFAR                 | P09411 | 0.00064309 | N-term +28.03 Da,              | 5437.10498  | 2 | 747.3800049 | 746.8828045 |
| DPAIYFKEQFLDGDWATNR           | P14211 | 0          | N-term +28.03 Da, K +28.03 Da, | 5439.461914 | 3 | 782.0499878 | 781.3865794 |
| SAGKVPETIDSVIVGNVMQSSSDAAYLAR | Q8BWT1 | 0          | N-term +28.03 Da, K +28.03 Da, | 5445.609375 | 3 | 1040.530029 | 1040.20782  |
| ALAPDDSLVPAGTSYVWER           | Q78JT3 | 0          | N-term +28.03 Da,              | 5448.557617 | 2 | 1095.069946 | 1094.567874 |
| ALAPDDSLVPAGTSYVWER           | Q78JT3 | 0          | N-term +28.03 Da,              | 5453.339355 | 2 | 1094.560059 | 1094.567874 |
| DEPQSQWDKVKDFANVYVDAVKDSGR    | Q00623 | 0          | N-term +28.03 Da, K +28.03 Da, | 5467.458496 | 4 | 778.4000244 | 777.8963754 |
| DPAIYFKEQFLDGDWATNR           | P14211 | 0.00063573 | N-term +28.03 Da, K +28.03 Da, | 5468.736328 | 2 | 1172.069946 | 1171.576231 |
| APQGSLSGEYLFER                | P29391 | 0          | N-term +28.03 Da,              | 5474.578125 | 2 | 747.3800049 | 747.883002  |
| DLSSDLSTASKIVKWKISQQN         | Q61838 | 0          | N-term +28.03 Da, K +28.03 Da, | 5475.70752  | 3 | 850.1400146 | 849.8058038 |
| DPAIYFKEQFLDGDWATNR           | P14211 | 0.01768003 | N-term +28.03 Da, K +28.03 Da, | 5479.489746 | 3 | 781.3900146 | 781.3865794 |
| TMTQEPLEDPDGLLEVSSLQTPAAPR    | Q91XT4 | 0.00159574 | N-term +28.03 Da,              | 5483.648438 | 3 | 942.4799805 | 941.8075451 |
| NPTVFFDITADDEPLGR             | P17742 | 0          | N-term +28.03 Da,              | 5486.289063 | 2 | 967.9799805 | 967.9783605 |
| VELEGETDPLLIAMKELKAR          | P61219 | 0          | N-term +28.03 Da, K +28.03 Da, | 5488.029785 | 4 | 586.0900269 | 585.5868218 |
| DLSSDLSTASKIVKWKISQQN         | Q61838 | 0          | N-term +28.03 Da, K +28.03 Da, | 5495.399414 | 4 | 637.6046753 | 637.606172  |
| DWVIPPINLPENSR                | P15116 | 0          | N-term +28.03 Da,              | 5496.312988 | 2 | 839.4500122 | 839.4515833 |
| EDFGLSIDIPLER                 | Q9CQG2 | 0.01105217 | N-term +28.03 Da,              | 5501.239746 | 2 | 767.4199829 | 766.4037677 |
| TFLDLNLDLSKFR                 | Q8BK30 | 0          | N-term +28.03 Da, K +28.03 Da, | 5501.972168 | 3 | 546.9799805 | 546.6468934 |
| DWVIPPINLPENSR                | P15116 | 0          | N-term +28.03 Da,              | 5506.120605 | 3 | 559.9699707 | 559.9701477 |
| TGEAIVDAALSALR                | Q922R8 | 0          | N-term +28.03 Da,              | 5517.71875  | 2 | 708.4000244 | 707.8986521 |
| DWVIPPINLPENSR                | P15116 | 0          | N-term +28.03 Da,              | 5526.668945 | 2 | 839.4497681 | 839.4515833 |
| DEPQSQWDKVKDFANVYVDAVKDSGR    | Q00623 | 0          | N-term +28.03 Da, K +28.03 Da, | 5527.199219 | 4 | 778.4000244 | 777.8963754 |
| LYSSDDVIELTPSNFNR             | Q922R8 | 0.00913659 | N-term +28.03 Da,              | 5527.566406 | 2 | 1043.01001  | 1043.01039  |
| LYSSDDVIELTPSNFNR             | Q922R8 | 0.00915332 | N-term +28.03 Da,              | 5531.007324 | 2 | 1042.5      | 1043.01039  |
| DWVIPPINLPENSR                | P15116 | 0          | N-term +28.03 Da,              | 5536.836426 | 3 | 559.9699707 | 559.9701477 |
| TILAETEGMLKDLQKSVEEER         | Q99PL5 | 0          | N-term +28.03 Da, K +28.03 Da, | 5539.04248  | 4 | 659.3499756 | 658.8492049 |
| TLGIETVGGVMTKLIPR             | P20029 | 0          | N-term +28.03 Da, K +28.03 Da, | 5539.239258 | 3 | 614.3699951 | 614.3691429 |
| DEPQSQWDKVKDFANVYVDAVKDSGR    | Q00623 | 0          | N-term +28.03 Da, K +28.03 Da, | 5539.45752  | 4 | 777.8900146 | 777.8963754 |
| IGENMNPDMVALLDYR              | P63028 | 0          | N-term +28.03 Da,              | 5555.533691 | 2 | 968.460022  | 968.4687908 |
| DWGDNGFFKILR                  | P10605 | 0.00575816 | N-term +28.03 Da, K +28.03 Da, | 5556.118164 | 3 | 508.9299927 | 508.6050282 |
| DWVIPPINLPENSR                | P15116 | 0          | N-term +28.03 Da,              | 5558.804688 | 2 | 839.4497681 | 839.4515833 |
| VQGDYEPIDATGFININSLR          | P16460 | 0          | N-term +28.03 Da,              | 5563.351074 | 2 | 1125.569946 | 1125.573688 |
| VNHPQVSALLGEEDEEALHYLTR       | Q9EQU5 | 0          | N-term +28.03 Da,              | 5564.715332 | 3 | 883.4400024 | 883.4486794 |
| VQGDYEPIDATGFININSLR          | P16460 | 0          | N-term +28.03 Da,              | 5571.07373  | 2 | 1126.069946 | 1125.573688 |
| LAEEAVTLDMLDLGAAR             | Q9D3D9 | 0          | N-term +28.03 Da,              | 5571.287598 | 2 | 908.9699707 | 908.4796814 |
| TGEAIVDAALSALR                | Q922R8 | 0          | N-term +28.03 Da,              | 5577.430176 | 2 | 708.4000244 | 707.8986521 |
| DEPQSQWDKVKDFANVYVDAVKDSGR    | Q00623 | 0          | N-term +28.03 Da, K +28.03 Da, | 5580.517578 | 4 | 777.9000244 | 777.8963754 |

|                                      |        |            |                                            |             |   |             |             |
|--------------------------------------|--------|------------|--------------------------------------------|-------------|---|-------------|-------------|
| LAEAVTLDMDLGAAR                      | Q9D3D9 | 0          | N-term +28.03 Da,                          | 5583.556152 | 2 | 908.4799805 | 908.4796814 |
| ILEFFGLKKEECPAVR                     | P09103 | 0          | N-term +28.03 Da, K +28.03 Da,C +57.02 Da, | 5585.05957  | 3 | 673.710022  | 674.048181  |
| LNQDQLDAVSKYQEVTTNNLEFAKELQR         | Q60865 | 0.00058997 | N-term +28.03 Da, K +28.03 Da,             | 5586.466309 | 3 | 1092.890015 | 1093.240289 |
| LTAEAVVTEIPKKEEKDPGMGAMGGMGGGGMGGGMF | P63038 | 0          | N-term +28.03 Da, K +28.03 Da,             | 5587.813965 | 3 | 1166.890015 | 1166.55463  |
| LNQDQLDAVSKYQEVTTNNLEFAKELQR         | Q60865 | 0          | N-term +28.03 Da, K +28.03 Da,             | 5589.92334  | 3 | 1093.22998  | 1093.240289 |
| LNQDQLDAVSKYQEVTTNNLEFAKELQR         | Q60865 | 0          | N-term +28.03 Da, K +28.03 Da,             | 5592.327148 | 4 | 820.1799927 | 820.182036  |
| DWVIPPINLPENSR                       | P15116 | 0          | N-term +28.03 Da,                          | 5592.497559 | 2 | 839.4512329 | 839.4515833 |
| TGEAIVDAALSALR                       | Q922R8 | 0          | N-term +28.03 Da,                          | 5593.200195 | 2 | 707.4000244 | 707.8986521 |
| DPAIYFKEQFLDGDWATNR                  | P14211 | 0          | N-term +28.03 Da, K +28.03 Da,             | 5599.869629 | 2 | 1172.569946 | 1171.576231 |
| DPAIYFKEQFLDGDWATNR                  | P14211 | 0          | N-term +28.03 Da, K +28.03 Da,             | 5601.100586 | 2 | 1171.579956 | 1171.576231 |
| FGSVETWPWQVLSTGGKEDVSYEER            | Q9R257 | 0.00447761 | N-term +28.03 Da, K +28.03 Da,             | 5606.981934 | 3 | 981.4799805 | 981.4784162 |
| IYVPADLTDPAATTFAHLDATTVLSR           | P56480 | 0          | N-term +28.03 Da,                          | 5609.70752  | 3 | 1000.51001  | 1000.516871 |
| IYVPADLTDPAATTFAHLDATTVLSR           | P56480 | 0          | N-term +28.03 Da,                          | 5609.826172 | 3 | 1001.179993 | 1000.516871 |
| FGSVETWPWQVLSTGGKEDVSYEER            | Q9R257 | 0          | N-term +28.03 Da, K +28.03 Da,             | 5611.63623  | 3 | 982.1500244 | 981.4784162 |
| VLLESEQFLTELTR                       | P16254 | 0          | N-term +28.03 Da,                          | 5616.195313 | 2 | 853.4697876 | 853.4721819 |
| DPAIYFKEQFLDGDWATNR                  | P14211 | 0          | N-term +28.03 Da, K +28.03 Da,             | 5617.337891 | 3 | 781.3851318 | 781.3865794 |
| LSPTNCDAEPLAEKVLDLINKGR              | Q9ESB3 | 0          | N-term +28.03 Da, K +28.03 Da,C +57.02 Da, | 5618.437012 | 4 | 682.1199951 | 681.8704715 |
| GNLPHYDVTEDSIKDFFR                   | Q8BGD9 | 0          | N-term +28.03 Da, K +28.03 Da,             | 5618.562988 | 2 | 1037.030029 | 1036.520393 |
| FTPSLSDFTFLPAGR                      | Q9CXE7 | 0          | N-term +28.03 Da,                          | 5618.687988 | 2 | 950.4760742 | 950.477996  |
| DDCNQTGQMTAGLLDWPQGTAFASQVTLGDKVKVER | Q9DCW4 | 0          | N-term +28.03 Da, K +28.03 Da,C +57.02 Da, | 5620.858398 | 4 | 1021        | 1020.501677 |
| VHLTDAEKAASCLWGKVNSEVGGGALGR         | P02088 | 0          | N-term +28.03 Da, K +28.03 Da,C +57.02 Da, | 5621.236816 | 4 | 814.4199829 | 813.922496  |
| GNLPHYDVTEDSIKDFFR                   | Q8BGD9 | 0          | N-term +28.03 Da, K +28.03 Da,             | 5622.62793  | 3 | 691.3475342 | 691.3493539 |
| DWVIPPINLPENSR                       | P15116 | 0.00909504 | N-term +28.03 Da,                          | 5625.312988 | 2 | 839.9500122 | 839.4515833 |
| GNLPHYDVTEDSIKDFFR                   | Q8BGD9 | 0          | N-term +28.03 Da, K +28.03 Da,             | 5628.219727 | 2 | 1036.51001  | 1036.520393 |
| DPAIYFKEQFLDGDWATNR                  | P14211 | 0          | N-term +28.03 Da, K +28.03 Da,             | 5631.679688 | 2 | 1172.579956 | 1171.576231 |
| IYVPADLTDPAATTFAHLDATTVLSR           | P56480 | 0          | N-term +28.03 Da,                          | 5641.569824 | 3 | 1000.51001  | 1000.516871 |
| DEPQSQWVKVDFANVYVDAVKDSGR            | Q00623 | 0.0015625  | N-term +28.03 Da, K +28.03 Da,             | 5642.65332  | 4 | 778.3900146 | 777.8963754 |
| GPPPIQDGEFTFLPAGR                    | Q3V009 | 0.00064809 | N-term +28.03 Da,                          | 5645.515137 | 3 | 647.6799927 | 647.3473956 |
| GPPPIQDGEFTFLPAGR                    | Q3V009 | 0          | N-term +28.03 Da,                          | 5646.314941 | 2 | 971.0200195 | 970.5174551 |
| DPAIYFKEQFLDGDWATNR                  | P14211 | 0          | N-term +28.03 Da, K +28.03 Da,             | 5647.958984 | 3 | 781.3840942 | 781.3865794 |
| LSPTNCDAEPLAEKVLDLINKGR              | Q9ESB3 | 0          | N-term +28.03 Da, K +28.03 Da,C +57.02 Da, | 5649.564941 | 4 | 682.1199951 | 681.8704715 |
| GQVNYEEFVQMMTAK                      | P62204 | 0          | N-term +28.03 Da, K +28.03 Da,             | 5649.807129 | 2 | 916.4400024 | 915.9418772 |
| GPPPIQDGEFTFLPAGR                    | Q3V009 | 0          | N-term +28.03 Da,                          | 5651.891602 | 2 | 970.5100098 | 970.5174551 |
| GQWLTLEAPLDTINVHLR                   | P70699 | 0          | N-term +28.03 Da,                          | 5660.414063 | 3 | 702.3900146 | 702.0565044 |
| DPAIYFKEQFLDGDWATNR                  | P14211 | 0          | N-term +28.03 Da, K +28.03 Da,             | 5662.14502  | 2 | 1171.574707 | 1171.576231 |
| DPAIYFKEQFLDGDWATNR                  | P14211 | 0          | N-term +28.03 Da, K +28.03 Da,             | 5678.712891 | 3 | 781.3849487 | 781.3865794 |
| ALSAGKVPETIDSVIVGNVMQSSSDAAYLAR      | Q8BWT1 | 0          | N-term +28.03 Da, K +28.03 Da,             | 5679.895996 | 4 | 826.9400024 | 826.437979  |
| EKNRVAQRSR                           | Q9D275 | 0.04523997 | N-term +28.03 Da, K +28.03 Da,             | 5682.444824 | 2 | 685.9071655 | 685.902394  |
| ALSAGKVPETIDSVIVGNVMQSSSDAAYLAR      | Q8BWT1 | 0          | N-term +28.03 Da, K +28.03 Da,             | 5686.551758 | 3 | 1101.910034 | 1101.581547 |
| ALSAGKVPETIDSVIVGNVMQSSSDAAYLAR      | Q8BWT1 | 0          | N-term +28.03 Da, K +28.03 Da,             | 5686.884277 | 4 | 826.6900024 | 826.437979  |

|                                      |        |            |                                            |             |   |             |             |
|--------------------------------------|--------|------------|--------------------------------------------|-------------|---|-------------|-------------|
| AIYVPADDLTPAPATTF AHL DATTVLSR       | P56480 | 0          | N-term +28.03 Da,                          | 5687.263184 | 3 | 1024.199951 | 1024.195909 |
| DPAIYFKEQFLDGD AWTNR                 | P14211 | 0          | N-term +28.03 Da, K +28.03 Da,             | 5693.884277 | 2 | 1171.575806 | 1171.576231 |
| ADKSYIEGYVPSQADVAVFEAVSGPPP ADLCHALR | O70251 | 0          | N-term +28.03 Da, K +28.03 Da,C +57.02 Da, | 5694.125    | 4 | 947.4699707 | 947.2265467 |
| ALSAGKVPPETIDSVIVGNVMQSSSDAAYLAR     | Q8BWT1 | 0          | N-term +28.03 Da, K +28.03 Da,             | 5695.658691 | 3 | 1101.579956 | 1101.581547 |
| DQSPASHEIATNLGDF AISLYR              | P07758 | 0          | N-term +28.03 Da,                          | 5702.90625  | 3 | 811.7399902 | 811.7396818 |
| ADKSYIEGYVPSQADVAVFEAVSGPPP ADLCHALR | O70251 | 0          | N-term +28.03 Da, K +28.03 Da,C +57.02 Da, | 5705.354492 | 3 | 1263.300049 | 1262.63297  |
| DPAIYFKEQFLDGD AWTNR                 | P14211 | 0          | N-term +28.03 Da, K +28.03 Da,             | 5709.826172 | 3 | 781.7199707 | 781.3865794 |
| DQSPASHEIATNLGDF AISLYR              | P07758 | 0          | N-term +28.03 Da,                          | 5714.342285 | 2 | 1217.099976 | 1217.105885 |
| FIGENMNP DGMVALLDYR                  | P63028 | 0          | N-term +28.03 Da,                          | 5717.98584  | 2 | 1043        | 1042.002998 |
| DQSPASHEIATNLGDF AISLYR              | P07758 | 0          | N-term +28.03 Da,                          | 5722.150879 | 3 | 812.4000244 | 811.7396818 |
| VIQELRPTLNELGISTPEELGLDKV            | P12787 | 0.00067935 | N-term +28.03 Da, K +28.03 Da,             | 5722.705566 | 3 | 940.5300293 | 940.53034   |
| LSEIAGITLPYDTLDQVR                   | Q91VD9 | 0          | N-term +28.03 Da,                          | 5725.021973 | 2 | 1017.049988 | 1016.551693 |
| PFVELETNLPASR                        | O35215 | 0.00574713 | N-term +28.03 Da,                          | 5731.095703 | 2 | 751.911377  | 750.9064771 |
| GDGQVNYEEFVQMMTAK                    | P62204 | 0          | N-term +28.03 Da, K +28.03 Da,             | 5733.416992 | 2 | 1001.966003 | 1001.966081 |
| VHLTDAEKA AVSCLWGK VNSDEVGGEALGR     | P02088 | 0          | N-term +28.03 Da, K +28.03 Da,C +57.02 Da, | 5735.573242 | 4 | 814.4099731 | 813.922496  |
| DFQLIGIQDGYLSLLQDSGEVR               | P63242 | 0.00054318 | N-term +28.03 Da,                          | 5737.412109 | 3 | 832.4400024 | 832.0989873 |
| EAE LFPID DV FVGMCLR                 | Q1RLK6 | 0.04106858 | N-term +28.03 Da, C +57.02 Da,             | 5739.731934 | 2 | 1020.48999  | 1020.002466 |
| DPAIYFKEQFLDGD AWTNR                 | P14211 | 0          | N-term +28.03 Da, K +28.03 Da,             | 5740.537598 | 3 | 781.7199707 | 781.3865794 |
| EIATNLGDF AISLYR                     | P07758 | 0          | N-term +28.03 Da,                          | 5749.64209  | 2 | 856.4500122 | 855.9566989 |
| DPAIYFKEQFLDGD AWTNR                 | P14211 | 0          | N-term +28.03 Da, K +28.03 Da,             | 5750.544922 | 2 | 1172.079956 | 1171.576231 |
| DPAIYFKEQFLDGD AWTNR                 | P14211 | 0.00063251 | N-term +28.03 Da, K +28.03 Da,             | 5752.124512 | 2 | 1172.579956 | 1171.576231 |
| GFGDLKTPAGLQV LNDYLADKS              | O70251 | 0.01102779 | N-term +28.03 Da, K +28.03 Da,             | 5758.427734 | 3 | 803.0999756 | 802.7686896 |
| DPAIYFKEQFLDGD AWTNR                 | P14211 | 0          | N-term +28.03 Da, K +28.03 Da,             | 5778.634277 | 3 | 781.7199707 | 781.3865794 |
| SSILLDVKPWDEDTMTKLEECVR              | O70251 | 0          | N-term +28.03 Da, K +28.03 Da,C +57.02 Da, | 5783.486816 | 3 | 988.5       | 988.4962022 |
| IINEPTAAAIAYGLDKR                    | P20029 | 0          | N-term +28.03 Da, K +28.03 Da,             | 5795.408203 | 3 | 624.3499756 | 624.6911623 |
| DFEQEMATAASSSSLEKSYELPDGQVITIGNER    | P60710 | 0          | N-term +28.03 Da, K +28.03 Da,             | 5797.390625 | 3 | 1220.920044 | 1220.252484 |
| DFEQEMATAASSSSLEKSYELPDGQVITIGNER    | P60710 | 0          | N-term +28.03 Da, K +28.03 Da,             | 5798.274414 | 3 | 1220.579956 | 1220.252484 |
| GLVSSDELAKDVTGAEALLER                | P16546 | 0          | N-term +28.03 Da, K +28.03 Da,             | 5803.20752  | 3 | 743.7299805 | 743.7372782 |
| VFGQSGAGNNWAKGHYTEGAELVDSVLDVVR      | P68372 | 0.02738047 | N-term +28.03 Da, K +28.03 Da,             | 5808.936035 | 4 | 834.1699829 | 833.6731067 |
| EGEPEVTDQLEWQSNQPWEQALNR             | P08226 | 0          | N-term +28.03 Da,                          | 5809.658691 | 3 | 971.1099854 | 971.1212917 |
| DPAIYFKEQFLDGD AWTNR                 | P14211 | 0          | N-term +28.03 Da, K +28.03 Da,             | 5810.193848 | 3 | 781.7199707 | 781.3865794 |
| SGSLIQVTTD GKTELTPAYF                | Q8BVI4 | 0.00448207 | N-term +28.03 Da, K +28.03 Da,             | 5811.142578 | 2 | 1142.609985 | 1142.109573 |
| EADDIVNWLK                           | P09103 | 0.00064226 | N-term +28.03 Da, K +28.03 Da,             | 5816.806641 | 2 | 629.3300171 | 629.8375314 |
| DPAIYFKEQFLDGD AWTNR                 | P14211 | 0.00072202 | N-term +28.03 Da, K +28.03 Da,             | 5817.900879 | 2 | 1171.569946 | 1171.576231 |
| ADNVIVPGTPDFL AYVR                   | O88587 | 0.00064725 | N-term +28.03 Da,                          | 5821.418457 | 2 | 938.5100098 | 938.0041806 |
| ADNVIVPGTPDFL AYVR                   | O88587 | 0.00065274 | N-term +28.03 Da,                          | 5822.910156 | 2 | 938         | 938.0041806 |
| NLDWGDNGFFKILR                       | P10605 | 0.0035229  | N-term +28.03 Da, K +28.03 Da,             | 5823.3125   | 3 | 584.6400146 | 584.3140257 |
| LNEAAAGLNQAATELVQASR                 | P26039 | 0          | N-term +28.03 Da,                          | 5830.12793  | 2 | 1027.530029 | 1028.045098 |
| SVQAIYVPADDLTPAPATTF AHL DATTVLSR    | P56480 | 0.00073206 | N-term +28.03 Da,                          | 5831.062988 | 3 | 1129.23999  | 1128.915583 |
| DFWDNLEKETDWVR                       | Q00623 | 0          | N-term +28.03 Da, K +28.03 Da,             | 5832.305176 | 3 | 636.9699707 | 636.9757391 |

|                                      |        |            |                                             |             |   |             |             |
|--------------------------------------|--------|------------|---------------------------------------------|-------------|---|-------------|-------------|
| DFWDNLEKETDWVR                       | Q00623 | 0.00066401 | N-term +28.03 Da, K +28.03 Da,              | 5836.668457 | 2 | 954.956665  | 954.9599704 |
| VISDPIPGAKPLPVPELAPFVGR              | Q8BKX1 | 0.00054735 | N-term +28.03 Da, K +28.03 Da,              | 5838.481934 | 3 | 841.4899902 | 841.4963525 |
| DPAIYFKEQFLDGDWATNR                  | P14211 | 0          | N-term +28.03 Da, K +28.03 Da,              | 5841.376465 | 3 | 781.3839111 | 781.3865794 |
| TATFAQALQSVPETQVSILDNGLR             | Q9CZ13 | 0          | N-term +28.03 Da,                           | 5842.611816 | 3 | 863.460022  | 863.1290581 |
| DFWDNLEKETDWVR                       | Q00623 | 0          | N-term +28.03 Da, K +28.03 Da,              | 5850.135742 | 3 | 636.6400146 | 636.9757391 |
| ALDFEQEMATAASSSSLEKSYELPDGQVITIGNER  | P60710 | 0          | N-term +28.03 Da, K +28.03 Da,              | 5850.296875 | 3 | 1281.959961 | 1281.62621  |
| EEVEGSLLLGSVQGYMEQASK                | P33622 | 0          | N-term +28.03 Da, K +28.03 Da,              | 5856.922363 | 3 | 771.0499878 | 770.7226404 |
| SQGQLKTLEDSEFLK                      | Q8C0C0 | 0.02521703 | N-term +28.03 Da, K +28.03 Da,              | 5857.745117 | 2 | 838.9799805 | 839.4747244 |
| EEVEGSLLLGSVQGYMEQASK                | P33622 | 0          | N-term +28.03 Da, K +28.03 Da,              | 5859.801758 | 3 | 770.7199707 | 770.7226404 |
| DIDAIFKDSIR                          | Q9WUK2 | 0          | N-term +28.03 Da, K +28.03 Da,              | 5863.930176 | 3 | 488.6199951 | 487.9485723 |
| DVDGLDPAFTPATGTPVLGGLSYR             | Q61176 | 0          | N-term +28.03 Da,                           | 5871.419434 | 2 | 1225.119995 | 1224.126286 |
| EGTLESIVEKKVKELLANR                  | Q8K426 | 0          | N-term +28.03 Da, K +28.03 Da,              | 5872.373535 | 4 | 568.0900269 | 567.8438876 |
| TALLELWELR                           | P16546 | 0.00070922 | N-term +28.03 Da,                           | 5872.495117 | 2 | 636.3699951 | 636.371541  |
| DVDGLDPAFTPATGTPVLGGLSYR             | Q61176 | 0          | N-term +28.03 Da,                           | 5872.785156 | 2 | 1224.630005 | 1224.126286 |
| DVDGLDPAFTPATGTPVLGGLSYR             | Q61176 | 0          | N-term +28.03 Da,                           | 5875.391602 | 3 | 816.4199829 | 816.4199492 |
| YHVEELDPGVVDNFPLLKALR                | P30115 | 0          | N-term +28.03 Da, K +28.03 Da,              | 5877.29541  | 4 | 621.0900269 | 620.8441534 |
| VNPTVFFDITADDEPLGR                   | P17742 | 0          | N-term +28.03 Da,                           | 5879.940918 | 2 | 1017.513794 | 1017.512568 |
| FATEATSDWLNANNVPATPVAWPSQEQNPSLSSIR  | Q8C196 | 0.00442043 | N-term +28.03 Da,                           | 5882.394043 | 4 | 972.2199707 | 971.7276055 |
| RQEQVPGEPDPQGVSEVEKIALNLEGCALSPTSQEP | Q99PG2 | 0.00107411 | N-term +28.03 Da, K +28.03 Da, C +57.02 Da, | 5886.495605 | 4 | 1026.530029 | 1026.019391 |
| DWVIPPINLPENSR                       | P15116 | 0          | N-term +28.03 Da,                           | 5888.036133 | 2 | 839.4500122 | 839.4515833 |
| APPPPPMPQLTPQIPLTGFVAR               | Q8CBW3 | 0.02486531 | N-term +28.03 Da,                           | 5891.874512 | 3 | 785.7700195 | 785.1082112 |
| TMFLTMFGEKLNTPEDVIR                  | Q3THE2 | 0.00054025 | N-term +28.03 Da, K +28.03 Da,              | 5895.383301 | 3 | 824.75      | 824.0834034 |
| APPVPGAVSGGSGEVDELFDVKNF             | Q89079 | 0          | N-term +28.03 Da, K +28.03 Da,              | 5903.66748  | 3 | 839.0900269 | 839.0953543 |
| VNPTVFFDITADDEPLGR                   | P17742 | 0          | N-term +28.03 Da,                           | 5906.961426 | 3 | 678.6746826 | 678.6774706 |
| TEGAELVDSVLDVVR                      | P68372 | 0          | N-term +28.03 Da,                           | 5908.143066 | 2 | 815.4400024 | 815.4383393 |
| DITSQLEINFGDLGR                      | Q9CY58 | 0          | N-term +28.03 Da,                           | 5909.032227 | 2 | 853.4400024 | 853.4414133 |
| VNPTVFFDITADDEPLGR                   | P17742 | 0          | N-term +28.03 Da,                           | 5911.015137 | 2 | 1017.509949 | 1017.512568 |
| LSISGDYNLKLMSPLGITR                  | P22599 | 0.00986105 | N-term +28.03 Da, K +28.03 Da,              | 5917.707031 | 3 | 745.4099731 | 745.7520935 |
| QLYCKLCKR                            | Q0VEE6 | 0.04347826 | N-term +28.03 Da, K +28.03 Da, C +57.02 Da, | 5925.23291  | 3 | 451.9316406 | 451.5895557 |
| GLIANDFTTVLSSLPSSEHQVVAVAAR          | Q9DBB8 | 0          | N-term +28.03 Da,                           | 5927.685059 | 3 | 937.5100098 | 937.5064173 |
| ALFQDVQKPSQDEWGKTEAMEAALAMEKNLN      | P29391 | 0.00156087 | N-term +28.03 Da, K +28.03 Da,              | 5930.253418 | 4 | 934.4699707 | 933.9707521 |
| VNPTVFFDITADDEPLGR                   | P17742 | 0          | N-term +28.03 Da,                           | 5937.852051 | 3 | 678.6762695 | 678.6774706 |
| NLLENWDTLGGSTVSQQLQER                | Q00623 | 0.00069013 | N-term +28.03 Da,                           | 5940.828613 | 2 | 1115.569946 | 1116.06877  |
| VNPTVFFDITADDEPLGR                   | P17742 | 0          | N-term +28.03 Da,                           | 5942.030762 | 2 | 1017.510925 | 1017.512568 |
| LINEKGETFQLMGLYGR                    | B5X0G2 | 0          | N-term +28.03 Da, K +28.03 Da,              | 5944.437012 | 2 | 1070.550049 | 1070.558995 |
| NLLENWDTLGGSTVSQQLQER                | Q00623 | 0          | N-term +28.03 Da,                           | 5946.864746 | 3 | 744.710022  | 744.3816057 |
| NLLENWDTLGGSTVSQQLQER                | Q00623 | 0          | N-term +28.03 Da,                           | 5949.309082 | 2 | 1116.569946 | 1116.06877  |
| VNPTVFFDITADDEPLGR                   | P17742 | 0          | N-term +28.03 Da,                           | 5972.953613 | 2 | 1017.509705 | 1017.512568 |
| VLELYDLLSQPCR                        | Q64471 | 0          | N-term +28.03 Da, C +57.02 Da,              | 5976.112305 | 2 | 874.4799805 | 873.9765769 |
| FIGENMNPDMVALLDYR                    | P63028 | 0          | N-term +28.03 Da,                           | 5991.309082 | 2 | 1042.5      | 1042.002998 |

|                                      |        |            |                                             |             |   |             |             |
|--------------------------------------|--------|------------|---------------------------------------------|-------------|---|-------------|-------------|
| ASQPDVDGFLVGGASLKPEFVDIINAKQ         | P17751 | 0          | N-term +28.03 Da, K +28.03 Da,              | 5991.569824 | 3 | 1000.539978 | 1000.541128 |
| AMTRDNLLGRFDLTGIPPAPR                | P16627 | 0.00058173 | N-term +28.03 Da,                           | 5995.334961 | 3 | 818.4500122 | 818.4409125 |
| IDSLSYTVDAFDYDLQGTQGISNR             | Q64374 | 0          | N-term +28.03 Da,                           | 5997.609863 | 2 | 1325.630005 | 1325.13758  |
| FIGENMNPDMVALLDYR                    | P63028 | 0          | N-term +28.03 Da,                           | 6001.022461 | 3 | 695.0031128 | 695.0044241 |
| VNPTVFFDITADDEPLGR                   | P17742 | 0          | N-term +28.03 Da,                           | 6004.632813 | 2 | 1017.51001  | 1017.512568 |
| VLELYDLLLSQPCR                       | Q64471 | 0          | N-term +28.03 Da, C +57.02 Da,              | 6007.364258 | 2 | 874.4699707 | 873.9765769 |
| ASDFEFGVDPADPELALALR                 | Q35226 | 0.00446429 | N-term +28.03 Da,                           | 6007.528809 | 2 | 1125.060059 | 1124.560247 |
| ELILEGNDIELVSNAAALIQATTVKNKDIR       | P51410 | 0.00060716 | N-term +28.03 Da, K +28.03 Da,              | 6009.519531 | 4 | 870.9899902 | 870.738447  |
| GFGDLKTPAGLQVLNDYLADKSY              | O70251 | 0          | N-term +28.03 Da, K +28.03 Da,              | 6011.291504 | 3 | 857.460022  | 857.1231327 |
| VHLTDAEKAAVSCLWGKVNSEVGGGEALGR       | P02088 | 0.00061728 | N-term +28.03 Da, K +28.03 Da, C +57.02 Da, | 6013.538574 | 3 | 1084.890015 | 1084.894236 |
| DFIETYLYSEQVKSSELGDHVTNLR            | P09528 | 0          | N-term +28.03 Da, K +28.03 Da,              | 6015.510742 | 3 | 1061.560059 | 1061.230842 |
| AMTKDNLLGKFDLTGIPPAPR                | P17156 | 0.00058651 | N-term +28.03 Da, K +28.03 Da,              | 6017.583984 | 3 | 818.789978  | 818.4576806 |
| VHLTDAEKAAVSCLWGKVNSEVGGGEALGR       | P02088 | 0.02185792 | N-term +28.03 Da, K +28.03 Da, C +57.02 Da, | 6019.470703 | 3 | 1085.569946 | 1084.894236 |
| FIGENMNPDMVALLDYR                    | P63028 | 0          | N-term +28.03 Da,                           | 6023.313965 | 2 | 1042.000488 | 1042.002998 |
| ALDFEQEMATAAASSSSLEKSYELPDGQVITIGNER | P60710 | 0          | N-term +28.03 Da, K +28.03 Da,              | 6024.027832 | 3 | 1281.619995 | 1281.62621  |
| DLSGTLESIPDKLKEFGNTLEDKAR            | P34928 | 0          | N-term +28.03 Da, K +28.03 Da,              | 6027.944824 | 4 | 723.1500244 | 722.8958439 |
| ALDFEQEMATAAASSSSLEKSYELPDGQVITIGNER | P60710 | 0          | N-term +28.03 Da, K +28.03 Da,              | 6028.22168  | 4 | 961.9699707 | 961.471477  |
| DFIETYLYSEQVKSSELGDHVTNLR            | P09528 | 0          | N-term +28.03 Da, K +28.03 Da,              | 6032.465332 | 4 | 796.4299927 | 796.1749508 |
| QLIGIQDGYLSLLQDSGEVR                 | P63242 | 0          | N-term +28.03 Da,                           | 6034.319824 | 2 | 1117.099976 | 1116.597163 |
| DLSGTLESIPDKLKEFGNTLEDKAR            | P34928 | 0          | N-term +28.03 Da, K +28.03 Da,              | 6035.125    | 3 | 964.1900024 | 963.5253664 |
| VNPTVFFDITADDEPLGR                   | P17742 | 0          | N-term +28.03 Da,                           | 6036.482422 | 2 | 1018.01001  | 1017.512568 |
| VHLTDAEKAAVSCLWGKVNSEVGGGEALGR       | P02088 | 0          | N-term +28.03 Da, K +28.03 Da, C +57.02 Da, | 6038.022461 | 4 | 813.9199829 | 813.922496  |
| VNPTVFFDITADDEPLGR                   | P17742 | 0.00054348 | N-term +28.03 Da,                           | 6039.003418 | 3 | 678.6799927 | 678.6774706 |
| VNPTVFFDITADDEPLGR                   | P17742 | 0          | N-term +28.03 Da,                           | 6039.311523 | 2 | 1018.51001  | 1017.512568 |
| DGKALEQFLQYFDGNLKR                   | P27773 | 0          | N-term +28.03 Da, K +28.03 Da,              | 6042.438965 | 3 | 786.4099731 | 785.7496292 |
| TATFAQALQSVPETQVSILDNGLR             | Q9CZ13 | 0          | N-term +28.03 Da,                           | 6047.82959  | 3 | 863.460022  | 863.1290581 |
| TATFAQALQSVPETQVSILDNGLR             | Q9CZ13 | 0.01223242 | N-term +28.03 Da,                           | 6051.583984 | 2 | 1295.180054 | 1294.189949 |
| SVQPTVSLGGFEITPPVVLR                 | Q61937 | 0          | N-term +28.03 Da,                           | 6051.864746 | 2 | 1063.099976 | 1062.606802 |
| MGPGDGMQVLMIDLPLSAAPTQVEEKQGPTPAGLPR | Q7TT50 | 0          | N-term +28.03 Da, K +28.03 Da,              | 6052.442871 | 3 | 1215.949951 | 1215.621019 |
| AMTKDNLLGKFDLTGIPPAPR                | P17156 | 0.00257467 | N-term +28.03 Da, K +28.03 Da,              | 6053.38916  | 3 | 818.460022  | 818.4576806 |
| MGPGDGMQVLMIDLPLSAAPTQVEEKQGPTPAGLPR | Q7TT50 | 0          | N-term +28.03 Da, K +28.03 Da,              | 6056.941406 | 4 | 912.4699707 | 911.9675836 |
| ALDFEQEMATAAASSSSLEKSYELPDGQVITIGNER | P60710 | 0          | N-term +28.03 Da, K +28.03 Da,              | 6058.859863 | 4 | 961.9699707 | 961.471477  |
| LADNVIVPGTPDFLAYVR                   | Q88587 | 0.00063012 | N-term +28.03 Da,                           | 6059.117188 | 2 | 995.039978  | 994.5462127 |
| MGPGDGMQVLMIDLPLSAAPTQVEEKQGPTPAGLPR | Q7TT50 | 0          | N-term +28.03 Da, K +28.03 Da,              | 6061.324219 | 3 | 1215.619995 | 1215.621019 |
| LADNVIVPGTPDFLAYVR                   | Q88587 | 0.00070572 | N-term +28.03 Da,                           | 6061.471191 | 2 | 995.5499878 | 994.5462127 |
| DWVIPPINLPENSRGPPFQELVR              | P15116 | 0.00063412 | N-term +28.03 Da,                           | 6071.145996 | 3 | 901.4899902 | 901.1535375 |
| VNPTVFFDITADDEPLGR                   | P17742 | 0          | N-term +28.03 Da,                           | 6074.148438 | 2 | 1017.51001  | 1017.512568 |
| ELNDFISYLQR                          | P27773 | 0.00062461 | N-term +28.03 Da,                           | 6076.140137 | 2 | 713.3599854 | 713.37227   |
| PGGLLLGDEAPNFEANTTIGR                | O08709 | 0          | N-term +28.03 Da,                           | 6078.246094 | 2 | 1085.550049 | 1085.560581 |
| AGVSVPEFPWPGLFAK                     | P47955 | 0          | N-term +28.03 Da, K +28.03 Da,              | 6081.392578 | 2 | 830.9584961 | 830.9585123 |

|                                      |        |            |                                             |             |   |             |             |
|--------------------------------------|--------|------------|---------------------------------------------|-------------|---|-------------|-------------|
| TATFAQALQSVPETQVSILDNGLR             | Q9CZ13 | 0.00944245 | N-term +28.03 Da,                           | 6083.100586 | 3 | 863.4560547 | 863.1290581 |
| VHLTDAEKSAVSLWAKVNPDEVGGEALGR        | P02089 | 0          | N-term +28.03 Da, K +28.03 Da, C +57.02 Da, | 6089.838379 | 4 | 823.9199829 | 823.930321  |
| ALDFEQEMATAASSSSLEKSYELPDGQVITIGNER  | P60710 | 0          | N-term +28.03 Da, K +28.03 Da,              | 6090.325195 | 3 | 1281.959961 | 1281.62621  |
| AMTKDNLLGKFDLTGIPPAPR                | P17156 | 0.02005975 | N-term +28.03 Da, K +28.03 Da,              | 6090.635254 | 3 | 818.460022  | 818.4576806 |
| VNPTVFFDITADDEPLGR                   | P17742 | 0          | N-term +28.03 Da,                           | 6090.800781 | 2 | 1018.01001  | 1017.512568 |
| VNPTVFFDITADDEPLGR                   | P17742 | 0          | N-term +28.03 Da,                           | 6096.411621 | 2 | 1018.530029 | 1017.512568 |
| TATFAQALQSVPETQVSILDNGLR             | Q9CZ13 | 0          | N-term +28.03 Da,                           | 6098.928223 | 3 | 863.1300049 | 863.1290581 |
| TATFAQALQSVPETQVSILDNGLR             | Q9CZ13 | 0          | N-term +28.03 Da,                           | 6102.584473 | 2 | 1294.189941 | 1294.189949 |
| ELNDFISYLQR                          | P27773 | 0          | N-term +28.03 Da,                           | 6114.002441 | 2 | 712.8599854 | 713.37227   |
| ALVDAFDFKDVTLGSLVGR                  | Q9R0H0 | 0          | N-term +28.03 Da, K +28.03 Da,              | 6122.953125 | 3 | 694.0499878 | 693.7210104 |
| EADIDGDGQVNYEEFVQMMTAK               | P62204 | 0          | N-term +28.03 Da, K +28.03 Da,              | 6129.279785 | 2 | 1274.069946 | 1273.574912 |
| TATFAQALQSVPETQVSILDNGLR             | Q9CZ13 | 0          | N-term +28.03 Da,                           | 6130.037598 | 3 | 863.1272583 | 863.1290581 |
| EADIDGDGQVNYEEFVQMMTAK               | P62204 | 0          | N-term +28.03 Da, K +28.03 Da,              | 6130.675293 | 3 | 850.0499878 | 849.3857    |
| DIDLSDVELDDLEKDEL                    | Q922R8 | 0          | N-term +28.03 Da, K +28.03 Da,              | 6130.804688 | 2 | 1016.98999  | 1016.496447 |
| EADIDGDGQVNYEEFVQMMTAK               | P62204 | 0          | N-term +28.03 Da, K +28.03 Da,              | 6132.294434 | 2 | 1274.569946 | 1273.574912 |
| TATFAQALQSVPETQVSILDNGLR             | Q9CZ13 | 0          | N-term +28.03 Da,                           | 6133.549805 | 2 | 1295.180054 | 1294.189949 |
| TWNDPSVQQDIKFLPF                     | P20029 | 0.00060205 | N-term +28.03 Da, K +28.03 Da,              | 6147.63916  | 2 | 996.0200195 | 996.0172881 |
| AIPENTNIGSLFPIPLATDR                 | E0CXD4 | 0          | N-term +28.03 Da,                           | 6153.391113 | 2 | 1084.589966 | 1084.091516 |
| AQLPNAVLESISVIDTPGILSGEKQR           | Q9QXY6 | 0          | N-term +28.03 Da, K +28.03 Da,              | 6161.60498  | 3 | 931.1900024 | 931.1903177 |
| TATFAQALQSVPETQVSILDNGLR             | Q9CZ13 | 0.00532946 | N-term +28.03 Da,                           | 6164.59375  | 3 | 863.4500122 | 863.1290581 |
| DFPCDQSNPYLK                         | Q3UQV5 | 0.0459364  | N-term +28.03 Da, K +28.03 Da, C +57.02 Da, | 6167.474609 | 2 | 826.9099731 | 826.9030776 |
| EADIDGDGQVNYEEFVQMMTAK               | P62204 | 0          | N-term +28.03 Da, K +28.03 Da,              | 6167.914063 | 2 | 1274.569946 | 1273.574912 |
| SQESKTTYLEDLPPLEPELSPSKLGDDEVDDVYLIR | Q8C5Q4 | 0.01066667 | N-term +28.03 Da, K +28.03 Da,              | 6169.301758 | 4 | 1057.050049 | 1056.5438   |
| EADIDGDGQVNYEEFVQMMTAK               | P62204 | 0          | N-term +28.03 Da, K +28.03 Da,              | 6170.486816 | 2 | 1274.079956 | 1273.574912 |
| DGKALEQFLQYFDGNLKR                   | P27773 | 0.00486381 | N-term +28.03 Da, K +28.03 Da,              | 6171.585449 | 3 | 785.4099731 | 785.7496292 |
| EADIDGDGQVNYEEFVQMMTAK               | P62204 | 0          | N-term +28.03 Da, K +28.03 Da,              | 6172.618164 | 3 | 849.7199707 | 849.3857    |
| PGLLLLGDEAPNFEANTTIGR                | O08709 | 0.00439883 | N-term +28.03 Da,                           | 6191.632813 | 2 | 1086.050049 | 1085.560581 |
| EADIDGDGQVNYEEFVQMMTAK               | P62204 | 0          | N-term +28.03 Da, K +28.03 Da,              | 6192.871094 | 3 | 849.3800049 | 849.3857    |
| SFDVDGLDPAFTPATGTPVLGGLSYR           | Q61176 | 0          | N-term +28.03 Da,                           | 6193.833496 | 3 | 894.789978  | 894.4534304 |
| SFDVDGLDPAFTPATGTPVLGGLSYR           | Q61176 | 0          | N-term +28.03 Da,                           | 6196.895508 | 2 | 1342.180054 | 1341.176507 |
| EADIDGDGQVNYEEFVQMMTAK               | P62204 | 0          | N-term +28.03 Da, K +28.03 Da,              | 6199.816406 | 2 | 1274.569946 | 1273.574912 |
| EADIDGDGQVNYEEFVQMMTAK               | P62204 | 0          | N-term +28.03 Da, K +28.03 Da,              | 6202.160156 | 2 | 1273.589966 | 1273.574912 |
| SFDVDGLDPAFTPATGTPVLGGLSYR           | Q61176 | 0          | N-term +28.03 Da,                           | 6206.203125 | 2 | 1341.180054 | 1341.176507 |
| LITLEEEMTKYKPEDELTAEKITEF            | P09103 | 0          | N-term +28.03 Da, K +28.03 Da,              | 6207.968262 | 3 | 1066.880005 | 1067.224254 |
| ALDFEQEMATAASSSSLEKSYELPDGQVITIGNER  | P60710 | 0          | N-term +28.03 Da, K +28.03 Da,              | 6210.048828 | 3 | 1281.959961 | 1281.62621  |
| EADIDGDGQVNYEEFVQMMTAK               | P62204 | 0          | N-term +28.03 Da, K +28.03 Da,              | 6225.019043 | 3 | 849.3800049 | 849.3857    |
| AEAAAAPAPAAGPGQMSFTFASPTQVFFDSANVK   | Q9D3D9 | 0          | N-term +28.03 Da, K +28.03 Da,              | 6240.206543 | 3 | 1137.890015 | 1137.562375 |
| GGHEADAQILELNQQLDLKLTVDGLEKER        | Q6PER3 | 0          | N-term +28.03 Da, K +28.03 Da,              | 6245.366211 | 4 | 858.7199707 | 858.2201557 |
| AEAAAAPAPAAGPGQMSFTFASPTQVFFDSANVK   | Q9D3D9 | 0          | N-term +28.03 Da, K +28.03 Da,              | 6246.901855 | 4 | 853.9199829 | 853.4236002 |
| AMFDQSQIQEFKEAFNMIDQNR               | Q3THE2 | 0          | N-term +28.03 Da, K +28.03 Da,              | 6248.913574 | 3 | 916.7700195 | 916.1036382 |



|                                      |        |            |                                             |             |   |             |             |
|--------------------------------------|--------|------------|---------------------------------------------|-------------|---|-------------|-------------|
| GGHEADAQILELNQQLDLKLTVDGLEKER        | Q6PER3 | 0          | N-term +28.03 Da, K +28.03 Da,              | 6255.419434 | 4 | 858.2199707 | 858.2201557 |
| YTDIQEPMLNAAQEFGGNPFASLVSSSSAEGTQPSR | Q8R317 | 0          | N-term +28.03 Da,                           | 6260.588867 | 3 | 1344.630005 | 1343.963885 |
| AMFDQSQIQEFKEAFNMIDQNR               | Q3THE2 | 0          | N-term +28.03 Da, K +28.03 Da,              | 6260.775391 | 3 | 916.4400024 | 916.1036382 |
| EADIDGDGQVNYEEFVQMMTAK               | P62204 | 0          | N-term +28.03 Da, K +28.03 Da,              | 6272.939941 | 2 | 1274.569946 | 1273.574912 |
| GGHEADAQILELNQQLDLKLTVDGLEKER        | Q6PER3 | 0          | N-term +28.03 Da, K +28.03 Da,              | 6286.027344 | 4 | 858.7199707 | 858.2201557 |
| AMFDQSQIQEFKEAFNMIDQNR               | Q3THE2 | 0          | N-term +28.03 Da, K +28.03 Da,              | 6292.701172 | 3 | 916.4299927 | 916.1036382 |
| ADLGFVDVIGPLFQTPR                    | P16332 | 0          | N-term +28.03 Da,                           | 6295.450195 | 2 | 944.9799805 | 944.993813  |
| FIMEDTIGVPLFVGSVR                    | Q61247 | 0          | N-term +28.03 Da,                           | 6306.299805 | 2 | 954.5200195 | 954.518609  |
| NLLENWDTLGGSTVSQLQER                 | Q00623 | 0          | N-term +28.03 Da,                           | 6323.917969 | 2 | 1116.560059 | 1116.06877  |
| APLLSLPLCILPPGSGSPR                  | Q8K0Y7 | 0.00601573 | N-term +28.03 Da, C +57.02 Da,              | 6325.048828 | 3 | 691.0599976 | 690.730852  |
| NLLENWDTLGGSTVSQLQER                 | Q00623 | 0          | N-term +28.03 Da,                           | 6327.435059 | 3 | 745.039978  | 744.3816057 |
| NLLENWDTLGGSTVSQLQER                 | Q00623 | 0          | N-term +28.03 Da,                           | 6328.32666  | 2 | 1117.060059 | 1116.06877  |
| MVNPTVFFDITADDEPLGR                  | P17742 | 0          | N-term +28.03 Da,                           | 6332.254883 | 2 | 1083.530029 | 1083.03281  |
| EELVSMNVQGDYEPIDATGFININSLR          | P16460 | 0          | N-term +28.03 Da,                           | 6339.612793 | 3 | 1018.51001  | 1018.169254 |
| VEFDEVDSLKEALTYDGALLGDR              | Q9WUK2 | 0          | N-term +28.03 Da, K +28.03 Da,              | 6348.562012 | 3 | 871.4400024 | 871.109441  |
| SEAAADREDDPNFFKMVEGFFDR              | P26443 | 0          | N-term +28.03 Da, K +28.03 Da,              | 6348.787109 | 4 | 688.0668335 | 688.0695253 |
| SEAAADREDDPNFFKMVEGFFDR              | P26443 | 0          | N-term +28.03 Da, K +28.03 Da,              | 6353.059082 | 3 | 917.0900269 | 917.0902749 |
| ALFQDVQKPSQDEWGKTQEAMEAALAMEKNLN     | P29391 | 0.00054083 | N-term +28.03 Da, K +28.03 Da,              | 6361.408203 | 3 | 1244.949951 | 1244.958577 |
| EEAQEIDCNDEAVFQAVDFSLKQFNPGVK        | O08677 | 0          | N-term +28.03 Da, K +28.03 Da, C +57.02 Da, | 6363.382324 | 3 | 1138.550049 | 1137.885295 |
| VEQSEPLINLATCVDEVVGDPPDR             | Q8BVZ1 | 0          | N-term +28.03 Da, C +57.02 Da,              | 6366.161621 | 3 | 894.7800293 | 894.1093353 |
| EELVSMNVQGDYEPIDATGFININSLR          | P16460 | 0          | N-term +28.03 Da,                           | 6368.154785 | 3 | 1018.169983 | 1018.169254 |
| EELVSMNVQGDYEPIDATGFININSLR          | P16460 | 0          | N-term +28.03 Da,                           | 6374.692871 | 2 | 1527.25     | 1526.750243 |
| EEAQEIDCNDEAVFQAVDFSLKQFNPGVK        | O08677 | 0          | N-term +28.03 Da, K +28.03 Da, C +57.02 Da, | 6374.882813 | 3 | 1137.880005 | 1137.885295 |
| VEQSEPLINLATCVDEVVGDPPDR             | Q8BVZ1 | 0          | N-term +28.03 Da, C +57.02 Da,              | 6376.455566 | 3 | 893.7800293 | 894.1093353 |
| SEAAADREDDPNFFKMVEGFFDR              | P26443 | 0          | N-term +28.03 Da, K +28.03 Da,              | 6380.929688 | 4 | 688.0671387 | 688.0695253 |
| SEAAADREDDPNFFKMVEGFFDR              | P26443 | 0          | N-term +28.03 Da, K +28.03 Da,              | 6385.027344 | 3 | 917.75      | 917.0902749 |
| SEAAADREDDPNFFKMVEGFFDR              | P26443 | 0          | N-term +28.03 Da, K +28.03 Da,              | 6385.148438 | 3 | 917.0847778 | 917.0902749 |
| SLFGSVETWQPWLSTGGKEDVSYEER           | Q9R257 | 0          | N-term +28.03 Da, K +28.03 Da,              | 6389.767578 | 3 | 1048.52002  | 1048.183781 |
| ALFQDVQKPSQDEWGKTQEAMEAALAMEKNLN     | P29391 | 0.0087236  | N-term +28.03 Da, K +28.03 Da,              | 6392.797363 | 3 | 1244.630005 | 1244.958577 |
| LGASDFEFGVDPSADPELALALR              | O35226 | 0          | N-term +28.03 Da,                           | 6397.63916  | 2 | 1210.609985 | 1209.613011 |
| LGASDFEFGVDPSADPELALALR              | O35226 | 0          | N-term +28.03 Da,                           | 6400.132813 | 2 | 1209.609985 | 1209.613011 |
| IEQCPEVLDIRAKR                       | Q4VAD2 | 0.04452325 | N-term +28.03 Da, K +28.03 Da, C +57.02 Da, | 6403.130859 | 3 | 676.7199707 | 676.3750683 |
| LGLAAAAAAAEELYGRAEPPFAPRSGDAH        | Q7TQ40 | 0.02620803 | N-term +28.03 Da,                           | 6407.502441 | 3 | 950.8200073 | 950.4946229 |
| SLFGSVETWQPWLSTGGKEDVSYEER           | Q9R257 | 0          | N-term +28.03 Da, K +28.03 Da,              | 6408.154297 | 3 | 1048.180054 | 1048.183781 |
| SEAAADREDDPNFFKMVEGFFDR              | P26443 | 0          | N-term +28.03 Da, K +28.03 Da,              | 6413.489258 | 4 | 688.0700073 | 688.0695253 |
| FLIEEGSKPEDVDGVLEEFGR                | Q9DBM2 | 0          | N-term +28.03 Da, K +28.03 Da,              | 6414.495117 | 3 | 857.4299927 | 856.7671263 |
| SEAAADREDDPNFFKMVEGFFDR              | P26443 | 0          | N-term +28.03 Da, K +28.03 Da,              | 6417.734375 | 3 | 917.0900269 | 917.0902749 |
| SDTPANCTYPDLLGTWVQVQGR               | P97821 | 0          | N-term +28.03 Da, C +57.02 Da,              | 6429.401855 | 2 | 1311.619995 | 1311.636495 |
| NLLENWDTLGGSTVSQLQER                 | Q00623 | 0.01391304 | N-term +28.03 Da,                           | 6429.60791  | 3 | 782.4099731 | 782.0762939 |
| TIDPSVSKELAKEVEKMGAVFMDAPVSGGGAAR    | Q99L13 | 0.0015674  | N-term +28.03 Da, K +28.03 Da,              | 6437.375488 | 4 | 890.9799805 | 890.4782127 |

|                                       |        |            |                                            |             |   |             |             |
|---------------------------------------|--------|------------|--------------------------------------------|-------------|---|-------------|-------------|
| MELEGLGEEVVAALPEDMR                   | E9Q3S2 | 0.01849462 | N-term +28.03 Da,                          | 6438.75293  | 2 | 1059.02002  | 1058.518679 |
| LNLLNWDTLGSTVSQLQER                   | Q00623 | 0          | N-term +28.03 Da,                          | 6445.385254 | 3 | 782.7399902 | 782.0762939 |
| LCYYIGATDDAATKIINEVSKPLAH             | Q9CXI5 | 0          | N-term +28.03 Da, K +28.03 Da,C +57.02 Da, | 6445.830078 | 3 | 949.5       | 949.8368869 |
| GDDEAAELMQQVKVLLKLTVEDLEKER           | Q61166 | 0.00071736 | N-term +28.03 Da, K +28.03 Da,             | 6447.422363 | 4 | 775.6699829 | 775.4217975 |
| LNLLNWDTLGSTVSQLQER                   | Q00623 | 0          | N-term +28.03 Da,                          | 6450.236328 | 2 | 1172.609985 | 1172.610803 |
| VVLETETLDEAIKIVNDNPNYGNGTAFITTINGATAR | Q9EQ20 | 0.00057339 | N-term +28.03 Da, K +28.03 Da,             | 6507.117188 | 4 | 942.2299805 | 941.7401816 |
| LPCVEDYLSAILNR                        | P07724 | 0.00071429 | N-term +28.03 Da, C +57.02 Da,             | 6538.591797 | 3 | 564.2999878 | 564.2992766 |
| NLNLLENWDTLGSTVSQLQER                 | Q00623 | 0          | N-term +28.03 Da,                          | 6548.989258 | 2 | 1230.130005 | 1229.632267 |
| TLQPLVDPEDIDLTPLSSGLGNLPR             | P33267 | 0          | N-term +28.03 Da,                          | 6552.537109 | 3 | 897.4799805 | 896.8200019 |
| TLQPLVDPEDIDLTPLSSGLGNLPR             | P33267 | 0          | N-term +28.03 Da,                          | 6564.382813 | 2 | 1345.22998  | 1344.726365 |
| AMLGDFVNMVEKGIIDPTKVVR                | P63038 | 0          | N-term +28.03 Da, K +28.03 Da,             | 6574.506836 | 4 | 629.8499756 | 629.8549351 |
| VLPLAEDFTEILSR                        | P21614 | 0.00954112 | N-term +28.03 Da,                          | 6600.371582 | 2 | 816.4500122 | 815.9561674 |
| ANLRYRFVGSFAVRTAAAAFEIDPR             | Q91ZIO | 0.01071907 | N-term +28.03 Da,                          | 6604.964844 | 3 | 949.5       | 949.8507406 |
| AITDEENDMLDLAFGLTDR                   | P46656 | 0          | N-term +28.03 Da,                          | 6638.884277 | 2 | 1084.530029 | 1084.014815 |
| SPVLLDFEFDESSELYR                     | Q9ESB3 | 0.037751   | N-term +28.03 Da,                          | 6672.727051 | 2 | 929.4500122 | 929.4670969 |
| GTIDFPEFLTMMAR                        | P62204 | 0.00644864 | N-term +28.03 Da,                          | 6674.569336 | 2 | 828.4099731 | 828.909848  |
| GHHGAQSVEDDPRILCAMHAGK                | A2AQA9 | 0.04003203 | N-term +28.03 Da, K +28.03 Da,C +57.02 Da, | 6681.623535 | 2 | 1277.630005 | 1278.13393  |
| GTIDFPEFLTMMAR                        | P62204 | 0.00059347 | N-term +28.03 Da,                          | 6721.871582 | 2 | 829.4099731 | 828.909848  |
| GTIDFPEFLTMMAR                        | P62204 | 0          | N-term +28.03 Da,                          | 6730.104492 | 2 | 829.9099731 | 828.909848  |
| VGTSFSHESTYGVGNFNTFKSTAKNISPSTNSVK    | Q6NXH3 | 0.01102293 | N-term +28.03 Da, K +28.03 Da,             | 6743.75293  | 3 | 1236.280029 | 1235.963485 |
| KDVPPVPTLADIAWIAADEEETIAR             | Q9CWE0 | 0.00257069 | N-term +28.03 Da, K +28.03 Da,             | 6749.458008 | 3 | 943.1599731 | 942.8235236 |
| QFFIGENMNPDMVALLDYR                   | P63028 | 0          | N-term +28.03 Da,                          | 6755.275879 | 2 | 1180.569946 | 1179.566494 |
| VVDVQFDEGLPPILNALEVQGR                | P56480 | 0          | N-term +28.03 Da,                          | 6757.309082 | 3 | 812.7800293 | 812.7759557 |
| GTIDFPEFLTMMAR                        | P62204 | 0          | N-term +28.03 Da,                          | 6762.19043  | 2 | 828.9099731 | 828.909848  |
| VVDVQFDEGLPPILNALEVQGR                | P56480 | 0.00107701 | N-term +28.03 Da,                          | 6763.237305 | 3 | 812.4299927 | 812.7759557 |
| EDLDSLLSALSNEESLGNR                   | Q8BGD9 | 0.0472841  | N-term +28.03 Da,                          | 6778.826172 | 2 | 1102.060059 | 1102.058069 |
| FTANPFEQDVEKATNEYNTTEDWSLIMDICDR      | O88811 | 0          | N-term +28.03 Da, K +28.03 Da,C +57.02 Da, | 6781.060059 | 3 | 1304.26001  | 1303.592512 |
| TIDFPEFLTMMAR                         | P62204 | 0          | N-term +28.03 Da,                          | 6782.72998  | 2 | 801.4000244 | 800.399116  |
| TQEAMEAALAMEKNLNQALLDLH               | P29391 | 0.04323681 | N-term +28.03 Da, K +28.03 Da,             | 6805.646484 | 3 | 871.1099854 | 870.7803839 |
| TIDFPEFLTMMAR                         | P62204 | 0.00066622 | N-term +28.03 Da,                          | 6814.694824 | 2 | 800.9000244 | 800.399116  |
| EADIDGDGQVNYEEFVQMMMTAK               | P62204 | 0          | N-term +28.03 Da, K +28.03 Da,             | 6817.255371 | 2 | 1273.069946 | 1273.574912 |
| VELLYHVEELDPGVVDNFPLLKALR             | P30115 | 0          | N-term +28.03 Da, K +28.03 Da,             | 6826.054199 | 4 | 734.9099731 | 734.4139377 |
| EADIDGDGQVNYEEFVQMMMTAK               | P62204 | 0          | N-term +28.03 Da, K +28.03 Da,             | 6826.840332 | 3 | 849.0499878 | 849.3857    |
| AEFEDLDSLLSALSNEESLGNRR               | Q8BGD9 | 0.00066313 | N-term +28.03 Da,                          | 6832.854004 | 3 | 902.789978  | 902.7908828 |
| EADIDGDGQVNYEEFVQMMMTAK               | P62204 | 0          | N-term +28.03 Da, K +28.03 Da,             | 6847.985352 | 2 | 1273.069946 | 1273.574912 |
| FDEVTAEAMTLK                          | A2ASS6 | 0.0110424  | N-term +28.03 Da, K +28.03 Da,             | 6855.453613 | 2 | 706.3599854 | 705.8628894 |
| VELLYHVEELDPGVVDNFPLLKALR             | P30115 | 0          | N-term +28.03 Da, K +28.03 Da,             | 6857.84082  | 4 | 734.6599731 | 734.4139377 |
| YVASYLLAALGGNSPSAKDIKILDSVIEADDDR     | P99027 | 0          | N-term +28.03 Da, K +28.03 Da,             | 6860.242676 | 4 | 967.2700195 | 966.7714817 |
| EADIDGDGQVNYEEFVQMMMTAK               | P62204 | 0          | N-term +28.03 Da, K +28.03 Da,             | 6892.650391 | 2 | 1273.569946 | 1273.574912 |
| MLLPEEEFTVDHPFFIFIR                   | Q9D154 | 0          | N-term +28.03 Da,                          | 6930.982422 | 3 | 804.0800171 | 803.4168221 |

|                                       |        |            |                                            |             |   |             |             |
|---------------------------------------|--------|------------|--------------------------------------------|-------------|---|-------------|-------------|
| FAHTNIESLVKEYDDNGEGITIFRPL            | P27773 | 0.02590461 | N-term +28.03 Da, K +28.03 Da,             | 6941.039551 | 3 | 1012.52002  | 1012.188866 |
| SEMLTELVPQVEPADLELLQELNR              | O88746 | 0          | N-term +28.03 Da,                          | 6946.711426 | 3 | 966.5       | 965.8388452 |
| ATNPFQDQVEKATSELNTEADWGLILDICDKVQSR   | P70297 | 0          | N-term +28.03 Da, K +28.03 Da,C +57.02 Da, | 6953.711914 | 4 | 1031.26001  | 1030.759946 |
| DLYHEMIESGVINLKDATSKVALVYGMNEPPGAR    | P56480 | 0          | N-term +28.03 Da, K +28.03 Da,             | 6956.10498  | 4 | 983.5100098 | 983.2589553 |
| HIDLGPSMLGDVLSIMDKDQWGSEEEEEAGGYR     | Q9JM96 | 0          | N-term +28.03 Da, K +28.03 Da,             | 6968.62793  | 4 | 931.1900024 | 930.6855548 |
| ENVLPLAEDFTEILSR                      | P21614 | 0          | N-term +28.03 Da,                          | 6979.943848 | 2 | 938.5       | 937.4989286 |
| ENVLPLAEDFTEILSR                      | P21614 | 0          | N-term +28.03 Da,                          | 6982.674805 | 2 | 937.5       | 937.4989286 |
| ADGNGTIDFPEFLTMAR                     | P62204 | 0          | N-term +28.03 Da,                          | 6985.278809 | 2 | 1007.969971 | 1007.474073 |
| ATNPFQDQVEKATSELNTEADWGLILDICDKVQSR   | P70297 | 0          | N-term +28.03 Da, K +28.03 Da,C +57.02 Da, | 6985.806641 | 4 | 1031.26001  | 1030.759946 |
| AALPDQDSFYDVTDALEQQGMEALVQR           | Q6P9Q4 | 0          | N-term +28.03 Da,                          | 6996.236816 | 3 | 1014.150024 | 1013.485243 |
| GNGTIDFPEFLTMAR                       | P62204 | 0.0006812  | N-term +28.03 Da,                          | 7012.9375   | 2 | 914.9299927 | 914.4420441 |
| ENVLPLAEDFTEILSR                      | P21614 | 0          | N-term +28.03 Da,                          | 7015.158203 | 2 | 937.4992065 | 937.4989286 |
| DFQLIGIQDGYLSLLQDSGEVR                | P63242 | 0          | N-term +28.03 Da,                          | 7028.76416  | 2 | 1247.640015 | 1247.644843 |
| NLLENWDTLGGSTVSQLQER                  | Q00623 | 0          | N-term +28.03 Da,                          | 7037.746582 | 2 | 1117.060059 | 1116.06877  |
| ASTLAELDGCCLQVLEDKFLR                 | G3UX05 | 0          | N-term +28.03 Da, K +28.03 Da,C +57.02 Da, | 7060.625488 | 3 | 779.0800171 | 778.7506415 |
| VGDPLDLVALAEQVQKADEFIR                | Q5EBG8 | 0          | N-term +28.03 Da, K +28.03 Da,             | 7108.805176 | 3 | 828.789978  | 828.123244  |
| TALLELWELR                            | P16546 | 0.01069519 | N-term +28.03 Da,                          | 7123.732422 | 2 | 636.3599854 | 636.371541  |
| VPAGPGGSQQVDLASVLTPEIMAPILANADVQR     | Q9JKV1 | 0          | N-term +28.03 Da,                          | 7141.86377  | 3 | 1158.27002  | 1157.943256 |
| VPAGPGGSQQVDLASVLTPEIMAPILANADVQR     | Q9JKV1 | 0          | N-term +28.03 Da,                          | 7142.026367 | 4 | 869.210022  | 868.7092609 |
| DFQLIGIQDGYLSLLQDSGEVR                | P63242 | 0          | N-term +28.03 Da,                          | 7144.376465 | 3 | 832.7700195 | 832.0989873 |
| VPAGPGGSQQVDLASVLTPEIMAPILANADVQR     | Q9JKV1 | 0          | N-term +28.03 Da,                          | 7145.394043 | 3 | 1157.939941 | 1157.943256 |
| DFQLIGIQDGYLSLLQDSGEVR                | P63242 | 0          | N-term +28.03 Da,                          | 7147.696777 | 2 | 1248.150024 | 1247.644843 |
| PFRGMSEEEVFTEVANLFRGQEDLLSEFGQFLPEAK  | Q62141 | 0.04       | N-term +28.03 Da, K +28.03 Da,             | 7149.493164 | 3 | 1401.709961 | 1401.696299 |
| DFQLIGIQDGYLSLLQDSGEVR                | P63242 | 0          | N-term +28.03 Da,                          | 7149.865723 | 2 | 1248.650024 | 1247.644843 |
| LPPLSATSFLEDLMDR                      | Q75N73 | 0.00062035 | N-term +28.03 Da,                          | 7153.324219 | 3 | 611.9899902 | 611.6536084 |
| SLGQQLNLNLENWDTLGGSTVSQLQER           | Q00623 | 0          | N-term +28.03 Da,                          | 7154.92041  | 3 | 1029.209961 | 1028.870196 |
| LPPLSATSFLEDLMDR                      | Q75N73 | 0.0005596  | N-term +28.03 Da,                          | 7159.73877  | 3 | 611.6500244 | 611.6536084 |
| SVQGYMEQASKTVQDALSSVQESDIAVVAR        | P33622 | 0          | N-term +28.03 Da, K +28.03 Da,             | 7172.604492 | 3 | 1085.219971 | 1084.885406 |
| FTLQPLVPEDIDLTPSSGLGNLPR              | P33267 | 0          | N-term +28.03 Da,                          | 7172.790527 | 3 | 946.1799927 | 945.8428066 |
| VPAGPGGSQQVDLASVLTPEIMAPILANADVQR     | Q9JKV1 | 0          | N-term +28.03 Da,                          | 7173.26709  | 4 | 868.960022  | 868.7092609 |
| KIISLSQLLEDLSLNADLSSLR                | P97372 | 0          | N-term +28.03 Da, K +28.03 Da,             | 7175.494141 | 3 | 866.4899902 | 866.8286086 |
| VPAGPGGSQQVDLASVLTPEIMAPILANADVQR     | Q9JKV1 | 0          | N-term +28.03 Da,                          | 7176.268066 | 3 | 1157.944336 | 1157.943256 |
| VIQELRPTLNELGISTPEELGLDKV             | P12787 | 0.00054945 | N-term +28.03 Da, K +28.03 Da,             | 7182.325684 | 3 | 940.2000122 | 940.53034   |
| SPVTRQEKMATVWDEAEQDQIGEEVLKMTSTEEIVQR | O88685 | 0.00909091 | N-term +28.03 Da, K +28.03 Da,             | 7183.076172 | 4 | 1051.780029 | 1051.529163 |
| AGDDMEVSATELMNINLKVVTR                | O88456 | 0          | N-term +28.03 Da, K +28.03 Da,             | 7196.649414 | 3 | 821.7600098 | 821.4258295 |
| AGDDMEVSATELMNINLKVVTR                | O88456 | 0.02222222 | N-term +28.03 Da, K +28.03 Da,             | 7202.420898 | 3 | 822.0999756 | 821.4258295 |
| NGGTVLAIAGEDFSIVASDTR                 | O09061 | 0          | N-term +28.03 Da,                          | 7224.381836 | 3 | 708.3599854 | 707.6989347 |
| TTEPVSELLKNYLDAQYGDIGITPPQCF          | P18242 | 0.00486618 | N-term +28.03 Da, K +28.03 Da,C +57.02 Da, | 7236.61377  | 3 | 1149.900024 | 1149.233924 |
| TAVLPVKCCLFVYQFFVKKAKKR               | Q8BJL9 | 0.04910366 | N-term +28.03 Da, K +28.03 Da,C +57.02 Da, | 7259.029297 | 3 | 1000.950012 | 1000.26701  |
| AGLPLSATSFLEDLMDR                     | Q75N73 | 0          | N-term +28.03 Da,                          | 7267.355957 | 2 | 981.0100098 | 981.0060635 |

|                                      |        |            |                                |             |   |             |             |
|--------------------------------------|--------|------------|--------------------------------|-------------|---|-------------|-------------|
| MNVPAGPGGSQQVDLASVLTPEIMAPILANADVQER | Q9JKV1 | 0          | N-term +28.03 Da,              | 7281.015625 | 3 | 1239.640015 | 1239.637727 |
| MNVPAGPGGSQQVDLASVLTPEIMAPILANADVQER | Q9JKV1 | 0          | N-term +28.03 Da,              | 7290.176758 | 4 | 930.4899902 | 929.9801142 |
| ALTPLQEEMAGLLQKIEVER                 | Q9EQI8 | 0          | N-term +28.03 Da,              | 7303.89502  | 3 | 766.4099731 | 766.0787581 |
| AFLQKAHLTEHQK                        | Q9CY99 | 0.04986365 | N-term +28.03 Da, K +28.03 Da, | 7307.846191 | 2 | 818.4699707 | 817.9724854 |
| SLGYDLPMVEEGEPDPEFEAILDTPVDPNR       | P16546 | 0          | N-term +28.03 Da,              | 7310.373047 | 3 | 1092.849976 | 1092.514868 |
| GSTLKETAIELGYLTAEQFDEWVKPKDMLGPK     | P97807 | 0          | N-term +28.03 Da, K +28.03 Da, | 7311.275879 | 4 | 935.0100098 | 934.5045906 |
| MNVPAGPGGSQQVDLASVLTPEIMAPILANADVQER | Q9JKV1 | 0          | N-term +28.03 Da,              | 7312.723145 | 3 | 1239.640015 | 1239.637727 |
| VGWEQLLTTIAR                         | P57780 | 0.00063331 | N-term +28.03 Da,              | 7318.249023 | 2 | 707.4000244 | 707.9062796 |
| MITSAAGIISLLDEEEPQLKEF               | Q3TXS7 | 0.00156576 | N-term +28.03 Da, K +28.03 Da, | 7323.658203 | 2 | 1246.150024 | 1245.65603  |
| VVDNPIYLSDMGAALTGAESHELQDVLEETNILKR  | Q8CGK3 | 0.00059524 | N-term +28.03 Da, K +28.03 Da, | 7323.874023 | 4 | 975.2600098 | 975.0042153 |
| TQEAMEAALAMEKNLNQALLDLHALGSAR        | P29391 | 0          | N-term +28.03 Da, K +28.03 Da, | 7325.524902 | 4 | 792.4199829 | 792.1653314 |
| MITSAAGIISLLDEEEPQLKEF               | Q3TXS7 | 0          | N-term +28.03 Da, K +28.03 Da, | 7333.271484 | 3 | 831.1099854 | 830.7731123 |
| SSVQLLAEEAVTLDMLDLGAAR               | Q9D3D9 | 0          | N-term +28.03 Da,              | 7338.066406 | 3 | 777.75      | 777.4139182 |
| MITSAAGIISLLDEEEPQLKEF               | Q3TXS7 | 0          | N-term +28.03 Da, K +28.03 Da, | 7341.644531 | 3 | 831.4400024 | 830.7731123 |
| TQEAMEAALAMEKNLNQALLDLHALGSAR        | P29391 | 0          | N-term +28.03 Da, K +28.03 Da, | 7341.855469 | 3 | 1056.209961 | 1055.884683 |
| ENVFKLLPQVMYLDGYDR                   | Q35381 | 0          | N-term +28.03 Da, K +28.03 Da, | 7346.430664 | 3 | 752.3900146 | 752.7292887 |
| AQKVPTANLENVLAEDFTEILSR              | P21614 | 0.00912409 | N-term +28.03 Da, K +28.03 Da, | 7357.39209  | 3 | 942.5200195 | 942.1866847 |
| TQEAMEAALAMEKNLNQALLDLHALGSAR        | P29391 | 0          | N-term +28.03 Da, K +28.03 Da, | 7358.522461 | 4 | 792.6699829 | 792.1653314 |
| MITSAAGIISLLDEEEPQLKEF               | Q3TXS7 | 0          | N-term +28.03 Da, K +28.03 Da, | 7367.060547 | 3 | 830.7700195 | 830.7731123 |
| AIAELDTLSEESYKDSTLIMQLLR             | P62259 | 0          | N-term +28.03 Da, K +28.03 Da, | 7369.747559 | 3 | 932.5       | 932.4964192 |
| LVTLEEFLLASTQR                       | Q02819 | 0.00579151 | N-term +28.03 Da,              | 7372.56543  | 3 | 511.9500122 | 512.2873653 |
| AEFEDLSDLLSALSLSNEESLGNR             | Q8BGD9 | 0          | N-term +28.03 Da,              | 7397.167969 | 3 | 851.4299927 | 850.757179  |
| AEFEDLSDLLSALSLSNEESLGNR             | Q8BGD9 | 0          | N-term +28.03 Da,              | 7399.915039 | 2 | 1276.640015 | 1275.63213  |
| AEFEDLSDLLSALSLSNEESLGNR             | Q8BGD9 | 0          | N-term +28.03 Da,              | 7429.270996 | 3 | 851.0900269 | 850.757179  |
| AEFEDLSDLLSALSLSNEESLGNR             | Q8BGD9 | 0          | N-term +28.03 Da,              | 7431.628418 | 2 | 1276.140015 | 1275.63213  |
| ADSSVQLLAEEAVTLDMLDLGAAR             | Q9D3D9 | 0.00157646 | N-term +28.03 Da,              | 7457.000488 | 3 | 839.4400024 | 839.4352709 |
| NDFQLIGIQDGYLSLLQDSGGEVR             | P63242 | 0          | N-term +28.03 Da,              | 7481.155762 | 3 | 870.7800293 | 870.1132967 |
| DVTFSPATIEEELIKF                     | Q9CXI5 | 0          | N-term +28.03 Da, K +28.03 Da, | 7481.352051 | 2 | 948.5100098 | 948.0060551 |
| NDFQLIGIQDGYLSLLQDSGGEVR             | P63242 | 0          | N-term +28.03 Da,              | 7485.362793 | 2 | 1305.670044 | 1304.666307 |
| LNPDNSFEILVDQSVVNSGNLLNDMTPPVNPSR    | P35564 | 0          | N-term +28.03 Da,              | 7511.675293 | 4 | 906.7000122 | 906.7057129 |
| ADSSVQLLAEEAVTLDMLDLGAAR             | Q9D3D9 | 0          | N-term +28.03 Da,              | 7518.188477 | 2 | 1259.150024 | 1258.649268 |
| ADSSVQLLAEEAVTLDMLDLGAAR             | Q9D3D9 | 0          | N-term +28.03 Da,              | 7519.250488 | 3 | 839.4400024 | 839.4352709 |
| ADSSVQLLAEEAVTLDMLDLGAAR             | Q9D3D9 | 0          | N-term +28.03 Da,              | 7525.53125  | 2 | 1259.660034 | 1258.649268 |
| NADSSVQLLAEEAVTLDMLDLGAAR            | Q9D3D9 | 0          | N-term +28.03 Da,              | 7545.140625 | 2 | 1316.670044 | 1315.670732 |
| ADSSVQLLAEEAVTLDMLDLGAAR             | Q9D3D9 | 0          | N-term +28.03 Da,              | 7550.254395 | 2 | 1258.660034 | 1258.649268 |
| ADSSVQLLAEEAVTLDMLDLGAAR             | Q9D3D9 | 0          | N-term +28.03 Da,              | 7552.974609 | 3 | 839.7700195 | 839.4352709 |
| NADSSVQLLAEEAVTLDMLDLGAAR            | Q9D3D9 | 0          | N-term +28.03 Da,              | 7559.469238 | 3 | 878.1199951 | 877.4495803 |
| SEQAPVMSEDELVSIIIDGVL                | Q8K5B2 | 0.00055586 | N-term +28.03 Da,              | 7577.528809 | 2 | 1158.599976 | 1158.093597 |
| SSSEVGYDAMLGDFVNMVEKGIIDPTKVVR       | P63038 | 0          | N-term +28.03 Da, K +28.03 Da, | 7578.867188 | 4 | 836.4299927 | 835.9346435 |
| SSEVGYDAMLGDFVNMVEKGIIDPTKVVR        | P63038 | 0          | N-term +28.03 Da, K +28.03 Da, | 7583.996582 | 3 | 1085.235352 | 1085.233089 |

|                                          |        |            |                                             |             |   |             |             |
|------------------------------------------|--------|------------|---------------------------------------------|-------------|---|-------------|-------------|
| ADSSVQLLAEAEVTLDMMLDLGAAR                | Q9D3D9 | 0          | N-term +28.03 Da,                           | 7585.300781 | 3 | 839.4400024 | 839.4352709 |
| SSEVGYDAMLGDFVNMVEKGIIDPTKVVR            | P63038 | 0          | N-term +28.03 Da, K +28.03 Da,              | 7585.571289 | 4 | 814.4299927 | 814.1766362 |
| ADSSVQLLAEAEVTLDMMLDLGAAR                | Q9D3D9 | 0          | N-term +28.03 Da,                           | 7588.996582 | 2 | 1259.650024 | 1258.649268 |
| SSSEVGYDAMLGDFVNMVEKGIIDPTKVVR           | P63038 | 0.00645756 | N-term +28.03 Da, K +28.03 Da,              | 7596.972168 | 3 | 1114.569946 | 1114.243766 |
| SSSEVGYDAMLGDFVNMVEKGIIDPTKVVR           | P63038 | 0.00062696 | N-term +28.03 Da, K +28.03 Da,              | 7609.448242 | 4 | 836.1799927 | 835.9346435 |
| LQSSSEVGYDAMLGDFVNMVEKGIIDPTKVVR         | P63038 | 0          | N-term +28.03 Da, K +28.03 Da,              | 7616.874512 | 4 | 896.4699707 | 896.2203041 |
| ILNPDNSFEILVDQSVVNSGNLLNDMTPPVNPSPR      | P35564 | 0.00063898 | N-term +28.03 Da,                           | 7636.847168 | 3 | 1246.630005 | 1246.29988  |
| LQSSSEVGYDAMLGDFVNMVEKGIIDPTKVVR         | P63038 | 0          | N-term +28.03 Da, K +28.03 Da,              | 7641.535156 | 4 | 896.2199707 | 896.2203041 |
| ADSSVQLLAEAEVTLDMMLDLGAAR                | Q9D3D9 | 0          | N-term +28.03 Da,                           | 7645.525879 | 3 | 839.4400024 | 839.4352709 |
| SAGTSLVNFSSLMNLEEKPAAPAA                 | P09813 | 0          | N-term +28.03 Da, K +28.03 Da,              | 7699.363281 | 2 | 1268.650024 | 1269.151446 |
| SAGTSLVNFSSLMNLEEKPAAPAA                 | P09813 | 0          | N-term +28.03 Da, K +28.03 Da,              | 7706.074219 | 2 | 1269.650024 | 1269.151446 |
| DAITDEENDMLDLAFGLTDR                     | P46656 | 0          | N-term +28.03 Da,                           | 7710.016602 | 2 | 1142.530029 | 1141.528287 |
| KKRETHEALAR                              | Q9WTX8 | 0.02375    | N-term +28.03 Da, K +28.03 Da,              | 7720.646973 | 2 | 712.9199829 | 711.9306202 |
| VGNLPFNTVQGDIDAIFKDLISIR                 | Q9WUK2 | 0          | N-term +28.03 Da, K +28.03 Da,              | 7750.84082  | 3 | 863.8099976 | 863.4742768 |
| EEVEGSLLLGSVQGYMEQASKTVQDALSSVQESDIAVVAR | P33622 | 0.00067705 | N-term +28.03 Da, K +28.03 Da,              | 7778.139648 | 4 | 1071.040039 | 1070.546711 |
| DSSVQLLAEAEVTLDMMLDLGAAR                 | Q9D3D9 | 0          | N-term +28.03 Da,                           | 7795.290039 | 3 | 815.75      | 815.7562329 |
| SAGTSLVNFSSLMNLEEKPAAPAA                 | P09813 | 0          | N-term +28.03 Da, K +28.03 Da,              | 7795.759277 | 2 | 1269.660034 | 1269.151446 |
| DSSVQLLAEAEVTLDMMLDLGAAR                 | Q9D3D9 | 0          | N-term +28.03 Da,                           | 7796.520996 | 2 | 1223.640015 | 1223.130711 |
| LDVKAMGPLVLTEVLFDEKIR                    | P59325 | 0          | N-term +28.03 Da, K +28.03 Da,              | 7804.250977 | 3 | 823.8099976 | 824.1499651 |
| MRPLDAVELAEPEEVEVLEPEEDFEQFLPVIHEMR      | Q9CQL7 | 0.02520661 | N-term +28.03 Da,                           | 7825.441895 | 4 | 1077.790039 | 1077.28791  |
| TTTKYFVSSGSVTVNADSSVQLLAEAEVTLDMMLDLGAAR | Q9D3D9 | 0          | N-term +28.03 Da, K +28.03 Da,              | 7870.797363 | 3 | 1373.369995 | 1372.706753 |
| TKYFVSSGSVTVNADSSVQLLAEAEVTLDMMLDLGAAR   | Q9D3D9 | 0          | N-term +28.03 Da, K +28.03 Da,              | 7871.074219 | 3 | 1306.01001  | 1305.341634 |
| FVSSGSVTVNADSSVQLLAEAEVTLDMMLDLGAAR      | Q9D3D9 | 0          | N-term +28.03 Da,                           | 7877.224609 | 3 | 1165.599976 | 1165.262543 |
| EEVEGSLLLGSVQGYMEQASKTVQDALSSVQESDIAVVAR | P33622 | 0          | N-term +28.03 Da, K +28.03 Da,              | 7881.336426 | 3 | 1427.390015 | 1427.059856 |
| NVWVFLATSGT                              | Q9CQN6 | 0.04325397 | N-term +28.03 Da,                           | 7882.435059 | 2 | 611.3256836 | 611.8269663 |
| EFFSYLHLPK                               | Q8C7U1 | 0.02556701 | N-term +28.03 Da, K +28.03 Da,              | 7930.563965 | 2 | 668.3699951 | 668.868634  |
| KKYLDTK                                  | Q9D5R4 | 0.04659358 | N-term +28.03 Da, K +28.03 Da,              | 7930.639648 | 2 | 505.3305359 | 504.3286128 |
| RYRRKLKKGK                               | Q8BGN9 | 0.03250711 | N-term +28.03 Da, K +28.03 Da,              | 8029.418457 | 2 | 818.5467529 | 818.5484966 |
| EEVEGSLLLGSVQGYMEQASKTVQDALSSVQESDIAVVAR | P33622 | 0          | N-term +28.03 Da, K +28.03 Da,              | 8170.607422 | 4 | 1070.800049 | 1070.546711 |
| FVSSGSVTVNADSSVQLLAEAEVTLDMMLDLGAAR      | Q9D3D9 | 0          | N-term +28.03 Da,                           | 8171.755859 | 3 | 1165.599976 | 1165.262543 |
| EEVEGSLLLGSVQGYMEQASKTVQDALSSVQESDIAVVAR | P33622 | 0          | N-term +28.03 Da, K +28.03 Da,              | 8175.286621 | 3 | 1427.72998  | 1427.059856 |
| SVTNADSSVQLLAEAEVTLDMMLDLGAAR            | Q9D3D9 | 0          | N-term +28.03 Da,                           | 8175.648438 | 3 | 1006.52002  | 1006.188426 |
| EEEDKKEDVGTVVIGIDLTTYSYCVGVFKNGR         | P20029 | 0.00158479 | N-term +28.03 Da, K +28.03 Da, C +57.02 Da, | 8192.576172 | 4 | 879.4453125 | 879.1999976 |
| RRAQKARLARIRAAKSGSAN                     | Q9Z0V2 | 0.02487562 | N-term +28.03 Da, K +28.03 Da,              | 8212.25293  | 2 | 1212.23999  | 1211.259304 |
| EGSGSSGTGEQKEDQKEEKQ                     | P38647 | 0          | N-term +14.02 Da, K +28.03 Da,              | 1014.109558 | 4 | 560.2700195 | 560.5238231 |
| PPPPEDDENKEKR                            | Q9WTX5 | 0          | N-term +14.02 Da, K +28.03 Da,              | 1091.083618 | 4 | 406.4599915 | 406.7151309 |
| PAAAEKR                                  | Q80XD8 | 0.03539823 | N-term +14.02 Da, K +28.03 Da,              | 1139.311401 | 3 | 306.1746521 | 306.1802075 |
| HDPVANVR                                 | Q8C0Y0 | 0.048      | N-term +14.02 Da,                           | 1703.529297 | 2 | 463.7600098 | 462.7566395 |
| TMVVHEKQDDLKGGKNEESTKTGNAGSR             | P08228 | 0          | N-term +14.02 Da, K +28.03 Da,              | 1798.30542  | 4 | 762.3900146 | 762.3872643 |
| TMVVHEKQDDLKGGKNEESTKTGNAGSR             | P08228 | 0.04237288 | N-term +14.02 Da, K +28.03 Da,              | 1847.430664 | 4 | 762.6300049 | 762.3872643 |

|                                    |         |            |                                            |             |   |             |             |
|------------------------------------|---------|------------|--------------------------------------------|-------------|---|-------------|-------------|
| SVDMTCEGCAEAVSR                    | O08997  | 0          | N-term +14.02 Da, C +57.02 Da,             | 1886.024658 | 2 | 844.3400269 | 844.8579808 |
| ELEAELEDER                         | Q61879  | 0.04958678 | N-term +14.02 Da,                          | 2368.193604 | 2 | 625.3099976 | 625.3014728 |
| ENYGELADCCTKQEPER                  | P07724  | 0          | N-term +14.02 Da, K +28.03 Da,C +57.02 Da, | 2383.652344 | 3 | 714.9799805 | 715.3192894 |
| SQSSDTEQPSPTSGGGKVA AVQPPEEGPSR    | Q88BGD9 | 0          | N-term +14.02 Da, K +28.03 Da,             | 2465.746094 | 3 | 1004.47998  | 1004.823352 |
| EQAGGDATENFEDVGHSTDR               | P56395  | 0          | N-term +14.02 Da,                          | 2525.176025 | 3 | 741.3200073 | 741.6580162 |
| EVKCDMEVSCPEGYTCCR                 | P28798  | 0          | N-term +14.02 Da, K +28.03 Da,C +57.02 Da, | 2915.73877  | 2 | 1163.459961 | 1162.977977 |
| ALTGETSGSGKSSFINTLR                | Q3UED7  | 0.04918033 | N-term +14.02 Da, K +28.03 Da,             | 2942.305176 | 3 | 628.3499756 | 628.6793629 |
| LQELQGR LSPVAEEFR                  | Q00623  | 0          | N-term +14.02 Da,                          | 2958.391846 | 2 | 945.5300293 | 945.0181156 |
| LIFAGKQLEDGR                       | P0CG49  | 0          | N-term +14.02 Da, K +28.03 Da,             | 2974.64502  | 3 | 464.269989  | 464.6066979 |
| ANLEKAQSELSGA ADEAAR               | Q9D3D9  | 0          | N-term +14.02 Da, K +28.03 Da,             | 2978.818359 | 3 | 659         | 659.3412989 |
| IHTGKPYVCSECGKAFSCR                | E9Q5X9  | 0.01923077 | N-term +14.02 Da, K +28.03 Da,C +57.02 Da, | 3106.066162 | 2 | 1230.569946 | 1230.087564 |
| FAKLCEEHGILR                       | P11589  | 0.03448276 | N-term +14.02 Da, K +28.03 Da,C +57.02 Da, | 3138.104004 | 3 | 506.6099854 | 506.6150875 |
| LAKVDATEESDLAQYGV R                | P09103  | 0          | N-term +14.02 Da, K +28.03 Da,             | 3199.408447 | 3 | 713.039978  | 713.3761207 |
| IQLVEEELDR                         | P21107  | 0.04724409 | N-term +14.02 Da,                          | 3331.050781 | 2 | 630.3400269 | 630.8458499 |
| LIGDAAKNQVAMNPQNTVFD ACR           | P16627  | 0          | N-term +14.02 Da, K +28.03 Da,             | 3435.827393 | 4 | 644.0999756 | 644.3522294 |
| VPTQPTSGPVPTTQIQEASAEHPPAVAPR      | Q3U422  | 0          | N-term +14.02 Da,                          | 3476.875732 | 3 | 993.8499756 | 994.1894173 |
| ELSKTYIIGELHPDDR                   | P56395  | 0          | N-term +14.02 Da, K +28.03 Da,             | 3487.417969 | 4 | 483.2600098 | 483.5125291 |
| LAKVDATEESDLAQYGV R                | P09103  | 0          | N-term +14.02 Da, K +28.03 Da,             | 3494.175537 | 2 | 1069.050049 | 1069.560543 |
| VPTQPTSGPVPTTQIQEASAEHPPAVAPR      | Q3U422  | 0          | N-term +14.02 Da,                          | 3497.997559 | 3 | 994.1900024 | 994.1894173 |
| QASGGPVDIGPEYQQDLDR                | P97450  | 0          | N-term +14.02 Da,                          | 3583.567139 | 2 | 1031        | 1031.497943 |
| VFDKDGNGYISAAELR                   | P62204  | 0          | N-term +14.02 Da, K +28.03 Da,             | 3584.041016 | 3 | 600.6400146 | 600.6494034 |
| IQARQFQDAGHFDAENIKKKQ EALVAR       | P16546  | 0          | N-term +14.02 Da, K +28.03 Da,             | 3587.277588 | 3 | 1071.920044 | 1071.594889 |
| LQELDAASKVTEQEW R                  | Q6IRU5  | 0          | N-term +14.02 Da, K +28.03 Da,             | 3616.690674 | 3 | 649.6699829 | 650.0110012 |
| HVGDLGNVTAGKDG VANVSIEDR           | P08228  | 0          | N-term +14.02 Da, K +28.03 Da,             | 3666.990479 | 3 | 789.7399902 | 790.0803672 |
| NVLSGGTTMYPGIADR                   | P62737  | 0          | N-term +14.02 Da,                          | 3700.334717 | 2 | 834.4299927 | 834.9248377 |
| NPEISHMLNNDIMR                     | Q8R317  | 0.02803738 | N-term +14.02 Da,                          | 3709.9021   | 2 | 898.9400024 | 899.4428716 |
| HIPTSAPVYQQPQQQMTSSYGGYKEPAAPVSIQR | Q61792  | 0          | N-term +14.02 Da, K +28.03 Da,             | 3713.461182 | 4 | 979.9899902 | 980.2467888 |
| IADQCPSLAIQENANALAR                | Q91Y97  | 0          | N-term +14.02 Da, C +57.02 Da,             | 3736.985596 | 2 | 1079.550049 | 1080.049819 |
| SIEALLEAGQAQDTQASHAEANQQQTR        | Q99PL5  | 0          | N-term +14.02 Da,                          | 3789.880859 | 3 | 971.1400146 | 971.4762865 |
| IRQNYSTEVEAAVNR                    | P29391  | 0.02857143 | N-term +14.02 Da,                          | 3871.20166  | 2 | 884.460022  | 883.9633404 |
| TCLLNETGDEPFQYKN                   | P15105  | 0          | N-term +14.02 Da, K +28.03 Da,C +57.02 Da, | 3956.107178 | 2 | 986.960022  | 987.4698074 |
| NNPLSVTLREVELR                     | P15119  | 0.04651163 | N-term +14.02 Da,                          | 3999.234619 | 3 | 552.6500244 | 552.9862381 |
| IQEITEQLDITTS EYEKEKLNER           | P63038  | 0          | N-term +14.02 Da, K +28.03 Da,             | 4025.609619 | 4 | 721.1300049 | 721.3815449 |
| SLGEYLFER                          | P29391  | 0.0483871  | N-term +14.02 Da,                          | 4035.544922 | 2 | 571.2999878 | 565.7981707 |
| PAPATTF AHL DATTVLSR               | P56480  | 0          | N-term +14.02 Da,                          | 4061.080566 | 2 | 943.0100098 | 943.5126661 |
| PYLPNVDEEVQIGHVPR                  | P11276  | 0          | N-term +14.02 Da,                          | 4066.208252 | 3 | 660.3400269 | 660.3513576 |
| ELEELSLEAQGIR                      | Q05D44  | 0          | N-term +14.02 Da,                          | 4107.098145 | 2 | 751.9000244 | 752.4068037 |
| RVAGPQPAQTGAPQGS LGEYLFER          | P29391  | 0          | N-term +14.02 Da,                          | 4130.235352 | 3 | 849.1099854 | 849.4435283 |
| SLFDKDG DGTITTKELGTVMR             | P62204  | 0          | N-term +14.02 Da, K +28.03 Da,             | 4141.759277 | 3 | 786.0800171 | 786.4192209 |
| HVGDLGNVTAGKDG VANVSIEDR           | P08228  | 0          | N-term +14.02 Da, K +28.03 Da,             | 4158.141602 | 2 | 1185.599976 | 1184.616913 |

|                                         |        |            |                                             |             |   |             |             |
|-----------------------------------------|--------|------------|---------------------------------------------|-------------|---|-------------|-------------|
| PEANEALERGLL                            | Q9QYB1 | 0.04615385 | N-term +14.02 Da,                           | 4159.446289 | 2 | 664.3753662 | 664.864574  |
| MTSQIRQNYSTEVEAAVNR                     | P29391 | 0          | N-term +14.02 Da,                           | 4192.51709  | 3 | 739.0300293 | 738.704243  |
| MGLEDERKMLTGSQDPKEEEEEELVDPLTTVR        | P99028 | 0          | N-term +14.02 Da, K +28.03 Da,              | 4200.012695 | 3 | 1235.930054 | 1235.946444 |
| IGPVEVENALAEHPAVAESAVVSSPKDR            | Q91VA0 | 0          | N-term +14.02 Da, K +28.03 Da,              | 4207.246582 | 4 | 758.4000244 | 758.6490812 |
| ENLATVEGNFASIDAR                        | Q99KJ8 | 0          | N-term +14.02 Da,                           | 4256.10498  | 2 | 861.9199829 | 862.4366243 |
| AAASDVLELTDENFESR                       | P27773 | 0          | N-term +14.02 Da,                           | 4272.779297 | 2 | 943.4400024 | 942.4552119 |
| NFNVEKINGEWHTIILASDKR                   | B5X0G2 | 0          | N-term +14.02 Da, K +28.03 Da,              | 4274.141602 | 4 | 639.8499756 | 640.1038457 |
| SLFDKDGDTITTKELGTVMR                    | P62204 | 0          | N-term +14.02 Da, K +28.03 Da,              | 4282.303711 | 4 | 590.0599976 | 590.0662348 |
| VLNKLGGVVEFNIDLPNKVC                    | O08997 | 0.03508772 | N-term +14.02 Da, K +28.03 Da, C +57.02 Da, | 4287.638672 | 4 | 590.0900269 | 590.3461496 |
| PVPEDKYALVDQEEKEDVKSCAEFVSGSQLR         | Q9DCX2 | 0          | N-term +14.02 Da, K +28.03 Da, C +57.02 Da, | 4316.964355 | 4 | 939.2199707 | 939.4778142 |
| IPSAVGYQPTLATDMGMTMQR                   | P56480 | 0          | N-term +14.02 Da,                           | 4349.438477 | 3 | 761.7000122 | 761.7101176 |
| IPSAVGYQPTLATDMGMTMQR                   | P56480 | 0          | N-term +14.02 Da,                           | 4352.123535 | 2 | 1141.560059 | 1142.061538 |
| AFNKELDPVQKLFVDKIR                      | P97450 | 0          | N-term +14.02 Da, K +28.03 Da,              | 4375.683105 | 3 | 755.1300049 | 754.452524  |
| PAQLGAQQLEADAQQWEFGKR                   | P58871 | 0          | N-term +14.02 Da, K +28.03 Da,              | 4464.178711 | 3 | 782.0700073 | 782.4064141 |
| SFPTLKFFPASADR                          | P09103 | 0.03571429 | N-term +14.02 Da, K +28.03 Da,              | 4485.015137 | 3 | 543.2999878 | 543.6330243 |
| NFNVEKINGEWHTIILASDKR                   | B5X0G2 | 0          | N-term +14.02 Da, K +28.03 Da,              | 4526.570313 | 4 | 639.8499756 | 640.1038457 |
| VAGPQPAQTGAPQGSGLGYLFR                  | P29391 | 0          | N-term +14.02 Da,                           | 4623.281738 | 2 | 1195.109985 | 1195.611099 |
| EPMQTGIKAVDSLPIGR                       | Q03265 | 0.046875   | N-term +14.02 Da, K +28.03 Da,              | 4642.083496 | 3 | 652.7000122 | 652.7047433 |
| QLLLESQSQLDEAKSEAQKQSDDELALVR           | Q99PL5 | 0          | N-term +14.02 Da, K +28.03 Da,              | 4675.355957 | 3 | 1076.910034 | 1077.249002 |
| LEAELAAHEPAIQGLVDTGKKLSDNTIGQEEIQQR     | P16546 | 0          | N-term +14.02 Da, K +28.03 Da,              | 4720.247559 | 4 | 998.0200195 | 998.2761725 |
| DLFSDGHSEFLKAASNLR                      | P27773 | 0          | N-term +14.02 Da, K +28.03 Da,              | 4743.655273 | 3 | 684.6900024 | 684.6901506 |
| PEFLEDPSVLTKDKLSELVANNVTLPAGEQR         | Q61029 | 0          | N-term +14.02 Da, K +28.03 Da,              | 4752.227051 | 3 | 1213.329956 | 1213.673312 |
| PPPQAVSTGTPQSPAVAAAAATTTATTTTTSGGHPLFLR | P54728 | 0          | N-term +14.02 Da,                           | 4787.951172 | 3 | 1293.329956 | 1293.66929  |
| PPPQAVSTGTPQSPAVAAAAATTTATTTTTSGGHPLFLR | P54728 | 0          | N-term +14.02 Da,                           | 4789.772949 | 4 | 970.25      | 970.5037864 |
| PPPQAVSTGTPQSPAVAAAAATTTATTTTTSGGHPLFLR | P54728 | 0          | N-term +14.02 Da,                           | 4792.024414 | 3 | 1293.670044 | 1293.66929  |
| TEEEFKKFISDKDASVVGFFR                   | P27773 | 0          | N-term +14.02 Da, K +28.03 Da,              | 4792.579102 | 4 | 645.5999756 | 645.8494169 |
| TEEEFKKFISDKDASVVGFFR                   | P27773 | 0          | N-term +14.02 Da, K +28.03 Da,              | 4815.130859 | 4 | 645.8499756 | 645.8494169 |
| PGLLLLGDEAPNFEANTTIGR                   | O08709 | 0          | N-term +14.02 Da,                           | 4821.092285 | 2 | 1079.560059 | 1080.06071  |
| EAPNFEANTTIGR                           | O08709 | 0          | N-term +14.02 Da,                           | 4827.60791  | 2 | 718.8599854 | 718.862563  |
| SSLSSAQADFNQLAELDR                      | P16546 | 0          | N-term +14.02 Da,                           | 4865.562988 | 2 | 984.4799805 | 984.9872105 |
| PGLLLLGDEAPNFEANTTIGR                   | O08709 | 0          | N-term +14.02 Da,                           | 4900.350098 | 3 | 720.0300293 | 720.376232  |
| EAPNFEANTTIGR                           | O08709 | 0          | N-term +14.02 Da,                           | 4996.993652 | 2 | 719.3699951 | 718.862563  |
| NFNVEKINGEWYTIILASDKR                   | A2AV72 | 0.02752294 | N-term +14.02 Da, K +28.03 Da,              | 5014.340332 | 4 | 646.3499756 | 646.6049499 |
| PGLLLLGDEAPNFEANTTIGR                   | O08709 | 0.04761905 | N-term +14.02 Da,                           | 5030.071289 | 2 | 1079.550049 | 1080.06071  |
| QFTSAGESFNKLVSGKLR                      | Q9CPY7 | 0          | N-term +14.02 Da, K +28.03 Da,              | 5038.755859 | 3 | 681.0499878 | 681.3862907 |
| LNQDQLDAVSKYQEVNTNLEFAKELQR             | Q60865 | 0          | N-term +14.02 Da, K +28.03 Da,              | 5154.918457 | 4 | 817.1699829 | 817.4321005 |
| KGMNTLVGYDLVPEPKIIDAALR                 | P12787 | 0          | N-term +14.02 Da, K +28.03 Da,              | 5193.781738 | 4 | 647.1199951 | 647.3739017 |
| SQTEEDCTEELFDLHAR                       | P99028 | 0          | N-term +14.02 Da, C +57.02 Da,              | 5266.691406 | 2 | 1122.51001  | 1122.499826 |
| LTGCLAEGEPEVTDQLEWQSNQPWEQALNR          | P08226 | 0.05       | N-term +14.02 Da, C +57.02 Da,              | 5274.84082  | 3 | 1172.890015 | 1172.556389 |
| SSILLDVKPWDEDTMTKLEECVR                 | O70251 | 0          | N-term +14.02 Da, K +28.03 Da, C +57.02 Da, | 5284.125488 | 3 | 984.4899902 | 984.8296215 |

|                                      |         |            |                                            |             |   |             |             |
|--------------------------------------|---------|------------|--------------------------------------------|-------------|---|-------------|-------------|
| AIAELGIYPAVDPLDSTSR                  | P56480  | 0.03478261 | N-term +14.02 Da,                          | 5292.871582 | 2 | 1002.52002  | 1003.036172 |
| ASDPFADASKGDDLLPAGTEDYIHIR           | J3QPZ8  | 0          | N-term +14.02 Da, K +28.03 Da,             | 5394.233398 | 4 | 705.5999756 | 705.6028707 |
| LITLEEEMTKYKPEDELTAEKITEF            | P09103  | 0          | N-term +14.02 Da, K +28.03 Da,             | 5411.522949 | 4 | 797.6699829 | 797.9200745 |
| PLVPPQLTIKDFYMTDSISR                 | Q91VD9  | 0.02777778 | N-term +14.02 Da, K +28.03 Da,             | 5454.97168  | 3 | 789.0999756 | 789.4328012 |
| PTLNELGISTPEELGLDKV                  | P12787  | 0          | N-term +14.02 Da, K +28.03 Da,             | 5537.220215 | 2 | 1035.060059 | 1035.572587 |
| GMEATLEQHLLEDTMKNPSIVGLVLTDSQGLNLGCR | G3UW70  | 0          | N-term +14.02 Da, K +28.03 Da,C +57.02 Da, | 5538.699707 | 3 | 1307.280029 | 1306.967079 |
| VEQIAAIAQELNELDYDHSNVNTR             | P57780  | 0          | N-term +14.02 Da,                          | 5670.808105 | 3 | 974.4699707 | 974.8141279 |
| DFEQEMVTAASSSLERSYELPDGQVITIGNER     | Q8BFZ3  | 0          | N-term +14.02 Da,                          | 5797.390625 | 3 | 1220.920044 | 1220.589648 |
| DFEQEMVTAASSSLERSYELPDGQVITIGNER     | Q8BFZ3  | 0.04878049 | N-term +14.02 Da,                          | 5798.274414 | 3 | 1220.579956 | 1220.589648 |
| VQSMLSNPDLMRQLIMANPQMQLIQR           | Q8R317  | 0.03636364 | N-term +14.02 Da,                          | 5805.137207 | 3 | 1067.22998  | 1067.557296 |
| VNPTVFFDITADDEPLGR                   | P17742  | 0          | N-term +14.02 Da,                          | 5821.175781 | 2 | 1011.5      | 1012.012697 |
| MTDQEAIQDLWQWR                       | Q61937  | 0          | N-term +14.02 Da,                          | 5823.893066 | 2 | 918.4400024 | 918.9410192 |
| PSLLFSDVYQEMPAQLR                    | P50136  | 0          | N-term +14.02 Da,                          | 5853.70459  | 2 | 1005.52002  | 1006.02201  |
| PPQLHNGLDFAKVIQGSLSLDPQAVR           | Q9Z2V4  | 0          | N-term +14.02 Da, K +28.03 Da,             | 5855.299805 | 4 | 733.6500244 | 733.9067921 |
| TILAETEGMLKDLQKSVEEER                | Q99PL5  | 0          | N-term +14.02 Da, K +28.03 Da,             | 5867.720703 | 3 | 874.1300049 | 874.4632671 |
| PPQLHNGLDFAKVIQGSLSLDPQAVR           | Q9Z2V4  | 0          | N-term +14.02 Da, K +28.03 Da,             | 5873.117188 | 3 | 978.5300293 | 978.2066307 |
| PPQLHNGLDFAKVIQGSLSLDPQAVR           | Q9Z2V4  | 0          | N-term +14.02 Da, K +28.03 Da,             | 5887.312012 | 4 | 733.6500244 | 733.9067921 |
| LKDINKVAEDLESEGLMAEEVQAVQQQEVYGMPR   | P16546  | 0          | N-term +14.02 Da, K +28.03 Da,             | 5999.03125  | 4 | 998.5100098 | 998.5104886 |
| TVEPMGEMFNKALVQQLEQFR                | P06728  | 0          | N-term +14.02 Da, K +28.03 Da,             | 6181.72998  | 3 | 847.0999756 | 847.4398502 |
| IEIESFFEGEDFSETLTR                   | P20029  | 0          | N-term +14.02 Da,                          | 6186.950195 | 2 | 1083.01001  | 1083.51801  |
| NLGAPVAGTCYQAEWDDYVPKLYEQLSGK        | P70296  | 0.03603604 | N-term +14.02 Da, K +28.03 Da,C +57.02 Da, | 6223.352539 | 3 | 1115.880005 | 1115.888528 |
| EADIDGDGQVNYEEFVQMMTAK               | P62204  | 0          | N-term +14.02 Da, K +28.03 Da,             | 6290.895996 | 2 | 1267.569946 | 1268.075041 |
| EADIDGDGQVNYEEFVQMMTAK               | P62204  | 0          | N-term +14.02 Da, K +28.03 Da,             | 6353.76709  | 2 | 1267.560059 | 1268.075041 |
| ETDTDADQVIASFKVLAGDKNFITAEELR        | P57780  | 0          | N-term +14.02 Da, K +28.03 Da,             | 6403.826172 | 4 | 868.4500122 | 868.7030484 |
| EADIDGDGQVNYEEFVQMMTAK               | P62204  | 0          | N-term +14.02 Da, K +28.03 Da,             | 6412.195801 | 2 | 1267.560059 | 1268.075041 |
| PSSISWDGLDPGKLYTLVLTDPDAPSR          | P70296  | 0          | N-term +14.02 Da, K +28.03 Da,             | 6422.796387 | 3 | 982.1699829 | 982.515019  |
| LPCVEDYLSAILNR                       | P07724  | 0.04273504 | N-term +14.02 Da, C +57.02 Da,             | 6505.301758 | 3 | 560.289978  | 560.632696  |
| ILGPGAGEMVNEAALALEYGASCEDIAR         | O08749  | 0          | N-term +14.02 Da, C +57.02 Da,             | 6584.454102 | 3 | 965.1400146 | 965.473949  |
| ADGNGTIDFPEFLTMAR                    | P62204  | 0          | N-term +14.02 Da,                          | 6723.560547 | 2 | 1001.48999  | 1001.974202 |
| MPFVELETNLPASR                       | O35215  | 0          | N-term +14.02 Da,                          | 6785.123535 | 2 | 810.4099731 | 810.9268487 |
| PLDFTFVCPTEIIAFSDHAEDFR              | Q61171  | 0.01941748 | N-term +14.02 Da, C +57.02 Da,             | 6828.778809 | 3 | 915.0999756 | 915.4406849 |
| VGDPLDLVALAEQVQKADEFIR               | Q5EBG8  | 0          | N-term +14.02 Da, K +28.03 Da,             | 7059.834961 | 3 | 824.1199951 | 824.4566634 |
| VVGEDTKAQLLGGVDEALNLLQDMQSR          | VQ8C7G5 | 0          | N-term +14.02 Da, K +28.03 Da,             | 7187.763184 | 3 | 981.8499756 | 982.1867966 |
| VVDNPIYLSDMGAALTGAESHELQDVLEETNILKR  | Q8CGK3  | 0          | N-term +14.02 Da, K +28.03 Da,             | 7312.523438 | 4 | 972         | 972.2542798 |
| AHCLSEVEHDTMPADLPAIAADFVEDQEVCKN     | P07724  | 0          | N-term +14.02 Da, K +28.03 Da,C +57.02 Da, | 7335.813477 | 3 | 1220.23999  | 1219.562047 |
| CEYLMELMTPAACPEPPPEAPSDGDHDEL        | O08795  | 0          | N-term +14.02 Da, C +57.02 Da,             | 7341.467285 | 3 | 1096.800049 | 1096.801186 |
| MPFVELETNLPASR                       | O35215  | 0          | N-term +14.02 Da,                          | 7354.569824 | 2 | 810.9199829 | 810.9268487 |
| AATAPLLEAVDNLSAFASNPEFSSVPAQISPEGR   | P26039  | 0          | N-term +14.02 Da,                          | 7452.001953 | 3 | 1158.25     | 1158.591428 |
| DVTFSPATIEELIKF                      | Q9CXI5  | 0          | N-term +14.02 Da, K +28.03 Da,             | 7467.36377  | 2 | 942         | 942.5061841 |
| SLGQNPTAEALQDMINEVDADGNGTIDFPEFLTMAR | P62204  | 0          | N-term +14.02 Da,                          | 7522.15918  | 3 | 1363.290039 | 1362.964169 |



|                                      |        |            |                                |             |   |             |             |
|--------------------------------------|--------|------------|--------------------------------|-------------|---|-------------|-------------|
| ADQLTEEQIAEFKEAFSLFDKDGDTITTKELGTVMR | P62204 | 0.02830189 | N-term +14.02 Da, K +28.03 Da, | 7561.67041  | 3 | 1412.699951 | 1412.387461 |
| ADQLTEEQIAEFKEAFSLFDKDGDTITTKELGTVMR | P62204 | 0          | N-term +14.02 Da, K +28.03 Da, | 7575.447754 | 3 | 1412.030029 | 1412.387461 |
| FVSSGSVTVNADSSVQLLAEEAVTLDMLDLGAAR   | Q9D3D9 | 0.00980392 | N-term +14.02 Da,              | 8168.755371 | 3 | 1161.26001  | 1161.595962 |
| ADAEKAQEQQQR                         | Q99PL5 | 0          | K +28.03 Da,                   | 956.6789551 | 3 | 477.2393494 | 477.2391858 |
| ADAEKAQEQQQR                         | Q99PL5 | 0          | K +28.03 Da,                   | 987.2800293 | 3 | 477.2392273 | 477.2391858 |
| EEAEEKSEKQ                           | P34022 | 0.04066543 | K +28.03 Da,                   | 987.9066162 | 3 | 464.5599976 | 464.5560695 |
| EGSGSSGTGEQKEDQKEEKQ                 | P38647 | 0          | K +28.03 Da,                   | 1011.434448 | 4 | 556.2600098 | 556.2659336 |
| EGSGSSGTGEQKEDQKEEKQ                 | P38647 | 0          | K +28.03 Da,                   | 1014.394226 | 3 | 741.6900024 | 741.3521527 |
| SGAQKAETAANR                         | P57780 | 0          | K +28.03 Da,                   | 1030.292358 | 3 | 411.2200012 | 411.217833  |
| SGAQKAETAANR                         | P57780 | 0          | K +28.03 Da,                   | 1038.46521  | 3 | 411.5499878 | 411.217833  |
| PGPATATAR                            | Q3UFM5 | 0.00527704 |                                | 1042.239014 | 2 | 421.230011  | 421.2299614 |
| TGSQGQCTQVR                          | P62858 | 0          | C +57.02 Da,                   | 1049.102295 | 2 | 611.2860718 | 611.2856716 |
| TGSESSQTGASATSGR                     | Q8BGD9 | 0          |                                | 1050.404663 | 2 | 742.3347778 | 742.334603  |
| SAPKEDDASASTSQSSR                    | Q8BGD9 | 0          | K +28.03 Da,                   | 1067.803223 | 3 | 584.6066284 | 584.6062637 |
| SSEDEKPGDESSQQTGH                    | Q5XG73 | 0          | K +28.03 Da,                   | 1073.741699 | 3 | 615.9299927 | 615.9292953 |
| EGSGSSGTGEQKEDQKEEKQ                 | P38647 | 0.01082251 | K +28.03 Da,                   | 1074.810913 | 3 | 742.0100098 | 741.3521527 |
| TAEEDADPKR                           | Q9D0J8 | 0          | K +28.03 Da,                   | 1075.637085 | 3 | 473.2196655 | 473.2195688 |
| TAEEDADPKR                           | Q9D0J8 | 0.00524934 | K +28.03 Da,                   | 1082.830811 | 2 | 709.3300171 | 709.3257149 |
| SNGEIQKSSR                           | P70441 | 0.00873362 | K +28.03 Da,                   | 1090.230469 | 3 | 421.8763733 | 421.5493601 |
| EEDEEEAAR                            | P19973 | 0.00471698 |                                | 1095.607544 | 2 | 539.2200928 | 539.2201865 |
| SAPKEDDASASTSQSSR                    | Q8BGD9 | 0          | K +28.03 Da,                   | 1101.215454 | 3 | 584.6099854 | 584.6062637 |
| EAHKSEIAHR                           | P07724 | 0.00526316 | K +28.03 Da,                   | 1130.989136 | 3 | 402.8789673 | 402.5510347 |
| TAEEDADPKR                           | Q9D0J8 | 0          | K +28.03 Da,                   | 1132.727661 | 3 | 473.219635  | 473.2195688 |
| TAEEDADPKR                           | Q9D0J8 | 0          | K +28.03 Da,                   | 1133.523438 | 2 | 709.8300171 | 709.3257149 |
| TAEEDADPKR                           | Q9D0J8 | 0          | K +28.03 Da,                   | 1164.713501 | 3 | 473.2199097 | 473.2195688 |
| TAEEDADPKR                           | Q9D0J8 | 0          | K +28.03 Da,                   | 1164.78894  | 2 | 709.3256226 | 709.3257149 |
| EAHKSEIAHR                           | P07724 | 0.00898876 | K +28.03 Da,                   | 1165.034424 | 3 | 402.8789673 | 402.5510347 |
| NDDDEEEAAR                           | D3Z6I7 | 0          |                                | 1173.252319 | 2 | 582.7177734 | 582.2260005 |
| EAHKSEIAHR                           | P07724 | 0.01902748 | K +28.03 Da,                   | 1173.840332 | 4 | 302.4100037 | 302.1650951 |
| TAEEDADPKR                           | Q9D0J8 | 0          | K +28.03 Da,                   | 1196.855347 | 3 | 473.2194519 | 473.2195688 |
| TAEEDADPKR                           | Q9D0J8 | 0          | K +28.03 Da,                   | 1197.460205 | 2 | 709.3300171 | 709.3257149 |
| PEPAKSAPAPK                          | P10853 | 0          | K +28.03 Da,                   | 1199.616333 | 3 | 383.5605469 | 383.5606481 |
| ADAEEEAATR                           | Q88487 | 0.00514139 |                                | 1217.275024 | 2 | 531.7393799 | 531.738546  |
| DGETLTTKGK                           | P46656 | 0.00680272 | K +28.03 Da,                   | 1223.378296 | 2 | 553.3099976 | 553.3086068 |
| PGDGGSLGSGAR                         | Q4VAA2 | 0          |                                | 1235.707764 | 2 | 516.25      | 515.7492475 |
| SQCGDVMR                             | Q60605 | 0.0391791  | C +57.02 Da,                   | 1285.171509 | 2 | 476.7000122 | 476.7023967 |
| TDDEVVQR                             | P08113 | 0.00683371 |                                | 1307.381836 | 2 | 481.2325745 | 481.232899  |
| AEETETAAPPPDKDR                      | Q0VGB7 | 0          | K +28.03 Da,                   | 1343.117188 | 3 | 552.5999756 | 552.2688113 |
| GVSNAGQRDR                           | Q6GQV0 | 0.0311284  |                                | 1345.080933 | 2 | 530.7600098 | 530.2681386 |
| LGKEVQAAQAR                          | P08226 | 0.02459016 | K +28.03 Da,                   | 1390.161621 | 3 | 400.2347717 | 400.2349351 |

|                             |        |            |              |             |   |             |             |
|-----------------------------|--------|------------|--------------|-------------|---|-------------|-------------|
| SALVDEKDQDSK                | Q80Y14 | 0          | K +28.03 Da, | 1391.555176 | 3 | 464.2402039 | 464.2401925 |
| SALVDEKDQDSK                | Q80Y14 | 0          | K +28.03 Da, | 1395.475952 | 2 | 695.8575439 | 695.8566505 |
| LGKEVQAAQAR                 | P08226 | 0.03461538 | K +28.03 Da, | 1397.748779 | 2 | 599.8484497 | 599.8487644 |
| LEEVDGNQAR                  | P08226 | 0.00511509 |              | 1406.031372 | 2 | 508.2600098 | 508.2619906 |
| TGEPPEQEAISR                | Q62418 | 0          |              | 1418.365601 | 2 | 601.786377  | 601.7860277 |
| ASGDKEAEGAPQEAGKR           | D3Z6I7 | 0          | K +28.03 Da, | 1446.278687 | 4 | 464.9899902 | 464.7431678 |
| KMKDTSDEEIR                 | P62204 | 0          | K +28.03 Da, | 1491.837524 | 3 | 513.2600098 | 512.9239872 |
| VAEDEDDEDVDTKKKQTEEDD       | P26350 | 0          | K +28.03 Da, | 1494.960449 | 3 | 841.7000122 | 841.7083315 |
| VAEDEDDEDVDTKKKQTEEDD       | P26350 | 0.00502513 | K +28.03 Da, | 1498.849976 | 4 | 631.7800293 | 631.5330678 |
| SKMEEQTQQIR                 | P08226 | 0.00470588 | K +28.03 Da, | 1524.249878 | 2 | 703.3600464 | 703.3588369 |
| VSIVRALEHLHSLKSLVIHR        | O09110 | 0.04954128 | K +28.03 Da, | 1552.932007 | 3 | 741.7800293 | 741.446326  |
| DGEEAGAYDGPR                | P27773 | 0          |              | 1554.461792 | 2 | 618.7591553 | 618.7600101 |
| EDDKPETVIKR                 | Q9WTP7 | 0          | K +28.03 Da, | 1576.546753 | 3 | 462.5899963 | 462.5926772 |
| TQLAPHSEQMR                 | Q00623 | 0.004662   |              | 1586.521362 | 3 | 433.5499878 | 433.215435  |
| NTVELQAESGKR                | Q61074 | 0          | K +28.03 Da, | 1593.418457 | 2 | 680.3699951 | 680.3649765 |
| QKLQELQGR                   | Q00623 | 0.03125    | K +28.03 Da, | 1594.774048 | 2 | 564.3300171 | 564.3302073 |
| DGEEAGAYDGPR                | P27773 | 0          |              | 1650.789185 | 2 | 618.7600098 | 618.7600101 |
| QGQEQQAAKR                  | A2A7F4 | 0.02464066 | K +28.03 Da, | 1667.962646 | 2 | 585.8099976 | 586.3125463 |
| STEVEAAVNR                  | P29391 | 0.00900901 |              | 1671.610107 | 2 | 538.2700195 | 538.2725556 |
| STEVEAAVNR                  | P29391 | 0.00493827 |              | 1702.141113 | 2 | 538.2715454 | 538.2725556 |
| SGGNSEPAQPAVQQAPAR          | Q7TNL9 | 0          |              | 1767.584351 | 2 | 882.9400024 | 882.9348183 |
| TMVVHEKQDDLKGGNEESTKTGNAGSR | P08228 | 0          | K +28.03 Da, | 1780.361938 | 4 | 758.3800049 | 758.1293748 |
| CKALAPEYAK                  | P09103 | 0.03094778 | K +28.03 Da, | 1802.814819 | 2 | 603.8306274 | 603.8311943 |
| EDEEDEDPTETETSGER           | Q9D1F4 | 0          |              | 1813.11792  | 2 | 1113.920044 | 1113.419853 |
| VYVDAVKDSGR                 | Q00623 | 0.04243542 | K +28.03 Da, | 1829.630859 | 3 | 413.230011  | 412.8909457 |
| DGEEAGAYDGPR                | P27773 | 0          |              | 1835.329712 | 2 | 618.7599487 | 618.7600101 |
| KMKDTSDEEIR                 | P62204 | 0.0045977  | K +28.03 Da, | 1839.08606  | 3 | 513.2519531 | 512.9239872 |
| IPAGLENR                    | O35215 | 0.03155819 |              | 1881.894287 | 2 | 435.2461853 | 435.2456115 |
| EQEIAAVQAR                  | Q99PL5 | 0.00522193 |              | 1892.9104   | 2 | 557.7963867 | 557.7961977 |
| SLQEQADAAEER                | E9Q453 | 0          |              | 1901.521362 | 2 | 673.8121338 | 673.8127744 |
| LSQETALGR                   | Q02819 | 0.00484262 |              | 1909.140137 | 2 | 552.289978  | 552.2882057 |
| DGEEAGAYDGPR                | P27773 | 0          |              | 1946.359375 | 2 | 618.7607422 | 618.7600101 |
| DGEEAGAYDGPR                | P27773 | 0          |              | 1976.678101 | 2 | 618.7598877 | 618.7600101 |
| CDMDQFQCKSGH                | Q91ZX7 | 0          | K +28.03 Da, | 2006.619019 | 2 | 770.2870483 | 770.8025145 |
| DGEEAGAYDGPR                | P27773 | 0          |              | 2007.619019 | 2 | 618.7600098 | 618.7600101 |
| TSGRIVSGQDAQLGR             | D6RGT5 | 0.04074074 |              | 2037.112671 | 3 | 515.2800293 | 515.6095016 |
| SDAAPTVPQSAPR               | Q8BJW6 | 0.00480769 |              | 2054.621826 | 2 | 697.3599854 | 697.3571515 |
| AGELTEDEVER                 | P62270 | 0.00507614 |              | 2065.799561 | 2 | 624.293457  | 624.2911433 |
| DPNASPGDAGEQAIR             | Q64727 | 0          |              | 2077.512451 | 2 | 749.3499756 | 749.3500555 |
| LAPEYAAAATR                 | P27773 | 0          |              | 2200.585938 | 2 | 596.3045044 | 596.3038558 |

|                                |        |            |              |             |   |             |             |
|--------------------------------|--------|------------|--------------|-------------|---|-------------|-------------|
| LAPEYAAAATR                    | P27773 | 0          |              | 2202.451904 | 2 | 596.8099976 | 596.3038558 |
| LAPEYAAAATR                    | P27773 | 0          |              | 2205.872559 | 2 | 597.3099976 | 596.3038558 |
| NNFEGEITKEK                    | P09103 | 0.00529101 | K +28.03 Da, | 2220.220947 | 2 | 682.8599854 | 682.856453  |
| PDEEEEEEE                      | Q8BI84 | 0.03605313 |              | 2222.950439 | 2 | 568.210022  | 567.701493  |
| DGKLVSESSDVVSK                 | P11679 | 0.00478469 | K +28.03 Da, | 2244.121338 | 3 | 502.6099854 | 502.606764  |
| SEINVEGPPR                     | P18572 | 0.00869565 |              | 2245.474121 | 2 | 549.7941895 | 549.2829232 |
| EPDLSSDIKER                    | B5X0G2 | 0          | K +28.03 Da, | 2257.094238 | 3 | 439.5615845 | 439.5612658 |
| EPDLSSDIKER                    | B5X0G2 | 0          | K +28.03 Da, | 2287.645508 | 3 | 439.5610962 | 439.5612658 |
| ALLAGKDSSETGENIR               | P38647 | 0.00469484 | K +28.03 Da, | 2287.721191 | 3 | 534.289978  | 534.621296  |
| LLEFQNDRGGGR                   | P29391 | 0.03454894 |              | 2288.961426 | 3 | 435.5618591 | 435.5617111 |
| EPDLSSDIKER                    | B5X0G2 | 0          | K +28.03 Da, | 2291.987549 | 2 | 658.8400269 | 658.8382605 |
| NPGLTGSDDGTGDWGTGSPR           | E9PV24 | 0          |              | 2298.10498  | 2 | 910.3900146 | 910.3957237 |
| YSTEVEAAVNR                    | P29391 | 0          |              | 2314.456787 | 2 | 619.7999878 | 619.8042203 |
| GKIGGHGAEYGAEALER              | P01942 | 0.03448276 | K +28.03 Da, | 2315.121582 | 3 | 581.6400146 | 581.6321951 |
| LGPLVEQGR                      | P08226 | 0.0046729  |              | 2321.410645 | 2 | 484.7799988 | 484.7798186 |
| EVKCDMEVSCPEGYTCCR             | P28798 | 0          | C +57.02 Da, | 2329.43042  | 3 | 769.9899902 | 769.9772239 |
| TANLGAGAAQPLR                  | P08226 | 0          |              | 2336.983643 | 2 | 620.8499756 | 620.3438464 |
| SVDEGLLDSKR                    | A2AS89 | 0.02443992 | K +28.03 Da, | 2337.181885 | 2 | 623.8400269 | 623.8355204 |
| ENYGELADCCTKQEPER              | P07724 | 0          | K +28.03 Da, | 2378.858887 | 3 | 709.6446533 | 709.6421034 |
| NGYDCECLGGGR                   | Q9DAK9 | 0          | C +57.02 Da, | 2396.828369 | 2 | 680.2600098 | 679.266622  |
| DGKLVSESSDVVSK                 | P11679 | 0          | K +28.03 Da, | 2405.328369 | 2 | 753.4072266 | 753.4065078 |
| EQAEAEVASLNR                   | D3Z6I8 | 0          |              | 2406.772705 | 2 | 658.824585  | 658.8256844 |
| SQSSDTEQPSPTSGGGKVAAVQPPEEGPSR | Q8BGD9 | 0          | K +28.03 Da, | 2425.453369 | 3 | 999.4899902 | 999.1461662 |
| ETAADVASLNR                    | E9Q453 | 0          |              | 2426.747803 | 2 | 638.3099976 | 638.3124098 |
| ALLEADVAHQDR                   | P16546 | 0.03137255 |              | 2427.51709  | 2 | 705.3699951 | 704.862601  |
| QNYHQDAEAANR                   | P09528 | 0          |              | 2432.685059 | 2 | 765.8499756 | 765.3582145 |
| AVDPDSPAASGLR                  | P70441 | 0          |              | 2433.875977 | 2 | 692.8360596 | 692.838792  |
| SVDMTCEGCAEAVSR                | O08997 | 0          | C +57.02 Da, | 2442.066895 | 2 | 836.3400269 | 836.3422018 |
| SVDMTCEGCAEAVSR                | O08997 | 0          | C +57.02 Da, | 2445.614258 | 2 | 837.3400269 | 836.3422018 |
| SQSSDTEQPSPTSGGGKVAAVQPPEEGPSR | Q8BGD9 | 0          | K +28.03 Da, | 2456.237061 | 3 | 999.8200073 | 999.1461662 |
| GETGPAGPAGPIGPAGAR             | P11087 | 0.00875274 |              | 2461.821777 | 2 | 766.8900146 | 766.8944326 |
| AVDPDSPAASGLR                  | P70441 | 0          |              | 2464.852295 | 2 | 692.8400269 | 692.838792  |
| GETGPAGPAGPIGPAGAR             | P11087 | 0.03598485 |              | 2465.895508 | 2 | 767.8900146 | 766.8944326 |
| QNYHQDAEAANR                   | P09528 | 0          |              | 2508.160645 | 2 | 765.8499756 | 765.3582145 |
| EQAGGDATENFEDVGHSTDAR          | P56395 | 0          |              | 2511.474121 | 3 | 736.3200073 | 735.9808302 |
| EAEETQNSLQAECDAQYR             | Q99PL5 | 0          | C +57.02 Da, | 2525.646484 | 2 | 1035.930054 | 1035.937096 |
| RYDLLCLYYHEPVSSDKVSKQ          | O09161 | 0.0441989  | K +28.03 Da, | 2536.212158 | 4 | 665.3400269 | 664.8414481 |
| YIYNREEYLR                     | P06344 | 0.0260521  |              | 2543.456055 | 2 | 709.3499756 | 709.856787  |
| DNIQGITKPAIR                   | P62806 | 0          | K +28.03 Da, | 2549.088867 | 3 | 451.9299927 | 451.9331449 |
| PKVIQPEVDTPLGR                 | Q8VCU1 | 0.00457666 | K +28.03 Da, | 2582.663818 | 3 | 526.9659424 | 526.3067598 |

|                                |        |            |              |             |   |             |             |
|--------------------------------|--------|------------|--------------|-------------|---|-------------|-------------|
| MVKVLD AVR                     | P07309 | 0.0087146  | K +28.03 Da, | 2583.030518 | 3 | 353.5507813 | 353.5512066 |
| MVKVLD AVR                     | P07309 | 0.01293103 | K +28.03 Da, | 2596.374756 | 3 | 353.2155762 | 353.5512066 |
| NTDEMVELR                      | P61979 | 0          |              | 2606.915039 | 2 | 553.7600098 | 553.7609665 |
| LNDFASAVR                      | P12787 | 0.00479616 |              | 2609.925537 | 2 | 497.2600098 | 496.7616261 |
| SVSDYDGKLS SFKR                | P09103 | 0          | K +28.03 Da, | 2618.885254 | 4 | 411.9698181 | 411.9702501 |
| ICLQDIKKPDK                    | Q9D5H4 | 0.00515464 | K +28.03 Da, | 2620.75415  | 4 | 361.4725037 | 361.2166336 |
| ICLQDIKKPDK                    | Q9D5H4 | 0.00475059 | K +28.03 Da, | 2626.072021 | 3 | 481.6292725 | 481.2864193 |
| KLENKSLDLFNCEVTNLNAYR          | O35381 | 0.00497512 | C +57.02 Da, | 2665.967773 | 4 | 678.3499756 | 678.3612765 |
| SLKEMEESIR                     | O08795 | 0.00501253 | K +28.03 Da, | 2682.508301 | 2 | 625.3300171 | 625.3264738 |
| EGTGIEGIR                      | G3X976 | 0.02286902 |              | 2691.505615 | 2 | 465.7510071 | 466.245809  |
| PVQKLFVDKIR                    | P97450 | 0          | K +28.03 Da, | 2694.335205 | 4 | 350.4756165 | 350.4762419 |
| PVQKLFVDKIR                    | P97450 | 0          | K +28.03 Da, | 2696.323486 | 3 | 466.9654236 | 466.965897  |
| LLEFQNDR                       | P29391 | 0.0172043  |              | 2698.099121 | 2 | 517.7664795 | 517.7669086 |
| TAKGEKFMQEEFSR                 | P27773 | 0          | K +28.03 Da, | 2705.773682 | 3 | 614.9849243 | 614.9854694 |
| AEACFVNCVER                    | Q9WVA2 | 0.0047619  | C +57.02 Da, | 2716.696289 | 2 | 678.2999878 | 677.7975576 |
| TSVQTEDDQLIAGQSAR              | P26231 | 0          |              | 2732.759033 | 2 | 910.4400024 | 909.9450494 |
| EVKCDMEVSCPEGYTCCR             | P28798 | 0          | C +57.02 Da, | 2733.255371 | 2 | 1153.959961 | 1154.462198 |
| DDTLHETEDVKEAIR                | Q9D855 | 0          | K +28.03 Da, | 2739.626709 | 2 | 899.9400024 | 899.9445179 |
| DDTLHETEDVKEAIR                | Q9D855 | 0          | K +28.03 Da, | 2741.405029 | 2 | 900.9500122 | 899.9445179 |
| DDTLHETEDVKEAIR                | Q9D855 | 0          | K +28.03 Da, | 2742.296875 | 4 | 450.4700012 | 450.4758972 |
| DDTLHETEDVKEAIR                | Q9D855 | 0          | K +28.03 Da, | 2744.755371 | 3 | 600.2980347 | 600.2987708 |
| EVKCDMEVSCPEGYTCCR             | P28798 | 0          | C +57.02 Da, | 2747.571533 | 2 | 1154.959961 | 1154.462198 |
| TGDGKILYSQCGDV MR              | Q60605 | 0          | C +57.02 Da, | 2763.361572 | 3 | 609.960022  | 609.9624476 |
| PDFVNDISEKEQR                  | P49710 | 0.00503778 | K +28.03 Da, | 2776.986084 | 3 | 535.5999756 | 535.602013  |
| NVYYNEATGGKYVPR                | P68372 | 0          | K +28.03 Da, | 2780.573242 | 3 | 587.6400146 | 586.9651741 |
| NDPYGPLPPGWEKR                 | Q8BZZ3 | 0.03564728 | K +28.03 Da, | 2806.874268 | 3 | 551.6257935 | 551.950976  |
| LGADMEDLR                      | P08226 | 0.00510204 |              | 2814.540771 | 2 | 510.2442627 | 510.2449519 |
| ADETVQTS DGSISAQHSSASLQDSVNASR | Q3UMF0 | 0          |              | 2816.511719 | 3 | 983.4500122 | 983.4536592 |
| AAGPLESSGKEITQLKER             | Q99PL5 | 0          | K +28.03 Da, | 2820.343506 | 4 | 525.539978  | 525.539029  |
| QDHPSSMGVYQGESGGFSGPGENR       | Q61545 | 0          |              | 2843.755371 | 2 | 1240.52002  | 1240.530216 |
| ADIVENQVMDTR                   | P10649 | 0          |              | 2857.102539 | 2 | 695.8300171 | 695.8351948 |
| NEVHTMLGQSTEEIR                | P08226 | 0          |              | 2859.45166  | 3 | 581.9500122 | 581.9491956 |
| NEVHTMLGQSTEEIR                | P08226 | 0          |              | 2861.577637 | 2 | 872.9199829 | 872.4201552 |
| GTITTKELGTVMR                  | P62204 | 0          | K +28.03 Da, | 2883.266113 | 3 | 478.9400024 | 478.9376789 |
| GTITTKELGTVMR                  | P62204 | 0.03281853 | K +28.03 Da, | 2883.494141 | 2 | 717.9028931 | 717.9028801 |
| LSPVAEEFR                      | Q00623 | 0.01713062 |              | 2901.984863 | 2 | 524.2769165 | 524.2771091 |
| GVQVSPSGEKITHTGQVYDEKD YR      | P52503 | 0.03162055 | K +28.03 Da, | 2940.133057 | 4 | 688.3400269 | 688.1002485 |
| FEKWGTLTDCVVMR                 | Q8BG05 | 0.03738318 | C +57.02 Da, | 2946.963379 | 3 | 590.960022  | 590.6286283 |
| WNPAGGPAHSTPK                  | O35161 | 0.02272727 | K +28.03 Da, | 2953.771729 | 2 | 674.8400269 | 674.3438464 |
| ETGVDLTKDNMALQR                | P38647 | 0          | K +28.03 Da, | 2966.396484 | 3 | 573.6300049 | 573.6295744 |

|                          |        |            |              |             |   |             |             |
|--------------------------|--------|------------|--------------|-------------|---|-------------|-------------|
| ANLEKAQSELSGAADEAAR      | Q9D3D9 | 0          | K +28.03 Da, | 2970.342285 | 3 | 654.3300171 | 653.6641129 |
| ANLEKAQSELSGAADEAAR      | Q9D3D9 | 0          | K +28.03 Da, | 2971.493408 | 3 | 653.6613159 | 653.6641129 |
| ANLEKAQSELSGAADEAAR      | Q9D3D9 | 0          | K +28.03 Da, | 2972.995605 | 2 | 980.4899902 | 979.9925311 |
| FRLDNTLGGTSEVIHR         | Q60520 | 0.01705757 |              | 2990.806152 | 2 | 907.4699707 | 907.9790285 |
| ETENVKSSEIEISAFR         | P16546 | 0          | K +28.03 Da, | 3000.698975 | 3 | 628.3099976 | 628.3058142 |
| FAQLCEEHGILR             | B5X0G2 | 0          | C +57.02 Da, | 3002.340332 | 3 | 491.5814209 | 491.5820065 |
| QNYSTEVEAAVNR            | P29391 | 0          |              | 3008.993164 | 2 | 740.852417  | 740.8549735 |
| QNYSTEVEAAVNR            | P29391 | 0          |              | 3015.821289 | 3 | 494.5700073 | 494.2390745 |
| NGDFLPTR                 | O35226 | 0.03903346 |              | 3030.283691 | 2 | 460.730011  | 460.235244  |
| FAKLCEEHGILR             | P11589 | 0.00487805 | C +57.02 Da, | 3035.806396 | 3 | 500.9299927 | 500.9379015 |
| KKELEEQQLGPVAEETR        | P08226 | 0.00884956 | K +28.03 Da, | 3047.20874  | 3 | 638.3499756 | 638.0177156 |
| GDGTITTKELGTVMR          | P62204 | 0          | K +28.03 Da, | 3058.114502 | 3 | 536.289978  | 536.2871483 |
| VISLSGEHSIIGR            | P08228 | 0          |              | 3063.830811 | 3 | 456.5899963 | 456.5928999 |
| VISLSGEHSIIGR            | P08228 | 0          |              | 3066.044922 | 3 | 456.9299927 | 456.5928999 |
| VISLSGEHSIIGR            | P08228 | 0          |              | 3068.390625 | 2 | 684.3800049 | 684.3857116 |
| CLSGQAEFDKAAEEVKR        | F6WUQ1 | 0.00496278 | K +28.03 Da, | 3068.561035 | 2 | 996.9899902 | 997.5042196 |
| AGEEAADSPELPR            | Q9CPW2 | 0          |              | 3070.152832 | 2 | 671.8099976 | 671.3176924 |
| TADGIVSHLKKQAGPASVPLR    | P27773 | 0          | K +28.03 Da, | 3072.303955 | 4 | 551.0700073 | 551.0745756 |
| NGPALQEAYVR              | Q62418 | 0.00678733 |              | 3089.51001  | 2 | 609.8099976 | 609.3172973 |
| VISLSGEHSIIGR            | P08228 | 0          |              | 3094.986816 | 3 | 457.2600098 | 456.5928999 |
| DEECSELSMVADKTEK         | B5X0G2 | 0          | K +28.03 Da, | 3097.86792  | 3 | 642.960022  | 642.9605503 |
| ENIIDLSNANR              | B5X0G2 | 0          |              | 3112.260498 | 2 | 629.8200073 | 629.8229444 |
| IELEQKFSIIR              | E9Q828 | 0.02439024 | K +28.03 Da, | 3117.210693 | 3 | 468.2799988 | 468.6134123 |
| TLQEQLNGPNTQLAR          | Q99PL5 | 0.00877193 |              | 3133.914307 | 2 | 906.960022  | 906.4659515 |
| TMDKSELVQKAKLAEQAER      | Q9CQV8 | 0.00461894 | K +28.03 Da, | 3145.57373  | 4 | 565.315918  | 565.5648838 |
| HVGDLGNVTAGKDGVANVSIEDR  | P08228 | 0          | K +28.03 Da, | 3167.012939 | 4 | 588.7999878 | 588.554205  |
| HVGDLGNVTAGKDGVANVSIEDR  | P08228 | 0          | K +28.03 Da, | 3178.567871 | 2 | 1176.589966 | 1176.101134 |
| HVGDLGNVTAGKDGVANVSIEDR  | P08228 | 0          | K +28.03 Da, | 3182.606934 | 2 | 1177.099976 | 1176.101134 |
| EENVRSLVNDKQAVVAQWQR     | Q91WR3 | 0.00518135 | K +28.03 Da, | 3186.081055 | 4 | 599.8200073 | 600.0712933 |
| HVGDLGNVTAGKDGVANVSIEDR  | P08228 | 0          | K +28.03 Da, | 3195.827148 | 4 | 589.0499878 | 588.554205  |
| HVGDLGNVTAGKDGVANVSIEDR  | P08228 | 0          | K +28.03 Da, | 3201.544922 | 4 | 588.2999878 | 588.554205  |
| CEKAMTAKGGDVSVCWEYR      | P56391 | 0.00879121 | C +57.02 Da, | 3213.291016 | 3 | 768.3499756 | 768.3587615 |
| CEKAMTAKGGDVSVCWEYR      | P56391 | 0          | C +57.02 Da, | 3218.344482 | 3 | 768.6799927 | 768.3587615 |
| SIAKEGFEEKSKGANPVEIR     | P63038 | 0          | K +28.03 Da, | 3218.936279 | 4 | 565.0800171 | 565.0783211 |
| DAETTLTELRL              | P05784 | 0.00505051 |              | 3234.613281 | 2 | 575.289978  | 574.7933213 |
| SLEDQVETLR               | O08795 | 0.00492611 |              | 3241.178955 | 2 | 595.3099976 | 595.3065958 |
| SAAETVTKGGIMLPEKSQGVQLQA | Q64433 | 0          | K +28.03 Da, | 3254.353271 | 4 | 632.6099854 | 632.6095572 |
| CKALAPEYAKAAAKLKAEGSEIR  | P09103 | 0.00506329 | K +28.03 Da, | 3282.137939 | 4 | 647.8699951 | 647.6214617 |
| NKPDIDAWELR              | P12787 | 0.0259481  | K +28.03 Da, | 3291.972412 | 2 | 692.3599854 | 692.864612  |
| PSGVKVLTAEDIQER          | P16546 | 0          | K +28.03 Da, | 3302.988525 | 3 | 600.3222046 | 600.3230275 |

|                             |        |            |              |             |   |             |             |
|-----------------------------|--------|------------|--------------|-------------|---|-------------|-------------|
| NDEELNKLGR                  | P22752 | 0          | K +28.03 Da, | 3319.910645 | 3 | 443.5799866 | 443.5771385 |
| HVGD LGNVTAGKDG VANVSIEDR   | P08228 | 0          | K +28.03 Da, | 3322.972412 | 4 | 588.7999878 | 588.554205  |
| SGQAEFDKAAEEVKR             | F6WUQ1 | 0          | K +28.03 Da, | 3332.802002 | 3 | 574.2999878 | 574.3003341 |
| EVKCDMEVSCPEGYTCCR          | P28798 | 0          | C +57.02 Da, | 3338.189941 | 2 | 1154.959961 | 1154.462198 |
| LLDLHALGSAR                 | P29391 | 0.0190678  |              | 3364.815186 | 3 | 389.230011  | 389.2277804 |
| KIQVLQQQADDAEER             | D3Z2H9 | 0          | K +28.03 Da, | 3398.800293 | 2 | 900.460022  | 899.968327  |
| EVKCDMEVSCPEGYTCCR          | P28798 | 0          | C +57.02 Da, | 3409.174805 | 2 | 1155.449951 | 1154.462198 |
| KIQVLQQQADDAEER             | D3Z2H9 | 0          | K +28.03 Da, | 3411.275146 | 3 | 600.6400146 | 600.3146435 |
| VGD LGNVTAGKDG VANVSIEDR    | P08228 | 0          | K +28.03 Da, | 3429.226807 | 3 | 738.710022  | 738.7168771 |
| ELQQAVLQMEQR                | Q02819 | 0.00886918 |              | 3442.148438 | 2 | 737.3900146 | 736.8799365 |
| GWLKS NVNDGVAQSTR           | P17751 | 0.02584493 | K +28.03 Da, | 3444.297119 | 2 | 880.9500122 | 880.4579289 |
| LAKVDATEESDLAQQYGVR         | P09103 | 0          | K +28.03 Da, | 3467.291016 | 3 | 708.3699951 | 707.6989347 |
| LAKVDATEESDLAQQYGVR         | P09103 | 0          | K +28.03 Da, | 3467.464355 | 3 | 707.7000122 | 707.6989347 |
| NEVHTMLGQSTEEIR             | P08226 | 0          |              | 3471.10083  | 2 | 872.9092407 | 872.4201552 |
| ERAKRDEKDRQHRDRDR           | Q0P678 | 0.0244898  | K +28.03 Da, | 3471.525635 | 2 | 1161.099976 | 1161.615942 |
| LAQIRTFTEMDSHEEKVFR         | Q5XJY5 | 0.03632887 | K +28.03 Da, | 3489.943848 | 2 | 1182.599976 | 1183.10209  |
| NPVDDICIAKPR                | P32261 | 0.00464037 | K +28.03 Da, | 3491.350342 | 2 | 714.3699951 | 713.379572  |
| LIGDAAKNQLTSNPENTVFDADR     | P20029 | 0          | K +28.03 Da, | 3494.963379 | 4 | 640.5900269 | 640.3447837 |
| NGESSELDLQGIR               | Q9QXT0 | 0          |              | 3496.959229 | 2 | 709.8374634 | 709.349524  |
| NPVDDICIAKPR                | P32261 | 0.00508906 | K +28.03 Da, | 3523.060059 | 2 | 714.3699951 | 713.379572  |
| NPVDDICIAKPR                | P32261 | 0.00490196 | K +28.03 Da, | 3530.322266 | 2 | 713.8674927 | 713.379572  |
| DVEDEETWIR                  | P16546 | 0          |              | 3539.222412 | 2 | 646.289978  | 646.2936858 |
| RVCLTTFNVQDGPDFQDR          | P97493 | 0          | C +57.02 Da, | 3567.615479 | 2 | 1085.530029 | 1084.513108 |
| QASGGPVDIGPEYQQDLDR         | P97450 | 0          |              | 3568.364746 | 2 | 1022.969971 | 1022.982164 |
| VFDKDGNGYISAAELR            | P62204 | 0.00533333 | K +28.03 Da, | 3569.833496 | 3 | 595.6300049 | 594.9722174 |
| EAFRVFDKDGNGYISAAELR        | P62204 | 0.03910615 | K +28.03 Da, | 3579.502441 | 3 | 763.0599976 | 762.7219621 |
| CKALAPEYAKAAAKLKAEGSEIR     | P09103 | 0          | K +28.03 Da, | 3604.800781 | 4 | 647.8599854 | 647.6214617 |
| FTDEEVDELYR                 | Q3THE2 | 0          |              | 3624.877441 | 2 | 708.3179932 | 708.3199009 |
| KVQSAVITVPAYFNDSQR          | P17156 | 0.00881057 | K +28.03 Da, | 3656.903809 | 3 | 684.3673706 | 684.3688597 |
| APLQELSPTEEEALR             | Q9DCU9 | 0.04963235 |              | 3670.590576 | 2 | 841.9400024 | 841.9334214 |
| SIEALLEAGQAQDTQASHAEANQQQTR | Q99PL5 | 0          |              | 3674.345947 | 3 | 966.1300049 | 965.7991005 |
| ADPHLCDFLESH                | Q9CPX4 | 0.00486618 | C +57.02 Da, | 3677.806641 | 3 | 480.8800049 | 480.8786003 |
| ADPHLCDFLESH                | Q9CPX4 | 0.02474227 | C +57.02 Da, | 3679.317627 | 2 | 720.8099976 | 720.8142623 |
| HVGD LGNVTAGKDG VANVSIEDR   | P08228 | 0          | K +28.03 Da, | 3682.824707 | 3 | 785.0599976 | 784.4031812 |
| HVGD LGNVTAGKDG VANVSIEDR   | P08228 | 0          | K +28.03 Da, | 3714.079102 | 3 | 785.0599976 | 784.4031812 |
| KVISTTKAPAAIGPYSQAVQVDR     | P52760 | 0          | K +28.03 Da, | 3723.48999  | 3 | 820.1300049 | 819.4672334 |
| KELDPVQKLFVDKIR             | P97450 | 0          | K +28.03 Da, | 3723.908447 | 4 | 478.7999878 | 478.7962084 |
| NGESSELDLQGIR               | Q9QXT0 | 0          |              | 3746.691162 | 2 | 709.8397827 | 709.349524  |
| SLGVAAEGLPDQYADGEAAR        | Q9QXF8 | 0          |              | 3752.454346 | 2 | 995.9799805 | 995.4792566 |
| QALLDLHALGSAR               | P29391 | 0          |              | 3753.802734 | 2 | 682.8800049 | 682.8858786 |

|                                          |        |            |              |             |   |             |             |
|------------------------------------------|--------|------------|--------------|-------------|---|-------------|-------------|
| ALKDEEKMELQEIQLEAKHIAEEADR               | P21107 | 0          | K +28.03 Da, | 3755.656494 | 4 | 827.6900024 | 827.4458041 |
| QALLDLHALGSAR                            | P29391 | 0.02777778 |              | 3765.186035 | 3 | 455.5917969 | 455.5930112 |
| QNYSTEVEAAVNR                            | P29391 | 0          |              | 3787.012207 | 2 | 740.3400269 | 740.8549735 |
| PKEEEEEELVDPLTTVR                        | P99028 | 0          | K +28.03 Da, | 3819.238037 | 2 | 1021.52002  | 1021.020423 |
| PVQKLFVDKIR                              | P97450 | 0.02301255 | K +28.03 Da, | 3830.803955 | 3 | 467.2999878 | 466.965897  |
| QNYSTEVEAAVNR                            | P29391 | 0          |              | 3843.650879 | 2 | 741.8499756 | 740.8549735 |
| QEEGLHAGTMLTTLTAQDPDR                    | P15116 | 0.00488998 |              | 3869.516602 | 2 | 1142.030029 | 1142.547345 |
| DEECSELSMVADKTEKAGEY                     | B5X0G2 | 0          | K +28.03 Da, | 3883.183594 | 3 | 783.3499756 | 783.0153843 |
| DEECSELSMVADKTEKAGEY                     | B5X0G2 | 0          | K +28.03 Da, | 3883.716553 | 2 | 1174.52002  | 1174.019438 |
| NTVVPTKKSQIFSTASDNQPTVTIKVY              | P20029 | 0          | K +28.03 Da, | 3888.927979 | 3 | 1018.22998  | 1017.563933 |
| ILEFFGLKKEECPAVR                         | P09103 | 0.02434077 | C +57.02 Da, | 3892.188721 | 3 | 664.3599854 | 664.7044143 |
| DEECSELSMVADKTEKAGEY                     | B5X0G2 | 0          | K +28.03 Da, | 3897.083008 | 2 | 1174.02002  | 1174.019438 |
| GDLGNVNTAGKDGVANVSIEDR                   | P08228 | 0.02282158 | K +28.03 Da, | 3920.169678 | 2 | 1059.030029 | 1058.03747  |
| TLSDYNIQKESTLHLVLR                       | P0CG49 | 0          | K +28.03 Da, | 3924.591309 | 4 | 540.5499878 | 540.3021212 |
| TLSDYNIQKESTLHLVLR                       | P0CG49 | 0          | K +28.03 Da, | 3929.081543 | 3 | 720.4000244 | 720.0670695 |
| TLSDYNIQKESTLHLVLR                       | P0CG49 | 0          | K +28.03 Da, | 3932.844727 | 4 | 540.2999878 | 540.3021212 |
| DTPENNPDPFDFTPENYKR                      | Q9D6J6 | 0          | K +28.03 Da, | 3943.127441 | 3 | 809.3699951 | 809.0362758 |
| ADTDDAPVPAPAGDQKDVPAESEKKVPEQPPELQDLSQHL | Q02819 | 0          | K +28.03 Da, | 3943.440186 | 4 | 1079.800049 | 1079.299864 |
| DGLNAEGLLR                               | Q64374 | 0          |              | 3949.026611 | 2 | 529.789978  | 529.2854657 |
| GYVKAGPWTPAAVEHPEAVR                     | O35490 | 0          | K +28.03 Da, | 3970.12915  | 3 | 765.3900146 | 764.7305688 |
| DELADEIANSSGKGALALEEKR                   | Q8VDD5 | 0          | K +28.03 Da, | 3975.509766 | 3 | 791.75      | 791.4149756 |
| DELADEIANSSGKGALALEEKR                   | Q8VDD5 | 0          | K +28.03 Da, | 3981.902588 | 4 | 594.3099976 | 593.8130508 |
| EEEAIQLDGLNASQIR                         | P08113 | 0          |              | 3982.393066 | 2 | 894.460022  | 893.4525099 |
| KMGAPEAGMAEYLFDKHTLGHGDES                | P09528 | 0          | K +28.03 Da, | 3999.568359 | 4 | 688.0800171 | 687.5755518 |
| LEEPEESKVLTPEEQLADKLR                    | Q3UGC7 | 0          | K +28.03 Da, | 4009.790039 | 4 | 628.0900269 | 628.0903549 |
| PFVELETNLPASR                            | O35215 | 0          |              | 4019.209717 | 2 | 736.8900146 | 736.8908271 |
| NTGLITVQGPVDREDLSTLR                     | F7BJK1 | 0          |              | 4030.177002 | 3 | 728.7199707 | 728.7254838 |
| NTGLITVQGPVDREDLSTLR                     | F7BJK1 | 0          |              | 4032.526123 | 3 | 729.3900146 | 728.7254838 |
| LNQALLDLHALGSAR                          | P29391 | 0          |              | 4051.03418  | 3 | 531.2999878 | 531.3020087 |
| PAPATTF AHLDATTVLSR                      | P56480 | 0          |              | 4077.377441 | 3 | 624         | 623.6670169 |
| DSDSILETLQR                              | Q9D6J6 | 0          |              | 4094.134766 | 2 | 639.3200073 | 638.8226104 |
| NTGTEAPDYLATVDVDPKSPQYSQVIHR             | P17563 | 0          | K +28.03 Da, | 4096.907715 | 4 | 783.6500244 | 783.1426452 |
| EEEAIQLDGLNASQIR                         | P08113 | 0          |              | 4102.718262 | 2 | 893.460022  | 893.4525099 |
| RVAGPQPAQTGAPQGSLGEYLFER                 | P29391 | 0          |              | 4105.700684 | 3 | 844.0999756 | 843.7663423 |
| RVAGPQPAQTGAPQGSLGEYLFER                 | P29391 | 0          |              | 4108.491211 | 3 | 844.4400024 | 843.7663423 |
| SAGVKVETTEDLVAKLKEVGR                    | Q9DCW4 | 0          | K +28.03 Da, | 4109.649414 | 4 | 579.3400269 | 579.0901574 |
| ANLEKAQSELSGAADEAAR                      | Q9D3D9 | 0          | K +28.03 Da, | 4114.699219 | 2 | 980.4799805 | 979.9925311 |
| ADPHLCDFLESHYLDKEVK                      | Q9CPX4 | 0          | K +28.03 Da, | 4118.194336 | 4 | 593.7952271 | 593.7952377 |
| ANLEKAQSELSGAADEAAR                      | Q9D3D9 | 0          | K +28.03 Da, | 4118.444824 | 3 | 653.9899902 | 653.6641129 |
| TASTPTPPQTGGSELPQNGESPQVAVIIRPDDR        | Q6NZJ6 | 0.00892857 |              | 4123.181641 | 3 | 1172.25     | 1171.592051 |

|                               |        |            |              |             |   |             |             |
|-------------------------------|--------|------------|--------------|-------------|---|-------------|-------------|
| SLFDKDGDTITTKELGTVMR          | P62204 | 0          | K +28.03 Da, | 4140.658203 | 4 | 585.8081055 | 585.8083453 |
| DMDDEESWIKEKLLVSSSEYGR        | P16546 | 0          | K +28.03 Da, | 4144.316895 | 4 | 715.1099854 | 714.8547532 |
| SPDEVTLTSIVPTR                | Q99JB8 | 0          |              | 4144.418945 | 2 | 758.4099731 | 757.9066747 |
| AEEGYENLLSPSDMAH              | P55302 | 0          |              | 4149.894531 | 2 | 881.8800049 | 881.8830716 |
| SLFDKDGDTITTKELGTVMR          | P62204 | 0          | K +28.03 Da, | 4151.485352 | 3 | 780.7404785 | 780.7420349 |
| IEANEALVKALE                  | Q9D3D9 | 0.00473934 | K +28.03 Da, | 4159.446289 | 2 | 664.3753662 | 664.3770211 |
| TDPHLCDFLESHYLDKEVK           | P29391 | 0          | K +28.03 Da, | 4175.46582  | 4 | 601.0499878 | 601.297879  |
| AAEEAFVNDIDESSPGTEWER         | O08585 | 0          |              | 4241.910645 | 2 | 1177.01001  | 1176.516766 |
| AGEELLKMSEEDEQGWQCQQLQSGR     | Q99JB8 | 0.00531915 | C +57.02 Da, | 4273.975098 | 3 | 965.4400024 | 965.107889  |
| SLFDKDGDTITTKELGTVMR          | P62204 | 0          | K +28.03 Da, | 4276.319336 | 4 | 585.8099976 | 585.8083453 |
| SLFDKDGDTITTKELGTVMR          | P62204 | 0.01079914 | K +28.03 Da, | 4277.744141 | 3 | 780.7399902 | 780.7420349 |
| ANLEKAQSELGADEAAR             | Q9D3D9 | 0.00483092 | K +28.03 Da, | 4290.877441 | 2 | 980.4799805 | 979.9925311 |
| NKELDPVQKLFVDKIR              | P97450 | 0          | K +28.03 Da, | 4314.096191 | 4 | 507.552063  | 507.3069405 |
| SLFDKDGDTITTKELGTVMR          | P62204 | 0          | K +28.03 Da, | 4317.583984 | 4 | 586.0599976 | 585.8083453 |
| DLQQSIEAASDEEDLR              | Q99JB8 | 0          |              | 4318.537598 | 2 | 910.4199829 | 909.9212404 |
| NKELDPVQKLFVDKIR              | P97450 | 0          | K +28.03 Da, | 4322.262695 | 3 | 676.7299805 | 676.0734952 |
| EELITNWEQIR                   | P16546 | 0          |              | 4332.907227 | 2 | 715.8699951 | 715.867352  |
| QASGGPVDIGPEYQQDLDR           | P97450 | 0          |              | 4334.658203 | 2 | 1023.97998  | 1022.982164 |
| QASGGPVDIGPEYQQDLDR           | P97450 | 0          |              | 4337.924316 | 2 | 1022.978149 | 1022.982164 |
| NKELDPVQKLFVDKIR              | P97450 | 0.00867679 | K +28.03 Da, | 4344.766113 | 4 | 507.5499878 | 507.3069405 |
| TASMLASAPPQEQKQMLGER          | P29341 | 0.03625954 | K +28.03 Da, | 4357.308105 | 2 | 1101.060059 | 1101.056294 |
| GPHFNPHSKKHGGPADEER           | P08228 | 0.02424242 | K +28.03 Da, | 4360.837891 | 3 | 718.6900024 | 718.3593576 |
| QASGGPVDIGPEYQQDLDR           | P97450 | 0          |              | 4369.091309 | 2 | 1023.47998  | 1022.982164 |
| NEFTLGEECELETMTGEKVK          | P12710 | 0          | K +28.03 Da, | 4383.993164 | 3 | 801.0499878 | 800.7151574 |
| NEFTLGEECELETMTGEKVK          | P12710 | 0          | K +28.03 Da, | 4386.126953 | 2 | 1201.069946 | 1200.569098 |
| NKELDPVQKLFVDKIR              | P97450 | 0          | K +28.03 Da, | 4394.492188 | 4 | 507.7999878 | 507.3069405 |
| LGEECELETMTGEKVK              | P12710 | 0          | K +28.03 Da, | 4403.043457 | 2 | 955.960022  | 954.9682899 |
| QASGGPVDIGPEYQQDLDR           | P97450 | 0          |              | 4405.496094 | 2 | 1022.47998  | 1022.982164 |
| LGEECELETMTGEKVK              | P12710 | 0.00458716 | K +28.03 Da, | 4411.282715 | 2 | 955.4556274 | 954.9682899 |
| QTGAPQGSLGEYLFER              | P29391 | 0          |              | 4413.728027 | 2 | 876.9299927 | 876.9312128 |
| SFPTLKFFPASADR                | P09103 | 0          | K +28.03 Da, | 4414.078613 | 3 | 537.9562378 | 537.9558383 |
| NEFTLGEECELETMTGEKVK          | P12710 | 0          | K +28.03 Da, | 4415.19043  | 3 | 801.039978  | 800.7151574 |
| SFPTLKFFPASADR                | P09103 | 0.00896861 | K +28.03 Da, | 4428.463379 | 2 | 806.9299927 | 806.4301193 |
| STMKPVQKVLSDSLKSDIDEIVLVGGSTR | P20029 | 0          | K +28.03 Da, | 4438.671875 | 4 | 875.9799805 | 875.7377528 |
| FIDTSQFILNR                   | Q4FZG7 | 0.02469136 |              | 4439.210938 | 2 | 677.3599854 | 677.361705  |
| STMKPVQKVLSDSLKSDIDEIVLVGGSTR | P20029 | 0          | K +28.03 Da, | 4446.476563 | 3 | 1167.650024 | 1167.314578 |
| DDVALEGVGHFFR                 | P29391 | 0          |              | 4449.469238 | 2 | 731.8599854 | 731.359694  |
| DDVALEGVGHFFR                 | P29391 | 0          |              | 4460.370117 | 3 | 487.9100037 | 487.9088882 |
| KLVIIEGDLER                   | P21107 | 0.01886792 | K +28.03 Da, | 4472.953125 | 2 | 657.8900146 | 656.8953806 |
| QKAMQDAEVSKSDIGEIVLVGMTR      | P38647 | 0.00902935 | K +28.03 Da, | 4476.213379 | 3 | 907.4699707 | 906.8103434 |



|                              |        |            |              |             |   |             |             |
|------------------------------|--------|------------|--------------|-------------|---|-------------|-------------|
| QKAMQDAEVSKSDIGEVLVGGMTR     | P38647 | 0          | K +28.03 Da, | 4476.300781 | 3 | 906.7999878 | 906.8103434 |
| QKAMQDAEVSKSDIGEVLVGGMTR     | P38647 | 0          | K +28.03 Da, | 4484.82666  | 3 | 906.460022  | 906.8103434 |
| TILEEITPTIQK                 | Q8CG48 | 0.00894855 | K +28.03 Da, | 4495.442871 | 2 | 771.9199829 | 771.9349009 |
| KLVIIEGDLER                  | P21107 | 0.03558052 | K +28.03 Da, | 4504.481445 | 2 | 657.3860474 | 656.8953806 |
| RHFMSAFHLR                   | A2A7F4 | 0.00883002 |              | 4510.790527 | 2 | 651.348938  | 651.3378432 |
| LINEKDGETFQLMGLYGR           | B5X0G2 | 0.0052356  | K +28.03 Da, | 4517.586914 | 3 | 704.6963501 | 704.6979886 |
| LRPGDCEVCISYLGR              | Q9CXI5 | 0          | C +57.02 Da, | 4520.303711 | 2 | 898.4276123 | 897.9349177 |
| AAEEAFVNDIDESSPGTEWER        | O08585 | 0          |              | 4523.334961 | 2 | 1177.02002  | 1176.516766 |
| AAEEAFVNDIDESSPGTEWER        | O08585 | 0.0242915  |              | 4526.963379 | 3 | 784.6799927 | 784.6802694 |
| SEAHLELLEEVCDR               | Q9QXT0 | 0          | C +57.02 Da, | 4527.826172 | 3 | 600.9500122 | 600.952606  |
| AAEEAFVNDIDESSPGTEWER        | O08585 | 0          |              | 4547.234863 | 2 | 1177.52002  | 1176.516766 |
| KMGAPEAGMAEYLFDKHTLGHGDES    | P09528 | 0          | K +28.03 Da, | 4569.539063 | 4 | 688.0700073 | 687.5755518 |
| DEECSELSMVADKTEKAGEYSVTY     | B5X0G2 | 0.00684932 | K +28.03 Da, | 4581.87207  | 3 | 933.0900269 | 933.0858683 |
| DEECSELSMVADKTEKAGEYSVTY     | B5X0G2 | 0          | K +28.03 Da, | 4589.351074 | 3 | 933.75      | 933.0858683 |
| PAFTPATGTPVLGGLSYR           | Q61176 | 0          |              | 4597.817871 | 2 | 903.4799805 | 902.983248  |
| AQFEGIVTDLIKR                | P38647 | 0          | K +28.03 Da, | 4601.473633 | 3 | 506.9599915 | 506.6277217 |
| PAFTPATGTPVLGGLSYR           | Q61176 | 0          |              | 4606.196777 | 2 | 902.980896  | 902.983248  |
| VAGPQPAQTGAPQGSGLGEYLFER     | P29391 | 0          |              | 4617.791016 | 2 | 1188.099976 | 1187.09532  |
| VAGPQPAQTGAPQGSGLGEYLFER     | P29391 | 0          |              | 4619.149414 | 2 | 1187.089966 | 1187.09532  |
| VAGPQPAQTGAPQGSGLGEYLFER     | P29391 | 0          |              | 4619.257324 | 3 | 792.0700073 | 791.7326385 |
| VISLSGEHSIIGR                | P08228 | 0.026      |              | 4636.924805 | 2 | 685.3896484 | 684.3857116 |
| TFKGIKSVTELNQDITNTMTLGDIVYKR | P12710 | 0          | K +28.03 Da, | 4643.216797 | 4 | 825.4400024 | 825.7034469 |
| KGIKSVTELNQDITNTMTLGDIVYKR   | P12710 | 0          | K +28.03 Da, | 4658.618164 | 4 | 764.1699829 | 763.6744235 |
| SGDPKEEEEELVDPLTTVR          | P99028 | 0.00468384 | K +28.03 Da, | 4729.000977 | 2 | 1151.050049 | 1150.560642 |
| KMGAPEAGMAEYLFDKH            | P09528 | 0.00681818 | K +28.03 Da, | 4762.683594 | 3 | 651.6500244 | 650.9865931 |
| GDPKEEEEELVDPLTTVR           | P99028 | 0          | K +28.03 Da, | 4773.73877  | 2 | 1108.040039 | 1107.044627 |
| SHELSDFGLESTTGEVPPVAIR       | P27773 | 0          |              | 4794.205078 | 3 | 782.0700073 | 781.7324159 |
| EADDIVNWLKKR                 | P09103 | 0          | K +28.03 Da, | 4810.524414 | 3 | 515.289978  | 514.9594714 |
| EKNLNQALLDLHALGSAR           | P29391 | 0.02414487 | K +28.03 Da, | 4811.025879 | 3 | 665.0300293 | 664.372604  |
| NEFTLGEECELETMTGEKVK         | P12710 | 0          | K +28.03 Da, | 4826.875488 | 3 | 801.039978  | 800.7151574 |
| TEEEFKKFISDKDASVVGFFR        | P27773 | 0          | K +28.03 Da, | 4829.120605 | 4 | 641.8400269 | 641.5915274 |
| NEFTLGEECELETMTGEKVK         | P12710 | 0          | K +28.03 Da, | 4830.624512 | 2 | 1201.060059 | 1200.569098 |
| PGGLLLGEAAPDFEANTTIGR        | Q8BG37 | 0          |              | 4838.313965 | 3 | 719.3699951 | 719.6989347 |
| PGGLLLGEAAPDFEANTTIGR        | Q8BG37 | 0.01890756 |              | 4851.599121 | 2 | 1078.550781 | 1079.044764 |
| LSPVAEEFR                    | Q00623 | 0.00477327 |              | 4855.140137 | 2 | 524.7700195 | 524.2771091 |
| PGGLLLGEAAPDFEANTTIGR        | Q8BG37 | 0          |              | 4868.778809 | 3 | 719.3699341 | 719.6989347 |
| PGGLLLGEAAPDFEANTTIGR        | Q8BG37 | 0.03143418 |              | 4882.865723 | 2 | 1079.050049 | 1079.044764 |
| EADDIVNWLKKR                 | P09103 | 0          | K +28.03 Da, | 4884.543945 | 3 | 515.289978  | 514.9594714 |
| DDDKNNDGYIDYAEFAKSLQ         | Q8K5B2 | 0          | K +28.03 Da, | 4887.140137 | 3 | 793.0300293 | 793.0325314 |
| DDDKNNDGYIDYAEFAKSLQ         | Q8K5B2 | 0          | K +28.03 Da, | 4887.731934 | 2 | 1189.540039 | 1189.045159 |

|                                     |        |            |              |             |   |             |             |
|-------------------------------------|--------|------------|--------------|-------------|---|-------------|-------------|
| EADDIVNWLKKR                        | P09103 | 0          | K +28.03 Da, | 4888.188477 | 3 | 515.6199951 | 514.9594714 |
| PGGLLLGEEAPDFEANTTIGR               | Q8BG37 | 0          |              | 4900.350098 | 3 | 720.0300293 | 719.6989347 |
| NKPTIYGVSPNYDKWEMER                 | P00520 | 0.03571429 | K +28.03 Da, | 4901.939941 | 3 | 795.7302856 | 795.0632194 |
| MWKSVMGHVSVSVETQGGDWDTPDFVNDISEKEQR | P49710 | 0.03149606 | K +28.03 Da, | 4921.296387 | 4 | 1077.23999  | 1077.252485 |
| PGGLLLGEEAPDFEANTTIGR               | Q8BG37 | 0.03591682 |              | 4939.075195 | 2 | 1079.050049 | 1079.044764 |
| DDDKNNDGYIDYAEFAKSLQ                | Q8K5B2 | 0          | K +28.03 Da, | 4943.760254 | 3 | 793.3599854 | 793.0325314 |
| EDRVISLSGEHSIIGR                    | P08228 | 0          |              | 4952.567871 | 2 | 884.9699707 | 884.4710365 |
| GVANVSIEDRVISLSGEHSIIGR             | P08228 | 0          |              | 4956.230957 | 2 | 1204.670044 | 1204.648251 |
| GVANVSIEDRVISLSGEHSIIGR             | P08228 | 0          |              | 4959.105957 | 2 | 1204.170044 | 1204.648251 |
| ASDVLELTDENFESR                     | P27773 | 0          |              | 4988.074707 | 2 | 863.3900146 | 862.9023188 |
| ALLDLHALGSAR                        | P29391 | 0.00472813 |              | 4991.497559 | 2 | 619.8511353 | 618.8565895 |
| PGGLLLGEEAPDFEANTTIGR               | Q8BG37 | 0.00512821 |              | 4996.438477 | 2 | 1078.540039 | 1079.044764 |
| PGGLLLGEEAPDFEANTTIGR               | Q8BG37 | 0.00516796 |              | 4997.369141 | 2 | 1079.040039 | 1079.044764 |
| DDDKNNDGYIDYAEFAKSLQ                | Q8K5B2 | 0          | K +28.03 Da, | 5015.359863 | 3 | 793.3599854 | 793.0325314 |
| GPAGAGESKCLPMVKVLD AVR              | P07309 | 0          | K +28.03 Da, | 5019.333496 | 3 | 738.4000244 | 737.7377897 |
| VISLSGEHSIIGR                       | P08228 | 0          |              | 5022.905273 | 2 | 684.8800049 | 684.3857116 |
| QKEVNENFAIDLIAQQPVNEVEHR            | P52503 | 0.00888889 | K +28.03 Da, | 5041.674316 | 4 | 712.8599854 | 712.8701603 |
| QKEVNENFAIDLIAQQPVNEVEHR            | P52503 | 0          | K +28.03 Da, | 5043.324707 | 3 | 949.8200073 | 950.1577882 |
| GPAGAGESKCLPMVKVLD AVR              | P07309 | 0          | K +28.03 Da, | 5055.20459  | 3 | 738.0640869 | 737.7377897 |
| ELNDFISYLQR                         | P27773 | 0.004914   |              | 5091.807129 | 2 | 699.8599854 | 699.35662   |
| EAEQLQGEIR                          | Q8C850 | 0.02296451 |              | 5095.249023 | 2 | 586.7999878 | 586.7989378 |
| SVTELNQDTITNTMTLGDIVYKR             | P12710 | 0          | K +28.03 Da, | 5119.094727 | 3 | 857.7700195 | 857.1107873 |
| SVTELNQDTITNTMTLGDIVYKR             | P12710 | 0          | K +28.03 Da, | 5126.185547 | 2 | 1285.660034 | 1285.162543 |
| ADPHLCDFLESHYLDKEVKLIK              | Q9CPX4 | 0.01702128 | K +28.03 Da, | 5168.366699 | 4 | 689.8599854 | 689.3688357 |
| SQTEEDCTEELFDLHAR                   | P99028 | 0          | C +57.02 Da, | 5241.998535 | 3 | 742.9899902 | 742.9917899 |
| SQTEEDCTEELFDLHAR                   | P99028 | 0          | C +57.02 Da, | 5248.334961 | 2 | 1113.97998  | 1113.984047 |
| LATALQKLEEAKEKADESER                | P21107 | 0          | K +28.03 Da, | 5251.72998  | 3 | 754.0599976 | 753.4006662 |
| SQTEEDCTEELFDLHAR                   | P99028 | 0          | C +57.02 Da, | 5255.415039 | 2 | 1114.97998  | 1113.984047 |
| SSILLDVKPWDETDMTKLEECVR             | O70251 | 0          | C +57.02 Da, | 5260.60791  | 4 | 735.1199951 | 734.6161457 |
| SSILLDVKPWDETDMTKLEECVR             | O70251 | 0          | C +57.02 Da, | 5269.327637 | 3 | 979.1599731 | 979.1524355 |
| SQTEEDCTEELFDLHAR                   | P99028 | 0          | C +57.02 Da, | 5273.191895 | 3 | 742.9904175 | 742.9917899 |
| SQTEEDCTEELFDLHAR                   | P99028 | 0          | C +57.02 Da, | 5287.100586 | 2 | 1114.98999  | 1113.984047 |
| SSILLDVKPWDETDMTKLEECVR             | O70251 | 0          | C +57.02 Da, | 5291.105469 | 4 | 734.8699951 | 734.6161457 |
| SSILLDVKPWDETDMAQLET CVRS           | P57776 | 0.03468208 | C +57.02 Da, | 5293.382813 | 4 | 735.3699951 | 734.8558617 |
| SQTEEDCTEELFDLHAR                   | P99028 | 0          | C +57.02 Da, | 5331.51709  | 3 | 742.9899902 | 742.9917899 |
| AEFDTSEIDSEIAALR                    | P41317 | 0          |              | 5369.304688 | 2 | 884.9299927 | 883.9257939 |
| NEFTLGEECELETMTGEKVKAVVKL           | P12710 | 0          | K +28.03 Da, | 5395.119141 | 4 | 735.6300049 | 735.3842548 |
| QQVAPMDDDETGKELVLALYDYQEKS PR       | P16546 | 0          | K +28.03 Da, | 5430.391113 | 3 | 1060.189941 | 1060.535826 |
| NEFTLGEECELETMTGEKVKAVVKL           | P12710 | 0          | K +28.03 Da, | 5440.39209  | 4 | 735.3800049 | 735.3842548 |
| QQVAPMDDDETGKELVLALYDYQEKS PR       | P16546 | 0          | K +28.03 Da, | 5452.683594 | 3 | 1061.189941 | 1060.535826 |

|                                   |        |            |              |             |   |             |             |
|-----------------------------------|--------|------------|--------------|-------------|---|-------------|-------------|
| MEADGLGCAVCVLTGASR                | Q64105 | 0          | C +57.02 Da, | 5453.220703 | 2 | 934.4299927 | 933.9289756 |
| KTFSHELSDFGLESTTGVEPVVAIR         | P27773 | 0          | K +28.03 Da, | 5466.342773 | 3 | 916.8099976 | 916.4798682 |
| HTVVYWLGRR                        | Q3V0D6 | 0.03118908 |              | 5483.883301 | 2 | 644.3699951 | 643.8594659 |
| VAGPQPAQTGAPQGSLEGYLFR            | P29391 | 0          |              | 5503.654785 | 2 | 1186.589966 | 1187.09532  |
| PTGGAGAVAMLIGPKAPLVLEQLGR         | P54869 | 0          | K +28.03 Da, | 5575.665039 | 3 | 815.8099976 | 815.4734421 |
| NAEENSAIQKVAKDIAYLGITDVR          | P41317 | 0          | K +28.03 Da, | 5590.045898 | 4 | 669.8699951 | 669.3657163 |
| DVDETIGWIKEKEQLMASDDFGR           | P16546 | 0          | K +28.03 Da, | 5595.469238 | 4 | 685.5900269 | 685.3390044 |
| EDVQETDTSQKDQSPASHEIATNLGDFAISLYR | P07758 | 0          | K +28.03 Da, | 5613.870117 | 3 | 1232.579956 | 1231.922015 |
| TGEAIVDAALSALR                    | Q922R8 | 0          |              | 5622.703613 | 2 | 693.8826904 | 693.8830021 |
| EDVQETDTSQKDQSPASHEIATNLGDFAISLYR | P07758 | 0.02419355 | K +28.03 Da, | 5624.635254 | 4 | 924.4400024 | 924.1933302 |
| EDVQETDTSQKDQSPASHEIATNLGDFAISLYR | P07758 | 0          | K +28.03 Da, | 5628.020996 | 3 | 1232.23999  | 1231.922015 |
| VHLTDAEKAASVSLGWKVNDSDEVGGEALGR   | P02088 | 0          | K +28.03 Da, | 5642.788086 | 3 | 1076.209961 | 1075.550469 |
| TALLELWELR                        | P16546 | 0.00498753 |              | 5679.227539 | 2 | 622.3450317 | 622.355891  |
| QPGLMAQMATTAAAGVAVGSVAVGHTLGH     | Q9D1L0 | 0          |              | 5714.646484 | 3 | 844.75      | 845.0931845 |
| VIQELRPTLNELGISTPEELGLDKV         | P12787 | 0.03578154 | K +28.03 Da, | 5737.532227 | 3 | 931.1834106 | 931.1865734 |
| EAALAMEKNLNQALLDLHALGSAR          | P29391 | 0          | K +28.03 Da, | 5760.751953 | 3 | 860.1300049 | 859.7987661 |
| SQTEEDCTEELDFDLH                  | P99028 | 0          | C +57.02 Da, | 5789.255859 | 2 | 1001.419983 | 1000.414934 |
| SQTEEDCTEELDFDLH                  | P99028 | 0          | C +57.02 Da, | 5801.526855 | 2 | 1000.409973 | 1000.414934 |
| QVSTEPSSTSSSSDPILDNLISLAVAKER     | P70441 | 0          | K +28.03 Da, | 5831.984863 | 3 | 1049.880005 | 1049.540294 |
| CHELDMQVAALQEEKSSLLAENQILMER      | Q8BUK6 | 0          | K +28.03 Da, | 5842.786621 | 3 | 1105.199951 | 1105.21236  |
| AQFEGIVTDLIKR                     | P38647 | 0          | K +28.03 Da, | 5854.285645 | 2 | 760.4299927 | 759.4379443 |
| GSYDGLGGPIITTQVTIPKDLAGSIIGKGGQR  | P61979 | 0          | K +28.03 Da, | 5878.765625 | 3 | 1076.589966 | 1075.932908 |
| DGKALEQLQEYFDGNLKR                | P27773 | 0          | K +28.03 Da, | 5902.79834  | 3 | 776.7399902 | 776.4058625 |
| DGKALEQLQEYFDGNLKR                | P27773 | 0          | K +28.03 Da, | 5913.271973 | 3 | 776.4000244 | 776.4058625 |
| DGKALEQLQEYFDGNLKR                | P27773 | 0          | K +28.03 Da, | 5916.763672 | 4 | 582.8099976 | 582.556216  |
| QLTVQMMQNPQILAALQER               | P28656 | 0          |              | 5923.893066 | 2 | 1106.569946 | 1106.582478 |
| DVDEIEAWISEKLQTASDESYKDPTNIQSKH   | P16546 | 0          | K +28.03 Da, | 5940.001465 | 4 | 916.460022  | 915.9533485 |
| QPGLMAQMATTAAAGVAVGSVAVGHTLGH     | Q9D1L0 | 0          |              | 5987.562012 | 3 | 844.75      | 845.0931845 |
| LFNCEVTNLNAYR                     | O35381 | 0          | C +57.02 Da, | 5995.753906 | 2 | 807.8800049 | 807.3906686 |
| MPFVELETNLPASR                    | O35215 | 0          |              | 6003.202148 | 2 | 801.9000244 | 802.4110697 |
| SVQPTVSLGGFEITPPVVLRL             | Q61937 | 0          |              | 6010.18457  | 2 | 1049.089966 | 1048.591152 |
| QLTVQMMQNPQILAALQER               | P28656 | 0          |              | 6015.668945 | 2 | 1106.569946 | 1106.582478 |
| GVVQDLQQAISKLEAR                  | P57776 | 0.02970297 | K +28.03 Da, | 6024.183105 | 3 | 595.0100098 | 595.0072619 |
| DFWDNLEKETDWVR                    | Q00623 | 0          | K +28.03 Da, | 6024.847656 | 2 | 941.4400024 | 940.9443204 |
| DFWDNLEKETDWVR                    | Q00623 | 0          | K +28.03 Da, | 6030.379883 | 2 | 940.9400024 | 940.9443204 |
| QPGLMAQMATTAAAGVAVGSVAVGHTLGH     | Q9D1L0 | 0          |              | 6031.122559 | 3 | 845.0800171 | 845.0931845 |
| DFWDNLEKETDWVR                    | Q00623 | 0          | K +28.03 Da, | 6034.436035 | 3 | 627.6300049 | 627.6319724 |
| VGWEQLLTIAR                       | P57780 | 0          |              | 6034.690918 | 2 | 693.8900146 | 693.8906296 |
| AAEAGDLHTALEKFGQAISLLPDR          | Q8VBW8 | 0          | K +28.03 Da, | 6049.20166  | 3 | 851.4500122 | 851.1220147 |
| CFQEMLEEEEEHEWFIPAR               | Q9D6V8 | 0          | C +57.02 Da, | 6059.436523 | 2 | 1255.530029 | 1255.043581 |

|                                     |        |            |              |             |   |             |             |
|-------------------------------------|--------|------------|--------------|-------------|---|-------------|-------------|
| SQDLDFDDVGTAFASGPPKYKDNPFSLGETFGSR  | Q99K28 | 0          | K +28.03 Da, | 6081.870117 | 4 | 912.960022  | 912.9518797 |
| CFQEMLEEEEEHEWFIPAR                 | Q9D6V8 | 0          | C +57.02 Da, | 6091.1875   | 2 | 1254.530029 | 1255.043581 |
| EADIDGDGQVNYEEFVQMMMTAK             | P62204 | 0          | K +28.03 Da, | 6102.349121 | 2 | 1260.060059 | 1259.559262 |
| EADIDGDGQVNYEEFVQMMMTAK             | P62204 | 0          | K +28.03 Da, | 6108.099121 | 3 | 840.3699951 | 840.0419334 |
| IERGIRQHPELGVGMTTEGIDVR             | A2AKQ8 | 0.02409639 |              | 6118.627441 | 3 | 854.789978  | 855.1184987 |
| EADIDGDGQVNYEEFVQMMMTAK             | P62204 | 0          | K +28.03 Da, | 6133.396973 | 2 | 1260.060059 | 1259.559262 |
| EADIDGDGQVNYEEFVQMMMTAK             | P62204 | 0          | K +28.03 Da, | 6138.694336 | 3 | 840.3699951 | 840.0419334 |
| EADIDGDGQVNYEEFVQMMMTAK             | P62204 | 0          | K +28.03 Da, | 6164.470215 | 2 | 1260.560059 | 1259.559262 |
| AADISQWAGPLCLQEVDPPQHALR            | P70296 | 0          | C +57.02 Da, | 6167.644043 | 3 | 934.7999878 | 934.4607021 |
| EADIDGDGQVNYEEFVQMMMTAK             | P62204 | 0          | K +28.03 Da, | 6170.125    | 3 | 840.3800049 | 840.0419334 |
| CLAPMMSEVMR                         | Q8BMS1 | 0          | C +57.02 Da, | 6172.327637 | 2 | 663.289978  | 662.7976569 |
| DGKALEQLQEYFDGNLKR                  | P27773 | 0          | K +28.03 Da, | 6180.126465 | 3 | 776.4000244 | 776.4058625 |
| TILAETEGMLKDLQKSVVEEER              | Q99PL5 | 0          | K +28.03 Da, | 6185.748047 | 4 | 651.8408813 | 651.8413799 |
| DGKALEQLQEYFDGNLKR                  | P27773 | 0          | K +28.03 Da, | 6192.452637 | 3 | 777.0700073 | 776.4058625 |
| EADIDGDGQVNYEEFVQMMMTAK             | P62204 | 0          | K +28.03 Da, | 6195.212891 | 2 | 1260.060059 | 1259.559262 |
| NLGA PVAGTCYQAEWDDYVPKLYEQLSGK      | P70296 | 0.02277433 | K +28.03 Da, | 6199.112305 | 3 | 1110.209961 | 1110.211342 |
| EADIDGDGQVNYEEFVQMMMTAK             | P62204 | 0          | K +28.03 Da, | 6200.480469 | 3 | 840.3699951 | 840.0419334 |
| TILAETEGMLKDLQKSVVEEER              | Q99PL5 | 0          | K +28.03 Da, | 6215.911621 | 3 | 869.4500122 | 868.7860811 |
| TILAETEGMLKDLQKSVVEEER              | Q99PL5 | 0          | K +28.03 Da, | 6216.933594 | 4 | 651.8380127 | 651.8413799 |
| TILAETEGMLKDLQKSVVEEER              | Q99PL5 | 0          | K +28.03 Da, | 6218.22998  | 3 | 868.460022  | 868.7860811 |
| EADIDGDGQVNYEEFVQMMMTAK             | P62204 | 0          | K +28.03 Da, | 6227.314941 | 2 | 1260.060059 | 1259.559262 |
| EADIDGDGQVNYEEFVQMMMTAK             | P62204 | 0.00460829 | K +28.03 Da, | 6250.300293 | 3 | 840.039978  | 840.0419334 |
| EADIDGDGQVNYEEFVQMMMTAK             | P62204 | 0          | K +28.03 Da, | 6256.904785 | 2 | 1259.550049 | 1259.559262 |
| EADIDGDGQVNYEEFVQMMMTAK             | P62204 | 0          | K +28.03 Da, | 6261.209473 | 2 | 1260.060059 | 1259.559262 |
| GMEATLEQHLEDTMKNPSIVGLCTDSQGLNLGCR  | G3UW70 | 0          | C +57.02 Da, | 6284.084473 | 3 | 1301.949951 | 1301.289893 |
| EADIDGDGQVNYEEFVQMMMTAK             | P62204 | 0          | K +28.03 Da, | 6309.599609 | 2 | 1259.550049 | 1259.559262 |
| KLVAATGKRCLPLSMDVR                  | Q9WV68 | 0.03612167 | C +57.02 Da, | 6324.395996 | 3 | 691.4000244 | 691.0674697 |
| ETD TDTADQVIASFVKLAGDKNFITAEELR     | P57780 | 0          | K +28.03 Da, | 6363.075684 | 4 | 864.6900024 | 864.4451589 |
| ETD TDTADQVIASFVKLAGDKNFITAEELR     | P57780 | 0          | K +28.03 Da, | 6394.500977 | 4 | 864.4400024 | 864.4451589 |
| DDGLADLLFVSSGPTNASAFTR              | P27546 | 0          |              | 6412.560547 | 2 | 1193.079956 | 1192.074251 |
| CLASFTELVR                          | Q9QXF8 | 0.00485437 | C +57.02 Da, | 6415.898438 | 2 | 598.8099976 | 598.3106262 |
| AEDVQETDTSQKQSPASHEIATNLGDFAI SLYR  | P07758 | 0          | K +28.03 Da, | 6434.96875  | 3 | 1255.609985 | 1255.601053 |
| AEDVQETDTSQKQSPASHEIATNLGDFAI SLYR  | P07758 | 0          | K +28.03 Da, | 6450.555664 | 4 | 941.960022  | 941.9526087 |
| SLAEDFAEQPIKDAVITVPAFFNQAER         | Q9JKR6 | 0.01716738 | K +28.03 Da, | 6488.09082  | 3 | 1012.179993 | 1012.188866 |
| TNISDEESEQATEMLVHNAQNLMQSVKETVR     | Q64727 | 0          | K +28.03 Da, | 6504.423828 | 4 | 890.6799927 | 890.680538  |
| QQLPTFLQQMQNPDTLSAMSNPR             | Q8R317 | 0          |              | 6513.325195 | 2 | 1324.140015 | 1323.144161 |
| EPWDGKGDELPEDDIDLSDELDDLEKDEL       | Q922R8 | 0.00520833 | K +28.03 Da, | 6523.782715 | 3 | 1200.880005 | 1200.227999 |
| FIYFTSILQNFTLQPLVDPEDIDLTPSSGLGNLPR | P33267 | 0          |              | 6558.699707 | 3 | 1345.72998  | 1345.376895 |
| CEYLMELMTPAACPEPPPEAPSDGDHDEL       | O08795 | 0.00530504 | C +57.02 Da, | 6571.564941 | 3 | 1091.439941 | 1091.124    |
| QLTVQMMQNPQLAALQER                  | P28656 | 0          |              | 6611.182129 | 2 | 1107.079956 | 1106.582478 |

|                                           |        |            |              |             |   |             |             |
|-------------------------------------------|--------|------------|--------------|-------------|---|-------------|-------------|
| NITEDELKEVFEDAMEIR                        | P09405 | 0          | K +28.03 Da, | 6621.387695 | 3 | 737.3599854 | 737.0279523 |
| NITEDELKEVFEDAMEIR                        | P09405 | 0          | K +28.03 Da, | 6662.580078 | 3 | 737.3599854 | 737.0279523 |
| QWANLMEKIQASVATNPITPVAQENQ                | P08226 | 0.02589641 | K +28.03 Da, | 6722.008301 | 2 | 1512.27002  | 1511.786962 |
| QWANLMEKIQASVATNPITPVAQENQ                | P08226 | 0.01898734 | K +28.03 Da, | 6739.8125   | 2 | 1511.780029 | 1511.786962 |
| QVLLGDQIPKFTI                             | Q60692 | 0.03106796 | K +28.03 Da, | 6773.502441 | 2 | 750.4400024 | 750.4452378 |
| GLVSSDELAKDVTGAEALLER                     | P16546 | 0.02291667 | K +28.03 Da, | 6794.164063 | 2 | 1102.079956 | 1101.086629 |
| TEDGFSLKEQLQDMGLIDLFSPEKSQLPGIVAGGR       | P32261 | 0          | K +28.03 Da, | 6805.312988 | 4 | 959.25      | 958.7513918 |
| ELNDFISYLQR                               | P27773 | 0          |              | 6813.870605 | 2 | 700.3499756 | 699.35662   |
| GVVQDLQQAISKLEAR                          | P57776 | 0.005      | K +28.03 Da, | 6836.677734 | 2 | 893         | 892.0072546 |
| DGETLEELMKLSPEELLR                        | Q99K51 | 0          | K +28.03 Da, | 6858.203613 | 3 | 748.7299805 | 748.3994975 |
| NEFLSPELVAAASAVADSLPFDKQTTKSELLR          | Q61733 | 0          | K +28.03 Da, | 6876.535645 | 4 | 876.9699707 | 876.72126   |
| ALVDELEWEIAR                              | Q9QXT0 | 0.04081633 |              | 6882.429199 | 2 | 723.3900146 | 722.3775526 |
| EADIDGDGQVNYEEFVQMMTAK                    | P62204 | 0          | K +28.03 Da, | 6887.556641 | 2 | 1260.060059 | 1259.559262 |
| QLFSDKLNINEIKIAPSFVAVESMEDALKAADTIGYPVMIR | Q8C196 | 0.01709402 | K +28.03 Da, | 6903.473633 | 4 | 1135.589966 | 1135.344488 |
| ALEQQVEEMKTQLEELEDELQATEDAKLR             | Q8VDD5 | 0          | K +28.03 Da, | 6923.964844 | 4 | 869.1900024 | 868.9395466 |
| SAGTSLVNFSSLMNLEEKPAAPAA                  | P09813 | 0          | K +28.03 Da, | 6959.425293 | 2 | 1255.619995 | 1255.135796 |
| QPGLMAQMATTAAGVAVGSAVGH                   | Q9D1L0 | 0          |              | 6961.890625 | 3 | 709.3599854 | 709.0224779 |
| CVQLVEAAAQ                                | Q80YT7 | 0.00481928 | C +57.02 Da, | 6976.84668  | 2 | 544.7636719 | 544.7738766 |
| NAFACFDEEAIGTIQEDYLR                      | Q6ZWQ9 | 0          | C +57.02 Da, | 7013.544434 | 2 | 1182.030029 | 1181.536446 |
| QPGLMAQMATTAAGVAVGSAVGHGHTLGH             | Q9D1L0 | 0          |              | 7043.256836 | 3 | 845.7600098 | 845.0931845 |
| QNMLQGTEIGVLAKTFIDQGKLIIPDDVMTR           | Q9WTP7 | 0          | K +28.03 Da, | 7073.567383 | 3 | 1130.27002  | 1129.938677 |
| QNMLQGTEIGVLAKTFIDQGKLIIPDDVMTR           | Q9WTP7 | 0          | K +28.03 Da, | 7079.561035 | 3 | 1130.599976 | 1129.938677 |
| QPGLMAQMATTAAGVAVGSAVGHGHTLGH             | Q9D1L0 | 0          |              | 7082.437012 | 3 | 845.4299927 | 845.0931845 |
| CDFTEDQTAEFKEAFQLFDR                      | Q60605 | 0          | K +28.03 Da, | 7109.187988 | 2 | 1263.579956 | 1263.068111 |
| CDFTEDQTAEFKEAFQLFDR                      | Q60605 | 0          | K +28.03 Da, | 7140.756836 | 2 | 1262.569946 | 1263.068111 |
| PAWPGGSQQVDLASVLTPEIMAPILANADVQER         | D3YUD8 | 0          |              | 7141.86377  | 3 | 1158.27002  | 1158.595967 |
| PAWPGGSQQVDLASVLTPEIMAPILANADVQER         | D3YUD8 | 0          |              | 7142.026367 | 4 | 869.210022  | 869.1987946 |
| QALQDLLSEYMGNAGR                          | P26231 | 0          |              | 7146.540527 | 2 | 883.4307861 | 883.4305227 |
| PAWPGGSQQVDLASVLTPEIMAPILANADVQER         | D3YUD8 | 0          |              | 7173.26709  | 4 | 868.960022  | 869.1987946 |
| NDFQLIGIQDGYLSLLQDSGEVR                   | P63242 | 0          |              | 7192.699219 | 2 | 1291.150024 | 1290.650657 |
| PAWPGGSQQVDLASVLTPEIMAPILANADVQER         | D3YUD8 | 0.00519481 |              | 7205.831543 | 4 | 869.460022  | 869.1987946 |
| SLGYDLPMVEEGEPDPEFEAILDTPVNR              | P16546 | 0          |              | 7267.799316 | 3 | 1083.51001  | 1083.171101 |
| QQNDELTTLADEAQLSKDEIDVLR                  | Q8BUK6 | 0          | K +28.03 Da, | 7272.976563 | 3 | 925.460022  | 924.8014479 |
| CPEALFQPSFLGMESCIGHETTFN                  | P60710 | 0.0049505  | C +57.02 Da, | 7292.631836 | 2 | 1387.109985 | 1386.608763 |
| NDFQLIGIQDGYLSLLQDSGEVR                   | P63242 | 0          |              | 7317.852539 | 2 | 1291.650024 | 1290.650657 |
| DVTFSPATIEEELIKF                          | Q9CXI5 | 0          | K +28.03 Da, | 7351.594238 | 2 | 934.4899902 | 933.9904051 |
| CEYLMELMTPAACPEPPPEAPSDGDHDEL             | O08795 | 0          | C +57.02 Da, | 7364.166016 | 3 | 1091.119995 | 1091.124    |
| QNLDPLEFYINNLR                            | Q922U2 | 0          |              | 7372.996582 | 2 | 938.4699707 | 938.981237  |
| QAASSLQQASLKFEMAY                         | P38647 | 0.03131115 | K +28.03 Da, | 7392.127441 | 2 | 1007.518555 | 1007.519338 |
| QQLVELVAEQADLEQAFSPDPDCVDR                | O35841 | 0          | C +57.02 Da, | 7393.333984 | 3 | 1020.820007 | 1020.480269 |

|                                         |        |            |              |             |   |             |             |
|-----------------------------------------|--------|------------|--------------|-------------|---|-------------|-------------|
| QFFIGENMNPDMVALLDYR                     | P63028 | 0          |              | 7398.513672 | 2 | 1166.040039 | 1165.550844 |
| QQLVELVAEQADLEQAFSPDPDCVDR              | O35841 | 0          | C +57.02 Da, | 7400.368652 | 2 | 1530.719971 | 1530.216765 |
| GAGADQLTEEQIAEFKEAFSLFDKDGDTITTKELGTVMR | Q3UKW2 | 0.00465116 | K +28.03 Da, | 7409.139648 | 4 | 1101.319946 | 1101.554536 |
| QQLVELVAEQADLEQAFSPDPDCVDR              | O35841 | 0          | C +57.02 Da, | 7414.969727 | 3 | 1020.47998  | 1020.480269 |
| PFVELETNLPASR                           | O35215 | 0          |              | 7419.790039 | 2 | 736.8900146 | 736.8908271 |
| GAGADQLTEEQIAEFKEAFSLFDKDGDTITTKELGTVMR | Q3UKW2 | 0          | K +28.03 Da, | 7441.030762 | 4 | 1101.310059 | 1101.554536 |
| VNPTVFFDITADDEPLGR                      | P17742 | 0          |              | 7444.146973 | 2 | 1004.48999  | 1003.496918 |
| PFVELETNLPASR                           | O35215 | 0          |              | 7450.705078 | 2 | 737.3900146 | 736.8908271 |
| GAGADQLTEEQIAEFKEAFSLFDKDGDTITTKELGTVMR | Q3UKW2 | 0.03100775 | K +28.03 Da, | 7472.443848 | 4 | 1101.310059 | 1101.554536 |
| ADSSVQLLAEEAVTLDMLDLGAAR                | Q9D3D9 | 0          |              | 7502.167969 | 2 | 1245.640015 | 1244.633618 |
| CFLSLLNMSK                              | A2AKQ8 | 0.03619048 | K +28.03 Da, | 7531.432129 | 2 | 685.8400269 | 685.3463518 |
| CEYLMELMTPAACPEPPPEAPSDGDHDEL           | O08795 | 0.01910828 | C +57.02 Da, | 7539.84082  | 3 | 1091.459961 | 1091.124    |
| GAGADQLTEEQIAEFKEAFSLFDKDGDTITTKELGTVMR | Q3UKW2 | 0          | K +28.03 Da, | 7567.980957 | 4 | 1101.310059 | 1101.554536 |
| CGESPVWEEASQSLFVDIPSKIICR               | Q64374 | 0          | C +57.02 Da, | 7581.839844 | 3 | 1017.159973 | 1016.843825 |
| ADSSVQLLAEEAVTLDMLDLGAAR                | Q9D3D9 | 0          |              | 7606.845703 | 2 | 1245.130005 | 1244.633618 |
| SAGTSLVNFSSLMNLEEKAPAAA                 | P09813 | 0          | K +28.03 Da, | 7795.116211 | 2 | 1256.140015 | 1255.135796 |
| VNPTVFFDITADDEPLGR                      | P17742 | 0          |              | 7800.51416  | 2 | 1004.48999  | 1003.496918 |
| CVLELADQILETQR                          | P13597 | 0          | C +57.02 Da, | 7808.902344 | 2 | 844.4395142 | 844.4378163 |
| GVDNTFADELVELSTALEHQEY                  | O35658 | 0          |              | 7820.42041  | 2 | 1241.069946 | 1240.576824 |
| SAGTSLVNFSSLMNLEEKAPAAA                 | P09813 | 0          | K +28.03 Da, | 7826.116211 | 2 | 1255.130005 | 1255.135796 |
| GVDNTFADELVELSTALEHQEY                  | O35658 | 0.02453988 |              | 7827.789063 | 3 | 827.3900146 | 827.3869745 |
| CVLELADQILETQR                          | P13597 | 0          | C +57.02 Da, | 7841.072266 | 2 | 844.9400024 | 844.4378163 |
| QWANLMEKIQASVATNPIITPVAQENQ             | P08226 | 0.03584906 | K +28.03 Da, | 7869.834473 | 2 | 1511.790039 | 1511.786962 |
| CDFTEDQTAEFKEAFQLFDR                    | Q60605 | 0          | K +28.03 Da, | 7872.946777 | 2 | 1262.569946 | 1263.068111 |
| TGPAATLSDTAAAESLVDSEVTVIGFFKDVESDSAKQF  | P09103 | 0          | K +28.03 Da, | 7879.075684 | 4 | 1037.768799 | 1037.766594 |
| GAGADQLTEEQIAEFKEAFSLFDKDGDTITTKELGTVMR | Q3UKW2 | 0.00462963 | K +28.03 Da, | 8189.027344 | 4 | 1101.310059 | 1101.554536 |
| NEFTLGEECELETMTGEKVKAVVKLEGDNKMVTTF     | P12710 | 0.01894737 | K +28.03 Da, | 8194.503906 | 4 | 1023.52002  | 1023.017471 |
| ECAKMQRKHHERMERRRRELAERSDT              | Q80T11 | 0.00890869 | K +28.03 Da, | 8223.904297 | 4 | 904.1900024 | 904.4573112 |
