# Supplementary material
Source: PubMed Central journal article supplement (PMC5083106)
Supplement: 10.1074_O115.056515_mcp.O115.056515-5.pdf [file 10.1074_O115.056515_mcp.O115.056515-5.pdf]

**Supplementary Table 4:** List of N-termini identified in cryopreserved liver tissue of C57BL/6 wild type mouse (replicate 3) after chemical labeling using  $^{12}\text{COH}_2$  formaldehyde. This is a comprehensive listing of all identified peptides.

| Peptide Sequence        | UniProt ID | MSGF+ score (E-value) | Modification                   | Retention Time (s) | Charge | Measured m/z | Theoretical m/z |
|-------------------------|------------|-----------------------|--------------------------------|--------------------|--------|--------------|-----------------|
| AASSSGEKEKER            | Q9CQA5     | 0.00143403            | N-term +42.01 Da, K +28.03 Da, | 967.4235229        | 3      | 459.9100037  | 459.5720535     |
| AASSSGEKEKER            | Q9CQA5     | 0                     | N-term +42.01 Da, K +28.03 Da, | 1003.048828        | 3      | 459.5700073  | 459.5720535     |
| FSLPGDVDRAR             | Q33DR2     | 0.01368653            | N-term +42.01 Da,              | 1011.168945        | 3      | 425.8900146  | 425.554445      |
| ADKTPGGSQKASSKNR        | Q6NV83     | 0                     | N-term +42.01 Da, K +28.03 Da, | 1017.442383        | 4      | 440.2433777  | 440.243069      |
| SMQTVQKTTTR             | P05784     | 0.04406211            | N-term +42.01 Da, K +28.03 Da, | 1017.547119        | 3      | 451.578125   | 450.9063787     |
| AEVEQKKKR               | P62843     | 0.01623519            | N-term +42.01 Da, K +28.03 Da, | 1024.337524        | 3      | 414.5905762  | 414.5907188     |
| SHASPAAKPSNSKNPR        | Q9CR16     | 0                     | N-term +42.01 Da, K +28.03 Da, | 1027.282959        | 4      | 437.7399902  | 437.4865987     |
| VFYYKSQLTRHQRSH         | F6QQI5     | 0.01585903            | N-term +42.01 Da, K +28.03 Da, | 1029.913208        | 3      | 674.3499756  | 674.0219052     |
| GMKVIENR                | G21107     | 0.04292929            | N-term +42.01 Da, K +28.03 Da, | 1030.739136        | 3      | 340.1944275  | 339.5234282     |
| AHYKAADSKR              | Q9EQS3     | 0.03792075            | N-term +42.01 Da, K +28.03 Da, | 1038.04248         | 3      | 415.5631409  | 415.5630517     |
| SASAGGSHQPSQSR          | P70445     | 0                     | N-term +42.01 Da,              | 1046.879639        | 2      | 699.8212891  | 699.8214648     |
| MDEDKGKR                | Q91WV7     | 0.00323176            | N-term +42.01 Da, K +28.03 Da, | 1065.208374        | 3      | 359.51828    | 359.5183432     |
| SHASPAAKPSNSKNPR        | Q9CR16     | 0                     | N-term +42.01 Da, K +28.03 Da, | 1075.088745        | 4      | 437.7326355  | 437.4865987     |
| SASAGGSHQPSQSR          | P70445     | 0                     | N-term +42.01 Da,              | 1079.459473        | 2      | 699.821228   | 699.8214648     |
| MLMPKKNR                | P63325     | 0                     | N-term +42.01 Da, K +28.03 Da, | 1090.08313         | 3      | 373.224884   | 372.5524416     |
| SASPSNIK                | Q8VDU5     | 0.03831418            | N-term +42.01 Da, K +28.03 Da, | 1096.171875        | 2      | 437.2427979  | 437.2374525     |
| TAEEDPADPKR             | Q9D0J8     | 0                     | N-term +42.01 Da, K +28.03 Da, | 1103.940063        | 3      | 487.8900146  | 487.2230904     |
| TAEEDPADPKR             | Q9D0J8     | 0                     | N-term +42.01 Da, K +28.03 Da, | 1115.265869        | 3      | 487.2200012  | 487.2230904     |
| AAADEPKPKK              | P55264     | 0.00234192            | N-term +42.01 Da, K +28.03 Da, | 1129.814331        | 3      | 394.236145   | 394.2360531     |
| TENSTSAPAAKPKR          | P10922     | 0.00143609            | N-term +42.01 Da, K +28.03 Da, | 1133.993896        | 2      | 778.4199829  | 778.4255658     |
| ADGKAGEEKPEKPKR         | Q6P8I4     | 0                     | N-term +42.01 Da, K +28.03 Da, | 1139.826782        | 4      | 442.2416992  | 442.241532      |
| AAAKDSHEDHDTSTENADESNHD | P34022     | 0.02424242            | N-term +42.01 Da, K +28.03 Da, | 1149.2052          | 4      | 642.5100098  | 642.2603746     |
| ADGKAGEEKPEKPKR         | Q6P8I4     | 0.00144928            | N-term +42.01 Da, K +28.03 Da, | 1157.517334        | 3      | 589.319458   | 589.3196171     |
| TENSTSAPAAKPKR          | P10922     | 0                     | N-term +42.01 Da, K +28.03 Da, | 1159.179321        | 3      | 519.289978   | 519.286136      |
| SESGKSSQPLASKQEKDGTEKR  | P17095     | 0                     | N-term +42.01 Da, K +28.03 Da, | 1168.098145        | 4      | 655.5999756  | 655.3462525     |
| ADGKAGEEKPEKPKR         | Q6P8I4     | 0                     | N-term +42.01 Da, K +28.03 Da, | 1176.591187        | 4      | 442.2414246  | 442.241532      |
| SSSPLSKKR               | Q02053     | 0.01328021            | N-term +42.01 Da, K +28.03 Da, | 1183.912964        | 3      | 363.2200012  | 363.2205144     |
| TENSTSAPAAKPKR          | P10922     | 0.00049702            | N-term +42.01 Da, K +28.03 Da, | 1188.787476        | 2      | 778.9199829  | 778.4255658     |
| TENSTSAPAAKPKR          | P10922     | 0                     | N-term +42.01 Da, K +28.03 Da, | 1189.941528        | 3      | 519.6143799  | 519.286136      |
| SSAAPAKKPYR             | Q9DCD5     | 0.03141136            | N-term +42.01 Da, K +28.03 Da, | 1194.223633        | 3      | 425.247406   | 425.2469521     |
| SESGKSSQPLASKQEKDGTEKR  | P17095     | 0                     | N-term +42.01 Da, K +28.03 Da, | 1199.131836        | 4      | 655.3461914  | 655.3462525     |
| SAGSSCSQTPSR            | Q60876     | 0                     | N-term +42.01 Da, C +57.02Da,  | 1199.494019        | 2      | 633.7700195  | 633.7725946     |
| AAAQPESR                | Q9ET26     | 0.00144718            | N-term +42.01 Da,              | 1211.057861        | 2      | 436.2172852  | 436.2170514     |

|                |        |            |                                           |             |   |             |             |
|----------------|--------|------------|-------------------------------------------|-------------|---|-------------|-------------|
| LVPQSGSR       | Q8CBY0 | 0.03545493 | N-term +42.01 Da,                         | 1219.764771 | 2 | 428.2399902 | 428.2377864 |
| TENSTSAPAAKPKR | P10922 | 0          | N-term +42.01 Da, K +28.03 Da,            | 1220.455811 | 3 | 519.6141968 | 519.286136  |
| TENSTSAPAAKPKR | P10922 | 0          | N-term +42.01 Da, K +28.03 Da,            | 1220.726563 | 2 | 778.9199829 | 778.4255658 |
| STILQQQFNR     | Q71LX4 | 0.02846054 | N-term +42.01 Da,                         | 1226.846802 | 2 | 638.3286133 | 638.8358544 |
| SAGSSCSQTPSR   | Q60876 | 0          | N-term +42.01 Da, C +57.02Da,             | 1230.455444 | 2 | 633.7731323 | 633.7725946 |
| AATGGGADDESR   | Q91WK7 | 0          | N-term +42.01 Da,                         | 1233.560181 | 2 | 574.7442627 | 574.74436   |
| ADEGKSYNEHDDR  | Q99JX7 | 0          | N-term +42.01 Da, K +28.03 Da,            | 1233.715454 | 3 | 535.9000244 | 535.8973775 |
| TAEEDDEADPKR   | Q9D0J8 | 0          | N-term +42.01 Da, K +28.03 Da,            | 1246.011841 | 2 | 730.8300171 | 730.3309974 |
| AAADEPKPK      | P55264 | 0          | N-term +42.01 Da, K +28.03 Da,            | 1267.102051 | 2 | 512.7875977 | 512.7873097 |
| TTYNNKGPKPER   | P49429 | 0          | N-term +42.01 Da, K +28.03 Da,            | 1299.419067 | 3 | 501.6038818 | 501.6035762 |
| SYEKEKAR       | G3UX43 | 0.00408534 | N-term +42.01 Da, K +28.03 Da,            | 1300.765869 | 3 | 370.2046204 | 370.204753  |
| MDQTQHPSK      | Q9JL3  | 0.00323625 | N-term +42.01 Da, K +28.03 Da,            | 1302.488281 | 2 | 571.2700195 | 571.2689585 |
| AVEEPPQK       | Q8BGC0 | 0.01028623 | N-term +42.01 Da, K +28.03 Da,            | 1307.63208  | 2 | 485.2533875 | 484.2583851 |
| SGEDVPHR       | Q9CR00 | 0          | N-term +42.01 Da,                         | 1330.959351 | 2 | 469.7203979 | 469.7199584 |
| HTSLITCHR      | Q922P8 | 0.01705291 | N-term +42.01 Da, C +57.02Da,             | 1331.396362 | 2 | 583.789978  | 583.7903921 |
| SQPGPKPAASPR   | P51125 | 0          | N-term +42.01 Da, K +28.03 Da,            | 1336.521851 | 2 | 631.8458862 | 631.8462219 |
| MESNKDEAER     | Q9QYI4 | 0          | N-term +42.01 Da, K +28.03 Da,            | 1345.446045 | 2 | 639.7841797 | 639.7851706 |
| AEAEEDCHSDADR  | Q8BK06 | 0          | N-term +42.01 Da, C +57.02Da,             | 1348.9198   | 2 | 773.7888184 | 773.7891712 |
| TKEMTENQR      | P30204 | 0          | N-term +42.01 Da, K +28.03 Da,            | 1349.051514 | 2 | 603.7929688 | 603.7927981 |
| KTPPPPPPK      | E9PZQ0 | 0.01827676 | N-term +42.01 Da, K +28.03 Da,            | 1357.894775 | 2 | 528.8200073 | 528.8262373 |
| ATGTPDSQAR     | Q9CRC6 | 0          | N-term +42.01 Da,                         | 1361.324829 | 2 | 523.25      | 523.2490805 |
| SGEDVPHR       | Q9CR00 | 0          | N-term +42.01 Da,                         | 1362.602539 | 2 | 469.7200928 | 469.7199584 |
| ADAAVGEKCKGDQR | Q9JKP8 | 0.0014549  | N-term +42.01 Da, K +28.03 Da,C +57.02Da, | 1368.342407 | 3 | 534.9400024 | 534.9349975 |
| AKPLTDQEKR     | Q9ET01 | 0.00409836 | N-term +42.01 Da, K +28.03 Da,            | 1375.989624 | 3 | 428.5822754 | 428.5821122 |
| AENSQLTER      | Q99PL5 | 0          | N-term +42.01 Da,                         | 1381.998779 | 2 | 545.7533569 | 545.2621881 |
| MEAVPEKKKK     | P14148 | 0          | N-term +42.01 Da, K +28.03 Da,            | 1382.859497 | 3 | 447.943634  | 447.9439932 |
| AKPAGDAAVGSR   | Q80UU1 | 0.00234632 | N-term +42.01 Da, K +28.03 Da,            | 1395.39502  | 2 | 585.3178711 | 585.3172973 |
| KMKDTSSEEEIR   | P62204 | 0          | N-term +42.01 Da, K +28.03 Da,            | 1397.220947 | 3 | 527.2600098 | 526.9275089 |
| ADNEKLDNQR     | Q35343 | 0.0174444  | N-term +42.01 Da, K +28.03 Da,            | 1399.116699 | 2 | 636.8099976 | 636.8125768 |
| AWPSLVHR       | Q91V83 | 0.00323774 | N-term +42.01 Da,                         | 1403.019653 | 3 | 337.185791  | 336.5188942 |
| SAQAQMR        | Q7TNC4 | 0.00452284 | N-term +42.01 Da,                         | 1407.394287 | 2 | 417.2000122 | 417.2003467 |
| STAGKVIKCK     | P00329 | 0.00720072 | N-term +42.01 Da, K +28.03 Da,C +57.02Da, | 1415.034668 | 3 | 406.5799866 | 406.5810548 |
| SATSVDQR       | Q8BYK6 | 0.00098668 | N-term +42.01 Da,                         | 1422.921875 | 2 | 453.2200012 | 453.2197914 |
| STAGKVIKCK     | P00329 | 0          | N-term +42.01 Da, K +28.03 Da,C +57.02Da, | 1423.333618 | 2 | 609.3673096 | 609.3679439 |
| MDSKQQTVR      | P70694 | 0          | N-term +42.01 Da, K +28.03 Da,            | 1430.975098 | 2 | 581.7956543 | 581.7978831 |
| STAGKVIKCK     | P00329 | 0.04600586 | N-term +42.01 Da, K +28.03 Da,C +57.02Da, | 1446.299438 | 3 | 406.581665  | 406.5810548 |
| ATKIDKEACR     | Q9CQI6 | 0.00098184 | N-term +42.01 Da, K +28.03 Da,C +57.02Da, | 1456.589844 | 3 | 430.5673218 | 430.5675857 |
| AAPSMKER       | Q8BGD8 | 0.00411335 | N-term +42.01 Da, K +28.03 Da,            | 1459.219482 | 2 | 480.25      | 480.2525794 |
| AEGDPEAQR      | P49769 | 0.01201068 | N-term +42.01 Da,                         | 1461.422607 | 2 | 507.730011  | 507.7279809 |
| MRNLTEEER      | Q9CQU1 | 0.00409277 | N-term +42.01 Da,                         | 1462.991821 | 3 | 407.5349731 | 407.1960406 |

|                           |        |            |                                           |             |   |             |             |
|---------------------------|--------|------------|-------------------------------------------|-------------|---|-------------|-------------|
| AEDIKTK                   | P56391 | 0.0459482  | N-term +42.01 Da, K +28.03 Da,            | 1471.296875 | 2 | 451.7630005 | 451.7633031 |
| SWLTIHLR                  | P10076 | 0.00235183 | N-term +42.01 Da,                         | 1475.396851 | 3 | 356.5447998 | 356.5380659 |
| AEELHKKR                  | Q8BR92 | 0.00049603 | N-term +42.01 Da, K +28.03 Da,            | 1485.390747 | 3 | 384.871582  | 384.871774  |
| TAEEDADPKR                | Q9D0J8 | 0          | N-term +42.01 Da, K +28.03 Da,            | 1498.172729 | 2 | 730.8300171 | 730.3309974 |
| AEDIKTK                   | P56391 | 0.0459482  | N-term +42.01 Da, K +28.03 Da,            | 1508.089355 | 2 | 451.7626648 | 451.7633031 |
| MEKEEETTR                 | E9Q616 | 0          | N-term +42.01 Da, K +28.03 Da,            | 1509.921997 | 2 | 611.7839966 | 611.7846391 |
| SSNECFKCGR                | P53996 | 0          | N-term +42.01 Da, K +28.03 Da,C +57.02Da, | 1512.966064 | 2 | 657.7808228 | 657.7819075 |
| ANKAPSQMER                | P31725 | 0          | N-term +42.01 Da, K +28.03 Da,            | 1514.329956 | 2 | 601.3024292 | 601.3033326 |
| ADLKAAGGR                 | Q99LH9 | 0          | N-term +42.01 Da, K +28.03 Da,            | 1523.63501  | 3 | 362.2203369 | 362.2206257 |
| SHGSHETDEEFDAR            | P12787 | 0          | N-term +42.01 Da,                         | 1540.128662 | 3 | 553.8900146 | 553.5607655 |
| ASGNAQIGK                 | Q61171 | 0.00236855 | N-term +42.01 Da, K +28.03 Da,            | 1541.860474 | 2 | 458.25      | 458.2483515 |
| SSNECFKCGR                | P53996 | 0          | N-term +42.01 Da, K +28.03 Da,C +57.02Da, | 1549.173706 | 2 | 657.7781982 | 657.7819075 |
| TTASPSQVR                 | P09528 | 0          | N-term +42.01 Da,                         | 1550.953613 | 2 | 494.756897  | 494.756541  |
| DFLPVEIR                  | E9Q309 | 0.04291123 | N-term +42.01 Da,                         | 1559.832764 | 2 | 515.2828979 | 515.7820271 |
| AQKPDGGAGLR               | Q9QYH6 | 0.0014437  | N-term +42.01 Da, K +28.03 Da,            | 1562.317017 | 2 | 570.3117065 | 570.3120147 |
| AAVVAKR                   | Q9CQW0 | 0.03221649 | N-term +42.01 Da, K +28.03 Da,            | 1564.37146  | 2 | 392.7553101 | 392.7556145 |
| TTASPSQVR                 | P09528 | 0          | N-term +42.01 Da,                         | 1581.669189 | 2 | 494.756958  | 494.756541  |
| MNKDAQMR                  | Q9JIX0 | 0.03945694 | N-term +42.01 Da, K +28.03 Da,            | 1584.715454 | 2 | 532.2600098 | 532.2547963 |
| SHGSHETDEEFDAR            | P12787 | 0          | N-term +42.01 Da,                         | 1599.728882 | 3 | 554.2299805 | 553.5607655 |
| AENPGLNHR                 | O35344 | 0          | N-term +42.01 Da,                         | 1609.535645 | 2 | 589.78125   | 589.7810791 |
| AAAAAGPASSQR              | Q9CX34 | 0          | N-term +42.01 Da,                         | 1609.802124 | 2 | 550.2800293 | 550.2781721 |
| AEKQIPGGSGGGSGGGGGGGSGGGR | Q8BMA6 | 0          | N-term +42.01 Da, K +28.03 Da,            | 1612.533813 | 3 | 743.6799927 | 743.6794853 |
| TTASPSQVR                 | P09528 | 0          | N-term +42.01 Da,                         | 1614.640381 | 2 | 494.7563477 | 494.756541  |
| MEQAVHGESKR               | Q9R1J0 | 0          | N-term +42.01 Da, K +28.03 Da,            | 1615.244263 | 3 | 448.2200012 | 447.89084   |
| SSNECFKCGR                | P53996 | 0          | N-term +42.01 Da, K +28.03 Da,C +57.02Da, | 1617.204102 | 2 | 658.2800293 | 657.7819075 |
| AAAVQDSR                  | Q9CYX7 | 0.00098522 | N-term +42.01 Da,                         | 1617.968506 | 2 | 430.2174988 | 430.2170514 |
| SGGGTETPVACDAAQGGKKR      | Q8R015 | 0          | N-term +42.01 Da, K +28.03 Da,C +57.02Da, | 1620.34729  | 3 | 682.3400269 | 682.3408642 |
| METPKPR                   | P70671 | 0.00409463 | N-term +42.01 Da, K +28.03 Da,            | 1631.427124 | 2 | 464.75      | 464.7496724 |
| STPGKENFR                 | Q60960 | 0.00323027 | N-term +42.01 Da, K +28.03 Da,            | 1631.578003 | 2 | 553.289978  | 553.2854656 |
| ATTAQSQPQVAGKR            | Q99J36 | 0          | N-term +42.01 Da, K +28.03 Da,            | 1642.983887 | 2 | 805.9400024 | 805.4364648 |
| TTASPSQVR                 | P09528 | 0          | N-term +42.01 Da,                         | 1645.383545 | 2 | 494.7566833 | 494.756541  |
| MDAQSSAKVNSR              | P49586 | 0.01997395 | N-term +42.01 Da, K +28.03 Da,            | 1651.783569 | 2 | 682.8400269 | 682.3353618 |
| AANPSGQGFQKNKR            | Q3TXT3 | 0.00097513 | N-term +42.01 Da, K +28.03 Da,            | 1655.917114 | 2 | 779.8900146 | 779.8896816 |
| AATDSSVSQK                | P52825 | 0.04055767 | N-term +42.01 Da, K +28.03 Da,            | 1657.845337 | 2 | 581.8084717 | 581.8011463 |
| AEEEVGNSQR                | O55091 | 0          | N-term +42.01 Da,                         | 1666.721802 | 2 | 581.2600098 | 580.7625526 |
| TTASPSQVR                 | P09528 | 0          | N-term +42.01 Da,                         | 1676.980347 | 2 | 494.7564697 | 494.756541  |
| SSNECFKCGR                | P53996 | 0.00233973 | N-term +42.01 Da, K +28.03 Da,C +57.02Da, | 1682.644165 | 2 | 658.2739258 | 657.7819075 |
| AQYKGAASEAGR              | Q9WV03 | 0          | N-term +42.01 Da, K +28.03 Da,            | 1684.431152 | 2 | 639.8200073 | 639.8254868 |
| AQDQGEKENPMR              | Q9CXW4 | 0.01331558 | N-term +42.01 Da, K +28.03 Da,            | 1689.817749 | 2 | 736.8400269 | 736.8435513 |
| AEELRQIK                  | Q91YR1 | 0.0394402  | N-term +42.01 Da, K +28.03 Da,            | 1690.118774 | 3 | 395.8900146 | 395.8873127 |

|                             |        |            |                                            |             |   |             |             |
|-----------------------------|--------|------------|--------------------------------------------|-------------|---|-------------|-------------|
| AAEKQIPGGGSGGGGSGGGGGGGGGGR | Q8BMA6 | 0          | N-term +42.01 Da, K +28.03 Da,             | 1695.689941 | 3 | 767.3588867 | 767.3585233 |
| AAEKQIPGGGSGGGGSGGGGGGGGGGR | Q8BMA6 | 0          | N-term +42.01 Da, K +28.03 Da,             | 1697.572998 | 2 | 1151.040039 | 1150.534147 |
| TTASPSQVR                   | P09528 | 0          | N-term +42.01 Da,                          | 1707.496094 | 2 | 494.7567139 | 494.756541  |
| AAGESMAQR                   | Q9D8S4 | 0          | N-term +42.01 Da,                          | 1721.822754 | 2 | 481.721405  | 481.7216438 |
| MNKDAQMR                    | Q9JIX0 | 0.00764388 | N-term +42.01 Da, K +28.03 Da,             | 1722.777466 | 2 | 532.7469482 | 532.2547963 |
| SETAPAETAAPAPVEKSPAKKKTTK   | P43276 | 0.00098328 | N-term +42.01 Da, K +28.03 Da,             | 1726.407593 | 4 | 681.1400146 | 680.8915669 |
| ATATPVQQQR                  | P14733 | 0          | N-term +42.01 Da,                          | 1731.149902 | 2 | 571.3013306 | 571.3016472 |
| AAAVPQR                     | Q62446 | 0.03507271 | N-term +42.01 Da,                          | 1734.615845 | 2 | 377.7099915 | 377.7139468 |
| TTASPSQVR                   | P09528 | 0.00097895 | N-term +42.01 Da,                          | 1737.640015 | 2 | 494.7565613 | 494.756541  |
| AQEEEDVR                    | Q505B7 | 0.00049579 | N-term +42.01 Da,                          | 1743.164673 | 2 | 509.2276001 | 509.227814  |
| ATSASSHLNKGKIK              | P15105 | 0          | N-term +42.01 Da, K +28.03 Da,             | 1744.029907 | 3 | 471.6000061 | 471.2683049 |
| TLKSSEGGNSMR                | P70290 | 0.00098087 | N-term +42.01 Da, K +28.03 Da,             | 1748.541992 | 2 | 761.8599854 | 761.8619414 |
| SSPPEGKLETK                 | Q91XC8 | 0          | N-term +42.01 Da, K +28.03 Da,             | 1751.733643 | 2 | 635.8480225 | 635.8480965 |
| SATSVDPQR                   | P59326 | 0.00234962 | N-term +42.01 Da,                          | 1760.923828 | 2 | 501.7458801 | 501.7461735 |
| TTASPSQVR                   | P09528 | 0.00144092 | N-term +42.01 Da,                          | 1777.952271 | 2 | 494.7600098 | 494.756541  |
| SSPPEGKLETK                 | Q91XC8 | 0          | N-term +42.01 Da, K +28.03 Da,             | 1782.445313 | 2 | 635.8482056 | 635.8480965 |
| METPSQR                     | P48678 | 0.00541761 | N-term +42.01 Da,                          | 1789.03064  | 2 | 445.705719  | 445.7054622 |
| GEIEQKPTPASR                | F8VPU2 | 0.03869048 | N-term +42.01 Da, K +28.03 Da,             | 1789.744263 | 2 | 691.8699951 | 691.867352  |
| MDPNCSCASDGCSCAGACKKQCK     | P02798 | 0          | N-term +42.01 Da, K +28.03 Da, C +57.02Da, | 1791.265137 | 3 | 1009.390015 | 1009.055775 |
| MEKPAASTEPQGSR              | Q9JMD3 | 0          | N-term +42.01 Da, K +28.03 Da,             | 1802.421143 | 2 | 779.8806763 | 779.880134  |
| AGAAEDVR                    | Q8C8T8 | 0.00097704 | N-term +42.01 Da,                          | 1803.106934 | 2 | 415.7034607 | 415.7037768 |
| SEAAPAAPAAAPPAEKAPAKKK      | P15864 | 0          | N-term +42.01 Da, K +28.03 Da,             | 1803.202881 | 4 | 557.3267212 | 557.3268676 |
| SEAAPAAPAAAPPAEKAPAKKK      | P15864 | 0          | N-term +42.01 Da, K +28.03 Da,             | 1803.863403 | 3 | 742.7700195 | 742.7667313 |
| AGQEDPVQR                   | Q91VR8 | 0.04566401 | N-term +42.01 Da,                          | 1808.390625 | 2 | 521.2519531 | 521.251623  |
| SSPPEGKLETK                 | Q91XC8 | 0          | N-term +42.01 Da, K +28.03 Da,             | 1813.39502  | 2 | 635.8486328 | 635.8480965 |
| SEAAPAAPAAAPPAEKAPAKKKAA    | P15864 | 0.00411711 | N-term +42.01 Da, K +28.03 Da,             | 1818.064331 | 4 | 593.0999756 | 592.8454247 |
| AAAAAAGSGTPR                | Q9CQ36 | 0          | N-term +42.01 Da,                          | 1830.026367 | 2 | 521.7700195 | 521.7674401 |
| SEAAPAAPAAAPPAEKAPAKKKAA    | P15864 | 0          | N-term +42.01 Da, K +28.03 Da,             | 1832.458984 | 3 | 790.460022  | 790.1248074 |
| SEAAPAAPAAAPPAEKAPAKKKAA    | P15864 | 0          | N-term +42.01 Da, K +28.03 Da,             | 1834.187866 | 3 | 790.789978  | 790.1248074 |
| AAAPPQEQKQMLGER             | A3KFU5 | 0          | N-term +42.01 Da, K +28.03 Da,             | 1837.791382 | 3 | 575.9713745 | 575.2980473 |
| SETAAPAAPAPAPAEKTPVKKKAR    | P43274 | 0          | N-term +42.01 Da, K +28.03 Da,             | 1839.547241 | 4 | 636.6300049 | 636.1245315 |
| SKQEYDEAGPSIVHR             | P62737 | 0.03796928 | N-term +42.01 Da, K +28.03 Da,             | 1840.568848 | 3 | 596.6356812 | 595.9637221 |
| LGKEVQAAQAR                 | P08226 | 0          | N-term +42.01 Da, K +28.03 Da,             | 1845.169312 | 2 | 620.8499756 | 620.8540469 |
| MDPNCSCASDGCSCAGACKKQCKC    | P02798 | 0          | N-term +42.01 Da, K +28.03 Da, C +57.02Da, | 1849.414551 | 3 | 1062.72998  | 1062.399324 |
| SEAAPAAPAAAPPAEKAPAKKKAA    | P15864 | 0          | N-term +42.01 Da, K +28.03 Da,             | 1849.553955 | 4 | 593.0999756 | 592.8454247 |
| ADTAPQLKR                   | Q9DAR7 | 0          | N-term +42.01 Da, K +28.03 Da,             | 1851.038696 | 2 | 535.303833  | 535.3036582 |
| SETAAPAAPAPAPAEKTPVKKKAR    | P43274 | 0          | N-term +42.01 Da, K +28.03 Da,             | 1853.259644 | 3 | 847.8306274 | 847.8302832 |
| ADIQTER                     | P62281 | 0.03942348 | N-term +42.01 Da,                          | 1855.049316 | 2 | 437.7168274 | 437.7168844 |
| AAAPAGVGR                   | Q8R344 | 0          | N-term +42.01 Da,                          | 1863.265503 | 2 | 406.2247009 | 406.2246789 |
| SETAAPAAPAPAPAEKTPVKKKAR    | P43274 | 0          | N-term +42.01 Da, K +28.03 Da,             | 1869.90918  | 4 | 636.1248779 | 636.1245315 |

|                              |        |            |                                           |             |   |             |             |
|------------------------------|--------|------------|-------------------------------------------|-------------|---|-------------|-------------|
| MDPNCSCASDGCSCAGACKCKQCKC    | P02798 | 0          | N-term +42.01 Da, K +28.03 Da,C +57.02Da, | 1880.095581 | 3 | 1063.069946 | 1062.399324 |
| MEEASGSAGNDR                 | O70404 | 0          | N-term +42.01 Da,                         | 1882.1073   | 2 | 633.255249  | 633.2567775 |
| AALNVKEKK                    | Q80Y55 | 0.03867403 | N-term +42.01 Da, K +28.03 Da,            | 1887.646973 | 3 | 376.2485352 | 376.2446598 |
| SETAAPAAPAPAEKTPVKKKAR       | P43274 | 0          | N-term +42.01 Da, K +28.03 Da,            | 1900.156128 | 4 | 636.3800049 | 636.1245315 |
| ATNDAVLKR                    | P31230 | 0          | N-term +42.01 Da, K +28.03 Da,            | 1901.795898 | 2 | 529.3039551 | 529.3036582 |
| VWRNSPR                      | Q8CDK2 | 0.00367309 | N-term +42.01 Da,                         | 1903.760864 | 2 | 478.7559509 | 478.7566775 |
| SGFSSEER                     | Q9D819 | 0.00142857 | N-term +42.01 Da,                         | 1911.120972 | 2 | 470.7039795 | 470.7039743 |
| ATDISSGADCKGDTKN             | Q9CQJ6 | 0          | N-term +42.01 Da, K +28.03 Da,C +57.02Da, | 1916.199707 | 2 | 977.4400024 | 977.4389403 |
| ASGSMATSEER                  | Q9DBC7 | 0          | N-term +42.01 Da,                         | 1916.542603 | 2 | 648.7722168 | 648.7722606 |
| MDQQTQHPSKAAQPLR             | Q9JL3  | 0          | N-term +42.01 Da, K +28.03 Da,            | 1916.723389 | 3 | 593.6400146 | 593.3053133 |
| MNTPSQPR                     | Q6NZJ6 | 0.0027894  | N-term +42.01 Da,                         | 1918.325439 | 2 | 486.7322693 | 486.7320113 |
| MDPNCSCASDGCSCAGACKCKQCKCTSC | P02798 | 0          | N-term +42.01 Da, K +28.03 Da,C +57.02Da, | 1918.658447 | 3 | 1178.77002  | 1178.43611  |
| SAYLKDKMR                    | Q91YM4 | 0.01158645 | N-term +42.01 Da, K +28.03 Da,            | 1919.721069 | 2 | 604.8300171 | 605.3366438 |
| AETVADTR                     | O70492 | 0          | N-term +42.01 Da,                         | 1923.962158 | 2 | 452.722168  | 452.7221669 |
| SSSPVNVK                     | Q8VEK3 | 0.00145208 | N-term +42.01 Da, K +28.03 Da,            | 1925.835449 | 2 | 444.2399902 | 444.2452775 |
| AQERPSCAVEPEHVQR             | P56389 | 0          | N-term +42.01 Da, C +57.02Da,             | 1927.68103  | 3 | 645.6433716 | 645.6427657 |
| ADADKSEAAAGDDGSQQQPAEPR      | Q8C854 | 0          | N-term +42.01 Da, K +28.03 Da,            | 1933.572998 | 3 | 795.6900024 | 795.358078  |
| ADADKSEAAAGDDGSQQQPAEPR      | Q8C854 | 0          | N-term +42.01 Da, K +28.03 Da,            | 1938.45813  | 2 | 1192.530029 | 1192.533479 |
| ADEVGGEALGR                  | A8DUK4 | 0.03713188 | N-term +42.01 Da,                         | 1940.494629 | 2 | 559.2800293 | 558.2700131 |
| KEVKCDMEVSCPEGYTCCR          | P28798 | 0          | N-term +42.01 Da, K +28.03 Da,C +57.02Da, | 1948.00061  | 4 | 627.7700195 | 627.2689442 |
| SSSPVNVKCLK                  | Q8VEK3 | 0.0027881  | N-term +42.01 Da, K +28.03 Da,            | 1950.997681 | 3 | 438.2781372 | 438.2781409 |
| ADPGVPGR                     | Q5EBG8 | 0.01703801 | N-term +42.01 Da,                         | 1955.492065 | 2 | 405.7088623 | 405.7088618 |
| MVADTPENLR                   | Q61792 | 0          | N-term +42.01 Da,                         | 1955.993896 | 2 | 595.2999878 | 594.2898911 |
| KEVKCDMEVSCPEGYTCCR          | P28798 | 0          | N-term +42.01 Da, K +28.03 Da,C +57.02Da, | 1959.105957 | 3 | 836.6900024 | 836.0228334 |
| SSSPVNVKCLK                  | Q8VEK3 | 0          | N-term +42.01 Da, K +28.03 Da,            | 1970.646484 | 2 | 656.9143066 | 656.9135732 |
| SETAAPAAPAPAEKTPVKKK         | P43274 | 0          | N-term +42.01 Da, K +28.03 Da,            | 1975.088135 | 3 | 772.1199951 | 772.1175414 |
| SETAAPAAPAPAEKTPVKKK         | P43274 | 0          | N-term +42.01 Da, K +28.03 Da,            | 1976.943726 | 4 | 579.8400269 | 579.3399751 |
| KISPEEIER                    | O08712 | 0.01028163 | N-term +42.01 Da, K +28.03 Da,            | 1978.828003 | 3 | 390.8900146 | 390.8836797 |
| SSSPVNVKCLK                  | Q8VEK3 | 0          | N-term +42.01 Da, K +28.03 Da,            | 1981.371582 | 3 | 438.2770081 | 438.2781409 |
| TMVVHEKQDDLGLGGNEESTKTGNAGSR | P08228 | 0          | N-term +42.01 Da, K +28.03 Da,            | 1986.068726 | 4 | 768.6300049 | 768.6320161 |
| SSNECFKC                     | P53996 | 0.00189843 | N-term +42.01 Da, K +28.03 Da,C +57.02Da, | 1997.284058 | 2 | 551.2185669 | 551.2206197 |
| SETAAPAAPAPAEKTPVKKK         | P43274 | 0          | N-term +42.01 Da, K +28.03 Da,            | 2007.389526 | 3 | 772.1199951 | 772.1175414 |
| MEAVPEKK                     | P14148 | 0.00236407 | N-term +42.01 Da, K +28.03 Da,            | 2012.048828 | 2 | 515.289978  | 515.2860881 |
| SETAAPAAPAPAEKTPVKKK         | P43274 | 0          | N-term +42.01 Da, K +28.03 Da,            | 2013.659912 | 4 | 579.5900269 | 579.3399751 |
| MQTAHTGLSHTADGADGQTSR        | Q9CR70 | 0          | N-term +42.01 Da,                         | 2019.419678 | 3 | 728.6636963 | 728.6626665 |
| SQTKEDKQLQDKPDLEER           | Q8K1N1 | 0.00049456 | N-term +42.01 Da, K +28.03 Da,            | 2020.791138 | 4 | 579.5599976 | 579.0537723 |
| MDSEVQR                      | Q8R034 | 0.00408905 | N-term +42.01 Da,                         | 2022.665894 | 2 | 453.70224   | 453.7029197 |
| MDPNCSCASDGCSCAGACKCKQ       | P02798 | 0          | N-term +42.01 Da, K +28.03 Da,C +57.02Da, | 2028.266113 | 3 | 904         | 903.6701372 |
| MDPNCSCASDGCSCAGACKCKQ       | P02798 | 0          | N-term +42.01 Da, K +28.03 Da,C +57.02Da, | 2030.348877 | 2 | 1355.5      | 1355.001568 |
| AEESSSSSSSPTAATSQQQQQQLKTK   | A2A432 | 0          | N-term +42.01 Da, K +28.03 Da,            | 2034.964233 | 3 | 1042.5      | 1042.167408 |

|                         |        |            |                                           |             |   |             |             |
|-------------------------|--------|------------|-------------------------------------------|-------------|---|-------------|-------------|
| MGESDDSIILR             | Q9CQR2 | 0          | N-term +42.01 Da,                         | 2043.007446 | 2 | 583.7689819 | 582.7637065 |
| MDPNCSCASDGCSCAGACKCK   | P02798 | 0          | N-term +42.01 Da, K +28.03 Da,C +57.02Da, | 2051.681885 | 2 | 1291.469971 | 1290.972278 |
| MDPNCSCASDGCSCAGACKCK   | P02798 | 0          | N-term +42.01 Da, K +28.03 Da,C +57.02Da, | 2053.64917  | 3 | 860.9822388 | 860.9839445 |
| MDPNCSCASDGCSCAGACKCK   | P02798 | 0          | N-term +42.01 Da, K +28.03 Da,C +57.02Da, | 2056.203613 | 2 | 1290.969971 | 1290.972278 |
| VAEDEDDEDVDTKKKQTEEDD   | P26350 | 0          | N-term +42.01 Da, K +28.03 Da,            | 2065.828369 | 3 | 855.3800049 | 855.7118532 |
| SSPPEGKLETKAGHPPAVK     | Q91XC8 | 0          | N-term +42.01 Da, K +28.03 Da,            | 2066.900635 | 4 | 514.791748  | 514.7913892 |
| AGVSFSGHR               | Q9QXS6 | 0.00234742 | N-term +42.01 Da,                         | 2070.066895 | 2 | 480.2381592 | 480.2383179 |
| TASSAEQLR               | D3YVI2 | 0          | N-term +42.01 Da,                         | 2072.455078 | 2 | 502.7550049 | 502.7539985 |
| AAGPISER                | Q8QZY9 | 0.00412655 | N-term +42.01 Da,                         | 2075.147949 | 2 | 422.7200012 | 421.7219694 |
| AATTGSGVKVPR            | Q9CZY3 | 0          | N-term +42.01 Da, K +28.03 Da,            | 2077.127686 | 2 | 607.3480225 | 607.3485974 |
| AAAEEDDGGPEGPNR         | O35445 | 0          | N-term +42.01 Da,                         | 2077.658203 | 2 | 770.828125  | 770.8291534 |
| ASEAGGIGGGGGGKIR        | E9Q3G8 | 0.00410771 | N-term +42.01 Da, K +28.03 Da,            | 2080.067871 | 2 | 735.8900146 | 735.8866076 |
| APKVSDSVEQLR            | Q9CYG7 | 0.00234302 | N-term +42.01 Da, K +28.03 Da,            | 2088.104492 | 3 | 467.6000061 | 466.9244269 |
| AAGPISER                | Q8QZY9 | 0.00412655 | N-term +42.01 Da,                         | 2090.367676 | 2 | 421.7200012 | 421.7219694 |
| SSPPEGKLETKAGHPPAVK     | Q91XC8 | 0          | N-term +42.01 Da, K +28.03 Da,            | 2090.628418 | 3 | 686.0545654 | 686.0527601 |
| DEEDEEEEEDEGPVR         | Q9D0J8 | 0          | N-term +42.01 Da,                         | 2090.767334 | 2 | 988.8900146 | 988.8718087 |
| AAAMDVDTPSGTNSGAGKKR    | P62878 | 0          | N-term +42.01 Da, K +28.03 Da,            | 2097.969238 | 3 | 678.0100098 | 678.0091145 |
| MDPNCSCASDGCSCAGACKCKQC | P02798 | 0          | N-term +42.01 Da, K +28.03 Da,C +57.02Da, | 2099.650635 | 3 | 957.3499756 | 957.0136869 |
| MDPNCSCASDGCSCAGACKCKQC | P02798 | 0.00098232 | N-term +42.01 Da, K +28.03 Da,C +57.02Da, | 2102.546631 | 2 | 1436.02002  | 1435.016892 |
| SKSFQQSSLGR             | Q8K310 | 0          | N-term +42.01 Da, K +28.03 Da,            | 2105.770752 | 2 | 647.8408203 | 647.8411369 |
| MQTAHTGLSHADGADGQTSR    | Q9CR70 | 0          | N-term +42.01 Da,                         | 2108.22876  | 3 | 729         | 728.6626665 |
| MDPNCSCASDGCSCAGACKCKQC | P02798 | 0          | N-term +42.01 Da, K +28.03 Da,C +57.02Da, | 2110.795654 | 3 | 957.0100098 | 957.0136869 |
| ALKQISSNR               | Q9R0P3 | 0.00145419 | N-term +42.01 Da, K +28.03 Da,            | 2114.277588 | 2 | 543.8200073 | 543.8169328 |
| MEEESIKEGSEKPR          | Q8K124 | 0          | N-term +42.01 Da, K +28.03 Da,            | 2116.298096 | 3 | 582.960022  | 582.9574683 |
| ATPAAPASGVR             | Q3UDR8 | 0          | N-term +42.01 Da,                         | 2118.709717 | 2 | 520.2800293 | 520.2801831 |
| ASSHTVLMR               | Q9Z0S1 | 0          | N-term +42.01 Da,                         | 2121.922119 | 2 | 522.2700195 | 522.268761  |
| VKCDMEVSCPEGYTCCR       | P28798 | 0          | N-term +42.01 Da, K +28.03 Da,C +57.02Da, | 2132.338867 | 3 | 741.6400146 | 740.9665475 |
| AGTTTIEAVKR             | D3Z2H9 | 0.00097418 | N-term +42.01 Da, K +28.03 Da,            | 2155.765869 | 2 | 608.8499756 | 608.8484304 |
| TSDQDAKVVAEPQAQR        | Q6A0A2 | 0          | N-term +42.01 Da, K +28.03 Da,            | 2157.93042  | 2 | 906.960022  | 906.9579594 |
| MNSVSPR                 | Q91WT7 | 0.00541516 | N-term +42.01 Da,                         | 2159.087891 | 2 | 416.7000122 | 416.7027222 |
| TSDQDAKVVAEPQAQR        | Q6A0A2 | 0          | N-term +42.01 Da, K +28.03 Da,            | 2159.678223 | 2 | 907.460022  | 906.9579594 |
| TSDQDAKVVAEPQAQR        | Q6A0A2 | 0.00097371 | N-term +42.01 Da, K +28.03 Da,            | 2163.53833  | 2 | 907.960022  | 906.9579594 |
| GTTTIEAVKR              | D3Z2H9 | 0.00143062 | N-term +42.01 Da, K +28.03 Da,            | 2167.544678 | 2 | 573.3319092 | 573.3298733 |
| SETAPAAPAAPAPVEKTPVKKK  | P43277 | 0          | N-term +42.01 Da, K +28.03 Da,            | 2168.187256 | 3 | 781.7999878 | 781.4613081 |
| AAATASSALKR             | Q9Z160 | 0.00235294 | N-term +42.01 Da, K +28.03 Da,            | 2173.555176 | 2 | 558.8220825 | 558.8222153 |
| MLSGSGSQGR              | D3Z6I7 | 0          | N-term +42.01 Da,                         | 2176.120361 | 2 | 511.2406616 | 511.2402009 |
| SSPPEGKLETKAGHPPAVKAGGM | Q91XC8 | 0          | N-term +42.01 Da, K +28.03 Da,            | 2192.306641 | 4 | 633.3499756 | 632.8467989 |
| SETAPAAPAAPAPVEKTPVKKK  | P43277 | 0          | N-term +42.01 Da, K +28.03 Da,            | 2192.96875  | 3 | 782.1300049 | 781.4613081 |
| GDVEKGGKIFVQK           | P62897 | 0          | N-term +42.01 Da, K +28.03 Da,            | 2196.904785 | 4 | 408.2537537 | 408.2539105 |
| AELYVKPGNKER            | Q80VJ2 | 0.00145773 | N-term +42.01 Da, K +28.03 Da,            | 2196.980225 | 3 | 501.2799988 | 501.283955  |

|                           |        |            |                                           |             |   |             |             |
|---------------------------|--------|------------|-------------------------------------------|-------------|---|-------------|-------------|
| AELYVKPGNKER              | Q80VJ2 | 0.00807899 | N-term +42.01 Da, K +28.03 Da,            | 2204.483154 | 2 | 751.9199829 | 751.4222942 |
| GDVEKGKKIFVQK             | P62897 | 0.01159679 | N-term +42.01 Da, K +28.03 Da,            | 2205.169189 | 2 | 816.5       | 815.5005445 |
| SAEGYQYR                  | P26450 | 0.00097943 | N-term +42.01 Da,                         | 2206.506104 | 2 | 508.2280579 | 508.2276164 |
| MLSGSGSQGR                | D3Z6I7 | 0          | N-term +42.01 Da,                         | 2207.375488 | 2 | 511.2396545 | 511.2402009 |
| MDTALKR                   | _sp Q6 | 0.01370469 | N-term +42.01 Da, K +28.03 Da,            | 2220.087646 | 2 | 452.75      | 452.7496724 |
| SSPPEGKLETKAGHPPAVKAGGMR  | Q91XC8 | 0          | N-term +42.01 Da, K +28.03 Da,            | 2222.779297 | 4 | 633.0999756 | 632.8467989 |
| MEEAPHGCGADSAQAGR         | Q9R060 | 0          | N-term +42.01 Da, C +57.02Da,             | 2223.261963 | 2 | 942.4000244 | 941.893979  |
| MEGHDPKEPEQLR             | B2RXM2 | 0          | N-term +42.01 Da, K +28.03 Da,            | 2223.43042  | 3 | 545.9312134 | 545.9313645 |
| SQAEFDKAAEEVKR            | P31786 | 0          | N-term +42.01 Da, K +28.03 Da,            | 2226.191895 | 3 | 569.2999878 | 569.2967011 |
| SETAPVAQAASATEKPAAAKTKKPA | P43275 | 0          | N-term +42.01 Da, K +28.03 Da,            | 2226.623291 | 4 | 709.9099731 | 709.6602074 |
| AELYVKPGNKER              | Q80VJ2 | 0.01998262 | N-term +42.01 Da, K +28.03 Da,            | 2227.374512 | 3 | 501.283844  | 501.283955  |
| MQSAPLEQPAKRPR            | Q60710 | 0          | N-term +42.01 Da, K +28.03 Da,            | 2228.153809 | 3 | 560.3067627 | 560.3067653 |
| SSPPEGKLETKAGHPPAVKAGGMR  | Q91XC8 | 0          | N-term +42.01 Da, K +28.03 Da,            | 2230.796875 | 3 | 843.789978  | 843.459973  |
| VELSNGEKRSRNRGPPPSWGRRRPR | P84104 | 0          | N-term +42.01 Da, K +28.03 Da,            | 2231.253174 | 3 | 953.1900024 | 953.5167549 |
| SSPPEGKLETKAGHPPAVKAGGMR  | Q91XC8 | 0          | N-term +42.01 Da, K +28.03 Da,            | 2236.619873 | 3 | 844.1300049 | 843.459973  |
| SETAPAAPAAPAPAEKTPVKK     | P43274 | 0          | N-term +42.01 Da, K +28.03 Da,            | 2241.02124  | 3 | 720.7399902 | 720.0754535 |
| MEVKPPPGRPQPDSCR          | Q8BG05 | 0          | N-term +42.01 Da, K +28.03 Da,            | 2242.170654 | 3 | 606.6490479 | 606.64908   |
| SQAEFDKAAEEVKR            | P31786 | 0          | N-term +42.01 Da, K +28.03 Da,            | 2242.717773 | 2 | 853.4420776 | 853.4414133 |
| MLSGSGSQGR                | D3Z6I7 | 0          | N-term +42.01 Da,                         | 2243.848633 | 2 | 511.2398682 | 511.2402009 |
| EVKCDMEVSCPEGYTCCR        | P28798 | 0          | N-term +42.01 Da, K +28.03 Da,C +57.02Da, | 2244.11084  | 3 | 784.6500244 | 783.9807456 |
| MDKNELVQKAK               | P63101 | 0.00097609 | N-term +42.01 Da, K +28.03 Da,            | 2246.383789 | 3 | 477.2738647 | 477.2742909 |
| AGTTTIEAVKR               | D3Z2H9 | 0          | N-term +42.01 Da, K +28.03 Da,            | 2248.605957 | 2 | 608.8480835 | 608.8484304 |
| AVAGAAAYR                 | Q9QXN3 | 0          | N-term +42.01 Da,                         | 2250.279785 | 2 | 410.7193604 | 410.7192293 |
| EVKCDMEVSCPEGYTCCR        | P28798 | 0          | N-term +42.01 Da, K +28.03 Da,C +57.02Da, | 2251.462158 | 2 | 1176.469971 | 1175.46748  |
| SSPPEGKLETKAGHPPAVKAGGMR  | Q91XC8 | 0          | N-term +42.01 Da, K +28.03 Da,            | 2253.677246 | 4 | 632.8477173 | 632.8467989 |
| MEGHDPKEPEQLR             | B2RXM2 | 0          | N-term +42.01 Da, K +28.03 Da,            | 2254.171143 | 3 | 545.9313354 | 545.9313645 |
| SQAEFDKAAEEVKR            | P31786 | 0          | N-term +42.01 Da, K +28.03 Da,            | 2257.552979 | 3 | 569.2966309 | 569.2967011 |
| AETAAESGGGDSGVGACER       | Q91XI1 | 0          | N-term +42.01 Da, C +57.02Da,             | 2258.570557 | 2 | 940.8900146 | 940.3897816 |
| AETAAESGGGDSGVGACER       | Q91XI1 | 0          | N-term +42.01 Da, C +57.02Da,             | 2264.02002  | 2 | 940.3900146 | 940.3897816 |
| SQAEFDKAAEEVKR            | P31786 | 0          | N-term +42.01 Da, K +28.03 Da,            | 2274.394043 | 2 | 853.4428711 | 853.4414133 |
| EVKCDMEVSCPEGYTCCR        | P28798 | 0          | N-term +42.01 Da, K +28.03 Da,C +57.02Da, | 2275.421387 | 3 | 784.6524048 | 783.9807456 |
| MEVKPPPGRPQPDSCR          | Q8BG05 | 0          | N-term +42.01 Da, K +28.03 Da,            | 2277.807617 | 3 | 606.3099976 | 606.64908   |
| EVKCDMEVSCPEGYTCCR        | P28798 | 0          | N-term +42.01 Da, K +28.03 Da,C +57.02Da, | 2281.780273 | 2 | 1176.474976 | 1175.46748  |
| STSVQGHNWTR               | Q8BT51 | 0          | N-term +42.01 Da,                         | 2282.949219 | 2 | 706.3400269 | 706.3392929 |
| SQAEFDKAAEEVKR            | P31786 | 0          | N-term +42.01 Da, K +28.03 Da,            | 2287.665771 | 3 | 569.2963867 | 569.2967011 |
| AAAATGLR                  | Q9CQZ5 | 0.002331   | N-term +42.01 Da,                         | 2287.913086 | 2 | 386.7185669 | 386.7192293 |
| MDPNCSCSTGGSCCTCTSSCACKN  | P02802 | 0          | N-term +42.01 Da, K +28.03 Da,C +57.02Da, | 2290.399658 | 3 | 891.6500244 | 891.3141308 |
| MDPNCSCSTGGSCCTCTSSCACKN  | P02802 | 0          | N-term +42.01 Da, K +28.03 Da,C +57.02Da, | 2292.849854 | 2 | 1337.469971 | 1336.467558 |
| MDPNCSCSTGGSCCTCTSSCACKN  | P02802 | 0          | N-term +42.01 Da, K +28.03 Da,C +57.02Da, | 2295.577637 | 3 | 891.3099976 | 891.3141308 |
| AAAPEPHETEKKPF            | Q9D7J4 | 0.01332149 | N-term +42.01 Da, K +28.03 Da,            | 2296.137939 | 3 | 550.6199951 | 550.6226367 |

|                        |        |            |                                           |             |   |             |             |
|------------------------|--------|------------|-------------------------------------------|-------------|---|-------------|-------------|
| MDPNCSCSTGGSCCTSSCACKN | P02802 | 0          | N-term +42.01 Da, K +28.03 Da,C +57.02Da, | 2299.026611 | 2 | 1336.469971 | 1336.467558 |
| EVKCDMEVSCPEGYTCCR     | P28798 | 0          | N-term +42.01 Da, K +28.03 Da,C +57.02Da, | 2305.892334 | 3 | 784.6500244 | 783.9807456 |
| SDSRDPASDQMKQWKEQR     | P24270 | 0          | N-term +42.01 Da, K +28.03 Da,            | 2313.29126  | 4 | 573.2772217 | 573.2774778 |
| AGSSAEQAADYR           | Q9ER72 | 0          | N-term +42.01 Da,                         | 2313.901367 | 2 | 634.2800293 | 634.2811097 |
| STSVPPQGHNWTR          | Q8BT51 | 0.03182796 | N-term +42.01 Da,                         | 2314.366211 | 2 | 706.3400269 | 706.3392929 |
| SDSRDPASDQMKQWKEQR     | P24270 | 0          | N-term +42.01 Da, K +28.03 Da,            | 2319.995605 | 3 | 764.3699951 | 764.0342116 |
| MEKPAASTEPPQGSRALGR    | Q9JMD3 | 0          | N-term +42.01 Da, K +28.03 Da,            | 2324.55127  | 3 | 685.0212402 | 685.0213542 |
| MDPNCSCSTGGSCCTSSCACKN | P02802 | 0          | N-term +42.01 Da, K +28.03 Da,C +57.02Da, | 2327.024902 | 3 | 891.6500244 | 891.3141308 |
| AAAATEGVPATR           | Q9CWG9 | 0          | N-term +42.01 Da,                         | 2331.200684 | 2 | 528.2770996 | 528.2776406 |
| SAPSEEEYAR             | Q921C5 | 0          | N-term +42.01 Da,                         | 2337.336182 | 2 | 655.2805786 | 655.2807757 |
| MFQGADSQAGKSGSR        | Q6PGH2 | 0          | N-term +42.01 Da, K +28.03 Da,            | 2349.013916 | 2 | 798.8699951 | 798.875383  |
| DEGDEEDEEEEEDEGPVR     | Q9D0J8 | 0          | N-term +42.01 Da,                         | 2349.654785 | 2 | 1139.939941 | 1139.41731  |
| ASTFNPR                | Q9JIL4 | 0.00852018 | N-term +42.01 Da,                         | 2351.342773 | 2 | 417.7083435 | 417.7088618 |
| DEGDEEDEEEEEDEGPVR     | Q9D0J8 | 0          | N-term +42.01 Da,                         | 2355.147217 | 2 | 1140.439941 | 1139.41731  |
| SGYTPDEKLR             | Q3UIU2 | 0.00143266 | N-term +42.01 Da, K +28.03 Da,            | 2356.149658 | 2 | 618.8200073 | 618.3169633 |
| AGTTTIEAVKR            | D3Z2H9 | 0          | N-term +42.01 Da, K +28.03 Da,            | 2365.486328 | 2 | 608.8480225 | 608.8484304 |
| AMHNKTAPPQIPDTR        | Q2VPQ9 | 0          | N-term +42.01 Da, K +28.03 Da,            | 2370.849365 | 3 | 583.2999878 | 582.970042  |
| MFQGADSQAGKSGSR        | Q6PGH2 | 0          | N-term +42.01 Da, K +28.03 Da,            | 2379.594727 | 2 | 798.8720093 | 798.875383  |
| AAPAAPAAGETGPDAR       | Q9D6Y9 | 0          | N-term +42.01 Da,                         | 2388.384277 | 2 | 732.8555908 | 732.857516  |
| MDPNCSCASDGCSCAGACK    | P02798 | 0          | N-term +42.01 Da, K +28.03 Da,C +57.02Da, | 2394.288818 | 2 | 1133.390015 | 1132.893822 |
| AGTTTIEAVKR            | D3Z2H9 | 0          | N-term +42.01 Da, K +28.03 Da,            | 2396.162842 | 2 | 608.8473511 | 608.8484304 |
| MDPNCSCASDGCSCAGACK    | P02798 | 0          | N-term +42.01 Da, K +28.03 Da,C +57.02Da, | 2399.806396 | 2 | 1132.890015 | 1132.893822 |
| SLKPQPQPAPATGR         | O70305 | 0          | N-term +42.01 Da, K +28.03 Da,            | 2403.409912 | 2 | 807.9500122 | 807.9517503 |
| AVSTGVKVR              | Q9D2M8 | 0          | N-term +42.01 Da, K +28.03 Da,            | 2419.502686 | 2 | 542.329895  | 542.3296758 |
| SDKSDLKAELER           | O88485 | 0.00764045 | N-term +42.01 Da, K +28.03 Da,            | 2424.810059 | 3 | 496.9400024 | 496.9349919 |
| AGTTTIEAVKR            | D3Z2H9 | 0          | N-term +42.01 Da, K +28.03 Da,            | 2427.979492 | 2 | 608.8480225 | 608.8484304 |
| SDKSDLKAELER           | O88485 | 0.00851636 | N-term +42.01 Da, K +28.03 Da,            | 2430.548096 | 2 | 744.9000244 | 744.8988497 |
| SLKPQPQPAPATGR         | O70305 | 0.00049505 | N-term +42.01 Da, K +28.03 Da,            | 2433.867432 | 2 | 807.9508057 | 807.9517503 |
| ADTYAVVQKR             | Q61152 | 0          | N-term +42.01 Da, K +28.03 Da,            | 2445.047607 | 2 | 610.836792  | 610.8353229 |
| AVSTGVKVR              | Q9D2M8 | 0.00278293 | N-term +42.01 Da, K +28.03 Da,            | 2450.319336 | 2 | 542.3290405 | 542.3296758 |
| MEVGQYGKNASR           | Q6PD10 | 0          | N-term +42.01 Da, K +28.03 Da,            | 2450.849365 | 2 | 705.3452148 | 705.3457293 |
| AGTTTIEAVKR            | D3Z2H9 | 0          | N-term +42.01 Da, K +28.03 Da,            | 2459.771973 | 2 | 608.8482056 | 608.8484304 |
| AENVVEPGPPSAKR         | B2RWS6 | 0.03672075 | N-term +42.01 Da, K +28.03 Da,            | 2460.082275 | 2 | 760.9099731 | 760.9070087 |
| SETAPAAPAAPAPVEKTPVKK  | P43277 | 0          | N-term +42.01 Da, K +28.03 Da,            | 2479.549561 | 3 | 730.0900269 | 729.4192202 |
| AGTTTIEAVKR            | D3Z2H9 | 0          | N-term +42.01 Da, K +28.03 Da,            | 2490.786133 | 2 | 608.8481445 | 608.8484304 |
| MEDPGEDTSIHR           | Q80X98 | 0          | N-term +42.01 Da,                         | 2491.637451 | 2 | 714.8099976 | 714.8066347 |
| LGKEVQAAQAR            | P08226 | 0.01702313 | N-term +42.01 Da, K +28.03 Da,            | 2492.127686 | 2 | 621.3535156 | 620.8540469 |
| MDPNCSCASDGCSCAGACK    | P02798 | 0          | N-term +42.01 Da, K +28.03 Da,C +57.02Da, | 2508.912354 | 2 | 1213.410034 | 1212.909147 |
| MQSAPLEQPAKR           | Q60710 | 0          | N-term +42.01 Da, K +28.03 Da,            | 2512.404785 | 2 | 713.8800049 | 713.379572  |
| AEFPSKVSTR             | Q9DCU2 | 0.03870693 | N-term +42.01 Da, K +28.03 Da,            | 2519.394043 | 2 | 596.3200073 | 596.3220483 |

|                          |        |            |                                |             |   |             |             |
|--------------------------|--------|------------|--------------------------------|-------------|---|-------------|-------------|
| AKFNTGSNPTEEAATSSR       | O35601 | 0          | N-term +42.01 Da, K +28.03 Da, | 2519.719971 | 2 | 969.460022  | 969.4636065 |
| AGTTTIEAVKR              | D3Z2H9 | 0          | N-term +42.01 Da, K +28.03 Da, | 2521.314453 | 2 | 608.8499756 | 608.8484304 |
| AKFNTGSNPTEEAATSSR       | O35601 | 0          | N-term +42.01 Da, K +28.03 Da, | 2530.801758 | 2 | 970.4699707 | 969.4636065 |
| AEEAIDPR                 | P19973 | 0.02507566 | N-term +42.01 Da,              | 2535.554199 | 2 | 442.7272339 | 442.7272519 |
| AEASAAGADAGSAVAHR        | Q9DOC1 | 0          | N-term +42.01 Da,              | 2538.022949 | 2 | 812.8900146 | 812.8873366 |
| AGTTTIEAVKR              | D3Z2H9 | 0          | N-term +42.01 Da, K +28.03 Da, | 2551.554932 | 2 | 608.8478394 | 608.8484304 |
| AEVQQLR                  | Q9CR98 | 0.0440806  | N-term +42.01 Da,              | 2553.947021 | 2 | 443.2429504 | 443.243069  |
| SQAEFDKAAEEVKR           | P31786 | 0.000978   | N-term +42.01 Da, K +28.03 Da, | 2554.418945 | 3 | 569.2999878 | 569.2967011 |
| AAVKTLNPKAEVAR           | P80317 | 0          | N-term +42.01 Da, K +28.03 Da, | 2560.449219 | 3 | 522.6500244 | 522.6506378 |
| ATTLDLKSKEEKDAELDKR      | Q8VC31 | 0          | N-term +42.01 Da, K +28.03 Da, | 2563.355225 | 4 | 587.3300171 | 586.8297064 |
| AGSSSLEAVR               | E9Q453 | 0.03904924 | N-term +42.01 Da,              | 2566.991943 | 2 | 509.7600098 | 509.7618236 |
| VHQVLYR                  | P52196 | 0.01665936 | N-term +42.01 Da,              | 2569.818359 | 2 | 478.769989  | 478.7692535 |
| AKIAKTHEDIEAQIR          | Q99NB9 | 0          | N-term +42.01 Da, K +28.03 Da, | 2578.563232 | 3 | 607.6806641 | 607.6791452 |
| AKIAKTHEDIEAQIR          | Q99NB9 | 0          | N-term +42.01 Da, K +28.03 Da, | 2580.719727 | 2 | 911.5200195 | 911.0150796 |
| AKIAKTHEDIEAQIR          | Q99NB9 | 0          | N-term +42.01 Da, K +28.03 Da, | 2581.94458  | 3 | 607.6785889 | 607.6791452 |
| AATAAVPGAAAGR            | Q8CHW4 | 0          | N-term +42.01 Da,              | 2583.912598 | 2 | 563.2999878 | 563.3041897 |
| AEVQQLR                  | Q9CR98 | 0.0440806  | N-term +42.01 Da,              | 2584.817627 | 2 | 443.2425842 | 443.243069  |
| ATESSPLTTH               | Q9CRB3 | 0          | N-term +42.01 Da,              | 2585.503418 | 2 | 543.2600098 | 543.2591141 |
| SHTILLVQPTKRPEGR         | P84089 | 0          | N-term +42.01 Da, K +28.03 Da, | 2591.017334 | 4 | 476.5299988 | 476.2784486 |
| SHTILLVQPTKRPEGR         | P84089 | 0          | N-term +42.01 Da, K +28.03 Da, | 2598.821045 | 3 | 635.039978  | 634.7021726 |
| GLELPVMSHTILLVQPTKRPEGR  | G3UW85 | 0.00145278 | N-term +42.01 Da, K +28.03 Da, | 2599.133545 | 4 | 661.6400146 | 661.1269112 |
| ALSDADVQKQ               | P50518 | 0          | N-term +42.01 Da, K +28.03 Da, | 2610.16626  | 2 | 572.7954712 | 572.7958637 |
| DDEGDEEDEEEEEDEGPVR      | Q9D0J8 | 0          | N-term +42.01 Da,              | 2622.396729 | 2 | 1196.949951 | 1196.930782 |
| SHTILLVQPTKRPEGR         | P84089 | 0          | N-term +42.01 Da, K +28.03 Da, | 2622.931396 | 4 | 476.2788391 | 476.2784486 |
| SHTILLVQPTKRPEGR         | P84089 | 0          | N-term +42.01 Da, K +28.03 Da, | 2627.123535 | 3 | 634.7000122 | 634.7021726 |
| SSSPVNVKKL               | Q8VEK3 | 0.01996528 | N-term +42.01 Da, K +28.03 Da, | 2628.803711 | 2 | 578.8508911 | 578.8504414 |
| ASGADSKGDDLSTAILKQKNRPNR | Q01853 | 0          | N-term +42.01 Da, K +28.03 Da, | 2629.543213 | 4 | 668.1199951 | 667.8648777 |
| AGSSSLEAVR               | E9Q453 | 0          | N-term +42.01 Da,              | 2637.377197 | 2 | 509.7626038 | 509.7618236 |
| DGEDDDEGDEEEEEDEGPVR     | Q9D0J8 | 0          | N-term +42.01 Da,              | 2639.727051 | 2 | 1405.51001  | 1404.989755 |
| ATSASSHLNKGIKQMY         | P15105 | 0          | N-term +42.01 Da, K +28.03 Da, | 2644.114746 | 3 | 611.9873657 | 611.9891024 |
| STAGVAAQDIR              | Q99JZ7 | 0          | N-term +42.01 Da,              | 2649.461182 | 2 | 565.7924194 | 565.7936552 |
| RSSTVLTRHIK              | G3UVV3 | 0.0386576  | N-term +42.01 Da, K +28.03 Da, | 2649.612061 | 3 | 456.9400024 | 456.6087726 |
| AHYHDNYGKNDEVEFVR        | P25688 | 0          | N-term +42.01 Da, K +28.03 Da, | 2661.055176 | 3 | 722         | 721.6678572 |
| ALSDADVQKQIKH            | P50518 | 0.00235738 | N-term +42.01 Da, K +28.03 Da, | 2661.425537 | 2 | 775.9313965 | 775.9304838 |
| AAETVELHKLK              | Q9D1J3 | 0.04091101 | N-term +42.01 Da, K +28.03 Da, | 2661.708496 | 2 | 668.9000244 | 668.8953806 |
| AGTTTIEAVKR              | D3Z2H9 | 0.00142925 | N-term +42.01 Da, K +28.03 Da, | 2666.216064 | 2 | 608.8499756 | 608.8484304 |
| AGSSSLEAVR               | E9Q453 | 0          | N-term +42.01 Da,              | 2667.630371 | 2 | 509.762085  | 509.7618236 |
| VVEFLEDK                 | Q61041 | 0.04446309 | N-term +42.01 Da, K +28.03 Da, | 2669.050781 | 2 | 524.7748413 | 524.7816932 |
| AHYHDNYGKNDEVEFVR        | P25688 | 0          | N-term +42.01 Da, K +28.03 Da, | 2669.394775 | 4 | 541.5028076 | 541.502712  |
| AHYHDNYGKNDEVEFVR        | P25688 | 0          | N-term +42.01 Da, K +28.03 Da, | 2672.090088 | 2 | 1082.5      | 1081.998148 |

|                               |        |            |                                |             |   |             |             |
|-------------------------------|--------|------------|--------------------------------|-------------|---|-------------|-------------|
| AKIAQGAMYR                    | P14824 | 0          | N-term +42.01 Da, K +28.03 Da, | 2673.198486 | 2 | 589.8215332 | 589.8211607 |
| AHYHDNYGKNDEVEFVR             | P25688 | 0          | N-term +42.01 Da, K +28.03 Da, | 2674.448242 | 2 | 1082        | 1081.998148 |
| ATSASSHLNKGIKQMY              | P15105 | 0          | N-term +42.01 Da, K +28.03 Da, | 2674.894531 | 3 | 611.9899902 | 611.9891024 |
| AESAESGGPPGAQDSAADGGPAEPK     | Q8R317 | 0          | N-term +42.01 Da, K +28.03 Da, | 2675.511719 | 3 | 775.0100098 | 775.0155407 |
| AATEPPSLR                     | Q61136 | 0.00143541 | N-term +42.01 Da,              | 2678.559814 | 2 | 492.260376  | 492.2614591 |
| DDDEGDEEDEEEEEDEGPVR          | Q9D0J8 | 0          | N-term +42.01 Da,              | 2682.415527 | 2 | 1254.959961 | 1254.444254 |
| STAGVAAQDIR                   | Q99JZ7 | 0          | N-term +42.01 Da,              | 2683.111084 | 2 | 566.2999878 | 565.7936552 |
| AAAEEGCGVGVEDDR               | Q8VCI5 | 0          | N-term +42.01 Da, C +57.02Da,  | 2685.929688 | 2 | 788.8306274 | 788.8308388 |
| AASTASHRPIKIL                 | Q9DCL8 | 0.01627805 | N-term +42.01 Da, K +28.03 Da, | 2692.075195 | 3 | 497.9611511 | 497.9595827 |
| MEPGPAAPSSGAPR                | E9QM38 | 0          | N-term +42.01 Da,              | 2697.012207 | 2 | 683.8300171 | 683.8246298 |
| AMNYSAKDEVDDGGPAGPPGGAAKTR    | Q8VEK0 | 0          | N-term +42.01 Da, K +28.03 Da, | 2700.008057 | 3 | 839.75      | 839.0797098 |
| SADAAAGEPLPR                  | P70441 | 0.00232775 | N-term +42.01 Da,              | 2701.209229 | 2 | 598.7971191 | 598.7989377 |
| YDGLVGMFDPKGR                 | Q61035 | 0.00232666 | N-term +42.01 Da, K +28.03 Da, | 2702.902832 | 2 | 763.3916016 | 762.879405  |
| AEMGSKGVTAGKIASNVQK           | O08539 | 0          | N-term +42.01 Da, K +28.03 Da, | 2703.063721 | 3 | 668.0388184 | 668.0382336 |
| AMNYSAKDEVDDGGPAGPPGGAAKTR    | Q8VEK0 | 0          | N-term +42.01 Da, K +28.03 Da, | 2703.651367 | 3 | 839.4099731 | 839.0797098 |
| ASSDIQVKELEKR                 | P54227 | 0          | N-term +42.01 Da, K +28.03 Da, | 2704.149902 | 3 | 534.3015747 | 534.3016747 |
| AGSSSLEAVR                    | E9Q453 | 0          | N-term +42.01 Da,              | 2706.15625  | 2 | 509.7629089 | 509.7618236 |
| AAQESLHVKTPLR                 | Q8VBT2 | 0          | N-term +42.01 Da, K +28.03 Da, | 2707.699707 | 3 | 507.2900085 | 507.291221  |
| AATEPPSLR                     | Q61136 | 0          | N-term +42.01 Da,              | 2709.454102 | 2 | 492.2619629 | 492.2614591 |
| AAQESLHVKTPLR                 | Q8VBT2 | 0          | N-term +42.01 Da, K +28.03 Da, | 2716.385254 | 2 | 760.9400024 | 760.4331933 |
| MEGYHKPDQKQLQALKDTANR         | P40142 | 0          | N-term +42.01 Da, K +28.03 Da, | 2726.008789 | 4 | 650.0900269 | 650.0930686 |
| MEGYHKPDQKQLQALKDTANR         | P40142 | 0.00630915 | N-term +42.01 Da, K +28.03 Da, | 2726.786133 | 3 | 866.4500122 | 866.4549993 |
| MTSDQDAKVAEPPAQQR             | Q6A0A2 | 0          | N-term +42.01 Da, K +28.03 Da, | 2734.286377 | 2 | 972.4779053 | 972.4782019 |
| TEQMTR                        | P68040 | 0.01330377 | N-term +42.01 Da,              | 2734.919922 | 2 | 460.730011  | 460.7289373 |
| ATSASSHLNKGIKQMY              | P15105 | 0          | N-term +42.01 Da, K +28.03 Da, | 2736.445557 | 3 | 611.9899902 | 611.9891024 |
| RKQEEALR                      | Q6Y7W8 | 0.03979678 | N-term +42.01 Da, K +28.03 Da, | 2736.769043 | 2 | 549.8099976 | 550.3145572 |
| AGSSSLEAVR                    | E9Q453 | 0.00144788 | N-term +42.01 Da,              | 2737.772705 | 2 | 510.2600098 | 509.7618236 |
| ASSAQSSGSSGPAVPTVQR           | Q78PY7 | 0          | N-term +42.01 Da,              | 2738.415527 | 2 | 937.460022  | 936.9559484 |
| AAQESLHVKTPLR                 | Q8VBT2 | 0          | N-term +42.01 Da, K +28.03 Da, | 2738.903564 | 3 | 507.2915649 | 507.291221  |
| SQAEFDKAAEEVKR                | P31786 | 0.00049677 | N-term +42.01 Da, K +28.03 Da, | 2739.831787 | 3 | 569.2999878 | 569.2967011 |
| VAIQAVLSLYASGR                | P60710 | 0.02340702 | N-term +42.01 Da,              | 2744.898926 | 3 | 497.2900085 | 497.283955  |
| AGLGHPSAFGR                   | Q9CWS0 | 0          | N-term +42.01 Da,              | 2747.830566 | 2 | 556.2858887 | 556.2857996 |
| MFQAAGAAQATPSHEAKSSGSSTVQR    | Q8BGB5 | 0          | N-term +42.01 Da, K +28.03 Da, | 2756.974609 | 3 | 912.1099854 | 911.4400783 |
| AQESPKNSAEIPVTSNGEVDDAHEHGYNR | A2RSX9 | 0          | N-term +42.01 Da, K +28.03 Da, | 2758.945313 | 4 | 824.3800049 | 823.8829914 |
| ADTPSVYETR                    | Q5XG73 | 0.01625659 | N-term +42.01 Da,              | 2760.033203 | 2 | 590.7764893 | 590.7776712 |
| AHYHDNYGKNDEVEFVR             | P25688 | 0          | N-term +42.01 Da, K +28.03 Da, | 2764.369629 | 4 | 541.75      | 541.502712  |
| AMNYSAKDEVDDGGPAGPPGGAAKTR    | Q8VEK0 | 0          | N-term +42.01 Da, K +28.03 Da, | 2765.61084  | 3 | 839.75      | 839.0797098 |
| GEPGPAGSVGPVAVGPR             | Q01149 | 0.00235627 | N-term +42.01 Da,              | 2766.279297 | 2 | 802.9199829 | 801.9153652 |
| MNYSAKDEVDDGGPAGPPGGAAKTR     | Q8VEK0 | 0          | N-term +42.01 Da, K +28.03 Da, | 2769.26123  | 3 | 815.7299805 | 815.4006718 |
| EEKVEVWFKNRRAK                | Q02591 | 0.01498457 | N-term +42.01 Da, K +28.03 Da, | 2772.038086 | 4 | 487.5297546 | 487.0309076 |

|                          |        |            |                                           |             |   |             |             |
|--------------------------|--------|------------|-------------------------------------------|-------------|---|-------------|-------------|
| ADEEKLPPGWEKR            | Q9QUR7 | 0          | N-term +42.01 Da, K +28.03 Da,            | 2781.385742 | 3 | 551.62677   | 551.6262697 |
| AESCEALGTVPEHER          | Q8R313 | 0          | N-term +42.01 Da, C +57.02Da,             | 2783.948486 | 2 | 864.8900146 | 863.8886881 |
| AEPLLTEHQHPQTSN          | Q8R409 | 0          | N-term +42.01 Da,                         | 2785.124023 | 2 | 936.4500122 | 936.4477589 |
| SADAAAGEPLPR             | P70441 | 0          | N-term +42.01 Da,                         | 2786.423584 | 2 | 598.7966919 | 598.7989377 |
| MQSNKAF                  | Q99K48 | 0.00236518 | N-term +42.01 Da, K +28.03 Da,            | 2786.499023 | 2 | 448.2203979 | 448.2207478 |
| AESCEALGTVPEHER          | Q8R313 | 0          | N-term +42.01 Da, C +57.02Da,             | 2788.752197 | 2 | 863.8900146 | 863.8886881 |
| GSIESEEKEKEK             | Q9Z2A5 | 0.03976311 | N-term +42.01 Da, K +28.03 Da,            | 2795.415527 | 2 | 760.8900146 | 759.8985157 |
| MNGGGKAEKENTPSEANLQEEVVR | Q9WVBO | 0          | N-term +42.01 Da, K +28.03 Da,            | 2797.471191 | 3 | 906.4299927 | 905.767861  |
| ASESGKLWGGR              | Q91YI0 | 0          | N-term +42.01 Da, K +28.03 Da,            | 2798.446045 | 2 | 609.3171387 | 609.3172973 |
| ATKCTKCGPGYSTPLEAMKGP    | P17563 | 0          | N-term +42.01 Da, K +28.03 Da,C +57.02Da, | 2798.521484 | 4 | 634.8200073 | 634.8234722 |
| ATSASSHLNKGIKQMY         | P15105 | 0          | N-term +42.01 Da, K +28.03 Da,            | 2802.07373  | 3 | 611.9880371 | 611.9891024 |
| SQAEFDKAAEEVKR           | P31786 | 0          | N-term +42.01 Da, K +28.03 Da,            | 2802.148926 | 3 | 569.2999878 | 569.2967011 |
| MDGEDDSNLVIKKR           | Q91WE2 | 0          | N-term +42.01 Da, K +28.03 Da,            | 2802.56543  | 3 | 573.289978  | 573.2978247 |
| ALDPAEQHLR               | Q9CPZ8 | 0          | N-term +42.01 Da,                         | 2803.769043 | 2 | 596.3093872 | 596.3094722 |
| MQPASAKWYDRR             | Q9R0Q7 | 0.01662292 | N-term +42.01 Da, K +28.03 Da,            | 2803.844482 | 3 | 526.9329834 | 526.9330392 |
| AELTNYKDAASNR            | Q8R4U7 | 0          | N-term +42.01 Da, K +28.03 Da,            | 2803.926514 | 2 | 761.8762817 | 761.8784486 |
| ATSASSHLNKGIKQMY         | P15105 | 0          | N-term +42.01 Da, K +28.03 Da,            | 2805.812744 | 2 | 917.4769287 | 917.4800154 |
| AGSSSLEAVR               | E9Q453 | 0          | N-term +42.01 Da,                         | 2808.404053 | 2 | 509.7600098 | 509.7618236 |
| SALLEKQEQQER             | Q5SUE8 | 0          | N-term +42.01 Da, K +28.03 Da,            | 2810.227539 | 2 | 764.9000244 | 764.9019237 |
| ADEEKLPPGWEKR            | Q9QUR7 | 0          | N-term +42.01 Da, K +28.03 Da,            | 2814.682373 | 3 | 551.6300049 | 551.6262697 |
| MNSVGEACTDMKR            | Q9D8Z2 | 0          | N-term +42.01 Da, K +28.03 Da,C +57.02Da, | 2816.008057 | 2 | 784.8463135 | 784.8469222 |
| SADAAAGEPLPR             | P70441 | 0          | N-term +42.01 Da,                         | 2816.956787 | 2 | 598.798645  | 598.7989377 |
| ADKEAAFDDAVEER           | Q60972 | 0          | N-term +42.01 Da, K +28.03 Da,            | 2818.978516 | 2 | 818.3778687 | 818.3784791 |
| EPDLSSDIKER              | B5X0G2 | 0          | N-term +42.01 Da, K +28.03 Da,            | 2819.150391 | 2 | 680.3394775 | 679.843543  |
| AALGEPVR                 | _sp Q6 | 0.00232558 | N-term +42.01 Da,                         | 2822.257568 | 2 | 427.7404175 | 427.7401619 |
| ATSASSHLNKGIKQMY         | P15105 | 0          | N-term +42.01 Da, K +28.03 Da,            | 2833.010986 | 3 | 611.9894409 | 611.9891024 |
| SQAEFDKAAEEVKR           | P31786 | 0          | N-term +42.01 Da, K +28.03 Da,            | 2833.087158 | 3 | 569.6300049 | 569.2967011 |
| SQAEFDKAAEEVKR           | P31786 | 0          | N-term +42.01 Da, K +28.03 Da,            | 2835.030518 | 3 | 569.2980347 | 569.2967011 |
| ALDPAEQHLR               | Q9CPZ8 | 0          | N-term +42.01 Da,                         | 2835.181396 | 2 | 596.3092651 | 596.3094722 |
| AEVEETLKR                | P62627 | 0          | N-term +42.01 Da, K +28.03 Da,            | 2842.034912 | 2 | 572.8137817 | 572.8140563 |
| GYEPQNSGDGVQNSEFK        | Q8ROT2 | 0          | N-term +42.01 Da, K +28.03 Da,            | 2846.340088 | 2 | 963.9199829 | 963.4292323 |
| SLSNPDIASE               | Q80U35 | 0.0041021  | N-term +42.01 Da,                         | 2846.624512 | 2 | 538.7650146 | 537.7511221 |
| SADAAAGEPLPR             | P70441 | 0.00277649 | N-term +42.01 Da,                         | 2847.312012 | 2 | 599.289978  | 598.7989377 |
| MHATGLAAPAGTPR           | Q9CX30 | 0          | N-term +42.01 Da,                         | 2849.122803 | 2 | 696.8568115 | 696.8562638 |
| SDNGELEDKPPAPPVR         | Q8CIN4 | 0          | N-term +42.01 Da, K +28.03 Da,            | 2849.630371 | 2 | 895.9500122 | 895.9496029 |
| SGDHLHNSQIEADFR          | Q04750 | 0          | N-term +42.01 Da,                         | 2864.546387 | 2 | 942.4199829 | 941.9193658 |
| SASNVLLHETSR             | Q8BZ09 | 0.00408348 | N-term +42.01 Da,                         | 2864.646729 | 2 | 722.3699951 | 721.865341  |
| SGDHLHNSQIEADFR          | Q04750 | 0          | N-term +42.01 Da,                         | 2865.632568 | 3 | 628.2819214 | 628.2820027 |
| AALTDVQR                 | Q9Z0Y1 | 0.00367647 | N-term +42.01 Da,                         | 2871.024414 | 2 | 458.25      | 458.2483515 |
| AEVEETLKR                | P62627 | 0          | N-term +42.01 Da, K +28.03 Da,            | 2873.688477 | 2 | 572.81427   | 572.8140563 |

|                            |        |            |                                            |             |   |             |             |
|----------------------------|--------|------------|--------------------------------------------|-------------|---|-------------|-------------|
| SADAAAGEPLPR               | P70441 | 0.00368324 | N-term +42.01 Da,                          | 2881.440186 | 2 | 599.2999878 | 598.7989377 |
| ATDELASKLSR                | Q9D8Y0 | 0          | N-term +42.01 Da, K +28.03 Da,             | 2886.909424 | 2 | 630.8400269 | 630.8433454 |
| SEKSVAAAELSADKLEKDKVEEKAGR | Q9D0J8 | 0          | N-term +42.01 Da, K +28.03 Da,             | 2888.868408 | 4 | 853.9899902 | 853.7381813 |
| SEAAPAAPAAAPPAEKAPA        | P15864 | 0.00234522 | N-term +42.01 Da, K +28.03 Da,             | 2894.925781 | 2 | 879.460022  | 879.4570634 |
| MEDEVVR                    | P10711 | 0.00407793 | N-term +42.01 Da,                          | 2918.919678 | 2 | 460.2126465 | 460.2131203 |
| MVPSQEPPAAER               | Q3U9N9 | 0          | N-term +42.01 Da,                          | 2919.588867 | 2 | 693.3200073 | 693.3219203 |
| MKVFTVGLPAEGR              | Q91Z53 | 0.00412088 | N-term +42.01 Da, K +28.03 Da,             | 2920.726318 | 3 | 525.2977905 | 524.6253236 |
| AEGGQAQQPPQLGPGAAAR        | Q8BP71 | 0          | N-term +42.01 Da,                          | 2925.653564 | 2 | 988.4899902 | 987.493032  |
| ATLQSEVVKVDGEQKLSKN        | Q99MN1 | 0          | N-term +42.01 Da, K +28.03 Da,             | 2927.168701 | 3 | 744.0700073 | 743.7372782 |
| SQAEFDKAAEEVKR             | P31786 | 0          | N-term +42.01 Da, K +28.03 Da,             | 2936.500732 | 3 | 569.2963257 | 569.2967011 |
| SQAEFDKAAEEVKR             | P31786 | 0          | N-term +42.01 Da, K +28.03 Da,             | 2936.764404 | 2 | 853.4400024 | 853.4414133 |
| GKAFIFPQESSTAYVSLIPKVR     | Q8R1M8 | 0.02633851 | N-term +42.01 Da, K +28.03 Da,             | 2944.680176 | 3 | 846.1300049 | 846.1439791 |
| SDNGELEDKPPAPPVR           | Q8CIN4 | 0          | N-term +42.01 Da, K +28.03 Da,             | 2944.835938 | 3 | 597.960022  | 597.6354941 |
| MMTSVGTNR                  | Q80X50 | 0          | N-term +42.01 Da,                          | 2950.263428 | 2 | 519.7399902 | 519.7389793 |
| MDKNIGEQLNR                | P70347 | 0          | N-term +42.01 Da, K +28.03 Da,             | 2955.458984 | 2 | 694.3499756 | 694.3535544 |
| ATLQSEVVKVDGEQKLSKNELKR    | Q99MN1 | 0          | N-term +42.01 Da, K +28.03 Da,             | 2956.495361 | 4 | 697.1400146 | 696.6432861 |
| SDAAVDTSEITTK              | P26350 | 0          | N-term +42.01 Da, K +28.03 Da,             | 2959.786621 | 2 | 747.8599854 | 747.8621306 |
| MNSVGEACTDMKR              | Q9D8Z2 | 0          | N-term +42.01 Da, K +28.03 Da, C +57.02Da, | 2961.749023 | 2 | 785.3400269 | 784.8469222 |
| SETAPAETAAPAPVEKSPA        | P43276 | 0          | N-term +42.01 Da, K +28.03 Da,             | 2965.098633 | 2 | 947.4799805 | 947.475651  |
| SDNGELEDKPPAPPVR           | Q8CIN4 | 0          | N-term +42.01 Da, K +28.03 Da,             | 2965.957275 | 2 | 896.9400024 | 895.9496029 |
| MEMKKKINMELK               | P97822 | 0.01202137 | N-term +42.01 Da, K +28.03 Da,             | 2974.955078 | 4 | 419.993042  | 419.9932476 |
| SESPVGPKPTMLR              | Q5SSZ5 | 0.0023663  | N-term +42.01 Da, K +28.03 Da,             | 2976.212646 | 2 | 735.9000244 | 734.895055  |
| SQAEFDKAAEEVKR             | P31786 | 0          | N-term +42.01 Da, K +28.03 Da,             | 2983.033936 | 3 | 569.2966919 | 569.2967011 |
| QNYSTEVEAAVNR              | P29391 | 0          | N-term +42.01 Da,                          | 2986.638672 | 2 | 762.8599854 | 761.860256  |
| GAGGALFVHR                 | Q9D6J6 | 0          | N-term +42.01 Da,                          | 2988.019531 | 2 | 513.7800293 | 513.7776101 |
| SQAEFDKAAEEVKR             | P31786 | 0          | N-term +42.01 Da, K +28.03 Da,             | 2989.800293 | 2 | 854.4400024 | 853.4414133 |
| SSTQFNKGPSYGLSAEVKNR       | Q08093 | 0          | N-term +42.01 Da, K +28.03 Da,             | 2992.942871 | 3 | 757.3900146 | 756.7254838 |
| ALSDADVQKQIK               | P50518 | 0          | N-term +42.01 Da, K +28.03 Da,             | 2995.619141 | 2 | 707.4000244 | 707.4010277 |
| ATLQSEVVKVDGEQKLSKN        | Q99MN1 | 0          | N-term +42.01 Da, K +28.03 Da,             | 3000.619141 | 3 | 743.7399902 | 743.7372782 |
| AQNLKDLAGR                 | Q35129 | 0          | N-term +42.01 Da, K +28.03 Da,             | 3007.584229 | 2 | 578.3279419 | 578.3276648 |
| ATEGMILTINHDSQIR           | Q8BUV3 | 0          | N-term +42.01 Da,                          | 3007.659668 | 3 | 593.2930908 | 593.293185  |
| SDAAVDTSEITTKDLKEKKEV      | P26350 | 0          | N-term +42.01 Da, K +28.03 Da,             | 3010.879883 | 4 | 637.8499756 | 637.845554  |
| SDAAVDTSEITTKDLKEKKEV      | P26350 | 0          | N-term +42.01 Da, K +28.03 Da,             | 3010.988525 | 3 | 850.460022  | 850.1249798 |
| SDAAVDTSEITTKDLKEK         | P26350 | 0          | N-term +42.01 Da, K +28.03 Da,             | 3020.017334 | 3 | 722.0499878 | 722.0458891 |
| SQAEFDKAAEEVKR             | P31786 | 0          | N-term +42.01 Da, K +28.03 Da,             | 3021.502197 | 3 | 569.2967529 | 569.2967011 |
| SQAEFDKAAEEVKR             | P31786 | 0          | N-term +42.01 Da, K +28.03 Da,             | 3021.807861 | 2 | 853.4421387 | 853.4414133 |
| SDNGELEDKPPAPPVR           | Q8CIN4 | 0.00049432 | N-term +42.01 Da, K +28.03 Da,             | 3023.871582 | 2 | 896.4407959 | 895.9496029 |
| NCLSGQAEFDKAAEEVKR         | F6WUQ1 | 0          | N-term +42.01 Da, K +28.03 Da, C +57.02Da, | 3040.518311 | 3 | 717.3699951 | 717.3564029 |
| CLSGQAEFDKAAEEVKR          | F6WUQ1 | 0          | N-term +42.01 Da, K +28.03 Da, C +57.02Da, | 3042.411621 | 3 | 679.3499756 | 679.3420935 |
| AGLNSLEAVKR                | Q6IRU2 | 0.01703057 | N-term +42.01 Da, K +28.03 Da,             | 3049.697998 | 2 | 614.8499756 | 614.3564224 |

|                             |        |            |                                           |             |   |             |             |
|-----------------------------|--------|------------|-------------------------------------------|-------------|---|-------------|-------------|
| SQAEFDKAAEEVKR              | P31786 | 0          | N-term +42.01 Da, K +28.03 Da,            | 3052.047607 | 3 | 569.2963257 | 569.2967011 |
| SQAEFDKAAEEVKR              | P31786 | 0          | N-term +42.01 Da, K +28.03 Da,            | 3052.390381 | 2 | 853.4395752 | 853.4414133 |
| LLLNKPKSEMTPPEELQKR         | P62317 | 0          | N-term +42.01 Da, K +28.03 Da,            | 3060.093506 | 4 | 564.5700073 | 564.3173428 |
| NCLSGQAEFDKAAEEVKR          | F6WUQ1 | 0          | N-term +42.01 Da, K +28.03 Da,C +57.02Da, | 3073.776855 | 3 | 717.3699951 | 717.3564029 |
| SVKEAEDNIREMLMAR            | Q9CWM4 | 0.04327731 | N-term +42.01 Da, K +28.03 Da,            | 3077.977295 | 3 | 654.6699829 | 654.6642904 |
| SQAEFDKAAEEVKR              | P31786 | 0          | N-term +42.01 Da, K +28.03 Da,            | 3082.547607 | 3 | 569.2966919 | 569.2967011 |
| AGKPVLYHYFDGR               | P30115 | 0          | N-term +42.01 Da, K +28.03 Da,            | 3082.698486 | 3 | 477.2600098 | 477.2577398 |
| SQAEFDKAAEEVKR              | P31786 | 0          | N-term +42.01 Da, K +28.03 Da,            | 3084.075928 | 2 | 853.4403687 | 853.4414133 |
| AQNPSNMEPLR                 | Q91W19 | 0          | N-term +42.01 Da,                         | 3085.571533 | 2 | 650.3099976 | 649.8115222 |
| ELLTTMGDR                   | Q3THE2 | 0.00098474 | N-term +42.01 Da,                         | 3086.054199 | 2 | 540.2700195 | 539.2658845 |
| ATDMSQGELIHPK               | Q3TEA8 | 0          | N-term +42.01 Da, K +28.03 Da,            | 3096.665283 | 2 | 749.3699951 | 748.87432   |
| ASSEQAEQPNQPSSPPGSENVVPR    | Q9ROA0 | 0          | N-term +42.01 Da,                         | 3097.245117 | 3 | 845.7299805 | 845.3966442 |
| SLSNKLTLDKLDVKGKR           | P09411 | 0.01585205 | N-term +42.01 Da, K +28.03 Da,            | 3098.291748 | 3 | 690.4249268 | 690.4279382 |
| ASSEQAEQPNQPSSPPGSENVVPR    | Q9ROA0 | 0          | N-term +42.01 Da,                         | 3101.383545 | 2 | 1267.589966 | 1267.591328 |
| SSSPVNVKCLKVSELKEELKKR      | Q8VEK3 | 0          | N-term +42.01 Da, K +28.03 Da,            | 3111.981689 | 4 | 684.9295654 | 684.929489  |
| SQAEFDKAAEEVKR              | P31786 | 0          | N-term +42.01 Da, K +28.03 Da,            | 3113.170654 | 3 | 569.296814  | 569.2967011 |
| AGKPVLYHYFDGR               | P30115 | 0          | N-term +42.01 Da, K +28.03 Da,            | 3113.246094 | 3 | 477.2583618 | 477.2577398 |
| SQAEFDKAAEEVKR              | P31786 | 0          | N-term +42.01 Da, K +28.03 Da,            | 3114.552002 | 2 | 853.4421387 | 853.4414133 |
| SEKSVEAAAELSAK              | Q9D0J8 | 0          | N-term +42.01 Da, K +28.03 Da,            | 3116.956299 | 2 | 759.4073486 | 759.4065077 |
| TSPEGAQNKEIDCLSPEAQR        | Q3UZ39 | 0          | N-term +42.01 Da, K +28.03 Da,C +57.02Da, | 3117.303223 | 2 | 1151.050049 | 1150.544803 |
| TSPEGAQNKEIDCLSPEAQR        | Q3UZ39 | 0          | N-term +42.01 Da, K +28.03 Da,C +57.02Da, | 3120.409424 | 3 | 767.7000122 | 767.3656273 |
| SSSPVNVKCLKVSELKEELKKR      | Q8VEK3 | 0          | N-term +42.01 Da, K +28.03 Da,            | 3120.877686 | 3 | 912.9000244 | 912.9035598 |
| TSPEGAQNKEIDCLSPEAQR        | Q3UZ39 | 0          | N-term +42.01 Da, K +28.03 Da,C +57.02Da, | 3125.298584 | 2 | 1150.540039 | 1150.544803 |
| MQPKVPQLR                   | Q88908 | 0          | N-term +42.01 Da, K +28.03 Da,            | 3125.476318 | 2 | 583.8384399 | 583.8393533 |
| MESPAASPASLPQTKGK           | O09110 | 0          | N-term +42.01 Da, K +28.03 Da,            | 3128.512939 | 2 | 948.5       | 948.000781  |
| AAAAAAGPEMVR                | P63085 | 0          | N-term +42.01 Da,                         | 3131.065918 | 2 | 578.789978  | 578.7926006 |
| AAAGSAAVSGAGTPVAGPTGR       | Q9Z266 | 0          | N-term +42.01 Da,                         | 3137.318848 | 2 | 884.453186  | 884.4528439 |
| AGVGAADR                    | Q5F285 | 0          | N-term +42.01 Da,                         | 3142.928223 | 2 | 395.714447  | 395.7139468 |
| SQAEFDKAAEEVKR              | P31786 | 0          | N-term +42.01 Da, K +28.03 Da,            | 3143.817627 | 3 | 569.296936  | 569.2967011 |
| SQAEFDKAAEEVKR              | P31786 | 0          | N-term +42.01 Da, K +28.03 Da,            | 3145.175537 | 2 | 853.4413452 | 853.4414133 |
| SSSPVNVKCLKVSELKEELKKR      | Q8VEK3 | 0.0432955  | N-term +42.01 Da, K +28.03 Da,            | 3146.941406 | 4 | 684.9299927 | 684.929489  |
| SEKSVEAAAELSAK              | Q9D0J8 | 0          | N-term +42.01 Da, K +28.03 Da,            | 3148.495117 | 2 | 759.4083862 | 759.4065077 |
| SSGALLPKPQMR                | Q9CPQ1 | 0          | N-term +42.01 Da, K +28.03 Da,            | 3150.758057 | 2 | 677.8798218 | 677.8792074 |
| ATDDKSSPTLDSANDLPR          | Q9Z1T6 | 0          | N-term +42.01 Da, K +28.03 Da,            | 3151.499756 | 2 | 987.4799805 | 986.9765471 |
| ATDISSGADCKGDTKNSAKLDADYPLR | Q9CQJ6 | 0          | N-term +42.01 Da, K +28.03 Da,C +57.02Da, | 3153.973389 | 4 | 804.1400146 | 803.6410441 |
| MNQEKLAKLQAQVR              | Q64152 | 0          | N-term +42.01 Da, K +28.03 Da,            | 3155.965088 | 3 | 585.6697998 | 585.6697038 |
| AAAATMAAAR                  | Q8C754 | 0          | N-term +42.01 Da,                         | 3156.115967 | 2 | 509.2612    | 509.2609359 |
| ATPEASGSGEKVEGSEPSVYYR      | Q9CQX2 | 0          | N-term +42.01 Da, K +28.03 Da,            | 3156.243408 | 2 | 1236.081421 | 1236.082273 |
| MEEAELVKGR                  | Q9JHU2 | 0          | N-term +42.01 Da, K +28.03 Da,            | 3159.715332 | 2 | 616.3208008 | 616.3211912 |
| ATPEASGSGEKVEGSEPSVYYR      | Q9CQX2 | 0          | N-term +42.01 Da, K +28.03 Da,            | 3159.799072 | 3 | 824.3909912 | 824.3906075 |

|                               |        |            |                                           |             |   |             |             |
|-------------------------------|--------|------------|-------------------------------------------|-------------|---|-------------|-------------|
| VISLSGEHSIIGR                 | P08228 | 0          | N-term +42.01 Da,                         | 3160.032227 | 3 | 471.2688599 | 470.5964216 |
| ISVYYNEATGGKVVPR              | P99024 | 0          | N-term +42.01 Da, K +28.03 Da,            | 3160.489746 | 3 | 629.6699829 | 629.6597508 |
| ATDISESSGADCKGDTKNSAKLDADYPLR | Q9CQJ6 | 0          | N-term +42.01 Da, K +28.03 Da,C +57.02Da, | 3161.398193 | 3 | 1071.52002  | 1071.185633 |
| MQPKVPQLR                     | Q88908 | 0          | N-term +42.01 Da, K +28.03 Da,            | 3167.391602 | 2 | 583.8391724 | 583.8393533 |
| AAAGSAAVSGAGTPVAGPTGR         | Q9Z266 | 0          | N-term +42.01 Da,                         | 3168.893311 | 2 | 885.4500122 | 884.4528439 |
| ASGADSKGDDLSTAILKQKN          | Q01853 | 0          | N-term +42.01 Da, K +28.03 Da,            | 3169.158691 | 3 | 716.0499878 | 715.7181064 |
| ATDELASKLSR                   | Q9D8Y0 | 0          | N-term +42.01 Da, K +28.03 Da,            | 3182.49585  | 2 | 630.8400269 | 630.8433454 |
| AASKVKQDMPPPGGYGPIDYKR        | Q9ERS2 | 0          | N-term +42.01 Da, K +28.03 Da,            | 3182.762207 | 4 | 626.3400269 | 626.0859833 |
| MLKPQPPQQTSSQPQQPPPTQQAVAR    | Q7TQH0 | 0          | N-term +42.01 Da, K +28.03 Da,            | 3184.737061 | 3 | 951.8400269 | 951.1676298 |
| AAAAAAVAGAGR                  | E9QNR6 | 0.01202673 | N-term +42.01 Da,                         | 3185.996582 | 2 | 499.2799988 | 499.7725251 |
| ATPEASGSGEKVEGSEPSVTYYR       | Q9CQX2 | 0          | N-term +42.01 Da, K +28.03 Da,            | 3187.007324 | 2 | 1236.579956 | 1236.082273 |
| MNQEKLAKLQAQVR                | Q64152 | 0          | N-term +42.01 Da, K +28.03 Da,            | 3187.617676 | 3 | 586         | 585.6697038 |
| SDKPDMAEIEKFDKSK              | P20065 | 0          | N-term +42.01 Da, K +28.03 Da,            | 3187.919434 | 4 | 506.2673645 | 506.2670528 |
| MNQEKLAKLQAQVR                | Q64152 | 0          | N-term +42.01 Da, K +28.03 Da,            | 3188.54541  | 2 | 878.5       | 878.0009175 |
| AEDIKTIKINYKTAPFDSR           | P56391 | 0.00235073 | N-term +42.01 Da, K +28.03 Da,            | 3189.523926 | 4 | 596.0900269 | 595.5875161 |
| SDKPDMAEIEKFDKSK              | P20065 | 0          | N-term +42.01 Da, K +28.03 Da,            | 3191.051758 | 3 | 674.6900024 | 674.6869783 |
| ATEGMILTNDHDIQR               | Q8BUV3 | 0          | N-term +42.01 Da,                         | 3193.28418  | 3 | 593.6199951 | 593.293185  |
| MDPEPTEHSTDGVSVPR             | G3UWA6 | 0          | N-term +42.01 Da,                         | 3195.836182 | 2 | 948.4199829 | 948.4256352 |
| GNVTAGKDGVANVSIEDR            | P08228 | 0.00142653 | N-term +42.01 Da, K +28.03 Da,            | 3197.375    | 2 | 937.4699707 | 936.4765165 |
| SDKPDMAEIEKFDKSK              | P20065 | 0          | N-term +42.01 Da, K +28.03 Da,            | 3197.491699 | 2 | 1011.530029 | 1011.526829 |
| SDKPDMAEIEKFDKSK              | P20065 | 0.00410023 | N-term +42.01 Da, K +28.03 Da,            | 3202.824463 | 2 | 1012.530029 | 1011.526829 |
| HVGDLGNVTAGKDGVANVSIEDR       | P08228 | 0          | N-term +42.01 Da, K +28.03 Da,            | 3206.03833  | 4 | 599.5599976 | 599.0568463 |
| TTKDPSEHPSVTLFR               | Q99JW2 | 0          | N-term +42.01 Da, K +28.03 Da,            | 3208.015137 | 3 | 638.6599731 | 638.6582988 |
| SLSVSSDFLGKDKPVSTLAR          | Q5SNZ0 | 0.02591793 | N-term +42.01 Da, K +28.03 Da,C +57.02Da, | 3210.311768 | 2 | 1183.609985 | 1183.125231 |
| MEQVNELKEKGN                  | Q60864 | 0.03977994 | N-term +42.01 Da, K +28.03 Da,            | 3210.779541 | 2 | 758.8876953 | 758.8874275 |
| MLGSGFKAER                    | Q9CX00 | 0          | N-term +42.01 Da, K +28.03 Da,            | 3213.05249  | 2 | 583.3085327 | 583.3053436 |
| AASKVKQDMPPPGGYGPIDYKR        | Q9ERS2 | 0          | N-term +42.01 Da, K +28.03 Da,            | 3213.544678 | 4 | 626.3400269 | 626.0859833 |
| AEMGSKGVTAGKIASNVQKQLTR       | O08539 | 0          | N-term +42.01 Da, K +28.03 Da,            | 3218.392822 | 4 | 632.8703003 | 632.870274  |
| ATDELASKLSR                   | Q9D8Y0 | 0          | N-term +42.01 Da, K +28.03 Da,            | 3219.536621 | 2 | 630.8429565 | 630.8433454 |
| SQAEFDKAAEEVKR                | P31786 | 0          | N-term +42.01 Da, K +28.03 Da,            | 3219.612061 | 3 | 569.2960815 | 569.2967011 |
| ATSASSHLNKGIKQMYM             | P15105 | 0          | N-term +42.01 Da, K +28.03 Da,            | 3220.966553 | 3 | 655.6690063 | 655.6692641 |
| ASLVPLKEK                     | P56135 | 0.00098814 | N-term +42.01 Da, K +28.03 Da,            | 3221.05127  | 2 | 541.8400269 | 541.8446274 |
| MESAIAEGGASR                  | Q62448 | 0          | N-term +42.01 Da,                         | 3224.545898 | 2 | 610.7800293 | 610.7824306 |
| MNQEKLAKLQAQVR                | Q64152 | 0.00049628 | N-term +42.01 Da, K +28.03 Da,            | 3229.717773 | 3 | 586         | 585.6697038 |
| AATLSVEPTGR                   | Q8BWN8 | 0          | N-term +42.01 Da,                         | 3235.791748 | 2 | 572.3063354 | 572.3038557 |
| ADKEAAFDDAVEER                | Q60972 | 0          | N-term +42.01 Da, K +28.03 Da,            | 3236.530762 | 2 | 818.3788452 | 818.3784791 |
| ASGADSKGDDLSTAILKQK           | Q01853 | 0          | N-term +42.01 Da, K +28.03 Da,            | 3240.901855 | 3 | 677.710022  | 677.7037971 |
| ADKEAAFDDAVEER                | Q60972 | 0          | N-term +42.01 Da, K +28.03 Da,            | 3244.32666  | 3 | 545.9199829 | 545.9214116 |
| SQAEFDKAAEEVKR                | P31786 | 0          | N-term +42.01 Da, K +28.03 Da,            | 3250.692139 | 3 | 569.624939  | 569.2967011 |
| ENIIDLSNANR                   | B5XOG2 | 0          | N-term +42.01 Da,                         | 3252.806396 | 2 | 650.8400269 | 650.8282269 |

|                                |        |            |                                |             |   |             |             |
|--------------------------------|--------|------------|--------------------------------|-------------|---|-------------|-------------|
| MESIAIEGGASR                   | Q62448 | 0          | N-term +42.01 Da,              | 3255.137207 | 2 | 610.7824097 | 610.7824306 |
| SHPSWLPPKSTGEPLGHVPAR          | Q8BFW7 | 0          | N-term +42.01 Da, K +28.03 Da, | 3257.023438 | 4 | 580.8099976 | 580.810379  |
| AGLNSLEAVKR                    | Q6IRU2 | 0          | N-term +42.01 Da, K +28.03 Da, | 3258.861816 | 2 | 614.3560791 | 614.3564224 |
| AEDIKTKIKNYKTAPFDSR            | P56391 | 0          | N-term +42.01 Da, K +28.03 Da, | 3261.849121 | 4 | 595.5877075 | 595.5875161 |
| SHPSWLPPKSTGEPLGHVPAR          | Q8BFW7 | 0.00233863 | N-term +42.01 Da, K +28.03 Da, | 3263.403809 | 3 | 774.4099731 | 774.0780798 |
| ADKEAAFDDAVEER                 | Q60972 | 0          | N-term +42.01 Da, K +28.03 Da, | 3266.882324 | 2 | 818.3776245 | 818.3784791 |
| AEPGTGSGDPAFGPGASESGTR         | Q80YR5 | 0          | N-term +42.01 Da,              | 3267.291748 | 2 | 1023.950012 | 1023.953603 |
| AEDIKTKIKNYKTAPFDSR            | P56391 | 0.00235405 | N-term +42.01 Da, K +28.03 Da, | 3270.018555 | 3 | 793.7800293 | 793.7809293 |
| AEDIKTKIKNYKTAPFDSR            | P56391 | 0          | N-term +42.01 Da, K +28.03 Da, | 3271.53418  | 3 | 794.4500122 | 793.7809293 |
| SEKSVEAAAELSAKDLKEKK           | Q9D0J8 | 0          | N-term +42.01 Da, K +28.03 Da, | 3271.996582 | 4 | 586.5900269 | 586.5899904 |
| ALKNVPFR                       | Q60787 | 0.00763702 | N-term +42.01 Da, K +28.03 Da, | 3272.353516 | 2 | 507.2999878 | 507.8083787 |
| SEKSVEAAAELSAKDLKEKK           | Q9D0J8 | 0          | N-term +42.01 Da, K +28.03 Da, | 3273.441406 | 4 | 586.8400269 | 586.5899904 |
| ASGVQVADEVCR                   | Q9R0P5 | 0          | N-term +42.01 Da, C +57.02Da,  | 3277.679932 | 2 | 666.8099976 | 666.8142622 |
| SQAEFDKAAEEVKR                 | P31786 | 0          | N-term +42.01 Da, K +28.03 Da, | 3282.011963 | 3 | 569.2999878 | 569.2967011 |
| SQGDSNPAIHPAAEDIQGDDR          | Q61206 | 0          | N-term +42.01 Da,              | 3282.557617 | 2 | 1154.52002  | 1153.517631 |
| AAAAYEHLKLH                    | Q9EP69 | 0          | N-term +42.01 Da, K +28.03 Da, | 3284.310547 | 3 | 432.2399902 | 431.9031854 |
| AGKPVLYHFDGR                   | P30115 | 0          | N-term +42.01 Da, K +28.03 Da, | 3287.834473 | 2 | 715.3830566 | 715.3829715 |
| MQPASAKWYDR                    | Q9R0Q7 | 0          | N-term +42.01 Da, K +28.03 Da, | 3289.25     | 2 | 712.3400269 | 711.8453648 |
| AGLNSLEAVKR                    | Q6IRU2 | 0          | N-term +42.01 Da, K +28.03 Da, | 3290.349854 | 2 | 614.3552246 | 614.3564224 |
| SHPSWLPPKSTGEPLGHVPAR          | Q8BFW7 | 0          | N-term +42.01 Da, K +28.03 Da, | 3291.071533 | 4 | 581.0599976 | 580.810379  |
| AEDIKTKIKNYKTAPFDSR            | P56391 | 0          | N-term +42.01 Da, K +28.03 Da, | 3292.496094 | 4 | 595.8400269 | 595.5875161 |
| SSPKSLEIIGAPFSKGQPR            | Q61176 | 0          | N-term +42.01 Da, K +28.03 Da, | 3293.471191 | 4 | 564.3300171 | 564.0795923 |
| SDKPDMAEIEKFDKSKLK             | P20065 | 0          | N-term +42.01 Da, K +28.03 Da, | 3294.927979 | 4 | 573.5690918 | 573.5696348 |
| AAPSEPAGFPR                    | P56213 | 0          | N-term +42.01 Da,              | 3297.9104   | 2 | 571.2849731 | 571.2854656 |
| AGKPVLYHFDGR                   | P30115 | 0          | N-term +42.01 Da, K +28.03 Da, | 3297.986084 | 3 | 477.9299927 | 477.2577398 |
| AKTEEMVQTEEMETPR               | Q60739 | 0          | N-term +42.01 Da, K +28.03 Da, | 3298.604004 | 2 | 989.9599609 | 989.9584538 |
| DHEEQAKVWR                     | E0CYA6 | 0.04089376 | N-term +42.01 Da, K +28.03 Da, | 3299.518555 | 2 | 685.3536987 | 684.3387614 |
| SDKPDMAEIEKFDKSKLK             | P20065 | 0          | N-term +42.01 Da, K +28.03 Da, | 3302.84668  | 3 | 764.4199829 | 764.4237542 |
| ALKNVPFR                       | Q60787 | 0.00277778 | N-term +42.01 Da, K +28.03 Da, | 3304.212891 | 2 | 507.8099976 | 507.8083787 |
| TAKGEKFMQEEFSR                 | P27773 | 0          | N-term +42.01 Da, K +28.03 Da, | 3306.423828 | 3 | 628.6599731 | 628.9889911 |
| AVAAAAVAAPAGGGGAR              | Q99L88 | 0          | N-term +42.01 Da,              | 3308.621582 | 2 | 690.37323   | 690.3731355 |
| SEKSVEAAAELSAKDLKEKKDKVVEEKAGR | Q9D0J8 | 0.00452899 | N-term +42.01 Da, K +28.03 Da, | 3311.550537 | 4 | 853.9899902 | 853.7381813 |
| ASASAAASTLSEPPR                | E9VPV0 | 0          | N-term +42.01 Da,              | 3313.257813 | 2 | 729.3599854 | 729.365174  |
| MDKNELVQKAKLAEQAER             | P63101 | 0          | N-term +42.01 Da, K +28.03 Da, | 3315.192871 | 4 | 557.8099976 | 557.55833   |
| SGEVPPNINIKEPR                 | Q99JR1 | 0          | N-term +42.01 Da, K +28.03 Da, | 3316.790771 | 2 | 810.4400024 | 810.4412158 |
| VISLSGEHSIIGR                  | P08228 | 0          | N-term +42.01 Da,              | 3319.384766 | 3 | 470.9400024 | 470.5964216 |
| AGLNSLEAVKR                    | Q6IRU2 | 0          | N-term +42.01 Da, K +28.03 Da, | 3321.55249  | 2 | 614.3563232 | 614.3564224 |
| SHPSWLPPKSTGEPLGHVPAR          | Q8BFW7 | 0          | N-term +42.01 Da, K +28.03 Da, | 3321.62793  | 4 | 581.0599976 | 580.810379  |
| SSPKSLEIIGAPFSKGQPR            | Q61176 | 0          | N-term +42.01 Da, K +28.03 Da, | 3322.136963 | 3 | 751.7700195 | 751.7703643 |
| SVAFAPR                        | Q62280 | 0.04087653 | N-term +42.01 Da,              | 3322.288086 | 2 | 430.730011  | 430.7348794 |

|                               |        |            |                                            |             |   |             |             |
|-------------------------------|--------|------------|--------------------------------------------|-------------|---|-------------|-------------|
| SSKPKSLEIIGAPFSKGQPR          | Q61176 | 0          | N-term +42.01 Da, K +28.03 Da,             | 3325.386963 | 4 | 564.0797119 | 564.0795923 |
| SDKPDMAEIEKFDKSKLK            | P20065 | 0          | N-term +42.01 Da, K +28.03 Da,             | 3325.72998  | 4 | 573.8200073 | 573.5696348 |
| AAAAAMAEQEGAR                 | Q9D1H7 | 0          | N-term +42.01 Da,                          | 3325.902832 | 2 | 644.7999878 | 644.8011547 |
| SEKSVEAAAELSAKDLKEKKDKVEEK    | Q9D0J8 | 0          | N-term +42.01 Da, K +28.03 Da,             | 3327.317871 | 4 | 782.9500122 | 782.6982589 |
| GDAPSPEEKHLITR                | Q91WQ3 | 0          | N-term +42.01 Da, K +28.03 Da,             | 3330.983398 | 3 | 578.3099976 | 578.3124624 |
| MEAKGGTVKAASGFNATEDAQLTR      | P97429 | 0          | N-term +42.01 Da, K +28.03 Da,             | 3332.344238 | 3 | 851.4299927 | 851.0988816 |
| AGLSNLEAVKR                   | Q6IRU2 | 0          | N-term +42.01 Da, K +28.03 Da,             | 3332.513184 | 2 | 614.3562622 | 614.3564224 |
| ASLKGDIVELNKR                 | E9PW13 | 0          | N-term +42.01 Da, K +28.03 Da,             | 3334.93457  | 3 | 514.3084717 | 514.3067597 |
| ATAVVVNIGKK                   | Q9DCL9 | 0          | N-term +42.01 Da, K +28.03 Da,             | 3338.494141 | 2 | 599.381897  | 599.3819085 |
| MVNDAEKFAEEDKCLKER            | P20029 | 0          | N-term +42.01 Da, K +28.03 Da,             | 3339.909424 | 4 | 584.0700073 | 584.3148003 |
| SEKSVEAAAELSAKDLKEKKDKVEEKAGR | Q9D0J8 | 0          | N-term +42.01 Da, K +28.03 Da,             | 3339.99707  | 3 | 1138.319946 | 1137.981816 |
| SEKSVEAAAELSAKDLKEKKDKVEEKAGR | Q9D0J8 | 0          | N-term +42.01 Da, K +28.03 Da,             | 3342.453613 | 4 | 853.9899902 | 853.7381813 |
| ALSDADVQKQIKHM                | P50518 | 0          | N-term +42.01 Da, K +28.03 Da,             | 3345.464111 | 3 | 561.2999878 | 561.3029097 |
| VSDIQELELDLIDKVEIGK           | Q9D2F7 | 0.01371681 | N-term +42.01 Da, K +28.03 Da,             | 3348.395752 | 4 | 564.8099976 | 564.3161661 |
| SDAPPLTDGIKDR                 | Q9CR21 | 0          | N-term +42.01 Da, K +28.03 Da,             | 3350.73584  | 3 | 523.289978  | 523.2823917 |
| MENQLTKSVEER                  | Q9DC50 | 0          | N-term +42.01 Da, K +28.03 Da,             | 3352.142578 | 2 | 767.8800049 | 767.3825095 |
| MENQLTKSVEER                  | Q9DC50 | 0          | N-term +42.01 Da, K +28.03 Da,             | 3352.614502 | 2 | 768.4000244 | 767.3825095 |
| SDAAVDTSEITTKDLKEKKEVVEEAENGR | P26350 | 0.03833049 | N-term +42.01 Da, K +28.03 Da,             | 3355.773193 | 4 | 859.4400024 | 858.9452577 |
| AGLSNLEAVKR                   | Q6IRU2 | 0.0014556  | N-term +42.01 Da, K +28.03 Da,             | 3359.760986 | 2 | 614.3499756 | 614.3564224 |
| SDAAVDTSEITTKDLK              | P26350 | 0          | N-term +42.01 Da, K +28.03 Da,             | 3360.886963 | 2 | 940.4699707 | 939.9807666 |
| ADFDTYDDR                     | Q9WUK2 | 0          | N-term +42.01 Da,                          | 3362.809814 | 2 | 580.2299805 | 580.230554  |
| SEKSVEAAAELSAKDLKEKKDKVEEKAGR | Q9D0J8 | 0          | N-term +42.01 Da, K +28.03 Da,             | 3370.435303 | 3 | 1137.980103 | 1137.981816 |
| TMDKSELVQKAKLAEQAER           | Q9CQV8 | 0          | N-term +42.01 Da, K +28.03 Da,             | 3372.288086 | 4 | 576.0700073 | 576.067525  |
| SEKSVEAAAELSAKDLKEKKDKVEEKAGR | Q9D0J8 | 0          | N-term +42.01 Da, K +28.03 Da,             | 3373.579834 | 4 | 853.7374878 | 853.7381813 |
| QNYSTEVEAAVNR                 | P29391 | 0          | N-term +42.01 Da,                          | 3374.614258 | 2 | 762.3599854 | 761.860256  |
| MEELGAAASGAGGGGGGEEHGGGR      | O70566 | 0          | N-term +42.01 Da,                          | 3374.726563 | 2 | 1085.959961 | 1085.464344 |
| TMDKSELVQKAKLAEQAER           | Q9CQV8 | 0          | N-term +42.01 Da, K +28.03 Da,             | 3376.080078 | 3 | 767.7527466 | 767.7542745 |
| SGLVLGQR                      | Q9DBS5 | 0.00451875 | N-term +42.01 Da,                          | 3376.416748 | 2 | 436.25      | 436.2534365 |
| LLVDPETDER                    | P70441 | 0          | N-term +42.01 Da,                          | 3376.626709 | 2 | 663.8499756 | 664.3406359 |
| ADSVQDQSKLPGVKEVCR            | Q810U5 | 0          | N-term +42.01 Da, K +28.03 Da, C +57.02Da, | 3377.658936 | 3 | 696.039978  | 695.7051433 |
| MEELGAAASGAGGGGGGEEHGGGR      | O70566 | 0          | N-term +42.01 Da,                          | 3378.682129 | 2 | 1086.469971 | 1085.464344 |
| ATCADILR                      | Q8K268 | 0.00144578 | N-term +42.01 Da, C +57.02Da,              | 3382.092285 | 2 | 481.2421265 | 481.2422119 |
| AVPPTYADLGKSAR                | Q60932 | 0          | N-term +42.01 Da, K +28.03 Da,             | 3388.290527 | 2 | 758.4199829 | 758.4119267 |
| ADFDTYDDR                     | Q9WUK2 | 0          | N-term +42.01 Da,                          | 3394.161377 | 2 | 580.2299805 | 580.230554  |
| SASSLLEQR                     | E9PW90 | 0          | N-term +42.01 Da,                          | 3396.649658 | 2 | 516.7693481 | 516.7696486 |
| SGEVPPNINIKEPR                | Q99JR1 | 0.00409091 | N-term +42.01 Da, K +28.03 Da,             | 3403.27124  | 2 | 810.4400024 | 810.4412158 |
| AGQSDKDVKYTYLLEIQKH           | P56395 | 0.04057481 | N-term +42.01 Da, K +28.03 Da,             | 3403.517334 | 4 | 595.3099976 | 595.311415  |
| MLSEAEPR                      | Q921Z5 | 0          | N-term +42.01 Da,                          | 3403.843018 | 2 | 552.2600098 | 552.255517  |
| SQAEFDKAAEEVK                 | P31786 | 0          | N-term +42.01 Da, K +28.03 Da,             | 3404.285889 | 2 | 774.9000244 | 775.3908577 |
| SEKSVEAAAELSAKDLKEKKDKVEEKAGR | Q9D0J8 | 0          | N-term +42.01 Da, K +28.03 Da,             | 3404.914307 | 4 | 853.9899902 | 853.7381813 |

|                                |        |            |                                           |             |   |             |             |
|--------------------------------|--------|------------|-------------------------------------------|-------------|---|-------------|-------------|
| SGLVLGQR                       | Q9DBS5 | 0.00451875 | N-term +42.01 Da,                         | 3406.768066 | 2 | 436.2531433 | 436.2534365 |
| ASLPPHAGPATPLSPTR              | P21619 | 0          | N-term +42.01 Da,                         | 3411.030518 | 2 | 856.4500122 | 856.4599399 |
| SSIKVECVLR                     | Q64374 | 0.01828472 | N-term +42.01 Da, K +28.03 Da,C +57.02Da, | 3414.139648 | 2 | 630.8546753 | 630.8526583 |
| ASKDLEGGKWR                    | Q05816 | 0          | N-term +42.01 Da, K +28.03 Da,            | 3414.587646 | 3 | 467.6000061 | 467.6013952 |
| AVPPTYADLGKSAR                 | Q60932 | 0          | N-term +42.01 Da, K +28.03 Da,            | 3420.154053 | 2 | 758.413147  | 758.4119267 |
| GTLPKQVKIVEVGPR                | P38060 | 0          | N-term +42.01 Da, K +28.03 Da,            | 3420.665527 | 3 | 573.6887817 | 573.6890926 |
| MNQEKLAKLQAQVR                 | Q64152 | 0          | N-term +42.01 Da, K +28.03 Da,            | 3441.118408 | 3 | 586         | 585.6697038 |
| SDKPDMAEIEKFDKSKLK             | P20065 | 0          | N-term +42.01 Da, K +28.03 Da,            | 3443.119385 | 4 | 573.8200073 | 573.5696348 |
| MDKNELVQKAKLAEQAER             | P63101 | 0          | N-term +42.01 Da, K +28.03 Da,            | 3443.361084 | 4 | 557.8099976 | 557.55833   |
| SSIKVECVLR                     | Q64374 | 0.00322729 | N-term +42.01 Da, K +28.03 Da,C +57.02Da, | 3446.039551 | 2 | 630.852417  | 630.8526583 |
| MDKNELVQKAKLAEQAER             | P63101 | 0.00233645 | N-term +42.01 Da, K +28.03 Da,            | 3446.526855 | 3 | 743.4099731 | 743.0753478 |
| MYTITKGPSKLVQQR                | Q9CQB2 | 0          | N-term +42.01 Da, K +28.03 Da,            | 3446.966309 | 3 | 598.0100098 | 597.6780878 |
| AGIAIKLAKDR                    | O08529 | 0          | N-term +42.01 Da, K +28.03 Da,            | 3450.137207 | 3 | 418.6022949 | 418.6028472 |
| AVPPTYADLGKSAR                 | Q60932 | 0          | N-term +42.01 Da, K +28.03 Da,            | 3451.085449 | 2 | 758.9199829 | 758.4119267 |
| AAVPSAVHLPR                    | Q3UFF7 | 0          | N-term +42.01 Da,                         | 3458.659668 | 2 | 580.3326416 | 580.3327498 |
| MDKNELVQKAKLAEQAER             | P63101 | 0.00541272 | N-term +42.01 Da, K +28.03 Da,            | 3462.538574 | 2 | 1115.109985 | 1114.109383 |
| SDAAVDTSSEITTKDLKEKKEVVEEAENGR | P26350 | 0          | N-term +42.01 Da, K +28.03 Da,            | 3465.953613 | 4 | 859.4400024 | 858.9452577 |
| MMAGAAEDVR                     | G3UWF3 | 0          | N-term +42.01 Da,                         | 3466.427246 | 2 | 546.7399902 | 546.7442618 |
| AWDLKVK                        | Q64339 | 0.03795309 | N-term +42.01 Da, K +28.03 Da,            | 3468.362305 | 2 | 479.2900085 | 479.2920301 |
| MEKTELIQKAKLAEQAER             | P68254 | 0          | N-term +42.01 Da, K +28.03 Da,            | 3469.358643 | 3 | 748.4199829 | 748.0873649 |
| AAAAATAAAAAAPSGGGGGGEEER       | D3Z7U4 | 0          | N-term +42.01 Da,                         | 3471.69873  | 2 | 1007.469971 | 1006.967045 |
| SDAAVDTSSEITTKDLKEKKEVVEEAENGR | P26350 | 0.01027244 | N-term +42.01 Da, K +28.03 Da,            | 3473.364014 | 3 | 1145.589966 | 1144.924585 |
| MDKNELVQKAKLAEQAER             | P63101 | 0          | N-term +42.01 Da, K +28.03 Da,            | 3474.958252 | 4 | 557.5583496 | 557.55833   |
| MEKTELIQKAKLAEQAER             | P68254 | 0          | N-term +42.01 Da, K +28.03 Da,            | 3476.756104 | 4 | 561.317627  | 561.3173428 |
| AAAAATAAAAAAPSGGGGGGEEER       | D3Z7U4 | 0          | N-term +42.01 Da,                         | 3477.612061 | 3 | 671.6473999 | 671.6471222 |
| MDKNELVQKAKLAEQAER             | P63101 | 0          | N-term +42.01 Da, K +28.03 Da,            | 3478.050049 | 3 | 743.0768433 | 743.0753478 |
| SEAFDCAKCNESLYGR               | Q9R059 | 0          | N-term +42.01 Da, K +28.03 Da,C +57.02Da, | 3479.112549 | 2 | 988.9299927 | 988.9274877 |
| MESTPFNR                       | Q9ERGO | 0          | N-term +42.01 Da,                         | 3479.604492 | 2 | 512.7299805 | 512.2318444 |
| AGLSLEAVKR                     | Q6IRU2 | 0.00097229 | N-term +42.01 Da, K +28.03 Da,            | 3480.087402 | 2 | 614.8484497 | 614.3564224 |
| MRNLTEERRAELR                  | Q9CQU1 | 0.01704545 | N-term +42.01 Da,                         | 3480.458496 | 2 | 923.4799805 | 922.9734204 |
| SQAEDKAAEEVKR                  | P31786 | 0          | N-term +42.01 Da, K +28.03 Da,            | 3482.060791 | 3 | 569.2999878 | 569.2967011 |
| ALETVPKDLR                     | P63271 | 0          | N-term +42.01 Da, K +28.03 Da,            | 3489.245117 | 2 | 606.3499756 | 606.3533484 |
| ASKEMFEDTVEER                  | Q60973 | 0          | N-term +42.01 Da, K +28.03 Da,            | 3490.907959 | 2 | 820.8800049 | 820.8772575 |
| SDAAVDTSSEITTKDLKEKKEVVEEAENGR | P26350 | 0.00098425 | N-term +42.01 Da, K +28.03 Da,            | 3496.962891 | 4 | 859.1899414 | 858.9452577 |
| SSIKVECVLR                     | Q64374 | 0          | N-term +42.01 Da, K +28.03 Da,C +57.02Da, | 3498.146973 | 2 | 630.8499756 | 630.8526583 |
| EYKRRSTPVILEGAQEETDTR          | E9Q6J5 | 0.01369258 | N-term +42.01 Da, K +28.03 Da,            | 3502.164307 | 3 | 884.1300049 | 883.7874724 |
| AGLSLEAVKR                     | Q6IRU2 | 0.03793691 | N-term +42.01 Da, K +28.03 Da,            | 3511.843018 | 2 | 614.8484497 | 614.3564224 |
| SQAEDKAAEEVKR                  | P31786 | 0          | N-term +42.01 Da, K +28.03 Da,            | 3515.535889 | 3 | 569.6300049 | 569.2967011 |
| MNFSGKYQ                       | P12710 | 0          | N-term +42.01 Da, K +28.03 Da,            | 3518.344238 | 2 | 522.7399902 | 522.7445874 |
| ASKEMFEDTVEER                  | Q60973 | 0          | N-term +42.01 Da, K +28.03 Da,            | 3521.839111 | 2 | 821.3800049 | 820.8772575 |

|                                     |        |            |                                |             |   |             |             |
|-------------------------------------|--------|------------|--------------------------------|-------------|---|-------------|-------------|
| ADKPDMEIASFDKAK                     | Q6ZWY8 | 0          | N-term +42.01 Da, K +28.03 Da, | 3524.658691 | 3 | 616.9855347 | 616.9852468 |
| SAAAAAEEGEDAPVPPSSEKEPEMPGPR        | Q7TNV0 | 0          | N-term +42.01 Da, K +28.03 Da, | 3524.83252  | 3 | 972.789978  | 972.4624378 |
| MKAAAEDVNVTFEDQQKINKFAR             | E9Q6U4 | 0          | N-term +42.01 Da, K +28.03 Da, | 3526.470703 | 4 | 735.1500244 | 734.6482083 |
| SDAAVDTSEITTKDLKEKKEVVEEAENGR       | P26350 | 0          | N-term +42.01 Da, K +28.03 Da, | 3527.44458  | 4 | 859.4400024 | 858.9452577 |
| AALYGGVEGGGTR                       | Q9QZ08 | 0          | N-term +42.01 Da,              | 3527.595459 | 2 | 625.3099976 | 625.3122123 |
| MKAAAEDVNVTFEDQQKINKFAR             | E9Q6U4 | 0          | N-term +42.01 Da, K +28.03 Da, | 3527.748779 | 4 | 734.9000244 | 734.6482083 |
| SDYNTGGPPPPPPAGGGGGAAGAGGGPPPPGAGDR | Q3U0V1 | 0          | N-term +42.01 Da,              | 3532.957764 | 3 | 1097.170044 | 1096.508209 |
| SDKPDMAEIEKFDK                      | P20065 | 0          | N-term +42.01 Da, K +28.03 Da, | 3533.916992 | 3 | 593.6300049 | 593.634214  |
| ADKPDMEIASFDKAK                     | Q6ZWY8 | 0.00049826 | N-term +42.01 Da, K +28.03 Da, | 3540.562988 | 2 | 924.9699707 | 924.9742319 |
| ATVDLEKLR                           | P12382 | 0          | N-term +42.01 Da, K +28.03 Da, | 3540.656494 | 2 | 557.8300171 | 557.8269663 |
| MEKPSPLLVGR                         | P97379 | 0.00764732 | N-term +42.01 Da, K +28.03 Da, | 3545.003174 | 2 | 648.8699951 | 648.8708509 |
| RVCLTTFNVQDGPDPFQDR                 | P97493 | 0          | N-term +42.01 Da, C +57.02Da,  | 3545.509033 | 2 | 1106.030029 | 1105.51839  |
| AAAPATLALDPQPEKQKDASESSELSR         | Q91WG2 | 0          | N-term +42.01 Da, K +28.03 Da, | 3548.920654 | 3 | 1013.52002  | 1012.854323 |
| ADKPDMEIASFDKAK                     | Q6ZWY8 | 0          | N-term +42.01 Da, K +28.03 Da, | 3555.467041 | 3 | 617.3200073 | 616.9852468 |
| AAAPATLALDPQPEKQKDASESSELSR         | Q91WG2 | 0          | N-term +42.01 Da, K +28.03 Da, | 3556.523438 | 3 | 1013.190002 | 1012.854323 |
| SDAAVDTSEITTKDLKEKKEVVEEAENGR       | P26350 | 0.00189663 | N-term +42.01 Da, K +28.03 Da, | 3559.056885 | 4 | 859.1901245 | 858.9452577 |
| SEKSVEAAAELSAKDLKEK                 | Q9D0J8 | 0          | N-term +42.01 Da, K +28.03 Da, | 3559.694092 | 4 | 548.0599976 | 547.5584245 |
| DQALRDLNTYTEKMR                     | Q6ZPK7 | 0.04094555 | N-term +42.01 Da, K +28.03 Da, | 3560.886963 | 2 | 963.5       | 962.4832869 |
| ASLVPLKEKKLMEVK                     | P56135 | 0          | N-term +42.01 Da, K +28.03 Da, | 3563.411865 | 4 | 467.7999878 | 467.5479732 |
| SQAEFDKAAEEVKR                      | P31786 | 0          | N-term +42.01 Da, K +28.03 Da, | 3568.043945 | 3 | 569.2999878 | 569.2967011 |
| SDAAVDTSEITTKDLKEKKEVVEEAENGR       | P26350 | 0          | N-term +42.01 Da, K +28.03 Da, | 3579.057861 | 3 | 1145.579956 | 1144.924585 |
| SDAAVDTSEITTKDLKEKKEVVEEAENGR       | P26350 | 0.00144161 | N-term +42.01 Da, K +28.03 Da, | 3585.239502 | 3 | 1145.25     | 1144.924585 |
| SDAAVDTSEITTKDLKEKKEVVEEAENGR       | P26350 | 0          | N-term +42.01 Da, K +28.03 Da, | 3589.422363 | 4 | 859.4400024 | 858.9452577 |
| ISVYYNEATGGKYVPR                    | P99024 | 0.00144858 | N-term +42.01 Da, K +28.03 Da, | 3593.761963 | 3 | 629.3200073 | 629.6597508 |
| TSQIRQNYSTEVEAAVNR                  | P29391 | 0          | N-term +42.01 Da,              | 3600.532959 | 2 | 1055.030029 | 1054.521987 |
| SQAEFDKAAEEVKR                      | P31786 | 0          | N-term +42.01 Da, K +28.03 Da, | 3608.437744 | 3 | 569.2999878 | 569.2967011 |
| SDAAVDTSEITTKDLKEKKEVVEEAENGR       | P26350 | 0          | N-term +42.01 Da, K +28.03 Da, | 3609.912842 | 3 | 1145.252441 | 1144.924585 |
| SDAAVDTSEITTKDLKEKKEVVEEAEN         | P26350 | 0          | N-term +42.01 Da, K +28.03 Da, | 3610.006104 | 3 | 1073.881836 | 1073.883726 |
| SDKPDLSEVETFDKSKLK                  | A2AF33 | 0          | N-term +42.01 Da, K +28.03 Da, | 3612.759033 | 4 | 556.0599976 | 555.8056998 |
| SDAAVDTSEITTKDLKEKKEVVEEAENGR       | P26350 | 0          | N-term +42.01 Da, K +28.03 Da, | 3619.891602 | 4 | 859.1904907 | 858.9452577 |
| SDAAVDTSEITTKDLKEKKEVVEEAEN         | P26350 | 0          | N-term +42.01 Da, K +28.03 Da, | 3619.967041 | 4 | 805.6639404 | 805.6646138 |
| LAPEYAAAATR                         | P27773 | 0          | N-term +42.01 Da,              | 3620.085938 | 2 | 617.8051758 | 617.3091383 |
| LAKVDATEESDLAQYGVGR                 | P09103 | 0          | N-term +42.01 Da, K +28.03 Da, | 3620.462646 | 3 | 722.3800049 | 721.7024564 |
| TFNVQDGPDPFQDR                      | P97493 | 0          | N-term +42.01 Da,              | 3620.574219 | 2 | 841.3911743 | 841.3762706 |
| AGQSDKDKVYYTLEEIQKHKDSKSTW          | P56395 | 0          | N-term +42.01 Da, K +28.03 Da, | 3623.835205 | 4 | 817.9299927 | 817.4290456 |
| ADKPDMEIASFDKAKLK                   | Q6ZWY8 | 0          | N-term +42.01 Da, K +28.03 Da, | 3624.065186 | 4 | 530.539978  | 530.2933362 |
| SGGLLKALR                           | Q9CQ49 | 0.00189573 | N-term +42.01 Da, K +28.03 Da, | 3634.46167  | 2 | 492.8099976 | 492.8136612 |
| SDAAVDTSEITTKDLKEKKEVVEEAEN         | P26350 | 0          | N-term +42.01 Da, K +28.03 Da, | 3640.549561 | 3 | 1074.219971 | 1073.883726 |
| SDAAVDTSEITTKDLKEKKEVVEEAENGR       | P26350 | 0          | N-term +42.01 Da, K +28.03 Da, | 3640.647705 | 3 | 1145.589966 | 1144.924585 |
| SDAAVDTSEITTKDLKEKKEVVEEAENGR       | P26350 | 0          | N-term +42.01 Da, K +28.03 Da, | 3643.003174 | 3 | 1145.25     | 1144.924585 |

|                                 |        |            |                                            |             |   |             |             |
|---------------------------------|--------|------------|--------------------------------------------|-------------|---|-------------|-------------|
| SAEVEAASAEQKEMEDKVTSPKAEAEAKLKR | P56212 | 0.00049801 | N-term +42.01 Da, K +28.03 Da,             | 3649.437988 | 4 | 975.7600098 | 975.2555019 |
| SDAAVDTSEITTKDLKEKKEVVEEAENGR   | P26350 | 0          | N-term +42.01 Da, K +28.03 Da,             | 3650.378662 | 4 | 859.4400024 | 858.9452577 |
| SDAAVDTSEITTKDLKEKKEVVEEAEN     | P26350 | 0.00097752 | N-term +42.01 Da, K +28.03 Da,             | 3652.030029 | 4 | 805.6637573 | 805.6646138 |
| ASLKDLEGKWR                     | Q05816 | 0          | N-term +42.01 Da, K +28.03 Da,             | 3653.744141 | 3 | 467.6000061 | 467.6013952 |
| KGNDISSGTVLSYVSGSPSGTGLHR       | P70296 | 0.00410959 | N-term +42.01 Da, K +28.03 Da,             | 3655.574219 | 4 | 683.0999756 | 682.8438769 |
| HVGDLGNVTAGKDGVANVSIEDR         | P08228 | 0          | N-term +42.01 Da, K +28.03 Da,             | 3667.491943 | 3 | 799.0700073 | 798.4067029 |
| SDAAVDTSEITTKDLKEKKEVVEEAEN     | P26350 | 0          | N-term +42.01 Da, K +28.03 Da,             | 3672.091797 | 3 | 1074.219971 | 1073.883726 |
| HVGDLGNVTAGKDGVANVSIEDR         | P08228 | 0          | N-term +42.01 Da, K +28.03 Da,             | 3672.23877  | 2 | 1197.609985 | 1197.106416 |
| AAPAKGENLSLVVHGPDIR             | Q64442 | 0          | N-term +42.01 Da, K +28.03 Da,             | 3673.949951 | 3 | 691.046936  | 691.0480091 |
| SDAAVDTSEITTKDLKEKKEVVEEAENGR   | P26350 | 0          | N-term +42.01 Da, K +28.03 Da,             | 3675.64624  | 3 | 1145.589966 | 1144.924585 |
| METASTPEATGTGKYIASTQRPDGTWR     | Q8CHP5 | 0          | N-term +42.01 Da, K +28.03 Da,             | 3675.817871 | 3 | 995.4799805 | 994.8135818 |
| AAPAKGENLSLVVHGPDIR             | Q64442 | 0          | N-term +42.01 Da, K +28.03 Da,             | 3677.467773 | 2 | 1037.069946 | 1036.068375 |
| SDAAVDTSEITTKDLKEKKEVVEEAEN     | P26350 | 0.00452694 | N-term +42.01 Da, K +28.03 Da,             | 3677.654297 | 3 | 1074.560059 | 1073.883726 |
| AEGKAGGAAGLFAKQMQ               | D3Z6Q9 | 0          | N-term +42.01 Da, K +28.03 Da,             | 3678.493652 | 2 | 867.4500122 | 866.9561758 |
| METASTPEATGTGKYIASTQRPDGTWR     | Q8CHP5 | 0          | N-term +42.01 Da, K +28.03 Da,             | 3678.836426 | 3 | 994.8099976 | 994.8135818 |
| AEGKAGGAAGLFAKQMQ               | D3Z6Q9 | 0.00235516 | N-term +42.01 Da, K +28.03 Da,             | 3680.738281 | 3 | 578.2999878 | 578.3065427 |
| SDAAVDTSEITTKDLKEKKEVVEEAENGR   | P26350 | 0          | N-term +42.01 Da, K +28.03 Da,             | 3681.756592 | 4 | 858.9442139 | 858.9452577 |
| LRPGDCEVCISYLR                  | Q9CXI5 | 0          | N-term +42.01 Da, C +57.02Da,              | 3682.655518 | 3 | 613.6400146 | 612.9625589 |
| SYTPGIGGDSAQLAQR                | O70439 | 0          | N-term +42.01 Da,                          | 3687.030518 | 2 | 832.4099731 | 831.9077377 |
| MEDSAPDAVAAPSGTPKSKLETLP        | Q8CHG3 | 0          | N-term +42.01 Da, K +28.03 Da,             | 3693.668457 | 3 | 913.4699707 | 913.1407468 |
| LHAMFDQGEIVEKR                  | Q8VI59 | 0.00367816 | N-term +42.01 Da, K +28.03 Da,             | 3694.795898 | 2 | 872.9544067 | 871.9483508 |
| MEQVNELKEKGNKAL                 | Q60864 | 0          | N-term +42.01 Da, K +28.03 Da,             | 3695.3125   | 3 | 620.3499756 | 619.6765245 |
| MEAADVHR                        | Q8BFS6 | 0          | N-term +42.01 Da,                          | 3696.569092 | 2 | 559.2600098 | 559.2583934 |
| SQAEFDKAAEEVKR                  | P31786 | 0          | N-term +42.01 Da, K +28.03 Da,             | 3697.302002 | 3 | 569.6300049 | 569.2967011 |
| HVGDLGNVTAGKDGVANVSIEDR         | P08228 | 0          | N-term +42.01 Da, K +28.03 Da,             | 3697.530518 | 3 | 798.4199829 | 798.4067029 |
| AAQVAPAAASSLGNPPPPSELKKAEEQQQR  | A2BH40 | 0          | N-term +42.01 Da, K +28.03 Da,             | 3698.669189 | 3 | 1046.890015 | 1046.229836 |
| AYNLNSPAQEHLTTVGCAR             | Q99JZ7 | 0          | N-term +42.01 Da, C +57.02Da,              | 3702.348389 | 2 | 1108.030029 | 1108.031665 |
| AAPAKGENLSLVVHGPDIR             | Q64442 | 0.04564489 | N-term +42.01 Da, K +28.03 Da,             | 3704.358887 | 3 | 691.0483398 | 691.0480091 |
| SRNRTLPIQIVPRCGVDPLPGR          | Q2MH31 | 0.02804142 | N-term +42.01 Da, C +57.02Da,              | 3704.553223 | 4 | 648.3400269 | 648.3417863 |
| SDAAVDTSEITTKDLKEKKEVVEEAENGR   | P26350 | 0          | N-term +42.01 Da, K +28.03 Da,             | 3707.600342 | 3 | 1144.930054 | 1144.924585 |
| SDAAVDTSEITTKDLKEKKEVVEEAENGR   | P26350 | 0          | N-term +42.01 Da, K +28.03 Da,             | 3712.517334 | 4 | 859.4400024 | 858.9452577 |
| AAQVAPAAASSLGNPPPPSELKKAEEQQQR  | A2BH40 | 0          | N-term +42.01 Da, K +28.03 Da,             | 3714.354248 | 3 | 1046.569946 | 1046.229836 |
| AFDGTWKVDR                      | P55050 | 0          | N-term +42.01 Da, K +28.03 Da,             | 3719.137695 | 2 | 632.8192139 | 632.8196728 |
| AASAASSEHFEKLHEIFR              | O88384 | 0          | N-term +42.01 Da, K +28.03 Da,             | 3725.744873 | 4 | 526.0200195 | 525.7681798 |
| ASESGKLW                        | Q91YI0 | 0.0009828  | N-term +42.01 Da, K +28.03 Da,             | 3730.996094 | 2 | 474.25      | 474.2452775 |
| SQAEFDKAAEEVKR                  | P31786 | 0          | N-term +42.01 Da, K +28.03 Da,             | 3733.519775 | 3 | 569.2999878 | 569.2967011 |
| AMKAVCVLKG                      | P08228 | 0.00189753 | N-term +42.01 Da, K +28.03 Da, C +57.02Da, | 3737.537842 | 2 | 645.3511353 | 645.3514368 |
| SDAAVDTSEITTKDLKEKKEVVEEAENGR   | P26350 | 0          | N-term +42.01 Da, K +28.03 Da,             | 3737.880859 | 3 | 1145.254272 | 1144.924585 |
| SDAAVDTSEITTKDLKEKKEVVEEAENGR   | P26350 | 0          | N-term +42.01 Da, K +28.03 Da,             | 3743.987305 | 4 | 859.4400024 | 858.9452577 |
| AELGEADEAELQR                   | P62077 | 0          | N-term +42.01 Da,                          | 3744.49585  | 2 | 737.3499756 | 736.8468145 |

|                                      |        |            |                                           |             |   |             |             |
|--------------------------------------|--------|------------|-------------------------------------------|-------------|---|-------------|-------------|
| AFDGTWKVDR                           | P55050 | 0          | N-term +42.01 Da, K +28.03 Da,            | 3750.021973 | 2 | 632.8186035 | 632.8196728 |
| ATNFLAH                              | P57776 | 0.00631199 | N-term +42.01 Da,                         | 3768.869629 | 2 | 408.7099915 | 408.2059548 |
| SEKSVEAAAELSAKDLK                    | Q9D0J8 | 0          | N-term +42.01 Da, K +28.03 Da,            | 3769.992432 | 3 | 634.6854248 | 634.6858546 |
| SDAAVDTSSSEITTKDLKEKKEVVEEAENGR      | P26350 | 0          | N-term +42.01 Da, K +28.03 Da,            | 3774.381104 | 4 | 859.4400024 | 858.9452577 |
| AEGKAGGAAGLFAKQM                     | D3Z6Q9 | 0.01829268 | N-term +42.01 Da, K +28.03 Da,            | 3780.177734 | 2 | 803.9199829 | 802.9268867 |
| AEGKAGGAAGLFAKQM                     | D3Z6Q9 | 0.00142993 | N-term +42.01 Da, K +28.03 Da,            | 3783.209717 | 3 | 535.9500122 | 535.6203499 |
| ASLKDLEGKWR                          | Q05816 | 0          | N-term +42.01 Da, K +28.03 Da,            | 3784.134766 | 3 | 467.2600098 | 467.6013952 |
| ADPKYADLPGIAR                        | Q99KJ8 | 0          | N-term +42.01 Da, K +28.03 Da,            | 3786.033691 | 2 | 729.3900146 | 728.8933696 |
| AFDGTWKVDR                           | P55050 | 0          | N-term +42.01 Da, K +28.03 Da,            | 3788.531494 | 2 | 632.8200073 | 632.8196728 |
| ASLKDLEGKWR                          | Q05816 | 0.00098717 | N-term +42.01 Da, K +28.03 Da,            | 3789.621338 | 2 | 700.9000244 | 700.8984546 |
| MKETIMNQEKLAKLQAQVR                  | Q64152 | 0          | N-term +42.01 Da, K +28.03 Da,            | 3794.189697 | 4 | 597.5900269 | 597.0893685 |
| ADMQNLVER                            | P40124 | 0          | N-term +42.01 Da,                         | 3795.997314 | 2 | 559.269104  | 559.2689585 |
| ADPKYADLPGIAR                        | Q99KJ8 | 0          | N-term +42.01 Da, K +28.03 Da,            | 3796.154785 | 3 | 486.2643127 | 486.2646719 |
| SDAAVDTSSSEITTKDLKEKKEVVEEAENGRDAPAN | P26350 | 0.00323475 | N-term +42.01 Da, K +28.03 Da,            | 3796.230225 | 4 | 976.4899902 | 975.9944739 |
| SQAEFDKAAEEVKR                       | P31786 | 0          | N-term +42.01 Da, K +28.03 Da,            | 3799.89209  | 3 | 569.289978  | 569.2967011 |
| SAMEAADVFHR                          | Q8BFS6 | 0          | N-term +42.01 Da,                         | 3802.380615 | 2 | 638.2925415 | 638.2929651 |
| SDAAVDTSSSEITTKDLKEKKEVVEEAENGR      | P26350 | 0.0208243  | N-term +42.01 Da, K +28.03 Da,            | 3804.689209 | 4 | 859.4400024 | 858.9452577 |
| SSSPVNVKCLKVSELKEEL                  | Q8VEK3 | 0          | N-term +42.01 Da, K +28.03 Da,            | 3806.924316 | 4 | 568.0900269 | 567.8410794 |
| AQALSEEEFQR                          | Q8VD04 | 0          | N-term +42.01 Da,                         | 3808.514893 | 2 | 675.3200073 | 675.3202348 |
| HVGDLGNVTAGKDGVANVSIEDR              | P08228 | 0          | N-term +42.01 Da, K +28.03 Da,            | 3811.664063 | 2 | 1197.109985 | 1197.106416 |
| SSSPVNVKCLKVSELKEEL                  | Q8VEK3 | 0          | N-term +42.01 Da, K +28.03 Da,            | 3811.739502 | 3 | 757.1199951 | 756.7856804 |
| ASLKDLEGKWR                          | Q05816 | 0          | N-term +42.01 Da, K +28.03 Da,            | 3814.617432 | 3 | 467.6008911 | 467.6013952 |
| SSSPVNVKCLKVSELKEEL                  | Q8VEK3 | 0.01628521 | N-term +42.01 Da, K +28.03 Da,            | 3816.563965 | 2 | 1134.670044 | 1134.674882 |
| ADPKYADLPGIAR                        | Q99KJ8 | 0          | N-term +42.01 Da, K +28.03 Da,            | 3817.072754 | 2 | 728.8931885 | 728.8933696 |
| AKFKNWDDVLTVDYTRNAEAVLQGGQGLSGK      | Q9JJ28 | 0.01289462 | N-term +42.01 Da, K +28.03 Da,            | 3818.152832 | 4 | 862.9500122 | 863.2070482 |
| NKELDPVQKLFVDKIR                     | P97450 | 0          | N-term +42.01 Da, K +28.03 Da,            | 3818.24585  | 4 | 518.0700073 | 517.8095817 |
| AAETVELHKLKLAELKQEC                  | Q9D1J3 | 0          | N-term +42.01 Da, K +28.03 Da,C +57.02Da, | 3821.229004 | 4 | 585.0800171 | 584.8278091 |
| AAETVELHKLKLAELKQEC                  | Q9D1J3 | 0          | N-term +42.01 Da, K +28.03 Da,C +57.02Da, | 3826.224121 | 3 | 779.4299927 | 779.4346532 |
| MNFSGKY                              | P12710 | 0.01627089 | N-term +42.01 Da, K +28.03 Da,            | 3828.54834  | 2 | 459.2200012 | 458.7152983 |
| SDAAVDTSSSEITTKDLKEKKEVVEEAENGR      | P26350 | 0.00496838 | N-term +42.01 Da, K +28.03 Da,            | 3835.698242 | 4 | 859.4400024 | 858.9452577 |
| HVGDLGNVTAGKDGVANVSIEDR              | P08228 | 0          | N-term +42.01 Da, K +28.03 Da,            | 3840.287109 | 3 | 798.4099731 | 798.4067029 |
| AQALSEEEFQR                          | Q8VD04 | 0          | N-term +42.01 Da,                         | 3840.697266 | 2 | 675.3200073 | 675.3202348 |
| SAAEEVDGLGVVRPH                      | Q9JKF1 | 0          | N-term +42.01 Da,                         | 3841.692139 | 2 | 789.4000244 | 789.3995482 |
| AAETVELHKLKLAELKQECLAR               | Q9D1J3 | 0          | N-term +42.01 Da, K +28.03 Da,C +57.02Da, | 3842.189941 | 4 | 670.1300049 | 669.8833815 |
| ASLKDLEGKWR                          | Q05816 | 0          | N-term +42.01 Da, K +28.03 Da,            | 3845.39917  | 3 | 467.6000061 | 467.6013952 |
| AAETVELHKLKLAELKQECLAR               | Q9D1J3 | 0          | N-term +42.01 Da, K +28.03 Da,C +57.02Da, | 3845.483398 | 3 | 893.1799927 | 892.8420832 |
| AAETVELHKLKLAELKQECLAR               | Q9D1J3 | 0          | N-term +42.01 Da, K +28.03 Da,C +57.02Da, | 3846.947998 | 4 | 669.8800049 | 669.8833815 |
| AAETVELHKLKLAELKQECLAR               | Q9D1J3 | 0          | N-term +42.01 Da, K +28.03 Da,C +57.02Da, | 3848.756104 | 3 | 892.8400269 | 892.8420832 |
| HVGDLGNVTAGKDGVANVSIEDR              | P08228 | 0          | N-term +42.01 Da, K +28.03 Da,            | 3849.094238 | 4 | 599.0599976 | 599.0568463 |
| HVGDLGNVTAGKDGVANVSIEDR              | P08228 | 0          | N-term +42.01 Da, K +28.03 Da,            | 3857.142334 | 3 | 798.75      | 798.4067029 |

|                                        |        |            |                                           |             |   |             |             |
|----------------------------------------|--------|------------|-------------------------------------------|-------------|---|-------------|-------------|
| TSDKKSERFFK                            | P70227 | 0.01745201 | N-term +42.01 Da, K +28.03 Da,            | 3860.351807 | 3 | 499.9400024 | 500.280322  |
| ASKLDLEGKWR                            | Q05816 | 0.00235849 | N-term +42.01 Da, K +28.03 Da,            | 3868.446777 | 3 | 468.269989  | 467.6013952 |
| MDFSKLPK                               | P50516 | 0          | N-term +42.01 Da, K +28.03 Da,            | 3872.296875 | 2 | 532.2962646 | 532.2964556 |
| AAPQLFR                                | Q99J99 | 0.03380402 | N-term +42.01 Da,                         | 3879.064941 | 2 | 422.7370911 | 422.7374219 |
| LLEFQNDR                               | P29391 | 0.00097324 | N-term +42.01 Da,                         | 3881.28833  | 2 | 538.7716064 | 538.7721911 |
| MDMVKVN                                | Q283N4 | 0.01665206 | N-term +42.01 Da, K +28.03 Da,            | 3890.296387 | 2 | 453.7242126 | 453.7248087 |
| LGEKLTDEEVDEMIR                        | P62204 | 0.01663748 | N-term +42.01 Da, K +28.03 Da,            | 3893.233643 | 3 | 616.3200073 | 616.3082784 |
| AQGLIEVER                              | Q8JZL3 | 0          | N-term +42.01 Da,                         | 3903.517822 | 2 | 529.289978  | 528.7878412 |
| AQEFVNCKIQ                             | Q9QUH0 | 0          | N-term +42.01 Da, K +28.03 Da,C +57.02Da, | 3905.265381 | 2 | 653.8200073 | 653.8266408 |
| AFCAPPAYLTHQKVLRL                      | Q9CQJ8 | 0          | N-term +42.01 Da, K +28.03 Da,C +57.02Da, | 3911.276123 | 3 | 691.039978  | 690.7032963 |
| ADKLQRELEDTRVATVSEK                    | D3Z2Z1 | 0.00236742 | N-term +42.01 Da, K +28.03 Da,            | 3923.656738 | 4 | 572.3096313 | 572.312952  |
| AESSAATQSPSVSSSSGAEPSALGGGGSPGACPALGAK | Q9ES97 | 0          | N-term +42.01 Da, K +28.03 Da,C +57.02Da, | 3927.186279 | 3 | 1187.550049 | 1187.219955 |
| SDFDEFER                               | P26369 | 0          | N-term +42.01 Da,                         | 3934.131104 | 2 | 543.7199707 | 543.7223644 |
| HVGDLGNVTAGKDGVANVSIEDR                | P08228 | 0          | N-term +42.01 Da, K +28.03 Da,            | 3934.431396 | 3 | 798.75      | 798.4067029 |
| AQGLIEVER                              | Q8JZL3 | 0          | N-term +42.01 Da,                         | 3935.388428 | 2 | 528.788269  | 528.7878412 |
| AAAAGAVVASAASGAEGKKITELR               | Q8CH25 | 0          | N-term +42.01 Da, K +28.03 Da,            | 3939.003662 | 3 | 799.1199951 | 798.7832217 |
| MLTLASKLKR                             | Q9CY34 | 0          | N-term +42.01 Da, K +28.03 Da,            | 3941.371826 | 3 | 420.6000061 | 420.2686995 |
| AQGLIEVER                              | Q8JZL3 | 0          | N-term +42.01 Da,                         | 3943.683838 | 2 | 528.289978  | 528.7878412 |
| AESAESGGPPGAQDSAADGGPAEPKIM            | Q8R317 | 0          | N-term +42.01 Da, K +28.03 Da,            | 3948.976318 | 2 | 1284.579956 | 1284.081947 |
| AAAAAAAAAAGAAGGR                       | Q8CCS6 | 0          | N-term +42.01 Da,                         | 3950.350098 | 2 | 620.8232422 | 620.8232783 |
| AESAESGGPPGAQDSAADGGPAEPKIM            | Q8R317 | 0          | N-term +42.01 Da, K +28.03 Da,            | 3950.62915  | 3 | 856.7199707 | 856.3903905 |
| AATMKKAAAEDVNVTFEDQQKINKFAR            | E9Q6U4 | 0          | N-term +42.01 Da, K +28.03 Da,            | 3950.848145 | 4 | 795.6799927 | 795.4286852 |
| TEKDAQPLEEADDDLSKLN                    | Q61599 | 0          | N-term +42.01 Da, K +28.03 Da,            | 3963.812744 | 2 | 1237.089966 | 1236.584846 |
| TEKDAQPLEEADDDLSKLN                    | Q61599 | 0          | N-term +42.01 Da, K +28.03 Da,            | 3964.594971 | 3 | 825.0599976 | 824.7256562 |
| TEKDAQPLEEADDDLSKLN                    | Q61599 | 0          | N-term +42.01 Da, K +28.03 Da,            | 3965.175049 | 2 | 1236.579956 | 1236.584846 |
| MEPDIIR                                | Q80WT5 | 0.04331371 | N-term +42.01 Da,                         | 3966.765137 | 2 | 458.7399902 | 458.2338554 |
| MMMAAAER                               | Q9DCS2 | 0          | N-term +42.01 Da,                         | 3970.357422 | 2 | 512.2244873 | 512.2246501 |
| AATMKKAAAEDVNVTFEDQQKINKFAR            | E9Q6U4 | 0          | N-term +42.01 Da, K +28.03 Da,            | 3970.850586 | 3 | 1060.910034 | 1060.235821 |
| LAKVDATEESDLAQYQYGVRL                  | P09103 | 0          | N-term +42.01 Da, K +28.03 Da,            | 3971.926514 | 3 | 722.039978  | 721.7024564 |
| LAKVDATEESDLAQYQYGVRL                  | P09103 | 0          | N-term +42.01 Da, K +28.03 Da,            | 3974.98877  | 2 | 1082.550049 | 1082.050046 |
| ATEGDVELELETETSGPERPPEKPR              | Q9CR41 | 0          | N-term +42.01 Da, K +28.03 Da,            | 3975.175781 | 3 | 946.4699707 | 946.1330862 |
| AAAAAAAAAAGAAGGR                       | Q8CCS6 | 0          | N-term +42.01 Da,                         | 3981.796875 | 2 | 620.8231201 | 620.8232783 |
| LAKVDATEESDLAQYQYGVRL                  | P09103 | 0          | N-term +42.01 Da, K +28.03 Da,            | 3985.212402 | 2 | 1083.050049 | 1082.050046 |
| TEPGASPEDPWVKASFADAHAGEGR              | O08609 | 0          | N-term +42.01 Da, K +28.03 Da,            | 3994.432861 | 3 | 885.0800171 | 884.7490176 |
| MMNGRPGHEPLKFLPDEAR                    | Q9CQ54 | 0          | N-term +42.01 Da, K +28.03 Da,            | 3994.64502  | 4 | 567.2800293 | 567.0371358 |
| SDAPPLTLDGKDR                          | Q9CR21 | 0          | N-term +42.01 Da, K +28.03 Da,            | 4001.726563 | 2 | 784.4194336 | 784.4199493 |
| MKSVCPTSGFSSPNPASAASAAQEVRL            | A2A432 | 0          | N-term +42.01 Da, K +28.03 Da,C +57.02Da, | 4003.482178 | 3 | 922.0999756 | 922.1058192 |
| ANLEKAQSELGADEAAR                      | Q9D3D9 | 0.00143816 | N-term +42.01 Da, K +28.03 Da,            | 4003.675537 | 2 | 1002        | 1000.997814 |
| LAKVDATEESDLAQYQYGVRL                  | P09103 | 0          | N-term +42.01 Da, K +28.03 Da,            | 4004.748047 | 3 | 722.039978  | 721.7024564 |
| ATEGDVELELETETSGPERPPEKPR              | Q9CR41 | 0          | N-term +42.01 Da, K +28.03 Da,            | 4006.876221 | 3 | 946.131958  | 946.1330862 |

|                            |        |            |                                           |             |   |             |             |
|----------------------------|--------|------------|-------------------------------------------|-------------|---|-------------|-------------|
| LHAMFDQGEIVEKR             | Q8VI59 | 0.00322581 | N-term +42.01 Da, K +28.03 Da,            | 4014.918213 | 2 | 872.9555054 | 871.9483508 |
| ADLEEQLSDEEKVR             | P47754 | 0          | N-term +42.01 Da, K +28.03 Da,            | 4022.265381 | 2 | 866.4299927 | 865.9257938 |
| MEIGTEISR                  | Q8BJ05 | 0          | N-term +42.01 Da,                         | 4028.101318 | 2 | 539.2700195 | 539.2658845 |
| MDFEDDYVHSTCR              | O88291 | 0          | N-term +42.01 Da, C +57.02Da,             | 4029.55249  | 2 | 858.8300171 | 858.8350668 |
| MQDAENVAVPEAAEER           | Q8JZQ9 | 0          | N-term +42.01 Da,                         | 4032.850586 | 2 | 900.9089966 | 900.9070782 |
| KGNDISSGTVLSDYVSGPPSGTGLHR | P70296 | 0          | N-term +42.01 Da, K +28.03 Da,            | 4034.967529 | 3 | 909.7999878 | 910.1227438 |
| ASYFDEHDCEPLNPER           | Q9CY62 | 0          | N-term +42.01 Da, C +57.02Da,             | 4035.157227 | 2 | 1010.919983 | 1010.920717 |
| ATEGDVELELETETSGPERPPEKPR  | Q9CR41 | 0          | N-term +42.01 Da, K +28.03 Da,            | 4037.651123 | 3 | 946.7999878 | 946.1330862 |
| SSVAVLTKESFAEHR            | Q8VDJ3 | 0          | N-term +42.01 Da,                         | 4038.208984 | 2 | 852.4299927 | 851.9233878 |
| QGKDRLTVLMCANATGSHRIK      | Q60976 | 0.00145068 | N-term +42.01 Da, K +28.03 Da,C +57.02Da, | 4038.605957 | 3 | 819.4400024 | 818.7737858 |
| AMKAVCVLKGDPVQGG           | P08228 | 0.00144509 | N-term +42.01 Da, K +28.03 Da,C +57.02Da, | 4041.390137 | 2 | 864.4614258 | 864.4627792 |
| ADEELEALR                  | P56812 | 0          | N-term +42.01 Da,                         | 4052.282471 | 2 | 544.2674561 | 544.2669391 |
| SSVAVLTKESFAEHR            | Q8VDJ3 | 0          | N-term +42.01 Da,                         | 4052.455078 | 2 | 852.9299927 | 851.9233878 |
| MDNKLDVFR                  | Q3UZZ6 | 0          | N-term +42.01 Da, K +28.03 Da,            | 4052.626465 | 2 | 604.3102417 | 604.3106262 |
| SLDIQCEQLSDAR              | Q91VI7 | 0          | N-term +42.01 Da, C +57.02Da,             | 4056.151367 | 2 | 789.3699951 | 788.867224  |
| MDEPSPLAKTLELNQHSR         | Q5SWU9 | 0          | N-term +42.01 Da, K +28.03 Da,            | 4058.4729   | 3 | 713.0300293 | 712.696648  |
| AMKAVCVLKGDPVQ             | P08228 | 0.00895255 | N-term +42.01 Da, K +28.03 Da,C +57.02Da, | 4060.501465 | 2 | 836.4500122 | 835.9520472 |
| SAKAISEQTGKELLYKY          | Q91V92 | 0          | N-term +42.01 Da, K +28.03 Da,            | 4062.481689 | 3 | 686.0499878 | 685.7172661 |
| ATEGDVELELETETSGPERPPEKPR  | Q9CR41 | 0          | N-term +42.01 Da, K +28.03 Da,            | 4068.207031 | 3 | 946.4699707 | 946.1330862 |
| AAVDPQQSVVMR               | P43883 | 0          | N-term +42.01 Da,                         | 4068.5625   | 2 | 721.3745117 | 721.3770295 |
| ATEGDVELELETETSGPERPPEKPR  | Q9CR41 | 0          | N-term +42.01 Da, K +28.03 Da,            | 4070.03125  | 3 | 946.7999878 | 946.1330862 |
| AKEWGYASHNGPDHWHELYPIAKGDN | P16015 | 0          | N-term +42.01 Da, K +28.03 Da,            | 4075.887695 | 4 | 773.8599854 | 773.3677848 |
| AKYGDLARPDDGQNEFSDIKSR     | E9Q6R7 | 0          | N-term +42.01 Da, K +28.03 Da,            | 4083.356201 | 4 | 706.5999756 | 706.3543432 |
| ADEELEALR                  | P56812 | 0          | N-term +42.01 Da,                         | 4083.898438 | 2 | 544.2666016 | 544.2669391 |
| MNHTSQAFITAASGGQPPNYER     | Q9CQW9 | 0          | N-term +42.01 Da,                         | 4085.45459  | 3 | 807.3800049 | 807.0413663 |
| ASQSQGIQQLLQAEKR           | Q9CR51 | 0          | N-term +42.01 Da, K +28.03 Da,            | 4091.630371 | 2 | 928.0100098 | 928.0052436 |
| SSDAQWLTAER                | Q9CZL5 | 0          | N-term +42.01 Da,                         | 4095.851807 | 2 | 717.8300171 | 717.8284244 |
| SSPAQPAVPAPLADLKIQHTK      | P24549 | 0          | N-term +42.01 Da, K +28.03 Da,            | 4100.234863 | 3 | 756.7600098 | 756.4301193 |
| SSPAQPAVPAPLADLKIQHTK      | P24549 | 0          | N-term +42.01 Da, K +28.03 Da,            | 4100.319824 | 3 | 756.4299927 | 756.4301193 |
| ATEGDVELELETETSGPERPPEKPR  | Q9CR41 | 0          | N-term +42.01 Da, K +28.03 Da,            | 4102.329102 | 3 | 946.4699707 | 946.1330862 |
| SMVLGYWDIR                 | P48774 | 0.03220266 | N-term +42.01 Da,                         | 4102.659668 | 2 | 641.3200073 | 641.3184512 |
| AMKAVCVLKGDPVQGGT          | P08228 | 0          | N-term +42.01 Da, K +28.03 Da,C +57.02Da, | 4103.395508 | 2 | 914.9899902 | 914.9866189 |
| MDDREDLVYQAKLAEQER         | P62259 | 0.00234082 | N-term +42.01 Da, K +28.03 Da,            | 4105.339844 | 3 | 784.3800049 | 784.0496391 |
| ATEGDVELELETETSGPERPPEKPR  | Q9CR41 | 0          | N-term +42.01 Da, K +28.03 Da,            | 4108.959961 | 3 | 946.7999878 | 946.1330862 |
| ASQSQGIQQLLQAEKR           | Q9CR51 | 0          | N-term +42.01 Da, K +28.03 Da,            | 4109.802734 | 2 | 929         | 928.0052436 |
| AAAKAVLGPLVGAVDQGTSSSTR    | Q64516 | 0          | N-term +42.01 Da, K +28.03 Da,            | 4112.737793 | 3 | 766.1099854 | 765.7725453 |
| MDFSKLPKIR                 | P50516 | 0          | N-term +42.01 Da, K +28.03 Da,            | 4114.866211 | 3 | 444.9278259 | 444.9284545 |
| AYYLRQLQNKQFKRIR           | O88879 | 0.04562578 | N-term +42.01 Da, K +28.03 Da,            | 4117.015137 | 4 | 557.0700073 | 556.577285  |
| AAQALAAQAVASR              | Q8BLY2 | 0          | N-term +42.01 Da,                         | 4118.435547 | 2 | 635.8499756 | 635.3491289 |
| AMKAVCVLKGDPVQGTIHFEQK     | P08228 | 0.01329787 | N-term +42.01 Da, K +28.03 Da,C +57.02Da, | 4123.250488 | 4 | 660.8599854 | 660.6066544 |

|                                        |        |            |                                           |             |   |             |             |
|----------------------------------------|--------|------------|-------------------------------------------|-------------|---|-------------|-------------|
| ASQSQGIQQLLQAEKR                       | Q9CR51 | 0          | N-term +42.01 Da, K +28.03 Da,            | 4123.326172 | 3 | 619.3400269 | 619.0059212 |
| AVNVYSTSVTSDNLSR                       | Q61166 | 0          | N-term +42.01 Da,                         | 4126.30957  | 2 | 877.9299927 | 877.9314103 |
| MEVHELFR                               | P41216 | 0          | N-term +42.01 Da,                         | 4127.964355 | 2 | 551.7706909 | 551.7711365 |
| SQAFFDKAAEEV                           | P31786 | 0.01624232 | N-term +42.01 Da, K +28.03 Da,            | 4133.26709  | 2 | 697.3269043 | 697.3277259 |
| FAQLCEEHGILR                           | B5X0G2 | 0          | N-term +42.01 Da, C +57.02Da,             | 4133.554199 | 2 | 757.8725586 | 757.8746539 |
| MEGPAGYLR                              | E9Q509 | 0          | N-term +42.01 Da,                         | 4136.222656 | 2 | 518.75      | 518.2500369 |
| MDLYKTLR                               | P06537 | 0.01664477 | N-term +42.01 Da, K +28.03 Da,            | 4141.652832 | 2 | 555.3054199 | 555.3048121 |
| AAAKKAVLGPLVGAVDQGTSSSTR               | Q64516 | 0          | N-term +42.01 Da, K +28.03 Da,            | 4144.549805 | 3 | 765.772522  | 765.7725453 |
| MELEAMSR                               | P61166 | 0          | N-term +42.01 Da,                         | 4145.476563 | 2 | 504.7283936 | 504.7280803 |
| ASQSQGIQQLLQAEKR                       | Q9CR51 | 0          | N-term +42.01 Da, K +28.03 Da,            | 4145.591309 | 2 | 928.0100098 | 928.0052436 |
| ATEGDVELELETETSGPERPPEKPR              | Q9CR41 | 0          | N-term +42.01 Da, K +28.03 Da,            | 4147.768555 | 3 | 946.4699707 | 946.1330862 |
| KMGAPEAGMAEYLFDKHTLGHGDES              | P09528 | 0          | N-term +42.01 Da, K +28.03 Da,            | 4148.550781 | 4 | 698.5800171 | 698.078193  |
| ASQSQGIQQLLQAEKR                       | Q9CR51 | 0          | N-term +42.01 Da, K +28.03 Da,            | 4154.912598 | 3 | 619.0057983 | 619.0059212 |
| MEKTLTVPLER                            | O88569 | 0          | N-term +42.01 Da, K +28.03 Da,            | 4155.522949 | 2 | 758.4074707 | 758.4079956 |
| DIQMTQSTSSLSASLGDR                     | P01646 | 0.049604   | N-term +42.01 Da,                         | 4158.044434 | 2 | 970.4699707 | 969.9572999 |
| AMKAVCVLKGDPVQGTIHFEQK                 | P08228 | 0          | N-term +42.01 Da, K +28.03 Da,C +57.02Da, | 4159.061035 | 4 | 661.1099854 | 660.6066544 |
| MEVHELFR                               | P41216 | 0          | N-term +42.01 Da,                         | 4159.787109 | 2 | 551.7709961 | 551.7711365 |
| AMKAVCVLKGDPVQGTIHFEQK                 | P08228 | 0          | N-term +42.01 Da, K +28.03 Da,C +57.02Da, | 4162.911133 | 3 | 880.7999878 | 880.4731137 |
| AAAAVVEFQR                             | Q8BG32 | 0          | N-term +42.01 Da,                         | 4164.660645 | 2 | 552.2966919 | 552.2958332 |
| METEQPEETFPNTEETNGEFGKRPAEDMEEEQAFKR   | P61979 | 0          | N-term +42.01 Da, K +28.03 Da,            | 4171.319336 | 4 | 1058.719971 | 1058.228316 |
| AAAAATAAAAAAPSGGGGGGEEERLEEKSEDDQLQGLR | D3Z7U4 | 0          | N-term +42.01 Da, K +28.03 Da,            | 4171.757324 | 3 | 1228.589966 | 1227.924418 |
| AFRRSSNLHRHER                          | Q80XR7 | 0.01329198 | N-term +42.01 Da,                         | 4173.666016 | 2 | 855.4400024 | 854.4485633 |
| MDSKESLAPPGRDEVPSLLGR                  | P06537 | 0          | N-term +42.01 Da, K +28.03 Da,            | 4175.04541  | 3 | 804.4099731 | 804.4126888 |
| ASQSQGIQQLLQAEKR                       | Q9CR51 | 0          | N-term +42.01 Da, K +28.03 Da,            | 4176.111328 | 2 | 928.0043945 | 928.0052436 |
| AAQKINEGLEHLAKAEKY                     | Q9CWZ7 | 0          | N-term +42.01 Da, K +28.03 Da,            | 4177.54541  | 4 | 535.7999878 | 535.5506677 |
| AAAVVDPQQSVVMR                         | P43883 | 0          | N-term +42.01 Da,                         | 4178.173828 | 2 | 756.892334  | 756.8955865 |
| MDSKESLAPPGRDEVPSLLGR                  | P06537 | 0          | N-term +42.01 Da, K +28.03 Da,            | 4178.938965 | 3 | 805.0800171 | 804.4126888 |
| ALDGPEQMELEEGKAGSGLR                   | P62196 | 0          | N-term +42.01 Da, K +28.03 Da,            | 4184.052246 | 2 | 1079.530029 | 1079.028257 |
| AMKAVCVLKGDPVQGTIHFEQK                 | P08228 | 0          | N-term +42.01 Da, K +28.03 Da,C +57.02Da, | 4187.60498  | 2 | 1320.209961 | 1320.206032 |
| ASQSQGIQQLLQAEKR                       | Q9CR51 | 0          | N-term +42.01 Da, K +28.03 Da,            | 4189.066895 | 3 | 619         | 619.0059212 |
| AMKAVCVLKGDPVQGTIHFEQK                 | P08228 | 0          | N-term +42.01 Da, K +28.03 Da,C +57.02Da, | 4190.364258 | 4 | 660.6057739 | 660.6066544 |
| AMKAVCVLKGDPVQGTIHFEQKASG              | P08228 | 0.00412466 | N-term +42.01 Da, K +28.03 Da,C +57.02Da, | 4191.987793 | 4 | 714.6300049 | 714.3793062 |
| AMKAVCVLKGDPVQGTIHFEQK                 | P08228 | 0          | N-term +42.01 Da, K +28.03 Da,C +57.02Da, | 4193.611328 | 3 | 880.8099976 | 880.4731137 |
| AMKAVCVLKGDPVQGTIHFEQKAS               | P08228 | 0.0040965  | N-term +42.01 Da, K +28.03 Da,C +57.02Da, | 4195.834473 | 3 | 933.8300171 | 933.1628281 |
| AAAAVVEFQR                             | Q8BG32 | 0          | N-term +42.01 Da,                         | 4199.088867 | 2 | 552.7999878 | 552.2958332 |
| AMKAVCVLKGDPVQGTIHFEQKA                | P08228 | 0.00144998 | N-term +42.01 Da, K +28.03 Da,C +57.02Da, | 4204.436523 | 4 | 678.6099854 | 678.3659329 |
| SSVAVLTQESFAEHR                        | Q8VDJ3 | 0          | N-term +42.01 Da,                         | 4209.580566 | 2 | 851.9217529 | 851.9233878 |
| ATIATMPVPETR                           | Q62189 | 0          | N-term +42.01 Da,                         | 4209.839844 | 2 | 664.8482056 | 664.8475733 |
| AMKAVCVLKGDPVQGTIHFEQKA                | P08228 | 0          | N-term +42.01 Da, K +28.03 Da,C +57.02Da, | 4211.297363 | 3 | 904.8200073 | 904.1521517 |
| AHQQTFTFPDLFPEKDRSPPELEEELPQQR         | O35972 | 0.04085931 | N-term +42.01 Da, K +28.03 Da,            | 4211.408691 | 3 | 1235.930054 | 1235.944313 |

|                                |        |            |                                            |             |   |             |             |
|--------------------------------|--------|------------|--------------------------------------------|-------------|---|-------------|-------------|
| SAHLQWMVVR                     | P41105 | 0          | N-term +42.01 Da,                          | 4211.693848 | 2 | 634.8300171 | 634.8320597 |
| ASSPQGLDNPALLR                 | A2ADY9 | 0          | N-term +42.01 Da,                          | 4215.386719 | 2 | 740.8900146 | 740.8913586 |
| MDNKLDFVR                      | Q3UZZ6 | 0.03940678 | N-term +42.01 Da, K +28.03 Da,             | 4215.660645 | 2 | 604.3105469 | 604.3106262 |
| AATMKKAAAEDEVNVTFFEDQQKINKF    | E9Q6U4 | 0          | N-term +42.01 Da, K +28.03 Da,             | 4216.720703 | 4 | 739.1400146 | 738.6441288 |
| MDLGLAGR                       | Q91X52 | 0.001443   | N-term +42.01 Da,                          | 4218.095215 | 2 | 437.730011  | 437.7261973 |
| AEGQVLVLDGR                    | P19253 | 0          | N-term +42.01 Da,                          | 4219.936035 | 2 | 599.8239746 | 599.8249553 |
| AMKAVCVLKGDPVQGTIHFEQK         | P08228 | 0          | N-term +42.01 Da, K +28.03 Da, C +57.02Da, | 4222.020508 | 4 | 660.605896  | 660.6066544 |
| AATMKKAAAEDEVNVTFFEDQQKINKF    | E9Q6U4 | 0          | N-term +42.01 Da, K +28.03 Da,             | 4222.391602 | 3 | 984.8599854 | 984.5230796 |
| LHAMFDQGEIVEKR                 | Q8VI59 | 0.00145702 | N-term +42.01 Da, K +28.03 Da,             | 4226.245117 | 2 | 872.960022  | 871.9483508 |
| ATEGDVELELETETSGPERPPEKPR      | Q9CR41 | 0          | N-term +42.01 Da, K +28.03 Da,             | 4235.607422 | 3 | 946.4699707 | 946.1330862 |
| SSVAVLTKESFAEHR                | Q8VDJ3 | 0          | N-term +42.01 Da,                          | 4235.748047 | 3 | 568.6199951 | 568.284684  |
| AMKAVCVLKGDPVQGTIHFEQKA        | P08228 | 0.00408719 | N-term +42.01 Da, K +28.03 Da, C +57.02Da, | 4236.436035 | 4 | 678.3657837 | 678.3659329 |
| MESGFYSKDTYLSHFNPR             | O55239 | 0          | N-term +42.01 Da, K +28.03 Da,             | 4236.98291  | 3 | 730.0100098 | 729.6773649 |
| TNLGKLTDEEVDDEMIR              | P62204 | 0.01029083 | N-term +42.01 Da, K +28.03 Da,             | 4238.53125  | 3 | 688.017334  | 688.0051476 |
| SSVAVLTKESFAEHR                | Q8VDJ3 | 0          | N-term +42.01 Da,                          | 4240.12793  | 2 | 851.9227905 | 851.9233878 |
| SSVAVLTKESFAEHR                | Q8VDJ3 | 0          | N-term +42.01 Da,                          | 4243.92334  | 3 | 568.2854614 | 568.284684  |
| VAPEEHPVLLTEAPLNPKANR          | P60710 | 0          | N-term +42.01 Da, K +28.03 Da,             | 4244.54834  | 3 | 788.7700195 | 789.100662  |
| GDPKEEEEEELVDPLTTVR            | P99028 | 0          | N-term +42.01 Da, K +28.03 Da,             | 4245.740723 | 2 | 1128.569946 | 1128.04991  |
| GDPKEEEEEELVDPLTTVR            | P99028 | 0.02254987 | N-term +42.01 Da, K +28.03 Da,             | 4245.984863 | 3 | 752.710022  | 752.3690321 |
| AASAIKGLSALR                   | Q9D8T7 | 0          | N-term +42.01 Da, K +28.03 Da,             | 4247.693359 | 2 | 614.3744507 | 614.374615  |
| AQGSHQIDFQVLHDLR               | Q99K90 | 0          | N-term +42.01 Da,                          | 4247.950684 | 3 | 636.3200073 | 635.9903825 |
| HVMTNLGKLTDEEVDDEMIR           | P62204 | 0.00144439 | N-term +42.01 Da, K +28.03 Da,             | 4248.307617 | 2 | 1215.609985 | 1215.087989 |
| AKSSLAGSDGALTWVNNATKKEELETANKN | Q64511 | 0          | N-term +42.01 Da, K +28.03 Da,             | 4250.256348 | 4 | 826.4400024 | 826.1873186 |
| AKSSLAGSDGALTWVNNATKKEELETANKN | Q64511 | 0          | N-term +42.01 Da, K +28.03 Da,             | 4251.875488 | 4 | 826.1900024 | 826.1873186 |
| AERPEDLNLNNAVITR               | Q9JKP7 | 0.00143335 | N-term +42.01 Da,                          | 4252.446289 | 2 | 926.4899902 | 925.491969  |
| MEEKAVASAGCWEPGPPR             | A7MCT6 | 0.02383016 | N-term +42.01 Da, K +28.03 Da, C +57.02Da, | 4255.890137 | 3 | 714.0100098 | 713.6714451 |
| TTNTVPLHPYWPR                  | P70245 | 0          | N-term +42.01 Da,                          | 4257.962402 | 2 | 813.4099731 | 812.4175432 |
| AAAAGAVVASAASGPAEGKKITELR      | Q8CH25 | 0          | N-term +42.01 Da, K +28.03 Da,             | 4261.411621 | 3 | 799.1199951 | 798.7832217 |
| ACGLVASNLNLKPGECKLVR           | P16045 | 0          | N-term +42.01 Da, K +28.03 Da, C +57.02Da, | 4265.336914 | 3 | 766.75      | 766.4204608 |
| AEVLSAGPESVAGCR                | Q7TQK4 | 0          | N-term +42.01 Da, C +57.02Da,              | 4268.395996 | 2 | 772.8699951 | 772.872309  |
| AMFEQMR                        | Q9DBZ5 | 0.00097656 | N-term +42.01 Da,                          | 4270.342285 | 2 | 477.7122498 | 477.7122327 |
| SSVAVLTKESFAEHR                | Q8VDJ3 | 0          | N-term +42.01 Da,                          | 4271.536621 | 2 | 851.9226074 | 851.9233878 |
| ADKPDMEIASFDKAKL               | Q6ZWY8 | 0          | N-term +42.01 Da, K +28.03 Da,             | 4271.903809 | 3 | 654.6793823 | 654.6799349 |
| MNPQGSQDVEYSVVQHADGEKSNVLR     | P48437 | 0          | N-term +42.01 Da, K +28.03 Da,             | 4282.859863 | 3 | 1029.819946 | 1029.487646 |
| ANHAPFETDISTLTR                | Q9QXD6 | 0          | N-term +42.01 Da,                          | 4286.899902 | 2 | 858.4199829 | 857.9233878 |
| MEVLATDTASQQR                  | Q9Z0P4 | 0          | N-term +42.01 Da,                          | 4287.324219 | 2 | 811.3800049 | 810.8803315 |
| ANHAPFETDISTLTR                | Q9QXD6 | 0          | N-term +42.01 Da,                          | 4288.758301 | 2 | 858.9299927 | 857.9233878 |
| ALSDADVQKQIKHMM                | P50518 | 0          | N-term +42.01 Da, K +28.03 Da,             | 4288.93457  | 3 | 605.3200073 | 604.9830713 |
| VISLSGEHSIIGR                  | P08228 | 0          | N-term +42.01 Da,                          | 4290.14502  | 2 | 705.3900146 | 705.3909941 |
| MELSGEYVGCDEGPQR               | POC8B4 | 0          | N-term +42.01 Da, C +57.02Da,              | 4291.941895 | 2 | 935.3900146 | 934.8931135 |

|                                    |        |            |                                           |             |   |             |             |
|------------------------------------|--------|------------|-------------------------------------------|-------------|---|-------------|-------------|
| AAAAGAVVASAASGPAEGKKITELR          | Q8CH25 | 0          | N-term +42.01 Da, K +28.03 Da,            | 4292.599121 | 3 | 798.7822876 | 798.7832217 |
| SSSRPVALVTGANKGIGFAIIR             | P48758 | 0          | N-term +42.01 Da, K +28.03 Da,            | 4295.179199 | 3 | 758.7600098 | 758.0972516 |
| MELSGEYVGCDEGEPQR                  | POC8B4 | 0          | N-term +42.01 Da, C +57.02Da,             | 4295.422363 | 2 | 934.8900146 | 934.8931135 |
| AMKAVCVLKGDDGVPVQGTIHFEQKASGE      | P08228 | 0.00144648 | N-term +42.01 Da, K +28.03 Da,C +57.02Da, | 4298.933594 | 4 | 746.8900146 | 746.6399548 |
| VISLSGEHSIIGR                      | P08228 | 0          | N-term +42.01 Da,                         | 4300.717773 | 3 | 470.6000061 | 470.5964216 |
| SSVAVLTKESFAEHR                    | Q8VDJ3 | 0          | N-term +42.01 Da,                         | 4301.944824 | 2 | 851.923584  | 851.9233878 |
| SGYPKSYNPFDDVVEEDTRPAPWKDVR        | Q9ERB0 | 0          | N-term +42.01 Da, K +28.03 Da,            | 4307.310547 | 4 | 853.9000244 | 853.4007512 |
| SGYPKSYNPFDDVVEEDTRPAPWKDVR        | Q9ERB0 | 0          | N-term +42.01 Da, K +28.03 Da,            | 4309.382813 | 4 | 853.6500244 | 853.4007512 |
| ANHAPFETDISTLTR                    | Q9QXD6 | 0          | N-term +42.01 Da,                         | 4309.632813 | 3 | 572.2850342 | 572.284684  |
| SGYPKSYNPFDDVVEEDTRPAPWKDVR        | Q9ERB0 | 0          | N-term +42.01 Da, K +28.03 Da,            | 4313.419922 | 3 | 1138.199951 | 1137.531909 |
| AASAAATAAASATAAASASGSPGSGEGSAGGEKR | Q62318 | 0          | N-term +42.01 Da, K +28.03 Da,            | 4314.925293 | 3 | 983.4699707 | 983.1377822 |
| ACGLVASNLNPKGECLKVR                | P16045 | 0          | N-term +42.01 Da, K +28.03 Da,C +57.02Da, | 4315.212402 | 3 | 766.4206543 | 766.4204608 |
| ANHAPFETDISTLTR                    | Q9QXD6 | 0          | N-term +42.01 Da,                         | 4319.586426 | 2 | 857.9224854 | 857.9233878 |
| AGAGPTMLLR                         | Q9D2U5 | 0          | N-term +42.01 Da,                         | 4322.333984 | 2 | 514.7807617 | 514.781504  |
| VISLSGEHSIIGR                      | P08228 | 0          | N-term +42.01 Da,                         | 4322.66748  | 2 | 705.3900146 | 705.3909941 |
| AAALGAGGGAGAGDDDFDQFDKPGAER        | Q9CXK9 | 0          | N-term +42.01 Da, K +28.03 Da,            | 4325.697754 | 3 | 869.7299805 | 869.3966442 |
| METGPAPLVAPPR                      | Q8BHL3 | 0          | N-term +42.01 Da,                         | 4327.255371 | 2 | 689.3633423 | 689.3633904 |
| AAALGAGGGAGAGDDDFDQFDKPGAER        | Q9CXK9 | 0          | N-term +42.01 Da, K +28.03 Da,            | 4327.474609 | 2 | 1303.579956 | 1303.591328 |
| MELSGEYVGCDEGEPQR                  | POC8B4 | 0          | N-term +42.01 Da, C +57.02Da,             | 4329.431152 | 2 | 935.3900146 | 934.8931135 |
| PGVALLASARLAAASDVLELTDENFESR       | P27773 | 0.01999131 | N-term +42.01 Da,                         | 4329.541016 | 3 | 1023.859985 | 1024.206697 |
| ACGLVASNLNPKGECLKVR                | P16045 | 0          | N-term +42.01 Da, K +28.03 Da,C +57.02Da, | 4330.897949 | 4 | 575.0700073 | 575.0671647 |
| ACGLVASNLNPKGECLKVR                | P16045 | 0          | N-term +42.01 Da, K +28.03 Da,C +57.02Da, | 4332.875488 | 2 | 1149.130005 | 1149.127053 |
| SSVAVLTKESFAEHR                    | Q8VDJ3 | 0          | N-term +42.01 Da,                         | 4332.950684 | 2 | 851.9224854 | 851.9233878 |
| AEPDYIEDDNPQLIRPQKLINPVKSSR        | Q3TGF2 | 0          | N-term +42.01 Da, K +28.03 Da,            | 4334.369629 | 4 | 809.6799927 | 809.4305826 |
| MQPASAKWY                          | Q9R0Q7 | 0          | N-term +42.01 Da, K +28.03 Da,            | 4334.67334  | 2 | 576.2800293 | 576.281337  |
| NKELDPVQKLFVDKIR                   | P97450 | 0          | N-term +42.01 Da, K +28.03 Da,            | 4340.299805 | 4 | 518.3099976 | 517.8095817 |
| AEPDYIEDDNPQLIRPQKLINPVKSSR        | Q3TGF2 | 0          | N-term +42.01 Da, K +28.03 Da,            | 4340.694336 | 3 | 1079.569946 | 1078.905018 |
| ACGLVASNLNPKGECLKVR                | P16045 | 0          | N-term +42.01 Da, K +28.03 Da,C +57.02Da, | 4345.893066 | 3 | 766.4202881 | 766.4204608 |
| SDEFSLADALPEQSSAKPPAVTNTKAGH       | Q8BH93 | 0          | N-term +42.01 Da, K +28.03 Da,            | 4351.742188 | 3 | 989.5       | 989.4962473 |
| AKVEQVLSLEPQHELKFR                 | Q9QY76 | 0          | N-term +42.01 Da, K +28.03 Da,            | 4352.64209  | 4 | 563.0713501 | 563.0717673 |
| ADVLDLHEAGGEDFAMDEGDDESIIHKLKEK    | Q9CWZ3 | 0          | N-term +42.01 Da, K +28.03 Da,            | 4355.091309 | 4 | 861.1599731 | 860.6607055 |
| ASIWVGPGR                          | O35639 | 0          | N-term +42.01 Da,                         | 4356.719727 | 2 | 464.2600098 | 464.255979  |
| AKVEQVLSLEPQHELKFR                 | Q9QY76 | 0          | N-term +42.01 Da, K +28.03 Da,            | 4358.294922 | 3 | 750.4271851 | 750.4265976 |
| ASWAEPSEPAALR                      | O35465 | 0          | N-term +42.01 Da,                         | 4363.312012 | 2 | 713.8516235 | 713.851702  |
| AMTEWILSISTIRICQLR                 | Q8C5I4 | 0.00097847 | N-term +42.01 Da, C +57.02Da,             | 4366.633301 | 3 | 744.7199707 | 745.0659064 |
| SSVAVLTKESFAEHR                    | Q8VDJ3 | 0          | N-term +42.01 Da,                         | 4367.71582  | 2 | 851.9199829 | 851.9233878 |
| SDEFSLADALPEQSSAKPPAVTNTKAGH       | Q8BH93 | 0          | N-term +42.01 Da, K +28.03 Da,            | 4369.081055 | 3 | 990.1599731 | 989.4962473 |
| IINEPTAAAAYGLDKR                   | P20029 | 0          | N-term +42.01 Da, K +28.03 Da,            | 4370.094238 | 3 | 629.3599854 | 629.3509173 |
| AAPRPPPAISVVSAPAFYAPQKK            | Q62523 | 0          | N-term +42.01 Da, K +28.03 Da,            | 4374.52832  | 3 | 850.4799805 | 850.1477235 |
| ACGLVASNLNPKGECLKVR                | P16045 | 0          | N-term +42.01 Da, K +28.03 Da,C +57.02Da, | 4376.40625  | 3 | 766.75      | 766.4204608 |

|                                        |        |            |                                            |             |   |             |             |
|----------------------------------------|--------|------------|--------------------------------------------|-------------|---|-------------|-------------|
| SIGVPIKVLHEAEGH                        | P62320 | 0          | N-term +42.01 Da, K +28.03 Da,             | 4378.370117 | 3 | 552.9799805 | 552.6420311 |
| VFDKDGNGFVSAELR                        | Q9D6P8 | 0.0397463  | N-term +42.01 Da, K +28.03 Da,             | 4381.911621 | 3 | 599.2999878 | 598.9722174 |
| MNHDFQALALESR                          | Q80U58 | 0          | N-term +42.01 Da,                          | 4384.117188 | 2 | 787.3699951 | 787.3750185 |
| GANEDQEMELEALR                         | Q9CPR1 | 0          | N-term +42.01 Da,                          | 4390.380859 | 2 | 823.8699951 | 823.869964  |
| VGDLGNVTAGKDGVANVSIEDR                 | P08228 | 0          | N-term +42.01 Da, K +28.03 Da,             | 4395.13623  | 2 | 1129.579956 | 1128.57696  |
| MEELSADEIR                             | Q9ES00 | 0          | N-term +42.01 Da,                          | 4395.29834  | 2 | 618.289978  | 617.7846391 |
| PRAALVDLEPGTMDSVR                      | Q922F4 | 0.00368494 | N-term +42.01 Da,                          | 4396.57373  | 2 | 935.5       | 934.9803799 |
| VLSGEDKSNIAAWGKIGGGHGAEYGAEALER        | P01942 | 0          | N-term +42.01 Da, K +28.03 Da,             | 4412.533203 | 4 | 836.1900024 | 835.6887568 |
| AKEWGYASHNGPDHWHELYPIAKGDNQSPIELH      | P16015 | 0          | N-term +42.01 Da, K +28.03 Da,             | 4415.848633 | 4 | 974.9699707 | 974.4710365 |
| SSEPPPPPLQPPTHQTSVGLLDTPR              | Q9CR86 | 0          | N-term +42.01 Da,                          | 4416.823242 | 2 | 1346.680054 | 1345.692856 |
| VISLSGEHSIIGR                          | P08228 | 0          | N-term +42.01 Da,                          | 4420.199219 | 2 | 705.8900146 | 705.3909941 |
| SSEPPPPPLQPPTHQTSVGLLDTPR              | Q9CR86 | 0          | N-term +42.01 Da,                          | 4426.697754 | 2 | 1345.699951 | 1345.692856 |
| SSEPPPPPLQPPTHQTSVGLLDTPR              | Q9CR86 | 0          | N-term +42.01 Da,                          | 4428.601074 | 3 | 898.1300049 | 897.4643294 |
| AKEWGYASHNGPDHWHELYPIAKGDNQSPIELH      | P16015 | 0          | N-term +42.01 Da, K +28.03 Da,             | 4429.098633 | 3 | 1299.619995 | 1298.958956 |
| SYAEKPDEITKDEWMEKLNHLHVQR              | Q9D7M1 | 0          | N-term +42.01 Da, K +28.03 Da,             | 4430.460938 | 4 | 800.9000244 | 800.6577679 |
| SSEPPPPPLQPPTHQTSVGLLDTPR              | Q9CR86 | 0          | N-term +42.01 Da,                          | 4432.178711 | 3 | 897.4699707 | 897.4643294 |
| SSEPPPPPLQPPTHQTSVGLLDTPR              | Q9CR86 | 0          | N-term +42.01 Da,                          | 4447.761719 | 2 | 1346.699951 | 1345.692856 |
| LIGDAAKNQLTSNPENTVFDAKR                | P20029 | 0          | N-term +42.01 Da, K +28.03 Da,             | 4451.938965 | 3 | 868.1300049 | 867.4608078 |
| MQAALEVTR                              | Q9CQP3 | 0          | N-term +42.01 Da,                          | 4453.89502  | 2 | 566.2970581 | 566.2949761 |
| AEQEPTAEQLAQIAAENEDEHSVNYKPPAQK        | Q99PT1 | 0          | N-term +42.01 Da, K +28.03 Da,             | 4454.140625 | 4 | 916.4400024 | 916.4418766 |
| MDHTGAIDTEEELGPLAH                     | G3X8R8 | 0          | N-term +42.01 Da,                          | 4456.163086 | 2 | 989.4500122 | 989.4465678 |
| AEQEPTAEQLAQIAAENEDEHSVNYKPPAQK        | Q99PT1 | 0          | N-term +42.01 Da, K +28.03 Da,             | 4456.404785 | 3 | 1222.23999  | 1221.586743 |
| MEAALAVTR                              | Q9CXA2 | 0          | N-term +42.01 Da,                          | 4456.538086 | 2 | 502.2654419 | 502.265687  |
| SSVAVLTSQESFAEHR                       | Q8VDJ3 | 0          | N-term +42.01 Da,                          | 4458.066895 | 2 | 852.9099731 | 851.9233878 |
| SSEPPPPPLQPPTHQTSVGLLDTPR              | Q9CR86 | 0          | N-term +42.01 Da,                          | 4458.797852 | 2 | 1346.189941 | 1345.692856 |
| AEQEPTAEQLAQIAAENEDEHSVNYKPPAQK        | Q99PT1 | 0          | N-term +42.01 Da, K +28.03 Da,             | 4459.189941 | 4 | 916.6900024 | 916.4418766 |
| VISLSGEHSIIGR                          | P08228 | 0.03217503 | N-term +42.01 Da,                          | 4463.316895 | 2 | 705.8919678 | 705.3909941 |
| AEQEPTAEQLAQIAAENEDEHSVNYKPPAQK        | Q99PT1 | 0          | N-term +42.01 Da, K +28.03 Da,             | 4464.416504 | 3 | 1221.920044 | 1221.586743 |
| SYGRPPPDVEGMTSLKVDNLTYR                | Q62093 | 0          | N-term +42.01 Da, K +28.03 Da,             | 4464.980469 | 3 | 889.4400024 | 889.1145317 |
| MDHTGAIDTEEELGPLAH                     | G3X8R8 | 0          | N-term +42.01 Da,                          | 4466.334961 | 2 | 990.4500122 | 989.4465678 |
| FAQLCEEHGILR                           | B5X0G2 | 0          | N-term +42.01 Da, C +57.02Da,              | 4468.622559 | 2 | 758.3703003 | 757.8746539 |
| MNFSGKYQLQ                             | P12710 | 0.00675676 | N-term +42.01 Da, K +28.03 Da,             | 4474.146484 | 2 | 643.8200073 | 643.3159087 |
| EQWSNCTIGQIR                           | P10605 | 0          | N-term +42.01 Da, C +57.02Da,              | 4476.453613 | 2 | 815.4000244 | 815.8857505 |
| ANHAPFETDISTLTR                        | Q9QXD6 | 0          | N-term +42.01 Da,                          | 4481.845703 | 2 | 858.4099731 | 857.9233878 |
| MQAALEVTR                              | Q9CQP3 | 0          | N-term +42.01 Da,                          | 4485.444824 | 2 | 566.2941284 | 566.2949761 |
| TAAASSSLERSYELPDGQVITIGNER             | Q8BFZ3 | 0          | N-term +42.01 Da,                          | 4485.913574 | 3 | 936.8099976 | 936.1333088 |
| ASGSPSPQPPASGSGYVPGVSAAFVTCPNEKVAKEIAR | Q9CQ89 | 0          | N-term +42.01 Da, K +28.03 Da, C +57.02Da, | 4489.015625 | 3 | 1352.02002  | 1351.684394 |
| ADEIAKAQVAQPGGDTIFGK                   | P70349 | 0          | N-term +42.01 Da, K +28.03 Da,             | 4490.48291  | 3 | 705.710022  | 705.3757917 |
| MFQPAGHGQDWAMEGPR                      | Q9Z1E3 | 0          | N-term +42.01 Da,                          | 4490.958984 | 2 | 978.9400024 | 978.9276241 |
| ADEIAKAQVAQPGGDTIFGK                   | P70349 | 0          | N-term +42.01 Da, K +28.03 Da,             | 4492.138184 | 2 | 1058.060059 | 1057.560049 |

|                              |        |            |                                           |             |   |             |             |
|------------------------------|--------|------------|-------------------------------------------|-------------|---|-------------|-------------|
| SYGRPPPDVEGMSLSKVDNLTYR      | Q62093 | 0          | N-term +42.01 Da, K +28.03 Da,            | 4497.933594 | 3 | 889.4500122 | 889.1145317 |
| ADEIAKAQVAQPGGDTIFGK         | P70349 | 0          | N-term +42.01 Da, K +28.03 Da,            | 4502.40918  | 2 | 1057.560059 | 1057.560049 |
| ASCASIDIEDATQHLLR            | Q3UJB9 | 0          | N-term +42.01 Da, C +57.02Da,             | 4506.823242 | 2 | 914.9260864 | 914.9283447 |
| AMKAVCVLKGDPVQGTIHFQK        | P08228 | 0.00145138 | N-term +42.01 Da, K +28.03 Da,C +57.02Da, | 4515.489746 | 4 | 661.0999756 | 660.6066544 |
| SSVAVLTSQESFAEHR             | Q8VDJ3 | 0.00098135 | N-term +42.01 Da,                         | 4521.321777 | 2 | 851.4299927 | 851.9233878 |
| METILEQQR                    | Q9D554 | 0          | N-term +42.01 Da,                         | 4523.09375  | 2 | 595.2970581 | 595.2977161 |
| MQAALEVTAR                   | Q9CQP3 | 0          | N-term +42.01 Da,                         | 4527.212891 | 2 | 566.2999878 | 566.2949761 |
| LIGDAAKNQVAMNPQNTVFDAKR      | P16627 | 0          | N-term +42.01 Da, K +28.03 Da,            | 4533.417969 | 4 | 650.3499756 | 650.5969811 |
| AAVVLGGDTMGPER               | Q64327 | 0          | N-term +42.01 Da,                         | 4537.016113 | 2 | 708.3499756 | 707.8533874 |
| ANHAPFETDISTLTR              | Q9QXD6 | 0          | N-term +42.01 Da,                         | 4537.197266 | 2 | 858.4105835 | 857.9233878 |
| TASSVLLHTGQKMPL              | Q9JII6 | 0          | N-term +42.01 Da, K +28.03 Da,            | 4539.077148 | 2 | 826.9559326 | 826.9556443 |
| AALGSSSQNVTEYVVR             | Q3THK3 | 0          | N-term +42.01 Da,                         | 4542.6875   | 2 | 861.9299927 | 861.9364953 |
| LYSSDDVIELTPSNFNR            | Q92DR8 | 0          | N-term +42.01 Da,                         | 4546.898438 | 2 | 1050.02002  | 1050.000022 |
| AAQAVSLLR                    | Q8BJY1 | 0          | N-term +42.01 Da,                         | 4548.625977 | 2 | 485.7900085 | 485.7876436 |
| SVPSALMKQPPIQSTAGAVPVR       | Q9CQU1 | 0          | N-term +42.01 Da, K +28.03 Da,            | 4550.061035 | 2 | 1153.140015 | 1152.640851 |
| MDAIKKMQML                   | P58771 | 0          | N-term +42.01 Da, K +28.03 Da,            | 4553.912109 | 3 | 488.2799988 | 488.2779901 |
| METILEQQR                    | Q9D554 | 0          | N-term +42.01 Da,                         | 4554.254883 | 2 | 595.2966919 | 595.2977161 |
| SVPSALMKQPPIQSTAGAVPVR       | Q9CQU1 | 0          | N-term +42.01 Da, K +28.03 Da,            | 4554.940918 | 3 | 768.7600098 | 768.7629925 |
| SVPSALMKQPPIQSTAGAVPVR       | Q9CQU1 | 0          | N-term +42.01 Da, K +28.03 Da,            | 4555.658203 | 2 | 1153.640015 | 1152.640851 |
| MEVQCGGAGFIPSSR              | Q99JY3 | 0          | N-term +42.01 Da, C +57.02Da,             | 4564.989746 | 2 | 883.9000244 | 883.8954585 |
| ANHAPFETDISTLTR              | Q9QXD6 | 0.0322442  | N-term +42.01 Da,                         | 4570.575195 | 2 | 858.4099731 | 857.9233878 |
| TSALENYINR                   | Q6ZWM4 | 0          | N-term +42.01 Da,                         | 4572.742676 | 2 | 611.8099976 | 611.8067628 |
| MQAALEVTAR                   | Q9CQP3 | 0          | N-term +42.01 Da,                         | 4578.819336 | 2 | 566.2999878 | 566.2949761 |
| ACGLVASNLNLKPGECKVR          | P16045 | 0          | N-term +42.01 Da, K +28.03 Da,C +57.02Da, | 4586.566406 | 3 | 766.75      | 766.4204608 |
| VTLCNGTYEGLLRNKVGRNNEKLPTLK  | P29812 | 0.02506482 | N-term +42.01 Da, K +28.03 Da,C +57.02Da, | 4592.603516 | 4 | 842.960022  | 843.2251462 |
| AAGFKTVEPLEYYR               | Q9D753 | 0          | N-term +42.01 Da, K +28.03 Da,            | 4594.82959  | 2 | 857.4400024 | 857.4459668 |
| SAGGAVPPPNPAVSFPAPR          | Q8BI08 | 0          | N-term +42.01 Da,                         | 4597.42041  | 3 | 643.6699829 | 643.3390115 |
| SAGGAVPPPNPAVSFPAPR          | Q8BI08 | 0          | N-term +42.01 Da,                         | 4601.208008 | 3 | 644.0100098 | 643.3390115 |
| MDVFKKGF                     | Q9Z0F7 | 0.0387234  | N-term +42.01 Da, K +28.03 Da,            | 4602.371582 | 2 | 535.289978  | 535.2911731 |
| SAGGAVPPPNPAVSFPAPR          | Q8BI08 | 0          | N-term +42.01 Da,                         | 4602.462891 | 2 | 964.5       | 964.5048791 |
| TAVHAGNINFKWDPKSLEIR         | P26231 | 0.04634656 | N-term +42.01 Da, K +28.03 Da,            | 4602.805664 | 4 | 599.8300171 | 599.3286703 |
| MQAALEVTAR                   | Q9CQP3 | 0          | N-term +42.01 Da,                         | 4602.911621 | 2 | 567.289978  | 566.2949761 |
| GSEAAQLLEAADFAAHKHR          | Q9D114 | 0          | N-term +42.01 Da, K +28.03 Da,            | 4605.942871 | 3 | 698.0200195 | 698.0238636 |
| TAVHAGNINFKWDPKSLEIR         | P26231 | 0          | N-term +42.01 Da, K +28.03 Da,            | 4606.116699 | 3 | 799.0999756 | 798.7691349 |
| AAVTEVVVPADGAEARPLAAEELAAQKR | Q9D198 | 0          | N-term +42.01 Da, K +28.03 Da,            | 4614.50293  | 3 | 968.8599854 | 968.19261   |
| AAVTEVVVPADGAEARPLAAEELAAQKR | Q9D198 | 0          | N-term +42.01 Da, K +28.03 Da,            | 4615.364258 | 3 | 968.5300293 | 968.19261   |
| VFDKDGNGYISAAELR             | P62204 | 0.00277906 | N-term +42.01 Da, K +28.03 Da,            | 4615.575195 | 3 | 609.2999878 | 608.9757391 |
| MEGKVIYGGEDYEKEFTPKDY        | P40936 | 0          | N-term +42.01 Da, K +28.03 Da,            | 4620.907715 | 3 | 876.0900269 | 875.4207389 |
| MKVFTVGLPLPAEGR              | Q91Z53 | 0          | N-term +42.01 Da, K +28.03 Da,            | 4622.288086 | 2 | 786.4317017 | 786.4343472 |
| MEGKVIYGGEDYEKEFTPKDY        | P40936 | 0          | N-term +42.01 Da, K +28.03 Da,            | 4622.579102 | 3 | 875.75      | 875.4207389 |

|                                   |         |            |                                           |             |   |             |             |
|-----------------------------------|---------|------------|-------------------------------------------|-------------|---|-------------|-------------|
| AGLSDLELR                         | Q6DVA0  | 0.00098765 | N-term +42.01 Da,                         | 4634.156738 | 2 | 508.269989  | 508.2745666 |
| MLGPEGGEGYVVKLR                   | Q9Z2X1  | 0          | N-term +42.01 Da, K +28.03 Da,            | 4635.67334  | 2 | 837.4500122 | 837.9478193 |
| AAGTSNYWEDLR                      | O88630  | 0          | N-term +42.01 Da,                         | 4643.823242 | 2 | 712.8230591 | 712.8256844 |
| MFNVESVER                         | Q8BUK6  | 0          | N-term +42.01 Da,                         | 4645.141113 | 2 | 576.770752  | 576.771334  |
| MLGPEGGEGYVVKLR                   | Q9Z2X1  | 0          | N-term +42.01 Da, K +28.03 Da,            | 4652.140625 | 3 | 558.9699707 | 558.9676383 |
| ADKMDMSLDDIILNR                   | O08583  | 0          | N-term +42.01 Da, K +28.03 Da,            | 4653.465332 | 3 | 660.0100098 | 659.3445578 |
| AAEHPEPPKGELQLPPPPPGHYGAWAAQELQAR | Q3UJB0  | 0          | N-term +42.01 Da, K +28.03 Da,            | 4657.821289 | 4 | 927.9799805 | 927.4745845 |
| AAEHPEPPKGELQLPPPPPGHYGAWAAQELQAR | Q3UJB0  | 0          | N-term +42.01 Da, K +28.03 Da,            | 4665.549316 | 3 | 1236.630005 | 1236.29702  |
| MLGPEGGEGYVVKLR                   | Q9Z2X1  | 0          | N-term +42.01 Da, K +28.03 Da,            | 4666.628418 | 2 | 837.9454346 | 837.9478193 |
| MDGIVPDIAVGTRK                    | P17225  | 0          | N-term +42.01 Da, K +28.03 Da,            | 4666.711426 | 2 | 771.4199829 | 771.4214372 |
| AELKYISGFGNECASEDPR               | O09173  | 0          | N-term +42.01 Da, K +28.03 Da,C +57.02Da, | 4672.811035 | 2 | 1107.01001  | 1107.012607 |
| AELKYISGFGNECASEDPR               | O09173  | 0          | N-term +42.01 Da, K +28.03 Da,C +57.02Da, | 4672.902832 | 3 | 738.6799927 | 738.3441632 |
| AASEDELLLP                        | Q6E1249 | 0          | N-term +42.01 Da,                         | 4675.211426 | 2 | 628.3292847 | 628.3300709 |
| LIGDAAKNQLTSNPENTVFDAR            | P20029  | 0          | N-term +42.01 Da, K +28.03 Da,            | 4700.37793  | 4 | 650.5999756 | 650.8474249 |
| AQWNQLQLDTR                       | P42227  | 0          | N-term +42.01 Da,                         | 4701.772949 | 2 | 771.8900146 | 771.8866076 |
| AELKYISGFGNECASEDPR               | O09173  | 0          | N-term +42.01 Da, K +28.03 Da,C +57.02Da, | 4703.384277 | 2 | 1107.011108 | 1107.012607 |
| AAEHPEPPKGELQLPPPPPGHYGAWAAQELQAR | Q3UJB0  | 0          | N-term +42.01 Da, K +28.03 Da,            | 4703.837402 | 4 | 927.4699707 | 927.4745845 |
| AELKYISGFGNECASEDPR               | O09173  | 0          | N-term +42.01 Da, K +28.03 Da,C +57.02Da, | 4705.614258 | 3 | 738.3446045 | 738.3441632 |
| ADGQLPFPSCYPSR                    | Q9JK92  | 0          | N-term +42.01 Da, C +57.02Da,             | 4715.307617 | 2 | 818.8699951 | 818.8748515 |
| MDGIVPDIAVGTRK                    | P17225  | 0          | N-term +42.01 Da, K +28.03 Da,            | 4715.382813 | 2 | 771.9199829 | 771.4214372 |
| MENMAEEELLPQEKEEAQR               | A2RSY6  | 0          | N-term +42.01 Da, K +28.03 Da,            | 4717.786133 | 2 | 1237.579956 | 1237.082904 |
| MENMAEEELLPQEKEEAQR               | A2RSY6  | 0          | N-term +42.01 Da, K +28.03 Da,            | 4722.978516 | 2 | 1238.089966 | 1237.082904 |
| VAGQPAQTGAPQGLGEYLFER             | P29391  | 0          | N-term +42.01 Da,                         | 4726.448242 | 2 | 1209.109985 | 1208.100602 |
| STIPTKQTQFTTYSNQPGLIQQVYEGE       | P17879  | 0          | N-term +42.01 Da, K +28.03 Da,            | 4749.528809 | 3 | 1158.589966 | 1157.914131 |
| METDVTSDTVEVLPQHKFDLR             | Q80XL6  | 0          | N-term +42.01 Da, K +28.03 Da,            | 4749.894531 | 3 | 844.0900269 | 844.0879826 |
| STIPTKQTQFTTYSNQPGLIQQVYEGE       | P17879  | 0          | N-term +42.01 Da, K +28.03 Da,            | 4750.085938 | 3 | 1158.26001  | 1157.914131 |
| STIPTKQTQFTTYSNQPGLIQQVYEGE       | P17879  | 0          | N-term +42.01 Da, K +28.03 Da,            | 4750.182617 | 4 | 869.2000122 | 868.6874174 |
| AEPDYIEDDNPQLIRPQKLNPKVS          | Q3TGF2  | 0          | N-term +42.01 Da, K +28.03 Da,            | 4751.726074 | 3 | 998.5300293 | 997.8606377 |
| MEIGVSVAECKSVPGVTSTPH             | O54931  | 0          | N-term +42.01 Da, K +28.03 Da,C +57.02Da, | 4756.786621 | 2 | 1129.060059 | 1128.05596  |
| MDAAGESEEPVSGEALSIAH              | Q9D0B6  | 0          | N-term +42.01 Da,                         | 4759.900879 | 2 | 1021.450623 | 1021.45459  |
| LLEFQNDR                          | P29391  | 0.00807537 | N-term +42.01 Da,                         | 4763.165527 | 2 | 539.2700195 | 538.7721911 |
| MFSWVSKDAR                        | Q9WVK4  | 0          | N-term +42.01 Da, K +28.03 Da,            | 4766.725586 | 2 | 648.8221436 | 648.8239007 |
| MEIGVSVAECKSVPGVTSTPH             | O54931  | 0          | N-term +42.01 Da, K +28.03 Da,C +57.02Da, | 4768.112305 | 2 | 1128.060059 | 1128.05596  |
| AGVDQHEGTIQVQGNLFFR               | Q8VCR7  | 0          | N-term +42.01 Da,                         | 4774.675293 | 3 | 763.0499878 | 762.7135781 |
| AELQEVQITEEKPLPGQTPETAKEAELAAR    | Q9QYG0  | 0          | N-term +42.01 Da, K +28.03 Da,            | 4777.460449 | 3 | 1163.959961 | 1163.289198 |
| AELQEVQITEEKPLPGQTPETAKEAELAAR    | Q9QYG0  | 0          | N-term +42.01 Da, K +28.03 Da,            | 4778.674805 | 4 | 873.2199707 | 872.7187175 |
| MDLVKSHLM                         | H3BLI9  | 0.00411523 | N-term +42.01 Da, K +28.03 Da,            | 4783.764648 | 2 | 572.2999878 | 572.2986725 |
| MDGIVPDIAVGTRK                    | P17225  | 0          | N-term +42.01 Da, K +28.03 Da,            | 4784.639648 | 2 | 771.4204102 | 771.4214372 |
| AEELLER                           | P21981  | 0.03257608 | N-term +42.01 Da,                         | 4794.671387 | 2 | 507.7799988 | 507.7769421 |
| MDLVKSHLMYAVR                     | P62500  | 0          | N-term +42.01 Da, K +28.03 Da,            | 4801.324219 | 3 | 544.960022  | 544.9581969 |

|                                        |        |            |                                           |             |   |             |             |
|----------------------------------------|--------|------------|-------------------------------------------|-------------|---|-------------|-------------|
| MLNMWKVR                               | Q5SUH6 | 0          | N-term +42.01 Da, K +28.03 Da,            | 4802.441895 | 2 | 574.3099976 | 574.309374  |
| GDPKEEEEEELVDPLTTVR                    | P99028 | 0          | N-term +42.01 Da, K +28.03 Da,            | 4804.017578 | 3 | 752.3699951 | 752.3690321 |
| AELQEVQITEEKPLLPGQTPETAKEAELAAR        | Q9QYG0 | 0          | N-term +42.01 Da, K +28.03 Da,            | 4807.943848 | 3 | 1163.949951 | 1163.289198 |
| AEGEDVGVWWR                            | Q80Y55 | 0          | N-term +42.01 Da,                         | 4808.026855 | 2 | 623.7800293 | 623.7780051 |
| SSPAQPAVPAPLADLKIQH                    | P24549 | 0          | N-term +42.01 Da, K +28.03 Da,            | 4808.592285 | 2 | 1005.549988 | 1005.554569 |
| HVMTNLGEKLTDEEVDDEMIR                  | P62204 | 0.02886687 | N-term +42.01 Da, K +28.03 Da,            | 4810.119141 | 3 | 810.0700073 | 810.3944181 |
| SSPAQPAVPAPLADLKIQH                    | P24549 | 0          | N-term +42.01 Da, K +28.03 Da,            | 4810.763672 | 3 | 671.3800049 | 670.7054717 |
| SSPAQPAVPAPLADLKIQH                    | P24549 | 0          | N-term +42.01 Da, K +28.03 Da,            | 4815.301758 | 3 | 671.039978  | 670.7054717 |
| LATALQKLEEAKEAADESER                   | P21107 | 0          | N-term +42.01 Da, K +28.03 Da,            | 4817.225098 | 3 | 767.4000244 | 767.4041879 |
| SSPAQPAVPAPLADLKIQH                    | P24549 | 0          | N-term +42.01 Da, K +28.03 Da,            | 4828.552734 | 2 | 1006.549988 | 1005.554569 |
| MLNMWKVR                               | Q5SUH6 | 0          | N-term +42.01 Da, K +28.03 Da,            | 4833.694824 | 2 | 574.3098145 | 574.309374  |
| AGLLKTTGLVGLAVCDTPHER                  | Q9CPP6 | 0.00144231 | N-term +42.01 Da, K +28.03 Da,C +57.02Da, | 4846.032715 | 4 | 609.5900269 | 609.3426206 |
| ACGLVASNLNLKPGEC                       | P16045 | 0          | N-term +42.01 Da, K +28.03 Da,C +57.02Da, | 4855.110352 | 2 | 887.4400024 | 886.9371262 |
| AGLLKTTGLVGLAVCDTPHER                  | Q9CPP6 | 0          | N-term +42.01 Da, K +28.03 Da,C +57.02Da, | 4855.287598 | 4 | 609.3400269 | 609.3426206 |
| SSNGTDAPAEQAAMEEPPVQPSVVDR             | Q9DBG5 | 0          | N-term +42.01 Da,                         | 4858.743652 | 2 | 1400.140015 | 1399.150893 |
| ADPDVLTEVPAALKR                        | Q9D0D5 | 0.01787271 | N-term +42.01 Da, K +28.03 Da,            | 4864.362793 | 2 | 832.960022  | 832.9645239 |
| ATDMSQGELIHPKALPL                      | Q3TEA8 | 0          | N-term +42.01 Da, K +28.03 Da,            | 4865.907715 | 2 | 946         | 946.0033235 |
| LEFFGLKKEECPAVR                        | P09103 | 0          | N-term +42.01 Da, K +28.03 Da,C +57.02Da, | 4868.107422 | 3 | 641.6699829 | 641.0132479 |
| ATDMSQGELIHPKALPL                      | Q3TEA8 | 0.00144023 | N-term +42.01 Da, K +28.03 Da,            | 4879.813965 | 2 | 947.0100098 | 946.0033235 |
| MNFSGKYQL                              | P12710 | 0.03013345 | N-term +42.01 Da, K +28.03 Da,            | 4887.12207  | 2 | 579.2857666 | 579.2866196 |
| MWKASAGHAVSITQDDGGADDWETDPDFVNDVSEKEQR | Q60598 | 0          | N-term +42.01 Da, K +28.03 Da,            | 4890.298828 | 4 | 1077.48999  | 1076.988289 |
| MWKASAGHAVSITQDDGGADDWETDPDFVNDVSEKEQR | Q60598 | 0          | N-term +42.01 Da, K +28.03 Da,            | 4894.570801 | 3 | 1435.97998  | 1435.648626 |
| MWKASAGHAVSITQDDGGADDWETDPDFVNDVSEKEQR | Q60598 | 0          | N-term +42.01 Da, K +28.03 Da,            | 4922.614258 | 4 | 1077.48999  | 1076.988289 |
| SKGPAVGIDLGTYSVGVFQHGKVEIANDQGNR       | P63017 | 0.00142721 | N-term +42.01 Da, K +28.03 Da,C +57.02Da, | 4930.599121 | 4 | 947.4799805 | 947.2374457 |
| KFLPLFDR                               | Q64433 | 0.00234412 | N-term +42.01 Da, K +28.03 Da,            | 4936.361328 | 2 | 553.8200073 | 553.3238618 |
| ADEIAKAQVAQPGGDTIFGKIIR                | P70349 | 0          | N-term +42.01 Da, K +28.03 Da,            | 4944.458008 | 4 | 625.0999756 | 624.8509729 |
| ANVADTKLYDILGVPPGASENELKKAYR           | Q9QYJ0 | 0          | N-term +42.01 Da, K +28.03 Da,            | 4950.880371 | 4 | 790.6799927 | 790.4328593 |
| SFLKSFPPPGSADGLR                       | Q61189 | 0          | N-term +42.01 Da, K +28.03 Da,            | 4955.567871 | 2 | 873.4699707 | 873.4646909 |
| SLASDPFADASKGDDLLPAGTEDYIHIR           | J3QPZ8 | 0          | N-term +42.01 Da, K +28.03 Da,            | 4967.321777 | 4 | 762.1300049 | 761.8766458 |
| SLASDPFADASKGDDLLPAGTEDYIHIR           | J3QPZ8 | 0          | N-term +42.01 Da, K +28.03 Da,            | 4969.576172 | 4 | 761.8699951 | 761.8766458 |
| GDVVFVGVPSVIVSR                        | Q64176 | 0          | N-term +42.01 Da,                         | 4969.727051 | 2 | 736.9199829 | 736.9090197 |
| SSIGTGYDLSASTFSPDGR                    | O70435 | 0          | N-term +42.01 Da,                         | 4970.802246 | 2 | 980.9500122 | 980.4501649 |
| GTPGTSAGALFLSSASAPSR                   | O70279 | 0          | N-term +42.01 Da,                         | 4971.371582 | 2 | 938.460022  | 938.9736095 |
| ADEIAKAQVAQPGGDTIFGKIIR                | P70349 | 0          | N-term +42.01 Da, K +28.03 Da,            | 4976.47168  | 3 | 833.4699707 | 832.7988718 |
| ADEIAKAQVAQPGGDTIFGKIIR                | P70349 | 0          | N-term +42.01 Da, K +28.03 Da,            | 4979.01416  | 4 | 625.0999756 | 624.8509729 |
| ADEIAKAQVAQPGGDTIFGKIIR                | P70349 | 0          | N-term +42.01 Da, K +28.03 Da,            | 4979.456055 | 2 | 1248.699951 | 1248.694669 |
| AELVQGSAPVGMKAEGFVDALHR                | A2AJ71 | 0          | N-term +42.01 Da, K +28.03 Da,            | 4980.899902 | 3 | 860.7800293 | 860.779483  |
| ANVADTKLYDILGVPPGASENELKKAYR           | Q9QYJ0 | 0          | N-term +42.01 Da, K +28.03 Da,            | 4982.31543  | 4 | 790.4336548 | 790.4328593 |
| ASASYHISNLLKMTSSDKDFR                  | Q6ZQ38 | 0          | N-term +42.01 Da, K +28.03 Da,            | 4987.953613 | 4 | 650.5800171 | 650.3271681 |
| AAGTLTYPENWR                           | Q9D8N0 | 0          | N-term +42.01 Da,                         | 4989.126465 | 2 | 792.3800049 | 792.3780841 |

|                                      |        |            |                                           |             |   |             |             |
|--------------------------------------|--------|------------|-------------------------------------------|-------------|---|-------------|-------------|
| SHVAVENALGLDQQFAGLDLNSSDNQSGGSTASKGR | Q62167 | 0          | N-term +42.01 Da, K +28.03 Da,            | 4996.853516 | 3 | 1234.930054 | 1234.264775 |
| SHVAVENALGLDQQFAGLDLNSSDNQSGGSTASKGR | Q62167 | 0          | N-term +42.01 Da, K +28.03 Da,            | 4998.48291  | 4 | 926.4500122 | 925.9504002 |
| KGKISVTELANGDTITNTMTLGDIVYKR         | P12710 | 0          | N-term +42.01 Da, K +28.03 Da,            | 4999.157227 | 4 | 774.1799927 | 774.1770647 |
| ADEIAKAQVAQPGGDTIFGKIIR              | P70349 | 0          | N-term +42.01 Da, K +28.03 Da,            | 5007.583496 | 3 | 832.7983398 | 832.7988718 |
| ADEIAKAQVAQPGGDTIFGKIIR              | P70349 | 0          | N-term +42.01 Da, K +28.03 Da,            | 5010.88623  | 4 | 624.8499756 | 624.8509729 |
| AQEKMELDLELPAGASPAEGGGPGGGGLR        | Q9DB52 | 0          | N-term +42.01 Da, K +28.03 Da,            | 5011.328125 | 3 | 945.8099976 | 945.4711558 |
| MDPSGVKVLTAEDIQER                    | P16546 | 0          | N-term +42.01 Da, K +28.03 Da,            | 5011.531738 | 3 | 696.6799927 | 696.3490256 |
| MNNYLEKLGPLR                         | Q8C7G5 | 0          | N-term +42.01 Da, K +28.03 Da,            | 5022.40625  | 2 | 759.4099731 | 759.4108721 |
| AQEKMELDLELPAGASPAEGGGPGGGGLR        | Q9DB52 | 0          | N-term +42.01 Da, K +28.03 Da,            | 5022.846191 | 2 | 1418.709961 | 1417.703095 |
| ASLLKVDQEVKLVDSFR                    | P61290 | 0          | N-term +42.01 Da, K +28.03 Da,            | 5024.02832  | 4 | 551.0800171 | 551.0780553 |
| AMKAVCVLKGDPVQGTIHFEQKASGEPVVL       | P08228 | 0.00851254 | N-term +42.01 Da, K +28.03 Da,C +57.02Da, | 5024.964844 | 3 | 1131.609985 | 1131.2754   |
| ANVADTKLYDILGVPPGASENELKKAYR         | Q9QYJ0 | 0          | N-term +42.01 Da, K +28.03 Da,            | 5027.151367 | 4 | 790.4299927 | 790.4328593 |
| SKGPAVGIDLGTYSVGVFQHGKVEIIANDQGNR    | P63017 | 0          | N-term +42.01 Da, K +28.03 Da,C +57.02Da, | 5027.479492 | 4 | 947.4899902 | 947.2374457 |
| MDPSGVKVLTAEDIQER                    | P16546 | 0          | N-term +42.01 Da, K +28.03 Da,            | 5029.200195 | 2 | 1044.018555 | 1044.0199   |
| ASGVAVSDGVIKVFNDMKVR                 | P18760 | 0          | N-term +42.01 Da, K +28.03 Da,            | 5040.591797 | 3 | 731.0700073 | 730.7365548 |
| SRGHNLSREELRGLRHYEATRAGIR            | Q8R1P5 | 0.0166302  | N-term +42.01 Da,                         | 5041.083008 | 3 | 1085.22998  | 1084.899705 |
| MDPSGVKVLTAEDIQER                    | P16546 | 0          | N-term +42.01 Da, K +28.03 Da,            | 5043.466309 | 3 | 696.348877  | 696.3490256 |
| AFTRLSNLQVHKRTHTGQKPYCCSQCGK         | E9PU88 | 0.04168421 | N-term +42.01 Da, K +28.03 Da,C +57.02Da, | 5044.07666  | 4 | 873.460022  | 872.9419682 |
| AQEFVNCKIQSGKVVVF                    | Q9QUH0 | 0          | N-term +42.01 Da, K +28.03 Da,C +57.02Da, | 5044.842773 | 3 | 684.710022  | 684.371324  |
| AVEELQSIKR                           | Q8BZM1 | 0          | N-term +42.01 Da, K +28.03 Da,            | 5049.203613 | 2 | 678.4000244 | 678.3982876 |
| PPQLDQKKPR                           | O88632 | 0          | N-term +42.01 Da, K +28.03 Da,            | 5055.355957 | 2 | 717.9000244 | 717.4091867 |
| MDPSGVKVLTAEDIQER                    | P16546 | 0          | N-term +42.01 Da, K +28.03 Da,            | 5060.248535 | 2 | 1044.52002  | 1044.0199   |
| ALLAEHLKPLPADR                       | Q9JL62 | 0          | N-term +42.01 Da, K +28.03 Da,            | 5062.394531 | 3 | 576.6799927 | 576.3453259 |
| AAVPELLEQQEEDR                       | Q9D8U8 | 0          | N-term +42.01 Da,                         | 5065.327148 | 2 | 834.9048462 | 834.9074037 |
| AGVPTVSFSELR                         | E9PY03 | 0          | N-term +42.01 Da,                         | 5066.672852 | 2 | 652.8451538 | 652.8458879 |
| AKDILGEAGLHFDELNKLK                  | Q61025 | 0          | N-term +42.01 Da, K +28.03 Da,            | 5076.541992 | 4 | 560.0599976 | 560.062671  |
| AMVSEFLKQAR                          | P10107 | 0          | N-term +42.01 Da, K +28.03 Da,            | 5085.376465 | 2 | 675.3599854 | 675.3659329 |
| ADQLTEEQIAEFKEA                      | P62204 | 0          | N-term +42.01 Da, K +28.03 Da,            | 5092.804199 | 2 | 896.9400024 | 896.4359944 |
| VAGPQPAQTGAPQGSLSGEYLFER             | P29391 | 0          | N-term +42.01 Da,                         | 5093.37793  | 2 | 1208.599976 | 1208.100602 |
| VAGPQPAQTGAPQGSLSGEYLFER             | P29391 | 0          | N-term +42.01 Da,                         | 5098.732422 | 2 | 1209.099976 | 1208.100602 |
| VISLSGEHSIIGR                        | P08228 | 0          | N-term +42.01 Da,                         | 5099.20752  | 3 | 470.2699989 | 470.5964216 |
| ASAMAGAGPAPGLPVAGGPVVPVPGVIGPKSGSEER | D3YYW8 | 0          | N-term +42.01 Da, K +28.03 Da,            | 5099.33252  | 3 | 1079.22998  | 1078.902842 |
| SGEDEQQEQTIAEDLVVTKYKMGDIANR         | P50580 | 0          | N-term +42.01 Da, K +28.03 Da,            | 5100.691406 | 3 | 1108.540039 | 1108.208438 |
| SHVAVENALGLDQQFAGLDLNSSDNQSGGSTASKGR | Q62167 | 0.02381984 | N-term +42.01 Da, K +28.03 Da,            | 5106.63623  | 4 | 926.210022  | 925.9504002 |
| MDNSGKQAEAMALLAEAER                  | Q9DB05 | 0          | N-term +42.01 Da, K +28.03 Da,            | 5113.294922 | 2 | 1053.51001  | 1053.003727 |
| MDNSGKQAEAMALLAEAER                  | Q9DB05 | 0          | N-term +42.01 Da, K +28.03 Da,            | 5114.128418 | 2 | 1053        | 1053.003727 |
| AMVSEFLKQAR                          | P10107 | 0          | N-term +42.01 Da, K +28.03 Da,            | 5117.34668  | 2 | 675.3657837 | 675.3659329 |
| AESDWDTVTVLR                         | Q9JMG1 | 0          | N-term +42.01 Da,                         | 5117.421875 | 2 | 717.3475952 | 717.3489925 |
| MDNKDEYLLNFKGY                       | O35403 | 0.00049776 | N-term +42.01 Da, K +28.03 Da,            | 5119.13916  | 2 | 924.9500122 | 924.4478498 |
| SDSLVVCVDPPELKETLR                   | Q9ERL7 | 0          | N-term +42.01 Da, K +28.03 Da,C +57.02Da, | 5123.592285 | 2 | 1080.040039 | 1080.048658 |

|                                      |        |            |                                            |             |   |             |             |
|--------------------------------------|--------|------------|--------------------------------------------|-------------|---|-------------|-------------|
| MLLAQINR                             | O70230 | 0.00189934 | N-term +42.01 Da,                          | 5125.538574 | 2 | 501.2900085 | 500.7840465 |
| SSSAASPLFAPGEDCGPAWR                 | O35969 | 0          | N-term +42.01 Da, C +57.02Da,              | 5126.240723 | 2 | 1053.469971 | 1052.973284 |
| MEDIDQSSLVSSSADSPRPPPAFKY            | Q99P72 | 0          | N-term +42.01 Da, K +28.03 Da,             | 5126.452637 | 3 | 964.7999878 | 964.4637784 |
| ADQLTTEEQIAEFKEA                     | P62204 | 0          | N-term +42.01 Da, K +28.03 Da,             | 5128.822754 | 2 | 896.4299927 | 896.4359944 |
| ATAVVVNIIGKKLY                       | Q9DCL9 | 0          | N-term +42.01 Da, K +28.03 Da,             | 5129.231934 | 2 | 737.4500122 | 737.4556053 |
| SHVAVENALGLDQQFAGLDLNSSDNQSGGSTASKGR | Q62167 | 0          | N-term +42.01 Da, K +28.03 Da,             | 5129.59375  | 3 | 1234.930054 | 1234.264775 |
| MEDIDQSSLVSSSADSPRPPPAFKY            | Q99P72 | 0          | N-term +42.01 Da, K +28.03 Da,             | 5132.252441 | 2 | 1447.189941 | 1446.192029 |
| AAVLENGVLSR                          | P16331 | 0          | N-term +42.01 Da,                          | 5132.629883 | 2 | 635.3599854 | 635.361705  |
| AEAPQVVETDPDFEPLPR                   | Q9R1E0 | 0          | N-term +42.01 Da,                          | 5134.00293  | 2 | 1027.5      | 1026.499658 |
| MEDIDQSSLVSSSADSPRPPPAFKY            | Q99P72 | 0          | N-term +42.01 Da, K +28.03 Da,             | 5135.532227 | 3 | 964.460022  | 964.4637784 |
| AEAPQVVETDPDFEPLPR                   | Q9R1E0 | 0          | N-term +42.01 Da,                          | 5137.893555 | 2 | 1026.48999  | 1026.499658 |
| AELEEVTLDGKPLQALR                    | Q9JIX8 | 0          | N-term +42.01 Da, K +28.03 Da,             | 5139.048828 | 2 | 977.039978  | 976.5385853 |
| AELEEVTLDGKPLQALR                    | Q9JIX8 | 0          | N-term +42.01 Da, K +28.03 Da,             | 5141.210938 | 2 | 976.539978  | 976.5385853 |
| MEDIDQSSLVSSSADSPRPPPAFKY            | Q99P72 | 0.00368155 | N-term +42.01 Da, K +28.03 Da,             | 5141.81543  | 2 | 1446.199951 | 1446.192029 |
| ATNFLAHEKIWFDFKDYDDAER               | P57776 | 0          | N-term +42.01 Da, K +28.03 Da,             | 5143.048828 | 4 | 718.6199951 | 718.3682588 |
| LEWVDGEPTEAEKEFWELASLDCYNNLSK        | P97313 | 0.03218884 | N-term +42.01 Da, K +28.03 Da, C +57.02Da, | 5160.96582  | 3 | 1190.579956 | 1190.892227 |
| AADIEQVFR                            | Q9QX47 | 0          | N-term +42.01 Da,                          | 5165.94873  | 2 | 545.7800293 | 545.7800161 |
| SKGPAVGIDLGTTYSCVGVFQH               | P63017 | 0          | N-term +42.01 Da, K +28.03 Da, C +57.02Da, | 5166.269043 | 2 | 1182.579956 | 1182.088648 |
| SKGPAVGIDLGTTYSCVGVFQH               | P63017 | 0          | N-term +42.01 Da, K +28.03 Da, C +57.02Da, | 5166.378418 | 3 | 788.4000244 | 788.3948578 |
| ILEFFGLKKEECPAVR                     | P09103 | 0          | N-term +42.01 Da, K +28.03 Da, C +57.02Da, | 5166.867676 | 3 | 679.039978  | 678.707936  |
| MELEDGVVYQEEPGGSGAVMSER              | Q58A65 | 0          | N-term +42.01 Da,                          | 5167.553711 | 2 | 1256.550049 | 1256.054344 |
| SKGPAVGIDLGTTYSCVGVFQH               | P63017 | 0          | N-term +42.01 Da, K +28.03 Da, C +57.02Da, | 5167.865234 | 2 | 1182.089966 | 1182.088648 |
| MEPDGTYEPGFVGIR                      | P60898 | 0          | N-term +42.01 Da,                          | 5169.482422 | 2 | 855.3962402 | 855.3956171 |
| AESDWDVTVTLR                         | Q9JMG1 | 0          | N-term +42.01 Da,                          | 5176.988281 | 2 | 717.3499756 | 717.3489925 |
| SSPAQPAVPAPLADLKIQHTKIF              | P24549 | 0          | N-term +42.01 Da, K +28.03 Da,             | 5180.325684 | 3 | 843.4799805 | 843.1476121 |
| ELVAQKGVGSIPANAADDGQWSQGLISAAR       | Q71LX4 | 0          | N-term +42.01 Da, K +28.03 Da,             | 5180.719727 | 3 | 1026.880005 | 1027.198424 |
| ETVGGVMTKLIPR                        | P20029 | 0          | N-term +42.01 Da, K +28.03 Da,             | 5182.382324 | 2 | 736.9099731 | 735.9210726 |
| AELEEVTLDGKPLQALR                    | Q9JIX8 | 0          | N-term +42.01 Da, K +28.03 Da,             | 5189.610352 | 2 | 976.539978  | 976.5385853 |
| ADKMDMSLDDIIKLNR                     | O08583 | 0          | N-term +42.01 Da, K +28.03 Da,             | 5196.726074 | 3 | 659.3499756 | 659.3445578 |
| SDKLPYKVADIGLAAWGR                   | P50247 | 0          | N-term +42.01 Da, K +28.03 Da,             | 5197.339355 | 3 | 687.0499878 | 686.7176001 |
| GDYFGVVLVQSNTGNKSAFPVR               | Q7TN98 | 0.00367985 | N-term +42.01 Da, K +28.03 Da,             | 5197.867188 | 3 | 795.4099731 | 795.0728835 |
| PVDKDSYVRYTR                         | Q5YD48 | 0.02844828 | N-term +42.01 Da, K +28.03 Da,             | 5198.091309 | 2 | 785.9199829 | 784.9070087 |
| SNKCSKPNGQKWKWIVSGRTAR               | P51945 | 0.00408163 | N-term +42.01 Da, K +28.03 Da, C +57.02Da, | 5198.321289 | 3 | 891.1599731 | 890.5059165 |
| AESDWDVTVTLR                         | Q9JMG1 | 0          | N-term +42.01 Da,                          | 5198.618652 | 2 | 716.8499756 | 717.3489925 |
| PGSISWDGLDPGKLY                      | Q8VIN1 | 0          | N-term +42.01 Da, K +28.03 Da,             | 5201.782715 | 2 | 837.9199829 | 837.9223248 |
| ADKMDMSLDDIIKLNR                     | O08583 | 0          | N-term +42.01 Da, K +28.03 Da,             | 5201.962891 | 2 | 989.0100098 | 988.5131985 |
| AAVLENGVLSR                          | P16331 | 0          | N-term +42.01 Da,                          | 5209.199219 | 2 | 635.3613281 | 635.361705  |
| AKPQVVVAPVLM SKL                     | D3Z3J6 | 0          | N-term +42.01 Da, K +28.03 Da,             | 5210.294434 | 2 | 839.5200195 | 839.5204225 |
| AKPQVVVAPVLM SKL                     | D3Z3J6 | 0          | N-term +42.01 Da, K +28.03 Da,             | 5212.074707 | 2 | 840.0200195 | 839.5204225 |
| VFDKDGNGYISAAELR                     | P62204 | 0.00049727 | N-term +42.01 Da, K +28.03 Da,             | 5213.315918 | 3 | 608.6400146 | 608.9757391 |

|                                      |        |            |                                           |             |   |             |             |
|--------------------------------------|--------|------------|-------------------------------------------|-------------|---|-------------|-------------|
| SSLQELCSGLPLRPLPENR                  | Q8VC12 | 0          | N-term +42.01 Da, C +57.02Da,             | 5214.911621 | 3 | 736.7199707 | 736.719564  |
| MLGGLGKLAEEGLAHR                     | Q8CF02 | 0          | N-term +42.01 Da, K +28.03 Da,            | 5216.858398 | 3 | 555.3129883 | 555.3152607 |
| MLGGLGKLAEEGLAHR                     | Q8CF02 | 0          | N-term +42.01 Da, K +28.03 Da,            | 5217.346191 | 2 | 832.9699707 | 832.4692528 |
| MLGGLGKLAEEGLAHR                     | Q8CF02 | 0          | N-term +42.01 Da, K +28.03 Da,            | 5219.575195 | 2 | 832.4699707 | 832.4692528 |
| MLGGLGKLAEEGLAHR                     | Q8CF02 | 0          | N-term +42.01 Da, K +28.03 Da,            | 5221.588867 | 3 | 555.3145752 | 555.3152607 |
| MEPDGTYEPGFVGIR                      | P60898 | 0          | N-term +42.01 Da,                         | 5226.507324 | 2 | 855.3900146 | 855.3956171 |
| ADKMDMSLDDIIKLN                      | O08583 | 0          | N-term +42.01 Da, K +28.03 Da,            | 5227.876953 | 3 | 659.3435059 | 659.3445578 |
| ADKMDMSLDDIIKLN                      | O08583 | 0          | N-term +42.01 Da, K +28.03 Da,            | 5233.479492 | 2 | 989.0100098 | 988.5131985 |
| AAVLENGVLSR                          | P16331 | 0          | N-term +42.01 Da,                         | 5239.691406 | 2 | 635.3599854 | 635.361705  |
| VFDKDGNGYISAAELR                     | P62204 | 0          | N-term +42.01 Da, K +28.03 Da,            | 5244.199219 | 3 | 608.6431885 | 608.9757391 |
| TSASKAVELQLQVKHNAEELQDFMR            | Q9D706 | 0          | N-term +42.01 Da, K +28.03 Da,            | 5244.54248  | 4 | 743.8900146 | 743.3892943 |
| MEATLEQHLEDTMKNPS                    | Q9D1L9 | 0          | N-term +42.01 Da, K +28.03 Da,            | 5245.451172 | 2 | 1022.969971 | 1022.471728 |
| SHKRIMLFTNEDDPHGR                    | P23475 | 0.03383298 | N-term +42.01 Da, K +28.03 Da,            | 5245.614258 | 3 | 708.6900024 | 708.3532152 |
| AGTVVLDDELVR                         | P25206 | 0          | N-term +42.01 Da,                         | 5248.805176 | 2 | 665.3599854 | 664.856453  |
| MEEAEGVAAAPGPASGLAFR                 | Q9CQV4 | 0.00143885 | N-term +42.01 Da,                         | 5252.467285 | 2 | 987.9799805 | 986.9752949 |
| WDDRSCTEETHGFCQK                     | Q64449 | 0.00720396 | N-term +42.01 Da, K +28.03 Da,C +57.02Da, | 5257.980469 | 2 | 1120.98999  | 1119.980783 |
| DIEHLTGLDFYR                         | Q9R1E6 | 0.00410584 | N-term +42.01 Da,                         | 5263.768066 | 2 | 761.8800049 | 760.8726345 |
| ADKMDMSLDDIIKLN                      | O08583 | 0          | N-term +42.01 Da, K +28.03 Da,            | 5264.933105 | 3 | 659.6799927 | 659.3445578 |
| TAIKEIVSR                            | O08586 | 0          | N-term +42.01 Da, K +28.03 Da,            | 5268.809082 | 2 | 600.3699951 | 600.371541  |
| SSGNAKIGYPAPNFKATAVMPDGQFKDISL       | P35700 | 0.00143747 | N-term +42.01 Da, K +28.03 Da,            | 5277.07666  | 3 | 1084.900024 | 1084.232077 |
| VFDKDGNGYISAAELR                     | P62204 | 0          | N-term +42.01 Da, K +28.03 Da,            | 5280.812988 | 3 | 608.6400146 | 608.9757391 |
| DDDIAALVVDNGSGMCKAGFAGDDAPR          | P60710 | 0          | N-term +42.01 Da, K +28.03 Da,C +57.02Da, | 5282.833496 | 2 | 1404.630005 | 1404.134189 |
| AELEEVTLDGKPLQALR                    | Q9JIX8 | 0          | N-term +42.01 Da, K +28.03 Da,            | 5284.466309 | 2 | 976.5404663 | 976.5385853 |
| AELEEVTLDGKPLQALR                    | Q9JIX8 | 0          | N-term +42.01 Da, K +28.03 Da,            | 5289.972656 | 3 | 651.6900024 | 651.3614823 |
| MEAQAQGLLETEPLQGR                    | O54818 | 0          | N-term +42.01 Da,                         | 5293.091797 | 2 | 956.9799805 | 956.9752949 |
| MNLSAAHHQISLSDGNNIPLIGLTYSDDPRVPGKTY | Q8VCX1 | 0          | N-term +42.01 Da, K +28.03 Da,            | 5293.830566 | 4 | 1001.77002  | 1001.763828 |
| AELQEVQITEEKPLPGQTPETAKEAELAA        | Q9QYG0 | 0          | N-term +42.01 Da, K +28.03 Da,            | 5294.550781 | 3 | 1111.599976 | 1111.255494 |
| AAKVFESIGKF                          | P67778 | 0.00097276 | N-term +42.01 Da, K +28.03 Da,            | 5295.555176 | 2 | 648.3800049 | 647.8739165 |
| ADKMDMSLDDIIKLN                      | O08583 | 0          | N-term +42.01 Da, K +28.03 Da,            | 5296.187012 | 3 | 659.3400269 | 659.3445578 |
| PGSISWDGLDPGKLY                      | Q8VIN1 | 0          | N-term +42.01 Da, K +28.03 Da,            | 5303.764648 | 2 | 838.9199829 | 837.9223248 |
| TEPAGSTESEMTKSSPLKITLFLFEEK          | Q8K298 | 0.01626374 | N-term +42.01 Da, K +28.03 Da,            | 5304.913086 | 4 | 777.8960571 | 777.9031722 |
| AAVLENGVLSR                          | P16331 | 0.01455026 | N-term +42.01 Da,                         | 5305.467285 | 2 | 635.8533325 | 635.361705  |
| CDKEFMWALKNGDLDEVKDYVAKGEDVNR        | P62774 | 0          | N-term +42.01 Da, K +28.03 Da,C +57.02Da, | 5307.125977 | 4 | 900.9400024 | 900.44437   |
| CDKEFMWALKNGDLDEVKDYVAKGEDVNR        | P62774 | 0          | N-term +42.01 Da, K +28.03 Da,C +57.02Da, | 5307.803711 | 3 | 1200.589966 | 1200.256735 |
| AELEEVTLDGKPLQALR                    | Q9JIX8 | 0          | N-term +42.01 Da, K +28.03 Da,            | 5314.899902 | 2 | 976.5368042 | 976.5385853 |
| LASARLAAASDVLELTDENFESR              | P27773 | 0          | N-term +42.01 Da,                         | 5315.918945 | 3 | 841.4400024 | 840.7574016 |
| GEFVDLYVPR                           | Q9CQR2 | 0.04670559 | N-term +42.01 Da,                         | 5322.636719 | 2 | 618.3200073 | 618.8165988 |
| FIGENMNPDMVALLDYR                    | P63028 | 0          | N-term +42.01 Da,                         | 5332.444336 | 2 | 1050        | 1048.99263  |
| SEPGGGEDGSAGLEVSQNVADVAVLQKHLR       | Q9JHU4 | 0          | N-term +42.01 Da, K +28.03 Da,            | 5332.541992 | 3 | 1087.550049 | 1087.223299 |
| FIGENMNPDMVALLDYR                    | P63028 | 0.0004985  | N-term +42.01 Da,                         | 5332.818359 | 3 | 700.3380127 | 699.6641791 |

|                                 |        |            |                                           |             |   |             |             |
|---------------------------------|--------|------------|-------------------------------------------|-------------|---|-------------|-------------|
| PGSISWDGLDPGKLY                 | Q8VIN1 | 0          | N-term +42.01 Da, K +28.03 Da,            | 5335.028809 | 2 | 837.9199829 | 837.9223248 |
| MELVEVLKR                       | Q7TMF3 | 0          | N-term +42.01 Da, K +28.03 Da,            | 5337.930176 | 2 | 593.8499756 | 593.8468443 |
| SEPGGGEDGSAGLEVSQNVADVAVLQKHLR  | Q9JHU4 | 0          | N-term +42.01 Da, K +28.03 Da,            | 5339.514648 | 3 | 1087.219971 | 1087.223299 |
| AFPSLSAGQNPWR                   | Q8K4H1 | 0          | N-term +42.01 Da,                         | 5341.152832 | 2 | 737.3699951 | 736.867686  |
| QLQEKEKLLATEQEEDA AVAKSKLR      | Q99PL5 | 0          | N-term +42.01 Da, K +28.03 Da,            | 5341.377441 | 4 | 721.1599731 | 720.9155735 |
| ADKMDMSLDDIILNR                 | O08583 | 0          | N-term +42.01 Da, K +28.03 Da,            | 5343.780762 | 3 | 659.6799927 | 659.3445578 |
| SSILLDVKPWDEDTMTKLEECVR         | O70251 | 0          | N-term +42.01 Da, K +28.03 Da,C +57.02Da, | 5346.310059 | 4 | 745.3800049 | 745.118787  |
| AAVLQQLVLERPELNKLPKSTQN         | Q7M739 | 0          | N-term +42.01 Da, K +28.03 Da,            | 5347.174316 | 3 | 859.1599731 | 858.8253095 |
| MEGKVYIGGEDYEKFTPKDYLTYY        | P40936 | 0          | N-term +42.01 Da, K +28.03 Da,            | 5349.302734 | 3 | 1035.51001  | 1034.83499  |
| MEDSMDMDSPLRPQ                  | Q61937 | 0          | N-term +42.01 Da,                         | 5362.571777 | 2 | 913.8699951 | 912.8671953 |
| AEAGVSVTEGSPGVVAALPEDMR         | H3BJ84 | 0          | N-term +42.01 Da,                         | 5362.66748  | 3 | 762.3800049 | 762.042373  |
| AEAGVSVTEGSPGVVAALPEDMR         | H3BJ84 | 0          | N-term +42.01 Da,                         | 5364.35498  | 2 | 1143.060059 | 1142.559921 |
| ATNFLAHEKIWFDFKFKYDDAER         | P57776 | 0          | N-term +42.01 Da, K +28.03 Da,            | 5365.574219 | 4 | 718.8599854 | 718.3682588 |
| AEAGVSVTEGSPGVVAALPEDMR         | H3BJ84 | 0          | N-term +42.01 Da,                         | 5365.776855 | 2 | 1143.560059 | 1142.559921 |
| MELVEVLKR                       | Q7TMF3 | 0          | N-term +42.01 Da, K +28.03 Da,            | 5368.955078 | 2 | 593.8461304 | 593.8468443 |
| AETLSGLGDASAAGAAAVSSAASETGTR    | D3YXK2 | 0          | N-term +42.01 Da,                         | 5378.563965 | 2 | 1261.609985 | 1261.104269 |
| MWIDENAVTEDQLIKR                | A2A8R0 | 0          | N-term +42.01 Da, K +28.03 Da,            | 5379.280273 | 2 | 1016.52002  | 1016.01442  |
| DDDIAALVVDNGSGMCKAGFAGDDAPR     | P60710 | 0          | N-term +42.01 Da, K +28.03 Da,C +57.02Da, | 5383.794922 | 3 | 936.75      | 936.4252179 |
| SVPLLTDAATVSGAER                | Q9WTL7 | 0          | N-term +42.01 Da,                         | 5384.445313 | 2 | 815.4299927 | 814.9281388 |
| DDDIAALVVDNGSGMCKAGFAGDDAPR     | P60710 | 0          | N-term +42.01 Da, K +28.03 Da,C +57.02Da, | 5387.212891 | 2 | 1405.130005 | 1404.134189 |
| MWIDENAVTEDQLIKR                | A2A8R0 | 0.00049554 | N-term +42.01 Da, K +28.03 Da,            | 5387.329102 | 2 | 1017.01001  | 1016.01442  |
| ASValseAEKVIVYHGVQEDLR          | Q9DOM0 | 0          | N-term +42.01 Da, K +28.03 Da,            | 5398.847656 | 3 | 828.7800293 | 828.4428653 |
| AAQKINEGLEHLAKAEKYLKTF          | Q9CWZ7 | 0          | N-term +42.01 Da, K +28.03 Da,            | 5399.470703 | 4 | 679.3900146 | 679.1376391 |
| AASTDIAGLEESFR                  | Q9CRB6 | 0          | N-term +42.01 Da,                         | 5405.975586 | 2 | 754.8599854 | 754.865007  |
| SILYSPHPDAFPSLR                 | Q9Z1Q9 | 0          | N-term +42.01 Da,                         | 5406.469238 | 2 | 921.4899902 | 920.983248  |
| MNFSGKYQLQSQENFEPFMK            | P12710 | 0          | N-term +42.01 Da, K +28.03 Da,            | 5409.881348 | 2 | 1276.599976 | 1276.103441 |
| ADDIDIEAMLEAPYKKDENKLNAN        | Q8VH51 | 0          | N-term +42.01 Da, K +28.03 Da,            | 5410.280273 | 3 | 979.1599731 | 978.4864719 |
| MNFSGKYQLQSQENFEPFMK            | P12710 | 0          | N-term +42.01 Da, K +28.03 Da,            | 5411.012695 | 2 | 1276.099976 | 1276.103441 |
| AGVSPAVFGCPDVTLGR               | Q5I2A0 | 0          | N-term +42.01 Da, C +57.02Da,             | 5424.563477 | 2 | 872.9400024 | 872.9379832 |
| DDDIAALVVDNGSGMCKAGFAGDDAPR     | P60710 | 0          | N-term +42.01 Da, K +28.03 Da,C +57.02Da, | 5424.703613 | 2 | 1405.130005 | 1404.134189 |
| TELQSALLR                       | P62254 | 0          | N-term +42.01 Da,                         | 5427.556641 | 2 | 593.3400269 | 593.3455234 |
| ASGVAVSDGVIVKVFNDMKVR           | P18760 | 0          | N-term +42.01 Da, K +28.03 Da,            | 5430.585938 | 3 | 731.0700073 | 730.7365548 |
| AEAALLPPEAAAER                  | E9QL65 | 0          | N-term +42.01 Da,                         | 5432.005859 | 2 | 782.9199829 | 782.4224918 |
| MNFSGKYQLQSQENFEPFMK            | P12710 | 0          | N-term +42.01 Da, K +28.03 Da,            | 5442.516602 | 2 | 1276.599976 | 1276.103441 |
| DDDIAALVVDNGSGMCKAGFAGDDAPR     | P60710 | 0          | N-term +42.01 Da, K +28.03 Da,C +57.02Da, | 5448.317383 | 3 | 936.7521973 | 936.4252179 |
| MNFSGKYQLQSQENFEPFMK            | P12710 | 0          | N-term +42.01 Da, K +28.03 Da,            | 5449.516602 | 3 | 851.7399902 | 851.0713864 |
| ASPAAGGVVIVGSLIGR               | Q99KP3 | 0          | N-term +42.01 Da,                         | 5451.224121 | 2 | 811.960022  | 811.9648579 |
| AAGVEAAA EVAATEPKMEEESGAPCVPSGN | Q9D0E1 | 0          | N-term +42.01 Da, K +28.03 Da,C +57.02Da, | 5452.960938 | 3 | 1001.119995 | 1000.458476 |
| AAGVEAAA EVAATEPKMEEESGAPCVPSGN | Q9D0E1 | 0          | N-term +42.01 Da, K +28.03 Da,C +57.02Da, | 5453.733887 | 3 | 1000.460022 | 1000.458476 |
| DDDIAALVVDNGSGMCKAGFAGDDAPR     | P60710 | 0          | N-term +42.01 Da, K +28.03 Da,C +57.02Da, | 5456.860352 | 2 | 1404.624146 | 1404.134189 |

|                                 |        |            |                                           |             |   |             |             |
|---------------------------------|--------|------------|-------------------------------------------|-------------|---|-------------|-------------|
| AEAPPVSGTFKFNDAAEFIPQER         | B1AY10 | 0.0004948  | N-term +42.01 Da, K +28.03 Da,            | 5458.664551 | 2 | 1347.670044 | 1346.666307 |
| RLKLCADFKRTGMDSNWWVLK           | Q80UV9 | 0.01913876 | N-term +42.01 Da, K +28.03 Da,C +57.02Da, | 5458.899414 | 4 | 688.1099854 | 688.3712837 |
| TELQSALLLR                      | P62254 | 0          | N-term +42.01 Da,                         | 5459.54834  | 2 | 593.8499756 | 593.3455234 |
| AGMQTQPLSTSLASIPR               | F8VQA1 | 0.03547009 | N-term +42.01 Da,                         | 5461.076172 | 2 | 899.9799805 | 900.4696479 |
| ADDIDIEAMLEAPYKDKENKLN          | Q8VH51 | 0          | N-term +42.01 Da, K +28.03 Da,            | 5466.325684 | 3 | 888.1199951 | 887.782448  |
| AAGVEAAA EVAATEPKMEEESGAPCVPSGN | Q9D0E1 | 0.00236072 | N-term +42.01 Da, K +28.03 Da,C +57.02Da, | 5469.626465 | 2 | 1500.680054 | 1500.184076 |
| CDFTEDQTAEFKEAF                 | Q60605 | 0          | N-term +42.01 Da, K +28.03 Da,C +57.02Da, | 5471.69043  | 2 | 954.9000244 | 954.4038372 |
| CDFTEDQTAEFKEAF                 | Q60605 | 0          | N-term +42.01 Da, K +28.03 Da,C +57.02Da, | 5474.71875  | 2 | 954.4000244 | 954.4038372 |
| MEEKYLPELMAEKDSLDPSTHALR        | Q9R226 | 0          | N-term +42.01 Da, K +28.03 Da,            | 5476.70459  | 4 | 763.3800049 | 762.8818793 |
| DDDIAALVVDNGSGMCKAGFAGDDAPR     | P60710 | 0          | N-term +42.01 Da, K +28.03 Da,C +57.02Da, | 5479.875    | 3 | 936.4237671 | 936.4252179 |
| AAGVEAAA EVAATEPKMEEESGAPCVPSGN | Q9D0E1 | 0.01913043 | N-term +42.01 Da, K +28.03 Da,C +57.02Da, | 5484.326172 | 3 | 1000.789978 | 1000.458476 |
| SSWWTHVEMGPPDPILGVTEAFKR        | P05202 | 0          | N-term +42.01 Da, K +28.03 Da,            | 5485.895996 | 4 | 703.8599854 | 703.3547227 |
| DDDIAALVVDNGSGMCKAGFAGDDAPR     | P60710 | 0          | N-term +42.01 Da, K +28.03 Da,C +57.02Da, | 5487.226563 | 2 | 1404.133545 | 1404.134189 |
| MDILKSEILR                      | Q8BM39 | 0          | N-term +42.01 Da, K +28.03 Da,            | 5489.014648 | 2 | 644.3699951 | 644.3706839 |
| ACGLVASNLNLKPGECL               | P16045 | 0.00049652 | N-term +42.01 Da, K +28.03 Da,C +57.02Da, | 5490.550781 | 2 | 943.4799805 | 943.4791583 |
| MNFSGKYQLQSQENFEPFMK            | P12710 | 0          | N-term +42.01 Da, K +28.03 Da,            | 5491.185059 | 3 | 851.0700073 | 851.0713864 |
| ATESSPLTTHVLDTASGLPAQGLCLR      | Q9CRB3 | 0          | N-term +42.01 Da, C +57.02Da,             | 5492.59375  | 3 | 913.1303711 | 913.1323627 |
| ATESSPLTTHVLDTASGLPAQGLCLR      | Q9CRB3 | 0          | N-term +42.01 Da, C +57.02Da,             | 5493.196289 | 2 | 1369.199951 | 1369.194906 |
| ATESSPLTTHVLDTASGLPAQGLCLR      | Q9CRB3 | 0          | N-term +42.01 Da, C +57.02Da,             | 5494.205566 | 2 | 1370.199951 | 1369.194906 |
| MNLSAAHHQISLSDGNNIPLIGLGTYS DPR | Q8VXC1 | 0.01159162 | N-term +42.01 Da,                         | 5498.356445 | 3 | 1078.540039 | 1078.538452 |
| CDFTEDQTAEFKEAF                 | Q60605 | 0          | N-term +42.01 Da, K +28.03 Da,C +57.02Da, | 5505.538086 | 2 | 954.4022827 | 954.4038372 |
| ATLTVVQPLTLDR                   | Q8JZ50 | 0          | N-term +42.01 Da,                         | 5505.61377  | 2 | 734.9227905 | 734.9221272 |
| MQNDAGEFVDLYVPR                 | Q9CQR2 | 0          | N-term +42.01 Da,                         | 5509.123047 | 2 | 898.9199829 | 898.4196237 |
| DDDIAALVVDNGSGMCKAGFAGDDAPR     | P60710 | 0          | N-term +42.01 Da, K +28.03 Da,C +57.02Da, | 5510.414063 | 3 | 936.75      | 936.4252179 |
| VQEAVDAMVKSVER                  | Q9CR98 | 0          | N-term +42.01 Da, K +28.03 Da,            | 5511.251465 | 2 | 815.4199829 | 815.9270842 |
| TLSSESYKDSSTLIMQLLR             | O70456 | 0.01368049 | N-term +42.01 Da, K +28.03 Da,            | 5513.615234 | 3 | 729.0599976 | 728.3803257 |
| DDDIAALVVDNGSGMCKAGFAGDDAPR     | P60710 | 0          | N-term +42.01 Da, K +28.03 Da,C +57.02Da, | 5518.898438 | 2 | 1404.619995 | 1404.134189 |
| AAGVEAAA EVAATEPKMEEESGAPCVPSGN | Q9D0E1 | 0.00145349 | N-term +42.01 Da, K +28.03 Da,C +57.02Da, | 5520.20166  | 3 | 1000.789978 | 1000.458476 |
| ATESSPLTTHVLDTASGLPAQGLCLR      | Q9CRB3 | 0          | N-term +42.01 Da, C +57.02Da,             | 5523.346191 | 3 | 913.4699707 | 913.1323627 |
| ASGVAVSDGVIKVFNDMKVR            | P18760 | 0          | N-term +42.01 Da, K +28.03 Da,            | 5526.014648 | 3 | 730.7299805 | 730.7365548 |
| MNFSGKYQLQSQENFEPFMK            | P12710 | 0          | N-term +42.01 Da, K +28.03 Da,            | 5526.554199 | 3 | 851.7399902 | 851.0713864 |
| MESELEALAPR                     | Q9CYS6 | 0          | N-term +42.01 Da,                         | 5531.453125 | 2 | 644.3151855 | 644.3161062 |
| KGMNTLVGYDLVPEPKIIDAALR         | P12787 | 0.00278164 | N-term +42.01 Da, K +28.03 Da,            | 5531.77832  | 4 | 653.3699951 | 653.6186535 |
| EGEPEVTDQLEWQSNQPWEQALNR        | P08226 | 0          | N-term +42.01 Da,                         | 5534.984375 | 3 | 976.1300049 | 975.7810467 |
| ATNFLAHEKIWFDFKFKY              | P57776 | 0          | N-term +42.01 Da, K +28.03 Da,            | 5535.592285 | 4 | 572.0599976 | 571.8095817 |
| DDDIAALVVDNGSGMCKAGFAGDDAPR     | P60710 | 0          | N-term +42.01 Da, K +28.03 Da,C +57.02Da, | 5535.709961 | 3 | 936.4199829 | 936.4252179 |
| MEAPAPSLTEEDLTVKKDALENLR        | Q9ZOH7 | 0          | N-term +42.01 Da, K +28.03 Da,            | 5538.531738 | 3 | 967.1699829 | 966.4986002 |
| VEADRPGLKFIGLNTETNEKALEAVFGKYGR | Q91VM5 | 0          | N-term +42.01 Da, K +28.03 Da,            | 5538.642578 | 4 | 902.4899902 | 902.238614  |
| ASGVAVSDGVIKVFNDMKVR            | P18760 | 0          | N-term +42.01 Da, K +28.03 Da,            | 5541.143555 | 2 | 1096.099976 | 1095.601194 |
| ADDVDQQQTNTVVEEPLDLIR           | P62311 | 0          | N-term +42.01 Da,                         | 5542.014648 | 2 | 1222.089966 | 1221.58518  |

|                                     |        |            |                                           |             |   |             |             |
|-------------------------------------|--------|------------|-------------------------------------------|-------------|---|-------------|-------------|
| AETLSGLGDASAAGAAAVSSAASETGTR        | D3YXK2 | 0          | N-term +42.01 Da,                         | 5545.44873  | 2 | 1262.099976 | 1261.104269 |
| ADDVDQQTNTNVEEPLDLIR                | P62311 | 0          | N-term +42.01 Da,                         | 5546.481934 | 3 | 815.0599976 | 814.7258789 |
| AAVLQQVLERPELNKLPK                  | F6ZDS4 | 0          | N-term +42.01 Da, K +28.03 Da,            | 5546.964355 | 3 | 715.4299927 | 715.4315713 |
| TDQAFVTLTTNDAYAKGALVLGSSLKQHR       | Q9R062 | 0          | N-term +42.01 Da, K +28.03 Da,            | 5548.047852 | 4 | 802.1799927 | 801.6819373 |
| AETLSGLGDASAAGAAAVSSAASETGTR        | D3YXK2 | 0          | N-term +42.01 Da,                         | 5550.086426 | 3 | 841.4099731 | 841.0719379 |
| CDFTEDQTAEFKEAF                     | Q60605 | 0          | N-term +42.01 Da, K +28.03 Da,C +57.02Da, | 5553.571289 | 2 | 954.40448   | 954.4038372 |
| AETLSGLGDASAAGAAAVSSAASETGTR        | D3YXK2 | 0          | N-term +42.01 Da,                         | 5554.702148 | 2 | 1261.103638 | 1261.104269 |
| ASGVAVSDGVIKVFNDMKVR                | P18760 | 0          | N-term +42.01 Da, K +28.03 Da,            | 5557.743164 | 3 | 730.7352295 | 730.7365548 |
| DDDIAALVVDNGSGMCKAGFAGDDAPR         | P60710 | 0          | N-term +42.01 Da, K +28.03 Da,C +57.02Da, | 5561.15332  | 2 | 1405.130005 | 1404.134189 |
| RRRHRSRR                            | _tr S4 | 0.03259005 | N-term +42.01 Da,                         | 5563.447754 | 2 | 611.3553467 | 611.3666463 |
| MESELEALAPR                         | Q9CYS6 | 0          | N-term +42.01 Da,                         | 5563.523438 | 2 | 644.3153687 | 644.3161062 |
| RALLEELCRRRKPGRICITTSKLFHK          | Q9Z1M0 | 0.04672507 | N-term +42.01 Da, K +28.03 Da,C +57.02Da, | 5578.173828 | 4 | 786.6699829 | 786.4282303 |
| MEGKVVIGGEDYEKEFTPKDYLTITY          | P40936 | 0          | N-term +42.01 Da, K +28.03 Da,            | 5581.655762 | 3 | 1089.52002  | 1089.189433 |
| AAESALQVVEKLQAR                     | Q8CB77 | 0          | N-term +42.01 Da, K +28.03 Da,            | 5581.945313 | 2 | 841.973877  | 841.975423  |
| TTSALFPLVPGSR                       | Q9JKV1 | 0          | N-term +42.01 Da,                         | 5582.044434 | 2 | 766.4099731 | 766.4093842 |
| AAESALQVVEKLQAR                     | Q8CB77 | 0          | N-term +42.01 Da, K +28.03 Da,            | 5582.65332  | 3 | 561.9899902 | 561.6527075 |
| AETLSGLGDASAAGAAAVSSAASETGTR        | D3YXK2 | 0          | N-term +42.01 Da,                         | 5585.256348 | 2 | 1261.109985 | 1261.104269 |
| MLTGSGDPKEEEEEELVDPLTTVR            | P99028 | 0          | N-term +42.01 Da, K +28.03 Da,            | 5587.361328 | 3 | 915.4500122 | 915.4442727 |
| CDFTEDQTAEFKEAF                     | Q60605 | 0          | N-term +42.01 Da, K +28.03 Da,C +57.02Da, | 5587.58252  | 2 | 954.9000244 | 954.4038372 |
| MLTGSGDPKEEEEEELVDPLTTVR            | P99028 | 0          | N-term +42.01 Da, K +28.03 Da,            | 5592.634766 | 2 | 1373.160034 | 1372.662771 |
| MEDSMDMDMSPLRPQNYLFGCELKADKDYH      | Q61937 | 0          | N-term +42.01 Da, K +28.03 Da,C +57.02Da, | 5595.907715 | 4 | 934.6599731 | 934.4130556 |
| DDDIAALVVDNGSGMCKAGFAGDDAPR         | P60710 | 0.00049529 | N-term +42.01 Da, K +28.03 Da,C +57.02Da, | 5596.60791  | 3 | 937.0900269 | 936.4252179 |
| KTLVSTVGSMTVFSEGEAQR                | Q99PL5 | 0.00233209 | N-term +42.01 Da, K +28.03 Da,            | 5596.743164 | 3 | 699.0300293 | 699.3612653 |
| AETLSGLGDASAAGAAAVSSAASETGTR        | D3YXK2 | 0          | N-term +42.01 Da,                         | 5600.81543  | 3 | 841.4000244 | 841.0719379 |
| MEEKYLPPELMAEKDSLDPSTFH             | Q9R226 | 0.00233536 | N-term +42.01 Da, K +28.03 Da,            | 5602.476074 | 3 | 903.7600098 | 903.4326502 |
| MEDSMDMDMSPLRPQNYLFGCELKADKDYH      | Q61937 | 0          | N-term +42.01 Da, K +28.03 Da,C +57.02Da, | 5604.92041  | 3 | 1245.880005 | 1245.548315 |
| MESSTSSSGSALGAVDPQLQHFIEVETQKQR     | Q9WVA2 | 0          | N-term +42.01 Da, K +28.03 Da,            | 5606.39209  | 3 | 1140.219971 | 1139.89122  |
| MLTGSGDPKEEEEEELVDPLTTVR            | P99028 | 0          | N-term +42.01 Da, K +28.03 Da,            | 5607.967285 | 3 | 916.1099854 | 915.4442727 |
| ASGNAQIGKSAPDFTATAVVDGAFKEIKLSDYR   | Q61171 | 0          | N-term +42.01 Da, K +28.03 Da,            | 5609.180176 | 3 | 1185.290039 | 1185.28942  |
| ASLSLAPVNIKAGADEER                  | P80314 | 0          | N-term +42.01 Da, K +28.03 Da,            | 5609.3125   | 2 | 1030.040039 | 1029.546942 |
| MWKSVMGHDVSVSVETQGDWDTPDFVNDISEKEQR | P49710 | 0          | N-term +42.01 Da, K +28.03 Da,            | 5612.094238 | 4 | 1088.01001  | 1087.755127 |
| ADIDNKEQSELDQDLEDVEEVEEETGEETKIKAR  | P28656 | 0          | N-term +42.01 Da, K +28.03 Da,            | 5612.19873  | 4 | 1048.25     | 1047.997411 |
| ASYEILDVPR                          | Q9QYI5 | 0          | N-term +42.01 Da,                         | 5612.274414 | 2 | 684.3442383 | 684.3457209 |
| AEVPPGPSLLPPPAPAAAAELR              | Q8CES0 | 0          | N-term +42.01 Da,                         | 5612.676758 | 2 | 1210.160034 | 1209.655013 |
| MESSTSSSGSALGAVDPQLQHFIEVETQKQR     | Q9WVA2 | 0          | N-term +42.01 Da, K +28.03 Da,            | 5614.191895 | 4 | 855.6699829 | 855.1702345 |
| ASGNAQIGKSAPDFTATAVVDGAFKEIKLSDYR   | Q61171 | 0          | N-term +42.01 Da, K +28.03 Da,            | 5614.414551 | 3 | 1185.959961 | 1185.28942  |
| ADHVQSLAQLLENLCKQLYETDITTR          | Q9EPK7 | 0          | N-term +42.01 Da, K +28.03 Da,C +57.02Da, | 5616.907227 | 3 | 1036.51001  | 1035.84343  |
| ASGNAQIGKSAPDFTATAVVDGAFKEIKLSDYR   | Q61171 | 0          | N-term +42.01 Da, K +28.03 Da,            | 5619.387695 | 4 | 889.7199707 | 889.2188845 |
| MDEDGLPLMGSGIDLTKVPAIQKRR           | Q9CR27 | 0.00407978 | N-term +42.01 Da, K +28.03 Da,            | 5622.056641 | 3 | 938.1599731 | 937.4978768 |
| AADISQWAGPLCLQEVDEPPQHALR           | P70296 | 0          | N-term +42.01 Da, C +57.02Da,             | 5624.244141 | 2 | 1422.689941 | 1422.192697 |

|                                     |        |            |                                           |             |   |             |             |
|-------------------------------------|--------|------------|-------------------------------------------|-------------|---|-------------|-------------|
| DDDIAALVVDNGSGMCKAGFAGDDAPR         | P60710 | 0          | N-term +42.01 Da, K +28.03 Da,C +57.02Da, | 5627.615234 | 3 | 937.0900269 | 936.4252179 |
| DDDIAALVVDNGSGMCKAGFAGDDAPR         | P60710 | 0          | N-term +42.01 Da, K +28.03 Da,C +57.02Da, | 5628.117188 | 2 | 1404.619995 | 1404.134189 |
| AEVPPGPSLLPPAPAAPAAAEALR            | Q8CE50 | 0          | N-term +42.01 Da,                         | 5628.233398 | 2 | 1210.660034 | 1209.655013 |
| ASGCKIGPSILNSDLANLGAECLR            | Q8VEE0 | 0          | N-term +42.01 Da, K +28.03 Da,C +57.02Da, | 5629.586426 | 2 | 1293.650024 | 1293.654362 |
| ASGCKIGPSILNSDLANLGAECLR            | Q8VEE0 | 0          | N-term +42.01 Da, K +28.03 Da,C +57.02Da, | 5629.958984 | 3 | 863.4400024 | 862.7719999 |
| ASGCKIGPSILNSDLANLGAECLR            | Q8VEE0 | 0          | N-term +42.01 Da, K +28.03 Da,C +57.02Da, | 5631.136719 | 2 | 1294.650024 | 1293.654362 |
| ATDSWALAVDEQEAEEAESLNLHLKEEKIPDAN   | Q8R3C7 | 0          | N-term +42.01 Da, K +28.03 Da,            | 5635.793457 | 4 | 956.2399902 | 955.7376391 |
| MESSTSSSGSALGAVDPQLQHFIEVETQKQR     | Q9WVA2 | 0          | N-term +42.01 Da, K +28.03 Da,            | 5636.79541  | 3 | 1139.890503 | 1139.89122  |
| ADIDNKEQSELDQDLEDVEVEVEEETGEETKIKAR | P28656 | 0          | N-term +42.01 Da, K +28.03 Da,            | 5638.676758 | 4 | 1047.98999  | 1047.997411 |
| ASLSLAPVNIKAGADEER                  | P80314 | 0          | N-term +42.01 Da, K +28.03 Da,            | 5639.082031 | 3 | 687.3699951 | 686.7003867 |
| CDFTEDQTAEFKEAF                     | Q60605 | 0          | N-term +42.01 Da, K +28.03 Da,C +57.02Da, | 5639.769043 | 2 | 954.4000244 | 954.4038372 |
| ASLSLAPVNIKAGADEER                  | P80314 | 0          | N-term +42.01 Da, K +28.03 Da,            | 5640.508789 | 2 | 1029.545776 | 1029.546942 |
| MESSTSSSGSALGAVDPQLQHFIEVETQKQR     | Q9WVA2 | 0          | N-term +42.01 Da, K +28.03 Da,            | 5644.643066 | 4 | 855.6699829 | 855.1702345 |
| ASGVAVSDGVIKVF                      | P18760 | 0          | N-term +42.01 Da, K +28.03 Da,            | 5646.715332 | 2 | 709.9000244 | 709.8981206 |
| AQQAADKYLVDKNFINNPLAQADWAAK         | Q8VDD5 | 0          | N-term +42.01 Da, K +28.03 Da,            | 5646.852539 | 3 | 1098.569946 | 1098.23822  |
| LITLEEEMTKYPESDELTAEKITEFCHR        | P09103 | 0          | N-term +42.01 Da, K +28.03 Da,C +57.02Da, | 5650.604492 | 4 | 917.210022  | 917.4624944 |
| AQQAADKYLVDKNFINNPLAQADWAAK         | Q8VDD5 | 0          | N-term +42.01 Da, K +28.03 Da,            | 5654.57959  | 3 | 1098.22998  | 1098.23822  |
| DDDIAALVVDNGSGMCKAGFAGDDAPR         | P60710 | 0          | N-term +42.01 Da, K +28.03 Da,C +57.02Da, | 5657.865234 | 3 | 936.7518311 | 936.4252179 |
| TGEAIVDAALSALR                      | Q922R8 | 0          | N-term +42.01 Da,                         | 5658.753906 | 2 | 715.4000244 | 714.8882846 |
| DDDIAALVVDNGSGMCKAGFAGDDAPR         | P60710 | 0          | N-term +42.01 Da, K +28.03 Da,C +57.02Da, | 5659.526367 | 2 | 1404.624512 | 1404.134189 |
| AEVPPGPSLLPPAPAAPAAAEALR            | Q8CE50 | 0.00142789 | N-term +42.01 Da,                         | 5660.191406 | 2 | 1210.170044 | 1209.655013 |
| ASGCKIGPSILNSDLANLGAECLR            | Q8VEE0 | 0          | N-term +42.01 Da, K +28.03 Da,C +57.02Da, | 5661.174805 | 3 | 862.7700195 | 862.7719999 |
| ASGCKIGPSILNSDLANLGAECLR            | Q8VEE0 | 0          | N-term +42.01 Da, K +28.03 Da,C +57.02Da, | 5661.865723 | 2 | 1294.160034 | 1293.654362 |
| AEVPPGPSLLPPAPAAPAAAEALR            | Q8CE50 | 0          | N-term +42.01 Da,                         | 5664.073242 | 2 | 1209.650024 | 1209.655013 |
| MESSTSSSGSALGAVDPQLQHFIEVETQKQR     | Q9WVA2 | 0          | N-term +42.01 Da, K +28.03 Da,            | 5667.120117 | 3 | 1139.891113 | 1139.89122  |
| SDQQLDCALDLMR                       | P47757 | 0          | N-term +42.01 Da, C +57.02Da,             | 5667.538574 | 2 | 803.8599854 | 803.8636269 |
| ASLSLAPVNIKAGADEER                  | P80314 | 0          | N-term +42.01 Da, K +28.03 Da,            | 5671.954102 | 2 | 1030.050049 | 1029.546942 |
| ASLSLAPVNIKAGADEER                  | P80314 | 0          | N-term +42.01 Da, K +28.03 Da,            | 5674.711914 | 2 | 1029.550049 | 1029.546942 |
| CDFTEDQTAEFKEAF                     | Q60605 | 0          | N-term +42.01 Da, K +28.03 Da,C +57.02Da, | 5674.838867 | 2 | 954.9000244 | 954.4038372 |
| SLLCADFKAQAQKQL                     | Q9NYQ2 | 0          | N-term +42.01 Da, K +28.03 Da,C +57.02Da, | 5676.827637 | 2 | 966.5300293 | 966.5347906 |
| MIEMAAEKEPF                         | Q8K3A9 | 0          | N-term +42.01 Da, K +28.03 Da,            | 5686.806641 | 2 | 683.3200073 | 683.3250852 |
| WEHITTLISSLREFVR                    | Q35099 | 0.03939009 | N-term +42.01 Da,                         | 5688.88623  | 2 | 1016.059998 | 1015.046911 |
| TGEAIVDAALSALR                      | Q922R8 | 0          | N-term +42.01 Da,                         | 5691.001953 | 2 | 714.8900146 | 714.8882846 |
| TTSTLQKAIIDLVTKATEEDKAKNYEEALR      | Q8VEJ9 | 0          | N-term +42.01 Da, K +28.03 Da,            | 5696.727539 | 4 | 856.4699707 | 855.967264  |
| STLQLKETKVPVSVQFVGDDDLVSHILDR       | Q60862 | 0          | N-term +42.01 Da, K +28.03 Da,            | 5697.241211 | 4 | 810.4400024 | 810.1895953 |
| ADLSLVDALTEPPPEIEGEIKR              | P27546 | 0          | N-term +42.01 Da, K +28.03 Da,            | 5698.560059 | 3 | 821.7700195 | 821.4390097 |
| AGPEWQSLEQCLEKHLPPDDLQVVKR          | Q8VC97 | 0          | N-term +42.01 Da, K +28.03 Da,C +57.02Da, | 5698.864258 | 4 | 786.6500244 | 786.4052101 |
| TTSTLQKAIIDLVTKATEEDKAKNYEEALR      | Q8VEJ9 | 0          | N-term +42.01 Da, K +28.03 Da,            | 5700.495605 | 4 | 855.9699707 | 855.967264  |
| MEDSMDMDMSPLRPQNY                   | Q61937 | 0          | N-term +42.01 Da,                         | 5700.600586 | 2 | 1051.420044 | 1051.420324 |
| MNFSGKYQLQSQENFEPFMK                | P12710 | 0          | N-term +42.01 Da, K +28.03 Da,            | 5701.226563 | 2 | 1277.099976 | 1276.103441 |

|                                      |        |            |                                           |             |   |             |             |
|--------------------------------------|--------|------------|-------------------------------------------|-------------|---|-------------|-------------|
| SWLFGIKGPKGEGTGPPLPLPPAQPGEAGGGDR    | Q925I1 | 0          | N-term +42.01 Da, K +28.03 Da,            | 5706.003418 | 3 | 1113.920044 | 1113.589252 |
| ADLSLVDALTEPPPEIEGEIKR               | P27546 | 0          | N-term +42.01 Da, K +28.03 Da,            | 5708.793945 | 2 | 1232.160034 | 1231.654876 |
| MESSTSSSSGALGAVDPQLQHFIEVETQKQR      | Q9WVA2 | 0          | N-term +42.01 Da, K +28.03 Da,            | 5725.268066 | 3 | 1140.550049 | 1139.89122  |
| VHLTDAEKSAVSLWAKVNPDEVGGEALGR        | P02089 | 0          | N-term +42.01 Da, K +28.03 Da,C +57.02Da, | 5731.210449 | 4 | 827.6799927 | 827.4251372 |
| TTYLEFIQNEER                         | Q01405 | 0          | N-term +42.01 Da,                         | 5748.215332 | 2 | 856.9099731 | 856.9099462 |
| AALVLEDGSLQGR                        | B2RQC6 | 0          | N-term +42.01 Da,                         | 5750.065918 | 2 | 735.9000244 | 735.4015592 |
| LAAQLEECALKDRERAGTGPRPSPR            | Q9D0P7 | 0.01371075 | N-term +42.01 Da, K +28.03 Da,C +57.02Da, | 5752.52832  | 3 | 969.1799927 | 969.1735552 |
| MESSTSSSSGALGAVDPQLQHFIEVETQKQR      | Q9WVA2 | 0          | N-term +42.01 Da, K +28.03 Da,            | 5756.675293 | 3 | 1140.22998  | 1139.89122  |
| AMFDQSQIQEFKEAFNMIDQNR               | Q3THE2 | 0          | N-term +42.01 Da, K +28.03 Da,            | 5757.079102 | 3 | 921.4400024 | 920.7633932 |
| AAATAAAPQQLSDEELFSQLR                | Q9WU40 | 0          | N-term +42.01 Da,                         | 5757.943359 | 3 | 777.3912354 | 777.3922821 |
| AAATAAAPQQLSDEELFSQLR                | Q9WU40 | 0          | N-term +42.01 Da,                         | 5771.950195 | 2 | 1165.579956 | 1165.584785 |
| DFENEMATAASSSSLEKSYELPDGQVITIGNER    | P62737 | 0          | N-term +42.01 Da, K +28.03 Da,            | 5774.302246 | 3 | 1220.579956 | 1220.240356 |
| AKFVLNQNLPLDLGGPPLYPGPTGSAR          | Q9Z1P7 | 0          | N-term +42.01 Da, K +28.03 Da,            | 5778.390625 | 3 | 917.4899902 | 917.1605809 |
| ADISQWAGPLCLQEVDPEPPQHALR            | P70296 | 0          | N-term +42.01 Da, C +57.02Da,             | 5778.55127  | 2 | 1387.680054 | 1386.67414  |
| PGLLLLGEEAPDFEANTTIGR                | Q8BG37 | 0.00143678 | N-term +42.01 Da,                         | 5778.689453 | 2 | 1099.540039 | 1100.050046 |
| ADISQWAGPLCLQEVDPEPPQHALR            | P70296 | 0          | N-term +42.01 Da, C +57.02Da,             | 5779.909668 | 3 | 924.789978  | 924.7851857 |
| AKFVLNQNLPLDLGGPPLYPGPTGSAR          | Q9Z1P7 | 0          | N-term +42.01 Da, K +28.03 Da,            | 5780.125    | 3 | 917.8300171 | 917.1605809 |
| ADISQWAGPLCLQEVDPEPPQHALR            | P70296 | 0          | N-term +42.01 Da, C +57.02Da,             | 5780.266602 | 2 | 1386.670044 | 1386.67414  |
| AADISQWAGPLCLQEVDPEPPQHALR           | P70296 | 0          | N-term +42.01 Da, C +57.02Da,             | 5782.027832 | 2 | 1423.189941 | 1422.192697 |
| SDFDSNPFADPDLNPFKDPSTVQVTR           | Q8K021 | 0          | N-term +42.01 Da, K +28.03 Da,            | 5784.981445 | 3 | 1032.48999  | 1031.81939  |
| SDFDSNPFADPDLNPFKDPSTVQVTR           | Q8K021 | 0          | N-term +42.01 Da, K +28.03 Da,            | 5785.554688 | 2 | 1547.72998  | 1547.225447 |
| SDFDSNPFADPDLNPFKDPSTVQVTR           | Q8K021 | 0          | N-term +42.01 Da, K +28.03 Da,            | 5788.702148 | 2 | 1548.22998  | 1547.225447 |
| TTQQVLQGGPGPWGFR                     | O70400 | 0          | N-term +42.01 Da,                         | 5795.512695 | 2 | 913.9800415 | 913.9810395 |
| MESSTSSSSGALGAVDPQLQHFIEVETQKQR      | Q9WVA2 | 0          | N-term +42.01 Da, K +28.03 Da,            | 5804.054688 | 3 | 1140.560059 | 1139.89122  |
| AEPQPASSGLTDEAFSCCSDPDPSTKDFLLQQTMLR | Q9CPU0 | 0          | N-term +42.01 Da, K +28.03 Da,C +57.02Da, | 5810.416992 | 3 | 1391.310059 | 1390.969543 |
| AADISQWAGPLCLQEVDPEPPQHALR           | P70296 | 0          | N-term +42.01 Da, C +57.02Da,             | 5811.168945 | 2 | 1422.699951 | 1422.192697 |
| ATQVEPLLPGAPLLQAEHGLAR               | Q6ZQ58 | 0          | N-term +42.01 Da,                         | 5811.841797 | 2 | 1262.180054 | 1262.181926 |
| ATQVEPLLPGAPLLQAEHGLAR               | Q6ZQ58 | 0          | N-term +42.01 Da,                         | 5811.937988 | 3 | 842.1199951 | 841.7903764 |
| AADISQWAGPLCLQEVDPEPPQHALR           | P70296 | 0          | N-term +42.01 Da, C +57.02Da,             | 5813.84668  | 3 | 948.4628906 | 948.4642237 |
| MEPSLELPVDAVR                        | Q9CXF0 | 0          | N-term +42.01 Da,                         | 5813.968262 | 2 | 797.9099731 | 797.9109026 |
| AADISQWAGPLCLQEVDPEPPQHALR           | P70296 | 0          | N-term +42.01 Da, C +57.02Da,             | 5817.663086 | 4 | 711.8499756 | 711.5999869 |
| YGLFPANYVELR                         | Q60598 | 0          | N-term +42.01 Da,                         | 5818.332031 | 2 | 741.8900146 | 742.3826376 |
| TQQGAALQNYNNELVKCIEELCQKR            | Q9JJ94 | 0          | N-term +42.01 Da, K +28.03 Da,C +57.02Da, | 5818.62793  | 3 | 1036.189941 | 1035.853383 |
| TTQQVLQGGPGPWGFR                     | O70400 | 0          | N-term +42.01 Da,                         | 5826.838379 | 2 | 914.4799805 | 913.9810395 |
| ALDFENEMATAASSSSLEKSYELPDGQVITIGNER  | P62737 | 0          | N-term +42.01 Da, K +28.03 Da,            | 5831.528809 | 3 | 1282.300049 | 1281.614082 |
| AADISQWAGPLCLQEVDPEPPQHALR           | P70296 | 0          | N-term +42.01 Da, C +57.02Da,             | 5841.736328 | 2 | 1422.19043  | 1422.192697 |
| ATQVEPLLPGAPLLQAEHGLAR               | Q6ZQ58 | 0          | N-term +42.01 Da,                         | 5843.243652 | 3 | 842.1199951 | 841.7903764 |
| ATQVEPLLPGAPLLQAEHGLAR               | Q6ZQ58 | 0          | N-term +42.01 Da,                         | 5843.345703 | 2 | 1262.181274 | 1262.181926 |
| AADISQWAGPLCLQEVDPEPPQHALR           | P70296 | 0          | N-term +42.01 Da, C +57.02Da,             | 5844.731445 | 3 | 948.4625854 | 948.4642237 |
| MEPSLELPVDAVR                        | Q9CXF0 | 0          | N-term +42.01 Da,                         | 5844.881836 | 2 | 797.90979   | 797.9109026 |

|                                       |        |            |                                            |             |   |             |             |
|---------------------------------------|--------|------------|--------------------------------------------|-------------|---|-------------|-------------|
| MNLFNLDL                              | Q04692 | 0          | N-term +42.01 Da,                          | 5846.310059 | 2 | 532.7600098 | 532.7633115 |
| AEPQPASSGLTDETAFCSCSDPDPSTKDFLLQQTMLR | Q9CPU0 | 0          | N-term +42.01 Da, K +28.03 Da, C +57.02Da, | 5847.233398 | 3 | 1391.640015 | 1390.969543 |
| AADISQWAGPLCLQEVEDEPPQHALR            | P70296 | 0          | N-term +42.01 Da, C +57.02Da,              | 5850.708984 | 4 | 711.8499756 | 711.5999869 |
| ALNGADVDDFTWEPPTAEATKVLQAR            | P56873 | 0          | N-term +42.01 Da, K +28.03 Da,             | 5852.763184 | 3 | 982.4799805 | 981.8172092 |
| ALNGADVDDFTWEPPTAEATKVLQAR            | P56873 | 0          | N-term +42.01 Da, K +28.03 Da,             | 5857.036133 | 2 | 1473.219971 | 1472.222176 |
| AADISQWAGPLCLQEVEDEPPQHALR            | P70296 | 0          | N-term +42.01 Da, C +57.02Da,              | 5858.435547 | 4 | 712.0999756 | 711.5999869 |
| TEVMMNAPSMEIEIGLSR                    | Q9CX60 | 0          | N-term +42.01 Da,                          | 5860.28125  | 2 | 1017.460022 | 1017.470674 |
| TEVMMNAPSMEIEIGLSR                    | Q9CX60 | 0          | N-term +42.01 Da,                          | 5862.86377  | 3 | 679.3200073 | 678.6495413 |
| AAAAQLSLTLQSSGNPVYEKY                 | P42567 | 0          | N-term +42.01 Da, K +28.03 Da,             | 5866.407227 | 2 | 1142.089966 | 1141.089172 |
| AAAAQLSLTLQSSGNPVYEKY                 | P42567 | 0          | N-term +42.01 Da, K +28.03 Da,             | 5869.65918  | 2 | 1141.089966 | 1141.089172 |
| ADDLDFETGDAGASATFPMQCSALR             | P63242 | 0          | N-term +42.01 Da, C +57.02Da,              | 5870.809082 | 2 | 1344.579956 | 1344.581257 |
| AADISQWAGPLCLQEVEDEPPQHALR            | P70296 | 0          | N-term +42.01 Da, C +57.02Da,              | 5873.84082  | 2 | 1422.689941 | 1422.192697 |
| AADISQWAGPLCLQEVEDEPPQHALR            | P70296 | 0          | N-term +42.01 Da, C +57.02Da,              | 5875.961426 | 3 | 948.7999878 | 948.4642237 |
| MEDEEVAESWEEAADSGEIDR                 | Q6NXN1 | 0          | N-term +42.01 Da,                          | 5876.884766 | 2 | 1220.5      | 1219.992464 |
| AETGAGISETVTETTETTTTETPETPENQSLIMKLR  | Q8K1L5 | 0          | N-term +42.01 Da, K +28.03 Da,             | 5879.093262 | 3 | 1346.670044 | 1346.670145 |
| ASVGTlafDEYGRPFLLIKDQDR               | P80316 | 0          | N-term +42.01 Da, K +28.03 Da,             | 5880.616699 | 3 | 894.4699707 | 894.4693031 |
| MEGLKDKTLQELEEMQNDPEAIAR              | Q8R105 | 0          | N-term +42.01 Da, K +28.03 Da,             | 5882.326172 | 3 | 963.4799805 | 962.8123018 |
| VIQELRPTLNELGISTPEELGLDKV             | P12787 | 0          | N-term +42.01 Da, K +28.03 Da,             | 5882.711914 | 3 | 945.5300293 | 945.190095  |
| MDDTLFQLKFTAKQLEKLAK                  | Q921W0 | 0          | N-term +42.01 Da, K +28.03 Da,             | 5883.259766 | 4 | 631.6099854 | 631.3630217 |
| MEGPLSVFGDR                           | P11983 | 0          | N-term +42.01 Da,                          | 5885.996094 | 2 | 625.2972412 | 625.2977161 |
| PMFIVNTNVPR                           | P34884 | 0          | N-term +42.01 Da,                          | 5887.679688 | 2 | 665.3499756 | 665.3528253 |
| MEDEEVAESWEEAADSGEIDR                 | Q6NXN1 | 0          | N-term +42.01 Da,                          | 5888.423828 | 2 | 1219.98999  | 1219.992464 |
| AETGAGISETVTETTETTTTETPETPENQSLIMKLR  | Q8K1L5 | 0          | N-term +42.01 Da, K +28.03 Da,             | 5890.31543  | 4 | 1010.75     | 1010.254428 |
| DGKALEQLQEYFDGNLKR                    | P27773 | 0          | N-term +42.01 Da, K +28.03 Da,             | 5893.21875  | 3 | 790.7399902 | 790.4093842 |
| ADDIDIEAMLEAPYKIDEN                   | Q8VH51 | 0          | N-term +42.01 Da, K +28.03 Da,             | 5898.89502  | 2 | 1140.050049 | 1139.543406 |
| AADISQWAGPLCLQEVEDEPPQHALR            | P70296 | 0          | N-term +42.01 Da, C +57.02Da,              | 5909.384766 | 3 | 948.789978  | 948.4642237 |
| ASVGTlafDEYGRPFLLIKDQDR               | P80316 | 0          | N-term +42.01 Da, K +28.03 Da,             | 5913.253418 | 3 | 895.1300049 | 894.4693031 |
| SSKMMVNSVEGCADDALAGLVASNPDLQLLQGHR    | Q8VC30 | 0          | N-term +42.01 Da, K +28.03 Da, C +57.02Da, | 5913.434082 | 4 | 920.4699707 | 920.4699136 |
| MEGPLSVFGDR                           | P11983 | 0          | N-term +42.01 Da,                          | 5917.259766 | 2 | 625.2975464 | 625.2977161 |
| SSKMMVNSVEGCADDALAGLVASNPDLQLLQGHR    | Q8VC30 | 0.01333333 | N-term +42.01 Da, K +28.03 Da, C +57.02Da, | 5919.258301 | 3 | 1226.939941 | 1226.957459 |
| MDSASQDINLNSPNKGVLSDFMTDVPVDPGVVHR    | Q9CY22 | 0          | N-term +42.01 Da, K +28.03 Da,             | 5922.427734 | 3 | 1242.599976 | 1242.269703 |
| MDSASQDINLNSPNKGVLSDFMTDVPVDPGVVHR    | Q9CY22 | 0          | N-term +42.01 Da, K +28.03 Da,             | 5928.04248  | 3 | 1242.939941 | 1242.269703 |
| AADISQWAGPLCLQEVEDEPPQHALR            | P70296 | 0          | N-term +42.01 Da, C +57.02Da,              | 5928.559082 | 2 | 1422.689941 | 1422.192697 |
| SLYPSLEDLKVDKVIQAQTAY                 | O08992 | 0          | N-term +42.01 Da, K +28.03 Da,             | 5936.045898 | 2 | 1240.670044 | 1240.170162 |
| MLTDSGGGTSFEEDLDSVAPR                 | E9PUR0 | 0          | N-term +42.01 Da,                          | 5937.131348 | 2 | 1141.51001  | 1142.007719 |
| AETGAGISETVTETTETTTTETPETPENQSLIMKLR  | Q8K1L5 | 0          | N-term +42.01 Da, K +28.03 Da,             | 5938.257324 | 4 | 1010.76001  | 1010.254428 |
| AADISQWAGPLCLQEVEDEPPQHALR            | P70296 | 0          | N-term +42.01 Da, C +57.02Da,              | 5944.55127  | 3 | 948.460022  | 948.4642237 |
| PLTKDNHLLGTFDLTGIPPAPR                | P20029 | 0.00143472 | N-term +42.01 Da, K +28.03 Da,             | 5944.856445 | 3 | 814.7800293 | 815.116312  |
| MDSASQDINLNSPNKGVLSDFMTDVPVDPGVVHR    | Q9CY22 | 0          | N-term +42.01 Da, K +28.03 Da,             | 5946.305664 | 4 | 932.2000122 | 931.9540966 |
| KKYEKAVQRR                            | E9Q9F7 | 0.01666667 | N-term +42.01 Da, K +28.03 Da,             | 5948.134277 | 2 | 716.4342651 | 716.4433633 |

|                                     |        |            |                                            |             |   |             |             |
|-------------------------------------|--------|------------|--------------------------------------------|-------------|---|-------------|-------------|
| TEWEAATPAVAETPDIKL                  | P97461 | 0          | N-term +42.01 Da, K +28.03 Da,             | 5950.085938 | 2 | 1006.509338 | 1006.514776 |
| VNPTVFFDITADDEPLGR                  | P17742 | 0          | N-term +42.01 Da,                          | 5950.219727 | 2 | 1024.52002  | 1024.5022   |
| EGEPEVTDQLEWQSNQPWEQALNR            | P08226 | 0          | N-term +42.01 Da,                          | 5952.416504 | 3 | 975.460022  | 975.7810467 |
| EGEPEVTDQLEWQSNQPWEQALNR            | P08226 | 0          | N-term +42.01 Da,                          | 5954.386719 | 2 | 1462.680054 | 1463.167932 |
| PFVELETNLPASR                       | O35215 | 0          | N-term +42.01 Da,                          | 5957.515137 | 2 | 758.9000244 | 757.8961096 |
| VEADRPGLKFIGGLNTETNEKALEAVFGKY      | Q91VM5 | 0.01330967 | N-term +42.01 Da, K +28.03 Da,             | 5962.633301 | 4 | 849.210022  | 848.9579702 |
| MESMVAPGEVLMSEQAIQPAHADSR           | Q9DBK0 | 0          | N-term +42.01 Da,                          | 5963.983398 | 2 | 1300.109985 | 1299.111472 |
| MDVGELLSYQPNR                       | Q9CWL8 | 0          | N-term +42.01 Da,                          | 5965.915527 | 2 | 782.3768311 | 782.377227  |
| MDSASQDINLNSPNKGVLSDFMTDVPVDPGVVHR  | Q9CYZ2 | 0          | N-term +42.01 Da, K +28.03 Da,             | 5971.621094 | 3 | 1242.599976 | 1242.269703 |
| EEEIAALVIDNGSGMCKAGFAGDDAPR         | P63260 | 0          | N-term +42.01 Da, K +28.03 Da, C +57.02Da, | 5971.820801 | 3 | 955.7700195 | 955.1127513 |
| AETGAGISETVTETTETTTETTEPENQSLIMKLR  | Q8K1L5 | 0          | N-term +42.01 Da, K +28.03 Da,             | 5974.549805 | 3 | 1347.01001  | 1346.670145 |
| ADLSLDELIR                          | Q8BG81 | 0          | N-term +42.01 Da,                          | 5977.512695 | 2 | 594.3200073 | 593.8193388 |
| AAMLGDAIMVAK                        | Q60936 | 0          | N-term +42.01 Da, K +28.03 Da,             | 5979.11084  | 2 | 630.8400269 | 630.8381622 |
| AADISQWAGPLCLQEVEPPQHALR            | P70296 | 0          | N-term +42.01 Da, C +57.02Da,              | 5979.395996 | 3 | 949.1300049 | 948.4642237 |
| AANATTNPSQLLPLELVDKICGSR            | P62322 | 0          | N-term +42.01 Da, K +28.03 Da, C +57.02Da, | 5984.743164 | 3 | 880.460022  | 880.1338147 |
| PFVELETNLPASR                       | O35215 | 0          | N-term +42.01 Da,                          | 5988.77832  | 2 | 757.8955078 | 757.8961096 |
| SWFADLAGR                           | Q9QYE6 | 0          | N-term +42.01 Da,                          | 5989.177246 | 2 | 532.7606812 | 532.761626  |
| ASGRPEELWEAVVGAER                   | Q9D1F4 | 0          | N-term +42.01 Da,                          | 5993.206055 | 2 | 984.9899902 | 984.9923336 |
| ATPDSLALFTGLGLENKAR                 | D3Z158 | 0          | N-term +42.01 Da, K +28.03 Da,             | 5995.199219 | 2 | 1067.079956 | 1066.073324 |
| AADISQWAGPLCLQEVEPPQHALR            | P70296 | 0          | N-term +42.01 Da, C +57.02Da,              | 5995.611328 | 2 | 1422.680054 | 1422.192697 |
| ASGRPEELWEAVVGAER                   | Q9D1F4 | 0.00233754 | N-term +42.01 Da,                          | 5995.72998  | 3 | 657.3300171 | 656.9973145 |
| AQPPPDVEGDDCLPEYHHLFCPDLLQDKVAF     | Q9WV68 | 0          | N-term +42.01 Da, K +28.03 Da, C +57.02Da, | 5997.136719 | 3 | 1231.900024 | 1231.572723 |
| ASFVTEVLAHSGSLEKEDLGTR              | O54692 | 0          | N-term +42.01 Da, K +28.03 Da,             | 6004.429199 | 3 | 806.4199829 | 806.0833373 |
| AADISQWAGPLCLQEVEPPQHALR            | P70296 | 0          | N-term +42.01 Da, C +57.02Da,              | 6010.989746 | 3 | 949.1300049 | 948.4642237 |
| MNVEHEVNLLVEEIH                     | Q4KML4 | 0          | N-term +42.01 Da,                          | 6012.901855 | 3 | 668.3381958 | 668.3386832 |
| AAAAPGPVELGFAEEAPAWR                | P46718 | 0          | N-term +42.01 Da,                          | 6018.378418 | 2 | 1026.51001  | 1026.512902 |
| PGSISWDGLDPGKLYTL                   | Q8VIN1 | 0          | N-term +42.01 Da, K +28.03 Da,             | 6018.513672 | 2 | 944.9899902 | 944.9881966 |
| SAIQNLHSFDPFADASKGDDLLPAGTEDYIHIR   | P48024 | 0          | N-term +42.01 Da, K +28.03 Da,             | 6019.431152 | 4 | 921.960022  | 921.7048702 |
| PFVELETNLPASR                       | O35215 | 0          | N-term +42.01 Da,                          | 6020.889648 | 2 | 757.8954468 | 757.8961096 |
| SWFADLAGR                           | Q9QYE6 | 0          | N-term +42.01 Da,                          | 6021.012207 | 2 | 532.7614746 | 532.761626  |
| ALDFENEMATAASSSSLEKSYELPDGQVITIGNER | P62737 | 0          | N-term +42.01 Da, K +28.03 Da,             | 6021.407227 | 4 | 961.9699707 | 961.4623807 |
| MDMSLDDIILNLR                       | O08583 | 0          | N-term +42.01 Da, K +28.03 Da,             | 6023.111328 | 2 | 817.4179077 | 817.4180376 |
| MNVEHEVNLLVEEIH                     | Q4KML4 | 0.00233318 | N-term +42.01 Da,                          | 6023.708496 | 2 | 1002.02002  | 1002.004387 |
| ASGRPEELWEAVVGAER                   | Q9D1F4 | 0          | N-term +42.01 Da,                          | 6024.60791  | 2 | 984.9909058 | 984.9923336 |
| ADIDNKEQSELDQDLEDVEVEEEEETGEETKIK   | P28656 | 0          | N-term +42.01 Da, K +28.03 Da,             | 6025.27002  | 3 | 1321.619995 | 1321.281381 |
| MEPQSQSMTLEVLPLSLGR                 | A4UHF3 | 0          | N-term +42.01 Da,                          | 6031.572754 | 2 | 1023.003296 | 1023.005738 |
| SAIQNLHSFDPFADASKGDDLLPAGTEDYIHIR   | P48024 | 0          | N-term +42.01 Da, K +28.03 Da,             | 6032.950195 | 3 | 1228.939941 | 1228.604068 |
| MQNDAGEFVDLYVPR                     | Q9CQR2 | 0          | N-term +42.01 Da,                          | 6035.533203 | 2 | 898.4193115 | 898.4196237 |
| SAIQNLHSFDPFADASKGDDLLPAGTEDYIHIR   | P48024 | 0          | N-term +42.01 Da, K +28.03 Da,             | 6035.928711 | 3 | 1228.599976 | 1228.604068 |
| MQNDAGEFVDLYVPR                     | Q9CQR2 | 0          | N-term +42.01 Da,                          | 6044.038086 | 3 | 599.6199951 | 599.2821746 |

|                                     |        |            |                                           |             |   |             |             |
|-------------------------------------|--------|------------|-------------------------------------------|-------------|---|-------------|-------------|
| MNVEHEVNLLVEEIH                     | Q4KML4 | 0          | N-term +42.01 Da,                         | 6045.041504 | 3 | 669.0100098 | 668.3386832 |
| AADISQWAGPLCLQEVDEPPQHALR           | P70296 | 0          | N-term +42.01 Da, C +57.02Da,             | 6045.585449 | 3 | 948.460022  | 948.4642237 |
| ALDFENEMATAASSSSLEKSYELPDGQVITIGNER | P62737 | 0          | N-term +42.01 Da, K +28.03 Da,            | 6048.601074 | 3 | 1282.290039 | 1281.614082 |
| LVTEEDCTEELDFDLHAR                  | Q9D2Q7 | 0          | N-term +42.01 Da, C +57.02Da,             | 6048.944336 | 2 | 1133.52002  | 1133.520265 |
| SAIQNLHSFDPFADASKGDDLLPAGTEDYIHIR   | P48024 | 0          | N-term +42.01 Da, K +28.03 Da,            | 6050.166992 | 4 | 921.9500122 | 921.7048702 |
| AAETQTLNFGPEWLR                     | Q6Y7W8 | 0          | N-term +42.01 Da,                         | 6050.899414 | 2 | 887.9400024 | 887.9415803 |
| PFVELETNLPASR                       | O35215 | 0          | N-term +42.01 Da,                         | 6051.799805 | 2 | 757.8950806 | 757.8961096 |
| ALDFENEMATAASSSSLEKSYELPDGQVITIGNER | P62737 | 0          | N-term +42.01 Da, K +28.03 Da,            | 6052.523438 | 4 | 961.9699707 | 961.4623807 |
| ASGNAQIGKSAPDFTATAVVDGAFKEIKL       | Q61171 | 0          | N-term +42.01 Da, K +28.03 Da,            | 6060.766602 | 3 | 1011.549988 | 1011.548282 |
| ATQADLMELDMAMEPDR                   | Q02248 | 0          | N-term +42.01 Da,                         | 6061.137207 | 2 | 989.9299927 | 989.9313816 |
| SDIVIIKDETETMKDLEAEMR               | E9Q9Q2 | 0          | N-term +42.01 Da, K +28.03 Da,            | 6061.938477 | 3 | 855.7700195 | 855.4326502 |
| SDIVIIKDETETMKDLEAEMR               | E9Q9Q2 | 0          | N-term +42.01 Da, K +28.03 Da,            | 6064.78125  | 3 | 855.4400024 | 855.4326502 |
| MEEKALEVYDLIR                       | Q9DCL2 | 0          | N-term +42.01 Da, K +28.03 Da,            | 6065.918457 | 2 | 839.9400024 | 839.9396603 |
| MQNDAGEFVDLYVPR                     | Q9CQR2 | 0          | N-term +42.01 Da,                         | 6066.512207 | 2 | 898.4180908 | 898.4196237 |
| MDPSWATQESEAVAEKVL                  | Q9EPQ7 | 0          | N-term +42.01 Da, K +28.03 Da,            | 6067.03125  | 2 | 1109.550049 | 1109.046449 |
| MEEKALEVYDLIR                       | Q9DCL2 | 0          | N-term +42.01 Da, K +28.03 Da,            | 6068.776855 | 2 | 840.4400024 | 839.9396603 |
| ASVGTlafDEYGRPF                     | P80316 | 0          | N-term +42.01 Da,                         | 6071.11084  | 2 | 837.4000244 | 836.4042992 |
| FIGENMNPdGMVALLDYR                  | P63028 | 0.03864119 | N-term +42.01 Da,                         | 6072.003418 | 2 | 1049.01001  | 1048.99263  |
| MDPSWATQESEAVAEKVL                  | Q9EPQ7 | 0          | N-term +42.01 Da, K +28.03 Da,            | 6073.458496 | 2 | 1109.060059 | 1109.046449 |
| MQNDAGEFVDLYVPR                     | Q9CQR2 | 0          | N-term +42.01 Da,                         | 6074.514648 | 3 | 599.2800293 | 599.2821746 |
| EEEIAALVIDNGSGMCKAGFAGDDAPR         | P63260 | 0          | N-term +42.01 Da, K +28.03 Da,C +57.02Da, | 6079.560059 | 2 | 1432.660034 | 1432.165489 |
| MDNPSSDPLSTLSGEEKPLALLPPVPR         | Q9D0B1 | 0          | N-term +42.01 Da, K +28.03 Da,            | 6080.42627  | 3 | 1052.880005 | 1052.875959 |
| EEEIAALVIDNGSGMCKAGFAGDDAPR         | P63260 | 0          | N-term +42.01 Da, K +28.03 Da,C +57.02Da, | 6081.210449 | 3 | 955.1126709 | 955.1127513 |
| ALDFENEMATAASSSSLEKSYELPDGQVITIGNER | P62737 | 0          | N-term +42.01 Da, K +28.03 Da,            | 6081.445801 | 3 | 1282.300049 | 1281.614082 |
| MESSEPEPTEDASMDAFLEKFQSQPYR         | Q8R3H9 | 0          | N-term +42.01 Da, K +28.03 Da,            | 6082.240723 | 3 | 1074.140015 | 1073.809286 |
| SIETLLEAAR                          | O08789 | 0          | N-term +42.01 Da,                         | 6083.226074 | 2 | 572.8099976 | 572.8140563 |
| MDSGFGSDFGGTGGGKLDPGAIMEQVKVQ       | P62075 | 0          | N-term +42.01 Da, K +28.03 Da,            | 6089.796387 | 3 | 995.8099976 | 995.1440514 |
| IQLVEEELDR                          | P21107 | 0          | N-term +42.01 Da,                         | 6090.516113 | 2 | 643.8300171 | 643.3353534 |
| ATQADLMELDMAMEPDR                   | Q02248 | 0          | N-term +42.01 Da,                         | 6091.722656 | 2 | 989.9313354 | 989.9313816 |
| SSILLDVKPWDEDTMTKLEECVR             | O70251 | 0          | N-term +42.01 Da, K +28.03 Da,C +57.02Da, | 6091.929199 | 3 | 992.8200073 | 993.1559572 |
| MQNDAGEFVDLYVPR                     | Q9CQR2 | 0          | N-term +42.01 Da,                         | 6097.430176 | 2 | 898.4190063 | 898.4196237 |
| ATAVVVNIGKKLYEGKTKVEYELLDTGPR       | Q9DCL9 | 0          | N-term +42.01 Da, K +28.03 Da,            | 6097.663574 | 4 | 837.7299805 | 837.231263  |
| TATFAQALQSVPETQVSILDNGLR            | Q9CZ13 | 0          | N-term +42.01 Da,                         | 6098.557129 | 3 | 868.1300049 | 867.7888131 |
| MDSGFGSDFGGTGGGKLDPGAIMEQVKVQ       | P62075 | 0          | N-term +42.01 Da, K +28.03 Da,            | 6103.667969 | 3 | 995.1400146 | 995.1440514 |
| ASPGEPQPPAPDTSSFDYLVIGGGSSGLASAR    | P47791 | 0          | N-term +42.01 Da,                         | 6104.400391 | 3 | 1034.829956 | 1034.16679  |
| MEAGGLGCAVCVLTGASR                  | G3UXX3 | 0          | N-term +42.01 Da, C +57.02Da,             | 6109.263184 | 2 | 925.9287109 | 925.9315181 |
| KKFKIDDQRR                          | Q99PU7 | 0.01455668 | N-term +42.01 Da, K +28.03 Da,            | 6119.53418  | 3 | 486.958252  | 487.296306  |
| AASGESGASGGGGSTEEAFMTFYSEVKQIEKR    | Q6NZB0 | 0          | N-term +42.01 Da, K +28.03 Da,            | 6121.478516 | 3 | 1123.199951 | 1122.864671 |
| EEEIAALVIDNGSGMCKAGFAGDDAPR         | P63260 | 0.00098377 | N-term +42.01 Da, K +28.03 Da,C +57.02Da, | 6121.603027 | 3 | 955.7999878 | 955.1127513 |
| AASGESGASGGGGSTEEAFMTFYSEVKQIEKR    | Q6NZB0 | 0          | N-term +42.01 Da, K +28.03 Da,            | 6126.500488 | 4 | 842.6500244 | 842.4003227 |

|                                         |        |            |                                           |             |   |             |             |
|-----------------------------------------|--------|------------|-------------------------------------------|-------------|---|-------------|-------------|
| MEDSFLESFGR                             | Q3V2Q8 | 0          | N-term +42.01 Da,                         | 6127.47168  | 2 | 680.2999878 | 680.2979137 |
| MQNDAGEFVDLYVPR                         | Q9CQR2 | 0          | N-term +42.01 Da,                         | 6128.140137 | 2 | 898.4179688 | 898.4196237 |
| ATAVVVNIGKKLYEGKTKEVYELLDTPGR           | Q9DCL9 | 0          | N-term +42.01 Da, K +28.03 Da,            | 6129.450684 | 4 | 837.2304077 | 837.231263  |
| SQLVECPNPFSEGNQVEIDAISR                 | Q91XD4 | 0          | N-term +42.01 Da, C +57.02Da,             | 6131.916504 | 2 | 1374.150024 | 1374.150696 |
| SQLVECPNPFSEGNQVEIDAISR                 | Q91XD4 | 0          | N-term +42.01 Da, C +57.02Da,             | 6135.078613 | 2 | 1375.150024 | 1374.150696 |
| SQLVECPNPFSEGNQVEIDAISR                 | Q91XD4 | 0          | N-term +42.01 Da, C +57.02Da,             | 6136.344727 | 2 | 1374.650024 | 1374.150696 |
| SQLVECPNPFSEGNQVEIDAISR                 | Q91XD4 | 0          | N-term +42.01 Da, C +57.02Da,             | 6138.671875 | 3 | 917.1099854 | 916.4362226 |
| MEAGGLGCAVCVLTGASR                      | G3UXX3 | 0          | N-term +42.01 Da, C +57.02Da,             | 6140.200684 | 2 | 926.4400024 | 925.9315181 |
| AANATTNPSQLLPELVDKCIGSR                 | P62322 | 0          | N-term +42.01 Da, K +28.03 Da,C +57.02Da, | 6140.291504 | 3 | 880.4699707 | 880.1338147 |
| AANATTNPSQLLPELVDKCIGSR                 | P62322 | 0          | N-term +42.01 Da, K +28.03 Da,C +57.02Da, | 6140.407715 | 2 | 1320.199951 | 1319.697084 |
| DGKALEQLQEYFDGNLKR                      | P27773 | 0          | N-term +42.01 Da, K +28.03 Da,            | 6142.303711 | 3 | 790.0800171 | 790.4093842 |
| MQKDASLSGFLPSFQHF                       | Q8VCN5 | 0.03381849 | N-term +42.01 Da, K +28.03 Da,            | 6145.735352 | 2 | 1005.48999  | 1005.493123 |
| AEIQMLLEEEIIPSGKR                       | Q8CBW3 | 0          | N-term +42.01 Da, K +28.03 Da,            | 6151.757324 | 2 | 957.5100098 | 957.0060635 |
| AASGESGASGGGGSTEEAFMTFYSEVKQIEKR        | Q6NZB0 | 0          | N-term +42.01 Da, K +28.03 Da,            | 6152.54834  | 3 | 1123.199951 | 1122.864671 |
| MQNDAGEFVDLYVPR                         | Q9CQR2 | 0          | N-term +42.01 Da,                         | 6160.023438 | 2 | 898.9109497 | 898.4196237 |
| MQDQHHPIDIQTSKLLDWLVDR                  | Q99LM2 | 0          | N-term +42.01 Da, K +28.03 Da,            | 6167.062012 | 4 | 715.6199951 | 715.122092  |
| SQLVECPNPFSEGNQVEIDAISR                 | Q91XD4 | 0          | N-term +42.01 Da, C +57.02Da,             | 6169.556641 | 2 | 1374.150024 | 1374.150696 |
| SQLVECPNPFSEGNQVEIDAISR                 | Q91XD4 | 0          | N-term +42.01 Da, C +57.02Da,             | 6170.464844 | 3 | 916.7700195 | 916.4362226 |
| SVPAFIDISEEDQAAELR                      | Q99JX4 | 0          | N-term +42.01 Da,                         | 6170.790527 | 2 | 1016.496277 | 1016.497115 |
| AANATTNPSQLLPELVDKCIGSR                 | P62322 | 0          | N-term +42.01 Da, K +28.03 Da,C +57.02Da, | 6172.562012 | 3 | 880.1331787 | 880.1338147 |
| AANATTNPSQLLPELVDKCIGSR                 | P62322 | 0          | N-term +42.01 Da, K +28.03 Da,C +57.02Da, | 6172.644043 | 2 | 1319.698853 | 1319.697084 |
| DGKALEQLQEYFDGNLKR                      | P27773 | 0          | N-term +42.01 Da, K +28.03 Da,            | 6174.392578 | 3 | 790.4199829 | 790.4093842 |
| AEYLASIFGTEKDKVN                        | Q8BGJ9 | 0          | N-term +42.01 Da, K +28.03 Da,            | 6181.656738 | 2 | 942.4899902 | 941.9934791 |
| AEYLASIFGTEKDKVN                        | Q8BGJ9 | 0          | N-term +42.01 Da, K +28.03 Da,            | 6188.821777 | 2 | 941.9899902 | 941.9934791 |
| MDSASQDINLNSPNKGVLSDFMTDVPVDPGVVHR      | Q9CYZ2 | 0          | N-term +42.01 Da, K +28.03 Da,            | 6188.971191 | 3 | 1242.930054 | 1242.269703 |
| MQNDAGEFVDLYVPR                         | Q9CQR2 | 0          | N-term +42.01 Da,                         | 6190.57373  | 2 | 898.9115601 | 898.4196237 |
| AADLGQIPDVIDSDGVFK                      | Q9DAK9 | 0          | N-term +42.01 Da, K +28.03 Da,            | 6193.059082 | 2 | 1024.01001  | 1023.007316 |
| AADLGQIPDVIDSDGVFK                      | Q9DAK9 | 0          | N-term +42.01 Da, K +28.03 Da,            | 6195.922363 | 2 | 1023.51001  | 1023.007316 |
| SVPAFIDISEEDQAAELR                      | Q99JX4 | 0          | N-term +42.01 Da,                         | 6201.804688 | 2 | 1017.51001  | 1016.497115 |
| ASEDIAKLAETLAKTQVAGGQLSFKGKGL           | P46061 | 0          | N-term +42.01 Da, K +28.03 Da,            | 6211.565918 | 4 | 772.4400024 | 772.1931433 |
| MAPEEDAGGEVLGGSFWEAGNYR                 | Q99JB8 | 0          | N-term +42.01 Da,                         | 6211.877441 | 2 | 1243.040039 | 1242.54226  |
| SSEEGKLFVGGGLNFNTDEQALEDFSSFGPISEVVVKDR | O89086 | 0          | N-term +42.01 Da, K +28.03 Da,            | 6212.714844 | 4 | 1121.310059 | 1121.059143 |
| SDILPLDVIGR                             | Q8CIV8 | 0          | N-term +42.01 Da,                         | 6213.362305 | 2 | 620.348938  | 620.3508059 |
| MAPEEDAGGEVLGGSFWEAGNYR                 | Q99JB8 | 0          | N-term +42.01 Da,                         | 6213.640137 | 2 | 1242.540039 | 1242.54226  |
| VHLTDAEKAASVCLWGKVNSEVGGGEALGR          | P02088 | 0          | N-term +42.01 Da, K +28.03 Da,C +57.02Da, | 6215.947754 | 4 | 817.1699829 | 817.4173122 |
| MAPEEDAGGEVLGGSFWEAGNYR                 | Q99JB8 | 0          | N-term +42.01 Da,                         | 6216.198242 | 3 | 829.0300293 | 828.6972657 |
| ATQVEPLLPAGAPLLQAEEH                    | Q6ZQ58 | 0          | N-term +42.01 Da,                         | 6218.016602 | 2 | 1064.060059 | 1063.560049 |
| MQNDAGEFVDLYVPR                         | Q9CQR2 | 0          | N-term +42.01 Da,                         | 6221.729004 | 2 | 898.9099731 | 898.4196237 |
| ATQVEPLLPAGAPLLQAEEH                    | Q6ZQ58 | 0          | N-term +42.01 Da,                         | 6227.078613 | 2 | 1064.560059 | 1063.560049 |
| SHVAVENALGLDQQFAGLDLNSSDN               | Q62167 | 0.00145631 | N-term +42.01 Da,                         | 6232.482422 | 2 | 1329.130005 | 1328.627911 |

|                                        |        |            |                                           |             |   |             |             |
|----------------------------------------|--------|------------|-------------------------------------------|-------------|---|-------------|-------------|
| SHVAVENALGLDQQFAGLDLNSSDN              | Q62167 | 0          | N-term +42.01 Da,                         | 6243.582031 | 2 | 1328.619995 | 1328.627911 |
| SSEEGKLVGGLNFNTEQALEDFHFSFGPISEVVVVKDR | O89086 | 0          | N-term +42.01 Da, K +28.03 Da,            | 6244.583008 | 4 | 1121.560059 | 1121.059143 |
| MAPEEDAGGEVLGGSFWEAGNYR                | Q99JB8 | 0          | N-term +42.01 Da,                         | 6245.745605 | 2 | 1242.541138 | 1242.54226  |
| EEEIAALVIDNGSGMCKAGFAGDDAPR            | P63260 | 0          | N-term +42.01 Da, K +28.03 Da,C +57.02Da, | 6247.22998  | 2 | 1432.660034 | 1432.165489 |
| MVHLTDAEKAASVGLWGKVNADVEVGGEALGR       | A8DUK4 | 0.0292851  | N-term +42.01 Da, K +28.03 Da,            | 6248.415039 | 4 | 820.4199829 | 820.4264085 |
| SQLVECPVNFSEGNQVEIDAISR                | Q91XD4 | 0          | N-term +42.01 Da, C +57.02Da,             | 6250.554199 | 3 | 917.1099854 | 916.4362226 |
| EEEIAALVIDNGSGMCKAGFAGDDAPR            | P63260 | 0          | N-term +42.01 Da, K +28.03 Da,C +57.02Da, | 6250.856934 | 3 | 955.7700195 | 955.1127513 |
| SQLVECPVNFSEGNQVEIDAISR                | Q91XD4 | 0          | N-term +42.01 Da, C +57.02Da,             | 6253.356445 | 2 | 1375.150024 | 1374.150696 |
| SHVAVENALGLDQQFAGLDLNSSDN              | Q62167 | 0.0023596  | N-term +42.01 Da,                         | 6254.339844 | 2 | 1329.630005 | 1328.627911 |
| MQNDAGEFVDLYVPR                        | Q9CQR2 | 0          | N-term +42.01 Da,                         | 6255.105957 | 2 | 898.9099731 | 898.4196237 |
| SQLVECPVNFSEGNQVEIDAISR                | Q91XD4 | 0          | N-term +42.01 Da, C +57.02Da,             | 6255.30957  | 2 | 1374.650024 | 1374.150696 |
| SVPAFIDISEEDQAAELR                     | Q99JX4 | 0          | N-term +42.01 Da,                         | 6255.702637 | 2 | 1015.98999  | 1016.497115 |
| AAETLNFSGPEWLR                         | Q99MR1 | 0.04598662 | N-term +42.01 Da,                         | 6263.53418  | 2 | 774.3900146 | 773.3884516 |
| AANATTNPSQLLPLELVDKICGSR               | P62322 | 0          | N-term +42.01 Da, K +28.03 Da,C +57.02Da, | 6263.826172 | 3 | 880.789978  | 880.1338147 |
| DGKALEQLFQEYFDGNLKR                    | P27773 | 0          | N-term +42.01 Da, K +28.03 Da,            | 6264.198242 | 3 | 790.4199829 | 790.4093842 |
| MDSAEELLAPLR                           | Q9CZD3 | 0          | N-term +42.01 Da,                         | 6271.129883 | 2 | 693.8499756 | 693.8503134 |
| AEYLASIFGTEKDKVNC                      | Q8BGJ9 | 0          | N-term +42.01 Da, K +28.03 Da,C +57.02Da, | 6276.523926 | 2 | 1022.010986 | 1022.008804 |
| EEEIAALVIDNGSGMCKAGFAGDDAPR            | P63260 | 0          | N-term +42.01 Da, K +28.03 Da,C +57.02Da, | 6278.121094 | 3 | 955.4400024 | 955.1127513 |
| KRVEQTTLKQTVAR                         | Q8R3D1 | 0.01328609 | N-term +42.01 Da, K +28.03 Da,            | 6280.55957  | 3 | 615.3599854 | 615.030178  |
| AANATTNPSQLLPLELVDKICGSR               | P62322 | 0          | N-term +42.01 Da, K +28.03 Da,C +57.02Da, | 6281.107422 | 2 | 1320.180054 | 1319.697084 |
| EADIDGDGVNYEEFVQMMTAK                  | P62204 | 0          | N-term +42.01 Da, K +28.03 Da,            | 6281.931641 | 2 | 1281.079956 | 1280.564544 |
| MQNDAGEFVDLYVPR                        | Q9CQR2 | 0          | N-term +42.01 Da,                         | 6287.019531 | 2 | 898.4176025 | 898.4196237 |
| ADKMDMSLDDIIL                          | O08583 | 0          | N-term +42.01 Da, K +28.03 Da,            | 6296.67041  | 2 | 853.4393311 | 853.4411787 |
| MFQIPEFEPSEQEDASATDR                   | Q61337 | 0          | N-term +42.01 Da,                         | 6297.020508 | 2 | 1185.51001  | 1185.015544 |
| TTQQVLQGGPGPW                          | O70400 | 0          | N-term +42.01 Da,                         | 6301.482422 | 2 | 733.8851929 | 733.8855446 |
| VHLTDAEKSAVSLWAKVNPDEVGGEALGR          | P02089 | 0          | N-term +42.01 Da, K +28.03 Da,C +57.02Da, | 6305.719727 | 4 | 827.6799927 | 827.4251372 |
| MFQIPEFEPSEQEDASATDR                   | Q61337 | 0          | N-term +42.01 Da,                         | 6308.521973 | 2 | 1185.01001  | 1185.015544 |
| ADLSLVDALTEPPPEIEGEIKR                 | P27546 | 0          | N-term +42.01 Da, K +28.03 Da,            | 6317.390625 | 3 | 821.4299927 | 821.4390097 |
| MEHAFTPLEPLPTGNLKY                     | Q9R0M5 | 0          | N-term +42.01 Da, K +28.03 Da,            | 6320.398438 | 2 | 1121.579956 | 1121.084845 |
| MDLFGDLPEPER                           | Q8R0F6 | 0          | N-term +42.01 Da,                         | 6321.877441 | 2 | 730.8391113 | 730.8399458 |
| LINEKGETFQLMGLYGR                      | B5X0G2 | 0.00411147 | N-term +42.01 Da, K +28.03 Da,            | 6322.018066 | 3 | 718.3800049 | 718.7015103 |
| ATDSWALAVDEQEAAVKSM                    | Q61655 | 0          | N-term +42.01 Da, K +28.03 Da,            | 6328.96875  | 2 | 1047.48999  | 1046.498801 |
| AANATTNPSQLLPLELVDKICGSR               | P62322 | 0          | N-term +42.01 Da, K +28.03 Da,C +57.02Da, | 6332.55127  | 3 | 880.460022  | 880.1338147 |
| MDPSWATQESEAVAEKVL                     | Q9EPQ7 | 0          | N-term +42.01 Da, K +28.03 Da,            | 6334.539551 | 2 | 1109.550049 | 1109.046449 |
| ASFVTEVLAH                             | O54692 | 0          | N-term +42.01 Da,                         | 6336.758789 | 2 | 558.289978  | 558.2902167 |
| SMPDAMPLPGVGEELKQAKEIEDAEKYSF          | Q80SW1 | 0          | N-term +42.01 Da, K +28.03 Da,            | 6339.057129 | 3 | 1112.880005 | 1112.552377 |
| AAPPDLQDEPLSLGSPGSQWFGGR               | Q8K0T0 | 0          | N-term +42.01 Da,                         | 6341.785645 | 2 | 1263.609985 | 1262.608792 |
| AALTAEHFVALQSLLK                       | Q8K2Q0 | 0          | N-term +42.01 Da, K +28.03 Da,            | 6341.977051 | 2 | 892.0100098 | 891.5116411 |
| MDPSWATQESEAVAEKVL                     | Q9EPQ7 | 0          | N-term +42.01 Da, K +28.03 Da,            | 6343.663574 | 3 | 739.697937  | 739.7000583 |
| SALKAVFQYIDENQDR                       | Q9D1A2 | 0          | N-term +42.01 Da, K +28.03 Da,            | 6344.398926 | 2 | 984.5       | 983.9970846 |

|                                   |        |            |                                            |             |   |             |             |
|-----------------------------------|--------|------------|--------------------------------------------|-------------|---|-------------|-------------|
| MFSWLGND                          | Q9QXY6 | 0          | N-term +42.01 Da,                          | 6352.341797 | 2 | 641.7800293 | 641.7796906 |
| MDLFGDLPEPER                      | Q8R0F6 | 0          | N-term +42.01 Da,                          | 6353.766602 | 2 | 730.8381958 | 730.8399458 |
| SALKAVFQYIDENQDR                  | Q9D1A2 | 0          | N-term +42.01 Da, K +28.03 Da,             | 6358.246582 | 2 | 983.9899902 | 983.9970846 |
| MDPSWATQSEAVAEKVL                 | Q9EPQ7 | 0          | N-term +42.01 Da, K +28.03 Da,             | 6365.286621 | 2 | 1109.045654 | 1109.046449 |
| SGALDVLQMKEEDVLKF                 | P14206 | 0          | N-term +42.01 Da, K +28.03 Da,             | 6366.937988 | 2 | 1011.030029 | 1010.537197 |
| ASFVTEVLAH                        | O54692 | 0          | N-term +42.01 Da,                          | 6367.614746 | 2 | 558.2894287 | 558.2902167 |
| ADLSLVDALTEPPPEIEGEIKR            | P27546 | 0          | N-term +42.01 Da, K +28.03 Da,             | 6371.962402 | 3 | 821.7700195 | 821.4390097 |
| ADLSLVDALTEPPPEIEGEIKR            | P27546 | 0          | N-term +42.01 Da, K +28.03 Da,             | 6379.529297 | 2 | 1232.160034 | 1231.654876 |
| ADQLTEEQIAEFKEAF                  | P62204 | 0          | N-term +42.01 Da, K +28.03 Da,             | 6380.208496 | 2 | 969.9768677 | 969.9702015 |
| DDDIAALVVDNGSGMCKAGF              | P60710 | 0          | N-term +42.01 Da, K +28.03 Da, C +57.02Da, | 6385.151855 | 2 | 1063.47998  | 1062.98246  |
| ALEQTLKKDWYSILGADPSANMSDLKQKY     | A2A4A1 | 0          | N-term +42.01 Da, K +28.03 Da,             | 6392.665039 | 4 | 867.960022  | 867.7087294 |
| MDPSWATQSEAVAEKVL                 | Q9EPQ7 | 0          | N-term +42.01 Da, K +28.03 Da,             | 6396.104492 | 2 | 1110.069946 | 1109.046449 |
| MVTEQEIEAIGKTLVDPKQLQAR           | Q99LN9 | 0          | N-term +42.01 Da, K +28.03 Da,             | 6400.456055 | 3 | 932.1799927 | 931.5124033 |
| AALSGVFWDEER                      | Q8R1R3 | 0          | N-term +42.01 Da,                          | 6403.214844 | 2 | 760.8699951 | 760.8726345 |
| ADLSLVDALTEPPPEIEGEIKR            | P27546 | 0          | N-term +42.01 Da, K +28.03 Da,             | 6404.121582 | 3 | 821.4381714 | 821.4390097 |
| ADQLTEEQIAEFKEAF                  | P62204 | 0          | N-term +42.01 Da, K +28.03 Da,             | 6410.952637 | 2 | 969.9694824 | 969.9702015 |
| ADLSLVDALTEPPPEIEGEIKR            | P27546 | 0          | N-term +42.01 Da, K +28.03 Da,             | 6411.063477 | 2 | 1232.660034 | 1231.654876 |
| AANATTNPSQLLPLELVDKC              | P62322 | 0          | N-term +42.01 Da, K +28.03 Da, C +57.02Da, | 6411.356934 | 2 | 1113.079956 | 1113.077749 |
| ATALSEEELDNEDYYSLLNVR             | Q5U458 | 0          | N-term +42.01 Da,                          | 6418.366211 | 2 | 1244.079956 | 1243.582106 |
| ATALSEEELDNEDYYSLLNVR             | Q5U458 | 0          | N-term +42.01 Da,                          | 6422.913574 | 2 | 1243.579956 | 1243.582106 |
| ATALSEEELDNEDYYSLLNVR             | Q5U458 | 0          | N-term +42.01 Da,                          | 6423.177734 | 3 | 829.7199707 | 829.3904962 |
| DDDIAALVVDNGSGMCKAGF              | P60710 | 0          | N-term +42.01 Da, K +28.03 Da, C +57.02Da, | 6424.760254 | 2 | 1063.48999  | 1062.98246  |
| AELQQLQLQEFDIPTGR                 | Q8BYZ1 | 0          | N-term +42.01 Da,                          | 6428.174316 | 2 | 1079.060059 | 1078.552756 |
| MQEPGQIVETYTEEDPEGAMSVSVVETDDGTTR | P30999 | 0          | N-term +42.01 Da,                          | 6430.723633 | 3 | 1248.880005 | 1248.552272 |
| ADESETAVKLPAPSLPLMMEGN            | O70310 | 0.01369863 | N-term +42.01 Da, K +28.03 Da,             | 6430.912109 | 2 | 1186.579956 | 1185.582008 |
| ADLSLVDALTEPPPEIEGEIKR            | P27546 | 0          | N-term +42.01 Da, K +28.03 Da,             | 6436.188965 | 3 | 821.4393311 | 821.4390097 |
| DDDIAALVVDNGSGMCKAGF              | P60710 | 0          | N-term +42.01 Da, K +28.03 Da, C +57.02Da, | 6441.009766 | 3 | 709.3200073 | 708.9907324 |
| ADQLTEEQIAEFKEAF                  | P62204 | 0          | N-term +42.01 Da, K +28.03 Da,             | 6441.553223 | 2 | 969.9706421 | 969.9702015 |
| TEWEAATPAVAETPDIKLFGKW            | P97461 | 0.00143198 | N-term +42.01 Da, K +28.03 Da,             | 6441.848633 | 3 | 854.1199951 | 853.4440947 |
| AADISQWAGPLCLQEVDEPPQH            | P70296 | 0          | N-term +42.01 Da, C +57.02Da,              | 6442.061523 | 3 | 835.0599976 | 835.0567938 |
| ADEDLIFCLEGVDGGR                  | O08796 | 0          | N-term +42.01 Da, C +57.02Da,              | 6442.516602 | 2 | 904.9099731 | 904.4119962 |
| AADISQWAGPLCLQEVDEPPQH            | P70296 | 0          | N-term +42.01 Da, C +57.02Da,              | 6442.702637 | 2 | 1252.579956 | 1252.081552 |
| TEWEAATPAVAETPDIKLFGKW            | P97461 | 0          | N-term +42.01 Da, K +28.03 Da,             | 6442.869141 | 3 | 853.4500122 | 853.4440947 |
| ADLSLVDALTEPPPEIEGEIKR            | P27546 | 0          | N-term +42.01 Da, K +28.03 Da,             | 6443.595215 | 2 | 1231.656006 | 1231.654876 |
| MDDSEVESTASILASVKEQEAQFEKLTR      | P30999 | 0          | N-term +42.01 Da, K +28.03 Da,             | 6444.170898 | 3 | 1080.869995 | 1080.537784 |
| TEWEAATPAVAETPDIKLFGKW            | P97461 | 0          | N-term +42.01 Da, K +28.03 Da,             | 6446.490723 | 2 | 1280.170044 | 1279.662504 |
| ADEDLIFCLEGVDGGR                  | O08796 | 0          | N-term +42.01 Da, C +57.02Da,              | 6446.946777 | 2 | 905.4199829 | 904.4119962 |
| AAAAAAAAAAGDSDSWDADTFMEDPVR       | Q66JS6 | 0          | N-term +42.01 Da,                          | 6447.427246 | 3 | 952.4199829 | 951.7471259 |
| ADLSLVDALTEPPPEIEGEIKR            | P27546 | 0.03341902 | N-term +42.01 Da, K +28.03 Da,             | 6448.432617 | 4 | 616.3300171 | 616.3310764 |
| AAAAAAAAAAGDSDSWDADTFMEDPVR       | Q66JS6 | 0          | N-term +42.01 Da,                          | 6449.48877  | 2 | 1427.630005 | 1427.117051 |

|                                   |        |            |                                           |             |   |             |             |
|-----------------------------------|--------|------------|-------------------------------------------|-------------|---|-------------|-------------|
| SDTSEEIPNFEEMFASR                 | Q9CQY2 | 0          | N-term +42.01 Da,                         | 6450.687012 | 2 | 1015.929993 | 1015.936033 |
| DDDIAALVVDNGSGMCKAGF              | P60710 | 0          | N-term +42.01 Da, K +28.03 Da,C +57.02Da, | 6452.63623  | 2 | 1063.476318 | 1062.98246  |
| AADISQWAGPLCLQEVDPPQH             | P70296 | 0          | N-term +42.01 Da, C +57.02Da,             | 6458.470703 | 2 | 1252.079956 | 1252.081552 |
| ADLSLVDALTEPPPEIEGEIKR            | P27546 | 0          | N-term +42.01 Da, K +28.03 Da,            | 6467.011719 | 3 | 821.43927   | 821.4390097 |
| MEANGFGLQNFPELKNDFLR              | P70697 | 0          | N-term +42.01 Da, K +28.03 Da,            | 6468.148438 | 2 | 1257.119995 | 1256.12048  |
| MEANGFGLQNFPELKNDFLR              | P70697 | 0          | N-term +42.01 Da, K +28.03 Da,            | 6469.211426 | 3 | 838.4099731 | 837.7494122 |
| MEEGMNHLHDFGIQSTR                 | P35576 | 0          | N-term +42.01 Da,                         | 6469.34082  | 2 | 1010.969971 | 1010.46678  |
| MNSSDEEKQLQLITSLKEQAIGEYEDLR      | Q8K2Q9 | 0          | N-term +42.01 Da, K +28.03 Da,            | 6470.197266 | 3 | 1123.22998  | 1122.564222 |
| AAGVDFGDLELFEAFDPPPEESTPKPVHTR    | Q9CYA6 | 0          | N-term +42.01 Da, K +28.03 Da,            | 6471.373047 | 3 | 1081.859985 | 1081.194457 |
| CDFTEDQTAEFKEAFQLFDR              | Q60605 | 0          | N-term +42.01 Da, K +28.03 Da,C +57.02Da, | 6471.652344 | 2 | 1285.079956 | 1284.073393 |
| CDFTEDQTAEFKEAFQLFDR              | Q60605 | 0          | N-term +42.01 Da, K +28.03 Da,C +57.02Da, | 6472.237305 | 3 | 856.3800049 | 856.3846878 |
| AADISQWAGPLCLQEVDPPQH             | P70296 | 0          | N-term +42.01 Da, C +57.02Da,             | 6473.077637 | 3 | 835.3900146 | 835.0567938 |
| ADQLTEEQIAEFKEAF                  | P62204 | 0          | N-term +42.01 Da, K +28.03 Da,            | 6473.198242 | 2 | 969.9699707 | 969.9702015 |
| ADLSLVDALTEPPPEIEGEIKR            | P27546 | 0          | N-term +42.01 Da, K +28.03 Da,            | 6474.913086 | 2 | 1231.656372 | 1231.654876 |
| GQPQKLAQENLKGSFEQDLYNMNNYLEKLGPLR | Q8C7G5 | 0          | N-term +42.01 Da, K +28.03 Da,            | 6479.785645 | 4 | 991.5200195 | 991.2674746 |
| SDTSEEIPNFEEMFASR                 | Q9CQY2 | 0          | N-term +42.01 Da,                         | 6482.217773 | 2 | 1015.936768 | 1015.936033 |
| MLSPAMSLK                         | Q923F1 | 0          | N-term +42.01 Da, K +28.03 Da,            | 6483.068848 | 2 | 598.3200073 | 597.8166981 |
| DDDIAALVVDNGSGMCKAGF              | P60710 | 0          | N-term +42.01 Da, K +28.03 Da,C +57.02Da, | 6483.624512 | 2 | 1063.97998  | 1062.98246  |
| ADLSLVDALTEPPPEIEGEIKR            | P27546 | 0          | N-term +42.01 Da, K +28.03 Da,            | 6498.372559 | 3 | 821.4400024 | 821.4390097 |
| MDDSEVESTASILASVKEQAQFEKLTR       | P30999 | 0          | N-term +42.01 Da, K +28.03 Da,            | 6503.813477 | 3 | 1081.199951 | 1080.537784 |
| CDFTEDQTAEFKEAFQLFDR              | Q60605 | 0          | N-term +42.01 Da, K +28.03 Da,C +57.02Da, | 6503.976074 | 2 | 1285.069946 | 1284.073393 |
| DGKALEQFLQYFDGNLKR                | P27773 | 0          | N-term +42.01 Da, K +28.03 Da,            | 6505.470703 | 3 | 791.0800171 | 790.4093842 |
| ADLSLVDALTEPPPEIEGEIKR            | P27546 | 0          | N-term +42.01 Da, K +28.03 Da,            | 6506.378418 | 2 | 1232.160034 | 1231.654876 |
| MNSSDEEKQLQLITSLKEQAIGEYEDLR      | Q8K2Q9 | 0.00190114 | N-term +42.01 Da, K +28.03 Da,            | 6506.606934 | 3 | 1122.910034 | 1122.564222 |
| AALTAEHFVALQSLLKAS                | Q8K2Q0 | 0.04092827 | N-term +42.01 Da, K +28.03 Da,            | 6507.80957  | 2 | 970.539978  | 970.5462128 |
| CDFTEDQTAEFKEAFQLFDR              | Q60605 | 0          | N-term +42.01 Da, K +28.03 Da,C +57.02Da, | 6509.058594 | 3 | 856.3900146 | 856.3846878 |
| AALTAEHFVALQSLLKAS                | Q8K2Q0 | 0          | N-term +42.01 Da, K +28.03 Da,            | 6512.212402 | 3 | 647.710022  | 647.3665673 |
| AATSEGPLFAASIEKTWGSVVR            | Q80YV2 | 0          | N-term +42.01 Da, K +28.03 Da,            | 6512.471191 | 2 | 1174.109985 | 1174.118263 |
| IDELRNEDVQPPLESLATVEETVVR         | H3BLE7 | 0.00278552 | N-term +42.01 Da,                         | 6514.638672 | 3 | 965.5100098 | 965.1644976 |
| AALTAEHFVALQSLLKAS                | Q8K2Q0 | 0          | N-term +42.01 Da, K +28.03 Da,            | 6516.230957 | 2 | 971.5499878 | 970.5462128 |
| IDELRNEDVQPPLESLATVEETVVR         | H3BLE7 | 0          | N-term +42.01 Da,                         | 6517.29541  | 3 | 965.1799927 | 965.1644976 |
| AADISQWAGPLC                      | P70296 | 0.02423193 | N-term +42.01 Da, C +57.02Da,             | 6520.282227 | 2 | 665.8099976 | 665.8084482 |
| EADIDGDGQVNYEEFVQMMTAK            | P62204 | 0.00412277 | N-term +42.01 Da, K +28.03 Da,            | 6520.693359 | 3 | 854.7000122 | 854.045455  |
| ADDLDFETGDAGASATFPMQC             | P63242 | 0          | N-term +42.01 Da, C +57.02Da,             | 6521.614258 | 2 | 1130.956421 | 1130.954098 |
| MDEMATTQISKDELDELKEAF             | Q99K51 | 0          | N-term +42.01 Da, K +28.03 Da,            | 6523.583008 | 3 | 848.4000244 | 848.0694891 |
| MDEMATTQISKDELDELKEAF             | Q99K51 | 0          | N-term +42.01 Da, K +28.03 Da,            | 6523.700195 | 2 | 1271.599976 | 1271.600595 |
| MEDSMDMDMSPLRPQNYL                | Q61937 | 0          | N-term +42.01 Da,                         | 6528.535156 | 2 | 1108.459961 | 1107.962356 |
| ADLSLVDALTEPPPEIEGEIKR            | P27546 | 0          | N-term +42.01 Da, K +28.03 Da,            | 6529.097168 | 3 | 821.4400024 | 821.4390097 |
| MKGALGSPVAAAGAAMQETFGCVVANR       | Q9JKS5 | 0          | N-term +42.01 Da, K +28.03 Da,C +57.02Da, | 6529.62793  | 3 | 912.460022  | 912.1206346 |
| MKGALGSPVAAAGAAMQETFGCVVANR       | Q9JKS5 | 0          | N-term +42.01 Da, K +28.03 Da,C +57.02Da, | 6531.408203 | 3 | 912.789978  | 912.1206346 |

|                                            |        |            |                                           |             |   |             |             |
|--------------------------------------------|--------|------------|-------------------------------------------|-------------|---|-------------|-------------|
| ADQLTEEQIAEFKEAF                           | P62204 | 0          | N-term +42.01 Da, K +28.03 Da,            | 6535.206543 | 2 | 969.9799805 | 969.9702015 |
| MKGALGSPVAAAGAAMQETFGCVVANR                | Q9JKS5 | 0          | N-term +42.01 Da, K +28.03 Da,C +57.02Da, | 6537.863281 | 2 | 1367.689941 | 1367.677314 |
| MKGALGSPVAAAGAAMQETFGCVVANR                | Q9JKS5 | 0          | N-term +42.01 Da, K +28.03 Da,C +57.02Da, | 6542.194336 | 2 | 1368.180054 | 1367.677314 |
| SSEEGKLFVGGVGLNFNTDEQALEDHFSSFGPISEVVVVKDR | O89086 | 0          | N-term +42.01 Da, K +28.03 Da,            | 6543.395508 | 4 | 1121.550049 | 1121.059143 |
| ADQLTEEQIAEFKEAF                           | P62204 | 0          | N-term +42.01 Da, K +28.03 Da,            | 6545.599609 | 3 | 647.3200073 | 646.9825598 |
| LDMLQQIATRVRQR                             | Q91ZU6 | 0.04486373 | N-term +42.01 Da,                         | 6547.444824 | 2 | 806.9400024 | 807.4432352 |
| ALTSFLPAPTQLSQDQLEAEER                     | Q9CSN1 | 0          | N-term +42.01 Da,                         | 6547.969238 | 2 | 1244.130005 | 1243.624108 |
| ALTSFLPAPTQLSQDQLEAEER                     | Q9CSN1 | 0          | N-term +42.01 Da,                         | 6548.094238 | 3 | 829.75      | 829.4184973 |
| AAGAAAALAFLNQESR                           | Q9CPP0 | 0          | N-term +42.01 Da,                         | 6549.51416  | 2 | 801.9151001 | 801.9153652 |
| CDFTEDQTAEFKEAFQLFDR                       | Q60605 | 0          | N-term +42.01 Da, K +28.03 Da,C +57.02Da, | 6549.901367 | 2 | 1284.069946 | 1284.073393 |
| AADISQWAGPLC                               | P70296 | 0.04054054 | N-term +42.01 Da, C +57.02Da,             | 6551.142578 | 2 | 665.8082886 | 665.8084482 |
| GELDGRDEFQAQLAEHPFIK                       | Q88QW6 | 0          | N-term +42.01 Da, K +28.03 Da,            | 6551.336914 | 2 | 1156.589966 | 1157.079138 |
| AKPPAVAAAAAASEELSQVPDEELLR                 | E9Q6B2 | 0          | N-term +42.01 Da, K +28.03 Da,            | 6552.335449 | 3 | 949.4899902 | 949.1695826 |
| ADDLDFETGDAGASATFPMQC                      | P63242 | 0.00278422 | N-term +42.01 Da, C +57.02Da,             | 6553.579102 | 2 | 1131.449951 | 1130.954098 |
| MDEMATTQISKDELDELKEAF                      | Q99K51 | 0          | N-term +42.01 Da, K +28.03 Da,            | 6556.54248  | 2 | 1272.099976 | 1271.600595 |
| MKGALGSPVAAAGAAMQETFGCVVANR                | Q9JKS5 | 0          | N-term +42.01 Da, K +28.03 Da,C +57.02Da, | 6560.537598 | 3 | 912.1199951 | 912.1206346 |
| STLFPSLFPR                                 | P60007 | 0          | N-term +42.01 Da,                         | 6565.242676 | 2 | 603.8300171 | 603.8295088 |
| WYAGRQLQCEFCPVTRWKVAICGLFEMQKCPK           | Q64707 | 0.00233427 | N-term +42.01 Da, K +28.03 Da,C +57.02Da, | 6565.722656 | 4 | 1044.25     | 1044.018356 |
| ADQLTEEQIAEFKEAF                           | P62204 | 0          | N-term +42.01 Da, K +28.03 Da,            | 6566.748047 | 2 | 969.9694214 | 969.9702015 |
| DGKALEQFLQEYFDGNLKR                        | P27773 | 0          | N-term +42.01 Da, K +28.03 Da,            | 6570.801758 | 3 | 790.0800171 | 790.4093842 |
| ADQLTEEQIAEFKEAF                           | P62204 | 0          | N-term +42.01 Da, K +28.03 Da,            | 6576.037598 | 3 | 646.9822998 | 646.9825598 |
| ALTSFLPAPTQLSQDQLEAEER                     | Q9CSN1 | 0          | N-term +42.01 Da,                         | 6579.582031 | 2 | 1244.619995 | 1243.624108 |
| MDDSEVESTASILASVKEQEAQFEKLTR               | P30999 | 0          | N-term +42.01 Da, K +28.03 Da,            | 6580.216309 | 3 | 1080.869995 | 1080.537784 |
| AADLGQIPDVVIDSDGVFKY                       | Q9DAK9 | 0          | N-term +42.01 Da, K +28.03 Da,            | 6580.327637 | 2 | 1104.539795 | 1104.53898  |
| SSEEGKLFVGGVGLNFNTDEQALEDHFSSFGPISEVVVVKDR | O89086 | 0          | N-term +42.01 Da, K +28.03 Da,            | 6580.722168 | 4 | 1121.310059 | 1121.059143 |
| AAAAAAAAAAGDSDSWDADTFSMEDPVR               | Q66JS6 | 0          | N-term +42.01 Da,                         | 6581.902832 | 3 | 976.0900269 | 975.426164  |
| AADLGQIPDVVIDSDGVFKY                       | Q9DAK9 | 0          | N-term +42.01 Da, K +28.03 Da,            | 6583.163574 | 3 | 737.3599854 | 736.695079  |
| AKPPAVAAAAAASEELSQVPDEELLR                 | E9Q6B2 | 0          | N-term +42.01 Da, K +28.03 Da,            | 6584.023926 | 3 | 949.5       | 949.1695826 |
| AADLGQIPDVVIDSDGVFKY                       | Q9DAK9 | 0          | N-term +42.01 Da, K +28.03 Da,            | 6586.496582 | 3 | 737.0300293 | 736.695079  |
| MDGVVTDLIAVGLKR                            | G3UXA6 | 0          | N-term +42.01 Da, K +28.03 Da,            | 6588.291992 | 2 | 829.4699707 | 828.9712944 |
| AAAAAAAAAAGDSDSWDADTFSMEDPVR               | Q66JS6 | 0          | N-term +42.01 Da,                         | 6589.217285 | 2 | 1463.640015 | 1462.635608 |
| AAAAAAAAAAGDSDSWDADTFSMEDPVR               | Q66JS6 | 0          | N-term +42.01 Da,                         | 6596.622559 | 2 | 1462.640015 | 1462.635608 |
| ADQLTEEQIAEFKEAF                           | P62204 | 0          | N-term +42.01 Da, K +28.03 Da,            | 6599.536621 | 2 | 969.9702759 | 969.9702015 |
| AELDPFGAPAGAPGGPALGN                       | O08585 | 0          | N-term +42.01 Da,                         | 6603.558105 | 2 | 910.9400024 | 910.9443204 |
| ASALEQFVNSVR                               | O88543 | 0          | N-term +42.01 Da,                         | 6604.129395 | 2 | 681.8499756 | 681.8542445 |
| MEPETTATTILASVKEQELQFQR                    | Q68FH0 | 0          | N-term +42.01 Da, K +28.03 Da,            | 6606.401367 | 3 | 907.460022  | 907.4652304 |
| ADQLTEEQIAEFKEAF                           | P62204 | 0          | N-term +42.01 Da, K +28.03 Da,            | 6607.156738 | 3 | 646.9799805 | 646.9825598 |
| HNQLPLVIEFTEQTAPKIFGGEIKTH                 | P09103 | 0          | N-term +42.01 Da, K +28.03 Da,            | 6610.0625   | 4 | 762.4099731 | 762.165657  |
| MDDSEVESTASILASVKEQEAQFEKLTR               | P30999 | 0          | N-term +42.01 Da, K +28.03 Da,            | 6612.010742 | 3 | 1080.53833  | 1080.537784 |
| AADLGQIPDVVIDSDGVFKY                       | Q9DAK9 | 0          | N-term +42.01 Da, K +28.03 Da,            | 6612.086426 | 2 | 1104.540161 | 1104.53898  |

|                                          |        |            |                                           |             |   |             |             |
|------------------------------------------|--------|------------|-------------------------------------------|-------------|---|-------------|-------------|
| AAAAAAAAAAAAAGSDSDWDADTFMEDPVR           | Q66JS6 | 0          | N-term +42.01 Da,                         | 6614.154785 | 3 | 975.7600098 | 975.426164  |
| SNLITHRKRSHIRDGAFCCAIGQTFDDEDRLMHQK      | Q5U4E2 | 0.00143954 | N-term +42.01 Da, K +28.03 Da,C +57.02Da, | 6617.64502  | 4 | 1108.300049 | 1107.785877 |
| AADLGQIPDVIDSDGVFKY                      | Q9DAK9 | 0          | N-term +42.01 Da, K +28.03 Da,            | 6618.698242 | 3 | 736.7000122 | 736.695079  |
| DDDI AALVVDNGSGMCKAGF                    | P60710 | 0.02422145 | N-term +42.01 Da, K +28.03 Da,C +57.02Da, | 6619.749512 | 2 | 1063.97998  | 1062.98246  |
| MEPETTATTILASVKEQLQFQR                   | Q68FH0 | 0          | N-term +42.01 Da, K +28.03 Da,            | 6621.23584  | 2 | 1360.699951 | 1360.694207 |
| AAAAAAAAAAAAAGSDSDWDADTFMEDPVR           | Q66JS6 | 0          | N-term +42.01 Da,                         | 6621.995605 | 2 | 1463.640015 | 1462.635608 |
| MEATLEQHLEDTMKNPSIVGVLTDSQGLNLGCR        | Q9D1L9 | 0          | N-term +42.01 Da, K +28.03 Da,C +57.02Da, | 6622.751953 | 3 | 1296.619995 | 1296.28626  |
| STIQNLQSFDPFADATKGDLLPAGTEDYIHIR         | Q9CXU9 | 0          | N-term +42.01 Da, K +28.03 Da,            | 6628.276855 | 3 | 1240.609985 | 1240.279362 |
| STIQNLQSFDPFADATKGDLLPAGTEDYIHIR         | Q9CXU9 | 0.00098619 | N-term +42.01 Da, K +28.03 Da,            | 6631.130859 | 4 | 930.460022  | 930.4613405 |
| ADQLTEEQIAEFKEAF                         | P62204 | 0          | N-term +42.01 Da, K +28.03 Da,            | 6632.269043 | 2 | 969.9694824 | 969.9702015 |
| RRRRRKMRR                                | A2AWT7 | 0.01027703 | N-term +42.01 Da, K +28.03 Da,            | 6638.266113 | 3 | 473.2999878 | 472.6273378 |
| ADQLTEEQIAEFKEAF                         | P62204 | 0          | N-term +42.01 Da, K +28.03 Da,            | 6639.247559 | 3 | 647.3200073 | 646.9825598 |
| MEVVENIENYEIR                            | Q35403 | 0          | N-term +42.01 Da,                         | 6642.660645 | 2 | 840.3997803 | 840.4008996 |
| MDDSEVESTASILASVKEQAQFEKLR               | P30999 | 0          | N-term +42.01 Da, K +28.03 Da,            | 6644.364746 | 3 | 1080.869995 | 1080.537784 |
| SSEEGKLFVGGVGNFNTDEQALEDHFSSFGPISEVVVKDR | O89086 | 0          | N-term +42.01 Da, K +28.03 Da,            | 6644.538574 | 3 | 1495.069946 | 1494.409765 |
| VDYIVEYDYDAVHDELDIR                      | Q9JLQ0 | 0          | N-term +42.01 Da,                         | 6644.875    | 2 | 1243.069946 | 1243.073917 |
| ATFEESVVLGFEEFDKAVKEHEGK                 | Q9CQM5 | 0          | N-term +42.01 Da, K +28.03 Da,            | 6645.039551 | 4 | 713.8699951 | 713.6154658 |
| AAAAAAAAAAAAAGSDSDWDADTFMEDPVR           | Q66JS6 | 0          | N-term +42.01 Da,                         | 6646.844238 | 3 | 975.7600098 | 975.426164  |
| ATFEESVVLGFEEFDKAVKEHEGK                 | Q9CQM5 | 0          | N-term +42.01 Da, K +28.03 Da,            | 6647.365723 | 3 | 951.4899902 | 951.1515289 |
| AADLGQIPDVIDSDGVFKY                      | Q9DAK9 | 0          | N-term +42.01 Da, K +28.03 Da,            | 6649.427246 | 3 | 737.0300293 | 736.695079  |
| DDDI AALVVDNGSGMCKAGF                    | P60710 | 0.01116071 | N-term +42.01 Da, K +28.03 Da,C +57.02Da, | 6651.929199 | 2 | 1063.969971 | 1062.98246  |
| AAVLQVVLRLPELN                           | Q7M739 | 0          | N-term +42.01 Da,                         | 6652.078125 | 2 | 811.4500122 | 811.4490408 |
| SSEEGKLFVGGVGNFNTDEQALEDHFSSFGPISEVVVKDR | O89086 | 0          | N-term +42.01 Da, K +28.03 Da,            | 6661.498047 | 4 | 1121.057739 | 1121.059143 |
| ADQLTEEQIAEFKEAF                         | P62204 | 0          | N-term +42.01 Da, K +28.03 Da,            | 6663.725586 | 2 | 969.9682617 | 969.9702015 |
| ATLCLFMDGTLTAPR                          | Q9Z2M7 | 0          | N-term +42.01 Da, C +57.02Da,             | 6667.65918  | 2 | 912.9400024 | 912.4369592 |
| ADQLTEEQIAEFKEAF                         | P62204 | 0.02805352 | N-term +42.01 Da, K +28.03 Da,            | 6670.769531 | 3 | 646.9799805 | 646.9825598 |
| MDAVLSDFVR                               | B2RUR8 | 0          | N-term +42.01 Da,                         | 6671.044922 | 2 | 597.7940674 | 597.7948091 |
| SSEEGKLFVGGVGNFNTDEQALEDHFSSFGPISEVVVKDR | O89086 | 0          | N-term +42.01 Da, K +28.03 Da,            | 6675.982422 | 3 | 1494.73999  | 1494.409765 |
| MDDLSEANGSFAISLLKILSEKDKSR               | O08800 | 0          | N-term +42.01 Da, K +28.03 Da,            | 6676.735352 | 4 | 749.4000244 | 749.1520526 |
| MEATLEQHLEDTMKNPSIVGVLTDSQGLNLGCR        | Q9D1L9 | 0          | N-term +42.01 Da, K +28.03 Da,C +57.02Da, | 6680.424805 | 3 | 1296.959961 | 1296.28626  |
| AASLGGMFTGPPGPPPPPLPGQASLLQAAPGAPR       | Q920D3 | 0          | N-term +42.01 Da,                         | 6681.382813 | 3 | 1167.609985 | 1167.27668  |
| AADISQWAGPLCLQEVEPPQHAL                  | P70296 | 0          | N-term +42.01 Da, C +57.02Da,             | 6686.955078 | 3 | 897.0999756 | 896.4305199 |
| AAAAAAAAAAAAAGSDSDWDADTFMEDPVR           | Q66JS6 | 0          | N-term +42.01 Da,                         | 6688.904297 | 3 | 975.4199829 | 975.426164  |
| SSEEGKLFVGGVGNFNTDEQALEDHFSSFGPISEVVVKDR | O89086 | 0          | N-term +42.01 Da, K +28.03 Da,            | 6692.866699 | 4 | 1121.560059 | 1121.059143 |
| ADQLTEEQIAEFKEAF                         | P62204 | 0          | N-term +42.01 Da, K +28.03 Da,            | 6694.057129 | 2 | 969.9667969 | 969.9702015 |
| ADQLTEEQIAEFKEAFSLFDKDGDTITTKELGTVMR     | P62204 | 0.00097466 | N-term +42.01 Da, K +28.03 Da,            | 6696.801758 | 4 | 1065.530029 | 1065.787167 |
| AADISQWAGPLCLQEVEPPQHAL                  | P70296 | 0          | N-term +42.01 Da, C +57.02Da,             | 6703.112305 | 3 | 896.4299927 | 896.4305199 |
| AAAAAAAAAAAAAGSDSDWDADTFMEDPVR           | Q66JS6 | 0          | N-term +42.01 Da,                         | 6708.785156 | 2 | 1463.130005 | 1462.635608 |
| AAAAAAAAAAAAAGSDSDWDADTFMEDPVR           | Q66JS6 | 0          | N-term +42.01 Da,                         | 6710.334961 | 3 | 976.0900269 | 975.426164  |
| CDFTEDQTAEFKEAFQLFDR                     | Q60605 | 0          | N-term +42.01 Da, K +28.03 Da,C +57.02Da, | 6714.566895 | 2 | 1285.079956 | 1284.073393 |

|                                          |        |            |                                           |             |   |             |             |
|------------------------------------------|--------|------------|-------------------------------------------|-------------|---|-------------|-------------|
| CDFTEDQTAEFKEAFQLFDR                     | Q60605 | 0          | N-term +42.01 Da, K +28.03 Da,C +57.02Da, | 6717.057129 | 2 | 1284.069946 | 1284.073393 |
| AADLGQIPDVIDSDGVFKY                      | Q9DAK9 | 0          | N-term +42.01 Da, K +28.03 Da,            | 6718.388184 | 2 | 1105.040039 | 1104.53898  |
| SSEEGKLFVGGLNFNNTDEQALEDHFSSFGPISEVVVKDR | O89086 | 0          | N-term +42.01 Da, K +28.03 Da,            | 6724.013184 | 4 | 1121.560059 | 1121.059143 |
| ADQLTEEQIAEFKEAF                         | P62204 | 0          | N-term +42.01 Da, K +28.03 Da,            | 6724.356445 | 2 | 969.9671631 | 969.9702015 |
| SSEEGKLFVGGLNFNNTDEQALEDHFSSFGPISEVVVKDR | O89086 | 0          | N-term +42.01 Da, K +28.03 Da,            | 6730.516602 | 4 | 1121.300049 | 1121.059143 |
| RTILAETEGMLKDLQKSVVEEER                  | Q99PL5 | 0.00410397 | N-term +42.01 Da, K +28.03 Da,            | 6732.541992 | 4 | 701.8599854 | 701.369299  |
| MEATLEQHLEDTMKNPSIVGVLCTDSQGLNLGCR       | Q9D1L9 | 0          | N-term +42.01 Da, K +28.03 Da,C +57.02Da, | 6735.272949 | 3 | 1296.949951 | 1296.28626  |
| CDFTEDQTAEFKEAFQLFDR                     | Q60605 | 0          | N-term +42.01 Da, K +28.03 Da,C +57.02Da, | 6737.987305 | 3 | 856.7199707 | 856.3846878 |
| AAAAAAAAAAAAAGSDSDWDADTFSMEDPVR          | Q66JS6 | 0          | N-term +42.01 Da,                         | 6739.150879 | 2 | 1462.633545 | 1462.635608 |
| ADQLTEEQIAEFKEAFS                        | P62204 | 0          | N-term +42.01 Da, K +28.03 Da,            | 6739.807129 | 2 | 1013.48999  | 1013.486216 |
| AAAAAAAAAAAAAGSDSDWDADTFSMEDPVR          | Q66JS6 | 0          | N-term +42.01 Da,                         | 6740.926758 | 3 | 975.7600098 | 975.426164  |
| ADQLTEEQIAEFKEAFSLFDKDGDTITTKELGTVMR     | P62204 | 0          | N-term +42.01 Da, K +28.03 Da,            | 6741.916992 | 4 | 1066.030029 | 1065.787167 |
| CDFTEDQTAEFKEAFQLFDR                     | Q60605 | 0          | N-term +42.01 Da, K +28.03 Da,C +57.02Da, | 6747.464355 | 2 | 1284.071533 | 1284.073393 |
| ADPWQECMDYAVILAR                         | O55023 | 0          | N-term +42.01 Da, C +57.02Da,             | 6750.310059 | 2 | 990.9500122 | 990.4531407 |
| ADQLTEEQIAEFKEAF                         | P62204 | 0          | N-term +42.01 Da, K +28.03 Da,            | 6759.332031 | 2 | 969.9683838 | 969.9702015 |
| MEATLEQHLEDTMKNPSIVGVLCTDSQGLNLGCR       | Q9D1L9 | 0          | N-term +42.01 Da, K +28.03 Da,C +57.02Da, | 6767.968262 | 3 | 1296.284912 | 1296.28626  |
| CDFTEDQTAEFKEAFQLFDR                     | Q60605 | 0          | N-term +42.01 Da, K +28.03 Da,C +57.02Da, | 6770.216797 | 3 | 856.383606  | 856.3846878 |
| AAAAAAAAAAAAAGSDSDWDADTFSMEDPVR          | Q66JS6 | 0          | N-term +42.01 Da,                         | 6770.672852 | 2 | 1463.130005 | 1462.635608 |
| AAAAAAAAAAAAAGSDSDWDADTFSMEDPVR          | Q66JS6 | 0          | N-term +42.01 Da,                         | 6772.408203 | 3 | 975.7600098 | 975.426164  |
| TEWEAATPAVAETPDIKLF                      | P97461 | 0          | N-term +42.01 Da, K +28.03 Da,            | 6778.071777 | 3 | 720.7000122 | 720.3684144 |
| CDFTEDQTAEFKEAFQLFDR                     | Q60605 | 0          | N-term +42.01 Da, K +28.03 Da,C +57.02Da, | 6780.128906 | 2 | 1284.074219 | 1284.073393 |
| ATFEESVVLGFEEFDKAVKEHEGKTIF              | Q9CQM5 | 0          | N-term +42.01 Da, K +28.03 Da,            | 6781.394531 | 4 | 804.1699829 | 803.9155053 |
| TEWEAATPAVAETPDIKLF                      | P97461 | 0          | N-term +42.01 Da, K +28.03 Da,            | 6784.953125 | 2 | 1080.049072 | 1080.048983 |
| ADQLTEEQIAEFKEAFSLFDKDGDSITTELQELGTVMRS  | Q9D6P8 | 0.00411899 | N-term +42.01 Da, K +28.03 Da,            | 6785.14502  | 4 | 1076.790039 | 1077.02434  |
| AALAMEKLNQALLDLHALGSAR                   | P29391 | 0          | N-term +42.01 Da, K +28.03 Da,            | 6785.766113 | 3 | 831.4500122 | 830.7880896 |
| ALPIIVKWGGQEY                            | Q8BGR9 | 0.00808262 | N-term +42.01 Da, K +28.03 Da,            | 6789.588379 | 2 | 772.4299927 | 772.4295878 |
| ADQLTEEQIAEFKEAF                         | P62204 | 0          | N-term +42.01 Da, K +28.03 Da,            | 6790.822754 | 2 | 969.9707642 | 969.9702015 |
| MDDLSEANGSFAISLLKILSEKDKSR               | O08800 | 0          | N-term +42.01 Da, K +28.03 Da,            | 6793.942871 | 4 | 749.6500244 | 749.1520526 |
| AKDLDELLDEVETKFCR                        | Q3UJP5 | 0          | N-term +42.01 Da, K +28.03 Da,C +57.02Da, | 6799.266602 | 3 | 727.039978  | 727.036559  |
| MEATLEQHLEDTMKNPSIVGVLCTDSQGLNLGCR       | Q9D1L9 | 0          | N-term +42.01 Da, K +28.03 Da,C +57.02Da, | 6800.029785 | 3 | 1296.959961 | 1296.28626  |
| CDFTEDQTAEFKEAFQLFDR                     | Q60605 | 0          | N-term +42.01 Da, K +28.03 Da,C +57.02Da, | 6801.542969 | 3 | 856.3855591 | 856.3846878 |
| ADQLTEEQIAEFKEAFSLFDKDGDTITTKELGTVMR     | P62204 | 0          | N-term +42.01 Da, K +28.03 Da,            | 6806.627441 | 4 | 1066.290039 | 1065.787167 |
| AAAAAAAAAAAAAGSDSDWDADTFSMEDPVR          | Q66JS6 | 0          | N-term +42.01 Da,                         | 6807.139648 | 3 | 976.0999756 | 975.426164  |
| AAAAAAAAAAAAAGSDSDWDADTFSMEDPVR          | Q66JS6 | 0          | N-term +42.01 Da,                         | 6808.252441 | 2 | 1463.640015 | 1462.635608 |
| SFIPVAEDSDFPIQNLPGYGFSTQSNPKPR           | P35505 | 0.00278681 | N-term +42.01 Da, K +28.03 Da,            | 6808.478516 | 3 | 1141.569946 | 1140.90854  |
| PGGILLGEEAPDFEANTTIGR                    | Q8BG37 | 0          | N-term +42.01 Da,                         | 6809.595215 | 2 | 1099.540039 | 1100.050046 |
| CDFTEDQTAEFKEAFQLFDR                     | Q60605 | 0          | N-term +42.01 Da, K +28.03 Da,C +57.02Da, | 6812.054199 | 2 | 1284.074097 | 1284.073393 |
| FQLQYMGHYLIREERKDPDR                     | E9PZQ1 | 0.01201602 | N-term +42.01 Da, K +28.03 Da,            | 6812.397461 | 3 | 920.7991943 | 921.1341487 |
| MDDLSEANGSFAISLLKILSEKDKSR               | O08800 | 0          | N-term +42.01 Da, K +28.03 Da,            | 6813.305176 | 3 | 999.2000122 | 998.5336447 |
| ADQLTEEQIAEFKEAF                         | P62204 | 0          | N-term +42.01 Da, K +28.03 Da,            | 6821.845703 | 2 | 969.9708862 | 969.9702015 |

|                                           |        |   |                                           |             |   |             |             |
|-------------------------------------------|--------|---|-------------------------------------------|-------------|---|-------------|-------------|
| MDDLSEANGSFAISLLKILSEKDKSR                | O08800 | 0 | N-term +42.01 Da, K +28.03 Da,            | 6826.862793 | 4 | 749.3983765 | 749.1520526 |
| AKDLDELLDEVETKFCR                         | Q3UJP5 | 0 | N-term +42.01 Da, K +28.03 Da,C +57.02Da, | 6831.577637 | 3 | 727.0360107 | 727.036559  |
| CDFTEDQTAEFKEAFQLFDR                      | Q60605 | 0 | N-term +42.01 Da, K +28.03 Da,C +57.02Da, | 6834.127441 | 3 | 856.7199707 | 856.3846878 |
| MEATLEQLHLEDTMKNPISIVGLCTDSQGLNLGCR       | Q9D1L9 | 0 | N-term +42.01 Da, K +28.03 Da,C +57.02Da, | 6836.128418 | 3 | 1296.630005 | 1296.28626  |
| SFIPVAEDSDFPIQNLPGVVFSTQSNPKPR            | P35505 | 0 | N-term +42.01 Da, K +28.03 Da,            | 6838.969727 | 3 | 1141.579956 | 1140.90854  |
| CDFTEDQTAEFKEAFQLFDR                      | Q60605 | 0 | N-term +42.01 Da, K +28.03 Da,C +57.02Da, | 6843.425293 | 2 | 1284.07373  | 1284.073393 |
| MEPAAEILVDSPPVVVSPETIEAR                  | Q9JHU9 | 0 | N-term +42.01 Da,                         | 6843.8125   | 2 | 1337.170044 | 1337.151841 |
| MKPAVDEMFPPEGAGPYVDLDEAGGSTGLLMDLAANEKAVH | Q3U898 | 0 | N-term +42.01 Da, K +28.03 Da,            | 6846.384766 | 4 | 1062.280029 | 1061.761366 |
| MKPAVDEMFPPEGAGPYVDLDEAGGSTGLLMDLAANEKAVH | Q3U898 | 0 | N-term +42.01 Da, K +28.03 Da,            | 6851.989258 | 3 | 1416.01001  | 1415.346062 |
| ADQLTEEQIAEFKEAF                          | P62204 | 0 | N-term +42.01 Da, K +28.03 Da,            | 6854.173828 | 2 | 969.9698486 | 969.9702015 |
| AAAAAAAAAAAAAGSDSDWDADTFMSMEDPVR          | Q66JS6 | 0 | N-term +42.01 Da,                         | 6856.233398 | 3 | 975.7600098 | 975.426164  |
| MEPSDSASTAMEEPDSLEVLVKTLDLSQTR            | Q9Z1R2 | 0 | N-term +42.01 Da, K +28.03 Da,            | 6860.603027 | 3 | 1079.51001  | 1079.511018 |
| MEPAAEILVDSPPVVVSPETIEAR                  | Q9JHU9 | 0 | N-term +42.01 Da,                         | 6860.787598 | 2 | 1337.650024 | 1337.151841 |
| CDFTEDQTAEFKEAFQLFDR                      | Q60605 | 0 | N-term +42.01 Da, K +28.03 Da,C +57.02Da, | 6865.911133 | 3 | 856.7199707 | 856.3846878 |
| AAALADMADLEELSR                           | Q9Z248 | 0 | N-term +42.01 Da,                         | 6866.524902 | 2 | 809.3900146 | 809.3930746 |
| AAALADMADLEELSR                           | Q9Z248 | 0 | N-term +42.01 Da,                         | 6868.717773 | 2 | 810.4000244 | 809.3930746 |
| AAQLLEEDVVTCSICLGR                        | Q8BFW4 | 0 | N-term +42.01 Da, C +57.02Da,             | 6869.986328 | 2 | 1039.01001  | 1038.508645 |
| SFIPVAEDSDFPIQNLPGVVFSTQSNPKPR            | P35505 | 0 | N-term +42.01 Da, K +28.03 Da,            | 6870.944824 | 3 | 1140.908936 | 1140.90854  |
| ADQLTEEQIAEFKEAFSLFDKDGDTITTKELGTVMR      | P62204 | 0 | N-term +42.01 Da, K +28.03 Da,            | 6871.020508 | 4 | 1066.290039 | 1065.787167 |
| MNAAAEAEFNILLATDSYKVTH                    | Q99KQ4 | 0 | N-term +42.01 Da, K +28.03 Da,            | 6872.17334  | 2 | 1241.119995 | 1240.112321 |
| SSEEGKLVGGNLFNTDEQALEDFHSSFGPISEVVVVKDR   | O89086 | 0 | N-term +42.01 Da, K +28.03 Da,            | 6872.415039 | 4 | 1121.050049 | 1121.059143 |
| MDDLSEANGSFAISLLKILSEKDKSR                | O08800 | 0 | N-term +42.01 Da, K +28.03 Da,            | 6873.121582 | 4 | 749.4000244 | 749.1520526 |
| CDFTEDQTAEFKEAFQLFDR                      | Q60605 | 0 | N-term +42.01 Da, K +28.03 Da,C +57.02Da, | 6876.489746 | 2 | 1284.07373  | 1284.073393 |
| MNAAAEAEFNILLATDSYKVTH                    | Q99KQ4 | 0 | N-term +42.01 Da, K +28.03 Da,            | 6880.746582 | 3 | 827.4099731 | 827.0773062 |
| FAHTNIESLVKEYDDNGEGITIFRPL                | P27773 | 0 | N-term +42.01 Da, K +28.03 Da,            | 6881.542969 | 3 | 1016.51001  | 1016.848621 |
| ADQLTEEQIAEFKEAFSLFDKDGDTITTK             | P62204 | 0 | N-term +42.01 Da, K +28.03 Da,            | 6882.583008 | 3 | 1158.920044 | 1158.578526 |
| ADQLTEEQIAEFKEAF                          | P62204 | 0 | N-term +42.01 Da, K +28.03 Da,            | 6885.369629 | 2 | 969.9699097 | 969.9702015 |
| MKPAVDEMFPPEGAGPYVDLDEAGGSTGLLMDLAANEKAVH | Q3U898 | 0 | N-term +42.01 Da, K +28.03 Da,            | 6885.734863 | 3 | 1415.680054 | 1415.346062 |
| ADQLTEEQIAEFKEAFSLFDKDGDTITTKELGTVMR      | P62204 | 0 | N-term +42.01 Da, K +28.03 Da,            | 6889.005371 | 3 | 1421.380005 | 1420.713797 |
| ADQLTEEQIAEFKEAFSLFDKDGDTITTK             | P62204 | 0 | N-term +42.01 Da, K +28.03 Da,            | 6892.404785 | 3 | 1158.579956 | 1158.578526 |
| CDFTEDQTAEFKEAFQLFDR                      | Q60605 | 0 | N-term +42.01 Da, K +28.03 Da,C +57.02Da, | 6896.561035 | 3 | 856.3850708 | 856.3846878 |
| ADQLTEEQIAEFKEAFSLFDKDGDTITTKELGTVMR      | P62204 | 0 | N-term +42.01 Da, K +28.03 Da,            | 6903.40332  | 4 | 1065.787231 | 1065.787167 |
| CDFTEDQTAEFKEAFQLFDR                      | Q60605 | 0 | N-term +42.01 Da, K +28.03 Da,C +57.02Da, | 6907.797363 | 2 | 1284.072998 | 1284.073393 |
| MNAAAEAEFNILLATDSYKVTH                    | Q99KQ4 | 0 | N-term +42.01 Da, K +28.03 Da,            | 6910.932129 | 2 | 1241.109985 | 1240.112321 |
| ADQLTEEQIAEFKEAF                          | P62204 | 0 | N-term +42.01 Da, K +28.03 Da,            | 6917.109375 | 2 | 969.9685669 | 969.9702015 |
| MDGVVTDLIAVGLKR                           | G3UXA6 | 0 | N-term +42.01 Da, K +28.03 Da,            | 6918.984375 | 2 | 828.9726563 | 828.9712944 |
| ADQLTEEQIAEFKEAF                          | P62204 | 0 | N-term +42.01 Da, K +28.03 Da,            | 6922.584961 | 3 | 646.9799805 | 646.9825598 |
| MLVVGSELQSDAQQLSAEAPR                     | P07607 | 0 | N-term +42.01 Da,                         | 6926.359375 | 2 | 1136.089966 | 1136.067913 |
| CDFTEDQTAEFKEAFQLFDR                      | Q60605 | 0 | N-term +42.01 Da, K +28.03 Da,C +57.02Da, | 6928.132324 | 3 | 856.3843994 | 856.3846878 |
| AAPSGSVNCEEFAEFQELLKVMR                   | Q8R3Q6 | 0 | N-term +42.01 Da, K +28.03 Da,C +57.02Da, | 6931.592285 | 2 | 1342.150024 | 1341.648745 |

|                                      |        |            |                                           |             |   |             |             |
|--------------------------------------|--------|------------|-------------------------------------------|-------------|---|-------------|-------------|
| AAKVFESIGKFGAL                       | P67778 | 0.01160196 | N-term +42.01 Da, K +28.03 Da,            | 6931.912598 | 2 | 824.9899902 | 824.98727   |
| MDDLSEANGSFAISLLK                    | O08800 | 0          | N-term +42.01 Da, K +28.03 Da,            | 6932.097168 | 2 | 941.460022  | 940.9691469 |
| AAAAAAAAAAAAAGSDSDSWDADTFMEDPVR      | Q66JS6 | 0          | N-term +42.01 Da,                         | 6932.678223 | 3 | 975.7700195 | 975.426164  |
| ATTAELEFPFVADEVIER                   | Q3TPX4 | 0          | N-term +42.01 Da,                         | 6935.157715 | 2 | 1136.540039 | 1136.536438 |
| ADQLTEEQIAEFKEAFSLFDKDGDTITTKELGTVMR | P62204 | 0          | N-term +42.01 Da, K +28.03 Da,            | 6936.138184 | 4 | 1065.787598 | 1065.787167 |
| MNFSGKYQLQSQENFEPFMKAIGLPEDLIQKG     | P12710 | 0          | N-term +42.01 Da, K +28.03 Da,            | 6936.510742 | 4 | 954.4899902 | 954.23622   |
| MEEVVAEELDDEEQLVR                    | Q8K2H2 | 0          | N-term +42.01 Da,                         | 6936.666504 | 2 | 1037.97998  | 1037.977899 |
| MDDLSEANGSFAISLLKILSEKDKSR           | O08800 | 0          | N-term +42.01 Da, K +28.03 Da,            | 6936.808594 | 4 | 749.6500244 | 749.1520526 |
| AEYLASIFGTEKDKVNCFSY                 | Q8BGJ9 | 0.00097991 | N-term +42.01 Da, K +28.03 Da,C +57.02Da, | 6937.35791  | 2 | 1221.099976 | 1220.59069  |
| CDFTEDQTAEFKEAFQLFDR                 | Q60605 | 0          | N-term +42.01 Da, K +28.03 Da,C +57.02Da, | 6938.461914 | 2 | 1284.073975 | 1284.073393 |
| MNFSGKYQLQSQENFEPFMKAIGLPEDLIQKG     | P12710 | 0          | N-term +42.01 Da, K +28.03 Da,            | 6938.905273 | 3 | 1272.650024 | 1271.979201 |
| MNAAAAEAFNILLATDSYKVT                | Q99KQ4 | 0          | N-term +42.01 Da, K +28.03 Da,            | 6944.016113 | 2 | 1241.109985 | 1240.112321 |
| ADQLTEEQIAEFKEAF                     | P62204 | 0          | N-term +42.01 Da, K +28.03 Da,            | 6949.194824 | 2 | 969.9712524 | 969.9702015 |
| MDGVVTDLIAVGLKR                      | G3UXA6 | 0          | N-term +42.01 Da, K +28.03 Da,            | 6949.639648 | 2 | 828.9712524 | 828.9712944 |
| MLAELGFIR                            | Q921N6 | 0          | N-term +42.01 Da,                         | 6949.714844 | 2 | 546.2998047 | 546.2995296 |
| ADTFLEHLCLLDIDSEPVAAR                | P53657 | 0          | N-term +42.01 Da, C +57.02Da,             | 6955.439941 | 3 | 809.7299805 | 809.7335395 |
| SNYSVSLVGPAPW                        | Q8CI51 | 0.00323326 | N-term +42.01 Da,                         | 6956.135254 | 2 | 710.3499756 | 709.8511705 |
| ADTFLEHLCLLDIDSEPVAAR                | P53657 | 0          | N-term +42.01 Da, C +57.02Da,             | 6956.329102 | 2 | 1214.099976 | 1214.096671 |
| AAPSGSVNCEEFAEFQELLKVMR              | Q8R3Q6 | 0          | N-term +42.01 Da, K +28.03 Da,C +57.02Da, | 6957.592285 | 2 | 1341.650024 | 1341.648745 |
| CDFTEDQTAEFKEAFQLFDR                 | Q60605 | 0          | N-term +42.01 Da, K +28.03 Da,C +57.02Da, | 6959.500977 | 3 | 856.3842773 | 856.3846878 |
| AAPSGSVNCEEFAEFQELLKVMR              | Q8R3Q6 | 0          | N-term +42.01 Da, K +28.03 Da,C +57.02Da, | 6961.60498  | 3 | 894.7684326 | 894.7682556 |
| VDYIVEYDYDAVHDELDIR                  | Q9JLQ0 | 0          | N-term +42.01 Da,                         | 6964.520996 | 2 | 1243.599976 | 1243.073917 |
| LLAALGGNSSPSAKDIKKILDSVIEADDDR       | P99027 | 0.00236295 | N-term +42.01 Da, K +28.03 Da,            | 6966.401855 | 3 | 1098.599976 | 1098.931233 |
| ADQLTEEQIAEFKEAFSLFDKDGDTITTKELGTVMR | P62204 | 0          | N-term +42.01 Da, K +28.03 Da,            | 6967.978027 | 4 | 1065.788208 | 1065.787167 |
| MEEVVAEELDDEEQLVR                    | Q8K2H2 | 0          | N-term +42.01 Da,                         | 6968.053711 | 2 | 1037.978271 | 1037.977899 |
| MNFSGKYQLQSQENFEPFMKAIGLPEDLIQKG     | P12710 | 0          | N-term +42.01 Da, K +28.03 Da,            | 6968.182617 | 4 | 954.7299805 | 954.23622   |
| CDFTEDQTAEFKEAFQLFDR                 | Q60605 | 0          | N-term +42.01 Da, K +28.03 Da,C +57.02Da, | 6969.919922 | 2 | 1284.072876 | 1284.073393 |
| ADQLTEEQIAEFKEAF                     | P62204 | 0          | N-term +42.01 Da, K +28.03 Da,            | 6979.78125  | 2 | 969.9699707 | 969.9702015 |
| ADQLTEEQIAEFKEAFSLFDKDGDTITTKELGTVMR | P62204 | 0          | N-term +42.01 Da, K +28.03 Da,            | 6983.723633 | 3 | 1420.714111 | 1420.713797 |
| CDFTEDQTAEFKEAFQLFDR                 | Q60605 | 0          | N-term +42.01 Da, K +28.03 Da,C +57.02Da, | 6989.989746 | 3 | 856.3800049 | 856.3846878 |
| ADQLTEEQIAEFKEAFSLFDKDGDTITTK        | P62204 | 0          | N-term +42.01 Da, K +28.03 Da,            | 6995.779785 | 3 | 1158.910034 | 1158.578526 |
| ADQLTEEQIAEFKEAFSLFDKDGDTITTKELGTVMR | P62204 | 0          | N-term +42.01 Da, K +28.03 Da,            | 6998.884277 | 4 | 1065.786377 | 1065.787167 |
| ATVWDEAEQDGIGEEVLKMSTEEIVQR          | O88685 | 0          | N-term +42.01 Da, K +28.03 Da,            | 6999.43457  | 3 | 1045.5      | 1044.839574 |
| AAPSGSVNCEEFAEFQELLKVMR              | Q8R3Q6 | 0          | N-term +42.01 Da, K +28.03 Da,C +57.02Da, | 7000.785156 | 2 | 1342.650024 | 1341.648745 |
| CDFTEDQTAEFKEAFQLFDR                 | Q60605 | 0          | N-term +42.01 Da, K +28.03 Da,C +57.02Da, | 7001.387207 | 2 | 1285.069946 | 1284.073393 |
| AAAVEPEVEDPLWSFVR                    | Q8C436 | 0          | N-term +42.01 Da,                         | 7009.458008 | 2 | 979.9899902 | 978.9887281 |
| AAPSGSVNCEEFAEFQELLKVMR              | Q8R3Q6 | 0          | N-term +42.01 Da, K +28.03 Da,C +57.02Da, | 7010.239258 | 3 | 895.4400024 | 894.7682556 |
| ADQLTEEQIAEFKEAF                     | P62204 | 0          | N-term +42.01 Da, K +28.03 Da,            | 7010.625488 | 2 | 969.9694824 | 969.9702015 |
| ATFEESVVLGFEEFDKAVKEH                | Q9CQM5 | 0          | N-term +42.01 Da, K +28.03 Da,            | 7010.844238 | 3 | 837.7600098 | 837.0880883 |
| ADQLTEEQIAEFKEAFSLFDKDGDTITTK        | P62204 | 0          | N-term +42.01 Da, K +28.03 Da,            | 7013.03418  | 4 | 869.4400024 | 869.1857134 |

|                                       |        |            |                                           |             |   |             |             |
|---------------------------------------|--------|------------|-------------------------------------------|-------------|---|-------------|-------------|
| ADQLTEEQIAEFKEAFSLFDKDGDTITTKELGTVMR  | P62204 | 0          | N-term +42.01 Da, K +28.03 Da,            | 7014.984375 | 3 | 1420.714478 | 1420.713797 |
| CDFTEDQTAEFKEAFQLFDR                  | Q60605 | 0          | N-term +42.01 Da, K +28.03 Da,C +57.02Da, | 7020.817871 | 3 | 856.3900146 | 856.3846878 |
| ATFEEVSVLGFEEFDKAVKEH                 | Q9CQM5 | 0          | N-term +42.01 Da, K +28.03 Da,            | 7023.689453 | 3 | 837.0900269 | 837.0880883 |
| ADQLTEEQIAEFKEAFSLFDKDGDTITTK         | P62204 | 0          | N-term +42.01 Da, K +28.03 Da,            | 7026.367676 | 3 | 1158.577881 | 1158.578526 |
| AADLGQIPDVDDSDGVFKYVLR                | Q9DAK9 | 0          | N-term +42.01 Da, K +28.03 Da,            | 7028.387207 | 2 | 1346.209961 | 1345.207808 |
| ADQLTEEQIAEFKEAFSLFDKDGDTITTKELGTVMR  | P62204 | 0          | N-term +42.01 Da, K +28.03 Da,            | 7029.181641 | 4 | 1065.786621 | 1065.787167 |
| AADLGQIPDVDDSDGVFKYVLR                | Q9DAK9 | 0          | N-term +42.01 Da, K +28.03 Da,            | 7029.510742 | 2 | 1345.719971 | 1345.207808 |
| CDFTEDQTAEFKEAFQLFDR                  | Q60605 | 0          | N-term +42.01 Da, K +28.03 Da,C +57.02Da, | 7033.495605 | 2 | 1285.079956 | 1284.073393 |
| MEGEAVEAIVEESETFIKGR                  | Q61164 | 0          | N-term +42.01 Da, K +28.03 Da,            | 7035.79541  | 3 | 860.4299927 | 860.4351596 |
| ADQLTEEQIAEFKEAF                      | P62204 | 0          | N-term +42.01 Da, K +28.03 Da,            | 7041.950195 | 2 | 970.4699707 | 969.9702015 |
| ADQLTEEQIAEFKEAFSLFDKDGDTITTKELGTVMR  | P62204 | 0          | N-term +42.01 Da, K +28.03 Da,            | 7045.620605 | 3 | 1420.714844 | 1420.713797 |
| MEGEAVEAIVEESETFIKGR                  | Q61164 | 0.00367478 | N-term +42.01 Da, K +28.03 Da,            | 7046.313477 | 2 | 1290.170044 | 1290.149101 |
| CDFTEDQTAEFKEAFQLFDR                  | Q60605 | 0          | N-term +42.01 Da, K +28.03 Da,C +57.02Da, | 7052.713379 | 3 | 856.3900146 | 856.3846878 |
| MLSPAMSLKSFPPPGSADGLR                 | Q923F1 | 0          | N-term +42.01 Da, K +28.03 Da,            | 7055.200195 | 3 | 793.4099731 | 792.7412001 |
| ADQLTEEQIAEFKEAFSLFDKDGDTITTK         | P62204 | 0          | N-term +42.01 Da, K +28.03 Da,            | 7057.267578 | 3 | 1158.910034 | 1158.578526 |
| ADQLTEEQIAEFKEAFSLFDKDGDTITTKELGTVMR  | P62204 | 0          | N-term +42.01 Da, K +28.03 Da,            | 7059.686035 | 4 | 1065.786621 | 1065.787167 |
| CDFTEDQTAEFKEAFQLFDR                  | Q60605 | 0          | N-term +42.01 Da, K +28.03 Da,C +57.02Da, | 7064.791016 | 2 | 1284.069946 | 1284.073393 |
| MLSPAMSLKSFPPPGSADGLR                 | Q923F1 | 0          | N-term +42.01 Da, K +28.03 Da,            | 7064.935059 | 2 | 1189.109985 | 1188.608162 |
| MLSPAMSLKSFPPPGSADGLR                 | Q923F1 | 0          | N-term +42.01 Da, K +28.03 Da,            | 7065.25     | 3 | 792.7399902 | 792.7412001 |
| MEGEAVEAIVEESETFIKGR                  | Q61164 | 0          | N-term +42.01 Da, K +28.03 Da,            | 7066.547852 | 3 | 860.4352417 | 860.4351596 |
| ADQLTEEQIAEFKEAF                      | P62204 | 0          | N-term +42.01 Da, K +28.03 Da,            | 7072.523926 | 2 | 969.9699707 | 969.9702015 |
| ADQLTEEQIAEFKEAFSLFDKDGDTITTKELGTVMR  | P62204 | 0          | N-term +42.01 Da, K +28.03 Da,            | 7075.938477 | 3 | 1421.380005 | 1420.713797 |
| ADEVALALQAAGSPSAAAAMEAASQPADEPLR      | Q923E4 | 0          | N-term +42.01 Da,                         | 7077.842773 | 3 | 1041.51001  | 1041.175068 |
| ADQLTEEQIAEFKEAFSLFDKDGDTITTK         | P62204 | 0          | N-term +42.01 Da, K +28.03 Da,            | 7078.824219 | 4 | 869.6900024 | 869.1857134 |
| ADEVALALQAAGSPSAAAAMEAASQPADEPLR      | Q923E4 | 0          | N-term +42.01 Da,                         | 7081.603027 | 3 | 1041.839966 | 1041.175068 |
| MDDTLFQLKF                            | Q921W0 | 0          | N-term +42.01 Da, K +28.03 Da,            | 7084.804688 | 2 | 664.3300171 | 664.3337673 |
| MEDSMDMDMSPLRPQNYLFGC                 | Q61937 | 0          | N-term +42.01 Da, C +57.02Da,             | 7085.725098 | 2 | 1290.52002  | 1290.02262  |
| ADQLTEEQIAEFKEAFSLFDKDGDTITTK         | P62204 | 0          | N-term +42.01 Da, K +28.03 Da,            | 7087.513672 | 4 | 869.4400024 | 869.1857134 |
| LKTVLELQYVLDKLGDDVDR                  | Q60865 | 0          | N-term +42.01 Da, K +28.03 Da,            | 7087.638184 | 3 | 810.460022  | 810.7878614 |
| ADQLTEEQIAEFKEAFSLFDKDGDTITTK         | P62204 | 0          | N-term +42.01 Da, K +28.03 Da,            | 7088.573242 | 3 | 1158.579956 | 1158.578526 |
| ADQLTEEQIAEFKEAFSLFDKDGDTITTKELGTVMR  | P62204 | 0          | N-term +42.01 Da, K +28.03 Da,            | 7090.338379 | 4 | 1065.786743 | 1065.787167 |
| CDFTEDQTAEFKEAFQLFDR                  | Q60605 | 0          | N-term +42.01 Da, K +28.03 Da,C +57.02Da, | 7096.294922 | 2 | 1284.074219 | 1284.073393 |
| MLSPAMSLKSFPPPGSADGLR                 | Q923F1 | 0          | N-term +42.01 Da, K +28.03 Da,            | 7096.418945 | 2 | 1189.109985 | 1188.608162 |
| MEALILEPSLYTVK                        | P61924 | 0          | N-term +42.01 Da, K +28.03 Da,            | 7097.41748  | 2 | 838.9623413 | 838.9626039 |
| ASDEGKLFVGGLSFDTNEQALEQVFSKYQISEVVKDR | P60824 | 0          | N-term +42.01 Da, K +28.03 Da,            | 7099.563477 | 4 | 1129.839966 | 1129.587802 |
| MLSPAMSLKSFPPPGSADGLR                 | Q923F1 | 0          | N-term +42.01 Da, K +28.03 Da,            | 7099.688965 | 3 | 792.7399902 | 792.7412001 |
| ADQLTEEQIAEFKEAF                      | P62204 | 0          | N-term +42.01 Da, K +28.03 Da,            | 7103.572754 | 2 | 969.9699707 | 969.9702015 |
| CDFTEDQTAEFKEAFQLFDR                  | Q60605 | 0          | N-term +42.01 Da, K +28.03 Da,C +57.02Da, | 7103.66748  | 3 | 857.0499878 | 856.3846878 |
| EEEIAALVIDNGSGMCKAGF                  | P63260 | 0          | N-term +42.01 Da, K +28.03 Da,C +57.02Da, | 7104.128418 | 2 | 1091.51001  | 1091.013761 |
| AAMLGDAIMVAKGLAK                      | Q60936 | 0          | N-term +42.01 Da, K +28.03 Da,            | 7104.260254 | 2 | 829.9799805 | 829.4726153 |

|                                         |        |            |                                           |             |   |             |             |
|-----------------------------------------|--------|------------|-------------------------------------------|-------------|---|-------------|-------------|
| ADQLTEEQIAEFKEAFSLFDKDGDTITTKELGTVMR    | P62204 | 0          | N-term +42.01 Da, K +28.03 Da,            | 7107.26709  | 3 | 1420.715942 | 1420.713797 |
| AEAPVDLSTGDNLEQKILQVLSDDGGPVKIGQLVKKC   | Q9QY24 | 0          | N-term +42.01 Da, K +28.03 Da,C +57.02Da, | 7112.72168  | 4 | 1023.309998 | 1023.059256 |
| AEAPVDLSTGDNLEQKILQVLSDDGGPVKIGQLVKKC   | Q9QY24 | 0          | N-term +42.01 Da, K +28.03 Da,C +57.02Da, | 7113.38916  | 4 | 1023.070007 | 1023.059256 |
| MNAAAEAEFNILLATDSYKVVTH                 | Q99KQ4 | 0.00232992 | N-term +42.01 Da, K +28.03 Da,            | 7118.265137 | 2 | 1240.630005 | 1240.112321 |
| ADQLTEEQIAEFKEAFSLFDKDGDTITTKELGTVMR    | P62204 | 0          | N-term +42.01 Da, K +28.03 Da,            | 7121.769531 | 4 | 1065.787231 | 1065.787167 |
| AGVCDMAPNFLSPSEDQALGLALGR               | Q9JLZ8 | 0          | N-term +42.01 Da, C +57.02Da,             | 7122.941406 | 3 | 878.0900269 | 877.7562385 |
| AAPSGSVNCEEFAEFQELLKVMR                 | Q8R3Q6 | 0          | N-term +42.01 Da, K +28.03 Da,C +57.02Da, | 7124.587891 | 3 | 895.4299927 | 894.7682556 |
| AGVCDMAPNFLSPSEDQALGLALGR               | Q9JLZ8 | 0          | N-term +42.01 Da, C +57.02Da,             | 7124.902344 | 2 | 1316.640015 | 1316.13072  |
| CDFTEDQTAEFKEAFQLFDR                    | Q60605 | 0          | N-term +42.01 Da, K +28.03 Da,C +57.02Da, | 7126.532227 | 2 | 1284.075317 | 1284.073393 |
| AGVCDMAPNFLSPSEDQALGLALGR               | Q9JLZ8 | 0          | N-term +42.01 Da, C +57.02Da,             | 7126.873047 | 2 | 1317.130005 | 1316.13072  |
| MLSPAMSFLLKSFPPPGSADGLR                 | Q923F1 | 0          | N-term +42.01 Da, K +28.03 Da,            | 7129.76416  | 2 | 1188.609985 | 1188.608162 |
| SVTLQTVLYSLQEEQAR                       | Q9D8C4 | 0          | N-term +42.01 Da,                         | 7134.532715 | 2 | 1004.030029 | 1004.0233   |
| ADQLTEEQIAEFKEAF                        | P62204 | 0          | N-term +42.01 Da, K +28.03 Da,            | 7136.255371 | 2 | 969.9703979 | 969.9702015 |
| ADQLTEEQIAEFKEAFSLFDKDGDTITTKELGTVMR    | P62204 | 0          | N-term +42.01 Da, K +28.03 Da,            | 7138.224609 | 3 | 1420.715088 | 1420.713797 |
| MLSPAMSFLLKSFPPPGSADGLR                 | Q923F1 | 0.00452489 | N-term +42.01 Da, K +28.03 Da,            | 7141.673828 | 2 | 1189.599976 | 1188.608162 |
| ASDEGKLFVGGLSFDTNEQALEQVFSKYQISEV VVKDR | P60824 | 0          | N-term +42.01 Da, K +28.03 Da,            | 7141.958496 | 4 | 1130.089966 | 1129.587802 |
| CDFTEDQTAEFKEAFQLFDR                    | Q60605 | 0          | N-term +42.01 Da, K +28.03 Da,C +57.02Da, | 7146.57373  | 3 | 857.0599976 | 856.3846878 |
| ADQLTEEQIAEFKEAFSLFDKDGDTITTKELGTVMR    | P62204 | 0          | N-term +42.01 Da, K +28.03 Da,            | 7153.96875  | 4 | 1065.788208 | 1065.787167 |
| ATVWDEAEQDGIGEEVLKMSTEEIVQR             | O88685 | 0          | N-term +42.01 Da, K +28.03 Da,            | 7156.831055 | 3 | 1045.180054 | 1044.839574 |
| AEAPVDLSTGDNLEQKILQVLSDDGGPVKIGQLVKKC   | Q9QY24 | 0          | N-term +42.01 Da, K +28.03 Da,C +57.02Da, | 7157.084961 | 4 | 1023.059998 | 1023.059256 |
| CDFTEDQTAEFKEAFQLFDR                    | Q60605 | 0          | N-term +42.01 Da, K +28.03 Da,C +57.02Da, | 7158.711426 | 2 | 1285.079956 | 1284.073393 |
| ATVWDEAEQDGIGEEVLKMSTEEIVQR             | O88685 | 0          | N-term +42.01 Da, K +28.03 Da,            | 7159.305176 | 2 | 1567.27002  | 1566.755723 |
| ATVWDEAEQDGIGEEVLKMSTEEIVQR             | O88685 | 0          | N-term +42.01 Da, K +28.03 Da,            | 7161.770996 | 2 | 1567.76001  | 1566.755723 |
| GSGPIDPKELLKGLDLSFLTR                   | Q80W00 | 0          | N-term +42.01 Da, K +28.03 Da,            | 7164.243652 | 3 | 748.0900269 | 747.7544916 |
| ADQLTEEQIAEFKEAFSLFDKDGDTITTKELGTVMR    | P62204 | 0          | N-term +42.01 Da, K +28.03 Da,            | 7168.535156 | 3 | 1420.715332 | 1420.713797 |
| AEAAAAGASGETMAALVAAEGLSPAGWSAGR         | P97364 | 0          | N-term +42.01 Da,                         | 7168.772949 | 3 | 967.7999878 | 967.4662934 |
| ADQLTEEQIAEFKEAF                        | P62204 | 0          | N-term +42.01 Da, K +28.03 Da,            | 7168.88916  | 2 | 969.9710693 | 969.9702015 |
| SVTLQTVLYSLQEEQAR                       | Q9D8C4 | 0          | N-term +42.01 Da,                         | 7169.035156 | 2 | 1004.52002  | 1004.0233   |
| AEAAAAGASGETMAALVAAEGLSPAGWSAGR         | P97364 | 0          | N-term +42.01 Da,                         | 7170.893555 | 2 | 1451.699951 | 1450.695802 |
| ASDEGKLFVGGLSFDTNEQALEQVFSKYQISEV VVKDR | P60824 | 0          | N-term +42.01 Da, K +28.03 Da,            | 7172.835449 | 4 | 1130.089966 | 1129.587802 |
| ADQLTEEQIAEFKEAFSLFDKDGDTITTKELG        | P62204 | 0          | N-term +42.01 Da, K +28.03 Da,            | 7176.385254 | 3 | 1258.630005 | 1258.294567 |
| ADQLTEEQIAEFKEAFSLFDKDGDTITTKELGTVMR    | P62204 | 0          | N-term +42.01 Da, K +28.03 Da,            | 7184.481445 | 4 | 1065.787842 | 1065.787167 |
| ATVWDEAEQDGIGEEVLKMSTEEIVQR             | O88685 | 0          | N-term +42.01 Da, K +28.03 Da,            | 7189.45752  | 3 | 1045.51001  | 1044.839574 |
| CDFTEDQTAEFKEAFQLFDR                    | Q60605 | 0          | N-term +42.01 Da, K +28.03 Da,C +57.02Da, | 7189.570313 | 2 | 1284.073853 | 1284.073393 |
| AEAPVDLSTGDNLEQKILQVLSDDGGPVKIGQLVKKC   | Q9QY24 | 0          | N-term +42.01 Da, K +28.03 Da,C +57.02Da, | 7189.719238 | 4 | 1023.309998 | 1023.059256 |
| ATFEESVVLGFEEDKAVK                      | Q9CQM5 | 0          | N-term +42.01 Da, K +28.03 Da,            | 7193.242188 | 2 | 1121.560059 | 1122.077741 |
| CDFTEDQTAEFKEAFQLFDR                    | Q60605 | 0          | N-term +42.01 Da, K +28.03 Da,C +57.02Da, | 7194.453125 | 3 | 856.3900146 | 856.3846878 |
| ADQLTEEQIAEFKEAFSLFDKDGDTITTKELG        | P62204 | 0          | N-term +42.01 Da, K +28.03 Da,            | 7197.367676 | 4 | 944.2199707 | 943.972744  |
| AEEGIAAGGVMDVNTALQEVLKTALIHDLGR         | P63323 | 0          | N-term +42.01 Da, K +28.03 Da,            | 7200.54834  | 3 | 1112.25     | 1111.588813 |
| AEAAAAGASGETMAALVAAEGLSPAGWSAGR         | P97364 | 0          | N-term +42.01 Da,                         | 7200.934082 | 3 | 967.7999878 | 967.4662934 |

|                                      |        |            |                                           |             |   |             |             |
|--------------------------------------|--------|------------|-------------------------------------------|-------------|---|-------------|-------------|
| ADQLTEEQIAEFKEAFSLFDKDGDTITTKELGTVMR | P62204 | 0          | N-term +42.01 Da, K +28.03 Da,            | 7201.009766 | 3 | 1420.716553 | 1420.713797 |
| ADQLTEEQIAEFKEAF                     | P62204 | 0          | N-term +42.01 Da, K +28.03 Da,            | 7201.111328 | 2 | 969.9699707 | 969.9702015 |
| AEEAAAGASGETMAALVAAEGSLGPAGWSAGR     | P97364 | 0          | N-term +42.01 Da,                         | 7205.411621 | 2 | 1450.689941 | 1450.695802 |
| ADQLTEEQIAEFKEAFSLFDKDGDTITTKELG     | P62204 | 0          | N-term +42.01 Da, K +28.03 Da,            | 7207.352539 | 3 | 1258.290039 | 1258.294567 |
| VNPTVFFDITADDEPLGR                   | P17742 | 0          | N-term +42.01 Da,                         | 7213.675293 | 2 | 1024.5      | 1024.5022   |
| ADQLTEEQIAEFKEAFSLFDKDGDTITTKELGTVMR | P62204 | 0          | N-term +42.01 Da, K +28.03 Da,            | 7214.902344 | 4 | 1065.788086 | 1065.787167 |
| CDFTEDQTAEFKEAFQLFDR                 | Q60605 | 0          | N-term +42.01 Da, K +28.03 Da,C +57.02Da, | 7221.883789 | 2 | 1284.07251  | 1284.073393 |
| CDFTEDQTAEFKEAFQLFDR                 | Q60605 | 0          | N-term +42.01 Da, K +28.03 Da,C +57.02Da, | 7227.347168 | 3 | 857.0499878 | 856.3846878 |
| SVTLQTVLYSLQEEQAR                    | Q9D8C4 | 0          | N-term +42.01 Da,                         | 7227.919922 | 2 | 1004.02002  | 1004.0233   |
| AAAAMAVSEAWPELELAER                  | Q505F5 | 0          | N-term +42.01 Da,                         | 7235.748535 | 2 | 1030.01001  | 1029.004053 |
| MEDSMDMDMSPLRPQNYLF                  | Q61937 | 0          | N-term +42.01 Da,                         | 7238.150879 | 2 | 1182        | 1181.496563 |
| ADQLTEEQIAEFKEAFSLFDKDGDTITTKELGT    | P62204 | 0          | N-term +42.01 Da, K +28.03 Da,            | 7240.512695 | 3 | 1292.310059 | 1291.977126 |
| ADQLTEEQIAEFKEAFSLFDKDGDTITTKEL      | P62204 | 0          | N-term +42.01 Da, K +28.03 Da,            | 7241.080078 | 3 | 1239.630005 | 1239.287412 |
| ADQLTEEQIAEFKEAFSLFDKDGDTITTKELGTVMR | P62204 | 0          | N-term +42.01 Da, K +28.03 Da,            | 7245.628418 | 4 | 1065.789673 | 1065.787167 |
| ADQLTEEQIAEFKEAF                     | P62204 | 0          | N-term +42.01 Da, K +28.03 Da,            | 7245.935547 | 2 | 969.9699707 | 969.9702015 |
| SESLVCDVAEDLVEKLR                    | Q9CQI3 | 0          | N-term +42.01 Da, K +28.03 Da,C +57.02Da, | 7248.516113 | 3 | 711.3800049 | 711.036559  |
| AEEAAAGASGETMAALVAAEGSLGPAGWSAGR     | P97364 | 0          | N-term +42.01 Da,                         | 7248.861816 | 3 | 967.4699707 | 967.4662934 |
| CDFTEDQTAEFKEAFQLFDR                 | Q60605 | 0          | N-term +42.01 Da, K +28.03 Da,C +57.02Da, | 7252.675293 | 2 | 1284.07605  | 1284.073393 |
| MDVFLMIR                             | P62869 | 0          | N-term +42.01 Da,                         | 7256.696777 | 2 | 533.7700195 | 533.7748329 |
| CDFTEDQTAEFKEAFQLFDR                 | Q60605 | 0          | N-term +42.01 Da, K +28.03 Da,C +57.02Da, | 7257.822754 | 3 | 857.0499878 | 856.3846878 |
| ADQLTEEQIAEFKEAFSLFDKDGDTITTKEL      | P62204 | 0          | N-term +42.01 Da, K +28.03 Da,            | 7258.500977 | 4 | 930.2199707 | 929.717378  |
| AAAAMAVSEAWPELELAER                  | Q505F5 | 0          | N-term +42.01 Da,                         | 7258.995117 | 3 | 686.3400269 | 686.3384605 |
| MDDLADLADLESTTSHISKR                 | Q8VI36 | 0          | N-term +42.01 Da, K +28.03 Da,            | 7262.32373  | 3 | 801.4000244 | 801.0686995 |
| ADQLTEEQIAEFKEAFSLFDKDGDTITTKELGTVMR | P62204 | 0          | N-term +42.01 Da, K +28.03 Da,            | 7263.526855 | 3 | 1421.040039 | 1420.713797 |
| AAAAMAVSEAWPELELAER                  | Q505F5 | 0          | N-term +42.01 Da,                         | 7266.404297 | 2 | 1029.002686 | 1029.004053 |
| ADQLTEEQIAEFKEAFSLFDKDGDTITTKELG     | P62204 | 0          | N-term +42.01 Da, K +28.03 Da,            | 7268.886719 | 3 | 1258.300049 | 1258.294567 |
| ADQLTEEQIAEFKEAFSLFDKDGDTITTKEL      | P62204 | 0          | N-term +42.01 Da, K +28.03 Da,            | 7274.144043 | 3 | 1239.630005 | 1239.287412 |
| ADQLTEEQIAEFKEAFSLFDKDGDTITTKELGTVMR | P62204 | 0          | N-term +42.01 Da, K +28.03 Da,            | 7276.579102 | 4 | 1066.040039 | 1065.787167 |
| ADQLTEEQIAEFKEAF                     | P62204 | 0          | N-term +42.01 Da, K +28.03 Da,            | 7276.695801 | 2 | 969.9705811 | 969.9702015 |
| AQCQSVQELIPDSFVPCVAALCSDEAER         | E9PWG2 | 0          | N-term +42.01 Da, C +57.02Da,             | 7281.114746 | 3 | 1107.849976 | 1107.512587 |
| AEEAAAGASGETMAALVAAEGSLGPAGWSAGR     | P97364 | 0          | N-term +42.01 Da,                         | 7282.118164 | 3 | 967.4699707 | 967.4662934 |
| MDDYAVLSDTELAAVLR                    | O08579 | 0          | N-term +42.01 Da,                         | 7283.135254 | 2 | 962.9799805 | 962.4720539 |
| CDFTEDQTAEFKEAFQLFDR                 | Q60605 | 0          | N-term +42.01 Da, K +28.03 Da,C +57.02Da, | 7284.335449 | 2 | 1285.079956 | 1284.073393 |
| CDFTEDQTAEFKEAFQLFDR                 | Q60605 | 0          | N-term +42.01 Da, K +28.03 Da,C +57.02Da, | 7290.892578 | 3 | 856.3900146 | 856.3846878 |
| ADQLTEEQIAEFKEAFSLFDKDGDTITTKEL      | P62204 | 0          | N-term +42.01 Da, K +28.03 Da,            | 7293.373047 | 4 | 930.2299805 | 929.717378  |
| ADQLTEEQIAEFKEAFSLFDKDGDTITTKELGTVMR | P62204 | 0.00234852 | N-term +42.01 Da, K +28.03 Da,            | 7295.630859 | 3 | 1421.380005 | 1420.713797 |
| EEEIAALVIDNGSGMCKAGF                 | P63260 | 0          | N-term +42.01 Da, K +28.03 Da,C +57.02Da, | 7296.165527 | 2 | 1091.500977 | 1091.013761 |
| ATFEESVVLGFEEDKAVKEHEGKTIFA          | Q9CQM5 | 0          | N-term +42.01 Da, K +28.03 Da,            | 7296.332031 | 4 | 821.9299927 | 821.6747838 |
| ADQLTEEQIAEFKEAFSLFDKDGDTITTKELGT    | P62204 | 0.00232883 | N-term +42.01 Da, K +28.03 Da,            | 7297.37207  | 3 | 1292.310059 | 1291.977126 |
| ADQLTEEQIAEFKEAFSLFDKDGDTITTKELG     | P62204 | 0          | N-term +42.01 Da, K +28.03 Da,            | 7300.922363 | 3 | 1258.630005 | 1258.294567 |

|                                       |        |            |                                           |             |   |             |             |
|---------------------------------------|--------|------------|-------------------------------------------|-------------|---|-------------|-------------|
| ATFEEVSVLGFEEFDKAVKEHEGKTIF           | Q9CQM5 | 0          | N-term +42.01 Da, K +28.03 Da,            | 7307.174316 | 4 | 804.4199829 | 803.9155053 |
| ADQLTEEQIAEFKEAFSLFDKDGDTITTKELGTVMR  | P62204 | 0          | N-term +42.01 Da, K +28.03 Da,            | 7308.371582 | 4 | 1065.787598 | 1065.787167 |
| MDVNTALQEVLTALIHDLGLAR                | P63323 | 0          | N-term +42.01 Da, K +28.03 Da,            | 7309.123047 | 3 | 827.1199951 | 826.7843453 |
| CDFTEDQTAEFKEAFQLFDR                  | Q60605 | 0          | N-term +42.01 Da, K +28.03 Da,C +57.02Da, | 7315.208496 | 2 | 1284.579956 | 1284.073393 |
| MDDYAVLSDTELAVALR                     | O08579 | 0          | N-term +42.01 Da,                         | 7315.364258 | 2 | 962.4733887 | 962.4720539 |
| ATFEEVSVLGFEEFDKAVKEHEGKTIF           | Q9CQM5 | 0          | N-term +42.01 Da, K +28.03 Da,            | 7315.714355 | 3 | 1071.550049 | 1071.551582 |
| METPFYGEELSLAAGASSVAGATGAPGGGGFAPPGR  | P15066 | 0          | N-term +42.01 Da,                         | 7316.583984 | 3 | 1170.569946 | 1169.887699 |
| CDFTEDQTAEFKEAFQLFDR                  | Q60605 | 0          | N-term +42.01 Da, K +28.03 Da,C +57.02Da, | 7324.974121 | 3 | 856.3900146 | 856.3846878 |
| DTQQKVKLADIQIEQLNR                    | Q9CWM4 | 0.04560669 | N-term +42.01 Da, K +28.03 Da,            | 7325.142578 | 3 | 747.4299927 | 746.7532622 |
| ADQLTEEQIAEFKEAF                      | P62204 | 0          | N-term +42.01 Da, K +28.03 Da,            | 7328.48584  | 2 | 969.9679565 | 969.9702015 |
| MEYEWKPDQGLQQLLQKESQSPDTTIQR          | Q8BFY9 | 0          | N-term +42.01 Da, K +28.03 Da,            | 7332.307617 | 3 | 1277.319946 | 1277.315419 |
| VIQELRPTLNLGISTPEELGLDKV              | P12787 | 0          | N-term +42.01 Da, K +28.03 Da,            | 7334.756836 | 3 | 945.1900024 | 945.190095  |
| ATFEEVSVLGFEEFDKAVKEHEGKTIF           | Q9CQM5 | 0          | N-term +42.01 Da, K +28.03 Da,            | 7338.754883 | 4 | 803.9158325 | 803.9155053 |
| ADQLTEEQIAEFKEAFSLFDKDGDTITTKEL       | P62204 | 0          | N-term +42.01 Da, K +28.03 Da,            | 7339.03418  | 3 | 1239.630005 | 1239.287412 |
| AWVPAESAVEELMPR                       | Q9CQQ4 | 0          | N-term +42.01 Da,                         | 7339.181641 | 2 | 864.4299927 | 863.9270842 |
| ADQLTEEQIAEFKEAFSLFDKDGDTITTKELGTVMR  | P62204 | 0          | N-term +42.01 Da, K +28.03 Da,            | 7341.29834  | 4 | 1066.290039 | 1065.787167 |
| MDVNTALQEVLTALIHDLGLAR                | P63323 | 0          | N-term +42.01 Da, K +28.03 Da,            | 7341.40625  | 3 | 827.1199951 | 826.7843453 |
| CDFTEDQTAEFKEAFQLFDR                  | Q60605 | 0          | N-term +42.01 Da, K +28.03 Da,C +57.02Da, | 7346.973145 | 2 | 1284.569946 | 1284.073393 |
| LHSPMYLLANFSLEIYVYVTVPNMLANFLSDTK     | L7N1X7 | 0.01332741 | N-term +42.01 Da, K +28.03 Da,            | 7355.294434 | 4 | 1062.790039 | 1062.296543 |
| AGLVDFQDEEQVKSFLNMEVECHY              | Q921H9 | 0          | N-term +42.01 Da, K +28.03 Da,C +57.02Da, | 7356.536621 | 3 | 1029.800049 | 1029.46345  |
| CDFTEDQTAEFKEAFQLFDR                  | Q60605 | 0          | N-term +42.01 Da, K +28.03 Da,C +57.02Da, | 7358.499512 | 3 | 857.0499878 | 856.3846878 |
| ADQLTEEQIAEFKEAF                      | P62204 | 0          | N-term +42.01 Da, K +28.03 Da,            | 7360.01416  | 2 | 969.9699707 | 969.9702015 |
| ADQLTEEQIAEFKEAFSLFDKDGDTITTKEL       | P62204 | 0          | N-term +42.01 Da, K +28.03 Da,            | 7365.477051 | 4 | 930.2199707 | 929.717378  |
| AWVPAESAVEELMPR                       | Q9CQQ4 | 0          | N-term +42.01 Da,                         | 7370.470703 | 2 | 863.9274902 | 863.9270842 |
| ADQLTEEQIAEFKEAFSLFDKDGDTITTKEL       | P62204 | 0          | N-term +42.01 Da, K +28.03 Da,            | 7370.640625 | 3 | 1239.959961 | 1239.287412 |
| ADQLTEEQIAEFKEAFSLFDKDGDTITTKELGTVMR  | P62204 | 0          | N-term +42.01 Da, K +28.03 Da,            | 7372.979004 | 4 | 1065.78894  | 1065.787167 |
| ADQLTEEQIAEFKEAFSLFDKDGDTITTKELGTVMR  | P62204 | 0.00278035 | N-term +42.01 Da, K +28.03 Da,            | 7376.699219 | 3 | 1421.050049 | 1420.713797 |
| CDFTEDQTAEFKEAFQLFDR                  | Q60605 | 0          | N-term +42.01 Da, K +28.03 Da,C +57.02Da, | 7377.61377  | 2 | 1285.069946 | 1284.073393 |
| CDFTEDQTAEFKEAFQLFDR                  | Q60605 | 0          | N-term +42.01 Da, K +28.03 Da,C +57.02Da, | 7378.085449 | 2 | 1284.569946 | 1284.073393 |
| ADQLTEEQIAEFKEAFSLFDKDGDSITTQELGTVMRS | Q9D6P8 | 0          | N-term +42.01 Da, K +28.03 Da,            | 7380.199707 | 4 | 1077.290039 | 1077.02434  |
| ADQLTEEQIAEFKEAF                      | P62204 | 0          | N-term +42.01 Da, K +28.03 Da,            | 7391.194824 | 2 | 969.9699707 | 969.9702015 |
| CDFTEDQTAEFKEAFQLFDR                  | Q60605 | 0          | N-term +42.01 Da, K +28.03 Da,C +57.02Da, | 7391.941895 | 3 | 856.7199707 | 856.3846878 |
| VNPTVFFDITADDEPLGR                    | P17742 | 0          | N-term +42.01 Da,                         | 7397.462402 | 2 | 1025.01001  | 1024.5022   |
| ATFEEVSVLGFEEFDKAVKE                  | Q9CQM5 | 0          | N-term +42.01 Da, K +28.03 Da,            | 7397.937012 | 3 | 791.7299805 | 791.4017842 |
| AEEGIAAGGVMDVNTALQEVLK                | P63323 | 0          | N-term +42.01 Da, K +28.03 Da,            | 7399.88623  | 2 | 1143.589966 | 1143.088314 |
| AWVPAESAVEELMPR                       | Q9CQQ4 | 0          | N-term +42.01 Da,                         | 7401.442871 | 2 | 864.4299927 | 863.9270842 |
| LSQLRRFDMAVMFMMSGPER                  | Q9D706 | 0.03505772 | N-term +42.01 Da,                         | 7402.861328 | 2 | 1157.579956 | 1157.068681 |
| ADQLTEEQIAEFKEAFSLFDKDGDTITTKELGTVMR  | P62204 | 0          | N-term +42.01 Da, K +28.03 Da,            | 7404.324219 | 4 | 1066.290039 | 1065.787167 |
| ATFEEVSVLGFEEFDKAVKE                  | Q9CQM5 | 0          | N-term +42.01 Da, K +28.03 Da,            | 7404.770996 | 2 | 1187.599976 | 1186.599038 |
| VNPTVFFDITADDEPLGR                    | P17742 | 0          | N-term +42.01 Da,                         | 7404.902832 | 2 | 1025.5      | 1024.5022   |

|                                       |        |            |                                           |             |   |             |             |
|---------------------------------------|--------|------------|-------------------------------------------|-------------|---|-------------|-------------|
| CDFTEDQTAEFKEAFQLFDR                  | Q60605 | 0          | N-term +42.01 Da, K +28.03 Da,C +57.02Da, | 7410.605469 | 2 | 1285.079956 | 1284.073393 |
| ADQLTEEQIAEFKEAFSLFDKDKDGSITTELGTVMRS | Q9D6P8 | 0          | N-term +42.01 Da, K +28.03 Da,            | 7412.336426 | 4 | 1077.540039 | 1077.02434  |
| AAADGDDSLYPIAVLIDELR                  | Q76MZ3 | 0          | N-term +42.01 Da,                         | 7413.720215 | 2 | 1081.050049 | 1080.046972 |
| ATFEEVSVLGFEEFDKAVKE                  | Q9CQM5 | 0          | N-term +42.01 Da, K +28.03 Da,            | 7414.617188 | 3 | 792.0700073 | 791.4017842 |
| ADQLTEEQIAEFKEAFSLFDKDKDGTITTKELGTVMR | P62204 | 0.04674457 | N-term +42.01 Da, K +28.03 Da,            | 7419.641602 | 3 | 1421.390015 | 1420.713797 |
| ATSWGSIQDEKQLEELAKQAIDR               | P51855 | 0          | N-term +42.01 Da, K +28.03 Da,            | 7421.158691 | 3 | 943.1699829 | 943.1660609 |
| ADQLTEEQIAEFKEAF                      | P62204 | 0          | N-term +42.01 Da, K +28.03 Da,            | 7422.58252  | 2 | 969.9699707 | 969.9702015 |
| CDFTEDQTAEFKEAFQLFDR                  | Q60605 | 0          | N-term +42.01 Da, K +28.03 Da,C +57.02Da, | 7424.805176 | 3 | 856.3800049 | 856.3846878 |
| AEEGIAAGGVMDVNTALQEVLK                | P63323 | 0          | N-term +42.01 Da, K +28.03 Da,            | 7429.853516 | 2 | 1143.089966 | 1143.088314 |
| ADQLTEEQIAEFKEAFSLFDKDKDGTITTKELGTVMR | P62204 | 0          | N-term +42.01 Da, K +28.03 Da,            | 7436.820801 | 4 | 1066.290039 | 1065.787167 |
| VNPTVFFDITADDEPLGR                    | P17742 | 0          | N-term +42.01 Da,                         | 7436.908691 | 2 | 1024.50293  | 1024.5022   |
| CDFTEDQTAEFKEAFQLFDR                  | Q60605 | 0          | N-term +42.01 Da, K +28.03 Da,C +57.02Da, | 7443.757813 | 2 | 1285.079956 | 1284.073393 |
| ADQLTEEQIAEFKEAFSLFDKDKDGSITTELGTVMRS | Q9D6P8 | 0.0014313  | N-term +42.01 Da, K +28.03 Da,            | 7443.941895 | 4 | 1077.280029 | 1077.02434  |
| MDLLGNPFSSPVGQR                       | O88746 | 0          | N-term +42.01 Da,                         | 7446.954102 | 2 | 904.4500122 | 903.9458083 |
| MDLLGNPFSSPVGQR                       | O88746 | 0          | N-term +42.01 Da,                         | 7448.638672 | 2 | 903.9500122 | 903.9458083 |
| ATSWGSIQDEKQLEELAKQAIDR               | P51855 | 0          | N-term +42.01 Da, K +28.03 Da,            | 7452.794434 | 3 | 943.5       | 943.1660609 |
| ADQLTEEQIAEFKEAF                      | P62204 | 0          | N-term +42.01 Da, K +28.03 Da,            | 7455.557617 | 2 | 969.9691162 | 969.9702015 |
| CDFTEDQTAEFKEAFQLFDR                  | Q60605 | 0          | N-term +42.01 Da, K +28.03 Da,C +57.02Da, | 7455.700684 | 3 | 856.7199707 | 856.3846878 |
| ATFEEVSVLGFEEFDKAVKEHEGKTIFA          | Q9CQM5 | 0          | N-term +42.01 Da, K +28.03 Da,            | 7456.712402 | 4 | 822.1799927 | 821.6747838 |
| VNPTVFFDITADDEPLGR                    | P17742 | 0          | N-term +42.01 Da,                         | 7460.333008 | 3 | 683.3384399 | 683.3372256 |
| ATFEEVSVLGFEEFDKAVKEHEGKTIF           | Q9CQM5 | 0          | N-term +42.01 Da, K +28.03 Da,            | 7464.899902 | 4 | 804.4199829 | 803.9155053 |
| DAIAELDTLSEESYKSTLIMQLLR              | P62259 | 0          | N-term +42.01 Da, K +28.03 Da,            | 7468.900391 | 3 | 975.8499756 | 975.4984889 |
| VNPTVFFDITADDEPLGR                    | P17742 | 0          | N-term +42.01 Da,                         | 7470.032227 | 2 | 1024.502563 | 1024.5022   |
| ADQLTEEQIAEFKEAFSLFDKDKDGTITTKELGTVMR | P62204 | 0          | N-term +42.01 Da, K +28.03 Da,            | 7470.183105 | 4 | 1066.290039 | 1065.787167 |
| MDKYDDLGLEASKFIEDLNMYEASKDGLFR        | Q9QXD8 | 0          | N-term +42.01 Da, K +28.03 Da,            | 7470.472656 | 4 | 911.1900024 | 910.6953908 |
| MEVMNLIQPIKVTEWQQTYTDSGIHSGVN         | Q02257 | 0          | N-term +42.01 Da, K +28.03 Da,            | 7473.730957 | 3 | 1227.930054 | 1227.591895 |
| CDFTEDQTAEFKEAFQLFDR                  | Q60605 | 0          | N-term +42.01 Da, K +28.03 Da,C +57.02Da, | 7477.857422 | 2 | 1284.569946 | 1284.073393 |
| MDLLGNPFSSPVGQR                       | O88746 | 0          | N-term +42.01 Da,                         | 7479.791016 | 2 | 903.9454346 | 903.9458083 |
| ATFEEVSVLGFEEFDKAVKEHEGKTIF           | Q9CQM5 | 0          | N-term +42.01 Da, K +28.03 Da,            | 7480.089844 | 4 | 803.9154663 | 803.9155053 |
| ASVSELACIYSALILHDDEVTVTEDIKIN         | P47955 | 0          | N-term +42.01 Da, K +28.03 Da,C +57.02Da, | 7482.332031 | 3 | 1059.530029 | 1059.195358 |
| MEDSMDMDMSPLRPQNYLFGCEL               | Q61937 | 0          | N-term +42.01 Da, C +57.02Da,             | 7485.083984 | 2 | 1412.089966 | 1411.085949 |
| ATSWGSIQDEKQLEELAKQAIDR               | P51855 | 0          | N-term +42.01 Da, K +28.03 Da,            | 7485.425293 | 3 | 943.8300171 | 943.1660609 |
| ADQLTEEQIAEFKEAF                      | P62204 | 0          | N-term +42.01 Da, K +28.03 Da,            | 7487.086914 | 2 | 969.9695435 | 969.9702015 |
| ATFEEVSVLGFEEFDKAVKEHEGKTIF           | Q9CQM5 | 0          | N-term +42.01 Da, K +28.03 Da,            | 7487.333496 | 3 | 1071.880005 | 1071.551582 |
| VNPTVFFDITADDEPLGR                    | P17742 | 0          | N-term +42.01 Da,                         | 7492.33252  | 3 | 683.3363647 | 683.3372256 |
| KPLVIAEDVDGEALSTLVNLR                 | P63038 | 0          | N-term +42.01 Da, K +28.03 Da,            | 7493.254395 | 3 | 812.1400146 | 812.4633778 |
| ATFEEVSVLGFEEFDKAVKEHEGKTIFA          | Q9CQM5 | 0          | N-term +42.01 Da, K +28.03 Da,            | 7493.430664 | 4 | 821.9199829 | 821.6747838 |
| SGFSPELIDYLEGKISFEFER                 | Q3TMP1 | 0          | N-term +42.01 Da, K +28.03 Da,            | 7493.890137 | 2 | 1332.660034 | 1331.649791 |
| TGEAIVDAALSALR                        | Q922R8 | 0          | N-term +42.01 Da,                         | 7497.265625 | 2 | 714.3900146 | 714.8882846 |
| VNPTVFFDITADDEPLGR                    | P17742 | 0          | N-term +42.01 Da,                         | 7502.189941 | 2 | 1024.501465 | 1024.5022   |

|                                      |        |            |                                           |             |   |             |             |
|--------------------------------------|--------|------------|-------------------------------------------|-------------|---|-------------|-------------|
| ADQLTEEQIAEFKEAFSLFDKDGDTITTKELGTVMR | P62204 | 0          | N-term +42.01 Da, K +28.03 Da,            | 7502.265625 | 4 | 1065.786499 | 1065.787167 |
| MDKYDDLGLLEASKFIEDLNMYEASKDGLFR      | Q9QXD8 | 0          | N-term +42.01 Da, K +28.03 Da,            | 7502.743164 | 4 | 911.1900024 | 910.6953908 |
| CDFTEDQTAEFKEAFQLFDR                 | Q60605 | 0          | N-term +42.01 Da, K +28.03 Da,C +57.02Da, | 7509.772949 | 2 | 1284.560059 | 1284.073393 |
| ATFEEVSVLGFEEFDKAVKEHEGKTIF          | Q9CQM5 | 0          | N-term +42.01 Da, K +28.03 Da,            | 7511.055664 | 4 | 803.9143677 | 803.9155053 |
| CDFTEDQTAEFKEAFQLFDR                 | Q60605 | 0          | N-term +42.01 Da, K +28.03 Da,C +57.02Da, | 7512.092285 | 3 | 857.0499878 | 856.3846878 |
| ASVSELACIYSALILHDDEVTVTDEKIN         | P47955 | 0          | N-term +42.01 Da, K +28.03 Da,C +57.02Da, | 7513.589844 | 3 | 1059.530029 | 1059.195358 |
| MEDSMMDMMSPLRPQNYLFGCEL              | Q61937 | 0          | N-term +42.01 Da, C +57.02Da,             | 7515.466309 | 2 | 1412.089966 | 1411.085949 |
| ADQLTEEQIAEFKEAF                     | P62204 | 0          | N-term +42.01 Da, K +28.03 Da,            | 7517.606445 | 2 | 969.968811  | 969.9702015 |
| ATFEEVSVLGFEEFDKAVKEHEGKTIF          | Q9CQM5 | 0          | N-term +42.01 Da, K +28.03 Da,            | 7518.953613 | 3 | 1071.549683 | 1071.551582 |
| AKDLDELLDEVETKF                      | Q3UJP5 | 0          | N-term +42.01 Da, K +28.03 Da,            | 7521.537598 | 3 | 621.6599731 | 621.6593055 |
| ADQLTEEQIAEFKEAFSLFDKDG              | P62204 | 0          | N-term +42.01 Da, K +28.03 Da,            | 7523.125977 | 3 | 968.1199951 | 967.7940705 |
| MDDL DALLADLESTTSHISKR               | Q8VI36 | 0          | N-term +42.01 Da, K +28.03 Da,            | 7524.992188 | 3 | 801.0700073 | 801.0686995 |
| AGELSQEALLDFLCQAGGR                  | Q8BZW2 | 0          | N-term +42.01 Da, C +57.02Da,             | 7528.637207 | 2 | 1039.5      | 1039.004584 |
| MEYLIQIQPDYVLVASDR                   | Q9R1P3 | 0          | N-term +42.01 Da,                         | 7528.777832 | 2 | 1091.550049 | 1091.04846  |
| ADQLTEEQIAEFKEAFSLFDKDGDTITTKELGTVMR | P62204 | 0          | N-term +42.01 Da, K +28.03 Da,            | 7533.930664 | 4 | 1066.290039 | 1065.787167 |
| VNPTVFFDITADDEPLGR                   | P17742 | 0          | N-term +42.01 Da,                         | 7534.033691 | 2 | 1024.499756 | 1024.5022   |
| AAAAEEGMSAAALVMSVPDSIGR              | Q3TYA6 | 0          | N-term +42.01 Da,                         | 7538.890625 | 2 | 1124.040039 | 1123.543217 |
| ADQLTEEQIAEFKEAFSLFDKDGDTITTKELGTVMR | P62204 | 0          | N-term +42.01 Da, K +28.03 Da,            | 7540.399414 | 3 | 1421.380005 | 1420.713797 |
| ATFEEVSVLGFEEFDKAVKEHEGKTIF          | Q9CQM5 | 0          | N-term +42.01 Da, K +28.03 Da,            | 7542.469727 | 4 | 803.9138184 | 803.9155053 |
| CDFTEDQTAEFKEAFQLFDR                 | Q60605 | 0          | N-term +42.01 Da, K +28.03 Da,C +57.02Da, | 7547.482422 | 2 | 1284.069946 | 1284.073393 |
| AAADELAFHEFEATNLLAETPDAATTSQSDELTSR  | Q99LP8 | 0          | N-term +42.01 Da,                         | 7548.086426 | 3 | 1299.27002  | 1298.599378 |
| ATFEEVSVLGFEEFDKAVKEHEGKTIF          | Q9CQM5 | 0          | N-term +42.01 Da, K +28.03 Da,            | 7549.335449 | 3 | 1071.880005 | 1071.551582 |
| ADQLTEEQIAEFKEAF                     | P62204 | 0          | N-term +42.01 Da, K +28.03 Da,            | 7549.84082  | 2 | 970.4699707 | 969.9702015 |
| AAADELAFHEFEATNLLAETPDAATTSQSDELTSR  | Q99LP8 | 0          | N-term +42.01 Da,                         | 7552.658203 | 3 | 1298.930054 | 1298.599378 |
| ADQLTEEQIAEFKEAFSLFDKDG              | P62204 | 0          | N-term +42.01 Da, K +28.03 Da,            | 7554.437988 | 3 | 967.791626  | 967.7940705 |
| AAADELAFHEFEATNLLAETPDAATTSQSDELTSR  | Q99LP8 | 0          | N-term +42.01 Da,                         | 7557.776855 | 4 | 974.710022  | 974.2013527 |
| CDFTEDQTAEFKEAFQLFDR                 | Q60605 | 0          | N-term +42.01 Da, K +28.03 Da,C +57.02Da, | 7560.185547 | 3 | 856.3800049 | 856.3846878 |
| AGELSQEALLDFLCQAGGR                  | Q8BZW2 | 0          | N-term +42.01 Da, C +57.02Da,             | 7560.584473 | 2 | 1039.51001  | 1039.004584 |
| CDFTEDQTAEFKEAFQLF                   | Q60605 | 0.00049751 | N-term +42.01 Da, K +28.03 Da,C +57.02Da, | 7560.797852 | 2 | 1148.51001  | 1148.509366 |
| ATFEEVSVLGFEEFDKA                    | Q9CQM5 | 0          | N-term +42.01 Da, K +28.03 Da,            | 7562.960938 | 2 | 994.4799805 | 994.4804021 |
| ADQLTEEQIAEFKEAFSLFDKDGDTITTKELGTVMR | P62204 | 0          | N-term +42.01 Da, K +28.03 Da,            | 7566.786621 | 4 | 1066.040039 | 1065.787167 |
| VNPTVFFDITADDEPLGR                   | P17742 | 0          | N-term +42.01 Da,                         | 7567.017578 | 2 | 1024.503174 | 1024.5022   |
| ADMPSGESCTSPLELFNSIATQGELVR          | P32921 | 0          | N-term +42.01 Da, C +57.02Da,             | 7567.785156 | 3 | 985.1400146 | 984.4635614 |
| ADMPSGESCTSPLELFNSIATQGELVR          | P32921 | 0          | N-term +42.01 Da, C +57.02Da,             | 7569.957031 | 2 | 1477.199951 | 1476.191704 |
| ADQLTEEQIAEFKEAFSLFDKDGDTITTKELGTVMR | P62204 | 0          | N-term +42.01 Da, K +28.03 Da,            | 7571.730957 | 3 | 1421.369995 | 1420.713797 |
| ADQLTEEQIAEFKEAFSLFDKDGDTITTKELGTVMR | P62204 | 0          | N-term +42.01 Da, K +28.03 Da,            | 7572.48877  | 3 | 1421.040039 | 1420.713797 |
| ATFEEVSVLGFEEFDKAVKEHEGKTIF          | Q9CQM5 | 0          | N-term +42.01 Da, K +28.03 Da,            | 7574.229004 | 4 | 803.9154053 | 803.9155053 |
| CDFTEDQTAEFKEAFQLFDR                 | Q60605 | 0          | N-term +42.01 Da, K +28.03 Da,C +57.02Da, | 7578.865723 | 2 | 1285.069946 | 1284.073393 |
| TDAAVSFAKDFLAGGVAAAIK                | P51881 | 0          | N-term +42.01 Da, K +28.03 Da,            | 7579.125977 | 3 | 736.4000244 | 736.7352085 |
| ADQLTEEQIAEFKEAF                     | P62204 | 0          | N-term +42.01 Da, K +28.03 Da,            | 7580.928223 | 2 | 969.9696045 | 969.9702015 |

|                                        |        |            |                                           |             |   |             |             |
|----------------------------------------|--------|------------|-------------------------------------------|-------------|---|-------------|-------------|
| TDAAVSFAKDFLAGGVAAAIK                  | P51881 | 0          | N-term +42.01 Da, K +28.03 Da,            | 7581.729004 | 2 | 1105.099976 | 1104.599175 |
| ADQLTEEQIAEFKEAFSL                     | P62204 | 0          | N-term +42.01 Da, K +28.03 Da,            | 7586.633789 | 3 | 714.0200195 | 713.6879243 |
| DAIAELDTLSEESYKDSTLIMQLLR              | P62259 | 0.00895656 | N-term +42.01 Da, K +28.03 Da,            | 7588.880859 | 2 | 1463.25     | 1462.744095 |
| CDFTEDQTAEFKEAFQLF                     | Q60605 | 0          | N-term +42.01 Da, K +28.03 Da,C +57.02Da, | 7591.554688 | 2 | 1148.510254 | 1148.509366 |
| CDFTEDQTAEFKEAFQLFDR                   | Q60605 | 0          | N-term +42.01 Da, K +28.03 Da,C +57.02Da, | 7591.69873  | 3 | 856.7199707 | 856.3846878 |
| ATFEVSVLGFEEFDKA                       | Q9CQM5 | 0          | N-term +42.01 Da, K +28.03 Da,            | 7593.838379 | 2 | 994.4783936 | 994.4804021 |
| AGTGLVAGEVVVDALPYFDQGYEAPGVR           | Q9D287 | 0          | N-term +42.01 Da,                         | 7594.175781 | 3 | 965.1500244 | 964.8186612 |
| ADLLGSILSSMEKPPSLGDQESR                | Q7TNE3 | 0          | N-term +42.01 Da, K +28.03 Da,            | 7595.737305 | 2 | 1251.140015 | 1250.633618 |
| ADLLGSILSSMEKPPSLGDQESR                | Q7TNE3 | 0          | N-term +42.01 Da, K +28.03 Da,            | 7597.395508 | 3 | 834.0900269 | 834.0915042 |
| ADLLGSILSSMEKPPSLGDQESR                | Q7TNE3 | 0          | N-term +42.01 Da, K +28.03 Da,            | 7597.789063 | 2 | 1251.640015 | 1250.633618 |
| ADQLTEEQIAEFKEAFSL                     | P62204 | 0          | N-term +42.01 Da, K +28.03 Da,            | 7598.400391 | 2 | 1070.027832 | 1070.028248 |
| ADQLTEEQIAEFKEAFSLFDKDKDGGTITTKELGTVMR | P62204 | 0          | N-term +42.01 Da, K +28.03 Da,            | 7598.476074 | 4 | 1065.786987 | 1065.787167 |
| VNPTVFFDITADDEPLGR                     | P17742 | 0          | N-term +42.01 Da,                         | 7598.932129 | 2 | 1025        | 1024.5022   |
| AGTGLVAGEVVVDALPYFDQGYEAPGVR           | Q9D287 | 0          | N-term +42.01 Da,                         | 7599.208984 | 2 | 1447.73999  | 1446.724354 |
| ATAMYLEHYLDSIENLPCELQR                 | Q9D8Y8 | 0          | N-term +42.01 Da, C +57.02Da,             | 7599.695801 | 3 | 904.0999756 | 903.4280105 |
| AGTGLVAGEVVVDALPYFDQGYEAPGVR           | Q9D287 | 0          | N-term +42.01 Da,                         | 7601.144531 | 2 | 1446.72998  | 1446.724354 |
| ADMPSGESCTSPLELFSIATQGELVR             | P32921 | 0          | N-term +42.01 Da, C +57.02Da,             | 7602.800293 | 2 | 1477.199951 | 1476.191704 |
| ADQLTEEQIAEFKEAFSLFDKDKDGGTITTKELGTVMR | P62204 | 0          | N-term +42.01 Da, K +28.03 Da,            | 7604.976563 | 3 | 1421.380005 | 1420.713797 |
| ADQLTEEQIAEFKEAFSLFDKDKD               | P62204 | 0          | N-term +42.01 Da, K +28.03 Da,            | 7609.445801 | 3 | 949.1199951 | 948.7869158 |
| CDFTEDQTAEFKEAFQLFDR                   | Q60605 | 0          | N-term +42.01 Da, K +28.03 Da,C +57.02Da, | 7611.041992 | 2 | 1284.579956 | 1284.073393 |
| VDALPYFDQGYEAPGVR                      | Q9D287 | 0          | N-term +42.01 Da,                         | 7612.455078 | 2 | 969.9685669 | 969.965253  |
| ADQLTEEQIAEFKEAFSLFDKDK                | P62204 | 0          | N-term +42.01 Da, K +28.03 Da,            | 7613.311035 | 3 | 891.7700195 | 891.4374464 |
| ADQLTEEQIAEFKEAFSLFDKDK                | P62204 | 0          | N-term +42.01 Da, K +28.03 Da,            | 7615.972168 | 2 | 1337.150024 | 1336.652531 |
| ADQLTEEQIAEFKEAFSL                     | P62204 | 0          | N-term +42.01 Da, K +28.03 Da,            | 7618.43457  | 3 | 714.3599854 | 713.6879243 |
| MDDL DALLADLESTTSHISKR                 | Q8VI36 | 0          | N-term +42.01 Da, K +28.03 Da,            | 7620.082031 | 3 | 801.4000244 | 801.0686995 |
| ATFEVSVLGFEEFDKAVKEHEGKTIFAY           | Q9CQM5 | 0          | N-term +42.01 Da, K +28.03 Da,            | 7622.232422 | 3 | 1149.920044 | 1149.585063 |
| AAPQPLALQLEQLLNPR                      | Q9JKX4 | 0          | N-term +42.01 Da,                         | 7622.462402 | 2 | 957.539978  | 957.5440042 |
| CDFTEDQTAEFKEAFQLFDR                   | Q60605 | 0          | N-term +42.01 Da, K +28.03 Da,C +57.02Da, | 7622.601074 | 3 | 857.0499878 | 856.3846878 |
| ATFEVSVLGFEEFDKA                       | Q9CQM5 | 0          | N-term +42.01 Da, K +28.03 Da,            | 7624.61377  | 2 | 994.4804077 | 994.4804021 |
| AGTGLVAGEVVVDALPYFDQGYEAPGVR           | Q9D287 | 0          | N-term +42.01 Da,                         | 7624.956543 | 3 | 964.8179932 | 964.8186612 |
| ATFEVSVLGFEEFDKAVKEHEGKTIFAY           | Q9CQM5 | 0          | N-term +42.01 Da, K +28.03 Da,            | 7626.634277 | 4 | 862.4396973 | 862.4406161 |
| ADQLTEEQIAEFKEAFSLFDKDK                | P62204 | 0          | N-term +42.01 Da, K +28.03 Da,            | 7627.536133 | 2 | 1337.650024 | 1336.652531 |
| ADQLTEEQIAEFKEAFSLFDKDKDGGTITTKELGTVMR | P62204 | 0          | N-term +42.01 Da, K +28.03 Da,            | 7629.448242 | 4 | 1065.786987 | 1065.787167 |
| ADLLGSILSSMEKPPSLGDQESR                | Q7TNE3 | 0          | N-term +42.01 Da, K +28.03 Da,            | 7629.524902 | 3 | 834.4199829 | 834.0915042 |
| ADLLGSILSSMEKPPSLGDQESR                | Q7TNE3 | 0          | N-term +42.01 Da, K +28.03 Da,            | 7629.625977 | 2 | 1250.634888 | 1250.633618 |
| AEEGIAAGGVMDVNTALQEV LKT               | P63323 | 0          | N-term +42.01 Da, K +28.03 Da,            | 7630.26709  | 2 | 1193.609985 | 1193.612154 |
| VNPTVFFDITADDEPLGR                     | P17742 | 0          | N-term +42.01 Da,                         | 7631.532227 | 2 | 1025        | 1024.5022   |
| AGTGLVAGEVVVDALPYFDQGYEAPGVR           | Q9D287 | 0          | N-term +42.01 Da,                         | 7632.535645 | 2 | 1446.723633 | 1446.724354 |
| ADQLTEEQIAEFKEAFSLFDKDKDGGTITTKELGTVMR | P62204 | 0.00098039 | N-term +42.01 Da, K +28.03 Da,            | 7634.998047 | 3 | 1421.380005 | 1420.713797 |
| MDDL DALLADLESTTSHISKR                 | Q8VI36 | 0          | N-term +42.01 Da, K +28.03 Da,            | 7635.40625  | 2 | 1201.609985 | 1201.099411 |

|                                      |        |            |                                           |             |   |             |             |
|--------------------------------------|--------|------------|-------------------------------------------|-------------|---|-------------|-------------|
| ADNPVLELLLR                          | Q8COC7 | 0          | N-term +42.01 Da,                         | 7639.575195 | 2 | 647.8727417 | 647.8719055 |
| AAPSEVAAAVLGEEDGGAFGSWLDGR           | Q9CR29 | 0          | N-term +42.01 Da,                         | 7639.913574 | 2 | 1252.599976 | 1251.598424 |
| CDFTEDQTAEFKEAFQLFDR                 | Q60605 | 0          | N-term +42.01 Da, K +28.03 Da,C +57.02Da, | 7641.821289 | 2 | 1284.569946 | 1284.073393 |
| ADQLTEEQIAEFKEAFSLFDKDG              | P62204 | 0          | N-term +42.01 Da, K +28.03 Da,            | 7643.20752  | 3 | 949.4500122 | 948.7869158 |
| ADQLTEEQIAEFKEAF                     | P62204 | 0          | N-term +42.01 Da, K +28.03 Da,            | 7644.178223 | 2 | 969.9661255 | 969.9702015 |
| AAPSEVAAAVLGEEDGGAFGSWLDGR           | Q9CR29 | 0          | N-term +42.01 Da,                         | 7644.448242 | 3 | 834.730835  | 834.7347082 |
| TDAAVSFAKDFLAGGVAAAISK               | P51881 | 0          | N-term +42.01 Da, K +28.03 Da,            | 7646.461914 | 3 | 736.4099731 | 736.7352085 |
| ADQLTEEQIAEFKEAFSLFDKD               | P62204 | 0          | N-term +42.01 Da, K +28.03 Da,            | 7647.390625 | 3 | 892.1099854 | 891.4374464 |
| TDAAVSFAKDFLAGGVAAAISK               | P51881 | 0          | N-term +42.01 Da, K +28.03 Da,            | 7647.920898 | 2 | 1105.099976 | 1104.599175 |
| AEEGIAAGGVMDVNTALQEVLKT              | P63323 | 0          | N-term +42.01 Da, K +28.03 Da,            | 7648.759277 | 3 | 796.0800171 | 796.0771949 |
| VNPTVFFDITADDEPLGR                   | P17742 | 0          | N-term +42.01 Da,                         | 7651.724609 | 2 | 1025.5      | 1024.5022   |
| AAPQPLALQLEQLLNPR                    | Q9JKX4 | 0          | N-term +42.01 Da,                         | 7653.067871 | 2 | 957.5432739 | 957.5440042 |
| MDDLADLADLESTTSHISKR                 | Q8VI36 | 0          | N-term +42.01 Da, K +28.03 Da,            | 7653.143555 | 3 | 801.4000244 | 801.0686995 |
| ATFEESVVLGFEEFDKAVKEHEGKTIFAY        | Q9CQM5 | 0          | N-term +42.01 Da, K +28.03 Da,            | 7653.239258 | 3 | 1149.585083 | 1149.585063 |
| CDFTEDQTAEFKEAFQLFDR                 | Q60605 | 0          | N-term +42.01 Da, K +28.03 Da,C +57.02Da, | 7655.200684 | 3 | 856.7199707 | 856.3846878 |
| CDFTEDQTAEFKEAFQLFDR                 | Q60605 | 0          | N-term +42.01 Da, K +28.03 Da,C +57.02Da, | 7655.821289 | 2 | 1284.069946 | 1284.073393 |
| ATFEESVVLGFEEFDKAVKEHEGKTIFAY        | Q9CQM5 | 0          | N-term +42.01 Da, K +28.03 Da,            | 7657.365723 | 4 | 862.4404297 | 862.4406161 |
| AGTGLVAGEVVVDALPYFDQGYEAPGVR         | Q9D287 | 0          | N-term +42.01 Da,                         | 7657.49707  | 3 | 965.1599731 | 964.8186612 |
| ADQLTEEQIAEFKEAFSLFDKDGDTITTKELGTVMR | P62204 | 0          | N-term +42.01 Da, K +28.03 Da,            | 7662.012695 | 4 | 1065.787476 | 1065.787167 |
| AEEGIAAGGVMDVNTALQEVLKT              | P63323 | 0          | N-term +42.01 Da, K +28.03 Da,            | 7664.567871 | 2 | 1194.109985 | 1193.612154 |
| AEEGIAAGGVMDVNTALQEVLKTALIHDLGLAR    | P63323 | 0          | N-term +42.01 Da, K +28.03 Da,            | 7665.172363 | 3 | 1111.920044 | 1111.588813 |
| ATFEESVVLGFEEFDKA                    | Q9CQM5 | 0          | N-term +42.01 Da, K +28.03 Da,            | 7665.844727 | 2 | 994.9799805 | 994.4804021 |
| ADNPVLELLLR                          | Q8COC7 | 0          | N-term +42.01 Da,                         | 7671.675781 | 2 | 647.8717651 | 647.8719055 |
| AAPSEVAAAVLGEEDGGAFGSWLDGR           | Q9CR29 | 0          | N-term +42.01 Da,                         | 7671.778809 | 2 | 1251.598877 | 1251.598424 |
| ADQLTEEQIAEFKEAF                     | P62204 | 0          | N-term +42.01 Da, K +28.03 Da,            | 7676.140137 | 2 | 969.9710083 | 969.9702015 |
| AAPSEVAAAVLGEEDGGAFGSWLDGR           | Q9CR29 | 0          | N-term +42.01 Da,                         | 7676.258301 | 3 | 834.7299805 | 834.7347082 |
| TDAAVSFAKDFLAGGVAAAISK               | P51881 | 0          | N-term +42.01 Da, K +28.03 Da,            | 7678.279297 | 3 | 736.4099731 | 736.7352085 |
| MELSDANLQTLTEYLKKTLDPPAIR            | Q9ERK4 | 0          | N-term +42.01 Da, K +28.03 Da,            | 7684.484863 | 3 | 1025.540039 | 1025.20905  |
| CDFTEDQTAEFKEAFQLFDR                 | Q60605 | 0          | N-term +42.01 Da, K +28.03 Da,C +57.02Da, | 7686.700684 | 2 | 1284.579956 | 1284.073393 |
| VNPTVFFDITADDEPLGR                   | P17742 | 0          | N-term +42.01 Da,                         | 7687.948242 | 2 | 1025        | 1024.5022   |
| ATFEESVVLGFEEFDKAVKEHEGKTIFAY        | Q9CQM5 | 0          | N-term +42.01 Da, K +28.03 Da,            | 7688.291016 | 4 | 862.9400024 | 862.4406161 |
| CDFTEDQTAEFKEAFQLFDR                 | Q60605 | 0          | N-term +42.01 Da, K +28.03 Da,C +57.02Da, | 7691.406738 | 3 | 856.7199707 | 856.3846878 |
| SHIQIPAGLTELQGYTVEVLR                | Q8K1M3 | 0          | N-term +42.01 Da,                         | 7691.653809 | 3 | 827.789978  | 827.1233554 |
| SHIQIPAGLTELQGYTVEVLR                | Q8K1M3 | 0          | N-term +42.01 Da,                         | 7693.156738 | 2 | 1241.180054 | 1240.181395 |
| ADQLTEEQIAEFKEAFSLFDKDGDTITTKELGTVMR | P62204 | 0          | N-term +42.01 Da, K +28.03 Da,            | 7694.273926 | 4 | 1066.290039 | 1065.787167 |
| SHIQIPAGLTELQGYTVEVLR                | Q8K1M3 | 0          | N-term +42.01 Da,                         | 7697.077637 | 3 | 827.460022  | 827.1233554 |
| ADQLTEEQIAEFKEAFSLFDKDGDTITTKELGTVMR | P62204 | 0.00190024 | N-term +42.01 Da, K +28.03 Da,            | 7697.525391 | 3 | 1421.369995 | 1420.713797 |
| SHIQIPAGLTELQGYTVEVLR                | Q8K1M3 | 0          | N-term +42.01 Da,                         | 7698.903809 | 2 | 1240.180054 | 1240.181395 |
| AEEGIAAGGVMDVNTALQEVLKT              | P63323 | 0          | N-term +42.01 Da, K +28.03 Da,            | 7699.23877  | 2 | 1194.609985 | 1193.612154 |
| AELSEEALLSVLPTIR                     | P56399 | 0          | N-term +42.01 Da,                         | 7701.79248  | 2 | 891.9963379 | 891.9960216 |

|                                      |        |            |                                           |             |   |             |             |
|--------------------------------------|--------|------------|-------------------------------------------|-------------|---|-------------|-------------|
| AAPSEVAAAVLGEEDGGAFGWSLDGR           | Q9CR29 | 0          | N-term +42.01 Da,                         | 7703.120605 | 2 | 1252.599976 | 1251.598424 |
| ADQLTEEQIAEFKEAF                     | P62204 | 0          | N-term +42.01 Da, K +28.03 Da,            | 7706.586426 | 2 | 970.4699707 | 969.9702015 |
| SSSFELSVQDLNDLLSDGSGCYSLPSQCNEVVPR   | Q9D7X3 | 0          | N-term +42.01 Da, C +57.02Da,             | 7707.127441 | 3 | 1300.930054 | 1300.263055 |
| AAPSEVAAAVLGEEDGGAFGWSLDGR           | Q9CR29 | 0          | N-term +42.01 Da,                         | 7707.469727 | 3 | 835.0700073 | 834.7347082 |
| AADLGQIPDVDDSDGVFKYVL                | Q9DAK9 | 0.00322878 | N-term +42.01 Da, K +28.03 Da,            | 7715.224121 | 2 | 1211.619995 | 1210.61522  |
| SHIQIPAGLTELQGYTVEVLR                | Q8K1M3 | 0          | N-term +42.01 Da,                         | 7717.167969 | 3 | 827.1199951 | 827.1233554 |
| CDFTEDQTAEFKEAFQLFDR                 | Q60605 | 0          | N-term +42.01 Da, K +28.03 Da,C +57.02Da, | 7719.48291  | 2 | 1284.569946 | 1284.073393 |
| MELSDANLQTLTEYLKKTLDPPAIR            | Q9ERK4 | 0.00098571 | N-term +42.01 Da, K +28.03 Da,            | 7721.17627  | 3 | 1025.880005 | 1025.20905  |
| SHIQIPAGLTELQGYTVEVLR                | Q8K1M3 | 0          | N-term +42.01 Da,                         | 7723.47168  | 2 | 1241.180054 | 1240.181395 |
| SHIQIPAGLTELQGYTVEVLR                | Q8K1M3 | 0          | N-term +42.01 Da,                         | 7731.288574 | 2 | 1240.180054 | 1240.181395 |
| AELSEALLSVLPTIR                      | P56399 | 0          | N-term +42.01 Da,                         | 7732.264648 | 2 | 891.9899902 | 891.9960216 |
| CDFTEDQTAEFKEAFQLFDR                 | Q60605 | 0          | N-term +42.01 Da, K +28.03 Da,C +57.02Da, | 7732.606934 | 2 | 1285.079956 | 1284.073393 |
| AAPSEVAAAVLGEEDGGAFGWSLDGR           | Q9CR29 | 0          | N-term +42.01 Da,                         | 7733.440918 | 2 | 1251.598511 | 1251.598424 |
| ADQLTEEQIAEFKEAF                     | P62204 | 0          | N-term +42.01 Da, K +28.03 Da,            | 7736.855957 | 2 | 970.4699707 | 969.9702015 |
| AAPSEVAAAVLGEEDGGAFGWSLDGR           | Q9CR29 | 0          | N-term +42.01 Da,                         | 7737.846191 | 3 | 834.7299805 | 834.7347082 |
| AADISQWAGPLCL                        | P70296 | 0.03223034 | N-term +42.01 Da, C +57.02Da,             | 7745.574219 | 2 | 722.8499756 | 722.3504804 |
| AADISQWAGPLCL                        | P70296 | 0.04526404 | N-term +42.01 Da, C +57.02Da,             | 7748.552246 | 2 | 722.3499756 | 722.3504804 |
| SHIQIPAGLTELQGYTVEVLR                | Q8K1M3 | 0          | N-term +42.01 Da,                         | 7749.480957 | 3 | 827.460022  | 827.1233554 |
| CDFTEDQTAEFKEAFQLFDR                 | Q60605 | 0          | N-term +42.01 Da, K +28.03 Da,C +57.02Da, | 7750.708984 | 2 | 1284.569946 | 1284.073393 |
| AAGVAGWGVEAEFEEDAPDVEPLEPTLSNIIQR    | O54984 | 0          | N-term +42.01 Da,                         | 7754.475586 | 3 | 1228.26001  | 1227.591606 |
| AEGIAAGGVMDVNTALQEVLTALIHDLGLAR      | P63323 | 0          | N-term +42.01 Da, K +28.03 Da,            | 7754.742188 | 3 | 1111.920044 | 1111.588813 |
| ADQLTEEQIAEFKEAFSLFDKDGDTITTKELGTVMR | P62204 | 0          | N-term +42.01 Da, K +28.03 Da,            | 7755.569824 | 4 | 1066.290039 | 1065.787167 |
| TDAAVSFAKDFLAGGVA AAIKTA VAPIER      | P51881 | 0          | N-term +42.01 Da, K +28.03 Da,            | 7758.195801 | 3 | 1016.570007 | 1015.892161 |
| CDFTEDQTAEFKEAFQLFDR                 | Q60605 | 0          | N-term +42.01 Da, K +28.03 Da,C +57.02Da, | 7758.916016 | 2 | 1284.069946 | 1284.073393 |
| AEGIAAGGVMDVNTALQEVLTALIHDLGLAR      | P63323 | 0          | N-term +42.01 Da, K +28.03 Da,            | 7759.053711 | 3 | 1112.26001  | 1111.588813 |
| AAGVAGWGVEAEFEEDAPDVEPLEPTLSNIIQR    | O54984 | 0          | N-term +42.01 Da,                         | 7760.36377  | 3 | 1227.930054 | 1227.591606 |
| AAPSEVAAAVLGEEDGGAFGWSLDGR           | Q9CR29 | 0          | N-term +42.01 Da,                         | 7763.816895 | 2 | 1252.099976 | 1251.598424 |
| CDFTEDQTAEFKEAFQLFDR                 | Q60605 | 0          | N-term +42.01 Da, K +28.03 Da,C +57.02Da, | 7766.79248  | 3 | 857.0499878 | 856.3846878 |
| AAPSEVAAAVLGEEDGGAFGWSLDGR           | Q9CR29 | 0          | N-term +42.01 Da,                         | 7769.335938 | 3 | 834.7299805 | 834.7347082 |
| TDAAVSFAKDFLAGGVA AAIKTA VAPIER      | P51881 | 0          | N-term +42.01 Da, K +28.03 Da,            | 7769.772461 | 4 | 762.6699829 | 762.1709395 |
| ADQLTEEQIAEFKEAF                     | P62204 | 0          | N-term +42.01 Da, K +28.03 Da,            | 7773.283203 | 2 | 969.9699707 | 969.9702015 |
| MEEIGILVEKI                          | P54775 | 0.01624945 | N-term +42.01 Da, K +28.03 Da,            | 7773.390137 | 2 | 672.3806152 | 672.378175  |
| AELSEALLSVLPTIR                      | P56399 | 0          | N-term +42.01 Da,                         | 7779.527344 | 2 | 892.5       | 891.9960216 |
| AADISQWAGPLCL                        | P70296 | 0          | N-term +42.01 Da, C +57.02Da,             | 7779.967773 | 2 | 722.3508301 | 722.3504804 |
| CDFTEDQTAEFKEAFQLFDR                 | Q60605 | 0          | N-term +42.01 Da, K +28.03 Da,C +57.02Da, | 7784.209961 | 2 | 1285.079956 | 1284.073393 |
| ADQLTEEQIAEFKEAFSLFDKDGDTITTKELGTVMR | P62204 | 0          | N-term +42.01 Da, K +28.03 Da,            | 7788.24707  | 4 | 1065.786987 | 1065.787167 |
| ASVSELACIYSALILHDDEVTVTEDKINAL       | P47955 | 0          | N-term +42.01 Da, K +28.03 Da,C +57.02Da, | 7789.28418  | 3 | 1120.900024 | 1120.569084 |
| CDFTEDQTAEFKEAFQLFDR                 | Q60605 | 0          | N-term +42.01 Da, K +28.03 Da,C +57.02Da, | 7789.708008 | 3 | 856.3900146 | 856.3846878 |
| AEGIAAGGVMDVNTALQEVLT                | P63323 | 0          | N-term +42.01 Da, K +28.03 Da,            | 7790.263184 | 2 | 1194.109985 | 1193.612154 |
| TDAAVSFAKDFLAGGVA AAIKTA VAPIER      | P51881 | 0          | N-term +42.01 Da, K +28.03 Da,            | 7790.72168  | 3 | 1015.891541 | 1015.892161 |

|                                       |        |   |                                           |             |   |             |             |
|---------------------------------------|--------|---|-------------------------------------------|-------------|---|-------------|-------------|
| AEEGIAAGGVMDVNTALQEVLTALIHDLGLAR      | P63323 | 0 | N-term +42.01 Da, K +28.03 Da,            | 7790.950684 | 3 | 1111.920044 | 1111.588813 |
| GADQLTEEQIAEFKEAFSLFDKDGDTITTKELGTVMR | Q3UKW2 | 0 | N-term +42.01 Da, K +28.03 Da,            | 7792.204102 | 4 | 1080.050049 | 1080.042533 |
| AAPSEVAAAVLGEEDGGGAFGSWLDGR           | Q9CR29 | 0 | N-term +42.01 Da,                         | 7796.170898 | 2 | 1251.59729  | 1251.598424 |
| AAPSEVAAAVLGEEDGGGAFGSWLDGR           | Q9CR29 | 0 | N-term +42.01 Da,                         | 7800.381836 | 3 | 834.7340698 | 834.7347082 |
| TDAAVSFAKDFLAGGVAASIKTAVAPIER         | P51881 | 0 | N-term +42.01 Da, K +28.03 Da,            | 7802.819336 | 4 | 762.1716919 | 762.1709395 |
| ADQLTEEQIAEFKEAF                      | P62204 | 0 | N-term +42.01 Da, K +28.03 Da,            | 7805.286621 | 2 | 969.9710693 | 969.9702015 |
| CDFTEDQTAEFKEAFQLFDR                  | Q60605 | 0 | N-term +42.01 Da, K +28.03 Da,C +57.02Da, | 7815.828125 | 2 | 1284.569946 | 1284.073393 |
| ASVSELACIYSALILHDDEVTVTEDIKINALIK     | P47955 | 0 | N-term +42.01 Da, K +28.03 Da,C +57.02Da, | 7817.189941 | 3 | 1210.969971 | 1210.30586  |
| MVNPTVFFDITADDEPLGR                   | P17742 | 0 | N-term +42.01 Da,                         | 7818.575195 | 2 | 1090.52002  | 1090.022443 |
| ADQLTEEQIAEFKEAFSLFDKDGDTITTKELGTVMR  | P62204 | 0 | N-term +42.01 Da, K +28.03 Da,            | 7820.254395 | 4 | 1065.787354 | 1065.787167 |
| TDAAVSFAKDFLAGGVAASIKTAVAPIER         | P51881 | 0 | N-term +42.01 Da, K +28.03 Da,            | 7822.903809 | 3 | 1015.892639 | 1015.892161 |
| CDFTEDQTAEFKEAFQLFDR                  | Q60605 | 0 | N-term +42.01 Da, K +28.03 Da,C +57.02Da, | 7825.644043 | 3 | 856.7199707 | 856.3846878 |
| AEEGIAAGGVMDVNTALQEVLTALIHDLGLAR      | P63323 | 0 | N-term +42.01 Da, K +28.03 Da,            | 7825.890137 | 3 | 1111.920044 | 1111.588813 |
| ADQLTEEQIAEFKEAF                      | P62204 | 0 | N-term +42.01 Da, K +28.03 Da,            | 7836.046387 | 2 | 970.4699707 | 969.9702015 |
| TDAAVSFAKDFLAGGVAASIKTAVAPIER         | P51881 | 0 | N-term +42.01 Da, K +28.03 Da,            | 7836.210449 | 4 | 762.4199829 | 762.1709395 |
| CDFTEDQTAEFKEAFQLFDR                  | Q60605 | 0 | N-term +42.01 Da, K +28.03 Da,C +57.02Da, | 7836.876465 | 3 | 856.3900146 | 856.3846878 |
| MEEFGISPGQLVAVFWDKSSPEEALKLVAR        | Q8WTY4 | 0 | N-term +42.01 Da, K +28.03 Da,            | 7838.861328 | 4 | 897.9899902 | 897.7350127 |
| CDFTEDQTAEFKEAFQLFDR                  | Q60605 | 0 | N-term +42.01 Da, K +28.03 Da,C +57.02Da, | 7840.148438 | 2 | 1284.079956 | 1284.073393 |
| AETGAGISSETVTETTETTTTETTEPENQSLIMKLR  | Q8K1L5 | 0 | N-term +42.01 Da, K +28.03 Da,            | 7842.432129 | 3 | 1347.339966 | 1346.670145 |
| AAPSEVAAAVLGEEDGGGAFGSWLDGR           | Q9CR29 | 0 | N-term +42.01 Da,                         | 7843.1875   | 2 | 1251.599976 | 1251.598424 |
| AAPSEVAAAVLGEEDGGGAFGSWLDGR           | Q9CR29 | 0 | N-term +42.01 Da,                         | 7846.221191 | 2 | 1252.609985 | 1251.598424 |
| MEAVLNELVSVEDLKNFER                   | Q9CQ92 | 0 | N-term +42.01 Da, K +28.03 Da,            | 7850.528809 | 2 | 1153.589966 | 1153.090857 |
| ADQLTEEQIAEFKEAFSLFDKDGDTITTKELGTVMR  | P62204 | 0 | N-term +42.01 Da, K +28.03 Da,            | 7852.428223 | 4 | 1066.040039 | 1065.787167 |
| AETGAGISSETVTETTETTTTETTEPENQSLIMKLR  | Q8K1L5 | 0 | N-term +42.01 Da, K +28.03 Da,            | 7852.977051 | 4 | 1010.5      | 1010.254428 |
| MEAVLNELVSVEDLKNFER                   | Q9CQ92 | 0 | N-term +42.01 Da, K +28.03 Da,            | 7855.469238 | 3 | 769.4000244 | 769.0629968 |
| AAMLGDAIMVAKGL                        | Q60936 | 0 | N-term +42.01 Da, K +28.03 Da,            | 7861.138672 | 2 | 716.3900146 | 715.8909264 |
| ATFEVSVLGFEEFDKAVKEHEGKTIF            | Q9CQM5 | 0 | N-term +42.01 Da, K +28.03 Da,            | 7865.489258 | 4 | 804.1599731 | 803.9155053 |
| AETGAGISSETVTETTETTTTETTEPENQSLIMKLR  | Q8K1L5 | 0 | N-term +42.01 Da, K +28.03 Da,            | 7865.730957 | 3 | 1347        | 1346.670145 |
| CDFTEDQTAEFKEAFQLFDR                  | Q60605 | 0 | N-term +42.01 Da, K +28.03 Da,C +57.02Da, | 7867.419434 | 3 | 856.3835449 | 856.3846878 |
| ADQLTEEQIAEFKEAF                      | P62204 | 0 | N-term +42.01 Da, K +28.03 Da,            | 7867.638672 | 2 | 969.9699707 | 969.9702015 |
| MDPFLVLLH                             | Q61160 | 0 | N-term +42.01 Da,                         | 7871.469727 | 2 | 563.7999878 | 563.8019051 |
| CDFTEDQTAEFKEAFQLFDR                  | Q60605 | 0 | N-term +42.01 Da, K +28.03 Da,C +57.02Da, | 7872.556641 | 2 | 1284.072266 | 1284.073393 |
| ADQLTEEQIAEFKEAFSLFDKDGDTITTKELGTVMR  | P62204 | 0 | N-term +42.01 Da, K +28.03 Da,            | 7872.825195 | 3 | 1421.380005 | 1420.713797 |
| ADQLTEEQIAEFKEAF                      | P62204 | 0 | N-term +42.01 Da, K +28.03 Da,            | 7873.040527 | 3 | 646.9810791 | 646.9825598 |
| AAAAAAAAAAAAAGSDSWDADTFMEDPVR         | Q66JS6 | 0 | N-term +42.01 Da,                         | 7873.1875   | 3 | 975.4279175 | 975.426164  |
| AAAAAAAAAAAAAGSDSWDADTFMEDPVR         | Q66JS6 | 0 | N-term +42.01 Da,                         | 7873.494629 | 2 | 1463.140015 | 1462.635608 |
| AEEGIAAGGVMDVNTALQEVLTALIHDLGLAR      | P63323 | 0 | N-term +42.01 Da, K +28.03 Da,            | 7875.279785 | 3 | 1111.920044 | 1111.588813 |
| AEEGIAAGGVMDVNTALQEVLTALIHDLGLAR      | P63323 | 0 | N-term +42.01 Da, K +28.03 Da,            | 7876.73291  | 4 | 833.9414063 | 833.9434286 |
| ASVSELACIYSALILHDDEVTVTEDIKIN         | P47955 | 0 | N-term +42.01 Da, K +28.03 Da,C +57.02Da, | 7876.807617 | 3 | 1059.530029 | 1059.195358 |
| ASVSELACIYSALILHDDEVTVTEDIKINALIK     | P47955 | 0 | N-term +42.01 Da, K +28.03 Da,C +57.02Da, | 7877.110352 | 3 | 1210.640015 | 1210.30586  |

|                                      |        |            |                                           |             |   |             |             |
|--------------------------------------|--------|------------|-------------------------------------------|-------------|---|-------------|-------------|
| AELTALESLIEMGFPR                     | Q922Y1 | 0          | N-term +42.01 Da,                         | 7879.395508 | 2 | 909.9673462 | 909.9689494 |
| AEEGIAAGGVMDVNTALQEVLTAL             | P63323 | 0          | N-term +42.01 Da, K +28.03 Da,            | 7879.471191 | 2 | 1285.671509 | 1285.672743 |
| AAGAAEAGEAAVAVVEVGSQAQQFEELLR        | Q9CQM9 | 0          | N-term +42.01 Da,                         | 7879.641602 | 2 | 1393.202515 | 1393.203786 |
| AAGAAEAGEAAVAVVEVGSQAQQFEELLR        | Q9CQM9 | 0          | N-term +42.01 Da,                         | 7879.990723 | 3 | 929.1361694 | 929.1382825 |
| AEEAAAGASGETMAALVAAEGLSPAGW          | P97364 | 0          | N-term +42.01 Da,                         | 7881.173828 | 3 | 843.7399902 | 843.7357205 |
| AEEGIAAGGVMDVNTALQEVLTAL             | P63323 | 0          | N-term +42.01 Da, K +28.03 Da,            | 7883.949219 | 3 | 858.1199951 | 857.450921  |
| AEEGIAAGGVMDVNTALQEVLTALIHDLGLAR     | P63323 | 0          | N-term +42.01 Da, K +28.03 Da,            | 7912.989746 | 3 | 1112.25     | 1111.588813 |
| MARKWNGRAVAR                         | O35622 | 0.00236183 | N-term +42.01 Da, K +28.03 Da,            | 7934.258301 | 2 | 743.9199829 | 743.414614  |
| AEEGIAAGGVMDVNTALQEVLTALIHDLGLAR     | P63323 | 0          | N-term +42.01 Da, K +28.03 Da,            | 7950.038574 | 3 | 1112.26001  | 1111.588813 |
| ADQLTEEQIAEFKEAF                     | P62204 | 0          | N-term +42.01 Da, K +28.03 Da,            | 7982.426758 | 2 | 970.4699707 | 969.9702015 |
| ADQLTEEQIAEFKEAFSLFDKDGDTITTKELGTVMR | P62204 | 0          | N-term +42.01 Da, K +28.03 Da,            | 7992.316406 | 4 | 1066.280029 | 1065.787167 |
| ADQLTEEQIAEFKEAF                     | P62204 | 0          | N-term +42.01 Da, K +28.03 Da,            | 8014.116699 | 2 | 969.9705811 | 969.9702015 |
| ADQLTEEQIAEFKEAFSLFDKDGDTITTKELGTVMR | P62204 | 0          | N-term +42.01 Da, K +28.03 Da,            | 8023.275391 | 4 | 1066.040039 | 1065.787167 |
| ADQLTEEQIAEFKEAF                     | P62204 | 0          | N-term +42.01 Da, K +28.03 Da,            | 8044.567383 | 2 | 970.4699707 | 969.9702015 |
| ADQLTEEQIAEFKEAFSLFDKDGDTITTKELGTVMR | P62204 | 0          | N-term +42.01 Da, K +28.03 Da,            | 8053.650391 | 4 | 1066.290039 | 1065.787167 |
| AEEGIAAGGVMDVNTALQEVLTALIHDLGLAR     | P63323 | 0          | N-term +42.01 Da, K +28.03 Da,            | 8059.713379 | 3 | 1112.26001  | 1111.588813 |
| ADQLTEEQIAEFKEAF                     | P62204 | 0          | N-term +42.01 Da, K +28.03 Da,            | 8074.962402 | 2 | 969.9699707 | 969.9702015 |
| AEEGIAAGGVMDVNTALQEVLTALIHDLGLAR     | P63323 | 0          | N-term +42.01 Da, K +28.03 Da,            | 8098.690918 | 3 | 1112.26001  | 1111.588813 |
| ADQLTEEQIAEFKEAF                     | P62204 | 0          | N-term +42.01 Da, K +28.03 Da,            | 8105.217773 | 2 | 969.9699707 | 969.9702015 |
| ADQLTEEQIAEFKEAFSLFDKDGDTITTKELGTVMR | P62204 | 0          | N-term +42.01 Da, K +28.03 Da,            | 8131.057129 | 4 | 1066.290039 | 1065.787167 |
| ADQLTEEQIAEFKEAFSLFDKDGDTITTKELGTVMR | P62204 | 0          | N-term +42.01 Da, K +28.03 Da,            | 8131.344238 | 4 | 1066.040039 | 1065.787167 |
| AEEGIAAGGVMDVNTALQEVLTALIHDLGLAR     | P63323 | 0          | N-term +42.01 Da, K +28.03 Da,            | 8132.748535 | 3 | 1111.589966 | 1111.588813 |
| ADQLTEEQIAEFKEAF                     | P62204 | 0          | N-term +42.01 Da, K +28.03 Da,            | 8136.032227 | 2 | 969.9699707 | 969.9702015 |
| AEEGIAAGGVMDVNTALQEVLTALIHDLGLAR     | P63323 | 0          | N-term +42.01 Da, K +28.03 Da,            | 8146.809082 | 3 | 1112.25     | 1111.588813 |
| CDFTEDQTAEFKEAFQLFDR                 | Q60605 | 0          | N-term +42.01 Da, K +28.03 Da,C +57.02Da, | 8153.90918  | 2 | 1284.569946 | 1284.073393 |
| CDFTEDQTAEFKEAFQLFDR                 | Q60605 | 0          | N-term +42.01 Da, K +28.03 Da,C +57.02Da, | 8160.393555 | 3 | 856.3831787 | 856.3846878 |
| ASVSELACIYSALILHDDEVTVTEDKINAL       | P47955 | 0          | N-term +42.01 Da, K +28.03 Da,C +57.02Da, | 8160.95166  | 3 | 1121.23999  | 1120.569084 |
| ADQLTEEQIAEFKEAFSLFDKDGDTITTKELGTVMR | P62204 | 0          | N-term +42.01 Da, K +28.03 Da,            | 8162.218262 | 4 | 1066.290039 | 1065.787167 |
| ADQLTEEQIAEFKEAF                     | P62204 | 0          | N-term +42.01 Da, K +28.03 Da,            | 8166.741211 | 2 | 969.9718018 | 969.9702015 |
| ASVSELACIYSALILHDDEVTVTEDKINAL       | P47955 | 0          | N-term +42.01 Da, K +28.03 Da,C +57.02Da, | 8167.487305 | 3 | 1120.579956 | 1120.569084 |
| AEEGIAAGGVMDVNTALQEVLTAL             | P63323 | 0.00049875 | N-term +42.01 Da, K +28.03 Da,            | 8175.649414 | 3 | 857.7800293 | 857.450921  |
| AEEGIAAGGVMDVNTALQEVLTALIHDLGLAR     | P63323 | 0          | N-term +42.01 Da, K +28.03 Da,            | 8177.585449 | 3 | 1112.26001  | 1111.588813 |
| CDFTEDQTAEFKEAFQLFDR                 | Q60605 | 0          | N-term +42.01 Da, K +28.03 Da,C +57.02Da, | 8184.316406 | 2 | 1284.579956 | 1284.073393 |
| ADQLTEEQIAEFKEAFSLFDKDGDTITTKELGTVMR | P62204 | 0.00097561 | N-term +42.01 Da, K +28.03 Da,            | 8184.833496 | 3 | 1421.050049 | 1420.713797 |
| RKWRGKK                              | E9QNP1 | 0.01830065 | N-term +42.01 Da, K +28.03 Da,            | 8187.411133 | 2 | 543.3499756 | 542.8587369 |
| ADQLTEEQIAEFKEAFSLFDKDGDTITTKELGTVMR | P62204 | 0          | N-term +42.01 Da, K +28.03 Da,            | 8192.339844 | 4 | 1065.78833  | 1065.787167 |
| SKGPAVGIDLGTYSVCVGFQHGKVEIANDQGNR    | P63017 | 0          | N-term +42.01 Da, K +28.03 Da,C +57.02Da, | 8192.489258 | 4 | 947.7399902 | 947.2374457 |
| ADQLTEEQIAEFKEAF                     | P62204 | 0          | N-term +42.01 Da, K +28.03 Da,            | 8202.447266 | 2 | 969.9699707 | 969.9702015 |
| AEEGIAAGGVMDVNTALQEVLTALIHDLGLAR     | P63323 | 0          | N-term +42.01 Da, K +28.03 Da,            | 8215.364258 | 3 | 1111.920044 | 1111.588813 |
| ADQLTEEQIAEFKEAFSLFDKDGDTITTKELGTVMR | P62204 | 0          | N-term +42.01 Da, K +28.03 Da,            | 8222.944336 | 4 | 1065.78772  | 1065.787167 |

|                                      |        |            |                                             |             |   |             |             |
|--------------------------------------|--------|------------|---------------------------------------------|-------------|---|-------------|-------------|
| ADQLTEEQIAEFKEAF                     | P62204 | 0          | N-term +42.01 Da, K +28.03 Da,              | 8236.637695 | 2 | 969.9699707 | 969.9702015 |
| AEEGIAAGGVMDVNTALQEVLTALIHDLGLAR     | P63323 | 0          | N-term +42.01 Da, K +28.03 Da,              | 8247.195313 | 3 | 1111.589966 | 1111.588813 |
| ADQLTEEQIAEFKEAF                     | P62204 | 0.00413034 | N-term +42.01 Da, K +28.03 Da,              | 8248.140625 | 2 | 970.9699707 | 969.9702015 |
| AEEGIAAGGVMDVNTALQEVLTALIHDLGLAR     | P63323 | 0          | N-term +42.01 Da, K +28.03 Da,              | 8251.140625 | 3 | 1112.26001  | 1111.588813 |
| ADQLTEEQIAEFKEAF                     | P62204 | 0          | N-term +42.01 Da, K +28.03 Da,              | 8278.55957  | 2 | 969.9699707 | 969.9702015 |
| ADQLTEEQIAEFKEAFSLFDKDGDTITTKELGTVMR | P62204 | 0          | N-term +42.01 Da, K +28.03 Da,              | 8284.540039 | 4 | 1066.290039 | 1065.787167 |
| ADAEKAQEQQQR                         | Q99PL5 | 0          | N-term +28.03 Da, K +28.03 Da,              | 961.2453003 | 3 | 486.5830383 | 486.5829525 |
| TQKLWYAVCTIGGKWLE                    | Q91YZ5 | 0.02638967 | N-term +28.03 Da, K +28.03 Da,              | 961.8146973 | 3 | 713.710022  | 713.0553357 |
| AAPKAGTATGR                          | P56480 | 0.00078064 | N-term +28.03 Da, K +28.03 Da,              | 963.2773438 | 3 | 352.876709  | 352.876859  |
| STSAPAAKPKR                          | P10922 | 0.00045767 | N-term +28.03 Da, K +28.03 Da,              | 984.1099854 | 3 | 399.9200134 | 399.9153138 |
| EGSGSSGTGEQKEDQKEEKQ                 | P38647 | 0          | N-term +28.03 Da, K +28.03 Da,              | 997.6293335 | 4 | 563.274231  | 563.2737586 |
| EGSGSSGTGEQKEDQKEEKQ                 | P38647 | 0          | N-term +28.03 Da, K +28.03 Da,              | 999.1342773 | 3 | 750.7000122 | 750.6959194 |
| AAPKAGTATGR                          | P56480 | 0.02772333 | N-term +28.03 Da, K +28.03 Da,              | 1000.149292 | 3 | 352.8800049 | 352.876859  |
| SDPAKPGNER                           | Q3UMU9 | 0.01528319 | N-term +28.03 Da, K +28.03 Da,              | 1001.914185 | 3 | 376.2000122 | 376.1998906 |
| SAAPKAGTATGR                         | P56480 | 0.0011169  | N-term +28.03 Da, K +28.03 Da,              | 1002.197815 | 3 | 381.8900146 | 381.8875353 |
| KQVAQQAER                            | P67778 | 0.02799552 | N-term +28.03 Da, K +28.03 Da,              | 1002.765076 | 3 | 415.230011  | 414.8982117 |
| ARPSGEKENVGKSR                       | Q9ERGO | 0          | N-term +28.03 Da, K +28.03 Da,              | 1009.596558 | 4 | 400.480011  | 400.4797791 |
| AAAAAATKPAR                          | Q99N96 | 0.00564784 | N-term +28.03 Da, K +28.03 Da,              | 1012.629456 | 3 | 352.2200012 | 352.217104  |
| EEPKDETAR                            | O55022 | 0.00807233 | N-term +28.03 Da, K +28.03 Da,              | 1014.197449 | 3 | 377.5278625 | 377.5277846 |
| TENSTSAPAAKPKR                       | P10922 | 0.00044563 | N-term +28.03 Da, K +28.03 Da,              | 1017.200378 | 4 | 386.2200012 | 386.2216049 |
| TENSTSAPAAKPKR                       | P10922 | 0          | N-term +28.03 Da, K +28.03 Da,              | 1017.97052  | 3 | 514.6300049 | 514.626381  |
| VQPTKRPEGR                           | P84089 | 0.01276984 | N-term +28.03 Da, K +28.03 Da,              | 1018.09729  | 4 | 306.6859436 | 306.6859289 |
| LPKKTESQVKV                          | Q8R1M2 | 0.0125     | N-term +28.03 Da, K +28.03 Da,              | 1019.882813 | 4 | 357.2399902 | 357.2405372 |
| EEEAGEEEGSQKR                        | O35381 | 0          | N-term +28.03 Da, K +28.03 Da,              | 1022.156311 | 3 | 511.9100037 | 511.9057615 |
| EGSGSSGTGEQKEDQKEEKQ                 | P38647 | 0          | N-term +28.03 Da, K +28.03 Da,              | 1022.671875 | 3 | 750.3599854 | 750.6959194 |
| PDPAKSAPAPKKGSK                      | Q64525 | 0          | N-term +28.03 Da, K +28.03 Da,              | 1023.341675 | 4 | 405.5025024 | 405.5027227 |
| KEPPPSPEKK                           | P27546 | 0.00376583 | N-term +28.03 Da, K +28.03 Da,              | 1025.397705 | 3 | 416.923645  | 416.9235865 |
| GAKPVDTAAR                           | Q8BGD9 | 0          | N-term +28.03 Da, K +28.03 Da,              | 1025.83252  | 3 | 347.87323   | 347.8732259 |
| YLDSSSQKR                            | Q80UM3 | 0.00144196 | N-term +28.03 Da, K +28.03 Da,              | 1026.833008 | 3 | 380.5403748 | 380.5400243 |
| AKTDQAQKAEGAGDAK                     | P09602 | 0          | N-term +28.03 Da, K +28.03 Da,              | 1027.739868 | 4 | 425.980011  | 425.9848947 |
| PDPAKSAPAPKKGS                       | Q64525 | 0.00079523 | N-term +28.03 Da, K +28.03 Da,              | 1031.079468 | 3 | 488.2926025 | 488.2924503 |
| KKSEMAPAQGQK                         | Q99PL5 | 0.00111982 | N-term +28.03 Da, K +28.03 Da,              | 1031.154785 | 3 | 472.2740173 | 472.2744022 |
| SRKPTMCQR                            | Q9CYA0 | 0.00042827 | N-term +28.03 Da, K +28.03 Da, C +57.02 Da, | 1033.577637 | 3 | 407.2178345 | 407.2181219 |
| VVSSPDKDR                            | Q91VA0 | 0.00370995 | N-term +28.03 Da, K +28.03 Da,              | 1036.612183 | 3 | 353.5328064 | 353.5328696 |
| AMVDEDKNNR                           | Q64374 | 0          | N-term +28.03 Da, K +28.03 Da,              | 1039.139771 | 4 | 351.6877747 | 351.6882404 |
| DVDTKKQKTEEDD                        | P26350 | 0.00835744 | N-term +28.03 Da, K +28.03 Da,              | 1040.540527 | 3 | 554.9528198 | 554.9526004 |
| KREPDDEGEEDD                         | O35381 | 0.00247001 | N-term +28.03 Da, K +28.03 Da,              | 1041.768677 | 2 | 745.3200073 | 745.3180874 |
| TDQAQKAEGAGDAK                       | P09602 | 0.02430752 | N-term +28.03 Da, K +28.03 Da,              | 1042.697876 | 3 | 491.9230957 | 491.9229749 |
| ASQSQAQDVR                           | Q91VA7 | 0          | N-term +28.03 Da, K +28.03 Da,              | 1042.773315 | 2 | 559.2836304 | 559.2834546 |
| AMVDEDKNNR                           | Q64374 | 0.0461126  | N-term +28.03 Da, K +28.03 Da,              | 1042.848877 | 3 | 468.9200134 | 468.5818951 |

|                     |        |            |                                             |             |   |             |             |
|---------------------|--------|------------|---------------------------------------------|-------------|---|-------------|-------------|
| VDAVKDSGR           | Q00623 | 0.00343879 | N-term +28.03 Da, K +28.03 Da,              | 1043.237061 | 3 | 334.8599854 | 334.8574646 |
| QASAAPKAGTATGR      | P56480 | 0          | N-term +28.03 Da, K +28.03 Da,              | 1043.435303 | 3 | 448.25      | 448.2527661 |
| EEAEAPTGR           | P26350 | 0.0010917  | N-term +28.03 Da, K +28.03 Da,              | 1043.527832 | 3 | 381.8708801 | 381.8716626 |
| NLEKQNHTPR          | Q99K48 | 0.00109329 | N-term +28.03 Da, K +28.03 Da,              | 1047.564209 | 3 | 431.9100037 | 431.5738394 |
| TENSTSAPAAKPKR      | P10922 | 0          | N-term +28.03 Da, K +28.03 Da,              | 1048.452881 | 4 | 386.4674072 | 386.2216049 |
| KMADEAGSEHR         | E9PV24 | 0.00972092 | N-term +28.03 Da, K +28.03 Da,              | 1049.117798 | 3 | 453.2224121 | 453.2224783 |
| DEEPKDETR           | O55022 | 0.04484425 | N-term +28.03 Da, K +28.03 Da,              | 1056.904297 | 3 | 415.8700562 | 415.8700993 |
| DEEPKDETR           | O55022 | 0.00081699 | N-term +28.03 Da, K +28.03 Da,              | 1057.186157 | 2 | 623.3012085 | 623.3015107 |
| VVSETNDTR           | P05784 | 0.01387632 | N-term +28.03 Da,                           | 1057.305054 | 2 | 524.7700195 | 524.7671061 |
| SVPPASAGR           | Q80WJ7 | 0.0010921  | N-term +28.03 Da, K +28.03 Da,              | 1057.380493 | 3 | 342.5412903 | 342.5415876 |
| SPANKKLTTPK         | P27773 | 0.00593081 | N-term +28.03 Da, K +28.03 Da,              | 1057.89209  | 3 | 399.2645264 | 399.2639428 |
| TGSQGOCTQVR         | P62858 | 0          | N-term +28.03 Da, C +57.02 Da,              | 1061.383423 | 2 | 625.3015747 | 625.3013216 |
| AQASAAPKAGTATGR     | P56480 | 0.00345543 | N-term +28.03 Da, K +28.03 Da,              | 1061.932495 | 3 | 471.9314575 | 471.9318042 |
| PDPAKSAPAPK         | Q64525 | 0.00045269 | N-term +28.03 Da, K +28.03 Da,              | 1062.007813 | 3 | 388.2319946 | 388.2325314 |
| TGSESSQTGASATSGR    | Q8BGD9 | 0          | N-term +28.03 Da,                           | 1062.867188 | 2 | 756.3499756 | 756.350253  |
| PDPSKSAPAPK         | Q8CGP0 | 0.0492939  | N-term +28.03 Da, K +28.03 Da,              | 1062.942627 | 3 | 393.5635986 | 393.5641697 |
| SGSSSSMPAR          | P59759 | 0.0010929  | N-term +28.03 Da,                           | 1063.083984 | 2 | 497.7345886 | 497.7347513 |
| HEEFEKSR            | Q61792 | 0.00913962 | N-term +28.03 Da, K +28.03 Da,              | 1063.660889 | 3 | 373.1900024 | 373.1927359 |
| GPKGDPGPQGPR        | P11087 | 0.02173913 | N-term +28.03 Da, K +28.03 Da,              | 1066.129395 | 3 | 406.8900146 | 406.8911683 |
| TQHIQQPR            | Q91XC8 | 0.00080354 | N-term +28.03 Da,                           | 1067.116821 | 3 | 345.8612671 | 345.8613202 |
| TAEEDADPKR          | Q9D0J8 | 0          | N-term +28.03 Da, K +28.03 Da,              | 1070.126953 | 3 | 482.5599976 | 482.5633354 |
| KAGKVPKPGPR         | Q9D6J6 | 0.00436095 | N-term +28.03 Da, K +28.03 Da, C +57.02 Da, | 1071.314087 | 4 | 312.464447  | 312.4644055 |
| TKQEGVSNQVK         | Q99PL5 | 0.00083787 | N-term +28.03 Da, K +28.03 Da,              | 1075.199951 | 3 | 434.5854797 | 434.5856338 |
| AANAASGAGGSSAAAAGSR | Q4VAA2 | 0          | N-term +28.03 Da,                           | 1075.913452 | 2 | 731.3499756 | 731.3556719 |
| SMDKHVSPR           | Q91XC8 | 0.00110092 | N-term +28.03 Da, K +28.03 Da,              | 1077.595337 | 3 | 371.5343933 | 371.5342159 |
| SVPEEKPR            | Q8CIN4 | 0.03076497 | N-term +28.03 Da, K +28.03 Da,              | 1078.503662 | 3 | 385.2399902 | 385.2361644 |
| SAPKEDDASASTSQSSR   | Q8BGD9 | 0          | N-term +28.03 Da, K +28.03 Da,              | 1082.561279 | 3 | 593.9494019 | 593.9500303 |
| AAQASAAPKAGTATGR    | P56480 | 0          | N-term +28.03 Da, K +28.03 Da,              | 1082.901855 | 3 | 495.6099854 | 495.6108422 |
| SPKEYTAGR           | P09103 | 0.00142755 | N-term +28.03 Da, K +28.03 Da,              | 1087.137573 | 3 | 355.5293274 | 355.5293479 |
| TMTGEKVK            | P12710 | 0.01081917 | N-term +28.03 Da, K +28.03 Da,              | 1087.311646 | 3 | 326.5299988 | 326.5281792 |
| PDPAKSAPAPK         | Q64525 | 0.0011534  | N-term +28.03 Da, K +28.03 Da,              | 1093.547607 | 3 | 388.2323303 | 388.2325314 |
| AAQASAAPKAGTATGR    | P56480 | 0          | N-term +28.03 Da, K +28.03 Da,              | 1096.852661 | 2 | 742.9099731 | 742.9126251 |
| LGGDDEER            | P23116 | 0.01901141 | N-term +28.03 Da, K +28.03 Da,              | 1098.361572 | 2 | 459.7099915 | 459.7117993 |
| VSSSSAEGTQPSR       | Q8R317 | 0.00078309 | N-term +28.03 Da, K +28.03 Da,              | 1102.141602 | 2 | 704.3400269 | 704.3391564 |
| ASMDKHVSPR          | Q91XC8 | 0.01168512 | N-term +28.03 Da, K +28.03 Da,              | 1104.015625 | 3 | 395.2099915 | 395.2132539 |
| GDAKTDQAQKAEGAGDAK  | P09602 | 0.00108538 | N-term +28.03 Da, K +28.03 Da,              | 1105.140869 | 4 | 469         | 468.9969967 |
| PEPAKSAPAPK         | P10853 | 0.001114   | N-term +28.03 Da, K +28.03 Da,              | 1105.813599 | 3 | 392.9100037 | 392.9044147 |
| LEEKKVCQGTSNR       | Q01279 | 0.00110132 | N-term +28.03 Da, C +57.02 Da,              | 1108.454834 | 3 | 544.9631348 | 544.962776  |
| GTTAKEEMER          | Q9CZB0 | 0.01083256 | N-term +28.03 Da, K +28.03 Da,              | 1109.057739 | 2 | 604.8099976 | 604.3029986 |
| AAQASAAPKAGTATGR    | P56480 | 0.00113208 | N-term +28.03 Da, K +28.03 Da,              | 1114.921631 | 3 | 495.6106567 | 495.6108422 |

|                        |        |            |                                             |             |   |             |             |
|------------------------|--------|------------|---------------------------------------------|-------------|---|-------------|-------------|
| EAGALER                | B2RXS4 | 0.04710921 | N-term +28.03 Da,                           | 1119.588867 | 2 | 387.2104492 | 387.2112373 |
| VMNNATCTR              | Q05816 | 0.0004583  | N-term +28.03 Da, C +57.02 Da,              | 1119.705933 | 2 | 547.7567139 | 547.7577033 |
| EKQDDLKGGNEESTKTGNAGSR | P08228 | 0.00313808 | N-term +28.03 Da, K +28.03 Da,              | 1122.196899 | 4 | 623.5700073 | 623.3162236 |
| TAEEDPADPKR            | Q9D0J8 | 0          | N-term +28.03 Da, K +28.03 Da,              | 1124.178589 | 3 | 482.5632935 | 482.5633354 |
| GDPGPQGP               | P11087 | 0.01000625 | N-term +28.03 Da,                           | 1124.491211 | 2 | 454.7324524 | 454.7328684 |
| TAEEDPADPKR            | Q9D0J8 | 0          | N-term +28.03 Da, K +28.03 Da,              | 1127.475586 | 2 | 723.3400269 | 723.3413649 |
| GLGEEQEKGAR            | O88908 | 0.00110701 | N-term +28.03 Da, K +28.03 Da,              | 1128.936768 | 3 | 410.5542297 | 410.5543337 |
| GIEADDDR               | P99027 | 0.01501051 | N-term +28.03 Da,                           | 1130.201294 | 2 | 459.7099915 | 459.7117993 |
| TSQIDTQR               | O08583 | 0.02002903 | N-term +28.03 Da,                           | 1133.55188  | 2 | 488.7563171 | 488.756541  |
| IKETECTSTQER           | O08692 | 0.00080841 | N-term +28.03 Da, C +57.02 Da,              | 1134.174683 | 3 | 513.2600098 | 513.2557368 |
| KEAGSEAESSADPGPGR      | P56183 | 0.0037225  | N-term +28.03 Da, K +28.03 Da, C +57.02 Da, | 1136.490601 | 3 | 596.9500122 | 596.618392  |
| SDLHAHKLR              | P01942 | 0.00177179 | N-term +28.03 Da, K +28.03 Da,              | 1138.470459 | 3 | 378.2200012 | 378.22437   |
| AQPPTAHGPER            | Q9JLV1 | 0.00890869 | N-term +28.03 Da,                           | 1141.206299 | 3 | 396.8800049 | 396.8755183 |
| GEAGPEDPSR             | Q61074 | 0.0179941  | N-term +28.03 Da,                           | 1141.924561 | 2 | 521.7437134 | 521.743631  |
| TITPDEKR               | O88844 | 0.02280502 | N-term +28.03 Da, K +28.03 Da,              | 1142        | 3 | 339.1971741 | 339.1975983 |
| EAGGAFGKR              | O35143 | 0.00110011 | N-term +28.03 Da, K +28.03 Da,              | 1142.433838 | 3 | 316.8500061 | 316.8468995 |
| AAQASAAPKAGTATGR       | P56480 | 0.00077942 | N-term +28.03 Da, K +28.03 Da,              | 1146.483276 | 3 | 495.9387512 | 495.6108422 |
| GKDLKPSTPR             | Q61937 | 0.01330109 | N-term +28.03 Da, K +28.03 Da,              | 1146.853882 | 3 | 394.911499  | 394.9116808 |
| EDEEAEPTGKR            | P26350 | 0          | N-term +28.03 Da, K +28.03 Da,              | 1147.514526 | 3 | 463.230011  | 463.2281754 |
| MKASGTLR               | P62717 | 0.00111193 | N-term +28.03 Da, K +28.03 Da,              | 1148.981445 | 3 | 307.1845093 | 307.1846351 |
| SAPAVQTK               | Q99JY0 | 0.01949374 | N-term +28.03 Da, K +28.03 Da,              | 1150.549561 | 2 | 429.2579651 | 429.2581875 |
| SPTAGAAKSSPASKPGSTPSR  | Q8R001 | 0.02101324 | N-term +28.03 Da, K +28.03 Da,              | 1150.819092 | 4 | 507.2799988 | 507.2786461 |
| DLKGGNEESTKTGNAGSR     | P08228 | 0          | N-term +28.03 Da, K +28.03 Da,              | 1151.034668 | 4 | 491.2529297 | 491.2526285 |
| SQVQLKGR               | P11725 | 0.0205143  | N-term +28.03 Da, K +28.03 Da,              | 1151.262939 | 2 | 486.2999878 | 486.3034606 |
| AASDAEMNQR             | E9Q394 | 0.00045496 | N-term +28.03 Da,                           | 1152.346191 | 2 | 560.7576294 | 560.7562154 |
| DLKGGNEESTKTGNAGSR     | P08228 | 0          | N-term +28.03 Da, K +28.03 Da,              | 1152.608276 | 3 | 654.6699829 | 654.6677459 |
| ESAAADKRPTVRPR         | Q9DCT2 | 0.0028169  | N-term +28.03 Da, K +28.03 Da,              | 1153.743164 | 4 | 403.2331848 | 403.2337751 |
| EHMEEVR                | P08226 | 0.00374915 | N-term +28.03 Da,                           | 1154.175537 | 2 | 479.2263184 | 479.2265618 |
| TAEEDPADPKR            | Q9D0J8 | 0.02003484 | N-term +28.03 Da, K +28.03 Da,              | 1154.854614 | 3 | 482.563324  | 482.5633354 |
| EDEEAEPTGKR            | P26350 | 0.00996574 | N-term +28.03 Da, K +28.03 Da,              | 1156.538818 | 2 | 694.8400269 | 694.3386249 |
| SQVQLKGR               | P11725 | 0.02279202 | N-term +28.03 Da, K +28.03 Da,              | 1159.103882 | 3 | 324.5380859 | 324.5380659 |
| LDHQMNTER              | Q8R311 | 0.00564035 | N-term +28.03 Da,                           | 1159.63855  | 3 | 391.1889648 | 391.1889972 |
| VVHEQIQSR              | Q91WT9 | 0.00114811 | N-term +28.03 Da,                           | 1159.714111 | 3 | 375.2120972 | 375.2121303 |
| VTPSPVKGK              | Q80XU3 | 0.00593276 | N-term +28.03 Da, K +28.03 Da,              | 1159.789551 | 3 | 332.8900146 | 332.8865837 |
| ENGDAKTDQAQKAEGAGDAK   | P09602 | 0.04489247 | N-term +28.03 Da, K +28.03 Da,              | 1163.950806 | 4 | 530.0100098 | 529.7683773 |
| ENGDAKTDQAQKAEGAGDAK   | P09602 | 0.00083928 | N-term +28.03 Da, K +28.03 Da,              | 1164.492554 | 3 | 706.3499756 | 706.0220776 |
| GIEADDDR               | P99027 | 0.02201258 | N-term +28.03 Da,                           | 1164.702637 | 2 | 459.7099915 | 459.7117993 |
| TTASPSQVR              | P09528 | 0.01718519 | N-term +28.03 Da, K +28.03 Da,              | 1166.413696 | 2 | 487.769989  | 487.7669085 |
| LRADAQAEQQQR           | Q99PL5 | 0          | N-term +28.03 Da, K +28.03 Da,              | 1167.922852 | 3 | 576.3109741 | 576.3113444 |
| SQTDPSGPPPR            | Q9CQV4 | 0.00563847 | N-term +28.03 Da,                           | 1170.053955 | 2 | 583.789978  | 583.7936552 |

|                            |        |            |                                |             |   |             |             |
|----------------------------|--------|------------|--------------------------------|-------------|---|-------------|-------------|
| DSAENETAEGEEKR             | D3Z6I7 | 0          | N-term +28.03 Da, K +28.03 Da, | 1170.204956 | 3 | 540.9165649 | 540.9164379 |
| EEDKENQGDQGGQPPQR          | P62960 | 0          | N-term +28.03 Da, K +28.03 Da, | 1171.417236 | 3 | 757.0200195 | 757.0157633 |
| EGDYNPGR                   | Q64511 | 0.03479452 | N-term +28.03 Da,              | 1173.841187 | 2 | 468.2099915 | 468.2145088 |
| SDDTCSDEKIR                | Q01853 | 0          | N-term +28.03 Da, K +28.03 Da, | 1174.324585 | 3 | 461.2139893 | 461.213649  |
| DDLKGGNEESTKTGNAGSR        | P08228 | 0.00078647 | N-term +28.03 Da, K +28.03 Da, | 1175.448853 | 3 | 693.3400269 | 693.0100606 |
| NVTTVDTKR                  | Q9Z1Q5 | 0.01923637 | N-term +28.03 Da, K +28.03 Da, | 1175.824829 | 2 | 545.3165283 | 545.3167657 |
| VVGATQGGQAGSCSR            | Q8BGD9 | 0          | N-term +28.03 Da, C +57.02 Da, | 1177.061035 | 2 | 703.3499756 | 703.3462608 |
| DSAENETAEGEEKR             | D3Z6I7 | 0          | N-term +28.03 Da, K +28.03 Da, | 1177.718872 | 2 | 810.8699951 | 810.8710186 |
| NGDAKTDQAQKAEGAGDAK        | P09602 | 0.00621728 | N-term +28.03 Da, K +28.03 Da, | 1179.872559 | 3 | 663.6699829 | 663.0078796 |
| FENKVPKQK                  | P48771 | 0.01881246 | N-term +28.03 Da, K +28.03 Da, | 1181.199829 | 3 | 453.6062317 | 453.6062576 |
| AAEKQIPGGGSGGGSGGGGGGGGGGR | Q8BMA6 | 0          | N-term +28.03 Da, K +28.03 Da, | 1184.698853 | 3 | 763.0300293 | 762.6987683 |
| AENGDAKTDQAQKAEGAGDAK      | P09602 | 0.02931323 | N-term +28.03 Da, K +28.03 Da, | 1186.137451 | 3 | 730.3599854 | 729.7011157 |
| EGPKGDPPGQGPGR             | P11087 | 0.01880694 | N-term +28.03 Da, K +28.03 Da, | 1186.345093 | 3 | 449.9041443 | 449.9053664 |
| SQVQLKGR                   | P11725 | 0.0343879  | N-term +28.03 Da, K +28.03 Da, | 1190.092651 | 3 | 324.5400085 | 324.5380659 |
| MIEDKGR                    | A6H8H2 | 0.0034626  | N-term +28.03 Da, K +28.03 Da, | 1191.118652 | 3 | 334.5193787 | 334.5197951 |
| EAELNAR                    | P02468 | 0.02560495 | N-term +28.03 Da,              | 1191.848877 | 2 | 415.7220459 | 415.7219693 |
| SLEDPQTHSNR                | P11499 | 0          | N-term +28.03 Da,              | 1192.081787 | 3 | 437.8811646 | 437.8811097 |
| SPIHTPQR                   | O88746 | 0.03386564 | N-term +28.03 Da,              | 1193.917969 | 3 | 321.8501892 | 321.8505325 |
| TQCDVPPSSR                 | P70699 | 0.00110824 | N-term +28.03 Da, C +57.02 Da, | 1198.401001 | 2 | 587.7803345 | 587.7796905 |
| SKEYFSKQK                  | P35700 | 0.00177873 | N-term +28.03 Da, K +28.03 Da, | 1199.64978  | 4 | 314.9400024 | 314.936684  |
| KEPQPSGPPQSGGAGGGGGK       | Q8JZQ2 | 0.00108814 | N-term +28.03 Da, K +28.03 Da, | 1200.639404 | 3 | 612.3200073 | 611.9866381 |
| AVTMGPKGR                  | P63038 | 0.01333333 | N-term +28.03 Da, K +28.03 Da, | 1202.384521 | 3 | 324.8598633 | 324.8601515 |
| DEDDVDTKKQKTEEDD           | P26350 | 0.00113766 | N-term +28.03 Da, K +28.03 Da, | 1206.046875 | 3 | 712.9944458 | 712.9937426 |
| SMQTVQKTTTR                | P05784 | 0.00042391 | N-term +28.03 Da, K +28.03 Da, | 1209.263672 | 3 | 446.246582  | 446.2466237 |
| SMQTVQKTTTR                | P05784 | 0.00082102 | N-term +28.03 Da, K +28.03 Da, | 1209.523804 | 2 | 668.8699951 | 668.8662974 |
| DTGAGSIR                   | O35143 | 0.00314136 | N-term +28.03 Da,              | 1209.674927 | 2 | 402.7139893 | 402.7141443 |
| ATITPDEKR                  | O88844 | 0.0065083  | N-term +28.03 Da, K +28.03 Da, | 1209.825684 | 3 | 362.8763123 | 362.8766363 |
| SVPDQGR                    | Q8CIM7 | 0.01197053 | N-term +28.03 Da,              | 1209.901245 | 2 | 442.234436  | 442.2352439 |
| VVLGHSER                   | P17751 | 0.01555955 | N-term +28.03 Da,              | 1210.145386 | 3 | 308.8500061 | 308.8468995 |
| VQFTSNDIR                  | Q1RME4 | 0.01719538 | N-term +28.03 Da,              | 1211.932983 | 2 | 554.2999878 | 554.2932906 |
| GNEEDKENQGDQGGQPPQR        | P62960 | 0.00081334 | N-term +28.03 Da, K +28.03 Da, | 1212.473389 | 3 | 814.039978  | 814.0372274 |
| AENGDAKTDQAQKAEGAGDAK      | P09602 | 0.00109729 | N-term +28.03 Da, K +28.03 Da, | 1214.098389 | 4 | 548.0200195 | 547.5276559 |
| EEEEEEAGEEGSQKR            | O35381 | 0          | N-term +28.03 Da, K +28.03 Da, | 1216.442749 | 3 | 636.2764282 | 636.2764724 |
| AENSQLTER                  | Q99PL5 | 0.00044623 | N-term +28.03 Da,              | 1219.322876 | 2 | 538.2700195 | 538.2725556 |
| SSSEDKITVH                 | P46656 | 0.00888043 | N-term +28.03 Da, K +28.03 Da, | 1219.676147 | 2 | 580.3099976 | 579.8036887 |
| SQSNQPTLR                  | Q6NV66 | 0.04092141 | N-term +28.03 Da,              | 1220.922485 | 2 | 494.2600098 | 494.264533  |
| EKEPIAASNTR                | P16546 | 0.00078094 | N-term +28.03 Da, K +28.03 Da, | 1221.577881 | 3 | 424.5699463 | 424.5699838 |
| SLEDPQTHSNR                | P11499 | 0          | N-term +28.03 Da, K +28.03 Da, | 1224.6073   | 3 | 437.8813171 | 437.8811097 |
| SKTSEVNCYR                 | P53996 | 0.0205321  | N-term +28.03 Da, C +57.02 Da, | 1225.149292 | 3 | 433.8835754 | 433.883574  |
| GQKDSYVGDEAQSQR            | P60710 | 0          | N-term +28.03 Da, K +28.03 Da, | 1225.454468 | 3 | 584.6363525 | 584.6356054 |

|                       |        |            |                                            |             |   |             |             |
|-----------------------|--------|------------|--------------------------------------------|-------------|---|-------------|-------------|
| VCDGDDDCGDGSDER       | Q924X6 | 0.00081533 | N-term +28.03 Da, C +57.02 Da,             | 1225.705811 | 2 | 849.7999878 | 850.2939611 |
| AESDPGFKR             | Q9D281 | 0.02283757 | N-term +28.03 Da, K +28.03 Da,             | 1227.329468 | 3 | 354.8576965 | 354.8574646 |
| SPAPADSTPGDSSR        | P54728 | 0.03387497 | N-term +28.03 Da, K +28.03 Da,             | 1228.845093 | 2 | 686.8200073 | 686.8205993 |
| EANQQQFNR             | P16546 | 0          | N-term +28.03 Da,                          | 1229.030396 | 2 | 645.8099976 | 645.8129107 |
| TQCDVPPSSR            | P70699 | 0.00143472 | N-term +28.03 Da, K +28.03 Da,C +57.02 Da, | 1230.292725 | 2 | 587.7800293 | 587.7796905 |
| SVTVQETKEGR           | O08677 | 0          | N-term +28.03 Da, K +28.03 Da,             | 1233.428345 | 3 | 430.5734863 | 430.5735054 |
| TSTQTMGPR             | P29341 | 0.02638226 | N-term +28.03 Da,                          | 1237.483276 | 2 | 503.7534485 | 503.7529439 |
| AQHLGESTVR            | P56480 | 0.01721579 | N-term +28.03 Da,                          | 1237.901733 | 3 | 375.8699951 | 375.8718853 |
| KVGGTSDVEVNEKKDR      | P63038 | 0.00043937 | N-term +28.03 Da, K +28.03 Da,             | 1238.36084  | 4 | 469.0153809 | 469.0151893 |
| FIDSDHTDNQR           | P09103 | 0.00083299 | N-term +28.03 Da,                          | 1238.456055 | 3 | 459.5499878 | 459.212748  |
| SVPGQQGKYR            | Q7TQH0 | 0.00972396 | N-term +28.03 Da, K +28.03 Da,             | 1250.023315 | 3 | 392.5557861 | 392.555897  |
| GPISQTTSQTR           | Q6A0A2 | 0.00043178 | N-term +28.03 Da,                          | 1251.289429 | 2 | 602.3200073 | 602.3200373 |
| GDEDEEAEAPTGKR        | P26350 | 0          | N-term +28.03 Da, K +28.03 Da,             | 1254.098633 | 2 | 781.3599854 | 780.362829  |
| SVTVQETKEGR           | O08677 | 0.00342818 | N-term +28.03 Da, K +28.03 Da,             | 1254.503296 | 3 | 430.2399902 | 430.5735054 |
| SLEDPQTHSNR           | P11499 | 0.00043802 | N-term +28.03 Da, K +28.03 Da,             | 1255.626221 | 3 | 437.8807678 | 437.8811097 |
| GDEDEEAEAPTGKR        | P26350 | 0          | N-term +28.03 Da, K +28.03 Da,             | 1257.918457 | 3 | 520.5778809 | 520.5776448 |
| TQCDVPPSSR            | P70699 | 0.00115385 | N-term +28.03 Da, K +28.03 Da,C +57.02 Da, | 1262.625977 | 2 | 587.7800293 | 587.7796905 |
| TDPSGPPPR             | Q9CQV4 | 0.01924759 | N-term +28.03 Da,                          | 1264.791016 | 2 | 476.2489624 | 476.2483515 |
| SMPEQTGEK             | P62889 | 0.00082169 | N-term +28.03 Da, K +28.03 Da,             | 1265.164307 | 2 | 531.760437  | 531.760435  |
| SAPGQPNPGTAR          | Q68FG3 | 0.03989145 | N-term +28.03 Da,                          | 1265.404053 | 2 | 590.8084717 | 590.8070967 |
| AALGGNSSPSAK          | P99027 | 0.00043554 | N-term +28.03 Da, K +28.03 Da,             | 1267.26062  | 2 | 558.3068237 | 558.3063982 |
| GLSSNSAVR             | Q91WS0 | 0.00344116 | N-term +28.03 Da, K +28.03 Da,             | 1267.436279 | 2 | 459.7539368 | 459.753801  |
| KNKITITNDQNR          | P20029 | 0          | N-term +28.03 Da, K +28.03 Da,             | 1269.219604 | 3 | 510.2987366 | 510.2983757 |
| SYVGDEAQSKR           | P60710 | 0          | N-term +28.03 Da, K +28.03 Da,             | 1269.463989 | 3 | 432.5599976 | 432.5578554 |
| TSATESEVTR            | Q9CZ13 | 0.00080873 | N-term +28.03 Da,                          | 1274.041016 | 2 | 554.7776489 | 554.7776711 |
| MLMPKKNR              | P63325 | 0.04421677 | N-term +28.03 Da, K +28.03 Da,             | 1277.362549 | 3 | 367.8928528 | 367.8926866 |
| FAEAVQKSR             | Q8C196 | 0.00113895 | N-term +28.03 Da, K +28.03 Da,             | 1278.72583  | 3 | 364.5454407 | 364.5451093 |
| KAPQPTGPPPAR          | Q6NZJ6 | 0.00910804 | N-term +28.03 Da, K +28.03 Da,             | 1278.801392 | 3 | 424.9188232 | 424.9189468 |
| FRGSDGYGSGR           | O88569 | 0.01693405 | N-term +28.03 Da,                          | 1281.15918  | 3 | 415.1989441 | 415.1986613 |
| VCDGDDDCGDGSDER       | Q924X6 | 0          | N-term +28.03 Da, C +57.02 Da,             | 1282.979004 | 2 | 850.2999878 | 850.2939611 |
| EVENQNLR              | P57776 | 0.03308519 | N-term +28.03 Da,                          | 1286.93103  | 2 | 515.2700195 | 515.2698156 |
| TASPKYTAGR            | P09103 | 0.00079554 | N-term +28.03 Da, K +28.03 Da,             | 1288.88208  | 3 | 412.8907166 | 412.8909457 |
| HQQISGR               | Q9Z0R6 | 0.02200629 | N-term +28.03 Da,                          | 1289.104858 | 2 | 426.7269592 | 427.2355779 |
| GHGEQQSQPPAAAQQQPSQQR | Q8VEK3 | 0          | N-term +28.03 Da,                          | 1292.460815 | 3 | 786.7199707 | 786.3828914 |
| SSSEDKITVH            | P46656 | 0.02123995 | N-term +28.03 Da, K +28.03 Da,C +57.02 Da, | 1292.822998 | 2 | 579.8041382 | 579.8036887 |
| DVDAGPSTNR            | Q91XD4 | 0.00044405 | N-term +28.03 Da,                          | 1293.049561 | 2 | 530.2567139 | 530.2569055 |
| EVQYDQR               | Q9CSN1 | 0.03335171 | N-term +28.03 Da,                          | 1298.970093 | 2 | 483.2399902 | 483.2379839 |
| SLEDPQTHANR           | P07901 | 0          | N-term +28.03 Da,                          | 1305.282959 | 3 | 432.549408  | 432.5494713 |
| YGEEAAQTPSR           | Q91XD4 | 0.00109971 | N-term +28.03 Da,                          | 1305.556763 | 2 | 554.2750854 | 554.2750981 |
| SHGSHETDEEFDAR        | P12787 | 0          | N-term +28.03 Da,                          | 1307.25293  | 3 | 548.9006958 | 548.9010105 |

|                        |        |            |                                            |             |   |             |             |
|------------------------|--------|------------|--------------------------------------------|-------------|---|-------------|-------------|
| SVEEPPQR               | Q9DCW4 | 0.02330207 | N-term +28.03 Da, K +28.03 Da,             | 1307.63208  | 2 | 485.2533875 | 485.253634  |
| FAEAVQKSR              | Q8C196 | 0.0007773  | N-term +28.03 Da, K +28.03 Da,             | 1309.840942 | 3 | 364.5450745 | 364.5451093 |
| MKEAELNR               | P70194 | 0.0010985  | N-term +28.03 Da, K +28.03 Da,             | 1312.111694 | 3 | 349.5299988 | 349.5269498 |
| DASASAASVR             | Q8CG76 | 0.03573377 | N-term +28.03 Da,                          | 1313.406372 | 2 | 481.25      | 481.748716  |
| LGKEVQAAQAR            | P08226 | 0          | N-term +28.03 Da, K +28.03 Da,C +57.02 Da, | 1316.688232 | 3 | 409.9100037 | 409.5787018 |
| SGKGDSTLQVSSR          | Q80WJ7 | 0          | N-term +28.03 Da, K +28.03 Da,C +57.02 Da, | 1317.333374 | 2 | 689.3699951 | 689.370259  |
| NVNDGVAQSTR            | P17751 | 0          | N-term +28.03 Da,                          | 1319.042236 | 2 | 594.8019409 | 594.8020117 |
| SEASQTDPSGPPPR         | Q9CQV4 | 0          | N-term +28.03 Da, K +28.03 Da,C +57.02 Da, | 1323.224365 | 2 | 727.8499756 | 727.3495239 |
| TDDEVVQR               | P08113 | 0.00078462 | N-term +28.03 Da, C +57.02 Da,             | 1324.394165 | 2 | 495.25      | 495.248549  |
| TVVAVGSGGK GK          | Q64433 | 0          | N-term +28.03 Da, K +28.03 Da,             | 1324.606689 | 2 | 572.3580933 | 572.3584334 |
| KMKDTSDEEIR            | P62204 | 0          | N-term +28.03 Da, K +28.03 Da,             | 1327.651978 | 3 | 522.2700195 | 522.2677539 |
| AQQPVNEVEHR            | P52503 | 0          | N-term +28.03 Da,                          | 1329.241699 | 3 | 445.5654907 | 445.5652327 |
| EDVGQPQPGR             | Q9WVA4 | 0          | N-term +28.03 Da,                          | 1329.770996 | 2 | 555.7800293 | 555.7805476 |
| QYLGGESAIMAEIR         | Q3UFJ6 | 0.04686663 | N-term +28.03 Da,                          | 1331.03479  | 4 | 392.2000122 | 392.2052605 |
| HDSPETSPIR             | E9PV38 | 0.00652742 | N-term +28.03 Da,                          | 1331.396362 | 2 | 583.789978  | 583.7936552 |
| GDSSDAPAYGAHPSR        | Q921T2 | 0.00079904 | N-term +28.03 Da,                          | 1331.471802 | 3 | 505.8990173 | 505.8989408 |
| VTGDVEPR               | Q8BIQ5 | 0.04395901 | N-term +28.03 Da,                          | 1331.547241 | 2 | 450.7399902 | 450.7429019 |
| AQNIPTQDR              | Q3TLP5 | 0.03176796 | N-term +28.03 Da, K +28.03 Da,C +57.02 Da, | 1332.536621 | 2 | 535.7800293 | 535.7830901 |
| AQQPVNEVEHR            | P52503 | 0          | N-term +28.03 Da, K +28.03 Da,C +57.02 Da, | 1332.721313 | 2 | 667.8455811 | 667.8442109 |
| KMKDTSDEEIR            | P62204 | 0          | N-term +28.03 Da, K +28.03 Da,             | 1332.850952 | 2 | 782.8961792 | 782.8979926 |
| GGGYGSGGGSGGYGSR       | Q8BG05 | 0          | N-term +28.03 Da, K +28.03 Da,             | 1332.984253 | 2 | 681.2999878 | 680.7974582 |
| RKTDTVANQGTKQEGVSNQVK  | Q99PL5 | 0          | N-term +28.03 Da, K +28.03 Da,             | 1334.636963 | 4 | 601.0900269 | 600.8355886 |
| TNPEHSDAMR             | O89086 | 0.00045935 | N-term +28.03 Da,                          | 1334.863403 | 3 | 419.527832  | 419.5277902 |
| QEMQEVQSSR             | O88569 | 0          | N-term +28.03 Da,                          | 1339.291382 | 2 | 625.2999878 | 625.2957051 |
| AVPGTNSPQQR            | A2ADY9 | 0.00347343 | N-term +28.03 Da,                          | 1340.772827 | 2 | 591.815979  | 591.8149217 |
| MQNDSAENETAEGEEKR      | D3Z6I7 | 0          | N-term +28.03 Da, K +28.03 Da,             | 1342.131592 | 3 | 665.2999878 | 665.2971017 |
| EQETPLSAKSSR           | Q99K28 | 0          | N-term +28.03 Da, K +28.03 Da,             | 1343.575806 | 3 | 463.5844421 | 463.5841818 |
| APVAGKKAKKGILER        | O35490 | 0.00314246 | N-term +28.03 Da, K +28.03 Da,C +57.02 Da, | 1347.237427 | 3 | 569.3856201 | 569.385344  |
| TQDAPEEVR              | Q9JH59 | 0.00315679 | N-term +28.03 Da, K +28.03 Da,             | 1348.603271 | 2 | 536.7666016 | 536.7671061 |
| APVAGKKAKKGILER        | O35490 | 0.00115473 | N-term +28.03 Da, K +28.03 Da,             | 1349.973022 | 4 | 427.2906189 | 427.2908271 |
| AKDVKFGADAR            | P63038 | 0.00403769 | N-term +28.03 Da, K +28.03 Da,             | 1351.543335 | 2 | 631.3669434 | 631.3667899 |
| APTQCDVPPSSR           | P70699 | 0.00113037 | N-term +28.03 Da, C +57.02 Da,             | 1357.481079 | 2 | 671.8200073 | 671.8246297 |
| SALVDEKDQDSK           | Q80Y14 | 0          | N-term +28.03 Da, K +28.03 Da,             | 1359.641479 | 3 | 473.5845642 | 473.5839592 |
| AQQPVNEVEHR            | P52503 | 0.00044763 | N-term +28.03 Da,                          | 1360.684326 | 3 | 445.5700073 | 445.5652327 |
| GTPPAGTPPGAR           | Q8K0L9 | 0.00081169 | N-term +28.03 Da, C +57.02 Da,             | 1363.168701 | 2 | 553.8010864 | 553.8012827 |
| SEASQTDPSGPPPR         | Q9CQV4 | 0.00043159 | N-term +28.03 Da,                          | 1364.1875   | 2 | 727.3499756 | 727.3495239 |
| KAVVVKKIETR            | P11679 | 0.00804117 | N-term +28.03 Da, K +28.03 Da,             | 1365.467285 | 3 | 461.6536865 | 461.6534304 |
| QSPGSHGGEW R           | Q8C7E7 | 0.02100115 | N-term +28.03 Da,                          | 1365.618286 | 3 | 409.5238342 | 409.1951396 |
| VGPAIKDR               | O08715 | 0.00282087 | N-term +28.03 Da, K +28.03 Da,             | 1366.205811 | 3 | 304.5274658 | 304.5272782 |
| NPAENGDAKTDOAQAEGAGDAK | P09602 | 0.0307735  | N-term +28.03 Da, K +28.03 Da,             | 1366.778442 | 3 | 800.7299805 | 800.0663465 |

|                     |        |            |                                |             |   |             |             |
|---------------------|--------|------------|--------------------------------|-------------|---|-------------|-------------|
| GEEAGAYDGPR         | P27773 | 0.00714518 | N-term +28.03 Da,              | 1366.940796 | 2 | 575.2600098 | 575.2621881 |
| SGEHSIIGR           | P08228 | 0.01715469 | N-term +28.03 Da,              | 1367.425049 | 3 | 328.5135498 | 328.5138092 |
| STGGKEDVSYEER       | Q9R257 | 0          | N-term +28.03 Da, K +28.03 Da, | 1369.75293  | 3 | 504.9100037 | 504.9107352 |
| SVSDNDIR            | Q01853 | 0.03000834 | N-term +28.03 Da,              | 1370.239868 | 2 | 467.2354736 | 467.2354414 |
| SHGSHETDEEFDAR      | P12787 | 0          | N-term +28.03 Da,              | 1371.212036 | 3 | 548.9013062 | 548.9010105 |
| EIQNPDSNCR          | P06796 | 0.00044444 | N-term +28.03 Da, C +57.02 Da, | 1373.560059 | 2 | 630.789978  | 630.7855046 |
| SHGSHETDEEFDAR      | P12787 | 0          | N-term +28.03 Da,              | 1374.8125   | 2 | 822.8499756 | 822.8478775 |
| AFLASVEKDAK         | Q8BW49 | 0.02281803 | N-term +28.03 Da, K +28.03 Da, | 1375.587769 | 4 | 316.1871643 | 316.4393252 |
| QPPQIAPKR           | Q6NZJ6 | 0.00805412 | N-term +28.03 Da, K +28.03 Da, | 1375.663208 | 3 | 364.2290955 | 364.2292323 |
| STGGKEDVSYEER       | Q9R257 | 0          | N-term +28.03 Da, K +28.03 Da, | 1376.546509 | 2 | 756.8599854 | 756.8624645 |
| GSSASQISSAEGR       | O55176 | 0.00116144 | N-term +28.03 Da,              | 1378.379517 | 2 | 633.3099976 | 632.8100343 |
| NQPPQIAPKR          | Q6NZJ6 | 0.00115696 | N-term +28.03 Da, K +28.03 Da, | 1379.25061  | 3 | 402.2433472 | 402.2435417 |
| DGDEDEEAAPTQKR      | P26350 | 0          | N-term +28.03 Da, K +28.03 Da, | 1381.178467 | 3 | 558.9191284 | 558.9199596 |
| VLSGEDKSNIK         | P01942 | 0.00805153 | N-term +28.03 Da, K +28.03 Da, | 1382.708496 | 3 | 425.2502747 | 425.2502512 |
| LKAEGSEIR           | P09103 | 0.00116369 | N-term +28.03 Da, K +28.03 Da, | 1383.010376 | 3 | 353.5400085 | 353.544998  |
| GDTASPKEYTAGR       | P09103 | 0          | N-term +28.03 Da, K +28.03 Da, | 1384.123169 | 2 | 704.8599854 | 704.8569845 |
| GDTASPKEYTAGR       | P09103 | 0          | N-term +28.03 Da, K +28.03 Da, | 1384.331055 | 3 | 470.2406616 | 470.2404151 |
| VLSGEDKSNIK         | P01942 | 0.00883559 | N-term +28.03 Da, K +28.03 Da, | 1384.75354  | 2 | 637.3716431 | 637.3717385 |
| SSVASPAAPR          | Q8BJZ4 | 0.00043384 | N-term +28.03 Da,              | 1391.27771  | 2 | 485.769043  | 485.769451  |
| AEDAVYGR            | Q6PDM2 | 0.00561983 | N-term +28.03 Da,              | 1391.511108 | 2 | 454.7264709 | 454.7272519 |
| TEASVLAPSFYQPRQKVER | Q8C170 | 0.02511995 | N-term +28.03 Da, K +28.03 Da, | 1392.528076 | 4 | 566.8099976 | 566.3114832 |
| ADLSCASDQNR         | Q99JZ7 | 0.00043328 | N-term +28.03 Da, C +57.02 Da, | 1393.364868 | 2 | 632.7800293 | 632.7829621 |
| GTPPAGTPPGAR        | Q8K0L9 | 0.00078802 | N-term +28.03 Da,              | 1394.467407 | 2 | 553.8015137 | 553.8012827 |
| LEEVGNGAR           | P08226 | 0.00045413 | N-term +28.03 Da,              | 1395.021118 | 2 | 522.2769165 | 522.2776406 |
| GEAGAAGPSGPAGPR     | Q01149 | 0          | N-term +28.03 Da,              | 1398.740112 | 2 | 640.8300171 | 640.3231113 |
| GMKVIENR            | P21107 | 0.00435657 | N-term +28.03 Da, K +28.03 Da, | 1401.513428 | 3 | 334.8635254 | 334.8636732 |
| SHGSHETDEEFDAR      | P12787 | 0          | N-term +28.03 Da,              | 1402.732666 | 3 | 548.901001  | 548.9010105 |
| ESGPSIVHR           | P60710 | 0.03501094 | N-term +28.03 Da, K +28.03 Da, | 1403.019653 | 3 | 337.185791  | 337.1856925 |
| YASEDKLENR          | O35490 | 0.00042445 | N-term +28.03 Da, K +28.03 Da, | 1403.224487 | 3 | 427.5543518 | 427.5542224 |
| EDGDEDEEAAPTQKR     | P26350 | 0          | N-term +28.03 Da, K +28.03 Da, | 1403.724609 | 3 | 602.2700195 | 601.9341576 |
| SHGSHETDEEFDAR      | P12787 | 0          | N-term +28.03 Da,              | 1406.555786 | 2 | 822.8461914 | 822.8478775 |
| TPSGTAEPYDGTKAR     | Q80Y55 | 0          | N-term +28.03 Da, K +28.03 Da, | 1409.109131 | 3 | 536.2739258 | 536.2738963 |
| HDSFIQTSQKR         | P50543 | 0.04326663 | N-term +28.03 Da, K +28.03 Da, | 1410.569092 | 3 | 468.2518311 | 468.2527661 |
| NQPPQIAPKR          | Q6NZJ6 | 0.00971482 | N-term +28.03 Da, K +28.03 Da, | 1411.210327 | 3 | 402.2399902 | 402.2435417 |
| EAPPKVPQR           | Q9JM52 | 0.01249238 | N-term +28.03 Da, K +28.03 Da, | 1411.971313 | 3 | 359.8841553 | 359.8853543 |
| VVHSQDQIMTKR        | Q91XE0 | 0          | N-term +28.03 Da, K +28.03 Da, | 1415.131104 | 4 | 375.4599915 | 375.2106113 |
| APTQCDVPPSSR        | P70699 | 0.00894569 | N-term +28.03 Da, C +57.02 Da, | 1419.261475 | 2 | 671.8238525 | 671.8246297 |
| EHCEQLEKCVK         | P99028 | 0          | N-term +28.03 Da, K +28.03 Da, | 1419.342773 | 3 | 515.2600098 | 515.2584237 |
| SEGTKAVTKYTSSK      | P10853 | 0.00777706 | N-term +28.03 Da, K +28.03 Da, | 1419.871826 | 3 | 534.3099976 | 533.6381754 |
| EHCEQLEKCVK         | P99028 | 0          | N-term +28.03 Da, K +28.03 Da, | 1422.846313 | 4 | 386.7000122 | 386.6956369 |

|                        |        |            |                                             |             |   |             |             |
|------------------------|--------|------------|---------------------------------------------|-------------|---|-------------|-------------|
| AVEEKSLGPSR            | Q8VC31 | 0.00108303 | N-term +28.03 Da, K +28.03 Da,              | 1427.137207 | 3 | 410.230011  | 410.2347124 |
| SLENSVKPR              | Q8BHI7 | 0.04324324 | N-term +28.03 Da, K +28.03 Da,              | 1427.448364 | 3 | 362.5499878 | 362.548631  |
| ALSVPASKAR             | Q8R404 | 0.02001741 | N-term +28.03 Da, K +28.03 Da,              | 1428.548218 | 3 | 352.5567017 | 352.5572377 |
| SKMEEQTQQIR            | P08226 | 0          | N-term +28.03 Da, K +28.03 Da,              | 1432.307983 | 3 | 478.9200134 | 478.5854168 |
| SHGSHETDEEFDAR         | P12787 | 0          | N-term +28.03 Da,                           | 1432.987305 | 3 | 548.9000244 | 548.9010105 |
| LDNTKFR                | Q6PDM2 | 0.01197421 | N-term +28.03 Da, K +28.03 Da,              | 1433.072021 | 3 | 317.1900024 | 317.1870332 |
| GFCEVCKK               | Q61207 | 0.01413109 | N-term +28.03 Da, K +28.03 Da,              | 1433.26123  | 3 | 371.1900024 | 371.1928021 |
| KITITNDQNR             | P20029 | 0.00806712 | N-term +28.03 Da, K +28.03 Da,              | 1435.777954 | 3 | 420.2399902 | 420.2419784 |
| SHTQDTEDEKDR           | Q80WJ7 | 0          | N-term +28.03 Da, K +28.03 Da,              | 1437.264648 | 3 | 577.6099854 | 577.6112373 |
| GETENQSPASEEEKEAKSD    | P18608 | 0.00653381 | N-term +28.03 Da, K +28.03 Da,              | 1440.368408 | 3 | 717.3300171 | 716.9974869 |
| SHTQDTEDEKDR           | Q80WJ7 | 0          | N-term +28.03 Da, K +28.03 Da,              | 1440.455811 | 4 | 433.4599915 | 433.4602471 |
| SKESYELR               | P67984 | 0.02098907 | N-term +28.03 Da, K +28.03 Da,              | 1441.85144  | 3 | 356.5299988 | 356.5292366 |
| TDTVANQGTQKQEGVSN      | Q99PL5 | 0.00045683 | N-term +28.03 Da, K +28.03 Da,              | 1443.9646   | 2 | 852.9199829 | 852.9235853 |
| GRLEEVGNQAR            | P08226 | 0.00995334 | N-term +28.03 Da, C +57.02 Da,              | 1447.13623  | 3 | 419.5599976 | 419.561711  |
| DRLEEV                 | P08226 | 0.0250987  | N-term +28.03 Da,                           | 1452.732178 | 3 | 315.5099792 | 315.5101762 |
| VAEDEDDEDDVDTKKQKTEEDD | P26350 | 0          | N-term +28.03 Da, K +28.03 Da, C +57.02 Da, | 1453.376099 | 3 | 851.3800049 | 851.0520982 |
| DEEDEEEAGEEEGSKQR      | O35381 | 0          | N-term +28.03 Da, K +28.03 Da,              | 1453.608887 | 3 | 674.9500122 | 674.6187871 |
| TEAPLNPKANR            | P60710 | 0.00316233 | N-term +28.03 Da, K +28.03 Da,              | 1454.070801 | 3 | 423.2399902 | 422.9103401 |
| TVEEDLGKSR             | P08113 | 0.00376712 | N-term +28.03 Da, K +28.03 Da,              | 1458.178223 | 3 | 397.2186584 | 397.218951  |
| NEATGGKYVPR            | P68372 | 0.01555024 | N-term +28.03 Da, K +28.03 Da,              | 1458.328979 | 3 | 416.5622864 | 416.5629404 |
| GGFCEVCKK              | Q61207 | 0.00043706 | N-term +28.03 Da, K +28.03 Da,              | 1461.15625  | 3 | 390.1994019 | 390.1999568 |
| VVDPETDER              | P70441 | 0.01722602 | N-term +28.03 Da, C +57.02 Da,              | 1462.916382 | 2 | 544.2669678 | 544.2669391 |
| FREPTTEER              | Q9WUK2 | 0.00315568 | N-term +28.03 Da,                           | 1462.991821 | 3 | 407.5349731 | 407.5350506 |
| IVTSSAGTGTTEDEAKK      | Q9D1J3 | 0          | N-term +28.03 Da, K +28.03 Da,              | 1463.192017 | 3 | 627.3300171 | 627.3334812 |
| GGFCEVCKK              | Q61207 | 0.00079681 | N-term +28.03 Da, K +28.03 Da,              | 1463.544189 | 2 | 584.7960815 | 584.796297  |
| VAEDEDDEDDVDTKKQKTEEDD | P26350 | 0          | N-term +28.03 Da, K +28.03 Da,              | 1469.383545 | 4 | 639.039978  | 638.5408928 |
| TTTIEAVKR              | D3Z2H9 | 0.00913386 | N-term +28.03 Da, K +28.03 Da,              | 1471.674072 | 3 | 358.8885803 | 358.8887647 |
| GGPEGEEQIR             | Q64727 | 0.00114112 | N-term +28.03 Da,                           | 1473.32959  | 2 | 550.7700195 | 550.2725556 |
| STVACINR               | Q01279 | 0.00889171 | N-term +28.03 Da, C +57.02 Da,              | 1475.232788 | 2 | 474.7494507 | 474.7502039 |
| SATYVNTTEGR            | Q91VD9 | 0.00044723 | N-term +28.03 Da,                           | 1479.455933 | 2 | 563.2790527 | 563.2803806 |
| MVQEAKEYKAEDEKQR       | P63017 | 0          | N-term +28.03 Da, K +28.03 Da,              | 1481.931274 | 4 | 524.7800293 | 524.2779518 |
| STGPGTGTGTAYDR         | Q9Z0G9 | 0          | N-term +28.03 Da,                           | 1483.197998 | 2 | 684.8237915 | 684.8231418 |
| GETNPADSKPGTIR         | P15532 | 0          | N-term +28.03 Da, K +28.03 Da,              | 1485.826416 | 2 | 749.8967896 | 749.8966411 |
| PGPTPSGTNVGSSGR        | Q9CQS8 | 0.00077851 | N-term +28.03 Da,                           | 1487.378418 | 2 | 699.852417  | 699.8522334 |
| SKFEEVER               | O08795 | 0.00110947 | N-term +28.03 Da, K +28.03 Da,              | 1488.951782 | 3 | 360.5291748 | 360.5292366 |
| GSHETDEEFDAR           | P12787 | 0          | N-term +28.03 Da, K +28.03 Da, C +57.02 Da, | 1490.365356 | 2 | 710.7999878 | 710.8024068 |
| APTQCDVPPSSR           | P70699 | 0.00833066 | N-term +28.03 Da, C +57.02 Da,              | 1490.516235 | 2 | 671.8240967 | 671.8246297 |
| GGFCEVCKK              | Q61207 | 0.00081136 | N-term +28.03 Da, K +28.03 Da,              | 1491.706055 | 3 | 390.1995239 | 390.1999568 |
| SHGSHETDEEFDAR         | P12787 | 0.00043309 | N-term +28.03 Da,                           | 1493.688721 | 3 | 548.9000244 | 548.9010105 |
| ADTPGEATPPPR           | Q9ERE7 | 0.00044209 | N-term +28.03 Da,                           | 1494.733276 | 2 | 618.81427   | 618.8145878 |

|                     |        |            |                                            |             |   |             |             |
|---------------------|--------|------------|--------------------------------------------|-------------|---|-------------|-------------|
| GEEEDGDEDEEAEAPTGKR | P26350 | 0          | N-term +28.03 Da, K +28.03 Da,             | 1496.594971 | 3 | 706.9689941 | 706.9697085 |
| QDKAIVQEATR         | Q8CHT0 | 0.00043573 | N-term +28.03 Da, K +28.03 Da,             | 1497.871826 | 3 | 438.9174194 | 438.9173835 |
| KCASQAGMTAYGTR      | Q9DAW9 | 0.04498922 | N-term +28.03 Da, C +57.02 Da,             | 1498.016968 | 3 | 519.9226685 | 519.9219231 |
| AVVVVKIETR          | P11679 | 0          | N-term +28.03 Da, K +28.03 Da,             | 1498.300171 | 4 | 307.4604492 | 307.460326  |
| ADESVGTMGNR         | Q91Y97 | 0.00043029 | N-term +28.03 Da,                          | 1505.770508 | 2 | 582.7674561 | 582.769323  |
| SHETDEEFDAR         | P12787 | 0          | N-term +28.03 Da,                          | 1512.255615 | 2 | 682.2911987 | 682.2916747 |
| TKLEECVR            | O70251 | 0.01330913 | N-term +28.03 Da, C +57.02 Da,             | 1514.405396 | 3 | 364.2018127 | 364.2023549 |
| GMGQKDSYVVGDEAQSQR  | P60710 | 0          | N-term +28.03 Da, K +28.03 Da,             | 1514.480835 | 4 | 485.7442322 | 485.7440104 |
| VHQVLYR             | P52196 | 0.01001252 | N-term +28.03 Da,                          | 1515.726074 | 3 | 314.8552551 | 314.8555062 |
| VICVNPR             | O55038 | 0.03075644 | N-term +28.03 Da, C +57.02 Da,             | 1518.0802   | 2 | 442.7453003 | 443.2523819 |
| APTQCDVPPSSR        | P70699 | 0.00373388 | N-term +28.03 Da, K +28.03 Da,C +57.02 Da, | 1521.246704 | 2 | 671.8250732 | 671.8246297 |
| NSTVACINR           | Q01279 | 0.0021179  | N-term +28.03 Da, K +28.03 Da,C +57.02 Da, | 1525.136963 | 2 | 531.7700195 | 531.771668  |
| GEEEDGDEDEEAEAPTGKR | P26350 | 0          | N-term +28.03 Da, K +28.03 Da,             | 1527.214722 | 3 | 706.9690552 | 706.9697085 |
| EVDSEYEAR           | Q99K28 | 0.00045147 | N-term +28.03 Da,                          | 1534.415283 | 2 | 563.2561035 | 563.2565716 |
| IVQEVETQR           | Q8BWP5 | 0.01022305 | N-term +28.03 Da,                          | 1536.056763 | 2 | 565.314209  | 565.3142232 |
| DITDGNSEHLKR        | Q9DBH5 | 0.00046404 | N-term +28.03 Da, K +28.03 Da,             | 1538.019165 | 3 | 480.9198914 | 480.9195645 |
| EEAIKQLR            | O08638 | 0.00590551 | N-term +28.03 Da, K +28.03 Da,             | 1538.094727 | 3 | 348.2133179 | 348.2133596 |
| YGEVPENR            | P15116 | 0.01743499 | N-term +28.03 Da,                          | 1539.579468 | 2 | 496.2460632 | 496.245809  |
| EKQPVLSQTEAR        | P99026 | 0.03412218 | N-term +28.03 Da, K +28.03 Da,             | 1541.528687 | 3 | 481.2719116 | 481.2718266 |
| GMGQKDSYVVGDEAQSQR  | P60710 | 0          | N-term +28.03 Da, K +28.03 Da,             | 1545.493408 | 4 | 486         | 485.7440104 |
| FCSEYRPK            | P63158 | 0.02057375 | N-term +28.03 Da, K +28.03 Da,C +57.02 Da, | 1547.343994 | 3 | 381.5269775 | 381.5269498 |
| SEEDKLTVSR          | P56480 | 0.01609538 | N-term +28.03 Da, K +28.03 Da,             | 1549.433105 | 3 | 407.2200012 | 407.2224727 |
| NIMTAGSR            | P24270 | 0.02719372 | N-term +28.03 Da,                          | 1551.028931 | 2 | 439.2314758 | 439.2316468 |
| FENLAKER            | Q60598 | 0.01879589 | N-term +28.03 Da, K +28.03 Da,             | 1555.556763 | 3 | 354.8697815 | 354.8695929 |
| TAGAQPDSDSIGGR      | G5E870 | 0.00083126 | N-term +28.03 Da,                          | 1557.577393 | 2 | 700.8400269 | 700.8418659 |
| GGSGNGGGAAFSQR      | O89090 | 0.00863447 | N-term +28.03 Da,                          | 1559.684448 | 2 | 677.3200073 | 676.3211003 |
| AAIQESGVER          | Q60692 | 0.00973312 | N-term +28.03 Da,                          | 1560.576294 | 2 | 544.2908325 | 544.2907481 |
| KEYGEQIDPSTHR       | Q9QXT0 | 0.01552702 | N-term +28.03 Da, K +28.03 Da,C +57.02 Da, | 1561.126953 | 3 | 539.2700195 | 539.2740076 |
| NLESEPTHQESSVR      | P42567 | 0.00343407 | N-term +28.03 Da,                          | 1564.640625 | 3 | 547.6004028 | 547.6006722 |
| TAGAQPDSDSIGGR      | G5E870 | 0          | N-term +28.03 Da,                          | 1564.766479 | 2 | 700.8422852 | 700.8418659 |
| GPGASPMSPPTHR       | Q6NXL1 | 0.01081582 | N-term +28.03 Da,                          | 1566.713623 | 3 | 440.5553894 | 440.55568   |
| TVVTSITTEPSR        | O08795 | 0.000819   | N-term +28.03 Da,                          | 1566.842041 | 2 | 603.3200073 | 603.3222458 |
| TKLDELKR            | Q02819 | 0.00374787 | N-term +28.03 Da, K +28.03 Da,             | 1567.06958  | 3 | 362.9005127 | 362.9008931 |
| TADDEPLGR           | P17742 | 0.00808016 | N-term +28.03 Da,                          | 1568.859497 | 2 | 501.25      | 501.248549  |
| SASATPLSGNSSR       | E9QN52 | 0.00079177 | N-term +28.03 Da,                          | 1569.93335  | 2 | 682.3499756 | 682.3442414 |
| EKLEEQPGEQAPR       | Q3UMU9 | 0.0088748  | N-term +28.03 Da, K +28.03 Da,             | 1570.427124 | 3 | 522.9419556 | 522.9422579 |
| TADSDVCSAQGVR       | Q91W90 | 0.00045788 | N-term +28.03 Da, C +57.02 Da,             | 1571.384277 | 2 | 697.8200073 | 697.3224517 |
| TEDVKEAIR           | Q9D855 | 0.00714982 | N-term +28.03 Da, K +28.03 Da,             | 1572.18042  | 3 | 372.8792725 | 372.880158  |
| GEEAGAYDGPR         | P27773 | 0          | N-term +28.03 Da, K +28.03 Da,             | 1572.471924 | 2 | 575.2600098 | 575.2621881 |
| TYGPKVVR            | P12710 | 0.00890585 | N-term +28.03 Da, K +28.03 Da,             | 1574.26416  | 3 | 325.8708191 | 325.8710449 |

|                      |        |            |                                |             |   |             |             |
|----------------------|--------|------------|--------------------------------|-------------|---|-------------|-------------|
| EAGEPGDVEPR          | P97855 | 0.00081037 | N-term +28.03 Da,              | 1575.208496 | 2 | 592.2800293 | 592.2831206 |
| SELQSQMQR            | Q8R317 | 0.00111235 | N-term +28.03 Da,              | 1577.501221 | 2 | 567.7800293 | 567.782233  |
| VDEPPQHALR           | P70296 | 0.00502176 | N-term +28.03 Da, K +28.03 Da, | 1580.584473 | 3 | 397.2164307 | 397.215652  |
| VITSQNSQLR           | P34927 | 0.04327833 | N-term +28.03 Da,              | 1581.206787 | 2 | 587.335022  | 587.3329473 |
| EDVCQDCMK            | Q61207 | 0          | N-term +28.03 Da, K +28.03 Da, | 1581.839844 | 2 | 620.7537842 | 620.7539698 |
| SAPASMSPDGTR         | P59764 | 0.00143266 | N-term +28.03 Da,              | 1583.498779 | 2 | 603.289978  | 602.7849731 |
| AIEAYNQGR            | O08692 | 0.00110254 | N-term +28.03 Da,              | 1583.829224 | 2 | 525.2731323 | 525.2723581 |
| DPPTTNPPTAR          | Q7TMF3 | 0.00593472 | N-term +28.03 Da,              | 1584.177612 | 2 | 597.8099976 | 597.8093052 |
| GFAGDDAPR            | P60710 | 0.01386795 | N-term +28.03 Da,              | 1586.50415  | 2 | 467.2249146 | 467.2248764 |
| ATDMGTMQER           | P56480 | 0.00046041 | N-term +28.03 Da,              | 1587.281616 | 2 | 584.2598877 | 584.2602764 |
| LGTTAKEEMER          | Q9CZB0 | 0.00375171 | N-term +28.03 Da, K +28.03 Da, | 1588.116211 | 3 | 440.9002686 | 440.8991127 |
| FYEDMKENPKR          | P52840 | 0.00111276 | N-term +28.03 Da, K +28.03 Da, | 1595.583618 | 4 | 385.9518433 | 385.9511657 |
| EMDEQIR              | D3Z2H9 | 0.01330511 | N-term +28.03 Da,              | 1602.232666 | 2 | 474.730011  | 474.7263948 |
| TAPYKYPR             | Q3UNX5 | 0.01138462 | N-term +28.03 Da, K +28.03 Da, | 1606.733398 | 3 | 351.203064  | 351.2026833 |
| KKDEDLFR             | O54962 | 0.02050245 | N-term +28.03 Da, K +28.03 Da, | 1606.884155 | 3 | 378.8890991 | 378.8887647 |
| YSHGSHETDEEFDAR      | P12787 | 0          | N-term +28.03 Da,              | 1607.895142 | 3 | 603.2558594 | 603.2554536 |
| GSEPAPGSVAQPKKIR     | Q9JLQ0 | 0.01001879 | N-term +28.03 Da, K +28.03 Da, | 1608.117432 | 4 | 427.2563477 | 427.254442  |
| GGGNYGPGGSGGGYGGGR   | O88569 | 0          | N-term +28.03 Da,              | 1611.438477 | 2 | 799.8499756 | 799.8507539 |
| TEVEAAVNR            | P29391 | 0.00889454 | N-term +28.03 Da,              | 1612.870239 | 2 | 508.7730408 | 508.7721911 |
| GKVFVTKGR            | O55022 | 0.01716992 | N-term +28.03 Da, K +28.03 Da, | 1614.942261 | 3 | 397.5801697 | 397.5800424 |
| AVQPPEEGPSR          | Q8BGD9 | 0.00045704 | N-term +28.03 Da,              | 1615.48999  | 2 | 597.8102417 | 597.8093052 |
| EKIEDNGNFR           | P02762 | 0          | N-term +28.03 Da, K +28.03 Da, | 1616.501709 | 3 | 427.2200012 | 426.5543337 |
| LVGMPAKR             | P38647 | 0.0011325  | N-term +28.03 Da, K +28.03 Da, | 1618.277832 | 3 | 309.8650513 | 309.8651252 |
| EKIEDNGNFR           | P02762 | 0.00992864 | N-term +28.03 Da, K +28.03 Da, | 1618.551636 | 2 | 639.3300171 | 639.3278623 |
| AQDKAIVQEATR         | Q8CHT0 | 0          | N-term +28.03 Da, K +28.03 Da, | 1621.654053 | 3 | 462.5961609 | 462.5964215 |
| RQPDTPAELR           | Q9WVL0 | 0.02332859 | N-term +28.03 Da,              | 1625.765015 | 2 | 605.8300171 | 605.8305718 |
| SAPAQAPKGAQAPKAQAPVK | P47915 | 0.01000313 | N-term +28.03 Da, K +28.03 Da, | 1625.950439 | 4 | 522.3099976 | 522.059931  |
| AEFASEACR            | Q9ERR7 | 0.01334142 | N-term +28.03 Da, C +57.02 Da, | 1630.279785 | 2 | 534.7399902 | 534.7425764 |
| SEFGDSSSPATR         | E9PV24 | 0.00081367 | N-term +28.03 Da, K +28.03 Da, | 1635.309937 | 2 | 634.789978  | 634.7913102 |
| SQSQFTAPR            | Q60865 | 0.00079114 | N-term +28.03 Da,              | 1643.861816 | 2 | 525.2700195 | 525.2723581 |
| AVQPPEEGPSR          | Q8BGD9 | 0          | N-term +28.03 Da, K +28.03 Da, | 1645.726563 | 2 | 597.8099976 | 597.8093052 |
| YAKEVAGLR            | Q99PL5 | 0.00371245 | N-term +28.03 Da, K +28.03 Da, | 1645.802124 | 3 | 354.8800049 | 354.8817213 |
| KGASQAGMLAPGTR       | Q9DAW9 | 0.02279852 | N-term +28.03 Da, K +28.03 Da, | 1645.908813 | 2 | 700.8900146 | 700.8875639 |
| GSPEGSSQLCSPR        | D3Z6Q9 | 0          | N-term +28.03 Da, C +57.02 Da, | 1646.716675 | 2 | 695.3300171 | 695.3249942 |
| GAVEAISDR            | P10605 | 0.00372503 | N-term +28.03 Da, K +28.03 Da, | 1647.776978 | 2 | 473.2537231 | 473.253634  |
| KGASQAGMLAPGTR       | Q9DAW9 | 0.0004529  | N-term +28.03 Da, K +28.03 Da, | 1647.852417 | 3 | 467.5944824 | 467.5941348 |
| TLTPEEAR             | P06151 | 0.00177305 | N-term +28.03 Da,              | 1651.594727 | 2 | 537.2764893 | 537.2773066 |
| GTGKTATPQQAQEVHEKLR  | P17751 | 0          | N-term +28.03 Da, K +28.03 Da, | 1651.88916  | 4 | 541.5499878 | 541.5524705 |
| SAPVASPNVR           | Q05920 | 0.00886356 | N-term +28.03 Da, K +28.03 Da, | 1653.432739 | 2 | 513.2905884 | 513.2905506 |
| SSAPVASPNVR          | Q05920 | 0.00864    | N-term +28.03 Da,              | 1653.829346 | 2 | 556.8099976 | 556.8065652 |

|                       |        |            |                                             |             |   |             |             |
|-----------------------|--------|------------|---------------------------------------------|-------------|---|-------------|-------------|
| GPMPMAPPR             | Q62318 | 0.01882353 | N-term +28.03 Da, K +28.03 Da,              | 1655.478027 | 2 | 454.2446594 | 454.2445568 |
| GQPQQTTGAASGGYIKR     | O09044 | 0          | N-term +28.03 Da, K +28.03 Da,              | 1656.419678 | 3 | 592.6500244 | 592.6514781 |
| GTVEEDLGKSR           | P08113 | 0.00886637 | N-term +28.03 Da, K +28.03 Da,              | 1661.047119 | 3 | 416.2272034 | 416.2261057 |
| STEVEAAVNR            | P29391 | 0.00115964 | N-term +28.03 Da,                           | 1663.896362 | 2 | 552.2890015 | 552.2882056 |
| SELSNPSETESER         | Q61584 | 0          | N-term +28.03 Da,                           | 1664.921753 | 2 | 746.8400269 | 746.8417295 |
| SEFGDSSSPATR          | E9PV24 | 0.00044743 | N-term +28.03 Da,                           | 1666.156982 | 2 | 634.7907104 | 634.7913102 |
| SFSAPEQQR             | P24270 | 0.04474394 | N-term +28.03 Da,                           | 1668.794434 | 2 | 539.2704468 | 539.2698156 |
| TDKPVDEALR            | Q9R257 | 0.00114548 | N-term +28.03 Da, K +28.03 Da,              | 1670.828979 | 3 | 400.5592957 | 400.559196  |
| TPCDDFTR              | P28798 | 0.00342936 | N-term +28.03 Da, C +57.02 Da,              | 1670.996216 | 2 | 520.2304077 | 520.2293018 |
| TDMGTMQER             | P56480 | 0.003427   | N-term +28.03 Da,                           | 1671.260498 | 2 | 548.7415161 | 548.7417193 |
| ENGEESER              | P21619 | 0.04974727 | N-term +28.03 Da,                           | 1672.770264 | 2 | 496.6837769 | 496.6881878 |
| TDEEFDAR              | P12787 | 0.01001565 | N-term +28.03 Da, K +28.03 Da,              | 1674.483521 | 2 | 505.7251587 | 505.7249069 |
| GGGPTTTGGPPAGAEAAQRPR | Q8R1S4 | 0          | N-term +28.03 Da,                           | 1675.999878 | 3 | 664.6679077 | 664.6679685 |
| TKVKAAPSEEAQAEGCSEER  | Q9CRB2 | 0          | N-term +28.03 Da, C +57.02 Da,              | 1676.59375  | 3 | 797.3800049 | 797.3883207 |
| EHAEKLMKLNQNR         | P09528 | 0.0007984  | N-term +28.03 Da, K +28.03 Da,              | 1681.174194 | 4 | 427.9935608 | 427.9936306 |
| TAEFEEAQR             | Q99PL5 | 0.00805932 | N-term +28.03 Da,                           | 1682.448975 | 2 | 555.2700195 | 554.7671061 |
| SMDTGAGSIR            | O35143 | 0.02002322 | N-term +28.03 Da,                           | 1687.942261 | 2 | 511.7503357 | 511.7504014 |
| SAPDLKSVR             | P27546 | 0.0037415  | N-term +28.03 Da, K +28.03 Da,              | 1691.723999 | 3 | 343.5415344 | 343.5414763 |
| TGQVYDEKDYR           | P52503 | 0.01081248 | N-term +28.03 Da, K +28.03 Da,              | 1691.960083 | 3 | 477.2362976 | 477.2367821 |
| SGMGNPGNISSR          | Q921H8 | 0          | N-term +28.03 Da,                           | 1696.191406 | 2 | 602.789978  | 602.7905896 |
| TKELGTVMR             | P62204 | 0.00116234 | N-term +28.03 Da, K +28.03 Da,              | 1699.1521   | 3 | 364.2147217 | 364.2144833 |
| ATTVQEQLR             | Q8BG07 | 0.00315236 | N-term +28.03 Da,                           | 1699.579346 | 2 | 537.7999878 | 537.3011157 |
| DAPVSGGVGAAR          | Q99L13 | 0.00042662 | N-term +28.03 Da,                           | 1699.769653 | 2 | 542.7911377 | 542.7909151 |
| SEPAQPAVQQAPAR        | Q7TNL9 | 0          | N-term +28.03 Da,                           | 1704.238403 | 2 | 739.3900146 | 739.3915256 |
| SEFGDSSSPATR          | E9PV24 | 0          | N-term +28.03 Da,                           | 1706.699341 | 2 | 634.789978  | 634.7913102 |
| SATSNNSTVACINR        | Q01279 | 0          | N-term +28.03 Da, C +57.02 Da,              | 1706.861206 | 2 | 761.8699951 | 761.8675579 |
| ERVPPRSHPSDGYHR       | Q8K2H1 | 0.03570455 | N-term +28.03 Da,                           | 1714.594727 | 3 | 606.6500244 | 606.6433167 |
| SGGNSEPAQPAVQQAPAR    | Q7TNL9 | 0          | N-term +28.03 Da,                           | 1715.243896 | 2 | 896.9500122 | 896.9504683 |
| EELPVNTSKAR           | Q80WJ7 | 0.02930505 | N-term +28.03 Da, K +28.03 Da,              | 1720.314209 | 3 | 433.9141846 | 433.9137505 |
| TDTDETELAR            | Q6ZWX6 | 0.00994098 | N-term +28.03 Da,                           | 1720.944702 | 2 | 589.7800293 | 589.7804112 |
| SVVPGAAEDQR           | Q6P6J9 | 0.00043516 | N-term +28.03 Da, K +28.03 Da,              | 1724.750977 | 2 | 578.8013916 | 578.8014802 |
| AGSETVSSTLR           | P56593 | 0.00044131 | N-term +28.03 Da,                           | 1726.209961 | 2 | 568.2999878 | 568.3013132 |
| SELGADEAAR            | Q9D3D9 | 0.0004649  | N-term +28.03 Da, K +28.03 Da,              | 1727.350586 | 2 | 602.7925415 | 602.7938527 |
| SDSGGSSSEPFER         | Q7TSC1 | 0          | N-term +28.03 Da,                           | 1728.059937 | 2 | 685.289978  | 685.2969572 |
| QLEEAEEEAQR           | Q8VDD5 | 0          | N-term +28.03 Da,                           | 1728.697021 | 2 | 680.3200073 | 680.3229748 |
| DAPVSGGVGAAR          | Q99L13 | 0.00346861 | N-term +28.03 Da, K +28.03 Da,              | 1731.250122 | 2 | 542.788147  | 542.7909151 |
| TPCDDFTR              | P28798 | 0.04973404 | N-term +28.03 Da, K +28.03 Da, C +57.02 Da, | 1732.885498 | 2 | 520.2284546 | 520.2293018 |
| STMSNPAIQR            | Q9JHR7 | 0.00113809 | N-term +28.03 Da,                           | 1734.842651 | 2 | 566.789978  | 566.7926006 |
| SEPAQPAVQQAPAR        | Q7TNL9 | 0          | N-term +28.03 Da,                           | 1735.305176 | 2 | 739.3900146 | 739.3915256 |
| TATEHIPSPAKKVPR       | Q8JZK9 | 0.03053011 | N-term +28.03 Da, K +28.03 Da, C +57.02 Da, | 1737.058228 | 4 | 429.7600098 | 429.7596258 |

|                        |        |            |                                            |             |   |             |             |
|------------------------|--------|------------|--------------------------------------------|-------------|---|-------------|-------------|
| DEPILSNKSGDNR          | P70296 | 0.01111111 | N-term +28.03 Da, K +28.03 Da,             | 1739.718018 | 3 | 500.9261169 | 500.9266079 |
| KVDVVGATQGQAGSCSR      | Q8BGD9 | 0          | N-term +28.03 Da, C +57.02 Da,             | 1739.931274 | 3 | 592.9699707 | 592.6404733 |
| IQDGSQNTNVDKPLR        | Q3U0V1 | 0          | N-term +28.03 Da, K +28.03 Da,             | 1741.534546 | 3 | 580.9824219 | 580.9794834 |
| DEPILSNKSGDNR          | P70296 | 0.01221374 | N-term +28.03 Da, K +28.03 Da,             | 1742.135864 | 2 | 751.3900146 | 750.8862736 |
| FKNGDTASPKEYTAGR       | P09103 | 0          | N-term +28.03 Da, K +28.03 Da,C +57.02 Da, | 1744.255371 | 4 | 457.4899902 | 457.241532  |
| DEPILSNKSGDNR          | P70296 | 0          | N-term +28.03 Da, K +28.03 Da,             | 1746.040649 | 2 | 750.8900146 | 750.8862736 |
| TEATLEAEQTR            | Q99PL5 | 0          | N-term +28.03 Da,                          | 1746.738892 | 2 | 638.8225098 | 638.8226103 |
| EGETAYIR               | Q6PDM2 | 0.01877383 | N-term +28.03 Da,                          | 1747.44165  | 2 | 483.7480164 | 483.7481845 |
| SDSMDTGAGSIR           | O35143 | 0.0091195  | N-term +28.03 Da,                          | 1750.598511 | 2 | 612.7800293 | 612.7798881 |
| SVGIEADDDR             | P99027 | 0.00344947 | N-term +28.03 Da,                          | 1758.915894 | 2 | 552.7600098 | 552.7620211 |
| VEVMPQNKQ              | Q9DCX2 | 0.00894855 | N-term +28.03 Da, K +28.03 Da,             | 1759.441772 | 2 | 564.8068237 | 564.8077191 |
| EEEGDGEEDGDEDEEAEPTGKR | P26350 | 0          | N-term +28.03 Da, K +28.03 Da,             | 1767.953613 | 3 | 894.0300293 | 893.3617721 |
| EGLNVVKTGR             | P15532 | 0.00622339 | N-term +28.03 Da, K +28.03 Da,             | 1768.948242 | 3 | 376.8961182 | 376.8960307 |
| MGNHLTNLR              | P29391 | 0.00045025 | N-term +28.03 Da,                          | 1769.057739 | 3 | 361.8599854 | 361.8624438 |
| GDAPDFDR               | P10649 | 0.01554094 | N-term +28.03 Da,                          | 1769.359619 | 2 | 460.7096252 | 460.7090593 |
| KVDVVGATQGQAGSCSR      | Q8BGD9 | 0          | N-term +28.03 Da, C +57.02 Da,             | 1770.447754 | 3 | 592.6400146 | 592.6404733 |
| IVGNEHYDVAR            | P56480 | 0          | N-term +28.03 Da,                          | 1772.650146 | 3 | 434.2263794 | 434.2263284 |
| GATTVQEQLR             | Q8BG07 | 0          | N-term +28.03 Da,                          | 1777.801147 | 2 | 565.8113403 | 565.8118477 |
| GFCEVCK                | Q61207 | 0.04495289 | N-term +28.03 Da, K +28.03 Da,             | 1778.178589 | 2 | 478.2200012 | 478.2224332 |
| AADAIKLER              | Q93092 | 0.01140567 | N-term +28.03 Da, K +28.03 Da,             | 1779.848633 | 3 | 348.2138367 | 348.2133596 |
| ENGEEEEE               | P21619 | 0.00533156 | N-term +28.03 Da,                          | 1781.682983 | 2 | 561.2053223 | 561.2094849 |
| LQSEPE SIR             | O08585 | 0.0089172  | N-term +28.03 Da,                          | 1782.058594 | 2 | 543.7941895 | 543.7931237 |
| RSSGSPYGGGYSGGGSGGYGSR | Q8BG05 | 0          | N-term +28.03 Da,                          | 1783.628052 | 3 | 699.3099976 | 698.9789831 |
| AVKAPGFGDNR            | P63038 | 0          | N-term +28.03 Da, K +28.03 Da,             | 1784.808716 | 3 | 396.5561523 | 396.555897  |
| TPHYLTKQDVER           | Q9DBG6 | 0.0071475  | N-term +28.03 Da, K +28.03 Da,             | 1788.955322 | 4 | 412.230011  | 411.7242461 |
| EEPTYVKVK              | P00397 | 0.00078431 | N-term +28.03 Da, K +28.03 Da,             | 1789.347778 | 3 | 392.9009705 | 392.9006704 |
| ESPAQSVSSGVR           | Q99NH0 | 0.02175157 | N-term +28.03 Da,                          | 1790.890259 | 2 | 616.3200073 | 616.3174948 |
| QRPAEDLTVR             | Q8VCH8 | 0.02357285 | N-term +28.03 Da,                          | 1792.357544 | 3 | 405.2221069 | 404.89469   |
| PGVVVPR                | Q3U0L2 | 0.03475643 | N-term +28.03 Da, K +28.03 Da,             | 1792.734863 | 2 | 376.2399902 | 376.2448824 |
| EAKVQAINVSSR           | Q9D8Y0 | 0.00045167 | N-term +28.03 Da, K +28.03 Da,             | 1794.043823 | 3 | 453.2644958 | 453.2647832 |
| HEELNAPIR              | Q3TQI7 | 0.00375043 | N-term +28.03 Da,                          | 1794.198364 | 2 | 553.7999878 | 553.8012827 |
| VADTPENLR              | Q61792 | 0.00079208 | N-term +28.03 Da,                          | 1795.657593 | 2 | 521.7796021 | 521.7800161 |
| VLTPDPAPSR             | P70296 | 0.04248985 | N-term +28.03 Da,                          | 1795.827515 | 2 | 549.7939453 | 549.7931237 |
| ALTVQADQNNPR           | Q9D0G0 | 0.00082542 | N-term +28.03 Da,                          | 1797.285522 | 2 | 678.3599854 | 677.8573184 |
| MNQPPQIAPKR            | Q6NZJ6 | 0.00113122 | N-term +28.03 Da, K +28.03 Da,             | 1797.513062 | 3 | 445.923584  | 445.9237034 |
| SSDSMDTGAGSIR          | O35143 | 0          | N-term +28.03 Da,                          | 1797.600098 | 2 | 656.2953491 | 656.2959026 |
| KQEYDESGPSIVHR         | P60710 | 0.00371747 | N-term +28.03 Da, K +28.03 Da,             | 1799.793213 | 3 | 567.960022  | 567.624929  |
| LPLAFAPAAALAGPGRVEPPQK | Q64731 | 0.03523627 | N-term +28.03 Da, K +28.03 Da,             | 1803.202881 | 4 | 557.3267212 | 557.5794935 |
| LPLAFAPAAALAGPGRVEPPQK | Q64731 | 0.02378929 | N-term +28.03 Da, K +28.03 Da,             | 1803.863403 | 3 | 742.7700195 | 743.1035659 |
| LSEEQENK               | Q8CHD8 | 0.00621524 | N-term +28.03 Da, K +28.03 Da,             | 1805.549072 | 2 | 516.7581177 | 516.7640321 |

|                           |        |            |                                             |             |   |             |             |
|---------------------------|--------|------------|---------------------------------------------|-------------|---|-------------|-------------|
| SDSMDTGAGSIR              | O35143 | 0          | N-term +28.03 Da,                           | 1805.668457 | 2 | 612.2800293 | 612.7798881 |
| SKQEYDESGPSIVHR           | P60710 | 0.00371622 | N-term +28.03 Da, K +28.03 Da,              | 1806.661865 | 4 | 447.980011  | 447.7285232 |
| SKQEYDESGPSIVHR           | P60710 | 0.00082953 | N-term +28.03 Da, K +28.03 Da,              | 1808.990967 | 3 | 596.9699707 | 596.6356054 |
| ATLKDITR                  | Q91VR2 | 0.04687919 | N-term +28.03 Da, K +28.03 Da,              | 1810.265991 | 3 | 325.2061157 | 325.2062049 |
| TAEKITEFCHR               | P09103 | 0.03127595 | N-term +28.03 Da, C +57.02 Da,              | 1811.712158 | 3 | 483.25      | 483.2502568 |
| MIPPQEASAR                | O35250 | 0.00343171 | N-term +28.03 Da,                           | 1814.05542  | 2 | 564.7999878 | 564.2975186 |
| AVKAPGFGDNR               | P63038 | 0          | N-term +28.03 Da, K +28.03 Da,              | 1815.421143 | 3 | 396.5561218 | 396.555897  |
| GGVVLGADSR                | Q60692 | 0.04932018 | N-term +28.03 Da,                           | 1815.983154 | 2 | 479.769989  | 479.769451  |
| EEEEGDGEEEDGDEDEEAEAPTGKR | P26350 | 0.02562658 | N-term +28.03 Da, K +28.03 Da,              | 1817.860107 | 3 | 936.3800049 | 936.3759702 |
| GGFCEVCK                  | Q61207 | 0.00110497 | N-term +28.03 Da, K +28.03 Da,              | 1820.016113 | 2 | 506.73349   | 506.7331652 |
| EQGTGCWQGNR               | O08795 | 0.00043956 | N-term +28.03 Da, C +57.02 Da,              | 1820.576294 | 2 | 709.3200073 | 709.3175032 |
| SDSMDTGAGSIR              | O35143 | 0          | N-term +28.03 Da,                           | 1829.376465 | 2 | 656.2958374 | 656.2959026 |
| ALLEEQSKQSQSNEHLR         | P57780 | 0          | N-term +28.03 Da, K +28.03 Da,              | 1829.870483 | 4 | 492.2600098 | 492.2642673 |
| DGEEAGAYDGPR              | P27773 | 0          | N-term +28.03 Da,                           | 1832.192627 | 2 | 632.7749634 | 632.7756601 |
| VFSEDEMCR                 | Q8C196 | 0.00082884 | N-term +28.03 Da, K +28.03 Da,              | 1835.820068 | 3 | 399.5400085 | 399.5375149 |
| GTQANVTKELER              | Q9DBC0 | 0.00043422 | N-term +28.03 Da, K +28.03 Da,              | 1836.102417 | 3 | 467.9299927 | 467.9280599 |
| SDSMDTGAGSIR              | O35143 | 0          | N-term +28.03 Da,                           | 1837.339966 | 2 | 612.7796021 | 612.7798881 |
| GSTPVGSGVYR               | Q64213 | 0.00083403 | N-term +28.03 Da,                           | 1837.688232 | 2 | 554.2938232 | 554.2932906 |
| ASAPPQEQKQMLGER           | P29341 | 0          | N-term +28.03 Da, K +28.03 Da,              | 1837.791382 | 3 | 575.9713745 | 575.9699307 |
| SNTQFIENR                 | Q6PGL7 | 0.00116279 | N-term +28.03 Da,                           | 1837.932129 | 2 | 568.789978  | 568.7883726 |
| VYVDAVKDSGR               | Q00623 | 0.03153527 | N-term +28.03 Da, K +28.03 Da,              | 1839.286499 | 3 | 422.2344055 | 422.2347124 |
| SPAQEHLTTVGAAR            | Q99JZ7 | 0.00566289 | N-term +28.03 Da, C +57.02 Da,              | 1839.421265 | 3 | 542.6099854 | 542.6069922 |
| GEVDDEEDEEAGEEESQKR       | O35381 | 0          | N-term +28.03 Da, K +28.03 Da,              | 1839.861694 | 3 | 808.3400269 | 808.0052593 |
| SKQEYDESGPSIVHR           | P60710 | 0          | N-term +28.03 Da, K +28.03 Da,              | 1840.568848 | 3 | 596.6356812 | 596.6356054 |
| FKNGDTASPEYTAGR           | P09103 | 0          | N-term +28.03 Da, K +28.03 Da,              | 1840.644409 | 4 | 457.4881592 | 457.241532  |
| ATLKDITR                  | Q91VR2 | 0.00972702 | N-term +28.03 Da, K +28.03 Da,              | 1842.137085 | 3 | 325.5400085 | 325.2062049 |
| AADGDFKIK                 | P16045 | 0.00682705 | N-term +28.03 Da, K +28.03 Da,              | 1843.612183 | 3 | 350.2058105 | 350.2060936 |
| MIPPQEASAR                | O35250 | 0.03484225 | N-term +28.03 Da,                           | 1844.63562  | 2 | 564.8026733 | 564.2975186 |
| ERLELCDNR                 | P99028 | 0.00084353 | N-term +28.03 Da, C +57.02 Da,              | 1845.054199 | 3 | 411.5400085 | 411.5399186 |
| STGPGPMAPPR               | Q62318 | 0.0014404  | N-term +28.03 Da,                           | 1847.255249 | 2 | 548.2845459 | 548.284411  |
| EVFQVSHPR                 | Q9WVLO | 0.00109769 | N-term +28.03 Da,                           | 1847.330811 | 3 | 376.2047424 | 376.2049756 |
| ERLELCDNR                 | P99028 | 0          | N-term +28.03 Da, K +28.03 Da, C +57.02 Da, | 1847.988159 | 2 | 616.805603  | 616.8062396 |
| EDTQDELGDPR               | P55302 | 0.01141271 | N-term +28.03 Da,                           | 1848.724854 | 2 | 651.7930298 | 651.7940502 |
| FLEEATR                   | Q8C196 | 0.02122168 | N-term +28.03 Da,                           | 1851.189087 | 2 | 447.2400818 | 447.2399949 |
| GKLVSESSDVVSK             | P11679 | 0.00884676 | N-term +28.03 Da, K +28.03 Da,              | 1851.340088 | 3 | 473.6082153 | 473.6082159 |
| SSEFEHIAR                 | Q3TLH4 | 0.00343525 | N-term +28.03 Da,                           | 1851.583008 | 3 | 397.5317688 | 397.5315289 |
| GKLVSESSDVVSK             | P11679 | 0          | N-term +28.03 Da, K +28.03 Da,              | 1851.713501 | 2 | 709.9099731 | 709.9086857 |
| SSSEDKITVHFKNR            | P46656 | 0          | N-term +28.03 Da, K +28.03 Da,              | 1853.845215 | 3 | 578.3200073 | 577.9844571 |
| EFMDDTSR                  | P62858 | 0.01927007 | N-term +28.03 Da,                           | 1854.822876 | 2 | 514.7215576 | 514.7213098 |
| SDTPCDDFTR                | P28798 | 0          | N-term +28.03 Da, C +57.02 Da,              | 1858.803467 | 2 | 621.2579346 | 621.2587885 |

|                         |        |            |                                             |             |   |             |             |
|-------------------------|--------|------------|---------------------------------------------|-------------|---|-------------|-------------|
| EQEIAAVQAR              | Q99PL5 | 0          | N-term +28.03 Da,                           | 1859.314697 | 2 | 571.8126831 | 571.8118477 |
| DGEEAGAYDGPR            | P27773 | 0          | N-term +28.03 Da,                           | 1860.009155 | 2 | 632.2700195 | 632.7756601 |
| QNYHQDAEAAINR           | P09528 | 0          | N-term +28.03 Da,                           | 1863.370972 | 3 | 519.9179688 | 519.9183352 |
| SGQP GPVGPAGVR          | Q01149 | 0.00113379 | N-term +28.03 Da,                           | 1863.987549 | 2 | 603.3200073 | 603.8331143 |
| SDSMDTGAGSIR            | O35143 | 0.00078247 | N-term +28.03 Da,                           | 1868.566772 | 2 | 612.7800293 | 612.7798881 |
| APGSPEGSSQLCSPR         | D3Z6Q9 | 0          | N-term +28.03 Da, C +57.02 Da,              | 1870.519653 | 2 | 779.3709717 | 779.3699334 |
| ERLQQQEHR               | E9Q3K0 | 0.02907464 | N-term +28.03 Da,                           | 1870.805176 | 2 | 704.3699951 | 704.381826  |
| SSSEDKITVHFKNR          | P46656 | 0          | N-term +28.03 Da, K +28.03 Da,              | 1871.830933 | 4 | 433.7406616 | 433.7401619 |
| KSWNETFHAR              | Q9DCX2 | 0.04376013 | N-term +28.03 Da, K +28.03 Da,              | 1872.057373 | 3 | 444.5667725 | 444.5666847 |
| SLQEQADAAEER            | E9Q453 | 0          | N-term +28.03 Da,                           | 1872.343506 | 2 | 687.8300171 | 687.8284244 |
| SKDPGLDLR               | Q91V76 | 0.01694915 | N-term +28.03 Da, K +28.03 Da,              | 1873.21521  | 3 | 352.8731995 | 352.8731146 |
| SDSMDTGAGSIR            | O35143 | 0.00045517 | N-term +28.03 Da,                           | 1873.399048 | 2 | 612.2700195 | 612.7798881 |
| EPEWVKTER               | O35887 | 0.0192757  | N-term +28.03 Da, K +28.03 Da,              | 1873.717285 | 3 | 410.555481  | 410.5556744 |
| GESPVDYDGG              | Q922R8 | 0.00115785 | N-term +28.03 Da,                           | 1875.169434 | 2 | 590.2700195 | 590.2674706 |
| EVFQVSHPR               | Q9WVLO | 0.00652103 | N-term +28.03 Da,                           | 1878.282837 | 3 | 376.2049866 | 376.2049756 |
| LETLSQSPQGR             | P60335 | 0.0007837  | N-term +28.03 Da,                           | 1878.637085 | 2 | 622.3400269 | 622.3356873 |
| QSSSDAAYLAR             | Q8BWT1 | 0          | N-term +28.03 Da,                           | 1879.155884 | 2 | 598.7991943 | 598.7989377 |
| YFHIGETEK               | Q8R1V4 | 0          | N-term +28.03 Da, K +28.03 Da,              | 1880.849609 | 4 | 334.9299927 | 334.6818494 |
| SSESFEHAR               | Q3TLH4 | 0.00081103 | N-term +28.03 Da, K +28.03 Da, C +57.02 Da, | 1883.276123 | 3 | 397.5311279 | 397.5315289 |
| AAPTPAASTTSSASSSGEPEVKR | P42128 | 0          | N-term +28.03 Da, K +28.03 Da,              | 1883.441528 | 3 | 754.0599976 | 753.7202874 |
| SSSEDKITVHFKNR          | P46656 | 0          | N-term +28.03 Da, K +28.03 Da,              | 1884.755493 | 3 | 577.9799805 | 577.9844571 |
| LVSESSDVVSK             | P11679 | 0          | N-term +28.03 Da, K +28.03 Da, C +57.02 Da, | 1885.734497 | 2 | 603.3337402 | 603.3348219 |
| TDEYNSGTVCENTCR         | O08795 | 0          | N-term +28.03 Da, C +57.02 Da,              | 1886.412231 | 2 | 917.3699951 | 917.3725454 |
| EFMDDTSR                | P62858 | 0.00621931 | N-term +28.03 Da,                           | 1887.854248 | 2 | 514.7199707 | 514.7213098 |
| SVTSSVPSPR              | Q8VCF0 | 0.01721068 | N-term +28.03 Da, C +57.02 Da,              | 1891.297607 | 2 | 573.3099976 | 573.3116807 |
| KEPAAPVSIQR             | Q61792 | 0.02101929 | N-term +28.03 Da, K +28.03 Da,              | 1896.378662 | 3 | 417.9189148 | 417.9188355 |
| DSMDTGAGSIR             | O35143 | 0.00115741 | N-term +28.03 Da,                           | 1897.97644  | 2 | 569.2642822 | 569.2638735 |
| GKVNSEVGGGEALGR         | P02088 | 0.0338843  | N-term +28.03 Da, K +28.03 Da,              | 1898.470337 | 3 | 515.2752075 | 515.2740076 |
| TIGQEEIQQR              | P16546 | 0.00082474 | N-term +28.03 Da,                           | 1898.767334 | 2 | 615.3300171 | 615.3278623 |
| MGPSGGEGVEPER           | Q61792 | 0.03498224 | N-term +28.03 Da,                           | 1899.244873 | 2 | 665.8099976 | 665.3088127 |
| AAPTPAASTTSSASSSGEPEVKR | P42128 | 0          | N-term +28.03 Da, K +28.03 Da,              | 1900.849121 | 3 | 754.3900146 | 753.7202874 |
| GLAEGGEAVEAR            | P59242 | 0.04635584 | N-term +28.03 Da,                           | 1900.986328 | 2 | 593.8099976 | 593.8067627 |
| SSSEDKITVHFKNR          | P46656 | 0          | N-term +28.03 Da, K +28.03 Da,              | 1902.515991 | 4 | 433.7399902 | 433.7401619 |
| VTKELQAEIR              | Q8WURO | 0.01925321 | N-term +28.03 Da, K +28.03 Da,              | 1902.742432 | 3 | 414.9200134 | 414.9187241 |
| STPQATQMNTPSQPR         | Q6NZJ6 | 0          | N-term +28.03 Da,                           | 1904.25293  | 2 | 836.9099731 | 836.4095901 |
| EKAQSELSGADEAAR         | Q9D3D9 | 0          | N-term +28.03 Da, K +28.03 Da,              | 1905.739014 | 3 | 563.9500122 | 563.619844  |
| STVEEAVATR              | Q9JIX8 | 0.0388904  | N-term +28.03 Da,                           | 1907.725464 | 2 | 545.789978  | 545.7905812 |
| DCQDVAADCEVK            | P10639 | 0          | N-term +28.03 Da, K +28.03 Da,              | 1911.529419 | 2 | 733.3200073 | 733.3185207 |
| AIEGSSSSSTGKAPY         | A2BE28 | 0.00374404 | N-term +28.03 Da, K +28.03 Da,              | 1911.779541 | 2 | 749.8800049 | 749.3752076 |
| AADLGTEAGVQR            | Q64105 | 0          | N-term +28.03 Da, K +28.03 Da, C +57.02 Da, | 1912.821899 | 2 | 608.321167  | 608.3200373 |

|                         |        |            |                                            |             |   |             |             |
|-------------------------|--------|------------|--------------------------------------------|-------------|---|-------------|-------------|
| RNPGTTGSDGTGDWGTGSPR    | E9PV24 | 0          | N-term +28.03 Da, K +28.03 Da,C +57.02 Da, | 1913.481812 | 3 | 668.9799805 | 668.6437118 |
| RNPGTTGSDGTGDWGTGSPR    | E9PV24 | 0          | N-term +28.03 Da,                          | 1913.974854 | 3 | 669.3099976 | 668.6437118 |
| EVEMDAVGKEGR            | Q8C196 | 0          | N-term +28.03 Da, K +28.03 Da,             | 1915.234619 | 3 | 459.2346497 | 459.234384  |
| ALSQSNPSALR             | Q01853 | 0.02120952 | N-term +28.03 Da,                          | 1915.429321 | 2 | 586.3237915 | 586.3251223 |
| SLNEESLGNR              | Q8B8D9 | 0.00997817 | N-term +28.03 Da,                          | 1916.840576 | 2 | 573.789978  | 573.7911127 |
| ALGENNEVLKSGR           | P05202 | 0          | N-term +28.03 Da, K +28.03 Da,             | 1920.60144  | 3 | 481.6037598 | 481.6035762 |
| SDSSDSMDTGAGSIR         | O35143 | 0          | N-term +28.03 Da, K +28.03 Da,C +57.02 Da, | 1920.822266 | 2 | 757.8300171 | 757.3253893 |
| MGTPSGTAEPYDGTKAR       | Q80Y55 | 0          | N-term +28.03 Da, K +28.03 Da,             | 1922.912842 | 3 | 599.289978  | 598.9612126 |
| TKDGFEEKSPEELR          | P52196 | 0.00080289 | N-term +28.03 Da, K +28.03 Da,             | 1924.03772  | 4 | 405.7211304 | 405.7214379 |
| TEPELSETQR              | Q9DD06 | 0.01138812 | N-term +28.03 Da,                          | 1924.156372 | 2 | 609.3019409 | 609.3040532 |
| STTEFEPR                | P55302 | 0.00281889 | N-term +28.03 Da,                          | 1926.193481 | 2 | 562.2700195 | 562.2669391 |
| AQSELGAADAEAR           | Q9D3D9 | 0.00045872 | N-term +28.03 Da,                          | 1928.756104 | 2 | 702.3400269 | 702.3416989 |
| SEVDYAPGPGR             | Q6P549 | 0.00177999 | N-term +28.03 Da,                          | 1931.533325 | 2 | 588.289978  | 588.2882056 |
| DPEATSHSTQDPLEAQAKSR    | P97290 | 0          | N-term +28.03 Da, K +28.03 Da,             | 1931.99646  | 3 | 742.0300293 | 742.0328654 |
| TKDGFEEKSPEELR          | P52196 | 0.00112867 | N-term +28.03 Da, K +28.03 Da,             | 1932.518555 | 3 | 540.6300049 | 540.6261583 |
| TAPTSSPSVTAPR           | Q9QXC1 | 0.00043346 | N-term +28.03 Da,                          | 1932.825562 | 2 | 650.3499756 | 650.3487949 |
| TRDGKLVSESSDVVSK        | P11679 | 0          | N-term +28.03 Da, K +28.03 Da,             | 1934.901733 | 3 | 597.6699829 | 597.6667942 |
| LSQETEALGR              | Q02819 | 0.01247718 | N-term +28.03 Da,                          | 1935.382324 | 2 | 566.3045654 | 566.3038557 |
| SDEVGGEALGR             | P02088 | 0.00913674 | N-term +28.03 Da,                          | 1940.494629 | 2 | 559.2800293 | 559.2778381 |
| DSMDTGAGSIR             | O35143 | 0.000814   | N-term +28.03 Da,                          | 1941.106934 | 2 | 569.2648926 | 569.2638735 |
| SLQAECQYR               | Q99PL5 | 0.00044504 | N-term +28.03 Da, C +57.02 Da,             | 1941.359009 | 2 | 649.2999878 | 649.2957051 |
| TQEPAGNLEENTNDKNSGPQGPR | Q14AX6 | 0.00144092 | N-term +28.03 Da, K +28.03 Da,C +57.02 Da, | 1943.948242 | 3 | 837.7399902 | 837.0686388 |
| ALSEASQTDPSPGPPPR       | Q9CQV4 | 0          | N-term +28.03 Da,                          | 1944.126465 | 2 | 819.9099731 | 819.4101132 |
| IFIDSDHTDNQR            | P09103 | 0          | N-term +28.03 Da,                          | 1945.123169 | 3 | 496.9078979 | 496.9074361 |
| GEVASDAKSF              | P16045 | 0.00622135 | N-term +28.03 Da, K +28.03 Da,             | 1945.771484 | 2 | 533.7745972 | 533.7743996 |
| IFIDSDHTDNQR            | P09103 | 0.00112486 | N-term +28.03 Da,                          | 1948.147461 | 2 | 744.8599854 | 744.857516  |
| VTPIPSDSTR              | P62264 | 0.015006   | N-term +28.03 Da,                          | 1950.922241 | 2 | 550.7999878 | 550.8009487 |
| SDSSDSMDTGAGSIR         | O35143 | 0          | N-term +28.03 Da,                          | 1951.828735 | 2 | 757.3254395 | 757.3253893 |
| FTEEEEAQVR              | Q9WTX5 | 0.01901697 | N-term +28.03 Da, K +28.03 Da,             | 1953.200073 | 2 | 633.3015747 | 633.3040532 |
| DFREPTTEER              | Q9WUK2 | 0.00077973 | N-term +28.03 Da,                          | 1953.563965 | 3 | 445.8771057 | 445.8773653 |
| YVYPDDKYR               | Q8CHT0 | 0.02352608 | N-term +28.03 Da, K +28.03 Da,             | 1953.747314 | 3 | 425.5517578 | 425.5520413 |
| ALSEASQTDPSPGPPPR       | Q9CQV4 | 0          | N-term +28.03 Da,                          | 1955.263916 | 2 | 819.4099731 | 819.4101132 |
| ADAVAVTMGPKGR           | P63038 | 0          | N-term +28.03 Da, K +28.03 Da,             | 1955.416504 | 3 | 443.5829468 | 443.5833471 |
| TSSMGTLPKQVK            | P38060 | 0.04144095 | N-term +28.03 Da, K +28.03 Da,             | 1955.793945 | 3 | 454.269989  | 454.2671362 |
| ELETMTGEKVK             | P12710 | 0          | N-term +28.03 Da, K +28.03 Da,             | 1957.152466 | 2 | 674.8731689 | 674.8732569 |
| SADAAAGEPLPR            | P70441 | 0          | N-term +28.03 Da, C +57.02 Da,             | 1966.006958 | 2 | 591.8099976 | 591.8093052 |
| GTPQQIDYAR              | Q91WJ8 | 0.00403361 | N-term +28.03 Da,                          | 1969.578247 | 2 | 588.7999878 | 588.8040227 |
| KEIDCLSPEAQR            | Q3UZ39 | 0.04996014 | N-term +28.03 Da, C +57.02 Da,             | 1970.957642 | 2 | 751.3900146 | 751.3875945 |
| SGPNSADSANDGFVR         | Q9Z2X1 | 0.00109529 | N-term +28.03 Da, K +28.03 Da,             | 1971.09082  | 2 | 761.8499756 | 761.3500554 |
| SDSVTEETLR              | Q8C196 | 0.00081867 | N-term +28.03 Da,                          | 1972.044189 | 2 | 582.7883301 | 582.7907787 |

|                     |        |            |                                |             |   |             |             |
|---------------------|--------|------------|--------------------------------|-------------|---|-------------|-------------|
| LQDESFR             | O35129 | 0.02029574 | N-term +28.03 Da,              | 1974.093506 | 2 | 512.2595215 | 512.2589165 |
| DYMTSPAR            | Q8CBW3 | 0.01276208 | N-term +28.03 Da,              | 1974.345581 | 2 | 484.7285767 | 484.7289373 |
| IFIDSDHTDNQR        | P09103 | 0          | N-term +28.03 Da,              | 1975.474121 | 3 | 496.9067078 | 496.9074361 |
| ELETMTGEKVK         | P12710 | 0.00436388 | N-term +28.03 Da, K +28.03 Da, | 1976.257813 | 3 | 450.2507019 | 450.2512635 |
| IIGELHPDDR          | P56395 | 0.00079397 | N-term +28.03 Da,              | 1977.632324 | 3 | 398.2099915 | 398.2155407 |
| LGETNPADSKPGTIR     | P15532 | 0          | N-term +28.03 Da, K +28.03 Da, | 1977.747925 | 3 | 537.9615479 | 537.961541  |
| NDFASAVR            | P12787 | 0.02637486 | N-term +28.03 Da,              | 1979.001587 | 2 | 454.2342834 | 454.2352439 |
| VLAESDPGFKR         | Q9D281 | 0.01854578 | N-term +28.03 Da, K +28.03 Da, | 1979.523926 | 3 | 425.5700073 | 425.5749574 |
| SLNEESLGNR          | Q8BGD9 | 0.01949942 | N-term +28.03 Da,              | 1980.254761 | 2 | 573.7900391 | 573.7911127 |
| GPEYQQDLDR          | P97450 | 0.01197789 | N-term +28.03 Da,              | 1981.455566 | 2 | 624.789978  | 624.7963952 |
| TVPDPTGISDR         | Q9CW42 | 0.01554559 | N-term +28.03 Da, K +28.03 Da, | 1982.924805 | 2 | 602.2963867 | 602.2962282 |
| SDSSDSMDTGAGSIR     | O35143 | 0          | N-term +28.03 Da,              | 1983.213135 | 2 | 757.8300171 | 757.3253893 |
| TNSVTTSSVPSPR       | Q8VCF0 | 0.00564222 | N-term +28.03 Da, K +28.03 Da, | 1987.537354 | 2 | 681.3599854 | 680.8569845 |
| VMQEFSR             | P27773 | 0.01975596 | N-term +28.03 Da,              | 1988.324341 | 2 | 527.7600098 | 527.2553194 |
| SGYGPSDGPSPYGR      | Q8CI61 | 0          | N-term +28.03 Da,              | 1990.278564 | 2 | 664.2999878 | 664.2993022 |
| SETIITGKR           | Q8VDJ3 | 0.03476595 | N-term +28.03 Da, K +28.03 Da, | 1991.715576 | 2 | 588.3699951 | 587.3637159 |
| AELHSDLKIQER        | P55302 | 0.0040309  | N-term +28.03 Da, K +28.03 Da, | 1992.891968 | 4 | 374.7099915 | 374.4623263 |
| GESDDSILR           | Q9CQR2 | 0.02256498 | N-term +28.03 Da,              | 1993.982056 | 2 | 510.2524414 | 510.2538315 |
| PPPPPPPPR           | A2AQ25 | 0.00084459 | N-term +28.03 Da, K +28.03 Da, | 1994.133057 | 2 | 491.2951355 | 490.2898216 |
| LEYTDSYDEKR         | P10649 | 0          | N-term +28.03 Da, K +28.03 Da, | 1995.424438 | 3 | 521.2498169 | 521.2508689 |
| GAGGALFVHR          | Q9D6J6 | 0.00043783 | N-term +28.03 Da,              | 1998.878662 | 2 | 506.7870483 | 506.7879776 |
| GAGGALFVHR          | Q9D6J6 | 0.02351275 | N-term +28.03 Da, K +28.03 Da, | 2001.432861 | 3 | 338.1936646 | 338.1944105 |
| SLDYAQASER          | Q3UJU9 | 0.00436242 | N-term +28.03 Da,              | 2006.789551 | 2 | 584.289978  | 584.2856631 |
| DGEVDDEEEDEEEEGSQKR | O35381 | 0          | N-term +28.03 Da, K +28.03 Da, | 2009.342529 | 3 | 846.3499756 | 846.3475741 |
| NDFASAVR            | P12787 | 0.01902253 | N-term +28.03 Da, K +28.03 Da, | 2009.685425 | 2 | 454.23526   | 454.2352439 |
| YVPEDELKR           | Q8R344 | 0.00084602 | N-term +28.03 Da, K +28.03 Da, | 2014.116821 | 3 | 440.5663452 | 440.5662394 |
| TADTDGGYIEER        | Q8BXZ1 | 0.00778715 | N-term +28.03 Da,              | 2014.352905 | 2 | 677.8099976 | 677.8097003 |
| AFDLATHR            | P16332 | 0.01358696 | N-term +28.03 Da,              | 2015.842407 | 3 | 320.1750183 | 320.1750161 |
| SIGQDQLTER          | O70551 | 0          | N-term +28.03 Da,              | 2017.640015 | 2 | 638.3300171 | 638.3306023 |
| PPPPPPPPR           | A2AQ25 | 0.00108972 | N-term +28.03 Da,              | 2025.797729 | 2 | 491.297699  | 490.2898216 |
| SGNSELIQYR          | Q9QYG0 | 0.00143369 | N-term +28.03 Da, K +28.03 Da, | 2027.628784 | 3 | 450.9170227 | 450.9173835 |
| KIQALQQADDAEDR      | Q6IRU2 | 0          | N-term +28.03 Da, K +28.03 Da, | 2029.219727 | 3 | 595.9799805 | 595.6427601 |
| EKEEDEEESPGQAKDEL   | P14211 | 0.00142857 | N-term +28.03 Da, K +28.03 Da, | 2029.917114 | 2 | 1023.469971 | 1023.473504 |
| LQASSEGHEPQEDDDLAQR | Q8VE22 | 0.00108617 | N-term +28.03 Da,              | 2031.684082 | 3 | 719         | 718.3295705 |
| FQESDDADEDYGR       | Q80XU3 | 0          | N-term +28.03 Da, K +28.03 Da, | 2031.838867 | 2 | 788.3200073 | 787.8157119 |
| SGPDPVKAVETR        | A2AJI0 | 0.00776448 | N-term +28.03 Da, K +28.03 Da, | 2032.300781 | 3 | 437.9100037 | 437.9137505 |
| EDEEEEEDEGPVR       | Q9D0J8 | 0          | N-term +28.03 Da, K +28.03 Da, | 2035.396729 | 2 | 860.3499756 | 859.847407  |
| SDQYVKLEEQR         | O54774 | 0          | N-term +28.03 Da, K +28.03 Da, | 2036.276855 | 3 | 484.2561035 | 484.2560652 |
| SDSSDSMDTGAGSIR     | O35143 | 0          | N-term +28.03 Da, K +28.03 Da, | 2037.522949 | 2 | 757.3272095 | 757.3253893 |
| LQASSEGHEPQEDDDLAQR | Q8VE22 | 0          | N-term +28.03 Da,              | 2037.656372 | 3 | 718.3300171 | 718.3295705 |

|                        |        |            |                                             |             |   |             |             |
|------------------------|--------|------------|---------------------------------------------|-------------|---|-------------|-------------|
| YGGGNYGPGGSGGSGGYGGR   | O88569 | 0.00042427 | N-term +28.03 Da, K +28.03 Da,              | 2041.371704 | 2 | 881.3800049 | 881.3824186 |
| TKSLDNNYSTLNER         | P30999 | 0.00108342 | N-term +28.03 Da, K +28.03 Da,              | 2043.247925 | 3 | 570.960022  | 570.960089  |
| AGELTEDEVER            | P62270 | 0          | N-term +28.03 Da,                           | 2045.117554 | 2 | 638.3099976 | 638.3067933 |
| SGSAGTAVGAYDAPR        | Q9QZQ1 | 0          | N-term +28.03 Da,                           | 2045.23645  | 2 | 704.3499756 | 704.3467839 |
| AVGSAFTQDTR            | Q8K2F8 | 0.00081967 | N-term +28.03 Da,                           | 2048.028809 | 2 | 590.8010254 | 590.8014802 |
| GPGGGNFGGSPGYGGGR      | O88569 | 0          | N-term +28.03 Da,                           | 2049.937988 | 2 | 740.3499756 | 739.8421999 |
| GPAVEAQEEEEQDHGVGR     | Q5F2E8 | 0.00082988 | N-term +28.03 Da,                           | 2050.612793 | 3 | 698.9799805 | 698.6505325 |
| QQGSRSESPK             | Q8BL80 | 0.04398273 | N-term +28.03 Da, K +28.03 Da,              | 2051.832764 | 2 | 580.7999878 | 580.3069297 |
| EVSCPEGYTCCR           | P28798 | 0.0011066  | N-term +28.03 Da, C +57.02 Da,              | 2052.254639 | 2 | 773.3099976 | 773.3101725 |
| TRDGKLVSESSDVVSK       | P11679 | 0.00807494 | N-term +28.03 Da, K +28.03 Da,              | 2055.219727 | 3 | 597.6699829 | 597.6667942 |
| PPPPPPPPR              | A2AQ25 | 0.00534224 | N-term +28.03 Da,                           | 2056.590088 | 2 | 491.2973938 | 490.2898216 |
| DSSDSMDTGAGSIR         | O35143 | 0          | N-term +28.03 Da,                           | 2057.02002  | 2 | 713.80896   | 713.8093747 |
| VSVDETIKNPR            | P80313 | 0.00115119 | N-term +28.03 Da, K +28.03 Da,              | 2058.395508 | 3 | 438.5860291 | 438.5856338 |
| GGPLSGPYR              | P16015 | 0.00112444 | N-term +28.03 Da,                           | 2060.250244 | 2 | 466.2533875 | 466.2534365 |
| AIQENANALAR            | Q91Y97 | 0          | N-term +28.03 Da, K +28.03 Da,              | 2061.770264 | 2 | 599.8300171 | 599.8305718 |
| SDTPCDDFTR             | P28798 | 0          | N-term +28.03 Da, K +28.03 Da, C +57.02 Da, | 2062.866943 | 2 | 621.2600098 | 621.2587885 |
| EHCEQLEKCVKAR          | P99028 | 0.00044014 | N-term +28.03 Da, K +28.03 Da,              | 2067.391357 | 4 | 443.230011  | 443.4801933 |
| SKKVDQSVANEISQKAAESQGR | Q61733 | 0          | N-term +28.03 Da, K +28.03 Da,              | 2068.368408 | 4 | 643.3599854 | 643.1040622 |
| FQESDDADEDYGR          | Q80XU3 | 0          | N-term +28.03 Da, K +28.03 Da,              | 2068.984131 | 2 | 787.8163452 | 787.8157119 |
| FGTPEPKNIPKR           | Q6PGH2 | 0.0375817  | N-term +28.03 Da, K +28.03 Da,              | 2069.724121 | 4 | 399.9835815 | 399.9831601 |
| EVLMETDSR              | P70699 | 0.00113636 | N-term +28.03 Da,                           | 2071.830322 | 2 | 554.2700195 | 554.271167  |
| LEEHPGGEEVLR           | P56395 | 0.02432127 | N-term +28.03 Da, K +28.03 Da,              | 2077.458984 | 3 | 464.9075623 | 464.9087768 |
| VEIANDQGNR             | P16627 | 0.0004329  | N-term +28.03 Da, K +28.03 Da,              | 2079.092529 | 2 | 628.833374  | 628.8333118 |
| SIENAEIR               | Q9QXN3 | 0.04492871 | N-term +28.03 Da,                           | 2079.861816 | 2 | 544.7800293 | 544.7827561 |
| LGEKFDETTADGR          | Q05816 | 0.00109609 | N-term +28.03 Da, K +28.03 Da,              | 2081.358887 | 3 | 498.91922   | 498.9193419 |
| VISLSGEH               | P08228 | 0.00593863 | N-term +28.03 Da,                           | 2081.434326 | 2 | 435.240509  | 435.2399949 |
| QGAGDMWR               | P05366 | 0.00884397 | N-term +28.03 Da,                           | 2085.30835  | 2 | 474.72229   | 474.7214462 |
| PPPPPPPPR              | A2AQ25 | 0.00084459 | N-term +28.03 Da, K +28.03 Da,              | 2087.077881 | 2 | 491.2980042 | 490.2898216 |
| DSSDSMDTGAGSIR         | O35143 | 0          | N-term +28.03 Da,                           | 2088.605469 | 2 | 713.80896   | 713.8093747 |
| EYGASCEDIAR            | O08749 | 0.00534581 | N-term +28.03 Da, C +57.02 Da,              | 2090.998291 | 2 | 650.289978  | 649.7877131 |
| DGEEAGAYDGPR           | P27773 | 0          | N-term +28.03 Da,                           | 2092.008057 | 2 | 632.7800293 | 632.7756601 |
| GPPDFSSDEER            | Q61029 | 0.00914538 | N-term +28.03 Da,                           | 2093.734863 | 2 | 632.2781982 | 632.2780356 |
| SDTPCDDFTR             | P28798 | 0          | N-term +28.03 Da, C +57.02 Da,              | 2094.195557 | 2 | 621.2584839 | 621.2587885 |
| ALDSSNSMQTVQKTTTR      | P05784 | 0          | N-term +28.03 Da, K +28.03 Da,              | 2095.753174 | 3 | 642.3400269 | 641.9983268 |
| GISGNVTPDQDPAR         | Q9D281 | 0.00044228 | N-term +28.03 Da, C +57.02 Da,              | 2102.205811 | 2 | 727.3735962 | 727.865341  |
| FQESDDADEDYGR          | Q80XU3 | 0          | N-term +28.03 Da,                           | 2103.088867 | 2 | 787.8168335 | 787.8157119 |
| QAGPASVPLR             | P27773 | 0.00078186 | N-term +28.03 Da,                           | 2104.655029 | 2 | 512.2999878 | 512.3009181 |
| VDPLDSTSR              | P56480 | 0.01925883 | N-term +28.03 Da,                           | 2107.525146 | 2 | 509.2636719 | 509.2641991 |
| EPDLSSDIKER            | B5X0G2 | 0          | N-term +28.03 Da, K +28.03 Da,              | 2113.013428 | 3 | 448.8999939 | 448.9050325 |
| TITYGPKVVR             | P12710 | 0.00561612 | N-term +28.03 Da, K +28.03 Da,              | 2118.790283 | 3 | 397.5799866 | 397.2482928 |

|                       |        |            |                                            |             |   |             |             |
|-----------------------|--------|------------|--------------------------------------------|-------------|---|-------------|-------------|
| SDTPCDDFTR            | P28798 | 0          | N-term +28.03 Da, C +57.02 Da,             | 2124.71167  | 2 | 621.25      | 621.2587885 |
| SPVQDPKTCSSGSAVLCR    | Q61207 | 0.00973007 | N-term +28.03 Da, C +57.02 Da,             | 2125.845459 | 3 | 659         | 658.9960401 |
| NAQQPLYEQR            | Q80X50 | 0.00042409 | N-term +28.03 Da,                          | 2125.924561 | 2 | 602.7999878 | 602.3094722 |
| IPKSVDWDR             | P06797 | 0.00343289 | N-term +28.03 Da, K +28.03 Da,             | 2127.405273 | 3 | 352.8800049 | 352.8781996 |
| TITYGPKVVR            | P12710 | 0.00888889 | N-term +28.03 Da, K +28.03 Da,             | 2128.434082 | 2 | 595.3699951 | 595.3688009 |
| IKELGDHVTNLR          | P09528 | 0.00080808 | N-term +28.03 Da, K +28.03 Da,C +57.02 Da, | 2132.158447 | 3 | 484.2799988 | 484.2840663 |
| SGQQQSNIYGPMMKGGSGGGR | Q8BG05 | 0          | N-term +28.03 Da, K +28.03 Da,             | 2135.1521   | 3 | 667.6500244 | 666.9865324 |
| IQTHNEDVLEYKR         | Q9CQY9 | 0.00043668 | N-term +28.03 Da, K +28.03 Da,             | 2136.948975 | 4 | 426.230011  | 425.9796121 |
| EPDLSSDIKER           | B5X0G2 | 0.00998129 | N-term +28.03 Da, K +28.03 Da,             | 2137.291748 | 2 | 672.854248  | 672.8539105 |
| SSSEDKITVHFK          | P46656 | 0          | N-term +28.03 Da, K +28.03 Da,             | 2138.204102 | 4 | 366.2000122 | 366.204152  |
| SGQQQSNIYGPMMKGGSGGGR | Q8BG05 | 0          | N-term +28.03 Da, K +28.03 Da,             | 2139.766113 | 3 | 666.9899902 | 666.9865324 |
| FGVPAEGR              | Q9JK92 | 0.00376197 | N-term +28.03 Da,                          | 2139.841553 | 2 | 430.7346191 | 430.7348794 |
| NATLSVEPEGR           | Q9QYR9 | 0.00108774 | N-term +28.03 Da, C +57.02 Da,             | 2140.186035 | 2 | 600.3099976 | 600.8145878 |
| AGPSSGQIYGPGR         | Q8BFW7 | 0          | N-term +28.03 Da,                          | 2141.214844 | 2 | 686.3539429 | 686.3544114 |
| NEVHTMLGQSTEEIR       | P08226 | 0          | N-term +28.03 Da,                          | 2141.549561 | 3 | 591.9533691 | 591.2929623 |
| IKGLPNVQR             | O88844 | 0.0470966  | N-term +28.03 Da, K +28.03 Da,             | 2143.572998 | 3 | 360.8999939 | 360.9011157 |
| EPDLSSDIKER           | B5X0G2 | 0          | N-term +28.03 Da, K +28.03 Da,             | 2143.967285 | 3 | 448.9047852 | 448.9050325 |
| GGPGGGNFGGSPGYGGGR    | O88569 | 0          | N-term +28.03 Da,                          | 2144.479736 | 2 | 768.3499756 | 768.3529319 |
| NVEEVVNDR             | Q8R3Q6 | 0.00079271 | N-term +28.03 Da,                          | 2146.393311 | 2 | 551.2800293 | 551.2803806 |
| GGPGGGNFGGSPGYGGGR    | O88569 | 0          | N-term +28.03 Da,                          | 2146.486816 | 2 | 796.8599854 | 796.863664  |
| FFPASADR              | P09103 | 0.02283105 | N-term +28.03 Da,                          | 2147.950928 | 2 | 469.7397156 | 469.7401619 |
| NATLSVEPEGR           | Q9QYR9 | 0.00043879 | N-term +28.03 Da,                          | 2148.484131 | 2 | 600.8099976 | 600.8145878 |
| TITYGPKVVR            | P12710 | 0.00895141 | N-term +28.03 Da, K +28.03 Da,             | 2149.223633 | 3 | 397.2479553 | 397.2482928 |
| ISKQEYDESGPSIVHR      | P60710 | 0.01716484 | N-term +28.03 Da, K +28.03 Da,             | 2149.491699 | 4 | 476         | 475.9995392 |
| AYEVLNPEKR            | Q9QYJ0 | 0          | N-term +28.03 Da, K +28.03 Da,             | 2150.781982 | 3 | 454.5799866 | 454.5856338 |
| VSDSSDMDTGAGSIR       | O35143 | 0          | N-term +28.03 Da,                          | 2152.325684 | 2 | 806.8599854 | 806.8595964 |
| TGGDAAAPGAAGTQALPHR   | Q9D0F3 | 0          | N-term +28.03 Da,                          | 2152.552002 | 3 | 625.9799805 | 625.9817758 |
| TKVSSLIER             | Q921X9 | 0.01696429 | N-term +28.03 Da, K +28.03 Da,             | 2153.908447 | 3 | 363.5599976 | 363.560648  |
| VPIDVDKTKVHNTEPVENAR  | P81117 | 0          | N-term +28.03 Da, K +28.03 Da,             | 2154.407959 | 4 | 587.0800171 | 587.0760443 |
| VPIDVDKTKVHNTEPVENAR  | P81117 | 0.0011107  | N-term +28.03 Da, K +28.03 Da,             | 2155.439941 | 4 | 587.3200073 | 587.0760443 |
| ILLDQGGTH             | Q9QYGO | 0.02305722 | N-term +28.03 Da,                          | 2155.599854 | 2 | 526.7902222 | 526.7903836 |
| IPKSVDWDR             | P06797 | 0.00993172 | N-term +28.03 Da, K +28.03 Da,C +57.02 Da, | 2158.326416 | 3 | 352.8778687 | 352.8781996 |
| ISKQEYDESGPSIVHR      | P60710 | 0          | N-term +28.03 Da, K +28.03 Da,             | 2158.937012 | 3 | 635         | 634.3302935 |
| EDMTYAVR              | Q6PDM2 | 0.0004415  | N-term +28.03 Da,                          | 2159.25     | 2 | 506.7425537 | 506.7420449 |
| ISKQEYDESGPSIVHR      | P60710 | 0          | N-term +28.03 Da, K +28.03 Da,             | 2160.016357 | 2 | 951.4899902 | 950.991802  |
| ISKQEYDESGPSIVHR      | P60710 | 0          | N-term +28.03 Da, K +28.03 Da,             | 2160.56958  | 2 | 950.9899902 | 950.991802  |
| ISKQEYDESGPSIVHR      | P60710 | 0          | N-term +28.03 Da, K +28.03 Da,             | 2167.462402 | 3 | 634.3302612 | 634.3302935 |
| YSQSQFTAPR            | Q60865 | 0          | N-term +28.03 Da, K +28.03 Da,             | 2169.124756 | 2 | 606.803772  | 606.8040227 |
| GVANVSIEDR            | P08228 | 0.00045851 | N-term +28.03 Da, K +28.03 Da,             | 2170.61792  | 2 | 544.2919312 | 544.2907481 |
| EPDLSSDIKER           | B5X0G2 | 0          | N-term +28.03 Da, K +28.03 Da,C +57.02 Da, | 2174.538574 | 3 | 448.9052429 | 448.9050325 |

|                     |        |            |                                             |             |   |             |             |
|---------------------|--------|------------|---------------------------------------------|-------------|---|-------------|-------------|
| GEPVALSEER          | Q3UJB0 | 0.00374277 | N-term +28.03 Da,                           | 2174.859619 | 2 | 622.3099976 | 622.3118783 |
| WQGEVPR             | Q9ERGO | 0.00079586 | N-term +28.03 Da,                           | 2177.301514 | 2 | 514.7626953 | 514.761626  |
| TGGDAAAPGAAGTQALPHR | Q9D0F3 | 0.01528777 | N-term +28.03 Da,                           | 2177.473633 | 3 | 626.3099976 | 625.9817758 |
| GGGPGGGNFGGSPGYGGGR | O88569 | 0          | N-term +28.03 Da,                           | 2177.987061 | 2 | 797.3699951 | 796.863664  |
| GKIGGHGAEYGAEALER   | P01942 | 0          | N-term +28.03 Da, K +28.03 Da,              | 2179.157227 | 3 | 590.9799805 | 590.9759617 |
| TPVKEDWNVN          | Q9ESZ8 | 0          | N-term +28.03 Da, K +28.03 Da, C +57.02 Da, | 2179.308105 | 3 | 433.9075012 | 433.9067071 |
| SMPPAQQITSGQMHR     | P26039 | 0.00080257 | N-term +28.03 Da,                           | 2180.840576 | 3 | 608.9699707 | 608.9663032 |
| SPPAPSDSVKIEER      | Q9R257 | 0.00534938 | N-term +28.03 Da, K +28.03 Da,              | 2182.274658 | 3 | 566.2999878 | 566.2965897 |
| TVIDYNGER           | P09103 | 0.00082372 | N-term +28.03 Da, K +28.03 Da,              | 2183.150391 | 2 | 547.7774658 | 547.7774736 |
| VSDSDSMDTGAGSIR     | O35143 | 0.00083091 | N-term +28.03 Da, K +28.03 Da, C +57.02 Da, | 2183.278564 | 2 | 807.3599854 | 806.8595964 |
| TEEEEEETEKESTEKDEL  | P08113 | 0.00042863 | N-term +28.03 Da, K +28.03 Da,              | 2183.962402 | 3 | 757.3499756 | 756.6760797 |
| NGGVVLGADSR         | Q60692 | 0.03480406 | N-term +28.03 Da,                           | 2187.001221 | 2 | 537.2835083 | 536.7909151 |
| TSVDLEETGR          | Q03265 | 0.0011355  | N-term +28.03 Da, K +28.03 Da, C +57.02 Da, | 2187.280518 | 2 | 567.7851563 | 567.7854962 |
| DTPCDDFTR           | P28798 | 0.00109012 | N-term +28.03 Da, C +57.02 Da,              | 2189.941406 | 2 | 577.7399902 | 577.7427739 |
| SNCPTIGQIR          | P10605 | 0.00211864 | N-term +28.03 Da, K +28.03 Da, C +57.02 Da, | 2190.510742 | 2 | 587.3057251 | 587.3058751 |
| FEELAAR             | Q02819 | 0.00314685 | N-term +28.03 Da,                           | 2192.144287 | 2 | 496.756134  | 496.7560095 |
| NMDVPNIKR           | P63242 | 0.02717848 | N-term +28.03 Da, K +28.03 Da,              | 2192.45752  | 3 | 381.5505981 | 381.5498659 |
| YSAIQSDTSGDYR       | O35639 | 0.0212156  | N-term +28.03 Da, K +28.03 Da, C +57.02 Da, | 2193.164551 | 2 | 745.8400269 | 745.8415319 |
| SLEDVSEASEQSNR      | Q9JHE7 | 0          | N-term +28.03 Da,                           | 2195.856934 | 2 | 789.8599854 | 789.865736  |
| YVHNDIFR            | P97855 | 0.0050184  | N-term +28.03 Da, K +28.03 Da,              | 2197.131104 | 3 | 364.5257568 | 364.5259375 |
| PPPPPPPPR           | A2AQ25 | 0.01198525 | N-term +28.03 Da,                           | 2197.206543 | 2 | 491.2999878 | 490.2898216 |
| FSGGNSEPAQPAVQQAPAR | Q7TNL9 | 0          | N-term +28.03 Da,                           | 2199.146729 | 2 | 970.4799805 | 970.4846755 |
| AAQASSSTPVVITR      | P42128 | 0.00083857 | N-term +28.03 Da, K +28.03 Da,              | 2199.427979 | 2 | 708.9000244 | 708.3962766 |
| DFGTQYR             | Q9D6Y7 | 0.02980501 | N-term +28.03 Da,                           | 2200.983643 | 2 | 457.7224426 | 457.7219693 |
| SQFQESDDADEDYGR     | Q80XU3 | 0          | N-term +28.03 Da, C +57.02 Da,              | 2201.239502 | 2 | 895.3599854 | 895.3610156 |
| EPDLSSDIKER         | B5X0G2 | 0.03001668 | N-term +28.03 Da, K +28.03 Da,              | 2202.512939 | 3 | 449.2373962 | 448.9050325 |
| VDDICIAKPR          | P32261 | 0.00045893 | N-term +28.03 Da, K +28.03 Da,              | 2206.430664 | 3 | 414.8999939 | 414.900676  |
| RVEFMDDTSR          | P62858 | 0.00115875 | N-term +28.03 Da, C +57.02 Da,              | 2207.835449 | 2 | 642.2999878 | 642.3060726 |
| DFSAGVANR           | P15105 | 0.00109689 | N-term +28.03 Da,                           | 2209.101318 | 2 | 482.7454224 | 482.7459759 |
| SMPPAQQITSGQMHR     | P26039 | 0.01715976 | N-term +28.03 Da, C +57.02 Da,              | 2212.17749  | 3 | 609.2999878 | 608.9663032 |
| SLTSAASIDGSR        | Q9QYG0 | 0.00083264 | N-term +28.03 Da,                           | 2225.009766 | 2 | 596.8099976 | 596.8120453 |
| EKFVEGVYR           | P07309 | 0.03385632 | N-term +28.03 Da, K +28.03 Da,              | 2225.221924 | 3 | 394.8900146 | 394.8887647 |
| QGSPPAPSDSVKIEER    | Q9R257 | 0          | N-term +28.03 Da, K +28.03 Da,              | 2228.060059 | 3 | 627.9899902 | 627.9899372 |
| MLQPSGPPADKPEEN     | Q923D4 | 0.01082921 | N-term +28.03 Da, K +28.03 Da,              | 2229.940918 | 2 | 833.4099731 | 833.4112671 |
| NQQPSNYGPMKSGNFGGSR | O88569 | 0          | N-term +28.03 Da, K +28.03 Da, C +57.02 Da, | 2231.760254 | 3 | 694.6599731 | 694.6655704 |
| SQFQESDDADEDYGR     | Q80XU3 | 0          | N-term +28.03 Da, K +28.03 Da,              | 2232.146484 | 2 | 895.3610229 | 895.3610156 |
| SSEAPLVNEDVKR       | Q91YQ5 | 0          | N-term +28.03 Da, K +28.03 Da,              | 2235.012695 | 3 | 532.9568481 | 532.957908  |
| SSIPEAGEGQIR        | Q9DCB8 | 0.00375683 | N-term +28.03 Da,                           | 2236.509766 | 2 | 636.3300171 | 636.3331448 |
| GPVQGTIHFEQK        | P08228 | 0          | N-term +28.03 Da, K +28.03 Da,              | 2237.108887 | 3 | 466.5899963 | 466.2576285 |
| SAPPLPSPGR          | Q8K117 | 0.00777958 | N-term +28.03 Da,                           | 2238.019775 | 2 | 503.7900085 | 503.7876436 |

|                      |        |            |                                            |             |   |             |             |
|----------------------|--------|------------|--------------------------------------------|-------------|---|-------------|-------------|
| VLTKFVEGAR           | Q8C196 | 0.00836013 | N-term +28.03 Da, K +28.03 Da,C +57.02 Da, | 2242.581787 | 3 | 392.5761414 | 392.5764094 |
| SKDSEGSWFR           | O55125 | 0.00177431 | N-term +28.03 Da, K +28.03 Da,             | 2243.924072 | 3 | 419.2099915 | 418.8752956 |
| EVGTETIIDKSK         | P54869 | 0.01976744 | N-term +28.03 Da, K +28.03 Da,             | 2244.350342 | 3 | 468.9400024 | 468.6045829 |
| AGEEAADSPELPR        | Q9CPW2 | 0          | N-term +28.03 Da,                          | 2245.442383 | 2 | 685.3335571 | 685.3333424 |
| SSEAPPLVNEDVKR       | Q91YQ5 | 0          | N-term +28.03 Da, K +28.03 Da,C +57.02 Da, | 2245.648682 | 2 | 798.9299927 | 798.9332238 |
| DTPCDDFTR            | P28798 | 0.00045809 | N-term +28.03 Da, K +28.03 Da,C +57.02 Da, | 2246.802246 | 2 | 577.7427368 | 577.7427739 |
| AAPEEESAYVAGER       | Q9CZ44 | 0.00343643 | N-term +28.03 Da,                          | 2247.684082 | 2 | 753.8571777 | 753.857182  |
| SQAEFDKAAEEVKR       | P31786 | 0.00042463 | N-term +28.03 Da, K +28.03 Da,             | 2248.681396 | 4 | 423.730011  | 423.7295287 |
| GELEDKPPAPPVR        | Q8CIN4 | 0.00083438 | N-term +28.03 Da, K +28.03 Da,             | 2248.75708  | 3 | 487.6099854 | 487.6084386 |
| TTVDPDTGISDR         | Q9CW42 | 0.01139513 | N-term +28.03 Da,                          | 2248.952393 | 2 | 653.3200073 | 652.8200678 |
| GADTSVDLEETGR        | Q03265 | 0          | N-term +28.03 Da,                          | 2250.900391 | 2 | 689.3264771 | 689.3282574 |
| SQAEFDKAAEEVKR       | P31786 | 0.04857219 | N-term +28.03 Da, K +28.03 Da,C +57.02 Da, | 2252.504639 | 3 | 564.9699707 | 564.6369461 |
| NSGYSQSQFTAPR        | Q60865 | 0          | N-term +28.03 Da,                          | 2252.913818 | 2 | 735.8499756 | 735.8522334 |
| SGYSQSQFTAPR         | Q60865 | 0          | N-term +28.03 Da,                          | 2254.410889 | 2 | 678.8302612 | 678.8307693 |
| RFGIVTSSAGTGTTEDEAKK | Q9D1J3 | 0          | N-term +28.03 Da, K +28.03 Da,             | 2254.486328 | 4 | 561.2999878 | 560.7996775 |
| ADEPEWVKTER          | O35887 | 0          | N-term +28.03 Da, K +28.03 Da,             | 2255.861572 | 3 | 472.5769958 | 472.5770271 |
| SLTSAASIDGSR         | Q9QYG0 | 0.000429   | N-term +28.03 Da,                          | 2255.937012 | 2 | 596.8115234 | 596.8120453 |
| NLGEKFDETTADGR       | Q05816 | 0          | N-term +28.03 Da, K +28.03 Da,             | 2256.087891 | 3 | 536.9299927 | 536.9336512 |
| EEDEKEEDEEESPGQAKDEL | P14211 | 0.00043975 | N-term +28.03 Da, K +28.03 Da,             | 2258.021973 | 3 | 807.0200195 | 807.0221387 |
| DIDNPQSIR            | P48758 | 0.00314575 | N-term +28.03 Da,                          | 2258.145508 | 2 | 543.2800293 | 543.2829231 |
| ANFENLAKER           | Q60598 | 0.00078895 | N-term +28.03 Da, K +28.03 Da,             | 2259.652344 | 3 | 416.5627441 | 416.5629404 |
| TSGMALAEQAR          | Q8QZY2 | 0.00078927 | N-term +28.03 Da,                          | 2259.838867 | 2 | 581.7938232 | 581.7978831 |
| AGEEAADSPELPR        | Q9CPW2 | 0.00110988 | N-term +28.03 Da,                          | 2261.854736 | 3 | 457.2241821 | 457.2246537 |
| GMEEGEFSEAR          | P05213 | 0.0011236  | N-term +28.03 Da,                          | 2262.239746 | 2 | 635.7800293 | 635.2744385 |
| AQLCEEHGILR          | B5X0G2 | 0          | N-term +28.03 Da, K +28.03 Da,C +57.02 Da, | 2264.171143 | 3 | 451.8999939 | 451.9029684 |
| SSEAPPLVNEDVKR       | Q91YQ5 | 0          | N-term +28.03 Da, K +28.03 Da,             | 2265.409424 | 3 | 532.9579468 | 532.957908  |
| EVENQILTR            | P57780 | 0.03310345 | N-term +28.03 Da,                          | 2265.484863 | 2 | 565.31427   | 565.3142232 |
| LEKAQSELSGADEAAR     | Q9D3D9 | 0.00044543 | N-term +28.03 Da, K +28.03 Da,             | 2266.385986 | 2 | 901.4699707 | 901.4681599 |
| SEPEEVIPSR           | Q91WQ3 | 0.0091425  | N-term +28.03 Da,                          | 2270.481445 | 2 | 585.803772  | 585.8036887 |
| SEKDLEEAEEYKEAR      | P48428 | 0.03231152 | N-term +28.03 Da, K +28.03 Da,             | 2270.597656 | 3 | 637.3200073 | 637.3178312 |
| SVPPSQTKSETNWESPKQIK | Q80WJ7 | 0.02745098 | N-term +28.03 Da, K +28.03 Da,             | 2270.854248 | 4 | 596.8300171 | 596.5771486 |
| EAFESDLAAHQDR        | O88990 | 0          | N-term +28.03 Da,                          | 2271.122559 | 2 | 758.8599854 | 758.8549735 |
| LAPEYAAAATR          | P27773 | 0.00108696 | N-term +28.03 Da,                          | 2272.649658 | 2 | 610.3189087 | 610.3195058 |
| VYLADYGLSYR          | Q8BN21 | 0.0352459  | N-term +28.03 Da,                          | 2272.819824 | 3 | 450.5700073 | 449.9029628 |
| VNSDEVGGREALGR       | P02088 | 0.00804635 | N-term +28.03 Da,                          | 2274.6604   | 2 | 665.8300171 | 665.8335094 |
| DADPILR              | Q8C196 | 0.04486835 | N-term +28.03 Da,                          | 2275.496826 | 2 | 414.234375  | 414.2347124 |
| AGEEAADSPELPR        | Q9CPW2 | 0          | N-term +28.03 Da,                          | 2275.839844 | 2 | 685.3327637 | 685.3333424 |
| DTPCDDFTR            | P28798 | 0.00046296 | N-term +28.03 Da, C +57.02 Da,             | 2277.331055 | 2 | 577.7424316 | 577.7427739 |
| SGSLDELSER           | E9PV24 | 0.01334951 | N-term +28.03 Da,                          | 2278.147461 | 2 | 561.2800293 | 560.7776711 |
| LAEHPVAESAVVSSPKDKR  | Q91VA0 | 0          | N-term +28.03 Da, K +28.03 Da,             | 2278.996582 | 4 | 534.5300293 | 534.2839286 |

|                         |        |            |                                             |             |   |             |             |
|-------------------------|--------|------------|---------------------------------------------|-------------|---|-------------|-------------|
| QSSGPGASSGPGGDHSELIVR   | D3Z7N2 | 0          | N-term +28.03 Da,                           | 2279.184082 | 3 | 675         | 674.9994955 |
| GSLDLGGDAAGR            | Q8VEK3 | 0          | N-term +28.03 Da,                           | 2280.392334 | 2 | 558.7851563 | 558.7858301 |
| AEPKTVYWDR              | P01887 | 0          | N-term +28.03 Da, K +28.03 Da,              | 2282.541748 | 3 | 440.9020691 | 440.9030741 |
| ALTDSFR                 | Q6P069 | 0.01898919 | N-term +28.03 Da,                           | 2286.243652 | 2 | 419.226532  | 419.2268874 |
| AGYDPPMKPYGR            | Q9R257 | 0          | N-term +28.03 Da, K +28.03 Da,              | 2289.942139 | 3 | 469.9075012 | 469.9078307 |
| DEPPPLPR                | O55022 | 0.0292887  | N-term +28.03 Da, K +28.03 Da,              | 2291.330078 | 2 | 474.760376  | 474.7610945 |
| ANFENLAKER              | Q60598 | 0          | N-term +28.03 Da, K +28.03 Da,              | 2291.446289 | 3 | 416.5599976 | 416.5629404 |
| NLGEKFDETTADGR          | Q05816 | 0.00081833 | N-term +28.03 Da, K +28.03 Da,              | 2292.212402 | 3 | 536.9299927 | 536.9336512 |
| WLQDADPENNSR            | P54729 | 0.00566101 | N-term +28.03 Da,                           | 2292.952881 | 2 | 737.3400269 | 736.8418659 |
| KIQVLQQADDAEER          | D3Z2H9 | 0          | N-term +28.03 Da, K +28.03 Da,              | 2293.451416 | 2 | 913.9799805 | 913.983977  |
| MVADTPENLR              | Q61792 | 0          | N-term +28.03 Da, K +28.03 Da,              | 2295.222412 | 2 | 587.2991943 | 587.3002586 |
| GAQKVSNSQSFTEIER        | Q99K28 | 0          | N-term +28.03 Da, K +28.03 Da,              | 2295.297852 | 3 | 583.975647  | 583.9758504 |
| KIQVLQQADDAEER          | D3Z2H9 | 0          | N-term +28.03 Da, K +28.03 Da,              | 2297.209961 | 3 | 609.6599731 | 609.6584102 |
| ASEPQEV LHIGSAHNR       | O70400 | 0          | N-term +28.03 Da, K +28.03 Da,              | 2297.2854   | 4 | 443.9808044 | 443.9814149 |
| ASEPQEV LHIGSAHNR       | O70400 | 0          | N-term +28.03 Da,                           | 2299.11377  | 3 | 591.9699707 | 591.639461  |
| FKDGLEMEKC              | P63028 | 0.01250381 | N-term +28.03 Da, K +28.03 Da, C +57.02 Da, | 2300.486328 | 3 | 447.5567627 | 447.5578103 |
| SEPEIPK GIR             | Q9WTP6 | 0.00110213 | N-term +28.03 Da, K +28.03 Da,              | 2300.837158 | 3 | 394.8999939 | 394.5678027 |
| GGPYGGGNYGPGSGGGSGGYGGR | O88569 | 0          | N-term +28.03 Da,                           | 2301.318848 | 2 | 987.4299927 | 986.9302648 |
| IQEELEKLR               | Q99PL5 | 0.00345304 | N-term +28.03 Da, K +28.03 Da,              | 2302.358643 | 3 | 405.2399902 | 405.2432078 |
| GGPYGGGNYGPGSGGGSGGYGGR | O88569 | 0          | N-term +28.03 Da,                           | 2302.558838 | 2 | 986.9299927 | 986.9302648 |
| EAIICKNIPR              | O88844 | 0          | N-term +28.03 Da, K +28.03 Da,              | 2307.5896   | 3 | 423.9152527 | 423.9164374 |
| DTPCDDFTR               | P28798 | 0.00044603 | N-term +28.03 Da, C +57.02 Da,              | 2310.241943 | 2 | 577.7399902 | 577.7427739 |
| DEAAYGALR               | P97372 | 0.00080939 | N-term +28.03 Da,                           | 2310.629395 | 2 | 497.25      | 497.253634  |
| GSLDLGGDAAGR            | Q8VEK3 | 0          | N-term +28.03 Da, K +28.03 Da,              | 2311.219238 | 2 | 558.7852173 | 558.7858301 |
| YGREPDLSSDIKER          | B5X0G2 | 0.00313917 | N-term +28.03 Da, K +28.03 Da,              | 2311.904785 | 4 | 430.980011  | 430.9770696 |
| VHPEAQAKVDVFR           | P97371 | 0          | N-term +28.03 Da, K +28.03 Da,              | 2311.982178 | 4 | 388.7200012 | 388.7215061 |
| DSSDSMDTGAGSIR          | O35143 | 0.00043821 | N-term +28.03 Da,                           | 2313.809326 | 2 | 714.3099976 | 713.8093747 |
| SEAWQQVER               | Q9CQB2 | 0.03992395 | N-term +28.03 Da,                           | 2314.977783 | 2 | 581.289978  | 580.7883726 |
| IQEELEKLR               | Q99PL5 | 0.01900029 | N-term +28.03 Da, K +28.03 Da,              | 2318.104492 | 2 | 607.3626709 | 607.3611734 |
| AENVAVPEAAEER           | Q8JZQ9 | 0.00315126 | N-term +28.03 Da, C +57.02 Da,              | 2318.745361 | 2 | 707.3599854 | 706.854442  |
| GGPYGGGNYGPGSGGGSGGYGGR | O88569 | 0          | N-term +28.03 Da,                           | 2320.092285 | 3 | 658.6199951 | 658.2892687 |
| EVTNLNAYR               | O35381 | 0.00110742 | N-term +28.03 Da, K +28.03 Da,              | 2321.17334  | 2 | 554.2929077 | 554.2932906 |
| LAAIQESGVER             | Q60692 | 0.00806972 | N-term +28.03 Da, K +28.03 Da,              | 2321.490967 | 2 | 600.831665  | 600.8327803 |
| SSGFSLEDPQTHSNR         | P11499 | 0.00176991 | N-term +28.03 Da, C +57.02 Da,              | 2321.566406 | 3 | 563.9331665 | 563.9324219 |
| NLGEKFDETTADGR          | Q05816 | 0          | N-term +28.03 Da, K +28.03 Da,              | 2322.500977 | 3 | 536.9330444 | 536.9336512 |
| MVADTPENLR              | Q61792 | 0.00046512 | N-term +28.03 Da,                           | 2325.653076 | 2 | 587.2998657 | 587.3002586 |
| ELSEEDKLT VSR           | P56480 | 0.0155363  | N-term +28.03 Da, K +28.03 Da,              | 2325.803955 | 3 | 487.9316711 | 487.9313589 |
| FTKEDLHLR               | Q9CQ01 | 0.00652955 | N-term +28.03 Da, K +28.03 Da,              | 2327.445557 | 3 | 405.5673828 | 405.5679141 |
| KVNTPELPAIEKTGKVR       | Q9CXN7 | 0.00078555 | N-term +28.03 Da, K +28.03 Da,              | 2328.053955 | 4 | 499.3099976 | 498.810853  |
| FKDGLEMEKC              | P63028 | 0.00371496 | N-term +28.03 Da, K +28.03 Da, C +57.02 Da, | 2330.842041 | 3 | 447.5574036 | 447.5578103 |

|                         |        |            |                                             |             |   |             |             |
|-------------------------|--------|------------|---------------------------------------------|-------------|---|-------------|-------------|
| SEPEIPK GIR             | Q9WTP6 | 0.03520742 | N-term +28.03 Da, K +28.03 Da, C +57.02 Da, | 2332.572754 | 3 | 394.5674438 | 394.5678027 |
| EMEALEDER               | Q8VDD5 | 0          | N-term +28.03 Da,                           | 2332.916748 | 2 | 639.7800293 | 639.7795541 |
| GGPYGGGNYGPGSGSGGYGGR   | O88569 | 0          | N-term +28.03 Da,                           | 2333.506592 | 2 | 986.9304199 | 986.9302648 |
| TANLGAGAAQPLR           | P08226 | 0          | N-term +28.03 Da,                           | 2335.453125 | 2 | 634.3581543 | 634.3594964 |
| TQPGVAMPTSGDSE R        | Q8COK8 | 0.02049654 | N-term +28.03 Da,                           | 2335.962646 | 2 | 781.3699951 | 780.8697664 |
| NLGEKFDETTADGR          | Q05816 | 0          | N-term +28.03 Da, K +28.03 Da,              | 2337.004883 | 2 | 804.8948975 | 804.8968386 |
| LCDFNPKSSKQAKDVSR       | O08585 | 0.00591327 | N-term +28.03 Da, K +28.03 Da,              | 2337.544678 | 4 | 523.7800293 | 523.7859438 |
| SLPCDICK                | Q61207 | 0.00344234 | N-term +28.03 Da, K +28.03 Da,              | 2339.851318 | 2 | 524.7600098 | 524.7619229 |
| EQAEAEVASLNR            | D3Z6I8 | 0          | N-term +28.03 Da,                           | 2340.837891 | 2 | 672.8406372 | 672.8413344 |
| VGTKGLDFSDR             | Q99KJ8 | 0.01332122 | N-term +28.03 Da, K +28.03 Da,              | 2343.372559 | 3 | 417.5599976 | 417.5628291 |
| EHAEKLMKLNQNR           | P09528 | 0.00115296 | N-term +28.03 Da, K +28.03 Da,              | 2345.200195 | 3 | 569.9799805 | 570.3224154 |
| MQPASAKWYDR             | Q9R0Q7 | 0.02123386 | N-term +28.03 Da, K +28.03 Da,              | 2346.579102 | 3 | 470.9100037 | 470.2395804 |
| YLESLGEEQR              | Q02819 | 0          | N-term +28.03 Da,                           | 2352.363037 | 2 | 626.3146973 | 626.3144208 |
| AGYLTEPVNR              | Q64521 | 0.00890019 | N-term +28.03 Da, K +28.03 Da,              | 2352.706055 | 2 | 574.3079224 | 574.3089407 |
| DVINASGYR               | Q91VA0 | 0.00109649 | N-term +28.03 Da,                           | 2356.225098 | 2 | 511.7668457 | 511.7669085 |
| TSSIPEAGEGQIR           | Q9DCB8 | 0.00282187 | N-term +28.03 Da, K +28.03 Da,              | 2358.1521   | 2 | 687.3499756 | 686.8569845 |
| DITTSEYEKEKLN ER        | P63038 | 0          | N-term +28.03 Da, K +28.03 Da,              | 2358.47998  | 4 | 485.7600098 | 485.505926  |
| SISESAFSAR              | P51655 | 0          | N-term +28.03 Da, K +28.03 Da,              | 2361.889404 | 2 | 542.2800293 | 541.7774736 |
| FPQKVMPPPQAR            | Q3U422 | 0          | N-term +28.03 Da, K +28.03 Da,              | 2363.456787 | 3 | 484.6099854 | 484.6112368 |
| TANLGAGAAQPLR           | P08226 | 0          | N-term +28.03 Da,                           | 2365.829346 | 2 | 634.3560181 | 634.3594964 |
| IVSVDETIKNPR            | P80313 | 0          | N-term +28.03 Da, K +28.03 Da,              | 2365.904785 | 3 | 476.2803345 | 476.2803219 |
| AEVQKKADEFIR            | Q5EBG8 | 0.00084211 | N-term +28.03 Da, K +28.03 Da,              | 2367.385742 | 3 | 497.6000061 | 497.2718266 |
| SLPCDICK                | Q61207 | 0.00114329 | N-term +28.03 Da, K +28.03 Da,              | 2370.088135 | 2 | 524.760498  | 524.7619229 |
| EQAEAEVASLNR            | D3Z6I8 | 0          | N-term +28.03 Da,                           | 2371.377686 | 2 | 672.8400269 | 672.8413344 |
| GGYKEPAAPVSIQR          | Q61792 | 0.00593668 | N-term +28.03 Da, K +28.03 Da,              | 2371.988037 | 3 | 510.2900085 | 510.287588  |
| GDEVIITGHCQGDGYR        | P35505 | 0.00078493 | N-term +28.03 Da, C +57.02 Da,              | 2372.141846 | 3 | 602.2800293 | 602.2809452 |
| SLDLGGDAAGR             | Q8VEK3 | 0.00345901 | N-term +28.03 Da,                           | 2376.769287 | 2 | 530.2727051 | 530.2750981 |
| VTAGKDGVANVSIEDR        | P08228 | 0          | N-term +28.03 Da, K +28.03 Da,              | 2376.844971 | 3 | 563.3099976 | 562.9722174 |
| AEVQKKADEFIR            | Q5EBG8 | 0          | N-term +28.03 Da, K +28.03 Da,              | 2376.931152 | 2 | 745.4000244 | 745.4041016 |
| SSVQDVL R               | Q8CFA2 | 0.03941288 | N-term +28.03 Da,                           | 2377.006836 | 2 | 466.2627563 | 466.2640015 |
| SEEEELDTKLTR            | Q62048 | 0.00114591 | N-term +28.03 Da, K +28.03 Da,              | 2377.082764 | 3 | 502.6000061 | 502.5946356 |
| VTAGKDGVANVSIEDR        | P08228 | 0          | N-term +28.03 Da, K +28.03 Da,              | 2377.158691 | 3 | 562.9699707 | 562.9722174 |
| MQPASAKWYDR             | Q9R0Q7 | 0          | N-term +28.03 Da, K +28.03 Da,              | 2377.583008 | 3 | 470.2399902 | 470.2395804 |
| LPCPGKVGSAALR           | O08784 | 0.00804376 | N-term +28.03 Da, K +28.03 Da,              | 2382.373047 | 3 | 461.6000061 | 461.2709918 |
| KEVKCDMEVSCPEGYTCCR     | P28798 | 0.01441874 | N-term +28.03 Da, C +57.02 Da,              | 2385.433594 | 3 | 831.3599854 | 831.3630784 |
| AGQDGGQIDADELQR         | Q6P069 | 0          | N-term +28.03 Da,                           | 2385.607422 | 2 | 772.8699951 | 772.370988  |
| SSEIFTPAHEENVR          | Q3UGS4 | 0          | N-term +28.03 Da, K +28.03 Da,              | 2385.704102 | 3 | 548.6099854 | 548.6056459 |
| TETQEKNLPSKETIEQEKQAGES | P20065 | 0.02052616 | N-term +28.03 Da, K +28.03 Da,              | 2385.907715 | 4 | 704.3599854 | 704.1158303 |
| KEVKCDMEVSCPEGYTCCR     | P28798 | 0          | N-term +28.03 Da, C +57.02 Da,              | 2390.092041 | 4 | 624.0200195 | 623.7741279 |
| ETAADVASLNR             | E9Q453 | 0          | N-term +28.03 Da, C +57.02 Da,              | 2390.254883 | 2 | 652.3300171 | 652.3280598 |

|                      |        |            |                                             |             |   |             |             |
|----------------------|--------|------------|---------------------------------------------|-------------|---|-------------|-------------|
| EEAGDGTTTATVLAR      | P63038 | 0.00080548 | N-term +28.03 Da,                           | 2390.341797 | 2 | 760.3800049 | 760.3835641 |
| TEDKGEFLSEGGGVR      | E9PV24 | 0          | N-term +28.03 Da, K +28.03 Da,              | 2391.720947 | 3 | 546.6099854 | 546.277418  |
| TEDKGEFLSEGGGVR      | E9PV24 | 0.00565724 | N-term +28.03 Da, K +28.03 Da,              | 2393.5354   | 3 | 546.2700195 | 546.277418  |
| SGGPPPTGEEDTSEKDEL   | P20029 | 0          | N-term +28.03 Da, K +28.03 Da, C +57.02 Da, | 2394.071777 | 2 | 951.4400024 | 950.9365564 |
| SVTGEQYGNPIR         | Q9ESP1 | 0.00999375 | N-term +28.03 Da,                           | 2397.109131 | 2 | 675.3499756 | 674.8464194 |
| SCNLGEKFDETTADGR     | Q05816 | 0.02056183 | N-term +28.03 Da, K +28.03 Da,              | 2399.37793  | 3 | 619.6199951 | 619.2878773 |
| ADNMTLTVSR           | O70400 | 0          | N-term +28.03 Da,                           | 2400.673828 | 2 | 568.289978  | 568.2924336 |
| DLSSSDLSTASK         | Q61838 | 0.00143937 | N-term +28.03 Da, K +28.03 Da,              | 2401.26123  | 2 | 633.3300171 | 633.8248189 |
| FVGDADLER            | P30999 | 0.00116324 | N-term +28.03 Da, K +28.03 Da, C +57.02 Da, | 2401.759766 | 2 | 525.2664795 | 525.2667416 |
| EVPALVHKDVTVK        | Q61838 | 0.0004279  | N-term +28.03 Da, K +28.03 Da,              | 2402.364502 | 4 | 380.4862061 | 380.4868069 |
| GGYKEPAAPVSIQR       | Q61792 | 0.01800472 | N-term +28.03 Da, K +28.03 Da,              | 2403.327881 | 3 | 510.2870789 | 510.287588  |
| QNYHQDAEAAINR        | P09528 | 0          | N-term +28.03 Da,                           | 2404.012451 | 2 | 778.8699951 | 779.3738645 |
| GSYFTTTAER           | P60710 | 0.00373134 | N-term +28.03 Da,                           | 2404.117188 | 2 | 580.7800293 | 580.7827561 |
| VTAGKDGVANVSIEDR     | P08228 | 0          | N-term +28.03 Da, K +28.03 Da,              | 2408.554443 | 3 | 562.972168  | 562.9722174 |
| VTFESPADAADAAR       | Q91VM5 | 0.00042699 | N-term +28.03 Da, K +28.03 Da,              | 2408.854248 | 3 | 511.9299927 | 511.9351032 |
| LLCGKETVVTSTTEPSR    | O08795 | 0          | N-term +28.03 Da, K +28.03 Da,              | 2412.497803 | 3 | 645.3468018 | 645.3469559 |
| VAPMKGQVCVVTGASR     | Q99L04 | 0.00562728 | N-term +28.03 Da, C +57.02 Da,              | 2412.798828 | 3 | 573.3099976 | 572.6480226 |
| DAPTPGTSTTPGLR       | Q08122 | 0.00044803 | N-term +28.03 Da,                           | 2413.447021 | 2 | 699.3599854 | 699.8648095 |
| LVNLHLR              | P29391 | 0.03547067 | N-term +28.03 Da,                           | 2414.5354   | 2 | 446.7898254 | 446.7899886 |
| TTSSIPEAGEGQIR       | Q9DCB8 | 0.00112994 | N-term +28.03 Da,                           | 2415.262695 | 2 | 737.3809814 | 737.3808241 |
| NGGFCEVCK            | Q61207 | 0.0011655  | N-term +28.03 Da, K +28.03 Da,              | 2416.329834 | 2 | 564.25      | 563.7546293 |
| SSEIFTPAHEENVR       | Q3UGS4 | 0.00045434 | N-term +28.03 Da, K +28.03 Da,              | 2417.522949 | 3 | 548.9400024 | 548.6056459 |
| SKYEFSEIR            | Q9CYA0 | 0.0348997  | N-term +28.03 Da, K +28.03 Da,              | 2418.580566 | 3 | 405.5499878 | 405.5520413 |
| TANLGAGAAQPLR        | P08226 | 0          | N-term +28.03 Da,                           | 2423.198486 | 2 | 634.3570557 | 634.3594964 |
| TDNCVVGIQANTER       | P97807 | 0.00078585 | N-term +28.03 Da, C +57.02 Da,              | 2423.67749  | 2 | 802.4000244 | 802.8884905 |
| QEILESDGKGDPNKPSGFR  | O70400 | 0.04712182 | N-term +28.03 Da, K +28.03 Da,              | 2426.457275 | 4 | 540.5300293 | 540.2839286 |
| RVVFDITYDR           | P16015 | 0.00832799 | N-term +28.03 Da,                           | 2426.701416 | 3 | 438.5499878 | 438.5543337 |
| SGGPPPTGEEDTSEKDEL   | P20029 | 0          | N-term +28.03 Da, K +28.03 Da,              | 2427.179443 | 2 | 950.9367676 | 950.9365564 |
| ASGGGVPTDEEQATGLER   | P19536 | 0.00042517 | N-term +28.03 Da,                           | 2427.32959  | 2 | 901.4299927 | 901.4317748 |
| ADNMTLTVSR           | O70400 | 0          | N-term +28.03 Da, K +28.03 Da,              | 2431.372803 | 2 | 568.291687  | 568.2924336 |
| DGTTTPVCEDIGR        | Q9CZ13 | 0          | N-term +28.03 Da, C +57.02 Da,              | 2434.730957 | 2 | 674.8099976 | 674.3140952 |
| ALAEHPAVAESAVVSSPKDR | Q91VA0 | 0          | N-term +28.03 Da, K +28.03 Da,              | 2438.472656 | 4 | 552.039978  | 552.0432072 |
| YFAKSAEIAGVR         | Q9Z224 | 0.029346   | N-term +28.03 Da, K +28.03 Da,              | 2439.84668  | 3 | 456.5933838 | 456.5942405 |
| NKIGFEKDIANEENR      | Q9JJU8 | 0.00044464 | N-term +28.03 Da, K +28.03 Da,              | 2442.236328 | 3 | 688.0200195 | 687.6918913 |
| VLSGEDKSNIKAAWGK     | P01942 | 0.00112528 | N-term +28.03 Da, K +28.03 Da,              | 2445.123047 | 4 | 454.5148315 | 454.5148248 |
| SAEASAELSSEGMNHR     | P26043 | 0.01720558 | N-term +28.03 Da,                           | 2445.215576 | 3 | 602.2800293 | 601.6161053 |
| LTPHTYLTKQDVER       | Q9DBG6 | 0          | N-term +28.03 Da, K +28.03 Da,              | 2445.491211 | 4 | 439.9899902 | 439.9952622 |
| TRSDPVVIVSAAR        | F2Z459 | 0.00110906 | N-term +28.03 Da, K +28.03 Da,              | 2447.147705 | 3 | 466.9396057 | 466.9402996 |
| IQEYEQLEKMR          | Q9DCX2 | 0          | N-term +28.03 Da, K +28.03 Da,              | 2448.395508 | 4 | 420.4848328 | 420.4853729 |
| SLGYDVENDR           | P57780 | 0          | N-term +28.03 Da,                           | 2448.836914 | 2 | 598.2825317 | 598.2831206 |

|                                 |        |            |                                            |             |   |             |             |
|---------------------------------|--------|------------|--------------------------------------------|-------------|---|-------------|-------------|
| SCNLGEKFDETTADGR                | Q05816 | 0          | N-term +28.03 Da, K +28.03 Da,             | 2448.925049 | 3 | 619.286377  | 619.2878773 |
| MEEDDDQKAVKDEL                  | P09103 | 0.0065189  | N-term +28.03 Da, K +28.03 Da,             | 2450.547852 | 3 | 583.6122437 | 583.613479  |
| VLSGEDKSNIKAAWGWK               | P01942 | 0          | N-term +28.03 Da, K +28.03 Da,             | 2450.638428 | 3 | 605.6799927 | 605.6840076 |
| LTPHTYLTQDVER                   | Q9DBG6 | 0.00046318 | N-term +28.03 Da, K +28.03 Da,             | 2451.189941 | 3 | 586.6599731 | 586.3245908 |
| HTEFTPTETDTYACR                 | P01887 | 0.00111732 | N-term +28.03 Da, C +57.02 Da,             | 2454.286133 | 2 | 928.9099731 | 928.9096206 |
| ANPIIGNGGAPDPTAR                | Q8C196 | 0          | N-term +28.03 Da, K +28.03 Da,C +57.02 Da, | 2454.535889 | 2 | 776.9099731 | 776.9075401 |
| HTEFTPTETDTYACR                 | P01887 | 0.00082203 | N-term +28.03 Da, C +57.02 Da,             | 2456.033936 | 3 | 619.9400024 | 619.6088392 |
| GEGMEEGEFSEAR                   | P05213 | 0          | N-term +28.03 Da,                          | 2456.343994 | 2 | 728.8099976 | 728.3064677 |
| ANPIIGNGGAPDPTAR                | Q8C196 | 0          | N-term +28.03 Da, C +57.02 Da,             | 2457.852783 | 2 | 777.4099731 | 776.9075401 |
| MVNDAAEKFAEEDKCLKER             | P20029 | 0.0011446  | N-term +28.03 Da, K +28.03 Da,             | 2458.119141 | 4 | 580.8209839 | 580.819984  |
| KKELEEQLGPVAEETR                | P08226 | 0          | N-term +28.03 Da, K +28.03 Da,             | 2461.373291 | 3 | 647.361145  | 647.3614823 |
| ETTSSIEPAGEGQIR                 | Q9DCB8 | 0.00043995 | N-term +28.03 Da,                          | 2462.599365 | 2 | 802.4000244 | 801.9021212 |
| PKHEFSVDMTCEGCAEAVSR            | O08997 | 0          | N-term +28.03 Da, K +28.03 Da,C +57.02 Da, | 2467.61377  | 3 | 789.6799927 | 789.3573095 |
| EVDPNIQAVR                      | P11679 | 0.00045641 | N-term +28.03 Da,                          | 2468.233398 | 2 | 584.8198242 | 584.8196728 |
| LLEYTDSSYDEKR                   | P10649 | 0          | N-term +28.03 Da, K +28.03 Da,             | 2468.406738 | 3 | 558.9400024 | 558.945557  |
| DDFDEEETEELKVPVKSVR             | Q61937 | 0          | N-term +28.03 Da, K +28.03 Da,             | 2468.505371 | 4 | 598.8099976 | 598.5627015 |
| AGTEEEEEETEKESTEKDEL            | P08113 | 0          | N-term +28.03 Da, K +28.03 Da,             | 2468.61377  | 3 | 800.0300293 | 799.3622724 |
| SLVVHGPDIR                      | Q64442 | 0.00042845 | N-term +28.03 Da,                          | 2468.773926 | 3 | 393.2277222 | 393.2277804 |
| KIGFEKDIANEENR                  | Q9JJU8 | 0.00079334 | N-term +28.03 Da, K +28.03 Da,             | 2468.989014 | 3 | 650.3400269 | 649.6775819 |
| SVVADTPELQR                     | Q61792 | 0.02586449 | N-term +28.03 Da,                          | 2470.690186 | 2 | 621.838562  | 621.8380629 |
| NETGDEPFQYKN                    | P15105 | 0          | N-term +28.03 Da, K +28.03 Da,             | 2471.643066 | 2 | 749.3457642 | 749.3464499 |
| TAMDAQEALAR                     | A2RTL5 | 0.02255854 | N-term +28.03 Da,                          | 2471.833496 | 2 | 602.8099976 | 602.8031656 |
| AHTEFTPTETDTYACR                | P01887 | 0          | N-term +28.03 Da, C +57.02 Da,             | 2473.064697 | 3 | 643.2884521 | 643.2878773 |
| KVPHTKSGIGTGDEPGPQGLNGEAGPEDPSR | Q61074 | 0.01080914 | N-term +28.03 Da, K +28.03 Da,             | 2473.665527 | 4 | 817.6599731 | 817.1666517 |
| REAGDVCYADVYR                   | Q6PDM2 | 0.00110335 | N-term +28.03 Da, C +57.02 Da,             | 2473.788086 | 3 | 534.9199829 | 534.5840761 |
| SISESAFSAR                      | P51655 | 0          | N-term +28.03 Da,                          | 2474.736084 | 2 | 541.7779541 | 541.7774736 |
| GVQVETISPGDGR                   | P26883 | 0          | N-term +28.03 Da,                          | 2475.838379 | 2 | 671.8518677 | 671.8517019 |
| VLSGEDKSNIKAAWGWK               | P01942 | 0          | N-term +28.03 Da, K +28.03 Da,             | 2475.913818 | 4 | 454.5153503 | 454.5148248 |
| DALDSSNSMQTVQKTTTR              | P05784 | 0          | N-term +28.03 Da, K +28.03 Da,             | 2476.064697 | 3 | 680.3411865 | 680.3406415 |
| AHTEFTPTETDTYACR                | P01887 | 0          | N-term +28.03 Da, C +57.02 Da,             | 2477.281982 | 2 | 964.9299927 | 964.4281777 |
| GNVTAGKDGVANVSIEDR              | P08228 | 0          | N-term +28.03 Da, K +28.03 Da,             | 2477.636719 | 3 | 620.3300171 | 619.9936815 |
| SGDNDDEPPPLPR                   | O55022 | 0.02353942 | N-term +28.03 Da,                          | 2478.323975 | 2 | 776.8499756 | 776.3497215 |
| YAFECKIER                       | A2BH40 | 0.0034662  | N-term +28.03 Da, K +28.03 Da,             | 2478.502441 | 3 | 424.5535889 | 424.5532763 |
| ETGDEPFQYKN                     | P15105 | 0.00808538 | N-term +28.03 Da, K +28.03 Da,             | 2478.977295 | 2 | 692.3200073 | 692.3249858 |
| DALDSSNSMQTVQKTTTR              | P05784 | 0          | N-term +28.03 Da, K +28.03 Da,             | 2479.142578 | 2 | 1020.01001  | 1020.007324 |
| TLGDIVYKR                       | P12710 | 0.0190281  | N-term +28.03 Da, K +28.03 Da,             | 2479.338379 | 2 | 560.8395386 | 560.8398763 |
| VLSGEDKSNIKAAWGWK               | P01942 | 0          | N-term +28.03 Da, K +28.03 Da,             | 2481.240967 | 3 | 605.6799927 | 605.6840076 |
| SDLAQQYGVYR                     | P09103 | 0.00082338 | N-term +28.03 Da, K +28.03 Da,             | 2481.557617 | 2 | 582.8039551 | 582.8040227 |
| ETWGVTKAAEKQMKDKQDEEQR          | P14211 | 0.00112024 | N-term +28.03 Da, K +28.03 Da,             | 2484.350586 | 4 | 694.6099854 | 694.6141    |
| AVDPDSPAASGLR                   | P70441 | 0.00084424 | N-term +28.03 Da,                          | 2485.998779 | 2 | 706.8599854 | 706.854442  |

|                           |        |            |                                            |             |   |             |             |
|---------------------------|--------|------------|--------------------------------------------|-------------|---|-------------|-------------|
| TLGDIVYKR                 | P12710 | 0.00142806 | N-term +28.03 Da, K +28.03 Da,             | 2487.267578 | 3 | 374.2286682 | 374.2290097 |
| TVDGSPGKLWR               | P16858 | 0          | N-term +28.03 Da, K +28.03 Da,             | 2490.094727 | 3 | 424.9100037 | 424.5750688 |
| EQAGGDATENFEDVGHSTDR      | P56395 | 0          | N-term +28.03 Da,                          | 2490.214355 | 3 | 745.6599731 | 745.3245969 |
| YLLENDEEER                | Q8R123 | 0.00083963 | N-term +28.03 Da,                          | 2491.733887 | 2 | 669.3099976 | 669.3146183 |
| DSSFQIVKNPR               | Q61176 | 0          | N-term +28.03 Da, K +28.03 Da,             | 2492.021973 | 3 | 449.9200134 | 449.5857451 |
| QAVDVSPLR                 | P97461 | 0.00044189 | N-term +28.03 Da,                          | 2493.79541  | 2 | 506.7900085 | 506.7929261 |
| FQGEETENEENLSSEKAGLDR     | A2AIX1 | 0.00834671 | N-term +28.03 Da, K +28.03 Da,             | 2496.631348 | 4 | 649.5700073 | 649.3199691 |
| SLPCDICKT                 | Q61207 | 0.01826215 | N-term +28.03 Da, K +28.03 Da,             | 2499.544434 | 2 | 575.2800293 | 575.2857625 |
| DRDEDEDEEKEEDEEESPGQAKDEL | P14211 | 0.00375299 | N-term +28.03 Da, K +28.03 Da,             | 2500.116455 | 3 | 1099.119995 | 1098.453498 |
| GKDSNNLCLHFNPR            | P16045 | 0.00081004 | N-term +28.03 Da, C +57.02 Da,             | 2501.608154 | 4 | 432.7200012 | 432.7216091 |
| ETSSIPEAGEGQIR            | Q9DCB8 | 0          | N-term +28.03 Da,                          | 2501.986816 | 2 | 801.9000244 | 801.9021212 |
| TIILKEPVR                 | Q99PL5 | 0.01950509 | N-term +28.03 Da, K +28.03 Da,             | 2503.244141 | 3 | 375.5850525 | 375.5849048 |
| DAGELITQR                 | P67778 | 0.0237691  | N-term +28.03 Da, K +28.03 Da,             | 2503.31958  | 2 | 515.7805786 | 515.7800161 |
| ANYEFSQVSGDRPGCR          | P56528 | 0.00112066 | N-term +28.03 Da, K +28.03 Da,C +57.02 Da, | 2503.401367 | 3 | 624.6199951 | 624.2882113 |
| EETGDNVGPLIKKKT           | Q91WS0 | 0.04756815 | N-term +28.03 Da, K +28.03 Da,             | 2503.495117 | 3 | 662.0499878 | 661.7172661 |
| GVQVSPSGEKITHTGQVYDEKDYR  | P52503 | 0.01138111 | N-term +28.03 Da, K +28.03 Da,             | 2505.574219 | 3 | 926.8099976 | 926.4750058 |
| GVQVETISPGDGR             | P26883 | 0          | N-term +28.03 Da, K +28.03 Da,             | 2506.362061 | 2 | 671.8499756 | 671.8517019 |
| AHTEFTPTETDTYACR          | P01887 | 0.00113852 | N-term +28.03 Da, C +57.02 Da,             | 2507.806885 | 2 | 964.4299927 | 964.4281777 |
| TSAAESFSQEVAR             | F6ZDS4 | 0.04976051 | N-term +28.03 Da,                          | 2508.049561 | 2 | 749.3699951 | 749.3626315 |
| SGPPPADLCHALR             | O70251 | 0.00078003 | N-term +28.03 Da, K +28.03 Da,C +57.02 Da, | 2510.255859 | 3 | 473.5794067 | 473.5784847 |
| HLDATTVLSR                | P56480 | 0.00143113 | N-term +28.03 Da,                          | 2511.867676 | 2 | 570.822998  | 570.8222153 |
| AEIITVSDGR                | Q9CQ80 | 0.00083822 | N-term +28.03 Da, K +28.03 Da,C +57.02 Da, | 2511.942871 | 2 | 544.8010864 | 544.8009487 |
| VEPGSPAESGLLAGDR          | P70441 | 0.0008071  | N-term +28.03 Da, K +28.03 Da,             | 2512.289307 | 3 | 580.3200073 | 580.3159841 |
| ETSSIPEAGEGQIR            | Q9DCB8 | 0.00043103 | N-term +28.03 Da,                          | 2513.111572 | 3 | 534.9379272 | 534.9371729 |
| AGVPAHVVDLR               | Q6XPS7 | 0.00346981 | N-term +28.03 Da, K +28.03 Da,C +57.02 Da, | 2514.943359 | 3 | 387.8962097 | 387.896142  |
| GVQVSPSGEKITHTGQVYDEKDYR  | P52503 | 0          | N-term +28.03 Da, K +28.03 Da,C +57.02 Da, | 2515.675049 | 4 | 695.1087646 | 695.1080735 |
| SFSVPDGQPR                | Q8CIM7 | 0.0122212  | N-term +28.03 Da,                          | 2515.976807 | 2 | 559.289978  | 559.2854656 |
| LGPLVEQGR                 | P08226 | 0.00082508 | N-term +28.03 Da,                          | 2516.087891 | 2 | 498.7962341 | 498.7954686 |
| EAEETQNSLQAECDQYR         | Q99PL5 | 0          | N-term +28.03 Da, C +57.02 Da,             | 2517.217773 | 2 | 1049.949951 | 1049.952746 |
| TYFLLGR                   | P97490 | 0.02104353 | N-term +28.03 Da,                          | 2517.302979 | 2 | 449.2600098 | 449.2632725 |
| VLSGEDKSNIAAWGK           | P01942 | 0.00114635 | N-term +28.03 Da, K +28.03 Da,             | 2519.306641 | 4 | 454.5150452 | 454.5148248 |
| EAEETQNSLQAECDQYR         | Q99PL5 | 0          | N-term +28.03 Da, C +57.02 Da,             | 2520.25708  | 3 | 700.9699707 | 700.3042564 |
| DDEPPPLPR                 | O55022 | 0.00373514 | N-term +28.03 Da,                          | 2521.389893 | 2 | 532.2749634 | 532.2745666 |
| HQGVMMVGMGQKDSYVGDQAQSKR  | P60710 | 0          | N-term +28.03 Da, K +28.03 Da,             | 2521.480225 | 4 | 648.3200073 | 648.5730775 |
| EQAGGDATENFEDVGHSTDR      | P56395 | 0          | N-term +28.03 Da,                          | 2522.939453 | 3 | 745.6599731 | 745.3245969 |
| SGGGVPTDEEQATGLER         | P19536 | 0          | N-term +28.03 Da, C +57.02 Da,             | 2523.748779 | 2 | 865.9099731 | 865.9132177 |
| LTPEEIER                  | P20029 | 0.00777202 | N-term +28.03 Da, K +28.03 Da,             | 2524.250244 | 2 | 507.7772217 | 507.7769421 |
| EAEETQNSLQAECDQYR         | Q99PL5 | 0          | N-term +28.03 Da, C +57.02 Da,             | 2524.954834 | 3 | 700.2999878 | 700.3042564 |
| GVQVSPSGEKITHTGQVYDEKDYR  | P52503 | 0.01222494 | N-term +28.03 Da, K +28.03 Da,             | 2525.473877 | 2 | 1389.709961 | 1389.20887  |
| KNEVDSTLTFR               | Q9CQA3 | 0.00435803 | N-term +28.03 Da, K +28.03 Da,             | 2526.497314 | 2 | 683.3699951 | 683.37227   |

|                                   |        |            |                                            |             |   |             |             |
|-----------------------------------|--------|------------|--------------------------------------------|-------------|---|-------------|-------------|
| EAAVGKDLFR                        | Q64471 | 0.01111454 | N-term +28.03 Da, K +28.03 Da,             | 2528.803955 | 2 | 581.3358154 | 581.3349583 |
| AAPTVQEEKQGPTPAGLPR               | Q7TT50 | 0.00143627 | N-term +28.03 Da, K +28.03 Da,             | 2530.662354 | 3 | 668.3699951 | 668.3688597 |
| GGGVPTDEEQATGLER                  | P19536 | 0          | N-term +28.03 Da,                          | 2530.915283 | 2 | 822.4000244 | 822.3972032 |
| GVQVSPSGEKITHTGQVYDEKDYR          | P52503 | 0          | N-term +28.03 Da, K +28.03 Da,             | 2532.205078 | 3 | 927.1400146 | 926.4750058 |
| SGADLTEICQR                       | Q01853 | 0          | N-term +28.03 Da, K +28.03 Da,C +57.02 Da, | 2532.368164 | 2 | 639.3099976 | 639.3113552 |
| ETTSIPEAGEGQIR                    | Q9DCB8 | 0          | N-term +28.03 Da,                          | 2533.436035 | 2 | 801.9017334 | 801.9021212 |
| VDISQDNALR                        | Q91VW3 | 0.00083056 | N-term +28.03 Da,                          | 2537.242432 | 2 | 579.8099976 | 579.8093052 |
| SVVADTPELQR                       | Q61792 | 0.00043725 | N-term +28.03 Da,                          | 2539.023682 | 2 | 621.8378906 | 621.8380629 |
| ASGGGVPTDEEQATGLER                | P19536 | 0          | N-term +28.03 Da, K +28.03 Da,             | 2539.264404 | 2 | 901.9400024 | 901.4317748 |
| SGPPPADLCHALR                     | O70251 | 0          | N-term +28.03 Da, C +57.02 Da,             | 2540.673584 | 3 | 473.5787048 | 473.5784847 |
| GWLKSNVNDGVAQSTR                  | P17751 | 0.0174453  | N-term +28.03 Da, K +28.03 Da,             | 2541.749756 | 3 | 596.6400146 | 596.6514781 |
| SVDMTCEGCAEAVSR                   | O08997 | 0          | N-term +28.03 Da, C +57.02 Da,             | 2542.480225 | 2 | 850.3599854 | 850.3578518 |
| TRTHINYGVKGDVAVIR                 | Q8BMS1 | 0.00995954 | N-term +28.03 Da, K +28.03 Da,             | 2542.555664 | 4 | 489.5357056 | 489.5350859 |
| GWLKSNVNDGVAQSTR                  | P17751 | 0.00176678 | N-term +28.03 Da, K +28.03 Da,             | 2544.800293 | 3 | 596.9899902 | 596.6514781 |
| EAAVGKDLFR                        | Q64471 | 0.00080743 | N-term +28.03 Da, K +28.03 Da,             | 2545.435303 | 3 | 387.8923645 | 387.8923977 |
| GVQVSPSGEKITHTGQVYDEKDYR          | P52503 | 0          | N-term +28.03 Da, K +28.03 Da,             | 2545.872314 | 4 | 695.1078491 | 695.1080735 |
| SKVSVISVEEPPQR                    | Q9DCW4 | 0.00108656 | N-term +28.03 Da, K +28.03 Da,             | 2547.549072 | 3 | 537.6420898 | 537.6419197 |
| LGPLVEQGR                         | P08226 | 0.00115163 | N-term +28.03 Da,                          | 2547.624512 | 2 | 498.7958069 | 498.7954686 |
| SEHGTEAGQISEPGTATGEAGPSCSSASDKLPR | Q61074 | 0          | N-term +28.03 Da, K +28.03 Da,             | 2548.775879 | 4 | 833.1400146 | 832.6403044 |
| ALNEDTQDELGDPR                    | P55302 | 0          | N-term +28.03 Da,                          | 2548.886719 | 2 | 800.8800049 | 800.8761036 |
| LSADQCSSPNTGKPAVNVR               | Q8CI51 | 0.00081301 | N-term +28.03 Da, K +28.03 Da,             | 2550.565186 | 3 | 751.0499878 | 751.0548354 |
| EDEDEDEKEEDEEESPGQAKDEL           | P14211 | 0.00114416 | N-term +28.03 Da, K +28.03 Da,             | 2551.168701 | 3 | 970.4000244 | 969.7351643 |
| DDEPPPLPR                         | O55022 | 0.00533511 | N-term +28.03 Da, K +28.03 Da,             | 2551.897705 | 2 | 532.2752686 | 532.2745666 |
| ASGGGVPTDEEQATGLER                | P19536 | 0.00832533 | N-term +28.03 Da,                          | 2551.973145 | 3 | 601.2903442 | 601.2902754 |
| GGVPTDEEQATGLER                   | P19536 | 0          | N-term +28.03 Da,                          | 2552.335693 | 2 | 793.8900146 | 793.8864711 |
| YGGGPGGGNFGGSPGYGGGR              | O88569 | 0          | N-term +28.03 Da,                          | 2552.96167  | 2 | 878.9000244 | 878.3953286 |
| VDPVNFK                           | P01942 | 0.00403633 | N-term +28.03 Da, K +28.03 Da,C +57.02 Da, | 2553.481689 | 2 | 437.7552795 | 437.7552805 |
| HGNPVDICIAKPR                     | P32261 | 0          | N-term +28.03 Da, K +28.03 Da,             | 2554.584229 | 3 | 550.6300049 | 549.9593656 |
| EDEDEDEKEEDEEESPGQAKDEL           | P14211 | 0          | N-term +28.03 Da, K +28.03 Da,             | 2554.893066 | 3 | 969.7399902 | 969.7351643 |
| SGGGVPTDEEQATGLER                 | P19536 | 0          | N-term +28.03 Da,                          | 2555.356201 | 2 | 865.9130249 | 865.9132177 |
| YGGGPGGGNFGGSPGYGGGR              | O88569 | 0          | N-term +28.03 Da,                          | 2555.546143 | 2 | 878.3900146 | 878.3953286 |
| EGDNKMVTTFKGIK                    | P12710 | 0          | N-term +28.03 Da, K +28.03 Da,             | 2556.88501  | 4 | 420.7399902 | 420.7404732 |
| SQGAYYIPGQGR                      | Q6NZJ6 | 0.00082645 | N-term +28.03 Da, K +28.03 Da,C +57.02 Da, | 2558.61792  | 2 | 662.8352051 | 662.8358543 |
| ASMGMLEAR                         | P97821 | 0.01801536 | N-term +28.03 Da,                          | 2560.373779 | 2 | 497.2454529 | 497.2464398 |
| LTPPEIER                          | P20029 | 0.01250763 | N-term +28.03 Da, K +28.03 Da,             | 2560.544189 | 2 | 507.2799988 | 507.7769421 |
| GGGVPTDEEQATGLER                  | P19536 | 0          | N-term +28.03 Da,                          | 2562.174561 | 2 | 822.4000244 | 822.3972032 |
| AIAEELAPER                        | O35490 | 0.00346141 | N-term +28.03 Da,                          | 2565.156982 | 2 | 563.809082  | 563.8087737 |
| TVVAVGSGGKGSGEIEPVSVK             | Q64433 | 0          | N-term +28.03 Da, K +28.03 Da,             | 2566.73291  | 4 | 550.0800171 | 550.0755128 |
| VAIDVDGCPR                        | Q3UVU3 | 0.00347222 | N-term +28.03 Da, C +57.02 Da,             | 2568.990967 | 2 | 565.289978  | 565.287151  |
| EKGIDPTKVVR                       | P63038 | 0.04759358 | N-term +28.03 Da, K +28.03 Da,             | 2569.150146 | 4 | 360.730011  | 360.4802531 |

|                                   |        |            |                                             |             |   |             |             |
|-----------------------------------|--------|------------|---------------------------------------------|-------------|---|-------------|-------------|
| ASGGGVPTDEEQATGLER                | P19536 | 0          | N-term +28.03 Da,                           | 2569.710205 | 2 | 901.4310303 | 901.4317748 |
| TAANPKESSYACYDEER                 | O89017 | 0          | N-term +28.03 Da, C +57.02 Da,              | 2570.39917  | 3 | 737.6599731 | 737.3284018 |
| SVVADTPELQR                       | Q61792 | 0.00043048 | N-term +28.03 Da,                           | 2571.074463 | 2 | 622.3400269 | 621.8380629 |
| SGPPPADLCHALR                     | O70251 | 0          | N-term +28.03 Da, C +57.02 Da,              | 2571.572266 | 3 | 473.578186  | 473.5784847 |
| EKGIIDPTKVVR                      | P63038 | 0.01334547 | N-term +28.03 Da, K +28.03 Da,              | 2572.077881 | 3 | 480.3042908 | 480.3045787 |
| AVNQENEHLMEDYER                   | P57780 | 0          | N-term +28.03 Da,                           | 2574.947266 | 3 | 635.6203003 | 635.619627  |
| SGMSASDELDDSQVR                   | Q9D1C8 | 0          | N-term +28.03 Da,                           | 2576.718018 | 2 | 813.3699951 | 812.8595964 |
| SQQSASGAPVLLR                     | Q9DCM0 | 0          | N-term +28.03 Da, K +28.03 Da,              | 2576.796387 | 2 | 671.3776855 | 671.3778865 |
| KEKESLQQLAEVTR                    | O08795 | 0          | N-term +28.03 Da, K +28.03 Da,              | 2579.163574 | 3 | 581.6699829 | 581.6718792 |
| SEHGTEAGQISEPGTATGEAGPSCSSASDKLPR | Q61074 | 0          | N-term +28.03 Da, K +28.03 Da,              | 2580.016113 | 4 | 833.1400146 | 832.6403044 |
| AIAEELAPER                        | O35490 | 0.01696934 | N-term +28.03 Da,                           | 2583.912598 | 2 | 563.2999878 | 563.8087737 |
| MGESDDSIILR                       | Q9CQR2 | 0          | N-term +28.03 Da,                           | 2585.427979 | 2 | 575.7738037 | 575.774074  |
| ASQGAYYIPGQGR                     | Q6NZJ6 | 0.00044346 | N-term +28.03 Da,                           | 2586.894287 | 2 | 698.3599854 | 698.3544114 |
| EEVDEMIR                          | P62204 | 0.01220629 | N-term +28.03 Da,                           | 2590.845459 | 2 | 524.75      | 524.7526099 |
| TLGSTVSQLQER                      | Q00623 | 0.00113679 | N-term +28.03 Da,                           | 2593.424805 | 2 | 673.8699951 | 673.867352  |
| VEFMDDTSR                         | P62858 | 0          | N-term +28.03 Da,                           | 2595.373047 | 2 | 564.25      | 564.2555169 |
| SILPTAPR                          | Q8BGD9 | 0.00807754 | N-term +28.03 Da, K +28.03 Da,              | 2598.745605 | 2 | 441.7735291 | 441.7740045 |
| TDTEKGEFLSEGQVVR                  | E9PV24 | 0          | N-term +28.03 Da, K +28.03 Da,              | 2599.501953 | 3 | 618.6400146 | 618.3022924 |
| TIQEDYLR                          | Q3THE2 | 0.01693908 | N-term +28.03 Da,                           | 2599.733398 | 2 | 533.7800293 | 533.2823916 |
| ASGGGVPTDEEQATGLER                | P19536 | 0          | N-term +28.03 Da,                           | 2600.119385 | 2 | 901.4299927 | 901.4317748 |
| DNPSLDETAYER                      | O35943 | 0.00533867 | N-term +28.03 Da,                           | 2600.462158 | 2 | 762.8400269 | 762.844272  |
| TIQEDYLR                          | Q3THE2 | 0.01801004 | N-term +28.03 Da,                           | 2600.691162 | 2 | 533.281311  | 533.2823916 |
| EKLSILSEER                        | P16546 | 0.00591716 | N-term +28.03 Da, K +28.03 Da,              | 2600.878906 | 3 | 420.5799866 | 420.5783678 |
| TSKVSIVSEPPQR                     | Q9DCW4 | 0.00108186 | N-term +28.03 Da, K +28.03 Da,              | 2601.136719 | 3 | 571.3200073 | 571.3244795 |
| VKCDMEVSCPEGYTCCR                 | P28798 | 0          | N-term +28.03 Da, C +57.02 Da,              | 2602.590332 | 3 | 736.9699707 | 736.3067925 |
| TSLEVENQNLN                       | P57776 | 0.02955116 | N-term +28.03 Da,                           | 2602.673828 | 2 | 665.8508911 | 665.8517019 |
| NVVFSEDEMCR                       | Q8C196 | 0          | N-term +28.03 Da, K +28.03 Da,              | 2603.03833  | 3 | 470.5700073 | 470.5746291 |
| TDTEKGEFLSEGQVVR                  | E9PV24 | 0          | N-term +28.03 Da, K +28.03 Da,              | 2604.259033 | 3 | 618.2999878 | 618.3022924 |
| VLSGEDKSNIAAWGK                   | P01942 | 0          | N-term +28.03 Da, K +28.03 Da,              | 2605.687012 | 4 | 454.519989  | 454.5148248 |
| SSTSAVPQITHTYVHPR                 | Q921G7 | 0          | N-term +28.03 Da, K +28.03 Da,              | 2607.135986 | 4 | 503.519989  | 503.2655386 |
| SGPPPADLCHALR                     | O70251 | 0          | N-term +28.03 Da, C +57.02 Da,              | 2607.395508 | 3 | 473.5799866 | 473.5784847 |
| SQQSASGAPVLLR                     | Q9DCM0 | 0.00281988 | N-term +28.03 Da, K +28.03 Da,              | 2608.244385 | 2 | 671.3800049 | 671.3778865 |
| VKCDMEVSCPEGYTCCR                 | P28798 | 0          | N-term +28.03 Da, C +57.02 Da,              | 2608.969971 | 2 | 1104.459961 | 1103.956551 |
| SAATLASLGGTSSR                    | Q3UZ39 | 0.02928054 | N-term +28.03 Da, K +28.03 Da,              | 2609.059814 | 2 | 653.8499756 | 653.8517019 |
| LADAVAVTMGPKGR                    | P63038 | 0          | N-term +28.03 Da, K +28.03 Da,              | 2609.199463 | 3 | 481.6099854 | 481.2780352 |
| VKCDMEVSCPEGYTCCR                 | P28798 | 0          | N-term +28.03 Da, K +28.03 Da, C +57.02 Da, | 2610.76416  | 2 | 1103.949951 | 1103.956551 |
| TDPEVIR                           | Q3THE2 | 0.01610979 | N-term +28.03 Da, K +28.03 Da,              | 2612.147461 | 2 | 486.75      | 486.753467  |
| SEIAVLQSR                         | Q91YQ5 | 0.01052632 | N-term +28.03 Da,                           | 2612.25     | 2 | 515.7999878 | 515.7982087 |
| LADAVAVTMGPKGR                    | P63038 | 0.03026937 | N-term +28.03 Da, K +28.03 Da,              | 2613.707764 | 3 | 481.2781067 | 481.2780352 |
| GQPADKAAGGAGAQQVGGSISSGSSASSVTVTR | P48678 | 0          | N-term +28.03 Da, K +28.03 Da,              | 2613.829834 | 3 | 959.1599731 | 958.8232459 |

|                                     |        |            |                                             |             |   |             |             |
|-------------------------------------|--------|------------|---------------------------------------------|-------------|---|-------------|-------------|
| FLQEEAIDR                           | O70493 | 0.01248477 | N-term +28.03 Da, K +28.03 Da,              | 2615.443848 | 2 | 574.7999878 | 574.8009487 |
| GYGGGPGGGNFGGSPGYGGGR               | O88569 | 0          | N-term +28.03 Da, K +28.03 Da,              | 2615.538086 | 2 | 907.4099731 | 906.9060606 |
| VAGQDGGQIDADELQR                    | Q6P069 | 0          | N-term +28.03 Da,                           | 2616.387207 | 2 | 821.9099731 | 821.9051952 |
| YSQFQESDDADEDYGR                    | Q80XU3 | 0          | N-term +28.03 Da,                           | 2617.804443 | 2 | 976.8900146 | 976.8926802 |
| SLSGMGNPGNISSR                      | Q921H8 | 0          | N-term +28.03 Da,                           | 2618.123291 | 2 | 703.8499756 | 702.8486363 |
| SLSGMGNPGNISSR                      | Q921H8 | 0          | N-term +28.03 Da,                           | 2620.09082  | 2 | 702.3599854 | 702.8486363 |
| GQPADKAAGGAGAQVGGSSISSGSSASSVTVTR   | P48678 | 0          | N-term +28.03 Da, K +28.03 Da,              | 2620.220947 | 3 | 958.8200073 | 958.8232459 |
| LAQEDPDYGLR                         | P24270 | 0          | N-term +28.03 Da,                           | 2623.797852 | 2 | 652.8260498 | 652.8276953 |
| YGQSETGISSATLR                      | Q91VA0 | 0.02979671 | N-term +28.03 Da,                           | 2627.220703 | 2 | 749.3699951 | 749.3808241 |
| TMLGQSTEIR                          | P08226 | 0.02050838 | N-term +28.03 Da,                           | 2627.435059 | 2 | 646.8307495 | 646.8293808 |
| ASGGGVPTDEEQATGLER                  | P19536 | 0          | N-term +28.03 Da,                           | 2630.508301 | 2 | 901.9400024 | 901.4317748 |
| KGEKFVMQEEFSR                       | P27773 | 0.00083229 | N-term +28.03 Da, K +28.03 Da,              | 2630.583984 | 3 | 566.9699707 | 566.9676383 |
| ANPIGNGGAPDITAR                     | Q8C196 | 0.03482314 | N-term +28.03 Da,                           | 2632.111816 | 2 | 777.3999634 | 776.9075401 |
| SANCCEDTQASMQVHQCIER                | Q9CR98 | 0.00046211 | N-term +28.03 Da, C +57.02 Da,              | 2633.431396 | 3 | 860.6900024 | 860.6946561 |
| VKCDMEVSCPEGYTCCR                   | P28798 | 0          | N-term +28.03 Da, K +28.03 Da, C +57.02 Da, | 2634.029785 | 3 | 736.6400146 | 736.3067925 |
| TDTEDKGEFLSEGGGVR                   | E9PV24 | 0          | N-term +28.03 Da, K +28.03 Da,              | 2635.515381 | 3 | 618.6400146 | 618.3022924 |
| QKVAPLGAELQESAR                     | Q00623 | 0.00043215 | N-term +28.03 Da, K +28.03 Da,              | 2636.025635 | 3 | 551.9799805 | 551.6491858 |
| LEVAEDSGHPWR                        | Q6P6J9 | 0          | N-term +28.03 Da, K +28.03 Da,              | 2637.452393 | 3 | 475.2376404 | 475.2370048 |
| SASQGAYYIPGQGR                      | Q6NZJ6 | 0          | N-term +28.03 Da,                           | 2638.968506 | 2 | 741.8696899 | 741.870426  |
| LEVAEDSGHPWR                        | Q6P6J9 | 0.0010981  | N-term +28.03 Da,                           | 2639.181885 | 2 | 712.3499756 | 712.3518689 |
| GYGGGPGGGNFGGSPGYGGGR               | O88569 | 0          | N-term +28.03 Da,                           | 2646.853516 | 2 | 907.4099731 | 906.9060606 |
| DGKLVSESSDVVSK                      | P11679 | 0          | N-term +28.03 Da, K +28.03 Da,              | 2648.328613 | 2 | 767.4199829 | 767.4221578 |
| IFLQDIKKPDR                         | P09528 | 0.00997195 | N-term +28.03 Da, K +28.03 Da,              | 2649.536621 | 4 | 365.230011  | 364.9776119 |
| ASVSTVLTSKYR                        | P01942 | 0          | N-term +28.03 Da, K +28.03 Da,              | 2649.612061 | 3 | 456.9400024 | 456.6012839 |
| DDDEPPPLPR                          | O55022 | 0.00078524 | N-term +28.03 Da,                           | 2649.866211 | 2 | 589.789978  | 589.7880387 |
| RIQEYKQLEKMR                        | Q9DCX2 | 0.00142704 | N-term +28.03 Da, K +28.03 Da,              | 2651.752686 | 3 | 613.0100098 | 612.3451088 |
| ELEDATETADAMNR                      | Q8VDD5 | 0          | N-term +28.03 Da,                           | 2652.342041 | 2 | 797.3551636 | 797.3566894 |
| GDVGAAGESPLDDTAAR                   | Q8BH60 | 0          | N-term +28.03 Da,                           | 2655.384766 | 2 | 815.3900146 | 815.3893781 |
| TAKGEKFVMQEEFSR                     | P27773 | 0.00045188 | N-term +28.03 Da, K +28.03 Da,              | 2656.532715 | 3 | 624.3300171 | 624.3292361 |
| SAGSAAAGPVEAAIR                     | Q9D8S9 | 0          | N-term +28.03 Da,                           | 2656.904785 | 2 | 678.3699951 | 678.367519  |
| GTAVTSAKVAVNGVHLYQR                 | Q8R164 | 0.00043478 | N-term +28.03 Da, K +28.03 Da,              | 2658.452393 | 3 | 722.7299805 | 722.0710364 |
| TQAIIDAAQEAR                        | O08795 | 0.00044053 | N-term +28.03 Da,                           | 2658.747559 | 2 | 658.3599854 | 657.8542444 |
| TMLGQSTEIR                          | P08226 | 0.00884956 | N-term +28.03 Da,                           | 2662.97583  | 2 | 647.3200073 | 646.8293808 |
| ALQKLEEAKEKADESER                   | P21107 | 0.00435511 | N-term +28.03 Da, K +28.03 Da,              | 2664.854248 | 3 | 668.0200195 | 667.688147  |
| MRGQVGDLSPPQQEALAR                  | Q8R0F9 | 0          | N-term +28.03 Da,                           | 2666.112793 | 3 | 671.6799927 | 671.3495822 |
| TCGQPADKAAGGAGAQVGGSSISSGSSASSVTVTR | P48678 | 0.00373768 | N-term +28.03 Da, K +28.03 Da,              | 2671.657959 | 3 | 1046.189941 | 1045.849355 |
| TCGQPADKAAGGAGAQVGGSSISSGSSASSVTVTR | P48678 | 0          | N-term +28.03 Da, K +28.03 Da,              | 2675.676514 | 3 | 1046.52002  | 1045.849355 |
| LGPVSDICKN                          | Q61207 | 0.00109489 | N-term +28.03 Da, K +28.03 Da,              | 2676.910156 | 2 | 608.3300171 | 608.3237337 |
| EVKCDMEVSCPEGYTCCR                  | P28798 | 0          | N-term +28.03 Da, C +57.02 Da,              | 2679.879639 | 3 | 779.3225708 | 779.3209906 |
| AANDFNPDAKALR                       | P14824 | 0          | N-term +28.03 Da, K +28.03 Da,              | 2680.599121 | 3 | 548.9484863 | 548.949524  |

|                          |        |            |                                |             |   |             |             |
|--------------------------|--------|------------|--------------------------------|-------------|---|-------------|-------------|
| MTKDMPLPGSYPR            | Q9D6J5 | 0          | N-term +28.03 Da, K +28.03 Da, | 2686.785645 | 3 | 484.584137  | 484.5843594 |
| TAKGEKFMVQEEFSR          | P27773 | 0.02853945 | N-term +28.03 Da, K +28.03 Da, | 2687.272949 | 3 | 624.6699829 | 624.3292361 |
| SGGTTMYPGIADR            | P60710 | 0.0004531  | N-term +28.03 Da,              | 2687.939697 | 2 | 677.3200073 | 677.3270052 |
| ILGSASPEEEQKPIILDRPTR    | Q6NXN1 | 0.00114286 | N-term +28.03 Da, K +28.03 Da, | 2688.98999  | 4 | 606.0800171 | 606.0800556 |
| PTVEELYR                 | O35841 | 0.00561798 | N-term +28.03 Da, K +28.03 Da, | 2690.830078 | 2 | 517.77948   | 517.7794846 |
| KIQGGSVVEMQGDDEMTR       | O88844 | 0          | N-term +28.03 Da, K +28.03 Da, | 2691.550293 | 3 | 641.6599731 | 640.988774  |
| KIQGGSVVEMQGDDEMTR       | O88844 | 0          | N-term +28.03 Da, K +28.03 Da, | 2693.017334 | 3 | 641.3300171 | 640.988774  |
| ANPIIGNGGAPDPTAR         | Q8C196 | 0.01329305 | N-term +28.03 Da,              | 2694.130859 | 2 | 777.4000244 | 776.9075401 |
| DAGMQLQGYR               | P05202 | 0          | N-term +28.03 Da,              | 2695.362549 | 2 | 583.7855835 | 583.7847755 |
| YVAEKISGQKVNEAACDIAR     | O35490 | 0          | N-term +28.03 Da, C +57.02 Da, | 2699.267334 | 4 | 577.3104858 | 577.3097835 |
| YVAEKISGQKVNEAACDIAR     | O35490 | 0          | N-term +28.03 Da, C +57.02 Da, | 2699.523193 | 3 | 769.75      | 769.4106191 |
| GTIQEDYLR                | Q3THE2 | 0.00564972 | N-term +28.03 Da,              | 2701.77417  | 2 | 562.289978  | 561.7931237 |
| YVAEKISGQKVNEAACDIAR     | O35490 | 0          | N-term +28.03 Da, C +57.02 Da, | 2703.155518 | 3 | 769.4099731 | 769.4106191 |
| KASAEALALGENNEVLKSGR     | P05202 | 0          | N-term +28.03 Da, K +28.03 Da, | 2704.376465 | 4 | 518.2948608 | 518.2942962 |
| SGPGLHADLLR              | Q8BWF0 | 0          | N-term +28.03 Da,              | 2704.741211 | 3 | 407.5599976 | 407.5630517 |
| ASGGGVPTDEEQATGLER       | P19536 | 0.00996264 | N-term +28.03 Da, K +28.03 Da, | 2705.729004 | 2 | 901.9299927 | 901.4317748 |
| FSDIYKIR                 | P63028 | 0.0138596  | N-term +28.03 Da, K +28.03 Da, | 2706.231689 | 3 | 366.5499878 | 366.5499717 |
| TAVSEKDNQEGTFVKWR        | Q8R016 | 0          | N-term +28.03 Da, K +28.03 Da, | 2706.452881 | 4 | 520.5300293 | 520.5271926 |
| TAHIVLEDGTMKMGY          | Q8C196 | 0          | N-term +28.03 Da, K +28.03 Da, | 2707.624268 | 3 | 582.9899902 | 582.9868101 |
| LGPVSDICKN               | Q61207 | 0.01742984 | N-term +28.03 Da, K +28.03 Da, | 2708.946289 | 2 | 608.3244019 | 608.3237337 |
| KASAEALALGENNEVLKSGR     | P05202 | 0          | N-term +28.03 Da, K +28.03 Da, | 2709.378418 | 3 | 690.7199707 | 690.7233027 |
| TAHIVLEDGTMKMGY          | Q8C196 | 0.00115252 | N-term +28.03 Da, K +28.03 Da, | 2709.929443 | 2 | 874.9799805 | 873.9765769 |
| MGGPYGGGNYPGGSGGGSGGYGGR | O88569 | 0          | N-term +28.03 Da, K +28.03 Da, | 2710.102295 | 2 | 1052.451172 | 1052.450507 |
| EVKCDMEVSCPEGYTCR        | P28798 | 0          | N-term +28.03 Da, C +57.02 Da, | 2710.824219 | 3 | 779.6500244 | 779.3209906 |
| TLVDKFNQGMANTAR          | Q9CYA0 | 0.00045746 | N-term +28.03 Da, K +28.03 Da, | 2711.420166 | 3 | 574.3099976 | 574.6382923 |
| LAQEDTEQSPDALASEDASR     | Q9CQU5 | 0          | N-term +28.03 Da,              | 2713.958496 | 2 | 1081.000732 | 1080.998209 |
| VMLGETNPADSKPGTIR        | P15532 | 0          | N-term +28.03 Da, K +28.03 Da, | 2715.132813 | 3 | 614.6628418 | 614.6645074 |
| LYFHIGETEKR              | Q8R1V4 | 0.00115031 | N-term +28.03 Da, K +28.03 Da, | 2715.466064 | 4 | 362.953186  | 362.9528655 |
| SAEQVVQGMKEAQR           | Q9CQU0 | 0          | N-term +28.03 Da, K +28.03 Da, | 2717.97583  | 3 | 582.6400146 | 582.6332073 |
| QQMWISKQEYDESGPSIVHR     | P60710 | 0.04374831 | N-term +28.03 Da, K +28.03 Da, | 2728.379639 | 4 | 619.0700073 | 619.308778  |
| SPVERPSPDLEEGEASVQTER    | Q9R049 | 0.00892288 | N-term +28.03 Da, K +28.03 Da, | 2728.938721 | 3 | 781.0499878 | 780.7153138 |
| SLVLKFHTVR               | P02762 | 0          | N-term +28.03 Da, K +28.03 Da, | 2730.423828 | 3 | 419.269989  | 419.2676872 |
| ADGDVDAVLSR              | Q8R0Y6 | 0.00078339 | N-term +28.03 Da,              | 2730.692139 | 2 | 573.289978  | 573.2934882 |
| SLQQLAEER                | P16546 | 0.00080483 | N-term +28.03 Da,              | 2731.865479 | 2 | 551.2999878 | 551.2985732 |
| SLVLKFHTVR               | P02762 | 0          | N-term +28.03 Da, K +28.03 Da, | 2731.940918 | 4 | 314.7000122 | 314.7025845 |
| FVSDSSDSMDTGAGSIR        | O35143 | 0          | N-term +28.03 Da,              | 2732.612061 | 2 | 880.8900146 | 880.3938036 |
| WISKQEYDESGPSIVHR        | P60710 | 0          | N-term +28.03 Da, K +28.03 Da, | 2733.660156 | 3 | 696.3599854 | 696.3567313 |
| SPVERPSPDLEEGEASVQTER    | Q9R049 | 0          | N-term +28.03 Da, C +57.02 Da, | 2733.750732 | 3 | 781.3900146 | 780.7153138 |
| ADDDYDEPTDSLDR           | Q8K0E8 | 0          | N-term +28.03 Da, K +28.03 Da, | 2734.026367 | 2 | 863.8599854 | 863.3579416 |
| MRLHRGAPVNVSSDLTGR       | Q9DC28 | 0.00080386 | N-term +28.03 Da,              | 2735.264648 | 3 | 694.3599854 | 694.3726096 |

|                            |        |            |                                             |             |   |             |             |
|----------------------------|--------|------------|---------------------------------------------|-------------|---|-------------|-------------|
| SAWPGTLR                   | Q9JK92 | 0.01247338 | N-term +28.03 Da,                           | 2737.213135 | 2 | 458.2600098 | 458.255979  |
| FVSDSSDSMDTGAGSIR          | O35143 | 0          | N-term +28.03 Da,                           | 2737.95874  | 2 | 881.4000244 | 880.3938036 |
| SVYYNEATGGKYVPR            | P99024 | 0          | N-term +28.03 Da, K +28.03 Da,              | 2739.419189 | 3 | 587.2999878 | 587.3053077 |
| EVKCDMEVSCPEGYTCCR         | P28798 | 0          | N-term +28.03 Da, K +28.03 Da, C +57.02 Da, | 2740.09375  | 2 | 1168.97998  | 1168.477848 |
| EVKCDMEVSCPEGYTCCR         | P28798 | 0          | N-term +28.03 Da, C +57.02 Da,              | 2741.299805 | 3 | 779.3208008 | 779.3209906 |
| TSVATKKTEQGPPSSEYIFER      | P29758 | 0          | N-term +28.03 Da, K +28.03 Da,              | 2741.47876  | 3 | 814.4299927 | 813.763716  |
| LIEVTETICKR                | Q9DAU1 | 0.00894283 | N-term +28.03 Da, K +28.03 Da,              | 2741.705078 | 3 | 473.2744751 | 473.2742909 |
| AGAVAADSPGFVEDR            | Q8BUY5 | 0.00591133 | N-term +28.03 Da,                           | 2743.59082  | 2 | 745.3599854 | 745.3677165 |
| EFVAVTGTEEDR               | Q9CZ44 | 0.00080128 | N-term +28.03 Da,                           | 2743.679199 | 2 | 690.8312378 | 690.8357179 |
| HQDQSSVGGGLTAEDIEKAR       | Q60936 | 0          | N-term +28.03 Da, K +28.03 Da,              | 2743.77124  | 3 | 699.6917114 | 699.6905506 |
| TSVATKKTEQGPPSSEYIFER      | P29758 | 0.00045126 | N-term +28.03 Da, K +28.03 Da,              | 2745.089355 | 4 | 610.5747681 | 610.5746061 |
| SAGSAAAGPVEAAIR            | Q9D859 | 0.00046189 | N-term +28.03 Da,                           | 2746.300781 | 2 | 678.3678589 | 678.367519  |
| GELKVPTDKYYGAQTVR          | P97807 | 0          | N-term +28.03 Da, K +28.03 Da,              | 2746.376221 | 4 | 503.0299988 | 503.0321106 |
| GVTVKDVNQEFVR              | Q9CZX8 | 0          | N-term +28.03 Da, K +28.03 Da,              | 2748.116943 | 3 | 558.9772949 | 558.9773024 |
| SFQATGDSEWR                | O35658 | 0.01923077 | N-term +28.03 Da,                           | 2748.409668 | 2 | 656.3013306 | 656.3018447 |
| AEACFVNCVER                | Q9WVA2 | 0          | N-term +28.03 Da, C +57.02 Da,              | 2750.20166  | 2 | 691.8099976 | 691.8132076 |
| LQEYFDGNLKR                | P27773 | 0.00562169 | N-term +28.03 Da, K +28.03 Da,              | 2750.377441 | 3 | 480.6000061 | 480.2611502 |
| EDQKIGIEIKR                | P63038 | 0.01717501 | N-term +28.03 Da, K +28.03 Da,              | 2751.184814 | 4 | 382.2388916 | 382.2382604 |
| YGGYKEPAAPVSIQR            | Q61792 | 0          | N-term +28.03 Da, K +28.03 Da,              | 2753.019287 | 3 | 564.6419067 | 564.6420311 |
| IVLAESDPGFKR               | Q9D281 | 0          | N-term +28.03 Da, K +28.03 Da,              | 2753.094727 | 3 | 463.2696838 | 463.2696456 |
| KLDADKYENDPELEKIR          | Q99JT9 | 0.00079051 | N-term +28.03 Da, K +28.03 Da,              | 2753.174316 | 4 | 547.7999878 | 547.8019542 |
| ILTEKEQIVPKPEEEVAQK        | Q9CPR4 | 0.00833333 | N-term +28.03 Da, K +28.03 Da,              | 2754.351563 | 4 | 580.8411255 | 580.8398081 |
| SLILGQDNAADQSR             | Q99KI3 | 0          | N-term +28.03 Da,                           | 2754.62207  | 2 | 758.3900146 | 758.3917231 |
| GLVGEIIKR                  | P15532 | 0.01195586 | N-term +28.03 Da, K +28.03 Da,              | 2754.697754 | 3 | 347.5655518 | 347.565733  |
| YGGYKEPAAPVSIQR            | Q61792 | 0.03756124 | N-term +28.03 Da, K +28.03 Da,              | 2758.103271 | 2 | 846.460022  | 846.4594083 |
| SASVSVISIR                 | P61804 | 0.00114943 | N-term +28.03 Da,                           | 2758.674072 | 2 | 516.8099976 | 516.8060337 |
| GLVGEIIKR                  | P15532 | 0.00143988 | N-term +28.03 Da, K +28.03 Da,              | 2760.219971 | 2 | 520.8453369 | 520.8449613 |
| SDLLMPR                    | P00329 | 0.02512705 | N-term +28.03 Da,                           | 2760.739746 | 2 | 430.2393494 | 430.2389403 |
| RVISLSGEHSIIGR             | P08228 | 0.00373008 | N-term +28.03 Da,                           | 2764.164063 | 3 | 517.9703369 | 517.9703703 |
| AIQIGHGNVIVR               | Q9QY24 | 0.0007874  | N-term +28.03 Da,                           | 2764.897705 | 3 | 435.6000061 | 435.5980962 |
| ADDDYDEPTDSLDR             | Q8K0E8 | 0          | N-term +28.03 Da,                           | 2765.283691 | 2 | 863.3599854 | 863.3579416 |
| SVVCPDAKTQCPDDSTCCCLPTGK   | P28798 | 0          | N-term +28.03 Da, K +28.03 Da,              | 2765.968262 | 3 | 937.0900269 | 937.0885607 |
| PGHLQEGFGCVVTNR            | Q9CY58 | 0.00083682 | N-term +28.03 Da, C +57.02 Da,              | 2766.933105 | 2 | 850.4299927 | 849.9226671 |
| SVVCPDAKTQCPDDSTCCCLPTGK   | P28798 | 0          | N-term +28.03 Da, K +28.03 Da,              | 2767.476807 | 3 | 937.7600098 | 937.0885607 |
| DDTLHETEDVKEAIR            | Q9D855 | 0.00109131 | N-term +28.03 Da, K +28.03 Da,              | 2767.55249  | 3 | 609.9799805 | 609.6425374 |
| GILNVS AVDKSTGKENKITINDKGR | P63017 | 0.00079872 | N-term +28.03 Da, K +28.03 Da,              | 2767.653564 | 4 | 725.6699829 | 725.421023  |
| ASGPGGLHADLLR              | Q8BWF0 | 0          | N-term +28.03 Da,                           | 2767.908447 | 3 | 431.2399902 | 431.2420898 |
| EVKCDMEVSCPEGYTCCR         | P28798 | 0          | N-term +28.03 Da, C +57.02 Da,              | 2770.345215 | 2 | 1168.97998  | 1168.477848 |
| PGHLQEGFGCVVTNR            | Q9CY58 | 0          | N-term +28.03 Da, C +57.02 Da,              | 2770.585693 | 3 | 566.9510498 | 566.9508702 |
| NSGYSQSQFTAPR              | Q60865 | 0          | N-term +28.03 Da, K +28.03 Da,              | 2770.835449 | 2 | 736.3400269 | 735.8522334 |

|                          |        |            |                                             |             |   |             |             |
|--------------------------|--------|------------|---------------------------------------------|-------------|---|-------------|-------------|
| LEVFAQVSHPR              | Q9WVLO | 0.00887762 | N-term +28.03 Da, C +57.02 Da,              | 2771.298096 | 3 | 413.8993225 | 413.8996637 |
| GTLPKQVKIVEGPR           | P38060 | 0.00347826 | N-term +28.03 Da, K +28.03 Da,              | 2772.209473 | 4 | 427.019989  | 427.0238223 |
| AVAGQDQGIDADELQR         | Q6P069 | 0          | N-term +28.03 Da, K +28.03 Da,              | 2772.56543  | 2 | 857.9299927 | 857.4237523 |
| SVAFDLATHR               | P16332 | 0.00078156 | N-term +28.03 Da,                           | 2772.666016 | 3 | 382.2090759 | 382.2084973 |
| DDTLHETEDVKCAIR          | Q9D855 | 0.00080515 | N-term +28.03 Da, K +28.03 Da,              | 2774.574463 | 2 | 913.960022  | 913.9601679 |
| AIQIGHGNVIVR             | Q9QY24 | 0.01384291 | N-term +28.03 Da,                           | 2777.431152 | 2 | 652.8900146 | 652.893506  |
| PGHLQEGFGCVVTR           | Q9CY58 | 0          | N-term +28.03 Da, C +57.02 Da,              | 2777.551514 | 2 | 849.9199829 | 849.9226671 |
| TEFTPTETDTYACR           | P01887 | 0.00142602 | N-term +28.03 Da, C +57.02 Da,              | 2778.177734 | 2 | 860.3800049 | 860.3801645 |
| KFAEDSAEAAVSPESR         | Q80WR5 | 0.00044843 | N-term +28.03 Da, K +28.03 Da,              | 2780.533691 | 2 | 924.9699707 | 924.9705355 |
| TKFLEEHPPGGEEVLR         | P56395 | 0.00561427 | N-term +28.03 Da, K +28.03 Da,              | 2781.553223 | 4 | 450.2399902 | 449.993991  |
| KVQEEDNVIGR              | P56657 | 0.00372376 | N-term +28.03 Da, K +28.03 Da,              | 2782.216553 | 2 | 728.9099731 | 728.4119267 |
| SEFLKAASNLR              | P27773 | 0.02057971 | N-term +28.03 Da, K +28.03 Da,              | 2784.642822 | 3 | 431.2509766 | 431.2504738 |
| GDVCYADVVR               | Q6PDM2 | 0          | N-term +28.03 Da, K +28.03 Da, C +57.02 Da, | 2786.574463 | 2 | 623.2821045 | 623.282066  |
| RKVVDYSQFQESDDADEDYGR    | Q80XU3 | 0          | N-term +28.03 Da, K +28.03 Da,              | 2787.223877 | 3 | 860.7299805 | 860.0612615 |
| AIQIGHGNVIVR             | Q9QY24 | 0.03474692 | N-term +28.03 Da,                           | 2792.135742 | 3 | 435.2600098 | 435.5980962 |
| SRVDPDLSSFDSAPSEPKSR     | Q9R182 | 0          | N-term +28.03 Da, K +28.03 Da,              | 2793.461914 | 4 | 559.5300293 | 559.0328397 |
| YEPQGGSGYDYSYAGGR        | P61979 | 0          | N-term +28.03 Da, K +28.03 Da,              | 2794.440918 | 2 | 927.9000244 | 927.9001102 |
| EATQAVLDKPKETLSSDASTR    | P50544 | 0          | N-term +28.03 Da, K +28.03 Da,              | 2794.991211 | 3 | 726.039978  | 725.7094997 |
| EPWNRAQHSLPR             | O70146 | 0.03       | N-term +28.03 Da,                           | 2795.415527 | 2 | 760.8900146 | 759.8998515 |
| EFTPTETDTYACR            | P01887 | 0          | N-term +28.03 Da, K +28.03 Da, C +57.02 Da, | 2796.67041  | 2 | 809.8599854 | 809.8563249 |
| LTEDEKQTMVDLHNQYR        | Q9ET66 | 0.00046062 | N-term +28.03 Da, K +28.03 Da,              | 2796.840332 | 4 | 545.0200195 | 544.7730338 |
| GLAADVGTLQR              | O35459 | 0.00082713 | N-term +28.03 Da,                           | 2798.857422 | 2 | 564.8223877 | 564.8222153 |
| ADEALDSGLVSR             | O35459 | 0.01555489 | N-term +28.03 Da,                           | 2799.042725 | 2 | 630.8200073 | 630.8251528 |
| EFTPTETDTYACR            | P01887 | 0          | N-term +28.03 Da, C +57.02 Da,              | 2799.143555 | 2 | 810.3599854 | 809.8563249 |
| GPADGYAAIAQADR           | Q6IRU5 | 0.04934649 | N-term +28.03 Da,                           | 2799.930908 | 2 | 702.3599854 | 702.3493264 |
| KETIMNQEKLAKLQAKVR       | Q64152 | 0          | N-term +28.03 Da, K +28.03 Da,              | 2800.124756 | 4 | 561.0800171 | 560.834431  |
| GTGVTPPPPLGTR            | Q99K01 | 0.00534045 | N-term +28.03 Da,                           | 2800.21875  | 2 | 689.8900146 | 689.888087  |
| NMGGPYGGGNYGPGGSGGGYGGGR | O88569 | 0          | N-term +28.03 Da,                           | 2800.678223 | 2 | 1109.469971 | 1109.471971 |
| DPDAANYKDISDVER          | Q9D819 | 0.03436899 | N-term +28.03 Da, K +28.03 Da,              | 2800.82373  | 2 | 882.9299927 | 882.4259608 |
| SNINDFSAGVANR            | P15105 | 0          | N-term +28.03 Da,                           | 2802.303955 | 2 | 696.8462524 | 696.8469509 |
| YEPQGGSGYDYSYAGGR        | P61979 | 0          | N-term +28.03 Da, K +28.03 Da,              | 2804.02002  | 2 | 928.9000244 | 927.9001102 |
| SYGGYKEPAAPVSIQR         | Q61792 | 0          | N-term +28.03 Da, K +28.03 Da,              | 2804.191895 | 3 | 593.6538696 | 593.6527074 |
| LAHTEFTPTETDTYACR        | P01887 | 0          | N-term +28.03 Da, C +57.02 Da,              | 2804.363037 | 3 | 680.9799805 | 680.9825654 |
| TAPSKLPSNSVYAGTVPSR      | Q8VCF0 | 0.00082001 | N-term +28.03 Da, K +28.03 Da,              | 2807.330078 | 3 | 663.3670654 | 663.3652266 |
| GQVGLDLPQQEALAR          | Q8R0F9 | 0          | N-term +28.03 Da,                           | 2809.207031 | 2 | 862.9500122 | 862.9499368 |
| NIPTSGAEIGGAFGGEKHTGGGR  | Q9DBF1 | 0          | N-term +28.03 Da, K +28.03 Da,              | 2809.775879 | 4 | 557.289978  | 557.2870026 |
| SLKEMEESIR               | O08795 | 0          | N-term +28.03 Da, K +28.03 Da,              | 2809.979004 | 3 | 426.5632324 | 426.5638414 |
| SDTQFPSLQSTAKHVESR       | Q4VAA2 | 0          | N-term +28.03 Da, K +28.03 Da,              | 2810.065918 | 4 | 519.2694702 | 519.2695498 |
| GTTVIKEVLQR              | Q8CAY6 | 0          | N-term +28.03 Da, K +28.03 Da,              | 2810.533691 | 3 | 433.9400024 | 433.9380072 |
| VVFDPTYDR                | P16015 | 0.039859   | N-term +28.03 Da,                           | 2811.478271 | 2 | 579.2774658 | 579.2773066 |

|                       |        |            |                                             |             |   |             |             |
|-----------------------|--------|------------|---------------------------------------------|-------------|---|-------------|-------------|
| TSEIAVLQSR            | Q91YQ5 | 0.00078989 | N-term +28.03 Da, K +28.03 Da,              | 2811.566406 | 2 | 566.3200073 | 566.3220483 |
| TVEVTDKPVDEALR        | Q9R257 | 0.00113293 | N-term +28.03 Da, K +28.03 Da,              | 2811.751709 | 3 | 543.6400146 | 543.3015634 |
| SMAEPKTVYVWDR         | P01887 | 0.00042717 | N-term +28.03 Da, K +28.03 Da,              | 2813.439697 | 3 | 513.9299927 | 513.5939121 |
| GEKLNGLTDPEDVIR       | Q3THE2 | 0.00108421 | N-term +28.03 Da, K +28.03 Da,              | 2814.0354   | 3 | 533.9453735 | 533.617663  |
| AWSMWRECLALR          | Q3UZY0 | 0.0261236  | N-term +28.03 Da, C +57.02 Da,              | 2818.803223 | 2 | 804.9099731 | 803.9026909 |
| MASGGGVPTDEEQATGLER   | P19536 | 0          | N-term +28.03 Da,                           | 2819.261719 | 2 | 966.9500122 | 966.9520173 |
| ASGGGVPTDEEQATGLER    | P19536 | 0          | N-term +28.03 Da,                           | 2821.024902 | 2 | 900.9199829 | 901.4317748 |
| MASGGGVPTDEEQATGLER   | P19536 | 0          | N-term +28.03 Da,                           | 2822.363525 | 2 | 967.9500122 | 966.9520173 |
| EILEESLR              | Q9WU78 | 0.02120344 | N-term +28.03 Da,                           | 2822.560791 | 2 | 509.2900085 | 508.7847671 |
| NEVHTMLGQSTEEIR       | P08226 | 0          | N-term +28.03 Da,                           | 2823.061279 | 2 | 887.4500122 | 886.4358052 |
| SDTQFPSLQSTAKHVESR    | Q4VAA2 | 0.00143575 | N-term +28.03 Da, K +28.03 Da,              | 2824.333252 | 3 | 692.0200195 | 692.023641  |
| NEVHTMLGQSTEEIR       | P08226 | 0          | N-term +28.03 Da,                           | 2825.456543 | 2 | 886.9299927 | 886.4358052 |
| MASGGGVPTDEEQATGLER   | P19536 | 0          | N-term +28.03 Da, K +28.03 Da,              | 2828.392578 | 3 | 644.9699707 | 644.970437  |
| YYPNSFSAPEQQR         | P24270 | 0          | N-term +28.03 Da,                           | 2829.108398 | 2 | 807.8800049 | 807.880991  |
| SQSTTSQYQWDVSR        | Q80WJ7 | 0          | N-term +28.03 Da,                           | 2829.747559 | 2 | 844.8800049 | 844.3815531 |
| ALEYGASCEDIAR         | O08749 | 0          | N-term +28.03 Da, K +28.03 Da, C +57.02 Da, | 2830.090576 | 2 | 741.8491211 | 741.8483023 |
| NPVDDICIAKPR          | P32261 | 0          | N-term +28.03 Da, K +28.03 Da,              | 2830.40918  | 3 | 485.6000061 | 485.2659068 |
| GFNKLGLMR             | Q9D855 | 0.0149925  | N-term +28.03 Da, K +28.03 Da,              | 2830.981934 | 3 | 364.5499878 | 364.5513179 |
| NEVHTMLGQSTEEIR       | P08226 | 0          | N-term +28.03 Da, C +57.02 Da,              | 2831.101563 | 2 | 886.4367676 | 886.4358052 |
| TEFTPTETDTYACR        | P01887 | 0          | N-term +28.03 Da, C +57.02 Da,              | 2831.735596 | 2 | 860.3800049 | 860.3801645 |
| GYISAAELR             | P62204 | 0.00373895 | N-term +28.03 Da,                           | 2831.974365 | 2 | 504.2796326 | 504.2796516 |
| EQEQLSCDEPILSNKSGDNR  | P70296 | 0          | N-term +28.03 Da, K +28.03 Da,              | 2833.666504 | 3 | 824.7299805 | 824.7272251 |
| GGVMTKLIPR            | P20029 | 0.00044366 | N-term +28.03 Da, K +28.03 Da,              | 2835.25708  | 3 | 376.5700073 | 376.5704897 |
| TEFTPTETDTYACR        | P01887 | 0          | N-term +28.03 Da, C +57.02 Da,              | 2835.539551 | 2 | 860.8800049 | 860.3801645 |
| EQEQLSCDEPILSNKSGDNR  | P70296 | 0          | N-term +28.03 Da, K +28.03 Da,              | 2835.642822 | 3 | 825.3900146 | 824.7272251 |
| TSSYGGYKEPAAPVSIQR    | Q61792 | 0          | N-term +28.03 Da, K +28.03 Da,              | 2838.258789 | 3 | 656.3499756 | 656.3459436 |
| KVFTGTLPLAEGR         | Q91Z53 | 0.00111483 | N-term +28.03 Da, K +28.03 Da,              | 2838.409668 | 3 | 476.2861938 | 476.2854069 |
| GPVPGYQQAPPQGVPR      | G3X972 | 0.04497711 | N-term +28.03 Da,                           | 2840.668701 | 3 | 559.2999878 | 559.3020087 |
| GAAELMQQKEATTEQQLR    | Q35490 | 0          | N-term +28.03 Da, K +28.03 Da,              | 2840.753174 | 3 | 697.0300293 | 696.6966479 |
| VTQPEVDTLGR           | Q63880 | 0          | N-term +28.03 Da,                           | 2840.843018 | 2 | 670.3599854 | 670.364445  |
| SDTQFPSLQSTAKHVESR    | Q4VAA2 | 0          | N-term +28.03 Da, K +28.03 Da,              | 2841.711182 | 4 | 519.269165  | 519.2695498 |
| SKLVPVGYGIK           | O70251 | 0.01139864 | N-term +28.03 Da, K +28.03 Da,              | 2841.884033 | 3 | 415.6047668 | 415.6040765 |
| GYGGGPGGGNFGGSPGYGGGR | O88569 | 0          | N-term +28.03 Da,                           | 2842.358398 | 2 | 907.9000244 | 906.9060606 |
| GEWHTIILASDKR         | B5X0G2 | 0          | N-term +28.03 Da, K +28.03 Da, C +57.02 Da, | 2842.716553 | 3 | 527.960022  | 527.9631043 |
| EQEQLSCDEPILSNKSGDNR  | P70296 | 0          | N-term +28.03 Da, K +28.03 Da,              | 2844.554199 | 2 | 1237.089966 | 1236.587199 |
| SMAEPKTVYVWDR         | P01887 | 0          | N-term +28.03 Da, K +28.03 Da,              | 2845.464355 | 3 | 513.593689  | 513.5939121 |
| AYEPQGGSGYDYSYAGGR    | P61979 | 0          | N-term +28.03 Da,                           | 2846.340088 | 2 | 963.9199829 | 963.4186673 |
| WGKVNSEVGGGEALGR      | P02088 | 0.047084   | N-term +28.03 Da, K +28.03 Da,              | 2847.53125  | 3 | 577.6300049 | 577.3004454 |
| AAYQVAALPR            | P52760 | 0.00889736 | N-term +28.03 Da,                           | 2847.702148 | 2 | 544.8099976 | 544.3165682 |
| THISRSQNQQYLVR        | O35066 | 0.00893142 | N-term +28.03 Da,                           | 2848.788574 | 3 | 586.65625   | 586.6517007 |

|                       |        |            |                                             |             |   |             |             |
|-----------------------|--------|------------|---------------------------------------------|-------------|---|-------------|-------------|
| EIAQDFKTDLR           | P02301 | 0          | N-term +28.03 Da, K +28.03 Da,              | 2849.521729 | 3 | 464.5886841 | 464.5891555 |
| YLLPDTKAYGDR          | P08113 | 0.00044267 | N-term +28.03 Da, K +28.03 Da,              | 2852.04248  | 3 | 489.9299927 | 489.9329222 |
| GPVPGYQQAPPQGVPR      | G3X972 | 0          | N-term +28.03 Da, K +28.03 Da,              | 2852.134033 | 2 | 838.4500122 | 838.4493748 |
| QVLTEAFR              | Q8BFY6 | 0.02126437 | N-term +28.03 Da, K +28.03 Da,              | 2852.32666  | 2 | 496.2799988 | 496.2821941 |
| MASGGGVPTDEEQATGLER   | P19536 | 0          | N-term +28.03 Da,                           | 2853.11084  | 2 | 967.9500122 | 966.9520173 |
| AYEPQGGSGYDYSYAGGR    | P61979 | 0          | N-term +28.03 Da,                           | 2853.662109 | 3 | 643.2800293 | 642.6148703 |
| NPVDDICIAKPR          | P32261 | 0          | N-term +28.03 Da, K +28.03 Da,              | 2854.294678 | 2 | 727.9000244 | 727.395222  |
| ENSLVLKFHTVR          | P02762 | 0          | N-term +28.03 Da, K +28.03 Da,              | 2854.828857 | 3 | 500.296875  | 500.2961946 |
| SDTQFPLSQSTAKHVESR    | Q4VAA2 | 0          | N-term +28.03 Da, K +28.03 Da,              | 2855.2146   | 3 | 692.3499756 | 692.023641  |
| WEAADLGNEER           | Q9R0P4 | 0.00079239 | N-term +28.03 Da,                           | 2855.824951 | 2 | 659.3070068 | 659.3071272 |
| AEKVAEKLEALSVR        | P34022 | 0.02378256 | N-term +28.03 Da, K +28.03 Da,              | 2857.644775 | 4 | 407.5       | 407.5001802 |
| DSQIEADFR             | Q04750 | 0.00592105 | N-term +28.03 Da,                           | 2858.498779 | 2 | 554.7700195 | 554.7671061 |
| NVYYNEAAGNKYVPR       | Q7TMM9 | 0.00078616 | N-term +28.03 Da, K +28.03 Da,              | 2859.174072 | 3 | 605.3099976 | 605.3125737 |
| VSDENDAKILNDVQDR      | Q8VDW0 | 0          | N-term +28.03 Da, K +28.03 Da,              | 2860.386963 | 3 | 629.6500244 | 629.6533252 |
| NPVDDICIAKPR          | P32261 | 0          | N-term +28.03 Da, K +28.03 Da,              | 2860.939209 | 3 | 485.2660828 | 485.2659068 |
| TFYTKVLNEEER          | P24270 | 0          | N-term +28.03 Da, K +28.03 Da, C +57.02 Da, | 2862.340088 | 3 | 528.9500122 | 528.9471203 |
| KLVILEGELKR           | Q6IRU2 | 0.00078401 | N-term +28.03 Da, K +28.03 Da,              | 2862.805664 | 3 | 461.6400146 | 461.3095524 |
| GYISAAELR             | P62204 | 0.04377195 | N-term +28.03 Da, K +28.03 Da,              | 2863.886719 | 2 | 504.2796021 | 504.2796516 |
| EVKCDMEVSCPEGYTCCR    | P28798 | 0.01193756 | N-term +28.03 Da, K +28.03 Da, C +57.02 Da, | 2864.262451 | 3 | 779.9799805 | 779.3209906 |
| AVTMDDFR              | Q01853 | 0.00344353 | N-term +28.03 Da,                           | 2864.429199 | 2 | 491.7364502 | 491.7367623 |
| TAEEMASDELKEMR        | P10711 | 0          | N-term +28.03 Da, K +28.03 Da,              | 2864.840332 | 3 | 565.9400024 | 565.9357872 |
| EQEQPLSCDEPILSNKSGDNR | P70296 | 0          | N-term +28.03 Da, K +28.03 Da,              | 2866.750488 | 3 | 825.0599976 | 824.7272251 |
| MDEIDAIGGR            | P62334 | 0.01194853 | N-term +28.03 Da,                           | 2867.028809 | 2 | 552.7713013 | 552.771334  |
| DAKGISQEQMQEFR        | P57780 | 0.00044643 | N-term +28.03 Da, K +28.03 Da,              | 2870.237305 | 3 | 575.289978  | 574.9541693 |
| DAKGISQEQMQEFR        | P57780 | 0.00043898 | N-term +28.03 Da, K +28.03 Da,              | 2870.434082 | 3 | 574.9500122 | 574.9541693 |
| AHGSVVKSEDYAFPTYADR   | P19783 | 0          | N-term +28.03 Da, K +28.03 Da,              | 2870.525391 | 3 | 723.6900024 | 723.6918913 |
| GKIETIEVMEDR          | Q8BG05 | 0.02077323 | N-term +28.03 Da, K +28.03 Da,              | 2870.727539 | 2 | 738.8900146 | 738.3923455 |
| REQWSNCPITIGQIR       | P10605 | 0.00043253 | N-term +28.03 Da, C +57.02 Da,              | 2874.825928 | 3 | 591.6342773 | 591.6335413 |
| PGVTVKDVENQEFVR       | Q9CZX8 | 0          | N-term +28.03 Da, K +28.03 Da,              | 2876.15625  | 3 | 591.3276978 | 591.3282238 |
| ASSGGQAEQLDALVKK      | Q80Y14 | 0.00082816 | N-term +28.03 Da, K +28.03 Da,              | 2876.259277 | 3 | 562.6500244 | 562.6525961 |
| AHGSVVKSEDYAFPTYADR   | P19783 | 0          | N-term +28.03 Da, K +28.03 Da,              | 2877.204834 | 2 | 1085.030029 | 1085.034199 |
| ATVEVTDKPVDEALR       | Q9R257 | 0          | N-term +28.03 Da, K +28.03 Da,              | 2877.605469 | 3 | 566.9799805 | 566.9806014 |
| DITADDEPLGR           | P17742 | 0.00083612 | N-term +28.03 Da, K +28.03 Da,              | 2879.348145 | 2 | 615.2999878 | 615.3040532 |
| THISRSQNQQYLVR        | O35066 | 0.01305404 | N-term +28.03 Da,                           | 2879.831299 | 3 | 586.9848633 | 586.6517007 |
| TDEEVDELYR            | Q3THE2 | 0.00108932 | N-term +28.03 Da,                           | 2880.212158 | 2 | 648.8001099 | 648.8013438 |
| GVSLSPALGR            | Q8K0R6 | 0.04859813 | N-term +28.03 Da,                           | 2880.3125   | 2 | 492.7950745 | 492.7954686 |
| SMLASAPPQEQKQMLGER    | P29341 | 0.00080451 | N-term +28.03 Da, K +28.03 Da,              | 2880.672363 | 3 | 686.6900024 | 686.3554568 |
| AVDEILTAR             | Q3U1F9 | 0.02404526 | N-term +28.03 Da,                           | 2881.879639 | 2 | 508.2946167 | 508.2927591 |
| SYDLGIENR             | O88844 | 0.00652316 | N-term +28.03 Da,                           | 2883.279297 | 2 | 547.7781982 | 547.7774736 |
| NVYYNEATGGKYVPR       | P68372 | 0.03500137 | N-term +28.03 Da, K +28.03 Da,              | 2883.818115 | 2 | 893.960022  | 893.9597729 |

|                      |        |            |                                             |             |   |             |             |
|----------------------|--------|------------|---------------------------------------------|-------------|---|-------------|-------------|
| GEFMTHKCLKQTENAFSPSR | E9QA16 | 0          | N-term +28.03 Da, K +28.03 Da,              | 2883.918213 | 3 | 764.730835  | 764.7316924 |
| SNVDSSAQPSVAQLAGR    | Q3UZA1 | 0          | N-term +28.03 Da,                           | 2884.755127 | 2 | 857.4500122 | 857.9395693 |
| NPVDDICIAKPR         | P32261 | 0          | N-term +28.03 Da, K +28.03 Da,              | 2886.09082  | 2 | 727.3953857 | 727.395222  |
| NVYYNEATGGKYVPR      | P68372 | 0          | N-term +28.03 Da, K +28.03 Da,              | 2886.828857 | 3 | 596.6400146 | 596.3089407 |
| SQIYADGPGALR         | Q62167 | 0.02148382 | N-term +28.03 Da,                           | 2888.552246 | 2 | 703.3599854 | 702.859527  |
| SPEPPAKTSTPEDFIR     | P26039 | 0.03486138 | N-term +28.03 Da, K +28.03 Da,              | 2890.795166 | 3 | 610.3200073 | 609.9877561 |
| NPVDDICIAKPR         | P32261 | 0          | N-term +28.03 Da, K +28.03 Da,              | 2891.32373  | 3 | 485.2656555 | 485.2659068 |
| VANPNSAIFGGAR        | Q9WUK2 | 0          | N-term +28.03 Da,                           | 2891.666504 | 2 | 651.3499756 | 651.3516714 |
| EKSEKFAFAQEVNR       | P08113 | 0          | N-term +28.03 Da, K +28.03 Da,              | 2893.387207 | 3 | 589.3099976 | 589.6527074 |
| AKNKDQGTIEDYVEGLR    | Q60605 | 0.00043365 | N-term +28.03 Da, K +28.03 Da,              | 2896.097412 | 3 | 690.6900024 | 690.6882583 |
| TVEVPEDEVVR          | Q80WJ7 | 0.00042373 | N-term +28.03 Da,                           | 2897.704346 | 2 | 650.3400269 | 650.3431784 |
| LVEPGSPAESGGLLAGDR   | P70441 | 0.00078864 | N-term +28.03 Da, K +28.03 Da,              | 2898.083252 | 3 | 618.3499756 | 618.0106722 |
| EVKCDMEVSCPEGYTCCR   | P28798 | 0          | N-term +28.03 Da, K +28.03 Da, C +57.02 Da, | 2898.285645 | 3 | 779.3200073 | 779.3209906 |
| TEESDLAQYGVGR        | P09103 | 0          | N-term +28.03 Da, K +28.03 Da,              | 2900.865723 | 2 | 762.8699951 | 762.3704565 |
| TEESDLAQYGVGR        | P09103 | 0          | N-term +28.03 Da,                           | 2902.27124  | 2 | 762.3690186 | 762.3704565 |
| TITTKELGTVMR         | P62204 | 0          | N-term +28.03 Da, K +28.03 Da,              | 2902.372314 | 3 | 469.269989  | 469.2742909 |
| GTITTKELGTVMR        | P62204 | 0          | N-term +28.03 Da, K +28.03 Da,              | 2903.968262 | 2 | 732.4199829 | 731.9185301 |
| TITTKELGTVMR         | P62204 | 0.005923   | N-term +28.03 Da, K +28.03 Da,              | 2904.062988 | 2 | 703.9099731 | 703.4077981 |
| ASHVPTLQVLR          | Q9D3D9 | 0.00622747 | N-term +28.03 Da,                           | 2907.268799 | 3 | 416.9187622 | 416.9189468 |
| TDEEVDEMIR           | P62204 | 0.00043011 | N-term +28.03 Da, K +28.03 Da,              | 2908.917969 | 2 | 632.7897339 | 632.7899216 |
| AGFNKGLLMR           | Q9D855 | 0.00374659 | N-term +28.03 Da, K +28.03 Da,              | 2909.30835  | 3 | 388.2305298 | 388.230356  |
| VEAAVGKDLFR          | Q64471 | 0          | N-term +28.03 Da, K +28.03 Da,              | 2909.383789 | 3 | 420.9152832 | 420.9152025 |
| SMEQPEMLEKVS         | Q9DCM2 | 0          | N-term +28.03 Da, K +28.03 Da,              | 2909.583252 | 3 | 540.6099854 | 540.6092338 |
| GTITTKELGTVMR        | P62204 | 0          | N-term +28.03 Da, K +28.03 Da,              | 2911.922363 | 3 | 488.2815247 | 488.2814456 |
| EIPLEGDEDASR         | P11499 | 0          | N-term +28.03 Da,                           | 2912.266846 | 2 | 728.3499756 | 728.3517325 |
| ALEVFQVSHPR          | Q9WV10 | 0          | N-term +28.03 Da,                           | 2913.636963 | 3 | 437.5787964 | 437.5787018 |
| TSISNLPKLNK1K        | O35381 | 0          | N-term +28.03 Da, K +28.03 Da,              | 2913.811768 | 4 | 392.7600098 | 392.7590943 |
| DLEPGTMDSVR          | P68372 | 0          | N-term +28.03 Da,                           | 2915.375977 | 2 | 624.2996826 | 624.3004561 |
| IDPGDSDIIR           | P62889 | 0.00110416 | N-term +28.03 Da,                           | 2915.457275 | 2 | 564.7977905 | 564.7984062 |
| GTLDPVEKALR          | P63017 | 0          | N-term +28.03 Da, K +28.03 Da,              | 2915.608154 | 3 | 418.9200134 | 418.9187241 |
| KNKDKQGTIEDYVEGLR    | Q60605 | 0.01442308 | N-term +28.03 Da, K +28.03 Da, C +57.02 Da, | 2919.42041  | 3 | 667.6799927 | 667.0092202 |
| FVEDLNESFKDNR        | Q8BXZ1 | 0          | N-term +28.03 Da, K +28.03 Da,              | 2919.49585  | 3 | 556.9500122 | 556.9457796 |
| ASIKIDEPLEGSEDR      | P61979 | 0.00111566 | N-term +28.03 Da, K +28.03 Da,              | 2919.892578 | 3 | 572.2999878 | 572.3001114 |
| ALEVFQVSHPR          | Q9WV10 | 0          | N-term +28.03 Da, K +28.03 Da,              | 2921.800293 | 2 | 655.8599854 | 655.8644144 |
| SGASIKIDEPLEGSEDR    | P61979 | 0          | N-term +28.03 Da, K +28.03 Da,              | 2927.779541 | 3 | 620.3200073 | 620.3179425 |
| TKGTPLDTEVPLER       | Q05920 | 0.00314795 | N-term +28.03 Da, K +28.03 Da,              | 2928.673584 | 3 | 537.9699707 | 537.9699251 |
| VAKNKDQGTIEDYVEGLR   | Q60605 | 0.02355278 | N-term +28.03 Da, K +28.03 Da,              | 2928.833984 | 3 | 724.039978  | 723.7110631 |
| SLDSLPAQAVR          | Q9Z2V4 | 0.02977184 | N-term +28.03 Da, C +57.02 Da,              | 2929.099854 | 2 | 557.3169556 | 557.3167657 |
| LNETGDEPFQYKN        | P15105 | 0          | N-term +28.03 Da, K +28.03 Da,              | 2930.191895 | 2 | 805.8875122 | 805.8884821 |
| NGTDPEDVIR           | Q3THE2 | 0.0011274  | N-term +28.03 Da, K +28.03 Da,              | 2931.823242 | 2 | 572.7776489 | 572.2856631 |

|                           |        |            |                                            |             |   |             |             |
|---------------------------|--------|------------|--------------------------------------------|-------------|---|-------------|-------------|
| NGDYIAVK                  | Q3TYA6 | 0.04760631 | N-term +28.03 Da, K +28.03 Da,             | 2931.898682 | 2 | 467.769989  | 468.26347   |
| GDSNPFDEDTTSGTEVR         | Q9WVE8 | 0          | N-term +28.03 Da,                          | 2933.41626  | 2 | 928.4000244 | 927.9030477 |
| SPESTSEVECGDFYNSGDR       | Q91VA0 | 0          | N-term +28.03 Da, K +28.03 Da,C +57.02 Da, | 2933.944092 | 2 | 1082.446045 | 1082.442212 |
| EGLEQAALPAEESR            | Q8C0L0 | 0.00114767 | N-term +28.03 Da,                          | 2934.150146 | 2 | 764.3902588 | 764.3861066 |
| SCVAVMEGKQAKVLENAEGAR     | P38647 | 0.01855124 | N-term +28.03 Da, K +28.03 Da,             | 2934.842285 | 3 | 778.4099731 | 777.7434924 |
| RHERIHTGEKPYKNECDK        | E9Q6M3 | 0.03490929 | N-term +28.03 Da, K +28.03 Da,             | 2934.946045 | 3 | 856.7700195 | 857.0969288 |
| TMRFLHSFTMYR              | O08712 | 0.01194121 | N-term +28.03 Da,                          | 2935.787598 | 2 | 810.4199829 | 809.4050664 |
| AIIVPIPKSHEAEAEQAEP       | Q9D8X0 | 0.00114504 | N-term +28.03 Da, K +28.03 Da,C +57.02 Da, | 2936.996582 | 4 | 561.3099976 | 561.0613998 |
| NDDDEPPPLPR               | O55022 | 0.00436535 | N-term +28.03 Da, K +28.03 Da,             | 2940.233154 | 2 | 646.8200073 | 646.8095028 |
| KTGTAEMSSILEER            | Q03265 | 0.00373641 | N-term +28.03 Da, K +28.03 Da,             | 2944.529053 | 3 | 536.6099854 | 536.6151536 |
| DDEATILADNKCMTCT          | P01592 | 0          | N-term +28.03 Da, C +57.02 Da,             | 2946.02832  | 3 | 656.9699707 | 656.9656409 |
| LEEEDNVLVLK               | P09103 | 0          | N-term +28.03 Da, K +28.03 Da,             | 2946.11499  | 3 | 504.9700012 | 504.9676327 |
| TEFTPTETDTYACR            | P01887 | 0          | N-term +28.03 Da, C +57.02 Da,             | 2947.54126  | 2 | 860.3804932 | 860.3801645 |
| SEVPGAAEGPGGSGVGLGDR      | Q9EP72 | 0          | N-term +28.03 Da,                          | 2947.833008 | 2 | 934.960022  | 934.4608664 |
| KTGTAEMSSILEER            | Q03265 | 0.03986981 | N-term +28.03 Da, K +28.03 Da,             | 2949.020996 | 2 | 804.4177856 | 804.4190922 |
| VSEGSAAAGESMAQR           | Q9D8S4 | 0          | N-term +28.03 Da,                          | 2950.664551 | 2 | 840.8900146 | 840.8876334 |
| LIFAGKQLEDGR              | P0CG49 | 0          | N-term +28.03 Da, K +28.03 Da,             | 2952.60791  | 3 | 468.9400024 | 468.2732786 |
| SFPTITPR                  | Q922R8 | 0.01695924 | N-term +28.03 Da,                          | 2953.561523 | 2 | 473.7704773 | 473.771462  |
| EAGDVCYADVYR              | Q6PDM2 | 0          | N-term +28.03 Da, C +57.02 Da,             | 2957.050293 | 2 | 723.3200073 | 723.3219202 |
| AGDKNFITAELR              | P57780 | 0          | N-term +28.03 Da, K +28.03 Da,             | 2959.033203 | 3 | 507.2799988 | 507.2753483 |
| TEFTPTETDTYACR            | P01887 | 0          | N-term +28.03 Da, C +57.02 Da,             | 2963.07959  | 3 | 573.9220581 | 573.9225352 |
| IEEKSCDLVGEKDKESKNEVALLER | P24668 | 0.02486578 | N-term +28.03 Da, K +28.03 Da,             | 2963.160645 | 4 | 765.4099731 | 765.4139724 |
| GDSASKVISAEALPGR          | Q9D6Y7 | 0          | N-term +28.03 Da, K +28.03 Da,             | 2969.562012 | 3 | 581.9799805 | 581.6476224 |
| LIFAGKQLEDGR              | P0CG49 | 0          | N-term +28.03 Da, K +28.03 Da,             | 2969.795898 | 3 | 468.2738953 | 468.2732786 |
| GEVVPVAIR                 | P27773 | 0.00808277 | N-term +28.03 Da,                          | 2970.984375 | 2 | 484.2998352 | 484.3003866 |
| SAMPFTASPAPSTR            | O70400 | 0.00111111 | N-term +28.03 Da, K +28.03 Da,             | 2971.638184 | 2 | 724.8699951 | 724.8637549 |
| LCAATATILDKPEDR           | O35215 | 0          | N-term +28.03 Da, K +28.03 Da,             | 2972.667236 | 3 | 577.3099976 | 577.309953  |
| SAGVSVPGMPGSPGR           | P11087 | 0.01527861 | N-term +28.03 Da,                          | 2973.035645 | 2 | 740.3845215 | 740.8824789 |
| GDSASKVISAEALPGR          | Q9D6Y7 | 0.00348432 | N-term +28.03 Da, K +28.03 Da,             | 2973.241943 | 2 | 872.4699707 | 871.9677954 |
| VTIILKEPVR                | Q99PL5 | 0.01384708 | N-term +28.03 Da, K +28.03 Da,             | 2973.387939 | 3 | 408.9400024 | 408.6077096 |
| GDSASKVISAEALPGR          | Q9D6Y7 | 0          | N-term +28.03 Da, K +28.03 Da,             | 2974.410645 | 3 | 581.3200073 | 581.6476224 |
| VISLSGEHSIIGR             | P08228 | 0          | N-term +28.03 Da, K +28.03 Da,             | 2974.683594 | 3 | 465.9357605 | 465.9366666 |
| GALGSVESLPDR              | Q9JLI6 | 0.0004268  | N-term +28.03 Da,                          | 2975.974609 | 2 | 614.8300171 | 614.8302378 |
| SDDLPLNVS                 | P08113 | 0.0056366  | N-term +28.03 Da,                          | 2976.299561 | 2 | 572.2999878 | 572.3038557 |
| THISRSQNQQYLVR            | O35066 | 0.00592495 | N-term +28.03 Da,                          | 2977.290771 | 3 | 587.3200073 | 586.6517007 |
| ADEFEDMVAEKR              | Q6ZWW3 | 0          | N-term +28.03 Da, K +28.03 Da,             | 2977.831787 | 3 | 499.241272  | 499.2414274 |
| TEFTPTETDTYACR            | P01887 | 0          | N-term +28.03 Da, C +57.02 Da,             | 2978.218018 | 2 | 860.3790283 | 860.3801645 |
| IFSSEHDIFR                | P51174 | 0          | N-term +28.03 Da, K +28.03 Da,             | 2978.450928 | 3 | 426.8900146 | 426.887424  |
| ITSLEVENQNL               | P57776 | 0.00044823 | N-term +28.03 Da,                          | 2978.692139 | 2 | 722.3900146 | 722.3937341 |
| SAMPFTASPAPSTR            | O70400 | 0          | N-term +28.03 Da,                          | 2981.85498  | 2 | 725.3699951 | 724.8637549 |

|                           |        |            |                                |             |   |             |             |
|---------------------------|--------|------------|--------------------------------|-------------|---|-------------|-------------|
| TYFPHFVSHGSAQVKGH         | P01942 | 0          | N-term +28.03 Da, K +28.03 Da, | 2985.140381 | 4 | 518.5100098 | 518.260256  |
| ATEESDLAQQYGVV            | P09103 | 0          | N-term +28.03 Da, K +28.03 Da, | 2986.34668  | 2 | 797.8800049 | 797.8890136 |
| SEKIQWSPVLTVEEGKR         | O70400 | 0          | N-term +28.03 Da, K +28.03 Da, | 2987.004395 | 4 | 494.0299988 | 493.5281981 |
| LGNVTAGKDGVANVSIEDR       | P08228 | 0          | N-term +28.03 Da, K +28.03 Da, | 2987.742188 | 3 | 657.6882324 | 657.6883696 |
| TFEESFQKALR               | Q8C196 | 0          | N-term +28.03 Da, K +28.03 Da, | 2991.37793  | 3 | 471.2585144 | 471.2575172 |
| VIDEYLDNGSDESATR          | Q63880 | 0.0099348  | N-term +28.03 Da,              | 2993.713867 | 2 | 907.4099731 | 906.4183333 |
| ALDLTMR                   | Q9D855 | 0.01977319 | N-term +28.03 Da,              | 2995.453369 | 2 | 424.2389832 | 424.2389403 |
| QNYSTEVEAAVNR             | P29391 | 0          | N-term +28.03 Da,              | 2996.597656 | 3 | 503.5828247 | 503.5828412 |
| ETGVDLTKDNMALQR           | P38647 | 0.01196686 | N-term +28.03 Da, K +28.03 Da, | 2997.216553 | 2 | 874.460022  | 873.9563733 |
| VQDVANNTNEEAGDGTATVLAR    | P63038 | 0          | N-term +28.03 Da, K +28.03 Da, | 2997.659668 | 2 | 1238.609985 | 1238.101529 |
| QNYSTEVEAAVNR             | P29391 | 0          | N-term +28.03 Da, K +28.03 Da, | 2998.739502 | 2 | 754.8699951 | 754.8706235 |
| TADGIVSHLKKQAGPASVPLR     | P27773 | 0          | N-term +28.03 Da, K +28.03 Da, | 2998.890137 | 4 | 558.083313  | 558.0824006 |
| ETGVDLTKDNMALQR           | P38647 | 0          | N-term +28.03 Da, K +28.03 Da, | 2998.96582  | 3 | 582.9699707 | 582.973341  |
| DLTGVQNLN                 | P16546 | 0.00044944 | N-term +28.03 Da, K +28.03 Da, | 2999.125732 | 2 | 522.2963867 | 522.2958331 |
| TKYKPESDELTAEKITEFCHR     | P09103 | 0.0348136  | N-term +28.03 Da, C +57.02 Da, | 2999.216553 | 4 | 674.5999756 | 674.3506431 |
| TTVDPDTGIIDR              | Q922Q1 | 0          | N-term +28.03 Da, K +28.03 Da, | 3000.523926 | 2 | 665.8474121 | 665.8460854 |
| ESGASIKIDEPLEGSEDR        | P61979 | 0.00082747 | N-term +28.03 Da, K +28.03 Da, | 3005.149414 | 2 | 994.5       | 994.4945726 |
| RVAPEEHPVLLTEAPLNPKANR    | P60710 | 0          | N-term +28.03 Da, K +28.03 Da, | 3006.258545 | 4 | 627.8599854 | 627.6077772 |
| SQEHPVVLTKFVEGAR          | Q8C196 | 0          | N-term +28.03 Da, K +28.03 Da, | 3006.409424 | 4 | 464.0134888 | 464.0124493 |
| GKDYQTLGLAR               | Q9QYJ3 | 0.00346741 | N-term +28.03 Da, K +28.03 Da, | 3006.484863 | 3 | 480.9337158 | 480.9330335 |
| GKDYQTLGLAR               | Q9QYJ3 | 0          | N-term +28.03 Da, K +28.03 Da, | 3006.68042  | 2 | 720.9000244 | 720.8959121 |
| LPLPPPPPR                 | P61979 | 0.01386377 | N-term +28.03 Da,              | 3007.287354 | 2 | 554.8476563 | 554.8475038 |
| EDDPTIF SAR               | Q8BP56 | 0.00080321 | N-term +28.03 Da, K +28.03 Da, | 3007.508545 | 2 | 589.7800293 | 589.7880387 |
| VLSGEDKSNIAAW             | P01942 | 0.00109449 | N-term +28.03 Da, K +28.03 Da, | 3007.735107 | 3 | 534.6400146 | 534.634765  |
| FAQLCEEHGILR              | B5X0G2 | 0          | N-term +28.03 Da, C +57.02 Da, | 3010.636719 | 3 | 500.9258728 | 500.9257731 |
| GVSDGSEVAKAQAAPGGASPTIFSR | Q9D0S9 | 0          | N-term +28.03 Da, K +28.03 Da, | 3013.757813 | 4 | 644.0999756 | 643.8486962 |
| FAQLCEEHGILR              | B5X0G2 | 0          | N-term +28.03 Da, C +57.02 Da, | 3015.011475 | 2 | 751.3800049 | 750.8850214 |
| LDNPSSLDETAYER            | O35943 | 0          | N-term +28.03 Da, K +28.03 Da, | 3015.571777 | 2 | 819.3900146 | 819.3863041 |
| QKTGTAEMSSILEER           | Q03265 | 0.02561216 | N-term +28.03 Da, K +28.03 Da, | 3016.99585  | 3 | 579.6400146 | 579.3013463 |
| SVGYTLKNVSMEDNEEDR        | P48776 | 0.00078125 | N-term +28.03 Da, K +28.03 Da, | 3017.420654 | 3 | 714.6699829 | 714.6721685 |
| VGLKAPGIIPR               | Q03265 | 0          | N-term +28.03 Da, K +28.03 Da, | 3017.504883 | 3 | 392.932251  | 392.9324158 |
| WRGGQRDQKAHEHWK           | Q3TVI8 | 0.04755544 | N-term +28.03 Da, K +28.03 Da, | 3019.128418 | 2 | 932.9799805 | 933.4977219 |
| ANLEKAQSELSGAADEAAR       | Q9D3D9 | 0          | N-term +28.03 Da, K +28.03 Da, | 3019.939209 | 3 | 663.0079956 | 663.0078796 |
| GDEAPNFEANTTIGR           | O08709 | 0          | N-term +28.03 Da,              | 3020.105469 | 2 | 810.3800049 | 810.3866381 |
| EAVSGPPPADLCHALR          | O70251 | 0          | N-term +28.03 Da, C +57.02 Da, | 3020.180908 | 3 | 573.2999878 | 573.2945256 |
| RVGVPTETGALTLNR           | Q8BWT1 | 0.00111857 | N-term +28.03 Da,              | 3020.256592 | 3 | 537.9799805 | 537.9774137 |
| SESPMVKEILKEQESR          | Q99LX0 | 0.00114373 | N-term +28.03 Da, K +28.03 Da, | 3020.55835  | 4 | 494.2711487 | 494.269861  |
| LEEEDNVLVLK               | P09103 | 0          | N-term +28.03 Da, K +28.03 Da, | 3022.061279 | 2 | 756.9477539 | 756.9478108 |
| LEEEDNVLVLK               | P09103 | 0          | N-term +28.03 Da, K +28.03 Da, | 3022.797363 | 3 | 504.9671631 | 504.9676327 |
| QQQQIQLQLQMEKER           | P46938 | 0          | N-term +28.03 Da, K +28.03 Da, | 3022.872559 | 3 | 705.039978  | 704.7125206 |

|                      |        |            |                                            |             |   |             |             |
|----------------------|--------|------------|--------------------------------------------|-------------|---|-------------|-------------|
| TLSKYEFSEIR          | Q9CYA0 | 0          | N-term +28.03 Da, K +28.03 Da,             | 3023.099121 | 3 | 476.9299927 | 476.9292892 |
| ANLEKAQSELSGADEAAR   | Q9D3D9 | 0          | N-term +28.03 Da, K +28.03 Da,             | 3023.348389 | 2 | 994.0056152 | 994.0081811 |
| VGGKDFEQPLAISR       | O70400 | 0.00044307 | N-term +28.03 Da, K +28.03 Da,             | 3024.026123 | 3 | 524.9629517 | 524.962993  |
| SLDSLPPQAVR          | Q9Z2V4 | 0.03152655 | N-term +28.03 Da, K +28.03 Da,C +57.02 Da, | 3024.101563 | 2 | 557.3200073 | 557.3167657 |
| VGGKDFEQPLAISR       | O70400 | 0          | N-term +28.03 Da, K +28.03 Da,             | 3024.177002 | 2 | 786.9400024 | 786.9408513 |
| SVVFPHPDEPLAGR       | Q99LB7 | 0          | N-term +28.03 Da,                          | 3025.492432 | 3 | 484.5899963 | 484.5928998 |
| EVTEFEDIKSGYR        | Q9EQU5 | 0          | N-term +28.03 Da, K +28.03 Da,             | 3025.567871 | 3 | 543.6099854 | 543.610397  |
| SDAPPLTLDGIKDR       | Q9CR21 | 0          | N-term +28.03 Da, K +28.03 Da,             | 3025.643311 | 3 | 518.6236572 | 518.6226367 |
| CLSGQAEFDKAAEEVKR    | F6WUQ1 | 0          | N-term +28.03 Da, K +28.03 Da,             | 3025.870117 | 3 | 674.6799927 | 674.6823385 |
| APPLTLDGIKDR         | Q9CR21 | 0.00044524 | N-term +28.03 Da, K +28.03 Da,             | 3028.653076 | 3 | 451.6000061 | 451.2696456 |
| FDELDSIAKAR          | Q01853 | 0          | N-term +28.03 Da, K +28.03 Da,             | 3028.730957 | 3 | 441.2399902 | 440.9101175 |
| APPLTLDGIKDR         | Q9CR21 | 0          | N-term +28.03 Da, K +28.03 Da,             | 3029.004639 | 3 | 451.2678833 | 451.2696456 |
| QLMGLYGR             | B5XOG2 | 0.00884117 | N-term +28.03 Da,                          | 3029.996338 | 2 | 483.2600098 | 483.2654894 |
| NLGPPEFVER           | Q9JM14 | 0.00912524 | N-term +28.03 Da, K +28.03 Da,             | 3031.804443 | 2 | 544.789978  | 544.7903836 |
| VISLSGEHSIIGR        | P08228 | 0          | N-term +28.03 Da,                          | 3032.908936 | 3 | 465.9400024 | 465.9366666 |
| WVEQNLGPEFVER        | Q9JM14 | 0.00083368 | N-term +28.03 Da,                          | 3032.984375 | 3 | 544.9500122 | 544.2789813 |
| RPPLGFLNPR           | O89023 | 0.0008107  | N-term +28.03 Da,                          | 3033.137451 | 3 | 398.9100037 | 398.9083817 |
| SIQMNVAEVDR          | Q9CQR2 | 0          | N-term +28.03 Da,                          | 3034.331787 | 2 | 645.3284912 | 645.3295477 |
| SDAPPLTLDGIKDR       | Q9CR21 | 0          | N-term +28.03 Da, K +28.03 Da,             | 3037.20459  | 2 | 777.4299927 | 777.4303168 |
| LSPVAEEFR            | Q00623 | 0.0004344  | N-term +28.03 Da,                          | 3037.280029 | 2 | 538.2927856 | 538.2927591 |
| LPLPPPPPPR           | P61979 | 0.00112108 | N-term +28.03 Da, K +28.03 Da,             | 3037.724121 | 2 | 554.8464966 | 554.8475038 |
| NGYISAAELR           | P62204 | 0.01471471 | N-term +28.03 Da,                          | 3040.736816 | 2 | 590.8099976 | 589.8118477 |
| YQVLAAEEPSVR         | Q64105 | 0          | N-term +28.03 Da,                          | 3043.518311 | 2 | 695.8699951 | 695.37227   |
| VFDKEGNGTVMGAEIR     | Q60605 | 0.01977894 | N-term +28.03 Da, K +28.03 Da,             | 3048.013428 | 3 | 594.2999878 | 593.6417027 |
| EQFVEFR              | O35887 | 0.00653595 | N-term +28.03 Da,                          | 3049.546875 | 2 | 491.75      | 491.7532695 |
| AWGKIGGHGAEYGAEALER  | P01942 | 0          | N-term +28.03 Da, K +28.03 Da,             | 3050.209717 | 3 | 677.3499756 | 676.6814376 |
| GDGTITTKELGTVMR      | P62204 | 0          | N-term +28.03 Da, K +28.03 Da,             | 3051.163086 | 3 | 546.2999878 | 545.630915  |
| AWGKIGGHGAEYGAEALER  | P01942 | 0.02535211 | N-term +28.03 Da, K +28.03 Da,             | 3051.240234 | 4 | 508.0100098 | 507.7628973 |
| NKPDIDAWELR          | P12787 | 0.00345066 | N-term +28.03 Da, K +28.03 Da,             | 3053.062988 | 3 | 471.9200134 | 471.5892668 |
| TLKFFPASADR          | P09103 | 0          | N-term +28.03 Da, K +28.03 Da,             | 3053.20752  | 3 | 437.25      | 436.9152025 |
| SEVAQLTEGMSGR        | Q92511 | 0          | N-term +28.03 Da,                          | 3055.452393 | 2 | 696.8400269 | 696.8430198 |
| SDAPPLTLDGIKDR       | Q9CR21 | 0          | N-term +28.03 Da, K +28.03 Da,             | 3056.253418 | 3 | 518.6220093 | 518.6226367 |
| MKETIMNQEKLAKLQAQVR  | Q64152 | 0          | N-term +28.03 Da, K +28.03 Da,             | 3058.473877 | 4 | 593.8400269 | 593.5945523 |
| MKETIMNQEKLAKLQAQVR  | Q64152 | 0.01826753 | N-term +28.03 Da, K +28.03 Da,             | 3058.834961 | 3 | 791.789978  | 791.1236442 |
| CLSGQAEFDKAAEEVKR    | F6WUQ1 | 0          | N-term +28.03 Da, K +28.03 Da,             | 3058.946289 | 3 | 675.3400269 | 674.6823385 |
| SDEHGIDPTGTYHGSDQLER | P68372 | 0          | N-term +28.03 Da,                          | 3061.872803 | 4 | 618.2813721 | 618.2833864 |
| SATSKLIHPDEDISLEER   | E9PW12 | 0.04118125 | N-term +28.03 Da, K +28.03 Da,             | 3063.313965 | 4 | 525.0300293 | 524.7772079 |
| MKETIMNQEKLAKLQAQVR  | Q64152 | 0.0008016  | N-term +28.03 Da, K +28.03 Da,             | 3063.476807 | 3 | 791.460022  | 791.1236442 |
| SEVASSLVLER          | Q9CYR0 | 0.00046425 | N-term +28.03 Da,                          | 3066.263916 | 2 | 609.3394775 | 609.3404384 |
| SVESIMATEDR          | Q8C196 | 0.00114025 | N-term +28.03 Da,                          | 3066.3396   | 2 | 633.3099976 | 633.3057387 |

|                           |        |            |                                             |             |   |             |             |
|---------------------------|--------|------------|---------------------------------------------|-------------|---|-------------|-------------|
| SDAPPLTLDGIKDR            | Q9CR21 | 0          | N-term +28.03 Da, K +28.03 Da,              | 3067.855225 | 2 | 777.4301758 | 777.4303168 |
| GNVYAEKISGQKVNAAACDIAR    | O35490 | 0          | N-term +28.03 Da, C +57.02 Da,              | 3067.940674 | 4 | 620.3300171 | 620.0758815 |
| TGEVPPVAIR                | P27773 | 0.00043085 | N-term +28.03 Da,                           | 3068.02832  | 2 | 534.8200073 | 534.8242263 |
| LPPLPPPPPR                | P61979 | 0.0011194  | N-term +28.03 Da, K +28.03 Da,              | 3068.607666 | 2 | 554.8468628 | 554.8475038 |
| MEMTDFTR                  | P26231 | 0.00371999 | N-term +28.03 Da,                           | 3072.489746 | 2 | 529.7399902 | 529.7359053 |
| ALGNMEEDNWR               | Q8K2B3 | 0          | N-term +28.03 Da,                           | 3072.576172 | 2 | 681.8079224 | 681.8089797 |
| FGVQVSPSGEKITHGQVYDEKDYR  | P52503 | 0          | N-term +28.03 Da, K +28.03 Da,              | 3074.891846 | 4 | 732.1199951 | 731.875177  |
| TTAIAEAWAR                | P05213 | 0          | N-term +28.03 Da,                           | 3074.973145 | 2 | 559.3068848 | 559.3036582 |
| SSSLPDICYR                | P53996 | 0.00142959 | N-term +28.03 Da, C +57.02 Da,              | 3078.054688 | 2 | 613.7999878 | 613.2977161 |
| ELFADKVPKTAENFR           | P17742 | 0.00142653 | N-term +28.03 Da, K +28.03 Da,              | 3078.519043 | 4 | 463.2600098 | 463.0109123 |
| VFDKEGNGTVMGAELR          | P05977 | 0.00082406 | N-term +28.03 Da, K +28.03 Da,              | 3080.457275 | 3 | 594.2999878 | 593.6417027 |
| GDGTITTKELGTVMR           | P62204 | 0.00886918 | N-term +28.03 Da, K +28.03 Da,              | 3084.403076 | 3 | 545.289978  | 545.630915  |
| NCLSGQAQAEFDKAAEEVKR      | F6WUQ1 | 0          | N-term +28.03 Da, K +28.03 Da,              | 3085.667969 | 2 | 1068.050049 | 1068.541334 |
| EQWQGGREQHK               | Q3V118 | 0.03863946 | N-term +28.03 Da, K +28.03 Da,              | 3085.955078 | 2 | 755.3931885 | 755.381492  |
| GDFCIQVGR                 | P15532 | 0          | N-term +28.03 Da, K +28.03 Da, C +57.02 Da, | 3086.054199 | 2 | 540.2700195 | 540.2687609 |
| GVPTETGALTLNR             | Q8BWT1 | 0          | N-term +28.03 Da,                           | 3087.225098 | 2 | 678.8800049 | 678.8777195 |
| DAWGDVPGTGTR              | A2AIX1 | 0.00078034 | N-term +28.03 Da,                           | 3087.305176 | 2 | 630.3041382 | 630.3043872 |
| SDAPPLTLDGIKDR            | Q9CR21 | 0          | N-term +28.03 Da, K +28.03 Da, C +57.02 Da, | 3088.93457  | 3 | 518.6199951 | 518.6226367 |
| TVVIPETEAVR               | Q9DBL7 | 0.00177494 | N-term +28.03 Da, K +28.03 Da, C +57.02 Da, | 3089.088867 | 2 | 621.3599854 | 621.3586309 |
| VLSGEDKSNIAAWGKIGGH       | P01942 | 0.00371371 | N-term +28.03 Da, K +28.03 Da,              | 3089.417236 | 4 | 545.8099976 | 545.561301  |
| TTGEVPPVAIR               | P27773 | 0.00078709 | N-term +28.03 Da,                           | 3094.805908 | 2 | 585.3499756 | 585.3480659 |
| VLQEILSDGKGDPNPKPSGFR     | O70400 | 0.00891436 | N-term +28.03 Da, K +28.03 Da,              | 3097.146729 | 4 | 593.8200073 | 593.3220483 |
| TGEVPPVAIR                | P27773 | 0.00111441 | N-term +28.03 Da,                           | 3099.425049 | 2 | 534.8239136 | 534.8242263 |
| GKVKEGMNIVEAMER           | P17742 | 0.0011308  | N-term +28.03 Da, K +28.03 Da,              | 3100.019287 | 3 | 592.3200073 | 592.3233163 |
| TLVLTDPDAPSR              | P70296 | 0.00043592 | N-term +28.03 Da, K +28.03 Da,              | 3101.961182 | 2 | 656.8613281 | 656.8589955 |
| TVGSMVFSEGEAQR            | Q99PL5 | 0          | N-term +28.03 Da,                           | 3102.232666 | 2 | 763.3672485 | 763.3694019 |
| QVANPNSAIFGGAR            | Q9WUW2 | 0.00044072 | N-term +28.03 Da,                           | 3103.231934 | 2 | 715.8734741 | 715.3809605 |
| APEEHPVLLTEAPLNPKANR      | P60710 | 0          | N-term +28.03 Da, K +28.03 Da,              | 3103.400635 | 4 | 564.0700073 | 563.8153958 |
| RILGADTSVDLEETGR          | Q03265 | 0.00893427 | N-term +28.03 Da,                           | 3103.70752  | 3 | 587.6500244 | 587.3110104 |
| TADGIVSHLKKQAGPASVPLR     | P27773 | 0          | N-term +28.03 Da, K +28.03 Da,              | 3103.925049 | 4 | 558.0800171 | 558.0824006 |
| LEYDQDLSVR                | Q9D8U8 | 0.00404176 | N-term +28.03 Da,                           | 3107.191406 | 2 | 633.3208008 | 633.3222458 |
| KLVQDVANNTNEEAGDGTTTATVLR | P63038 | 0          | N-term +28.03 Da, K +28.03 Da,              | 3107.390869 | 3 | 915.4699707 | 915.4735538 |
| GKVKEGMNIVEAMER           | P17742 | 0          | N-term +28.03 Da, K +28.03 Da,              | 3107.931152 | 2 | 887.9802856 | 887.9813363 |
| YVGEEMEEGEFSEAR           | P05213 | 0          | N-term +28.03 Da,                           | 3112.062012 | 2 | 859.3730469 | 859.3723395 |
| ESTPTGITDHAQQGPEPNLEESPKR | Q9CRD0 | 0          | N-term +28.03 Da, K +28.03 Da,              | 3112.362549 | 4 | 690.8499756 | 690.6016185 |
| TVGDVNTDRPGLLDLKGK        | P31786 | 0.00045208 | N-term +28.03 Da, K +28.03 Da,              | 3112.765381 | 4 | 496.7900085 | 496.2874766 |
| SSMAEVDAAMAAR             | O88569 | 0          | N-term +28.03 Da,                           | 3113.398926 | 2 | 669.3129883 | 669.3130406 |
| KSICVEVDHGLLPR            | Q62264 | 0          | N-term +28.03 Da, C +57.02 Da,              | 3115.549072 | 4 | 420.7399902 | 420.4881811 |
| TVGDVNTDRPGLLDLKGK        | P31786 | 0          | N-term +28.03 Da, K +28.03 Da,              | 3120.322998 | 3 | 661.7199707 | 661.3808767 |
| SVLICPDGKTVEAAAHGTVTR     | O88844 | 0          | N-term +28.03 Da, K +28.03 Da,              | 3122.150635 | 4 | 592.8200073 | 592.5638782 |

|                            |        |            |                                             |             |   |             |             |
|----------------------------|--------|------------|---------------------------------------------|-------------|---|-------------|-------------|
| QKEFDPTITDGSLSGSPSR        | D3Z6I7 | 0.01526946 | N-term +28.03 Da, K +28.03 Da,              | 3127.502197 | 3 | 664.3400269 | 664.3408586 |
| RSLQPEIQFPQTASR            | Q9ESB3 | 0.03915171 | N-term +28.03 Da, K +28.03 Da,              | 3132.893555 | 3 | 628.6799927 | 628.3426445 |
| VISLSGEHSIIGR              | P08228 | 0          | N-term +28.03 Da,                           | 3134.895508 | 3 | 465.9376831 | 465.9366666 |
| SEVSALLGR                  | P56480 | 0.02377583 | N-term +28.03 Da, K +28.03 Da,              | 3135.634033 | 2 | 480.7799988 | 480.2796516 |
| WMKDSNGTPSLVTIDGR          | Q9ERC8 | 0.01021988 | N-term +28.03 Da, K +28.03 Da,              | 3136.550537 | 2 | 966.5       | 966.99603   |
| AFGAVEAISDR                | P10605 | 0          | N-term +28.03 Da,                           | 3136.893555 | 2 | 582.3076172 | 582.3063982 |
| FFEAKVQAINVSSR             | Q9D8Y0 | 0.00046168 | N-term +28.03 Da, K +28.03 Da,              | 3142.509033 | 3 | 551.3110962 | 551.3103927 |
| YVGEEMEEGEFSEAR            | P05213 | 0          | N-term +28.03 Da,                           | 3143.893066 | 2 | 859.3726196 | 859.3723395 |
| TVGDVNTDRPGLLDLKGK         | P31786 | 0          | N-term +28.03 Da, K +28.03 Da,              | 3144.119385 | 4 | 496.288147  | 496.2874766 |
| ERQREWEDKDKGR              | E9Q784 | 0.0233087  | N-term +28.03 Da, K +28.03 Da,              | 3144.486084 | 2 | 909.4699707 | 908.4766529 |
| VISLSGEHSIIGR              | P08228 | 0          | N-term +28.03 Da,                           | 3148.580811 | 2 | 698.4000244 | 698.4013616 |
| ILAHTEFTPTETDTYACR         | P01887 | 0          | N-term +28.03 Da, C +57.02 Da,              | 3152.494141 | 3 | 719.0100098 | 718.6772535 |
| SLLKHPALDEETEHDYQNH        | P08101 | 0.02278553 | N-term +28.03 Da, K +28.03 Da,              | 3152.670166 | 4 | 644.5700073 | 644.3172291 |
| KLKPLVDPKIDMTPK            | P56657 | 0          | N-term +28.03 Da, K +28.03 Da,              | 3155.279297 | 4 | 495.3052368 | 495.3059804 |
| LEGVGHFFR                  | P29391 | 0.00083195 | N-term +28.03 Da, K +28.03 Da,              | 3157.050537 | 3 | 363.8699951 | 363.8661826 |
| GPTDSYAAISEVDR             | O08585 | 0          | N-term +28.03 Da,                           | 3157.791748 | 2 | 754.8599854 | 754.865007  |
| ETIMNQEKLAKLQAQVR          | Q64152 | 0          | N-term +28.03 Da, K +28.03 Da,              | 3160.25415  | 4 | 521.7999878 | 521.8028652 |
| KVDATEESDLAQYQYVGR         | P09103 | 0.00891152 | N-term +28.03 Da, K +28.03 Da,              | 3160.38208  | 2 | 983.5100098 | 982.9998246 |
| SKGPPDFSSDEEREPTVLGSGASVGR | Q61029 | 0.00833868 | N-term +28.03 Da, K +28.03 Da,              | 3161.740479 | 4 | 704.3530273 | 704.353072  |
| TSTPSAAMKLISPR             | Q9EPQ7 | 0          | N-term +28.03 Da, K +28.03 Da,              | 3162.148926 | 3 | 505.9599915 | 505.9569619 |
| ETIMNQEKLAKLQAQVR          | Q64152 | 0          | N-term +28.03 Da, K +28.03 Da,              | 3162.367432 | 3 | 696.0700073 | 695.4013947 |
| TAKGEKFMVQEEFSR            | P27773 | 0.00045475 | N-term +28.03 Da, K +28.03 Da,              | 3163.275635 | 3 | 623.9899902 | 624.3292361 |
| VISLSGEHSIIGR              | P08228 | 0          | N-term +28.03 Da, K +28.03 Da,              | 3165.154785 | 3 | 465.9368896 | 465.9366666 |
| LLVDPETDER                 | P70441 | 0.02559775 | N-term +28.03 Da, K +28.03 Da,              | 3167.645996 | 2 | 657.3499756 | 657.3510034 |
| VDVDGTVEEDLGKSR            | P08113 | 0          | N-term +28.03 Da, K +28.03 Da,              | 3169.259277 | 3 | 558.960022  | 558.9563447 |
| LGFDPAEQPVR                | P97825 | 0          | N-term +28.03 Da, K +28.03 Da,              | 3172.910645 | 2 | 693.3567505 | 693.3566199 |
| ELFADKVPKTAENFR            | P17742 | 0          | N-term +28.03 Da, K +28.03 Da,              | 3172.98584  | 4 | 463.0104065 | 463.0109123 |
| QKTGTAEMSSILEER            | Q03265 | 0.02055588 | N-term +28.03 Da, K +28.03 Da,              | 3174.650879 | 3 | 579.6291504 | 579.3013463 |
| APAPVLMNQPPQIAPKR          | Q6NZJ6 | 0          | N-term +28.03 Da, K +28.03 Da,              | 3174.910156 | 3 | 629.0300293 | 628.7011152 |
| ENIIDLSNANR                | B5X0G2 | 0          | N-term +28.03 Da,                           | 3175.121094 | 2 | 644.3400269 | 643.8385944 |
| GLFEDTNLCAIHAQR            | P02301 | 0.00080645 | N-term +28.03 Da, K +28.03 Da,              | 3177.22168  | 4 | 450.9899902 | 450.9910881 |
| AKVDATEESDLAQYQYVGR        | P09103 | 0.00114987 | N-term +28.03 Da, K +28.03 Da,              | 3179.101563 | 3 | 679.6799927 | 679.3480133 |
| VISLSGEHSIIGR              | P08228 | 0          | N-term +28.03 Da, K +28.03 Da,              | 3180.251465 | 2 | 698.4006958 | 698.4013616 |
| QKTGTAEMSSILEER            | Q03265 | 0          | N-term +28.03 Da, K +28.03 Da,              | 3180.326904 | 2 | 868.9391479 | 868.4483813 |
| ANLFASEGQPGKVIEWQAKR       | Q91V76 | 0          | N-term +28.03 Da, K +28.03 Da,              | 3182.864502 | 4 | 557.3206177 | 557.3205795 |
| AKVDATEESDLAQYQYVGR        | P09103 | 0          | N-term +28.03 Da, K +28.03 Da,              | 3185.223145 | 2 | 1018.52002  | 1018.518382 |
| HGGLSPSIDLTHIR             | P62715 | 0.00534402 | N-term +28.03 Da, K +28.03 Da, C +57.02 Da, | 3189.807861 | 3 | 549.289978  | 549.293402  |
| GESSELDLQIR                | Q9QXT0 | 0          | N-term +28.03 Da,                           | 3190.976318 | 2 | 666.3435059 | 666.3437099 |
| ALIGTQANVTKELEK            | Q9DBC0 | 0          | N-term +28.03 Da, K +28.03 Da,              | 3192.629395 | 3 | 567         | 566.9964742 |
| VISLSGEHSIIGR              | P08228 | 0          | N-term +28.03 Da,                           | 3196.554443 | 3 | 465.9364929 | 465.9366666 |

|                               |        |            |                                            |             |   |             |             |
|-------------------------------|--------|------------|--------------------------------------------|-------------|---|-------------|-------------|
| AGEDFSIVASDTR                 | O09061 | 0          | N-term +28.03 Da,                          | 3198.744629 | 2 | 698.3400269 | 698.3411674 |
| EDQMAVEKLSDGIR                | Q93092 | 0.00083577 | N-term +28.03 Da, K +28.03 Da,C +57.02 Da, | 3199.182861 | 3 | 549.6195679 | 549.6187866 |
| SLPDICYR                      | P53996 | 0.01413534 | N-term +28.03 Da, K +28.03 Da,C +57.02 Da, | 3202.625    | 2 | 526.2647705 | 526.2656869 |
| LGFEPAEQPVR                   | P97825 | 0          | N-term +28.03 Da,                          | 3203.833984 | 2 | 693.3599854 | 693.3566199 |
| HVGDLGNVTAGKDGVANVSIEDR       | P08228 | 0          | N-term +28.03 Da, K +28.03 Da,             | 3205.758789 | 3 | 794.0800171 | 793.7469479 |
| LWGVNSDEVGGEALGR              | P02088 | 0.0004363  | N-term +28.03 Da, K +28.03 Da,             | 3205.8479   | 3 | 615.3300171 | 614.9951335 |
| ENIIDLSNANR                   | B5X0G2 | 0          | N-term +28.03 Da,                          | 3207.69751  | 2 | 643.8384399 | 643.8385944 |
| HVGDLGNVTAGKDGVANVSIEDR       | P08228 | 0          | N-term +28.03 Da, K +28.03 Da,             | 3207.772949 | 4 | 595.5599976 | 595.56203   |
| SPAVPPAEQDPMKLTQLER           | Q99PL5 | 0          | N-term +28.03 Da, K +28.03 Da,             | 3209.313721 | 4 | 580.8200073 | 580.57398   |
| HVGDLGNVTAGKDGVANVSIEDR       | P08228 | 0          | N-term +28.03 Da, K +28.03 Da,             | 3210.044678 | 2 | 1190.619995 | 1190.116784 |
| ASGASDTPHHQSPSESVPVQVGVGVCMMR | A2A589 | 0          | N-term +28.03 Da, C +57.02 Da,             | 3212.588379 | 4 | 802.8699951 | 802.6208597 |
| LWGVNSDEVGGEALGR              | P02088 | 0          | N-term +28.03 Da, K +28.03 Da,             | 3212.753174 | 3 | 614.9899902 | 614.9951335 |
| MADEALDSGLVSR                 | O35459 | 0          | N-term +28.03 Da,                          | 3213.988037 | 2 | 696.3400269 | 696.3453953 |
| TLSLQDMASR                    | O88543 | 0.0010925  | N-term +28.03 Da,                          | 3214.346436 | 2 | 575.7999878 | 575.3002586 |
| TKLPWDAVGR                    | P54869 | 0          | N-term +28.03 Da, K +28.03 Da,             | 3215.189697 | 3 | 400.2399902 | 400.2362757 |
| VWEGLNVVKTGR                  | P15532 | 0          | N-term +28.03 Da, K +28.03 Da,             | 3215.265137 | 3 | 471.9448853 | 471.9452732 |
| VYEQEQPLSCDEPILNSKSGDNR       | P70296 | 0          | N-term +28.03 Da, K +28.03 Da,             | 3216.719727 | 3 | 912.4400024 | 912.104473  |
| VLSGEDKSNIKAAWGKIG            | P01942 | 0.00042553 | N-term +28.03 Da, K +28.03 Da,             | 3216.946045 | 4 | 497.0400085 | 497.0412069 |
| TTYVTKELQAEIR                 | Q8WURO | 0.00116099 | N-term +28.03 Da, K +28.03 Da,             | 3219.6875   | 3 | 536.6400146 | 536.6382867 |
| SDAPPLTDGIKDR                 | Q9CR21 | 0.03477547 | N-term +28.03 Da, K +28.03 Da,             | 3219.853271 | 3 | 518.6199951 | 518.6226367 |
| GTLDNPSLDETAYER               | O35943 | 0          | N-term +28.03 Da, C +57.02 Da,             | 3220.168457 | 2 | 898.4199829 | 898.4208758 |
| DGVANVSIEDR                   | P08228 | 0          | N-term +28.03 Da, K +28.03 Da,C +57.02 Da, | 3223.185547 | 2 | 601.7999878 | 601.8042202 |
| SICEEFSQADDKGCFR              | Q61838 | 0          | N-term +28.03 Da, C +57.02 Da,             | 3224.701172 | 3 | 711.6506958 | 711.65071   |
| GTLDNPSLDETAYER               | O35943 | 0          | N-term +28.03 Da,                          | 3226.465088 | 3 | 599.6199951 | 599.2830093 |
| SVSDLPKLPKLLK                 | Q9EST5 | 0.00080096 | N-term +28.03 Da, K +28.03 Da,             | 3226.638916 | 4 | 359.9899902 | 359.9917249 |
| NALALAMER                     | Q60692 | 0.00347584 | N-term +28.03 Da,                          | 3227.77417  | 2 | 508.7821655 | 508.781504  |
| GQMPGSGIGTGPGVIQDR            | Q62448 | 0          | N-term +28.03 Da,                          | 3228.236328 | 2 | 878.4500122 | 877.9463397 |
| TTFNVQDGPDPFQDR               | P97493 | 0          | N-term +28.03 Da,                          | 3229.621582 | 2 | 834.3900146 | 834.3866381 |
| AGVEFEKFLKTR                  | P30115 | 0          | N-term +28.03 Da, K +28.03 Da,             | 3232.795654 | 3 | 546.9799805 | 546.6468934 |
| VYVEEVPWKR                    | P25688 | 0          | N-term +28.03 Da, K +28.03 Da,             | 3233.661377 | 3 | 454.5899963 | 454.2589692 |
| SLPDICYR                      | P53996 | 0.00883838 | N-term +28.03 Da, C +57.02 Da,             | 3234.17749  | 2 | 526.2653809 | 526.2656869 |
| TSVLICPDGKTVEAAAHGTVTR        | O88844 | 0          | N-term +28.03 Da, K +28.03 Da,             | 3234.852783 | 4 | 617.8300171 | 617.825798  |
| HVGDLGNVTAGKDGVANVSIEDR       | P08228 | 0          | N-term +28.03 Da, K +28.03 Da,             | 3236.28833  | 3 | 794.0800171 | 793.7469479 |
| SSMGTLPKQVKIVEGPR             | P38060 | 0.00044385 | N-term +28.03 Da, K +28.03 Da,             | 3237.816162 | 4 | 503.2999878 | 503.2999581 |
| AGVEFEKFLKTR                  | P30115 | 0.00110294 | N-term +28.03 Da, K +28.03 Da,             | 3239.349854 | 4 | 410.2368774 | 410.2369892 |
| FNQFPGFKEVR                   | Q62189 | 0.01000938 | N-term +28.03 Da, K +28.03 Da,C +57.02 Da, | 3239.425293 | 3 | 475.5899963 | 475.5943518 |
| HVGDLGNVTAGKDGVANVSIEDR       | P08228 | 0          | N-term +28.03 Da, K +28.03 Da,             | 3239.581787 | 4 | 595.5622559 | 595.56203   |
| IPNQFQGSPPAPSDSVKIEER         | Q9R257 | 0          | N-term +28.03 Da, K +28.03 Da,             | 3239.748779 | 3 | 828.4299927 | 827.7588536 |
| SDAPPLTDGIKDR                 | Q9CR21 | 0          | N-term +28.03 Da, K +28.03 Da,             | 3239.837891 | 2 | 777.9299927 | 777.4303168 |
| HTVYQSVELPETHQMLR             | Q07417 | 0          | N-term +28.03 Da,                          | 3240.998535 | 3 | 699.6900024 | 699.3579662 |

|                            |        |            |                                            |             |   |             |             |
|----------------------------|--------|------------|--------------------------------------------|-------------|---|-------------|-------------|
| KKTLEAEFNNPCPLTPEPGEGPR    | Q8K2Q9 | 0.0439946  | N-term +28.03 Da, C +57.02 Da,             | 3242.94751  | 3 | 889.460022  | 889.12666   |
| MADEALDSGLVSR              | O35459 | 0          | N-term +28.03 Da, K +28.03 Da,             | 3244.251221 | 2 | 696.3400269 | 696.3453953 |
| KEALTYDGALLGDR             | Q9WUK2 | 0.00083752 | N-term +28.03 Da, K +28.03 Da,             | 3244.4021   | 3 | 526.6223145 | 526.6226367 |
| KLVIIEGLDER                | P21107 | 0.00046533 | N-term +28.03 Da, K +28.03 Da,             | 3247.918457 | 3 | 447.9400024 | 447.6097792 |
| FHMTKDMLPGSYPR             | Q9D6J5 | 0          | N-term +28.03 Da, K +28.03 Da,             | 3248.186279 | 3 | 579.2937622 | 579.2934682 |
| SDAPPLTLDGIKDR             | Q9CR21 | 0          | N-term +28.03 Da, K +28.03 Da,             | 3250.616699 | 3 | 518.6224365 | 518.6226367 |
| GTLDNPSSLDLETAYER          | O35943 | 0          | N-term +28.03 Da, K +28.03 Da,C +57.02 Da, | 3250.767578 | 2 | 898.4197388 | 898.4208758 |
| KEALTYDGALLGDR             | Q9WUK2 | 0.00112317 | N-term +28.03 Da, K +28.03 Da,             | 3250.856934 | 2 | 789.9299927 | 789.4303168 |
| LAKVDATEESDLAQQYGV         | P09103 | 0.0007946  | N-term +28.03 Da, K +28.03 Da,             | 3250.944092 | 3 | 717.3800049 | 717.0427014 |
| KLVIIEGLDER                | P21107 | 0.00888607 | N-term +28.03 Da, K +28.03 Da,             | 3252.573975 | 2 | 670.9102173 | 670.9110306 |
| SIAGEFEKISKGANPVEIR        | P63038 | 0.03572403 | N-term +28.03 Da, K +28.03 Da,             | 3252.9729   | 4 | 572.0900269 | 572.0861461 |
| TTTSATSKLIHPDEDISLEER      | E9PW12 | 0          | N-term +28.03 Da, K +28.03 Da,             | 3253.057861 | 4 | 600.5599976 | 600.5629673 |
| SSEGKPYVTKEELYQNLTR        | P16546 | 0          | N-term +28.03 Da, K +28.03 Da,             | 3253.462158 | 4 | 582.3099976 | 582.3126863 |
| KMMADEALDSGLVSR            | O35459 | 0.00111899 | N-term +28.03 Da, K +28.03 Da,             | 3255.746582 | 3 | 560.6199951 | 560.2882719 |
| SAAETVTKGGIMLPEKSQKVLQA    | Q64433 | 0.00890302 | N-term +28.03 Da, K +28.03 Da,             | 3256.942871 | 4 | 639.8699951 | 639.6173822 |
| DAETTLTEL                  | P05784 | 0          | N-term +28.03 Da, K +28.03 Da,             | 3259.039795 | 2 | 588.8088989 | 588.8089713 |
| EGEEMDAGTEEEEEETEKESTEKDEL | P08113 | 0          | N-term +28.03 Da, K +28.03 Da,             | 3259.32373  | 3 | 1029.430054 | 1029.434498 |
| IENPADVSVISSR              | P14206 | 0.00043687 | N-term +28.03 Da,                          | 3259.41748  | 2 | 707.8800049 | 707.8804595 |
| KLVIIESDLER                | P58771 | 0.00651466 | N-term +28.03 Da, K +28.03 Da,             | 3260.465576 | 2 | 685.9199829 | 685.9163132 |
| SIANSNAIQIGHGNVIVR         | Q9QY24 | 0.00115652 | N-term +28.03 Da,                          | 3265.244629 | 3 | 631.0200195 | 631.0217939 |
| DLPETFDAR                  | P10605 | 0.00143524 | N-term +28.03 Da, K +28.03 Da,             | 3266.957764 | 2 | 546.2717285 | 546.2720241 |
| HPTAAVTEKQQMLEQHLQDVR      | P42227 | 0          | N-term +28.03 Da, K +28.03 Da,             | 3268.727539 | 4 | 654.3499756 | 654.3497059 |
| SIANSNAIQIGHGNVIVR         | Q9QY24 | 0          | N-term +28.03 Da,                          | 3268.89502  | 3 | 631.6900024 | 631.0217939 |
| STSSMGTLPKQVKIVEVGPR       | P38060 | 0          | N-term +28.03 Da, K +28.03 Da,             | 3277.909668 | 4 | 550.5700073 | 550.3198852 |
| TSSMGTLPKQVKIVEVGPR        | P38060 | 0          | N-term +28.03 Da, K +28.03 Da,             | 3279.11792  | 4 | 529.0599976 | 528.5618779 |
| SDAPPLTLDGIKDR             | Q9CR21 | 0          | N-term +28.03 Da, K +28.03 Da,             | 3283.984131 | 3 | 518.960022  | 518.6226367 |
| FVSAGIQTSFR                | Q61656 | 0.04490454 | N-term +28.03 Da,                          | 3284.48877  | 2 | 620.8400269 | 620.8378653 |
| FSVEKLGSLR                 | Q922Q1 | 0.01223242 | N-term +28.03 Da, K +28.03 Da,             | 3285.184326 | 3 | 397.9082947 | 397.9080478 |
| SVNVDYSKLLKEGPDF           | Q62425 | 0.02353275 | N-term +28.03 Da, K +28.03 Da,             | 3285.794922 | 3 | 646.6901855 | 646.6909396 |
| VVALGPGGVSMDEKKKEW         | Q64310 | 0.01695419 | N-term +28.03 Da, K +28.03 Da,             | 3286.466797 | 4 | 511.5400085 | 511.2893249 |
| KPIDAWELR                  | P12787 | 0.02004066 | N-term +28.03 Da, K +28.03 Da,             | 3286.748535 | 3 | 433.9100037 | 433.5749574 |
| MGDSASKVISAEALPGR          | Q9D6Y7 | 0          | N-term +28.03 Da, K +28.03 Da,             | 3287.985352 | 3 | 625.6599731 | 625.3277841 |
| ENIIDLSNANR                | B5X0G2 | 0.03483269 | N-term +28.03 Da,                          | 3288.521484 | 2 | 643.8400269 | 643.8385944 |
| SDAPPLTLDGIKDR             | Q9CR21 | 0          | N-term +28.03 Da, K +28.03 Da,             | 3289.174561 | 2 | 777.430481  | 777.4303168 |
| STSSMGTLPKQVKIVEVGPR       | P38060 | 0.00079365 | N-term +28.03 Da, K +28.03 Da,             | 3291.155518 | 3 | 733.7600098 | 733.4240882 |
| AMPVPFTPELKPGR             | Q9JL35 | 0          | N-term +28.03 Da, K +28.03 Da,             | 3291.477539 | 4 | 424.5100098 | 424.5061079 |
| VAPEEHPVLLTEAPLNPKANR      | P60710 | 0          | N-term +28.03 Da, K +28.03 Da,             | 3294.852539 | 4 | 588.8300171 | 588.5824993 |
| IGLEEHLNALDR               | Q8VC30 | 0          | N-term +28.03 Da,                          | 3295.003418 | 3 | 469.9200134 | 469.9245382 |
| DLPETFDAR                  | P10605 | 0.00111359 | N-term +28.03 Da,                          | 3297.300049 | 2 | 546.2717896 | 546.2720241 |
| STSSMGTLPKQVKIVEVGPR       | P38060 | 0.00043141 | N-term +28.03 Da, K +28.03 Da,             | 3298.696533 | 3 | 733.4199829 | 733.4240882 |

|                          |        |            |                                             |             |   |             |             |
|--------------------------|--------|------------|---------------------------------------------|-------------|---|-------------|-------------|
| ALKVPTTEKPTVTNVFR        | Q6NZJ6 | 0          | N-term +28.03 Da, K +28.03 Da,              | 3299.59375  | 4 | 497.0502014 | 497.0503032 |
| SVVAGGPEVTLTPER          | Q8CIM3 | 0          | N-term +28.03 Da,                           | 3301.921631 | 2 | 771.4299927 | 770.4224917 |
| WSHPLLLIPDNR             | Q9QXY6 | 0.01082586 | N-term +28.03 Da,                           | 3304.39917  | 2 | 688.3800049 | 688.377689  |
| LGDLYEEEMR               | P20152 | 0.00113982 | N-term +28.03 Da,                           | 3306.331787 | 2 | 642.2999878 | 641.8028317 |
| TIPKDLAGSIIGKGGQR        | P61979 | 0          | N-term +28.03 Da, K +28.03 Da,              | 3306.540039 | 4 | 449.519989  | 449.5254581 |
| SLFGDSYETQVIAHGQGSSKGPR  | Q78JT3 | 0          | N-term +28.03 Da, K +28.03 Da,              | 3307.897705 | 4 | 620.5700073 | 620.0659425 |
| GQAISLLPDR               | Q8VBW8 | 0.00992248 | N-term +28.03 Da, K +28.03 Da,              | 3308.251465 | 2 | 549.3200073 | 549.3193082 |
| VGSNQAGEYIFER            | Q9EQ20 | 0.00373261 | N-term +28.03 Da,                           | 3308.439209 | 2 | 749.3599854 | 749.370259  |
| AVEEYSCEFGSMK            | Q8VEM8 | 0          | N-term +28.03 Da, K +28.03 Da,              | 3308.529785 | 2 | 796.8499756 | 796.8521963 |
| SLFGDSYETQVIAHGQGSSKGPR  | Q78JT3 | 0.00561056 | N-term +28.03 Da, K +28.03 Da,              | 3311.763184 | 3 | 826.7600098 | 826.4188312 |
| TAEMSSILEER              | Q03265 | 0          | N-term +28.03 Da,                           | 3312.989014 | 2 | 647.3200073 | 647.3213887 |
| KLDYDEASAMLR             | Q99L47 | 0.00343761 | N-term +28.03 Da, K +28.03 Da,              | 3314.800049 | 3 | 528.2641602 | 528.2642322 |
| SDAPPLTLDGIKDR           | Q9CR21 | 0          | N-term +28.03 Da, K +28.03 Da,              | 3315.9104   | 3 | 518.6225586 | 518.6226367 |
| SDAPPLTLDGIKDR           | Q9CR21 | 0          | N-term +28.03 Da, K +28.03 Da,              | 3319.770508 | 2 | 777.4299927 | 777.4303168 |
| GYVKAGPWTPAAVEHPEAVR     | O35490 | 0.0017762  | N-term +28.03 Da, K +28.03 Da,              | 3321.62793  | 4 | 581.0599976 | 580.8075707 |
| ISLGYDVENDR              | P57780 | 0.00281789 | N-term +28.03 Da,                           | 3323.828857 | 2 | 654.8241577 | 654.8251528 |
| VFMDAPVSGGVGAAR          | Q99L13 | 0.00081666 | N-term +28.03 Da,                           | 3324.01416  | 2 | 731.8800049 | 731.3795719 |
| NLPLPPPPPPR              | P61979 | 0.00563287 | N-term +28.03 Da,                           | 3324.115967 | 2 | 611.8699951 | 611.8689679 |
| TVESTSLYNKVAAQGEVVR      | Q8CGC7 | 0          | N-term +28.03 Da, K +28.03 Da,              | 3326.060547 | 3 | 703.3800049 | 703.0513081 |
| MKAVCVLKGDPVQGTIHFQK     | P08228 | 0.02720135 | N-term +28.03 Da, K +28.03 Da,              | 3330.631104 | 4 | 639.5999756 | 639.3525596 |
| KDQGTIEDYVEGLR           | Q60605 | 0.02281152 | N-term +28.03 Da, K +28.03 Da,              | 3334.476563 | 3 | 576.9500122 | 576.952823  |
| VQEAVDAMVKSVER           | Q9CR98 | 0          | N-term +28.03 Da, K +28.03 Da,              | 3338.868896 | 3 | 539.6300049 | 539.6273933 |
| FNVQDGPDFQDR             | P97493 | 0.0011257  | N-term +28.03 Da,                           | 3342.013428 | 2 | 733.3352661 | 733.3389589 |
| VISLSGEHSIIGR            | P08228 | 0          | N-term +28.03 Da, K +28.03 Da,              | 3343.321777 | 3 | 465.9358521 | 465.9366666 |
| FDEIDAIGGAR              | P46471 | 0.00044248 | N-term +28.03 Da, K +28.03 Da,              | 3344.321533 | 2 | 596.7999878 | 596.3038557 |
| NKPDIDAWELR              | P12787 | 0          | N-term +28.03 Da, K +28.03 Da,              | 3344.418701 | 3 | 471.5889282 | 471.5892668 |
| NKPDIDAWELR              | P12787 | 0          | N-term +28.03 Da, K +28.03 Da,              | 3345.623291 | 2 | 706.8822632 | 706.880262  |
| SKVPEIEVTVEGPNNSPQTS AVR | Q9ESZ8 | 0          | N-term +28.03 Da, K +28.03 Da,              | 3345.793701 | 3 | 861.4500122 | 861.1204514 |
| SDAPPLTLDGIKDR           | Q9CR21 | 0          | N-term +28.03 Da, K +28.03 Da,              | 3346.362549 | 3 | 518.6220703 | 518.6226367 |
| SKVPEIEVTVEGPNNSPQTS AVR | Q9ESZ8 | 0          | N-term +28.03 Da, K +28.03 Da,              | 3348.487305 | 3 | 861.1199951 | 861.1204514 |
| SDAPPLTLDGIKDR           | Q9CR21 | 0.00834403 | N-term +28.03 Da, K +28.03 Da,              | 3350.450439 | 2 | 778.4299927 | 777.4303168 |
| HEVSPLQNAEVTLIR          | E9Q7N9 | 0.01276596 | N-term +28.03 Da, K +28.03 Da,              | 3352.420898 | 3 | 579.3300171 | 578.6563405 |
| TTNFSELQSQMQR            | Q8R317 | 0          | N-term +28.03 Da, K +28.03 Da,              | 3353.942383 | 2 | 799.3800049 | 799.3855835 |
| GDGTITTKELGTVMR          | P62204 | 0.00078217 | N-term +28.03 Da, K +28.03 Da,              | 3354.269531 | 3 | 545.960022  | 545.630915  |
| VSSSLPDI CYR             | P53996 | 0.00111152 | N-term +28.03 Da, C +57.02 Da,              | 3357.338379 | 2 | 662.8300171 | 662.8319233 |
| VG YDLVPEPK              | P12787 | 0.00372881 | N-term +28.03 Da, K +28.03 Da,              | 3362.734375 | 2 | 586.831665  | 586.8317173 |
| EQWSNCP TIGQIR           | P10605 | 0          | N-term +28.03 Da, C +57.02 Da,              | 3363.224854 | 2 | 808.9000244 | 808.896118  |
| TQVEGDEEAALLER           | D3Z6I7 | 0.00043649 | N-term +28.03 Da, K +28.03 Da,              | 3365.552734 | 2 | 794.4000244 | 794.3966717 |
| FAHL DATTVLSR            | P56480 | 0.00045537 | N-term +28.03 Da,                           | 3366.002197 | 3 | 454.25      | 453.5857451 |
| VFDKDGNGYISAAELR         | P62204 | 0          | N-term +28.03 Da, K +28.03 Da, C +57.02 Da, | 3366.96875  | 3 | 604.3141479 | 604.3159841 |

|                                |        |            |                                            |             |   |             |             |
|--------------------------------|--------|------------|--------------------------------------------|-------------|---|-------------|-------------|
| FAHLDATTVLSR                   | P56480 | 0.00046275 | N-term +28.03 Da,                          | 3367.517334 | 3 | 453.5899963 | 453.5857451 |
| LTISELKPTYQDR                  | P14094 | 0.02333523 | N-term +28.03 Da, K +28.03 Da,             | 3370.611328 | 3 | 540.9699707 | 540.6382867 |
| GPFPQELVR                      | P15116 | 0.00143318 | N-term +28.03 Da,                          | 3372.758301 | 2 | 536.2999878 | 535.8032937 |
| ATAGDGLIELR                    | P67778 | 0.01193025 | N-term +28.03 Da,                          | 3374.190186 | 2 | 572.3220825 | 572.3220483 |
| SASMNESTPTGITDHIAQGPEPNLEESPKR | Q9CRD0 | 0          | N-term +28.03 Da, K +28.03 Da,             | 3374.357666 | 4 | 813.1500244 | 813.1477649 |
| GPLGLDHMASSIER                 | Q9D0E1 | 0          | N-term +28.03 Da, K +28.03 Da,             | 3374.899414 | 3 | 504.2617188 | 504.2609331 |
| LPPDAEGPHGQFVQDKKVEPW          | P48758 | 0.04636827 | N-term +28.03 Da, K +28.03 Da,             | 3374.998047 | 4 | 615.5700073 | 615.3245908 |
| NKPDIDAWELR                    | P12787 | 0.00081633 | N-term +28.03 Da, K +28.03 Da,C +57.02 Da, | 3375.630371 | 3 | 471.5889587 | 471.5892668 |
| EQWSNCPTIGQIR                  | P10605 | 0          | N-term +28.03 Da, C +57.02 Da,             | 3376.246338 | 2 | 809.9000244 | 808.896118  |
| VLAELYVSDR                     | Q8BP47 | 0.0011583  | N-term +28.03 Da,                          | 3376.341064 | 2 | 596.8300171 | 596.8322488 |
| VGVKPVGSDPDFQPELSGAGSR         | Q8CDN6 | 0.00344828 | N-term +28.03 Da, K +28.03 Da,             | 3379.774902 | 3 | 752.7299805 | 752.3937341 |
| SLTPVAQSDPLVR                  | Q60865 | 0          | N-term +28.03 Da,                          | 3381.128174 | 2 | 705.9000244 | 705.9011946 |
| TYEDYVEGLR                     | Q60605 | 0          | N-term +28.03 Da, K +28.03 Da,             | 3381.616699 | 2 | 637.3099976 | 636.8089713 |
| DDEVDVDGTVEEDLGKSR             | P08113 | 0          | N-term +28.03 Da, K +28.03 Da,             | 3385.072998 | 2 | 1017.47998  | 1017.47912  |
| DDEVDVDGTVEEDLGKSR             | P08113 | 0          | N-term +28.03 Da, K +28.03 Da,             | 3386.232422 | 3 | 678.6550293 | 678.6551722 |
| NVLASEPEIPK GIR                | Q9WTP6 | 0          | N-term +28.03 Da, K +28.03 Da,             | 3386.662109 | 3 | 526.9799805 | 526.9786431 |
| NLPLPPPPPPR                    | P61979 | 0.01610018 | N-term +28.03 Da,                          | 3387.365479 | 2 | 612.3699951 | 611.8689679 |
| MKFNPFVTS DR                   | P61255 | 0          | N-term +28.03 Da, K +28.03 Da,             | 3388.388428 | 3 | 466.5799866 | 466.5797141 |
| LPPDAEGPHGQFVQDKKVEPW          | P48758 | 0.00176741 | N-term +28.03 Da, K +28.03 Da,C +57.02 Da, | 3398.275879 | 4 | 615.3200073 | 615.3245908 |
| SPTWFGIPRLER                   | Q9ESZ8 | 0.00143164 | N-term +28.03 Da, K +28.03 Da,C +57.02 Da, | 3398.504639 | 3 | 495.9500122 | 496.2770229 |
| AGAESDGGQFQFTGIK KY            | Q78IK2 | 0.00113422 | N-term +28.03 Da, K +28.03 Da,             | 3398.770996 | 3 | 645         | 644.3351559 |
| EQEVDNELQELSTQGSR              | Q06890 | 0          | N-term +28.03 Da, K +28.03 Da,             | 3400.11084  | 2 | 1039.48999  | 1038.987644 |
| AVDATVNQVLASR                  | Q922R8 | 0          | N-term +28.03 Da,                          | 3403.617676 | 2 | 686.8900146 | 686.383169  |
| KADASSLTVDVTPASKVPTTVEDR       | Q99JX3 | 0.00042644 | N-term +28.03 Da, K +28.03 Da,             | 3404.398438 | 4 | 665.8599854 | 665.3603655 |
| ISFHLPVNSR                     | Q9D1D4 | 0.00109051 | N-term +28.03 Da, K +28.03 Da,C +57.02 Da, | 3407.296875 | 3 | 399.8958435 | 399.896142  |
| EQEVDNELQELSTQGSR              | Q06890 | 0          | N-term +28.03 Da,                          | 3407.855225 | 3 | 693.3300171 | 692.9941879 |
| GLPPSGSWQDLKD HMR              | Q6PDM2 | 0          | N-term +28.03 Da, K +28.03 Da,             | 3410.812256 | 4 | 470.7399902 | 470.7425417 |
| TINEVENQILTR                   | P57780 | 0          | N-term +28.03 Da, K +28.03 Da,C +57.02 Da, | 3412.523926 | 2 | 729.4000244 | 729.4015591 |
| LIGDAAKNQLTSPNPENTVFDAKR       | P20029 | 0          | N-term +28.03 Da, K +28.03 Da,C +57.02 Da, | 3415.43335  | 4 | 647.3527222 | 647.3526087 |
| EIYKTYFQGSLPAR                 | P52760 | 0.02054398 | N-term +28.03 Da, K +28.03 Da,             | 3419.457764 | 3 | 576.9799805 | 576.9821648 |
| VFDKDGNGYISAAELR               | P62204 | 0          | N-term +28.03 Da, K +28.03 Da,             | 3420.871826 | 3 | 604.6500244 | 604.3159841 |
| FNPDVSWDR                      | Q62425 | 0.00112402 | N-term +28.03 Da, K +28.03 Da,C +57.02 Da, | 3422.211182 | 2 | 582.2772217 | 582.2776406 |
| DDEVDVDGTVEEDLGKSR             | P08113 | 0          | N-term +28.03 Da, K +28.03 Da,             | 3422.484375 | 3 | 678.6599731 | 678.6551722 |
| LIGDAAKNQLTSPNPENTVFDAKR       | P20029 | 0          | N-term +28.03 Da, K +28.03 Da,C +57.02 Da, | 3422.586914 | 3 | 862.7999878 | 862.8010528 |
| SDAPPLTLDG IKDR                | Q9CR21 | 0          | N-term +28.03 Da, K +28.03 Da,C +57.02 Da, | 3423.075439 | 3 | 518.960022  | 518.6226367 |
| SGSAMNVVFESEDMKR               | Q8C196 | 0          | N-term +28.03 Da, K +28.03 Da,             | 3427.477539 | 3 | 614.960022  | 614.9623363 |
| ELQQAVLQMEQR                   | Q02819 | 0          | N-term +28.03 Da,                          | 3429.890137 | 2 | 750.8942261 | 750.8955865 |
| TNVEDVLNAR                     | Q9CR29 | 0.00082679 | N-term +28.03 Da,                          | 3429.977783 | 2 | 579.8099976 | 579.8093052 |
| VNFTVDQIR                      | P58252 | 0          | N-term +28.03 Da, K +28.03 Da,C +57.02 Da, | 3431.062988 | 2 | 560.3092041 | 560.3114832 |
| EREAEQRGREAE R                 | Q06666 | 0.00833601 | N-term +28.03 Da,                          | 3431.77002  | 2 | 901.460022  | 900.4646083 |

|                             |        |            |                                            |             |   |             |             |
|-----------------------------|--------|------------|--------------------------------------------|-------------|---|-------------|-------------|
| VFVTGPLPAEGR                | Q91Z53 | 0.00144144 | N-term +28.03 Da,                          | 3432.172363 | 2 | 635.8599854 | 635.8613404 |
| GVKIMGTSPLQIDR              | Q8C196 | 0.0008261  | N-term +28.03 Da, K +28.03 Da,C +57.02 Da, | 3435.352295 | 3 | 524.2999878 | 524.3043616 |
| VFVTGPLPAEGR                | Q91Z53 | 0.00080678 | N-term +28.03 Da,                          | 3436.517334 | 2 | 636.3599854 | 635.8613404 |
| DLSSSDLSTASKIVK             | Q61838 | 0          | N-term +28.03 Da, K +28.03 Da,             | 3439.386719 | 3 | 545.9799805 | 545.6452188 |
| LVGGKDFEQPLAISR             | O70400 | 0          | N-term +28.03 Da, K +28.03 Da,             | 3439.842041 | 3 | 562.6599731 | 562.6576811 |
| DPSPKKEESYSWGLR             | Q99P27 | 0          | N-term +28.03 Da, K +28.03 Da,C +57.02 Da, | 3441.436523 | 3 | 650.9733887 | 650.9741758 |
| LLNETGDEPFQYKN              | P15105 | 0          | N-term +28.03 Da, K +28.03 Da,             | 3444.711182 | 2 | 862.4299927 | 862.4305143 |
| SGNELIQTYTYEGVEAKR          | P55050 | 0          | N-term +28.03 Da, K +28.03 Da,             | 3445.122803 | 3 | 705.3599854 | 705.3636633 |
| LRYPHPAYATFCR               | Q3UV70 | 0.04483221 | N-term +28.03 Da, K +28.03 Da,C +57.02 Da, | 3445.232178 | 2 | 891.4500122 | 890.9512272 |
| SGLPPSGSWQDLKDHMR           | Q6PDM2 | 0.00885515 | N-term +28.03 Da, K +28.03 Da,             | 3445.53125  | 4 | 492.5       | 492.5005489 |
| SVPDEESKPASSNTQVEGDEEAALLER | D3Z6I7 | 0          | N-term +28.03 Da, K +28.03 Da,             | 3446.430908 | 3 | 982.1400146 | 981.8070392 |
| SEVLQMEPDNVNALKDR           | Q91YW3 | 0          | N-term +28.03 Da, K +28.03 Da,             | 3448.811523 | 3 | 672.0200195 | 672.0139769 |
| SEMQMIEQETPLSAKSSR          | Q99K28 | 0          | N-term +28.03 Da, K +28.03 Da,             | 3449.585693 | 3 | 703.3499756 | 703.3502605 |
| VDVNPNDSSFQIVKNPR           | Q61176 | 0          | N-term +28.03 Da, K +28.03 Da,             | 3450.04834  | 3 | 624.3404541 | 624.3389002 |
| ILGADTSVDLEETGR             | Q03265 | 0          | N-term +28.03 Da, K +28.03 Da,C +57.02 Da, | 3453.02124  | 2 | 802.4123535 | 802.4123217 |
| NLIVEEEDLR                  | A2ASS6 | 0.02100719 | N-term +28.03 Da,                          | 3454.656494 | 2 | 629.3375244 | 629.3378959 |
| EATENPGALIKDIR              | Q8VEE0 | 0.00776699 | N-term +28.03 Da, K +28.03 Da,             | 3455.291504 | 3 | 528.2987061 | 528.298153  |
| AEIDYTFHQAPEVVR             | F7BJK1 | 0          | N-term +28.03 Da,                          | 3456.873535 | 3 | 601.9699707 | 601.6405791 |
| GPLCLQEVDEPPQHALR           | P70296 | 0.00561241 | N-term +28.03 Da, C +57.02 Da,             | 3458.092529 | 3 | 663.3499756 | 663.0070448 |
| RPLQLLGTCAELCR              | Q8BTE6 | 0          | N-term +28.03 Da, K +28.03 Da,C +57.02 Da, | 3459.481934 | 3 | 572.3099976 | 572.3078889 |
| AEIDYTFHQAPEVVR             | F7BJK1 | 0          | N-term +28.03 Da,                          | 3459.694824 | 3 | 601.6400146 | 601.6405791 |
| AWPSQEGQNPSLSSIR            | Q8C196 | 0          | N-term +28.03 Da, K +28.03 Da,             | 3459.805176 | 2 | 892.960022  | 892.9499368 |
| GLTSISNLPKLNKLK             | O35381 | 0          | N-term +28.03 Da, K +28.03 Da,             | 3461.112061 | 4 | 435.7900085 | 435.2854764 |
| LHLGVTSPVLR                 | O89023 | 0.00914826 | N-term +28.03 Da,                          | 3461.923828 | 3 | 407.25      | 407.2555588 |
| KFFPIPVEHLEEEIRVRSADDCKRFR  | P49446 | 0.03051318 | N-term +28.03 Da, K +28.03 Da,             | 3463.065918 | 4 | 840.4400024 | 840.2026765 |
| GLTSISNLPKLNKLK             | O35381 | 0.03521704 | N-term +28.03 Da, K +28.03 Da,             | 3463.270508 | 3 | 580.039978  | 580.0448763 |
| TTFNVQDGPDPFQDR             | P97493 | 0          | N-term +28.03 Da,                          | 3467.894043 | 2 | 834.3900146 | 834.3866381 |
| KAGQQGLSVAFLATHR            | P16332 | 0          | N-term +28.03 Da, K +28.03 Da,C +57.02 Da, | 3469.628418 | 3 | 619.0100098 | 619.0110062 |
| MKVFTGPLPAEGR               | Q91Z53 | 0          | N-term +28.03 Da, K +28.03 Da,C +57.02 Da, | 3469.704102 | 3 | 520.2999878 | 519.9655686 |
| FNPDVSWDR                   | Q62425 | 0.0008058  | N-term +28.03 Da,                          | 3469.807129 | 2 | 582.2800293 | 582.2776406 |
| FGPITTDIR                   | Q9D6Y7 | 0.00142908 | N-term +28.03 Da, C +57.02 Da,             | 3475.2229   | 2 | 524.2964478 | 524.2953016 |
| IQLVEEELDR                  | P21107 | 0.01720047 | N-term +28.03 Da, K +28.03 Da,C +57.02 Da, | 3477.176758 | 2 | 636.3499756 | 636.3457209 |
| VAVDAPVSSVALR               | Q64374 | 0.00113593 | N-term +28.03 Da,                          | 3477.281982 | 2 | 656.8900146 | 656.38518   |
| ELSKTYIIGELHPDDR            | P56395 | 0.00045956 | N-term +28.03 Da, K +28.03 Da,             | 3478.3479   | 3 | 648.3499756 | 648.0141939 |
| SGLPPSGSWQDLKDHMR           | Q6PDM2 | 0          | N-term +28.03 Da, K +28.03 Da,             | 3478.459961 | 4 | 492.75      | 492.5005489 |
| SDVYQEMPAQLR                | P50136 | 0          | N-term +28.03 Da, K +28.03 Da,             | 3478.670654 | 2 | 732.8599854 | 732.8612124 |
| TLGEECELETMTGEKVK           | P12710 | 0          | N-term +28.03 Da, K +28.03 Da,             | 3480.675049 | 3 | 680.6699829 | 680.0076118 |
| AWPSQEGQNPSLSSIR            | Q8C196 | 0          | N-term +28.03 Da,                          | 3480.888672 | 2 | 892.460022  | 892.9499368 |
| AALEFLNR                    | Q60864 | 0.04997342 | N-term +28.03 Da,                          | 3482.329346 | 2 | 481.2767334 | 481.2769116 |
| ELSKTYIIGELHPDDR            | P56395 | 0.00116009 | N-term +28.03 Da, K +28.03 Da,             | 3482.533691 | 3 | 648.0100098 | 648.0141939 |

|                             |        |            |                                             |             |   |             |             |
|-----------------------------|--------|------------|---------------------------------------------|-------------|---|-------------|-------------|
| TASAGIQVVGDDLTVTNPKR        | P17182 | 0          | N-term +28.03 Da, K +28.03 Da,              | 3483.3396   | 3 | 700.7199707 | 700.0549411 |
| GLPPSGSWQDLKDHMR            | Q6PDM2 | 0          | N-term +28.03 Da, K +28.03 Da,              | 3486.444824 | 4 | 470.7399902 | 470.7425417 |
| AVELEGEQPISVPPSTNHTVYR      | Q8CHT0 | 0.00045558 | N-term +28.03 Da,                           | 3487.393555 | 3 | 818.0900269 | 817.7553319 |
| NGEWHTIILASDKR              | B5X0G2 | 0          | N-term +28.03 Da, K +28.03 Da,              | 3488.992432 | 3 | 566.3099976 | 565.9774137 |
| NGEWHTIILASDKR              | B5X0G2 | 0.00590939 | N-term +28.03 Da, K +28.03 Da,              | 3490.458008 | 2 | 849.4500122 | 848.4624823 |
| TLGEECELETMTGEKVK           | P12710 | 0          | N-term +28.03 Da, K +28.03 Da,              | 3490.722656 | 2 | 1020        | 1019.507779 |
| GMLDPVEKDANNMPVTAR          | D3Z0Y2 | 0.00345781 | N-term +28.03 Da, K +28.03 Da,              | 3491.421631 | 3 | 672.0100098 | 672.0080571 |
| HAPFETDISTLTR               | Q9QXD6 | 0.00533333 | N-term +28.03 Da,                           | 3492.642334 | 3 | 505.9299927 | 505.9315816 |
| HAPFETDISTLTR               | Q9QXD6 | 0.00403497 | N-term +28.03 Da,                           | 3495.868652 | 2 | 758.3913574 | 758.3937341 |
| AGAKAISSDMFFGR              | Q99K28 | 0          | N-term +28.03 Da, K +28.03 Da,              | 3496.141846 | 3 | 505.2600098 | 505.2659068 |
| AKDIAYLGITDVR               | P41317 | 0.02982163 | N-term +28.03 Da, K +28.03 Da,              | 3499.029541 | 3 | 497.9599915 | 497.6240886 |
| AAAGVEFEKFLKTR              | P30115 | 0          | N-term +28.03 Da, K +28.03 Da,              | 3499.105225 | 4 | 445.7550659 | 445.7555463 |
| TVGGVMTKLIPR                | P20029 | 0.00083507 | N-term +28.03 Da, K +28.03 Da,              | 3499.180664 | 3 | 443.2799988 | 443.2758542 |
| TTPSVVAFADGER               | P38647 | 0          | N-term +28.03 Da, K +28.03 Da,              | 3499.38623  | 2 | 740.3800049 | 739.877917  |
| LRPGDCEVCISYLGR             | Q9CXI5 | 0.0037112  | N-term +28.03 Da, C +57.02 Da,              | 3500.094482 | 3 | 608.2999878 | 608.3028039 |
| DALNQATSQVESKQNTLAKLR       | Q99PL5 | 0          | N-term +28.03 Da, K +28.03 Da,              | 3500.948242 | 4 | 633.0999756 | 632.8474249 |
| AAEGFKGKILF                 | P09103 | 0.03488053 | N-term +28.03 Da, K +28.03 Da,              | 3501.878418 | 3 | 422.2599182 | 422.2603098 |
| TTFNVQDGPDPFQDR             | P97493 | 0          | N-term +28.03 Da,                           | 3501.960449 | 2 | 834.3842773 | 834.3866381 |
| DALEEDNVLVLKK               | P09103 | 0          | N-term +28.03 Da, K +28.03 Da,              | 3504.025391 | 3 | 566.9899902 | 566.9889855 |
| IGGSMDAKGSFPWQAK            | Q61646 | 0.01903367 | N-term +28.03 Da, K +28.03 Da,              | 3504.635254 | 3 | 588.9799805 | 588.6431547 |
| TAGSPTDFLEER                | P27546 | 0          | N-term +28.03 Da, K +28.03 Da,              | 3505.518799 | 2 | 675.829834  | 675.8304354 |
| DPLVPEIAR                   | P61079 | 0.00913098 | N-term +28.03 Da,                           | 3507.278076 | 2 | 519.7999878 | 519.3031267 |
| DALNQATSQVESKQNTLAKLR       | Q99PL5 | 0          | N-term +28.03 Da, K +28.03 Da,              | 3508.86377  | 3 | 843.7999878 | 843.4608077 |
| DATEESDLAQYQVGR             | P09103 | 0          | N-term +28.03 Da,                           | 3509.16626  | 2 | 855.9000244 | 855.4024857 |
| SAKVIQGSLSLPPQAVR           | Q9Z2V4 | 0.00113464 | N-term +28.03 Da, K +28.03 Da,              | 3509.626709 | 3 | 609.3599854 | 609.0229119 |
| AYEPVWAIGTGKTATPQQAQEVHEKLR | P17751 | 0          | N-term +28.03 Da, K +28.03 Da,              | 3510.393555 | 4 | 773.9199829 | 773.9186475 |
| VFDKDGNGYISAAELR            | P62204 | 0          | N-term +28.03 Da, K +28.03 Da,              | 3511.767822 | 3 | 604.6436157 | 604.3159841 |
| TLGEECELETMTGEKVK           | P12710 | 0          | N-term +28.03 Da, K +28.03 Da,              | 3512.447754 | 3 | 680.6799927 | 680.0076118 |
| AAGGVEHQQLDLAQKHLSSVSR      | Q9CZ13 | 0          | N-term +28.03 Da, K +28.03 Da,              | 3514.230469 | 4 | 626.0999756 | 625.8462219 |
| FVDIPSKIICR                 | Q64374 | 0.00077912 | N-term +28.03 Da, C +57.02 Da,              | 3514.689697 | 3 | 468.9400024 | 468.6074925 |
| DLGNVTAGKDGVANVSIEDR        | P08228 | 0          | N-term +28.03 Da, K +28.03 Da, C +57.02 Da, | 3515.725098 | 3 | 696.0348511 | 696.0306843 |
| VSTSSMGTLPKQVKIVEVGPR       | P38060 | 0          | N-term +28.03 Da, K +28.03 Da,              | 3516.070313 | 4 | 575.5900269 | 575.0869888 |
| VFDKDGNGYISAAELR            | P62204 | 0.02514124 | N-term +28.03 Da, K +28.03 Da,              | 3516.814453 | 2 | 906.4606323 | 905.9703379 |
| AVPSLGLKTDIIPGR             | P00405 | 0          | N-term +28.03 Da, K +28.03 Da,              | 3517.7229   | 3 | 517.6461792 | 517.6470047 |
| AVELEGEQPISVPPSTNHTVYR      | Q8CHT0 | 0.01248858 | N-term +28.03 Da, K +28.03 Da,              | 3519.538818 | 3 | 817.75      | 817.7553319 |
| NFDEILR                     | O08709 | 0.0210314  | N-term +28.03 Da, K +28.03 Da,              | 3519.664307 | 2 | 467.75      | 467.7532695 |
| SGYPTLKIFR                  | P08003 | 0.00043271 | N-term +28.03 Da, K +28.03 Da,              | 3519.855225 | 3 | 413.25      | 413.2482928 |
| EAPIDKKGNFNIEFTR            | Q3THE2 | 0.00084388 | N-term +28.03 Da, K +28.03 Da,              | 3520.678467 | 4 | 532.539978  | 532.2874766 |
| LRPGDCEVCISYLGR             | Q9CXI5 | 0.00115562 | N-term +28.03 Da, K +28.03 Da, C +57.02 Da, | 3520.770996 | 3 | 608.9699707 | 608.3028039 |
| RKGMNTLVGYDLVPEPK           | P12787 | 0.02257143 | N-term +28.03 Da, K +28.03 Da,              | 3521.354248 | 3 | 668.3800049 | 667.711569  |

|                                       |        |            |                                            |             |   |             |             |
|---------------------------------------|--------|------------|--------------------------------------------|-------------|---|-------------|-------------|
| APAGILNGKLVSAQIR                      | Q922D8 | 0          | N-term +28.03 Da, K +28.03 Da,             | 3522.666016 | 3 | 555.6799927 | 555.3454372 |
| KDENATLDGGDVLFTGR                     | Q9CWS0 | 0          | N-term +28.03 Da, K +28.03 Da,             | 3523.436279 | 3 | 621.9899902 | 621.9864155 |
| SGIPETVPLSTVNR                        | Q8VCH0 | 0          | N-term +28.03 Da,                          | 3523.789063 | 2 | 749.4199829 | 749.4172092 |
| DMLDLGAAR                             | Q9D3D9 | 0.00404313 | N-term +28.03 Da,                          | 3527.670898 | 2 | 495.2600098 | 495.2578619 |
| AEKVLKQALER                           | Q8C0S4 | 0.01329707 | N-term +28.03 Da, K +28.03 Da,C +57.02 Da, | 3528.238037 | 3 | 456.9500122 | 456.9572903 |
| AIDLIAQQPVNEVEHR                      | P52503 | 0          | N-term +28.03 Da,                          | 3529.095215 | 3 | 620.6699829 | 620.6706498 |
| MQIFVKTLTGK                           | P0CG49 | 0          | N-term +28.03 Da, K +28.03 Da,             | 3529.272217 | 3 | 450.6117859 | 450.6123549 |
| YYCPWPSPERSAQCKQIPFDTTNNRKIR          | A2ARA8 | 0.03940217 | N-term +28.03 Da, K +28.03 Da,             | 3529.36377  | 4 | 875.6799927 | 875.689505  |
| TGTPVLGGLSYR                          | Q61176 | 0.00078278 | N-term +28.03 Da,                          | 3531.029053 | 2 | 624.8504639 | 624.8509729 |
| SVAPAPVLMNQPPIAPKR                    | Q6NZJ6 | 0          | N-term +28.03 Da, K +28.03 Da,             | 3532.73999  | 3 | 691.0700073 | 690.7345964 |
| MQIFVKTLTGK                           | P0CG49 | 0          | N-term +28.03 Da, K +28.03 Da,             | 3536.332764 | 2 | 675.4099731 | 675.4148941 |
| AIGTIQEDYLR                           | Q6ZWQ9 | 0          | N-term +28.03 Da, C +57.02 Da,             | 3536.425293 | 2 | 653.8499756 | 653.8537129 |
| EAPIDKKGNFNYIEFTR                     | Q3THE2 | 0.00043535 | N-term +28.03 Da, K +28.03 Da,             | 3536.517822 | 3 | 709.3699951 | 709.3808767 |
| LAKVDATEESDLAQYQYGVV                  | P09103 | 0          | N-term +28.03 Da, K +28.03 Da,C +57.02 Da, | 3537.749512 | 3 | 717.0420532 | 717.0427014 |
| GSTAPVGGGSFPTITPR                     | Q922R8 | 0          | N-term +28.03 Da, K +28.03 Da,             | 3538.036865 | 2 | 815.4299927 | 815.4333908 |
| TTFNVQDGPDPFQDR                       | P97493 | 0          | N-term +28.03 Da,                          | 3538.785889 | 2 | 834.3900146 | 834.3866381 |
| TVGLGLPMSR                            | Q99KN9 | 0.00622543 | N-term +28.03 Da, K +28.03 Da,             | 3539.30542  | 2 | 530.3099976 | 529.8049791 |
| STNTVGLGLPMSR                         | Q99KN9 | 0.00042481 | N-term +28.03 Da, K +28.03 Da,C +57.02 Da, | 3539.962158 | 2 | 681.3599854 | 680.8662974 |
| TMTLGDIVYKR                           | P12710 | 0          | N-term +28.03 Da, K +28.03 Da,             | 3540.305176 | 3 | 451.5899963 | 451.5917311 |
| DIVNWLKKR                             | P09103 | 0.00112909 | N-term +28.03 Da, K +28.03 Da,             | 3541.893555 | 3 | 419.2674255 | 419.2676872 |
| VFDKDGNGYISAAELR                      | P62204 | 0.00081202 | N-term +28.03 Da, K +28.03 Da,             | 3543.016357 | 3 | 604.6432495 | 604.3159841 |
| VGVPPTETGALTLNR                       | Q8BWT1 | 0          | N-term +28.03 Da, K +28.03 Da,C +57.02 Da, | 3543.453613 | 2 | 728.9099731 | 728.4119267 |
| GPVDIGPEYQQDLDR                       | P97450 | 0          | N-term +28.03 Da,                          | 3543.542725 | 2 | 865.4199829 | 865.4232208 |
| VQAWYMEDESTADPR                       | Q99JT9 | 0          | N-term +28.03 Da, K +28.03 Da,C +57.02 Da, | 3543.727539 | 2 | 848.8800049 | 848.8854165 |
| TTFNVQDGPDPFQDR                       | P97493 | 0          | N-term +28.03 Da,                          | 3544.84668  | 3 | 556.5921021 | 556.5935176 |
| LAKVDATEESDLAQYQYGVV                  | P09103 | 0.01552239 | N-term +28.03 Da, K +28.03 Da,             | 3547.94458  | 4 | 538.2800293 | 538.0338452 |
| GIHETTFNSIMKCDVDIR                    | P60710 | 0.00045351 | N-term +28.03 Da, K +28.03 Da,C +57.02 Da, | 3548.185303 | 4 | 549.0200195 | 548.776419  |
| HLEATENPGALIKDIR                      | Q8VEE0 | 0.00911376 | N-term +28.03 Da, K +28.03 Da,             | 3548.552246 | 3 | 611.6799927 | 611.6791452 |
| GPVDGQGDNPGSQAAEHGADTAVPSDGDKKLPEMDID | Q61316 | 0.00893997 | N-term +28.03 Da, K +28.03 Da,             | 3549.856934 | 4 | 944.9400024 | 944.4404426 |
| LPLTESQIVQKEAEQAER                    | Q9JIX8 | 0          | N-term +28.03 Da, K +28.03 Da,             | 3550.0896   | 3 | 709.0599976 | 709.0548298 |
| NKELDPVQKLFVDKIR                      | P97450 | 0          | N-term +28.03 Da, K +28.03 Da,C +57.02 Da, | 3550.173584 | 4 | 514.3099976 | 514.3147655 |
| STAPVGGGSFPTITPR                      | Q922R8 | 0          | N-term +28.03 Da,                          | 3550.340332 | 2 | 787.4199829 | 786.9226587 |
| SQATDFGEALVR                          | Q35887 | 0.00565912 | N-term +28.03 Da, K +28.03 Da,             | 3551.395752 | 2 | 661.3400269 | 661.3409699 |
| VTPGELQKQSMLEMPER                     | Q8K2T4 | 0.01718009 | N-term +28.03 Da, K +28.03 Da,             | 3552.936768 | 3 | 719.710022  | 719.7062669 |
| STNTVGLGLPMSR                         | Q99KN9 | 0          | N-term +28.03 Da, K +28.03 Da,             | 3553.218262 | 2 | 681.8599854 | 680.8662974 |
| TNTMTLGDIVYKR                         | P12710 | 0          | N-term +28.03 Da, K +28.03 Da,             | 3554.31543  | 3 | 523.289978  | 523.2886003 |
| INPDGSQSVEVPYAR                       | Q9QXT0 | 0          | N-term +28.03 Da,                          | 3554.662109 | 2 | 879.4500122 | 879.9546879 |
| INPDGSQSVEVPYAR                       | Q9QXT0 | 0          | N-term +28.03 Da,                          | 3559.462402 | 2 | 879.9500122 | 879.9546879 |
| TNIPLQFR                              | O08692 | 0.01877934 | N-term +28.03 Da,                          | 3560.072266 | 2 | 508.7985535 | 508.7980111 |
| NKELDPVQKLFVDKIR                      | P97450 | 0          | N-term +28.03 Da, K +28.03 Da,C +57.02 Da, | 3560.71167  | 3 | 685.4199829 | 685.4172618 |

|                                |        |            |                                            |             |   |             |             |
|--------------------------------|--------|------------|--------------------------------------------|-------------|---|-------------|-------------|
| AGPLCLQEVDPEPPQHALR            | P70296 | 0          | N-term +28.03 Da, C +57.02 Da,             | 3564.177246 | 3 | 686.6854248 | 686.6860829 |
| LMDQNLK                        | D3Z2H9 | 0.01221747 | N-term +28.03 Da, K +28.03 Da,             | 3564.518311 | 2 | 458.75      | 459.2598729 |
| AADISSKSPVAVQGSKINLIYSR        | O35459 | 0          | N-term +28.03 Da, K +28.03 Da,             | 3564.704346 | 4 | 623.1099854 | 622.858798  |
| APNVLASEPEIPKQIR               | Q9WTP6 | 0          | N-term +28.03 Da, K +28.03 Da,             | 3565.721191 | 3 | 583.0100098 | 583.0086025 |
| APNVLASEPEIPKQIR               | Q9WTP6 | 0          | N-term +28.03 Da, K +28.03 Da,             | 3568.204834 | 3 | 583.6799927 | 583.0086025 |
| LAKVDATEESDLAQYQGVGR           | P09103 | 0          | N-term +28.03 Da, K +28.03 Da,             | 3569.011719 | 3 | 717.3800049 | 717.0427014 |
| IQLVEEELDR                     | P21107 | 0.00042974 | N-term +28.03 Da,                          | 3569.162842 | 2 | 636.3400269 | 636.3457209 |
| TTFNVQDGPDPFQDR                | P97493 | 0          | N-term +28.03 Da, K +28.03 Da,C +57.02 Da, | 3569.988037 | 2 | 834.3861084 | 834.3866381 |
| DKNLKPIKPMQFLGDEETVR           | Q9DBJ1 | 0.02908277 | N-term +28.03 Da, K +28.03 Da,             | 3572.349609 | 4 | 618.5999756 | 618.3489086 |
| TANALALAMER                    | Q60692 | 0          | N-term +28.03 Da,                          | 3577.057617 | 2 | 594.8237915 | 594.8239007 |
| ERQAKLAEEKMRKEEEEAQ            | O88346 | 0.04508857 | N-term +28.03 Da, K +28.03 Da,             | 3580.330078 | 4 | 619.0999756 | 618.8427194 |
| ALEVGDIVKVTR                   | P47941 | 0          | N-term +28.03 Da, K +28.03 Da,C +57.02 Da, | 3583.662842 | 3 | 452.9500122 | 452.6134123 |
| VSGQSSFSGTSPAADNIEKEALPR       | Q9CRD0 | 0          | N-term +28.03 Da, K +28.03 Da,C +57.02 Da, | 3584.923584 | 3 | 806.4099731 | 806.4150869 |
| AQDFGVVEESCFPYTAKDSPCKPR       | P97821 | 0          | N-term +28.03 Da, K +28.03 Da,             | 3585.104248 | 4 | 719.3400269 | 718.8465678 |
| GAVSPGLTASGVVSGPAAAPAAQHRL     | P46938 | 0          | N-term +28.03 Da,                          | 3586.483154 | 3 | 825.1199951 | 824.450354  |
| VTLDEAIKITNR                   | P57746 | 0          | N-term +28.03 Da, K +28.03 Da,             | 3587.136475 | 3 | 476.9517212 | 476.9522053 |
| KGNDISSGTVLSDYVSGSPSGTGLHR     | P70296 | 0.00108735 | N-term +28.03 Da, K +28.03 Da,             | 3587.617432 | 4 | 679.3499756 | 679.3490607 |
| SGGPPVDIGPEYQQDLDR             | P97450 | 0          | N-term +28.03 Da,                          | 3588.294434 | 2 | 937.4500122 | 937.4499674 |
| LHTVYQSVLPEPTHQMLR             | Q07417 | 0          | N-term +28.03 Da,                          | 3589.933594 | 3 | 737.0499878 | 737.0526543 |
| QASGGPVDIGPEYQQDLDR            | P97450 | 0          | N-term +28.03 Da,                          | 3592.879395 | 2 | 1037.48999  | 1036.997814 |
| NKELDPVQKLFVDKIR               | P97450 | 0          | N-term +28.03 Da, K +28.03 Da,C +57.02 Da, | 3592.979004 | 4 | 514.5700073 | 514.3147655 |
| HVGDLGNVTAGKDGVANVSIEDR        | P08228 | 0          | N-term +28.03 Da, K +28.03 Da,             | 3593.150391 | 3 | 794.0700073 | 793.7469479 |
| EIEPPPEMPPWQKR                 | Q3TJZ6 | 0.00143781 | N-term +28.03 Da, K +28.03 Da,C +57.02 Da, | 3593.761963 | 3 | 629.3200073 | 629.6659594 |
| LHTVYQSVLPEPTHQMLR             | Q07417 | 0          | N-term +28.03 Da,                          | 3596.65332  | 4 | 553.5499878 | 553.0413099 |
| FAKLVRPPVQVYGIAGR              | Q9DBZ0 | 0.04532046 | N-term +28.03 Da, K +28.03 Da,             | 3596.918701 | 4 | 497.2999878 | 497.0478289 |
| ASGGPVDIGPEYQQDLDR             | P97450 | 0          | N-term +28.03 Da,                          | 3597.03125  | 2 | 973.460022  | 972.9685245 |
| HVGDLGNVTAGKDGVANVSIEDR        | P08228 | 0          | N-term +28.03 Da, K +28.03 Da,             | 3598.509521 | 2 | 1190.099976 | 1190.116784 |
| GLLEKLEKTEYDVR                 | Q61176 | 0          | N-term +28.03 Da, K +28.03 Da,             | 3602.108643 | 3 | 593.0100098 | 593.0083799 |
| ASQTEGELKVTVLKEKFPFR           | Q8CEI1 | 0          | N-term +28.03 Da, K +28.03 Da,             | 3603.268799 | 4 | 600.8508911 | 600.8519784 |
| SLADAINTEFKNTR                 | P20152 | 0          | N-term +28.03 Da, K +28.03 Da,             | 3603.344238 | 3 | 545.9609985 | 545.961541  |
| EISPPHAAAAEEDDDWGEDTTEEAQR     | P59325 | 0          | N-term +28.03 Da, K +28.03 Da,             | 3603.7854   | 3 | 1014.76001  | 1014.430409 |
| SAPVYQPPQQQMTSSYGGYKEPAAPVSIQR | Q61792 | 0          | N-term +28.03 Da, K +28.03 Da,C +57.02 Da, | 3604.034424 | 3 | 1161.25     | 1160.912067 |
| TGTAEMSSILEER                  | Q03265 | 0          | N-term +28.03 Da, K +28.03 Da,             | 3604.669922 | 2 | 727.3499756 | 726.3559604 |
| LRPGDCEVCISYLGR                | Q9CXI5 | 0          | N-term +28.03 Da, C +57.02 Da,             | 3604.778809 | 3 | 608.2999878 | 608.3028039 |
| ASGGPVDIGPEYQQDLDR             | P97450 | 0          | N-term +28.03 Da,                          | 3605.009766 | 3 | 649.3099976 | 648.9814418 |
| VEVTEFEDIKSGYR                 | Q9EQU5 | 0          | N-term +28.03 Da, K +28.03 Da,C +57.02 Da, | 3606.699463 | 3 | 576.633667  | 576.6332017 |
| ETGVDLTKDNMALQR                | P38647 | 0.01       | N-term +28.03 Da, K +28.03 Da,             | 3608.125732 | 2 | 873.4500122 | 873.9563733 |
| TAQCRNTVAAIEEVSQR              | E9PYQ7 | 0.0091109  | N-term +28.03 Da, K +28.03 Da,C +57.02 Da, | 3608.986816 | 2 | 946.4899902 | 945.4785359 |
| KEVDMGLAADVGLTLQR              | O35459 | 0.00177683 | N-term +28.03 Da, K +28.03 Da,             | 3610.081543 | 3 | 587.3300171 | 586.9854694 |
| GPTPAPASPAAEVGSQEALSSSAQSPGR   | D3Z6Q9 | 0          | N-term +28.03 Da,                          | 3610.390137 | 3 | 922.4500122 | 922.1176587 |

|                               |        |            |                                            |             |   |             |             |
|-------------------------------|--------|------------|--------------------------------------------|-------------|---|-------------|-------------|
| SEKPPAIDWAYYR                 | Q9DCX2 | 0          | N-term +28.03 Da, K +28.03 Da,             | 3612.632568 | 3 | 551.289978  | 551.2874766 |
| KEVDMGLAADVGTLQR              | O35459 | 0          | N-term +28.03 Da, K +28.03 Da,             | 3615.427734 | 3 | 586.9899902 | 586.9854694 |
| TALVDQEEKEDVKSCAEFVSGSQLR     | Q9DCX2 | 0          | N-term +28.03 Da, K +28.03 Da,C +57.02 Da, | 3615.5979   | 4 | 728.6199951 | 728.1194813 |
| KEVDMGLAADVGTLQR              | O35459 | 0          | N-term +28.03 Da, K +28.03 Da,             | 3615.705566 | 2 | 879.9799805 | 879.9745659 |
| SDYCNLPLYTKSEAFFRKADGR        | Q4VA61 | 0.00806192 | N-term +28.03 Da, K +28.03 Da,             | 3616.05249  | 3 | 908.4699707 | 908.1267713 |
| FDMDGTLTAPR                   | Q9Z2M7 | 0.00079713 | N-term +28.03 Da,                          | 3617.168457 | 2 | 626.3040161 | 626.3055411 |
| VTLDEAIKITNR                  | P57746 | 0          | N-term +28.03 Da, K +28.03 Da,             | 3618.982178 | 3 | 476.9518433 | 476.9522053 |
| GPTPASPAPAAEVGSQEEALSSSAQSPGR | D3Z6Q9 | 0          | N-term +28.03 Da,                          | 3621.718262 | 2 | 1382.670044 | 1382.67285  |
| HVGDLGNVTAGKDGVANVSIEDR       | P08228 | 0          | N-term +28.03 Da, K +28.03 Da,             | 3624.256592 | 3 | 793.4099731 | 793.7469479 |
| TALVDQEEKEDVKSCAEFVSGSQLR     | Q9DCX2 | 0          | N-term +28.03 Da, C +57.02 Da,             | 3624.557129 | 3 | 970.5       | 970.4902162 |
| LRPGDCEVCISYLGR               | Q9CXI5 | 0          | N-term +28.03 Da, K +28.03 Da,C +57.02 Da, | 3625.624023 | 2 | 911.9481201 | 911.9505677 |
| VFDKDGNGYISAAELR              | P62204 | 0.00044326 | N-term +28.03 Da, K +28.03 Da,             | 3627.599854 | 3 | 604.6400146 | 604.3159841 |
| DDEVVDVDTVEEDLGKSR            | P08113 | 0          | N-term +28.03 Da, K +28.03 Da,             | 3629.383789 | 3 | 678.9899902 | 678.6551722 |
| KGNDISSGTVLSDYVSGPPSGTGLHR    | P70296 | 0          | N-term +28.03 Da, K +28.03 Da,             | 3631.168945 | 4 | 679.5999756 | 679.3490607 |
| KGNDISSGTVLSDYVSGPPSGTGLHR    | P70296 | 0          | N-term +28.03 Da, K +28.03 Da,C +57.02 Da, | 3632.73877  | 3 | 905.460022  | 905.4629888 |
| KELDPVQKLFVDKIR               | P97450 | 0          | N-term +28.03 Da, K +28.03 Da,             | 3634.273926 | 4 | 485.7999878 | 485.8040334 |
| VSTVGSVMVFSEGEAQR             | Q99PL5 | 0          | N-term +28.03 Da,                          | 3634.365723 | 2 | 856.9199829 | 856.4196237 |
| LRPGDCEVCISYLGR               | Q9CXI5 | 0          | N-term +28.03 Da, K +28.03 Da,C +57.02 Da, | 3635.647217 | 3 | 608.302124  | 608.3028039 |
| KELDPVQKLFVDKIR               | P97450 | 0.00343053 | N-term +28.03 Da, K +28.03 Da,             | 3636.387451 | 3 | 647.7399902 | 647.4029524 |
| VSTVGSVMVFSEGEAQR             | Q99PL5 | 0          | N-term +28.03 Da,                          | 3636.562012 | 3 | 571.6199951 | 571.2821746 |
| DDEVVDVDTVEEDLGKSR            | P08113 | 0          | N-term +28.03 Da, K +28.03 Da,             | 3638.033203 | 2 | 1017.97998  | 1017.47912  |
| ADVYRDGTGVVEFVR               | Q6PDM2 | 0          | N-term +28.03 Da,                          | 3638.122803 | 3 | 570.9699707 | 570.965174  |
| SSPLFKFPVR                    | B2RQG2 | 0.00591522 | N-term +28.03 Da, K +28.03 Da,             | 3639.557617 | 3 | 412.25      | 411.9166544 |
| APAGILNGKLVSAQIR              | Q922D8 | 0          | N-term +28.03 Da, K +28.03 Da,             | 3641.681885 | 3 | 555.6699829 | 555.3454372 |
| DLLVDLDHQR                    | Q8VDD5 | 0.00348068 | N-term +28.03 Da,                          | 3642.494629 | 2 | 626.8400269 | 626.3382298 |
| SPADLPKNWDWR                  | Q9WUU7 | 0.00083647 | N-term +28.03 Da, K +28.03 Da,             | 3642.785889 | 3 | 514.2687378 | 514.2684162 |
| SEEAYEKYVKSIEE                | Q91WK5 | 0.0099844  | N-term +28.03 Da, K +28.03 Da,             | 3643.107422 | 3 | 596.9699707 | 596.6365008 |
| SEKPPAIDWAYYR                 | Q9DCX2 | 0          | N-term +28.03 Da, K +28.03 Da,             | 3644.142334 | 3 | 551.2871704 | 551.2874766 |
| SEKPPAIDWAYYR                 | Q9DCX2 | 0.00114899 | N-term +28.03 Da, K +28.03 Da,C +57.02 Da, | 3644.485352 | 2 | 826.4264526 | 826.4275767 |
| TVFSCNLGEKFDETTADGR           | Q05816 | 0.00110783 | N-term +28.03 Da, K +28.03 Da,             | 3645.13501  | 3 | 735.3499756 | 735.0160466 |
| ASGPPKYKDNPFSLGETTFGSR        | Q99K28 | 0.02030162 | N-term +28.03 Da, K +28.03 Da,             | 3646.464844 | 4 | 585.8099976 | 585.556216  |
| TVFSCNLGEKFDETTADGR           | Q05816 | 0          | N-term +28.03 Da, K +28.03 Da,             | 3646.559814 | 3 | 735.0200195 | 735.0160466 |
| TAKNAVITVPAYFNDSQR            | P38647 | 0          | N-term +28.03 Da, K +28.03 Da,             | 3646.765137 | 3 | 684.710022  | 684.3688597 |
| TAPVGGGSFPTITPR               | Q922R8 | 0          | N-term +28.03 Da, K +28.03 Da,             | 3649.234131 | 2 | 743.4099731 | 743.4066441 |
| TAKNAVITVPAYFNDSQR            | P38647 | 0          | N-term +28.03 Da, K +28.03 Da,             | 3651.568848 | 3 | 684.3699951 | 684.3688597 |
| KPWDDETDMTKLEECVR             | O70251 | 0          | N-term +28.03 Da, C +57.02 Da,             | 3652.303467 | 3 | 746.0254517 | 746.0256655 |
| IVANGKILAADESVGTMGNR          | Q91Y97 | 0          | N-term +28.03 Da, K +28.03 Da,             | 3655.678711 | 3 | 710.7199707 | 710.3842927 |
| GVAGPDESDYNPWADR              | Q8BKX1 | 0          | N-term +28.03 Da, K +28.03 Da,             | 3657.891357 | 2 | 888.9000244 | 888.8948276 |
| TPYKTLPEVPKPTVPNDYMTSPAR      | Q8CBW3 | 0          | N-term +28.03 Da, K +28.03 Da,             | 3658.976318 | 4 | 697.6300049 | 697.3753895 |
| SDLELHPPSYPSWSHR              | Q9DOM3 | 0.00042992 | N-term +28.03 Da,                          | 3659.536621 | 4 | 462.980011  | 462.9811491 |

|                                |        |            |                                             |             |   |             |             |
|--------------------------------|--------|------------|---------------------------------------------|-------------|---|-------------|-------------|
| DDEVVDVGTVEEDLGKSR             | P08113 | 0          | N-term +28.03 Da, K +28.03 Da,              | 3660.300781 | 3 | 678.6552124 | 678.6551722 |
| KGNDISSGTVLSDYVVGSGPPSGTGLHR   | P70296 | 0          | N-term +28.03 Da, K +28.03 Da,              | 3663.736084 | 3 | 905.4699707 | 905.4629888 |
| HVGD LGNV TAGK DGV ANV SIEDR   | P08228 | 0.00082068 | N-term +28.03 Da, K +28.03 Da,              | 3664.227539 | 4 | 595.3099976 | 595.56203   |
| MQTEIEEQDDILDR                 | Q9ERB0 | 0          | N-term +28.03 Da, K +28.03 Da,              | 3664.552979 | 2 | 881.9099731 | 881.9118292 |
| AVELEGEQPISVPPSTNHTVYR         | Q8CHT0 | 0.03487095 | N-term +28.03 Da, K +28.03 Da,              | 3664.668457 | 3 | 817.7600098 | 817.7553319 |
| KELDPVQKLFVDKIR                | P97450 | 0          | N-term +28.03 Da, K +28.03 Da,              | 3665.316162 | 4 | 485.8044434 | 485.8040334 |
| GAVFMDAPVSGGVGAAR              | Q99L13 | 0.00348311 | N-term +28.03 Da,                           | 3666.01001  | 3 | 530.6099854 | 530.6083329 |
| LRPGDCEVCISYLGR                | Q9CXI5 | 0          | N-term +28.03 Da, C +57.02 Da,              | 3667.036865 | 3 | 608.6400146 | 608.3028039 |
| HVGD LGNV TAGK DGV ANV SIEDR   | P08228 | 0          | N-term +28.03 Da, K +28.03 Da,              | 3667.865967 | 2 | 1189.599976 | 1190.116784 |
| DDEVVDVGTVEEDLGKSR             | P08113 | 0          | N-term +28.03 Da, K +28.03 Da,              | 3668.638672 | 2 | 1017.97998  | 1017.47912  |
| LVYEQEQPLSCDEPILSNKSGDNR       | P70296 | 0          | N-term +28.03 Da, K +28.03 Da, C +57.02 Da, | 3670.682617 | 3 | 950.1300049 | 949.7991611 |
| LSGEDKSNIKAAWKGIGGHGAEYGAEALER | P01942 | 0          | N-term +28.03 Da, K +28.03 Da,              | 3671.027832 | 4 | 807.9299927 | 807.426837  |
| IMNVIGEPIDER                   | P56480 | 0          | N-term +28.03 Da,                           | 3671.128174 | 2 | 707.3699951 | 707.3739554 |
| GTLEDQLSHLKQYER                | P57780 | 0          | N-term +28.03 Da, K +28.03 Da,              | 3673.046875 | 4 | 469.0014343 | 469.0008105 |
| GPEPDWVLSER                    | Q05186 | 0.00176866 | N-term +28.03 Da,                           | 3673.715576 | 2 | 656.8300171 | 656.8302378 |
| NKYGVSGYPTLKIFR                | P27773 | 0          | N-term +28.03 Da, K +28.03 Da,              | 3675.96875  | 4 | 457.5177307 | 457.5186385 |
| GTLEDQLSHLKQYER                | P57780 | 0          | N-term +28.03 Da, K +28.03 Da,              | 3676.064697 | 3 | 625.3300171 | 624.9986552 |
| GFGADLTEICQR                   | Q01853 | 0          | N-term +28.03 Da, C +57.02 Da,              | 3676.510742 | 2 | 741.8599854 | 741.3562944 |
| SAGFLQASADVVVVHGR              | Q8VCH0 | 0          | N-term +28.03 Da, K +28.03 Da,              | 3678.914307 | 3 | 609.9899902 | 609.9952448 |
| VGSQATDFGEALVR                 | Q35887 | 0          | N-term +28.03 Da,                           | 3679.078857 | 2 | 739.3800049 | 739.3859091 |
| YILAHTFTPTTETDYACR             | P01887 | 0.00112824 | N-term +28.03 Da, C +57.02 Da,              | 3680.587402 | 3 | 773.3699951 | 773.0316966 |
| TQAGSEVSALLGR                  | P56480 | 0          | N-term +28.03 Da,                           | 3681.8479   | 2 | 659.3599854 | 658.8620695 |
| LQELDAASKVTEQEWR               | Q6IRU5 | 0.00654022 | N-term +28.03 Da, K +28.03 Da,              | 3682.47876  | 2 | 980.5       | 980.0127346 |
| AIIDPGDSDIIR                   | P62889 | 0.00109569 | N-term +28.03 Da,                           | 3683.456055 | 2 | 656.3499756 | 656.8589955 |
| GPWIQTKMEEIGR                  | P57780 | 0          | N-term +28.03 Da, K +28.03 Da,              | 3684.592041 | 3 | 534.6199951 | 534.2887116 |
| LQELDAASKVTEQEWR               | Q6IRU5 | 0          | N-term +28.03 Da, K +28.03 Da, C +57.02 Da, | 3684.89624  | 3 | 653.6779175 | 653.6775819 |
| FEGEDFSETLTR                   | P20029 | 0          | N-term +28.03 Da, K +28.03 Da, C +57.02 Da, | 3685.142334 | 2 | 729.8400269 | 729.8410004 |
| DDEVVDVGTVEEDLGKSR             | P08113 | 0          | N-term +28.03 Da, K +28.03 Da, C +57.02 Da, | 3691.078613 | 3 | 678.6549683 | 678.6551722 |
| TIEEELIKFCR                    | Q9CXI5 | 0.00081268 | N-term +28.03 Da, C +57.02 Da,              | 3692.12085  | 3 | 498.6099854 | 498.6059292 |
| SEKISSVQSIVPALEIANHR           | P63038 | 0.0077695  | N-term +28.03 Da, K +28.03 Da,              | 3692.391846 | 4 | 616.1099854 | 616.1088814 |
| TLPD TVDWR                     | O70370 | 0          | N-term +28.03 Da, K +28.03 Da,              | 3693.108154 | 2 | 565.789978  | 565.7956662 |
| ELISNASDALDKIR                 | P08113 | 0          | N-term +28.03 Da, K +28.03 Da,              | 3695.387939 | 3 | 534.6400146 | 534.3016747 |
| PGHLQEGFGCVV TNR               | Q9CY58 | 0          | N-term +28.03 Da, C +57.02 Da,              | 3697.189697 | 2 | 850.9400024 | 849.9226671 |
| AKDFDPAINEYLQR                 | Q9QXD6 | 0.04274892 | N-term +28.03 Da, K +28.03 Da,              | 3699.00708  | 3 | 579.3052368 | 579.3053077 |
| TCNKYGVSGYPTLKIFR              | P27773 | 0          | N-term +28.03 Da, K +28.03 Da,              | 3699.130859 | 4 | 523.039978  | 522.7882206 |
| DDEVVDVGTVEEDLGKSR             | P08113 | 0          | N-term +28.03 Da, K +28.03 Da,              | 3699.857666 | 2 | 1017.47998  | 1017.47912  |
| PGHLQEGFGCVV TNR               | Q9CY58 | 0          | N-term +28.03 Da, C +57.02 Da,              | 3699.974854 | 2 | 850.4099731 | 849.9226671 |
| ELISNASDALDKIR                 | P08113 | 0          | N-term +28.03 Da, K +28.03 Da,              | 3700.125488 | 3 | 534.3015137 | 534.3016747 |
| STPQSQFQESSPVWKLGR             | Q9D115 | 0          | N-term +28.03 Da, K +28.03 Da,              | 3700.499512 | 3 | 707.039978  | 706.704131  |
| DVEDEETWIR                     | P16546 | 0          | N-term +28.03 Da,                           | 3701.591309 | 2 | 660.3099976 | 660.3093358 |

|                                |        |            |                                             |             |   |             |             |
|--------------------------------|--------|------------|---------------------------------------------|-------------|---|-------------|-------------|
| ATLSIPITPER                    | P23116 | 0.0034459  | N-term +28.03 Da,                           | 3703.48584  | 2 | 613.3602905 | 613.3611734 |
| NYLQVCLR                       | Q80WE4 | 0.02909091 | N-term +28.03 Da, C +57.02 Da,              | 3703.726074 | 2 | 548.289978  | 547.2947785 |
| YFEELSLER                      | Q8C196 | 0.00376454 | N-term +28.03 Da,                           | 3703.973145 | 2 | 607.3099976 | 607.3086067 |
| LEEEDNVLVLK                    | P09103 | 0.00044903 | N-term +28.03 Da, K +28.03 Da,              | 3704.752197 | 2 | 678.8842773 | 678.8846791 |
| MALKVPTTEKPTVTNFR              | Q6NZI6 | 0          | N-term +28.03 Da, K +28.03 Da,              | 3705.045166 | 4 | 529.8099976 | 529.8104244 |
| GEALSTLVVLR                    | P63038 | 0.00079745 | N-term +28.03 Da,                           | 3706.552246 | 2 | 600.8499756 | 600.8509729 |
| ANTNTCNKYGVSGYPTLKIFR          | P27773 | 0          | N-term +28.03 Da, K +28.03 Da,              | 3706.898682 | 4 | 623.0800171 | 622.830883  |
| EIPAKIIFEDDR                   | P70349 | 0          | N-term +28.03 Da, K +28.03 Da,              | 3708.094971 | 3 | 501.2799988 | 501.2802106 |
| NYLEKLGPLR                     | Q8C7G5 | 0.00176803 | N-term +28.03 Da, K +28.03 Da,              | 3709.543213 | 3 | 420.9200134 | 420.2554475 |
| LVDLEPGTMDSVR                  | P68372 | 0.02613094 | N-term +28.03 Da,                           | 3709.618652 | 2 | 730.3777466 | 730.3766955 |
| GIHETTFNSIMKCDVDIR             | P60710 | 0          | N-term +28.03 Da, C +57.02 Da,              | 3711.45166  | 4 | 548.7800293 | 548.776419  |
| HVGDLGNVTAGKDGVANVSIEDR        | P08228 | 0          | N-term +28.03 Da, K +28.03 Da,              | 3714.148926 | 3 | 793.4099731 | 793.7469479 |
| ALKDEEKMELQEIQLKEAKHIAEEADR    | P21107 | 0          | N-term +28.03 Da, K +28.03 Da,              | 3714.45166  | 4 | 834.710022  | 834.4536291 |
| QVTIPKDLAGSIIGKGGQR            | P61979 | 0          | N-term +28.03 Da, K +28.03 Da,              | 3715.682373 | 4 | 506.5599976 | 506.3072062 |
| SAGFLQASASDVVVVHGR             | Q8VCH0 | 0.00746511 | N-term +28.03 Da,                           | 3717.387451 | 3 | 609.9899902 | 609.9952448 |
| FSVVADTPELQR                   | Q61792 | 0          | N-term +28.03 Da,                           | 3717.746582 | 2 | 695.3699951 | 695.37227   |
| KMINLSPDPTIDER                 | Q61233 | 0.00043917 | N-term +28.03 Da, K +28.03 Da,              | 3721.640869 | 3 | 563.3099976 | 562.9746817 |
| LEALGIKEGTIPPEYR               | P51125 | 0.00043764 | N-term +28.03 Da, K +28.03 Da,              | 3724.273682 | 3 | 614.6799927 | 614.6838962 |
| AIIDPGDSDIIR                   | P62889 | 0.00372124 | N-term +28.03 Da,                           | 3725.438477 | 2 | 656.8581543 | 656.8589955 |
| VLLTMIAR                       | O08547 | 0.01140919 | N-term +28.03 Da,                           | 3725.513916 | 2 | 472.7999878 | 472.8017076 |
| DDEVVDVGTVEEDLGKSR             | P08113 | 0          | N-term +28.03 Da, K +28.03 Da,              | 3727.307129 | 3 | 678.6543579 | 678.6551722 |
| STGTFVVSQPLNYR                 | Q9JLJ2 | 0          | N-term +28.03 Da, K +28.03 Da,              | 3728.65332  | 2 | 799.4199829 | 798.9226587 |
| TFFAHLDATTVLSR                 | P56480 | 0          | N-term +28.03 Da,                           | 3729.071777 | 3 | 520.9505615 | 520.9508646 |
| VFFDITADDEPLGR                 | P17742 | 0.00376326 | N-term +28.03 Da,                           | 3731.920654 | 2 | 812.9199829 | 811.9066747 |
| MNIVEAMER                      | P17742 | 0.00887199 | N-term +28.03 Da, K +28.03 Da, C +57.02 Da, | 3732.916992 | 2 | 560.7800293 | 560.7781044 |
| ASVVGFFR                       | P27773 | 0.02201887 | N-term +28.03 Da, K +28.03 Da, C +57.02 Da, | 3734.652344 | 2 | 455.7600098 | 455.760897  |
| FTDEEVDELYR                    | Q3THE2 | 0          | N-term +28.03 Da,                           | 3734.732422 | 2 | 722.8400269 | 722.3355509 |
| EEKQSKLLELQAGKKSLEDQVETLR      | O08795 | 0          | N-term +28.03 Da, K +28.03 Da,              | 3736.154053 | 4 | 761.1900024 | 760.6879596 |
| NKELDPVQKLFVDKIR               | P97450 | 0          | N-term +28.03 Da, K +28.03 Da,              | 3736.320557 | 4 | 514.5700073 | 514.3147655 |
| HSILPVDDINGLNEEQKQLR           | Q9JHI5 | 0          | N-term +28.03 Da, K +28.03 Da, C +57.02 Da, | 3738.559082 | 4 | 623.3300171 | 623.0803213 |
| EKNWKAMEALALAEER               | Q99PL5 | 0.00046104 | N-term +28.03 Da, K +28.03 Da,              | 3739.991455 | 3 | 615.6699829 | 615.3414758 |
| NILGGTVFR                      | O88844 | 0.00044924 | N-term +28.03 Da, K +28.03 Da,              | 3742.921631 | 2 | 503.2999878 | 502.7980111 |
| HVGDLGNVTAGKDGVANVSIEDR        | P08228 | 0.00042337 | N-term +28.03 Da, K +28.03 Da,              | 3743.107422 | 4 | 595.3099976 | 595.56203   |
| ISGDLEVLAEKCPN                 | O35381 | 0          | N-term +28.03 Da, K +28.03 Da, C +57.02 Da, | 3744.412598 | 2 | 800.9199829 | 800.9161851 |
| HSILPVDDINGLNEEQKQLR           | Q9JHI5 | 0.00079968 | N-term +28.03 Da, K +28.03 Da,              | 3745.883789 | 3 | 831.0999756 | 830.438003  |
| NKELDPVQKLFVDKIR               | P97450 | 0.00042589 | N-term +28.03 Da, K +28.03 Da, C +57.02 Da, | 3746.041748 | 3 | 685.4199829 | 685.4172618 |
| HVGDLGNVTAGKDGVANVSIEDR        | P08228 | 0.00111607 | N-term +28.03 Da, K +28.03 Da,              | 3747.669434 | 4 | 595.8099976 | 595.56203   |
| SLFPDHPQLQER                   | Q9CQ60 | 0          | N-term +28.03 Da,                           | 3750.313721 | 3 | 493.9400024 | 493.9366666 |
| VLSGEDKSNIAAWGKIGGHGAEYGAEALER | P01942 | 0          | N-term +28.03 Da, K +28.03 Da,              | 3750.391846 | 4 | 832.4400024 | 832.1939406 |
| SLQPEIQPPQTASR                 | Q9ESB3 | 0.00046083 | N-term +28.03 Da,                           | 3750.647949 | 2 | 864.4500122 | 863.9597729 |

|                                 |         |            |                                            |             |   |             |             |
|---------------------------------|---------|------------|--------------------------------------------|-------------|---|-------------|-------------|
| SLFPDHPLLQER                    | Q9CQ60  | 0          | N-term +28.03 Da, K +28.03 Da,             | 3750.75415  | 3 | 494.269989  | 493.9366666 |
| GSEISDSDYQAEYPDEYHGEYPDDYPR     | Q9DAW9  | 0          | N-term +28.03 Da,                          | 3752.675293 | 3 | 1076.109985 | 1075.774176 |
| VLSGEDKSNIKAAWKGIGGHGAEYGAEALER | P01942  | 0.0056516  | N-term +28.03 Da, K +28.03 Da,             | 3753.862793 | 3 | 1109.920044 | 1109.256162 |
| DALEEEEDNVLVLKK                 | P09103  | 0          | N-term +28.03 Da, K +28.03 Da,             | 3754.04541  | 3 | 566.9880371 | 566.9889855 |
| AIIDPGDSDIIR                    | P62889  | 0.00044964 | N-term +28.03 Da,                          | 3755.96582  | 2 | 656.8579102 | 656.8589955 |
| FLLGADGGCITR                    | Q91VD9  | 0.01221001 | N-term +28.03 Da, C +57.02 Da,             | 3757.146973 | 2 | 654.3400269 | 654.3424578 |
| DALEEEEDNVLVLKK                 | P09103  | 0          | N-term +28.03 Da, K +28.03 Da,C +57.02 Da, | 3758.597412 | 2 | 850.4699707 | 849.97984   |
| DDEVVDVDTVEEDLGKSR              | P08113  | 0          | N-term +28.03 Da, K +28.03 Da,C +57.02 Da, | 3758.753174 | 3 | 678.6500244 | 678.6551722 |
| ILEFFGLKKEECPAVR                | P09103  | 0          | N-term +28.03 Da, K +28.03 Da,C +57.02 Da, | 3758.841553 | 4 | 505.7900085 | 505.7879548 |
| ADPHLCDFLESH                    | Q9CPX4  | 0          | N-term +28.03 Da, C +57.02 Da,             | 3760.431885 | 3 | 490.5599976 | 490.222367  |
| LGTLDPSSLDETAYER                | O35943  | 0          | N-term +28.03 Da,                          | 3763.843506 | 2 | 955.4699707 | 954.962908  |
| VLSGEDKSNIKAAWKGIGGHGAEYGAEALER | P01942  | 0          | N-term +28.03 Da, K +28.03 Da,             | 3765.479248 | 3 | 1109.25     | 1109.256162 |
| FEKFLVGPDPGVPVR                 | P11352  | 0          | N-term +28.03 Da, K +28.03 Da,             | 3766.13501  | 3 | 539.3099976 | 539.3117334 |
| ILEFFGLKKEECPAVR                | P09103  | 0          | N-term +28.03 Da, C +57.02 Da,             | 3767.088379 | 3 | 674.3800049 | 674.048181  |
| NKELDPVQKLFVDKIR                | P97450  | 0          | N-term +28.03 Da, K +28.03 Da,C +57.02 Da, | 3773.264404 | 4 | 514.5700073 | 514.3147655 |
| ALGLMEDEQEQAQQLR                | Q8VCA8  | 0          | N-term +28.03 Da, K +28.03 Da,C +57.02 Da, | 3773.769775 | 2 | 944.460022  | 943.9674699 |
| HVGDLGNVTAGKDGVANVSIEDR         | P08228  | 0          | N-term +28.03 Da, K +28.03 Da,             | 3774.92627  | 3 | 793.7399902 | 793.7469479 |
| NKELDPVQKLFVDKIR                | P97450  | 0          | N-term +28.03 Da, K +28.03 Da,C +57.02 Da, | 3776.839844 | 3 | 685.4168701 | 685.4172618 |
| FPITEKYEVFR                     | P58321  | 0.00042753 | N-term +28.03 Da, K +28.03 Da,             | 3776.993652 | 3 | 495.6099854 | 495.6097792 |
| DGLNAEGLLR                      | QL64374 | 0.00043197 | N-term +28.03 Da,                          | 3777.069092 | 2 | 543.2999878 | 543.3011157 |
| AAYNVLDDEPELR                   | Q80Y14  | 0          | N-term +28.03 Da, K +28.03 Da,C +57.02 Da, | 3777.433105 | 2 | 702.3599854 | 702.3619025 |
| SKQQLSAEELDAQDAYNAR             | O08583  | 0          | N-term +28.03 Da, K +28.03 Da,             | 3778.394287 | 3 | 769.7299805 | 769.3922821 |
| NKELDPVQKLFVDKIR                | P97450  | 0          | N-term +28.03 Da, K +28.03 Da,             | 3779.012207 | 2 | 1027.619995 | 1027.622255 |
| VLSGEDKSNIKAAWKGIGGHGAEYGAEALER | P01942  | 0          | N-term +28.03 Da, K +28.03 Da,C +57.02 Da, | 3780.908936 | 4 | 832.6900024 | 832.1939406 |
| KGSFSEQGINEFLR                  | Q922R8  | 0.00079936 | N-term +28.03 Da, K +28.03 Da,C +57.02 Da, | 3781.519287 | 2 | 834.4400024 | 834.4412158 |
| KGSFSEQGINEFLR                  | Q922R8  | 0.00044663 | N-term +28.03 Da, K +28.03 Da,             | 3784.286621 | 3 | 556.6311035 | 556.6299027 |
| MAVEEPAAITSDIR                  | Q8CCJ3  | 0.00114242 | N-term +28.03 Da, K +28.03 Da,C +57.02 Da, | 3785.037354 | 2 | 765.9000244 | 765.8952525 |
| DALEEEEDNVLVLKK                 | P09103  | 0          | N-term +28.03 Da, K +28.03 Da,C +57.02 Da, | 3785.423096 | 3 | 566.9887085 | 566.9889855 |
| GVSGYPTLKIFR                    | P27773  | 0          | N-term +28.03 Da, K +28.03 Da,             | 3786.111572 | 3 | 465.2799988 | 465.2782522 |
| AEPVELAQEFR                     | Q9DCT2  | 0          | N-term +28.03 Da, K +28.03 Da,C +57.02 Da, | 3786.269043 | 2 | 658.8458862 | 658.8458879 |
| ANQDTIFEGIGGPR                  | O88207  | 0          | N-term +28.03 Da,                          | 3787.01123  | 2 | 751.8840332 | 751.8835335 |
| DLPNWWDWR                       | Q9WUU7  | 0.00082034 | N-term +28.03 Da, K +28.03 Da,             | 3788.438721 | 3 | 429.230011  | 429.2277804 |
| ILEFFGLKKEECPAVR                | P09103  | 0          | N-term +28.03 Da, K +28.03 Da,C +57.02 Da, | 3789.545898 | 4 | 506.0400085 | 505.7879548 |
| EKDPYALDVPNTAFGR                | Q8R311  | 0          | N-term +28.03 Da, K +28.03 Da,C +57.02 Da, | 3789.697021 | 3 | 616.9873047 | 616.9878675 |
| LGEKLTDEEVDIMIR                 | P62204  | 0.00374532 | N-term +28.03 Da, K +28.03 Da,             | 3789.858398 | 3 | 611.9799805 | 611.6485234 |
| DDEVVDVDTVEEDLGKSR              | P08113  | 0          | N-term +28.03 Da, K +28.03 Da,C +57.02 Da, | 3790.112549 | 3 | 678.6599731 | 678.6551722 |
| ITPSYVAFTPEGER                  | P20029  | 0          | N-term +28.03 Da,                          | 3790.19873  | 2 | 797.9099731 | 797.9092172 |
| LNFASAVR                        | P12787  | 0.00115207 | N-term +28.03 Da,                          | 3791.230713 | 2 | 510.269989  | 510.7772761 |
| THSLGGGTGSGMGTLLISKIR           | P68372  | 0          | N-term +28.03 Da, K +28.03 Da,             | 3791.310547 | 4 | 525.5499878 | 525.5464936 |
| SITPAEVLGVGKDR                  | P62962  | 0          | N-term +28.03 Da, K +28.03 Da,             | 3794.508545 | 3 | 532.9799805 | 532.9821648 |

|                                |        |            |                                            |             |   |             |             |
|--------------------------------|--------|------------|--------------------------------------------|-------------|---|-------------|-------------|
| THSLGGGTGSGMGTLISKIR           | P68372 | 0          | N-term +28.03 Da, K +28.03 Da,C +57.02 Da, | 3795.654297 | 4 | 526.0499878 | 525.5464936 |
| HSFP TLKFFPASADR               | P09103 | 0.00892004 | N-term +28.03 Da, K +28.03 Da,             | 3796.305664 | 3 | 593.3200073 | 592.9859091 |
| VTAVAFNKELDPVQKLFVDKIR         | P97450 | 0          | N-term +28.03 Da, K +28.03 Da,             | 3797.879883 | 4 | 661.1400146 | 661.3965531 |
| SGGSGAPGLAAAIAGAKLR            | P70460 | 0          | N-term +28.03 Da, K +28.03 Da,C +57.02 Da, | 3799.406738 | 3 | 561         | 560.9966968 |
| SDAPPLTDGIKDR                  | Q9CR21 | 0.00112613 | N-term +28.03 Da, K +28.03 Da,             | 3799.484131 | 2 | 776.9199829 | 777.4303168 |
| GVS GYPTLKIFR                  | P27773 | 0.00564596 | N-term +28.03 Da, K +28.03 Da,             | 3802.625    | 2 | 697.4099731 | 697.4137401 |
| NKELDPVQKLFVDKIR               | P97450 | 0          | N-term +28.03 Da, K +28.03 Da,             | 3803.794434 | 4 | 514.3143921 | 514.3147655 |
| AIGDTLVQDIR                    | Q9CXN7 | 0          | N-term +28.03 Da,                          | 3804.764404 | 2 | 614.8476563 | 614.8484304 |
| LLLPGELAK                      | P10853 | 0.00316011 | N-term +28.03 Da, K +28.03 Da,             | 3805.290527 | 2 | 505.3368225 | 505.3364378 |
| KGNDISSGTVLSDYVSGSPSGTGLHR     | P70296 | 0          | N-term +28.03 Da, K +28.03 Da,             | 3808.59668  | 4 | 679.8400269 | 679.3490607 |
| HVGDLGNVTAGKDG VANVSIEDR       | P08228 | 0          | N-term +28.03 Da, K +28.03 Da,             | 3808.956055 | 3 | 794.4099731 | 793.7469479 |
| NKELDPVQKLFVDKIR               | P97450 | 0.00080032 | N-term +28.03 Da, K +28.03 Da,             | 3810.114746 | 2 | 1027.619995 | 1027.622255 |
| QALLDLHALGSAR                  | P29391 | 0          | N-term +28.03 Da,                          | 3810.190186 | 3 | 464.9400024 | 464.9367779 |
| HVGDLGNVTAGKDG VANVSIEDR       | P08228 | 0          | N-term +28.03 Da, K +28.03 Da,             | 3810.265381 | 3 | 793.4099731 | 793.7469479 |
| ADEERHVGDLGNVTAGKDG VANVSIEDR  | P08228 | 0.00995644 | N-term +28.03 Da, K +28.03 Da,             | 3814.873535 | 3 | 993.8499756 | 993.8304006 |
| SSIKTEPPVFTAASSNSELIR          | Q8CDG3 | 0          | N-term +28.03 Da, K +28.03 Da,             | 3815.047607 | 3 | 764.0800171 | 764.0811562 |
| HVGDLGNVTAGKDG VANVSIEDR       | P08228 | 0.00079302 | N-term +28.03 Da, K +28.03 Da,             | 3817.834229 | 4 | 595.3099976 | 595.56203   |
| HSILPVDDINGLNEEQKQLR           | Q9JHI5 | 0          | N-term +28.03 Da, K +28.03 Da,             | 3820.678223 | 3 | 830.7700195 | 830.438003  |
| LGTSVESIMATEDR                 | Q8C196 | 0          | N-term +28.03 Da, K +28.03 Da,             | 3822.425781 | 2 | 768.87854   | 768.8823425 |
| ANVAKPGLVDDFEKKY               | Q9DCX2 | 0.00143885 | N-term +28.03 Da, K +28.03 Da,C +57.02 Da, | 3824.774414 | 3 | 635.6900024 | 636.027663  |
| EADDIVNWLKKR                   | P09103 | 0          | N-term +28.03 Da, K +28.03 Da,             | 3826.299561 | 3 | 524.2999878 | 524.303238  |
| HSFP TLKFFPASADR               | P09103 | 0.00044092 | N-term +28.03 Da, K +28.03 Da,             | 3827.474365 | 3 | 592.9899902 | 592.9859091 |
| GKIPEHDLDPNVTIILKEPVR          | Q99PL5 | 0          | N-term +28.03 Da, K +28.03 Da,             | 3828.177979 | 4 | 617.8599854 | 617.6125282 |
| SGGMSEEDATLNLNAINR             | Q91Y97 | 0          | N-term +28.03 Da,                          | 3828.432617 | 2 | 960.460022  | 960.4600093 |
| EADDIVNWLKKR                   | P09103 | 0          | N-term +28.03 Da, K +28.03 Da,C +57.02 Da, | 3829.854248 | 4 | 393.480011  | 393.4792476 |
| YKNKYRSLMFNLKDP                | B2RQG2 | 0.01744014 | N-term +28.03 Da, K +28.03 Da,             | 3831.474121 | 4 | 508.2835388 | 508.0380383 |
| EADDIVNWLKKR                   | P09103 | 0.00344709 | N-term +28.03 Da, K +28.03 Da,             | 3831.808838 | 2 | 785.9500122 | 785.9512188 |
| TGSGMGTLISKIR                  | P68372 | 0.00971787 | N-term +28.03 Da, K +28.03 Da,             | 3833.408936 | 3 | 497.2999878 | 497.2972069 |
| NKELDPVQKLFVDKIR               | P97450 | 0          | N-term +28.03 Da, K +28.03 Da,             | 3834.150391 | 4 | 514.3145142 | 514.3147655 |
| VDPVNFKLLSH                    | P01942 | 0          | N-term +28.03 Da, K +28.03 Da,             | 3834.96167  | 3 | 442.2600098 | 442.2589692 |
| VLSGEDKSNIAAWGKIGGHGAEYGAEALER | P01942 | 0.02125826 | N-term +28.03 Da, K +28.03 Da,             | 3836.584717 | 4 | 832.4500122 | 832.1939406 |
| TEDFSVVVEPGVTR                 | Q7TNG8 | 0.00080613 | N-term +28.03 Da,                          | 3837.134521 | 2 | 782.4099731 | 781.9066747 |
| GKIPEHDLDPNVTIILKEPVR          | Q99PL5 | 0          | N-term +28.03 Da, K +28.03 Da,             | 3838.399902 | 3 | 823.4899902 | 823.1476121 |
| GLESTTGEVPVVAIR                | P27773 | 0          | N-term +28.03 Da,                          | 3838.750488 | 2 | 778.9400024 | 778.4381418 |
| SIEALLEAGQAQDTQASHAEANQQQTR    | Q99PL5 | 0          | N-term +28.03 Da,                          | 3838.84668  | 3 | 975.8099976 | 975.1428672 |
| AQEILPQAPIAVR                  | Q3TLP5 | 0.00084531 | N-term +28.03 Da,                          | 3840.614014 | 2 | 717.4299927 | 717.4273792 |
| NEEEVEKRFEGR                   | Q08943 | 0.02511287 | N-term +28.03 Da, K +28.03 Da,             | 3841.692139 | 2 | 789.4000244 | 789.3995481 |
| GEWEPPIQNPEYKGEWKPR            | P14211 | 0          | N-term +28.03 Da, K +28.03 Da,             | 3842.110352 | 4 | 631.8300171 | 631.5812281 |
| LALVQVSHPR                     | Q9WVLO | 0          | N-term +28.03 Da, K +28.03 Da,             | 3842.275635 | 3 | 475.6099854 | 475.2733899 |
| IDLPAENSNSETHITGKR             | Q8VDJ3 | 0.00143062 | N-term +28.03 Da, K +28.03 Da,             | 3845.804199 | 3 | 709.7299805 | 709.7267131 |

|                            |        |            |                                            |             |   |             |             |
|----------------------------|--------|------------|--------------------------------------------|-------------|---|-------------|-------------|
| FVKGVVSDDLPLNVSR           | P08113 | 0.0010993  | N-term +28.03 Da, K +28.03 Da,             | 3847.519287 | 3 | 639.6900024 | 639.3544389 |
| SLPAGGQQHEAAESEKPDAPR      | D6RIL7 | 0.02174535 | N-term +28.03 Da, K +28.03 Da,             | 3847.760254 | 2 | 1115.560059 | 1116.056194 |
| IIGGSMDAKGSFPWQAK          | Q61646 | 0          | N-term +28.03 Da, K +28.03 Da,             | 3855.077637 | 3 | 626.3370972 | 626.3378428 |
| NGESSELDLQ GIR             | Q9QXT0 | 0          | N-term +28.03 Da,                          | 3855.153076 | 2 | 724.3599854 | 723.365174  |
| SYMEEFPPFYIILR             | A2ANY6 | 0.00313698 | N-term +28.03 Da,                          | 3858.9021   | 3 | 660.6599731 | 660.6707105 |
| ISDKDASVVGFFR              | P27773 | 0          | N-term +28.03 Da, K +28.03 Da,             | 3860.351807 | 3 | 499.9400024 | 499.6084386 |
| SLPPHQKVPLPSLPTMQAGTIAR    | Q8BMF4 | 0.00042535 | N-term +28.03 Da, K +28.03 Da,C +57.02 Da, | 3862.400635 | 4 | 646.8699951 | 646.3676327 |
| DDEVVDV DGTVEEDLGKSR       | P08113 | 0          | N-term +28.03 Da, K +28.03 Da,             | 3862.48291  | 3 | 678.9899902 | 678.6551722 |
| LVYDQELLGPSDKSEAALR        | Q8R404 | 0          | N-term +28.03 Da, K +28.03 Da,             | 3864.17749  | 3 | 721.0599976 | 720.7230801 |
| IIFEHSQSPLFVGKVVDP THK     | Q00898 | 0          | N-term +28.03 Da, K +28.03 Da,             | 3864.449951 | 4 | 648.8599854 | 648.611257  |
| VDPQLQH FIEVETQKQR         | Q9WVA2 | 0          | N-term +28.03 Da, K +28.03 Da,             | 3864.665771 | 4 | 538.539978  | 538.5443797 |
| NKELDPVQKLFVDKIR           | P97450 | 0          | N-term +28.03 Da, K +28.03 Da,             | 3865.53833  | 4 | 514.3099976 | 514.3147655 |
| SYDVPPPPMEPDHHPFYSNISKDR   | Q9DBJ1 | 0          | N-term +28.03 Da, K +28.03 Da,             | 3866.449707 | 4 | 687.0800171 | 686.8310806 |
| GEWEPPIQNPEYKGEWKPR        | P14211 | 0.00084175 | N-term +28.03 Da, K +28.03 Da,             | 3873.350586 | 4 | 632.0800171 | 631.5812281 |
| GKIPEHDLDPNVTIILKEPVR      | Q99PL5 | 0          | N-term +28.03 Da, K +28.03 Da,C +57.02 Da, | 3874.25293  | 4 | 617.8599854 | 617.6125282 |
| VEGLPINDFSR                | P14152 | 0.00115075 | N-term +28.03 Da,                          | 3875.701172 | 2 | 637.8393555 | 637.8406054 |
| VALEGVGHFFR                | P29391 | 0          | N-term +28.03 Da,                          | 3876.053467 | 3 | 420.5700073 | 420.5680254 |
| TAWEEKLSKYEFSEIR           | Q9CYA0 | 0          | N-term +28.03 Da, K +28.03 Da,             | 3877.157959 | 4 | 551.0411987 | 551.0426757 |
| YLSLLQDSGEVR               | P63242 | 0          | N-term +28.03 Da,                          | 3877.445068 | 2 | 704.8800049 | 704.3775525 |
| AGLLEKLEKETEYDVR           | Q61176 | 0          | N-term +28.03 Da, K +28.03 Da,             | 3877.988281 | 4 | 462.769989  | 462.7673826 |
| LLNKLADLMER                | O35945 | 0          | N-term +28.03 Da, K +28.03 Da,             | 3878.651611 | 3 | 457.9400024 | 457.9391308 |
| STQAAEDKEEESLHSISNTEAVR    | Q9CQN1 | 0.00082136 | N-term +28.03 Da, K +28.03 Da,             | 3881.533936 | 4 | 675.8400269 | 675.8385262 |
| DQGGAPLAGTNKETTIGLDGLSER   | Q91Y97 | 0.00080775 | N-term +28.03 Da, K +28.03 Da,             | 3883.07373  | 3 | 862.4400024 | 862.111956  |
| KEFGDTGEGWKT VEMSPAYTEELKR | Q02819 | 0          | N-term +28.03 Da, K +28.03 Da,             | 3883.233398 | 4 | 783.6400146 | 783.1416851 |
| VLESTMVCVDNSEYMR           | O35226 | 0          | N-term +28.03 Da, C +57.02 Da,             | 3885.284668 | 2 | 981.9400024 | 980.9442916 |
| NGESSELDLQ GIR             | Q9QXT0 | 0.00177054 | N-term +28.03 Da,                          | 3885.777832 | 2 | 724.3599854 | 723.365174  |
| VLESTMVCVDNSEYMR           | O35226 | 0          | N-term +28.03 Da, C +57.02 Da,             | 3888.384766 | 2 | 980.9500122 | 980.9442916 |
| ADTIGYPVMIR                | Q8C196 | 0.00314465 | N-term +28.03 Da, K +28.03 Da,             | 3888.47998  | 2 | 632.8400269 | 632.3419263 |
| VVAGDVPFQLR                | F7BJK1 | 0.00083893 | N-term +28.03 Da,                          | 3890.220947 | 2 | 614.8499756 | 614.8560579 |
| LGCQVCLTKAMDNMVTR          | P46656 | 0          | N-term +28.03 Da, K +28.03 Da,C +57.02 Da, | 3890.758789 | 3 | 685.6699829 | 685.006894  |
| IVGDQISFADYR               | F6RWR5 | 0.02331533 | N-term +28.03 Da, C +57.02 Da,             | 3893.63623  | 2 | 706.3599854 | 706.364445  |
| LGCQVCLTKAMDNMVTR          | P46656 | 0          | N-term +28.03 Da, K +28.03 Da,             | 3895.064453 | 3 | 685.3400269 | 685.006894  |
| FREPATINYPFEKGPLSPR        | Q8K3J1 | 0.00375811 | N-term +28.03 Da, K +28.03 Da,             | 3898.241211 | 4 | 569.5599976 | 569.561301  |
| TAESGELHGLTTDEKFEVGVYR     | P07309 | 0          | N-term +28.03 Da, K +28.03 Da,             | 3900.199951 | 4 | 624.5700073 | 624.3169633 |
| GQKVLDSGAPIKIPVGPETLGR     | P56480 | 0.00177557 | N-term +28.03 Da, K +28.03 Da,             | 3901.595703 | 4 | 580.0999756 | 579.8466959 |
| DDEVVDV DGTVEEDLGKSR       | P08113 | 0          | N-term +28.03 Da, K +28.03 Da,             | 3903.608887 | 3 | 678.9899902 | 678.6551722 |
| LTVSPESVLKVAR              | P55264 | 0          | N-term +28.03 Da, K +28.03 Da,             | 3904.344482 | 3 | 485.9700012 | 485.636217  |
| LDDFVETGDIR                | O35114 | 0.04858516 | N-term +28.03 Da,                          | 3905.265381 | 2 | 653.8200073 | 654.3275283 |
| SLPPHQKVPLPSLPTMQAGTIAR    | Q8BMF4 | 0.00042937 | N-term +28.03 Da, K +28.03 Da,             | 3907.464355 | 4 | 646.6199951 | 646.3676327 |
| TLGGLEMLER                 | Q9JKR6 | 0.00804894 | N-term +28.03 Da, K +28.03 Da,             | 3909.254395 | 2 | 573.8099976 | 573.8130017 |

|                          |        |            |                                            |             |   |             |             |
|--------------------------|--------|------------|--------------------------------------------|-------------|---|-------------|-------------|
| TMFGEKLNQDPEDVIR         | Q3THE2 | 0          | N-term +28.03 Da, K +28.03 Da,             | 3911.362305 | 3 | 660.3400269 | 660.0031892 |
| ENEPPVPLVGNWRPPQPVKGR    | P16015 | 0          | N-term +28.03 Da, K +28.03 Da,C +57.02 Da, | 3915.278564 | 4 | 606.3300171 | 606.3393036 |
| AWGVTKGAAELMQQKEATTEQQLR | O35490 | 0          | N-term +28.03 Da, K +28.03 Da,             | 3915.354004 | 4 | 690.6199951 | 690.3693672 |
| AWGVTKGAAELMQQKEATTEQQLR | O35490 | 0          | N-term +28.03 Da, K +28.03 Da,             | 3917.029541 | 3 | 920.4899902 | 920.1567308 |
| TFKFDDPKFEVIDK PQS       | P97450 | 0.01248097 | N-term +28.03 Da, K +28.03 Da,C +57.02 Da, | 3919.029053 | 4 | 539.5499878 | 539.0436812 |
| VSLHLGVTPSVLR            | O89023 | 0          | N-term +28.03 Da, K +28.03 Da,C +57.02 Da, | 3920.220459 | 3 | 469.2900085 | 469.2890399 |
| IPLSQKDLENLKAЕVAR        | Q5SW19 | 0.01383875 | N-term +28.03 Da, K +28.03 Da,             | 3920.295898 | 4 | 502.7999878 | 502.8004854 |
| LATALQKLEEAЕKAАDESER     | P21107 | 0          | N-term +28.03 Da, K +28.03 Da,             | 3921.352783 | 3 | 763.0800171 | 762.7444329 |
| AWGVTKGAAELMQQKEATTEQQLR | O35490 | 0          | N-term +28.03 Da, K +28.03 Da,             | 3921.963379 | 3 | 920.1599731 | 920.1567308 |
| FDEEATGTIQEDYLR          | Q3THE2 | 0          | N-term +28.03 Da,                          | 3922.041992 | 2 | 907.9199829 | 907.9257938 |
| KDIEDVFYKYGAIR           | Q6PDM2 | 0          | N-term +28.03 Da, K +28.03 Da,             | 3922.395264 | 3 | 601.0012207 | 601.0013365 |
| LATALQKLEEAЕKAАDESER     | P21107 | 0          | N-term +28.03 Da, K +28.03 Da,             | 3923.656738 | 4 | 572.3096313 | 572.3101438 |
| MLADMMGQLR               | Q8VBW8 | 0          | N-term +28.03 Da,                          | 3923.962402 | 2 | 597.2999878 | 597.2956069 |
| ASNQPEQFDWAINDR          | Q92511 | 0          | N-term +28.03 Da,                          | 3924.195801 | 2 | 909.9199829 | 909.9239192 |
| YLEPYLKEVIR              | Q9D855 | 0          | N-term +28.03 Da, K +28.03 Da,C +57.02 Da, | 3924.329102 | 3 | 493.6300049 | 493.6254293 |
| DDEVVDVGTVEEDLGKSR       | P08113 | 0          | N-term +28.03 Da, K +28.03 Da,             | 3929.427246 | 3 | 678.6500244 | 678.6551722 |
| FDITADDEPLGR             | P17742 | 0          | N-term +28.03 Da, K +28.03 Da,C +57.02 Da, | 3931.021484 | 2 | 688.8375244 | 688.8382604 |
| FVSSSLPDCYR              | P53996 | 0          | N-term +28.03 Da, C +57.02 Da,             | 3932.936523 | 2 | 736.3599854 | 736.3661304 |
| IDLPETFDAR               | P10605 | 0.0449408  | N-term +28.03 Da, K +28.03 Da,             | 3935.798096 | 2 | 602.8099976 | 602.8140563 |
| ELDPVPEPEAFR             | Q8BI84 | 0.00115607 | N-term +28.03 Da,                          | 3938.709961 | 2 | 714.3599854 | 713.864278  |
| TPVVEGLTEGEEELR          | Q9CY22 | 0          | N-term +28.03 Da,                          | 3939.218506 | 2 | 907.960022  | 907.9545514 |
| STQFGGYAKEADYVAHATQLR    | Q9R257 | 0.01697439 | N-term +28.03 Da, K +28.03 Da,             | 3941.103516 | 4 | 593.5499878 | 593.0525692 |
| DNAEKVAEKLEALSVR         | P34022 | 0          | N-term +28.03 Da, K +28.03 Da,             | 3942.820313 | 4 | 465.019989  | 464.7676483 |
| ELDPVPEPEAFR             | Q8BI84 | 0.00112191 | N-term +28.03 Da,                          | 3943.147461 | 2 | 713.8599854 | 713.864278  |
| STQFGGYAKEADYVAHATQLR    | Q9R257 | 0          | N-term +28.03 Da, K +28.03 Da,             | 3948.157959 | 3 | 790.7399902 | 790.4010001 |
| YEEPTAEIYR               | Q61907 | 0.00045725 | N-term +28.03 Da,                          | 3948.571045 | 2 | 723.8499756 | 723.3510034 |
| TTGGESLLPEEYEQWKQR       | Q91VA0 | 0          | N-term +28.03 Da, K +28.03 Da,             | 3950.014893 | 3 | 736.3699951 | 736.370818  |
| GIYPAVDPLDSTR            | P56480 | 0          | N-term +28.03 Da,                          | 3950.274658 | 2 | 759.8928223 | 759.8935671 |
| HLTFGKEFTEAVEAKQVAQQAER  | P67778 | 0.00622951 | N-term +28.03 Da, K +28.03 Da,             | 3952.446289 | 4 | 708.8800049 | 708.373807  |
| RNEFTLGEECELETMTGEKVK    | P12710 | 0          | N-term +28.03 Da, K +28.03 Da,             | 3953.277344 | 4 | 647.0700073 | 646.82129   |
| FDITADDEPLGR             | P17742 | 0          | N-term +28.03 Da,                          | 3959.600342 | 2 | 688.3400269 | 688.8382604 |
| ESFGFTADLR               | P58252 | 0.01827291 | N-term +28.03 Da, K +28.03 Da,             | 3960.653809 | 2 | 585.789978  | 585.7931237 |
| DDEVVDVGTVEEDLGKSR       | P08113 | 0          | N-term +28.03 Da, K +28.03 Da,             | 3960.75293  | 3 | 678.6500244 | 678.6551722 |
| LEEALPDMEEEDDQKAVKDEL    | P09103 | 0          | N-term +28.03 Da, K +28.03 Da,             | 3963.035889 | 3 | 882.75      | 882.4177236 |
| ANCDPYAVTEAIVR           | P15105 | 0          | N-term +28.03 Da, C +57.02 Da,             | 3966.689697 | 2 | 803.9000244 | 803.8983265 |
| IDLPETFDAR               | P10605 | 0.00832266 | N-term +28.03 Da, K +28.03 Da,             | 3967.687744 | 2 | 602.8132935 | 602.8140563 |
| EAICPAQAITIEAEPР         | Q8K3J1 | 0.00502008 | N-term +28.03 Da, K +28.03 Da,C +57.02 Da, | 3968.228271 | 2 | 898.960022  | 898.9641983 |
| LEEALPDMEEEDDQKAVKDEL    | P09103 | 0          | N-term +28.03 Da, K +28.03 Da,             | 3970.075684 | 3 | 882.4199829 | 882.4177236 |
| AIAGEDFSIVASDTR          | O09061 | 0          | N-term +28.03 Da,                          | 3973.288818 | 2 | 790.4020386 | 790.4017567 |
| FVDEADAFLR               | Q92511 | 0.04978701 | N-term +28.03 Da,                          | 3978.361084 | 2 | 605.8099976 | 605.8087737 |

|                               |        |            |                                             |             |   |             |             |
|-------------------------------|--------|------------|---------------------------------------------|-------------|---|-------------|-------------|
| TLSDYNIQKESTLHLVLR            | P0CG49 | 0.00177368 | N-term +28.03 Da, K +28.03 Da,              | 3979.148926 | 3 | 729.7399902 | 729.4108362 |
| EPEGKEVWDYVTVR                | Q920A5 | 0          | N-term +28.03 Da, K +28.03 Da,              | 3980.491699 | 3 | 588.6400146 | 588.3051964 |
| ALTLNAWEGGTAPTDSR             | Q3B7Z2 | 0          | N-term +28.03 Da,                           | 3982.562012 | 2 | 894.9500122 | 894.4497698 |
| EPEGKEVWDYVTVR                | Q920A5 | 0          | N-term +28.03 Da, K +28.03 Da,              | 3983.634521 | 2 | 882.460022  | 881.9541564 |
| ALDIETTIR                     | P11679 | 0.03073941 | N-term +28.03 Da,                           | 3986.265625 | 2 | 612.3400269 | 611.8375314 |
| KMGAPEAGMAEYLFDKHTLGHGDES     | P09528 | 0.00081235 | N-term +28.03 Da, K +28.03 Da,              | 3987.082275 | 4 | 695.0900269 | 694.5833768 |
| SGNLLNDMTPPVNPSR              | P35564 | 0          | N-term +28.03 Da,                           | 3987.53125  | 2 | 870.4500122 | 870.4408902 |
| ASKPTLNEVVIVSAIR              | Q8QZT1 | 0.02306378 | N-term +28.03 Da, K +28.03 Da,              | 3988.719238 | 3 | 585.0200195 | 585.0242526 |
| YFQEPGVAEAELEKNMSR            | P34914 | 0          | N-term +28.03 Da, K +28.03 Da,              | 3990.828857 | 3 | 719.0200195 | 718.6893819 |
| AVSCLWGKVNSEVGGALGR           | P02088 | 0          | N-term +28.03 Da, K +28.03 Da,              | 3990.918213 | 3 | 754.0509033 | 754.0512023 |
| SIEAPEVAIDVDGCPR              | Q3UVU3 | 0          | N-term +28.03 Da, C +57.02 Da,              | 3991.70874  | 2 | 878.4299927 | 878.4327312 |
| DSDILGKYVD                    | Q64433 | 0.01442741 | N-term +28.03 Da, K +28.03 Da,              | 3994.170898 | 2 | 590.8081665 | 590.8084398 |
| AVVTPPAYFNDAQR                | P20029 | 0          | N-term +28.03 Da,                           | 3994.531494 | 2 | 789.9199829 | 789.9173762 |
| SVSLLNPNEKNQSWGDAVVGER        | A2AIX1 | 0.00316122 | N-term +28.03 Da, K +28.03 Da,              | 3995.292725 | 3 | 819.4299927 | 819.0907146 |
| SSAPLAEDIDPELAR               | Q99LI8 | 0          | N-term +28.03 Da,                           | 3996.46167  | 2 | 806.9199829 | 806.4148642 |
| ALYDFKSENPEISLR               | Q91ZR2 | 0          | N-term +28.03 Da, K +28.03 Da,              | 3997.953125 | 3 | 632.6699829 | 632.3351559 |
| IEKLDASQNLNSQEDFDR            | Q9JM13 | 0          | N-term +28.03 Da, K +28.03 Da,              | 3998.547363 | 3 | 727.039978  | 726.3743397 |
| SGAPLRPATVLGTMEMGR            | Q8CG76 | 0.000818   | N-term +28.03 Da,                           | 4000.053467 | 3 | 625         | 624.6658537 |
| TITNTMTLGDIVYKR               | P12710 | 0          | N-term +28.03 Da, K +28.03 Da,              | 4000.352295 | 3 | 594.6679077 | 594.6658481 |
| VTSVQVFK                      | Q99LF7 | 0.02147151 | N-term +28.03 Da, K +28.03 Da,              | 4001.575684 | 2 | 482.2999878 | 482.2973126 |
| ILMAINGKVFVDVTKGR             | O55022 | 0.00110375 | N-term +28.03 Da, K +28.03 Da, C +57.02 Da, | 4002.072021 | 4 | 462.5299988 | 462.280031  |
| LDPTSVTLKPMER                 | O09159 | 0          | N-term +28.03 Da, K +28.03 Da,              | 4003.956055 | 3 | 552.6500244 | 552.6515387 |
| KGMNTLVGYDLVPEPK              | P12787 | 0.03489011 | N-term +28.03 Da, K +28.03 Da,              | 4006.347168 | 3 | 616.0100098 | 615.6778652 |
| SSSDDVIELTPSNFNR              | Q922R8 | 0          | N-term +28.03 Da, K +28.03 Da,              | 4009.229004 | 2 | 904.9336548 | 904.9366928 |
| KGMNTLVGYDLVPEPK              | P12787 | 0.00651042 | N-term +28.03 Da, K +28.03 Da,              | 4010.080078 | 3 | 616.3499756 | 615.6778652 |
| AVVTPPAYFNDAQR                | P20029 | 0          | N-term +28.03 Da,                           | 4010.447754 | 3 | 526.9500122 | 526.9473429 |
| SSDDVIELTPSNFNR               | Q922R8 | 0.00346021 | N-term +28.03 Da,                           | 4012.355469 | 2 | 861.4299927 | 861.4206783 |
| SGAPLRPATVLGTMEMGR            | Q8CG76 | 0.0011646  | N-term +28.03 Da,                           | 4014.301758 | 3 | 625.3300171 | 624.6658537 |
| MKPLVVFLGGPGAGKGTQCAR         | Q9DBP5 | 0          | N-term +28.03 Da, C +57.02 Da,              | 4016.070557 | 3 | 776.7800293 | 776.4411958 |
| DLEPTVIDEVR                   | P05213 | 0          | N-term +28.03 Da,                           | 4017.877441 | 2 | 657.8499756 | 657.3510034 |
| ASKPTLNEVVIVSAIR              | Q8QZT1 | 0.0077821  | N-term +28.03 Da, K +28.03 Da,              | 4019.083496 | 3 | 585.0238037 | 585.0242526 |
| EDVQETDTSQKQSPASHEIATNLGDFALR | Q00897 | 0          | N-term +28.03 Da, K +28.03 Da,              | 4020.396484 | 3 | 1120.540039 | 1120.205974 |
| LKKILIEEWKTAR                 | O08795 | 0          | N-term +28.03 Da, K +28.03 Da,              | 4022.358398 | 4 | 435.5299988 | 435.7841063 |
| TLGEECELETMTGKVKAVVK          | P12710 | 0          | N-term +28.03 Da, K +28.03 Da,              | 4022.753418 | 4 | 617.0800171 | 616.5825795 |
| FNKPDIDAWELR                  | P12787 | 0          | N-term +28.03 Da, K +28.03 Da,              | 4024.034668 | 3 | 520.6112061 | 520.6120716 |
| ANLEKAQSELGAADAAR             | Q9D3D9 | 0          | N-term +28.03 Da, K +28.03 Da,              | 4025.489014 | 2 | 993.5       | 994.0081811 |
| DLAALGDKVNSLGETAQR            | P16546 | 0          | N-term +28.03 Da, K +28.03 Da,              | 4026.547852 | 3 | 638.6802979 | 638.6812149 |
| SPWEAFPAYR                    | Q9DCT2 | 0.00347102 | N-term +28.03 Da,                           | 4026.782715 | 2 | 626.8099976 | 626.3114832 |
| TTIFEVLPEKADR                 | Q92111 | 0          | N-term +28.03 Da, K +28.03 Da,              | 4026.87793  | 3 | 525.6300049 | 525.631132  |
| SPWEAFPAYR                    | Q9DCT2 | 0.00116189 | N-term +28.03 Da, K +28.03 Da, C +57.02 Da, | 4028.322021 | 2 | 626.3099976 | 626.3114832 |

|                                |         |            |                                            |             |   |             |             |
|--------------------------------|---------|------------|--------------------------------------------|-------------|---|-------------|-------------|
| DLAALGDKVNSLGETAQR             | P16546  | 0.01249619 | N-term +28.03 Da, K +28.03 Da,             | 4029.82666  | 2 | 958.5100098 | 957.5181841 |
| QILPGDPFDNSSRPSQVVAETR         | P58252  | 0.00623155 | N-term +28.03 Da,                          | 4031.492676 | 3 | 814.75      | 814.4188312 |
| VTSVQVFK                       | Q99LF7  | 0.0448563  | N-term +28.03 Da, K +28.03 Da,             | 4032.240234 | 2 | 482.2966003 | 482.2973126 |
| FNKPDIDAWELR                   | P12787  | 0.01799941 | N-term +28.03 Da, K +28.03 Da,             | 4037.570801 | 2 | 780.4138794 | 780.4144692 |
| ALDIEIATYR                     | P03995  | 0.01926445 | N-term +28.03 Da,                          | 4038.030273 | 2 | 596.8303833 | 596.8322488 |
| LEKEVLDKNDMVQLLGR              | Q8JZQ2  | 0.01194487 | N-term +28.03 Da, K +28.03 Da,             | 4038.511963 | 4 | 546.0599976 | 546.063248  |
| ENLLEEQGSIALR                  | P16546  | 0          | N-term +28.03 Da,                          | 4040.247803 | 2 | 750.9099731 | 750.4068417 |
| KMGAPEAGMAEYLFDKH              | P09528  | 0.00110173 | N-term +28.03 Da, K +28.03 Da,             | 4041.465576 | 3 | 661         | 660.3303597 |
| TAEILELAGNAAR                  | P22752  | 0          | N-term +28.03 Da,                          | 4044.498535 | 2 | 678.8800049 | 678.8777195 |
| SLEDELQASIQR                   | Q99JR1  | 0.00044984 | N-term +28.03 Da, K +28.03 Da,             | 4047.340576 | 2 | 708.8699951 | 708.870092  |
| KMGAPEAGMAEYLFDKH              | P09528  | 0          | N-term +28.03 Da, K +28.03 Da,             | 4047.467285 | 4 | 495.75      | 495.4995889 |
| DWDFLPPKKIKDPDAAKPEDWDER       | P14211  | 0          | N-term +28.03 Da, K +28.03 Da,             | 4047.588623 | 4 | 763.6500244 | 763.6511111 |
| ASKPTLNEVVIVSAIR               | Q8QZT1  | 0.0235461  | N-term +28.03 Da, K +28.03 Da,             | 4048.986572 | 3 | 584.7000122 | 585.0242526 |
| GDPKEEEEEELVPLTTVR             | P99028  | 0.04972082 | N-term +28.03 Da, K +28.03 Da,             | 4049.285889 | 3 | 748.039978  | 747.7092771 |
| ASKPTLNEVVIVSAIR               | Q8QZT1  | 0.02351941 | N-term +28.03 Da, K +28.03 Da,             | 4050.099609 | 3 | 585.0200195 | 585.0242526 |
| ILPPNTEGYIGIR                  | Q91VA0  | 0          | N-term +28.03 Da,                          | 4050.839111 | 2 | 735.9199829 | 735.9193872 |
| ELFSDIYKIR                     | P63028  | 0.00080906 | N-term +28.03 Da, K +28.03 Da,             | 4051.427979 | 3 | 447.2600098 | 447.2588578 |
| EEWYYQIEILK                    | Q9JL18  | 0.01899474 | N-term +28.03 Da, K +28.03 Da,             | 4053.072754 | 2 | 786.4099731 | 785.4136037 |
| SLSEKPPAIDWAYYR                | Q9DCX2  | 0          | N-term +28.03 Da, K +28.03 Da,             | 4053.148193 | 3 | 618.3300171 | 617.9928411 |
| SDDVIELTPSNFNR                 | Q922R8  | 0.00777454 | N-term +28.03 Da,                          | 4055.033447 | 2 | 817.4099731 | 817.9046637 |
| SYAPGPLDNDMQQQLAR              | Q64105  | 0.00045106 | N-term +28.03 Da,                          | 4056.575684 | 2 | 903.4429932 | 902.4383477 |
| ANLEKAQSELSGADEAAR             | Q9D3D9  | 0.03311258 | N-term +28.03 Da, K +28.03 Da,C +57.02 Da, | 4059.17627  | 3 | 663.3499756 | 663.0078796 |
| FSDVYQEMPAQLR                  | P50136  | 0          | N-term +28.03 Da,                          | 4059.26001  | 2 | 806.3900146 | 806.3954195 |
| NKELDPVQKLFVDKIR               | P97450  | 0          | N-term +28.03 Da, K +28.03 Da,             | 4062.992188 | 4 | 514.8099976 | 514.3147655 |
| IQLLEEELDR                     | Q6IRU2  | 0.00082576 | N-term +28.03 Da, C +57.02 Da,             | 4063.513428 | 2 | 643.3499756 | 643.3535459 |
| IQEITEQLDITTSEYEKEKLNER        | P63038  | 0          | N-term +28.03 Da, K +28.03 Da,             | 4064.664551 | 4 | 724.3800049 | 724.1314804 |
| GTDAPAEAQAAMEEPVVQPSVVDR       | Q9DBG5  | 0          | N-term +28.03 Da,                          | 4068.470703 | 3 | 832.7399902 | 832.4076038 |
| GTDAPAEAQAAMEEPVVQPSVVDR       | Q9DBG5  | 0          | N-term +28.03 Da,                          | 4070.718506 | 2 | 1248.099976 | 1248.107767 |
| HVMNTNLGEKLTDEEVDEMIR          | P62204  | 0.03177673 | N-term +28.03 Da, K +28.03 Da,             | 4072.32251  | 3 | 805.7299805 | 805.7346631 |
| VVPDVESLPSWAQKR                | P41216  | 0          | N-term +28.03 Da, K +28.03 Da,             | 4072.969238 | 3 | 589.3302002 | 589.6648358 |
| SDVLELTDENFESR                 | P27773  | 0.00045998 | N-term +28.03 Da,                          | 4073.189697 | 2 | 841.4000244 | 841.3994117 |
| EDVQETDTSQKDQSPASHEIATNLGDFALR | QV00897 | 0.00084638 | N-term +28.03 Da, K +28.03 Da,             | 4074.492676 | 4 | 840.4099731 | 840.4062995 |
| KGMNTLVGYDLVPEPK               | P12787  | 0.02076723 | N-term +28.03 Da, K +28.03 Da,             | 4076.677979 | 3 | 615.3400269 | 615.6778652 |
| ILMAINGKVFVDTKGR               | O55022  | 0.00316678 | N-term +28.03 Da, K +28.03 Da,C +57.02 Da, | 4077.241699 | 4 | 462.7799988 | 462.280031  |
| GTDAPAEAQAAMEEPVVQPSVVDR       | Q9DBG5  | 0          | N-term +28.03 Da,                          | 4078.764893 | 2 | 1249.109985 | 1248.107767 |
| SLGGGTGSGMGTLLISK              | P68372  | 0.02636746 | N-term +28.03 Da, K +28.03 Da,             | 4079.002686 | 2 | 796.4299927 | 796.4398272 |
| STDITSLDQYVER                  | P08113  | 0.00042808 | N-term +28.03 Da,                          | 4079.168457 | 2 | 777.8800049 | 777.8859396 |
| GIDDLTGEPLIQR                  | Q9WTP7  | 0          | N-term +28.03 Da,                          | 4082.665039 | 2 | 728.3900146 | 727.8961096 |
| SLSEKPPAIDWAYYR                | Q9DCX2  | 0.0271861  | N-term +28.03 Da, K +28.03 Da,             | 4083.258789 | 2 | 927.4899902 | 926.4856235 |
| TMFGKLNKGTDPEDVIR              | Q3THE2  | 0.0172209  | N-term +28.03 Da, K +28.03 Da,             | 4083.822998 | 3 | 660.3303833 | 660.0031892 |

|                             |        |            |                                            |             |   |             |             |
|-----------------------------|--------|------------|--------------------------------------------|-------------|---|-------------|-------------|
| SLSEKPPAIDWAYYR             | Q9DCX2 | 0          | N-term +28.03 Da, K +28.03 Da,             | 4083.973877 | 3 | 617.992981  | 617.9928411 |
| TMFGEKLNKGTDPEDVIR          | Q3THE2 | 0.00043459 | N-term +28.03 Da, K +28.03 Da,             | 4084.063721 | 2 | 989.9899902 | 989.5011455 |
| ELEELSLEAQQGIR              | Q05D44 | 0          | N-term +28.03 Da, K +28.03 Da,C +57.02 Da, | 4084.455078 | 2 | 757.9065552 | 757.9066747 |
| GFGDLKTPAGL                 | O70251 | 0          | N-term +28.03 Da, K +28.03 Da,             | 4085.797607 | 2 | 566.3233643 | 566.3240593 |
| GISDVVKVTLTPPEEAR           | P06151 | 0          | N-term +28.03 Da, K +28.03 Da,             | 4085.873047 | 3 | 633.6851807 | 633.6859659 |
| IQLLEEELDR                  | Q6IRU2 | 0.00993789 | N-term +28.03 Da,                          | 4086.130859 | 2 | 643.8499756 | 643.3535459 |
| GISDVVKVTLTPPEEAR           | P06151 | 0          | N-term +28.03 Da, K +28.03 Da,             | 4088.171875 | 2 | 950.0200195 | 950.0253107 |
| ELISNASDALDKIR              | P08113 | 0.00110051 | N-term +28.03 Da, K +28.03 Da,             | 4089.275146 | 3 | 534.6300049 | 534.3016747 |
| ASQTQGIQQLLQAEKR            | Q9WTT4 | 0          | N-term +28.03 Da, K +28.03 Da,             | 4091.630371 | 2 | 928.0100098 | 928.0234361 |
| DDKDYFLFR                   | Q64433 | 0.00042918 | N-term +28.03 Da, K +28.03 Da,             | 4092.303955 | 3 | 425.8900146 | 425.5520413 |
| NKELDPVQKLFVDKIR            | P97450 | 0          | N-term +28.03 Da, K +28.03 Da,             | 4094.176025 | 4 | 514.5603638 | 514.3147655 |
| VTSVQVFK                    | Q99LF7 | 0.01385542 | N-term +28.03 Da, K +28.03 Da,             | 4094.254639 | 2 | 482.2999878 | 482.2973126 |
| SLFKAFEEEEQALR              | P49429 | 0          | N-term +28.03 Da, K +28.03 Da,             | 4095.099854 | 3 | 541.9627075 | 541.9628817 |
| NKELDPVQKLFVDKIR            | P97450 | 0          | N-term +28.03 Da, K +28.03 Da,             | 4097.648438 | 3 | 685.7399902 | 685.4172618 |
| SLFKAFEEEEQALR              | P49429 | 0          | N-term +28.03 Da, K +28.03 Da,             | 4098.501465 | 2 | 812.4400024 | 812.4406843 |
| SLFDKDGDTITTKELGTVMR        | P62204 | 0          | N-term +28.03 Da, K +28.03 Da,             | 4098.584961 | 3 | 790.75      | 790.0858015 |
| ALAADISSKSPVAVQGSKINLIYSR   | O35459 | 0          | N-term +28.03 Da, K +28.03 Da,             | 4098.841797 | 4 | 668.8900146 | 668.8890926 |
| DDEVVDVGTVEEDLGKSR          | P08113 | 0          | N-term +28.03 Da, K +28.03 Da,             | 4102.528809 | 3 | 678.6500244 | 678.6551722 |
| PMTLGYWDIR                  | P15626 | 0.00043611 | N-term +28.03 Da,                          | 4102.659668 | 2 | 641.3200073 | 640.3288187 |
| ANVAKPGLVDDFEKKYNAL         | Q9DCX2 | 0          | N-term +28.03 Da, K +28.03 Da,             | 4103.931152 | 4 | 552.3099976 | 551.813593  |
| ANVAKPGLVDDFEKKYNAL         | Q9DCX2 | 0          | N-term +28.03 Da, K +28.03 Da,             | 4105.445801 | 4 | 551.8099976 | 551.813593  |
| QLDKDGVVLFKFKFDEGR          | P09103 | 0          | N-term +28.03 Da, K +28.03 Da,             | 4107.495117 | 4 | 527.0499878 | 527.304398  |
| ASLSEKPPAIDWAYYR            | Q9DCX2 | 0.0007776  | N-term +28.03 Da, K +28.03 Da,             | 4109.263672 | 3 | 641.6699829 | 641.6718792 |
| NGTLEDQLSHLKQYER            | P57780 | 0          | N-term +28.03 Da, K +28.03 Da,             | 4109.581543 | 3 | 663.3400269 | 663.0129646 |
| LPPDLPLEPECR                | Q8BGT0 | 0.01905041 | N-term +28.03 Da, C +57.02 Da,             | 4111.076172 | 2 | 790.3900146 | 789.8952525 |
| ASLSEKPPAIDWAYYR            | Q9DCX2 | 0          | N-term +28.03 Da, K +28.03 Da,             | 4111.300293 | 3 | 642.3400269 | 641.6718792 |
| SHTSAAAGTMAGVPTVSFSELR      | E9PY03 | 0.02978013 | N-term +28.03 Da, K +28.03 Da,             | 4111.967773 | 3 | 735.3800049 | 735.7038026 |
| GLGGELLAAR                  | Q60936 | 0.00084104 | N-term +28.03 Da,                          | 4112.961914 | 2 | 549.3369751 | 549.3375008 |
| TMFGEKLNKGTDPEDVIR          | Q3THE2 | 0.04977376 | N-term +28.03 Da, K +28.03 Da,             | 4114.620605 | 3 | 660.3310547 | 660.0031892 |
| SHTSAAAGTMAGVPTVSFSELR      | E9PY03 | 0          | N-term +28.03 Da,                          | 4116.485352 | 3 | 736.039978  | 735.7038026 |
| AIMEYLEETRPIPR              | Q9WVL0 | 0          | N-term +28.03 Da, K +28.03 Da,             | 4116.880859 | 3 | 582.9799805 | 582.6466764 |
| GISDVVKVTLTPPEEAR           | P06151 | 0          | N-term +28.03 Da, K +28.03 Da,             | 4117.786621 | 3 | 633.6864014 | 633.6859659 |
| ASVYGNETEIGEALKESVSGKAVPR   | Q9JII6 | 0          | N-term +28.03 Da, K +28.03 Da,             | 4119.928223 | 4 | 684.1199951 | 683.8670863 |
| DIQMTQSPSSLSASLGER          | P01639 | 0          | N-term +28.03 Da,                          | 4120.11377  | 2 | 967.9699707 | 967.9780349 |
| DALEEDNVLVLKK               | P09103 | 0          | N-term +28.03 Da, K +28.03 Da,             | 4120.416992 | 2 | 849.9799805 | 849.97984   |
| ASLSEKPPAIDWAYYR            | Q9DCX2 | 0.00045086 | N-term +28.03 Da, K +28.03 Da,             | 4120.663086 | 2 | 962.5100098 | 962.0041806 |
| TGTEAPDYLATVDVDPKSPQYSQVIHR | P17563 | 0.00083542 | N-term +28.03 Da, K +28.03 Da,             | 4120.788086 | 4 | 761.8900146 | 761.6397381 |
| SDVLELTDENFESR              | P27773 | 0          | N-term +28.03 Da, C +57.02 Da,             | 4121.890137 | 2 | 841.3991699 | 841.3994117 |
| LNQALLDLHALGSAR             | P29391 | 0          | N-term +28.03 Da,                          | 4122.148438 | 3 | 540.6462402 | 540.6457754 |
| FALIGTQANVTKELER            | Q9DBC0 | 0          | N-term +28.03 Da, K +28.03 Da,             | 4122.92627  | 3 | 616.3599854 | 616.0192789 |

|                               |        |            |                                             |             |   |             |             |
|-------------------------------|--------|------------|---------------------------------------------|-------------|---|-------------|-------------|
| ASEAIKGAVVGIDLGTNSCVAVMEGKQAK | P38647 | 0          | N-term +28.03 Da, K +28.03 Da,              | 4123.868164 | 3 | 1040.22998  | 1039.561317 |
| AIMEYLEETRPIPR                | Q9WVLO | 0.00682927 | N-term +28.03 Da,                           | 4123.986328 | 2 | 873.9699707 | 873.4663763 |
| FSVSDLPKLPK                   | Q9EST5 | 0          | N-term +28.03 Da, K +28.03 Da,              | 4125.083984 | 3 | 438.9400024 | 438.9392366 |
| GGTKVVLDDKDYFLFR              | Q64433 | 0          | N-term +28.03 Da, K +28.03 Da,              | 4125.308594 | 4 | 490.2799988 | 490.0252911 |
| ASEAIKGAVVGIDLGTNSCVAVMEGKQAK | P38647 | 0          | N-term +28.03 Da, K +28.03 Da,              | 4126.384766 | 4 | 779.9230957 | 779.9228072 |
| SVYGNETEIGEALKESVSGKAVPR      | Q9JII6 | 0          | N-term +28.03 Da, K +28.03 Da,              | 4127.291504 | 4 | 666.3599854 | 666.1078077 |
| ATPLNQVANPNSAIFGGAR           | Q9WUK2 | 0          | N-term +28.03 Da,                           | 4128.074707 | 2 | 963.5157471 | 963.5132356 |
| AVFEAVSGPPPADLCHALR           | O70251 | 0          | N-term +28.03 Da, K +28.03 Da, C +57.02 Da, | 4128.297852 | 3 | 679.0184937 | 679.0191732 |
| RVAGPQPAQTGAPQGSGLGEYLFER     | P29391 | 0          | N-term +28.03 Da,                           | 4128.418945 | 3 | 853.4400024 | 853.110109  |
| GTKVVLDDKDYFLFR               | Q64433 | 0          | N-term +28.03 Da, K +28.03 Da,              | 4129.885254 | 4 | 475.769989  | 475.7699251 |
| TLGGVFTKLINR                  | P38647 | 0.02282454 | N-term +28.03 Da, K +28.03 Da,              | 4131.107422 | 3 | 458.9500122 | 458.9537686 |
| GLDLWQVK                      | P14211 | 0.00886076 | N-term +28.03 Da, K +28.03 Da,              | 4131.390137 | 2 | 507.8026428 | 507.8027622 |
| LAQFVEHWKELKQLAAAR            | P16546 | 0          | N-term +28.03 Da, K +28.03 Da,              | 4134.380859 | 4 | 556.3300171 | 556.3256645 |
| LKLPAVVTADLR                  | Q9DCW4 | 0.00083472 | N-term +28.03 Da, K +28.03 Da,              | 4135.922363 | 3 | 451.2900085 | 451.2939023 |
| EEEAIQLDGLNASQIR              | P08113 | 0          | N-term +28.03 Da,                           | 4137.715332 | 2 | 907.9699707 | 907.4681599 |
| SVYGNETEIGEALKESVSGKAVPR      | Q9JII6 | 0          | N-term +28.03 Da, K +28.03 Da,              | 4137.899902 | 4 | 666.1099854 | 666.1078077 |
| VPPVQVSPLIKFGR                | Q06185 | 0          | N-term +28.03 Da, K +28.03 Da,              | 4139.359863 | 3 | 531.6680298 | 531.6677398 |
| SDVLELTDENFESR                | P27773 | 0          | N-term +28.03 Da,                           | 4139.435059 | 3 | 561.2700195 | 561.2686999 |
| MSTGTFFVVSQPLNYR              | Q9JLJ2 | 0          | N-term +28.03 Da,                           | 4139.543457 | 2 | 864.4400024 | 864.4429012 |
| SPVLLNDPVLCDVAKR              | Q9JLI0 | 0.03053859 | N-term +28.03 Da, K +28.03 Da,              | 4139.618652 | 3 | 618.3599854 | 618.0168808 |
| NGGFCVCKKLV                   | Q61207 | 0.00371873 | N-term +28.03 Da, K +28.03 Da,              | 4139.998535 | 3 | 537.289978  | 536.6264472 |
| ADLVQDLSISTCR                 | Q8BHC0 | 0.0008285  | N-term +28.03 Da, C +57.02 Da,              | 4141.206055 | 2 | 753.3800049 | 753.385052  |
| LPPDLPDLEPECR                 | Q8BGT0 | 0.0007902  | N-term +28.03 Da, C +57.02 Da,              | 4143.108887 | 2 | 789.894104  | 789.8952525 |
| AAAVSDIQDLMR                  | Q9CR00 | 0          | N-term +28.03 Da,                           | 4145.173828 | 2 | 659.3455811 | 659.3451978 |
| ASQTQGIQQLLQAEKR              | Q9WTT4 | 0          | N-term +28.03 Da, K +28.03 Da,              | 4145.591309 | 2 | 928.0100098 | 928.0234361 |
| GISTPEELGLDKV                 | P12787 | 0.00111773 | N-term +28.03 Da, K +28.03 Da,              | 4146.083496 | 2 | 707.4000244 | 707.3954111 |
| KTITSQWKEEDATLSSPAVVMPTMGR    | Q9EQ20 | 0.02052023 | N-term +28.03 Da, K +28.03 Da,              | 4147.541016 | 4 | 737.6400146 | 737.6371465 |
| AIMEYLEETRPIPR                | Q9WVLO | 0.00345662 | N-term +28.03 Da, K +28.03 Da,              | 4148.196289 | 3 | 582.6463013 | 582.6466764 |
| TGSGDPKEEEEELVDPLTTVR         | P99028 | 0          | N-term +28.03 Da, K +28.03 Da, C +57.02 Da, | 4148.467773 | 3 | 829.4123535 | 829.4096679 |
| KTITSQWKEEDATLSSPAVVMPTMGR    | Q9EQ20 | 0          | N-term +28.03 Da, K +28.03 Da,              | 4148.972656 | 3 | 983.5100098 | 983.1804365 |
| AISSDMFFGR                    | Q99K28 | 0.00043745 | N-term +28.03 Da, K +28.03 Da,              | 4149.337402 | 2 | 579.789978  | 579.784244  |
| GIESEIVAGIPR                  | P10605 | 0          | N-term +28.03 Da, K +28.03 Da, C +57.02 Da, | 4149.723145 | 2 | 634.8599854 | 634.8640805 |
| EKDGETFQLMGLYGR               | B5X0G2 | 0.00112697 | N-term +28.03 Da, K +28.03 Da,              | 4150.04248  | 3 | 600.9699707 | 600.6380697 |
| TGSGDPKEEEEELVDPLTTVR         | P99028 | 0          | N-term +28.03 Da, K +28.03 Da,              | 4150.273438 | 2 | 1244.609985 | 1243.610864 |
| TAASSSSLEKSYELPDGQVITIGNER    | P60710 | 0.00111815 | N-term +28.03 Da, K +28.03 Da,              | 4151.050781 | 3 | 937.4899902 | 936.8135762 |
| SLFDKDGDTITTKELGTVMR          | P62204 | 0          | N-term +28.03 Da, K +28.03 Da,              | 4152.122559 | 4 | 593.0700073 | 592.8161703 |
| ADFEIGHFLR                    | P28656 | 0.00077882 | N-term +28.03 Da, K +28.03 Da,              | 4152.59668  | 3 | 411.5499878 | 411.552264  |
| SDVLELTDENFESR                | P27773 | 0          | N-term +28.03 Da,                           | 4153.820801 | 2 | 841.3989868 | 841.3994117 |
| ASQTQGIQQLLQAEKR              | Q9WTT4 | 0          | N-term +28.03 Da, K +28.03 Da,              | 4154.912598 | 3 | 619.0057983 | 619.0180496 |
| EDIDLPEFDAR                   | P10605 | 0.000456   | N-term +28.03 Da,                           | 4156.308105 | 2 | 724.8499756 | 724.8488255 |

|                                |        |            |                                            |             |   |             |             |
|--------------------------------|--------|------------|--------------------------------------------|-------------|---|-------------|-------------|
| TGAWTIEGNKLIKGFTR              | P55050 | 0          | N-term +28.03 Da, K +28.03 Da,C +57.02 Da, | 4156.616211 | 4 | 494.7900085 | 494.7886491 |
| DIQMTQTSSLSASLGDR              | P01643 | 0          | N-term +28.03 Da,                          | 4158.044434 | 2 | 970.4699707 | 969.9754924 |
| NKELDPVQKLFVDKIR               | P97450 | 0.00078958 | N-term +28.03 Da, K +28.03 Da,             | 4159.233398 | 4 | 514.5599976 | 514.3147655 |
| ASEAIKGAVVGIDLGTNSCAVAVMEGKQAK | P38647 | 0          | N-term +28.03 Da, K +28.03 Da,             | 4159.412109 | 4 | 780.1699829 | 779.9228072 |
| GQNGISDVVKVTLTPEEEAR           | P06151 | 0          | N-term +28.03 Da, K +28.03 Da,             | 4160.95752  | 3 | 734.0599976 | 733.3936228 |
| DLSSPIQTTSTLYER                | Q8BM55 | 0          | N-term +28.03 Da,                          | 4161.415527 | 2 | 869.9500122 | 869.9465289 |
| ASEAIKGAVVGIDLGTNSCAVAVMEGKQAK | P38647 | 0          | N-term +28.03 Da, K +28.03 Da,             | 4161.64209  | 3 | 1040.219971 | 1039.561317 |
| AVRPLQLLGTCAELCR               | Q8BTE6 | 0          | N-term +28.03 Da, C +57.02 Da,             | 4162.713867 | 3 | 629.0095825 | 629.0097317 |
| GSGDPKEEEEEELVDPLTTVR          | P99028 | 0.00345185 | N-term +28.03 Da, K +28.03 Da,             | 4163.276367 | 2 | 1193.089966 | 1193.087024 |
| TNLGEKLTDEEVDDEMIR             | P62204 | 0.00375427 | N-term +28.03 Da, K +28.03 Da,             | 4163.637207 | 3 | 683.6799927 | 683.3453926 |
| EKDGETFQLMGLYGR                | B5X0G2 | 0.00078771 | N-term +28.03 Da, K +28.03 Da,             | 4164.366699 | 2 | 900.4500122 | 900.4534663 |
| GQNGISDVVKVTLTPEEEAR           | P06151 | 0          | N-term +28.03 Da, K +28.03 Da,             | 4166.108398 | 3 | 733.7199707 | 733.3936228 |
| GSGDPKEEEEEELVDPLTTVR          | P99028 | 0          | N-term +28.03 Da, K +28.03 Da,             | 4166.239746 | 2 | 1194.089966 | 1193.087024 |
| SDNQPGVLIQVYEGER               | P16627 | 0          | N-term +28.03 Da,                          | 4166.566406 | 2 | 916.4645386 | 916.4628774 |
| EKLNQALLDLHALGSAR              | P29391 | 0.00835207 | N-term +28.03 Da, K +28.03 Da,             | 4167.622559 | 4 | 506.0400085 | 505.5390971 |
| GSGDPKEEEEEELVDPLTTVR          | P99028 | 0.00565536 | N-term +28.03 Da, K +28.03 Da,             | 4167.856445 | 3 | 796.0599976 | 795.7271082 |
| ADPPASVVVGPVVVPR               | P29699 | 0.02125215 | N-term +28.03 Da,                          | 4168.05127  | 3 | 530.3200073 | 529.6470047 |
| SEDASYINGETVVVGGGTPSRL         | Q99LB2 | 0          | N-term +28.03 Da,                          | 4169.925293 | 2 | 1119.050049 | 1118.558236 |
| GMVALLDYR                      | P63028 | 0.00079618 | N-term +28.03 Da,                          | 4171.420898 | 2 | 533.289978  | 533.2917045 |
| APDQDEIDCLPGLAKQPSFR           | P16675 | 0          | N-term +28.03 Da, K +28.03 Da,             | 4173.254883 | 3 | 771.7199707 | 771.7229744 |
| AKGAEEMETVIPVDVMR              | Q99LX0 | 0.03966314 | N-term +28.03 Da, K +28.03 Da,C +57.02 Da, | 4173.361328 | 2 | 967         | 966.0024664 |
| SFPDVEPQLPQAPTR                | E9Q0S6 | 0.00080225 | N-term +28.03 Da,                          | 4173.666016 | 2 | 855.4400024 | 855.4464983 |
| LPPDLPDLEPECR                  | Q8BGT0 | 0.01358286 | N-term +28.03 Da, K +28.03 Da,C +57.02 Da, | 4174.865723 | 2 | 790.4099731 | 789.8952525 |
| TGSGDPKEEEEEELVDPLTTVR         | P99028 | 0          | N-term +28.03 Da, K +28.03 Da,             | 4179.324707 | 3 | 830.0800171 | 829.4096679 |
| GDPKEEEEEELVDPLTTVR            | P99028 | 0.00111524 | N-term +28.03 Da, K +28.03 Da,             | 4181.949219 | 3 | 747.710022  | 747.7092771 |
| GDPKEEEEEELVDPLTTVR            | P99028 | 0          | N-term +28.03 Da, K +28.03 Da,             | 4183.799316 | 2 | 1121.560059 | 1121.060277 |
| NKELDPVQKLFVDKIR               | P97450 | 0          | N-term +28.03 Da, K +28.03 Da,             | 4184.71582  | 3 | 685.7399902 | 685.4172618 |
| EEMDGEWEPPIQNPYKGEWKPR         | P14211 | 0          | N-term +28.03 Da, K +28.03 Da,             | 4185.326172 | 4 | 758.1199951 | 757.6193825 |
| SDVLELTDENFESR                 | P27773 | 0          | N-term +28.03 Da,                          | 4185.853516 | 2 | 841.4000244 | 841.3994117 |
| KEESFGPIMIISR                  | Q8ROY6 | 0.02561937 | N-term +28.03 Da, K +28.03 Da,             | 4187.71582  | 3 | 521.6199951 | 521.6252123 |
| EVEAVKVHSFPTLKFFPASADR         | P09103 | 0          | N-term +28.03 Da, K +28.03 Da,             | 4188.885254 | 4 | 640.8499756 | 640.6047032 |
| NKELDPVQKLFVDKIR               | P97450 | 0          | N-term +28.03 Da, K +28.03 Da,             | 4190.439453 | 4 | 514.5604858 | 514.3147655 |
| GDPKEEEEEELVDPLTTVR            | P99028 | 0.01110768 | N-term +28.03 Da, K +28.03 Da,             | 4195.175293 | 4 | 561.2800293 | 561.0337769 |
| THILLFLPK                      | P09103 | 0.01195952 | N-term +28.03 Da, K +28.03 Da,             | 4195.442383 | 3 | 379.9200134 | 379.9179951 |
| VAEPVELAQEFR                   | Q9DCT2 | 0.00683149 | N-term +28.03 Da,                          | 4196.791992 | 2 | 708.3800049 | 708.380095  |
| ASTFEEVVQVPSAYQK               | Q60598 | 0.00113507 | N-term +28.03 Da, K +28.03 Da,             | 4198.867188 | 2 | 920.4799805 | 919.9803715 |
| THILLFLPK                      | P09103 | 0.00080418 | N-term +28.03 Da, K +28.03 Da,             | 4202.712402 | 2 | 569.3718262 | 569.3733544 |
| APDQDEIDCLPGLAKQPSFR           | P16675 | 0          | N-term +28.03 Da, K +28.03 Da,             | 4203.75     | 3 | 771.7199707 | 771.7229744 |
| EVEAVKVHSFPTLKFFPASADR         | P09103 | 0          | N-term +28.03 Da, K +28.03 Da,             | 4204.688477 | 4 | 640.5999756 | 640.6047032 |
| DIDAWELR                       | P12787 | 0.01332929 | N-term +28.03 Da, K +28.03 Da,             | 4205.104492 | 2 | 523.2700195 | 523.2692841 |

|                          |        |            |                                |             |   |             |             |
|--------------------------|--------|------------|--------------------------------|-------------|---|-------------|-------------|
| TVDAFDYDLQTGQISNR        | Q64374 | 0          | N-term +28.03 Da,              | 4206.291504 | 2 | 986.4699707 | 985.9763495 |
| LDDKDYFLFR               | Q64433 | 0          | N-term +28.03 Da, K +28.03 Da, | 4207.688965 | 3 | 463.25      | 463.2467295 |
| GDPKEEEEEELVDPLTTVR      | P99028 | 0.01609058 | N-term +28.03 Da, K +28.03 Da, | 4212.279785 | 3 | 747.7079468 | 747.7092771 |
| TKVVLDDKDYFLFR           | Q64433 | 0.01275433 | N-term +28.03 Da, K +28.03 Da, | 4213.263672 | 3 | 615.3499756 | 615.0169866 |
| MIFFKDGLEMEKC            | P63028 | 0          | N-term +28.03 Da, C +57.02 Da, | 4213.367676 | 3 | 578.289978  | 577.9554648 |
| SDIDEIVLVGGSTR           | P20029 | 0          | N-term +28.03 Da,              | 4213.711426 | 2 | 744.3900146 | 744.8988496 |
| GDPKEEEEEELVDPLTTVR      | P99028 | 0          | N-term +28.03 Da, K +28.03 Da, | 4214.536133 | 2 | 1121.05896  | 1121.060277 |
| NKELDPVQKLFVDKIR         | P97450 | 0.00177117 | N-term +28.03 Da, K +28.03 Da, | 4214.879395 | 3 | 685.7443237 | 685.4172618 |
| TVDAFDYDLQTGQISNR        | Q64374 | 0          | N-term +28.03 Da,              | 4218.193359 | 2 | 985.9799805 | 985.9763495 |
| TKVVLDDKDYFLFR           | Q64433 | 0          | N-term +28.03 Da, K +28.03 Da, | 4218.411621 | 4 | 462.019989  | 461.514559  |
| SDIDEIVLVGGSTR           | P20029 | 0          | N-term +28.03 Da,              | 4219.758301 | 2 | 745.3900146 | 744.8988496 |
| EAQEFVGR                 | P05366 | 0          | N-term +28.03 Da,              | 4220.15332  | 2 | 579.7800293 | 579.7825586 |
| NKELDPVQKLFVDKIR         | P97450 | 0          | N-term +28.03 Da, K +28.03 Da, | 4221.334961 | 4 | 514.5606079 | 514.3147655 |
| VMMQDSSPDFEDTWR          | Q8K1Z0 | 0          | N-term +28.03 Da,              | 4222.493164 | 2 | 937.4000244 | 936.400574  |
| SLFDKDGDTITTKELGTVMR     | P62204 | 0          | N-term +28.03 Da, K +28.03 Da, | 4222.708496 | 4 | 592.8200073 | 592.8161703 |
| SDVLELTDENFESR           | P27773 | 0          | N-term +28.03 Da,              | 4223.794922 | 2 | 841.4000244 | 841.3994117 |
| SLATAGDGLIELR            | P67778 | 0.00081599 | N-term +28.03 Da, K +28.03 Da, | 4225.973633 | 2 | 672.3800049 | 672.380095  |
| VLESDLKKSDIDEIVLVGGSTR   | P20029 | 0          | N-term +28.03 Da, K +28.03 Da, | 4230.453613 | 3 | 858.1400146 | 858.1408525 |
| TFDLTGIPPAPR             | P20029 | 0          | N-term +28.03 Da,              | 4233.062012 | 2 | 656.8667603 | 656.866623  |
| AWITAPVALR               | O55111 | 0.00110619 | N-term +28.03 Da, K +28.03 Da, | 4233.20166  | 2 | 563.3421021 | 563.3425858 |
| GESKCPMLVVKVLDVAVR       | P07309 | 0          | N-term +28.03 Da, K +28.03 Da, | 4234.731445 | 4 | 472.269989  | 472.2705062 |
| DALEEDNVLVLK             | P09103 | 0          | N-term +28.03 Da, K +28.03 Da, | 4236.884766 | 2 | 771.916687  | 771.9167082 |
| TLVGYDLVPEPK             | P12787 | 0          | N-term +28.03 Da, K +28.03 Da, | 4237.224609 | 2 | 693.9000244 | 693.8975891 |
| HVMTNLGEKLTDEEVDEMIR     | P62204 | 0.01906158 | N-term +28.03 Da, K +28.03 Da, | 4238.455566 | 2 | 1208.599976 | 1208.098356 |
| GIQLPGTTHQQPSVGQMMIFEHGF | P11276 | 0          | N-term +28.03 Da,              | 4240.43457  | 4 | 738.6199951 | 738.37117   |
| ELVDKATNVVMNYSEIESKVR    | Q5SUH6 | 0          | N-term +28.03 Da, K +28.03 Da, | 4241.525879 | 3 | 837.1199951 | 836.7841226 |
| GPASGLPTTSSPSSSLPSPSPTPR | Q9ET54 | 0          | N-term +28.03 Da,              | 4241.866211 | 2 | 1296.170044 | 1295.671589 |
| GDPKEEEEEELVDPLTTVR      | P99028 | 0.00108853 | N-term +28.03 Da, K +28.03 Da, | 4243.3125   | 3 | 747.7093506 | 747.7092771 |
| TDITSLDQYVER             | P08113 | 0          | N-term +28.03 Da,              | 4244.091309 | 2 | 734.3699951 | 734.369925  |
| GDPKEEEEEELVDPLTTVR      | P99028 | 0          | N-term +28.03 Da, K +28.03 Da, | 4245.558105 | 2 | 1121.060425 | 1121.060277 |
| EKDGTFQLMGLYGR           | B5X0G2 | 0          | N-term +28.03 Da, K +28.03 Da, | 4246.188965 | 3 | 600.9699707 | 600.6380697 |
| YSSDDVIELTPSNFNR         | Q922R8 | 0          | N-term +28.03 Da,              | 4249.43457  | 2 | 986.4683838 | 986.4683575 |
| ELDPVQKLFVDKIR           | P97450 | 0.00046147 | N-term +28.03 Da, K +28.03 Da, | 4249.51123  | 3 | 595.7000122 | 595.3608646 |
| NKELDPVQKLFVDKIR         | P97450 | 0.00042571 | N-term +28.03 Da, K +28.03 Da, | 4251.77832  | 4 | 514.5599976 | 514.3147655 |
| DSDSILETLQR              | Q9D6J6 | 0          | N-term +28.03 Da,              | 4253.413574 | 2 | 653.3400269 | 652.8382604 |
| YSSDDVIELTPSNFNR         | Q922R8 | 0          | N-term +28.03 Da,              | 4253.48877  | 3 | 657.9799805 | 657.9813305 |
| SDVLELTDENFESR           | P27773 | 0          | N-term +28.03 Da, K +28.03 Da, | 4255.000488 | 2 | 841.4000244 | 841.3994117 |
| ELDPVQKLFVDKIR           | P97450 | 0          | N-term +28.03 Da, K +28.03 Da, | 4261.237305 | 4 | 446.7723389 | 446.7724676 |
| SLGEYLFER                | P29391 | 0.00176616 | N-term +28.03 Da,              | 4263.716797 | 2 | 571.2984009 | 571.2980417 |
| NKELDPVQKLFVDKIR         | P97450 | 0.00042955 | N-term +28.03 Da, K +28.03 Da, | 4263.815918 | 3 | 685.0800171 | 685.4172618 |

|                              |        |            |                                             |             |   |             |             |
|------------------------------|--------|------------|---------------------------------------------|-------------|---|-------------|-------------|
| FPASVAPAPVLMNQPPQIAPKR       | Q6NZJ6 | 0          | N-term +28.03 Da, K +28.03 Da,              | 4265.127441 | 3 | 796.1199951 | 795.7873606 |
| GFDVNNLDPDLR                 | P70315 | 0          | N-term +28.03 Da, K +28.03 Da,              | 4265.232422 | 2 | 701.8584595 | 701.8517019 |
| ANEVEAVKVHVSPTLKFPPASADR     | P09103 | 0          | N-term +28.03 Da, K +28.03 Da,              | 4266.90332  | 4 | 687.3800049 | 686.8747138 |
| TLVGYDLVPEPK                 | P12787 | 0          | N-term +28.03 Da, K +28.03 Da,              | 4267.77002  | 2 | 693.8955688 | 693.8975891 |
| SDVLELTDENFESR               | P27773 | 0          | N-term +28.03 Da,                           | 4271.989746 | 3 | 561.2680054 | 561.2686999 |
| VANQDFVENVLVR                | O88746 | 0.00109409 | N-term +28.03 Da,                           | 4272.078613 | 2 | 765.4099731 | 765.9173762 |
| DELLQVLR                     | P61022 | 0.00892573 | N-term +28.03 Da,                           | 4272.380371 | 2 | 507.3032532 | 507.3031267 |
| VLDDKDYFLFR                  | Q64433 | 0          | N-term +28.03 Da, K +28.03 Da,              | 4272.60791  | 3 | 496.269989  | 496.2695342 |
| GDPKEEEEEELVDPLTTVR          | P99028 | 0.00806452 | N-term +28.03 Da, K +28.03 Da,              | 4273.412598 | 3 | 747.710022  | 747.7092771 |
| IEANEALVKALE                 | Q9D3D9 | 0          | N-term +28.03 Da, K +28.03 Da,              | 4275.233398 | 2 | 678.3925171 | 678.3926711 |
| GEFVDLVVPR                   | Q9CQR2 | 0          | N-term +28.03 Da, K +28.03 Da,              | 4276.197266 | 2 | 611.8300171 | 611.8269663 |
| TGLTVAEYFR                   | P56480 | 0.00109369 | N-term +28.03 Da,                           | 4277.137695 | 2 | 592.8200073 | 592.8191413 |
| IGPVEVENALAEHPAESAASVSSPDKDR | Q91VA0 | 0          | N-term +28.03 Da, K +28.03 Da,              | 4277.31543  | 4 | 761.4000244 | 761.3990167 |
| YSSSDDVIELTPSNFNR            | Q922R8 | 0          | N-term +28.03 Da,                           | 4280.869141 | 2 | 986.4666748 | 986.4683575 |
| YLEFADTGSVKDFGIQPVEDKGACR    | Q3UD01 | 0          | N-term +28.03 Da, C +57.02 Da,              | 4281.554688 | 4 | 722.6099854 | 722.3640165 |
| FPASVAPAPVLMNQPPQIAPKR       | Q6NZJ6 | 0          | N-term +28.03 Da, K +28.03 Da,              | 4281.634766 | 3 | 795.789978  | 795.7873606 |
| NALALAMER                    | Q60692 | 0.01853486 | N-term +28.03 Da,                           | 4282.943848 | 2 | 509.2741699 | 508.781504  |
| YSSSDDVIELTPSNFNR            | Q922R8 | 0          | N-term +28.03 Da,                           | 4284.216309 | 3 | 658.6500244 | 657.9813305 |
| VALLLASARLAAASDVLELTDENFESR  | P27773 | 0          | N-term +28.03 Da, K +28.03 Da,              | 4284.460449 | 3 | 968.8599854 | 968.1888657 |
| SDVLELTDENFESR               | P27773 | 0          | N-term +28.03 Da,                           | 4285.549805 | 2 | 841.3974609 | 841.3994117 |
| MDLPLSAAPTQEEKQGPTPAGLPR     | Q7TT50 | 0          | N-term +28.03 Da, K +28.03 Da,              | 4286.980957 | 3 | 887.8099976 | 887.1423101 |
| LASARLAAASDVLELTDENFESR      | P27773 | 0          | N-term +28.03 Da, K +28.03 Da,              | 4287.161621 | 2 | 1254.130005 | 1253.642832 |
| TVEEPLDLIR                   | P62311 | 0.01900585 | N-term +28.03 Da, K +28.03 Da,              | 4288.530762 | 2 | 607.3499756 | 606.8453564 |
| DLNLDLSKFR                   | Q8BK30 | 0.00113336 | N-term +28.03 Da, K +28.03 Da,              | 4290.220703 | 3 | 426.25      | 426.2468408 |
| NGETPTEKLPFPIIDKGR           | O08709 | 0          | N-term +28.03 Da, K +28.03 Da,              | 4291.76123  | 3 | 738.4000244 | 737.7388415 |
| TFDLTGIPPAPR                 | P20029 | 0          | N-term +28.03 Da,                           | 4292.125    | 2 | 657.3699951 | 656.866623  |
| MDLPLSAAPTQEEKQGPTPAGLPR     | Q7TT50 | 0          | N-term +28.03 Da, K +28.03 Da,              | 4297.467285 | 4 | 665.8599854 | 665.6085517 |
| RPANPNWGVFSEFGDSSSPATR       | E9PV24 | 0          | N-term +28.03 Da,                           | 4299.100098 | 3 | 803.3900146 | 803.0523711 |
| SLGGGTGSGMGTLISKIR           | P68372 | 0          | N-term +28.03 Da, K +28.03 Da,              | 4301.039551 | 3 | 621.6900024 | 621.0240355 |
| LAAASDVLELTDENFESR           | P27773 | 0.00082271 | N-term +28.03 Da, K +28.03 Da,              | 4302.467773 | 2 | 1005.01001  | 1004.497115 |
| SLGGGTGSGMGTLISKIR           | P68372 | 0          | N-term +28.03 Da, K +28.03 Da,              | 4302.661133 | 3 | 621.0252686 | 621.0240355 |
| LKTQPTDEEMLFIYSH             | P31786 | 0.00111029 | N-term +28.03 Da, K +28.03 Da,              | 4302.980469 | 3 | 670.3400269 | 670.0080515 |
| SDVLELTDENFESR               | P27773 | 0          | N-term +28.03 Da,                           | 4303.373047 | 3 | 561.2684326 | 561.2686999 |
| VLDDKDYFLFR                  | Q64433 | 0          | N-term +28.03 Da, K +28.03 Da,              | 4303.44873  | 3 | 496.2696533 | 496.2695342 |
| KSEMEVQDAELKALLQSSASR        | P50580 | 0.0004417  | N-term +28.03 Da, K +28.03 Da,              | 4303.630859 | 3 | 802.4299927 | 802.0965892 |
| SSFIQGFVDHVKEDCDR            | Q61207 | 0          | N-term +28.03 Da, K +28.03 Da, C +57.02 Da, | 4303.845215 | 4 | 524.5       | 524.503289  |
| LKTQPTDEEMLFIYSH             | P31786 | 0          | N-term +28.03 Da, K +28.03 Da,              | 4305.580078 | 3 | 670.0100098 | 670.0080515 |
| KSEMEVQDAELKALLQSSASR        | P50580 | 0          | N-term +28.03 Da, K +28.03 Da,              | 4305.900391 | 4 | 602.0700073 | 601.824261  |
| NKELDPVQKLFVDKIR             | P97450 | 0          | N-term +28.03 Da, K +28.03 Da,              | 4306.043457 | 4 | 514.5599976 | 514.3147655 |
| SSLDDMTKNDPFKAR              | Q62523 | 0          | N-term +28.03 Da, K +28.03 Da,              | 4307.805176 | 4 | 481.2600098 | 481.2567535 |

|                                 |        |            |                                            |             |   |             |             |
|---------------------------------|--------|------------|--------------------------------------------|-------------|---|-------------|-------------|
| SVTGWKEIEYEVVR                  | Q8C196 | 0          | N-term +28.03 Da, K +28.03 Da,             | 4308.257324 | 3 | 584.9799805 | 584.3173248 |
| FGGGNTAWEKTLKSYEFSEIR           | Q9CYA0 | 0          | N-term +28.03 Da, K +28.03 Da,             | 4309.557617 | 4 | 659.3300171 | 659.0866094 |
| TANEVEAVKVFHPTLKFPPASADR        | P09103 | 0          | N-term +28.03 Da, K +28.03 Da,             | 4309.812988 | 4 | 712.6400146 | 712.1366336 |
| GQVVQFKLSDIGEGIR                | P53395 | 0          | N-term +28.03 Da, K +28.03 Da,             | 4310.017578 | 3 | 601.3436279 | 601.3438739 |
| SVTGWKEIEYEVVR                  | Q8C196 | 0          | N-term +28.03 Da, K +28.03 Da,             | 4310.128418 | 3 | 584.3173828 | 584.3173248 |
| DQDEIDCLPLGAKQPSFR              | P16675 | 0          | N-term +28.03 Da, K +28.03 Da,C +57.02 Da, | 4310.233398 | 3 | 715.6931763 | 715.6930149 |
| HEVSPLQNAEVTLIR                 | E9Q7N9 | 0.02508455 | N-term +28.03 Da,                          | 4312.394043 | 3 | 579         | 578.6563405 |
| GQNGISDVVKVTLTPPEEAR            | P06151 | 0          | N-term +28.03 Da, K +28.03 Da,             | 4312.99707  | 3 | 734.0599976 | 733.3936228 |
| LCDPNPDDPLVPEIAR                | P61079 | 0.00042626 | N-term +28.03 Da, C +57.02 Da,             | 4313.53418  | 2 | 925.4699707 | 924.9616558 |
| AHLLLEEVCDR                     | Q9QXT0 | 0.00078833 | N-term +28.03 Da, C +57.02 Da,             | 4314.181152 | 3 | 538.2700195 | 538.2714982 |
| GQVVQFKLSDIGEGIR                | P53395 | 0          | N-term +28.03 Da, K +28.03 Da,             | 4314.676758 | 2 | 902.0100098 | 901.5121726 |
| YSSDDVIELTPSNFNR                | Q922R8 | 0          | N-term +28.03 Da,                          | 4315.335938 | 2 | 986.9699707 | 986.4683575 |
| SDVLELTDENFESR                  | P27773 | 0          | N-term +28.03 Da,                          | 4316.22998  | 2 | 841.3987427 | 841.3994117 |
| ANAAGHLDDLPGALSALDLHAKLR        | Q91VB8 | 0          | N-term +28.03 Da, K +28.03 Da,             | 4318.473145 | 4 | 680.6199951 | 680.6214162 |
| GQVVQFKLSDIGEGIR                | P53395 | 0.0004384  | N-term +28.03 Da, K +28.03 Da,             | 4320.812012 | 2 | 902.5100098 | 901.5121726 |
| GQNGISDVVKVTLTPPEEAR            | P06151 | 0          | N-term +28.03 Da, K +28.03 Da,             | 4320.933594 | 2 | 1100.579956 | 1099.586796 |
| LLGEDEEALHYLTR                  | Q9EQU5 | 0          | N-term +28.03 Da, K +28.03 Da,             | 4322.15918  | 3 | 605.9755249 | 605.9756278 |
| EQWSNCTIGQIR                    | P10605 | 0          | N-term +28.03 Da, C +57.02 Da,             | 4323.912598 | 2 | 808.3900146 | 808.896118  |
| SLGGGTGSGMGTLISKIR              | P68372 | 0          | N-term +28.03 Da, K +28.03 Da,             | 4333.928711 | 3 | 621.3599854 | 621.0240355 |
| SDVLELTDENFESR                  | P27773 | 0          | N-term +28.03 Da,                          | 4334.597656 | 3 | 561.2700195 | 561.2686999 |
| LLLPGLAKHAVSEGTKAVTKY           | P10853 | 0          | N-term +28.03 Da, K +28.03 Da,             | 4334.753418 | 4 | 610.3699951 | 610.116175  |
| APQGSLSGEYLFER                  | P29391 | 0.00888325 | N-term +28.03 Da, K +28.03 Da,C +57.02 Da, | 4335.128418 | 3 | 498.9200134 | 498.9244269 |
| AGAGESKPLMVKVLDAVR              | P07309 | 0.00079491 | N-term +28.03 Da, K +28.03 Da,             | 4336.20459  | 4 | 522.539978  | 522.0444293 |
| SLGGGTGSGMGTLISKIR              | P68372 | 0          | N-term +28.03 Da, K +28.03 Da,             | 4337.106934 | 2 | 931.0300293 | 931.0324151 |
| GPAGAGESKPLMVKVLDAVR            | P07309 | 0          | N-term +28.03 Da, K +28.03 Da,             | 4338.027832 | 4 | 560.5599976 | 560.5629864 |
| TLMNLGGLAVAR                    | Q9WVA4 | 0.00592885 | N-term +28.03 Da,                          | 4338.284668 | 2 | 622.8599854 | 622.3631928 |
| NKELDPVQKLFVDKIR                | P97450 | 0          | N-term +28.03 Da, K +28.03 Da,             | 4338.554688 | 4 | 514.5599976 | 514.3147655 |
| GLFDEYGSKSDYIKLY                | P08113 | 0          | N-term +28.03 Da, K +28.03 Da,C +57.02 Da, | 4341.067871 | 4 | 535.539978  | 535.2909564 |
| AAIAQELNLDYYDSHNVNTR            | P57780 | 0          | N-term +28.03 Da,                          | 4344.087402 | 3 | 822.3900146 | 822.0628248 |
| ARNPPGFAFVEFEDPR                | P84104 | 0.00347705 | N-term +28.03 Da,                          | 4344.380859 | 3 | 626.31604   | 626.3162068 |
| SGPPVSELITKAVAASKER             | P15864 | 0          | N-term +28.03 Da, K +28.03 Da,             | 4344.716309 | 4 | 507.0499878 | 506.7992142 |
| GYLSLLQDSGEVR                   | P63242 | 0.00045045 | N-term +28.03 Da,                          | 4346.230957 | 2 | 732.8870239 | 732.8882846 |
| SSEKAPDMSSEEFPSFGAQVAPKTLPWGPKR | Q8VDJ3 | 0.00044883 | N-term +28.03 Da, K +28.03 Da,             | 4346.333496 | 4 | 891.460022  | 890.9578074 |
| VSGNLAVVQKLRFLVDR               | Q8QZW8 | 0.02513414 | N-term +28.03 Da, K +28.03 Da,             | 4346.596191 | 4 | 493.5499878 | 493.3031949 |
| APQGSLSGEYLFER                  | P29391 | 0.00143678 | N-term +28.03 Da,                          | 4347.26123  | 2 | 747.8824463 | 747.883002  |
| SDVLELTDENFESR                  | P27773 | 0          | N-term +28.03 Da,                          | 4347.336426 | 2 | 841.3988647 | 841.3994117 |
| TFHLEATENPGALIKDIR              | Q8VEE0 | 0          | N-term +28.03 Da, K +28.03 Da,             | 4347.487793 | 4 | 521.0394287 | 521.0402014 |
| SAMTEEAAVAIAKAMAK               | P63242 | 0          | N-term +28.03 Da, K +28.03 Da,             | 4349.428223 | 3 | 569.3099976 | 569.3124173 |
| ALFNPDVSWDR                     | Q62425 | 0.00043234 | N-term +28.03 Da,                          | 4350.917969 | 2 | 674.3377686 | 674.3382298 |
| FSVSDLPKLPKLR                   | Q9EST5 | 0          | N-term +28.03 Da, K +28.03 Da,             | 4351.497559 | 4 | 397.0100098 | 396.7588285 |

|                                         |        |            |                                             |             |   |             |             |
|-----------------------------------------|--------|------------|---------------------------------------------|-------------|---|-------------|-------------|
| TVILLENLR                               | P09411 | 0.01798879 | N-term +28.03 Da,                           | 4352.40625  | 2 | 549.8499756 | 549.8477014 |
| VGPIEEAVAKADKLAEEHGS                    | P56480 | 0.02124605 | N-term +28.03 Da, K +28.03 Da,              | 4353.431152 | 4 | 534.539978  | 534.2902167 |
| YSSDDVIELTPSNFNRR                       | Q922R8 | 0          | N-term +28.03 Da,                           | 4354.312012 | 2 | 986.960022  | 986.4683575 |
| LKGWFEPIVEDMHR                          | P08226 | 0          | N-term +28.03 Da, K +28.03 Da,              | 4355.168945 | 4 | 453.9919739 | 453.9920936 |
| SQWAGPLCLQEVDPEPPQHALR                  | P70296 | 0          | N-term +28.03 Da, C +57.02 Da,              | 4356.39209  | 3 | 820.7399902 | 820.4093898 |
| TQVNSEDKGALAKLVEAIR                     | P12970 | 0          | N-term +28.03 Da, K +28.03 Da,              | 4356.467285 | 4 | 532.5599976 | 532.3099462 |
| FSVSDLPKLPKPK                           | Q9EST5 | 0          | N-term +28.03 Da, K +28.03 Da,              | 4357.327637 | 3 | 528.6760864 | 528.6760125 |
| KIPVPEDKYTALVDQEEKEDVKSCAEFVSGSQLR      | Q9DCX2 | 0          | N-term +28.03 Da, C +57.02 Da,              | 4358.775879 | 4 | 1009.780029 | 1009.530332 |
| VHLTDAEKSAVSCLV                         | P02089 | 0.00372629 | N-term +28.03 Da, C +57.02 Da,              | 4358.881836 | 2 | 886.460022  | 886.4560088 |
| LKGWFEPIVEDMHR                          | P08226 | 0          | N-term +28.03 Da, K +28.03 Da,              | 4359.791504 | 3 | 605.6500244 | 604.9870327 |
| NLEPDNVGVVVFNGNDKLIKEGDVVKR             | Q03265 | 0.00108264 | N-term +28.03 Da, K +28.03 Da,              | 4363.43457  | 4 | 742.1629028 | 742.173482  |
| FDRDDVALEGVGHFFR                        | P29391 | 0          | N-term +28.03 Da,                           | 4365.818359 | 4 | 477.7406311 | 477.7404277 |
| STANEVEAVKVHSFPTLKFFPASADR              | P09103 | 0          | N-term +28.03 Da, K +28.03 Da,              | 4366.370117 | 4 | 734.3900146 | 733.8946409 |
| GPAGAGESKCPLMVKVLDAVR                   | P07309 | 0          | N-term +28.03 Da, K +28.03 Da,              | 4367.400879 | 3 | 747.081543  | 747.0815564 |
| DVKPWDEDTMTKLEECVR                      | O70251 | 0.04507647 | N-term +28.03 Da, C +57.02 Da,              | 4367.596191 | 3 | 817.4000244 | 817.390785  |
| GPAGAGESKCPLMVKVLDAVR                   | P07309 | 0          | N-term +28.03 Da, K +28.03 Da,              | 4368.705078 | 4 | 560.5633545 | 560.5629864 |
| GLLSQGSPLSWEETQR                        | P97494 | 0          | N-term +28.03 Da, C +57.02 Da,              | 4371.319336 | 2 | 908.960022  | 908.4654199 |
| GPAGAGESKCPLMVKVLDAVR                   | P07309 | 0          | N-term +28.03 Da, K +28.03 Da, C +57.02 Da, | 4371.710938 | 2 | 1120.119995 | 1120.118696 |
| AQPQVTMQQPAVHVQGEPLTASMLASAPPQEQKQMLGER | P29341 | 0          | N-term +28.03 Da, K +28.03 Da,              | 4374.756348 | 4 | 1099.810059 | 1099.810718 |
| TEPVDEYCIQALPEFDGKR                     | P08113 | 0          | N-term +28.03 Da, K +28.03 Da,              | 4374.871582 | 3 | 775.3800049 | 775.0473467 |
| SDVLELTDENFESR                          | P27773 | 0          | N-term +28.03 Da,                           | 4378.776367 | 2 | 841.4000244 | 841.3994117 |
| QAFIDFMSR                               | P57780 | 0.00079145 | N-term +28.03 Da,                           | 4380.07959  | 2 | 571.789978  | 571.7867865 |
| GLLSQGSPLSWEETQR                        | P97494 | 0          | N-term +28.03 Da, K +28.03 Da,              | 4381.207031 | 3 | 605.9799805 | 605.9793721 |
| ALFNPDVSWDR                             | Q62425 | 0          | N-term +28.03 Da,                           | 4381.785156 | 2 | 674.3400269 | 674.3382298 |
| GDIEGEDAFLLGR                           | Q8R4U7 | 0.0037087  | N-term +28.03 Da, K +28.03 Da,              | 4384.846191 | 2 | 710.8599854 | 710.35936   |
| DIDLPEFDAR                              | P10605 | 0.00079777 | N-term +28.03 Da,                           | 4386.662109 | 2 | 660.3300171 | 660.3275283 |
| RDLISHDELFSDIYKIR                       | P63028 | 0          | N-term +28.03 Da, K +28.03 Da,              | 4388.442383 | 4 | 544.7996826 | 544.7994799 |
| NGGFCEVCKKLV                            | Q61207 | 0.00042355 | N-term +28.03 Da, K +28.03 Da,              | 4390.609375 | 3 | 537.289978  | 536.6264472 |
| ASKTPVGFIGLGNMGNPMAK                    | Q99L13 | 0.00077821 | N-term +28.03 Da, K +28.03 Da,              | 4392.337891 | 3 | 692.3699951 | 692.0444422 |
| EKNWKAMEALALAER                         | Q99PL5 | 0          | N-term +28.03 Da, K +28.03 Da,              | 4394.418457 | 3 | 615.3400269 | 615.3414758 |
| TTIAGVVYKDGIVLGADTR                     | P70195 | 0          | N-term +28.03 Da, K +28.03 Da,              | 4397.34375  | 2 | 1003.073853 | 1003.070052 |
| GPAGAGESKCPLMVKVLDAVR                   | P07309 | 0          | N-term +28.03 Da, K +28.03 Da,              | 4398.717285 | 3 | 747.0812988 | 747.0815564 |
| TDAEKAASVSLWGKVNDSDEVGGEALGR            | P02088 | 0.00044425 | N-term +28.03 Da, K +28.03 Da,              | 4398.840332 | 3 | 968.4899902 | 968.4904388 |
| GPAGAGESKCPLMVKVLDAVR                   | P07309 | 0          | N-term +28.03 Da, K +28.03 Da,              | 4400.487793 | 4 | 560.5631714 | 560.5629864 |
| FLKAEQMKRQEKQRLER                       | P51954 | 0.01359106 | N-term +28.03 Da, K +28.03 Da,              | 4400.656738 | 4 | 583.5900269 | 583.3426888 |
| TDAEKAASVSLWGKVNDSDEVGGEALGR            | P02088 | 0          | N-term +28.03 Da, K +28.03 Da,              | 4401.05957  | 4 | 726.8699951 | 726.6196482 |
| GPAGAGESKCPLMVKVLDAVR                   | P07309 | 0          | N-term +28.03 Da, K +28.03 Da,              | 4402.519531 | 2 | 1120.619995 | 1120.118696 |
| TDPAPATTF AHL DATTVLSR                  | P56480 | 0          | N-term +28.03 Da,                           | 4402.869629 | 3 | 705.3699951 | 705.035658  |
| EEEEELVDPLTTVR                          | P99028 | 0          | N-term +28.03 Da,                           | 4403.236328 | 2 | 908.9500122 | 908.4465594 |
| TTIAGVVYKDGIVLGADTR                     | P70195 | 0          | N-term +28.03 Da, K +28.03 Da,              | 4404.713867 | 3 | 669.0482788 | 669.0491271 |

|                               |        |            |                                |             |   |             |             |
|-------------------------------|--------|------------|--------------------------------|-------------|---|-------------|-------------|
| EFVPSFLR                      | Q8R050 | 0.01694411 | N-term +28.03 Da,              | 4405.479492 | 2 | 512.289978  | 511.7871121 |
| MEVVENIENYEIR                 | O35403 | 0          | N-term +28.03 Da,              | 4405.624023 | 2 | 833.4099731 | 833.4112671 |
| GGGGASALLIEKL                 | Q8QZT1 | 0.00108225 | N-term +28.03 Da, K +28.03 Da, | 4406.428223 | 2 | 621.3759155 | 621.3768235 |
| VVVPDVESLPSWAQKR              | P41216 | 0          | N-term +28.03 Da, K +28.03 Da, | 4406.974121 | 3 | 623.0200195 | 622.6876406 |
| SDVLELTDENFESR                | P27773 | 0          | N-term +28.03 Da,              | 4410.409668 | 2 | 841.8930054 | 841.3994117 |
| APLDLDKYVEIAR                 | Q9CQR6 | 0          | N-term +28.03 Da, K +28.03 Da, | 4410.782227 | 3 | 520.2991943 | 520.2994937 |
| EAGFMTKDLAACIKGLPNVQR         | O88844 | 0          | N-term +28.03 Da, K +28.03 Da, | 4410.897949 | 4 | 601.5800171 | 601.577631  |
| KTWKFVEGLPINDFSR              | P14152 | 0.04933333 | N-term +28.03 Da, K +28.03 Da, | 4412.072754 | 3 | 675.0499878 | 674.378807  |
| DVALEGVGHFFR                  | P29391 | 0          | N-term +28.03 Da,              | 4412.288574 | 3 | 459.2399902 | 458.9103401 |
| EAGFMTKDLAACIKGLPNVQR         | O88844 | 0          | N-term +28.03 Da, K +28.03 Da, | 4412.807129 | 3 | 802.4299927 | 801.7677491 |
| VEVMPQNKQAIGNALKSWNETFHAR     | Q9DCX2 | 0.02127048 | N-term +28.03 Da, K +28.03 Da, | 4414.391113 | 4 | 739.4000244 | 738.893275  |
| VRQYEVTWGIDQFGPPMIHFHFR       | Q8COV9 | 0.0293378  | N-term +28.03 Da,              | 4415.952637 | 3 | 907.1300049 | 906.4722127 |
| DFISYLQR                      | P27773 | 0.01878485 | N-term +28.03 Da,              | 4416.02832  | 2 | 535.2868652 | 535.2874766 |
| VQLSDAYSTGSSMLPQKKNPDSLELIR   | Q91YI0 | 0          | N-term +28.03 Da, K +28.03 Da, | 4416.268555 | 4 | 766.4099731 | 766.1614147 |
| DVSPFLDGLERPQR                | Q9R1P4 | 0          | N-term +28.03 Da,              | 4418.57959  | 3 | 595.9799805 | 595.9758504 |
| VVVPDVESLPSWAQKR              | P41216 | 0.00046019 | N-term +28.03 Da, K +28.03 Da, | 4420.123535 | 2 | 934.0300293 | 933.5278226 |
| LIGDAAKNQLTSNPENTVFDAKR       | P20029 | 0          | N-term +28.03 Da, K +28.03 Da, | 4420.29248  | 4 | 647.0999756 | 647.3526087 |
| GGAGSYIEKPKQTEAPQVTGPIEVPVVR  | Q9DCT8 | 0          | N-term +28.03 Da, K +28.03 Da, | 4422.055176 | 3 | 1000.539978 | 1000.200994 |
| GAPQGSGLGEYLFER               | P29391 | 0.00991633 | N-term +28.03 Da, K +28.03 Da, | 4422.474121 | 3 | 518.2700195 | 517.9315816 |
| LIGDAAKNQVAMNPQNTVFDAKR       | P16627 | 0.00116505 | N-term +28.03 Da, K +28.03 Da, | 4423.803223 | 3 | 862.1304321 | 862.4671277 |
| GGAGSYIEKPKQTEAPQVTGPIEVPVVR  | Q9DCT8 | 0          | N-term +28.03 Da, K +28.03 Da, | 4428.023926 | 3 | 1000.200012 | 1000.200994 |
| STMKPVQKVLSDSLKSDIDEIVLVGGSTR | P20029 | 0          | N-term +28.03 Da, K +28.03 Da, | 4428.493164 | 4 | 883         | 882.7455778 |
| GPAGAGESKCLPMVKVLDVAVR        | P07309 | 0          | N-term +28.03 Da, K +28.03 Da, | 4432.283203 | 4 | 560.5599976 | 560.5629864 |
| KTLVSTVGSVMVFSEGEAQR          | Q99PL5 | 0.00080064 | N-term +28.03 Da, K +28.03 Da, | 4432.589355 | 3 | 695.0300293 | 694.7015103 |
| KTLVSTVGSVMVFSEGEAQR          | Q99PL5 | 0          | N-term +28.03 Da, K +28.03 Da, | 4433.758301 | 3 | 694.7000122 | 694.7015103 |
| DPKEEEEEELVDPLTTVR            | P99028 | 0.00143833 | N-term +28.03 Da, K +28.03 Da, | 4434.378418 | 3 | 728.6900024 | 728.7021224 |
| EFTLGEECELETMTGEKVK           | P12710 | 0          | N-term +28.03 Da, K +28.03 Da, | 4435.6875   | 3 | 772.3800049 | 772.0446147 |
| SGDWELEVNGTEAKLLR             | O35658 | 0.00110865 | N-term +28.03 Da, K +28.03 Da, | 4437.505371 | 3 | 659.0100098 | 658.3494653 |
| GAPQGSGLGEYLFER               | P29391 | 0          | N-term +28.03 Da,              | 4438.239258 | 2 | 776.3930664 | 776.3937341 |
| VVVPDVESLPSWAQKR              | P41216 | 0          | N-term +28.03 Da, K +28.03 Da, | 4438.352051 | 3 | 623.0200195 | 622.6876406 |
| LYSSDDVIELTPSNFNFR            | Q922R8 | 0          | N-term +28.03 Da,              | 4438.914551 | 2 | 1043.52002  | 1043.01039  |
| KTLVSTVGSVMVFSEGEAQR          | Q99PL5 | 0          | N-term +28.03 Da, K +28.03 Da, | 4440.527832 | 2 | 1042.050049 | 1041.548627 |
| SDVLELTDENFESR                | P27773 | 0          | N-term +28.03 Da,              | 4441.772461 | 2 | 841.8925781 | 841.3994117 |
| LYSSDDVIELTPSNFNFR            | Q922R8 | 0          | N-term +28.03 Da,              | 4441.883789 | 2 | 1043        | 1043.01039  |
| AVLVDLEPGTMDSVR               | P68372 | 0          | N-term +28.03 Da,              | 4441.974121 | 2 | 815.4299927 | 815.4294597 |
| EFTLGEECELETMTGEKVK           | P12710 | 0          | N-term +28.03 Da, K +28.03 Da, | 4442.472656 | 2 | 1158.060059 | 1157.563284 |
| DPKEEEEEELVDPLTTVR            | P99028 | 0          | N-term +28.03 Da, K +28.03 Da, | 4443.874512 | 2 | 1092.550049 | 1092.549545 |
| HISVGFPPVVSLMVGSVVLSMAPDDH    | Q9R155 | 0.02510578 | N-term +28.03 Da, K +28.03 Da, | 4447.587402 | 3 | 907.1300049 | 906.8046407 |
| GPHFNPHSKKHGGPADEER           | P08228 | 0.00885796 | N-term +28.03 Da, K +28.03 Da, | 4448.242676 | 3 | 727.3599854 | 727.7031243 |
| DPKEEEEEELVDPLTTVR            | P99028 | 0.00083022 | N-term +28.03 Da, K +28.03 Da, | 4448.424316 | 3 | 729.3699951 | 728.7021224 |

|                                        |        |            |                                            |             |   |             |             |
|----------------------------------------|--------|------------|--------------------------------------------|-------------|---|-------------|-------------|
| DEAYAEFFGNETWGVTKAAEQMKDKQDEEQR        | P14211 | 0          | N-term +28.03 Da, K +28.03 Da,             | 4448.511719 | 4 | 976.4699707 | 975.9703727 |
| FIDTSQFILNR                            | Q4FZG7 | 0          | N-term +28.03 Da,                          | 4448.681152 | 2 | 691.3790283 | 691.377355  |
| EFTLGEECELETMTGKVK                     | P12710 | 0          | N-term +28.03 Da, K +28.03 Da,             | 4448.905273 | 2 | 1157.560059 | 1157.563284 |
| AVLVDLEPGTMDSVR                        | P68372 | 0          | N-term +28.03 Da,                          | 4452.029785 | 2 | 816.4299927 | 815.4294597 |
| NEFTLGEECELETMTGKVK                    | P12710 | 0          | N-term +28.03 Da, K +28.03 Da,             | 4453.410156 | 3 | 810.0597534 | 810.0589241 |
| KNSSEKSVLEEIDVIVASLLDILLR              | P59764 | 0.01924198 | N-term +28.03 Da, K +28.03 Da,             | 4461.443848 | 3 | 956.5800171 | 956.5616402 |
| ASEAIKGAVVGIDLGTNSCVAVMEGKQAKVLENAEGAR | P38647 | 0.00912237 | N-term +28.03 Da, K +28.03 Da,             | 4462.750488 | 4 | 1015.289978 | 1014.792157 |
| DLEPTVIDEIR                            | P68368 | 0.00112952 | N-term +28.03 Da,                          | 4464.73877  | 2 | 664.8699951 | 664.3588285 |
| EVTAEEPSAAVPDEIPPLEGDEEDASR            | P11499 | 0          | N-term +28.03 Da,                          | 4466.550781 | 2 | 1376.650024 | 1376.1458   |
| TYFNKPDIDAWELR                         | P12787 | 0          | N-term +28.03 Da, K +28.03 Da,             | 4466.780762 | 3 | 608.9799805 | 608.6490744 |
| SDVLELTDENFESR                         | P27773 | 0          | N-term +28.03 Da,                          | 4472.328613 | 2 | 841.8900146 | 841.3994117 |
| LYSSDDVIELTPSNFNR                      | Q922R8 | 0          | N-term +28.03 Da, K +28.03 Da,C +57.02 Da, | 4474.313965 | 2 | 1044.01001  | 1043.01039  |
| LYSSDDVIELTPSNFNR                      | Q922R8 | 0          | N-term +28.03 Da, K +28.03 Da,             | 4475.270508 | 3 | 696.0100098 | 695.6760186 |
| LYSSDDVIELTPSNFNR                      | Q922R8 | 0          | N-term +28.03 Da, K +28.03 Da,             | 4476.132813 | 2 | 1043.01001  | 1043.01039  |
| YSSDDVIELTPSNFNR                       | Q922R8 | 0.01527403 | N-term +28.03 Da, K +28.03 Da,             | 4477.584473 | 2 | 986.960022  | 986.4683575 |
| DALEEDNVLVLK                           | P09103 | 0          | N-term +28.03 Da, K +28.03 Da,             | 4478.803711 | 2 | 771.9099731 | 771.9167082 |
| AEFKEAFQLFDR                           | Q60605 | 0          | N-term +28.03 Da, K +28.03 Da,             | 4481.920898 | 3 | 519.6099854 | 519.6084386 |
| GPPDPILGVTEAFKR                        | P05202 | 0          | N-term +28.03 Da, K +28.03 Da,             | 4482.009766 | 3 | 551.6494751 | 551.6505264 |
| TAASSSSLEKSYELPDGQVITIGNER             | P60710 | 0          | N-term +28.03 Da, K +28.03 Da,             | 4483.972656 | 3 | 937.4899902 | 936.8135762 |
| TAASSSSLEKSYELPDGQVITIGNER             | P60710 | 0          | N-term +28.03 Da, K +28.03 Da,             | 4485.712891 | 3 | 937.1400146 | 936.8135762 |
| TGAPQGSGLGEYLFER                       | P29391 | 0          | N-term +28.03 Da, K +28.03 Da,             | 4485.799805 | 2 | 827.4199829 | 826.9175737 |
| TAASSSSLEKSYELPDGQVITIGNER             | P60710 | 0          | N-term +28.03 Da, K +28.03 Da,             | 4485.913574 | 3 | 936.8099976 | 936.8135762 |
| AEFKEAFQLFDR                           | Q60605 | 0          | N-term +28.03 Da, K +28.03 Da,             | 4487.02832  | 3 | 520.2800293 | 519.6084386 |
| AGMNVYPSEFENIKEEYNVR                   | Q921X9 | 0          | N-term +28.03 Da, K +28.03 Da,             | 4488.492676 | 3 | 816.3900146 | 815.7300178 |
| DEPQSQWDKVKDFANVYVDAVKDSGR             | Q00623 | 0          | N-term +28.03 Da, K +28.03 Da,             | 4488.658691 | 4 | 778.1500244 | 777.8963754 |
| SDVLELTDENFESR                         | P27773 | 0          | N-term +28.03 Da, K +28.03 Da,             | 4490.320801 | 2 | 841.4000244 | 841.3994117 |
| SFPTLKFFPASADR                         | P09103 | 0          | N-term +28.03 Da, K +28.03 Da,             | 4491.962402 | 3 | 547.2999878 | 547.299605  |
| GSFSEQGINEFLR                          | Q922R8 | 0          | N-term +28.03 Da, K +28.03 Da,             | 4494.120117 | 2 | 756.3800049 | 756.378084  |
| ELISNASDALDKIR                         | P08113 | 0          | N-term +28.03 Da, K +28.03 Da,             | 4501.033691 | 2 | 800.4400024 | 800.9488738 |
| LYSSDDVIELTPSNFNR                      | Q922R8 | 0.00314906 | N-term +28.03 Da, K +28.03 Da,             | 4508.478027 | 3 | 696.0100098 | 695.6760186 |
| DALEEDNVLVLLKSNFEEALAAHK               | P09103 | 0          | N-term +28.03 Da, K +28.03 Da,             | 4511.795898 | 4 | 732.1400146 | 731.8958439 |
| GPPDPILGVTEAFKR                        | P05202 | 0          | N-term +28.03 Da, K +28.03 Da,             | 4513.504883 | 3 | 551.6500244 | 551.6505264 |
| KMGAPEAGMAEYLFDKHTLGHGDES              | P09528 | 0          | N-term +28.03 Da, K +28.03 Da,             | 4517.516602 | 4 | 694.3300171 | 694.5833768 |
| SFPTLKFFPASADR                         | P09103 | 0          | N-term +28.03 Da, K +28.03 Da,             | 4522.716309 | 3 | 547.2996826 | 547.299605  |
| SFPTLKFFPASADR                         | P09103 | 0.00044111 | N-term +28.03 Da, K +28.03 Da,             | 4522.942383 | 2 | 820.4451904 | 820.4457693 |
| LINEKDGETFQLMGLYGR                     | B5X0G2 | 0          | N-term +28.03 Da, K +28.03 Da,             | 4524.564941 | 3 | 714.3800049 | 714.0417553 |
| SDVLELTDENFESR                         | P27773 | 0          | N-term +28.03 Da, K +28.03 Da,             | 4525.007324 | 2 | 841.3984375 | 841.3994117 |
| LINEKDGETFQLMGLYGR                     | B5X0G2 | 0          | N-term +28.03 Da, K +28.03 Da,             | 4527.47168  | 2 | 1070.560059 | 1070.558995 |
| GQGLFDDEDESDFKKEAPR                    | Q6PGL7 | 0          | N-term +28.03 Da, K +28.03 Da,             | 4528.715332 | 3 | 742.6799927 | 742.0183333 |
| SQAAAKVDIEFDYDGPLMKTEVPGPR             | P61922 | 0          | N-term +28.03 Da, K +28.03 Da,             | 4528.828125 | 4 | 730.8800049 | 730.3796665 |

|                                         |        |            |                                            |             |   |             |             |
|-----------------------------------------|--------|------------|--------------------------------------------|-------------|---|-------------|-------------|
| FSLTEEMKIDALNKNVR                       | Q8VCX1 | 0.00044287 | N-term +28.03 Da, K +28.03 Da,             | 4531.757813 | 4 | 584.5599976 | 584.8096165 |
| FIPLSQKDLENLKAQEVAR                     | Q5SW19 | 0          | N-term +28.03 Da, K +28.03 Da,             | 4533.143066 | 4 | 539.567749  | 539.567589  |
| FSLTEEMKIDALNKNVR                       | Q8VCX1 | 0          | N-term +28.03 Da, K +28.03 Da,             | 4533.765137 | 4 | 584.8099976 | 584.8096165 |
| SFSEQGINEFLR                            | Q922R8 | 0.00079083 | N-term +28.03 Da, K +28.03 Da,             | 4535.041504 | 2 | 727.3599854 | 727.867352  |
| KSLDLFNCEVTNLNAYR                       | O35381 | 0          | N-term +28.03 Da, K +28.03 Da,C +57.02 Da, | 4535.225098 | 3 | 705.3599854 | 705.0297383 |
| KSLDLFNCEVTNLNAYR                       | O35381 | 0          | N-term +28.03 Da, K +28.03 Da,C +57.02 Da, | 4537.390137 | 2 | 1057.540039 | 1057.040969 |
| SIPFPTPTTPTLGR                          | Q80X50 | 0.00079428 | N-term +28.03 Da, K +28.03 Da,             | 4539.251465 | 2 | 756.9199829 | 756.9246697 |
| WLPLTESQIVQKEAEQAER                     | Q9JIX8 | 0          | N-term +28.03 Da, K +28.03 Da,             | 4540.387207 | 3 | 771.0799561 | 771.0812675 |
| FIPLSQKDLENLKAQEVAR                     | Q5SW19 | 0          | N-term +28.03 Da, K +28.03 Da,             | 4540.956543 | 3 | 719.0859985 | 719.0876932 |
| KSLDLFNCEVTNLNAYR                       | O35381 | 0          | N-term +28.03 Da, K +28.03 Da,C +57.02 Da, | 4542.601563 | 2 | 1058.040039 | 1057.040969 |
| LINEKDGETFQLMGLYGR                      | B5X0G2 | 0.00863724 | N-term +28.03 Da, K +28.03 Da,             | 4543.199707 | 2 | 1071.560059 | 1070.558995 |
| EEEDKKEDVGTVVGIDLGTTYSCVGVFKNGR         | P20029 | 0          | N-term +28.03 Da, K +28.03 Da,             | 4543.335449 | 3 | 1172.599976 | 1171.930905 |
| YRDLISHDELFSDIYKIR                      | P63028 | 0          | N-term +28.03 Da, K +28.03 Da,             | 4544.255859 | 4 | 585.5599976 | 585.5653123 |
| VDCPDLTKEPFTFPVR                        | Q91V76 | 0          | N-term +28.03 Da, K +28.03 Da,             | 4544.679688 | 3 | 660.0100098 | 659.6765245 |
| KHLEDIVEKLGEELESSDQVR                   | Q99PL5 | 0          | N-term +28.03 Da, K +28.03 Da,             | 4548.147949 | 4 | 642.1099854 | 641.8628092 |
| TEKLTQVMQNPQVLAALQER                    | Q78ZA7 | 0          | N-term +28.03 Da, K +28.03 Da,             | 4548.23584  | 3 | 823.4400024 | 823.4441003 |
| YRDLISHDELFSDIYKIR                      | P63028 | 0          | N-term +28.03 Da, K +28.03 Da,             | 4551.928711 | 3 | 780.75      | 780.4179909 |
| LAIIDPGDSDIIR                           | P62889 | 0.00315457 | N-term +28.03 Da, K +28.03 Da,             | 4553.709961 | 2 | 713.9000244 | 713.4010276 |
| GVLNSWTDQDSKSTYSMSSTLTLTKDEYER          | P01837 | 0          | N-term +28.03 Da, K +28.03 Da,             | 4556.685547 | 4 | 911.6900024 | 911.1845451 |
| ASEAIKGAVVGIDLGTTNSCVAVMEGK             | P38647 | 0          | N-term +28.03 Da, K +28.03 Da,             | 4557.63916  | 3 | 921.4899902 | 921.1539988 |
| ASEAIKGAVVGIDLGTTNSCVAVMEGKQAKVLENAEGAR | P38647 | 0          | N-term +28.03 Da, K +28.03 Da,             | 4559.574219 | 4 | 1015.039978 | 1014.792157 |
| AKFEELNMDLFR                            | P20029 | 0          | N-term +28.03 Da, K +28.03 Da,             | 4559.795898 | 3 | 523.6096191 | 523.6095622 |
| EEEDKKEDVGTVVGIDLGTTYSCVGVFKNGR         | P20029 | 0          | N-term +28.03 Da, K +28.03 Da,             | 4562.915039 | 4 | 878.9500122 | 879.1999976 |
| DDVALEGVGHFFR                           | P29391 | 0          | N-term +28.03 Da, K +28.03 Da,             | 4562.990234 | 3 | 497.25      | 497.2526548 |
| ESHLDICNLR                              | Q99MR9 | 0.00590745 | N-term +28.03 Da, K +28.03 Da,C +57.02 Da, | 4563.324707 | 2 | 643.3200073 | 642.8218897 |
| AKFEELNMDLFR                            | P20029 | 0          | N-term +28.03 Da, K +28.03 Da,             | 4564.706055 | 2 | 784.9123535 | 784.9107051 |
| SIPFPTPTTPTLGR                          | Q80X50 | 0          | N-term +28.03 Da, K +28.03 Da,             | 4570.265625 | 2 | 756.9242554 | 756.9246697 |
| MFIQTQDTPNPNSLKFIPGKPVLETR              | Q9QZ23 | 0          | N-term +28.03 Da, K +28.03 Da,             | 4570.365234 | 4 | 764.9199829 | 764.6716834 |
| QVVLEHMPVGPDAILR                        | Q9Z1R2 | 0          | N-term +28.03 Da, K +28.03 Da,             | 4570.918945 | 3 | 602         | 601.3379541 |
| ELIEFFSR                                | Q9QXT0 | 0.03078203 | N-term +28.03 Da, K +28.03 Da,             | 4571.183105 | 2 | 534.7902222 | 534.7898521 |
| LPFTNTEQSDRDPR                          | F6SJR1 | 0.04882604 | N-term +28.03 Da, K +28.03 Da,             | 4572.666992 | 2 | 852.4199829 | 852.4210122 |
| FIIFEHSQSPLFVGKVVDPHTK                  | Q00898 | 0.0008316  | N-term +28.03 Da, K +28.03 Da,             | 4575.147461 | 4 | 685.3800049 | 685.3783605 |
| YRDLISHDELFSDIYKIR                      | P63028 | 0          | N-term +28.03 Da, K +28.03 Da,             | 4575.533203 | 4 | 585.8200073 | 585.5653123 |
| EAIKGAVVGIDLGTTNSCVAVMEGKQAKVLENAEGAR   | P38647 | 0          | N-term +28.03 Da, K +28.03 Da,             | 4578.320801 | 4 | 975.7700195 | 975.2748711 |
| MFIQTQDTPNPNSLKFIPGKPVLETR              | Q9QZ23 | 0          | N-term +28.03 Da, K +28.03 Da,             | 4579.962891 | 3 | 1019.900024 | 1019.226486 |
| LQGDVAGALEDLER                          | Q8VBW8 | 0.00315789 | N-term +28.03 Da, K +28.03 Da,             | 4582.000488 | 2 | 758.3999023 | 757.3964741 |
| FLPLFDR                                 | Q64433 | 0.0197617  | N-term +28.03 Da, K +28.03 Da,             | 4582.444824 | 2 | 468.269989  | 468.2710975 |
| AGAGEAGKLEEVMQELR                       | Q9WUM3 | 0          | N-term +28.03 Da, K +28.03 Da,             | 4582.569824 | 3 | 615.3200073 | 615.3242624 |
| SQAAAKVDIEFDYDGLPMKTEVPGPR              | P61922 | 0          | N-term +28.03 Da, K +28.03 Da,             | 4585.227539 | 4 | 730.3800049 | 730.3796665 |
| SEAIKGAVVGIDLGTTNSCVAVMEGKQAKVLENAEGAR  | P38647 | 0          | N-term +28.03 Da, K +28.03 Da,             | 4588.552734 | 4 | 997.2800293 | 997.0328784 |

|                                        |        |            |                                            |             |   |             |             |
|----------------------------------------|--------|------------|--------------------------------------------|-------------|---|-------------|-------------|
| QLIMANPQMQLIQR                         | Q8R317 | 0.00042499 | N-term +28.03 Da, K +28.03 Da,             | 4591.45752  | 2 | 921.4899902 | 920.5002273 |
| CFDVLAVEYVVPDADQWTSVTPMRAGQSEAGCCLLER  | Q8BGY4 | 0.02585722 | N-term +28.03 Da, K +28.03 Da,C +57.02 Da, | 4591.581055 | 4 | 1081.73999  | 1081.246991 |
| APGPSGKTADYAFEMAVSNIR                  | Q8RON6 | 0          | N-term +28.03 Da, K +28.03 Da,             | 4593.114258 | 3 | 746.7109375 | 746.712298  |
| LINEKDGETFQLMGLYGR                     | B5X0G2 | 0          | N-term +28.03 Da, K +28.03 Da,             | 4593.316406 | 3 | 714.039978  | 714.0417553 |
| EEEDKKEDVGTVVGIDLGTTYSCVGVFKNGR        | P20029 | 0.00108893 | N-term +28.03 Da, K +28.03 Da,             | 4594.343262 | 4 | 879.7000122 | 879.1999976 |
| SAAATSAVPAPNHQPEVFCNQIFINNEWHDAVSR     | P47738 | 0          | N-term +28.03 Da, K +28.03 Da,C +57.02 Da, | 4594.647461 | 4 | 952.4500122 | 952.2089539 |
| SEAHLELLEEVCDR                         | Q9QXT0 | 0          | N-term +28.03 Da, K +28.03 Da,C +57.02 Da, | 4596.555664 | 3 | 610.2956543 | 610.2963727 |
| AAATSAVPAPNHQPEVFCNQIFINNEWHDAVSR      | P47738 | 0          | N-term +28.03 Da, K +28.03 Da,C +57.02 Da, | 4598.786133 | 4 | 930.7000122 | 930.4509466 |
| KGIKSVTELANGDTITNTMTLGDIVYKR           | P12710 | 0          | N-term +28.03 Da, K +28.03 Da,             | 4601.097168 | 4 | 771.1799927 | 770.6822485 |
| ASEAIKGAVVGIDLGTNSCVAVMEGKQAKVLENAEGAR | P38647 | 0          | N-term +28.03 Da, K +28.03 Da,             | 4603.329102 | 3 | 1352.718994 | 1352.72045  |
| KGIKSVTELANGDTITNTMTLGDIVYKR           | P12710 | 0          | N-term +28.03 Da, K +28.03 Da,             | 4603.417969 | 4 | 770.9299927 | 770.6822485 |
| KFYGPEGPYGVFAGR                        | O55022 | 0.00114723 | N-term +28.03 Da, K +28.03 Da,             | 4606.041016 | 2 | 850.9400024 | 850.9433938 |
| DEPQSQWVKVDFANVYVDAVKDSGR              | Q00623 | 0          | N-term +28.03 Da, K +28.03 Da,             | 4606.310059 | 4 | 778.4000244 | 777.8963754 |
| LTDPAATTFAHLDATTVLSR                   | P56480 | 0          | N-term +28.03 Da, K +28.03 Da,             | 4606.962891 | 3 | 742.7299805 | 742.7303461 |
| TSLEDEEVFEQKHKKPDGLFRNR                | Q9DAT5 | 0.03074792 | N-term +28.03 Da, K +28.03 Da,             | 4612.460938 | 4 | 754.9099731 | 754.6529139 |
| EPMQTGIKAVDSLPIGR                      | Q03265 | 0.00044683 | N-term +28.03 Da, K +28.03 Da,             | 4614.26709  | 3 | 656.3699951 | 656.3713239 |
| SAAATSAVPAPNHQPEVFCNQIFINNEWHDAVSR     | P47738 | 0          | N-term +28.03 Da, K +28.03 Da,C +57.02 Da, | 4614.845703 | 4 | 952.210022  | 952.2089539 |
| AAEFVPSFLR                             | Q8R050 | 0.00178063 | N-term +28.03 Da, K +28.03 Da,             | 4616.618652 | 2 | 582.8200073 | 582.8242263 |
| LDVKPWDDDETDMTKLEECVR                  | O70251 | 0          | N-term +28.03 Da, K +28.03 Da,C +57.02 Da, | 4618.674805 | 4 | 641.5599976 | 641.565924  |
| EEEDKKEDVGTVVGIDLGTTYSCVGVFKNGR        | P20029 | 0.00044783 | N-term +28.03 Da, K +28.03 Da,             | 4619.930176 | 3 | 1172.26001  | 1171.930905 |
| EEEDKKEDVGTVVGIDLGTTYSCVGVFKNGR        | P20029 | 0.00112275 | N-term +28.03 Da, K +28.03 Da,             | 4625.067871 | 4 | 879.7000122 | 879.1999976 |
| AQFEGIVTDLIKR                          | P38647 | 0          | N-term +28.03 Da, K +28.03 Da,             | 4630.259766 | 3 | 515.9699707 | 515.9714884 |
| HLLGTFDLTGIPAPR                        | P20029 | 0.02056779 | N-term +28.03 Da, K +28.03 Da,             | 4631.174316 | 3 | 578.3300171 | 578.3296758 |
| EADDIVNWLKRR                           | P09103 | 0          | N-term +28.03 Da, K +28.03 Da,             | 4632.259766 | 3 | 523.9699707 | 524.303238  |
| TAEFKEAFQLFDR                          | Q60605 | 0          | N-term +28.03 Da, K +28.03 Da,             | 4632.675781 | 3 | 553.289978  | 553.2909983 |
| ASEAIKGAVVGIDLGTNSCVAVMEGKQAKVLENAEGAR | P38647 | 0          | N-term +28.03 Da, K +28.03 Da,             | 4634.06543  | 4 | 1015.039978 | 1014.792157 |
| KGVPPEDAVETLAGSLGTR                    | P51125 | 0          | N-term +28.03 Da, K +28.03 Da,             | 4634.458496 | 3 | 652.3699951 | 652.3651153 |
| KGIKSVTELANGDTITNTMTLGDIVYKR           | P12710 | 0          | N-term +28.03 Da, K +28.03 Da,             | 4635.095703 | 4 | 771.1799927 | 770.6822485 |
| AGANQYTFHLEATENPGALIKDIR               | Q8VEE0 | 0          | N-term +28.03 Da, K +28.03 Da,             | 4635.411621 | 4 | 672.3599854 | 672.1053334 |
| GETFQLMGLYGR                           | B5X0G2 | 0          | N-term +28.03 Da, K +28.03 Da,             | 4635.487793 | 2 | 700.3550415 | 700.3555653 |
| DLVPEPKIIDAALR                         | P12787 | 0          | N-term +28.03 Da, K +28.03 Da,             | 4635.583008 | 3 | 535.9899902 | 535.9906601 |
| SDVLELTDENFESR                         | P27773 | 0.00045455 | N-term +28.03 Da, K +28.03 Da,             | 4638.587891 | 2 | 841.4000244 | 841.3994117 |
| SGDSAPLQEAMAVLQHHDAVSGTAR              | O09159 | 0          | N-term +28.03 Da, K +28.03 Da,             | 4649.880859 | 4 | 645.0700073 | 644.8185045 |
| GVEALQLEHEQATTQDNLDDKLR                | Q6PAR5 | 0          | N-term +28.03 Da, K +28.03 Da,             | 4653.547852 | 4 | 699.1199951 | 698.8660808 |
| GKGEMDTFPTFKFDDPKFEVIDK PQS            | P97450 | 0.00999688 | N-term +28.03 Da, K +28.03 Da,             | 4655.762207 | 4 | 786.9099731 | 786.6556994 |
| SSPASLQLGAVSPGTLTASGVVSGPAAAPAAQHLR    | P46938 | 0          | N-term +28.03 Da, K +28.03 Da,             | 4655.861816 | 3 | 1086.26001  | 1085.587912 |
| SQAAAKVDIEFDYDGLMKTEVPGPR              | P61922 | 0.00114199 | N-term +28.03 Da, K +28.03 Da,             | 4658.133789 | 4 | 730.6300049 | 730.3796665 |
| LLSATPPSSQNPNATNIPLQFR                 | O08692 | 0.00652529 | N-term +28.03 Da, K +28.03 Da,             | 4658.484375 | 3 | 761.0800171 | 760.7497405 |
| VAGPQPAQTGAPQGLSEYLFER                 | P29391 | 0          | N-term +28.03 Da, K +28.03 Da,             | 4660.60791  | 2 | 1202.109985 | 1201.11097  |
| DLFSDGHSEFLKAASNLR                     | P27773 | 0          | N-term +28.03 Da, K +28.03 Da,             | 4661.677734 | 3 | 688.3599854 | 688.3567313 |

|                                      |        |            |                                            |             |   |             |             |
|--------------------------------------|--------|------------|--------------------------------------------|-------------|---|-------------|-------------|
| GIETVGGVMTKLIPR                      | P20029 | 0          | N-term +28.03 Da, K +28.03 Da,             | 4661.75293  | 3 | 542.9899902 | 542.9918951 |
| DLFSDGHSEFLKAASNLR                   | P27773 | 0          | N-term +28.03 Da, K +28.03 Da,             | 4662.211914 | 4 | 516.7700195 | 516.5193676 |
| NGDTITNTMTLGDIVYKR                   | P12710 | 0          | N-term +28.03 Da, K +28.03 Da,             | 4662.330078 | 2 | 1035.530029 | 1034.540802 |
| VAGPQPAQTGAPQSGLEYLFR                | P29391 | 0          | N-term +28.03 Da, K +28.03 Da,             | 4663.326172 | 3 | 801.4099731 | 801.0764052 |
| GLFIIDDKGILR                         | P35700 | 0          | N-term +28.03 Da, K +28.03 Da,             | 4665.20752  | 3 | 472.9599915 | 472.6255406 |
| NGDTITNTMTLGDIVYKR                   | P12710 | 0          | N-term +28.03 Da, K +28.03 Da,             | 4665.29834  | 3 | 690.3571777 | 690.0296269 |
| ALDVCPFIPVR                          | Q91XD4 | 0.00435949 | N-term +28.03 Da, K +28.03 Da,C +57.02 Da, | 4665.416016 | 2 | 657.3699951 | 657.8655683 |
| DLVPEPKIIDAALR                       | P12787 | 0          | N-term +28.03 Da, K +28.03 Da,             | 4666.552734 | 3 | 535.9900513 | 535.9906601 |
| TEELDFLHAR                           | P99028 | 0          | N-term +28.03 Da, K +28.03 Da,             | 4668.755859 | 3 | 469.5799866 | 469.2418671 |
| MKTILSNQTVDIPENVEITLKGR              | P51410 | 0          | N-term +28.03 Da, K +28.03 Da,             | 4670.911133 | 4 | 672.1300049 | 671.6320268 |
| SPNKGVLSDFMTDVPVDPGVVHR              | Q9CYZ2 | 0          | N-term +28.03 Da, K +28.03 Da,             | 4674.057129 | 4 | 631.5800171 | 631.3322531 |
| MKTILSNQTVDIPENVEITLKGR              | P51410 | 0          | N-term +28.03 Da, K +28.03 Da,             | 4676.950684 | 3 | 895.1699829 | 895.1736102 |
| TDAEKSAVSLWAKVNPDEVGGEALGR           | P02089 | 0.0014301  | N-term +28.03 Da, K +28.03 Da,             | 4677.296875 | 3 | 981.8300171 | 981.8342055 |
| NMVGWPWIQTKMEEIGR                    | P57780 | 0.00045249 | N-term +28.03 Da, K +28.03 Da,             | 4677.508301 | 3 | 649.3400269 | 649.0059874 |
| VDQLTAQLADLAAR                       | Q64727 | 0          | N-term +28.03 Da, K +28.03 Da,             | 4680.364746 | 2 | 756.9199829 | 756.9226587 |
| ASPGSPLEKLVSSVSDLPKR                 | P54869 | 0          | N-term +28.03 Da, K +28.03 Da,             | 4682.503418 | 4 | 538.8200073 | 538.5650465 |
| QLLLESQSQLDEAKSEAQKQSDDELALVR        | Q99PL5 | 0          | N-term +28.03 Da, K +28.03 Da,             | 4683.5      | 4 | 810.9400024 | 810.9385063 |
| VHLTDAEKAASVSLWGKVNSEVGGGEALGR       | P02088 | 0.00348189 | N-term +28.03 Da, K +28.03 Da,             | 4684.342773 | 3 | 1085.560059 | 1084.894236 |
| LGQNGISDVVKVTLTPEEEAR                | P06151 | 0          | N-term +28.03 Da, K +28.03 Da,             | 4688.057617 | 3 | 771.75      | 771.0883109 |
| LGQNGISDVVKVTLTPEEEAR                | P06151 | 0.00082919 | N-term +28.03 Da, K +28.03 Da,             | 4691.342285 | 2 | 1156.619995 | 1156.128828 |
| LGQNGISDVVKVTLTPEEEAR                | P06151 | 0          | N-term +28.03 Da, K +28.03 Da,             | 4691.569336 | 2 | 1157.119995 | 1156.128828 |
| VAGPQPAQTGAPQSGLEYLFR                | P29391 | 0          | N-term +28.03 Da, K +28.03 Da,             | 4692.195313 | 2 | 1201.110474 | 1201.11097  |
| KMGAPFAGMAEYLFDKH                    | P09528 | 0.00045914 | N-term +28.03 Da, K +28.03 Da,             | 4696.123535 | 3 | 660.3200073 | 660.3303597 |
| SSPSAKDIKKILDSVGIEADDDR              | P99027 | 0.00046382 | N-term +28.03 Da, K +28.03 Da,             | 4698.922363 | 4 | 643.5999756 | 643.6023582 |
| SSPSAKDIKKILDSVGIEADDDR              | P99027 | 0.00403226 | N-term +28.03 Da, K +28.03 Da,             | 4700.03418  | 3 | 858.1400146 | 857.8007188 |
| SSPSAKDIKKILDSVGIEADDDR              | P99027 | 0          | N-term +28.03 Da, K +28.03 Da,             | 4701.874512 | 4 | 644.0999756 | 643.6023582 |
| ALRLHERHTHTGDKPYGCTKCDAKFSQPSALKTHLR | Q4VBD9 | 0.03677472 | N-term +28.03 Da, K +28.03 Da,             | 4701.976563 | 4 | 1056.310059 | 1055.813757 |
| GDLVEELKKGIR                         | Q80Y14 | 0          | N-term +28.03 Da, K +28.03 Da,             | 4702.551758 | 3 | 518.6599731 | 518.6590218 |
| LGDFAIISLYR                          | P07758 | 0.00084069 | N-term +28.03 Da, K +28.03 Da,             | 4703.720703 | 2 | 591.8300171 | 591.8295088 |
| EEEDKEDVGLTVVGDILGTTYSCVGVFKNGR      | P20029 | 0.00108578 | N-term +28.03 Da, K +28.03 Da,             | 4707.581055 | 4 | 879.4400024 | 879.1999976 |
| AAVEEGIVLGGGCALLR                    | P63038 | 0          | N-term +28.03 Da, K +28.03 Da,C +57.02 Da, | 4707.981445 | 3 | 571.9799805 | 571.6503094 |
| LKDKEVSFWAELR                        | Q8VCT4 | 0          | N-term +28.03 Da, K +28.03 Da,             | 4711.564941 | 3 | 568.6599731 | 568.9942931 |
| TSAAAGTMAGVPTVSFSELR                 | E9PY03 | 0          | N-term +28.03 Da, K +28.03 Da,             | 4712.769531 | 2 | 991.5100098 | 991.006595  |
| HLLGTFDLTGIPPAPR                     | P20029 | 0.00110579 | N-term +28.03 Da, K +28.03 Da,             | 4712.9375   | 3 | 579         | 578.3296758 |
| ALLKGSFSEQINEFLR                     | Q922R8 | 0.01879037 | N-term +28.03 Da, K +28.03 Da,             | 4715.539063 | 3 | 656.0300293 | 655.698317  |
| KTFSHELSDFGLESTTGEVPPVAIR            | P27773 | 0          | N-term +28.03 Da, K +28.03 Da,             | 4720.044434 | 4 | 694.6199951 | 694.6195453 |
| TLAIIDPGDSDIIR                       | P62889 | 0          | N-term +28.03 Da, K +28.03 Da,             | 4721.553711 | 2 | 763.9255371 | 763.9248672 |
| KTFSHELSDFGLESTTGEVPPVAIR            | P27773 | 0          | N-term +28.03 Da, K +28.03 Da,             | 4721.744629 | 3 | 925.8200073 | 925.8236349 |
| AEPVDVLEAWGVHR                       | Q9JLI2 | 0.00562914 | N-term +28.03 Da, K +28.03 Da,             | 4722.592285 | 3 | 536.2800293 | 535.9509759 |
| SYTVDAFDYDLQGTGQISNR                 | Q64374 | 0          | N-term +28.03 Da, K +28.03 Da,             | 4723.969727 | 2 | 1111.02002  | 1111.024029 |

|                                     |        |            |                                             |             |   |             |             |
|-------------------------------------|--------|------------|---------------------------------------------|-------------|---|-------------|-------------|
| LDGLVDTPPTGYIESLPKVVKR              | P28656 | 0          | N-term +28.03 Da, K +28.03 Da,              | 4725.191895 | 4 | 597.0999756 | 596.8504414 |
| AEPVDVLEAWGVHR                      | Q9JLI2 | 0.00046253 | N-term +28.03 Da, K +28.03 Da,              | 4725.529297 | 3 | 535.9500122 | 535.9509759 |
| ESVQTVGQIELCFTKEDLHLR               | Q9CQ01 | 0          | N-term +28.03 Da, K +28.03 Da,              | 4732.591309 | 4 | 640.5900269 | 640.3375356 |
| DLFSDGHSEFLKAASNLR                  | P27773 | 0          | N-term +28.03 Da, K +28.03 Da,              | 4734.705566 | 3 | 688.3499756 | 688.3567313 |
| DLFSDGHSEFLKAASNLR                  | P27773 | 0          | N-term +28.03 Da, K +28.03 Da,              | 4735.573242 | 4 | 517.0200195 | 516.5193676 |
| MTAMANEESRLTASSVQIVGLCSEEIKQIV      | Q7TQK5 | 0.01002192 | N-term +28.03 Da, K +28.03 Da,              | 4737.964844 | 4 | 852.7000122 | 852.6859342 |
| ESVQTVGQIELCFTKEDLHLR               | Q9CQ01 | 0          | N-term +28.03 Da, K +28.03 Da,              | 4738.378906 | 3 | 854.1199951 | 853.447622  |
| LLVVYPWTQR                          | P02088 | 0.00042608 | N-term +28.03 Da, K +28.03 Da,              | 4741.416504 | 2 | 652.3800049 | 651.8820755 |
| MPSLSAATLASLGGTSSR                  | Q3UZ39 | 0.02102535 | N-term +28.03 Da, K +28.03 Da,              | 4743.943359 | 3 | 579.3099976 | 578.973341  |
| LTMFGEKLNKGTDPEDVIR                 | Q3THE2 | 0.01880141 | N-term +28.03 Da, K +28.03 Da,              | 4744.054199 | 3 | 698.3599854 | 697.6978773 |
| ESVQTVGQIELCFTKEDLHLR               | Q9CQ01 | 0          | N-term +28.03 Da, K +28.03 Da,              | 4744.531738 | 2 | 1280.170044 | 1279.667795 |
| MVGPIEEAVAKADKLAEEHGS               | P56480 | 0          | N-term +28.03 Da, K +28.03 Da,              | 4745.52832  | 4 | 567.2999878 | 567.0503379 |
| ASASSTNLKDVLSNLIPIKEQAR             | Q9CZU6 | 0          | N-term +28.03 Da, K +28.03 Da,              | 4745.629883 | 4 | 607.5999756 | 607.3457892 |
| TEEEFKKFKSDKASVVGFFR                | P27773 | 0          | N-term +28.03 Da, K +28.03 Da,              | 4746.797363 | 4 | 649.0999756 | 648.5993524 |
| TTIPTKQTQFTTYSNQPGLIQVYEGER         | P63017 | 0          | N-term +28.03 Da, K +28.03 Da,              | 4749.528809 | 3 | 1158.589966 | 1157.926259 |
| TTIPTKQTQFTTYSNQPGLIQVYEGER         | P63017 | 0          | N-term +28.03 Da, K +28.03 Da,              | 4750.085938 | 3 | 1158.26001  | 1157.926259 |
| TTIPTKQTQFTTYSNQPGLIQVYEGER         | P63017 | 0          | N-term +28.03 Da, K +28.03 Da,              | 4750.182617 | 4 | 869.2000122 | 868.6965136 |
| GESVQTVGQIELCFTKEDLHLR              | Q9CQ01 | 0          | N-term +28.03 Da, K +28.03 Da,              | 4751.523438 | 4 | 654.8400269 | 654.5929016 |
| SQWPLPVPPTNAGDSSTGLHEPLSGTLSQPR     | A2AIX1 | 0          | N-term +28.03 Da, K +28.03 Da,              | 4751.626465 | 3 | 1106.219971 | 1105.89166  |
| SANGDKDIGNIISDAMKKVGR               | P63038 | 0.0323026  | N-term +28.03 Da, K +28.03 Da,              | 4752.057617 | 4 | 576.5700073 | 576.0703332 |
| NPDGMVALLDYR                        | P63028 | 0          | N-term +28.03 Da, K +28.03 Da,              | 4754.818848 | 2 | 696.3499756 | 696.3530228 |
| NDVITVQTPAFAESVTEGDVDR              | Q9D2G2 | 0          | N-term +28.03 Da, K +28.03 Da,              | 4756.666016 | 2 | 1138.569946 | 1138.573886 |
| SYTVDAFDYDLQGTQISNR                 | Q64374 | 0          | N-term +28.03 Da, K +28.03 Da,              | 4758.449707 | 2 | 1111.02002  | 1111.024029 |
| AIYFKEQLFDGDAWTNR                   | P14211 | 0          | N-term +28.03 Da, K +28.03 Da,              | 4758.931641 | 3 | 710.6900024 | 710.6933433 |
| RKGMNTLVGYDLVPEPKIIDAALR            | P12787 | 0          | N-term +28.03 Da, K +28.03 Da,              | 4760.588379 | 4 | 689.4000244 | 689.1491151 |
| ALPADPPASVVVGPVVVPR                 | P29699 | 0          | N-term +28.03 Da, K +28.03 Da,              | 4760.866211 | 2 | 935.0499878 | 934.5538402 |
| ALPADPPASVVVGPVVVPR                 | P29699 | 0          | N-term +28.03 Da, K +28.03 Da,              | 4761.979492 | 3 | 624.039978  | 623.3716523 |
| ALPADPPASVVVGPVVVPR                 | P29699 | 0          | N-term +28.03 Da, K +28.03 Da,              | 4763.039551 | 3 | 623.7000122 | 623.3716523 |
| ESVQTVGQIELCFTKEDLHLR               | Q9CQ01 | 0          | N-term +28.03 Da, K +28.03 Da,              | 4764.869629 | 4 | 640.3400269 | 640.3375356 |
| NDVITVQTPAFAESVTEGDVDR              | Q9D2G2 | 0          | N-term +28.03 Da, K +28.03 Da,              | 4764.944824 | 3 | 759.7199707 | 759.3850161 |
| SSSVPTVKLFDGKFKVESKSDKWIHNPATNEVVGR | Q9EQ20 | 0.01332526 | N-term +28.03 Da, K +28.03 Da,              | 4765.444336 | 4 | 1083.089966 | 1082.588875 |
| NDVITVQTPAFAESVTEGDVDR              | Q9D2G2 | 0          | N-term +28.03 Da, K +28.03 Da,              | 4766.805664 | 2 | 1139.569946 | 1138.573886 |
| HTEGDKAFVEFLTDEIKEEK                | O35658 | 0          | N-term +28.03 Da, K +28.03 Da,              | 4766.883301 | 4 | 620.3300171 | 620.0757103 |
| LDLAFGLTDR                          | P46656 | 0.00565348 | N-term +28.03 Da, K +28.03 Da,              | 4769.597656 | 2 | 574.8200073 | 574.8191413 |
| LCDFLESHYLDKEVK                     | P29391 | 0          | N-term +28.03 Da, K +28.03 Da,              | 4773.797363 | 3 | 660.3400269 | 660.6764132 |
| SAAATSAVPAPNHQPEVFCNQIFINNEWHDAVSR  | P47738 | 0          | N-term +28.03 Da, K +28.03 Da, C +57.02 Da, | 4774.757324 | 4 | 952.460022  | 952.2089539 |
| AALPADPPASVVVGPVVVPR                | P29699 | 0          | N-term +28.03 Da, K +28.03 Da,              | 4780.471191 | 2 | 970.5700073 | 970.0723973 |
| AALPADPPASVVVGPVVVPR                | P29699 | 0.00651254 | N-term +28.03 Da, K +28.03 Da,              | 4780.673828 | 3 | 647.7199707 | 647.0506904 |
| EADDIVNWLK                          | P09103 | 0          | N-term +28.03 Da, K +28.03 Da,              | 4783.973633 | 2 | 630.3400269 | 629.8375314 |
| SAPNPDDPLANDVAEQWKTNEAQAIETAR       | P61089 | 0          | N-term +28.03 Da, K +28.03 Da,              | 4788.300293 | 3 | 1070.530029 | 1069.856616 |

|                               |        |            |                                            |             |   |             |             |
|-------------------------------|--------|------------|--------------------------------------------|-------------|---|-------------|-------------|
| LLEFQNDR                      | P29391 | 0.0010989  | N-term +28.03 Da, K +28.03 Da,             | 4791.527832 | 2 | 531.2800293 | 531.7825586 |
| SVFYIEILNSPDR                 | P62259 | 0          | N-term +28.03 Da, K +28.03 Da,             | 4793.60791  | 2 | 816.4000244 | 815.9092172 |
| FNSLFKAFEEEEQALR              | P49429 | 0          | N-term +28.03 Da, K +28.03 Da,             | 4796.779297 | 3 | 629.3300171 | 628.9999958 |
| SVFYIEILNSPDR                 | P62259 | 0.00083998 | N-term +28.03 Da, K +28.03 Da,             | 4800.158203 | 2 | 816.9099731 | 815.9092172 |
| NLEPIPGALDALR                 | Q9JM14 | 0          | N-term +28.03 Da, K +28.03 Da,             | 4808.119629 | 2 | 703.9000244 | 703.9037371 |
| SHELSDFGLESTTGEVPPVAIR        | P27773 | 0          | N-term +28.03 Da, K +28.03 Da,             | 4810.195801 | 3 | 791.4099731 | 791.0761825 |
| SDGYGFTTDLFGR                 | Q9Z2X1 | 0          | N-term +28.03 Da, K +28.03 Da,             | 4814.095215 | 2 | 732.3400269 | 732.3437099 |
| SALGAVDPQLQHFIEVETQKQR        | Q9WVA2 | 0          | N-term +28.03 Da, K +28.03 Da,             | 4815.568848 | 4 | 638.8499756 | 638.3473262 |
| FGLESTTGEVPPVAIR              | P27773 | 0          | N-term +28.03 Da, K +28.03 Da,             | 4817.318359 | 2 | 851.9699707 | 851.9723489 |
| FDEEAIGTIQEDYLR               | Q6ZWQ9 | 0          | N-term +28.03 Da, K +28.03 Da,             | 4820.73877  | 2 | 913.9500122 | 913.9439864 |
| LPEYGGTKVVLDDKDYFLFR          | Q64433 | 0          | N-term +28.03 Da, K +28.03 Da,             | 4821.605957 | 4 | 615.8400269 | 615.5859791 |
| KVGDKVLLPEYGGTKVVLDDKDYFLFR   | Q64433 | 0          | N-term +28.03 Da, K +28.03 Da,             | 4824.483887 | 3 | 1086.280029 | 1085.619489 |
| LTMFGEKLNQDPEDVIR             | Q3THE2 | 0.00885236 | N-term +28.03 Da, K +28.03 Da,             | 4832.408203 | 3 | 698.0300293 | 697.6978773 |
| FDEEAIGTIQEDYLR               | Q6ZWQ9 | 0.00116054 | N-term +28.03 Da, K +28.03 Da,             | 4839.218262 | 3 | 609.6300049 | 609.6317497 |
| TFPTFKFDDPKFEVIDKQPS          | P97450 | 0.0040404  | N-term +28.03 Da, K +28.03 Da,             | 4840.405762 | 4 | 625.5900269 | 625.3358956 |
| KVGDKVLLPEYGGTKVVLDDKDYFLFR   | Q64433 | 0          | N-term +28.03 Da, K +28.03 Da,             | 4849.591309 | 4 | 814.960022  | 814.4664362 |
| SDFGLESTTGEVPPVAIR            | P27773 | 0          | N-term +28.03 Da, K +28.03 Da,             | 4858.526855 | 2 | 953.5       | 953.0018356 |
| SDFGLESTTGEVPPVAIR            | P27773 | 0          | N-term +28.03 Da, K +28.03 Da,             | 4860.524902 | 2 | 954         | 953.0018356 |
| NGDKDIGNIISDAMKKVGR           | P63038 | 0          | N-term +28.03 Da, K +28.03 Da,             | 4862.486816 | 4 | 537.0499878 | 536.5530474 |
| LLPPDLPDLEPECR                | Q8BGT0 | 0.00046125 | N-term +28.03 Da, K +28.03 Da,C +57.02 Da, | 4866.257324 | 3 | 564.6300049 | 564.627282  |
| LLPPDLPDLEPECR                | Q8BGT0 | 0          | N-term +28.03 Da, K +28.03 Da,C +57.02 Da, | 4867.379883 | 2 | 846.4344482 | 846.4372847 |
| SDFGLESTTGEVPPVAIR            | P27773 | 0          | N-term +28.03 Da, K +28.03 Da,             | 4867.560059 | 3 | 635.6699829 | 635.6703159 |
| NFNVEKINGEWHITIASDKR          | B5X0G2 | 0          | N-term +28.03 Da, K +28.03 Da,             | 4870.902344 | 4 | 642.8499756 | 642.8537812 |
| LLPPDLPDLEPECR                | Q8BGT0 | 0.00045372 | N-term +28.03 Da, K +28.03 Da,C +57.02 Da, | 4871.458496 | 3 | 565.289978  | 564.627282  |
| AKFPVFNVAEAFVPSFLR            | Q8R050 | 0          | N-term +28.03 Da, K +28.03 Da,             | 4874.427246 | 3 | 728.0800171 | 728.0772395 |
| LPNDLLDLQPTFFHPSVHAM          | Q7M6Y3 | 0.00376068 | N-term +28.03 Da, K +28.03 Da,             | 4876.769531 | 3 | 768.0599976 | 767.7280594 |
| EGDVLTLLESER                  | P62858 | 0          | N-term +28.03 Da, K +28.03 Da,             | 4878.081543 | 2 | 694.8699951 | 694.867018  |
| LATALQKLEEAKEADESER           | P21107 | 0          | N-term +28.03 Da, K +28.03 Da,             | 4883.29834  | 2 | 1143.109985 | 1143.613011 |
| RPTLNELGISTPEELGLDKV          | P12787 | 0.00045331 | N-term +28.03 Da, K +28.03 Da,             | 4886.924805 | 3 | 746.75      | 746.4177682 |
| VNHPQVSALLGEEDEEALHYLTR       | Q9EQU5 | 0          | N-term +28.03 Da, K +28.03 Da,             | 4887.020996 | 4 | 662.8400269 | 662.8383286 |
| VNHPQVSALLGEEDEEALHYLTR       | Q9EQU5 | 0          | N-term +28.03 Da, K +28.03 Da,             | 4888.258301 | 3 | 884.1099854 | 883.4486794 |
| LATALQKLEEAKEADESER           | P21107 | 0          | N-term +28.03 Da, K +28.03 Da,             | 4890.731445 | 2 | 1143.599976 | 1143.613011 |
| ESVQTVGQIELCFTKEDLHLR         | Q9CQ01 | 0.00081766 | N-term +28.03 Da, K +28.03 Da,             | 4891.044922 | 4 | 640.3400269 | 640.3375356 |
| SDFGLESTTGEVPPVAIR            | P27773 | 0          | N-term +28.03 Da, K +28.03 Da,             | 4891.559082 | 2 | 953.5       | 953.0018356 |
| VELGNDAMDFEDDSCPPEIANGYVEHLVR | Q61646 | 0.0004562  | N-term +28.03 Da, K +28.03 Da,             | 4895.546875 | 3 | 1191.890015 | 1191.560594 |
| DELEIIEGMKFDR                 | P63038 | 0.00042735 | N-term +28.03 Da, K +28.03 Da,             | 4896.568848 | 3 | 551.6199951 | 550.9517656 |
| LLPPDLPDLEPECR                | Q8BGT0 | 0          | N-term +28.03 Da, K +28.03 Da,C +57.02 Da, | 4898.245605 | 2 | 846.9400024 | 846.4372847 |
| AMLTYYVTKELQAEIR              | Q8WURO | 0          | N-term +28.03 Da, K +28.03 Da,             | 4898.626953 | 3 | 642.0300293 | 641.6921746 |
| VELGNDAMDFEDDSCPPEIANGYVEHLVR | Q61646 | 0          | N-term +28.03 Da, K +28.03 Da,             | 4900.086914 | 4 | 894.1674194 | 893.9222649 |
| LLPPDLPDLEPECR                | Q8BGT0 | 0          | N-term +28.03 Da, K +28.03 Da,C +57.02 Da, | 4901.930664 | 2 | 846.4400024 | 846.4372847 |

|                                    |        |            |                                            |             |   |             |             |
|------------------------------------|--------|------------|--------------------------------------------|-------------|---|-------------|-------------|
| LLPPDLPDLEPECR                     | Q8BGT0 | 0          | N-term +28.03 Da, K +28.03 Da,C +57.02 Da, | 4903.440918 | 3 | 564.6300049 | 564.627282  |
| AMLTITYVTKELQAEIR                  | Q8WURO | 0          | N-term +28.03 Da, K +28.03 Da,             | 4903.890625 | 3 | 642.3599854 | 641.6921746 |
| VLKEEASDYLELDTIKNLVR               | P08113 | 0          | N-term +28.03 Da, K +28.03 Da,             | 4904.82959  | 4 | 609.3499756 | 608.8466277 |
| VHLTDAEKAASVSLWGKVNDSDEVGGALGR     | P02088 | 0.00084567 | N-term +28.03 Da, K +28.03 Da,             | 4905.993164 | 4 | 814.1685791 | 813.922496  |
| VHLTDAEKAASVSLWGKVNDSDEVGGALGR     | P02088 | 0.00562355 | N-term +28.03 Da, K +28.03 Da,             | 4908.186523 | 3 | 1085.560059 | 1084.894236 |
| NDAMDFEDDSCPKPPEIANGYVEHLVR        | Q61646 | 0.000815   | N-term +28.03 Da, K +28.03 Da,             | 4908.942871 | 3 | 1058.810059 | 1058.821749 |
| NGDTITNTMTLGDIVYKR                 | P12710 | 0          | N-term +28.03 Da, K +28.03 Da,             | 4912.846191 | 3 | 690.6900024 | 690.0296269 |
| RPTLNELGISTPEELGLDKV               | P12787 | 0          | N-term +28.03 Da, K +28.03 Da,             | 4918.219238 | 3 | 746.4199829 | 746.4177682 |
| AALGGNSSPSAKDIKKILDSVIGIEADDDR     | P99027 | 0          | N-term +28.03 Da, K +28.03 Da,             | 4918.443848 | 4 | 764.6599731 | 764.4133955 |
| FAVELGNDAMDFEDDSCPKPPEIANGYVEHLVR  | Q61646 | 0.00113165 | N-term +28.03 Da, K +28.03 Da,             | 4922.508789 | 4 | 948.4400024 | 948.4486471 |
| EMGPPDPILGVTEAFKR                  | P05202 | 0          | N-term +28.03 Da, K +28.03 Da,             | 4924.562012 | 3 | 638.6799927 | 638.3448862 |
| NGDTITNTMTLGDIVYKR                 | P12710 | 0          | N-term +28.03 Da, K +28.03 Da,             | 4926.11377  | 2 | 1035.032715 | 1034.540802 |
| WALGELLPDSGR                       | P70671 | 0.0010846  | N-term +28.03 Da, K +28.03 Da,             | 4930.999512 | 2 | 736.3800049 | 735.883002  |
| VDIEFDYDGLMKTEVPGPR                | P61922 | 0          | N-term +28.03 Da, K +28.03 Da,             | 4938.165527 | 3 | 779.0599976 | 778.7277254 |
| NGDTITNTMTLGDIVYKR                 | P12710 | 0          | N-term +28.03 Da, K +28.03 Da,             | 4943.189453 | 3 | 690.3572998 | 690.0296269 |
| APVIEPSGPELVVEPGETVTLR             | P09581 | 0          | N-term +28.03 Da, K +28.03 Da,             | 4945.481934 | 2 | 1159.140015 | 1159.136122 |
| VADLVEEAQESVSKSENMSPLVR            | Q61160 | 0          | N-term +28.03 Da, K +28.03 Da,             | 4947.251953 | 3 | 859.1099854 | 858.4424256 |
| AALGGNSSPSAKDIKKILDSVIGIEADDDR     | P99027 | 0          | N-term +28.03 Da, K +28.03 Da,             | 4948.750977 | 4 | 764.6599731 | 764.4133955 |
| DVITVQTPAFAESVTEGDVR               | Q9D2G2 | 0          | N-term +28.03 Da, K +28.03 Da,             | 4957.494629 | 2 | 1082.560059 | 1081.552422 |
| FAYVAEREDELSLVKGSR                 | O55033 | 0.02535926 | N-term +28.03 Da, K +28.03 Da,             | 4964.830566 | 3 | 709.3800049 | 709.0477864 |
| HSFDPFADASKGDDLLPAGTEDIHIR         | P48024 | 0          | N-term +28.03 Da, K +28.03 Da,             | 4967.321777 | 4 | 762.1300049 | 761.6253593 |
| HSFDPFADASKGDDLLPAGTEDIHIR         | P48024 | 0          | N-term +28.03 Da, K +28.03 Da,             | 4969.576172 | 4 | 761.8699951 | 761.6253593 |
| ADVVFVGVPSVIVSR                    | Q8VCT4 | 0.00043403 | N-term +28.03 Da, K +28.03 Da,             | 4969.727051 | 2 | 736.9199829 | 736.9272122 |
| ELRYNESLTFSCNGK                    | Q8K3P5 | 0.01904483 | N-term +28.03 Da, K +28.03 Da,             | 4969.914063 | 2 | 993.9899902 | 994.4807444 |
| DVITVQTPAFAESVTEGDVR               | Q9D2G2 | 0.00045977 | N-term +28.03 Da, K +28.03 Da,             | 4972.029785 | 2 | 1081.550049 | 1081.552422 |
| VELGNDAMDFEDDSCPKPPEIANGYVEHLVR    | Q61646 | 0          | N-term +28.03 Da, K +28.03 Da,             | 4980.604004 | 4 | 894.4199829 | 893.9222649 |
| VELGNDAMDFEDDSCPKPPEIANGYVEHLVR    | Q61646 | 0          | N-term +28.03 Da, K +28.03 Da,             | 4983.113281 | 3 | 1192.219971 | 1191.560594 |
| RPTLNELGISTPEELGLDKV               | P12787 | 0.03522665 | N-term +28.03 Da, K +28.03 Da,             | 4983.680176 | 3 | 746.75      | 746.4177682 |
| RPTLNELGISTPEELGLDKV               | P12787 | 0.03485181 | N-term +28.03 Da, K +28.03 Da,             | 4985.318848 | 3 | 747.0800171 | 746.4177682 |
| SAKVSDAISTQYPVVDHEFDVAVVVGAGGAGLR  | Q8K2B3 | 0.01139163 | N-term +28.03 Da, K +28.03 Da,             | 4989.305176 | 4 | 819.1799927 | 818.6793948 |
| STLIMQLLR                          | O70456 | 0.00912811 | N-term +28.03 Da, K +28.03 Da,             | 4991.490723 | 2 | 551.8400269 | 551.8362792 |
| SAKVSDAISTQYPVVDHEFDVAVVVGAGGAGLR  | Q8K2B3 | 0          | N-term +28.03 Da, K +28.03 Da,             | 4992.526855 | 3 | 1090.890015 | 1091.236768 |
| SAKVSDAISTQYPVVDHEFDVAVVVGAGGAGLR  | Q8K2B3 | 0          | N-term +28.03 Da, K +28.03 Da,             | 4993.015625 | 3 | 1091.900024 | 1091.236768 |
| VAGPQAQTGAPQGSGLGYLFR              | P29391 | 0          | N-term +28.03 Da, K +28.03 Da,             | 4993.277832 | 2 | 1201.109985 | 1201.11097  |
| ASPVLDPSDLILTR                     | Q8VCE2 | 0.00115429 | N-term +28.03 Da, K +28.03 Da,             | 4996.987305 | 2 | 763.4299927 | 762.9352348 |
| ASAKVSDAISTQYPVVDHEFDVAVVVGAGGAGLR | Q8K2B3 | 0.0011215  | N-term +28.03 Da, K +28.03 Da,             | 4998.692383 | 4 | 836.6900024 | 836.4386733 |
| YMVGPIEEAVAKADKLAEEHGS             | P56480 | 0          | N-term +28.03 Da, K +28.03 Da,             | 4999.287109 | 4 | 608.0700073 | 607.8161703 |
| ANVPAGTEVVCAPPTAYIDFAR             | P17751 | 0          | N-term +28.03 Da, K +28.03 Da,C +57.02 Da, | 5003.137207 | 2 | 1174.589966 | 1174.091191 |
| DIPVNPLCIYR                        | P32261 | 0.0008244  | N-term +28.03 Da, K +28.03 Da,C +57.02 Da, | 5003.737305 | 2 | 694.8800049 | 694.3737579 |
| TGAIVDVPVGEELLGR                   | Q03265 | 0          | N-term +28.03 Da, K +28.03 Da,             | 5004.682617 | 2 | 826.960022  | 826.9645239 |

|                                         |        |            |                                            |             |   |             |             |
|-----------------------------------------|--------|------------|--------------------------------------------|-------------|---|-------------|-------------|
| ILGQNGISDVVKVTLTPEEEAR                  | P06151 | 0          | N-term +28.03 Da, K +28.03 Da,             | 5006.273438 | 3 | 809.4400024 | 808.782999  |
| ANVPAGTEVVCAPPTAYIDFAR                  | P17751 | 0          | N-term +28.03 Da, K +28.03 Da,C +57.02 Da, | 5007.829102 | 3 | 783.4000244 | 783.0632194 |
| VFDKDGNGYISAAELR                        | P62204 | 0.03437844 | N-term +28.03 Da, K +28.03 Da,             | 5008.10498  | 3 | 603.9701538 | 604.3159841 |
| LNLPESWDWR                              | P97821 | 0          | N-term +28.03 Da, K +28.03 Da,             | 5008.498047 | 2 | 672.340332  | 672.3407723 |
| VHLTDAEKAASVCLWGKVNSEVGGALGR            | P02088 | 0          | N-term +28.03 Da, K +28.03 Da,             | 5009.73877  | 4 | 814.1699829 | 813.922496  |
| VHLTDAEKAASVCLWGKVNSEVGGALGR            | P02088 | 0          | N-term +28.03 Da, K +28.03 Da,             | 5009.949219 | 3 | 1085.22998  | 1084.894236 |
| DLISHDELFSDIYKIR                        | P63028 | 0.00083717 | N-term +28.03 Da, K +28.03 Da,             | 5012.674805 | 3 | 674.3599854 | 674.029844  |
| SLPKMSGDWELEVNGTEAKLLR                  | O35658 | 0.00746753 | N-term +28.03 Da, K +28.03 Da,             | 5017.535645 | 4 | 640.3400269 | 640.0978196 |
| DLISHDELFSDIYKIR                        | P63028 | 0          | N-term +28.03 Da, K +28.03 Da,             | 5020.87207  | 4 | 505.769989  | 505.7742021 |
| NDVITVQTPAFAESVTEGDVR                   | Q9D2G2 | 0          | N-term +28.03 Da, K +28.03 Da,             | 5022.131348 | 2 | 1139.569946 | 1138.573886 |
| LRKDLIRSWFITQRHRMRGYRR                  | B6ZND9 | 0.04195994 | N-term +28.03 Da, K +28.03 Da,             | 5025.040527 | 3 | 1001.570007 | 1000.910381 |
| NDVITVQTPAFAESVTEGDVR                   | Q9D2G2 | 0          | N-term +28.03 Da, K +28.03 Da,             | 5027.373535 | 3 | 760.039978  | 759.3850161 |
| SAKVSDAISTQYPVVDHEFDVAVVVGAGGAGLR       | Q8K2B3 | 0.00778463 | N-term +28.03 Da, K +28.03 Da,             | 5029.898438 | 4 | 819.1799927 | 818.6793948 |
| YMGVPIEEAVAKADKLAEEHGS                  | P56480 | 0          | N-term +28.03 Da, K +28.03 Da,             | 5030.172363 | 4 | 608.3200073 | 607.8161703 |
| DLISHDELFSDIYKIR                        | P63028 | 0          | N-term +28.03 Da, K +28.03 Da,             | 5030.391113 | 3 | 674.0300293 | 674.029844  |
| TELNGDITNTMTLGDIVYKR                    | P12710 | 0          | N-term +28.03 Da, K +28.03 Da,             | 5032.463379 | 2 | 1206.619995 | 1206.127971 |
| PGFLCRRR                                | B2RX70 | 0.0099194  | N-term +28.03 Da, K +28.03 Da,C +57.02 Da, | 5034.95166  | 2 | 545.3147583 | 545.308554  |
| GLLDWQPQGTAFASQVTLLEGDKVKVER            | Q9DCW4 | 0          | N-term +28.03 Da, K +28.03 Da,             | 5035.870605 | 4 | 715.1400146 | 715.1419161 |
| VFDKDGNGYISAAELR                        | P62204 | 0.00077791 | N-term +28.03 Da, K +28.03 Da,             | 5038.596191 | 3 | 604.3099976 | 604.3159841 |
| VHLTDAEKAASVCLWGKVNSEVGGALGR            | P02088 | 0          | N-term +28.03 Da, K +28.03 Da,             | 5040.165527 | 4 | 813.9214478 | 813.922496  |
| VHLTDAEKAASVCLWGKVNSEVGGALGR            | P02088 | 0          | N-term +28.03 Da, K +28.03 Da,             | 5041.083008 | 3 | 1085.22998  | 1084.894236 |
| AVQCPSGFQFPCDSATCCIMVDGSGWCCPMPQASCCEDR | P28798 | 0          | N-term +28.03 Da, K +28.03 Da,C +57.02 Da, | 5044.729492 | 3 | 1534.25     | 1533.587977 |
| FLVDFGKEPLGPAHAHEL                      | P17563 | 0          | N-term +28.03 Da, K +28.03 Da,             | 5045.482422 | 4 | 542.3099976 | 542.058394  |
| SILHSAADSVTSAVQKASQALNER                | Q8R3T5 | 0          | N-term +28.03 Da, K +28.03 Da,             | 5050.900391 | 4 | 636.0900269 | 635.5923246 |
| DAGEFDLVYPR                             | Q9CQR2 | 0          | N-term +28.03 Da, K +28.03 Da,             | 5050.998535 | 2 | 705.3599854 | 704.8589955 |
| AVQCPSGFQFPCDSATCCIMVDGSGWCCPMPQASCCEDR | P28798 | 0          | N-term +28.03 Da, K +28.03 Da,C +57.02 Da, | 5051.107422 | 4 | 1150.689941 | 1150.442802 |
| PGGLLLGDEAPNFEANTTIGR                   | O08709 | 0          | N-term +28.03 Da, K +28.03 Da,             | 5052.889648 | 3 | 724.3800049 | 724.0428127 |
| VGPYSGDSAPLQEAMAVLQHHDVAVSGTAR          | O09159 | 0          | N-term +28.03 Da, K +28.03 Da,             | 5056.825684 | 4 | 763.3800049 | 763.1253635 |
| APDDSLVPAAGTSYVWER                      | Q78JT3 | 0          | N-term +28.03 Da, K +28.03 Da,             | 5061.029297 | 3 | 669.0100098 | 668.6739489 |
| ELNDFISYLQR                             | P27773 | 0          | N-term +28.03 Da, K +28.03 Da,             | 5066.975098 | 2 | 713.3707275 | 713.37227   |
| ADGTELTGAWTIEGNKLIKGFTR                 | P55050 | 0          | N-term +28.03 Da, K +28.03 Da,             | 5069.128418 | 4 | 641.5999756 | 641.3536142 |
| VFDKDGNGYISAAELR                        | P62204 | 0.00996885 | N-term +28.03 Da, K +28.03 Da,             | 5071.197754 | 3 | 603.9699707 | 604.3159841 |
| SLKGVVPEDAVETLAGSLGTR                   | P51125 | 0          | N-term +28.03 Da, K +28.03 Da,             | 5071.652344 | 3 | 719.0700073 | 719.0704798 |
| EFQLTSEDMKVLDDLKNR                      | P70694 | 0          | N-term +28.03 Da, K +28.03 Da,             | 5073.282227 | 4 | 623.8300171 | 623.8320861 |
| DIDISLYVPR                              | Q3TIV5 | 0.00082237 | N-term +28.03 Da, K +28.03 Da,             | 5076.653809 | 2 | 609.8400269 | 609.8400739 |
| DIELVSNSAALIQQATTVKNKDIR                | P51410 | 0          | N-term +28.03 Da, K +28.03 Da,             | 5078.077637 | 4 | 678.6400146 | 678.6380036 |
| DLTDPAPATTFHAHLDATTVLSR                 | P56480 | 0          | N-term +28.03 Da, K +28.03 Da,             | 5081.294434 | 2 | 1171.599976 | 1171.105353 |
| VDLLADAVAVTMGPKGR                       | P63038 | 0          | N-term +28.03 Da, K +28.03 Da,             | 5085.617676 | 3 | 591         | 590.3378428 |
| DLTDPAPATTFHAHLDATTVLSR                 | P56480 | 0          | N-term +28.03 Da, K +28.03 Da,             | 5087.61084  | 2 | 1172.099976 | 1171.105353 |
| VHLTDAEKAASVCLWGKVNSEVGGALGR            | P02088 | 0          | N-term +28.03 Da, K +28.03 Da,             | 5089.05957  | 3 | 1085.560059 | 1084.894236 |

|                                    |        |            |                                            |             |   |             |             |
|------------------------------------|--------|------------|--------------------------------------------|-------------|---|-------------|-------------|
| ASAKVSDAISTQYPVVDHEFDVAVVVGAGGAGLR | Q8K2B3 | 0.00316567 | N-term +28.03 Da, K +28.03 Da,             | 5089.168945 | 4 | 836.6900024 | 836.4386733 |
| ISGDLEVLAEKCPN                     | O35381 | 0.00892857 | N-term +28.03 Da, K +28.03 Da,C +57.02 Da, | 5091.252441 | 2 | 800.4099731 | 800.9161851 |
| YMIGEQQFSSLLPLGWETVR               | O55239 | 0          | N-term +28.03 Da, K +28.03 Da,             | 5095.140625 | 3 | 766.4099731 | 766.4048051 |
| VHLTDAEKAASVCLWGKVNDSDEVGGEALGR    | P02088 | 0.00082305 | N-term +28.03 Da, K +28.03 Da,             | 5095.678711 | 3 | 1085.219971 | 1084.894236 |
| ELNDFISYLQR                        | P27773 | 0          | N-term +28.03 Da, K +28.03 Da,             | 5097.88623  | 2 | 713.8599854 | 713.37227   |
| EDVQETDTSQKDQSPASHEIATNLGDFAIISLYR | P07758 | 0.00081733 | N-term +28.03 Da, K +28.03 Da,             | 5098.505859 | 4 | 931.7000122 | 931.2011552 |
| EANLAAAFGKPINF                     | O08749 | 0.00079808 | N-term +28.03 Da, K +28.03 Da,             | 5099.064453 | 2 | 759.9195557 | 759.9193872 |
| EDVQETDTSQKDQSPASHEIATNLGDFAIISLYR | P07758 | 0          | N-term +28.03 Da, K +28.03 Da,             | 5102.842285 | 3 | 1241.930054 | 1241.265781 |
| DLAALEDKVKALCAEADR                 | P16546 | 0          | N-term +28.03 Da, K +28.03 Da,C +57.02 Da, | 5104.397461 | 3 | 691.710022  | 691.3733936 |
| VHLTDAEKSAVSLWAKVNPDEVGGEALGR      | P02089 | 0          | N-term +28.03 Da, K +28.03 Da,             | 5106.295898 | 3 | 1098.569946 | 1098.238002 |
| VHLTDAEKSAVSLWAKVNPDEVGGEALGR      | P02089 | 0          | N-term +28.03 Da, K +28.03 Da,             | 5107.883789 | 4 | 824.4299927 | 823.930321  |
| KDPQEPIMKEEIFGVPVLTVVVYPDDKYR      | Q8CHT0 | 0.00114855 | N-term +28.03 Da, K +28.03 Da,             | 5108.568848 | 4 | 871.710022  | 871.2136474 |
| KSPIFGPQEVSSIEGDSVSITCYYPDTSVNR    | O70570 | 0          | N-term +28.03 Da, K +28.03 Da,C +57.02 Da, | 5112.022461 | 3 | 1164.22998  | 1163.567855 |
| ADLVAITELMHPVGGGCPVFEHGPR          | Q64471 | 0.00533689 | N-term +28.03 Da, K +28.03 Da,C +57.02 Da, | 5114.272461 | 4 | 672.5900269 | 672.59127   |
| KDPQEPIMKEEIFGVPVLTVVVYPDDKYR      | Q8CHT0 | 0.00347947 | N-term +28.03 Da, K +28.03 Da,             | 5119.880859 | 4 | 871.4699707 | 871.2136474 |
| KCRERDGSERAGSEPR                   | Q9CWW7 | 0.01881799 | N-term +28.03 Da, K +28.03 Da,C +57.02 Da, | 5120.000977 | 2 | 974.5       | 973.4846839 |
| KSPIFGPQEVSSIEGDSVSITCYYPDTSVNR    | O70570 | 0          | N-term +28.03 Da, K +28.03 Da,C +57.02 Da, | 5123.003418 | 3 | 1163.560059 | 1163.567855 |
| EGEPEVTDQLEWQSNQPWEQALNR           | P08226 | 0          | N-term +28.03 Da, K +28.03 Da,             | 5123.47168  | 2 | 1456.680054 | 1456.178299 |
| EGEPEVTDQLEWQSNQPWEQALNR           | P08226 | 0          | N-term +28.03 Da, K +28.03 Da,             | 5123.846191 | 3 | 971.1199951 | 971.1212917 |
| SDVLELTDENFESR                     | P27773 | 0.00045005 | N-term +28.03 Da, K +28.03 Da,             | 5124.352051 | 2 | 841.9000244 | 841.3994117 |
| SVLSEMQMIEQETPLSAKSSR              | Q99K28 | 0          | N-term +28.03 Da, K +28.03 Da,             | 5124.72168  | 3 | 803.0800171 | 803.0784298 |
| AEEAVTLDMLDLGAAR                   | Q9D3D9 | 0          | N-term +28.03 Da, K +28.03 Da,             | 5126.148926 | 2 | 852.4400024 | 851.9376492 |
| IMNSFVNDIFER                       | P10853 | 0.02049062 | N-term +28.03 Da, K +28.03 Da,             | 5126.977051 | 2 | 757.3800049 | 756.8794049 |
| AIKFLEVIKPF                        | P61620 | 0.00045579 | N-term +28.03 Da, K +28.03 Da,             | 5128.900391 | 3 | 463.6400146 | 463.6353767 |
| ILLDVKPWDDEETDMTKLEECVR            | O70251 | 0          | N-term +28.03 Da, K +28.03 Da,C +57.02 Da, | 5129.119629 | 4 | 698.3599854 | 698.1079562 |
| EDVQETDTSQKDQSPASHEIATNLGDFAIISLYR | P07758 | 0          | N-term +28.03 Da, K +28.03 Da,             | 5133.203125 | 4 | 931.1998901 | 931.2011552 |
| EDVQETDTSQKDQSPASHEIATNLGDFAIISLYR | P07758 | 0          | N-term +28.03 Da, K +28.03 Da,             | 5133.621582 | 3 | 1241.599976 | 1241.265781 |
| LLPEYGGTKVVLDDKDYFLFR              | Q64433 | 0          | N-term +28.03 Da, K +28.03 Da,             | 5135.641113 | 4 | 644.1099854 | 643.8569952 |
| VHLTDAEKSAVSLWAKVNPDEVGGEALGR      | P02089 | 0          | N-term +28.03 Da, K +28.03 Da,             | 5137.104004 | 3 | 1098.569946 | 1098.238002 |
| SVPIATYGPVSPVTSFQPLPR              | Q8VCF0 | 0          | N-term +28.03 Da, K +28.03 Da,             | 5143.802734 | 3 | 747.75      | 747.7474482 |
| AQEQLATALQNLEEAKEAADESER           | Q6IRU2 | 0.00045065 | N-term +28.03 Da, K +28.03 Da,             | 5146.710938 | 3 | 901.4500122 | 900.7822761 |
| LLPEYGGTKVVLDDKDYFLFR              | Q64433 | 0.01082251 | N-term +28.03 Da, K +28.03 Da,             | 5148.513184 | 3 | 858.1400146 | 858.1402348 |
| VELGNDAMDFEDDSCPKPPEIANGYVEHLVR    | Q61646 | 0          | N-term +28.03 Da, K +28.03 Da,             | 5149.751953 | 4 | 894.4099731 | 893.9222649 |
| LQQELDLLVDLDHQR                    | Q8VDD5 | 0          | N-term +28.03 Da, K +28.03 Da,             | 5154.019531 | 3 | 660.3499756 | 660.0128532 |
| SQLLQEDSLNVADLSSLR                 | P97372 | 0          | N-term +28.03 Da, K +28.03 Da,             | 5157.958496 | 2 | 1009.02002  | 1008.534032 |
| NIEFNPPKTVGIDDLTGEPLIQR            | Q9WTP7 | 0          | N-term +28.03 Da, K +28.03 Da,             | 5160.527832 | 3 | 875.4799805 | 874.8094368 |
| SQSLLFVDIPSKIICR                   | Q64374 | 0          | N-term +28.03 Da, K +28.03 Da,C +57.02 Da, | 5166.051758 | 3 | 644.710022  | 644.7044143 |
| FSMDKCELNVTEALKAIAIR               | Q9JHS4 | 0          | N-term +28.03 Da, K +28.03 Da,             | 5166.739258 | 4 | 599.8200073 | 599.5644552 |
| AELIDFFR                           | Q8CHT0 | 0.02332196 | N-term +28.03 Da, K +28.03 Da,             | 5168.323242 | 2 | 519.7844238 | 519.7845696 |
| FLSPPTLLEGPLR                      | Q8R311 | 0          | N-term +28.03 Da, K +28.03 Da,             | 5174.063477 | 2 | 734.4299927 | 734.4321302 |

|                                  |        |            |                                             |             |   |             |             |
|----------------------------------|--------|------------|---------------------------------------------|-------------|---|-------------|-------------|
| LDLEEALPDMEEEDDDQKAVKDEL         | P09103 | 0          | N-term +28.03 Da, K +28.03 Da,              | 5178.146484 | 3 | 958.4500122 | 958.4547264 |
| SQLLQEDSLNVADLSSLR               | P97372 | 0          | N-term +28.03 Da, K +28.03 Da,              | 5178.67041  | 3 | 672.6900024 | 672.69178   |
| EDLDLEEALPDMEEEDDDQKAVKDEL       | P09103 | 0          | N-term +28.03 Da, K +28.03 Da,              | 5180.086914 | 3 | 1040.469971 | 1039.811239 |
| LDLEEALPDMEEEDDDQKAVKDEL         | P09103 | 0          | N-term +28.03 Da, K +28.03 Da,              | 5182.02002  | 3 | 959.1199951 | 958.4547264 |
| VEIEAIVQGPFKA                    | P52760 | 0          | N-term +28.03 Da, K +28.03 Da,              | 5182.241211 | 2 | 821.4799805 | 820.9847275 |
| AELVDSVLDVVR                     | P68372 | 0          | N-term +28.03 Da, K +28.03 Da,              | 5185.921387 | 2 | 671.8800049 | 671.8824705 |
| SVTELNGDTITNTMTLGDIVYKR          | P12710 | 0          | N-term +28.03 Da, K +28.03 Da,              | 5186.035156 | 3 | 866.7800293 | 866.454554  |
| ELEGLEDMSIR                      | Q8BI84 | 0          | N-term +28.03 Da, K +28.03 Da,              | 5186.557617 | 2 | 716.8699951 | 716.8712459 |
| EDVQETDTSQKQSPASHEIATNLGDFAIISYR | P07758 | 0          | N-term +28.03 Da, K +28.03 Da,              | 5189.477051 | 4 | 931.4500122 | 931.2011552 |
| AALGGNSSPSAKDIKKILDSVIGIEADDDR   | P99027 | 0          | N-term +28.03 Da, K +28.03 Da,              | 5195.963379 | 4 | 764.6584473 | 764.4133955 |
| GIQDGYLSLLQDSGEVR                | P63242 | 0          | N-term +28.03 Da, K +28.03 Da,              | 5197.978027 | 2 | 940.4899902 | 939.48381   |
| GLDPAFTPATGTPVLGGLSYR            | Q61176 | 0          | N-term +28.03 Da, K +28.03 Da,              | 5199.539063 | 2 | 1059.569946 | 1059.565134 |
| SPASHEIATNLGDFAIISYR             | P07758 | 0          | N-term +28.03 Da, K +28.03 Da,              | 5205.712891 | 3 | 731.3800049 | 730.7111744 |
| VKLTALIEQAAQYTNVAVR              | P57784 | 0          | N-term +28.03 Da, K +28.03 Da,              | 5207.757324 | 3 | 725.7399902 | 725.4108362 |
| ALVDELEWEIAR                     | Q9QXT0 | 0          | N-term +28.03 Da, K +28.03 Da,              | 5209.632813 | 2 | 736.3948364 | 736.3932026 |
| QGDIDAIKDLISIR                   | Q9WUK2 | 0          | N-term +28.03 Da, K +28.03 Da,              | 5209.881836 | 3 | 549.6400146 | 549.6419197 |
| EPEVTDQLEWQSNQPWEQALNR           | P08226 | 0          | N-term +28.03 Da, K +28.03 Da,              | 5210.140625 | 2 | 1363.650024 | 1363.14627  |
| YLQEVINVLETGDGHR                 | Q02819 | 0          | N-term +28.03 Da, K +28.03 Da,              | 5211.353027 | 3 | 654.3400269 | 654.3424219 |
| GLDPAFTPATGTPVLGGLSYR            | Q61176 | 0          | N-term +28.03 Da, K +28.03 Da,              | 5214.590332 | 3 | 706.710022  | 706.712515  |
| ISSEDLVHWSAVPSLGLKTDIAPGR        | P00405 | 0          | N-term +28.03 Da, K +28.03 Da,              | 5214.826172 | 4 | 677.3699951 | 676.8721713 |
| EPEVTDQLEWQSNQPWEQALNR           | P08226 | 0          | N-term +28.03 Da, K +28.03 Da,              | 5215.03418  | 2 | 1364.150024 | 1363.14627  |
| LEGLTDEINFLR                     | P11679 | 0          | N-term +28.03 Da, K +28.03 Da,              | 5219.92627  | 2 | 724.3900146 | 724.3932026 |
| ADVQSVVDCPDLTKPFTFPVR            | Q91V76 | 0          | N-term +28.03 Da, K +28.03 Da,              | 5221.946777 | 3 | 892.789978  | 892.4631607 |
| QGDIDAIKDLISIR                   | Q9WUK2 | 0          | N-term +28.03 Da, K +28.03 Da,              | 5222.175293 | 3 | 550.3099976 | 549.6419197 |
| GAGDDEDLDLEEALPDMEEEDDDQKAVKDEL  | P09103 | 0          | N-term +28.03 Da, K +28.03 Da,              | 5224.081543 | 3 | 1178.859985 | 1178.189216 |
| TFVNHPQVSALLGEEDEEALHYLTR        | Q9EQU5 | 0          | N-term +28.03 Da, K +28.03 Da,              | 5232.684082 | 4 | 725.1099854 | 724.867352  |
| TTAEAVVTEIPKEEKDPGMGAMGGMGGMGGMF | P63038 | 0.03309432 | N-term +28.03 Da, K +28.03 Da,              | 5235.088867 | 3 | 1129.530029 | 1128.859941 |
| TEEDCTEELDFLHAR                  | P99028 | 0          | N-term +28.03 Da, K +28.03 Da, C +57.02 Da, | 5236.810059 | 3 | 680.9699707 | 680.6386874 |
| EGEPEVTDQLEWQSNQPWEQALNR         | P08226 | 0          | N-term +28.03 Da, K +28.03 Da,              | 5237.035645 | 3 | 971.4500122 | 971.1212917 |
| VSPSPVDPVAVPVVPIGPPAGFR          | Q05920 | 0          | N-term +28.03 Da, K +28.03 Da,              | 5238.491211 | 3 | 760.7600098 | 760.7632096 |
| KTFSHELSDFGLESTTGEVPPVAIR        | P27773 | 0          | N-term +28.03 Da, K +28.03 Da,              | 5240.062988 | 3 | 925.4799805 | 925.8236349 |
| YLPGLAPVNFCAEKSNECKADIELFVNR     | P58021 | 0          | N-term +28.03 Da, K +28.03 Da,              | 5241.915527 | 4 | 867.9400024 | 867.6889052 |
| YVPADLTDPAATTF AHLDATTVLSR       | P56480 | 0          | N-term +28.03 Da, K +28.03 Da,              | 5247.01416  | 3 | 963.1599731 | 962.8221829 |
| EGEPEVTDQLEWQSNQPWEQALNR         | P08226 | 0          | N-term +28.03 Da, K +28.03 Da,              | 5247.246094 | 2 | 1456.680054 | 1456.178299 |
| GVDLLADAVAVTMGPKGR               | P63038 | 0          | N-term +28.03 Da, K +28.03 Da,              | 5247.626465 | 3 | 609.3400269 | 609.3449975 |
| EGEPEVTDQLEWQSNQPWEQALNR         | P08226 | 0          | N-term +28.03 Da, K +28.03 Da,              | 5249.868652 | 3 | 971.1199951 | 971.1212917 |
| IVPTEIHQKAPVVMGSSEDEVQEFLEIYR    | Q9QXD6 | 0          | N-term +28.03 Da, K +28.03 Da,              | 5252.240723 | 4 | 818.6799927 | 818.4324307 |
| WDRSCTEETHGFCQK                  | Q64449 | 0.01798349 | N-term +28.03 Da, K +28.03 Da,              | 5252.351563 | 2 | 1113.98999  | 1112.991151 |
| EGEPEVTDQLEWQSNQPWEQALNR         | P08226 | 0          | N-term +28.03 Da, K +28.03 Da,              | 5260.833008 | 4 | 728.8400269 | 728.5927879 |
| TVFFDITADDEPLGR                  | P17742 | 0          | N-term +28.03 Da, K +28.03 Da,              | 5261.002441 | 2 | 862.4299927 | 862.4305143 |

|                                  |        |            |                                            |             |   |             |             |
|----------------------------------|--------|------------|--------------------------------------------|-------------|---|-------------|-------------|
| TFVCPTEIIAFSDR                   | P35700 | 0          | N-term +28.03 Da, K +28.03 Da,C +57.02 Da, | 5261.496582 | 2 | 842.9299927 | 842.4241772 |
| MNPDGMVALLDYR                    | P63028 | 0.00081566 | N-term +28.03 Da, K +28.03 Da,             | 5263.768066 | 2 | 761.8800049 | 761.8732653 |
| SQTEEDCTEELFDLHAR                | P99028 | 0          | N-term +28.03 Da, K +28.03 Da,C +57.02 Da, | 5264.842773 | 3 | 753         | 752.3355565 |
| TFVCPTEIIAFSDR                   | P35700 | 0          | N-term +28.03 Da, K +28.03 Da,C +57.02 Da, | 5265.913574 | 2 | 843.4199829 | 842.4241772 |
| QQVAPMDDETGKELVLALYDYQEKSPP      | P16546 | 0          | N-term +28.03 Da, K +28.03 Da,             | 5271.608398 | 4 | 802.9099731 | 802.6615134 |
| EEALQRSWDTK                      | Q99JP7 | 0.02357955 | N-term +28.03 Da, K +28.03 Da,             | 5272.6875   | 2 | 710.3599854 | 709.867352  |
| DEPQSQWDKVKDFANVYVDAVKDSGR       | Q00623 | 0          | N-term +28.03 Da, K +28.03 Da,             | 5274.246582 | 4 | 778.3900146 | 777.8963754 |
| DIVLTQSPASLAVSLGQR               | P01654 | 0          | N-term +28.03 Da, K +28.03 Da,             | 5274.774902 | 2 | 942.0300293 | 942.0334697 |
| SSILLDVKPWDEDTDMTKLEECVR         | O70251 | 0          | N-term +28.03 Da, K +28.03 Da,C +57.02 Da, | 5276.258301 | 4 | 741.6199951 | 741.6239707 |
| EGEPEVTDQLEWQSNQPWEQALNR         | P08226 | 0          | N-term +28.03 Da, K +28.03 Da,             | 5277.978027 | 2 | 1456.177124 | 1456.178299 |
| SSILLDVKPWDEDTDMTKLEECVR         | O70251 | 0          | N-term +28.03 Da, K +28.03 Da,C +57.02 Da, | 5280.022949 | 3 | 988.8300171 | 988.4962022 |
| EGEPEVTDQLEWQSNQPWEQALNR         | P08226 | 0          | N-term +28.03 Da, K +28.03 Da,             | 5281.572266 | 3 | 971.1203003 | 971.1212917 |
| DEPQSQWDKVKDFANVYVDAVKDSGR       | Q00623 | 0          | N-term +28.03 Da, K +28.03 Da,             | 5282.098633 | 3 | 1037.530029 | 1036.859408 |
| GDTFLGGEDFDQALLR                 | P38647 | 0          | N-term +28.03 Da, K +28.03 Da,             | 5283.408203 | 2 | 891.9400024 | 891.4388708 |
| DIVLTQSPASLAVSLGQR               | P01654 | 0          | N-term +28.03 Da, K +28.03 Da,             | 5284.257324 | 3 | 628.3582764 | 628.3580719 |
| GVPPEDAVETLAGSLGTR               | P51125 | 0          | N-term +28.03 Da, K +28.03 Da,             | 5285.20166  | 3 | 600.6599731 | 600.3230275 |
| GIETLGGVFTKLINR                  | P38647 | 0          | N-term +28.03 Da, K +28.03 Da,             | 5286.648438 | 3 | 559         | 558.6698095 |
| GDTFLGGEDFDQALLR                 | P38647 | 0          | N-term +28.03 Da, K +28.03 Da,             | 5289.897461 | 2 | 891.4360962 | 891.4388708 |
| TQEPLDPDGLLEVISSLQTPAAPR         | Q91XT4 | 0          | N-term +28.03 Da, K +28.03 Da,             | 5290.090332 | 3 | 864.4500122 | 864.4448237 |
| MADVVFQVPSVIVSR                  | Q8VCT4 | 0          | N-term +28.03 Da, K +28.03 Da,             | 5294.833984 | 2 | 802.4500122 | 802.4474547 |
| TVGLAQQWDQLDQLGMR                | P16546 | 0          | N-term +28.03 Da, K +28.03 Da,             | 5295.283203 | 2 | 994.5       | 994.006929  |
| GSYGDLGPIITQVTIPKDLAGSIIGKGGQR   | P61979 | 0          | N-term +28.03 Da, K +28.03 Da,             | 5296.859863 | 4 | 814.710022  | 814.2093249 |
| SGLSDGYGFTTDLFGR                 | Q9Z2X1 | 0          | N-term +28.03 Da, K +28.03 Da,             | 5297.214355 | 2 | 860.9099731 | 860.9124887 |
| SCQDSLQDYWTIHGLWPDR              | Q9CQ01 | 0          | N-term +28.03 Da, K +28.03 Da,C +57.02 Da, | 5298.731445 | 3 | 760.0200195 | 759.6846309 |
| TQEPLDPDGLLEVISSLQTPAAPR         | Q91XT4 | 0          | N-term +28.03 Da, K +28.03 Da,             | 5299.858887 | 2 | 1296.170044 | 1296.163597 |
| AVLDPCSAYISLNEPWR                | Q8R4V5 | 0          | N-term +28.03 Da, K +28.03 Da,C +57.02 Da, | 5302.182129 | 2 | 1010.01001  | 1010.003855 |
| DEPQSQWDKVKDFANVYVDAVKDSGR       | Q00623 | 0          | N-term +28.03 Da, K +28.03 Da,             | 5304.913086 | 4 | 777.8960571 | 777.8963754 |
| NDVITVQTPAFAESVTEGDVR            | Q9D2G2 | 0          | N-term +28.03 Da, K +28.03 Da,             | 5307.246582 | 2 | 1139.569946 | 1138.573886 |
| EMKAPLVCLPVFVSKDPLDLR            | Q91V76 | 0.00116414 | N-term +28.03 Da, K +28.03 Da,             | 5308.55127  | 4 | 643.3599854 | 642.8627601 |
| AIAELGIYPAVDPLDSTSR              | P56480 | 0          | N-term +28.03 Da, K +28.03 Da,             | 5309.893555 | 2 | 1008.539978 | 1008.536043 |
| NDVITVQTPAFAESVTEGDVR            | Q9D2G2 | 0          | N-term +28.03 Da, K +28.03 Da,             | 5310.002441 | 3 | 760.0499878 | 759.3850161 |
| EGEPEVTDQLEWQSNQPWEQALNR         | P08226 | 0          | N-term +28.03 Da, K +28.03 Da,             | 5310.278809 | 2 | 1456.680054 | 1456.178299 |
| AIAELGIYPAVDPLDSTSR              | P56480 | 0          | N-term +28.03 Da, K +28.03 Da,             | 5311.388184 | 2 | 1009.539978 | 1008.536043 |
| GAFEGTLQGPFGHGYGEGAGEGIDDAEWVVAR | Q9QXY6 | 0          | N-term +28.03 Da, K +28.03 Da,             | 5311.775879 | 3 | 1093.839966 | 1093.177689 |
| DEPQSQWDKVKDFANVYVDAVKDSGR       | Q00623 | 0          | N-term +28.03 Da, K +28.03 Da,             | 5312.818848 | 3 | 1037.189941 | 1036.859408 |
| QGVDLLADAVAVTMGPKGR              | P63038 | 0          | N-term +28.03 Da, K +28.03 Da,             | 5313.149902 | 3 | 652.3699951 | 652.0311902 |
| NDVITVQTPAFAESVTEGDVR            | Q9D2G2 | 0          | N-term +28.03 Da, K +28.03 Da,             | 5315.184082 | 3 | 759.710022  | 759.3850161 |
| AIAELGIYPAVDPLDSTSR              | P56480 | 0          | N-term +28.03 Da, K +28.03 Da,             | 5315.297852 | 3 | 673.0300293 | 672.6931206 |
| EGEPEVTDQLEWQSNQPWEQALNR         | P08226 | 0          | N-term +28.03 Da, K +28.03 Da,             | 5315.411621 | 3 | 971.4500122 | 971.1212917 |
| ILNLPESWDWR                      | P97821 | 0.00835476 | N-term +28.03 Da, K +28.03 Da,             | 5316.65625  | 2 | 728.8834839 | 728.8828045 |

|                                  |        |            |                                            |             |   |             |             |
|----------------------------------|--------|------------|--------------------------------------------|-------------|---|-------------|-------------|
| VASILHDDCAFLSAFGDLSKPER          | Q9D1Q6 | 0          | N-term +28.03 Da, K +28.03 Da,             | 5317.438965 | 4 | 652.0800171 | 651.8336231 |
| ELPTAFDYVEFTR                    | P16546 | 0          | N-term +28.03 Da, K +28.03 Da,             | 5320.633789 | 2 | 808.9099731 | 808.4037677 |
| TEEEFKKFKSDKASVVGFFR             | P27773 | 0          | N-term +28.03 Da, K +28.03 Da,             | 5322.744141 | 4 | 648.3499756 | 648.5993524 |
| KEVLDYSTPTTNGTPEAALSEDINLIR      | Q9DBG7 | 0          | N-term +28.03 Da, K +28.03 Da,             | 5322.960938 | 3 | 1002.179993 | 1001.855553 |
| ELVSIIDGVLRL                     | Q8K5B2 | 0.00994406 | N-term +28.03 Da, K +28.03 Da,             | 5326.483398 | 2 | 621.3800049 | 621.3768235 |
| EWDDYVVKLYEQLSGK                 | P70296 | 0          | N-term +28.03 Da, K +28.03 Da,             | 5326.974121 | 3 | 685.6900024 | 685.3542163 |
| EVYFPAQYVDQTDLEKFNNEAGKYTVGLGQTR | P54869 | 0          | N-term +28.03 Da, K +28.03 Da,             | 5328.833008 | 4 | 966.9899902 | 966.7427241 |
| AVGVPVPTANAALPADPPASVVVGPVVVPR   | P29699 | 0          | N-term +28.03 Da, K +28.03 Da,             | 5330.265625 | 3 | 916.1900024 | 915.8602426 |
| ATTNPSQLLPLELVKICIGSR            | P62322 | 0          | N-term +28.03 Da, K +28.03 Da,C +57.02 Da, | 5330.472656 | 3 | 790.4400024 | 790.1016742 |
| TEDQTAEFKEAFQLFDR                | Q60605 | 0          | N-term +28.03 Da, K +28.03 Da,             | 5330.589355 | 3 | 711.3499756 | 711.0162636 |
| ELNDFISYLQR                      | P27773 | 0.03052164 | N-term +28.03 Da, K +28.03 Da,             | 5335.634766 | 2 | 713.8635254 | 713.37227   |
| LITLEEEMTKYKPESDELTAEKITEFCHR    | P09103 | 0          | N-term +28.03 Da, K +28.03 Da,C +57.02 Da, | 5337.043457 | 4 | 913.960022  | 913.9676781 |
| NDVITVQTPAFAESVTEGDVRL           | Q9D2G2 | 0          | N-term +28.03 Da, K +28.03 Da,             | 5338.570313 | 2 | 1139.065552 | 1138.573886 |
| GGAFEGTLQGPFHGYGEGEGEGIDDAEWWVAR | Q9QXY6 | 0          | N-term +28.03 Da, K +28.03 Da,             | 5343.429199 | 3 | 1112.849976 | 1112.184844 |
| NDVITVQTPAFAESVTEGDVRL           | Q9D2G2 | 0          | N-term +28.03 Da, K +28.03 Da,             | 5353.478027 | 3 | 759.710022  | 759.3850161 |
| QELRPTLNELGISTPEELGLDKV          | P12787 | 0.02854744 | N-term +28.03 Da, K +28.03 Da,             | 5353.575684 | 3 | 870.4799805 | 869.8128472 |
| ATTNPSQLLPLELVKICIGSR            | P62322 | 0          | N-term +28.03 Da, K +28.03 Da,C +57.02 Da, | 5357.046875 | 3 | 790.7700195 | 790.1016742 |
| AVFVDLEPTVIDEVR                  | P05213 | 0          | N-term +28.03 Da, K +28.03 Da,             | 5357.264648 | 2 | 865.4708252 | 865.4721819 |
| LITLEEEMTKYKPESDELTAEKITEF       | P09103 | 0.00110538 | N-term +28.03 Da, K +28.03 Da,             | 5358.822754 | 4 | 801.1699829 | 800.67001   |
| FDPFADASKGDDLLPAGTEDYIHIR        | P48024 | 0.00044583 | N-term +28.03 Da, K +28.03 Da,             | 5362.379883 | 4 | 706.0999756 | 705.602624  |
| TLVTEAVQAPQLAAEAVNVIKR           | Q9ESX5 | 0          | N-term +28.03 Da, K +28.03 Da,             | 5364.020996 | 3 | 793.4699707 | 793.1319621 |
| FDPFADASKGDDLLPAGTEDYIHIR        | P48024 | 0          | N-term +28.03 Da, K +28.03 Da,             | 5373.672363 | 3 | 941.1300049 | 940.4677398 |
| VALTGLTVAEYFR                    | P56480 | 0          | N-term +28.03 Da, K +28.03 Da,             | 5374.505859 | 2 | 734.4099731 | 734.4139377 |
| SPPGDTSNLFPGTWYLER               | P54869 | 0.00046361 | N-term +28.03 Da, K +28.03 Da,             | 5376.040527 | 2 | 1033.01001  | 1033.00491  |
| SDFPFADASKGDDLLPAGTEDYIHIR       | P48024 | 0          | N-term +28.03 Da, K +28.03 Da,             | 5377.850098 | 4 | 727.8599854 | 727.3606312 |
| DELDLLEEALPDMEEEDDQKAVKDEL       | P09103 | 0          | N-term +28.03 Da, K +28.03 Da,             | 5378.894531 | 3 | 1078.819946 | 1078.153554 |
| EGEPEVTDQLEWQSNQPWEQALNR         | P08226 | 0          | N-term +28.03 Da, K +28.03 Da,             | 5379.44043  | 3 | 971.7800293 | 971.1212917 |
| TLVTEAVQAPQLAAEAVNVIKR           | Q9ESX5 | 0          | N-term +28.03 Da, K +28.03 Da,             | 5380.147949 | 4 | 595.5999756 | 595.1007907 |
| DELDLLEEALPDMEEEDDQKAVKDEL       | P09103 | 0          | N-term +28.03 Da, K +28.03 Da,             | 5381.878418 | 3 | 1078.48999  | 1078.153554 |
| ELSDFGLESTTGEVPPVAIR             | P27773 | 0          | N-term +28.03 Da, K +28.03 Da,             | 5382.117676 | 2 | 1074.560059 | 1074.065165 |
| DELDLLEEALPDMEEEDDQKAVKDEL       | P09103 | 0          | N-term +28.03 Da, K +28.03 Da,             | 5383.681641 | 3 | 1078.150024 | 1078.153554 |
| ELSDFGLESTTGEVPPVAIR             | P27773 | 0          | N-term +28.03 Da, K +28.03 Da,             | 5384.102539 | 2 | 1074.060059 | 1074.065165 |
| SSILLDVKPWDDETDMTKLEEC           | O70251 | 0          | N-term +28.03 Da, K +28.03 Da,C +57.02 Da, | 5386.833984 | 3 | 903.7700195 | 903.4396936 |
| EVGMVGVNEGLISSVECPFGGVKQSGLGR    | Q8BWF0 | 0          | N-term +28.03 Da, K +28.03 Da,             | 5389.164551 | 3 | 1007.51001  | 1006.851091 |
| TADQVIASFKVLAGDKNFITAELR         | P57780 | 0          | N-term +28.03 Da, K +28.03 Da,             | 5393.495117 | 4 | 706.4000244 | 705.8931039 |
| GLDFSAKVIQGSLSLPPQAVR            | Q9Z2V4 | 0          | N-term +28.03 Da, K +28.03 Da,             | 5393.737793 | 3 | 753.4299927 | 753.0898742 |
| TLVTEAVQAPQLAAEAVNVIKR           | Q9ESX5 | 0          | N-term +28.03 Da, K +28.03 Da,             | 5394.62793  | 3 | 793.1307983 | 793.1319621 |
| VAGPQPAQTGAPQSGLEYLFR            | P29391 | 0          | N-term +28.03 Da, K +28.03 Da,             | 5394.795898 | 3 | 800.7399902 | 801.0764052 |
| TGAIVDVPPVGEELLGR                | Q03265 | 0.003159   | N-term +28.03 Da, K +28.03 Da,             | 5396.414063 | 2 | 826.4500122 | 826.9645239 |
| VAGPQPAQTGAPQSGLEYLFR            | P29391 | 0          | N-term +28.03 Da, K +28.03 Da,             | 5396.734375 | 2 | 1200.599976 | 1201.11097  |

|                                          |        |            |                                            |             |   |             |             |
|------------------------------------------|--------|------------|--------------------------------------------|-------------|---|-------------|-------------|
| GKVPPEIDSVIVGNVMQSSSDAAYLAR              | Q8BWT1 | 0          | N-term +28.03 Da, K +28.03 Da,             | 5399.215332 | 3 | 987.8499756 | 987.5181059 |
| TNPQLLPLELVDKICIGSR                      | P62322 | 0          | N-term +28.03 Da, K +28.03 Da,C +57.02 Da, | 5402.361816 | 3 | 733.4099731 | 732.7400764 |
| NEFTLGECELETMTGKVKAVVKL                  | P12710 | 0          | N-term +28.03 Da, K +28.03 Da,             | 5402.678711 | 4 | 742.3900146 | 742.3920798 |
| DPAIYFKEQFLDGDWATNR                      | P14211 | 0          | N-term +28.03 Da, K +28.03 Da,             | 5404.521973 | 2 | 1172.069946 | 1171.576231 |
| NEFTLGECELETMTGKVKAVVKL                  | P12710 | 0          | N-term +28.03 Da, K +28.03 Da,             | 5406.344238 | 3 | 989.8599854 | 989.5203476 |
| HLVYESDQNKDGKLTKEEIVDKYDLFVGSQATDFGEALVR | O35887 | 0          | N-term +28.03 Da, K +28.03 Da,             | 5406.608887 | 4 | 1175.109985 | 1175.114184 |
| HLVYESDQNKDGKLTKEEIVDKYDLFVGSQATDFGEALVR | O35887 | 0          | N-term +28.03 Da, K +28.03 Da,             | 5407.918457 | 4 | 1175.619995 | 1175.114184 |
| DPAIYFKEQFLDGDWATNR                      | P14211 | 0          | N-term +28.03 Da, K +28.03 Da,             | 5409.203125 | 3 | 781.3900146 | 781.3865794 |
| SDSGKNTLVTEAVQAPQLAAEAVNVIKR             | Q9ESX5 | 0          | N-term +28.03 Da, K +28.03 Da,             | 5409.311523 | 4 | 749.6699829 | 749.1712052 |
| HIDIRPRDFGSLWANR                         | B7ZWI3 | 0.03178552 | N-term +28.03 Da, K +28.03 Da,             | 5411.543945 | 2 | 992.0300293 | 991.0293866 |
| DPAIYFKEQFLDGDWATNR                      | P14211 | 0          | N-term +28.03 Da, K +28.03 Da,             | 5415.425293 | 2 | 1171.569946 | 1171.576231 |
| DWVIPPINLPENSR                           | P15116 | 0          | N-term +28.03 Da, K +28.03 Da,             | 5418.955566 | 2 | 839.4500122 | 839.4515833 |
| SAGKVPPEIDSVIVGNVMQSSSDAAYLAR            | Q8BWT1 | 0          | N-term +28.03 Da, K +28.03 Da,             | 5419.609375 | 3 | 1040.540039 | 1040.20782  |
| SPTNCDASEPLAEKVLDLINKGR                  | Q9ESB3 | 0          | N-term +28.03 Da, K +28.03 Da,             | 5420.023438 | 4 | 653.5999756 | 653.5994554 |
| VSEFELFADKVPKTAENFR                      | P17742 | 0          | N-term +28.03 Da, K +28.03 Da,             | 5430.690918 | 3 | 727.7299805 | 728.0684101 |
| GPVGVFEWEAFAR                            | P09411 | 0          | N-term +28.03 Da, K +28.03 Da,             | 5432.458984 | 2 | 747.3800049 | 746.8828045 |
| GKVPPEIDSVIVGNVMQSSSDAAYLAR              | Q8BWT1 | 0          | N-term +28.03 Da, K +28.03 Da,             | 5436.439453 | 3 | 987.8499756 | 987.5181059 |
| MPPAPVPPGTPAPPGPATMMPDGLTLPPTTER         | Q99K48 | 0          | N-term +28.03 Da, K +28.03 Da,             | 5437.806152 | 4 | 845.4299927 | 845.1790159 |
| GGHEADAQILELNQQLDLKLTVDGLEKER            | Q6PER3 | 0          | N-term +28.03 Da, K +28.03 Da,             | 5438.034668 | 4 | 858.7199707 | 858.2201557 |
| DFLVDDAEVERLR                            | Q8R1Y2 | 0.04066143 | N-term +28.03 Da, K +28.03 Da,             | 5439.562012 | 2 | 803.4299927 | 802.9175737 |
| DPAIYFKEQFLDGDWATNR                      | P14211 | 0          | N-term +28.03 Da, K +28.03 Da,             | 5440.546387 | 3 | 781.3858643 | 781.3865794 |
| ALAPDDSLVLPAGTSYVWER                     | Q78JT3 | 0.01387214 | N-term +28.03 Da, K +28.03 Da,             | 5441.071777 | 3 | 730.3800049 | 730.0476751 |
| GAMPPAPVPPGTPAPPGPATMMPDGLTLPPTTER       | Q99K48 | 0          | N-term +28.03 Da, K +28.03 Da,             | 5441.616699 | 4 | 877.4500122 | 877.1936605 |
| ALAPDDSLVLPAGTSYVWER                     | Q78JT3 | 0          | N-term +28.03 Da, K +28.03 Da,             | 5443.563477 | 2 | 1094.560059 | 1094.567874 |
| DLSSDLSLSTASKIVKWKQKQ                    | Q61838 | 0.00081466 | N-term +28.03 Da, K +28.03 Da,             | 5444.951172 | 3 | 849.8099976 | 849.8058038 |
| DPAIYFKEQFLDGDWATNR                      | P14211 | 0          | N-term +28.03 Da, K +28.03 Da,             | 5446.228027 | 2 | 1172.079956 | 1171.576231 |
| ALAPDDSLVLPAGTSYVWER                     | Q78JT3 | 0          | N-term +28.03 Da, K +28.03 Da,             | 5449.418457 | 2 | 1095.569946 | 1094.567874 |
| YEPIDATGFININSLR                         | P16460 | 0          | N-term +28.03 Da, K +28.03 Da,             | 5449.619629 | 2 | 925.9799805 | 925.985988  |
| DWVIPPINLPENSR                           | P15116 | 0          | N-term +28.03 Da, K +28.03 Da,             | 5449.839844 | 2 | 839.4500122 | 839.4515833 |
| TILAETEGMLKDLQKSVVEEER                   | Q99PL5 | 0          | N-term +28.03 Da, K +28.03 Da,             | 5451.12207  | 4 | 659.0999756 | 658.8492049 |
| TILAETEGMLKDLQKSVVEEER                   | Q99PL5 | 0          | N-term +28.03 Da, K +28.03 Da,             | 5460.757813 | 3 | 878.4699707 | 878.1298477 |
| SRDGKALEQFLQEYFDGNLKR                    | P27773 | 0          | N-term +28.03 Da, K +28.03 Da,             | 5466.222656 | 4 | 650.5999756 | 650.3473262 |
| TMTQEPLDPDGLVEISSLQTPAAPR                | Q91XT4 | 0.00372755 | N-term +28.03 Da, K +28.03 Da,             | 5469.833008 | 3 | 942.1400146 | 941.8075451 |
| TMTQEPLDPDGLVEISSLQTPAAPR                | Q91XT4 | 0          | N-term +28.03 Da, K +28.03 Da,             | 5471.494141 | 3 | 941.8099976 | 941.8075451 |
| DPAIYFKEQFLDGDWATNR                      | P14211 | 0          | N-term +28.03 Da, K +28.03 Da,             | 5471.588379 | 3 | 781.3900146 | 781.3865794 |
| LWDFQSGPIVSRDTRCGRLEVMESKDFGLRLVVQR      | G3X942 | 0.02929688 | N-term +28.03 Da, K +28.03 Da,             | 5473.428711 | 4 | 1085.069946 | 1084.813689 |
| TMTQEPLDPDGLVEISSLQTPAAPR                | Q91XT4 | 0          | N-term +28.03 Da, K +28.03 Da,             | 5473.554688 | 2 | 1413.219971 | 1412.207679 |
| GAMPPAPVPPGTPAPPGPATMMPDGLTLPPTTER       | Q99K48 | 0          | N-term +28.03 Da, K +28.03 Da,             | 5475.297363 | 3 | 1169.589966 | 1169.255788 |
| TLVGYDLVPEPKIIDAALR                      | P12787 | 0.0059269  | N-term +28.03 Da, K +28.03 Da,             | 5479.334961 | 2 | 1070.109985 | 1070.124828 |
| GAMPPAPVPPGTPAPPGPATMMPDGLTLPPTTER       | Q99K48 | 0          | N-term +28.03 Da, K +28.03 Da,             | 5480.995605 | 4 | 877.4400024 | 877.1936605 |

|                                   |        |            |                                            |             |   |             |             |
|-----------------------------------|--------|------------|--------------------------------------------|-------------|---|-------------|-------------|
| TFLDLNLDLSKFR                     | Q8BK30 | 0          | N-term +28.03 Da, K +28.03 Da,             | 5481.455566 | 3 | 546.9799805 | 546.6468934 |
| NPTVFFDITADDEPLGR                 | P17742 | 0          | N-term +28.03 Da, K +28.03 Da,             | 5487.925293 | 2 | 968.9799805 | 967.9783605 |
| DWVIPPINLPENSR                    | P15116 | 0          | N-term +28.03 Da, K +28.03 Da,             | 5494.425781 | 2 | 839.9500122 | 839.4515833 |
| TFLDLNLDLSKFR                     | Q8BK30 | 0          | N-term +28.03 Da, K +28.03 Da,             | 5494.937012 | 3 | 546.3200073 | 546.6468934 |
| VDGLDPAFTPATGTPVLGGLSYR           | Q61176 | 0          | N-term +28.03 Da, K +28.03 Da,             | 5496.425781 | 2 | 1167.109985 | 1166.612814 |
| TLGIETVGGVMTKLIPR                 | P20029 | 0          | N-term +28.03 Da, K +28.03 Da,             | 5496.817383 | 3 | 614.3699951 | 614.3691429 |
| LKTQPTDEEMLIYSHF                  | P31786 | 0.01951077 | N-term +28.03 Da, K +28.03 Da,             | 5499.648438 | 3 | 719.3699951 | 719.0308563 |
| VDGLDPAFTPATGTPVLGGLSYR           | Q61176 | 0          | N-term +28.03 Da, K +28.03 Da,             | 5499.76123  | 2 | 1166.609985 | 1166.612814 |
| DWVIPPINLPENSR                    | P15116 | 0          | N-term +28.03 Da, K +28.03 Da,             | 5501.081055 | 2 | 839.4512329 | 839.4515833 |
| DWVIPPINLPENSR                    | P15116 | 0          | N-term +28.03 Da, K +28.03 Da,             | 5506.63623  | 3 | 559.9699707 | 559.9701477 |
| TGEAIVDAALSALR                    | Q922R8 | 0          | N-term +28.03 Da, K +28.03 Da,             | 5511.611816 | 2 | 707.8974609 | 707.8986521 |
| TLSEESYKDSTLIMQLLR                | P62259 | 0          | N-term +28.03 Da, K +28.03 Da,             | 5513.069824 | 3 | 728.7299805 | 728.3924541 |
| TLSEESYKDSTLIMQLLR                | P62259 | 0          | N-term +28.03 Da, K +28.03 Da,             | 5513.615234 | 3 | 729.0599976 | 728.3924541 |
| VDAALSALR                         | Q922R8 | 0.0437365  | N-term +28.03 Da, K +28.03 Da,             | 5517.458984 | 2 | 472.2900085 | 472.2821941 |
| AKFEELNMDLFR                      | P20029 | 0          | N-term +28.03 Da, K +28.03 Da,             | 5519.588867 | 2 | 784.4000244 | 784.9107051 |
| NPTVFFDITADDEPLGR                 | P17742 | 0          | N-term +28.03 Da, K +28.03 Da,             | 5519.813477 | 2 | 968.4799805 | 967.9783605 |
| VDYAGVTVDELGKVLTPQVMNR            | P70296 | 0          | N-term +28.03 Da, K +28.03 Da,             | 5521.727051 | 3 | 854.789978  | 854.459639  |
| TLGIETVGGVMTKLIPR                 | P20029 | 0          | N-term +28.03 Da, K +28.03 Da,             | 5527.472168 | 3 | 614.3699951 | 614.3691429 |
| VNHPQVSALLGEEDEEALHYLTR           | Q9EQU5 | 0          | N-term +28.03 Da, K +28.03 Da,             | 5527.746582 | 3 | 883.1099854 | 883.4486794 |
| VNPTVFFDITADDEPLGR                | P17742 | 0          | N-term +28.03 Da, K +28.03 Da,             | 5530.231934 | 2 | 1017.52002  | 1017.512568 |
| DWVIPPINLPENSR                    | P15116 | 0          | N-term +28.03 Da, K +28.03 Da,             | 5531.377441 | 2 | 839.4509888 | 839.4515833 |
| LYSSDDVIELTPSNFNR                 | Q922R8 | 0.00080192 | N-term +28.03 Da, K +28.03 Da,             | 5534.880371 | 2 | 1042.51001  | 1043.01039  |
| QFWKRSNSK                         | Q8R5A6 | 0.02103746 | N-term +28.03 Da, K +28.03 Da,             | 5537.408203 | 2 | 633.3685303 | 632.8616744 |
| DWVIPPINLPENSR                    | P15116 | 0          | N-term +28.03 Da, K +28.03 Da,             | 5537.483398 | 3 | 559.9697876 | 559.9701477 |
| LTAEAVVTEIPKKEEDPGMGAMGGMGGMGGGMF | P63038 | 0          | N-term +28.03 Da, K +28.03 Da,             | 5538.858398 | 3 | 1166.890015 | 1166.55463  |
| SLEPADDTVHESAEP SRGENAAQTPR       | O08543 | 0.02356616 | N-term +28.03 Da, K +28.03 Da,             | 5539.550293 | 2 | 1396.130005 | 1396.657731 |
| ILEFFGLKKEECPAVR                  | P09103 | 0          | N-term +28.03 Da, K +28.03 Da,C +57.02 Da, | 5543.018555 | 4 | 505.5299988 | 505.7879548 |
| IGENMNP DGMVALLDYR                | P63028 | 0          | N-term +28.03 Da, K +28.03 Da,             | 5544.350586 | 2 | 969.4699707 | 968.4687908 |
| VQGDYEPIDATGF ININSLR             | P16460 | 0          | N-term +28.03 Da, K +28.03 Da,             | 5544.686035 | 2 | 1125.569946 | 1125.573688 |
| DWGDNGFFKILR                      | P10605 | 0.00108382 | N-term +28.03 Da, K +28.03 Da,             | 5550.408203 | 3 | 509.269989  | 508.6050282 |
| EMAGDNKLLGQFTLIGIPPAPR            | P38647 | 0          | N-term +28.03 Da, K +28.03 Da,             | 5551.077148 | 3 | 799.1099854 | 798.7786426 |
| LNQDQLDAVSKYQEV TNNLEFAKELQR      | Q60865 | 0          | N-term +28.03 Da, K +28.03 Da,             | 5553.464355 | 4 | 820.1799927 | 820.182036  |
| LLAALGGNSSPSAKDIKKILDSVGEADDDR    | P99027 | 0          | N-term +28.03 Da, K +28.03 Da,             | 5558.086426 | 4 | 821.210022  | 820.9554276 |
| MKQVEELYQS LLELGEKR               | P16546 | 0.0014373  | N-term +28.03 Da, K +28.03 Da,             | 5558.676758 | 3 | 760.0900269 | 759.7556152 |
| VQGDYEPIDATGF ININSLR             | P16460 | 0          | N-term +28.03 Da, K +28.03 Da,             | 5560.029785 | 2 | 1126.569946 | 1125.573688 |
| LAEEAVTLDMLDLGAAR                 | Q9D3D9 | 0          | N-term +28.03 Da, K +28.03 Da,             | 5562.136719 | 2 | 908.4799805 | 908.4796814 |
| GPLLVDVFTDEMAHFDR                 | P24270 | 0          | N-term +28.03 Da, K +28.03 Da,             | 5566.596191 | 3 | 739.710022  | 739.7051433 |
| QKGLTDNFADVQSVVDCPDLTKPEPFFPVR    | Q91V76 | 0          | N-term +28.03 Da, K +28.03 Da,             | 5568.09375  | 4 | 902.960022  | 902.4682737 |
| ILEFFGLKKEECPAVR                  | P09103 | 0          | N-term +28.03 Da, K +28.03 Da,C +57.02 Da, | 5570.029297 | 3 | 673.710022  | 674.048181  |
| LSPTNCDA SEPLAEKVLDLINKGR         | Q9ESB3 | 0          | N-term +28.03 Da, K +28.03 Da,             | 5570.847656 | 4 | 682.3800049 | 681.8704715 |

|                                       |        |            |                                |             |   |             |             |
|---------------------------------------|--------|------------|--------------------------------|-------------|---|-------------|-------------|
| DPAIYFKEQFLDGDWATNR                   | P14211 | 0          | N-term +28.03 Da, K +28.03 Da, | 5571.267578 | 3 | 781.7199707 | 781.3865794 |
| FGSVETWPWQVLSTGGKEDVSYEER             | Q9R257 | 0          | N-term +28.03 Da, K +28.03 Da, | 5572.849609 | 3 | 981.8099976 | 981.4784162 |
| DPAIYFKEQFLDGDWATNR                   | P14211 | 0.04491662 | N-term +28.03 Da, K +28.03 Da, | 5573.46582  | 2 | 1172.589966 | 1171.576231 |
| IYVPADDLTDPAPATTFHAHLDATTVLSR         | P56480 | 0          | N-term +28.03 Da, K +28.03 Da, | 5575.566406 | 3 | 1001.179993 | 1000.516871 |
| GNLPYDVTEDSIKDFFR                     | Q8BGD9 | 0          | N-term +28.03 Da, K +28.03 Da, | 5575.924316 | 3 | 691.6799927 | 691.3493539 |
| DDCNQTGQMNTAGLLDWPQGTFASQVTLEGDKVKVER | Q9DCW4 | 0          | N-term +28.03 Da, K +28.03 Da, | 5582.364258 | 4 | 1020.75     | 1020.501677 |
| NVQGDYEPIDATGFININSLR                 | P16460 | 0          | N-term +28.03 Da, K +28.03 Da, | 5583.745605 | 2 | 1183.089966 | 1182.595152 |
| SIQADGLVWGSSKLVVPGY                   | O70251 | 0.03988063 | N-term +28.03 Da, K +28.03 Da, | 5583.858887 | 2 | 1016.559998 | 1016.55932  |
| GNLPYDVTEDSIKDFFR                     | Q8BGD9 | 0          | N-term +28.03 Da, K +28.03 Da, | 5584.317871 | 2 | 1036.518677 | 1036.520393 |
| IYVPADDLTDPAPATTFHAHLDATTVLSR         | P56480 | 0          | N-term +28.03 Da, K +28.03 Da, | 5585.444824 | 4 | 751.1400146 | 750.6394724 |
| DPAIYFKEQFLDGDWATNR                   | P14211 | 0          | N-term +28.03 Da, K +28.03 Da, | 5585.569336 | 2 | 1171.569946 | 1171.576231 |
| VLLESEQFLTELTR                        | P16254 | 0          | N-term +28.03 Da, K +28.03 Da, | 5590.779297 | 2 | 853.4721069 | 853.4721819 |
| IGIQDGYLSLLQDSGEVR                    | P63242 | 0          | N-term +28.03 Da, K +28.03 Da, | 5594.398438 | 2 | 995.5300293 | 996.0258422 |
| DWGDNGFFKILR                          | P10605 | 0.00314027 | N-term +28.03 Da, K +28.03 Da, | 5598.94043  | 3 | 508.9299927 | 508.6050282 |
| EELITNWEQIR                           | P16546 | 0          | N-term +28.03 Da, K +28.03 Da, | 5599.397949 | 2 | 729.3800049 | 729.883002  |
| DWVIPPINLPENSR                        | P15116 | 0          | N-term +28.03 Da, K +28.03 Da, | 5600.48291  | 2 | 839.4500122 | 839.4515833 |
| FTPSLSDSDFFTLPAGR                     | Q9CXE7 | 0          | N-term +28.03 Da, K +28.03 Da, | 5600.596191 | 2 | 950.4799805 | 950.477996  |
| DPAIYFKEQFLDGDWATNR                   | P14211 | 0          | N-term +28.03 Da, K +28.03 Da, | 5602.204102 | 3 | 781.7199707 | 781.3865794 |
| VLLESEQFLTELTR                        | P16254 | 0          | N-term +28.03 Da, K +28.03 Da, | 5603.369141 | 3 | 569.3200073 | 569.3172135 |
| GNLPYDVTEDSIKDFFR                     | Q8BGD9 | 0          | N-term +28.03 Da, K +28.03 Da, | 5606.724121 | 3 | 691.3493042 | 691.3493539 |
| LKTQPTDEEMLFYSHFKQA                   | P31786 | 0.00834939 | N-term +28.03 Da, K +28.03 Da, | 5608.431152 | 3 | 837.0999756 | 837.4381749 |
| DWVIPPINLPENSR                        | P15116 | 0          | N-term +28.03 Da, K +28.03 Da, | 5610.083496 | 2 | 840.460022  | 839.4515833 |
| VESMEDALKAADTIGYPMIR                  | Q8C196 | 0          | N-term +28.03 Da, K +28.03 Da, | 5610.460449 | 3 | 789.4099731 | 789.0762488 |
| KTSPEFSQPLKKVEEEQEAEEDVSEEEAEDREGASK  | Q8VBT0 | 0.044965   | N-term +28.03 Da, K +28.03 Da, | 5612.094238 | 4 | 1088.01001  | 1088.022424 |
| DPAIYFKEQFLDGDWATNR                   | P14211 | 0          | N-term +28.03 Da, K +28.03 Da, | 5617.59668  | 2 | 1171.574829 | 1171.576231 |
| QAIYVPADDLTDPAPATTFHAHLDATTVLSR       | P56480 | 0          | N-term +28.03 Da, K +28.03 Da, | 5618.526855 | 3 | 1067.219971 | 1066.882102 |
| EIENLILNDPDFQHEDYNFLTR                | Q9R0H0 | 0          | N-term +28.03 Da, K +28.03 Da, | 5618.653809 | 3 | 922.4500122 | 921.7802064 |
| GQWLTLLEAPLDTINVHLR                   | P70699 | 0          | N-term +28.03 Da, K +28.03 Da, | 5619.936523 | 3 | 702.3900146 | 702.0565044 |
| FTPSLSDSDFFTLPAGR                     | Q9CXE7 | 0          | N-term +28.03 Da, K +28.03 Da, | 5621.395996 | 2 | 951.4799805 | 950.477996  |
| GPPPIQDGEFTLLPAGR                     | Q3V009 | 0          | N-term +28.03 Da, K +28.03 Da, | 5626.32373  | 2 | 971.0100098 | 970.5174551 |
| GPPPIQDGEFTLLPAGR                     | Q3V009 | 0          | N-term +28.03 Da, K +28.03 Da, | 5628.558105 | 3 | 647.6799927 | 647.3473956 |
| VSHKKLEEEEGSAPATSR                    | A2APB8 | 0.0349918  | N-term +28.03 Da, K +28.03 Da, | 5631.500488 | 3 | 775.0800171 | 775.4200606 |
| ALSAGKVPPETIDSVIVGNVMQSSSDAAYLAR      | Q8BWT1 | 0          | N-term +28.03 Da, K +28.03 Da, | 5631.615723 | 3 | 1101.920044 | 1101.581547 |
| DPAIYFKEQFLDGDWATNR                   | P14211 | 0          | N-term +28.03 Da, K +28.03 Da, | 5632.740234 | 3 | 781.3856812 | 781.3865794 |
| LVTLEEF LASTQR                        | Q02819 | 0          | N-term +28.03 Da, K +28.03 Da, | 5633.424805 | 3 | 512.6199951 | 512.2873653 |
| VVTPLSPPTNLHLEANPDTGVLTVSWER          | P11276 | 0          | N-term +28.03 Da, K +28.03 Da, | 5634.046387 | 3 | 1024.540039 | 1024.211782 |
| EGTLESIVEKKVKELLANR                   | Q8K426 | 0          | N-term +28.03 Da, K +28.03 Da, | 5635.494629 | 4 | 568.0900269 | 567.8438876 |
| EGTLESIVEKKVKELLANR                   | Q8K426 | 0.03478499 | N-term +28.03 Da, K +28.03 Da, | 5635.96582  | 3 | 756.789978  | 756.7894247 |
| DPAIYFKEQFLDGDWATNR                   | P14211 | 0.02976356 | N-term +28.03 Da, K +28.03 Da, | 5639.45459  | 4 | 586.539978  | 586.2917537 |
| NTSAIQDYLQQLTGAR                      | Q9QUHO | 0          | N-term +28.03 Da, K +28.03 Da, | 5640.123535 | 2 | 903.9699707 | 903.9708694 |

|                                     |        |            |                                            |             |   |             |             |
|-------------------------------------|--------|------------|--------------------------------------------|-------------|---|-------------|-------------|
| ADKSYIEGYVPSQADVAVFEAVSGPPPADLCHALR | O70251 | 0          | N-term +28.03 Da, K +28.03 Da,C +57.02 Da, | 5641.207031 | 4 | 947.7299805 | 947.2265467 |
| LVTLEEF LASTQR                      | Q02819 | 0          | N-term +28.03 Da, K +28.03 Da,             | 5642.867676 | 2 | 767.9299927 | 767.9274097 |
| EGTLESIVEKVKKELLANR                 | Q8K426 | 0          | N-term +28.03 Da, K +28.03 Da,             | 5645.001465 | 3 | 757.460022  | 756.7894247 |
| AQFEGIVTDLIKR                       | P38647 | 0          | N-term +28.03 Da, K +28.03 Da,             | 5645.731445 | 3 | 515.6300049 | 515.9714884 |
| DPAIYFKEQFLDGDWATNR                 | P14211 | 0          | N-term +28.03 Da, K +28.03 Da,             | 5648.3125   | 2 | 1171.575562 | 1171.576231 |
| ADKSYIEGYVPSQADVAVFEAVSGPPPADLCHALR | O70251 | 0          | N-term +28.03 Da, K +28.03 Da,C +57.02 Da, | 5648.509766 | 3 | 1263.300049 | 1262.63297  |
| FFKEGVP GADMLPQP YLDASCPMLPTALVLSR  | Q8K3X4 | 0.00344471 | N-term +28.03 Da, K +28.03 Da,C +57.02 Da, | 5650.604492 | 4 | 917.210022  | 916.7210481 |
| ALSAGKVP PETIDSVIVGNVMQSSSDAAYLAR   | Q8BWT1 | 0          | N-term +28.03 Da, K +28.03 Da,             | 5650.999512 | 4 | 826.6900024 | 826.437979  |
| SQTEEDCTEELFDLHAR                   | P99028 | 0          | N-term +28.03 Da, K +28.03 Da,C +57.02 Da, | 5654.901855 | 3 | 752         | 752.3355565 |
| GPPPIQDGEFTFLPAGR                   | Q3V009 | 0          | N-term +28.03 Da, K +28.03 Da,             | 5657.521973 | 2 | 971.0200195 | 970.5174551 |
| SQTEEDCTEELFDLHAR                   | P99028 | 0          | N-term +28.03 Da, K +28.03 Da,C +57.02 Da, | 5659.008301 | 2 | 1128        | 1127.999697 |
| DPAIYFKEQFLDGDWATNR                 | P14211 | 0          | N-term +28.03 Da, K +28.03 Da,             | 5663.526367 | 3 | 781.3859253 | 781.3865794 |
| AIYVPADDLTD PAPATTF AHL DATTVLSR    | P56480 | 0          | N-term +28.03 Da, K +28.03 Da,             | 5665.683594 | 3 | 1024.530029 | 1024.195909 |
| MLDPSIGEFIMVDR                      | Q9QXD6 | 0          | N-term +28.03 Da, K +28.03 Da,             | 5665.792969 | 2 | 825.9099731 | 825.9151305 |
| EGTLESIVEKVKKELLANR                 | Q8K426 | 0          | N-term +28.03 Da, K +28.03 Da,             | 5667.195801 | 4 | 568.0900269 | 567.8438876 |
| SKLPIPDSQVLTINPALPVEDAAEDYAR        | Q9CQ60 | 0          | N-term +28.03 Da, K +28.03 Da,             | 5668.656738 | 3 | 1027.219971 | 1026.883442 |
| VIQELRPTLNELGISTPEELGLDKV           | P12787 | 0          | N-term +28.03 Da, K +28.03 Da,             | 5673.946777 | 3 | 940.5307617 | 940.53034   |
| VEQIAAIAQELNELDYD SHNVNTR           | P57780 | 0.00113723 | N-term +28.03 Da, K +28.03 Da,             | 5675.132324 | 3 | 978.4699707 | 978.4807085 |
| DPAIYFKEQFLDGDWATNR                 | P14211 | 0          | N-term +28.03 Da, K +28.03 Da,             | 5679.325195 | 2 | 1172.079956 | 1171.576231 |
| VIQELRPTLNELGISTPEELGLDKV           | P12787 | 0.00084246 | N-term +28.03 Da, K +28.03 Da,             | 5683.883789 | 2 | 1410.790039 | 1410.291872 |
| LSEIAGITLPYD TLDQVR                 | Q91VD9 | 0.01854032 | N-term +28.03 Da, K +28.03 Da,             | 5688.88623  | 2 | 1016.059998 | 1016.551693 |
| NLDWGDNGFFKILR                      | P10605 | 0.01697945 | N-term +28.03 Da, K +28.03 Da,             | 5689.163086 | 3 | 584.9799805 | 584.3140257 |
| LSEIAGITLPYD TLDQVR                 | Q91VD9 | 0          | N-term +28.03 Da, K +28.03 Da,             | 5691.879883 | 2 | 1017.549988 | 1016.551693 |
| AALSGANVLT LIEKDIR                  | Q91ZX7 | 0          | N-term +28.03 Da, K +28.03 Da,             | 5693.549316 | 3 | 614.0300293 | 614.034929  |
| DPAIYFKEQFLDGDWATNR                 | P14211 | 0          | N-term +28.03 Da, K +28.03 Da,             | 5694.524414 | 3 | 781.7199707 | 781.3865794 |
| SLEAFIFETQDKLYQPEYQEVSTEEQR         | Q9JKR6 | 0          | N-term +28.03 Da, K +28.03 Da,             | 5694.779785 | 3 | 1122.550049 | 1121.880427 |
| FIGENMNP DGMVALLDYR                 | P63028 | 0          | N-term +28.03 Da, K +28.03 Da,             | 5696.628418 | 2 | 1042        | 1042.002998 |
| NLDWGDNGFFKILR                      | P10605 | 0.04980027 | N-term +28.03 Da, K +28.03 Da,             | 5697.117188 | 2 | 876.460022  | 875.9674004 |
| SLEAFIFETQDKLYQPEYQEVSTEEQR         | Q9JKR6 | 0          | N-term +28.03 Da, K +28.03 Da,             | 5698.388672 | 3 | 1122.209961 | 1121.880427 |
| ELIPEYLN FIR                        | P07901 | 0.01331719 | N-term +28.03 Da, K +28.03 Da,             | 5700.724609 | 2 | 717.8900146 | 717.9032056 |
| VFGQSGAGN NWAKGHYTEGAELVDSVLDVVR    | P68372 | 0.00112655 | N-term +28.03 Da, K +28.03 Da,             | 5702.409668 | 4 | 834.1699829 | 833.6731067 |
| RHREEKERR                           | Q3UFY4 | 0.01526489 | N-term +28.03 Da, K +28.03 Da,             | 5702.585938 | 2 | 677.3942871 | 676.386911  |
| TQVPEVFLSKVLEPTL KTLR               | P21614 | 0          | N-term +28.03 Da, K +28.03 Da,             | 5704.313965 | 4 | 596.6099854 | 596.3647215 |
| IKSVTELN GDTITNTMTLGDIVYKR          | P12710 | 0          | N-term +28.03 Da, K +28.03 Da,             | 5704.443359 | 3 | 956.5100098 | 956.19133   |
| VIQELRPTLNELGISTPEELGLDKV           | P12787 | 0          | N-term +28.03 Da, K +28.03 Da,             | 5704.786133 | 3 | 940.5300293 | 940.53034   |
| EAAAMEKNLNQALLDLHALGSAR             | P29391 | 0          | N-term +28.03 Da, K +28.03 Da,             | 5705.660156 | 3 | 869.8099976 | 869.1425327 |
| LPPLESLATVEETVVR                    | Q76MZ3 | 0          | N-term +28.03 Da, K +28.03 Da,             | 5707.14502  | 3 | 594.3400269 | 594.3400182 |
| SVEPFWPG LFAK                       | P47955 | 0          | N-term +28.03 Da, K +28.03 Da,             | 5709.144531 | 2 | 717.3900146 | 717.3950161 |
| DPAIYFKEQFLDGDWATNR                 | P14211 | 0          | N-term +28.03 Da, K +28.03 Da,             | 5710.385254 | 2 | 1172.569946 | 1171.576231 |
| GDGQVNYEEFVQMM TAK                  | P62204 | 0          | N-term +28.03 Da, K +28.03 Da,             | 5712.875977 | 2 | 1002.469971 | 1001.966081 |

|                                      |        |            |                                            |             |   |             |             |
|--------------------------------------|--------|------------|--------------------------------------------|-------------|---|-------------|-------------|
| GMNTLVGYDLVPEPKIIDAALR               | P12787 | 0          | N-term +28.03 Da, K +28.03 Da,             | 5714.95459  | 3 | 814.789978  | 814.4539363 |
| DPAIYFKEQFLDGDWNTNR                  | P14211 | 0          | N-term +28.03 Da, K +28.03 Da,             | 5725.155762 | 3 | 781.7199707 | 781.3865794 |
| DPAIYFKEQFLDGDWNTNR                  | P14211 | 0          | N-term +28.03 Da, K +28.03 Da,             | 5726.893555 | 3 | 782.0499878 | 781.3865794 |
| EALFPIDDVVFGMCLR                     | Q1RLK6 | 0.01551776 | N-term +28.03 Da, K +28.03 Da,C +57.02 Da, | 5727.126465 | 2 | 1019.98999  | 1020.002466 |
| VEIQCPQVVGGIYGLVNR                   | P58252 | 0          | N-term +28.03 Da, K +28.03 Da,C +57.02 Da, | 5728.628906 | 3 | 720.3800049 | 720.0490213 |
| SFGLIIQQVFDNGSIYNPEVLDITEQALHSR      | P14869 | 0.0008     | N-term +28.03 Da, K +28.03 Da,             | 5732.425781 | 4 | 883.4400024 | 883.7084182 |
| DPAIYFKEQFLDGDWNTNR                  | P14211 | 0.00044703 | N-term +28.03 Da, K +28.03 Da,             | 5739.366211 | 2 | 1171.569946 | 1171.576231 |
| VEIQCPQVVGGIYGLVNR                   | P58252 | 0          | N-term +28.03 Da, K +28.03 Da,C +57.02 Da, | 5741.660645 | 2 | 1079.579956 | 1079.569894 |
| DPAIYFKEQFLDGDWNTNR                  | P14211 | 0.00044863 | N-term +28.03 Da, K +28.03 Da,             | 5742.243652 | 2 | 1172.569946 | 1171.576231 |
| LKTVLELDQYVLDKLGDDDDR                | Q60865 | 0          | N-term +28.03 Da, K +28.03 Da,             | 5743.819824 | 4 | 605.0999756 | 604.8478989 |
| ASQPDVDGFLVGGASLKPEFVDIINAKQ         | P17751 | 0          | N-term +28.03 Da, K +28.03 Da,             | 5744.046387 | 3 | 1001.210022 | 1000.541128 |
| SSILLDVKPWDDEDTMTKLEECVR             | O70251 | 0          | N-term +28.03 Da, K +28.03 Da,C +57.02 Da, | 5746.973145 | 3 | 988.4899902 | 988.4962022 |
| SMNVQGDYEPIDATGFININSLR              | P16460 | 0          | N-term +28.03 Da, K +28.03 Da,             | 5748.099609 | 2 | 1291.630005 | 1291.63141  |
| EGILCGTPEEVWDCIKPVASGLR              | Q9EPQ7 | 0          | N-term +28.03 Da, K +28.03 Da,             | 5749.142578 | 3 | 881.7800293 | 881.4487456 |
| ASQPDVDGFLVGGASLKPEFVDIINAKQ         | P17751 | 0          | N-term +28.03 Da, K +28.03 Da,             | 5749.952637 | 3 | 1000.869995 | 1000.541128 |
| AKVAVLGGASGGIGQPLSLLKNSPLVSR         | P08249 | 0          | N-term +28.03 Da, K +28.03 Da,             | 5752.169922 | 4 | 708.4400024 | 708.1876633 |
| AKVAVLGGASGGIGQPLSLLKNSPLVSR         | P08249 | 0          | N-term +28.03 Da, K +28.03 Da,             | 5764.15332  | 3 | 944.2399902 | 943.9144589 |
| AKVAVLGGASGGIGQPLSLLKNSPLVSR         | P08249 | 0          | N-term +28.03 Da, K +28.03 Da,             | 5766.012695 | 3 | 943.9199829 | 943.9144589 |
| IINEPTAAAIAYGLDKR                    | P20029 | 0          | N-term +28.03 Da, K +28.03 Da,             | 5766.28418  | 3 | 624.3499756 | 624.6911623 |
| YHVEELDPGVVDNFPLLKALR                | P30115 | 0          | N-term +28.03 Da, K +28.03 Da,             | 5768.327148 | 3 | 827.4500122 | 827.4564457 |
| GLVSSDELAKDVTGAEALLER                | P16546 | 0          | N-term +28.03 Da, K +28.03 Da,             | 5769.382324 | 3 | 743.7357178 | 743.7372782 |
| DPAIYFKEQFLDGDWNTNR                  | P14211 | 0.0007965  | N-term +28.03 Da, K +28.03 Da,             | 5773.82666  | 2 | 1172.069946 | 1171.576231 |
| NLDWGDNGFFKILR                       | P10605 | 0.00343997 | N-term +28.03 Da, K +28.03 Da,             | 5773.990723 | 3 | 584.6414795 | 584.3140257 |
| DFEQEMATAASSSSLEKSYELPDGQVITIGNER    | P60710 | 0          | N-term +28.03 Da, K +28.03 Da,             | 5774.302246 | 3 | 1220.579956 | 1220.252484 |
| IINEPTAAAIAYGLDKR                    | P20029 | 0          | N-term +28.03 Da, K +28.03 Da,             | 5776.438965 | 3 | 624.6900024 | 624.6911623 |
| VISDPIPGAKPLPVPELAPFVGR              | Q8BKX1 | 0          | N-term +28.03 Da, K +28.03 Da,             | 5776.557617 | 3 | 842.1599731 | 841.4963525 |
| VTVKHLEDIVEKLGEESSDQVR               | Q99PL5 | 0          | N-term +28.03 Da, K +28.03 Da,             | 5778.138184 | 4 | 717.1599731 | 716.6589362 |
| SSWVTHVEMGPPDPILGVTEAFKR             | P05202 | 0          | N-term +28.03 Da, K +28.03 Da,             | 5779.685547 | 4 | 700.3599854 | 699.8599064 |
| DPAIYFKEQFLDGDWNTNR                  | P14211 | 0          | N-term +28.03 Da, K +28.03 Da,             | 5780.01416  | 3 | 781.3860474 | 781.3865794 |
| NLDWGDNGFFKILR                       | P10605 | 0.00994716 | N-term +28.03 Da, K +28.03 Da,             | 5785.679688 | 2 | 876.460022  | 875.9674004 |
| ADNVIVPGTPDFLAYVR                    | O88587 | 0.00080972 | N-term +28.03 Da, K +28.03 Da,             | 5787.256836 | 2 | 938.5100098 | 938.0041806 |
| SGSLIQVVTDDGKTELTPAYF                | Q8BVI4 | 0.00045228 | N-term +28.03 Da, K +28.03 Da,             | 5787.393066 | 2 | 1142.109985 | 1142.109573 |
| SQFFKGSASSALELTHEELATAEAVR           | Q8R0Y6 | 0          | N-term +28.03 Da, K +28.03 Da,             | 5792.143066 | 3 | 943.4899902 | 943.1501882 |
| NLILEALKDSTEVEIVDEKMR                | Q8R3F0 | 0          | N-term +28.03 Da, K +28.03 Da,             | 5792.390137 | 3 | 844.1300049 | 843.7996614 |
| DPAIYFKEQFLDGDWNTNR                  | P14211 | 0          | N-term +28.03 Da, K +28.03 Da,             | 5794.69873  | 2 | 1171.579956 | 1171.576231 |
| VLELQYVLDKLGDDDDR                    | Q60865 | 0          | N-term +28.03 Da, K +28.03 Da,             | 5796.053223 | 3 | 682.710022  | 682.7087707 |
| RQEQVPGPEDPQGVSEVEKIALNLEGCALSPTSQEP | Q99PG2 | 0.0011592  | N-term +28.03 Da, K +28.03 Da,C +57.02 Da, | 5800.65332  | 4 | 1026.27002  | 1026.019391 |
| VLPLDLNPLR                           | Q6NZR5 | 0          | N-term +28.03 Da, K +28.03 Da,             | 5801.446777 | 2 | 742.960022  | 742.9635973 |
| NLDWGDNGFFKILR                       | P10605 | 0.00347464 | N-term +28.03 Da, K +28.03 Da,             | 5804.899414 | 3 | 584.6414185 | 584.3140257 |
| FDQSQQEFKEAFNMIDQNR                  | Q3THE2 | 0          | N-term +28.03 Da, K +28.03 Da,             | 5805.138184 | 3 | 849.0800171 | 848.7444385 |

|                                      |        |            |                                            |             |   |             |             |
|--------------------------------------|--------|------------|--------------------------------------------|-------------|---|-------------|-------------|
| DFWDNLEKETDWVR                       | Q00623 | 0          | N-term +28.03 Da, K +28.03 Da,             | 5807.30957  | 3 | 636.9799805 | 636.9757391 |
| ELEKYRDIIDEILR                       | Q9JLH8 | 0.02975528 | N-term +28.03 Da, K +28.03 Da,             | 5808.064941 | 2 | 997.5100098 | 996.5178502 |
| DFWDNLEKETDWVR                       | Q00623 | 0          | N-term +28.03 Da, K +28.03 Da,             | 5810.697754 | 2 | 954.9612427 | 954.9599704 |
| VLELQYVLDKLGDDDDR                    | Q60865 | 0          | N-term +28.03 Da, K +28.03 Da,             | 5810.837402 | 3 | 682.7089233 | 682.7087707 |
| DFWDNLEKETDWVR                       | Q00623 | 0          | N-term +28.03 Da, K +28.03 Da,             | 5810.984863 | 3 | 637.6400146 | 636.9757391 |
| DPAIYFKEQFLDGDWATNR                  | P14211 | 0          | N-term +28.03 Da, K +28.03 Da,             | 5811.555176 | 3 | 781.7199707 | 781.3865794 |
| SDMGAALTGAESHQLQDVLEETNILKR          | Q8CGK3 | 0          | N-term +28.03 Da, K +28.03 Da,             | 5813.136719 | 4 | 746.8800049 | 746.6314846 |
| TATFAQALQSVPETQVSILDNGLR             | Q9CZ13 | 0          | N-term +28.03 Da, K +28.03 Da,             | 5816.436035 | 3 | 863.7999878 | 863.1290581 |
| DPAIYFKEQFLDGDWATNR                  | P14211 | 0          | N-term +28.03 Da, K +28.03 Da,             | 5817.444336 | 2 | 1172.579956 | 1171.576231 |
| SQFFKGSASSALELLEEELATAEAVR           | Q8R0Y6 | 0          | N-term +28.03 Da, K +28.03 Da,             | 5821.432129 | 3 | 943.1500244 | 943.1501882 |
| MENPFVQSMLSNPDLMR                    | Q8R317 | 0          | N-term +28.03 Da, K +28.03 Da,             | 5821.553711 | 2 | 1019.47998  | 1018.983751 |
| ALDFEQEMATAASSSSLEKSYELPDGQVITIGNER  | P60710 | 0          | N-term +28.03 Da, K +28.03 Da,             | 5831.528809 | 3 | 1282.300049 | 1281.62621  |
| IDLSDVELDDLEKDEL                     | Q922R8 | 0          | N-term +28.03 Da, K +28.03 Da,             | 5834.485352 | 2 | 958.9799805 | 958.9829751 |
| APDLSGTLESIPDKLKEFGNTLEDKAR          | P34928 | 0          | N-term +28.03 Da, K +28.03 Da,             | 5836.362305 | 4 | 765.4199829 | 764.9183135 |
| LNEAAAGLNQAATELVQASR                 | P26039 | 0          | N-term +28.03 Da, K +28.03 Da,             | 5837.04248  | 2 | 1027.540039 | 1028.045098 |
| QHGMIRTE                             | Q9QWY8 | 0.014997   | N-term +28.03 Da, K +28.03 Da,             | 5838.130859 | 2 | 500.7600098 | 500.2556534 |
| DIDAIFKDSIR                          | Q9WUK2 | 0          | N-term +28.03 Da, K +28.03 Da,             | 5838.322754 | 2 | 731.4199829 | 731.4192202 |
| DIDAIFKDSIR                          | Q9WUK2 | 0          | N-term +28.03 Da, K +28.03 Da,             | 5838.40332  | 3 | 488.2799988 | 487.9485723 |
| EEVEGSLLLGSGVQGYMEQASK               | P33622 | 0.00114155 | N-term +28.03 Da, K +28.03 Da,             | 5838.530762 | 3 | 770.7199707 | 770.7226404 |
| TALLELWELR                           | P16546 | 0          | N-term +28.03 Da, K +28.03 Da,             | 5840.42334  | 2 | 636.3699951 | 636.371541  |
| EKIEDAKESQSRSGNVAELALK               | Q99MD9 | 0.0119339  | N-term +28.03 Da, K +28.03 Da,             | 5841.210938 | 3 | 810.4400024 | 809.786632  |
| VNPTVFFDITADDEPLGR                   | P17742 | 0          | N-term +28.03 Da, K +28.03 Da,             | 5853.855957 | 2 | 1017.51001  | 1017.512568 |
| TMFLTMFGKLNKNGTDPEDVIR               | Q3THE2 | 0.00045662 | N-term +28.03 Da, K +28.03 Da,             | 5855.777344 | 3 | 824.7399902 | 824.0834034 |
| SSILLDVKPWDEDTMTKLEECV               | O70251 | 0          | N-term +28.03 Da, K +28.03 Da,C +57.02 Da, | 5860.833984 | 3 | 936.789978  | 936.4624984 |
| DVDGLDPAFTPATGTPVLGGLSYR             | Q61176 | 0          | N-term +28.03 Da, K +28.03 Da,             | 5863.925781 | 2 | 1224.619995 | 1224.126286 |
| DFGTVNEIYKTYFQGSLPAR                 | P52760 | 0.00108499 | N-term +28.03 Da, K +28.03 Da,             | 5864.066895 | 3 | 788.0700073 | 788.0741128 |
| DVDGLDPAFTPATGTPVLGGLSYR             | Q61176 | 0          | N-term +28.03 Da, K +28.03 Da,             | 5864.218262 | 3 | 816.4199829 | 816.4199492 |
| DGKALEQLQEYFDGNLKR                   | P27773 | 0          | N-term +28.03 Da, K +28.03 Da,             | 5870.281738 | 3 | 786.0800171 | 785.7496292 |
| VNPTVFFDITADDEPLGR                   | P17742 | 0.0004386  | N-term +28.03 Da, K +28.03 Da,             | 5871.904785 | 3 | 678.6798096 | 678.6774706 |
| FATEATSDWLNANNVPATPVAWPSQEQGNPSLSSIR | Q8C196 | 0          | N-term +28.03 Da, K +28.03 Da,             | 5872.239746 | 3 | 1295.300049 | 1295.301049 |
| TLKMSVQPTVSLGGFEITPPVVLRL            | Q61937 | 0.00046468 | N-term +28.03 Da, K +28.03 Da,             | 5872.919434 | 3 | 876.1699829 | 875.8397908 |
| DGKALEQLQEYFDGNLKR                   | P27773 | 0          | N-term +28.03 Da, K +28.03 Da,             | 5873.350098 | 3 | 786.4199829 | 785.7496292 |
| APPVPGAVSGSGSEVDELFDVKNAP            | O89079 | 0          | N-term +28.03 Da, K +28.03 Da,             | 5874.23584  | 3 | 839.4199829 | 839.0953543 |
| FATEATSDWLNANNVPATPVAWPSQEQGNPSLSSIR | Q8C196 | 0          | N-term +28.03 Da, K +28.03 Da,             | 5876.666992 | 4 | 971.9799805 | 971.7276055 |
| LPTLEQPIIPSDYVAIKAPM                 | Q8C196 | 0.02639708 | N-term +28.03 Da, K +28.03 Da,             | 5877.435059 | 2 | 1127.119995 | 1126.634171 |
| QRRLEFEK                             | Q5NCC9 | 0.02122777 | N-term +28.03 Da, K +28.03 Da,             | 5882.018066 | 3 | 437.2571106 | 436.9189468 |
| LPTLEQPIIPSDYVAIKAPM                 | Q8C196 | 0          | N-term +28.03 Da, K +28.03 Da,             | 5882.844238 | 3 | 751.7600098 | 751.4252062 |
| ALFQDVQKPSQDEWGKTEAMEALAMEKNLN       | P29391 | 0.00315016 | N-term +28.03 Da, K +28.03 Da,             | 5884.162598 | 4 | 934.4699707 | 933.9707521 |
| VNPTVFFDITADDEPLGR                   | P17742 | 0          | N-term +28.03 Da, K +28.03 Da,             | 5885.620117 | 2 | 1017.512207 | 1017.512568 |
| TEGAELVDSVLDVVR                      | P68372 | 0          | N-term +28.03 Da, K +28.03 Da,             | 5886.09668  | 2 | 815.4400024 | 815.4383393 |

|                                     |        |            |                                             |             |   |             |             |
|-------------------------------------|--------|------------|---------------------------------------------|-------------|---|-------------|-------------|
| APPVPGAVSGGSEVDELFDVKNFAF           | O89079 | 0.00178126 | N-term +28.03 Da, K +28.03 Da,              | 5887.985352 | 2 | 1259.150024 | 1258.139393 |
| ALFQDQVQKPSQDEWGTQEAMEALAMEKNLN     | P29391 | 0          | N-term +28.03 Da, K +28.03 Da,              | 5888.164551 | 4 | 933.9703979 | 933.9707521 |
| TENDIYNFFSPLNPVR                    | O35737 | 0          | N-term +28.03 Da, K +28.03 Da,              | 5888.286621 | 2 | 977.9899902 | 977.488895  |
| MTDQEAIQDLWQWR                      | Q61937 | 0          | N-term +28.03 Da, K +28.03 Da,              | 5892.773438 | 2 | 924.9400024 | 924.4408902 |
| GLIANDFTVLSSLPSEHQVVAVAAR           | Q9DBB8 | 0.00177746 | N-term +28.03 Da, K +28.03 Da,              | 5893.068848 | 3 | 937.5       | 937.5064173 |
| PPSPWPEGIGSLR                       | Q9QZZ4 | 0.01610498 | N-term +28.03 Da, K +28.03 Da,              | 5895.03418  | 2 | 711.3900146 | 710.8828045 |
| DITSQLEINFGDLGR                     | Q9CY58 | 0          | N-term +28.03 Da, K +28.03 Da,              | 5900.542969 | 2 | 853.4400024 | 853.4414133 |
| VNPTVFFDITADDEPLGR                  | P17742 | 0          | N-term +28.03 Da, K +28.03 Da,              | 5903.080566 | 3 | 678.6772461 | 678.6774706 |
| GLIANDFTVLSSLPSEHQVVAVAAR           | Q9DBB8 | 0          | N-term +28.03 Da, K +28.03 Da,              | 5906.030762 | 3 | 938.1699829 | 937.5064173 |
| RDDGNMPDVPSPHPQDPLGPSLDWLKLN        | Q9CQ91 | 0.00078678 | N-term +28.03 Da, K +28.03 Da,              | 5915.643066 | 3 | 1024.180054 | 1023.841472 |
| VNPTVFFDITADDEPLGR                  | P17742 | 0          | N-term +28.03 Da, K +28.03 Da,              | 5917.108887 | 2 | 1017.511475 | 1017.512568 |
| RDDGNMPDVPSPHPQDPLGPSLDWLKLN        | Q9CQ91 | 0.00893712 | N-term +28.03 Da, K +28.03 Da,              | 5919.498535 | 4 | 768.6300049 | 768.1329228 |
| LGNLPYDVTEDSIKDFFR                  | Q8BGD9 | 0          | N-term +28.03 Da, K +28.03 Da,              | 5921.394043 | 3 | 729.039978  | 729.0440421 |
| NLLENWDTLGSTVSQQLQER                | Q00623 | 0          | N-term +28.03 Da, K +28.03 Da,              | 5923.98584  | 2 | 1116.069946 | 1116.06877  |
| LVPDPEDIDTLPSSGLGNLPR               | P33267 | 0          | N-term +28.03 Da, K +28.03 Da,              | 5924.150391 | 2 | 1125.609985 | 1125.104822 |
| TMFLTMFGEKLNQDTPEDVIR               | Q3THE2 | 0.00081433 | N-term +28.03 Da, K +28.03 Da,              | 5925.388184 | 3 | 824.7399902 | 824.0834034 |
| NLLENWDTLGSTVSQQLQER                | Q00623 | 0          | N-term +28.03 Da, K +28.03 Da,              | 5929.409668 | 3 | 744.3800049 | 744.3816057 |
| KPAPEIFENEVMELLR                    | Q8C6I2 | 0          | N-term +28.03 Da, K +28.03 Da,              | 5930.053223 | 3 | 657.6921997 | 657.6921746 |
| DITSQLEINFGDLGR                     | Q9CY58 | 0          | N-term +28.03 Da, K +28.03 Da,              | 5931.177734 | 2 | 853.4400024 | 853.4414133 |
| LVPDPEDIDTLPSSGLGNLPR               | P33267 | 0          | N-term +28.03 Da, K +28.03 Da,              | 5935.762695 | 2 | 1126.099976 | 1125.104822 |
| ADPIKVLMPSPSPTMEQGNIVKWLR           | Q8BKZ9 | 0          | N-term +28.03 Da, K +28.03 Da,              | 5935.838379 | 4 | 727.65979   | 727.6604241 |
| ADPIKVLMPSPSPTMEQGNIVKWLR           | Q8BKZ9 | 0          | N-term +28.03 Da, K +28.03 Da,              | 5944.13916  | 3 | 970.539978  | 969.8781399 |
| DFIETYLSEQVKSIKELGDHVTNLR           | P09528 | 0          | N-term +28.03 Da, K +28.03 Da,              | 5946.455566 | 3 | 1061.890015 | 1061.230842 |
| ELTLCKGGCEAIVDTGTSLLVGPVEEVKELQK    | P18242 | 0          | N-term +28.03 Da, K +28.03 Da,              | 5947.239258 | 4 | 897.2299805 | 896.9845995 |
| VNPTVFFDITADDEPLGR                  | P17742 | 0          | N-term +28.03 Da, K +28.03 Da,              | 5948.059082 | 2 | 1017.512695 | 1017.512568 |
| YIYRPRSRSPR                         | Q61464 | 0.01305008 | N-term +28.03 Da, K +28.03 Da,              | 5953.029785 | 2 | 740.9199829 | 739.9205866 |
| AMTKDNLLGKFDLTGIPPAPR               | P17156 | 0.00564409 | N-term +28.03 Da, K +28.03 Da,              | 5954.535645 | 3 | 818.789978  | 818.4576806 |
| DLNVDPQLQIDIPDALSER                 | Q9D8U8 | 0          | N-term +28.03 Da, K +28.03 Da,              | 5955.882324 | 2 | 1069.550049 | 1069.552422 |
| LYHVEELDPGVVDNFPLLKALR              | P30115 | 0          | N-term +28.03 Da, K +28.03 Da,              | 5958.129395 | 4 | 649.3599854 | 649.1151695 |
| ASQPDPVDFLVGGASLKPEFVDIINAKQ        | P17751 | 0          | N-term +28.03 Da, K +28.03 Da,              | 5961.546875 | 3 | 1000.880005 | 1000.541128 |
| GFDLKTAPAGLQVLNDYLADKSY             | G70251 | 0          | N-term +28.03 Da, K +28.03 Da,              | 5961.685547 | 3 | 857.789978  | 857.1231327 |
| IQQVFDNGSIYNPEVLDTIQALHSR           | P14869 | 0          | N-term +28.03 Da, K +28.03 Da,              | 5961.834473 | 3 | 1006.169983 | 1005.51212  |
| AEAGDLHTALEKFGQAISLLPDR             | Q8VBW8 | 0          | N-term +28.03 Da, K +28.03 Da,              | 5964.125977 | 4 | 628.3499756 | 627.8418766 |
| VLELYDLDSQPCR                       | Q64471 | 0          | N-term +28.03 Da, K +28.03 Da, C +57.02 Da, | 5964.263672 | 2 | 874.4799805 | 873.9765769 |
| SIQALLSAPNPDDPLANDVAEQWKTNEAQAIETAR | P61089 | 0          | N-term +28.03 Da, K +28.03 Da,              | 5964.595703 | 3 | 1278.97998  | 1278.316587 |
| LYHVEELDPGVVDNFPLLKALR              | P30115 | 0          | N-term +28.03 Da, K +28.03 Da,              | 5965.791504 | 4 | 649.1199951 | 649.1151695 |
| FIGENMNPDMVALLDYR                   | P63028 | 0          | N-term +28.03 Da, K +28.03 Da,              | 5966.055176 | 2 | 1042.003784 | 1042.002998 |
| DGKALEQFLQEFYFDGNLKR                | P27773 | 0          | N-term +28.03 Da, K +28.03 Da,              | 5967.687012 | 3 | 786.0800171 | 785.7496292 |
| ELILEGNDIELVSNAAIIQQAATTVKNKDIR     | P51410 | 0          | N-term +28.03 Da, K +28.03 Da,              | 5970.129395 | 4 | 871.2399902 | 870.738447  |
| VDYAGVTVDELGKVLTPQV                 | P70296 | 0.00113938 | N-term +28.03 Da, K +28.03 Da,              | 5970.410156 | 2 | 1080.599976 | 1080.593558 |

|                                     |        |            |                                            |             |   |             |             |
|-------------------------------------|--------|------------|--------------------------------------------|-------------|---|-------------|-------------|
| VHLTDAEKA AVSCLWGK VNSDEVGGEALGR    | P02088 | 0          | N-term +28.03 Da, K +28.03 Da,             | 5970.821777 | 4 | 813.6699829 | 813.922496  |
| ENWKPKATKTDQVIQSLIALVNDPQPEHPLR     | P68037 | 0.00109091 | N-term +28.03 Da, K +28.03 Da,             | 5972.07959  | 4 | 881.4899902 | 881.2333315 |
| ELTLCKGGCEAIVDTGTSLLVGPVEEVKELQK    | P18242 | 0          | N-term +28.03 Da, K +28.03 Da,             | 5972.839355 | 4 | 896.9799805 | 896.9845995 |
| AAEAGDLHTALEKFGQAISLLPDR            | Q8VBW8 | 0          | N-term +28.03 Da, K +28.03 Da,             | 5975.935547 | 4 | 645.8499756 | 645.6011552 |
| TTECPQFVQNIENLFR                    | P27005 | 0          | N-term +28.03 Da, K +28.03 Da,C +57.02 Da, | 5976.430664 | 2 | 1126.060059 | 1126.062433 |
| FIGENMNPDMVALLDYR                   | P63028 | 0          | N-term +28.03 Da, K +28.03 Da,             | 5978.589844 | 3 | 695.00354   | 695.0044241 |
| VNPTVFFDITADDEPLGR                  | P17742 | 0          | N-term +28.03 Da, K +28.03 Da,             | 5980.166504 | 2 | 1017.509155 | 1017.512568 |
| TNGAFTGEISPGMIKDLGATWVVLGHSER       | P17751 | 0.019056   | N-term +28.03 Da, K +28.03 Da,             | 5982.088867 | 4 | 776.1500244 | 775.6537566 |
| VHLTDAEKA AVSCLWGK VNSDEVGGEALGR    | P02088 | 0          | N-term +28.03 Da, K +28.03 Da,             | 5982.668457 | 3 | 1084.560059 | 1084.894236 |
| SAGADEIGKLFVGGLDWSTTQETLR           | Q9JII5 | 0          | N-term +28.03 Da, K +28.03 Da,             | 5983.168457 | 3 | 903.7999878 | 903.1361015 |
| AMTKDNNLLGKFDLTGIPPAPR              | P17156 | 0.00995025 | N-term +28.03 Da, K +28.03 Da,             | 5987.008301 | 3 | 818.1199951 | 818.4576806 |
| TECPQFVQNIENLFR                     | P27005 | 0          | N-term +28.03 Da, K +28.03 Da,C +57.02 Da, | 5987.755371 | 2 | 1076.540039 | 1075.538594 |
| TTECPQFVQNIENLFR                    | P27005 | 0.00112782 | N-term +28.03 Da, K +28.03 Da,C +57.02 Da, | 5989.302246 | 3 | 751.3800049 | 751.0440476 |
| DLSGTLESIPDKLKEFGNTLEDKAR           | P34928 | 0          | N-term +28.03 Da, K +28.03 Da,             | 5991.28418  | 4 | 722.8968506 | 722.8958439 |
| VLELYDLLSQPCR                       | Q64471 | 0          | N-term +28.03 Da, K +28.03 Da,C +57.02 Da, | 5993.939941 | 2 | 873.4699707 | 873.9765769 |
| SQPDVDGFLVGGASLKPEFVDIINAKQ         | P17751 | 0.04754274 | N-term +28.03 Da, K +28.03 Da,             | 5995.390137 | 3 | 977.1900024 | 976.8620897 |
| FIGENMNPDMVALLDYR                   | P63028 | 0          | N-term +28.03 Da, K +28.03 Da,             | 5996.849121 | 2 | 1042.001587 | 1042.002998 |
| DGKALEQLFQEYFDGNLKR                 | P27773 | 0          | N-term +28.03 Da, K +28.03 Da,             | 5998.896973 | 3 | 786.0800171 | 785.7496292 |
| LIELDTNDDIVFEDFAR                   | Q8BWG8 | 0          | N-term +28.03 Da, K +28.03 Da,             | 6000.955566 | 2 | 1084.52002  | 1084.52333  |
| ECPQFVQNIENLFR                      | P27005 | 0          | N-term +28.03 Da, K +28.03 Da,C +57.02 Da, | 6006.539551 | 2 | 1024.52002  | 1025.014754 |
| VNPTVFFDITADDEPLGR                  | P17742 | 0          | N-term +28.03 Da, K +28.03 Da,             | 6011.150879 | 2 | 1018.01001  | 1017.512568 |
| VNPTVFFDITADDEPLGR                  | P17742 | 0          | N-term +28.03 Da, K +28.03 Da,             | 6011.34082  | 2 | 1018.51001  | 1017.512568 |
| AAGVSVEPFWPGLFAK                    | P47955 | 0          | N-term +28.03 Da, K +28.03 Da,             | 6013.541016 | 2 | 866.9799805 | 866.4770694 |
| QLIGIQDGYLSLLQDSGEVR                | P63242 | 0          | N-term +28.03 Da, K +28.03 Da,             | 6015.388184 | 2 | 1117.099976 | 1116.597163 |
| ALDFEQEMATAASSSSLEKSYELPDGQVITIGNER | P60710 | 0          | N-term +28.03 Da, K +28.03 Da,             | 6021.407227 | 4 | 961.9699707 | 961.471477  |
| QLIGIQDGYLSLLQDSGEVR                | P63242 | 0          | N-term +28.03 Da, K +28.03 Da,             | 6024.807617 | 3 | 745.0700073 | 744.7338678 |
| AGVSVEPFWPGLFAK                     | P47955 | 0          | N-term +28.03 Da, K +28.03 Da,             | 6026.604004 | 2 | 831.460022  | 830.9585123 |
| FEFGVDPSADPELALALR                  | O35226 | 0.01195219 | N-term +28.03 Da, K +28.03 Da,             | 6026.740723 | 2 | 988.5       | 988.0122031 |
| GASDFEFGVDPSADPELALALR              | O35226 | 0          | N-term +28.03 Da, K +28.03 Da,             | 6028.752441 | 2 | 1153.069946 | 1153.070979 |
| RQAQQRDELADEIA NSSGK GALALEEK       | Q8VDD5 | 0.00375555 | N-term +28.03 Da, K +28.03 Da,             | 6030.683594 | 4 | 786.4099731 | 785.9100145 |
| SVQPTVSLGGFEITPPVVLR                | Q61937 | 0          | N-term +28.03 Da, K +28.03 Da,             | 6033.265137 | 2 | 1063.099976 | 1062.606802 |
| ADFSAIKELDTLNNNEIVDLQR              | P42567 | 0          | N-term +28.03 Da, K +28.03 Da,             | 6035.776855 | 3 | 821.0999756 | 820.7708707 |
| GKDGELPVEDDIDLSDVELDDLEKDEL         | Q922R8 | 0          | N-term +28.03 Da, K +28.03 Da,             | 6038.885254 | 3 | 1034.170044 | 1033.837894 |
| LADNVIVPGTPDFLAYVR                  | O88587 | 0          | N-term +28.03 Da, K +28.03 Da,             | 6039.585449 | 2 | 994.5447388 | 994.5462127 |
| VNPTVFFDITADDEPLGR                  | P17742 | 0          | N-term +28.03 Da, K +28.03 Da,             | 6042.616699 | 2 | 1017.51001  | 1017.512568 |
| TATFAQALQSVPETQVSILDNGLR            | Q9CZ13 | 0.00653808 | N-term +28.03 Da, K +28.03 Da,             | 6047.258301 | 3 | 863.460022  | 863.1290581 |
| LPLTEAELALIATPPEDSDMASLQQQR         | Q9DBG5 | 0          | N-term +28.03 Da, K +28.03 Da,             | 6047.785156 | 3 | 989.5100098 | 989.1777496 |
| QLIGIQDGYLSLLQDSGEVR                | P63242 | 0          | N-term +28.03 Da, K +28.03 Da,             | 6048.109375 | 2 | 1117.099976 | 1116.597163 |
| ALDFEQEMATAASSSSLEKSYELPDGQVITIGNER | P60710 | 0          | N-term +28.03 Da, K +28.03 Da,             | 6048.601074 | 3 | 1282.290039 | 1281.62621  |
| LADNVIVPGTPDFLAYVR                  | O88587 | 0          | N-term +28.03 Da, K +28.03 Da,             | 6049.305664 | 3 | 663.7000122 | 663.3665673 |

|                                         |        |            |                                            |             |   |             |             |
|-----------------------------------------|--------|------------|--------------------------------------------|-------------|---|-------------|-------------|
| TATFAQALQSVPETQVSILDNGLR                | Q9CZ13 | 0.03890098 | N-term +28.03 Da, K +28.03 Da,             | 6050.777344 | 2 | 1295.180054 | 1294.189949 |
| ALDFEQEMATAASSSSLEKSYELPDGQVITIGNER     | P60710 | 0          | N-term +28.03 Da, K +28.03 Da,             | 6052.523438 | 4 | 961.9699707 | 961.471477  |
| AGVSVPEFPWPLFAK                         | P47955 | 0.00046447 | N-term +28.03 Da, K +28.03 Da,             | 6058.326172 | 2 | 831.460022  | 830.9585123 |
| VHLTDAEKSAVSLWAKVNPDEVGGEALGR           | P02089 | 0          | N-term +28.03 Da, K +28.03 Da,             | 6058.822754 | 4 | 824.4299927 | 823.930321  |
| TNGAFTGEISPGMIKDLGATWVVLGHSER           | P17751 | 0          | N-term +28.03 Da, K +28.03 Da,             | 6061.006836 | 4 | 775.9000244 | 775.6537566 |
| VHLTDAEKSAVSLWAKVNPDEVGGEALGR           | P02089 | 0          | N-term +28.03 Da, K +28.03 Da,             | 6062.93457  | 4 | 823.6699829 | 823.930321  |
| GALGSPVAAAGAMQETFGCVVANR                | Q9JKS5 | 0          | N-term +28.03 Da, K +28.03 Da,C +57.02 Da, | 6065.394531 | 3 | 812.0700073 | 811.73863   |
| SELEILKEKFR                             | Q640L5 | 0.02509163 | N-term +28.03 Da, K +28.03 Da,             | 6066.73877  | 2 | 738.4500122 | 738.4452378 |
| SITSVQAIYVPADLTDPAATTFHAHLDATTVLSR      | P56480 | 0          | N-term +28.03 Da, K +28.03 Da,             | 6067.196289 | 3 | 1229.640015 | 1229.303507 |
| VNPTVFFDITADDEPLGR                      | P17742 | 0          | N-term +28.03 Da, K +28.03 Da,             | 6074.651367 | 2 | 1018.51001  | 1017.512568 |
| VTTECPQFVQININIENLFR                    | P27005 | 0          | N-term +28.03 Da, K +28.03 Da,C +57.02 Da, | 6077.863281 | 2 | 1176.589966 | 1175.59664  |
| TATFAQALQSVPETQVSILDNGLR                | Q9CZ13 | 0.0037594  | N-term +28.03 Da, K +28.03 Da,             | 6079.020508 | 3 | 863.456543  | 863.1290581 |
| PGGLLLGDEAPNFEEANTTIGR                  | O08709 | 0          | N-term +28.03 Da, K +28.03 Da,             | 6079.783691 | 2 | 1085.550049 | 1085.560581 |
| ELNDFISYLQR                             | P27773 | 0.00404449 | N-term +28.03 Da, K +28.03 Da,             | 6081.113281 | 2 | 713.3599854 | 713.37227   |
| ALDFEQEMATAASSSSLEKSYELPDGQVITIGNER     | P60710 | 0          | N-term +28.03 Da, K +28.03 Da,             | 6081.445801 | 3 | 1282.300049 | 1281.62621  |
| TATFAQALQSVPETQVSILDNGLR                | Q9CZ13 | 0.00316456 | N-term +28.03 Da, K +28.03 Da,             | 6082.812012 | 2 | 1295.180054 | 1294.189949 |
| APPVPGAVSGSGEVDLFDVKNAFY                | O89079 | 0.04930704 | N-term +28.03 Da, K +28.03 Da,             | 6099.475098 | 3 | 893.789978  | 893.4497974 |
| VNPTVFFDITADDEPLGR                      | P17742 | 0          | N-term +28.03 Da, K +28.03 Da,             | 6107.018555 | 2 | 1018.01001  | 1017.512568 |
| SQPSSSWEQDVVSPMMGHQGGRRGRKEPR           | Q6K1E7 | 0.04325493 | N-term +28.03 Da, K +28.03 Da,             | 6108.603516 | 3 | 1056.869995 | 1056.180493 |
| TATFAQALQSVPETQVSILDNGLR                | Q9CZ13 | 0          | N-term +28.03 Da, K +28.03 Da,             | 6110.693359 | 3 | 863.12854   | 863.1290581 |
| MQVFEFQLTSEDMKVLDDLNKNIR                | P70694 | 0.01198157 | N-term +28.03 Da, K +28.03 Da,             | 6111.083984 | 3 | 1000.52002  | 999.8523199 |
| LDFEHFLPMLQTVAKNKDQGTEDYVEGLR           | Q60605 | 0          | N-term +28.03 Da, K +28.03 Da,             | 6112.878418 | 4 | 911.460022  | 910.9643611 |
| TATFAQALQSVPETQVSILDNGLR                | Q9CZ13 | 0          | N-term +28.03 Da, K +28.03 Da,             | 6114.445313 | 2 | 1294.186768 | 1294.189949 |
| MQVFEFQLTSEDMKVLDDLNKNIR                | P70694 | 0          | N-term +28.03 Da, K +28.03 Da,             | 6115.817383 | 4 | 750.3900146 | 750.141059  |
| ELNDFISYLQR                             | P27773 | 0          | N-term +28.03 Da, K +28.03 Da,             | 6123.414551 | 2 | 712.8599854 | 713.37227   |
| EADIDGDGQVNYEEFVQMMTAK                  | P62204 | 0          | N-term +28.03 Da, K +28.03 Da,             | 6126.394043 | 2 | 1274.069946 | 1273.574912 |
| QAASSLQASLKFEMAY                        | P38647 | 0          | N-term +28.03 Da, K +28.03 Da,             | 6130.160156 | 2 | 1022.030029 | 1021.534988 |
| AIPENTNIGSLFPIPLATDR                    | E0CXD4 | 0          | N-term +28.03 Da, K +28.03 Da,             | 6130.274902 | 3 | 723.0599976 | 723.0634364 |
| DIDLSDELDDLEKDEL                        | Q922R8 | 0          | N-term +28.03 Da, K +28.03 Da,             | 6130.807617 | 2 | 1016.48999  | 1016.496447 |
| EADIDGDGQVNYEEFVQMMTAK                  | P62204 | 0          | N-term +28.03 Da, K +28.03 Da,             | 6132.006836 | 3 | 849.7199707 | 849.3857    |
| DGKALEQFLQYFDGNLKR                      | P27773 | 0.00911663 | N-term +28.03 Da, K +28.03 Da,             | 6132.78125  | 3 | 786.0800171 | 785.7496292 |
| AIPENTNIGSLFPIPLATDR                    | E0CXD4 | 0          | N-term +28.03 Da, K +28.03 Da,             | 6138.566895 | 2 | 1084.589966 | 1084.091516 |
| MVSGTECEECFLTCHK                        | Q6PGG2 | 0.04500135 | N-term +28.03 Da, K +28.03 Da,             | 6138.786621 | 2 | 1022.429993 | 1022.435777 |
| VVLSELPEDDRELFEEDLLR                    | Q8R1X6 | 0.00046339 | N-term +28.03 Da, K +28.03 Da,             | 6143.20752  | 3 | 801.75      | 801.4198379 |
| VVLSELPEDDRELFEEDLLR                    | Q8R1X6 | 0          | N-term +28.03 Da, K +28.03 Da,             | 6145.124023 | 3 | 802.0900269 | 801.4198379 |
| KDILDIVPTEIHQKAPVVMGSSSEDEVQEFLEIYR     | Q9QXD6 | 0          | N-term +28.03 Da, K +28.03 Da,             | 6149.63916  | 4 | 971.7700195 | 971.5195009 |
| TWNDPSVQQDIKFLPF                        | P20029 | 0.00044484 | N-term +28.03 Da, K +28.03 Da,             | 6152.669922 | 2 | 996.0130005 | 996.0172881 |
| DAFRSRIQNLKTHCIDVYPQKCFDEVDNDRLLNSKIR   | Q9D451 | 0.02099511 | N-term +28.03 Da, K +28.03 Da,             | 6157.258301 | 4 | 1202.109985 | 1201.87481  |
| EADIDGDGQVNYEEFVQMMTAK                  | P62204 | 0          | N-term +28.03 Da, K +28.03 Da,             | 6158.280762 | 2 | 1274.079956 | 1273.574912 |
| LNDYLADKSYIEGYVPSQADVAVFEAVSGPPPDLCHALR | O70251 | 0          | N-term +28.03 Da, K +28.03 Da,C +57.02 Da, | 6162.628418 | 4 | 1102.300049 | 1101.801879 |

|                                    |        |            |                                             |             |   |             |             |
|------------------------------------|--------|------------|---------------------------------------------|-------------|---|-------------|-------------|
| EADIDGDGQVNYEEFVQMMTAK             | P62204 | 0          | N-term +28.03 Da, K +28.03 Da,              | 6164.456543 | 3 | 849.3800049 | 849.3857    |
| TATFAQALQSVPETQVSILDNGLR           | Q9CZ13 | 0.01951646 | N-term +28.03 Da, K +28.03 Da,              | 6167.377441 | 3 | 863.460022  | 863.1290581 |
| AMTRDNLLGRFDLTGIPPAPR              | P16627 | 0.00345423 | N-term +28.03 Da, K +28.03 Da,              | 6167.719727 | 3 | 818.789978  | 818.4409125 |
| DLLDSKENEELQKLLK                   | P15533 | 0.03991311 | N-term +28.03 Da, K +28.03 Da,              | 6167.903809 | 3 | 638.710022  | 638.697983  |
| DMLDLAFLGLTDR                      | P46656 | 0          | N-term +28.03 Da, K +28.03 Da,              | 6171.732422 | 2 | 697.8530273 | 697.8528558 |
| DFPCDQSNPYLK                       | Q3UQV5 | 0.00653168 | N-term +28.03 Da, K +28.03 Da,              | 6173.863281 | 2 | 826.9099731 | 826.9030776 |
| GGHEADAQILELNQQLDLKLTVDGLEKER      | Q6PER3 | 0          | N-term +28.03 Da, K +28.03 Da,              | 6178.945801 | 4 | 858.7199707 | 858.2201557 |
| DFPCDQSNPYLK                       | Q3UQV5 | 0.00805672 | N-term +28.03 Da, K +28.03 Da,              | 6179.077637 | 2 | 827.9199829 | 826.9030776 |
| LITLEEEMTKYKPEDELTAEKITEF          | P09103 | 0.02431439 | N-term +28.03 Da, K +28.03 Da,              | 6183.393555 | 3 | 1066.890015 | 1067.224254 |
| LSALLQETKELKNEIKALSEER             | Q9Z1Z0 | 0.0008414  | N-term +28.03 Da, K +28.03 Da,              | 6184.947754 | 4 | 664.1400146 | 664.3889256 |
| EADIDGDGQVNYEEFVQMMTAK             | P62204 | 0          | N-term +28.03 Da, K +28.03 Da,              | 6190.708008 | 2 | 1274.069946 | 1273.574912 |
| LITLEEEMTKYKPEDELTAEKITEF          | P09103 | 0.00591911 | N-term +28.03 Da, K +28.03 Da,              | 6192.212891 | 4 | 800.4199829 | 800.67001   |
| TATFAQALQSVPETQVSILDNGLR           | Q9CZ13 | 0.02932142 | N-term +28.03 Da, K +28.03 Da,              | 6197.824707 | 3 | 863.789978  | 863.1290581 |
| EADIDGDGQVNYEEFVQMMTAK             | P62204 | 0          | N-term +28.03 Da, K +28.03 Da,              | 6198.135742 | 3 | 849.3800049 | 849.3857    |
| SFDVDGLDPAFTPATGTPVLGGLSYR         | Q61176 | 0          | N-term +28.03 Da, K +28.03 Da,              | 6206.955078 | 2 | 1341.680054 | 1341.176507 |
| GGHEADAQILELNQQLDLKLTVDGLEKER      | Q6PER3 | 0          | N-term +28.03 Da, K +28.03 Da,              | 6210.987793 | 4 | 858.4699707 | 858.2201557 |
| SFDVDGLDPAFTPATGTPVLGGLSYR         | Q61176 | 0          | N-term +28.03 Da, K +28.03 Da,              | 6211.992676 | 3 | 894.789978  | 894.4534304 |
| SEVGQQVEVELLGNYPATIIQEPLVLTEPAR    | Q9DBT9 | 0          | N-term +28.03 Da, K +28.03 Da,              | 6212.415039 | 3 | 1193.319946 | 1192.988971 |
| VKLIESKEAFQEALAAAGDKLVVDF          | P10639 | 0.02054993 | N-term +28.03 Da, K +28.03 Da,              | 6217.891113 | 3 | 968.2205811 | 968.2228471 |
| LVGFTNKGTEDFIVESLDASFR             | Q9CY50 | 0          | N-term +28.03 Da, K +28.03 Da,              | 6218.356934 | 3 | 834.4299927 | 834.4355993 |
| FQIFDFSLTEEMKDIDALNKNVR            | Q8VCX1 | 0          | N-term +28.03 Da, K +28.03 Da,              | 6220.941406 | 4 | 747.3800049 | 747.3862203 |
| EADIDGDGQVNYEEFVQMMTAK             | P62204 | 0          | N-term +28.03 Da, K +28.03 Da,              | 6221.622559 | 2 | 1274.079956 | 1273.574912 |
| AAFAQFGSDLDAATQQLSR                | Q03265 | 0          | N-term +28.03 Da, K +28.03 Da,              | 6225.576172 | 3 | 713.7000122 | 713.3674077 |
| VDFLAYDILDQYR                      | P10649 | 0          | N-term +28.03 Da, K +28.03 Da,              | 6226.78125  | 2 | 830.4248657 | 829.9248672 |
| EADIDGDGQVNYEEFVQMMTAK             | P62204 | 0          | N-term +28.03 Da, K +28.03 Da,              | 6228.992188 | 3 | 849.3847656 | 849.3857    |
| VNPTVFFDITADDEPLGR                 | P17742 | 0          | N-term +28.03 Da, K +28.03 Da,              | 6230.025391 | 2 | 1018.01001  | 1017.512568 |
| SYLLAALGGNSSPSAKDIKKILDSVIGIADDDR  | P99027 | 0          | N-term +28.03 Da, K +28.03 Da,              | 6231.997559 | 4 | 883.2399902 | 883.4792673 |
| FIGENMNPDMVALLDYR                  | P63028 | 0          | N-term +28.03 Da, K +28.03 Da,              | 6238.074219 | 2 | 1042.48999  | 1042.002998 |
| FIGENMNPDMVALLDYR                  | P63028 | 0.00535117 | N-term +28.03 Da, K +28.03 Da,              | 6239.976563 | 3 | 695.3300171 | 695.0044241 |
| AEAAAAPAPAAGPGQMSFTFASPTQVFFDSANVK | Q9D3D9 | 0          | N-term +28.03 Da, K +28.03 Da,              | 6252.476563 | 3 | 1138.22998  | 1137.562375 |
| RRFVEACRAREAAFDIEYLR               | Q6X759 | 0.01277372 | N-term +28.03 Da, K +28.03 Da, C +57.02 Da, | 6254.544434 | 3 | 853.4500122 | 852.7799282 |
| EADIDGDGQVNYEEFVQMMTAK             | P62204 | 0          | N-term +28.03 Da, K +28.03 Da,              | 6254.786621 | 2 | 1274.069946 | 1273.574912 |
| LLEIDNSELLHMLESPESLR               | P29341 | 0          | N-term +28.03 Da, K +28.03 Da,              | 6259.744141 | 3 | 789.75      | 789.4139182 |
| EARRRSRDIDALLAR                    | P27600 | 0.01719028 | N-term +28.03 Da, K +28.03 Da,              | 6260.586426 | 2 | 913.0300293 | 913.5270111 |
| VNPTVFFDITADDEPLGR                 | P17742 | 0          | N-term +28.03 Da, K +28.03 Da,              | 6269.37793  | 2 | 1018.01001  | 1017.512568 |
| IEIESFFEGEDFSETLTR                 | P20029 | 0          | N-term +28.03 Da, K +28.03 Da,              | 6274.125    | 2 | 1089.52002  | 1089.017881 |
| EADIDGDGQVNYEEFVQMMTAK             | P62204 | 0          | N-term +28.03 Da, K +28.03 Da,              | 6274.356445 | 2 | 1274.579956 | 1273.574912 |
| EADIDGDGQVNYEEFVQMMTAK             | P62204 | 0          | N-term +28.03 Da, K +28.03 Da,              | 6274.974121 | 3 | 849.7199707 | 849.3857    |
| AMFDQSQIQEFKEAFNMIDQNR             | Q3THE2 | 0          | N-term +28.03 Da, K +28.03 Da,              | 6275.76709  | 3 | 916.0999756 | 916.1036382 |
| AMFDQSQIQEFKEAFNMIDQNR             | Q3THE2 | 0          | N-term +28.03 Da, K +28.03 Da,              | 6276.190918 | 4 | 687.5800171 | 687.3295478 |

|                                       |        |            |                                             |             |   |             |             |
|---------------------------------------|--------|------------|---------------------------------------------|-------------|---|-------------|-------------|
| FGDMQEIIQNFVR                         | Q9QYG0 | 0          | N-term +28.03 Da, K +28.03 Da,              | 6279.448242 | 2 | 813.4099731 | 812.9112366 |
| TSSIPDMILGHLFSQEELSGNSELIQKYR         | Q9QYG0 | 0.00562541 | N-term +28.03 Da, K +28.03 Da,              | 6280.885742 | 4 | 838.4299927 | 837.9340665 |
| GILSGTSDLLLTDFDEAEVR                  | Q64727 | 0.00111649 | N-term +28.03 Da, K +28.03 Da,              | 6282.941895 | 2 | 1032.530029 | 1032.546608 |
| FGDMQEIIQNFVR                         | Q9QYG0 | 0          | N-term +28.03 Da, K +28.03 Da,              | 6283.251465 | 2 | 812.9099731 | 812.9112366 |
| EADIDGDGQVNYEEFVQMMTAK                | P62204 | 0          | N-term +28.03 Da, K +28.03 Da,              | 6287.244141 | 2 | 1273.569946 | 1273.574912 |
| ASYLLAALGGNSSPSAKDIKKILDSVGIEADDDR    | P99027 | 0          | N-term +28.03 Da, K +28.03 Da,              | 6290.132813 | 4 | 901.4899902 | 901.2385458 |
| LKTQPTDEEMLFYSHFKQATVGDVNTDRPGLL      | P31786 | 0          | N-term +28.03 Da, K +28.03 Da,              | 6294.976563 | 4 | 962.75      | 962.7539343 |
| FIMEDTIGVPLFVGSVR                     | Q61247 | 0          | N-term +28.03 Da, K +28.03 Da,              | 6296.824707 | 2 | 954.5200195 | 954.518609  |
| SEAAADREDDPNFFKMVEGFFDR               | P26443 | 0          | N-term +28.03 Da, K +28.03 Da,              | 6301.803711 | 4 | 688.0661011 | 688.0695253 |
| NEELVSMNVQGDYEPIDATGFININSLR          | P16460 | 0          | N-term +28.03 Da, K +28.03 Da,              | 6303.715332 | 3 | 1056.849976 | 1056.183564 |
| NEELVSMNVQGDYEPIDATGFININSLR          | P16460 | 0          | N-term +28.03 Da, K +28.03 Da,              | 6306.46582  | 2 | 1584.77002  | 1583.771707 |
| SEAAADREDDPNFFKMVEGFFDR               | P26443 | 0          | N-term +28.03 Da, K +28.03 Da,              | 6308.077637 | 3 | 917.0880127 | 917.0902749 |
| PTTGIIIEYPFLENIIIFRMVDVGGQSRERR       | P21278 | 0.03361808 | N-term +28.03 Da, K +28.03 Da,              | 6308.229492 | 4 | 884.9799805 | 884.9634239 |
| IEIESFFEGEDFSETLTR                    | P20029 | 0          | N-term +28.03 Da, K +28.03 Da,              | 6310.154297 | 2 | 1089.51001  | 1089.017881 |
| AVFVDLEPTVIDEVR                       | P05213 | 0.02355947 | N-term +28.03 Da, K +28.03 Da,              | 6313.695801 | 2 | 865.460022  | 865.4721819 |
| MVNPTVFFDITADDEPLGR                   | P17742 | 0          | N-term +28.03 Da, K +28.03 Da,              | 6319.516602 | 2 | 1083.530029 | 1083.03281  |
| YFYAISNIEVIGR                         | Q8R4F1 | 0.03757147 | N-term +28.03 Da, K +28.03 Da,              | 6319.806641 | 2 | 786.4099731 | 786.9246697 |
| SLYIPGYVENGKIVLNPPRPDVQEEAIEATVEDFNR  | Q9EQR4 | 0          | N-term +28.03 Da, K +28.03 Da,              | 6330.02832  | 4 | 1033.030029 | 1032.787663 |
| MVNPTVFFDITADDEPLGR                   | P17742 | 0          | N-term +28.03 Da, K +28.03 Da,              | 6330.154785 | 2 | 1083.030029 | 1083.03281  |
| HYRKHTGHR                             | P46099 | 0.005631   | N-term +28.03 Da, K +28.03 Da,              | 6330.292969 | 2 | 625.3400269 | 624.3470568 |
| SEAAADREDDPNFFKMVEGFFDR               | P26443 | 0          | N-term +28.03 Da, K +28.03 Da,              | 6334.055176 | 4 | 688.0683594 | 688.0695253 |
| EAKPAPEIFENEVMELLR                    | Q8C6I2 | 0          | N-term +28.03 Da, K +28.03 Da,              | 6334.408203 | 3 | 724.7199707 | 724.3854107 |
| MLQGVDLLADAVAVTMGPKGR                 | P63038 | 0          | N-term +28.03 Da, K +28.03 Da,              | 6335.410645 | 3 | 733.7399902 | 733.40604   |
| NEELVSMNVQGDYEPIDATGFININSLR          | P16460 | 0          | N-term +28.03 Da, K +28.03 Da,              | 6336.194824 | 3 | 1056.52002  | 1056.183564 |
| SEAAADREDDPNFFKMVEGFFDR               | P26443 | 0          | N-term +28.03 Da, K +28.03 Da,              | 6338.370117 | 3 | 917.4199829 | 917.0902749 |
| VNPTVFFDITADDEPLGR                    | P17742 | 0.0127582  | N-term +28.03 Da, K +28.03 Da,              | 6339.348633 | 2 | 1018.01001  | 1017.512568 |
| EELVSMNVQGDYEPIDATGFININSLR           | P16460 | 0          | N-term +28.03 Da, K +28.03 Da,              | 6346.249023 | 3 | 1018.51001  | 1018.169254 |
| VEFDEVDSLKEALTYDYGALLGDR              | Q9WUK2 | 0.00112233 | N-term +28.03 Da, K +28.03 Da,              | 6349.507813 | 3 | 871.4500122 | 871.109441  |
| EAKPAPEIFENEVMELLR                    | Q8C6I2 | 0          | N-term +28.03 Da, K +28.03 Da,              | 6354.089355 | 3 | 724.0599976 | 724.3854107 |
| GDDEAAELMQQVKVLKLTVEDLEKER            | Q61166 | 0          | N-term +28.03 Da, K +28.03 Da,              | 6354.187012 | 4 | 775.4199829 | 775.4217975 |
| NGAFTGEISPGMIKDLGATVWVVLGHSE          | P17751 | 0.00083333 | N-term +28.03 Da, K +28.03 Da,              | 6357.208984 | 4 | 750.8900146 | 750.3918368 |
| ETDTDADQVIASFKVLAGDKNFITAEELR         | P57780 | 0          | N-term +28.03 Da, K +28.03 Da,              | 6358.477051 | 4 | 871.7000122 | 871.4529839 |
| VETSGSSAGHDAEKLTVNLEQVLSGLVTDGTMATDQR | Q8CIM3 | 0.00403904 | N-term +28.03 Da, K +28.03 Da,              | 6360.789063 | 4 | 997.9899902 | 997.4957493 |
| VYRLSKYNTTEEFITVYPT                   | Q3UCV8 | 0.02559055 | N-term +28.03 Da, K +28.03 Da,              | 6366.020508 | 2 | 1139.579956 | 1140.10155  |
| DGKALEQLQEYFDGNLKR                    | P27773 | 0          | N-term +28.03 Da, K +28.03 Da,              | 6366.369141 | 3 | 785.4099731 | 785.7496292 |
| VETSGSSAGHDAEKLTVNLEQVLSGLVTDGTMATDQR | Q8CIM3 | 0          | N-term +28.03 Da, K +28.03 Da,              | 6370.423828 | 4 | 997.75      | 997.4957493 |
| VEQSEPLINLATCVDEVVGDPPR               | Q8BVZ1 | 0          | N-term +28.03 Da, K +28.03 Da, C +57.02 Da, | 6374.263184 | 3 | 894.7800293 | 894.1093353 |
| EADIDGDGQVNYEEFVQMMTAK                | P62204 | 0          | N-term +28.03 Da, K +28.03 Da,              | 6375.138184 | 2 | 1274.579956 | 1273.574912 |
| EELVSMNVQGDYEPIDATGFININSLR           | P16460 | 0          | N-term +28.03 Da, K +28.03 Da,              | 6377.28125  | 2 | 1527.25     | 1526.750243 |
| EELVSMNVQGDYEPIDATGFININSLR           | P16460 | 0          | N-term +28.03 Da, K +28.03 Da,              | 6379.162109 | 3 | 1018.840027 | 1018.169254 |

|                                         |        |            |                                            |             |   |             |             |
|-----------------------------------------|--------|------------|--------------------------------------------|-------------|---|-------------|-------------|
| VEQSEPLINLATCVDEVVGDPPDR                | Q8BVZ1 | 0          | N-term +28.03 Da, K +28.03 Da,C +57.02 Da, | 6380.446777 | 2 | 1340.662109 | 1340.660365 |
| RLMVERLRFQKIYGENGSKSMSDVSVAEDVQNL       | E9PYF4 | 0.00651678 | N-term +28.03 Da, K +28.03 Da,             | 6381.202148 | 4 | 946.4899902 | 946.7434722 |
| SLFGSVETWPWQVLSTGGKEDVSYEER             | Q9R257 | 0          | N-term +28.03 Da, K +28.03 Da,             | 6383.727539 | 3 | 1048.52002  | 1048.183781 |
| TEKGVIEGPLSAQTNWDIAHMISGF               | P99026 | 0.031544   | N-term +28.03 Da, K +28.03 Da,             | 6390.608398 | 3 | 1005.830017 | 1005.830461 |
| FTLAESLGGYESLAELPAIMTHASVPEKDR          | Q8VCN5 | 0          | N-term +28.03 Da, K +28.03 Da,             | 6395.947266 | 4 | 823.1799927 | 822.9259757 |
| DGKALEQLFQEYFDGNLKR                     | P27773 | 0.00342583 | N-term +28.03 Da, K +28.03 Da,             | 6397.972168 | 3 | 785.4199829 | 785.7496292 |
| GSYIKAMGDEDSDESDESGGSPKPSPK             | B1AZP2 | 0.00110457 | N-term +28.03 Da, K +28.03 Da,             | 6398.299316 | 2 | 1304.609985 | 1304.625991 |
| LGASDFEFGVDPSADPELALALR                 | O35226 | 0          | N-term +28.03 Da, K +28.03 Da,             | 6401.029785 | 2 | 1209.619995 | 1209.613011 |
| VEQSEPLINLATCVDEVVGDPPDR                | Q8BVZ1 | 0.02076125 | N-term +28.03 Da, K +28.03 Da,C +57.02 Da, | 6404.464844 | 3 | 894.1199951 | 894.1093353 |
| LGASDFEFGVDPSADPELALALR                 | O35226 | 0          | N-term +28.03 Da, K +28.03 Da,             | 6405.309082 | 2 | 1210.619995 | 1209.613011 |
| FLIEEGSKPEDVDGVLLEEFGR                  | Q9DBM2 | 0          | N-term +28.03 Da, K +28.03 Da,             | 6406.82959  | 3 | 857.4400024 | 856.7671263 |
| GFLDEQELEALFTR                          | P81117 | 0          | N-term +28.03 Da, K +28.03 Da,             | 6418.625977 | 2 | 848.9500122 | 848.4330568 |
| NDYLADKSYIEGYVPSQADVAVFEAVSGPPPADLCHALR | O70251 | 0          | N-term +28.03 Da, K +28.03 Da,C +57.02 Da, | 6422.683105 | 4 | 1074.030029 | 1073.530863 |
| EPWDGKDGELPVEDDIDLSDVELDDLEKDEL         | Q922R8 | 0          | N-term +28.03 Da, K +28.03 Da,             | 6427.458008 | 3 | 1210.23999  | 1209.571766 |
| LFGAIIINLVPSSMLLRPIHSQSNNSNDIENK        | Q8ROM8 | 0.03571429 | N-term +28.03 Da, K +28.03 Da,             | 6432.039551 | 4 | 898.9799805 | 898.4895402 |
| SEAAADREDDPNFFKMVEGFFDR                 | P26443 | 0          | N-term +28.03 Da, K +28.03 Da,             | 6435.120605 | 4 | 688.5700073 | 688.0695253 |
| LCYIGATDDAATKIINEVSKPLAH                | Q9CXI5 | 0          | N-term +28.03 Da, K +28.03 Da,             | 6438.536621 | 3 | 949.5       | 949.8368869 |
| DGKALEQLFQEYFDGNLKR                     | P27773 | 0.00046232 | N-term +28.03 Da, K +28.03 Da,             | 6443.902344 | 3 | 786.4199829 | 785.7496292 |
| LCYIGATDDAATKIINEVSKPLAH                | Q9CXI5 | 0          | N-term +28.03 Da, K +28.03 Da,             | 6444.026367 | 3 | 949.8300171 | 949.8368869 |
| AVALVDAFDKDVTLGSLGR                     | Q9ROH0 | 0          | N-term +28.03 Da, K +28.03 Da,             | 6452.561523 | 3 | 750.4299927 | 750.4228532 |
| LCYIGATDDAATKIINEVSKPLAH                | Q9CXI5 | 0          | N-term +28.03 Da, K +28.03 Da,             | 6456.609375 | 4 | 712.3800049 | 712.6294843 |
| CPVWEQELANKYSCK                         | D3YU81 | 0.00997506 | N-term +28.03 Da, K +28.03 Da,             | 6461.729004 | 2 | 998.4799805 | 998.4869833 |
| FLGNLPHYDVTEDSIKDFFR                    | Q8BGD9 | 0          | N-term +28.03 Da, K +28.03 Da,             | 6466.30957  | 3 | 778.4000244 | 778.0668468 |
| LNLLENWDTLGGSTVSQLQER                   | Q00623 | 0          | N-term +28.03 Da, K +28.03 Da,             | 6467.991699 | 3 | 782.75      | 782.0762939 |
| AMLGDFVNMVEKGIIDPTKVVR                  | P63038 | 0          | N-term +28.03 Da, K +28.03 Da,             | 6473.555176 | 4 | 630.3599854 | 629.8549351 |
| AMLGDFVNMVEKGIIDPTKVVR                  | P63038 | 0          | N-term +28.03 Da, K +28.03 Da,             | 6475.910156 | 4 | 629.8599854 | 629.8549351 |
| DGKALEQLFQEYFDGNLKR                     | P27773 | 0          | N-term +28.03 Da, K +28.03 Da,             | 6476.035645 | 3 | 786.0800171 | 785.7496292 |
| EPWDGKDGELPVEDDIDLSDVELDDLEKDEL         | Q922R8 | 0          | N-term +28.03 Da, K +28.03 Da,             | 6478.623535 | 3 | 1210.25     | 1209.571766 |
| DGKALEQLFQEYFDGNLKR                     | P27773 | 0          | N-term +28.03 Da, K +28.03 Da,             | 6480.681641 | 3 | 785.75      | 785.7496292 |
| LLPEEFTVDHPFFIR                         | Q9D154 | 0          | N-term +28.03 Da, K +28.03 Da,             | 6480.817383 | 3 | 760.0700073 | 759.7366605 |
| SLAEDFAEQPIKDAVITVPAFFNQAER             | Q9JKR6 | 0          | N-term +28.03 Da, K +28.03 Da,             | 6484.578613 | 3 | 1021.869995 | 1021.532632 |
| AGVSPAVLGCPOVTLER                       | D3Z450 | 0.01168152 | N-term +28.03 Da, K +28.03 Da,C +57.02 Da, | 6492.960449 | 3 | 590.9899902 | 590.313586  |
| SLAEDFAEQPIKDAVITVPAFFNQAER             | Q9JKR6 | 0          | N-term +28.03 Da, K +28.03 Da,             | 6495.925293 | 4 | 766.6500244 | 766.4012934 |
| AMLGDFVNMVEKGIIDPTKVVR                  | P63038 | 0          | N-term +28.03 Da, K +28.03 Da,             | 6508.339355 | 4 | 630.1099854 | 629.8549351 |
| AINPAALLPTVALQIPGTPVSSSELAFPSSEPR       | Q6PGL7 | 0          | N-term +28.03 Da, K +28.03 Da,             | 6509.546387 | 4 | 872.5       | 871.9908073 |
| VGGPEYVHCLLPPLSLATVEETVVR               | Q76MZ3 | 0.00045393 | N-term +28.03 Da, K +28.03 Da,C +57.02 Da, | 6514.638672 | 3 | 965.5100098 | 964.8440416 |
| VGGPEYVHCLLPPLSLATVEETVVR               | Q76MZ3 | 0          | N-term +28.03 Da, K +28.03 Da,C +57.02 Da, | 6517.29541  | 3 | 965.1799927 | 964.8440416 |
| VVLETETLDEAIKIVNDNPNYNGTAIFTTNGATAR     | Q9EQ20 | 0.00114068 | N-term +28.03 Da, K +28.03 Da,             | 6520.043945 | 4 | 942.2299805 | 941.7401816 |
| SAVALLNQALESSDLVAVQNQLR                 | Q3UQ44 | 0          | N-term +28.03 Da, K +28.03 Da,             | 6525.98877  | 3 | 823.460022  | 823.1220147 |
| SYGVPPDLLYSFPVVIK                       | P14152 | 0.00563474 | N-term +28.03 Da, K +28.03 Da,             | 6526.372559 | 2 | 985.039978  | 984.5400647 |

|                                |        |            |                                            |             |   |             |             |
|--------------------------------|--------|------------|--------------------------------------------|-------------|---|-------------|-------------|
| IFVEESVYDEFVKR                 | P24549 | 0.01903925 | N-term +28.03 Da, K +28.03 Da,             | 6533.062988 | 2 | 908.4799805 | 908.480007  |
| SAVALLNQALESDDLVAVQNQLR        | Q3UQ44 | 0          | N-term +28.03 Da, K +28.03 Da,             | 6535.016602 | 2 | 1234.680054 | 1234.179384 |
| DVTFSPATIEEELIKFCR             | Q9CXI5 | 0          | N-term +28.03 Da, K +28.03 Da,C +57.02 Da, | 6543.770996 | 3 | 738.0599976 | 737.717049  |
| QLYWCVQQDNEQLAR                | G3X9K3 | 0.00502344 | N-term +28.03 Da, K +28.03 Da,C +57.02 Da, | 6543.907227 | 2 | 990.4699707 | 989.9756289 |
| GELPVEDDIDLSDVLEDDLEKDEL       | Q922R8 | 0          | N-term +28.03 Da, K +28.03 Da,             | 6551.804199 | 3 | 924.7800293 | 924.4463368 |
| GELPVEDDIDLSDVLEDDLEKDEL       | Q922R8 | 0          | N-term +28.03 Da, K +28.03 Da,             | 6553.981934 | 2 | 1386.670044 | 1386.165867 |
| NLNLLNWDTLGSTVSQLQER           | Q00623 | 0          | N-term +28.03 Da, K +28.03 Da,             | 6557.065918 | 3 | 820.4199829 | 820.0906033 |
| VTVKHLEDIVEKLGEESSDQVR         | Q99PL5 | 0          | N-term +28.03 Da, K +28.03 Da,             | 6560.274414 | 4 | 716.4000244 | 716.6589362 |
| TLQPLVDPEDIDLTPLSSGLGNLPR      | P33267 | 0          | N-term +28.03 Da, K +28.03 Da,             | 6560.735352 | 2 | 1345.22998  | 1344.726365 |
| TLQPLVDPEDIDLTPLSSGLGNLPR      | P33267 | 0          | N-term +28.03 Da, K +28.03 Da,             | 6563.923828 | 3 | 897.1500244 | 896.8200019 |
| TLQPLVDPEDIDLTPLSSGLGNLPR      | P33267 | 0          | N-term +28.03 Da, K +28.03 Da,             | 6564.295898 | 2 | 1345.72998  | 1344.726365 |
| TLQPLVDPEDIDLTPLSSGLGNLPR      | P33267 | 0          | N-term +28.03 Da, K +28.03 Da,             | 6567.697266 | 3 | 896.8200073 | 896.8200019 |
| GELPVEDDIDLSDVLEDDLEKDEL       | Q922R8 | 0          | N-term +28.03 Da, K +28.03 Da,             | 6567.967773 | 2 | 1386.170044 | 1386.165867 |
| LDVKAMGPLVLTEVLFDEKIR          | P59325 | 0          | N-term +28.03 Da, K +28.03 Da,             | 6582.756836 | 4 | 618.3599854 | 618.3642929 |
| MEVEDSGGVVLTAYHSHAR            | Q8BN58 | 0.00314356 | N-term +28.03 Da, K +28.03 Da,             | 6591.348633 | 2 | 1043.48999  | 1043.504751 |
| DAVIYPILVEFTR                  | Q9JKR6 | 0          | N-term +28.03 Da, K +28.03 Da,             | 6609.001953 | 2 | 782.9500122 | 782.4426953 |
| NSVFTLYELTSGEDTEDEEFHGLDEATLLR | Q9CQ80 | 0          | N-term +28.03 Da, K +28.03 Da,             | 6640.693848 | 3 | 1154.199951 | 1153.542252 |
| AVWPTLVDINSLDLTEAYKLR          | Q9ROH0 | 0          | N-term +28.03 Da, K +28.03 Da,             | 6647.004395 | 3 | 854.8099976 | 854.1388941 |
| DSTQNLIAPAPSLTVPQPDR           | P11672 | 0.01388051 | N-term +28.03 Da, K +28.03 Da,             | 6647.568359 | 2 | 1226.670044 | 1225.66812  |
| DFTSLAVLEIH                    | Q80TS5 | 0.02981332 | N-term +28.03 Da, K +28.03 Da,             | 6647.757813 | 2 | 637.3400269 | 636.8453564 |
| SSEVGYDAMLGDFVNMVEKGIIDPTKVV   | P63038 | 0.00316344 | N-term +28.03 Da, K +28.03 Da,             | 6648.19043  | 4 | 814.6799927 | 814.1766362 |
| TQVPEVFLSKVLEPTLTKLR           | P21614 | 0          | N-term +28.03 Da, K +28.03 Da,             | 6652.413574 | 3 | 794.4799805 | 794.8172031 |
| KDVPVPTLADIAWIAADEEETAR        | Q9CWE0 | 0          | N-term +28.03 Da, K +28.03 Da,             | 6655.8125   | 3 | 943.1599731 | 942.8235236 |
| GPELEEVLQLAAADAR               | Q99KK7 | 0          | N-term +28.03 Da, K +28.03 Da,             | 6657.773926 | 2 | 912.5       | 911.9990956 |
| VLPLAEDFTEILSR                 | P21614 | 0          | N-term +28.03 Da, K +28.03 Da,             | 6660.868652 | 2 | 815.960022  | 815.9561674 |
| APPSVFAQVPQAPPVLFKL            | P05201 | 0          | N-term +28.03 Da, K +28.03 Da,             | 6661.86084  | 3 | 721.0999756 | 721.0976406 |
| GPELEEVLQLAAADAR               | Q99KK7 | 0          | N-term +28.03 Da, K +28.03 Da,             | 6662.541504 | 3 | 608.6699829 | 608.3351559 |
| GESPVWEEASQSLFVDIPSKIICR       | Q64374 | 0          | N-term +28.03 Da, K +28.03 Da,C +57.02 Da, | 6669.27832  | 3 | 973.5100098 | 972.8440416 |
| APPSVFAQVPQAPPVLFKL            | P05201 | 0          | N-term +28.03 Da, K +28.03 Da,             | 6679.046387 | 3 | 720.75      | 721.0976406 |
| AIAELDTLNEDSYKDSTLIMQLLR       | P61982 | 0          | N-term +28.03 Da, K +28.03 Da,             | 6680.753418 | 3 | 937.1599731 | 936.8281689 |
| SSRPVFDWKDPLILEEQLTADEKLR      | Q60759 | 0          | N-term +28.03 Da, K +28.03 Da,             | 6685.395508 | 4 | 796.4299927 | 796.4419556 |
| SSRPVFDWKDPLILEEQLTADEKLR      | Q60759 | 0          | N-term +28.03 Da, K +28.03 Da,             | 6685.881836 | 4 | 796.1799927 | 796.4419556 |
| AIAELDTLNEDSYKDSTLIMQLLR       | P61982 | 0          | N-term +28.03 Da, K +28.03 Da,             | 6688.025879 | 3 | 936.8300171 | 936.8281689 |
| GTIDFPEFLTMAR                  | P62204 | 0          | N-term +28.03 Da, K +28.03 Da,             | 6703.279297 | 2 | 828.9099731 | 828.909848  |
| VELLYHVEELDPGVVDNFPLLKALR      | P30115 | 0          | N-term +28.03 Da, K +28.03 Da,             | 6727.941406 | 4 | 734.4099731 | 734.4139377 |
| GTIDFPEFLTMAR                  | P62204 | 0          | N-term +28.03 Da, K +28.03 Da,             | 6734.583008 | 2 | 828.9105835 | 828.909848  |
| SEDELVSIIIDGVL                 | Q8K5B2 | 0          | N-term +28.03 Da, K +28.03 Da,             | 6736.903809 | 2 | 786.9199829 | 786.9276073 |
| QFFIGENMNPDMVALLDYR            | P63028 | 0          | N-term +28.03 Da, K +28.03 Da,             | 6738.416016 | 2 | 1179.560059 | 1179.566494 |
| QFFIGENMNPDMVALLDYR            | P63028 | 0.00044033 | N-term +28.03 Da, K +28.03 Da,             | 6743.754395 | 3 | 786.710022  | 786.7134216 |
| TQEAMEAALAMEKNLNQALLDLH        | P29391 | 0.00177242 | N-term +28.03 Da, K +28.03 Da,             | 6745.985352 | 3 | 871.1099854 | 870.7803839 |

|                                       |        |            |                                            |             |   |             |             |
|---------------------------------------|--------|------------|--------------------------------------------|-------------|---|-------------|-------------|
| TIDPFELTMMAR                          | P62204 | 0          | N-term +28.03 Da, K +28.03 Da,             | 6747.713867 | 2 | 800.4000244 | 800.399116  |
| TQEAMEAALAMEKNLNQALLDLH               | P29391 | 0.00176929 | N-term +28.03 Da, K +28.03 Da,             | 6752.733398 | 3 | 870.7800293 | 870.7803839 |
| VVDVQFDEGLPPILNALEVQGR                | P56480 | 0          | N-term +28.03 Da, K +28.03 Da,             | 6754.696777 | 3 | 813.4500122 | 812.7759557 |
| VELLYHVEELDPGVVDNFPLKALR              | P30115 | 0          | N-term +28.03 Da, K +28.03 Da,             | 6758.875    | 4 | 734.4124756 | 734.4139377 |
| ALEQQVEEMRTQLEEELELQATEDAKLR          | Q61879 | 0          | N-term +28.03 Da, K +28.03 Da,             | 6763.816895 | 4 | 876.1900024 | 875.9410836 |
| ELIQTERTDYLTDLELCLREVVP               | Q80VK6 | 0.04954715 | N-term +28.03 Da, K +28.03 Da,C +57.02 Da, | 6767.389648 | 3 | 954.4799805 | 954.1635515 |
| NANAQERSGAMSQALNFIK                   | Q62468 | 0.01222868 | N-term +28.03 Da, K +28.03 Da,             | 6771.407227 | 3 | 702.3499756 | 702.6968706 |
| AEFEDLDSLLSALSLSNEESLGNRR             | Q8BGD9 | 0          | N-term +28.03 Da, K +28.03 Da,             | 6775.903809 | 3 | 903.1300049 | 902.7908828 |
| FEVNISELPDEIDISSYIEQTR                | Q9Z1N5 | 0          | N-term +28.03 Da, K +28.03 Da,             | 6786.462402 | 2 | 1313.650024 | 1313.150156 |
| CAQTVMEELDIVIAYGQSDSEYFVFRKKSNEWFK    | Q9CY52 | 0.04994687 | N-term +28.03 Da, K +28.03 Da,             | 6790.979004 | 4 | 1058.540039 | 1058.278617 |
| EADIDGDGQVNYEEFVQMMTAK                | P62204 | 0          | N-term +28.03 Da, K +28.03 Da,             | 6830.341309 | 2 | 1273.569946 | 1273.574912 |
| NTSAIQDYLQQLTGAR                      | Q9QUHO | 0          | N-term +28.03 Da, K +28.03 Da,             | 6844.77832  | 2 | 904.4699707 | 903.9708694 |
| MLLPEEFTVDHPFFIFIR                    | Q9D154 | 0          | N-term +28.03 Da, K +28.03 Da,             | 6852.663086 | 3 | 803.75      | 803.4168221 |
| DPWFSTYDSTCQIAQIEAKIQER               | Q88983 | 0          | N-term +28.03 Da, K +28.03 Da,             | 6862.54541  | 3 | 991.4799805 | 991.1429278 |
| MLLPEEFTVDHPFFIFIR                    | Q9D154 | 0          | N-term +28.03 Da, K +28.03 Da,             | 6864.495605 | 3 | 804.0800171 | 803.4168221 |
| DLYHEMIESGVINLKDATSKVALVYGQMNPEPPGAR  | P56480 | 0          | N-term +28.03 Da, K +28.03 Da,             | 6866.908203 | 4 | 983.5100098 | 983.2589553 |
| EADIDGDGQVNYEEFVQMMTAK                | P62204 | 0          | N-term +28.03 Da, K +28.03 Da,             | 6868.268555 | 2 | 1273.079956 | 1273.574912 |
| EADIDGDGQVNYEEFVQMMTAK                | P62204 | 0          | N-term +28.03 Da, K +28.03 Da,             | 6869.331055 | 2 | 1273.569946 | 1273.574912 |
| SVQSGNLALAASAAVDAGMAMAGQSPVLR         | P17225 | 0.04488041 | N-term +28.03 Da, K +28.03 Da,             | 6876.022949 | 3 | 948.8200073 | 948.1565137 |
| RFEAGEALRTLRLGLQR                     | Q8CHW5 | 0.01196319 | N-term +28.03 Da, K +28.03 Da,             | 6881.790039 | 3 | 634.7000122 | 634.3657833 |
| EKIAPSFAVESMEDALKAADTIGYPMIR          | Q8C196 | 0          | N-term +28.03 Da, K +28.03 Da,             | 6888.792969 | 4 | 810.1799927 | 809.9290952 |
| FAHTNIESLVKEYDDNGEGITIFRPL            | P27773 | 0.00042772 | N-term +28.03 Da, K +28.03 Da,             | 6901.833984 | 3 | 1012.52002  | 1012.188866 |
| EDWGLILDICDKVGQSR                     | P70297 | 0          | N-term +28.03 Da, K +28.03 Da,             | 6902.661621 | 2 | 1031.01001  | 1030.527695 |
| ATNPFDDQDVEKATSELNTEADWGLILDICDKVGQSR | P70297 | 0          | N-term +28.03 Da, K +28.03 Da,             | 6905.800293 | 4 | 1031.26001  | 1030.759946 |
| EADIDGDGQVNYEEFVQMMTAK                | P62204 | 0          | N-term +28.03 Da, K +28.03 Da,             | 6909.088867 | 2 | 1273.569946 | 1273.574912 |
| GSTLKETAIELGYLTAEQFDEWVKPKDMLGPK      | P97807 | 0          | N-term +28.03 Da, K +28.03 Da,             | 6915.311523 | 4 | 934.7600098 | 934.5045906 |
| NEELVSMNVQGDYEPIDATGFININSLR          | P16460 | 0          | N-term +28.03 Da, K +28.03 Da,             | 6917.972168 | 3 | 1056.849976 | 1056.183564 |
| SEMTELVPQTQVEPADLELLQELNR             | Q88746 | 0          | N-term +28.03 Da, K +28.03 Da,             | 6934.943359 | 3 | 966.1699829 | 965.8388452 |
| GQNDLMGTAEDFADQFLR                    | Q64310 | 0          | N-term +28.03 Da, K +28.03 Da,             | 6937.153809 | 2 | 1028.469971 | 1028.475659 |
| EAIAEELDTLNEESYKDSLIMQLLR             | Q9CQV8 | 0          | N-term +28.03 Da, K +28.03 Da,             | 6944.543457 | 3 | 984.8499756 | 984.5142503 |
| ENVLPLAEDFTEILSR                      | P21614 | 0          | N-term +28.03 Da, K +28.03 Da,             | 6952.408203 | 2 | 937.5018921 | 937.4989286 |
| ENVLPLAEDFTEILSR                      | P21614 | 0          | N-term +28.03 Da, K +28.03 Da,             | 6969.157227 | 3 | 625.6699829 | 625.3350445 |
| ADGNGTIDPFELTMMAR                     | P62204 | 0          | N-term +28.03 Da, K +28.03 Da,             | 6975.341797 | 2 | 1008.469971 | 1007.474073 |
| ENVLPLAEDFTEILSR                      | P21614 | 0          | N-term +28.03 Da, K +28.03 Da,             | 6983.837402 | 2 | 937.5       | 937.4989286 |
| MDDAEKTFVPMTENIYNAIIDKTLKL            | O35488 | 0          | N-term +28.03 Da, K +28.03 Da,             | 6986.991211 | 4 | 782.1699829 | 782.1682797 |
| GNGTIDPFELTMMAR                       | P62204 | 0          | N-term +28.03 Da, K +28.03 Da,             | 6990.821777 | 2 | 914.9299927 | 914.4420441 |
| AALPDQDSFYDVTDALEQQGMEALVQR           | Q6P9Q4 | 0          | N-term +28.03 Da, K +28.03 Da,             | 6993.474121 | 3 | 1014.150024 | 1013.485243 |
| DLTDYLMKILTER                         | P60710 | 0          | N-term +28.03 Da, K +28.03 Da,             | 6998.11377  | 2 | 834.460022  | 833.9578528 |
| EKEFLPILQEEPLPLALVPFTEEEQR            | Q6Y7W8 | 0          | N-term +28.03 Da, K +28.03 Da,             | 7015.571289 | 3 | 1083.579956 | 1083.254876 |
| DVTFSPATIEEELIKFCR                    | Q9CXI5 | 0.0034638  | N-term +28.03 Da, K +28.03 Da,C +57.02 Da, | 7022.050781 | 2 | 1105.569946 | 1106.071935 |

|                                       |        |            |                                            |             |   |             |             |
|---------------------------------------|--------|------------|--------------------------------------------|-------------|---|-------------|-------------|
| APSFAVESMEDALKAADTIGYPMIR             | Q8C196 | 0.00115518 | N-term +28.03 Da, K +28.03 Da,             | 7035.047852 | 3 | 947.4899902 | 946.8187274 |
| DFQLIGIQDGYLSLLQDSGEVR                | P63242 | 0.03312172 | N-term +28.03 Da, K +28.03 Da,             | 7048.27002  | 2 | 1247.130005 | 1247.644843 |
| VGDPLDLVALAEQVQKADEFIR                | Q5EBG8 | 0          | N-term +28.03 Da, K +28.03 Da,             | 7061.915039 | 3 | 828.460022  | 828.123244  |
| GADQLTEEQIAEFKEAFSLFDKDGDTITTKELGTVMR | Q3UKW2 | 0          | N-term +28.03 Da, K +28.03 Da,             | 7082.64502  | 3 | 1434.699951 | 1435.061196 |
| LDQNQEIIHDNAGDAFVGGFSLQVSDKPLTECIR    | P55264 | 0.00084034 | N-term +28.03 Da, K +28.03 Da,C +57.02 Da, | 7083.875488 | 3 | 1370.02002  | 1369.351081 |
| LDQNQEIIHDNAGDAFVGGFSLQVSDKPLTECIR    | P55264 | 0          | N-term +28.03 Da, K +28.03 Da,C +57.02 Da, | 7084.104492 | 4 | 1027.5      | 1027.26513  |
| TGPAATLSDTAAAEVLDSSEVTVIGF            | P09103 | 0.02974701 | N-term +28.03 Da, K +28.03 Da,             | 7091.983398 | 3 | 913.460022  | 913.4587991 |
| VGDPLDLVALAEQVQKADEFIR                | Q5EBG8 | 0          | N-term +28.03 Da, K +28.03 Da,             | 7094.311035 | 3 | 828.460022  | 828.123244  |
| TQEAMEAALAMEKNLNQALLDLHALGSAR         | P29391 | 0          | N-term +28.03 Da, K +28.03 Da,             | 7112.981445 | 4 | 792.6699829 | 792.1653314 |
| AINLPLSPISFELDPEDTLLEENEVR            | Q9EPC1 | 0          | N-term +28.03 Da, K +28.03 Da,             | 7119.991699 | 3 | 995.1799927 | 994.5166484 |
| VPAGPGGSQQVDLASVLTPEIMAPILANADVQER    | Q9JKV1 | 0          | N-term +28.03 Da, K +28.03 Da,             | 7134.382324 | 3 | 1158.609985 | 1157.943256 |
| VPAGPGGSQQVDLASVLTPEIMAPILANADVQER    | Q9JKV1 | 0          | N-term +28.03 Da, K +28.03 Da,             | 7135.436523 | 4 | 869.210022  | 868.7092609 |
| GSTLKETAIELGYLTAEQFDEWVKPKDMLGPK      | P97807 | 0          | N-term +28.03 Da, K +28.03 Da,             | 7142.560059 | 4 | 935.0100098 | 934.5045906 |
| AGDDMEVSATELMNINLKVVTR                | O88456 | 0          | N-term +28.03 Da, K +28.03 Da,             | 7144.001465 | 3 | 821.4299927 | 821.4258295 |
| TQEAMEAALAMEKNLNQALLDLHALGSAR         | P29391 | 0          | N-term +28.03 Da, K +28.03 Da,             | 7145.938965 | 4 | 792.166626  | 792.1653314 |
| DFQLIGIQDGYLSLLQDSGEVR                | P63242 | 0          | N-term +28.03 Da, K +28.03 Da,             | 7151.921875 | 2 | 1248.150024 | 1247.644843 |
| KIISLQQLLEDLSLNVADLSSLR               | P97372 | 0          | N-term +28.03 Da, K +28.03 Da,             | 7153.337402 | 3 | 866.4899902 | 866.8286086 |
| DFQLIGIQDGYLSLLQDSGEVR                | P63242 | 0          | N-term +28.03 Da, K +28.03 Da,             | 7154.913086 | 3 | 832.0999756 | 832.0989873 |
| EVDADGNGTIDFPEFLTMAR                  | P62204 | 0          | N-term +28.03 Da, K +28.03 Da,             | 7155.697754 | 2 | 1179.540039 | 1179.04305  |
| VVGEDTKAQLLGGVDEALNLLQDMQSR           | Q8C7G5 | 0          | N-term +28.03 Da, K +28.03 Da,             | 7160.168945 | 3 | 986.1900024 | 985.8533773 |
| VIQELRPTLNELGISTPEELGLDKV             | P12787 | 0.00081934 | N-term +28.03 Da, K +28.03 Da,             | 7164.562988 | 3 | 940.2000122 | 940.53034   |
| AGSEEDDEVVAMIKELLDTR                  | Q9QZ23 | 0          | N-term +28.03 Da, K +28.03 Da,             | 7165.5      | 3 | 759.3900146 | 759.3823954 |
| VPAGPGGSQQVDLASVLTPEIMAPILANADVQER    | Q9JKV1 | 0          | N-term +28.03 Da, K +28.03 Da,             | 7166.714355 | 3 | 1157.944458 | 1157.943256 |
| VPAGPGGSQQVDLASVLTPEIMAPILANADVQER    | Q9JKV1 | 0          | N-term +28.03 Da, K +28.03 Da,             | 7166.872559 | 4 | 869.210022  | 868.7092609 |
| QFGRPISSWTCLLDLEGLNMR                 | B2RXM5 | 0.04758086 | N-term +28.03 Da, K +28.03 Da,C +57.02 Da, | 7174.909668 | 2 | 1262.119995 | 1261.138149 |
| LDQNQEIIHDNAGDAFVGGFSLQVSDKPLTECIR    | P55264 | 0          | N-term +28.03 Da, K +28.03 Da,C +57.02 Da, | 7175.472656 | 3 | 1370.02002  | 1369.351081 |
| TQEAMEAALAMEKNLNQALLDLHALGSAR         | P29391 | 0          | N-term +28.03 Da, K +28.03 Da,             | 7177.491699 | 4 | 792.4099731 | 792.1653314 |
| SEAQVQASVVKVLTLELEQER                 | O08784 | 0          | N-term +28.03 Da, K +28.03 Da,             | 7187.5625   | 3 | 805.1199951 | 804.782999  |
| AAFDDLGVLALPSIAGAFR                   | P34914 | 0.0017819  | N-term +28.03 Da, K +28.03 Da,             | 7197.902832 | 3 | 645.3599854 | 644.6911623 |
| DLAILLGMLDPVEKDANNMPVTAR              | D3Z0Y2 | 0          | N-term +28.03 Da, K +28.03 Da,             | 7199.172363 | 3 | 885.1400146 | 884.8081623 |
| VPAGPGGSQQVDLASVLTPEIMAPILANADVQER    | Q9JKV1 | 0          | N-term +28.03 Da, K +28.03 Da,             | 7199.34668  | 3 | 1158.280029 | 1157.943256 |
| VIQELRPTLNELGISTPEELGLDKV             | P12787 | 0.00315347 | N-term +28.03 Da, K +28.03 Da,             | 7203.055664 | 3 | 940.5300293 | 940.53034   |
| DLAILLGMLDPVEKDANNMPVTAR              | D3Z0Y2 | 0          | N-term +28.03 Da, K +28.03 Da,             | 7210.877441 | 3 | 884.8099976 | 884.8081623 |
| DLAILLGMLDPVEKDANNMPVTAR              | D3Z0Y2 | 0          | N-term +28.03 Da, K +28.03 Da,             | 7211.12207  | 4 | 664.3599854 | 663.8579409 |
| AIAELDTLSEESYKDSTLIMQLLR              | P62259 | 0          | N-term +28.03 Da, K +28.03 Da,             | 7213.064941 | 3 | 933.1699829 | 932.4964192 |
| AIAELDTLSEESYKDSTLIMQLLR              | P62259 | 0          | N-term +28.03 Da, K +28.03 Da,             | 7218.047852 | 3 | 932.5       | 932.4964192 |
| TQEAMEAALAMEKNLNQALLDLHALGSAR         | P29391 | 0          | N-term +28.03 Da, K +28.03 Da,             | 7222.708984 | 4 | 792.4099731 | 792.1653314 |
| SEAQVQASVVKVLTLELEQER                 | O08784 | 0          | N-term +28.03 Da, K +28.03 Da,             | 7224.622559 | 3 | 805.4500122 | 804.782999  |
| VVDNPIYLSDMGAALTGAESHELQDVLEETNILKR   | Q8CGK3 | 0          | N-term +28.03 Da, K +28.03 Da,             | 7230.222168 | 4 | 975.2600098 | 975.0042153 |
| AGLPPLSATSFLEDLMR                     | Q75N73 | 0          | N-term +28.03 Da, K +28.03 Da,             | 7231.15918  | 2 | 981.0100098 | 981.0060635 |

|                                      |        |            |                                             |             |   |             |             |
|--------------------------------------|--------|------------|---------------------------------------------|-------------|---|-------------|-------------|
| ASVYESPGFFLNLEPIPGALDALR             | Q9JM14 | 0.00534759 | N-term +28.03 Da, K +28.03 Da,              | 7232.824219 | 3 | 869.460022  | 868.7951274 |
| AELTALESLEMGFPR                      | Q922Y1 | 0.00043497 | N-term +28.03 Da, K +28.03 Da,              | 7233.240234 | 3 | 602.3200073 | 602.3219701 |
| ALMLQGVDLLADAVAVTMGPKGR              | P63038 | 0          | N-term +28.03 Da, K +28.03 Da,              | 7237.953125 | 3 | 794.7800293 | 794.7797662 |
| ASVYESPGFFLNLEPIPGALDALR             | Q9JM14 | 0          | N-term +28.03 Da, K +28.03 Da,              | 7243.518066 | 2 | 1303.189941 | 1302.689053 |
| AIAELDTLSEESYKDSTLIMQLLR             | P62259 | 0          | N-term +28.03 Da, K +28.03 Da,              | 7250.491699 | 3 | 933.1599731 | 932.4964192 |
| TQEAMEAALAMEKLNQALLDLHALGSAR         | P29391 | 0          | N-term +28.03 Da, K +28.03 Da,              | 7255.090332 | 4 | 792.1658325 | 792.1653314 |
| AGLPPLSATSFLDLMDR                    | Q75N73 | 0          | N-term +28.03 Da, K +28.03 Da,              | 7261.800781 | 2 | 981         | 981.0060635 |
| VVDNPIYLSDMGAALTGAESHELQDVLEETNILKR  | Q8CGK3 | 0          | N-term +28.03 Da, K +28.03 Da,              | 7262.032715 | 4 | 975.25      | 975.0042153 |
| ALMLQGVDLLADAVAVTMGPKGR              | P63038 | 0          | N-term +28.03 Da, K +28.03 Da,              | 7268.342773 | 3 | 795.4500122 | 794.7797662 |
| TTEPVSELLKNYLDAQYGDIGITPPQCF         | P18242 | 0.00114679 | N-term +28.03 Da, K +28.03 Da, C +57.02 Da, | 7271.466797 | 3 | 1149.569946 | 1149.233924 |
| SSVQLLAAEAVALDMLDLGAAR               | Q9D3D9 | 0          | N-term +28.03 Da, K +28.03 Da,              | 7285.689453 | 2 | 1166.619995 | 1165.617239 |
| AIAELDTLSEESYKDSTLIMQLLR             | P62259 | 0.00043122 | N-term +28.03 Da, K +28.03 Da,              | 7288.143555 | 3 | 932.8300171 | 932.4964192 |
| SSVQLLAAEAVALDMLDLGAAR               | Q9D3D9 | 0          | N-term +28.03 Da, K +28.03 Da,              | 7288.533691 | 3 | 777.75      | 777.4139182 |
| FYTKQILEGLKYLHENQIVHR                | A2AQW0 | 0.03128461 | N-term +28.03 Da, K +28.03 Da,              | 7293.212891 | 2 | 1357.25     | 1357.263053 |
| MNVPAGPGGSQQVDLASVLTPEIMAPILANADVQER | Q9JKV1 | 0          | N-term +28.03 Da, K +28.03 Da,              | 7293.373047 | 4 | 930.2299805 | 929.9801142 |
| EFGFEIPDIDAEKLMCPQEIVDYIADKKDVYE     | Q9CR21 | 0          | N-term +28.03 Da, K +28.03 Da,              | 7294.024902 | 4 | 984.2399902 | 983.737256  |
| PHWVAAERTEKNGVQR                     | Q9Z1D8 | 0.01140216 | N-term +28.03 Da, K +28.03 Da,              | 7296.705078 | 2 | 967.5114746 | 967.5213946 |
| ALTPLQEEMAGLLQQIEVER                 | Q9EQI8 | 0          | N-term +28.03 Da, K +28.03 Da,              | 7299.104492 | 3 | 766.4099731 | 766.0787581 |
| SSVQLLAAEAVALDMLDLGAAR               | Q9D3D9 | 0          | N-term +28.03 Da, K +28.03 Da,              | 7299.736328 | 3 | 777.4199829 | 777.4139182 |
| MITSAAGIISLLDEEEPQLKEF               | Q3TXS7 | 0          | N-term +28.03 Da, K +28.03 Da,              | 7301.271484 | 3 | 830.7723389 | 830.7731123 |
| VGWEQLLTIAR                          | P57780 | 0          | N-term +28.03 Da, K +28.03 Da,              | 7305.191895 | 2 | 707.4000244 | 707.9062796 |
| MNVPAGPGGSQQVDLASVLTPEIMAPILANADVQER | Q9JKV1 | 0          | N-term +28.03 Da, K +28.03 Da,              | 7306.038574 | 3 | 1240.300049 | 1239.637727 |
| SSVQLLAAEAVALDMLDLGAAR               | Q9D3D9 | 0          | N-term +28.03 Da, K +28.03 Da,              | 7309.625977 | 2 | 1165.619995 | 1165.617239 |
| MITSAAGIISLLDEEEPQLKEF               | Q3TXS7 | 0          | N-term +28.03 Da, K +28.03 Da,              | 7311.231445 | 2 | 1246.160034 | 1245.65603  |
| SLGYDLPMVEEGEPDPEFEAILDTPVDPNR       | P16546 | 0          | N-term +28.03 Da, K +28.03 Da,              | 7315.883789 | 3 | 1093.189941 | 1092.514868 |
| SSVQLLAAEAVALDMLDLGAAR               | Q9D3D9 | 0          | N-term +28.03 Da, K +28.03 Da,              | 7330.991211 | 3 | 777.4099731 | 777.4139182 |
| SSVQLLAAEAVALDMLDLGAAR               | Q9D3D9 | 0          | N-term +28.03 Da, K +28.03 Da,              | 7333.573242 | 2 | 1166.619995 | 1165.617239 |
| MITSAAGIISLLDEEEPQLKEF               | Q3TXS7 | 0          | N-term +28.03 Da, K +28.03 Da,              | 7337.393555 | 3 | 831.1099854 | 830.7731123 |
| DLGPSMLGDVLSIMDKDQWGSEEEEEAGGYR      | Q9JM96 | 0.02932961 | N-term +28.03 Da, K +28.03 Da,              | 7338.369141 | 3 | 1157.859985 | 1157.197322 |
| MITSAAGIISLLDEEEPQLKEF               | Q3TXS7 | 0.00043066 | N-term +28.03 Da, K +28.03 Da,              | 7343.614258 | 2 | 1246.660034 | 1245.65603  |
| ENVFKLLPQVMYLDGYDR                   | O35381 | 0          | N-term +28.03 Da, K +28.03 Da,              | 7347.961426 | 3 | 752.7299805 | 752.7292887 |
| LVTLEEFLLASTQR                       | Q02819 | 0          | N-term +28.03 Da, K +28.03 Da,              | 7349.066895 | 2 | 767.4199829 | 767.9274097 |
| LHTPMYLLANFSFLEIYVYVSTVPMNLANFLSDTK  | E9PV79 | 0.00992556 | N-term +28.03 Da, K +28.03 Da,              | 7355.294434 | 4 | 1062.790039 | 1062.30564  |
| SSVQLLAAEAVALDMLDLGAAR               | Q9D3D9 | 0          | N-term +28.03 Da, K +28.03 Da,              | 7362.232422 | 3 | 777.75      | 777.4139182 |
| ALMLQGVDLLADAVAVTMGPKGR              | P63038 | 0          | N-term +28.03 Da, K +28.03 Da,              | 7363.428223 | 3 | 795.1099854 | 794.7797662 |
| MEDEFGEIPDIDAEKLMCPQEIVDYIADKKDVYE   | Q9CR21 | 0          | N-term +28.03 Da, K +28.03 Da,              | 7368.027832 | 4 | 1077.76001  | 1077.514762 |
| LENVPLAEDFTEILSR                     | P21614 | 0.00111317 | N-term +28.03 Da, K +28.03 Da,              | 7377.06543  | 2 | 995.039978  | 994.0409607 |
| VNIAQLLPQEDLEALVMPTLR                | Q76MZ3 | 0          | N-term +28.03 Da, K +28.03 Da,              | 7379.111328 | 3 | 798.1199951 | 797.7820529 |
| AEFEDLDSLLSALSNEESLGNR               | Q8BGD9 | 0          | N-term +28.03 Da, K +28.03 Da,              | 7403.725586 | 3 | 851.0900269 | 850.757179  |
| AEFEDLDSLLSALSNEESLGNR               | Q8BGD9 | 0          | N-term +28.03 Da, K +28.03 Da,              | 7406.935059 | 3 | 850.7600098 | 850.757179  |

|                                    |        |            |                                |             |   |             |             |
|------------------------------------|--------|------------|--------------------------------|-------------|---|-------------|-------------|
| AEFEDLDSLLSALSNEESLGNR             | Q8BGD9 | 0          | N-term +28.03 Da, K +28.03 Da, | 7408.747559 | 2 | 1275.630005 | 1275.63213  |
| VDMDGVLADFESGLLQGFR                | Q9JM14 | 0          | N-term +28.03 Da, K +28.03 Da, | 7409.644043 | 2 | 1049.02002  | 1049.019703 |
| AEFEDLDSLLSALSNEESLGNR             | Q8BGD9 | 0          | N-term +28.03 Da, K +28.03 Da, | 7412.679688 | 2 | 1276.640015 | 1275.63213  |
| AATAPLLEAVDNLSAFASNPEFSSVPAQISPEGR | P26039 | 0.04397087 | N-term +28.03 Da, K +28.03 Da, | 7422.079102 | 3 | 1162.599976 | 1162.258009 |
| SSVQLLAEEAVTLDMLDLGAAR             | Q9D3D9 | 0.00042882 | N-term +28.03 Da, K +28.03 Da, | 7423.197754 | 3 | 777.0800171 | 777.4139182 |
| SSEVGVDAMLGDFVNMVMEKGIIDPTKVVR     | P63038 | 0          | N-term +28.03 Da, K +28.03 Da, | 7424.469238 | 4 | 814.4299927 | 814.1766362 |
| ADSSVQLLAEEAVTLDMLDLGAAR           | Q9D3D9 | 0          | N-term +28.03 Da, K +28.03 Da, | 7425.583008 | 3 | 840.0999756 | 839.4352709 |
| LVGFTNKGTEDFIVESLDASFR             | Q9CY50 | 0.00999063 | N-term +28.03 Da, K +28.03 Da, | 7429.54541  | 3 | 834.0999756 | 834.4355993 |
| ADSSVQLLAEEAVTLDMLDLGAAR           | Q9D3D9 | 0          | N-term +28.03 Da, K +28.03 Da, | 7435.127441 | 3 | 839.4299927 | 839.4352709 |
| IKEDDDKTVMDLAVVLFETATLR            | P08113 | 0.00177936 | N-term +28.03 Da, K +28.03 Da, | 7435.432617 | 4 | 709.8800049 | 709.6319586 |
| AEFEDLDSLLSALSNEESLGNR             | Q8BGD9 | 0          | N-term +28.03 Da, K +28.03 Da, | 7438.662109 | 3 | 851.0999756 | 850.757179  |
| STIIDDEDNPVDEYQIFKAIFQTIQNR        | Q9EPL8 | 0.04170051 | N-term +28.03 Da, K +28.03 Da, | 7447.498047 | 3 | 1090.540039 | 1090.217262 |
| LNPDNSFEILVDQSVVNSGNLLNDMTPPVNPSR  | P35564 | 0          | N-term +28.03 Da, K +28.03 Da, | 7448.831543 | 3 | 1208.939941 | 1208.605192 |
| ADSSVQLLAEEAVTLDMLDLGAAR           | Q9D3D9 | 0          | N-term +28.03 Da, K +28.03 Da, | 7449.380859 | 2 | 1259.150024 | 1258.649268 |
| NADSSVQLLAEEAVTLDMLDLGAAR          | Q9D3D9 | 0          | N-term +28.03 Da, K +28.03 Da, | 7453.169922 | 3 | 877.4500122 | 877.4495803 |
| IKEDDDKTVMDLAVVLFETATLR            | P08113 | 0.00082781 | N-term +28.03 Da, K +28.03 Da, | 7453.964355 | 3 | 946.5200195 | 945.8401859 |
| LNPDNSFEILVDQSVVNSGNLLNDMTPPVNPSR  | P35564 | 0.00084282 | N-term +28.03 Da, K +28.03 Da, | 7456.191406 | 4 | 906.9500122 | 906.7057129 |
| ADSSVQLLAEEAVTLDMLDLGAAR           | Q9D3D9 | 0          | N-term +28.03 Da, K +28.03 Da, | 7458.844238 | 3 | 840.0999756 | 839.4352709 |
| RQLSPERPVLMEAEENTFDLNTAGPSKK       | C3S7Q5 | 0.02053804 | N-term +28.03 Da, K +28.03 Da, | 7459.036133 | 3 | 1206.589966 | 1205.943039 |
| LNPDNSFEILVDQSVVNSGNLLNDMTPPVNPSR  | P35564 | 0          | N-term +28.03 Da, K +28.03 Da, | 7465.465332 | 4 | 906.710022  | 906.7057129 |
| DVTFSPATIEEELIKF                   | Q9CXI5 | 0          | N-term +28.03 Da, K +28.03 Da, | 7468.475586 | 2 | 948.0083618 | 948.0060551 |
| EAI AELDTLSEESYK D STLIMQLLR       | P63101 | 0          | N-term +28.03 Da, K +28.03 Da, | 7468.900391 | 3 | 975.8499756 | 975.5106173 |
| RQARMDY SFDITAEDPVWR               | O54824 | 0.0150015  | N-term +28.03 Da, K +28.03 Da, | 7478.062988 | 2 | 1193.599976 | 1192.576239 |
| LNPDNSFEILVDQSVVNSGNLLNDMTPPVNPSR  | P35564 | 0          | N-term +28.03 Da, K +28.03 Da, | 7479.936035 | 3 | 1209.27002  | 1208.605192 |
| DVTFSPATIEEELIKF                   | Q9CXI5 | 0          | N-term +28.03 Da, K +28.03 Da, | 7480.423828 | 3 | 632.3400269 | 632.3397956 |
| NADSSVQLLAEEAVTLDMLDLGAAR          | Q9D3D9 | 0          | N-term +28.03 Da, K +28.03 Da, | 7481.437988 | 2 | 1316.160034 | 1315.670732 |
| ADSSVQLLAEEAVTLDMLDLGAAR           | Q9D3D9 | 0          | N-term +28.03 Da, K +28.03 Da, | 7482.130859 | 2 | 1259.150024 | 1258.649268 |
| NADSSVQLLAEEAVTLDMLDLGAAR          | Q9D3D9 | 0          | N-term +28.03 Da, K +28.03 Da, | 7484.585938 | 3 | 877.4500122 | 877.4495803 |
| NADSSVQLLAEEAVTLDMLDLGAAR          | Q9D3D9 | 0          | N-term +28.03 Da, K +28.03 Da, | 7487.874023 | 3 | 878.1199951 | 877.4495803 |
| ADSSVQLLAEEAVTLDMLDLGAAR           | Q9D3D9 | 0          | N-term +28.03 Da, K +28.03 Da, | 7492.202637 | 3 | 839.4336548 | 839.4352709 |
| LNPDNSFEILVDQSVVNSGNLLNDMTPPVNPSR  | P35564 | 0          | N-term +28.03 Da, K +28.03 Da, | 7496.807617 | 4 | 907.2000122 | 906.7057129 |
| NDFQLIGIQDGYLSLLQDSGEVR            | P63242 | 0          | N-term +28.03 Da, K +28.03 Da, | 7498.824707 | 2 | 1305.160034 | 1304.666307 |
| DVTFSPATIEEELIKF                   | Q9CXI5 | 0          | N-term +28.03 Da, K +28.03 Da, | 7499.829102 | 2 | 948         | 948.0060551 |
| SEQAPVMSEDELVSII DGVLR             | Q8K5B2 | 0          | N-term +28.03 Da, K +28.03 Da, | 7501.04834  | 2 | 1158.089966 | 1158.093597 |
| SEQAPVMSEDELVSII DGVLR             | Q8K5B2 | 0          | N-term +28.03 Da, K +28.03 Da, | 7505.86377  | 2 | 1159.089966 | 1158.093597 |
| NDFQLIGIQDGYLSLLQDSGEVR            | P63242 | 0.00143421 | N-term +28.03 Da, K +28.03 Da, | 7510.712402 | 3 | 870.7700195 | 870.1132967 |
| ADSSVQLLAEEAVTLDMLDLGAAR           | Q9D3D9 | 0          | N-term +28.03 Da, K +28.03 Da, | 7513.431152 | 2 | 1259.650024 | 1258.649268 |
| ERIFARETGQNGYLNDIRLSKEAFSSSSHK     | Q80TM6 | 0.01333737 | N-term +28.03 Da, K +28.03 Da, | 7516.076172 | 3 | 1176.26001  | 1175.613009 |
| ADSSVQLLAEEAVTLDMLDLGAAR           | Q9D3D9 | 0          | N-term +28.03 Da, K +28.03 Da, | 7522.746094 | 3 | 839.4400024 | 839.4352709 |
| ADSSVQLLAEEAVTLDMLDLGAAR           | Q9D3D9 | 0          | N-term +28.03 Da, K +28.03 Da, | 7545.034668 | 2 | 1259.650024 | 1258.649268 |

|                                        |        |            |                                             |             |   |             |             |
|----------------------------------------|--------|------------|---------------------------------------------|-------------|---|-------------|-------------|
| AYVPVQLSEVGQQVEVELLGNYPATIIQEPLVLTEPAR | Q9DBT9 | 0.01002506 | N-term +28.03 Da, K +28.03 Da,              | 7553.015625 | 4 | 1088.109985 | 1087.601717 |
| SSEVGYDAMLGDFVNMVEKGIIDPTKVVR          | P63038 | 0          | N-term +28.03 Da, K +28.03 Da,              | 7554.720215 | 4 | 814.6799927 | 814.1766362 |
| ADSSVQLLAEEAVTLDMLDLGAAR               | Q9D3D9 | 0          | N-term +28.03 Da, K +28.03 Da,              | 7554.851563 | 3 | 839.4299927 | 839.4352709 |
| DAIAELDTLNEDSYKDSTLIMQLLR              | P61982 | 0          | N-term +28.03 Da, K +28.03 Da,              | 7569.688965 | 3 | 975.8400269 | 975.1704836 |
| IKEDDDKTVMDLAVLVFETATLR                | P08113 | 0.00998752 | N-term +28.03 Da, K +28.03 Da,              | 7572.092773 | 4 | 709.8800049 | 709.6319586 |
| SSEVGYDAMLGDFVNMVEKGIIDPTKVVR          | P63038 | 0          | N-term +28.03 Da, K +28.03 Da,              | 7577.242676 | 3 | 1085.910034 | 1085.233089 |
| ADSSVQLLAEEAVTLDMLDLGAAR               | Q9D3D9 | 0          | N-term +28.03 Da, K +28.03 Da,              | 7579.598633 | 2 | 1259.650024 | 1258.649268 |
| DAIAELDTLNEDSYKDSTLIMQLLR              | P61982 | 0          | N-term +28.03 Da, K +28.03 Da,              | 7579.854004 | 4 | 731.8800049 | 731.6296818 |
| SSSEVGYDAMLGDFVNMVEKGIIDPTKVVR         | P63038 | 0.00084317 | N-term +28.03 Da, K +28.03 Da,              | 7584.337891 | 4 | 836.4199829 | 835.9346435 |
| SSEVGYDAMLGDFVNMVEKGIIDPTKVVR          | P63038 | 0          | N-term +28.03 Da, K +28.03 Da,              | 7586.26416  | 4 | 814.1760254 | 814.1766362 |
| ADSSVQLLAEEAVTLDMLDLGAAR               | Q9D3D9 | 0          | N-term +28.03 Da, K +28.03 Da,              | 7587.092285 | 3 | 839.7700195 | 839.4352709 |
| DAIAELDTLNEDSYKDSTLIMQLLR              | P61982 | 0          | N-term +28.03 Da, K +28.03 Da,              | 7588.880859 | 2 | 1463.25     | 1462.252087 |
| DAIAELDTLNEDSYKDSTLIMQLLR              | P61982 | 0          | N-term +28.03 Da, K +28.03 Da,              | 7600.701172 | 3 | 975.5       | 975.1704836 |
| SEVGYDAMLGDFVNMVEKGIIDPTKVVR           | P63038 | 0          | N-term +28.03 Da, K +28.03 Da,              | 7601.85791  | 4 | 792.6699829 | 792.4186289 |
| IKEDDDKTVMDLAVLVFETATLR                | P08113 | 0.00143215 | N-term +28.03 Da, K +28.03 Da,              | 7603.297363 | 4 | 709.8800049 | 709.6319586 |
| TNLSILELHGNYFDCTCDISDFRSWLDENLNITPK    | P58682 | 0.0317943  | N-term +28.03 Da, K +28.03 Da,              | 7611.868164 | 4 | 1093.530029 | 1093.283159 |
| ADSSVQLLAEEAVTLDMLDLGAAR               | Q9D3D9 | 0          | N-term +28.03 Da, K +28.03 Da,              | 7618.169922 | 3 | 839.4299927 | 839.4352709 |
| LQSSSEVGYDAMLGDFVNMVEKGIIDPTKVVR       | P63038 | 0          | N-term +28.03 Da, K +28.03 Da,              | 7620.192383 | 4 | 896.4699707 | 896.2203041 |
| ILNPDNSFEILVDQSVVNSGNLLNDMTPPVNPSPR    | P35564 | 0          | N-term +28.03 Da, K +28.03 Da,              | 7620.51709  | 3 | 1246.630005 | 1246.29988  |
| RGTRATGHYNTISRMDRHRVMDHYSDDRSHFLTLPR   | D9HP81 | 0.01385125 | N-term +28.03 Da, K +28.03 Da,              | 7623.873535 | 3 | 1529.069946 | 1529.077687 |
| IKEDDDKTVMDLAVLVFETATLR                | P08113 | 0.03990228 | N-term +28.03 Da, K +28.03 Da,              | 7637.661133 | 4 | 709.6300049 | 709.6319586 |
| GNLPFNTVQGDIDAIKDLISIR                 | Q9WUK2 | 0          | N-term +28.03 Da, K +28.03 Da,              | 7658.918457 | 3 | 830.4400024 | 830.451472  |
| RPLDAVELAEPEEVEVLEPEEDEFQFLLPVIHEMR    | Q9CQL7 | 0          | N-term +28.03 Da, K +28.03 Da,              | 7660.410645 | 4 | 1044.780029 | 1044.527789 |
| ADSSVQLLAEEAVTLDMLDLGAAR               | Q9D3D9 | 0          | N-term +28.03 Da, K +28.03 Da,              | 7663.058594 | 3 | 839.4356079 | 839.4352709 |
| ISNEQLTEELLMINDLNNVFLR                 | O88746 | 0.00281591 | N-term +28.03 Da, K +28.03 Da,              | 7664.045898 | 3 | 920.460022  | 920.8127414 |
| ADSSVQLLAEEAVTLDMLDLGAAR               | Q9D3D9 | 0          | N-term +28.03 Da, K +28.03 Da,              | 7682.514648 | 2 | 1259.150024 | 1258.649268 |
| DAITDEENDMLDLAFGLTDR                   | P46656 | 0          | N-term +28.03 Da, K +28.03 Da,              | 7704.037109 | 3 | 761.3499756 | 761.354617  |
| DAITDEENDMLDLAFGLTDR                   | P46656 | 0          | N-term +28.03 Da, K +28.03 Da,              | 7705.434082 | 2 | 1142.030029 | 1141.528287 |
| ASGLPLVTEETPPPGEAGSEEDDEVVAMIKELLDTR   | Q9QZ23 | 0.00834135 | N-term +28.03 Da, K +28.03 Da,              | 7736.024902 | 3 | 1317.329956 | 1316.660921 |
| LTDEEESSEDEERTGESVKGKSDLQP             | Q0KK56 | 0.00177809 | N-term +28.03 Da, K +28.03 Da,              | 7742.366211 | 3 | 1022.809998 | 1022.480881 |
| VGNLFPNTVQGDIDAIKDLISIR                | Q9WUK2 | 0          | N-term +28.03 Da, K +28.03 Da,              | 7750.366211 | 3 | 863.8099976 | 863.4742768 |
| VGNLFPNTVQGDIDAIKDLISIR                | Q9WUK2 | 0          | N-term +28.03 Da, K +28.03 Da,              | 7783.212402 | 3 | 863.8099976 | 863.4742768 |
| KFSSSTFEQVNLVKEVVS LTEECAEGADPTCYDTR   | P21614 | 0          | N-term +28.03 Da, K +28.03 Da, C +57.02 Da, | 7786.176758 | 4 | 1093.52002  | 1093.013184 |
| DSSVQLLAEEAVTLDMLDLGAAR                | Q9D3D9 | 0          | N-term +28.03 Da, K +28.03 Da,              | 7788.821289 | 3 | 816.0900269 | 815.7562329 |
| KFSSSTFEQVNLVKEVVS LTEECAEGADPTCYDTR   | P21614 | 0          | N-term +28.03 Da, K +28.03 Da, C +57.02 Da, | 7794.238281 | 4 | 1092.76001  | 1093.013184 |
| DSSVQLLAEEAVTLDMLDLGAAR                | Q9D3D9 | 0          | N-term +28.03 Da, K +28.03 Da,              | 7794.776855 | 2 | 1223.640015 | 1223.130711 |
| DQALSFLKDFLAGGIAAAVSKTAVAPIER          | P48962 | 0.00374022 | N-term +28.03 Da, K +28.03 Da,              | 7802.819336 | 4 | 762.1716919 | 761.6852195 |
| GVDNTFADELVELSTALEHQEY                 | O35658 | 0          | N-term +28.03 Da, K +28.03 Da,              | 7809.092285 | 2 | 1254.589966 | 1254.592474 |
| DSSVQLLAEEAVTLDMLDLGAAR                | Q9D3D9 | 0          | N-term +28.03 Da, K +28.03 Da,              | 7837.064941 | 3 | 816.0900269 | 815.7562329 |
| EEEDKKEVDGTVVGDIDLGTTYSCVGVFKNGR       | P20029 | 0.02147766 | N-term +28.03 Da, K +28.03 Da,              | 7858.10498  | 4 | 879.7000122 | 879.1999976 |

|                                          |        |            |                                             |             |   |             |             |
|------------------------------------------|--------|------------|---------------------------------------------|-------------|---|-------------|-------------|
| EREKQKKESEKER                            | Q5DTM8 | 0.01331316 | N-term +28.03 Da, K +28.03 Da,              | 7869.088379 | 2 | 978.5900269 | 979.0756688 |
| TKYFVSSGSVTVNADSSVQLLAEAEVTLDMDLGAAR     | Q9D3D9 | 0          | N-term +28.03 Da, K +28.03 Da,              | 7869.343262 | 3 | 1305.660034 | 1305.341634 |
| RRTWRPNPQQAFR                            | Q8R2N0 | 0.04533262 | N-term +28.03 Da, K +28.03 Da,              | 7917.85791  | 2 | 871.4699707 | 870.9794988 |
| QQQQQQFLAR                               | Q8BXA1 | 0.02978842 | N-term +28.03 Da, K +28.03 Da,              | 7975.023438 | 2 | 651.3400269 | 651.8492959 |
| SVTVNADSSVQLLAEAEVTLDMDLGAAR             | Q9D3D9 | 0          | N-term +28.03 Da, K +28.03 Da,              | 8168.055664 | 3 | 1006.52002  | 1006.188426 |
| EEVEGSLLLGSVQGYMEQASKTVQDALSSVQESDIAVVAR | P33622 | 0          | N-term +28.03 Da, K +28.03 Da,              | 8170.181641 | 4 | 1070.290039 | 1070.546711 |
| KKHRKNSRKHKK                             | A2AR02 | 0.03623978 | N-term +28.03 Da, K +28.03 Da,              | 8170.875    | 2 | 886.1099854 | 886.1045018 |
| ASEAIKGAVVGDIDLTNNSCVAVMEGKQAKVLENAEGAR  | P38647 | 0          | N-term +28.03 Da, K +28.03 Da,              | 8194.266602 | 4 | 1015.289978 | 1014.792157 |
| KRCPFRCRFQK                              | P33242 | 0.01553166 | N-term +28.03 Da, K +28.03 Da,              | 8232.436523 | 2 | 756.4199829 | 755.9103184 |
| KKDKDQDTDCGT                             | Q78WZ7 | 0.003465   | N-term +28.03 Da, K +28.03 Da, C +57.02 Da, | 8237.208008 | 2 | 768.4099731 | 768.9187276 |
| IQEELEKLR                                | Q99PL5 | 0.00833333 | N-term +14.02 Da, K +28.03 Da,              | 2226.860107 | 3 | 401.2399902 | 401.5766271 |
| PNDSSFQIVKNPR                            | Q61176 | 0          | N-term +14.02 Da, K +28.03 Da,              | 2358.374268 | 3 | 515.9500122 | 516.2843953 |
| PTKVAVAVDCGKNNVIR                        | Q8C196 | 0.00934579 | N-term +14.02 Da, K +28.03 Da, C +57.02 Da, | 2615.795166 | 4 | 489.5400085 | 489.7922811 |
| PKHEFSVDMTCEGCAEAVSR                     | O08997 | 0          | N-term +14.02 Da, K +28.03 Da, C +57.02 Da, | 2801.077393 | 2 | 1177.530029 | 1178.032455 |
| PGVTVKDVNQEFVR                           | Q9CZX8 | 0          | N-term +14.02 Da, K +28.03 Da,              | 2977.290771 | 3 | 587.3200073 | 587.6616431 |
| QKEFDPTITDGSLSGPSR                       | D3Z617 | 0          | N-term +14.02 Da, K +28.03 Da,              | 3111.612305 | 3 | 660.3400269 | 660.6742779 |
| HVGDGLGNVTAGKDGVANVSIEDR                 | P08228 | 0          | N-term +14.02 Da, K +28.03 Da,              | 3205.942139 | 3 | 789.7399902 | 790.0803672 |
| NELQELSTQGSR                             | Q06890 | 0.00884956 | N-term +14.02 Da,                           | 3412.237549 | 2 | 693.3599854 | 689.8521954 |
| PWQVLSTGGKEDVSYEER                       | Q9R257 | 0          | N-term +14.02 Da, K +28.03 Da,              | 3412.625244 | 3 | 708.6900024 | 709.0251993 |
| PNVLASEPEIPKIGR                          | Q9WTP6 | 0          | N-term +14.02 Da, K +28.03 Da,              | 3426.043701 | 3 | 555.3300171 | 555.6629838 |
| PGLPPSGSWQDLKDHMR                        | F6RTE1 | 0          | N-term +14.02 Da, K +28.03 Da,              | 3478.459961 | 4 | 492.75      | 492.2557972 |
| VPTQPTSGPVPTTQIQEASAEHPPAVAPR            | Q3U422 | 0          | N-term +14.02 Da,                           | 3480.273438 | 3 | 994.1900024 | 994.1894173 |
| VFDKDGNGYISAAELR                         | P62204 | 0          | N-term +14.02 Da, K +28.03 Da,              | 3482.253906 | 3 | 600.3099976 | 600.6494034 |
| ISQWAGPLCLQEVDEPPQHALR                   | P70296 | 0          | N-term +14.02 Da, C +57.02 Da,              | 3570.677734 | 3 | 854.4500122 | 854.4374972 |
| ISQWAGPLCLQEVDEPPQHALR                   | P70296 | 0          | N-term +14.02 Da, C +57.02 Da,              | 3573.893066 | 3 | 855.1199951 | 854.4374972 |
| VFDKDGNGYISAAELR                         | P62204 | 0.00961538 | N-term +14.02 Da, K +28.03 Da,              | 3577.134521 | 3 | 600.6400146 | 600.6494034 |
| QASGGPVDIGPEYQQDLDR                      | P97450 | 0          | N-term +14.02 Da,                           | 3584.754395 | 2 | 1031        | 1031.497943 |
| MILLEVNNR                                | Q9CVB6 | 0          | N-term +14.02 Da,                           | 3593.653564 | 2 | 565.8200073 | 559.8236652 |
| VFDKDGNGYISAAELR                         | P62204 | 0.00909091 | N-term +14.02 Da, K +28.03 Da,              | 3629.569092 | 3 | 600.3099976 | 600.6494034 |
| TNTCNKYGVSGYPTLKIFR                      | P27773 | 0          | N-term +14.02 Da, K +28.03 Da, C +57.02 Da, | 3709.38501  | 4 | 574.3068237 | 573.8109369 |
| PSKEVEEDEYKAFYKSF                        | P08113 | 0          | N-term +14.02 Da, K +28.03 Da,              | 3723.886719 | 4 | 549.7800293 | 550.0332947 |
| KKSLEDQVETLR                             | O08795 | 0.00877193 | N-term +14.02 Da, K +28.03 Da,              | 3727.767822 | 2 | 760.9400024 | 759.9486383 |
| PMLQTVAKNKDQGTIEDYVEGLR                  | Q60605 | 0.00980392 | N-term +14.02 Da, K +28.03 Da,              | 3733.232422 | 4 | 682.5999756 | 682.8560737 |
| IGHGAEYGAELER                            | P01942 | 0.01020408 | N-term +14.02 Da,                           | 3758.254639 | 2 | 773.9000244 | 773.8865696 |
| SIEALLEAGQAQDTQASHAEANQQQTR              | Q99PL5 | 0          | N-term +14.02 Da,                           | 3801.110596 | 3 | 971.1400146 | 971.4762865 |
| SILEAEGVFHR                              | Q8R422 | 0.01       | N-term +14.02 Da,                           | 3826.568848 | 2 | 638.8599854 | 637.8487264 |
| LLPPDAEGPHGQFVQDKKVEPW                   | P48758 | 0          | N-term +14.02 Da, K +28.03 Da,              | 3875.498291 | 4 | 641.3434448 | 640.8456714 |
| IRQNYSTEVEAAVNR                          | P29391 | 0.016      | N-term +14.02 Da,                           | 3875.915527 | 2 | 884.960022  | 883.9633404 |
| PSAMEVEEDDPVPEIR                         | Q01853 | 0          | N-term +14.02 Da,                           | 3922.914307 | 2 | 914.9299927 | 915.4354333 |
| TLSDYNIQKESTLHLVLR                       | P0CG49 | 0          | N-term +14.02 Da, K +28.03 Da,              | 3971.539307 | 3 | 725.4000244 | 725.7442555 |

|                                     |        |            |                                             |             |   |             |             |
|-------------------------------------|--------|------------|---------------------------------------------|-------------|---|-------------|-------------|
| PQMSEIETSQLEPEIAR                   | Q925N0 | 0.01612903 | N-term +14.02 Da,                           | 3973.973877 | 2 | 987.4799805 | 987.9961895 |
| PAPATTFAHLDAATVLSR                  | P56480 | 0          | N-term +14.02 Da,                           | 4050.537842 | 3 | 629.0100098 | 629.3442029 |
| PAPATTFAHLDAATVLSR                  | P56480 | 0          | N-term +14.02 Da,                           | 4060.576904 | 2 | 943.0100098 | 943.5126661 |
| IIAEGANGPTTPEADKIFLER               | P26443 | 0          | N-term +14.02 Da, K +28.03 Da,              | 4083.039307 | 3 | 762.7399902 | 763.0829372 |
| IIAEGANGPTTPEADKIFLER               | P26443 | 0.03076923 | N-term +14.02 Da, K +28.03 Da,              | 4085.962646 | 3 | 763.0700073 | 763.0829372 |
| PAPPPGSPPLYPAFPER                   | Q8K010 | 0.00826446 | N-term +14.02 Da,                           | 4103.649902 | 3 | 602.6500244 | 602.9911005 |
| PLANDVAEQWKTNEAQAIETAR              | P61089 | 0          | N-term +14.02 Da, K +28.03 Da,              | 4157.112793 | 3 | 833.7600098 | 834.099539  |
| PTVDDTSAAVTEEMPPLGDDDTSR            | P07901 | 0          | N-term +14.02 Da,                           | 4161.090332 | 2 | 1332.589966 | 1333.095215 |
| PTVDDTSAAVTEEMPPLGDDDTSR            | P07901 | 0          | N-term +14.02 Da,                           | 4166.019531 | 3 | 888.7299805 | 889.0659019 |
| HVGDLGNVTAGKDGVANVSIEDR             | P08228 | 0          | N-term +14.02 Da, K +28.03 Da,              | 4166.704102 | 2 | 1185.099976 | 1184.616913 |
| ATDFVVPGPVKVEITYTPKDGTKVQVY         | O88844 | 0.01626016 | N-term +14.02 Da, K +28.03 Da,              | 4169.568848 | 4 | 753.6599731 | 753.9140175 |
| PTVDDTSAAVTEEMPPLGDDDTSR            | P07901 | 0          | N-term +14.02 Da,                           | 4176.290039 | 2 | 1333.089966 | 1333.095215 |
| IGPVEVENALAEHPVAESAVVSSPKDR         | Q91VA0 | 0          | N-term +14.02 Da, K +28.03 Da,              | 4209.249023 | 4 | 758.3900146 | 758.6490812 |
| MGLEDERKMLTGSQDPKEEEEEELVDPLTTVR    | P99028 | 0          | N-term +14.02 Da, K +28.03 Da,              | 4213.878906 | 3 | 1236.26001  | 1235.946444 |
| HVGDLGNVTAGKDGVANVSIEDR             | P08228 | 0          | N-term +14.02 Da, K +28.03 Da,              | 4220.629883 | 2 | 1184.599976 | 1184.616913 |
| NFNVEKINGEWHITILASDKR               | B5X0G2 | 0          | N-term +14.02 Da, K +28.03 Da,              | 4259.773438 | 4 | 639.8499756 | 640.1038457 |
| AAASDVLELTDENFESR                   | P27773 | 0          | N-term +14.02 Da,                           | 4275.158203 | 2 | 943.4431152 | 942.4552119 |
| PVPEDKYALVDQEEKEDVKSCAEFVSGSCLR     | Q9DCX2 | 0          | N-term +14.02 Da, K +28.03 Da, C +57.02 Da, | 4302.276855 | 4 | 939.2199707 | 939.4778142 |
| VSEFELFADKVPKTAENFR                 | P17742 | 0          | N-term +14.02 Da, K +28.03 Da,              | 4363.737793 | 4 | 543.2999878 | 543.5531912 |
| PMNIQLVTSQIDTQR                     | O08583 | 0          | N-term +14.02 Da,                           | 4365.547852 | 3 | 587.3099976 | 587.6506384 |
| AFNKELDPVQKLFVDKIR                  | P97450 | 0          | N-term +14.02 Da, K +28.03 Da,              | 4371.097656 | 3 | 755.1300049 | 754.452524  |
| STMKPVQKVLLEDSDLKSDIDEIVLVGGSTR     | P20029 | 0          | N-term +14.02 Da, K +28.03 Da,              | 4421.929199 | 3 | 1172.660034 | 1172.991764 |
| AILVDLEPGTMDSVR                     | P99024 | 0.00892857 | N-term +14.02 Da,                           | 4452.029785 | 2 | 816.4299927 | 816.9374137 |
| SFPTLKFFPASADR                      | P09103 | 0          | N-term +14.02 Da, K +28.03 Da,              | 4490.675293 | 3 | 543.2999878 | 543.6330243 |
| LINEKGETFQLMGLYGR                   | B5X0G2 | 0          | N-term +14.02 Da, K +28.03 Da,              | 4517.365723 | 2 | 1064.560059 | 1065.059124 |
| NQIFINNEWHDAVSR                     | P47738 | 0          | N-term +14.02 Da,                           | 4596.480469 | 2 | 930.4540405 | 930.4635074 |
| KGIKSVTELNGDTITNTMTLGDIVYKR         | P12710 | 0          | N-term +14.02 Da, K +28.03 Da,              | 4630.344238 | 4 | 768.1799927 | 767.932313  |
| QLLLESQSLDEAKSEAQQSDELALVR          | Q99PL5 | 0          | N-term +14.02 Da, K +28.03 Da,              | 4673.478027 | 3 | 1076.910034 | 1077.249002 |
| QLLLESQSLDEAKSEAQQSDELALVR          | Q99PL5 | 0          | N-term +14.02 Da, K +28.03 Da,              | 4680.269531 | 3 | 1077.25     | 1077.249002 |
| KTFSHELSDFGLESTTGVEPVAIR            | P27773 | 0          | N-term +14.02 Da, K +28.03 Da,              | 4727.304199 | 3 | 921.8200073 | 922.1570542 |
| LEAELAAHEPAIQGVLDTGKKSDDNTIGQEEIQQR | P16546 | 0          | N-term +14.02 Da, K +28.03 Da,              | 4727.510254 | 4 | 998.0300293 | 998.2761725 |
| PEFLEDPSVLTKDKLSELVANNVTLPAGEQR     | Q61029 | 0          | N-term +14.02 Da, K +28.03 Da,              | 4753.65625  | 3 | 1213.339966 | 1213.673312 |
| PEFLEDPSVLTKDKLSELVANNVTLPAGEQR     | Q61029 | 0          | N-term +14.02 Da, K +28.03 Da,              | 4760.49707  | 3 | 1213.670044 | 1213.673312 |
| PGLLLLGDEAPNFEANTTIGR               | O08709 | 0          | N-term +14.02 Da,                           | 4838.581543 | 2 | 1079.560059 | 1080.06071  |
| SSLSSAQADFNQLAELDR                  | P16546 | 0          | N-term +14.02 Da,                           | 4872.077148 | 2 | 984.9699707 | 984.9872105 |
| EGDVLTLLESER                        | P62858 | 0          | N-term +14.02 Da,                           | 4874.95459  | 2 | 688.8599854 | 689.367147  |
| PGLLLLGDEAPNFEANTTIGR               | O08709 | 0          | N-term +14.02 Da,                           | 4900.173828 | 2 | 1079.550049 | 1080.06071  |
| PGLLLLGDEAPNFEANTTIGR               | O08709 | 0          | N-term +14.02 Da,                           | 4910.121582 | 3 | 720.039978  | 720.376232  |
| LNQDQLDAVSKYQEVNTNLEFAKELQR         | Q60865 | 0          | N-term +14.02 Da, K +28.03 Da,              | 4958.393555 | 4 | 817.1799927 | 817.4321005 |
| PGLLLLGDEAPNFEANTTIGR               | O08709 | 0.03125    | N-term +14.02 Da,                           | 5033.666016 | 2 | 1079.550049 | 1080.06071  |

|                                      |        |            |                                            |             |   |             |             |
|--------------------------------------|--------|------------|--------------------------------------------|-------------|---|-------------|-------------|
| QHSKVAQTQAGEAAGGWTGQESLSDSPPEMWELLQR | Q9CZN7 | 0          | N-term +14.02 Da, K +28.03 Da,             | 5171.986328 | 3 | 1324.630005 | 1324.965889 |
| SSILLDVKPWDDDETDMTKLEECVR            | O70251 | 0          | N-term +14.02 Da, K +28.03 Da,C +57.02 Da, | 5263.154785 | 4 | 738.6199951 | 738.8740352 |
| PPQLHNGLDLSAKVIQGSLSLPPQAVR          | Q9Z2V4 | 0          | N-term +14.02 Da, K +28.03 Da,             | 5353.77832  | 4 | 734.4000244 | 733.9067921 |
| PPQLHNGLDLSAKVIQGSLSLPPQAVR          | Q9Z2V4 | 0          | N-term +14.02 Da, K +28.03 Da,             | 5355.512695 | 4 | 733.6599731 | 733.9067921 |
| FDPFADATKGGDLLPAGTEDYIHIR            | Q9CXU9 | 0.00917431 | N-term +14.02 Da, K +28.03 Da,             | 5362.379883 | 4 | 706.0999756 | 706.356601  |
| ASDPFADASKGDDLLPAGTEDYIHIR           | J3QPZ8 | 0          | N-term +14.02 Da, K +28.03 Da,             | 5373.672363 | 3 | 941.1300049 | 940.4680688 |
| SDFPFADATKGGDLLPAGTEDYIHIR           | Q9CXU9 | 0.00925926 | N-term +14.02 Da, K +28.03 Da,             | 5377.850098 | 4 | 727.8599854 | 728.1146083 |
| PLVPPQLTIKDFYMTDSISR                 | Q91VD9 | 0.00990099 | N-term +14.02 Da, K +28.03 Da,             | 5414.509277 | 3 | 789.4299927 | 789.4328012 |
| TLVGYDLVPEPKIIDAALR                  | P12787 | 0          | N-term +14.02 Da, K +28.03 Da,             | 5438.561523 | 3 | 709.75      | 710.0857299 |
| TLNEDSYKDDSTLIMQLLR                  | P61982 | 0.00952381 | N-term +14.02 Da, K +28.03 Da,             | 5513.069824 | 3 | 728.7299805 | 729.0576231 |
| PTGGAGAVAMLIGPKAPLVLEQGLR            | P54869 | 0          | N-term +14.02 Da, K +28.03 Da,             | 5522.609375 | 2 | 1230.719971 | 1231.222304 |
| PPQLHNGLDLSAKVIQGSLSLPPQAVR          | Q9Z2V4 | 0.00900901 | N-term +14.02 Da, K +28.03 Da,             | 5606.923828 | 4 | 733.9000244 | 733.9067921 |
| VEQIAAIAQELNELDYDSSHNVNTR            | P57780 | 0          | N-term +14.02 Da,                          | 5622.175293 | 3 | 974.4799805 | 974.8141279 |
| TQVPEVFLSKVLEPTLKTLR                 | P21614 | 0          | N-term +14.02 Da, K +28.03 Da,             | 5628.343262 | 4 | 593.3599854 | 593.614786  |
| VTVKHLEDIVEKLGEESSDQVR               | Q99PL5 | 0          | N-term +14.02 Da, K +28.03 Da,             | 5640.927246 | 4 | 713.6599731 | 713.9090007 |
| PEQVAELKQELTALKSQLCSQSLEITR          | Q9Z1Z0 | 0          | N-term +14.02 Da, K +28.03 Da,C +57.02 Da, | 5656.740234 | 4 | 793.6799927 | 793.9378613 |
| VTGAVDVTLGAVQNSVDKTKSAMTSGVQSVMGSR   | Q9DBG5 | 0.01010101 | N-term +14.02 Da, K +28.03 Da,             | 5670.132324 | 4 | 863.9500122 | 864.2077091 |
| PYVIQELRPTLNELGISTPEELGLDKV          | P12787 | 0          | N-term +14.02 Da, K +28.03 Da,             | 5693.95752  | 3 | 1023.22998  | 1023.569124 |
| PYVIQELRPTLNELGISTPEELGLDKV          | P12787 | 0.00819672 | N-term +14.02 Da, K +28.03 Da,             | 5694.648438 | 3 | 1023.580017 | 1023.569124 |
| LKTVLELQYVLDKLGDDVDR                 | Q60865 | 0          | N-term +14.02 Da, K +28.03 Da,             | 5697.388184 | 4 | 601.8499756 | 602.0979634 |
| PPQLHNGLDLSAKVIQGSLSLPPQAVR          | Q9Z2V4 | 0          | N-term +14.02 Da, K +28.03 Da,             | 5797.710449 | 4 | 733.9000244 | 733.9067921 |
| VNPTVFFDITADDEPLGR                   | P17742 | 0          | N-term +14.02 Da,                          | 5801.316406 | 2 | 1011.5      | 1012.012697 |
| PPQLHNGLDLSAKVIQGSLSLPPQAVR          | Q9Z2V4 | 0          | N-term +14.02 Da, K +28.03 Da,             | 5812.179199 | 3 | 977.8599854 | 978.2066307 |
| TAVVVNIGKKLYEGKTKEVYELLDTPGR         | Q9DCL9 | 0          | N-term +14.02 Da, K +28.03 Da,             | 5825.851074 | 4 | 813.2199707 | 813.2272327 |
| TLQTLLEIDLDSMKNQINLENLSDGVEAR        | P05784 | 0          | N-term +14.02 Da, K +28.03 Da,             | 5866.033203 | 3 | 1106.890015 | 1106.901386 |
| LKDINKVAEDLESEGLMAEEVQAVQQQEVYGGAMPR | P16546 | 0          | N-term +14.02 Da, K +28.03 Da,             | 5927.450195 | 4 | 998.5100098 | 998.5104886 |
| AMTKDNLLGKFDLTGIPPAPR                | P17156 | 0.00840336 | N-term +14.02 Da, K +28.03 Da,             | 5934.442383 | 3 | 814.4500122 | 814.7911    |
| AMTRDNLLGRFDLTGIPPAPR                | P16627 | 0.00847458 | N-term +14.02 Da,                          | 5965.359863 | 3 | 814.4500122 | 814.7743319 |
| ALDFEQEMVTAASSSLERSYELPDGQVITIGNER   | Q8BFZ3 | 0.00869565 | N-term +14.02 Da,                          | 6021.407227 | 4 | 961.9699707 | 961.7243497 |
| EADIDGGQVNYEEFVQMMMTAK               | P62204 | 0          | N-term +14.02 Da, K +28.03 Da,             | 6134.031738 | 2 | 1267.560059 | 1268.075041 |
| EADIDGGQVNYEEFVQMMMTAK               | P62204 | 0          | N-term +14.02 Da, K +28.03 Da,             | 6136.442383 | 3 | 845.3800049 | 845.7191194 |
| KYEGGRELNDFISYLQR                    | P27773 | 0.03100775 | N-term +14.02 Da, K +28.03 Da,             | 6144.662598 | 3 | 711.6997681 | 711.7094337 |
| IEIESFFEGEDFSETLTR                   | P20029 | 0          | N-term +14.02 Da,                          | 6168.095215 | 2 | 1083.01001  | 1083.51801  |
| PTTQQSPQDEQEKLLEDAIQAVKVQSF          | Q9EQH3 | 0.00854701 | N-term +14.02 Da, K +28.03 Da,             | 6220.650391 | 3 | 1043.880005 | 1044.21541  |
| PKAYEIIQTMQENSGLVVTLPEVADEQVLQQALRP  | Q8VC12 | 0          | N-term +14.02 Da, K +28.03 Da,C +57.02 Da, | 6299.699219 | 4 | 1063.300049 | 1063.305412 |
| PDNFVFGQSGAGNNWAKGHYTEGAELVDSVLDVVR  | P68372 | 0.00862069 | N-term +14.02 Da, K +28.03 Da,             | 6314.214844 | 4 | 949.4699707 | 949.220934  |
| IEIESFFEGEDFSETLTR                   | P20029 | 0          | N-term +14.02 Da,                          | 6330.154785 | 2 | 1083.030029 | 1083.51801  |
| PVDFNGYWKMLSNENFEEYLR                | Q00915 | 0          | N-term +14.02 Da, K +28.03 Da,             | 6392.950195 | 3 | 899.0900269 | 899.4336416 |
| PSSISWDGLDPGKLYTLVLTPDAPSR           | P70296 | 0          | N-term +14.02 Da, K +28.03 Da,             | 6434.703613 | 3 | 982.1799927 | 982.515019  |
| TNISDEESEQATEMLVHNAQNLMSVKETVR       | Q64727 | 0          | N-term +14.02 Da, K +28.03 Da,             | 6471.501465 | 4 | 894.6799927 | 894.9384275 |

|                                          |        |            |                                            |             |   |             |             |
|------------------------------------------|--------|------------|--------------------------------------------|-------------|---|-------------|-------------|
| PVFDWKDPLILEEQLTADEKLIR                  | Q60759 | 0.00970874 | N-term +14.02 Da, K +28.03 Da,             | 6475.493164 | 3 | 947.5300293 | 947.8652114 |
| EPWDGKDGELPVEDDIDLSDVLEDDLEKDEL          | Q922R8 | 0          | N-term +14.02 Da, K +28.03 Da,             | 6480.550293 | 3 | 1205.569946 | 1205.905185 |
| EPWDGKDGELPVEDDIDLSDVLEDDLEKDEL          | Q922R8 | 0          | N-term +14.02 Da, K +28.03 Da,             | 6549.324219 | 3 | 1205.569946 | 1205.905185 |
| ILGPGAGEMVNEAALALEYGASCEDIAR             | O08749 | 0          | N-term +14.02 Da, C +57.02 Da,             | 6572.540039 | 3 | 965.1400146 | 965.473949  |
| ADGNGTIDFPEFLTMMAR                       | P62204 | 0          | N-term +14.02 Da,                          | 6714.771484 | 2 | 1001.47998  | 1001.974202 |
| ALEQQVEEMRTQLEEELEDELQATEDAKLR           | Q61879 | 0          | N-term +14.02 Da, K +28.03 Da,             | 6791.916016 | 4 | 873.2000122 | 873.1911481 |
| ALEQQVEEMKTLQLEEELEDELQATEDAKLR          | Q8VDD5 | 0          | N-term +14.02 Da, K +28.03 Da,             | 6824.458984 | 4 | 872.9500122 | 873.1974361 |
| DISLSEYKGYVVFYPLDFTFVCPTEIIAFSDR         | P35700 | 0          | N-term +14.02 Da, K +28.03 Da,C +57.02 Da, | 6824.973145 | 4 | 1072.540039 | 1072.550782 |
| VGDPLDLVALAEQVQKADEFIR                   | Q5EBG8 | 0          | N-term +14.02 Da, K +28.03 Da,             | 7027.204102 | 3 | 824.1199951 | 824.4566634 |
| PVKEEDDYDVMQDPEFLQSVLENLPGVDPNNAIR       | O35226 | 0          | N-term +14.02 Da, K +28.03 Da,             | 7106.079102 | 3 | 1334.650024 | 1334.654429 |
| PAWPGGSQQVDLASVLTPEIMAPILANADVQER        | D3YUD8 | 0          | N-term +14.02 Da,                          | 7154.446289 | 3 | 1163.949951 | 1164.273153 |
| VVDNPIYLSMDMGAALTGAESHELQDVLEETNILKR     | Q8CGK3 | 0          | N-term +14.02 Da, K +28.03 Da,             | 7224.746582 | 4 | 972.25      | 972.2542798 |
| KIYPPQLPRDYRPVHYFRPVVAATAENAH            | Q9DBM1 | 0.01587302 | N-term +14.02 Da, K +28.03 Da,             | 7274.82959  | 3 | 1182.959961 | 1183.308971 |
| SLGYDLPMVEEGEPDPEFAILDVDPNR              | P16546 | 0          | N-term +14.02 Da,                          | 7310.265137 | 3 | 1088.51001  | 1088.848287 |
| TPVVEGLTEGEEEEELRAELAKVEEIVTLR           | Q9CYZ2 | 0          | N-term +14.02 Da, K +28.03 Da,             | 7403.245605 | 4 | 853.710022  | 853.9581487 |
| ADQLTEEQIAEFKEAFSLFDKDGDTITTKELGTVMR     | P62204 | 0.01574803 | N-term +14.02 Da, K +28.03 Da,             | 7546.211914 | 3 | 1412.699951 | 1412.387461 |
| EAI AELDTLNEDSYKDSTLIMQLLR               | P68254 | 0          | N-term +14.02 Da, K +28.03 Da,             | 7569.688965 | 3 | 975.8400269 | 976.1757863 |
| EAMADLHTLSEDSYKDSTLIMQLLR                | O70456 | 0          | N-term +14.02 Da, K +28.03 Da,             | 7579.854004 | 4 | 731.8800049 | 732.1241187 |
| EAI AELDTLNEDSYKDSTLIMQLLR               | P68254 | 0.00943396 | N-term +14.02 Da, K +28.03 Da,             | 7588.880859 | 2 | 1463.25     | 1463.760041 |
| EAMADLHTLSEDSYKDSTLIMQLLR                | O70456 | 0          | N-term +14.02 Da, K +28.03 Da,             | 7600.701172 | 3 | 975.5       | 975.8297328 |
| PLGTPGSSPQQSDLASLIQAGQQFAQQMQQQNPEFVEQIR | Q8BJU0 | 0.03053435 | N-term +14.02 Da,                          | 7648.483398 | 4 | 1101.050049 | 1100.5501   |
| QQQQQQQNGGQNKVRPAK                       | P80206 | 0.03283582 | K +28.03 Da,                               | 956.6789551 | 3 | 477.2393494 | 477.2391858 |
| EGSGSSGTGEQKEDQKEEKQ                     | P38647 | 0          | K +28.03 Da,                               | 987.2800293 | 3 | 477.2392273 | 477.2391858 |
| EAHKSEIAHR                               | P07724 | 0          | K +28.03 Da,                               | 987.9066162 | 3 | 464.5599976 | 464.5560695 |
| TAE EDEADPKR                             | Q9D0J8 | 0          | K +28.03 Da,                               | 1011.434448 | 4 | 556.2600098 | 556.2659336 |
| EGSGSSGTGEQKEDQKEEKQ                     | P38647 | 0          | K +28.03 Da,                               | 1014.394226 | 3 | 741.6900024 | 741.3521527 |
| TAE EDEADPKR                             | Q9D0J8 | 0          | K +28.03 Da,                               | 1030.292358 | 3 | 411.2200012 | 411.217833  |
| TAE EDEADPKR                             | Q9D0J8 | 0          | K +28.03 Da,                               | 1038.46521  | 3 | 411.5499878 | 411.217833  |
| TAE EDEADPKR                             | Q9D0J8 | 0.01623377 | K +28.03 Da,                               | 1042.239014 | 2 | 421.230011  | 421.2299614 |
| PEPAKSAPAK                               | P10853 | 0          | K +28.03 Da,                               | 1049.102295 | 2 | 611.2860718 | 611.2856716 |
| NDDDEEEAAR                               | D3Z6I7 | 0          |                                            | 1050.404663 | 2 | 742.3347778 | 742.334603  |
| LCNGQDDCGDGS DER                         | Q91ZX7 | 0          | C +57.02 Da,                               | 1067.803223 | 3 | 584.6066284 | 584.6062637 |
| TDDEVVQR                                 | P08113 | 0          |                                            | 1073.741699 | 3 | 615.9299927 | 615.9292953 |
| LGKEVQAAQAR                              | P08226 | 0.01572327 | K +28.03 Da,                               | 1074.810913 | 3 | 742.0100098 | 741.3521527 |
| VMSQANVSR                                | P70670 | 0.01027397 |                                            | 1075.637085 | 3 | 473.2196655 | 473.2195688 |
| LCNGQDDCGDGS DER                         | Q91ZX7 | 0          | C +57.02 Da,                               | 1082.830811 | 2 | 709.3300171 | 709.3257149 |
| STGGKEDVSYEER                            | Q9R257 | 0          | K +28.03 Da,                               | 1090.230469 | 3 | 421.8763733 | 421.5493601 |
| TDENFESR                                 | P27773 | 0.02735562 |                                            | 1095.607544 | 2 | 539.2200928 | 539.2201865 |
| KVTTAPGR                                 | P17095 | 0.01067616 | K +28.03 Da,                               | 1101.215454 | 3 | 584.6099854 | 584.6062637 |
| VAEDEDDDVDTKKQKTEEDD                     | P26350 | 0          | K +28.03 Da,                               | 1130.989136 | 3 | 402.8789673 | 402.5510347 |

|                      |        |            |                          |             |   |             |             |
|----------------------|--------|------------|--------------------------|-------------|---|-------------|-------------|
| YGEVPENR             | P15116 | 0.0247678  |                          | 1132.727661 | 3 | 473.219635  | 473.2195688 |
| FLQSSGCTR            | P70444 | 0          | C +57.02 Da,             | 1133.523438 | 2 | 709.8300171 | 709.3257149 |
| NGESLSEGDR           | P31809 | 0          |                          | 1164.713501 | 3 | 473.2199097 | 473.2195688 |
| GACAGSEDAVKAR        | P16546 | 0          | K +28.03 Da,C +57.02 Da, | 1164.78894  | 2 | 709.3256226 | 709.3257149 |
| EAPLEESQSQR          | Q99MJ9 | 0          |                          | 1165.034424 | 3 | 402.8789673 | 402.5510347 |
| FGSEAESEAER          | Q5XJE5 | 0          |                          | 1173.252319 | 2 | 582.7177734 | 582.2260005 |
| STEVEAAVNR           | P29391 | 0.01602564 |                          | 1173.840332 | 4 | 302.4100037 | 302.1650951 |
| SEFGDSSSPATR         | E9PV24 | 0          |                          | 1196.855347 | 3 | 473.2194519 | 473.2195688 |
| IAQQPVNEVEHR         | P52503 | 0          |                          | 1197.460205 | 2 | 709.3300171 | 709.3257149 |
| QEVDEPPQHALR         | P70296 | 0          |                          | 1199.616333 | 3 | 383.5605469 | 383.5606481 |
| KMKDTSDEEIR          | P62204 | 0          | K +28.03 Da,             | 1217.275024 | 2 | 531.7393799 | 531.738546  |
| QEVDEPPQHALR         | P70296 | 0          |                          | 1223.378296 | 2 | 553.3099976 | 553.3086068 |
| QEVDEPPQHALR         | P70296 | 0          |                          | 1235.707764 | 2 | 516.25      | 515.7492475 |
| KMKDTSDEEIR          | P62204 | 0          | K +28.03 Da,             | 1285.171509 | 2 | 476.7000122 | 476.7023967 |
| QEVDEPPQHALR         | P70296 | 0          |                          | 1307.381836 | 2 | 481.2325745 | 481.232899  |
| QEVDEPPQHALR         | P70296 | 0          |                          | 1343.117188 | 3 | 552.5999756 | 552.2688113 |
| DGEEAGAYDGPR         | P27773 | 0          |                          | 1345.080933 | 2 | 530.7600098 | 530.2681386 |
| DGEEAGAYDGPR         | P27773 | 0          |                          | 1390.161621 | 3 | 400.2347717 | 400.2349351 |
| YSLQEEQAR            | Q9D8C4 | 0.01013514 |                          | 1391.555176 | 3 | 464.2402039 | 464.2401925 |
| SLQEQADAAEER         | E9Q453 | 0          |                          | 1395.475952 | 2 | 695.8575439 | 695.8566505 |
| LSEYMGNAGR           | P26231 | 0.0106383  |                          | 1397.748779 | 2 | 599.8484497 | 599.8487644 |
| QNYHQDAEAAINR        | P09528 | 0.00729927 |                          | 1406.031372 | 2 | 508.2600098 | 508.2619906 |
| GSHTDEEFDAR          | P12787 | 0          |                          | 1418.365601 | 2 | 601.786377  | 601.7860277 |
| LTDENFESR            | P27773 | 0.00383142 |                          | 1446.278687 | 4 | 464.9899902 | 464.7431678 |
| DGEEAGAYDGPR         | P27773 | 0          |                          | 1491.837524 | 3 | 513.2600098 | 512.9239872 |
| IFIDSDHTDNQR         | P09103 | 0          |                          | 1494.960449 | 3 | 841.7000122 | 841.7083315 |
| CDMDQFQCKSGH         | Q91ZX7 | 0          | K +28.03 Da,C +57.02 Da, | 1498.849976 | 4 | 631.7800293 | 631.5330678 |
| DGEEAGAYDGPR         | P27773 | 0          |                          | 1524.249878 | 2 | 703.3600464 | 703.3588369 |
| TITYGPKVVR           | P12710 | 0.01337793 | K +28.03 Da,             | 1552.932007 | 3 | 741.7800293 | 741.446326  |
| DDSSDFQFHFLK         | P70398 | 0.02180685 | K +28.03 Da,             | 1554.461792 | 2 | 618.7591553 | 618.7600101 |
| MAQEDDWDR            | P57780 | 0          |                          | 1576.546753 | 3 | 462.5899963 | 462.5926772 |
| VPEAVADVR            | P46656 | 0.01030928 |                          | 1586.521362 | 3 | 433.5499878 | 433.215435  |
| PTLGFGEERCDPIR       | Q61088 | 0          | C +57.02 Da,             | 1593.418457 | 2 | 680.3699951 | 680.3649765 |
| ESAYNAFNR            | Q9D1C8 | 0          |                          | 1594.774048 | 2 | 564.3300171 | 564.3302073 |
| LAPEYAAAATR          | P27773 | 0          |                          | 1650.789185 | 2 | 618.7600098 | 618.7600101 |
| NISLAVAKER           | P70441 | 0.01328904 | K +28.03 Da,             | 1667.962646 | 2 | 585.8099976 | 586.3125463 |
| ISEEDQAAELR          | Q99JX4 | 0          |                          | 1671.610107 | 2 | 538.2700195 | 538.2725556 |
| NGQQQSNYGP MKGGSFGGR | J3QNY1 | 0          | K +28.03 Da,             | 1702.141113 | 2 | 538.2715454 | 538.2725556 |
| EPDLSSDIKER          | B5X0G2 | 0          | K +28.03 Da,             | 1767.584351 | 2 | 882.9400024 | 882.9348183 |
| GMDKNIGEQLNR         | P70347 | 0.003861   | K +28.03 Da,             | 1780.361938 | 4 | 758.3800049 | 758.1293748 |

|                         |        |            |                          |             |   |             |             |
|-------------------------|--------|------------|--------------------------|-------------|---|-------------|-------------|
| RRGEEGHDPKEPEQLR        | Q8BG05 | 0          | K +28.03 Da,             | 1802.814819 | 2 | 603.8306274 | 603.8311943 |
| TANLGAGAAQPLR           | P08226 | 0          |                          | 1813.11792  | 2 | 1113.920044 | 1113.419853 |
| RFTCVRKWR               | Q6E1M8 | 0.01567398 | K +28.03 Da,C +57.02 Da, | 1829.630859 | 3 | 413.230011  | 412.8909457 |
| EVVYQQCLR               | Q9D358 | 0          | C +57.02 Da,             | 1835.329712 | 2 | 618.7599487 | 618.7600101 |
| EPIICKNIPR              | P54071 | 0.01342282 | K +28.03 Da,C +57.02 Da, | 1839.08606  | 3 | 513.2519531 | 512.9239872 |
| ELTDENFESR              | P27773 | 0          |                          | 1881.894287 | 2 | 435.2461853 | 435.2456115 |
| VVDNGSGMCKAGFAGDDAPR    | P60710 | 0          | K +28.03 Da,C +57.02 Da, | 1892.9104   | 2 | 557.7963867 | 557.7961977 |
| PAVDPLDSTSR             | P56480 | 0.00381679 |                          | 1901.521362 | 2 | 673.8121338 | 673.8127744 |
| PILANADVQER             | Q9JKV1 | 0          |                          | 1909.140137 | 2 | 552.289978  | 552.2882057 |
| EQAGGDATENFEDVGHSTDR    | P56395 | 0.02469136 |                          | 1946.359375 | 2 | 618.7607422 | 618.7600101 |
| FVQMMTAK                | P62204 | 0.00387597 | K +28.03 Da,             | 1976.678101 | 2 | 618.7598877 | 618.7600101 |
| PKVIQPEVDTPLGR          | Q8VCU1 | 0          | K +28.03 Da,             | 2006.619019 | 2 | 770.2870483 | 770.8025145 |
| FVQMMTAK                | P62204 | 0          | K +28.03 Da,             | 2007.619019 | 2 | 618.7600098 | 618.7600101 |
| YIYNREEYLR              | P06344 | 0.01324503 |                          | 2037.112671 | 3 | 515.2800293 | 515.6095016 |
| MVKVLD AVR              | P07309 | 0.01083032 | K +28.03 Da,             | 2054.621826 | 2 | 697.3599854 | 697.3571515 |
| VVDNGSGMCKAGFAGDDAPR    | P60710 | 0          | K +28.03 Da,C +57.02 Da, | 2065.799561 | 2 | 624.293457  | 624.2911433 |
| PKVIQPEVDTPLGR          | Q8VCU1 | 0          | K +28.03 Da,             | 2077.512451 | 2 | 749.3499756 | 749.3500555 |
| FVQNQEVLPR              | A2AIX1 | 0          |                          | 2200.585938 | 2 | 596.3045044 | 596.3038558 |
| FVQNQEVLPR              | A2AIX1 | 0          |                          | 2202.451904 | 2 | 596.8099976 | 596.3038558 |
| DITADDEPLGR             | P17742 | 0          |                          | 2205.872559 | 2 | 597.3099976 | 596.3038558 |
| PVQKLFVDKIR             | P97450 | 0          | K +28.03 Da,             | 2220.220947 | 2 | 682.8599854 | 682.856453  |
| PVQKLFVDKIR             | P97450 | 0          | K +28.03 Da,             | 2222.950439 | 2 | 568.210022  | 567.701493  |
| LQEGAQTLLECTMHGVL R     | Q8R151 | 0.01592357 | C +57.02 Da,             | 2244.121338 | 3 | 502.6099854 | 502.606764  |
| DITADDEPLGR             | P17742 | 0          |                          | 2245.474121 | 2 | 549.7941895 | 549.2829232 |
| PVQKLFVDKIR             | P97450 | 0          | K +28.03 Da,             | 2257.094238 | 3 | 439.5615845 | 439.5612658 |
| DITADDEPLGR             | P17742 | 0          |                          | 2287.645508 | 3 | 439.5610962 | 439.5612658 |
| EVKCDMEVSCPEGYTCCR      | P28798 | 0.01577287 | K +28.03 Da,C +57.02 Da, | 2287.721191 | 3 | 534.289978  | 534.621296  |
| NVYYNEATGGKYVPR         | P68372 | 0          | K +28.03 Da,             | 2288.961426 | 3 | 435.5618591 | 435.5617111 |
| MTDVPVDPGVVHR           | Q9CYZ2 | 0          |                          | 2291.987549 | 2 | 658.8400269 | 658.8382605 |
| FEAFDPPEESTPKPVHTR      | Q9CYA6 | 0          | K +28.03 Da,             | 2298.10498  | 2 | 910.3900146 | 910.3957237 |
| LGADMEDLR               | P08226 | 0          |                          | 2314.456787 | 2 | 619.7999878 | 619.8042203 |
| QDHPSSMGVYQESGGFSGPGENR | Q61545 | 0          |                          | 2315.121582 | 3 | 581.6400146 | 581.6321951 |
| GTITTKELGTVMR           | P62204 | 0          | K +28.03 Da,             | 2321.410645 | 2 | 484.7799988 | 484.7798186 |
| GTITTKELGTVMR           | P62204 | 0.01582278 | K +28.03 Da,             | 2329.43042  | 3 | 769.9899902 | 769.9772239 |
| MLSNPDLMR               | Q8R317 | 0.01060071 |                          | 2336.983643 | 2 | 620.8499756 | 620.3438464 |
| LIGELAKEVR              | P97352 | 0.00377358 | K +28.03 Da,             | 2337.181885 | 2 | 623.8400269 | 623.8355204 |
| VDIPSKIICR              | Q64374 | 0          | K +28.03 Da,C +57.02 Da, | 2378.858887 | 3 | 709.6446533 | 709.6421034 |
| FVSSGPTNASAFTR          | P27546 | 0          |                          | 2396.828369 | 2 | 680.2600098 | 679.266622  |
| ETNLPASRIPAGLENR        | O35215 | 0          |                          | 2405.328369 | 2 | 753.4072266 | 753.4065078 |
| ANLEKAQSELSGAAD EAAR    | Q9D3D9 | 0          | K +28.03 Da,             | 2406.772705 | 2 | 658.824585  | 658.8256844 |

|                               |        |            |                          |             |   |             |             |
|-------------------------------|--------|------------|--------------------------|-------------|---|-------------|-------------|
| FAQLCEEHGILR                  | B5X0G2 | 0          | C +57.02 Da,             | 2425.453369 | 3 | 999.4899902 | 999.1461662 |
| EAVSGPPPADLCHALR              | O70251 | 0          | C +57.02 Da,             | 2426.747803 | 2 | 638.3099976 | 638.3124098 |
| QNYSTEVEAAVNR                 | P29391 | 0          |                          | 2427.51709  | 2 | 705.3699951 | 704.862601  |
| GDGTITTKELGTVMR               | P62204 | 0          | K +28.03 Da,             | 2432.685059 | 2 | 765.8499756 | 765.3582145 |
| VISLSGEHSIIGR                 | P08228 | 0          |                          | 2433.875977 | 2 | 692.8360596 | 692.838792  |
| VISLSGEHSIIGR                 | P08228 | 0          |                          | 2442.066895 | 2 | 836.3400269 | 836.3422018 |
| VFDKESNGTVMGAELR              | P09541 | 0.01618123 | K +28.03 Da,             | 2445.614258 | 2 | 837.3400269 | 836.3422018 |
| GKEEEEEEGKEEEEEKEEEEEKEEEEE   | E9Q743 | 0.03303303 | K +28.03 Da,             | 2456.237061 | 3 | 999.8200073 | 999.1461662 |
| VFDKESNGTVMGAELR              | P09541 | 0.02743902 | K +28.03 Da,             | 2461.821777 | 2 | 766.8900146 | 766.8944326 |
| GKEEEEEEGKEEEEEKEEEEEKEEEEE   | E9Q743 | 0          | K +28.03 Da,             | 2464.852295 | 2 | 692.8400269 | 692.838792  |
| CLSGQAEFDKAAAEVKR             | F6WUQ1 | 0          | K +28.03 Da,C +57.02 Da, | 2465.895508 | 2 | 767.8900146 | 766.8944326 |
| EKEEEEEKEEGKEEEEEKEEEEEKEEEEE | E9Q743 | 0.01607717 | K +28.03 Da,             | 2508.160645 | 2 | 765.8499756 | 765.3582145 |
| TMDKSELVQKAKLAEQAER           | Q9CQV8 | 0.04142012 | K +28.03 Da,             | 2511.474121 | 3 | 736.3200073 | 735.9808302 |
| LVVDNGSGMCKAGFAGDDAPR         | P60710 | 0          | K +28.03 Da,C +57.02 Da, | 2525.646484 | 2 | 1035.930054 | 1035.937096 |
| ALLAGKDSETGENIR               | P38647 | 0          | K +28.03 Da,             | 2536.212158 | 4 | 665.3400269 | 664.8414481 |
| HVGDGLGNVTAGKDGVANVSIEDR      | P08228 | 0          | K +28.03 Da,             | 2543.456055 | 2 | 709.3499756 | 709.856787  |
| HVGDGLGNVTAGKDGVANVSIEDR      | P08228 | 0          | K +28.03 Da,             | 2549.088867 | 3 | 451.9299927 | 451.9331449 |
| LVVDNGSGMCKAGFAGDDAPR         | P60710 | 0          | K +28.03 Da,C +57.02 Da, | 2582.663818 | 3 | 526.9659424 | 526.3067598 |
| DKDGDGTITTKELGTVMR            | P62204 | 0          | K +28.03 Da,             | 2583.030518 | 3 | 353.5507813 | 353.5512066 |
| CEKAMTAKGGDVSVCWEYR           | P56391 | 0          | K +28.03 Da,C +57.02 Da, | 2596.374756 | 3 | 353.2155762 | 353.5512066 |
| CEKAMTAKGGDVSVCWEYR           | P56391 | 0          | K +28.03 Da,C +57.02 Da, | 2606.915039 | 2 | 553.7600098 | 553.7609665 |
| IDISEEDQAAELR                 | Q99JX4 | 0          |                          | 2609.925537 | 2 | 497.2600098 | 496.7616261 |
| VWLVKTGFCPR                   | Q4KUS1 | 0          | K +28.03 Da,C +57.02 Da, | 2618.885254 | 4 | 411.9698181 | 411.9702501 |
| MTPAACPEPPPPEAPSDGDHDEL       | O08795 | 0          | C +57.02 Da,             | 2620.75415  | 4 | 361.4725037 | 361.2166336 |
| MTPAACPEPPPPEAPSDGDHDEL       | O08795 | 0          | C +57.02 Da,             | 2626.072021 | 3 | 481.6292725 | 481.2864193 |
| MTPAACPEPPPPEAPSDGDHDEL       | O08795 | 0          | C +57.02 Da,             | 2665.967773 | 4 | 678.3499756 | 678.3612765 |
| FDKDGDGTITTKELGTVMR           | P62204 | 0          | K +28.03 Da,             | 2682.508301 | 2 | 625.3300171 | 625.3264738 |
| FDKDGDGTITTKELGTVMR           | P62204 | 0          | K +28.03 Da,             | 2691.505615 | 2 | 465.7510071 | 466.245809  |
| FDKDGDGTITTKELGTVMR           | P62204 | 0          | K +28.03 Da,             | 2694.335205 | 4 | 350.4756165 | 350.4762419 |
| MTPAACPEPPPPEAPSDGDHDEL       | O08795 | 0          | C +57.02 Da,             | 2696.323486 | 3 | 466.9654236 | 466.965897  |
| PSGVKVLTAEDIQER               | P16546 | 0          | K +28.03 Da,             | 2698.099121 | 2 | 517.7664795 | 517.7669086 |
| FDKDGDGTITTKELGTVMR           | P62204 | 0          | K +28.03 Da,             | 2705.773682 | 3 | 614.9849243 | 614.9854694 |
| PSGVKVLTAEDIQER               | P16546 | 0.02727273 | K +28.03 Da,             | 2716.696289 | 2 | 678.2999878 | 677.7975576 |
| MTPAACPEPPPPEAPSDGDHDEL       | O08795 | 0          | C +57.02 Da,             | 2732.759033 | 2 | 910.4400024 | 909.9450494 |
| SGQAEFDKAAAEVKR               | F6WUQ1 | 0          | K +28.03 Da,             | 2733.255371 | 2 | 1153.959961 | 1154.462198 |
| MTPAACPEPPPPEAPSDGDHDEL       | O08795 | 0.01020408 | C +57.02 Da,             | 2739.626709 | 2 | 899.9400024 | 899.9445179 |
| MTPAACPEPPPPEAPSDGDHDEL       | O08795 | 0          | C +57.02 Da,             | 2741.405029 | 2 | 900.9500122 | 899.9445179 |
| YPPYTTTPRRMRQRAPDLK           | O35071 | 0.04154303 | K +28.03 Da,             | 2742.296875 | 4 | 450.4700012 | 450.4758972 |
| KIQVLQQQADDAEER               | D3Z2H9 | 0          | K +28.03 Da,             | 2744.755371 | 3 | 600.2980347 | 600.2987708 |
| VSVEDLKNFER                   | Q9CQ92 | 0.0037594  | K +28.03 Da,             | 2747.571533 | 2 | 1154.959961 | 1154.462198 |

|                         |        |            |                          |             |   |             |             |
|-------------------------|--------|------------|--------------------------|-------------|---|-------------|-------------|
| GDGTITTKELGTVMR         | P62204 | 0          | K +28.03 Da,             | 2763.361572 | 3 | 609.960022  | 609.9624476 |
| FDKDGDTITTKELGTVMR      | P62204 | 0          | K +28.03 Da,             | 2776.986084 | 3 | 535.5999756 | 535.602013  |
| EVKCDMEVSCPEGYTCCR      | P28798 | 0          | K +28.03 Da,C +57.02 Da, | 2780.573242 | 3 | 587.6400146 | 586.9651741 |
| FDKDGDTITTKELGTVMR      | P62204 | 0          | K +28.03 Da,             | 2806.874268 | 3 | 551.6257935 | 551.950976  |
| VGDLGNVTAGKDGVANVSIEDR  | P08228 | 0          | K +28.03 Da,             | 2814.540771 | 2 | 510.2442627 | 510.2449519 |
| FDMDGTLTAPR             | Q9Z2M7 | 0          |                          | 2816.511719 | 3 | 983.4500122 | 983.4536592 |
| YHRGGYRPVWNR            | Q8K019 | 0.01628664 |                          | 2820.343506 | 4 | 525.539978  | 525.539029  |
| IQLVEEELDR              | P21107 | 0          |                          | 2843.755371 | 2 | 1240.52002  | 1240.530216 |
| LVIDNGSGMCKAGFAGDDAPR   | P63260 | 0          | K +28.03 Da,C +57.02 Da, | 2857.102539 | 2 | 695.8300171 | 695.8351948 |
| FGEKNGTDPEDVIR          | Q3THE2 | 0.01079137 | K +28.03 Da,             | 2859.45166  | 3 | 581.9500122 | 581.9491956 |
| DDVYTLDEELPK            | Q8BW72 | 0.03293413 | K +28.03 Da,             | 2861.577637 | 2 | 872.9199829 | 872.4201552 |
| FVDIPSKIICR             | Q64374 | 0.02719033 | K +28.03 Da,C +57.02 Da, | 2883.266113 | 3 | 478.9400024 | 478.9376789 |
| SSSSSSSSSR              | Q3TZW0 | 0.00371747 |                          | 2883.494141 | 2 | 717.9028931 | 717.9028801 |
| NPVDDICIAKPR            | P32261 | 0.04424779 | K +28.03 Da,C +57.02 Da, | 2901.984863 | 2 | 524.2769165 | 524.2771091 |
| NPVDDICIAKPR            | P32261 | 0          | K +28.03 Da,C +57.02 Da, | 2940.133057 | 4 | 688.3400269 | 688.1002485 |
| YQESNGPTDSYAAISEVDR     | O08585 | 0          |                          | 2946.963379 | 3 | 590.960022  | 590.6286283 |
| NILGGTVFR               | O88844 | 0.00735294 |                          | 2953.771729 | 2 | 674.8400269 | 674.3438464 |
| FEGEDFSETLTR            | P20029 | 0          |                          | 2966.396484 | 3 | 573.6300049 | 573.6295744 |
| EEALEPDMEEEDDQKAVKDEL   | P09103 | 0          | K +28.03 Da,             | 2970.342285 | 3 | 654.3300171 | 653.6641129 |
| KVQSAVITVPAYFNDSQR      | P17156 | 0          | K +28.03 Da,             | 2971.493408 | 3 | 653.6613159 | 653.6641129 |
| KVQSAVITVPAYFNDSQR      | P17156 | 0          | K +28.03 Da,             | 2972.995605 | 2 | 980.4899902 | 979.9925311 |
| HVGDLGNVTAGKDGVANVSIEDR | P08228 | 0          | K +28.03 Da,             | 2990.806152 | 2 | 907.4699707 | 907.9790285 |
| KELDPVQKLFVDKIR         | P97450 | 0          | K +28.03 Da,             | 3000.698975 | 3 | 628.3099976 | 628.3058142 |
| GNVVAEKISGQKVNEAACDIAR  | O35490 | 0.01086957 | K +28.03 Da,C +57.02 Da, | 3002.340332 | 3 | 491.5814209 | 491.5820065 |
| HVGDLGNVTAGKDGVANVSIEDR | P08228 | 0          | K +28.03 Da,             | 3008.993164 | 2 | 740.852417  | 740.8549735 |
| FDITADDEPLGR            | P17742 | 0          |                          | 3015.821289 | 3 | 494.5700073 | 494.2390745 |
| NKELDPVQKLFVDKIR        | P97450 | 0          | K +28.03 Da,             | 3030.283691 | 2 | 460.730011  | 460.235244  |
| QALLDLHALGSAR           | P29391 | 0.00727273 |                          | 3035.806396 | 3 | 500.9299927 | 500.9379015 |
| NGESSELDLQGIR           | Q9QXT0 | 0          |                          | 3047.20874  | 3 | 638.3499756 | 638.0177156 |
| LMTPAACPEPPPEAPSDGDHDEL | O08795 | 0.01320132 | C +57.02 Da,             | 3058.114502 | 3 | 536.289978  | 536.2871483 |
| LEEEEEHEWFIPAR          | Q9D6V8 | 0          |                          | 3063.830811 | 3 | 456.5899963 | 456.5928999 |
| PKEEEEEELVDPLTTVR       | P99028 | 0.02484472 | K +28.03 Da,             | 3066.044922 | 3 | 456.9299927 | 456.5928999 |
| PKEEEEEELVDPLTTVR       | P99028 | 0          | K +28.03 Da,             | 3068.390625 | 2 | 684.3800049 | 684.3857116 |
| IRQNYSTEVEAAVNR         | P29391 | 0.00380228 |                          | 3068.561035 | 2 | 996.9899902 | 997.5042196 |
| SQIRQNYSTEVEAAVNR       | P29391 | 0          |                          | 3070.152832 | 2 | 671.8099976 | 671.3176924 |
| QEGLHAGTMLTLTAQDPDR     | P15116 | 0          |                          | 3072.303955 | 4 | 551.0700073 | 551.0745756 |
| TLSDYNIQESTLHLVLR       | P0CG49 | 0          | K +28.03 Da,             | 3089.51001  | 2 | 609.8099976 | 609.3172973 |
| GYVKAGPWTPAAAVEHPEAVR   | O35490 | 0          | K +28.03 Da,             | 3094.986816 | 3 | 457.2600098 | 456.5928999 |
| VAEQADLEQAFSPDPDCVDR    | O35841 | 0          | C +57.02 Da,             | 3097.86792  | 3 | 642.960022  | 642.9605503 |
| PFVELETNLPASR           | O35215 | 0.02453988 |                          | 3112.260498 | 2 | 629.8200073 | 629.8229444 |

|                             |        |            |                          |             |   |             |             |
|-----------------------------|--------|------------|--------------------------|-------------|---|-------------|-------------|
| PAPATTF AHL DATTVLSR        | P56480 | 0          |                          | 3117.210693 | 3 | 468.2799988 | 468.6134123 |
| EEAEEDGEDGVFPQAQLEHSALELQGV | Q8VBW8 | 0          | K +28.03 Da,             | 3133.914307 | 2 | 906.960022  | 906.4659515 |
| EWQSNQPWEQALNR              | P08226 | 0          |                          | 3145.57373  | 4 | 565.315918  | 565.5648838 |
| EEEAQLDGLNASQIR             | P08113 | 0          |                          | 3167.012939 | 4 | 588.7999878 | 588.554205  |
| ANLEKAQSELSGAADAAAR         | Q9D3D9 | 0          | K +28.03 Da,             | 3178.567871 | 2 | 1176.589966 | 1176.101134 |
| ANLEKAQSELSGAADAAAR         | Q9D3D9 | 0          | K +28.03 Da,             | 3182.606934 | 2 | 1177.099976 | 1176.101134 |
| SLFDKDGDTITTKELGTVMR        | P62204 | 0          | K +28.03 Da,             | 3186.081055 | 4 | 599.8200073 | 600.0712933 |
| SLFDKDGDTITTKELGTVMR        | P62204 | 0          | K +28.03 Da,             | 3195.827148 | 4 | 589.0499878 | 588.554205  |
| SLFDKDGDTITTKELGTVMR        | P62204 | 0.00384615 | K +28.03 Da,             | 3201.544922 | 4 | 588.2999878 | 588.554205  |
| LVGE EEEEEEEVLDPLGIMR       | Q3TC93 | 0.01639344 |                          | 3213.291016 | 3 | 768.3499756 | 768.3587615 |
| SLFDKDGDTITTKELGTVMR        | P62204 | 0          | K +28.03 Da,             | 3218.344482 | 3 | 768.6799927 | 768.3587615 |
| SLFDKDGDTITTKELGTVMR        | P62204 | 0          | K +28.03 Da,             | 3218.936279 | 4 | 565.0800171 | 565.0783211 |
| CVVSEAGKALDMSYDHPKPEDEVELAR | Q61074 | 0.01041667 | K +28.03 Da,C +57.02 Da, | 3234.613281 | 2 | 575.289978  | 574.7933213 |
| EQWSNCTIGQIR                | P10605 | 0          | C +57.02 Da,             | 3241.178955 | 2 | 595.3099976 | 595.3065958 |
| IGIQGPDYVLVASDR             | Q9R1P3 | 0          |                          | 3254.353271 | 4 | 632.6099854 | 632.6095572 |
| SLFDKDGDTITTKELGTVMR        | P62204 | 0          | K +28.03 Da,             | 3282.137939 | 4 | 647.8699951 | 647.6214617 |
| SLFDKDGDTITTKELGTVMR        | P62204 | 0          | K +28.03 Da,             | 3291.972412 | 2 | 692.3599854 | 692.864612  |
| WDDDNVEDDFSNQLR             | P60897 | 0.01048951 |                          | 3302.988525 | 3 | 600.3222046 | 600.3230275 |
| ANLEKAQSELSGAADAAAR         | Q9D3D9 | 0          | K +28.03 Da,             | 3319.910645 | 3 | 443.5799866 | 443.5771385 |
| RRGGPPFAFVEFEDPR            | Q6PDM2 | 0.03313253 |                          | 3322.972412 | 4 | 588.7999878 | 588.554205  |
| QASGGPVDIGPEYQQDLDR         | P97450 | 0          |                          | 3332.802002 | 3 | 574.2999878 | 574.3003341 |
| LFVDIPSKIICR                | Q64374 | 0.01075269 | K +28.03 Da,C +57.02 Da, | 3338.189941 | 2 | 1154.959961 | 1154.462198 |
| GSTAPVGGGSFPTITPR           | Q922R8 | 0          |                          | 3364.815186 | 3 | 389.230011  | 389.2277804 |
| QASGGPVDIGPEYQQDLDR         | P97450 | 0          |                          | 3398.800293 | 2 | 900.460022  | 899.968327  |
| LGEECELETMTGEKVK            | P12710 | 0          | K +28.03 Da,C +57.02 Da, | 3409.174805 | 2 | 1155.449951 | 1154.462198 |
| AGPLCLQEVDEPPQHALR          | P70296 | 0          | C +57.02 Da,             | 3411.275146 | 3 | 600.6400146 | 600.3146435 |
| NKELDPVQKLFVDKIR            | P97450 | 0          | K +28.03 Da,             | 3429.226807 | 3 | 738.710022  | 738.7168771 |
| PRAILVDLEPGTMDSVR           | P99024 | 0          |                          | 3442.148438 | 2 | 737.3900146 | 736.8799365 |
| AILVDLEPGTMDSVR             | P99024 | 0          |                          | 3444.297119 | 2 | 880.9500122 | 880.4579289 |
| LGEECELETMTGEKVK            | P12710 | 0          | K +28.03 Da,C +57.02 Da, | 3467.291016 | 3 | 708.3699951 | 707.6989347 |
| SFPTLKFFPASADR              | P09103 | 0          | K +28.03 Da,             | 3467.464355 | 3 | 707.7000122 | 707.6989347 |
| MELMTPAACPEPPPEAPSDGDHDEL   | O08795 | 0          | C +57.02 Da,             | 3471.10083  | 2 | 872.9092407 | 872.4201552 |
| SFPTLKFFPASADR              | P09103 | 0.01052632 | K +28.03 Da,             | 3471.525635 | 2 | 1161.099976 | 1161.615942 |
| SFPTLKFFPASADR              | P09103 | 0.01333333 | K +28.03 Da,             | 3489.943848 | 2 | 1182.599976 | 1183.10209  |
| QKAMQDAEVSKSDIGEVLVGGMTR    | P38647 | 0          | K +28.03 Da,             | 3491.350342 | 2 | 714.3699951 | 713.379572  |
| KLVIIEGDLER                 | P21107 | 0.01045296 | K +28.03 Da,             | 3494.963379 | 4 | 640.5900269 | 640.3447837 |
| KLVIIEGDLER                 | P21107 | 0          | K +28.03 Da,             | 3496.959229 | 2 | 709.8374634 | 709.349524  |
| MELMTPAACPEPPPEAPSDGDHDEL   | O08795 | 0          | C +57.02 Da,             | 3523.060059 | 2 | 714.3699951 | 713.379572  |
| ILSIMYYAREPGKINHMR          | Q8CE96 | 0.00378788 | K +28.03 Da,             | 3530.322266 | 2 | 713.8674927 | 713.379572  |
| AAEEAFVNDIDESSPGTEWER       | O08585 | 0          |                          | 3539.222412 | 2 | 646.289978  | 646.2936858 |

|                                     |        |            |                          |             |   |             |             |
|-------------------------------------|--------|------------|--------------------------|-------------|---|-------------|-------------|
| DEEDQDWFIPAR                        | Q91W45 | 0          |                          | 3567.615479 | 2 | 1085.530029 | 1084.513108 |
| KMGAPEAGMAEYLFDKHTLGHGDES           | P09528 | 0          | K +28.03 Da,             | 3568.364746 | 2 | 1022.969971 | 1022.982164 |
| VAGPQPAQTGAPQGLSGLGYLFR             | P29391 | 0          |                          | 3569.833496 | 3 | 595.6300049 | 594.9722174 |
| VISLSGEHSIIGR                       | P08228 | 0          |                          | 3579.502441 | 3 | 763.0599976 | 762.7219621 |
| KGIKSVTELNQDITNTMTLGDIVYKR          | P12710 | 0          | K +28.03 Da,             | 3604.800781 | 4 | 647.8599854 | 647.6214617 |
| ACGLVASNLNLKPGCECLKVR               | P16045 | 0          | K +28.03 Da,C +57.02 Da, | 3624.877441 | 2 | 708.3179932 | 708.3199009 |
| ALEGVGHFFR                          | P29391 | 0          |                          | 3656.903809 | 3 | 684.3673706 | 684.3688597 |
| KFYGPEGYPGVFAGR                     | O55022 | 0          | K +28.03 Da,             | 3670.590576 | 2 | 841.9400024 | 841.9334214 |
| SGDPKEEEEEELVDPLTTVR                | P99028 | 0          | K +28.03 Da,             | 3674.345947 | 3 | 966.1300049 | 965.7991005 |
| GASIVEDKLVEDLKTR                    | P26443 | 0          | K +28.03 Da,             | 3677.806641 | 3 | 480.8800049 | 480.8786003 |
| EADDIVNWLKRR                        | P09103 | 0          | K +28.03 Da,             | 3679.317627 | 2 | 720.8099976 | 720.8142623 |
| PGGLLGEEAPDFEANTTIGR                | Q8BG37 | 0          |                          | 3682.824707 | 3 | 785.0599976 | 784.4031812 |
| ALEGVGHFFR                          | P29391 | 0.0037037  |                          | 3714.079102 | 3 | 785.0599976 | 784.4031812 |
| PGGLLGEEAPDFEANTTIGR                | Q8BG37 | 0.01644737 |                          | 3723.48999  | 3 | 820.1300049 | 819.4672334 |
| NFNVEKINGEWYTIILASDKR               | A2AV72 | 0.01056338 | K +28.03 Da,             | 3723.908447 | 4 | 478.7999878 | 478.7962084 |
| PGGLLGEEAPDFEANTTIGR                | Q8BG37 | 0          |                          | 3746.691162 | 2 | 709.8397827 | 709.349524  |
| TFVNHPQVSALLGEEDEEALHYLTR           | Q9EQU5 | 0          |                          | 3752.454346 | 2 | 995.9799805 | 995.4792566 |
| EADDIVNWLKRR                        | P09103 | 0          | K +28.03 Da,             | 3753.802734 | 2 | 682.8800049 | 682.8858786 |
| TFVNHPQVSALLGEEDEEALHYLTR           | Q9EQU5 | 0          |                          | 3755.656494 | 4 | 827.6900024 | 827.4458041 |
| PGGLLGEEAPDFEANTTIGR                | Q8BG37 | 0.01038062 |                          | 3765.186035 | 3 | 455.5917969 | 455.5930112 |
| PGGLLGEEAPDFEANTTIGR                | Q8BG37 | 0          |                          | 3787.012207 | 2 | 740.3400269 | 740.8549735 |
| MWKSVMGHDVSVSVETQGDWDTPDFVNDISEKEQR | P49710 | 0          | K +28.03 Da,             | 3819.238037 | 2 | 1021.52002  | 1021.020423 |
| PGGLLGEEAPDFEANTTIGR                | Q8BG37 | 0          |                          | 3830.803955 | 3 | 467.2999878 | 466.965897  |
| EDRVISLSGEHSIIGR                    | P08228 | 0          |                          | 3843.650879 | 2 | 741.8499756 | 740.8549735 |
| GVANVSIEDRVISLSGEHSIIGR             | P08228 | 0          |                          | 3869.516602 | 2 | 1142.030029 | 1142.547345 |
| GVANVSIEDRVISLSGEHSIIGR             | P08228 | 0          |                          | 3883.183594 | 3 | 783.3499756 | 783.0153843 |
| PGGLLGEEAPDFEANTTIGR                | Q8BG37 | 0.00738007 |                          | 3883.716553 | 2 | 1174.52002  | 1174.019438 |
| QKEVNENFAIDLIAQQPVNEVEHR            | P52503 | 0          | K +28.03 Da,             | 3888.927979 | 3 | 1018.22998  | 1017.563933 |
| QKEVNENFAIDLIAQQPVNEVEHR            | P52503 | 0          | K +28.03 Da,             | 3892.188721 | 3 | 664.3599854 | 664.7044143 |
| QNVAYEYLCHLEEAKR                    | Q9JKF1 | 0          | K +28.03 Da,C +57.02 Da, | 3897.083008 | 2 | 1174.02002  | 1174.019438 |
| QLIMANPQMQLIQR                      | Q8R317 | 0          |                          | 3920.169678 | 2 | 1059.030029 | 1058.03747  |
| SQTEEDCTEELFDLHAR                   | P99028 | 0          | C +57.02 Da,             | 3924.591309 | 4 | 540.5499878 | 540.3021212 |
| SQTEEDCTEELFDLHAR                   | P99028 | 0          | C +57.02 Da,             | 3929.081543 | 3 | 720.4000244 | 720.0670695 |
| SQTEEDCTEELFDLHAR                   | P99028 | 0          | C +57.02 Da,             | 3932.844727 | 4 | 540.2999878 | 540.3021212 |
| LLPGELAKHAVSEGTKAVTKY               | P10853 | 0          | K +28.03 Da,             | 3943.127441 | 3 | 809.3699951 | 809.0362758 |
| CVESFSDYPPPLGR                      | P10126 | 0          | C +57.02 Da,             | 3943.440186 | 4 | 1079.800049 | 1079.299864 |
| LATALQKLEEAKEKADESER                | P21107 | 0.01612903 | K +28.03 Da,             | 3949.026611 | 2 | 529.789978  | 529.2854657 |
| EVAGLRQLLLESQSQLDEAKSEAQKQSDDELALVR | Q99PL5 | 0          | K +28.03 Da,             | 3970.12915  | 3 | 765.3900146 | 764.7305688 |
| MISDLNESIIAVERVK                    | B2RX12 | 0          | K +28.03 Da,             | 3975.509766 | 3 | 791.75      | 791.4149756 |
| QQVAPMDDDETGKELVLALYDYQEKSPR        | P16546 | 0          | K +28.03 Da,             | 3981.902588 | 4 | 594.3099976 | 593.8130508 |

|                                    |        |            |                          |             |   |             |             |
|------------------------------------|--------|------------|--------------------------|-------------|---|-------------|-------------|
| AKFEELNMDLFR                       | P20029 | 0          | K +28.03 Da,             | 3982.393066 | 2 | 894.460022  | 893.4525099 |
| QLLLESQSQLDEAKSEAQKQSDDELALVR      | Q99PL5 | 0          | K +28.03 Da,             | 3999.568359 | 4 | 688.0800171 | 687.5755518 |
| QLLLESQSQLDEAKSEAQKQSDDELALVR      | Q99PL5 | 0          | K +28.03 Da,             | 4009.790039 | 4 | 628.0900269 | 628.0903549 |
| MEADGLGCAVCVLTGASR                 | Q64105 | 0          | C +57.02 Da,             | 4019.209717 | 2 | 736.8900146 | 736.8908271 |
| KTFSHELSDFGLESTTGEVPVVAIR          | P27773 | 0.00732601 | K +28.03 Da,             | 4030.177002 | 3 | 728.7199707 | 728.7254838 |
| KTFSHELSDFGLESTTGEVPVVAIR          | P27773 | 0          | K +28.03 Da,             | 4032.526123 | 3 | 729.3900146 | 728.7254838 |
| TLNEESYKDSTLIMQLLR                 | Q9CQV8 | 0          | K +28.03 Da,             | 4051.03418  | 3 | 531.2999878 | 531.3020087 |
| PTGGAGAVAMLIGPKAPLVLEQGLR          | P54869 | 0          | K +28.03 Da,             | 4077.377441 | 3 | 624         | 623.6670169 |
| PTLNELGISTPEELGLDKV                | P12787 | 0.01597444 | K +28.03 Da,             | 4094.134766 | 2 | 639.3200073 | 638.8226104 |
| QQLPTFLQQMQNPDTLSAMSNPR            | Q8R317 | 0          |                          | 4096.907715 | 4 | 783.6500244 | 783.1426452 |
| TGEAIVDAALSALR                     | Q922R8 | 0          |                          | 4102.718262 | 2 | 893.460022  | 893.4525099 |
| QPGLMAQMATTAAAGVAVGSAVGHTLGH       | Q9D1L0 | 0          |                          | 4105.700684 | 3 | 844.0999756 | 843.7663423 |
| IFGQTGAGNNWAKGHYTEGAELVDSVLDVVR    | Q922F4 | 0.02752294 | K +28.03 Da,             | 4108.491211 | 3 | 844.4400024 | 843.7663423 |
| QPGLMAQMATTAAAGVAVGSAVGHTLGH       | Q9D1L0 | 0          |                          | 4109.649414 | 4 | 579.3400269 | 579.0901574 |
| QPGLMAQMATTAAAGVAVGSAVGHTLGH       | Q9D1L0 | 0          |                          | 4114.699219 | 2 | 980.4799805 | 979.9925311 |
| QLGGYVATIGTKFC                     | Q64374 | 0          | K +28.03 Da,C +57.02 Da, | 4118.194336 | 4 | 593.7952271 | 593.7952377 |
| QVSTPSSSTSSSDPILDNLISLAVAKER       | P70441 | 0          | K +28.03 Da,             | 4118.444824 | 3 | 653.9899902 | 653.6641129 |
| DGKALEQLQEYFDGNLKR                 | P27773 | 0          | K +28.03 Da,             | 4123.181641 | 3 | 1172.25     | 1171.592051 |
| GLFIHDDKGILR                       | P35700 | 0.01633987 | K +28.03 Da,             | 4140.658203 | 4 | 585.8081055 | 585.8083453 |
| NLLENWDTLGSTVSQLQER                | Q00623 | 0          |                          | 4144.316895 | 4 | 715.1099854 | 714.8547532 |
| ALLKGSFSEQGINEFLR                  | Q922R8 | 0          | K +28.03 Da,             | 4144.418945 | 2 | 758.4099731 | 757.9066747 |
| QGDYEPIDATGFININSLR                | P16460 | 0          |                          | 4149.894531 | 2 | 881.8800049 | 881.8830716 |
| QQVAPMDDETGKELVLALDYQEKSPPR        | P16546 | 0          | K +28.03 Da,             | 4151.485352 | 3 | 780.7404785 | 780.7420349 |
| QLTVQMMQNPQILAALQER                | P28656 | 0          |                          | 4159.446289 | 2 | 664.3753662 | 664.3770211 |
| QLTVQMMQNPQILAALQER                | P28656 | 0          |                          | 4175.46582  | 4 | 601.0499878 | 601.297879  |
| DFWDNLEKETDWVR                     | Q00623 | 0          | K +28.03 Da,             | 4241.910645 | 2 | 1177.01001  | 1176.516766 |
| QLTVQMMQNPQILAALQER                | P28656 | 0          |                          | 4273.975098 | 3 | 965.4400024 | 965.107889  |
| GMEATLEQHLEDTMKNPSIVGLCTDSQGLNLGCR | G3UW70 | 0          | K +28.03 Da,C +57.02 Da, | 4276.319336 | 4 | 585.8099976 | 585.8083453 |
| QPGLMAQMATTAAAGVAVGSAVGHTLGH       | Q9D1L0 | 0          |                          | 4277.744141 | 3 | 780.7399902 | 780.7420349 |
| CFQEMLEEEEEHEWFIPAR                | Q9D6V8 | 0          | C +57.02 Da,             | 4290.877441 | 2 | 980.4799805 | 979.9925311 |
| EEDCTEELFDLHAR                     | P99028 | 0          | C +57.02 Da,             | 4314.096191 | 4 | 507.552063  | 507.3069405 |
| CFQEMLEEEEEHEWFIPAR                | Q9D6V8 | 0          | C +57.02 Da,             | 4317.583984 | 4 | 586.0599976 | 585.8083453 |
| CFQEMLEEEEEHEWFIPAR                | Q9D6V8 | 0          | C +57.02 Da,             | 4318.537598 | 2 | 910.4199829 | 909.9212404 |
| EADIDGDGQVNYEEFVQMMMTAK            | P62204 | 0          | K +28.03 Da,             | 4322.262695 | 3 | 676.7299805 | 676.0734952 |
| EADIDGDGQVNYEEFVQMMMTAK            | P62204 | 0          | K +28.03 Da,             | 4332.907227 | 2 | 715.8699951 | 715.867352  |
| MEADGLGCAVCVLTGASR                 | Q64105 | 0          | C +57.02 Da,             | 4334.658203 | 2 | 1023.97998  | 1022.982164 |
| EADIDGDGQVNYEEFVQMMMTAK            | P62204 | 0          | K +28.03 Da,             | 4337.924316 | 2 | 1022.978149 | 1022.982164 |
| FGDMQEIIQNFVR                      | Q9QYGO | 0          |                          | 4344.766113 | 4 | 507.5499878 | 507.3069405 |
| FGDMQEIIQNFVR                      | Q9QYGO | 0          |                          | 4357.308105 | 2 | 1101.060059 | 1101.056294 |
| EALKDAQEKLELAEKKATDAEADVASLNR      | P58771 | 0.021875   | K +28.03 Da,             | 4360.837891 | 3 | 718.6900024 | 718.3593576 |

|                                         |        |            |                          |             |   |             |             |
|-----------------------------------------|--------|------------|--------------------------|-------------|---|-------------|-------------|
| EANLAAAFGKPINF                          | O08749 | 0.01016949 | K +28.03 Da,             | 4369.091309 | 2 | 1023.47998  | 1022.982164 |
| GMEATLEQHLEDTMKNPSIVGLCTDSQGLNLGCR      | G3UW70 | 0          | K +28.03 Da,C +57.02 Da, | 4383.993164 | 3 | 801.0499878 | 800.7151574 |
| RADPHLCDFLESHYLDKEVK                    | Q9CPX4 | 0.01071429 | K +28.03 Da,C +57.02 Da, | 4386.126953 | 2 | 1201.069946 | 1200.569098 |
| AGNFNSLFKAFEEEQALR                      | P49429 | 0          | K +28.03 Da,             | 4394.492188 | 4 | 507.7999878 | 507.3069405 |
| QQLPTFLQQMQNPDTLSAMSNPR                 | Q8R317 | 0          |                          | 4403.043457 | 2 | 955.960022  | 954.9682899 |
| CEYLMELMTPAACPEPPPEAPSDGDHDEL           | O08795 | 0          | C +57.02 Da,             | 4405.496094 | 2 | 1022.47998  | 1022.982164 |
| PNFFKMVEGFFDR                           | P26443 | 0          | K +28.03 Da,             | 4411.282715 | 2 | 955.4556274 | 954.9682899 |
| LAAADPAIYFKEQFLDGDWATNR                 | P14211 | 0.01587302 | K +28.03 Da,             | 4413.728027 | 2 | 876.9299927 | 876.9312128 |
| QWANLMEKIQASVATNPIITPVAQENQ             | P08226 | 0          | K +28.03 Da,             | 4414.078613 | 3 | 537.9562378 | 537.9558383 |
| CFQEMLDEEDQDWIFIPAR                     | Q91W45 | 0          | C +57.02 Da,             | 4415.19043  | 3 | 801.039978  | 800.7151574 |
| GVVQDLQQAISKLEAR                        | P57776 | 0          | K +28.03 Da,             | 4428.463379 | 2 | 806.9299927 | 806.4301193 |
| ELNDFISYLQR                             | P27773 | 0          |                          | 4438.671875 | 4 | 875.9799805 | 875.7377528 |
| QLFSDKLNEINEKIAPSAVESMEDALKAADTIGYPVMIR | Q8C196 | 0.04166667 | K +28.03 Da,             | 4439.210938 | 2 | 677.3599854 | 677.361705  |
| EADIDGDGQVNYEEFVQMMTAK                  | P62204 | 0          | K +28.03 Da,             | 4446.476563 | 3 | 1167.650024 | 1167.314578 |
| EADIDGDGQVNYEEFVQMMTAK                  | P62204 | 0          | K +28.03 Da,             | 4449.469238 | 2 | 731.8599854 | 731.359694  |
| QNMLQGTEIGVLAKTFIDQKGLIPDDVMTR          | Q9WTP7 | 0          | K +28.03 Da,             | 4460.370117 | 3 | 487.9100037 | 487.9088882 |
| QPGLMAQMATTAAGVAVGSAVGHTLGH             | Q9D1L0 | 0          |                          | 4472.953125 | 2 | 657.8900146 | 656.8953806 |
| QPGLMAQMATTAAGVAVGSAVGHTLGH             | Q9D1L0 | 0          |                          | 4476.213379 | 3 | 907.4699707 | 906.8103434 |
| CDFTEDQTAEFKEAFQLFDR                    | Q60605 | 0          | K +28.03 Da,C +57.02 Da, | 4476.300781 | 3 | 906.7999878 | 906.8103434 |
| PAWPGGSQQVDLASVLTPPEIMAPILANADVQER      | D3YUD8 | 0          |                          | 4484.82666  | 3 | 906.460022  | 906.8103434 |
| PAWPGGSQQVDLASVLTPPEIMAPILANADVQER      | D3YUD8 | 0          |                          | 4495.442871 | 2 | 771.9199829 | 771.9349009 |
| PAWPGGSQQVDLASVLTPPEIMAPILANADVQER      | D3YUD8 | 0          |                          | 4504.481445 | 2 | 657.3860474 | 656.8953806 |
| QALQDLLSEYMGNAGR                        | P26231 | 0          |                          | 4510.790527 | 2 | 651.348938  | 651.3378432 |
| ASSWVTHVEMGPPDPILGVTEAFKR               | P05202 | 0          | K +28.03 Da,             | 4517.586914 | 3 | 704.6963501 | 704.6979886 |
| SCLLLVLFGIWRTAPQTHASSAGLPLSATSFLDLMDR   | Q75N73 | 0          | C +57.02 Da,             | 4520.303711 | 2 | 898.4276123 | 897.9349177 |
| PAWPGGSQQVDLASVLTPPEIMAPILANADVQER      | D3YUD8 | 0.01346801 |                          | 4523.334961 | 2 | 1177.02002  | 1176.516766 |
| CMALSTAILVGEAKKWLPELVDR                 | Q9EQ20 | 0          | K +28.03 Da,C +57.02 Da, | 4526.963379 | 3 | 784.6799927 | 784.6802694 |
| QLIGIQDGYLSLLQDSGEVR                    | P63242 | 0          |                          | 4527.826172 | 3 | 600.9500122 | 600.952606  |
| CPEALFQPSFLGMESCGIHETFFN                | P60710 | 0          | C +57.02 Da,             | 4547.234863 | 2 | 1177.52002  | 1176.516766 |
| GAGADQLTEEQIAEFKEAFSLFDKGDGTITTKELGTVMR | Q3UKW2 | 0.00373134 | K +28.03 Da,             | 4569.539063 | 4 | 688.0700073 | 687.5755518 |
| CEYLMELMTPAACPEPPPEAPSDGDHDEL           | O08795 | 0.00374532 | C +57.02 Da,             | 4581.87207  | 3 | 933.0900269 | 933.0858683 |
| CEYLMELMTPAACPEPPPEAPSDGDHDEL           | O08795 | 0          | C +57.02 Da,             | 4589.351074 | 3 | 933.75      | 933.0858683 |
| QQLVELVAEQADLEQAFSPSPDCVDR              | O35841 | 0          | C +57.02 Da,             | 4597.817871 | 2 | 903.4799805 | 902.983248  |
| PFVELETNLPASR                           | O35215 | 0          |                          | 4601.473633 | 3 | 506.9599915 | 506.6277217 |
| VNPTVFFDITADDEPLGR                      | P17742 | 0          |                          | 4606.196777 | 2 | 902.980896  | 902.983248  |
| CMTEEIFGPVTCVVPFDSEEVITR                | Q8BH00 | 0.01023891 | C +57.02 Da,             | 4617.791016 | 2 | 1188.099976 | 1187.09532  |
| EAI AELDTLNEESYKDSTLIMQLLR              | Q9CQV8 | 0.01034483 | K +28.03 Da,             | 4619.149414 | 2 | 1187.089966 | 1187.09532  |
| VNPTVFFDITADDEPLGR                      | P17742 | 0          |                          | 4619.257324 | 3 | 792.0700073 | 791.7326385 |
| CVLELADQILETQR                          | P13597 | 0          | C +57.02 Da,             | 4636.924805 | 2 | 685.3896484 | 684.3857116 |
| QWANLMEKIQASVATNPIITPVAQENQ             | P08226 | 0.02461538 | K +28.03 Da,             | 4643.216797 | 4 | 825.4400024 | 825.7034469 |
