# Supplementary material
Source: PubMed Central journal article supplement (PMC5083106)
Supplement: 10.1074_O115.056515_mcp.O115.056515-6.pdf [file 10.1074_O115.056515_mcp.O115.056515-6.pdf]

**Supplementary Table 5:** List of N-termini identified in FFPE liver tissue of C57BL/6 wild type mouse (replicate 1) after chemical labeling using  $^{12}\text{CO}_2$  formaldehyde. This is a comprehensive listing of all identified peptides.

| Peptide Sequence      | UniProt ID | MSGF+ score (E-value) | Modification                               | Retention Time (s) | Charge | Measured m/z | Theoretical m/z |
|-----------------------|------------|-----------------------|--------------------------------------------|--------------------|--------|--------------|-----------------|
| SHASPAAKPSNSKNPR      | Q9CR16     | 0                     | N-term +42.01 Da, K +28.03 Da,             | 967.4235229        | 3      | 459.9100037  | 459.5720535     |
| SASAGGSHQPSQSR        | P70445     | 0                     | N-term +42.01 Da,                          | 1003.048828        | 3      | 459.5700073  | 459.5720535     |
| SSSSASAAAKK           | Q61425     | 0.04659091            | N-term +42.01 Da, K +28.03 Da,             | 1011.168945        | 3      | 425.8900146  | 425.554445      |
| SKNTVSSAR             | Q9CPW4     | 0.00230238            | N-term +42.01 Da, K +28.03 Da,             | 1017.442383        | 4      | 440.2433777  | 440.243069      |
| ATSSHQGAAGSQAHR       | Q75N62     | 0                     | N-term +42.01 Da,                          | 1017.547119        | 3      | 451.578125   | 450.9063787     |
| PEPAKSAPAPK           | P10853     | 0.01620948            | N-term +42.01 Da, K +28.03 Da,             | 1024.337524        | 3      | 414.5905762  | 414.5907188     |
| SSSIEQKKGSTR          | Q9D4J7     | 0.00291545            | N-term +42.01 Da, K +28.03 Da,             | 1027.282959        | 4      | 437.7399902  | 437.4865987     |
| TENSTSAPAAKPKR        | P10922     | 0                     | N-term +42.01 Da, K +28.03 Da,             | 1029.913208        | 3      | 674.3499756  | 674.0219052     |
| TENSTSAPAAKPKR        | P10922     | 0                     | N-term +42.01 Da, K +28.03 Da,             | 1030.739136        | 3      | 340.1944275  | 339.5234282     |
| ADGKAGEEKEPKQR        | Q6P8I4     | 0                     | N-term +42.01 Da, K +28.03 Da,             | 1038.04248         | 3      | 415.5631409  | 415.5630517     |
| SESGKSSQPLASKQEKGTEKR | P17095     | 0                     | N-term +42.01 Da, K +28.03 Da,             | 1046.879639        | 2      | 699.8212891  | 699.8214648     |
| SAAKENPCR             | P97434     | 0.03592462            | N-term +42.01 Da, K +28.03 Da, C +57.02Da, | 1065.208374        | 3      | 359.51828    | 359.5183432     |
| GEPHGSMR              | P23591     | 0.00413793            | N-term +42.01 Da,                          | 1075.088745        | 4      | 437.7326355  | 437.4865987     |
| ADGKAGEEKEPKQR        | Q6P8I4     | 0.00083056            | N-term +42.01 Da, K +28.03 Da,             | 1079.459473        | 2      | 699.821228   | 699.8214648     |
| TENSTSAPAAKPKR        | P10922     | 0                     | N-term +42.01 Da, K +28.03 Da,             | 1090.08313         | 3      | 373.224884   | 372.5524416     |
| GSKMASATR             | Q9CQX8     | 0.02474351            | N-term +42.01 Da, K +28.03 Da,             | 1096.171875        | 2      | 437.2427979  | 437.2374525     |
| SNLSKGTGSR            | Q9JLV5     | 0                     | N-term +42.01 Da, K +28.03 Da,             | 1103.940063        | 3      | 487.8900146  | 487.2230904     |
| TENSTSAPAAKPKR        | P10922     | 0                     | N-term +42.01 Da, K +28.03 Da,             | 1115.265869        | 3      | 487.2200012  | 487.2230904     |
| TENSTSAPAAKPKR        | P10922     | 0                     | N-term +42.01 Da, K +28.03 Da,             | 1129.814331        | 3      | 394.236145   | 394.2360531     |
| MEHSKQIR              | E0CX86     | 0.00236035            | N-term +42.01 Da, K +28.03 Da,             | 1133.993896        | 2      | 778.4199829  | 778.4255658     |
| SAGSSCSQTPSR          | Q60876     | 0                     | N-term +42.01 Da, C +57.02Da,              | 1139.826782        | 4      | 442.2416992  | 442.241532      |
| PTKLRAPAYFR           | Q920N1     | 0.02070646            | N-term +42.01 Da, K +28.03 Da,             | 1149.2052          | 4      | 642.5100098  | 642.2603746     |
| TTYNKGPKPER           | P49429     | 0                     | N-term +42.01 Da, K +28.03 Da,             | 1157.517334        | 3      | 589.319458   | 589.3196171     |
| AGSHAGTLR             | Q9CYU6     | 0.0029985             | N-term +42.01 Da,                          | 1159.179321        | 3      | 519.289978   | 519.286136      |
| MEAVPEKKKK            | P14148     | 0.00982962            | N-term +42.01 Da, K +28.03 Da,             | 1168.098145        | 4      | 655.5999756  | 655.3462525     |
| TTYNKGPKPER           | P49429     | 0.00605653            | N-term +42.01 Da, K +28.03 Da,             | 1176.591187        | 4      | 442.2414246  | 442.241532      |
| AAADEPKPK             | P55264     | 0.00082372            | N-term +42.01 Da, K +28.03 Da,             | 1183.912964        | 3      | 363.2200012  | 363.2205144     |
| TTYNKGPKPER           | P49429     | 0                     | N-term +42.01 Da, K +28.03 Da,             | 1188.787476        | 2      | 778.9199829  | 778.4255658     |
| SGGSADYNR             | P10630     | 0                     | N-term +42.01 Da,                          | 1189.941528        | 3      | 519.6143799  | 519.286136      |
| TENSTSAPAAKPK         | P10922     | 0                     | N-term +42.01 Da, K +28.03 Da,             | 1194.223633        | 3      | 425.247406   | 425.2469521     |
| TTYNKGPKPER           | P49429     | 0.00290698            | N-term +42.01 Da, K +28.03 Da,             | 1199.131836        | 4      | 655.3461914  | 655.3462525     |
| AAADEPKPK             | P55264     | 0                     | N-term +42.01 Da, K +28.03 Da,             | 1199.494019        | 2      | 633.7700195  | 633.7725946     |
| MDQIQHPSK             | Q9JLJ3     | 0                     | N-term +42.01 Da, K +28.03 Da,             | 1211.057861        | 2      | 436.2172852  | 436.2170514     |

|                      |        |            |                                           |             |   |             |             |
|----------------------|--------|------------|-------------------------------------------|-------------|---|-------------|-------------|
| SSSASAANGNDSKKFKGDNR | P17225 | 0.03325416 | N-term +42.01 Da, K +28.03 Da,            | 1219.764771 | 2 | 428.2399902 | 428.2377864 |
| TTYNNKGPKPER         | P49429 | 0.00923483 | N-term +42.01 Da, K +28.03 Da,            | 1220.455811 | 3 | 519.6141968 | 519.286136  |
| AKPLTDQEKR           | Q9ET01 | 0.002886   | N-term +42.01 Da, K +28.03 Da,            | 1220.726563 | 2 | 778.9199829 | 778.4255658 |
| TKEMTENQR            | P30204 | 0          | N-term +42.01 Da, K +28.03 Da,            | 1226.846802 | 2 | 638.3286133 | 638.8358544 |
| SQPGPKPAASPR         | P51125 | 0.04365307 | N-term +42.01 Da, K +28.03 Da,            | 1230.455444 | 2 | 633.7731323 | 633.7725946 |
| SGEDVPHR             | Q9CR00 | 0.00230769 | N-term +42.01 Da,                         | 1233.560181 | 2 | 574.7442627 | 574.74436   |
| TTYNNKGPKPER         | P49429 | 0.00356379 | N-term +42.01 Da, K +28.03 Da,            | 1233.715454 | 3 | 535.9000244 | 535.8973775 |
| STAGKVIKCK           | P00329 | 0.00237718 | N-term +42.01 Da, K +28.03 Da,C +57.02Da, | 1246.011841 | 2 | 730.8300171 | 730.3309974 |
| STAGKVIKCK           | P00329 | 0.00081967 | N-term +42.01 Da, K +28.03 Da,C +57.02Da, | 1267.102051 | 2 | 512.7875977 | 512.7873097 |
| AAEHSR               | _tr G3 | 0.04372842 | N-term +42.01 Da,                         | 1299.419067 | 3 | 501.6038818 | 501.6035762 |
| AQASAAPKAGTATGR      | P56480 | 0.01679104 | N-term +42.01 Da, K +28.03 Da,            | 1300.765869 | 3 | 370.2046204 | 370.204753  |
| AKPLTDQEKR           | Q9ET01 | 0.00610169 | N-term +42.01 Da, K +28.03 Da,            | 1302.488281 | 2 | 571.2700195 | 571.2689585 |
| SYQGLKKNIPR          | O08553 | 0.04035088 | N-term +42.01 Da, K +28.03 Da,            | 1307.63208  | 2 | 485.2533875 | 484.2583851 |
| AAAAGAEGR            | Q80YR4 | 0.0035791  | N-term +42.01 Da,                         | 1330.959351 | 2 | 469.7203979 | 469.7199584 |
| AATASPGAGR           | Q9CR62 | 0.00083333 | N-term +42.01 Da,                         | 1331.396362 | 2 | 583.789978  | 583.7903921 |
| TTYNNKGPKPER         | P49429 | 0.0470255  | N-term +42.01 Da, K +28.03 Da,            | 1336.521851 | 2 | 631.8458862 | 631.8462219 |
| ATKIDKEACR           | Q9CQI6 | 0.03539823 | N-term +42.01 Da, K +28.03 Da,C +57.02Da, | 1345.446045 | 2 | 639.7841797 | 639.7851706 |
| TTYNNKGPKPER         | P49429 | 0.04685714 | N-term +42.01 Da, K +28.03 Da,            | 1348.9198   | 2 | 773.7888184 | 773.7891712 |
| MDSKQQTVR            | P70694 | 0.00082508 | N-term +42.01 Da, K +28.03 Da,            | 1349.051514 | 2 | 603.7929688 | 603.7927981 |
| ATSASSHLNK           | P15105 | 0          | N-term +42.01 Da, K +28.03 Da,            | 1357.894775 | 2 | 528.8200073 | 528.8262373 |
| ATSASSHLNKG          | P15105 | 0.00293686 | N-term +42.01 Da, K +28.03 Da,            | 1361.324829 | 2 | 523.25      | 523.2490805 |
| AAPSMKER             | Q8BGD8 | 0.00226586 | N-term +42.01 Da, K +28.03 Da,            | 1362.602539 | 2 | 469.7200928 | 469.7199584 |
| MDSKQQTVR            | P70694 | 0.01039636 | N-term +42.01 Da, K +28.03 Da,            | 1368.342407 | 3 | 534.9400024 | 534.9349975 |
| PDPSKSAPAPK          | Q8CGP0 | 0.00353357 | N-term +42.01 Da, K +28.03 Da,            | 1375.989624 | 3 | 428.5822754 | 428.5821122 |
| AEDIKTK              | P56391 | 0.0432526  | N-term +42.01 Da, K +28.03 Da,            | 1381.998779 | 2 | 545.7533569 | 545.2621881 |
| ATSASSHLNK           | P15105 | 0.00419287 | N-term +42.01 Da, K +28.03 Da,            | 1382.859497 | 3 | 447.943634  | 447.9439932 |
| ASASGAMAKHEQ         | Q9WV55 | 0.00289645 | N-term +42.01 Da, K +28.03 Da,            | 1395.39502  | 2 | 585.3178711 | 585.3172973 |
| ANKAPSQMER           | P31725 | 0.03697183 | N-term +42.01 Da, K +28.03 Da,            | 1397.220947 | 3 | 527.2600098 | 526.9275089 |
| MDSKQQTVR            | P70694 | 0          | N-term +42.01 Da, K +28.03 Da,            | 1399.116699 | 2 | 636.8099976 | 636.8125768 |
| PEPAKSAPAPK          | P10853 | 0.00291971 | N-term +42.01 Da, K +28.03 Da,            | 1403.019653 | 3 | 337.185791  | 336.5188942 |
| AEDIKTK              | P56391 | 0.0432526  | N-term +42.01 Da, K +28.03 Da,            | 1407.394287 | 2 | 417.2000122 | 417.2003467 |
| AQASAAPKAGTATGR      | P56480 | 0          | N-term +42.01 Da, K +28.03 Da,            | 1415.034668 | 3 | 406.5799866 | 406.5810548 |
| SSSPVNVKK            | Q8VEK3 | 0          | N-term +42.01 Da, K +28.03 Da,            | 1422.921875 | 2 | 453.2200012 | 453.2197914 |
| PDPAKSAPAPK          | Q64525 | 0          | N-term +42.01 Da, K +28.03 Da,            | 1423.333618 | 2 | 609.3673096 | 609.3679439 |
| MDSKQQTVR            | P70694 | 0          | N-term +42.01 Da, K +28.03 Da,            | 1430.975098 | 2 | 581.7956543 | 581.7978831 |
| MEKEEETTR            | E9Q616 | 0          | N-term +42.01 Da, K +28.03 Da,            | 1446.299438 | 3 | 406.581665  | 406.5810548 |
| SHGSHETDEEFDAR       | P12787 | 0          | N-term +42.01 Da,                         | 1456.589844 | 3 | 430.5673218 | 430.5675857 |
| VSHSELR              | Q99L53 | 0.04680365 | N-term +42.01 Da,                         | 1459.219482 | 2 | 480.25      | 480.2525794 |
| SHGSHETDEEFDAR       | P12787 | 0          | N-term +42.01 Da,                         | 1461.422607 | 2 | 507.730011  | 507.7279809 |
| AQASAAPKAGTATGR      | P56480 | 0.003003   | N-term +42.01 Da, K +28.03 Da,            | 1462.991821 | 3 | 407.5349731 | 407.1960406 |

|                            |        |            |                                           |             |   |             |             |
|----------------------------|--------|------------|-------------------------------------------|-------------|---|-------------|-------------|
| PDPAKSAPAPK                | Q64525 | 0          | N-term +42.01 Da, K +28.03 Da,            | 1471.296875 | 2 | 451.7630005 | 451.7633031 |
| SSNECFKCGR                 | P53996 | 0          | N-term +42.01 Da, K +28.03 Da,C +57.02Da, | 1475.396851 | 3 | 356.5447998 | 356.5380659 |
| MNKDAQMR                   | Q9JIX0 | 0.00287563 | N-term +42.01 Da, K +28.03 Da,            | 1485.390747 | 3 | 384.871582  | 384.871774  |
| MEQAVHGESKR                | Q9R1J0 | 0          | N-term +42.01 Da, K +28.03 Da,            | 1498.172729 | 2 | 730.8300171 | 730.3309974 |
| SSKTASTNSIAQAR             | Q9DAS9 | 0.01458465 | N-term +42.01 Da, K +28.03 Da,            | 1508.089355 | 2 | 451.7626648 | 451.7633031 |
| ASGNAQIGK                  | Q61171 | 0.01957187 | N-term +42.01 Da, K +28.03 Da,            | 1509.921997 | 2 | 611.7839966 | 611.7846391 |
| PDPAKSAPAPK                | Q64525 | 0          | N-term +42.01 Da, K +28.03 Da,            | 1512.966064 | 2 | 657.7808228 | 657.7819075 |
| MDSKQQTVR                  | P70694 | 0.01089045 | N-term +42.01 Da, K +28.03 Da,            | 1514.329956 | 2 | 601.3024292 | 601.3033326 |
| SKSESPKEPEQLR              | P49312 | 0.00290065 | N-term +42.01 Da, K +28.03 Da,            | 1523.63501  | 3 | 362.2203369 | 362.2206257 |
| AAQASAAPKAGTATGR           | P56480 | 0.00162734 | N-term +42.01 Da, K +28.03 Da,            | 1540.128662 | 3 | 553.8900146 | 553.5607655 |
| TTASPSQVR                  | P09528 | 0          | N-term +42.01 Da,                         | 1541.860474 | 2 | 458.25      | 458.2483515 |
| MNNQKQKPTLSGQR             | Q9CQC6 | 0          | N-term +42.01 Da, K +28.03 Da,            | 1549.173706 | 2 | 657.7781982 | 657.7819075 |
| ASGNAQIGK                  | Q61171 | 0.00667111 | N-term +42.01 Da, K +28.03 Da,            | 1550.953613 | 2 | 494.756897  | 494.756541  |
| MNNQKQKPTLSGQR             | Q9CQC6 | 0.04330254 | N-term +42.01 Da, K +28.03 Da,            | 1559.832764 | 2 | 515.2828979 | 515.7820271 |
| SKSESPKEPEQLR              | P49312 | 0.01513241 | N-term +42.01 Da, K +28.03 Da,            | 1562.317017 | 2 | 570.3117065 | 570.3120147 |
| SSKTASTNSIAQAR             | Q9DAS9 | 0          | N-term +42.01 Da, K +28.03 Da,            | 1564.37146  | 2 | 392.7553101 | 392.7556145 |
| LEDEEPIR                   | Q5U4C1 | 0.02487864 | N-term +42.01 Da,                         | 1581.669189 | 2 | 494.756958  | 494.756541  |
| AAQASAAPKAGTATGR           | P56480 | 0          | N-term +42.01 Da, K +28.03 Da,            | 1584.715454 | 2 | 532.2600098 | 532.2547963 |
| AAADEPKPKKL                | P55264 | 0.02484848 | N-term +42.01 Da, K +28.03 Da,            | 1599.728882 | 3 | 554.2299805 | 553.5607655 |
| AAVTVNSAKR                 | Q9D110 | 0          | N-term +42.01 Da, K +28.03 Da,            | 1609.535645 | 2 | 589.78125   | 589.7810791 |
| ATSASSHLNKGK               | P15105 | 0.02702703 | N-term +42.01 Da, K +28.03 Da,            | 1609.802124 | 2 | 550.2800293 | 550.2781721 |
| AENPGLENHR                 | O35344 | 0.00082781 | N-term +42.01 Da,                         | 1612.533813 | 3 | 743.6799927 | 743.6794853 |
| STPGKENFR                  | Q60960 | 0.0035461  | N-term +42.01 Da, K +28.03 Da,            | 1614.640381 | 2 | 494.7563477 | 494.756541  |
| SSKTASTNSIAQAR             | Q9DAS9 | 0          | N-term +42.01 Da, K +28.03 Da,            | 1615.244263 | 3 | 448.2200012 | 447.89084   |
| AAQASAAPKAGTATGR           | P56480 | 0          | N-term +42.01 Da, K +28.03 Da,            | 1617.204102 | 2 | 658.2800293 | 657.7819075 |
| AAAAAGPASSQR               | Q9CX34 | 0          | N-term +42.01 Da,                         | 1617.968506 | 2 | 430.2174988 | 430.2170514 |
| TTASPSQVR                  | P09528 | 0.00358166 | N-term +42.01 Da,                         | 1620.34729  | 3 | 682.3400269 | 682.3408642 |
| THSVTLR                    | P70271 | 0.02066869 | N-term +42.01 Da,                         | 1631.427124 | 2 | 464.75      | 464.7496724 |
| SSAGGEGPEAGPGR             | Q3TZZ7 | 0          | N-term +42.01 Da,                         | 1631.578003 | 2 | 553.289978  | 553.2854656 |
| ATTAQQSPQPVAGKR            | Q99J36 | 0          | N-term +42.01 Da, K +28.03 Da,            | 1642.983887 | 2 | 805.9400024 | 805.4364648 |
| AANPSGQGFQNKNR             | Q3TXT3 | 0.0270108  | N-term +42.01 Da, K +28.03 Da,            | 1645.383545 | 2 | 494.7566833 | 494.756541  |
| AQDQGEKENPMR               | Q9CXW4 | 0.00294118 | N-term +42.01 Da, K +28.03 Da,            | 1651.783569 | 2 | 682.8400269 | 682.3353618 |
| AAQASAAPKAGTATGR           | P56480 | 0          | N-term +42.01 Da, K +28.03 Da,            | 1655.917114 | 2 | 779.8900146 | 779.8896816 |
| AAAAAGPASSQR               | Q9CX34 | 0          | N-term +42.01 Da,                         | 1657.845337 | 2 | 581.8084717 | 581.8011463 |
| TTASPSQVR                  | P09528 | 0          | N-term +42.01 Da,                         | 1666.721802 | 2 | 581.2600098 | 580.7625526 |
| AQDQGEKENPMR               | Q9CXW4 | 0          | N-term +42.01 Da, K +28.03 Da,            | 1676.980347 | 2 | 494.7564697 | 494.756541  |
| AQYKGAASEAGR               | Q9WV03 | 0          | N-term +42.01 Da, K +28.03 Da,            | 1682.644165 | 2 | 658.2739258 | 657.7819075 |
| AAQASAAPKAGTATGR           | P56480 | 0          | N-term +42.01 Da, K +28.03 Da,            | 1684.431152 | 2 | 639.8200073 | 639.8254868 |
| TTASPSQVR                  | P09528 | 0          | N-term +42.01 Da,                         | 1689.817749 | 2 | 736.8400269 | 736.8435513 |
| AAEQIPGGGSGGGGSGGGGGGGGGGR | Q8BMA6 | 0          | N-term +42.01 Da, K +28.03 Da,            | 1690.118774 | 3 | 395.8900146 | 395.8873127 |

|                          |        |            |                                           |             |   |             |             |
|--------------------------|--------|------------|-------------------------------------------|-------------|---|-------------|-------------|
| ATSASSHLNKGIK            | P15105 | 0          | N-term +42.01 Da, K +28.03 Da,            | 1695.689941 | 3 | 767.3588867 | 767.3585233 |
| AAQESLH                  | Q8VBT2 | 0.04137529 | N-term +42.01 Da,                         | 1697.572998 | 2 | 1151.040039 | 1150.534147 |
| AAQESLH                  | Q8VBT2 | 0.04137529 | N-term +42.01 Da,                         | 1707.496094 | 2 | 494.7567139 | 494.756541  |
| ATGQQLMR                 | P47199 | 0.032162   | N-term +42.01 Da, K +28.03 Da,            | 1721.822754 | 2 | 481.721405  | 481.7216438 |
| AQDQGEKENPMR             | Q9CXW4 | 0          | N-term +42.01 Da, K +28.03 Da,            | 1722.777466 | 2 | 532.7469482 | 532.2547963 |
| AAQASAAPKAGTATGR         | P56480 | 0          | N-term +42.01 Da, K +28.03 Da,            | 1726.407593 | 4 | 681.1400146 | 680.8915669 |
| TTASPSQVR                | P09528 | 0.00301659 | N-term +42.01 Da,                         | 1731.149902 | 2 | 571.3013306 | 571.3016472 |
| METAPKPGR                | Q9Z0H1 | 0.00239044 | N-term +42.01 Da, K +28.03 Da,            | 1734.615845 | 2 | 377.7099915 | 377.7139468 |
| ATSASSHLNKGIKQ           | P15105 | 0.00163399 | N-term +42.01 Da, K +28.03 Da,            | 1737.640015 | 2 | 494.7565613 | 494.756541  |
| AAGESMAQR                | Q9D8S4 | 0.04920814 | N-term +42.01 Da,                         | 1743.164673 | 2 | 509.2276001 | 509.227814  |
| SDTAVADTR                | O70493 | 0          | N-term +42.01 Da,                         | 1744.029907 | 3 | 471.6000061 | 471.2683049 |
| SETAPAAPAAPAPAEKTPVKKKAR | P43274 | 0          | N-term +42.01 Da, K +28.03 Da,            | 1748.541992 | 2 | 761.8599854 | 761.8619414 |
| AAQASAAPKAGTATGR         | P56480 | 0.00797342 | N-term +42.01 Da, K +28.03 Da,            | 1751.733643 | 2 | 635.8480225 | 635.8480965 |
| SETAPAAPAAPAPAEKTPVKKKAR | P43274 | 0          | N-term +42.01 Da, K +28.03 Da,            | 1760.923828 | 2 | 501.7458801 | 501.7461735 |
| SEAAPAAPAAAPPAEKAPAKKK   | P15864 | 0          | N-term +42.01 Da, K +28.03 Da,            | 1777.952271 | 2 | 494.7600098 | 494.756541  |
| SETAPAAPAAPAPAEKTPVKKKAR | P43274 | 0          | N-term +42.01 Da, K +28.03 Da,            | 1782.445313 | 2 | 635.8482056 | 635.8480965 |
| AAAVPQR                  | Q62446 | 0.0236938  | N-term +42.01 Da,                         | 1789.03064  | 2 | 445.705719  | 445.7054622 |
| AQEEEDVR                 | Q505B7 | 0.00295203 | N-term +42.01 Da,                         | 1789.744263 | 2 | 691.8699951 | 691.867352  |
| SEAAPAAPAAAPPAEKAPAKKKAA | P15864 | 0          | N-term +42.01 Da, K +28.03 Da,            | 1791.265137 | 3 | 1009.390015 | 1009.055775 |
| SEDEEKVKLR               | Q9D0I4 | 0          | N-term +42.01 Da, K +28.03 Da,            | 1802.421143 | 2 | 779.8806763 | 779.880134  |
| SEAAPAAPAAAPPAEKAPAKKK   | P15864 | 0          | N-term +42.01 Da, K +28.03 Da,            | 1803.106934 | 2 | 415.7034607 | 415.7037768 |
| SEAAPAAPAAAPPAEKAPAKKKAA | P15864 | 0          | N-term +42.01 Da, K +28.03 Da,            | 1803.202881 | 4 | 557.3267212 | 557.3268676 |
| SSPPEGKLETK              | Q91XC8 | 0.00415225 | N-term +42.01 Da, K +28.03 Da,            | 1803.863403 | 3 | 742.7700195 | 742.7667313 |
| SEAAPAAPAAAPPAEKAPAKKKAA | P15864 | 0          | N-term +42.01 Da, K +28.03 Da,            | 1808.390625 | 2 | 521.2519531 | 521.251623  |
| QTTPCFKSR                | B7ZWJ3 | 0.01091142 | N-term +42.01 Da, K +28.03 Da,C +57.02Da, | 1813.39502  | 2 | 635.8486328 | 635.8480965 |
| KCLKEDLER                | S4R1U5 | 0.03323442 | N-term +42.01 Da, K +28.03 Da,C +57.02Da, | 1818.064331 | 4 | 593.0999756 | 592.8454247 |
| MEKPAASTEPPQGSR          | Q9JMD3 | 0.01043705 | N-term +42.01 Da, K +28.03 Da,            | 1830.026367 | 2 | 521.7700195 | 521.7674401 |
| MEKPAASTEPPQGSR          | Q9JMD3 | 0          | N-term +42.01 Da, K +28.03 Da,            | 1832.458984 | 3 | 790.460022  | 790.1248074 |
| ATESGSDSQLR              | Q8CEC6 | 0          | N-term +42.01 Da,                         | 1834.187866 | 3 | 790.789978  | 790.1248074 |
| SETAPAAPAAPAPAEKTPVKKKAR | P43274 | 0          | N-term +42.01 Da, K +28.03 Da,            | 1837.791382 | 3 | 575.9713745 | 575.2980473 |
| SETAPAETAAPAPVEKSPAKKK   | P43276 | 0.00161812 | N-term +42.01 Da, K +28.03 Da,            | 1839.547241 | 4 | 636.6300049 | 636.1245315 |
| MEKPAASTEPPQGSR          | Q9JMD3 | 0          | N-term +42.01 Da, K +28.03 Da,            | 1840.568848 | 3 | 596.6356812 | 595.9637221 |
| SEAAPAAPAAAPPAEKAPAKKK   | P15864 | 0          | N-term +42.01 Da, K +28.03 Da,            | 1845.169312 | 2 | 620.8499756 | 620.8540469 |
| AGQEDPVQR                | Q91VR8 | 0.00299177 | N-term +42.01 Da,                         | 1849.414551 | 3 | 1062.72998  | 1062.399324 |
| MNKLSGGGGR               | P98083 | 0.00082237 | N-term +42.01 Da, K +28.03 Da,            | 1849.553955 | 4 | 593.0999756 | 592.8454247 |
| ADTAPQLKR                | Q9DAR7 | 0          | N-term +42.01 Da, K +28.03 Da,            | 1851.038696 | 2 | 535.303833  | 535.3036582 |
| AGAAEDVR                 | Q8C8T8 | 0.04289855 | N-term +42.01 Da,                         | 1853.259644 | 3 | 847.8306274 | 847.8302832 |
| SHGSHETDEEFDAR           | P12787 | 0.00861498 | N-term +42.01 Da,                         | 1855.049316 | 2 | 437.7168274 | 437.7168844 |
| SHGSHETDEEFDAR           | P12787 | 0          | N-term +42.01 Da,                         | 1863.265503 | 2 | 406.2247009 | 406.2246789 |
| AAAAAAGSGTPR             | Q9CQ36 | 0          | N-term +42.01 Da,                         | 1869.90918  | 4 | 636.1248779 | 636.1245315 |

|                          |        |            |                                            |             |   |             |             |
|--------------------------|--------|------------|--------------------------------------------|-------------|---|-------------|-------------|
| MDQTQHPSKAAQPLR          | Q9JL3  | 0          | N-term +42.01 Da, K +28.03 Da,             | 1880.095581 | 3 | 1063.069946 | 1062.399324 |
| ADIQTER                  | P62281 | 0.03925015 | N-term +42.01 Da,                          | 1882.1073   | 2 | 633.255249  | 633.2567775 |
| ATNDAVLKR                | P31230 | 0.00226757 | N-term +42.01 Da, K +28.03 Da,             | 1887.646973 | 3 | 376.2485352 | 376.2446598 |
| MDQTQHPSKAAQPLR          | Q9JL3  | 0          | N-term +42.01 Da, K +28.03 Da,             | 1900.156128 | 4 | 636.3800049 | 636.1245315 |
| AAPQDVHVR                | Q6QD59 | 0          | N-term +42.01 Da,                          | 1901.795898 | 2 | 529.3039551 | 529.3036582 |
| STGVPSGSSAATGSNR         | P63024 | 0          | N-term +42.01 Da,                          | 1903.760864 | 2 | 478.7559509 | 478.7566775 |
| SHGSHETDEEFDAR           | P12787 | 0          | N-term +42.01 Da,                          | 1911.120972 | 2 | 470.7039795 | 470.7039743 |
| EVEMDAVGKEGR             | Q8C196 | 0.00162999 | N-term +42.01 Da, K +28.03 Da,             | 1916.199707 | 2 | 977.4400024 | 977.4389403 |
| SSSPVNVKLLK              | Q8VEK3 | 0.00083264 | N-term +42.01 Da, K +28.03 Da,             | 1916.542603 | 2 | 648.7722168 | 648.7722606 |
| AQERPSCAVEPEHVQR         | P56389 | 0          | N-term +42.01 Da, C +57.02Da,              | 1916.723389 | 3 | 593.6400146 | 593.3053133 |
| TMGDAPDFDR               | P10649 | 0.01559576 | N-term +42.01 Da,                          | 1918.325439 | 2 | 486.7322693 | 486.7320113 |
| MDQTQHPSKAAQPLR          | Q9JL3  | 0          | N-term +42.01 Da, K +28.03 Da,             | 1918.658447 | 3 | 1178.77002  | 1178.43611  |
| MEEASGSAGNDR             | O70404 | 0          | N-term +42.01 Da,                          | 1919.721069 | 2 | 604.8300171 | 605.3366438 |
| METENQKTMEESTR           | Q05CL8 | 0.00419874 | N-term +42.01 Da, K +28.03 Da,             | 1923.962158 | 2 | 452.722168  | 452.7221669 |
| DAALHMEK                 | P35969 | 0.01907692 | N-term +42.01 Da, K +28.03 Da,             | 1925.835449 | 2 | 444.2399902 | 444.2452775 |
| SETAPAAPAAPAPAIEKTPVKKK  | P43274 | 0          | N-term +42.01 Da, K +28.03 Da,             | 1927.68103  | 3 | 645.6433716 | 645.6427657 |
| SETAPAAPAAPAPAIEKTPVKKK  | P43274 | 0          | N-term +42.01 Da, K +28.03 Da,             | 1933.572998 | 3 | 795.6900024 | 795.358078  |
| SGFSSEER                 | Q9D819 | 0.00421644 | N-term +42.01 Da,                          | 1938.45813  | 2 | 1192.530029 | 1192.533479 |
| ASGSMATSEER              | Q9DBC7 | 0          | N-term +42.01 Da,                          | 1940.494629 | 2 | 559.2800293 | 558.2700131 |
| AETVADTR                 | O70492 | 0.00297398 | N-term +42.01 Da,                          | 1948.00061  | 4 | 627.7700195 | 627.2689442 |
| ADADKSEAAAGDDGSQQPAEPR   | Q8C854 | 0.04088785 | N-term +42.01 Da, K +28.03 Da,             | 1950.997681 | 3 | 438.2781372 | 438.2781409 |
| YTDSSYDEKR               | P10649 | 0          | N-term +42.01 Da, K +28.03 Da,             | 1955.492065 | 2 | 405.7088623 | 405.7088618 |
| AQTAAAAAPR               | Q9CQA3 | 0          | N-term +42.01 Da,                          | 1955.993896 | 2 | 595.2999878 | 594.2898911 |
| SETAPAAPAAPAPAIEKTPVKKK  | P43274 | 0          | N-term +42.01 Da, K +28.03 Da,             | 1959.105957 | 3 | 836.6900024 | 836.0228334 |
| SETAPAAPAAPAPAIEKTPVKKK  | P43274 | 0          | N-term +42.01 Da, K +28.03 Da,             | 1970.646484 | 2 | 656.9143066 | 656.9135732 |
| RPAPPRER                 | Q8BHC9 | 0.01736973 | N-term +42.01 Da,                          | 1975.088135 | 3 | 772.1199951 | 772.1175414 |
| VTGKPISQGGIHGR           | P26443 | 0.04656445 | N-term +42.01 Da, K +28.03 Da,             | 1976.943726 | 4 | 579.8400269 | 579.3399751 |
| QQIQEHEEEAR              | F6U775 | 0          | N-term +42.01 Da,                          | 1978.828003 | 3 | 390.8900146 | 390.8836797 |
| FYDISSGCIR               | Q9DC29 | 0.02486355 | N-term +42.01 Da, C +57.02Da,              | 1981.371582 | 3 | 438.2770081 | 438.2781409 |
| AAAAAAPGGGGGEPR          | Q63844 | 0.00238284 | N-term +42.01 Da,                          | 1986.068726 | 4 | 768.6300049 | 768.6320161 |
| MDFQHRPGGKTGSGGVASSSESNR | Q62203 | 0          | N-term +42.01 Da, K +28.03 Da,             | 1997.284058 | 2 | 551.2185669 | 551.2206197 |
| SETAPAAPAAPAPAIEKTPVKKK  | P43274 | 0          | N-term +42.01 Da, K +28.03 Da,             | 2007.389526 | 3 | 772.1199951 | 772.1175414 |
| SETAPAAPAAPAPAIEKTPVKKK  | P43274 | 0          | N-term +42.01 Da, K +28.03 Da, C +57.02Da, | 2012.048828 | 2 | 515.289978  | 515.2860881 |
| ALKQISSNR                | Q9R0P3 | 0.00299401 | N-term +42.01 Da, K +28.03 Da,             | 2013.659912 | 4 | 579.5900269 | 579.3399751 |
| MEAVPEKK                 | P14148 | 0.03106332 | N-term +42.01 Da, K +28.03 Da,             | 2019.419678 | 3 | 728.6636963 | 728.6626665 |
| AQQAADKY                 | Q8VDD5 | 0.01043025 | N-term +42.01 Da, K +28.03 Da,             | 2020.791138 | 4 | 579.5599976 | 579.0537723 |
| SSNECFKC                 | P53996 | 0.00606061 | N-term +42.01 Da, K +28.03 Da, C +57.02Da, | 2022.665894 | 2 | 453.70224   | 453.7029197 |
| MLEAQGSNHGCER            | Q9D0T2 | 0          | N-term +42.01 Da, C +57.02Da,              | 2028.266113 | 3 | 904         | 903.6701372 |
| MDAQSSAKVN               | P49586 | 0.00234192 | N-term +42.01 Da, K +28.03 Da,             | 2030.348877 | 2 | 1355.5      | 1355.001568 |
| AEDIKTKIK                | P56391 | 0.00731383 | N-term +42.01 Da, K +28.03 Da,             | 2034.964233 | 3 | 1042.5      | 1042.167408 |

|                      |        |            |                                           |             |   |             |             |
|----------------------|--------|------------|-------------------------------------------|-------------|---|-------------|-------------|
| AIYLVRNPR            | P52843 | 0.02480339 | N-term +42.01 Da,                         | 2043.007446 | 2 | 583.7689819 | 582.7637065 |
| AATTGSGVKVPR         | Q9CZY3 | 0          | N-term +42.01 Da, K +28.03 Da,            | 2051.681885 | 2 | 1291.469971 | 1290.972278 |
| AANATMATSGSAR        | Q91VC3 | 0          | N-term +42.01 Da,                         | 2053.64917  | 3 | 860.9822388 | 860.9839445 |
| AAAMDVDTPSGTNSGAGKKR | P62878 | 0          | N-term +42.01 Da, K +28.03 Da,            | 2056.203613 | 2 | 1290.969971 | 1290.972278 |
| ASEAGGIGGGGGGKIR     | E9Q3G8 | 0          | N-term +42.01 Da, K +28.03 Da,            | 2065.828369 | 3 | 855.3800049 | 855.7118532 |
| ATNDAVLKR            | P31230 | 0.04524628 | N-term +42.01 Da, K +28.03 Da,            | 2066.900635 | 4 | 514.791748  | 514.7913892 |
| ALKQISSNR            | Q9R0P3 | 0.04669704 | N-term +42.01 Da, K +28.03 Da,            | 2070.066895 | 2 | 480.2381592 | 480.2383179 |
| ASSHTVLMR            | Q9Z0S1 | 0          | N-term +42.01 Da,                         | 2072.455078 | 2 | 502.7550049 | 502.7539985 |
| MEEESIKEGSEKPR       | Q8K124 | 0          | N-term +42.01 Da, K +28.03 Da,            | 2075.147949 | 2 | 422.7200012 | 421.7219694 |
| AATTGSGVKVPR         | Q9CZY3 | 0          | N-term +42.01 Da, K +28.03 Da,            | 2077.127686 | 2 | 607.3480225 | 607.3485974 |
| SKSFQQSSLGR          | Q8K310 | 0          | N-term +42.01 Da, K +28.03 Da,            | 2077.658203 | 2 | 770.828125  | 770.8291534 |
| MDADKDNIKQACDER      | Q35309 | 0.00161943 | N-term +42.01 Da, K +28.03 Da,C +57.02Da, | 2080.067871 | 2 | 735.8900146 | 735.8866076 |
| AAAEEDGGPEGPNR       | O35445 | 0          | N-term +42.01 Da,                         | 2088.104492 | 3 | 467.6000061 | 466.9244269 |
| AAGPISER             | Q8QZY9 | 0.00603217 | N-term +42.01 Da,                         | 2090.367676 | 2 | 421.7200012 | 421.7219694 |
| ALKQISSNR            | Q9R0P3 | 0.01680149 | N-term +42.01 Da, K +28.03 Da,            | 2090.628418 | 3 | 686.0545654 | 686.0527601 |
| GDVEKGKKIFVQK        | P62897 | 0.01561524 | N-term +42.01 Da, K +28.03 Da,            | 2090.767334 | 2 | 988.8900146 | 988.8718087 |
| MNLSAAHH             | Q8VXC1 | 0.00083682 | N-term +42.01 Da,                         | 2097.969238 | 3 | 678.0100098 | 678.0091145 |
| SETAAPAAPAPVEKTPVKKK | P43277 | 0          | N-term +42.01 Da, K +28.03 Da,            | 2099.650635 | 3 | 957.3499756 | 957.0136869 |
| ASNNTASIAQAR         | P63213 | 0.00927152 | N-term +42.01 Da,                         | 2102.546631 | 2 | 1436.02002  | 1435.016892 |
| MKHYEVEIR            | Q9CY27 | 0.00421348 | N-term +42.01 Da, K +28.03 Da,            | 2105.770752 | 2 | 647.8408203 | 647.8411369 |
| SETAAPAAPAPVEKTPVKKK | P43277 | 0          | N-term +42.01 Da, K +28.03 Da,            | 2108.22876  | 3 | 729         | 728.6626665 |
| SETAAPAAPAPVEKTPVKKK | P43277 | 0          | N-term +42.01 Da, K +28.03 Da,            | 2110.795654 | 3 | 957.0100098 | 957.0136869 |
| ATPAAPASGVR          | Q3UDR8 | 0.0191358  | N-term +42.01 Da,                         | 2114.277588 | 2 | 543.8200073 | 543.8169328 |
| ALKQISSNR            | Q9R0P3 | 0.0048011  | N-term +42.01 Da, K +28.03 Da,            | 2116.298096 | 3 | 582.960022  | 582.9574683 |
| AGTTTIEAVKR          | D3Z2H9 | 0.01682243 | N-term +42.01 Da, K +28.03 Da,            | 2118.709717 | 2 | 520.2800293 | 520.2801831 |
| SETAAPAAPAPVEKTPVKKK | P43277 | 0          | N-term +42.01 Da, K +28.03 Da,            | 2121.922119 | 2 | 522.2700195 | 522.268761  |
| TMDKSELVQKAK         | Q9CQV8 | 0          | N-term +42.01 Da, K +28.03 Da,            | 2132.338867 | 3 | 741.6400146 | 740.9665475 |
| MNSVSPR              | Q91WT7 | 0.00984898 | N-term +42.01 Da,                         | 2155.765869 | 2 | 608.8499756 | 608.8484304 |
| TMDKSELVQKAK         | Q9CQV8 | 0.01099612 | N-term +42.01 Da, K +28.03 Da,            | 2157.93042  | 2 | 906.960022  | 906.9579594 |
| AASGDPSAESYR         | P54822 | 0          | N-term +42.01 Da,                         | 2159.087891 | 2 | 416.7000122 | 416.7027222 |
| MQSAPLEQPAKRPR       | Q60710 | 0          | N-term +42.01 Da, K +28.03 Da,            | 2159.678223 | 2 | 907.460022  | 906.9579594 |
| MEGHDPKEPEQLR        | B2RXM2 | 0          | N-term +42.01 Da, K +28.03 Da,            | 2163.53833  | 2 | 907.960022  | 906.9579594 |
| AAPGTPPPSASGGGGGEP   | Q99N42 | 0.01510384 | N-term +42.01 Da,                         | 2167.544678 | 2 | 573.3319092 | 573.3298733 |
| MEGHDPKEPEQLR        | B2RXM2 | 0.00610998 | N-term +42.01 Da, K +28.03 Da,            | 2168.187256 | 3 | 781.7999878 | 781.4613081 |
| SEAAPAAPAAPAEKAPAKKK | P15864 | 0.03212374 | N-term +42.01 Da, K +28.03 Da,            | 2173.555176 | 2 | 558.8220825 | 558.8222153 |
| SSPTIPSR             | Q8R111 | 0.0073187  | N-term +42.01 Da,                         | 2176.120361 | 2 | 511.2406616 | 511.2402009 |
| MNKAPQPTGPPPAR       | Q6NZJ6 | 0          | N-term +42.01 Da, K +28.03 Da,            | 2192.306641 | 4 | 633.3499756 | 632.8467989 |
| SNGYEDHMAEDCR        | P70372 | 0          | N-term +42.01 Da, C +57.02Da,             | 2192.96875  | 3 | 782.1300049 | 781.4613081 |
| MEVKPPGPRPQDPSGR     | Q8BG05 | 0.00422535 | N-term +42.01 Da, K +28.03 Da,            | 2196.904785 | 4 | 408.2537537 | 408.2539105 |
| TTQGLVANR            | Q9CZX9 | 0          | N-term +42.01 Da,                         | 2196.980225 | 3 | 501.2799988 | 501.283955  |

|                       |        |            |                                |             |   |             |             |
|-----------------------|--------|------------|--------------------------------|-------------|---|-------------|-------------|
| MLSGSGSQGR            | D3Z6I7 | 0          | N-term +42.01 Da,              | 2204.483154 | 2 | 751.9199829 | 751.4222942 |
| MESNHKSGDGLSGTQKEAALR | Q5YD48 | 0          | N-term +42.01 Da, K +28.03 Da, | 2205.169189 | 2 | 816.5       | 815.5005445 |
| SQAEFDKAAEEVKR        | P31786 | 0.0196681  | N-term +42.01 Da, K +28.03 Da, | 2206.506104 | 2 | 508.2280579 | 508.2276164 |
| MEGHDPKEPEQLR         | B2RXM2 | 0          | N-term +42.01 Da, K +28.03 Da, | 2207.375488 | 2 | 511.2396545 | 511.2402009 |
| SETAPAAPAAPAPAEKTPVKK | P43274 | 0          | N-term +42.01 Da, K +28.03 Da, | 2220.087646 | 2 | 452.75      | 452.7496724 |
| MEVKPPPGRPQPDSDGR     | Q8BG05 | 0.00241546 | N-term +42.01 Da, K +28.03 Da, | 2222.779297 | 4 | 633.0999756 | 632.8467989 |
| SQAEFDKAAEEVKR        | P31786 | 0          | N-term +42.01 Da, K +28.03 Da, | 2223.261963 | 2 | 942.4000244 | 941.893979  |
| WSMDRNTDR             | Q3UVV9 | 0.01960784 | N-term +42.01 Da,              | 2223.43042  | 3 | 545.9312134 | 545.9313645 |
| MEVKPPPGR             | Q8BG05 | 0.00234558 | N-term +42.01 Da, K +28.03 Da, | 2226.191895 | 3 | 569.2999878 | 569.2967011 |
| ATSPQKSPLVPKSPKSPPSR  | Q9EPC1 | 0          | N-term +42.01 Da, K +28.03 Da, | 2226.623291 | 4 | 709.9099731 | 709.6602074 |
| MEEAPHGCPGADSAQAGR    | Q9R060 | 0          | N-term +42.01 Da, C +57.02Da,  | 2227.374512 | 3 | 501.283844  | 501.283955  |
| SQAEFDKAAEEVKR        | P31786 | 0          | N-term +42.01 Da, K +28.03 Da, | 2228.153809 | 3 | 560.3067627 | 560.3067653 |
| MEETEKKVATQEGR        | Q9QXZ6 | 0          | N-term +42.01 Da, K +28.03 Da, | 2230.796875 | 3 | 843.789978  | 843.459973  |
| MEETEKKVATQEGR        | Q9QXZ6 | 0          | N-term +42.01 Da, K +28.03 Da, | 2231.253174 | 3 | 953.1900024 | 953.5167549 |
| SETAPAAPAAPAPAEKTPVKK | P43274 | 0          | N-term +42.01 Da, K +28.03 Da, | 2236.619873 | 3 | 844.1300049 | 843.459973  |
| STNENANLPAAR          | P52293 | 0          | N-term +42.01 Da,              | 2241.02124  | 3 | 720.7399902 | 720.0754535 |
| MEVKPPPGRPQPDSDGR     | Q8BG05 | 0          | N-term +42.01 Da, K +28.03 Da, | 2242.170654 | 3 | 606.6490479 | 606.64908   |
| ATSASSHLNKGIKQM       | P15105 | 0          | N-term +42.01 Da, K +28.03 Da, | 2242.717773 | 2 | 853.4420776 | 853.4414133 |
| AGTTTTIEAVKR          | D3Z2H9 | 0.00163132 | N-term +42.01 Da, K +28.03 Da, | 2243.848633 | 2 | 511.2398682 | 511.2402009 |
| AVAGAAAYR             | Q9QXN3 | 0.02584135 | N-term +42.01 Da,              | 2244.11084  | 3 | 784.6500244 | 783.9807456 |
| AAAATGLR              | Q9CQZ5 | 0.00481431 | N-term +42.01 Da,              | 2246.383789 | 3 | 477.2738647 | 477.2742909 |
| STSVPGQHWNWTR         | Q8BT51 | 0.00082576 | N-term +42.01 Da,              | 2248.605957 | 2 | 608.8480835 | 608.8484304 |
| MNSVSPR               | Q91WT7 | 0.00984898 | N-term +42.01 Da,              | 2250.279785 | 2 | 410.7193604 | 410.7192293 |
| MEGYHKPDQQKL          | P40142 | 0          | N-term +42.01 Da, K +28.03 Da, | 2251.462158 | 2 | 1176.469971 | 1175.46748  |
| ANIAVQR               | P61087 | 0.02930622 | N-term +42.01 Da,              | 2253.677246 | 4 | 632.8477173 | 632.8467989 |
| AVKTLNPKAEVAR         | P80317 | 0.02017115 | N-term +42.01 Da, K +28.03 Da, | 2254.171143 | 3 | 545.9313354 | 545.9313645 |
| AAAATGLR              | Q9CQZ5 | 0.00481431 | N-term +42.01 Da,              | 2257.552979 | 3 | 569.2966309 | 569.2967011 |
| SDSRDPASDQMKQWKEQR    | P24270 | 0          | N-term +42.01 Da, K +28.03 Da, | 2258.570557 | 2 | 940.8900146 | 940.3897816 |
| AEMKSPKAEPATPAEAAQSDR | Q7TPV4 | 0          | N-term +42.01 Da, K +28.03 Da, | 2264.02002  | 2 | 940.3900146 | 940.3897816 |
| AGNFDSEER             | Q64010 | 0.01509434 | N-term +42.01 Da,              | 2274.394043 | 2 | 853.4428711 | 853.4414133 |
| TETDGFYKSR            | O08738 | 0.00353857 | N-term +42.01 Da, K +28.03 Da, | 2275.421387 | 3 | 784.6524048 | 783.9807456 |
| GKMWWTLR              | Q9ER60 | 0.02932376 | N-term +42.01 Da, K +28.03 Da, | 2277.807617 | 3 | 606.3099976 | 606.64908   |
| AGSSAEQAADYR          | Q9ER72 | 0          | N-term +42.01 Da,              | 2281.780273 | 2 | 1176.474976 | 1175.46748  |
| AGTTTTIEAVKR          | D3Z2H9 | 0          | N-term +42.01 Da, K +28.03 Da, | 2282.949219 | 2 | 706.3400269 | 706.3392929 |
| SGYTPDEKLR            | Q3UIU2 | 0          | N-term +42.01 Da, K +28.03 Da, | 2287.665771 | 3 | 569.2963867 | 569.2967011 |
| SOLDMKEHPDAEVQKN      | O55060 | 0          | N-term +42.01 Da, K +28.03 Da, | 2287.913086 | 2 | 386.7185669 | 386.7192293 |
| METQEGVSKQSIR         | Q3URQ7 | 0.0104712  | N-term +42.01 Da, K +28.03 Da, | 2290.399658 | 3 | 891.6500244 | 891.3141308 |
| SGYTPDEKLR            | Q3UIU2 | 0.00296296 | N-term +42.01 Da, K +28.03 Da, | 2292.849854 | 2 | 1337.469971 | 1336.467558 |
| MFQGADSQAGKSGSR       | Q6PGH2 | 0          | N-term +42.01 Da, K +28.03 Da, | 2295.577637 | 3 | 891.3099976 | 891.3141308 |
| AAAAEGVPATR           | Q9CWG9 | 0          | N-term +42.01 Da,              | 2296.137939 | 3 | 550.6199951 | 550.6226367 |

|                          |        |            |                                |             |   |             |             |
|--------------------------|--------|------------|--------------------------------|-------------|---|-------------|-------------|
| ASTFNPR                  | Q9JIL4 | 0.01041667 | N-term +42.01 Da,              | 2299.026611 | 2 | 1336.469971 | 1336.467558 |
| AGTTTIEAVKR              | D3Z2H9 | 0          | N-term +42.01 Da, K +28.03 Da, | 2305.892334 | 3 | 784.6500244 | 783.9807456 |
| ASTFNPR                  | Q9JIL4 | 0.01041667 | N-term +42.01 Da,              | 2313.29126  | 4 | 573.2772217 | 573.2774778 |
| AVSTGVKVP                | Q9D2M8 | 0.00228311 | N-term +42.01 Da, K +28.03 Da, | 2313.901367 | 2 | 634.2800293 | 634.2811097 |
| SDKSDLKAELE              | O88485 | 0          | N-term +42.01 Da, K +28.03 Da, | 2314.366211 | 2 | 706.3400269 | 706.3392929 |
| SDKSDLKAELE              | O88485 | 0.004158   | N-term +42.01 Da, K +28.03 Da, | 2319.995605 | 3 | 764.3699951 | 764.0342116 |
| AGTTTIEAVKR              | D3Z2H9 | 0          | N-term +42.01 Da, K +28.03 Da, | 2324.55127  | 3 | 685.0212402 | 685.0213542 |
| PLPYTFITVEIK             | Q61838 | 0.01678061 | N-term +42.01 Da, K +28.03 Da, | 2327.024902 | 3 | 891.6500244 | 891.3141308 |
| AAPAAPAAGETGPDAR         | Q9D6Y9 | 0          | N-term +42.01 Da,              | 2331.200684 | 2 | 528.2770996 | 528.2776406 |
| AVSTGVKVP                | Q9D2M8 | 0          | N-term +42.01 Da, K +28.03 Da, | 2337.336182 | 2 | 655.2805786 | 655.2807757 |
| AESSELSASSPAR            | P97310 | 0.00241158 | N-term +42.01 Da,              | 2349.013916 | 2 | 798.8699951 | 798.875383  |
| MEKTELIQKAK              | P68254 | 0.00988142 | N-term +42.01 Da, K +28.03 Da, | 2349.654785 | 2 | 1139.939941 | 1139.41731  |
| MKPILLQGHER              | Q9QZD9 | 0.04867006 | N-term +42.01 Da, K +28.03 Da, | 2351.342773 | 2 | 417.7083435 | 417.7088618 |
| AEGGAADLDTQR             | Q8R5H1 | 0          | N-term +42.01 Da,              | 2355.147217 | 2 | 1140.439941 | 1139.41731  |
| SETAPAETAAPAPVEKSPAK     | P43276 | 0.00082034 | N-term +42.01 Da, K +28.03 Da, | 2356.149658 | 2 | 618.8200073 | 618.3169633 |
| AAPAAPAAGETGPDAR         | Q9D6Y9 | 0          | N-term +42.01 Da,              | 2365.486328 | 2 | 608.8480225 | 608.8484304 |
| SETAAPAAPAPVEKTPVKK      | P43277 | 0          | N-term +42.01 Da, K +28.03 Da, | 2370.849365 | 3 | 583.2999878 | 582.970042  |
| LMKEGLEAAR               | O35490 | 0.00230947 | N-term +42.01 Da, K +28.03 Da, | 2379.594727 | 2 | 798.8720093 | 798.875383  |
| SETAAPAAPAPAEKTPVKKK     | P43274 | 0          | N-term +42.01 Da, K +28.03 Da, | 2388.384277 | 2 | 732.8555908 | 732.857516  |
| AVSTGVKVP                | Q9D2M8 | 0.01958384 | N-term +42.01 Da, K +28.03 Da, | 2394.288818 | 2 | 1133.390015 | 1132.893822 |
| GEVAGGAAPGPPR            | Q61210 | 0          | N-term +42.01 Da,              | 2396.162842 | 2 | 608.8473511 | 608.8484304 |
| AAVKTLNPKAEVAR           | P80317 | 0          | N-term +42.01 Da, K +28.03 Da, | 2399.806396 | 2 | 1132.890015 | 1132.893822 |
| SEGDSVGDVHGKPSVVYR       | Q9CQU3 | 0          | N-term +42.01 Da, K +28.03 Da, | 2403.409912 | 2 | 807.9500122 | 807.9517503 |
| SETAAPAAPAPVEKTPVKK      | P43277 | 0          | N-term +42.01 Da, K +28.03 Da, | 2419.502686 | 2 | 542.329895  | 542.3296758 |
| AKIAKTHEDIEAQIR          | Q99NB9 | 0.01335029 | N-term +42.01 Da, K +28.03 Da, | 2424.810059 | 3 | 496.9400024 | 496.9349919 |
| SHTILLVQPTKRPEGR         | P84089 | 0          | N-term +42.01 Da, K +28.03 Da, | 2427.979492 | 2 | 608.8480225 | 608.8484304 |
| SHTILLVQPTKRPEGR         | P84089 | 0          | N-term +42.01 Da, K +28.03 Da, | 2430.548096 | 2 | 744.9000244 | 744.8988497 |
| AEFPSKVSTR               | Q9DCU2 | 0          | N-term +42.01 Da, K +28.03 Da, | 2433.867432 | 2 | 807.9508057 | 807.9517503 |
| MQSAPLEQPAKR             | Q60710 | 0          | N-term +42.01 Da, K +28.03 Da, | 2445.047607 | 2 | 610.836792  | 610.8353229 |
| AAVKTLNPKAEVAR           | P80317 | 0          | N-term +42.01 Da, K +28.03 Da, | 2450.319336 | 2 | 542.3290405 | 542.3296758 |
| AADTQVSETLKR             | E9PVA8 | 0          | N-term +42.01 Da, K +28.03 Da, | 2450.849365 | 2 | 705.3452148 | 705.3457293 |
| AEASAAGADAGSAVAHR        | Q9D0C1 | 0          | N-term +42.01 Da,              | 2459.771973 | 2 | 608.8482056 | 608.8484304 |
| ASLVLKEKK                | P56135 | 0.00301887 | N-term +42.01 Da, K +28.03 Da, | 2460.082275 | 2 | 760.9099731 | 760.9070087 |
| ATSASSHLNKGKQMY          | P15105 | 0          | N-term +42.01 Da, K +28.03 Da, | 2479.549561 | 3 | 730.0900269 | 729.4192202 |
| ASGADSKGDDLSTAILKQKNRPNR | Q01853 | 0          | N-term +42.01 Da, K +28.03 Da, | 2490.786133 | 2 | 608.8481445 | 608.8484304 |
| AEVQQLR                  | Q9CR98 | 0.04292343 | N-term +42.01 Da,              | 2491.637451 | 2 | 714.8099976 | 714.8066347 |
| AHYHDNYGKNDEVEFVR        | P25688 | 0          | N-term +42.01 Da, K +28.03 Da, | 2492.127686 | 2 | 621.3535156 | 620.8540469 |
| AHYHDNYGKNDEVEFVR        | P25688 | 0          | N-term +42.01 Da, K +28.03 Da, | 2508.912354 | 2 | 1213.410034 | 1212.909147 |
| AHYHDNYGKNDEVEFVR        | P25688 | 0          | N-term +42.01 Da, K +28.03 Da, | 2512.404785 | 2 | 713.8800049 | 713.379572  |
| AAETVELHLK               | Q9D1J3 | 0          | N-term +42.01 Da, K +28.03 Da, | 2519.394043 | 2 | 596.3200073 | 596.3220483 |



|                          |        |            |                                |             |   |             |             |
|--------------------------|--------|------------|--------------------------------|-------------|---|-------------|-------------|
| ASGADSKGDDLSTAILKQKNRPNR | Q01853 | 0          | N-term +42.01 Da, K +28.03 Da, | 2519.719971 | 2 | 969.460022  | 969.4636065 |
| MKHYEVEIR                | Q9CY27 | 0.00235479 | N-term +42.01 Da, K +28.03 Da, | 2521.314453 | 2 | 608.8499756 | 608.8484304 |
| AHYHDNYGKNDEVEFVR        | P25688 | 0          | N-term +42.01 Da, K +28.03 Da, | 2530.801758 | 2 | 970.4699707 | 969.4636065 |
| ATSASSHLNKGIKQMY         | P15105 | 0.00296736 | N-term +42.01 Da, K +28.03 Da, | 2535.554199 | 2 | 442.7272339 | 442.7272519 |
| AGSSSLEAVR               | E9Q453 | 0.0008244  | N-term +42.01 Da,              | 2538.022949 | 2 | 812.8900146 | 812.8873366 |
| AATAAVPGAAAGR            | Q8CHW4 | 0.00356633 | N-term +42.01 Da,              | 2551.554932 | 2 | 608.8478394 | 608.8484304 |
| AEVQQLR                  | Q9CR98 | 0.04292343 | N-term +42.01 Da,              | 2553.947021 | 2 | 443.2429504 | 443.243069  |
| ATESSPLTTH               | Q9CRB3 | 0          | N-term +42.01 Da,              | 2554.418945 | 3 | 569.2999878 | 569.2967011 |
| SETAAPAAPAPAEK           | P43274 | 0.04648526 | N-term +42.01 Da, K +28.03 Da, | 2560.449219 | 3 | 522.6500244 | 522.6506378 |
| SETAAPAAPAPAEKTPVK       | P43274 | 0          | N-term +42.01 Da, K +28.03 Da, | 2563.355225 | 4 | 587.3300171 | 586.8297064 |
| MEPAGGGGVSSSTDP          | Q78JE5 | 0.00082102 | N-term +42.01 Da,              | 2566.991943 | 2 | 509.7600098 | 509.7618236 |
| SETAAPAAPAPAEKTPVK       | P43274 | 0          | N-term +42.01 Da, K +28.03 Da, | 2569.818359 | 2 | 478.769989  | 478.7692535 |
| ATESSPLTTH               | Q9CRB3 | 0.04284887 | N-term +42.01 Da,              | 2578.563232 | 3 | 607.6806641 | 607.6791452 |
| ASSDIQVKELEKR            | P54227 | 0.00162206 | N-term +42.01 Da, K +28.03 Da, | 2580.719727 | 2 | 911.5200195 | 911.0150796 |
| ALSDADVQKQ               | P50518 | 0          | N-term +42.01 Da, K +28.03 Da, | 2581.94458  | 3 | 607.6785889 | 607.6791452 |
| AKIAQGAMYR               | P14824 | 0.01047806 | N-term +42.01 Da, K +28.03 Da, | 2583.912598 | 2 | 563.2999878 | 563.3041897 |
| AGSSSLEAVR               | E9Q453 | 0          | N-term +42.01 Da,              | 2584.817627 | 2 | 443.2425842 | 443.243069  |
| SQAEFDKAAE               | P31786 | 0.01088348 | N-term +42.01 Da, K +28.03 Da, | 2585.503418 | 2 | 543.2600098 | 543.2591141 |
| AAQESLHVKTPLR            | Q8VBT2 | 0          | N-term +42.01 Da, K +28.03 Da, | 2591.017334 | 4 | 476.5299988 | 476.2784486 |
| AAQESLHVKTPLR            | Q8VBT2 | 0          | N-term +42.01 Da, K +28.03 Da, | 2598.821045 | 3 | 635.039978  | 634.7021726 |
| AGLGHPSAFGR              | Q9CWS0 | 0          | N-term +42.01 Da,              | 2599.133545 | 4 | 661.6400146 | 661.1269112 |
| MENQLTK                  | Q9DC50 | 0.00986842 | N-term +42.01 Da, K +28.03 Da, | 2610.16626  | 2 | 572.7954712 | 572.7958637 |
| STAGVAAQDIR              | Q99JZ7 | 0.00414938 | N-term +42.01 Da,              | 2622.396729 | 2 | 1196.949951 | 1196.930782 |
| AHYHDNYGKNDEVEFVR        | P25688 | 0          | N-term +42.01 Da, K +28.03 Da, | 2622.931396 | 4 | 476.2788391 | 476.2784486 |
| MEGYHKPDQKQLKALDANR      | P40142 | 0          | N-term +42.01 Da, K +28.03 Da, | 2627.123535 | 3 | 634.7000122 | 634.7021726 |
| ATSASSHLNKGIKQMY         | P15105 | 0          | N-term +42.01 Da, K +28.03 Da, | 2628.803711 | 2 | 578.8508911 | 578.8504414 |
| AGSSSLEAVR               | E9Q453 | 0          | N-term +42.01 Da,              | 2629.543213 | 4 | 668.1199951 | 667.8648777 |
| AAQESLHVKTPLR            | Q8VBT2 | 0          | N-term +42.01 Da, K +28.03 Da, | 2637.377197 | 2 | 509.7626038 | 509.7618236 |
| AAQESLHVKTPLR            | Q8VBT2 | 0          | N-term +42.01 Da, K +28.03 Da, | 2639.727051 | 2 | 1405.51001  | 1404.989755 |
| AGLGHPSAFGR              | Q9CWS0 | 0          | N-term +42.01 Da,              | 2644.114746 | 3 | 611.9873657 | 611.9891024 |
| AHYHDNYGKNDEVEFVR        | P25688 | 0          | N-term +42.01 Da, K +28.03 Da, | 2649.461182 | 2 | 565.7924194 | 565.7936552 |
| AHYHDNYGKNDEVEFVR        | P25688 | 0          | N-term +42.01 Da, K +28.03 Da, | 2649.612061 | 3 | 456.9400024 | 456.6087726 |
| AFQVLYR                  | P48377 | 0.01093248 | N-term +42.01 Da,              | 2661.055176 | 3 | 722         | 721.6678572 |
| AHYHDNYGKNDEVEFVR        | P25688 | 0          | N-term +42.01 Da, K +28.03 Da, | 2661.425537 | 2 | 775.9313965 | 775.9304838 |
| ATSASSHLNKGIKQMY         | P15105 | 0.01395939 | N-term +42.01 Da, K +28.03 Da, | 2661.708496 | 2 | 668.9000244 | 668.8953806 |
| MDMGNQHPSISR             | Q8CI32 | 0          | N-term +42.01 Da,              | 2666.216064 | 2 | 608.8499756 | 608.8484304 |
| MNVNDLKQR                | Q91YN5 | 0          | N-term +42.01 Da, K +28.03 Da, | 2667.630371 | 2 | 509.762085  | 509.7618236 |
| AGLGHPSAFGR              | Q9CWS0 | 0          | N-term +42.01 Da,              | 2669.050781 | 2 | 524.7748413 | 524.7816932 |
| AHYHDNYGKNDEVEFVR        | P25688 | 0          | N-term +42.01 Da, K +28.03 Da, | 2669.394775 | 4 | 541.5028076 | 541.502712  |
| AHYHDNYGKNDEVEFVR        | P25688 | 0          | N-term +42.01 Da, K +28.03 Da, | 2672.090088 | 2 | 1082.5      | 1081.998148 |

|                           |        |            |                                           |             |   |             |             |
|---------------------------|--------|------------|-------------------------------------------|-------------|---|-------------|-------------|
| MFSSSAK                   | P62082 | 0.01396825 | N-term +42.01 Da, K +28.03 Da,            | 2673.198486 | 2 | 589.8215332 | 589.8211607 |
| AFQVLYR                   | P48377 | 0.01093248 | N-term +42.01 Da,                         | 2674.448242 | 2 | 1082        | 1081.998148 |
| TEQMTLR                   | P68040 | 0.01151631 | N-term +42.01 Da,                         | 2674.894531 | 3 | 611.9899902 | 611.9891024 |
| ASSAQSSGSSGGPAVPTVQR      | Q78PY7 | 0          | N-term +42.01 Da,                         | 2675.511719 | 3 | 775.0100098 | 775.0155407 |
| ASESGKLWGGR               | Q91YI0 | 0          | N-term +42.01 Da, K +28.03 Da,            | 2678.559814 | 2 | 492.260376  | 492.2614591 |
| ASESGKLWGGR               | Q91YI0 | 0.00234926 | N-term +42.01 Da, K +28.03 Da,            | 2682.415527 | 2 | 1254.959961 | 1254.444254 |
| ATSASSHLNKGKIQMY          | P15105 | 0          | N-term +42.01 Da, K +28.03 Da,            | 2683.111084 | 2 | 566.2999878 | 565.7936552 |
| ATSASSHLNKGKIQMY          | P15105 | 0          | N-term +42.01 Da, K +28.03 Da,            | 2685.929688 | 2 | 788.8306274 | 788.8308388 |
| ASSAQSSGSSGGPAVPTVQR      | Q78PY7 | 0          | N-term +42.01 Da,                         | 2692.075195 | 3 | 497.9611511 | 497.9595827 |
| AMNYSAKDEVDDGGPAGPPGGAATR | Q8VEK0 | 0.00608519 | N-term +42.01 Da, K +28.03 Da,            | 2697.012207 | 2 | 683.8300171 | 683.8246298 |
| ATKCTKCGPGYSTPLEAMKGP     | P17563 | 0.0248184  | N-term +42.01 Da, K +28.03 Da,C +57.02Da, | 2700.008057 | 3 | 839.75      | 839.0797098 |
| ALDPAEQHLR                | Q9CPZ8 | 0          | N-term +42.01 Da,                         | 2701.209229 | 2 | 598.7971191 | 598.7989377 |
| ASSAQSSGSSGGPAVPTVQR      | Q78PY7 | 0          | N-term +42.01 Da,                         | 2702.902832 | 2 | 763.3916016 | 762.879405  |
| VHQVLYR                   | P52196 | 0.00732357 | N-term +42.01 Da,                         | 2703.063721 | 3 | 668.0388184 | 668.0382336 |
| SQAEFDKAAEEVKR            | P31786 | 0          | N-term +42.01 Da, K +28.03 Da,            | 2703.651367 | 3 | 839.4099731 | 839.0797098 |
| ADTPSVYETR                | Q5XG73 | 0.0419092  | N-term +42.01 Da,                         | 2704.149902 | 3 | 534.3015747 | 534.3016747 |
| ATSASSHLNKGKIQMY          | P15105 | 0          | N-term +42.01 Da, K +28.03 Da,            | 2706.15625  | 2 | 509.7629089 | 509.7618236 |
| AGEGLGQQGASATAAPETR       | Q9CZE3 | 0          | N-term +42.01 Da,                         | 2707.699707 | 3 | 507.2900085 | 507.291221  |
| AHYHDNYGKNDEVEFVR         | P25688 | 0          | N-term +42.01 Da, K +28.03 Da,            | 2709.454102 | 2 | 492.2619629 | 492.2614591 |
| ATGANATPLDFPSKKR          | Q64213 | 0          | N-term +42.01 Da, K +28.03 Da,            | 2716.385254 | 2 | 760.9400024 | 760.4331933 |
| TMTLGDIVYKR               | P12710 | 0.02528597 | N-term +42.01 Da, K +28.03 Da,            | 2726.008789 | 4 | 650.0900269 | 650.0930686 |
| ALDPAEQHLR                | Q9CPZ8 | 0          | N-term +42.01 Da,                         | 2726.786133 | 3 | 866.4500122 | 866.4549993 |
| AHYHDNYGKNDEVEFVR         | P25688 | 0          | N-term +42.01 Da, K +28.03 Da,            | 2734.286377 | 2 | 972.4779053 | 972.4782019 |
| AHYHDNYGKNDEVEFVR         | P25688 | 0.01455696 | N-term +42.01 Da, K +28.03 Da,            | 2734.919922 | 2 | 460.730011  | 460.7289373 |
| AEVEETLKR                 | P62627 | 0.00082919 | N-term +42.01 Da, K +28.03 Da,            | 2736.445557 | 3 | 611.9899902 | 611.9891024 |
| ATSASSHLNKGKIQMY          | P15105 | 0          | N-term +42.01 Da, K +28.03 Da,            | 2736.769043 | 2 | 549.8099976 | 550.3145572 |
| AWKSGGASHSELIHNL          | P23506 | 0          | N-term +42.01 Da, K +28.03 Da,            | 2737.772705 | 2 | 510.2600098 | 509.7618236 |
| ADKEAAFDDAVEER            | Q60972 | 0.00480439 | N-term +42.01 Da, K +28.03 Da,            | 2738.415527 | 2 | 937.460022  | 936.9559484 |
| MHATGLAAPAGTPR            | Q9CX30 | 0          | N-term +42.01 Da,                         | 2738.903564 | 3 | 507.2915649 | 507.291221  |
| SADAAAGEPLPR              | P70441 | 0          | N-term +42.01 Da,                         | 2739.831787 | 3 | 569.2999878 | 569.2967011 |
| SASNVLLHETSR              | Q8BZ09 | 0          | N-term +42.01 Da,                         | 2744.898926 | 3 | 497.2900085 | 497.283955  |
| EVEMDAVGKEGR              | Q8C196 | 0.00416956 | N-term +42.01 Da, K +28.03 Da,            | 2747.830566 | 2 | 556.2858887 | 556.2857996 |
| ASGADSKGDDLSTAILKQKNR     | Q01853 | 0          | N-term +42.01 Da, K +28.03 Da,            | 2756.974609 | 3 | 912.1099854 | 911.4400783 |
| AEVEETLKR                 | P62627 | 0.00606469 | N-term +42.01 Da, K +28.03 Da,            | 2758.945313 | 4 | 824.3800049 | 823.8829914 |
| AHYHDNYGKNDEVEFVR         | P25688 | 0          | N-term +42.01 Da, K +28.03 Da,            | 2760.033203 | 2 | 590.7764893 | 590.7776712 |
| AQDGVLEKSVR               | Q8CAK3 | 0          | N-term +42.01 Da, K +28.03 Da,            | 2764.369629 | 4 | 541.75      | 541.502712  |
| ASESGKLWGGR               | Q91YI0 | 0.0466174  | N-term +42.01 Da, K +28.03 Da,            | 2765.61084  | 3 | 839.75      | 839.0797098 |
| ANSANTNTVPKLYR            | Q99PM3 | 0.00479781 | N-term +42.01 Da, K +28.03 Da,            | 2766.279297 | 2 | 802.9199829 | 801.9153652 |
| ATDELASKLSR               | Q9D8Y0 | 0.01046436 | N-term +42.01 Da, K +28.03 Da,            | 2769.26123  | 3 | 815.7299805 | 815.4006718 |
| MQVLTKR                   | Q62264 | 0.01091843 | N-term +42.01 Da, K +28.03 Da,            | 2772.038086 | 4 | 487.5297546 | 487.0309076 |

|                      |        |            |                                |             |   |             |             |
|----------------------|--------|------------|--------------------------------|-------------|---|-------------|-------------|
| SQAEFDKAAEEVKR       | P31786 | 0          | N-term +42.01 Da, K +28.03 Da, | 2781.385742 | 3 | 551.62677   | 551.6262697 |
| AGKPVLYHFDGR         | P30115 | 0          | N-term +42.01 Da, K +28.03 Da, | 2783.948486 | 2 | 864.8900146 | 863.8886881 |
| MMAAAAER             | Q9DCS2 | 0.00163666 | N-term +42.01 Da,              | 2785.124023 | 2 | 936.4500122 | 936.4477589 |
| ASQPPPPKPVWESR       | Q9DOK1 | 0          | N-term +42.01 Da, K +28.03 Da, | 2786.423584 | 2 | 598.7966919 | 598.7989377 |
| SQAEFDKAAEEVKR       | P31786 | 0          | N-term +42.01 Da, K +28.03 Da, | 2786.499023 | 2 | 448.2203979 | 448.2207478 |
| ATLKDITR             | Q91VR2 | 0.01681196 | N-term +42.01 Da, K +28.03 Da, | 2788.752197 | 2 | 863.8900146 | 863.8886881 |
| AECVPCPR             | Q60930 | 0.00083126 | N-term +42.01 Da, C +57.02Da,  | 2795.415527 | 2 | 760.8900146 | 759.8985157 |
| SQAEFDKAAEEVKR       | P31786 | 0          | N-term +42.01 Da, K +28.03 Da, | 2797.471191 | 3 | 906.4299927 | 905.767861  |
| MEESGFR              | Q3V4B5 | 0.02069385 | N-term +42.01 Da,              | 2798.446045 | 2 | 609.3171387 | 609.3172973 |
| MVPSQEEPAER          | Q3U9N9 | 0          | N-term +42.01 Da,              | 2798.521484 | 4 | 634.8200073 | 634.8234722 |
| ATLKDITR             | Q91VR2 | 0.00478796 | N-term +42.01 Da, K +28.03 Da, | 2802.07373  | 3 | 611.9880371 | 611.9891024 |
| SQWNQVQQLKIK         | P42228 | 0.01210191 | N-term +42.01 Da, K +28.03 Da, | 2802.148926 | 3 | 569.2999878 | 569.2967011 |
| SDNGELEDKPPAPPVR     | Q8CIN4 | 0          | N-term +42.01 Da, K +28.03 Da, | 2802.56543  | 3 | 573.289978  | 573.2978247 |
| MEPSGGGLGPR          | O08808 | 0          | N-term +42.01 Da,              | 2803.769043 | 2 | 596.3093872 | 596.3094722 |
| AQNLKDLAGR           | O35129 | 0.00602813 | N-term +42.01 Da, K +28.03 Da, | 2803.844482 | 3 | 526.9329834 | 526.9330392 |
| SQAEFDKAAEEVKR       | P31786 | 0          | N-term +42.01 Da, K +28.03 Da, | 2803.926514 | 2 | 761.8762817 | 761.8784486 |
| AFKDTGKTPVEPEVAIHR   | P60867 | 0          | N-term +42.01 Da, K +28.03 Da, | 2805.812744 | 2 | 917.4769287 | 917.4800154 |
| SDNGELEDKPPAPPVR     | Q8CIN4 | 0.01504702 | N-term +42.01 Da, K +28.03 Da, | 2808.404053 | 2 | 509.7600098 | 509.7618236 |
| SDAAVDTSSEITTK       | P26350 | 0          | N-term +42.01 Da, K +28.03 Da, | 2810.227539 | 2 | 764.9000244 | 764.9019237 |
| SETAPAETAAPAPVEKSPA  | P43276 | 0          | N-term +42.01 Da, K +28.03 Da, | 2814.682373 | 3 | 551.6300049 | 551.6262697 |
| AFKDTGKTPVEPEVAIHR   | P60867 | 0          | N-term +42.01 Da, K +28.03 Da, | 2816.008057 | 2 | 784.8463135 | 784.8469222 |
| ATEGMILTNDHQIR       | Q8BUV3 | 0          | N-term +42.01 Da,              | 2816.956787 | 2 | 598.798645  | 598.7989377 |
| SSTQFNKGPSYGLSAEVKNR | Q08093 | 0.04677695 | N-term +42.01 Da, K +28.03 Da, | 2818.978516 | 2 | 818.3778687 | 818.3784791 |
| YHRQSTEILQELQSKLELR  | Q62421 | 0.00601202 | N-term +42.01 Da, K +28.03 Da, | 2819.150391 | 2 | 680.3394775 | 679.843543  |
| MDALEKGAVTSGPAPRGR   | Q99KK2 | 0.02525556 | N-term +42.01 Da, K +28.03 Da, | 2822.257568 | 2 | 427.7404175 | 427.7401619 |
| AFKDTGKTPVEPEVAIHR   | P60867 | 0.01965602 | N-term +42.01 Da, K +28.03 Da, | 2833.010986 | 3 | 611.9894409 | 611.9891024 |
| VSVEIEKPR            | P97328 | 0.01501877 | N-term +42.01 Da, K +28.03 Da, | 2833.087158 | 3 | 569.6300049 | 569.2967011 |
| AQNLKDLAGR           | O35129 | 0          | N-term +42.01 Da, K +28.03 Da, | 2835.030518 | 3 | 569.2980347 | 569.2967011 |
| AFKDTGKTPVEPEVAIHR   | P60867 | 0          | N-term +42.01 Da, K +28.03 Da, | 2835.181396 | 2 | 596.3092651 | 596.3094722 |
| GAREASSKPKVRRR       | F6RGI3 | 0.03640634 | N-term +42.01 Da, K +28.03 Da, | 2842.034912 | 2 | 572.8137817 | 572.8140563 |
| LLLNKPKSEMTPPELQKR   | P62317 | 0          | N-term +42.01 Da, K +28.03 Da, | 2846.340088 | 2 | 963.9199829 | 963.4292323 |
| LLLNKPKSEMTPPELQKR   | P62317 | 0          | N-term +42.01 Da, K +28.03 Da, | 2846.624512 | 2 | 538.7650146 | 537.7511221 |
| SLSNKLTLDKLDVKGKR    | P09411 | 0.00608108 | N-term +42.01 Da, K +28.03 Da, | 2847.312012 | 2 | 599.289978  | 598.7989377 |
| AFKDTGKTPVEPEVAIHR   | P60867 | 0.01097482 | N-term +42.01 Da, K +28.03 Da, | 2849.122803 | 2 | 696.8568115 | 696.8562638 |
| AGKPVLYHFNAR         | P10648 | 0.00240577 | N-term +42.01 Da, K +28.03 Da, | 2849.630371 | 2 | 895.9500122 | 895.9496029 |
| MRGQVGDLSPPQQEALAR   | Q8R0F9 | 0.01560549 | N-term +42.01 Da,              | 2864.546387 | 2 | 942.4199829 | 941.9193658 |
| SQAEFDKAAEEVKR       | P31786 | 0          | N-term +42.01 Da, K +28.03 Da, | 2864.646729 | 2 | 722.3699951 | 721.865341  |
| SQAEFDKAAEEVKR       | P31786 | 0          | N-term +42.01 Da, K +28.03 Da, | 2865.632568 | 3 | 628.2819214 | 628.2820027 |
| SLSNKLTLDKLDVKGKR    | P09411 | 0.04527221 | N-term +42.01 Da, K +28.03 Da, | 2871.024414 | 2 | 458.25      | 458.2483515 |
| AGKPVLYHFNAR         | P10648 | 0          | N-term +42.01 Da, K +28.03 Da, | 2873.688477 | 2 | 572.81427   | 572.8140563 |

|                          |        |            |                                |             |   |             |             |
|--------------------------|--------|------------|--------------------------------|-------------|---|-------------|-------------|
| AGPGPGAALSPR             | Q3U487 | 0          | N-term +42.01 Da,              | 2881.440186 | 2 | 599.2999878 | 598.7989377 |
| AGGEGGVTLGQPHLSR         | Q9ZON1 | 0          | N-term +42.01 Da,              | 2886.909424 | 2 | 630.8400269 | 630.8433454 |
| SQAEFDKAAEEVKR           | P31786 | 0          | N-term +42.01 Da, K +28.03 Da, | 2888.868408 | 4 | 853.9899902 | 853.7381813 |
| SQAEFDKAAEEVKR           | P31786 | 0          | N-term +42.01 Da, K +28.03 Da, | 2894.925781 | 2 | 879.460022  | 879.4570634 |
| AAASGYTDLR               | Q3TSG4 | 0          | N-term +42.01 Da,              | 2918.919678 | 2 | 460.2126465 | 460.2131203 |
| AGGEGGVTLGQPHLSR         | Q9ZON1 | 0          | N-term +42.01 Da,              | 2919.588867 | 2 | 693.3200073 | 693.3219203 |
| AGKPVLYHFDGR             | P30115 | 0          | N-term +42.01 Da, K +28.03 Da, | 2920.726318 | 3 | 525.2977905 | 524.6253236 |
| AEYDLTTR                 | P60229 | 0.0029873  | N-term +42.01 Da,              | 2925.653564 | 2 | 988.4899902 | 987.493032  |
| AGKPVLYHFDGR             | P30115 | 0          | N-term +42.01 Da, K +28.03 Da, | 2927.168701 | 3 | 744.0700073 | 743.7372782 |
| AGGEGGVTLGQPHLSR         | Q9ZON1 | 0          | N-term +42.01 Da,              | 2936.500732 | 3 | 569.2963257 | 569.2967011 |
| SQAEFDKAAEEVKR           | P31786 | 0          | N-term +42.01 Da, K +28.03 Da, | 2936.764404 | 2 | 853.4400024 | 853.4414133 |
| AGKPVLYHFDGR             | P30115 | 0          | N-term +42.01 Da, K +28.03 Da, | 2944.680176 | 3 | 846.1300049 | 846.1439791 |
| AAAVSGVVR                | Q8BR90 | 0          | N-term +42.01 Da,              | 2944.835938 | 3 | 597.960022  | 597.6354941 |
| ASSEQAEQPNQPSSPPGSENVVPR | Q9ROA0 | 0          | N-term +42.01 Da,              | 2950.263428 | 2 | 519.7399902 | 519.7389793 |
| ATDMSQGELIHPK            | Q3TEA8 | 0          | N-term +42.01 Da, K +28.03 Da, | 2955.458984 | 2 | 694.3499756 | 694.3535544 |
| ATEEAIIR                 | Q9EQK5 | 0.01500938 | N-term +42.01 Da,              | 2956.495361 | 4 | 697.1400146 | 696.6432861 |
| SASEDVWR                 | Q9QWG7 | 0.00607698 | N-term +42.01 Da,              | 2959.786621 | 2 | 747.8599854 | 747.8621306 |
| AQNPSNMEPLR              | Q91W19 | 0          | N-term +42.01 Da,              | 2961.749023 | 2 | 785.3400269 | 784.8469222 |
| SQAEFDKAAEEVKR           | P31786 | 0          | N-term +42.01 Da, K +28.03 Da, | 2965.098633 | 2 | 947.4799805 | 947.475651  |
| SSGALLPKPQMR             | Q9CPQ1 | 0.00353607 | N-term +42.01 Da, K +28.03 Da, | 2965.957275 | 2 | 896.9400024 | 895.9496029 |
| AGVGAAFR                 | Q5F285 | 0.00296516 | N-term +42.01 Da,              | 2974.955078 | 4 | 419.993042  | 419.9932476 |
| AGKPVLYHFDGR             | P30115 | 0          | N-term +42.01 Da, K +28.03 Da, | 2976.212646 | 2 | 735.9000244 | 734.895055  |
| AAAAAAGPEMVR             | P63085 | 0          | N-term +42.01 Da,              | 2983.033936 | 3 | 569.2966919 | 569.2967011 |
| AHYHDNYGKNDEVEFVR        | P25688 | 0          | N-term +42.01 Da, K +28.03 Da, | 2986.638672 | 2 | 762.8599854 | 761.860256  |
| AAAGSAAVSGAGTPVAGPTGR    | Q9Z266 | 0          | N-term +42.01 Da,              | 2988.019531 | 2 | 513.7800293 | 513.7776101 |
| SQAEFDKAAEEVKR           | P31786 | 0          | N-term +42.01 Da, K +28.03 Da, | 2989.800293 | 2 | 854.4400024 | 853.4414133 |
| AASKVKQDMPPPGGYGPIDYKR   | Q9ERS2 | 0          | N-term +42.01 Da, K +28.03 Da, | 2992.942871 | 3 | 757.3900146 | 756.7254838 |
| ATPEASGSGEKVEGSEPSVTYYR  | Q9CQX2 | 0          | N-term +42.01 Da, K +28.03 Da, | 2995.619141 | 2 | 707.4000244 | 707.4010277 |
| ATPEASGSGEKVEGSEPSVTYYR  | Q9CQX2 | 0          | N-term +42.01 Da, K +28.03 Da, | 3000.619141 | 3 | 743.7399902 | 743.7372782 |
| MNQEKLAKLQAQVR           | Q64152 | 0          | N-term +42.01 Da, K +28.03 Da, | 3007.584229 | 2 | 578.3279419 | 578.3276648 |
| ASGADSKGDDLSTAILKQKN     | Q01853 | 0          | N-term +42.01 Da, K +28.03 Da, | 3007.659668 | 3 | 593.2930908 | 593.293185  |
| SSGALLPKPQMR             | Q9CPQ1 | 0          | N-term +42.01 Da, K +28.03 Da, | 3010.879883 | 4 | 637.8499756 | 637.845554  |
| MNQEKLAKLQAQVR           | Q64152 | 0          | N-term +42.01 Da, K +28.03 Da, | 3010.988525 | 3 | 850.460022  | 850.1249798 |
| AGKPVLYHFDGR             | P30115 | 0          | N-term +42.01 Da, K +28.03 Da, | 3020.017334 | 3 | 722.0499878 | 722.0458891 |
| SDKPDMAEIEKFDKSK         | P20065 | 0          | N-term +42.01 Da, K +28.03 Da, | 3021.502197 | 3 | 569.2967529 | 569.2967011 |
| TTKDPSEHPSVTLFR          | Q99JW2 | 0          | N-term +42.01 Da, K +28.03 Da, | 3021.807861 | 2 | 853.4421387 | 853.4414133 |
| TTKDPSEHPSVTLFR          | Q99JW2 | 0          | N-term +42.01 Da, K +28.03 Da, | 3023.871582 | 2 | 896.4407959 | 895.9496029 |
| MDATLTAR                 | Q8BGQ7 | 0.00227445 | N-term +42.01 Da,              | 3040.518311 | 3 | 717.3699951 | 717.3564029 |
| AAAAAAGPEMVR             | P63085 | 0.00606878 | N-term +42.01 Da,              | 3042.411621 | 3 | 679.3499756 | 679.3420935 |
| MQPKVPQLR                | Q88908 | 0          | N-term +42.01 Da, K +28.03 Da, | 3049.697998 | 2 | 614.8499756 | 614.3564224 |

|                         |        |            |                                |             |   |             |             |
|-------------------------|--------|------------|--------------------------------|-------------|---|-------------|-------------|
| MEEAELVKGR              | Q9JHU2 | 0          | N-term +42.01 Da, K +28.03 Da, | 3052.047607 | 3 | 569.2963257 | 569.2967011 |
| TTKDPSEHPSVTLFR         | Q99JW2 | 0          | N-term +42.01 Da, K +28.03 Da, | 3052.390381 | 2 | 853.4395752 | 853.4414133 |
| ATPEASGSGEKVEGSEPSVTTYR | Q9CQX2 | 0          | N-term +42.01 Da, K +28.03 Da, | 3060.093506 | 4 | 564.5700073 | 564.3173428 |
| ATPEASGSGEKVEGSEPSVTTYR | Q9CQX2 | 0          | N-term +42.01 Da, K +28.03 Da, | 3073.776855 | 3 | 717.3699951 | 717.3564029 |
| AASKVKQDMPPPGGGYPIDYKR  | Q9ERS2 | 0          | N-term +42.01 Da, K +28.03 Da, | 3077.977295 | 3 | 654.6699829 | 654.6642904 |
| SQAEFDKAAEEVKR          | P31786 | 0          | N-term +42.01 Da, K +28.03 Da, | 3082.547607 | 3 | 569.2966919 | 569.2967011 |
| TTKDPSEHPSVTLFR         | Q99JW2 | 0          | N-term +42.01 Da, K +28.03 Da, | 3082.698486 | 3 | 477.2600098 | 477.2577398 |
| MNQEKLAKLQAQVR          | Q64152 | 0.00479452 | N-term +42.01 Da, K +28.03 Da, | 3084.075928 | 2 | 853.4403687 | 853.4414133 |
| ATDELASKLSR             | Q9D8Y0 | 0          | N-term +42.01 Da, K +28.03 Da, | 3085.571533 | 2 | 650.3099976 | 649.8115222 |
| VHQVLYR                 | P52196 | 0.00732357 | N-term +42.01 Da,              | 3086.054199 | 2 | 540.2700195 | 539.2658845 |
| ASGADSKGDDLSTAILKQK     | Q01853 | 0          | N-term +42.01 Da, K +28.03 Da, | 3096.665283 | 2 | 749.3699951 | 748.87432   |
| VHQVLYR                 | P52196 | 0.00732357 | N-term +42.01 Da,              | 3097.245117 | 3 | 845.7299805 | 845.3966442 |
| AAAAAIVAGAGR            | E9QNR6 | 0          | N-term +42.01 Da,              | 3098.291748 | 3 | 690.4249268 | 690.4279382 |
| METASTPEATGTGKY         | Q8CHP5 | 0          | N-term +42.01 Da, K +28.03 Da, | 3101.383545 | 2 | 1267.589966 | 1267.591328 |
| MEQVNELKEKGN            | Q60864 | 0.00293255 | N-term +42.01 Da, K +28.03 Da, | 3111.981689 | 4 | 684.9295654 | 684.929489  |
| GDRSIPGLNEQCQLVDHR      | Q9QUQ5 | 0.02068127 | N-term +42.01 Da, C +57.02Da,  | 3113.170654 | 3 | 569.296814  | 569.2967011 |
| DQWWESKEEKAK            | E9PYH6 | 0.04188482 | N-term +42.01 Da, K +28.03 Da, | 3113.246094 | 3 | 477.2583618 | 477.2577398 |
| AGKPVLYHFDGR            | P30115 | 0          | N-term +42.01 Da, K +28.03 Da, | 3114.552002 | 2 | 853.4421387 | 853.4414133 |
| SQAEFDKAAEEVKR          | P31786 | 0          | N-term +42.01 Da, K +28.03 Da, | 3116.956299 | 2 | 759.4073486 | 759.4065077 |
| ASLVPLKEK               | P56135 | 0.00229885 | N-term +42.01 Da, K +28.03 Da, | 3117.303223 | 2 | 1151.050049 | 1150.544803 |
| AGKPVLYHFDGR            | P30115 | 0          | N-term +42.01 Da, K +28.03 Da, | 3120.409424 | 3 | 767.7000122 | 767.3656273 |
| TTKDPSEHPSVTLFR         | Q99JW2 | 0.01454775 | N-term +42.01 Da, K +28.03 Da, | 3120.877686 | 3 | 912.9000244 | 912.9035598 |
| ATDELASKLSR             | Q9D8Y0 | 0          | N-term +42.01 Da, K +28.03 Da, | 3125.298584 | 2 | 1150.540039 | 1150.544803 |
| AEDIKTIKINYKTAPFDSR     | P56391 | 0.02477341 | N-term +42.01 Da, K +28.03 Da, | 3125.476318 | 2 | 583.8384399 | 583.8393533 |
| ASGADSKGDDLSTAILKQK     | Q01853 | 0          | N-term +42.01 Da, K +28.03 Da, | 3128.512939 | 2 | 948.5       | 948.000781  |
| AQNLKDLAGR              | Q35129 | 0.0207697  | N-term +42.01 Da, K +28.03 Da, | 3131.065918 | 2 | 578.789978  | 578.7926006 |
| ASGADSKGDDLSTAILKQK     | Q01853 | 0          | N-term +42.01 Da, K +28.03 Da, | 3137.318848 | 2 | 884.453186  | 884.4528439 |
| SHPSWLPPKSTGEPLGHVPAR   | Q8BFW7 | 0.01506591 | N-term +42.01 Da, K +28.03 Da, | 3142.928223 | 2 | 395.714447  | 395.7139468 |
| ADKEAAFDDAVEER          | Q60972 | 0          | N-term +42.01 Da, K +28.03 Da, | 3143.817627 | 3 | 569.296936  | 569.2967011 |
| MHHQSVLHSGYFHPL         | P10518 | 0.03108189 | N-term +42.01 Da,              | 3145.175537 | 2 | 853.4413452 | 853.4414133 |
| SSKPKSLEIIGAPFSKGQPR    | Q61176 | 0          | N-term +42.01 Da, K +28.03 Da, | 3146.941406 | 4 | 684.9299927 | 684.929489  |
| MHHQSVLHSGYFHPLLR       | P10518 | 0          | N-term +42.01 Da,              | 3148.495117 | 2 | 759.4083862 | 759.4065077 |
| KEYWQNLN                | Q35490 | 0.00600801 | N-term +42.01 Da, K +28.03 Da, | 3150.758057 | 2 | 677.8798218 | 677.8792074 |
| AGKPVLYHFDGR            | P30115 | 0          | N-term +42.01 Da, K +28.03 Da, | 3151.499756 | 2 | 987.4799805 | 986.9765471 |
| AATLSVEPTGR             | Q8BWN8 | 0          | N-term +42.01 Da,              | 3153.973389 | 4 | 804.1400146 | 803.6410441 |
| MESAI AEGGASR           | Q62448 | 0          | N-term +42.01 Da,              | 3155.965088 | 3 | 585.6697998 | 585.6697038 |
| ASLVPLKEK               | P56135 | 0.00357143 | N-term +42.01 Da, K +28.03 Da, | 3156.115967 | 2 | 509.2612    | 509.2609359 |
| AGKPVLYHFDGR            | P30115 | 0          | N-term +42.01 Da, K +28.03 Da, | 3156.243408 | 2 | 1236.081421 | 1236.082273 |
| SQAEFDKAAEEVKR          | P31786 | 0          | N-term +42.01 Da, K +28.03 Da, | 3159.715332 | 2 | 616.3208008 | 616.3211912 |
| AAAAYEHLKLH             | Q9EP69 | 0          | N-term +42.01 Da, K +28.03 Da, | 3159.799072 | 3 | 824.3909912 | 824.3906075 |

|                          |        |            |                                           |             |   |             |             |
|--------------------------|--------|------------|-------------------------------------------|-------------|---|-------------|-------------|
| SSGALLPKPQ               | Q9CPQ1 | 0.00234009 | N-term +42.01 Da, K +28.03 Da,            | 3160.032227 | 3 | 471.2688599 | 470.5964216 |
| MNDTVTIR                 | P62849 | 0.00240385 | N-term +42.01 Da,                         | 3160.489746 | 3 | 629.6699829 | 629.6597508 |
| SSIKVECVLR               | Q64374 | 0.01045069 | N-term +42.01 Da, K +28.03 Da,C +57.02Da, | 3161.398193 | 3 | 1071.52002  | 1071.185633 |
| ASGADSKGDDLSTAILKQK      | Q01853 | 0          | N-term +42.01 Da, K +28.03 Da,            | 3167.391602 | 2 | 583.8391724 | 583.8393533 |
| AGLNSLEAVKR              | Q6IRU2 | 0          | N-term +42.01 Da, K +28.03 Da,            | 3168.893311 | 2 | 885.4500122 | 884.4528439 |
| SSGNAKIGYPAPNFK          | P35700 | 0.00083542 | N-term +42.01 Da, K +28.03 Da,            | 3169.158691 | 3 | 716.0499878 | 715.7181064 |
| AKNGSEADIDESLYSR         | Q02053 | 0.00604839 | N-term +42.01 Da, K +28.03 Da,            | 3182.49585  | 2 | 630.8400269 | 630.8433454 |
| LEEHPGGEEVLR             | P56395 | 0.00357398 | N-term +42.01 Da,                         | 3182.762207 | 4 | 626.3400269 | 626.0859833 |
| AQNLKDLAGR               | O35129 | 0.01213282 | N-term +42.01 Da, K +28.03 Da,            | 3184.737061 | 3 | 951.8400269 | 951.1676298 |
| ADKEAAFDDAVEER           | Q60972 | 0          | N-term +42.01 Da, K +28.03 Da,            | 3185.996582 | 2 | 499.2799988 | 499.7725251 |
| MQPASAKWYDR              | Q9ROQ7 | 0          | N-term +42.01 Da, K +28.03 Da,            | 3187.007324 | 2 | 1236.579956 | 1236.082273 |
| MDLEAVCKR                | Q9CYR6 | 0          | N-term +42.01 Da, K +28.03 Da,C +57.02Da, | 3187.617676 | 3 | 586         | 585.6697038 |
| ALKNVPPFR                | Q60787 | 0.01512287 | N-term +42.01 Da, K +28.03 Da,            | 3187.919434 | 4 | 506.2673645 | 506.2670528 |
| DFVDSLSEKIFQLTPGR        | Q2UY11 | 0.01911221 | N-term +42.01 Da, K +28.03 Da,            | 3188.54541  | 2 | 878.5       | 878.0009175 |
| AVSVTPIR                 | Q9JKP5 | 0.00414651 | N-term +42.01 Da, K +28.03 Da,            | 3189.523926 | 4 | 596.0900269 | 595.5875161 |
| SGEVPPNINIKEPR           | Q99JR1 | 0          | N-term +42.01 Da, K +28.03 Da,            | 3191.051758 | 3 | 674.6900024 | 674.6869783 |
| AGKPVLYHFDGR             | P30115 | 0          | N-term +42.01 Da, K +28.03 Da,            | 3193.28418  | 3 | 593.6199951 | 593.293185  |
| ASGVQVADEVCR             | Q9R0P5 | 0          | N-term +42.01 Da, C +57.02Da,             | 3195.836182 | 2 | 948.4199829 | 948.4256352 |
| AGKPVLYHFDGR             | P30115 | 0          | N-term +42.01 Da, K +28.03 Da,            | 3197.375    | 2 | 937.4699707 | 936.4765165 |
| SSGALLPKPQ               | Q9CPQ1 | 0.00233281 | N-term +42.01 Da, K +28.03 Da,            | 3197.491699 | 2 | 1011.530029 | 1011.526829 |
| SSKPKSLEIIGAPFSKGQPR     | Q61176 | 0          | N-term +42.01 Da, K +28.03 Da,            | 3202.824463 | 2 | 1012.530029 | 1011.526829 |
| SHPSWLPKSTGEPLGHVPAR     | Q8BFW7 | 0.01452937 | N-term +42.01 Da, K +28.03 Da,            | 3206.03833  | 4 | 599.5599976 | 599.0568463 |
| ASGADSKGDDLSTAILKQK      | Q01853 | 0          | N-term +42.01 Da, K +28.03 Da,            | 3208.015137 | 3 | 638.6599731 | 638.6582988 |
| AGLNSLEAVKR              | Q6IRU2 | 0.00292612 | N-term +42.01 Da, K +28.03 Da,            | 3210.311768 | 2 | 1183.609985 | 1183.125231 |
| SEPELKLVAR               | P08030 | 0.00082645 | N-term +42.01 Da, K +28.03 Da,            | 3210.779541 | 2 | 758.8876953 | 758.8874275 |
| SGEVPPNINIKEPR           | Q99JR1 | 0          | N-term +42.01 Da, K +28.03 Da,            | 3213.05249  | 2 | 583.3085327 | 583.3053436 |
| MDDREDLVYQAK             | P62259 | 0.00294551 | N-term +42.01 Da, K +28.03 Da,            | 3213.544678 | 4 | 626.3400269 | 626.0859833 |
| ASGVQVADEVCR             | Q9R0P5 | 0          | N-term +42.01 Da, C +57.02Da,             | 3218.392822 | 4 | 632.8703003 | 632.870274  |
| AAPSEPAGFPR              | P56213 | 0          | N-term +42.01 Da,                         | 3219.536621 | 2 | 630.8429565 | 630.8433454 |
| ASASAAASTLSEPPR          | E9PVP0 | 0          | N-term +42.01 Da,                         | 3219.612061 | 3 | 569.2960815 | 569.2967011 |
| SGEVPPNINIKEPR           | Q99JR1 | 0.00355114 | N-term +42.01 Da, K +28.03 Da,            | 3220.966553 | 3 | 655.6690063 | 655.6692641 |
| MEAKGGTVKAASGFNATEDAQLTR | P97429 | 0          | N-term +42.01 Da, K +28.03 Da,            | 3221.05127  | 2 | 541.8400269 | 541.8446274 |
| ATVAATTKVPEIR            | Q9WTM5 | 0          | N-term +42.01 Da, K +28.03 Da,            | 3224.545898 | 2 | 610.7800293 | 610.7824306 |
| SETAPAAPAAPAPAEKTPV      | P43274 | 0.04320276 | N-term +42.01 Da, K +28.03 Da,            | 3229.717773 | 3 | 586         | 585.6697038 |
| AAAAAAMAEQEGAR           | Q9D1H7 | 0          | N-term +42.01 Da,                         | 3235.791748 | 2 | 572.3063354 | 572.3038557 |
| SEPELKLVAR               | P08030 | 0          | N-term +42.01 Da, K +28.03 Da,            | 3236.530762 | 2 | 818.3788452 | 818.3784791 |
| AVAAAAVAAPAGGGGAR        | Q99L88 | 0.00288184 | N-term +42.01 Da,                         | 3240.901855 | 3 | 677.710022  | 677.7037971 |
| SGEVPPNINIKEPR           | Q99JR1 | 0          | N-term +42.01 Da, K +28.03 Da,            | 3244.32666  | 3 | 545.9199829 | 545.9214116 |
| MENQLTKSVEER             | Q9DC50 | 0.0028777  | N-term +42.01 Da, K +28.03 Da,            | 3250.692139 | 3 | 569.624939  | 569.2967011 |
| AKNGSEADIDESLYSR         | Q02053 | 0.01515152 | N-term +42.01 Da, K +28.03 Da,            | 3252.806396 | 2 | 650.8400269 | 650.8282269 |

|                          |        |            |                                           |             |   |             |             |
|--------------------------|--------|------------|-------------------------------------------|-------------|---|-------------|-------------|
| SALEHSVQCAVDVKKR         | P24270 | 0.00237906 | N-term +42.01 Da, K +28.03 Da,C +57.02Da, | 3255.137207 | 2 | 610.7824097 | 610.7824306 |
| AVAAAAVAAPAGGGGAR        | Q99L88 | 0.01103896 | N-term +42.01 Da,                         | 3257.023438 | 4 | 580.8099976 | 580.810379  |
| ATVAATTKVPEIR            | Q9WTM5 | 0          | N-term +42.01 Da, K +28.03 Da,            | 3258.861816 | 2 | 614.3560791 | 614.3564224 |
| TMDKSELVQKAKLAEQAER      | Q9CQV8 | 0          | N-term +42.01 Da, K +28.03 Da,            | 3261.849121 | 4 | 595.5877075 | 595.5875161 |
| SGEVPPNINIKEPR           | Q99JR1 | 0          | N-term +42.01 Da, K +28.03 Da,            | 3263.403809 | 3 | 774.4099731 | 774.0780798 |
| VVAECGCRKCLPR            | D3Z7H8 | 0.04683038 | N-term +42.01 Da, K +28.03 Da,C +57.02Da, | 3266.882324 | 2 | 818.3776245 | 818.3784791 |
| AVTLDKDAYR               | Q920B9 | 0          | N-term +42.01 Da, K +28.03 Da,            | 3267.291748 | 2 | 1023.950012 | 1023.953603 |
| SDAAVDTSEITTKDLK         | P26350 | 0          | N-term +42.01 Da, K +28.03 Da,            | 3270.018555 | 3 | 793.7800293 | 793.7809293 |
| MENQLTKSVEER             | Q9DC50 | 0          | N-term +42.01 Da, K +28.03 Da,            | 3271.53418  | 3 | 794.4500122 | 793.7809293 |
| QHATNVGIMFR              | P35505 | 0          | N-term +42.01 Da,                         | 3271.996582 | 4 | 586.5900269 | 586.5899904 |
| AVPPTYADLGKSAR           | Q60932 | 0          | N-term +42.01 Da, K +28.03 Da,            | 3272.353516 | 2 | 507.2999878 | 507.8083787 |
| SDAAVDTSEITTKDLK         | P26350 | 0          | N-term +42.01 Da, K +28.03 Da,            | 3273.441406 | 4 | 586.8400269 | 586.5899904 |
| SNLKPDEHCTGAGTGSPLEEEVR  | Q8VC52 | 0          | N-term +42.01 Da, K +28.03 Da,C +57.02Da, | 3277.679932 | 2 | 666.8099976 | 666.8142622 |
| AAAAASGAGGVAVAGAGGAGPAGR | E9PU87 | 0          | N-term +42.01 Da,                         | 3282.011963 | 3 | 569.2999878 | 569.2967011 |
| SNLKPDEHCTGAGTGSPLEEEVR  | Q8VC52 | 0          | N-term +42.01 Da, K +28.03 Da,C +57.02Da, | 3282.557617 | 2 | 1154.52002  | 1153.517631 |
| AGQSDKDKYTYLLEIQQH       | P56395 | 0.00295421 | N-term +42.01 Da, K +28.03 Da,            | 3284.310547 | 3 | 432.2399902 | 431.9031854 |
| ALNVAPVR                 | Q8C181 | 0.00612245 | N-term +42.01 Da,                         | 3287.834473 | 2 | 715.3830566 | 715.3829715 |
| ADFDTYDDR                | Q9WUK2 | 0          | N-term +42.01 Da,                         | 3289.25     | 2 | 712.3400269 | 711.8453648 |
| ASGGGVPTDEEQATGLER       | P19536 | 0          | N-term +42.01 Da,                         | 3290.349854 | 2 | 614.3552246 | 614.3564224 |
| ATCADILR                 | Q8K268 | 0.0115016  | N-term +42.01 Da, C +57.02Da,             | 3291.071533 | 4 | 581.0599976 | 580.810379  |
| SGLVLGQR                 | Q9DBS5 | 0.00922874 | N-term +42.01 Da,                         | 3292.496094 | 4 | 595.8400269 | 595.5875161 |
| AVPPTYADLGKSAR           | Q60932 | 0          | N-term +42.01 Da, K +28.03 Da,            | 3293.471191 | 4 | 564.3300171 | 564.0795923 |
| SGEVPPNINIKEPR           | Q99JR1 | 0          | N-term +42.01 Da, K +28.03 Da,            | 3294.927979 | 4 | 573.5690918 | 573.5696348 |
| ASLKDLEGKWR              | Q05816 | 0.00612662 | N-term +42.01 Da, K +28.03 Da,            | 3297.9104   | 2 | 571.2849731 | 571.2854656 |
| AVPPTYADLGKSAR           | Q60932 | 0          | N-term +42.01 Da, K +28.03 Da,            | 3297.986084 | 3 | 477.9299927 | 477.2577398 |
| AGIAIKLAKDR              | O08529 | 0          | N-term +42.01 Da, K +28.03 Da,            | 3298.604004 | 2 | 989.9599609 | 989.9584538 |
| SASSLLEQR                | E9PW90 | 0.015625   | N-term +42.01 Da,                         | 3299.518555 | 2 | 685.3536987 | 684.3387614 |
| AVPPTYADLGKSAR           | Q60932 | 0          | N-term +42.01 Da, K +28.03 Da,            | 3302.84668  | 3 | 764.4199829 | 764.4237542 |
| SSIKVECVLR               | Q64374 | 0.0133418  | N-term +42.01 Da, K +28.03 Da,C +57.02Da, | 3304.212891 | 2 | 507.8099976 | 507.8083787 |
| SGEVPPNINIKEPR           | Q99JR1 | 0          | N-term +42.01 Da, K +28.03 Da,            | 3306.423828 | 3 | 628.6599731 | 628.9889911 |
| AAQESLHVKTPL             | Q8VBT2 | 0.00230592 | N-term +42.01 Da, K +28.03 Da,            | 3308.621582 | 2 | 690.37323   | 690.3731355 |
| ASLPPHAGPATPLSPTR        | P21619 | 0          | N-term +42.01 Da,                         | 3311.550537 | 4 | 853.9899902 | 853.7381813 |
| AVPPTYADLGKSAR           | Q60932 | 0          | N-term +42.01 Da, K +28.03 Da,            | 3313.257813 | 2 | 729.3599854 | 729.365174  |
| AAVPSAVHLPR              | Q3UFF7 | 0          | N-term +42.01 Da,                         | 3315.192871 | 4 | 557.8099976 | 557.55833   |
| MDKNELVQKAKLAEQAER       | P63101 | 0          | N-term +42.01 Da, K +28.03 Da,            | 3316.790771 | 2 | 810.4400024 | 810.4412158 |
| MEKTELIQKAKLAEQAER       | P68254 | 0          | N-term +42.01 Da, K +28.03 Da,            | 3319.384766 | 3 | 470.9400024 | 470.5964216 |
| MNDTVTIR                 | P62849 | 0.03436019 | N-term +42.01 Da,                         | 3321.55249  | 2 | 614.3563232 | 614.3564224 |
| VTEWITRQEPR              | Q62504 | 0.02527076 | N-term +42.01 Da,                         | 3321.62793  | 4 | 581.0599976 | 580.810379  |
| SSIKVECVLR               | Q64374 | 0          | N-term +42.01 Da, K +28.03 Da,C +57.02Da, | 3322.136963 | 3 | 751.7700195 | 751.7703643 |
| AHGSVVKSEDIYAFPTYADR     | P19783 | 0          | N-term +42.01 Da, K +28.03 Da,            | 3322.288086 | 2 | 430.730011  | 430.7348794 |

|                               |        |            |                                           |             |   |             |             |
|-------------------------------|--------|------------|-------------------------------------------|-------------|---|-------------|-------------|
| AVPPTYADLGKSAR                | Q60932 | 0          | N-term +42.01 Da, K +28.03 Da,            | 3325.386963 | 4 | 564.0797119 | 564.0795923 |
| AAVPSAVHLPR                   | Q3UFF7 | 0          | N-term +42.01 Da,                         | 3325.72998  | 4 | 573.8200073 | 573.5696348 |
| MLAAGVGGQGER                  | D3YY55 | 0.0023622  | N-term +42.01 Da,                         | 3325.902832 | 2 | 644.7999878 | 644.8011547 |
| SENLNLSIKMDLTRHSGTISQPR       | Q5SYL3 | 0.02071907 | N-term +42.01 Da, K +28.03 Da,            | 3327.317871 | 4 | 782.9500122 | 782.6982589 |
| ALETVPKDLR                    | P63271 | 0.00296956 | N-term +42.01 Da, K +28.03 Da,            | 3330.983398 | 3 | 578.3099976 | 578.3124624 |
| SDAAVDTSEITTKDLKEKKEVVEEAENGR | P26350 | 0.01505646 | N-term +42.01 Da, K +28.03 Da,            | 3332.344238 | 3 | 851.4299927 | 851.0988816 |
| ASKEMFEDTVEER                 | Q60973 | 0          | N-term +42.01 Da, K +28.03 Da,            | 3332.513184 | 2 | 614.3562622 | 614.3564224 |
| AAAAATAAAAAAPSGGGGGGEEER      | D3Z7U4 | 0          | N-term +42.01 Da,                         | 3334.93457  | 3 | 514.3084717 | 514.3067597 |
| AVPPTYADLGKSAR                | Q60932 | 0          | N-term +42.01 Da, K +28.03 Da,            | 3338.494141 | 2 | 599.381897  | 599.3819085 |
| SSIKVECVLR                    | Q64374 | 0.01914762 | N-term +42.01 Da, K +28.03 Da,C +57.02Da, | 3339.909424 | 4 | 584.0700073 | 584.3148003 |
| ALTPELSR                      | Q9D939 | 0.02073171 | N-term +42.01 Da,                         | 3339.99707  | 3 | 1138.319946 | 1137.981816 |
| TEADVNPKEYPLADAH              | Q9D0T1 | 0.00415512 | N-term +42.01 Da, K +28.03 Da,            | 3342.453613 | 4 | 853.9899902 | 853.7381813 |
| AAAAATAAAAAAPSGGGGGGEEER      | D3Z7U4 | 0          | N-term +42.01 Da,                         | 3345.464111 | 3 | 561.2999878 | 561.3029097 |
| SAAEEVDGLGVVRPH               | Q9JKF1 | 0          | N-term +42.01 Da,                         | 3348.395752 | 4 | 564.8099976 | 564.3161661 |
| ASLVPLKEKKLMEVK               | P56135 | 0          | N-term +42.01 Da, K +28.03 Da,            | 3350.73584  | 3 | 523.289978  | 523.2823917 |
| ASLVPLKEKKLMEVK               | P56135 | 0.00417827 | N-term +42.01 Da, K +28.03 Da,            | 3352.142578 | 2 | 767.8800049 | 767.3825095 |
| MNFSGKYQ                      | P12710 | 0          | N-term +42.01 Da, K +28.03 Da,            | 3352.614502 | 2 | 768.4000244 | 767.3825095 |
| AVPPTYADLGKSAR                | Q60932 | 0          | N-term +42.01 Da, K +28.03 Da,            | 3355.773193 | 4 | 859.4400024 | 858.9452577 |
| ATVDLEKLR                     | P12382 | 0.00229709 | N-term +42.01 Da, K +28.03 Da,            | 3359.760986 | 2 | 614.3499756 | 614.3564224 |
| MELSESVQR                     | Q63829 | 0.00232739 | N-term +42.01 Da,                         | 3360.886963 | 2 | 940.4699707 | 939.9807666 |
| MLSVAAR                       | Q9CR68 | 0.03429923 | N-term +42.01 Da,                         | 3362.809814 | 2 | 580.2299805 | 580.230554  |
| ADKPDMEIASFDKAK               | Q6ZWY8 | 0          | N-term +42.01 Da, K +28.03 Da,            | 3370.435303 | 3 | 1137.980103 | 1137.981816 |
| MEKPSPLLVGR                   | P97379 | 0.03486998 | N-term +42.01 Da, K +28.03 Da,            | 3372.288086 | 4 | 576.0700073 | 576.067525  |
| AALYGGVEGGGTR                 | Q9QZ08 | 0.0060241  | N-term +42.01 Da,                         | 3373.579834 | 4 | 853.7374878 | 853.7381813 |
| LHTPMYFFLR                    | E9Q2S3 | 0.04370328 | N-term +42.01 Da,                         | 3374.614258 | 2 | 762.3599854 | 761.860256  |
| MNFSGKYQ                      | P12710 | 0          | N-term +42.01 Da, K +28.03 Da,            | 3374.726563 | 2 | 1085.959961 | 1085.464344 |
| TASSVLLH                      | Q9JII6 | 0.00603622 | N-term +42.01 Da,                         | 3376.080078 | 3 | 767.7527466 | 767.7542745 |
| DESVWEKPLR                    | P11714 | 0          | N-term +42.01 Da, K +28.03 Da,            | 3376.416748 | 2 | 436.25      | 436.2534365 |
| AAPAKGENLSLVHGPDIR            | Q64442 | 0.03981265 | N-term +42.01 Da, K +28.03 Da,            | 3376.626709 | 2 | 663.8499756 | 664.3406359 |
| NYVAEKISGQKVNAAACDIAR         | O35490 | 0          | N-term +42.01 Da, K +28.03 Da,C +57.02Da, | 3377.658936 | 3 | 696.039978  | 695.7051433 |
| NYVAEKISGQKVNAAACDIAR         | O35490 | 0.004811   | N-term +42.01 Da, K +28.03 Da,C +57.02Da, | 3378.682129 | 2 | 1086.469971 | 1085.464344 |
| VGVPTETGALTINR                | Q8BWT1 | 0          | N-term +42.01 Da,                         | 3382.092285 | 2 | 481.2421265 | 481.2422119 |
| MFDIPPGAR                     | G3X9D2 | 0.04918033 | N-term +42.01 Da,                         | 3388.290527 | 2 | 758.4199829 | 758.4119267 |
| AFKDTGKTPVEPEVAIHR            | P60867 | 0          | N-term +42.01 Da, K +28.03 Da,            | 3394.161377 | 2 | 580.2299805 | 580.230554  |
| AGLQFPVGR                     | P0C0S6 | 0          | N-term +42.01 Da,                         | 3396.649658 | 2 | 516.7693481 | 516.7696486 |
| METLLKR                       | Q8K274 | 0.0428737  | N-term +42.01 Da, K +28.03 Da,            | 3403.27124  | 2 | 810.4400024 | 810.4412158 |
| MEKVPDMEIER                   | Q9CX80 | 0.00416378 | N-term +42.01 Da, K +28.03 Da,            | 3403.517334 | 4 | 595.3099976 | 595.311415  |
| GEVMAIGRTFEESFQKALR           | Q8C196 | 0          | N-term +42.01 Da, K +28.03 Da,            | 3403.843018 | 2 | 552.2600098 | 552.255517  |
| AQQAADKYLVDKN                 | Q8VDD5 | 0.00231839 | N-term +42.01 Da, K +28.03 Da,            | 3404.285889 | 2 | 774.9000244 | 775.3908577 |
| GEVMAIGRTFEESFQKALR           | Q8C196 | 0.01095361 | N-term +42.01 Da, K +28.03 Da,            | 3404.914307 | 4 | 853.9899902 | 853.7381813 |



|                                |        |            |                                           |             |   |             |             |
|--------------------------------|--------|------------|-------------------------------------------|-------------|---|-------------|-------------|
| SAGGDFGNPLR                    | P35279 | 0          | N-term +42.01 Da,                         | 3406.768066 | 2 | 436.2531433 | 436.2534365 |
| AAPGAGDPLNAKNGNAPFAQR          | Q9D2R6 | 0.00862069 | N-term +42.01 Da, K +28.03 Da,            | 3411.030518 | 2 | 856.4500122 | 856.4599399 |
| ASGADSKGDDLSTAILK              | Q01853 | 0.04529817 | N-term +42.01 Da, K +28.03 Da,            | 3414.139648 | 2 | 630.8546753 | 630.8526583 |
| ASGPGGLHADLLR                  | Q8BWF0 | 0          | N-term +42.01 Da,                         | 3414.587646 | 3 | 467.6000061 | 467.6013952 |
| AGKPVLYHFDGR                   | P30115 | 0          | N-term +42.01 Da, K +28.03 Da,            | 3420.154053 | 2 | 758.413147  | 758.4119267 |
| AAPAKGENLSLVVHGPDIR            | Q64442 | 0          | N-term +42.01 Da, K +28.03 Da,            | 3420.665527 | 3 | 573.6887817 | 573.6890926 |
| SDAAVDTSSEITTKDLKEKKEVVEEAENGR | P26350 | 0          | N-term +42.01 Da, K +28.03 Da,            | 3441.118408 | 3 | 586         | 585.6697038 |
| MFDIPPGAR                      | G3X9D2 | 0.00301205 | N-term +42.01 Da,                         | 3443.119385 | 4 | 573.8200073 | 573.5696348 |
| SLIQUHERIHTGKPFQCTECGKAFLK     | Q7TNU6 | 0.00926539 | N-term +42.01 Da, K +28.03 Da,C +57.02Da, | 3443.361084 | 4 | 557.8099976 | 557.55833   |
| AASAASSEHFELKHEIFR             | O88384 | 0          | N-term +42.01 Da, K +28.03 Da,            | 3446.039551 | 2 | 630.852417  | 630.8526583 |
| EEHPTLLTEAPLNPKANR             | P62737 | 0.01457541 | N-term +42.01 Da, K +28.03 Da,            | 3446.526855 | 3 | 743.4099731 | 743.0753478 |
| METASTPEATGTGKYIASTQRPDGTWR    | Q8CHP5 | 0          | N-term +42.01 Da, K +28.03 Da,            | 3446.966309 | 3 | 598.0100098 | 597.6780878 |
| AAPAKGENLSLVVHGPDIR            | Q64442 | 0.00288809 | N-term +42.01 Da, K +28.03 Da,            | 3450.137207 | 3 | 418.6022949 | 418.6028472 |
| EECELETMTGEKVK                 | P12710 | 0          | N-term +42.01 Da, K +28.03 Da,C +57.02Da, | 3451.085449 | 2 | 758.9199829 | 758.4119267 |
| MEQVNELKEKGNKAL                | Q60864 | 0.00238663 | N-term +42.01 Da, K +28.03 Da,            | 3458.659668 | 2 | 580.3326416 | 580.3327498 |
| LIEHGVTADDLVR                  | Q9Z2L7 | 0.04579279 | N-term +42.01 Da,                         | 3462.538574 | 2 | 1115.109985 | 1114.109383 |
| AAPAKGENLSLVVHGPDIR            | Q64442 | 0          | N-term +42.01 Da, K +28.03 Da,            | 3465.953613 | 4 | 859.4400024 | 858.9452577 |
| AHRFPALTPEQKKESEIAQR           | Q91Y97 | 0          | N-term +42.01 Da, K +28.03 Da,            | 3466.427246 | 2 | 546.7399902 | 546.7442618 |
| MNGPVDGLCDH                    | Q91X83 | 0          | N-term +42.01 Da, C +57.02Da,             | 3468.362305 | 2 | 479.2900085 | 479.2920301 |
| AFDGTWKVDR                     | P55050 | 0          | N-term +42.01 Da, K +28.03 Da,            | 3469.358643 | 3 | 748.4199829 | 748.0873649 |
| LVSSVSDLPKR                    | P54869 | 0.00354359 | N-term +42.01 Da, K +28.03 Da,            | 3471.69873  | 2 | 1007.469971 | 1006.967045 |
| MHTEAAEVLLER                   | Q8QZ51 | 0          | N-term +42.01 Da,                         | 3473.364014 | 3 | 1145.589966 | 1144.924585 |
| DIHTPGVAADLSHIETR              | P08249 | 0.00298285 | N-term +42.01 Da,                         | 3474.958252 | 4 | 557.5583496 | 557.55833   |
| TASSVLLHTGQ                    | Q9JII6 | 0          | N-term +42.01 Da,                         | 3476.756104 | 4 | 561.317627  | 561.3173428 |
| AQQAADKYL                      | Q8VDD5 | 0.01212508 | N-term +42.01 Da, K +28.03 Da,            | 3477.612061 | 3 | 671.6473999 | 671.6471222 |
| AFDGTWKVDR                     | P55050 | 0          | N-term +42.01 Da, K +28.03 Da,            | 3478.050049 | 3 | 743.0768433 | 743.0753478 |
| AELGEADEAELQR                  | P62077 | 0          | N-term +42.01 Da,                         | 3479.112549 | 2 | 988.9299927 | 988.9274877 |
| ASLKDLEGKWR                    | Q05816 | 0          | N-term +42.01 Da, K +28.03 Da,            | 3479.604492 | 2 | 512.7299805 | 512.2318444 |
| AAPAKGENLSLVVHGPDIR            | Q64442 | 0.00290487 | N-term +42.01 Da, K +28.03 Da,            | 3480.087402 | 2 | 614.8484497 | 614.3564224 |
| MKETIMNQEKLAKLQAQVR            | Q64152 | 0          | N-term +42.01 Da, K +28.03 Da,            | 3480.458496 | 2 | 923.4799805 | 922.9734204 |
| SQAEFDKAAEEVKR                 | P31786 | 0          | N-term +42.01 Da, K +28.03 Da,            | 3482.060791 | 3 | 569.2999878 | 569.2967011 |
| AFDGTWKVDR                     | P55050 | 0.00294334 | N-term +42.01 Da, K +28.03 Da,            | 3489.245117 | 2 | 606.3499756 | 606.3533484 |
| TSALTQGLER                     | Q8CF66 | 0          | N-term +42.01 Da,                         | 3490.907959 | 2 | 820.8800049 | 820.8772575 |
| SAPMPAVVPAAR                   | P97823 | 0          | N-term +42.01 Da,                         | 3496.962891 | 4 | 859.1899414 | 858.9452577 |
| SYTPGQPVTAVVQR                 | Q9DBG9 | 0          | N-term +42.01 Da,                         | 3498.146973 | 2 | 630.8499756 | 630.8526583 |
| ASLKDLEGKWR                    | Q05816 | 0          | N-term +42.01 Da, K +28.03 Da,            | 3502.164307 | 3 | 884.1300049 | 883.7874724 |
| SAMEAADVFHR                    | Q8BFS6 | 0          | N-term +42.01 Da,                         | 3511.843018 | 2 | 614.8484497 | 614.3564224 |
| ADPKYADLPGIAR                  | Q99KJ8 | 0.0008285  | N-term +42.01 Da, K +28.03 Da,            | 3515.535889 | 3 | 569.6300049 | 569.2967011 |
| AAETVELHKLKLAELKQECLAR         | Q9D1J3 | 0          | N-term +42.01 Da, K +28.03 Da,C +57.02Da, | 3518.344238 | 2 | 522.7399902 | 522.7445874 |
| ATNFLAH                        | P57776 | 0.01098901 | N-term +42.01 Da,                         | 3521.839111 | 2 | 821.3800049 | 820.8772575 |

|                       |        |            |                                           |             |   |             |             |
|-----------------------|--------|------------|-------------------------------------------|-------------|---|-------------|-------------|
| MNFSGKY               | P12710 | 0.01090443 | N-term +42.01 Da, K +28.03 Da,            | 3524.658691 | 3 | 616.9855347 | 616.9852468 |
| MFAKAFR               | Q61211 | 0.00418702 | N-term +42.01 Da, K +28.03 Da,            | 3524.83252  | 3 | 972.789978  | 972.4624378 |
| ADMQNLVER             | P40124 | 0          | N-term +42.01 Da,                         | 3526.470703 | 4 | 735.1500244 | 734.6482083 |
| ASLLKVDQEVK           | P61290 | 0.00229358 | N-term +42.01 Da, K +28.03 Da,            | 3527.44458  | 4 | 859.4400024 | 858.9452577 |
| ASLKDLEGKWR           | Q05816 | 0.00163532 | N-term +42.01 Da, K +28.03 Da,            | 3527.595459 | 2 | 625.3099976 | 625.3122123 |
| LDNTTAAVQELGR         | Q8BL66 | 0.02478839 | N-term +42.01 Da,                         | 3527.748779 | 4 | 734.9000244 | 734.6482083 |
| CLTETPTRYLR           | O08650 | 0.01098191 | N-term +42.01 Da, C +57.02Da,             | 3532.957764 | 3 | 1097.170044 | 1096.508209 |
| AQALSEEEFQR           | Q8VD04 | 0          | N-term +42.01 Da,                         | 3533.916992 | 3 | 593.6300049 | 593.634214  |
| MNFSGKY               | P12710 | 0.0173482  | N-term +42.01 Da, K +28.03 Da,            | 3540.562988 | 2 | 924.9699707 | 924.9742319 |
| ALHVPKAPGFAQ          | P42932 | 0.00240192 | N-term +42.01 Da, K +28.03 Da,            | 3540.656494 | 2 | 557.8300171 | 557.8269663 |
| ADMQNLVER             | P40124 | 0.00613915 | N-term +42.01 Da,                         | 3545.003174 | 2 | 648.8699951 | 648.8708509 |
| GDSASKVISAEELPGR      | QSD6Y7 | 0.00233645 | N-term +42.01 Da, K +28.03 Da,            | 3545.509033 | 2 | 1106.030029 | 1105.51839  |
| SAAEVVDGLGVVRPH       | Q9JKF1 | 0          | N-term +42.01 Da,                         | 3548.920654 | 3 | 1013.52002  | 1012.854323 |
| MDASPEPQQGGTLVLVR     | P58735 | 0          | N-term +42.01 Da, K +28.03 Da,            | 3555.467041 | 3 | 617.3200073 | 616.9852468 |
| SAAEVVDGLGVVRPH       | Q9JKF1 | 0          | N-term +42.01 Da,                         | 3556.523438 | 3 | 1013.190002 | 1012.854323 |
| MNFSGKY               | P12710 | 0.01089744 | N-term +42.01 Da, K +28.03 Da,            | 3559.056885 | 4 | 859.1901245 | 858.9452577 |
| MDFSKLPK              | P50516 | 0.00231125 | N-term +42.01 Da, K +28.03 Da,            | 3559.694092 | 4 | 548.0599976 | 547.5584245 |
| AAPQLFR               | Q99J99 | 0.03220036 | N-term +42.01 Da,                         | 3560.886963 | 2 | 963.5       | 962.4832869 |
| AVSESQLKMMM           | Q61187 | 0.02483343 | N-term +42.01 Da, K +28.03 Da,            | 3563.411865 | 4 | 467.7999878 | 467.5479732 |
| METQVLTPH             | Q8K2C9 | 0          | N-term +42.01 Da,                         | 3568.043945 | 3 | 569.2999878 | 569.2967011 |
| SLSNKLTLDKLDVK        | P09411 | 0.03870968 | N-term +42.01 Da, K +28.03 Da,            | 3579.057861 | 3 | 1145.579956 | 1144.924585 |
| AAPQLFR               | Q99J99 | 0.03220036 | N-term +42.01 Da,                         | 3585.239502 | 3 | 1145.25     | 1144.924585 |
| MDMVKVN               | Q283N4 | 0.01101175 | N-term +42.01 Da, K +28.03 Da,            | 3589.422363 | 4 | 859.4400024 | 858.9452577 |
| AQEFVNCKIQ            | Q9QUH0 | 0          | N-term +42.01 Da, K +28.03 Da,C +57.02Da, | 3593.761963 | 3 | 629.3200073 | 629.6597508 |
| GYVKAGPWTPEAAVEHPEAVR | Q35490 | 0.00231303 | N-term +42.01 Da, K +28.03 Da,            | 3600.532959 | 2 | 1055.030029 | 1054.521987 |
| AQGLIEVER             | Q8JZL3 | 0.0023678  | N-term +42.01 Da, K +28.03 Da,            | 3608.437744 | 3 | 569.2999878 | 569.2967011 |
| EFEEKFLKTR            | P30115 | 0.01961987 | N-term +42.01 Da, K +28.03 Da,            | 3609.912842 | 3 | 1145.252441 | 1144.924585 |
| AQGLIEVER             | Q8JZL3 | 0.00357654 | N-term +42.01 Da,                         | 3610.006104 | 3 | 1073.881836 | 1073.883726 |
| AVFPWHSR              | Q8BWQ6 | 0          | N-term +42.01 Da,                         | 3612.759033 | 4 | 556.0599976 | 555.8056998 |
| ACSEFSFH              | Q91V76 | 0.03644915 | N-term +42.01 Da, K +28.03 Da,C +57.02Da, | 3619.891602 | 4 | 859.1904907 | 858.9452577 |
| MKFNPFVTSDR           | P61255 | 0          | N-term +42.01 Da, K +28.03 Da,            | 3619.967041 | 4 | 805.6639404 | 805.6646138 |
| AAAAAAAAAAGAAGGR      | Q8CCS6 | 0          | N-term +42.01 Da,                         | 3620.085938 | 2 | 617.8051758 | 617.3091383 |
| TEKDAQPQLEEADDDLSKLN  | Q61599 | 0          | N-term +42.01 Da, K +28.03 Da,            | 3620.462646 | 3 | 722.3800049 | 721.7024564 |
| TEKDAQPQLEEADDDLSKLN  | Q61599 | 0          | N-term +42.01 Da, K +28.03 Da,            | 3620.574219 | 2 | 841.3911743 | 841.3762706 |
| SHQTGIQASEDVKEIFAR    | Q91YR1 | 0          | N-term +42.01 Da, K +28.03 Da,            | 3623.835205 | 4 | 817.9299927 | 817.4290456 |
| SSVPIQIPSR            | Q9DBN5 | 0.00229183 | N-term +42.01 Da,                         | 3624.065186 | 4 | 530.539978  | 530.2933362 |
| ASEVEEQIPVR           | Q8BVA5 | 0          | N-term +42.01 Da,                         | 3634.46167  | 2 | 492.8099976 | 492.8136612 |
| ANHAPFETDISTLTR       | Q9QXD6 | 0          | N-term +42.01 Da,                         | 3640.549561 | 3 | 1074.219971 | 1073.883726 |
| MMMAAAAER             | Q9DCS2 | 0          | N-term +42.01 Da,                         | 3640.647705 | 3 | 1145.589966 | 1144.924585 |
| AAAVVEFQR             | Q8BG32 | 0.00226929 | N-term +42.01 Da,                         | 3643.003174 | 3 | 1145.25     | 1144.924585 |

|                           |        |            |                                           |             |   |             |             |
|---------------------------|--------|------------|-------------------------------------------|-------------|---|-------------|-------------|
| MKVFTVGLPLAEGR            | Q91Z53 | 0          | N-term +42.01 Da, K +28.03 Da,            | 3649.437988 | 4 | 975.7600098 | 975.2555019 |
| ATEGDVELELETETSGPERPPEKPR | Q9CR41 | 0          | N-term +42.01 Da, K +28.03 Da,            | 3650.378662 | 4 | 859.4400024 | 858.9452577 |
| AAAAAAAAAAGAAGGR          | Q8CCS6 | 0          | N-term +42.01 Da,                         | 3652.030029 | 4 | 805.6637573 | 805.6646138 |
| MNLSAAHHQSL               | Q8VCX1 | 0.00422238 | N-term +42.01 Da,                         | 3653.744141 | 3 | 467.6000061 | 467.6013952 |
| MNGPVDGLCDH               | Q91X83 | 0          | N-term +42.01 Da, K +28.03 Da,C +57.02Da, | 3655.574219 | 4 | 683.0999756 | 682.8438769 |
| SHQTGIQASEDVKEIFAR        | Q91YR1 | 0.01100324 | N-term +42.01 Da, K +28.03 Da,            | 3667.491943 | 3 | 799.0700073 | 798.4067029 |
| MEMELDSEGR                | Q8CC86 | 0          | N-term +42.01 Da,                         | 3672.091797 | 3 | 1074.219971 | 1073.883726 |
| SDAPPLTLDGIKDR            | Q9CR21 | 0.00289017 | N-term +42.01 Da, K +28.03 Da,            | 3672.23877  | 2 | 1197.609985 | 1197.106416 |
| MQNVINTVKGK               | Q9CPX6 | 0          | N-term +42.01 Da, K +28.03 Da,            | 3673.949951 | 3 | 691.046936  | 691.0480091 |
| EAALAEAVR                 | P0C872 | 0.00240964 | N-term +42.01 Da,                         | 3675.64624  | 3 | 1145.589966 | 1144.924585 |
| AVPPTYADLGK               | Q60932 | 0          | N-term +42.01 Da, K +28.03 Da,            | 3675.817871 | 3 | 995.4799805 | 994.8135818 |
| ADLEEQLSDEEKVR            | P47754 | 0          | N-term +42.01 Da, K +28.03 Da,            | 3677.467773 | 2 | 1037.069946 | 1036.068375 |
| MNGPVDGLCDH               | Q91X83 | 0          | N-term +42.01 Da, C +57.02Da,             | 3677.654297 | 3 | 1074.560059 | 1073.883726 |
| CGKCFIYPSLLR              | E9PZ68 | 0.01502818 | N-term +42.01 Da, K +28.03 Da,C +57.02Da, | 3678.493652 | 2 | 867.4500122 | 866.9561758 |
| AVPPTYADLGK               | Q60932 | 0          | N-term +42.01 Da, K +28.03 Da,            | 3678.836426 | 3 | 994.8099976 | 994.8135818 |
| MDNKLDFR                  | Q3UZZ6 | 0.00601604 | N-term +42.01 Da, K +28.03 Da,            | 3680.738281 | 3 | 578.2999878 | 578.3065427 |
| PFVELETNLPASR             | O35215 | 0.00604027 | N-term +42.01 Da,                         | 3681.756592 | 4 | 858.9442139 | 858.9452577 |
| AGTSSEAEAEALAAAR          | Q99PW4 | 0          | N-term +42.01 Da,                         | 3682.655518 | 3 | 613.6400146 | 612.9625589 |
| MQDAENVAVPEAAEER          | Q8JZQ9 | 0          | N-term +42.01 Da,                         | 3687.030518 | 2 | 832.4099731 | 831.9077377 |
| SMHTEAAEVLLER             | Q8QZS1 | 0          | N-term +42.01 Da,                         | 3693.668457 | 3 | 913.4699707 | 913.1407468 |
| ADLEEQLSDEEKVR            | P47754 | 0          | N-term +42.01 Da, K +28.03 Da,            | 3694.795898 | 2 | 872.9544067 | 871.9483508 |
| ADEELEALR                 | P56812 | 0.00232558 | N-term +42.01 Da,                         | 3695.3125   | 3 | 620.3499756 | 619.6765245 |
| SASVSVISR                 | P61804 | 0          | N-term +42.01 Da, K +28.03 Da,            | 3696.569092 | 2 | 559.2600098 | 559.2583934 |
| SLDIQCEQLSDAR             | Q91VI7 | 0          | N-term +42.01 Da, C +57.02Da,             | 3697.302002 | 3 | 569.6300049 | 569.2967011 |
| AVPPTYADLGK               | Q60932 | 0          | N-term +42.01 Da, K +28.03 Da,            | 3697.530518 | 3 | 798.4199829 | 798.4067029 |
| VSQEHPPVLTKEVEGAR         | Q8C196 | 0          | N-term +42.01 Da, K +28.03 Da,            | 3698.669189 | 3 | 1046.890015 | 1046.229836 |
| SLVIPEKFQH                | P62270 | 0.00355619 | N-term +42.01 Da, K +28.03 Da,            | 3702.348389 | 2 | 1108.030029 | 1108.031665 |
| AAVVDPPQSVVMMR            | P43883 | 0          | N-term +42.01 Da,                         | 3704.358887 | 3 | 691.0483398 | 691.0480091 |
| AKLLTSSLSVR               | Q9D9V3 | 0.01096774 | N-term +42.01 Da, K +28.03 Da,C +57.02Da, | 3704.553223 | 4 | 648.3400269 | 648.3417863 |
| MSPEIALNR                 | Q8K3W0 | 0          | N-term +42.01 Da,                         | 3707.600342 | 3 | 1144.930054 | 1144.924585 |
| VVLVGGSTR                 | Q8BM72 | 0.04277457 | N-term +42.01 Da,                         | 3712.517334 | 4 | 859.4400024 | 858.9452577 |
| METEQPETFPNTEINGEFGKR     | P61979 | 0.00083195 | N-term +42.01 Da, K +28.03 Da,            | 3714.354248 | 3 | 1046.569946 | 1046.229836 |
| SSPAQPAVPAPLADLKIHTK      | P24549 | 0          | N-term +42.01 Da, K +28.03 Da,            | 3719.137695 | 2 | 632.8192139 | 632.8196728 |
| AAAKAVLGPLVGAVDQGSSTR     | Q64516 | 0          | N-term +42.01 Da, K +28.03 Da,            | 3725.744873 | 4 | 526.0200195 | 525.7681798 |
| SASVSVISR                 | P61804 | 0          | N-term +42.01 Da,                         | 3730.996094 | 2 | 474.25      | 474.2452775 |
| SSDAQWLTAER               | Q9CZL5 | 0          | N-term +42.01 Da,                         | 3733.519775 | 3 | 569.2999878 | 569.2967011 |
| SSPAQPAVPAPLADLKIHTK      | P24549 | 0          | N-term +42.01 Da, K +28.03 Da,            | 3737.537842 | 2 | 645.3511353 | 645.3514368 |
| MDFSKLPKIR                | P50516 | 0          | N-term +42.01 Da, K +28.03 Da,            | 3737.880859 | 3 | 1145.254272 | 1144.924585 |
| SSPAQPAVPAPLADLKIHTK      | P24549 | 0          | N-term +42.01 Da, K +28.03 Da,            | 3743.987305 | 4 | 859.4400024 | 858.9452577 |
| MEVHELFR                  | P41216 | 0.00241741 | N-term +42.01 Da,                         | 3744.49585  | 2 | 737.3499756 | 736.8468145 |

|                           |        |            |                                           |             |   |             |             |
|---------------------------|--------|------------|-------------------------------------------|-------------|---|-------------|-------------|
| MDDREDLVYQAKLAEQAER       | P62259 | 0          | N-term +42.01 Da, K +28.03 Da,            | 3750.021973 | 2 | 632.8186035 | 632.8196728 |
| EWHTIILASDKR              | B5X0G2 | 0.00239425 | N-term +42.01 Da, K +28.03 Da,            | 3768.869629 | 2 | 408.7099915 | 408.2059548 |
| SSPAQPAVPAPLADLKIQHTK     | P24549 | 0          | N-term +42.01 Da, K +28.03 Da,            | 3769.992432 | 3 | 634.6854248 | 634.6858546 |
| MQIFVKLTGK                | P0CG49 | 0          | N-term +42.01 Da, K +28.03 Da,            | 3774.381104 | 4 | 859.4400024 | 858.9452577 |
| AAAKKAVLGPLVGAVDQGTSSSTR  | Q64516 | 0          | N-term +42.01 Da, K +28.03 Da,            | 3780.177734 | 2 | 803.9199829 | 802.9268867 |
| MDFSKLPKIR                | P50516 | 0          | N-term +42.01 Da, K +28.03 Da,            | 3783.209717 | 3 | 535.9500122 | 535.6203499 |
| AAQALAAQAVASR             | Q8BLY2 | 0          | N-term +42.01 Da,                         | 3784.134766 | 3 | 467.2600098 | 467.6013952 |
| MPFVELETNLPASR            | O35215 | 0          | N-term +42.01 Da,                         | 3786.033691 | 2 | 729.3900146 | 728.8933696 |
| METEQPEETFPNTETNGEFGKR    | P61979 | 0.00288392 | N-term +42.01 Da, K +28.03 Da,            | 3788.531494 | 2 | 632.8200073 | 632.8196728 |
| MEVHELFR                  | P41216 | 0.00241741 | N-term +42.01 Da,                         | 3789.621338 | 2 | 700.9000244 | 700.8984546 |
| MEGPAGYLR                 | E9Q509 | 0          | N-term +42.01 Da,                         | 3794.189697 | 4 | 597.5900269 | 597.0893685 |
| MEKTLETVPLER              | O88569 | 0          | N-term +42.01 Da, K +28.03 Da,            | 3795.997314 | 2 | 559.269104  | 559.2689585 |
| MELEAMSR                  | P61166 | 0.00228137 | N-term +42.01 Da,                         | 3796.154785 | 3 | 486.2643127 | 486.2646719 |
| AAAKKAVLGPLVGAVDQGTSSSTR  | Q64516 | 0          | N-term +42.01 Da, K +28.03 Da,            | 3796.230225 | 4 | 976.4899902 | 975.9944739 |
| ASQSQGIQQLLQAEKR          | Q9CR51 | 0          | N-term +42.01 Da, K +28.03 Da,            | 3799.89209  | 3 | 569.289978  | 569.2967011 |
| ANHAPFETDISTLTR           | Q9QXD6 | 0          | N-term +42.01 Da,                         | 3802.380615 | 2 | 638.2925415 | 638.2929651 |
| AEGQLVLDGR                | P19253 | 0.000819   | N-term +42.01 Da,                         | 3804.689209 | 4 | 859.4400024 | 858.9452577 |
| SVFGKLFAGGGKAGKGGPTQEAIQR | Q9D8B3 | 0          | N-term +42.01 Da, K +28.03 Da,            | 3806.924316 | 4 | 568.0900269 | 567.8410794 |
| DDEVVDVGTVEEDLGKSR        | P08113 | 0          | N-term +42.01 Da, K +28.03 Da,            | 3808.514893 | 2 | 675.3200073 | 675.3202348 |
| ALHVPKAPGFAQMLKDGAK       | P42932 | 0          | N-term +42.01 Da, K +28.03 Da,            | 3811.664063 | 2 | 1197.109985 | 1197.106416 |
| AAAAVVEFQR                | Q8BG32 | 0          | N-term +42.01 Da,                         | 3811.739502 | 3 | 757.1199951 | 756.7856804 |
| AMKAVCVLKGDPVQGTIHFEQK    | P08228 | 0.03537736 | N-term +42.01 Da, K +28.03 Da,C +57.02Da, | 3814.617432 | 3 | 467.6008911 | 467.6013952 |
| MEGPAGYLR                 | E9Q509 | 0          | N-term +42.01 Da,                         | 3816.563965 | 2 | 1134.670044 | 1134.674882 |
| AAATLSFGPER               | Q80TM9 | 0          | N-term +42.01 Da,                         | 3817.072754 | 2 | 728.8931885 | 728.8933696 |
| ASQSQGIQQLLQAEKR          | Q9CR51 | 0          | N-term +42.01 Da, K +28.03 Da,            | 3818.152832 | 4 | 862.9500122 | 863.2070482 |
| MEKTLETVPLER              | O88569 | 0          | N-term +42.01 Da, K +28.03 Da,            | 3818.24585  | 4 | 518.0700073 | 517.8095817 |
| AMKAVCVLKGDPVQGTIHFEQK    | P08228 | 0.01102464 | N-term +42.01 Da, K +28.03 Da,C +57.02Da, | 3821.229004 | 4 | 585.0800171 | 584.8278091 |
| AALVVSETAEPGSR            | Q5NCQ5 | 0          | N-term +42.01 Da,                         | 3826.224121 | 3 | 779.4299927 | 779.4346532 |
| AAAAVDPQQSVVMR            | P43883 | 0          | N-term +42.01 Da,                         | 3828.54834  | 2 | 459.2200012 | 458.7152983 |
| AEGQLVLDGR                | P19253 | 0          | N-term +42.01 Da,                         | 3835.698242 | 4 | 859.4400024 | 858.9452577 |
| ALDGPEQMELEEGKAGSGLR      | P62196 | 0          | N-term +42.01 Da, K +28.03 Da,            | 3840.287109 | 3 | 798.4099731 | 798.4067029 |
| ALDGPEQMELEEGKAGSGLR      | P62196 | 0          | N-term +42.01 Da, K +28.03 Da,            | 3840.697266 | 2 | 675.3200073 | 675.3202348 |
| AAAAVVEFQR                | Q8BG32 | 0          | N-term +42.01 Da,                         | 3841.692139 | 2 | 789.4000244 | 789.3995482 |
| ANHAPFETDISTLTR           | Q9QXD6 | 0          | N-term +42.01 Da,                         | 3842.189941 | 4 | 670.1300049 | 669.8833815 |
| MDNKLDFR                  | Q3UZZ6 | 0          | N-term +42.01 Da, K +28.03 Da,            | 3845.39917  | 3 | 467.6000061 | 467.6013952 |
| MDLGLAGR                  | Q91X52 | 0.00354862 | N-term +42.01 Da,                         | 3845.483398 | 3 | 893.1799927 | 892.8420832 |
| ATIATMPVPETR              | Q62189 | 0          | N-term +42.01 Da,                         | 3846.947998 | 4 | 669.8800049 | 669.8833815 |
| AEGQLVLDGR                | P19253 | 0          | N-term +42.01 Da,                         | 3848.756104 | 3 | 892.8400269 | 892.8420832 |
| AAAGAAATDLEVVR            | Q6PD26 | 0          | N-term +42.01 Da,                         | 3849.094238 | 4 | 599.0599976 | 599.0568463 |
| ADEIAKAQVAQPGGDTIFGK      | P70349 | 0          | N-term +42.01 Da, K +28.03 Da,            | 3857.142334 | 3 | 798.75      | 798.4067029 |

|                                |        |            |                                           |             |   |             |             |
|--------------------------------|--------|------------|-------------------------------------------|-------------|---|-------------|-------------|
| FLFLKICGN                      | Q9D5R4 | 0.03647059 | N-term +42.01 Da, K +28.03 Da,C +57.02Da, | 3860.351807 | 3 | 499.9400024 | 500.280322  |
| SIGVPIKVLH                     | P62320 | 0.01910043 | N-term +42.01 Da, K +28.03 Da,            | 3868.446777 | 3 | 468.269989  | 467.6013952 |
| SHQTGIQASEDVKEIF               | Q91YR1 | 0          | N-term +42.01 Da, K +28.03 Da,            | 3872.296875 | 2 | 532.2962646 | 532.2964556 |
| SSVAVLTQESFAEHR                | Q8VDJ3 | 0          | N-term +42.01 Da,                         | 3879.064941 | 2 | 422.7370911 | 422.7374219 |
| SHQTGIQASEDVKEIF               | Q91YR1 | 0          | N-term +42.01 Da, K +28.03 Da,            | 3881.28833  | 2 | 538.7716064 | 538.7721911 |
| AERPEDLNLPNAVITR               | Q9JKP7 | 0.01150895 | N-term +42.01 Da,                         | 3890.296387 | 2 | 453.7242126 | 453.7248087 |
| ATIATMPVPETR                   | Q62189 | 0.01044386 | N-term +42.01 Da,                         | 3893.233643 | 3 | 616.3200073 | 616.3082784 |
| TTNTVPLHPYWPR                  | P70245 | 0          | N-term +42.01 Da,                         | 3903.517822 | 2 | 529.289978  | 528.7878412 |
| AEGQVLVLDGR                    | P19253 | 0          | N-term +42.01 Da,                         | 3905.265381 | 2 | 653.8200073 | 653.8266408 |
| ANHAPFETDISTLTR                | Q9QXD6 | 0.00082988 | N-term +42.01 Da,                         | 3911.276123 | 3 | 691.039978  | 690.7032963 |
| AASAIKGLSALR                   | Q9D8T7 | 0.00289855 | N-term +42.01 Da, K +28.03 Da,            | 3923.656738 | 4 | 572.3096313 | 572.312952  |
| STNTDLSLSSYDEGQGSKFIR          | Q9JLR9 | 0          | N-term +42.01 Da, K +28.03 Da,            | 3927.186279 | 3 | 1187.550049 | 1187.219955 |
| ANHAPFETDISTLTR                | Q9QXD6 | 0          | N-term +42.01 Da,                         | 3934.131104 | 2 | 543.7199707 | 543.7223644 |
| AMFEQMR                        | Q9DBZ5 | 0.00290276 | N-term +42.01 Da,                         | 3934.431396 | 3 | 798.75      | 798.4067029 |
| STNTDLSLSSYDEGQGSKFIR          | Q9JLR9 | 0          | N-term +42.01 Da, K +28.03 Da,            | 3935.388428 | 2 | 528.788269  | 528.7878412 |
| SSVAVLTQESFAEHR                | Q8VDJ3 | 0          | N-term +42.01 Da,                         | 3939.003662 | 3 | 799.1199951 | 798.7832217 |
| ADKPDMEIASFDKAKL               | Q6ZWY8 | 0.00301432 | N-term +42.01 Da, K +28.03 Da,            | 3941.371826 | 3 | 420.6000061 | 420.2686995 |
| AAAAGAVVASAASGPAEGKKITELR      | Q8CH25 | 0          | N-term +42.01 Da, K +28.03 Da,            | 3943.683838 | 2 | 528.289978  | 528.7878412 |
| ADTATTASAAAASAPNASTDAPPFQLGKPR | Q925N0 | 0          | N-term +42.01 Da, K +28.03 Da,            | 3948.976318 | 2 | 1284.579956 | 1284.081947 |
| ANHAPFETDISTLTR                | Q9QXD6 | 0          | N-term +42.01 Da,                         | 3950.350098 | 2 | 620.8232422 | 620.8232783 |
| AAVTEVVVPADGAEAR               | Q9D198 | 0          | N-term +42.01 Da,                         | 3950.62915  | 3 | 856.7199707 | 856.3903905 |
| ANHAPFETDISTLTR                | Q9QXD6 | 0          | N-term +42.01 Da,                         | 3950.848145 | 4 | 795.6799927 | 795.4286852 |
| ADAWEEIR                       | Q8CCJ3 | 0.00228833 | N-term +42.01 Da,                         | 3963.812744 | 2 | 1237.089966 | 1236.584846 |
| MDALDKVLKPK                    | Q9JJ80 | 0          | N-term +42.01 Da, K +28.03 Da,            | 3964.594971 | 3 | 825.0599976 | 824.7256562 |
| NKELDPVQKLFVDKIR               | P97450 | 0          | N-term +42.01 Da, K +28.03 Da,            | 3965.175049 | 2 | 1236.579956 | 1236.584846 |
| LTITYGPKVVR                    | P12710 | 0.00241352 | N-term +42.01 Da, K +28.03 Da,            | 3966.765137 | 2 | 458.7399902 | 458.2338554 |
| ANHAPFETDISTLTR                | Q9QXD6 | 0          | N-term +42.01 Da,                         | 3970.357422 | 2 | 512.2244873 | 512.2246501 |
| ACGLVASNLNLKPGCECLKVR          | P16045 | 0          | N-term +42.01 Da, K +28.03 Da,C +57.02Da, | 3970.850586 | 3 | 1060.910034 | 1060.235821 |
| AKVEQVLSLEPQHELKFR             | Q9QY76 | 0          | N-term +42.01 Da, K +28.03 Da,            | 3971.926514 | 3 | 722.039978  | 721.7024564 |
| ANHAPFETDISTLTR                | Q9QXD6 | 0          | N-term +42.01 Da,                         | 3974.98877  | 2 | 1082.550049 | 1082.050046 |
| AKVEQVLSLEPQHELKFR             | Q9QY76 | 0          | N-term +42.01 Da, K +28.03 Da,            | 3975.175781 | 3 | 946.4699707 | 946.1330862 |
| MQAGKPILY                      | Q9WVL0 | 0.01511335 | N-term +42.01 Da, K +28.03 Da,            | 3981.796875 | 2 | 620.8231201 | 620.8232783 |
| TASSVLLHTGQKMPL                | Q9JII6 | 0.00230061 | N-term +42.01 Da, K +28.03 Da,            | 3985.212402 | 2 | 1083.050049 | 1082.050046 |
| LDHFFSLFFERALR                 | Q059U7 | 0.04915254 | N-term +42.01 Da,                         | 3994.432861 | 3 | 885.0800171 | 884.7490176 |
| AKVEQVLSLEPQHELKFR             | Q9QY76 | 0          | N-term +42.01 Da, K +28.03 Da,            | 3994.64502  | 4 | 567.2800293 | 567.0371358 |
| SIGVPIKLHEAEGH                 | P62320 | 0.00237154 | N-term +42.01 Da, K +28.03 Da,            | 4001.726563 | 2 | 784.4194336 | 784.4199493 |
| GAQAESLGPLQVAR                 | Q9DCW4 | 0.00298063 | N-term +42.01 Da,                         | 4003.482178 | 3 | 922.0999756 | 922.1058192 |
| SSVAVLTQESFAEHR                | Q8VDJ3 | 0.00352858 | N-term +42.01 Da,                         | 4003.675537 | 2 | 1002        | 1000.997814 |
| AGQSDKDKVYYTLEEIQKH            | P56395 | 0          | N-term +42.01 Da, K +28.03 Da,            | 4004.748047 | 3 | 722.039978  | 721.7024564 |
| AKVEQVLSLEPQHELKFR             | Q9QY76 | 0          | N-term +42.01 Da, K +28.03 Da,            | 4006.876221 | 3 | 946.131958  | 946.1330862 |

|                                 |        |            |                                |             |   |             |             |
|---------------------------------|--------|------------|--------------------------------|-------------|---|-------------|-------------|
| ANHAPFETDISTLTR                 | Q9QXD6 | 0          | N-term +42.01 Da,              | 4014.918213 | 2 | 872.9555054 | 871.9483508 |
| SIFTPTNQIR                      | P70122 | 0          | N-term +42.01 Da,              | 4022.265381 | 2 | 866.4299927 | 865.9257938 |
| ASWAEPSIPAALR                   | O35465 | 0          | N-term +42.01 Da,              | 4028.101318 | 2 | 539.2700195 | 539.2658845 |
| MKTILSNQTVDIPENVEITLKGR         | P51410 | 0          | N-term +42.01 Da, K +28.03 Da, | 4029.55249  | 2 | 858.8300171 | 858.8350668 |
| ASTADGDMGETLEQMR                | Q91V01 | 0          | N-term +42.01 Da,              | 4032.850586 | 2 | 900.9089966 | 900.9070782 |
| STGTFVVSQPLNYR                  | Q9JLJ2 | 0          | N-term +42.01 Da,              | 4034.967529 | 3 | 909.7999878 | 910.1227438 |
| SIMSYNGGAVMAMKGN                | Q9R1P1 | 0          | N-term +42.01 Da, K +28.03 Da, | 4035.157227 | 2 | 1010.919983 | 1010.920717 |
| MDNKDEIDFKFKGY                  | G5E904 | 0          | N-term +42.01 Da, K +28.03 Da, | 4037.651123 | 3 | 946.7999878 | 946.1330862 |
| ANHAPFETDISTLTR                 | Q9QXD6 | 0.00227964 | N-term +42.01 Da,              | 4038.208984 | 2 | 852.4299927 | 851.9233878 |
| ANHAPFETDISTLTR                 | Q9QXD6 | 0          | N-term +42.01 Da,              | 4038.605957 | 3 | 819.4400024 | 818.7737858 |
| SSEPPPPPLQPPTHQTSVGLLDTPR       | Q9CR86 | 0          | N-term +42.01 Da,              | 4041.390137 | 2 | 864.4614258 | 864.4627792 |
| TTNTVPLHPYVWR                   | P70245 | 0          | N-term +42.01 Da,              | 4052.282471 | 2 | 544.2674561 | 544.2669391 |
| TASSVLLHTGQKMPL                 | Q9JII6 | 0.00162075 | N-term +42.01 Da, K +28.03 Da, | 4052.455078 | 2 | 852.9299927 | 851.9233878 |
| SSEPPPPPLQPPTHQTSVGLLDTPR       | Q9CR86 | 0          | N-term +42.01 Da,              | 4052.626465 | 2 | 604.3102417 | 604.3106262 |
| SSEPPPPPLQPPTHQTSVGLLDTPR       | Q9CR86 | 0          | N-term +42.01 Da,              | 4056.151367 | 2 | 789.3699951 | 788.867224  |
| MNVVDLGR                        | Q9DB60 | 0.00236967 | N-term +42.01 Da,              | 4058.4729   | 3 | 713.0300293 | 712.696648  |
| MQAALEVTR                       | Q9CQP3 | 0          | N-term +42.01 Da,              | 4060.501465 | 2 | 836.4500122 | 835.9520472 |
| AEQEPTAEQLAQIAAENEDEHSVNYKPPAQK | Q99PT1 | 0          | N-term +42.01 Da, K +28.03 Da, | 4062.481689 | 3 | 686.0499878 | 685.7172661 |
| MEAAVTR                         | Q9CXA2 | 0          | N-term +42.01 Da,              | 4068.207031 | 3 | 946.4699707 | 946.1330862 |
| AEQEPTAEQLAQIAAENEDEHSVNYKPPAQK | Q99PT1 | 0          | N-term +42.01 Da, K +28.03 Da, | 4068.5625   | 2 | 721.3745117 | 721.3770295 |
| AEQEPTAEQLAQIAAENEDEHSVNYKPPAQK | Q99PT1 | 0          | N-term +42.01 Da, K +28.03 Da, | 4070.03125  | 3 | 946.7999878 | 946.1330862 |
| SYGRPPPDVEGMSLKVNDLTYR          | Q62093 | 0          | N-term +42.01 Da, K +28.03 Da, | 4075.887695 | 4 | 773.8599854 | 773.3677848 |
| MNFSGKYQLQ                      | P12710 | 0.00605245 | N-term +42.01 Da, K +28.03 Da, | 4083.356201 | 4 | 706.5999756 | 706.3543432 |
| SSEPPPPPLQPPTHQTSVGLLDTPR       | Q9CR86 | 0          | N-term +42.01 Da,              | 4083.898438 | 2 | 544.2666016 | 544.2669391 |
| SSEPPPPPLQPPTHQTSVGLLDTPR       | Q9CR86 | 0          | N-term +42.01 Da,              | 4085.45459  | 3 | 807.3800049 | 807.0413663 |
| ANHAPFETDISTLTR                 | Q9QXD6 | 0          | N-term +42.01 Da,              | 4091.630371 | 2 | 928.0100098 | 928.0052436 |
| AAPAKGENLSLVVHGPDIR             | Q64442 | 0          | N-term +42.01 Da, K +28.03 Da, | 4095.851807 | 2 | 717.8300171 | 717.8284244 |
| AAPAKGENLSLVVHGPDIR             | Q64442 | 0          | N-term +42.01 Da, K +28.03 Da, | 4100.234863 | 3 | 756.7600098 | 756.4301193 |
| ANHAPFETDISTLTR                 | Q9QXD6 | 0.00235849 | N-term +42.01 Da,              | 4100.319824 | 3 | 756.4299927 | 756.4301193 |
| ADEIAKAQVAQPGGDTIFGK            | P70349 | 0          | N-term +42.01 Da, K +28.03 Da, | 4102.329102 | 3 | 946.4699707 | 946.1330862 |
| ADEIAKAQVAQPGGDTIFGK            | P70349 | 0          | N-term +42.01 Da, K +28.03 Da, | 4102.659668 | 2 | 641.3200073 | 641.3184512 |
| ADEIAKAQVAQPGGDTIFGK            | P70349 | 0          | N-term +42.01 Da, K +28.03 Da, | 4103.395508 | 2 | 914.9899902 | 914.9866189 |
| ADPESPWSQIGR                    | Q99JV5 | 0          | N-term +42.01 Da,              | 4105.339844 | 3 | 784.3800049 | 784.0496391 |
| SGEPAPVSVVPPGVEAGSGVH           | Q9CQ86 | 0.00613079 | N-term +42.01 Da,              | 4108.959961 | 3 | 946.7999878 | 946.1330862 |
| MNFSGKYQLQ                      | P12710 | 0.01092545 | N-term +42.01 Da, K +28.03 Da, | 4109.802734 | 2 | 929         | 928.0052436 |
| ANHAPFETDISTLTR                 | Q9QXD6 | 0          | N-term +42.01 Da,              | 4112.737793 | 3 | 766.1099854 | 765.7725453 |
| MLGPEGGEGYVVK                   | Q9Z2X1 | 0          | N-term +42.01 Da, K +28.03 Da, | 4114.866211 | 3 | 444.9278259 | 444.9284545 |
| MEATLNLEPSGR                    | O55137 | 0          | N-term +42.01 Da,              | 4117.015137 | 4 | 557.0700073 | 556.577285  |
| ADEIAKAQVAQPGGDTIFGK            | P70349 | 0          | N-term +42.01 Da, K +28.03 Da, | 4118.435547 | 2 | 635.8499756 | 635.3491289 |
| ADEIAKAQVAQPGGDTIFGK            | P70349 | 0.0028715  | N-term +42.01 Da, K +28.03 Da, | 4123.250488 | 4 | 660.8599854 | 660.6066544 |

|                             |        |            |                                           |             |   |             |             |
|-----------------------------|--------|------------|-------------------------------------------|-------------|---|-------------|-------------|
| AGVEFEKFLKTR                | P30115 | 0.0041958  | N-term +42.01 Da, K +28.03 Da,            | 4123.326172 | 3 | 619.3400269 | 619.0059212 |
| TASSVLLHTGQKMPL             | Q9JII6 | 0          | N-term +42.01 Da, K +28.03 Da,            | 4126.30957  | 2 | 877.9299927 | 877.9314103 |
| SSPAQPAVPAPLADLKIQH         | P24549 | 0          | N-term +42.01 Da, K +28.03 Da,            | 4127.964355 | 2 | 551.7706909 | 551.7711365 |
| ASGNAIQKSAPDFTATAVVDGAFKEIK | Q61171 | 0.04239257 | N-term +42.01 Da, K +28.03 Da,            | 4133.26709  | 2 | 697.3269043 | 697.3277259 |
| SGDATLMLPTQTSQGAIEKVKDATR   | Q8C196 | 0.00162602 | N-term +42.01 Da, K +28.03 Da,            | 4133.554199 | 2 | 757.8725586 | 757.8746539 |
| ANHAPFETDISTLTR             | Q9QXD6 | 0.00232919 | N-term +42.01 Da,                         | 4136.222656 | 2 | 518.75      | 518.2500369 |
| METILEQQR                   | Q9D554 | 0.00227101 | N-term +42.01 Da,                         | 4141.652832 | 2 | 555.3054199 | 555.3048121 |
| ANHAPFETDISTLTR             | Q9QXD6 | 0          | N-term +42.01 Da,                         | 4144.549805 | 3 | 765.772522  | 765.7725453 |
| AAQAVSLLR                   | Q8BJY1 | 0.00232019 | N-term +42.01 Da,                         | 4145.476563 | 2 | 504.7283936 | 504.7280803 |
| AALGSSSQNVTEYVVR            | Q3THK3 | 0          | N-term +42.01 Da,                         | 4145.591309 | 2 | 928.0100098 | 928.0052436 |
| TASSVLLHTGQKMPL             | Q9JII6 | 0.01453856 | N-term +42.01 Da, K +28.03 Da,            | 4147.768555 | 3 | 946.4699707 | 946.1330862 |
| MEATLNLEPSGR                | O55137 | 0          | N-term +42.01 Da,                         | 4148.550781 | 4 | 698.5800171 | 698.078193  |
| AGVSSAEAEALAAAR             | A2A5R0 | 0          | N-term +42.01 Da,                         | 4154.912598 | 3 | 619.0057983 | 619.0059212 |
| AAAAAASHNLNDALR             | Q8CH72 | 0          | N-term +42.01 Da,                         | 4155.522949 | 2 | 758.4074707 | 758.4079956 |
| ANHAPFETDISTLTR             | Q9QXD6 | 0          | N-term +42.01 Da,                         | 4158.044434 | 2 | 970.4699707 | 969.9572999 |
| AAQAVSLLR                   | Q8BJY1 | 0.00232019 | N-term +42.01 Da,                         | 4159.061035 | 4 | 661.1099854 | 660.6066544 |
| TASSVLLHTGQKMPL             | Q9JII6 | 0.01915946 | N-term +42.01 Da, K +28.03 Da,            | 4159.787109 | 2 | 551.7709961 | 551.7711365 |
| ATFVELSTK                   | P21300 | 0.00235294 | N-term +42.01 Da, K +28.03 Da,            | 4162.911133 | 3 | 880.7999878 | 880.4731137 |
| AAGFKTVEPLEYYR              | Q9D753 | 0          | N-term +42.01 Da, K +28.03 Da,            | 4164.660645 | 2 | 552.2966919 | 552.2958332 |
| STGTFVVSQPLNYR              | Q9JLJ2 | 0.00289436 | N-term +42.01 Da,                         | 4171.319336 | 4 | 1058.719971 | 1058.228316 |
| SAGGAVPPPPNPAVSFPAPR        | Q8BI08 | 0          | N-term +42.01 Da,                         | 4171.757324 | 3 | 1228.589966 | 1227.924418 |
| SAGGAVPPPPNPAVSFPAPR        | Q8BI08 | 0          | N-term +42.01 Da,                         | 4173.666016 | 2 | 855.4400024 | 854.4485633 |
| TAVHAGNINFKWDPKSLEIR        | P26231 | 0.02472859 | N-term +42.01 Da, K +28.03 Da,            | 4175.04541  | 3 | 804.4099731 | 804.4126888 |
| MKVFTGGLPAEGR               | Q91Z53 | 0          | N-term +42.01 Da, K +28.03 Da,            | 4176.111328 | 2 | 928.0043945 | 928.0052436 |
| ANHAPFETDISTLTR             | Q9QXD6 | 0          | N-term +42.01 Da,                         | 4177.54541  | 4 | 535.7999878 | 535.5506677 |
| MLGPEGGEGYVVKLR             | Q9Z2X1 | 0          | N-term +42.01 Da, K +28.03 Da,            | 4178.173828 | 2 | 756.892334  | 756.8955865 |
| AGLSDLELR                   | Q6DVA0 | 0.0029347  | N-term +42.01 Da,                         | 4178.938965 | 3 | 805.0800171 | 804.4126888 |
| SAGGAVPPPPNPAVSFPAPR        | Q8BI08 | 0          | N-term +42.01 Da,                         | 4184.052246 | 2 | 1079.530029 | 1079.028257 |
| MDGIVPDIAVGTKR              | P17225 | 0          | N-term +42.01 Da, K +28.03 Da,            | 4187.60498  | 2 | 1320.209961 | 1320.206032 |
| SAGGAVPPPPNPAVSFPAPR        | Q8BI08 | 0          | N-term +42.01 Da,                         | 4189.066895 | 3 | 619         | 619.0059212 |
| AAGTSNYWEDLR                | O88630 | 0          | N-term +42.01 Da,                         | 4190.364258 | 4 | 660.6057739 | 660.6066544 |
| GHLKPFETLLAQNR              | F6LRW5 | 0          | N-term +42.01 Da, K +28.03 Da,            | 4191.987793 | 4 | 714.6300049 | 714.3793062 |
| STGTFVVSQPLNYR              | Q9JLJ2 | 0          | N-term +42.01 Da,                         | 4193.611328 | 3 | 880.8099976 | 880.4731137 |
| MLGPEGGEGYVVKLR             | Q9Z2X1 | 0          | N-term +42.01 Da, K +28.03 Da,            | 4195.834473 | 3 | 933.8300171 | 933.1628281 |
| AELKYISGFGNECASEDPR         | O09173 | 0          | N-term +42.01 Da, K +28.03 Da,C +57.02Da, | 4199.088867 | 2 | 552.7999878 | 552.2958332 |
| AASEDELLPR                  | Q61249 | 0          | N-term +42.01 Da,                         | 4204.436523 | 4 | 678.6099854 | 678.3659329 |
| AELKYISGFGNECASEDPR         | O09173 | 0.00082713 | N-term +42.01 Da, K +28.03 Da,C +57.02Da, | 4209.580566 | 2 | 851.9217529 | 851.9233878 |
| AAQIPESDQIKQFKEF            | Q9WV98 | 0          | N-term +42.01 Da, K +28.03 Da,            | 4209.839844 | 2 | 664.8482056 | 664.8475733 |
| AAAVVEAAAGDVQR              | Q8VEJ4 | 0          | N-term +42.01 Da,                         | 4211.297363 | 3 | 904.8200073 | 904.1521517 |
| AAQIPESDQIKQFKEF            | Q9WV98 | 0          | N-term +42.01 Da, K +28.03 Da,            | 4211.408691 | 3 | 1235.930054 | 1235.944313 |

|                                |        |            |                                           |             |   |             |             |
|--------------------------------|--------|------------|-------------------------------------------|-------------|---|-------------|-------------|
| STGTFVVSQPLNYR                 | Q9JLJ2 | 0          | N-term +42.01 Da,                         | 4211.693848 | 2 | 634.8300171 | 634.8320597 |
| AQEVSEYLSQNPR                  | Q8BI72 | 0          | N-term +42.01 Da,                         | 4215.386719 | 2 | 740.8900146 | 740.8913586 |
| MNAGSDPVVIVSAAR                | Q8CAY6 | 0          | N-term +42.01 Da,                         | 4215.660645 | 2 | 604.3105469 | 604.3106262 |
| LIGDAAKNQLTSNPENTVFDAGR        | P20029 | 0          | N-term +42.01 Da, K +28.03 Da,            | 4216.720703 | 4 | 739.1400146 | 738.6441288 |
| AELKYISGFGNECASEDPR            | O09173 | 0          | N-term +42.01 Da, K +28.03 Da,C +57.02Da, | 4218.095215 | 2 | 437.730011  | 437.7261973 |
| MDNLSPEEVQLR                   | O09044 | 0          | N-term +42.01 Da,                         | 4219.936035 | 2 | 599.8239746 | 599.8249553 |
| AQWNQLQLDTR                    | P42227 | 0          | N-term +42.01 Da,                         | 4222.020508 | 4 | 660.605896  | 660.6066544 |
| AELKYISGFGNECASEDPR            | O09173 | 0          | N-term +42.01 Da, K +28.03 Da,C +57.02Da, | 4222.391602 | 3 | 984.8599854 | 984.5230796 |
| STGTFVVSQPLNYR                 | Q9JLJ2 | 0          | N-term +42.01 Da,                         | 4226.245117 | 2 | 872.960022  | 871.9483508 |
| MDGIVPDIAVGTKR                 | P17225 | 0.03544005 | N-term +42.01 Da, K +28.03 Da,            | 4235.607422 | 3 | 946.4699707 | 946.1330862 |
| MNAGSDPVVIVSAAR                | Q8CAY6 | 0          | N-term +42.01 Da,                         | 4235.748047 | 3 | 568.6199951 | 568.284684  |
| METDVTSDTVEVLPQHKFDLR          | Q80XL6 | 0          | N-term +42.01 Da, K +28.03 Da,            | 4236.436035 | 4 | 678.3657837 | 678.3659329 |
| MFSWVSKDAR                     | Q9WVK4 | 0          | N-term +42.01 Da, K +28.03 Da,            | 4236.98291  | 3 | 730.0100098 | 729.6773649 |
| METDVTSDTVEVLPQHKFDLR          | Q80XL6 | 0          | N-term +42.01 Da, K +28.03 Da,            | 4238.53125  | 3 | 688.017334  | 688.0051476 |
| MDGIVPDIAVGTKR                 | P17225 | 0          | N-term +42.01 Da, K +28.03 Da,            | 4240.12793  | 2 | 851.9227905 | 851.9233878 |
| METDVTSDTVEVLPQHKFDLR          | Q80XL6 | 0          | N-term +42.01 Da, K +28.03 Da,            | 4243.92334  | 3 | 568.2854614 | 568.284684  |
| AGVDQHEGTIQVQGQNLFFR           | Q8VCR7 | 0          | N-term +42.01 Da,                         | 4244.54834  | 3 | 788.7700195 | 789.100662  |
| AGVDQHEGTIQVQGQNLFFR           | Q8VCR7 | 0          | N-term +42.01 Da,                         | 4245.740723 | 2 | 1128.569946 | 1128.04991  |
| AGVDQHEGTIQVQGQNLFFR           | Q8VCR7 | 0          | N-term +42.01 Da,                         | 4245.984863 | 3 | 752.710022  | 752.3690321 |
| SGEDEQQEQTIAEDLVVTKYK          | P50580 | 0          | N-term +42.01 Da, K +28.03 Da,            | 4247.693359 | 2 | 614.3744507 | 614.374615  |
| SGEDEQQEQTIAEDLVVTKYK          | P50580 | 0          | N-term +42.01 Da, K +28.03 Da,            | 4247.950684 | 3 | 636.3200073 | 635.9903825 |
| MFSWVSKDAR                     | Q9WVK4 | 0          | N-term +42.01 Da, K +28.03 Da,            | 4248.307617 | 2 | 1215.609985 | 1215.087989 |
| AASVDLELKKAF                   | Q9CWM4 | 0.00162338 | N-term +42.01 Da, K +28.03 Da,            | 4250.256348 | 4 | 826.4400024 | 826.1873186 |
| AEPWGNELASAAAAR                | Q60772 | 0          | N-term +42.01 Da,                         | 4251.875488 | 4 | 826.1900024 | 826.1873186 |
| NNVLSGGTTMYPGIADR              | P62737 | 0          | N-term +42.01 Da,                         | 4252.446289 | 2 | 926.4899902 | 925.491969  |
| AELQEVQITEEKPLLPQGTPEAKEAELAAR | Q9QYG0 | 0          | N-term +42.01 Da, K +28.03 Da,            | 4255.890137 | 3 | 714.0100098 | 713.6714451 |
| LSRCMRRLR                      | A2BDX4 | 0.01964395 | N-term +42.01 Da, C +57.02Da,             | 4257.962402 | 2 | 813.4099731 | 812.4175432 |
| AELQEVQITEEKPLLPQGTPEAKEAELAAR | Q9QYG0 | 0          | N-term +42.01 Da, K +28.03 Da,            | 4261.411621 | 3 | 799.1199951 | 798.7832217 |
| METDVTSDTVEVLPQHKF             | Q80XL6 | 0          | N-term +42.01 Da, K +28.03 Da,            | 4265.336914 | 3 | 766.75      | 766.4204608 |
| MDGIVPDIAVGTKR                 | P17225 | 0          | N-term +42.01 Da, K +28.03 Da,            | 4268.395996 | 2 | 772.8699951 | 772.872309  |
| MHSLATAAPVPTALAQVDR            | Q9JKY0 | 0          | N-term +42.01 Da,                         | 4270.342285 | 2 | 477.7122498 | 477.7122327 |
| AGVDQHEGTIQVQGQNLFFR           | Q8VCR7 | 0          | N-term +42.01 Da,                         | 4271.536621 | 2 | 851.9226074 | 851.9233878 |
| METDVTSDTVEVLPQHKF             | Q80XL6 | 0          | N-term +42.01 Da, K +28.03 Da,            | 4271.903809 | 3 | 654.6793823 | 654.6799349 |
| AEELLER                        | P21981 | 0.02934132 | N-term +42.01 Da,                         | 4282.859863 | 3 | 1029.819946 | 1029.487646 |
| GFEAPTYKDTLLPKLPR              | P49429 | 0.03319502 | N-term +42.01 Da, K +28.03 Da,            | 4286.899902 | 2 | 858.4199829 | 857.9233878 |
| AGVDQHEGTIQVQGQNLFFR           | Q8VCR7 | 0          | N-term +42.01 Da,                         | 4287.324219 | 2 | 811.3800049 | 810.8803315 |
| AQAPTIVITQPGFVR                | Q9JI48 | 0          | N-term +42.01 Da,                         | 4288.758301 | 2 | 858.9299927 | 857.9233878 |
| SSPAQPAVPAPLADLKIQH            | P24549 | 0          | N-term +42.01 Da, K +28.03 Da,            | 4288.93457  | 3 | 605.3200073 | 604.9830713 |
| SSPAQPAVPAPLADLKIQH            | P24549 | 0          | N-term +42.01 Da, K +28.03 Da,            | 4290.14502  | 2 | 705.3900146 | 705.3909941 |
| AAQVVVTDLSASR                  | Q64442 | 0          | N-term +42.01 Da,                         | 4291.941895 | 2 | 935.3900146 | 934.8931135 |



|                                         |        |            |                                           |             |   |             |             |
|-----------------------------------------|--------|------------|-------------------------------------------|-------------|---|-------------|-------------|
| SSPAQPAVPAPLADLKIQH                     | P24549 | 0          | N-term +42.01 Da, K +28.03 Da,            | 4292.599121 | 3 | 798.7822876 | 798.7832217 |
| MESDFYLR                                | P61327 | 0.00234375 | N-term +42.01 Da,                         | 4295.179199 | 3 | 758.7600098 | 758.0972516 |
| AELQEVQITEEKPLLPGQTPETAKEAELAAR         | Q9QYG0 | 0          | N-term +42.01 Da, K +28.03 Da,            | 4295.422363 | 2 | 934.8900146 | 934.8931135 |
| AELQEVQITEEKPLLPGQTPETAKEAELAAR         | Q9QYG0 | 0          | N-term +42.01 Da, K +28.03 Da,            | 4298.933594 | 4 | 746.8900146 | 746.6399548 |
| MLNMWVKVR                               | Q5SUH6 | 0.03327392 | N-term +42.01 Da, K +28.03 Da,            | 4300.717773 | 3 | 470.6000061 | 470.5964216 |
| AEELLER                                 | P21981 | 0.02934132 | N-term +42.01 Da,                         | 4301.944824 | 2 | 851.923584  | 851.9233878 |
| CNTPTYCDLGKAAKDVF                       | Q60931 | 0          | N-term +42.01 Da, K +28.03 Da,C +57.02Da, | 4307.310547 | 4 | 853.9000244 | 853.4007512 |
| MPPYTIIVYFPVR                           | P19157 | 0          | N-term +42.01 Da,                         | 4309.382813 | 4 | 853.6500244 | 853.4007512 |
| SSPAQPAVPAPLADLKIQH                     | P24549 | 0          | N-term +42.01 Da, K +28.03 Da,            | 4309.632813 | 3 | 572.2850342 | 572.284684  |
| CNTPTYCDLGKAAKDVF                       | Q60931 | 0          | N-term +42.01 Da, K +28.03 Da,C +57.02Da, | 4313.419922 | 3 | 1138.199951 | 1137.531909 |
| SSPAQPAVPAPLADLKIQH                     | P24549 | 0          | N-term +42.01 Da, K +28.03 Da,            | 4314.925293 | 3 | 983.4699707 | 983.1377822 |
| AGLLKTTGLVGLAVCDTPHER                   | Q9CPP6 | 0.00354108 | N-term +42.01 Da, K +28.03 Da,C +57.02Da, | 4315.212402 | 3 | 766.4206543 | 766.4204608 |
| AGVDQHEGTIQVQGNLFFR                     | Q8VCR7 | 0          | N-term +42.01 Da,                         | 4319.586426 | 2 | 857.9224854 | 857.9233878 |
| ASKPTLNEVVIVSAIR                        | Q8QZT1 | 0          | N-term +42.01 Da, K +28.03 Da,            | 4322.333984 | 2 | 514.7807617 | 514.781504  |
| AGLLKTTGLVGLAVCDTPHER                   | Q9CPP6 | 0          | N-term +42.01 Da, K +28.03 Da,C +57.02Da, | 4322.66748  | 2 | 705.3900146 | 705.3909941 |
| AASKPIEAAMAAAAPGSGNGVGGGGGTAGPGSGAGTLPR | Q9CZW5 | 0          | N-term +42.01 Da, K +28.03 Da,            | 4325.697754 | 3 | 869.7299805 | 869.3966442 |
| MNAGSDPVVIVSAAR                         | Q8CAY6 | 0          | N-term +42.01 Da,                         | 4327.255371 | 2 | 689.3633423 | 689.3633904 |
| ASKPTLNEVVIVSAIR                        | Q8QZT1 | 0.00610583 | N-term +42.01 Da, K +28.03 Da,            | 4327.474609 | 2 | 1303.579956 | 1303.591328 |
| SSPAQPAVPAPLADLKIQH                     | P24549 | 0          | N-term +42.01 Da, K +28.03 Da,            | 4329.431152 | 2 | 935.3900146 | 934.8931135 |
| ASGNAQIGKSAPDFTATAVVDGAFKEIKLSDYR       | Q61171 | 0          | N-term +42.01 Da, K +28.03 Da,            | 4329.541016 | 3 | 1023.859985 | 1024.206697 |
| AEPDYIEDDNPELIRPQ                       | Q3TGF2 | 0          | N-term +42.01 Da,                         | 4330.897949 | 4 | 575.0700073 | 575.0671647 |
| SSPAQPAVPAPLADLKIQH                     | P24549 | 0          | N-term +42.01 Da, K +28.03 Da,            | 4332.875488 | 2 | 1149.130005 | 1149.127053 |
| SKGPAVGIDLGTYSVGVFQHGKVEIANDQGNR        | P63017 | 0          | N-term +42.01 Da, K +28.03 Da,C +57.02Da, | 4332.950684 | 2 | 851.9224854 | 851.9233878 |
| SHQTGIQASEDVKEIFAR                      | Q91YR1 | 0          | N-term +42.01 Da, K +28.03 Da,            | 4334.369629 | 4 | 809.6799927 | 809.4305826 |
| ASGNAQIGKSAPDFTATAVVDGAFKEIKLSDYR       | Q61171 | 0.04651163 | N-term +42.01 Da, K +28.03 Da,            | 4334.67334  | 2 | 576.2800293 | 576.281337  |
| ASKPTLNEVVIVSAIR                        | Q8QZT1 | 0.00423131 | N-term +42.01 Da, K +28.03 Da,            | 4340.299805 | 4 | 518.3099976 | 517.8095817 |
| MQETSLTPAHLSSAAQQR                      | P54869 | 0          | N-term +42.01 Da,                         | 4340.694336 | 3 | 1079.569946 | 1078.905018 |
| PEFTLPVHFYGR                            | Q9WUB3 | 0.00417537 | N-term +42.01 Da,                         | 4345.893066 | 3 | 766.4202881 | 766.4204608 |
| ADPDVLTEVPAALKR                         | Q9D0D5 | 0.00482094 | N-term +42.01 Da, K +28.03 Da,            | 4351.742188 | 3 | 989.5       | 989.4962473 |
| ASKPTLNEVVIVSAIR                        | Q8QZT1 | 0          | N-term +42.01 Da, K +28.03 Da,            | 4352.64209  | 4 | 563.0713501 | 563.0717673 |
| SGSKYKPAPLATLPSTLDPAEYDVSPETR           | Q9CQC7 | 0          | N-term +42.01 Da, K +28.03 Da,            | 4355.091309 | 4 | 861.1599731 | 860.6607055 |
| PEFTLPVHFYGR                            | Q9WUB3 | 0.00482426 | N-term +42.01 Da,                         | 4356.719727 | 2 | 464.2600098 | 464.255979  |
| MNFSGKYQL                               | P12710 | 0.04672365 | N-term +42.01 Da, K +28.03 Da,            | 4358.294922 | 3 | 750.4271851 | 750.4265976 |
| AEEQPQVELFVK                            | Q9Z1Q5 | 0          | N-term +42.01 Da, K +28.03 Da,            | 4363.312012 | 2 | 713.8516235 | 713.851702  |
| EKQEKKSEASREDEYKQKYSR                   | Q9DBR7 | 0.01094656 | N-term +42.01 Da, K +28.03 Da,            | 4366.633301 | 3 | 744.7199707 | 745.0659064 |
| ATAATEEPFPFHGLLPKKTGASSFLCR             | Q64514 | 0          | N-term +42.01 Da, K +28.03 Da,C +57.02Da, | 4367.71582  | 2 | 851.9199829 | 851.9233878 |
| HNVLLSYRCHGPPIR                         | B9EKK6 | 0.03594579 | N-term +42.01 Da, C +57.02Da,             | 4369.081055 | 3 | 990.1599731 | 989.4962473 |
| SKGPAVGIDLGTYSVGVFQHGKVEIANDQGNR        | P63017 | 0          | N-term +42.01 Da, K +28.03 Da,C +57.02Da, | 4370.094238 | 3 | 629.3599854 | 629.3509173 |
| LGPNYLQIPVNCPIYR                        | P24270 | 0          | N-term +42.01 Da, C +57.02Da,             | 4374.52832  | 3 | 850.4799805 | 850.1477235 |
| TEWEAATPAVAETPDIK                       | P97461 | 0          | N-term +42.01 Da, K +28.03 Da,            | 4376.40625  | 3 | 766.75      | 766.4204608 |

|                                      |        |            |                                           |             |   |             |             |
|--------------------------------------|--------|------------|-------------------------------------------|-------------|---|-------------|-------------|
| PGLLLGDEAPNFEANTTIGR                 | O08709 | 0          | N-term +42.01 Da,                         | 4378.370117 | 3 | 552.9799805 | 552.6420311 |
| SSPAQPAVPAPLADLK                     | P24549 | 0          | N-term +42.01 Da, K +28.03 Da,            | 4381.911621 | 3 | 599.2999878 | 598.9722174 |
| SKGPAVGIDLTTYSCVGVFQHGKVEIANDQGNR    | P63017 | 0          | N-term +42.01 Da, K +28.03 Da,C +57.02Da, | 4384.117188 | 2 | 787.3699951 | 787.3750185 |
| GEIKVSPDYNWFR                        | Q9CQC8 | 0.04193361 | N-term +42.01 Da, K +28.03 Da,            | 4390.380859 | 2 | 823.8699951 | 823.869964  |
| ADEIAKAQVAQPGGDTIFGKIIR              | P70349 | 0          | N-term +42.01 Da, K +28.03 Da,            | 4395.13623  | 2 | 1129.579956 | 1128.57696  |
| SSIGTGYDLSASTFSPDGR                  | O70435 | 0          | N-term +42.01 Da,                         | 4395.29834  | 2 | 618.289978  | 617.7846391 |
| MDVNLAPLR                            | Q8R5J9 | 0          | N-term +42.01 Da,                         | 4396.57373  | 2 | 935.5       | 934.9803799 |
| SSKSMVLGYWDIR                        | P48774 | 0          | N-term +42.01 Da, K +28.03 Da,            | 4412.533203 | 4 | 836.1900024 | 835.6887568 |
| LDYMVTKIPR                           | Q8C196 | 0.00614334 | N-term +42.01 Da, K +28.03 Da,            | 4415.848633 | 4 | 974.9699707 | 974.4710365 |
| ANVADTKLYDILGVPPGASENELKKAYR         | Q9QYJ0 | 0          | N-term +42.01 Da, K +28.03 Da,            | 4416.823242 | 2 | 1346.680054 | 1345.692856 |
| ASVGTLAFDEYGR                        | P80316 | 0          | N-term +42.01 Da,                         | 4420.199219 | 2 | 705.8900146 | 705.3909941 |
| GYNAREFYERLPELR                      | Q8CI94 | 0.00287356 | N-term +42.01 Da,                         | 4426.697754 | 2 | 1345.699951 | 1345.692856 |
| ASGVTVNDEVKVFNDMKVR                  | P45591 | 0          | N-term +42.01 Da, K +28.03 Da,            | 4428.601074 | 3 | 898.1300049 | 897.4643294 |
| MSNLKLANPAGGRGPKGEPGK                | P98083 | 0.04631218 | N-term +42.01 Da, K +28.03 Da,            | 4429.098633 | 3 | 1299.619995 | 1298.958956 |
| IIGGSMDAKGSFPWQAK                    | Q61646 | 0.00607287 | N-term +42.01 Da, K +28.03 Da,            | 4430.460938 | 4 | 800.9000244 | 800.6577679 |
| SFLKSFPFPGSADGLR                     | Q61189 | 0.04477612 | N-term +42.01 Da, K +28.03 Da,            | 4432.178711 | 3 | 897.4699707 | 897.4643294 |
| SSIGTGYDLSASTFSPDGR                  | O70435 | 0          | N-term +42.01 Da,                         | 4447.761719 | 2 | 1346.699951 | 1345.692856 |
| AAGTLTYPENWR                         | Q9D8N0 | 0          | N-term +42.01 Da,                         | 4451.938965 | 3 | 868.1300049 | 867.4608078 |
| DKLYFEELSLR                          | Q8C196 | 0.00614754 | N-term +42.01 Da, K +28.03 Da,            | 4453.89502  | 2 | 566.2970581 | 566.2949761 |
| NLQDPQEETLTCSICQGFIMNPVYLK           | P86448 | 0.01210962 | N-term +42.01 Da, K +28.03 Da,C +57.02Da, | 4454.140625 | 4 | 916.4400024 | 916.4418766 |
| ADEIAKAQVAQPGGDTIFGKIIR              | P70349 | 0          | N-term +42.01 Da, K +28.03 Da,            | 4456.163086 | 2 | 989.4500122 | 989.4465678 |
| ASVGTLAFDEYGR                        | P80316 | 0          | N-term +42.01 Da,                         | 4456.404785 | 3 | 1222.23999  | 1221.586743 |
| ADEIAKAQVAQPGGDTIFGKIIR              | P70349 | 0          | N-term +42.01 Da, K +28.03 Da,            | 4456.538086 | 2 | 502.2654419 | 502.265687  |
| ADEIAKAQVAQPGGDTIFGKIIR              | P70349 | 0          | N-term +42.01 Da, K +28.03 Da,            | 4458.066895 | 2 | 852.9099731 | 851.9233878 |
| LLLAEPHVVALGHRVGRR                   | Q9CXJ1 | 0.02817746 | N-term +42.01 Da,                         | 4458.797852 | 2 | 1346.189941 | 1345.692856 |
| MKTILSNQTVDIPENVEITLKGR              | P51410 | 0          | N-term +42.01 Da, K +28.03 Da,            | 4459.189941 | 4 | 916.6900024 | 916.4418766 |
| EGDVVKRTGAIVDVPVGEELLGR              | Q03265 | 0          | N-term +42.01 Da, K +28.03 Da,            | 4463.316895 | 2 | 705.8919678 | 705.3909941 |
| VLELAGNAAR                           | Q8CGP4 | 0.00420168 | N-term +42.01 Da,                         | 4464.416504 | 3 | 1221.920044 | 1221.586743 |
| MELSADYLR                            | Q8BGS2 | 0          | N-term +42.01 Da,                         | 4464.980469 | 3 | 889.4400024 | 889.1145317 |
| AAGTLTYPENWR                         | Q9D8N0 | 0          | N-term +42.01 Da,                         | 4466.334961 | 2 | 990.4500122 | 989.4465678 |
| PGLLLGDEAPNFEANTTIGR                 | O08709 | 0.04037449 | N-term +42.01 Da,                         | 4468.622559 | 2 | 758.3703003 | 757.8746539 |
| SHVAVENALGLDQQFAGLDLNSSDNQSGGSTASKGR | Q62167 | 0          | N-term +42.01 Da, K +28.03 Da,            | 4474.146484 | 2 | 643.8200073 | 643.3159087 |
| ADEIAKAQVAQPGGDTIFGKIIR              | P70349 | 0          | N-term +42.01 Da, K +28.03 Da,            | 4476.453613 | 2 | 815.4000244 | 815.8857505 |
| ANVADTKLYDILGVPPGASENELKKAYR         | Q9QYJ0 | 0          | N-term +42.01 Da, K +28.03 Da,            | 4481.845703 | 2 | 858.4099731 | 857.9233878 |
| MDPSGVKVLTAEDIQER                    | P16546 | 0          | N-term +42.01 Da, K +28.03 Da,            | 4485.444824 | 2 | 566.2941284 | 566.2949761 |
| ADEIAKAQVAQPGGDTIFGKIIR              | P70349 | 0          | N-term +42.01 Da, K +28.03 Da,            | 4485.913574 | 3 | 936.8099976 | 936.1333088 |
| FNMIPFEHRSGGK                        | Q6Y5D8 | 0.04032729 | N-term +42.01 Da, K +28.03 Da,            | 4489.015625 | 3 | 1352.02002  | 1351.684394 |
| MDPSGVKVLTAEDIQER                    | P16546 | 0          | N-term +42.01 Da, K +28.03 Da,            | 4490.48291  | 3 | 705.710022  | 705.3757917 |
| ASLLKVDQEVKLVDSFR                    | P61290 | 0          | N-term +42.01 Da, K +28.03 Da,            | 4490.958984 | 2 | 978.9400024 | 978.9276241 |
| AAVPELLEQQEEDR                       | Q9D8U8 | 0          | N-term +42.01 Da,                         | 4492.138184 | 2 | 1058.060059 | 1057.560049 |

|                                |        |            |                                           |             |   |             |             |
|--------------------------------|--------|------------|-------------------------------------------|-------------|---|-------------|-------------|
| AQEFVNCKIQSGKVVVF              | Q9QUHO | 0.0041841  | N-term +42.01 Da, K +28.03 Da,C +57.02Da, | 4497.933594 | 3 | 889.4500122 | 889.1145317 |
| SLPLNPKPF                      | P62307 | 0.00287977 | N-term +42.01 Da, K +28.03 Da,            | 4502.40918  | 2 | 1057.560059 | 1057.560049 |
| MDPSGVKVLTAEDIQER              | P16546 | 0          | N-term +42.01 Da, K +28.03 Da,            | 4506.823242 | 2 | 914.9260864 | 914.9283447 |
| TEGLQPASVVVLP                  | Q8BH86 | 0.00297619 | N-term +42.01 Da,                         | 4515.489746 | 4 | 661.0999756 | 660.6066544 |
| FPALTPEQKKELSEIAQR             | Q91Y97 | 0.00233463 | N-term +42.01 Da, K +28.03 Da,            | 4521.321777 | 2 | 851.4299927 | 851.9233878 |
| SIGVPIKVLHEAEGHIVTCETNTGEVYR   | P62320 | 0          | N-term +42.01 Da, K +28.03 Da,C +57.02Da, | 4523.09375  | 2 | 595.2970581 | 595.2977161 |
| EVLELAGNAAR                    | Q8CGP4 | 0.00161681 | N-term +42.01 Da,                         | 4527.212891 | 2 | 566.2999878 | 566.2949761 |
| AVEELQSIKR                     | Q8BZM1 | 0.00236593 | N-term +42.01 Da, K +28.03 Da,            | 4533.417969 | 4 | 650.3499756 | 650.5969811 |
| ALLAEHLKLPADR                  | Q9JL62 | 0          | N-term +42.01 Da, K +28.03 Da,            | 4537.016113 | 2 | 708.3499756 | 707.8533874 |
| AGVPTVSFSELR                   | E9PY03 | 0.00238474 | N-term +42.01 Da,                         | 4537.197266 | 2 | 858.4105835 | 857.9233878 |
| MMLGPEGGEGYVVKLR               | Q9Z2X1 | 0          | N-term +42.01 Da, K +28.03 Da,            | 4539.077148 | 2 | 826.9559326 | 826.9556443 |
| AAVPELLEQQEEDR                 | Q9D8U8 | 0          | N-term +42.01 Da,                         | 4542.6875   | 2 | 861.9299927 | 861.9364953 |
| VNFTVDQIR                      | P58252 | 0          | N-term +42.01 Da,                         | 4546.898438 | 2 | 1050.02002  | 1050.000022 |
| AATFFGEVVKAPCR                 | Q9JK23 | 0          | N-term +42.01 Da, K +28.03 Da,C +57.02Da, | 4548.625977 | 2 | 485.7900085 | 485.7876436 |
| SIGVPIKVLHEAEGHIVTCETNTGEVYR   | P62320 | 0          | N-term +42.01 Da, K +28.03 Da,C +57.02Da, | 4550.061035 | 2 | 1153.140015 | 1152.640851 |
| EVLELAGNAAR                    | Q8CGP4 | 0          | N-term +42.01 Da,                         | 4553.912109 | 3 | 488.2799988 | 488.2779901 |
| SSPAQPAVPAPLADLKIQHTKIFINNEWHN | P24549 | 0.00290909 | N-term +42.01 Da, K +28.03 Da,            | 4554.254883 | 2 | 595.2966919 | 595.2977161 |
| AGVPTVSFSELR                   | E9PY03 | 0.00356888 | N-term +42.01 Da,                         | 4554.940918 | 3 | 768.7600098 | 768.7629925 |
| SSPAQPAVPAPLADLKIQHTKIFINNEWHN | P24549 | 0          | N-term +42.01 Da, K +28.03 Da,            | 4555.658203 | 2 | 1153.640015 | 1152.640851 |
| ADQLTEEQIAEFKEA                | P62204 | 0          | N-term +42.01 Da, K +28.03 Da,            | 4564.989746 | 2 | 883.9000244 | 883.8954585 |
| AMVSEFLKQAR                    | P10107 | 0          | N-term +42.01 Da, K +28.03 Da,            | 4570.575195 | 2 | 858.4099731 | 857.9233878 |
| MDNSGKQAEAMALLAEAER            | Q9DB05 | 0          | N-term +42.01 Da, K +28.03 Da,            | 4572.742676 | 2 | 611.8099976 | 611.8067628 |
| MDNKDEYLLNFKGY                 | O35403 | 0.00292184 | N-term +42.01 Da, K +28.03 Da,            | 4578.819336 | 2 | 566.2999878 | 566.2949761 |
| ASGVAVSDGVKIVFNDMKVR           | P18760 | 0          | N-term +42.01 Da, K +28.03 Da,            | 4586.566406 | 3 | 766.75      | 766.4204608 |
| MDNSGKQAEAMALLAEAER            | Q9DB05 | 0          | N-term +42.01 Da, K +28.03 Da,            | 4592.603516 | 4 | 842.960022  | 843.2251462 |
| SSSAASPLFAPGEDCGPAWR           | O35969 | 0          | N-term +42.01 Da, C +57.02Da,             | 4594.82959  | 2 | 857.4400024 | 857.4459668 |
| MDNKDEYLLNFKGY                 | O35403 | 0.00609756 | N-term +42.01 Da, K +28.03 Da,            | 4597.42041  | 3 | 643.6699829 | 643.3390115 |
| PGGLLLGDEAPNFEANTTIGR          | O08709 | 0          | N-term +42.01 Da,                         | 4601.208008 | 3 | 644.0100098 | 643.3390115 |
| MMLGAEGGEGFVVKVR               | O35737 | 0.00229008 | N-term +42.01 Da, K +28.03 Da,            | 4602.371582 | 2 | 535.289978  | 535.2911731 |
| SLLCADFKAQAQK                  | Q9NYQ2 | 0          | N-term +42.01 Da, K +28.03 Da,C +57.02Da, | 4602.462891 | 2 | 964.5       | 964.5048791 |
| AMVSEFLKQAR                    | P10107 | 0          | N-term +42.01 Da, K +28.03 Da,            | 4602.805664 | 4 | 599.8300171 | 599.3286703 |
| SSSAASPLFAPGEDCGPAWR           | O35969 | 0          | N-term +42.01 Da, C +57.02Da,             | 4602.911621 | 2 | 567.289978  | 566.2949761 |
| AAVLENGVLSR                    | P16331 | 0          | N-term +42.01 Da,                         | 4605.942871 | 3 | 698.0200195 | 698.0238636 |
| AESDWDVTVTLR                   | Q9JMG1 | 0          | N-term +42.01 Da,                         | 4606.116699 | 3 | 799.0999756 | 798.7691349 |
| MDNKDEYLLNFKGY                 | O35403 | 0.00298507 | N-term +42.01 Da, K +28.03 Da,            | 4614.50293  | 3 | 968.8599854 | 968.19261   |
| ATAVVVNIKKLY                   | Q9DCL9 | 0          | N-term +42.01 Da, K +28.03 Da,            | 4615.364258 | 3 | 968.5300293 | 968.19261   |
| AELEEVTLDGKPLQALR              | Q9JIX8 | 0          | N-term +42.01 Da, K +28.03 Da,            | 4615.575195 | 3 | 609.2999878 | 608.9757391 |
| ASGVAVSDGVKIVFNDMKVR           | P18760 | 0          | N-term +42.01 Da, K +28.03 Da,            | 4620.907715 | 3 | 876.0900269 | 875.4207389 |
| SSSAASPLFAPGEDCGPAWR           | O35969 | 0.00234742 | N-term +42.01 Da, C +57.02Da,             | 4622.288086 | 2 | 786.4317017 | 786.4343472 |
| SKGPAVGIDLGTYSVGVFQH           | P63017 | 0          | N-term +42.01 Da, K +28.03 Da,C +57.02Da, | 4622.579102 | 3 | 875.75      | 875.4207389 |

|                                    |        |            |                                           |             |   |             |             |
|------------------------------------|--------|------------|-------------------------------------------|-------------|---|-------------|-------------|
| SKGPAVGIDLGTTYSCVGVFQH             | P63017 | 0          | N-term +42.01 Da, K +28.03 Da,C +57.02Da, | 4634.156738 | 2 | 508.269989  | 508.2745666 |
| QFGTFPGNYVK                        | Q62417 | 0.0191713  | N-term +42.01 Da, K +28.03 Da,            | 4635.67334  | 2 | 837.4500122 | 837.9478193 |
| GFVFALEKR                          | O35490 | 0.00355366 | N-term +42.01 Da, K +28.03 Da,            | 4643.823242 | 2 | 712.8230591 | 712.8256844 |
| SKGPAVGIDLGTTYSCVGVFQH             | P63017 | 0          | N-term +42.01 Da, K +28.03 Da,C +57.02Da, | 4645.141113 | 2 | 576.770752  | 576.771334  |
| SSPAQPAVPAPLADLKIQHTKIF            | P24549 | 0          | N-term +42.01 Da, K +28.03 Da,            | 4652.140625 | 3 | 558.9699707 | 558.9676383 |
| DGSIDLVINLPNNNTKFVHDNYVIR          | Q8C196 | 0.00161551 | N-term +42.01 Da, K +28.03 Da,            | 4653.465332 | 3 | 660.0100098 | 659.3445578 |
| AADIEQVFR                          | Q9QX47 | 0          | N-term +42.01 Da,                         | 4657.821289 | 4 | 927.9799805 | 927.4745845 |
| LKAADTIGYPVMIR                     | Q8C196 | 0          | N-term +42.01 Da, K +28.03 Da,            | 4665.549316 | 3 | 1236.630005 | 1236.29702  |
| SSPAQPAVPAPLADLKIQHTKIF            | P24549 | 0.01096067 | N-term +42.01 Da, K +28.03 Da,            | 4666.628418 | 2 | 837.9454346 | 837.9478193 |
| ASValseAEKVY                       | Q9D0M0 | 0          | N-term +42.01 Da, K +28.03 Da,            | 4666.711426 | 2 | 771.4199829 | 771.4214372 |
| SKGPAVGIDLGTTYSCVGVFQH             | P63017 | 0          | N-term +42.01 Da, K +28.03 Da,C +57.02Da, | 4672.811035 | 2 | 1107.01001  | 1107.012607 |
| PGSISWDGLDPGKLY                    | Q8VIN1 | 0          | N-term +42.01 Da, K +28.03 Da,            | 4672.902832 | 3 | 738.6799927 | 738.3441632 |
| SKGPAVGIDLGTTYSCVGVFQH             | P63017 | 0          | N-term +42.01 Da, K +28.03 Da,C +57.02Da, | 4675.211426 | 2 | 628.3292847 | 628.3300709 |
| SSPAQPAVPAPLADLKIQHTKIF            | P24549 | 0          | N-term +42.01 Da, K +28.03 Da,            | 4700.37793  | 4 | 650.5999756 | 650.8474249 |
| ADKMDMSLDDIIKLNLR                  | O08583 | 0          | N-term +42.01 Da, K +28.03 Da,            | 4701.772949 | 2 | 771.8900146 | 771.8866076 |
| SSLQELCSGLPLRPLPENR                | Q8VC12 | 0          | N-term +42.01 Da, C +57.02Da,             | 4703.384277 | 2 | 1107.011108 | 1107.012607 |
| SSLQELCSGLPLRPLPENR                | Q8VC12 | 0          | N-term +42.01 Da, C +57.02Da,             | 4703.837402 | 4 | 927.4699707 | 927.4745845 |
| ADKMDMSLDDIIKLNLR                  | O08583 | 0          | N-term +42.01 Da, K +28.03 Da,            | 4705.614258 | 3 | 738.3446045 | 738.3441632 |
| AAVLENGVLSR                        | P16331 | 0          | N-term +42.01 Da,                         | 4715.307617 | 2 | 818.8699951 | 818.8748515 |
| IVANGKILAADESVGTMGNR               | Q91Y97 | 0          | N-term +42.01 Da, K +28.03 Da,            | 4715.382813 | 2 | 771.9199829 | 771.4214372 |
| SSLQELCSGLPLRPLPENR                | Q8VC12 | 0          | N-term +42.01 Da, C +57.02Da,             | 4717.786133 | 2 | 1237.579956 | 1237.082904 |
| AGLELLSDQGYR                       | Q92119 | 0.0016247  | N-term +42.01 Da,                         | 4722.978516 | 2 | 1238.089966 | 1237.082904 |
| AAVLENGVLSR                        | P16331 | 0.00294985 | N-term +42.01 Da,                         | 4726.448242 | 2 | 1209.109985 | 1208.100602 |
| ADGELNVDSLITR                      | P62141 | 0          | N-term +42.01 Da,                         | 4749.528809 | 3 | 1158.589966 | 1157.914131 |
| AGYEYVSPEQLSGFDKYKY                | Q80TA1 | 0.00420757 | N-term +42.01 Da, K +28.03 Da,            | 4749.894531 | 3 | 844.0900269 | 844.0879826 |
| MEEAEGVAAAPGPASGLAFR               | Q9CQV4 | 0          | N-term +42.01 Da,                         | 4750.085938 | 3 | 1158.26001  | 1157.914131 |
| AGYEYVSPEQLSGFDKYKY                | Q80TA1 | 0          | N-term +42.01 Da, K +28.03 Da,            | 4750.182617 | 4 | 869.2000122 | 868.6874174 |
| AAATAAAAAAAAAAAGEGMEPR             | Q9R0A1 | 0          | N-term +42.01 Da,                         | 4751.726074 | 3 | 998.5300293 | 997.8606377 |
| DDDIAALVVDNGSGMKAGFAGDDAPR         | P60710 | 0          | N-term +42.01 Da, K +28.03 Da,C +57.02Da, | 4756.786621 | 2 | 1129.060059 | 1128.05596  |
| AGLELLSDQGYR                       | Q92119 | 0.03218117 | N-term +42.01 Da,                         | 4759.900879 | 2 | 1021.450623 | 1021.45459  |
| AGTVVLDDELRLR                      | P25206 | 0.00289226 | N-term +42.01 Da,                         | 4763.165527 | 2 | 539.2700195 | 538.7721911 |
| AAVLENGVLSR                        | P16331 | 0.00297841 | N-term +42.01 Da,                         | 4766.725586 | 2 | 648.8221436 | 648.8239007 |
| PYNPSMSRPDAWGVTGKAAELMQQKEATTEQQLR | O35490 | 0          | N-term +42.01 Da, K +28.03 Da,            | 4768.112305 | 2 | 1128.060059 | 1128.05596  |
| AELEEVTLDGKPLQALR                  | Q9JIX8 | 0          | N-term +42.01 Da, K +28.03 Da,            | 4774.675293 | 3 | 763.0499878 | 762.7135781 |
| PGSISWDGLDPGKLY                    | Q8VIN1 | 0          | N-term +42.01 Da, K +28.03 Da,            | 4777.460449 | 3 | 1163.959961 | 1163.289198 |
| ADIDKLNIDSIIQR                     | P63087 | 0          | N-term +42.01 Da, K +28.03 Da,            | 4778.674805 | 4 | 873.2199707 | 872.7187175 |
| AAKVFSIGKF                         | P67778 | 0.00232378 | N-term +42.01 Da, K +28.03 Da,            | 4783.764648 | 2 | 572.2999878 | 572.2986725 |
| DDVALEGVGHFFR                      | P29391 | 0.0029304  | N-term +42.01 Da,                         | 4784.639648 | 2 | 771.4204102 | 771.4214372 |
| AVAAAAAATAMSAAGGGGASAAR            | Q8CG72 | 0          | N-term +42.01 Da,                         | 4794.671387 | 2 | 507.7799988 | 507.7769421 |
| AGSVADSDAVVKLDDGHLNLSLSPVQADVYFPR  | Q8VED9 | 0          | N-term +42.01 Da, K +28.03 Da,            | 4801.324219 | 3 | 544.960022  | 544.9581969 |

|                             |        |            |                                           |             |   |             |             |
|-----------------------------|--------|------------|-------------------------------------------|-------------|---|-------------|-------------|
| PGSISWDGLDPGKLY             | Q8VIN1 | 0          | N-term +42.01 Da, K +28.03 Da,            | 4802.441895 | 2 | 574.3099976 | 574.309374  |
| GEALSTLVLNR                 | P63038 | 0.00924092 | N-term +42.01 Da,                         | 4804.017578 | 3 | 752.3699951 | 752.3690321 |
| AFPSLSAGQNPWR               | Q8K4H1 | 0          | N-term +42.01 Da,                         | 4807.943848 | 3 | 1163.949951 | 1163.289198 |
| AAKVFESIGKF                 | P67778 | 0.02489375 | N-term +42.01 Da, K +28.03 Da,            | 4808.026855 | 2 | 623.7800293 | 623.7780051 |
| SGALDVLQMKEEDVLK            | P14206 | 0          | N-term +42.01 Da, K +28.03 Da,            | 4808.592285 | 2 | 1005.549988 | 1005.554569 |
| MELVEVLKR                   | Q7TMF3 | 0          | N-term +42.01 Da, K +28.03 Da,            | 4810.119141 | 3 | 810.0700073 | 810.3944181 |
| MNEVSVIKEGWLH               | Q60823 | 0.00611829 | N-term +42.01 Da, K +28.03 Da,            | 4810.763672 | 3 | 671.3800049 | 670.7054717 |
| IGELQGHYLFVQPTGHR           | Q61139 | 0.01336728 | N-term +42.01 Da,                         | 4815.301758 | 3 | 671.039978  | 670.7054717 |
| AAPEDVAALQAEITR             | A2BDX3 | 0          | N-term +42.01 Da,                         | 4817.225098 | 3 | 767.4000244 | 767.4041879 |
| DDDIAALVVDNGSGMCKAGFAGDDAPR | P60710 | 0          | N-term +42.01 Da, K +28.03 Da,C +57.02Da, | 4828.552734 | 2 | 1006.549988 | 1005.554569 |
| DDDIAALVVDNGSGMCKAGFAGDDAPR | P60710 | 0          | N-term +42.01 Da, K +28.03 Da,C +57.02Da, | 4833.694824 | 2 | 574.3098145 | 574.309374  |
| AFPSLSAGQNPWR               | Q8K4H1 | 0          | N-term +42.01 Da,                         | 4846.032715 | 4 | 609.5900269 | 609.3426206 |
| SVPLLTDAATVSGAER            | Q9WTL7 | 0          | N-term +42.01 Da,                         | 4855.110352 | 2 | 887.4400024 | 886.9371262 |
| SSLQELCSGLPLR               | Q8VC12 | 0          | N-term +42.01 Da, C +57.02Da,             | 4855.287598 | 4 | 609.3400269 | 609.3426206 |
| MELVEVLKR                   | Q7TMF3 | 0          | N-term +42.01 Da, K +28.03 Da,            | 4858.743652 | 2 | 1400.140015 | 1399.150893 |
| DDDIAALVVDNGSGMCKAGFAGDDAPR | P60710 | 0          | N-term +42.01 Da, K +28.03 Da,C +57.02Da, | 4864.362793 | 2 | 832.960022  | 832.9645239 |
| ASValseAEKVYIVHGVQEDLR      | Q9D0M0 | 0          | N-term +42.01 Da, K +28.03 Da,            | 4865.907715 | 2 | 946         | 946.0033235 |
| SILYSPHPDAFPSLR             | Q9Z1Q9 | 0          | N-term +42.01 Da,                         | 4868.107422 | 3 | 641.6699829 | 641.0132479 |
| AFPSLSAGQNPWR               | Q8K4H1 | 0          | N-term +42.01 Da,                         | 4879.813965 | 2 | 947.0100098 | 946.0033235 |
| SVPLLTDAATVSGAER            | Q9WTL7 | 0          | N-term +42.01 Da,                         | 4887.12207  | 2 | 579.2857666 | 579.2866196 |
| MDAATLTDTLR                 | Q8BGE6 | 0          | N-term +42.01 Da,                         | 4890.298828 | 4 | 1077.48999  | 1076.988289 |
| DDDIAALVVDNGSGMCKAGFAGDDAPR | P60710 | 0          | N-term +42.01 Da, K +28.03 Da,C +57.02Da, | 4894.570801 | 3 | 1435.97998  | 1435.648626 |
| ASGVAVSDGVKVFNDMKVR         | P18760 | 0          | N-term +42.01 Da, K +28.03 Da,            | 4922.614258 | 4 | 1077.48999  | 1076.988289 |
| MQKDasLSGFLPSFQH            | Q8VCN5 | 0.00355872 | N-term +42.01 Da, K +28.03 Da,            | 4930.599121 | 4 | 947.4799805 | 947.2374457 |
| DDDIAALVVDNGSGMCKAGFAGDDAPR | P60710 | 0          | N-term +42.01 Da, K +28.03 Da,C +57.02Da, | 4936.361328 | 2 | 553.8200073 | 553.3238618 |
| TELQSALLR                   | P62254 | 0          | N-term +42.01 Da,                         | 4944.458008 | 4 | 625.0999756 | 624.8509729 |
| ASPAAGGVVIVGSLIGR           | Q99KP3 | 0          | N-term +42.01 Da,                         | 4950.880371 | 4 | 790.6799927 | 790.4328593 |
| MQKDasLSGFLPSFQH            | Q8VCN5 | 0.00291121 | N-term +42.01 Da, K +28.03 Da,            | 4955.567871 | 2 | 873.4699707 | 873.4646909 |
| MNGPVDGLCDHSLSEEGAF         | Q91X83 | 0.04675029 | N-term +42.01 Da, C +57.02Da,             | 4967.321777 | 4 | 762.1300049 | 761.8766458 |
| AEALLLPPEAAAER              | E9QL65 | 0.04367816 | N-term +42.01 Da,                         | 4969.576172 | 4 | 761.8699951 | 761.8766458 |
| DDDIAALVVDNGSGMCKAGFAGDDAPR | P60710 | 0          | N-term +42.01 Da, K +28.03 Da,C +57.02Da, | 4969.727051 | 2 | 736.9199829 | 736.9090197 |
| ASGVTVNDEVKVFNDMKVR         | P45591 | 0          | N-term +42.01 Da, K +28.03 Da,            | 4970.802246 | 2 | 980.9500122 | 980.4501649 |
| SSWWTHVEMGPPDPILGVTEAFKR    | P05202 | 0          | N-term +42.01 Da, K +28.03 Da,            | 4971.371582 | 2 | 938.460022  | 938.9736095 |
| DDDIAALVVDNGSGMCKAGFAGDDAPR | P60710 | 0          | N-term +42.01 Da, K +28.03 Da,C +57.02Da, | 4976.47168  | 3 | 833.4699707 | 832.7988718 |
| CDFTEDQTAEFKEAF             | Q60605 | 0          | N-term +42.01 Da, K +28.03 Da,C +57.02Da, | 4979.01416  | 4 | 625.0999756 | 624.8509729 |
| TELQSALLR                   | P62254 | 0          | N-term +42.01 Da,                         | 4979.456055 | 2 | 1248.699951 | 1248.694669 |
| CDFTEDQTAEFKEAF             | Q60605 | 0          | N-term +42.01 Da, K +28.03 Da,C +57.02Da, | 4980.899902 | 3 | 860.7800293 | 860.779483  |
| ASPAAGGVVIVGSLIGR           | Q99KP3 | 0          | N-term +42.01 Da,                         | 4982.31543  | 4 | 790.4336548 | 790.4328593 |
| MEPEPEVLLQEAR               | Q9Z2L7 | 0          | N-term +42.01 Da,                         | 4987.953613 | 4 | 650.5800171 | 650.3271681 |
| TGAIVDVPVGEELLGR            | Q03265 | 0          | N-term +42.01 Da,                         | 4989.126465 | 2 | 792.3800049 | 792.3780841 |

|                                |        |            |                                           |             |   |             |             |
|--------------------------------|--------|------------|-------------------------------------------|-------------|---|-------------|-------------|
| MNLSAAHHQISLSDGNNIPLIGLTYS DPR | Q8VCX1 | 0.01456618 | N-term +42.01 Da,                         | 4996.853516 | 3 | 1234.930054 | 1234.264775 |
| DD DIAALVVDNGSGMCKAGFAGDDAPR   | P60710 | 0          | N-term +42.01 Da, K +28.03 Da,C +57.02Da, | 4998.48291  | 4 | 926.4500122 | 925.9504002 |
| MLS LDFLDDVR                   | Q9R0P6 | 0          | N-term +42.01 Da,                         | 4999.157227 | 4 | 774.1799927 | 774.1770647 |
| SLPLNPKPFLN                    | P62307 | 0.00987492 | N-term +42.01 Da, K +28.03 Da,            | 5007.583496 | 3 | 832.7983398 | 832.7988718 |
| ATESSPLTTHVLDTASGLPAQGLCLR     | Q9CRB3 | 0          | N-term +42.01 Da, C +57.02Da,             | 5010.88623  | 4 | 624.8499756 | 624.8509729 |
| ATESSPLTTHVLDTASGLPAQGLCLR     | Q9CRB3 | 0          | N-term +42.01 Da, C +57.02Da,             | 5011.328125 | 3 | 945.8099976 | 945.4711558 |
| DD DIAALVVDNGSGMCKAGFAGDDAPR   | P60710 | 0          | N-term +42.01 Da, K +28.03 Da,C +57.02Da, | 5011.531738 | 3 | 696.6799927 | 696.3490256 |
| MQNDAGEFVDLYVPR                | Q9CQR2 | 0          | N-term +42.01 Da,                         | 5022.40625  | 2 | 759.4099731 | 759.4108721 |
| QDQELEKETVMERKAPEPSQGLPR       | B2RUS7 | 0.02074436 | N-term +42.01 Da, K +28.03 Da,            | 5022.846191 | 2 | 1418.709961 | 1417.703095 |
| CDFTEDQTAEFKEAF                | Q60605 | 0          | N-term +42.01 Da, K +28.03 Da,C +57.02Da, | 5024.02832  | 4 | 551.0800171 | 551.0780553 |
| MQNDAGEFVDLYVPR                | Q9CQR2 | 0          | N-term +42.01 Da,                         | 5024.964844 | 3 | 1131.609985 | 1131.2754   |
| ATESSPLTTHVLDTASGLPAQGLCLR     | Q9CRB3 | 0          | N-term +42.01 Da, C +57.02Da,             | 5027.151367 | 4 | 790.4299927 | 790.4328593 |
| DD DIAALVVDNGSGMCKAGFAGDDAPR   | P60710 | 0          | N-term +42.01 Da, K +28.03 Da,C +57.02Da, | 5027.479492 | 4 | 947.4899902 | 947.2374457 |
| DD DIAALVVDNGSGMCK             | P60710 | 0          | N-term +42.01 Da, K +28.03 Da,C +57.02Da, | 5029.200195 | 2 | 1044.018555 | 1044.0199   |
| ASGVAVSDGVIKVFNDMKVR           | P18760 | 0          | N-term +42.01 Da, K +28.03 Da,            | 5040.591797 | 3 | 731.0700073 | 730.7365548 |
| ATESSPLTTHVLDTASGLPAQGLCLR     | Q9CRB3 | 0          | N-term +42.01 Da, C +57.02Da,             | 5041.083008 | 3 | 1085.22998  | 1084.899705 |
| ASGVAVSDGVIKVFNDMKVR           | P18760 | 0          | N-term +42.01 Da, K +28.03 Da,            | 5043.466309 | 3 | 696.348877  | 696.3490256 |
| LLADAVAVTMGPKGR                | P63038 | 0          | N-term +42.01 Da, K +28.03 Da,            | 5044.07666  | 4 | 873.460022  | 872.9419682 |
| ATESSPLTTHVLDTASGLPAQGLCLR     | Q9CRB3 | 0          | N-term +42.01 Da, C +57.02Da,             | 5044.842773 | 3 | 684.710022  | 684.371324  |
| TDQAFVTLTTNDAYAKGALVLGSSSLKQHR | Q9R062 | 0.03590347 | N-term +42.01 Da, K +28.03 Da,            | 5049.203613 | 2 | 678.4000244 | 678.3982876 |
| AIGDTLVQDIR                    | Q9CXN7 | 0.002331   | N-term +42.01 Da,                         | 5055.355957 | 2 | 717.9000244 | 717.4091867 |
| VDYEVVLGVQR                    | O54946 | 0          | N-term +42.01 Da,                         | 5060.248535 | 2 | 1044.52002  | 1044.0199   |
| MESELEALAPR                    | Q9CYS6 | 0          | N-term +42.01 Da,                         | 5062.394531 | 3 | 576.6799927 | 576.3453259 |
| DD DIAALVVDNGSGMCK             | P60710 | 0          | N-term +42.01 Da, K +28.03 Da,C +57.02Da, | 5065.327148 | 2 | 834.9048462 | 834.9074037 |
| SGEDEQQEQTIAEDLVVTKY           | P50580 | 0          | N-term +42.01 Da, K +28.03 Da,            | 5066.672852 | 2 | 652.8451538 | 652.8458879 |
| SEPGGEDGSAGLEVS AVQNVADVAVLQKH | Q9JHU4 | 0.00233827 | N-term +42.01 Da, K +28.03 Da,            | 5076.541992 | 4 | 560.0599976 | 560.062671  |
| SGEDEQQEQTIAEDLVVTKY           | P50580 | 0          | N-term +42.01 Da, K +28.03 Da,            | 5085.376465 | 2 | 675.3599854 | 675.3659329 |
| AETLSGLGDASAAGAAVSSAASETGTR    | D3YXK2 | 0          | N-term +42.01 Da,                         | 5092.804199 | 2 | 896.9400024 | 896.4359944 |
| ASGVAVSDGVIKVFNDMKVR           | P18760 | 0          | N-term +42.01 Da, K +28.03 Da,            | 5093.37793  | 2 | 1208.599976 | 1208.100602 |
| AETLSGLGDASAAGAAVSSAASETGTR    | D3YXK2 | 0          | N-term +42.01 Da,                         | 5098.732422 | 2 | 1209.099976 | 1208.100602 |
| DD DIAALVVDNGSGMCK             | P60710 | 0          | N-term +42.01 Da, K +28.03 Da,C +57.02Da, | 5099.20752  | 3 | 470.269989  | 470.5964216 |
| DD DIAALVVDNGSGMCKAGFAGDDAPR   | P60710 | 0          | N-term +42.01 Da, K +28.03 Da,C +57.02Da, | 5099.33252  | 3 | 1079.22998  | 1078.902842 |
| MESELEALAPR                    | Q9CYS6 | 0          | N-term +42.01 Da,                         | 5100.691406 | 3 | 1108.540039 | 1108.208438 |
| DD DIAALVVDNGSGMCKA            | P60710 | 0.02475845 | N-term +42.01 Da, K +28.03 Da,C +57.02Da, | 5106.63623  | 4 | 926.210022  | 925.9504002 |
| AALVLEDGSLVQGR                 | B2RQC6 | 0          | N-term +42.01 Da,                         | 5113.294922 | 2 | 1053.51001  | 1053.003727 |
| MENS QLCKLF                    | Q9CX86 | 0.00300526 | N-term +42.01 Da, K +28.03 Da,C +57.02Da, | 5114.128418 | 2 | 1053        | 1053.003727 |
| SDIGDWFR                       | Q99J56 | 0.00163265 | N-term +42.01 Da,                         | 5117.34668  | 2 | 675.3657837 | 675.3659329 |
| ASGVAVSDGVIKVFNDMKVR           | P18760 | 0          | N-term +42.01 Da, K +28.03 Da,            | 5117.421875 | 2 | 717.3475952 | 717.3489925 |
| AAESALQVVEKLQAR                | Q8CB77 | 0          | N-term +42.01 Da, K +28.03 Da,            | 5119.13916  | 2 | 924.9500122 | 924.4478498 |
| MNLSAAHHQISLSDGNNIPLIGLTYS DPR | Q8VCX1 | 0          | N-term +42.01 Da,                         | 5123.592285 | 2 | 1080.040039 | 1080.048658 |

|                                   |        |            |                                           |             |   |             |             |
|-----------------------------------|--------|------------|-------------------------------------------|-------------|---|-------------|-------------|
| ASGNAQIGKSAPDFTATAVVDGAFKEIKLSDYR | Q61171 | 0          | N-term +42.01 Da, K +28.03 Da,            | 5125.538574 | 2 | 501.2900085 | 500.7840465 |
| ADTFLEHLC                         | D3Z2C4 | 0.0023166  | N-term +42.01 Da, C +57.02Da,             | 5126.240723 | 2 | 1053.469971 | 1052.973284 |
| ILGADTSVDLEETGR                   | Q03265 | 0          | N-term +42.01 Da,                         | 5126.452637 | 3 | 964.7999878 | 964.4637784 |
| TTSGALFPSLVPGSR                   | Q9JKV1 | 0          | N-term +42.01 Da,                         | 5128.822754 | 2 | 896.4299927 | 896.4359944 |
| ASGGSGGVSVPALWSEVNR               | E9Q740 | 0          | N-term +42.01 Da,                         | 5129.231934 | 2 | 737.4500122 | 737.4556053 |
| ASGNAQIGKSAPDFTATAVVDGAFKEIKLSDYR | Q61171 | 0          | N-term +42.01 Da, K +28.03 Da,            | 5129.59375  | 3 | 1234.930054 | 1234.264775 |
| ASGVAVSDGVIKVF                    | P18760 | 0          | N-term +42.01 Da, K +28.03 Da,            | 5132.252441 | 2 | 1447.189941 | 1446.192029 |
| EILELAGNAAR                       | P22752 | 0.01335878 | N-term +42.01 Da,                         | 5132.629883 | 2 | 635.3599854 | 635.361705  |
| ASYEILDVPR                        | Q9QYI5 | 0          | N-term +42.01 Da,                         | 5134.00293  | 2 | 1027.5      | 1026.499658 |
| ASLSLAPVNIFKAGADEER               | P80314 | 0          | N-term +42.01 Da, K +28.03 Da,            | 5135.532227 | 3 | 964.460022  | 964.4637784 |
| VHLTDAEKAASVCLWGKVNSEVGGGEALGR    | P02088 | 0          | N-term +42.01 Da, K +28.03 Da,C +57.02Da, | 5137.893555 | 2 | 1026.48999  | 1026.499658 |
| GLFIHDDKILR                       | P35700 | 0.00295858 | N-term +42.01 Da, K +28.03 Da,            | 5139.048828 | 2 | 977.039978  | 976.5385853 |
| MESSTSSSGSALGAVDPQLQHFIEVETQKQR   | Q9WVA2 | 0          | N-term +42.01 Da, K +28.03 Da,            | 5141.210938 | 2 | 976.539978  | 976.5385853 |
| DDIAALVVDNGSGMCKAGFAGDDAPR        | P60710 | 0          | N-term +42.01 Da, K +28.03 Da,C +57.02Da, | 5141.81543  | 2 | 1446.199951 | 1446.192029 |
| DDIAALVVDNGSGMCKAGFAGDDAPR        | P60710 | 0          | N-term +42.01 Da, K +28.03 Da,C +57.02Da, | 5143.048828 | 4 | 718.6199951 | 718.3682588 |
| ASGNAQIGKSAPDFTATAVVDGAFKEIKLSDYR | Q61171 | 0          | N-term +42.01 Da, K +28.03 Da,            | 5160.96582  | 3 | 1190.579956 | 1190.892227 |
| AADISQWAGPLCLQEVDEPPQHALR         | P70296 | 0          | N-term +42.01 Da, C +57.02Da,             | 5165.94873  | 2 | 545.7800293 | 545.7800161 |
| DDIAALVVDNGSGMCKAGFAGDDAPR        | P60710 | 0          | N-term +42.01 Da, K +28.03 Da,C +57.02Da, | 5166.269043 | 2 | 1182.579956 | 1182.088648 |
| MESSTSSSGSALGAVDPQLQHFIEVETQKQR   | Q9WVA2 | 0          | N-term +42.01 Da, K +28.03 Da,            | 5166.378418 | 3 | 788.4000244 | 788.3948578 |
| ASLSLAPVNIFKAGADEER               | P80314 | 0          | N-term +42.01 Da, K +28.03 Da,            | 5166.867676 | 3 | 679.039978  | 678.707936  |
| ASGVAVSDGVIKVF                    | P18760 | 0          | N-term +42.01 Da, K +28.03 Da,            | 5167.553711 | 2 | 1256.550049 | 1256.054344 |
| ASYEILDVPR                        | Q9QYI5 | 0.00356125 | N-term +42.01 Da,                         | 5167.865234 | 2 | 1182.089966 | 1182.088648 |
| ASGCKIGPSILNSDLANLGAELCR          | Q8VEE0 | 0          | N-term +42.01 Da, K +28.03 Da,C +57.02Da, | 5169.482422 | 2 | 855.3962402 | 855.3956171 |
| ASLSLAPVNIFKAGADEER               | P80314 | 0          | N-term +42.01 Da, K +28.03 Da,            | 5176.988281 | 2 | 717.3499756 | 717.3489925 |
| MNLSAAHHQISLSDGNNIPLIGLTYS DPR    | Q8VXC1 | 0          | N-term +42.01 Da,                         | 5180.325684 | 3 | 843.4799805 | 843.1476121 |
| ASLSLAPVNIFKAGADEER               | P80314 | 0          | N-term +42.01 Da, K +28.03 Da,            | 5180.719727 | 3 | 1026.880005 | 1027.198424 |
| VHLTDAEKAASVCLWGKVNSEVGGGEALGR    | P02088 | 0          | N-term +42.01 Da, K +28.03 Da,C +57.02Da, | 5182.382324 | 2 | 736.9099731 | 735.9210726 |
| MESSTSSSGSALGAVDPQLQHFIEVETQKQR   | Q9WVA2 | 0          | N-term +42.01 Da, K +28.03 Da,            | 5189.610352 | 2 | 976.539978  | 976.5385853 |
| ASGNAQIGKSAPDFTATAVVDGAFKEIKLSDYR | Q61171 | 0          | N-term +42.01 Da, K +28.03 Da,            | 5196.726074 | 3 | 659.3499756 | 659.3445578 |
| DDIAALVVDNGSGMCKAGFAGDDAPR        | P60710 | 0          | N-term +42.01 Da, K +28.03 Da,C +57.02Da, | 5197.339355 | 3 | 687.0499878 | 686.7176001 |
| SDQQLCDALDLMR                     | P47757 | 0          | N-term +42.01 Da, C +57.02Da,             | 5197.867188 | 3 | 795.4099731 | 795.0728835 |
| DDIAALVVDNGSGMCKAGFAGDDAPR        | P60710 | 0          | N-term +42.01 Da, K +28.03 Da,C +57.02Da, | 5198.091309 | 2 | 785.9199829 | 784.9070087 |
| ASGVAVSDGVIKVF                    | P18760 | 0.00986193 | N-term +42.01 Da, K +28.03 Da,            | 5198.321289 | 3 | 891.1599731 | 890.5059165 |
| ADEIAKAQVAQPGGDTIFGKIIR           | P70349 | 0          | N-term +42.01 Da, K +28.03 Da,            | 5198.618652 | 2 | 716.8499756 | 717.3489925 |
| ATESSPLTHVLDTASGLPAQGLC           | Q9CRB3 | 0.04667046 | N-term +42.01 Da, C +57.02Da,             | 5201.782715 | 2 | 837.9199829 | 837.9223248 |
| ADEIAKAQVAQPGGDTIFGKIIR           | P70349 | 0          | N-term +42.01 Da, K +28.03 Da,            | 5201.962891 | 2 | 989.0100098 | 988.5131985 |
| KKDRAPERR                         | Q99LM3 | 0.00480769 | N-term +42.01 Da, K +28.03 Da,            | 5209.199219 | 2 | 635.3613281 | 635.361705  |
| SLLCCLADFKAQAQKQL                 | Q9NYQ2 | 0          | N-term +42.01 Da, K +28.03 Da,C +57.02Da, | 5210.294434 | 2 | 839.5200195 | 839.5204225 |
| ASLSLAPVNIFKAGADEER               | P80314 | 0          | N-term +42.01 Da, K +28.03 Da,            | 5212.074707 | 2 | 840.0200195 | 839.5204225 |
| SSPAQPAVPAPLADLKIQ                | P24549 | 0.02471368 | N-term +42.01 Da, K +28.03 Da,            | 5213.315918 | 3 | 608.6400146 | 608.9757391 |

|                                     |        |            |                                           |             |   |             |             |
|-------------------------------------|--------|------------|-------------------------------------------|-------------|---|-------------|-------------|
| AGPEWQSLEQCLEKHLPPDDLAQVKR          | Q8VC97 | 0          | N-term +42.01 Da, K +28.03 Da,C +57.02Da, | 5214.911621 | 3 | 736.7199707 | 736.719564  |
| SSPAQPAVPAPLADLKIQ                  | P24549 | 0          | N-term +42.01 Da, K +28.03 Da,            | 5216.858398 | 3 | 555.3129883 | 555.3152607 |
| LLCLADFKAQAQKQL                     | Q9NYQ2 | 0          | N-term +42.01 Da, K +28.03 Da,C +57.02Da, | 5217.346191 | 2 | 832.9699707 | 832.4692528 |
| ADTQYILPNDIGVSSLDLDCR               | Q99KK7 | 0          | N-term +42.01 Da, C +57.02Da,             | 5219.575195 | 2 | 832.4699707 | 832.4692528 |
| VNPTVFFDITADDEPLGR                  | P17742 | 0.00416667 | N-term +42.01 Da,                         | 5221.588867 | 3 | 555.3145752 | 555.3152607 |
| SSPAQPAVPAPLADLKIQ                  | P24549 | 0          | N-term +42.01 Da, K +28.03 Da,            | 5226.507324 | 2 | 855.3900146 | 855.3956171 |
| SDQQLDCALDLMR                       | P47757 | 0          | N-term +42.01 Da, C +57.02Da,             | 5227.876953 | 3 | 659.3435059 | 659.3445578 |
| SSPAQPAVPAPLADLKIQH                 | P24549 | 0          | N-term +42.01 Da, K +28.03 Da,            | 5233.479492 | 2 | 989.0100098 | 988.5131985 |
| MNNAAGLNSEKVSALIQL                  | Q8R016 | 0.00421941 | N-term +42.01 Da, K +28.03 Da,            | 5239.691406 | 2 | 635.3599854 | 635.361705  |
| SWLFGIKGPKGEGTGPPLPPAQPGEAGGGDR     | Q92511 | 0.00984252 | N-term +42.01 Da, K +28.03 Da,            | 5244.199219 | 3 | 608.6431885 | 608.9757391 |
| VHLTDAEKAASVCLWGKVNNSDEVGGEALGR     | P02088 | 0          | N-term +42.01 Da, K +28.03 Da,C +57.02Da, | 5244.54248  | 4 | 743.8900146 | 743.3892943 |
| AELKYISGF                           | O09173 | 0.00286738 | N-term +42.01 Da, K +28.03 Da,            | 5245.451172 | 2 | 1022.969971 | 1022.471728 |
| MIEMAAKEPF                          | Q8K3A9 | 0.00293902 | N-term +42.01 Da, K +28.03 Da,            | 5245.614258 | 3 | 708.6900024 | 708.3532152 |
| LLCLADFKAQAQKQL                     | Q9NYQ2 | 0          | N-term +42.01 Da, K +28.03 Da,C +57.02Da, | 5248.805176 | 2 | 665.3599854 | 664.856453  |
| AGPEWQSLEQCLEKHLPPDDLAQVKR          | Q8VC97 | 0          | N-term +42.01 Da, K +28.03 Da,C +57.02Da, | 5252.467285 | 2 | 987.9799805 | 986.9752949 |
| SSPAQPAVPAPLADLKIQ                  | P24549 | 0          | N-term +42.01 Da, K +28.03 Da,            | 5257.980469 | 2 | 1120.98999  | 1119.980783 |
| RRWSSRQRNFSR                        | Q9CPU3 | 0.02819436 | N-term +42.01 Da,                         | 5263.768066 | 2 | 761.8800049 | 760.8726345 |
| TEWEAATPAVAETPDIKLFGK               | P97461 | 0          | N-term +42.01 Da, K +28.03 Da,            | 5264.933105 | 3 | 659.6799927 | 659.3445578 |
| SWLFGIKGPKGEGTGPPLPPAQPGEAGGGDR     | Q92511 | 0.0024077  | N-term +42.01 Da, K +28.03 Da,            | 5268.809082 | 2 | 600.3699951 | 600.371541  |
| AEMDLVAELPR                         | Q8VDG5 | 0          | N-term +42.01 Da,                         | 5277.07666  | 3 | 1084.900024 | 1084.232077 |
| TEWEAATPAVAETPDIKLFGK               | P97461 | 0.00983607 | N-term +42.01 Da, K +28.03 Da,            | 5280.812988 | 3 | 608.6400146 | 608.9757391 |
| ASGVTVNDEVIKVFNDMKVR                | P45591 | 0          | N-term +42.01 Da, K +28.03 Da,            | 5282.833496 | 2 | 1404.630005 | 1404.134189 |
| ADEIAKAQVAQPGGDTIFGKIIR             | P70349 | 0          | N-term +42.01 Da, K +28.03 Da,            | 5284.466309 | 2 | 976.5404663 | 976.5385853 |
| TTYLEFIQQNEER                       | Q01405 | 0          | N-term +42.01 Da,                         | 5289.972656 | 3 | 651.6900024 | 651.3614823 |
| AALVLEDGSLVQGR                      | B2RQC6 | 0          | N-term +42.01 Da,                         | 5293.091797 | 2 | 956.9799805 | 956.9752949 |
| PFVELETNLPASR                       | O35215 | 0          | N-term +42.01 Da,                         | 5293.830566 | 4 | 1001.77002  | 1001.763828 |
| DDDIAALVVDNGSGMCK                   | P60710 | 0.00478469 | N-term +42.01 Da, K +28.03 Da,C +57.02Da, | 5294.550781 | 3 | 1111.599976 | 1111.255494 |
| AALVLEDGSLVQGR                      | B2RQC6 | 0          | N-term +42.01 Da,                         | 5295.555176 | 2 | 648.3800049 | 647.8739165 |
| TYEEQFKQLYELDADPK                   | A6PWV5 | 0.01101036 | N-term +42.01 Da, K +28.03 Da,            | 5296.187012 | 3 | 659.3400269 | 659.3445578 |
| AAATAAAAPQQLSDEELFSQLR              | Q9WU40 | 0          | N-term +42.01 Da,                         | 5303.764648 | 2 | 838.9199829 | 837.9223248 |
| AAATAAAAPQQLSDEELFSQLR              | Q9WU40 | 0          | N-term +42.01 Da,                         | 5304.913086 | 4 | 777.8960571 | 777.9031722 |
| ASGVAVSDGVIKVFNDMK                  | P18760 | 0          | N-term +42.01 Da, K +28.03 Da,            | 5305.467285 | 2 | 635.8533325 | 635.361705  |
| TTQQVLLQGGPGPWGFR                   | O70400 | 0          | N-term +42.01 Da,                         | 5307.125977 | 4 | 900.9400024 | 900.44437   |
| MDAGVTESGLNVTLIR                    | P60335 | 0.01508485 | N-term +42.01 Da,                         | 5307.803711 | 3 | 1200.589966 | 1200.256735 |
| ALWEETSFLDLLQAEP                    | Q5SUR0 | 0.04576659 | N-term +42.01 Da,                         | 5314.899902 | 2 | 976.5368042 | 976.5385853 |
| ASGVAVSDGVIKVFNDMK                  | P18760 | 0          | N-term +42.01 Da, K +28.03 Da,            | 5315.918945 | 3 | 841.4400024 | 840.7574016 |
| ASGNAIQKSAPDFTATAVVDGAFKEIKLSDYR    | Q61171 | 0.0110318  | N-term +42.01 Da, K +28.03 Da,            | 5322.636719 | 2 | 618.3200073 | 618.8165988 |
| AASVDLELKAFTLQAK                    | Q9CWM4 | 0          | N-term +42.01 Da, K +28.03 Da,            | 5332.444336 | 2 | 1050        | 1048.99263  |
| VAGPQPAQTGAPQGLGEYLFER              | P29391 | 0          | N-term +42.01 Da,                         | 5332.541992 | 3 | 1087.550049 | 1087.223299 |
| AEPQPASSGLTDEAFSCSDPDPSTKDFLLQQTMLR | Q9CPU0 | 0          | N-term +42.01 Da, K +28.03 Da,C +57.02Da, | 5332.818359 | 3 | 700.3380127 | 699.6641791 |



|                                    |        |            |                                           |             |   |             |             |
|------------------------------------|--------|------------|-------------------------------------------|-------------|---|-------------|-------------|
| AADISQWAGPLCLQEVEPPQHALR           | P70296 | 0          | N-term +42.01 Da, C +57.02Da,             | 5335.028809 | 2 | 837.9199829 | 837.9223248 |
| TTQQIVLQGGPWGFR                    | O70400 | 0          | N-term +42.01 Da,                         | 5337.930176 | 2 | 593.8499756 | 593.8468443 |
| AADISQWAGPLCLQEVEPPQHALR           | P70296 | 0          | N-term +42.01 Da, C +57.02Da,             | 5339.514648 | 3 | 1087.219971 | 1087.223299 |
| MEPSPLELPVDAVR                     | Q9CXF0 | 0          | N-term +42.01 Da,                         | 5341.152832 | 2 | 737.3699951 | 736.867686  |
| ATQVEPLLPAGAPLLQAEHGLAR            | Q6ZQ58 | 0          | N-term +42.01 Da,                         | 5341.377441 | 4 | 721.1599731 | 720.9155735 |
| ATQVEPLLPAGAPLLQAEHGLAR            | Q6ZQ58 | 0          | N-term +42.01 Da,                         | 5343.780762 | 3 | 659.6799927 | 659.3445578 |
| ATQVEPLLPAGAPLLQAEHGLAR            | Q6ZQ58 | 0          | N-term +42.01 Da,                         | 5346.310059 | 4 | 745.3800049 | 745.118787  |
| AADISQWAGPLCLQEVEPPQHALR           | P70296 | 0          | N-term +42.01 Da, C +57.02Da,             | 5347.174316 | 3 | 859.1599731 | 858.8253095 |
| SRHRWDWPRGGWDFGGLR                 | D3Z4U8 | 0.01211735 | N-term +42.01 Da,                         | 5349.302734 | 3 | 1035.51001  | 1034.83499  |
| AADISQWAGPLCLQEVEPPQHALR           | P70296 | 0          | N-term +42.01 Da, C +57.02Da,             | 5362.571777 | 2 | 913.8699951 | 912.8671953 |
| AADISQWAGPLCLQEVEPPQHALR           | P70296 | 0          | N-term +42.01 Da, C +57.02Da,             | 5362.66748  | 3 | 762.3800049 | 762.042373  |
| MEPSPLELPVDAVR                     | Q9CXF0 | 0          | N-term +42.01 Da,                         | 5364.35498  | 2 | 1143.060059 | 1142.559921 |
| STLLIHHQYAWLQDLGLR                 | Q9DBF1 | 0          | N-term +42.01 Da,                         | 5365.574219 | 4 | 718.8599854 | 718.3682588 |
| ASVGTlafDEYGRPFLIKDQDR             | P80316 | 0          | N-term +42.01 Da, K +28.03 Da,            | 5365.776855 | 2 | 1143.560059 | 1142.559921 |
| ATYLEFIQQNEER                      | Q9D662 | 0          | N-term +42.01 Da,                         | 5368.955078 | 2 | 593.8461304 | 593.8468443 |
| VHLTDAEKAAVSCLWGKVNSEVGGGALGR      | P02088 | 0.00479124 | N-term +42.01 Da, K +28.03 Da,C +57.02Da, | 5378.563965 | 2 | 1261.609985 | 1261.104269 |
| SITSDEVNFLVYR                      | Q9QXE7 | 0          | N-term +42.01 Da,                         | 5379.280273 | 2 | 1016.52002  | 1016.01442  |
| MDLVAELPR                          | Q8VDG5 | 0.00291758 | N-term +42.01 Da,                         | 5383.794922 | 3 | 936.75      | 936.4252179 |
| VHLTDAEKAAVSCLWGKVNSEVGGGALGR      | P02088 | 0          | N-term +42.01 Da, K +28.03 Da,C +57.02Da, | 5384.445313 | 2 | 815.4299927 | 814.9281388 |
| ASVGTlafDEYGRPFLIKDQDR             | P80316 | 0.00295639 | N-term +42.01 Da, K +28.03 Da,            | 5387.212891 | 2 | 1405.130005 | 1404.134189 |
| MEGPLSVFGDR                        | P11983 | 0          | N-term +42.01 Da,                         | 5387.329102 | 2 | 1017.01001  | 1016.01442  |
| SSWWTHVEMGPPDPILGVTEAFKR           | P05202 | 0          | N-term +42.01 Da, K +28.03 Da,            | 5398.847656 | 3 | 828.7800293 | 828.4428653 |
| SSWWTHVEMGPPDPILGVTEAFKR           | P05202 | 0          | N-term +42.01 Da, K +28.03 Da,            | 5399.470703 | 4 | 679.3900146 | 679.1376391 |
| ADSVKTFQLDLGR                      | Q61070 | 0          | N-term +42.01 Da, K +28.03 Da,            | 5405.975586 | 2 | 754.8599854 | 754.865007  |
| AAPAEAEVAAAPGLTEAAEAAELTR          | B9EJR8 | 0          | N-term +42.01 Da,                         | 5406.469238 | 2 | 921.4899902 | 920.983248  |
| MEGPLSVFGDR                        | P11983 | 0          | N-term +42.01 Da,                         | 5409.881348 | 2 | 1276.599976 | 1276.103441 |
| MNSAGADEIGKLF                      | Q9JII5 | 0          | N-term +42.01 Da, K +28.03 Da,            | 5410.280273 | 3 | 979.1599731 | 978.4864719 |
| MDSASQDINLNSPNKGVLSDFMTDVPVDPGVVHR | Q9CYZ2 | 0          | N-term +42.01 Da, K +28.03 Da,            | 5411.012695 | 2 | 1276.099976 | 1276.103441 |
| GLFIIDDKGILR                       | P35700 | 0.00609343 | N-term +42.01 Da, K +28.03 Da,            | 5424.563477 | 2 | 872.9400024 | 872.9379832 |
| SSWWTHVEMGPPDPILGVTEAFKR           | P05202 | 0          | N-term +42.01 Da, K +28.03 Da,            | 5424.703613 | 2 | 1405.130005 | 1404.134189 |
| TEWEAATPAVAETPDIKL                 | P97461 | 0          | N-term +42.01 Da, K +28.03 Da,            | 5427.556641 | 2 | 593.3400269 | 593.3455234 |
| SSWWTHVEMGPPDPILGVTEAFKR           | P05202 | 0          | N-term +42.01 Da, K +28.03 Da,            | 5430.585938 | 3 | 731.0700073 | 730.7365548 |
| AAVPSGASTGIYEALER                  | P17182 | 0          | N-term +42.01 Da,                         | 5432.005859 | 2 | 782.9199829 | 782.4224918 |
| PGLLLLGEEAPDFEANTTIGR              | Q8BG37 | 0.01507538 | N-term +42.01 Da,                         | 5442.516602 | 2 | 1276.599976 | 1276.103441 |
| EEEIAALVIDNGSGMCKAGFAGDDAPR        | P63260 | 0          | N-term +42.01 Da, K +28.03 Da,C +57.02Da, | 5448.317383 | 3 | 936.7521973 | 936.4252179 |
| EEEIAALVIDNGSGMCKAGFAGDDAPR        | P63260 | 0          | N-term +42.01 Da, K +28.03 Da,C +57.02Da, | 5449.516602 | 3 | 851.7399902 | 851.0713864 |
| PFVELETNLPASR                      | O35215 | 0          | N-term +42.01 Da,                         | 5451.224121 | 2 | 811.960022  | 811.9648579 |
| AQPPPDVEGDDCLPEYHHLFCPDLLQDKVAF    | Q9WV68 | 0.00294768 | N-term +42.01 Da, K +28.03 Da,C +57.02Da, | 5452.960938 | 3 | 1001.119995 | 1000.458476 |
| PMILGYWNVNR                        | P10649 | 0.00353107 | N-term +42.01 Da,                         | 5453.733887 | 3 | 1000.460022 | 1000.458476 |
| AAAAVVVPAAEWIKNWEKSGR              | B1AZI6 | 0.00613497 | N-term +42.01 Da, K +28.03 Da,            | 5456.860352 | 2 | 1404.624146 | 1404.134189 |

|                                  |        |            |                                           |             |   |             |             |
|----------------------------------|--------|------------|-------------------------------------------|-------------|---|-------------|-------------|
| AQPPDVEGDDCLPEYHHLFCPDLQDKVAF    | Q9WV68 | 0          | N-term +42.01 Da, K +28.03 Da,C +57.02Da, | 5458.664551 | 2 | 1347.670044 | 1346.666307 |
| MDVGELLSYQPNR                    | Q9CWL8 | 0          | N-term +42.01 Da,                         | 5458.899414 | 4 | 688.1099854 | 688.3712837 |
| ATPDSLALFTGLGLENKAR              | D3Z158 | 0          | N-term +42.01 Da, K +28.03 Da,            | 5459.54834  | 2 | 593.8499756 | 593.3455234 |
| LPFLAKMLAPK                      | Q8C7J6 | 0.04653802 | N-term +42.01 Da, K +28.03 Da,            | 5461.076172 | 2 | 899.9799805 | 900.4696479 |
| SGTLAKIAEIEAEMAR                 | P32233 | 0          | N-term +42.01 Da, K +28.03 Da,            | 5466.325684 | 3 | 888.1199951 | 887.782448  |
| AAMLGDAIMVAK                     | Q60936 | 0          | N-term +42.01 Da, K +28.03 Da,            | 5469.626465 | 2 | 1500.680054 | 1500.184076 |
| EEEIAALVIDNGSGMCKAGFAGDDAPR      | P63260 | 0          | N-term +42.01 Da, K +28.03 Da,C +57.02Da, | 5471.69043  | 2 | 954.9000244 | 954.4038372 |
| PFVELETNLPASR                    | O35215 | 0          | N-term +42.01 Da,                         | 5474.71875  | 2 | 954.4000244 | 954.4038372 |
| MNVEHEVNLLVEEHR                  | Q4KML4 | 0          | N-term +42.01 Da,                         | 5476.70459  | 4 | 763.3800049 | 762.8818793 |
| MKIAVIGQSLFGQEVYQCLR             | Q8R0Y6 | 0          | N-term +42.01 Da, K +28.03 Da,C +57.02Da, | 5479.875    | 3 | 936.4237671 | 936.4252179 |
| ASGRPEELWEAVVGAER                | Q9D1F4 | 0          | N-term +42.01 Da,                         | 5484.326172 | 3 | 1000.789978 | 1000.458476 |
| AALVAAEGSLGPAGWSAGR              | P97364 | 0          | N-term +42.01 Da,                         | 5485.895996 | 4 | 703.8599854 | 703.3547227 |
| PGGLLLGEAAPDFEANTTIGR            | Q8BG37 | 0.00422833 | N-term +42.01 Da,                         | 5487.226563 | 2 | 1404.133545 | 1404.134189 |
| ATPDSLALFTGLGLENKAR              | D3Z158 | 0          | N-term +42.01 Da, K +28.03 Da,            | 5489.014648 | 2 | 644.3699951 | 644.3706839 |
| ASGRPEELWEAVVGAER                | Q9D1F4 | 0          | N-term +42.01 Da,                         | 5490.550781 | 2 | 943.4799805 | 943.4791583 |
| ASGRPEELWEAVVGAER                | Q9D1F4 | 0.00230415 | N-term +42.01 Da,                         | 5491.185059 | 3 | 851.0700073 | 851.0713864 |
| MQKDASLSGFLPSFQHFATQAIH          | Q8VCN5 | 0.04086398 | N-term +42.01 Da, K +28.03 Da,            | 5492.59375  | 3 | 913.1303711 | 913.1323627 |
| AAMLGDAIMVAK                     | Q60936 | 0          | N-term +42.01 Da, K +28.03 Da,            | 5493.196289 | 2 | 1369.199951 | 1369.194906 |
| PFVELETNLPASR                    | O35215 | 0          | N-term +42.01 Da,                         | 5494.205566 | 2 | 1370.199951 | 1369.194906 |
| EQELLEAAR                        | P59672 | 0.01908867 | N-term +42.01 Da,                         | 5498.356445 | 3 | 1078.540039 | 1078.538452 |
| MQNDAGEFVDLYVPR                  | Q9CQR2 | 0          | N-term +42.01 Da,                         | 5505.538086 | 2 | 954.4022827 | 954.4038372 |
| MEPQSQSMTLEVPLSLGR               | A4UHF3 | 0          | N-term +42.01 Da,                         | 5505.61377  | 2 | 734.9227905 | 734.9221272 |
| TAEVLELAGNAAR                    | Q8CGP4 | 0.01503759 | N-term +42.01 Da,                         | 5509.123047 | 2 | 898.9199829 | 898.4196237 |
| MQNDAGEFVDLYVPR                  | Q9CQR2 | 0          | N-term +42.01 Da,                         | 5510.414063 | 3 | 936.75      | 936.4252179 |
| PFVELETNLPASR                    | O35215 | 0          | N-term +42.01 Da,                         | 5511.251465 | 2 | 815.4199829 | 815.9270842 |
| WLDFAASYSALR                     | Q8BFW3 | 0.03321471 | N-term +42.01 Da,                         | 5513.615234 | 3 | 729.0599976 | 728.3803257 |
| ASVGTLAFDEYGRPF                  | P80316 | 0          | N-term +42.01 Da,                         | 5518.898438 | 2 | 1404.619995 | 1404.134189 |
| MQNDAGEFVDLYVPR                  | Q9CQR2 | 0          | N-term +42.01 Da,                         | 5520.20166  | 3 | 1000.789978 | 1000.458476 |
| MEEKALEVYDLIR                    | Q9DCL2 | 0.00300978 | N-term +42.01 Da, K +28.03 Da,            | 5523.346191 | 3 | 913.4699707 | 913.1323627 |
| EEEIAALVIDNGSGMCKAGFAGDDAPR      | P63260 | 0          | N-term +42.01 Da, K +28.03 Da,C +57.02Da, | 5526.014648 | 3 | 730.7299805 | 730.7365548 |
| EEEIAALVIDNGSGMCKAGFAGDDAPR      | P63260 | 0          | N-term +42.01 Da, K +28.03 Da,C +57.02Da, | 5526.554199 | 3 | 851.7399902 | 851.0713864 |
| MDSGFGSDFGGTGGKLDPGAIMEQVKVQ     | P62075 | 0          | N-term +42.01 Da, K +28.03 Da,            | 5531.453125 | 2 | 644.3151855 | 644.3161062 |
| ATQADLMELDMAMEPDR                | Q02248 | 0          | N-term +42.01 Da,                         | 5531.77832  | 4 | 653.3699951 | 653.6186535 |
| LVLEVAQHLGESTVR                  | P56480 | 0.0023753  | N-term +42.01 Da,                         | 5534.984375 | 3 | 976.1300049 | 975.7810467 |
| GDKPIWEQIGSSFIQH                 | P61971 | 0.0022779  | N-term +42.01 Da, K +28.03 Da,            | 5535.592285 | 4 | 572.0599976 | 571.8095817 |
| PFVELETNLPASR                    | O35215 | 0          | N-term +42.01 Da,                         | 5535.709961 | 3 | 936.4199829 | 936.4252179 |
| ASPGEPQPPAPDTSSFDYLVIGGGSSGLASAR | P47791 | 0          | N-term +42.01 Da,                         | 5538.531738 | 3 | 967.1699829 | 966.4986002 |
| SSLSGKVQTVLGLVEPSQLGR            | Q60866 | 0          | N-term +42.01 Da, K +28.03 Da,            | 5538.642578 | 4 | 902.4899902 | 902.238614  |
| ASVGTLAFDEYGRPF                  | P80316 | 0          | N-term +42.01 Da,                         | 5541.143555 | 2 | 1096.099976 | 1095.601194 |
| SSLSGKVQTVLGLVEPSQLGR            | Q60866 | 0          | N-term +42.01 Da, K +28.03 Da,            | 5542.014648 | 2 | 1222.089966 | 1221.58518  |

|                                  |        |            |                                           |             |   |             |             |
|----------------------------------|--------|------------|-------------------------------------------|-------------|---|-------------|-------------|
| MEAGGLGCAVCVLTGASR               | G3UXX3 | 0          | N-term +42.01 Da, C +57.02Da,             | 5545.44873  | 2 | 1262.099976 | 1261.104269 |
| SSLSGKVQTVLGLVPSQLGR             | Q60866 | 0          | N-term +42.01 Da, K +28.03 Da,            | 5546.481934 | 3 | 815.0599976 | 814.7258789 |
| AASGESGASGGGGSTEEAFMTFYSEVKQIEKR | Q6NZB0 | 0          | N-term +42.01 Da, K +28.03 Da,            | 5546.964355 | 3 | 715.4299927 | 715.4315713 |
| MEAGGLGCAVCVLTGASR               | G3UXX3 | 0          | N-term +42.01 Da, C +57.02Da,             | 5548.047852 | 4 | 802.1799927 | 801.6819373 |
| MQKDASLSGFLPSFQHF                | Q8VCN5 | 0.0253012  | N-term +42.01 Da, K +28.03 Da,            | 5550.086426 | 3 | 841.4099731 | 841.0719379 |
| MQKDASLSGFLPSFQHF                | Q8VCN5 | 0          | N-term +42.01 Da, K +28.03 Da,            | 5553.571289 | 2 | 954.40448   | 954.4038372 |
| SQLVECVPNFSEGNNQVIDAISR          | Q91XD4 | 0          | N-term +42.01 Da, C +57.02Da,             | 5554.702148 | 2 | 1261.103638 | 1261.104269 |
| MQKDASLSGFLPSFQHF                | Q8VCN5 | 0          | N-term +42.01 Da, K +28.03 Da,            | 5557.743164 | 3 | 730.7352295 | 730.7365548 |
| SQLVECVPNFSEGNNQVIDAISR          | Q91XD4 | 0          | N-term +42.01 Da, C +57.02Da,             | 5561.15332  | 2 | 1405.130005 | 1404.134189 |
| SCRNVLVKILHR                     | F6TRH6 | 0.04756512 | N-term +42.01 Da, K +28.03 Da,C +57.02Da, | 5563.447754 | 2 | 611.3553467 | 611.3666463 |
| AANATTNPSQLLPLELVDKCIGSR         | P62322 | 0          | N-term +42.01 Da, K +28.03 Da,C +57.02Da, | 5563.523438 | 2 | 644.3153687 | 644.3161062 |
| MQNDAGEFVDLYVPR                  | Q9CQR2 | 0          | N-term +42.01 Da,                         | 5578.173828 | 4 | 786.6699829 | 786.4282303 |
| AALAPLPPPAQFK                    | Q9CR26 | 0.00231481 | N-term +42.01 Da, K +28.03 Da,            | 5581.655762 | 3 | 1089.52002  | 1089.189433 |
| AELQMLLEEEIPSGKR                 | Q8CBW3 | 0          | N-term +42.01 Da, K +28.03 Da,            | 5581.945313 | 2 | 841.973877  | 841.975423  |
| SVPAFIDISEEDQAAELR               | Q99JX4 | 0          | N-term +42.01 Da,                         | 5582.044434 | 2 | 766.4099731 | 766.4093842 |
| AELQMLLEEEIPSGKR                 | Q8CBW3 | 0          | N-term +42.01 Da, K +28.03 Da,            | 5582.65332  | 3 | 561.9899902 | 561.6527075 |
| AANATTNPSQLLPLELVDKCIGSR         | P62322 | 0          | N-term +42.01 Da, K +28.03 Da,C +57.02Da, | 5585.256348 | 2 | 1261.109985 | 1261.104269 |
| AANATTNPSQLLPLELVDKCIGSR         | P62322 | 0          | N-term +42.01 Da, K +28.03 Da,C +57.02Da, | 5587.361328 | 3 | 915.4500122 | 915.4442727 |
| ASVGTAFDEYGRPF                   | P80316 | 0.03104478 | N-term +42.01 Da,                         | 5587.58252  | 2 | 954.9000244 | 954.4038372 |
| SQLVECVPNFSEGNNQVIDAISR          | Q91XD4 | 0          | N-term +42.01 Da, C +57.02Da,             | 5592.634766 | 2 | 1373.160034 | 1372.662771 |
| MNSAGADEIGKLF                    | Q9JII5 | 0.00292826 | N-term +42.01 Da, K +28.03 Da,            | 5595.907715 | 4 | 934.6599731 | 934.4130556 |
| ASAVSPANLPAVLLQPR                | Q61191 | 0          | N-term +42.01 Da,                         | 5596.60791  | 3 | 937.0900269 | 936.4252179 |
| SQLVECVPNFSEGNNQVIDAISR          | Q91XD4 | 0          | N-term +42.01 Da, C +57.02Da,             | 5596.743164 | 3 | 699.0300293 | 699.3612653 |
| ASAVSPANLPAVLLQPR                | Q61191 | 0          | N-term +42.01 Da,                         | 5600.81543  | 3 | 841.4000244 | 841.0719379 |
| SVPAFIDISEEDQAAELR               | Q99JX4 | 0          | N-term +42.01 Da,                         | 5602.476074 | 3 | 903.7600098 | 903.4326502 |
| MDQVMQFVEPSR                     | P60060 | 0          | N-term +42.01 Da,                         | 5604.92041  | 3 | 1245.880005 | 1245.548315 |
| AEYLASIFGTEKDKVN                 | Q8BGJ9 | 0          | N-term +42.01 Da, K +28.03 Da,            | 5606.39209  | 3 | 1140.219971 | 1139.89122  |
| MQNDAGEFVDLYVPR                  | Q9CQR2 | 0          | N-term +42.01 Da,                         | 5607.967285 | 3 | 916.1099854 | 915.4442727 |
| SVPAFIDISEEDQAAELR               | Q99JX4 | 0          | N-term +42.01 Da,                         | 5609.180176 | 3 | 1185.290039 | 1185.28942  |
| EEEIAALVIDNGSGMCK                | P63260 | 0.00421053 | N-term +42.01 Da, K +28.03 Da,C +57.02Da, | 5609.3125   | 2 | 1030.040039 | 1029.546942 |
| ASGVAVSDGVKIVFNDMKVR             | P18760 | 0          | N-term +42.01 Da, K +28.03 Da,            | 5612.094238 | 4 | 1088.01001  | 1087.755127 |
| DDIAALVVDNGSGMCKAGF              | P60710 | 0          | N-term +42.01 Da, K +28.03 Da,C +57.02Da, | 5612.19873  | 4 | 1048.25     | 1047.997411 |
| ASAVSPANLPAVLLQPR                | Q61191 | 0          | N-term +42.01 Da,                         | 5612.274414 | 2 | 684.3442383 | 684.3457209 |
| SSLQELCSGLPLRPLPE                | Q8VC12 | 0.01514196 | N-term +42.01 Da, C +57.02Da,             | 5612.676758 | 2 | 1210.160034 | 1209.655013 |
| MDIEAYFER                        | P50294 | 0          | N-term +42.01 Da,                         | 5614.191895 | 4 | 855.6699829 | 855.1702345 |
| SDILPLDVIGR                      | Q8CIV8 | 0.00228484 | N-term +42.01 Da,                         | 5614.414551 | 3 | 1185.959961 | 1185.28942  |
| MQNDAGEFVDLYVPR                  | Q9CQR2 | 0          | N-term +42.01 Da,                         | 5616.907227 | 3 | 1036.51001  | 1035.84343  |
| SLVDLGGKLLAAR                    | Q00420 | 0          | N-term +42.01 Da, K +28.03 Da,            | 5619.387695 | 4 | 889.7199707 | 889.2188845 |
| AAKVFEISIGKFGL                   | P67778 | 0.00296077 | N-term +42.01 Da, K +28.03 Da,            | 5622.056641 | 3 | 938.1599731 | 937.4978768 |
| EEEIAALVIDNGSGMCKAGFAGDDAPR      | P63260 | 0          | N-term +42.01 Da, K +28.03 Da,C +57.02Da, | 5624.244141 | 2 | 1422.689941 | 1422.192697 |

|                                   |        |            |                                           |             |   |             |             |
|-----------------------------------|--------|------------|-------------------------------------------|-------------|---|-------------|-------------|
| CGGLAASAMDELLR                    | Q99J39 | 0          | N-term +42.01 Da, C +57.02Da,             | 5627.615234 | 3 | 937.0900269 | 936.4252179 |
| MQNDAGEFVDLYVPR                   | Q9CQR2 | 0          | N-term +42.01 Da,                         | 5628.117188 | 2 | 1404.619995 | 1404.134189 |
| SQLVECPNPFSEGNQVEIDAISR           | Q91XD4 | 0          | N-term +42.01 Da, C +57.02Da,             | 5628.233398 | 2 | 1210.660034 | 1209.655013 |
| DDDIAALVVDNGSGMCKAGF              | P60710 | 0.01738051 | N-term +42.01 Da, K +28.03 Da,C +57.02Da, | 5629.586426 | 2 | 1293.650024 | 1293.654362 |
| AEYLASIFGTEKDKVNC                 | Q8BGJ9 | 0.00300075 | N-term +42.01 Da, K +28.03 Da,C +57.02Da, | 5629.958984 | 3 | 863.4400024 | 862.7719999 |
| MQLSQQLDLFPECR                    | Q8QZZ7 | 0          | N-term +42.01 Da, C +57.02Da,             | 5631.136719 | 2 | 1294.650024 | 1293.654362 |
| MQNDAGEFVDLYVPR                   | Q9CQR2 | 0          | N-term +42.01 Da,                         | 5635.793457 | 4 | 956.2399902 | 955.7376391 |
| EEEIAALVIDNGSGMCKAGFAGDDAPR       | P63260 | 0          | N-term +42.01 Da, K +28.03 Da,C +57.02Da, | 5636.79541  | 3 | 1139.890503 | 1139.89122  |
| MDSAEELLAPLR                      | Q9CZD3 | 0          | N-term +42.01 Da,                         | 5638.676758 | 4 | 1047.98999  | 1047.997411 |
| PFVELETNLPASR                     | O35215 | 0.00239617 | N-term +42.01 Da,                         | 5639.082031 | 3 | 687.3699951 | 686.7003867 |
| MDLLFGR                           | _sp Q8 | 0.01906519 | N-term +42.01 Da,                         | 5639.769043 | 2 | 954.4000244 | 954.4038372 |
| ADKMDMSLDDIIL                     | O08583 | 0.00238854 | N-term +42.01 Da, K +28.03 Da,            | 5640.508789 | 2 | 1029.545776 | 1029.546942 |
| SMPDAMPLPGVGEELKQAKEIEDAEKYSF     | Q80SW1 | 0.00297177 | N-term +42.01 Da, K +28.03 Da,            | 5644.643066 | 4 | 855.6699829 | 855.1702345 |
| AAPEEQDLTQEQTTEKLLQFQDLTGIESMEQCR | Q3TDN2 | 0          | N-term +42.01 Da, K +28.03 Da,C +57.02Da, | 5646.715332 | 2 | 709.9000244 | 709.8981206 |
| EEEIAALVIDNGSGMCK                 | P63260 | 0          | N-term +42.01 Da, K +28.03 Da,C +57.02Da, | 5646.852539 | 3 | 1098.569946 | 1098.23822  |
| TTQQVLQGGPGPW                     | O70400 | 0.00083472 | N-term +42.01 Da,                         | 5650.604492 | 4 | 917.210022  | 917.4624944 |
| ASGVAVSDGVIKVFNDMKVR              | P18760 | 0          | N-term +42.01 Da, K +28.03 Da,            | 5654.57959  | 3 | 1098.22998  | 1098.23822  |
| SQLVECPNPFSEGNQVEIDAISR           | Q91XD4 | 0          | N-term +42.01 Da, C +57.02Da,             | 5657.865234 | 3 | 936.7518311 | 936.4252179 |
| MDPSWATQESEAVAEKVLRL              | Q9EPQ7 | 0          | N-term +42.01 Da, K +28.03 Da,            | 5658.753906 | 2 | 715.4000244 | 714.8882846 |
| MDPSWATQESEAVAEKVLRL              | Q9EPQ7 | 0          | N-term +42.01 Da, K +28.03 Da,            | 5659.526367 | 2 | 1404.624512 | 1404.134189 |
| MESALDQLKQF                       | Q93092 | 0          | N-term +42.01 Da, K +28.03 Da,            | 5660.191406 | 2 | 1210.170044 | 1209.655013 |
| MDPSWATQESEAVAEKVLRL              | Q9EPQ7 | 0          | N-term +42.01 Da, K +28.03 Da,            | 5661.174805 | 3 | 862.7700195 | 862.7719999 |
| MDLFGDLPEPER                      | Q8R0F6 | 0          | N-term +42.01 Da,                         | 5661.865723 | 2 | 1294.160034 | 1293.654362 |
| SGALDVLQMKKEEDVLKFL               | P14206 | 0          | N-term +42.01 Da, K +28.03 Da,            | 5664.073242 | 2 | 1209.650024 | 1209.655013 |
| MFSWLGNDDR                        | Q9QXY6 | 0          | N-term +42.01 Da,                         | 5667.120117 | 3 | 1139.891113 | 1139.89122  |
| SGALDVLQMKKEEDVLKFL               | P14206 | 0          | N-term +42.01 Da, K +28.03 Da,            | 5667.538574 | 2 | 803.8599854 | 803.8636269 |
| ATDSWALAVDEQEAAVKSM               | Q61655 | 0          | N-term +42.01 Da, K +28.03 Da,            | 5671.954102 | 2 | 1030.050049 | 1029.546942 |
| DDDIAALVVDNGSGMCKAGF              | P60710 | 0          | N-term +42.01 Da, K +28.03 Da,C +57.02Da, | 5674.711914 | 2 | 1029.550049 | 1029.546942 |
| ASFVTEVLAH                        | O54692 | 0          | N-term +42.01 Da,                         | 5674.838867 | 2 | 954.9000244 | 954.4038372 |
| ALQVELIPTGEIIR                    | Q9WTI7 | 0.00414079 | N-term +42.01 Da,                         | 5676.827637 | 2 | 966.5300293 | 966.5347906 |
| MDPSWATQESEAVAEKVLRL              | Q9EPQ7 | 0          | N-term +42.01 Da, K +28.03 Da,            | 5686.806641 | 2 | 683.3200073 | 683.3250852 |
| MESALDQLKQF                       | Q93092 | 0          | N-term +42.01 Da, K +28.03 Da,            | 5688.88623  | 2 | 1016.059998 | 1015.046911 |
| SGALDVLQMKKEEDVLKFL               | P14206 | 0          | N-term +42.01 Da, K +28.03 Da,            | 5691.001953 | 2 | 714.8900146 | 714.8882846 |
| WLKMIQLRL                         | P15539 | 0.019124   | N-term +42.01 Da, K +28.03 Da,            | 5696.727539 | 4 | 856.4699707 | 855.967264  |
| MFSWLGNDDR                        | Q9QXY6 | 0          | N-term +42.01 Da,                         | 5697.241211 | 4 | 810.4400024 | 810.1895953 |
| DDDIAALVVDNGSGMCKAGF              | P60710 | 0          | N-term +42.01 Da, K +28.03 Da,C +57.02Da, | 5698.560059 | 3 | 821.7700195 | 821.4390097 |
| ADQLTEEQIAEFKEAF                  | P62204 | 0          | N-term +42.01 Da, K +28.03 Da,            | 5698.864258 | 4 | 786.6500244 | 786.4052101 |
| ALQVELIPTGEIIR                    | Q9WTI7 | 0.03927315 | N-term +42.01 Da,                         | 5700.495605 | 4 | 855.9699707 | 855.967264  |
| ATALSEEELDNEDYSSLNVR              | Q5U458 | 0          | N-term +42.01 Da,                         | 5700.600586 | 2 | 1051.420044 | 1051.420324 |
| ADLSLVDALTEPPPEIEGEIKR            | P27546 | 0          | N-term +42.01 Da, K +28.03 Da,            | 5701.226563 | 2 | 1277.099976 | 1276.103441 |

|                                 |         |            |                                           |             |   |             |             |
|---------------------------------|---------|------------|-------------------------------------------|-------------|---|-------------|-------------|
| ATALSEEELDNEDYSSLNVR            | Q5U458  | 0          | N-term +42.01 Da,                         | 5706.003418 | 3 | 1113.920044 | 1113.589252 |
| ADQLTEEQIAEFKEAF                | P62204  | 0          | N-term +42.01 Da, K +28.03 Da,            | 5708.793945 | 2 | 1232.160034 | 1231.654876 |
| TEWEAATPAVAETPDIKLFGKW          | P97461  | 0          | N-term +42.01 Da, K +28.03 Da,            | 5725.268066 | 3 | 1140.550049 | 1139.89122  |
| DDIAALVVDNGSGMCKAGF             | P60710  | 0          | N-term +42.01 Da, K +28.03 Da,C +57.02Da, | 5731.210449 | 4 | 827.6799927 | 827.4251372 |
| ATALSEEELDNEDYSSLNVR            | Q5U458  | 0          | N-term +42.01 Da,                         | 5748.215332 | 2 | 856.9099731 | 856.9099462 |
| TEWEAATPAVAETPDIKLFGKW          | P97461  | 0          | N-term +42.01 Da, K +28.03 Da,            | 5750.065918 | 2 | 735.9000244 | 735.4015592 |
| VHLTDAEKAAVSCLWGKVN SDEVGGEALGR | P02088  | 0          | N-term +42.01 Da, K +28.03 Da,C +57.02Da, | 5752.52832  | 3 | 969.1799927 | 969.1735552 |
| VHLTDAEKAAVSCLWGKVN SDEVGGEALGR | P02088  | 0          | N-term +42.01 Da, K +28.03 Da,C +57.02Da, | 5756.675293 | 3 | 1140.22998  | 1139.89122  |
| FEELNADLFR                      | P17156  | 0.00299625 | N-term +42.01 Da,                         | 5757.079102 | 3 | 921.4400024 | 920.7633932 |
| VHLTDAEKAAVSCLWGKVN SDEVGGEALGR | P02088  | 0          | N-term +42.01 Da, K +28.03 Da,C +57.02Da, | 5757.943359 | 3 | 777.3912354 | 777.3922821 |
| ADLSLVDALTEPPPEIEGEIKR          | P27546  | 0          | N-term +42.01 Da, K +28.03 Da,            | 5771.950195 | 2 | 1165.579956 | 1165.584785 |
| DDIAALVVDNGSGMCKAGF             | P60710  | 0          | N-term +42.01 Da, K +28.03 Da,C +57.02Da, | 5774.302246 | 3 | 1220.579956 | 1220.240356 |
| TDAAVSFAKDFLAGGVA AAIKSTAVAPIER | P51881  | 0          | N-term +42.01 Da, K +28.03 Da,            | 5778.390625 | 3 | 917.4899902 | 917.1605809 |
| MEANGFGLQNFPELKN DTFRLR         | P70697  | 0          | N-term +42.01 Da, K +28.03 Da,            | 5778.55127  | 2 | 1387.680054 | 1386.67414  |
| ADLSLVDALTEPPPEIEGEIKR          | P27546  | 0          | N-term +42.01 Da, K +28.03 Da,            | 5778.689453 | 2 | 1099.540039 | 1100.050046 |
| FDKFDVTLGSLVGR                  | Q9R0H0  | 0.00611413 | N-term +42.01 Da, K +28.03 Da,            | 5779.909668 | 3 | 924.789978  | 924.7851857 |
| MEEGMNILDHFGIQSTR               | P35576  | 0          | N-term +42.01 Da,                         | 5780.125    | 3 | 917.8300171 | 917.1605809 |
| DDIAALVVDNGSGMCKAGF             | P60710  | 0          | N-term +42.01 Da, K +28.03 Da,C +57.02Da, | 5780.266602 | 2 | 1386.670044 | 1386.67414  |
| AADISQWAGPLCLQEVD EPPQH         | P70296  | 0          | N-term +42.01 Da, C +57.02Da,             | 5782.027832 | 2 | 1423.189941 | 1422.192697 |
| ADLSLVDALTEPPPEIEGEIKR          | P27546  | 0          | N-term +42.01 Da, K +28.03 Da,            | 5784.981445 | 3 | 1032.48999  | 1031.81939  |
| AADISQWAGPLCLQEVD EPPQH         | P70296  | 0          | N-term +42.01 Da, C +57.02Da,             | 5785.554688 | 2 | 1547.72998  | 1547.225447 |
| SDTSEEIPNFEEMFASR               | Q9CQY2  | 0          | N-term +42.01 Da,                         | 5788.702148 | 2 | 1548.22998  | 1547.225447 |
| ADLSLVDALTEPPPEIEGEIKR          | P27546  | 0          | N-term +42.01 Da, K +28.03 Da,            | 5795.512695 | 2 | 913.9800415 | 913.9810395 |
| DDIAALVVDNGSGMCKAGF             | P60710  | 0          | N-term +42.01 Da, K +28.03 Da,C +57.02Da, | 5804.054688 | 3 | 1140.560059 | 1139.89122  |
| AATSEGPLFAASIEKTWGSVVR          | Q80YV2  | 0.00291333 | N-term +42.01 Da, K +28.03 Da,            | 5810.416992 | 3 | 1391.310059 | 1390.969543 |
| ADLSLVDALTEPPPEIEGEIKR          | P27546  | 0          | N-term +42.01 Da, K +28.03 Da,            | 5811.168945 | 2 | 1422.699951 | 1422.192697 |
| DDIAALVVDNGSGMCKAGF             | P60710  | 0          | N-term +42.01 Da, K +28.03 Da,C +57.02Da, | 5811.841797 | 2 | 1262.180054 | 1262.181926 |
| FKDLDAVAVLVGSMR                 | P14152  | 0          | N-term +42.01 Da, K +28.03 Da,            | 5811.937988 | 3 | 842.1199951 | 841.7903764 |
| ADQLTEEQIAEFKEAF                | P62204  | 0          | N-term +42.01 Da, K +28.03 Da,            | 5813.84668  | 3 | 948.4628906 | 948.4642237 |
| MDEMATTQISKDELDELKEAF           | Q99K51  | 0          | N-term +42.01 Da, K +28.03 Da,            | 5813.968262 | 2 | 797.9099731 | 797.9109026 |
| MDEMATTQISKDELDELKEAF           | Q99K51  | 0          | N-term +42.01 Da, K +28.03 Da,            | 5817.663086 | 4 | 711.8499756 | 711.5999869 |
| DDIAALVVDNGSGMCKAGF             | P60710  | 0.00082305 | N-term +42.01 Da, K +28.03 Da,C +57.02Da, | 5818.332031 | 2 | 741.8900146 | 742.3826376 |
| AADISQWAGPLC                    | P70296  | 0.00602007 | N-term +42.01 Da, C +57.02Da,             | 5818.62793  | 3 | 1036.189941 | 1035.853383 |
| SPDRLADINYEGRLEAVSRK            | QP6PFD9 | 0.01959584 | N-term +42.01 Da, K +28.03 Da,            | 5826.838379 | 2 | 914.4799805 | 913.9810395 |
| MDELQDVQLTEIKPL                 | Q9QYF9  | 0          | N-term +42.01 Da, K +28.03 Da,            | 5831.528809 | 3 | 1282.300049 | 1281.614082 |
| ASGVAVSDGVIVKVFNDM              | P18760  | 0          | N-term +42.01 Da, K +28.03 Da,            | 5841.736328 | 2 | 1422.19043  | 1422.192697 |
| ADQLTEEQIAEFKEAF                | P62204  | 0          | N-term +42.01 Da, K +28.03 Da,            | 5843.243652 | 3 | 842.1199951 | 841.7903764 |
| AETLEFNDIFQEVKGS MNDGR          | Q08943  | 0          | N-term +42.01 Da, K +28.03 Da,            | 5843.345703 | 2 | 1262.181274 | 1262.181926 |
| AETLEFNDIFQEVKGS MNDGR          | Q08943  | 0          | N-term +42.01 Da, K +28.03 Da,            | 5844.731445 | 3 | 948.4625854 | 948.4642237 |
| AETLEFNDIFQEVKGS MNDGR          | Q08943  | 0          | N-term +42.01 Da, K +28.03 Da,            | 5844.881836 | 2 | 797.90979   | 797.9109026 |

|                                           |        |            |                                           |             |   |             |             |
|-------------------------------------------|--------|------------|-------------------------------------------|-------------|---|-------------|-------------|
| ADQLTEEQIAEFKEAF                          | P62204 | 0          | N-term +42.01 Da, K +28.03 Da,            | 5846.310059 | 2 | 532.7600098 | 532.7633115 |
| ADDLDFETGDAGASATFPMQC                     | P63242 | 0          | N-term +42.01 Da, C +57.02Da,             | 5847.233398 | 3 | 1391.640015 | 1390.969543 |
| ALTSFLPAPTQLSQDQLEAEER                    | Q9CSN1 | 0          | N-term +42.01 Da,                         | 5850.708984 | 4 | 711.8499756 | 711.5999869 |
| AAGAAAAAFLNQESR                           | Q9CPP0 | 0          | N-term +42.01 Da,                         | 5852.763184 | 3 | 982.4799805 | 981.8172092 |
| ALTSFLPAPTQLSQDQLEAEER                    | Q9CSN1 | 0          | N-term +42.01 Da,                         | 5857.036133 | 2 | 1473.219971 | 1472.222176 |
| ALTSFLPAPTQLSQDQLEAEER                    | Q9CSN1 | 0          | N-term +42.01 Da,                         | 5858.435547 | 4 | 712.0999756 | 711.5999869 |
| DDIAALVVDNGSGMCKAGF                       | P60710 | 0.00227618 | N-term +42.01 Da, K +28.03 Da,C +57.02Da, | 5860.28125  | 2 | 1017.460022 | 1017.470674 |
| ASGVAVSDGVKVFNDM                          | P18760 | 0          | N-term +42.01 Da, K +28.03 Da,            | 5862.86377  | 3 | 679.3200073 | 678.6495413 |
| DDIAALVVDNGSGMCKAGF                       | P60710 | 0.00228659 | N-term +42.01 Da, K +28.03 Da,C +57.02Da, | 5866.407227 | 2 | 1142.089966 | 1141.089172 |
| MDDSEVESTASILASVKEQEAQFEKLTR              | P30999 | 0          | N-term +42.01 Da, K +28.03 Da,            | 5869.65918  | 2 | 1141.089966 | 1141.089172 |
| ADQLTEEQIAEFKEAF                          | P62204 | 0          | N-term +42.01 Da, K +28.03 Da,            | 5870.809082 | 2 | 1344.579956 | 1344.581257 |
| AADLGQIPDVIDSDGVFKY                       | Q9DAK9 | 0          | N-term +42.01 Da, K +28.03 Da,            | 5873.84082  | 2 | 1422.689941 | 1422.192697 |
| AADLGQIPDVIDSDGVFKY                       | Q9DAK9 | 0          | N-term +42.01 Da, K +28.03 Da,            | 5875.961426 | 3 | 948.7999878 | 948.4642237 |
| ADQLTEEQIAEFKEAF                          | P62204 | 0.00229533 | N-term +42.01 Da, K +28.03 Da,            | 5876.884766 | 2 | 1220.5      | 1219.992464 |
| AADLGQIPDVIDSDGVFKY                       | Q9DAK9 | 0          | N-term +42.01 Da, K +28.03 Da,            | 5879.093262 | 3 | 1346.670044 | 1346.670145 |
| LQFWTETLPR                                | Q63880 | 0          | N-term +42.01 Da,                         | 5880.616699 | 3 | 894.4699707 | 894.4693031 |
| ATLCLFMDGTLTAPR                           | Q9Z2M7 | 0          | N-term +42.01 Da, C +57.02Da,             | 5882.326172 | 3 | 963.4799805 | 962.8123018 |
| STIQNLQSFDPFADATKGDLLPAGTEDYIHIR          | Q9CXU9 | 0          | N-term +42.01 Da, K +28.03 Da,            | 5882.711914 | 3 | 945.5300293 | 945.190095  |
| ADQLTEEQIAEFKEAF                          | P62204 | 0          | N-term +42.01 Da, K +28.03 Da,            | 5883.259766 | 4 | 631.6099854 | 631.3630217 |
| LLADAVAVTMGPKGR                           | P63038 | 0          | N-term +42.01 Da, K +28.03 Da,            | 5885.996094 | 2 | 625.2972412 | 625.2977161 |
| AADLGQIPDVIDSDGVFKY                       | Q9DAK9 | 0          | N-term +42.01 Da, K +28.03 Da,            | 5887.679688 | 2 | 665.3499756 | 665.3528253 |
| SSEEGKLFVGGLNFNTEQALEHDHFFSSFGPISEVVVVKDR | O89086 | 0          | N-term +42.01 Da, K +28.03 Da,            | 5888.423828 | 2 | 1219.98999  | 1219.992464 |
| ASALEQFVNSVR                              | O88543 | 0          | N-term +42.01 Da,                         | 5890.31543  | 4 | 1010.75     | 1010.254428 |
| DDIAALVVDNGSGMCKAGF                       | P60710 | 0.00161421 | N-term +42.01 Da, K +28.03 Da,C +57.02Da, | 5893.21875  | 3 | 790.7399902 | 790.4093842 |
| ADQLTEEQIAEFKEAF                          | P62204 | 0          | N-term +42.01 Da, K +28.03 Da,            | 5898.89502  | 2 | 1140.050049 | 1139.543406 |
| ADQLTEEQIAEFKEAF                          | P62204 | 0          | N-term +42.01 Da, K +28.03 Da,            | 5909.384766 | 3 | 948.789978  | 948.4642237 |
| PTTLAETMGQAEMWLIR                         | Q8VCN3 | 0          | N-term +42.01 Da,                         | 5913.253418 | 3 | 895.1300049 | 894.4693031 |
| GKQGFIDLPEFPFGLPR                         | O35490 | 0          | N-term +42.01 Da, K +28.03 Da,            | 5913.434082 | 4 | 920.4699707 | 920.4699136 |
| DDIAALVVDNGSGMCKAGF                       | P60710 | 0          | N-term +42.01 Da, K +28.03 Da,C +57.02Da, | 5917.259766 | 2 | 625.2975464 | 625.2977161 |
| ADQLTEEQIAEFKEAF                          | P62204 | 0          | N-term +42.01 Da, K +28.03 Da,            | 5919.258301 | 3 | 1226.939941 | 1226.957459 |
| MDSYVIQTNVNDLPSVLDRV                      | Q8QZR1 | 0          | N-term +42.01 Da,                         | 5922.427734 | 3 | 1242.599976 | 1242.269703 |
| DDIAALVVDNGSGMCKAGF                       | P60710 | 0.00227273 | N-term +42.01 Da, K +28.03 Da,C +57.02Da, | 5928.04248  | 3 | 1242.939941 | 1242.269703 |
| ATLCLFMDGTLTAPR                           | Q9Z2M7 | 0          | N-term +42.01 Da, C +57.02Da,             | 5928.559082 | 2 | 1422.689941 | 1422.192697 |
| MDAVLSDFVR                                | B2RUR8 | 0          | N-term +42.01 Da,                         | 5936.045898 | 2 | 1240.670044 | 1240.170162 |
| AADISQWAGPLCLQEVDEPPQHAL                  | P70296 | 0          | N-term +42.01 Da, C +57.02Da,             | 5937.131348 | 2 | 1141.51001  | 1142.007719 |
| PAGIVAVLKQQR                              | Q9CS74 | 0.04317789 | N-term +42.01 Da, K +28.03 Da,            | 5938.257324 | 4 | 1010.76001  | 1010.254428 |
| ADQLTEEQIAEFKEAF                          | P62204 | 0          | N-term +42.01 Da, K +28.03 Da,            | 5944.55127  | 3 | 948.460022  | 948.4642237 |
| AAAAAAAAAAAAAGSDSDWDATFMSMEDPVR           | Q66JS6 | 0          | N-term +42.01 Da,                         | 5944.856445 | 3 | 814.7800293 | 815.116312  |
| DDIAALVVDNGSGM                            | P60710 | 0.01735896 | N-term +42.01 Da,                         | 5946.305664 | 4 | 932.2000122 | 931.9540966 |
| AAAAAAAAAAAAAGSDSDWDATFMSMEDPVR           | Q66JS6 | 0          | N-term +42.01 Da,                         | 5948.134277 | 2 | 716.4342651 | 716.4433633 |

|                                      |        |            |                                           |             |   |             |             |
|--------------------------------------|--------|------------|-------------------------------------------|-------------|---|-------------|-------------|
| GVVDNFPLLKALR                        | P30115 | 0          | N-term +42.01 Da, K +28.03 Da,            | 5950.085938 | 2 | 1006.509338 | 1006.514776 |
| DDDIAALVVDNGSGMCKAGF                 | P60710 | 0.0023511  | N-term +42.01 Da, K +28.03 Da,C +57.02Da, | 5950.219727 | 2 | 1024.52002  | 1024.5022   |
| DDDIAALVVDNGSGMC                     | P60710 | 0.00417246 | N-term +42.01 Da, C +57.02Da,             | 5952.416504 | 3 | 975.460022  | 975.7810467 |
| ADPWQECMDYAVILAR                     | O55023 | 0          | N-term +42.01 Da, C +57.02Da,             | 5954.386719 | 2 | 1462.680054 | 1463.167932 |
| AADLGQIPDVIDSDGVFKY                  | Q9DAK9 | 0.01040989 | N-term +42.01 Da, K +28.03 Da,            | 5957.515137 | 2 | 758.9000244 | 757.8961096 |
| CDFTEDQTAEFKEAFQLFDR                 | Q60605 | 0          | N-term +42.01 Da, K +28.03 Da,C +57.02Da, | 5962.633301 | 4 | 849.210022  | 848.9579702 |
| TEWEAATPAVAETPDIKLF                  | P97461 | 0          | N-term +42.01 Da, K +28.03 Da,            | 5963.983398 | 2 | 1300.109985 | 1299.111472 |
| AAAAAAAAAAAAAGSDSDWDADTFMEDPVR       | Q66JS6 | 0          | N-term +42.01 Da,                         | 5965.915527 | 2 | 782.3768311 | 782.377227  |
| AAAAAAAAAAAAAGSDSDWDADTFMEDPVR       | Q66JS6 | 0          | N-term +42.01 Da,                         | 5971.621094 | 3 | 1242.599976 | 1242.269703 |
| ADQLTEEQIAEFKEAF                     | P62204 | 0          | N-term +42.01 Da, K +28.03 Da,            | 5971.820801 | 3 | 955.7700195 | 955.1127513 |
| CDFTEDQTAEFKEAFQLFDR                 | Q60605 | 0          | N-term +42.01 Da, K +28.03 Da,C +57.02Da, | 5974.549805 | 3 | 1347.01001  | 1346.670145 |
| GVVDNFPLLKALR                        | P30115 | 0          | N-term +42.01 Da, K +28.03 Da,            | 5977.512695 | 2 | 594.3200073 | 593.8193388 |
| TEWEAATPAVAETPDIKLF                  | P97461 | 0          | N-term +42.01 Da, K +28.03 Da,            | 5979.11084  | 2 | 630.8400269 | 630.8381622 |
| CDFTEDQTAEFKEAFQLFDR                 | Q60605 | 0          | N-term +42.01 Da, K +28.03 Da,C +57.02Da, | 5979.395996 | 3 | 949.1300049 | 948.4642237 |
| TEWEAATPAVAETPDIKLF                  | P97461 | 0          | N-term +42.01 Da, K +28.03 Da,            | 5984.743164 | 3 | 880.460022  | 880.1338147 |
| ALPIIVKWGGQEY                        | Q8BGR9 | 0.00418994 | N-term +42.01 Da, K +28.03 Da,            | 5988.77832  | 2 | 757.8955078 | 757.8961096 |
| TEWEAATPAVAETPDIKLF                  | P97461 | 0          | N-term +42.01 Da, K +28.03 Da,            | 5989.177246 | 2 | 532.7606812 | 532.761626  |
| MPRQGYQFEQACFVNPSFQWGLLNRSRRWKPLMGQR | Q80UG8 | 0.00862641 | N-term +42.01 Da, K +28.03 Da,C +57.02Da, | 5993.206055 | 2 | 984.9899902 | 984.9923336 |
| TEWEAATPAVAETPDIKLF                  | P97461 | 0          | N-term +42.01 Da, K +28.03 Da,            | 5995.199219 | 2 | 1067.079956 | 1066.073324 |
| SFIPVAEDSDFPIQNLPLYGVFSTQSNPKPR      | P35505 | 0          | N-term +42.01 Da, K +28.03 Da,            | 5995.611328 | 2 | 1422.680054 | 1422.192697 |
| ASGVTVNDEVIKVFNDM                    | P45591 | 0.04084014 | N-term +42.01 Da, K +28.03 Da,            | 5995.72998  | 3 | 657.3300171 | 656.9973145 |
| TEWEAATPAVAETPDIKLF                  | P97461 | 0          | N-term +42.01 Da, K +28.03 Da,            | 5997.136719 | 3 | 1231.900024 | 1231.572723 |
| SFIPVAEDSDFPIQNLPLYGVFSTQSNPKPR      | P35505 | 0          | N-term +42.01 Da, K +28.03 Da,            | 6004.429199 | 3 | 806.4199829 | 806.0833373 |
| MESYDVIANQPVVDINGSGVIKAGF            | P61164 | 0.03642773 | N-term +42.01 Da, K +28.03 Da,            | 6010.989746 | 3 | 949.1300049 | 948.4642237 |
| ADQLTEEQIAEFKEAF                     | P62204 | 0          | N-term +42.01 Da, K +28.03 Da,            | 6012.901855 | 3 | 668.3381958 | 668.3386832 |
| CDFTEDQTAEFKEAFQLFDR                 | Q60605 | 0.00416089 | N-term +42.01 Da, K +28.03 Da,C +57.02Da, | 6018.378418 | 2 | 1026.51001  | 1026.512902 |
| MENLFQLVR                            | Q9CZ42 | 0.00237342 | N-term +42.01 Da,                         | 6018.513672 | 2 | 944.9899902 | 944.9881966 |
| ADQLTEEQIAEFKEAF                     | P62204 | 0          | N-term +42.01 Da, K +28.03 Da,            | 6019.431152 | 4 | 921.960022  | 921.7048702 |
| MLSLDFLDDVR                          | Q9R0P6 | 0          | N-term +42.01 Da,                         | 6020.889648 | 2 | 757.8954468 | 757.8961096 |
| SFIPVAEDSDFPIQNLPLYGVFSTQSNPKPR      | P35505 | 0          | N-term +42.01 Da, K +28.03 Da,            | 6021.012207 | 2 | 532.7614746 | 532.761626  |
| TEWEAATPAVAETPDIKLF                  | P97461 | 0.00083403 | N-term +42.01 Da, K +28.03 Da,            | 6021.407227 | 4 | 961.9699707 | 961.4623807 |
| ADQLTEEQIAEFKEAFSLFDKDGDTITTKELGTVMR | P62204 | 0          | N-term +42.01 Da, K +28.03 Da,            | 6023.111328 | 2 | 817.4179077 | 817.4180376 |
| SFIPVAEDSDFPIQNLPLYGVFSTQSNPKPR      | P35505 | 0          | N-term +42.01 Da, K +28.03 Da,            | 6023.708496 | 2 | 1002.02002  | 1002.004387 |
| MEPAAEILVDSPDVVYSPETIEAR             | Q9JHU9 | 0          | N-term +42.01 Da,                         | 6024.60791  | 2 | 984.9909058 | 984.9923336 |
| MNAAAEAFNILLATDSYKVTHT               | Q99KQ4 | 0          | N-term +42.01 Da, K +28.03 Da,            | 6025.27002  | 3 | 1321.619995 | 1321.281381 |
| MNAAAEAFNILLATDSYKVTHT               | Q99KQ4 | 0          | N-term +42.01 Da, K +28.03 Da,            | 6031.572754 | 2 | 1023.003296 | 1023.005738 |
| DDDIAALVVDNGSGM                      | P60710 | 0.01677019 | N-term +42.01 Da,                         | 6032.950195 | 3 | 1228.939941 | 1228.604068 |
| LTAIELELAGNAAR                       | P22752 | 0.00162866 | N-term +42.01 Da,                         | 6035.533203 | 2 | 898.4193115 | 898.4196237 |
| SFIPVAEDSDFPIQNLPLYGVFSTQSNPKPR      | P35505 | 0          | N-term +42.01 Da, K +28.03 Da,            | 6035.928711 | 3 | 1228.599976 | 1228.604068 |
| IQDAGLVLDALR                         | Q8R0N6 | 0          | N-term +42.01 Da,                         | 6044.038086 | 3 | 599.6199951 | 599.2821746 |

|                                      |        |            |                                           |             |   |             |             |
|--------------------------------------|--------|------------|-------------------------------------------|-------------|---|-------------|-------------|
| AADISQWAGPL                          | P70296 | 0.00924703 | N-term +42.01 Da,                         | 6045.041504 | 3 | 669.0100098 | 668.3386832 |
| ADQLTEEQIAEFKEAFSLFDKDGDTITTKELGTVMR | P62204 | 0          | N-term +42.01 Da, K +28.03 Da,            | 6045.585449 | 3 | 948.460022  | 948.4642237 |
| FFLTVPESVLKVAR                       | P55264 | 0.00418118 | N-term +42.01 Da, K +28.03 Da,            | 6048.601074 | 3 | 1282.290039 | 1281.614082 |
| SEAAADREDDPNFFKMVEGFFDR              | P26443 | 0          | N-term +42.01 Da, K +28.03 Da,            | 6048.944336 | 2 | 1133.52002  | 1133.520265 |
| MLSLDFLDDVR                          | Q9R0P6 | 0          | N-term +42.01 Da,                         | 6050.166992 | 4 | 921.9500122 | 921.7048702 |
| AAKVFESIGKFLAL                       | P67778 | 0.0424172  | N-term +42.01 Da, K +28.03 Da,            | 6050.899414 | 2 | 887.9400024 | 887.9415803 |
| QNNELEKVALK                          | Q8C636 | 0.03541913 | N-term +42.01 Da, K +28.03 Da,            | 6051.799805 | 2 | 757.8950806 | 757.8961096 |
| LTAEILELAGNAAR                       | P22752 | 0.00083612 | N-term +42.01 Da,                         | 6052.523438 | 4 | 961.9699707 | 961.4623807 |
| MDGVVTDLIAVGLKR                      | G3UXA6 | 0          | N-term +42.01 Da, K +28.03 Da,            | 6060.766602 | 3 | 1011.549988 | 1011.548282 |
| MADVVFVGVPSVIVSR                     | Q8VCT4 | 0.00082169 | N-term +42.01 Da,                         | 6061.137207 | 2 | 989.9299927 | 989.9313816 |
| MDGVVTDLIAVGLKR                      | G3UXA6 | 0          | N-term +42.01 Da, K +28.03 Da,            | 6061.938477 | 3 | 855.7700195 | 855.4326502 |
| GDKPIWEQIGSSFIQHYY                   | P61971 | 0          | N-term +42.01 Da, K +28.03 Da,            | 6064.78125  | 3 | 855.4400024 | 855.4326502 |
| AAPSGSVNCEEFAEFQELLKVMR              | Q8R3Q6 | 0          | N-term +42.01 Da, K +28.03 Da,C +57.02Da, | 6065.918457 | 2 | 839.9400024 | 839.9396603 |
| AAPSGSVNCEEFAEFQELLKVMR              | Q8R3Q6 | 0          | N-term +42.01 Da, K +28.03 Da,C +57.02Da, | 6066.512207 | 2 | 898.4180908 | 898.4196237 |
| AAKVFESIGKFLAL                       | P67778 | 0.04322767 | N-term +42.01 Da, K +28.03 Da,            | 6067.03125  | 2 | 1109.550049 | 1109.046449 |
| ADTFLEHLCLLDIDSEPVAAR                | P53657 | 0          | N-term +42.01 Da, C +57.02Da,             | 6068.776855 | 2 | 840.4400024 | 839.9396603 |
| AWALDIAELR                           | Q8QZR5 | 0.01040312 | N-term +42.01 Da,                         | 6071.11084  | 2 | 837.4000244 | 836.4042992 |
| EELDPGVVDNFPLKALR                    | P30115 | 0          | N-term +42.01 Da, K +28.03 Da,            | 6072.003418 | 2 | 1049.01001  | 1048.99263  |
| AEAAAAGASGETMAALVAAEGSLGPAGWSAGR     | P97364 | 0          | N-term +42.01 Da,                         | 6073.458496 | 2 | 1109.060059 | 1109.046449 |
| ADTFLEHLCLLDIDSEPVAAR                | P53657 | 0          | N-term +42.01 Da, C +57.02Da,             | 6074.514648 | 3 | 599.2800293 | 599.2821746 |
| ATTAELFEPPFVADEYIER                  | Q3TPX4 | 0          | N-term +42.01 Da,                         | 6079.560059 | 2 | 1432.660034 | 1432.165489 |
| AAPSGSVNCEEFAEFQELLKVMR              | Q8R3Q6 | 0          | N-term +42.01 Da, K +28.03 Da,C +57.02Da, | 6080.42627  | 3 | 1052.880005 | 1052.875959 |
| ADQLTEEQIAEFKEAFSLFDKDGDTITTKELGTVMR | P62204 | 0          | N-term +42.01 Da, K +28.03 Da,            | 6081.210449 | 3 | 955.1126709 | 955.1127513 |
| DDIAALVVDNGSGM                       | P60710 | 0          | N-term +42.01 Da,                         | 6081.445801 | 3 | 1282.300049 | 1281.614082 |
| TDAAVSFAKDFL                         | P51881 | 0.00796813 | N-term +42.01 Da, K +28.03 Da,            | 6082.240723 | 3 | 1074.140015 | 1073.809286 |
| ADQLTEEQIAEFKEAFSLFDKDGDTITTK        | P62204 | 0          | N-term +42.01 Da, K +28.03 Da,            | 6083.226074 | 2 | 572.8099976 | 572.8140563 |
| ATVWDEAEQDGIGEEVLKMSTEEIVQR          | O88685 | 0          | N-term +42.01 Da, K +28.03 Da,            | 6089.796387 | 3 | 995.8099976 | 995.1440514 |
| EEEIAALVIDNGSGMCKAGF                 | P63260 | 0.00414365 | N-term +42.01 Da, K +28.03 Da,C +57.02Da, | 6090.516113 | 2 | 643.8300171 | 643.3353534 |
| VNPTVFFDITADDEPLGR                   | P17742 | 0          | N-term +42.01 Da,                         | 6091.722656 | 2 | 989.9313354 | 989.9313816 |
| DDIAALVVDNGSGM                       | P60710 | 0          | N-term +42.01 Da,                         | 6091.929199 | 3 | 992.8200073 | 993.1559572 |
| MEGEAVEAIVEESETFIKGR                 | Q61164 | 0          | N-term +42.01 Da, K +28.03 Da,            | 6097.430176 | 2 | 898.4190063 | 898.4196237 |
| ENVQDVLPALPNPDDYFLLR                 | Q5SQ27 | 0.04279931 | N-term +42.01 Da,                         | 6097.663574 | 4 | 837.7299805 | 837.231263  |
| EEEIAALVIDNGSGMCKAGF                 | P63260 | 0          | N-term +42.01 Da, K +28.03 Da,C +57.02Da, | 6098.557129 | 3 | 868.1300049 | 867.7888131 |
| TDAAVSFAKDFL                         | P51881 | 0.00239808 | N-term +42.01 Da, K +28.03 Da,            | 6103.667969 | 3 | 995.1400146 | 995.1440514 |
| AAAVEPEVEDPLWSFVR                    | Q8C436 | 0          | N-term +42.01 Da,                         | 6104.400391 | 3 | 1034.829956 | 1034.16679  |
| ADQLTEEQIAEFKEAFSLFDKDGDTITTKELGTVMR | P62204 | 0          | N-term +42.01 Da, K +28.03 Da,            | 6109.263184 | 2 | 925.9287109 | 925.9315181 |
| ADQLTEEQIAEFKEAF                     | P62204 | 0          | N-term +42.01 Da, K +28.03 Da,            | 6119.53418  | 3 | 486.958252  | 487.296306  |
| MESYDIANQPVVINDNGSGVIKAGF            | Q8R5C5 | 0.00292398 | N-term +42.01 Da, K +28.03 Da,            | 6121.478516 | 3 | 1123.199951 | 1122.864671 |
| EEEIAALVIDNGSGMCKAGF                 | P63260 | 0          | N-term +42.01 Da, K +28.03 Da,C +57.02Da, | 6121.603027 | 3 | 955.7999878 | 955.1127513 |
| AEAAAAGASGETMAALVAAEGSLGPAGWSAGR     | P97364 | 0          | N-term +42.01 Da,                         | 6126.500488 | 4 | 842.6500244 | 842.4003227 |



|                                      |        |            |                                           |             |   |             |             |
|--------------------------------------|--------|------------|-------------------------------------------|-------------|---|-------------|-------------|
| AAMLGDAIMVAKGLAK                     | Q60936 | 0          | N-term +42.01 Da, K +28.03 Da,            | 6127.47168  | 2 | 680.2999878 | 680.2979137 |
| ATSWGSIQDEKQLEEL                     | P51855 | 0.00925926 | N-term +42.01 Da, K +28.03 Da,            | 6128.140137 | 2 | 898.4179688 | 898.4196237 |
| EEEIAALVIDNGSGMCKAGF                 | P63260 | 0          | N-term +42.01 Da, K +28.03 Da,C +57.02Da, | 6129.450684 | 4 | 837.2304077 | 837.231263  |
| EEEIAALVIDNGSGMCKAGF                 | P63260 | 0          | N-term +42.01 Da, K +28.03 Da,C +57.02Da, | 6131.916504 | 2 | 1374.150024 | 1374.150696 |
| MDDTLFQLKF                           | Q921W0 | 0          | N-term +42.01 Da, K +28.03 Da,            | 6135.078613 | 2 | 1375.150024 | 1374.150696 |
| EEEIAALVIDNGSGMCKAGF                 | P63260 | 0          | N-term +42.01 Da, K +28.03 Da,C +57.02Da, | 6136.344727 | 2 | 1374.650024 | 1374.150696 |
| ADQLTEEQIAEFKEAFSLFDKDGDTITTKELGTVMR | P62204 | 0          | N-term +42.01 Da, K +28.03 Da,            | 6138.671875 | 3 | 917.1099854 | 916.4362226 |
| AVTSWLEVLRL                          | Q8BPA8 | 0          | N-term +42.01 Da,                         | 6140.200684 | 2 | 926.4400024 | 925.9315181 |
| EEEIAALVIDNGSGMCKAGF                 | P63260 | 0          | N-term +42.01 Da, K +28.03 Da,C +57.02Da, | 6140.291504 | 3 | 880.4699707 | 880.1338147 |
| GSGPIDPKELLKGLDSFLTR                 | Q80W00 | 0          | N-term +42.01 Da, K +28.03 Da,            | 6140.407715 | 2 | 1320.199951 | 1319.697084 |
| TDAAVSFADKFLAGGVAAAIK                | P51881 | 0          | N-term +42.01 Da, K +28.03 Da,            | 6142.303711 | 3 | 790.0800171 | 790.4093842 |
| VNPTVFFDITADDEPLGR                   | P17742 | 0          | N-term +42.01 Da,                         | 6145.735352 | 2 | 1005.48999  | 1005.493123 |
| ATVWDEAEQDGIIEEVLKMTSEIIVQR          | Q88685 | 0          | N-term +42.01 Da, K +28.03 Da,            | 6151.757324 | 2 | 957.5100098 | 957.0060635 |
| AEEAAAGASGETMAALVAAEGSLGPAGWSAGR     | P97364 | 0          | N-term +42.01 Da,                         | 6152.54834  | 3 | 1123.199951 | 1122.864671 |
| VNPTVFFDITADDEPLGR                   | P17742 | 0          | N-term +42.01 Da,                         | 6160.023438 | 2 | 898.9109497 | 898.4196237 |
| MNSAGADEIGKLVGGGLDWSTTQETLR          | Q9JII5 | 0          | N-term +42.01 Da, K +28.03 Da,            | 6167.062012 | 4 | 715.6199951 | 715.122092  |
| MNSAGADEIGKLVGGGLDWSTTQETLR          | Q9JII5 | 0          | N-term +42.01 Da, K +28.03 Da,            | 6169.556641 | 2 | 1374.150024 | 1374.150696 |
| AEEAAAGASGETMAALVAAEGSLGPAGWSAGR     | P97364 | 0          | N-term +42.01 Da,                         | 6170.464844 | 3 | 916.7700195 | 916.4362226 |
| AEEAAAGASGETMAALVAAEGSLGPAGWSAGR     | P97364 | 0          | N-term +42.01 Da,                         | 6170.790527 | 2 | 1016.496277 | 1016.497115 |
| AEEAAAGASGETMAALVAAEGSLGPAGWSAGR     | P97364 | 0          | N-term +42.01 Da,                         | 6172.562012 | 3 | 880.1331787 | 880.1338147 |
| ALSMPNLGLKEEDKEPLIEF                 | Q9QYB1 | 0.04244186 | N-term +42.01 Da, K +28.03 Da,            | 6172.644043 | 2 | 1319.698853 | 1319.697084 |
| AEEAAAGASGETMAALVAAEGSLGPAGWSAGR     | P97364 | 0          | N-term +42.01 Da,                         | 6174.392578 | 3 | 790.4199829 | 790.4093842 |
| SESLVCDVAEDLVEKLR                    | Q9CQI3 | 0          | N-term +42.01 Da, K +28.03 Da,C +57.02Da, | 6181.656738 | 2 | 942.4899902 | 941.9934791 |
| SESLVCDVAEDLVEKLR                    | Q9CQI3 | 0          | N-term +42.01 Da, K +28.03 Da,C +57.02Da, | 6188.821777 | 2 | 941.9899902 | 941.9934791 |
| VNPTVFFDITADDEPLGR                   | P17742 | 0          | N-term +42.01 Da,                         | 6188.971191 | 3 | 1242.930054 | 1242.269703 |
| AEEAAAGASGETMAALVAAEGSLGPAGWSAGR     | P97364 | 0          | N-term +42.01 Da,                         | 6190.57373  | 2 | 898.9115601 | 898.4196237 |
| AAAAMAVSEAWPELELAER                  | Q505F5 | 0          | N-term +42.01 Da,                         | 6193.059082 | 2 | 1024.01001  | 1023.007316 |
| VNPTVFFDITADDEPLGR                   | P17742 | 0          | N-term +42.01 Da,                         | 6195.922363 | 2 | 1023.51001  | 1023.007316 |
| SESLVCDVAEDLVEKLR                    | Q9CQI3 | 0          | N-term +42.01 Da, K +28.03 Da,C +57.02Da, | 6201.804688 | 2 | 1017.51001  | 1016.497115 |
| SGALDVLQMKKEEDVLKFLAAGTH             | P14206 | 0          | N-term +42.01 Da, K +28.03 Da,            | 6211.565918 | 4 | 772.4400024 | 772.1931433 |
| AAAAMAVSEAWPELELAER                  | Q505F5 | 0          | N-term +42.01 Da,                         | 6211.877441 | 2 | 1243.040039 | 1242.54226  |
| AEGYDAALSVAEWLR                      | Q4LDD4 | 0          | N-term +42.01 Da,                         | 6212.714844 | 4 | 1121.310059 | 1121.059143 |
| AAAAMAVSEAWPELELAER                  | Q505F5 | 0          | N-term +42.01 Da,                         | 6213.362305 | 2 | 620.348938  | 620.3508059 |
| RDPELLQNDRI                          | Q921Q3 | 0.04532415 | N-term +42.01 Da,                         | 6213.640137 | 2 | 1242.540039 | 1242.54226  |
| MDVNTALQEVKLTALIHDLGLR               | P63323 | 0          | N-term +42.01 Da, K +28.03 Da,            | 6215.947754 | 4 | 817.1699829 | 817.4173122 |
| ATFEEVSVLGFEEFDKAVKEHEGKTF           | Q9CQM5 | 0          | N-term +42.01 Da, K +28.03 Da,            | 6216.198242 | 3 | 829.0300293 | 828.6972657 |
| AEEAAAGASGETMAALVAAEGSLGPAGWSAGR     | P97364 | 0          | N-term +42.01 Da,                         | 6218.016602 | 2 | 1064.060059 | 1063.560049 |
| MEAVVNLYHEL                          | Q9JLJ5 | 0          | N-term +42.01 Da,                         | 6221.729004 | 2 | 898.9099731 | 898.4196237 |
| AAEDVVATGADPSELEGGGLLHEIF            | O55022 | 0          | N-term +42.01 Da,                         | 6227.078613 | 2 | 1064.560059 | 1063.560049 |
| AAEDVVATGADPSELEGGGLLHEIF            | O55022 | 0          | N-term +42.01 Da,                         | 6232.482422 | 2 | 1329.130005 | 1328.627911 |

|                                  |        |            |                                           |             |   |             |             |
|----------------------------------|--------|------------|-------------------------------------------|-------------|---|-------------|-------------|
| TDAAVSFAKDFLAGGVAAAISKTAVAPIER   | P51881 | 0          | N-term +42.01 Da, K +28.03 Da,            | 6243.582031 | 2 | 1328.619995 | 1328.627911 |
| TDAAVSFAKDFLAGGVAAAISKTAVAPIER   | P51881 | 0          | N-term +42.01 Da, K +28.03 Da,            | 6244.583008 | 4 | 1121.560059 | 1121.059143 |
| AAEDVVATGADPSELEGGLLHEIF         | O55022 | 0.03433985 | N-term +42.01 Da,                         | 6245.745605 | 2 | 1242.541138 | 1242.54226  |
| EEEIAALVIDNGSGMCKAGF             | P63260 | 0.0024     | N-term +42.01 Da, K +28.03 Da,C +57.02Da, | 6247.22998  | 2 | 1432.660034 | 1432.165489 |
| RDELLQNDRIR                      | Q921Q3 | 0.04664391 | N-term +42.01 Da,                         | 6248.415039 | 4 | 820.4199829 | 820.4264085 |
| MDVNTALQEVLTALIHDLGLAR           | P63323 | 0          | N-term +42.01 Da, K +28.03 Da,            | 6250.554199 | 3 | 917.1099854 | 916.4362226 |
| MDDYAVLSDELAAVLR                 | O08579 | 0          | N-term +42.01 Da,                         | 6250.856934 | 3 | 955.7700195 | 955.1127513 |
| ATFEEVSVLGFEEFDKAVKEHEGKTIF      | Q9CQM5 | 0          | N-term +42.01 Da, K +28.03 Da,            | 6253.356445 | 2 | 1375.150024 | 1374.150696 |
| LRFHLPMTVIP                      | Q8C9R9 | 0.04332756 | N-term +42.01 Da,                         | 6254.339844 | 2 | 1329.630005 | 1328.627911 |
| EEEIAALVIDNGSGMCKAGF             | P63260 | 0          | N-term +42.01 Da, K +28.03 Da,C +57.02Da, | 6255.105957 | 2 | 898.9099731 | 898.4196237 |
| AEAAAAGASGETMAALVAAEGSLGPAGWSAGR | P97364 | 0          | N-term +42.01 Da,                         | 6255.30957  | 2 | 1374.650024 | 1374.150696 |
| AEAAAAGASGETMAALVAAEGSLGPAGWSAGR | P97364 | 0          | N-term +42.01 Da,                         | 6255.702637 | 2 | 1015.98999  | 1016.497115 |
| ELVDSVLDVVR                      | P68372 | 0.00235664 | N-term +42.01 Da,                         | 6263.53418  | 2 | 774.3900146 | 773.3884516 |
| EEEIAALVIDNGSGMCKAGF             | P63260 | 0.00238095 | N-term +42.01 Da, K +28.03 Da,C +57.02Da, | 6263.826172 | 3 | 880.789978  | 880.1338147 |
| ATSWGSIQDEKQLEELAKQAIDR          | P51855 | 0          | N-term +42.01 Da, K +28.03 Da,            | 6264.198242 | 3 | 790.4199829 | 790.4093842 |
| MKLPIFIADAFTATAFR                | Q9CXN7 | 0          | N-term +42.01 Da, K +28.03 Da,            | 6271.129883 | 2 | 693.8499756 | 693.8503134 |
| ATSWGSIQDEKQLEELAKQAIDR          | P51855 | 0          | N-term +42.01 Da, K +28.03 Da,            | 6276.523926 | 2 | 1022.010986 | 1022.008804 |
| ATSWGSIQDEKQLEELAKQAIDR          | P51855 | 0          | N-term +42.01 Da, K +28.03 Da,            | 6278.121094 | 3 | 955.4400024 | 955.1127513 |
| VNPTVFFDITADDEPLGR               | P17742 | 0          | N-term +42.01 Da,                         | 6280.55957  | 3 | 615.3599854 | 615.030178  |
| AWVPAESAVEELMPR                  | Q9CQQ4 | 0          | N-term +42.01 Da,                         | 6281.107422 | 2 | 1320.180054 | 1319.697084 |
| MKLPIFIADAFTATAFR                | Q9CXN7 | 0          | N-term +42.01 Da, K +28.03 Da,            | 6281.931641 | 2 | 1281.079956 | 1280.564544 |
| MADVDFGVPSVIVSR                  | Q8VCT4 | 0.02075702 | N-term +42.01 Da,                         | 6287.019531 | 2 | 898.4176025 | 898.4196237 |
| ATSWGSIQDEKQLEELAKQAIDR          | P51855 | 0          | N-term +42.01 Da, K +28.03 Da,            | 6296.67041  | 2 | 853.4393311 | 853.4411787 |
| AEAAAAGASGETMAALVAAEGSLGPAGWSAGR | P97364 | 0          | N-term +42.01 Da,                         | 6297.020508 | 2 | 1185.51001  | 1185.015544 |
| DFLAYDILDQYR                     | P10649 | 0          | N-term +42.01 Da,                         | 6301.482422 | 2 | 733.8851929 | 733.8855446 |
| EEEIAALVIDNGSGM                  | P63260 | 0.01794554 | N-term +42.01 Da,                         | 6305.719727 | 4 | 827.6799927 | 827.4251372 |
| TDAAVSFAKDFLAGGVAAAISK           | P51881 | 0          | N-term +42.01 Da, K +28.03 Da,            | 6308.521973 | 2 | 1185.01001  | 1185.015544 |
| AEEGIAAGGVMDVNTALQEVLK           | P63323 | 0          | N-term +42.01 Da, K +28.03 Da,            | 6317.390625 | 3 | 821.4299927 | 821.4390097 |
| VNPTVFFDITADDEPLGR               | P17742 | 0          | N-term +42.01 Da,                         | 6320.398438 | 2 | 1121.579956 | 1121.084845 |
| AEEGIAAGGVMDVNTALQEVLK           | P63323 | 0          | N-term +42.01 Da, K +28.03 Da,            | 6321.877441 | 2 | 730.8391113 | 730.8399458 |
| AEEGIAAGGVMDVNTALQEVLK           | P63323 | 0          | N-term +42.01 Da, K +28.03 Da,            | 6322.018066 | 3 | 718.3800049 | 718.7015103 |
| VNPTVFFDITADDEPLGR               | P17742 | 0          | N-term +42.01 Da,                         | 6328.96875  | 2 | 1047.48999  | 1046.498801 |
| ADSAQVPTLVYLVGTGGCGFLGEHIVR      | Q9EQC1 | 0          | N-term +42.01 Da, C +57.02Da,             | 6332.55127  | 3 | 880.460022  | 880.1338147 |
| ADSAQVPTLVYLVGTGGCGFLGEHIVR      | Q9EQC1 | 0          | N-term +42.01 Da, C +57.02Da,             | 6334.539551 | 2 | 1109.550049 | 1109.046449 |
| AEEGIAAGGVMDVNTALQEVLK           | P63323 | 0          | N-term +42.01 Da, K +28.03 Da,            | 6336.758789 | 2 | 558.289978  | 558.2902167 |
| VNPTVFFDITADDEPLGR               | P17742 | 0          | N-term +42.01 Da,                         | 6339.057129 | 3 | 1112.880005 | 1112.552377 |
| GLEYLDLMSQPCR                    | G3UX05 | 0          | N-term +42.01 Da, C +57.02Da,             | 6341.785645 | 2 | 1263.609985 | 1262.608792 |
| FSDSEIGGITIAWKFDSPDRNLWNLK       | P42230 | 0.01045752 | N-term +42.01 Da, K +28.03 Da,            | 6341.977051 | 2 | 892.0100098 | 891.5116411 |
| VNPTVFFDITADDEPLGR               | P17742 | 0          | N-term +42.01 Da,                         | 6343.663574 | 3 | 739.697937  | 739.7000583 |
| TDAAVSFAKDFLAGGVAAAISKTAVAPIER   | P51881 | 0          | N-term +42.01 Da, K +28.03 Da,            | 6344.398926 | 2 | 984.5       | 983.9970846 |

|                                     |        |            |                                |             |   |             |             |
|-------------------------------------|--------|------------|--------------------------------|-------------|---|-------------|-------------|
| FDVDGLDPAFTPATGTPVLGGLSYR           | Q61176 | 0          | N-term +42.01 Da,              | 6352.341797 | 2 | 641.7800293 | 641.7796906 |
| VNPTVFFDITADDEPLGR                  | P17742 | 0          | N-term +42.01 Da,              | 6353.766602 | 2 | 730.8381958 | 730.8399458 |
| VNPTVFFDITADDEPLGR                  | P17742 | 0          | N-term +42.01 Da,              | 6358.246582 | 2 | 983.9899902 | 983.9970846 |
| MELITILEK                           | P70168 | 0.00608931 | N-term +42.01 Da, K +28.03 Da, | 6365.286621 | 2 | 1109.045654 | 1109.046449 |
| MEYLIGIQGPDYVLVASDR                 | Q9R1P3 | 0          | N-term +42.01 Da,              | 6366.937988 | 2 | 1011.030029 | 1010.537197 |
| MEYLIGIQGPDYVLVASDR                 | Q9R1P3 | 0          | N-term +42.01 Da,              | 6367.614746 | 2 | 558.2894287 | 558.2902167 |
| VNPTVFFDITADDEPLGR                  | P17742 | 0          | N-term +42.01 Da,              | 6371.962402 | 3 | 821.7700195 | 821.4390097 |
| MELITILEK                           | P70168 | 0.00298954 | N-term +42.01 Da, K +28.03 Da, | 6379.529297 | 2 | 1232.160034 | 1231.654876 |
| AAADELAFHEFEATNLLAETPDAATTSQSDELTSR | Q99LP8 | 0          | N-term +42.01 Da,              | 6380.208496 | 2 | 969.9768677 | 969.9702015 |
| MLSLDFLDDVR                         | Q9R0P6 | 0          | N-term +42.01 Da,              | 6385.151855 | 2 | 1063.47998  | 1062.98246  |
| MEYLIGIQGPDYVLVASDR                 | Q9R1P3 | 0          | N-term +42.01 Da,              | 6392.665039 | 4 | 867.960022  | 867.7087294 |
| MEYLIGIQGPDYVLVASDR                 | Q9R1P3 | 0          | N-term +42.01 Da,              | 6396.104492 | 2 | 1110.069946 | 1109.046449 |
| AGELSQEALLDFLCQAGGR                 | Q8BZW2 | 0          | N-term +42.01 Da, C +57.02Da,  | 6400.456055 | 3 | 932.1799927 | 931.5124033 |
| VNPTVFFDITADDEPLGR                  | P17742 | 0          | N-term +42.01 Da,              | 6403.214844 | 2 | 760.8699951 | 760.8726345 |
| TDAAVSFAKDFLAGGVAIAISK              | P51881 | 0          | N-term +42.01 Da, K +28.03 Da, | 6404.121582 | 3 | 821.4381714 | 821.4390097 |
| TDAAVSFAKDFLAGGVAIAISK              | P51881 | 0          | N-term +42.01 Da, K +28.03 Da, | 6410.952637 | 2 | 969.9694824 | 969.9702015 |
| VNPTVFFDITADDEPLGR                  | P17742 | 0          | N-term +42.01 Da,              | 6411.063477 | 2 | 1232.660034 | 1231.654876 |
| AEEGIAAGGVMDVNTALQEVLTALIHDLGLAR    | P63323 | 0          | N-term +42.01 Da, K +28.03 Da, | 6411.356934 | 2 | 1113.079956 | 1113.077749 |
| TDAAVSFAKDFLAGGVAIAISK              | P51881 | 0          | N-term +42.01 Da, K +28.03 Da, | 6418.366211 | 2 | 1244.079956 | 1243.582106 |
| TDAAVSFAKDFLAGGVAIAISK              | P51881 | 0          | N-term +42.01 Da, K +28.03 Da, | 6422.913574 | 2 | 1243.579956 | 1243.582106 |
| TDAAVSFAKDFLAGGVAIAISKTAVAPIER      | P51881 | 0          | N-term +42.01 Da, K +28.03 Da, | 6423.177734 | 3 | 829.7199707 | 829.3904962 |
| ADMPSGESCTSPLELFNSIATQGELVR         | P32921 | 0          | N-term +42.01 Da, C +57.02Da,  | 6424.760254 | 2 | 1063.48999  | 1062.98246  |
| TDAAVSFAKDFLAGGVAIAISKTAVAPIER      | P51881 | 0          | N-term +42.01 Da, K +28.03 Da, | 6428.174316 | 2 | 1079.060059 | 1078.552756 |
| SHIQIPAGLTELQGYTVEVLR               | Q8K1M3 | 0          | N-term +42.01 Da,              | 6430.723633 | 3 | 1248.880005 | 1248.552272 |
| SHIQIPAGLTELQGYTVEVLR               | Q8K1M3 | 0          | N-term +42.01 Da,              | 6430.912109 | 2 | 1186.579956 | 1185.582008 |
| ADLLGSILSSMEKPPSLGDQESR             | Q7TNE3 | 0          | N-term +42.01 Da, K +28.03 Da, | 6436.188965 | 3 | 821.4393311 | 821.4390097 |
| AGTGLVAGEVVVDALPYFDQGYEAPGVR        | Q9D287 | 0          | N-term +42.01 Da,              | 6441.009766 | 3 | 709.3200073 | 708.9907324 |
| VNPTVFFDITADDEPLGR                  | P17742 | 0          | N-term +42.01 Da,              | 6441.553223 | 2 | 969.9706421 | 969.9702015 |
| AGTGLVAGEVVVDALPYFDQGYEAPGVR        | Q9D287 | 0          | N-term +42.01 Da,              | 6441.848633 | 3 | 854.1199951 | 853.4440947 |
| TDAAVSFAKDFLAGGVAIAISKTAVAPIER      | P51881 | 0          | N-term +42.01 Da, K +28.03 Da, | 6442.061523 | 3 | 835.0599976 | 835.0567938 |
| AEEGIAAGGVMDVNTALQEVLTALIHDLGLAR    | P63323 | 0          | N-term +42.01 Da, K +28.03 Da, | 6442.516602 | 2 | 904.9099731 | 904.4119962 |
| AGTGLVAGEVVVDALPYFDQGYEAPGVR        | Q9D287 | 0          | N-term +42.01 Da,              | 6442.702637 | 2 | 1252.579956 | 1252.081552 |
| TDAAVSFAKDFLAGGVAIAISKTAVAPIER      | P51881 | 0          | N-term +42.01 Da, K +28.03 Da, | 6442.869141 | 3 | 853.4500122 | 853.4440947 |
| ADNPVLELLLR                         | Q8C0C7 | 0          | N-term +42.01 Da,              | 6443.595215 | 2 | 1231.656006 | 1231.654876 |
| AEEGIAAGGVMDVNTALQEVLT              | P63323 | 0          | N-term +42.01 Da, K +28.03 Da, | 6444.170898 | 3 | 1080.869995 | 1080.537784 |
| VNPTVFFDITADDEPLGR                  | P17742 | 0          | N-term +42.01 Da,              | 6446.490723 | 2 | 1280.170044 | 1279.662504 |
| AGTGLVAGEVVVDALPYFDQGYEAPGVR        | Q9D287 | 0          | N-term +42.01 Da,              | 6446.946777 | 2 | 905.4199829 | 904.4119962 |
| AEEGIAAGGVMDVNTALQEVLT              | P63323 | 0          | N-term +42.01 Da, K +28.03 Da, | 6447.427246 | 3 | 952.4199829 | 951.7471259 |
| TDAAVSFAKDFLAGGVAIAISKTAVAPIER      | P51881 | 0          | N-term +42.01 Da, K +28.03 Da, | 6448.432617 | 4 | 616.3300171 | 616.3310764 |
| ADNPVLELLLR                         | Q8C0C7 | 0          | N-term +42.01 Da,              | 6449.48877  | 2 | 1427.630005 | 1427.117051 |

|                                  |         |            |                                           |             |   |             |             |
|----------------------------------|---------|------------|-------------------------------------------|-------------|---|-------------|-------------|
| AEEGIAAGGVMDVNTALQEVLT           | P63323  | 0          | N-term +42.01 Da, K +28.03 Da,            | 6450.687012 | 2 | 1015.929993 | 1015.936033 |
| AAPSEVAAAVLGEVDGGAFGSWLDGR       | Q9CR29  | 0          | N-term +42.01 Da,                         | 6452.63623  | 2 | 1063.476318 | 1062.98246  |
| AAPSEVAAAVLGEVDGGAFGSWLDGR       | Q9CR29  | 0          | N-term +42.01 Da,                         | 6458.470703 | 2 | 1252.079956 | 1252.081552 |
| VNPTVFFDITADDEPLGR               | P17742  | 0          | N-term +42.01 Da,                         | 6467.011719 | 3 | 821.43927   | 821.4390097 |
| VNPTVFFDITADDEPLGR               | P17742  | 0          | N-term +42.01 Da,                         | 6468.148438 | 2 | 1257.119995 | 1256.12048  |
| ADNPVLELLLR                      | Q8C0C7  | 0.00239234 | N-term +42.01 Da,                         | 6469.211426 | 3 | 838.4099731 | 837.7494122 |
| AELSEEALLSVLPTIR                 | P56399  | 0          | N-term +42.01 Da,                         | 6469.34082  | 2 | 1010.969971 | 1010.46678  |
| CEQCRRRVTKYFCRSR                 | Q9WUD6  | 0.03269917 | N-term +42.01 Da, K +28.03 Da,C +57.02Da, | 6470.197266 | 3 | 1123.22998  | 1122.564222 |
| VNPTVFFDITADDEPLGR               | P17742  | 0          | N-term +42.01 Da,                         | 6471.373047 | 3 | 1081.859985 | 1081.194457 |
| SALKAVFQYIDENQDR                 | Q9D1A2  | 0          | N-term +42.01 Da, K +28.03 Da,            | 6471.652344 | 2 | 1285.079956 | 1284.073393 |
| AEEGIAAGGVMDVNTALQEVLTALIHDLGLAR | P63323  | 0.00286944 | N-term +42.01 Da, K +28.03 Da,            | 6472.237305 | 3 | 856.3800049 | 856.3846878 |
| AAPSEVAAAVLGEVDGGAFGSWLDGR       | Q9CR29  | 0          | N-term +42.01 Da,                         | 6473.077637 | 3 | 835.3900146 | 835.0567938 |
| AELSEEALLSVLPTIR                 | P56399  | 0          | N-term +42.01 Da,                         | 6473.198242 | 2 | 969.9699707 | 969.9702015 |
| AAPSEVAAAVLGEVDGGAFGSWLDGR       | Q9CR29  | 0          | N-term +42.01 Da,                         | 6474.913086 | 2 | 1231.656372 | 1231.654876 |
| MEAVLNELSVEDLKNFER               | Q9CQ92  | 0          | N-term +42.01 Da, K +28.03 Da,            | 6479.785645 | 4 | 991.5200195 | 991.2674746 |
| MEAVLNELSVEDLKNFER               | Q9CQ92  | 0          | N-term +42.01 Da, K +28.03 Da,            | 6482.217773 | 2 | 1015.936768 | 1015.936033 |
| AAGVAGWVGEAEFEFADPVEPLEPTLSNIIQR | O54984  | 0          | N-term +42.01 Da,                         | 6483.068848 | 2 | 598.3200073 | 597.8166981 |
| AAGVAGWVGEAEFEFADPVEPLEPTLSNIIQR | O54984  | 0          | N-term +42.01 Da,                         | 6483.624512 | 2 | 1063.97998  | 1062.98246  |
| AEEGIAAGGVMDVNTALQEVLTALIHDLGLAR | P63323  | 0          | N-term +42.01 Da, K +28.03 Da,            | 6498.372559 | 3 | 821.4400024 | 821.4390097 |
| VNPTVFFDITADDEPLGR               | P17742  | 0          | N-term +42.01 Da,                         | 6503.813477 | 3 | 1081.199951 | 1080.537784 |
| SVVQQYLDVVGYPF                   | P70699  | 0.04282407 | N-term +42.01 Da,                         | 6503.976074 | 2 | 1285.069946 | 1284.073393 |
| VNPTVFFDITADDEPLGR               | P17742  | 0          | N-term +42.01 Da,                         | 6505.470703 | 3 | 791.0800171 | 790.4093842 |
| PVCNQVECHLYLNQRKLLDYCESK         | Q8VC28  | 0.00925314 | N-term +42.01 Da, K +28.03 Da,C +57.02Da, | 6506.378418 | 2 | 1232.160034 | 1231.654876 |
| TDAAVSFAKDFLAGGVAAAISKT          | P51881  | 0          | N-term +42.01 Da, K +28.03 Da,            | 6506.606934 | 3 | 1122.910034 | 1122.564222 |
| TDAAVSFAKDFLAGGVAAAISKT          | P51881  | 0          | N-term +42.01 Da, K +28.03 Da,            | 6507.80957  | 2 | 970.539978  | 970.5462128 |
| VNPTVFFDITADDEPLGR               | P17742  | 0          | N-term +42.01 Da,                         | 6509.058594 | 3 | 856.3900146 | 856.3846878 |
| AEEGIAAGGVMDVNTALQEVLTALIHDLGLAR | P63323  | 0          | N-term +42.01 Da, K +28.03 Da,            | 6512.212402 | 3 | 647.710022  | 647.3665673 |
| TDAAVSFAKDFLAGGVAAAISKT          | P51881  | 0          | N-term +42.01 Da, K +28.03 Da,            | 6512.471191 | 2 | 1174.109985 | 1174.118263 |
| AEEGIAAGGVMDVNTALQEVLTALIHDLGLAR | P63323  | 0          | N-term +42.01 Da, K +28.03 Da,            | 6514.638672 | 3 | 965.5100098 | 965.1644976 |
| AEEGIAAGGVMDVNTALQEVLTALIHDLGLAR | P63323  | 0          | N-term +42.01 Da, K +28.03 Da,            | 6516.230957 | 2 | 971.5499878 | 970.5462128 |
| MVNPTVFFDITADDEPLGR              | P17742  | 0          | N-term +42.01 Da,                         | 6517.29541  | 3 | 965.1799927 | 965.1644976 |
| EFQILLDALDKIK                    | PF16015 | 0          | N-term +42.01 Da, K +28.03 Da,            | 6520.282227 | 2 | 665.8099976 | 665.8084482 |
| AAMLGDAIMVAKGL                   | Q60936  | 0          | N-term +42.01 Da, K +28.03 Da,            | 6520.693359 | 3 | 854.7000122 | 854.045455  |
| SSVPDLIPALTAEEQRAAASLK           | Q8C0Y0  | 0.0196319  | N-term +42.01 Da, K +28.03 Da,            | 6521.614258 | 2 | 1130.956421 | 1130.954098 |
| AEEGIAAGGVMDVNTALQEVLTALIHDLGLAR | P63323  | 0          | N-term +42.01 Da, K +28.03 Da,            | 6523.583008 | 3 | 848.4000244 | 848.0694891 |
| TDAAVSFAKDFLAGGVAAAISKTA         | P51881  | 0          | N-term +42.01 Da, K +28.03 Da,            | 6523.700195 | 2 | 1271.599976 | 1271.600595 |
| VNPTVFFDITADDEPLGR               | P17742  | 0          | N-term +42.01 Da,                         | 6528.535156 | 2 | 1108.459961 | 1107.962356 |
| GQNDLMGTAEDFADQFLR               | Q64310  | 0          | N-term +42.01 Da,                         | 6529.097168 | 3 | 821.4400024 | 821.4390097 |
| AEEGIAAGGVMDVNTALQEVLTALIHDLGLAR | P63323  | 0          | N-term +42.01 Da, K +28.03 Da,            | 6529.62793  | 3 | 912.460022  | 912.1206346 |
| TDAAVSFAKDFLAGGVAAAISKTA         | P51881  | 0.00420463 | N-term +42.01 Da, K +28.03 Da,            | 6531.408203 | 3 | 912.789978  | 912.1206346 |

|                                      |        |            |                                            |             |   |             |             |
|--------------------------------------|--------|------------|--------------------------------------------|-------------|---|-------------|-------------|
| AAMLGDAIMVAKGL                       | Q60936 | 0          | N-term +42.01 Da, K +28.03 Da,             | 6535.206543 | 2 | 969.9799805 | 969.9702015 |
| AAAEPSVAALAGGGVAGAPSGGVPVLF          | Q91V64 | 0.00604433 | N-term +42.01 Da,                          | 6537.863281 | 2 | 1367.689941 | 1367.677314 |
| AEEGIAAGGVMVDNNTALQEVLTALIHDLGLAR    | P63323 | 0          | N-term +42.01 Da, K +28.03 Da,             | 6542.194336 | 2 | 1368.180054 | 1367.677314 |
| VNPTVFFDITADDEPLGR                   | P17742 | 0          | N-term +42.01 Da,                          | 6543.395508 | 4 | 1121.550049 | 1121.059143 |
| LMADVVFVGVPSVIVSR                    | Q8VCT4 | 0          | N-term +42.01 Da,                          | 6545.599609 | 3 | 647.3200073 | 646.9825598 |
| ADQLTEEQIAEFKEAF                     | P62204 | 0          | N-term +42.01 Da, K +28.03 Da,             | 6547.444824 | 2 | 806.9400024 | 807.4432352 |
| AEEAAAAGASGETMAALVAAEGSLGPAGWSAGR    | P97364 | 0.01795666 | N-term +42.01 Da,                          | 6547.969238 | 2 | 1244.130005 | 1243.624108 |
| GLVGGPDFAHCLLPPLLESATVEETVVR         | Q7TNP2 | 0.00236407 | N-term +42.01 Da, C +57.02Da,              | 6548.094238 | 3 | 829.75      | 829.4184973 |
| AEEGIAAGGVMVDNNTALQEVLTAL            | P63323 | 0          | N-term +42.01 Da, K +28.03 Da,             | 6549.51416  | 2 | 801.9151001 | 801.9153652 |
| AEEAAAAGASGETMAALVAAEGSLGPAGW        | P97364 | 0          | N-term +42.01 Da,                          | 6549.901367 | 2 | 1284.069946 | 1284.073393 |
| AEEAAAAGASGETMAALVAAEGSLGPAGW        | P97364 | 0          | N-term +42.01 Da,                          | 6551.142578 | 2 | 665.8082886 | 665.8084482 |
| AELTALESLIEMGFPR                     | Q922Y1 | 0          | N-term +42.01 Da,                          | 6551.336914 | 2 | 1156.589966 | 1157.079138 |
| AEEGIAAGGVMVDNNTALQEVLTAL            | P63323 | 0          | N-term +42.01 Da, K +28.03 Da,             | 6552.335449 | 3 | 949.4899902 | 949.1695826 |
| AQADIALIGLAVMGQN                     | Q9DCD0 | 0.00300752 | N-term +42.01 Da,                          | 6553.579102 | 2 | 1131.449951 | 1130.954098 |
| SFIPVAEDSDFPIQLNPYGVF                | P35505 | 0.03214286 | N-term +42.01 Da,                          | 6556.54248  | 2 | 1272.099976 | 1271.600595 |
| ADQLTEEQIAEFKEAFSLFDKDGDTITTKELGTVMR | P62204 | 0          | N-term +42.01 Da, K +28.03 Da,             | 6560.537598 | 3 | 912.1199951 | 912.1206346 |
| SKGPAVGIDLGTYSVGVFQHGKVEIANDQGNR     | P63017 | 0.03431953 | N-term +42.01 Da, K +28.03 Da,C +57.02Da,  | 6565.242676 | 2 | 603.8300171 | 603.8295088 |
| TENSTSAPAAKPKR                       | P10922 | 0          | N-term +28.03 Da, K +28.03 Da,             | 1004.896851 | 4 | 386.2214966 | 386.2216049 |
| SAAAHTEKTQIR                         | Q60759 | 0          | N-term +28.03 Da, K +28.03 Da,             | 1013.848206 | 4 | 342.9500122 | 342.9453062 |
| SSAAAHTEKTQIR                        | Q60759 | 0.01617796 | N-term +28.03 Da, K +28.03 Da,             | 1020.020386 | 3 | 485.9400024 | 485.9353259 |
| SSAAAHTEKTQIR                        | Q60759 | 0          | N-term +28.03 Da, K +28.03 Da,             | 1021.579895 | 4 | 364.7033386 | 364.7033135 |
| PDPAKSAPAPKKG                        | Q64525 | 0.00235571 | N-term +28.03 Da, K +28.03 Da,             | 1024.196655 | 4 | 366.4716187 | 366.4711569 |
| TENSTSAPAAKPKR                       | P10922 | 0          | N-term +28.03 Da, K +28.03 Da,             | 1029.271118 | 3 | 515.289978  | 514.626381  |
| CDHIVQKAR                            | P49429 | 0.0115304  | N-term +28.03 Da, K +28.03 Da,C +57.02 Da, | 1029.828613 | 3 | 394.8900146 | 394.8852486 |
| VAGADSPQSSSKGGR                      | Q8BIJ6 | 0          | N-term +28.03 Da, K +28.03 Da,             | 1033.222778 | 3 | 487.2549744 | 487.2548358 |
| TENSTSAPAAKPKR                       | P10922 | 0.00235849 | N-term +28.03 Da, K +28.03 Da,             | 1036.341064 | 4 | 386.4674683 | 386.2216049 |
| AAAAAATKPAR                          | Q99N96 | 0          | N-term +28.03 Da, K +28.03 Da,             | 1038.505981 | 3 | 375.8999939 | 375.896142  |
| QASAAPKAGTATGR                       | P56480 | 0.01342975 | N-term +28.03 Da, K +28.03 Da,             | 1039.764038 | 3 | 448.2528992 | 448.2527661 |
| SSGKAAGDETGAKVER                     | P97351 | 0.0087241  | N-term +28.03 Da, K +28.03 Da,             | 1039.952271 | 4 | 412.473175  | 412.4731571 |
| SEKQLTKSNAPR                         | P26443 | 0          | N-term +28.03 Da, K +28.03 Da,             | 1040.232056 | 4 | 361.4599915 | 361.4635976 |
| SAPSTGGVKKPHR                        | P02301 | 0          | N-term +28.03 Da, K +28.03 Da,             | 1040.51416  | 4 | 352.4599915 | 352.212311  |
| LSSAQEQASKR                          | Q35459 | 0.0261927  | N-term +28.03 Da, K +28.03 Da,             | 1043.070435 | 3 | 407.2256165 | 407.226217  |
| AQASAAPKAGTATGR                      | P56480 | 0          | N-term +28.03 Da, K +28.03 Da,             | 1044.772461 | 3 | 471.9321594 | 471.9318042 |
| EAHKSEIAHR                           | P07724 | 0          | N-term +28.03 Da, K +28.03 Da,             | 1047.962402 | 3 | 411.8900146 | 411.8948014 |
| STESGSESATHDSSAPR                    | Q9CY16 | 0          | N-term +28.03 Da,                          | 1048.531738 | 3 | 578.5900269 | 578.5906136 |
| AQASAAPKAGTATGR                      | P56480 | 0.00966702 | N-term +28.03 Da, K +28.03 Da,             | 1053.91394  | 2 | 707.3931274 | 707.3940681 |
| ESAAADRPTVR                          | Q9DCT2 | 0          | N-term +28.03 Da, K +28.03 Da,             | 1055.325806 | 4 | 339.9454041 | 339.9453062 |
| DEEPKDETR                            | O55022 | 0          | N-term +28.03 Da, K +28.03 Da,             | 1056.528564 | 3 | 415.8699951 | 415.8700993 |
| PDPAKSAPAPK                          | Q64525 | 0          | N-term +28.03 Da, K +28.03 Da,             | 1056.813354 | 2 | 581.8452759 | 581.8451589 |
| AAQASAAPKAGTATGR                     | P56480 | 0          | N-term +28.03 Da, K +28.03 Da,             | 1057.096924 | 3 | 495.6105347 | 495.6108422 |

|                  |        |            |                                            |             |   |             |             |
|------------------|--------|------------|--------------------------------------------|-------------|---|-------------|-------------|
| DEEPKDETAR       | O55022 | 0.02257761 | N-term +28.03 Da, K +28.03 Da,             | 1057.875854 | 2 | 623.2999878 | 623.3015107 |
| HSAQELAGSR       | P54869 | 0          | N-term +28.03 Da,                          | 1060.882446 | 2 | 542.281311  | 542.2807146 |
| GTTAKEEMER       | Q9CZB0 | 0.01070664 | N-term +28.03 Da, K +28.03 Da,             | 1062.940918 | 3 | 403.2045288 | 403.2044246 |
| TSDVVEVNEKKDR    | P63038 | 0          | N-term +28.03 Da, K +28.03 Da,             | 1064.076294 | 4 | 376.7054443 | 376.7057878 |
| VKMAAAGGGGGGGR   | Q8R081 | 0          | N-term +28.03 Da, K +28.03 Da,             | 1068.148682 | 3 | 401.2204285 | 401.2205199 |
| AAQASAAPKAGTATGR | P56480 | 0          | N-term +28.03 Da, K +28.03 Da,             | 1068.330322 | 2 | 742.9128418 | 742.9126251 |
| TTQYTEAKAR       | Q9DBT9 | 0.02121504 | N-term +28.03 Da, K +28.03 Da,             | 1069.779175 | 3 | 408.8915405 | 408.8909457 |
| PDPKSAPAPK       | Q8CGP0 | 0.03065825 | N-term +28.03 Da, K +28.03 Da,             | 1073.69165  | 3 | 393.5644226 | 393.5641697 |
| TENSTSAPAAKPKR   | P10922 | 0          | N-term +28.03 Da, K +28.03 Da,             | 1073.97522  | 3 | 514.6199951 | 514.626381  |
| AQASAAPKAGTATGR  | P56480 | 0          | N-term +28.03 Da, K +28.03 Da,             | 1076.86499  | 3 | 472.2600098 | 471.9318042 |
| TVSNQVQR         | Q64374 | 0.01749271 | N-term +28.03 Da,                          | 1077.247681 | 2 | 480.269989  | 480.2670755 |
| EPPQHALR         | P70296 | 0.03826087 | N-term +28.03 Da,                          | 1077.441895 | 3 | 325.8504944 | 325.8505325 |
| AQTA AAAAPR      | Q9CQA3 | 0          | N-term +28.03 Da,                          | 1080.253662 | 2 | 478.2697754 | 478.269618  |
| PDPKSAAPAPK      | Q64525 | 0          | N-term +28.03 Da, K +28.03 Da,             | 1082.279419 | 3 | 388.2325134 | 388.2325314 |
| DDEEPKDETAR      | O55022 | 0          | N-term +28.03 Da, K +28.03 Da,             | 1088.63562  | 3 | 454.5499878 | 454.212414  |
| AAQASAAPKAGTATGR | P56480 | 0          | N-term +28.03 Da, K +28.03 Da,             | 1089.591064 | 3 | 495.6106567 | 495.6108422 |
| APVAGKKAKKGILR   | O35490 | 0          | N-term +28.03 Da, K +28.03 Da,             | 1093.428223 | 4 | 427.2911072 | 427.2908271 |
| TAEEDADPKR       | Q9D0J8 | 0          | N-term +28.03 Da, K +28.03 Da,             | 1094.093018 | 3 | 482.5599976 | 482.5633354 |
| GQKLGQPQTAR      | P13707 | 0          | N-term +28.03 Da, K +28.03 Da,             | 1095.230713 | 3 | 413.9101257 | 413.9104514 |
| HLDGETEER        | P10649 | 0          | N-term +28.03 Da,                          | 1103.177368 | 2 | 621.7837524 | 621.7834852 |
| SAPAVQTK         | Q99JY0 | 0.02665441 | N-term +28.03 Da, K +28.03 Da,             | 1107.792969 | 2 | 429.2582397 | 429.2581875 |
| MLMPKKNR         | P63325 | 0          | N-term +28.03 Da, K +28.03 Da,             | 1110.559937 | 3 | 367.8924561 | 367.8926866 |
| LDPETGKR         | Q64374 | 0.01244813 | N-term +28.03 Da, K +28.03 Da,             | 1113.071167 | 3 | 324.519989  | 324.5221932 |
| AMSRPPPPR        | Q8CG76 | 0.0125     | N-term +28.03 Da,                          | 1113.285522 | 3 | 346.2000122 | 346.1955342 |
| GAESEALKQR       | Q9CWD8 | 0          | N-term +28.03 Da, K +28.03 Da,             | 1116.90564  | 3 | 382.5499878 | 382.2155407 |
| TVVCKDAEEAKR     | P05202 | 0.00233372 | N-term +28.03 Da, K +28.03 Da,C +57.02 Da, | 1117.4729   | 4 | 373.2071228 | 373.2065318 |
| STSQTTVDSR       | Q8BMS4 | 0.0162767  | N-term +28.03 Da,                          | 1121.822021 | 2 | 555.2700195 | 555.2752956 |
| AAQASAAPKAGTATGR | P56480 | 0.02747253 | N-term +28.03 Da, K +28.03 Da,             | 1122.64563  | 3 | 495.9389648 | 495.6108422 |
| STEPPYSQKR       | P10126 | 0.04919423 | N-term +28.03 Da, K +28.03 Da,             | 1123.411499 | 3 | 416.8905945 | 416.8909457 |
| TENSTSAPAAKPKR   | P10922 | 0          | N-term +28.03 Da, K +28.03 Da,             | 1123.695313 | 3 | 514.6199951 | 514.626381  |
| YRAPPPPR         | Q9CR59 | 0.02182163 | N-term +28.03 Da,                          | 1150.755981 | 3 | 327.8590393 | 327.8591392 |
| SLEAASSSR        | Q9EQI8 | 0          | N-term +28.03 Da,                          | 1152.974854 | 2 | 511.7593384 | 511.759281  |
| SQAVQVDR         | P52760 | 0.03703704 | N-term +28.03 Da,                          | 1159.0802   | 2 | 465.7537842 | 465.753801  |
| SVTVQETKEGR      | O08677 | 0.0022779  | N-term +28.03 Da, K +28.03 Da,             | 1161.93042  | 3 | 430.5700073 | 430.5735054 |
| SHGSHETDEEFDAR   | P12787 | 0          | N-term +28.03 Da,                          | 1170.584473 | 3 | 548.901123  | 548.9010105 |
| AKDVKFGADAR      | P63038 | 0.02115385 | N-term +28.03 Da, K +28.03 Da,             | 1184.188354 | 4 | 316.1870117 | 316.1870332 |
| SYVGDEAQSKR      | P60710 | 0          | N-term +28.03 Da, K +28.03 Da,             | 1186.455811 | 3 | 432.5578613 | 432.5578554 |
| AKDVKFGADAR      | P63038 | 0.01611279 | N-term +28.03 Da, K +28.03 Da,             | 1189.790771 | 2 | 631.3665161 | 631.3667899 |
| GLSSNSAVR        | Q91WS0 | 0          | N-term +28.03 Da,                          | 1200.011963 | 2 | 459.75      | 459.753801  |
| AVLHEVQR         | E9PZ31 | 0.00666667 | N-term +28.03 Da,                          | 1200.626709 | 3 | 327.1947327 | 327.1942992 |

|                  |        |            |                                             |             |   |             |             |
|------------------|--------|------------|---------------------------------------------|-------------|---|-------------|-------------|
| SAQELAGSR        | P54869 | 0.01678184 | N-term +28.03 Da,                           | 1215.828613 | 2 | 473.7514343 | 473.7512585 |
| GPTPSGTVNGSSGR   | Q9CQS8 | 0.01674877 | N-term +28.03 Da,                           | 1244.60083  | 2 | 651.3300171 | 651.3258513 |
| TETTSTTLR        | O54750 | 0.00967742 | N-term +28.03 Da,                           | 1261.337036 | 2 | 519.2800293 | 519.2773066 |
| EDNVTQVR         | P24270 | 0.01151832 | N-term +28.03 Da,                           | 1289.379761 | 2 | 494.7565918 | 494.756541  |
| HLDGETEER        | P10649 | 0.0160804  | N-term +28.03 Da,                           | 1290.151001 | 2 | 622.289978  | 621.7834852 |
| EPIENEAR         | Q9Z2I8 | 0.0344523  | N-term +28.03 Da,                           | 1303.550171 | 2 | 529.2700195 | 528.7696486 |
| HTIILASDKR       | B5X0G2 | 0.03303571 | N-term +28.03 Da, K +28.03 Da,              | 1306.762207 | 3 | 403.9154663 | 403.9153138 |
| AAQASAAPKAGTATGR | P56480 | 0          | N-term +28.03 Da, K +28.03 Da,              | 1309.812012 | 3 | 495.269989  | 495.6108422 |
| VHQVLYR          | P52196 | 0.04974705 | N-term +28.03 Da,                           | 1320.778198 | 3 | 314.8553467 | 314.8555062 |
| AAQASAAPKAGTATGR | P56480 | 0.03700441 | N-term +28.03 Da, K +28.03 Da,              | 1325.868408 | 2 | 742.3964233 | 742.9126251 |
| NAGVSDGSEVAKAQK  | Q9D0S9 | 0.00449944 | N-term +28.03 Da, K +28.03 Da,              | 1330.057129 | 3 | 515.6147461 | 515.6141413 |
| AAQASAAPKAGTATGR | P56480 | 0          | N-term +28.03 Da, K +28.03 Da,              | 1356.713745 | 2 | 742.397583  | 742.9126251 |
| TEAPLNPKANR      | P60710 | 0.01679842 | N-term +28.03 Da, K +28.03 Da,              | 1357.150391 | 3 | 422.9100342 | 422.9103401 |
| AQASAAPKAGTATGR  | P56480 | 0.01673228 | N-term +28.03 Da, K +28.03 Da,              | 1358.894775 | 3 | 471.5899963 | 471.9318042 |
| TEAPLNPKANR      | P60710 | 0.01686508 | N-term +28.03 Da, K +28.03 Da,              | 1366.013184 | 2 | 633.8613281 | 633.8618719 |
| TYLHQQMR         | Q9EQ21 | 0.04983108 | N-term +28.03 Da,                           | 1374.812622 | 3 | 368.8587341 | 368.8588108 |
| SANEDNVTQVR      | P24270 | 0          | N-term +28.03 Da,                           | 1376.431885 | 2 | 630.8129883 | 630.8125768 |
| CKAGFAGDDAPR     | P60710 | 0.02599814 | N-term +28.03 Da, K +28.03 Da, C +57.02 Da, | 1393.742065 | 3 | 440.8800049 | 440.8836853 |
| SFTTTAER         | P60710 | 0.04116638 | N-term +28.03 Da,                           | 1410.176392 | 2 | 470.7399902 | 470.7403594 |
| DPANQEIER        | Q99KI0 | 0.00771775 | N-term +28.03 Da,                           | 1423.251709 | 2 | 550.2700195 | 550.2725556 |
| TNVSNYER         | O88451 | 0.04680851 | N-term +28.03 Da,                           | 1432.130737 | 2 | 505.75      | 505.748716  |
| TTLQSKSPR        | A2AWT7 | 0.01681503 | N-term +28.03 Da, K +28.03 Da,              | 1438.976685 | 2 | 537.3141479 | 537.3193082 |
| SANEDNVTQVR      | P24270 | 0          | N-term +28.03 Da,                           | 1440.88269  | 2 | 630.8118286 | 630.8125768 |
| TKTPGPGAQSALR    | P62264 | 0.01766438 | N-term +28.03 Da, K +28.03 Da,              | 1442.475952 | 3 | 447.6000061 | 447.2612615 |
| ADTPGEATPPPR     | Q9ERE7 | 0          | N-term +28.03 Da,                           | 1470.314453 | 2 | 618.8099976 | 618.8145878 |
| SANEDNVTQVR      | P24270 | 0          | N-term +28.03 Da,                           | 1471.915039 | 2 | 630.812561  | 630.8125768 |
| LGTTAKEEMER      | Q9CZB0 | 0.03147482 | N-term +28.03 Da, K +28.03 Da,              | 1476.442017 | 3 | 440.899231  | 440.8991127 |
| AAQASAAPKAGTATGR | P56480 | 0          | N-term +28.03 Da, K +28.03 Da,              | 1490.391113 | 2 | 743.4000244 | 742.9126251 |
| NPATNEVVGR       | Q9EQ20 | 0          | N-term +28.03 Da,                           | 1517.275635 | 2 | 542.7901611 | 542.7909151 |
| DEDEEAEAPTGKR    | P26350 | 0          | N-term +28.03 Da, K +28.03 Da,              | 1530.796143 | 2 | 752.3400269 | 751.852097  |
| ATLKDITR         | Q91VR2 | 0.01761252 | N-term +28.03 Da, K +28.03 Da,              | 1540.010376 | 3 | 325.2099915 | 325.2062049 |
| SSPTIPSR         | Q8R1I1 | 0.01616162 | N-term +28.03 Da,                           | 1555.295288 | 2 | 436.7453003 | 436.7454444 |
| GVPPGEC AVR      | G35490 | 0.01435897 | N-term +28.03 Da, C +57.02 Da,              | 1555.576416 | 2 | 535.2784424 | 535.276586  |
| SHGQDYLVGNR      | P10648 | 0          | N-term +28.03 Da,                           | 1558.869873 | 2 | 637.3099976 | 637.3178287 |
| AVAVTMGPKGR      | P63038 | 0.01669941 | N-term +28.03 Da, K +28.03 Da,              | 1577.330933 | 3 | 381.5625    | 381.5619943 |
| SFSAPEQQR        | P24270 | 0.03141831 | N-term +28.03 Da,                           | 1578.875366 | 2 | 539.2693481 | 539.2698156 |
| CQDVAADCEVK      | P10639 | 0.04041273 | N-term +28.03 Da, K +28.03 Da, C +57.02 Da, | 1594.131226 | 2 | 676.3099976 | 675.8050486 |
| HSPECEFVR        | P16460 | 0.0404475  | N-term +28.03 Da, C +57.02 Da,              | 1602.935913 | 2 | 594.7800293 | 594.7769505 |
| SAPVASPNVR       | Q05920 | 0          | N-term +28.03 Da,                           | 1604.437988 | 2 | 513.2904053 | 513.2905506 |
| SSSAPVASPNVR     | Q05920 | 0          | N-term +28.03 Da,                           | 1610.761719 | 2 | 600.3200073 | 600.3225798 |

|                        |        |            |                                |             |   |             |             |
|------------------------|--------|------------|--------------------------------|-------------|---|-------------|-------------|
| DGDEDEEAAPTGKR         | P26350 | 0.03300624 | N-term +28.03 Da, K +28.03 Da, | 1614.892334 | 2 | 837.8599854 | 837.8763011 |
| SSAPVASPNVR            | Q05920 | 0          | N-term +28.03 Da,              | 1619.655762 | 2 | 556.8063354 | 556.8065652 |
| STEVEAAVNR             | P29391 | 0.00119617 | N-term +28.03 Da,              | 1629.660889 | 2 | 552.2896729 | 552.2882056 |
| SFSAPEQQR              | P24270 | 0.0217803  | N-term +28.03 Da,              | 1638.147827 | 2 | 539.2694092 | 539.2698156 |
| SSAPVASPNVR            | Q05920 | 0          | N-term +28.03 Da,              | 1641.869751 | 2 | 600.3216553 | 600.3225798 |
| TPEAAVEHPEAVR          | O35490 | 0          | N-term +28.03 Da,              | 1648.893799 | 3 | 478.5851746 | 478.5842932 |
| AGFAGDDAPR             | P60710 | 0          | N-term +28.03 Da,              | 1662.751953 | 2 | 502.7399902 | 502.7434334 |
| SEPAQPAVQQAPAR         | Q7TNL9 | 0          | N-term +28.03 Da,              | 1688.75769  | 2 | 739.3900146 | 739.3915256 |
| SELSGAADEAAR           | Q9D3D9 | 0.00965665 | N-term +28.03 Da,              | 1692.531128 | 2 | 602.7936401 | 602.7938527 |
| IVGNEHYDVAR            | P56480 | 0          | N-term +28.03 Da,              | 1700.13208  | 3 | 434.2262573 | 434.2263284 |
| SVDDVIKR               | P24549 | 0.01155462 | N-term +28.03 Da, K +28.03 Da, | 1712.043091 | 3 | 329.8699951 | 329.8659599 |
| ETDEEFDAR              | P12787 | 0          | N-term +28.03 Da,              | 1716.083618 | 2 | 570.25      | 570.246204  |
| ATLKDITR               | Q91VR2 | 0.01167728 | N-term +28.03 Da, K +28.03 Da, | 1720.748413 | 3 | 325.2058105 | 325.2062049 |
| ATLKDITR               | Q91VR2 | 0.03979239 | N-term +28.03 Da, K +28.03 Da, | 1725.4104   | 2 | 487.3059082 | 487.3056692 |
| SSLEDSQIEKER           | Q9CZ13 | 0.0055991  | N-term +28.03 Da, K +28.03 Da, | 1733.210327 | 3 | 492.9200134 | 492.9228635 |
| GATTVQEQLR             | Q8BG07 | 0          | N-term +28.03 Da,              | 1743.752563 | 2 | 565.8121948 | 565.8118477 |
| LPLAFAPAAALAGPGRVEPPQK | Q64731 | 0.0453379  | N-term +28.03 Da, K +28.03 Da, | 1750.420898 | 4 | 557.3271484 | 557.5794935 |
| ATLKDITR               | Q91VR2 | 0.01434426 | N-term +28.03 Da, K +28.03 Da, | 1752.116699 | 3 | 325.2062073 | 325.2062049 |
| GTTTATVLAR             | P63038 | 0          | N-term +28.03 Da,              | 1767.548462 | 2 | 509.7987671 | 509.7982087 |
| ATLKDITR               | Q91VR2 | 0.03758741 | N-term +28.03 Da, K +28.03 Da, | 1782.769775 | 3 | 325.20578   | 325.2062049 |
| TDEPSEKDALQPGR         | Q9QXD6 | 0.0217597  | N-term +28.03 Da, K +28.03 Da, | 1788.658813 | 3 | 533.6099854 | 533.6055346 |
| SDSMDTGAGSIR           | O35143 | 0          | N-term +28.03 Da,              | 1794.924927 | 2 | 612.7800293 | 612.7798881 |
| SDSMDTGAGSIR           | O35143 | 0          | N-term +28.03 Da,              | 1795.568237 | 2 | 612.7805786 | 612.7798881 |
| SSDSMDTGAGSIR          | O35143 | 0.00561798 | N-term +28.03 Da,              | 1795.779297 | 2 | 656.2961426 | 656.2959026 |
| YYLTDIER               | P30677 | 0.02592593 | N-term +28.03 Da,              | 1830.6698   | 2 | 550.289978  | 550.7847671 |
| TIQVDNTDAEGR           | Q9CPY7 | 0.00228311 | N-term +28.03 Da,              | 1853.614746 | 2 | 673.8300171 | 673.8309669 |
| STSSMGLPKQVK           | P38060 | 0.0498732  | N-term +28.03 Da, K +28.03 Da, | 1872.190918 | 3 | 483.2791138 | 483.2778125 |
| GNETEATFAR             | P55264 | 0          | N-term +28.03 Da,              | 1885.260864 | 2 | 598.289978  | 597.7911127 |
| YRPGTVALR              | P02301 | 0          | N-term +28.03 Da,              | 1885.711182 | 3 | 354.2134705 | 354.2135823 |
| TEPELSETQR             | Q9DD06 | 0.00863931 | N-term +28.03 Da,              | 1892.620361 | 2 | 609.2999878 | 609.3040532 |
| TATILDKPEDR            | O35215 | 0          | N-term +28.03 Da, K +28.03 Da, | 1896.187744 | 3 | 438.9138184 | 438.9136391 |
| GVNESLTDAR             | P11725 | 0          | N-term +28.03 Da,              | 1899.189453 | 2 | 595.8024292 | 595.8042202 |
| STSSMGLPKQVK           | P38060 | 0          | N-term +28.03 Da, K +28.03 Da, | 1902.670044 | 3 | 483.2781677 | 483.2778125 |
| SDPVVSYR               | P58252 | 0.04684838 | N-term +28.03 Da,              | 1904.089355 | 2 | 475.75      | 475.750727  |
| RPELTGAKVVVSGGR        | Q99LC5 | 0          | N-term +28.03 Da, K +28.03 Da, | 1904.190063 | 4 | 396.2426758 | 396.2413344 |
| SDSVTEETLR             | Q8C196 | 0          | N-term +28.03 Da,              | 1930.768677 | 2 | 582.7892456 | 582.7907787 |
| SDSSDSMDTGAGSIR        | O35143 | 0          | N-term +28.03 Da,              | 1933.338989 | 2 | 757.3200073 | 757.3253893 |
| MKPILLQGHER            | Q9QZD9 | 0          | N-term +28.03 Da, K +28.03 Da, | 1940.566406 | 4 | 345.2060242 | 345.2063342 |
| FYASEDKLENR            | O35490 | 0          | N-term +28.03 Da, K +28.03 Da, | 1952.354614 | 3 | 476.5767212 | 476.5770271 |
| TENFEDVGHSTDAR         | P56395 | 0          | N-term +28.03 Da,              | 1952.430176 | 3 | 535.9091187 | 535.9095058 |



|                     |        |            |                                |             |   |             |             |
|---------------------|--------|------------|--------------------------------|-------------|---|-------------|-------------|
| GQDYLVGNR           | P10648 | 0.00559284 | N-term +28.03 Da,              | 1978.765015 | 2 | 525.2724609 | 525.2723581 |
| TNDPLEAAR           | P11725 | 0.00770077 | N-term +28.03 Da,              | 1985.411621 | 2 | 507.7600098 | 507.764366  |
| ATENFEDVGHSTDAR     | P56395 | 0          | N-term +28.03 Da,              | 2002.065674 | 3 | 559.5900269 | 559.5885439 |
| SSFQIVKNPR          | Q61176 | 0          | N-term +28.03 Da, K +28.03 Da, | 2010.144897 | 3 | 411.243927  | 411.2434304 |
| STKPQAQEQPPASPEALR  | Q9WU79 | 0.03309481 | N-term +28.03 Da, K +28.03 Da, | 2010.524414 | 3 | 664.357605  | 664.3567313 |
| CVEAFVEVGR          | O88986 | 0.01066098 | N-term +28.03 Da, C +57.02 Da, | 2011.932251 | 2 | 597.2999878 | 597.3028011 |
| HTFYNELR            | P60710 | 0.04611443 | N-term +28.03 Da,              | 2024.960815 | 2 | 554.28302   | 554.2827256 |
| GSDSLQLER           | P68372 | 0.02095238 | N-term +28.03 Da,              | 2025.266113 | 2 | 530.7700195 | 530.7671061 |
| TKVSSLIER           | Q921X9 | 0.02911738 | N-term +28.03 Da, K +28.03 Da, | 2026.928223 | 3 | 363.5605164 | 363.560648  |
| EEESAAEELKAR        | Q80VN0 | 0.02093245 | N-term +28.03 Da, K +28.03 Da, | 2027.358154 | 2 | 765.3914185 | 765.9041322 |
| AGELTEDEVER         | P62270 | 0          | N-term +28.03 Da,              | 2027.553833 | 2 | 638.3059692 | 638.3067933 |
| SFQIVKNPR           | Q61176 | 0          | N-term +28.03 Da, K +28.03 Da, | 2039.420288 | 3 | 382.2329102 | 382.232754  |
| EDEEEEEDEGPVR       | Q9D0J8 | 0          | N-term +28.03 Da,              | 2053.483643 | 2 | 859.8499756 | 859.847407  |
| SDTPCDDFTR          | P28798 | 0          | N-term +28.03 Da, C +57.02 Da, | 2057.854492 | 2 | 621.2600098 | 621.2587885 |
| DLSKQAVAYR          | Q03265 | 0.025878   | N-term +28.03 Da, K +28.03 Da, | 2058.382324 | 3 | 402.899292  | 402.8995524 |
| VEIIANDQGNR         | P16627 | 0.01671583 | N-term +28.03 Da,              | 2059.500977 | 2 | 628.8317871 | 628.8333118 |
| SEPEEFQPER          | Q64459 | 0          | N-term +28.03 Da,              | 2071.246582 | 2 | 638.2999878 | 638.2962282 |
| GTTVPCEDIGR         | Q9CZ13 | 0          | N-term +28.03 Da, C +57.02 Da, | 2076.380859 | 2 | 616.7999878 | 616.8006231 |
| LPAAPSGCPGQCR       | Q8K377 | 0.01694915 | N-term +28.03 Da, C +57.02 Da, | 2097.075928 | 2 | 699.8300171 | 699.8344741 |
| SKDSEGSWFR          | O55125 | 0.04911092 | N-term +28.03 Da, K +28.03 Da, | 2104.348877 | 3 | 418.8699951 | 418.8752956 |
| EPDLSSEDIKER        | B5X0G2 | 0          | N-term +28.03 Da, K +28.03 Da, | 2107.43335  | 3 | 448.8999939 | 448.9050325 |
| TGGDAAAPGAAGTQALPHR | Q9D0F3 | 0          | N-term +28.03 Da,              | 2122.575928 | 3 | 625.9803467 | 625.9817758 |
| NATLSVEPEGR         | Q9QYR9 | 0          | N-term +28.03 Da,              | 2125.825195 | 2 | 600.8153076 | 600.8145878 |
| SHGQDYLVGNR         | P10648 | 0          | N-term +28.03 Da,              | 2132.731445 | 2 | 638.3200073 | 637.3178287 |
| SKDSEGSWFR          | O55125 | 0.00772627 | N-term +28.03 Da, K +28.03 Da, | 2135.050537 | 3 | 418.8751831 | 418.8752956 |
| TSNPENTVFDAGR       | P20029 | 0          | N-term +28.03 Da, K +28.03 Da, | 2137.490479 | 3 | 512.2679443 | 512.2668529 |
| TYCPANNEPIAR        | Q9DBF1 | 0.01842871 | N-term +28.03 Da, C +57.02 Da, | 2137.808594 | 2 | 717.8499756 | 717.3457293 |
| TALIHDLAR           | P63323 | 0.01601602 | N-term +28.03 Da,              | 2144.169678 | 3 | 365.5499878 | 365.5487423 |
| TKFVHDNYVIR         | Q8C196 | 0          | N-term +28.03 Da, K +28.03 Da, | 2149.142578 | 3 | 483.2738037 | 483.2733899 |
| YMVTKIPR            | Q8C196 | 0.01532176 | N-term +28.03 Da, K +28.03 Da, | 2157.072754 | 3 | 355.2200012 | 355.2159352 |
| RPEFMRGGGSGGRRGR    | F6QC10 | 0.02097235 | N-term +28.03 Da,              | 2157.869873 | 3 | 607.3200073 | 606.651929  |
| TTPVCEDIGR          | Q9CZ13 | 0.01441813 | N-term +28.03 Da, C +57.02 Da, | 2169.609375 | 2 | 588.289978  | 588.2898911 |
| TSVDLEETGR          | Q03265 | 0          | N-term +28.03 Da,              | 2172.214844 | 2 | 567.7854004 | 567.7854962 |
| SEINVEGPPR          | P18572 | 0          | N-term +28.03 Da,              | 2178.867676 | 2 | 563.2999878 | 563.2985732 |
| SSEAPLVNEDVKR       | Q91YQ5 | 0          | N-term +28.03 Da, K +28.03 Da, | 2196.372559 | 3 | 532.9575806 | 532.957908  |
| SSEAPLVNEDVKR       | Q91YQ5 | 0          | N-term +28.03 Da, K +28.03 Da, | 2205.875488 | 2 | 798.9299927 | 798.9332238 |
| YPSPPVVNTVKGK       | Q8VCT4 | 0          | N-term +28.03 Da, K +28.03 Da, | 2214.457764 | 3 | 519.6397095 | 519.6397387 |
| DFSAGVANR           | P15105 | 0.00227273 | N-term +28.03 Da,              | 2214.533447 | 2 | 482.7456665 | 482.7459759 |
| MDVPNIKR            | P63242 | 0.01068376 | N-term +28.03 Da, K +28.03 Da, | 2218.56665  | 3 | 343.5400085 | 343.5355565 |
| SSEAPLVNEDVKR       | Q91YQ5 | 0.00119048 | N-term +28.03 Da, K +28.03 Da, | 2227.255371 | 3 | 532.9567871 | 532.957908  |

|                             |        |            |                                             |             |   |             |             |
|-----------------------------|--------|------------|---------------------------------------------|-------------|---|-------------|-------------|
| SEPEIPK GIR                 | Q9WTP6 | 0.00862999 | N-term +28.03 Da, K +28.03 Da,              | 2231.69458  | 3 | 394.5700073 | 394.5678027 |
| VKVGVNGFGR                  | P16858 | 0          | N-term +28.03 Da, K +28.03 Da,              | 2233.12915  | 3 | 363.5571899 | 363.557349  |
| AGEEAADSP ELP R             | Q9CPW2 | 0          | N-term +28.03 Da,                           | 2253.636475 | 2 | 685.3300171 | 685.3333424 |
| SEPEIPK GIR                 | Q9WTP6 | 0.01064963 | N-term +28.03 Da, K +28.03 Da,              | 2263.615967 | 3 | 394.5677185 | 394.5678027 |
| DTPCDDFTR                   | P28798 | 0          | N-term +28.03 Da, C +57.02 Da,              | 2265.336426 | 2 | 577.7399902 | 577.7427739 |
| SKDSEGSWFR                  | O55125 | 0.02439024 | N-term +28.03 Da, K +28.03 Da,              | 2265.885742 | 3 | 418.8800049 | 418.8752956 |
| GQVITIGNER                  | P60710 | 0.0115425  | N-term +28.03 Da,                           | 2267.751465 | 2 | 557.814209  | 557.8143902 |
| TEPLPAIEKTGKVR              | Q9CXN7 | 0.01632653 | N-term +28.03 Da, K +28.03 Da,              | 2273.475342 | 4 | 406.5       | 406.5014515 |
| ELSEEDKLT VSR               | P56480 | 0          | N-term +28.03 Da, K +28.03 Da,              | 2278.736572 | 3 | 487.9299927 | 487.9313589 |
| YNFTTTAER                   | Q8BFZ3 | 0.00773481 | N-term +28.03 Da,                           | 2279.056641 | 2 | 566.7700195 | 565.7774736 |
| ITADDEPLGR                  | P17742 | 0.04051724 | N-term +28.03 Da,                           | 2289.441895 | 2 | 557.7923584 | 557.7905812 |
| SEPEIPK GIR                 | Q9WTP6 | 0.00968784 | N-term +28.03 Da, K +28.03 Da,              | 2293.909912 | 3 | 394.5679321 | 394.5678027 |
| TWDPDQPPR                   | P24456 | 0          | N-term +28.03 Da,                           | 2304.718262 | 2 | 570.7800293 | 570.2776406 |
| LTPHYLTKQDVER               | Q9DBG6 | 0          | N-term +28.03 Da, K +28.03 Da,              | 2306.97583  | 3 | 586.6599731 | 586.3245908 |
| TANLGAGAAQPLR               | P08226 | 0          | N-term +28.03 Da,                           | 2308.914551 | 2 | 634.3595581 | 634.3594964 |
| LTPHYLTKQDVER               | Q9DBG6 | 0          | N-term +28.03 Da, K +28.03 Da,              | 2315.765381 | 4 | 439.9955139 | 439.9952622 |
| SEPEIPK GIR                 | Q9WTP6 | 0.00768386 | N-term +28.03 Da, K +28.03 Da,              | 2325.606445 | 3 | 394.567627  | 394.5678027 |
| VTAGKDG VANVSIEDR           | P08228 | 0          | N-term +28.03 Da, K +28.03 Da,              | 2338.735107 | 3 | 562.9699707 | 562.9722174 |
| VAPMKGQVCVVTGASR            | Q99L04 | 0          | N-term +28.03 Da, K +28.03 Da, C +57.02 Da, | 2340.558105 | 3 | 572.6481323 | 572.6480226 |
| VLSGEDKSNIAAWGK             | P01942 | 0          | N-term +28.03 Da, K +28.03 Da,              | 2345.716553 | 4 | 454.5150452 | 454.5148248 |
| GAEYGAEALER                 | P01942 | 0          | N-term +28.03 Da,                           | 2349.200439 | 2 | 597.2908325 | 597.2934882 |
| DIEVAPPKAHEVR               | P00329 | 0.01164021 | N-term +28.03 Da, K +28.03 Da,              | 2349.63208  | 3 | 506.2799988 | 506.287588  |
| EEAGDGTTTATV LAR            | P63038 | 0          | N-term +28.03 Da,                           | 2366.057129 | 2 | 760.8800049 | 760.3835641 |
| PEEKEASLAKIKEQTR            | P30115 | 0          | N-term +28.03 Da, K +28.03 Da,              | 2367.758057 | 4 | 493.2799988 | 493.0386644 |
| TVIFTQGR                    | P55264 | 0.04915254 | N-term +28.03 Da,                           | 2371.355225 | 2 | 475.2799988 | 475.2769116 |
| TDQGIKNLPVGEAGR             | P24270 | 0.00229095 | N-term +28.03 Da, K +28.03 Da,              | 2376.496338 | 3 | 537.6300049 | 537.6335357 |
| GDVDAVLSR                   | Q8R0Y6 | 0.01844466 | N-term +28.03 Da,                           | 2386.526611 | 2 | 480.2619324 | 480.261459  |
| TVDGPGSKLWR                 | P16858 | 0          | N-term +28.03 Da, K +28.03 Da,              | 2398.827393 | 3 | 424.5750427 | 424.5750688 |
| DSSFQIVKNPR                 | Q61176 | 0          | N-term +28.03 Da, K +28.03 Da,              | 2414.425049 | 3 | 449.585968  | 449.5857451 |
| DSSFQIVKNPR                 | Q61176 | 0          | N-term +28.03 Da, K +28.03 Da,              | 2420.242188 | 2 | 673.8800049 | 673.8749795 |
| AGVPAHVVDLR                 | Q6XPS7 | 0.00866739 | N-term +28.03 Da,                           | 2422.052979 | 3 | 387.8959961 | 387.896142  |
| TPTGTHFCEVEQMR              | P25688 | 0          | N-term +28.03 Da, C +57.02 Da,              | 2423.156738 | 3 | 574.2650146 | 574.2642378 |
| TNEEAGDGTTTATV LAR          | P63038 | 0          | N-term +28.03 Da,                           | 2423.638184 | 2 | 867.9315186 | 867.9288678 |
| GVQVSPSGEKITHTGQVYDEKDYR    | P52503 | 0          | N-term +28.03 Da, K +28.03 Da,              | 2424.469727 | 4 | 695.3599854 | 695.1080735 |
| HQGVMMVGMGQKDSYVGD E A QSKR | P60710 | 0          | N-term +28.03 Da, K +28.03 Da,              | 2432.705811 | 4 | 648.3200073 | 648.5730775 |
| GVQVETISPGDGR               | P26883 | 0          | N-term +28.03 Da,                           | 2436.81958  | 2 | 671.8512573 | 671.8517019 |
| NATLSVEPEGR                 | Q9QYR9 | 0.03975799 | N-term +28.03 Da,                           | 2445.696777 | 2 | 601.3068848 | 600.8145878 |
| SGDNDDDEPPPLPR              | O55022 | 0          | N-term +28.03 Da,                           | 2452.416016 | 2 | 776.3400269 | 776.3497215 |
| TGGDAAAPGAAGTQAE LPHR       | Q9D0F3 | 0          | N-term +28.03 Da,                           | 2455.497803 | 2 | 937.960022  | 938.4690254 |
| VKIVTVKTQAYPDQKPGTSGLR      | Q9D0F9 | 0.03448276 | N-term +28.03 Da, K +28.03 Da,              | 2464.376709 | 4 | 625.3744507 | 625.373078  |

|                            |        |            |                                |             |   |             |             |
|----------------------------|--------|------------|--------------------------------|-------------|---|-------------|-------------|
| VKIVTVKTQAYPDQKPGTSGLR     | Q9D0F9 | 0.03775241 | N-term +28.03 Da, K +28.03 Da, | 2467.281738 | 3 | 833.4899902 | 833.4950118 |
| HQGVMMVGMGQKDSYVVGDEAQSQR  | P60710 | 0          | N-term +28.03 Da, K +28.03 Da, | 2468.16626  | 3 | 865.0800171 | 864.4283445 |
| GVQVETISPGDGR              | P26883 | 0          | N-term +28.03 Da,              | 2471.875488 | 2 | 671.8499756 | 671.8517019 |
| ETSSIPAEAGEGQIR            | Q9DCB8 | 0          | N-term +28.03 Da,              | 2480.438477 | 2 | 801.9000244 | 801.9021212 |
| TISQGAIEKVKDATR            | Q8C196 | 0.0011919  | N-term +28.03 Da, K +28.03 Da, | 2484.832275 | 4 | 426.0029602 | 426.0030872 |
| TISQGAIEKVKDATR            | Q8C196 | 0          | N-term +28.03 Da, K +28.03 Da, | 2487.621094 | 3 | 567.6699829 | 567.6683575 |
| TMGDAPDFDR                 | P10649 | 0          | N-term +28.03 Da,              | 2489.097168 | 2 | 576.753479  | 576.7531414 |
| SGGGVPTDEEQATGLER          | P19536 | 0.016      | N-term +28.03 Da,              | 2503.293945 | 2 | 866.4099731 | 865.9132177 |
| AIAEELAPER                 | O35490 | 0          | N-term +28.03 Da,              | 2509.259521 | 2 | 564.3099976 | 563.8087737 |
| SQQSASGAPVLLR              | Q9DCM0 | 0.02604651 | N-term +28.03 Da,              | 2514.117188 | 2 | 671.3778076 | 671.3778865 |
| DDTLHETEDVKEAIR            | Q9D855 | 0.02614379 | N-term +28.03 Da, K +28.03 Da, | 2514.716553 | 3 | 610.3200073 | 609.6425374 |
| GGGVPTDEEQATGLER           | P19536 | 0          | N-term +28.03 Da,              | 2516.356201 | 2 | 822.4000244 | 822.3972032 |
| ASGGGVPTDEEQATGLER         | P19536 | 0          | N-term +28.03 Da,              | 2520.205566 | 2 | 901.4308472 | 901.4317748 |
| ASGGGVPTDEEQATGLER         | P19536 | 0.00226757 | N-term +28.03 Da,              | 2525.086914 | 3 | 601.6199951 | 601.2902754 |
| ASGGGVPTDEEQATGLER         | P19536 | 0.01247401 | N-term +28.03 Da,              | 2526.87915  | 3 | 601.289978  | 601.2902754 |
| GTVPAAMLR                  | Q9D404 | 0.02609506 | N-term +28.03 Da,              | 2528.125977 | 2 | 472.2720947 | 472.2733144 |
| YTDNELEKTR                 | P26443 | 0.02585411 | N-term +28.03 Da, K +28.03 Da, | 2529.737793 | 3 | 479.9237366 | 479.9243155 |
| KATIPAAALQAQESTEGPGTGQDRPR | Q9DBG1 | 0.01764706 | N-term +28.03 Da, K +28.03 Da, | 2531.051514 | 3 | 879.7999878 | 879.1314617 |
| KATIPAAALQAQESTEGPGTGQDRPR | Q9DBG1 | 0          | N-term +28.03 Da, K +28.03 Da, | 2535.401367 | 4 | 659.5999756 | 659.6004154 |
| TTVGECLDATAQR              | Q8VCW8 | 0.04058722 | N-term +28.03 Da, C +57.02 Da, | 2539.034668 | 2 | 725.3499756 | 725.3537519 |
| YDLQTGGQISNR               | Q64374 | 0          | N-term +28.03 Da,              | 2543.67334  | 2 | 662.3400269 | 661.8385944 |
| SQQSASGAPVLLR              | Q9DCM0 | 0          | N-term +28.03 Da,              | 2544.754883 | 2 | 671.3775024 | 671.3778865 |
| TDTEKGEFLSEGQVVR           | E9PV24 | 0          | N-term +28.03 Da, K +28.03 Da, | 2545.208008 | 3 | 618.6400146 | 618.3022924 |
| LYFHIGETEKR                | Q8R1V4 | 0          | N-term +28.03 Da, K +28.03 Da, | 2545.712158 | 4 | 363.2000122 | 362.9528655 |
| GESSFDLADR                 | O09164 | 0          | N-term +28.03 Da,              | 2547.205078 | 2 | 563.2600098 | 562.7645636 |
| ASGGGVPTDEEQATGLER         | P19536 | 0          | N-term +28.03 Da,              | 2551.609375 | 2 | 901.4312744 | 901.4317748 |
| SVVEMQGDDEMTR              | O88844 | 0          | N-term +28.03 Da,              | 2551.733398 | 2 | 705.3200073 | 705.3236057 |
| GVQVETISPGDGR              | P26883 | 0.04120172 | N-term +28.03 Da,              | 2553.526611 | 2 | 671.3452759 | 671.8517019 |
| LEVAEDSGHPWR               | Q6P6J9 | 0          | N-term +28.03 Da,              | 2558.976318 | 3 | 475.2375183 | 475.2370048 |
| TIAPALVSK                  | P17182 | 0.01246106 | N-term +28.03 Da, K +28.03 Da, | 2573.856445 | 2 | 478.3099976 | 478.3129627 |
| YPSPPVNTVK                 | Q8VCT4 | 0.01251303 | N-term +28.03 Da, K +28.03 Da, | 2575.589844 | 2 | 672.3822632 | 672.382106  |
| TLDPVEKALR                 | P63017 | 0          | N-term +28.03 Da, K +28.03 Da, | 2583.089844 | 3 | 400.2399902 | 399.9115694 |
| ASGGGVPTDEEQATGLER         | P19536 | 0          | N-term +28.03 Da,              | 2584.372314 | 2 | 901.4306641 | 901.4317748 |
| SMTNDPLEAAR                | P11725 | 0.0405522  | N-term +28.03 Da,              | 2593.875    | 2 | 616.7998657 | 616.8006231 |
| AVAESAVVSSPKDR             | Q91VA0 | 0          | N-term +28.03 Da, K +28.03 Da, | 2594.123047 | 2 | 793.9099731 | 793.9228562 |
| DVSGTDSPPFR                | Q8VC12 | 0.01696607 | N-term +28.03 Da,              | 2604.869873 | 2 | 554.7700195 | 554.7671061 |
| SGPGGLHADLLR               | Q8BWF0 | 0          | N-term +28.03 Da,              | 2606.400635 | 3 | 407.5630493 | 407.5630517 |
| ELAPGLHLR                  | Q99JR5 | 0          | N-term +28.03 Da,              | 2609.422852 | 3 | 345.2099915 | 345.2099493 |
| GLVGEIIKR                  | P15532 | 0.00119904 | N-term +28.03 Da, K +28.03 Da, | 2631.202148 | 3 | 347.5656128 | 347.565733  |
| TPEAAVEHPEAVR              | O35490 | 0          | N-term +28.03 Da,              | 2631.378418 | 2 | 717.3699951 | 717.3728015 |

|                                 |        |            |                                            |             |   |             |             |
|---------------------------------|--------|------------|--------------------------------------------|-------------|---|-------------|-------------|
| ASGPGGLHADLLR                   | Q8BWF0 | 0.03291815 | N-term +28.03 Da,                          | 2634.84668  | 3 | 431.5799866 | 431.2420898 |
| SGGTTMYPGIADR                   | P60710 | 0.00558036 | N-term +28.03 Da,                          | 2635.244141 | 2 | 677.3300171 | 677.3270052 |
| GGTTMYPGIADR                    | P60710 | 0.01757813 | N-term +28.03 Da,                          | 2637.531738 | 2 | 633.8099976 | 633.8109907 |
| GGTTMYPGIADR                    | P60710 | 0.0210325  | N-term +28.03 Da,                          | 2641.001465 | 2 | 634.3200073 | 633.8109907 |
| GLLSDPVR                        | Q9WTK3 | 0.02662994 | N-term +28.03 Da,                          | 2649.296143 | 2 | 442.7600098 | 442.763637  |
| LDLKKELSEPSSTR                  | Q8C196 | 0.0023015  | N-term +28.03 Da, K +28.03 Da,             | 2659.973389 | 3 | 562.9899902 | 562.9927298 |
| TSVATKKTEQGPPSSEYIFER           | P29758 | 0          | N-term +28.03 Da, K +28.03 Da,             | 2663.072021 | 4 | 610.8200073 | 610.5746061 |
| MKHYEVEIR                       | Q9CY27 | 0.0087146  | N-term +28.03 Da, K +28.03 Da,             | 2665.372803 | 3 | 420.5599976 | 420.8971543 |
| GKGILAADESIGSMGNR               | A6ZI46 | 0.00233918 | N-term +28.03 Da, K +28.03 Da,             | 2671.907959 | 2 | 866.460022  | 866.4565403 |
| HPSVDGFTPR                      | Q8C196 | 0          | N-term +28.03 Da,                          | 2682.289795 | 2 | 570.2999878 | 570.7934576 |
| GVTVKDVNQQEFVR                  | Q9CZX8 | 0          | N-term +28.03 Da, K +28.03 Da,             | 2684.512207 | 2 | 837.960022  | 837.9623154 |
| ASGPGGLHADLLR                   | Q8BWF0 | 0          | N-term +28.03 Da,                          | 2686.872559 | 3 | 431.2400818 | 431.2420898 |
| TSSYSALSEPSR                    | Q9DCS3 | 0          | N-term +28.03 Da,                          | 2692.841064 | 2 | 656.3200073 | 656.8226103 |
| EVKCDMEVSCPEGYTCRR              | P28798 | 0          | N-term +28.03 Da, K +28.03 Da,C +57.02 Da, | 2707.80542  | 3 | 779.6500244 | 779.3209906 |
| SSIVVSGTPIR                     | P35505 | 0          | N-term +28.03 Da,                          | 2730.582275 | 2 | 572.3400269 | 572.3402408 |
| ELGDHVTNLR                      | P09528 | 0          | N-term +28.03 Da,                          | 2743.518799 | 2 | 592.3099976 | 591.3172972 |
| DEVFYSR                         | P11725 | 0.02436739 | N-term +28.03 Da,                          | 2747.72876  | 2 | 520.7600098 | 520.7560095 |
| ELGDHVTNLR                      | P09528 | 0          | N-term +28.03 Da,                          | 2748.986328 | 2 | 590.8200073 | 591.3172972 |
| VVFDTYDR                        | P16015 | 0.00769231 | N-term +28.03 Da,                          | 2764.020996 | 2 | 579.7800293 | 579.2773066 |
| EIAQDFKTDLR                     | P02301 | 0.03697183 | N-term +28.03 Da, K +28.03 Da,             | 2778.387207 | 3 | 464.5899963 | 464.5891555 |
| EDTVYHLQPSGR                    | Q91X83 | 0.02898551 | N-term +28.03 Da,                          | 2778.744873 | 2 | 715.3699951 | 715.3571514 |
| THISRSQNQQYLVR                  | O35066 | 0.0298103  | N-term +28.03 Da,                          | 2790.092529 | 3 | 586.6564941 | 586.6517007 |
| KETTIQGLDGLSER                  | Q91Y97 | 0.00235294 | N-term +28.03 Da, K +28.03 Da,             | 2792.033447 | 3 | 534.9657593 | 534.9614297 |
| MASGGGVPTDEEQATGLER             | P19536 | 0          | N-term +28.03 Da,                          | 2800.830322 | 2 | 967.4500122 | 966.9520173 |
| AHGSVVKSEDYAFPTYADR             | P19783 | 0          | N-term +28.03 Da, K +28.03 Da,             | 2803.732666 | 3 | 723.6900024 | 723.6918913 |
| AHGSVVKSEDYAFPTYADR             | P19783 | 0          | N-term +28.03 Da, K +28.03 Da,             | 2810.325439 | 2 | 1085.030029 | 1085.034199 |
| NPVDDICIAKPR                    | P32261 | 0          | N-term +28.03 Da, K +28.03 Da,C +57.02 Da, | 2812.158203 | 3 | 485.2651978 | 485.2659068 |
| AHGPRGAAVTRSMASGGGVPTDEEQATGLER | Q9D881 | 0          | N-term +28.03 Da,                          | 2817.34082  | 3 | 1032.5      | 1031.842535 |
| LETMTGEKVK                      | P12710 | 0.0252809  | N-term +28.03 Da, K +28.03 Da,             | 2817.41626  | 2 | 610.3400269 | 610.3519598 |
| TWVVLGHSER                      | P17751 | 0          | N-term +28.03 Da,                          | 2826.13208  | 3 | 404.5599976 | 404.555897  |
| TELFYK GIR                      | Q03265 | 0.01693227 | N-term +28.03 Da, K +28.03 Da,             | 2828.835449 | 3 | 394.9007568 | 394.9008931 |
| NPVDDICIAKPR                    | P32261 | 0          | N-term +28.03 Da, K +28.03 Da,C +57.02 Da, | 2843.9375   | 3 | 485.265564  | 485.2659068 |
| AREATQAVLDKPETLSSDASTR          | P50544 | 0          | N-term +28.03 Da, K +28.03 Da,             | 2846.082275 | 4 | 601.0599976 | 601.3185003 |
| SDPVVIVSAAR                     | Q8CAY6 | 0          | N-term +28.03 Da,                          | 2848.215576 | 2 | 571.3300171 | 571.3324158 |
| FTVDQIK                         | _sp Q9 | 0.04978903 | N-term +28.03 Da, K +28.03 Da,             | 2854.988037 | 2 | 453.7600098 | 453.768388  |
| GGDATENFEDVGHSTDAR              | P56395 | 0          | N-term +28.03 Da,                          | 2857.894531 | 2 | 953.9000244 | 953.4141138 |
| TEESDLAQQYGVR                   | P09103 | 0          | N-term +28.03 Da,                          | 2875.981934 | 2 | 762.3699951 | 762.3704565 |
| ADIVENQVMDTR                    | P10649 | 0          | N-term +28.03 Da,                          | 2881.202148 | 2 | 710.3499756 | 709.8508448 |
| TPGVAADLSHIETR                  | P08249 | 0          | N-term +28.03 Da,                          | 2891.393311 | 3 | 498.9352722 | 498.9352146 |
| VEFEKFLKTR                      | P30115 | 0.00877193 | N-term +28.03 Da, K +28.03 Da,             | 2901.925293 | 4 | 378.2226257 | 378.2223446 |

|                      |        |            |                                            |             |   |             |             |
|----------------------|--------|------------|--------------------------------------------|-------------|---|-------------|-------------|
| AEGQVLVLDGR          | P19253 | 0          | N-term +28.03 Da,                          | 2909.768555 | 2 | 592.8300171 | 592.8353228 |
| TEVKIDFFPR           | Q8CAY6 | 0          | N-term +28.03 Da, K +28.03 Da,             | 2911.242188 | 3 | 430.5739136 | 430.5748461 |
| SPESTSEVECGDFYNSGDR  | Q91VA0 | 0          | N-term +28.03 Da, C +57.02 Da,             | 2914.424072 | 2 | 1082.939941 | 1082.442212 |
| TFASQVTLEGDVKVVER    | Q9DCW4 | 0          | N-term +28.03 Da, K +28.03 Da,             | 2918.922852 | 4 | 498.5299988 | 498.5347519 |
| DPVPTPGPASAQLR       | Q920L1 | 0          | N-term +28.03 Da,                          | 2925.333008 | 2 | 717.3900146 | 717.3909941 |
| GDSASKVISAEALPGR     | Q9D6Y7 | 0          | N-term +28.03 Da, K +28.03 Da,             | 2926.697998 | 3 | 581.9799805 | 581.6476224 |
| SEVPGAAEPPGGSGVGLGDR | Q9EP72 | 0          | N-term +28.03 Da,                          | 2931.537109 | 2 | 934.460022  | 934.4608664 |
| LCAATATILDKPEDR      | O35215 | 0          | N-term +28.03 Da, K +28.03 Da,C +57.02 Da, | 2933.518311 | 3 | 577.3099976 | 577.309953  |
| GDSASKVISAEALPGR     | Q9D6Y7 | 0          | N-term +28.03 Da, K +28.03 Da,             | 2937.135498 | 2 | 871.9699707 | 871.9677954 |
| TTKAPAAIGPYSQAVQVDR  | P52760 | 0          | N-term +28.03 Da, K +28.03 Da,             | 2938.79541  | 3 | 677.3800049 | 677.040743  |
| TMKLELAQYR           | Q03265 | 0          | N-term +28.03 Da, K +28.03 Da,             | 2940.430176 | 3 | 436.9200134 | 436.9163261 |
| AEGQVLVLDGR          | P19253 | 0.0217186  | N-term +28.03 Da,                          | 2941.452637 | 2 | 592.8358765 | 592.8353228 |
| TPEADKIFLER          | P26443 | 0.00770925 | N-term +28.03 Da, K +28.03 Da,             | 2960.672363 | 3 | 458.9200134 | 458.9257675 |
| GFPEAASSFR           | P32020 | 0.04113111 | N-term +28.03 Da,                          | 2967.996582 | 2 | 548.7800293 | 548.7747336 |
| FAQLCEEHGILR         | B5X0G2 | 0.00868621 | N-term +28.03 Da, C +57.02 Da,             | 2972.581299 | 3 | 500.9299927 | 500.9257731 |
| TFIAIKPDGVQR         | P15532 | 0          | N-term +28.03 Da, K +28.03 Da,             | 2974.030518 | 3 | 467.6099854 | 467.6135236 |
| TYFGSLPAR            | P52760 | 0          | N-term +28.03 Da,                          | 2976.079834 | 2 | 584.3104248 | 584.3114832 |
| RPPLGFLNPR           | O89023 | 0          | N-term +28.03 Da,                          | 2986.671631 | 3 | 398.9075928 | 398.9083817 |
| TMAEETAPAVLER        | Q64374 | 0          | N-term +28.03 Da,                          | 2991.694824 | 2 | 723.3699951 | 723.3688704 |
| LTPHTYLTKQDVER       | Q9DBG6 | 0          | N-term +28.03 Da, K +28.03 Da,             | 2991.7854   | 3 | 585.9899902 | 586.3245908 |
| DYNHWLATAK           | Q8C196 | 0.00229621 | N-term +28.03 Da, K +28.03 Da,             | 2996.824707 | 3 | 401.8800049 | 401.8767476 |
| SVVFPHDEPLAGR        | Q99LB7 | 0          | N-term +28.03 Da,                          | 2998.632813 | 3 | 484.9299927 | 484.5928998 |
| LEEDNVLVLKK          | P09103 | 0          | N-term +28.03 Da, K +28.03 Da,             | 3000.096924 | 3 | 504.9700012 | 504.9676327 |
| TLKGLNSDSVTEETLR     | Q8C196 | 0          | N-term +28.03 Da, K +28.03 Da,             | 3003.201904 | 3 | 607.3300171 | 606.9984325 |
| DIDTAAKF             | P56383 | 0.02441315 | N-term +28.03 Da, K +28.03 Da,             | 3007.485352 | 2 | 468.7548523 | 468.755478  |
| CDILIPAASEKQLTKSNAPR | P26443 | 0          | N-term +28.03 Da, K +28.03 Da,C +57.02 Da, | 3023.675293 | 4 | 575.0700073 | 574.8227923 |
| SPGGPQAQNSPR         | Q99K41 | 0.02119461 | N-term +28.03 Da,                          | 3027.998779 | 2 | 611.8099976 | 612.3100037 |
| PMTLGYWNTR           | P19639 | 0.0023175  | N-term +28.03 Da,                          | 3031.140381 | 2 | 634.8099976 | 633.8186182 |
| SDAPPLTLDGIKDR       | Q9CR21 | 0          | N-term +28.03 Da, K +28.03 Da,             | 3039.635986 | 3 | 518.6199951 | 518.6226367 |
| SVESIMATEDR          | Q8C196 | 0          | N-term +28.03 Da,                          | 3041.230957 | 2 | 633.3099976 | 633.3057387 |
| SDAPPLTLDGIKDR       | Q9CR21 | 0          | N-term +28.03 Da, K +28.03 Da,             | 3041.389648 | 2 | 777.4299927 | 777.4303168 |
| SEVASSVLRLER         | Q9CYR0 | 0          | N-term +28.03 Da,                          | 3046.336426 | 2 | 609.8400269 | 609.3404384 |
| TGGEVPSLGLSLR        | P11352 | 0.00236128 | N-term +28.03 Da,                          | 3046.633057 | 2 | 600.8337402 | 600.8327803 |
| APEEHPVLLTEAPLNPKANR | P60710 | 0.00875274 | N-term +28.03 Da, K +28.03 Da,             | 3051.541016 | 4 | 564.0700073 | 563.8153958 |
| TSYPFDTVR            | P51881 | 0.04529915 | N-term +28.03 Da,                          | 3051.855957 | 2 | 556.7800293 | 557.2823916 |
| TSVATKKTEQPPSSEYIFER | P29758 | 0.02111324 | N-term +28.03 Da, K +28.03 Da,             | 3052.861572 | 3 | 813.4199829 | 813.763716  |
| SSDAQWLTAEER         | Q9CZL5 | 0          | N-term +28.03 Da,                          | 3053.914795 | 2 | 711.3400269 | 710.8387919 |
| TGEVPPVAIR           | P27773 | 0.01533742 | N-term +28.03 Da,                          | 3063.876465 | 2 | 534.8200073 | 534.8242263 |
| APDPVPTPGPASAQLR     | Q920L1 | 0.0096463  | N-term +28.03 Da,                          | 3066.942627 | 2 | 801.4390259 | 801.4359333 |
| AGGEAGVTLGQPHLSR     | Q9ZON2 | 0          | N-term +28.03 Da,                          | 3076.035889 | 2 | 789.4099731 | 789.4233572 |

|                       |        |            |                                            |             |   |             |             |
|-----------------------|--------|------------|--------------------------------------------|-------------|---|-------------|-------------|
| SATDLTEFAAR           | Q8BWT1 | 0.02906449 | N-term +28.03 Da,                          | 3082.76001  | 2 | 605.3099976 | 605.3091382 |
| LEGVGHFFR             | P29391 | 0.01344364 | N-term +28.03 Da,                          | 3098.814209 | 3 | 364.2000122 | 363.8661826 |
| SEVSALLGR             | P56480 | 0.02167766 | N-term +28.03 Da,                          | 3103.420654 | 2 | 480.2791748 | 480.2796516 |
| PSQEGQNPSLSSIR        | Q8C196 | 0          | N-term +28.03 Da,                          | 3114.070557 | 2 | 764.4000244 | 764.3917231 |
| ADDDYDEPTDSLDR        | Q8K0E8 | 0.00452489 | N-term +28.03 Da,                          | 3114.663818 | 2 | 862.8499756 | 863.3579416 |
| EIDGGLETLR            | Q9DCW4 | 0.00230415 | N-term +28.03 Da,                          | 3116.000977 | 2 | 565.7999878 | 565.8062312 |
| SLAIQENANALAR         | Q91Y97 | 0          | N-term +28.03 Da,                          | 3117.19873  | 2 | 699.888916  | 699.8886185 |
| TKLPWDAVGR            | P54869 | 0          | N-term +28.03 Da, K +28.03 Da,             | 3164.206543 | 3 | 400.2358704 | 400.2362757 |
| SLVFEAENR             | P11725 | 0.01691542 | N-term +28.03 Da,                          | 3166.045898 | 2 | 595.3143921 | 595.3142232 |
| GPWTPEAAVEHPEAVR      | O35490 | 0          | N-term +28.03 Da,                          | 3190.703125 | 3 | 591.9699707 | 591.968807  |
| TTPEADKIFLER          | P26443 | 0          | N-term +28.03 Da, K +28.03 Da,             | 3191.269287 | 3 | 492.6075134 | 492.6083273 |
| CELETMTGEEKVK         | P12710 | 0.0210728  | N-term +28.03 Da, K +28.03 Da,C +57.02 Da, | 3198.177979 | 2 | 755.8900146 | 754.8885814 |
| SDAPPLTLDGIKDR        | Q9CR21 | 0.00876232 | N-term +28.03 Da, K +28.03 Da,             | 3205.798828 | 3 | 518.6199951 | 518.6226367 |
| GTLDNPSSLDETAYER      | O35943 | 0          | N-term +28.03 Da,                          | 3211.784424 | 2 | 898.4185181 | 898.4208758 |
| STSSMGLTPKQVKIVEVGPR  | P38060 | 0          | N-term +28.03 Da, K +28.03 Da,             | 3222.273193 | 4 | 550.8200073 | 550.3198852 |
| TEDPETLQAQFR          | Q8BK48 | 0          | N-term +28.03 Da,                          | 3225.197754 | 2 | 732.3599854 | 731.862267  |
| TAYIDFAR              | P17751 | 0.03768624 | N-term +28.03 Da,                          | 3232.136963 | 2 | 492.7600098 | 492.7610945 |
| GTTPGGSITKVLIANR      | Q99MR8 | 0          | N-term +28.03 Da, K +28.03 Da,             | 3237.045898 | 3 | 547.6599731 | 547.6613141 |
| STSSMGLTPKQVKIVEVGPR  | P38060 | 0          | N-term +28.03 Da, K +28.03 Da,             | 3253.692627 | 4 | 550.8200073 | 550.3198852 |
| VAPEEHPVLLTEAPLNPKANR | P60710 | 0          | N-term +28.03 Da, K +28.03 Da,             | 3256.388428 | 4 | 589.0800171 | 588.5824993 |
| AGLQFPVGR             | P0C056 | 0.02983725 | N-term +28.03 Da,                          | 3256.741699 | 2 | 487.2799988 | 486.7849036 |
| SDAPPLTLDGIKDR        | Q9CR21 | 0          | N-term +28.03 Da, K +28.03 Da,             | 3259.717773 | 3 | 518.6199951 | 518.6226367 |
| SDAPPLTLDGIKDR        | Q9CR21 | 0          | N-term +28.03 Da, K +28.03 Da,             | 3268.89502  | 2 | 777.4299927 | 777.4303168 |
| GPPTPEADKIFLER        | P26443 | 0          | N-term +28.03 Da, K +28.03 Da,             | 3272.061279 | 2 | 815.4441528 | 815.4459668 |
| FAVTVAPPGAR           | Q8VEK3 | 0.00229885 | N-term +28.03 Da,                          | 3276.1875   | 2 | 557.3244019 | 557.3243932 |
| SVVAGGPEVTLTPER       | Q8CIM3 | 0          | N-term +28.03 Da,                          | 3281.405029 | 2 | 770.4199829 | 770.4224917 |
| TMANPIIINGGAPDPTAR    | Q8C196 | 0          | N-term +28.03 Da,                          | 3284.539551 | 2 | 893.4431152 | 892.9516223 |
| AHGSVVKSEDYAFPTYADR   | P19783 | 0.00227531 | N-term +28.03 Da, K +28.03 Da,             | 3286.884277 | 3 | 723.6900024 | 723.6918913 |
| LSLVVHGPGDIR          | Q64442 | 0          | N-term +28.03 Da,                          | 3287.755615 | 3 | 430.9200134 | 430.9224685 |
| SDAPPLTLDGIKDR        | Q9CR21 | 0          | N-term +28.03 Da, K +28.03 Da,             | 3291.200684 | 3 | 518.6224365 | 518.6226367 |
| TAEMSSILEER           | Q03265 | 0          | N-term +28.03 Da,                          | 3294.936768 | 2 | 647.3216553 | 647.3213887 |
| GPPTPEADKIFLER        | P26443 | 0          | N-term +28.03 Da, K +28.03 Da,             | 3296.184814 | 3 | 543.9663696 | 543.9664034 |
| SFSDYPPPLGR           | P10126 | 0          | N-term +28.03 Da,                          | 3296.4375   | 2 | 584.2999878 | 583.7956662 |
| MKFNPFVTSR            | P61255 | 0          | N-term +28.03 Da, K +28.03 Da,             | 3308.187988 | 3 | 466.5799866 | 466.5797141 |
| PVAVALDTKGPEIR        | P52480 | 0.01683168 | N-term +28.03 Da, K +28.03 Da,             | 3310.360107 | 3 | 507.9709778 | 507.9714884 |
| SDAPPLTLDGIKDR        | Q9CR21 | 0          | N-term +28.03 Da, K +28.03 Da,             | 3322.407959 | 3 | 518.960022  | 518.6226367 |
| MKFNPFVTSR            | P61255 | 0          | N-term +28.03 Da, K +28.03 Da,             | 3334.551025 | 3 | 467.25      | 466.5797141 |
| MKFNPFVTSR            | P61255 | 0          | N-term +28.03 Da, K +28.03 Da,             | 3338.873779 | 3 | 466.5799866 | 466.5797141 |
| AHGSVVKSEDYAFPTYADR   | P19783 | 0          | N-term +28.03 Da, K +28.03 Da,             | 3348.83252  | 3 | 723.6799927 | 723.6918913 |
| VLAELVSDR             | Q8BP47 | 0.02099237 | N-term +28.03 Da,                          | 3349.201904 | 2 | 596.8331299 | 596.8322488 |

|                         |        |            |                                             |             |   |             |             |
|-------------------------|--------|------------|---------------------------------------------|-------------|---|-------------|-------------|
| TQPEPDI VGLDSGHIR       | P52196 | 0.0376203  | N-term +28.03 Da,                           | 3349.539307 | 3 | 588.2999878 | 587.9758504 |
| MPGVTVKD V NQQEFVR      | Q9CZX8 | 0.03466667 | N-term +28.03 Da, K +28.03 Da,              | 3352.049072 | 3 | 635.0100098 | 635.0083855 |
| NVLASEPEIPK GIR         | Q9WTP6 | 0          | N-term +28.03 Da, K +28.03 Da,              | 3357.43335  | 3 | 526.9799805 | 526.9786431 |
| SAGIQV V GDDLTV TNPKR   | P17182 | 0.00232019 | N-term +28.03 Da, K +28.03 Da,              | 3358.006592 | 3 | 643.0300293 | 642.6933433 |
| TTEPVSELLKN             | P18242 | 0.01149425 | N-term +28.03 Da, K +28.03 Da,              | 3362.483887 | 2 | 643.8638916 | 643.8637465 |
| VGVKPVGSDP DFQPELSGAGSR | Q8CDN6 | 0.01689861 | N-term +28.03 Da, K +28.03 Da,              | 3366.314209 | 3 | 753.0599976 | 752.3937341 |
| AHG SVVKSEDYAFPTYADR    | P19783 | 0          | N-term +28.03 Da, K +28.03 Da,              | 3367.239746 | 3 | 723.3699951 | 723.6918913 |
| KHGGTIPV VPTAEFQDR      | P26443 | 0.01934236 | N-term +28.03 Da, K +28.03 Da,              | 3368.744873 | 3 | 637.3400269 | 636.6827782 |
| GGFPEPFR                | Q05920 | 0.03819444 | N-term +28.03 Da,                           | 3370.883057 | 2 | 467.7399902 | 467.7427044 |
| EFEKFLKTR               | P30115 | 0.01156677 | N-term +28.03 Da, K +28.03 Da,              | 3373.071777 | 3 | 470.9299927 | 470.9378959 |
| ISFVTEDFAAQEGHFPPR      | Q9D5U8 | 0.0483871  | N-term +28.03 Da,                           | 3376.803955 | 2 | 1039.030029 | 1038.512902 |
| VNFTVDQIR               | P58252 | 0          | N-term +28.03 Da,                           | 3382.662842 | 2 | 560.3100586 | 560.3114832 |
| GLEEELLR                | P23881 | 0.03982684 | N-term +28.03 Da,                           | 3386.098145 | 2 | 493.7799988 | 493.7794846 |
| DDEV D V DGTVEEDLGKSR   | P08113 | 0          | N-term +28.03 Da, K +28.03 Da,              | 3388.077393 | 3 | 678.6500244 | 678.6551722 |
| HYLFDVQR                | Q9CQQ7 | 0.01157895 | N-term +28.03 Da,                           | 3389.393799 | 2 | 553.289978  | 553.2930931 |
| VLSGGT MYPGIADR         | P60710 | 0          | N-term +28.03 Da,                           | 3389.802002 | 2 | 783.4099731 | 783.4032446 |
| SIYHPSLLPR              | Q8K009 | 0          | N-term +28.03 Da,                           | 3389.892822 | 3 | 442.269989  | 441.9309638 |
| TSVESIMATEDR            | Q8C196 | 0          | N-term +28.03 Da,                           | 3396.706543 | 2 | 683.8296509 | 683.8295783 |
| TGPNLHGLFGR             | P62897 | 0          | N-term +28.03 Da,                           | 3401.924561 | 3 | 399.2200012 | 399.5560083 |
| TILAEGLHFR              | O35129 | 0.00561167 | N-term +28.03 Da,                           | 3402.124756 | 3 | 395.5599976 | 395.5643924 |
| NDEELNKLGR              | P22752 | 0          | N-term +28.03 Da, K +28.03 Da,              | 3405.688232 | 3 | 452.9200134 | 452.9209052 |
| HPVLLTEAPLNPKANR        | P60710 | 0          | N-term +28.03 Da, K +28.03 Da,              | 3410.465576 | 3 | 609.3499756 | 609.3597466 |
| VNFTVDQIR               | P58252 | 0.01170213 | N-term +28.03 Da,                           | 3413.0979   | 2 | 560.3112793 | 560.3114832 |
| AGAESD GQFQFTGIKKY      | Q78IK2 | 0          | N-term +28.03 Da, K +28.03 Da,              | 3415.00708  | 3 | 644.3300171 | 644.3351559 |
| DPAIN EYLQR             | Q9QXD6 | 0.01444788 | N-term +28.03 Da,                           | 3430.870361 | 2 | 623.3193359 | 623.8249553 |
| VKEALVDHGEEFAGR         | P56654 | 0          | N-term +28.03 Da, K +28.03 Da,              | 3438.48584  | 3 | 571.2999878 | 571.6370574 |
| MKV FVTGPLPAEGR         | Q91Z53 | 0          | N-term +28.03 Da, K +28.03 Da,              | 3438.991211 | 3 | 519.9650879 | 519.9655686 |
| SEEDATLNLNAINR          | Q91Y97 | 0.01839303 | N-term +28.03 Da,                           | 3448.529785 | 2 | 793.9099731 | 794.4022882 |
| SEEDATLNLNAINR          | Q91Y97 | 0          | N-term +28.03 Da,                           | 3452.368164 | 2 | 794.4099731 | 794.4022882 |
| LPTQTISQGAIEKVKDATR     | Q8C196 | 0          | N-term +28.03 Da, K +28.03 Da,              | 3467.992676 | 4 | 536.0599976 | 535.8138588 |
| HAPPETDISTLTR           | Q9QXD6 | 0.00236967 | N-term +28.03 Da,                           | 3469.875732 | 3 | 505.9299927 | 505.9315816 |
| VAVDAPVSSVALR           | Q64374 | 0          | N-term +28.03 Da,                           | 3474.108887 | 2 | 656.3800049 | 656.38518   |
| FDNKTVTFEEHIK           | P11881 | 0.0283105  | N-term +28.03 Da, K +28.03 Da,              | 3474.985352 | 2 | 846.9400024 | 846.4537918 |
| FVNDIFER                | P10853 | 0.03693931 | N-term +28.03 Da,                           | 3478.583252 | 2 | 534.7800293 | 534.2796516 |
| TLGEECELETMTGEKVK       | P12710 | 0          | N-term +28.03 Da, K +28.03 Da, C +57.02 Da, | 3479.622803 | 3 | 680.0100098 | 680.0076118 |
| EHPTLLTEAPLNPKANR       | P62737 | 0          | N-term +28.03 Da, K +28.03 Da,              | 3480.206543 | 3 | 652.6900024 | 653.0336996 |
| SHTDVKVPDFSDYR          | Q9CR68 | 0.02836231 | N-term +28.03 Da, K +28.03 Da,              | 3491.602051 | 3 | 574.2800293 | 574.621296  |
| GVPVFKFPR               | Q8R0Y6 | 0          | N-term +28.03 Da, K +28.03 Da,              | 3491.793701 | 3 | 368.230011  | 368.230573  |
| GVPAFFR                 | Q3V132 | 0.01676529 | N-term +28.03 Da,                           | 3492.179688 | 2 | 411.2399902 | 411.2370574 |
| FDLRPGVIVR              | Q3TH56 | 0.00665927 | N-term +28.03 Da,                           | 3493.532227 | 3 | 400.5796814 | 400.5801538 |

|                         |        |            |                                             |             |   |             |             |
|-------------------------|--------|------------|---------------------------------------------|-------------|---|-------------|-------------|
| TMTLGDIVYKR             | P12710 | 0          | N-term +28.03 Da, K +28.03 Da,              | 3510.9646   | 3 | 451.5899963 | 451.5917311 |
| AGLQFPVGR               | P0C056 | 0.00664452 | N-term +28.03 Da,                           | 3511.541748 | 2 | 486.2799988 | 486.7849036 |
| TTFNVQDGPDPFQDR         | P97493 | 0          | N-term +28.03 Da,                           | 3511.680908 | 2 | 834.8900146 | 834.3866381 |
| PFHRYEVYR               | Q2QI47 | 0.04537671 | N-term +28.03 Da,                           | 3516.743652 | 2 | 567.3200073 | 566.3065346 |
| TGTPVLGGLSYR            | Q61176 | 0          | N-term +28.03 Da,                           | 3519.993408 | 2 | 624.8494873 | 624.8509729 |
| SIVEDKLVEDLKTR          | P26443 | 0          | N-term +28.03 Da, K +28.03 Da,              | 3520.094482 | 3 | 577.3400269 | 577.0083799 |
| SIVEDKLVEDLKTR          | P26443 | 0.01750973 | N-term +28.03 Da, K +28.03 Da,              | 3520.319092 | 4 | 433.2600098 | 433.008104  |
| SIVPALEIANAHR           | P63038 | 0          | N-term +28.03 Da,                           | 3523.23999  | 3 | 473.9400024 | 473.6086612 |
| FVELETNLPASR            | O35215 | 0          | N-term +28.03 Da,                           | 3527.652344 | 2 | 702.3808594 | 702.380095  |
| TFTFYASEDKLENR          | O35490 | 0          | N-term +28.03 Da, K +28.03 Da,              | 3527.746338 | 3 | 592.9637451 | 592.9649514 |
| GTNKETTIQGLDGLSER       | Q91Y97 | 0.00236407 | N-term +28.03 Da, K +28.03 Da,              | 3538.332275 | 2 | 938.4799805 | 937.9945421 |
| EEHPVLLTEAPLNPKANR      | P60710 | 0          | N-term +28.03 Da, K +28.03 Da,              | 3543.743408 | 3 | 696.0499878 | 695.3881427 |
| LHTVYQSVLELPETHQMLR     | Q07417 | 0          | N-term +28.03 Da,                           | 3543.875    | 4 | 553.289978  | 553.0413099 |
| APNVLASEPEIPKGR         | Q9WTP6 | 0          | N-term +28.03 Da, K +28.03 Da,              | 3551.831055 | 3 | 583.0100098 | 583.0086025 |
| TTFNVQDGPDPFQDR         | P97493 | 0          | N-term +28.03 Da,                           | 3553.657227 | 2 | 834.3822021 | 834.3866381 |
| TFAHLDATTVLSR           | P56480 | 0          | N-term +28.03 Da,                           | 3559.595459 | 3 | 487.269989  | 487.2683049 |
| TTFNVQDGPDPFQDR         | P97493 | 0          | N-term +28.03 Da,                           | 3566.765869 | 3 | 556.5900269 | 556.5935176 |
| KLFDCLPGGTEPEVALHR      | F6TNE3 | 0          | N-term +28.03 Da, K +28.03 Da, C +57.02 Da, | 3578.24585  | 3 | 698.710022  | 699.0383449 |
| VSEPTTVPFDVR            | Q9CPT4 | 0.02169811 | N-term +28.03 Da,                           | 3595.328857 | 2 | 687.8699951 | 687.8668205 |
| HVGDLGNVTAGKDGVANVSIEDR | P08228 | 0          | N-term +28.03 Da, K +28.03 Da,              | 3595.668457 | 2 | 1190.599976 | 1190.116784 |
| SQEHPVLTKFVEGAR         | Q8C196 | 0          | N-term +28.03 Da, K +28.03 Da,              | 3596.772217 | 3 | 618.6699829 | 618.3475069 |
| SEVPGAAAEGPGGSGVGLGDR   | Q9EP72 | 0          | N-term +28.03 Da,                           | 3605.483643 | 2 | 933.9500122 | 934.4608664 |
| TGTAEMSILEER            | Q03265 | 0          | N-term +28.03 Da,                           | 3608.402344 | 2 | 726.3599854 | 726.3559604 |
| LRPGDCEVCISYLGR         | Q9CXI5 | 0          | N-term +28.03 Da, C +57.02 Da,              | 3611.118652 | 3 | 608.6400146 | 608.3028039 |
| APKGGSKQQSEEDLLLQDFSR   | Q9DCF9 | 0.02597403 | N-term +28.03 Da, K +28.03 Da,              | 3613.401855 | 3 | 806.4199829 | 806.4272153 |
| APAGILNGKLVSAQIR        | Q922D8 | 0          | N-term +28.03 Da, K +28.03 Da,              | 3622.621582 | 3 | 555.6699829 | 555.3454372 |
| TSIAIDTIINQKR           | Q03265 | 0          | N-term +28.03 Da, K +28.03 Da,              | 3622.71875  | 3 | 510.3099976 | 510.3067597 |
| HVGDLGNVTAGKDGVANVSIEDR | P08228 | 0          | N-term +28.03 Da, K +28.03 Da,              | 3623.327148 | 3 | 794.0700073 | 793.7469479 |
| FVHDNYVIR               | Q8C196 | 0          | N-term +28.03 Da,                           | 3623.453857 | 2 | 596.3099976 | 595.8194752 |
| SDLELHPPSYPWVSHR        | Q9DOM3 | 0.01629328 | N-term +28.03 Da,                           | 3625.991943 | 3 | 617.6400146 | 616.97244   |
| VALEQQSPDIAQCVCVHLDK    | Q91X83 | 0          | N-term +28.03 Da, C +57.02 Da,              | 3627.647217 | 3 | 703.3599854 | 703.0248759 |
| SAGFLQASASDVVVVHGR      | Q8VCHO | 0          | N-term +28.03 Da,                           | 3629.189941 | 3 | 609.9937744 | 609.9952448 |
| APAGILNGKLVSAQIR        | Q922D8 | 0.02749771 | N-term +28.03 Da, K +28.03 Da,              | 3629.702148 | 2 | 833         | 832.5145175 |
| DDEVVDVGTVEEDLGKSR      | P08113 | 0          | N-term +28.03 Da, K +28.03 Da,              | 3640.524902 | 3 | 678.9899902 | 678.6551722 |
| DDEVVDVGTVEEDLGKSR      | P08113 | 0          | N-term +28.03 Da, K +28.03 Da,              | 3647.421387 | 2 | 1017.97998  | 1017.47912  |
| GASIVEDKLVEDLKTR        | P26443 | 0          | N-term +28.03 Da, K +28.03 Da,              | 3650.238525 | 4 | 465.019989  | 465.0227486 |
| APAGILNGKLVSAQIR        | Q922D8 | 0.01754386 | N-term +28.03 Da, K +28.03 Da,              | 3653.626953 | 3 | 555.6734009 | 555.3454372 |
| TPATGTPVLGGLSYR         | Q61176 | 0.00453001 | N-term +28.03 Da,                           | 3659.970947 | 2 | 759.9199829 | 759.4197517 |
| SAGFLQASASDVVVVHGR      | Q8VCHO | 0          | N-term +28.03 Da,                           | 3661.25708  | 3 | 609.9899902 | 609.9952448 |
| EHPVLTKFVEGAR           | Q8C196 | 0          | N-term +28.03 Da, K +28.03 Da,              | 3661.834717 | 3 | 546.6400146 | 546.6506377 |



|                         |        |            |                                |             |   |             |             |
|-------------------------|--------|------------|--------------------------------|-------------|---|-------------|-------------|
| TQAGSEVSALLGR           | P56480 | 0          | N-term +28.03 Da,              | 3663.503906 | 2 | 659.3599854 | 658.8620695 |
| IMNVIGEPIDER            | P56480 | 0          | N-term +28.03 Da,              | 3665.365723 | 2 | 707.3723145 | 707.3739554 |
| AAPAKGENLSLVVHGPDIR     | Q64442 | 0.02903811 | N-term +28.03 Da, K +28.03 Da, | 3666.806641 | 3 | 686.3800049 | 686.3882541 |
| SAGFLQASASDVVVHGR       | Q8VCH0 | 0          | N-term +28.03 Da,              | 3667.443359 | 2 | 914.4899902 | 914.489229  |
| HVGDGLNVTAGKDGVANVSIEDR | P08228 | 0          | N-term +28.03 Da, K +28.03 Da, | 3670.54126  | 3 | 793.4099731 | 793.7469479 |
| SGAPIKIPVGPETLGR        | P56480 | 0          | N-term +28.03 Da, K +28.03 Da, | 3678.903564 | 3 | 550         | 549.9979261 |
| TVLSGGTMMYPGIADR        | P60710 | 0          | N-term +28.03 Da,              | 3691.778564 | 2 | 833.9265137 | 833.9270842 |
| GEALSTLVNLR             | P63038 | 0          | N-term +28.03 Da,              | 3694.510254 | 2 | 600.8499756 | 600.8509729 |
| STPQSQFQESSPVWKLGR      | Q9D115 | 0          | N-term +28.03 Da, K +28.03 Da, | 3695.973145 | 3 | 707.039978  | 706.704131  |
| SLPDLGLR                | Q05920 | 0.03063063 | N-term +28.03 Da,              | 3699.642578 | 2 | 449.7715149 | 449.771462  |
| TLPDPTVDWR              | O70370 | 0          | N-term +28.03 Da,              | 3702.842041 | 2 | 565.7948608 | 565.7956662 |
| VLLTMIAR                | O08547 | 0.03225806 | N-term +28.03 Da,              | 3707.05249  | 2 | 472.8013916 | 472.8017076 |
| SSQVSDGAAAVLLAR         | Q8VCH0 | 0          | N-term +28.03 Da,              | 3707.12793  | 2 | 736.9099731 | 736.9070086 |
| SAGFLQASASDVVVHGR       | Q8VCH0 | 0          | N-term +28.03 Da,              | 3711.508789 | 3 | 609.9899902 | 609.9952448 |
| GVAADLSHIETR            | P08249 | 0.00234467 | N-term +28.03 Da,              | 3717.17334  | 2 | 649.3400269 | 648.8489619 |
| APAGILNGKLVSAQIR        | Q922D8 | 0          | N-term +28.03 Da, K +28.03 Da, | 3717.50293  | 3 | 555.6727905 | 555.3454372 |
| STGTFVVSQPLNYR          | Q9JLJ2 | 0          | N-term +28.03 Da,              | 3725.595459 | 2 | 799.4299927 | 798.9226587 |
| EMNLSETAFIR             | Q9DCG6 | 0          | N-term +28.03 Da,              | 3726.256348 | 2 | 669.3499756 | 669.8397483 |
| NKELDPVQKLFVDKIR        | P97450 | 0          | N-term +28.03 Da, K +28.03 Da, | 3727.605225 | 4 | 514.5700073 | 514.3147655 |
| TFVVSQPLNYR             | Q9JLJ2 | 0.01688183 | N-term +28.03 Da,              | 3731.32251  | 2 | 676.3699951 | 676.3720725 |
| IVENQVMDTR              | P10649 | 0          | N-term +28.03 Da,              | 3732.699951 | 2 | 616.3200073 | 616.8188157 |
| NKELDPVQKLFVDKIR        | P97450 | 0          | N-term +28.03 Da, K +28.03 Da, | 3735.0271   | 3 | 685.4172974 | 685.4172618 |
| EEKERHRDKHVDGFLR        | E9Q4F7 | 0.03306524 | N-term +28.03 Da, K +28.03 Da, | 3742.292969 | 3 | 712.710022  | 712.387136  |
| TVLSGGTMMYPGIADR        | P60710 | 0.00667408 | N-term +28.03 Da,              | 3751.727295 | 2 | 834.4299927 | 833.9270842 |
| DALEEEEDNVLVLKK         | P09103 | 0          | N-term +28.03 Da, K +28.03 Da, | 3753.512939 | 3 | 566.9899902 | 566.9889855 |
| APEEHPTLLTEAPLNPKANR    | P62737 | 0          | N-term +28.03 Da, K +28.03 Da, | 3754.80835  | 3 | 751.7299805 | 752.0778572 |
| GSWEVIEGYR              | P26443 | 0          | N-term +28.03 Da,              | 3756.975586 | 2 | 612.2999878 | 612.3063982 |
| NKELDPVQKLFVDKIR        | P97450 | 0          | N-term +28.03 Da, K +28.03 Da, | 3759.822021 | 4 | 514.3148193 | 514.3147655 |
| EKDGTVPVFKFPR           | Q8K009 | 0.01698302 | N-term +28.03 Da, K +28.03 Da, | 3760.2146   | 3 | 501.9500122 | 502.2889286 |
| TGTFVVSQPLNYR           | Q9JLJ2 | 0          | N-term +28.03 Da,              | 3763.044922 | 2 | 755.4000244 | 755.4066441 |
| DALEEEEDNVLVLKK         | P09103 | 0.00774336 | N-term +28.03 Da, K +28.03 Da, | 3763.612305 | 2 | 850.4699707 | 849.97984   |
| IQLDGLNASQIR            | P08113 | 0          | N-term +28.03 Da,              | 3767.265625 | 2 | 678.8900146 | 678.3857115 |
| SLDSLTEAYKLR            | Q9R0H0 | 0          | N-term +28.03 Da, K +28.03 Da, | 3768.112061 | 3 | 484.6099854 | 484.6083273 |
| TIGDYDFYSSR             | P35505 | 0          | N-term +28.03 Da,              | 3769.239746 | 2 | 726.8347778 | 726.8357179 |
| DGLNAEGLLR              | Q64374 | 0          | N-term +28.03 Da,              | 3774.39624  | 2 | 543.2999878 | 543.3011157 |
| SWEVIEGYR               | P26443 | 0.02101242 | N-term +28.03 Da,              | 3775.42041  | 2 | 583.7963257 | 583.7956662 |
| DALEEEEDNVLVLKK         | P09103 | 0          | N-term +28.03 Da, K +28.03 Da, | 3776.443115 | 3 | 567.6599731 | 566.9889855 |
| DLPKNWDWR               | Q9WUU7 | 0          | N-term +28.03 Da, K +28.03 Da, | 3779.539551 | 3 | 429.230011  | 429.2277804 |
| TGIKAVDSLVPIGR          | Q03265 | 0          | N-term +28.03 Da, K +28.03 Da, | 3779.655273 | 3 | 494.6400146 | 494.63985   |
| GETPTEKLPFPIIDKGR       | O08709 | 0          | N-term +28.03 Da, K +28.03 Da, | 3784.906494 | 4 | 525.5499878 | 525.0452182 |

|                           |        |            |                                             |             |   |             |             |
|---------------------------|--------|------------|---------------------------------------------|-------------|---|-------------|-------------|
| GETPTEKLPFPIIDDKGR        | O08709 | 0          | N-term +28.03 Da, K +28.03 Da,              | 3789.429932 | 4 | 525.039978  | 525.0452182 |
| SDAPPLTLDGIKDR            | Q9CR21 | 0.00234192 | N-term +28.03 Da, K +28.03 Da,              | 3802.387695 | 3 | 518.2800293 | 518.6226367 |
| TVEQIENLR                 | Q8QZS1 | 0.00119332 | N-term +28.03 Da,                           | 3806.574707 | 2 | 621.8599854 | 621.8562554 |
| SLGVAAEGLPDQYADGEAAR      | Q9QXF8 | 0          | N-term +28.03 Da,                           | 3811.579834 | 2 | 1010        | 1009.494907 |
| KWNTDNTLGTTEITVEDQLAR     | Q60932 | 0          | N-term +28.03 Da, K +28.03 Da,              | 3821.041748 | 3 | 787.4199829 | 787.4079322 |
| QITLNDLPVGR               | O08807 | 0.01759531 | N-term +28.03 Da,                           | 3825.738525 | 2 | 627.3638306 | 627.3642474 |
| IIGGSMDAKGSFPWQAK         | Q61646 | 0          | N-term +28.03 Da, K +28.03 Da,              | 3839.98291  | 3 | 626.6699829 | 626.3378428 |
| MASGGGVPTDEEQATGLER       | P19536 | 0          | N-term +28.03 Da,                           | 3841.908203 | 2 | 966.4400024 | 966.9520173 |
| TLAVLALR                  | Q8C6B0 | 0.02895928 | N-term +28.03 Da,                           | 3845.155029 | 2 | 442.7999878 | 442.8000221 |
| SLPPHQKVPPLPSLSPTMQAGTIAR | Q8BMF4 | 0.0022805  | N-term +28.03 Da, K +28.03 Da,              | 3848.996338 | 4 | 646.6199951 | 646.3676327 |
| SVSLLDGGFR                | Q99J99 | 0.0125261  | N-term +28.03 Da,                           | 3850.485352 | 2 | 539.7999878 | 539.7982087 |
| NEEEVEKRFEGR              | Q08943 | 0.02909091 | N-term +28.03 Da, K +28.03 Da,              | 3851.584961 | 2 | 789.4000244 | 789.3995481 |
| PKVIQPEVDTPLGR            | Q8VCU1 | 0          | N-term +28.03 Da, K +28.03 Da,              | 3853.743164 | 2 | 802.960022  | 802.9721514 |
| VALEGVGHFFR               | P29391 | 0          | N-term +28.03 Da,                           | 3853.867188 | 3 | 420.5700073 | 420.5680254 |
| ASQTEGELKVTQVLKEKFPFR     | Q8CEI1 | 0          | N-term +28.03 Da, K +28.03 Da,              | 3855.400635 | 4 | 600.8499756 | 600.8519784 |
| ASQTEGELKVTQVLKEKFPFR     | Q8CEI1 | 0.04607509 | N-term +28.03 Da, K +28.03 Da,              | 3858.039307 | 4 | 600.5999756 | 600.8519784 |
| SLGVAAEGLPDQYADGEAAR      | Q9QXF8 | 0          | N-term +28.03 Da,                           | 3859.580322 | 2 | 1009.48999  | 1009.494907 |
| STQAAEDKEEESLHSISNTEAVR   | Q9CQN1 | 0          | N-term +28.03 Da, K +28.03 Da,              | 3864.875732 | 4 | 675.8400269 | 675.8385262 |
| QKTGTAEMSSILEER           | Q03265 | 0          | N-term +28.03 Da, K +28.03 Da,              | 3873.678467 | 2 | 867.9324341 | 868.4483813 |
| TCLICGDRATGLHYGIISCEGCK   | Q64249 | 0.0377193  | N-term +28.03 Da, K +28.03 Da, C +57.02 Da, | 3894.764404 | 2 | 1348.630005 | 1349.134424 |
| NVLASEPEIPK GIR           | Q9WTP6 | 0          | N-term +28.03 Da, K +28.03 Da,              | 3907.762939 | 2 | 789.9500122 | 789.9643264 |
| SPEEFTEIMNQR              | P54869 | 0.00228571 | N-term +28.03 Da,                           | 3910.11084  | 2 | 754.8565063 | 754.8561274 |
| PKVIQPEVDTPLGR            | Q8VCU1 | 0          | N-term +28.03 Da, K +28.03 Da,              | 3924.258301 | 2 | 802.960022  | 802.9721514 |
| TLNNDIMLLK                | Q79220 | 0          | N-term +28.03 Da, K +28.03 Da,              | 3928.464355 | 2 | 615.8606567 | 615.8599518 |
| TIVYFPVR                  | P19157 | 0.02825889 | N-term +28.03 Da,                           | 3931.11499  | 2 | 511.8054504 | 511.8053047 |
| TKLPWDAVGR                | P54869 | 0.02833638 | N-term +28.03 Da, K +28.03 Da,              | 3933.839844 | 2 | 599.3599854 | 599.8507754 |
| FDITADDEPLGR              | P17742 | 0          | N-term +28.03 Da,                           | 3936.370361 | 2 | 688.8400269 | 688.8382604 |
| STPQSQFQESSPVWKLGR        | Q9D115 | 0          | N-term +28.03 Da, K +28.03 Da,              | 3936.740479 | 2 | 1059.540039 | 1059.552558 |
| FDITADDEPLGR              | P17742 | 0          | N-term +28.03 Da,                           | 3951.429688 | 2 | 688.3300171 | 688.8382604 |
| TVSLHLGVTPSVLR            | O89023 | 0          | N-term +28.03 Da,                           | 3962.609619 | 3 | 503.3099976 | 502.9715997 |
| LLEYTDSSYDEKR             | P10649 | 0          | N-term +28.03 Da, K +28.03 Da,              | 3963.128174 | 2 | 838.4000244 | 837.9146972 |
| TTITSVLPK PALVASR         | Q8C196 | 0          | N-term +28.03 Da, K +28.03 Da,              | 3964.612793 | 3 | 571.3599854 | 570.6889812 |
| SDLDAATQQLLSR             | Q03265 | 0          | N-term +28.03 Da,                           | 3972.186768 | 2 | 723.3800049 | 723.3833666 |
| HVLSLSFPIR                | P26443 | 0          | N-term +28.03 Da,                           | 3975.563477 | 2 | 598.8599854 | 598.8611429 |
| TATFGPLDSL NTR            | Q05920 | 0.01160338 | N-term +28.03 Da,                           | 3980.880859 | 2 | 711.8800049 | 710.875177  |
| YVKAGPWTPEAAVEHPEAVR      | O35490 | 0          | N-term +28.03 Da, K +28.03 Da,              | 3981.551758 | 3 | 755.3882446 | 755.0671808 |
| GVEFEKFLKTR               | P30115 | 0          | N-term +28.03 Da, K +28.03 Da,              | 3982.739746 | 3 | 522.960022  | 522.9678554 |
| SKPTLNEVVIVSAIR           | Q8QZT1 | 0.01614531 | N-term +28.03 Da, K +28.03 Da,              | 3984.83667  | 3 | 561.3400269 | 561.3452145 |
| GGTIPVVPTAEFQDR           | P26443 | 0.03765324 | N-term +28.03 Da,                           | 3986.751709 | 2 | 808.4299927 | 807.9279412 |
| EPEGKEVWDYVTVR            | Q920A5 | 0          | N-term +28.03 Da, K +28.03 Da,              | 3990.325928 | 3 | 588.6400146 | 588.3051964 |

|                             |        |            |                                |             |   |             |             |
|-----------------------------|--------|------------|--------------------------------|-------------|---|-------------|-------------|
| SSLAIQENANALAR              | Q91Y97 | 0          | N-term +28.03 Da,              | 3994.437256 | 2 | 743.3900146 | 743.4046331 |
| TITNTMTLGDIVYKR             | P12710 | 0          | N-term +28.03 Da, K +28.03 Da, | 3994.997559 | 3 | 595         | 594.6658481 |
| ASKPTLNEVVIVSAIR            | Q8QZT1 | 0          | N-term +28.03 Da, K +28.03 Da, | 3997.257568 | 3 | 585.3599854 | 585.0242526 |
| ASKPTLNEVVIVSAIR            | Q8QZT1 | 0          | N-term +28.03 Da, K +28.03 Da, | 4000.492188 | 2 | 877.539978  | 877.0327407 |
| LIGPKAPLVLEQGLR             | P54869 | 0          | N-term +28.03 Da, K +28.03 Da, | 4019.65918  | 3 | 554.3599854 | 554.0221829 |
| GTIPVVPTAEFQDR              | P26443 | 0.02901179 | N-term +28.03 Da,              | 4026.817139 | 2 | 779.4199829 | 779.4172092 |
| TAEILELAGNAAR               | P22752 | 0          | N-term +28.03 Da,              | 4033.288086 | 2 | 679.3800049 | 678.8777195 |
| TPVAWPSQEGQNPSLSSIR         | Q8C196 | 0          | N-term +28.03 Da,              | 4036.472412 | 2 | 1041.540039 | 1041.534366 |
| VAPEEHPVLLTEAPLNPKANR       | P60710 | 0          | N-term +28.03 Da, K +28.03 Da, | 4037.108398 | 3 | 784.7600098 | 784.440907  |
| DDEVVDVGTVEEDLGKSR          | P08113 | 0          | N-term +28.03 Da, K +28.03 Da, | 4039.052979 | 2 | 1017.469971 | 1017.47912  |
| NKELDPVQKLFVDKIR            | P97450 | 0          | N-term +28.03 Da, K +28.03 Da, | 4040.949951 | 4 | 514.8099976 | 514.3147655 |
| SLFKAFEEEQALR               | P49429 | 0.00236686 | N-term +28.03 Da, K +28.03 Da, | 4050.014893 | 3 | 541.960022  | 541.9628817 |
| VVPTAEFQDR                  | P26443 | 0.00232829 | N-term +28.03 Da,              | 4050.142334 | 2 | 596.3099976 | 595.3142232 |
| TNLPDVSADKFEKVDLTR          | P97328 | 0.01067236 | N-term +28.03 Da, K +28.03 Da, | 4050.29541  | 4 | 534.0499878 | 533.7954004 |
| LEEEDNVLVLKK                | P09103 | 0.00865801 | N-term +28.03 Da, K +28.03 Da, | 4076.288818 | 2 | 756.4400024 | 756.9478108 |
| AGPELLDSNIR                 | Q99KI3 | 0          | N-term +28.03 Da,              | 4076.419189 | 2 | 663.8800049 | 663.3748125 |
| EPSLDYMTKIPR                | Q8C196 | 0          | N-term +28.03 Da, K +28.03 Da, | 4077.480469 | 3 | 535.6300049 | 535.628734  |
| GFGDLKTPAGL                 | O70251 | 0          | N-term +28.03 Da, K +28.03 Da, | 4080.467041 | 2 | 566.3238525 | 566.3240593 |
| STGTFVVSQPLNYR              | Q9JLJ2 | 0.02616822 | N-term +28.03 Da,              | 4084.093994 | 2 | 799.4099731 | 798.9226587 |
| STQAAEDKEEESLHSISNTEAVR     | Q9CQN1 | 0.00227015 | N-term +28.03 Da, K +28.03 Da, | 4086.168701 | 3 | 900.4400024 | 900.7822761 |
| STDITSLDQYVER               | P08113 | 0          | N-term +28.03 Da,              | 4086.38916  | 2 | 777.8800049 | 777.8859396 |
| HSILPVDDINGLNEEQQLR         | Q9JHI5 | 0          | N-term +28.03 Da, K +28.03 Da, | 4094.702393 | 3 | 830.0999756 | 830.438003  |
| FDPAINELYQR                 | D9QXD6 | 0          | N-term +28.03 Da,              | 4109.629395 | 2 | 697.3599854 | 697.3591624 |
| PFVELETNLPASR               | O35215 | 0.02580645 | N-term +28.03 Da,              | 4116.710938 | 2 | 751.4000244 | 750.9064771 |
| PMTLGYWDIR                  | P15626 | 0.00235018 | N-term +28.03 Da,              | 4119.407715 | 2 | 641.3400269 | 640.3288187 |
| TTFNVQDGPDFQDR              | P97493 | 0          | N-term +28.03 Da,              | 4128.413574 | 2 | 833.8800049 | 834.3866381 |
| TGTEAPDYLATVDVDPKSPQYSQVIHR | P17563 | 0          | N-term +28.03 Da, K +28.03 Da, | 4129.00293  | 4 | 762.1400146 | 761.6397381 |
| SPLEKLVSSVSDLPKR            | P54869 | 0          | N-term +28.03 Da, K +28.03 Da, | 4130.298828 | 4 | 460.5299988 | 460.5292036 |
| THFDPSCLFPACR               | P16015 | 0.03989592 | N-term +28.03 Da, C +57.02 Da, | 4134.239746 | 3 | 546.25      | 545.9184014 |
| VPPVQVSPLIKFGR              | Q06185 | 0          | N-term +28.03 Da, K +28.03 Da, | 4135.692383 | 3 | 532         | 531.6677398 |
| SFVNDIFER                   | P10853 | 0          | N-term +28.03 Da,              | 4145.197754 | 2 | 577.7952881 | 577.7956662 |
| SDVLELTDENFESR              | PD7773 | 0          | N-term +28.03 Da,              | 4145.820801 | 2 | 841.3900146 | 841.3994117 |
| DALEEDNVLVLKK               | P09103 | 0          | N-term +28.03 Da, K +28.03 Da, | 4146.391113 | 3 | 566.6500244 | 566.9889855 |
| MSTGTFVVSQPLNYR             | Q9JLJ2 | 0          | N-term +28.03 Da,              | 4148.375    | 2 | 864.4400024 | 864.4429012 |
| GVVSEDLPLNISR               | P07901 | 0          | N-term +28.03 Da,              | 4154.91748  | 2 | 771.4099731 | 771.4121242 |
| ASQTQGIQQLLQAEKR            | Q9WTT4 | 0          | N-term +28.03 Da, K +28.03 Da, | 4158.626953 | 2 | 928.0056763 | 928.0234361 |
| PFVELETNLPASR               | O35215 | 0          | N-term +28.03 Da,              | 4161.836914 | 2 | 750.9099731 | 750.9064771 |
| PSYVLSGSAMNVVSEDEMKR        | Q8C196 | 0          | N-term +28.03 Da, K +28.03 Da, | 4166.10498  | 3 | 801.3800049 | 801.39587   |
| EQEVSDNELQELSTQGSR          | Q06890 | 0          | N-term +28.03 Da,              | 4170.91748  | 2 | 1038.48999  | 1038.987644 |
| TIAQDYGVKKADEGISFR          | P35700 | 0          | N-term +28.03 Da, K +28.03 Da, | 4174.365234 | 3 | 680.7000122 | 680.3651153 |

|                      |        |            |                                             |             |   |             |             |
|----------------------|--------|------------|---------------------------------------------|-------------|---|-------------|-------------|
| PSYVLSGSAMNVVFEDEMKR | Q8C196 | 0.00560538 | N-term +28.03 Da, K +28.03 Da,              | 4175.249512 | 2 | 1202.069946 | 1201.590167 |
| TIPVVPTAEFQDR        | P26443 | 0          | N-term +28.03 Da,                           | 4192.881836 | 2 | 750.9050293 | 750.9064771 |
| DVLVIECNLR           | Q8C196 | 0          | N-term +28.03 Da, C +57.02 Da,              | 4193.51123  | 2 | 630.3400269 | 629.8448333 |
| PSYVLSGSAMNVVFEDEMKR | Q8C196 | 0.01606426 | N-term +28.03 Da, K +28.03 Da,              | 4196.622559 | 3 | 802.0499878 | 801.39587   |
| GDPKEEEEEELVDPLTTVR  | P99028 | 0.00557414 | N-term +28.03 Da, K +28.03 Da,              | 4203.987305 | 2 | 1121.560059 | 1121.060277 |
| GDPKEEEEEELVDPLTTVR  | P99028 | 0.01069519 | N-term +28.03 Da, K +28.03 Da,              | 4205.604492 | 3 | 747.7076416 | 747.7092771 |
| NKELDPVQKLFVDKIR     | P97450 | 0          | N-term +28.03 Da, K +28.03 Da,              | 4206.991699 | 4 | 514.5605469 | 514.3147655 |
| ALSDHHVYLEGTLKPN     | P05063 | 0.02828467 | N-term +28.03 Da, K +28.03 Da,              | 4208.100586 | 3 | 655.3499756 | 655.0264336 |
| APDQDEIDCLPGLAKQPSFR | P16675 | 0          | N-term +28.03 Da, K +28.03 Da, C +57.02 Da, | 4210.402344 | 3 | 772.0599976 | 771.7229744 |
| SLAPQIKVIAPWR        | P16460 | 0.00234742 | N-term +28.03 Da, K +28.03 Da,              | 4210.477539 | 3 | 512.3184814 | 512.3204514 |
| DIDAWELR             | P12787 | 0.03832753 | N-term +28.03 Da,                           | 4212.510254 | 2 | 523.2700195 | 523.2692841 |
| NKELDPVQKLFVDKIR     | P97450 | 0          | N-term +28.03 Da, K +28.03 Da,              | 4214.032227 | 3 | 686.0800171 | 685.4172618 |
| FSFEVIGR             | P00329 | 0.03463588 | N-term +28.03 Da,                           | 4214.161621 | 2 | 491.769989  | 491.771462  |
| HSILPVDDINGLNEEQKQLR | Q9JHI5 | 0          | N-term +28.03 Da, K +28.03 Da,              | 4216.057129 | 3 | 830.4299927 | 830.438003  |
| SDLELHPPSYPWHR       | Q9D0M3 | 0          | N-term +28.03 Da,                           | 4219.05127  | 3 | 616.6300049 | 616.97244   |
| GDPKEEEEEELVDPLTTVR  | P99028 | 0          | N-term +28.03 Da, K +28.03 Da,              | 4220.186035 | 2 | 1121.061646 | 1121.060277 |
| SGFTSLLMER           | P05213 | 0          | N-term +28.03 Da,                           | 4223.70166  | 2 | 584.8099976 | 584.8051766 |
| STGIYEALER           | P17182 | 0.01626016 | N-term +28.03 Da,                           | 4225.008789 | 2 | 640.3499756 | 640.3482634 |
| SAGFLQASASDVVVVHGR   | Q8VCH0 | 0          | N-term +28.03 Da,                           | 4228.381348 | 2 | 913.9799805 | 914.489229  |
| SLATAGDGLIELR        | P67778 | 0.01161563 | N-term +28.03 Da,                           | 4229.388672 | 2 | 672.3800049 | 672.380095  |
| TVDAFDYDLQTGQISNR    | Q64374 | 0          | N-term +28.03 Da,                           | 4229.685059 | 2 | 986.9799805 | 985.9763495 |
| TVDAFDYDLQTGQISNR    | Q64374 | 0          | N-term +28.03 Da,                           | 4233.555664 | 2 | 985.9699707 | 985.9763495 |
| GDPKEEEEEELVDPLTTVR  | P99028 | 0.01248699 | N-term +28.03 Da, K +28.03 Da,              | 4236.411133 | 3 | 747.7089233 | 747.7092771 |
| TEKLPFIIDDKGR        | O08709 | 0          | N-term +28.03 Da, K +28.03 Da,              | 4238.709961 | 3 | 571.6585693 | 571.6696982 |
| AWITAPVALR           | O55111 | 0          | N-term +28.03 Da,                           | 4241.666504 | 2 | 563.8400269 | 563.3425858 |
| SLGEYLFER            | P29391 | 0.04906937 | N-term +28.03 Da,                           | 4250.022461 | 2 | 571.2999878 | 571.2980417 |
| LHTVYQSVELPETHQMLR   | Q07417 | 0          | N-term +28.03 Da,                           | 4251.293945 | 3 | 737.3900146 | 737.0526543 |
| TLVGYDLVPEPK         | P12787 | 0          | N-term +28.03 Da, K +28.03 Da,              | 4255.939941 | 2 | 693.9000244 | 693.8975891 |
| TVMPAWVIDKYGKNEVLR   | Q924D0 | 0          | N-term +28.03 Da, K +28.03 Da,              | 4262.043945 | 4 | 551.8099976 | 551.5631492 |
| LAGTNKETTIQGLDGLSER  | Q91Y97 | 0          | N-term +28.03 Da, K +28.03 Da,              | 4265.82959  | 3 | 687.3699951 | 687.0391797 |
| LAGTNKETTIQGLDGLSER  | Q91Y97 | 0          | N-term +28.03 Da, K +28.03 Da,              | 4265.972656 | 2 | 1030.540039 | 1030.055131 |
| PLPPLPEYGGKVR        | Q9CQ7  | 0.00665188 | N-term +28.03 Da, K +28.03 Da,              | 4273.296387 | 2 | 740.4299927 | 739.9401222 |
| SVTGWKEIEYEVVR       | Q8C196 | 0          | N-term +28.03 Da, K +28.03 Da,              | 4273.973633 | 3 | 584.6500244 | 584.3173248 |
| SVTGWKEIEYEVVR       | Q8C196 | 0          | N-term +28.03 Da, K +28.03 Da,              | 4277.027344 | 3 | 584.3200073 | 584.3173248 |
| YLDEDTVYHLQPSGR      | Q91X83 | 0          | N-term +28.03 Da,                           | 4280.240234 | 2 | 910.9299927 | 910.9443203 |
| NWLAASLLHRVSR        | Q6ZQJ5 | 0.02667893 | N-term +28.03 Da,                           | 4282.614258 | 2 | 775.9500122 | 775.9493442 |
| LADAVAVTMGPKGR       | P63038 | 0          | N-term +28.03 Da, K +28.03 Da,              | 4286.125488 | 2 | 721.4000244 | 721.4134146 |
| DLDAATQQLLSR         | Q03265 | 0          | N-term +28.03 Da,                           | 4287.023926 | 2 | 679.8699951 | 679.867352  |
| SDVLELTDENFESR       | P27773 | 0          | N-term +28.03 Da,                           | 4297.238281 | 2 | 841.3990479 | 841.3994117 |
| SDVLELTDENFESR       | P27773 | 0          | N-term +28.03 Da,                           | 4303.102539 | 3 | 561.5999756 | 561.2686999 |

|                          |        |            |                                            |             |   |             |             |
|--------------------------|--------|------------|--------------------------------------------|-------------|---|-------------|-------------|
| GDTITNTMTLGDIVYKR        | P12710 | 0          | N-term +28.03 Da, K +28.03 Da,             | 4313.936035 | 3 | 652.6799927 | 652.0153175 |
| DQDEIDCLPLGAKQPSFR       | P16675 | 0          | N-term +28.03 Da, K +28.03 Da,C +57.02 Da, | 4317.585449 | 3 | 716.3599854 | 715.6930149 |
| NKELDPVQKLFVDKIR         | P97450 | 0          | N-term +28.03 Da, K +28.03 Da,             | 4319.274414 | 4 | 514.3099976 | 514.3147655 |
| TGIYEALELR               | P17182 | 0.002331   | N-term +28.03 Da,                          | 4321.019043 | 2 | 596.8327026 | 596.8322488 |
| SLGGGTSGMGTLISKIR        | P68372 | 0          | N-term +28.03 Da, K +28.03 Da,             | 4322.972656 | 3 | 621.0200195 | 621.0240355 |
| NKELDPVQKLFVDKIR         | P97450 | 0          | N-term +28.03 Da, K +28.03 Da,             | 4324.046387 | 3 | 685.4099731 | 685.4172618 |
| SDVLELTDFESR             | P27773 | 0          | N-term +28.03 Da,                          | 4329.14502  | 2 | 841.3978882 | 841.3994117 |
| SGPPVSELITKAVAASKER      | P15864 | 0          | N-term +28.03 Da, K +28.03 Da,             | 4329.472168 | 4 | 506.7999878 | 506.7992142 |
| PMILGYWNVNR              | P10649 | 0.02123552 | N-term +28.03 Da,                          | 4330.039063 | 2 | 639.8400269 | 638.8471783 |
| APQGSGLGEYLFER           | P29391 | 0.02105263 | N-term +28.03 Da,                          | 4337.316406 | 2 | 747.8800049 | 747.883002  |
| AAGVEFEFKLTKTR           | P30115 | 0          | N-term +28.03 Da, K +28.03 Da,             | 4346.918945 | 3 | 570.3200073 | 570.3259315 |
| TVILLENLR                | P09411 | 0.03460515 | N-term +28.03 Da,                          | 4350.61377  | 2 | 549.8479004 | 549.8477014 |
| SAWDKQFYPLDLR            | P17563 | 0          | N-term +28.03 Da, K +28.03 Da,             | 4355.146484 | 3 | 565.6400146 | 565.6348764 |
| TYIGELHPDDR              | P56395 | 0.032287   | N-term +28.03 Da,                          | 4355.807129 | 2 | 729.3900146 | 728.875177  |
| EAGYFNEEMAPIEVK          | Q8BWT1 | 0          | N-term +28.03 Da, K +28.03 Da,             | 4359.29834  | 2 | 891.9299927 | 891.9345752 |
| VNFTVDQIR                | P58252 | 0.00232558 | N-term +28.03 Da,                          | 4360.33252  | 2 | 560.8099976 | 560.3114832 |
| GYLEELLR                 | Q640N3 | 0.01841085 | N-term +28.03 Da,                          | 4360.502441 | 2 | 510.7900085 | 510.7898521 |
| VISLGEHSIIGR             | P08228 | 0          | N-term +28.03 Da,                          | 4364.306641 | 2 | 698.3900146 | 698.4013616 |
| TTIAGVVKDGIVLGADTR       | P70195 | 0          | N-term +28.03 Da, K +28.03 Da,             | 4366.678711 | 3 | 669.0490112 | 669.0491271 |
| GLLSQGSPLSWEETQR         | P97494 | 0          | N-term +28.03 Da,                          | 4367.381836 | 3 | 606.3200073 | 605.9793721 |
| VPATPVAWPSQEGQNPSLSSIR   | Q8C196 | 0          | N-term +28.03 Da,                          | 4367.769531 | 3 | 784.4099731 | 783.7447668 |
| VPATPVAWPSQEGQNPSLSSIR   | Q8C196 | 0          | N-term +28.03 Da,                          | 4372.982422 | 2 | 1175.619995 | 1175.113512 |
| TTIAGVVKDGIVLGADTR       | P70195 | 0          | N-term +28.03 Da, K +28.03 Da,             | 4374.348633 | 2 | 1003.070007 | 1003.070052 |
| TISPLDLAKLNQVAR          | P60335 | 0          | N-term +28.03 Da, K +28.03 Da,             | 4374.764648 | 3 | 565.6777954 | 565.6769642 |
| NYSVVFPHDEPLAGR          | Q99LB7 | 0          | N-term +28.03 Da,                          | 4378.788086 | 2 | 864.9400024 | 864.9388403 |
| HSILPVDDINGLNEEQKQLR     | Q9JHI5 | 0.02590194 | N-term +28.03 Da, K +28.03 Da,             | 4379.128418 | 3 | 830.0900269 | 830.438003  |
| MFEPKCLDAFPNLR           | P10649 | 0          | N-term +28.03 Da, K +28.03 Da,C +57.02 Da, | 4384.077637 | 3 | 598.9799805 | 598.6407566 |
| EDALKAADTIGYPVMIR        | Q8C196 | 0          | N-term +28.03 Da, K +28.03 Da,             | 4384.348633 | 3 | 640.3499756 | 640.3484079 |
| ATEFGLASGVFTR            | Q8R0Y6 | 0          | N-term +28.03 Da,                          | 4386.29541  | 2 | 692.8699951 | 692.3669875 |
| APLAGTNKETTIQGLDGLSER    | Q91Y97 | 0          | N-term +28.03 Da, K +28.03 Da,             | 4387.107422 | 3 | 743.3900146 | 743.0691392 |
| GDKDIGNIISDAMKKVGR       | P63038 | 0.00450958 | N-term +28.03 Da, K +28.03 Da,             | 4388.280273 | 4 | 508.5400085 | 508.0423154 |
| APLAGTNKETTIQGLDGLSER    | Q91Y97 | 0          | N-term +28.03 Da, K +28.03 Da,             | 4388.97998  | 2 | 1114.589966 | 1114.100071 |
| DITSLDQYVER              | P08113 | 0          | N-term +28.03 Da,                          | 4389.121582 | 2 | 684.3499756 | 683.8460854 |
| APTIVILEPAGGCLCDQPVHIAVR | Q9QYR7 | 0          | N-term +28.03 Da, C +57.02 Da,             | 4390.32373  | 3 | 835.1099854 | 834.4382918 |
| APLDLDKYVEIAR            | Q9CQR6 | 0          | N-term +28.03 Da, K +28.03 Da,             | 4391.006836 | 3 | 520.2999878 | 520.2994937 |
| TDPAPATTF AHL DATTVLSR   | P56480 | 0          | N-term +28.03 Da,                          | 4391.108887 | 3 | 705.3699951 | 705.035658  |
| GLLSQGSPLSWEETQR         | P97494 | 0          | N-term +28.03 Da,                          | 4392.705078 | 2 | 908.460022  | 908.4654199 |
| VPATPVAWPSQEGQNPSLSSIR   | Q8C196 | 0          | N-term +28.03 Da,                          | 4399.146484 | 3 | 784.0800171 | 783.7447668 |
| DVALEGVGHFFR             | P29391 | 0          | N-term +28.03 Da,                          | 4399.380859 | 3 | 459.2399902 | 458.9103401 |
| DVALEGVGHFFR             | P29391 | 0          | N-term +28.03 Da,                          | 4400.419922 | 2 | 688.3599854 | 687.8618719 |

|                                   |        |            |                                            |             |   |             |             |
|-----------------------------------|--------|------------|--------------------------------------------|-------------|---|-------------|-------------|
| TAGLLWQLR                         | Q99LB7 | 0.00870511 | N-term +28.03 Da,                          | 4404.991211 | 2 | 543.3300171 | 543.3269357 |
| SIVEDKLVEDLKTR                    | P26443 | 0          | N-term +28.03 Da, K +28.03 Da,             | 4412.587402 | 3 | 577         | 577.0083799 |
| KDFDPAINERYLQR                    | Q9QXD6 | 0          | N-term +28.03 Da, K +28.03 Da,             | 4416.145996 | 2 | 832.9199829 | 832.9357663 |
| TTIAGLVFR                         | O35955 | 0.03839442 | N-term +28.03 Da,                          | 4418.17627  | 2 | 503.3078613 | 503.3082117 |
| TSGPPVSELITKAVAASKER              | P43274 | 0.00874317 | N-term +28.03 Da, K +28.03 Da,             | 4419.969238 | 4 | 532.3099976 | 532.061134  |
| GAPQGSLSGEYLFER                   | P29391 | 0          | N-term +28.03 Da,                          | 4420.109375 | 2 | 777.4000244 | 776.3937341 |
| GAPQGSLSGEYLFER                   | P29391 | 0          | N-term +28.03 Da,                          | 4422.580566 | 2 | 776.9000244 | 776.3937341 |
| DVAITELFSFR                       | O35129 | 0.04037801 | N-term +28.03 Da,                          | 4422.717773 | 2 | 633.3499756 | 633.3404384 |
| TLNQLVGAAFGAAGQR                  | Q9EQ20 | 0          | N-term +28.03 Da,                          | 4432.396484 | 2 | 802.4400024 | 801.4415498 |
| TLNQLVGAAFGAAGQR                  | Q9EQ20 | 0          | N-term +28.03 Da,                          | 4433.026367 | 3 | 534.960022  | 534.6301253 |
| EFTLGEECELETMTGEKVK               | P12710 | 0          | N-term +28.03 Da, K +28.03 Da,C +57.02 Da, | 4436.916504 | 3 | 772.3800049 | 772.0446147 |
| NEFTLGEECELETMTGEKVK              | P12710 | 0          | N-term +28.03 Da, K +28.03 Da,C +57.02 Da, | 4443.446777 | 3 | 810.3900146 | 810.0589241 |
| ASKPTLNEVVIVSAIR                  | Q8QZT1 | 0          | N-term +28.03 Da, K +28.03 Da,             | 4445.276367 | 2 | 876.5300293 | 877.0327407 |
| KELDPVQKLFVDKIR                   | P97450 | 0          | N-term +28.03 Da, K +28.03 Da,             | 4445.964355 | 4 | 485.5499878 | 485.8040334 |
| NKELDPVQKLFVDKIR                  | P97450 | 0          | N-term +28.03 Da, K +28.03 Da,             | 4448.598633 | 4 | 514.5599976 | 514.3147655 |
| NEFTLGEECELETMTGEKVK              | P12710 | 0          | N-term +28.03 Da, K +28.03 Da,C +57.02 Da, | 4452.115234 | 3 | 809.7399902 | 810.0589241 |
| SSSLEKSYELPDGQVITIGNER            | P60710 | 0          | N-term +28.03 Da, K +28.03 Da,             | 4460.545898 | 3 | 827.0999756 | 826.762264  |
| PYNPMSRPDAWGVTKGAAELMQQKEATTEQQLR | O35490 | 0          | N-term +28.03 Da, K +28.03 Da,             | 4461.70166  | 4 | 976.7299805 | 976.4936545 |
| YTIVYFPVR                         | P19157 | 0          | N-term +28.03 Da,                          | 4463.174805 | 2 | 593.3358765 | 593.3369693 |
| LYSSDDVIELTPSNFNR                 | Q922R8 | 0          | N-term +28.03 Da,                          | 4471.552734 | 3 | 696.0100098 | 695.6760186 |
| LYSSDDVIELTPSNFNR                 | Q922R8 | 0          | N-term +28.03 Da,                          | 4472.942871 | 2 | 1043.01001  | 1043.01039  |
| LYSSDDVIELTPSNFNR                 | Q922R8 | 0          | N-term +28.03 Da,                          | 4474.578125 | 3 | 696.3400269 | 695.6760186 |
| LDILDVLSK                         | P28650 | 0.02186312 | N-term +28.03 Da, K +28.03 Da,             | 4477.163086 | 2 | 657.3900146 | 657.3999646 |
| TAASSSSLEKSYELPDGQVITIGNER        | P60710 | 0          | N-term +28.03 Da, K +28.03 Da,             | 4478.807617 | 3 | 937.4699707 | 936.8135762 |
| EFPGLEPR                          | O35490 | 0.01440329 | N-term +28.03 Da,                          | 4489.402832 | 2 | 560.2999878 | 560.2953016 |
| SFPTLKFFPASADR                    | P09103 | 0.00558659 | N-term +28.03 Da, K +28.03 Da,             | 4489.480957 | 3 | 547.2999878 | 547.299605  |
| TGAPQGSLSGEYLFER                  | P29391 | 0          | N-term +28.03 Da,                          | 4489.779297 | 2 | 826.9199829 | 826.9175737 |
| GPPDPILGVTEAFKR                   | P05202 | 0          | N-term +28.03 Da, K +28.03 Da,             | 4490.168945 | 3 | 551.9799805 | 551.6505264 |
| DALEEDNVLVLK                      | P09103 | 0          | N-term +28.03 Da, K +28.03 Da,             | 4491.209473 | 2 | 771.9199829 | 771.9167082 |
| AFTPATGTPVLGGLSYR                 | Q61176 | 0.02180095 | N-term +28.03 Da,                          | 4497.840332 | 2 | 868.4699707 | 868.4725159 |
| GQKVLDSGAPIKIPVGPETLGR            | P56480 | 0.00233645 | N-term +28.03 Da, K +28.03 Da,             | 4500.019531 | 3 | 772.7800293 | 772.793169  |
| FTIEDIEVAPPKAHEVR                 | P00329 | 0          | N-term +28.03 Da, K +28.03 Da,             | 4503.92627  | 3 | 669.6900024 | 669.7018387 |
| NVPATPVAWPSQEGQNPSLSSIR           | Q8C196 | 0          | N-term +28.03 Da,                          | 4508.064941 | 2 | 1232.640015 | 1232.134976 |
| DPASTLPDIQVQENFSES                | Q07456 | 0          | N-term +28.03 Da,                          | 4517.477051 | 2 | 1081.530029 | 1081.024029 |
| DKLYFEELSLE                       | Q8C196 | 0.03144654 | N-term +28.03 Da, K +28.03 Da,             | 4528.614746 | 2 | 799.9299927 | 799.4272428 |
| EWPANLDLKKELSEPSSTR               | Q8C196 | 0          | N-term +28.03 Da, K +28.03 Da,             | 4537.480469 | 3 | 762.4000244 | 762.0776345 |
| ASEAIKGAVVGIDLGTNSCAVMEGKQAK      | P38647 | 0          | N-term +28.03 Da, K +28.03 Da,C +57.02 Da, | 4547.07373  | 4 | 779.6699829 | 779.9228072 |
| GDPKEEEEEELVDPLTTVR               | P99028 | 0          | N-term +28.03 Da, K +28.03 Da,             | 4547.211914 | 2 | 1121.050049 | 1121.060277 |
| SWAVPSLGLKTDIPIGR                 | P00405 | 0          | N-term +28.03 Da, K +28.03 Da,             | 4560.461426 | 3 | 609.0200195 | 608.6841189 |
| IVENLKLKNELFQR                    | Q61425 | 0          | N-term +28.03 Da, K +28.03 Da,             | 4562.441895 | 3 | 610.7000122 | 610.040014  |

|                                   |        |            |                                             |             |   |             |             |
|-----------------------------------|--------|------------|---------------------------------------------|-------------|---|-------------|-------------|
| SPGSPLEKLVSSVSDLPKR               | P54869 | 0          | N-term +28.03 Da, K +28.03 Da,              | 4571.442871 | 4 | 521.0599976 | 520.805768  |
| PEFMLPVHIFYGR                     | Q9ET01 | 0          | N-term +28.03 Da,                           | 4581.557129 | 3 | 507.9200134 | 507.5954755 |
| THVEMGPPDPILGVTEAFKR              | P05202 | 0          | N-term +28.03 Da, K +28.03 Da,              | 4589.223633 | 4 | 563.5599976 | 563.3042352 |
| EPMQTGIKAVDSLVPGR                 | Q03265 | 0.01622718 | N-term +28.03 Da, K +28.03 Da,              | 4596.016113 | 3 | 656.7000122 | 656.3713239 |
| ISFHLPVNSR                        | Q9D1D4 | 0.02028986 | N-term +28.03 Da,                           | 4596.894531 | 3 | 399.5599976 | 399.896142  |
| SQAPGPSGKTADYAFEMAVSNIR           | Q8R0N6 | 0          | N-term +28.03 Da, K +28.03 Da,              | 4600.680176 | 3 | 818.7399902 | 818.4091671 |
| ISQAAAKVDIEFDYDGPLMKTEVPGPR       | P61922 | 0          | N-term +28.03 Da, K +28.03 Da,              | 4600.825684 | 4 | 759.1500244 | 758.6506826 |
| SAAATSAVPAPNHQEVFCNQIFINNEWHDAVSR | P47738 | 0          | N-term +28.03 Da, C +57.02 Da,              | 4601.734375 | 4 | 952.710022  | 952.2089539 |
| TLMLPTQTISQGAIEKVKDATR            | Q8C196 | 0          | N-term +28.03 Da, K +28.03 Da,              | 4602.591797 | 4 | 622.1099854 | 622.1069159 |
| PEFMLPVHIFYGR                     | Q9ET01 | 0          | N-term +28.03 Da,                           | 4612.692871 | 3 | 507.9200134 | 507.5954755 |
| LTDPAATTFAHLDATTVLSR              | P56480 | 0          | N-term +28.03 Da,                           | 4614.006348 | 3 | 743.0599976 | 742.7303461 |
| TALEKFGQAISLLPDR                  | Q8VBW8 | 0          | N-term +28.03 Da, K +28.03 Da,              | 4619.700195 | 3 | 606.0200195 | 605.6840076 |
| GDVVGSLWFDHIR                     | Q35403 | 0          | N-term +28.03 Da,                           | 4622.911133 | 3 | 510.269989  | 510.2684162 |
| FSATDLTEFAAR                      | Q8BWT1 | 0          | N-term +28.03 Da,                           | 4624.246094 | 2 | 678.8417969 | 678.8433454 |
| LDLDPKNTVSGGAIALGHPLGGSGSR        | Q8BWT1 | 0.01162791 | N-term +28.03 Da, K +28.03 Da,              | 4632.214355 | 3 | 878.460022  | 878.1399571 |
| VLSGEDKSNIAAWGKIGGHGAIEYGAEALER   | P01942 | 0          | N-term +28.03 Da, K +28.03 Da,              | 4635.905273 | 4 | 832.1900024 | 832.1939406 |
| ASPGSPLEKLVSSVSDLPKR              | P54869 | 0          | N-term +28.03 Da, K +28.03 Da,              | 4647.101563 | 4 | 538.5700073 | 538.5650465 |
| MKTILSNQTVDIPENVEITLKGR           | P51410 | 0          | N-term +28.03 Da, K +28.03 Da,              | 4656.558594 | 4 | 671.6300049 | 671.6320268 |
| ASPGSPLEKLVSSVSDLPKR              | P54869 | 0.02607076 | N-term +28.03 Da, K +28.03 Da,              | 4684.190918 | 4 | 538.8200073 | 538.5650465 |
| SYELPDGQVITIGNER                  | P60710 | 0          | N-term +28.03 Da,                           | 4697.855957 | 2 | 909.9699707 | 909.9652529 |
| ASASSTNLKDVLSNLIPEQAR             | Q9CZU6 | 0          | N-term +28.03 Da, K +28.03 Da,              | 4707.937012 | 4 | 607.5999756 | 607.3457892 |
| GASIVEDKLVEDLKTR                  | P26443 | 0          | N-term +28.03 Da, K +28.03 Da,              | 4720.395996 | 3 | 620.0200195 | 619.6945726 |
| ASASSTNLKDVLSNLIPEQAR             | Q9CZU6 | 0.01159115 | N-term +28.03 Da, K +28.03 Da,              | 4725.47168  | 3 | 809.460022  | 809.4586267 |
| TFVQENVYDEFVER                    | P47738 | 0          | N-term +28.03 Da,                           | 4730.663086 | 2 | 901.9299927 | 901.9334213 |
| GFILDGFPR                         | G3UYQ4 | 0.03454384 | N-term +28.03 Da,                           | 4734.993164 | 2 | 525.2919312 | 525.2925616 |
| MPFVELETNLPASR                    | O35215 | 0.0134715  | N-term +28.03 Da,                           | 4746.634277 | 2 | 816.9299927 | 816.4267197 |
| SGDATLMLPTQTISQGAIEKVKDATR        | Q8C196 | 0          | N-term +28.03 Da, K +28.03 Da,              | 4749.212402 | 3 | 939.5200195 | 939.1793129 |
| GLLEKLEKETEYDVR                   | Q61176 | 0.03294746 | N-term +28.03 Da, K +28.03 Da,              | 4752.11377  | 3 | 593         | 593.0083799 |
| GVDTILDKVDGVSAEPTPESWR            | O35488 | 0          | N-term +28.03 Da, K +28.03 Da,              | 4753.036621 | 3 | 809.75      | 809.7515876 |
| NDVITVQTPAFAESVTEGDVR             | Q9D2G2 | 0          | N-term +28.03 Da,                           | 4754.910156 | 2 | 1138.579956 | 1138.573886 |
| SEMDNILANLR                       | Q8BMS1 | 0          | N-term +28.03 Da,                           | 4755.334961 | 2 | 652.336853  | 652.3373728 |
| SVTGWKEIEYEVVR                    | Q8C196 | 0          | N-term +28.03 Da, K +28.03 Da,              | 4757.253906 | 2 | 875.4699707 | 875.9723489 |
| ASIVEDKLVEDLKTR                   | P26443 | 0          | N-term +28.03 Da, K +28.03 Da,              | 4759.816406 | 3 | 600.6766357 | 600.6874179 |
| NDVITVQTPAFAESVTEGDVR             | Q9D2G2 | 0          | N-term +28.03 Da,                           | 4763.818848 | 3 | 759.3900146 | 759.3850161 |
| TTITSVLPKALVASR                   | Q8C196 | 0          | N-term +28.03 Da, K +28.03 Da,              | 4764.383301 | 2 | 856.5200195 | 855.5298336 |
| LLEFQNDR                          | P29391 | 0.00229358 | N-term +28.03 Da,                           | 4765.085938 | 2 | 531.2800293 | 531.7825586 |
| SGDATLMLPTQTISQGAIEKVKDATR        | Q8C196 | 0          | N-term +28.03 Da, K +28.03 Da,              | 4768.138184 | 4 | 705.1400146 | 704.6363038 |
| VASVGKDEYTFVVVGAGSAGCVLASR        | Q8BJ64 | 0          | N-term +28.03 Da, K +28.03 Da, C +57.02 Da, | 4772.387695 | 3 | 886.4799805 | 885.7985434 |
| MKVFTGPLPAEGR                     | Q91Z53 | 0          | N-term +28.03 Da, K +28.03 Da,              | 4773.849121 | 2 | 778.9400024 | 779.4447147 |
| MPFVELETNLPASR                    | O35215 | 0          | N-term +28.03 Da,                           | 4777.893066 | 2 | 816.4199829 | 816.4267197 |

|                                       |         |            |                                            |             |   |             |             |
|---------------------------------------|---------|------------|--------------------------------------------|-------------|---|-------------|-------------|
| GDPKEEEEEELVDPLTTVR                   | P99028  | 0          | N-term +28.03 Da, K +28.03 Da,             | 4779.220215 | 3 | 748.0300293 | 747.7092771 |
| GDPKEEEEEELVDPLTTVR                   | P99028  | 0.03451327 | N-term +28.03 Da, K +28.03 Da,             | 4781.290039 | 2 | 1121.550049 | 1121.060277 |
| TTIAGVVYKDGIVLGADTR                   | P70195  | 0.01168969 | N-term +28.03 Da, K +28.03 Da,             | 4782.646973 | 3 | 668.710022  | 669.0491271 |
| NDVITVQTPAFAESVTEGDVR                 | Q9D2G2  | 0          | N-term +28.03 Da,                          | 4786.460938 | 2 | 1138.569946 | 1138.573886 |
| GDPKEEEEEELVDPLTTVR                   | P99028  | 0.01438849 | N-term +28.03 Da, K +28.03 Da,             | 4788.421387 | 3 | 748.3699951 | 747.7092771 |
| MKVFTGGLPAEGR                         | Q91Z53  | 0.00668151 | N-term +28.03 Da, K +28.03 Da,             | 4789.962891 | 3 | 519.960022  | 519.9655686 |
| GGLAASAMDELLR                         | Q99J39  | 0          | N-term +28.03 Da,                          | 4797.649902 | 2 | 666.3499756 | 666.3530228 |
| AFQDLLNLVGSBGR                        | E9Q6M5  | 0          | N-term +28.03 Da,                          | 4802.098633 | 3 | 518.9500122 | 518.9510873 |
| LKAADTIGYPMIR                         | Q8C196  | 0          | N-term +28.03 Da, K +28.03 Da,             | 4810.534668 | 2 | 802.4500122 | 802.4656473 |
| SPGEFLITGSGSELHDLR                    | Q9DBT9  | 0          | N-term +28.03 Da,                          | 4812.837402 | 3 | 686.7000122 | 686.0285033 |
| VEESVYDEFVKR                          | P24549  | 0          | N-term +28.03 Da, K +28.03 Da,             | 4816.952637 | 2 | 778.8900146 | 778.4037677 |
| DHGDALAFVDVPNDSSSFQIVKNPR             | QH61176 | 0          | N-term +28.03 Da, K +28.03 Da,             | 4821.541504 | 3 | 876.4400024 | 876.1135193 |
| GTAEDFADQFLR                          | Q64310  | 0          | N-term +28.03 Da,                          | 4828.320313 | 2 | 699.3400269 | 699.3384274 |
| SPVTFMNFPEDTLEQKAGSVGR                | Q8VCW8  | 0          | N-term +28.03 Da, K +28.03 Da,             | 4829.484863 | 3 | 823.4199829 | 822.7493008 |
| GGLLLGDEAPNFEANTTIGR                  | O08709  | 0          | N-term +28.03 Da,                          | 4837.429688 | 2 | 1037.540039 | 1037.034199 |
| GLLLGDEAPNFEANTTIGR                   | O08709  | 0          | N-term +28.03 Da,                          | 4837.570801 | 2 | 1009.030029 | 1008.523467 |
| GGLLLGDEAPNFEANTTIGR                  | O08709  | 0          | N-term +28.03 Da,                          | 4840.97168  | 3 | 691.3499756 | 691.6918913 |
| FAKLVPPPQVYVYIEGR                     | Q9DB20  | 0          | N-term +28.03 Da, K +28.03 Da,             | 4843.405273 | 3 | 662.0599976 | 662.3946797 |
| GGLLLGDEAPNFEANTTIGR                  | O08709  | 0          | N-term +28.03 Da,                          | 4843.833984 | 3 | 691.6918945 | 691.6918913 |
| GGLLLGDEAPNFEANTTIGR                  | O08709  | 0          | N-term +28.03 Da,                          | 4859.98584  | 2 | 1038.040039 | 1037.034199 |
| ALKAADTIGYPMIR                        | Q8C196  | 0          | N-term +28.03 Da, K +28.03 Da,             | 4864.36377  | 2 | 838.4699707 | 837.9842044 |
| SACFEPGLDYMVTIKIPR                    | Q8C196  | 0          | N-term +28.03 Da, K +28.03 Da,C +57.02 Da, | 4864.512695 | 3 | 690.6900024 | 690.6848028 |
| TLLALDCLPPTRPTDKPLR                   | P10126  | 0          | N-term +28.03 Da, K +28.03 Da,C +57.02 Da, | 4865.109375 | 4 | 619.8599854 | 619.6055459 |
| FGVQALLAAR                            | Q9ER42  | 0.00862069 | N-term +28.03 Da,                          | 4875.665039 | 2 | 538.3200073 | 537.3269357 |
| EAPDFEANTTIGR                         | Q8BG37  | 0          | N-term +28.03 Da,                          | 4878.681641 | 2 | 725.8599854 | 724.854442  |
| VAWPSQEGQNPSSLIR                      | Q8C196  | 0          | N-term +28.03 Da,                          | 4883.868164 | 2 | 942.9699707 | 942.484144  |
| LLPPDLPLEPECR                         | Q8BGT0  | 0          | N-term +28.03 Da, C +57.02 Da,             | 4885.083984 | 2 | 846.9400024 | 846.4372847 |
| TSACFEPGLDYMVTIKIPR                   | Q8C196  | 0          | N-term +28.03 Da, K +28.03 Da,C +57.02 Da, | 4894.675293 | 3 | 724.7000122 | 724.3673626 |
| DELEIIEGMKFDR                         | P63038  | 0          | N-term +28.03 Da, K +28.03 Da,             | 4903.630859 | 3 | 551.289978  | 550.9517656 |
| FPALTPQKKELSEIAQR                     | Q91Y97  | 0          | N-term +28.03 Da, K +28.03 Da,             | 4908.591797 | 3 | 723.4000244 | 723.7474482 |
| APATTFALHDATTVLSR                     | P56480  | 0          | N-term +28.03 Da,                          | 4914.409668 | 2 | 900.4699707 | 900.486155  |
| ASEAIKGAVVGDGLGTTNSCAVMGKQAKVLENAEGAR | P38647  | 0          | N-term +28.03 Da, K +28.03 Da,C +57.02 Da, | 4918.20166  | 4 | 1014.789978 | 1014.792157 |
| ECDKLYFEELSLR                         | Q8C196  | 0          | N-term +28.03 Da, K +28.03 Da,C +57.02 Da, | 4918.505859 | 2 | 944.4500122 | 943.9638644 |
| ATPVAWPSQEGQNPSSLIR                   | Q8C196  | 0          | N-term +28.03 Da,                          | 4927.823242 | 2 | 1077.040039 | 1077.052923 |
| DLTKFLEEHPGEEVLR                      | P56395  | 0.03297683 | N-term +28.03 Da, K +28.03 Da,             | 4928.675781 | 3 | 675.6834106 | 675.693232  |
| CGGLAASAMDELLR                        | Q99J39  | 0          | N-term +28.03 Da, C +57.02 Da,             | 4938.474121 | 2 | 746.8699951 | 746.3683473 |
| NKELDPVQKLFVDKIR                      | P97450  | 0          | N-term +28.03 Da, K +28.03 Da,             | 4940.318848 | 3 | 685.0700073 | 685.4172618 |
| LETFLYK GIR                           | Q03265  | 0          | N-term +28.03 Da, K +28.03 Da,             | 4945.147461 | 2 | 713.4000244 | 712.9110306 |
| AIVDVPVGEELLGR                        | Q03265  | 0          | N-term +28.03 Da,                          | 4949.946777 | 2 | 748.4299927 | 747.9299522 |
| GAIVDVPVGEELLGR                       | Q03265  | 0          | N-term +28.03 Da,                          | 4954.487305 | 2 | 776.4400024 | 776.4406843 |



|                                   |        |            |                                            |             |   |             |             |
|-----------------------------------|--------|------------|--------------------------------------------|-------------|---|-------------|-------------|
| PGLLLLDEAPNFEANTTIGR              | O08709 | 0          | N-term +28.03 Da,                          | 4956.666992 | 2 | 1086.060059 | 1085.560581 |
| DVITVQTPAFAESVTEGDVR              | Q9D2G2 | 0          | N-term +28.03 Da,                          | 4965.524902 | 2 | 1082.060059 | 1081.552422 |
| FELFADKVPKTAENFR                  | P17742 | 0          | N-term +28.03 Da, K +28.03 Da,             | 4971.652344 | 3 | 666.0232544 | 666.034929  |
| CLDAFPNLK                         | O35660 | 0          | N-term +28.03 Da, K +28.03 Da,C +57.02 Da, | 4975.919434 | 2 | 567.3099976 | 567.3048121 |
| SDVLELTDEFESR                     | P27773 | 0          | N-term +28.03 Da,                          | 4980.384277 | 2 | 840.8900146 | 841.3994117 |
| KLYFEELSLE                        | Q8C196 | 0          | N-term +28.03 Da, K +28.03 Da,             | 4986.083984 | 2 | 741.9000244 | 741.9137707 |
| VHLTDAEKA AVSCLWGK VNSDEVGG EALGR | P02088 | 0          | N-term +28.03 Da, K +28.03 Da,C +57.02 Da, | 5003.035645 | 4 | 814.4199829 | 813.922496  |
| VHLTDAEKA AVSCLWGK VNSDEVGG EALGR | P02088 | 0          | N-term +28.03 Da, K +28.03 Da,C +57.02 Da, | 5004.589844 | 3 | 1085.22998  | 1084.894236 |
| VHLTDAEKA AVSCLWGK VNSDEVGG EALGR | P02088 | 0          | N-term +28.03 Da, K +28.03 Da,C +57.02 Da, | 5006.646484 | 3 | 1084.900024 | 1084.894236 |
| SAKVSDAISTQYPVVDHEFD AVVGGAGGLR   | Q8K2B3 | 0          | N-term +28.03 Da, K +28.03 Da,             | 5007.007813 | 3 | 1091.900024 | 1091.236768 |
| SAKVSDAISTQYPVVDHEFD AVVGGAGGLR   | Q8K2B3 | 0          | N-term +28.03 Da, K +28.03 Da,             | 5010.15918  | 4 | 819.1799927 | 818.6793948 |
| ASQQDFENALNQVKL                   | Q9WUR2 | 0          | N-term +28.03 Da, K +28.03 Da,             | 5012.936523 | 2 | 880.960022  | 880.9625129 |
| ASAKVSDAISTQYPVVDHEFD AVVGGAGGLR  | Q8K2B3 | 0          | N-term +28.03 Da, K +28.03 Da,             | 5014.246582 | 4 | 836.4500122 | 836.4386733 |
| TGAIVDVPVGEELLGR                  | Q03265 | 0          | N-term +28.03 Da,                          | 5017.629883 | 2 | 826.9633179 | 826.9645239 |
| TDFDECDKLYFEELSLE                 | Q8C196 | 0          | N-term +28.03 Da, K +28.03 Da,C +57.02 Da, | 5022.314941 | 3 | 789.3699951 | 789.0349957 |
| ASQQDFENALNQVKL                   | Q9WUR2 | 0          | N-term +28.03 Da, K +28.03 Da,             | 5023.944336 | 3 | 587.6400146 | 587.6441008 |
| NDVITVQTPAFAESVTEGDVR             | Q9D2G2 | 0          | N-term +28.03 Da,                          | 5028.164063 | 2 | 1139.060059 | 1138.573886 |
| VVFTDEMAHFDR                      | P24270 | 0          | N-term +28.03 Da,                          | 5038.407715 | 2 | 747.8699951 | 747.8559298 |
| PAPATTF AHL DATTVLSR              | P56480 | 0          | N-term +28.03 Da,                          | 5042.501953 | 2 | 949.5       | 949.0125371 |
| TAGLLDWPQGT FASQVTLEGDKVKVER      | Q9DCW4 | 0          | N-term +28.03 Da, K +28.03 Da,             | 5051.44043  | 4 | 758.4199829 | 758.1631144 |
| DAGEFVDLYVPR                      | Q9CQR2 | 0          | N-term +28.03 Da,                          | 5065.351563 | 2 | 704.8585815 | 704.8589955 |
| ELEDFKLQHGSILGFPK                 | P26443 | 0.00118765 | N-term +28.03 Da, K +28.03 Da,             | 5070.330078 | 3 | 682.039978  | 681.3822174 |
| APLVLEQGLR                        | P54869 | 0          | N-term +28.03 Da,                          | 5074.121094 | 2 | 562.3400269 | 562.3453258 |
| DLTDPAPATTF AHL DATTVLSR          | P56480 | 0          | N-term +28.03 Da,                          | 5085.77002  | 3 | 781.7399902 | 781.0726608 |
| ELEDFKLQHGSILGFPK                 | P26443 | 0          | N-term +28.03 Da, K +28.03 Da,             | 5092.848145 | 3 | 681.3699951 | 681.3822174 |
| LGLEAEKDGVPVFKFPR                 | Q8R0Y6 | 0          | N-term +28.03 Da, K +28.03 Da,             | 5100.617188 | 3 | 663.3800049 | 662.7189407 |
| ADQPIEADVTVIGSGPGGYVAAIK          | O08749 | 0          | N-term +28.03 Da, K +28.03 Da,             | 5119.052246 | 3 | 795.4299927 | 795.4284446 |
| TFLGGEDFDQALLR                    | P38647 | 0          | N-term +28.03 Da,                          | 5123.580566 | 2 | 805.9099731 | 805.4146667 |
| AIKFLEVIKPF                       | P61620 | 0          | N-term +28.03 Da, K +28.03 Da,             | 5136.365723 | 3 | 463.6400146 | 463.6353767 |
| FGYFEVTHDITR                      | P24270 | 0          | N-term +28.03 Da,                          | 5136.626465 | 2 | 756.3900146 | 756.8777195 |
| VNFTVDQIR                         | P58252 | 0.00118906 | N-term +28.03 Da,                          | 5148.307617 | 2 | 559.7999878 | 560.3114832 |
| ILTDYGFEGHPFR                     | Q9DCT2 | 0.02117421 | N-term +28.03 Da,                          | 5165.228516 | 2 | 790.4099731 | 790.3988191 |
| MSTGTFVVSQPLNYR                   | Q9JLJ2 | 0          | N-term +28.03 Da,                          | 5175.467285 | 2 | 863.9400024 | 864.4429012 |
| LDPAFTPATGTPVLGGLSYR              | Q61176 | 0          | N-term +28.03 Da,                          | 5182.541016 | 2 | 1031.060059 | 1031.054402 |
| GILEKISEIEKEIAR                   | Q9QXB9 | 0          | N-term +28.03 Da, K +28.03 Da,             | 5184.339844 | 4 | 453.7799988 | 453.7764788 |
| DDVALEGVGHFFR                     | P29391 | 0          | N-term +28.03 Da,                          | 5184.903809 | 2 | 746.3699951 | 745.375344  |
| SQSLLFVDIPSKIICR                  | Q64374 | 0          | N-term +28.03 Da, K +28.03 Da,C +57.02 Da, | 5186.905273 | 3 | 645.039978  | 644.7044143 |
| AGAFGYFEVTHDITR                   | P24270 | 0          | N-term +28.03 Da,                          | 5188.060547 | 2 | 857.4199829 | 856.4255657 |
| LKTLVPVPTFENVSIPER                | Q99N93 | 0          | N-term +28.03 Da, K +28.03 Da,             | 5191.94043  | 3 | 704.0800171 | 703.7487888 |
| TIAQDYGVLKADEGISFR                | P35700 | 0          | N-term +28.03 Da, K +28.03 Da,             | 5192.930176 | 2 | 1020.030029 | 1020.044035 |

|                                    |        |            |                                            |             |   |             |             |
|------------------------------------|--------|------------|--------------------------------------------|-------------|---|-------------|-------------|
| TIAQDYGVKADEGISFR                  | P35700 | 0          | N-term +28.03 Da, K +28.03 Da,             | 5196.246094 | 2 | 1020.530029 | 1020.044035 |
| SKAEELGLPILGVLR                    | Q8VCH0 | 0          | N-term +28.03 Da, K +28.03 Da,             | 5198.524902 | 3 | 551.0100098 | 551.0099432 |
| EFTLGEECELETMTGKVK                 | P12710 | 0          | N-term +28.03 Da, K +28.03 Da,C +57.02 Da, | 5200.042969 | 2 | 1158.550049 | 1157.563284 |
| SVTELNGDTITNTMTLGDIVYKR            | P12710 | 0          | N-term +28.03 Da, K +28.03 Da,             | 5200.355957 | 3 | 867.1199951 | 866.454554  |
| LKTLPLVPVTFENVISIPER               | Q99N93 | 0          | N-term +28.03 Da, K +28.03 Da,             | 5204.501465 | 3 | 704.4199829 | 703.7487888 |
| PTGGAGAVAMLIGPKAPLVLEQGLR          | P54869 | 0          | N-term +28.03 Da, K +28.03 Da,             | 5218.510742 | 4 | 619.3599854 | 618.8647257 |
| GVQPPNFSWVLPGR                     | Q6NT99 | 0          | N-term +28.03 Da,                          | 5219.234375 | 2 | 791.9299927 | 791.4304532 |
| GLDPAFTPATGTPVLGGLSYR              | Q61176 | 0          | N-term +28.03 Da,                          | 5219.691406 | 2 | 1060.569946 | 1059.565134 |
| GLDPAFTPATGTPVLGGLSYR              | Q61176 | 0          | N-term +28.03 Da,                          | 5222.301758 | 3 | 707.0499878 | 706.712515  |
| GLDPAFTPATGTPVLGGLSYR              | Q61176 | 0          | N-term +28.03 Da,                          | 5223.810059 | 2 | 1059.560059 | 1059.565134 |
| SDVLELTDENFESR                     | P27773 | 0          | N-term +28.03 Da,                          | 5224.059082 | 2 | 840.8900146 | 841.3994117 |
| GLDPAFTPATGTPVLGGLSYR              | Q61176 | 0          | N-term +28.03 Da,                          | 5224.19873  | 3 | 706.710022  | 706.712515  |
| VCNKEVYGFLPVPLR                    | Q8K297 | 0.04048234 | N-term +28.03 Da, K +28.03 Da,C +57.02 Da, | 5243.367188 | 2 | 925.0100098 | 924.016036  |
| VSPSPVDPVAVPVVPIGPPAGFR            | Q05920 | 0          | N-term +28.03 Da,                          | 5255.239258 | 3 | 761.0999756 | 760.7632096 |
| SLLFVDIPSKIICR                     | Q64374 | 0          | N-term +28.03 Da, K +28.03 Da,C +57.02 Da, | 5256.570801 | 3 | 573.3400269 | 573.0075451 |
| SVVVAPAQTLNSNAEFQMLR               | Q8C196 | 0          | N-term +28.03 Da,                          | 5258.031738 | 2 | 1045.060059 | 1045.059162 |
| APSQLALFSVSDKTGLVEFAR              | Q9CWJ9 | 0          | N-term +28.03 Da, K +28.03 Da,             | 5266.069336 | 3 | 764.7600098 | 764.7581246 |
| PTGGAGAVAMLIGPKAPLVLEQGLR          | P54869 | 0.0260223  | N-term +28.03 Da, K +28.03 Da,             | 5270.466309 | 3 | 825.1400146 | 824.8172087 |
| HVADFLVADFR                        | P97328 | 0          | N-term +28.03 Da,                          | 5271.564453 | 2 | 659.8400269 | 659.3511399 |
| KDLDVAVLVGSMR                      | P14152 | 0.02594995 | N-term +28.03 Da, K +28.03 Da,             | 5272.996582 | 2 | 778.9581909 | 778.4474547 |
| EGEPEVTDQLEWQSNQPWEQALNR           | P08226 | 0          | N-term +28.03 Da,                          | 5273.408691 | 3 | 971.789978  | 971.1212917 |
| DALEEEEDNVLVK                      | P09103 | 0.03829417 | N-term +28.03 Da, K +28.03 Da,             | 5274.507813 | 2 | 772.4099731 | 771.9167082 |
| EGEPEVTDQLEWQSNQPWEQALNR           | P08226 | 0          | N-term +28.03 Da,                          | 5278.164063 | 2 | 1456.680054 | 1456.178299 |
| TFVCPTEIIAFSDR                     | P35700 | 0          | N-term +28.03 Da, C +57.02 Da,             | 5287.641113 | 2 | 842.4199829 | 842.4241772 |
| SGDATLMLPTQTISQGAIEKVKDATR         | Q8C196 | 0.01603206 | N-term +28.03 Da, K +28.03 Da,             | 5292.494141 | 3 | 939.8300171 | 939.1793129 |
| PTGGAGAVAMLIGPKAPLVLEQGLR          | P54869 | 0          | N-term +28.03 Da, K +28.03 Da,             | 5294.384277 | 2 | 1236.699951 | 1236.722175 |
| SPEEFTEIMNQR                       | P54869 | 0.00232288 | N-term +28.03 Da,                          | 5296.72168  | 2 | 754.8699951 | 754.8561274 |
| SMEDALKAADTIGYPMIR                 | Q8C196 | 0          | N-term +28.03 Da, K +28.03 Da,             | 5298.337891 | 3 | 713.3800049 | 713.0392459 |
| DIVLTQSPASLAVSLGQR                 | P01654 | 0          | N-term +28.03 Da,                          | 5303.16748  | 2 | 943.0300293 | 942.0334697 |
| DIVLTQSPASLAVSLGQR                 | P01654 | 0          | N-term +28.03 Da,                          | 5306.133301 | 2 | 942.0300293 | 942.0334697 |
| GDTFLGGEDFDQALLR                   | P38647 | 0          | N-term +28.03 Da,                          | 5309.094238 | 2 | 891.4389038 | 891.4388708 |
| GPSQMALEDLAMFR                     | P40142 | 0          | N-term +28.03 Da,                          | 5314.689453 | 2 | 797.3900146 | 797.3918224 |
| ASAKVSDAISTQYPVVDHEFDVAVVVGAGGAGLR | Q8K2B3 | 0          | N-term +28.03 Da, K +28.03 Da,             | 5316.817383 | 3 | 1114.910034 | 1114.915806 |
| NDVITVQTPAFAESVTEGDVR              | Q9D2G2 | 0          | N-term +28.03 Da,                          | 5317.225098 | 2 | 1139.569946 | 1138.573886 |
| NDVITVQTPAFAESVTEGDVR              | Q9D2G2 | 0          | N-term +28.03 Da,                          | 5319.356934 | 3 | 760.0499878 | 759.3850161 |
| DVFVIEEWGR                         | P99029 | 0          | N-term +28.03 Da,                          | 5336.126953 | 2 | 640.3400269 | 639.3298733 |
| ILNLPESWDWR                        | P97821 | 0          | N-term +28.03 Da,                          | 5337.052734 | 2 | 728.8831787 | 728.8828045 |
| SAKVSDAISTQYPVVDHEFDVAVVVGAGGAGLR  | Q8K2B3 | 0          | N-term +28.03 Da, K +28.03 Da,             | 5337.95166  | 3 | 1090.900024 | 1091.236768 |
| ASAKVSDAISTQYPVVDHEFDVAVVVGAGGAGLR | Q8K2B3 | 0          | N-term +28.03 Da, K +28.03 Da,             | 5339.546387 | 3 | 1115.579956 | 1114.915806 |
| SAKVSDAISTQYPVVDHEFDVAVVVGAGGAGLR  | Q8K2B3 | 0.03986135 | N-term +28.03 Da, K +28.03 Da,             | 5346.569824 | 3 | 1091.560059 | 1091.236768 |

|                                    |         |            |                                            |             |   |             |             |
|------------------------------------|---------|------------|--------------------------------------------|-------------|---|-------------|-------------|
| ASAKVSDAISTQYPVVDHEFDVAVVVGAGGAGLR | Q8K2B3  | 0          | N-term +28.03 Da, K +28.03 Da,             | 5347.942383 | 3 | 1114.569946 | 1114.915806 |
| NDVITVQTPAFAESVTEGDVR              | Q9D2G2  | 0          | N-term +28.03 Da,                          | 5349.875977 | 2 | 1139.06665  | 1138.573886 |
| NDVITVQTPAFAESVTEGDVR              | Q9D2G2  | 0          | N-term +28.03 Da,                          | 5349.986328 | 3 | 760.0499878 | 759.3850161 |
| ISQAAAKVDIEFDYDGLMKTEVPGPR         | P61922  | 0          | N-term +28.03 Da, K +28.03 Da,             | 5353.376953 | 3 | 1011.530029 | 1011.198485 |
| AILEDLVFPSEIVGKR                   | P62082  | 0          | N-term +28.03 Da, K +28.03 Da,             | 5356.99707  | 3 | 615.0300293 | 614.6960246 |
| ISQAAAKVDIEFDYDGLMKTEVPGPR         | P61922  | 0          | N-term +28.03 Da, K +28.03 Da,             | 5361.258301 | 3 | 1010.859985 | 1011.198485 |
| DPLGLEAEKDGVPVFKFPR                | Q8R0Y6  | 0          | N-term +28.03 Da, K +28.03 Da,             | 5371.912109 | 3 | 733.4000244 | 733.4121768 |
| GLFIIDDKGILR                       | P35700  | 0          | N-term +28.03 Da, K +28.03 Da,             | 5374.249023 | 2 | 707.9299927 | 708.4346727 |
| SPPGDTSNLFPGTWYLER                 | P54869  | 0          | N-term +28.03 Da,                          | 5378.45166  | 2 | 1033.51001  | 1033.00491  |
| VKVLGTSVESIMATEDR                  | Q8C196  | 0          | N-term +28.03 Da, K +28.03 Da,             | 5380.796875 | 3 | 631         | 631.0116845 |
| VLDSGAPIKIPVGPETLGR                | P56480  | 0          | N-term +28.03 Da, K +28.03 Da,             | 5384.041016 | 2 | 988.5700073 | 988.0829624 |
| VKVLGTSVESIMATEDR                  | Q8C196  | 0          | N-term +28.03 Da, K +28.03 Da,             | 5389.027832 | 2 | 946.5       | 946.0138885 |
| MKTILSNQTVDIPENVEITLKGR            | P51410  | 0          | N-term +28.03 Da, K +28.03 Da,             | 5389.336426 | 3 | 894.8300171 | 895.1736102 |
| DATLMLPTQTISQGAIEKVKDATR           | Q8C196  | 0          | N-term +28.03 Da, K +28.03 Da,             | 5390.104004 | 3 | 891.4799805 | 891.1614818 |
| WIEEAAFR                           | Q9DBT9  | 0.01630989 | N-term +28.03 Da,                          | 5405.123535 | 2 | 525.2800293 | 525.2743691 |
| DPAIYFKEQFLDGDWATNR                | P14211  | 0          | N-term +28.03 Da, K +28.03 Da,             | 5410.340332 | 3 | 781.7199707 | 781.3865794 |
| SSALELTEEELATAEAVR                 | Q8R0Y6  | 0          | N-term +28.03 Da,                          | 5414.846191 | 3 | 649.6699829 | 649.6687526 |
| ADLPALPGGPAGGTGELAKYGLPGVAQLR      | O08600  | 0          | N-term +28.03 Da, K +28.03 Da,             | 5424.948242 | 3 | 935.5300293 | 934.855269  |
| DPAIYFKEQFLDGDWATNR                | P14211  | 0          | N-term +28.03 Da, K +28.03 Da,             | 5425.32666  | 2 | 1172.579956 | 1171.576231 |
| TGDSVVVAPAQTLNAEFQMLR              | Q8C196  | 0          | N-term +28.03 Da,                          | 5430.206055 | 2 | 1182.109985 | 1181.607205 |
| ASQQDFENALNQVKL                    | Q9WUR2  | 0          | N-term +28.03 Da, K +28.03 Da,             | 5432.873535 | 2 | 880.460022  | 880.9625129 |
| HPHVTRQSQEDQHRVNYEESMMVRLSVSKR     | Q9DB96  | 0.03312444 | N-term +28.03 Da, K +28.03 Da,             | 5438.167969 | 3 | 1241.280029 | 1240.625037 |
| DPAIYFKEQFLDGDWATNR                | P14211  | 0          | N-term +28.03 Da, K +28.03 Da,             | 5441.358398 | 3 | 781.3800049 | 781.3865794 |
| VHLTDAEKAASVSLWGKVNSEVGGGALGR      | P02088  | 0.03457447 | N-term +28.03 Da, K +28.03 Da,C +57.02 Da, | 5442.204102 | 4 | 814.4099731 | 813.922496  |
| IVVGIKLDQGGAPLAGTNKETTIGLDGLSER    | Q91Y97  | 0          | N-term +28.03 Da, K +28.03 Da,             | 5467.070313 | 3 | 1112.609985 | 1112.290872 |
| VHLTDAEKAASVSLWGKVNSEVGGGALGR      | P02088  | 0          | N-term +28.03 Da, K +28.03 Da,C +57.02 Da, | 5481.818359 | 4 | 813.9099731 | 813.922496  |
| GSPLEKLVSSVSDLPKR                  | P54869  | 0          | N-term +28.03 Da, K +28.03 Da,             | 5492.427734 | 3 | 632.7000122 | 632.710334  |
| DPAIYFKEQFLDGDWATNR                | P14211  | 0          | N-term +28.03 Da, K +28.03 Da,             | 5497.594238 | 3 | 781.3900146 | 781.3865794 |
| VLSGEDKSNKAAW                      | P01942  | 0.01621074 | N-term +28.03 Da, K +28.03 Da,             | 5505.019043 | 2 | 800.960022  | 801.4485093 |
| PMFIVNTNVPR                        | P34884  | 0          | N-term +28.03 Da,                          | 5507.396484 | 2 | 658.3700562 | 658.3631928 |
| VDGLDPAFTPATGTPVLGGLSYR            | VD61176 | 0          | N-term +28.03 Da,                          | 5512.349121 | 2 | 1166.609985 | 1166.612814 |
| NDVITVQTPAFAESVTEGDVR              | Q9D2G2  | 0          | N-term +28.03 Da,                          | 5517.71582  | 2 | 1138.069946 | 1138.573886 |
| DWVIPPINLPENSR                     | P15116  | 0          | N-term +28.03 Da,                          | 5520.925293 | 2 | 839.9500122 | 839.4515833 |
| TGEAIVDAALSALR                     | Q922R8  | 0          | N-term +28.03 Da,                          | 5531.744629 | 2 | 707.9000244 | 707.8986521 |
| ADQPIEADVTVIGSGPGGYVAAIK           | O08749  | 0          | N-term +28.03 Da, K +28.03 Da,             | 5538.003906 | 3 | 795.0900269 | 795.4284446 |
| AKFEELNMDLFR                       | P20029  | 0.01752678 | N-term +28.03 Da, K +28.03 Da,             | 5538.500977 | 2 | 784.4199829 | 784.9107051 |
| ADQPIEADVTVIGSGPGGYVAAIK           | O08749  | 0          | N-term +28.03 Da, K +28.03 Da,             | 5540.89502  | 3 | 795.4299927 | 795.4284446 |
| ADQPIEADVTVIGSGPGGYVAAIK           | O08749  | 0          | N-term +28.03 Da, K +28.03 Da,             | 5549.282227 | 2 | 1192.140015 | 1192.639029 |
| DWVIPPINLPENSR                     | P15116  | 0          | N-term +28.03 Da,                          | 5552.750977 | 2 | 839.9500122 | 839.4515833 |
| VHLTDAEKAASVSLWGKVNSEVGGGALGR      | P02088  | 0          | N-term +28.03 Da, K +28.03 Da,C +57.02 Da, | 5562.371094 | 4 | 814.1699829 | 813.922496  |

|                                     |        |            |                                            |             |   |             |             |
|-------------------------------------|--------|------------|--------------------------------------------|-------------|---|-------------|-------------|
| VHLTDAEKA AVSCLWGK VNSDEVGGEALGR    | P02088 | 0          | N-term +28.03 Da, K +28.03 Da,C +57.02 Da, | 5564.043457 | 3 | 1085.209961 | 1084.894236 |
| LTD PAPATTF AHL DATT VLSR           | P56480 | 0          | N-term +28.03 Da,                          | 5569.585938 | 2 | 1113.569946 | 1113.591881 |
| SGTT LLEALDCILPPTRPTDKPLR           | P10126 | 0          | N-term +28.03 Da, K +28.03 Da,C +57.02 Da, | 5570.286621 | 4 | 681.3800049 | 680.880839  |
| TEATSDWLNANNVPATPVAVWSPQEGQNPSLSSIR | Q8C196 | 0          | N-term +28.03 Da,                          | 5574.476563 | 3 | 1222.930054 | 1222.599206 |
| IATSPAAELSPTELTEMR                  | Q9JKF7 | 0.03778559 | N-term +28.03 Da,                          | 5576.836914 | 2 | 972.4899902 | 973.0009785 |
| EGLPPILNALEVQGR                     | P56480 | 0          | N-term +28.03 Da,                          | 5578.03125  | 2 | 817.4699707 | 817.4672334 |
| VDFAI WGA VR                        | P25688 | 0.02583026 | N-term +28.03 Da,                          | 5580.150391 | 2 | 645.8400269 | 645.8456904 |
| LSPTNC DASEPLAEKVLDLINKGR           | Q9ESB3 | 0          | N-term +28.03 Da, K +28.03 Da,C +57.02 Da, | 5580.437012 | 4 | 682.3800049 | 681.8704715 |
| AFTPATGTPVLGGLSYR                   | Q61176 | 0          | N-term +28.03 Da,                          | 5583.061523 | 2 | 868.960022  | 868.4725159 |
| TAMINWDQPAEAIHNWIR                  | Q8R0Y6 | 0          | N-term +28.03 Da,                          | 5592.966797 | 3 | 732.3699951 | 732.0335939 |
| EDVQETDTSQK DQSPASHEIATNLGDF AISLYR | P07758 | 0          | N-term +28.03 Da, K +28.03 Da,             | 5593.133789 | 3 | 1240.930054 | 1241.265781 |
| VHLTDAEKA AVSCLWGK VNSDEVGGEALGR    | P02088 | 0          | N-term +28.03 Da, K +28.03 Da,C +57.02 Da, | 5594.316406 | 4 | 814.4199829 | 813.922496  |
| EDVQETDTSQK DQSPASHEIATNLGDF AISLYR | P07758 | 0          | N-term +28.03 Da, K +28.03 Da,             | 5596.39502  | 4 | 931.2000122 | 931.2011552 |
| VLLESEQFLTELTR                      | P16254 | 0          | N-term +28.03 Da,                          | 5596.556641 | 2 | 853.4717407 | 853.4721819 |
| ASGTT LLEALDCILPPTRPTDKPLR          | P10126 | 0.00869565 | N-term +28.03 Da, K +28.03 Da,C +57.02 Da, | 5601.053711 | 4 | 698.8900146 | 698.6401176 |
| DP AIYFKEQFLDGD AW TN R             | P14211 | 0          | N-term +28.03 Da, K +28.03 Da,             | 5603.819824 | 2 | 1171.579956 | 1171.576231 |
| DP AIYFKEQFLDGD AW TN R             | P14211 | 0          | N-term +28.03 Da, K +28.03 Da,             | 5603.981934 | 3 | 781.3800049 | 781.3865794 |
| VLLESEQFLTELTR                      | P16254 | 0          | N-term +28.03 Da,                          | 5608.623047 | 3 | 569.3200073 | 569.3172135 |
| TSACFEP SLDY MVT KIP R              | Q8C196 | 0.01165254 | N-term +28.03 Da, K +28.03 Da,C +57.02 Da, | 5611.02002  | 2 | 1085.540039 | 1086.047406 |
| FTP SLDSDFTFLPAGR                   | Q9CXE7 | 0          | N-term +28.03 Da,                          | 5611.507324 | 2 | 951.4899902 | 950.477996  |
| LSPTNC DASEPLAEKVLDLINKGR           | Q9ESB3 | 0.0267035  | N-term +28.03 Da, K +28.03 Da,C +57.02 Da, | 5613.472168 | 4 | 682.3699951 | 681.8704715 |
| MQIFVKLT LGKTITILEVPSDTIENVKAK      | POCG49 | 0.00118624 | N-term +28.03 Da, K +28.03 Da,             | 5618.059082 | 4 | 844.2399902 | 844.2371225 |
| SASSALEL TEELATAE AV R              | Q8R0Y6 | 0          | N-term +28.03 Da,                          | 5618.387207 | 3 | 702.3599854 | 702.358467  |
| DP AIYFKEQFLDGD AW TN R             | P14211 | 0          | N-term +28.03 Da, K +28.03 Da,             | 5621.773438 | 2 | 1172.589966 | 1171.576231 |
| VLLESEQFLTELTR                      | P16254 | 0          | N-term +28.03 Da,                          | 5628.699707 | 2 | 853.4699707 | 853.4721819 |
| SASGTT LLEALDCILPPTRPTDKPLR         | P10126 | 0          | N-term +28.03 Da, K +28.03 Da,C +57.02 Da, | 5630.688477 | 4 | 720.9000244 | 720.3981248 |
| EDVDGEALSTLV LNR                    | P63038 | 0          | N-term +28.03 Da,                          | 5635.786621 | 2 | 829.9199829 | 829.9334213 |
| DP AIYFKEQFLDGD AW TN R             | P14211 | 0          | N-term +28.03 Da, K +28.03 Da,             | 5636.427734 | 3 | 781.7199707 | 781.3865794 |
| GPPPIQDGEFTFLLPAGR                  | Q3V009 | 0          | N-term +28.03 Da,                          | 5644.36084  | 2 | 970.5200195 | 970.5174551 |
| DLPALPGGPAGGTGELAKYGLPGVAQLR        | O08600 | 0          | N-term +28.03 Da, K +28.03 Da,             | 5645.695313 | 3 | 911.5100098 | 911.1762309 |
| GPPPIQDGEFTFLLPAGR                  | Q3V009 | 0          | N-term +28.03 Da,                          | 5647.021973 | 3 | 647.6799927 | 647.3473956 |
| GPPPIQDGEFTFLLPAGR                  | Q3V009 | 0          | N-term +28.03 Da,                          | 5648.123047 | 3 | 647.3499756 | 647.3473956 |
| CFEP SLDY MVT KIP R                 | Q8C196 | 0          | N-term +28.03 Da, K +28.03 Da,C +57.02 Da, | 5651.130371 | 2 | 956.4899902 | 956.4889943 |
| DP AIYFKEQFLDGD AW TN R             | P14211 | 0          | N-term +28.03 Da, K +28.03 Da,             | 5653.46875  | 2 | 1172.079956 | 1171.576231 |
| VHLTDAEKA AVSCLWGK VNSDEVGGEALGR    | P02088 | 0          | N-term +28.03 Da, K +28.03 Da,C +57.02 Da, | 5659.011719 | 3 | 1085.560059 | 1084.894236 |
| DVVGSLWFDHIR                        | O35403 | 0          | N-term +28.03 Da,                          | 5661.069824 | 2 | 737.4000244 | 736.388254  |
| VHLTDAEKA AVSCLWGK VNSDEVGGEALGR    | P02088 | 0          | N-term +28.03 Da, K +28.03 Da,C +57.02 Da, | 5663.32666  | 4 | 814.1599731 | 813.922496  |
| DP AIYFKEQFLDGD AW TN R             | P14211 | 0          | N-term +28.03 Da, K +28.03 Da,             | 5667.726074 | 3 | 781.387146  | 781.3865794 |
| FTPATGTPVLGGLSYR                    | Q61176 | 0          | N-term +28.03 Da,                          | 5672.534668 | 2 | 832.9383545 | 832.9539588 |
| PMFIVNTNVPR                         | P34884 | 0          | N-term +28.03 Da,                          | 5677.344727 | 2 | 657.8699951 | 658.3631928 |

|                                      |        |            |                                            |             |   |             |             |
|--------------------------------------|--------|------------|--------------------------------------------|-------------|---|-------------|-------------|
| ASQQDFENALNQVKLL                     | Q9WUR2 | 0          | N-term +28.03 Da, K +28.03 Da,             | 5684.169922 | 3 | 625.6699829 | 625.3387889 |
| ASQQDFENALNQVKLL                     | Q9WUR2 | 0          | N-term +28.03 Da, K +28.03 Da,             | 5690.071777 | 2 | 938.0100098 | 937.5045451 |
| GLELYDLMSQPCR                        | G3UX05 | 0          | N-term +28.03 Da, C +57.02 Da,             | 5701.687988 | 2 | 862.4299927 | 861.9313121 |
| IMNVIGEPIDER                         | P56480 | 0          | N-term +28.03 Da,                          | 5702.819336 | 2 | 707.3699951 | 707.3739554 |
| LAFVDVPNDSSFQIVKNPR                  | Q61176 | 0.00231481 | N-term +28.03 Da, K +28.03 Da,             | 5703.235352 | 2 | 1102.099976 | 1101.599508 |
| PMFIVNTNVPR                          | P34884 | 0          | N-term +28.03 Da,                          | 5709.190918 | 2 | 657.8690796 | 658.3631928 |
| DLDAVAVLVGSMR                        | P14152 | 0          | N-term +28.03 Da,                          | 5729.398438 | 2 | 701.3900146 | 700.384323  |
| TFVQENVYDEFVER                       | P47738 | 0          | N-term +28.03 Da,                          | 5732.637695 | 2 | 901.4299927 | 901.9334213 |
| PMFIVNTNVPR                          | P34884 | 0          | N-term +28.03 Da,                          | 5740.355957 | 2 | 657.8699951 | 658.3631928 |
| PFVELETNLPASR                        | O35215 | 0          | N-term +28.03 Da,                          | 5747.200195 | 2 | 751.9173584 | 750.9064771 |
| VHLTDAEKSAVSLWAKVNPDEVGGALGR         | P02089 | 0.02184236 | N-term +28.03 Da, K +28.03 Da,C +57.02 Da, | 5752.310059 | 3 | 1098.219971 | 1098.238002 |
| VHLTDAEKSAVSLWAKVNPDEVGGALGR         | P02089 | 0          | N-term +28.03 Da, K +28.03 Da,C +57.02 Da, | 5757.258301 | 4 | 824.4199829 | 823.930321  |
| VHLTDAEKAAVSLWGKVN                   | P02088 | 0          | N-term +28.03 Da, K +28.03 Da,C +57.02 Da, | 5758.88916  | 3 | 728.0599976 | 728.0611497 |
| LIKAAIGDTLVQDIR                      | Q9CXN7 | 0          | N-term +28.03 Da, K +28.03 Da,             | 5774.96582  | 2 | 842         | 841.5141836 |
| SSWWTHVEMGPPDPILGVTEAFKR             | P05202 | 0          | N-term +28.03 Da, K +28.03 Da,             | 5782.642578 | 4 | 700.3699951 | 699.8599064 |
| CGKQGFIDLPEFPFGLPR                   | O35490 | 0          | N-term +28.03 Da, K +28.03 Da,C +57.02 Da, | 5787.22998  | 3 | 755.7299805 | 755.0575167 |
| LYSSDDVIELTPSNFNR                    | Q922R8 | 0          | N-term +28.03 Da,                          | 5793.668945 | 2 | 1043        | 1043.01039  |
| TGLGGYPEALDTPAYKQILTMANPIINGGAPDPTAR | Q8C196 | 0.01437372 | N-term +28.03 Da, K +28.03 Da,             | 5798.114746 | 3 | 1287.329956 | 1286.66293  |
| MPMFIVNTNVPR                         | P34884 | 0          | N-term +28.03 Da,                          | 5799.904297 | 2 | 723.3900146 | 723.8834353 |
| VHLTDAEKAAVSLWGKVNSEVGGALGR          | P02088 | 0.01604814 | N-term +28.03 Da, K +28.03 Da,C +57.02 Da, | 5800.488281 | 4 | 814.1699829 | 813.922496  |
| EGEPEVTDQLEWQSNQPWEQALNR             | P08226 | 0          | N-term +28.03 Da,                          | 5803.000488 | 3 | 970.789978  | 971.1212917 |
| DPAIYFKEQFLDGDWNTNR                  | P14211 | 0          | N-term +28.03 Da, K +28.03 Da,             | 5807.20459  | 3 | 781.3900146 | 781.3865794 |
| EGEPEVTDQLEWQSNQPWEQALNR             | P08226 | 0          | N-term +28.03 Da,                          | 5808.520996 | 2 | 1455.680054 | 1456.178299 |
| VHLTDAEKAAVSLWGKVNSEVGGALGR          | P02088 | 0.00867679 | N-term +28.03 Da, K +28.03 Da,C +57.02 Da, | 5810.927734 | 3 | 1085.550049 | 1084.894236 |
| VYDLTKFLEEHPGGEEVLR                  | P56395 | 0          | N-term +28.03 Da, K +28.03 Da,             | 5818.905273 | 3 | 763.7299805 | 763.0704798 |
| VLAELYVSDR                           | Q8BP47 | 0.01619433 | N-term +28.03 Da,                          | 5824.147949 | 2 | 596.3200073 | 596.8322488 |
| GGLLLGDEAPNFEANTTIGR                 | O08709 | 0.0116649  | N-term +28.03 Da,                          | 5828.14209  | 2 | 1037.52002  | 1037.034199 |
| MLSLDFLDDVR                          | Q9R0P6 | 0          | N-term +28.03 Da,                          | 5828.217773 | 2 | 676.3499756 | 676.3499488 |
| LLCGVVQGLR                           | Q8VBT2 | 0.0045045  | N-term +28.03 Da, C +57.02 Da,             | 5831.783203 | 2 | 572.3300171 | 571.8393532 |
| LDPGVVDNFPLLKALR                     | P30115 | 0          | N-term +28.03 Da, K +28.03 Da,             | 5840.441406 | 3 | 608.7000122 | 608.3644976 |
| TTLLEALDCILPPTRPDKPLR                | P10126 | 0          | N-term +28.03 Da, K +28.03 Da,C +57.02 Da, | 5843.241699 | 4 | 645.3699951 | 644.8674657 |
| VNPTVFFDITADDEPLGR                   | P17742 | 0          | N-term +28.03 Da,                          | 5858.166504 | 2 | 1018.01001  | 1017.512568 |
| VNPTVFFDITADDEPLGR                   | P17742 | 0          | N-term +28.03 Da,                          | 5870.233887 | 3 | 678.6799927 | 678.6774706 |
| APPVPGAVSGGSGEVDELFDVKNAF            | O89079 | 0          | N-term +28.03 Da, K +28.03 Da,             | 5872.472656 | 3 | 839.0900269 | 839.0953543 |
| VHLTDAEKAAVSLWGKVNSEVGGALGR          | P02088 | 0          | N-term +28.03 Da, K +28.03 Da,C +57.02 Da, | 5874.236816 | 4 | 813.9199829 | 813.922496  |
| VNPTVFFDITADDEPLGR                   | P17742 | 0          | N-term +28.03 Da,                          | 5876.554688 | 2 | 1017.512512 | 1017.512568 |
| ELLEVVNKNFDRPGVIVR                   | Q91X83 | 0          | N-term +28.03 Da, K +28.03 Da,             | 5878.272461 | 3 | 756.4400024 | 756.1142423 |
| APPVPGAVSGGSGEVDELFDVKNAF            | O89079 | 0          | N-term +28.03 Da, K +28.03 Da,             | 5878.552734 | 2 | 1258.640015 | 1258.139393 |
| VLGTSVESIMATEDR                      | Q8C196 | 0          | N-term +28.03 Da,                          | 5879.821289 | 2 | 819.4299927 | 818.4165497 |
| LPTLEQPIIPSDYVAIKAPM                 | Q8C196 | 0          | N-term +28.03 Da, K +28.03 Da,             | 5880.207031 | 3 | 751.4224243 | 751.4252062 |

|                                |        |            |                                            |             |   |             |             |
|--------------------------------|--------|------------|--------------------------------------------|-------------|---|-------------|-------------|
| TEGAELVDSVLDVVR                | P68372 | 0          | N-term +28.03 Da,                          | 5884.969727 | 2 | 815.4400024 | 815.4383393 |
| TPDCGKQGFIDLPEFPFGLLEPR        | O35490 | 0          | N-term +28.03 Da, K +28.03 Da,C +57.02 Da, | 5891.933594 | 3 | 859.4299927 | 859.4333126 |
| VNPTVFFDITADDEPLGR             | P17742 | 0          | N-term +28.03 Da,                          | 5901.921875 | 3 | 678.6777344 | 678.6774706 |
| APPVPGAVSGGSGEVDELFDVKNFA      | O89079 | 0          | N-term +28.03 Da, K +28.03 Da,             | 5906.006836 | 3 | 839.4299927 | 839.0953543 |
| VNPTVFFDITADDEPLGR             | P17742 | 0          | N-term +28.03 Da,                          | 5908.79541  | 2 | 1017.512329 | 1017.512568 |
| DLPEFPFGLLEPR                  | O35490 | 0          | N-term +28.03 Da,                          | 5934.807129 | 2 | 722.8793335 | 722.877188  |
| VHLTDAEKAASVSLWGKVNSEVGGGEALGR | P02088 | 0          | N-term +28.03 Da, K +28.03 Da,C +57.02 Da, | 5936.521973 | 4 | 813.6699829 | 813.922496  |
| VNPTVFFDITADDEPLGR             | P17742 | 0          | N-term +28.03 Da,                          | 5939.994141 | 2 | 1017.51001  | 1017.512568 |
| VHLTDAEKAASVSLWGKVNSEVGGGEALGR | P02088 | 0          | N-term +28.03 Da, K +28.03 Da,C +57.02 Da, | 5943.333984 | 3 | 1084.890015 | 1084.894236 |
| ADLPALPGGPGAGGTGELAKYGLPGVAQLR | O08600 | 0          | N-term +28.03 Da, K +28.03 Da,             | 5947.092773 | 3 | 934.8499756 | 934.855269  |
| VLELYDLLSQPCR                  | Q64471 | 0          | N-term +28.03 Da, C +57.02 Da,             | 5951.11084  | 2 | 873.9799805 | 873.9765769 |
| VLELYDLLSQPCR                  | Q64471 | 0          | N-term +28.03 Da, C +57.02 Da,             | 5951.304688 | 3 | 582.9899902 | 582.9868101 |
| DLSGTLESIPDKLKEFGNTLEDKAR      | P34928 | 0          | N-term +28.03 Da, K +28.03 Da,             | 5954.916992 | 4 | 723.4000244 | 722.8958439 |
| VPILLTEQYPEGLGPTVPELGAQGIR     | P85094 | 0          | N-term +28.03 Da,                          | 5966.703125 | 3 | 926.1799927 | 925.8478916 |
| ETADAIKSEVKK                   | Q60870 | 0.03755459 | N-term +28.03 Da, K +28.03 Da,             | 5974.135254 | 2 | 716.4400024 | 715.9268782 |
| VHLTDAEKAASVSLWGKVNSEVGGGEALGR | P02088 | 0          | N-term +28.03 Da, K +28.03 Da,C +57.02 Da, | 5974.370605 | 3 | 1084.890015 | 1084.894236 |
| VLELYDLLSQPCR                  | Q64471 | 0          | N-term +28.03 Da, C +57.02 Da,             | 5984.416016 | 2 | 874.9699707 | 873.9765769 |
| VNPTVFFDITADDEPLGR             | P17742 | 0          | N-term +28.03 Da,                          | 5988.331055 | 2 | 1017.51001  | 1017.512568 |
| ELDPGVVDNFPLLKALR              | P30115 | 0          | N-term +28.03 Da, K +28.03 Da,             | 6004.744141 | 3 | 651.3800049 | 651.3786957 |
| AEKEEENRRLEEKRR                | Q62418 | 0.04676871 | N-term +28.03 Da, K +28.03 Da,             | 6007.623047 | 2 | 1028.560059 | 1028.566531 |
| VHLTDAEKSAVSLWAKVNPDEVGGGEALGR | P02089 | 0          | N-term +28.03 Da, K +28.03 Da,C +57.02 Da, | 6018.162109 | 4 | 823.9299927 | 823.930321  |
| LLLPGEALAK                     | P10853 | 0.01345756 | N-term +28.03 Da, K +28.03 Da,             | 6021.191406 | 2 | 504.8299866 | 505.3364378 |
| VHLTDAEKSAVSLWAKVNPDEVGGGEALGR | P02089 | 0.03836094 | N-term +28.03 Da, K +28.03 Da,C +57.02 Da, | 6025.811035 | 3 | 1098.569946 | 1098.238002 |
| GLELYDLLSQPSR                  | Q61133 | 0          | N-term +28.03 Da,                          | 6032.084473 | 2 | 816.4500122 | 816.4537918 |
| PEFVVDCKR                      | Q571H0 | 0          | N-term +28.03 Da, K +28.03 Da,C +57.02 Da, | 6034.200195 | 2 | 603.3099976 | 603.3209937 |
| SLLDLVVFGR                     | Q8K2B3 | 0          | N-term +28.03 Da,                          | 6035.180176 | 2 | 573.8499756 | 573.8477014 |
| AEPGASVQRLRPVLR                | M0QWY1 | 0.01762977 | N-term +28.03 Da,                          | 6036.404297 | 2 | 838.9998779 | 838.999566  |
| TATFAQALQSVPETQVSILDNGLR       | Q9CZ13 | 0.02443609 | N-term +28.03 Da,                          | 6039.790039 | 3 | 863.789978  | 863.1290581 |
| DKKPWREAEK                     | P70194 | 0.04970514 | N-term +28.03 Da, K +28.03 Da,             | 6044.256836 | 2 | 699.4085693 | 699.9088221 |
| DGAAALVLMTAEAAQR               | Q8QZT1 | 0.03618711 | N-term +28.03 Da,                          | 6047.033203 | 2 | 808.4400024 | 808.4272512 |
| VHLTDAEKSAVSLWAKVNPDEVGGGEALGR | P02089 | 0          | N-term +28.03 Da, K +28.03 Da,C +57.02 Da, | 6049.22998  | 4 | 823.6799927 | 823.930321  |
| DVDFEAIWGAVR                   | P25688 | 0          | N-term +28.03 Da,                          | 6050.145996 | 2 | 703.3599854 | 703.3591624 |
| HVEELDPGVVDNFPLLKALR           | P30115 | 0          | N-term +28.03 Da, K +28.03 Da,             | 6056.844238 | 3 | 773.7600098 | 773.1020026 |
| SFDVDGLDPAFTPATGTPVLGGLSYR     | Q61176 | 0.01684836 | N-term +28.03 Da,                          | 6061.005371 | 2 | 1341.160034 | 1341.176507 |
| APSPLYSEVFSEEPFGVIVR           | P70699 | 0          | N-term +28.03 Da,                          | 6064.086426 | 2 | 1126.089966 | 1126.0859   |
| VEELDPGVVDNFPLLKALR            | P30115 | 0          | N-term +28.03 Da, K +28.03 Da,             | 6070.452148 | 3 | 727.75      | 727.4156985 |
| TATFAQALQSVPETQVSILDNGLR       | Q9CZ13 | 0          | N-term +28.03 Da,                          | 6072.724609 | 3 | 863.789978  | 863.1290581 |
| PGGILLGDEAPNFEANTTIGR          | O08709 | 0          | N-term +28.03 Da,                          | 6073.441406 | 3 | 724.3699951 | 724.0428127 |
| TATFAQALQSVPETQVSILDNGLR       | Q9CZ13 | 0          | N-term +28.03 Da,                          | 6085.052246 | 2 | 1295.199951 | 1294.189949 |
| PGGILLGDEAPNFEANTTIGR          | O08709 | 0          | N-term +28.03 Da,                          | 6086.824219 | 2 | 1085.54248  | 1085.560581 |

|                             |        |            |                                            |             |   |             |             |
|-----------------------------|--------|------------|--------------------------------------------|-------------|---|-------------|-------------|
| TATFAQALQSVPETQVSILDNGLR    | Q9CZ13 | 0          | N-term +28.03 Da,                          | 6087.213379 | 2 | 1294.189941 | 1294.189949 |
| APPVPGAVSGGSGEVDLFDVKNAPF   | O89079 | 0          | N-term +28.03 Da, K +28.03 Da,             | 6095.125    | 3 | 893.4400024 | 893.4497974 |
| SLAPGHVADFLVADFR            | P97328 | 0          | N-term +28.03 Da,                          | 6100.592773 | 2 | 871.4500122 | 871.9648579 |
| LITLEQGTKLADAEGDVFR         | Q9EQ20 | 0          | N-term +28.03 Da, K +28.03 Da,             | 6103.268555 | 3 | 711.3900146 | 711.3914418 |
| TATFAQALQSVPETQVSILDNGLR    | Q9CZ13 | 0          | N-term +28.03 Da,                          | 6104.649414 | 3 | 863.7999878 | 863.1290581 |
| PGLLLLGDEAPNFEANTTIGR       | O08709 | 0          | N-term +28.03 Da,                          | 6104.802734 | 3 | 724.7000122 | 724.0428127 |
| PGLLLLGDEAPNFEANTTIGR       | O08709 | 0          | N-term +28.03 Da,                          | 6128.00293  | 2 | 1085.540039 | 1085.560581 |
| ASQQDFENALNQVKLL            | Q9WUR2 | 0          | N-term +28.03 Da, K +28.03 Da,             | 6138.583984 | 2 | 937.5       | 937.5045451 |
| IDLPEFPFGLLEPR              | O35490 | 0.00451467 | N-term +28.03 Da,                          | 6140.744629 | 2 | 779.9199829 | 779.4192202 |
| PGLLLLGDEAPNFEANTTIGR       | O08709 | 0          | N-term +28.03 Da,                          | 6158.886719 | 2 | 1085.540039 | 1085.560581 |
| DFPCDQNSINPYLK              | Q3UQV5 | 0.02823315 | N-term +28.03 Da, K +28.03 Da,C +57.02 Da, | 6161.937012 | 2 | 826.9099731 | 826.9030776 |
| IDLPEFPFGLLEPR              | O35490 | 0.01612903 | N-term +28.03 Da,                          | 6173.154785 | 2 | 779.9199829 | 779.4192202 |
| LSPTNCDASEPLAEKVLDLINKGR    | Q9ESB3 | 0.0011976  | N-term +28.03 Da, K +28.03 Da,C +57.02 Da, | 6177.529785 | 3 | 908.4899902 | 908.8248698 |
| MILLEVNNR                   | Q9CVB6 | 0.00873362 | N-term +28.03 Da,                          | 6181.365723 | 2 | 564.8200073 | 565.3235362 |
| DGLDPAFTPATGTPVLGGLSYR      | Q61176 | 0          | N-term +28.03 Da,                          | 6192.333984 | 2 | 1117.560059 | 1117.078606 |
| SFDVDGLDPAFTPATGTPVLGGLSYR  | Q61176 | 0          | N-term +28.03 Da,                          | 6192.533203 | 3 | 894.789978  | 894.4534304 |
| SFDVDGLDPAFTPATGTPVLGGLSYR  | Q61176 | 0          | N-term +28.03 Da,                          | 6194.357422 | 2 | 1341.670044 | 1341.176507 |
| LLKDFSATDLTEFAAR            | Q8BWT1 | 0          | N-term +28.03 Da, K +28.03 Da,             | 6202.638184 | 2 | 928.4899902 | 927.5040136 |
| EVEDLIKAAIGDTLVQDIR         | Q9CXN7 | 0          | N-term +28.03 Da, K +28.03 Da,             | 6218.148438 | 3 | 718.7399902 | 718.7387302 |
| SMEDALKAADTIGYPVMIR         | Q8C196 | 0          | N-term +28.03 Da, K +28.03 Da,             | 6241.644043 | 2 | 1069.040039 | 1069.055231 |
| LETEKDYVFDKRLR              | Q9D5D8 | 0.00864865 | N-term +28.03 Da, K +28.03 Da,             | 6244.032715 | 3 | 633.0300293 | 632.6911623 |
| SEAAADREDDPNFFKMVEGFFDR     | P26443 | 0          | N-term +28.03 Da, K +28.03 Da,             | 6253.942383 | 4 | 688.5700073 | 688.0695253 |
| PAWEAPEGVPIDAIFGGR          | Q8BH04 | 0          | N-term +28.03 Da,                          | 6256.239746 | 2 | 1012.02002  | 1012.036012 |
| SEAAADREDDPNFFKMVEGFFDR     | P26443 | 0          | N-term +28.03 Da, K +28.03 Da,             | 6257.748047 | 4 | 688.0700073 | 688.0695253 |
| SSWVTHVEMGPPDPILGVTEAFKR    | P05202 | 0          | N-term +28.03 Da, K +28.03 Da,             | 6264.073242 | 3 | 932.4699707 | 932.8107831 |
| TLGVDFIDVATKVM              | Q8C196 | 0          | N-term +28.03 Da, K +28.03 Da,             | 6266.6875   | 2 | 782.9366455 | 782.9363887 |
| SSWVTHVEMGPPDPILGVTEAFKR    | P05202 | 0          | N-term +28.03 Da, K +28.03 Da,             | 6272.561035 | 4 | 699.6099854 | 699.8599064 |
| SEAAADREDDPNFFKMVEGFFDR     | P26443 | 0          | N-term +28.03 Da, K +28.03 Da,             | 6287.313477 | 3 | 917.0905151 | 917.0902749 |
| SEAAADREDDPNFFKMVEGFFDR     | P26443 | 0          | N-term +28.03 Da, K +28.03 Da,             | 6289.995117 | 4 | 688.0693359 | 688.0695253 |
| SSWVTHVEMGPPDPILGVTEAFKR    | P05202 | 0          | N-term +28.03 Da, K +28.03 Da,             | 6297.102539 | 3 | 932.8099976 | 932.8107831 |
| IMFGVPSVIVSR                | Q8VCC2 | 0          | N-term +28.03 Da,                          | 6301.477051 | 2 | 666.3900146 | 666.8890434 |
| TLGVDFIDVATKVMIGESIDEKR     | Q8C196 | 0          | N-term +28.03 Da, K +28.03 Da,             | 6318.648438 | 4 | 656.1099854 | 655.8621149 |
| MQLSQQLDLFPECR              | Q8QZZ7 | 0          | N-term +28.03 Da, C +57.02 Da,             | 6339.657227 | 2 | 896.4400024 | 896.9396686 |
| IFVEESVYDEFVKR              | P24549 | 0          | N-term +28.03 Da, K +28.03 Da,             | 6340.64502  | 2 | 908.4699707 | 908.480007  |
| AKVAVLGASGGIGQPLSLLKNSPLVSR | P08249 | 0          | N-term +28.03 Da, K +28.03 Da,             | 6354.76416  | 3 | 943.5800171 | 943.9144589 |
| LDPFTPATGTPVLGGLSYR         | Q61176 | 0          | N-term +28.03 Da,                          | 6370.429199 | 2 | 1031.040039 | 1031.054402 |
| SEAAADREDDPNFFKMVEGFFDR     | P26443 | 0.00119474 | N-term +28.03 Da, K +28.03 Da,             | 6377.986328 | 4 | 688.0700073 | 688.0695253 |
| SASGTTLLEALDCILPPTRPDKPLR   | P10126 | 0          | N-term +28.03 Da, K +28.03 Da,C +57.02 Da, | 6387.037598 | 3 | 960.1799927 | 960.1950743 |
| APLPGTLLDDIVAAGGKEQNLALQR   | Q8VCW8 | 0          | N-term +28.03 Da, K +28.03 Da,             | 6391.462891 | 4 | 683.4000244 | 683.1444586 |
| SGTTLLEALDCILPPTRPDKPLR     | P10126 | 0          | N-term +28.03 Da, K +28.03 Da,C +57.02 Da, | 6392.202637 | 3 | 907.8300171 | 907.5053599 |

|                               |        |            |                                            |             |   |             |             |
|-------------------------------|--------|------------|--------------------------------------------|-------------|---|-------------|-------------|
| APLPGTLLDDIVAAGGKEQNLAQLR     | Q8VCW8 | 0          | N-term +28.03 Da, K +28.03 Da,             | 6394.782715 | 3 | 911.1900024 | 910.5235193 |
| SEAAADREDDPNFFKMVEGFFDR       | P26443 | 0          | N-term +28.03 Da, K +28.03 Da,             | 6416.851563 | 4 | 688.3200073 | 688.0695253 |
| FAVESMEDALKAADTIGYPVMIR       | Q8C196 | 0          | N-term +28.03 Da, K +28.03 Da,             | 6422.152832 | 3 | 862.1099854 | 861.7780916 |
| SPVVVEEASQSLLFVDIPSKIICR      | Q64374 | 0          | N-term +28.03 Da, K +28.03 Da,C +57.02 Da, | 6448.719727 | 3 | 911.4899902 | 910.8226888 |
| DPAIYFKEQFLDGDAWTNR           | P14211 | 0          | N-term +28.03 Da, K +28.03 Da,             | 6452.458008 | 3 | 782.039978  | 781.3865794 |
| DYEPIDATGFININSLR             | P16460 | 0          | N-term +28.03 Da,                          | 6469.80957  | 2 | 984.4899902 | 983.4994601 |
| DMPDGTFLVR                    | Q64143 | 0.00231214 | N-term +28.03 Da,                          | 6475.971191 | 2 | 589.7999878 | 589.7973516 |
| GTTLLEALDCILPPTRPDKPLR        | P10126 | 0          | N-term +28.03 Da, K +28.03 Da,C +57.02 Da, | 6477.552734 | 3 | 878.4799805 | 878.4946835 |
| EHNQRLDEEILALR                | Q8BVF4 | 0.03822763 | N-term +28.03 Da,                          | 6479.575195 | 2 | 882.4699707 | 882.4735789 |
| VHLTDAEKAASVCLWGKVNSEVGGALGR  | P02088 | 0          | N-term +28.03 Da, K +28.03 Da,C +57.02 Da, | 6480.993164 | 3 | 1084.540039 | 1084.894236 |
| MKLPIFIADAFTATAFR             | Q9CXN7 | 0          | N-term +28.03 Da, K +28.03 Da,             | 6484.416504 | 3 | 657.039978  | 657.0375046 |
| VHLTDAEKAASVCLWGKVNSEVGGALGR  | P02088 | 0          | N-term +28.03 Da, K +28.03 Da,C +57.02 Da, | 6488.089844 | 4 | 813.6599731 | 813.922496  |
| FIDLPEFPFGLLEPR               | O35490 | 0          | N-term +28.03 Da,                          | 6490.566406 | 2 | 852.9500122 | 852.9534273 |
| GKQGFIDLPEFPFGLLEPR           | O35490 | 0          | N-term +28.03 Da, K +28.03 Da,             | 6514.219238 | 2 | 1052.052124 | 1052.067312 |
| GKQGFIDLPEFPFGLLEPR           | O35490 | 0          | N-term +28.03 Da, K +28.03 Da,             | 6515.976563 | 3 | 702.039978  | 701.713967  |
| LLAAAGVEFEEKFLKTR             | P30115 | 0          | N-term +28.03 Da, K +28.03 Da,             | 6531.172852 | 3 | 669.7199707 | 669.3943457 |
| KQGFIDLPEFPFGLLEPR            | O35490 | 0          | N-term +28.03 Da, K +28.03 Da,             | 6542.802734 | 3 | 683.0300293 | 682.7068123 |
| VLDELTLRADLEMQIENLR           | Q9Z2K1 | 0.01756098 | N-term +28.03 Da,                          | 6544.061523 | 3 | 796.0800171 | 796.0930675 |
| KQGFIDLPEFPFGLLEPR            | O35490 | 0          | N-term +28.03 Da, K +28.03 Da,             | 6549.802734 | 2 | 1023.539978 | 1023.55658  |
| DCGKQGFIDLPEFPFGLLEPR         | O35490 | 0          | N-term +28.03 Da, K +28.03 Da,C +57.02 Da, | 6568.67627  | 2 | 1190.079956 | 1189.596109 |
| AGAVAMLIQPKAPLVLEQGLR         | P54869 | 0          | N-term +28.03 Da, K +28.03 Da,             | 6573.916992 | 3 | 720.7600098 | 720.7694182 |
| DCGKQGFIDLPEFPFGLLEPR         | O35490 | 0          | N-term +28.03 Da, K +28.03 Da,C +57.02 Da, | 6581.211426 | 2 | 1190.589966 | 1189.596109 |
| DEVGVDVAQHVAEDLKGAFGER        | Q8BMS1 | 0          | N-term +28.03 Da, K +28.03 Da,             | 6585.078125 | 3 | 800.4000244 | 799.7396818 |
| AVWPTLVLDINSLDSLTEAYKLR       | Q9R0H0 | 0          | N-term +28.03 Da, K +28.03 Da,             | 6595.557129 | 3 | 854.1400146 | 854.1388941 |
| APPSVFAQVPQAPPVLVFKL          | P05201 | 0          | N-term +28.03 Da, K +28.03 Da,             | 6599.643555 | 3 | 721.097168  | 721.0976406 |
| APPSVFAQVPQAPPVLVFKL          | P05201 | 0          | N-term +28.03 Da, K +28.03 Da,             | 6605.905762 | 2 | 1081.140015 | 1081.142823 |
| LYHVEELDPGVVDNFPLLK           | P30115 | 0          | N-term +28.03 Da, K +28.03 Da,             | 6613.319824 | 3 | 752.4000244 | 751.7437038 |
| SPVLLDFEDELSELYR              | Q9ESB3 | 0          | N-term +28.03 Da,                          | 6613.893555 | 2 | 929.460022  | 929.4670969 |
| APPSVFAQVPQAPPVLVFKL          | P05201 | 0          | N-term +28.03 Da, K +28.03 Da,             | 6628.697266 | 3 | 721.0999756 | 721.0976406 |
| VHLTDAEKSASVCLWAKVNPDEVGGALGR | P02089 | 0.01150628 | N-term +28.03 Da, K +28.03 Da,C +57.02 Da, | 6646.541992 | 3 | 1097.890015 | 1098.238002 |
| GVDLLADAVAVTMGPKGR            | P63038 | 0          | N-term +28.03 Da, K +28.03 Da,             | 6650.413574 | 2 | 914         | 913.513858  |
| VHLTDAEKAASVCLWGKVNSEVGGALGR  | P02088 | 0          | N-term +28.03 Da, K +28.03 Da,C +57.02 Da, | 6660.456055 | 3 | 1084.880005 | 1084.894236 |
| VHLTDAEKAASVCLWGKVNSEVGGALGR  | P02088 | 0          | N-term +28.03 Da, K +28.03 Da,C +57.02 Da, | 6667.387207 | 4 | 813.6599731 | 813.922496  |
| KGEFQILLDALDKIK               | P16015 | 0.021093   | N-term +28.03 Da, K +28.03 Da,             | 6672.619629 | 3 | 615.039978  | 615.0482867 |
| TATFAQALQSVPETQVSILDNGLR      | Q9CZ13 | 0          | N-term +28.03 Da,                          | 6672.907227 | 2 | 1293.689941 | 1294.189949 |
| TATFAQALQSVPETQVSILDNGLR      | Q9CZ13 | 0          | N-term +28.03 Da,                          | 6683.04541  | 2 | 1294.680054 | 1294.189949 |
| GFIDLPEFPFGLLEPR              | O35490 | 0.01624365 | N-term +28.03 Da,                          | 6696.714844 | 2 | 881.960022  | 881.4641594 |
| GFIDLPEFPFGLLEPR              | O35490 | 0          | N-term +28.03 Da,                          | 6711.401855 | 2 | 881.4699707 | 881.4641594 |
| MKIAVIGQSLFGQEVYCQLR          | Q8R0Y6 | 0          | N-term +28.03 Da, K +28.03 Da,C +57.02 Da, | 6712.607422 | 3 | 799.0999756 | 799.4324778 |
| DLTDYLMKILTER                 | P60710 | 0          | N-term +28.03 Da, K +28.03 Da,             | 6734.436523 | 2 | 833.4500122 | 833.9578528 |



|                         |        |            |                                |             |   |             |             |
|-------------------------|--------|------------|--------------------------------|-------------|---|-------------|-------------|
| EELDPGVVDNFPLLKALR      | P30115 | 0          | N-term +28.03 Da, K +28.03 Da, | 6793.021973 | 2 | 1042.069946 | 1041.085702 |
| VDLLADAVAVTMGPKGR       | P63038 | 0          | N-term +28.03 Da, K +28.03 Da, | 6813.584473 | 2 | 884.9859009 | 885.003126  |
| RFEAGEALRTLRLGLQR       | Q8CHW5 | 0.01432958 | N-term +28.03 Da,              | 6823.499512 | 3 | 634.6900024 | 634.3657833 |
| VESMEDALKAADTIGYPMIR    | Q8C196 | 0          | N-term +28.03 Da, K +28.03 Da, | 6825.625    | 2 | 1183.589966 | 1183.110735 |
| SEAAADREDDPNFFKMVEGFFDR | P26443 | 0          | N-term +28.03 Da, K +28.03 Da, | 6837.202637 | 3 | 917.4099731 | 917.0902749 |
| ELDPGVVDNFPLLKALR       | P30115 | 0          | N-term +28.03 Da, K +28.03 Da, | 6843.320801 | 2 | 976.5470581 | 976.5644053 |
| SEAAADREDDPNFFKMVEGFFDR | P26443 | 0          | N-term +28.03 Da, K +28.03 Da, | 6868.641113 | 3 | 917.0772705 | 917.0902749 |
| TIEYLEEVAVNFAKGLADR     | Q8BMS1 | 0          | N-term +28.03 Da, K +28.03 Da, | 6869.72168  | 3 | 732.4000244 | 732.0633251 |
| ELDPGVVDNFPLLKALR       | P30115 | 0          | N-term +28.03 Da, K +28.03 Da, | 6876.48291  | 2 | 976.5485229 | 976.5644053 |
| VDFIDVATKVMIGESIDDKR    | Q8C196 | 0          | N-term +28.03 Da, K +28.03 Da, | 6884.465332 | 3 | 783.7515869 | 783.7626585 |
| GQNDLMGTAEDFADQFLR      | Q64310 | 0          | N-term +28.03 Da,              | 6894.937988 | 3 | 686.3200073 | 685.9861984 |
| GQNDLMGTAEDFADQFLR      | Q64310 | 0          | N-term +28.03 Da,              | 6895.797363 | 2 | 1028.473511 | 1028.475659 |
| DDLLYSFPVVIK            | P14152 | 0          | N-term +28.03 Da, K +28.03 Da, | 6896.158691 | 2 | 733.4099731 | 732.9210642 |
| EFQILLDALDKIKTK         | P16015 | 0          | N-term +28.03 Da, K +28.03 Da, | 6911.53418  | 3 | 630.0499878 | 629.7236917 |
| IGDVVFGVPSVIVSR         | Q64176 | 0          | N-term +28.03 Da,              | 6917.442383 | 2 | 786.4500122 | 786.4614193 |
| AVWPTLV DINSLSL TEAYKLR | Q9R0H0 | 0          | N-term +28.03 Da, K +28.03 Da, | 6929.241211 | 3 | 854.460022  | 854.1388941 |
| DVDFEAIWGAVR            | P25688 | 0          | N-term +28.03 Da,              | 6929.494629 | 2 | 702.8499756 | 703.3591624 |
| DLTDYLMKILTER           | P60710 | 0          | N-term +28.03 Da, K +28.03 Da, | 6952.61377  | 3 | 556.3099976 | 556.3076607 |
| FTPSLSDSFTFTLPAGR       | Q9CXE7 | 0          | N-term +28.03 Da,              | 6966.417969 | 2 | 949.9699707 | 950.477996  |
| LDPGVVDNFPLLKALR        | P30115 | 0          | N-term +28.03 Da, K +28.03 Da, | 7030.395508 | 2 | 912.0262451 | 912.0431082 |
| SKEFVEEVIWPAVQSSALYEDR  | P16460 | 0          | N-term +28.03 Da, K +28.03 Da, | 7038.781738 | 3 | 896.4400024 | 896.118159  |
| VLEYLTAIELELAGNAAR      | P22752 | 0.00230681 | N-term +28.03 Da,              | 7052.827637 | 3 | 659.039978  | 658.7017273 |
| SKEFVEEVIWPAVQSSALYEDR  | P16460 | 0.0261194  | N-term +28.03 Da, K +28.03 Da, | 7057.817871 | 3 | 895.7700195 | 896.118159  |
| VNPTVFFDITADDEPLGR      | P17742 | 0          | N-term +28.03 Da,              | 7077.771973 | 2 | 1017.01001  | 1017.512568 |
| VEELDPGVVDNFPLLKALR     | P30115 | 0          | N-term +28.03 Da, K +28.03 Da, | 7095.703613 | 2 | 1091.109985 | 1090.61991  |
| VEELDPGVVDNFPLLKALR     | P30115 | 0          | N-term +28.03 Da, K +28.03 Da, | 7099.858887 | 3 | 727.7399902 | 727.4156985 |
| SSAGLPPLSATSFLDLMDR     | Q75N73 | 0          | N-term +28.03 Da,              | 7109.675781 | 2 | 1068.040039 | 1068.038093 |
| SSAGLPPLSATSFLDLMDR     | Q75N73 | 0          | N-term +28.03 Da,              | 7113.33252  | 2 | 1069.040039 | 1068.038093 |
| VNPTVFFDITADDEPLGR      | P17742 | 0          | N-term +28.03 Da,              | 7126.481934 | 2 | 1017.5      | 1017.512568 |
| MIQLIATPSNALVDEPVSIR    | Q8BGG9 | 0          | N-term +28.03 Da,              | 7129.103027 | 3 | 732.0700073 | 732.4083268 |
| LPTLEQPIIPSDYVAIKAPM    | Q8C196 | 0          | N-term +28.03 Da, K +28.03 Da, | 7129.675293 | 2 | 1126.619995 | 1126.634171 |
| VEELDPGVVDNFPLLKALR     | P30115 | 0          | N-term +28.03 Da, K +28.03 Da, | 7131.224609 | 3 | 727.7399902 | 727.4156985 |
| MIQLIATPSNALVDEPVSIR    | Q8BGG9 | 0          | N-term +28.03 Da,              | 7133.40918  | 2 | 1098.099976 | 1098.108852 |
| LPTLEQPIIPSDYVAIKAPM    | Q8C196 | 0          | N-term +28.03 Da, K +28.03 Da, | 7134.341797 | 3 | 751.75      | 751.4252062 |
| KEFVEEVIWPAVQSSALYEDR   | P16460 | 0          | N-term +28.03 Da, K +28.03 Da, | 7147.499512 | 3 | 867.4299927 | 867.1074827 |
| DPNFFKMVEGFFDR          | P26443 | 0          | N-term +28.03 Da, K +28.03 Da, | 7152.647461 | 3 | 602.2999878 | 602.295755  |
| VEELDPGVVDNFPLLK        | P30115 | 0.01609658 | N-term +28.03 Da, K +28.03 Da, | 7152.934082 | 2 | 920.5200195 | 920.5087646 |
| VNPTVFFDITADDEPLGR      | P17742 | 0          | N-term +28.03 Da,              | 7159.253418 | 2 | 1018        | 1017.512568 |
| VEEVIWPAVQSSALYEDR      | P16460 | 0          | N-term +28.03 Da,              | 7167.328613 | 2 | 1084.530029 | 1084.03895  |
| AVWPTLV DINSLSL TEAYKLR | Q9R0H0 | 0          | N-term +28.03 Da, K +28.03 Da, | 7181.15918  | 2 | 1280.199951 | 1280.704703 |

|                                |        |            |                                            |             |   |             |             |
|--------------------------------|--------|------------|--------------------------------------------|-------------|---|-------------|-------------|
| TTFGDFIQLLVR                   | Q8R0Y6 | 0          | N-term +28.03 Da,                          | 7184.59375  | 2 | 719.4099731 | 719.4086551 |
| VEEFIWPAVQSSALYEDR             | P16460 | 0          | N-term +28.03 Da,                          | 7184.880371 | 2 | 1084.02002  | 1084.03895  |
| DKVTYVDFLAYDILDQYR             | P10649 | 0          | N-term +28.03 Da, K +28.03 Da,             | 7185.737793 | 3 | 765.0499878 | 765.0632138 |
| QFDEGLPPILNALEVQGR             | P56480 | 0          | N-term +28.03 Da,                          | 7198.833496 | 2 | 1013.030029 | 1012.544202 |
| QLLHWNGSLKALRETKCSR            | Q6P566 | 0.02752294 | N-term +28.03 Da, K +28.03 Da,C +57.02 Da, | 7230.457031 | 2 | 1191.160034 | 1191.165358 |
| MITSAAGIISLLDEEEPQLKEF         | Q3TXS7 | 0          | N-term +28.03 Da, K +28.03 Da,             | 7232.875977 | 3 | 831.1099854 | 830.7731123 |
| VADALANAAGHLDDLPGALSALSDLHAH   | Q91VB8 | 0.01443299 | N-term +28.03 Da,                          | 7271.421387 | 3 | 922.1300049 | 921.8068668 |
| PIHLSFDVDGLDPAFTPATGTPVLGGLSYR | Q61176 | 0          | N-term +28.03 Da,                          | 7281.195801 | 3 | 1048.540039 | 1047.880032 |
| FDVDGLDPAFTPATGTPVLGGLSYR      | Q61176 | 0          | N-term +28.03 Da,                          | 7286.476563 | 2 | 1298.150024 | 1297.660493 |
| VEELDPGVVDNFPLLKALR            | P30115 | 0          | N-term +28.03 Da, K +28.03 Da,             | 7293.892578 | 2 | 1090.099976 | 1090.61991  |
| IGDIMFGVPSVIVSR                | Q8VCC2 | 0          | N-term +28.03 Da,                          | 7341.560547 | 2 | 809.4400024 | 809.4552797 |
| VNPTVFFDITADDEPLGR             | P17742 | 0          | N-term +28.03 Da,                          | 7350.316895 | 2 | 1018.5      | 1017.512568 |
| AELGLPILGVLR                   | Q8VCH0 | 0.00451977 | N-term +28.03 Da,                          | 7361.394043 | 2 | 704.9199829 | 704.4321302 |
| FLGVAEQLHNEGKLF                | Q8C196 | 0          | N-term +28.03 Da, K +28.03 Da,             | 7365.302246 | 2 | 953.5       | 953.0170906 |
| TEGAELVDSVLDVVR                | P68372 | 0          | N-term +28.03 Da,                          | 7375.617188 | 2 | 816.4299927 | 815.4383393 |
| VPEVLLGILPGAGGTQR              | Q8BMS1 | 0.02259887 | N-term +28.03 Da,                          | 7391.475586 | 2 | 853.4899902 | 853.003983  |
| KIAPSAVESMEDALKAADTIGYPMIR     | Q8C196 | 0          | N-term +28.03 Da, K +28.03 Da,             | 7415.006348 | 3 | 1036.880005 | 1036.555503 |
| KIAPSAVESMEDALKAADTIGYPMIR     | Q8C196 | 0          | N-term +28.03 Da, K +28.03 Da,             | 7421.390625 | 4 | 777.9099731 | 777.6684466 |
| TLADEVGVDAQHVADLKGAFGER        | Q8BMS1 | 0          | N-term +28.03 Da, K +28.03 Da,             | 7425.55127  | 3 | 895.4500122 | 894.7959678 |
| FDEGLPPILNALEVQGR              | P56480 | 0          | N-term +28.03 Da,                          | 7468.101563 | 2 | 949         | 948.5149126 |
| TLGVDFIDVATKVMIGESIDDKR        | Q8C196 | 0          | N-term +28.03 Da, K +28.03 Da,             | 7474.867676 | 3 | 874.7999878 | 874.1470611 |
| IHTQPPPPPIPEVVATWEAISLGR       | Q8BGA8 | 0          | N-term +28.03 Da,                          | 7495.004395 | 3 | 878.1500244 | 878.4865165 |
| VAIADFVIFPPR                   | O09173 | 0.02978339 | N-term +28.03 Da,                          | 7510.783203 | 2 | 686.4000244 | 686.9030081 |
| IHTQPPPPPIPEVVATWEAISLGR       | Q8BGA8 | 0          | N-term +28.03 Da,                          | 7527.969238 | 3 | 878.8099976 | 878.4865165 |
| VQFDEGLPPILNALEVQGR            | P56480 | 0          | N-term +28.03 Da,                          | 7528.704102 | 2 | 1062.560059 | 1062.078409 |
| IHTQPPPPPIPEVVATWEAISLGR       | Q8BGA8 | 0          | N-term +28.03 Da,                          | 7530.627441 | 3 | 878.4899902 | 878.4865165 |
| IHTQPPPPPIPEVVATWEAISLGR       | Q8BGA8 | 0          | N-term +28.03 Da,                          | 7561.890625 | 3 | 878.1500244 | 878.4865165 |
| IHTQPPPPPIPEVVATWEAISLGR       | Q8BGA8 | 0          | N-term +28.03 Da,                          | 7571.413574 | 2 | 1317.22998  | 1317.226136 |
| FAQFGSDLDAAATQQLLSR            | Q03265 | 0          | N-term +28.03 Da,                          | 7574.761719 | 2 | 998.5       | 998.5103591 |
| EINEKIAPSAVESMEDALKAADTIGYPMIR | Q8C196 | 0.02173913 | N-term +28.03 Da, K +28.03 Da,             | 7575.410156 | 3 | 1198.949951 | 1198.292897 |
| INEKIAPSAVESMEDALKAADTIGYPMIR  | Q8C196 | 0.00228833 | N-term +28.03 Da, K +28.03 Da,             | 7605.327637 | 3 | 1155.599976 | 1155.278699 |
| SSAGLPPLSATSFLDLMDR            | Q75N73 | 0          | N-term +28.03 Da,                          | 7624.466797 | 2 | 1067.540039 | 1068.038093 |
| EFQILLDALDKIK                  | P16015 | 0          | N-term +28.03 Da, K +28.03 Da,             | 7654.348145 | 2 | 815.4799805 | 815.494928  |
| SRTQVVHESFQGRSRLGLDLGR         | P20917 | 0.04842821 | N-term +28.03 Da,                          | 7654.669434 | 2 | 1320.719971 | 1320.228065 |
| AFAQFGSDLDAAATQQLLSR           | Q03265 | 0.00230947 | N-term +28.03 Da,                          | 7657.730469 | 2 | 1034.01001  | 1034.028916 |
| SGPLPEPVVEAITQGDLVAVGVLSGMR    | P28271 | 0          | N-term +28.03 Da,                          | 7659.93457  | 3 | 901.8300171 | 901.4956296 |
| QGFIDLPEFPFGLLEPR              | O35490 | 0          | N-term +28.03 Da,                          | 7666.445313 | 2 | 945.4799805 | 945.4934485 |
| AFAQFGSDLDAAATQQLLSR           | Q03265 | 0          | N-term +28.03 Da,                          | 7674.296387 | 2 | 1035.02002  | 1034.028916 |
| IEATSERALLASNASY               | Q9R0B6 | 0.04688832 | N-term +28.03 Da,                          | 7734.524414 | 2 | 862.460022  | 862.4466958 |
| VNPTVFFDITADDEPLGR             | P17742 | 0          | N-term +28.03 Da,                          | 7793.748047 | 3 | 678.3400269 | 678.6774706 |

|                                    |        |            |                                            |             |   |             |             |
|------------------------------------|--------|------------|--------------------------------------------|-------------|---|-------------|-------------|
| VLAQAELPALHYRFNAPIAR               | P58459 | 0.03060306 | N-term +28.03 Da,                          | 7819.128418 | 2 | 1140.130005 | 1139.644584 |
| SFAVESMEDALKAADTIGYPMIR            | Q8C196 | 0          | N-term +28.03 Da, K +28.03 Da,             | 7864.817383 | 3 | 891.1099854 | 890.788768  |
| SFAVESMEDALKAADTIGYPMIR            | Q8C196 | 0.02113353 | N-term +28.03 Da, K +28.03 Da,             | 7868.04834  | 2 | 1336.160034 | 1335.679514 |
| AAFAQFGSDLDAATQQLLSR               | Q03265 | 0          | N-term +28.03 Da,                          | 7868.619629 | 2 | 1070.040039 | 1069.547473 |
| PAEYDVSPETR                        | Q9CQC7 | 0          | N-term +14.02 Da,                          | 2050.849854 | 2 | 640.2999878 | 640.8120073 |
| PEPEEFQPER                         | Q64481 | 0          | N-term +14.02 Da,                          | 2071.246582 | 2 | 638.2999878 | 637.8067247 |
| EQAGGDATENFEDVGHSTDAR              | P56395 | 0          | N-term +14.02 Da,                          | 2452.806152 | 3 | 741.3200073 | 741.6580162 |
| NPVDDICIAKPR                       | P32261 | 0          | N-term +14.02 Da, K +28.03 Da,C +57.02 Da, | 2778.236328 | 3 | 481.269989  | 481.5993261 |
| KDSSGQEAAPGPESSEDIATCPK            | Q9DC04 | 0.01923077 | N-term +14.02 Da, K +28.03 Da,C +57.02 Da, | 2825.300293 | 3 | 873.0800171 | 873.4148649 |
| FVEGAREVEMDAVGKEGR                 | Q8C196 | 0          | N-term +14.02 Da, K +28.03 Da,             | 2887.411621 | 3 | 675.3499756 | 675.3475075 |
| HQGVMMVGMGQKDSYVGDQAQSKR           | P60710 | 0          | N-term +14.02 Da, K +28.03 Da,             | 2979.376465 | 3 | 861.0800171 | 860.7617638 |
| HQGVMMVGMGQKDSYVGDQAQSKR           | P60710 | 0          | N-term +14.02 Da, K +28.03 Da,             | 3008.301514 | 3 | 860.4400024 | 860.7617638 |
| PASPATETVPAFSE                     | Q78PY7 | 0          | N-term +14.02 Da,                          | 3020.682129 | 2 | 788.40271   | 788.9044282 |
| PSPSPSPSLSTQSAVSKAGAVVPK           | Q9DC70 | 0          | N-term +14.02 Da, K +28.03 Da,             | 3335.859375 | 3 | 856.1400146 | 856.4744945 |
| IVANGKILAADESVGTMGNR               | Q91Y97 | 0          | N-term +14.02 Da, K +28.03 Da,             | 3615.341309 | 3 | 706.3699951 | 706.717712  |
| PFPDGLAEDIDKGEVSAR                 | P58252 | 0          | N-term +14.02 Da, K +28.03 Da,             | 4014.314453 | 3 | 654         | 654.3390066 |
| ASQRPDVLTTGGGNPIGDKLNIMTAGSR       | P24270 | 0          | N-term +14.02 Da, K +28.03 Da,             | 4125.155762 | 4 | 718.3800049 | 718.634342  |
| HVGDGLNVTAGKDGVANVSIEDR            | P08228 | 0          | N-term +14.02 Da, K +28.03 Da,             | 4222.668457 | 3 | 790.4000244 | 790.0803672 |
| PDAWGVTKGAAELMQQKEATTEQQLR         | O35490 | 0          | N-term +14.02 Da, K +28.03 Da,             | 4491.535156 | 4 | 740.6400146 | 740.6393588 |
| PYNPMSRPPDAWGVTKGAAELMQQKEATTEQQLR | O35490 | 0          | N-term +14.02 Da, K +28.03 Da,             | 4533.631836 | 4 | 973.4899902 | 973.743719  |
| PFVELETNLPASRIPAGLENR              | O35215 | 0          | N-term +14.02 Da,                          | 4608.481445 | 3 | 780.4299927 | 780.7621979 |
| NHQPEVFCNQIFINNEWHDAVSR            | P47738 | 0          | N-term +14.02 Da, C +57.02 Da,             | 4658.686523 | 3 | 957.460022  | 957.7858486 |
| PGLLLLGDEAPNFEANTTIGR              | O08709 | 0          | N-term +14.02 Da,                          | 4911.946289 | 2 | 1079.550049 | 1080.06071  |
| FEELCADLFR                         | P16627 | 0.01818182 | N-term +14.02 Da, C +57.02 Da,             | 4954.021973 | 3 | 439.2200012 | 439.5499723 |
| QLFHPEQLITGKEDAANNYAR              | P05213 | 0.01851852 | N-term +14.02 Da, K +28.03 Da,             | 5268.810547 | 2 | 1231.119995 | 1230.637648 |
| QLVHELDEAEYQEIR                    | P97371 | 0          | N-term +14.02 Da,                          | 5419.06543  | 2 | 944.960022  | 944.976114  |
| PTGGAGAVAMLIGPKAPLVLEQGLR          | P54869 | 0          | N-term +14.02 Da, K +28.03 Da,             | 5533.308594 | 4 | 616.1099854 | 616.1147902 |
| PPQLHNGLDLFSAKVIQGSLSLPQAVR        | Q9Z2V4 | 0          | N-term +14.02 Da, K +28.03 Da,             | 5606.608398 | 4 | 733.9000244 | 733.9067921 |
| NLVGSLWFDHIR                       | G5E904 | 0          | N-term +14.02 Da,                          | 5661.069824 | 2 | 737.4000244 | 737.4042001 |
| GPLCLQEVDEPPQHALLR                 | P70296 | 0          | N-term +14.02 Da, C +57.02 Da,             | 5796.619141 | 2 | 989.0200195 | 988.507058  |
| PPQLHNGLDLFSAKVIQGSLSLPQAVR        | Q9Z2V4 | 0          | N-term +14.02 Da, K +28.03 Da,             | 5798.310547 | 4 | 733.6500244 | 733.9067921 |
| HPDEPVLLLEPVVLAALAEKHGR            | Q9JII6 | 0          | N-term +14.02 Da, K +28.03 Da,             | 5802.669922 | 3 | 832.1199951 | 831.8006527 |
| PAYAPGTGTPEIAGLTSPQALEIIR          | A2AS89 | 0          | N-term +14.02 Da,                          | 5805.465332 | 3 | 847.1300049 | 847.4638181 |
| PPQLHNGLDLFSAKVIQGSLSLPQAVR        | Q9Z2V4 | 0          | N-term +14.02 Da, K +28.03 Da,             | 5810.304199 | 3 | 978.2000122 | 978.2066307 |
| PPQLHNGLDLFSAKVIQGSLSLPQAVR        | Q9Z2V4 | 0          | N-term +14.02 Da, K +28.03 Da,             | 5829.938965 | 4 | 733.9000244 | 733.9067921 |
| HTPCGKQGFIDLPEFPFGLPR              | O35490 | 0          | N-term +14.02 Da, K +28.03 Da,C +57.02 Da, | 5860.533203 | 3 | 901.4400024 | 901.453036  |
| HNHQGFAGNFNSLFKAFEEEQALR           | P49429 | 0          | N-term +14.02 Da, K +28.03 Da,             | 5903.238281 | 3 | 965.460022  | 965.1441418 |
| VGWEQLLTTIAR                       | P57780 | 0.03571429 | N-term +14.02 Da,                          | 6012.675781 | 2 | 701.9099731 | 702.4064086 |
| VHLTDAEKAASVCLWGVNSDEVGGEALGR      | P02088 | 0          | N-term +14.02 Da, K +28.03 Da,C +57.02 Da, | 6106.618652 | 3 | 1081.880005 | 1081.227655 |
| PTTQQSPQDEQEKLLDEAIQAVKVQSF        | Q9EQH3 | 0          | N-term +14.02 Da, K +28.03 Da,             | 6199.84375  | 3 | 1043.880005 | 1044.21541  |

|                                |        |            |                                            |             |   |             |             |
|--------------------------------|--------|------------|--------------------------------------------|-------------|---|-------------|-------------|
| PIHLSFDVDGLDPAFTPATGTPVLGGLSYR | Q61176 | 0          | N-term +14.02 Da,                          | 6335.556152 | 3 | 1044.209961 | 1044.213451 |
| PVFDWKDPLILEEQTLADEKLIR        | Q60759 | 0          | N-term +14.02 Da, K +28.03 Da,             | 6411.125977 | 4 | 710.9000244 | 711.1507276 |
| INQDGTFLVR                     | Q60787 | 0          | N-term +14.02 Da,                          | 6461.229004 | 2 | 590.3300171 | 590.3301693 |
| HTPDCGKQGFI DLPEFPFGL EPR      | O35490 | 0          | N-term +14.02 Da, K +28.03 Da,C +57.02 Da, | 6497.811035 | 3 | 901.7700195 | 901.453036  |
| HTPDCGKQGFI DLPEFPFGL EPR      | O35490 | 0          | N-term +14.02 Da, K +28.03 Da,C +57.02 Da, | 6511.019043 | 2 | 1351.650024 | 1351.675916 |
| HTPDCGKQGFI DLPEFPFGL EPR      | O35490 | 0          | N-term +14.02 Da, K +28.03 Da,C +57.02 Da, | 6531.830566 | 3 | 901.4400024 | 901.453036  |
| PVFDWKDPLILEEQTLADEKLIR        | Q60759 | 0          | N-term +14.02 Da, K +28.03 Da,             | 6622.630371 | 3 | 947.5200195 | 947.8652114 |
| MPFVELETNLPASR                 | O35215 | 0          | N-term +14.02 Da,                          | 6786.226563 | 2 | 810.4099731 | 810.9268487 |
| GTTLLEALDCILPPT RTPDKPLR       | P10126 | 0          | N-term +14.02 Da, K +28.03 Da,C +57.02 Da, | 7018.344238 | 3 | 874.4799805 | 874.8281028 |
| RMGDSASKVISAEALPGR             | Q9D6Y7 | 0          | N-term +14.02 Da, K +28.03 Da,             | 7051.694824 | 2 | 1011.025635 | 1010.038723 |
| RMGDSASKVISAEALPGR             | Q9D6Y7 | 0          | N-term +14.02 Da, K +28.03 Da,             | 7069.06543  | 3 | 674.3545532 | 673.6949072 |
| RMGDSASKVISAEALPGR             | Q9D6Y7 | 0          | N-term +14.02 Da, K +28.03 Da,             | 7085.53418  | 2 | 1011.027405 | 1010.038723 |
| RMGDSASKVISAEALPGR             | Q9D6Y7 | 0          | N-term +14.02 Da, K +28.03 Da,             | 7101.529297 | 3 | 674.3547363 | 673.6949072 |
| RMGDSASKVISAEALPGR             | Q9D6Y7 | 0          | N-term +14.02 Da, K +28.03 Da,             | 7117.287109 | 2 | 1011.030029 | 1010.038723 |
| GDKVTYVDFL AYDILDQYR           | P10649 | 0          | N-term +14.02 Da, K +28.03 Da,             | 7156.692383 | 3 | 780.75      | 780.4037878 |
| CGESPVWEEASQSL LFVDIPSKIICR    | Q64374 | 0          | N-term +14.02 Da, K +28.03 Da,C +57.02 Da, | 7211.116211 | 2 | 1532.75     | 1533.277878 |
| MPFVELETNLPASR                 | O35215 | 0          | N-term +14.02 Da,                          | 7298.829102 | 2 | 811.4199829 | 810.9268487 |
| MPFVELETNLPASR                 | O35215 | 0          | N-term +14.02 Da,                          | 7332.958984 | 2 | 811.4199829 | 810.9268487 |
| CGESPVWEEASQSL LFVDIPSKIICR    | Q64374 | 0.01886792 | N-term +14.02 Da, K +28.03 Da,C +57.02 Da, | 7439.229492 | 2 | 1532.75     | 1533.277878 |
| QGFIDLPEFPFGL EPR              | O35490 | 0          | N-term +14.02 Da,                          | 7696.297852 | 2 | 940.9799805 | 939.9935775 |
| PEPSKSAPAPK                    | Q64475 | 0.02040816 | K +28.03 Da,                               | 1051.405762 | 3 | 388.8910828 | 388.8922864 |
| KHHL DGETEEER                  | P10649 | 0          | K +28.03 Da,                               | 1063.229736 | 3 | 503.5700073 | 503.2427075 |
| PEPAKSAPAPK                    | P10853 | 0.00829876 | K +28.03 Da,                               | 1083.558594 | 3 | 383.5599976 | 383.5606481 |
| PSQVVAETR                      | P58252 | 0          |                                            | 1191.904663 | 2 | 493.7649231 | 493.7669086 |
| QMPVHYGCKER                    | P50136 | 0          | K +28.03 Da,C +57.02 Da,                   | 1323.184326 | 3 | 477.8887939 | 478.23232   |
| SPEASPIRNTHTGQVR               | Q6PDB7 | 0          |                                            | 1671.495972 | 3 | 583.960022  | 583.9712107 |
| LGLTEAQTR                      | Q8C196 | 0.03289474 |                                            | 1915.511353 | 2 | 494.7754822 | 494.7747336 |
| DGEEAGAYDGPR                   | P27773 | 0          |                                            | 1938.334839 | 2 | 618.7600098 | 618.7600101 |
| EYTDSSYDEKR                    | P10649 | 0          | K +28.03 Da,                               | 1939.493652 | 2 | 711.3063965 | 710.8149829 |
| GAQTAAAAAPR                    | Q9CQA3 | 0.01454545 |                                            | 1971.500854 | 2 | 493.2580261 | 492.7647001 |
| SIGVVGTAEQNR                   | O35215 | 0.0083682  |                                            | 1980.096558 | 2 | 615.8253174 | 615.8254869 |
| EYTDSSYDEKR                    | P10649 | 0          | K +28.03 Da,                               | 2006.245361 | 2 | 711.3099976 | 710.8149829 |
| FNSANEDNVTQVR                  | P24270 | 0          |                                            | 2065.737061 | 2 | 747.3490601 | 747.352598  |
| ECWYPNPSAR                     | Q61288 | 0.01730104 | C +57.02 Da,                               | 2102.358398 | 2 | 641.2788086 | 640.2798576 |
| HQGVMMVGMGQKDSYVGD EAQSKR      | P60710 | 0          | K +28.03 Da,                               | 2153.243164 | 4 | 642.0700073 | 641.5652525 |
| GYSFTT AER                     | P60710 | 0          |                                            | 2279.056641 | 2 | 566.7700195 | 566.7671061 |
| PKVIQPEVD TPLGR                | Q8VCU1 | 0.00429185 | K +28.03 Da,                               | 2385.032471 | 3 | 526.9699707 | 526.3067598 |
| GPKVIQPEVD TPLGR               | Q8VCU1 | 0.00772201 | K +28.03 Da,                               | 2408.242188 | 3 | 545.6400146 | 545.3139145 |
| NVVFSEDEM KR                   | Q8C196 | 0.01712329 | K +28.03 Da,                               | 2411.560059 | 3 | 461.230011  | 461.2308624 |
| AIAEELAPER                     | O35490 | 0.02348993 |                                            | 2415.719971 | 2 | 549.793396  | 549.7931237 |

|                        |        |            |                          |             |   |             |             |
|------------------------|--------|------------|--------------------------|-------------|---|-------------|-------------|
| PKVIQPEVDTPPLGR        | Q8VCU1 | 0          | K +28.03 Da,             | 2456.663818 | 3 | 526.9661865 | 526.3067598 |
| PSFVSAMR               | Q8VCT4 | 0.00749064 |                          | 2470.419922 | 2 | 447.7295532 | 447.7287398 |
| PVQKLFVDKIR            | P97450 | 0          | K +28.03 Da,             | 2477.645752 | 4 | 350.480011  | 350.4762419 |
| MCHPSVDGFTPR           | Q8C196 | 0          | C +57.02 Da,             | 2494.610596 | 3 | 468.544281  | 468.5446752 |
| PGLLVIDHR              | Q9QXF8 | 0.03761755 |                          | 2536.815918 | 3 | 359.5453491 | 359.5452207 |
| EVAQHLGESTVR           | P56480 | 0.00735294 |                          | 2556.981201 | 2 | 663.8345947 | 663.3440439 |
| PKVIQPEVDTPPLGR        | Q8VCU1 | 0          | K +28.03 Da,             | 2636.911377 | 3 | 526.2979126 | 526.3067598 |
| TFAERYRDLR             | Q8BFT6 | 0          |                          | 2643.350098 | 2 | 745.3800049 | 745.3809606 |
| VVFDITYDR              | P16015 | 0          |                          | 2655.816162 | 2 | 565.2600098 | 565.2616566 |
| EVAQHLGESTVR           | P56480 | 0          |                          | 2667.428955 | 2 | 663.8400269 | 663.3440439 |
| LCAATATILDKPEDR        | O35215 | 0          | K +28.03 Da,C +57.02 Da, | 2821.706299 | 3 | 568.289978  | 567.9661864 |
| HGSIIYHPSLLPR          | Q8K009 | 0.01438849 |                          | 2822.493652 | 3 | 497.2799988 | 497.2806559 |
| PLEMIEPR               | P14131 | 0.02990033 |                          | 2838.155518 | 2 | 492.7600098 | 492.76278   |
| VGLKAPGIIPR            | Q03265 | 0          | K +28.03 Da,             | 2854.402588 | 3 | 383.5881653 | 383.5886492 |
| CATPPDDGNLCR           | Q64442 | 0          | C +57.02 Da,             | 2868.999268 | 2 | 688.289978  | 688.2900971 |
| VFEHIGKR               | P24270 | 0.02033898 | K +28.03 Da,             | 2894.133545 | 3 | 339.2000122 | 338.5345443 |
| FAKLCEEHGILR           | P11589 | 0.02047782 | K +28.03 Da,C +57.02 Da, | 2972.581299 | 3 | 500.9299927 | 500.9379015 |
| VISLGEHSIIGR           | P08228 | 0          |                          | 3027.900146 | 3 | 456.5899963 | 456.5928999 |
| ENIIDLSNANR            | B5X0G2 | 0.0174216  |                          | 3083.754883 | 2 | 629.8200073 | 629.8229444 |
| ENIIDLSNANR            | B5X0G2 | 0.01444043 |                          | 3095.321533 | 2 | 630.8251953 | 629.8229444 |
| GPVQGTIHFEQK           | P08228 | 0.01094891 | K +28.03 Da,             | 3113.958984 | 2 | 685.3599854 | 684.8671545 |
| QMSGAQIKIANPVEGSSGR    | P60335 | 0          | K +28.03 Da,             | 3139.774414 | 2 | 979.5       | 979.5098361 |
| QKQRACMEETLWLQENIR     | Q61739 | 0.03225806 | K +28.03 Da,C +57.02 Da, | 3149.446045 | 3 | 787.4099731 | 787.7315867 |
| QVAMNPTNTVFDAGR        | P63017 | 0          | K +28.03 Da,             | 3197.716797 | 2 | 859.9299927 | 860.4459753 |
| QKDIFAMDDKSENEPIEENEAR | Q9Z218 | 0          | K +28.03 Da,             | 3218.019531 | 3 | 869.4099731 | 869.4182802 |
| TFEESFQKALR            | Q8C196 | 0          | K +28.03 Da,             | 3226.334473 | 3 | 461.9136047 | 461.9137505 |
| SGQAEFDKAAEEVKR        | F6WUQ1 | 0          | K +28.03 Da,             | 3316.572021 | 3 | 573.9699707 | 574.3003341 |
| GYSFTTTAER             | P60710 | 0          |                          | 3334.056885 | 2 | 567.2600098 | 566.7671061 |
| PDGTWDVETPQGSVR        | Q9DBT9 | 0          |                          | 3345.918701 | 2 | 828.3900146 | 822.3866382 |
| ELIGEAAAGKLHTGR        | Q91YI0 | 0.00833333 | K +28.03 Da,             | 3377.515869 | 3 | 494.6099854 | 493.9474543 |
| VGVPPTETGALTLNR        | Q8BWT1 | 0          |                          | 3439.441895 | 2 | 714.4000244 | 714.3962767 |
| AHVYVEEVPWKR           | P25688 | 0          | K +28.03 Da,             | 3517.552002 | 3 | 514.9400024 | 514.2805446 |
| EEHPTLLTEAPLNPKANR     | P62737 | 0          | K +28.03 Da,             | 3579.729004 | 3 | 687.039978  | 686.704131  |
| EEHPVLLTEAPLNPKANR     | P60710 | 0          | K +28.03 Da,             | 3586.511719 | 3 | 686.3699951 | 686.0443761 |
| EECELEMTGKVK           | P12710 | 0          | K +28.03 Da,C +57.02 Da, | 3665.709473 | 2 | 870.9099731 | 869.9155257 |
| GNVVAEKISGQKVNEAACDIAR | O35490 | 0          | K +28.03 Da,C +57.02 Da, | 3690.124512 | 3 | 817.75      | 817.0883165 |
| PLTGGEPVSLGSLR         | P11352 | 0          |                          | 3713.884766 | 2 | 692.3900146 | 691.8855446 |
| PLTGGEPVSLGSLR         | P11352 | 0          |                          | 3715.690674 | 2 | 691.8848877 | 691.8855446 |
| KGLTEVKIDFPR           | Q8CAY6 | 0.01433692 | K +28.03 Da,             | 3718.301025 | 3 | 530.6400146 | 529.9750101 |
| QITINDLPVGR            | P35700 | 0.00434783 |                          | 3725.13623  | 2 | 613.3499756 | 613.3485974 |

|                          |        |            |                          |             |   |             |             |
|--------------------------|--------|------------|--------------------------|-------------|---|-------------|-------------|
| ASQAQESKEPSTRREMKFEDPWLK | Q7TNC6 | 0.00760456 | K +28.03 Da,             | 3744.897217 | 3 | 988.5100098 | 988.1745619 |
| ATSVATKKTEQGPPSSEYIFER   | P29758 | 0          | K +28.03 Da,             | 3756.599854 | 3 | 828.4199829 | 828.0989873 |
| GTLDPVEKALR              | P63017 | 0.00790514 | K +28.03 Da,             | 3774.135986 | 2 | 614.3500977 | 613.858798  |
| YRSRLVVEDDLR             | B2RPU8 | 0.03278689 |                          | 3919.175293 | 2 | 760.4000244 | 760.9126252 |
| VEFEEKFLKTR              | P30115 | 0.00847458 | K +28.03 Da,             | 3941.552002 | 3 | 494.9446106 | 494.616934  |
| GYVKAGPWTPEAAVEHPEAVR    | O35490 | 0          | K +28.03 Da,             | 3968.555664 | 3 | 765.3900146 | 764.7305688 |
| EIAQDFKTDLR              | P02301 | 0          | K +28.03 Da,             | 3973.356689 | 2 | 682.8560791 | 682.364445  |
| ANNVLSGGTTMYPGIADR       | P62737 | 0          |                          | 3981.763428 | 2 | 918.9500122 | 918.9490798 |
| AIAEELAPER               | O35490 | 0.02356902 |                          | 3996.745361 | 2 | 550.2854614 | 549.7931237 |
| LIGPKAPLVLEQGLR          | P54869 | 0          | K +28.03 Da,             | 3997.512451 | 3 | 544.6799927 | 544.6784162 |
| NDEELNKLLGGV             | P27661 | 0          | K +28.03 Da,             | 4008.645264 | 3 | 443.8999939 | 443.5733942 |
| NDEELNKLLGR              | P22752 | 0.01736111 | K +28.03 Da,             | 4013.020996 | 2 | 665.3546143 | 664.8620695 |
| PFVELETNLPASR            | O35215 | 0          |                          | 4016.125    | 2 | 736.8900146 | 736.8908271 |
| IQEEAQCCLVEELR           | P12791 | 0          | C +57.02 Da,             | 4016.783691 | 2 | 808.9000244 | 808.9010666 |
| QGTPLAQAVEGPPSENVR       | Q9CZ13 | 0.03184713 |                          | 4018.001953 | 2 | 877.4400024 | 876.9473944 |
| GPWTPEAAVEHPEAVR         | O35490 | 0          |                          | 4038.510986 | 2 | 873.9199829 | 873.4339223 |
| EIAQDFKTDLR              | P02301 | 0.03205128 | K +28.03 Da,             | 4056.871338 | 2 | 683.3599854 | 682.364445  |
| QPSQGPTFGIKGGAAGGGY      | Q922D8 | 0          | K +28.03 Da,             | 4072.690674 | 2 | 889.9400024 | 889.4470299 |
| YYKESEDPKHKF             | Q8K4R4 | 0.04907975 | K +28.03 Da,             | 4074.829346 | 2 | 828.9299927 | 827.9274098 |
| QAEMLDDLMEKR             | Q9WTP6 | 0          | K +28.03 Da,             | 4078.534912 | 2 | 753.3519287 | 753.8681804 |
| AGPWTPEAAVEHPEAVR        | O35490 | 0          |                          | 4100.897461 | 2 | 909.4400024 | 908.9524794 |
| FTQAGSEVSALLGR           | P56480 | 0          |                          | 4172.250977 | 2 | 718.8800049 | 718.3806266 |
| AHRFPALTPEQKKEISEIAQR    | Q91Y97 | 0          | K +28.03 Da,             | 4207.502441 | 4 | 627.5999756 | 627.1038647 |
| QTNPSAMEVEEDDPVPEIR      | Q01853 | 0          |                          | 4343.376953 | 2 | 1077.97998  | 1078.494247 |
| AKGAGAFGYFEVTHDITR       | P24270 | 0.02364865 | K +28.03 Da,             | 4347.069824 | 3 | 656.99823   | 656.6706499 |
| QASGGPVDIGPEYQQDLDR      | P97450 | 0          |                          | 4357.692871 | 2 | 1022.97998  | 1022.982164 |
| GNWGHLDQVAALR            | Q8VCT4 | 0          |                          | 4358.907715 | 2 | 719.8699951 | 718.8733025 |
| LFAYPDTHR                | P24270 | 0          |                          | 4372.54541  | 2 | 560.7800293 | 560.2827256 |
| QTNPSAMEVEEDDPVPEIR      | Q01853 | 0          |                          | 4374.195313 | 2 | 1078.97998  | 1078.494247 |
| LGEECELETMTGKVK          | P12710 | 0          | K +28.03 Da,C +57.02 Da, | 4376.783691 | 2 | 955.460022  | 954.9682899 |
| NEFTLGEECELETMTGKVK      | P12710 | 0          | K +28.03 Da,C +57.02 Da, | 4380.028809 | 3 | 801.0499878 | 800.7151574 |
| LGEECELETMTGKVK          | P12710 | 0          | K +28.03 Da,C +57.02 Da, | 4408.771484 | 2 | 955.4699707 | 954.9682899 |
| AAAGVEFEEKFLKTR          | P30115 | 0          | K +28.03 Da,             | 4455.606934 | 3 | 584.9880371 | 584.6612028 |
| QKAMQDAEVSKSDIGEVLVGGMTR | P38647 | 0.00796813 | K +28.03 Da,             | 4470.078125 | 3 | 906.7999878 | 906.8103434 |
| GQKVLDSGAPIKIPVGPETLGR   | P56480 | 0          | K +28.03 Da,             | 4478.256836 | 3 | 764.1099854 | 763.4494024 |
| KVADIGLAAWGR             | P50247 | 0          | K +28.03 Da,             | 4532.893555 | 2 | 643.3659058 | 642.874782  |
| ASIVEDKLVLDLKTR          | P26443 | 0          | K +28.03 Da,             | 4551.315918 | 3 | 591.6699829 | 591.3436513 |
| TLLTEAPLNPKANR           | P62737 | 0          | K +28.03 Da,             | 4554.812988 | 2 | 783.460022  | 783.4541259 |
| QITVNDLPVGR              | Q61171 | 0          |                          | 4580.543945 | 2 | 606.3400269 | 606.3407724 |
| PAFTPATGTPVLGGLSYR       | Q61176 | 0          |                          | 4596.280762 | 2 | 902.9851685 | 902.983248  |

|                         |        |            |                          |             |   |             |             |
|-------------------------|--------|------------|--------------------------|-------------|---|-------------|-------------|
| LQFWTETLPR              | Q63880 | 0          |                          | 4599.745605 | 2 | 645.8468018 | 645.8456904 |
| PAFTPATGTPVLGGLSYR      | Q61176 | 0          |                          | 4601.312012 | 3 | 602.3300171 | 602.3245908 |
| KNGGLGHMNIITLLSDITKQISR | P20108 | 0          | K +28.03 Da,             | 4605.013184 | 4 | 613.5900269 | 613.8480701 |
| GKDLGEAALNEYLR          | Q8ROY6 | 0.00746269 | K +28.03 Da,             | 4607.912598 | 2 | 789.4199829 | 788.9201163 |
| PAFTPATGTPVLGGLSYR      | Q61176 | 0          |                          | 4627.323242 | 2 | 903.4799805 | 902.983248  |
| AIVENLKLKNELFQR         | Q61425 | 0          | K +28.03 Da,             | 4643.684082 | 3 | 624.7000122 | 624.3752854 |
| PFFPGLVKY               | Q01768 | 0.01413428 | K +28.03 Da,             | 4684.605957 | 2 | 548.8200073 | 548.3155053 |
| AIVENLKLKNELFQR         | Q61425 | 0.00793651 | K +28.03 Da,             | 4688.650391 | 3 | 624.7000122 | 624.3752854 |
| IVEDKLVEDLKTR           | P26443 | 0.00740741 | K +28.03 Da,             | 4698.276855 | 3 | 538.9799805 | 538.6539368 |
| QTLMWSATWPKEVR          | Q50116 | 0          | K +28.03 Da,             | 4718.251465 | 2 | 880.4500122 | 880.9612608 |
| GASIVEDKLVEDLKTR        | P26443 | 0          | K +28.03 Da,             | 4726.533691 | 3 | 610.6803589 | 610.350806  |
| GASIVEDKLVEDLKTR        | P26443 | 0          | K +28.03 Da,             | 4728.069336 | 3 | 610.6799927 | 610.350806  |
| CNQIFINNEWHDVAVSR       | P47738 | 0          | C +57.02 Da,             | 4734.1875   | 2 | 1002.450012 | 1001.963053 |
| DRDRDKDRERDRDRER        | A2A4P0 | 0.01724138 | K +28.03 Da,             | 4735.696289 | 2 | 1109.040039 | 1108.553007 |
| QTNPSAMEVEEDDPVPEIR     | Q01853 | 0          |                          | 4771.862793 | 2 | 1078.48999  | 1078.494247 |
| NEFTLGEECELETMTGEKVK    | P12710 | 0          | K +28.03 Da,C +57.02 Da, | 4839.429199 | 3 | 801.3800049 | 800.7151574 |
| PGGLLLGEAAPDFEANTTIGR   | Q8BG37 | 0.00757576 |                          | 4847.783203 | 3 | 720.039978  | 719.6989347 |
| ALEGVGHFFR              | P29391 | 0.01718213 |                          | 4856.354492 | 2 | 567.2891846 | 566.7985427 |
| PGGLLLGEAAPDFEANTTIGR   | Q8BG37 | 0          |                          | 4861.776367 | 3 | 719.3699951 | 719.6989347 |
| EGDVLTLLESER            | P62858 | 0          |                          | 4867.327637 | 2 | 680.3532715 | 680.851368  |
| PGGLLLGEAAPDFEANTTIGR   | Q8BG37 | 0.03164557 |                          | 4871.592285 | 2 | 1078.553711 | 1079.044764 |
| PGGLLLGDEAPNFEANTTIGR   | O08709 | 0          |                          | 4883.540039 | 2 | 1071.550049 | 1071.544931 |
| VVLTKFVEGAR             | Q8C196 | 0.03194888 | K +28.03 Da,             | 4899.425781 | 2 | 624.3699951 | 623.879533  |
| PGGLLLGEAAPDFEANTTIGR   | Q8BG37 | 0.040625   |                          | 4903.525391 | 2 | 1079.050049 | 1079.044764 |
| PGGLLLGEAAPDFEANTTIGR   | Q8BG37 | 0.00851064 |                          | 4911.946289 | 2 | 1079.550049 | 1079.044764 |
| LIFAGKQLEDGR            | P0CG49 | 0.01449275 | K +28.03 Da,             | 4928.910156 | 2 | 688.3838501 | 687.8906296 |
| TGAIVDVPVGEELLGR        | Q03265 | 0          |                          | 4942.244629 | 2 | 812.9500122 | 812.9488739 |
| PVAALPTLR               | Q0VDT2 | 0.03215434 |                          | 4943.515137 | 2 | 533.8131104 | 533.8164013 |
| ALLDLHALGSAR            | P29391 | 0.03174603 |                          | 4948.3125   | 2 | 619.3499756 | 618.8565895 |
| HTPGVAADLSHIETR         | P08249 | 0.00823045 |                          | 4961.54541  | 2 | 802.9199829 | 802.4129897 |
| ALKAADTIGYPVMIR         | Q8C196 | 0.0078125  | K +28.03 Da,             | 4963.422852 | 2 | 824.460022  | 823.9685544 |
| ECDKLYFEELSLER          | Q8C196 | 0          | K +28.03 Da,C +57.02 Da, | 4963.990234 | 2 | 930.4400024 | 929.9482144 |
| QITINDLPVGR             | P35700 | 0          |                          | 4982.041504 | 2 | 613.3494873 | 613.3485974 |
| QITLNDLPVGR             | O08807 | 0          |                          | 5013.446289 | 2 | 613.3499756 | 613.3485974 |
| ALLDLHALGSAR            | P29391 | 0          |                          | 5020.283691 | 2 | 619.3499756 | 618.8565895 |
| VISLGEHSIIGR            | P08228 | 0          |                          | 5046.123047 | 2 | 684.8800049 | 684.3857116 |
| PGGLLLGEAAPDFEANTTIGR   | Q8BG37 | 0          |                          | 5078.172363 | 2 | 1078.540039 | 1079.044764 |
| QPDAGNIFKIT             | Q64374 | 0          | K +28.03 Da,             | 5107.316895 | 2 | 616.3300171 | 616.3376984 |
| PGGLLLGEAAPDFEANTTIGR   | Q8BG37 | 0          |                          | 5115.824219 | 2 | 1078.540039 | 1079.044764 |
| PGGLLLGEAAPDFEANTTIGR   | Q8BG37 | 0          |                          | 5147.289063 | 2 | 1078.540039 | 1079.044764 |

|                               |        |            |                          |             |   |             |             |
|-------------------------------|--------|------------|--------------------------|-------------|---|-------------|-------------|
| CADMAVQNFVGDACR               | Q8VC12 | 0          | C +57.02 Da,             | 5175.320313 | 2 | 857.8599854 | 857.3607283 |
| CSGIASAAATAVEVAR              | Q91X91 | 0          | C +57.02 Da,             | 5189.647949 | 2 | 766.9000244 | 767.3881261 |
| CSGIASAAATAVEVAR              | Q91X91 | 0          | C +57.02 Da,             | 5193.429199 | 2 | 767.3900146 | 767.3881261 |
| AEILELAGNAAR                  | P22752 | 0.00763359 |                          | 5225.428711 | 2 | 614.8300171 | 614.3382299 |
| DQVPMVEIDGMKLVQTR             | P10648 | 0.0462963  | K +28.03 Da,             | 5225.958496 | 2 | 993.5300293 | 994.0211905 |
| CPGLLTPSQIKPGTY               | Q9CRB3 | 0          | K +28.03 Da,C +57.02 Da, | 5235.290527 | 2 | 830.4416504 | 830.4423698 |
| VALEGVGHFFR                   | P29391 | 0          |                          | 5238.27832  | 2 | 616.8254395 | 616.3327498 |
| LLLPGELAKHAVSEGTKAVTKY        | P10853 | 0          | K +28.03 Da,             | 5249.241699 | 4 | 603.5999756 | 603.10835   |
| EILELAGNAAR                   | P22752 | 0.02333333 |                          | 5284.166992 | 2 | 579.3099976 | 578.8196728 |
| PYHMALEDLAMFR                 | Q99MX0 | 0.00769231 |                          | 5314.689453 | 2 | 797.3900146 | 797.3812574 |
| CVESFSDYPPPLGR                | P10126 | 0          | C +57.02 Da,             | 5323.891602 | 2 | 763.8522949 | 763.8508449 |
| QLLQEEVGPVGVETMR              | Q7TNG8 | 0          |                          | 5340.09375  | 2 | 893.460022  | 892.9641984 |
| CVESFSDYPPPLGR                | P10126 | 0          | C +57.02 Da,             | 5356.289551 | 2 | 763.8500977 | 763.8508449 |
| GIHVEIPGAQAESLGLQVAR          | Q9DCW4 | 0.03470032 |                          | 5360.055664 | 2 | 1072.579956 | 1071.586932 |
| QNPDPQLQEPSDYLR               | Q9DBM2 | 0.00803213 |                          | 5371.643555 | 2 | 892.9432983 | 892.9443204 |
| QADVMIAGTLTNKMAPALR           | Q9DC70 | 0          | K +28.03 Da,             | 5378.803223 | 2 | 1064.069946 | 1064.584489 |
| CVESFSDYPPPLGR                | P10126 | 0          | C +57.02 Da,             | 5386.945801 | 2 | 763.8499756 | 763.8508449 |
| QLDEVPAIDALR                  | Q9NYQ2 | 0          |                          | 5391.831543 | 2 | 713.8800049 | 713.8804596 |
| QCSSGLQAVANIAGGIR             | Q8VCH0 | 0          | C +57.02 Da,             | 5392.147461 | 2 | 851.4400024 | 851.4386817 |
| LLADAVAVTMGPKGR               | P63038 | 0          | K +28.03 Da,             | 5428.435547 | 2 | 764.4310913 | 763.9397967 |
| QQVAPMDEDTGKELVLALDYQEKSPR    | P16546 | 0          | K +28.03 Da,             | 5444.563965 | 3 | 1060.189941 | 1060.535826 |
| QILLDALDKIKTK                 | P16015 | 0          | K +28.03 Da,             | 5467.759277 | 3 | 528.6699829 | 528.3429222 |
| MEADGLGCAVCVLTGASR            | Q64105 | 0          | C +57.02 Da,             | 5473.35791  | 2 | 933.9299316 | 933.9289756 |
| CEMASTGEVACFGEGHTAF           | Q8C196 | 0          | C +57.02 Da,             | 5481.681152 | 2 | 1087.439941 | 1087.453013 |
| CVGDEVSMADVCLVPQVANAER        | Q9WVL0 | 0          | C +57.02 Da,             | 5482.45752  | 2 | 1209.540039 | 1210.056166 |
| CVLTTVDPDTGIIDR               | Q922Q1 | 0          | C +57.02 Da,             | 5484.899902 | 2 | 838.4299927 | 837.9219992 |
| AKFEELNMDLFR                  | P20029 | 0.00743494 | K +28.03 Da,             | 5487.106934 | 2 | 771.3900146 | 770.8950551 |
| CVGDEVSMADVCLVPQVANAER        | Q9WVL0 | 0          | C +57.02 Da,             | 5489.967773 | 2 | 1210.540039 | 1210.056166 |
| LVSSVSDLPKR                   | P54869 | 0.03459119 | K +28.03 Da,             | 5507.584473 | 2 | 614.3699951 | 614.866623  |
| PTGGAGAVAMLIGPKAPLVLEQLR      | P54869 | 0          | K +28.03 Da,             | 5527.343262 | 3 | 815.8099976 | 815.4734421 |
| QGEIFLLPAR                    | Q78JT3 | 0.01423488 |                          | 5528.954102 | 2 | 572.3300171 | 572.3296758 |
| QKAPVVMGSSSEDVQEFLEIYR        | Q9QXD6 | 0          | K +28.03 Da,             | 5544.54248  | 2 | 1226.609985 | 1227.122689 |
| QKAPVVMGSSSEDVQEFLEIYR        | Q9QXD6 | 0          | K +28.03 Da,             | 5551.007813 | 3 | 818.0700073 | 818.4175512 |
| DDELTAALVVDNGSGMCK            | Q8BFZ3 | 0          | K +28.03 Da,C +57.02 Da, | 5559.594238 | 2 | 925.9099731 | 926.4267892 |
| CQLMDSSEDLGMSIQGPASR          | Q99LB7 | 0          | C +57.02 Da,             | 5564.812988 | 2 | 1148.01001  | 1148.024334 |
| PTLNELGISTPEELGLDKV           | P12787 | 0.00787402 | K +28.03 Da,             | 5575.456543 | 2 | 1027.550049 | 1027.056808 |
| CLDAFPNLR                     | P10649 | 0          | C +57.02 Da,             | 5581.10498  | 2 | 553.2761841 | 553.276586  |
| CQLMDSSEDLGMSIQGPASR          | Q99LB7 | 0          | C +57.02 Da,             | 5606.260742 | 2 | 1147.51001  | 1148.024334 |
| QTEMVELVPNGKHLEGLLPVGVPTTDTQR | Q9DCP2 | 0          | K +28.03 Da,             | 5641.986328 | 3 | 1063.219971 | 1062.899098 |
| CGLLSENGAFLAESR               | P10518 | 0          | C +57.02 Da,             | 5691.140625 | 2 | 877.4000244 | 876.9147057 |



|                                    |        |            |                          |             |   |             |             |
|------------------------------------|--------|------------|--------------------------|-------------|---|-------------|-------------|
| LLADAVAVTMGPKGR                    | P63038 | 0          | K +28.03 Da,             | 5696.583496 | 2 | 764.4299927 | 763.9397967 |
| LLADAVAVTMGPKGR                    | P63038 | 0          | K +28.03 Da,             | 5728.275391 | 2 | 764.4299927 | 763.9397967 |
| ASAKVSDAISTQYPVVDHEFDVAVVVGAGGAGLR | Q8K2B3 | 0          | K +28.03 Da,             | 5742.188477 | 3 | 1105.890015 | 1105.572039 |
| ASAKVSDAISTQYPVVDHEFDVAVVVGAGGAGLR | Q8K2B3 | 0          | K +28.03 Da,             | 5743.525391 | 4 | 829.6699829 | 829.4308483 |
| ASAKVSDAISTQYPVVDHEFDVAVVVGAGGAGLR | Q8K2B3 | 0          | K +28.03 Da,             | 5763.02832  | 3 | 1106.219971 | 1105.572039 |
| ASAKVSDAISTQYPVVDHEFDVAVVVGAGGAGLR | Q8K2B3 | 0          | K +28.03 Da,             | 5773.941406 | 4 | 829.4199829 | 829.4308483 |
| ASAKVSDAISTQYPVVDHEFDVAVVVGAGGAGLR | Q8K2B3 | 0          | K +28.03 Da,             | 5777.706543 | 3 | 1105.219971 | 1105.572039 |
| LIGPKAPLVLEQGLR                    | P54869 | 0.04361371 | K +28.03 Da,             | 5790.309082 | 2 | 817.0065918 | 816.5139861 |
| ELLEVVNKNFDLR                      | Q91X83 | 0          | K +28.03 Da,             | 5802.826172 | 2 | 809.4500122 | 808.9539589 |
| QSTLVIAEHANDSLAPITLNTITAAGR        | Q99LC5 | 0          |                          | 5826.663086 | 3 | 926.4899902 | 926.4979219 |
| ILLDALDKIKTK                       | P16015 | 0          | K +28.03 Da,             | 5844.334961 | 3 | 486.3200073 | 485.6567295 |
| GLFIHDDKGILR                       | P35700 | 0.00775194 | K +28.03 Da,             | 5847.514648 | 2 | 694.909668  | 694.4190227 |
| AQFEGIVTDLIKR                      | P38647 | 0          | K +28.03 Da,             | 5850.518066 | 2 | 759.932373  | 759.4379443 |
| QLGGYVATIGTKF                      | Q64374 | 0.00809717 | K +28.03 Da,             | 5901.213379 | 2 | 691.8900146 | 691.8875556 |
| LVLEVAQHLGESTVR                    | P56480 | 0          |                          | 5903.561523 | 2 | 826.9500122 | 825.9623154 |
| CEMASTGEVACFGEGIHAF                | Q8C196 | 0          | C +57.02 Da,             | 5920.456055 | 2 | 1087.449951 | 1087.453013 |
| ELLEVVNKNFDLR                      | Q91X83 | 0.01098901 | K +28.03 Da,             | 5961.308105 | 2 | 809.4500122 | 808.9539589 |
| AAVPSGASTGIYEALER                  | P17182 | 0          |                          | 5968.721191 | 2 | 903.4699707 | 902.9756205 |
| AEDVQETDTSQKQSPASHEIATNLGDFAISLYR  | P07758 | 0          | K +28.03 Da,             | 5980.40918  | 3 | 1255.589966 | 1255.601053 |
| CSVQEDINSLCLTVVQR                  | P54869 | 0          | C +57.02 Da,             | 5981.206055 | 2 | 1011.98999  | 1010.993162 |
| QGIVPAGLTENELWR                    | Q99JR1 | 0          |                          | 5983.599121 | 2 | 841.9400024 | 841.9466654 |
| CNLEIIDHIVGNQPDQEQMSASEWYLNKLQFHR  | P49429 | 0.008      | K +28.03 Da,C +57.02 Da, | 6012.528809 | 4 | 1011.22998  | 1010.990008 |
| CEMASTGEVACFGEGIHAFKAM             | Q8C196 | 0          | K +28.03 Da,C +57.02 Da, | 6048.388184 | 2 | 1323.579956 | 1323.096976 |
| MVNPTVFFDITADDEPLGR                | P17742 | 0          |                          | 6054.699219 | 2 | 1069.530029 | 1069.01716  |
| LYLPGKGHCVTGEIYEVDEQMLR            | Q923B0 | 0.00784314 | K +28.03 Da,C +57.02 Da, | 6089.224609 | 3 | 912.460022  | 912.4559003 |
| MEADGLGCAVCVLTGASR                 | Q64105 | 0          | C +57.02 Da,             | 6115.549805 | 2 | 934.4400024 | 933.9289756 |
| CVGDEVSMADVCLVPQVANAER             | Q9WVLO | 0          | C +57.02 Da,             | 6140.416992 | 2 | 1210.550049 | 1210.056166 |
| FTQAGSEVSALLGR                     | P56480 | 0          |                          | 6146.465332 | 2 | 718.8699951 | 718.3806266 |
| ETLIDLGTKAF                        | Q8C196 | 0.01398601 | K +28.03 Da,             | 6172.538574 | 2 | 619.3400269 | 618.347732  |
| CSQFIPMEVINAPR                     | Q8R0Y6 | 0          | C +57.02 Da,             | 6174.320313 | 2 | 831.9099731 | 831.4105465 |
| CQLMDSSEDLGMLSIGQPASR              | Q99LB7 | 0          | C +57.02 Da,             | 6176.408203 | 2 | 1148.52002  | 1148.024334 |
| CSQFIPMEVINAPR                     | Q8R0Y6 | 0          | C +57.02 Da,             | 6179.276367 | 2 | 831.4067383 | 831.4105465 |
| LVLEVAQHLGESTVR                    | P56480 | 0          |                          | 6191.336914 | 2 | 826.4500122 | 825.9623154 |
| QAAAVLPVLDLAQR                     | Q9D6J6 | 0.00826446 |                          | 6266.038574 | 2 | 732.9301758 | 732.9302863 |
| QVSGEFAMLWHGAQAGAFDLR              | P10518 | 0          |                          | 6266.598145 | 2 | 1146.550049 | 1146.054942 |
| QVSGEFAMLWHGAQAGAFDLR              | P10518 | 0.00816327 |                          | 6269.071777 | 3 | 764.0300293 | 764.372387  |
| GLDPAFTPATGTPVLGGLSYR              | Q61176 | 0          |                          | 6303.580078 | 2 | 1046.540039 | 1045.549484 |
| QVSGEFAMLWHGAQAGAFDLR              | P10518 | 0          |                          | 6311.490234 | 2 | 1146.040039 | 1146.054942 |
| QVSGEFAMLWHGAQAGAFDLR              | P10518 | 0          |                          | 6312.324707 | 3 | 764.3599854 | 764.372387  |
| RESQDEEPRAVLAQRIEK                 | Q99K30 | 0.03236246 | K +28.03 Da,             | 6317.072266 | 3 | 728.3900146 | 728.0573448 |

|                                        |        |            |                          |             |   |             |             |
|----------------------------------------|--------|------------|--------------------------|-------------|---|-------------|-------------|
| QVSGEFAMLWHGAQAGAFDLR                  | P10518 | 0.00766284 |                          | 6320.282227 | 3 | 764.7000122 | 764.372387  |
| QHSQDLAFVSMNLNDIAATPTAAMPFR            | P19096 | 0          |                          | 6323.330566 | 3 | 945.1199951 | 944.7984377 |
| QHSQDLAFVSMNLNDIAATPTAAMPFR            | P19096 | 0          |                          | 6326.703613 | 2 | 1417.180054 | 1416.694018 |
| QHSQDLAFVSMNLNDIAATPTAAMPFR            | P19096 | 0          |                          | 6332.362793 | 2 | 1416.689941 | 1416.694018 |
| ELFDELVKKF                             | P55264 | 0.04334365 | K +28.03 Da,             | 6359.354004 | 2 | 662.3800049 | 662.3815746 |
| CLASFTLVLR                             | Q9QXF8 | 0.004329   | C +57.02 Da,             | 6390.98584  | 2 | 598.3099976 | 598.3106262 |
| AEGEPEVTDQLEWQSNQPWEQALNR              | P08226 | 0          |                          | 6394.616211 | 3 | 985.4400024 | 985.4565631 |
| FTQAGSEVSALLGR                         | P56480 | 0          |                          | 6401.179688 | 2 | 718.8699951 | 718.3806266 |
| KKLAQIRQQQYK                           | P26039 | 0.02980132 | K +28.03 Da,             | 6406.933594 | 2 | 809         | 808.5039525 |
| LLADAVAVTMGPK                          | P63038 | 0          | K +28.03 Da,             | 6417.387207 | 2 | 657.8699951 | 657.378509  |
| CLASFTLVLR                             | Q9QXF8 | 0.00431034 | C +57.02 Da,             | 6423.876465 | 2 | 598.3096313 | 598.3106262 |
| QGVDLLADAVAVTMGPKGR                    | P63038 | 0          | K +28.03 Da,             | 6453.569336 | 2 | 964.5200195 | 963.5274971 |
| QPDAGNIFKITGL                          | Q64374 | 0.01403509 | K +28.03 Da,             | 6455.294922 | 2 | 701.3897095 | 701.3904626 |
| ASGTTLLEALDCILPPTRPTDKPLR              | P10126 | 0.03257329 | K +28.03 Da,C +57.02 Da, | 6456.832031 | 3 | 922.5       | 921.8406312 |
| AALSAGKVPETIDSVIVGNVMQSSSDAAYLAR       | Q8BWT1 | 0.01408451 | K +28.03 Da,             | 6459.40625  | 3 | 1116.579956 | 1115.916818 |
| LYFEELSLER                             | Q8C196 | 0          |                          | 6459.964844 | 2 | 650.3266602 | 649.8349889 |
| KEPLFGISTGNIITGLAAGAKSY                | Q8C196 | 0          | K +28.03 Da,             | 6463.05127  | 3 | 789.4400024 | 788.7772964 |
| ELVDSVLDVVR                            | P68372 | 0          |                          | 6528.92627  | 2 | 622.8400269 | 622.3482635 |
| CYVALDFEQEMATAASSSSLEKSYELPDGQVITIGNER | P60710 | 0          | K +28.03 Da,C +57.02 Da, | 6530.360352 | 3 | 1413.329956 | 1413.003241 |
| PNFFKMVEGFFDR                          | P26443 | 0          | K +28.03 Da,             | 6549.679199 | 3 | 554.9400024 | 554.6096736 |
| EELDPGVVDNFPLLK                        | P30115 | 0          | K +28.03 Da,             | 6565.56543  | 2 | 857.9500122 | 856.9589075 |
| QKENGITITAAANASTLNDGAAALVLMTEAAQR      | Q8QZT1 | 0          | K +28.03 Da,             | 6641.913574 | 3 | 1077.540039 | 1077.2209   |
| VDGLDPAFTPATGTPVLGGLSYR                | Q61176 | 0          |                          | 6648.964355 | 2 | 1153.589966 | 1152.597164 |
| CAFMSGSLAPGHVADFLVADFR                 | P97328 | 0          | C +57.02 Da,             | 6660.731445 | 2 | 1140.530029 | 1141.048271 |
| VVDNFPLLKALR                           | P30115 | 0.00738007 | K +28.03 Da,             | 6661.739258 | 2 | 707.4267578 | 706.9348398 |
| CAFMSGSLAPGHVADFLVADFR                 | P97328 | 0          | C +57.02 Da,             | 6665.405273 | 3 | 761.0300293 | 761.0346062 |
| EKGFEQILLDALDKIK                       | P16015 | 0          | K +28.03 Da,             | 6672.298828 | 3 | 649.3800049 | 648.7187181 |
| GVDLLADAVAVTMGPKGR                     | P63038 | 0          | K +28.03 Da,             | 6738.283691 | 2 | 900.4899902 | 899.498208  |
| ELDPGVVDNFPLLK                         | P30115 | 0          | K +28.03 Da,             | 6739.812012 | 2 | 793.4299927 | 792.4376103 |
| LLADAVAVTMGPK                          | P63038 | 0          | K +28.03 Da,             | 6743.641113 | 2 | 658.3699951 | 657.378509  |
| ELDPGVVDNFPLLK                         | P30115 | 0          | K +28.03 Da,             | 6778.225586 | 2 | 792.9299927 | 792.4376103 |
| EELDPGVVDNFPLLKALR                     | P30115 | 0.00813008 | K +28.03 Da,             | 6797.879395 | 2 | 1027.5625   | 1027.070052 |
| EELDPGVVDNFPLLKALR                     | P30115 | 0          | K +28.03 Da,             | 6828.77832  | 2 | 1027.569946 | 1027.070052 |
| LFDELDSIAKAR                           | Q01853 | 0          | K +28.03 Da,             | 6830.132324 | 2 | 777.4099731 | 776.9221273 |
| AIAELGIYPAVDPLDSTSR                    | P56480 | 0          |                          | 6850.527832 | 2 | 995.5200195 | 994.5203927 |
| EELDPGVVDNFPLLKALR                     | P30115 | 0          | K +28.03 Da,             | 6862.365723 | 2 | 1027.56311  | 1027.070052 |
| AVESMEDALKAADTIGYPMIR                  | Q8C196 | 0.00854701 | K +28.03 Da,             | 6891.877441 | 2 | 1205.109985 | 1204.613642 |
| LDVAVLVGSMPR                           | P14152 | 0.02341137 |                          | 6898.02002  | 2 | 629.3499756 | 628.8552009 |
| ELDPGVVDNFPLLKALR                      | P30115 | 0          | K +28.03 Da,             | 6958.1875   | 2 | 963.041687  | 962.5487553 |
| CGESPVWEEASQSLFVDIPSKIICR              | Q64374 | 0          | K +28.03 Da,C +57.02 Da, | 6965.236816 | 3 | 1016.840027 | 1016.843825 |

|                                        |        |            |                          |             |   |             |             |
|----------------------------------------|--------|------------|--------------------------|-------------|---|-------------|-------------|
| CGESPVWEEASQSLLFVDIPSKIICR             | Q64374 | 0          | K +28.03 Da,C +57.02 Da, | 6976.667969 | 3 | 1017.159973 | 1016.843825 |
| QNMLQGTEIGVLAKTFIDQGKLIIPDDVMTR        | Q9WTP7 | 0          | K +28.03 Da,             | 6977.942383 | 3 | 1129.930054 | 1129.938677 |
| QNMLQGTEIGVLAKTFIDQGKLIIPDDVMTR        | Q9WTP7 | 0          | K +28.03 Da,             | 6981.544434 | 3 | 1130.599976 | 1129.938677 |
| ELDPGVVDNFPLLKALR                      | P30115 | 0          | K +28.03 Da,             | 6989.687012 | 2 | 963.0413818 | 962.5487553 |
| GPLLVDVVFTEDEMAHFDR                    | P24270 | 0          |                          | 6991.862305 | 2 | 1096.040039 | 1095.038427 |
| QELDAFLAQALSPK                         | Q6A0A9 | 0.00806452 | K +28.03 Da,             | 6998.899902 | 2 | 779.9299927 | 779.9274098 |
| LDPGVVDNFPLLK                          | P30115 | 0          | K +28.03 Da,             | 7013.714844 | 2 | 728.4099731 | 727.9163132 |
| QSAEMSLDQIEQVILVGGATR                  | Q9JKR6 | 0          |                          | 7040.88916  | 2 | 1123.060059 | 1123.078281 |
| ALSPTNCDASEPLAEKVLIDLINKGR             | Q9ESB3 | 0          | K +28.03 Da,C +57.02 Da, | 7083.870605 | 3 | 923.1500244 | 923.1601412 |
| EFQILLDALDKIKTK                        | P16015 | 0          | K +28.03 Da,             | 7108.329102 | 3 | 621.039978  | 620.3799251 |
| QDSTQNLIPAPSLTVPLOQPDFR                | P11672 | 0          |                          | 7156.980469 | 2 | 1276.189941 | 1275.681759 |
| LDPGVVDNFPLLKALR                       | P30115 | 0          | K +28.03 Da,             | 7168.160156 | 2 | 899.0200195 | 898.0274582 |
| CAGLLMTLKGLPSTY                        | Q91YI0 | 0          | K +28.03 Da,C +57.02 Da, | 7169.480957 | 2 | 826.9404297 | 826.9411482 |
| CMALSTAILVGEAKKWLPELVDR                | Q9EQ20 | 0          | K +28.03 Da,C +57.02 Da, | 7170.529297 | 3 | 886.1500244 | 886.1570141 |
| VEELDPGVVDNFPLLKALR                    | P30115 | 0          | K +28.03 Da,             | 7171.958496 | 2 | 1077.589966 | 1076.60426  |
| CMALSTAILVGEAKKWLPELVDR                | Q9EQ20 | 0          | K +28.03 Da,C +57.02 Da, | 7205.007813 | 3 | 886.8099976 | 886.1570141 |
| CMALSTAILVGEAKKWLPELVDR                | Q9EQ20 | 0          | K +28.03 Da,C +57.02 Da, | 7208.245605 | 3 | 885.8099976 | 886.1570141 |
| EGAELVDSVLDVVR                         | P68372 | 0.00840336 |                          | 7229.313965 | 2 | 751.8900146 | 750.8988497 |
| VEELDPGVVDNFPLLKALR                    | P30115 | 0          | K +28.03 Da,             | 7235.65332  | 2 | 1077.599976 | 1076.60426  |
| CPEALFQPSFLGMESCIGHETTFN               | P60710 | 0          | C +57.02 Da,             | 7258.94043  | 2 | 1386.609985 | 1386.608763 |
| LDPGVVDNFPLLKALR                       | P30115 | 0.00819672 | K +28.03 Da,             | 7259.512695 | 2 | 899.0200195 | 898.0274582 |
| CPEALFQPSFLGMESCIGHETTFN               | P60710 | 0          | C +57.02 Da,             | 7262.524902 | 3 | 925.4099731 | 924.7416008 |
| CIALAPDSSLVPAGTSYVWER                  | Q78JT3 | 0.03246753 | C +57.02 Da,             | 7272.845215 | 2 | 1217.619995 | 1217.109581 |
| QHSQDLAFVSMNLNDIAATPTAAMPFR            | P19096 | 0          |                          | 7273.702148 | 3 | 945.1300049 | 944.7984377 |
| LDVAVLVGSMPR                           | P14152 | 0.03267974 |                          | 7273.986816 | 2 | 629.3499756 | 628.8552009 |
| QFAPIHAEAPEFIEMSVEQEILVTGIK            | P56480 | 0          | K +28.03 Da,             | 7288.699219 | 3 | 1018.859985 | 1018.866735 |
| IILDISESPIKGR                          | P61979 | 0          | K +28.03 Da,             | 7296.412109 | 2 | 792.4799805 | 791.482352  |
| GIMNSFVNDIFER                          | P10853 | 0          |                          | 7312.720215 | 2 | 772.3699951 | 771.374487  |
| QLIYNYPEQLFGAAGVMAIEHADFAGVER          | P80314 | 0          |                          | 7313.577148 | 3 | 1070.849976 | 1070.529005 |
| CGESPVWEEASQSLLFVDIPSKIICR             | Q64374 | 0          | K +28.03 Da,C +57.02 Da, | 7318.750977 | 3 | 1016.51001  | 1016.843825 |
| QFAPIHAEAPEFIEMSVEQEILVTGIK            | P56480 | 0          | K +28.03 Da,             | 7321.163574 | 3 | 1018.859985 | 1018.866735 |
| CGESPVWEEASQSLLFVDIPSKIICR             | Q64374 | 0.01428571 | K +28.03 Da,C +57.02 Da, | 7323.336426 | 2 | 1524.75     | 1524.762099 |
| CYVALDFENEMATAASSSSLEKSYELPDGQVITIGNER | P62737 | 0          | K +28.03 Da,C +57.02 Da, | 7342.973633 | 3 | 1408        | 1408.331358 |
| QIIQQNPSLLPALLQQIGR                    | P54728 | 0          |                          | 7376.858887 | 2 | 1066.119995 | 1065.623318 |
| QGVDLLADAVAVTMGPK                      | P63038 | 0          | K +28.03 Da,             | 7409.947266 | 2 | 857.460022  | 856.9662094 |
| LTAEILELAGNAAR                         | P22752 | 0.0077821  |                          | 7432.71582  | 2 | 721.897522  | 721.4041017 |
| PFVELETNLPASR                          | O35215 | 0          |                          | 7446.304199 | 2 | 737.3900146 | 736.8908271 |
| CGESPVWEEASQSLLFVDIPSKIICR             | Q64374 | 0          | K +28.03 Da,C +57.02 Da, | 7455.783203 | 3 | 1017.51001  | 1016.843825 |
| CGESPVWEEASQSLLFVDIPSKIICR             | Q64374 | 0          | K +28.03 Da,C +57.02 Da, | 7457.683105 | 2 | 1524.73999  | 1524.762099 |
| CGESPVWEEASQSLLFVDIPSKIICR             | Q64374 | 0          | K +28.03 Da,C +57.02 Da, | 7464.375    | 2 | 1525.75     | 1524.762099 |

|                                        |        |            |                          |             |   |             |             |
|----------------------------------------|--------|------------|--------------------------|-------------|---|-------------|-------------|
| CGESPVWEEASQSLLFVDIPSK                 | Q64374 | 0          | K +28.03 Da,C +57.02 Da, | 7475.155273 | 2 | 1253.609985 | 1253.612154 |
| CGESPVWEEASQSLLFVDIPSKIICR             | Q64374 | 0          | K +28.03 Da,C +57.02 Da, | 7489.474609 | 3 | 1017.169983 | 1016.843825 |
| QIENIIDQEVQTLSGGELQR                   | P61222 | 0          |                          | 7498.790039 | 2 | 1136.589966 | 1135.584785 |
| VDFEAIWGAVR                            | P25688 | 0.04347826 |                          | 7512.365234 | 2 | 632.3200073 | 631.8300404 |
| CGESPVWEEASQSLLFVDIPSKIICR             | Q64374 | 0          | K +28.03 Da,C +57.02 Da, | 7521.54248  | 3 | 1017.51001  | 1016.843825 |
| QGFQELLQAVPLADSF                       | P28352 | 0          |                          | 7565.76709  | 2 | 924.4799805 | 924.486155  |
| YLTAEILELAGNAAR                        | P22752 | 0          |                          | 7588.243652 | 2 | 803.4299927 | 802.9357663 |
| GEFQILLDALDKIK                         | P16015 | 0.0075188  | K +28.03 Da,             | 7636.625977 | 2 | 830.4799805 | 829.9900101 |
| VQFDEGLPPILNALEVQGR                    | P56480 | 0.00843882 |                          | 7664.490723 | 2 | 1049.050049 | 1048.062759 |
| QGFIDLPEFPFGLLEPR                      | O35490 | 0          |                          | 7674.020996 | 2 | 932.4699707 | 931.4777985 |
| EVEDLIKAAIGDTLVQDIR                    | Q9CXN7 | 0          | K +28.03 Da,             | 7675.916992 | 3 | 710.0599976 | 709.3949635 |
| IDLPEFPFGLLEPR                         | O35490 | 0          |                          | 7681.914063 | 2 | 765.9000244 | 765.4035702 |
| QGFIDLPEFPFGLLEPR                      | O35490 | 0          |                          | 7704.708008 | 2 | 932.4699707 | 931.4777985 |
| EDDPNFFKMVEGFFDR                       | P26443 | 0          | K +28.03 Da,             | 7747.581055 | 2 | 1011.950012 | 1010.959113 |
| VNPTVFFDITADDEPLGR                     | P17742 | 0          |                          | 7771.294434 | 2 | 1003.98999  | 1003.496918 |
| QGFIDLPEFPFGLLEPR                      | O35490 | 0          |                          | 7771.553223 | 2 | 931.9799805 | 931.4777985 |
| QGFIDLPEFPFGLLEPR                      | O35490 | 0          |                          | 7776.905762 | 2 | 931.4799805 | 931.4777985 |
| EVEDLIKAAIGDTLVQDIR                    | Q9CXN7 | 0.0141844  | K +28.03 Da,             | 7784.145996 | 3 | 709.7199707 | 709.3949635 |
| CLELSELAEDKENY                         | P11499 | 0.04923077 | K +28.03 Da,C +57.02 Da, | 7797.479492 | 2 | 944.4400024 | 944.4376798 |
| QGFIDLPEFPFGLLEPR                      | O35490 | 0          |                          | 7808.145996 | 2 | 931.9799805 | 931.4777985 |
| CDVTKTPPLGSAQVPLADCVLTLFLAMECACPDIDTYR | P40936 | 0          | K +28.03 Da,C +57.02 Da, | 7813.248535 | 3 | 1405.660034 | 1404.99761  |
| EFQILLDALDKIK                          | P16015 | 0.0330033  | K +28.03 Da,             | 7813.526855 | 2 | 802.4699707 | 801.479278  |
| VDFLAYDILDQYR                          | P10649 | 0          |                          | 7830.723145 | 2 | 816.4008179 | 815.9092172 |
| EFQILLDALDKIK                          | P16015 | 0.00754717 | K +28.03 Da,             | 7846.086426 | 2 | 801.9746704 | 801.479278  |
| QMVETELKICCDILDVLDKH                   | P62259 | 0          | K +28.03 Da,C +57.02 Da, | 7846.945801 | 3 | 877.1099854 | 876.7863699 |
| AAGGDGDDSLYPIAVLIDELR                  | Q7TNP2 | 0          |                          | 7878.317383 | 2 | 1081.540039 | 1080.544597 |
