# Supplementary material
Source: PubMed Central journal article supplement (PMC5083106)
Supplement: 10.1074_O115.056515_mcp.O115.056515-7.pdf [file 10.1074_O115.056515_mcp.O115.056515-7.pdf]

**Supplementary Table 6:** List of N-termini identified in FFPE liver tissue of C57BL/6 wild type mouse (replicate 2) after chemical labeling using  $^{12}\text{COH}_2$  formaldehyde. This is a comprehensive listing of all identified peptides.

| Peptide Sequence        | UniProt ID | MSGF+ score (E-value) | Modification                               | Retention Time (s) | Charge | Measured m/z | Theoretical m/z |
|-------------------------|------------|-----------------------|--------------------------------------------|--------------------|--------|--------------|-----------------|
| AEVEQKKKR               | P62843     | 0.00890519            | N-term +42.01 Da, K +28.03 Da,             | 961.3948975        | 3      | 414.5906982  | 414.5907188     |
| ADKTPGGSQKASSKNR        | Q6NV83     | 0.04086426            | N-term +42.01 Da, K +28.03 Da,             | 964.3294067        | 4      | 440.2399902  | 440.243069      |
| SHASPAAKPSNSKNPR        | Q9CR16     | 0                     | N-term +42.01 Da, K +28.03 Da,             | 1011.128784        | 4      | 437.4871826  | 437.4865987     |
| SHASPAAKPSNSKNPR        | Q9CR16     | 0                     | N-term +42.01 Da, K +28.03 Da,             | 1013.279175        | 3      | 582.9806519  | 582.9797061     |
| EAHKSEIAHR              | P07724     | 0                     | N-term +42.01 Da, K +28.03 Da,             | 1027.114624        | 3      | 416.5545044  | 416.5545564     |
| EGSGSSGTGEQKEDQKEEKQ    | P38647     | 0                     | N-term +42.01 Da, K +28.03 Da,             | 1029.053223        | 3      | 755.0300293  | 755.3556744     |
| EAHKSEIAHR              | P07724     | 0.00282646            | N-term +42.01 Da, K +28.03 Da,             | 1034.532349        | 2      | 624.3300171  | 624.3281963     |
| SASAGGSHQPSQSR          | P70445     | 0                     | N-term +42.01 Da,                          | 1042.846436        | 2      | 700.3200073  | 699.8214648     |
| ADGEEPEKKR              | Q8C878     | 0                     | N-term +42.01 Da, K +28.03 Da,             | 1044.104736        | 3      | 419.554718   | 419.5542224     |
| SHASPAAKPSN             | Q9CR16     | 0                     | N-term +42.01 Da, K +28.03 Da,             | 1052.316162        | 2      | 569.289978   | 568.7883727     |
| ATSSHQGAAGSQAEHR        | Q75N62     | 0                     | N-term +42.01 Da,                          | 1054.87439         | 3      | 569.9310303  | 569.9313039     |
| TENSTSAPAAKPKR          | P10922     | 0                     | N-term +42.01 Da, K +28.03 Da,             | 1072.546509        | 3      | 519.2859497  | 519.286136      |
| ADGKAGEEKPEKPQR         | Q6P8I4     | 0                     | N-term +42.01 Da, K +28.03 Da,             | 1077.058228        | 4      | 442.2399902  | 442.241532      |
| TENSTSAPAAKPKR          | P10922     | 0                     | N-term +42.01 Da, K +28.03 Da,             | 1077.353149        | 2      | 778.4249268  | 778.4255658     |
| SSSIEQKKGSTR            | Q9D4J7     | 0.00438356            | N-term +42.01 Da, K +28.03 Da,             | 1078.217651        | 3      | 469.2600098  | 469.2596982     |
| SESGKSSQLASKQEKDGTGTEKR | P17095     | 0                     | N-term +42.01 Da, K +28.03 Da,             | 1080.648071        | 4      | 655.3458252  | 655.3462525     |
| SAAKENPCR               | P97434     | 0.04242424            | N-term +42.01 Da, K +28.03 Da, C +57.02Da, | 1081.084351        | 2      | 551.7700195  | 551.7691255     |
| SSSPLSKKR               | Q02053     | 0.01510574            | N-term +42.01 Da, K +28.03 Da,             | 1084.846924        | 3      | 363.2200928  | 363.2205144     |
| ADGKAGEEKPEKPQR         | Q6P8I4     | 0                     | N-term +42.01 Da, K +28.03 Da,             | 1085.751709        | 3      | 589.3185425  | 589.3196171     |
| TENSTSAPAAKPKR          | P10922     | 0                     | N-term +42.01 Da, K +28.03 Da,             | 1103.629395        | 3      | 519.6151123  | 519.286136      |
| TENSTSAPAAKPKR          | P10922     | 0                     | N-term +42.01 Da, K +28.03 Da,             | 1109.313965        | 2      | 778.9179688  | 778.4255658     |
| LEEEEDDTEK              | Q60675     | 0.00592353            | N-term +42.01 Da, K +28.03 Da,             | 1110.520508        | 2      | 653.289978   | 653.7802748     |
| TENSTSAPAAKPKR          | P10922     | 0                     | N-term +42.01 Da, K +28.03 Da,             | 1136.083008        | 3      | 519.6142578  | 519.286136      |
| MEHSKQIR                | E0CX86     | 0.00228571            | N-term +42.01 Da, K +28.03 Da,             | 1147.269653        | 3      | 366.8619995  | 366.8623325     |
| ADEGKSYNEHDDR           | Q99JX7     | 0                     | N-term +42.01 Da, K +28.03 Da,             | 1154.022827        | 3      | 535.897522   | 535.8973775     |
| DEEEDKKAAR              | P57776     | 0.00283768            | N-term +42.01 Da, K +28.03 Da,             | 1172.481445        | 2      | 696.2999878  | 695.8020728     |
| TTYNNGPKPER             | P49429     | 0.00643777            | N-term +42.01 Da, K +28.03 Da,             | 1174.953003        | 3      | 501.6037903  | 501.6035762     |
| SAGSSCSQTPSR            | Q60876     | 0                     | N-term +42.01 Da, C +57.02Da,              | 1177.522461        | 2      | 633.7700195  | 633.7725946     |
| TTYNNGPKPER             | P49429     | 0                     | N-term +42.01 Da, K +28.03 Da,             | 1187.224243        | 2      | 751.9017334  | 751.9017261     |
| AAADEPKPK               | P55264     | 0.00063735            | N-term +42.01 Da, K +28.03 Da,             | 1194.711548        | 2      | 512.7870483  | 512.7873097     |
| DDEEPKDETAR             | O55022     | 0.00888657            | N-term +42.01 Da, K +28.03 Da,             | 1199.034058        | 2      | 688.302002   | 687.8046153     |
| TTYNNGPKPER             | P49429     | 0                     | N-term +42.01 Da, K +28.03 Da,             | 1206.278931        | 3      | 501.6033936  | 501.6035762     |
| AATGGGADDES             | Q91WK7     | 0                     | N-term +42.01 Da,                          | 1212.754395        | 2      | 574.7399902  | 574.74436       |

|                  |         |            |                                           |             |   |             |             |
|------------------|---------|------------|-------------------------------------------|-------------|---|-------------|-------------|
| TENSTSAPAAKPK    | P10922  | 0          | N-term +42.01 Da, K +28.03 Da,            | 1217.059204 | 2 | 700.3747559 | 700.3750101 |
| AAADEPKPK        | P55264  | 0.00063735 | N-term +42.01 Da, K +28.03 Da,            | 1225.3396   | 2 | 512.7876587 | 512.7873097 |
| MDQTDQHPK        | Q9JUL3  | 0          | N-term +42.01 Da, K +28.03 Da,            | 1230.491821 | 2 | 571.2685547 | 571.2689585 |
| AKPLTDQEK        | Q9ET01  | 0.00281532 | N-term +42.01 Da, K +28.03 Da,            | 1249.646118 | 3 | 428.5825806 | 428.5821122 |
| TKEMTENQR        | P30204  | 0.01033058 | N-term +42.01 Da, K +28.03 Da,            | 1252.019897 | 2 | 603.789978  | 603.7927981 |
| AKPLTDQEK        | Q9ET01  | 0.0132181  | N-term +42.01 Da, K +28.03 Da,            | 1257.509033 | 2 | 642.3694458 | 642.36953   |
| AAADEPKPK        | P55264  | 0.04281061 | N-term +42.01 Da, K +28.03 Da,            | 1258.997803 | 2 | 512.7880249 | 512.7873097 |
| MESNKDEAER       | Q9QYI4  | 0.00063251 | N-term +42.01 Da, K +28.03 Da,            | 1260.979858 | 2 | 639.7800293 | 639.7851706 |
| STAGKVIKCK       | P00329  | 0          | N-term +42.01 Da, K +28.03 Da,C +57.02Da, | 1261.437622 | 3 | 406.5815125 | 406.5810548 |
| SQPGPKPAASPR     | P51125  | 0.02807357 | N-term +42.01 Da, K +28.03 Da,            | 1263.491333 | 2 | 631.8499756 | 631.8462219 |
| SGEDVPHR         | Q9CR00  | 0.00058754 | N-term +42.01 Da,                         | 1276.106812 | 2 | 469.7199707 | 469.7199584 |
| ADAAVGKEKCGDQR   | Q9JKP8  | 0.01080803 | N-term +42.01 Da, K +28.03 Da,C +57.02Da, | 1277.178101 | 3 | 534.9299927 | 534.9349975 |
| DDEEPKDEAR       | O55022  | 0.00594595 | N-term +42.01 Da, K +28.03 Da,            | 1279.775269 | 2 | 688.795105  | 687.8046153 |
| AKPLTDQEK        | Q9ET01  | 0.00061387 | N-term +42.01 Da, K +28.03 Da,            | 1280.355225 | 3 | 428.5821838 | 428.5821122 |
| EWLAAVGR         | A3LKGW5 | 0.03285714 | N-term +42.01 Da,                         | 1282.547241 | 2 | 473.2521973 | 472.2534365 |
| AKPLTDQEK        | Q9ET01  | 0.00059172 | N-term +42.01 Da, K +28.03 Da,            | 1289.495972 | 2 | 642.3700562 | 642.36953   |
| SYQGKKNIPR       | O08553  | 0.00596529 | N-term +42.01 Da, K +28.03 Da,            | 1294.376831 | 3 | 430.2507019 | 430.2505851 |
| SYQGKKNIPR       | O08553  | 0.00059988 | N-term +42.01 Da, K +28.03 Da,            | 1296.832642 | 2 | 644.8713989 | 644.8722395 |
| ATSAEAPAKEAQR    | Q8BGA5  | 0.0017301  | N-term +42.01 Da, K +28.03 Da,            | 1304.776123 | 3 | 519.289978  | 519.286136  |
| ANKAPSQMER       | P31725  | 0.0271581  | N-term +42.01 Da, K +28.03 Da,            | 1310.158081 | 2 | 601.2999878 | 601.3033326 |
| TTYNNKGPCKPER    | P49429  | 0.04408353 | N-term +42.01 Da, K +28.03 Da,            | 1327.953613 | 2 | 752.3942871 | 751.9017261 |
| ATSASSHLNK       | P15105  | 0.00060459 | N-term +42.01 Da, K +28.03 Da,            | 1339.954712 | 2 | 543.2800293 | 543.2829231 |
| ATSASSHLNKG      | P15105  | 0.00594916 | N-term +42.01 Da, K +28.03 Da,            | 1354.685425 | 2 | 571.789978  | 571.7936552 |
| MDSKQQTVR        | P70694  | 0.0201871  | N-term +42.01 Da, K +28.03 Da,            | 1366.382446 | 2 | 581.7980347 | 581.7978831 |
| ATSASSHLNK       | P15105  | 0.00172911 | N-term +42.01 Da, K +28.03 Da,            | 1371.687012 | 2 | 543.2832642 | 543.2829231 |
| PDPKSAPAPK       | Q8CGP0  | 0          | N-term +42.01 Da, K +28.03 Da,            | 1380.787109 | 2 | 596.831543  | 596.8322489 |
| AAPSMKER         | Q8BGD8  | 0.01029866 | N-term +42.01 Da, K +28.03 Da,            | 1389.344727 | 2 | 480.2534485 | 480.2525794 |
| ASASGAMAKHEQ     | Q9WV55  | 0          | N-term +42.01 Da, K +28.03 Da,            | 1391.207642 | 2 | 629.2999878 | 629.2982476 |
| PEPAKSAPAPK      | P10853  | 0          | N-term +42.01 Da, K +28.03 Da,            | 1395.009766 | 2 | 596.3399658 | 595.8426164 |
| ANKAPSQMER       | P31725  | 0          | N-term +42.01 Da, K +28.03 Da,            | 1396.142334 | 2 | 601.3031616 | 601.3033326 |
| MDSKQQTVR        | P70694  | 0          | N-term +42.01 Da, K +28.03 Da,            | 1397.092285 | 2 | 581.7978516 | 581.7978831 |
| AQASAAPKAGTATGR  | P56480  | 0          | N-term +42.01 Da, K +28.03 Da,            | 1411.744751 | 2 | 714.3800049 | 714.3837006 |
| AAQASAAPKAGTATGR | P56480  | 0.00333148 | N-term +42.01 Da, K +28.03 Da,            | 1413.081055 | 2 | 750.4000244 | 749.9022576 |
| SSSPVNVKK        | Q8VEK3  | 0.00060241 | N-term +42.01 Da, K +28.03 Da,            | 1415.631226 | 2 | 522.3083496 | 522.3084092 |
| PDPKSAPAPK       | Q64525  | 0          | N-term +42.01 Da, K +28.03 Da,            | 1421.556396 | 2 | 588.8356323 | 588.8347914 |
| SHGSHETDEEFDAR   | P12787  | 0          | N-term +42.01 Da,                         | 1427.736694 | 3 | 554.2299805 | 553.5607655 |
| ASCDEIKEHPR      | Q8C650  | 0          | N-term +42.01 Da, K +28.03 Da,C +57.02Da, | 1428.826416 | 3 | 471.2200012 | 471.226     |
| MEKEEETTR        | E9Q616  | 0.00060277 | N-term +42.01 Da, K +28.03 Da,            | 1434.512451 | 2 | 611.7800293 | 611.7846391 |
| AQASAAPKAGTATGR  | P56480  | 0          | N-term +42.01 Da, K +28.03 Da,            | 1444.125    | 2 | 714.8900146 | 714.3837006 |
| PDPKSAPAPK       | Q64525  | 0          | N-term +42.01 Da, K +28.03 Da,            | 1452.018921 | 2 | 588.8344116 | 588.8347914 |

|                             |        |            |                                           |             |   |             |             |
|-----------------------------|--------|------------|-------------------------------------------|-------------|---|-------------|-------------|
| SHGSHETDEEFDAR              | P12787 | 0          | N-term +42.01 Da,                         | 1459.748291 | 3 | 553.9000244 | 553.5607655 |
| ATKCTKCGPGY                 | P17563 | 0.04285049 | N-term +42.01 Da, K +28.03 Da,C +57.02Da, | 1461.309448 | 2 | 670.8200073 | 670.8205011 |
| SHGSHETDEEFDAR              | P12787 | 0          | N-term +42.01 Da,                         | 1462.704712 | 2 | 829.8400269 | 829.83751   |
| MNKDAQMR                    | Q9JIX0 | 0.01324503 | N-term +42.01 Da, K +28.03 Da,            | 1466.150146 | 2 | 532.2548828 | 532.2547963 |
| SSNECFKCGR                  | P53996 | 0          | N-term +42.01 Da, K +28.03 Da,C +57.02Da, | 1469.905518 | 2 | 657.7816162 | 657.7819075 |
| PDPAKSAPAPK                 | Q64525 | 0.02932692 | N-term +42.01 Da, K +28.03 Da,            | 1483.388672 | 2 | 588.8353271 | 588.8347914 |
| SSKTASTNSIAQAR              | Q9DAS9 | 0.03325416 | N-term +42.01 Da, K +28.03 Da,            | 1484.602417 | 2 | 746.8800049 | 746.3917231 |
| AEAEAGGDEAR                 | Q8CHP8 | 0          | N-term +42.01 Da,                         | 1488.796753 | 2 | 559.2415771 | 559.241453  |
| MEQAVHGESKR                 | Q9R1J0 | 0          | N-term +42.01 Da, K +28.03 Da,            | 1492.606812 | 3 | 447.8909912 | 447.89084   |
| SQEKASSPSGKMDGKPVDASEEKR    | Q9D0R2 | 0.00059595 | N-term +42.01 Da, K +28.03 Da,            | 1493.016602 | 4 | 708.8599854 | 708.6077437 |
| SQEKASSPSGKMDGKPVDASEEKR    | Q9D0R2 | 0.02850242 | N-term +42.01 Da, K +28.03 Da,            | 1494.886353 | 3 | 944.8099976 | 944.4745661 |
| AAQASAAPKAGTATGR            | P56480 | 0          | N-term +42.01 Da, K +28.03 Da,            | 1495.814209 | 2 | 749.9055176 | 749.9022576 |
| TTASPSQVR                   | P09528 | 0.00062893 | N-term +42.01 Da,                         | 1504.670654 | 2 | 494.7578735 | 494.756541  |
| ASGNAQIGK                   | Q61171 | 0.00064767 | N-term +42.01 Da, K +28.03 Da,            | 1507.241211 | 2 | 458.2479858 | 458.2483515 |
| MNNQKQKPTLSGQR              | Q9CQC6 | 0.00064144 | N-term +42.01 Da, K +28.03 Da,            | 1509.615234 | 3 | 619.3317871 | 619.3317511 |
| AAEAAGGKYR                  | O35382 | 0.00059666 | N-term +42.01 Da, K +28.03 Da,            | 1530.251953 | 2 | 532.2799072 | 532.2801831 |
| AENPGLNHR                   | O35344 | 0          | N-term +42.01 Da,                         | 1530.478271 | 2 | 589.7771606 | 589.7810791 |
| AAQASAAPKAGTATGR            | P56480 | 0          | N-term +42.01 Da, K +28.03 Da,            | 1535.359985 | 2 | 749.9020386 | 749.9022576 |
| ASGNAQIGK                   | Q61171 | 0.00058858 | N-term +42.01 Da, K +28.03 Da,            | 1538.146606 | 2 | 458.2478943 | 458.2483515 |
| AAADEPKPKKL                 | P55264 | 0.01557007 | N-term +42.01 Da, K +28.03 Da,            | 1538.488647 | 3 | 431.9306641 | 431.9307412 |
| SSKTASTNSIAQAR              | Q9DAS9 | 0          | N-term +42.01 Da, K +28.03 Da,            | 1549.419312 | 2 | 746.3908081 | 746.3917231 |
| ATTAQQSPQPVAGKR             | Q99J36 | 0          | N-term +42.01 Da, K +28.03 Da,            | 1559.705688 | 2 | 805.4400024 | 805.4364648 |
| ADAAASPVGKR                 | Q6ZPY7 | 0.0006169  | N-term +42.01 Da, K +28.03 Da,            | 1560.941772 | 2 | 556.8063965 | 556.8065652 |
| SAHEVILDFIR                 | Q52KF3 | 0.02936928 | N-term +42.01 Da,                         | 1563.051758 | 3 | 447.9100037 | 447.9102288 |
| AAAAAGPASSQR                | Q9CX34 | 0          | N-term +42.01 Da,                         | 1563.17627  | 2 | 550.2783813 | 550.2781721 |
| ATTAQQSPQPVAGKR             | Q99J36 | 0          | N-term +42.01 Da, K +28.03 Da,            | 1565.154053 | 3 | 537.2952881 | 537.293402  |
| AAQASAAPKAGTATGR            | P56480 | 0          | N-term +42.01 Da, K +28.03 Da,            | 1566.168091 | 2 | 749.9012451 | 749.9022576 |
| AANPSGQGFQNKNR              | Q3TXT3 | 0          | N-term +42.01 Da, K +28.03 Da,            | 1567.166016 | 2 | 779.8900146 | 779.8896816 |
| AQDQGEKENPMR                | Q9CXW4 | 0.00065232 | N-term +42.01 Da, K +28.03 Da,            | 1572.322632 | 2 | 736.8435059 | 736.8435513 |
| THSVTLR                     | P70271 | 0.03113027 | N-term +42.01 Da,                         | 1572.49707  | 2 | 428.2399902 | 428.2377864 |
| SSAGGEGPEAGPGR              | Q3TZZ7 | 0          | N-term +42.01 Da,                         | 1573.967285 | 2 | 636.289978  | 635.7865592 |
| TTASPSQVR                   | P09528 | 0          | N-term +42.01 Da,                         | 1575.258179 | 2 | 494.7565308 | 494.756541  |
| AAQASAAPKAGTATGR            | P56480 | 0          | N-term +42.01 Da, K +28.03 Da,            | 1597.154541 | 2 | 749.9000244 | 749.9022576 |
| AQDQGEKENPMR                | Q9CXW4 | 0          | N-term +42.01 Da, K +28.03 Da,            | 1603.031982 | 2 | 736.8427124 | 736.8435513 |
| GSSSSTALAR                  | Q922Q1 | 0.00064267 | N-term +42.01 Da,                         | 1603.471558 | 2 | 489.7460632 | 489.7461735 |
| SETPAQSSIKQER               | P97360 | 0.01323155 | N-term +42.01 Da, K +28.03 Da,            | 1606.84082  | 2 | 766.3905029 | 765.8915561 |
| AQYKGAASEAGR                | Q9WV03 | 0          | N-term +42.01 Da, K +28.03 Da,            | 1609.491577 | 2 | 639.8300171 | 639.8254868 |
| DEEEEEDEGPVR                | Q9D0J8 | 0          | N-term +42.01 Da,                         | 1609.844116 | 2 | 802.3300171 | 802.3157424 |
| AAAGGAAAAAGR                | P35282 | 0          | N-term +42.01 Da,                         | 1611.558228 | 2 | 507.2587585 | 507.259782  |
| AAEKQIPGGGSGGGGSGGGGGGGGGGR | Q8BMA6 | 0          | N-term +42.01 Da, K +28.03 Da,            | 1615.202393 | 3 | 768.0200195 | 767.3585233 |

|                           |        |            |                                |             |   |             |             |
|---------------------------|--------|------------|--------------------------------|-------------|---|-------------|-------------|
| AAQASAAPKAGTATGR          | P56480 | 0          | N-term +42.01 Da, K +28.03 Da, | 1628.045654 | 2 | 749.9014282 | 749.9022576 |
| AEVGEDSGAR                | P42128 | 0.00280584 | N-term +42.01 Da,              | 1630.66748  | 2 | 516.7299805 | 516.7332635 |
| AQDQGEKENPMR              | Q9CXW4 | 0          | N-term +42.01 Da, K +28.03 Da, | 1634.259155 | 2 | 736.8400269 | 736.8435513 |
| TTASPQVR                  | P09528 | 0          | N-term +42.01 Da,              | 1635.889038 | 2 | 494.7564392 | 494.756541  |
| TDYGEEQR                  | Q9CQK7 | 0.00333333 | N-term +42.01 Da,              | 1642.03125  | 2 | 520.2194214 | 520.2199889 |
| HGSHTDEEFDAR              | P12787 | 0.00597501 | N-term +42.01 Da,              | 1644.152954 | 3 | 525.2103271 | 524.5500891 |
| ATSASSHLNKGIKQ            | P15105 | 0.00059242 | N-term +42.01 Da, K +28.03 Da, | 1646.93457  | 3 | 513.9500122 | 513.9544977 |
| SETAPAAPAAPAPAEKTPVKKKAR  | P43274 | 0          | N-term +42.01 Da, K +28.03 Da, | 1656.097534 | 3 | 848.5       | 847.8302832 |
| SETAPAAPAAPAPAEKTPVKKKAR  | P43274 | 0          | N-term +42.01 Da, K +28.03 Da, | 1657.422729 | 4 | 636.1245117 | 636.1245315 |
| AAGESMAQR                 | Q9D8S4 | 0.0005872  | N-term +42.01 Da,              | 1662.979492 | 2 | 481.7218628 | 481.7216438 |
| SDTAVADTR                 | O70493 | 0.00934094 | N-term +42.01 Da,              | 1664.163086 | 2 | 489.2301331 | 489.2303565 |
| SEAAPAAPAAAAPPAEKAPAKKK   | P15864 | 0          | N-term +42.01 Da, K +28.03 Da, | 1670.243286 | 3 | 742.7662964 | 742.7667313 |
| SEAAPAAPAAAAPPAEKAPAKKKAA | P15864 | 0.00285225 | N-term +42.01 Da, K +28.03 Da, | 1672.460693 | 3 | 790.460022  | 790.1248074 |
| SEAAPAAPAAAAPPAEKAPAKKKAA | P15864 | 0          | N-term +42.01 Da, K +28.03 Da, | 1673.734985 | 4 | 592.8458252 | 592.8454247 |
| SSPPEGKLETK               | Q91XC8 | 0.0006035  | N-term +42.01 Da, K +28.03 Da, | 1675.166138 | 2 | 635.8477173 | 635.8480965 |
| AAAVPQR                   | Q62446 | 0.03111537 | N-term +42.01 Da,              | 1684.46814  | 2 | 377.7099915 | 377.7139468 |
| AQEEEDVR                  | Q505B7 | 0.00282965 | N-term +42.01 Da,              | 1687.460815 | 2 | 509.2279358 | 509.227814  |
| TEADVNP                   | Q9D0T1 | 0.00058893 | N-term +42.01 Da, K +28.03 Da, | 1690.46106  | 2 | 472.2406616 | 472.2401925 |
| MEKPAASTEPPQGSR           | Q9JMD3 | 0.00116686 | N-term +42.01 Da, K +28.03 Da, | 1697.980835 | 3 | 520.257019  | 520.2558482 |
| MEKPAASTEPPQGSR           | Q9JMD3 | 0.00062189 | N-term +42.01 Da, K +28.03 Da, | 1708.235474 | 2 | 779.8796997 | 779.880134  |
| GEEGHDPKEPEQLR            | Q8BG05 | 0.04094118 | N-term +42.01 Da, K +28.03 Da, | 1735.067627 | 3 | 564.9400024 | 564.2725556 |
| MEKPAASTEPPQGSR           | Q9JMD3 | 0          | N-term +42.01 Da, K +28.03 Da, | 1738.864868 | 2 | 779.8812866 | 779.880134  |
| ASAGGGGSESAPEADRPQPR      | P52623 | 0          | N-term +42.01 Da,              | 1739.393677 | 3 | 671.3099976 | 670.6472335 |
| ADTAPQLKR                 | Q9DAR7 | 0.02576568 | N-term +42.01 Da, K +28.03 Da, | 1746.596436 | 2 | 535.3036499 | 535.3036582 |
| MEKDSLRSR                 | Q64261 | 0.00385463 | N-term +42.01 Da, K +28.03 Da, | 1757.389893 | 2 | 518.2611084 | 518.260602  |
| SHGSHETDEEFDAR            | P12787 | 0          | N-term +42.01 Da,              | 1760.238647 | 3 | 553.5599976 | 553.5607655 |
| MDQTQHPSKAAQPLR           | Q9JL3  | 0          | N-term +42.01 Da, K +28.03 Da, | 1767.315552 | 3 | 593.2999878 | 593.3053133 |
| SHGSHETDEEFDAR            | P12787 | 0          | N-term +42.01 Da,              | 1770.123901 | 2 | 829.8400269 | 829.83751   |
| AAAAAAGSGTPR              | Q9CQ36 | 0          | N-term +42.01 Da,              | 1773.775146 | 2 | 522.269104  | 521.7674401 |
| MDQTQHPSKAAQPLR           | Q9JL3  | 0          | N-term +42.01 Da, K +28.03 Da, | 1775.998047 | 2 | 889.4500122 | 889.4543318 |
| ATNDAVLKR                 | P31230 | 0.00792393 | N-term +42.01 Da, K +28.03 Da, | 1778.481201 | 2 | 529.3039551 | 529.3036582 |
| ADEDEGEGIHPSAPHR          | Q3UHD6 | 0.00061501 | N-term +42.01 Da,              | 1779.723511 | 3 | 543.9099731 | 543.9132502 |
| SEAGTPEGPIKK              | Q99J11 | 0          | N-term +42.01 Da, K +28.03 Da, | 1782.701294 | 2 | 656.3621216 | 656.361371  |
| AAPQDVHVR                 | Q6QD59 | 0          | N-term +42.01 Da,              | 1787.376953 | 2 | 517.7715454 | 517.7725251 |
| ADIQTER                   | P62281 | 0.0427907  | N-term +42.01 Da,              | 1790.109497 | 2 | 437.7164917 | 437.7168844 |
| AQERPSCAVEPEHVQR          | P56389 | 0          | N-term +42.01 Da, C +57.02Da,  | 1797.015015 | 3 | 645.6428223 | 645.6427657 |
| KISPEEIER                 | O08712 | 0.01467611 | N-term +42.01 Da, K +28.03 Da, | 1797.332397 | 3 | 390.8872681 | 390.8836797 |
| MDQTQHPSKAAQPLR           | Q9JL3  | 0          | N-term +42.01 Da, K +28.03 Da, | 1797.981323 | 3 | 593.3051758 | 593.3053133 |
| SSSPVNVKKLK               | Q8VEK3 | 0          | N-term +42.01 Da, K +28.03 Da, | 1798.703003 | 3 | 438.2778931 | 438.2781409 |
| SSSPVNVKKLK               | Q8VEK3 | 0          | N-term +42.01 Da, K +28.03 Da, | 1799.929077 | 2 | 656.9126587 | 656.9135732 |

|                        |        |            |                                            |             |   |             |             |
|------------------------|--------|------------|--------------------------------------------|-------------|---|-------------|-------------|
| SHGSHETDEEFDAR         | P12787 | 0          | N-term +42.01 Da,                          | 1801.36499  | 2 | 829.8400269 | 829.83751   |
| SHGSHETDEEFDAR         | P12787 | 0.00064725 | N-term +42.01 Da,                          | 1806.494019 | 2 | 829.8370972 | 829.83751   |
| TMGDAPDFDR             | P10649 | 0.00641711 | N-term +42.01 Da,                          | 1808.140625 | 2 | 584.7501831 | 583.7427739 |
| STGVPSGSSAATGSNR       | P63024 | 0          | N-term +42.01 Da,                          | 1808.615112 | 2 | 739.3451538 | 739.347513  |
| ATNDAVLKR              | P31230 | 0.03151862 | N-term +42.01 Da, K +28.03 Da,             | 1809.444458 | 2 | 529.3026733 | 529.3036582 |
| EVEDMVAVGKEGR          | Q8C196 | 0.00843437 | N-term +42.01 Da, K +28.03 Da,             | 1810.069458 | 2 | 696.3300171 | 695.3375703 |
| ADEVGGEALGR            | A8DUK4 | 0.01174668 | N-term +42.01 Da,                          | 1820.314331 | 2 | 559.2787476 | 558.2700131 |
| METENQKTMEESTKR        | Q05CL8 | 0.02443793 | N-term +42.01 Da, K +28.03 Da,             | 1820.757568 | 3 | 647.6400146 | 647.3081727 |
| MEEASGSAGNDR           | O70404 | 0          | N-term +42.01 Da,                          | 1834.234253 | 2 | 633.2576904 | 633.2567775 |
| SHGSHETDEEFDAR         | P12787 | 0          | N-term +42.01 Da,                          | 1836.818604 | 2 | 829.8400269 | 829.83751   |
| VAPMKGQVCVVTGASR       | Q99L04 | 0.00061652 | N-term +42.01 Da, K +28.03 Da, C +57.02Da, | 1839.436646 | 3 | 577.9823608 | 577.3077776 |
| SETAAPAAPAPAEKTPVKKK   | P43274 | 0          | N-term +42.01 Da, K +28.03 Da,             | 1841.084839 | 4 | 579.5900269 | 579.3399751 |
| SETAAPAAPAPAEKTPVKKK   | P43274 | 0          | N-term +42.01 Da, K +28.03 Da,             | 1842.941406 | 3 | 772.4500122 | 772.1175414 |
| SETAAPAAPAPAEKTPVKKK   | P43274 | 0          | N-term +42.01 Da, K +28.03 Da,             | 1843.116333 | 3 | 772.1199951 | 772.1175414 |
| SGFSSEER               | Q9D819 | 0.00599129 | N-term +42.01 Da,                          | 1850.009644 | 2 | 470.7046814 | 470.7039743 |
| SETAAPAAPAPAEKTPVKKK   | P43274 | 0          | N-term +42.01 Da, K +28.03 Da,             | 1857.180298 | 2 | 1158.170044 | 1157.672674 |
| ASGSMATSEER            | Q9DBC7 | 0          | N-term +42.01 Da,                          | 1858.307861 | 2 | 648.7700195 | 648.7722606 |
| MNTPSQPR               | Q6NZJ6 | 0.00059347 | N-term +42.01 Da,                          | 1861.328735 | 2 | 486.730011  | 486.7320113 |
| SSSPVNVK               | Q8VEK3 | 0.04123711 | N-term +42.01 Da, K +28.03 Da,             | 1864.978149 | 2 | 444.2461548 | 444.2452775 |
| SHGSHETDEEFDAR         | P12787 | 0          | N-term +42.01 Da,                          | 1867.793945 | 2 | 830.3400269 | 829.83751   |
| AETVADTR               | O70492 | 0.00640342 | N-term +42.01 Da,                          | 1868.370239 | 2 | 452.720459  | 452.7221669 |
| SETAAPAAPAPAEKTPVKKK   | P43274 | 0          | N-term +42.01 Da, K +28.03 Da,             | 1872.533569 | 4 | 579.3415527 | 579.3399751 |
| AAQESLHVK              | Q8VBT2 | 0.00062933 | N-term +42.01 Da, K +28.03 Da,             | 1873.042358 | 2 | 526.7918701 | 526.7903837 |
| SETAAPAAPAPAEKTPVKKK   | P43274 | 0          | N-term +42.01 Da, K +28.03 Da,             | 1874.118652 | 3 | 772.4500122 | 772.1175414 |
| YTDSSYDEKR             | P10649 | 0.000625   | N-term +42.01 Da, K +28.03 Da,             | 1875.479858 | 2 | 668.2905884 | 667.2989683 |
| ITWSKPNVNL             | A2ASS6 | 0.01507538 | N-term +42.01 Da, K +28.03 Da,             | 1876.776489 | 3 | 466.6099854 | 466.6015066 |
| ADADKSEAAAGDDGSQQPAEPR | Q8C854 | 0.00591716 | N-term +42.01 Da, K +28.03 Da,             | 1880.906372 | 3 | 795.3599854 | 795.358078  |
| CAYLQAR                | B1AVH7 | 0.02017717 | N-term +42.01 Da, C +57.02Da,              | 1883.887573 | 2 | 462.230011  | 462.2238218 |
| QQIQEHEEEAR            | F6U775 | 0          | N-term +42.01 Da,                          | 1899.000366 | 2 | 783.8608398 | 783.8607875 |
| SETAAPAAPAPAEKTPVKKK   | P43274 | 0          | N-term +42.01 Da, K +28.03 Da,             | 1903.974487 | 4 | 579.8400269 | 579.3399751 |
| ALKQISSNR              | Q9R0P3 | 0.00172315 | N-term +42.01 Da, K +28.03 Da,             | 1910.162109 | 2 | 543.8200073 | 543.8169328 |
| MEAVPEKK               | P14148 | 0.01941264 | N-term +42.01 Da, K +28.03 Da,             | 1910.237549 | 2 | 515.2860107 | 515.2860881 |
| ADPGVPGR               | Q5EBG8 | 0.00887728 | N-term +42.01 Da,                          | 1922.290894 | 2 | 405.7084045 | 405.7088618 |
| AAAAAAPGGGGGEPR        | Q63844 | 0.00333704 | N-term +42.01 Da,                          | 1923.560181 | 2 | 626.3068237 | 626.3074612 |
| GLSSNSAVR              | Q91WSO | 0.0310559  | N-term +42.01 Da,                          | 1923.989746 | 2 | 466.7399902 | 466.7434335 |
| AASLVGKK               | Q9D892 | 0.02945437 | N-term +42.01 Da, K +28.03 Da,             | 1930.260132 | 2 | 436.2834473 | 436.2842051 |
| SSPPEGKLETKAGHPPAVK    | Q91XC8 | 0.01468354 | N-term +42.01 Da, K +28.03 Da,             | 1930.48938  | 4 | 515.039978  | 514.7913892 |
| AQQAADKY               | Q8VDD5 | 0.03116012 | N-term +42.01 Da, K +28.03 Da,             | 1935.966064 | 2 | 482.7399902 | 482.7403595 |
| AATMSEPR               | Q9DCC4 | 0.00116144 | N-term +42.01 Da,                          | 1937.573242 | 2 | 452.7115479 | 452.7132873 |
| AEDIKTKIK              | P56391 | 0.04319554 | N-term +42.01 Da, K +28.03 Da,             | 1958.669067 | 3 | 391.2481689 | 391.2480702 |

|                         |        |            |                                |             |   |             |             |
|-------------------------|--------|------------|--------------------------------|-------------|---|-------------|-------------|
| AATTGSGVKVPR            | Q9CZY3 | 0          | N-term +42.01 Da, K +28.03 Da, | 1979.147217 | 2 | 607.3484497 | 607.3485974 |
| AANATMATSGSAR           | Q91VC3 | 0          | N-term +42.01 Da,              | 1991.366333 | 2 | 625.7906494 | 625.7933296 |
| AAAMDVDTPSGTNSGAGKKR    | P62878 | 0          | N-term +42.01 Da, K +28.03 Da, | 1991.849121 | 3 | 678.3400269 | 678.0091145 |
| ASEAGGIGGGGGGKIR        | E9Q3G8 | 0.0006068  | N-term +42.01 Da, K +28.03 Da, | 1993.848755 | 2 | 735.8900146 | 735.8866076 |
| ASSHTVLMR               | Q9Z0S1 | 0.00741918 | N-term +42.01 Da,              | 1994.536987 | 2 | 522.7695923 | 522.268761  |
| ALKQISSNR               | Q9R0P3 | 0.00439319 | N-term +42.01 Da, K +28.03 Da, | 2002.013306 | 2 | 543.8168945 | 543.8169328 |
| ATNDAVLKR               | P31230 | 0.0017311  | N-term +42.01 Da, K +28.03 Da, | 2003.810425 | 2 | 529.7953491 | 529.3036582 |
| MEEESIKEGSEKPR          | Q8K124 | 0          | N-term +42.01 Da, K +28.03 Da, | 2009.524902 | 3 | 582.960022  | 582.9574683 |
| AATTGSGVKVPR            | Q9CZY3 | 0.00890052 | N-term +42.01 Da, K +28.03 Da, | 2010.38623  | 2 | 607.3481445 | 607.3485974 |
| SKSFQQSSLGR             | Q8K310 | 0          | N-term +42.01 Da, K +28.03 Da, | 2013.945801 | 2 | 647.8404541 | 647.8411369 |
| MDKNELVQKAK             | P63101 | 0.02251591 | N-term +42.01 Da, K +28.03 Da, | 2015.564209 | 3 | 477.6021118 | 477.2742909 |
| SETAPAETAAPAPVEKSPAkk   | P43276 | 0.00279955 | N-term +42.01 Da, K +28.03 Da, | 2015.916504 | 3 | 736.7399902 | 736.0703685 |
| AAGPISEr                | Q8QZY9 | 0.00936524 | N-term +42.01 Da,              | 2020.059937 | 2 | 421.7218933 | 421.7219694 |
| ALKQISSNR               | Q9R0P3 | 0.04197761 | N-term +42.01 Da, K +28.03 Da, | 2032.356812 | 2 | 543.8163452 | 543.8169328 |
| SAPEGLGDAHGDADR         | P58137 | 0          | N-term +42.01 Da,              | 2041.514526 | 2 | 755.3300171 | 755.3318629 |
| MNLSAAHH                | Q8Vcx1 | 0.03600189 | N-term +42.01 Da,              | 2043.259888 | 2 | 461.7099915 | 461.7136212 |
| SKSFQQSSLGR             | Q8K310 | 0          | N-term +42.01 Da, K +28.03 Da, | 2044.249146 | 2 | 648.3400269 | 647.8411369 |
| SKSFQQSSLGR             | Q8K310 | 0          | N-term +42.01 Da, K +28.03 Da, | 2044.725952 | 2 | 647.8400269 | 647.8411369 |
| AAAEEDGGPEGPNR          | O35445 | 0          | N-term +42.01 Da,              | 2046.655884 | 2 | 770.8300171 | 770.8291534 |
| SETAPAAPAAPAPVEKTPVKKK  | P43277 | 0          | N-term +42.01 Da, K +28.03 Da, | 2053.636719 | 3 | 781.460022  | 781.4613081 |
| MESNHKSGDGLSGTQKEAALR   | Q5YD48 | 0          | N-term +42.01 Da, K +28.03 Da, | 2056.233643 | 4 | 579.789978  | 579.2918567 |
| SETAPAAPAAPAPVEKTPVKKK  | P43277 | 0          | N-term +42.01 Da, K +28.03 Da, | 2059.114014 | 4 | 586.5999756 | 586.3478002 |
| SSPEGKLETKAGHPPAVKAGGMR | Q91XC8 | 0.01944167 | N-term +42.01 Da, K +28.03 Da, | 2061.147461 | 4 | 633.3499756 | 632.8467989 |
| ATPAAPASGVR             | Q3UDR8 | 0.00982928 | N-term +42.01 Da,              | 2062.281494 | 2 | 520.2800293 | 520.2801831 |
| AELYVVPGNKER            | Q80VJ2 | 0.02113022 | N-term +42.01 Da, K +28.03 Da, | 2063.437256 | 3 | 501.2828674 | 501.283955  |
| ASNNTASIAQAR            | P63213 | 0.00063131 | N-term +42.01 Da,              | 2066.673584 | 2 | 623.3099976 | 623.3127438 |
| SKSFQQSSLGR             | Q8K310 | 0          | N-term +42.01 Da, K +28.03 Da, | 2075.883789 | 2 | 648.3400269 | 647.8411369 |
| SKSFQQSSLGR             | Q8K310 | 0.00063291 | N-term +42.01 Da, K +28.03 Da, | 2077.334961 | 2 | 647.8400269 | 647.8411369 |
| AGTTTIEAVKR             | D3Z2H9 | 0.00591398 | N-term +42.01 Da, K +28.03 Da, | 2080.835938 | 2 | 608.8400269 | 608.8484304 |
| SETAPAAPAAPAPVEKTPVKKK  | P43277 | 0          | N-term +42.01 Da, K +28.03 Da, | 2089.828613 | 4 | 586.5999756 | 586.3478002 |
| GYMTLPR                 | Q3V118 | 0.04581212 | N-term +42.01 Da,              | 2092.786377 | 2 | 440.730011  | 440.2232903 |
| TMDKSELVQKAK            | Q9CQV8 | 0          | N-term +42.01 Da, K +28.03 Da, | 2093.983643 | 3 | 501.9529114 | 501.9532176 |
| MEVKPPPGRPQPDSGR        | Q8BG05 | 0.00061767 | N-term +42.01 Da, K +28.03 Da, | 2094.166992 | 3 | 606.6500244 | 606.64908   |
| MNSVSPR                 | Q91WT7 | 0.01172871 | N-term +42.01 Da,              | 2095.922607 | 2 | 416.7022705 | 416.7027222 |
| MEVKPPPGRPQPDSGR        | Q8BG05 | 0          | N-term +42.01 Da, K +28.03 Da, | 2099.712402 | 3 | 607.3200073 | 606.64908   |
| SETAPAAPAAPAPVEKTPVKKK  | P43277 | 0.00062112 | N-term +42.01 Da, K +28.03 Da, | 2100.012207 | 3 | 781.460022  | 781.4613081 |
| MQSAPLEQPAKRPR          | Q60710 | 0          | N-term +42.01 Da, K +28.03 Da, | 2112.870117 | 3 | 560.3099976 | 560.3067653 |
| MDKNELVQKAK             | P63101 | 0          | N-term +42.01 Da, K +28.03 Da, | 2117.946777 | 3 | 477.2739258 | 477.2742909 |
| MEGHDPKEPEQLR           | B2RXM2 | 0          | N-term +42.01 Da, K +28.03 Da, | 2118.440674 | 3 | 545.9299927 | 545.9313645 |
| MDKNELVQKAK             | P63101 | 0          | N-term +42.01 Da, K +28.03 Da, | 2118.516113 | 2 | 715.4066772 | 715.4077981 |

|                        |        |            |                                           |             |   |             |             |
|------------------------|--------|------------|-------------------------------------------|-------------|---|-------------|-------------|
| MEGHDPKEPEQLR          | B2RXM2 | 0.00062422 | N-term +42.01 Da, K +28.03 Da,            | 2123.438232 | 2 | 818.3928833 | 818.3934086 |
| MNKAPQPTGPPPAR         | Q6NZJ6 | 0.00065703 | N-term +42.01 Da, K +28.03 Da,            | 2125.003418 | 2 | 766.9099731 | 766.4061211 |
| AASGDPPGSAESYR         | P54822 | 0          | N-term +42.01 Da,                         | 2126.761719 | 2 | 655.289978  | 655.2863922 |
| MEVKPPGPRQPDSGR        | Q8BG05 | 0          | N-term +42.01 Da, K +28.03 Da,            | 2130.681396 | 3 | 606.6489868 | 606.64908   |
| SEAAPAAPAAAPAEKAPAKKK  | P15864 | 0          | N-term +42.01 Da, K +28.03 Da,            | 2130.847168 | 3 | 743.0900269 | 742.7667313 |
| SNGYEDHMAEDCR          | P70372 | 0          | N-term +42.01 Da, C +57.02Da,             | 2143.708008 | 2 | 813.7929688 | 813.3013911 |
| MEGHDPKEPEQLR          | B2RXM2 | 0.00172414 | N-term +42.01 Da, K +28.03 Da,            | 2149.421143 | 3 | 545.9315796 | 545.9313645 |
| YTDSSYDEKR             | P10649 | 0.00059453 | N-term +42.01 Da, K +28.03 Da,            | 2149.509521 | 2 | 668.289978  | 667.2989683 |
| AAPGTPPPSASGGGGGEPR    | Q99N42 | 0          | N-term +42.01 Da,                         | 2150.708496 | 2 | 831.3970947 | 831.3975372 |
| ATSPQKSPLVPKSPKSPPSR   | Q9EPC1 | 0          | N-term +42.01 Da, K +28.03 Da,            | 2152.553223 | 4 | 604.1003418 | 604.1007907 |
| SETAAPAAPAPAEKTPVKK    | P43274 | 0          | N-term +42.01 Da, K +28.03 Da,            | 2155.487305 | 3 | 720.0771484 | 720.0754535 |
| SQAEFDKAAEEVKR         | P31786 | 0          | N-term +42.01 Da, K +28.03 Da,            | 2159.834229 | 2 | 853.4407959 | 853.4414133 |
| MEVKPPGPRQPDSGR        | Q8BG05 | 0.00115607 | N-term +42.01 Da, K +28.03 Da,            | 2161.768555 | 3 | 606.649292  | 606.64908   |
| MNKAPQPTGPPPAR         | Q6NZJ6 | 0.0193837  | N-term +42.01 Da, K +28.03 Da,            | 2163.023438 | 2 | 766.9099731 | 766.4061211 |
| ADEDEGEGIHPSAPH        | Q3UHD6 | 0.04893813 | N-term +42.01 Da,                         | 2164.760254 | 2 | 737.8200073 | 737.3156813 |
| AGTTTIEAVKR            | D3Z2H9 | 0.0084122  | N-term +42.01 Da, K +28.03 Da,            | 2167.24707  | 2 | 608.8499756 | 608.8484304 |
| SETAAPAAPAPAEKTPVKK    | P43274 | 0          | N-term +42.01 Da, K +28.03 Da,            | 2170.995605 | 2 | 1079.609985 | 1079.609542 |
| SQAEFDKAAEEVKR         | P31786 | 0          | N-term +42.01 Da, K +28.03 Da,            | 2171.665283 | 3 | 569.2966309 | 569.2967011 |
| MEEAPHGCPGADSAQAGR     | Q9R060 | 0          | N-term +42.01 Da, C +57.02Da,             | 2177.032227 | 2 | 942.8900146 | 941.893979  |
| MEETEKKVATQEGR         | Q9QXZ6 | 0          | N-term +42.01 Da, K +28.03 Da,            | 2181.400879 | 3 | 578.6300049 | 578.629463  |
| MEETEKKVATQEGR         | Q9QXZ6 | 0.00064226 | N-term +42.01 Da, K +28.03 Da,            | 2183.619629 | 2 | 867.4400024 | 867.4405563 |
| EVKCDMEVSCPEGYTCCR     | P28798 | 0          | N-term +42.01 Da, K +28.03 Da,C +57.02Da, | 2184.444824 | 3 | 784.6500244 | 783.9807456 |
| MEVKPPGPRQPDSGR        | Q8BG05 | 0.02024691 | N-term +42.01 Da, K +28.03 Da,            | 2193.446045 | 3 | 606.6500244 | 606.64908   |
| MDSKQQTVR              | P70694 | 0.00061162 | N-term +42.01 Da, K +28.03 Da,            | 2197.579346 | 2 | 581.7999878 | 581.7978831 |
| AGTTTIEAVKR            | D3Z2H9 | 0.00438596 | N-term +42.01 Da, K +28.03 Da,            | 2200.022461 | 2 | 608.8473511 | 608.8484304 |
| SQAEFDKAAEEVKR         | P31786 | 0.00388027 | N-term +42.01 Da, K +28.03 Da,            | 2204.064209 | 3 | 569.2999878 | 569.2967011 |
| AAAATGLR               | Q9CQZ5 | 0.00742706 | N-term +42.01 Da,                         | 2205.099854 | 2 | 386.7200012 | 386.7192293 |
| AVKTLNPKAEVAR          | P80317 | 0.00743494 | N-term +42.01 Da, K +28.03 Da,            | 2224.656738 | 3 | 499.2999878 | 498.9715997 |
| MLGSEQDPPAKR           | Q9JK81 | 0          | N-term +42.01 Da, K +28.03 Da,            | 2225.787109 | 2 | 699.8599854 | 699.8559299 |
| AAAATGLR               | Q9CQZ5 | 0.00742706 | N-term +42.01 Da,                         | 2236.421631 | 2 | 386.7188721 | 386.7192293 |
| KVDMDKR                | Q3UHC0 | 0.02623907 | N-term +42.01 Da, K +28.03 Da,            | 2240.559814 | 2 | 495.2799988 | 495.2760545 |
| AGNFDSEER              | Q64010 | 0.00891453 | N-term +42.01 Da,                         | 2242.242676 | 2 | 533.7299805 | 533.7254384 |
| SDSRDPASDQMKQWKEQR     | P24270 | 0          | N-term +42.01 Da, K +28.03 Da,            | 2243.411865 | 4 | 573.2782593 | 573.2774778 |
| MDKNELVQKAK            | P63101 | 0.01512859 | N-term +42.01 Da, K +28.03 Da,            | 2246.644043 | 3 | 477.2738647 | 477.2742909 |
| ANIAVQR                | P61087 | 0.03780718 | N-term +42.01 Da,                         | 2248.441406 | 2 | 407.2322693 | 407.2325039 |
| AEMKSPTKAEPATPAEAAQSDR | Q7TPV4 | 0          | N-term +42.01 Da, K +28.03 Da,            | 2257.130371 | 3 | 795.4000244 | 795.3969275 |
| SGYTPDEKLR             | Q3UIU2 | 0.002849   | N-term +42.01 Da, K +28.03 Da,            | 2273.403809 | 2 | 618.8200073 | 618.3169633 |
| AGSSAEQAADYR           | Q9ER72 | 0          | N-term +42.01 Da,                         | 2273.554932 | 2 | 634.2800293 | 634.2811097 |
| SLDMKEHPDAEVQKN        | O55060 | 0.00282167 | N-term +42.01 Da, K +28.03 Da,            | 2273.7854   | 3 | 613.6400146 | 613.6366177 |
| SGYTPDEKLR             | Q3UIU2 | 0          | N-term +42.01 Da, K +28.03 Da,            | 2275.008545 | 2 | 618.3167114 | 618.3169633 |

|                        |        |            |                                |             |   |             |             |
|------------------------|--------|------------|--------------------------------|-------------|---|-------------|-------------|
| MFQGADSQAGKSGSR        | Q6PGH2 | 0          | N-term +42.01 Da, K +28.03 Da, | 2278.743408 | 2 | 798.8737183 | 798.875383  |
| AGTTTIEAVKR            | D3Z2H9 | 0          | N-term +42.01 Da, K +28.03 Da, | 2279.850098 | 2 | 608.8482666 | 608.8484304 |
| ASTFNPR                | Q9JIL4 | 0.01466127 | N-term +42.01 Da,              | 2288.672363 | 2 | 417.7087097 | 417.7088618 |
| VKEHQESLDVTNPR         | P56655 | 0.00063052 | N-term +42.01 Da, K +28.03 Da, | 2290.512939 | 3 | 574.6300049 | 574.6320837 |
| AAAAEGVPATR            | Q9CWG9 | 0.0112532  | N-term +42.01 Da,              | 2297.800049 | 2 | 528.2774658 | 528.2776406 |
| SEAAPAAPAAAPPAEKAPAK   | P15864 | 0          | N-term +42.01 Da, K +28.03 Da, | 2301.05127  | 2 | 957.5200195 | 957.5201952 |
| SEAAPAAPAAAPPAEKAPAK   | P15864 | 0          | N-term +42.01 Da, K +28.03 Da, | 2301.976563 | 3 | 638.6827393 | 638.6825556 |
| SDKSDLKAELER           | O88485 | 0.01508296 | N-term +42.01 Da, K +28.03 Da, | 2304.145752 | 3 | 496.9299927 | 496.9349919 |
| QNYHQDAEAAINR          | P09528 | 0.00064641 | N-term +42.01 Da,              | 2305.957275 | 2 | 785.8599854 | 786.363497  |
| AGTTTIEAVKR            | D3Z2H9 | 0.00060753 | N-term +42.01 Da, K +28.03 Da, | 2310.404785 | 2 | 608.8480835 | 608.8484304 |
| SDKSDLKAELER           | O88485 | 0.0028393  | N-term +42.01 Da, K +28.03 Da, | 2310.555664 | 2 | 744.8977051 | 744.8988497 |
| ADEVGGEALGR            | A8DUK4 | 0.01945137 | N-term +42.01 Da,              | 2324.140381 | 2 | 558.2685547 | 558.2700131 |
| SETVICSSR              | P70460 | 0.00059809 | N-term +42.01 Da, C +57.02Da,  | 2325.49707  | 2 | 540.7542725 | 540.7531415 |
| AVSTGVKVPTR            | Q9D2M8 | 0.00436681 | N-term +42.01 Da, K +28.03 Da, | 2334.730713 | 2 | 542.3300171 | 542.3296758 |
| ATPGEQCAGLR            | Q9R1S7 | 0.00387168 | N-term +42.01 Da, C +57.02Da,  | 2336.958008 | 2 | 601.7800293 | 601.2851401 |
| MEKTELIQKAK            | P68254 | 0.00065189 | N-term +42.01 Da, K +28.03 Da, | 2340.979004 | 3 | 482.6199951 | 482.2863079 |
| MEKTELIQKAK            | P68254 | 0.00062383 | N-term +42.01 Da, K +28.03 Da, | 2343.442139 | 3 | 482.2857971 | 482.2863079 |
| AAPAAPAAAGETGPDAR      | Q9D6Y9 | 0          | N-term +42.01 Da,              | 2353.030762 | 2 | 733.3599854 | 732.857516  |
| ADTYAVVQKR             | Q61152 | 0.046716   | N-term +42.01 Da, K +28.03 Da, | 2353.416016 | 2 | 611.3400269 | 610.8353229 |
| MEKTELIQKAK            | P68254 | 0          | N-term +42.01 Da, K +28.03 Da, | 2357.543701 | 2 | 722.9258423 | 722.9258237 |
| AGTTTIEAVKR            | D3Z2H9 | 0.00281849 | N-term +42.01 Da, K +28.03 Da, | 2358.096436 | 2 | 608.8491211 | 608.8484304 |
| LGRNVNLR               | Q8CG48 | 0.01078029 | N-term +42.01 Da,              | 2362.576416 | 2 | 493.2930298 | 492.2908846 |
| AESSELSASSPAR          | P97310 | 0          | N-term +42.01 Da,              | 2365.756104 | 2 | 710.8300171 | 710.8311644 |
| AVSTGVKVPTR            | Q9D2M8 | 0          | N-term +42.01 Da, K +28.03 Da, | 2366.14209  | 2 | 542.329895  | 542.3296758 |
| AEGGAADLDTQR           | Q8R5H1 | 0          | N-term +42.01 Da,              | 2369.80542  | 2 | 623.289978  | 623.2889347 |
| SETAPAETAAPAPVEKSPAK   | P43276 | 0          | N-term +42.01 Da, K +28.03 Da, | 2374.320313 | 3 | 684.0300293 | 684.0282807 |
| SETAPAETAAPAPVEKSPAK   | P43276 | 0          | N-term +42.01 Da, K +28.03 Da, | 2374.732422 | 2 | 1026.040039 | 1025.538783 |
| SETAAPAAPAPAPVEKTPVKK  | P43277 | 0          | N-term +42.01 Da, K +28.03 Da, | 2376.033447 | 3 | 729.4196777 | 729.4192202 |
| SETAAPAAPAPAPAEKTPVKKK | P43274 | 0          | N-term +42.01 Da, K +28.03 Da, | 2379.287109 | 3 | 772.4400024 | 772.1175414 |
| AAVKTLNPKAEVAR         | P80317 | 0.01371254 | N-term +42.01 Da, K +28.03 Da, | 2381.193604 | 2 | 783.9699707 | 783.4723184 |
| AAPAAPAAAGETGPDAR      | Q9D6Y9 | 0          | N-term +42.01 Da,              | 2384.126709 | 2 | 732.8599854 | 732.857516  |
| SHTILLVQPTKRPEGR       | P84089 | 0          | N-term +42.01 Da, K +28.03 Da, | 2387.186035 | 3 | 634.7000122 | 634.7021726 |
| SEGDSVGDVHGKPSVVYR     | Q9CQU3 | 0          | N-term +42.01 Da, K +28.03 Da, | 2401.18042  | 3 | 682.6699829 | 682.3359962 |
| SSMTQNLRL              | Q9CQR4 | 0.00115942 | N-term +42.01 Da,              | 2402.150879 | 2 | 489.7399902 | 489.7372939 |
| GEVAGGAAPGPPR          | Q61210 | 0.0419972  | N-term +42.01 Da,              | 2402.988281 | 2 | 589.2999878 | 589.3016472 |
| AAVKTLNPKAEVAR         | P80317 | 0          | N-term +42.01 Da, K +28.03 Da, | 2407.2771   | 3 | 522.6507568 | 522.6506378 |
| SETAAPAAPAPAPVEKTPVKK  | P43277 | 0.00060938 | N-term +42.01 Da, K +28.03 Da, | 2407.443115 | 3 | 729.75      | 729.4192202 |
| MQSAPLEQPAKR           | Q60710 | 0          | N-term +42.01 Da, K +28.03 Da, | 2407.683838 | 2 | 713.3800049 | 713.379572  |
| AKIAKTHEDIEAQIR        | Q99NB9 | 0          | N-term +42.01 Da, K +28.03 Da, | 2408.561768 | 3 | 607.6790161 | 607.6791452 |
| ATLTLKSKKEEKDAELDKR    | Q8VC31 | 0          | N-term +42.01 Da, K +28.03 Da, | 2416.463379 | 4 | 587.0800171 | 586.8297064 |



|                          |        |            |                                |             |   |             |             |
|--------------------------|--------|------------|--------------------------------|-------------|---|-------------|-------------|
| SSGASVSALQR              | Q9CXP8 | 0          | N-term +42.01 Da,              | 2422.220459 | 2 | 553.289978  | 552.7858302 |
| VHQVLYR                  | P52196 | 0.01030397 | N-term +42.01 Da,              | 2426.372559 | 2 | 478.769104  | 478.7692535 |
| SFLEADKNAIR              | Q6PDG8 | 0.02621359 | N-term +42.01 Da, K +28.03 Da, | 2431.723633 | 2 | 667.8499756 | 667.3591625 |
| ASLVPLKEKK               | P56135 | 0.00592672 | N-term +42.01 Da, K +28.03 Da, | 2443.637939 | 3 | 413.6073914 | 413.6075982 |
| AADTQVSETLKR             | E9PVA8 | 0          | N-term +42.01 Da, K +28.03 Da, | 2458.759766 | 2 | 694.8699951 | 694.8726345 |
| AAQESLHVKTPLR            | Q8VBT2 | 0          | N-term +42.01 Da, K +28.03 Da, | 2467.485352 | 3 | 507.6300049 | 507.291221  |
| ATSASSHLNKGKIQMY         | P15105 | 0          | N-term +42.01 Da, K +28.03 Da, | 2469.025146 | 3 | 611.9899902 | 611.9891024 |
| AEASAAGADAGSAVAHR        | Q9D0C1 | 0          | N-term +42.01 Da,              | 2470.676758 | 2 | 813.3900146 | 812.8873366 |
| SQDNFGLELAAVEAAVR        | Q68FG2 | 0.03775366 | N-term +42.01 Da,              | 2475.467041 | 2 | 917.4799805 | 916.4628774 |
| ASGADSKGDDLSTAILKQKNRPNR | Q01853 | 0          | N-term +42.01 Da, K +28.03 Da, | 2476.630615 | 4 | 667.8699951 | 667.8648777 |
| AHYHDNYGKNDEVEFVR        | P25688 | 0          | N-term +42.01 Da, K +28.03 Da, | 2486.384766 | 4 | 541.5021973 | 541.502712  |
| AHYHDNYGKNDEVEFVR        | P25688 | 0          | N-term +42.01 Da, K +28.03 Da, | 2489.485352 | 3 | 722         | 721.6678572 |
| AHYHDNYGKNDEVEFVR        | P25688 | 0          | N-term +42.01 Da, K +28.03 Da, | 2491.047119 | 2 | 1082        | 1081.998148 |
| MKHYEVEIR                | Q9CY27 | 0.00592034 | N-term +42.01 Da, K +28.03 Da, | 2492.618408 | 3 | 425.8900146 | 425.5569093 |
| AHYHDNYGKNDEVEFVR        | P25688 | 0          | N-term +42.01 Da, K +28.03 Da, | 2495.909912 | 2 | 1083        | 1081.998148 |
| AHYHDNYGKNDEVEFVR        | P25688 | 0          | N-term +42.01 Da, K +28.03 Da, | 2499.226563 | 3 | 721.6671753 | 721.6678572 |
| SSKVSRTLYEAVR            | P53026 | 0          | N-term +42.01 Da, K +28.03 Da, | 2516.27417  | 3 | 561.2999878 | 560.9686957 |
| AHYHDNYGKNDEVEFVR        | P25688 | 0          | N-term +42.01 Da, K +28.03 Da, | 2517.146484 | 4 | 541.5026245 | 541.502712  |
| VHQVLYR                  | P52196 | 0.03913248 | N-term +42.01 Da,              | 2521.132568 | 2 | 478.769989  | 478.7692535 |
| AKIAQGAMYR               | P14824 | 0.00691489 | N-term +42.01 Da, K +28.03 Da, | 2543.106445 | 2 | 589.821106  | 589.8211607 |
| ASSDIQVKELEKR            | P54227 | 0.00064935 | N-term +42.01 Da, K +28.03 Da, | 2550.22168  | 3 | 534.302063  | 534.3016747 |
| VHQVLYR                  | P52196 | 0.01030397 | N-term +42.01 Da,              | 2552.509521 | 2 | 478.769989  | 478.7692535 |
| SETAPAAPAAPAPAECTPVK     | P43274 | 0          | N-term +42.01 Da, K +28.03 Da, | 2553.785645 | 3 | 668.3699951 | 668.0333657 |
| ASSDIQVKELEKR            | P54227 | 0.01705971 | N-term +42.01 Da, K +28.03 Da, | 2554.172607 | 2 | 800.9500122 | 800.9488739 |
| SETAPAAPAAPAPAEEK        | P43274 | 0.0427708  | N-term +42.01 Da, K +28.03 Da, | 2557.112793 | 2 | 775.4000244 | 774.8988497 |
| SETAPAAPAAPAPAECTPVK     | P43274 | 0          | N-term +42.01 Da, K +28.03 Da, | 2561.464355 | 3 | 668.7000122 | 668.0333657 |
| AAQESLHVKTPLR            | Q8VBT2 | 0          | N-term +42.01 Da, K +28.03 Da, | 2561.539795 | 3 | 507.2900085 | 507.291221  |
| ATESSPLTTH               | Q9CRB3 | 0.00116077 | N-term +42.01 Da,              | 2562.644043 | 2 | 543.2599487 | 543.2591141 |
| ALSDADVQKQ               | P50518 | 0          | N-term +42.01 Da, K +28.03 Da, | 2562.870605 | 2 | 572.7999878 | 572.7958637 |
| AAQESLHVKTPLR            | Q8VBT2 | 0          | N-term +42.01 Da, K +28.03 Da, | 2564.338867 | 2 | 760.4299927 | 760.4331933 |
| EASLAKIKEQTR             | P30115 | 0.00058548 | N-term +42.01 Da, K +28.03 Da, | 2570.616455 | 3 | 491.947113  | 491.2874767 |
| ATSASSHLNKGKIQMY         | P15105 | 0          | N-term +42.01 Da, K +28.03 Da, | 2585.324219 | 3 | 611.9889526 | 611.9891024 |
| MEGYHKPDQKQLQALKDTANR    | P40142 | 0.00062814 | N-term +42.01 Da, K +28.03 Da, | 2586.996582 | 4 | 650.0900269 | 650.0930686 |
| STAGVAAQDIR              | Q99JZ7 | 0          | N-term +42.01 Da,              | 2591.479248 | 2 | 565.7999878 | 565.7936552 |
| AAQESLHVKTPLR            | Q8VBT2 | 0          | N-term +42.01 Da, K +28.03 Da, | 2591.978516 | 3 | 507.2908936 | 507.291221  |
| AGSSSLEAVR               | E9Q453 | 0          | N-term +42.01 Da,              | 2593.920898 | 2 | 509.7615662 | 509.7618236 |
| ASESGLWGGRR              | Q91YI0 | 0          | N-term +42.01 Da, K +28.03 Da, | 2598.957031 | 2 | 609.3162842 | 609.3172973 |
| AGLGHPSAFGR              | Q9CWS0 | 0          | N-term +42.01 Da,              | 2605.127686 | 2 | 556.2855225 | 556.2857996 |
| VHQVLYR                  | P52196 | 0.01030397 | N-term +42.01 Da,              | 2607.544434 | 2 | 478.769989  | 478.7692535 |
| GHGAEYGAEALER            | P01942 | 0          | N-term +42.01 Da,              | 2614.331543 | 2 | 702.3128662 | 701.3233088 |

|                           |        |            |                                           |             |   |             |             |
|---------------------------|--------|------------|-------------------------------------------|-------------|---|-------------|-------------|
| VHQVLYR                   | P52196 | 0.04543347 | N-term +42.01 Da,                         | 2615.989746 | 2 | 479.2799988 | 478.7692535 |
| AHYHDNYGKNDEVEFVR         | P25688 | 0          | N-term +42.01 Da, K +28.03 Da,            | 2621.30835  | 4 | 541.75      | 541.502712  |
| AHYHDNYGKNDEVEFVR         | P25688 | 0          | N-term +42.01 Da, K +28.03 Da,            | 2624.460449 | 3 | 722         | 721.6678572 |
| AHYHDNYGKNDEVEFVR         | P25688 | 0          | N-term +42.01 Da, K +28.03 Da,            | 2629.995361 | 2 | 1082.48999  | 1081.998148 |
| ASESGKLWGGR               | Q91YI0 | 0.00172513 | N-term +42.01 Da, K +28.03 Da,            | 2631.11792  | 2 | 609.3191528 | 609.3172973 |
| ATSASSHLNKGIKQMY          | P15105 | 0.00116754 | N-term +42.01 Da, K +28.03 Da,            | 2631.345947 | 3 | 612.3200073 | 611.9891024 |
| AAQESLHVKTPLR             | Q8VBT2 | 0          | N-term +42.01 Da, K +28.03 Da,            | 2631.504639 | 3 | 507.6300049 | 507.291221  |
| MDMGNQHPSISR              | Q8CI32 | 0          | N-term +42.01 Da,                         | 2632.656494 | 2 | 707.8137817 | 707.8137391 |
| MNVNDLKQR                 | Q91YN5 | 0          | N-term +42.01 Da, K +28.03 Da,            | 2635.304932 | 2 | 594.3134766 | 594.3137002 |
| AGLGHPSAFGR               | Q9CWS0 | 0          | N-term +42.01 Da,                         | 2636.585693 | 2 | 556.2857666 | 556.2857996 |
| AFQVLYR                   | P48377 | 0.01751752 | N-term +42.01 Da,                         | 2638.136719 | 2 | 469.7600098 | 469.7583545 |
| MFSSSAK                   | P62082 | 0.01977261 | N-term +42.01 Da, K +28.03 Da,            | 2639.645752 | 2 | 414.202301  | 414.2020237 |
| AHYHDNYGKNDEVEFVR         | P25688 | 0          | N-term +42.01 Da, K +28.03 Da,            | 2641.628662 | 2 | 1083        | 1081.998148 |
| AESAESGGPPGAQDSAADGGPAEPK | Q8R317 | 0          | N-term +42.01 Da, K +28.03 Da,            | 2646.679688 | 3 | 775.6799927 | 775.0155407 |
| ASESGKLWGGR               | Q91YI0 | 0          | N-term +42.01 Da, K +28.03 Da,            | 2646.868408 | 3 | 406.5499878 | 406.5472903 |
| AESAESGGPPGAQDSAADGGPAEPK | Q8R317 | 0          | N-term +42.01 Da, K +28.03 Da,            | 2648.720703 | 2 | 1162.52002  | 1162.019673 |
| ASESGKLWGGR               | Q91YI0 | 0          | N-term +42.01 Da, K +28.03 Da,            | 2650.067627 | 3 | 406.8800049 | 406.5472903 |
| TEQMTLR                   | P68040 | 0.03464642 | N-term +42.01 Da,                         | 2651.109375 | 2 | 460.730011  | 460.7289373 |
| AHYHDNYGKNDEVEFVR         | P25688 | 0          | N-term +42.01 Da, K +28.03 Da,            | 2652.330078 | 4 | 541.7493286 | 541.502712  |
| ASESGKLWGGR               | Q91YI0 | 0          | N-term +42.01 Da, K +28.03 Da,            | 2661.828125 | 2 | 609.3171997 | 609.3172973 |
| ATSASSHLNKGIKQMY          | P15105 | 0          | N-term +42.01 Da, K +28.03 Da,            | 2661.903809 | 3 | 611.9888306 | 611.9891024 |
| ATKCTKCGPGYSTPLEAMKGP     | P17563 | 0          | N-term +42.01 Da, K +28.03 Da,C +57.02Da, | 2662.130127 | 4 | 635.0700073 | 634.8234722 |
| ADEEKLPPGWEKR             | Q9QUR7 | 0          | N-term +42.01 Da, K +28.03 Da,            | 2663.449463 | 3 | 551.6273804 | 551.6262697 |
| VHQVLYR                   | P52196 | 0.01030397 | N-term +42.01 Da,                         | 2671.442627 | 2 | 478.7684937 | 478.7692535 |
| SQAEFDKAAEEVKR            | P31786 | 0.00115741 | N-term +42.01 Da, K +28.03 Da,            | 2685.573242 | 3 | 569.2999878 | 569.2967011 |
| ATIGPSGLHPGER             | Q3TRM8 | 0.00280112 | N-term +42.01 Da,                         | 2686.960938 | 2 | 668.3400269 | 667.3465864 |
| ATGANATPLDFPSKKR          | Q64213 | 0.00062539 | N-term +42.01 Da, K +28.03 Da,            | 2688.767822 | 3 | 591.6599731 | 591.3282238 |
| ATSASSHLNKGIKQMY          | P15105 | 0          | N-term +42.01 Da, K +28.03 Da,            | 2692.863525 | 3 | 611.9899902 | 611.9891024 |
| ASESGKLWGGR               | Q91YI0 | 0.01931649 | N-term +42.01 Da, K +28.03 Da,            | 2693.212891 | 2 | 609.3162231 | 609.3172973 |
| ADEEKLPPGWEKR             | Q9QUR7 | 0          | N-term +42.01 Da, K +28.03 Da,            | 2694.31665  | 3 | 552.2999878 | 551.6262697 |
| ATIGPSGLHPGER             | Q3TRM8 | 0.0093216  | N-term +42.01 Da,                         | 2694.467529 | 2 | 667.3400269 | 667.3465864 |
| ASSKVTLSVLSR              | Q9D711 | 0.00281373 | N-term +42.01 Da, K +28.03 Da,            | 2694.876953 | 3 | 491.9700012 | 491.9714884 |
| SALLEKQEQQER              | Q5SUE8 | 0          | N-term +42.01 Da, K +28.03 Da,            | 2695.919434 | 2 | 764.9012451 | 764.9019237 |
| ATGANATPLDFPSKKR          | Q64213 | 0          | N-term +42.01 Da, K +28.03 Da,            | 2699.387207 | 2 | 886.4899902 | 886.4886975 |
| ALDPAEQHLR                | Q9CPZ8 | 0          | N-term +42.01 Da,                         | 2702.962158 | 2 | 596.3093872 | 596.3094722 |
| METMASPGKDNYR             | O35345 | 0          | N-term +42.01 Da, K +28.03 Da,            | 2705.260498 | 2 | 785.3599854 | 785.3554373 |
| ASSAQSSGSSGGPAVPTVQR      | Q78PY7 | 0          | N-term +42.01 Da,                         | 2706.993896 | 2 | 936.9543457 | 936.9559484 |
| ADTPSVYETR                | Q5XG73 | 0          | N-term +42.01 Da,                         | 2715.793945 | 2 | 590.7773438 | 590.7776712 |
| AWKSGGASHSELIHNL          | P23506 | 0.00598802 | N-term +42.01 Da, K +28.03 Da,            | 2715.944824 | 4 | 484.2600098 | 484.006427  |
| AHYHDNYGKNDEVEFVR         | P25688 | 0          | N-term +42.01 Da, K +28.03 Da,            | 2716.246582 | 4 | 541.75      | 541.502712  |

|                          |        |            |                                |             |   |             |             |
|--------------------------|--------|------------|--------------------------------|-------------|---|-------------|-------------|
| SSFESALEKK               | Q9CSU0 | 0          | N-term +42.01 Da, K +28.03 Da, | 2728.667969 | 2 | 655.8452148 | 655.845554  |
| AWKSGGASHSELIHNL         | P23506 | 0.00062344 | N-term +42.01 Da, K +28.03 Da, | 2729.498779 | 3 | 645.3300171 | 645.0061439 |
| SQAEDKAAEEVKR            | P31786 | 0          | N-term +42.01 Da, K +28.03 Da, | 2729.921875 | 3 | 569.9699707 | 569.2967011 |
| AGKPVLYHFDGR             | P30115 | 0          | N-term +42.01 Da, K +28.03 Da, | 2730.459229 | 3 | 477.5899963 | 477.2577398 |
| SADAAAGEPLPR             | P70441 | 0.02440215 | N-term +42.01 Da,              | 2732.838379 | 2 | 598.7988892 | 598.7989377 |
| AALGEPVR                 | _sp Q6 | 0.00741525 | N-term +42.01 Da,              | 2737.908936 | 2 | 427.7399902 | 427.7401619 |
| SASNVLLHETSR             | Q8BZ09 | 0          | N-term +42.01 Da,              | 2743.703613 | 2 | 721.8699951 | 721.865341  |
| ADKEAAFDDAVEER           | Q60972 | 0          | N-term +42.01 Da, K +28.03 Da, | 2744.177246 | 2 | 818.37854   | 818.3784791 |
| ASGADSKGDDLSTAILKQKNR    | Q01853 | 0          | N-term +42.01 Da, K +28.03 Da, | 2745.473145 | 4 | 576.3200073 | 576.0656768 |
| AEVEETLKR                | P62627 | 0.00062267 | N-term +42.01 Da, K +28.03 Da, | 2750.488037 | 2 | 572.8135376 | 572.8140563 |
| MREIVHLQAGQCGN           | P68372 | 0.01174068 | N-term +42.01 Da, C +57.02Da,  | 2751.874268 | 2 | 827.8900146 | 827.8930524 |
| MEMTSTSLKR               | Q91VU7 | 0.00063091 | N-term +42.01 Da, K +28.03 Da, | 2754.877197 | 2 | 627.8200073 | 627.3150516 |
| MKVFTGPLPAEGR            | Q91Z53 | 0          | N-term +42.01 Da, K +28.03 Da, | 2756.403076 | 3 | 525.2999878 | 524.6253236 |
| AQDGVLEKSVR              | Q8CAK3 | 0          | N-term +42.01 Da, K +28.03 Da, | 2759.173828 | 2 | 700.3699951 | 700.8726345 |
| AHYHDNYGKNDEVEFVR        | P25688 | 0          | N-term +42.01 Da, K +28.03 Da, | 2760.961182 | 4 | 541.7493286 | 541.502712  |
| SADAAAGEPLPR             | P70441 | 0          | N-term +42.01 Da,              | 2764.377197 | 2 | 598.7982178 | 598.7989377 |
| ANSANTNTVPKLYR           | Q99PM3 | 0          | N-term +42.01 Da, K +28.03 Da, | 2771.649414 | 2 | 810.4199829 | 809.9310153 |
| AGKPVLYHFDGR             | P30115 | 0          | N-term +42.01 Da, K +28.03 Da, | 2783.501465 | 3 | 477.5899963 | 477.2577398 |
| AALTDVQR                 | Q9Z0Y1 | 0.0088634  | N-term +42.01 Da,              | 2792.536377 | 2 | 458.25      | 458.2483515 |
| MEKTELIQKAKLAEQAER       | P68254 | 0.04158879 | N-term +42.01 Da, K +28.03 Da, | 2798.642578 | 4 | 561.5576782 | 561.3173428 |
| MEKTELIQKAKLAEQAER       | P68254 | 0.03245823 | N-term +42.01 Da, K +28.03 Da, | 2801.276855 | 3 | 748.4099731 | 748.0873649 |
| SQAEDKAAEEVKR            | P31786 | 0          | N-term +42.01 Da, K +28.03 Da, | 2808.796875 | 3 | 569.2972412 | 569.2967011 |
| SQAEDKAAEEVKR            | P31786 | 0          | N-term +42.01 Da, K +28.03 Da, | 2810.062012 | 2 | 853.9400024 | 853.4414133 |
| MMAAAAER                 | Q9DCS2 | 0.00228702 | N-term +42.01 Da,              | 2819.984619 | 2 | 446.7040405 | 446.7044076 |
| TASSVLLHTGQK             | Q9JII6 | 0          | N-term +42.01 Da, K +28.03 Da, | 2823.330811 | 2 | 656.3668213 | 656.3669875 |
| AGSEEQWPR                | Q8VE09 | 0          | N-term +42.01 Da,              | 2839.965576 | 2 | 551.2515259 | 551.251623  |
| SQAEDKAAEEVKR            | P31786 | 0          | N-term +42.01 Da, K +28.03 Da, | 2840.583984 | 2 | 853.9500122 | 853.4414133 |
| ASQPPPPKPWESR            | Q9D0K1 | 0          | N-term +42.01 Da, K +28.03 Da, | 2840.908203 | 2 | 822.9199829 | 822.4306508 |
| GAGGALFVHR               | Q9D6J6 | 0.02111984 | N-term +42.01 Da,              | 2845.305176 | 2 | 513.7800293 | 513.7776101 |
| SQAEDKAAEEVKR            | P31786 | 0          | N-term +42.01 Da, K +28.03 Da, | 2848.470947 | 2 | 854.4400024 | 853.4414133 |
| ATLKDITR                 | Q91VR2 | 0.01321138 | N-term +42.01 Da, K +28.03 Da, | 2858.518311 | 2 | 494.2947083 | 494.2953017 |
| AECCVPVCPR               | Q60930 | 0          | N-term +42.01 Da, C +57.02Da,  | 2859.090332 | 2 | 645.2800293 | 645.2754034 |
| MVPSQEPPAAER             | Q3U9N9 | 0          | N-term +42.01 Da,              | 2860.942139 | 2 | 693.3200073 | 693.3219203 |
| ASGADSKGDDLSTAILKQKNRPNR | Q01853 | 0          | N-term +42.01 Da, K +28.03 Da, | 2876.141113 | 4 | 668.1099854 | 667.8648777 |
| AFKDTGKTPVEPEVAIHR       | P60867 | 0          | N-term +42.01 Da, K +28.03 Da, | 2879.750732 | 3 | 698.7199707 | 698.3845097 |
| SQAEDKAAEEVKR            | P31786 | 0          | N-term +42.01 Da, K +28.03 Da, | 2883.713867 | 3 | 569.2967529 | 569.2967011 |
| AFKDTGKTPVEPEVAIHR       | P60867 | 0          | N-term +42.01 Da, K +28.03 Da, | 2884.808838 | 2 | 1047.569946 | 1047.073126 |
| SDNGELEDKPPAPPVR         | Q8CIN4 | 0          | N-term +42.01 Da, K +28.03 Da, | 2885.436523 | 2 | 896.4400024 | 895.9496029 |
| SLGPLMASMAERNMRLFSGR     | Q9CZA5 | 0.04410399 | N-term +42.01 Da,              | 2885.590332 | 3 | 756.7199707 | 756.0466289 |
| ATEGMILTINHDIHQIR        | Q8BUV3 | 0          | N-term +42.01 Da,              | 2886.879639 | 3 | 593.960022  | 593.293185  |

|                     |        |            |                                           |             |   |             |             |
|---------------------|--------|------------|-------------------------------------------|-------------|---|-------------|-------------|
| SDNGELEDKPPAPPVR    | Q8CIN4 | 0          | N-term +42.01 Da, K +28.03 Da,            | 2889.001221 | 3 | 598.3099976 | 597.6354941 |
| ATEGMILTNDHQIR      | Q8BUV3 | 0          | N-term +42.01 Da,                         | 2890.976807 | 3 | 593.2922974 | 593.293185  |
| SQAEFDKAAEEVKR      | P31786 | 0.00283126 | N-term +42.01 Da, K +28.03 Da,            | 2891.550537 | 2 | 853.4417114 | 853.4414133 |
| AQNLKDLAGR          | Q35129 | 0          | N-term +42.01 Da, K +28.03 Da,            | 2892.570068 | 2 | 578.3268433 | 578.3276648 |
| ATEGMILTNDHQIR      | Q8BUV3 | 0          | N-term +42.01 Da,                         | 2897.80127  | 2 | 889.4400024 | 889.4361392 |
| AGKPVLYHFYFNAR      | P10648 | 0          | N-term +42.01 Da, K +28.03 Da,            | 2905.101563 | 3 | 481.6000061 | 481.6016179 |
| MDALEKGAVTSGPAPRGR  | Q99KK2 | 0.0038674  | N-term +42.01 Da, K +28.03 Da,            | 2906.310303 | 3 | 628.3300171 | 628.3316398 |
| AFKDTGKTPVEPEVAIHR  | P60867 | 0          | N-term +42.01 Da, K +28.03 Da,            | 2910.545654 | 3 | 698.3900146 | 698.3845097 |
| LLNKPKESEMTPPEELQKR | P62317 | 0          | N-term +42.01 Da, K +28.03 Da,            | 2913.946533 | 4 | 564.5700073 | 564.3173428 |
| AQNPSNMEPLR         | Q91W19 | 0          | N-term +42.01 Da,                         | 2914.875244 | 2 | 650.3099976 | 649.8115222 |
| ALSDADVQKQIK        | P50518 | 0          | N-term +42.01 Da, K +28.03 Da,            | 2916.381348 | 2 | 707.4000244 | 707.4010277 |
| SETAPAETAAPAPVEKSPA | P43276 | 0.00060168 | N-term +42.01 Da, K +28.03 Da,            | 2917.946777 | 2 | 948.4799805 | 947.475651  |
| LLNKPKESEMTPPEELQKR | P62317 | 0          | N-term +42.01 Da, K +28.03 Da,            | 2919.44043  | 3 | 752.0900269 | 752.0873649 |
| AQNLKDLAGR          | Q35129 | 0          | N-term +42.01 Da, K +28.03 Da,            | 2922.973389 | 2 | 578.3275146 | 578.3276648 |
| SLSNKLTLDKLDVKGKGR  | P09411 | 0          | N-term +42.01 Da, K +28.03 Da,            | 2925.779541 | 3 | 690.4275513 | 690.4279382 |
| SLSNKLTLDKLDVKGKGR  | P09411 | 0.00058928 | N-term +42.01 Da, K +28.03 Da,            | 2926.031738 | 2 | 1035.140015 | 1035.138269 |
| SQAEFDKAAEEVKR      | P31786 | 0          | N-term +42.01 Da, K +28.03 Da,            | 2932.930908 | 3 | 569.6300049 | 569.2967011 |
| AGKPVLYHFYFNAR      | P10648 | 0          | N-term +42.01 Da, K +28.03 Da,            | 2934.049561 | 2 | 721.899292  | 721.8987886 |
| SQAEFDKAAEEVKR      | P31786 | 0          | N-term +42.01 Da, K +28.03 Da,            | 2934.276123 | 2 | 853.4400024 | 853.4414133 |
| AGKPVLYHFYFNAR      | P10648 | 0          | N-term +42.01 Da, K +28.03 Da,            | 2936.539551 | 3 | 481.6013184 | 481.6016179 |
| SQAEFDKAAEEVKR      | P31786 | 0          | N-term +42.01 Da, K +28.03 Da,            | 2963.937256 | 3 | 569.2961426 | 569.2967011 |
| SQAEFDKAAEEVKR      | P31786 | 0          | N-term +42.01 Da, K +28.03 Da,            | 2964.600098 | 2 | 853.4398193 | 853.4414133 |
| KLCEEHGIIR          | P04939 | 0.00059382 | N-term +42.01 Da, K +28.03 Da,C +57.02Da, | 2965.519043 | 2 | 663.3499756 | 662.8557323 |
| AGKPVLYHFDGR        | P30115 | 0          | N-term +42.01 Da, K +28.03 Da,            | 2972.127197 | 3 | 477.5899963 | 477.2577398 |
| AGGEGGVTLGQPHLSR    | Q9Z0N1 | 0          | N-term +42.01 Da,                         | 2980.871826 | 2 | 789.4000244 | 789.4051647 |
| AAASGYTDLR          | Q3TSG4 | 0          | N-term +42.01 Da,                         | 2990.759766 | 2 | 533.7600098 | 533.7618236 |
| AGKPVLYHFDGR        | P30115 | 0          | N-term +42.01 Da, K +28.03 Da,            | 2992.161377 | 2 | 715.3822021 | 715.3829715 |
| AQNLKDLAGR          | Q35129 | 0          | N-term +42.01 Da, K +28.03 Da,            | 2992.702148 | 2 | 578.3300171 | 578.3276648 |
| SQAEFDKAAEEVKR      | P31786 | 0          | N-term +42.01 Da, K +28.03 Da,            | 2995.062988 | 3 | 569.2966309 | 569.2967011 |
| SQAEFDKAAEEVKR      | P31786 | 0          | N-term +42.01 Da, K +28.03 Da,            | 2995.213867 | 2 | 853.4400024 | 853.4414133 |
| TFAEDKTYKY          | Q8VCF0 | 0.00282008 | N-term +42.01 Da, K +28.03 Da,            | 2996.799316 | 2 | 682.3449097 | 682.3426469 |
| AGKPVLYHFDGR        | P30115 | 0          | N-term +42.01 Da, K +28.03 Da,            | 3003.483643 | 3 | 477.2578735 | 477.2577398 |
| AEYDLTTR            | P60229 | 0.0017192  | N-term +42.01 Da,                         | 3009.70752  | 2 | 505.743042  | 505.7430995 |
| AAAVSGVVR           | Q8BR90 | 0.00065104 | N-term +42.01 Da,                         | 3017.374512 | 2 | 436.25      | 436.2534365 |
| AQNPSNMEPLR         | Q91W19 | 0          | N-term +42.01 Da,                         | 3025.156494 | 2 | 649.8099976 | 649.8115222 |
| SQAEFDKAAEEVKR      | P31786 | 0          | N-term +42.01 Da, K +28.03 Da,            | 3026.324951 | 3 | 569.2964478 | 569.2967011 |
| ATDMSQGELIHPK       | Q3TEA8 | 0          | N-term +42.01 Da, K +28.03 Da,            | 3031.619141 | 2 | 748.8699951 | 748.87432   |
| AGKPVLYHFDGR        | P30115 | 0          | N-term +42.01 Da, K +28.03 Da,            | 3034.063721 | 3 | 477.2579041 | 477.2577398 |
| SASEDVWR            | Q9QWG7 | 0.020207   | N-term +42.01 Da,                         | 3037.162354 | 2 | 496.2279053 | 496.2276164 |
| ATEEAHIR            | Q9EQK5 | 0.02934103 | N-term +42.01 Da,                         | 3042.308838 | 2 | 472.7600098 | 472.7560095 |

|                          |        |            |                                            |             |   |             |             |
|--------------------------|--------|------------|--------------------------------------------|-------------|---|-------------|-------------|
| AGVGAAFR                 | Q5F285 | 0.00285063 | N-term +42.01 Da,                          | 3049.484619 | 2 | 395.7099915 | 395.7139468 |
| ATDMSQGELIHPK            | Q3TEA8 | 0.0017321  | N-term +42.01 Da, K +28.03 Da,             | 3049.789551 | 2 | 748.3599854 | 748.87432   |
| AQNPSNMEPLR              | Q91W19 | 0          | N-term +42.01 Da,                          | 3055.706543 | 2 | 649.8113403 | 649.8115222 |
| ASSEQAEQPNQPSSPPGSENVVPR | Q9R0A0 | 0          | N-term +42.01 Da,                          | 3056.703125 | 2 | 1267.589966 | 1267.591328 |
| SQAEFDKAAEEVKR           | P31786 | 0          | N-term +42.01 Da, K +28.03 Da,             | 3057.089111 | 3 | 569.296875  | 569.2967011 |
| ASSEQAEQPNQPSSPPGSENVVPR | Q9R0A0 | 0          | N-term +42.01 Da,                          | 3058.751709 | 3 | 845.7299805 | 845.3966442 |
| MQPKVPQLR                | O88908 | 0.00386954 | N-term +42.01 Da, K +28.03 Da,             | 3060.656982 | 2 | 583.8388062 | 583.8393533 |
| TSPEGAQNKEIDCLSPEAQR     | Q3UZ39 | 0          | N-term +42.01 Da, K +28.03 Da, C +57.02Da, | 3061.736572 | 2 | 1151.040039 | 1150.544803 |
| MNQEKLAKLQAQVR           | Q64152 | 0          | N-term +42.01 Da, K +28.03 Da,             | 3063.19043  | 3 | 585.6694336 | 585.6697038 |
| AASKVKQDMPPPGGYGPIDYKR   | Q9ERS2 | 0          | N-term +42.01 Da, K +28.03 Da,             | 3063.42041  | 4 | 626.5900269 | 626.0859833 |
| AGKPVLYHYFDGR            | P30115 | 0          | N-term +42.01 Da, K +28.03 Da,             | 3064.725342 | 3 | 477.2573242 | 477.2577398 |
| SSGALLPKPQMR             | Q9CPQ1 | 0.0028169  | N-term +42.01 Da, K +28.03 Da,             | 3070.559082 | 2 | 677.8786011 | 677.8792074 |
| MNQEKLAKLQAQVR           | Q64152 | 0          | N-term +42.01 Da, K +28.03 Da,             | 3070.7854   | 2 | 878.000061  | 878.0009175 |
| AAAAAAGPEMVR             | P63085 | 0          | N-term +42.01 Da,                          | 3070.86084  | 2 | 578.7921753 | 578.7926006 |
| SEKSVEAAAELSAK           | Q9D0J8 | 0          | N-term +42.01 Da, K +28.03 Da,             | 3073.102783 | 2 | 759.4076538 | 759.4065077 |
| ASGADSKGDDLSTAILKQKN     | Q01853 | 0.00740349 | N-term +42.01 Da, K +28.03 Da,             | 3074.682129 | 3 | 715.7199707 | 715.7181064 |
| SDKPDMAEIEKFDKSK         | P20065 | 0          | N-term +42.01 Da, K +28.03 Da,             | 3078.171631 | 4 | 506.2668762 | 506.2670528 |
| ATSASSHLNKGIKQMYM        | P15105 | 0.00335196 | N-term +42.01 Da, K +28.03 Da,             | 3079.515381 | 3 | 656         | 655.6692641 |
| SDKPDMAEIEKFDKSK         | P20065 | 0.00641026 | N-term +42.01 Da, K +28.03 Da,             | 3083.166016 | 3 | 674.6900024 | 674.6869783 |
| TTKDPSEHPSVTLFR          | Q99JW2 | 0.00889121 | N-term +42.01 Da, K +28.03 Da,             | 3083.331055 | 3 | 639.3300171 | 638.6582988 |
| AASKVKQDMPPPGGYGPIDYKR   | Q9ERS2 | 0.01463907 | N-term +42.01 Da, K +28.03 Da,             | 3084.877441 | 3 | 835.1099854 | 834.4455523 |
| ATPEASGSGEKVEGSEPSVTYYR  | Q9CQX2 | 0          | N-term +42.01 Da, K +28.03 Da,             | 3085.209473 | 2 | 1236.589966 | 1236.082273 |
| ATEGMILTNDHDHQR          | Q8BUB3 | 0          | N-term +42.01 Da,                          | 3086.373535 | 3 | 593.960022  | 593.293185  |
| MEEAELVKGR               | Q9JHU2 | 0          | N-term +42.01 Da, K +28.03 Da,             | 3086.44873  | 2 | 616.3207397 | 616.3211912 |
| SQAEFDKAAEEVKR           | P31786 | 0          | N-term +42.01 Da, K +28.03 Da,             | 3087.331299 | 3 | 569.6300049 | 569.2967011 |
| ATPEASGSGEKVEGSEPSVTYYR  | Q9CQX2 | 0          | N-term +42.01 Da, K +28.03 Da,             | 3087.573242 | 3 | 824.3899536 | 824.3906075 |
| AASKVKQDMPPPGGYGPIDYKR   | Q9ERS2 | 0          | N-term +42.01 Da, K +28.03 Da,             | 3094.234375 | 4 | 626.3400269 | 626.0859833 |
| MNQEKLAKLQAQVR           | Q64152 | 0          | N-term +42.01 Da, K +28.03 Da,             | 3094.310303 | 3 | 585.6699829 | 585.6697038 |
| AGKPVLYHYFDGR            | P30115 | 0.00885878 | N-term +42.01 Da, K +28.03 Da,             | 3095.612793 | 3 | 477.2600098 | 477.2577398 |
| TTKDPSEHPSVTLFR          | Q99JW2 | 0          | N-term +42.01 Da, K +28.03 Da,             | 3097.556396 | 2 | 957.9899902 | 957.48381   |
| AAAAAAGPEMVR             | P63085 | 0          | N-term +42.01 Da,                          | 3100.37207  | 2 | 578.2946777 | 578.7926006 |
| SNMEKHLF                 | Q99LU0 | 0.01032525 | N-term +42.01 Da, K +28.03 Da,             | 3103.312988 | 2 | 538.2650146 | 538.265687  |
| MDATLTAR                 | Q8BGQ7 | 0.00116009 | N-term +42.01 Da,                          | 3106.320557 | 2 | 460.730011  | 460.7289373 |
| TTKDPSEHPSVTLFR          | Q99JW2 | 0          | N-term +42.01 Da, K +28.03 Da,             | 3113.67041  | 3 | 638.6580811 | 638.6582988 |
| ATDELASKLSR              | Q9D8Y0 | 0          | N-term +42.01 Da, K +28.03 Da,             | 3113.74585  | 2 | 630.8432007 | 630.8433454 |
| ATPEASGSGEKVEGSEPSVTYYR  | Q9CQX2 | 0          | N-term +42.01 Da, K +28.03 Da,             | 3115.993408 | 2 | 1236.081665 | 1236.082273 |
| ASGADSKGDDLSTAILKQK      | Q01853 | 0          | N-term +42.01 Da, K +28.03 Da,             | 3116.336426 | 3 | 677.7054443 | 677.7037971 |
| AAAGSAAVSGAGTPVAGPTGR    | Q9Z266 | 0          | N-term +42.01 Da,                          | 3117.682373 | 2 | 884.453125  | 884.4528439 |
| ATPEASGSGEKVEGSEPSVTYYR  | Q9CQX2 | 0          | N-term +42.01 Da, K +28.03 Da,             | 3118.966309 | 3 | 824.3900146 | 824.3906075 |
| ASLVPLKEK                | P56135 | 0.02810078 | N-term +42.01 Da, K +28.03 Da,             | 3119.429932 | 2 | 541.8400269 | 541.8446274 |

|                       |        |            |                                            |             |   |             |             |
|-----------------------|--------|------------|--------------------------------------------|-------------|---|-------------|-------------|
| SSKPKSLEIIGAPFSKGQPR  | Q61176 | 0.00059277 | N-term +42.01 Da, K +28.03 Da,             | 3125.369629 | 4 | 564.0800171 | 564.0795923 |
| AGKPVLYFDGR           | P30115 | 0          | N-term +42.01 Da, K +28.03 Da,             | 3126.720703 | 2 | 715.3800049 | 715.3829715 |
| SQAEDKAAEEVKR         | P31786 | 0          | N-term +42.01 Da, K +28.03 Da,             | 3129.888184 | 3 | 569.6247559 | 569.2967011 |
| AAAAAIVAGAGR          | E9QNR6 | 0          | N-term +42.01 Da,                          | 3130.986816 | 2 | 499.769989  | 499.7725251 |
| AGKPVLYFDGR           | P30115 | 0          | N-term +42.01 Da, K +28.03 Da,             | 3132.187988 | 3 | 477.2574463 | 477.2577398 |
| SIRLLDGVFASLDVLR      | D3YY33 | 0.0127421  | N-term +42.01 Da,                          | 3132.655518 | 3 | 605.6699829 | 606.0157572 |
| QTIDTEYDILNFWNLPK     | E9PWW0 | 0.00334076 | N-term +42.01 Da, K +28.03 Da,             | 3134.142334 | 3 | 727.039978  | 727.3685257 |
| MEQVNLKEKGN           | Q60864 | 0.00887265 | N-term +42.01 Da, K +28.03 Da,             | 3135.880127 | 2 | 758.8900146 | 758.8874275 |
| AEDIKTIKINYKTAPFDSR   | P56391 | 0          | N-term +42.01 Da, K +28.03 Da,             | 3139.614014 | 4 | 595.8400269 | 595.5875161 |
| SEKSVEAAAELSAKDLKEKK  | Q9D0J8 | 0          | N-term +42.01 Da, K +28.03 Da,             | 3140.44873  | 4 | 586.5900269 | 586.5899904 |
| SHPSWLPPKSTGEPLGHVPAR | Q8BFW7 | 0          | N-term +42.01 Da, K +28.03 Da,             | 3143.672119 | 4 | 581.0599976 | 580.810379  |
| ATDELASKLSR           | Q9D8Y0 | 0          | N-term +42.01 Da, K +28.03 Da,             | 3144.49585  | 2 | 630.8430786 | 630.8433454 |
| AAAAYEHLKHLH          | Q9EP69 | 0          | N-term +42.01 Da, K +28.03 Da,             | 3145.25708  | 3 | 431.8999939 | 431.9031854 |
| ASGADSKGDDLSTAILKQK   | Q01853 | 0          | N-term +42.01 Da, K +28.03 Da,             | 3146.713379 | 3 | 677.7033081 | 677.7037971 |
| ASGADSKGDDLSTAILKQK   | Q01853 | 0          | N-term +42.01 Da, K +28.03 Da,             | 3147.254395 | 2 | 1016.549988 | 1016.052057 |
| ATDELASKLSR           | Q9D8Y0 | 0          | N-term +42.01 Da, K +28.03 Da,             | 3149.531738 | 2 | 630.3300171 | 630.8433454 |
| ASLVPLKEK             | P56135 | 0.00438837 | N-term +42.01 Da, K +28.03 Da,             | 3150.291016 | 2 | 541.8433228 | 541.8446274 |
| AGKPVLYFDGR           | P30115 | 0          | N-term +42.01 Da, K +28.03 Da,             | 3158.231201 | 2 | 715.3814087 | 715.3829715 |
| ALKNVFPR              | Q60787 | 0.01469098 | N-term +42.01 Da, K +28.03 Da,             | 3158.306641 | 2 | 507.8099976 | 507.8083787 |
| AGLNSLEAVKR           | Q6IRU2 | 0          | N-term +42.01 Da, K +28.03 Da,             | 3159.889404 | 2 | 614.3549805 | 614.3564224 |
| SQAEDKAAEEVKR         | P31786 | 0          | N-term +42.01 Da, K +28.03 Da,             | 3160.909668 | 3 | 569.6294556 | 569.2967011 |
| AGKPVLYFDGR           | P30115 | 0          | N-term +42.01 Da, K +28.03 Da,             | 3162.618408 | 3 | 477.2572632 | 477.2577398 |
| ADKEAAFDDAVEER        | Q60972 | 0          | N-term +42.01 Da, K +28.03 Da,             | 3168.936768 | 2 | 818.3800049 | 818.3784791 |
| SQAEDKAAEEVKR         | P31786 | 0          | N-term +42.01 Da, K +28.03 Da,             | 3173.870117 | 3 | 569.2999878 | 569.2967011 |
| AQEFVNCKIQSGK         | Q9QUH0 | 0          | N-term +42.01 Da, K +28.03 Da, C +57.02Da, | 3174.339844 | 2 | 803.4130859 | 803.9165191 |
| SSIKVECVLR            | Q64374 | 0.00333519 | N-term +42.01 Da, K +28.03 Da, C +57.02Da, | 3176.184326 | 2 | 630.8499756 | 630.8526583 |
| ASGADSKGDDLSTAILKQK   | Q01853 | 0          | N-term +42.01 Da, K +28.03 Da,             | 3176.97876  | 3 | 677.7044678 | 677.7037971 |
| SSKPKSLEIIGAPFSKGQPR  | Q61176 | 0          | N-term +42.01 Da, K +28.03 Da,             | 3177.321045 | 4 | 564.3300171 | 564.0795923 |
| SSGALLPKPQ            | Q9CPQ1 | 0          | N-term +42.01 Da, K +28.03 Da,             | 3177.396484 | 2 | 534.3077393 | 534.3084092 |
| ADKEAAFDDAVEER        | Q60972 | 0          | N-term +42.01 Da, K +28.03 Da,             | 3179.77124  | 3 | 546.25      | 545.9214116 |
| MNDTVTIR              | P62849 | 0.0006105  | N-term +42.01 Da,                          | 3180.170898 | 2 | 496.25      | 496.2474944 |
| MESAIIEGGASR          | Q62448 | 0          | N-term +42.01 Da,                          | 3181.40332  | 2 | 610.78302   | 610.7824306 |
| MQPASAKWYDR           | Q9R0Q7 | 0          | N-term +42.01 Da, K +28.03 Da,             | 3182.649902 | 2 | 711.8400269 | 711.8453648 |
| IQTLIYDALERPR         | Q8K3F6 | 0.0374053  | N-term +42.01 Da,                          | 3185.305664 | 2 | 815.4400024 | 815.4515833 |
| AGKPVLYFDGR           | P30115 | 0          | N-term +42.01 Da, K +28.03 Da,             | 3189.166748 | 2 | 715.3828735 | 715.3829715 |
| AGLNSLEAVKR           | Q6IRU2 | 0          | N-term +42.01 Da, K +28.03 Da,             | 3190.485107 | 2 | 614.355835  | 614.3564224 |
| AVSVTPIR              | Q9JKP5 | 0.00692226 | N-term +42.01 Da,                          | 3190.990479 | 2 | 442.7600098 | 442.763637  |
| AKNGSEADIDESLYSR      | Q02053 | 0.00065833 | N-term +42.01 Da, K +28.03 Da,             | 3191.155518 | 2 | 913.4199829 | 912.9341504 |
| ASGVQVADEVCR          | Q9R0P5 | 0.00282805 | N-term +42.01 Da, C +57.02Da,              | 3192.529785 | 2 | 666.8099976 | 666.8142622 |
| AGKPVLYFDGR           | P30115 | 0          | N-term +42.01 Da, K +28.03 Da,             | 3193.741943 | 3 | 477.2574158 | 477.2577398 |

|                               |        |            |                                            |             |   |             |             |
|-------------------------------|--------|------------|--------------------------------------------|-------------|---|-------------|-------------|
| ADKEAAFDDAVEER                | Q60972 | 0.00063211 | N-term +42.01 Da, K +28.03 Da,             | 3204.982178 | 2 | 818.3800049 | 818.3784791 |
| SEPELKLVAR                    | P08030 | 0          | N-term +42.01 Da, K +28.03 Da,             | 3206.181152 | 2 | 606.3535767 | 606.3533484 |
| ASGADSKGDDLSTAILKQK           | Q01853 | 0          | N-term +42.01 Da, K +28.03 Da,             | 3207.243408 | 3 | 677.7043457 | 677.7037971 |
| SSGALLPKPQ                    | Q9CPQ1 | 0          | N-term +42.01 Da, K +28.03 Da,             | 3207.85376  | 2 | 534.3081665 | 534.3084092 |
| MKETIMNQEKLAKLQAQVR           | Q64152 | 0          | N-term +42.01 Da, K +28.03 Da,             | 3211.981201 | 4 | 597.3400269 | 597.0893685 |
| ETPEHLKQLKFLLR                | Q8VDP4 | 0.01078582 | N-term +42.01 Da, K +28.03 Da,             | 3213.987793 | 4 | 502.2999878 | 501.7964742 |
| SGEVPPNINIKEPR                | Q99JR1 | 0          | N-term +42.01 Da, K +28.03 Da,             | 3214.063477 | 2 | 810.4400024 | 810.4412158 |
| SEKSVEAAAELSAKDLKEKKDKVEEKAGR | Q9D0J8 | 0          | N-term +42.01 Da, K +28.03 Da,             | 3217.257324 | 4 | 854.2399902 | 853.7381813 |
| AGLNSLEAVKR                   | Q6IRU2 | 0.00062617 | N-term +42.01 Da, K +28.03 Da,             | 3221.460449 | 2 | 614.3599854 | 614.3564224 |
| AGKPVLYHYFDGR                 | P30115 | 0          | N-term +42.01 Da, K +28.03 Da,             | 3224.047852 | 3 | 477.2572632 | 477.2577398 |
| ASGVQVADEVCR                  | Q9R0P5 | 0          | N-term +42.01 Da, C +57.02Da,              | 3224.123291 | 2 | 666.8099976 | 666.8142622 |
| AKTEEMVQTEEMETPR              | Q60739 | 0          | N-term +42.01 Da, K +28.03 Da,             | 3228.134033 | 2 | 990.960022  | 989.9584538 |
| ASGADSKGDDLSTAILKQK           | Q01853 | 0.01509814 | N-term +42.01 Da, K +28.03 Da,             | 3231.57666  | 3 | 677.3599854 | 677.7037971 |
| SQGDSNPAIPHAAEDIQGDDR         | Q61206 | 0          | N-term +42.01 Da,                          | 3234.167725 | 2 | 1154.02002  | 1153.517631 |
| SEPELKLVAR                    | P08030 | 0          | N-term +42.01 Da, K +28.03 Da,             | 3236.972168 | 2 | 606.3522949 | 606.3533484 |
| MEAKGGTVKAASGFNATEDAQTLR      | P97429 | 0          | N-term +42.01 Da, K +28.03 Da,             | 3237.657959 | 3 | 851.0999756 | 851.0988816 |
| AAPSEPAGFPR                   | P56213 | 0          | N-term +42.01 Da,                          | 3240.284668 | 2 | 571.2800293 | 571.2854656 |
| ATVAATTKVPEIR                 | Q9WTM5 | 0          | N-term +42.01 Da, K +28.03 Da,             | 3240.360107 | 2 | 713.9199829 | 713.9168447 |
| ALSDADVQKQIKHM                | P50518 | 0          | N-term +42.01 Da, K +28.03 Da,             | 3241.64209  | 3 | 561.3009644 | 561.3029097 |
| SGEVPPNINIKEPR                | Q99JR1 | 0          | N-term +42.01 Da, K +28.03 Da,             | 3244.802979 | 2 | 810.4407959 | 810.4412158 |
| MDDREDLVYQAK                  | P62259 | 0.00596206 | N-term +42.01 Da, K +28.03 Da,             | 3249.765869 | 2 | 776.8667603 | 776.869235  |
| ASASAAASTLSEPPR               | E9PVP0 | 0          | N-term +42.01 Da,                          | 3252.662598 | 2 | 729.3599854 | 729.365174  |
| ASGVQVADEVCR                  | Q9R0P5 | 0          | N-term +42.01 Da, C +57.02Da,              | 3255.074219 | 2 | 666.8131104 | 666.8142622 |
| AVAAAAVAAPAGGGGAR             | Q99L88 | 0          | N-term +42.01 Da,                          | 3256.155518 | 2 | 690.8671875 | 690.3731355 |
| MENQLTKSVEER                  | Q9DC50 | 0          | N-term +42.01 Da, K +28.03 Da,             | 3260.348877 | 2 | 767.3800049 | 767.3825095 |
| AAAAAMAEQEGAR                 | Q9D1H7 | 0          | N-term +42.01 Da,                          | 3260.658691 | 2 | 644.7999878 | 644.8011547 |
| MEAKGGTVKAASGFNATEDAQTLR      | P97429 | 0.03557875 | N-term +42.01 Da, K +28.03 Da,             | 3269.403076 | 3 | 851.4299927 | 851.0988816 |
| AAPSEPAGFPR                   | P56213 | 0          | N-term +42.01 Da,                          | 3270.409668 | 2 | 571.289978  | 571.2854656 |
| ATVAATTKVPEIR                 | Q9WTM5 | 0          | N-term +42.01 Da, K +28.03 Da,             | 3270.772705 | 2 | 713.9159546 | 713.9168447 |
| AAPSEPAGFPR                   | P56213 | 0          | N-term +42.01 Da,                          | 3272.870361 | 2 | 572.2999878 | 571.2854656 |
| TMDKSELVQKAKLAEQAER           | Q9CQV8 | 0          | N-term +42.01 Da, K +28.03 Da,             | 3274.430908 | 4 | 576.3200073 | 576.067525  |
| SGEVPPNINIKEPR                | Q99JR1 | 0          | N-term +42.01 Da, K +28.03 Da,             | 3275.201172 | 2 | 810.4400024 | 810.4412158 |
| WFCPRCVQEKRK                  | Q9D8Y8 | 0.03330162 | N-term +42.01 Da, K +28.03 Da, C +57.02Da, | 3284.239746 | 2 | 896.460022  | 896.4609047 |
| TMDKSELVQKAKLAEQAER           | Q9CQV8 | 0          | N-term +42.01 Da, K +28.03 Da,             | 3288.619141 | 3 | 768.0900269 | 767.7542745 |
| AVPPTYADLGKSAR                | Q60932 | 0          | N-term +42.01 Da, K +28.03 Da,             | 3296.234863 | 2 | 758.4199829 | 758.4119267 |
| SQAEFDKAAEEVKR                | P31786 | 0          | N-term +42.01 Da, K +28.03 Da,             | 3297.492188 | 3 | 569.9699707 | 569.2967011 |
| SDAAVDTSEITTKDLK              | P26350 | 0.01033592 | N-term +42.01 Da, K +28.03 Da,             | 3299.220703 | 2 | 939.9799805 | 939.9807666 |
| MNFSGKYQ                      | P12710 | 0.00593632 | N-term +42.01 Da, K +28.03 Da,             | 3299.477295 | 2 | 522.7399902 | 522.7445874 |
| AGQSDKDKVYYTLEEIQKH           | P56395 | 0.00116279 | N-term +42.01 Da, K +28.03 Da,             | 3304.419434 | 3 | 793.4099731 | 793.4127946 |
| MEAKGGTVKAASGFNATEDAQTLR      | P97429 | 0.03241182 | N-term +42.01 Da, K +28.03 Da,             | 3304.82251  | 3 | 851.7600098 | 851.0988816 |

|                                 |        |            |                                           |             |   |             |             |
|---------------------------------|--------|------------|-------------------------------------------|-------------|---|-------------|-------------|
| SGEVPPNINIKIKEPR                | Q99JR1 | 0          | N-term +42.01 Da, K +28.03 Da,            | 3306.388184 | 2 | 810.4425049 | 810.4412158 |
| SSIKVECVLR                      | Q64374 | 0.01322482 | N-term +42.01 Da, K +28.03 Da,C +57.02Da, | 3306.829834 | 2 | 630.8522949 | 630.8526583 |
| AGIAIKLAKDR                     | O08529 | 0          | N-term +42.01 Da, K +28.03 Da,            | 3308.66626  | 3 | 418.6027222 | 418.6028472 |
| ASLKDLEGKWR                     | Q05816 | 0          | N-term +42.01 Da, K +28.03 Da,            | 3309.945313 | 3 | 467.9299927 | 467.6013952 |
| SNLKPDEVHCTGAGTGSPLLEEVR        | Q8VCS2 | 0          | N-term +42.01 Da, K +28.03 Da,C +57.02Da, | 3312.083984 | 3 | 884.75      | 884.7571846 |
| AGQSDKDKVKYYTLEEIQKH            | P56395 | 0.02065912 | N-term +42.01 Da, K +28.03 Da,            | 3313.752441 | 2 | 1190.119995 | 1189.615554 |
| AAGDGDVKLSTLGGSGGSDGSPGGAGATAAR | Q80UU9 | 0          | N-term +42.01 Da, K +28.03 Da,            | 3317.716064 | 3 | 958.789978  | 958.4551111 |
| AAAAASGAGGVAVAGAGGAGPAGR        | E9PU87 | 0          | N-term +42.01 Da,                         | 3326.681641 | 2 | 918.4699707 | 918.9691924 |
| AVPPTYADLGKSAR                  | Q60932 | 0          | N-term +42.01 Da, K +28.03 Da,            | 3327.146973 | 2 | 758.4107666 | 758.4119267 |
| SSIKVECVLR                      | Q64374 | 0.00544959 | N-term +42.01 Da, K +28.03 Da,C +57.02Da, | 3337.246826 | 2 | 630.8521729 | 630.8526583 |
| ADFDTYDDR                       | Q9WUK2 | 0          | N-term +42.01 Da,                         | 3337.399414 | 2 | 580.2305298 | 580.230554  |
| SGEVPPNINIKIKEPR                | Q99JR1 | 0.00060864 | N-term +42.01 Da, K +28.03 Da,            | 3338.874512 | 2 | 810.4400024 | 810.4412158 |
| AAQESLHVKTPL                    | Q8VBT2 | 0.00063654 | N-term +42.01 Da, K +28.03 Da,            | 3339.105225 | 2 | 682.8800049 | 682.3826376 |
| SASSLLEQR                       | E9PW90 | 0.0059108  | N-term +42.01 Da,                         | 3346.546875 | 2 | 516.7700195 | 516.7696486 |
| ASGGGVPTDEEQATGLER              | P19536 | 0          | N-term +42.01 Da,                         | 3348.24292  | 2 | 908.9199829 | 908.4214073 |
| MDKNELVQKAKLAEQAER              | P63101 | 0          | N-term +42.01 Da, K +28.03 Da,            | 3350.858398 | 4 | 558.0599976 | 557.55833   |
| MDKNELVQKAKLAEQAER              | P63101 | 0.02023692 | N-term +42.01 Da, K +28.03 Da,            | 3352.876709 | 3 | 743.75      | 743.0753478 |
| MEKTELIQKAKLAEQAER              | P68254 | 0          | N-term +42.01 Da, K +28.03 Da,            | 3355.079834 | 3 | 748.4199829 | 748.0873649 |
| MEKTELIQKAKLAEQAER              | P68254 | 0          | N-term +42.01 Da, K +28.03 Da,            | 3356.249268 | 4 | 561.5700073 | 561.3173428 |
| AAVPSAVHLPR                     | Q3UFF7 | 0          | N-term +42.01 Da,                         | 3357.624512 | 2 | 580.331543  | 580.3327498 |
| AVPPTYADLGKSAR                  | Q60932 | 0          | N-term +42.01 Da, K +28.03 Da,            | 3358.503906 | 2 | 758.4113159 | 758.4119267 |
| SGEVPPNINIKIKEPR                | Q99JR1 | 0          | N-term +42.01 Da, K +28.03 Da,            | 3360.733154 | 2 | 811.4400024 | 810.4412158 |
| MDKNELVQKAKLAEQAER              | P63101 | 0          | N-term +42.01 Da, K +28.03 Da,            | 3364.512451 | 2 | 1115.119995 | 1114.109383 |
| ASLPPHAGPATPLSPTR               | P21619 | 0          | N-term +42.01 Da,                         | 3364.601318 | 2 | 856.960022  | 856.4599399 |
| AVPPTYADLGKSAR                  | Q60932 | 0.00059773 | N-term +42.01 Da, K +28.03 Da,            | 3365.493408 | 3 | 505.9400024 | 505.9437099 |
| SSIKVECVLR                      | Q64374 | 0.02208047 | N-term +42.01 Da, K +28.03 Da,C +57.02Da, | 3368.278809 | 2 | 630.852478  | 630.8526583 |
| AHGSVVKSEDYAFPTYADR             | P19783 | 0          | N-term +42.01 Da, K +28.03 Da,            | 3381.082275 | 3 | 728.3499756 | 728.3516463 |
| ASSSGNDDDLTIPR                  | Q91WV0 | 0          | N-term +42.01 Da,                         | 3381.520264 | 2 | 745.3449097 | 745.3418965 |
| MDKNELVQKAKLAEQAER              | P63101 | 0          | N-term +42.01 Da, K +28.03 Da,            | 3382.177979 | 4 | 557.8099976 | 557.55833   |
| SGVDIQIVGDDLTVTNPKR             | P21550 | 0.00058651 | N-term +42.01 Da, K +28.03 Da,            | 3388.265869 | 3 | 700.0499878 | 699.7110631 |
| AVPPTYADLGKSAR                  | Q60932 | 0          | N-term +42.01 Da, K +28.03 Da,            | 3389.060547 | 2 | 758.4124756 | 758.4119267 |
| MLAAGVGGQGER                    | D3YY55 | 0.00593312 | N-term +42.01 Da,                         | 3389.554199 | 2 | 594.289978  | 594.2955076 |
| ALETVPKDLR                      | P63271 | 0.00385675 | N-term +42.01 Da, K +28.03 Da,            | 3389.629883 | 2 | 606.3530273 | 606.3533484 |
| SGGKYVDSEGHLYTVPIR              | P49817 | 0.01420599 | N-term +42.01 Da, K +28.03 Da,            | 3390.006592 | 3 | 683.6900024 | 683.3530983 |
| SGEVPPNINIKIKEPR                | Q99JR1 | 0          | N-term +42.01 Da, K +28.03 Da,            | 3392.236328 | 2 | 810.9400024 | 810.4412158 |
| VLSGEDKSNIKAAWGWK               | P01942 | 0.00062228 | N-term +42.01 Da, K +28.03 Da,            | 3397.430176 | 3 | 610.3400269 | 610.3437626 |
| SSIKVECVLR                      | Q64374 | 0.00739958 | N-term +42.01 Da, K +28.03 Da,C +57.02Da, | 3398.618652 | 2 | 630.8529053 | 630.8526583 |
| MNDTVTIR                        | P62849 | 0.01928783 | N-term +42.01 Da,                         | 3401.560547 | 2 | 496.7399902 | 496.2474944 |
| ASKEMFEDTVEER                   | Q60973 | 0          | N-term +42.01 Da, K +28.03 Da,            | 3415.929199 | 2 | 820.8747559 | 820.8772575 |
| AVPPTYADLGKSAR                  | Q60932 | 0          | N-term +42.01 Da, K +28.03 Da,            | 3420.385986 | 2 | 758.4111938 | 758.4119267 |



|                               |        |            |                                           |             |   |             |             |
|-------------------------------|--------|------------|-------------------------------------------|-------------|---|-------------|-------------|
| ASLVPLKEKKLMEVK               | P56135 | 0          | N-term +42.01 Da, K +28.03 Da,            | 3420.503662 | 4 | 467.5499878 | 467.5479732 |
| ASLVPLKEKKLMEVK               | P56135 | 0.00061425 | N-term +42.01 Da, K +28.03 Da,            | 3424.631592 | 3 | 623.3900146 | 623.0615387 |
| SETAPVAQAASTATEKPAAA          | P43275 | 0.00065317 | N-term +42.01 Da, K +28.03 Da,            | 3426.02417  | 2 | 971.9899902 | 971.4918326 |
| ALTPELSR                      | Q9D939 | 0.03114518 | N-term +42.01 Da,                         | 3427.942139 | 2 | 464.7600098 | 464.758552  |
| SSIKVECVLR                    | Q64374 | 0.00888192 | N-term +42.01 Da, K +28.03 Da,C +57.02Da, | 3429.179932 | 2 | 630.8513794 | 630.8526583 |
| AQDLSEKELLR                   | Q61017 | 0          | N-term +42.01 Da, K +28.03 Da,            | 3432.711182 | 2 | 686.3800049 | 686.3775526 |
| AAAAATAAAAAAPSGGGGGGEEER      | D3Z7U4 | 0          | N-term +42.01 Da,                         | 3433.274658 | 2 | 1007.469971 | 1006.967045 |
| SETAPVAQAASTATEKPAAA          | P43275 | 0          | N-term +42.01 Da, K +28.03 Da,            | 3436.141357 | 2 | 971.5       | 971.4918326 |
| ATVDLEKLR                     | P12382 | 0.00061275 | N-term +42.01 Da, K +28.03 Da,            | 3444.134277 | 2 | 558.3300171 | 557.8269663 |
| MNFSGKYQ                      | P12710 | 0.00596853 | N-term +42.01 Da, K +28.03 Da,            | 3445.556641 | 2 | 522.7445068 | 522.7445874 |
| AAAAATAAAAAAPSGGGGGGEEER      | D3Z7U4 | 0          | N-term +42.01 Da,                         | 3446.81665  | 2 | 1007.969971 | 1006.967045 |
| MEKPSPLLGR                    | P97379 | 0.00886802 | N-term +42.01 Da, K +28.03 Da,            | 3451.091064 | 2 | 648.8713379 | 648.8708509 |
| AVPPTYADLGKSAR                | Q60932 | 0          | N-term +42.01 Da, K +28.03 Da,            | 3451.317383 | 2 | 758.4199829 | 758.4119267 |
| ADKPDMGEIASFDKAK              | Q6ZWY8 | 0          | N-term +42.01 Da, K +28.03 Da,            | 3455.57959  | 3 | 616.9799805 | 616.9852468 |
| MLSVAAR                       | Q9CR68 | 0.0408259  | N-term +42.01 Da,                         | 3455.916016 | 2 | 395.2200012 | 395.2180078 |
| SEKSVEAAAELSAKDLKEK           | Q9D0J8 | 0          | N-term +42.01 Da, K +28.03 Da,            | 3459.081787 | 4 | 547.5599976 | 547.5584245 |
| SSIKVECVLR                    | Q64374 | 0.02805999 | N-term +42.01 Da, K +28.03 Da,C +57.02Da, | 3459.610352 | 2 | 630.8515625 | 630.8526583 |
| TASSVLLH                      | Q9JII6 | 0.00885417 | N-term +42.01 Da,                         | 3467.263672 | 2 | 435.2404785 | 435.239995  |
| DESVWEKPLR                    | P11714 | 0          | N-term +42.01 Da, K +28.03 Da,            | 3469.936035 | 2 | 665.3499756 | 664.8458879 |
| SDAAVDTSEITTKDLKEKKEVVEEAENGR | P26350 | 0.018009   | N-term +42.01 Da, K +28.03 Da,            | 3470.823242 | 4 | 859.4400024 | 858.9452577 |
| AVPPTYADLGKSAR                | Q60932 | 0          | N-term +42.01 Da, K +28.03 Da,            | 3472.952881 | 2 | 758.4000244 | 758.4119267 |
| ASGVAVSDGVIK                  | P18760 | 0.00063573 | N-term +42.01 Da, K +28.03 Da,            | 3475.613037 | 2 | 586.8300171 | 586.8297064 |
| NYVAEKISGQKVNEAACDIAR         | Q35490 | 0.00063452 | N-term +42.01 Da, K +28.03 Da,C +57.02Da, | 3479.052734 | 3 | 811.75      | 812.0846835 |
| NYVAEKISGQKVNEAACDIAR         | Q35490 | 0.0005963  | N-term +42.01 Da, K +28.03 Da,C +57.02Da, | 3480.210938 | 3 | 812.4199829 | 812.0846835 |
| AAPAKGENLSLVVHGPDIR           | Q64442 | 0.00060901 | N-term +42.01 Da, K +28.03 Da,            | 3483.705322 | 3 | 691.3800049 | 691.0480091 |
| AFKDTGKTPVEPEVAIHR            | P60867 | 0          | N-term +42.01 Da, K +28.03 Da,            | 3485.20874  | 3 | 699.039978  | 698.3845097 |
| VGVPDETETGALTLNR              | Q8BWT1 | 0.00839454 | N-term +42.01 Da,                         | 3489.562744 | 2 | 734.9000244 | 735.4015592 |
| AGQSDKDVKYTLEEIQKHKDSKSTW     | P56395 | 0          | N-term +42.01 Da, K +28.03 Da,            | 3489.804932 | 4 | 817.9299927 | 817.4290456 |
| SGGLLKALR                     | Q9CQ49 | 0.00335758 | N-term +42.01 Da, K +28.03 Da,            | 3490.000732 | 2 | 492.8132324 | 492.8136612 |
| AGLGHPSAF                     | Q9CWS0 | 0.00597177 | N-term +42.01 Da,                         | 3502.609131 | 2 | 449.7241516 | 449.7245119 |
| AAAAAAAAGAAGGR                | Q8CCS6 | 0          | N-term +42.01 Da,                         | 3519.831787 | 2 | 585.8099976 | 585.3047212 |
| SDAAVDTSEITTKDLKEKKEVVEEAENGR | P26350 | 0.00842993 | N-term +42.01 Da, K +28.03 Da,            | 3523.697754 | 4 | 859.4400024 | 858.9452577 |
| MEKVPDMEIER                   | Q9CX80 | 0.0033389  | N-term +42.01 Da, K +28.03 Da,            | 3527.968262 | 2 | 752.8599854 | 752.3627309 |
| MEKVPDMEIER                   | Q9CX80 | 0.00284576 | N-term +42.01 Da, K +28.03 Da,            | 3529.91748  | 2 | 752.3599854 | 752.3627309 |
| AQQAADKYLYVDKN                | Q8VDD5 | 0          | N-term +42.01 Da, K +28.03 Da,            | 3542.471191 | 2 | 863.4500122 | 862.9463314 |
| AAAAAAAAGAAGGR                | Q8CCS6 | 0          | N-term +42.01 Da,                         | 3545.813721 | 2 | 584.802124  | 585.3047212 |
| PPKFDPNVKKVYLR                | P35979 | 0.00058617 | N-term +42.01 Da, K +28.03 Da,            | 3558.303711 | 4 | 475.7799988 | 475.5239211 |
| AQQAADKYLYVDKN                | Q8VDD5 | 0          | N-term +42.01 Da, K +28.03 Da,            | 3562.348145 | 2 | 862.9500122 | 862.9463314 |
| SAGGDFGNPLR                   | P35279 | 0          | N-term +42.01 Da,                         | 3563.678711 | 2 | 566.7700195 | 566.7727226 |
| AAPAKGENLSLVVHGPDIR           | Q64442 | 0.00840778 | N-term +42.01 Da, K +28.03 Da,            | 3568.101563 | 3 | 691.3800049 | 691.0480091 |

|                               |        |            |                                           |             |   |             |             |
|-------------------------------|--------|------------|-------------------------------------------|-------------|---|-------------|-------------|
| AGKPVLYHFDGR                  | P30115 | 0          | N-term +42.01 Da, K +28.03 Da,            | 3573.407959 | 3 | 477.2600098 | 477.2577398 |
| AAPAKGENLSLVVHGPGDIR          | Q64442 | 0          | N-term +42.01 Da, K +28.03 Da,            | 3575.112793 | 2 | 1036.569946 | 1036.068375 |
| SDAAVDTSEITTKDLKEKKEVVEEAENGR | P26350 | 0          | N-term +42.01 Da, K +28.03 Da,            | 3594.299316 | 4 | 858.9441528 | 858.9452577 |
| EEHPTLLTEAPLNPKANR            | P62737 | 0          | N-term +42.01 Da, K +28.03 Da,            | 3594.601563 | 3 | 701.039978  | 700.7076527 |
| MEQVNELKEKGNKAL               | Q60864 | 0          | N-term +42.01 Da, K +28.03 Da,            | 3597.439941 | 3 | 619.6699829 | 619.6765245 |
| AAPAKGENLSLVVHGPGDIR          | Q64442 | 0.00063613 | N-term +42.01 Da, K +28.03 Da,            | 3598.650879 | 3 | 691.0473022 | 691.0480091 |
| METASTPEATGTGKYIASTQRPDGTWR   | Q8CHP5 | 0          | N-term +42.01 Da, K +28.03 Da,            | 3598.944336 | 3 | 995.1500244 | 994.8135818 |
| AAPAKGENLSLVVHGPGDIR          | Q64442 | 0          | N-term +42.01 Da, K +28.03 Da,            | 3606.116943 | 2 | 1036.069946 | 1036.068375 |
| MFDIPPGAR                     | G3X9D2 | 0.00285388 | N-term +42.01 Da,                         | 3606.192627 | 2 | 522.75      | 523.2604044 |
| MEAADVFHR                     | Q8BFS6 | 0.00064309 | N-term +42.01 Da,                         | 3609.298096 | 2 | 559.2578125 | 559.2583934 |
| EECELETMTGEKVK                | P12710 | 0          | N-term +42.01 Da, K +28.03 Da,C +57.02Da, | 3609.540283 | 2 | 891.9099731 | 890.9208082 |
| HVGDLGNVTAGKDGVANVSIEDR       | P08228 | 0          | N-term +42.01 Da, K +28.03 Da,            | 3612.545166 | 3 | 798.7399902 | 798.4067029 |
| AGKPVLYHFDGR                  | P30115 | 0.00060533 | N-term +42.01 Da, K +28.03 Da,            | 3616.208252 | 3 | 476.9200134 | 477.2577398 |
| AFDGTWKVDNR                   | P55050 | 0          | N-term +42.01 Da, K +28.03 Da,            | 3628.502441 | 2 | 632.8185425 | 632.8196728 |
| QKTGTAEMSSILEER               | Q03265 | 0.00934579 | N-term +42.01 Da, K +28.03 Da,            | 3628.980469 | 2 | 874.9299927 | 875.4380138 |
| SDAAVDTSEITTKDLKEKKEVVEEAENGR | P26350 | 0.00115674 | N-term +42.01 Da, K +28.03 Da,            | 3632.436035 | 3 | 1145.589966 | 1144.924585 |
| ASESGKLW                      | Q91YI0 | 0.04115996 | N-term +42.01 Da, K +28.03 Da,            | 3632.511475 | 2 | 474.2445984 | 474.2452775 |
| MHTEAAEVLLER                  | Q8QZS1 | 0          | N-term +42.01 Da,                         | 3637.020996 | 2 | 721.3599854 | 720.8612124 |
| AAPAKGENLSLVVHGPGDIR          | Q64442 | 0.01080247 | N-term +42.01 Da, K +28.03 Da,            | 3637.172363 | 3 | 691.0499878 | 691.0480091 |
| QKTGTAEMSSILEER               | Q03265 | 0          | N-term +42.01 Da, K +28.03 Da,            | 3641.26416  | 2 | 875.4299927 | 875.4380138 |
| AQQAADKYL                     | Q8VDD5 | 0.00116655 | N-term +42.01 Da, K +28.03 Da,            | 3650.978516 | 2 | 539.2809448 | 539.2823916 |
| AFDGTWKVDNR                   | P55050 | 0          | N-term +42.01 Da, K +28.03 Da,            | 3659.826416 | 2 | 632.8186035 | 632.8196728 |
| MKETIMNQEKLAKLQAQVR           | Q64152 | 0          | N-term +42.01 Da, K +28.03 Da,            | 3664.002197 | 4 | 597.3400269 | 597.0893685 |
| ASLKDLEGKWR                   | Q05816 | 0          | N-term +42.01 Da, K +28.03 Da,            | 3667.339844 | 3 | 467.6000061 | 467.6013952 |
| AAPAKGENLSLVVHGPGDIR          | Q64442 | 0.00386527 | N-term +42.01 Da, K +28.03 Da,            | 3670.163574 | 3 | 691.0499878 | 691.0480091 |
| ASLKDLEGKWR                   | Q05816 | 0.00281215 | N-term +42.01 Da, K +28.03 Da,            | 3672.593506 | 2 | 700.8973389 | 700.8984546 |
| SSSPVNVKCLKVSELKEEL           | Q8VEK3 | 0          | N-term +42.01 Da, K +28.03 Da,            | 3672.672852 | 3 | 756.789978  | 756.7856804 |
| SEKSVEAAAELSAKDLK             | Q9D0J8 | 0.00742312 | N-term +42.01 Da, K +28.03 Da,            | 3674.185547 | 3 | 634.6854858 | 634.6858546 |
| SQAEFDKAAEEVKKR               | P31786 | 0.01937407 | N-term +42.01 Da, K +28.03 Da,            | 3676.014404 | 2 | 852.930481  | 853.4414133 |
| AFDGTWKVDNR                   | P55050 | 0          | N-term +42.01 Da, K +28.03 Da,            | 3691.369629 | 2 | 633.3200073 | 632.8196728 |
| MNGPVDGLCDH                   | Q91X83 | 0          | N-term +42.01 Da, C +57.02Da,             | 3693.349854 | 2 | 629.25      | 628.7553584 |
| TSALTQGLER                    | Q8CF66 | 0          | N-term +42.01 Da,                         | 3693.728271 | 2 | 559.2953491 | 559.2960307 |
| AAETVELHKLKLAELKQECLAR        | Q9D1J3 | 0          | N-term +42.01 Da, K +28.03 Da,C +57.02Da, | 3694.963379 | 4 | 670.1300049 | 669.8833815 |
| SQAEFDKAAEEVKKR               | P31786 | 0          | N-term +42.01 Da, K +28.03 Da,            | 3697.592285 | 3 | 569.6199951 | 569.2967011 |
| ASLKDLEGKWR                   | Q05816 | 0          | N-term +42.01 Da, K +28.03 Da,            | 3698.138184 | 3 | 467.6010437 | 467.6013952 |
| AAETVELHKLKLAELKQEC           | Q9D1J3 | 0          | N-term +42.01 Da, K +28.03 Da,C +57.02Da, | 3698.953613 | 4 | 585.0800171 | 584.8278091 |
| AELGEADEAELQR                 | P62077 | 0          | N-term +42.01 Da,                         | 3700.176514 | 2 | 736.8499756 | 736.8468145 |
| ATNFLAH                       | P57776 | 0.01323829 | N-term +42.01 Da,                         | 3702.73291  | 2 | 408.2056885 | 408.2059548 |
| IENQNSDGGNNTIRR               | Q5DU37 | 0.00641368 | N-term +42.01 Da,                         | 3709.442383 | 2 | 865.4299927 | 865.4142502 |
| SAMEAADVFHR                   | Q8BFS6 | 0          | N-term +42.01 Da,                         | 3710.686768 | 2 | 638.2922363 | 638.2929651 |

|                           |        |            |                                           |             |   |             |             |
|---------------------------|--------|------------|-------------------------------------------|-------------|---|-------------|-------------|
| SAPMPAVVPAAR              | P97823 | 0          | N-term +42.01 Da,                         | 3711.525391 | 2 | 604.8252563 | 604.8264432 |
| MNFSGKY                   | P12710 | 0.01465387 | N-term +42.01 Da, K +28.03 Da,            | 3714.720215 | 2 | 458.7099915 | 458.7152983 |
| ASLLKVDQEVK               | P61290 | 0.0006135  | N-term +42.01 Da, K +28.03 Da,            | 3724.286621 | 2 | 664.3900146 | 664.3952136 |
| ASLKDLEGKWR               | Q05816 | 0          | N-term +42.01 Da, K +28.03 Da,            | 3729.802734 | 3 | 467.6000061 | 467.6013952 |
| KMRDSYIEVLLPLGTDPELR      | Q9R0X4 | 0.00644468 | N-term +42.01 Da, K +28.03 Da,            | 3730.7771   | 3 | 805.4199829 | 805.7699246 |
| SYTPGQPVTAVVQR            | Q9DBG9 | 0          | N-term +42.01 Da,                         | 3736.295898 | 2 | 772.4000244 | 772.9070087 |
| ADMQNLVER                 | P40124 | 0.00065531 | N-term +42.01 Da,                         | 3737.949951 | 2 | 559.2681885 | 559.2689585 |
| SAPMPAVVPAAR              | P97823 | 0          | N-term +42.01 Da,                         | 3741.958252 | 2 | 604.8300171 | 604.8264432 |
| ADPKYADLPGIAR             | Q99KJ8 | 0.00062972 | N-term +42.01 Da, K +28.03 Da,            | 3742.301025 | 2 | 728.8900146 | 728.8933696 |
| SLWVDKYR                  | Q8R323 | 0.00062461 | N-term +42.01 Da, K +28.03 Da,            | 3745.38916  | 2 | 568.8099976 | 568.8085762 |
| ALHVPKAPGFAQ              | P42932 | 0          | N-term +42.01 Da, K +28.03 Da,            | 3747.318848 | 2 | 653.3672485 | 653.3693325 |
| AAPAKGENLSLVVHGPGDIR      | Q64442 | 0          | N-term +42.01 Da, K +28.03 Da,            | 3751.721924 | 3 | 691.0499878 | 691.0480091 |
| GDSASKVISAEEALPGR         | Q9D6Y7 | 0.00064977 | N-term +42.01 Da, K +28.03 Da,            | 3752.483643 | 2 | 879.460022  | 878.9574279 |
| AFDGTWKVDNR               | P55050 | 0.01512097 | N-term +42.01 Da, K +28.03 Da,            | 3754.336426 | 2 | 632.8200073 | 632.8196728 |
| AAPAKGENLSLVVHGPGDIR      | Q64442 | 0          | N-term +42.01 Da, K +28.03 Da,            | 3757.497559 | 3 | 691.7199707 | 691.0480091 |
| ATVVNQDGGQPLIEGKLK        | A1A535 | 0.04088346 | N-term +42.01 Da, K +28.03 Da,            | 3758.8479   | 3 | 636.3699951 | 636.6982057 |
| SAAEVDGLGVVRPH            | Q9JKF1 | 0          | N-term +42.01 Da,                         | 3767.967773 | 2 | 789.4000244 | 789.3995482 |
| MDASPEPQQKGGTLVLVR        | P58735 | 0          | N-term +42.01 Da, K +28.03 Da,            | 3769.546387 | 2 | 998.5300293 | 998.5302371 |
| MNFSGKY                   | P12710 | 0.02110947 | N-term +42.01 Da, K +28.03 Da,            | 3776.502441 | 2 | 458.7147522 | 458.7152983 |
| MDFSKLPK                  | P50516 | 0.00388457 | N-term +42.01 Da, K +28.03 Da,            | 3779.623047 | 2 | 532.7999878 | 532.2964556 |
| AAPQLFR                   | Q99J99 | 0.03956665 | N-term +42.01 Da,                         | 3784.884033 | 2 | 422.7370911 | 422.7374219 |
| SLSNKLTLDKLDVK            | P09411 | 0.00063532 | N-term +42.01 Da, K +28.03 Da,            | 3800.228516 | 3 | 567.3400269 | 567.3449919 |
| AAPQLFR                   | Q99J99 | 0.03956665 | N-term +42.01 Da,                         | 3815.607666 | 2 | 422.7368164 | 422.7374219 |
| PEHFPLVPESPR              | Q80YV2 | 0.01847229 | N-term +42.01 Da,                         | 3816.043457 | 2 | 723.3800049 | 723.872437  |
| MDMVKVN                   | Q283N4 | 0.01936445 | N-term +42.01 Da, K +28.03 Da,            | 3829.865723 | 2 | 454.230011  | 453.7248087 |
| AQEFVNCKIQ                | Q9QUH0 | 0          | N-term +42.01 Da, K +28.03 Da,C +57.02Da, | 3834.692383 | 2 | 653.8248291 | 653.8266408 |
| AQGLIEVER                 | Q8JZL3 | 0.00059916 | N-term +42.01 Da,                         | 3839.936035 | 2 | 529.289978  | 528.7878412 |
| VLSGEDKSNIAAWGK           | P01942 | 0          | N-term +42.01 Da, K +28.03 Da,            | 3867.662354 | 3 | 611.0100098 | 610.3437626 |
| MKFNPFVTSR                | P61255 | 0.00593952 | N-term +42.01 Da, K +28.03 Da,            | 3874.347656 | 2 | 706.3549805 | 706.3555654 |
| SHQTGIQASEDVKEIFAR        | Q91YR1 | 0          | N-term +42.01 Da, K +28.03 Da,            | 3886.216553 | 3 | 696.0237427 | 696.023641  |
| MKVFTGPLPAEGR             | Q91Z53 | 0          | N-term +42.01 Da, K +28.03 Da,            | 3886.548096 | 2 | 786.9299927 | 786.4343472 |
| AAAAAAAAAAGAAGGR          | Q8CCS6 | 0          | N-term +42.01 Da,                         | 3887.01001  | 2 | 620.8231201 | 620.8232783 |
| ATEGDVELELETETSGPERPPEKPR | Q9CR41 | 0          | N-term +42.01 Da, K +28.03 Da,            | 3889.980225 | 3 | 946.1300049 | 946.1330862 |
| ANHAPFETDISTLTR           | Q9QXD6 | 0          | N-term +42.01 Da,                         | 3891.41333  | 2 | 857.9199829 | 857.9233878 |
| MMMAAAAER                 | Q9DCS2 | 0          | N-term +42.01 Da,                         | 3893.181885 | 2 | 512.2199707 | 512.2246501 |
| TEKDAQPQLEEADDDLSKLN      | Q61599 | 0.00061614 | N-term +42.01 Da, K +28.03 Da,            | 3896.735352 | 2 | 1237.579956 | 1236.584846 |
| MNLSAAHHQISL              | Q8VCX1 | 0.03328578 | N-term +42.01 Da,                         | 3897.071777 | 2 | 682.3400269 | 682.3429893 |
| TEKDAQPQLEEADDDLSKLN      | Q61599 | 0          | N-term +42.01 Da, K +28.03 Da,            | 3898.550049 | 2 | 1236.579956 | 1236.584846 |
| ATEGDVELELETETSGPERPPEKPR | Q9CR41 | 0          | N-term +42.01 Da, K +28.03 Da,            | 3898.740479 | 3 | 946.7999878 | 946.1330862 |
| TEKDAQPQLEEADDDLSKLN      | Q61599 | 0          | N-term +42.01 Da, K +28.03 Da,            | 3900.125732 | 3 | 825.0599976 | 824.7256562 |

|                       |        |            |                                           |             |   |             |             |
|-----------------------|--------|------------|-------------------------------------------|-------------|---|-------------|-------------|
| SDAPPLTLDGKDR         | Q9CR21 | 0.02808717 | N-term +42.01 Da, K +28.03 Da,            | 3908.458252 | 2 | 784.4099731 | 784.4199493 |
| ASEVEEQIPVR           | Q8BVA5 | 0          | N-term +42.01 Da,                         | 3909.325439 | 2 | 650.3300171 | 649.8329779 |
| AAAVVEFQR             | Q8BG32 | 0.00116822 | N-term +42.01 Da,                         | 3910.633057 | 2 | 516.7800293 | 516.7772761 |
| ASEVEEQIPVR           | Q8BVA5 | 0          | N-term +42.01 Da,                         | 3911.782471 | 2 | 649.8300171 | 649.8329779 |
| MQNVINTVKGK           | Q9CPX6 | 0          | N-term +42.01 Da, K +28.03 Da,            | 3916.457031 | 2 | 665.3800049 | 665.381583  |
| AAAAAAAAAAGAAGGR      | Q8CCS6 | 0          | N-term +42.01 Da,                         | 3917.703369 | 2 | 620.8225098 | 620.8232783 |
| VLSGEDKSNIAAWGKIGGH   | P01942 | 0.00284738 | N-term +42.01 Da, K +28.03 Da,            | 3930.563721 | 4 | 549.5599976 | 549.0561172 |
| SAKAISEQTGKELLYKY     | Q91V92 | 0.00643432 | N-term +42.01 Da, K +28.03 Da,            | 3935.006104 | 3 | 686.0499878 | 685.7172661 |
| AVPPTYADLGK           | Q60932 | 0          | N-term +42.01 Da, K +28.03 Da,            | 3940.470703 | 2 | 601.8300171 | 601.3267993 |
| AEAALAVR              | P0C872 | 0.00061125 | N-term +42.01 Da,                         | 3940.926758 | 2 | 486.2600098 | 486.2614591 |
| MEMELDSEGR            | Q8CC86 | 0          | N-term +42.01 Da,                         | 3944.200439 | 2 | 619.75      | 619.7550244 |
| ADLEEQLSDEEKVR        | P47754 | 0          | N-term +42.01 Da, K +28.03 Da,            | 3945.529053 | 2 | 865.9199829 | 865.9257938 |
| MDNKLDVFR             | Q3UZ26 | 0.00280269 | N-term +42.01 Da, K +28.03 Da,            | 3948.985596 | 2 | 604.3099976 | 604.3106262 |
| ANHAPFETDISTLTR       | Q9QXD6 | 0          | N-term +42.01 Da,                         | 3954.600342 | 2 | 857.9199829 | 857.9233878 |
| ANHAPFETDISTLTR       | Q9QXD6 | 0.02206964 | N-term +42.01 Da,                         | 3959.398926 | 2 | 858.9199829 | 857.9233878 |
| SSVAVLTQESFAEHR       | Q8VDJ3 | 0          | N-term +42.01 Da,                         | 3965.21582  | 2 | 852.4199829 | 851.9233878 |
| AEDIKTIKIKNYKTAPFDSR  | P56391 | 0.04898336 | N-term +42.01 Da, K +28.03 Da,            | 3966.858154 | 4 | 596.0800171 | 595.5875161 |
| AGTSEAEAEALAAAR       | Q99PW4 | 0          | N-term +42.01 Da,                         | 3971.428467 | 2 | 773.8699951 | 773.8708211 |
| SMHTEAAEVLLER         | Q8QZS1 | 0          | N-term +42.01 Da,                         | 3971.673828 | 2 | 764.3699951 | 764.377227  |
| SMVLGYWDIR            | P48774 | 0.02021696 | N-term +42.01 Da,                         | 3974.599854 | 2 | 641.3175659 | 641.3184512 |
| ADLEEQLSDEEKVR        | P47754 | 0          | N-term +42.01 Da, K +28.03 Da,            | 3976.597412 | 2 | 866.4199829 | 865.9257938 |
| SGSSVAAMKVVVQQLR      | Q80S27 | 0          | N-term +42.01 Da, K +28.03 Da,            | 3981.726318 | 3 | 625.6900024 | 625.3557852 |
| AKCLLTSSLSVR          | Q9D9V3 | 0.0093361  | N-term +42.01 Da, K +28.03 Da,C +57.02Da, | 3982.545654 | 2 | 703.4000244 | 702.8975975 |
| LFCRVAGNTAYYQLR       | E9PUN6 | 0.02935515 | N-term +42.01 Da, C +57.02Da,             | 3982.813721 | 2 | 936.9799805 | 937.4725243 |
| MQDAENVAVPEAAEER      | Q8JZQ9 | 0          | N-term +42.01 Da,                         | 3983.86499  | 2 | 900.9052124 | 900.9070782 |
| SSPAQPAVPAPLADLKIHTK  | P24549 | 0          | N-term +42.01 Da, K +28.03 Da,            | 3984.031006 | 3 | 756.4299927 | 756.4301193 |
| AVPPTYADLGK           | Q60932 | 0          | N-term +42.01 Da, K +28.03 Da,            | 3984.188965 | 2 | 601.3300171 | 601.3267993 |
| PFVELETNLPASR         | O35215 | 0.00063492 | N-term +42.01 Da,                         | 3985.280273 | 2 | 758.9024658 | 757.8961096 |
| AKVEQVLSLEPQHELK      | Q9QY76 | 0          | N-term +42.01 Da, K +28.03 Da,            | 3985.623779 | 3 | 649.7000122 | 649.370089  |
| SASVVSVISR            | P61804 | 0          | N-term +42.01 Da,                         | 3987.949707 | 2 | 523.7955933 | 523.7956662 |
| ADLEEQLSDEEKVR        | P47754 | 0          | N-term +42.01 Da, K +28.03 Da,            | 3988.231689 | 2 | 866.9199829 | 865.9257938 |
| AIAEELAPER            | O35490 | 0.00060827 | N-term +42.01 Da,                         | 3988.447266 | 2 | 570.2999878 | 570.7984062 |
| VVLVGGSTR             | Q8BM72 | 0.02804642 | N-term +42.01 Da,                         | 3991.246094 | 2 | 465.269989  | 465.2743691 |
| AAAKAVLGPLVGAVDQGTSTR | Q64516 | 0          | N-term +42.01 Da, K +28.03 Da,            | 3993.135254 | 3 | 765.7700195 | 765.7725453 |
| SSPAQPAVPAPLADLKIHTK  | P24549 | 0          | N-term +42.01 Da, K +28.03 Da,            | 3996.562744 | 2 | 1134.650024 | 1134.141541 |
| AAAKAVLGPLVGAVDQGTSTR | Q64516 | 0          | N-term +42.01 Da, K +28.03 Da,            | 4000.074463 | 3 | 766.4400024 | 765.7725453 |
| MSPEIALNR             | Q8K3W0 | 0.00061312 | N-term +42.01 Da,                         | 4000.149902 | 2 | 536.2800293 | 536.776419  |
| AAPAKGENLSLVVHGPGDIR  | Q64442 | 0.02851619 | N-term +42.01 Da, K +28.03 Da,            | 4000.347412 | 3 | 691.710022  | 691.0480091 |
| MDFSKLPKIR            | P50516 | 0          | N-term +42.01 Da, K +28.03 Da,            | 4003.608887 | 3 | 444.9299927 | 444.9284545 |
| ADEELEALR             | P56812 | 0.00059137 | N-term +42.01 Da,                         | 4006.334229 | 2 | 544.2672119 | 544.2669391 |

|                               |        |            |                                           |             |   |             |             |
|-------------------------------|--------|------------|-------------------------------------------|-------------|---|-------------|-------------|
| ADDAGAAGGPGGGPGLGRRGGFRGGFG   | P25444 | 0.00594273 | N-term +42.01 Da,                         | 4012.792725 | 3 | 814.0599976 | 814.3828914 |
| MEVHELFR                      | P41216 | 0.000612   | N-term +42.01 Da,                         | 4013.594482 | 2 | 551.7700195 | 551.7711365 |
| SLDIQCEQLSDAR                 | Q91V17 | 0          | N-term +42.01 Da, C +57.02Da,             | 4014.358154 | 2 | 788.8668823 | 788.867224  |
| METEQPEETFPNTEtNGEFGKR        | P61979 | 0.0006079  | N-term +42.01 Da, K +28.03 Da,            | 4014.920166 | 2 | 1322.079956 | 1321.089772 |
| SSPAQPAVPAPLADLKIQHTK         | P24549 | 0          | N-term +42.01 Da, K +28.03 Da,            | 4015.496094 | 3 | 756.4292603 | 756.4301193 |
| MQIFVKLTGK                    | P0CG49 | 0          | N-term +42.01 Da, K +28.03 Da,            | 4020.43457  | 2 | 682.4031982 | 682.4045266 |
| ALDGPEQMELEEGKAGSGLR          | P62196 | 0          | N-term +42.01 Da, K +28.03 Da,            | 4021.019531 | 2 | 1079.530029 | 1079.028257 |
| SASVVSIVSR                    | P61804 | 0.00283607 | N-term +42.01 Da,                         | 4022.112549 | 2 | 523.789978  | 523.7956662 |
| MDDREDLVYQAKLAEQAER           | P62259 | 0          | N-term +42.01 Da, K +28.03 Da,            | 4023.703613 | 3 | 784.3800049 | 784.0496391 |
| AAAKKAVLGPLVGAVDQGTSSSTR      | Q64516 | 0.00059312 | N-term +42.01 Da, K +28.03 Da,            | 4024.831787 | 2 | 1148.160034 | 1148.15518  |
| SSDAQWLTAER                   | Q9CZL5 | 0          | N-term +42.01 Da,                         | 4025.191406 | 2 | 717.8300171 | 717.8284244 |
| METEQPEETFPNTEtNGEFGKR        | P61979 | 0.0006006  | N-term +42.01 Da, K +28.03 Da,            | 4027.602051 | 3 | 881.7199707 | 881.0622738 |
| AAAKKAVLGPLVGAVDQGTSSSTR      | Q64516 | 0          | N-term +42.01 Da, K +28.03 Da,            | 4031.143066 | 3 | 765.7719727 | 765.7725453 |
| MDFSKLPKIR                    | P50516 | 0          | N-term +42.01 Da, K +28.03 Da,            | 4034.193359 | 3 | 444.9299927 | 444.9284545 |
| MDLYKTLR                      | P06537 | 0.04585456 | N-term +42.01 Da, K +28.03 Da,            | 4044.836182 | 2 | 555.3099976 | 555.3048121 |
| AAQALAAQAVASR                 | Q8BLY2 | 0          | N-term +42.01 Da,                         | 4045.105225 | 2 | 635.3482056 | 635.3491289 |
| AASKVKQDMPPPGGYGPIDY          | Q9ERS2 | 0.00116618 | N-term +42.01 Da, K +28.03 Da,            | 4045.987793 | 2 | 1095.550049 | 1095.051003 |
| SVFGKLFAGGGKAGGGPTPQEAIR      | Q9D8B3 | 0          | N-term +42.01 Da, K +28.03 Da,            | 4048.077637 | 4 | 686.6300049 | 686.1328881 |
| SDAAVDTSEITTKDLKEKKEVVEEAENGR | P26350 | 0.00743889 | N-term +42.01 Da, K +28.03 Da,            | 4051.200684 | 4 | 859.1900024 | 858.9452577 |
| MEKTLETVPLER                  | Q88569 | 0          | N-term +42.01 Da, K +28.03 Da,            | 4052.597412 | 2 | 758.4099731 | 758.4079956 |
| MEGPAGYLR                     | E9Q509 | 0          | N-term +42.01 Da,                         | 4053.922607 | 2 | 518.25      | 518.2500369 |
| ASQSQGIQQLLQAEKR              | Q9CR51 | 0          | N-term +42.01 Da, K +28.03 Da,            | 4055.851563 | 2 | 928         | 928.0052436 |
| MEKTLETVPLER                  | Q88569 | 0.00439078 | N-term +42.01 Da, K +28.03 Da,            | 4059.25293  | 3 | 505.9400024 | 505.9410892 |
| ASQSQGIQQLLQAEKR              | Q9CR51 | 0          | N-term +42.01 Da, K +28.03 Da,            | 4060.826904 | 3 | 619.3400269 | 619.0059212 |
| AMKAVCVLKGDPVQGTIHFEQK        | P08228 | 0.0043692  | N-term +42.01 Da, K +28.03 Da,C +57.02Da, | 4061.512695 | 4 | 660.5999756 | 660.6066544 |
| AAAKKAVLGPLVGAVDQGTSSSTR      | Q64516 | 0          | N-term +42.01 Da, K +28.03 Da,            | 4062.161133 | 3 | 765.7700195 | 765.7725453 |
| METEQPEETFPNTEtNGEFGKR        | P61979 | 0.00059067 | N-term +42.01 Da, K +28.03 Da,            | 4066.925049 | 2 | 1322.069946 | 1321.089772 |
| ANHAPFETDISTLTR               | Q9QXD6 | 0          | N-term +42.01 Da,                         | 4070.995361 | 2 | 858.4199829 | 857.9233878 |
| AMKAVCVLKGDPVQGTIHFEQK        | P08228 | 0.00692595 | N-term +42.01 Da, K +28.03 Da,C +57.02Da, | 4072.862305 | 3 | 881.1400146 | 880.4731137 |
| ADLEEQLSDEEKVR                | P47754 | 0.02938343 | N-term +42.01 Da, K +28.03 Da,            | 4080.672852 | 2 | 865.9400024 | 865.9257938 |
| MEKTLETVPLER                  | Q88569 | 0          | N-term +42.01 Da, K +28.03 Da,            | 4083.159912 | 2 | 758.4082031 | 758.4079956 |
| AAAAVVEFQR                    | Q8BG32 | 0          | N-term +42.01 Da,                         | 4083.38623  | 2 | 552.2954102 | 552.2958332 |
| MEGPAGYLR                     | E9Q509 | 0          | N-term +42.01 Da,                         | 4084.668213 | 2 | 518.2489624 | 518.2500369 |
| ASQSQGIQQLLQAEKR              | Q9CR51 | 0          | N-term +42.01 Da, K +28.03 Da,            | 4086.75415  | 2 | 928.5100098 | 928.0052436 |
| SAHLQWMVVR                    | P41105 | 0          | N-term +42.01 Da,                         | 4092.507568 | 2 | 634.8308105 | 634.8320597 |
| AAATLSFGPER                   | Q80TM9 | 0.00840336 | N-term +42.01 Da,                         | 4098.734863 | 2 | 581.2999878 | 581.2985732 |
| ALDGPEQMELEEGKAGSGLR          | P62196 | 0          | N-term +42.01 Da, K +28.03 Da,            | 4100.060059 | 2 | 1080.02002  | 1079.028257 |
| ALDGPEQMELEEGKAGSGLR          | P62196 | 0          | N-term +42.01 Da, K +28.03 Da,            | 4107.205078 | 3 | 719.6900024 | 719.6879299 |
| AAAVVDPQQSVVMR                | P43883 | 0          | N-term +42.01 Da,                         | 4108.260254 | 2 | 756.9000244 | 756.8955865 |
| AEGQVLVLDGR                   | P19253 | 0          | N-term +42.01 Da,                         | 4112.012695 | 2 | 599.8200073 | 599.8249553 |

|                                  |        |            |                                           |             |   |             |             |
|----------------------------------|--------|------------|-------------------------------------------|-------------|---|-------------|-------------|
| AAAAVVEFQR                       | Q8BG32 | 0          | N-term +42.01 Da,                         | 4115.241211 | 2 | 552.2949219 | 552.2958332 |
| MDNKLDFVR                        | Q3UZZ6 | 0          | N-term +42.01 Da, K +28.03 Da,            | 4127.135254 | 2 | 604.3093872 | 604.3106262 |
| VAPEEHPVLLTEAPLNPKANR            | P60710 | 0          | N-term +42.01 Da, K +28.03 Da,            | 4127.547363 | 3 | 788.7700195 | 789.100662  |
| MKRWQACQDLR                      | Q8C0X8 | 0.01934524 | N-term +42.01 Da, K +28.03 Da,C +57.02Da, | 4127.823242 | 2 | 781.8900146 | 781.3899479 |
| ALDGPEQMELEEGKAGSGLR             | P62196 | 0          | N-term +42.01 Da, K +28.03 Da,            | 4130.638672 | 2 | 1079.530029 | 1079.028257 |
| MDLGLAGR                         | Q91X52 | 0.00437637 | N-term +42.01 Da,                         | 4138.043457 | 2 | 437.730011  | 437.7261973 |
| VLSGEDKSNIAAW                    | P01942 | 0.018      | N-term +42.01 Da, K +28.03 Da,            | 4138.716309 | 2 | 808.934021  | 808.4381418 |
| AAAVVDPQQSVVMR                   | P43883 | 0          | N-term +42.01 Da,                         | 4139.717773 | 2 | 756.9000244 | 756.8955865 |
| SHQTGIQASEDVKEIF                 | Q91YR1 | 0          | N-term +42.01 Da, K +28.03 Da,            | 4140.600586 | 2 | 929.960022  | 929.9627105 |
| ATIATMPVPETR                     | Q62189 | 0          | N-term +42.01 Da,                         | 4141.833008 | 2 | 665.3499756 | 664.8475733 |
| SHQTGIQASEDVKEIF                 | Q91YR1 | 0          | N-term +42.01 Da, K +28.03 Da,            | 4144.949219 | 2 | 930.960022  | 929.9627105 |
| SSVAVLTQESFAEHR                  | Q8VDJ3 | 0          | N-term +42.01 Da,                         | 4147.986816 | 2 | 852.9299927 | 851.9233878 |
| AASAIKGLSALR                     | Q9D8T7 | 0          | N-term +42.01 Da, K +28.03 Da,            | 4148.137695 | 2 | 614.3737183 | 614.374615  |
| AEGQVLVLDGR                      | P19253 | 0          | N-term +42.01 Da,                         | 4151.729492 | 2 | 599.8200073 | 599.8249553 |
| AAAAVVEFQR                       | Q8BG32 | 0          | N-term +42.01 Da,                         | 4159.42041  | 2 | 552.2999878 | 552.2958332 |
| AERPEDLNLNNAVITR                 | Q9JKP7 | 0.01175869 | N-term +42.01 Da,                         | 4160.828125 | 2 | 926.4899902 | 925.491969  |
| AGVEFEEKFLKTR                    | P30115 | 0.00595238 | N-term +42.01 Da, K +28.03 Da,            | 4161.205566 | 3 | 551.9699707 | 551.3066484 |
| ASMAAIIASR                       | Q8C3W1 | 0          | N-term +42.01 Da,                         | 4166.614746 | 2 | 531.2700195 | 531.2740435 |
| TMDKSELVQKAKLAEQAER              | Q9CQV8 | 0          | N-term +42.01 Da, K +28.03 Da,            | 4166.82959  | 3 | 767.7399902 | 767.7542745 |
| TTNTVPLHPYWPR                    | P70245 | 0          | N-term +42.01 Da,                         | 4168.395508 | 2 | 812.4199829 | 812.4175432 |
| MDLGLAGR                         | Q91X52 | 0.00437637 | N-term +42.01 Da,                         | 4168.49707  | 2 | 437.730011  | 437.7261973 |
| ANHAPFETDISTLTR                  | Q9QXD6 | 0          | N-term +42.01 Da,                         | 4171.977051 | 2 | 857.9216919 | 857.9233878 |
| ATIATMPVPETR                     | Q62189 | 0.00061576 | N-term +42.01 Da,                         | 4172.362793 | 2 | 664.8446045 | 664.8475733 |
| MKDVP AFLQQSSGPGQAAVWHR          | Q9WVJ2 | 0          | N-term +42.01 Da, K +28.03 Da,            | 4175.070801 | 3 | 899.460022  | 899.1184986 |
| SSVAVLTQESFAEHR                  | Q8VDJ3 | 0          | N-term +42.01 Da,                         | 4179.187012 | 2 | 851.9216919 | 851.9233878 |
| AEGQVLVLDGR                      | P19253 | 0          | N-term +42.01 Da,                         | 4182.16748  | 2 | 599.8242798 | 599.8249553 |
| AAAAGAVVASAASGPAEGKKITELR        | Q8CH25 | 0          | N-term +42.01 Da, K +28.03 Da,            | 4184.15918  | 3 | 799.1199951 | 798.7832217 |
| AMFEQMR                          | Q9DBZ5 | 0.00334448 | N-term +42.01 Da,                         | 4184.319336 | 2 | 477.7119751 | 477.7122327 |
| LPTWPSYLDPCGLSRFTSMSSRSPQSVSAAPK | A2ARQ6 | 0.02941176 | N-term +42.01 Da, K +28.03 Da,C +57.02Da, | 4189.946289 | 3 | 1194.609985 | 1194.256957 |
| STNTDLSLSSYDEGQGSKFIR            | Q9JLR9 | 0          | N-term +42.01 Da, K +28.03 Da,            | 4194.988281 | 2 | 1188.569946 | 1188.071708 |
| STNTDLSLSSYDEGQGSKFIR            | Q9JLR9 | 0          | N-term +42.01 Da, K +28.03 Da,            | 4196.98584  | 2 | 1188.069946 | 1188.071708 |
| AEGQVLVLDGR                      | P19253 | 0.00061538 | N-term +42.01 Da,                         | 4199.09668  | 2 | 599.3200073 | 599.8249553 |
| ANHAPFETDISTLTR                  | Q9QXD6 | 0          | N-term +42.01 Da,                         | 4205.213379 | 2 | 857.9219971 | 857.9233878 |
| ANHAPFETDISTLTR                  | Q9QXD6 | 0          | N-term +42.01 Da,                         | 4207.118164 | 3 | 572.2800293 | 572.284684  |
| AGKPVLYHFDGR                     | P30115 | 0          | N-term +42.01 Da, K +28.03 Da,            | 4207.518555 | 2 | 714.8800049 | 715.3829715 |
| AEVLSAGPESVAGCR                  | Q7TQK4 | 0          | N-term +42.01 Da, C +57.02Da,             | 4213.236816 | 2 | 773.3699951 | 772.872309  |
| FLSNLQTLDLR                      | Q52KR2 | 0.01935484 | N-term +42.01 Da,                         | 4214.533691 | 2 | 682.3699951 | 681.3748125 |
| ADTATTASAAAASAPNASTDAPPFQLGKPR   | Q925N0 | 0          | N-term +42.01 Da, K +28.03 Da,            | 4215.305176 | 3 | 1029.51001  | 1028.845939 |
| NKELDPVQKLFVDKIR                 | P97450 | 0          | N-term +42.01 Da, K +28.03 Da,            | 4215.380371 | 4 | 517.5599976 | 517.8095817 |
| TFEESFQKALR                      | Q8C196 | 0.02114061 | N-term +42.01 Da, K +28.03 Da,            | 4226.367676 | 2 | 712.8800049 | 713.37227   |

|                                 |        |            |                                           |             |   |             |             |
|---------------------------------|--------|------------|-------------------------------------------|-------------|---|-------------|-------------|
| ACGLVASNLNLKPGECKVR             | P16045 | 0          | N-term +42.01 Da, K +28.03 Da,C +57.02Da, | 4227.601563 | 3 | 766.75      | 766.4204608 |
| SGYPKSYNPFDDVEEEDTRPAPWKDVR     | Q9ERB0 | 0          | N-term +42.01 Da, K +28.03 Da,            | 4228.106934 | 4 | 853.4000244 | 853.4007512 |
| AKVEQVLSLEPQHELKFR              | Q9QY76 | 0          | N-term +42.01 Da, K +28.03 Da,            | 4235.793945 | 4 | 563.3200073 | 563.0717673 |
| ANHAPFETDISTLTR                 | Q9QXD6 | 0          | N-term +42.01 Da,                         | 4236.984863 | 2 | 857.921936  | 857.9233878 |
| ANHAPFETDISTLTR                 | Q9QXD6 | 0          | N-term +42.01 Da,                         | 4238.189453 | 3 | 572.2846069 | 572.284684  |
| AAVTEVVVPADGAEAR                | Q9D198 | 0          | N-term +42.01 Da,                         | 4239.308105 | 2 | 798.9199829 | 798.9150312 |
| AKVEQVLSLEPQHELKFR              | Q9QY76 | 0          | N-term +42.01 Da, K +28.03 Da,            | 4240.54541  | 3 | 750.7600098 | 750.4265976 |
| ADAWEEIR                        | Q8CCJ3 | 0.00058445 | N-term +42.01 Da,                         | 4242.395996 | 2 | 516.7399902 | 516.2432665 |
| DEGKCVGILEIFDMLLATTAR           | O08537 | 0.04117922 | N-term +42.01 Da, K +28.03 Da,C +57.02Da, | 4247.075195 | 3 | 851.4299927 | 851.0976015 |
| SIGVPIKVLHEAEGH                 | P62320 | 0          | N-term +42.01 Da, K +28.03 Da,            | 4251.525391 | 3 | 552.6400146 | 552.6420311 |
| SMVLGYWDIR                      | P48774 | 0.00063412 | N-term +42.01 Da,                         | 4251.601074 | 2 | 640.8099976 | 641.3184512 |
| AKVEQVLSLEPQHELKFR              | Q9QY76 | 0          | N-term +42.01 Da, K +28.03 Da,            | 4266.17334  | 4 | 563.0700073 | 563.0717673 |
| ANHAPFETDISTLTR                 | Q9QXD6 | 0          | N-term +42.01 Da,                         | 4267.682617 | 2 | 857.9229736 | 857.9233878 |
| AGQSDKDKVYTYLLEIQKH             | P56395 | 0          | N-term +42.01 Da, K +28.03 Da,            | 4270.299805 | 3 | 793.4000244 | 793.4127946 |
| AAALGAGGAGAGDDDFDQFDKPGAER      | Q9CXK9 | 0.00172612 | N-term +42.01 Da, K +28.03 Da,            | 4270.880371 | 2 | 1304.089966 | 1303.591328 |
| SSVAULTQESFAEHR                 | Q8VDJ3 | 0          | N-term +42.01 Da,                         | 4272.918945 | 2 | 852.4400024 | 851.9233878 |
| NKELDPVQKLFVDKIR                | P97450 | 0          | N-term +42.01 Da, K +28.03 Da,            | 4275.912598 | 4 | 517.8099976 | 517.8095817 |
| SDEFSLADALPEQSSAKPPAVTNTKAGH    | Q8BH93 | 0          | N-term +42.01 Da, K +28.03 Da,            | 4278.459473 | 3 | 989.5       | 989.4962473 |
| ASIVVVGPR                       | O35639 | 0.00172811 | N-term +42.01 Da,                         | 4278.716309 | 2 | 464.2600098 | 464.255979  |
| SIGVPIKVLHEAEGH                 | P62320 | 0.00060024 | N-term +42.01 Da, K +28.03 Da,            | 4282.851074 | 3 | 552.6416626 | 552.6420311 |
| SIFTPTNQIR                      | P70122 | 0          | N-term +42.01 Da,                         | 4283.498047 | 2 | 609.8267212 | 609.8274978 |
| KQPWHKMELR                      | Q8VDD9 | 0.02939759 | N-term +42.01 Da, K +28.03 Da,            | 4288.921387 | 2 | 725.8900146 | 725.9030165 |
| ASWAEPSEPAALR                   | Q35465 | 0          | N-term +42.01 Da,                         | 4294.76416  | 2 | 714.3499756 | 713.851702  |
| MDNKDEDIFKFKGY                  | G5E904 | 0          | N-term +42.01 Da, K +28.03 Da,            | 4299.969238 | 3 | 626.3099976 | 625.9780921 |
| SIMSNGGAVMAMKGN                 | Q9R1P1 | 0.00385039 | N-term +42.01 Da, K +28.03 Da,            | 4301.501465 | 2 | 929.447876  | 928.9570042 |
| MDNKDEDIFKFKGY                  | G5E904 | 0          | N-term +42.01 Da, K +28.03 Da,            | 4303.174316 | 3 | 626.6500244 | 625.9780921 |
| ANHAPFETDISTLTR                 | Q9QXD6 | 0          | N-term +42.01 Da,                         | 4306.283691 | 2 | 857.9202881 | 857.9233878 |
| AAYKLVLR                        | Q9DBJ1 | 0.00932642 | N-term +42.01 Da, K +28.03 Da,            | 4306.399414 | 2 | 558.8600464 | 558.8606114 |
| STGTFVVSQPLNYR                  | Q9JLJ2 | 0          | N-term +42.01 Da,                         | 4311.314453 | 2 | 806.4099731 | 805.9122912 |
| SSSRPVALVTGANKGIGF              | P48758 | 0.0310856  | N-term +42.01 Da, K +28.03 Da,            | 4312.725098 | 3 | 611.0100098 | 611.0072619 |
| ACGLVASNLNLKPGECKVR             | P16045 | 0.02442599 | N-term +42.01 Da, K +28.03 Da,C +57.02Da, | 4318.402344 | 3 | 767.0800171 | 766.4204608 |
| ANHAPFETDISTLTR                 | Q9QXD6 | 0          | N-term +42.01 Da,                         | 4336.76709  | 2 | 857.9220581 | 857.9233878 |
| SSEPPPPPLQPPTHQTSVGLLDTPR       | Q9CR86 | 0          | N-term +42.01 Da,                         | 4346.084961 | 2 | 1346.689941 | 1345.692856 |
| TTNTVPLHPYWPR                   | P70245 | 0          | N-term +42.01 Da,                         | 4348.62207  | 2 | 812.9072266 | 812.4175432 |
| SSEPPPPPLQPPTHQTSVGLLDTPR       | Q9CR86 | 0          | N-term +42.01 Da,                         | 4349.020508 | 2 | 1345.689941 | 1345.692856 |
| SSEPPPPPLQPPTHQTSVGLLDTPR       | Q9CR86 | 0.00061087 | N-term +42.01 Da,                         | 4353.848145 | 3 | 898.1300049 | 897.4643294 |
| AEQEPTAEQLAQIAAENEDEHSVNYKPPAQK | Q99PT1 | 0          | N-term +42.01 Da, K +28.03 Da,            | 4357.970215 | 3 | 1221.920044 | 1221.586743 |
| AEQEPTAEQLAQIAAENEDEHSVNYKPPAQK | Q99PT1 | 0          | N-term +42.01 Da, K +28.03 Da,            | 4359.632324 | 4 | 916.6900024 | 916.4418766 |
| MNFSGKYQLQ                      | P12710 | 0.02976476 | N-term +42.01 Da, K +28.03 Da,            | 4359.976074 | 2 | 643.8099976 | 643.3159087 |
| AEQEPTAEQLAQIAAENEDEHSVNYKPPAQK | Q99PT1 | 0          | N-term +42.01 Da, K +28.03 Da,            | 4366.387695 | 3 | 1221.579956 | 1221.586743 |

|                           |        |            |                                           |             |   |             |             |
|---------------------------|--------|------------|-------------------------------------------|-------------|---|-------------|-------------|
| MEAAALAVTR                | Q9CXA2 | 0          | N-term +42.01 Da,                         | 4367.133301 | 2 | 502.769989  | 502.265687  |
| SLSDWHLAVK                | Q91W67 | 0.00064433 | N-term +42.01 Da, K +28.03 Da,            | 4367.333008 | 2 | 613.8300171 | 613.3324158 |
| MEADGLGCAVCVLTGASR        | Q64105 | 0          | N-term +42.01 Da, C +57.02Da,             | 4370.776855 | 2 | 954.9500122 | 954.9342581 |
| MNVVDLGR                  | Q9DB60 | 0.00059952 | N-term +42.01 Da,                         | 4372.983398 | 2 | 473.2399902 | 473.2447544 |
| SSEPPPPPLQPPTHQTSVGLLDTPR | Q9CR86 | 0          | N-term +42.01 Da,                         | 4377.774902 | 2 | 1346.699951 | 1345.692856 |
| SSEPPPPPLQPPTHQTSVGLLDTPR | Q9CR86 | 0          | N-term +42.01 Da,                         | 4380.608398 | 3 | 897.460022  | 897.4643294 |
| SYGRPPPDVEGMTSLKVDNLTYR   | Q62093 | 0          | N-term +42.01 Da, K +28.03 Da,            | 4382.021484 | 3 | 889.4500122 | 889.1145317 |
| ANHAPFETDISTLTR           | Q9QXD6 | 0          | N-term +42.01 Da,                         | 4388.117676 | 2 | 858.4099731 | 857.9233878 |
| AAPAKGENLSLVVHGPDIR       | Q64442 | 0          | N-term +42.01 Da, K +28.03 Da,            | 4394.635742 | 2 | 1036.550049 | 1036.068375 |
| NEFTLGECELETMTGEKVK       | P12710 | 0          | N-term +42.01 Da, K +28.03 Da,C +57.02Da, | 4395.87793  | 3 | 815.4000244 | 814.7186791 |
| DQGWGGGRQPNQGWTSVK        | Q8BK12 | 0.01126472 | N-term +42.01 Da, K +28.03 Da,            | 4401.055664 | 2 | 992.960022  | 993.4642744 |
| AAPAKGENLSLVVHGPDIR       | Q64442 | 0          | N-term +42.01 Da, K +28.03 Da,            | 4401.301758 | 3 | 691.3699951 | 691.0480091 |
| MQAALVETAR                | Q9CQP3 | 0          | N-term +42.01 Da,                         | 4406.686035 | 2 | 566.289978  | 566.2949761 |
| ADEIAKAQVAQPGDITFGK       | P70349 | 0          | N-term +42.01 Da, K +28.03 Da,            | 4408.211914 | 2 | 1057.560059 | 1057.560049 |
| ADEIAKAQVAQPGDITFGK       | P70349 | 0          | N-term +42.01 Da, K +28.03 Da,            | 4413.294922 | 3 | 705.3699951 | 705.3757917 |
| ANHAPFETDISTLTR           | Q9QXD6 | 0          | N-term +42.01 Da,                         | 4419.663574 | 2 | 858.4137573 | 857.9233878 |
| TASSVLLHTGQKMPL           | Q9J116 | 0          | N-term +42.01 Da, K +28.03 Da,            | 4424.575195 | 2 | 826.9550781 | 826.9556443 |
| ADPESPWSQIGR              | Q99JV5 | 0          | N-term +42.01 Da,                         | 4425.491211 | 2 | 693.3300171 | 692.8282269 |
| MESSTSSSGSALGAVDPQLQH     | Q9WVA2 | 0          | N-term +42.01 Da,                         | 4431.873047 | 2 | 1066.48999  | 1065.984047 |
| MLGPEGGEGYVVK             | Q9Z2X1 | 0          | N-term +42.01 Da, K +28.03 Da,            | 4433.625488 | 2 | 703.3599854 | 703.3552314 |
| ADEIAKAQVAQPGDITFGK       | P70349 | 0          | N-term +42.01 Da, K +28.03 Da,            | 4439.224121 | 2 | 1058.060059 | 1057.560049 |
| ANHAPFETDISTLTR           | Q9QXD6 | 0          | N-term +42.01 Da,                         | 4449.908691 | 2 | 858.4099731 | 857.9233878 |
| MEATLNLEPSGR              | Q55137 | 0          | N-term +42.01 Da,                         | 4454.27832  | 2 | 680.3306885 | 680.3322878 |
| SSPAQPAVPAPLADLKIQH       | P24549 | 0          | N-term +42.01 Da, K +28.03 Da,            | 4454.365723 | 2 | 1005.559998 | 1005.554569 |
| TASSVLLHTGQKMPL           | Q9J116 | 0.00598477 | N-term +42.01 Da, K +28.03 Da,            | 4454.909668 | 2 | 826.9537964 | 826.9556443 |
| MDSSAVITQISKEEAR          | P58466 | 0          | N-term +42.01 Da, K +28.03 Da,            | 4455.419922 | 2 | 917.960022  | 917.9643959 |
| IMNVIGEPIDER              | P56480 | 0.01752629 | N-term +42.01 Da,                         | 4456.053711 | 2 | 714.8699951 | 714.3635879 |
| METILEQQR                 | Q9D554 | 0.00116212 | N-term +42.01 Da,                         | 4457.349609 | 2 | 595.2999878 | 595.2977161 |
| AAQAVSLLR                 | Q8BJY1 | 0.00058962 | N-term +42.01 Da,                         | 4459.671387 | 2 | 485.7900085 | 485.7876436 |
| ANHAPFETDISTLTR           | Q9QXD6 | 0.00060096 | N-term +42.01 Da,                         | 4461.174805 | 3 | 572.6099854 | 572.284684  |
| AALGSSSQNVTEYVVR          | Q3THK3 | 0          | N-term +42.01 Da,                         | 4475.731445 | 2 | 862.4400024 | 861.9364953 |
| ACGLVASNLNLKPGECK         | P16045 | 0.00059701 | N-term +42.01 Da, K +28.03 Da,C +57.02Da, | 4478.178223 | 2 | 1022.530029 | 1021.54229  |
| GSEAAQLLEAADFAAHKHR       | Q9D114 | 0          | N-term +42.01 Da, K +28.03 Da,            | 4479.035645 | 3 | 698.0228882 | 698.0238636 |
| ANHAPFETDISTLTR           | Q9QXD6 | 0          | N-term +42.01 Da,                         | 4480.385742 | 2 | 858.4140015 | 857.9233878 |
| RDDVALEGVGHFFR            | P29391 | 0          | N-term +42.01 Da,                         | 4480.742188 | 3 | 554.6099854 | 553.9461136 |
| GSEAAQLLEAADFAAHKHR       | Q9D114 | 0          | N-term +42.01 Da, K +28.03 Da,            | 4482.379883 | 4 | 524.0200195 | 523.7697168 |
| AGVSSEAEAEALAAAR          | A2A5R0 | 0          | N-term +42.01 Da,                         | 4485.72998  | 2 | 772.8800049 | 772.8811886 |
| METILEQQR                 | Q9D554 | 0.00058514 | N-term +42.01 Da,                         | 4488.553711 | 2 | 595.2973633 | 595.2977161 |
| AAQAVSLLR                 | Q8BJY1 | 0.00058962 | N-term +42.01 Da,                         | 4490.16748  | 2 | 485.7875671 | 485.7876436 |
| TSALENYINR                | Q6ZWM4 | 0          | N-term +42.01 Da,                         | 4507.532715 | 2 | 611.8064575 | 611.8067628 |



|                                   |        |            |                                           |             |   |             |             |
|-----------------------------------|--------|------------|-------------------------------------------|-------------|---|-------------|-------------|
| ANHAPFETDISTLTR                   | Q9QXD6 | 0          | N-term +42.01 Da,                         | 4511.197266 | 2 | 858.4141235 | 857.9233878 |
| ATFVELSTK                         | P21300 | 0.00065147 | N-term +42.01 Da, K +28.03 Da,            | 4511.41748  | 2 | 533.2937012 | 533.2949677 |
| MEDIMQLPKAR                       | Q9CQ71 | 0          | N-term +42.01 Da, K +28.03 Da,            | 4515.027832 | 2 | 701.3631592 | 701.3650758 |
| MKVFTVGLPAEGR                     | Q91Z53 | 0          | N-term +42.01 Da, K +28.03 Da,            | 4515.117188 | 2 | 786.4299927 | 786.4343472 |
| STGTFVVSQPLNYR                    | Q9JLJ2 | 0.00065062 | N-term +42.01 Da,                         | 4524.319336 | 2 | 805.4099731 | 805.9122912 |
| SAGGAVPPPPNPAVSFPAPR              | Q8BI08 | 0          | N-term +42.01 Da,                         | 4526.220703 | 2 | 965         | 964.5048791 |
| SAGGAVPPPPNPAVSFPAPR              | Q8BI08 | 0          | N-term +42.01 Da,                         | 4526.329102 | 3 | 644.0100098 | 643.3390115 |
| SAGGAVPPPPNPAVSFPAPR              | Q8BI08 | 0          | N-term +42.01 Da,                         | 4529.300293 | 3 | 643.3400269 | 643.3390115 |
| AASLVGKKIVF                       | Q9D892 | 0.02253797 | N-term +42.01 Da, K +28.03 Da,            | 4538.304688 | 2 | 616.4000244 | 615.8946516 |
| ANHAPFETDISTLTR                   | Q9QXD6 | 0.04287046 | N-term +42.01 Da,                         | 4544.522949 | 2 | 858.4099731 | 857.9233878 |
| MLGPEGGEGYVVKLR                   | Q9Z2X1 | 0          | N-term +42.01 Da, K +28.03 Da,            | 4544.616211 | 2 | 837.9429321 | 837.9478193 |
| MKVFTVGLPAEGR                     | Q91Z53 | 0.00172216 | N-term +42.01 Da, K +28.03 Da,            | 4545.945801 | 2 | 786.9299927 | 786.4343472 |
| SAGGAVPPPPNPAVSFPAPR              | Q8BI08 | 0          | N-term +42.01 Da,                         | 4555.407715 | 2 | 965.5100098 | 964.5048791 |
| AAGTSNYWEDLR                      | Q88630 | 0          | N-term +42.01 Da,                         | 4555.488281 | 2 | 712.8200073 | 712.8256844 |
| MDGIVPDIAVGTRK                    | P17225 | 0          | N-term +42.01 Da, K +28.03 Da,            | 4558.130371 | 2 | 771.9199829 | 771.4214372 |
| SAGGAVPPPPNPAVSFPAPR              | Q8BI08 | 0          | N-term +42.01 Da,                         | 4560.408691 | 3 | 643.6699829 | 643.3390115 |
| AGLSDLELR                         | Q6DVA0 | 0.00280899 | N-term +42.01 Da,                         | 4560.577148 | 2 | 508.269989  | 508.2745666 |
| AAEHPEPPKGELQLPPPPPGHYGAWAAQELQAR | Q3UJB0 | 0          | N-term +42.01 Da, K +28.03 Da,            | 4574.508301 | 4 | 927.4699707 | 927.4745845 |
| MLGPEGGEGYVVKLR                   | Q9Z2X1 | 0          | N-term +42.01 Da, K +28.03 Da,            | 4575.474121 | 2 | 837.9467773 | 837.9478193 |
| STGTFVVSQPLNYR                    | Q9JLJ2 | 0          | N-term +42.01 Da,                         | 4577.648926 | 2 | 805.9099731 | 805.9122912 |
| SDSEKLNLDISIIGR                   | P62137 | 0          | N-term +42.01 Da, K +28.03 Da,            | 4579.580566 | 2 | 808.9299927 | 808.9281388 |
| SDSEKLNLDISIIGR                   | P62137 | 0.00386313 | N-term +42.01 Da, K +28.03 Da,            | 4581.359863 | 2 | 809.9299927 | 808.9281388 |
| AELKYISGFGNECASEDPR               | O09173 | 0          | N-term +42.01 Da, K +28.03 Da,C +57.02Da, | 4583.789551 | 2 | 1107.51001  | 1107.012607 |
| AELKYISGFGNECASEDPR               | O09173 | 0          | N-term +42.01 Da, K +28.03 Da,C +57.02Da, | 4584.912598 | 3 | 738.6799927 | 738.3441632 |
| AELKYISGFGNECASEDPR               | O09173 | 0          | N-term +42.01 Da, K +28.03 Da,C +57.02Da, | 4589.726074 | 2 | 1108.01001  | 1107.012607 |
| AAQIPESDQIKQFKEF                  | Q9WV98 | 0          | N-term +42.01 Da, K +28.03 Da,            | 4589.813477 | 2 | 989.0200195 | 989.0200282 |
| AASEDELLPR                        | Q61249 | 0          | N-term +42.01 Da,                         | 4590.19873  | 2 | 628.3300171 | 628.3300709 |
| AAQIPESDQIKQFKEF                  | Q9WV98 | 0          | N-term +42.01 Da, K +28.03 Da,            | 4593.610352 | 3 | 660.0200195 | 659.6824443 |
| AASEDELLPR                        | Q61249 | 0          | N-term +42.01 Da,                         | 4595.236816 | 2 | 628.3292236 | 628.3300709 |
| AAQIPESDQIKQFKEF                  | Q9WV98 | 0          | N-term +42.01 Da, K +28.03 Da,            | 4597.355957 | 3 | 659.6799927 | 659.6824443 |
| LIGDAAKNQLTSNPENTVFDAGR           | P20029 | 0          | N-term +42.01 Da, K +28.03 Da,            | 4603.044922 | 3 | 867.1300049 | 867.4608078 |
| STGTFVVSQPLNYR                    | Q9JLJ2 | 0          | N-term +42.01 Da,                         | 4609.069336 | 2 | 805.9116211 | 805.9122912 |
| AQEVEYLSQNPR                      | Q8BI72 | 0          | N-term +42.01 Da,                         | 4610.347168 | 2 | 782.3699951 | 781.8759061 |
| SDSEKLNLDISIIGR                   | P62137 | 0.04541242 | N-term +42.01 Da, K +28.03 Da,            | 4612.671387 | 2 | 809.4299927 | 808.9281388 |
| AQEVEYLSQNPR                      | Q8BI72 | 0          | N-term +42.01 Da,                         | 4614.290527 | 2 | 781.8699951 | 781.8759061 |
| AELKYISGFGNECASEDPR               | O09173 | 0          | N-term +42.01 Da, K +28.03 Da,C +57.02Da, | 4615.576172 | 3 | 738.6799927 | 738.3441632 |
| MNAGSDPVVIVSAAR                   | Q8CAY6 | 0          | N-term +42.01 Da,                         | 4615.793945 | 2 | 764.8893433 | 764.893044  |
| AELKYISGFGNECASEDPR               | O09173 | 0.03107075 | N-term +42.01 Da, K +28.03 Da,C +57.02Da, | 4620.642578 | 2 | 1108.01001  | 1107.012607 |
| MDNLSPEEVQLR                      | O09044 | 0          | N-term +42.01 Da,                         | 4625.046387 | 2 | 736.8599854 | 736.8561274 |
| AASEDELLPR                        | Q61249 | 0          | N-term +42.01 Da,                         | 4625.856934 | 2 | 628.3284912 | 628.3300709 |

|                                 |        |            |                                           |             |   |             |             |
|---------------------------------|--------|------------|-------------------------------------------|-------------|---|-------------|-------------|
| AQWNQLQLDTR                     | P42227 | 0          | N-term +42.01 Da,                         | 4633.147949 | 2 | 772.3900146 | 771.8866076 |
| MDGIVPDIAVGTKR                  | P17225 | 0.01127049 | N-term +42.01 Da, K +28.03 Da,            | 4644.290039 | 2 | 771.9199829 | 771.4214372 |
| MFSWVSKDAR                      | Q9WVK4 | 0          | N-term +42.01 Da, K +28.03 Da,            | 4646.269043 | 2 | 648.8200073 | 648.8239007 |
| PEFLKTIPEKMK                    | P10649 | 0.00335008 | N-term +42.01 Da, K +28.03 Da,            | 4649.962891 | 3 | 530.3200073 | 529.6457247 |
| METDVTSDTVEVLPQHKFDLR           | Q80XL6 | 0          | N-term +42.01 Da, K +28.03 Da,            | 4670.29834  | 3 | 844.0900269 | 844.0879826 |
| SKQQPTQFINPETPGYVGFANLPNQVHR    | P42208 | 0          | N-term +42.01 Da, K +28.03 Da,            | 4672.063965 | 3 | 1080.550049 | 1079.88618  |
| MDGIVPDIAVGTKR                  | P17225 | 0          | N-term +42.01 Da, K +28.03 Da,            | 4675.853516 | 2 | 771.4199829 | 771.4214372 |
| MDGIVPDIAVGTKR                  | P17225 | 0          | N-term +42.01 Da, K +28.03 Da,            | 4676.911621 | 2 | 772.4199829 | 771.4214372 |
| MFSWVSKDAR                      | Q9WVK4 | 0          | N-term +42.01 Da, K +28.03 Da,            | 4677.461426 | 2 | 648.824646  | 648.8239007 |
| METDVTSDTVEVLPQHKFDLR           | Q80XL6 | 0.0328728  | N-term +42.01 Da, K +28.03 Da,            | 4678.032227 | 2 | 1266.640015 | 1265.628336 |
| AGVDQHEGTIQVQGQNLFFR            | Q8VCR7 | 0          | N-term +42.01 Da,                         | 4683.777344 | 2 | 1144.560059 | 1143.566729 |
| SGEDEQQEQTIAEDLVVTKYK           | P50580 | 0          | N-term +42.01 Da, K +28.03 Da,            | 4683.869141 | 3 | 837.4199829 | 836.749913  |
| AGVDQHEGTIQVQGQNLFFR            | Q8VCR7 | 0          | N-term +42.01 Da,                         | 4686.470215 | 3 | 762.710022  | 762.7135781 |
| SGEDEQQEQTIAEDLVVTKYK           | P50580 | 0          | N-term +42.01 Da, K +28.03 Da,            | 4687.89502  | 2 | 1255.119995 | 1254.621231 |
| SGEDEQQEQTIAEDLVVTKYK           | P50580 | 0          | N-term +42.01 Da, K +28.03 Da,            | 4691.022949 | 2 | 1254.609985 | 1254.621231 |
| AASVDLELKKAF                    | Q9CWM4 | 0.00062775 | N-term +42.01 Da, K +28.03 Da,            | 4698.592773 | 2 | 695.4036865 | 695.4030387 |
| AELQEVQITEEKPLLPGQTPETAKEAELAAR | Q9QYG0 | 0          | N-term +42.01 Da, K +28.03 Da,            | 4701.07959  | 3 | 1163.619995 | 1163.289198 |
| MNFSGKYQL                       | P12710 | 0.01175268 | N-term +42.01 Da, K +28.03 Da,            | 4705.177734 | 2 | 579.2857666 | 579.2866196 |
| MDGIVPDIAVGTKR                  | P17225 | 0          | N-term +42.01 Da, K +28.03 Da,            | 4707.325684 | 2 | 771.4207764 | 771.4214372 |
| MHSLATAAPVPTALAQVDR             | Q9JKY0 | 0          | N-term +42.01 Da,                         | 4707.430176 | 2 | 996.0200195 | 996.0225791 |
| AEPWGNELASAAAR                  | Q60772 | 0          | N-term +42.01 Da,                         | 4707.821777 | 2 | 742.8599854 | 742.8600585 |
| MLNMWVKVR                       | Q5SUH6 | 0          | N-term +42.01 Da, K +28.03 Da,            | 4709.572754 | 2 | 574.3074951 | 574.309374  |
| AGVDQHEGTIQVQGQNLFFR            | Q8VCR7 | 0          | N-term +42.01 Da,                         | 4715.154785 | 2 | 1144.069946 | 1143.566729 |
| AEELLER                         | P21981 | 0.03736991 | N-term +42.01 Da,                         | 4715.519531 | 2 | 507.7799988 | 507.7769421 |
| AEPWGNELASAAAR                  | Q60772 | 0          | N-term +42.01 Da,                         | 4716.724121 | 2 | 743.8599854 | 742.8600585 |
| AGVDQHEGTIQVQGQNLFFR            | Q8VCR7 | 0          | N-term +42.01 Da,                         | 4718.148438 | 3 | 762.7121582 | 762.7135781 |
| SSPAQPAVPAPLADLKIQHT            | P24549 | 0.00281057 | N-term +42.01 Da, K +28.03 Da,            | 4718.986816 | 2 | 1056.569946 | 1056.078409 |
| AQAPTIVITQPGFVR                 | Q9JI48 | 0          | N-term +42.01 Da,                         | 4720.578125 | 2 | 813.9500122 | 813.4541258 |
| METDVTSDTVEVLPQHKF              | Q80XL6 | 0          | N-term +42.01 Da, K +28.03 Da,            | 4723.578613 | 2 | 1074.02002  | 1073.522276 |
| SSPAQPAVPAPLADLKIQH             | P24549 | 0          | N-term +42.01 Da, K +28.03 Da,            | 4723.668945 | 2 | 1006.049988 | 1005.554569 |
| SSPAQPAVPAPLADLKIQH             | P24549 | 0          | N-term +42.01 Da, K +28.03 Da,            | 4727.896973 | 3 | 670.7039795 | 670.7054717 |
| AELQEVQITEEKPLLPGQTPETAKEAELAAR | Q9QYG0 | 0          | N-term +42.01 Da, K +28.03 Da,            | 4731.50293  | 3 | 1163.287842 | 1163.289198 |
| AELQEVQITEEKPLLPGQTPETAKEAELAAR | Q9QYG0 | 0          | N-term +42.01 Da, K +28.03 Da,            | 4731.578613 | 4 | 872.7186279 | 872.7187175 |
| ALEQTLKGDWY                     | A2A4A1 | 0.04283054 | N-term +42.01 Da, K +28.03 Da,            | 4738.062988 | 2 | 747.4099731 | 746.9059457 |
| AELKYISGFGNECASEDPR             | O09173 | 0.00388242 | N-term +42.01 Da, K +28.03 Da,C +57.02Da, | 4738.53418  | 2 | 1107.5      | 1107.012607 |
| MESDFYLR                        | P61327 | 0.00280741 | N-term +42.01 Da,                         | 4740.661133 | 2 | 552.25      | 551.7473274 |
| GDPKEEEEEELVDPLTTVR             | P99028 | 0.00890985 | N-term +42.01 Da, K +28.03 Da,            | 4743.27832  | 2 | 1128.540039 | 1128.04991  |
| AEELLER                         | P21981 | 0.03736991 | N-term +42.01 Da,                         | 4745.868164 | 2 | 507.7761841 | 507.7769421 |
| GDPKEEEEEELVDPLTTVR             | P99028 | 0.01509054 | N-term +42.01 Da, K +28.03 Da,            | 4748.119629 | 3 | 752.7000122 | 752.3690321 |
| AQAPTIVITQPGFVR                 | Q9JI48 | 0          | N-term +42.01 Da,                         | 4750.734375 | 2 | 813.4500122 | 813.4541258 |

|                                         |        |            |                                           |             |   |             |             |
|-----------------------------------------|--------|------------|-------------------------------------------|-------------|---|-------------|-------------|
| SSPAQPAVPAPLADLKIQH                     | P24549 | 0          | N-term +42.01 Da, K +28.03 Da,            | 4754.17041  | 2 | 1005.553223 | 1005.554569 |
| AGVDQHEGTIQVQGQNLFFR                    | Q8VCR7 | 0          | N-term +42.01 Da,                         | 4756.638184 | 2 | 1144.060059 | 1143.566729 |
| ASGVAVSDGVIKVFNDMKVR                    | P18760 | 0.02977906 | N-term +42.01 Da, K +28.03 Da,            | 4758.121582 | 3 | 731.4000244 | 730.7365548 |
| SSPAQPAVPAPLADLKIQH                     | P24549 | 0          | N-term +42.01 Da, K +28.03 Da,            | 4759.25293  | 3 | 670.7050781 | 670.7054717 |
| MNTGEYNKLGSAIEVSR                       | Q8BNX1 | 0          | N-term +42.01 Da, K +28.03 Da,            | 4762.664551 | 2 | 1035.51001  | 1034.504417 |
| AGLLKTTGLVGLAVCDTPHER                   | Q9CPP6 | 0.03326996 | N-term +42.01 Da, K +28.03 Da,C +57.02Da, | 4771.225098 | 4 | 609.5900269 | 609.3426206 |
| AELQEVQITEEKPLLPGQTPETAKEAELAAR         | Q9QYG0 | 0          | N-term +42.01 Da, K +28.03 Da,            | 4771.549805 | 3 | 1163.959961 | 1163.289198 |
| ASKPTLNEVVIVSAIR                        | Q8QZT1 | 0.01470588 | N-term +42.01 Da, K +28.03 Da,            | 4771.682129 | 3 | 590.0200195 | 589.6840076 |
| SGSKYKPAPLATLPSTLDPAEYDVSPETR           | Q9CQC7 | 0          | N-term +42.01 Da, K +28.03 Da,            | 4776.809082 | 3 | 1063.880005 | 1063.550241 |
| LIFAGKQLEDGR                            | P0CG49 | 0.00844327 | N-term +42.01 Da, K +28.03 Da,            | 4779.616211 | 2 | 708.4000244 | 708.8959121 |
| ASGVAVSDGVIKVFNDMKVR                    | P18760 | 0.00115875 | N-term +42.01 Da, K +28.03 Da,            | 4780.018555 | 3 | 731.06427   | 730.7365548 |
| SGSKYKPAPLATLPSTLDPAEYDVSPETR           | Q9CQC7 | 0          | N-term +42.01 Da, K +28.03 Da,            | 4781.638184 | 3 | 1064.219971 | 1063.550241 |
| AGLLKTTGLVGLAVCDTPHER                   | Q9CPP6 | 0          | N-term +42.01 Da, K +28.03 Da,C +57.02Da, | 4781.802246 | 3 | 812.460022  | 812.1210686 |
| ASKPTLNEVVIVSAIR                        | Q8QZT1 | 0          | N-term +42.01 Da, K +28.03 Da,            | 4783.434082 | 2 | 884.0200195 | 884.0223732 |
| SSPAQPAVPAPLADLKIQH                     | P24549 | 0          | N-term +42.01 Da, K +28.03 Da,            | 4784.66748  | 2 | 1005.553101 | 1005.554569 |
| AGVDQHEGTIQVQGQNLFFR                    | Q8VCR7 | 0          | N-term +42.01 Da,                         | 4785.352539 | 2 | 1144.560059 | 1143.566729 |
| AGVDQHEGTIQVQGQNLFFR                    | Q8VCR7 | 0          | N-term +42.01 Da,                         | 4788.657715 | 2 | 1143.560059 | 1143.566729 |
| ASGVAVSDGVIKVFNDMKVR                    | P18760 | 0.00058789 | N-term +42.01 Da, K +28.03 Da,            | 4788.834961 | 3 | 731.0634766 | 730.7365548 |
| SSPAQPAVPAPLADLKIQH                     | P24549 | 0          | N-term +42.01 Da, K +28.03 Da,            | 4790.168457 | 3 | 671.039978  | 670.7054717 |
| ASKPTLNEVVIVSAIR                        | Q8QZT1 | 0.00595883 | N-term +42.01 Da, K +28.03 Da,            | 4790.32666  | 3 | 589.3499756 | 589.6840076 |
| ASGNAQIGKSAPDFTATAVVDGAFKEIKLSDYR       | Q61171 | 0          | N-term +42.01 Da, K +28.03 Da,            | 4798.134766 | 4 | 889.4699707 | 889.2188845 |
| ASGNAQIGKSAPDFTATAVVDGAFKEIKLSDYR       | Q61171 | 0          | N-term +42.01 Da, K +28.03 Da,            | 4799.731445 | 4 | 889.7199707 | 889.2188845 |
| AASKPIEAAMAAAAAPSGNGVGGGGGTAGPGSGAGTLPR | Q9CZW5 | 0.00064558 | N-term +42.01 Da, K +28.03 Da,            | 4800.748047 | 3 | 1131.22998  | 1130.567071 |
| AGLLKTTGLVGLAVCDTPHER                   | Q9CPP6 | 0.00841662 | N-term +42.01 Da, K +28.03 Da,C +57.02Da, | 4801.609863 | 4 | 609.8400269 | 609.3426206 |
| ADPDVLTEVPAALKR                         | Q9D0D5 | 0.00334635 | N-term +42.01 Da, K +28.03 Da,            | 4802.185547 | 2 | 832.960022  | 832.9645239 |
| ASGNAQIGKSAPDFTATAVVDGAFKEIKLSDYR       | Q61171 | 0          | N-term +42.01 Da, K +28.03 Da,            | 4807.211426 | 3 | 1185.609985 | 1185.28942  |
| ASGNAQIGKSAPDFTATAVVDGAFKEIKLSDYR       | Q61171 | 0          | N-term +42.01 Da, K +28.03 Da,            | 4811.740234 | 3 | 1185.290039 | 1185.28942  |
| SGSKYKPAPLATLPSTLDPAEYDVSPETR           | Q9CQC7 | 0          | N-term +42.01 Da, K +28.03 Da,            | 4813.810547 | 3 | 1063.880005 | 1063.550241 |
| PEFTLPVHFYGR                            | Q9WUB3 | 0.00642742 | N-term +42.01 Da,                         | 4814.780273 | 3 | 502.5899963 | 502.2576285 |
| SKGPAVGIDLGTTYSCVGVFQHGKVEIANDQGNR      | P63017 | 0          | N-term +42.01 Da, K +28.03 Da,C +57.02Da, | 4814.870117 | 4 | 947.4899902 | 947.2374457 |
| ATDMSQGELIHPKALPL                       | Q3TEA8 | 0.0011554  | N-term +42.01 Da, K +28.03 Da,            | 4814.94873  | 2 | 946.5       | 946.0033235 |
| AELQEVQITEEKPLLPGQTPETAKEAELAAR         | Q9QYG0 | 0          | N-term +42.01 Da, K +28.03 Da,            | 4837.206055 | 3 | 1163.949951 | 1163.289198 |
| AELQEVQITEEKPLLPGQTPETAKEAELAAR         | Q9QYG0 | 0          | N-term +42.01 Da, K +28.03 Da,            | 4844.998535 | 3 | 1163.609985 | 1163.289198 |
| ATAATEEPFPHGLLPKKTGASSFLCR              | Q64514 | 0          | N-term +42.01 Da, K +28.03 Da,C +57.02Da, | 4857.445313 | 4 | 791.1599731 | 790.9088569 |
| ADEIAKAQVAQPGDITFGKIIR                  | P70349 | 0.00937012 | N-term +42.01 Da, K +28.03 Da,            | 4862.844238 | 3 | 833.1300049 | 832.7988718 |
| SKGPAVGIDLGTTYSCVGVFQHGKVEIANDQGNR      | P63017 | 0          | N-term +42.01 Da, K +28.03 Da,C +57.02Da, | 4862.950195 | 4 | 947.4899902 | 947.2374457 |
| TEWEAATPAVAETPDIK                       | P97461 | 0          | N-term +42.01 Da, K +28.03 Da,            | 4865.262695 | 2 | 949.9699707 | 949.972744  |
| SSPAQPAVPAPLADLK                        | P24549 | 0          | N-term +42.01 Da, K +28.03 Da,            | 4865.367188 | 2 | 816.960022  | 816.4537919 |
| GEIKVSPDYNWFR                           | Q9CQC8 | 0.02019704 | N-term +42.01 Da, K +28.03 Da,            | 4873.342285 | 2 | 840.9261475 | 840.9226587 |
| ASGVAVSDGVIKVFNDMKVR                    | P18760 | 0          | N-term +42.01 Da, K +28.03 Da,            | 4875.944336 | 3 | 731.0700073 | 730.7365548 |

|                                      |        |            |                                           |             |   |             |             |
|--------------------------------------|--------|------------|-------------------------------------------|-------------|---|-------------|-------------|
| SSIGTYDLSASTFSPDGR                   | O70435 | 0.02486592 | N-term +42.01 Da,                         | 4879.378906 | 2 | 980.960022  | 980.4501649 |
| SSKSMVLGYWDIR                        | P48774 | 0.00062035 | N-term +42.01 Da, K +28.03 Da,            | 4882.586914 | 2 | 807.4199829 | 806.4136121 |
| QITLNDLPVGR                          | O08807 | 0.00172712 | N-term +42.01 Da,                         | 4890.806152 | 2 | 635.3499756 | 634.3538799 |
| ANVADTKLYDILGVPPGASENELKKAYR         | Q9QYJ0 | 0          | N-term +42.01 Da, K +28.03 Da,            | 4891.584961 | 4 | 790.9299927 | 790.4328593 |
| ADEIAKAQVAQPGGDTIFGKIIR              | P70349 | 0          | N-term +42.01 Da, K +28.03 Da,            | 4891.799805 | 4 | 624.8508301 | 624.8509729 |
| ADEIAKAQVAQPGGDTIFGKIIR              | P70349 | 0          | N-term +42.01 Da, K +28.03 Da,            | 4894.790039 | 3 | 833.1300049 | 832.7988718 |
| ASGVTVNDEVIKVFNDMKVR                 | P45591 | 0          | N-term +42.01 Da, K +28.03 Da,            | 4900.261719 | 3 | 774.4099731 | 773.7507528 |
| MDVNLAPLR                            | Q8R5J9 | 0          | N-term +42.01 Da,                         | 4902.449219 | 2 | 535.789978  | 535.7867866 |
| ASVGTlafDEYGR                        | P80316 | 0          | N-term +42.01 Da,                         | 4905.884277 | 2 | 714.3397217 | 714.3437099 |
| ANVADTKLYDILGVPPGASENELKKAYR         | Q9QYJ0 | 0.01466869 | N-term +42.01 Da, K +28.03 Da,            | 4906.006836 | 3 | 1054.23999  | 1053.57472  |
| MKAVCVLKGDPVQGTIHFEQK                | P08228 | 0          | N-term +42.01 Da, K +28.03 Da,C +57.02Da, | 4907.69043  | 3 | 857.1199951 | 856.7940756 |
| SFLKSFPPPGSADQLR                     | Q61189 | 0.02530414 | N-term +42.01 Da, K +28.03 Da,            | 4908.030273 | 2 | 874.4699707 | 873.4646909 |
| MKAVCVLKGDPVQGTIHFEQK                | P08228 | 0.00059524 | N-term +42.01 Da, K +28.03 Da,C +57.02Da, | 4912.534668 | 3 | 856.7800293 | 856.7940756 |
| SSIGTYDLSASTFSPDGR                   | O70435 | 0          | N-term +42.01 Da,                         | 4917.937012 | 2 | 980.9500122 | 980.4501649 |
| SSIGTYDLSASTFSPDGR                   | O70435 | 0          | N-term +42.01 Da,                         | 4919.474121 | 2 | 980.4485474 | 980.4501649 |
| ADEIAKAQVAQPGGDTIFGKIIR              | P70349 | 0          | N-term +42.01 Da, K +28.03 Da,            | 4924.644531 | 4 | 625.0999756 | 624.8509729 |
| AAGTLYTPENWR                         | Q9D8N0 | 0          | N-term +42.01 Da,                         | 4924.996582 | 2 | 792.3800049 | 792.3780841 |
| ADEIAKAQVAQPGGDTIFGKIIR              | P70349 | 0          | N-term +42.01 Da, K +28.03 Da,            | 4925.302246 | 2 | 1248.689941 | 1248.694669 |
| ADEIAKAQVAQPGGDTIFGKIIR              | P70349 | 0          | N-term +42.01 Da, K +28.03 Da,            | 4925.996582 | 3 | 832.7974854 | 832.7988718 |
| VLELAGNAAR                           | Q8CGP4 | 0.00598151 | N-term +42.01 Da,                         | 4939.409668 | 2 | 528.7999878 | 528.2958332 |
| KGIKSVTELNGDTITNTMTLGDIVYKR          | P12710 | 0          | N-term +42.01 Da, K +28.03 Da,            | 4940.533203 | 4 | 774.1799927 | 774.1770647 |
| LLGTFDLTGIPPAPR                      | P20029 | 0.03735225 | N-term +42.01 Da,                         | 4949.254883 | 2 | 805.9500122 | 805.4510518 |
| SSIGTYDLSASTFSPDGR                   | O70435 | 0          | N-term +42.01 Da,                         | 4952.625    | 2 | 980.9500122 | 980.4501649 |
| ADEIAKAQVAQPGGDTIFGKIIR              | P70349 | 0          | N-term +42.01 Da, K +28.03 Da,            | 4955.167969 | 4 | 624.8499756 | 624.8509729 |
| PGGLLLGDEAPNFEANTTIGR                | O08709 | 0.02942595 | N-term +42.01 Da,                         | 4955.628906 | 2 | 1092.550049 | 1092.550213 |
| MELSADYLR                            | Q8BGS2 | 0          | N-term +42.01 Da,                         | 4955.954102 | 2 | 570.2722778 | 570.2737095 |
| SHVAVENALGLDQQFAGLDLNSSDNQSGGSTASKGR | Q62167 | 0          | N-term +42.01 Da, K +28.03 Da,            | 4956.141602 | 4 | 926.4500122 | 925.9504002 |
| ADEIAKAQVAQPGGDTIFGKIIR              | P70349 | 0          | N-term +42.01 Da, K +28.03 Da,            | 4956.855469 | 3 | 833.1300049 | 832.7988718 |
| AAGTLYTPENWR                         | Q9D8N0 | 0          | N-term +42.01 Da,                         | 4956.941895 | 2 | 792.3800049 | 792.3780841 |
| MNNYLEKLGPLR                         | Q8C7G5 | 0          | N-term +42.01 Da, K +28.03 Da,            | 4958.418945 | 2 | 759.4099731 | 759.4108721 |
| PGGLLLGDEAPNFEANTTIGR                | O08709 | 0.00116482 | N-term +42.01 Da,                         | 4960.520508 | 2 | 1093.550049 | 1092.550213 |
| MDPSGVKVLTAEDIQER                    | P16546 | 0          | N-term +42.01 Da, K +28.03 Da,            | 4965.151367 | 2 | 1044.52002  | 1044.0199   |
| AQEFVNCKIQSGKVVVF                    | Q9QUHO | 0          | N-term +42.01 Da, K +28.03 Da,C +57.02Da, | 4967.030273 | 3 | 684.3699951 | 684.371324  |
| MDPSGVKVLTAEDIQER                    | P16546 | 0          | N-term +42.01 Da, K +28.03 Da,            | 4970.943359 | 3 | 697.0100098 | 696.3490256 |
| AQEFVNCKIQSGKVVVF                    | Q9QUHO | 0.00065876 | N-term +42.01 Da, K +28.03 Da,C +57.02Da, | 4971.226563 | 3 | 685.039978  | 684.371324  |
| ASLLKVDQEVKLVDSFR                    | P61290 | 0          | N-term +42.01 Da, K +28.03 Da,            | 4974.340332 | 4 | 551.3300171 | 551.0780553 |
| MEANVTIPIWQNKPH                      | Q9CWE0 | 0.00116414 | N-term +42.01 Da, K +28.03 Da,            | 4978.047852 | 2 | 924.4699707 | 924.4772754 |
| SLPLNPKPF                            | P62307 | 0.00889587 | N-term +42.01 Da, K +28.03 Da,            | 4986.700195 | 2 | 541.8200073 | 541.8158698 |
| ADEIAKAQVAQPGGDTIFGKIIR              | P70349 | 0.00283286 | N-term +42.01 Da, K +28.03 Da,            | 4987.933105 | 3 | 833.4699707 | 832.7988718 |
| ASGVAVSDGVKIVFNDMKVR                 | P18760 | 0          | N-term +42.01 Da, K +28.03 Da,            | 4988.237305 | 3 | 730.734314  | 730.7365548 |

|                                |        |            |                                           |             |   |             |             |
|--------------------------------|--------|------------|-------------------------------------------|-------------|---|-------------|-------------|
| AAVPELLEQQEEDR                 | Q9D8U8 | 0          | N-term +42.01 Da,                         | 4992.708008 | 2 | 835.4099731 | 834.9074037 |
| KNLNQALLDLHALGSAR              | P29391 | 0          | N-term +42.01 Da, K +28.03 Da,            | 4993.928711 | 3 | 636.0200195 | 635.3619276 |
| AQEFVNCKIQSGKVVVF              | Q9QUH0 | 0.03554502 | N-term +42.01 Da, K +28.03 Da,C +57.02Da, | 4994.445313 | 2 | 1026.050049 | 1026.053348 |
| MDPSGVKVLETAEDIQER             | P16546 | 0          | N-term +42.01 Da, K +28.03 Da,            | 4996.345215 | 2 | 1044.018188 | 1044.0199   |
| AVEELQSIKR                     | Q8BZM1 | 0          | N-term +42.01 Da, K +28.03 Da,            | 4998.251465 | 2 | 678.3995972 | 678.3982876 |
| ALLAEHLLKPLPADR                | Q9JL62 | 0          | N-term +42.01 Da, K +28.03 Da,            | 4998.782715 | 3 | 576.3446655 | 576.3453259 |
| ASGVAVSDGVIKVFNDMKVR           | P18760 | 0          | N-term +42.01 Da, K +28.03 Da,            | 4998.911133 | 2 | 1096.099976 | 1095.601194 |
| MDPSGVKVLETAEDIQER             | P16546 | 0          | N-term +42.01 Da, K +28.03 Da,            | 5001.57666  | 3 | 696.3499756 | 696.3490256 |
| TEGLQPASVVVLP                  | Q8BH86 | 0          | N-term +42.01 Da,                         | 5002.623047 | 2 | 754.4299927 | 754.4275768 |
| EVLELAGNAAR                    | Q8CGP4 | 0.01939334 | N-term +42.01 Da,                         | 5003.731445 | 2 | 592.8200073 | 592.8171303 |
| ASLLKVDQEVKLVDSFR              | P61290 | 0          | N-term +42.01 Da, K +28.03 Da,            | 5005.071289 | 4 | 551.0800171 | 551.0780553 |
| ASGVAVSDGVIKVFNDMKVR           | P18760 | 0          | N-term +42.01 Da, K +28.03 Da,            | 5011.069824 | 3 | 730.7399902 | 730.7365548 |
| MPNYKLLYFNMRGRAEIIIR           | Q9JHF7 | 0.03773585 | N-term +42.01 Da, K +28.03 Da,            | 5013.414063 | 3 | 819.4500122 | 819.1082168 |
| MMLGPEGGEGYVVKLR               | Q9Z2X1 | 0          | N-term +42.01 Da, K +28.03 Da,            | 5016.829102 | 2 | 903.4699707 | 903.4680618 |
| AGVPTVSFSELR                   | E9PY03 | 0.00844773 | N-term +42.01 Da,                         | 5017.032227 | 2 | 653.3499756 | 652.8458879 |
| SLPLNPKPF                      | P62307 | 0.00059102 | N-term +42.01 Da, K +28.03 Da,            | 5018.092773 | 2 | 541.8153076 | 541.8158698 |
| FPALTPEQKKELSEIAQR             | Q91Y97 | 0          | N-term +42.01 Da, K +28.03 Da,            | 5020.301758 | 3 | 728.0700073 | 728.4072032 |
| AAVPELLEQQEEDR                 | Q9D8U8 | 0          | N-term +42.01 Da,                         | 5023.242676 | 2 | 834.9058228 | 834.9074037 |
| AATFFGEVVKAPCR                 | Q9JK23 | 0          | N-term +42.01 Da, K +28.03 Da,C +57.02Da, | 5027.349121 | 2 | 811.9204712 | 811.9216041 |
| SIGVPIKVLHEAEGHIVTCETNTGEVYR   | P62320 | 0          | N-term +42.01 Da, K +28.03 Da,C +57.02Da, | 5032.520508 | 4 | 795.6599731 | 795.4104927 |
| EVLELAGNAAR                    | Q8CGP4 | 0.00063939 | N-term +42.01 Da,                         | 5034.21875  | 2 | 592.8161011 | 592.8171303 |
| AMVSEFLKQAR                    | P10107 | 0          | N-term +42.01 Da, K +28.03 Da,            | 5038.987793 | 2 | 675.3642578 | 675.3659329 |
| AGVPTVSFSELR                   | E9PY03 | 0.00063371 | N-term +42.01 Da,                         | 5047.988281 | 2 | 652.8400269 | 652.8458879 |
| CRETLRPR                       | F6QM68 | 0.04160823 | N-term +42.01 Da, C +57.02Da,             | 5053.210938 | 2 | 564.789978  | 565.2983841 |
| ADEIAKAQVAQPGGDTIFGKIIR        | P70349 | 0          | N-term +42.01 Da, K +28.03 Da,            | 5057.840332 | 3 | 833.4699707 | 832.7988718 |
| SIGVPIKVLHEAEGHIVTCETNTGEVYR   | P62320 | 0          | N-term +42.01 Da, K +28.03 Da,C +57.02Da, | 5063.782227 | 4 | 795.6599731 | 795.4104927 |
| SSPAQPAVPAPLADLKIQHTKIFINNEWHN | P24549 | 0.00437158 | N-term +42.01 Da, K +28.03 Da,            | 5068.114746 | 4 | 859.460022  | 859.4609454 |
| ASGVAVSDGVIKVFNDMKVR           | P18760 | 0          | N-term +42.01 Da, K +28.03 Da,            | 5069.681641 | 3 | 731.0700073 | 730.7365548 |
| MDNSGKQAEAMALLAEAER            | Q9DB05 | 0          | N-term +42.01 Da, K +28.03 Da,            | 5069.925293 | 2 | 1054        | 1053.003727 |
| ASASYHISLNLEKM                 | Q6ZQ38 | 0.01125896 | N-term +42.01 Da, K +28.03 Da,            | 5071.844727 | 2 | 817.4141846 | 817.4163522 |
| MDNSGKQAEAMALLAEAER            | Q9DB05 | 0          | N-term +42.01 Da, K +28.03 Da,            | 5073.896484 | 3 | 702.3400269 | 702.3382435 |
| MDNKDEYLLNFKGY                 | Q35403 | 0.00060423 | N-term +42.01 Da, K +28.03 Da,            | 5074.830078 | 2 | 924.4400024 | 924.4478498 |
| GIKFLEVIKPF                    | Q9JLR1 | 0          | N-term +42.01 Da, K +28.03 Da,            | 5080.008789 | 3 | 463.6300049 | 463.6232483 |
| SLCLADFKAAQAK                  | Q9NYQ2 | 0          | N-term +42.01 Da, K +28.03 Da,C +57.02Da, | 5080.11377  | 2 | 845.9662476 | 845.9634693 |
| ADQLTEEQIAEFKEA                | P62204 | 0          | N-term +42.01 Da, K +28.03 Da,            | 5080.572754 | 2 | 896.4299927 | 896.4359944 |
| ELISNASDALDKIR                 | P08113 | 0.00062735 | N-term +42.01 Da, K +28.03 Da,            | 5081.146973 | 2 | 808.4299927 | 807.9385063 |
| SSSAASPLFAPGEDCGPAWR           | O35969 | 0          | N-term +42.01 Da, C +57.02Da,             | 5086.342285 | 2 | 1053.469971 | 1052.973284 |
| ATAVVVNIKKLY                   | Q9DCL9 | 0          | N-term +42.01 Da, K +28.03 Da,            | 5090.883301 | 2 | 737.4500122 | 737.4556053 |
| SSSAASPLFAPGEDCGPAWR           | O35969 | 0          | N-term +42.01 Da, C +57.02Da,             | 5095.948242 | 2 | 1052.969971 | 1052.973284 |
| SDSLVVCEVDPELKETLR             | Q9ERL7 | 0          | N-term +42.01 Da, K +28.03 Da,C +57.02Da, | 5096.233887 | 2 | 1080.550049 | 1080.048658 |

|                                 |        |            |                                           |             |   |             |             |
|---------------------------------|--------|------------|-------------------------------------------|-------------|---|-------------|-------------|
| AAVLENGVLSR                     | P16331 | 0          | N-term +42.01 Da,                         | 5097.34082  | 2 | 635.3616943 | 635.361705  |
| ASGVAVSDGVIKVFNDMKVR            | P18760 | 0          | N-term +42.01 Da, K +28.03 Da,            | 5101.208496 | 3 | 731.0700073 | 730.7365548 |
| AESDWDVTVTLR                    | Q9JMG1 | 0          | N-term +42.01 Da,                         | 5104.650391 | 2 | 717.3496704 | 717.3489925 |
| AELEEVTLDGKPLQALR               | Q9JIX8 | 0          | N-term +42.01 Da, K +28.03 Da,            | 5107.151367 | 2 | 976.539978  | 976.5385853 |
| SKGPAVGIDLGTTCVGVFQH            | P63017 | 0          | N-term +42.01 Da, K +28.03 Da,C +57.02Da, | 5118.959473 | 3 | 788.7299805 | 788.3948578 |
| SKGPAVGIDLGTTCVGVFQH            | P63017 | 0          | N-term +42.01 Da, K +28.03 Da,C +57.02Da, | 5119.160156 | 2 | 1182.589966 | 1182.088648 |
| MQIFVKTLTGKTITLEVEPSDTIENVKAK   | P0CG49 | 0          | N-term +42.01 Da, K +28.03 Da,            | 5121.045898 | 4 | 848.2299805 | 847.7319387 |
| SKGPAVGIDLGTTCVGVFQH            | P63017 | 0          | N-term +42.01 Da, K +28.03 Da,C +57.02Da, | 5123.347168 | 2 | 1182.089966 | 1182.088648 |
| SSPAQPAVPAPLADLKIHTKIF          | P24549 | 0          | N-term +42.01 Da, K +28.03 Da,            | 5123.857422 | 3 | 843.4799805 | 843.1476121 |
| SSPAQPAVPAPLADLKIHTKIF          | P24549 | 0          | N-term +42.01 Da, K +28.03 Da,            | 5125.280762 | 3 | 843.1500244 | 843.1476121 |
| SSPAQPAVPAPLADLKIHTKIF          | P24549 | 0.00284091 | N-term +42.01 Da, K +28.03 Da,            | 5127.456055 | 2 | 1264.709961 | 1264.21778  |
| AANKGMAIGIDLGTTCVGVFQH          | P16627 | 0.04499072 | N-term +42.01 Da, K +28.03 Da,C +57.02Da, | 5127.570313 | 3 | 861.4099731 | 860.7576905 |
| AHDQPLLVVQEALR                  | Q499E6 | 0          | N-term +42.01 Da,                         | 5128.047852 | 2 | 816.4500122 | 815.9492078 |
| SSPAQPAVPAPLADLKIHTKIF          | P24549 | 0          | N-term +42.01 Da, K +28.03 Da,            | 5130.255859 | 2 | 1265.22998  | 1264.21778  |
| AADIEQVFR                       | Q9QX47 | 0          | N-term +42.01 Da,                         | 5136.783203 | 2 | 545.7796021 | 545.7800161 |
| ASValseaekvy                    | Q9D0M0 | 0          | N-term +42.01 Da, K +28.03 Da,            | 5137.229492 | 2 | 668.8499756 | 668.853379  |
| YLSLGFDFDRDDVALEGVGHFFR         | P29391 | 0.01077476 | N-term +42.01 Da,                         | 5140.614746 | 4 | 688.0900269 | 688.0906889 |
| SKGPAVGIDLGTTCVGVFQH            | P63017 | 0          | N-term +42.01 Da, K +28.03 Da,C +57.02Da, | 5151.12793  | 3 | 788.3927612 | 788.3948578 |
| KQFPAMALKIPAKRIFGDNFDPDFI       | Q9ERE3 | 0.04896074 | N-term +42.01 Da, K +28.03 Da,            | 5154.19043  | 4 | 752.6599731 | 752.1634939 |
| SKGPAVGIDLGTTCVGVFQH            | P63017 | 0          | N-term +42.01 Da, K +28.03 Da,C +57.02Da, | 5155.125977 | 2 | 1182.589966 | 1182.088648 |
| ASGNAQIGKSAPDFTATAVVDGAFKEIK    | Q61171 | 0          | N-term +42.01 Da, K +28.03 Da,            | 5155.812988 | 3 | 974.1900024 | 973.8535944 |
| ADKMDMSLDDIILNLR                | Q08583 | 0          | N-term +42.01 Da, K +28.03 Da,            | 5159.477051 | 3 | 659.3400269 | 659.3445578 |
| PGSISWDGLDPGKLY                 | Q8VIN1 | 0.00228833 | N-term +42.01 Da, K +28.03 Da,            | 5159.790039 | 2 | 837.9199829 | 837.9223248 |
| AAVLENGVLSR                     | P16331 | 0          | N-term +42.01 Da,                         | 5163.371582 | 2 | 635.3599854 | 635.361705  |
| SSLQELCSGLPLRPLPENR             | Q8VC12 | 0          | N-term +42.01 Da, C +57.02Da,             | 5165.243652 | 3 | 736.7199707 | 736.719564  |
| ADKMDMSLDDIILNLR                | Q08583 | 0          | N-term +42.01 Da, K +28.03 Da,            | 5166.196777 | 2 | 989.5200195 | 988.5131985 |
| MLGGLGKLAEEGLAHR                | Q8CF02 | 0          | N-term +42.01 Da, K +28.03 Da,            | 5174.488281 | 3 | 555.6500244 | 555.3152607 |
| IVANGKILAADESVGTMGNR            | Q91Y97 | 0          | N-term +42.01 Da, K +28.03 Da,            | 5179.13916  | 3 | 714.710022  | 715.0440477 |
| RKQLRDQYCFECDCIR                | Q9CWR2 | 0.01942231 | N-term +42.01 Da, K +28.03 Da,C +57.02Da, | 5182.243652 | 2 | 1158.550049 | 1159.035369 |
| IVANGKILAADESVGTMGNR            | Q91Y97 | 0          | N-term +42.01 Da, K +28.03 Da,            | 5182.458008 | 2 | 1071.560059 | 1072.062433 |
| VHLTDAEKAAVSCLWGKVNNSDEVGGEALGR | P02088 | 0.02441406 | N-term +42.01 Da, K +28.03 Da,C +57.02Da, | 5182.570801 | 4 | 817.4299927 | 817.4173122 |
| AAVLENGVLSR                     | P16331 | 0          | N-term +42.01 Da,                         | 5195.078613 | 2 | 635.361145  | 635.361705  |
| AGLELLSDQGYR                    | Q921I9 | 0          | N-term +42.01 Da,                         | 5200.807129 | 2 | 682.3469849 | 682.3462524 |
| TAIKEIVSR                       | Q08586 | 0.00064683 | N-term +42.01 Da, K +28.03 Da,            | 5204.814941 | 2 | 600.3699951 | 600.371541  |
| AGYEYVSPEQLSGFDKYKY             | Q80TA1 | 0.00065617 | N-term +42.01 Da, K +28.03 Da,            | 5208.757324 | 2 | 1172.069946 | 1171.564998 |
| ADGELNVDSLITR                   | P62141 | 0          | N-term +42.01 Da,                         | 5216.199707 | 2 | 722.8699951 | 722.8675495 |
| AAKVFSIGKF                      | P67778 | 0.0006215  | N-term +42.01 Da, K +28.03 Da,            | 5228.005859 | 2 | 647.8734131 | 647.8739165 |
| AAATAAAAAAAAAAGEGMEPR           | Q9R0A1 | 0          | N-term +42.01 Da,                         | 5229.364746 | 2 | 886.4299927 | 885.9256047 |
| MEEAEGVAAAPGPASGLAFR            | Q9CQV4 | 0.01034126 | N-term +42.01 Da,                         | 5230.132324 | 2 | 986.9699707 | 986.9752949 |
| AAVLENGVLSR                     | P16331 | 0.00640683 | N-term +42.01 Da,                         | 5230.71875  | 2 | 635.8540039 | 635.361705  |

|                                    |        |            |                                           |             |   |             |             |
|------------------------------------|--------|------------|-------------------------------------------|-------------|---|-------------|-------------|
| AELEEVTLDGKPLQALR                  | Q9JIX8 | 0          | N-term +42.01 Da, K +28.03 Da,            | 5240.650391 | 2 | 976.5383911 | 976.5385853 |
| DDDIAALVVDNGSGMCKAGFAGDDAPR        | P60710 | 0          | N-term +42.01 Da, K +28.03 Da,C +57.02Da, | 5255.323242 | 2 | 1405.130005 | 1404.134189 |
| ADIDKLNIDSIIQR                     | P63087 | 0          | N-term +42.01 Da, K +28.03 Da,            | 5256.287109 | 2 | 842.4699707 | 842.4674309 |
| AAKVFESIGKF                        | P67778 | 0.00642398 | N-term +42.01 Da, K +28.03 Da,            | 5258.277832 | 2 | 647.8734741 | 647.8739165 |
| ASGVTVNDEVIKVFNDMKVR               | P45591 | 0          | N-term +42.01 Da, K +28.03 Da,            | 5262.743164 | 3 | 773.75      | 773.7507528 |
| AVAAAAAATAMSAAGGGGASAAR            | Q8CG72 | 0          | N-term +42.01 Da,                         | 5271.218262 | 2 | 937.4610596 | 937.4628858 |
| MELVEVLKR                          | Q7TMF3 | 0.0006398  | N-term +42.01 Da, K +28.03 Da,            | 5271.960938 | 2 | 593.8499756 | 593.8468443 |
| PGSISWDGLDPGKLY                    | Q8VIN1 | 0          | N-term +42.01 Da, K +28.03 Da,            | 5273.286621 | 2 | 837.9221802 | 837.9223248 |
| AGSVADSDAVVKLDDGHLNNSLGSPVQADVFPFR | Q8VED9 | 0          | N-term +42.01 Da, K +28.03 Da,            | 5280.783203 | 3 | 1195.589966 | 1195.260301 |
| ELISNASDALDKIR                     | P08113 | 0.00334821 | N-term +42.01 Da, K +28.03 Da,            | 5283.74707  | 2 | 808.9299927 | 807.9385063 |
| ATLKDQLIVNLLKEEQAPQNK              | P06151 | 0          | N-term +42.01 Da, K +28.03 Da,            | 5284.770508 | 3 | 840.8200073 | 840.4862939 |
| SGALDVLQMKEEDVLK                   | P14206 | 0          | N-term +42.01 Da, K +28.03 Da,            | 5289.087891 | 2 | 937.5       | 937.0029895 |
| AFPSLSAGQNPWR                      | Q8K4H1 | 0          | N-term +42.01 Da,                         | 5291.024902 | 2 | 736.8699951 | 736.867686  |
| ASGNAQIGKSAPDFTATAVVDGAFKEIKLSDYR  | Q61171 | 0          | N-term +42.01 Da, K +28.03 Da,            | 5297.084961 | 4 | 889.7199707 | 889.2188845 |
| AAFADLDR                           | Q88796 | 0.00059032 | N-term +42.01 Da,                         | 5300.577637 | 2 | 517.2700195 | 517.2692841 |
| MNEVSVIKEGWLH                      | Q60823 | 0.01463169 | N-term +42.01 Da, K +28.03 Da,            | 5301.854004 | 2 | 806.9199829 | 806.4136121 |
| ASGVAVSDGVIKVFNDMKVR               | P18760 | 0.00229095 | N-term +42.01 Da, K +28.03 Da,            | 5302.091309 | 3 | 731.0599976 | 730.7365548 |
| MELVEVLKR                          | Q7TMF3 | 0.00063816 | N-term +42.01 Da, K +28.03 Da,            | 5303.15332  | 2 | 593.8462524 | 593.8468443 |
| RKKNWFGT                           | Q8BZZ3 | 0.00058685 | N-term +42.01 Da, K +28.03 Da,            | 5317.981445 | 2 | 567.3291626 | 567.8245603 |
| ASVALSEAEKVYIVHGVQEDLR             | Q9D0M0 | 0          | N-term +42.01 Da, K +28.03 Da,            | 5318.552734 | 3 | 828.4400024 | 828.4428653 |
| AAPEdVAALQAEITR                    | A2BDX3 | 0          | N-term +42.01 Da,                         | 5318.67334  | 2 | 798.9099731 | 798.9150312 |
| AFPSLSAGQNPWR                      | Q8K4H1 | 0          | N-term +42.01 Da,                         | 5322.817871 | 2 | 736.866333  | 736.867686  |
| AAPEdVAALQAEITR                    | A2BDX3 | 0          | N-term +42.01 Da,                         | 5323.228027 | 2 | 799.4099731 | 798.9150312 |
| ASGVAVSDGVIKVFEN                   | P18760 | 0.00842105 | N-term +42.01 Da, K +28.03 Da,            | 5323.668457 | 2 | 767.4099731 | 766.9195847 |
| AFPSLSAGQNPWR                      | Q8K4H1 | 0          | N-term +42.01 Da,                         | 5331.415039 | 2 | 736.3599854 | 736.867686  |
| SVPLLTDAATVSGAER                   | Q9WTL7 | 0          | N-term +42.01 Da,                         | 5337.679199 | 2 | 814.9299927 | 814.9281388 |
| SILYVSPHPDAFPSLR                   | Q9Z1Q9 | 0          | N-term +42.01 Da,                         | 5342.953613 | 2 | 920.9899902 | 920.983248  |
| MNFSGKYQLQSQENFEPFMK               | P12710 | 0          | N-term +42.01 Da, K +28.03 Da,            | 5354.838867 | 3 | 851.4000244 | 851.0713864 |
| DDDIAALVVDNGSGMCKAGFAGDDAPR        | P60710 | 0          | N-term +42.01 Da, K +28.03 Da,C +57.02Da, | 5354.961426 | 3 | 937.0900269 | 936.4252179 |
| DDDIAALVVDNGSGMCKAGFAGDDAPR        | P60710 | 0          | N-term +42.01 Da, K +28.03 Da,C +57.02Da, | 5355.47998  | 2 | 1405.130005 | 1404.134189 |
| ASGVAVSDGVIKVFNDMKVR               | P18760 | 0          | N-term +42.01 Da, K +28.03 Da,            | 5358.409668 | 3 | 730.7346191 | 730.7365548 |
| DDDIAALVVDNGSGMCKAGFAGDDAPR        | P60710 | 0          | N-term +42.01 Da, K +28.03 Da,C +57.02Da, | 5367.074707 | 2 | 1404.619995 | 1404.134189 |
| TGKNPNDQLLKEPFLNTR                 | Q78JT3 | 0          | N-term +42.01 Da, K +28.03 Da,            | 5367.527344 | 3 | 792.4500122 | 792.7810407 |
| STAFQKKLEPAYQVKNKGHKIR             | O70468 | 0.01976285 | N-term +42.01 Da, K +28.03 Da,            | 5367.651855 | 4 | 649.8699951 | 650.128611  |
| SVPLLTDAATVSGAER                   | Q9WTL7 | 0          | N-term +42.01 Da,                         | 5368.849121 | 2 | 814.9260864 | 814.9281388 |
| SSWVTHVEMGPPDPILGVTEAFKR           | P05202 | 0          | N-term +42.01 Da, K +28.03 Da,            | 5371.936523 | 4 | 703.8499756 | 703.3547227 |
| AASTDIAGLEESFR                     | Q9CRB6 | 0          | N-term +42.01 Da,                         | 5374.041016 | 2 | 754.8599854 | 754.865007  |
| MDAATLTYDTLR                       | Q8BGE6 | 0          | N-term +42.01 Da,                         | 5375.23584  | 2 | 706.8400269 | 706.8399458 |
| TELQSALLR                          | P62254 | 0.00064103 | N-term +42.01 Da,                         | 5377.745117 | 2 | 593.3446045 | 593.3455234 |
| MQKDASLSGFLPSFQH                   | Q8VCN5 | 0.00387382 | N-term +42.01 Da, K +28.03 Da,            | 5382.006836 | 3 | 622.3099976 | 621.6417027 |

|                                  |        |            |                                           |             |   |             |             |
|----------------------------------|--------|------------|-------------------------------------------|-------------|---|-------------|-------------|
| VHLTDAEKA AVSCLWGK VNSDEVGGEALGR | P02088 | 0          | N-term +42.01 Da, K +28.03 Da,C +57.02Da, | 5382.862305 | 3 | 1090.219971 | 1089.553991 |
| DDDIAALVVDNGSGMCKAGFAGDDAPR      | P60710 | 0          | N-term +42.01 Da, K +28.03 Da,C +57.02Da, | 5386.268555 | 3 | 937.0900269 | 936.4252179 |
| DVALEGVGHFFR                     | P29391 | 0          | N-term +42.01 Da,                         | 5386.605469 | 2 | 695.8413086 | 694.8515044 |
| AGVSPAVFGCPDVTLGR                | Q5I2A0 | 0          | N-term +42.01 Da, C +57.02Da,             | 5387.411133 | 2 | 872.4299927 | 872.9379832 |
| ALAMEKNLNQALLDLHALGSAR           | P29391 | 0.00059488 | N-term +42.01 Da, K +28.03 Da,            | 5390.778809 | 3 | 807.7700195 | 807.1090516 |
| AGVSPAVFGCPDVTLGR                | Q5I2A0 | 0          | N-term +42.01 Da, C +57.02Da,             | 5391.449707 | 2 | 872.9299927 | 872.9379832 |
| ASPAAGGVVIVGSLIGR                | Q99KP3 | 0          | N-term +42.01 Da,                         | 5392.556641 | 2 | 811.960022  | 811.9648579 |
| ASGVTVNDEVIKVFNDMKVR             | P45591 | 0          | N-term +42.01 Da, K +28.03 Da,            | 5397.208008 | 3 | 774.4099731 | 773.7507528 |
| DDDIAALVVDNGSGMCKAGFAGDDAPR      | P60710 | 0          | N-term +42.01 Da, K +28.03 Da,C +57.02Da, | 5404.424316 | 2 | 1404.630005 | 1404.134189 |
| DDDIAALVVDNGSGMCKAGFAGDDAPR      | P60710 | 0          | N-term +42.01 Da, K +28.03 Da,C +57.02Da, | 5416.879395 | 3 | 937.0900269 | 936.4252179 |
| DDDIAALVVDNGSGMCKAGFAGDDAPR      | P60710 | 0          | N-term +42.01 Da, K +28.03 Da,C +57.02Da, | 5417.106445 | 2 | 1404.625244 | 1404.134189 |
| MLSDFLDLDDVR                     | Q9R0P6 | 0          | N-term +42.01 Da,                         | 5422.931152 | 2 | 684.3499756 | 683.3395813 |
| ASPAAGGVVIVGSLIGR                | Q99KP3 | 0          | N-term +42.01 Da,                         | 5423.594238 | 2 | 811.960022  | 811.9648579 |
| TGAIVDVPVGEELLGR                 | Q03265 | 0          | N-term +42.01 Da,                         | 5425.969727 | 2 | 833.460022  | 833.9541564 |
| VSQLMNGDPAFRRGR                  | A2AH75 | 0.00282326 | N-term +42.01 Da,                         | 5428.319824 | 2 | 873.4500122 | 873.4468407 |
| MDILKSEILR                       | Q8BM39 | 0.00334262 | N-term +42.01 Da, K +28.03 Da,            | 5431.703125 | 2 | 644.3699951 | 644.3706839 |
| MDASLEKIADPTLAEMGKN              | Q99K01 | 0          | N-term +42.01 Da, K +28.03 Da,            | 5432.223145 | 2 | 1066.530029 | 1066.534329 |
| ADVLSVLR                         | Q8JZM7 | 0.01173469 | N-term +42.01 Da,                         | 5433.545898 | 2 | 457.769989  | 457.7689196 |
| MNLSAAHHQISLSDGNNIPLIGLGTYS DPR  | Q8VCX1 | 0.00060386 | N-term +42.01 Da,                         | 5439.135254 | 3 | 1078.530029 | 1078.538452 |
| ATESSPLTTHVLDTASGLPAQGLCLR       | Q9CRB3 | 0          | N-term +42.01 Da, C +57.02Da,             | 5439.360352 | 2 | 1370.199951 | 1369.194906 |
| PKNVVGDHADDVYVFGAPILR            | Q91WU0 | 0.00062696 | N-term +42.01 Da, K +28.03 Da,            | 5442.630859 | 3 | 813.4299927 | 813.7604169 |
| ASGVAVSDGVIKVFNDMKVR             | P18760 | 0          | N-term +42.01 Da, K +28.03 Da,            | 5445.953613 | 3 | 730.7365112 | 730.7365548 |
| DDDIAALVVDNGSGMCKAGFAGDDAPR      | P60710 | 0          | N-term +42.01 Da, K +28.03 Da,C +57.02Da, | 5447.544434 | 3 | 936.7600098 | 936.4252179 |
| ATESSPLTTHVLDTASGLPAQGLCLR       | Q9CRB3 | 0          | N-term +42.01 Da, C +57.02Da,             | 5447.85791  | 2 | 1369.189941 | 1369.194906 |
| DDDIAALVVDNGSGMCKAGFAGDDAPR      | P60710 | 0          | N-term +42.01 Da, K +28.03 Da,C +57.02Da, | 5449.206543 | 2 | 1405.130005 | 1404.134189 |
| ASGVAVSDGVIKVFNDMKVR             | P18760 | 0          | N-term +42.01 Da, K +28.03 Da,            | 5451.359863 | 2 | 1095.599976 | 1095.601194 |
| CDFTEDQTAEFKEAF                  | Q60605 | 0.00061805 | N-term +42.01 Da, K +28.03 Da,C +57.02Da, | 5454.969727 | 2 | 954.4000244 | 954.4038372 |
| VHLTDAEKA AVSCLWGK VNSDEVGGEALGR | P02088 | 0          | N-term +42.01 Da, K +28.03 Da,C +57.02Da, | 5458.899902 | 4 | 817.9199829 | 817.4173122 |
| ATESSPLTTHVLDTASGLPAQGLCLR       | Q9CRB3 | 0          | N-term +42.01 Da, C +57.02Da,             | 5466.949219 | 3 | 913.1303711 | 913.1323627 |
| ASGVAVSDGVIKVFNDMKVR             | P18760 | 0          | N-term +42.01 Da, K +28.03 Da,            | 5476.161621 | 3 | 730.7354126 | 730.7365548 |
| MQNDAGEFVDLYVPR                  | Q9CQR2 | 0          | N-term +42.01 Da,                         | 5476.73877  | 2 | 899.4199829 | 898.4196237 |
| QTDTLQTDYFAIK                    | P27577 | 0.01929738 | N-term +42.01 Da, K +28.03 Da,            | 5476.972656 | 2 | 808.4199829 | 807.4065077 |
| ATESSPLTTHVLDTASGLPAQGLCLR       | Q9CRB3 | 0          | N-term +42.01 Da, C +57.02Da,             | 5479.544922 | 2 | 1369.699951 | 1369.194906 |
| LLADAVAVTMGPKGR                  | P63038 | 0          | N-term +42.01 Da, K +28.03 Da,            | 5479.885742 | 2 | 785.9345703 | 784.9450792 |
| DDDIAALVVDNGSGMCKAGFAGDDAPR      | P60710 | 0          | N-term +42.01 Da, K +28.03 Da,C +57.02Da, | 5481.41748  | 2 | 1404.619995 | 1404.134189 |
| ASGVAVSDGVIKVFNDMKVR             | P18760 | 0          | N-term +42.01 Da, K +28.03 Da,            | 5482.481934 | 2 | 1095.599976 | 1095.601194 |
| FLVGPDPVPR                       | P11352 | 0.00935551 | N-term +42.01 Da,                         | 5490.800781 | 2 | 600.3317261 | 599.3349583 |
| VALEGVGHFFR                      | P29391 | 0.00061996 | N-term +42.01 Da,                         | 5492.663574 | 2 | 638.3300171 | 637.3380323 |
| MESELEALAPR                      | Q9CYS6 | 0          | N-term +42.01 Da,                         | 5493.342773 | 2 | 644.8200073 | 644.3161062 |
| EEDSTALVCDNGSLCKAGFAGDDAPR       | P62737 | 0.00741133 | N-term +42.01 Da, K +28.03 Da,C +57.02Da, | 5495.124512 | 2 | 1441.150024 | 1441.632011 |



|                                    |        |            |                                           |             |   |             |             |
|------------------------------------|--------|------------|-------------------------------------------|-------------|---|-------------|-------------|
| GDIAFVDPNDSSFQIVKNPR               | Q61176 | 0.01076371 | N-term +42.01 Da, K +28.03 Da,            | 5495.389648 | 3 | 797.4099731 | 796.7446555 |
| AIGDTLVQDIR                        | Q9CXN7 | 0.00228964 | N-term +42.01 Da,                         | 5496.067383 | 2 | 622.3400269 | 621.8380629 |
| VDYEVVLGVQR                        | O54946 | 0          | N-term +42.01 Da,                         | 5499.069824 | 2 | 691.8497925 | 691.8511705 |
| CDFTEDQTAEFKEAF                    | Q60605 | 0          | N-term +42.01 Da, K +28.03 Da,C +57.02Da, | 5500.149902 | 2 | 954.4000244 | 954.4038372 |
| CDFTEDQTAEFKEAF                    | Q60605 | 0          | N-term +42.01 Da, K +28.03 Da,C +57.02Da, | 5502.371582 | 2 | 955.4099731 | 954.4038372 |
| MEKNLNQALLDLHALGSAR                | P29391 | 0.00592992 | N-term +42.01 Da, K +28.03 Da,            | 5503.679688 | 3 | 722.7199707 | 722.0562874 |
| ASGVAVSDGVIKVFNDMKVR               | P18760 | 0          | N-term +42.01 Da, K +28.03 Da,            | 5508.291504 | 3 | 731.0700073 | 730.7365548 |
| SEPGGGEDGSAGLEVSAVQNVADVAVLQKH     | Q9JHU4 | 0          | N-term +42.01 Da, K +28.03 Da,            | 5509.146484 | 3 | 997.4899902 | 997.4949066 |
| AAEDVWATGADPSELEGGGLLH             | O55022 | 0          | N-term +42.01 Da,                         | 5509.567383 | 2 | 1076.02002  | 1075.516037 |
| ATLKDQLVNLKKEEQAPQNKIT             | P06151 | 0.00061463 | N-term +42.01 Da, K +28.03 Da,            | 5510.44873  | 3 | 912.2000122 | 911.8635417 |
| AAESALQVVEKLQAR                    | Q8CB77 | 0          | N-term +42.01 Da, K +28.03 Da,            | 5510.560547 | 2 | 841.9699707 | 841.975423  |
| SGEDEQQEQTIAEDLVVTKY               | P50580 | 0          | N-term +42.01 Da, K +28.03 Da,            | 5511.215332 | 3 | 784.710022  | 784.7078251 |
| DDDIAALVVDNNGSGMCKAGFAGDDAPR       | P60710 | 0          | N-term +42.01 Da, K +28.03 Da,C +57.02Da, | 5513.917969 | 2 | 1404.630005 | 1404.134189 |
| MESELEALAPR                        | Q9CYS6 | 0          | N-term +42.01 Da,                         | 5523.756348 | 2 | 644.3158569 | 644.3161062 |
| AETLSGLGDASAAGAAAVSSAASETGTR       | D3YXK2 | 0          | N-term +42.01 Da,                         | 5528.020996 | 2 | 1262.109985 | 1261.104269 |
| DDDIAALVVDNNGSGMCK                 | P60710 | 0          | N-term +42.01 Da, K +28.03 Da,C +57.02Da, | 5528.102051 | 2 | 925.4199829 | 925.4189641 |
| AETLSGLGDASAAGAAAVSSAASETGTR       | D3YXK2 | 0          | N-term +42.01 Da,                         | 5528.649902 | 2 | 1261.599976 | 1261.104269 |
| AETLSGLGDASAAGAAAVSSAASETGTR       | D3YXK2 | 0          | N-term +42.01 Da,                         | 5530.880859 | 3 | 841.4000244 | 841.0719379 |
| DDDIAALVVDNNGSGMCKAGFAGDDAPR       | P60710 | 0          | N-term +42.01 Da, K +28.03 Da,C +57.02Da, | 5532.491699 | 3 | 937.0900269 | 936.4252179 |
| ASGNAQIGKSAPDFTATAVVDGAFKEIKLSDYR  | Q61171 | 0          | N-term +42.01 Da, K +28.03 Da,            | 5536.129395 | 3 | 1185.619995 | 1185.28942  |
| ASGVAVSDGVIKVFNDMKVR               | P18760 | 0          | N-term +42.01 Da, K +28.03 Da,            | 5539.568848 | 3 | 731.4000244 | 730.7365548 |
| ASGNAQIGKSAPDFTATAVVDGAFKEIKLSDYR  | Q61171 | 0          | N-term +42.01 Da, K +28.03 Da,            | 5541.62793  | 4 | 889.4699707 | 889.2188845 |
| LKTEVTITNLIKDNDRIQSSNKAGSADDEDSDIK | P27671 | 0.01370558 | N-term +42.01 Da, K +28.03 Da,            | 5542.76416  | 3 | 1296.650024 | 1296.674329 |
| DDDIAALVVDNNGSGMCKAGFAGDDAPR       | P60710 | 0          | N-term +42.01 Da, K +28.03 Da,C +57.02Da, | 5544.955078 | 2 | 1404.630005 | 1404.134189 |
| TTSALFPPSLVPGSR                    | Q9JKV1 | 0          | N-term +42.01 Da,                         | 5545.56543  | 2 | 766.4077759 | 766.4093842 |
| ASLSLAPVNIKAGADEER                 | P80314 | 0          | N-term +42.01 Da, K +28.03 Da,            | 5549.756348 | 2 | 1030.050049 | 1029.546942 |
| ADHVQSLAQLNLCKQLYETDITTR           | Q9EPK7 | 0          | N-term +42.01 Da, K +28.03 Da,C +57.02Da, | 5551.813477 | 3 | 1036.170044 | 1035.84343  |
| ASLLAKDQTYLQDLAKKIC                | P70279 | 0          | N-term +42.01 Da, K +28.03 Da,C +57.02Da, | 5556.055176 | 3 | 726.75      | 726.4131892 |
| AETLSGLGDASAAGAAAVSSAASETGTR       | D3YXK2 | 0          | N-term +42.01 Da,                         | 5558.535645 | 2 | 1262.109985 | 1261.104269 |
| HEIATNLGDFAIISLYR                  | P07758 | 0.02931283 | N-term +42.01 Da,                         | 5558.878418 | 2 | 931.4799805 | 931.4757875 |
| GLFIHDDKGILR                       | P35700 | 0.00063857 | N-term +42.01 Da, K +28.03 Da,            | 5559.26123  | 2 | 715.9199829 | 715.4243052 |
| MESSTSSSGSALGAVDPQLQHFIQVETQKQR    | Q9WVA2 | 0          | N-term +42.01 Da, K +28.03 Da,            | 5561.284668 | 3 | 1140.219971 | 1139.89122  |
| VHLTDAEKAASVCLWGKVNSEVGGGALGR      | P02088 | 0          | N-term +42.01 Da, K +28.03 Da,C +57.02Da, | 5562.79541  | 4 | 817.1599731 | 817.4173122 |
| ASGVAVSDGVIKVF                     | P18760 | 0          | N-term +42.01 Da, K +28.03 Da,            | 5564.777832 | 2 | 710.4000244 | 709.8981206 |
| SDIGDWFR                           | Q99J56 | 0.00061843 | N-term +42.01 Da,                         | 5565.523926 | 2 | 519.2399902 | 519.237984  |
| ASGGSGGVSPALWSEVNR                 | E9Q740 | 0          | N-term +42.01 Da,                         | 5566.626953 | 2 | 936.9699707 | 936.4659514 |
| ASYEILDVPR                         | Q9QYI5 | 0          | N-term +42.01 Da,                         | 5571.128906 | 2 | 684.8499756 | 684.3457209 |
| ASGNAQIGKSAPDFTATAVVDGAFKEIKLSDYR  | Q61171 | 0          | N-term +42.01 Da, K +28.03 Da,            | 5572.186523 | 4 | 889.4699707 | 889.2188845 |
| AETLSGLGDASAAGAAAVSSAASETGTR       | D3YXK2 | 0          | N-term +42.01 Da,                         | 5574.163086 | 3 | 841.0700073 | 841.0719379 |
| TTSALFPPSLVPGSR                    | Q9JKV1 | 0.00284252 | N-term +42.01 Da,                         | 5575.900391 | 2 | 766.9099731 | 766.4093842 |

|                                    |        |            |                                           |             |   |             |             |
|------------------------------------|--------|------------|-------------------------------------------|-------------|---|-------------|-------------|
| ASLSLAPVNIKAGADEER                 | P80314 | 0          | N-term +42.01 Da, K +28.03 Da,            | 5579.040527 | 3 | 687.3599854 | 686.7003867 |
| ASLSLAPVNIKAGADEER                 | P80314 | 0          | N-term +42.01 Da, K +28.03 Da,            | 5581.823242 | 2 | 1029.546021 | 1029.546942 |
| ASGCKIGPSILNSDLANLGAECLE           | Q8VEEO | 0          | N-term +42.01 Da, K +28.03 Da,C +57.02Da, | 5585.519531 | 3 | 863.4299927 | 862.7719999 |
| ASGCKIGPSILNSDLANLGAECLE           | Q8VEEO | 0          | N-term +42.01 Da, K +28.03 Da,C +57.02Da, | 5587.32959  | 2 | 1293.660034 | 1293.654362 |
| VHLTDAEKA AVSCLWGK VNSDEVGGEALGR   | P02088 | 0          | N-term +42.01 Da, K +28.03 Da,C +57.02Da, | 5587.4375   | 3 | 1089.890015 | 1089.553991 |
| ASLSLAPVNIKAGADEER                 | P80314 | 0          | N-term +42.01 Da, K +28.03 Da,            | 5593.016602 | 3 | 686.6994019 | 686.7003867 |
| MESSTSSSSGALGAVDPQLQHFIEVETQKQR    | Q9WVA2 | 0          | N-term +42.01 Da, K +28.03 Da,            | 5593.11377  | 3 | 1140.560059 | 1139.89122  |
| VHLTDAEKA AVSCLWGK VNSDEVGGEALGR   | P02088 | 0          | N-term +42.01 Da, K +28.03 Da,C +57.02Da, | 5594.148926 | 4 | 817.4161987 | 817.4173122 |
| DDDI AALVVDNGSGMCKAGFAGDDAPR       | P60710 | 0          | N-term +42.01 Da, K +28.03 Da,C +57.02Da, | 5594.81543  | 2 | 1405.130005 | 1404.134189 |
| DDDI AALVVDNGSGMCKAGFAGDDAPR       | P60710 | 0          | N-term +42.01 Da, K +28.03 Da,C +57.02Da, | 5595.143066 | 2 | 1404.630005 | 1404.134189 |
| ASGVAVSDGVIKVF                     | P18760 | 0          | N-term +42.01 Da, K +28.03 Da,            | 5596.271973 | 2 | 709.9000244 | 709.8981206 |
| EAALAMEKNLNQALLDLHALGSAR           | P29391 | 0.00490998 | N-term +42.01 Da, K +28.03 Da,            | 5596.738281 | 3 | 874.460022  | 873.8022877 |
| ASGNAIQIGKSAPDFTATAVVDGAFKEIKLSDYR | Q61171 | 0          | N-term +42.01 Da, K +28.03 Da,            | 5602.843262 | 4 | 889.4699707 | 889.2188845 |
| DDDI AALVVDNGSGMCKAGFAGDDAPR       | P60710 | 0          | N-term +42.01 Da, K +28.03 Da,C +57.02Da, | 5602.918945 | 3 | 936.75      | 936.4252179 |
| AGPEWQSLEQCLEKHLPPDDLAQVKR         | Q8VC97 | 0          | N-term +42.01 Da, K +28.03 Da,C +57.02Da, | 5604.772461 | 4 | 786.6599731 | 786.4052101 |
| SLLC LADFKAQAQKQL                  | Q9NYQ2 | 0          | N-term +42.01 Da, K +28.03 Da,C +57.02Da, | 5606.333984 | 2 | 966.5350342 | 966.5347906 |
| TTSTLQK AIDLVTKATEEDKAKNYEEALR     | Q8VEJ9 | 0.00058824 | N-term +42.01 Da, K +28.03 Da,            | 5612.111328 | 4 | 856.4699707 | 855.967264  |
| ASLSLAPVNIKAGADEER                 | P80314 | 0          | N-term +42.01 Da, K +28.03 Da,            | 5613.347168 | 2 | 1030.050049 | 1029.546942 |
| SLLC LADFKAQAQKQL                  | Q9NYQ2 | 0          | N-term +42.01 Da, K +28.03 Da,C +57.02Da, | 5613.436523 | 3 | 644.6900024 | 644.6922859 |
| VHLTDAEKA AVSCLWGK VNSDEVGGEALGR   | P02088 | 0          | N-term +42.01 Da, K +28.03 Da,C +57.02Da, | 5618.571777 | 3 | 1089.560059 | 1089.553991 |
| ADEIAKAQVAQPGGDTIFGKIIR            | P70349 | 0          | N-term +42.01 Da, K +28.03 Da,            | 5621.368652 | 3 | 832.789978  | 832.7988718 |
| ADEIAKAQVAQPGGDTIFGKIIR            | P70349 | 0          | N-term +42.01 Da, K +28.03 Da,            | 5624.100586 | 2 | 1249.180054 | 1248.694669 |
| VHLTDAEKA AVSCLWGK VNSDEVGGEALGR   | P02088 | 0          | N-term +42.01 Da, K +28.03 Da,C +57.02Da, | 5624.756348 | 4 | 817.9199829 | 817.4173122 |
| MNNAAGLNSEKVSALIQLK                | Q8R016 | 0          | N-term +42.01 Da, K +28.03 Da,            | 5625.232422 | 2 | 1015.059998 | 1014.561537 |
| DDDI AALVVDNGSGMCKAGFAGDDAPR       | P60710 | 0          | N-term +42.01 Da, K +28.03 Da,C +57.02Da, | 5626.672852 | 2 | 1404.624634 | 1404.134189 |
| SWLFGIKGPKGEGTGPPLPPAQPGEAGGGDR    | Q92511 | 0.04092192 | N-term +42.01 Da, K +28.03 Da,            | 5627.582031 | 3 | 1114.26001  | 1113.589252 |
| MNNAAGLNSEKVSALIQLK                | Q8R016 | 0          | N-term +42.01 Da, K +28.03 Da,            | 5631.782227 | 2 | 1014.559998 | 1014.561537 |
| DDDI AALVVDNGSGMCKAGFAGDDAPR       | P60710 | 0          | N-term +42.01 Da, K +28.03 Da,C +57.02Da, | 5633.530762 | 3 | 936.7518921 | 936.4252179 |
| SDQQLD CALDLMR                     | P47757 | 0          | N-term +42.01 Da, C +57.02Da,             | 5635.252441 | 2 | 803.8629761 | 803.8636269 |
| AGPEWQSLEQCLEKHLPPDDLAQVKR         | Q8VC97 | 0          | N-term +42.01 Da, K +28.03 Da,C +57.02Da, | 5636.936523 | 4 | 786.6599731 | 786.4052101 |
| SLLC LADFKAQAQKQL                  | Q9NYQ2 | 0          | N-term +42.01 Da, K +28.03 Da,C +57.02Da, | 5637.506348 | 2 | 967.0300293 | 966.5347906 |
| SSPAQPAVPAPLADLKI Q                | P24549 | 0          | N-term +42.01 Da, K +28.03 Da,            | 5641.241699 | 3 | 625.0200195 | 625.0191676 |
| SSPAQPAVPAPLADLKI Q                | P24549 | 0          | N-term +42.01 Da, K +28.03 Da,            | 5643.12207  | 2 | 937.0239868 | 937.0251132 |
| VHLTDAEKA AVSCLWGK VNSDEVGGEALGR   | P02088 | 0          | N-term +42.01 Da, K +28.03 Da,C +57.02Da, | 5650.220215 | 3 | 1090.219971 | 1089.553991 |
| ASGVAVSDGVIKVF                     | P18760 | 0          | N-term +42.01 Da, K +28.03 Da,            | 5654.221191 | 2 | 710.4000244 | 709.8981206 |
| VHLTDAEKSAV SCLWAKVNPDEVGGEALGR    | P02089 | 0          | N-term +42.01 Da, K +28.03 Da,C +57.02Da, | 5654.341797 | 4 | 827.6699829 | 827.4251372 |
| VHLTDAEKA AVSCLWGK VNSDEVGGEALGR   | P02088 | 0          | N-term +42.01 Da, K +28.03 Da,C +57.02Da, | 5655.830078 | 4 | 817.4163818 | 817.4173122 |
| SSPAQPAVPAPLADLKI QH               | P24549 | 0.00059418 | N-term +42.01 Da, K +28.03 Da,            | 5657.040039 | 2 | 1006.039978 | 1005.554569 |
| DDDI AALVVDNGSGMCKAGFAGDDAPR       | P60710 | 0          | N-term +42.01 Da, K +28.03 Da,C +57.02Da, | 5657.997559 | 2 | 1405.130005 | 1404.134189 |
| ASGVAVSDGVIKVFNDMKVR               | P18760 | 0          | N-term +42.01 Da, K +28.03 Da,            | 5658.669434 | 3 | 731.0599976 | 730.7365548 |

|                                   |         |            |                                           |             |   |             |             |
|-----------------------------------|---------|------------|-------------------------------------------|-------------|---|-------------|-------------|
| VHLTDAEKSAVSLWAKVNPDEVGGEALGR     | P02089  | 0          | N-term +42.01 Da, K +28.03 Da,C +57.02Da, | 5664.258789 | 4 | 827.1699829 | 827.4251372 |
| SDQQLDLDCALDMR                    | P47757  | 0          | N-term +42.01 Da, C +57.02Da,             | 5665.938965 | 2 | 803.8599854 | 803.8636269 |
| ADTQYILPNDIGVSSLDLDCR             | Q99KK7  | 0          | N-term +42.01 Da, C +57.02Da,             | 5668.476074 | 2 | 1090.51001  | 1090.020432 |
| ASGVTVNDEVIKVFNDMKVR              | P45591  | 0          | N-term +42.01 Da, K +28.03 Da,            | 5671.456543 | 3 | 773.75      | 773.7507528 |
| TEWEAATPAVAETPDIKLFGK             | P97461  | 0          | N-term +42.01 Da, K +28.03 Da,            | 5674.885254 | 2 | 1186.630005 | 1186.622847 |
| DDIAALVVDNGSGMCKAGFAGDDAPR        | P60710  | 0          | N-term +42.01 Da, K +28.03 Da,C +57.02Da, | 5679.5625   | 3 | 937.0800171 | 936.4252179 |
| TEWEAATPAVAETPDIKLFGK             | P97461  | 0          | N-term +42.01 Da, K +28.03 Da,            | 5681.334473 | 3 | 791.75      | 791.4176569 |
| SISSDEVNFLVYR                     | Q8BHJ5  | 0          | N-term +42.01 Da,                         | 5682.306641 | 2 | 786.4000244 | 785.8910246 |
| VHLTDAEKSAVSLWAKVNPDEVGGEALGR     | P02089  | 0          | N-term +42.01 Da, K +28.03 Da,C +57.02Da, | 5685.677734 | 4 | 827.9199829 | 827.4251372 |
| ASGVTVNDEVIKVFNDMKVR              | P45591  | 0          | N-term +42.01 Da, K +28.03 Da,            | 5688.353516 | 2 | 1160.630005 | 1160.122491 |
| GSPLEKLVSSVSDLPKR                 | P54869  | 0          | N-term +42.01 Da, K +28.03 Da,            | 5690.067871 | 3 | 638.0300293 | 637.370089  |
| AHLLTSGPPPDEQDFIQAYEEVR           | E9QLJ5  | 0          | N-term +42.01 Da,                         | 5697.80957  | 3 | 886.0999756 | 885.429285  |
| ASGVTVNDEVIKVFNDMKVR              | P45591  | 0          | N-term +42.01 Da, K +28.03 Da,            | 5702.06543  | 3 | 774.0800171 | 773.7507528 |
| ASGVAVSDGVIKVFNDMKVR              | P18760  | 0          | N-term +42.01 Da, K +28.03 Da,            | 5704.82959  | 3 | 731.0700073 | 730.7365548 |
| PFVELETNLPASR                     | Q35215  | 0          | N-term +42.01 Da,                         | 5705.15918  | 2 | 757.8900146 | 757.8961096 |
| AALVLEDGSLVQGR                    | B2LRQC6 | 0          | N-term +42.01 Da,                         | 5712.099121 | 2 | 735.9000244 | 735.4015592 |
| TTYLEFIQQNEER                     | Q01405  | 0          | N-term +42.01 Da,                         | 5712.174316 | 2 | 856.9100342 | 856.9099462 |
| AASVDLELKAFTLEQAK                 | Q9CWM4  | 0          | N-term +42.01 Da, K +28.03 Da,            | 5713.27832  | 3 | 697.0700073 | 696.7365492 |
| ASGVAVSDGVIKVFNDMK                | P18760  | 0          | N-term +42.01 Da, K +28.03 Da,            | 5715.62793  | 2 | 968.0200195 | 968.0164311 |
| AASVDLELKAFTLEQAK                 | Q9CWM4  | 0          | N-term +42.01 Da, K +28.03 Da,            | 5717.653809 | 3 | 697.4000244 | 696.7365492 |
| VHLTDAEKAASVSLWGKVNDSDEVGGEALGR   | P02088  | 0          | N-term +42.01 Da, K +28.03 Da,C +57.02Da, | 5718.55957  | 3 | 1090.219971 | 1089.553991 |
| ASGNAQIGKSAPDFTATAVVDGAFKEIKLSDYR | Q61171  | 0          | N-term +42.01 Da, K +28.03 Da,            | 5722.750977 | 4 | 889.460022  | 889.2188845 |
| VHLTDAEKSAVSLWAKVNPDEVGGEALGR     | P02089  | 0          | N-term +42.01 Da, K +28.03 Da,C +57.02Da, | 5729.59082  | 4 | 827.4199829 | 827.4251372 |
| AAATAAAAPQQLSDEELFSQLR            | Q9WU40  | 0          | N-term +42.01 Da,                         | 5730.255859 | 3 | 777.7199707 | 777.3922821 |
| AAATAAAAPQQLSDEELFSQLR            | Q9WU40  | 0          | N-term +42.01 Da,                         | 5730.859863 | 2 | 1165.579956 | 1165.584785 |
| DDIAALVVDNGSGMCK                  | P60710  | 0.00065402 | N-term +42.01 Da, K +28.03 Da,C +57.02Da, | 5735.647949 | 2 | 925.9099731 | 925.4189641 |
| AAATAAAAPQQLSDEELFSQLR            | Q9WU40  | 0          | N-term +42.01 Da,                         | 5736.291992 | 2 | 1166.089966 | 1165.584785 |
| VHLTDAEKSAVSLWAKVNPDEVGGEALGR     | P02089  | 0          | N-term +42.01 Da, K +28.03 Da,C +57.02Da, | 5743.263184 | 3 | 1103.560059 | 1102.897757 |
| TTQQIVLQGGPWGFR                   | O70400  | 0          | N-term +42.01 Da,                         | 5743.379395 | 2 | 913.9799805 | 913.9810395 |
| ASGVAVSDGVIKVF                    | P18760  | 0.00283447 | N-term +42.01 Da, K +28.03 Da,            | 5749.977051 | 2 | 710.4000244 | 709.8981206 |
| VHLTDAEKAASVSLWGKVNDSDEVGGEALGR   | P02088  | 0.01076923 | N-term +42.01 Da, K +28.03 Da,C +57.02Da, | 5750.981934 | 4 | 817.6699829 | 817.4173122 |
| SDFDSNPFADPDLNPNFKDPSVTQVTR       | Q8K021  | 0.04048964 | N-term +42.01 Da, K +28.03 Da,            | 5755.592773 | 2 | 1547.72998  | 1547.225447 |
| ATQVEPLLPAGAPLLQAEHGLAR           | Q6ZQ58  | 0          | N-term +42.01 Da,                         | 5764.470703 | 2 | 1262.680054 | 1262.181926 |
| PFVELETNLPASR                     | Q35215  | 0.0043956  | N-term +42.01 Da,                         | 5766.305664 | 2 | 758.9099731 | 757.8961096 |
| ATQVEPLLPAGAPLLQAEHGLAR           | Q6ZQ58  | 0          | N-term +42.01 Da,                         | 5767.652344 | 2 | 1262.180054 | 1262.181926 |
| ATQVEPLLPAGAPLLQAEHGLAR           | Q6ZQ58  | 0          | N-term +42.01 Da,                         | 5768.797852 | 3 | 842.1199951 | 841.7903764 |
| VAGPQAQTGAPQGSLEGYLFR             | P29391  | 0          | N-term +42.01 Da,                         | 5770.581055 | 2 | 1207.609985 | 1208.100602 |
| LQEGHTDCSGRVEIWHK                 | Q2VLH6  | 0.01705115 | N-term +42.01 Da, K +28.03 Da,C +57.02Da, | 5772.6875   | 2 | 1062.51001  | 1061.510368 |
| AADISQWAGPLCLQEVDEPPQHALR         | P70296  | 0          | N-term +42.01 Da, C +57.02Da,             | 5773.45166  | 3 | 948.460022  | 948.4642237 |
| TTQQIVLQGGPWGFR                   | O70400  | 0          | N-term +42.01 Da,                         | 5774.334961 | 2 | 913.9799805 | 913.9810395 |

|                                      |        |            |                                           |             |   |             |             |
|--------------------------------------|--------|------------|-------------------------------------------|-------------|---|-------------|-------------|
| AADISQWAGPLCLQEVEPPQHALR             | P70296 | 0          | N-term +42.01 Da, C +57.02Da,             | 5774.703613 | 2 | 1422.689941 | 1422.192697 |
| AADISQWAGPLCLQEVEPPQHALR             | P70296 | 0          | N-term +42.01 Da, C +57.02Da,             | 5776.398438 | 3 | 949.1300049 | 948.4642237 |
| MEPSLELPVDAVR                        | Q9CXFO | 0          | N-term +42.01 Da,                         | 5777.796875 | 2 | 798.4099731 | 797.9109026 |
| AEPQPASSGLTDEAFSCCSDPDPSTKDFLLQQTMLR | Q9CPU0 | 0          | N-term +42.01 Da, K +28.03 Da,C +57.02Da, | 5783.89502  | 3 | 1391.630005 | 1390.969543 |
| VHLTDAEKA AVSCLWGK VNSDEVGG EALGR    | P02088 | 0          | N-term +42.01 Da, K +28.03 Da,C +57.02Da, | 5784.010254 | 4 | 817.6599731 | 817.4173122 |
| AEPQPASSGLTDEAFSCCSDPDPSTKDFLLQQTMLR | Q9CPU0 | 0          | N-term +42.01 Da, K +28.03 Da,C +57.02Da, | 5786.993652 | 3 | 1390.969971 | 1390.969543 |
| PFVELETNLPASR                        | O35215 | 0          | N-term +42.01 Da,                         | 5789.862793 | 2 | 757.9000244 | 757.8961096 |
| ASGVAVSDGVIKVFNDMKVR                 | P18760 | 0.00597826 | N-term +42.01 Da, K +28.03 Da,            | 5790.00293  | 3 | 730.7299805 | 730.7365548 |
| AADISQWAGPLCLQEVEPPQHALR             | P70296 | 0          | N-term +42.01 Da, C +57.02Da,             | 5799.034668 | 4 | 711.5999756 | 711.5999869 |
| AADISQWAGPLCLQEVEPPQHALR             | P70296 | 0          | N-term +42.01 Da, C +57.02Da,             | 5805.429688 | 2 | 1422.689941 | 1422.192697 |
| AADISQWAGPLCLQEVEPPQHALR             | P70296 | 0          | N-term +42.01 Da, C +57.02Da,             | 5806.672363 | 3 | 948.4624023 | 948.4642237 |
| MEPSLELPVDAVR                        | Q9CXFO | 0          | N-term +42.01 Da,                         | 5808.999512 | 2 | 797.9102173 | 797.9109026 |
| ASEDIAKLAETLAKTVAGGQLSFKGK           | P46061 | 0          | N-term +42.01 Da, K +28.03 Da,            | 5809.32666  | 4 | 729.9199829 | 729.6667612 |
| ASVGTLAFDEYGRPFLLIKDQDR              | P80316 | 0          | N-term +42.01 Da, K +28.03 Da,            | 5811.382324 | 3 | 895.1400146 | 894.4693031 |
| PMFIVNTNVPR                          | P34884 | 0          | N-term +42.01 Da,                         | 5817.387207 | 2 | 665.3499756 | 665.3528253 |
| STLLIHPQYAWLQDLGLR                   | Q9DBF1 | 0          | N-term +42.01 Da,                         | 5818.862305 | 3 | 768.4152832 | 768.4146918 |
| VHLTDAEKA AVSCLWGK VNSDEVGG EALGR    | P02088 | 0          | N-term +42.01 Da, K +28.03 Da,C +57.02Da, | 5824.697754 | 4 | 817.9199829 | 817.4173122 |
| NLNQALLDLHALGSAR                     | P29391 | 0          | N-term +42.01 Da,                         | 5825.150879 | 2 | 875.4664307 | 874.4761214 |
| PFVELETNLPASR                        | O35215 | 0          | N-term +42.01 Da,                         | 5827.138184 | 2 | 757.9000244 | 757.8961096 |
| AAAAQLSLTQLSSGNPVYKEY                | P42567 | 0          | N-term +42.01 Da, K +28.03 Da,            | 5830.92627  | 2 | 1141.589966 | 1141.089172 |
| ATYLEFIQQNEER                        | Q9D662 | 0          | N-term +42.01 Da,                         | 5831.933594 | 2 | 841.9000244 | 841.9046637 |
| ATYLEFIQQNEER                        | Q9D662 | 0          | N-term +42.01 Da,                         | 5833.486328 | 2 | 842.4046631 | 841.9046637 |
| VHLTDAEKA AVSCLWGK VNSDEVGG EALGR    | P02088 | 0          | N-term +42.01 Da, K +28.03 Da,C +57.02Da, | 5834.467285 | 3 | 1090.219971 | 1089.553991 |
| PFVELETNLPASR                        | O35215 | 0          | N-term +42.01 Da,                         | 5838.066406 | 2 | 758.8900146 | 757.8961096 |
| MDLVAELPR                            | Q8VDG5 | 0.0033557  | N-term +42.01 Da,                         | 5840.293457 | 2 | 543.2872314 | 543.2866196 |
| ASVGTLAFDEYGRPFLLIKDQDR              | P80316 | 0          | N-term +42.01 Da, K +28.03 Da,            | 5841.879883 | 3 | 894.4699707 | 894.4693031 |
| PFVELETNLPASR                        | O35215 | 0          | N-term +42.01 Da,                         | 5843.522949 | 2 | 757.3900146 | 757.8961096 |
| SITSDEVNFLVYR                        | Q9QXE7 | 0          | N-term +42.01 Da,                         | 5846.745117 | 2 | 793.4099731 | 792.8988497 |
| SSWWTHVEMGPPDPILGVTEAFKR             | P05202 | 0          | N-term +42.01 Da, K +28.03 Da,            | 5854.508301 | 4 | 703.5999756 | 703.3547227 |
| VHLTDAEKA AVSCLWGK VNSDEVGG EALGR    | P02088 | 0          | N-term +42.01 Da, K +28.03 Da,C +57.02Da, | 5855.201172 | 4 | 817.4199829 | 817.4173122 |
| ADSVKTFLLQDLGR                       | Q61070 | 0.00063694 | N-term +42.01 Da, K +28.03 Da,            | 5855.995605 | 2 | 760.9099731 | 760.4093842 |
| MEGPLSVFGDR                          | P11983 | 0          | N-term +42.01 Da,                         | 5858.714844 | 2 | 625.296875  | 625.2977161 |
| SSWWTHVEMGPPDPILGVTEAFKR             | P05202 | 0          | N-term +42.01 Da, K +28.03 Da,            | 5861.165527 | 4 | 703.3499756 | 703.3547227 |
| GQNDLMGTAEDFADQFLR                   | Q64310 | 0          | N-term +42.01 Da,                         | 5861.786133 | 2 | 1036.469971 | 1035.465292 |
| SSWWTHVEMGPPDPILGVTEAFKR             | P05202 | 0          | N-term +42.01 Da, K +28.03 Da,            | 5866.920898 | 3 | 937.4699707 | 937.4705381 |
| ASGVAVSDGVIKVFNDMKVR                 | P18760 | 0.00064516 | N-term +42.01 Da, K +28.03 Da,            | 5867.496094 | 3 | 730.7399902 | 730.7365548 |
| MEGPLSVFGDR                          | P11983 | 0          | N-term +42.01 Da,                         | 5890.133789 | 2 | 625.7999878 | 625.2977161 |
| MNSAGADEIGKLF                        | Q9JII5 | 0          | N-term +42.01 Da, K +28.03 Da,            | 5890.773438 | 2 | 711.8497925 | 711.8503134 |
| MDSASQDINLNSPNKGVLSDFMTDVPDVG VVHR   | Q9CY22 | 0          | N-term +42.01 Da, K +28.03 Da,            | 5891.600098 | 3 | 1242.939941 | 1242.269703 |
| SSWWTHVEMGPPDPILGVTEAFKR             | P05202 | 0          | N-term +42.01 Da, K +28.03 Da,            | 5892.72998  | 4 | 703.8599854 | 703.3547227 |

|                                   |        |            |                                           |             |   |             |             |
|-----------------------------------|--------|------------|-------------------------------------------|-------------|---|-------------|-------------|
| MDSASQDINLNSPNKGVLSDFMTDVPDGPVVHR | Q9CY22 | 0          | N-term +42.01 Da, K +28.03 Da,            | 5893.025879 | 4 | 932.4500122 | 931.9540966 |
| MVGGEASAAVEKLVSGVR                | Q9D211 | 0          | N-term +42.01 Da, K +28.03 Da,            | 5895.458008 | 2 | 915.4899902 | 915.493123  |
| GLFIIDDKGILR                      | P35700 | 0.00839895 | N-term +42.01 Da, K +28.03 Da,            | 5895.533691 | 2 | 714.9299927 | 715.4243052 |
| ASDYLELDTIKLNLR                   | P08113 | 0.00060496 | N-term +42.01 Da, K +28.03 Da,            | 5895.65625  | 2 | 911.4799805 | 910.4936461 |
| AAAAVVPAEWIKNWEKSGR               | B1AZI6 | 0          | N-term +42.01 Da, K +28.03 Da,            | 5899.937988 | 3 | 761.0900269 | 760.7548255 |
| VHLTDAEKAASVCLWGKVNSEVGGALGR      | P02088 | 0          | N-term +42.01 Da, K +28.03 Da,C +57.02Da, | 5906.064941 | 3 | 1089.880005 | 1089.553991 |
| TEWEAATPAVAETPDIKL                | P97461 | 0          | N-term +42.01 Da, K +28.03 Da,            | 5906.565918 | 2 | 1006.52002  | 1006.514776 |
| PFVELETNLPASR                     | O35215 | 0          | N-term +42.01 Da,                         | 5908.247559 | 2 | 758.3900146 | 757.8961096 |
| VHLTDAEKSAVSLWAKVNPDEVGGALGR      | P02089 | 0          | N-term +42.01 Da, K +28.03 Da,C +57.02Da, | 5910.161133 | 3 | 1103.560059 | 1102.897757 |
| MESMVAPGEVLSMQAIQPAHADSR          | Q9DBK0 | 0          | N-term +42.01 Da,                         | 5910.795898 | 2 | 1299.609985 | 1299.111472 |
| SGTLAKIAEIEAEMAR                  | P32233 | 0          | N-term +42.01 Da, K +28.03 Da,            | 5914.800781 | 2 | 880.4707031 | 880.4665739 |
| AAMLGDAIMVAK                      | Q60936 | 0          | N-term +42.01 Da, K +28.03 Da,            | 5920.993164 | 2 | 630.8400269 | 630.8381622 |
| AAMLGDAIMVAK                      | Q60936 | 0          | N-term +42.01 Da, K +28.03 Da,            | 5924.59668  | 2 | 631.3400269 | 630.8381622 |
| ASFVTEVLAHSGSLEKEDLGR             | O54692 | 0          | N-term +42.01 Da, K +28.03 Da,            | 5928.48584  | 3 | 806.4199829 | 806.0833373 |
| MNVEHEVNLLVEEIH                   | Q4KML4 | 0          | N-term +42.01 Da,                         | 5928.85791  | 3 | 669.0100098 | 668.3386832 |
| ATPDSLALFTGLGSENKAR               | D3Z158 | 0          | N-term +42.01 Da, K +28.03 Da,            | 5929.137207 | 2 | 1066.079956 | 1066.073324 |
| VHLTDAEKSAVSLWAKVNPDEVGGALGR      | P02089 | 0          | N-term +42.01 Da, K +28.03 Da,C +57.02Da, | 5930.636719 | 4 | 827.4199829 | 827.4251372 |
| SGTLAKIAEIEAEMAR                  | P32233 | 0          | N-term +42.01 Da, K +28.03 Da,            | 5931.09668  | 3 | 587.3099976 | 587.3134747 |
| EEEIAALVDNGSGMCKAGFAGDDAPR        | P63260 | 0          | N-term +42.01 Da, K +28.03 Da,C +57.02Da, | 5933.921875 | 2 | 1433.160034 | 1432.165489 |
| MKIAVIGQSLFGQEVYQCLR              | Q8R0Y6 | 0          | N-term +42.01 Da, K +28.03 Da,C +57.02Da, | 5936.998535 | 3 | 804.4299927 | 804.0922328 |
| ADLSLDELIR                        | Q8BG81 | 0.00064809 | N-term +42.01 Da,                         | 5937.729004 | 2 | 593.8200073 | 593.8193388 |
| PFVELETNLPASR                     | O35215 | 0          | N-term +42.01 Da,                         | 5939.792969 | 2 | 758.4000244 | 757.8961096 |
| MDVGELLSYQPNR                     | Q9CWL8 | 0          | N-term +42.01 Da,                         | 5941.014648 | 2 | 782.3800049 | 782.377227  |
| ASGRPEELWEAVVGAER                 | Q9D1F4 | 0          | N-term +42.01 Da,                         | 5941.404785 | 2 | 984.9899902 | 984.9923336 |
| MQKDASLSGFLPSFQHFATQAIH           | Q8VCN5 | 0.00387812 | N-term +42.01 Da, K +28.03 Da,            | 5941.770508 | 3 | 878.1099854 | 877.7723283 |
| MDVGELLSYQPNR                     | Q9CWL8 | 0          | N-term +42.01 Da,                         | 5942.727051 | 2 | 783.3800049 | 782.377227  |
| MLSFQYPDVYR                       | Q9QUR6 | 0          | N-term +42.01 Da,                         | 5942.802734 | 2 | 731.8499756 | 730.8475733 |
| SCTIEKALADAKALVER                 | Q9CRA9 | 0          | N-term +42.01 Da, K +28.03 Da,C +57.02Da, | 5943.102539 | 3 | 658.7000122 | 658.3627173 |
| ASGRPEELWEAVVGAER                 | Q9D1F4 | 0          | N-term +42.01 Da,                         | 5948.468262 | 3 | 657.3300171 | 656.9973145 |
| PGGLLLGEEAPDFEANTTIGR             | Q8BG37 | 0.01511335 | N-term +42.01 Da,                         | 5952.137207 | 2 | 1101.050049 | 1100.050046 |
| ASGVTVNDEVIKVFNDMKVR              | P45591 | 0          | N-term +42.01 Da, K +28.03 Da,            | 5952.828125 | 3 | 774.4099731 | 773.7507528 |
| ASGRPEELWEAVVGAER                 | Q9D1F4 | 0.00064851 | N-term +42.01 Da,                         | 5954.257813 | 3 | 656.9899902 | 656.9973145 |
| EEEIAALVDNGSGMCKAGFAGDDAPR        | P63260 | 0          | N-term +42.01 Da, K +28.03 Da,C +57.02Da, | 5956.237305 | 3 | 955.7700195 | 955.1127513 |
| AAMLGDAIMVAK                      | Q60936 | 0          | N-term +42.01 Da, K +28.03 Da,            | 5956.312988 | 2 | 630.836853  | 630.8381622 |
| PMILGYWNVR                        | P10649 | 0.00061958 | N-term +42.01 Da,                         | 5956.908691 | 2 | 646.8300171 | 645.8368108 |
| AALVAAEGSLGPAGWSAGR               | P97364 | 0          | N-term +42.01 Da,                         | 5959.439941 | 2 | 891.9500122 | 891.9603044 |
| MNVEHEVNLLVEEIH                   | Q4KML4 | 0.00282486 | N-term +42.01 Da,                         | 5960.128906 | 3 | 668.6699829 | 668.3386832 |
| AALVAAEGSLGPAGWSAGR               | P97364 | 0          | N-term +42.01 Da,                         | 5960.440918 | 2 | 892.460022  | 891.9603044 |
| MQKDASLSGFLPSFQHFATQ              | Q8VCN5 | 0.02487805 | N-term +42.01 Da, K +28.03 Da,            | 5962.526855 | 3 | 771.3800049 | 770.712298  |
| ASHLELNNGTKMPTLGLGTW              | P45376 | 0.02250489 | N-term +42.01 Da, K +28.03 Da,            | 5966.406738 | 2 | 1106.050049 | 1105.567351 |

|                                  |        |            |                                           |             |   |             |             |
|----------------------------------|--------|------------|-------------------------------------------|-------------|---|-------------|-------------|
| PFVELETNLPASR                    | O35215 | 0          | N-term +42.01 Da,                         | 5970.046875 | 2 | 757.8947754 | 757.8961096 |
| DCGKSFYSNLSLLQHK                 | Q8C827 | 0.04275093 | N-term +42.01 Da, K +28.03 Da,C +57.02Da, | 5970.688477 | 2 | 997.5100098 | 998.003855  |
| AAAAPGPVELGFAEEAPAWR             | P46718 | 0.00064475 | N-term +42.01 Da,                         | 5974.301758 | 2 | 1026.52002  | 1026.512902 |
| AAAAPGPVELGFAEEAPAWR             | P46718 | 0.00643087 | N-term +42.01 Da,                         | 5986.041504 | 2 | 1026.01001  | 1026.512902 |
| TAEVLELAGNAAR                    | Q8CGP4 | 0.00931677 | N-term +42.01 Da,                         | 5987.472656 | 2 | 678.3499756 | 678.859527  |
| MQNDAGEFVDLYVPR                  | Q9CQR2 | 0          | N-term +42.01 Da,                         | 5998.032227 | 2 | 898.4199829 | 898.4196237 |
| PFVELETNLPASR                    | O35215 | 0          | N-term +42.01 Da,                         | 6000.527344 | 2 | 757.8948975 | 757.8961096 |
| MEPQSQSMTLEVPLSLGR               | A4UHF3 | 0          | N-term +42.01 Da,                         | 6000.966797 | 2 | 1023.003662 | 1023.005738 |
| MEEKALEVYDLIR                    | Q9DCL2 | 0.01933565 | N-term +42.01 Da, K +28.03 Da,            | 6007.057129 | 2 | 840.4299927 | 839.9396603 |
| MQNDAGEFVDLYVPR                  | Q9CQR2 | 0          | N-term +42.01 Da,                         | 6010.748535 | 3 | 599.6199951 | 599.2821746 |
| MDPSWATQESEAVAEKVLK              | Q9EPQ7 | 0          | N-term +42.01 Da, K +28.03 Da,            | 6011.461914 | 2 | 1109.550049 | 1109.046449 |
| LVLEVAQHLGESTVR                  | P56480 | 0          | N-term +42.01 Da,                         | 6012.684082 | 2 | 847.9567261 | 846.9675979 |
| PFVELETNLPASRIPAGLENR            | O35215 | 0          | N-term +42.01 Da,                         | 6015.844727 | 3 | 789.7600098 | 789.0885336 |
| EEEIAALVIDNGSGMCKAGFAGDDAPR      | P63260 | 0          | N-term +42.01 Da, K +28.03 Da,C +57.02Da, | 6018.494629 | 3 | 955.7800293 | 955.1127513 |
| EEEIAALVIDNGSGMCKAGFAGDDAPR      | P63260 | 0          | N-term +42.01 Da, K +28.03 Da,C +57.02Da, | 6022.175781 | 2 | 1432.660034 | 1432.165489 |
| EEEIAALVIDNGSGMCKAGFAGDDAPR      | P63260 | 0          | N-term +42.01 Da, K +28.03 Da,C +57.02Da, | 6026.092773 | 3 | 955.1099854 | 955.1127513 |
| GDKPIWEQIGSSFIQH                 | P61971 | 0.00595556 | N-term +42.01 Da, K +28.03 Da,            | 6028.977051 | 3 | 637.9899902 | 637.9915005 |
| MQNDAGEFVDLYVPR                  | Q9CQR2 | 0          | N-term +42.01 Da,                         | 6029.76709  | 2 | 898.4177246 | 898.4196237 |
| PFVELETNLPASR                    | O35215 | 0          | N-term +42.01 Da,                         | 6031.594727 | 2 | 757.8950195 | 757.8961096 |
| ASVGTlafDEYGRPF                  | P80316 | 0          | N-term +42.01 Da,                         | 6031.994629 | 2 | 836.4000244 | 836.4042992 |
| EQELLEAAR                        | P59672 | 0.02532879 | N-term +42.01 Da,                         | 6033.713867 | 2 | 550.289978  | 550.7827562 |
| SSLSGKVQTVLGLVEPSQLGR            | Q60866 | 0          | N-term +42.01 Da, K +28.03 Da,            | 6040.116699 | 2 | 1113.630005 | 1113.128631 |
| MQNDAGEFVDLYVPR                  | Q9CQR2 | 0          | N-term +42.01 Da,                         | 6042.514648 | 3 | 599.6199951 | 599.2821746 |
| MDSGFGSDFGGTGGGKLDPGAIMEQVKVQ    | P62075 | 0          | N-term +42.01 Da, K +28.03 Da,            | 6044.751465 | 3 | 995.4799805 | 995.1440514 |
| SSLSGKVQTVLGLVEPSQLGR            | Q60866 | 0          | N-term +42.01 Da, K +28.03 Da,            | 6046.527832 | 3 | 742.75      | 742.4215126 |
| KREHHEVKNDTKRSSAVDGLR            | Q922M7 | 0.01940299 | N-term +42.01 Da, K +28.03 Da,            | 6054.503418 | 3 | 863.4567261 | 863.4720408 |
| MQNDAGEFVDLYVPR                  | Q9CQR2 | 0          | N-term +42.01 Da,                         | 6060.739258 | 2 | 898.4187012 | 898.4196237 |
| ASVGTlafDEYGRPF                  | P80316 | 0          | N-term +42.01 Da,                         | 6062.458008 | 2 | 836.4037476 | 836.4042992 |
| PFVELETNLPASR                    | O35215 | 0          | N-term +42.01 Da,                         | 6062.567871 | 2 | 757.8935547 | 757.8961096 |
| ASPGEPQPPAPDTSSFDYLVIGGGSSGLASAR | P47791 | 0          | N-term +42.01 Da,                         | 6067.532227 | 3 | 1034.5      | 1034.16679  |
| MQKDASLSGFLPSFQHF                | Q8VCN5 | 0.02529183 | N-term +42.01 Da, K +28.03 Da,            | 6067.689453 | 3 | 670.6599731 | 670.6645075 |
| MQKDASLSGFLPSFQHF                | Q8VCN5 | 0          | N-term +42.01 Da, K +28.03 Da,            | 6069.021484 | 2 | 1005.98999  | 1005.493123 |
| DGKALEQFLQEYFDGNLKR              | P27773 | 0.00061013 | N-term +42.01 Da, K +28.03 Da,            | 6069.967773 | 3 | 790.0800171 | 790.4093842 |
| MEAGGLGCAVCVLTGASR               | G3UXX3 | 0          | N-term +42.01 Da, C +57.02Da,             | 6070.916016 | 2 | 925.9306641 | 925.9315181 |
| VHLTDAEKAASVCLWGKVNSEVGGGALGR    | P02088 | 0          | N-term +42.01 Da, K +28.03 Da,C +57.02Da, | 6071.307129 | 4 | 817.4199829 | 817.4173122 |
| AALAPLPLPAQFK                    | Q9CR26 | 0          | N-term +42.01 Da, K +28.03 Da,            | 6080.151367 | 2 | 752.4500122 | 752.4503228 |
| MDSGFGSDFGGTGGGKLDPGAIMEQVKVQ    | P62075 | 0          | N-term +42.01 Da, K +28.03 Da,            | 6080.289063 | 3 | 995.8099976 | 995.1440514 |
| AANATTNPSQLLPLELVDKCIGSR         | P62322 | 0          | N-term +42.01 Da, K +28.03 Da,C +57.02Da, | 6080.618164 | 3 | 880.4699707 | 880.1338147 |
| AANATTNPSQLLPLELVDKCIGSR         | P62322 | 0          | N-term +42.01 Da, K +28.03 Da,C +57.02Da, | 6081.52002  | 2 | 1320.689941 | 1319.697084 |
| AANATTNPSQLLPLELVDKCIGSR         | P62322 | 0          | N-term +42.01 Da, K +28.03 Da,C +57.02Da, | 6082.347656 | 2 | 1319.699951 | 1319.697084 |

|                                  |        |            |                                           |             |   |             |             |
|----------------------------------|--------|------------|-------------------------------------------|-------------|---|-------------|-------------|
| ASEDIAKLAETLAKTQVAGGQLSFKGKGL    | P46061 | 0          | N-term +42.01 Da, K +28.03 Da,            | 6084.515625 | 4 | 772.6900024 | 772.1931433 |
| ASPGEPQPPAPDTSFDFYLVIGGGSGGLASAR | P47791 | 0          | N-term +42.01 Da,                         | 6085.546387 | 3 | 1034.829956 | 1034.16679  |
| AELQMLLEEEIPSGKR                 | Q8CBW3 | 0          | N-term +42.01 Da, K +28.03 Da,            | 6086.827148 | 2 | 957.5200195 | 957.0060635 |
| MEAGGLGCAVCVLTGASR               | G3UXX3 | 0          | N-term +42.01 Da, C +57.02Da,             | 6087.075195 | 3 | 617.6199951 | 617.6234375 |
| AALAPLPPLPAQFK                   | Q9CR26 | 0          | N-term +42.01 Da, K +28.03 Da,            | 6091.791016 | 3 | 501.9700012 | 501.9693074 |
| ASVGTlafDEYGRPF                  | P80316 | 0          | N-term +42.01 Da,                         | 6093.512207 | 2 | 836.9099731 | 836.4042992 |
| MEAGGLGCAVCVLTGASR               | G3UXX3 | 0          | N-term +42.01 Da, C +57.02Da,             | 6102.396484 | 2 | 925.9299927 | 925.9315181 |
| SQLVECPVNFSEGNQVEIDAISR          | Q91XD4 | 0          | N-term +42.01 Da, C +57.02Da,             | 6104.973145 | 2 | 1374.140015 | 1374.150696 |
| AEYLASIFGTEKDKVN                 | Q8BGJ9 | 0.003861   | N-term +42.01 Da, K +28.03 Da,            | 6110.167969 | 2 | 942.4899902 | 941.9934791 |
| SQLVECPVNFSEGNQVEIDAISR          | Q91XD4 | 0          | N-term +42.01 Da, C +57.02Da,             | 6115.439941 | 3 | 916.4347534 | 916.4362226 |
| AEYLASIFGTEKDKVN                 | Q8BGJ9 | 0          | N-term +42.01 Da, K +28.03 Da,            | 6115.636719 | 2 | 942.9899902 | 941.9934791 |
| ASGVAVSDGVIKVFNDM                | P18760 | 0.00642055 | N-term +42.01 Da, K +28.03 Da,            | 6116.137207 | 2 | 889.9500122 | 889.9532993 |
| NWGYLDQVAALR                     | Q8BK48 | 0.03117506 | N-term +42.01 Da,                         | 6116.467285 | 2 | 723.8599854 | 724.3700615 |
| ASAVSPANLPVLLQPR                 | Q61191 | 0          | N-term +42.01 Da,                         | 6121.28418  | 2 | 874         | 873.499065  |
| MQNDAGEFVDLYVPR                  | Q9CQR2 | 0          | N-term +42.01 Da,                         | 6124.84668  | 2 | 898.9199829 | 898.4196237 |
| ASGVAVSDGVIKVFNDMKVR             | P18760 | 0          | N-term +42.01 Da, K +28.03 Da,            | 6127.365723 | 2 | 1095.589966 | 1095.601194 |
| AAKVFESIGKFGL                    | P67778 | 0.01932607 | N-term +42.01 Da, K +28.03 Da,            | 6131.338379 | 2 | 733.4299927 | 732.9266807 |
| MNSAGADEIGKLF                    | Q9JII5 | 0.00064392 | N-term +42.01 Da, K +28.03 Da,            | 6132.230957 | 2 | 712.3400269 | 711.8503134 |
| SVPAFIDISEEDQAAELR               | Q99JX4 | 0          | N-term +42.01 Da,                         | 6135.21582  | 2 | 1016.496094 | 1016.497115 |
| MQNDAGEFVDLYVPR                  | Q9CQR2 | 0          | N-term +42.01 Da,                         | 6135.74707  | 2 | 899.4099731 | 898.4196237 |
| SLVDLGGKLLAAR                    | Q00420 | 0          | N-term +42.01 Da, K +28.03 Da,            | 6136.319824 | 3 | 538         | 537.6661765 |
| SQLVECPVNFSEGNQVEIDAISR          | Q91XD4 | 0          | N-term +42.01 Da, C +57.02Da,             | 6147.884766 | 3 | 916.7700195 | 916.4362226 |
| VHLTDAEKAAVSCLWGKVNSEVGGGALGR    | P02088 | 0.00842549 | N-term +42.01 Da, K +28.03 Da,C +57.02Da, | 6153.41748  | 4 | 817.4199829 | 817.4173122 |
| VHLTDAEKAAVSCLWGKVNSEVGGGALGR    | P02088 | 0          | N-term +42.01 Da, K +28.03 Da,C +57.02Da, | 6156.295898 | 3 | 1089.560059 | 1089.553991 |
| DEPWLPHPWEPGSRVGLIALK            | Q99N95 | 0.00639659 | N-term +42.01 Da, K +28.03 Da,            | 6160.013184 | 3 | 872.4500122 | 872.1320734 |
| VHLTDAEKAAVSCLWGKVNSEVGGGALGR    | P02088 | 0          | N-term +42.01 Da, K +28.03 Da,C +57.02Da, | 6160.774414 | 3 | 1089.219971 | 1089.553991 |
| PFVELETNLPASR                    | O35215 | 0          | N-term +42.01 Da,                         | 6162.521484 | 2 | 758.4000244 | 757.8961096 |
| MQNDAGEFVDLYVPR                  | Q9CQR2 | 0          | N-term +42.01 Da,                         | 6166.461426 | 2 | 898.9099731 | 898.4196237 |
| DDIAALVVDNGSGMCKAGF              | P60710 | 0          | N-term +42.01 Da, K +28.03 Da,C +57.02Da, | 6169.144043 | 2 | 1063.97998  | 1062.98246  |
| MDIEAYFER                        | P50294 | 0          | N-term +42.01 Da,                         | 6173.25293  | 2 | 608.2700195 | 608.271167  |
| VHLTDAEKAAVSCLWGKVNSEVGGGALGR    | P02088 | 0          | N-term +42.01 Da, K +28.03 Da,C +57.02Da, | 6184.767578 | 3 | 1090.209961 | 1089.553991 |
| EEEIAALVIDNGSGMCKAGFAGDDAPR      | P63260 | 0          | N-term +42.01 Da, K +28.03 Da,C +57.02Da, | 6195.000977 | 2 | 1432.660034 | 1432.165489 |
| VHLTDAEKAAVSCLWGKVNSEVGGGALGR    | P02088 | 0          | N-term +42.01 Da, K +28.03 Da,C +57.02Da, | 6197.312012 | 3 | 1089.869995 | 1089.553991 |
| PFVELETNLPASR                    | O35215 | 0          | N-term +42.01 Da,                         | 6200.321289 | 2 | 758.3900146 | 757.8961096 |
| SMVLGYWDIR                       | P48774 | 0.04715673 | N-term +42.01 Da,                         | 6205.422363 | 2 | 640.8099976 | 641.3184512 |
| AEYLASIFGTEKDKVNC                | Q8BGJ9 | 0          | N-term +42.01 Da, K +28.03 Da,C +57.02Da, | 6205.873047 | 2 | 1023.01001  | 1022.008804 |
| DPNFFKMVEGFFDR                   | P26443 | 0.04080675 | N-term +42.01 Da, K +28.03 Da,            | 6209.537598 | 3 | 607.6266479 | 606.95551   |
| AEYLASIFGTEKDKVNC                | Q8BGJ9 | 0          | N-term +42.01 Da, K +28.03 Da,C +57.02Da, | 6216.377441 | 3 | 681.6699829 | 681.6749612 |
| EEEIAALVIDNGSGMCKAGFAGDDAPR      | P63260 | 0          | N-term +42.01 Da, K +28.03 Da,C +57.02Da, | 6225.697266 | 2 | 1432.660034 | 1432.165489 |
| VHLTDAEKAAVSCLWGKVNSEVGGGALGR    | P02088 | 0          | N-term +42.01 Da, K +28.03 Da,C +57.02Da, | 6226.165039 | 3 | 1090.209961 | 1089.553991 |

|                                |        |            |                                           |             |   |             |             |
|--------------------------------|--------|------------|-------------------------------------------|-------------|---|-------------|-------------|
| EEEIAALVIDNGSGMCKAGFAGDDAPR    | P63260 | 0          | N-term +42.01 Da, K +28.03 Da,C +57.02Da, | 6228.207031 | 3 | 955.7700195 | 955.1127513 |
| SQLVECVPNFSEGNQVEIDAISR        | Q91XD4 | 0.02347188 | N-term +42.01 Da, C +57.02Da,             | 6230.291016 | 3 | 917.088501  | 916.4362226 |
| MDSAEELLAPLR                   | Q9CZD3 | 0          | N-term +42.01 Da,                         | 6233.765625 | 2 | 693.8504639 | 693.8503134 |
| ADKMDMSLDDIIKL                 | O08583 | 0          | N-term +42.01 Da, K +28.03 Da,            | 6234.716309 | 2 | 853.4400024 | 853.4411787 |
| MEHAFTPLELLPTGNLKY             | Q9R0M5 | 0          | N-term +42.01 Da, K +28.03 Da,            | 6239.026855 | 2 | 1121.589966 | 1121.084845 |
| MDLLFGR                        | _sp Q8 | 0.02944015 | N-term +42.01 Da,                         | 6240.970703 | 2 | 447.230011  | 447.2311153 |
| MQLSQQLDLFPECR                 | Q8QZZ7 | 0          | N-term +42.01 Da, C +57.02Da,             | 6241.708008 | 2 | 903.9299927 | 903.9293011 |
| ADKMDMSLDDIIKL                 | O08583 | 0          | N-term +42.01 Da, K +28.03 Da,            | 6242.641602 | 3 | 569.2999878 | 569.2965446 |
| MEHAFTPLELLPTGNLKY             | Q9R0M5 | 0          | N-term +42.01 Da, K +28.03 Da,            | 6245.685547 | 3 | 747.7299805 | 747.7256557 |
| MEHAFTPLELLPTGNLKY             | Q9R0M5 | 0          | N-term +42.01 Da, K +28.03 Da,            | 6246.020996 | 2 | 1121.079956 | 1121.084845 |
| DDDIAALVVDNGSGMCKAGF           | P60710 | 0.00437397 | N-term +42.01 Da, K +28.03 Da,C +57.02Da, | 6247.221191 | 2 | 1063.469971 | 1062.98246  |
| MQNDAGEFVDLYVPR                | Q9CQR2 | 0          | N-term +42.01 Da,                         | 6250.112305 | 2 | 899.4199829 | 898.4196237 |
| MQNDAGEFVDLYVPR                | Q9CQR2 | 0          | N-term +42.01 Da,                         | 6251.711426 | 2 | 898.4185181 | 898.4196237 |
| ASGVAVSDGVIKVFNDMKVLR          | P18760 | 0          | N-term +42.01 Da, K +28.03 Da,            | 6252.00293  | 2 | 1096.089966 | 1095.601194 |
| SMPDAMPLPGVGEELKQAKEIEDAEKYSF  | Q80SW1 | 0          | N-term +42.01 Da, K +28.03 Da,            | 6252.469727 | 3 | 1113.209961 | 1112.552377 |
| VSLWGKVNSEVGGGEALGR            | P02088 | 0.01943199 | N-term +42.01 Da, K +28.03 Da,C +57.02Da, | 6267.744141 | 2 | 1101.550049 | 1102.044241 |
| MDPSWATQESEAVAEKVLRL           | Q9EPQ7 | 0          | N-term +42.01 Da, K +28.03 Da,            | 6274.353516 | 2 | 1109.550049 | 1109.046449 |
| EEEIAALVIDNGSGMCK              | P63260 | 0          | N-term +42.01 Da, K +28.03 Da,C +57.02Da, | 6276.731934 | 2 | 953.4494019 | 953.4502643 |
| SQLVECVPNFSEGNQVEIDAISR        | Q91XD4 | 0.02534113 | N-term +42.01 Da, C +57.02Da,             | 6280.231934 | 3 | 917.0900269 | 916.4362226 |
| SGALDVLQMKEEDVLKQF             | P14206 | 0          | N-term +42.01 Da, K +28.03 Da,            | 6281.609375 | 2 | 1010.539978 | 1010.537197 |
| AAGAAAALAFLNQESR               | Q9CPP0 | 0          | N-term +42.01 Da,                         | 6282.891602 | 2 | 801.9099731 | 801.9153652 |
| SALKAVFQYIDENQDR               | Q9D1A2 | 0          | N-term +42.01 Da, K +28.03 Da,            | 6283.474121 | 2 | 984         | 983.9970846 |
| MDPSWATQESEAVAEKVLRL           | Q9EPQ7 | 0          | N-term +42.01 Da, K +28.03 Da,            | 6284.368652 | 3 | 739.6995239 | 739.7000583 |
| SGALDVLQMKEEDVLKQF             | P14206 | 0          | N-term +42.01 Da, K +28.03 Da,            | 6285.188477 | 3 | 674.3599854 | 674.0272233 |
| MESALDQLKQF                    | Q93092 | 0          | N-term +42.01 Da, K +28.03 Da,            | 6287.368652 | 2 | 690.8499756 | 690.3474064 |
| TTQQVVLQGGPGPW                 | O70400 | 0.0006402  | N-term +42.01 Da,                         | 6294.361816 | 2 | 733.8900146 | 733.8855446 |
| MDLFGDLPEPER                   | Q8R0F6 | 0          | N-term +42.01 Da,                         | 6296.779297 | 2 | 730.8400269 | 730.8399458 |
| ASFVTEVLAH                     | O54692 | 0          | N-term +42.01 Da,                         | 6302.239258 | 2 | 558.2894897 | 558.2902167 |
| AASVDLELKKAFTEL                | Q9CWM4 | 0.03242728 | N-term +42.01 Da, K +28.03 Da,            | 6302.359863 | 2 | 867.4899902 | 866.9902076 |
| ATDSWALAVDEQEAAVKSM            | Q61655 | 0          | N-term +42.01 Da, K +28.03 Da,            | 6303.260254 | 2 | 1046.5      | 1046.498801 |
| MFSWLGNDNR                     | Q9QXY6 | 0          | N-term +42.01 Da,                         | 6304.739258 | 2 | 641.7776489 | 641.7796906 |
| MDPSWATQESEAVAEKVLRL           | Q9EPQ7 | 0          | N-term +42.01 Da, K +28.03 Da,            | 6305.953613 | 2 | 1109.045166 | 1109.046449 |
| ALQVELIPTGEIIR                 | Q9WTI7 | 0          | N-term +42.01 Da,                         | 6307.660645 | 2 | 797.460022  | 797.4641594 |
| SGALDVLQMKEEDVLKQF             | P14206 | 0          | N-term +42.01 Da, K +28.03 Da,            | 6313.635742 | 2 | 1010.536133 | 1010.537197 |
| VHLTDAEKAASVSLWGKVNSEVGGGEALGR | P02088 | 0          | N-term +42.01 Da, K +28.03 Da,C +57.02Da, | 6316.832031 | 3 | 1089.869995 | 1089.553991 |
| SGALDVLQMKEEDVLKQF             | P14206 | 0          | N-term +42.01 Da, K +28.03 Da,            | 6317.696289 | 3 | 674.3599854 | 674.0272233 |
| MESALDQLKQF                    | Q93092 | 0          | N-term +42.01 Da, K +28.03 Da,            | 6318.226074 | 2 | 690.3469849 | 690.3474064 |
| MDPSWATQESEAVAEKVLRL           | Q9EPQ7 | 0          | N-term +42.01 Da, K +28.03 Da,            | 6318.581543 | 3 | 739.7000122 | 739.7000583 |
| DDDIAALVVDNGSGMCKAGF           | P60710 | 0          | N-term +42.01 Da, K +28.03 Da,C +57.02Da, | 6322.838867 | 2 | 1063.469971 | 1062.98246  |
| DDDIAALVVDNGSGMCKAGF           | P60710 | 0          | N-term +42.01 Da, K +28.03 Da,C +57.02Da, | 6335.323242 | 2 | 1062.97998  | 1062.98246  |



|                                   |        |            |                                            |             |   |             |             |
|-----------------------------------|--------|------------|--------------------------------------------|-------------|---|-------------|-------------|
| MFSWLGNDDR                        | Q9QXY6 | 0          | N-term +42.01 Da,                          | 6336.830566 | 2 | 641.77948   | 641.7796906 |
| GQPQKLAQENLKGSFEQDLYNMNNYLEKLGPLR | Q8C7G5 | 0          | N-term +42.01 Da, K +28.03 Da,             | 6353.82666  | 4 | 991.5100098 | 991.2674746 |
| VHLTDAEKA AVSCLWGK VNSDEVGGEALGR  | P02088 | 0.01848152 | N-term +42.01 Da, K +28.03 Da, C +57.02Da, | 6354.051758 | 3 | 1089.199951 | 1089.553991 |
| DD DIAALVVDNGSGMCKAGF             | P60710 | 0          | N-term +42.01 Da, K +28.03 Da, C +57.02Da, | 6354.167969 | 2 | 1063.47998  | 1062.98246  |
| AGKELKQCQQADEVTEIMLNNFDKVLER      | Q9Z2P8 | 0          | N-term +42.01 Da, K +28.03 Da, C +57.02Da, | 6356.308105 | 4 | 891.210022  | 890.9576446 |
| TEWEAATPAVAETPDIKLFGKW            | P97461 | 0          | N-term +42.01 Da, K +28.03 Da,             | 6358.206543 | 2 | 1280.160034 | 1279.662504 |
| ADLSLVDALTEPPPEIEGEIKR            | P27546 | 0          | N-term +42.01 Da, K +28.03 Da,             | 6358.687012 | 3 | 821.4299927 | 821.4390097 |
| ADLSLVDALTEPPPEIEGEIKR            | P27546 | 0          | N-term +42.01 Da, K +28.03 Da,             | 6359.18457  | 2 | 1231.650024 | 1231.654876 |
| ADQLTEEQIAEFKEAF                  | P62204 | 0          | N-term +42.01 Da, K +28.03 Da,             | 6360.605957 | 2 | 969.9708252 | 969.9702015 |
| TEWEAATPAVAETPDIKLFGKW            | P97461 | 0          | N-term +42.01 Da, K +28.03 Da,             | 6362.187988 | 2 | 1280.670044 | 1279.662504 |
| VHLTDAEKA AVSCLWGK VNSDEVGGEALGR  | P02088 | 0          | N-term +42.01 Da, K +28.03 Da, C +57.02Da, | 6366.604004 | 4 | 817.6699829 | 817.4173122 |
| TEWEAATPAVAETPDIKLFGKW            | P97461 | 0          | N-term +42.01 Da, K +28.03 Da,             | 6366.737793 | 3 | 853.4400024 | 853.4440947 |
| ATALSEEELDNEDYYSLLNVR             | Q5U458 | 0          | N-term +42.01 Da,                          | 6378.181152 | 2 | 1244.579956 | 1243.582106 |
| VHLTDAEKA AVSCLWGK VNSDEVGGEALGR  | P02088 | 0          | N-term +42.01 Da, K +28.03 Da, C +57.02Da, | 6386.476563 | 3 | 1089.890015 | 1089.553991 |
| DD DIAALVVDNGSGMCKAGF             | P60710 | 0          | N-term +42.01 Da, K +28.03 Da, C +57.02Da, | 6386.666016 | 2 | 1063.473389 | 1062.98246  |
| AELQQLQLQEFDIPTGR                 | Q8BYZ1 | 0          | N-term +42.01 Da,                          | 6386.89209  | 2 | 1079.050049 | 1078.552756 |
| AALAPLPLPAQFKSIQ                  | Q9CR26 | 0          | N-term +42.01 Da, K +28.03 Da,             | 6387.910156 | 2 | 916.5354004 | 916.5376587 |
| TDA AVSFAKDFLAGGVAA AISKTAVAPIER  | P51881 | 0          | N-term +42.01 Da, K +28.03 Da,             | 6389.363281 | 3 | 1016.22998  | 1015.892161 |
| ADLSLVDALTEPPPEIEGEIKR            | P27546 | 0          | N-term +42.01 Da, K +28.03 Da,             | 6390.521973 | 3 | 821.4379883 | 821.4390097 |
| ADLSLVDALTEPPPEIEGEIKR            | P27546 | 0          | N-term +42.01 Da, K +28.03 Da,             | 6390.912109 | 2 | 1232.160034 | 1231.654876 |
| ADQLTEEQIAEFKEAF                  | P62204 | 0          | N-term +42.01 Da, K +28.03 Da,             | 6392.729004 | 2 | 969.9664917 | 969.9702015 |
| MEANGFGLQNFPELKNDFLR              | P70697 | 0          | N-term +42.01 Da, K +28.03 Da,             | 6394.413574 | 3 | 838.4099731 | 837.7494122 |
| DD DIAALVVDNGSGMCKAGF             | P60710 | 0          | N-term +42.01 Da, K +28.03 Da, C +57.02Da, | 6394.797363 | 3 | 708.9899902 | 708.9907324 |
| MEAGGLGCAVCVLTGASR                | G3UXX3 | 0          | N-term +42.01 Da, C +57.02Da,              | 6396.74707  | 2 | 926.4290771 | 925.9315181 |
| LITLEQKGLDAEGDVFR                 | Q9EQ20 | 0.00335383 | N-term +42.01 Da, K +28.03 Da,             | 6397.036621 | 2 | 1073.079956 | 1073.573157 |
| VHLTDAEKA AVSCLWGK VNSDEVGGEALGR  | P02088 | 0          | N-term +42.01 Da, K +28.03 Da, C +57.02Da, | 6401.546387 | 4 | 817.6599731 | 817.4173122 |
| AATSEGPLFAASIEKTWGSVVR            | Q80YV2 | 0          | N-term +42.01 Da, K +28.03 Da,             | 6406.213867 | 2 | 1174.119995 | 1174.118263 |
| MEEGMNILDHDFGIQSTR                | P35576 | 0          | N-term +42.01 Da,                          | 6406.875488 | 2 | 1010.469971 | 1010.46678  |
| VHLTDAEKA AVSCLWGK VNSDEVGGEALGR  | P02088 | 0          | N-term +42.01 Da, K +28.03 Da, C +57.02Da, | 6417.162109 | 3 | 1089.869995 | 1089.553991 |
| DD DIAALVVDNGSGMCKAGF             | P60710 | 0          | N-term +42.01 Da, K +28.03 Da, C +57.02Da, | 6418.953613 | 2 | 1063.47998  | 1062.98246  |
| AADISQWAGPLCLQEVDPPQH             | P70296 | 0          | N-term +42.01 Da, C +57.02Da,              | 6419.675293 | 3 | 835.3900146 | 835.0567938 |
| ADLSLVDALTEPPPEIEGEIKR            | P27546 | 0          | N-term +42.01 Da, K +28.03 Da,             | 6420.96582  | 3 | 822.1099854 | 821.4390097 |
| AADISQWAGPLCLQEVDPPQH             | P70296 | 0          | N-term +42.01 Da, C +57.02Da,              | 6422.095703 | 2 | 1252.569946 | 1252.081552 |
| AALTAEHFVALQSLKAS                 | Q8K2Q0 | 0          | N-term +42.01 Da, K +28.03 Da,             | 6422.247559 | 2 | 970.539978  | 970.5462128 |
| MEANGFGLQNFPELKNDFLR              | P70697 | 0          | N-term +42.01 Da, K +28.03 Da,             | 6423.280273 | 2 | 1257.109985 | 1256.12048  |
| ADQLTEEQIAEFKEAF                  | P62204 | 0          | N-term +42.01 Da, K +28.03 Da,             | 6424.041504 | 2 | 970.9699707 | 969.9702015 |
| DD DIAALVVDNGSGMCKAGF             | P60710 | 0          | N-term +42.01 Da, K +28.03 Da, C +57.02Da, | 6425.472656 | 3 | 709.6500244 | 708.9907324 |
| MEANGFGLQNFPELKNDFLR              | P70697 | 0          | N-term +42.01 Da, K +28.03 Da,             | 6427.067871 | 3 | 838.4099731 | 837.7494122 |
| AADISQWAGPLCLQEVDPPQH             | P70296 | 0          | N-term +42.01 Da, C +57.02Da,              | 6428.503906 | 2 | 1252.079956 | 1252.081552 |
| SDTSEEIPNFEEMFASR                 | Q9CQY2 | 0          | N-term +42.01 Da,                          | 6429.203613 | 2 | 1016.429993 | 1015.936033 |

|                               |        |            |                                           |             |   |             |             |
|-------------------------------|--------|------------|-------------------------------------------|-------------|---|-------------|-------------|
| FEELNADLFR                    | P17156 | 0          | N-term +42.01 Da,                         | 6435.586914 | 2 | 649.3099976 | 648.3169633 |
| VHLTDAEKSAVSLWAKVNPDEVGGEALGR | P02089 | 0          | N-term +42.01 Da, K +28.03 Da,C +57.02Da, | 6450.47168  | 3 | 1103.560059 | 1102.897757 |
| DDDIAALVVDNGSGMCKAGF          | P60710 | 0          | N-term +42.01 Da, K +28.03 Da,C +57.02Da, | 6450.87793  | 2 | 1063.472534 | 1062.98246  |
| AADISQWAGPLCLQVEDEPPQH        | P70296 | 0          | N-term +42.01 Da, C +57.02Da,             | 6451        | 3 | 835.3900146 | 835.0567938 |
| VHLTDAEKSAVSLWAKVNPDEVGGEALGR | P02089 | 0          | N-term +42.01 Da, K +28.03 Da,C +57.02Da, | 6453.320313 | 3 | 1103.219971 | 1102.897757 |
| SPDRLADINYEGRLEAVSRK          | Q6PFD9 | 0.02022694 | N-term +42.01 Da, K +28.03 Da,            | 6454.924316 | 2 | 1180.140015 | 1180.121869 |
| ADQLTEEQIAEFKEAF              | P62204 | 0          | N-term +42.01 Da, K +28.03 Da,            | 6455.074219 | 2 | 970.4699707 | 969.9702015 |
| ATSWGSIQDEKQLEELAK            | P51855 | 0          | N-term +42.01 Da, K +28.03 Da,            | 6455.796387 | 2 | 1123.589966 | 1122.591547 |
| DDDIAALVVDNGSGMCKAGF          | P60710 | 0          | N-term +42.01 Da, K +28.03 Da,C +57.02Da, | 6456.99707  | 3 | 709.6500244 | 708.9907324 |
| MDEMATTQISKDELDELKEAF         | Q99K51 | 0.00065746 | N-term +42.01 Da, K +28.03 Da,            | 6458.158203 | 2 | 1271.599976 | 1271.600595 |
| MKGALGSPVAAAGAAMQETFVCVVR     | Q9JK55 | 0          | N-term +42.01 Da, K +28.03 Da,C +57.02Da, | 6462.087402 | 3 | 912.460022  | 912.1206346 |
| LDMLQIATRVRQR                 | Q91ZU6 | 0.00933126 | N-term +42.01 Da,                         | 6470.791016 | 2 | 806.9385986 | 807.4432352 |
| MDEMATTQISKDELDELKEAF         | Q99K51 | 0          | N-term +42.01 Da, K +28.03 Da,            | 6472.369141 | 3 | 848.7399902 | 848.0694891 |
| ATSWGSIQDEKQLEELAK            | P51855 | 0.00065274 | N-term +42.01 Da, K +28.03 Da,            | 6473.385742 | 3 | 749.4000244 | 748.7301235 |
| SPDRLADINYEGRLEAVSRK          | Q6PFD9 | 0.03778932 | N-term +42.01 Da, K +28.03 Da,            | 6480.031738 | 3 | 787.4299927 | 787.0836712 |
| DDDIAALVVDNGSGMCKAGF          | P60710 | 0          | N-term +42.01 Da, K +28.03 Da,C +57.02Da, | 6483.169922 | 2 | 1063.47998  | 1062.98246  |
| MDELQDVQLTEIKPL               | Q9QYF9 | 0.03110048 | N-term +42.01 Da, K +28.03 Da,            | 6485.006836 | 2 | 922.4799805 | 921.48189   |
| AETLEFNDIFQEVKGSMDNDR         | Q08943 | 0          | N-term +42.01 Da, K +28.03 Da,            | 6488.003906 | 2 | 1236.589966 | 1235.581385 |
| MDEMATTQISKDELDELKEAF         | Q99K51 | 0          | N-term +42.01 Da, K +28.03 Da,            | 6488.489258 | 2 | 1271.589966 | 1271.600595 |
| ASGVAVSDGVIKVFNDM             | P18760 | 0.0006502  | N-term +42.01 Da, K +28.03 Da,            | 6495.307129 | 2 | 889.9500122 | 889.9532993 |
| AAGAAAALAFLNQESR              | Q9CPP0 | 0          | N-term +42.01 Da,                         | 6501.128418 | 2 | 801.9199829 | 801.9153652 |
| LLVVPWTQR                     | P02088 | 0          | N-term +42.01 Da,                         | 6502.300293 | 2 | 659.3699951 | 658.871708  |
| ADQLTEEQIAEFKEAF              | P62204 | 0          | N-term +42.01 Da, K +28.03 Da,            | 6503.293945 | 2 | 969.9685669 | 969.9702015 |
| ADQLTEEQIAEFKEAF              | P62204 | 0.00065789 | N-term +42.01 Da, K +28.03 Da,            | 6507.369629 | 3 | 647.3200073 | 646.9825598 |
| AETLEFNDIFQEVKGSMDNDR         | Q08943 | 0.00064185 | N-term +42.01 Da, K +28.03 Da,            | 6510.766602 | 2 | 1235.579956 | 1235.581385 |
| MDDSEVESTASILASVKEQEAQFEKLTR  | P30999 | 0          | N-term +42.01 Da, K +28.03 Da,            | 6516.786621 | 3 | 1080.540039 | 1080.537784 |
| ALTSFLPAPTQLSQDQLEAEER        | Q9CSN1 | 0          | N-term +42.01 Da,                         | 6518.435547 | 3 | 829.75      | 829.4184973 |
| DDDIAALVVDNGSGMCKAGF          | P60710 | 0          | N-term +42.01 Da, K +28.03 Da,C +57.02Da, | 6520.050781 | 2 | 1063.469971 | 1062.98246  |
| ALTSFLPAPTQLSQDQLEAEER        | Q9CSN1 | 0          | N-term +42.01 Da,                         | 6521.196777 | 2 | 1244.119995 | 1243.624108 |
| ASGVAVSDGVIKVFNDM             | P18760 | 0          | N-term +42.01 Da, K +28.03 Da,            | 6526.551758 | 2 | 889.9519043 | 889.9532993 |
| AAGAAAALAFLNQESR              | Q9CPP0 | 0          | N-term +42.01 Da,                         | 6533.179199 | 2 | 802.4199829 | 801.9153652 |
| ADQLTEEQIAEFKEAF              | P62204 | 0          | N-term +42.01 Da, K +28.03 Da,            | 6534.230957 | 2 | 969.9683838 | 969.9702015 |
| ATFEESVVLGFEEFDKAVKEHEGK      | Q9CQM5 | 0          | N-term +42.01 Da, K +28.03 Da,            | 6538.107422 | 4 | 714.1199951 | 713.6154658 |
| ADQLTEEQIAEFKEAF              | P62204 | 0          | N-term +42.01 Da, K +28.03 Da,            | 6539.516602 | 3 | 646.9818115 | 646.9825598 |
| ADDLDFETGDAGASATFPMQC         | P63242 | 0.00061881 | N-term +42.01 Da, C +57.02Da,             | 6542.230957 | 2 | 1130.952148 | 1130.954098 |
| LLADAVAVTMGPKGR               | P63038 | 0.00064061 | N-term +42.01 Da, K +28.03 Da,            | 6549.245605 | 2 | 785.9400024 | 784.9450792 |
| MGPPEAAELAAEAVELR             | Q8BY79 | 0          | N-term +42.01 Da,                         | 6550.436035 | 2 | 941.9699707 | 941.9643959 |
| ASALEQFVNSVR                  | O88543 | 0          | N-term +42.01 Da,                         | 6552.261719 | 2 | 682.3599854 | 681.8542445 |
| AADLGQIPDVIDSDGVFKY           | Q9DAK9 | 0          | N-term +42.01 Da, K +28.03 Da,            | 6554.837891 | 3 | 737.3599854 | 736.695079  |
| ASGVAVSDGVIKVFNDM             | P18760 | 0.00060716 | N-term +42.01 Da, K +28.03 Da,            | 6558.283691 | 2 | 889.9500122 | 889.9532993 |

|                                       |        |            |                                           |             |   |             |             |
|---------------------------------------|--------|------------|-------------------------------------------|-------------|---|-------------|-------------|
| AADLGQIPDVDDSDGVFKY                   | Q9DAK9 | 0          | N-term +42.01 Da, K +28.03 Da,            | 6563.239746 | 2 | 1105.540039 | 1104.53898  |
| ADQLTEEQIAEFKEAF                      | P62204 | 0          | N-term +42.01 Da, K +28.03 Da,            | 6565.352539 | 2 | 969.9697876 | 969.9702015 |
| ATLCLFMDGTLTAPR                       | Q9Z2M7 | 0          | N-term +42.01 Da, C +57.02Da,             | 6566.276367 | 2 | 912.4299927 | 912.4369592 |
| STIQNLQSFDPFADATKGDLLPAGTEDYIHIR      | Q9CXU9 | 0          | N-term +42.01 Da, K +28.03 Da,            | 6568.386719 | 3 | 1240.280029 | 1240.279362 |
| ADQLTEEQIAEFKEAF                      | P62204 | 0          | N-term +42.01 Da, K +28.03 Da,            | 6570.115234 | 3 | 646.9817505 | 646.9825598 |
| SSEEGKLFVGGLNFNTEQALEDHSSFGPISEVVVKDR | O89086 | 0          | N-term +42.01 Da, K +28.03 Da,            | 6576.041504 | 4 | 1121.310059 | 1121.059143 |
| GKVMEEFYSYLLGR                        | Q61176 | 0.00060205 | N-term +42.01 Da, K +28.03 Da,            | 6580.366699 | 2 | 851.4299927 | 850.4398272 |
| AADLGQIPDVDDSDGVFKY                   | Q9DAK9 | 0          | N-term +42.01 Da, K +28.03 Da,            | 6588.428223 | 3 | 737.0300293 | 736.695079  |
| GKQGFIDLPEFPFGLLEPR                   | O35490 | 0.0006435  | N-term +42.01 Da, K +28.03 Da,            | 6594.481934 | 2 | 1060.050049 | 1059.056945 |
| ADQLTEEQIAEFKEAF                      | P62204 | 0          | N-term +42.01 Da, K +28.03 Da,            | 6595.791992 | 2 | 969.9689331 | 969.9702015 |
| PTTLAETMGQAEMWLIR                     | Q8VCN3 | 0          | N-term +42.01 Da,                         | 6596.388672 | 2 | 995.5       | 995.4922659 |
| PTTLAETMGQAEMWLIR                     | Q8VCN3 | 0          | N-term +42.01 Da,                         | 6600.561523 | 3 | 663.6699829 | 663.9972694 |
| ADQLTEEQIAEFKEAF                      | P62204 | 0          | N-term +42.01 Da, K +28.03 Da,            | 6602.797363 | 3 | 647.3200073 | 646.9825598 |
| KQGFIDLPEFPFGLLEPR                    | O35490 | 0.00062578 | N-term +42.01 Da, K +28.03 Da,            | 6608.27832  | 2 | 1031.530029 | 1030.546213 |
| DDIAALVVDNGSGMCKAGF                   | P60710 | 0.00280426 | N-term +42.01 Da, K +28.03 Da,C +57.02Da, | 6612.568359 | 2 | 1063.473633 | 1062.98246  |
| MDAVLSDFVR                            | B2RUR8 | 0          | N-term +42.01 Da,                         | 6624.496582 | 2 | 597.789978  | 597.7948091 |
| ATLCLFMDGTLTAPR                       | Q9Z2M7 | 0          | N-term +42.01 Da, C +57.02Da,             | 6625.04834  | 2 | 913.4299927 | 912.4369592 |
| ADQLTEEQIAEFKEAF                      | P62204 | 0          | N-term +42.01 Da, K +28.03 Da,            | 6626.422363 | 2 | 969.9696045 | 969.9702015 |
| PTTLAETMGQAEMWLIR                     | Q8VCN3 | 0.00061728 | N-term +42.01 Da,                         | 6628.533203 | 2 | 995.5       | 995.4922659 |
| ADQLTEEQIAEFKEAF                      | P62204 | 0          | N-term +42.01 Da, K +28.03 Da,            | 6633.424316 | 3 | 646.9813843 | 646.9825598 |
| VHLTDAEKSAVSLWAKVNPDEVGGALGR          | P02089 | 0          | N-term +42.01 Da, K +28.03 Da,C +57.02Da, | 6637.206055 | 3 | 1103.219971 | 1102.897757 |
| DDIAALVVDNGSGMCKAGF                   | P60710 | 0.00935065 | N-term +42.01 Da, K +28.03 Da,C +57.02Da, | 6643.806641 | 2 | 1063.474365 | 1062.98246  |
| ADQLTEEQIAEFKEAFSLFDKDGDTITTKELGTVMR  | P62204 | 0          | N-term +42.01 Da, K +28.03 Da,            | 6644.227051 | 4 | 1066.040039 | 1065.787167 |
| MDSYVIQTNVNDLSPVLDFR                  | Q8QZR1 | 0          | N-term +42.01 Da,                         | 6645.493652 | 2 | 1205.099976 | 1204.094128 |
| AADISQWAGPLCLQEVDEPPQHAL              | P70296 | 0.00387597 | N-term +42.01 Da, C +57.02Da,             | 6651.098633 | 3 | 897.0999756 | 896.4305199 |
| AADISQWAGPLCLQEVDEPPQHAL              | P70296 | 0          | N-term +42.01 Da, C +57.02Da,             | 6652.758789 | 3 | 896.7600098 | 896.4305199 |
| GVVDNFLLKALR                          | P30115 | 0          | N-term +42.01 Da, K +28.03 Da,            | 6652.864746 | 2 | 757.4400024 | 756.4508543 |
| ADQLTEEQIAEFKEAF                      | P62204 | 0          | N-term +42.01 Da, K +28.03 Da,            | 6656.821289 | 2 | 969.9694824 | 969.9702015 |
| VHLTDAEKAAVSLWGKVNSEVGGALGR           | P02088 | 0.00063898 | N-term +42.01 Da, K +28.03 Da,C +57.02Da, | 6668.989746 | 3 | 1089.209961 | 1089.553991 |
| AAAAAAAAAAAAAGSDSWDADTFMEDPVR         | Q66JS6 | 0          | N-term +42.01 Da,                         | 6670.746094 | 3 | 975.7600098 | 975.426164  |
| AAAAAAAAAAAAAGSDSWDADTFMEDPVR         | Q66JS6 | 0          | N-term +42.01 Da,                         | 6674.788086 | 2 | 1463.630005 | 1462.635608 |
| TEWEAATPAVAETPDIKLF                   | P97461 | 0.00744285 | N-term +42.01 Da, K +28.03 Da,            | 6676.521484 | 2 | 1080.050049 | 1080.048983 |
| CDFTEDQTAEFKEAFQLFDR                  | Q60605 | 0          | N-term +42.01 Da, K +28.03 Da,C +57.02Da, | 6680.831543 | 2 | 1284.069946 | 1284.073393 |
| ADPWQECMDYAVILAR                      | O55023 | 0          | N-term +42.01 Da, C +57.02Da,             | 6683.169434 | 2 | 990.4500122 | 990.4531407 |
| AAAAAAAAAAAAAGSDSWDADTFMEDPVR         | Q66JS6 | 0          | N-term +42.01 Da,                         | 6683.357422 | 2 | 1462.640015 | 1462.635608 |
| GVVDNFLLKALR                          | P30115 | 0          | N-term +42.01 Da, K +28.03 Da,            | 6684.511719 | 2 | 757.4400024 | 756.4508543 |
| ADQLTEEQIAEFKEAF                      | P62204 | 0          | N-term +42.01 Da, K +28.03 Da,            | 6687.801758 | 2 | 969.9668579 | 969.9702015 |
| CDFTEDQTAEFKEAFQLFDR                  | Q60605 | 0          | N-term +42.01 Da, K +28.03 Da,C +57.02Da, | 6688.449219 | 3 | 856.7199707 | 856.3846878 |
| ADPWQECMDYAVILAR                      | O55023 | 0          | N-term +42.01 Da, C +57.02Da,             | 6688.663574 | 2 | 991.4500122 | 990.4531407 |
| CDFTEDQTAEFKEAFQLFDR                  | Q60605 | 0          | N-term +42.01 Da, K +28.03 Da,C +57.02Da, | 6690.165527 | 2 | 1285.069946 | 1284.073393 |

|                                           |        |            |                                           |             |   |             |             |
|-------------------------------------------|--------|------------|-------------------------------------------|-------------|---|-------------|-------------|
| DDDIAALVVDNGSGM                           | P60710 | 0.00064893 | N-term +42.01 Da,                         | 6701.692871 | 2 | 767.3400269 | 767.3405079 |
| TPYKNEKNLSRACWPR                          | D6RH57 | 0.02622632 | N-term +42.01 Da, K +28.03 Da,C +57.02Da, | 6707.402832 | 2 | 1060.540039 | 1059.549295 |
| ALPIIVKWGGQEQY                            | Q8BGR9 | 0.00059207 | N-term +42.01 Da, K +28.03 Da,            | 6710.338867 | 2 | 772.4299927 | 772.4295878 |
| MDSGFGSDFGGTGGGKLDPGAIMEQVKVQIA           | P62075 | 0          | N-term +42.01 Da, K +28.03 Da,            | 6711.146484 | 3 | 1056.849976 | 1056.517778 |
| ALPIIVKWGGQEQY                            | Q8BGR9 | 0.03331747 | N-term +42.01 Da, K +28.03 Da,            | 6711.341309 | 2 | 773.4299927 | 772.4295878 |
| TEWEAATPAVAETPDIKLF                       | P97461 | 0          | N-term +42.01 Da, K +28.03 Da,            | 6713.020996 | 2 | 1080.550049 | 1080.048983 |
| TEWEAATPAVAETPDIKLF                       | P97461 | 0          | N-term +42.01 Da, K +28.03 Da,            | 6713.72168  | 2 | 1080.046875 | 1080.048983 |
| GVVDNFPLLKALR                             | P30115 | 0.00063012 | N-term +42.01 Da, K +28.03 Da,            | 6716.527344 | 2 | 757.4400024 | 756.4508543 |
| ADQLTEEQIAEFKEAF                          | P62204 | 0          | N-term +42.01 Da, K +28.03 Da,            | 6719.465332 | 2 | 969.9691772 | 969.9702015 |
| CDFTEDQTAEFKEAFQLFDR                      | Q60605 | 0          | N-term +42.01 Da, K +28.03 Da,C +57.02Da, | 6719.578125 | 3 | 857.0499878 | 856.3846878 |
| SFRTENYDEHLEVFKAINREK                     | P06683 | 0.02252693 | N-term +42.01 Da, K +28.03 Da,            | 6719.727539 | 3 | 908.8099976 | 908.4644408 |
| TEWEAATPAVAETPDIKLF                       | P97461 | 0          | N-term +42.01 Da, K +28.03 Da,            | 6719.994629 | 3 | 720.366394  | 720.3684144 |
| CDFTEDQTAEFKEAFQLFDR                      | Q60605 | 0          | N-term +42.01 Da, K +28.03 Da,C +57.02Da, | 6721.430176 | 2 | 1284.072144 | 1284.073393 |
| MDSGFGSDFGGTGGGKLDPGAIMEQVKVQIA           | P62075 | 0          | N-term +42.01 Da, K +28.03 Da,            | 6722.016602 | 3 | 1056.52002  | 1056.517778 |
| TPYKNEKNLSRACWPR                          | D6RH57 | 0.04078762 | N-term +42.01 Da, K +28.03 Da,C +57.02Da, | 6723.407227 | 2 | 1059.540039 | 1059.549295 |
| EKGEFQILLDALDKIK                          | P16015 | 0          | N-term +42.01 Da, K +28.03 Da,            | 6724.917969 | 3 | 663.3800049 | 662.7222398 |
| ASGVTVNDEVIKVFNDM                         | P45591 | 0          | N-term +42.01 Da, K +28.03 Da,            | 6741.097168 | 2 | 954.4799805 | 954.4745964 |
| KGEFQILLDALDKIK                           | P16015 | 0          | N-term +42.01 Da, K +28.03 Da,            | 6741.770508 | 3 | 620.3674927 | 619.7080417 |
| MENEFTYEDYETTAKWLLQH                      | P23492 | 0          | N-term +42.01 Da, K +28.03 Da,            | 6744.561035 | 2 | 1310.089966 | 1309.591419 |
| TEWEAATPAVAETPDIKLF                       | P97461 | 0          | N-term +42.01 Da, K +28.03 Da,            | 6745.486816 | 2 | 1080.049438 | 1080.048983 |
| SFIPVAEDSDFPIQNLPLYGVFSTQSNPKPR           | P35505 | 0          | N-term +42.01 Da, K +28.03 Da,            | 6745.856934 | 3 | 1141.579956 | 1140.90854  |
| ADQLTEEQIAEFKEAF                          | P62204 | 0          | N-term +42.01 Da, K +28.03 Da,            | 6750.801758 | 2 | 969.9713135 | 969.9702015 |
| TEWEAATPAVAETPDIKLF                       | P97461 | 0          | N-term +42.01 Da, K +28.03 Da,            | 6753.56543  | 3 | 720.7000122 | 720.3684144 |
| CDFTEDQTAEFKEAFQLFDR                      | Q60605 | 0          | N-term +42.01 Da, K +28.03 Da,C +57.02Da, | 6753.774414 | 2 | 1284.079956 | 1284.073393 |
| MENLFQLVR                                 | Q9CZ42 | 0.00058582 | N-term +42.01 Da,                         | 6756.45459  | 2 | 596.3099976 | 596.3131687 |
| ADQLTEEQIAEFKEAFSLFDKDGDTITTKELGTVMR      | P62204 | 0.00065488 | N-term +42.01 Da, K +28.03 Da,            | 6765.302246 | 4 | 1066.280029 | 1065.787167 |
| SFIPVAEDSDFPIQNLPLYGVFSTQSNPKPR           | P35505 | 0          | N-term +42.01 Da, K +28.03 Da,            | 6778.413574 | 3 | 1141.23999  | 1140.90854  |
| TEWEAATPAVAETPDIKLF                       | P97461 | 0          | N-term +42.01 Da, K +28.03 Da,            | 6779.022461 | 2 | 1080.050049 | 1080.048983 |
| ADQLTEEQIAEFKEAF                          | P62204 | 0          | N-term +42.01 Da, K +28.03 Da,            | 6783.838867 | 2 | 969.9685669 | 969.9702015 |
| CDFTEDQTAEFKEAFQLFDR                      | Q60605 | 0          | N-term +42.01 Da, K +28.03 Da,C +57.02Da, | 6786.975586 | 2 | 1284.569946 | 1284.073393 |
| MENLFQLVR                                 | Q9CZ42 | 0.00059844 | N-term +42.01 Da,                         | 6788.59082  | 2 | 596.3115845 | 596.3131687 |
| MKPAVDEMFPPEGAGPYVDLDEAGGSTGLLMDLAANEKAVH | Q3U898 | 0          | N-term +42.01 Da, K +28.03 Da,            | 6789.371582 | 4 | 1062.26001  | 1061.761366 |
| KVADALASAAGHLDDLPGALSALDLHAH              | P01942 | 0          | N-term +42.01 Da, K +28.03 Da,            | 6789.773926 | 4 | 727.8800049 | 727.3806266 |
| SFIPVAEDSDFPIQNLPLYGVFSTQSNPKPR           | P35505 | 0          | N-term +42.01 Da, K +28.03 Da,            | 6791.521973 | 4 | 856.4299927 | 855.9332238 |
| ADQLTEEQIAEFKEAFSLFDKDGDTITTKELGTVMR      | P62204 | 0          | N-term +42.01 Da, K +28.03 Da,            | 6797.970703 | 4 | 1066.040039 | 1065.787167 |
| MEPAAEILVSPDVVYSPETIEAR                   | Q9JHU9 | 0.0412178  | N-term +42.01 Da,                         | 6801.590332 | 3 | 892.4299927 | 891.7703197 |
| MEPAAEILVSPDVVYSPETIEAR                   | Q9JHU9 | 0          | N-term +42.01 Da,                         | 6804.65332  | 2 | 1337.660034 | 1337.151841 |
| SFIPVAEDSDFPIQNLPLYGVFSTQSNPKPR           | P35505 | 0          | N-term +42.01 Da, K +28.03 Da,            | 6810.768066 | 3 | 1140.908325 | 1140.90854  |
| IQDAGLVLDALR                              | Q8R0N6 | 0.00490731 | N-term +42.01 Da,                         | 6812.879395 | 2 | 698.4000244 | 698.8933696 |
| MEPAAEILVSPDVVYSPETIEAR                   | Q9JHU9 | 0          | N-term +42.01 Da,                         | 6813.507813 | 2 | 1337.140015 | 1337.151841 |

|                                       |        |            |                                           |             |   |             |             |
|---------------------------------------|--------|------------|-------------------------------------------|-------------|---|-------------|-------------|
| MNAAAEAFNILLATDSYKVTH                 | Q99KQ4 | 0          | N-term +42.01 Da, K +28.03 Da,            | 6814.083496 | 2 | 1240.609985 | 1240.112321 |
| ADQLTEEQIAEFKEAF                      | P62204 | 0          | N-term +42.01 Da, K +28.03 Da,            | 6815.233887 | 2 | 969.9682007 | 969.9702015 |
| DLFYNIPLWSLAMTEWILSISTIRICQLR         | Q8C5I4 | 0.04090268 | N-term +42.01 Da, C +57.02Da,             | 6821.098633 | 3 | 1161.280029 | 1161.271878 |
| FFLTVSPESVLKVAR                       | P55264 | 0.00060132 | N-term +42.01 Da, K +28.03 Da,            | 6821.672852 | 2 | 883         | 882.0087341 |
| SFIPVAEDSDFPIQNLPGVGFSTQSNPKPR        | P35505 | 0          | N-term +42.01 Da, K +28.03 Da,            | 6822.23291  | 4 | 856.4299927 | 855.9332238 |
| MEPAAEILVSDPDVVYSPETIEAR              | Q9JHU9 | 0          | N-term +42.01 Da,                         | 6833.281738 | 3 | 892.0999756 | 891.7703197 |
| SEAAADREDDPNFFKMVEGFFDR               | P26443 | 0          | N-term +42.01 Da, K +28.03 Da,            | 6838.654297 | 3 | 922.0800171 | 921.7500299 |
| CDFTEDQTAEFKEAFQLFDR                  | Q60605 | 0          | N-term +42.01 Da, K +28.03 Da,C +57.02Da, | 6839.524414 | 2 | 1284.579956 | 1284.073393 |
| CDFTEDQTAEFKEAFQLFDR                  | Q60605 | 0          | N-term +42.01 Da, K +28.03 Da,C +57.02Da, | 6840.869629 | 3 | 856.7199707 | 856.3846878 |
| AAKVFESIGKFGAL                        | P67778 | 0.00065574 | N-term +42.01 Da, K +28.03 Da,            | 6843.918457 | 2 | 824.9866333 | 824.98727   |
| ADQLTEEQIAEFKEAF                      | P62204 | 0          | N-term +42.01 Da, K +28.03 Da,            | 6846.387695 | 2 | 969.9696655 | 969.9702015 |
| MDGVVTDLIAVGLKR                       | G3UXA6 | 0          | N-term +42.01 Da, K +28.03 Da,            | 6849.073242 | 2 | 828.9721069 | 828.9712944 |
| EELDPGVVDNFPLLKALR                    | P30115 | 0.0006566  | N-term +42.01 Da, K +28.03 Da,            | 6849.931641 | 2 | 1049.069946 | 1048.075335 |
| GDKPIWEQIGSSFIQHYY                    | P61971 | 0          | N-term +42.01 Da, K +28.03 Da,            | 6850.811523 | 3 | 747.0300293 | 746.7003867 |
| DDIAALVVDNGSGM                        | P60710 | 0.017991   | N-term +42.01 Da,                         | 6852.678223 | 2 | 767.3400269 | 767.3405079 |
| LTAEILELAGNAAR                        | P22752 | 0          | N-term +42.01 Da,                         | 6852.873535 | 2 | 743.4000244 | 742.4093842 |
| AAPSGSVNCEEFAEFQELLKVMR               | Q8R3Q6 | 0          | N-term +42.01 Da, K +28.03 Da,C +57.02Da, | 6855.839844 | 2 | 1342.640015 | 1341.648745 |
| AAPSGSVNCEEFAEFQELLKVMR               | Q8R3Q6 | 0          | N-term +42.01 Da, K +28.03 Da,C +57.02Da, | 6856.792969 | 3 | 895.0999756 | 894.7682556 |
| SFIPVAEDSDFPIQNLPGVGFSTQSNPKPR        | P35505 | 0          | N-term +42.01 Da, K +28.03 Da,            | 6857.511719 | 3 | 1141.579956 | 1140.90854  |
| AAPSGSVNCEEFAEFQELLKVMR               | Q8R3Q6 | 0          | N-term +42.01 Da, K +28.03 Da,C +57.02Da, | 6859.26416  | 2 | 1342.150024 | 1341.648745 |
| MNAAAEAFNILLATDSYKVTH                 | Q99KQ4 | 0          | N-term +42.01 Da, K +28.03 Da,            | 6863.164063 | 2 | 1240.619995 | 1240.112321 |
| ADQLTEEQIAEFKEAFSLFDKDKDGTITTKELGTVMR | P62204 | 0          | N-term +42.01 Da, K +28.03 Da,            | 6864.789551 | 4 | 1066.290039 | 1065.787167 |
| GDKPIWEQIGSSFIQHYY                    | P61971 | 0          | N-term +42.01 Da, K +28.03 Da,            | 6869.06543  | 3 | 747.3699951 | 746.7003867 |
| ADQLTEEQIAEFKEAF                      | P62204 | 0          | N-term +42.01 Da, K +28.03 Da,            | 6877.682617 | 2 | 969.9699707 | 969.9702015 |
| ADTFLEHLCLLDIDSEPVAAR                 | P53657 | 0          | N-term +42.01 Da, C +57.02Da,             | 6879.531738 | 2 | 1214.599976 | 1214.096671 |
| ADTFLEHLCLLDIDSEPVAAR                 | P53657 | 0          | N-term +42.01 Da, C +57.02Da,             | 6882.325684 | 3 | 810.4000244 | 809.7335395 |
| MLAELGFIR                             | Q921N6 | 0.00062305 | N-term +42.01 Da,                         | 6883.012695 | 2 | 546.2999878 | 546.2995296 |
| CDFTEDQTAEFKEAFQLFDR                  | Q60605 | 0          | N-term +42.01 Da, K +28.03 Da,C +57.02Da, | 6885.03125  | 2 | 1285.079956 | 1284.073393 |
| AAPSGSVNCEEFAEFQELLKVMR               | Q8R3Q6 | 0          | N-term +42.01 Da, K +28.03 Da,C +57.02Da, | 6888.130859 | 3 | 894.7661743 | 894.7682556 |
| AAPSGSVNCEEFAEFQELLKVMR               | Q8R3Q6 | 0          | N-term +42.01 Da, K +28.03 Da,C +57.02Da, | 6890.677734 | 2 | 1342.150024 | 1341.648745 |
| EELDPGVVDNFPLLKALR                    | P30115 | 0.0006192  | N-term +42.01 Da, K +28.03 Da,            | 6891.039551 | 2 | 1049.060059 | 1048.075335 |
| AEAAAAGASGETMAALVAAEGLGPAGWSAGR       | P97364 | 0          | N-term +42.01 Da,                         | 6893.134766 | 3 | 967.460022  | 967.4662934 |
| ADTFLEHLCLLDIDSEPVAAR                 | P53657 | 0          | N-term +42.01 Da, C +57.02Da,             | 6895.857422 | 2 | 1214.098877 | 1214.096671 |
| ADTFLEHLCLLDIDSEPVAAR                 | P53657 | 0          | N-term +42.01 Da, C +57.02Da,             | 6900.899414 | 3 | 809.7299805 | 809.7335395 |
| ATTAELFEPPVADEYIER                    | Q3TPX4 | 0          | N-term +42.01 Da,                         | 6901.245605 | 2 | 1137.540039 | 1136.536438 |
| VHLTDAEKAASVCLWGKVNSEVGGGALGR         | P02088 | 0          | N-term +42.01 Da, K +28.03 Da,C +57.02Da, | 6901.437012 | 3 | 1090.209961 | 1089.553991 |
| MEEVVAEELDDEEQLVR                     | Q8K2H2 | 0          | N-term +42.01 Da,                         | 6905.104004 | 2 | 1038.47998  | 1037.977899 |
| AEAAAAGASGETMAALVAAEGLGPAGWSAGR       | P97364 | 0          | N-term +42.01 Da,                         | 6909.94873  | 2 | 1451.689941 | 1450.695802 |
| ADQLTEEQIAEFKEAF                      | P62204 | 0          | N-term +42.01 Da, K +28.03 Da,            | 6910.677734 | 2 | 969.9693604 | 969.9702015 |
| ADQLTEEQIAEFKEAFSLFDKDKDGTITTKELGTVMR | P62204 | 0          | N-term +42.01 Da, K +28.03 Da,            | 6911.136719 | 4 | 1066.040039 | 1065.787167 |

|                                       |        |            |                                           |             |   |             |             |
|---------------------------------------|--------|------------|-------------------------------------------|-------------|---|-------------|-------------|
| IGMARLVLGLVSCFFLAVSGLYSSDDVIELTPSNFNR | Q3TML0 | 0.01464646 | N-term +42.01 Da, C +57.02Da,             | 6912.484375 | 4 | 1073.540039 | 1073.549898 |
| ATFEESVVLGFEEFDKAVKEH                 | Q9CQM5 | 0          | N-term +42.01 Da, K +28.03 Da,            | 6913.536621 | 3 | 837.4199829 | 837.0880883 |
| LVLEVAQHLGESTVR                       | P56480 | 0          | N-term +42.01 Da,                         | 6917.04541  | 2 | 847.4699707 | 846.9675979 |
| ELDPGVVDNFPLLKALR                     | P30115 | 0          | N-term +42.01 Da, K +28.03 Da,            | 6919.97998  | 2 | 984.5499878 | 983.5540378 |
| ADQLTEEQIAEFKEAFSLFDKDGDTITTK         | P62204 | 0          | N-term +42.01 Da, K +28.03 Da,            | 6920.625    | 3 | 1158.920044 | 1158.578526 |
| CKDLGTQLAPIIQEFFHSEQYR                | Q78JT3 | 0.0281144  | N-term +42.01 Da, K +28.03 Da,C +57.02Da, | 6920.771973 | 3 | 917.4500122 | 917.4584097 |
| TDAAVSFAKDFL                          | P51881 | 0.01930693 | N-term +42.01 Da, K +28.03 Da,            | 6921.566895 | 2 | 677.8499756 | 677.8480965 |
| ADQLTEEQIAEFKEAFSLFDKDGDTITTKELGTVMR  | P62204 | 0.00644122 | N-term +42.01 Da, K +28.03 Da,            | 6922.972656 | 3 | 1421.380005 | 1420.713797 |
| MEGEAVEAIVEESETFIKGER                 | Q61164 | 0          | N-term +42.01 Da, K +28.03 Da,            | 6929.899414 | 3 | 860.4400024 | 860.4351596 |
| DDIAALVVDNGSGM                        | P60710 | 0.00385888 | N-term +42.01 Da,                         | 6930.696777 | 2 | 767.3400269 | 767.3405079 |
| ADQLTEEQIAEFKEAFSLFDKDGDTITTKELGTVMR  | P62204 | 0          | N-term +42.01 Da, K +28.03 Da,            | 6932.355469 | 3 | 1420.709961 | 1420.713797 |
| ATVWDEAEQDGIGEEVLK MSTEEIVQR          | O88685 | 0          | N-term +42.01 Da, K +28.03 Da,            | 6939.225098 | 3 | 1045.170044 | 1044.839574 |
| LPEPQDVTQCLEVRVFD                     | P07147 | 0.01079692 | N-term +42.01 Da, C +57.02Da,             | 6939.785156 | 2 | 1095.530029 | 1094.533175 |
| ADQLTEEQIAEFKEAF                      | P62204 | 0          | N-term +42.01 Da, K +28.03 Da,            | 6941.383789 | 2 | 969.9699707 | 969.9702015 |
| ADQLTEEQIAEFKEAFSLFDKDGDTITTKELGTVMR  | P62204 | 0          | N-term +42.01 Da, K +28.03 Da,            | 6943.248535 | 4 | 1065.785522 | 1065.787167 |
| ATFEESVVLGFEEFDKAVKEH                 | Q9CQM5 | 0          | N-term +42.01 Da, K +28.03 Da,            | 6945.529297 | 3 | 837.4199829 | 837.0880883 |
| VNPTVFFDITADDEPLGR                    | P17742 | 0          | N-term +42.01 Da,                         | 6948.585449 | 2 | 1025.01001  | 1024.5022   |
| AAAVEPEVEDPLWSFVR                     | Q8C436 | 0          | N-term +42.01 Da,                         | 6951.666992 | 2 | 979.4899902 | 978.9887281 |
| TDAAVSFAKDFL                          | P51881 | 0.00228441 | N-term +42.01 Da, K +28.03 Da,            | 6952.542969 | 2 | 677.8499756 | 677.8480965 |
| ADQLTEEQIAEFKEAFSLFDKDGDTITTK         | P62204 | 0          | N-term +42.01 Da, K +28.03 Da,            | 6953.185059 | 3 | 1159.23999  | 1158.578526 |
| MITSAAGIISLLDEEPPQLKEF                | Q3TXS7 | 0.03119002 | N-term +42.01 Da, K +28.03 Da,            | 6953.564453 | 2 | 1253.650024 | 1252.645663 |
| EEEIAALVIDNGSGMCKAGF                  | P63260 | 0          | N-term +42.01 Da, K +28.03 Da,C +57.02Da, | 6955.584961 | 3 | 728.3400269 | 727.6782658 |
| VNPTVFFDITADDEPLGR                    | P17742 | 0          | N-term +42.01 Da,                         | 6956.115234 | 2 | 1025.5      | 1024.5022   |
| ENVQDVLPALPNPDDYFLLR                  | Q5SQ27 | 0.01079137 | N-term +42.01 Da,                         | 6956.507324 | 2 | 1186.099976 | 1185.602446 |
| AAAVEPEVEDPLWSFVR                     | Q8C436 | 0          | N-term +42.01 Da,                         | 6958.780273 | 2 | 978.9899902 | 978.9887281 |
| DDIAALVVDNGSGM                        | P60710 | 0          | N-term +42.01 Da,                         | 6962.483398 | 2 | 767.3393555 | 767.3405079 |
| MEGEAVEAIVEESETFIKGER                 | Q61164 | 0          | N-term +42.01 Da, K +28.03 Da,            | 6964.098145 | 3 | 860.4299927 | 860.4351596 |
| ADQLTEEQIAEFKEAF                      | P62204 | 0          | N-term +42.01 Da, K +28.03 Da,            | 6973.112793 | 2 | 969.9684448 | 969.9702015 |
| ADQLTEEQIAEFKEAFSLFDKDGDTITTKELGTVMR  | P62204 | 0          | N-term +42.01 Da, K +28.03 Da,            | 6975.729492 | 4 | 1066.290039 | 1065.787167 |
| ATSWGSIQDEKQLEELAKQAIDR               | P51855 | 0          | N-term +42.01 Da, K +28.03 Da,            | 6982.882813 | 3 | 943.5       | 943.1660609 |
| EEEIAALVIDNGSGMCKAGF                  | P63260 | 0.00060314 | N-term +42.01 Da, K +28.03 Da,C +57.02Da, | 6983.480469 | 2 | 1091.504028 | 1091.013761 |
| ADQLTEEQIAEFKEAFSLFDKDGDTITTK         | P62204 | 0          | N-term +42.01 Da, K +28.03 Da,            | 6985.663574 | 3 | 1158.569946 | 1158.578526 |
| EEEIAALVIDNGSGMCKAGF                  | P63260 | 0          | N-term +42.01 Da, K +28.03 Da,C +57.02Da, | 6986.116211 | 3 | 728.3400269 | 727.6782658 |
| AAMLGDAIMVAKGLAK                      | Q60936 | 0          | N-term +42.01 Da, K +28.03 Da,            | 6989.898438 | 2 | 829.4707642 | 829.4726153 |
| ADQLTEEQIAEFKEAF                      | P62204 | 0          | N-term +42.01 Da, K +28.03 Da,            | 7004.236816 | 2 | 970.4699707 | 969.9702015 |
| PLLKKAHCLSEVHDTMPADLPAIAADFVEDQEVCKN  | P07724 | 0.00060606 | N-term +42.01 Da, K +28.03 Da,C +57.02Da, | 7014.030762 | 4 | 1080.540039 | 1080.036461 |
| ATVWDEAEQDGIGEEVLK MSTEEIVQR          | O88685 | 0          | N-term +42.01 Da, K +28.03 Da,            | 7016.527344 | 3 | 1045.51001  | 1044.839574 |
| ADQLTEEQIAEFKEAFSLFDKDGDTITTK         | P62204 | 0          | N-term +42.01 Da, K +28.03 Da,            | 7019.144531 | 3 | 1158.910034 | 1158.578526 |
| ATSWGSIQDEKQLEELAKQAIDR               | P51855 | 0          | N-term +42.01 Da, K +28.03 Da,            | 7019.791992 | 3 | 943.8300171 | 943.1660609 |
| ELDPGVVDNFPLLKALR                     | P30115 | 0.0005848  | N-term +42.01 Da, K +28.03 Da,            | 7020.01123  | 2 | 984.539978  | 983.5540378 |

|                                         |        |            |                                           |             |   |             |             |
|-----------------------------------------|--------|------------|-------------------------------------------|-------------|---|-------------|-------------|
| AAMLGDAIMVAKGLAK                        | Q60936 | 0          | N-term +42.01 Da, K +28.03 Da,            | 7020.954102 | 2 | 829.4730835 | 829.4726153 |
| EEEIAALVIDNGSGMCKAGF                    | P63260 | 0          | N-term +42.01 Da, K +28.03 Da,C +57.02Da, | 7021.89502  | 2 | 1091.51001  | 1091.013761 |
| AAPSGSVNCEEFAEFQELLKVMR                 | Q8R3Q6 | 0          | N-term +42.01 Da, K +28.03 Da,C +57.02Da, | 7031.890137 | 3 | 895.0999756 | 894.7682556 |
| MDDTLFQLKF                              | Q921W0 | 0          | N-term +42.01 Da, K +28.03 Da,            | 7032.310059 | 2 | 664.3300171 | 664.3337673 |
| ASDEGKLFVGGLSFDTNEQALEQVFSKYGQISEVVVKDR | P60824 | 0          | N-term +42.01 Da, K +28.03 Da,            | 7034.671387 | 4 | 1129.829956 | 1129.587802 |
| EEEIAALVIDNGSGMCKAGF                    | P63260 | 0          | N-term +42.01 Da, K +28.03 Da,C +57.02Da, | 7035.047852 | 2 | 1091.02002  | 1091.013761 |
| ADQLTEEQIAEFKEAFSLFDKDGDTITTKELGTVMR    | P62204 | 0          | N-term +42.01 Da, K +28.03 Da,            | 7039.143555 | 4 | 1066.040039 | 1065.787167 |
| EEEIAALVIDNGSGMCKAGF                    | P63260 | 0          | N-term +42.01 Da, K +28.03 Da,C +57.02Da, | 7040.378906 | 3 | 727.6799927 | 727.6782658 |
| AVTSWLEVLRL                             | Q8BPA8 | 0          | N-term +42.01 Da,                         | 7047.243652 | 2 | 608.3400269 | 608.3402409 |
| ADQLTEEQIAEFKEAFSLFDKDGDTITTKELGTVMR    | P62204 | 0          | N-term +42.01 Da, K +28.03 Da,            | 7052.916992 | 3 | 1421.050049 | 1420.713797 |
| ADQLTEEQIAEFKEAF                        | P62204 | 0          | N-term +42.01 Da, K +28.03 Da,            | 7056.446289 | 2 | 969.9682617 | 969.9702015 |
| EEEIAALVIDNGSGMCKAGF                    | P63260 | 0          | N-term +42.01 Da, K +28.03 Da,C +57.02Da, | 7066.788574 | 2 | 1091.013184 | 1091.013761 |
| ADQLTEEQIAEFKEAFSLFDKDGDTITTKELGTVMR    | P62204 | 0          | N-term +42.01 Da, K +28.03 Da,            | 7069.708008 | 4 | 1066.040039 | 1065.787167 |
| GSGPIDPKELLKGLDSFLTR                    | Q80W00 | 0          | N-term +42.01 Da, K +28.03 Da,            | 7069.996582 | 3 | 748.0900269 | 747.7544916 |
| MEQAPPDPEKLLQPGPLEPLGGPGAVLEAAVGEENEGTR | Q91YJ2 | 0          | N-term +42.01 Da, K +28.03 Da,            | 7080.52002  | 3 | 1355.349976 | 1355.015809 |
| GSGPIDPKELLKGLDSFLTR                    | Q80W00 | 0.01704261 | N-term +42.01 Da, K +28.03 Da,            | 7083.611816 | 3 | 747.75      | 747.7544916 |
| ADQLTEEQIAEFKEAF                        | P62204 | 0          | N-term +42.01 Da, K +28.03 Da,            | 7087.145996 | 2 | 969.9692993 | 969.9702015 |
| AGVCDMAPNFLSPSEDQALGLALGR               | Q9JLZ8 | 0.00065359 | N-term +42.01 Da, C +57.02Da,             | 7090.740234 | 2 | 1316.650024 | 1316.13072  |
| VNPTVFFDITADDEPLGR                      | P17742 | 0          | N-term +42.01 Da,                         | 7097.371094 | 2 | 1024.48999  | 1024.5022   |
| MNSAGADEIGKLFVGGLDWSTTQETLR             | Q9JII5 | 0          | N-term +42.01 Da, K +28.03 Da,            | 7105.387695 | 3 | 990.1500244 | 989.4903275 |
| ATVWDEAEQDGIGEEVLK MSTEEIVQR            | Q88685 | 0          | N-term +42.01 Da, K +28.03 Da,            | 7107.897461 | 3 | 1045.51001  | 1044.839574 |
| MNSAGADEIGKLFVGGLDWSTTQETLR             | Q9JII5 | 0          | N-term +42.01 Da, K +28.03 Da,            | 7108.252441 | 3 | 989.4899902 | 989.4903275 |
| AEEAAAGASGETMAALVAAEGSLGPAGWSAGR        | P97364 | 0          | N-term +42.01 Da,                         | 7112.739746 | 3 | 968.1300049 | 967.4662934 |
| MNSAGADEIGKLFVGGLDWSTTQETLR             | Q9JII5 | 0          | N-term +42.01 Da, K +28.03 Da,            | 7113.112305 | 2 | 1484.23999  | 1483.731853 |
| AEEGIAAGGVMDVNTALQEVLTALIHDLGLAR        | P63323 | 0          | N-term +42.01 Da, K +28.03 Da,            | 7113.291504 | 3 | 1112.25     | 1111.588813 |
| ATVWDEAEQDGIGEEVLK MSTEEIVQR            | Q88685 | 0          | N-term +42.01 Da, K +28.03 Da,            | 7114.379395 | 2 | 1566.75     | 1566.755723 |
| ATVWDEAEQDGIGEEVLK MSTEEIVQR            | Q88685 | 0          | N-term +42.01 Da, K +28.03 Da,            | 7115.248047 | 3 | 1044.839966 | 1044.839574 |
| AEEAAAGASGETMAALVAAEGSLGPAGWSAGR        | P97364 | 0          | N-term +42.01 Da,                         | 7119        | 2 | 1451.199951 | 1450.695802 |
| ADQLTEEQIAEFKEAF                        | P62204 | 0          | N-term +42.01 Da, K +28.03 Da,            | 7120.418945 | 2 | 969.9699707 | 969.9702015 |
| AEEAAAGASGETMAALVAAEGSLGPAGWSAGR        | P97364 | 0          | N-term +42.01 Da,                         | 7128.880859 | 4 | 726.0999756 | 725.8515392 |
| VNPTVFFDITADDEPLGR                      | P17742 | 0          | N-term +42.01 Da,                         | 7140.424805 | 2 | 1023.98999  | 1024.5022   |
| MNSAGADEIGKLFVGGLDWSTTQETLR             | Q9JII5 | 0          | N-term +42.01 Da, K +28.03 Da,            | 7140.971191 | 3 | 990.1599731 | 989.4903275 |
| AEEAAAGASGETMAALVAAEGSLGPAGWSAGR        | P97364 | 0          | N-term +42.01 Da,                         | 7143.223633 | 3 | 967.4645386 | 967.4662934 |
| AEEGIAAGGVMDVNTALQEVLTALIHDLGLAR        | P63323 | 0.00116347 | N-term +42.01 Da, K +28.03 Da,            | 7145.900391 | 3 | 1111.920044 | 1111.588813 |
| PGPGSAFPSLSIGMDS CVIPLR                 | P97364 | 0.02717128 | N-term +42.01 Da, C +57.02Da,             | 7148.656738 | 2 | 1150.089966 | 1150.574319 |
| AEEAAAGASGETMAALVAAEGSLGPAGWSAGR        | P97364 | 0          | N-term +42.01 Da,                         | 7150.024414 | 2 | 1450.694458 | 1450.695802 |
| SESLVCDVAEDLVEKLR                       | Q9CQI3 | 0          | N-term +42.01 Da, K +28.03 Da,C +57.02Da, | 7151.842773 | 2 | 1066.050049 | 1066.0512   |
| VNPTVFFDITADDEPLGR                      | P17742 | 0          | N-term +42.01 Da,                         | 7153.037598 | 2 | 1024.51001  | 1024.5022   |
| SESLVCDVAEDLVEKLR                       | Q9CQI3 | 0          | N-term +42.01 Da, K +28.03 Da,C +57.02Da, | 7160.802734 | 3 | 711.3699951 | 711.036559  |
| MVHLTDAEKA AVSGLWGK VNADEVGGEALGR       | A8DUK4 | 0.00065445 | N-term +42.01 Da, K +28.03 Da,            | 7166.202637 | 3 | 1093.22998  | 1093.566119 |

|                                  |        |            |                                           |             |   |             |             |
|----------------------------------|--------|------------|-------------------------------------------|-------------|---|-------------|-------------|
| AEAAAAGASGETMAALVAAEGSLGPAGWSAGR | P97364 | 0          | N-term +42.01 Da,                         | 7175.756348 | 3 | 967.4650269 | 967.4662934 |
| AAAAMAVSEAWPELELAER              | Q505F5 | 0          | N-term +42.01 Da,                         | 7176.38916  | 2 | 1029        | 1029.004053 |
| SESLVCDVAEDLVEKLR                | Q9CQI3 | 0          | N-term +42.01 Da, K +28.03 Da,C +57.02Da, | 7182.309082 | 2 | 1066.050049 | 1066.0512   |
| AAAAMAVSEAWPELELAER              | Q505F5 | 0          | N-term +42.01 Da,                         | 7183.250488 | 3 | 687.0100098 | 686.3384605 |
| VNPTVFFDITADDEPLGR               | P17742 | 0          | N-term +42.01 Da,                         | 7183.867188 | 2 | 1025.01001  | 1024.5022   |
| VNPTVFFDITADDEPLGR               | P17742 | 0          | N-term +42.01 Da,                         | 7184.118652 | 2 | 1024.5      | 1024.5022   |
| AEAAAAGASGETMAALVAAEGSLGPAGWSAGR | P97364 | 0          | N-term +42.01 Da,                         | 7187.148438 | 2 | 1451.199951 | 1450.695802 |
| ADQLTEEQIAEFKEAFSLFDKDGDTITTKEL  | P62204 | 0          | N-term +42.01 Da, K +28.03 Da,            | 7189.799316 | 3 | 1239.619995 | 1239.287412 |
| SESLVCDVAEDLVEKLR                | Q9CQI3 | 0          | N-term +42.01 Da, K +28.03 Da,C +57.02Da, | 7191.446289 | 3 | 711.3699951 | 711.036559  |
| MTEWEAATPAVAETPDIKLF             | P97461 | 0          | N-term +42.01 Da, K +28.03 Da,            | 7194.784668 | 2 | 1146.069946 | 1145.569226 |
| ADQLTEEQIAEFKEAF                 | P62204 | 0          | N-term +42.01 Da, K +28.03 Da,            | 7196.836426 | 2 | 970.4699707 | 969.9702015 |
| AAAAMAVSEAWPELELAER              | Q505F5 | 0          | N-term +42.01 Da,                         | 7197.327637 | 3 | 686.3400269 | 686.3384605 |
| AEGYDAALSVAEWLR                  | Q4LDD4 | 0          | N-term +42.01 Da,                         | 7201.011719 | 2 | 847.4199829 | 846.9150312 |
| AEAAAAGASGETMAALVAAEGSLGPAGWSAGR | P97364 | 0          | N-term +42.01 Da,                         | 7204.801758 | 2 | 1450.699951 | 1450.695802 |
| AEAAAAGASGETMAALVAAEGSLGPAGWSAGR | P97364 | 0          | N-term +42.01 Da,                         | 7206.26709  | 3 | 968.1300049 | 967.4662934 |
| AAAAMAVSEAWPELELAER              | Q505F5 | 0          | N-term +42.01 Da,                         | 7206.745605 | 2 | 1030.01001  | 1029.004053 |
| VNPTVFFDITADDEPLGR               | P17742 | 0          | N-term +42.01 Da,                         | 7207.484375 | 2 | 1024.01001  | 1024.5022   |
| LVDMVNDGLEDLFR                   | F6RWR5 | 0.00062854 | N-term +42.01 Da,                         | 7208.037598 | 2 | 840.4000244 | 839.4112672 |
| SESLVCDVAEDLVEKLR                | Q9CQI3 | 0          | N-term +42.01 Da, K +28.03 Da,C +57.02Da, | 7213.930664 | 2 | 1066.540039 | 1066.0512   |
| AAEDVVATGADPSELEGGGLLHEIF        | O55022 | 0          | N-term +42.01 Da,                         | 7214.344727 | 2 | 1270.609985 | 1270.113573 |
| SGALDVLQMKEEDVLKFLAAGTH          | P14206 | 0.00060643 | N-term +42.01 Da, K +28.03 Da,            | 7222.854004 | 3 | 857.789978  | 857.456006  |
| RDELLQNDRIR                      | Q921Q3 | 0.04583333 | N-term +42.01 Da,                         | 7224.723145 | 2 | 735.4004517 | 735.3945996 |
| EEEIAALVIDNGSGMCKAGF             | P63260 | 0.00061237 | N-term +42.01 Da, K +28.03 Da,C +57.02Da, | 7225.636719 | 2 | 1092        | 1091.013761 |
| TELLKSVDYEVFGTVQGVCFR            | P56375 | 0          | N-term +42.01 Da, K +28.03 Da,C +57.02Da, | 7226.202637 | 3 | 840.0900269 | 839.7613179 |
| ADQLTEEQIAEFKEAF                 | P62204 | 0          | N-term +42.01 Da, K +28.03 Da,            | 7229.59375  | 2 | 969.9699707 | 969.9702015 |
| SGALDVLQMKEEDVLKFLAAGTH          | P14206 | 0          | N-term +42.01 Da, K +28.03 Da,            | 7230.14502  | 3 | 858.1199951 | 857.456006  |
| MDVN TALQEV LK TALIH DGLAR       | P63323 | 0          | N-term +42.01 Da, K +28.03 Da,            | 7231.638184 | 3 | 826.7800293 | 826.7843453 |
| AAEDVVATGADPSELEGGGLLHEIF        | O55022 | 0.00439802 | N-term +42.01 Da,                         | 7232.710938 | 3 | 847.4099731 | 847.0781409 |
| MIGVDMVLLEPLNEETFIDNLKRR         | P46735 | 0          | N-term +42.01 Da, K +28.03 Da,            | 7235.331055 | 3 | 991.5300293 | 991.5326986 |
| AEAAAAGASGETMAALVAAEGSLGPAGWSAGR | P97364 | 0          | N-term +42.01 Da,                         | 7238.538574 | 3 | 967.7999878 | 967.4662934 |
| AEAAAAGASGETMAALVAAEGSLGPAGWSAGR | P97364 | 0          | N-term +42.01 Da,                         | 7242.153809 | 2 | 1450.709961 | 1450.695802 |
| ADQLTEEQIAEFKEAF                 | P62204 | 0          | N-term +42.01 Da, K +28.03 Da,            | 7249.453125 | 2 | 970.9699707 | 969.9702015 |
| EEEIAALVIDNGSGMCKAGF             | P63260 | 0.0005988  | N-term +42.01 Da, K +28.03 Da,C +57.02Da, | 7256.782227 | 2 | 1091.50415  | 1091.013761 |
| MDVN TALQEV LK TALIH DGLAR       | P63323 | 0          | N-term +42.01 Da, K +28.03 Da,            | 7262.189453 | 3 | 826.7826538 | 826.7843453 |
| SGALDVLQMKEEDVLKFLAAGTH          | P14206 | 0          | N-term +42.01 Da, K +28.03 Da,            | 7262.296875 | 3 | 857.4535522 | 857.456006  |
| VNPTVFFDITADDEPLGR               | P17742 | 0.01606426 | N-term +42.01 Da,                         | 7265.561035 | 2 | 1025.5      | 1024.5022   |
| ATFEESV LGFE EFDKAVKEHEGKTIF     | Q9CQM5 | 0          | N-term +42.01 Da, K +28.03 Da,            | 7267.890137 | 4 | 804.4199829 | 803.9155053 |
| AEAAAAGASGETMAALVAAEGSLGPAGWSAGR | P97364 | 0          | N-term +42.01 Da,                         | 7270.952637 | 3 | 967.7999878 | 967.4662934 |
| ELVDSVL DVVR                     | P68372 | 0.00059737 | N-term +42.01 Da,                         | 7272.487793 | 2 | 644.3599854 | 643.353546  |
| TDAAVSFAKDFLAGGVAAAISKTA VAPIER  | P51881 | 0          | N-term +42.01 Da, K +28.03 Da,            | 7273.537109 | 3 | 1016.559998 | 1015.892161 |



|                                  |        |            |                                           |             |   |             |             |
|----------------------------------|--------|------------|-------------------------------------------|-------------|---|-------------|-------------|
| VNPTVFFDITADDEPLGR               | P17742 | 0          | N-term +42.01 Da,                         | 7277.122559 | 2 | 1025        | 1024.5022   |
| VNPTVFFDITADDEPLGR               | P17742 | 0          | N-term +42.01 Da,                         | 7280.436035 | 2 | 1024.5      | 1024.5022   |
| ADQLTEEQIAEFKEAF                 | P62204 | 0          | N-term +42.01 Da, K +28.03 Da,            | 7281.012695 | 2 | 969.9683838 | 969.9702015 |
| ATFEEVSVLGFEEFDKAVKEHEGKTIF      | Q9CQM5 | 0          | N-term +42.01 Da, K +28.03 Da,            | 7291.477051 | 3 | 1071.880005 | 1071.551582 |
| MDVNTALQEVLTALIHDLGLAR           | P63323 | 0          | N-term +42.01 Da, K +28.03 Da,            | 7293.527832 | 3 | 827.1199951 | 826.7843453 |
| MDLGLMLLQDMEKER                  | P82343 | 0          | N-term +42.01 Da, K +28.03 Da,            | 7298.567871 | 2 | 946.9699707 | 946.4699447 |
| ATFEEVSVLGFEEFDKAVKEHEGKTIF      | Q9CQM5 | 0          | N-term +42.01 Da, K +28.03 Da,            | 7300.740723 | 4 | 803.9146118 | 803.9155053 |
| AEEAAAGASGETMAALVAAEGSLGPAGWSAGR | P97364 | 0          | N-term +42.01 Da,                         | 7301.682129 | 3 | 968.1300049 | 967.4662934 |
| ATSWGSIQDEKQLEELAKQAIDR          | P51855 | 0          | N-term +42.01 Da, K +28.03 Da,            | 7304.725098 | 3 | 943.5       | 943.1660609 |
| AEEAAAGASGETMAALVAAEGSLGPAGWSAGR | P97364 | 0          | N-term +42.01 Da,                         | 7305.58252  | 2 | 1451.709961 | 1450.695802 |
| VNPTVFFDITADDEPLGR               | P17742 | 0          | N-term +42.01 Da,                         | 7310.069824 | 2 | 1025.5      | 1024.5022   |
| ADQLTEEQIAEFKEAF                 | P62204 | 0          | N-term +42.01 Da, K +28.03 Da,            | 7312.169922 | 2 | 970.4699707 | 969.9702015 |
| ADQLTEEQIAEFKEAF                 | P62204 | 0          | N-term +42.01 Da, K +28.03 Da,            | 7312.618164 | 2 | 969.9699707 | 969.9702015 |
| GDKVTYVDFLAYDILDQYR              | P10649 | 0          | N-term +42.01 Da, K +28.03 Da,            | 7316.504883 | 3 | 789.3900146 | 788.7301235 |
| MADVVFVGVPSVIVSR                 | Q8VCT4 | 0.04084507 | N-term +42.01 Da,                         | 7322.794434 | 2 | 809.4400024 | 809.4370872 |
| ATSWGSIQDEKQLEELAKQAIDR          | P51855 | 0          | N-term +42.01 Da, K +28.03 Da,            | 7323.32959  | 2 | 1414.75     | 1414.245453 |
| ATSWGSIQDEKQLEELAKQAIDR          | P51855 | 0          | N-term +42.01 Da, K +28.03 Da,            | 7325.192383 | 4 | 707.8800049 | 707.6263648 |
| MKLPIFIADAFTATAFR                | Q9CXN7 | 0          | N-term +42.01 Da, K +28.03 Da,            | 7329.601074 | 3 | 661.7000122 | 661.6972596 |
| AWVPAESAVEELMPR                  | Q9CQQ4 | 0          | N-term +42.01 Da,                         | 7331.950195 | 2 | 863.9199829 | 863.9270842 |
| ATFEEVSVLGFEEFDKAVKEHEGKTIF      | Q9CQM5 | 0          | N-term +42.01 Da, K +28.03 Da,            | 7333.151855 | 4 | 804.1599731 | 803.9155053 |
| AEEAAAGASGETMAALVAAEGSLGPAGWSAGR | P97364 | 0          | N-term +42.01 Da,                         | 7333.524414 | 3 | 967.7999878 | 967.4662934 |
| ATSWGSIQDEKQLEELAKQAIDR          | P51855 | 0          | N-term +42.01 Da, K +28.03 Da,            | 7335.943848 | 3 | 943.1646729 | 943.1660609 |
| DFLAYDILDQYR                     | P10649 | 0          | N-term +42.01 Da,                         | 7337.330566 | 2 | 788.3699951 | 787.3802926 |
| ADQLTEEQIAEFKEAF                 | P62204 | 0          | N-term +42.01 Da, K +28.03 Da,            | 7344.516602 | 2 | 970.4699707 | 969.9702015 |
| MKLPIFIADAFTATAFR                | Q9CXN7 | 0          | N-term +42.01 Da, K +28.03 Da,            | 7344.67627  | 2 | 992.039978  | 992.0422511 |
| CEITVWVSLPGK                     | Q8VCK7 | 0.04937702 | N-term +42.01 Da, K +28.03 Da,C +57.02Da, | 7350.283691 | 2 | 679.8599854 | 680.3524914 |
| VNPTVFFDITADDEPLGR               | P17742 | 0          | N-term +42.01 Da,                         | 7354.424316 | 2 | 1025.5      | 1024.5022   |
| AEEGIAAGGVMDVNTALQEVLK           | P63323 | 0          | N-term +42.01 Da, K +28.03 Da,            | 7358.785645 | 2 | 1143.089966 | 1143.088314 |
| MKLPIFIADAFTATAFR                | Q9CXN7 | 0          | N-term +42.01 Da, K +28.03 Da,            | 7360.084961 | 3 | 661.7000122 | 661.6972596 |
| EKPSQTLQYFPRGEVPPGR              | Q9D219 | 0.00740741 | N-term +42.01 Da, K +28.03 Da,            | 7364.126465 | 2 | 1080.050049 | 1080.065833 |
| AEEAAAGASGETMAALVAAEGSLGPAGWSAGR | P97364 | 0          | N-term +42.01 Da,                         | 7364.750977 | 3 | 967.7999878 | 967.4662934 |
| ATSWGSIQDEKQLEELAKQAIDR          | P51855 | 0          | N-term +42.01 Da, K +28.03 Da,            | 7367.580566 | 3 | 943.8400269 | 943.1660609 |
| IGSPYCLHLRVKFYSEPNNLR            | Q8BGS1 | 0.03777148 | N-term +42.01 Da, K +28.03 Da,C +57.02Da, | 7371.511719 | 3 | 907.4699707 | 907.4707607 |
| MKLPIFIADAFTATAFR                | Q9CXN7 | 0          | N-term +42.01 Da, K +28.03 Da,            | 7375.80957  | 2 | 992.039978  | 992.0422511 |
| AEEAAAGASGETMAALVAAEGSLGPAGWSAGR | P97364 | 0          | N-term +42.01 Da,                         | 7376.695801 | 3 | 967.460022  | 967.4662934 |
| AEEGIAAGGVMDVNTALQEVLK           | P63323 | 0          | N-term +42.01 Da, K +28.03 Da,            | 7377.317383 | 3 | 762.3900146 | 762.3946351 |
| AAADGDDSLYPIAVLIDELR             | Q76MZ3 | 0          | N-term +42.01 Da,                         | 7383.731934 | 2 | 1081.050049 | 1080.046972 |
| ATFEEVSVLGFEEFDKAVKEHEGKTIFAY    | Q9CQM5 | 0.00059559 | N-term +42.01 Da, K +28.03 Da,            | 7384.768066 | 4 | 862.9400024 | 862.4406161 |
| VNPTVFFDITADDEPLGR               | P17742 | 0          | N-term +42.01 Da,                         | 7386.205078 | 2 | 1024.501221 | 1024.5022   |
| ADQLTEEQIAEFKEAF                 | P62204 | 0          | N-term +42.01 Da, K +28.03 Da,            | 7389.041504 | 2 | 969.9699707 | 969.9702015 |

|                                      |        |            |                                |             |   |             |             |
|--------------------------------------|--------|------------|--------------------------------|-------------|---|-------------|-------------|
| AEEGIAAGGVMDVNTALQEVLK               | P63323 | 0          | N-term +42.01 Da, K +28.03 Da, | 7391.876465 | 2 | 1143.091309 | 1143.088314 |
| MKLPIFIADAFTATAFR                    | Q9CXN7 | 0          | N-term +42.01 Da, K +28.03 Da, | 7393.695801 | 3 | 661.7000122 | 661.6972596 |
| VNPTVFFDITADDEPLGR                   | P17742 | 0          | N-term +42.01 Da,              | 7396.513184 | 3 | 683.6699829 | 683.3372256 |
| GLELYLDLMSQPCR                       | G3UX05 | 0          | N-term +42.01 Da, C +57.02Da,  | 7400.402832 | 2 | 868.9199829 | 868.9209446 |
| AEEAAAGASGETMAALVAAEGLSPAGWSAGR      | P97364 | 0          | N-term +42.01 Da,              | 7401.033691 | 3 | 968.1300049 | 967.4662934 |
| ATFEEVSVLGFEEFDKAVKEHEGKTIFAY        | Q9CQM5 | 0          | N-term +42.01 Da, K +28.03 Da, | 7416.820801 | 4 | 862.9400024 | 862.4406161 |
| VNPTVFFDITADDEPLGR                   | P17742 | 0          | N-term +42.01 Da,              | 7419.44043  | 2 | 1024.501587 | 1024.5022   |
| MDFLLGPNPFSSPVGQR                    | O88746 | 0          | N-term +42.01 Da,              | 7422.381836 | 2 | 903.9431152 | 903.9458083 |
| FDVDGLDPAFTPATGTPVLGGLSYR            | Q61176 | 0          | N-term +42.01 Da,              | 7422.828613 | 2 | 1305.650024 | 1304.650125 |
| AEEGIAAGGVMDVNTALQEVLK               | P63323 | 0          | N-term +42.01 Da, K +28.03 Da, | 7425.270996 | 2 | 1143.589966 | 1143.088314 |
| VNPTVFFDITADDEPLGR                   | P17742 | 0          | N-term +42.01 Da,              | 7427.333984 | 3 | 683.3400269 | 683.3372256 |
| ADQLTEEQIAEFKEAF                     | P62204 | 0          | N-term +42.01 Da, K +28.03 Da, | 7431.15918  | 2 | 969.9699707 | 969.9702015 |
| AEEAAAGASGETMAALVAAEGLSPAGWSAGR      | P97364 | 0          | N-term +42.01 Da,              | 7440.848633 | 3 | 967.7999878 | 967.4662934 |
| ADSAQVPTLVYLVGTGGCGFLGEHIVR          | Q9EQC1 | 0          | N-term +42.01 Da, C +57.02Da,  | 7441.725586 | 3 | 934.4799805 | 934.4812145 |
| VSQHGSDEVVIETDFGLR                   | E9Q0B5 | 0.03323837 | N-term +42.01 Da,              | 7442.521973 | 2 | 951.4699707 | 950.9736095 |
| SGALDVLQMKEEDVLKFL                   | P14206 | 0          | N-term +42.01 Da, K +28.03 Da, | 7445.189453 | 2 | 1067.079956 | 1067.079229 |
| MELITILEK                            | P70168 | 0.00172018 | N-term +42.01 Da, K +28.03 Da, | 7447.67334  | 2 | 580.3300171 | 580.3357783 |
| SGALDVLQMKEEDVLKFL                   | P14206 | 0          | N-term +42.01 Da, K +28.03 Da, | 7448.881836 | 3 | 712.0499878 | 711.7219114 |
| ADQLTEEQIAEFKEAFSLFDKDGDTITTKELGTVMR | P62204 | 0.00936037 | N-term +42.01 Da, K +28.03 Da, | 7450.043457 | 3 | 1421.030029 | 1420.713797 |
| VNPTVFFDITADDEPLGR                   | P17742 | 0          | N-term +42.01 Da,              | 7452.018555 | 2 | 1024.5      | 1024.5022   |
| VNPTVFFDITADDEPLGR                   | P17742 | 0          | N-term +42.01 Da,              | 7460.486328 | 3 | 683.3374634 | 683.3372256 |
| SGALDVLQMKEEDVLKFL                   | P14206 | 0          | N-term +42.01 Da, K +28.03 Da, | 7460.645508 | 3 | 712.3900146 | 711.7219114 |
| ADQLTEEQIAEFKEAF                     | P62204 | 0          | N-term +42.01 Da, K +28.03 Da, | 7463.851074 | 2 | 969.9699707 | 969.9702015 |
| TDAAVSFAKDFLAGGVAASIKTAVAPIER        | P51881 | 0          | N-term +42.01 Da, K +28.03 Da, | 7465.669922 | 3 | 1016.22998  | 1015.892161 |
| MEYLIQGPDPYVLVASDR                   | Q9R1P3 | 0          | N-term +42.01 Da,              | 7466.130371 | 2 | 1091.550049 | 1091.04846  |
| ADQLTEEQIAEFKEAFSLFDKDGDTITTKELGTVMR | P62204 | 0.00691857 | N-term +42.01 Da, K +28.03 Da, | 7470.282715 | 3 | 1420.689941 | 1420.713797 |
| SGALDVLQMKEEDVLKFL                   | P14206 | 0          | N-term +42.01 Da, K +28.03 Da, | 7477.119629 | 2 | 1067.079956 | 1067.079229 |
| MELITILEK                            | P70168 | 0.00172018 | N-term +42.01 Da, K +28.03 Da, | 7479.67627  | 2 | 580.3343506 | 580.3357783 |
| MEYLIQGPDPYVLVASDR                   | Q9R1P3 | 0          | N-term +42.01 Da,              | 7480.208496 | 3 | 728.039978  | 727.701399  |
| VNPTVFFDITADDEPLGR                   | P17742 | 0          | N-term +42.01 Da,              | 7484.027344 | 2 | 1024.499756 | 1024.5022   |
| MDDLADLADLESTTSHISKR                 | Q8VI36 | 0          | N-term +42.01 Da, K +28.03 Da, | 7492.319336 | 3 | 801.7399902 | 801.0686995 |
| AEEAAAGASGETMAALVAAEGLSPAGWSAGR      | P97364 | 0          | N-term +42.01 Da,              | 7495.234375 | 3 | 968.1300049 | 967.4662934 |
| MEYLIQGPDPYVLVASDR                   | Q9R1P3 | 0          | N-term +42.01 Da,              | 7496.937988 | 2 | 1091.046631 | 1091.04846  |
| ADQLTEEQIAEFKEAF                     | P62204 | 0          | N-term +42.01 Da, K +28.03 Da, | 7498.412598 | 2 | 969.9699707 | 969.9702015 |
| TDAAVSFAKDFLAGGVAASIKTAVAPIER        | P51881 | 0          | N-term +42.01 Da, K +28.03 Da, | 7502.187988 | 3 | 1016.219971 | 1015.892161 |
| AGELSQEALLDFLCQAGGR                  | Q8BZW2 | 0          | N-term +42.01 Da, C +57.02Da,  | 7505.008789 | 2 | 1039.01001  | 1039.004584 |
| MEYLIQGPDPYVLVASDR                   | Q9R1P3 | 0          | N-term +42.01 Da,              | 7510.895508 | 3 | 728.3699951 | 727.701399  |
| VNPTVFFDITADDEPLGR                   | P17742 | 0          | N-term +42.01 Da,              | 7514.656738 | 2 | 1024.500732 | 1024.5022   |
| AEEAAAGASGETMAALVAAEGLSPAGWSAGR      | P97364 | 0          | N-term +42.01 Da,              | 7515.967773 | 3 | 967.460022  | 967.4662934 |
| TDAAVSFAKDFLAGGVAASIKTAVAPIER        | P51881 | 0.00063171 | N-term +42.01 Da, K +28.03 Da, | 7517.963379 | 3 | 1016.559998 | 1015.892161 |

|                                      |        |            |                                |             |   |             |             |
|--------------------------------------|--------|------------|--------------------------------|-------------|---|-------------|-------------|
| MDDL DALLADLESTTSHISKR               | Q8VI36 | 0          | N-term +42.01 Da, K +28.03 Da, | 7522.799316 | 3 | 801.0700073 | 801.0686995 |
| MEYLIQIQPDYVLVASDR                   | Q9R1P3 | 0          | N-term +42.01 Da,              | 7528.119141 | 2 | 1091.048584 | 1091.04846  |
| AEEGIAAGGVMDVNTALQEVLTALIH DGLAR     | P63323 | 0          | N-term +42.01 Da, K +28.03 Da, | 7536.444824 | 3 | 1111.589966 | 1111.588813 |
| ADQLTEEQIAEFKEAF                     | P62204 | 0          | N-term +42.01 Da, K +28.03 Da, | 7537.682617 | 2 | 969.9799805 | 969.9702015 |
| TDAAVSFAKDFLAGGVAAAISK               | P51881 | 0          | N-term +42.01 Da, K +28.03 Da, | 7540.130371 | 3 | 737.0700073 | 736.7352085 |
| ADMPSGESCTSPLELFNSIATQGELVR          | P32921 | 0          | N-term +42.01 Da, C +57.02Da,  | 7541.130371 | 2 | 1476.699951 | 1476.191704 |
| TDAAVSFAKDFLAGGVAAAISK               | P51881 | 0          | N-term +42.01 Da, K +28.03 Da, | 7543.041016 | 2 | 1105.099976 | 1104.599175 |
| VNPTVFFDITADDEPLGR                   | P17742 | 0          | N-term +42.01 Da,              | 7545.641602 | 2 | 1024.504395 | 1024.5022   |
| ADMPSGESCTSPLELFNSIATQGELVR          | P32921 | 0          | N-term +42.01 Da, C +57.02Da,  | 7545.84375  | 3 | 985.1300049 | 984.4635614 |
| ADMPSGESCTSPLELFNSIATQGELVR          | P32921 | 0          | N-term +42.01 Da, C +57.02Da,  | 7553.258789 | 2 | 1476.199951 | 1476.191704 |
| MEYLIQIQPDYVLVASDR                   | Q9R1P3 | 0          | N-term +42.01 Da,              | 7560.206543 | 2 | 1091.550049 | 1091.04846  |
| ADNPVLELLLR                          | Q8C0C7 | 0.00062073 | N-term +42.01 Da,              | 7567.130859 | 2 | 647.8699951 | 647.8719055 |
| AEEGIAAGGVMDVNTALQEVLTALIH DGLAR     | P63323 | 0          | N-term +42.01 Da, K +28.03 Da, | 7568.913574 | 3 | 1111.589966 | 1111.588813 |
| TDAAVSFAKDFLAGGVAAAISK               | P51881 | 0          | N-term +42.01 Da, K +28.03 Da, | 7571.333008 | 3 | 736.7363281 | 736.7352085 |
| AEEAAAGASGETMAALVAAEGSLGPAGWSAGR     | P97364 | 0          | N-term +42.01 Da,              | 7571.90332  | 3 | 967.7999878 | 967.4662934 |
| TDAAVSFAKDFLAGGVAAAISK TAVAPIER      | P51881 | 0          | N-term +42.01 Da, K +28.03 Da, | 7572.3125   | 3 | 1015.890015 | 1015.892161 |
| AGTGLVAGEVV D DALPYFDQGYEAPGVR       | Q9D287 | 0          | N-term +42.01 Da,              | 7573.541016 | 3 | 965.1599731 | 964.8186612 |
| TDAAVSFAKDFLAGGVAAAISK               | P51881 | 0          | N-term +42.01 Da, K +28.03 Da, | 7574.24707  | 2 | 1104.600586 | 1104.599175 |
| ADQLTEEQIAEFKEAFSLFDKDGDTITTKELGTVMR | P62204 | 0          | N-term +42.01 Da, K +28.03 Da, | 7575.812012 | 4 | 1066.040039 | 1065.787167 |
| PEQREARIK VLEE QINEGEQQLK            | Q91YJ2 | 0.02531646 | N-term +42.01 Da, K +28.03 Da, | 7576.03418  | 3 | 955.5300293 | 954.8488433 |
| VNPTVFFDITADDEPLGR                   | P17742 | 0          | N-term +42.01 Da,              | 7576.649902 | 2 | 1025        | 1024.5022   |
| TDAAVSFAKDFLAGGVAAAISK TAVAPIER      | P51881 | 0          | N-term +42.01 Da, K +28.03 Da, | 7577.654785 | 4 | 762.6699829 | 762.1709395 |
| ADLLGSILSSMEKPPSLGDQESR              | Q7TNE3 | 0          | N-term +42.01 Da, K +28.03 Da, | 7578.138184 | 3 | 834.4299927 | 834.0915042 |
| SHIQIPAGL TELLQGYTVEVLR              | Q8K1M3 | 0          | N-term +42.01 Da,              | 7581.4375   | 2 | 1240.680054 | 1240.181395 |
| ADLLGSILSSMEKPPSLGDQESR              | Q7TNE3 | 0          | N-term +42.01 Da, K +28.03 Da, | 7581.703125 | 2 | 1250.630005 | 1250.633618 |
| AGTGLVAGEVV D DALPYFDQGYEAPGVR       | Q9D287 | 0          | N-term +42.01 Da,              | 7582.866211 | 2 | 1447.22998  | 1446.724354 |
| SHIQIPAGL TELLQGYTVEVLR              | Q8K1M3 | 0          | N-term +42.01 Da,              | 7585.71582  | 3 | 827.1256104 | 827.1233554 |
| ADLLGSILSSMEKPPSLGDQESR              | Q7TNE3 | 0.00063331 | N-term +42.01 Da, K +28.03 Da, | 7593.742188 | 2 | 1251.640015 | 1250.633618 |
| ADNPVLELLLR                          | Q8C0C7 | 0          | N-term +42.01 Da,              | 7597.9375   | 2 | 647.8721924 | 647.8719055 |
| ADQLTEEQIAEFKEAF                     | P62204 | 0          | N-term +42.01 Da, K +28.03 Da, | 7599.272461 | 2 | 970.4699707 | 969.9702015 |
| VADALASAAGHLDDLPGALSALSDLHAH         | P01942 | 0          | N-term +42.01 Da,              | 7599.405762 | 3 | 917.7999878 | 917.4629888 |
| ADQLTEEQIAEFKEAFSLFDKDGDTITTKELGTVMR | P62204 | 0.00284414 | N-term +42.01 Da, K +28.03 Da, | 7599.58252  | 3 | 1421.040039 | 1420.713797 |
| AEEGIAAGGVMDVNTALQEVLTALIH DGLAR     | P63323 | 0          | N-term +42.01 Da, K +28.03 Da, | 7601.496094 | 3 | 1112.26001  | 1111.588813 |
| TDAAVSFAKDFLAGGVAAAISK TAVAPIER      | P51881 | 0          | N-term +42.01 Da, K +28.03 Da, | 7602.616211 | 3 | 1015.892395 | 1015.892161 |
| AEEGIAAGGVMDVNTALQEVLT               | P63323 | 0          | N-term +42.01 Da, K +28.03 Da, | 7603.226563 | 2 | 1194.109985 | 1193.612154 |
| AGTGLVAGEVV D DALPYFDQGYEAPGVR       | Q9D287 | 0          | N-term +42.01 Da,              | 7604.140625 | 3 | 965.4899902 | 964.8186612 |
| TDAAVSFAKDFLAGGVAAAISK TAVAPIER      | P51881 | 0          | N-term +42.01 Da, K +28.03 Da, | 7608.529297 | 4 | 762.4199829 | 762.1709395 |
| VNPTVFFDITADDEPLGR                   | P17742 | 0          | N-term +42.01 Da,              | 7608.670898 | 2 | 1025        | 1024.5022   |
| AEEGIAAGGVMDVNTALQEVLT               | P63323 | 0          | N-term +42.01 Da, K +28.03 Da, | 7610.475098 | 3 | 796.0800171 | 796.0771949 |
| SHIQIPAGL TELLQGYTVEVLR              | Q8K1M3 | 0          | N-term +42.01 Da,              | 7612.347656 | 2 | 1240.180054 | 1240.181395 |

|                                      |        |            |                                |             |   |             |             |
|--------------------------------------|--------|------------|--------------------------------|-------------|---|-------------|-------------|
| ADQLTEEQIAEFKEAFSLFDKDGDTITTKELGTVMR | P62204 | 0.00062657 | N-term +42.01 Da, K +28.03 Da, | 7613.044922 | 3 | 1421.369995 | 1420.713797 |
| AGTGLVAGEVVVDALPYFDQGYEAPGVR         | Q9D287 | 0          | N-term +42.01 Da,              | 7614.5      | 2 | 1447.22998  | 1446.724354 |
| SHIQIPAGLTELQGYTVEVLR                | Q8K1M3 | 0          | N-term +42.01 Da,              | 7616.257324 | 3 | 827.1199951 | 827.1233554 |
| AEEGIAAGGVMDVNTALQEVLKT              | P63323 | 0          | N-term +42.01 Da, K +28.03 Da, | 7621.070801 | 3 | 796.75      | 796.0771949 |
| AAPSEVAAAVLGEVDGGAFGWSWLDGR          | Q9CR29 | 0          | N-term +42.01 Da,              | 7627.14502  | 2 | 1251.589966 | 1251.598424 |
| ADNPVLELLLR                          | Q8C0C7 | 0          | N-term +42.01 Da,              | 7628.910156 | 2 | 647.8722534 | 647.8719055 |
| AEEAAAGASGETMAALVAAEGLSPAGWSAGR      | P97364 | 0          | N-term +42.01 Da,              | 7630.46582  | 3 | 968.1400146 | 967.4662934 |
| VADALASAAGHLDDLPGALSALSDLHAH         | P01942 | 0.04156936 | N-term +42.01 Da,              | 7631.226563 | 3 | 918.1300049 | 917.4629888 |
| TDAAVSFAKDFLAGGVAAAISKTAVAPIER       | P51881 | 0          | N-term +42.01 Da, K +28.03 Da, | 7633.344727 | 3 | 1015.893372 | 1015.892161 |
| ADQLTEEQIAEFKEAF                     | P62204 | 0          | N-term +42.01 Da, K +28.03 Da, | 7635.236816 | 2 | 970.9799805 | 969.9702015 |
| AEEGIAAGGVMDVNTALQEVLKT              | P63323 | 0          | N-term +42.01 Da, K +28.03 Da, | 7635.8125   | 2 | 1194.119995 | 1193.612154 |
| VGDPLDLVALAEQVQKADFIR                | Q5EBG8 | 0          | N-term +42.01 Da, K +28.03 Da, | 7640.420898 | 3 | 832.460022  | 832.782999  |
| VNPTVFFDITADDEPLGR                   | P17742 | 0          | N-term +42.01 Da,              | 7641.243164 | 2 | 1024.498291 | 1024.5022   |
| TDAAVSFAKDFLAGGVAAAISKTAVAPIER       | P51881 | 0          | N-term +42.01 Da, K +28.03 Da, | 7641.428223 | 4 | 762.4199829 | 762.1709395 |
| AAPSEVAAAVLGEVDGGAFGWSWLDGR          | Q9CR29 | 0          | N-term +42.01 Da,              | 7645.10498  | 3 | 834.7399902 | 834.7347082 |
| ADQLTEEQIAEFKEAF                     | P62204 | 0          | N-term +42.01 Da, K +28.03 Da, | 7648.395996 | 2 | 969.9699707 | 969.9702015 |
| AELSEEALLSVLPTIR                     | P56399 | 0          | N-term +42.01 Da,              | 7673.128418 | 2 | 891.9967651 | 891.9960216 |
| VNPTVFFDITADDEPLGR                   | P17742 | 0          | N-term +42.01 Da,              | 7677.447754 | 2 | 1024.5      | 1024.5022   |
| AAPSEVAAAVLGEVDGGAFGWSWLDGR          | Q9CR29 | 0          | N-term +42.01 Da,              | 7701.937012 | 2 | 1252.099976 | 1251.598424 |
| AELSEEALLSVLPTIR                     | P56399 | 0          | N-term +42.01 Da,              | 7703.574707 | 2 | 891.9956055 | 891.9960216 |
| AAPSEVAAAVLGEVDGGAFGWSWLDGR          | Q9CR29 | 0          | N-term +42.01 Da,              | 7710.165039 | 3 | 835.0700073 | 834.7347082 |
| AAPSEVAAAVLGEVDGGAFGWSWLDGR          | Q9CR29 | 0          | N-term +42.01 Da,              | 7710.277832 | 2 | 1251.599976 | 1251.598424 |
| MEAVLNELVSVEDLKNFER                  | Q9CQ92 | 0          | N-term +42.01 Da, K +28.03 Da, | 7713.889648 | 2 | 1153.589966 | 1153.090857 |
| MEAVLNELVSVEDLKNFER                  | Q9CQ92 | 0          | N-term +42.01 Da, K +28.03 Da, | 7715.063965 | 3 | 769.7299805 | 769.0629968 |
| AAPSEVAAAVLGEVDGGAFGWSWLDGR          | Q9CR29 | 0          | N-term +42.01 Da,              | 7715.229004 | 3 | 834.7399902 | 834.7347082 |
| MEAVLNELVSVEDLKNFER                  | Q9CQ92 | 0          | N-term +42.01 Da, K +28.03 Da, | 7716.694824 | 2 | 1153.089966 | 1153.090857 |
| VNPTVFFDITADDEPLGR                   | P17742 | 0          | N-term +42.01 Da,              | 7718.498535 | 2 | 1024.48999  | 1024.5022   |
| VNPTVFFDITADDEPLGR                   | P17742 | 0          | N-term +42.01 Da,              | 7720.117676 | 2 | 1025.51001  | 1024.5022   |
| AEEGIAAGGVMDVNTALQEVLKTALIHDLGLAR    | P63323 | 0          | N-term +42.01 Da, K +28.03 Da, | 7729.206543 | 3 | 1112.26001  | 1111.588813 |
| ADQLTEEQIAEFKEAF                     | P62204 | 0          | N-term +42.01 Da, K +28.03 Da, | 7729.523926 | 2 | 970.4699707 | 969.9702015 |
| AELSEEALLSVLPTIR                     | P56399 | 0          | N-term +42.01 Da,              | 7733.734375 | 2 | 892.5       | 891.9960216 |
| ADQLTEEQIAEFKEAF                     | P62204 | 0          | N-term +42.01 Da, K +28.03 Da, | 7736.077637 | 2 | 969.9699707 | 969.9702015 |
| GLELYLDLLSQPSR                       | Q61133 | 0          | N-term +42.01 Da,              | 7744.922363 | 2 | 823.9400024 | 823.4434243 |
| MEAVLNELVSVEDLKNFER                  | Q9CQ92 | 0          | N-term +42.01 Da, K +28.03 Da, | 7745.830566 | 3 | 769.0639038 | 769.0629968 |
| YKDEAQLYKEEHLR                       | Q6KAR6 | 0.0038525  | N-term +42.01 Da, K +28.03 Da, | 7747.496582 | 2 | 960.9799805 | 960.4967201 |
| MEAVLNELVSVEDLKNFER                  | Q9CQ92 | 0          | N-term +42.01 Da, K +28.03 Da, | 7748.349609 | 2 | 1153.09021  | 1153.090857 |
| IGDIMFGVPSVIVSR                      | Q8VCC2 | 0.00843882 | N-term +42.01 Da,              | 7756.133789 | 2 | 817.4400024 | 816.4449122 |
| AAGVAGWGVEAEFEFDAPDVEPLEPTLSNIEQR    | O54984 | 0          | N-term +42.01 Da,              | 7756.495117 | 3 | 1227.920044 | 1227.591606 |
| VNPTVFFDITADDEPLGR                   | P17742 | 0          | N-term +42.01 Da,              | 7756.837891 | 2 | 1025.006714 | 1024.5022   |
| AEEGIAAGGVMDVNTALQEVLKTALIHDLGLAR    | P63323 | 0          | N-term +42.01 Da, K +28.03 Da, | 7763.282227 | 3 | 1111.920044 | 1111.588813 |

|                                          |        |            |                                           |             |   |             |             |
|------------------------------------------|--------|------------|-------------------------------------------|-------------|---|-------------|-------------|
| AEEGIAAGGVMDVNTALQEVLTALIHDLARG          | P63323 | 0          | N-term +42.01 Da, K +28.03 Da,            | 7763.519043 | 3 | 1131.26001  | 1130.595967 |
| AAPSEVAAAVLGEEDGGAFGSWLDGR               | Q9CR29 | 0          | N-term +42.01 Da,                         | 7766.746094 | 2 | 1252.599976 | 1251.598424 |
| AAPSEVAAAVLGEEDGGAFGSWLDGR               | Q9CR29 | 0          | N-term +42.01 Da,                         | 7767.208008 | 3 | 835.0700073 | 834.7347082 |
| QGFDLPEFPFGLPR                           | Q35490 | 0          | N-term +42.01 Da,                         | 7769.124512 | 2 | 953.4705811 | 952.483081  |
| AEEAAAGASGETMAALVAAEGLSPAGWSAGR          | P97364 | 0          | N-term +42.01 Da,                         | 7770.358398 | 3 | 968.1300049 | 967.4662934 |
| ADQLTEEQIAEFKEAF                         | P62204 | 0          | N-term +42.01 Da, K +28.03 Da,            | 7771.51416  | 2 | 969.9699707 | 969.9702015 |
| VNPTVFFDITADDEPLGR                       | P17742 | 0          | N-term +42.01 Da,                         | 7787.182129 | 3 | 683.6798706 | 683.3372256 |
| VNPTVFFDITADDEPLGR                       | P17742 | 0          | N-term +42.01 Da,                         | 7789.521973 | 2 | 1024.500977 | 1024.5022   |
| ASVSELACIYSALIHDEVTVTEDKIN               | P47955 | 0          | N-term +42.01 Da, K +28.03 Da,C +57.02Da, | 7790.118164 | 3 | 1059.540039 | 1059.195358 |
| LQGVDLLADAVAVTMGPKGR                     | P63038 | 0          | N-term +42.01 Da, K +28.03 Da,            | 7790.870605 | 2 | 1042.060059 | 1041.074812 |
| MMPTPVILLKEGTDSSQGIPQLVSNISAC            | P80313 | 0.0064     | N-term +42.01 Da, K +28.03 Da,C +57.02Da, | 7792.415039 | 3 | 1052.870605 | 1052.871163 |
| TDAAVSFAKDFLAGGVAIAISKT                  | P51881 | 0          | N-term +42.01 Da, K +28.03 Da,            | 7796.458984 | 3 | 770.4199829 | 770.4177682 |
| AEEGIAAGGVMDVNTALQEVLTALIHDLARG          | P63323 | 0          | N-term +42.01 Da, K +28.03 Da,            | 7796.711914 | 3 | 1112.26001  | 1111.588813 |
| ASVSELACIYSALIHDEVTVTEDKINAL             | P47955 | 0          | N-term +42.01 Da, K +28.03 Da,C +57.02Da, | 7800.009766 | 3 | 1120.560059 | 1120.569084 |
| ADQLTEEQIAEFKEAF                         | P62204 | 0          | N-term +42.01 Da, K +28.03 Da,            | 7807.927734 | 2 | 969.9699707 | 969.9702015 |
| MVNPTVFFDITADDEPLGR                      | P17742 | 0          | N-term +42.01 Da,                         | 7812.626465 | 2 | 1090.52002  | 1090.022443 |
| TDAAVSFAKDFLAGGVAIAISKT                  | P51881 | 0          | N-term +42.01 Da, K +28.03 Da,            | 7813.232422 | 2 | 1155.630005 | 1155.123014 |
| MFCLQSSQALQVLENSLR                       | Q9DCY0 | 0          | N-term +42.01 Da, C +57.02Da,             | 7814.443848 | 2 | 1083.540039 | 1083.537737 |
| MEAVLNELVSVEDLKNFER                      | Q9CQ92 | 0          | N-term +42.01 Da, K +28.03 Da,            | 7816.489746 | 2 | 1154.089966 | 1153.090857 |
| AEEGIAAGGVMDVNTALQEVLTALIHDLARG          | P63323 | 0          | N-term +42.01 Da, K +28.03 Da,            | 7818.868164 | 4 | 834.1900024 | 833.9434286 |
| VNPTVFFDITADDEPLGR                       | P17742 | 0          | N-term +42.01 Da,                         | 7821.068848 | 2 | 1024.5      | 1024.5022   |
| SSVPDLIPALTAAEQRAAASLK                   | Q8C0Y0 | 0.03556188 | N-term +42.01 Da, K +28.03 Da,            | 7825.279785 | 2 | 1139.630005 | 1140.133913 |
| VNPTVFFDITADDEPLGR                       | P17742 | 0          | N-term +42.01 Da,                         | 7825.987793 | 3 | 683.6799927 | 683.3372256 |
| AEEGIAAGGVMDVNTALQEVLTALIHDLARG          | P63323 | 0          | N-term +42.01 Da, K +28.03 Da,            | 7830.086914 | 3 | 1111.589111 | 1111.588813 |
| TDAAVSFAKDFLAGGVAIAISKT                  | P51881 | 0          | N-term +42.01 Da, K +28.03 Da,            | 7832.419922 | 3 | 770.75      | 770.4177682 |
| MVNPTVFFDITADDEPLGR                      | P17742 | 0          | N-term +42.01 Da,                         | 7833.932617 | 2 | 1090.02002  | 1090.022443 |
| AAMLGDAIMVAKGL                           | Q60936 | 0          | N-term +42.01 Da, K +28.03 Da,            | 7836.982422 | 2 | 716.3900146 | 715.8909264 |
| TDAAVSFAKDFLAGGVAIAISKTA                 | P51881 | 0          | N-term +42.01 Da, K +28.03 Da,            | 7840.701172 | 3 | 794.0999756 | 794.0968063 |
| AFAQFGSDLDAAATQQLSR                      | Q03265 | 0          | N-term +42.01 Da,                         | 7844.304199 | 2 | 1041.5      | 1041.018549 |
| ADQLTEEQIAEFKEAFSLFDKDGDTITTKELGTVMR     | P62204 | 0          | N-term +42.01 Da, K +28.03 Da,            | 7846.374023 | 4 | 1066.290039 | 1065.787167 |
| TDAAVSFAKDFLAGGVAIAISKTA                 | P51881 | 0          | N-term +42.01 Da, K +28.03 Da,            | 7848.390137 | 3 | 794.7600098 | 794.0968063 |
| ASGVAVSDGVIKVFNDMKVR                     | P18760 | 0          | N-term +42.01 Da, K +28.03 Da,            | 7849.428223 | 3 | 731.4000244 | 730.7365548 |
| AEEGIAAGGVMDVNTALQEVLTALIHDLARG          | P63323 | 0          | N-term +42.01 Da, K +28.03 Da,            | 7850.54834  | 4 | 833.9434814 | 833.9434286 |
| MVNPTVFFDITADDEPLGR                      | P17742 | 0.01469843 | N-term +42.01 Da,                         | 7850.813477 | 2 | 1089.540039 | 1090.022443 |
| ADQLTEEQIAEFKEAFSLFDKDGDTITTKELGTVMR     | P62204 | 0          | N-term +42.01 Da, K +28.03 Da,            | 7851.934082 | 4 | 1066.040039 | 1065.787167 |
| EEVEGSLLLGSVQGYMEQASKTVQDALSSVQESDIAVVAR | P33622 | 0.00064599 | N-term +42.01 Da, K +28.03 Da,            | 7852.176758 | 4 | 1074.540039 | 1074.041527 |
| VNPTVFFDITADDEPLGR                       | P17742 | 0          | N-term +42.01 Da,                         | 7853.810547 | 2 | 1024.5      | 1024.5022   |
| SSVPDLIPALTAAEQRAAASLK                   | Q8C0Y0 | 0.03244275 | N-term +42.01 Da, K +28.03 Da,            | 7856.907715 | 2 | 1139.626709 | 1140.133913 |
| AEEGIAAGGVMDVNTALQEVLTALIHDLARG          | P63323 | 0          | N-term +42.01 Da, K +28.03 Da,            | 7862.243164 | 3 | 1111.588135 | 1111.588813 |
| AGWNAVYIDSLMADGTCQDAIVGYKDSPSVW          | P62962 | 0.00115808 | N-term +42.01 Da, K +28.03 Da,C +57.02Da, | 7864.318359 | 3 | 1144.859985 | 1144.52348  |

|                                           |        |            |                                           |             |   |             |             |
|-------------------------------------------|--------|------------|-------------------------------------------|-------------|---|-------------|-------------|
| CDFTEDQTAEFKEAFQLFDR                      | Q60605 | 0          | N-term +42.01 Da, K +28.03 Da,C +57.02Da, | 7865.912598 | 2 | 1284.579956 | 1284.073393 |
| AAMLGDAIMVAKGL                            | Q60936 | 0          | N-term +42.01 Da, K +28.03 Da,            | 7867.712402 | 2 | 715.8902588 | 715.8909264 |
| ADQLTEEQIAEFKEAF                          | P62204 | 0          | N-term +42.01 Da, K +28.03 Da,            | 7870.35791  | 2 | 969.9694824 | 969.9702015 |
| MNAAAEAEFNILLATDSYKVTH                    | Q99KQ4 | 0          | N-term +42.01 Da, K +28.03 Da,            | 7872.032227 | 2 | 1240.109985 | 1240.112321 |
| MDTGVIIEGLNVTLTIR                         | Q61990 | 0          | N-term +42.01 Da,                         | 7873.125977 | 2 | 915.9840088 | 915.985131  |
| AEAAAAGASGETMAALVAAEGSLGPAGWSAGR          | P97364 | 0          | N-term +42.01 Da,                         | 7875.518555 | 3 | 967.4662476 | 967.4662934 |
| AEAAAAGASGETMAALVAAEGSLGPAGWSAGR          | P97364 | 0          | N-term +42.01 Da,                         | 7875.766113 | 2 | 1451.199951 | 1450.695802 |
| EEVEGSLLLGSGVQGYMEQASKTVQDALSSVQESDIAVVAR | P33622 | 0.0411985  | N-term +42.01 Da, K +28.03 Da,            | 7877.75293  | 3 | 1432.060059 | 1431.719611 |
| AAGAAEAGEAAVAVVEVGSQAQFEELLR              | Q9CQM9 | 0          | N-term +42.01 Da,                         | 7877.85498  | 2 | 1393.208008 | 1393.203786 |
| AAGAAEAGEAAVAVVEVGSQAQFEELLR              | Q9CQM9 | 0          | N-term +42.01 Da,                         | 7877.932617 | 3 | 929.4699707 | 929.1382825 |
| MELITILEKTVSPDR                           | P70168 | 0          | N-term +42.01 Da, K +28.03 Da,            | 7878.01416  | 2 | 908.0018921 | 908.0002495 |
| AEEGIAAGGVMDVNTALQEVLLKAL                 | P63323 | 0          | N-term +42.01 Da, K +28.03 Da,            | 7880.234375 | 2 | 1285.672119 | 1285.672743 |
| AELTALESLEMGFPR                           | Q922Y1 | 0          | N-term +42.01 Da,                         | 7880.310059 | 2 | 909.9674683 | 909.9689494 |
| AEAAAAGASGETMAALVAAEGSLGPAGW              | P97364 | 0          | N-term +42.01 Da,                         | 7880.536133 | 2 | 1265.098389 | 1265.099942 |
| AEEGIAAGGVMDVNTALQEVLLKAL                 | P63323 | 0          | N-term +42.01 Da, K +28.03 Da,            | 7880.623047 | 3 | 857.4503784 | 857.450921  |
| AEAAAAGASGETMAALVAAEGSLGPAGW              | P97364 | 0          | N-term +42.01 Da,                         | 7881.352051 | 3 | 844.4000244 | 843.7357205 |
| SFIPVAEDSDFPIQNLPGYVF                     | P35505 | 0.00060569 | N-term +42.01 Da,                         | 7887.390137 | 2 | 1199.085571 | 1199.086098 |
| SLVAEAFVQSQAATEPWPENATLY                  | O88441 | 0          | N-term +42.01 Da,                         | 7890.425293 | 2 | 1325.660034 | 1325.157783 |
| AEEGIAAGGVMDVNTALQEVLLKAL                 | P63323 | 0          | N-term +42.01 Da, K +28.03 Da,            | 7916.852539 | 2 | 1286.170044 | 1285.672743 |
| AEEGIAAGGVMDVNTALQEVLLKAL                 | P63323 | 0          | N-term +42.01 Da, K +28.03 Da,            | 7918.093262 | 2 | 1285.680054 | 1285.672743 |
| MARKWNGRAVAR                              | O35622 | 0.02205882 | N-term +42.01 Da, K +28.03 Da,            | 7934.492188 | 2 | 743.4126587 | 743.414614  |
| AEEGIAAGGVMDVNTALQEVLLKAL                 | P63323 | 0          | N-term +42.01 Da, K +28.03 Da,            | 7949.357422 | 2 | 1286.670044 | 1285.672743 |
| AEEGIAAGGVMDVNTALQEVLLKAL                 | P63323 | 0          | N-term +42.01 Da, K +28.03 Da,            | 7951.942383 | 2 | 1285.670044 | 1285.672743 |
| ADQLTEEQIAEFKEAF                          | P62204 | 0.00060976 | N-term +42.01 Da, K +28.03 Da,            | 7979.890137 | 2 | 969.9699707 | 969.9702015 |
| AEEGIAAGGVMDVNTALQEVLLKAL                 | P63323 | 0          | N-term +42.01 Da, K +28.03 Da,            | 7985.674805 | 3 | 857.7800293 | 857.450921  |
| AEEGIAAGGVMDVNTALQEVLLKAL                 | P63323 | 0          | N-term +42.01 Da, K +28.03 Da,            | 7990.898438 | 3 | 857.4500122 | 857.450921  |
| AEEGIAAGGVMDVNTALQEVLLKAL                 | P63323 | 0          | N-term +42.01 Da, K +28.03 Da,            | 8009.339355 | 2 | 1286.180054 | 1285.672743 |
| AEAAAAGASGETMAALVAAEGSLGPAGW              | P97364 | 0.01896208 | N-term +42.01 Da,                         | 8011.064453 | 3 | 843.7399902 | 843.7357205 |
| AEEGIAAGGVMDVNTALQEVLLKAL                 | P63323 | 0          | N-term +42.01 Da, K +28.03 Da,            | 8023.460449 | 3 | 857.789978  | 857.450921  |
| AEEGIAAGGVMDVNTALQEVLLKAL                 | P63323 | 0          | N-term +42.01 Da, K +28.03 Da,            | 8036.288574 | 3 | 858.1199951 | 857.450921  |
| AAGAAEAGEAAVAVVEVGSQAQFEELLR              | Q9CQM9 | 0          | N-term +42.01 Da,                         | 8045.584961 | 3 | 929.8099976 | 929.1382825 |
| AEEGIAAGGVMDVNTALQEVLLKAL                 | P63323 | 0.01753507 | N-term +42.01 Da, K +28.03 Da,            | 8052.473633 | 2 | 1286.170044 | 1285.672743 |
| ADQLTEEQIAEFKEAF                          | P62204 | 0          | N-term +42.01 Da, K +28.03 Da,            | 8058.149414 | 2 | 970.4699707 | 969.9702015 |
| AEAAAAGASGETMAALVAAEGSLGPAGW              | P97364 | 0          | N-term +42.01 Da,                         | 8059.395508 | 3 | 844.0700073 | 843.7357205 |
| AEAAAAGASGETMAALVAAEGSLGPAGW              | P97364 | 0          | N-term +42.01 Da,                         | 8091.187988 | 3 | 844.0700073 | 843.7357205 |
| VNPTVFFDITADDEPLGR                        | P17742 | 0          | N-term +42.01 Da,                         | 8095.595215 | 2 | 1025        | 1024.5022   |
| AEAAAAGASGETMAALVAAEGSLGPAGW              | P97364 | 0.04154995 | N-term +42.01 Da,                         | 8103.135742 | 3 | 843.7399902 | 843.7357205 |
| ADQLTEEQIAEFKEAF                          | P62204 | 0          | N-term +42.01 Da, K +28.03 Da,            | 8103.810059 | 2 | 970.4699707 | 969.9702015 |
| AEAAAAGASGETMAALVAAEGSLGPAGWSAGR          | P97364 | 0          | N-term +42.01 Da,                         | 8122.180664 | 3 | 967.4699707 | 967.4662934 |
| AEEGIAAGGVMDVNTALQEVLLKAL                 | P63323 | 0          | N-term +42.01 Da, K +28.03 Da,            | 8139.527832 | 3 | 858.1199951 | 857.450921  |

|                                    |        |            |                                           |             |   |             |             |
|------------------------------------|--------|------------|-------------------------------------------|-------------|---|-------------|-------------|
| ADQLTEEQIAEFKEAF                   | P62204 | 0          | N-term +42.01 Da, K +28.03 Da,            | 8142.752441 | 2 | 969.9699707 | 969.9702015 |
| AEEGIAAGGVMDVNTALQEVLTAL           | P63323 | 0          | N-term +42.01 Da, K +28.03 Da,            | 8146.140137 | 3 | 857.4500122 | 857.450921  |
| AAGAAEAGEAAVAVVEVGSQAQQFEELLR      | Q9CQM9 | 0          | N-term +42.01 Da,                         | 8146.709961 | 3 | 929.1400146 | 929.1382825 |
| AEAAAAGASGETMAALVAAEGSLGPAGW       | P97364 | 0.00438116 | N-term +42.01 Da,                         | 8150.979492 | 3 | 844.0700073 | 843.7357205 |
| VNPTVFFDITADDEPLGR                 | P17742 | 0          | N-term +42.01 Da,                         | 8158.230957 | 2 | 1024.51001  | 1024.5022   |
| AAGAAEAGEAAVAVVEVGSQAQQFEELLR      | Q9CQM9 | 0          | N-term +42.01 Da,                         | 8165.299316 | 3 | 929.8099976 | 929.1382825 |
| AEEGIAAGGVMDVNTALQEVLTALIHDLGLAR   | P63323 | 0          | N-term +42.01 Da, K +28.03 Da,            | 8165.871582 | 3 | 1111.920044 | 1111.588813 |
| ADQLTEEQIAEFKEAF                   | P62204 | 0          | N-term +42.01 Da, K +28.03 Da,            | 8173.925293 | 2 | 969.9699707 | 969.9702015 |
| AEEGIAAGGVMDVNTALQEVLTAL           | P63323 | 0          | N-term +42.01 Da, K +28.03 Da,            | 8177.165527 | 2 | 1285.670044 | 1285.672743 |
| AEEGIAAGGVMDVNTALQEVLTAL           | P63323 | 0          | N-term +42.01 Da, K +28.03 Da,            | 8178.144531 | 3 | 857.789978  | 857.450921  |
| SKGPAVGIDLGTYSVGVFQHGKVEIANDQGNR   | P63017 | 0          | N-term +42.01 Da, K +28.03 Da,C +57.02Da, | 8192.164063 | 4 | 947.7299805 | 947.2374457 |
| ASGNAQIGKSAPDFDTATAVVDGAFKEIKLSDYR | Q61171 | 0          | N-term +42.01 Da, K +28.03 Da,            | 8192.734375 | 4 | 889.4699707 | 889.2188845 |
| VNPTVFFDITADDEPLGR                 | P17742 | 0          | N-term +42.01 Da,                         | 8228.988281 | 2 | 1024.5      | 1024.5022   |
| VNPTVFFDITADDEPLGR                 | P17742 | 0          | N-term +42.01 Da,                         | 8260.569336 | 2 | 1024.5      | 1024.5022   |
| EGSGSSGTGEQKEDQKEEQ                | P38647 | 0          | N-term +28.03 Da, K +28.03 Da,            | 957.439209  | 4 | 563.2700195 | 563.2737586 |
| APVAGKKAK                          | O35490 | 0.0119225  | N-term +28.03 Da, K +28.03 Da,            | 958.3920898 | 3 | 327.8987427 | 327.8988234 |
| TENSTSAPAAKPKR                     | P10922 | 0          | N-term +28.03 Da, K +28.03 Da,            | 961.1112671 | 4 | 386.2218018 | 386.2216049 |
| TENSTSAPAAKPKR                     | P10922 | 0          | N-term +28.03 Da, K +28.03 Da,            | 961.678833  | 3 | 514.626709  | 514.626381  |
| TENSTSAPAAKPKR                     | P10922 | 0          | N-term +28.03 Da, K +28.03 Da,            | 991.6395264 | 4 | 386.2216492 | 386.2216049 |
| SSAAAHTTEKTQIR                     | Q60759 | 0          | N-term +28.03 Da, K +28.03 Da,            | 1007.58075  | 4 | 364.7000122 | 364.7033135 |
| PDPAKSAPAPKKGGS                    | Q64525 | 0.0041806  | N-term +28.03 Da, K +28.03 Da,            | 1010.845154 | 4 | 366.4718018 | 366.4711569 |
| EGSGSSGTGEQKEDQKEEQ                | P38647 | 0.00706991 | N-term +28.03 Da, K +28.03 Da,            | 1015.926208 | 3 | 750.3599854 | 750.6959194 |
| PDPAKSAPAPKKGSK                    | Q64525 | 0          | N-term +28.03 Da, K +28.03 Da,            | 1018.019226 | 4 | 405.5031433 | 405.5027227 |
| TENSTSAPAAKPKR                     | P10922 | 0.00564972 | N-term +28.03 Da, K +28.03 Da,            | 1024.84082  | 4 | 386.4674988 | 386.2216049 |
| VAGADSPQSSSKGGR                    | Q8BIJ6 | 0          | N-term +28.03 Da, K +28.03 Da,            | 1025.276733 | 3 | 487.2548523 | 487.2548358 |
| SAPSTGGVKKPHR                      | P02301 | 0          | N-term +28.03 Da, K +28.03 Da,            | 1027.915039 | 4 | 352.2124939 | 352.212311  |
| AAAAAATKPAR                        | Q99N96 | 0          | N-term +28.03 Da, K +28.03 Da,            | 1031.153442 | 3 | 375.8960876 | 375.896142  |
| SSGKAAGDETGAKVER                   | P97351 | 0.00837776 | N-term +28.03 Da, K +28.03 Da,            | 1031.332153 | 4 | 412.4733276 | 412.4731571 |
| AQASAAPKAGTATGR                    | P56480 | 0.00347222 | N-term +28.03 Da, K +28.03 Da,            | 1036.431641 | 3 | 471.9324951 | 471.9318042 |
| TESGSESATHDSSAPR                   | Q9CY16 | 0          | N-term +28.03 Da,                         | 1039.245605 | 3 | 549.9099731 | 549.5799372 |
| STESGSESATHDSSAPR                  | Q9CY16 | 0          | N-term +28.03 Da,                         | 1041.857666 | 3 | 578.5900269 | 578.5906136 |
| PDPAKSAPAPK                        | Q64525 | 0          | N-term +28.03 Da, K +28.03 Da,            | 1043.912231 | 3 | 388.2323608 | 388.2325314 |
| AQASAAPKAGTATGR                    | P56480 | 0          | N-term +28.03 Da, K +28.03 Da,            | 1044.735474 | 2 | 707.3936157 | 707.3940681 |
| EGSGSSGTGEQKEDQKEEQ                | P38647 | 0          | N-term +28.03 Da, K +28.03 Da,            | 1046.004639 | 3 | 751.0200195 | 750.6959194 |
| ESAAADRPTVR                        | Q9DCT2 | 0          | N-term +28.03 Da, K +28.03 Da,            | 1046.434326 | 4 | 339.9500122 | 339.9453062 |
| AAQASAAPKAGTATGR                   | P56480 | 0          | N-term +28.03 Da, K +28.03 Da,            | 1047.593872 | 3 | 495.6099854 | 495.6108422 |
| PDPAKSAPAPK                        | Q64525 | 0          | N-term +28.03 Da, K +28.03 Da,            | 1048.673828 | 2 | 581.8446655 | 581.8451589 |
| DEEEESGKGEKR                       | Q9EST5 | 0.02240896 | N-term +28.03 Da, K +28.03 Da,            | 1049.786133 | 3 | 536.25      | 535.9249332 |
| ASTESGSESATHDSSAPR                 | Q9CY16 | 0          | N-term +28.03 Da,                         | 1055.18689  | 3 | 602.2700195 | 602.2696516 |
| TQVIAHGQSSSKGPR                    | Q78JT3 | 0          | N-term +28.03 Da, K +28.03 Da,            | 1057.131592 | 4 | 395.4700012 | 395.4732254 |

|                     |        |            |                                |             |   |             |             |
|---------------------|--------|------------|--------------------------------|-------------|---|-------------|-------------|
| VKMAAAGGGGGGR       | Q8R081 | 0          | N-term +28.03 Da, K +28.03 Da, | 1057.207031 | 3 | 401.2200012 | 401.2205199 |
| PDPAKSAPAPKKGSK     | Q64525 | 0.00563607 | N-term +28.03 Da, K +28.03 Da, | 1059.328979 | 3 | 540.3300171 | 540.3345382 |
| AAQASAAPKAGTATGR    | P56480 | 0          | N-term +28.03 Da, K +28.03 Da, | 1059.894897 | 2 | 742.9128418 | 742.9126251 |
| AAQASATAPRKEER      | Q9EP53 | 0          | N-term +28.03 Da, K +28.03 Da, | 1060.336548 | 3 | 514.6199951 | 514.6179969 |
| APVAGKKAKKGILER     | O35490 | 0          | N-term +28.03 Da, K +28.03 Da, | 1060.421021 | 4 | 427.290863  | 427.2908271 |
| TSYAQHQQVR          | P97351 | 0          | N-term +28.03 Da,              | 1064.751831 | 3 | 415.8829956 | 415.882673  |
| EPPQHALR            | P70296 | 0.02304469 | N-term +28.03 Da,              | 1066.533325 | 3 | 325.8500061 | 325.8505325 |
| AQASAAPKAGTATGR     | P56480 | 0          | N-term +28.03 Da, K +28.03 Da, | 1067.950195 | 3 | 472.2599792 | 471.9318042 |
| VSSSSAEGTQPSR       | Q8R317 | 0          | N-term +28.03 Da,              | 1074.05249  | 2 | 704.3400269 | 704.3391564 |
| PDPAKSAPAPK         | Q64525 | 0          | N-term +28.03 Da, K +28.03 Da, | 1076.627319 | 3 | 388.2322693 | 388.2325314 |
| DDEEPKDETR          | O55022 | 0          | N-term +28.03 Da, K +28.03 Da, | 1077.133789 | 3 | 454.2124023 | 454.212414  |
| AAQASAAPKAGTATGR    | P56480 | 0          | N-term +28.03 Da, K +28.03 Da, | 1078.03479  | 3 | 495.6107788 | 495.6108422 |
| GQKLQGPQTAR         | P13707 | 0          | N-term +28.03 Da, K +28.03 Da, | 1078.44397  | 3 | 413.90979   | 413.9104514 |
| TAEEDADPKR          | Q9D0J8 | 0          | N-term +28.03 Da, K +28.03 Da, | 1078.782837 | 3 | 482.5599976 | 482.5633354 |
| DDEEPKDETR          | O55022 | 0.00839054 | N-term +28.03 Da, K +28.03 Da, | 1081.566162 | 2 | 680.8200073 | 680.8149828 |
| HLDGETEER           | P10649 | 0          | N-term +28.03 Da,              | 1086.717651 | 2 | 621.782959  | 621.7834852 |
| TIENVKAK            | P0CG49 | 0.04327869 | N-term +28.03 Da, K +28.03 Da, | 1086.86853  | 3 | 329.5461426 | 329.5463386 |
| LDPETGKR            | Q64374 | 0.03925482 | N-term +28.03 Da, K +28.03 Da, | 1089.085938 | 3 | 324.5220337 | 324.5221932 |
| DLGKGGNEESTKTGNAGSR | P08228 | 0.00347524 | N-term +28.03 Da, K +28.03 Da, | 1089.262573 | 4 | 491.25      | 491.2526285 |
| SAPAVQTK            | Q99JY0 | 0.01842665 | N-term +28.03 Da, K +28.03 Da, | 1092.517822 | 2 | 429.2585449 | 429.2581875 |
| AMSRPPPPR           | Q8CG76 | 0.00572831 | N-term +28.03 Da,              | 1092.897339 | 3 | 346.2000122 | 346.1955342 |
| GAESEALKQR          | Q9CWD8 | 0.00090992 | N-term +28.03 Da, K +28.03 Da, | 1095.994385 | 3 | 382.2200012 | 382.2155407 |
| GAESEALKQR          | Q9CWD8 | 0.00090253 | N-term +28.03 Da, K +28.03 Da, | 1096.108276 | 2 | 572.3099976 | 572.8196728 |
| EEAGEEESQKR         | O35381 | 0          | N-term +28.03 Da, K +28.03 Da, | 1096.362915 | 2 | 702.8200073 | 702.8337069 |
| AAQASAAPKAGTATGR    | P56480 | 0          | N-term +28.03 Da, K +28.03 Da, | 1109.397705 | 3 | 495.9389954 | 495.6108422 |
| SMQTVQKTTTR         | P05784 | 0.00497925 | N-term +28.03 Da, K +28.03 Da, | 1109.839233 | 3 | 446.246582  | 446.2466237 |
| SRPPCTGEGDTPR       | P10605 | 0          | N-term +28.03 Da, C +57.02 Da, | 1111.411011 | 3 | 486.5647888 | 486.5649044 |
| DDEEPKDETR          | O55022 | 0          | N-term +28.03 Da, K +28.03 Da, | 1114.687012 | 3 | 454.2099915 | 454.212414  |
| SHGSHETDEEFDAR      | P12787 | 0          | N-term +28.03 Da,              | 1114.913452 | 3 | 548.9024658 | 548.9010105 |
| DEDIHTANER          | Q91YI0 | 0.02237762 | N-term +28.03 Da,              | 1115.14563  | 2 | 614.7932739 | 614.2836521 |
| TDPDAPSR            | P70296 | 0.04333552 | N-term +28.03 Da,              | 1117.060303 | 2 | 443.7167969 | 443.7168843 |
| SVTVQETKEGR         | O08677 | 0          | N-term +28.03 Da, K +28.03 Da, | 1117.135742 | 3 | 430.5732422 | 430.5735054 |
| YRAPPPPR            | Q9CR59 | 0.01774308 | N-term +28.03 Da,              | 1118.93103  | 3 | 327.8592834 | 327.8591392 |
| SSAAAHTKTKQIR       | Q60759 | 0          | N-term +28.03 Da, K +28.03 Da, | 1119.60437  | 3 | 485.6000061 | 485.9353259 |
| AAETEEAEEDR         | Q62264 | 0          | N-term +28.03 Da,              | 1120.668945 | 2 | 639.2800293 | 639.2782332 |
| SLEDPQTHSNR         | P11499 | 0          | N-term +28.03 Da,              | 1122.852783 | 3 | 437.8800049 | 437.8811097 |
| SLEAASSSSR          | Q9EQI8 | 0          | N-term +28.03 Da,              | 1123.827637 | 2 | 511.7595215 | 511.759281  |
| TENSTSAPAAKPKR      | P10922 | 0.00714286 | N-term +28.03 Da, K +28.03 Da, | 1126.282837 | 3 | 514.2826538 | 514.626381  |
| SVTVQETKEGR         | O08677 | 0          | N-term +28.03 Da, K +28.03 Da, | 1128.094604 | 2 | 645.3599854 | 645.3566199 |
| TAKEAEELAAAR        | Q9QYGO | 0          | N-term +28.03 Da, K +28.03 Da, | 1128.321167 | 3 | 372.5525208 | 372.5521527 |



|                      |        |            |                                |             |   |             |             |
|----------------------|--------|------------|--------------------------------|-------------|---|-------------|-------------|
| KDSYVGDEAQSKR        | P60710 | 0          | N-term +28.03 Da, K +28.03 Da, | 1129.474731 | 3 | 523.2700195 | 522.9422579 |
| AGGGVHIQPR           | Q9CPU2 | 0.00336134 | N-term +28.03 Da,              | 1130.609131 | 3 | 340.5300598 | 340.5296819 |
| SNVNDGVAQSTR         | P17751 | 0.03017833 | N-term +28.03 Da,              | 1135.253174 | 2 | 638.324646  | 638.3180263 |
| AGGGVHIQPR           | Q9CPU2 | 0.04798464 | N-term +28.03 Da,              | 1136.771973 | 2 | 510.2918091 | 510.2908846 |
| SHGSHETDEEFDAR       | P12787 | 0          | N-term +28.03 Da,              | 1138.720703 | 2 | 822.8499756 | 822.8478775 |
| VEKVVVSNR            | P07901 | 0          | N-term +28.03 Da, K +28.03 Da, | 1139.022705 | 3 | 362.8924866 | 362.5607594 |
| AKDVKFGADAR          | P63038 | 0.00570962 | N-term +28.03 Da, K +28.03 Da, | 1144.401489 | 2 | 631.3699951 | 631.3667899 |
| SHGSHETDEEFDAR       | P12787 | 0          | N-term +28.03 Da,              | 1146.984619 | 3 | 548.9014893 | 548.9010105 |
| SYVGDEAQSKR          | P60710 | 0          | N-term +28.03 Da, K +28.03 Da, | 1149.315186 | 3 | 432.558075  | 432.5578554 |
| AKDVKFGADAR          | P63038 | 0.02236198 | N-term +28.03 Da, K +28.03 Da, | 1150.849121 | 4 | 316.1871948 | 316.1870332 |
| AVLHEVQR             | E9PZ31 | 0.00089127 | N-term +28.03 Da,              | 1151.231323 | 3 | 327.1940308 | 327.1942992 |
| SYVGDEAQSKR          | P60710 | 0.00090416 | N-term +28.03 Da, K +28.03 Da, | 1151.805298 | 2 | 648.3300171 | 648.3331448 |
| PGPAGPAGPR           | Q01149 | 0.04755784 | N-term +28.03 Da,              | 1163.999512 | 2 | 452.25      | 452.7536034 |
| TKVLNEEER            | P24270 | 0.00339559 | N-term +28.03 Da, K +28.03 Da, | 1167.865723 | 3 | 391.887207  | 391.8873127 |
| TKFVEGAR             | Q8C196 | 0.03197279 | N-term +28.03 Da, K +28.03 Da, | 1172.944458 | 3 | 321.8588867 | 321.8589165 |
| EEPKDETAR            | O55022 | 0.04305284 | N-term +28.03 Da, K +28.03 Da, | 1183.93811  | 2 | 565.2800293 | 565.7880387 |
| LCGETEEER            | O35660 | 0.01838755 | N-term +28.03 Da, C +57.02 Da, | 1186.279297 | 2 | 575.7550659 | 575.7558815 |
| DEEEDKEAAR           | P57776 | 0.04398448 | N-term +28.03 Da, K +28.03 Da, | 1187.853027 | 2 | 688.7999878 | 688.8124403 |
| SAQELAGSR            | P54869 | 0.03011636 | N-term +28.03 Da,              | 1192.36792  | 2 | 473.7513733 | 473.7512585 |
| SKPPVYGACR           | P35505 | 0.00704225 | N-term +28.03 Da, C +57.02 Da, | 1216.4823   | 3 | 397.5503845 | 397.5498659 |
| SNVNDGVAQSTR         | P17751 | 0          | N-term +28.03 Da,              | 1226.227783 | 2 | 638.3200073 | 638.3180263 |
| TETTSTTLR            | O54750 | 0.01191363 | N-term +28.03 Da,              | 1228.438843 | 2 | 519.2770386 | 519.2773066 |
| DTVSNQVQR            | Q64374 | 0.00703675 | N-term +28.03 Da,              | 1236.405151 | 2 | 537.7810669 | 537.7805476 |
| TINGHNAEVR           | O88569 | 0.00911854 | N-term +28.03 Da,              | 1244.249634 | 3 | 380.5318604 | 380.2036349 |
| VLSGEDKSNIK          | P01942 | 0.00566802 | N-term +28.03 Da, K +28.03 Da, | 1247.764526 | 3 | 425.2504272 | 425.2502512 |
| VLSGEDKSNIK          | P01942 | 0.00090909 | N-term +28.03 Da, K +28.03 Da, | 1251.82373  | 2 | 637.3713379 | 637.3717385 |
| HLDGETEER            | P10649 | 0.00569569 | N-term +28.03 Da,              | 1259.306519 | 2 | 622.289978  | 621.7834852 |
| SVSDNDIR             | Q01853 | 0.00571429 | N-term +28.03 Da,              | 1261.592041 | 2 | 467.235199  | 467.2354414 |
| VHQVLYR              | P52196 | 0.00836502 | N-term +28.03 Da,              | 1267.123047 | 3 | 314.8551636 | 314.8555062 |
| FEDVGHSTDAR          | P56395 | 0.03797468 | N-term +28.03 Da,              | 1279.130737 | 2 | 631.289978  | 631.2940197 |
| HTIILASDKR           | B5X0G2 | 0.0190409  | N-term +28.03 Da, K +28.03 Da, | 1291.22998  | 3 | 403.9154053 | 403.9153138 |
| AAQASAAPKAGTATGR     | P56480 | 0.01516245 | N-term +28.03 Da, K +28.03 Da, | 1297.768311 | 2 | 742.3967285 | 742.9126251 |
| TATPQQAQEVH          | P17751 | 0          | N-term +28.03 Da,              | 1299.756958 | 2 | 619.3099976 | 619.3122122 |
| IHEKIQER             | Q9Z1K6 | 0.04633205 | N-term +28.03 Da, K +28.03 Da, | 1310.52417  | 2 | 554.8271484 | 554.8273003 |
| VVHGPGDIR            | Q64442 | 0.00697674 | N-term +28.03 Da,              | 1317.160522 | 3 | 326.519989  | 326.5224159 |
| TEAPLNPKANR          | P60710 | 0.0362173  | N-term +28.03 Da, K +28.03 Da, | 1321.475342 | 3 | 422.9112854 | 422.9103401 |
| AQASAAPKAGTATGR      | P56480 | 0          | N-term +28.03 Da, K +28.03 Da, | 1322.0448   | 2 | 706.8787231 | 707.3940681 |
| QDAEAAINR            | P09528 | 0.005      | N-term +28.03 Da,              | 1325.10791  | 2 | 508.2618408 | 508.2619905 |
| AAQASAAPKAGTATGR     | P56480 | 0          | N-term +28.03 Da, K +28.03 Da, | 1329.527588 | 2 | 742.3968506 | 742.9126251 |
| QDDLKGGNEESTKTGNAGSR | P08228 | 0          | N-term +28.03 Da, K +28.03 Da, | 1330.397705 | 3 | 736.0200195 | 735.6962533 |

|                  |        |            |                                |             |   |             |             |
|------------------|--------|------------|--------------------------------|-------------|---|-------------|-------------|
| GGVEKGPAALR      | Q61176 | 0.02035088 | N-term +28.03 Da, K +28.03 Da, | 1337.006348 | 2 | 555.8300171 | 555.8351253 |
| SANEDNVTQVR      | P24270 | 0          | N-term +28.03 Da,              | 1341.555908 | 2 | 630.8121338 | 630.8125768 |
| GSHTDEEFDAR      | P12787 | 0          | N-term +28.03 Da,              | 1347.51709  | 2 | 711.2999878 | 710.8024068 |
| GSHTDEEFDAR      | P12787 | 0.01582734 | N-term +28.03 Da,              | 1347.780029 | 3 | 474.2032776 | 474.20403   |
| DEESEEAKKLR      | O70251 | 0.01187825 | N-term +28.03 Da, K +28.03 Da, | 1349.527954 | 3 | 516.2700195 | 516.2701519 |
| TEAPLNPKANR      | P60710 | 0          | N-term +28.03 Da, K +28.03 Da, | 1352.183105 | 3 | 422.9100952 | 422.9103401 |
| SFTTTAER         | P60710 | 0.04746632 | N-term +28.03 Da,              | 1365.133301 | 2 | 470.7399902 | 470.7403594 |
| ITHFEQK          | Q9D3T1 | 0.03643725 | N-term +28.03 Da, K +28.03 Da, | 1372.356445 | 3 | 320.1829529 | 320.1834002 |
| DPANQEIER        | Q99KI0 | 0.01188707 | N-term +28.03 Da,              | 1391.692017 | 2 | 550.272522  | 550.2725556 |
| VLSGEDKSNIK      | P01942 | 0.04235606 | N-term +28.03 Da, K +28.03 Da, | 1393.009277 | 3 | 425.25      | 425.2502512 |
| TYGPKVVR         | P12710 | 0.03641268 | N-term +28.03 Da, K +28.03 Da, | 1393.616821 | 3 | 325.8705444 | 325.8710449 |
| PEPSKAPAPK       | Q64475 | 0.00343053 | N-term +28.03 Da, K +28.03 Da, | 1395.009766 | 2 | 596.3399658 | 596.8504414 |
| TKTPGPGAQSALR    | P62264 | 0.00568182 | N-term +28.03 Da, K +28.03 Da, | 1402.223022 | 3 | 447.5899963 | 447.2612615 |
| TTLQSKSPR        | A2AWT7 | 0.01062215 | N-term +28.03 Da, K +28.03 Da, | 1403.048462 | 2 | 537.3135986 | 537.3193082 |
| SANEDNVTQVR      | P24270 | 0          | N-term +28.03 Da,              | 1413.572876 | 2 | 630.8120728 | 630.8125768 |
| AAQASAAPKAGTATGR | P56480 | 0.01779359 | N-term +28.03 Da, K +28.03 Da, | 1428.516235 | 2 | 743.4000244 | 742.9126251 |
| ADTPGEATPPPR     | Q9ERE7 | 0          | N-term +28.03 Da,              | 1437.368164 | 2 | 618.8135986 | 618.8145878 |
| LGTTAKEEMER      | Q9CZB0 | 0          | N-term +28.03 Da, K +28.03 Da, | 1441.526123 | 3 | 440.8993835 | 440.8991127 |
| SANEDNVTQVR      | P24270 | 0          | N-term +28.03 Da,              | 1443.865112 | 2 | 630.8116455 | 630.8125768 |
| SVQCAVDVKKR      | P24270 | 0.00576132 | N-term +28.03 Da, K +28.03 Da, | 1452.778809 | 3 | 406.5599976 | 406.5605423 |
| TNAVIHEVQR       | O54749 | 0.04392765 | N-term +28.03 Da,              | 1456.767456 | 3 | 399.230011  | 398.8911683 |
| GPSGKLWR         | P16858 | 0.01901408 | N-term +28.03 Da, K +28.03 Da, | 1482.312744 | 3 | 319.5274048 | 319.5273895 |
| GNPSSPPVDDTAHGK  | Q91WU0 | 0          | N-term +28.03 Da, K +28.03 Da, | 1487.616943 | 3 | 506.9400024 | 506.9352146 |
| EKIEDNGNFR       | P02762 | 0          | N-term +28.03 Da, K +28.03 Da, | 1490.267212 | 3 | 426.5546265 | 426.5543337 |
| DEDEEAAPTQKR     | P26350 | 0          | N-term +28.03 Da, K +28.03 Da, | 1497.960327 | 2 | 751.8400269 | 751.852097  |
| DESVGTMGNR       | Q91Y97 | 0          | N-term +28.03 Da,              | 1506.666626 | 2 | 547.25      | 547.2507659 |
| SHGSHETDEEFDAR   | P12787 | 0.00699301 | N-term +28.03 Da,              | 1507.915894 | 3 | 548.5599976 | 548.9010105 |
| GPSGKLWR         | P16858 | 0.03139932 | N-term +28.03 Da, K +28.03 Da, | 1514.247437 | 3 | 319.5270691 | 319.5273895 |
| SHGQDYLVGNR      | P10648 | 0          | N-term +28.03 Da,              | 1525.975098 | 2 | 637.3099976 | 637.3178287 |
| TEVEAAVNR        | P29391 | 0.00353669 | N-term +28.03 Da,              | 1535.276855 | 2 | 508.7719727 | 508.7721911 |
| AVAVTMGPKGR      | P63038 | 0          | N-term +28.03 Da, K +28.03 Da, | 1540.97876  | 3 | 381.5611877 | 381.5619943 |
| SFSAPEQQR        | P24270 | 0.02773925 | N-term +28.03 Da,              | 1542.160156 | 2 | 539.2700195 | 539.2698156 |
| AEFASEACR        | Q9ERR7 | 0.00715421 | N-term +28.03 Da, C +57.02 Da, | 1547.434326 | 2 | 534.7435913 | 534.7425764 |
| VFDVTKGR         | O55022 | 0.00091158 | N-term +28.03 Da, K +28.03 Da, | 1551.522827 | 3 | 326.5299988 | 326.5307999 |
| CQDVAADCEVK      | P10639 | 0          | N-term +28.03 Da, K +28.03 Da, | 1558.256958 | 2 | 676.3099976 | 675.8050486 |
| SSSAPVASPNVR     | Q05920 | 0          | N-term +28.03 Da,              | 1569.029663 | 2 | 600.3224487 | 600.3225798 |
| DLTVTNPKR        | P17182 | 0.02036517 | N-term +28.03 Da, K +28.03 Da, | 1570.904175 | 3 | 367.2206116 | 367.2205143 |
| SFSAPEQQR        | P24270 | 0.00699844 | N-term +28.03 Da,              | 1573.260132 | 2 | 539.2700195 | 539.2698156 |
| EKIEDNGNFR       | P02762 | 0.04310908 | N-term +28.03 Da, K +28.03 Da, | 1580.122803 | 3 | 426.8823547 | 426.5543337 |
| TPCDDFTR         | P28798 | 0.03133515 | N-term +28.03 Da, C +57.02 Da, | 1587.964966 | 2 | 520.2287598 | 520.2293018 |

|                     |        |            |                                |             |   |             |             |
|---------------------|--------|------------|--------------------------------|-------------|---|-------------|-------------|
| KSHQEELDR           | Q6P9Q6 | 0.0428195  | N-term +28.03 Da, K +28.03 Da, | 1588.040405 | 3 | 399.8747559 | 399.8789287 |
| TPEAAVEHPEAVR       | O35490 | 0          | N-term +28.03 Da,              | 1598.272827 | 3 | 478.5799866 | 478.5842932 |
| TPEAAVEHPEAVR       | O35490 | 0          | N-term +28.03 Da,              | 1605.330811 | 2 | 717.8699951 | 717.3728015 |
| AGFAGDDAPR          | P60710 | 0          | N-term +28.03 Da,              | 1612.115967 | 2 | 502.7399902 | 502.7434334 |
| SVVPGAAEDQR         | Q6P6J9 | 0          | N-term +28.03 Da,              | 1633.567017 | 2 | 578.7999878 | 578.8014802 |
| SELSGAADEAAR        | Q9D3D9 | 0          | N-term +28.03 Da,              | 1639.979126 | 2 | 602.7938843 | 602.7938527 |
| SRIPAGLENR          | O35215 | 0.0071599  | N-term +28.03 Da,              | 1657.740479 | 3 | 380.8875122 | 380.8876467 |
| SVDDVIKR            | P24549 | 0.0041876  | N-term +28.03 Da, K +28.03 Da, | 1659.590942 | 3 | 329.8699951 | 329.8659599 |
| SPGFSKFR            | Q9QXF8 | 0.01648746 | N-term +28.03 Da, K +28.03 Da, | 1662.903931 | 3 | 327.8599854 | 327.8553949 |
| TATPQQAQEVHEKLR     | P17751 | 0          | N-term +28.03 Da, K +28.03 Da, | 1663.054932 | 4 | 448.7488708 | 448.7482527 |
| ATLKDIR             | Q91VR2 | 0.01649928 | N-term +28.03 Da, K +28.03 Da, | 1664.541992 | 3 | 325.2065735 | 325.2062049 |
| ETDEEFDAR           | P12787 | 0          | N-term +28.03 Da,              | 1665.946045 | 2 | 570.25      | 570.246204  |
| TEGKNPAEWAQ         | Q92111 | 0          | N-term +28.03 Da, K +28.03 Da, | 1666.141724 | 3 | 438.9100037 | 438.9065958 |
| VKIVTVKTQ           | Q9D0F9 | 0.00565885 | N-term +28.03 Da, K +28.03 Da, | 1667.425903 | 3 | 367.2532349 | 367.2531551 |
| DVKFGADAR           | P63038 | 0.01052632 | N-term +28.03 Da, K +28.03 Da, | 1670.394409 | 3 | 345.5299988 | 345.5258262 |
| SSLEDSQIEKER        | Q9CZ13 | 0          | N-term +28.03 Da, K +28.03 Da, | 1670.469849 | 3 | 492.9229736 | 492.9228635 |
| GATTVQEQLR          | Q8BG07 | 0          | N-term +28.03 Da,              | 1676.88623  | 2 | 565.8111572 | 565.8118477 |
| RPLPPSPVVR          | Q9ESY9 | 0.00844854 | N-term +28.03 Da,              | 1688.561646 | 3 | 381.9044189 | 381.9047487 |
| GTTTATVLAR          | P63038 | 0.00343938 | N-term +28.03 Da,              | 1694.290527 | 2 | 509.7999878 | 509.7982087 |
| VKIVTVKTQ           | Q9D0F9 | 0.03013699 | N-term +28.03 Da, K +28.03 Da, | 1699.267822 | 3 | 367.2531433 | 367.2531551 |
| DGTEVAVK            | Q566J8 | 0.03513514 | N-term +28.03 Da, K +28.03 Da, | 1699.911011 | 2 | 437.7399902 | 437.747653  |
| TDEPSEKDALQPGR      | Q9QXD6 | 0.00638468 | N-term +28.03 Da, K +28.03 Da, | 1715.054688 | 3 | 533.6052856 | 533.6055346 |
| TDEPSEKDALQPGR      | Q9QXD6 | 0.01048689 | N-term +28.03 Da, K +28.03 Da, | 1715.96521  | 3 | 533.9400024 | 533.6055346 |
| SSASAIMGNPR         | P02104 | 0          | N-term +28.03 Da,              | 1717.580688 | 2 | 560.2858887 | 559.7847755 |
| SDSMDTGAGSIR        | O35143 | 0          | N-term +28.03 Da,              | 1724.717529 | 2 | 613.2800293 | 612.7798881 |
| ITYGPKVVR           | P12710 | 0.00349956 | N-term +28.03 Da, K +28.03 Da, | 1730.083984 | 3 | 363.5655212 | 363.565733  |
| KEASLAKIKEQTR       | P30115 | 0.00701481 | N-term +28.03 Da, K +28.03 Da, | 1747.247192 | 3 | 538.6599731 | 538.6698095 |
| TDEMAHFDR           | P24270 | 0          | N-term +28.03 Da,              | 1754.460327 | 3 | 383.8372803 | 383.8379644 |
| SDICTLPEKEK         | P07724 | 0          | N-term +28.03 Da, K +28.03 Da, | 1771.629639 | 3 | 468.5899963 | 468.5865348 |
| TDPPTAPTTAER        | Q8VD31 | 0          | N-term +28.03 Da,              | 1773.624268 | 2 | 642.8300171 | 642.8251528 |
| SSGTTAPKKTSGSLKDEDR | Q91YT0 | 0          | N-term +28.03 Da, K +28.03 Da, | 1778.949097 | 4 | 556.5499878 | 556.8009487 |
| STSSMGTLPKQVK       | P38060 | 0          | N-term +28.03 Da, K +28.03 Da, | 1790.539551 | 3 | 483.2764282 | 483.2778125 |
| TATILDKPEDR         | O35215 | 0          | N-term +28.03 Da, K +28.03 Da, | 1812.786255 | 2 | 657.8659058 | 657.8668205 |
| GNETEAAATFAR        | P55264 | 0          | N-term +28.03 Da,              | 1816.23938  | 2 | 598.2901611 | 597.7911127 |
| TATILDKPEDR         | O35215 | 0          | N-term +28.03 Da, K +28.03 Da, | 1818.346191 | 3 | 438.9143066 | 438.9136391 |
| TEPELSETQR          | Q9DD06 | 0          | N-term +28.03 Da,              | 1819.928101 | 2 | 609.3033447 | 609.3040532 |
| SDEVGGEALGR         | P02088 | 0.00694981 | N-term +28.03 Da,              | 1820.314331 | 2 | 559.2787476 | 559.2778381 |
| GVNESLTDATAR        | P11725 | 0          | N-term +28.03 Da,              | 1822.44043  | 2 | 595.7999878 | 595.8042202 |
| GAGGALFVHR          | Q9D6J6 | 0          | N-term +28.03 Da,              | 1823.921631 | 2 | 506.7892456 | 506.7879776 |
| TWTELLAGR           | Q9JL70 | 0.03646185 | N-term +28.03 Da,              | 1829.130737 | 2 | 538.7999878 | 537.8007512 |

|                     |        |            |                                |             |   |             |             |
|---------------------|--------|------------|--------------------------------|-------------|---|-------------|-------------|
| ELSEIAQR            | Q91Y97 | 0.02706454 | N-term +28.03 Da,              | 1848.06897  | 2 | 487.269989  | 487.2692841 |
| FTDVHPDYGAR         | P24270 | 0          | N-term +28.03 Da,              | 1850.084839 | 3 | 435.8800049 | 435.8789287 |
| TSYTNLDGR           | Q9CRB3 | 0.0035057  | N-term +28.03 Da,              | 1858.641602 | 2 | 527.7600098 | 527.7618235 |
| SVDLEETGR           | Q03265 | 0.03324288 | N-term +28.03 Da,              | 1859.316162 | 2 | 517.2626343 | 517.2616566 |
| SDSVTEETLR          | Q8C196 | 0          | N-term +28.03 Da,              | 1869.999634 | 2 | 582.7926636 | 582.7907787 |
| SDSSDSMDTGAGSIR     | Q35143 | 0          | N-term +28.03 Da,              | 1880.144165 | 2 | 757.3300171 | 757.3253893 |
| SGNQPPAMVPR         | Q9DCM2 | 0.01709402 | N-term +28.03 Da,              | 1889.884033 | 2 | 591.3099976 | 591.3084176 |
| TENFEDVGHSTDR       | P56395 | 0          | N-term +28.03 Da,              | 1890.703613 | 3 | 535.9092407 | 535.9095058 |
| TQQGPQVDKEQFER      | Q9CZS1 | 0.00576606 | N-term +28.03 Da, K +28.03 Da, | 1895.678223 | 3 | 582.6300049 | 582.6320837 |
| TLHETEDVKEAIR       | Q9D855 | 0          | N-term +28.03 Da, K +28.03 Da, | 1917.274292 | 4 | 400.2200012 | 399.9702501 |
| TLHETEDVKEAIR       | Q9D855 | 0.00344234 | N-term +28.03 Da, K +28.03 Da, | 1918.50415  | 3 | 532.960022  | 532.957908  |
| SSFQIVKNPR          | Q61176 | 0          | N-term +28.03 Da, K +28.03 Da, | 1935.735474 | 3 | 411.5799866 | 411.2434304 |
| ATENFEDVGHSTDR      | P56395 | 0          | N-term +28.03 Da,              | 1937.649292 | 3 | 559.9199829 | 559.5885439 |
| GDGTTTATVLAR        | P63038 | 0.01059803 | N-term +28.03 Da,              | 1954.3927   | 2 | 596.3300171 | 595.8224128 |
| STKPQAQEQPPASPEALR  | Q9WU79 | 0.00637959 | N-term +28.03 Da, K +28.03 Da, | 1955.129028 | 3 | 664.6900024 | 664.3567313 |
| TAGKDGVANVSIEDR     | P08228 | 0          | N-term +28.03 Da, K +28.03 Da, | 1959.123169 | 3 | 529.9498901 | 529.9494126 |
| SFQIVKNPR           | Q61176 | 0          | N-term +28.03 Da, K +28.03 Da, | 1961.814453 | 3 | 382.2327881 | 382.232754  |
| AGELTEDEVER         | P62270 | 0          | N-term +28.03 Da,              | 1968.785278 | 2 | 638.3099976 | 638.3067933 |
| TITYGPKVVR          | P12710 | 0.0124269  | N-term +28.03 Da, K +28.03 Da, | 1970.922363 | 2 | 595.3699951 | 595.3688009 |
| EEEEEEEEDEGPVR      | Q9D0J8 | 0          | N-term +28.03 Da,              | 1975.067505 | 2 | 924.8699951 | 924.3687042 |
| EEESAAEELKAR        | Q80VNO | 0.04353476 | N-term +28.03 Da, K +28.03 Da, | 1983.574097 | 2 | 765.8900146 | 765.9041322 |
| SDTPCDDFTR          | P28798 | 0          | N-term +28.03 Da, C +57.02 Da, | 1995.649414 | 2 | 621.258728  | 621.2587885 |
| DLSKQAVAYR          | Q03265 | 0.01059002 | N-term +28.03 Da, K +28.03 Da, | 1997.204224 | 3 | 402.8992004 | 402.8995524 |
| EDEEEEEDEGPVR       | Q9D0J8 | 0          | N-term +28.03 Da,              | 2003.391968 | 2 | 859.8499756 | 859.847407  |
| TEEEFKKF            | P27773 | 0.00563154 | N-term +28.03 Da, K +28.03 Da, | 2009.751221 | 3 | 381.5400085 | 381.209504  |
| APKVSDSVEQLR        | Q9CYG7 | 0          | N-term +28.03 Da, K +28.03 Da, | 2011.020142 | 3 | 462.2600098 | 462.2646719 |
| SEPEEFQPER          | Q64459 | 0.00496689 | N-term +28.03 Da,              | 2011.10144  | 2 | 638.2999878 | 638.2962282 |
| TESFEDVGHSPDAR      | Q9CQX2 | 0          | N-term +28.03 Da,              | 2012.374512 | 3 | 525.5700073 | 525.5742345 |
| EPDLSSDIKER         | B5X0G2 | 0.00711462 | N-term +28.03 Da, K +28.03 Da, | 2014.02124  | 3 | 449.2399902 | 448.9050325 |
| NIVGNEHYDVAR        | P56480 | 0.00716561 | N-term +28.03 Da,              | 2038.954834 | 3 | 472.2399902 | 472.2406378 |
| DSSDSMDTGAGSIR      | Q35143 | 0          | N-term +28.03 Da,              | 2045.27063  | 2 | 713.8099976 | 713.8093747 |
| EEKEASLAKIKEQTR     | P30115 | 0.00707547 | N-term +28.03 Da, K +28.03 Da, | 2046.315186 | 3 | 624.6900024 | 624.6982056 |
| SAPGQGGILAQR        | Q9CPW5 | 0          | N-term +28.03 Da,              | 2051.034668 | 2 | 591.8302002 | 591.8331143 |
| DSSDSMDTGAGSIR      | Q35143 | 0          | N-term +28.03 Da,              | 2051.425049 | 2 | 714.3099976 | 713.8093747 |
| TGGDAAAPGAAGTQALPHR | Q9D0F3 | 0          | N-term +28.03 Da,              | 2060.596436 | 3 | 625.9799805 | 625.9817758 |
| GKLTGMAFR           | P16858 | 0          | N-term +28.03 Da, K +28.03 Da, | 2063.892578 | 3 | 346.5400085 | 346.2039182 |
| TSNPENTVFDAGR       | P20029 | 0          | N-term +28.03 Da, K +28.03 Da, | 2065.461914 | 3 | 512.2700195 | 512.2668529 |
| SHGQDYLVGNR         | P10648 | 0          | N-term +28.03 Da,              | 2067.016602 | 2 | 638.3220825 | 637.3178287 |
| TYCPANNEPIAR        | Q9DBF1 | 0.03626595 | N-term +28.03 Da, C +57.02 Da, | 2067.748779 | 2 | 717.8499756 | 717.3457293 |
| SKDSEGSWFR          | Q55125 | 0.00640512 | N-term +28.03 Da, K +28.03 Da, | 2068.359131 | 3 | 418.8748169 | 418.8752956 |

|                     |        |            |                                |             |   |             |             |
|---------------------|--------|------------|--------------------------------|-------------|---|-------------|-------------|
| TALIHDLAR           | P63323 | 0.01836158 | N-term +28.03 Da,              | 2068.53833  | 3 | 365.8800049 | 365.5487423 |
| TKFVHDNYVIR         | Q8C196 | 0          | N-term +28.03 Da, K +28.03 Da, | 2080.583984 | 3 | 483.6099854 | 483.2733899 |
| TGGDAAAPGAAGTQALPHR | Q9D0F3 | 0          | N-term +28.03 Da,              | 2085.128418 | 2 | 938.9699707 | 938.4690254 |
| NPDEVGGALGR         | P02089 | 0.00090171 | N-term +28.03 Da,              | 2088.057373 | 2 | 621.8099976 | 621.3096697 |
| TGGDAAAPGAAGTQALPHR | Q9D0F3 | 0          | N-term +28.03 Da,              | 2091.813477 | 3 | 625.9799805 | 625.9817758 |
| TFSETGAGKHVPR       | P05213 | 0          | N-term +28.03 Da, K +28.03 Da, | 2092.382813 | 4 | 398.2200012 | 398.2163223 |
| FVEGVYR             | P07309 | 0.02770083 | N-term +28.03 Da,              | 2095.847168 | 2 | 449.2453003 | 449.2450799 |
| YMVTKIPR            | Q8C196 | 0.00841622 | N-term +28.03 Da, K +28.03 Da, | 2097.846924 | 3 | 355.2200012 | 355.2159352 |
| SQAEFDKAAEEVKR      | P31786 | 0.02569444 | N-term +28.03 Da, K +28.03 Da, | 2111.683838 | 3 | 564.6363525 | 564.6369461 |
| TSVDLEETGR          | Q03265 | 0.02301255 | N-term +28.03 Da,              | 2113.280029 | 2 | 568.289978  | 567.7854962 |
| APKVTSELLR          | Q6P1B1 | 0          | N-term +28.03 Da, K +28.03 Da, | 2128.198486 | 3 | 390.5801086 | 390.5799311 |
| SSEAPLVNEDVVKR      | Q91YQ5 | 0          | N-term +28.03 Da, K +28.03 Da, | 2128.349365 | 3 | 532.960022  | 532.957908  |
| SEDSPTIEAVR         | P10518 | 0.042961   | N-term +28.03 Da,              | 2130.122803 | 2 | 616.3120728 | 616.3118783 |
| YPSPPVVNTVKGK       | Q8VCT4 | 0          | N-term +28.03 Da, K +28.03 Da, | 2132.230225 | 3 | 519.6398315 | 519.6397387 |
| TVIKEVLQR           | Q8CAY6 | 0.01171303 | N-term +28.03 Da, K +28.03 Da, | 2133.903564 | 3 | 381.2485352 | 381.2482928 |
| STSPAGQGGLAQR       | Q9CPW5 | 0          | N-term +28.03 Da,              | 2136.370117 | 2 | 685.8699951 | 685.8729685 |
| PTGSYHGDSLQLER      | Q7TMM9 | 0          | N-term +28.03 Da,              | 2138.078125 | 3 | 568.272583  | 568.2725556 |
| SSEAPLVNEDVVKR      | Q91YQ5 | 0          | N-term +28.03 Da, K +28.03 Da, | 2138.164307 | 2 | 798.9299927 | 798.9332238 |
| SEPEIPK GIR         | Q9WTP6 | 0.00702028 | N-term +28.03 Da, K +28.03 Da, | 2155.959473 | 3 | 394.5681763 | 394.5678027 |
| VKVG VNGFGR         | P16858 | 0          | N-term +28.03 Da, K +28.03 Da, | 2162.605225 | 3 | 363.5573425 | 363.557349  |
| VHQVLYR             | P52196 | 0.01639344 | N-term +28.03 Da,              | 2168.817871 | 2 | 472.2799988 | 471.779621  |
| GNPSSPPVVDTAHGKVLGK | Q91WU0 | 0.00569106 | N-term +28.03 Da, K +28.03 Da, | 2174.956787 | 4 | 486.7783508 | 486.7782816 |
| AGEEAADSP ELPR      | Q9CPW2 | 0          | N-term +28.03 Da,              | 2181.63208  | 2 | 685.3300171 | 685.3333424 |
| SEPEIPK GIR         | Q9WTP6 | 0.0130719  | N-term +28.03 Da, K +28.03 Da, | 2187.102295 | 3 | 394.5677795 | 394.5678027 |
| AGEEAADSP ELPR      | Q9CPW2 | 0          | N-term +28.03 Da,              | 2193.37085  | 2 | 686.3419189 | 685.3333424 |
| IGNKPAGRIQMLLR      | Q9QZH3 | 0.0034188  | N-term +28.03 Da, K +28.03 Da, | 2202.233887 | 4 | 406.5010071 | 406.5026282 |
| VNSDEVGGALGR        | P02088 | 0.00710339 | N-term +28.03 Da,              | 2204.146484 | 2 | 665.8318481 | 665.8335094 |
| DTPCDDFTR           | P28798 | 0          | N-term +28.03 Da, C +57.02 Da, | 2205.175293 | 2 | 577.7399902 | 577.7427739 |
| SEPEIPK GIR         | Q9WTP6 | 0.0064154  | N-term +28.03 Da, K +28.03 Da, | 2207.996826 | 2 | 591.3467407 | 591.3480659 |
| SEPEIPK GIR         | Q9WTP6 | 0.04336399 | N-term +28.03 Da, K +28.03 Da, | 2217.947021 | 3 | 394.5672913 | 394.5678027 |
| ITADDEPLGR          | P17742 | 0.00417711 | N-term +28.03 Da,              | 2229.064697 | 2 | 557.7905884 | 557.7905812 |
| TANLGAGAAQPLR       | P08226 | 0          | N-term +28.03 Da,              | 2240.028076 | 2 | 634.3574829 | 634.3594964 |
| LTPHTLTKQDVER       | Q9DBG6 | 0          | N-term +28.03 Da, K +28.03 Da, | 2244.686768 | 3 | 586.3200073 | 586.3245908 |
| TWDPDQPPR           | P24456 | 0          | N-term +28.03 Da,              | 2244.916992 | 2 | 570.2800293 | 570.2776406 |
| LTPHTLTKQDVER       | Q9DBG6 | 0          | N-term +28.03 Da, K +28.03 Da, | 2246.568604 | 4 | 439.9953003 | 439.9952622 |
| SEPEIPK GIR         | Q9WTP6 | 0.00694444 | N-term +28.03 Da, K +28.03 Da, | 2248.516846 | 3 | 394.5679932 | 394.5678027 |
| VSTSSMGTLPKQVK      | P38060 | 0.03616879 | N-term +28.03 Da, K +28.03 Da, | 2258.633301 | 3 | 516.3006592 | 516.3006173 |
| AGYLTEPVNR          | Q64521 | 0.01581596 | N-term +28.03 Da,              | 2262.992676 | 2 | 574.3083496 | 574.3089407 |
| VHQVLYR             | P52196 | 0.01639344 | N-term +28.03 Da,              | 2264.306152 | 2 | 472.2828674 | 471.779621  |
| WHEYEMKALPR         | Q9Z0T6 | 0.0184136  | N-term +28.03 Da, K +28.03 Da, | 2266.883057 | 2 | 759.3900146 | 758.392482  |

|                          |        |            |                                |             |   |             |             |
|--------------------------|--------|------------|--------------------------------|-------------|---|-------------|-------------|
| CELEMTGKVK               | P12710 | 0          | N-term +28.03 Da, K +28.03 Da, | 2268.150635 | 3 | 503.594574  | 503.5948131 |
| VLSGEDKSNIAAWGK          | P01942 | 0.00090744 | N-term +28.03 Da, K +28.03 Da, | 2271.753174 | 4 | 454.5145264 | 454.5148248 |
| VAPMKGQVCVVTGASR         | Q99L04 | 0          | N-term +28.03 Da, C +57.02 Da, | 2273.479248 | 3 | 572.647583  | 572.6480226 |
| VTAGKDGVANVSIEDR         | P08228 | 0.00500417 | N-term +28.03 Da, K +28.03 Da, | 2275.310547 | 3 | 562.9718018 | 562.9722174 |
| SLVVHGPDIR               | Q64442 | 0.00769823 | N-term +28.03 Da,              | 2277.427979 | 3 | 393.5599976 | 393.2277804 |
| VLSGEDKSNIAAWGK          | P01942 | 0          | N-term +28.03 Da, K +28.03 Da, | 2278.592285 | 3 | 605.684082  | 605.6840076 |
| VLSGEDKSNIAAWGK          | P01942 | 0          | N-term +28.03 Da, K +28.03 Da, | 2279.222168 | 2 | 908.5200195 | 908.0223731 |
| GAEYGAEALER              | P01942 | 0          | N-term +28.03 Da,              | 2280.140381 | 2 | 597.2923584 | 597.2934882 |
| VLSGEDKSNIAAWGK          | P01942 | 0          | N-term +28.03 Da, K +28.03 Da, | 2281.456787 | 2 | 908.0228882 | 908.0223731 |
| VAVTMGPKGR               | P63038 | 0.0034904  | N-term +28.03 Da, K +28.03 Da, | 2283.626221 | 2 | 535.8099976 | 536.3207961 |
| YMLQDTLR                 | E9Q8T7 | 0.0158046  | N-term +28.03 Da,              | 2285.249512 | 2 | 533.789978  | 534.281337  |
| DIEVAPPKAHEVR            | P00329 | 0.04279131 | N-term +28.03 Da, K +28.03 Da, | 2288.974121 | 3 | 506.2799988 | 506.287588  |
| IKEHEESLDVTNPR           | P56657 | 0          | N-term +28.03 Da, K +28.03 Da, | 2290.512939 | 3 | 574.6300049 | 574.9722174 |
| ALAEHPVAEASAVVSSPKDR     | Q91VA0 | 0          | N-term +28.03 Da, K +28.03 Da, | 2290.597656 | 4 | 552.289978  | 552.0432072 |
| VVFEDEMKR                | Q8C196 | 0.00088968 | N-term +28.03 Da, K +28.03 Da, | 2291.882324 | 3 | 432.5600281 | 432.5603197 |
| TLGDIVYKR                | P12710 | 0.00575658 | N-term +28.03 Da, K +28.03 Da, | 2294.946777 | 3 | 374.230011  | 374.2290097 |
| TVIFTQGR                 | P55264 | 0.04302477 | N-term +28.03 Da,              | 2296.544434 | 2 | 475.2770996 | 475.2769116 |
| FYTKVLNEEER              | P24270 | 0          | N-term +28.03 Da, K +28.03 Da, | 2296.620117 | 3 | 495.2650146 | 495.2645606 |
| KVTQPEVDTPLGR            | Q63880 | 0.01056604 | N-term +28.03 Da, K +28.03 Da, | 2299.489014 | 3 | 499.2900085 | 499.2874766 |
| VLSGEDKSNIAAWGK          | P01942 | 0          | N-term +28.03 Da, K +28.03 Da, | 2303.157959 | 4 | 454.5149536 | 454.5148248 |
| EEAGDGTTTATVLAR          | P63038 | 0.03144224 | N-term +28.03 Da,              | 2304.534424 | 2 | 760.8800049 | 760.3835641 |
| TVKKIAIFGATGR            | Q923D2 | 0          | N-term +28.03 Da, K +28.03 Da, | 2307.104736 | 3 | 482.6450806 | 482.644935  |
| TDQGIKNLPVGEAGR          | P24270 | 0          | N-term +28.03 Da, K +28.03 Da, | 2313.865723 | 3 | 537.6331787 | 537.6335357 |
| GDVDAVLSR                | Q8R0Y6 | 0.00570033 | N-term +28.03 Da,              | 2322.713135 | 2 | 480.2600098 | 480.261459  |
| VLSGEDKSNIAAWGK          | P01942 | 0.00342759 | N-term +28.03 Da, K +28.03 Da, | 2333.565186 | 4 | 454.5138855 | 454.5148248 |
| DSSFQIVKNPR              | Q61176 | 0          | N-term +28.03 Da, K +28.03 Da, | 2346.989502 | 3 | 449.5860596 | 449.5857451 |
| AGVPAHVVDLR              | Q6XPS7 | 0.00090009 | N-term +28.03 Da,              | 2348.955811 | 3 | 387.8959656 | 387.896142  |
| DSSFQIVKNPR              | Q61176 | 0          | N-term +28.03 Da, K +28.03 Da, | 2351.783203 | 2 | 673.8699951 | 673.8749795 |
| DLSSSDLSTASK             | Q61838 | 0          | N-term +28.03 Da, K +28.03 Da, | 2353.106201 | 2 | 633.8300171 | 633.8248189 |
| GVQVSPSGEKITHTGVVDEKDYR  | P52503 | 0          | N-term +28.03 Da, K +28.03 Da, | 2356.230713 | 4 | 695.6099854 | 695.1080735 |
| GKVNSEVGGGEALGR          | P02088 | 0          | N-term +28.03 Da, K +28.03 Da, | 2358.180176 | 2 | 772.4000244 | 772.4073732 |
| TNEEAGDGTTTATVLAR        | P63038 | 0          | N-term +28.03 Da,              | 2362.752441 | 2 | 867.9299927 | 867.9288678 |
| GVQVETISPGDGR            | P26883 | 0          | N-term +28.03 Da,              | 2365.225098 | 2 | 671.8499756 | 671.8517019 |
| HQGVMMVGMGQKDSYVGDQAQSKR | P60710 | 0          | N-term +28.03 Da, K +28.03 Da, | 2366.512207 | 4 | 648.3200073 | 648.5730775 |
| RVEIANDQGNR              | P20029 | 0.00695518 | N-term +28.03 Da,              | 2376.583252 | 2 | 707.3800049 | 706.8838675 |
| SDLAQQYGVR               | P09103 | 0.0104712  | N-term +28.03 Da,              | 2378.182617 | 2 | 582.8096924 | 582.8040227 |
| SDLAQQYGVR               | P09103 | 0          | N-term +28.03 Da,              | 2382.766602 | 2 | 582.8099976 | 582.8040227 |
| RVEIANDQGNR              | P20029 | 0.01176471 | N-term +28.03 Da,              | 2384.787598 | 2 | 706.3777466 | 706.8838675 |
| NTNEEAGDGTTTATVLAR       | P63038 | 0          | N-term +28.03 Da,              | 2386.232666 | 2 | 924.9500122 | 924.9503319 |
| DSSDSMDTGAGSIR           | O35143 | 0          | N-term +28.03 Da,              | 2388.951416 | 2 | 713.2999878 | 713.8093747 |

|                            |        |            |                                |             |   |             |             |
|----------------------------|--------|------------|--------------------------------|-------------|---|-------------|-------------|
| VKIVTVKTQAYPDQKPGTSGLR     | Q9D0F9 | 0          | N-term +28.03 Da, K +28.03 Da, | 2391.876953 | 4 | 625.3730469 | 625.373078  |
| SGDNDDDEPPPLPR             | O55022 | 0          | N-term +28.03 Da,              | 2395.20459  | 2 | 776.3499756 | 776.3497215 |
| VKIVTVKTQAYPDQKPGTSGLR     | Q9D0F9 | 0          | N-term +28.03 Da, K +28.03 Da, | 2395.289063 | 3 | 834.1599731 | 833.4950118 |
| GVQVETISPGDGR              | P26883 | 0          | N-term +28.03 Da,              | 2396.091064 | 2 | 671.8513184 | 671.8517019 |
| VLSGEDKSNIAAWGK            | P01942 | 0.00839695 | N-term +28.03 Da, K +28.03 Da, | 2399.781006 | 4 | 454.769989  | 454.5148248 |
| HQGVMMVGMGQKDSYVGDQAQSKR   | P60710 | 0          | N-term +28.03 Da, K +28.03 Da, | 2401.647949 | 3 | 865.0800171 | 864.4283445 |
| GKPITIFQER                 | P16858 | 0.04513217 | N-term +28.03 Da, K +28.03 Da, | 2402.913086 | 2 | 622.8699951 | 622.871708  |
| TEQGPQVDETQFK              | P47738 | 0          | N-term +28.03 Da, K +28.03 Da, | 2409.035645 | 2 | 782.3800049 | 781.8884821 |
| VDPVNFK                    | P01942 | 0.02103787 | N-term +28.03 Da, K +28.03 Da, | 2414.793945 | 2 | 437.7600098 | 437.7552805 |
| EKEEDEEESPGQAKDEL          | P14211 | 0.00498339 | N-term +28.03 Da, K +28.03 Da, | 2415.302979 | 2 | 1023.960022 | 1023.473504 |
| GAAAVLLAR                  | Q8VCH0 | 0.00840336 | N-term +28.03 Da,              | 2418.45874  | 2 | 435.2799988 | 435.2819966 |
| TISQGAIEKVKDATR            | Q8C196 | 0.01239067 | N-term +28.03 Da, K +28.03 Da, | 2420.3479   | 3 | 567.6672363 | 567.6683575 |
| TMGDAPDFDR                 | P10649 | 0.00337553 | N-term +28.03 Da,              | 2425.15625  | 2 | 576.75      | 576.7531414 |
| GVQVETISPGDGR              | P26883 | 0          | N-term +28.03 Da,              | 2427.825195 | 2 | 671.8513184 | 671.8517019 |
| TGGDAAAPGAAGTQAELPHR       | Q9D0F3 | 0          | N-term +28.03 Da,              | 2438.165283 | 2 | 937.960022  | 938.4690254 |
| GDNDDEPPPLPR               | O55022 | 0          | N-term +28.03 Da,              | 2439.400391 | 2 | 732.8319092 | 732.8337069 |
| VAESAVSSPDKDR              | Q91VA0 | 0          | N-term +28.03 Da, K +28.03 Da, | 2441.092285 | 2 | 758.3900146 | 758.4042992 |
| AIAEELAPER                 | O35490 | 0          | N-term +28.03 Da,              | 2443.788818 | 2 | 563.8085938 | 563.8087737 |
| SGGGVPTDEEQATGLER          | P19536 | 0          | N-term +28.03 Da,              | 2452.583252 | 2 | 866.4099731 | 865.9132177 |
| VLSGEDKSNIAAWGK            | P01942 | 0.01645207 | N-term +28.03 Da, K +28.03 Da, | 2455.493164 | 4 | 454.5100098 | 454.5148248 |
| KATIPAAALQAQESTEGPGTGQDRPR | Q9DBG1 | 0          | N-term +28.03 Da, K +28.03 Da, | 2455.794922 | 4 | 659.8499756 | 659.6004154 |
| SFETTEESLR                 | Q88569 | 0.00562249 | N-term +28.03 Da,              | 2455.870361 | 2 | 613.7999878 | 613.7986037 |
| SSIFTKDLGR                 | Q9DBF1 | 0.00571895 | N-term +28.03 Da, K +28.03 Da, | 2462.200684 | 3 | 393.8956909 | 393.8959194 |
| ASGGGVPTDEEQATGLER         | P19536 | 0          | N-term +28.03 Da,              | 2467.885498 | 2 | 901.9299927 | 901.4317748 |
| SQQSASGAPVLLR              | Q9DCM0 | 0          | N-term +28.03 Da,              | 2468.363037 | 2 | 671.3776245 | 671.3778865 |
| TLGSTVSQLQER               | Q00623 | 0          | N-term +28.03 Da,              | 2471.837402 | 2 | 674.3699951 | 673.867352  |
| GGVPTDEEQATGLER            | P19536 | 0          | N-term +28.03 Da,              | 2475.555176 | 2 | 794.4000244 | 793.8864711 |
| ASGGGVPTDEEQATGLER         | P19536 | 0.00705882 | N-term +28.03 Da,              | 2477.08374  | 3 | 601.2905273 | 601.2902754 |
| TDTEDKGEFLSEGGGVR          | E9PV24 | 0          | N-term +28.03 Da, K +28.03 Da, | 2479.625244 | 3 | 618.3018188 | 618.3022924 |
| GESSFDLADR                 | O09164 | 0          | N-term +28.03 Da,              | 2481.29541  | 2 | 562.7600098 | 562.7645636 |
| YDLQTGQISNR                | Q64374 | 0.00838415 | N-term +28.03 Da,              | 2481.636475 | 2 | 661.836731  | 661.8385944 |
| TDTEDKGEFLSEGGGVR          | E9PV24 | 0.00700389 | N-term +28.03 Da, K +28.03 Da, | 2483.00708  | 2 | 927.9500122 | 926.9498004 |
| TDEKFVEGVYR                | P07309 | 0.01898734 | N-term +28.03 Da, K +28.03 Da, | 2483.327393 | 3 | 466.9100037 | 466.9136391 |
| YDLQTGQISNR                | Q64374 | 0          | N-term +28.03 Da,              | 2492.199707 | 2 | 661.3300171 | 661.8385944 |
| GVQVETISPGDGR              | P26883 | 0          | N-term +28.03 Da,              | 2492.350586 | 2 | 671.3492432 | 671.8517019 |
| STGSVVGQQPFGGAR            | Q8CHT0 | 0.00842266 | N-term +28.03 Da,              | 2498.056885 | 2 | 738.3800049 | 738.3837005 |
| ASGGGVPTDEEQATGLER         | P19536 | 0          | N-term +28.03 Da,              | 2498.615967 | 2 | 901.4308472 | 901.4317748 |
| YPSPPVVNTVK                | Q8VCT4 | 0.00354296 | N-term +28.03 Da, K +28.03 Da, | 2501.136475 | 2 | 672.3815308 | 672.382106  |
| TMLGQSTEIR                 | P08226 | 0          | N-term +28.03 Da,              | 2507.017578 | 2 | 646.8294067 | 646.8293808 |
| TLDPVEKALR                 | P63017 | 0          | N-term +28.03 Da, K +28.03 Da, | 2509.400635 | 3 | 399.9100037 | 399.9115694 |

|                         |        |            |                                |             |   |             |             |
|-------------------------|--------|------------|--------------------------------|-------------|---|-------------|-------------|
| DRIIDAGPKGNYAR          | O88491 | 0.04850032 | N-term +28.03 Da, K +28.03 Da, | 2515.042969 | 2 | 801.9400024 | 801.4415498 |
| TTVIKEVLQR              | Q8CAY6 | 0.03032391 | N-term +28.03 Da, K +28.03 Da, | 2518.915527 | 3 | 414.9307861 | 414.9308525 |
| LAQEDPDYGLR             | P24270 | 0          | N-term +28.03 Da,              | 2523.80127  | 2 | 653.3300171 | 652.8276953 |
| DEKEEDEEEESPGQAKDEL     | P14211 | 0          | N-term +28.03 Da, K +28.03 Da, | 2525.744629 | 2 | 1081.469971 | 1080.986976 |
| ASGGGVPTDEEQATGLER      | P19536 | 0          | N-term +28.03 Da,              | 2528.872559 | 2 | 901.4299927 | 901.4317748 |
| DEKEEDEEEESPGQAKDEL     | P14211 | 0.03015764 | N-term +28.03 Da, K +28.03 Da, | 2531.137939 | 2 | 1081.969971 | 1080.986976 |
| YPSPPVNTVK              | Q8VCT4 | 0          | N-term +28.03 Da, K +28.03 Da, | 2531.517334 | 2 | 672.382019  | 672.382106  |
| AVAESAVVSSPKDR          | Q91VA0 | 0          | N-term +28.03 Da, K +28.03 Da, | 2532.939209 | 2 | 793.9099731 | 793.9228562 |
| VPNDSSFQIVKNPR          | Q61176 | 0          | N-term +28.03 Da, K +28.03 Da, | 2535.349854 | 3 | 552.9699707 | 552.9737807 |
| VSGGAIALGHPLGGSGSR      | Q8BWT1 | 0          | N-term +28.03 Da,              | 2536.598877 | 3 | 540.9660034 | 540.9653967 |
| DGTGGDAAAPGAAGTQAELEPHR | Q9D0F3 | 0          | N-term +28.03 Da,              | 2544.043457 | 2 | 1023.98999  | 1024.49323  |
| TLYQKDSQGNLFR           | Q91Y97 | 0.0433925  | N-term +28.03 Da, K +28.03 Da, | 2550.466064 | 2 | 813.4400024 | 813.4359333 |
| LNDFASAVR               | P12787 | 0.03192935 | N-term +28.03 Da,              | 2551.984131 | 2 | 510.7799988 | 510.7772761 |
| GLVGEIIR                | P15532 | 0.00089606 | N-term +28.03 Da, K +28.03 Da, | 2552.434082 | 3 | 347.5700073 | 347.565733  |
| GVKLEVFR                | PODJE0 | 0.00341588 | N-term +28.03 Da, K +28.03 Da, | 2570.734375 | 3 | 335.5499878 | 335.2148116 |
| SGGTTMYPGIADR           | P60710 | 0          | N-term +28.03 Da,              | 2574.852539 | 2 | 677.3228149 | 677.3270052 |
| SCAEFVSGSQLR            | Q9DCX2 | 0          | N-term +28.03 Da, C +57.02 Da, | 2576.850098 | 2 | 684.8300171 | 684.8324548 |
| SEFLKAASNLR             | P27773 | 0          | N-term +28.03 Da, K +28.03 Da, | 2577.954346 | 3 | 431.2511902 | 431.2504738 |
| MKLTDVSLR               | Q8BFQ4 | 0          | N-term +28.03 Da, K +28.03 Da, | 2581.137695 | 3 | 373.5599976 | 373.55825   |
| TSVATKKTEQGPPSSEYIFER   | P29758 | 0          | N-term +28.03 Da, K +28.03 Da, | 2583.676514 | 4 | 611.0800171 | 610.5746061 |
| TSVATKKTEQGPPSSEYIFER   | P29758 | 0          | N-term +28.03 Da, K +28.03 Da, | 2586.921143 | 3 | 814.4299927 | 813.763716  |
| SAGSAAAGPVEAAIR         | Q9D8S9 | 0          | N-term +28.03 Da,              | 2592.890869 | 2 | 678.8699951 | 678.367519  |
| TKFLEEHPGGEEVLR         | P56395 | 0.03515889 | N-term +28.03 Da, K +28.03 Da, | 2595.042236 | 4 | 450.2399902 | 449.993991  |
| GKGILAADESVGTMGNR       | Q91Y97 | 0          | N-term +28.03 Da, K +28.03 Da, | 2604.193359 | 2 | 866.960022  | 866.4565403 |
| GKGILAADESVGTMGNR       | Q91Y97 | 0.00705329 | N-term +28.03 Da, K +28.03 Da, | 2609.160889 | 2 | 866.4500122 | 866.4565403 |
| SAGSAAAGPVEAAIR         | Q9D8S9 | 0          | N-term +28.03 Da,              | 2612.755859 | 2 | 679.3699951 | 678.367519  |
| GVTVKDQVQQEFVR          | Q9CZX8 | 0.00344531 | N-term +28.03 Da, K +28.03 Da, | 2616.071777 | 2 | 838.460022  | 837.9623154 |
| VMEKPSPLLVGR            | P97379 | 0.00696594 | N-term +28.03 Da, K +28.03 Da, | 2618.655029 | 3 | 461.6099854 | 461.2793759 |
| SEEVEKAVETIR            | Q80XN0 | 0.00348736 | N-term +28.03 Da, K +28.03 Da, | 2621.383789 | 3 | 482.5999756 | 482.5997206 |
| TTMYPGIADR              | P60710 | 0.01651113 | N-term +28.03 Da,              | 2629.419434 | 2 | 576.7894287 | 576.7895266 |
| QLTSNPENTVFDADR         | P20029 | 0.00350263 | N-term +28.03 Da, K +28.03 Da, | 2654.256348 | 3 | 592.9799805 | 592.6477338 |
| FLEEHPGGEEVLR           | P56395 | 0.00352113 | N-term +28.03 Da,              | 2656.166504 | 2 | 770.3900146 | 770.3937341 |
| LLHVTDTGVGMTR           | P08113 | 0.00574713 | N-term +28.03 Da,              | 2656.96167  | 3 | 476.5899963 | 476.5940235 |
| SSIVVSGTPIR             | P35505 | 0.01060606 | N-term +28.03 Da,              | 2657.29541  | 2 | 572.3400269 | 572.3402408 |
| EVKCDMEVSCPEGYTCR       | P28798 | 0          | N-term +28.03 Da, C +57.02 Da, | 2657.375732 | 3 | 779.3222046 | 779.3209906 |
| ADDDYDEPTDSLDR          | Q8K0E8 | 0          | N-term +28.03 Da,              | 2690.059082 | 2 | 863.3599854 | 863.3579416 |
| DEVFYSR                 | P11725 | 0.01445087 | N-term +28.03 Da,              | 2693.599609 | 2 | 520.7600098 | 520.7560095 |
| VVFDPTYDR               | P16015 | 0.03028217 | N-term +28.03 Da,              | 2700.643066 | 2 | 579.2800293 | 579.2773066 |
| LTITYGPK                | P12710 | 0.0106141  | N-term +28.03 Da, K +28.03 Da, | 2708.015137 | 2 | 474.7919006 | 474.7918631 |
| VLSGEDKSNIK             | P01942 | 0.00500835 | N-term +28.03 Da, K +28.03 Da, | 2709.087891 | 3 | 424.9100037 | 425.2502512 |



|                       |        |            |                                |             |   |             |             |
|-----------------------|--------|------------|--------------------------------|-------------|---|-------------|-------------|
| NPEGSSFDLADR          | O09164 | 0          | N-term +28.03 Da,              | 2716.020264 | 2 | 668.3099976 | 668.3124098 |
| APPLTLDGKDR           | Q9CR21 | 0.00350877 | N-term +28.03 Da, K +28.03 Da, | 2718.047607 | 3 | 451.2702026 | 451.2696456 |
| THISRSQNNQYLVR        | O35066 | 0.00089206 | N-term +28.03 Da,              | 2725.808838 | 3 | 586.6567383 | 586.6517007 |
| AHGSVVKSEDYAFPTYADR   | P19783 | 0          | N-term +28.03 Da, K +28.03 Da, | 2730.223877 | 3 | 724.0300293 | 723.6918913 |
| NPVDDICIAKPR          | P32261 | 0          | N-term +28.03 Da, K +28.03 Da, | 2731.490479 | 3 | 485.2663574 | 485.2659068 |
| AHGSVVKSEDYAFPTYADR   | P19783 | 0          | N-term +28.03 Da, K +28.03 Da, | 2733.544678 | 2 | 1086.040039 | 1085.034199 |
| LPKNWDWR              | Q9WUU7 | 0.02242467 | N-term +28.03 Da, K +28.03 Da, | 2736.498779 | 3 | 390.8853149 | 390.8854656 |
| TELFYKGIR             | Q03265 | 0.00840979 | N-term +28.03 Da, K +28.03 Da, | 2742.35083  | 3 | 395.2399902 | 394.9008931 |
| TSNINDFSAGVANR        | P15105 | 0          | N-term +28.03 Da,              | 2749.673828 | 2 | 747.8699951 | 747.3707905 |
| MASGGGVPTDEEQATGLER   | P19536 | 0          | N-term +28.03 Da,              | 2749.852295 | 2 | 967.4500122 | 966.9520173 |
| NPVDDICIAKPR          | P32261 | 0          | N-term +28.03 Da, K +28.03 Da, | 2754.717529 | 2 | 727.394104  | 727.395222  |
| NTNEEAGDGTATTATVLR    | P63038 | 0          | N-term +28.03 Da,              | 2755.200195 | 2 | 924.4400024 | 924.9503319 |
| GTITTKELGTVMR         | P62204 | 0.00348129 | N-term +28.03 Da, K +28.03 Da, | 2757.989258 | 3 | 488.2799988 | 488.2814456 |
| SSEAPPLVNEDVKR        | Q91YQ5 | 0.00338123 | N-term +28.03 Da, K +28.03 Da, | 2760.729492 | 2 | 799.4299927 | 798.9332238 |
| SSEAPPLVNEDVKR        | Q91YQ5 | 0          | N-term +28.03 Da, K +28.03 Da, | 2762.338623 | 2 | 798.9199829 | 798.9332238 |
| NPVDDICIAKPR          | P32261 | 0          | N-term +28.03 Da, K +28.03 Da, | 2763.042236 | 3 | 485.2661743 | 485.2659068 |
| SDPVVIVSAAR           | Q8CAY6 | 0          | N-term +28.03 Da,              | 2769.023926 | 2 | 571.3330688 | 571.3324158 |
| VLSHGGQDYLVGNR        | P10648 | 0          | N-term +28.03 Da, K +28.03 Da, | 2772.298096 | 3 | 548.2999878 | 547.973892  |
| GTLDPVEKALR           | P63017 | 0          | N-term +28.03 Da, K +28.03 Da, | 2772.879395 | 3 | 419.25      | 418.9187241 |
| VHLTDAEKSAVSC         | P02089 | 0.0034632  | N-term +28.03 Da, C +57.02 Da, | 2785.421631 | 2 | 736.8599854 | 736.8743199 |
| SGYFHPLLR             | P10518 | 0.00693909 | N-term +28.03 Da,              | 2789.873047 | 3 | 373.2097778 | 373.2099493 |
| AREATQAVLDKPELSSDASTR | P50544 | 0.01177336 | N-term +28.03 Da, K +28.03 Da, | 2792.765137 | 4 | 601.0599976 | 601.3185003 |
| TNKETTIQGLDGLSER      | Q91Y97 | 0          | N-term +28.03 Da, K +28.03 Da, | 2798.395996 | 3 | 606.65802   | 606.6582988 |
| APGSWEGFWSLPGR        | H3BJG9 | 0.01644031 | N-term +28.03 Da,              | 2803.712158 | 3 | 525.2700195 | 525.5965329 |
| VEFEKFLKTR            | P30115 | 0          | N-term +28.03 Da, K +28.03 Da, | 2815.182129 | 4 | 378.2200012 | 378.2223446 |
| SQEGQNPSLSSIR         | Q8C196 | 0.00709779 | N-term +28.03 Da,              | 2815.978027 | 2 | 716.3699951 | 715.865341  |
| TEESDLAQYGVV          | P09103 | 0          | N-term +28.03 Da,              | 2817.105713 | 2 | 762.3699951 | 762.3704565 |
| EPDLSSDIKEK           | P11591 | 0          | N-term +28.03 Da, K +28.03 Da, | 2818.31665  | 2 | 672.8699951 | 672.8664865 |
| ADIVENQVMDTR          | P10649 | 0          | N-term +28.03 Da,              | 2821.637939 | 2 | 709.8505249 | 709.8508448 |
| TPGVAADLSHIETR        | P08249 | 0          | N-term +28.03 Da,              | 2823.174561 | 3 | 498.9348755 | 498.9352146 |
| TEVKIDEFPR            | Q8CAY6 | 0          | N-term +28.03 Da, K +28.03 Da, | 2832.249023 | 3 | 430.5742493 | 430.5748461 |
| TPEADKIFLER           | P26443 | 0          | N-term +28.03 Da, K +28.03 Da, | 2848.627197 | 3 | 458.9200134 | 458.9257675 |
| TFASQVTLEGDKVKVER     | Q9DCW4 | 0          | N-term +28.03 Da, K +28.03 Da, | 2848.866455 | 4 | 499.0400085 | 498.5347519 |
| TFEESFQKALR           | Q8C196 | 0          | N-term +28.03 Da, K +28.03 Da, | 2854.646729 | 3 | 471.2600098 | 471.2575172 |
| EAPNFEANTTIGR         | O08709 | 0          | N-term +28.03 Da,              | 2857.686035 | 2 | 725.3800049 | 724.362434  |
| LCAATATILDKPEDR       | O35215 | 0.00770416 | N-term +28.03 Da, K +28.03 Da, | 2860.640381 | 3 | 577.3099976 | 577.309953  |
| TTKAPAAIGPYSQAVQVDR   | P52760 | 0          | N-term +28.03 Da, K +28.03 Da, | 2862.86377  | 3 | 677.039978  | 677.040743  |
| EAPNFEANTTIGR         | O08709 | 0.00091241 | N-term +28.03 Da,              | 2863.249512 | 2 | 724.3599854 | 724.362434  |
| TMKLELAQYR            | Q03265 | 0          | N-term +28.03 Da, K +28.03 Da, | 2863.604248 | 3 | 436.9200134 | 436.9163261 |
| TTKAPAAIGPYSQAVQVDR   | P52760 | 0          | N-term +28.03 Da, K +28.03 Da, | 2865.169922 | 3 | 677.041687  | 677.040743  |

|                       |        |            |                                |             |   |             |             |
|-----------------------|--------|------------|--------------------------------|-------------|---|-------------|-------------|
| GEPVSLGSLR            | P11352 | 0.01173021 | N-term +28.03 Da,              | 2865.41626  | 2 | 521.7999878 | 521.7982087 |
| SPESTSEVECGDFYNSGDR   | Q91VA0 | 0          | N-term +28.03 Da, C +57.02 Da, | 2870.814697 | 2 | 1082.939941 | 1082.442212 |
| FNKEVMYAVYVDQHDVFSKG  | G3X9K3 | 0.04749679 | N-term +28.03 Da, K +28.03 Da, | 2871.709229 | 3 | 754.3800049 | 754.7015103 |
| AEGQVLVLDGR           | P19253 | 0          | N-term +28.03 Da,              | 2872.892822 | 2 | 592.8354492 | 592.8353228 |
| GDSASKVISAEEALPGR     | Q9D6Y7 | 0          | N-term +28.03 Da, K +28.03 Da, | 2873.208496 | 2 | 871.9699707 | 871.9677954 |
| DPVPTPGPASAQLR        | Q920L1 | 0.03135651 | N-term +28.03 Da,              | 2875.751465 | 2 | 717.4000244 | 717.3909941 |
| TKAPAAIGPYSQAVQVDR    | P52760 | 0          | N-term +28.03 Da, K +28.03 Da, | 2876.903809 | 3 | 643.3590698 | 643.3581833 |
| SEVPGAAAEGPGGSGVGLGDR | Q9EP72 | 0          | N-term +28.03 Da,              | 2878.793213 | 2 | 934.9699707 | 934.4608664 |
| QKTGTAEMSSILEER       | Q03265 | 0.01375815 | N-term +28.03 Da, K +28.03 Da, | 2879.675293 | 3 | 579.2999878 | 579.3013463 |
| TPEADKIFLER           | P26443 | 0.04364821 | N-term +28.03 Da, K +28.03 Da, | 2881.550537 | 3 | 458.9266052 | 458.9257675 |
| TKAPAAIGPYSQAVQVDR    | P52760 | 0.00842912 | N-term +28.03 Da, K +28.03 Da, | 2882.21167  | 2 | 964.5300293 | 964.5336367 |
| QKTGTAEMSSILEER       | Q03265 | 0.00495458 | N-term +28.03 Da, K +28.03 Da, | 2882.919678 | 2 | 868.4484863 | 868.4483813 |
| TFIAIKPDGVQR          | P15532 | 0          | N-term +28.03 Da, K +28.03 Da, | 2886.324463 | 3 | 467.9500122 | 467.6135236 |
| AVIDDATKEVVYR         | Q9D2G2 | 0          | N-term +28.03 Da, K +28.03 Da, | 2889.1521   | 3 | 512.289978  | 512.2873653 |
| GGEPVSLGSLR           | P11352 | 0          | N-term +28.03 Da,              | 2891.141357 | 2 | 550.8099976 | 550.3089407 |
| SEVPGAAAEGPGGSGVGLGDR | Q9EP72 | 0          | N-term +28.03 Da,              | 2893.814941 | 2 | 935.4699707 | 934.4608664 |
| GFPEAASSFR            | P32020 | 0          | N-term +28.03 Da,              | 2894.410889 | 2 | 548.7738037 | 548.7747336 |
| RPPLGFLNPR            | O89023 | 0.0033557  | N-term +28.03 Da,              | 2898.562256 | 3 | 398.9080811 | 398.9083817 |
| TKDAGQISGLNVLR        | P38647 | 0.00697134 | N-term +28.03 Da, K +28.03 Da, | 2906.789795 | 3 | 510.2999878 | 509.966626  |
| ATEESDLAQQYGVR        | P09103 | 0          | N-term +28.03 Da,              | 2910.698486 | 2 | 797.8800049 | 797.8890136 |
| ANLEKAQSELSGADEAAR    | Q9D3D9 | 0          | N-term +28.03 Da, K +28.03 Da, | 2915.117676 | 3 | 663.0064697 | 663.0078796 |
| TMAEETAPAVLER         | Q64374 | 0          | N-term +28.03 Da,              | 2918.022217 | 2 | 723.3699951 | 723.3688704 |
| LEEDNVLVLKK           | P09103 | 0          | N-term +28.03 Da, K +28.03 Da, | 2919.061523 | 3 | 504.9700012 | 504.9676327 |
| VLSGEDKSNIAAWGKIGGH   | P01942 | 0.01515152 | N-term +28.03 Da, K +28.03 Da, | 2919.137207 | 4 | 545.5599976 | 545.561301  |
| LTPHYLTKQDVER         | Q9DBG6 | 0          | N-term +28.03 Da, K +28.03 Da, | 2920.693604 | 4 | 439.9899902 | 439.9952622 |
| SQQSASGAPVLLR         | Q9DCM0 | 0          | N-term +28.03 Da,              | 2924.913818 | 2 | 670.8699951 | 671.3778865 |
| APPLTLDGIKDR          | Q9CR21 | 0          | N-term +28.03 Da, K +28.03 Da, | 2929.453125 | 3 | 451.2693481 | 451.2696456 |
| CDILIPAASEKQLTKSNAPR  | P26443 | 0          | N-term +28.03 Da, K +28.03 Da, | 2929.528564 | 4 | 574.8200073 | 574.8227923 |
| VLSGEDKSNIAAWGKIGGH   | P01942 | 0          | N-term +28.03 Da, K +28.03 Da, | 2931.208008 | 3 | 727.078125  | 727.0793092 |
| TLKGLNSDSVTEETLR      | Q8C196 | 0          | N-term +28.03 Da, K +28.03 Da, | 2931.520508 | 3 | 607         | 606.9984325 |
| TKLSMTNDPLEAAR        | P11725 | 0.04795396 | N-term +28.03 Da, K +28.03 Da, | 2937.98584  | 3 | 534.960022  | 534.9555099 |
| NCLSGQAEFDKAAEEVKR    | F6WUQ1 | 0          | N-term +28.03 Da, K +28.03 Da, | 2940.157471 | 3 | 712.3699951 | 712.6966479 |
| MWVKLLFQAEAAEREERKR   | B0R015 | 0.03984064 | N-term +28.03 Da, K +28.03 Da, | 2942.858643 | 3 | 845.460022  | 844.7966963 |
| SDAPPLTLDGIKDR        | Q9CR21 | 0          | N-term +28.03 Da, K +28.03 Da, | 2952.311035 | 3 | 518.6199951 | 518.6226367 |
| NCLSGQAEFDKAAEEVKR    | F6WUQ1 | 0.00339847 | N-term +28.03 Da, K +28.03 Da, | 2952.475342 | 2 | 1068.050049 | 1068.541334 |
| TTAIAEAWAR            | P05213 | 0.01239971 | N-term +28.03 Da,              | 2956.440186 | 2 | 559.3009033 | 559.3036582 |
| TGGEPVSLGSLR          | P11352 | 0.003367   | N-term +28.03 Da,              | 2958.825439 | 2 | 600.8300171 | 600.8327803 |
| SDAPPLTLDGIKDR        | Q9CR21 | 0          | N-term +28.03 Da, K +28.03 Da, | 2959.929688 | 2 | 777.4299927 | 777.4303168 |
| SEVASSLVLER           | Q9CYR0 | 0          | N-term +28.03 Da,              | 2961.127686 | 2 | 609.3397217 | 609.3404384 |
| APDPVPTPGPASAQLR      | Q920L1 | 0.02503477 | N-term +28.03 Da,              | 2969.995361 | 2 | 801.4299927 | 801.4359333 |

|                        |        |            |                                |             |   |             |             |
|------------------------|--------|------------|--------------------------------|-------------|---|-------------|-------------|
| NCLSGQAEFDKAAEEVKR     | F6WUQ1 | 0          | N-term +28.03 Da, K +28.03 Da, | 2971.516846 | 3 | 712.3699951 | 712.6966479 |
| TGEVPPVAIR             | P27773 | 0          | N-term +28.03 Da,              | 2973.766602 | 2 | 534.8233032 | 534.8242263 |
| SSDAQWLTAEEER          | Q9CZL5 | 0          | N-term +28.03 Da,              | 2978.149658 | 2 | 711.3400269 | 710.8387919 |
| SDAPPLTLDGIKDR         | Q9CR21 | 0          | N-term +28.03 Da, K +28.03 Da, | 2983.870117 | 3 | 518.960022  | 518.6226367 |
| LEGVGHFFR              | P29391 | 0.00353982 | N-term +28.03 Da,              | 2989.452148 | 3 | 364.2000122 | 363.8661826 |
| LDAATQQLLSR            | Q03265 | 0.00337838 | N-term +28.03 Da,              | 2998.77417  | 2 | 622.3532104 | 622.3538799 |
| SEVSALLGR              | P56480 | 0.01310998 | N-term +28.03 Da,              | 3016.973633 | 2 | 480.2798767 | 480.2796516 |
| TGPAHWELLQR            | Q9JHW2 | 0          | N-term +28.03 Da,              | 3018.859375 | 3 | 445.9100037 | 445.9104514 |
| GPQNPQQHR              | Q7TSH8 | 0.01180812 | N-term +28.03 Da,              | 3024.352295 | 2 | 544.789978  | 545.2810486 |
| ALVDHGEEFAGR           | P56654 | 0.04356307 | N-term +28.03 Da,              | 3025.081055 | 2 | 664.3400269 | 664.8333118 |
| SGPLLQLGR              | Q9ZOM5 | 0.03986711 | N-term +28.03 Da,              | 3027.054688 | 2 | 484.7999878 | 484.7980111 |
| EIDGGLETLR             | Q9DCW4 | 0.00845503 | N-term +28.03 Da,              | 3032.876953 | 2 | 565.8099976 | 565.8062312 |
| LKEEELQDYQR            | Q6AW69 | 0.0485623  | N-term +28.03 Da, K +28.03 Da, | 3044.318848 | 2 | 754.8900146 | 753.8935671 |
| TSVATKKTEQGPPSSEYIFR   | P29758 | 0          | N-term +28.03 Da, K +28.03 Da, | 3052.041504 | 3 | 813.7600098 | 813.763716  |
| SIAKEGFEEKISGANPVEIR   | P63038 | 0.00089047 | N-term +28.03 Da, K +28.03 Da, | 3052.351074 | 4 | 572.3400269 | 572.0861461 |
| TIQGLDGLSER            | Q91Y97 | 0.04801536 | N-term +28.03 Da,              | 3060.430664 | 2 | 608.8306274 | 608.8302378 |
| TKLPWDAVGR             | P54869 | 0          | N-term +28.03 Da, K +28.03 Da, | 3063.604248 | 3 | 400.5700073 | 400.2362757 |
| EILELAGNAAR            | P22752 | 0.03024055 | N-term +28.03 Da,              | 3071.011719 | 2 | 592.8341675 | 592.8353228 |
| PNQSSPPGSENVVPR        | Q9ROA0 | 0.04350649 | N-term +28.03 Da,              | 3072.641602 | 2 | 844.9400024 | 845.4313798 |
| SLVFPEAENR             | P11725 | 0.03928096 | N-term +28.03 Da,              | 3075.012207 | 2 | 595.8099976 | 595.3142232 |
| LLLPGELAKH             | P10853 | 0.043222   | N-term +28.03 Da, K +28.03 Da, | 3081.977539 | 3 | 382.9100037 | 382.9130214 |
| GKNEEILNSLKYVR         | P11352 | 0          | N-term +28.03 Da, K +28.03 Da, | 3108.868896 | 4 | 437.7600098 | 437.508271  |
| TPPEADKIFLER           | P26443 | 0          | N-term +28.03 Da, K +28.03 Da, | 3109.452881 | 3 | 492.6081848 | 492.6083273 |
| YPSPPVNTVTKGKVLGK      | Q8VCT4 | 0          | N-term +28.03 Da, K +28.03 Da, | 3117.083984 | 4 | 496.5599976 | 496.3066747 |
| DELSEEDKLTVSR          | P56480 | 0          | N-term +28.03 Da, K +28.03 Da, | 3118.325684 | 2 | 788.4099731 | 788.9068722 |
| SDAPPLTLDGIKDR         | Q9CR21 | 0          | N-term +28.03 Da, K +28.03 Da, | 3122.680908 | 3 | 518.6199951 | 518.6226367 |
| SDAPPLTLDGIKDR         | Q9CR21 | 0          | N-term +28.03 Da, K +28.03 Da, | 3122.885498 | 3 | 519.289978  | 518.6226367 |
| TPALIALR               | P70694 | 0.02501737 | N-term +28.03 Da,              | 3132.844238 | 2 | 441.7900085 | 441.7921971 |
| AGKPVLYHFDGR           | P30115 | 0          | N-term +28.03 Da, K +28.03 Da, | 3139.689697 | 3 | 472.5899963 | 472.5979848 |
| TAYIDFAR               | P17751 | 0.04325033 | N-term +28.03 Da,              | 3141.180176 | 2 | 492.7600098 | 492.7610945 |
| TLADAEGDVFR            | Q9EQ20 | 0          | N-term +28.03 Da,              | 3142.52002  | 2 | 611.8099976 | 611.3091382 |
| ETGQVVGFBHQPGSIR       | Q9DBT9 | 0.00338983 | N-term +28.03 Da,              | 3143.59668  | 2 | 820.9199829 | 820.4311822 |
| TEDPETLQAQFR           | Q8BK48 | 0          | N-term +28.03 Da,              | 3145.559082 | 2 | 731.8599854 | 731.862267  |
| TKYPQLLSGIR            | P50247 | 0.02969613 | N-term +28.03 Da, K +28.03 Da, | 3148.176514 | 3 | 444.9400024 | 444.6063689 |
| GTLDNPSLDETAYER        | O35943 | 0          | N-term +28.03 Da,              | 3154.068604 | 2 | 898.4199829 | 898.4208758 |
| STSSMGLTPKQKIVIVEGPR   | P38060 | 0          | N-term +28.03 Da, K +28.03 Da, | 3158.700195 | 4 | 550.5700073 | 550.3198852 |
| VKIVTVKTQAYPDQKPGTSGLR | Q9D0F9 | 0.00345423 | N-term +28.03 Da, K +28.03 Da, | 3161.670898 | 4 | 625.3699951 | 625.373078  |
| AGLQFPVGR              | P0C0S6 | 0.00700935 | N-term +28.03 Da,              | 3161.904297 | 2 | 486.7799988 | 486.7849036 |
| VAPEEHPVLLTEAPLNPKANR  | P60710 | 0          | N-term +28.03 Da, K +28.03 Da, | 3171.561523 | 4 | 588.8331909 | 588.5824993 |
| TCFSTEGPNLVTR          | P07724 | 0.04319372 | N-term +28.03 Da, C +57.02 Da, | 3173.535889 | 2 | 756.3699951 | 755.3719444 |

|                        |        |            |                                |             |   |              |             |
|------------------------|--------|------------|--------------------------------|-------------|---|--------------|-------------|
| SVVAGGPEVTLTPER        | Q8CIM3 | 0          | N-term +28.03 Da,              | 3174.913574 | 2 | 770.4199829  | 770.4224917 |
| LLADAVAVTMGPKGR        | P63038 | 0          | N-term +28.03 Da, K +28.03 Da, | 3177.643066 | 3 | 518.9699707  | 518.9727233 |
| GPTTPEADKIFLER         | P26443 | 0          | N-term +28.03 Da, K +28.03 Da, | 3178.639893 | 3 | 543.9699707  | 543.9664034 |
| SDAPPLTLDGIKDR         | Q9CR21 | 0          | N-term +28.03 Da, K +28.03 Da, | 3182.574463 | 3 | 518.6223145  | 518.6226367 |
| SDAPPLTLDGIKDR         | Q9CR21 | 0          | N-term +28.03 Da, K +28.03 Da, | 3183.751709 | 2 | 777.9299927  | 777.4303168 |
| GPTTPEADKIFLER         | P26443 | 0          | N-term +28.03 Da, K +28.03 Da, | 3185.305664 | 2 | 815.4400024  | 815.4459668 |
| PKVTQPEVDTPPLGR        | Q63880 | 0          | N-term +28.03 Da, K +28.03 Da, | 3190.727783 | 2 | 796.9400024  | 796.9539588 |
| TAEMSSILEER            | Q03265 | 0          | N-term +28.03 Da,              | 3192.919922 | 2 | 647.8200073  | 647.3213887 |
| TYIIGELHPDDR           | P56395 | 0          | N-term +28.03 Da,              | 3193.997314 | 3 | 486.25       | 486.2525435 |
| FAVTVAPPGAR            | Q8VEK3 | 0.0177305  | N-term +28.03 Da,              | 3203.915771 | 2 | 557.3200073  | 557.3243932 |
| GPTTPEADKIFLER         | P26443 | 0          | N-term +28.03 Da, K +28.03 Da, | 3209.248047 | 3 | 543.9664307  | 543.9664034 |
| LSLVVHGPGDIR           | Q64442 | 0          | N-term +28.03 Da,              | 3210.226074 | 3 | 430.92219666 | 430.9224685 |
| SVVAGGPEVTLTPER        | Q8CIM3 | 0          | N-term +28.03 Da,              | 3211.485596 | 2 | 770.4199829  | 770.4224917 |
| ALEGVGHFFR             | P29391 | 0          | N-term +28.03 Da,              | 3212.790039 | 3 | 387.5400085  | 387.5452206 |
| MKFNPFVTSR             | P61255 | 0          | N-term +28.03 Da, K +28.03 Da, | 3213.281006 | 3 | 467.25       | 466.5797141 |
| SDAPPLTLDGIKDR         | Q9CR21 | 0          | N-term +28.03 Da, K +28.03 Da, | 3213.824219 | 3 | 518.6221924  | 518.6226367 |
| SDAPPLTLDGIKDR         | Q9CR21 | 0          | N-term +28.03 Da, K +28.03 Da, | 3215.021729 | 2 | 777.9299927  | 777.4303168 |
| AAGVEFEKFLKTR          | P30115 | 0          | N-term +28.03 Da, K +28.03 Da, | 3215.934082 | 4 | 428.25       | 427.9962677 |
| AHGSVKSEDYAFPTYADR     | P19783 | 0.00567721 | N-term +28.03 Da, K +28.03 Da, | 3216.293701 | 3 | 723.3499756  | 723.6918913 |
| PVAVALDTKGPEIR         | P52480 | 0          | N-term +28.03 Da, K +28.03 Da, | 3220.307861 | 3 | 507.9700012  | 507.9714884 |
| PKVTQPEVDTPPLGR        | Q63880 | 0          | N-term +28.03 Da, K +28.03 Da, | 3221.384766 | 2 | 796.9400024  | 796.9539588 |
| TEDIITAIR              | P49429 | 0.01310044 | N-term +28.03 Da,              | 3221.615234 | 2 | 530.3051758  | 530.3058667 |
| TMANPIIGNGGAPDTPAR     | Q8C196 | 0.04108681 | N-term +28.03 Da,              | 3227.684082 | 2 | 893.4400024  | 892.9516223 |
| AVPIAQKSEFQSLNEALMR    | Q9JIQ3 | 0          | N-term +28.03 Da, K +28.03 Da, | 3227.920898 | 3 | 743.0700073  | 742.4034644 |
| GEKAHPLFTFLR           | P11352 | 0.01119403 | N-term +28.03 Da, K +28.03 Da, | 3232.999268 | 3 | 491.2900085  | 491.2855183 |
| HVFGESDELIGQKVSH       | P17751 | 0.0064     | N-term +28.03 Da, K +28.03 Da, | 3241.871338 | 2 | 919.960022   | 919.4757874 |
| ISFHLPVNSR             | Q9D1D4 | 0.00570497 | N-term +28.03 Da,              | 3242.190918 | 3 | 399.8999939  | 399.896142  |
| AHGSVKSEDYAFPTYADR     | P19783 | 0          | N-term +28.03 Da, K +28.03 Da, | 3242.574951 | 2 | 1084.530029  | 1085.034199 |
| SDAPPLTLDGIKDR         | Q9CR21 | 0.00090662 | N-term +28.03 Da, K +28.03 Da, | 3244.727539 | 3 | 518.6199951  | 518.6226367 |
| TNVGIMFR               | P35505 | 0.00837139 | N-term +28.03 Da,              | 3254.328613 | 2 | 483.769989   | 483.2654894 |
| IGHGAEYGAELER          | P01942 | 0          | N-term +28.03 Da,              | 3259.093506 | 2 | 780.3900146  | 779.3864406 |
| TIAMDGTEGLVR           | P56480 | 0          | N-term +28.03 Da,              | 3259.395264 | 2 | 646.3400269  | 645.8397483 |
| NVLASEPEIPKGR          | Q9WTP6 | 0          | N-term +28.03 Da, K +28.03 Da, | 3264.026611 | 3 | 527.3099976  | 526.9786431 |
| NLYKGLEAFR             | P54869 | 0.00091324 | N-term +28.03 Da, K +28.03 Da, | 3264.12085  | 3 | 422.9100037  | 422.9116808 |
| NLYKGLEAFR             | P54869 | 0.038      | N-term +28.03 Da, K +28.03 Da, | 3265.615234 | 2 | 634.3599854  | 633.8638829 |
| TEIIAFSDR              | P35700 | 0.01641685 | N-term +28.03 Da,              | 3271.423584 | 2 | 540.289978   | 540.2902166 |
| GVQVETISPGDGR          | P26883 | 0.00562701 | N-term +28.03 Da,              | 3284.416504 | 2 | 671.3400269  | 671.8517019 |
| DNIQGITKPAIR           | P62806 | 0.00567261 | N-term +28.03 Da, K +28.03 Da, | 3293.242676 | 2 | 690.9000244  | 691.4117291 |
| VGVKPVGSDPDFQPELSGAGSR | Q8CDN6 | 0          | N-term +28.03 Da, K +28.03 Da, | 3303.147949 | 3 | 752.7299805  | 752.3937341 |
| TASGLPAQGLCLR          | Q9CRB3 | 0.0137781  | N-term +28.03 Da, C +57.02 Da, | 3304.572021 | 2 | 686.8699951  | 686.3742894 |

|                          |        |            |                                |             |   |             |             |
|--------------------------|--------|------------|--------------------------------|-------------|---|-------------|-------------|
| LEPTVIDEVR               | P05213 | 0.00346921 | N-term +28.03 Da,              | 3308.2854   | 2 | 599.8400269 | 599.8375314 |
| SIYHPSLLPR               | Q8K009 | 0          | N-term +28.03 Da,              | 3308.436523 | 3 | 441.9312134 | 441.9309638 |
| TILAEGLHFR               | O35129 | 0          | N-term +28.03 Da,              | 3313.95166  | 3 | 395.5599976 | 395.5643924 |
| KFGKHGGTIPVVPTAEFQDR     | P26443 | 0.00089686 | N-term +28.03 Da, K +28.03 Da, | 3315.891602 | 4 | 567.8099976 | 567.8179383 |
| TSVESIMATEDR             | Q8C196 | 0.00089366 | N-term +28.03 Da,              | 3320.546631 | 2 | 683.8300171 | 683.8295783 |
| NDEELNLLGR               | P22752 | 0          | N-term +28.03 Da, K +28.03 Da, | 3325.320557 | 3 | 452.9200134 | 452.9209052 |
| AGAESDGGQFQFTGIKKY       | Q78IK2 | 0          | N-term +28.03 Da, K +28.03 Da, | 3333.560547 | 3 | 644.3400269 | 644.3351559 |
| SADVDSVVSGLTR            | Q8CHT0 | 0          | N-term +28.03 Da,              | 3334.75293  | 2 | 668.3499756 | 667.3515349 |
| DDEVVDVDTVEEDLGKSR       | P08113 | 0          | N-term +28.03 Da, K +28.03 Da, | 3340.254883 | 3 | 678.6500244 | 678.6551722 |
| SSADVDSVVSGLTR           | Q8CHT0 | 0          | N-term +28.03 Da,              | 3341.623291 | 2 | 710.3635254 | 710.8675495 |
| DDEVVDVDTVEEDLGKSR       | P08113 | 0          | N-term +28.03 Da, K +28.03 Da, | 3346.292725 | 2 | 1017.969971 | 1017.47912  |
| MKVFTGTGPLPAEGR          | Q91Z53 | 0          | N-term +28.03 Da, K +28.03 Da, | 3349.231934 | 3 | 519.9650879 | 519.9655686 |
| DPSPEEESYSWDWGLR         | Q99P27 | 0.007109   | N-term +28.03 Da, K +28.03 Da, | 3358.59375  | 3 | 650.9699707 | 650.9741758 |
| DLSSDLSTASKIVK           | Q61838 | 0          | N-term +28.03 Da, K +28.03 Da, | 3363.855225 | 3 | 545.6461182 | 545.6452188 |
| MEKTELIQKAKLAEQAER       | P68254 | 0          | N-term +28.03 Da, K +28.03 Da, | 3364.512451 | 2 | 1115.119995 | 1114.637777 |
| TVGGVMTKLIPR             | P20029 | 0          | N-term +28.03 Da, K +28.03 Da, | 3365.245361 | 3 | 443.2799988 | 443.2758542 |
| DPAINYLQR                | Q9QXD6 | 0.00351494 | N-term +28.03 Da,              | 3368.958984 | 2 | 623.8200073 | 623.8249553 |
| TTIQGLDGLSER             | Q91Y97 | 0          | N-term +28.03 Da,              | 3371.047119 | 2 | 659.354187  | 659.3540774 |
| GVPAFFR                  | Q3V132 | 0.01193139 | N-term +28.03 Da,              | 3374.901367 | 2 | 411.2362976 | 411.2370574 |
| GVPVFKFPR                | Q8R0Y6 | 0          | N-term +28.03 Da, K +28.03 Da, | 3382.395752 | 3 | 368.230011  | 368.230573  |
| EFVSRHLFWR               | Q8BN57 | 0.0313779  | N-term +28.03 Da,              | 3385.339355 | 2 | 702.3800049 | 702.8803985 |
| TASAGIQVVGDDLTVTNPKR     | P17182 | 0          | N-term +28.03 Da, K +28.03 Da, | 3388.265869 | 3 | 700.0499878 | 700.0549411 |
| LPTQTISQGAIEKVKDATR      | Q8C196 | 0          | N-term +28.03 Da, K +28.03 Da, | 3391.257324 | 4 | 535.8099976 | 535.8138588 |
| FVNDIFER                 | P10853 | 0.01240876 | N-term +28.03 Da,              | 3394.608887 | 2 | 534.2800903 | 534.2796516 |
| TLGEECELETMTGEKVK        | P12710 | 0          | N-term +28.03 Da, K +28.03 Da, | 3398.923584 | 3 | 680.0046387 | 680.0076118 |
| FDLRPGVIVR               | Q3THS6 | 0.00638978 | N-term +28.03 Da,              | 3402.766846 | 3 | 400.9100037 | 400.5801538 |
| TLGEECELETMTGEKVK        | P12710 | 0          | N-term +28.03 Da, K +28.03 Da, | 3406.222168 | 2 | 1020.01001  | 1019.507779 |
| SEEDATLNLNAINR           | Q91Y97 | 0.03389831 | N-term +28.03 Da,              | 3407.1521   | 2 | 794.4099731 | 794.4022882 |
| VSTSSMGTLPKQVKIVEVGPR    | P38060 | 0          | N-term +28.03 Da, K +28.03 Da, | 3410.042725 | 4 | 575.0855103 | 575.0869888 |
| TMTLGDIVYKR              | P12710 | 0          | N-term +28.03 Da, K +28.03 Da, | 3411.318359 | 3 | 451.5899963 | 451.5917311 |
| APAGILNGKLVSAQIR         | Q922D8 | 0          | N-term +28.03 Da, K +28.03 Da, | 3413.442627 | 3 | 555.3466797 | 555.3454372 |
| STSSMGTLPKQVKIVEVGPR     | P38060 | 0          | N-term +28.03 Da, K +28.03 Da, | 3422.19165  | 3 | 733.0900269 | 733.4240882 |
| STSSMGTLPKQVKIVEVGPR     | P38060 | 0          | N-term +28.03 Da, K +28.03 Da, | 3424.847168 | 3 | 733.4199829 | 733.4240882 |
| TGTPVLGGLSYR             | Q61176 | 0.00349345 | N-term +28.03 Da,              | 3428.409424 | 2 | 624.8499756 | 624.8509729 |
| FVELETNLPASR             | O35215 | 0          | N-term +28.03 Da,              | 3432.938232 | 2 | 702.3800049 | 702.380095  |
| VGD LGNVTAGKDG VANVSIEDR | P08228 | 0          | N-term +28.03 Da, K +28.03 Da, | 3445.63208  | 3 | 748.3900146 | 748.0606438 |
| TFTFYASEDKLENR           | O35490 | 0          | N-term +28.03 Da, K +28.03 Da, | 3446.893311 | 3 | 593.2999878 | 592.9649514 |
| SIVEDKLVEDLKTR           | P26443 | 0          | N-term +28.03 Da, K +28.03 Da, | 3452.979248 | 4 | 433.2600098 | 433.008104  |
| SIVEDKLVEDLKTR           | P26443 | 0          | N-term +28.03 Da, K +28.03 Da, | 3454.451416 | 3 | 577.0082397 | 577.0083799 |
| TFNVQDGPDFQDR            | P97493 | 0          | N-term +28.03 Da,              | 3455.350586 | 2 | 834.3900146 | 834.3866381 |

|                         |        |            |                                |             |   |             |             |
|-------------------------|--------|------------|--------------------------------|-------------|---|-------------|-------------|
| EEHPVLLTEAPLNPKANR      | P60710 | 0          | N-term +28.03 Da, K +28.03 Da, | 3455.655273 | 3 | 695.710022  | 695.3881427 |
| APNVLASEPEIPKQIR        | Q9WTP6 | 0          | N-term +28.03 Da, K +28.03 Da, | 3461.563965 | 3 | 583.0100098 | 583.0086025 |
| MILLEVNRR               | Q9CVB6 | 0.00564061 | N-term +28.03 Da,              | 3475.688477 | 2 | 565.3200073 | 565.3235362 |
| VQAWYMDDESTADPR         | Q99JT9 | 0.01376812 | N-term +28.03 Da,              | 3477.2854   | 2 | 848.8800049 | 848.8854165 |
| TFAHLDATTVLSR           | P56480 | 0          | N-term +28.03 Da,              | 3480.364502 | 3 | 487.269989  | 487.2683049 |
| KLFDCLPGGTEPEVALHR      | F6TNE3 | 0.03026135 | N-term +28.03 Da, C +57.02 Da, | 3485.20874  | 3 | 699.039978  | 699.0383449 |
| TTFNVQDGPDPFQDR         | P97493 | 0          | N-term +28.03 Da,              | 3486.143555 | 2 | 834.3862915 | 834.3866381 |
| KELDPVQKLFVDKIR         | P97450 | 0          | N-term +28.03 Da, K +28.03 Da, | 3490.844482 | 4 | 485.8034668 | 485.8040334 |
| APNVLASEPEIPKQIR        | Q9WTP6 | 0          | N-term +28.03 Da, K +28.03 Da, | 3491.989258 | 3 | 583.0100098 | 583.0086025 |
| TTFNVQDGPDPFQDR         | P97493 | 0.02973721 | N-term +28.03 Da,              | 3492.090576 | 3 | 556.9299927 | 556.5935176 |
| TGGGNPIGDKLNIMTAGSR     | P24270 | 0          | N-term +28.03 Da, K +28.03 Da, | 3495.451416 | 3 | 639.6699829 | 639.0070448 |
| SQHPVVLTKFVEGAR         | Q8C196 | 0          | N-term +28.03 Da, K +28.03 Da, | 3502.864014 | 3 | 618.6699829 | 618.3475069 |
| SDAPPLTLDDGIKDR         | Q9CR21 | 0.01047904 | N-term +28.03 Da, K +28.03 Da, | 3513.991699 | 2 | 776.9199829 | 777.4303168 |
| MRGQVGDLSPPQQEALAR      | Q8R0F9 | 0.00089286 | N-term +28.03 Da,              | 3515.030518 | 2 | 1006.01001  | 1006.520735 |
| EECELETMTGEKVK          | P12710 | 0          | N-term +28.03 Da, K +28.03 Da, | 3517.105469 | 2 | 884.4500122 | 883.9311757 |
| SDLELHPPSYPWSHR         | Q9D0M3 | 0.004971   | N-term +28.03 Da,              | 3517.273682 | 4 | 462.980011  | 462.9811491 |
| TPTEKLPFPIIDDKGR        | O08709 | 0.01120239 | N-term +28.03 Da, K +28.03 Da, | 3519.195557 | 4 | 478.5292053 | 478.5292036 |
| NVLASEPEIPKQIR          | Q9WTP6 | 0          | N-term +28.03 Da, K +28.03 Da, | 3520.670166 | 3 | 527.6400146 | 526.9786431 |
| TGTAEMSSILEER           | Q03265 | 0          | N-term +28.03 Da,              | 3521.700195 | 2 | 726.3499756 | 726.3559604 |
| HVGDLGNVTAGKDGVANVSIEDR | P08228 | 0          | N-term +28.03 Da, K +28.03 Da, | 3523.62207  | 2 | 1190.599976 | 1190.116784 |
| TSIAIDIINQKR            | Q03265 | 0          | N-term +28.03 Da, K +28.03 Da, | 3524.922363 | 3 | 510.3099976 | 510.3067597 |
| HVGDLGNVTAGKDGVANVSIEDR | P08228 | 0          | N-term +28.03 Da, K +28.03 Da, | 3525.01001  | 2 | 1190.099976 | 1190.116784 |
| SDLELHPPSYPWSHR         | Q9D0M3 | 0          | N-term +28.03 Da,              | 3528.669189 | 3 | 617.3099976 | 616.97244   |
| LRPGDCEVCISYLGR         | Q9CXI5 | 0          | N-term +28.03 Da, C +57.02 Da, | 3529.253174 | 3 | 608.2999878 | 608.3028039 |
| SPADLPKNWDWR            | Q9WUU7 | 0          | N-term +28.03 Da, K +28.03 Da, | 3531.357666 | 3 | 514.5999756 | 514.2684162 |
| APAGILNGKLVSAQIR        | Q922D8 | 0          | N-term +28.03 Da, K +28.03 Da, | 3532.774658 | 3 | 555.6699829 | 555.3454372 |
| SAGFLQASASDVVVVHGR      | Q8VCH0 | 0          | N-term +28.03 Da,              | 3547.064209 | 3 | 609.9899902 | 609.9952448 |
| TAPVGGGSFPTITPR         | Q922R8 | 0          | N-term +28.03 Da,              | 3549.037598 | 2 | 743.4099731 | 743.4066441 |
| VALEQQSPDIAQCVHLDR      | Q91X83 | 0          | N-term +28.03 Da, C +57.02 Da, | 3550.84668  | 3 | 703.3599854 | 703.0248759 |
| SDLELHPPSYPWSHR         | Q9D0M3 | 0.00348432 | N-term +28.03 Da,              | 3552.861572 | 4 | 463.230011  | 462.9811491 |
| SDLTEFMR                | Q89023 | 0.01057402 | N-term +28.03 Da,              | 3561.041016 | 2 | 513.75      | 513.7498699 |
| APAGILNGKLVSAQIR        | Q922D8 | 0.04574742 | N-term +28.03 Da, K +28.03 Da, | 3563.596436 | 3 | 555.6731567 | 555.3454372 |
| QKTGTAEMSSILEER         | Q03265 | 0          | N-term +28.03 Da, K +28.03 Da, | 3565.118164 | 2 | 867.9400024 | 868.4483813 |
| SAGFLQASASDVVVVHGR      | Q8VCH0 | 0          | N-term +28.03 Da,              | 3569.611572 | 2 | 915.4799805 | 914.489229  |
| TPATGTPVLGGLSYR         | Q61176 | 0          | N-term +28.03 Da,              | 3571.895752 | 2 | 759.420166  | 759.4197517 |
| AGAESDGGQFQFTGIKKY      | Q78IK2 | 0.03609626 | N-term +28.03 Da, K +28.03 Da, | 3574.775146 | 2 | 965.9899902 | 965.9990956 |
| DDEVDVDGTVEEDLGKSR      | P08113 | 0          | N-term +28.03 Da, K +28.03 Da, | 3575.022217 | 3 | 679.3200073 | 678.6551722 |
| SAGFLQASASDVVVVHGR      | Q8VCH0 | 0          | N-term +28.03 Da,              | 3578.810059 | 3 | 609.9951172 | 609.9952448 |
| DDEVDVDGTVEEDLGKSR      | P08113 | 0          | N-term +28.03 Da, K +28.03 Da, | 3579.294922 | 2 | 1017.469971 | 1017.47912  |
| SGAPIKIPVGPETLGR        | P56480 | 0          | N-term +28.03 Da, K +28.03 Da, | 3580.584473 | 3 | 550.3300171 | 549.9979261 |

|                              |         |            |                                |             |   |             |             |
|------------------------------|---------|------------|--------------------------------|-------------|---|-------------|-------------|
| HVGD LGNV TAGK DGV ANV SIEDR | P08228  | 0          | N-term +28.03 Da, K +28.03 Da, | 3592.976074 | 3 | 793.4099731 | 793.7469479 |
| STPQSQFQESSVWKLGR            | Q9D115  | 0          | N-term +28.03 Da, K +28.03 Da, | 3595.868652 | 3 | 706.7000122 | 706.704131  |
| TLPD TVDWR                   | O70370  | 0.00713154 | N-term +28.03 Da,              | 3598.264893 | 2 | 565.7954712 | 565.7956662 |
| VLLTMIAR                     | O08547  | 0.0130814  | N-term +28.03 Da,              | 3599.029297 | 2 | 472.8013306 | 472.8017076 |
| GEALSTLV LNR                 | P63038  | 0          | N-term +28.03 Da,              | 3599.27124  | 2 | 600.8499756 | 600.8509729 |
| HVGD LGNV TAGK DGV ANV SIEDR | P08228  | 0          | N-term +28.03 Da, K +28.03 Da, | 3602.384033 | 4 | 595.3099976 | 595.56203   |
| TVLSGGT TMYPGIADR            | P60710  | 0          | N-term +28.03 Da,              | 3607.700439 | 2 | 833.9259033 | 833.9270842 |
| TLPD TVDWR                   | O70370  | 0          | N-term +28.03 Da,              | 3619.200928 | 2 | 565.2902832 | 565.7956662 |
| VLSGEDKSN IAAWGK             | P01942  | 0          | N-term +28.03 Da, K +28.03 Da, | 3624.008057 | 3 | 606.0100098 | 605.6840076 |
| APAGILNGKLVSAQIR             | Q922D8  | 0.04401294 | N-term +28.03 Da, K +28.03 Da, | 3624.083496 | 3 | 555.6731567 | 555.3454372 |
| NKELDPVQKLFVDKIR             | P97450  | 0          | N-term +28.03 Da, K +28.03 Da, | 3625.446777 | 4 | 514.3099976 | 514.3147655 |
| SVVAGGPEVTLTPER              | QV8CIM3 | 0          | N-term +28.03 Da,              | 3625.707275 | 2 | 770.4099731 | 770.4224917 |
| NKELDPVQKLFVDKIR             | P97450  | 0          | N-term +28.03 Da, K +28.03 Da, | 3630.063721 | 3 | 685.4177246 | 685.4172618 |
| HVGD LGNV TAGK DGV ANV SIEDR | P08228  | 0.00089526 | N-term +28.03 Da, K +28.03 Da, | 3631.171143 | 3 | 793.4099731 | 793.7469479 |
| NKELDPVQKLFVDKIR             | P97450  | 0          | N-term +28.03 Da, K +28.03 Da, | 3639.876709 | 2 | 1027.619995 | 1027.622255 |
| HVGD LGNV TAGK DGV ANV SIEDR | P08228  | 0          | N-term +28.03 Da, K +28.03 Da, | 3641.188721 | 3 | 794.4099731 | 793.7469479 |
| QNYSTEVEAAVNR                | P29391  | 0          | N-term +28.03 Da,              | 3642.214355 | 2 | 754.3599854 | 754.8706235 |
| RDDVALEGVGHFFR               | P29391  | 0          | N-term +28.03 Da,              | 3642.307129 | 3 | 549.289978  | 549.2863586 |
| STGTFVVSQPLNYR               | Q9JLJ2  | 0          | N-term +28.03 Da,              | 3644.156494 | 2 | 799.4199829 | 798.9226587 |
| NKELDPVQKLFVDKIR             | P97450  | 0          | N-term +28.03 Da, K +28.03 Da, | 3656.780518 | 4 | 514.5599976 | 514.3147655 |
| GSWEVIEGYR                   | P26443  | 0          | N-term +28.03 Da,              | 3669.681885 | 2 | 612.2999878 | 612.3063982 |
| DALEEEEDNV LVLKK             | P09103  | 0          | N-term +28.03 Da, K +28.03 Da, | 3674.110107 | 3 | 566.9899902 | 566.9889855 |
| AFDYDLQTGQISNR               | Q64374  | 0          | N-term +28.03 Da,              | 3675.856445 | 2 | 828.9000244 | 828.4048307 |
| DALEEEEDNV LVLKK             | P09103  | 0          | N-term +28.03 Da, K +28.03 Da, | 3677.208496 | 2 | 849.9799805 | 849.97984   |
| GETPTEKLPFPIIDDKGR           | O08709  | 0          | N-term +28.03 Da, K +28.03 Da, | 3678.39624  | 4 | 525.2999878 | 525.0452182 |
| KTGTAEMSSILEER               | Q03265  | 0          | N-term +28.03 Da, K +28.03 Da, | 3680.355469 | 2 | 804.4199829 | 804.4190922 |
| TVLSGGT TMYPGIADR            | P60710  | 0.01585014 | N-term +28.03 Da,              | 3681.864258 | 2 | 834.4299927 | 833.9270842 |
| DLPKNWDWR                    | Q9WUU7  | 0          | N-term +28.03 Da, K +28.03 Da, | 3687.711914 | 3 | 429.2275085 | 429.2277804 |
| STVAAAAPSHEAKGLVISPEGLSPAVR  | Q8K370  | 0          | N-term +28.03 Da, K +28.03 Da, | 3688.209473 | 3 | 915.5       | 915.5028956 |
| SWEVIEGYR                    | P26443  | 0.00343643 | N-term +28.03 Da,              | 3688.860107 | 2 | 584.289978  | 583.7956662 |
| ELPDGQVITIGNER               | P60710  | 0.01778094 | N-term +28.03 Da,              | 3689.406982 | 2 | 784.9191895 | 784.9175737 |
| TGIKAVDSLVP IGR              | Q03265  | 0.01053424 | N-term +28.03 Da, K +28.03 Da, | 3691.898682 | 3 | 494.9700012 | 494.63985   |
| TIGDYTDFYSSR                 | P35505  | 0          | N-term +28.03 Da,              | 3693.812256 | 2 | 726.8344116 | 726.8357179 |
| TGIKAVDSLVP IGR              | Q03265  | 0.01183432 | N-term +28.03 Da, K +28.03 Da, | 3693.896484 | 2 | 741.960022  | 741.4561368 |
| MKETIMNQEKLAKLQAQVR          | Q64152  | 0.00089767 | N-term +28.03 Da, K +28.03 Da, | 3694.885498 | 3 | 790.7800293 | 791.1236442 |
| ELPDGQVITIGNER               | P60710  | 0          | N-term +28.03 Da,              | 3695.120605 | 2 | 784.4099731 | 784.9175737 |
| QALLDLHALGSAR                | P29391  | 0          | N-term +28.03 Da,              | 3700.251953 | 3 | 464.9400024 | 464.9367779 |
| WGKVN SDEVGGEALGR            | P02088  | 0          | N-term +28.03 Da, K +28.03 Da, | 3709.442383 | 2 | 865.4299927 | 865.4470298 |
| SDAPPLTLDG IADR              | Q9CR21  | 0.00561798 | N-term +28.03 Da, K +28.03 Da, | 3716.16626  | 2 | 776.9199829 | 777.4303168 |
| DDEV DVDGTVEEDLGKSR          | P08113  | 0          | N-term +28.03 Da, K +28.03 Da, | 3722.68457  | 2 | 1016.969971 | 1017.47912  |

|                      |        |            |                                |             |   |             |             |
|----------------------|--------|------------|--------------------------------|-------------|---|-------------|-------------|
| APAGILNGKLVSAQIR     | Q922D8 | 0.00265957 | N-term +28.03 Da, K +28.03 Da, | 3726.4021   | 3 | 556.0100098 | 555.3454372 |
| CLDAFPNLR            | P10649 | 0          | N-term +28.03 Da, C +57.02 Da, | 3726.819336 | 2 | 567.289978  | 567.292236  |
| ILLRPELEELR          | Q9DCN2 | 0.00698758 | N-term +28.03 Da,              | 3732.34082  | 3 | 470.2900085 | 470.2889286 |
| TLAVLALR             | Q8C6B0 | 0.02299652 | N-term +28.03 Da,              | 3733.606689 | 2 | 442.7999878 | 442.8000221 |
| IIGGSMDAKGSFPWQAK    | Q61646 | 0          | N-term +28.03 Da, K +28.03 Da, | 3736.450195 | 3 | 626.3400269 | 626.3378428 |
| VALEGVGHFFR          | P29391 | 0          | N-term +28.03 Da,              | 3752.407959 | 3 | 420.5675964 | 420.5680254 |
| PKVIQPEVDTPLGR       | Q8VCU1 | 0          | N-term +28.03 Da, K +28.03 Da, | 3762.529785 | 2 | 803.460022  | 802.9721514 |
| NEEEVEKRFEGFR        | Q08943 | 0.03518268 | N-term +28.03 Da, K +28.03 Da, | 3767.967773 | 2 | 789.4000244 | 789.3995481 |
| TDLTDYLNLR           | Q9CZ13 | 0.00091075 | N-term +28.03 Da,              | 3768.592285 | 2 | 569.789978  | 569.7905812 |
| SLGVAAEGLPDQYADGEAAR | Q9QXF8 | 0          | N-term +28.03 Da,              | 3774.43335  | 2 | 1009.48999  | 1009.494907 |
| QKTGTAEMSSILEER      | Q03265 | 0          | N-term +28.03 Da, K +28.03 Da, | 3778.680176 | 2 | 867.9299927 | 868.4483813 |
| MASGGGVPTDEEQATGLER  | P19536 | 0.03195105 | N-term +28.03 Da,              | 3783.600098 | 2 | 966.9400024 | 966.9520173 |
| SLGVAAEGLPDQYADGEAAR | Q9QXF8 | 0          | N-term +28.03 Da,              | 3785.432129 | 2 | 1010.5      | 1009.494907 |
| VSLHLGVTPSVLR        | Q89023 | 0          | N-term +28.03 Da,              | 3789.62793  | 3 | 469.2900085 | 469.2890399 |
| QKTGTAEMSSILEER      | Q03265 | 0.03636364 | N-term +28.03 Da, K +28.03 Da, | 3789.884277 | 3 | 579.289978  | 579.3013463 |
| EAKYAGIWHCIR         | Q6IS41 | 0.01049475 | N-term +28.03 Da, C +57.02 Da, | 3796.209961 | 2 | 780.9099731 | 780.411206  |
| EKEIMTYLHDLEMK       | J3KMI7 | 0.03619303 | N-term +28.03 Da, K +28.03 Da, | 3808.213135 | 2 | 932.4699707 | 932.4833778 |
| VLESTMVCVDNSEYMR     | O35226 | 0          | N-term +28.03 Da, C +57.02 Da, | 3809.526611 | 2 | 981.4400024 | 980.9442916 |
| NVLASEPEIPK GIR      | Q9WTP6 | 0          | N-term +28.03 Da, K +28.03 Da, | 3814.297852 | 2 | 789.9500122 | 789.9643264 |
| SPEEFTEIMNQR         | P54869 | 0          | N-term +28.03 Da,              | 3814.934326 | 2 | 754.8599854 | 754.8561274 |
| DEQYLQLDTPAVGR       | Q8QZR3 | 0.00708104 | N-term +28.03 Da,              | 3819.431152 | 2 | 880.960022  | 880.9443203 |
| TIVYFPVR             | P19157 | 0.01172161 | N-term +28.03 Da,              | 3823.052734 | 2 | 511.8043823 | 511.8053047 |
| TLNNDIMLLK           | Q79220 | 0          | N-term +28.03 Da, K +28.03 Da, | 3825.860352 | 2 | 615.8590088 | 615.8599518 |
| FHQDQSSVGGTLAEDIEKAR | Q60936 | 0          | N-term +28.03 Da, K +28.03 Da, | 3829.231201 | 3 | 748.710022  | 748.7133554 |
| STPQSQFQESSPVWKLGR   | Q9D1I5 | 0.00345722 | N-term +28.03 Da, K +28.03 Da, | 3835.916504 | 3 | 706.3599854 | 706.704131  |
| STPQSQFQESSPVWKLGR   | Q9D1I5 | 0          | N-term +28.03 Da, K +28.03 Da, | 3839.19873  | 3 | 707.039978  | 706.704131  |
| DVQLVESGGGLVQP GGSR  | P01783 | 0          | N-term +28.03 Da,              | 3847.150146 | 2 | 891.9699707 | 891.9708694 |
| TVSLHLGVTPSVLR       | O89023 | 0          | N-term +28.03 Da,              | 3849.982178 | 3 | 503.3099976 | 502.9715997 |
| DVQLVESGGGLVQP GGSR  | P01783 | 0.03142077 | N-term +28.03 Da,              | 3851.807861 | 3 | 595.3200073 | 594.9830051 |
| TIVYFPVR             | P19157 | 0.01374819 | N-term +28.03 Da,              | 3853.799316 | 2 | 511.8052979 | 511.8053047 |
| LTPEQKKELSEIAQR      | Q91Y97 | 0          | N-term +28.03 Da, K +28.03 Da, | 3854.368164 | 3 | 619.0200195 | 618.694684  |
| FDITADDEPLGR         | P17742 | 0          | N-term +28.03 Da,              | 3858.465088 | 2 | 689.3400269 | 688.8382604 |
| LDGNQDLIR            | P54071 | 0.04853129 | N-term +28.03 Da,              | 3860.756592 | 2 | 536.2999878 | 536.2932906 |
| VLSGEDKSNIAAWGKIGGH  | P01942 | 0.00696056 | N-term +28.03 Da, K +28.03 Da, | 3864.104492 | 3 | 727.0700073 | 727.0793092 |
| DFLESHYLDKEVK        | P29391 | 0.00353357 | N-term +28.03 Da, K +28.03 Da, | 3867.567871 | 3 | 569.3099976 | 569.6381754 |
| TTPEADKIFLER         | P26443 | 0.0070922  | N-term +28.03 Da, K +28.03 Da, | 3880.394775 | 2 | 738.4000244 | 738.4088527 |
| EPEGKEVWDYVTVR       | Q920A5 | 0          | N-term +28.03 Da, K +28.03 Da, | 3882.556641 | 2 | 882.4500122 | 881.9541564 |
| ASKPTLNEVVIVSAIR     | Q8QZT1 | 0          | N-term +28.03 Da, K +28.03 Da, | 3884.372803 | 3 | 585.0240479 | 585.0242526 |
| ASKPTLNEVVIVSAIR     | Q8QZT1 | 0          | N-term +28.03 Da, K +28.03 Da, | 3884.848877 | 2 | 877.5300293 | 877.0327407 |
| IDLPEFDAR            | P10605 | 0.04047777 | N-term +28.03 Da,              | 3884.947021 | 2 | 602.8133545 | 602.8140563 |



|                                |        |            |                                |             |   |             |             |
|--------------------------------|--------|------------|--------------------------------|-------------|---|-------------|-------------|
| TITNTMTLGDIVYKR                | P12710 | 0          | N-term +28.03 Da, K +28.03 Da, | 3887.210693 | 3 | 595         | 594.6658481 |
| SDLDAATQQLLSR                  | Q03265 | 0          | N-term +28.03 Da,              | 3887.596191 | 2 | 723.8800049 | 723.3833666 |
| EPEGKEVWDYVTVR                 | Q920A5 | 0          | N-term +28.03 Da, K +28.03 Da, | 3888.33667  | 3 | 588.3048096 | 588.3051964 |
| SDLDAATQQLLSR                  | Q03265 | 0          | N-term +28.03 Da,              | 3893.449951 | 2 | 723.3786621 | 723.3833666 |
| GGTIPVVPTAEFQDR                | P26443 | 0          | N-term +28.03 Da,              | 3894.341553 | 2 | 807.9268799 | 807.9279412 |
| TITNTMTLGDIVYKR                | P12710 | 0          | N-term +28.03 Da, K +28.03 Da, | 3901.980957 | 3 | 595.3300171 | 594.6658481 |
| ASKPTLNEVVIVSAIR               | Q8QZT1 | 0.00342466 | N-term +28.03 Da, K +28.03 Da, | 3914.940674 | 3 | 585.0200195 | 585.0242526 |
| HSILPVDDINGLNEEQKQLR           | Q9JHI5 | 0          | N-term +28.03 Da, K +28.03 Da, | 3915.091553 | 3 | 830.0900269 | 830.438003  |
| GPWTPAAVEHPEAVR                | O35490 | 0          | N-term +28.03 Da,              | 3918.91333  | 2 | 888.460022  | 887.4495723 |
| SPWEAFPAYR                     | Q9DCT2 | 0.02965517 | N-term +28.03 Da,              | 3928.601563 | 2 | 626.3099976 | 626.3114832 |
| TAEILELAGNAAR                  | P22752 | 0          | N-term +28.03 Da,              | 3930.401855 | 2 | 678.8800049 | 678.8777195 |
| VAPEEHPVLLTEAPLNPKANR          | P60710 | 0          | N-term +28.03 Da, K +28.03 Da, | 3932.396729 | 3 | 784.7600098 | 784.440907  |
| NKELDPVQKLFVDKIR               | P97450 | 0          | N-term +28.03 Da, K +28.03 Da, | 3932.478516 | 4 | 514.5599976 | 514.3147655 |
| NKELDPVQKLFVDKIR               | P97450 | 0.02437326 | N-term +28.03 Da, K +28.03 Da, | 3935.114014 | 3 | 685.7399902 | 685.4172618 |
| TPVAWPSQEGQNPSLSSIR            | Q8C196 | 0.00340136 | N-term +28.03 Da,              | 3936.570557 | 2 | 1042.540039 | 1041.534366 |
| TPVAWPSQEGQNPSLSSIR            | Q8C196 | 0          | N-term +28.03 Da,              | 3942.417236 | 2 | 1041.540039 | 1041.534366 |
| TPVAWPSQEGQNPSLSSIR            | Q8C196 | 0          | N-term +28.03 Da,              | 3947.417236 | 3 | 695.0300293 | 694.6920026 |
| ANLEKAQSELGADEAAR              | Q9D3D9 | 0          | N-term +28.03 Da, K +28.03 Da, | 3951.64502  | 2 | 994         | 994.0081811 |
| SLFKAFEEEEQALR                 | P49429 | 0          | N-term +28.03 Da, K +28.03 Da, | 3957.874756 | 3 | 541.960022  | 541.9628817 |
| LCAATATILDKPEDR                | O35215 | 0          | N-term +28.03 Da, K +28.03 Da, | 3958.101318 | 3 | 577.3099976 | 577.309953  |
| ASKPTLNEVVIVSAIR               | Q8QZT1 | 0.03387534 | N-term +28.03 Da, K +28.03 Da, | 3958.215088 | 3 | 585.6900024 | 585.0242526 |
| DDEVVDVDTVEEDLKGSR             | P08113 | 0          | N-term +28.03 Da, K +28.03 Da, | 3962.097412 | 2 | 1016.969971 | 1017.47912  |
| SLFKAFEEEEQALR                 | P49429 | 0          | N-term +28.03 Da, K +28.03 Da, | 3963.745361 | 2 | 812.9400024 | 812.4406843 |
| EAHYNKNMQFLVFNRR               | Q68FG1 | 0.00336984 | N-term +28.03 Da, K +28.03 Da, | 3963.820801 | 3 | 708.3599854 | 708.3704286 |
| AGPELLDSNIR                    | Q99KI3 | 0.00337268 | N-term +28.03 Da,              | 3972.422119 | 2 | 663.3699951 | 663.3748125 |
| STDITSLDQYVER                  | P08113 | 0          | N-term +28.03 Da,              | 3978.965088 | 2 | 778.8900146 | 777.8859396 |
| GFGDLKTPAGL                    | O70251 | 0          | N-term +28.03 Da, K +28.03 Da, | 3979.383545 | 2 | 566.3200073 | 566.3240593 |
| EEHPVLLTEAPLNPR                | P61164 | 0          | N-term +28.03 Da,              | 3989.130859 | 2 | 871.460022  | 871.9754229 |
| ENKNMSTEDVKRNFEK               | E9PV03 | 0.03021978 | N-term +28.03 Da, K +28.03 Da, | 3989.734375 | 2 | 1041.030029 | 1041.038427 |
| STQAAEDKEEESLHSIISNTEAVR       | Q9CQN1 | 0          | N-term +28.03 Da, K +28.03 Da, | 3999.815674 | 3 | 900.4400024 | 900.7822761 |
| STDITSLDQYVER                  | P08113 | 0          | N-term +28.03 Da,              | 4006.259033 | 2 | 777.8800049 | 777.8859396 |
| LNQALLDLHALGSAR                | P29391 | 0          | N-term +28.03 Da,              | 4006.567871 | 3 | 540.6455688 | 540.6457754 |
| NQNCAAEIPQVVEISIEK             | O54928 | 0.01182557 | N-term +28.03 Da, K +28.03 Da, | 4008.42749  | 3 | 700.6900024 | 700.0331486 |
| ESCLKHGAHGSLEDPK               | Q8VDI7 | 0.01184308 | N-term +28.03 Da, K +28.03 Da, | 4017.310791 | 2 | 925.960022  | 924.9672723 |
| SPLKLVSSVSDLPKR                | P54869 | 0.00574241 | N-term +28.03 Da, K +28.03 Da, | 4017.479736 | 3 | 613.7000122 | 613.7031793 |
| FDPAINYLQR                     | Q9QXD6 | 0          | N-term +28.03 Da,              | 4020.359131 | 2 | 697.3599854 | 697.3591624 |
| ASEAIKGAVVGIDLGTTNSCVAVMEGKQAK | P38647 | 0          | N-term +28.03 Da, K +28.03 Da, | 4029.886963 | 4 | 780.4299927 | 779.9228072 |
| SVQSIVPALEIANHR                | P63038 | 0          | N-term +28.03 Da,              | 4030.072754 | 3 | 578.3300171 | 578.3283351 |
| PFVELETNLPASR                  | O35215 | 0.00336417 | N-term +28.03 Da,              | 4033.140381 | 2 | 750.9000244 | 750.9064771 |
| TDPKYIHWSPVCR                  | P11352 | 0          | N-term +28.03 Da, C +57.02 Da, | 4035.904053 | 3 | 564.6400146 | 564.3043616 |

|                            |        |            |                                |             |   |             |             |
|----------------------------|--------|------------|--------------------------------|-------------|---|-------------|-------------|
| EKDGETFQLMGLYGR            | B5X0G2 | 0.01051841 | N-term +28.03 Da, K +28.03 Da, | 4043.641113 | 3 | 600.6400146 | 600.6380697 |
| TTFNVQDGPDPFQDR            | P97493 | 0.00499168 | N-term +28.03 Da,              | 4048.768799 | 2 | 833.8800049 | 834.3866381 |
| DIQMTQSPSSLSASLGER         | P01639 | 0          | N-term +28.03 Da,              | 4050.667725 | 2 | 967.9799805 | 967.9780349 |
| DALEEEEDNVLVLKK            | P09103 | 0          | N-term +28.03 Da, K +28.03 Da, | 4051.395264 | 3 | 566.6500244 | 566.9889855 |
| TAASSSSLEKSYELPDGQVITIGNER | P60710 | 0          | N-term +28.03 Da, K +28.03 Da, | 4056.197266 | 3 | 937.1500244 | 936.8135762 |
| SFVNDIFER                  | P10853 | 0          | N-term +28.03 Da,              | 4058.924805 | 2 | 577.7999878 | 577.7956662 |
| GVVDESDIPLNLSR             | Q9CQN1 | 0          | N-term +28.03 Da,              | 4062.60083  | 2 | 771.9099731 | 771.4121242 |
| PFVELETNLPASR              | O35215 | 0          | N-term +28.03 Da,              | 4063.730225 | 2 | 750.9065552 | 750.9064771 |
| NKELDPVQKLFVDKIR           | P97450 | 0          | N-term +28.03 Da, K +28.03 Da, | 4064.195068 | 4 | 514.8099976 | 514.3147655 |
| SDVLELTDENFESR             | P27773 | 0          | N-term +28.03 Da,              | 4068.428467 | 2 | 841.4000244 | 841.3994117 |
| TGSGDPEEEEEELVDPLTTVR      | P99028 | 0.00089847 | N-term +28.03 Da, K +28.03 Da, | 4069.046631 | 3 | 830.0800171 | 829.4096679 |
| ESEVASSLVLER               | Q9CYR0 | 0.01054217 | N-term +28.03 Da,              | 4071.350586 | 2 | 673.3599854 | 673.8617355 |
| QLEEEQALQKLLK              | P58774 | 0.04387097 | N-term +28.03 Da, K +28.03 Da, | 4075.978271 | 2 | 912.5300293 | 913.0433057 |
| TIAQDYGVLKADEGISFR         | P35700 | 0          | N-term +28.03 Da, K +28.03 Da, | 4076.05957  | 3 | 680.3599854 | 680.3651153 |
| DDEVVDVGTVEEDLGKSR         | P08113 | 0          | N-term +28.03 Da, K +28.03 Da, | 4081.043945 | 2 | 1016.969971 | 1017.47912  |
| ASQTQGIQQLLQAEKR           | Q9WTT4 | 0          | N-term +28.03 Da, K +28.03 Da, | 4086.75415  | 2 | 928.5100098 | 928.0234361 |
| TIPVPTAEFQDR               | P26443 | 0          | N-term +28.03 Da,              | 4095.067139 | 2 | 750.9071655 | 750.9064771 |
| NKELDPVQKLFVDKIR           | P97450 | 0          | N-term +28.03 Da, K +28.03 Da, | 4099.176758 | 4 | 514.5600586 | 514.3147655 |
| NKELDPVQKLFVDKIR           | P97450 | 0          | N-term +28.03 Da, K +28.03 Da, | 4101.474609 | 3 | 685.7443237 | 685.4172618 |
| APDQDEIDCLPGLAKQPSFR       | P16675 | 0          | N-term +28.03 Da, K +28.03 Da, | 4106.625    | 3 | 771.722168  | 771.7229744 |
| TFDLTGIPPAPR               | P20029 | 0          | N-term +28.03 Da,              | 4107.121582 | 2 | 656.8599854 | 656.866623  |
| DVLVIECNLR                 | Q8C196 | 0          | N-term +28.03 Da, C +57.02 Da, | 4112.40625  | 2 | 629.8432007 | 629.8448333 |
| GDPKEEEEEELVDPLTTVR        | P99028 | 0          | N-term +28.03 Da, K +28.03 Da, | 4113.851074 | 2 | 1122.060059 | 1121.060277 |
| GDPKEEEEEELVDPLTTVR        | P99028 | 0.00499584 | N-term +28.03 Da, K +28.03 Da, | 4120.263184 | 3 | 747.7081909 | 747.7092771 |
| STGIYEALELR                | P17182 | 0.04361979 | N-term +28.03 Da,              | 4121.751465 | 2 | 640.3499756 | 640.3482634 |
| NKELDPVQKLFVDKIR           | P97450 | 0          | N-term +28.03 Da, K +28.03 Da, | 4127.214844 | 4 | 514.0599976 | 514.3147655 |
| HSILPVDDINGLNEEQKQLR       | Q9JHI5 | 0          | N-term +28.03 Da, K +28.03 Da, | 4128.849609 | 3 | 830.0900269 | 830.438003  |
| DIDAWELR                   | P12787 | 0.03638814 | N-term +28.03 Da,              | 4132.734863 | 2 | 523.2700195 | 523.2692841 |
| SDIDEIVLVGGSTR             | P20029 | 0.00340426 | N-term +28.03 Da,              | 4134.070801 | 2 | 744.9000244 | 744.8988496 |
| TEKLPFIIDDKGR              | O08709 | 0          | N-term +28.03 Da, K +28.03 Da, | 4135.34375  | 3 | 572.3300171 | 571.6696982 |
| NKELDPVQKLFVDKIR           | P97450 | 0.04330709 | N-term +28.03 Da, K +28.03 Da, | 4137.289551 | 2 | 1027.109985 | 1027.622255 |
| AWITAPVALR                 | O55111 | 0          | N-term +28.03 Da,              | 4140.431641 | 2 | 563.34198   | 563.3425858 |
| ELDPVQKLFVDKIR             | P97450 | 0          | N-term +28.03 Da, K +28.03 Da, | 4143.480957 | 4 | 447.019989  | 446.7724676 |
| GDPKEEEEEELVDPLTTVR        | P99028 | 0          | N-term +28.03 Da, K +28.03 Da, | 4144.564941 | 2 | 1121.059204 | 1121.060277 |
| TVDAFDYDLQTGQISNR          | Q64374 | 0          | N-term +28.03 Da,              | 4146.747559 | 2 | 986.9799805 | 985.9763495 |
| TVDAFDYDLQTGQISNR          | Q64374 | 0          | N-term +28.03 Da,              | 4148.376953 | 2 | 985.9799805 | 985.9763495 |
| SDLELHPPSYPSWSHR           | Q9D0M3 | 0          | N-term +28.03 Da,              | 4152.053223 | 3 | 616.9699707 | 616.97244   |
| SAGFLQASADVVVVHGR          | Q8VCH0 | 0          | N-term +28.03 Da,              | 4155.422852 | 2 | 914.4799805 | 914.489229  |
| TLVGYDLVPEPK               | P12787 | 0          | N-term +28.03 Da, K +28.03 Da, | 4156.501953 | 2 | 693.9000244 | 693.8975891 |
| SLGEYLFER                  | P29391 | 0.04045093 | N-term +28.03 Da,              | 4160.979004 | 2 | 571.2999878 | 571.2980417 |

|                                |        |            |                                |             |   |             |             |
|--------------------------------|--------|------------|--------------------------------|-------------|---|-------------|-------------|
| SDVLELTDENFESR                 | P27773 | 0          | N-term +28.03 Da,              | 4161.369629 | 2 | 841.9000244 | 841.3994117 |
| NYWHYDYNLQVCVGSPPKRR           | P21812 | 0.00703125 | N-term +28.03 Da, K +28.03 Da, | 4164.231934 | 3 | 890.460022  | 889.7919453 |
| TFDLTGIPPAPR                   | P20029 | 0.01179071 | N-term +28.03 Da,              | 4166.944824 | 2 | 656.8699951 | 656.866623  |
| TTIAGVVYKDGIVLGADTR            | P70195 | 0          | N-term +28.03 Da, K +28.03 Da, | 4174.084961 | 3 | 669.0499878 | 669.0491271 |
| LAGTNKETTIQGLDGLSER            | Q91Y97 | 0.0041841  | N-term +28.03 Da, K +28.03 Da, | 4177.893555 | 2 | 1030.540039 | 1030.055131 |
| TVPVHEMGTTVIKEVLQR             | Q8CAY6 | 0          | N-term +28.03 Da, K +28.03 Da, | 4186.751465 | 4 | 524.0499878 | 524.0501404 |
| VNFTVDQIR                      | P58252 | 0.00338696 | N-term +28.03 Da,              | 4186.879395 | 2 | 559.7999878 | 560.3114832 |
| TLVGYDLVPEPK                   | P12787 | 0          | N-term +28.03 Da, K +28.03 Da, | 4187.34082  | 2 | 693.8968506 | 693.8975891 |
| SVTGWKEIEYEVVR                 | Q8C196 | 0          | N-term +28.03 Da, K +28.03 Da, | 4188.245117 | 3 | 584.6500244 | 584.3173248 |
| KGAGAFGYFEVTHDITR              | P24270 | 0          | N-term +28.03 Da, K +28.03 Da, | 4199.973145 | 3 | 642.6599731 | 642.3353785 |
| WAKVNPDEVGGEALGR               | P02089 | 0          | N-term +28.03 Da, K +28.03 Da, | 4200.069336 | 2 | 877.9500122 | 877.4652224 |
| ADIVENQVMDTR                   | P10649 | 0          | N-term +28.03 Da,              | 4203.302734 | 2 | 709.8400269 | 709.8508448 |
| MGDSASKVISAEALPGR              | Q9D6Y7 | 0          | N-term +28.03 Da, K +28.03 Da, | 4205.583008 | 2 | 937.4899902 | 937.4880379 |
| TFIDQGKLIPDDVMTR               | Q9WTP7 | 0          | N-term +28.03 Da, K +28.03 Da, | 4209.771484 | 3 | 636.0100098 | 635.6765245 |
| GQVVQFKLSDIGEGIR               | P53395 | 0          | N-term +28.03 Da, K +28.03 Da, | 4212.349609 | 3 | 601.6799927 | 601.3438739 |
| GAPLAGTNKETTIQGLDGLSER         | Q91Y97 | 0.01373825 | N-term +28.03 Da, K +28.03 Da, | 4212.653809 | 2 | 1142.589966 | 1142.610803 |
| SDVLELTDENFESR                 | P27773 | 0          | N-term +28.03 Da,              | 4213.039551 | 2 | 841.3978271 | 841.3994117 |
| NKELDPVQKLFVDKIR               | P97450 | 0          | N-term +28.03 Da, K +28.03 Da, | 4218.125488 | 4 | 514.5599976 | 514.3147655 |
| SDVLELTDENFESR                 | P27773 | 0          | N-term +28.03 Da,              | 4220.69043  | 3 | 561.2678833 | 561.2686999 |
| GDTITNTMTLGDIVYKR              | P12710 | 0          | N-term +28.03 Da, K +28.03 Da, | 4224.483398 | 3 | 652.3499756 | 652.0153175 |
| TGIYEALELR                     | P17182 | 0          | N-term +28.03 Da,              | 4224.675781 | 2 | 596.8300171 | 596.8322488 |
| DQDEIDCLPLAKQPSFR              | P16675 | 0          | N-term +28.03 Da, K +28.03 Da, | 4233.080078 | 3 | 715.6900024 | 715.6930149 |
| VLSGEDKSNIAAWGKIGGHGAEYGAEALER | P01942 | 0          | N-term +28.03 Da, K +28.03 Da, | 4234.294434 | 4 | 832.4400024 | 832.1939406 |
| TVILLENLR                      | P09411 | 0.01840057 | N-term +28.03 Da,              | 4238.799805 | 2 | 549.8499756 | 549.8477014 |
| TLGEECELETMTGEKVK              | P12710 | 0          | N-term +28.03 Da, K +28.03 Da, | 4239.415039 | 2 | 1019.98999  | 1019.507779 |
| SDVLELTDENFESR                 | P27773 | 0          | N-term +28.03 Da,              | 4243.349121 | 2 | 841.3982544 | 841.3994117 |
| NKELDPVQKLFVDKIR               | P97450 | 0          | N-term +28.03 Da, K +28.03 Da, | 4249.758301 | 4 | 514.5599976 | 514.3147655 |
| NKELDPVQKLFVDKIR               | P97450 | 0          | N-term +28.03 Da, K +28.03 Da, | 4254.203125 | 3 | 685.7399902 | 685.4172618 |
| VLSGEDKSNIAAWGKIGGH            | P01942 | 0          | N-term +28.03 Da, K +28.03 Da, | 4255.711426 | 3 | 727.0800171 | 727.0793092 |
| VLSGEDKSNIAAWGKIGGHGAEYGAEALER | P01942 | 0          | N-term +28.03 Da, K +28.03 Da, | 4265.830078 | 4 | 832.6900024 | 832.1939406 |
| LHIGNYNGTAGDALR                | P12804 | 0.03624161 | N-term +28.03 Da,              | 4272.611328 | 2 | 801.4099731 | 800.4155322 |
| VPATPVAWPSQEGQNPSLSSIR         | Q8C196 | 0          | N-term +28.03 Da,              | 4277.469727 | 3 | 784.4099731 | 783.7447668 |
| DKLYFEELSRLR                   | Q8C196 | 0.02768166 | N-term +28.03 Da, K +28.03 Da, | 4279.414063 | 3 | 533.960022  | 533.287254  |
| VPATPVAWPSQEGQNPSLSSIR         | Q8C196 | 0          | N-term +28.03 Da,              | 4281.391602 | 2 | 1175.609985 | 1175.113512 |
| TTIAGVVYKDGIVLGADTR            | P70195 | 0          | N-term +28.03 Da, K +28.03 Da, | 4281.54248  | 3 | 669.0494385 | 669.0491271 |
| TISPLDLAKLNQVAR                | P60335 | 0.00266193 | N-term +28.03 Da, K +28.03 Da, | 4282.128418 | 3 | 566.0100098 | 565.6769642 |
| GLLSQGSPLSWEETQR               | P97494 | 0          | N-term +28.03 Da,              | 4283.666504 | 3 | 606.3120728 | 605.9793721 |
| GYLEELLR                       | Q640N3 | 0.01837456 | N-term +28.03 Da,              | 4284.841309 | 2 | 510.789093  | 510.7898521 |
| VISLSGEHSIIGR                  | P08228 | 0          | N-term +28.03 Da,              | 4286.353516 | 2 | 698.3900146 | 698.4013616 |
| TTIAGVVYKDGIVLGADTR            | P70195 | 0          | N-term +28.03 Da, K +28.03 Da, | 4286.45166  | 2 | 1003.070007 | 1003.070052 |

|                              |        |            |                                |             |   |             |             |
|------------------------------|--------|------------|--------------------------------|-------------|---|-------------|-------------|
| TEPVDEYCIQALPEFDGKR          | P08113 | 0.00495868 | N-term +28.03 Da, K +28.03 Da, | 4287.519531 | 3 | 775.0499878 | 775.0473467 |
| SPVMREAAPTCELRLWYHIASRDVAELR | A2AJA7 | 0.0190007  | N-term +28.03 Da, C +57.02 Da, | 4292.008301 | 4 | 839.9500122 | 839.4354102 |
| MFEPKCLDAFPNLR               | P10649 | 0          | N-term +28.03 Da, C +57.02 Da, | 4292.22168  | 3 | 598.9699707 | 598.6407566 |
| TTIAGVVYKDGIVLGADTR          | P70195 | 0          | N-term +28.03 Da, K +28.03 Da, | 4294.455078 | 2 | 1004.070007 | 1003.070052 |
| NKELDPVQKLFVDKIR             | P97450 | 0          | N-term +28.03 Da, K +28.03 Da, | 4294.859375 | 3 | 685.7399902 | 685.4172618 |
| GDKDIGNIISDAMKKVGR           | P63038 | 0.04276316 | N-term +28.03 Da, K +28.03 Da, | 4296.163086 | 4 | 508.2900085 | 508.0423154 |
| APLAGTNKETTIQGLDGLSER        | Q91Y97 | 0          | N-term +28.03 Da, K +28.03 Da, | 4298.633789 | 2 | 1114.079956 | 1114.100071 |
| APLDLDKYVEIAR                | Q9CQR6 | 0          | N-term +28.03 Da, K +28.03 Da, | 4299.697266 | 3 | 520.2999878 | 520.2994937 |
| TDAEKAAVSCLWGKVNSEVGGALGR    | P02088 | 0          | N-term +28.03 Da, K +28.03 Da, | 4301.599609 | 4 | 727.1199951 | 726.6196482 |
| ATEFGLASGVFTR                | Q8R0Y6 | 0.01174743 | N-term +28.03 Da,              | 4303.414063 | 2 | 692.3699951 | 692.3669875 |
| VISLSGEHSIIGR                | P08228 | 0          | N-term +28.03 Da,              | 4303.803711 | 2 | 697.9099731 | 698.4013616 |
| TDAEKAAVSCLWGKVNSEVGGALGR    | P02088 | 0          | N-term +28.03 Da, K +28.03 Da, | 4304.414551 | 3 | 969.1599731 | 968.4904388 |
| TDPAPATTF AHL DATTVLSR       | P56480 | 0          | N-term +28.03 Da,              | 4305.109863 | 3 | 705.039978  | 705.035658  |
| APT VILEPAGGCLCDQP V HIAVR   | Q9QYR7 | 0          | N-term +28.03 Da, C +57.02 Da, | 4307.790527 | 3 | 834.4400024 | 834.4382918 |
| DVALEGVGHFFR                 | P29391 | 0          | N-term +28.03 Da,              | 4313.040527 | 3 | 459.2399902 | 458.9103401 |
| DVALEGVGHFFR                 | P29391 | 0          | N-term +28.03 Da,              | 4318.860352 | 2 | 687.8599854 | 687.8618719 |
| SIVEDKLVEDLKTR               | P26443 | 0          | N-term +28.03 Da, K +28.03 Da, | 4318.959961 | 3 | 577         | 577.0083799 |
| ASKPTLNEVVIVSAIR             | Q8QZT1 | 0          | N-term +28.03 Da, K +28.03 Da, | 4319.365723 | 2 | 877.0200195 | 877.0327407 |
| GAPQGS LGEYLFER              | P29391 | 0          | N-term +28.03 Da,              | 4320.87207  | 2 | 776.3900146 | 776.3937341 |
| TLEDILFR                     | Q8VCM7 | 0.01055011 | N-term +28.03 Da,              | 4321.271484 | 2 | 517.7999878 | 517.7976772 |
| VGD LGNVTAGK DGVANV SIEDR    | P08228 | 0          | N-term +28.03 Da, K +28.03 Da, | 4328.028809 | 2 | 1122.069946 | 1121.587327 |
| KDFDPAIN EYLQR               | Q9QXD6 | 0          | N-term +28.03 Da, K +28.03 Da, | 4332.534668 | 2 | 832.4500122 | 832.9357663 |
| TLNQLVGA AFGAAGQR            | Q9EQ20 | 0.00573301 | N-term +28.03 Da,              | 4332.742676 | 2 | 801.9400024 | 801.4415498 |
| TFVGQPECVVEGALHAAR           | Q91XD4 | 0          | N-term +28.03 Da, C +57.02 Da, | 4334.309082 | 3 | 657.3300171 | 657.0035231 |
| EFTLGEECELETMTGEKVK          | P12710 | 0          | N-term +28.03 Da, K +28.03 Da, | 4345.541504 | 3 | 772.3800049 | 772.0446147 |
| SDVLELT D ENFESR             | P27773 | 0.03989362 | N-term +28.03 Da,              | 4345.785645 | 2 | 841.8901978 | 841.3994117 |
| NEFTLGEECELETMTGEKVK         | P12710 | 0          | N-term +28.03 Da, K +28.03 Da, | 4351.919434 | 3 | 810.7199707 | 810.0589241 |
| NKELDPVQKLFVDKIR             | P97450 | 0          | N-term +28.03 Da, K +28.03 Da, | 4352.436523 | 4 | 514.5599976 | 514.3147655 |
| EFTLGEECELETMTGEKVK          | P12710 | 0          | N-term +28.03 Da, K +28.03 Da, | 4356.540039 | 2 | 1157.569946 | 1157.563284 |
| AFDYDLQTGQISNR               | Q64374 | 0.02971666 | N-term +28.03 Da,              | 4357.866211 | 2 | 828.3900146 | 828.4048307 |
| YTIVYFPVR                    | P19157 | 0.00089928 | N-term +28.03 Da,              | 4362.819336 | 2 | 593.3400269 | 593.3369693 |
| NEFTLGEECELETMTGEKVK         | P12710 | 0          | N-term +28.03 Da, K +28.03 Da, | 4363.006836 | 3 | 809.7399902 | 810.0589241 |
| DPKEEEEEELV D PLTTVR         | P99028 | 0          | N-term +28.03 Da, K +28.03 Da, | 4363.733887 | 2 | 1093.050049 | 1092.549545 |
| DPKEEEEEELV D PLTTVR         | P99028 | 0.01055807 | N-term +28.03 Da, K +28.03 Da, | 4364.362793 | 2 | 1093.540039 | 1092.549545 |
| HSILPV D DDINGLNEEQKQLR      | Q9JHI5 | 0.00352734 | N-term +28.03 Da, K +28.03 Da, | 4365.466309 | 2 | 1244.630005 | 1245.153366 |
| EMVIFFGHPR                   | G5E8C2 | 0.0361204  | N-term +28.03 Da,              | 4373.330078 | 2 | 631.3300171 | 630.8315282 |
| SFP TLKFFPASADR              | P09103 | 0          | N-term +28.03 Da, K +28.03 Da, | 4380.519043 | 3 | 547.2999878 | 547.299605  |
| TAASSSLEKSYELPDGQVITIGNER    | P60710 | 0          | N-term +28.03 Da, K +28.03 Da, | 4383.978516 | 3 | 937.1500244 | 936.8135762 |
| LYSSDDVIELTPSNFNR            | Q922R8 | 0          | N-term +28.03 Da,              | 4385.759277 | 2 | 1043.01001  | 1043.01039  |
| TGAPQGS LGEYLFER             | P29391 | 0          | N-term +28.03 Da,              | 4385.849609 | 2 | 826.9199829 | 826.9175737 |

|                                |         |            |                                |             |   |             |             |
|--------------------------------|---------|------------|--------------------------------|-------------|---|-------------|-------------|
| DDGSWEVIEGYR                   | P26443  | 0          | N-term +28.03 Da,              | 4386.637695 | 2 | 727.3300171 | 727.3333424 |
| LYSSDDVIELTPSNFNR              | Q922R8  | 0          | N-term +28.03 Da,              | 4391.310059 | 2 | 1044.01001  | 1043.01039  |
| LYSSDDVIELTPSNFNR              | Q922R8  | 0          | N-term +28.03 Da,              | 4391.391602 | 3 | 695.6746216 | 695.6760186 |
| ILAADESVMGTMGNR                | Q91Y97  | 0          | N-term +28.03 Da,              | 4394.435059 | 2 | 731.3599854 | 731.3719444 |
| EFPFGLPR                       | Q35490  | 0.00335289 | N-term +28.03 Da,              | 4394.731445 | 2 | 560.289978  | 560.2953016 |
| GQKVLDSGAPIKIPVGPETLGR         | P56480  | 0.00566343 | N-term +28.03 Da, K +28.03 Da, | 4396.240723 | 3 | 772.7800293 | 772.793169  |
| DALEEEEDNVLVLK                 | P09103  | 0.03614458 | N-term +28.03 Da, K +28.03 Da, | 4399.398438 | 2 | 772.4099731 | 771.9167082 |
| DVQLVESGGGLVQPGGSR             | P01783  | 0          | N-term +28.03 Da,              | 4401.138672 | 2 | 891.460022  | 891.9708694 |
| DALEEEEDNVLVLK                 | P09103  | 0          | N-term +28.03 Da, K +28.03 Da, | 4403.247559 | 2 | 771.9099731 | 771.9167082 |
| VLSGEDKSNIKAAW                 | P01942  | 0.04740551 | N-term +28.03 Da, K +28.03 Da, | 4410.243164 | 3 | 534.6300049 | 534.634765  |
| AFTPATGTPVLGGLSYR              | Q61176  | 0          | N-term +28.03 Da,              | 4411.62793  | 2 | 868.4699707 | 868.4725159 |
| NVPATPVAWPSQEQGNPSSLSIR        | Q8C196  | 0          | N-term +28.03 Da,              | 4415.251465 | 2 | 1233.130005 | 1232.134976 |
| NVPATPVAWPSQEQGNPSSLSIR        | Q8C196  | 0          | N-term +28.03 Da,              | 4416.771973 | 2 | 1232.140015 | 1232.134976 |
| GLTEVKIDFPR                    | Q8CAY6  | 0          | N-term +28.03 Da, K +28.03 Da, | 4418.418457 | 2 | 730.9000244 | 730.4113952 |
| VLSGEDKSNIKAAWGWK              | P01942  | 0          | N-term +28.03 Da, K +28.03 Da, | 4430.574219 | 3 | 605.3400269 | 605.6840076 |
| GLLSQGSPLSWEETQR               | P97494  | 0          | N-term +28.03 Da,              | 4430.92334  | 2 | 908.460022  | 908.4654199 |
| LQVVAVKAPGFGDNR                | P63038  | 0.01309091 | N-term +28.03 Da, K +28.03 Da, | 4436.070313 | 2 | 813.960022  | 813.9699429 |
| EKAAVSCLWGKVNSEVGGALGR         | P02088  | 0          | N-term +28.03 Da, K +28.03 Da, | 4448.839844 | 3 | 873.4500122 | 872.7865263 |
| SWAVPSLGLKTDIPIGR              | P00405  | 0.00340716 | N-term +28.03 Da, K +28.03 Da, | 4452.520508 | 3 | 609.0200195 | 608.6841189 |
| EDVQETDTSQKQSPASHEIATNLGDFALR  | Q00897  | 0          | N-term +28.03 Da, K +28.03 Da, | 4453.206543 | 3 | 1119.869995 | 1120.205974 |
| ASEAIKGAVVGIDLGTTNSCVAVMEGKQAK | P38647  | 0          | N-term +28.03 Da, K +28.03 Da, | 4453.960449 | 4 | 779.6699829 | 779.9228072 |
| EKAAVSCLWGKVNSEVGGALGR         | P02088  | 0          | N-term +28.03 Da, K +28.03 Da, | 4454.202637 | 3 | 872.7700195 | 872.7865263 |
| ASEAIKGAVVGIDLGTTNSCVAVMEGKQAK | P38647  | 0          | N-term +28.03 Da, K +28.03 Da, | 4460.782715 | 3 | 1039.560059 | 1039.561317 |
| DPASTLPDIQVQENFSESR            | Q07456  | 0          | N-term +28.03 Da,              | 4460.958984 | 2 | 1081.52002  | 1081.024029 |
| DDVALEGVGHFFR                  | P29391  | 0          | N-term +28.03 Da,              | 4465.020996 | 3 | 497.25      | 497.2526548 |
| SPGSPLEKLVSSVSDLPKR            | P54869  | 0          | N-term +28.03 Da, K +28.03 Da, | 4471.661133 | 4 | 520.8099976 | 520.805768  |
| GVLEEFGR                       | Q9DBM2  | 0.0008881  | N-term +28.03 Da,              | 4475.936523 | 2 | 541.289978  | 541.2874766 |
| SPGSPLEKLVSSVSDLPKR            | P54869  | 0          | N-term +28.03 Da, K +28.03 Da, | 4477.522949 | 4 | 520.8052979 | 520.805768  |
| LYSSDDVIELTPSNFNR              | Q922R8  | 0.00911162 | N-term +28.03 Da,              | 4478.069336 | 2 | 1043.51001  | 1043.01039  |
| TFQLMGLYGR                     | B5X0G2  | 0.00641026 | N-term +28.03 Da,              | 4483.539551 | 2 | 607.3200073 | 607.3235362 |
| TVGIDDLTGEPLIQR                | TV9WTP7 | 0.00346021 | N-term +28.03 Da,              | 4485.654297 | 2 | 827.960022  | 827.9541564 |
| SFGPIMIISR                     | Q8R0Y6  | 0.03633917 | N-term +28.03 Da,              | 4486.013184 | 2 | 574.8300171 | 574.8284542 |
| HIDCASVYGNETEIGEALKESVSGKAVPR  | Q9JII6  | 0.00341297 | N-term +28.03 Da, K +28.03 Da, | 4492.477539 | 4 | 815.4099731 | 815.1672287 |
| HPDYSVSLLR                     | P07724  | 0          | N-term +28.03 Da,              | 4494.726563 | 2 | 664.8623047 | 664.3720725 |
| SHTSAAAGTMAGVPTVSFSELR         | E9PY03  | 0          | N-term +28.03 Da,              | 4494.848633 | 2 | 1102.550049 | 1103.052066 |
| ISFHLPVNSR                     | Q9D1D4  | 0.0243563  | N-term +28.03 Da,              | 4496.353027 | 3 | 399.5599976 | 399.896142  |
| SHTSAAAGTMAGVPTVSFSELR         | E9PY03  | 0          | N-term +28.03 Da,              | 4497.785645 | 2 | 1103.050049 | 1103.052066 |
| SQAPGPSGKTADYAFEMAVSNIR        | Q8R0N6  | 0          | N-term +28.03 Da, K +28.03 Da, | 4499.362793 | 3 | 818.7399902 | 818.4091671 |
| TLMLPTQTISQGAIEKVKDATR         | Q8C196  | 0          | N-term +28.03 Da, K +28.03 Da, | 4501.625977 | 4 | 622.1099854 | 622.1069159 |
| PEFMPLPVHFYGR                  | Q9ET01  | 0          | N-term +28.03 Da,              | 4501.814453 | 3 | 507.9200134 | 507.5954755 |

|                                         |        |            |                                |             |   |             |             |
|-----------------------------------------|--------|------------|--------------------------------|-------------|---|-------------|-------------|
| ASEAIKGAVVGIDLGTTNSCVAVMEGKQAK          | P38647 | 0          | N-term +28.03 Da, K +28.03 Da, | 4505.731934 | 4 | 779.9199829 | 779.9228072 |
| SAAATSAVPAPNHQPEVFCNQIFINNEWHDAVSR      | P47738 | 0          | N-term +28.03 Da, C +57.02 Da, | 4507.622559 | 4 | 952.4500122 | 952.2089539 |
| KFYGPEGPYGVFAGR                         | O55022 | 0          | N-term +28.03 Da, K +28.03 Da, | 4519.005371 | 2 | 850.4400024 | 850.9433938 |
| ASEAIKGAVVGIDLGTTNSCVAVMEGKQAKVLENAEGAR | P38647 | 0          | N-term +28.03 Da, K +28.03 Da, | 4521.699219 | 4 | 1015.289978 | 1014.792157 |
| NQALLDLHALGSAR                          | P29391 | 0.0410596  | N-term +28.03 Da,              | 4527.743652 | 2 | 753.9099731 | 753.9229927 |
| TALEKFGQAISLLPDR                        | Q8VBW8 | 0          | N-term +28.03 Da, K +28.03 Da, | 4529.512207 | 3 | 605.6799927 | 605.6840076 |
| YLELDTIKNLVR                            | P08113 | 0          | N-term +28.03 Da, K +28.03 Da, | 4529.989258 | 3 | 511.6400146 | 511.6397387 |
| GDVVGSLWFDHIR                           | O35403 | 0          | N-term +28.03 Da,              | 4533.052246 | 3 | 510.269989  | 510.2684162 |
| DELFSDIYKIR                             | P63028 | 0          | N-term +28.03 Da, K +28.03 Da, | 4542.107422 | 3 | 485.9400024 | 485.6011726 |
| ASPGSPLEKLVSSVSDLPKR                    | P54869 | 0          | N-term +28.03 Da, K +28.03 Da, | 4546.599609 | 4 | 539.0700073 | 538.5650465 |
| FSATDLTEFAAR                            | Q8BWT1 | 0.02302861 | N-term +28.03 Da,              | 4547.79834  | 2 | 678.8427124 | 678.8433454 |
| VLSGEDKSNIKAAWGKIGGHGAEYGAEALER         | P01942 | 0          | N-term +28.03 Da, K +28.03 Da, | 4557.958984 | 4 | 832.1900024 | 832.1939406 |
| DQDEIDCLPLGLAKQPSFR                     | P16675 | 0          | N-term +28.03 Da, K +28.03 Da, | 4558.304688 | 2 | 1072.530029 | 1073.035884 |
| MKTILSNQTVDIPENVEITLKGR                 | P51410 | 0          | N-term +28.03 Da, K +28.03 Da, | 4561.647461 | 4 | 672.1300049 | 671.6320268 |
| VLSGEDKSNIKAAWGKIGGHGAEYGAEALER         | P01942 | 0          | N-term +28.03 Da, K +28.03 Da, | 4563.029785 | 3 | 1109.25     | 1109.256162 |
| DQDEIDCLPLGLAKQPSFR                     | P16675 | 0          | N-term +28.03 Da, K +28.03 Da, | 4563.869141 | 3 | 715.6900024 | 715.6930149 |
| TEELDFLHAR                              | P99028 | 0          | N-term +28.03 Da,              | 4566.280762 | 3 | 469.2399902 | 469.2418671 |
| VLSGEDKSNIKAAWGKIGGHGAEYGAEALER         | P01942 | 0          | N-term +28.03 Da, K +28.03 Da, | 4567.394043 | 3 | 1109.920044 | 1109.256162 |
| VHLTDAEKAAVSCLWGKVN                     | P02088 | 0          | N-term +28.03 Da, K +28.03 Da, | 4569.157715 | 3 | 728.0599976 | 728.0611497 |
| IKLDQGGAPLAGTNKETTIGLDGLSER             | Q91Y97 | 0.00708661 | N-term +28.03 Da, K +28.03 Da, | 4569.262695 | 3 | 990.2000122 | 989.5434201 |
| VAGPQPAQTGAPQGSLEGYLFR                  | P29391 | 0          | N-term +28.03 Da,              | 4576.118652 | 2 | 1202.119995 | 1201.11097  |
| ATTFALHDATTVLSR                         | P56480 | 0          | N-term +28.03 Da,              | 4577.887695 | 2 | 816.9299927 | 816.4412158 |
| VAGPQPAQTGAPQGSLEGYLFR                  | P29391 | 0          | N-term +28.03 Da,              | 4579.668945 | 3 | 801.4099731 | 801.0764052 |
| VHLTDAEKAAVSCLWGKVNSEVGGAEALGR          | P02088 | 0          | N-term +28.03 Da, K +28.03 Da, | 4581.627441 | 4 | 814.4199829 | 813.922496  |
| VLSGEDKSNIKAAWGKIGGHGAEYGAEALER         | P01942 | 0          | N-term +28.03 Da, K +28.03 Da, | 4589.115723 | 4 | 832.1900024 | 832.1939406 |
| SYELPDGQVITIGNER                        | P60710 | 0          | N-term +28.03 Da,              | 4592.075684 | 2 | 909.960022  | 909.9652529 |
| LGDFAIISLYR                             | P07758 | 0.00090334 | N-term +28.03 Da,              | 4612.104492 | 2 | 592.3300171 | 591.8295088 |
| ASASSTNLKDVLSNLIPEQAR                   | Q9CZU6 | 0          | N-term +28.03 Da, K +28.03 Da, | 4614.112305 | 4 | 607.3499756 | 607.3457892 |
| SFFEGEDFSETLTR                          | P20029 | 0.01190476 | N-term +28.03 Da,              | 4617.902344 | 2 | 846.3900146 | 846.8912221 |
| VGSLNLEELSEMR                           | Q8K2C7 | 0          | N-term +28.03 Da,              | 4626.929688 | 2 | 752.8900146 | 752.8874275 |
| KNLNQALLDLHALGSAR                       | P29391 | 0          | N-term +28.03 Da, K +28.03 Da, | 4636.541992 | 3 | 630.6900024 | 630.7021726 |
| GFILDGFPR                               | G3UYQ4 | 0.00344828 | N-term +28.03 Da,              | 4646.762695 | 2 | 525.789978  | 525.2925616 |
| VHLTDAEKAAVSCLWGKVNSEVGGAEALGR          | P02088 | 0.00639488 | N-term +28.03 Da, K +28.03 Da, | 4649.569336 | 3 | 1085.550049 | 1084.894236 |
| TFVQENVYDEFVER                          | P47738 | 0          | N-term +28.03 Da,              | 4657.785645 | 2 | 902.9400024 | 901.9334213 |
| MPFVELETNLPASR                          | O35215 | 0          | N-term +28.03 Da,              | 4662.514648 | 2 | 816.4261475 | 816.4267197 |
| MPFVELETNLPASR                          | O35215 | 0          | N-term +28.03 Da,              | 4663.375    | 3 | 544.6193848 | 544.6202386 |
| NDVITVQTPAFAESVTEGDVR                   | Q9D2G2 | 0          | N-term +28.03 Da,              | 4673.426758 | 2 | 1139.579956 | 1138.573886 |
| SGDATLMLPTQTISQGAIEKVKDATR              | Q8C196 | 0          | N-term +28.03 Da, K +28.03 Da, | 4678.241699 | 4 | 704.8900146 | 704.6363038 |
| NDVITVQTPAFAESVTEGDVR                   | Q9D2G2 | 0          | N-term +28.03 Da,              | 4680.748535 | 2 | 1139.069946 | 1138.573886 |
| NDVITVQTPAFAESVTEGDVR                   | Q9D2G2 | 0          | N-term +28.03 Da,              | 4683.323242 | 3 | 759.3900146 | 759.3850161 |

|                                         |        |            |                                |             |   |             |             |
|-----------------------------------------|--------|------------|--------------------------------|-------------|---|-------------|-------------|
| MPFVELETNLPASR                          | O35215 | 0          | N-term +28.03 Da,              | 4693.586914 | 2 | 816.4299927 | 816.4267197 |
| MPFVELETNLPASR                          | O35215 | 0          | N-term +28.03 Da,              | 4694.197266 | 2 | 816.4229126 | 816.4267197 |
| TTALAEFGYIR                             | Q8C165 | 0          | N-term +28.03 Da,              | 4695.225098 | 2 | 700.3599854 | 699.8668205 |
| VASVGKDEYTFVVVGAGSAGCVLASR              | Q8BJ64 | 0          | N-term +28.03 Da, C +57.02 Da, | 4701.940918 | 3 | 886.1300049 | 885.7985434 |
| NDVITVQTPAFAESVTEGDVR                   | Q9D2G2 | 0          | N-term +28.03 Da,              | 4712.167969 | 2 | 1139.069946 | 1138.573886 |
| NDVITVQTPAFAESVTEGDVR                   | Q9D2G2 | 0          | N-term +28.03 Da,              | 4713.492188 | 3 | 759.3800049 | 759.3850161 |
| GDPKEEEEEELVDPLTTVR                     | P99028 | 0.04359141 | N-term +28.03 Da, K +28.03 Da, | 4715.390137 | 3 | 748.0300293 | 747.7092771 |
| GDPKEEEEEELVDPLTTVR                     | P99028 | 0          | N-term +28.03 Da, K +28.03 Da, | 4716.472656 | 2 | 1121.040039 | 1121.060277 |
| AFQDLLNLVGSHGR                          | E9Q6M5 | 0          | N-term +28.03 Da,              | 4721.040039 | 3 | 518.9500122 | 518.9510873 |
| LKDKEVDFWTELR                           | Q8VCC2 | 0          | N-term +28.03 Da, K +28.03 Da, | 4721.26416  | 3 | 588.3200073 | 588.3294532 |
| TQPTDEEMLCFIYSH                         | P31786 | 0          | N-term +28.03 Da,              | 4724.179199 | 2 | 869.9099731 | 869.9032751 |
| SVQEDINSLCLTVVQR                        | P54869 | 0          | N-term +28.03 Da, C +57.02 Da, | 4725.930664 | 2 | 945.4899902 | 944.9934875 |
| DDVALEGVGHFFR                           | P29391 | 0.00497512 | N-term +28.03 Da,              | 4732.604004 | 2 | 745.8900146 | 745.375344  |
| LKAADTIGYPVMIR                          | Q8C196 | 0          | N-term +28.03 Da, K +28.03 Da, | 4734.213867 | 2 | 802.4500122 | 802.4656473 |
| GGLLLGDEAPNFEANTTIGR                    | O08709 | 0          | N-term +28.03 Da,              | 4762.565918 | 2 | 1037.040039 | 1037.034199 |
| LTAEILELAGNAAR                          | P22752 | 0.00347826 | N-term +28.03 Da,              | 4764.293457 | 2 | 735.4199829 | 735.4197517 |
| GLLLGDEAPNFEANTTIGR                     | O08709 | 0          | N-term +28.03 Da,              | 4764.688477 | 2 | 1009.02002  | 1008.523467 |
| GGLLLGDEAPNFEANTTIGR                    | O08709 | 0          | N-term +28.03 Da,              | 4765.959961 | 3 | 692.0300293 | 691.6918913 |
| TFWPAVREDNRR                            | Q91VU1 | 0.04571797 | N-term +28.03 Da,              | 4769.95459  | 2 | 788.4000244 | 787.9129591 |
| GGLLLGDEAPNFEANTTIGR                    | O08709 | 0          | N-term +28.03 Da,              | 4793.62207  | 2 | 1037.030029 | 1037.034199 |
| GGLLLGDEAPNFEANTTIGR                    | O08709 | 0          | N-term +28.03 Da,              | 4798.595703 | 2 | 1038.030029 | 1037.034199 |
| TLLEALDCILPPTRPTDKPLR                   | P10126 | 0          | N-term +28.03 Da, K +28.03 Da, | 4800.020508 | 4 | 619.6099854 | 619.6055459 |
| GKTLNDELEIEGMMKFDR                      | P63038 | 0.01241782 | N-term +28.03 Da, K +28.03 Da, | 4805.765625 | 4 | 549.0499878 | 548.7962432 |
| EGDVLTLLESER                            | P62858 | 0          | N-term +28.03 Da,              | 4809.289063 | 2 | 694.8699951 | 694.867018  |
| LLPPDLPDLEPECR                          | Q8BGT0 | 0          | N-term +28.03 Da, C +57.02 Da, | 4810.405273 | 2 | 846.4299927 | 846.4372847 |
| NCWLARTDPK                              | Q8BH04 | 0.04313725 | N-term +28.03 Da, K +28.03 Da, | 4816.520508 | 2 | 659.3395386 | 658.8426248 |
| TTIAGVVYKDGIVLGADTR                     | P70195 | 0          | N-term +28.03 Da, K +28.03 Da, | 4818.154785 | 3 | 668.710022  | 669.0491271 |
| FPALTPEQKKELSEIAQR                      | Q91Y97 | 0          | N-term +28.03 Da, K +28.03 Da, | 4829.716309 | 3 | 724.0700073 | 723.7474482 |
| FVCPTEIIAFSDR                           | P35700 | 0.0475273  | N-term +28.03 Da, C +57.02 Da, | 4832.169922 | 2 | 791.9000244 | 791.9003375 |
| DELEIEGMMKFDR                           | P63038 | 0          | N-term +28.03 Da, K +28.03 Da, | 4839.875    | 3 | 551.289978  | 550.9517656 |
| LLPPDLPDLEPECR                          | Q8BGT0 | 0          | N-term +28.03 Da, C +57.02 Da, | 4841.028809 | 2 | 846.9400024 | 846.4372847 |
| LTDAEKAAVSCLWGKVNSEVGGALGR              | P02088 | 0          | N-term +28.03 Da, K +28.03 Da, | 4842.125977 | 4 | 754.8900146 | 754.8906643 |
| LTDAEKAAVSCLWGKVNSEVGGALGR              | P02088 | 0          | N-term +28.03 Da, K +28.03 Da, | 4844.437988 | 4 | 755.1400146 | 754.8906643 |
| APATTFAHLDATTVLSR                       | P56480 | 0          | N-term +28.03 Da,              | 4847.922852 | 2 | 900.9699707 | 900.486155  |
| AGLLEKLETEYDVR                          | Q61176 | 0.00572363 | N-term +28.03 Da, K +28.03 Da, | 4849.20459  | 3 | 617.0100098 | 616.6874179 |
| ASEAIKGAVVGIDLGTTNSCVAVMEGKQAKVLENAEGAR | P38647 | 0          | N-term +28.03 Da, K +28.03 Da, | 4852.281738 | 4 | 1014.789978 | 1014.792157 |
| ECDKLYFEELSRLER                         | Q8C196 | 0.0009009  | N-term +28.03 Da, K +28.03 Da, | 4859.213867 | 2 | 944.4500122 | 943.9638644 |
| APATTFAHLDATTVLSR                       | P56480 | 0          | N-term +28.03 Da,              | 4867.724121 | 2 | 900.4799805 | 900.486155  |
| ASEAIKGAVVGIDLGTTNSCVAVMEGKQAKVLENAEGAR | P38647 | 0          | N-term +28.03 Da, K +28.03 Da, | 4867.970703 | 4 | 1015.289978 | 1014.792157 |
| FVDVPPNDSSSQIVKNPR                      | Q61176 | 0          | N-term +28.03 Da, K +28.03 Da, | 4873.584473 | 2 | 1009.530029 | 1009.538919 |

|                                          |        |            |                                |             |   |             |             |
|------------------------------------------|--------|------------|--------------------------------|-------------|---|-------------|-------------|
| EEDSTALVCDNGSGLCKAGFAGDDAPR              | P62737 | 0.00088889 | N-term +28.03 Da, K +28.03 Da, | 4874.931152 | 2 | 1434.130005 | 1434.642378 |
| CGGLAASAMDELLR                           | Q99J39 | 0          | N-term +28.03 Da, C +57.02 Da, | 4875.54248  | 2 | 747.3699951 | 746.3683473 |
| AIVDVPVGEELLGR                           | Q03265 | 0          | N-term +28.03 Da,              | 4880.416504 | 2 | 747.9299927 | 747.9299522 |
| TVINLNVPEVIKQR                           | Q9WTP7 | 0          | N-term +28.03 Da, K +28.03 Da, | 4882.750488 | 3 | 609.7000122 | 609.3681306 |
| ELPGHLKPFETLLAQRN                        | F6RWR5 | 0          | N-term +28.03 Da, K +28.03 Da, | 4883.097168 | 3 | 674.039978  | 673.7177114 |
| VHLTDAEKAASVSLWGKVNSEVGGGEALGR           | P02088 | 0          | N-term +28.03 Da, K +28.03 Da, | 4887.893066 | 4 | 814.1699829 | 813.922496  |
| LGLEELGIELDPKGR                          | O08749 | 0          | N-term +28.03 Da, K +28.03 Da, | 4890.466797 | 3 | 566         | 565.6610915 |
| GGLLLGDEAPNFEANTTIGR                     | O08709 | 0          | N-term +28.03 Da,              | 4891.931152 | 2 | 1037.540039 | 1037.034199 |
| GAIVDVPVGEELLGR                          | Q03265 | 0          | N-term +28.03 Da,              | 4892.057129 | 2 | 776.4400024 | 776.4406843 |
| APVIEPSGPELVVEPGETVTLR                   | P09581 | 0          | N-term +28.03 Da,              | 4895.392578 | 2 | 1160.140015 | 1159.136122 |
| ASEAIKGAVVGIDLGTNTNSCVAVMEGKQAKVLENAEGAR | P38647 | 0          | N-term +28.03 Da, K +28.03 Da, | 4896.727051 | 4 | 1014.539978 | 1014.792157 |
| NKELDPVQKLFVDKIR                         | P97450 | 0          | N-term +28.03 Da, K +28.03 Da, | 4901.660645 | 3 | 685.0700073 | 685.4172618 |
| ASEAIKGAVVGIDLGTNTNSCVAVMEGKQAKVLENAEGAR | P38647 | 0          | N-term +28.03 Da, K +28.03 Da, | 4901.972656 | 4 | 1015.289978 | 1014.792157 |
| KVYDLTKFLEEHPGGEEVLR                     | P56395 | 0          | N-term +28.03 Da, K +28.03 Da, | 4913.826172 | 4 | 611.8300171 | 611.5862449 |
| VVLPMEPIR                                | P00405 | 0          | N-term +28.03 Da,              | 4914.393066 | 2 | 598.3699951 | 597.8675793 |
| DALEEEEDNVLVLK                           | P09103 | 0          | N-term +28.03 Da, K +28.03 Da, | 4917.641602 | 2 | 771.4099731 | 771.9167082 |
| DVITVQTPAFAESVTEGDVR                     | Q9D2G2 | 0          | N-term +28.03 Da,              | 4917.837402 | 2 | 1082.540039 | 1081.552422 |
| DVITVQTPAFAESVTEGDVR                     | Q9D2G2 | 0          | N-term +28.03 Da,              | 4921.35498  | 3 | 721.3699951 | 721.3707067 |
| VSCLWGKVNSEVGGGEALGR                     | P02088 | 0          | N-term +28.03 Da, K +28.03 Da, | 4922.962891 | 2 | 1095.540039 | 1095.054608 |
| SAKVSDAISTQYPVVDHEFDVAVVGAGGAGLR         | Q8K2B3 | 0          | N-term +28.03 Da, K +28.03 Da, | 4943.520508 | 4 | 818.9299927 | 818.6793948 |
| TGAIVDVPVGEELLGR                         | Q03265 | 0          | N-term +28.03 Da,              | 4945.511719 | 2 | 826.960022  | 826.9645239 |
| MFEPTCLDAFPNLK                           | Q35660 | 0.01175606 | N-term +28.03 Da, K +28.03 Da, | 4946.583496 | 2 | 869.4199829 | 869.9307806 |
| VHLTDAEKAASVSLWGKVNSEVGGGEALGR           | P02088 | 0          | N-term +28.03 Da, K +28.03 Da, | 4949.074707 | 3 | 1085.22998  | 1084.894236 |
| ASPGSPLEKLVSSVSDLPKR                     | P54869 | 0.01586157 | N-term +28.03 Da, K +28.03 Da, | 4950.375488 | 3 | 717.4099731 | 717.7509699 |
| WGKVNSEVGGGEALGR                         | P02088 | 0          | N-term +28.03 Da, K +28.03 Da, | 4952.73291  | 2 | 864.9299927 | 865.4470298 |
| ASQQDFENALNQVKL                          | Q9WUR2 | 0.02967564 | N-term +28.03 Da, K +28.03 Da, | 4956.029785 | 3 | 587.9799805 | 587.6441008 |
| AVSCLWGKVNSEVGGGEALGR                    | P02088 | 0          | N-term +28.03 Da, K +28.03 Da, | 4956.267578 | 2 | 1131.560059 | 1130.573165 |
| SAKVSDAISTQYPVVDHEFDVAVVGAGGAGLR         | Q8K2B3 | 0          | N-term +28.03 Da, K +28.03 Da, | 4957.675781 | 3 | 1091.569946 | 1091.236768 |
| ASASSTNLKDVLSNLIPEQAR                    | Q9CZU6 | 0          | N-term +28.03 Da, K +28.03 Da, | 4963.248535 | 3 | 809.1199951 | 809.4586267 |
| PAPATTFAHLDATTVLSR                       | P56480 | 0          | N-term +28.03 Da,              | 4966.932617 | 2 | 948.9966431 | 949.0125371 |
| SQAPGPSGKTADYAFEMAVSNIR                  | Q8R0N6 | 0          | N-term +28.03 Da, K +28.03 Da, | 4971.861816 | 3 | 818.0700073 | 818.4091671 |
| VHLTDAEKAASVSLWGKVNSEVGGGEALGR           | P02088 | 0          | N-term +28.03 Da, K +28.03 Da, | 4976.143555 | 4 | 813.9209595 | 813.922496  |
| NDVITVQTPAFAESVTEGDVR                    | Q9D2G2 | 0          | N-term +28.03 Da,              | 4976.509766 | 2 | 1139.560059 | 1138.573886 |
| VHLTDAEKAASVSLWGKVNSEVGGGEALGR           | P02088 | 0          | N-term +28.03 Da, K +28.03 Da, | 4979.689941 | 3 | 1085.560059 | 1084.894236 |
| VHLTDAEKAASVSLWGKVNSEVGGGEALGR           | P02088 | 0          | N-term +28.03 Da, K +28.03 Da, | 4979.776367 | 3 | 1084.900024 | 1084.894236 |
| NDVITVQTPAFAESVTEGDVR                    | Q9D2G2 | 0          | N-term +28.03 Da,              | 4984.715332 | 3 | 760.039978  | 759.3850161 |
| NDVITVQTPAFAESVTEGDVR                    | Q9D2G2 | 0          | N-term +28.03 Da,              | 4986.347656 | 2 | 1139.060059 | 1138.573886 |
| TELNGDTITNTMTLGDIVYKR                    | P12710 | 0          | N-term +28.03 Da, K +28.03 Da, | 4990.313965 | 3 | 804.75      | 804.4210729 |
| MQIFVKTLTGK                              | POCG49 | 0.00717131 | N-term +28.03 Da, K +28.03 Da, | 4993.577637 | 2 | 674.9099731 | 675.4148941 |
| DGETFQLMGLYGR                            | B5X0G2 | 0          | N-term +28.03 Da,              | 4999.893555 | 2 | 758.3599854 | 757.8690374 |



|                                    |        |            |                                |             |   |             |             |
|------------------------------------|--------|------------|--------------------------------|-------------|---|-------------|-------------|
| VEDYLSAILNR                        | P07724 | 0.04316547 | N-term +28.03 Da,              | 5000.634766 | 2 | 660.8599854 | 660.861538  |
| GSINYNPEVLDITEQALHSR               | P14869 | 0.0034965  | N-term +28.03 Da,              | 5002.406738 | 3 | 724.3829346 | 724.0428127 |
| DAGEFVDLYVPR                       | Q9CQR2 | 0          | N-term +28.03 Da,              | 5011.145508 | 2 | 704.8599854 | 704.8589955 |
| KWERYKNTTEKFHRR                    | Q80XC3 | 0.04345006 | N-term +28.03 Da, K +28.03 Da, | 5026.543457 | 2 | 1046.099976 | 1045.592154 |
| TLNDELEIIEGMKFDR                   | P63038 | 0          | N-term +28.03 Da, K +28.03 Da, | 5030.475586 | 3 | 660.6799927 | 660.3433229 |
| VHLTDAEKSAVSLWAK                   | P02089 | 0          | N-term +28.03 Da, K +28.03 Da, | 5031.379883 | 3 | 667.3599854 | 667.0275572 |
| DLTDPAPATTF AHL DATTVLSR           | P56480 | 0          | N-term +28.03 Da,              | 5042.289551 | 3 | 781.0700073 | 781.0726608 |
| VHLTDAEKA AVSCLWGK VNSDEVGG EALGR  | P02088 | 0.00342173 | N-term +28.03 Da, K +28.03 Da, | 5051.026855 | 4 | 814.1699829 | 813.922496  |
| VHLTDAEKSAVSLWAKVNPDEVGG EALGR     | P02089 | 0          | N-term +28.03 Da, K +28.03 Da, | 5062.359375 | 3 | 1098.910034 | 1098.238002 |
| EDVQETDTSQKDQSPASHEIATNLGDF AISLYR | P07758 | 0.00343348 | N-term +28.03 Da, K +28.03 Da, | 5071.47998  | 3 | 1241.599976 | 1241.265781 |
| EDVQETDTSQKDQSPASHEIATNLGDF AISLYR | P07758 | 0          | N-term +28.03 Da, K +28.03 Da, | 5071.59375  | 4 | 931.2000122 | 931.2011552 |
| TFLGGEDFDQALLR                     | P38647 | 0          | N-term +28.03 Da,              | 5074.726074 | 2 | 805.4099731 | 805.4146667 |
| AIKFLEVIKPF                        | P61620 | 0          | N-term +28.03 Da, K +28.03 Da, | 5080.008789 | 3 | 463.6300049 | 463.6353767 |
| FGYFEVTHDITR                       | P24270 | 0          | N-term +28.03 Da,              | 5081.284668 | 2 | 756.3699951 | 756.8777195 |
| PGLLLGDEAPNFEANTTIGR               | O08709 | 0.0057377  | N-term +28.03 Da,              | 5084.797852 | 2 | 1086.550049 | 1085.560581 |
| FGYFEVTHDITR                       | P24270 | 0          | N-term +28.03 Da,              | 5088.113281 | 2 | 757.8699951 | 756.8777195 |
| LDVAVLVGSMPR                       | P14152 | 0          | N-term +28.03 Da,              | 5098.37793  | 2 | 642.8699951 | 642.8708509 |
| DVALEGVGHFFR                       | P29391 | 0          | N-term +28.03 Da,              | 5098.510254 | 2 | 688.3499756 | 687.8618719 |
| SALELTHEELATAEAVR                  | Q8R0Y6 | 0          | N-term +28.03 Da,              | 5102.51709  | 3 | 620.9899902 | 620.6580762 |
| VNFTVDQIR                          | P58252 | 0.00089445 | N-term +28.03 Da,              | 5104.055664 | 2 | 559.7999878 | 560.3114832 |
| SALELTHEELATAEAVR                  | Q8R0Y6 | 0          | N-term +28.03 Da,              | 5105.166504 | 2 | 930.4799805 | 930.483476  |
| VHLTDAEKSAVSLW                     | P02089 | 0          | N-term +28.03 Da, C +57.02 Da, | 5114.224121 | 2 | 886.4400024 | 886.4560088 |
| LDPAFTPATGTPVLGGLSYR               | Q61176 | 0          | N-term +28.03 Da,              | 5117.267578 | 2 | 1031.060059 | 1031.054402 |
| SQSLFVDIPSKIICR                    | Q64374 | 0          | N-term +28.03 Da, C +57.02 Da, | 5117.427734 | 3 | 645.039978  | 644.7044143 |
| VLESVVADLLNR                       | Q8BX70 | 0          | N-term +28.03 Da,              | 5118.081543 | 2 | 678.9000244 | 678.3982876 |
| EFTLGEECELETMTGEKVK                | P12710 | 0          | N-term +28.03 Da, K +28.03 Da, | 5125.383301 | 3 | 771.710022  | 772.0446147 |
| EFTLGEECELETMTGEKVK                | P12710 | 0          | N-term +28.03 Da, K +28.03 Da, | 5127.211426 | 2 | 1157.560059 | 1157.563284 |
| LKTLVPVPTFENV SIPER                | Q99N93 | 0          | N-term +28.03 Da, K +28.03 Da, | 5129.975098 | 3 | 703.75      | 703.7487888 |
| TIAQDYGV LK ADEGISFR               | P35700 | 0          | N-term +28.03 Da, K +28.03 Da, | 5130.709961 | 2 | 1021.030029 | 1020.044035 |
| GILEKISEIEKIAR                     | Q9QXB9 | 0          | N-term +28.03 Da, K +28.03 Da, | 5133.205566 | 4 | 454.0299988 | 453.7764788 |
| LTD PAPATTF AHL DATTVLSR           | P56480 | 0.01186944 | N-term +28.03 Da,              | 5136.086426 | 3 | 742.4000244 | 742.7303461 |
| TIAQDYGV LK ADEGISFR               | P35700 | 0          | N-term +28.03 Da, K +28.03 Da, | 5138.720215 | 2 | 1020.530029 | 1020.044035 |
| GVQPPNF SWVLPGR                    | Q6NT99 | 0.00698216 | N-term +28.03 Da,              | 5144.812012 | 2 | 792.4199829 | 791.4304532 |
| GLDPAFTPATGTPVLGGLSYR              | Q61176 | 0          | N-term +28.03 Da,              | 5153.809082 | 2 | 1060.069946 | 1059.565134 |
| SPASHEIATNLGDF AISLYR              | P07758 | 0          | N-term +28.03 Da,              | 5155.690918 | 3 | 730.710022  | 730.7111744 |
| VHLTDAEKA AVSCLWGK VNSDEVGG EALGR  | P02088 | 0          | N-term +28.03 Da, K +28.03 Da, | 5156.062988 | 4 | 814.1599731 | 813.922496  |
| GLDPAFTPATGTPVLGGLSYR              | Q61176 | 0          | N-term +28.03 Da,              | 5157.336914 | 3 | 706.710022  | 706.712515  |
| VHLTDAEKA AVSCLWGK VNSDEVGG EALGR  | P02088 | 0          | N-term +28.03 Da, K +28.03 Da, | 5157.579102 | 3 | 1085.560059 | 1084.894236 |
| VHLTDAEKA AVSCLWGK VNSDEVGG EALGR  | P02088 | 0          | N-term +28.03 Da, K +28.03 Da, | 5161.07959  | 4 | 813.9099731 | 813.922496  |
| VKLTAE LIEQAAQYTN AVR              | P57784 | 0          | N-term +28.03 Da, K +28.03 Da, | 5163.952637 | 3 | 726.0800171 | 725.4108362 |

|                                    |        |            |                                |             |   |             |             |
|------------------------------------|--------|------------|--------------------------------|-------------|---|-------------|-------------|
| SLLFVDIPSKIICR                     | Q64374 | 0          | N-term +28.03 Da, C +57.02 Da, | 5179.33252  | 3 | 573.3400269 | 573.0075451 |
| VSPSPVDPVAVPVVPIGPPAGFR            | Q05920 | 0          | N-term +28.03 Da,              | 5179.797363 | 3 | 760.7600098 | 760.7632096 |
| SLLFVDIPSKIICR                     | Q64374 | 0.01170446 | N-term +28.03 Da, C +57.02 Da, | 5187.961914 | 2 | 859.5100098 | 859.0076795 |
| VSPSPVDPVAVPVVPIGPPAGFR            | Q05920 | 0          | N-term +28.03 Da,              | 5190.426758 | 2 | 1141.640015 | 1140.641176 |
| APSQLALFVSDKTGLVEFAR               | Q9CWJ9 | 0          | N-term +28.03 Da, K +28.03 Da, | 5191.719238 | 3 | 765.0900269 | 764.7581246 |
| EGEPEVTDQLEWQSNQPWEQALNR           | P08226 | 0          | N-term +28.03 Da,              | 5219.385254 | 3 | 971.4500122 | 971.1212917 |
| DEPQSQWDKVKDFANVYVDAVKDSGR         | Q00623 | 0          | N-term +28.03 Da, K +28.03 Da, | 5221.349609 | 4 | 778.1400146 | 777.8963754 |
| EGEPEVTDQLEWQSNQPWEQALNR           | P08226 | 0          | N-term +28.03 Da,              | 5226.667969 | 2 | 1456.680054 | 1456.178299 |
| ECYSVFTNRRRIPLK                    | D3Z707 | 0.0137881  | N-term +28.03 Da, K +28.03 Da, | 5231.624023 | 2 | 919.4899902 | 920.0009174 |
| GPSQMALEDLAMFR                     | P40142 | 0          | N-term +28.03 Da,              | 5231.750977 | 2 | 797.8900146 | 797.3918224 |
| PTGGAGAVAMLIGPKAPLVLEQLGR          | P54869 | 0          | N-term +28.03 Da, K +28.03 Da, | 5233.414551 | 2 | 1237.709961 | 1236.722175 |
| GPSQMALEDLAMFR                     | P40142 | 0          | N-term +28.03 Da,              | 5235.336914 | 2 | 797.3900146 | 797.3918224 |
| DIVLTQSPASLAVSLGQR                 | P01654 | 0          | N-term +28.03 Da,              | 5244.638672 | 2 | 942.0300293 | 942.0334697 |
| GDTFLGGEDFDQALLR                   | P38647 | 0          | N-term +28.03 Da,              | 5245.368652 | 2 | 891.4400024 | 891.4388708 |
| SDVLELTDENFESR                     | P27773 | 0.01178203 | N-term +28.03 Da,              | 5249.825684 | 2 | 841.3900146 | 841.3994117 |
| DIVLTQSPASLAVSLGQR                 | P01654 | 0          | N-term +28.03 Da,              | 5252.919922 | 2 | 943.039978  | 942.0334697 |
| FTLGEECELETMTGEKVK                 | P12710 | 0          | N-term +28.03 Da, K +28.03 Da, | 5253.068848 | 2 | 1093.530029 | 1093.041987 |
| EWDFQGLSLKMPVPFIPR                 | Q921L7 | 0.00564516 | N-term +28.03 Da, K +28.03 Da, | 5254.512695 | 3 | 772.4299927 | 772.4255402 |
| AIAELGIYPAVDPLDSTSR                | P56480 | 0          | N-term +28.03 Da,              | 5265.921875 | 2 | 1009.039978 | 1008.536043 |
| WKRDRQETLEAAVYVPPVDDPR             | E9Q6U5 | 0.00702576 | N-term +28.03 Da, K +28.03 Da, | 5267.841309 | 3 | 861.8200073 | 861.8062491 |
| TVVEVPQVTWEDIGGLEDKR               | Q01853 | 0          | N-term +28.03 Da, K +28.03 Da, | 5274.849609 | 3 | 809.4400024 | 809.103961  |
| GFTYYKAGRQEAR                      | Q8BHP7 | 0.03735824 | N-term +28.03 Da, K +28.03 Da, | 5275.879395 | 2 | 801.9099731 | 801.9229927 |
| NDVITVQTPAFAESVTEGDVR              | Q9D2G2 | 0          | N-term +28.03 Da,              | 5279.075195 | 2 | 1139.060059 | 1138.573886 |
| AILEDLVFPSEIVGKR                   | P62082 | 0          | N-term +28.03 Da, K +28.03 Da, | 5279.440918 | 3 | 614.7000122 | 614.6960246 |
| ASAKVSDAISTQYPVVDHEFDVAVVVGAGGAGLR | Q8K2B3 | 0          | N-term +28.03 Da, K +28.03 Da, | 5283.213867 | 3 | 1114.569946 | 1114.915806 |
| NDVITVQTPAFAESVTEGDVR              | Q9D2G2 | 0          | N-term +28.03 Da,              | 5284.662109 | 3 | 760.0499878 | 759.3850161 |
| VLSGEDKSNKAAWGKIGGHGAEYGAELER      | P01942 | 0          | N-term +28.03 Da, K +28.03 Da, | 5292.97998  | 4 | 831.9299927 | 832.1939406 |
| ASAKVSDAISTQYPVVDHEFDVAVVVGAGGAGLR | Q8K2B3 | 0          | N-term +28.03 Da, K +28.03 Da, | 5295.61377  | 4 | 836.1900024 | 836.4386733 |
| LDPGVVDNFPLLK                      | P30115 | 0          | N-term +28.03 Da, K +28.03 Da, | 5296.134277 | 2 | 742.4299927 | 741.9319632 |
| FLAYDILDQYR                        | P10649 | 0          | N-term +28.03 Da,              | 5303.450195 | 2 | 723.3800049 | 722.877188  |
| ASQQDFENALNQVKL                    | Q9WUR2 | 0          | N-term +28.03 Da, K +28.03 Da, | 5306.284668 | 2 | 880.460022  | 880.9625129 |
| VKVLGTSVESIMATEDR                  | Q8C196 | 0          | N-term +28.03 Da, K +28.03 Da, | 5307.77832  | 2 | 946.5       | 946.0138885 |
| NDVITVQTPAFAESVTEGDVR              | Q9D2G2 | 0          | N-term +28.03 Da,              | 5311.022949 | 2 | 1139.062988 | 1138.573886 |
| VKVLGTSVESIMATEDR                  | Q8C196 | 0          | N-term +28.03 Da, K +28.03 Da, | 5315.341797 | 3 | 631.6699829 | 631.0116845 |
| MKTILSNQTVDIPENVEITLKGR            | P51410 | 0          | N-term +28.03 Da, K +28.03 Da, | 5318.316406 | 3 | 895.1699829 | 895.1736102 |
| MKTILSNQTVDIPENVEITLKGR            | P51410 | 0          | N-term +28.03 Da, K +28.03 Da, | 5318.4375   | 4 | 671.6300049 | 671.6320268 |
| VKVLGTSVESIMATEDR                  | Q8C196 | 0          | N-term +28.03 Da, K +28.03 Da, | 5326.587402 | 2 | 946         | 946.0138885 |
| VHLTDAEKAAVSCLWGKVNSEVGGGALGR      | P02088 | 0          | N-term +28.03 Da, K +28.03 Da, | 5331.29834  | 4 | 814.1699829 | 813.922496  |
| SITTIIDTFHQY                       | P31725 | 0          | N-term +28.03 Da,              | 5334.299805 | 2 | 733.8800049 | 733.879928  |
| SSALELTEEELATAEAVR                 | Q8R0Y6 | 0          | N-term +28.03 Da,              | 5341.512695 | 2 | 974         | 973.9994906 |

|                               |        |            |                                |             |   |             |             |
|-------------------------------|--------|------------|--------------------------------|-------------|---|-------------|-------------|
| ADLPALPGGPAGGTGELAKYGLPGVAQLR | O08600 | 0          | N-term +28.03 Da, K +28.03 Da, | 5343.26416  | 3 | 935.1900024 | 934.855269  |
| TGAIVDVPVGEELLGR              | Q03265 | 0          | N-term +28.03 Da,              | 5349.822754 | 2 | 826.460022  | 826.9645239 |
| DPAIYFKEQFLDGDWNTNR           | P14211 | 0          | N-term +28.03 Da, K +28.03 Da, | 5356.449219 | 3 | 781.7199707 | 781.3865794 |
| DPAIYFKEQFLDGDWNTNR           | P14211 | 0          | N-term +28.03 Da, K +28.03 Da, | 5362.032715 | 2 | 1172.589966 | 1171.576231 |
| TGDSVVVAPAQTLNAEFQMLR         | Q8C196 | 0          | N-term +28.03 Da,              | 5369.816406 | 2 | 1182.609985 | 1181.607205 |
| DPAIYFKEQFLDGDWNTNR           | P14211 | 0          | N-term +28.03 Da, K +28.03 Da, | 5371.158691 | 2 | 1171.569946 | 1171.576231 |
| VDYEVVLGVQR                   | O54946 | 0          | N-term +28.03 Da,              | 5383.691895 | 2 | 684.3499756 | 684.861538  |
| DPAIYFKEQFLDGDWNTNR           | P14211 | 0          | N-term +28.03 Da, K +28.03 Da, | 5387.797363 | 3 | 781.7199707 | 781.3865794 |
| NDVITVQTPAFAESVTEGDVR         | Q9D2G2 | 0          | N-term +28.03 Da,              | 5388.417969 | 2 | 1138.060059 | 1138.573886 |
| VHLTDAEKAASVSLWGKVNSEVGGGALGR | P02088 | 0          | N-term +28.03 Da, K +28.03 Da, | 5392.674805 | 3 | 1085.209961 | 1084.894236 |
| NDVITVQTPAFAESVTEGDVR         | Q9D2G2 | 0          | N-term +28.03 Da,              | 5394.025879 | 3 | 759.3800049 | 759.3850161 |
| VSLWGKVNSEVGGGALGR            | P02088 | 0          | N-term +28.03 Da, K +28.03 Da, | 5400.694336 | 2 | 1095.069946 | 1095.054608 |
| DPAIYFKEQFLDGDWNTNR           | P14211 | 0          | N-term +28.03 Da, K +28.03 Da, | 5401.733398 | 2 | 1172.069946 | 1171.576231 |
| PMFIVNTNVPR                   | P34884 | 0          | N-term +28.03 Da,              | 5405.009766 | 2 | 657.8499756 | 658.3631928 |
| DEPQSQWDKVKDFANVYVDAVKDSGR    | Q00623 | 0          | N-term +28.03 Da, K +28.03 Da, | 5406.249023 | 4 | 778.1400146 | 777.8963754 |
| GSPLEKLVSSVSDLPKR             | P54869 | 0          | N-term +28.03 Da, K +28.03 Da, | 5407.95166  | 3 | 632.7000122 | 632.710334  |
| IIGGSMDAKGSFPWQAK             | Q61646 | 0          | N-term +28.03 Da, K +28.03 Da, | 5408.027344 | 3 | 626.3300171 | 626.3378428 |
| VHLTDAEKAASVSLWGKVNSEVGGGALGR | P02088 | 0          | N-term +28.03 Da, K +28.03 Da, | 5410.852539 | 4 | 814.4099731 | 813.922496  |
| DEPQSQWDKVKDFANVYVDAVKDSGR    | Q00623 | 0.02239328 | N-term +28.03 Da, K +28.03 Da, | 5413.538574 | 3 | 1036.52002  | 1036.859408 |
| DPAIYFKEQFLDGDWNTNR           | P14211 | 0          | N-term +28.03 Da, K +28.03 Da, | 5418.5      | 3 | 781.7199707 | 781.3865794 |
| ILLDALDKIKTK                  | P16015 | 0          | N-term +28.03 Da, K +28.03 Da, | 5420.22168  | 3 | 495.6600037 | 495.0004962 |
| MFASFPTTK                     | P01942 | 0          | N-term +28.03 Da, K +28.03 Da, | 5424.665039 | 2 | 542.7800293 | 543.2886305 |
| VHLTDAEKAASVSLWGKVNSEVGGGALGR | P02088 | 0          | N-term +28.03 Da, K +28.03 Da, | 5426.875977 | 3 | 1085.550049 | 1084.894236 |
| PMFIVNTNVPR                   | P34884 | 0          | N-term +28.03 Da,              | 5427.904785 | 2 | 658.3699951 | 658.3631928 |
| TLSEESYKDSTLIMQLLR            | P62259 | 0.01186064 | N-term +28.03 Da, K +28.03 Da, | 5428.441406 | 3 | 728.3900146 | 728.3924541 |
| TLGIETVGGVMTKLIPR             | P20029 | 0          | N-term +28.03 Da, K +28.03 Da, | 5436.101074 | 3 | 614.7000122 | 614.3691429 |
| VDGLDPAFTPATGTPVLGGLSYR       | Q61176 | 0          | N-term +28.03 Da,              | 5437.77002  | 2 | 1167.609985 | 1166.612814 |
| GPFTPDLAHPADVGTVAEKEGWPLDIR   | Q99K10 | 0          | N-term +28.03 Da, K +28.03 Da, | 5442.53125  | 4 | 761.9000244 | 761.6526481 |
| TPEIAGLTPSQALEIIR             | A2AS89 | 0.00843558 | N-term +28.03 Da,              | 5444.414551 | 2 | 919.024292  | 919.0251132 |
| VHLTDAEKSAVSLWAKVNPDEVGGGALGR | P02089 | 0.01050263 | N-term +28.03 Da, K +28.03 Da, | 5448.144531 | 4 | 824.1900024 | 823.930321  |
| TGEAIVDAALSALR                | Q922R8 | 0          | N-term +28.03 Da,              | 5451.689941 | 2 | 708.4000244 | 707.8986521 |
| NDVITVQTPAFAESVTEGDVR         | Q9D2G2 | 0          | N-term +28.03 Da,              | 5451.936523 | 2 | 1138.060059 | 1138.573886 |
| NDVITVQTPAFAESVTEGDVR         | Q9D2G2 | 0          | N-term +28.03 Da,              | 5458.21875  | 3 | 759.0499878 | 759.3850161 |
| TGEAIVDAALSALR                | Q922R8 | 0          | N-term +28.03 Da,              | 5460.332031 | 2 | 707.3900146 | 707.8986521 |
| DWVIPPINLPENSR                | P15116 | 0          | N-term +28.03 Da,              | 5462.605957 | 2 | 839.4500122 | 839.4515833 |
| DWVIPPINLPENSR                | P15116 | 0          | N-term +28.03 Da,              | 5464.234375 | 2 | 840.4500122 | 839.4515833 |
| VRMNVLADALKSINNAEKR           | P62245 | 0          | N-term +28.03 Da, K +28.03 Da, | 5466.192383 | 4 | 557.0700073 | 557.3242305 |
| VNPTVFFDITADDEPLGR            | P17742 | 0          | N-term +28.03 Da,              | 5472.828613 | 2 | 1018.01001  | 1017.512568 |
| AKFEELNMDLFR                  | P20029 | 0          | N-term +28.03 Da, K +28.03 Da, | 5473.464355 | 2 | 784.4199829 | 784.9107051 |
| VNPTVFFDITADDEPLGR            | P17742 | 0          | N-term +28.03 Da,              | 5475.052246 | 2 | 1018.52002  | 1017.512568 |

|                                 |        |            |                                |             |   |             |             |
|---------------------------------|--------|------------|--------------------------------|-------------|---|-------------|-------------|
| LSPTNCDASEPLAEKVLDLINKGR        | Q9ESB3 | 0          | N-term +28.03 Da, K +28.03 Da, | 5481.720703 | 4 | 682.1199951 | 681.8704715 |
| VHLTDAEKAAVSCLWGKVNSEVGGGALGR   | P02088 | 0          | N-term +28.03 Da, K +28.03 Da, | 5487.200195 | 3 | 1085.219971 | 1084.894236 |
| DWVIPPINLPENSR                  | P15116 | 0          | N-term +28.03 Da,              | 5494.422363 | 2 | 839.4501343 | 839.4515833 |
| VHLTDAEKAAVSCLWGKVNSEVGGGALGR   | P02088 | 0          | N-term +28.03 Da, K +28.03 Da, | 5498.585938 | 4 | 813.9127808 | 813.922496  |
| ADQPIEADVTVIGSGPGGYVAIAK        | O08749 | 0          | N-term +28.03 Da, K +28.03 Da, | 5507.820313 | 3 | 795.0900269 | 795.4284446 |
| DDLTPAPATTFAHLDATTVLSR          | P56480 | 0          | N-term +28.03 Da,              | 5510.161133 | 2 | 1229.099976 | 1228.618825 |
| LSPTNCDASEPLAEKVLDLINKGR        | Q9ESB3 | 0          | N-term +28.03 Da, K +28.03 Da, | 5513.783691 | 4 | 682.3699951 | 681.8704715 |
| VLLESEQFLTELTR                  | P16254 | 0          | N-term +28.03 Da,              | 5515.726074 | 2 | 853.4699707 | 853.4721819 |
| VHLTDAEKAAVSCLWGKVNSEVGGGALGR   | P02088 | 0          | N-term +28.03 Da, K +28.03 Da, | 5518.869629 | 3 | 1084.881348 | 1084.894236 |
| VHLTDAEKSAVSLWAKVNPDEVGGGALGR   | P02089 | 0          | N-term +28.03 Da, K +28.03 Da, | 5522.364746 | 4 | 824.4299927 | 823.930321  |
| HVEELDPGVVDNFPLLKALR            | P30115 | 0          | N-term +28.03 Da, K +28.03 Da, | 5524.067871 | 3 | 773.0999756 | 773.1020026 |
| EDVQETDTSQKQSPASHEIATNLGDFALSYR | P07758 | 0          | N-term +28.03 Da, K +28.03 Da, | 5528.413086 | 3 | 1241.589966 | 1241.265781 |
| VHLTDAEKAAVSCLWGKVNSEVGGGALGR   | P02088 | 0          | N-term +28.03 Da, K +28.03 Da, | 5529.690918 | 4 | 813.9099731 | 813.922496  |
| DPAIYFKEQFLDGDWNTNR             | P14211 | 0          | N-term +28.03 Da, K +28.03 Da, | 5530.141602 | 3 | 781.7199707 | 781.3865794 |
| MQIFVKLTGKTITLEVEPSDTIENVKAK    | P0CG49 | 0.01583873 | N-term +28.03 Da, K +28.03 Da, | 5533.916992 | 4 | 844.2299805 | 844.2371225 |
| EDVQETDTSQKQSPASHEIATNLGDFALSYR | P07758 | 0          | N-term +28.03 Da, K +28.03 Da, | 5535.81543  | 3 | 1240.920044 | 1241.265781 |
| GSASGTTLLEALDCILPPTRPDKPLR      | P10126 | 0          | N-term +28.03 Da, K +28.03 Da, | 5537.978516 | 4 | 735.1500244 | 734.6534909 |
| SASGTTLLEALDCILPPTRPDKPLR       | P10126 | 0          | N-term +28.03 Da, K +28.03 Da, | 5540.766602 | 4 | 720.9000244 | 720.3981248 |
| VHLTDAEKAAVSCLWGKVNSEVGGGALGR   | P02088 | 0          | N-term +28.03 Da, K +28.03 Da, | 5541.939453 | 3 | 1084.560059 | 1084.894236 |
| DPAIYFKEQFLDGDWNTNR             | P14211 | 0          | N-term +28.03 Da, K +28.03 Da, | 5543.719238 | 3 | 782.0499878 | 781.3865794 |
| FTPSLSDSFTFLPAGR                | Q9CXE7 | 0          | N-term +28.03 Da,              | 5544.282227 | 2 | 950.9699707 | 950.477996  |
| VLLESEQFLTELTR                  | P16254 | 0          | N-term +28.03 Da,              | 5547.241699 | 2 | 853.4718628 | 853.4721819 |
| DPAIYFKEQFLDGDWNTNR             | P14211 | 0          | N-term +28.03 Da, K +28.03 Da, | 5549.894043 | 2 | 1172.579956 | 1171.576231 |
| FTPSLSDSFTFLPAGR                | Q9CXE7 | 0          | N-term +28.03 Da,              | 5551.195801 | 2 | 950.4754028 | 950.477996  |
| SASSALELTHEELATAEAVR            | Q8R0Y6 | 0          | N-term +28.03 Da,              | 5551.314941 | 3 | 702.3599854 | 702.358467  |
| SASSALELTHEELATAEAVR            | Q8R0Y6 | 0          | N-term +28.03 Da,              | 5551.683105 | 2 | 1053.040039 | 1053.034062 |
| GPPPIQDGEFTFLPAGR               | Q3V009 | 0          | N-term +28.03 Da,              | 5563.359375 | 2 | 970.5200195 | 970.5174551 |
| SASSALELTHEELATAEAVR            | Q8R0Y6 | 0          | N-term +28.03 Da,              | 5563.618652 | 2 | 1054.040039 | 1053.034062 |
| GPPPIQDGEFTFLPAGR               | Q3V009 | 0          | N-term +28.03 Da,              | 5568.527832 | 3 | 647.3466797 | 647.3473956 |
| VHLTDAEKAAVSCLWGKVNSEVGGGALGR   | P02088 | 0          | N-term +28.03 Da, K +28.03 Da, | 5570.930176 | 4 | 814.4099731 | 813.922496  |
| DPAIYFKEQFLDGDWNTNR             | P14211 | 0          | N-term +28.03 Da, K +28.03 Da, | 5574.548828 | 3 | 781.3855591 | 781.3865794 |
| VHLTDAEKAAVSCLWGKVNSEVGGGALGR   | P02088 | 0          | N-term +28.03 Da, K +28.03 Da, | 5576.303711 | 3 | 1085.550049 | 1084.894236 |
| VHLTDAEKSAVSLWAKVNPDEVGGGALGR   | P02089 | 0          | N-term +28.03 Da, K +28.03 Da, | 5580.329102 | 4 | 824.1699829 | 823.930321  |
| VHLTDAEKSAVSLWAKVNPDEVGGGALGR   | P02089 | 0          | N-term +28.03 Da, K +28.03 Da, | 5580.742676 | 3 | 1098.569946 | 1098.238002 |
| DPAIYFKEQFLDGDWNTNR             | P14211 | 0          | N-term +28.03 Da, K +28.03 Da, | 5581.898438 | 2 | 1171.575806 | 1171.576231 |
| DLPALPGGPAGGTGELAKYGLPVAQLR     | O08600 | 0          | N-term +28.03 Da, K +28.03 Da, | 5582.422852 | 3 | 911.1799927 | 911.1762309 |
| VHLTDAEKAAVSCLWGKVNSEVGGGALGR   | P02088 | 0          | N-term +28.03 Da, K +28.03 Da, | 5591.442383 | 3 | 1085.209961 | 1084.894236 |
| GPPPIQDGEFTFLPAGR               | Q3V009 | 0          | N-term +28.03 Da,              | 5591.766602 | 2 | 971.5200195 | 970.5174551 |
| VHLTDAEKAAVSCLWGKVNSEVGGGALGR   | P02088 | 0          | N-term +28.03 Da, K +28.03 Da, | 5602.660156 | 4 | 814.1599731 | 813.922496  |
| FTPSLSDSFTFLPAGR                | Q9CXE7 | 0.00712025 | N-term +28.03 Da,              | 5603.188477 | 2 | 951.5       | 950.477996  |

|                                 |        |            |                                |             |   |             |             |
|---------------------------------|--------|------------|--------------------------------|-------------|---|-------------|-------------|
| NDVITVQTPAFAESVTEGDVR           | Q9D2G2 | 0          | N-term +28.03 Da,              | 5605.394043 | 2 | 1138.560059 | 1138.573886 |
| DPAIYFKEQFLDGDWATNR             | P14211 | 0          | N-term +28.03 Da, K +28.03 Da, | 5605.908203 | 3 | 781.3856201 | 781.3865794 |
| VHLTDAEKSAVSLWAKVNPDEVGGEALGR   | P02089 | 0          | N-term +28.03 Da, K +28.03 Da, | 5606.229492 | 4 | 823.9299927 | 823.930321  |
| KGSASSALELTEEELATAEAVR          | Q8R0Y6 | 0          | N-term +28.03 Da, K +28.03 Da, | 5609.604492 | 3 | 773.7399902 | 773.4077095 |
| VHLTDAEKSAVSLWAKVNPDEVGGEALGR   | P02089 | 0          | N-term +28.03 Da, K +28.03 Da, | 5609.774414 | 3 | 1098.22998  | 1098.238002 |
| KSPIFGPQEVSSIEGDSVSITCYPDTSVNR  | O70570 | 0          | N-term +28.03 Da, C +57.02 Da, | 5610.015625 | 3 | 1163.219971 | 1163.567855 |
| DPAIYFKEQFLDGDWATNR             | P14211 | 0          | N-term +28.03 Da, K +28.03 Da, | 5613.253418 | 2 | 1172.579956 | 1171.576231 |
| KSPIFGPQEVSSIEGDSVSITCYPDTSVNR  | O70570 | 0          | N-term +28.03 Da, C +57.02 Da, | 5615.898438 | 3 | 1163.890015 | 1163.567855 |
| VHLTDAEKSAVSLWAKVNPDEVGGEALGR   | P02089 | 0.03629032 | N-term +28.03 Da, K +28.03 Da, | 5616.997559 | 3 | 1098.569946 | 1098.238002 |
| PPYIVYFPSR                      | F6RWRS | 0          | N-term +28.03 Da,              | 5617.294922 | 2 | 685.3800049 | 684.371541  |
| ASQQDFENALNQVKLL                | Q9WUR2 | 0.0177683  | N-term +28.03 Da, K +28.03 Da, | 5620.952637 | 3 | 626.0100098 | 625.3387889 |
| ASQQDFENALNQVKLL                | Q9WUR2 | 0          | N-term +28.03 Da, K +28.03 Da, | 5621.490234 | 3 | 625.3376465 | 625.3387889 |
| PMFIVNTNVPR                     | P34884 | 0          | N-term +28.03 Da,              | 5621.73877  | 2 | 657.8699951 | 658.3631928 |
| VHLTDAEKAASVSLWGKVNSEDEVGGEALGR | P02088 | 0          | N-term +28.03 Da, K +28.03 Da, | 5622.403809 | 3 | 1085.550049 | 1084.894236 |
| VHLTDAEKAASVSLWGKVNSEDEVGGEALGR | P02088 | 0          | N-term +28.03 Da, K +28.03 Da, | 5633.835449 | 4 | 813.9099731 | 813.922496  |
| DPAIYFKEQFLDGDWATNR             | P14211 | 0          | N-term +28.03 Da, K +28.03 Da, | 5637.050781 | 3 | 781.7199707 | 781.3865794 |
| VHLTDAEKSAVSLWAKVNPDEVGGEALGR   | P02089 | 0.00844206 | N-term +28.03 Da, K +28.03 Da, | 5638.696289 | 4 | 823.6799927 | 823.930321  |
| AMEKNLNQALLDLHALGSAR            | P29391 | 0.00353045 | N-term +28.03 Da, K +28.03 Da, | 5651.27002  | 3 | 740.7299805 | 741.0755704 |
| TLEIPGSSDPNIVPDGDFSSLVR         | P01029 | 0          | N-term +28.03 Da,              | 5652.874512 | 2 | 1223.130005 | 1222.121201 |
| KVITAFNDGLNHLDSLKGTF            | P02088 | 0.01121076 | N-term +28.03 Da, K +28.03 Da, | 5666.179688 | 3 | 759.0800171 | 758.7546029 |
| DPAIYFKEQFLDGDWATNR             | P14211 | 0          | N-term +28.03 Da, K +28.03 Da, | 5669.218262 | 3 | 782.0499878 | 781.3865794 |
| VHLTDAEKAASVSLWGKVNSEDEVGGEALGR | P02088 | 0          | N-term +28.03 Da, K +28.03 Da, | 5670.360352 | 3 | 1085.209961 | 1084.894236 |
| VHLTDAEKSAVSLWAKVNPDEVGGEALGR   | P02089 | 0          | N-term +28.03 Da, K +28.03 Da, | 5677.654297 | 4 | 824.4299927 | 823.930321  |
| CVEDYLSAILNR                    | P07724 | 0          | N-term +28.03 Da, C +57.02 Da, | 5680.013672 | 2 | 741.3800049 | 740.8768624 |
| VHLTDAEKSAVSLWAKVNPDEVGGEALGR   | P02089 | 0          | N-term +28.03 Da, K +28.03 Da, | 5681.65332  | 3 | 1098.890015 | 1098.238002 |
| SITSDEVNFLVYR                   | Q9QXE7 | 0          | N-term +28.03 Da,              | 5682.306641 | 2 | 786.4000244 | 785.9092172 |
| APPSVFAQVPQAPPVLVFK             | P05201 | 0          | N-term +28.03 Da, K +28.03 Da, | 5692.099121 | 3 | 683.4000244 | 683.4029524 |
| LIKAAIGDTLVQDIR                 | Q9CXN7 | 0.00352423 | N-term +28.03 Da, K +28.03 Da, | 5693.822266 | 2 | 842         | 841.5141836 |
| PAFTPATGTPVLGGLSYR              | Q61176 | 0          | N-term +28.03 Da,              | 5705.32373  | 2 | 917.4896851 | 916.998898  |
| FEPSLDYMVTKIPR                  | Q8C196 | 0          | N-term +28.03 Da, K +28.03 Da, | 5708.761719 | 2 | 877.460022  | 876.4736698 |
| CGKQGFIDLPEFPFGLLEPR            | O35490 | 0          | N-term +28.03 Da, K +28.03 Da, | 5710.40625  | 3 | 755.3900146 | 755.0575167 |
| DLSGTLESIPDKLKEFGNTLEDKAR       | P34928 | 0          | N-term +28.03 Da, K +28.03 Da, | 5712.588867 | 4 | 722.8900146 | 722.8958439 |
| CGKQGFIDLPEFPFGLLEPR            | O35490 | 0          | N-term +28.03 Da, K +28.03 Da, | 5714.016113 | 3 | 755.7299805 | 755.0575167 |
| VHLTDAEKAASVSLWGKVNSEDEVGGEALGR | P02088 | 0          | N-term +28.03 Da, K +28.03 Da, | 5714.431641 | 3 | 1084.880005 | 1084.894236 |
| VHLTDAEKAASVSLWGKVN             | P02088 | 0          | N-term +28.03 Da, K +28.03 Da, | 5720.995605 | 3 | 727.7199707 | 728.0611497 |
| FEPSLDYMVTKIPR                  | Q8C196 | 0          | N-term +28.03 Da, K +28.03 Da, | 5723.341797 | 2 | 876.460022  | 876.4736698 |
| APAIIFIDELDAIAPKR               | Q01853 | 0          | N-term +28.03 Da, K +28.03 Da, | 5723.566406 | 3 | 637.039978  | 637.0434243 |
| LNQALLDLHALGSAR                 | P29391 | 0          | N-term +28.03 Da,              | 5733.265625 | 2 | 810.4500122 | 810.4650248 |
| VHLTDAEKAASVSLWGKVNSEDEVGGEALGR | P02088 | 0          | N-term +28.03 Da, K +28.03 Da, | 5736.021484 | 4 | 813.6699829 | 813.922496  |
| DLSGTLESIPDKLKEFGNTLEDKAR       | P34928 | 0          | N-term +28.03 Da, K +28.03 Da, | 5742.918945 | 4 | 722.6400146 | 722.8958439 |

|                                      |        |            |                                |             |   |             |             |
|--------------------------------------|--------|------------|--------------------------------|-------------|---|-------------|-------------|
| VHLTDAEKAASVCLWGKVNSEVGGALGR         | P02088 | 0          | N-term +28.03 Da, K +28.03 Da, | 5744.991211 | 3 | 1085.219971 | 1084.894236 |
| SQFFKGSASSALELLEEELATAEAVR           | Q8R0Y6 | 0          | N-term +28.03 Da, K +28.03 Da, | 5745.108887 | 3 | 943.4799805 | 943.1501882 |
| CGKQGFIDLPEFPFGLLEPR                 | O35490 | 0          | N-term +28.03 Da, K +28.03 Da, | 5745.98291  | 3 | 755.7199707 | 755.0575167 |
| LDPGVVDNFPLLKALR                     | P30115 | 0          | N-term +28.03 Da, K +28.03 Da, | 5747.736328 | 3 | 608.3599854 | 608.3644976 |
| DPAIYFKEQFLDGDWATNR                  | P14211 | 0          | N-term +28.03 Da, K +28.03 Da, | 5750.764648 | 3 | 781.7199707 | 781.3865794 |
| LYSSDDVIELTPSNFNR                    | Q922R8 | 0.03674015 | N-term +28.03 Da,              | 5751.106445 | 2 | 1043        | 1043.01039  |
| GKQGFIDLPEFPFGLLEPR                  | O35490 | 0.01185185 | N-term +28.03 Da, K +28.03 Da, | 5752.759766 | 3 | 702.0499878 | 701.713967  |
| TGLGGYPEALDTPAYKQILTMANPIINGGAPDTTAR | Q8C196 | 0          | N-term +28.03 Da, K +28.03 Da, | 5758.166992 | 3 | 1287.319946 | 1286.66293  |
| FEPSLDYMVTKIPR                       | Q8C196 | 0          | N-term +28.03 Da, K +28.03 Da, | 5760.243652 | 2 | 876.4799805 | 876.4736698 |
| DPAIYFKEQFLDGDWATNR                  | P14211 | 0.03146375 | N-term +28.03 Da, K +28.03 Da, | 5761.517578 | 2 | 1172.579956 | 1171.576231 |
| TATFAQALQSVPETQVSILDNGLR             | Q9CZ13 | 0.04308094 | N-term +28.03 Da,              | 5761.95752  | 2 | 1295.189941 | 1294.189949 |
| VHLTDAEKAASVCLWGKVNSEVGGALGR         | P02088 | 0.0034662  | N-term +28.03 Da, K +28.03 Da, | 5766.73877  | 4 | 814.1699829 | 813.922496  |
| EGEPEVTDQLEWQSNQPWEQALNR             | P08226 | 0          | N-term +28.03 Da,              | 5772.873047 | 3 | 971.1199951 | 971.1212917 |
| LLCGVVQGLR                           | Q8VBT2 | 0.00714853 | N-term +28.03 Da, C +57.02 Da, | 5773.068848 | 2 | 572.3300171 | 571.8393532 |
| DPAIYFKEQFLDGDWATNR                  | P14211 | 0          | N-term +28.03 Da, K +28.03 Da, | 5781.742188 | 3 | 781.3900146 | 781.3865794 |
| EGEPEVTDQLEWQSNQPWEQALNR             | P08226 | 0          | N-term +28.03 Da,              | 5782.279297 | 2 | 1456.170044 | 1456.178299 |
| SGMPPGAAAIAVLPVTLDTMNR               | Q8BVI4 | 0          | N-term +28.03 Da,              | 5787.854492 | 3 | 770.0800171 | 769.7448331 |
| ASDYLELDTIKNLVR                      | P08113 | 0          | N-term +28.03 Da, K +28.03 Da, | 5791.053223 | 2 | 903.4899902 | 903.5040136 |
| VHLTDAEKAASVCLWGKVNSEVGGALGR         | P02088 | 0          | N-term +28.03 Da, K +28.03 Da, | 5800.681641 | 4 | 814.1599731 | 813.922496  |
| VHLTDAEKAASVCLWGKVNSEVGGALGR         | P02088 | 0          | N-term +28.03 Da, K +28.03 Da, | 5804.413086 | 4 | 813.9199829 | 813.922496  |
| APPVPGAVSGGSGEDELDFVKNFAF            | Q89079 | 0          | N-term +28.03 Da, K +28.03 Da, | 5804.533203 | 3 | 839.0900269 | 839.0953543 |
| VNPTVFFDITADDEPLGR                   | P17742 | 0          | N-term +28.03 Da,              | 5805.607422 | 2 | 1018.01001  | 1017.512568 |
| HTPDCGKQGFIDLPEFPFGLLEPR             | O35490 | 0          | N-term +28.03 Da, K +28.03 Da, | 5811.796875 | 3 | 905.4400024 | 905.1196166 |
| VHLTDAEKAASVCLWGKVNSEVGGALGR         | P02088 | 0          | N-term +28.03 Da, K +28.03 Da, | 5813.689453 | 3 | 1084.560059 | 1084.894236 |
| APPVPGAVSGGSGEDELDFVKNFAF            | Q89079 | 0.03190767 | N-term +28.03 Da, K +28.03 Da, | 5814.612793 | 2 | 1258.140015 | 1258.139393 |
| LPTLEQPIIPSDYVAIKAPM                 | Q8C196 | 0          | N-term +28.03 Da, K +28.03 Da, | 5821.159668 | 3 | 751.7600098 | 751.4252062 |
| VNPTVFFDITADDEPLGR                   | P17742 | 0          | N-term +28.03 Da,              | 5822.619141 | 3 | 678.6760864 | 678.6774706 |
| APPVPGAVSGGSGEDELDFVKNFAF            | Q89079 | 0          | N-term +28.03 Da, K +28.03 Da, | 5822.868164 | 2 | 1259.140015 | 1258.139393 |
| TATFAQALQSVPETQVSILDNGLR             | Q9CZ13 | 0.0474359  | N-term +28.03 Da,              | 5823.265137 | 3 | 863.460022  | 863.1290581 |
| VNPTVFFDITADDEPLGR                   | P17742 | 0          | N-term +28.03 Da,              | 5828.815918 | 3 | 678.677002  | 678.6774706 |
| TEGAELVDSVLDVVR                      | P68372 | 0.00704777 | N-term +28.03 Da,              | 5831.312988 | 3 | 543.960022  | 543.9613184 |
| TEGAELVDSVLDVVR                      | P68372 | 0          | N-term +28.03 Da,              | 5833.019531 | 2 | 815.4400024 | 815.4383393 |
| APPVPGAVSGGSGEDELDFVKNFAF            | Q89079 | 0          | N-term +28.03 Da, K +28.03 Da, | 5834.810059 | 3 | 839.4299927 | 839.0953543 |
| DVDGLDPAFTPATGTPVLGGLSYR             | Q61176 | 0          | N-term +28.03 Da,              | 5836.269043 | 2 | 1225.119995 | 1224.126286 |
| VNPTVFFDITADDEPLGR                   | P17742 | 0          | N-term +28.03 Da,              | 5836.654785 | 2 | 1017.511597 | 1017.512568 |
| VHLTDAEKSAVSLWAKVNPDEVGGALGR         | P02089 | 0          | N-term +28.03 Da, K +28.03 Da, | 5844.558594 | 4 | 824.1799927 | 823.930321  |
| RSKLYGEIDKLK                         | Q499E4 | 0.04339378 | N-term +28.03 Da, K +28.03 Da, | 5848.468262 | 2 | 781.9849243 | 781.4874369 |
| PPSPWPEGIGSLR                        | Q9QZ24 | 0.04293263 | N-term +28.03 Da,              | 5853.527344 | 2 | 711.3895264 | 710.8828045 |
| VNPTVFFDITADDEPLGR                   | P17742 | 0          | N-term +28.03 Da,              | 5860.236816 | 3 | 678.6765137 | 678.6774706 |
| VNPTVFFDITADDEPLGR                   | P17742 | 0          | N-term +28.03 Da,              | 5868.573242 | 2 | 1017.51178  | 1017.512568 |

|                                    |        |            |                                |             |   |             |             |
|------------------------------------|--------|------------|--------------------------------|-------------|---|-------------|-------------|
| VHLTDAEKAASVCLWGKVNSEVGGGALGR      | P02088 | 0          | N-term +28.03 Da, K +28.03 Da, | 5870.600586 | 4 | 814.1699829 | 813.922496  |
| VLELYDLLSQPCR                      | Q64471 | 0          | N-term +28.03 Da, C +57.02 Da, | 5890.895508 | 2 | 873.9753418 | 873.9765769 |
| VLELYDLLSQPCR                      | Q64471 | 0          | N-term +28.03 Da, C +57.02 Da, | 5893.873047 | 3 | 582.9899902 | 582.9868101 |
| LVDWVNDGLEDLFR                     | F6RWRS | 0          | N-term +28.03 Da,              | 5894.011719 | 2 | 832.4199829 | 832.4216347 |
| ADLPALPGGPAGGTGELAKYGLPGVAQLR      | O08600 | 0          | N-term +28.03 Da, K +28.03 Da, | 5895.005371 | 3 | 934.8499756 | 934.855269  |
| VNPTVFFDITADDEPLGR                 | P17742 | 0          | N-term +28.03 Da,              | 5899.161621 | 2 | 1017.510437 | 1017.512568 |
| DLSGTLESIPDKLKEFGNTLEDKAR          | P34928 | 0          | N-term +28.03 Da, K +28.03 Da, | 5900.961426 | 4 | 723.4000244 | 722.8958439 |
| VSPSPVDPVAVPVVPIGPPAGFR            | Q05920 | 0.01647564 | N-term +28.03 Da,              | 5914.288574 | 2 | 1140.140015 | 1140.641176 |
| VSCLWGKVNSEVGGGALGR                | P02088 | 0          | N-term +28.03 Da, K +28.03 Da, | 5916.714355 | 2 | 1096.050049 | 1095.054608 |
| ELDPGVVDNFPLLKALR                  | P30115 | 0          | N-term +28.03 Da, K +28.03 Da, | 5917.084473 | 3 | 651.710022  | 651.3786957 |
| ASASSTNLKDVLSNLIPEQAR              | Q9CZU6 | 0          | N-term +28.03 Da, K +28.03 Da, | 5919.259277 | 4 | 607.0900269 | 607.3457892 |
| DAILEDLVFPSEIVGKR                  | P62082 | 0          | N-term +28.03 Da, K +28.03 Da, | 5920.167969 | 3 | 653.039978  | 653.0383393 |
| VLELYDLLSQPCR                      | Q64471 | 0          | N-term +28.03 Da, C +57.02 Da, | 5921.972168 | 2 | 873.9744873 | 873.9765769 |
| VLELYDLLSQPCR                      | Q64471 | 0          | N-term +28.03 Da, C +57.02 Da, | 5926.334473 | 3 | 583.3200073 | 582.9868101 |
| VNPTVFFDITADDEPLGR                 | P17742 | 0          | N-term +28.03 Da,              | 5930.381836 | 2 | 1018.02002  | 1017.512568 |
| VHLTDAEKAASVCLWGKVNSEVGGGALGR      | P02088 | 0          | N-term +28.03 Da, K +28.03 Da, | 5937.886719 | 3 | 1084.890015 | 1084.894236 |
| VHLTDAEKAASVCLWGKVNSEVGGGALGR      | P02088 | 0          | N-term +28.03 Da, K +28.03 Da, | 5946.64502  | 4 | 814.1699829 | 813.922496  |
| VHLTDAEKAASVCLWGKVNSEVGGGALGR      | P02088 | 0          | N-term +28.03 Da, K +28.03 Da, | 5952.466309 | 3 | 1085.550049 | 1084.894236 |
| ELDPGVVDNFPLLKALR                  | P30115 | 0          | N-term +28.03 Da, K +28.03 Da, | 5952.707031 | 3 | 651.710022  | 651.3786957 |
| VLELYDLLSQPCR                      | Q64471 | 0          | N-term +28.03 Da, C +57.02 Da, | 5954.481445 | 2 | 874.4699707 | 873.9765769 |
| VHLTDAEKSAVSLWAKVNPDEVGGGALGR      | P02089 | 0          | N-term +28.03 Da, K +28.03 Da, | 5958.515137 | 4 | 823.9299927 | 823.930321  |
| VNPTVFFDITADDEPLGR                 | P17742 | 0          | N-term +28.03 Da,              | 5962.418945 | 2 | 1018.52002  | 1017.512568 |
| VHLTDAEKSAVSLWAKVNPDEVGGGALGR      | P02089 | 0          | N-term +28.03 Da, K +28.03 Da, | 5962.904297 | 3 | 1097.900024 | 1098.238002 |
| ALDIAENEMPLMR                      | P50247 | 0          | N-term +28.03 Da,              | 5967.260254 | 2 | 794.9000244 | 794.397105  |
| VHLTDAEKAASVCLWGKVNSEVGGGALGR      | P02088 | 0          | N-term +28.03 Da, K +28.03 Da, | 5972.410156 | 3 | 1084.560059 | 1084.894236 |
| FVEEFIWPAVQSSALYEDR                | P16460 | 0.00713719 | N-term +28.03 Da,              | 5980.000488 | 3 | 772.0499878 | 772.0511967 |
| FTFVCPTEIIAFSDR                    | P35700 | 0.01058201 | N-term +28.03 Da, C +57.02 Da, | 5980.466309 | 2 | 915.4699707 | 915.9583843 |
| VHLTDAEKAASVCLWGKVNSEVGGGALGR      | P02088 | 0          | N-term +28.03 Da, K +28.03 Da, | 5981.720703 | 4 | 814.4199829 | 813.922496  |
| GLELYDLLSQPSR                      | Q61133 | 0          | N-term +28.03 Da,              | 5981.843262 | 2 | 816.4500122 | 816.4537918 |
| DGAAALVLMTAEAAQR                   | Q8QZT1 | 0.00565428 | N-term +28.03 Da,              | 5987.57666  | 2 | 808.4400024 | 808.4272512 |
| VHLTDAEKSAVSLWAKVNPDEVGGGALGR      | P02089 | 0          | N-term +28.03 Da, K +28.03 Da, | 5989.199707 | 4 | 823.6799927 | 823.930321  |
| PEFVDCRK                           | Q571H0 | 0.00338409 | N-term +28.03 Da, K +28.03 Da, | 5989.416504 | 2 | 603.3099976 | 603.3209937 |
| APSPLYSVEFSEEPFGVIVR               | P70699 | 0          | N-term +28.03 Da,              | 5989.937988 | 2 | 1126.569946 | 1126.0859   |
| SQSLFVDIPSKIICR                    | Q64374 | 0          | N-term +28.03 Da, C +57.02 Da, | 5993.494141 | 2 | 967.039978  | 966.5529832 |
| VHLTDAEKSAVSLWAKVNPDEVGGGALGR      | P02089 | 0          | N-term +28.03 Da, K +28.03 Da, | 5993.599609 | 3 | 1097.890015 | 1098.238002 |
| TATFAQALQSVPETQVSILDNGLR           | Q9CZ13 | 0.02772003 | N-term +28.03 Da,              | 5993.838867 | 2 | 1294.680054 | 1294.189949 |
| VNPTVFFDITADDEPLGR                 | P17742 | 0          | N-term +28.03 Da,              | 5995.817383 | 2 | 1018.01001  | 1017.512568 |
| VNPTVFFDITADDEPLGR                 | P17742 | 0          | N-term +28.03 Da,              | 5997.113281 | 2 | 1017.51001  | 1017.512568 |
| VEELDPGVVDNFPLLKALR                | P30115 | 0          | N-term +28.03 Da, K +28.03 Da, | 5997.215332 | 3 | 727.4199829 | 727.4156985 |
| SITSVQAIYVPAADLTDPAATTFAHLDATTVLSR | P56480 | 0          | N-term +28.03 Da,              | 5999.506836 | 3 | 1229.630005 | 1229.303507 |

|                              |        |            |                                |             |   |             |             |
|------------------------------|--------|------------|--------------------------------|-------------|---|-------------|-------------|
| PGLLLLGDEAPNFEANTTIGR        | O08709 | 0          | N-term +28.03 Da,              | 6003.036133 | 2 | 1085.540039 | 1085.560581 |
| HVEELDPGVVDNFPLLKALR         | P30115 | 0          | N-term +28.03 Da, K +28.03 Da, | 6006.215332 | 3 | 773.7600098 | 773.1020026 |
| HVEELDPGVVDNFPLLKALR         | P30115 | 0          | N-term +28.03 Da, K +28.03 Da, | 6009.26416  | 3 | 773.0900269 | 773.1020026 |
| DVDFAIWGAVR                  | P25688 | 0          | N-term +28.03 Da,              | 6014.030273 | 2 | 703.3599854 | 703.3591624 |
| SFDVDGLDPAFTPATGTPVLGGLSYR   | Q61176 | 0          | N-term +28.03 Da,              | 6019.834961 | 3 | 894.460022  | 894.4534304 |
| LTDAEKAAVSCLWGKVNSEVGGALGR   | P02088 | 0          | N-term +28.03 Da, K +28.03 Da, | 6020.231934 | 3 | 1006.840027 | 1006.185127 |
| PGLLLLGDEAPNFEANTTIGR        | O08709 | 0          | N-term +28.03 Da,              | 6021.179199 | 3 | 724.0300293 | 724.0428127 |
| TATFAQALQSVPETQVSILDNGLR     | Q9CZ13 | 0          | N-term +28.03 Da,              | 6023.773438 | 3 | 863.1271973 | 863.1290581 |
| EFQILLDALDKIK                | P16015 | 0          | N-term +28.03 Da, K +28.03 Da, | 6029.381348 | 3 | 544.3300171 | 543.9990442 |
| PGLLLLGDEAPNFEANTTIGR        | O08709 | 0          | N-term +28.03 Da,              | 6033.508789 | 2 | 1085.539063 | 1085.560581 |
| TATFAQALQSVPETQVSILDNGLR     | Q9CZ13 | 0          | N-term +28.03 Da,              | 6035.591309 | 2 | 1294.187866 | 1294.189949 |
| TATFAQALQSVPETQVSILDNGLR     | Q9CZ13 | 0          | N-term +28.03 Da,              | 6036.372559 | 4 | 647.8499756 | 647.5986127 |
| TVLIMELINNVAKAH              | P56480 | 0          | N-term +28.03 Da, K +28.03 Da, | 6044.109375 | 3 | 575         | 574.6709331 |
| QSLLFVDIPSKIICR              | Q64374 | 0          | N-term +28.03 Da, C +57.02 Da, | 6045.780762 | 2 | 923.0200195 | 923.0369686 |
| VNPTVFFDITADDEPLGR           | P17742 | 0          | N-term +28.03 Da,              | 6047.51123  | 2 | 1017.51001  | 1017.512568 |
| EASQSLLFVDIPSKIICR           | Q64374 | 0          | N-term +28.03 Da, C +57.02 Da, | 6050.54541  | 2 | 1067.079956 | 1066.592837 |
| PGLLLLGDEAPNFEANTTIGR        | O08709 | 0          | N-term +28.03 Da,              | 6052.516113 | 3 | 724.0292969 | 724.0428127 |
| TATFAQALQSVPETQVSILDNGLR     | Q9CZ13 | 0          | N-term +28.03 Da,              | 6054.503418 | 3 | 863.4567261 | 863.1290581 |
| LITLEQGKTLDAEGDVFR           | Q9EQ20 | 0          | N-term +28.03 Da, K +28.03 Da, | 6057.102539 | 3 | 711.3800049 | 711.3914418 |
| PGLLLLGDEAPNFEANTTIGR        | O08709 | 0          | N-term +28.03 Da,              | 6064.572754 | 2 | 1085.541748 | 1085.560581 |
| EASQSLLFVDIPSKIICR           | Q64374 | 0          | N-term +28.03 Da, C +57.02 Da, | 6066.586914 | 2 | 1067.579956 | 1066.592837 |
| VHLTDAEKAASVCLWGKVNSEVGGALGR | P02088 | 0          | N-term +28.03 Da, K +28.03 Da, | 6082.458008 | 4 | 813.6599731 | 813.922496  |
| PGLLLLGDEAPNFEANTTIGR        | O08709 | 0          | N-term +28.03 Da,              | 6095.265625 | 2 | 1085.540039 | 1085.560581 |
| LSPTNCDAESEPLAEKVLDLINKGR    | Q9ESB3 | 0          | N-term +28.03 Da, K +28.03 Da, | 6099.628906 | 4 | 681.8699951 | 681.8704715 |
| TATFAQALQSVPETQVSILDNGLR     | Q9CZ13 | 0.00351803 | N-term +28.03 Da,              | 6100.991211 | 3 | 863.4500122 | 863.1290581 |
| LSPTNCDAESEPLAEKVLDLINKGR    | Q9ESB3 | 0          | N-term +28.03 Da, K +28.03 Da, | 6106.273438 | 3 | 908.8200073 | 908.8248698 |
| TATFAQALQSVPETQVSILDNGLR     | Q9CZ13 | 0.00769231 | N-term +28.03 Da,              | 6110.278809 | 2 | 1294.680054 | 1294.189949 |
| QFGSDLAATQQLSR               | Q03265 | 0          | N-term +28.03 Da,              | 6116.137207 | 2 | 889.9500122 | 889.4575949 |
| EAPNFEANTTIGR                | O08709 | 0          | N-term +28.03 Da,              | 6116.467285 | 2 | 723.8599854 | 724.362434  |
| EAPNFEANTTIGR                | O08709 | 0          | N-term +28.03 Da,              | 6125.604004 | 2 | 723.8616333 | 724.362434  |
| PGLLLLGDEAPNFEANTTIGR        | O08709 | 0          | N-term +28.03 Da,              | 6126.937988 | 2 | 1085.540039 | 1085.560581 |
| MILLEVNNR                    | Q9CVB6 | 0.0009058  | N-term +28.03 Da,              | 6127.757813 | 2 | 564.8200073 | 565.3235362 |
| LSPTNCDAESEPLAEKVLDLINKGR    | Q9ESB3 | 0          | N-term +28.03 Da, K +28.03 Da, | 6131.08252  | 4 | 681.6199951 | 681.8704715 |
| GLDPAFTPATGTPVLGGLSYR        | Q61176 | 0.00568643 | N-term +28.03 Da,              | 6150.821777 | 2 | 1060.550049 | 1059.565134 |
| PGLLLLGDEAPNFEANTTIGR        | O08709 | 0          | N-term +28.03 Da,              | 6151.393066 | 3 | 724.0300293 | 724.0428127 |
| SFDVDGLDPAFTPATGTPVLGGLSYR   | Q61176 | 0          | N-term +28.03 Da,              | 6152.983398 | 2 | 1341.680054 | 1341.176507 |
| PGLLLLGEEAPDFEANTTIGR        | Q8BG37 | 0          | N-term +28.03 Da,              | 6156.802734 | 2 | 1094.050049 | 1093.060414 |
| PGLLLLGDEAPNFEANTTIGR        | O08709 | 0          | N-term +28.03 Da,              | 6157.591309 | 2 | 1085.540039 | 1085.560581 |
| PGLLLLGDEAPNFEANTTIGR        | O08709 | 0          | N-term +28.03 Da,              | 6158.377441 | 3 | 724.7000122 | 724.0428127 |
| VSCLWGKVNSEVGGALGR           | P02088 | 0          | N-term +28.03 Da, K +28.03 Da, | 6164.734375 | 2 | 1095.550049 | 1095.054608 |



|                              |        |            |                                |             |   |             |             |
|------------------------------|--------|------------|--------------------------------|-------------|---|-------------|-------------|
| EVEDLIKAAIGDTLVQDIR          | Q9CXN7 | 0          | N-term +28.03 Da, K +28.03 Da, | 6171.336426 | 3 | 718.7399902 | 718.7387302 |
| SFDVDGLDPAFTPATGTPVLGGLSYR   | Q61176 | 0          | N-term +28.03 Da,              | 6171.657227 | 3 | 894.789978  | 894.4534304 |
| PGGLLLGDEAPNFEANTTIGR        | Q08709 | 0          | N-term +28.03 Da,              | 6188.363281 | 2 | 1085.540039 | 1085.560581 |
| SEAAADREDDPNFFKMVEGFFDR      | P26443 | 0          | N-term +28.03 Da, K +28.03 Da, | 6192.716309 | 4 | 688.0700073 | 688.0695253 |
| VHLTDAEKAASVSLWGKVNSEVGGALGR | P02088 | 0          | N-term +28.03 Da, K +28.03 Da, | 6193.348633 | 4 | 813.6699829 | 813.922496  |
| SEAAADREDDPNFFKMVEGFFDR      | P26443 | 0          | N-term +28.03 Da, K +28.03 Da, | 6199.099121 | 3 | 917.7600098 | 917.0902749 |
| DPAIYFKEQFLDGAWTNR           | P14211 | 0.0049505  | N-term +28.03 Da, K +28.03 Da, | 6200.171875 | 2 | 1171.560059 | 1171.576231 |
| PAWEAPEGVPIDAIFGGR           | Q8BH04 | 0          | N-term +28.03 Da,              | 6201.571777 | 2 | 1012.52002  | 1012.036012 |
| SMEDALKAADTIGYPVMIR          | Q8C196 | 0          | N-term +28.03 Da, K +28.03 Da, | 6203.667969 | 2 | 1069.540039 | 1069.055231 |
| LFLEQIHVLEK                  | P11589 | 0          | N-term +28.03 Da, K +28.03 Da, | 6204.695801 | 2 | 712.4199829 | 712.9292232 |
| SSWWTHVEMGPPDPILGVTEAFKR     | P05202 | 0          | N-term +28.03 Da, K +28.03 Da, | 6208.818359 | 3 | 932.4699707 | 932.8107831 |
| SSWWTHVEMGPPDPILGVTEAFKR     | P05202 | 0          | N-term +28.03 Da, K +28.03 Da, | 6214.458008 | 4 | 699.6099854 | 699.8599064 |
| FDVDGLDPAFTPATGTPVLGGLSYR    | Q61176 | 0.018974   | N-term +28.03 Da,              | 6219.40625  | 3 | 865.4500122 | 865.442754  |
| SEAAADREDDPNFFKMVEGFFDR      | P26443 | 0          | N-term +28.03 Da, K +28.03 Da, | 6223.250488 | 4 | 688.0684814 | 688.0695253 |
| SEAAADREDDPNFFKMVEGFFDR      | P26443 | 0          | N-term +28.03 Da, K +28.03 Da, | 6230.291016 | 3 | 917.088501  | 917.0902749 |
| VSLWGKVNSEVGGALGR            | P02088 | 0          | N-term +28.03 Da, K +28.03 Da, | 6234.586426 | 2 | 1094.560059 | 1095.054608 |
| DFLAYDILDQYR                 | P10649 | 0          | N-term +28.03 Da,              | 6236.348633 | 2 | 780.9000244 | 780.3906601 |
| SSWWTHVEMGPPDPILGVTEAFKR     | P05202 | 0          | N-term +28.03 Da, K +28.03 Da, | 6240.68457  | 3 | 932.4699707 | 932.8107831 |
| SSWWTHVEMGPPDPILGVTEAFKR     | P05202 | 0          | N-term +28.03 Da, K +28.03 Da, | 6247.936035 | 4 | 699.6099854 | 699.8599064 |
| LAMEKNLNQALLDLHALGSAR        | P29391 | 0          | N-term +28.03 Da, K +28.03 Da, | 6254.164063 | 3 | 779.4299927 | 778.7702585 |
| SEAAADREDDPNFFKMVEGFFDR      | P26443 | 0          | N-term +28.03 Da, K +28.03 Da, | 6256.012695 | 4 | 688.3200073 | 688.0695253 |
| LYFEELSLEK                   | Q8C196 | 0          | N-term +28.03 Da,              | 6256.861328 | 2 | 663.8499756 | 663.8506389 |
| TDLVVEAIVENLKLKNEFQR         | Q61425 | 0          | N-term +28.03 Da, K +28.03 Da, | 6258.219238 | 4 | 639.8800049 | 639.6256358 |
| SASFFKFLTEELSLDQDR           | Q35215 | 0          | N-term +28.03 Da, K +28.03 Da, | 6262.734375 | 3 | 730.7199707 | 730.3756804 |
| VNPTVFFDITADDEPLGR           | P17742 | 0.01642857 | N-term +28.03 Da,              | 6274.607422 | 2 | 1017.51001  | 1017.512568 |
| DIAWNFEKFLVGPDPVPR           | P11352 | 0          | N-term +28.03 Da, K +28.03 Da, | 6279.446777 | 3 | 739.0700073 | 739.0685214 |
| SEAAADREDDPNFFKMVEGFFDR      | P26443 | 0.01646385 | N-term +28.03 Da, K +28.03 Da, | 6280.231934 | 3 | 917.0900269 | 917.0902749 |
| AKVAVLGASGGIGQPLSLLKNSPLVSR  | P08249 | 0          | N-term +28.03 Da, K +28.03 Da, | 6290.287598 | 4 | 707.9299927 | 708.1876633 |
| AKVAVLGASGGIGQPLSLLKNSPLVSR  | P08249 | 0          | N-term +28.03 Da, K +28.03 Da, | 6291.422363 | 3 | 943.5800171 | 943.9144589 |
| VIHDNFGIVEGLMTTVH            | P16858 | 0          | N-term +28.03 Da,              | 6304.663574 | 2 | 955.4799805 | 955.4956654 |
| VHLTDAEKAASVSLWGKVNSEVGGALGR | P02088 | 0          | N-term +28.03 Da, K +28.03 Da, | 6306.72168  | 3 | 1084.540039 | 1084.894236 |
| EKNAPAIIFIDELDAIAPKR         | Q01853 | 0.00341006 | N-term +28.03 Da, K +28.03 Da, | 6324.856934 | 3 | 770.0999756 | 770.1140197 |
| SASGTTLLEALDCILPPTPTDKPLR    | P10126 | 0          | N-term +28.03 Da, K +28.03 Da, | 6327.590332 | 3 | 960.5200195 | 960.1950743 |
| SEAAADREDDPNFFKMVEGFFDR      | P26443 | 0          | N-term +28.03 Da, K +28.03 Da, | 6327.667969 | 4 | 688.3200073 | 688.0695253 |
| GPETLCGAELVDALQFVCGPR        | P05017 | 0          | N-term +28.03 Da, C +57.02 Da, | 6330.986328 | 3 | 773.3800049 | 773.048693  |
| VSLWGKVNSEVGGALGR            | P02088 | 0.04347826 | N-term +28.03 Da, K +28.03 Da, | 6334.841309 | 2 | 1094.540039 | 1095.054608 |
| GPETLCGAELVDALQFVCGPR        | P05017 | 0          | N-term +28.03 Da, C +57.02 Da, | 6339.005371 | 3 | 773.0499878 | 773.048693  |
| YVDFLAYDILDQYR               | P10649 | 0          | N-term +28.03 Da,              | 6340.22998  | 2 | 911.4500122 | 911.4565319 |
| AMLGDFVNMVEKGIIDPTKVVR       | P63038 | 0          | N-term +28.03 Da, K +28.03 Da, | 6373.901367 | 4 | 630.0999756 | 629.8549351 |
| LNLENWDTLGGSTVSQLQER         | Q00623 | 0          | N-term +28.03 Da,              | 6376.21875  | 3 | 782.4099731 | 782.0762939 |

|                                |        |            |                                |             |   |             |             |
|--------------------------------|--------|------------|--------------------------------|-------------|---|-------------|-------------|
| TVPAAVPGICFLSGGMSEEDATLNLNAINR | Q91Y97 | 0          | N-term +28.03 Da, C +57.02 Da, | 6383.430176 | 3 | 1049.199951 | 1049.193405 |
| SPVWEEASQSLLFVDIPSKIICR        | Q64374 | 0          | N-term +28.03 Da, C +57.02 Da, | 6397.474609 | 3 | 911.4899902 | 910.8226888 |
| SPVWEEASQSLLFVDIPSKIICR        | Q64374 | 0          | N-term +28.03 Da, C +57.02 Da, | 6403.565918 | 3 | 910.8200073 | 910.8226888 |
| ASGTTLLEALDCILPPTPTDKPLR       | P10126 | 0          | N-term +28.03 Da, K +28.03 Da, | 6403.868164 | 3 | 931.5100098 | 931.1843979 |
| DPAIYFKEQFLDGDWATNR            | P14211 | 0          | N-term +28.03 Da, K +28.03 Da, | 6405.913574 | 2 | 1171.560059 | 1171.576231 |
| DPAIYFKEQFLDGDWATNR            | P14211 | 0          | N-term +28.03 Da, K +28.03 Da, | 6409.64502  | 3 | 781.710022  | 781.3865794 |
| VHLTDAEKAASVSLWGKVNSEVGGALGR   | P02088 | 0          | N-term +28.03 Da, K +28.03 Da, | 6425.763672 | 3 | 1084.880005 | 1084.894236 |
| VHLTDAEKAASVSLWGKVNSEVGGALGR   | P02088 | 0          | N-term +28.03 Da, K +28.03 Da, | 6429.589844 | 4 | 813.6599731 | 813.922496  |
| VHLTDAEKAASVSLWGKVNSEVGGALGR   | P02088 | 0          | N-term +28.03 Da, K +28.03 Da, | 6430.804199 | 4 | 814.1599731 | 813.922496  |
| DMPDGTFLVR                     | Q64143 | 0.03030303 | N-term +28.03 Da,              | 6431.92334  | 2 | 589.7999878 | 589.7973516 |
| SPVWEEASQSLLFVDIPSKIICR        | Q64374 | 0          | N-term +28.03 Da, C +57.02 Da, | 6436.097168 | 3 | 911.1599731 | 910.8226888 |
| KEERSWEQKLEDMRK                | Q61081 | 0.03199455 | N-term +28.03 Da, K +28.03 Da, | 6437.465332 | 3 | 701.7000122 | 702.0454996 |
| EPYQLLDGTFCQAALRGR             | Q9CX11 | 0.03738318 | N-term +28.03 Da, C +57.02 Da, | 6437.697754 | 2 | 1119.089966 | 1118.580793 |
| FIDLPEFPFGLR                   | Q35490 | 0          | N-term +28.03 Da,              | 6438.842773 | 2 | 853.4500122 | 852.9534273 |
| MKLPIFIADAFTATAFR              | Q9CXN7 | 0          | N-term +28.03 Da, K +28.03 Da, | 6455.331543 | 3 | 657.710022  | 657.0375046 |
| CPVWEQELANKYSCK                | D3YU81 | 0.04342191 | N-term +28.03 Da, K +28.03 Da, | 6456.307129 | 2 | 998.9799805 | 998.4869833 |
| VHLTDAEKAASVSLWGKVNSEVGGALGR   | P02088 | 0          | N-term +28.03 Da, K +28.03 Da, | 6456.864746 | 3 | 1084.540039 | 1084.894236 |
| MKLPIFIADAFTATAFR              | Q9CXN7 | 0          | N-term +28.03 Da, K +28.03 Da, | 6459.75     | 3 | 657.3699951 | 657.0375046 |
| GKQGFIDLPEFPFGLR               | Q35490 | 0          | N-term +28.03 Da, K +28.03 Da, | 6465.204102 | 2 | 1053.060059 | 1052.067312 |
| EELDPGVVDNFPPLK                | P30115 | 0          | N-term +28.03 Da, K +28.03 Da, | 6470.512207 | 2 | 871.460022  | 870.9745575 |
| EELDPGVVDNFPPLK                | P30115 | 0          | N-term +28.03 Da, K +28.03 Da, | 6472.501953 | 2 | 870.960022  | 870.9745575 |
| VHLTDAEKAASVSLWGKVNSEVGGALGR   | P02088 | 0          | N-term +28.03 Da, K +28.03 Da, | 6473.851074 | 4 | 813.6599731 | 813.922496  |
| LLAAAGVEFEKFLKTR               | P30115 | 0          | N-term +28.03 Da, K +28.03 Da, | 6474.855957 | 3 | 669.7199707 | 669.3943457 |
| GKQGFIDLPEFPFGLR               | Q35490 | 0.00090498 | N-term +28.03 Da, K +28.03 Da, | 6479.82959  | 3 | 702.3699951 | 701.713967  |
| ALAMEKNLNQALLDLHALGSAR         | P29391 | 0          | N-term +28.03 Da, K +28.03 Da, | 6483.598145 | 3 | 802.7700195 | 802.4492966 |
| KVADALANAAGHLDDLPGALSALSDLHAH  | Q91VB8 | 0          | N-term +28.03 Da, K +28.03 Da, | 6485.464844 | 4 | 730.8800049 | 730.6385351 |
| ALAMEKNLNQALLDLHALGSAR         | P29391 | 0          | N-term +28.03 Da, K +28.03 Da, | 6492.330566 | 3 | 802.4400024 | 802.4492966 |
| KQGFIDLPEFPFGLR                | Q35490 | 0          | N-term +28.03 Da, K +28.03 Da, | 6492.666992 | 2 | 1024.040039 | 1023.55658  |
| LLAAAGVEFEKFLKTR               | P30115 | 0          | N-term +28.03 Da, K +28.03 Da, | 6505.097168 | 3 | 669.7199707 | 669.3943457 |
| VHLTDAEKSAVSLWAKVNPDEVGGALGR   | P02089 | 0          | N-term +28.03 Da, K +28.03 Da, | 6530.921387 | 3 | 1098.219971 | 1098.238002 |
| VHLTDAEKSAVSLWAKVNPDEVGGALGR   | P02089 | 0          | N-term +28.03 Da, K +28.03 Da, | 6531.151855 | 4 | 824.1699829 | 823.930321  |
| VHLTDAEKSAVSLWAKVNPDEVGGALGR   | P02089 | 0          | N-term +28.03 Da, K +28.03 Da, | 6534.982422 | 4 | 823.6699829 | 823.930321  |
| DCGKQGFIDLPEFPFGLR             | Q35490 | 0          | N-term +28.03 Da, K +28.03 Da, | 6536.821289 | 2 | 1189.589966 | 1189.596109 |
| DEVGVDVAQHV AEDLGKAFGER        | Q8BMS1 | 0          | N-term +28.03 Da, K +28.03 Da, | 6540.587891 | 3 | 799.7299805 | 799.7396818 |
| APPSVFAQVPQAPPVLFKFL           | P05201 | 0          | N-term +28.03 Da, K +28.03 Da, | 6540.941406 | 3 | 721.7700195 | 721.0976406 |
| VDGLDPAFTPATGTPVLGGLSYR        | Q61176 | 0          | N-term +28.03 Da,              | 6543.081543 | 2 | 1166.589966 | 1166.612814 |
| APPSVFAQVPQAPPVLFKFL           | P05201 | 0          | N-term +28.03 Da, K +28.03 Da, | 6547.145996 | 2 | 1081.140015 | 1081.142823 |
| AVWPTLV DINSLSL TEAYKLR        | Q9R0H0 | 0          | N-term +28.03 Da, K +28.03 Da, | 6556.518555 | 3 | 854.8099976 | 854.1388941 |
| SPVLLDFFEDSELYR                | Q9ESB3 | 0          | N-term +28.03 Da,              | 6560.047363 | 2 | 929.960022  | 929.4670969 |
| ELDPGVVDNFPPLK                 | P30115 | 0          | N-term +28.03 Da, K +28.03 Da, | 6562.914063 | 2 | 806.4621582 | 806.4532603 |

|                                   |        |            |                                |             |   |             |             |
|-----------------------------------|--------|------------|--------------------------------|-------------|---|-------------|-------------|
| APPSVFAQVPQAPPVLVFKL              | P05201 | 0          | N-term +28.03 Da, K +28.03 Da, | 6565.695801 | 3 | 721.0973511 | 721.0976406 |
| VVEAIVENLKLKNELFQR                | Q61425 | 0          | N-term +28.03 Da, K +28.03 Da, | 6569.189453 | 3 | 742.7700195 | 742.7788596 |
| AAEDVVATGADPSELEGGLLHEIF          | O55022 | 0.00335852 | N-term +28.03 Da,              | 6573.632813 | 2 | 1262.609985 | 1263.123941 |
| APPSVFAQVPQAPPVLVFKL              | P05201 | 0          | N-term +28.03 Da, K +28.03 Da, | 6578.166504 | 2 | 1081.143311 | 1081.142823 |
| TYVDFLAYDILDQYR                   | P10649 | 0          | N-term +28.03 Da,              | 6598.518066 | 2 | 962.4699707 | 961.9803715 |
| EKGEFQILLDALDKIK                  | P16015 | 0          | N-term +28.03 Da, K +28.03 Da, | 6601.746582 | 3 | 657.7199707 | 658.0624848 |
| VHLTDAEKSAVSCSLWAKVNPDEVGGEALGR   | P02089 | 0          | N-term +28.03 Da, K +28.03 Da, | 6614.922363 | 3 | 1097.890015 | 1098.238002 |
| CGESPVWEEASQSLLFVDIPSKIICR        | Q64374 | 0          | N-term +28.03 Da, C +57.02 Da, | 6616.80957  | 3 | 1026.189941 | 1026.187591 |
| VHLTDAEKAASVSCSLWGKVNNSDEVGGEALGR | P02088 | 0          | N-term +28.03 Da, K +28.03 Da, | 6631.496582 | 3 | 1084.550049 | 1084.894236 |
| VHLTDAEKAASVSCSLWGKVNNSDEVGGEALGR | P02088 | 0          | N-term +28.03 Da, K +28.03 Da, | 6633.986328 | 4 | 813.9099731 | 813.922496  |
| TATFAQALQSVPETQVSILDNGLR          | Q9CZ13 | 0          | N-term +28.03 Da,              | 6636.523926 | 3 | 863.1199951 | 863.1290581 |
| AGDLHTALEKFGQAIISLLPDR            | Q8VBW8 | 0.00345125 | N-term +28.03 Da, K +28.03 Da, | 6649.637207 | 3 | 770.4199829 | 770.0935072 |
| TATFAQALQSVPETQVSILDNGLR          | Q9CZ13 | 0          | N-term +28.03 Da,              | 6654.134766 | 2 | 1294.180054 | 1294.189949 |
| VHLTDAEKAASVSCSLWGKVNNSDEVGGEALGR | P02088 | 0          | N-term +28.03 Da, K +28.03 Da, | 6662.095703 | 3 | 1084.880005 | 1084.894236 |
| GFIDLPEFPFGLR                     | O35490 | 0.00712589 | N-term +28.03 Da,              | 6680.463379 | 2 | 881.960022  | 881.4641594 |
| LIQCIVFGPLRVSER                   | Q9R049 | 0.0352065  | N-term +28.03 Da, C +57.02 Da, | 6685.31543  | 2 | 908.5200195 | 908.01911   |
| DLTDYLMKILTER                     | P60710 | 0          | N-term +28.03 Da, K +28.03 Da, | 6692.59375  | 2 | 833.4500122 | 833.9578528 |
| DLTDYLMKILTER                     | P60710 | 0          | N-term +28.03 Da, K +28.03 Da, | 6694.183594 | 2 | 833.9500122 | 833.9578528 |
| VITAFNDGLNHLDSLKGTG               | P02088 | 0          | N-term +28.03 Da, K +28.03 Da, | 6713.85498  | 2 | 1060.050049 | 1059.565134 |
| GLELYDLLSQPSR                     | Q61133 | 0          | N-term +28.03 Da,              | 6720.131836 | 2 | 815.9400024 | 816.4537918 |
| EKIAPSFAVESMEDALKAADTIGYPMIR      | Q8C196 | 0          | N-term +28.03 Da, K +28.03 Da, | 6743.818359 | 4 | 810.1799927 | 809.9290952 |
| EELDPGVVDNFPLLKALR                | P30115 | 0.00496278 | N-term +28.03 Da, K +28.03 Da, | 6744.783691 | 3 | 694.7199707 | 694.3928938 |
| LLVQDVVFTDEMAHFDR                 | P24270 | 0          | N-term +28.03 Da,              | 6751.895508 | 2 | 1032.5      | 1032.016963 |
| VDLLADAVAVTMGPKGR                 | P63038 | 0          | N-term +28.03 Da, K +28.03 Da, | 6753.975098 | 2 | 884.9899902 | 885.003126  |
| AALAMEKNLNQALLDLHALGSAR           | P29391 | 0          | N-term +28.03 Da, K +28.03 Da, | 6759.140625 | 3 | 826.1199951 | 826.1283346 |
| TDLLDDSLVSLFGNR                   | P99029 | 0          | N-term +28.03 Da,              | 6761.087402 | 2 | 903.4799805 | 903.485821  |
| EEVEGSLLLSVQGYMEQASK              | P33622 | 0          | N-term +28.03 Da, K +28.03 Da, | 6765.096191 | 2 | 1155.579956 | 1155.580322 |
| LDPGVVDNFPLLK                     | P30115 | 0          | N-term +28.03 Da, K +28.03 Da, | 6775.893066 | 2 | 742.4199829 | 741.9319632 |
| AILEDLVFPSEIVGKR                  | P62082 | 0.00339271 | N-term +28.03 Da, K +28.03 Da, | 6782.602051 | 2 | 921.5223999 | 921.5403987 |
| ELDPGVVDNFPLLKALR                 | P30115 | 0.00706436 | N-term +28.03 Da, K +28.03 Da, | 6791.263184 | 2 | 977.0599976 | 976.5644053 |
| MADVVFVGVPSVIVSR                  | Q8VCT4 | 0          | N-term +28.03 Da,              | 6801.750977 | 2 | 801.9500122 | 802.4474547 |
| SEAAADREDDPNFFKMVEGFFDR           | P26443 | 0          | N-term +28.03 Da, K +28.03 Da, | 6806.478516 | 3 | 917.4099731 | 917.0902749 |
| DPAIFYKEQFLDGDWATNR               | P14211 | 0          | N-term +28.03 Da, K +28.03 Da, | 6815.537598 | 3 | 781.710022  | 781.3865794 |
| TVFFDITADDEPLGR                   | P17742 | 0.01051051 | N-term +28.03 Da,              | 6816.925293 | 2 | 862.4299927 | 862.4305143 |
| LYHVEELDPGVVDNFPLLKALR            | P30115 | 0          | N-term +28.03 Da, K +28.03 Da, | 6820.095215 | 3 | 865.4699707 | 865.1511338 |
| TIEYLEEAVNFAKGLADR                | Q8BMS1 | 0          | N-term +28.03 Da, K +28.03 Da, | 6827.421387 | 3 | 732.0599976 | 732.0633251 |
| LPEFPFGLR                         | O35490 | 0.00575185 | N-term +28.03 Da,              | 6840.280273 | 2 | 664.8599854 | 665.3637159 |
| ELDPGVVDNFPLLKALR                 | P30115 | 0          | N-term +28.03 Da, K +28.03 Da, | 6843.547363 | 2 | 976.5499878 | 976.5644053 |
| SEAAADREDDPNFFKMVEGFFDR           | P26443 | 0          | N-term +28.03 Da, K +28.03 Da, | 6848.62793  | 3 | 917.75      | 917.0902749 |
| SEAAADREDDPNFFKMVEGFFDR           | P26443 | 0          | N-term +28.03 Da, K +28.03 Da, | 6849.713867 | 3 | 917.0800171 | 917.0902749 |

|                                     |        |            |                                |             |   |             |             |
|-------------------------------------|--------|------------|--------------------------------|-------------|---|-------------|-------------|
| EFQILLDALDKIKTK                     | P16015 | 0          | N-term +28.03 Da, K +28.03 Da, | 6865.747559 | 3 | 630.0499878 | 629.7236917 |
| GQNDLMGTAEDFADQFLR                  | Q64310 | 0          | N-term +28.03 Da,              | 6870.583008 | 2 | 1028.469971 | 1028.475659 |
| GQNDLMGTAEDFADQFLR                  | Q64310 | 0          | N-term +28.03 Da,              | 6875.439453 | 3 | 685.9799805 | 685.9861984 |
| FFKGSASSALELTEEELATAEAVR            | Q8R0Y6 | 0          | N-term +28.03 Da, K +28.03 Da, | 6876.921387 | 3 | 871.4400024 | 871.4533191 |
| AVWPTLVLDINSLDSLTEAYKLR             | Q9R0H0 | 0          | N-term +28.03 Da, K +28.03 Da, | 6911.929688 | 3 | 854.1300049 | 854.1388941 |
| DLTDYLMKILTER                       | P60710 | 0          | N-term +28.03 Da, K +28.03 Da, | 6921.242188 | 3 | 556.3079224 | 556.3076607 |
| EAALAMEKNLNQALLDLHALGSAR            | P29391 | 0          | N-term +28.03 Da, K +28.03 Da, | 6946.474609 | 3 | 869.460022  | 869.1425327 |
| ITAEEMSAVLEERDAALSQCKRLHQELHR       | E9PZ24 | 0.04287599 | N-term +28.03 Da, K +28.03 Da, | 6953.185059 | 3 | 1159.23999  | 1159.596084 |
| LDPGVVDNFPLLKALR                    | P30115 | 0          | N-term +28.03 Da, K +28.03 Da, | 6965.961426 | 2 | 912.0300293 | 912.0431082 |
| TQEAMEAALAMEKNLNQALLDLHALGSAR       | P29391 | 0          | N-term +28.03 Da, K +28.03 Da, | 6999.874023 | 4 | 792.4099731 | 792.1653314 |
| SKEFVEEFIWPAVQSSALYEDR              | P16460 | 0          | N-term +28.03 Da, K +28.03 Da, | 7007.381348 | 3 | 896.4400024 | 896.118159  |
| VLEYLTAIEILELAGNAAR                 | P22752 | 0          | N-term +28.03 Da,              | 7026.900391 | 2 | 988.039978  | 987.5489528 |
| VNPTVFFDITADDEPLGR                  | P17742 | 0          | N-term +28.03 Da,              | 7046.577637 | 2 | 1017.5      | 1017.512568 |
| VEELDPGVVDNFPLLKALR                 | P30115 | 0          | N-term +28.03 Da, K +28.03 Da, | 7075.038574 | 2 | 1090.609985 | 1090.61991  |
| SSAGLPLSATSFLLEDLMDR                | Q75N73 | 0.00090827 | N-term +28.03 Da,              | 7082.695801 | 2 | 1068.540039 | 1068.038093 |
| AFEEAEKNAPAIIFIDELDAIAPKR           | Q01853 | 0          | N-term +28.03 Da, K +28.03 Da, | 7090.452637 | 3 | 952.5100098 | 952.5232967 |
| DFQLIGIQDGYLSLLQDSGEVR              | P63242 | 0.00351185 | N-term +28.03 Da,              | 7104.650879 | 2 | 1248.640015 | 1247.644843 |
| VEELDPGVVDNFPLLKALR                 | P30115 | 0          | N-term +28.03 Da, K +28.03 Da, | 7107.430176 | 2 | 1090.601563 | 1090.61991  |
| LPTLEQPIIPSDYVAIKAPM                | Q8C196 | 0.01189591 | N-term +28.03 Da, K +28.03 Da, | 7111.746582 | 3 | 751.75      | 751.4252062 |
| LPTLEQPIIPSDYVAIKAPM                | Q8C196 | 0          | N-term +28.03 Da, K +28.03 Da, | 7114.090332 | 2 | 1127.119995 | 1126.634171 |
| SSAGLPLSATSFLLEDLMDR                | Q75N73 | 0          | N-term +28.03 Da,              | 7114.876953 | 2 | 1069.040039 | 1068.038093 |
| MIQLIATPSNALVDEPVSIR                | Q8BGG9 | 0.01181684 | N-term +28.03 Da,              | 7117.13916  | 3 | 732.4000244 | 732.4083268 |
| NVPAGPGGSQQVDLASVLTPEIMAPILANADVQER | Q9JKV1 | 0          | N-term +28.03 Da,              | 7117.729004 | 3 | 1196.290039 | 1195.957565 |
| TATFAQALQSVPETQVSILDNGLR            | Q9CZ13 | 0          | N-term +28.03 Da,              | 7124.553711 | 3 | 863.1199951 | 863.1290581 |
| VEELDPGVVDNFPLLK                    | P30115 | 0.03631473 | N-term +28.03 Da, K +28.03 Da, | 7126.897949 | 2 | 920.5200195 | 920.5087646 |
| VEELDPGVVDNFPLLK                    | P30115 | 0          | N-term +28.03 Da, K +28.03 Da, | 7137.152344 | 2 | 920.0200195 | 920.5087646 |
| AIAELDTLSEESYKDSTLIMQLLR            | P62259 | 0          | N-term +28.03 Da, K +28.03 Da, | 7138.983398 | 3 | 932.8200073 | 932.4964192 |
| DLAILLGMLDPVEKDANNMPVTAR            | D3Z0Y2 | 0.01902748 | N-term +28.03 Da, K +28.03 Da, | 7141.57373  | 3 | 885.1400146 | 884.8081623 |
| GDKVTYVDFLAYDILDQYR                 | P10649 | 0          | N-term +28.03 Da, K +28.03 Da, | 7148.491699 | 3 | 784.3900146 | 784.0703685 |
| DPNFFKFMVEGFFDR                     | P26443 | 0          | N-term +28.03 Da, K +28.03 Da, | 7154.125977 | 3 | 602.960022  | 602.295755  |
| AGDKVTYVDFLAYDILDQYR                | P10649 | 0          | N-term +28.03 Da, K +28.03 Da, | 7154.281738 | 3 | 807.7399902 | 807.7494066 |
| AVWPTLVLDINSLDSLTEAYKLR             | Q9R0H0 | 0          | N-term +28.03 Da, K +28.03 Da, | 7156.667969 | 3 | 853.7999878 | 854.1388941 |
| DKVTYVDFLAYDILDQYR                  | P10649 | 0          | N-term +28.03 Da, K +28.03 Da, | 7161.157227 | 2 | 1147.079956 | 1147.091182 |
| KEFVEEFIWPAVQSSALYEDR               | P16460 | 0          | N-term +28.03 Da, K +28.03 Da, | 7161.773926 | 3 | 867.4299927 | 867.1074827 |
| TTFGDFIQLLVR                        | Q8R0Y6 | 0          | N-term +28.03 Da,              | 7163.800293 | 2 | 719.4072876 | 719.4086551 |
| DEMYKALLEVLGR                       | Q99KB8 | 0          | N-term +28.03 Da, K +28.03 Da, | 7169.060547 | 2 | 797.4299927 | 796.9394627 |
| AVWPTLVLDINSLDSLTEAYKLR             | Q9R0H0 | 0          | N-term +28.03 Da, K +28.03 Da, | 7173.803223 | 2 | 1280.199951 | 1280.704703 |
| VEEFIWPAVQSSALYEDR                  | P16460 | 0          | N-term +28.03 Da,              | 7181.660156 | 2 | 1084.02002  | 1084.03895  |
| KTQEAMEAALAMEKNLNQALLDLHALGSAR      | P29391 | 0          | N-term +28.03 Da, K +28.03 Da, | 7187.527832 | 4 | 831.1900024 | 831.1968973 |
| VNPTVFFDITADDEPLGR                  | P17742 | 0          | N-term +28.03 Da,              | 7192.072266 | 2 | 1017.5      | 1017.512568 |

|                                  |        |            |                                |             |   |             |             |
|----------------------------------|--------|------------|--------------------------------|-------------|---|-------------|-------------|
| SYGVPDDLLYSPFVVIK                | P14152 | 0.04389929 | N-term +28.03 Da, K +28.03 Da, | 7195.402832 | 2 | 984.0300293 | 984.5400647 |
| AVWPTLVLDINSLDLTEAYKLR           | Q9R0H0 | 0          | N-term +28.03 Da, K +28.03 Da, | 7201.814941 | 3 | 853.7999878 | 854.1388941 |
| HYGALUIGLNR                      | P15327 | 0.04284773 | N-term +28.03 Da,              | 7209.779297 | 2 | 571.8300171 | 571.3274672 |
| TTVLLADMNDFGTVNEIYKTYF           | P52760 | 0          | N-term +28.03 Da, K +28.03 Da, | 7220.588867 | 2 | 1306.160034 | 1306.153655 |
| TTVLLADMNDFGTVNEIYKTYF           | P52760 | 0          | N-term +28.03 Da, K +28.03 Da, | 7223.08252  | 2 | 1307.160034 | 1306.153655 |
| MITSAAGIISLLDEEEPQLKEF           | Q3TXS7 | 0          | N-term +28.03 Da, K +28.03 Da, | 7234.969727 | 3 | 830.7700195 | 830.7731123 |
| MITSAAGIISLLDEEEPQLKEF           | Q3TXS7 | 0          | N-term +28.03 Da, K +28.03 Da, | 7249.090332 | 3 | 831.4400024 | 830.7731123 |
| MITSAAGIISLLDEEEPQLKEF           | Q3TXS7 | 0          | N-term +28.03 Da, K +28.03 Da, | 7258.923828 | 2 | 1246.160034 | 1245.65603  |
| FDVDGLDPAFTPATGTPVLGGLSYR        | Q61176 | 0          | N-term +28.03 Da,              | 7269.169922 | 2 | 1298.640015 | 1297.660493 |
| EAGITEKVVFEQTKVIADNVKDWSKVVL     | P17751 | 0          | N-term +28.03 Da, K +28.03 Da, | 7275.535645 | 4 | 822.210022  | 822.2231722 |
| VHLTDAEKAASVCLWGKVNSEVGGALGR     | P02088 | 0          | N-term +28.03 Da, K +28.03 Da, | 7286.208496 | 3 | 1084.540039 | 1084.894236 |
| YSDFERLHRNLQRQFRGPMASISFPR       | Q3UR97 | 0.04630225 | N-term +28.03 Da,              | 7313.820801 | 3 | 1079.540039 | 1079.559744 |
| VADALANAAGHLDDLPGALSALSDLHAH     | Q91VB8 | 0          | N-term +28.03 Da,              | 7315.460938 | 3 | 922.1300049 | 921.8068668 |
| IGDIMFGVPSVIVSR                  | Q8VCC2 | 0          | N-term +28.03 Da,              | 7322.794434 | 2 | 809.4400024 | 809.4552797 |
| VNPTVFFDITADDEPLGR               | P17742 | 0          | N-term +28.03 Da,              | 7349.140625 | 2 | 1017.493103 | 1017.512568 |
| TEGAELVDSVLDVVR                  | P68372 | 0.00498753 | N-term +28.03 Da,              | 7352.82959  | 2 | 816.4299927 | 815.4383393 |
| GESPVWEEASQSLFVDIPSKIICR         | Q64374 | 0          | N-term +28.03 Da, C +57.02 Da, | 7411.669922 | 3 | 973.5       | 972.8440416 |
| SEVGYDAMLGDFVNMVEKGIIDPTKVVR     | P63038 | 0          | N-term +28.03 Da, K +28.03 Da, | 7420.360352 | 4 | 792.9199829 | 792.4186289 |
| FLGVAEQLHNEGKLF                  | Q8C196 | 0          | N-term +28.03 Da, K +28.03 Da, | 7431.34668  | 2 | 953.5       | 953.0170906 |
| VSKEFVEEVIWPAVQSSALYEDR          | P16460 | 0          | N-term +28.03 Da, K +28.03 Da, | 7444.080078 | 3 | 929.7999878 | 929.1409638 |
| RQLSPERPVLMEAEENTEFLDNTAGPSKK    | C3S7Q5 | 0.04395604 | N-term +28.03 Da, K +28.03 Da, | 7457.968262 | 3 | 1206.26001  | 1205.943039 |
| TLADEVGVDAQHVADLKGAFGER          | Q8BMS1 | 0          | N-term +28.03 Da, K +28.03 Da, | 7463.406738 | 3 | 895.4500122 | 894.7959678 |
| VQFDEGLPPIILNALEVQGR             | P56480 | 0          | N-term +28.03 Da,              | 7519.082031 | 2 | 1062.560059 | 1062.078409 |
| IHTQPPPPPIPEVVATWEAISLGR         | Q8BGA8 | 0          | N-term +28.03 Da,              | 7528.64502  | 3 | 878.4799805 | 878.4865165 |
| LVDMVNDGLEDLFR                   | F6RWR5 | 0.01834862 | N-term +28.03 Da,              | 7542.871094 | 2 | 832.4299927 | 832.4216347 |
| IHTQPPPPPIPEVVATWEAISLGR         | Q8BGA8 | 0          | N-term +28.03 Da,              | 7561.246582 | 3 | 878.1500244 | 878.4865165 |
| IHTQPPPPPIPEVVATWEAISLGR         | Q8BGA8 | 0          | N-term +28.03 Da,              | 7572.792969 | 2 | 1317.23999  | 1317.226136 |
| IHTQPPPPPIPEVVATWEAISLGR         | Q8BGA8 | 0          | N-term +28.03 Da,              | 7593.553223 | 3 | 878.1500244 | 878.4865165 |
| PFLAIMEVPPPEIMPTVIDEYLDNGSDQSATR | Q8VCU1 | 0          | N-term +28.03 Da,              | 7622.353027 | 3 | 1160.22998  | 1159.570319 |
| IHTQPPPPPIPEVVATWEAISLGR         | Q8BGA8 | 0          | N-term +28.03 Da,              | 7625.854004 | 3 | 878.1500244 | 878.4865165 |
| ATLADEVGVDAQHVADLKGAFGER         | Q8BMS1 | 0.01179941 | N-term +28.03 Da, K +28.03 Da, | 7631.226563 | 3 | 918.1300049 | 918.4750058 |
| MEAAALAMEKNLNQALLDLHALGSAR       | P29391 | 0          | N-term +28.03 Da, K +28.03 Da, | 7632.742188 | 3 | 912.8099976 | 912.8226944 |
| DQALSFLKDFLAGGIAAAVSKTAVAPIER    | P48962 | 0.04298942 | N-term +28.03 Da, K +28.03 Da, | 7633.344727 | 3 | 1015.893372 | 1015.244534 |
| SSAGLPLSATSFLLEDLMDR             | Q75N73 | 0          | N-term +28.03 Da,              | 7636.245605 | 2 | 1067.530029 | 1068.038093 |
| IHTQPPPPPIPEVVATWEAISLGR         | Q8BGA8 | 0          | N-term +28.03 Da,              | 7637.005371 | 2 | 1316.719971 | 1317.226136 |
| PLLAHMQLPPEIMPTVIDEYLDNGSDESATR  | Q63880 | 0          | N-term +28.03 Da,              | 7637.730957 | 3 | 1160.890015 | 1160.905702 |
| ATLADEVGVDAQHVADLKGAFGER         | Q8BMS1 | 0          | N-term +28.03 Da, K +28.03 Da, | 7641.660645 | 3 | 918.7999878 | 918.4750058 |
| TADEMYKALLEVLGR                  | Q99KB8 | 0          | N-term +28.03 Da, K +28.03 Da, | 7651.88916  | 2 | 883.4662476 | 882.9818594 |
| GLELYLDLLSQPSR                   | Q61133 | 0          | N-term +28.03 Da,              | 7653.109863 | 2 | 816.460022  | 816.4537918 |
| FAGDKVTVVDFLAYDILDQYR            | P10649 | 0          | N-term +28.03 Da, K +28.03 Da, | 7656.333496 | 3 | 857.0900269 | 856.7722113 |

|                                     |        |            |                                             |             |   |             |             |
|-------------------------------------|--------|------------|---------------------------------------------|-------------|---|-------------|-------------|
| VNPTVFFDITADDEPLGR                  | P17742 | 0          | N-term +28.03 Da,                           | 7659.442383 | 2 | 1017.01001  | 1017.512568 |
| YLTAEILELAGNAAR                     | P22752 | 0          | N-term +28.03 Da,                           | 7663.321289 | 2 | 816.9400024 | 816.9514163 |
| AFAQFGSDLDAATQQLLSR                 | Q03265 | 0          | N-term +28.03 Da,                           | 7664.949707 | 2 | 1035.02002  | 1034.028916 |
| GEFQILLDALDKIK                      | P16015 | 0          | N-term +28.03 Da, K +28.03 Da,              | 7699.84668  | 2 | 843.9899902 | 844.0056601 |
| VEDLIKAAIGDTLVQDIR                  | Q9CXN7 | 0          | N-term +28.03 Da, K +28.03 Da,              | 7724.275391 | 2 | 1013.070007 | 1013.08316  |
| VEDLIKAAIGDTLVQDIR                  | Q9CXN7 | 0          | N-term +28.03 Da, K +28.03 Da,              | 7725.717773 | 3 | 676.0499878 | 675.7245321 |
| DLTDYLMKILTER                       | P60710 | 0          | N-term +28.03 Da, K +28.03 Da,              | 7728.771973 | 2 | 833.9415283 | 833.9578528 |
| DLTDYLMKILTER                       | P60710 | 0          | N-term +28.03 Da, K +28.03 Da,              | 7759.982422 | 2 | 833.9418335 | 833.9578528 |
| LIGDVVFGVPSVIVSR                    | Q64176 | 0          | N-term +28.03 Da,                           | 7762.35498  | 2 | 842.9899902 | 843.0034515 |
| DDPNFFKMVEGFFDR                     | P26443 | 0          | N-term +28.03 Da, K +28.03 Da,              | 7771.237305 | 2 | 960.9400024 | 960.4534663 |
| KDQQEAALVDMVNDGLEDLFR               | F6RWRS | 0          | N-term +28.03 Da, K +28.03 Da,              | 7808.153809 | 3 | 821.4000244 | 821.4125775 |
| KDQQEAALVDMVNDGLEDLFR               | F6RWRS | 0.01173881 | N-term +28.03 Da, K +28.03 Da,              | 7810.776367 | 2 | 1232.099976 | 1231.615228 |
| EVEDLIKAAIGDTLVQDIR                 | Q9CXN7 | 0.00494641 | N-term +28.03 Da, K +28.03 Da,              | 7813.780273 | 2 | 1078.089966 | 1077.604457 |
| EVEDLIKAAIGDTLVQDIR                 | Q9CXN7 | 0          | N-term +28.03 Da, K +28.03 Da,              | 7814.01709  | 3 | 719.0599976 | 718.7387302 |
| GQNDLMGTAEDFADQFLR                  | Q64310 | 0.04290429 | N-term +28.03 Da,                           | 7823.587402 | 2 | 1028.48999  | 1028.475659 |
| VLAQAELPALHYRFNAPIAR                | P58459 | 0.03019904 | N-term +28.03 Da,                           | 7825.279785 | 2 | 1139.630005 | 1139.644584 |
| NVPAGPGGSQQVDLASVLTPEIMAPILANADVQER | Q9JKV1 | 0          | N-term +28.03 Da,                           | 7827.178223 | 3 | 1195.619995 | 1195.957565 |
| ALVDMVNDGLEDLFR                     | F6RWRS | 0          | N-term +28.03 Da,                           | 7845.419434 | 2 | 867.4500122 | 867.9401917 |
| TQRKRQHTYLTR                        | A2AHJ4 | 0.01775568 | N-term +28.03 Da, K +28.03 Da,              | 7900.634766 | 2 | 822.4699707 | 822.4762578 |
| VNPTVFFDITADDEPLGR                  | P17742 | 0          | N-term +28.03 Da,                           | 7954.940918 | 2 | 1017.01001  | 1017.512568 |
| VNPTVFFDITADDEPLGR                  | P17742 | 0          | N-term +28.03 Da,                           | 8243.969727 | 2 | 1017.01001  | 1017.512568 |
| KHHLDGTEEER                         | P10649 | 0          | N-term +14.02 Da, K +28.03 Da,              | 1056.130005 | 3 | 508.5799866 | 508.9198935 |
| MNLTRAGAR                           | Q35386 | 0.04411765 | N-term +14.02 Da,                           | 1303.106201 | 2 | 504.7900085 | 503.784874  |
| PAEYDVSPETR                         | Q9CQC7 | 0.03333333 | N-term +14.02 Da,                           | 1988.591919 | 2 | 640.2999878 | 640.8120073 |
| GHGQDYLVGNR                         | E9Q6L7 | 0          | N-term +14.02 Da,                           | 2130.122803 | 2 | 616.3120728 | 616.8126752 |
| TDTEDKGEFLSEGGGVR                   | E9PV24 | 0          | N-term +14.02 Da, K +28.03 Da,              | 2428.202637 | 3 | 614.2999878 | 614.6357118 |
| NPVDDICIAKPR                        | P32261 | 0          | N-term +14.02 Da, K +28.03 Da, C +57.02 Da, | 2674.305908 | 3 | 481.269989  | 481.5993261 |
| NPVDDICIAKPR                        | P32261 | 0          | N-term +14.02 Da, K +28.03 Da, C +57.02 Da, | 2705.889648 | 3 | 481.269989  | 481.5993261 |
| PDSWDKDVPEPPSR                      | Q9DCS9 | 0          | N-term +14.02 Da, K +28.03 Da,              | 2897.565186 | 3 | 611.2999878 | 611.6336421 |
| VAPEEHPVLLTEAPLNPKANR               | P60710 | 0          | N-term +14.02 Da, K +28.03 Da,              | 3112.215088 | 4 | 585.5800171 | 585.8325638 |
| YFRDKEGLRDFYLDQFR                   | Q01097 | 0.03076923 | N-term +14.02 Da, K +28.03 Da,              | 3143.822998 | 3 | 771.4000244 | 771.7323498 |
| VNADEVGGEALGR                       | A8DUK4 | 0.04477612 | N-term +14.02 Da,                           | 3240.76416  | 2 | 652.3400269 | 652.3361809 |
| PAGILNGKLVSAQIR                     | Q922D8 | 0.04545455 | N-term +14.02 Da, K +28.03 Da,              | 3477.913818 | 3 | 527.6599731 | 527.9998185 |
| HVGDLGNVTAGKDGVANVSIEDR             | P08228 | 0          | N-term +14.02 Da, K +28.03 Da,              | 3516.609131 | 3 | 790.0700073 | 790.0803672 |
| IVANGKGILAADESVMGMNR                | Q91Y97 | 0          | N-term +14.02 Da, K +28.03 Da,              | 3530.314941 | 3 | 706.710022  | 706.717712  |
| NKELDPVQKLFVDKIR                    | P97450 | 0          | N-term +14.02 Da, K +28.03 Da,              | 3589.676514 | 4 | 511.3099976 | 511.56483   |
| PMFIVNTNVPR                         | P34884 | 0          | N-term +14.02 Da,                           | 3765.510986 | 2 | 652.3599854 | 652.8633218 |
| PFVELETNLPASR                       | O35215 | 0          | N-term +14.02 Da,                           | 3791.084961 | 2 | 744.9000244 | 745.4066061 |
| PFPDGLAEDIDKGEVSAR                  | P58252 | 0          | N-term +14.02 Da, K +28.03 Da,              | 3821.822754 | 3 | 654         | 654.3390066 |
| PFPDGLAEDIDKGEVSAR                  | P58252 | 0          | N-term +14.02 Da, K +28.03 Da,              | 3928.523682 | 3 | 654         | 654.3390066 |

|                                         |        |            |                                             |             |   |             |             |
|-----------------------------------------|--------|------------|---------------------------------------------|-------------|---|-------------|-------------|
| PAPATTF AHL DATTVLSR                    | P56480 | 0          | N-term +14.02 Da,                           | 3942.594971 | 3 | 629.0100098 | 629.3442029 |
| PFPDGLAEDIDKGEVSAR                      | P58252 | 0.01724138 | N-term +14.02 Da, K +28.03 Da,              | 3960.106201 | 3 | 654.3400269 | 654.3390066 |
| IIEGANGPTTPEADKIFLER                    | P26443 | 0          | N-term +14.02 Da, K +28.03 Da,              | 3996.931885 | 3 | 763.0800171 | 763.0829372 |
| HVGD LGNV TAGK DGVANVSIEDR              | P08228 | 0          | N-term +14.02 Da, K +28.03 Da,              | 4098.494141 | 3 | 790.4000244 | 790.0803672 |
| PFVELETNLPASR                           | O35215 | 0          | N-term +14.02 Da,                           | 4134.070801 | 2 | 744.9000244 | 745.4066061 |
| HVFGESDELIGQKVSH                        | P17751 | 0          | N-term +14.02 Da, K +28.03 Da,              | 4155.422852 | 2 | 914.4799805 | 913.9759164 |
| PDAWGVTKGAAELMQQKEATTEQQLR              | O35490 | 0          | N-term +14.02 Da, K +28.03 Da,              | 4391.228027 | 4 | 740.3800049 | 740.6393588 |
| PPPQAVSTGTPQSPAVAAAAATTTATTTTTSGGHPLFLR | P54728 | 0          | N-term +14.02 Da,                           | 4721.754883 | 3 | 1293.329956 | 1293.66929  |
| PPPQAVSTGTPQSPAVAAAAATTTATTTTTSGGHPLFLR | P54728 | 0          | N-term +14.02 Da,                           | 4723.762207 | 4 | 970.25      | 970.5037864 |
| PNWGVFSEFGDSSSPATR                      | E9PV24 | 0          | N-term +14.02 Da,                           | 4847.82666  | 2 | 978.9500122 | 979.4580884 |
| VHLTDAEKA AVSCLWGK VNSDEVGGEALGR        | P02088 | 0          | N-term +14.02 Da, K +28.03 Da, C +57.02 Da, | 4893.595215 | 4 | 810.9199829 | 811.1725605 |
| FAVECSDFK                               | Q9Z0T6 | 0.03125    | N-term +14.02 Da, K +28.03 Da, C +57.02 Da, | 5090.407227 | 2 | 574.7842407 | 574.2787565 |
| NCWQNYLDFHR                             | P56391 | 0          | N-term +14.02 Da, C +57.02 Da,              | 5137.600098 | 2 | 784.8400269 | 785.3569243 |
| PPQLHNGLD FSAKVIQGS LDSL PQAVR          | Q9Z2V4 | 0          | N-term +14.02 Da, K +28.03 Da,              | 5275.32959  | 4 | 733.6500244 | 733.9067921 |
| FPNQNTKNCWQNYLDFHR                      | P56391 | 0          | N-term +14.02 Da, K +28.03 Da, C +57.02 Da, | 5343.773926 | 2 | 1278.130005 | 1278.105991 |
| PPQLHNGLD FSAKVIQGS LDSL PQAVR          | Q9Z2V4 | 0          | N-term +14.02 Da, K +28.03 Da,              | 5543.820313 | 4 | 733.6500244 | 733.9067921 |
| MVHLTDAEKSAV SCLWAKVNPDEVGGEALGR        | P02089 | 0.01694915 | N-term +14.02 Da, K +28.03 Da, C +57.02 Da, | 5656.75293  | 4 | 854.4400024 | 853.9405067 |
| DPTGSYHGSD LQLER                        | Q7TMM9 | 0.03225806 | N-term +14.02 Da,                           | 5676.820801 | 2 | 903.4299927 | 903.9187963 |
| HPDEPV LLEEPV LALAEKHGR                 | Q9JII6 | 0          | N-term +14.02 Da, K +28.03 Da,              | 5721.538574 | 3 | 832.1199951 | 831.8006527 |
| PPQLHNGLD FSAKVIQGS LDSL PQAVR          | Q9Z2V4 | 0          | N-term +14.02 Da, K +28.03 Da,              | 5731.934082 | 4 | 733.9000244 | 733.9067921 |
| PAYAPGTGTPEIAGLTPSQALEIR                | A2AS89 | 0          | N-term +14.02 Da,                           | 5734.79541  | 3 | 847.1300049 | 847.4638181 |
| VNPVTFFDITADDEPLGR                      | P17742 | 0          | N-term +14.02 Da,                           | 5737.625    | 2 | 1011.51001  | 1012.012697 |
| PPQLHNGLD FSAKVIQGS LDSL PQAVR          | Q9Z2V4 | 0          | N-term +14.02 Da, K +28.03 Da,              | 5743.140625 | 3 | 977.8599854 | 978.2066307 |
| PPQLHNGLD FSAKVIQGS LDSL PQAVR          | Q9Z2V4 | 0          | N-term +14.02 Da, K +28.03 Da,              | 5762.608887 | 4 | 733.9000244 | 733.9067921 |
| MVHLTDAEKA AVSCLWGK VNSDEVGGEALGR       | P02088 | 0          | N-term +14.02 Da, K +28.03 Da, C +57.02 Da, | 5931.003906 | 3 | 1125.22998  | 1124.907817 |
| VHLTDAEKA AVSCLWGK VNSDEVGGEALGR        | P02088 | 0          | N-term +14.02 Da, K +28.03 Da, C +57.02 Da, | 6060.847168 | 4 | 811.4099731 | 811.1725605 |
| PGIVELPTLEELKVEEVKSSAVLK                | Q9DCJ5 | 0          | N-term +14.02 Da, K +28.03 Da,              | 6096.571777 | 4 | 702.4199829 | 702.675307  |
| VSCLWGK VNSDEVGGEALGR                   | P02088 | 0.03174603 | N-term +14.02 Da, K +28.03 Da, C +57.02 Da, | 6099.792969 | 2 | 1089.550049 | 1089.554737 |
| VHLTDAEKSAV SCLWAKVNPDEVGGEALGR         | P02089 | 0          | N-term +14.02 Da, K +28.03 Da, C +57.02 Da, | 6116.82959  | 3 | 1094.550049 | 1094.571422 |
| PTTQSQPQDEQEKL LDEAIQAVKVSQSF           | Q9EQH3 | 0          | N-term +14.02 Da, K +28.03 Da,              | 6135.510742 | 3 | 1043.880005 | 1044.21541  |
| PIHLSFDVDGLDPAFTPATGTPVLGGLSYR          | Q61176 | 0          | N-term +14.02 Da,                           | 6197.455078 | 3 | 1043.869995 | 1044.213451 |
| SEAAADREDDPNFFKMVEGFFDR                 | P26443 | 0          | N-term +14.02 Da, K +28.03 Da,              | 6213.54834  | 4 | 685.0700073 | 685.3195898 |
| PVFDWKDPLILEEQ LTADEKLIR                | Q60759 | 0          | N-term +14.02 Da, K +28.03 Da,              | 6358.319824 | 4 | 710.9000244 | 711.1507276 |
| PVFDWKDPLILEEQ LTADEKLIR                | Q60759 | 0          | N-term +14.02 Da, K +28.03 Da,              | 6369.530762 | 3 | 947.8599854 | 947.8652114 |
| VSCLWGK VNSDEVGGEALGR                   | P02088 | 0          | N-term +14.02 Da, K +28.03 Da, C +57.02 Da, | 6474.994141 | 2 | 1089.540039 | 1089.554737 |
| VSCLWGK VNSDEVGGEALGR                   | P02088 | 0          | N-term +14.02 Da, K +28.03 Da, C +57.02 Da, | 6593.973145 | 2 | 1089.540039 | 1089.554737 |
| PTGAFGKATDLLLDDSLVSLFGNR                | P99029 | 0          | N-term +14.02 Da, K +28.03 Da,              | 6722.688965 | 3 | 851.4500122 | 851.4638181 |
| VADALASAAGHLDDLPGALSALSDLHAH            | P01942 | 0          | N-term +14.02 Da,                           | 7013.26416  | 3 | 908.8099976 | 909.1366531 |
| CGESPVWEEASQSL LFDIPSKIICR              | Q64374 | 0          | N-term +14.02 Da, K +28.03 Da, C +57.02 Da, | 7035.872559 | 2 | 1533.25     | 1533.277878 |
| CGESPVWEEASQSL LFDIPSKIICR              | Q64374 | 0          | N-term +14.02 Da, K +28.03 Da, C +57.02 Da, | 7067.379395 | 3 | 1022.169983 | 1022.521011 |

|                              |        |            |                                            |             |   |             |             |
|------------------------------|--------|------------|--------------------------------------------|-------------|---|-------------|-------------|
| RMGDSASKVISAEALPGR           | Q9D6Y7 | 0          | N-term +14.02 Da, K +28.03 Da,             | 7081.925293 | 2 | 1011.024902 | 1010.038723 |
| CGESPVWEEASQSLLFVDIPSKIICR   | Q64374 | 0          | N-term +14.02 Da, K +28.03 Da,C +57.02 Da, | 7202.318359 | 3 | 1022.840027 | 1022.521011 |
| MPFVELETNLPASR               | Q35215 | 0          | N-term +14.02 Da,                          | 7286.511719 | 2 | 810.918457  | 810.9268487 |
| CGESPVWEEASQSLLFVDIPSKIICR   | Q64374 | 0          | N-term +14.02 Da, K +28.03 Da,C +57.02 Da, | 7323.606445 | 2 | 1532.75     | 1533.277878 |
| CGESPVWEEASQSLLFVDIPSKIICR   | Q64374 | 0          | N-term +14.02 Da, K +28.03 Da,C +57.02 Da, | 7468.581055 | 2 | 1532.76001  | 1533.277878 |
| VADALANAAGHLDDLPGALSALSDLHAH | Q91VB8 | 0          | N-term +14.02 Da,                          | 7599.405762 | 3 | 917.7999878 | 918.1402861 |
| PNGKGLPPWPQLNQLQLEYLEIGLEPR  | Q63880 | 0          | N-term +14.02 Da, K +28.03 Da,             | 7725.594238 | 3 | 1010.869995 | 1011.218648 |
| VNPTVFFDITADDEPLGR           | P17742 | 0          | N-term +14.02 Da,                          | 7785.126465 | 2 | 1012.5      | 1012.012697 |
| HFDSAYLYQIEEVEGQAIR          | Q91WT7 | 0.03278689 | N-term +14.02 Da,                          | 7844.017578 | 2 | 1143.550049 | 1143.065992 |
| KHHLDGETEER                  | P10649 | 0          | K +28.03 Da,                               | 1051.951782 | 3 | 503.5698547 | 503.2427075 |
| KHHLDGETEER                  | P10649 | 0.01265823 | K +28.03 Da,                               | 1058.925293 | 2 | 754.8499756 | 754.360423  |
| KQLATKAAR                    | P68433 | 0.00970874 | K +28.03 Da,                               | 1059.970215 | 3 | 348.5572815 | 348.2292324 |
| TAEEDADPKR                   | Q9D0J8 | 0.00993377 | K +28.03 Da,                               | 1068.833984 | 3 | 473.2200012 | 473.2195688 |
| PEPAKSAPAPK                  | P10853 | 0          | K +28.03 Da,                               | 1076.55188  | 3 | 383.5603333 | 383.5606481 |
| IKVENTEENR                   | Q91Y97 | 0.03672316 | K +28.03 Da,                               | 1090.389526 | 3 | 420.5580139 | 420.5578554 |
| IKVENTEENR                   | Q91Y97 | 0.00378788 | K +28.03 Da,                               | 1090.981079 | 2 | 630.3300171 | 630.3331449 |
| PSQVVAETR                    | P58252 | 0          |                                            | 1162.026001 | 2 | 493.7656555 | 493.7669086 |
| TDDEVVQR                     | P08113 | 0.00367647 |                                            | 1165.645508 | 2 | 481.2330017 | 481.232899  |
| EDVGHSTDAR                   | P56395 | 0.00990099 |                                            | 1168.640503 | 2 | 544.2360229 | 543.7441625 |
| QTMQVDEHAR                   | Q8BWT1 | 0          |                                            | 1240.338135 | 2 | 607.2700195 | 607.7827646 |
| EDGNEEKENQGDQGGQPPQR         | P62960 | 0          | K +28.03 Da,                               | 1246.95874  | 3 | 886.0499878 | 886.0499735 |
| AQASAAPKAGTATGR              | P56480 | 0.00996678 | K +28.03 Da,                               | 1253.621216 | 2 | 693.8699951 | 693.3784181 |
| GGVEKGPAALR                  | Q61176 | 0          | K +28.03 Da,                               | 1282.865234 | 3 | 361.5489502 | 361.5487423 |
| QDDLKGGKNEESTKTGNAGSR        | P08228 | 0.00706714 | K +28.03 Da,                               | 1322.431763 | 3 | 727.0200195 | 726.3524867 |
| AAQASAAPKAGTATGR             | P56480 | 0.00377358 | K +28.03 Da,                               | 1386.084106 | 2 | 729.3900146 | 728.8969751 |
| AAQASAAPKAGTATGR             | P56480 | 0.00371747 | K +28.03 Da,                               | 1417.249634 | 2 | 729.3889771 | 728.8969751 |
| VTDALNATR                    | P63038 | 0          |                                            | 1474.203979 | 2 | 480.7657166 | 480.7590836 |
| SDEVGGEALGR                  | P02088 | 0          |                                            | 1758.771851 | 2 | 545.2615356 | 545.2621881 |
| DGEEAGAYDGPR                 | P27773 | 0          |                                            | 1874.729126 | 2 | 618.7612915 | 618.7600101 |
| EYTDSSYDEKR                  | P10649 | 0          | K +28.03 Da,                               | 1878.805176 | 2 | 711.3062744 | 710.8149829 |
| SIGVVGTAEQNR                 | Q35215 | 0          |                                            | 1910.540405 | 2 | 615.8200073 | 615.8254869 |
| EYTDSSYDEKR                  | P10649 | 0          | K +28.03 Da,                               | 1951.680542 | 2 | 711.3056641 | 710.8149829 |
| FNSANEDNVTQVR                | P24270 | 0          |                                            | 2012.772461 | 2 | 747.3499756 | 747.352598  |
| VNSDEVGGEALGR                | P02088 | 0          |                                            | 2079.200439 | 2 | 651.8200073 | 651.8178594 |
| KGEHLSDAFAR                  | Q64471 | 0.01010101 | K +28.03 Da,                               | 2120.145508 | 3 | 420.5499878 | 420.2228067 |
| PTGTYHGSDQLQLER              | P68372 | 0          |                                            | 2121.662842 | 3 | 563.5999756 | 563.6006723 |
| YSTEVEAAVNR                  | P29391 | 0.00359712 |                                            | 2137.324951 | 2 | 619.3099976 | 619.8042203 |
| GYSFTTTAER                   | P60710 | 0          |                                            | 2205.514648 | 2 | 567.2700195 | 566.7671061 |
| KEAESSPFVER                  | P08113 | 0.01515152 | K +28.03 Da,                               | 2264.890137 | 2 | 654.3262939 | 653.8355204 |
| GPDADCFEKASK                 | O09173 | 0.00704225 | K +28.03 Da,C +57.02 Da,                   | 2312.779785 | 2 | 691.3200073 | 690.8268383 |



|                         |        |            |                          |             |   |             |             |
|-------------------------|--------|------------|--------------------------|-------------|---|-------------|-------------|
| LLEYTDSSYDEKR           | P10649 | 0          | K +28.03 Da,             | 2343.826172 | 3 | 549.5999756 | 549.6017903 |
| TLGDIVYKR               | P12710 | 0.0467033  | K +28.03 Da,             | 2351.556641 | 2 | 546.8239746 | 546.8242263 |
| AIAEELAPER              | O35490 | 0.0123839  |                          | 2353.257813 | 2 | 549.789978  | 549.7931237 |
| TLGDIVYKR               | P12710 | 0.01769912 | K +28.03 Da,             | 2357.694336 | 3 | 364.8850098 | 364.885243  |
| GPKVIQPEVDTPPLGR        | Q8VCU1 | 0          | K +28.03 Da,             | 2392.027832 | 3 | 545.6400146 | 545.3139145 |
| PKVIQPEVDTPPLGR         | Q8VCU1 | 0.00364964 | K +28.03 Da,             | 2393.054932 | 3 | 526.9666748 | 526.3067598 |
| GKVNSEVGGGEALGR         | P02088 | 0.01775148 | K +28.03 Da,             | 2395.044678 | 2 | 758.8800049 | 758.3917232 |
| PVQKLFVDKIR             | P97450 | 0          | K +28.03 Da,             | 2396.317627 | 4 | 350.4759216 | 350.4762419 |
| PVQKLFVDKIR             | P97450 | 0          | K +28.03 Da,             | 2397.63623  | 3 | 466.9660645 | 466.965897  |
| EEVRKNYCRPR             | Q62504 | 0.02890173 | K +28.03 Da,C +57.02 Da, | 2403.614746 | 2 | 768.3900146 | 767.8989945 |
| PGGLLVIDHR              | Q9QXF8 | 0.01506024 |                          | 2463.805908 | 3 | 359.5400085 | 359.5452207 |
| LLEFQNDR                | P29391 | 0.00967742 |                          | 2510.529785 | 2 | 517.7700195 | 517.7669086 |
| NCAEFVSGSQLR            | D3Z1B2 | 0.02058824 | C +57.02 Da,             | 2576.850098 | 2 | 684.8300171 | 684.3222543 |
| LTITYGPKVVR             | P12710 | 0          | K +28.03 Da,             | 2660.818848 | 3 | 425.6000061 | 425.5992142 |
| HGSIIYHPSLLPR           | Q8K009 | 0          |                          | 2740.596924 | 3 | 497.2799988 | 497.2806559 |
| LCAATATILDKPEDR         | O35215 | 0          | K +28.03 Da,C +57.02 Da, | 2749.762207 | 3 | 567.9699707 | 567.9661864 |
| ADIVENQVMDTR            | P10649 | 0.0148368  |                          | 2752.187744 | 2 | 696.3300171 | 695.8351948 |
| VGLKAPGIIPR             | Q03265 | 0          | K +28.03 Da,             | 2770.908936 | 3 | 383.9200134 | 383.5886492 |
| MVEKGIIDPTKVVR          | P63038 | 0          | K +28.03 Da,             | 2791.489258 | 4 | 411         | 410.999653  |
| SGQAEFDKAAEEVKR         | F6WUQ1 | 0          | K +28.03 Da,             | 2804.556396 | 3 | 574.6300049 | 574.3003341 |
| APPLTLDGIKDR            | Q9CR21 | 0.04683196 | K +28.03 Da,             | 2876.75293  | 3 | 441.9299927 | 441.9258789 |
| ENIIDLSNANR             | B5X0G2 | 0          |                          | 3018.252441 | 2 | 629.8232422 | 629.8229444 |
| GVKEGATLVCVGNQVPR       | Q8R0Y6 | 0.00955414 | K +28.03 Da,C +57.02 Da, | 3021.610596 | 2 | 886.460022  | 885.4699819 |
| FNSANEDNVTQVR           | P24270 | 0          |                          | 3049.789551 | 2 | 748.3599854 | 747.352598  |
| CEKAMTAKGGDVSVCWEYR     | P56391 | 0          | K +28.03 Da,C +57.02 Da, | 3106.397217 | 3 | 768.3499756 | 768.3587615 |
| CEKAMTAKGGDVSVCWEYR     | P56391 | 0          | K +28.03 Da,C +57.02 Da, | 3111.594238 | 2 | 1152.02002  | 1152.034504 |
| QVAMNPTNTVFDAGR         | P63017 | 0          | K +28.03 Da,             | 3128.015625 | 2 | 860.4299927 | 860.4459753 |
| QKDIFAMDDKSENEPIEENEAAR | Q9Z218 | 0          | K +28.03 Da,             | 3163.379639 | 3 | 869.4099731 | 869.4182802 |
| IGDTLVQDIR              | Q9CXN7 | 0.04709141 |                          | 3188.24292  | 2 | 565.817627  | 565.3142233 |
| GPKVTQPEVDTPPLGR        | Q63880 | 0.01510574 | K +28.03 Da,             | 3208.004639 | 2 | 811.9406128 | 811.4490409 |
| VAVDAPVSSVALR           | Q64374 | 0          |                          | 3233.320068 | 2 | 642.3688965 | 642.36953   |
| SGQAEFDKAAEEVKR         | F6WUQ1 | 0          | K +28.03 Da,             | 3235.173096 | 3 | 574.2999878 | 574.3003341 |
| ERHQFLMELR              | A3KGW5 | 0.02881844 |                          | 3242.36792  | 2 | 680.3599854 | 679.8535238 |
| VNSDEVGGGEALGR          | P02088 | 0          |                          | 3248.27832  | 2 | 652.8099976 | 651.8178594 |
| ELLCYSLDGLR             | Q09M02 | 0.01052632 | C +57.02 Da,             | 3251.342041 | 2 | 670.8400269 | 669.8397483 |
| RTTRQTTITAH             | P13864 | 0.03899721 |                          | 3302.425293 | 2 | 643.3599854 | 643.3522029 |
| IGGHGAEYGAEALER         | P01942 | 0.03910615 |                          | 3326.443604 | 2 | 765.3800049 | 765.3707906 |
| EQQWAPLERPRAQSNPR       | Q9EPX2 | 0.01034483 |                          | 3350.945068 | 3 | 688.0200195 | 688.3558359 |
| QHATNVGIMFR             | P35505 | 0.00363636 |                          | 3365.32959  | 2 | 636.8200073 | 637.3271417 |
| EEHPVLLTEAPLNPKANR      | P60710 | 0          | K +28.03 Da,             | 3488.370605 | 3 | 686.710022  | 686.0443761 |

|                         |        |            |                          |             |   |             |             |
|-------------------------|--------|------------|--------------------------|-------------|---|-------------|-------------|
| VLSGEDKSNIAAWGK         | P01942 | 0          | K +28.03 Da,             | 3489.722412 | 3 | 597         | 596.3402409 |
| EEHPVLLTEAPLNPKANR      | P60710 | 0          | K +28.03 Da,             | 3492.436035 | 3 | 686.3800049 | 686.0443761 |
| GEECELETMTGEKVK         | P12710 | 0          | K +28.03 Da,C +57.02 Da, | 3565.042725 | 2 | 898.914917  | 898.4262577 |
| EECELETMTGEKVK          | P12710 | 0.01041667 | K +28.03 Da,C +57.02 Da, | 3592.8125   | 2 | 870.4099731 | 869.9155257 |
| KVISTTKAPAAIGPYSQAVQVDR | P52760 | 0          | K +28.03 Da,             | 3594.845947 | 3 | 820.1300049 | 819.4672334 |
| GNYVAEKISGQKVNAAACDIAR  | O35490 | 0          | K +28.03 Da,C +57.02 Da, | 3606.588867 | 3 | 817.75      | 817.0883165 |
| KGLTEVKIDEFPR           | Q8CAY6 | 0          | K +28.03 Da,             | 3625.994385 | 3 | 530.6400146 | 529.9750101 |
| PLTGGEVPSVLSGLR         | P11352 | 0          |                          | 3626.86084  | 2 | 691.8843994 | 691.8855446 |
| QALLDLHALGSAR           | P29391 | 0          |                          | 3631.32959  | 3 | 455.5899963 | 455.5930112 |
| KVISTTKAPAAIGPYSQAVQVDR | P52760 | 0          | K +28.03 Da,             | 3632.984619 | 3 | 820.1300049 | 819.4672334 |
| QITLNDLPVGR             | O08807 | 0          |                          | 3642.720215 | 2 | 613.3400269 | 613.3485974 |
| KGLTEVKIDEFPR           | Q8CAY6 | 0.01253918 | K +28.03 Da,             | 3667.146973 | 3 | 530.2999878 | 529.9750101 |
| NGESSELDLQGITR          | Q9QXT0 | 0          |                          | 3711.247314 | 2 | 709.8400269 | 709.349524  |
| VLSGEDKSNIAAWGK         | P01942 | 0          | K +28.03 Da,             | 3775.599365 | 3 | 597         | 596.3402409 |
| IRQNYSTEVEAAVNR         | P29391 | 0          |                          | 3821.43042  | 2 | 875.460022  | 875.4475614 |
| GYVKAGPWTPEAAVEHPEAVR   | O35490 | 0          | K +28.03 Da,             | 3864.766602 | 3 | 765.3900146 | 764.7305688 |
| GYVKAGPWTPEAAVEHPEAVR   | O35490 | 0          | K +28.03 Da,             | 3877.224609 | 3 | 765.0599976 | 764.7305688 |
| LIGPKAPLVLEQGLR         | P54869 | 0          | K +28.03 Da,             | 3885.239502 | 3 | 544.6799927 | 544.6784162 |
| ANNVLSGGTTMYPGIADR      | P62737 | 0          |                          | 3902.063965 | 2 | 918.9500122 | 918.9490798 |
| NDEELNKLGGV             | P27661 | 0.0070922  | K +28.03 Da,             | 3916.789551 | 3 | 443.8999939 | 443.5733942 |
| AIAEELAPER              | O35490 | 0.00952381 |                          | 3921.521729 | 2 | 550.789978  | 549.7931237 |
| GPWTPEAAVEHPEAVR        | O35490 | 0          |                          | 3942.945557 | 2 | 873.9238892 | 873.4339223 |
| PFVELETNLPASR           | O35215 | 0          |                          | 3945.317627 | 2 | 736.890564  | 736.8908271 |
| GPWTPEAAVEHPEAVR        | O35490 | 0.00358423 |                          | 3956.73584  | 2 | 873.4500122 | 873.4339223 |
| PAPATTFAHLDAATTVLSR     | P56480 | 0          |                          | 3970.642578 | 3 | 623.6699829 | 623.6670169 |
| FQKYIGFAPCIFHGR         | Q9DCV3 | 0.01230769 | K +28.03 Da,C +57.02 Da, | 4010.626709 | 2 | 935.4799805 | 934.9850699 |
| GPTTPEADKIFLER          | P26443 | 0.0037594  | K +28.03 Da,             | 4033.0354   | 2 | 802.4199829 | 801.4303168 |
| AHRFPALTPEQKELSEIAQR    | Q91Y97 | 0          | K +28.03 Da,             | 4093.901855 | 4 | 627.5999756 | 627.1038647 |
| VSSGERWIKGDKSELNEIK     | A2AR02 | 0.03418803 | K +28.03 Da,             | 4122.047363 | 2 | 1130.130005 | 1130.120806 |
| VAPEEHPVLLTEAPLNPKANR   | P60710 | 0          | K +28.03 Da,             | 4127.932617 | 3 | 775.4199829 | 775.0971403 |
| NGETPTEKLPFPIIDDKGR     | O08709 | 0          | K +28.03 Da,             | 4130.89209  | 4 | 547.0499878 | 546.5481252 |
| SGDPKEEEEEELVDPLTTVR    | P99028 | 0.02873563 | K +28.03 Da,             | 4144.867188 | 3 | 767.3800049 | 767.3761868 |
| AAGVEFEKFLKTR           | P30115 | 0          | K +28.03 Da,             | 4167.88623  | 3 | 561.3099976 | 560.9821648 |
| AAGVEFEKFLKTR           | P30115 | 0          | K +28.03 Da,             | 4170.166992 | 3 | 561.6400146 | 560.9821648 |
| LFLHESIHNEVVDR          | Q9DBF1 | 0          |                          | 4200.30127  | 3 | 570.289978  | 569.9652854 |
| FGDIAPLNLR              | P24456 | 0.01501502 |                          | 4267.059082 | 2 | 606.3300171 | 606.8404079 |
| QTNPSAMEVEEDDPVPEIR     | Q01853 | 0          |                          | 4272.505371 | 2 | 1077.97998  | 1078.494247 |
| NEFTLGECELETMTGEKVK     | P12710 | 0          | K +28.03 Da,C +57.02 Da, | 4291.915039 | 3 | 801.0499878 | 800.7151574 |
| LGEECELETMTGEKVK        | P12710 | 0          | K +28.03 Da,C +57.02 Da, | 4292.524414 | 2 | 955.960022  | 954.9682899 |
| QASGGPVDIGPEYQQDLDR     | P97450 | 0          |                          | 4299.62207  | 2 | 1022.97998  | 1022.982164 |

|                            |        |            |                          |             |   |             |             |
|----------------------------|--------|------------|--------------------------|-------------|---|-------------|-------------|
| LGEECELETMTGEKVK           | P12710 | 0          | K +28.03 Da,C +57.02 Da, | 4324.198242 | 2 | 955.960022  | 954.9682899 |
| KTSGPPVSELITKAVAASKER      | P43274 | 0          | K +28.03 Da,             | 4326.121094 | 4 | 564.5800171 | 564.0848749 |
| AAAGVEFEEKFLKTR            | P30115 | 0          | K +28.03 Da,             | 4355.706543 | 3 | 584.9877319 | 584.6612028 |
| QKAMQDAEVSKSDIGEVLVGGMTR   | P38647 | 0          | K +28.03 Da,             | 4380.700684 | 3 | 906.460022  | 906.8103434 |
| GQKVLDSGAPIKIPVGPETLGR     | P56480 | 0          | K +28.03 Da,             | 4388.361816 | 3 | 763.7758179 | 763.4494024 |
| DKLPYKVADIGLAAWGR          | P50247 | 0.01242236 | K +28.03 Da,             | 4455.859863 | 3 | 643.3699951 | 643.703402  |
| ASIVEDKLVEDLKTR            | P26443 | 0          | K +28.03 Da,             | 4458.986816 | 3 | 591.6699829 | 591.3436513 |
| KVADIGLAAWGR               | P50247 | 0          | K +28.03 Da,             | 4461.272949 | 2 | 643.3660889 | 642.874782  |
| PGVVDFNPLLK                | P30115 | 0.01215805 | K +28.03 Da,             | 4487.462402 | 2 | 613.8599854 | 613.860809  |
| KNGGLGHMNITLLSDITKQISR     | P20108 | 0          | K +28.03 Da,             | 4495.918945 | 4 | 613.8400269 | 613.8480701 |
| PAFTPATGTPVLGGLSYR         | Q61176 | 0          |                          | 4498.663574 | 2 | 902.9799805 | 902.983248  |
| PAFTPATGTPVLGGLSYR         | Q61176 | 0.02052786 |                          | 4502.082031 | 3 | 602.3300171 | 602.3245908 |
| LLVVYPWTQR                 | P02088 | 0          |                          | 4529.204102 | 2 | 637.8655396 | 637.8664255 |
| GKDLGEAALNEYLR             | Q8R0Y6 | 0.00958466 | K +28.03 Da,             | 4529.398926 | 2 | 789.4099731 | 788.9201163 |
| PAFTPATGTPVLGGLSYR         | Q61176 | 0          |                          | 4530.540039 | 2 | 902.9799805 | 902.983248  |
| KGIKSVTELNQDITNTMTLGDIVYKR | P12710 | 0          | K +28.03 Da,             | 4536.29834  | 4 | 764.1699829 | 763.6744235 |
| VAGPQAQTGAPQGSLEGYLFR      | P29391 | 0          |                          | 4539.17334  | 2 | 1187.109985 | 1187.09532  |
| AIVENLKLKNELFQR            | Q61425 | 0          | K +28.03 Da,             | 4545.005859 | 3 | 625.039978  | 624.3752854 |
| ALEGVGHFFR                 | P29391 | 0.0096463  |                          | 4583.685547 | 2 | 567.289978  | 566.7985427 |
| PFFPGLVKY                  | Q01768 | 0          | K +28.03 Da,             | 4588.612305 | 2 | 548.3147583 | 548.3155053 |
| IVEDKLVEDLKTR              | P26443 | 0          | K +28.03 Da,             | 4608.547363 | 3 | 538.9813232 | 538.6539368 |
| AHSILPVDDINGLNNEEQKQLR     | Q9JH15 | 0.03428571 | K +28.03 Da,             | 4635.111816 | 3 | 845.4299927 | 844.7732744 |
| QTLMWSATWPKEVR             | Q501J6 | 0          | K +28.03 Da,             | 4636.719238 | 2 | 880.4500122 | 880.9612608 |
| GASIVEDKLVEDLKTR           | P26443 | 0          | K +28.03 Da,             | 4638.290527 | 3 | 610.6794434 | 610.350806  |
| GASIVEDKLVEDLKTR           | P26443 | 0          | K +28.03 Da,             | 4647.63623  | 3 | 610.6799927 | 610.350806  |
| CNQIFINNEWHDAVSR           | P47738 | 0          | C +57.02 Da,             | 4649.350586 | 2 | 1002.960022 | 1001.963053 |
| QTNPNAMEVEEDDPVPEIR        | Q01853 | 0          |                          | 4709.878418 | 2 | 1078.5      | 1078.494247 |
| EADDIVNWLKRR               | P09103 | 0          | K +28.03 Da,             | 4724.300781 | 3 | 515.6199951 | 514.9594714 |
| GDPKEEEEEELVDPLTTVR        | P99028 | 0          | K +28.03 Da,             | 4728.999023 | 2 | 1107.530029 | 1107.044627 |
| EKGGETFQLMGLYGR            | B5X0G2 | 0          | K +28.03 Da,             | 4740.757813 | 2 | 887.4299927 | 886.4378163 |
| LYSEFLGKR                  | P10649 | 0.02325581 | K +28.03 Da,             | 4744.052246 | 2 | 571.3200073 | 570.8242263 |
| NEFTLGEECELETMTGEKVK       | P12710 | 0          | K +28.03 Da,C +57.02 Da, | 4764.385254 | 3 | 801.3800049 | 800.7151574 |
| NEFTLGEECELETMTGEKVK       | P12710 | 0          | K +28.03 Da,C +57.02 Da, | 4771.809082 | 2 | 1201.560059 | 1200.569098 |
| PGGLLGEEAPDFEANTTIGR       | Q8BG37 | 0          |                          | 4786.793945 | 3 | 719.7000122 | 719.6989347 |
| NDIAWNFEKF                 | P11352 | 0          | K +28.03 Da,             | 4796.929199 | 2 | 656.3200073 | 656.3220483 |
| PGGLLGDEAPNFEANTTIGR       | O08709 | 0          |                          | 4808.901855 | 2 | 1072.540039 | 1071.544931 |
| PGGLLGEEAPDFEANTTIGR       | Q8BG37 | 0.01234568 |                          | 4814.286133 | 2 | 1078.550537 | 1079.044764 |
| PGGLLGEEAPDFEANTTIGR       | Q8BG37 | 0          |                          | 4817.304688 | 3 | 719.3699951 | 719.6989347 |
| ELISNASDALDKIR             | P08113 | 0          | K +28.03 Da,             | 4826.961914 | 2 | 787.9299927 | 786.9332238 |
| LIFAGKQLEDGR               | P0CG49 | 0          | K +28.03 Da,             | 4846.115723 | 2 | 688.3807373 | 687.8906296 |

|                             |        |            |                          |             |   |             |             |
|-----------------------------|--------|------------|--------------------------|-------------|---|-------------|-------------|
| PGLLLLGEEAPDFEANTTIGR       | Q8BG37 | 0          |                          | 4854.070313 | 3 | 719.7000122 | 719.6989347 |
| EEETALVCDNGSLCKAGFAGDDAPR   | P63268 | 0.01016949 | K +28.03 Da,C +57.02 Da, | 4874.931152 | 2 | 1434.130005 | 1434.642378 |
| ALLDLHALGSAR                | P29391 | 0.0037037  |                          | 4877.915527 | 2 | 619.3499756 | 618.8565895 |
| EKINEAFDLLR                 | P00329 | 0.04696133 | K +28.03 Da,             | 4878.301758 | 2 | 688.8800049 | 688.3826376 |
| TGAIVDVPVGEELLGR            | Q03265 | 0          |                          | 4880.29834  | 2 | 813.4500122 | 812.9488739 |
| AHPLFTFLR                   | P11352 | 0.01257862 |                          | 4888.83252  | 2 | 551.8099976 | 551.3138282 |
| PGLLLLGEEAPDFEANTTIGR       | Q8BG37 | 0          |                          | 4898.783691 | 2 | 1078.550049 | 1079.044764 |
| ELISNASDALDKIR              | P08113 | 0          | K +28.03 Da,             | 4911.881348 | 2 | 787.4199829 | 786.9332238 |
| QITLNDLPVGR                 | O08807 | 0          |                          | 4924.909668 | 2 | 613.3499756 | 613.3485974 |
| EDRVISLSGEHSIIGR            | P08228 | 0.01003344 |                          | 4926.168457 | 2 | 885.4699707 | 884.4710365 |
| GSDLDAATQQLSR               | Q03265 | 0.01027397 |                          | 4996.5      | 2 | 738.8699951 | 737.8784486 |
| PGLLLLGEEAPDFEANTTIGR       | Q8BG37 | 0          |                          | 5036.013672 | 3 | 719.3599854 | 719.6989347 |
| LIIDTDEAVAEDKRRRRR          | Q9D2E2 | 0.00980392 | K +28.03 Da,             | 5037.96582  | 4 | 560.8099976 | 560.8200068 |
| HIFDLVEQNMQLGR              | Q9D2K4 | 0.03409091 |                          | 5064.644531 | 2 | 908.4500122 | 907.9463398 |
| PGLLLLGEEAPDFEANTTIGR       | Q8BG37 | 0          |                          | 5081.890625 | 2 | 1078.540039 | 1079.044764 |
| PGLLLLGEEAPDFEANTTIGR       | Q8BG37 | 0          |                          | 5133.933105 | 2 | 1079.030029 | 1079.044764 |
| CSGIAAAAATAVEVAR            | Q91X91 | 0          | C +57.02 Da,             | 5147.887695 | 2 | 767.8900146 | 767.3881261 |
| CPGLLTPSQIKPGTY             | Q9CRB3 | 0.01045296 | K +28.03 Da,C +57.02 Da, | 5166.66748  | 2 | 830.4408569 | 830.4423698 |
| VALEGVGHFFR                 | P29391 | 0          |                          | 5172.480957 | 2 | 616.8242188 | 616.3327498 |
| QLIMANPQMQLIQR              | Q8R317 | 0          |                          | 5185.846191 | 2 | 906.4699707 | 906.4845773 |
| VALEGVGHFFR                 | P29391 | 0          |                          | 5204.20459  | 2 | 616.8237915 | 616.3327498 |
| EILELAGNAAR                 | P22752 | 0.03151862 |                          | 5221.006836 | 2 | 579.3099976 | 578.8196728 |
| PYHMALEDLAMFR               | Q99MX0 | 0.01497006 |                          | 5231.750977 | 2 | 797.8900146 | 797.3812574 |
| PYHMALEDLAMFR               | Q99MX0 | 0          |                          | 5235.336914 | 2 | 797.3900146 | 797.3812574 |
| CVESFSDYPPPLGR              | P10126 | 0          | C +57.02 Da,             | 5280.532227 | 2 | 763.8499756 | 763.8508449 |
| LKPFETLLAQNR                | F6RWR5 | 0          | K +28.03 Da,             | 5288.492676 | 2 | 729.9199829 | 729.4273793 |
| QLLQEEVGPVGVETMR            | Q7TNG8 | 0          |                          | 5292.587891 | 2 | 893.4500122 | 892.9641984 |
| QADVMIVAGTLTNKMAPALR        | Q9DC70 | 0          | K +28.03 Da,             | 5306.526855 | 2 | 1064.569946 | 1064.584489 |
| CVESFSDYPPPLGR              | P10126 | 0          | C +57.02 Da,             | 5311.098633 | 2 | 763.8499756 | 763.8508449 |
| MFASFPTTK                   | P01942 | 0          | K +28.03 Da,             | 5321.659668 | 2 | 530.2700195 | 529.2729805 |
| LLADAVAVTMGPKGR             | P63038 | 0          | K +28.03 Da,             | 5329.318848 | 2 | 764.4299927 | 763.9397967 |
| QNPDIPLQLEPSDYLR            | Q9DBM2 | 0.0125     |                          | 5331.914063 | 2 | 893.4500122 | 892.9443204 |
| QQVAPMDDDETGKELVLALYDQEKSPR | P16546 | 0          | K +28.03 Da,             | 5365.204102 | 3 | 1061.189941 | 1060.535826 |
| ASPGSPLEKLVSSVSDLPKR        | P54869 | 0          | K +28.03 Da,             | 5387.290527 | 3 | 709.0700073 | 708.4072032 |
| MEADGLGCAVCVLTGASR          | Q64105 | 0          | C +57.02 Da,             | 5402.392578 | 2 | 933.925354  | 933.9289756 |
| AKFEELNMDLFR                | P20029 | 0          | K +28.03 Da,             | 5414.243164 | 2 | 771.3875122 | 770.8950551 |
| MEADGLGCAVCVLTGASR          | Q64105 | 0.01023891 | C +57.02 Da,             | 5440.285156 | 2 | 933.9299927 | 933.9289756 |
| MEADGLGCAVCVLTGASR          | Q64105 | 0.04918033 | C +57.02 Da,             | 5441.210938 | 2 | 933.4400024 | 933.9289756 |
| CEMASTGEVACFGEGIHAF         | Q8C196 | 0          | C +57.02 Da,             | 5442.322266 | 2 | 1086.930054 | 1087.453013 |
| CVLTTVDPDTGIIDR             | Q922Q1 | 0          | C +57.02 Da,             | 5444.883789 | 2 | 837.4199829 | 837.9219992 |

|                                    |         |            |                          |             |   |             |             |
|------------------------------------|---------|------------|--------------------------|-------------|---|-------------|-------------|
| CVLTTVDPDTGIIDR                    | Q922Q1  | 0          | C +57.02 Da,             | 5451.464844 | 2 | 838.4199829 | 837.9219992 |
| CVGDEVSMADVCLVPQVANAER             | Q9WVVL0 | 0          | C +57.02 Da,             | 5458.766602 | 2 | 1210.040039 | 1210.056166 |
| QKAPVVMGSSSEDVQEFLEIYR             | Q9QXD6  | 0          | K +28.03 Da,             | 5473.568848 | 3 | 818.7399902 | 818.4175512 |
| QKAPVVMGSSSEDVQEFLEIYR             | Q9QXD6  | 0          | K +28.03 Da,             | 5474.606445 | 2 | 1227.109985 | 1227.122689 |
| PTLNELGISTPEELGLDKV                | P12787  | 0          | K +28.03 Da,             | 5511.088379 | 2 | 1027.050049 | 1027.056808 |
| VHLTDAEKAASVSLWGKVNDSDEVGGEALGR    | P02088  | 0          | K +28.03 Da,C +57.02 Da, | 5515.96582  | 3 | 1076.209961 | 1075.550469 |
| VHLTDAEKAASVSLWGKVNDSDEVGGEALGR    | P02088  | 0          | K +28.03 Da,C +57.02 Da, | 5528.196777 | 3 | 1075.869995 | 1075.550469 |
| CLDAFPNLR                          | P10649  | 0          | C +57.02 Da,             | 5528.772461 | 2 | 553.2800293 | 553.276586  |
| ANATEFGLASGVFTR                    | Q8R0Y6  | 0          |                          | 5552.247559 | 2 | 771.4000244 | 770.8913586 |
| LLADAVAVTMGPKGR                    | P63038  | 0          | K +28.03 Da,             | 5621.039551 | 2 | 764.4301147 | 763.9397967 |
| LLADAVAVTMGPKGR                    | P63038  | 0          | K +28.03 Da,             | 5651.92334  | 2 | 764.4313354 | 763.9397967 |
| DPTGTYHGSDSLQLER                   | P68372  | 0.01013514 |                          | 5676.820801 | 2 | 903.4299927 | 902.4108423 |
| ASAKVSDAISTQYPVVDHEFDVAVVVGAGGAGLR | Q8K2B3  | 0          | K +28.03 Da,             | 5693.713867 | 3 | 1105.550049 | 1105.572039 |
| ASAKVSDAISTQYPVVDHEFDVAVVVGAGGAGLR | Q8K2B3  | 0          | K +28.03 Da,             | 5706.456543 | 4 | 829.6699829 | 829.4308483 |
| VHLTDAEKAASVSLWGKVNDSDEVGGEALGR    | P02088  | 0          | K +28.03 Da,C +57.02 Da, | 5706.790039 | 3 | 1076.219971 | 1075.550469 |
| ASAKVSDAISTQYPVVDHEFDVAVVVGAGGAGLR | Q8K2B3  | 0          | K +28.03 Da,             | 5725.339844 | 3 | 1105.890015 | 1105.572039 |
| VNPTVFFDITADDEPLGR                 | P17742  | 0          |                          | 5739.204102 | 2 | 1004.5      | 1003.496918 |
| AQFEGIVTDLIKR                      | P38647  | 0          | K +28.03 Da,             | 5776.814453 | 2 | 759.9299927 | 759.4379443 |
| GLFIHDDKGILR                       | P35700  | 0          | K +28.03 Da,             | 5783.352051 | 2 | 694.90979   | 694.4190227 |
| AQFEGIVTDLIKR                      | P38647  | 0          | K +28.03 Da,             | 5815.908203 | 2 | 759.9310913 | 759.4379443 |
| LVLEVAQHLGESTVR                    | P56480  | 0          |                          | 5834.922363 | 2 | 826.4500122 | 825.9623154 |
| ELLEVVNKNFDLRPGVIVR                | Q91X83  | 0          | K +28.03 Da,             | 5842.808105 | 3 | 747.4299927 | 746.7704756 |
| EASDYLELDTIKNLVR                   | P08113  | 0          | K +28.03 Da,             | 5872.53125  | 2 | 954.5       | 954.0096607 |
| SDGSLMFQQVPMVEIDGMKLVQTK           | P30115  | 0          | K +28.03 Da,             | 5875.897949 | 3 | 913.1300049 | 913.1372913 |
| MPFVELETNLPASR                     | O35215  | 0          |                          | 5883.348145 | 2 | 802.9099731 | 802.4110697 |
| AEDVQETDTSQKQSPASHEIATNLGDFAISLYR  | P07758  | 0          | K +28.03 Da,             | 5925.835449 | 3 | 1256.26001  | 1255.601053 |
| CSVQEDINSLCLTVVQR                  | P54869  | 0          | C +57.02 Da,             | 5944.700195 | 2 | 1011.47998  | 1010.993162 |
| GVVDNFPLLKALR                      | P30115  | 0          | K +28.03 Da,             | 5988.061035 | 2 | 735.9400024 | 735.4455718 |
| LDLDEVIKVYR                        | Q9CZS1  | 0.00974026 | K +28.03 Da,             | 5991.70752  | 2 | 696.3912964 | 695.9006632 |
| KGLKEGIPALDNFLDKL                  | P58252  | 0.00977199 | K +28.03 Da,             | 5995.943848 | 3 | 653.0499878 | 652.3907128 |
| SDGSLMFQQVPMVEIDGMKLVQTK           | P30115  | 0.01246106 | K +28.03 Da,             | 6046.64209  | 3 | 913.4699707 | 913.1372913 |
| MEADGLGCAVCVLTGASR                 | Q64105  | 0          | C +57.02 Da,             | 6079.070801 | 2 | 934.4400024 | 933.9289756 |
| LVLEVAQHLGESTVR                    | P56480  | 0          |                          | 6110.51123  | 2 | 826.4500122 | 825.9623154 |
| LFLEQIHVLEK                        | P11589  | 0          | K +28.03 Da,             | 6133.722656 | 2 | 699.4055786 | 698.9135732 |
| CSQFIPMEVINAPR                     | Q8R0Y6  | 0          | C +57.02 Da,             | 6139.748535 | 2 | 831.4099731 | 831.4105465 |
| QVSGEFAMLWHGAQAGAFDLR              | P10518  | 0          |                          | 6206.357422 | 2 | 1146.040039 | 1146.054942 |
| QVSGEFAMLWHGAQAGAFDLR              | P10518  | 0          |                          | 6210.125    | 2 | 1146.540039 | 1146.054942 |
| QVSGEFAMLWHGAQAGAFDLR              | P10518  | 0.00986842 |                          | 6224.215332 | 3 | 764.7000122 | 764.372387  |
| QAAAVLPVLDLAQR                     | Q9D6J6  | 0          |                          | 6228.358398 | 2 | 732.9295044 | 732.9302863 |
| LLNKLADLMER                        | O35945  | 0.01492537 | K +28.03 Da,             | 6229.308594 | 2 | 672.8800049 | 672.389408  |

|                                         |        |            |                          |             |   |             |             |
|-----------------------------------------|--------|------------|--------------------------|-------------|---|-------------|-------------|
| VHLTDAEKAASVSLWGKVNSEVGGALGR            | P02088 | 0          | K +28.03 Da,C +57.02 Da, | 6239.469238 | 4 | 807.4099731 | 806.914671  |
| VHLTDAEKAASVSLWGKVNSEVGGALGR            | P02088 | 0          | K +28.03 Da,C +57.02 Da, | 6244.935059 | 3 | 1076.209961 | 1075.550469 |
| KAFEEAEKNAPAIIFIDELDAIAPKR              | Q01853 | 0.00961538 | K +28.03 Da,             | 6271.106934 | 4 | 747.1599731 | 746.6680325 |
| VSLWGKVNSEVGGALGR                       | P02088 | 0          | K +28.03 Da,C +57.02 Da, | 6272.483398 | 2 | 1081.560059 | 1081.038958 |
| ELFDELVKKF                              | P55264 | 0.04444444 | K +28.03 Da,             | 6292.130371 | 2 | 662.8713989 | 662.3815746 |
| MVHLTDAEKAASVSLWGKVNSEVGGALGR           | P02088 | 0          | K +28.03 Da,C +57.02 Da, | 6306.600586 | 4 | 839.4199829 | 839.6747922 |
| MVHLTDAEKAASVSLWGKVNSEVGGALGR           | P02088 | 0          | K +28.03 Da,C +57.02 Da, | 6312.744141 | 3 | 1119.22998  | 1119.230631 |
| MVHLTDAEKAASVSLWGKVNSEVGGALGR           | P02088 | 0          | K +28.03 Da,C +57.02 Da, | 6313.825195 | 4 | 839.9099731 | 839.6747922 |
| AIVDAALSALR                             | Q922R8 | 0.01219512 |                          | 6347.652832 | 2 | 550.8200073 | 550.3271333 |
| FTQAGSEVSALLGR                          | P56480 | 0.00369004 |                          | 6350.44043  | 2 | 718.8699951 | 718.3806266 |
| CLASFTELVV                              | Q9QXF8 | 0          | C +57.02 Da,             | 6356.187988 | 2 | 598.3099976 | 598.3106262 |
| LLADAVAVTMGPK                           | P63038 | 0          | K +28.03 Da,             | 6363.391113 | 2 | 657.8699951 | 657.378509  |
| AEGEPEVTDQLEWQSNQPWEQALNR               | P08226 | 0          |                          | 6375.259277 | 3 | 985.4400024 | 985.4565631 |
| AIVDAALSALR                             | Q922R8 | 0.00983607 |                          | 6382.859375 | 2 | 550.8187866 | 550.3271333 |
| AEGEPEVTDQLEWQSNQPWEQALNR               | P08226 | 0          |                          | 6388.085938 | 3 | 985.1099854 | 985.4565631 |
| QGVDLLADAVAVTMGPKGR                     | P63038 | 0          | K +28.03 Da,             | 6391.323242 | 2 | 964.5200195 | 963.5274971 |
| QPDAGNIFKITGL                           | Q64374 | 0          | K +28.03 Da,             | 6408.967285 | 2 | 701.3900146 | 701.3904626 |
| LSPTNCDASEPLAEKVLDLINKGR                | Q9ESB3 | 0.00357143 | K +28.03 Da,C +57.02 Da, | 6475.128418 | 3 | 900.1400146 | 899.4811031 |
| AFPAWADTSILSR                           | Q9EQ20 | 0          |                          | 6486.342773 | 2 | 718.3599854 | 717.872437  |
| QGVDLLADAVAVTMGPKGR                     | P63038 | 0          | K +28.03 Da,             | 6516.214844 | 2 | 963.5100098 | 963.5274971 |
| LLNKLADLMER                             | Q35945 | 0.01226994 | K +28.03 Da,             | 6519.183105 | 2 | 672.8800049 | 672.389408  |
| EELDPGVVDNFPLK                          | P30115 | 0          | K +28.03 Da,             | 6531.849121 | 2 | 857.4500122 | 856.9589075 |
| ELVDSVLDVVR                             | P68372 | 0.00361011 |                          | 6541.932617 | 2 | 622.8400269 | 622.3482635 |
| CAFMSGSLAPGHVADFLVADFR                  | P97328 | 0          | C +57.02 Da,             | 6629.582031 | 3 | 761.0200195 | 761.0346062 |
| VDGLDPAFTPATGTPVLGGLSYR                 | Q61176 | 0.00374532 |                          | 6634.722656 | 2 | 1153.089966 | 1152.597164 |
| CAFMSGSLAPGHVADFLVADFR                  | P97328 | 0          | C +57.02 Da,             | 6636.132813 | 2 | 1141.030029 | 1141.048271 |
| EKGEFQILLDALDKIK                        | P16015 | 0          | K +28.03 Da,             | 6637.405762 | 3 | 649.0499878 | 648.7187181 |
| VHLTDAEKSAVSLWAKVNPDEVGGALGR            | P02089 | 0          | K +28.03 Da,C +57.02 Da, | 6668.989746 | 3 | 1089.209961 | 1088.894236 |
| GVDLLADAVAVTMGPKGR                      | P63038 | 0          | K +28.03 Da,             | 6680.375977 | 2 | 900.4899902 | 899.498208  |
| LLADAVAVTMGPK                           | P63038 | 0          | K +28.03 Da,             | 6705.73877  | 2 | 657.8696899 | 657.378509  |
| VHLTDAEKAASVSLWGKVNSEVGGALGR            | P02088 | 0.00355872 | K +28.03 Da,C +57.02 Da, | 6707.614258 | 3 | 1075.540039 | 1075.550469 |
| AIAELGIYPAVDPLDSTSR                     | P56480 | 0          |                          | 6716.666992 | 2 | 995.0100098 | 994.5203927 |
| AAEAGDLHTALEKFGQAISLLPDR                | Q8VBW8 | 0.01006711 | K +28.03 Da,             | 6722.688965 | 3 | 851.4500122 | 851.1220147 |
| ELDPGVVDNFPLK                           | P30115 | 0          | K +28.03 Da,             | 6728.293945 | 2 | 792.9299927 | 792.4376103 |
| DLLEECKKAVELGDKASRLR                    | Q6A4J8 | 0.01488095 | K +28.03 Da,C +57.02 Da, | 6731.166504 | 2 | 1236.670044 | 1236.186154 |
| EIVDAALSALR                             | Q922R8 | 0.01030928 |                          | 6746.617676 | 2 | 615.3400269 | 614.8484305 |
| AELVDSVLDVVR                            | P68372 | 0          |                          | 6764.048828 | 2 | 658.3599854 | 657.8668205 |
| QLFSDKLNEINEKIAPSAVESMEDALKAADTIGYPVMIR | Q8C196 | 0.01038062 | K +28.03 Da,             | 6767.277832 | 4 | 1135.085327 | 1135.344488 |
| EELDPGVVDNFPLKALR                       | P30115 | 0          | K +28.03 Da,             | 6769.918945 | 2 | 1027.560059 | 1027.070052 |
| EAALAMEKNLNQALLDLHALGSAR                | P29391 | 0          | K +28.03 Da,             | 6790.171875 | 3 | 860.460022  | 859.7987661 |

|                                         |        |            |                          |             |   |             |             |
|-----------------------------------------|--------|------------|--------------------------|-------------|---|-------------|-------------|
| QLFSDKLNEINEKIAPSAVESMEDALKAADTIGYPVMIR | Q8C196 | 0.0368272  | K +28.03 Da,             | 6798.581543 | 4 | 1135.08667  | 1135.344488 |
| EELDPGVVDNFP LLKALR                     | P30115 | 0          | K +28.03 Da,             | 6801.138184 | 2 | 1028.060059 | 1027.070052 |
| VDLLADAVAVTMGPKGR                       | P63038 | 0          | K +28.03 Da,             | 6810.95752  | 2 | 871.9799805 | 870.987476  |
| KGLKESPVVPLAESELLAEILEEAR               | Q9DBB8 | 0          | K +28.03 Da,             | 6820.398438 | 3 | 926.8599854 | 926.1950687 |
| EELDPGVVDNFP LLKALR                     | P30115 | 0          | K +28.03 Da,             | 6833.118164 | 2 | 1027.560059 | 1027.070052 |
| AIAELGIYPAVDPLDSTSR                     | P56480 | 0          |                          | 6833.675293 | 2 | 995.5100098 | 994.5203927 |
| LDVAVLVGSMPR                            | P14152 | 0          |                          | 6852.492188 | 2 | 629.3471069 | 628.8552009 |
| GFGFVTFDDHDPVDKIVL                      | O88569 | 0.02339181 | K +28.03 Da,             | 6877.107422 | 2 | 1026.01001  | 1025.020028 |
| GFGFVTFDDHDPVDKIVL                      | O88569 | 0.01223242 | K +28.03 Da,             | 6882.833008 | 2 | 1025.52002  | 1025.020028 |
| GEFQILLDALDKIKTK                        | P16015 | 0          | K +28.03 Da,             | 6893.555176 | 3 | 640.0499878 | 639.3870798 |
| ELDPGVVDNFP LLKALR                      | P30115 | 0          | K +28.03 Da,             | 6919.59375  | 2 | 963.039978  | 962.5487553 |
| CGESPVWEEASQSLLFVDIPSKIICR              | Q64374 | 0          | K +28.03 Da,C +57.02 Da, | 6920.160645 | 3 | 1017.5      | 1016.843825 |
| GPLLVDVFTDEMAHFDR                       | P24270 | 0          |                          | 6939.785156 | 2 | 1095.530029 | 1095.038427 |
| CGESPVWEEASQSLLFVDIPSKIICR              | Q64374 | 0          | K +28.03 Da,C +57.02 Da, | 6945.961914 | 3 | 1016.830017 | 1016.843825 |
| ELDPGVVDNFP LLKALR                      | P30115 | 0          | K +28.03 Da,             | 6950.17334  | 2 | 963.0394897 | 962.5487553 |
| QNMLQGTEIGVLAKTFIDQGLIPDDVMTR           | Q9WTP7 | 0          | K +28.03 Da,             | 6956.308105 | 3 | 1129.939941 | 1129.938677 |
| CGESPVWEEASQSLLFVDIPSKIICR              | Q64374 | 0          | K +28.03 Da,C +57.02 Da, | 6960.875    | 3 | 1016.5      | 1016.843825 |
| CGESPVWEEASQSLLFVDIPSKIICR              | Q64374 | 0          | K +28.03 Da,C +57.02 Da, | 6979.436523 | 3 | 1017.51001  | 1016.843825 |
| DGETLEELMKLSPEELLR                      | Q99K51 | 0          | K +28.03 Da,             | 6979.663086 | 3 | 748.4000244 | 748.3994975 |
| ELDPGVVDNFP LLKALR                      | P30115 | 0          | K +28.03 Da,             | 6981.055176 | 2 | 963.0397339 | 962.5487553 |
| QNMLQGTEIGVLAKTFIDQGLIPDDVMTR           | Q9WTP7 | 0          | K +28.03 Da,             | 6989.17627  | 3 | 1130.26001  | 1129.938677 |
| MNSGPVVAMVWEGLVVKTGR                    | Q01768 | 0          | K +28.03 Da,             | 6992.066895 | 2 | 1137.079956 | 1136.600671 |
| QGKASDVVLGFALEGLQKQPY                   | Q8K157 | 0.02318841 | K +28.03 Da,             | 7005.215332 | 3 | 866.460022  | 866.1267658 |
| QSAEMSLDQIEQVILVGGATR                   | Q9JKR6 | 0.02332362 |                          | 7021.683594 | 3 | 749.039978  | 749.0546128 |
| QSAEMSLDQIEQVILVGGATR                   | Q9JKR6 | 0          |                          | 7056.307617 | 2 | 1123.060059 | 1123.078281 |
| VEELDPGVVDNFP LLK                       | P30115 | 0          | K +28.03 Da,             | 7058.830566 | 2 | 906.9837646 | 906.4931146 |
| GFLDVVAALR                              | Q63880 | 0          |                          | 7071.504395 | 2 | 531.3034058 | 530.8111188 |
| EFQILLDALDKIKTK                         | P16015 | 0          | K +28.03 Da,             | 7089.68457  | 3 | 621.039978  | 620.3799251 |
| CGESPVWEEASQSLLFVDIPSKIICR              | Q64374 | 0.01048951 | K +28.03 Da,C +57.02 Da, | 7101.801758 | 2 | 1524.75     | 1524.762099 |
| VPAWPGGSGQVDLASVLTPEIMAPILANADVQER      | D3YUD8 | 0          |                          | 7106.241699 | 3 | 1191.280029 | 1191.618772 |
| GAELVDSVLDVVR                           | P68372 | 0.00362319 |                          | 7115.644043 | 2 | 687.3699951 | 686.3775526 |
| ALSPTNCDAEPLAEKVLDLINKGR                | Q9ESB3 | 0          | K +28.03 Da,C +57.02 Da, | 7120.594238 | 3 | 923.4799805 | 923.1601412 |
| VEELDPGVVDNFP LLKALR                    | P30115 | 0          | K +28.03 Da,             | 7142.041016 | 2 | 1077.589966 | 1076.60426  |
| ALVDAFDFKDVTLGSLVGR                     | Q9R0H0 | 0          | K +28.03 Da,             | 7160.974609 | 2 | 1027.050049 | 1026.062227 |
| VLENSLVKLF                              | A2CEK7 | 0.03932584 | K +28.03 Da,             | 7179.047852 | 2 | 596.3599854 | 595.3631845 |
| CMALSTAILVGEAKKWLPELVDR                 | Q9EQ20 | 0          | K +28.03 Da,C +57.02 Da, | 7192.243164 | 3 | 886.8099976 | 886.1570141 |
| CMALSTAILVGEAKKWLPELVDR                 | Q9EQ20 | 0          | K +28.03 Da,C +57.02 Da, | 7206.875977 | 3 | 885.8099976 | 886.1570141 |
| LDPGVVDNFP LLKALR                       | P30115 | 0.04931507 | K +28.03 Da,             | 7235.145996 | 2 | 899.0200195 | 898.0274582 |
| CMALSTAILVGEAKKWLPELVDR                 | Q9EQ20 | 0          | K +28.03 Da,C +57.02 Da, | 7238.244141 | 3 | 886.1500244 | 886.1570141 |
| LDVAVLVGSMPR                            | P14152 | 0.03661972 |                          | 7243.991211 | 2 | 629.3499756 | 628.8552009 |

|                                        |        |            |                          |             |   |             |             |
|----------------------------------------|--------|------------|--------------------------|-------------|---|-------------|-------------|
| CPEALFQPSFLGMESCIGIHETTFN              | P60710 | 0          | C +57.02 Da,             | 7246.895996 | 2 | 1387.109985 | 1386.608763 |
| CPEALFQPSFLGMESCIGIHETTFN              | P60710 | 0          | C +57.02 Da,             | 7248.919922 | 2 | 1387.609985 | 1386.608763 |
| CPEALFQPSFLGMESCIGIHETTFN              | P60710 | 0          | C +57.02 Da,             | 7255.009277 | 3 | 924.7399902 | 924.7416008 |
| QDYKSLQDIIAILGMDELSEEDKLTVSR           | P56480 | 0.00373134 | K +28.03 Da,             | 7259.976563 | 3 | 1089.219971 | 1089.233924 |
| LDPGVVDNFPLLKALR                       | P30115 | 0          | K +28.03 Da,             | 7267.509766 | 2 | 898.5203857 | 898.0274582 |
| CIALAPDDSLVPAAGTSYVWER                 | Q78JT3 | 0          | C +57.02 Da,             | 7268.086914 | 2 | 1217.609985 | 1217.109581 |
| GIMNSFVNDIFER                          | P10853 | 0          |                          | 7304.554688 | 2 | 771.8699951 | 771.374487  |
| QFAPIHAEAPEFIEMSVEQEILVTGIK            | P56480 | 0.003663   | K +28.03 Da,             | 7305.101563 | 3 | 1018.52002  | 1018.866735 |
| CGESPVWEEASQSLLFVDIPSKIICR             | Q64374 | 0          | K +28.03 Da,C +57.02 Da, | 7313.558594 | 2 | 1524.73999  | 1524.762099 |
| CGESPVWEEASQSLLFVDIPSKIICR             | Q64374 | 0          | K +28.03 Da,C +57.02 Da, | 7318.492676 | 3 | 1016.5      | 1016.843825 |
| QFAPIHAEAPEFIEMSVEQEILVTGIK            | P56480 | 0          | K +28.03 Da,             | 7336.269043 | 3 | 1019.190002 | 1018.866735 |
| CGESPVWEEASQSLLFVDIPSKIICR             | Q64374 | 0          | K +28.03 Da,C +57.02 Da, | 7338.750488 | 3 | 1017.5      | 1016.843825 |
| CGESPVWEEASQSLLFVDIPSKIICR             | Q64374 | 0          | K +28.03 Da,C +57.02 Da, | 7346.518066 | 2 | 1525.25     | 1524.762099 |
| ELLYHVEELDPGVVDNFPLLK                  | P30115 | 0.01020408 | K +28.03 Da,             | 7352.469238 | 3 | 823.4299927 | 823.1088234 |
| CYVALDFENEMATAASSSSLEKSYELPDGQVITIGNER | P62737 | 0          | K +28.03 Da,C +57.02 Da, | 7358.043457 | 3 | 1408.660034 | 1408.331358 |
| VFFDITADDEPLGR                         | P17742 | 0          |                          | 7361.713867 | 2 | 798.8800049 | 797.8910247 |
| CGESPVWEEASQSLLFVDIPSKIICR             | Q64374 | 0          | K +28.03 Da,C +57.02 Da, | 7394.609863 | 2 | 1524.75     | 1524.762099 |
| LTAEILELAGNAAR                         | P22752 | 0          |                          | 7409.604004 | 2 | 721.8955688 | 721.4041017 |
| CYVALDFENEMATAASSSSLEKSYELPDGQVITIGNER | P62737 | 0          | K +28.03 Da,C +57.02 Da, | 7412.69873  | 3 | 1408.319946 | 1408.331358 |
| VNPTVFFDITADDEPLGR                     | P17742 | 0          |                          | 7415.779785 | 2 | 1003.98999  | 1003.496918 |
| PFVELETNLPASR                          | O35215 | 0          |                          | 7441.276367 | 2 | 736.8800049 | 736.8908271 |
| CYVALDFENEMATAASSSSLEKSYELPDGQVITIGNER | P62737 | 0          | K +28.03 Da,C +57.02 Da, | 7446.414063 | 3 | 1408.339966 | 1408.331358 |
| VNPTVFFDITADDEPLGR                     | P17742 | 0          |                          | 7447.384277 | 2 | 1004.48999  | 1003.496918 |
| CGESPVWEEASQSLLFVDIPSKIICR             | Q64374 | 0.0126183  | K +28.03 Da,C +57.02 Da, | 7461.514648 | 2 | 1524.75     | 1524.762099 |
| CGESPVWEEASQSLLFVDIPSKIICR             | Q64374 | 0          | K +28.03 Da,C +57.02 Da, | 7466.419434 | 2 | 1524.23999  | 1524.762099 |
| CGESPVWEEASQSLLFVDIPSK                 | Q64374 | 0          | K +28.03 Da,C +57.02 Da, | 7467.142578 | 2 | 1254.109985 | 1253.612154 |
| CGESPVWEEASQSLLFVDIPSKIICR             | Q64374 | 0          | K +28.03 Da,C +57.02 Da, | 7485.736816 | 3 | 1017.169983 | 1016.843825 |
| CGESPVWEEASQSLLFVDIPSKIICR             | Q64374 | 0          | K +28.03 Da,C +57.02 Da, | 7497.376953 | 2 | 1525.76001  | 1524.762099 |
| CYVALDFENEMATAASSSSLEKSYELPDGQVITIGNER | P62737 | 0          | K +28.03 Da,C +57.02 Da, | 7510.31543  | 3 | 1407.98999  | 1408.331358 |
| CGESPVWEEASQSLLFVDIPSKIICR             | Q64374 | 0          | K +28.03 Da,C +57.02 Da, | 7517.15332  | 3 | 1017.51001  | 1016.843825 |
| CGESPVWEEASQSLLFVDIPSKIICR             | Q64374 | 0          | K +28.03 Da,C +57.02 Da, | 7540.336426 | 3 | 1016.51001  | 1016.843825 |
| CGESPVWEEASQSLLFVDIPSKIICR             | Q64374 | 0          | K +28.03 Da,C +57.02 Da, | 7548.79541  | 3 | 1017.51001  | 1016.843825 |
| QGFQELLQAVPLADSF                       | P28352 | 0          |                          | 7574.522949 | 2 | 924.9899902 | 924.486155  |
| YLTAEILELAGNAAR                        | P22752 | 0          |                          | 7604.803223 | 2 | 803.4299927 | 802.9357663 |
| VSKEFVEEVIWPAVQSSALYEDR                | P16460 | 0          | K +28.03 Da,             | 7632.358398 | 3 | 920.460022  | 919.7971971 |
| ELIGDVVFGVPSVIVSR                      | Q64176 | 0.03921569 |                          | 7654.036133 | 2 | 894.5       | 893.5090986 |
| GEFQILLDALDKIK                         | P16015 | 0          | K +28.03 Da,             | 7671.703125 | 2 | 830.9799805 | 829.9900101 |
| QGFIDLPEFPFGLLEPR                      | O35490 | 0          |                          | 7691.350586 | 2 | 931.9699707 | 931.4777985 |
| CGESPVWEEASQSLLFVDIPSKIICR             | Q64374 | 0          | K +28.03 Da,C +57.02 Da, | 7703.996582 | 2 | 1524.26001  | 1524.762099 |
| QGFIDLPEFPFGLLEPR                      | O35490 | 0          |                          | 7722.649414 | 2 | 931.9699707 | 931.4777985 |



|                                        |        |      |                          |             |   |             |             |
|----------------------------------------|--------|------|--------------------------|-------------|---|-------------|-------------|
| GLELYDLLSQPSR                          | Q61133 | 0    |                          | 7723.213379 | 2 | 803.4299927 | 802.4381418 |
| AAFAQFGSDLDAATQQLSR                    | Q03265 | 0    |                          | 7732.641113 | 2 | 1056.52002  | 1055.531823 |
| QGFIDLPEFPFGLLEPR                      | O35490 | 0    |                          | 7761.775879 | 2 | 931.4699707 | 931.4777985 |
| VNPTVFFDITADDEPLGR                     | P17742 | 0    |                          | 7769.821777 | 2 | 1004.48999  | 1003.496918 |
| QGFIDLPEFPFGLLEPR                      | O35490 | 0    |                          | 7789.907227 | 2 | 931.477417  | 931.4777985 |
| CVLELADQILETQR                         | P13597 | 0    | C +57.02 Da,             | 7791.741211 | 2 | 844.4400024 | 844.4378163 |
| EVEDLKAAGDTLVQDIR                      | Q9CXN7 | 0    | K +28.03 Da,             | 7796.930176 | 3 | 709.722168  | 709.3949635 |
| VNPTVFFDITADDEPLGR                     | P17742 | 0    |                          | 7800.884277 | 2 | 1003.987488 | 1003.496918 |
| QGDENYMEFLEVLTEGLNR                    | Q9WVL3 | 0    |                          | 7820.414551 | 2 | 1128.540039 | 1129.025714 |
| QGFIDLPEFPFGLLEPR                      | O35490 | 0    |                          | 7821.304199 | 2 | 931.4725952 | 931.4777985 |
| EFQILLDALDKIK                          | P16015 | 0.01 | K +28.03 Da,             | 7835.51123  | 2 | 802.4699707 | 801.479278  |
| VDFLAYDILDQYR                          | P10649 | 0    |                          | 7850.161621 | 2 | 816.3998413 | 815.9092172 |
| QMVETELKICCDILDVLDKH                   | P62259 | 0    | K +28.03 Da,C +57.02 Da, | 7860.446289 | 3 | 876.7800293 | 876.7863699 |
| EFQILLDALDKIK                          | P16015 | 0    | K +28.03 Da,             | 7868.885254 | 2 | 801.9699707 | 801.479278  |
| CYVALDFENEMATAASSSSLEKSYELPDGQVITIGNER | P62737 | 0    | K +28.03 Da,C +57.02 Da, | 7870.672363 | 3 | 1408        | 1408.331358 |
