# Supplementary material
Source: PubMed Central journal article supplement (PMC5083106)
Supplement: 10.1074_O115.056515_mcp.O115.056515-9.pdf [file 10.1074_O115.056515_mcp.O115.056515-9.pdf]

**Supplementary Table 8:** List of N-termini identified in FFPE liver tissue of C57BL/6 wild type mouse after chemical labeling using <sup>13</sup>COD<sub>2</sub> formaldehyde. This is a comprehensive listing of all identified peptides.

| Peptide Sequence                 | UniProt ID | MSGF+ score<br>(E-value) | Modification                         | Retention<br>Time (s) | Charge | Measured m/z | Theoretical m/z |
|----------------------------------|------------|--------------------------|--------------------------------------|-----------------------|--------|--------------|-----------------|
| DVCPRTLGIETVGGVMTKLIPR           | P20029     | 0                        | n +34.06 Da,K +34.06 Da,C +57.02 Da, | 5036.237305           | 3      | 813.1400146  | 813.1446329     |
| VFTTQELVQAFTHAPAALADR            | Q8BK64     | 0.00765697               |                                      | 4971.618164           | 3      | 815.0900269  | 815.0920552     |
| IHTQPPPPPIPEVVATWEAISLGR         | Q8BGA8     | 0.02121641               | n +31.05 Da,                         | 4953.561035           | 2      | 1318.72998   | 1318.73409      |
| CGESPVVWEEASQSLFVDIPSKIICR       | Q64374     | 0                        | n +42.03 Da,K +34.06 Da,C +57.02 Da, | 4816.135742           | 3      | 1032.869995  | 1032.857952     |
| TDAAVSFAKDFLAGGVAASIKTAVAPIER    | P51881     | 0                        | n +42.03 Da,K +34.06 Da,             | 4812.000977           | 4      | 765.1871338  | 765.186848      |
| ADQLTEEQIAEFKEAFSLFDKDGDTITTK    | P62204     | 0                        | n +42.03 Da,K +34.06 Da,             | 4750.523438           | 4      | 873.710022   | 873.7095761     |
| AVWPTLVDINSLDSLTEAYKLR           | Q9R0H0     | 0                        | n +34.06 Da,K +34.06 Da,             | 4731.763672           | 3      | 858.1500244  | 858.1601054     |
| AVWPTLVDINSLDSLTEAYKLR           | Q9R0H0     | 0                        | n +34.06 Da,K +34.06 Da,             | 4673.059082           | 3      | 858.1605835  | 858.1601054     |
| PIHLSFDVDGLDPAFTPATGTPVLGGLSYR   | Q61176     | 0                        | n +14.02 Da,                         | 4671.687988           | 3      | 1043.209961  | 1043.208149     |
| SPLEKAVSSFFSGSCVPCADPVAFPKLC     | Q92111     | 0                        | n +17.03 Da,K +34.06 Da,C +57.02 Da, | 4666.979004           | 3      | 1048.199951  | 1048.208074     |
| CGESPVVWEEASQSLFVDIPSKIICR       | Q64374     | 0                        | n +42.03 Da,K +34.06 Da,C +57.02 Da, | 4665.722168           | 3      | 1032.869995  | 1032.857952     |
| AMEAALAMEKNLNQALLDLHALGVSAR      | P29391     | 0.00765697               | n +17.03 Da,K +34.06 Da,             | 4651.770996           | 3      | 934.8300171  | 934.8457574     |
| SISWDGLDPGKLYTLVLTDPDAPSR        | P70296     | 0                        | n +34.06 Da,K +34.06 Da,             | 4639.993652           | 3      | 928.8400269  | 928.8412132     |
| TNGAGDAFVGGFLSRLVSDKPLTECIR      | P55264     | 0                        | n +17.03 Da,K +34.06 Da,C +57.02 Da, | 4624.591797           | 3      | 968.5100098  | 968.5113209     |
| GAGDAFVGGFLSRLVSDKPLTECIR        | P55264     | 0                        | n +34.06 Da,K +34.06 Da,C +57.02 Da, | 4615.330078           | 4      | 677.1199951  | 677.1205477     |
| PSSISWDGLDPGKLYTLVLTDPDAPSR      | P70296     | 0.04221636               | n +42.03 Da,K +28.03 Da,             | 4606.573242           | 4      | 743.3900146  | 743.3828351     |
| AASGESGASGGGGSTEEAFMTFYSEVKQIEKR | Q6NZB0     | 0                        | n +42.03 Da,K +34.06 Da,             | 4543.186523           | 4      | 845.4099731  | 845.4162312     |
| PFLAIMEVPPPEIMPTVIDEYLDNGSDQSATR | Q8VCU1     | 0.00162338               | n +34.06 Da,                         | 4530.262695           | 3      | 1161.560059  | 1161.580925     |
| PGLVQEGEPFSEEAFLTKELVLQR         | Q78PY7     | 0                        | n +17.03 Da,K +34.06 Da,             | 4530.04248            | 3      | 956.8599854  | 956.858715      |
| TELLKQGQYSPMAIEEQVAVIYAGVR       | Q03265     | 0.02121641               | n +42.03 Da,K +28.03 Da,             | 4529.336426           | 3      | 988.5100098  | 988.5230796     |
| DCGKQGFIDLPEFPFLGLEPR            | O35490     | 0                        | n +34.06 Da,K +34.06 Da,C +57.02 Da, | 4522.066895           | 3      | 797.4199829  | 797.4210427     |
| DFDEYTMTIQQVIKSGSDEVQAGQQR       | P01027     | 0                        | n +34.06 Da,K +34.06 Da,             | 4512.114746           | 3      | 1014.51001   | 1014.510087     |
| PILISILVNFILFICIR                | P97751     | 0.03047091               | n +42.03 Da,C +57.02 Da,             | 4498.795898           | 3      | 733.7700195  | 733.7827759     |
| DNSLNHEYLPILGLAEFR               | P05201     | 0                        | n +34.06 Da,                         | 4486.338867           | 3      | 712.3800049  | 712.382987      |
| DGTPATMSQVAKDVATFLR              | Q9D0M3     | 0                        | n +34.06 Da,K +34.06 Da,             | 4484.63916            | 3      | 692.7211914  | 692.7191999     |
| DPAIYFKEQFLDGDWATNR              | P14211     | 0                        | n +34.06 Da,K +34.06 Da,             | 4451.706543           | 2      | 1177.609985  | 1177.608048     |
| ASVGTLAFDEYGRPFLLIKDQDR          | P80316     | 0                        | n +42.03 Da,K +34.06 Da,             | 4441.601563           | 3      | 896.4799805  | 896.4799088     |
| TPLPGITVGDIGPKMGFENIDNGFLR       | Q9QXD1     | 0.01603499               | n +34.06 Da,K +34.06 Da,             | 4436.553223           | 3      | 942.8599854  | 942.8546878     |
| VTVAATAAALKAPWPAAPVTRCAD         | F6R8N2     | 0.02121641               | n +42.03 Da,K +34.06 Da,C +57.02 Da, | 4435.18457            | 3      | 818.789978   | 818.7843859     |
| TLEQPIIPSDYVAIKAPMFSWPR          | Q8C196     | 0                        | n +34.06 Da,K +34.06 Da,             | 4429.366699           | 3      | 909.8499756  | 909.8453521     |
| VHLTDAEKAASVSLWGKVNDSDEVGGEALGR  | P02088     | 0                        | n +42.03 Da,K +34.06 Da,C +57.02 Da, | 4483.822754           | 4      | 820.4299927  | 820.4332207     |
| AADISQWAGPLCLQEVDEPPQHALR        | P70296     | 0                        | n +42.03 Da,C +57.02 Da,             | 4393.624512           | 3      | 948.460022   | 948.4642237     |
| GVLKEYGVKVLGTSVESIMATEDR         | Q8C196     | 0.04456094               | n +14.02 Da,K +28.03 Da,             | 4486.559082           | 4      | 663.6199951  | 663.6135685     |
| LAILLGMGLDPVEKDANNMPVTAR         | D3Z0Y2     | 0                        | n +34.06 Da,K +34.06 Da,             | 4358.574219           | 4      | 638.1099854  | 638.1171133     |

|                                    |        |            |                                      |             |   |             |             |
|------------------------------------|--------|------------|--------------------------------------|-------------|---|-------------|-------------|
| DPTALMTDPKYYIWPVCR                 | P11352 | 0          | n +34.06 Da,K +34.06 Da,C +57.02 Da, | 4337.979492 | 3 | 777.7564087 | 777.7552567 |
| SAGGESVSVLVLSPAKNLFQR              | Q64176 | 0          | n +34.06 Da,K +34.06 Da,             | 4334.98877  | 3 | 780.8099976 | 780.802252  |
| TTGIVMDSGDGVTHTVPIYEGYALPHAILR     | P60710 | 0          |                                      | 4325.930664 | 3 | 1071.199951 | 1071.22006  |
| DPAIYFKEQFLDGDWATNR                | P14211 | 0          | n +34.06 Da,K +34.06 Da,             | 4319.015625 | 3 | 785.4078369 | 785.4077907 |
| DPAIYFKEQFLDGDWATNR                | P14211 | 0          | n +34.06 Da,K +34.06 Da,             | 4314.913574 | 2 | 1177.609741 | 1177.608048 |
| SFIPVAEDSDFPIQNLPGVVFSTQSNPKPR     | P35505 | 0          | n +34.06 Da,K +34.06 Da,             | 4415.60791  | 4 | 855.460022  | 855.4543161 |
| VVQEPRRVIIRKTEYGSRLR               | Q9Z138 | 0.04336399 | n +42.03 Da,K +34.06 Da,             | 4416.760742 | 3 | 844.5098877 | 844.5083552 |
| TPDCGKQGFIDLPEFPFGLR               | O35490 | 0          | n +34.06 Da,K +34.06 Da,C +57.02 Da, | 4400.438477 | 3 | 863.460022  | 863.4545239 |
| MDEDGLPLMGSGIDLTQVPAIQQR           | Q9CR27 | 0          | n +42.03 Da,K +34.06 Da,             | 4301.285156 | 3 | 941.5209961 | 941.5190881 |
| GEQPLSAMVSMVTKDNPGVVTCLDEAR        | Q02053 | 0          | n +34.06 Da,K +34.06 Da,C +57.02 Da, | 4366.676758 | 3 | 991.5200195 | 991.5102644 |
| TSHVSVLGEDGSAAVATSTINTPFGAMVYSPR   | Q9Z2A9 | 0          | n +31.05 Da,                         | 4329.111816 | 3 | 1085.209961 | 1085.211782 |
| DPAIYFKEQFLDGDWATNR                | P14211 | 0          | n +34.06 Da,K +34.06 Da,             | 4278.204102 | 3 | 785.4067383 | 785.4077907 |
| SWLFPLAKSASSAAGSPAGLTSLQQQQR       | Q8CHS8 | 0          | n +42.03 Da,K +34.06 Da,             | 4273.90625  | 3 | 1071.589966 | 1071.594814 |
| LSAAATSAPVAPNHQPEVFCNQIFINNEWHDVSR | P47738 | 0          | C +57.02 Da,                         | 4261.118164 | 4 | 980.4799805 | 980.4799699 |
| LSAAATSAPVAPNHQPEVFCNQIFINNEWHDVSR | P47738 | 0          | n +31.05 Da,C +57.02 Da,             | 4259.442383 | 4 | 981.2299805 | 981.2339469 |
| MELGELLYNKSEYIETASGNKVS            | Q9QZB9 | 0          | n +42.03 Da,K +34.06 Da,             | 4335.684082 | 3 | 947.8390503 | 947.8373632 |
| AAATFNPELITHLDGSPENR               | Q9R0H0 | 0          | n +14.02 Da,                         | 4221.290527 | 3 | 794.4000244 | 794.4080435 |
| MKIAVIGQSLFGQEVYQQLR               | Q8R0Y6 | 0          | n +34.06 Da,K +34.06 Da,C +57.02 Da, | 4220.958984 | 3 | 803.4560547 | 803.4536891 |
| MNLSAAHHQISLSDGNNIPLIGLGTYSDDR     | Q8VCX1 | 0          | n +42.03 Da,                         | 4205.262207 | 3 | 1078.530029 | 1078.538452 |
| GESPVWEEASQSLFVDIPSIIICR           | Q64374 | 0          | n +34.06 Da,K +34.06 Da,C +57.02 Da, | 4656.090332 | 3 | 976.8699951 | 976.8652529 |
| ATLKDQIVNLLKKEEQAPQNK              | P06151 | 0          | n +42.03 Da,K +34.06 Da,             | 4192.515137 | 3 | 846.5200195 | 846.5181108 |
| SGEDEQQEQTIAEDLVVTKYKMGGDIANR      | P50580 | 0          | n +42.03 Da,K +34.06 Da,             | 4181.13623  | 3 | 1112.228516 | 1112.229649 |
| AAIVDMVPGKPMCVESFSDYPLGR           | P10126 | 0          | n +34.06 Da,K +34.06 Da,C +57.02 Da, | 4178.403809 | 3 | 935.4906006 | 935.4867306 |
| DFGTVNEIYKTYFQGSPLAR               | P52760 | 0          | n +34.06 Da,K +34.06 Da,             | 4444.559082 | 2 | 1187.63916  | 1187.639348 |
| DSSAEELKLATQLTGPMPIR               | P47963 | 0          | n +34.06 Da,K +34.06 Da,             | 4171.696777 | 3 | 775.4500122 | 775.4437362 |
| ADKMDMSLDDIILNR                    | O08583 | 0          | n +42.03 Da,K +34.06 Da,             | 4160.898926 | 3 | 663.3699951 | 663.3657691 |
| DFTTVLSSLPSEHQVVAAR                | Q9DBB8 | 0          | n +34.06 Da,                         | 4160.305176 | 3 | 783.4199829 | 783.4271445 |
| GLDPGKLYTLVLTDPDAPSR               | P70296 | 0          | n +34.06 Da,K +34.06 Da,             | 4154.091797 | 3 | 732.75      | 732.7564198 |
| DIKAIKSVGNSQAGEYIFER               | Q9EQ20 | 0          | n +34.06 Da,K +34.06 Da,             | 4153.498535 | 3 | 771.4199829 | 771.4234408 |
| TLDDDIVAAGGKEQNLAQLR               | Q8VCW8 | 0          | n +34.06 Da,K +34.06 Da,             | 4143.944824 | 3 | 769.460022  | 769.462007  |
| GAGAVAMLIGPKAPLVLEQGLR             | P54869 | 0          | n +34.06 Da,K +34.06 Da,             | 4132.574219 | 3 | 743.8040161 | 743.7977842 |
| ATWEALEACKDAGLVKSLGVSFNFR          | Q8VCX1 | 0          | n +42.03 Da,K +34.06 Da,C +57.02 Da, | 4296.041016 | 3 | 949.5200195 | 949.5095805 |
| MESSTSSSGSALGAVDPQLQHFIEVETQKQR    | Q9WVA2 | 0          | n +42.03 Da,K +34.06 Da,             | 4131.427734 | 3 | 1141.900024 | 1141.901826 |
| MFEPKCLDAFPNLR                     | P10649 | 0          | n +42.03 Da,K +34.06 Da,C +57.02 Da, | 4127.79541  | 3 | 605.3099976 | 605.3111173 |
| VSMVNTVDTSHEDMIHDAQMDYYGTR         | Q9D1M0 | 0          | n +42.03 Da,                         | 4115.924805 | 3 | 1019.7724   | 1019.772289 |
| PETVSTDFDECDKLYFEELSLR             | Q8C196 | 0          | n +17.03 Da,K +34.06 Da,C +57.02 Da, | 4182.614746 | 4 | 719.0999756 | 719.0969549 |
| QKEVNFENFAIDLIAQQPVNEVEHR          | P52503 | 0.02253521 | n +31.05 Da,                         | 4122.968262 | 3 | 951.1599731 | 951.1630911 |
| AIKFLEVIKPF                        | P61620 | 0          | n +34.06 Da,K +34.06 Da,             | 4098.937012 | 3 | 469.6680298 | 469.6671937 |
| SSPAQPAVPAPLADLKIHTKIF             | P24549 | 0          | n +42.03 Da,K +34.06 Da,             | 4091.460205 | 2 | 1270.259155 | 1270.249597 |
| AGAVAMLIGPKAPLVLEQGLR              | P54869 | 0          | n +34.06 Da,K +34.06 Da,             | 4090.802246 | 3 | 724.7953491 | 724.7906295 |

|                               |        |            |                                      |             |   |             |             |
|-------------------------------|--------|------------|--------------------------------------|-------------|---|-------------|-------------|
| GVINMSIPIVLPVSADDKAR          | O88428 | 0          | n +34.06 Da,K +34.06 Da,             | 4088.088623 | 3 | 721.7675171 | 721.7662614 |
| DLTDPAPATTFAHLDATTVLSR        | P56480 | 0          | n +34.06 Da,                         | 4086.392334 | 3 | 783.0849609 | 783.0832665 |
| AYHSSLMDDPDKLIGNMALLPLR       | Q9JM76 | 0          | n +42.03 Da,K +34.06 Da,             | 4399.193848 | 3 | 878.1400146 | 878.1398413 |
| DLKVALIGSPVDLTYR              | Q91VD9 | 0          | n +34.06 Da,K +34.06 Da,             | 4070.357666 | 3 | 610.039978  | 610.0453526 |
| KQEVNENFAIDLIAQQPVNEVEHR      | P52503 | 0          | n +31.05 Da,                         | 4069.099121 | 3 | 951.1599731 | 951.1630911 |
| TENSPVTFMNFPEDTLEQKAGSVGR     | Q8VCW8 | 0          | n +34.06 Da,K +34.06 Da,             | 4056.794922 | 3 | 941.4899902 | 941.4815794 |
| ADEIAKAQVAQPGGDTIFGKIIR       | P70349 | 0          | n +42.03 Da,K +34.06 Da,             | 4055.211426 | 3 | 836.8170776 | 836.8200831 |
| AEEQPQVELFVKAGSDGAKIGNCPFSQR  | Q9Z1Q5 | 0          | n +42.03 Da,K +34.06 Da,C +57.02 Da, | 4045.45166  | 3 | 1058.209961 | 1058.217126 |
| AQEFVNCKIQSGKVVVFIKPTCPY      | Q9QUH0 | 0          | n +42.03 Da,K +34.06 Da,C +57.02 Da, | 4043.562256 | 3 | 986.210022  | 986.2223122 |
| TTGIVMDSGDGVTHTVPIYEGYALPH    | P60710 | 0          |                                      | 4036.812256 | 3 | 920.1099854 | 920.117942  |
| NALPTPSDDPTALMTDPKYIIVSPVCR   | P11352 | 0          | n +42.03 Da,K +34.06 Da,C +57.02 Da, | 4395.548828 | 3 | 1045.540039 | 1045.529835 |
| INLKDATSKVALVYQGMNEPPGAR      | P56480 | 0          | n +42.03 Da,K +28.03 Da,             | 4204.597656 | 3 | 890.8200073 | 890.8143048 |
| ADEIAKAQVAQPGGDTIFGKIIR       | P70349 | 0          | n +42.03 Da,K +34.06 Da,             | 4024.055176 | 2 | 1254.719971 | 1254.726486 |
| EIENLILNDPDFQHEDYNFLTR        | Q9R0H0 | 0          |                                      | 4341.046875 | 3 | 921.7845459 | 921.7802064 |
| LTVEQLTLDFEYVINEVIR           | Q6PFH3 | 0.04456094 | n +42.03 Da,                         | 4015.952148 | 3 | 779.4280396 | 779.4176569 |
| ADEIAKAQVAQPGGDTIFGKIIR       | P70349 | 0          | n +42.03 Da,K +34.06 Da,             | 4014.585938 | 3 | 836.8227539 | 836.8200831 |
| TGDLQLLQKCEDVLPDDTVSTLYNR     | Q8R0Y6 | 0          | n +34.06 Da,K +34.06 Da,C +57.02 Da, | 4010.842773 | 3 | 945.1720581 | 945.1690015 |
| ADEIAKAQVAQPGGDTIFGKIIR       | P70349 | 0          | n +42.03 Da,K +34.06 Da,             | 4004.118896 | 4 | 627.8688965 | 627.8668814 |
| DYLHLPPEIVPATLR               | P63325 | 0          |                                      | 4004.008789 | 3 | 578.6588135 | 578.6576812 |
| AQEFVNCKIQSGKVVVFIKPTCPY      | Q9QUH0 | 0          | n +42.03 Da,K +34.06 Da,C +57.02 Da, | 4000.279541 | 3 | 986.2199707 | 986.2223122 |
| MEFDLAAALGPGSKKPEGAGH         | Q9D809 | 0          | n +42.03 Da,K +34.06 Da,             | 3999.241211 | 3 | 731.7299805 | 731.7263546 |
| SGEDEQQEQTIAEDLVTKYKMGGDIANR  | P50580 | 0.00162338 | n +42.03 Da,K +34.06 Da,             | 3995.058105 | 4 | 834.4199829 | 834.4240562 |
| SPVTFMNFPEDTLEQKAGSVGR        | Q8VCW8 | 0          | n +34.06 Da,K +34.06 Da,             | 3990.217529 | 3 | 826.7713623 | 826.7705122 |
| SYQLLVPPPEALSKPLSVPTR         | O35423 | 0          | n +34.06 Da,K +34.06 Da,             | 3984.749512 | 3 | 787.4796753 | 787.4789977 |
| TTGIVMDSGDGVTHTVPIYEGYALPH    | P60710 | 0.00314465 |                                      | 3979.087158 | 4 | 690.3400269 | 690.3402756 |
| PLISQCTPKVDFPQDQLATLTGR       | P08249 | 0          | n +17.03 Da,K +34.06 Da,C +57.02 Da, | 3970.932617 | 3 | 879.4799805 | 879.4828134 |
| TVAGIIVEPIQSEGDNHASDDFFR      | P61922 | 0          |                                      | 3967.236572 | 3 | 901.4299927 | 901.4400727 |
| ADEIAKAQVAQPGGDTIFGKIIR       | P70349 | 0          | n +42.03 Da,K +34.06 Da,             | 3962.905518 | 2 | 1254.719971 | 1254.726486 |
| DDVALEGVGHFFR                 | P29391 | 0          | n +34.06 Da,                         | 3961.896973 | 3 | 499.2600098 | 499.2632605 |
| SSENDFALINIGR                 | Q3V1L6 | 0.04941482 |                                      | 3960.537109 | 2 | 732.3900146 | 732.378084  |
| TANVFEQICGLQQGDHLALILPR       | Q91VA0 | 0          | n +31.05 Da,C +57.02 Da,             | 4398.04834  | 3 | 875.4699707 | 875.4724303 |
| ASLLAKDTYLQDLAKKIC            | P70279 | 0          | n +42.03 Da,K +34.06 Da,C +57.02 Da, | 4271.615234 | 3 | 732.4400024 | 732.4450061 |
| VEAAQAEYVEKFAFPFAAVR          | Q99MN9 | 0          | n +34.06 Da,K +34.06 Da,             | 3956.925293 | 3 | 792.4400024 | 792.4392022 |
| VASVGKDEYTFVVVGAGSAGCVLASR    | Q8BJ64 | 0          | n +34.06 Da,K +34.06 Da,C +57.02 Da, | 3956.743164 | 3 | 889.8153076 | 889.8197547 |
| ASGVAVSDGVIKVFNMDMKVR         | P18760 | 0          | n +42.03 Da,K +34.06 Da,             | 4266.159668 | 3 | 734.7600098 | 734.7577661 |
| QSLLSPLKLEVDPNIQAVR           | P11679 | 0          | n +34.06 Da,K +34.06 Da,             | 3955.639648 | 3 | 730.1099854 | 730.1160592 |
| PMILGYWNVNR                   | P10649 | 0.00162338 | n +17.03 Da,                         | 3973.255371 | 2 | 633.3461914 | 633.3473073 |
| LEFGQTPKQLFVTPHPR             | O35242 | 0.04941482 | n +31.05 Da,                         | 3952.078125 | 2 | 1013.580017 | 1013.567775 |
| PLVYNMSHEDPGNVSYSEIGGLSEQIR   | P62334 | 0          | n +17.03 Da,                         | 3951.52832  | 3 | 1003.47998  | 1003.487135 |
| LLEDGEDFSLNDALDSSNSMQTVQKTTTR | P05784 | 0          | n +17.03 Da,K +34.06 Da,             | 3949.796875 | 3 | 1089.530029 | 1089.536702 |

|                                |        |            |                                        |             |   |             |             |
|--------------------------------|--------|------------|----------------------------------------|-------------|---|-------------|-------------|
| TTIPTKQTFTTYSNQPGLVLIQVYEGER   | P63017 | 0.03415301 | n +34.06 Da,K +34.06 Da,               | 3943.372314 | 3 | 1161.959961 | 1161.947471 |
| VAVMPPHIGDQPLTGAYTVTLDR        | Q923D2 | 0          | n +34.06 Da,                           | 3928.051514 | 3 | 848.1295166 | 848.1230676 |
| DLTDPAPATTFHAHLDAVVLSR         | P56480 | 0          | n +34.06 Da,                           | 3919.529053 | 4 | 587.56427   | 587.564269  |
| DIAALVVDNGSGMCKAGFAGDDAPR      | P60710 | 0          | n +34.06 Da,K +34.06 Da,C +57.02 Da,   | 3918.498047 | 3 | 859.1011353 | 859.1020448 |
| EAINEDNSVVSLSQPKMDELQLFR       | Q01853 | 0          | n +34.06 Da,K +34.06 Da,               | 4147.665039 | 3 | 944.1599731 | 944.1691128 |
| SKQQPTQFINPETPGYVGFANLPNQVHR   | P42208 | 0          | n +42.03 Da,K +34.06 Da,               | 3929.422119 | 4 | 811.6746216 | 811.6744085 |
| DPAIYFKEQFLDGDWATNR            | P14211 | 0          | n +34.06 Da, K +34.06 Da,              | 4295.220703 | 4 | 589.3099976 | 589.3076622 |
| ASGNAQIGKSAPDFTATAVVDGAFKEIK   | Q61171 | 0          | n +42.03 Da, K +34.06 Da,              | 4129.838867 | 3 | 979.8900146 | 979.8854113 |
| AMGVHTGDSVVVAPAQTLNSAEFQMLR    | Q8C196 | 0.01043219 | n +31.05 Da,                           | 4259.553223 | 3 | 954.1500244 | 954.1546617 |
| SYGRPPDVEGMTSLKVDNLTYR         | Q62093 | 0          | n +42.03 Da, K +34.06 Da,              | 3885.358398 | 3 | 891.1298218 | 891.1251373 |
| SGSKYKAPLALPSTLDPAEYDVSPETR    | Q9CQC7 | 0          | n +42.03 Da, K +34.06 Da,              | 3882.876221 | 3 | 1067.569946 | 1067.571452 |
| TVSTDFDECDKLYFEELSLE           | Q8C196 | 0          | n +34.06 Da, K +34.06 Da, C +57.02 Da, | 4148.92334  | 3 | 888.7700195 | 888.7722479 |
| KSEVYYDKSPLTPILLGNPGR          | P50172 | 0.02657343 | n +14.02 Da, K +28.03 Da,              | 3878.548828 | 3 | 806.460022  | 806.4528127 |
| ESGVINLKDATSKVALVYQMNNEPPGAR   | P56480 | 0.01043219 | n +14.02 Da, K +28.03 Da,              | 4256.484863 | 3 | 1005.549988 | 1005.5375   |
| GSLPEEKDSALWSDTPKGLPSAYR       | Q9EPL9 | 0          | n +42.03 Da, K +34.06 Da,              | 3873.413818 | 3 | 905.4799805 | 905.4817964 |
| PFVELETNLPASRIPAGLENR          | O35215 | 0          | n +14.02 Da,                           | 3866.365479 | 3 | 779.7600098 | 779.7568952 |
| AFVGGFLSQLVSDKPLTECIR          | P55264 | 0          | n +34.06 Da, K +34.06 Da, C +57.02 Da, | 4358.903809 | 3 | 802.460022  | 802.4559759 |
| SYGRPPDVEGMTSLKVDNLTYR         | Q62093 | 0          | n +42.03 Da, K +34.06 Da,              | 3926.354736 | 3 | 891.1287842 | 891.1251373 |
| SKQQPTQFINPETPGYVGFANLPNQVHR   | P42208 | 0          | n +42.03 Da, K +34.06 Da,              | 3969.308838 | 3 | 1081.896118 | 1081.896786 |
| DVLTGGGNPIGDKLNIMTAGSR         | P24270 | 0          | n +34.06 Da, K +34.06 Da,              | 3845.374023 | 3 | 785.7700195 | 785.7706235 |
| DPAIYFKEQFLDGDWATNR            | P14211 | 0          | n +34.06 Da, K +34.06 Da,              | 4359.720215 | 3 | 785.4100342 | 785.4077907 |
| SYGRPPDVEGMTSLKVDNLTYR         | Q62093 | 0          | n +42.03 Da, K +34.06 Da,              | 3844.493896 | 3 | 891.1264038 | 891.1251373 |
| DIPVDSPELKEVLGH                | O08677 | 0          | n +34.06 Da, K +34.06 Da,              | 3840.728516 | 3 | 572.6680298 | 572.6665414 |
| FPIDLFHLEAEMKGDGDR             | P39061 | 0.01043219 | n +31.05 Da,                           | 3830.971436 | 3 | 750.3900146 | 750.3859623 |
| PTALMTDPKYIHWSPVCR             | P11352 | 0.00162338 | n +34.06 Da, K +34.06 Da, C +57.02 Da, | 3830.263916 | 3 | 739.4000244 | 739.412942  |
| PAVGAIVLTGGDKAFAAGADIKEMQNR    | Q8BH95 | 0          | n +17.03 Da, K +34.06 Da,              | 3829.715088 | 4 | 697.1500244 | 697.148349  |
| LTDPAATTFHAHLDAVVLSR           | P56480 | 0          | n +34.06 Da,                           | 3813.964111 | 3 | 744.7404785 | 744.7409518 |
| LLLQKECDVLPDDTVSTLYNR          | Q8R0Y6 | 0          | n +34.06 Da, K +34.06 Da, C +57.02 Da, | 3804.29248  | 3 | 854.1350098 | 854.1369723 |
| SYGRPPDVEGMTSLKVDNLTYR         | Q62093 | 0          | n +42.03 Da, K +34.06 Da,              | 3804.187988 | 3 | 891.1242676 | 891.1251373 |
| DVDEPLETPLSHVLGR               | Q922Y1 | 0          | n +34.06 Da,                           | 3996.314941 | 3 | 604.3300171 | 604.3301115 |
| VAPVSDIIEIKSPDTFVR             | Q99LC5 | 0          | n +34.06 Da, K +34.06 Da,              | 3786.63501  | 3 | 685.4121704 | 685.4104721 |
| EIENLILNDPDFQHEDYNFLTR         | Q9R0H0 | 0          |                                        | 4389.402832 | 3 | 921.77948   | 921.7802064 |
| TDPAYKGQILTMANPIIGNGGAPDTPAR   | Q8C196 | 0          | n +34.06 Da, K +34.06 Da,              | 3806.246094 | 3 | 971.1900024 | 971.1921402 |
| SGSKYKAPLALPSTLDPAEYDVSPETR    | Q9CQC7 | 0          | n +42.03 Da, K +34.06 Da,              | 3769.05127  | 4 | 800.9299927 | 800.9304082 |
| SHTSAAAGTMAGVPTVFSSELR         | E9PY03 | 0          | n +31.05 Da,                           | 3766.840332 | 2 | 1104.550049 | 1104.56002  |
| PAFTPATGTPVLGGLSYR             | Q61176 | 0          |                                        | 3762.446533 | 3 | 602.3248901 | 602.3245908 |
| YHTSQSGDEMSTLSEYVSR            | P11499 | 0          |                                        | 3784.571289 | 3 | 735.6599731 | 735.6636732 |
| PAIVSAQPMNPTQNMDMPQLVCPQVHSESR | Q60865 | 0          | n +17.03 Da, C +57.02 Da,              | 3817.810547 | 3 | 1127.199951 | 1127.206992 |
| ASFVTEVLAHSGSLEKEDLGTR         | O54692 | 0.01043219 | n +42.03 Da, K +34.06 Da,              | 4431.777832 | 3 | 808.09375   | 808.0939429 |
| PLVYNMSHEDPGNVSYSEIGGLSEQIR    | P62334 | 0          | n +34.06 Da,                           | 3742.273193 | 3 | 1009.150024 | 1009.164321 |

|                                          |        |            |                                      |             |   |             |             |
|------------------------------------------|--------|------------|--------------------------------------|-------------|---|-------------|-------------|
| DYFFALAHTVR                              | Q8CI94 | 0.04138852 | n +42.03 Da,                         | 3735.447266 | 2 | 691.3499756 | 691.3485974 |
| TFPVYDPASGAKLGTVADCGVPEAR                | Q8BWF0 | 0          | n +34.06 Da,K +34.06 Da,C +57.02 Da, | 3721.351807 | 3 | 882.8099976 | 882.8004716 |
| SYGRPPPDEGMTSLKVDNLTYR                   | Q62093 | 0          | n +42.03 Da,K +34.06 Da,             | 3718.13623  | 3 | 891.1199951 | 891.1251373 |
| SIMSYNGGAVMAMKGKNCVAIAADR                | Q9R1P1 | 0          | n +42.03 Da,K +34.06 Da,C +57.02 Da, | 3718.025879 | 3 | 909.1300049 | 909.1358148 |
| SLLPPTPEAHTDGSVPVFIR                     | Q3URE1 | 0.01881331 | n +34.06 Da,                         | 3707.738525 | 3 | 724.3900146 | 724.4021588 |
| DDEVVDVGTVEEDLGKSR                       | P08113 | 0          | n +34.06 Da,K +34.06 Da,             | 3698.880127 | 3 | 682.6799927 | 682.6763835 |
| MEWKDPSGSAYEAKTASFQDAVR                  | A2AK70 | 0          | n +42.03 Da,K +34.06 Da,             | 3692.499756 | 3 | 895.4500122 | 895.4480982 |
| GSYQLLVPPPEALSKPLSVPTR                   | O35423 | 0          | n +34.06 Da,K +34.06 Da,             | 3938.610107 | 3 | 806.4899902 | 806.4861524 |
| PPPQAVSTGTQPSPAVAAAAATTTATTTTTSGGHPLEFLR | P54728 | 0          | n +17.03 Da,                         | 3686.617188 | 4 | 970.5       | 970.5037864 |
| PDVFAQFKDFTATFGPLDSLNR                   | Q05920 | 0          | n +17.03 Da,K +34.06 Da,             | 4739.623535 | 3 | 880.1300049 | 880.130657  |
| VGAPMADVILPGAAYTEKATYVNTTEGR             | Q91VD9 | 0          | n +34.06 Da,K +34.06 Da,             | 3942.144043 | 3 | 983.8599854 | 983.8602792 |
| DISSGTVLSDYVGSPPSGTGLHR                  | P70296 | 0          | n +34.06 Da,                         | 3673.109619 | 3 | 798.4107666 | 798.4100425 |
| DPVEKPAQPIEVLLER                         | Q9R1Z8 | 0          | n +34.06 Da,K +34.06 Da,             | 3671.707031 | 3 | 634.3800049 | 634.3841456 |
| SKQQPTQFINPETPGYVGFANLPNQVHR             | P42208 | 0          | n +42.03 Da,K +34.06 Da,             | 3669.418945 | 4 | 811.6799927 | 811.6744085 |
| PAPGILGPPPPSFHGGPAVGR                    | Q8K310 | 0          | n +17.03 Da,                         | 3668.058838 | 3 | 735.75      | 735.7495631 |
| LGVDLTSKVSIVSEPPQR                       | Q9DCW4 | 0          | n +34.06 Da,K +34.06 Da,             | 3667.397705 | 3 | 741.1099854 | 741.1073412 |
| TTIAGVVYKDGIVLGADTR                      | P70195 | 0          | n +34.06 Da,K +34.06 Da,             | 3662.409912 | 3 | 673.0700073 | 673.0703384 |
| ASTVRPSFSLGNETLKVPLALFALNR               | Q11136 | 0          | n +42.03 Da,K +34.06 Da,             | 4602.460938 | 4 | 720.1658325 | 720.1656874 |
| NKELDPVQKLFVDKIR                         | P97450 | 0          | n +34.06 Da,K +34.06 Da,             | 3655.669678 | 5 | 416.480011  | 416.4787213 |
| TAPDLLPQKPLPASAFIEDGR                    | A2A8L5 | 0          | n +34.06 Da,K +34.06 Da,             | 3846.187256 | 3 | 768.7804565 | 768.7793359 |
| DPNAQGDFAKTLFVAR                         | Q62376 | 0          | n +34.06 Da,K +34.06 Da,             | 3616.031494 | 3 | 606.6799927 | 606.6775518 |
| LVIDNGSGMCKAGFAGDDAPR                    | P63260 | 0          | n +17.03 Da,K +34.06 Da,C +57.02 Da, | 3615.330566 | 3 | 734.6900024 | 734.7016628 |
| SDEFSLADALPEQSSAKPPAVTNTKAGH             | Q8BH93 | 0          | n +42.03 Da,K +34.06 Da,             | 3612.645264 | 3 | 993.5100098 | 993.5174586 |
| SDKLPYKVADIGLAAWGR                       | P50247 | 0          | n +42.03 Da,K +34.06 Da,             | 4165.63623  | 3 | 690.7399902 | 690.7388114 |
| AAAAGAVVASAASGPAEGKKITELR                | Q8CH25 | 0          | n +42.03 Da,K +34.06 Da,             | 3610.399658 | 3 | 802.7999878 | 802.804433  |
| DQDEIDCLPLAKQPSFR                        | P16675 | 0          | n +34.06 Da,K +34.06 Da,C +57.02 Da, | 3609.40625  | 3 | 719.715271  | 719.7142262 |
| ASGVTVNDEVIKVFNDMKVR                     | P45591 | 0          | n +42.03 Da,K +34.06 Da,             | 4376.179199 | 3 | 777.7700195 | 777.7719642 |
| ADEIAKAQVAQPGGDTIFGKIIR                  | P70349 | 0          | n +42.03 Da,K +34.06 Da,             | 3604.008789 | 4 | 627.8668823 | 627.8668814 |
| GAYKYIQELWR                              | Q9CZM2 | 0          | n +34.06 Da,K +34.06 Da,             | 3599.255127 | 3 | 498.9599915 | 498.9628516 |
| SLPPHQKVPLPSLPTMQAGTIAR                  | Q8BMF4 | 0          | n +42.03 Da,K +34.06 Da,             | 3597.124023 | 3 | 868.1599731 | 868.1581121 |
| PPEDMKQDQDIQAVATSLPLTQANLR               | Q8CAK3 | 0          | n +34.06 Da,K +34.06 Da,             | 4298.661621 | 3 | 1020.880005 | 1020.893872 |
| APLPGTLLDDIVAAGGKEQNLAQLR                | Q8VCW8 | 0          | n +34.06 Da,K +34.06 Da,             | 4589.845703 | 4 | 686.1593628 | 686.1603671 |
| AAPRPPPAISVSVSAPAFYAPQKK                 | Q62523 | 0          | n +42.03 Da,K +34.06 Da,             | 3588.33667  | 3 | 854.1699829 | 854.1689348 |
| PTGAFGKATLLLLDSDLVSLFGNR                 | P99029 | 0.03415301 | n +17.03 Da,K +34.06 Da,             | 4601.54834  | 4 | 640.3599854 | 640.3576369 |
| GGQYALVAACAAGGQGHAMIVEAYPK               | Q99JY0 | 0.02121641 | n +34.06 Da,K +34.06 Da,C +57.02 Da, | 3584.982422 | 3 | 886.7999878 | 886.7982962 |
| GQVVQFKLSDIGEGIR                         | P53395 | 0          | n +34.06 Da,K +34.06 Da,             | 3584.762207 | 3 | 605.3699951 | 605.3650852 |
| ADKPDMEIASFDKAKL                         | Q6ZWY8 | 0.00162338 | n +42.03 Da,K +34.06 Da,             | 3574.362061 | 3 | 660.710144  | 660.7117519 |
| DPLFPPIEKFYALDPSFPR                      | Q1HFZ0 | 0          | n +34.06 Da,K +34.06 Da,             | 4626.888184 | 3 | 773.0999756 | 773.1016385 |
| NNIPLIGLGTYS DPR                         | Q8VCX1 | 0.00765697 |                                      | 3739.62207  | 2 | 815.4400024 | 815.4333908 |
| QPVQAVPEEATIASTMQEEAANSSVPSIR            | Q60775 | 0.04138852 | n +42.03 Da,                         | 3567.120361 | 3 | 1028.180054 | 1028.171435 |

|                                 |        |            |                                      |             |   |             |             |
|---------------------------------|--------|------------|--------------------------------------|-------------|---|-------------|-------------|
| GEGVTCVKPGDKVIPLFSPQCCECR       | P00329 | 0.01603499 | n +14.02 Da,K +28.03 Da,C +57.02 Da, | 3563.58252  | 3 | 954.1599731 | 954.143328  |
| DVPMILVGNKCDLEDER               | P62835 | 0          | n +34.06 Da,K +34.06 Da,C +57.02 Da, | 3558.032227 | 3 | 691.0333252 | 691.0326788 |
| MDSKESLAPPGRDEVPSLLGR           | P06537 | 0          | n +42.03 Da,K +34.06 Da,             | 3557.613037 | 3 | 806.4232788 | 806.4232945 |
| SFVNDIFER                       | P10853 | 0.02924791 |                                      | 3556.909668 | 2 | 563.7800903 | 563.7800162 |
| AELVQQQSAPVGMKAEGFVDALHR        | A2AJ71 | 0          | n +42.03 Da,K +34.06 Da,             | 4034.074219 | 4 | 647.3400269 | 647.3443856 |
| VELGEELEAVTARPEAVER             | P59017 | 0          | n +34.06 Da,                         | 3556.387695 | 3 | 754.0700073 | 754.0675051 |
| SSSRPVALVTGANKGIGFAITR          | P48758 | 0          | n +42.03 Da,K +34.06 Da,             | 3556.27832  | 3 | 760.1080933 | 760.1078573 |
| MNSSDEEKQLQLITSLKEQAIGEYEDLR    | Q8K2Q9 | 0          | n +42.03 Da,K +34.06 Da,             | 4653.140137 | 4 | 845.1900024 | 845.190894  |
| DDEVVDVDTVEEDLGKSR              | P08113 | 0          | n +34.06 Da,K +34.06 Da,             | 3553.704834 | 3 | 682.6799927 | 682.6763835 |
| PIHLSFDVDGLDPAFTPATGTPVLGGLSYR  | Q61176 | 0          | n +14.02 Da,                         | 4616.036621 | 3 | 1043.199951 | 1043.208149 |
| DPDVEPLETPLSHVLGR               | Q922Y1 | 0          | n +34.06 Da,                         | 4042.162109 | 3 | 675.0200195 | 675.0233476 |
| TTIAGVVYKDGIVLGADTR             | P70195 | 0          | n +34.06 Da,K +34.06 Da,             | 3539.14502  | 3 | 673.0701904 | 673.0703384 |
| MNPQGSSEQDVEYSVVQHADGEKSNVLR    | P48437 | 0          | n +42.03 Da,K +34.06 Da,             | 3538.109131 | 3 | 1031.498413 | 1031.498252 |
| TGLSIHEVYGQSETGISSATLR          | Q91VA0 | 0          | n +42.03 Da,                         | 3531.663086 | 3 | 783.4099731 | 783.3958038 |
| PLLAHMQLPPEIMPTVIDEYLDNGSDESATR | Q63880 | 0          | n +31.05 Da,                         | 4572.047852 | 3 | 1161.890015 | 1161.911004 |
| DIAALVVDNGSGMCKAGFAGDDAPR       | P60710 | 0          | n +34.06 Da,K +34.06 Da,C +57.02 Da, | 3919.859619 | 4 | 644.5795288 | 644.5783527 |
| PAIVSAQPMNPTQNMDMPQLVCPQVHSESR  | Q60865 | 0          | n +34.06 Da,C +57.02 Da,             | 3530.631836 | 4 | 849.9000244 | 849.9149528 |
| ANHAPFETDISTLTR                 | Q9QXD6 | 0          | n +42.03 Da,                         | 3525.922119 | 2 | 857.9199829 | 857.9233878 |
| SSSRPVALVTGANKGIGFAITR          | P48758 | 0          | n +42.03 Da,K +34.06 Da,             | 3523.109863 | 4 | 570.3320313 | 570.3327121 |
| DVAPQAPVHFLVIPR                 | Q9D0S9 | 0          |                                      | 3753.389893 | 3 | 562.9899902 | 562.9945158 |
| PVSLESEPIAEDGALGPPEIQGTAQPVKR   | Q8VBT9 | 0          | n +17.03 Da,K +34.06 Da,             | 3518.289551 | 3 | 1045.23999  | 1045.238255 |
| FTTVLSSLPSSEHQVVAVAAR           | Q9DBB8 | 0          | n +34.06 Da,                         | 3563.692383 | 3 | 745.0800171 | 745.0848298 |
| PPVQGGIDDITGEPLVQQEDDKPEAVAAR   | Q9WUR9 | 0          | n +17.03 Da,K +34.06 Da,             | 3512.722412 | 3 | 1056.219971 | 1056.221153 |
| DDEVVDVDTVEEDLGKSR              | P08113 | 0          | n +34.06 Da,K +34.06 Da,             | 3657.441406 | 3 | 682.6799927 | 682.6763835 |
| TAASSSLEKSYELPDGQVITIGNER       | P60710 | 0          | n +34.06 Da,K +34.06 Da,             | 3498.468262 | 3 | 940.8374634 | 940.8347875 |
| AAYKLVLIR                       | Q9DBJ1 | 0.03415301 | n +42.03 Da,K +34.06 Da,             | 3493.639893 | 2 | 561.8773193 | 561.8765199 |
| VHLTDAEKAASVSLWGKVNDSDEVGGEALGR | P02088 | 0          | n +31.05 Da,K +31.05 Da,C +57.02 Da, | 4560.903809 | 3 | 1077.540039 | 1077.561075 |
| HSILPVDDINGLNEEQKQLR            | Q9JHI5 | 0          | n +42.03 Da,K +34.06 Da,             | 3485.637207 | 3 | 837.0999756 | 837.1083636 |
| TGSGDPKEEEEELVDPLTTVR           | P99028 | 0          | n +17.03 Da,K +34.06 Da,             | 3477.968994 | 3 | 827.7600098 | 827.7536929 |
| DPAPATTF AHL DATTVLSR           | P56480 | 0          | n +34.06 Da,                         | 3701.610107 | 3 | 673.3621826 | 673.3637039 |
| DPAIYFKEQFLDGD AWTNR            | P14211 | 0          | n +34.06 Da,K +34.06 Da,             | 4458.772949 | 4 | 589.3099976 | 589.3076622 |
| VLD SGAPIKIPVGPETLGR            | P56480 | 0          | n +34.06 Da,K +34.06 Da,             | 3467.883301 | 3 | 663.0800171 | 663.0789451 |
| TFEESFQKALR                     | Q8C196 | 0.00162338 | n +42.03 Da,K +34.06 Da,             | 3466.958008 | 2 | 716.3900146 | 716.3881785 |
| ADEIAKAQVAQPGGDTIFGKIIR         | P70349 | 0          | n +42.03 Da,K +34.06 Da,             | 3466.19043  | 4 | 627.8674927 | 627.8668814 |
| SWLFGIKGPKGEGTGPPLPPAQP AEGGGDR | Q925I1 | 0.03163686 | n +42.03 Da,K +34.06 Da,             | 4319.125977 | 4 | 838.4605713 | 838.4596668 |
| GSGPIDPKELLKGLD SFLTR           | Q80W00 | 0          | n +42.03 Da,K +34.06 Da,             | 4884.326172 | 3 | 751.7758789 | 751.7757029 |
| TDPAPATTF AHL DATTVLSR          | P56480 | 0          | n +34.06 Da,                         | 3596.09082  | 3 | 707.0499878 | 707.0462637 |
| PDNFMFGAGPLVHLSTPSADMSTR        | Q99MR8 | 0          | n +34.06 Da,                         | 3449.579346 | 3 | 882.7600098 | 882.7669555 |
| SGSKYPAPLATLPSTLDP AEYDVSPETR   | Q9CQC7 | 0          | n +42.03 Da,K +34.06 Da,             | 3449.468994 | 3 | 1067.579956 | 1067.571452 |
| ADEIAKAQVAQPGGDTIFGKIIR         | P70349 | 0.02524544 | n +42.03 Da,K +34.06 Da,             | 3434.882324 | 3 | 836.8200073 | 836.8200831 |

|                                   |        |            |                                      |             |   |             |             |
|-----------------------------------|--------|------------|--------------------------------------|-------------|---|-------------|-------------|
| EAGTEVVKAKAGAGSATLSMAYAGAR        | P08249 | 0          | n +42.03 Da,K +34.06 Da,             | 3433.957764 | 3 | 859.789978  | 859.8041047 |
| SYGRPPPDVEGMTSLKVDNLTYR           | Q62093 | 0          | n +42.03 Da,K +34.06 Da,             | 3433.408203 | 3 | 891.1199951 | 891.1251373 |
| AAAKKAVLGPLVGAVDQGTSSSTR          | Q64516 | 0          | n +42.03 Da,K +34.06 Da,             | 3499.830566 | 3 | 769.793335  | 769.7937566 |
| QKENGITITAAANASTLNDGAAALVLMTEAAQR | Q8QZT1 | 0          | n +31.05 Da,                         | 4729.256836 | 3 | 1078.219971 | 1078.226203 |
| SYGRPPPDVEGMTSLKVDNLTYR           | Q62093 | 0          | n +42.03 Da,K +34.06 Da,             | 3420.287354 | 4 | 668.5961304 | 668.5956721 |
| AAAKKAVLGPLVGAVDQGTSSSTR          | Q64516 | 0          | n +42.03 Da,K +34.06 Da,             | 3418.48877  | 3 | 769.7938232 | 769.7937566 |
| PQFQTWEEFSR                       | P49962 | 0          | n +17.03 Da,                         | 3406.345947 | 2 | 736.3499756 | 736.3543734 |
| VPIISNEVCNSPDFYGNQIKPK            | O35453 | 0          | n +34.06 Da,K +34.06 Da,C +57.02 Da, | 3400.77417  | 4 | 656.1099854 | 656.1177699 |
| ADQLTEEQIAEFKEAFSLFDKDGDTITTK     | P62204 | 0          | n +42.03 Da,K +34.06 Da,             | 4746.746094 | 3 | 1164.619995 | 1164.610343 |
| DDEVVDVGTVEEDLGKSR                | P08113 | 0          | n +34.06 Da,K +34.06 Da,             | 3392.60376  | 2 | 1023.51001  | 1023.510937 |
| LSPTNCDAEPLAEKVLDLINKGR           | Q9ESB3 | 0.00162338 | n +42.03 Da,K +34.06 Da,C +57.02 Da, | 4814.143066 | 3 | 917.5       | 917.5058361 |
| DDEVVDVGTVEEDLGKSR                | P08113 | 0          | n +17.03 Da,K +34.06 Da,             | 3381.4729   | 3 | 676.9899902 | 676.9991972 |
| AMEAALAMEKLNQLALLHALGSAR          | P29391 | 0          | n +17.03 Da,K +34.06 Da,             | 4833.646973 | 3 | 934.8305054 | 934.8457574 |
| AEAMDLGKDPNGPTHSSTLFVR            | Q91VL8 | 0.01043219 | n +42.03 Da,K +34.06 Da,             | 3359.55957  | 3 | 807.0800171 | 807.0760061 |
| SSPAQPAVPAPLADLKIQH               | P24549 | 0          | n +34.06 Da,K +34.06 Da,             | 3357.144531 | 3 | 670.0636597 | 670.066928  |
| PAVAAAAATTTATTTTTSGGHPLEFLR       | P54728 | 0          | n +14.02 Da,                         | 3352.460449 | 3 | 876.7800293 | 876.7924461 |
| NSATLIQQATTVKNKDIR                | S4R1R7 | 0          | n +42.03 Da,K +34.06 Da,             | 3351.910889 | 3 | 704.4108887 | 704.4200305 |
| SGEDEQQEQTIAEDLVVTKYKMGGDIANR     | P50580 | 0          | n +42.03 Da,K +34.06 Da,             | 3660.838623 | 3 | 1112.22998  | 1112.229649 |
| ISDEHGIDPTGTYHGSDLQLER            | P68372 | 0          |                                      | 3347.807373 | 3 | 861.7217407 | 861.7367779 |
| AKVEQVLSLEPQHELK                  | Q9QY76 | 0          | n +42.03 Da,K +34.06 Da,             | 3345.233154 | 3 | 653.3900146 | 653.3913003 |
| STAPVASIHPPQLTVPGQQAEFR           | Q05793 | 0          | n +34.06 Da,                         | 3344.529297 | 3 | 865.1400146 | 865.1363647 |
| TTIAGVVYKDGIVLGADTR               | P70195 | 0          | n +34.06 Da,K +34.06 Da,             | 3497.432373 | 3 | 673.0698242 | 673.0703384 |
| DDEVVDVGTVEEDLGKSR                | P08113 | 0          | n +34.06 Da,K +34.06 Da,             | 3342.300781 | 3 | 682.6758423 | 682.6763835 |
| AAAKKAVLGPLVGAVDQGTSSSTR          | Q64516 | 0          | n +42.03 Da,K +34.06 Da,             | 3338.765381 | 4 | 577.5999756 | 577.5971366 |
| SDEFSLADALPEQSSAKPPAVTNTKAGH      | Q8BH93 | 0          | n +42.03 Da,K +34.06 Da,             | 3638.824951 | 4 | 745.3900146 | 745.3899131 |
| AAAKKAVLGPLVGAVDQGTSSSTR          | Q64516 | 0          | n +42.03 Da,K +34.06 Da,             | 3380.036377 | 4 | 577.5965576 | 577.5971366 |
| TDPAPATTF AHL DATTVLSR            | P56480 | 0          | n +34.06 Da,                         | 3636.836426 | 3 | 707.0473022 | 707.0462637 |
| DDEVVDVGTVEEDLGKSR                | P08113 | 0          | n +34.06 Da,K +34.06 Da,             | 3327.041748 | 2 | 1023.51001  | 1023.510937 |
| PAPATTF AHL DATTVLSR              | P56480 | 0          | n +17.03 Da,                         | 3382.834473 | 3 | 629.3400269 | 629.3442029 |
| APTIVILEPAGGCLCDQPVHIAVR          | Q9QYR7 | 0          | n +34.06 Da,                         | 3591.85083  | 4 | 627.5895996 | 627.5884922 |
| SIDNPGYEPVAVVHPGGDTAVVGGT DGNVR   | O88342 | 0.00162338 | n +17.03 Da,                         | 3317.500488 | 3 | 1032.5      | 1032.507475 |
| AAFQLGSPWR                        | P47738 | 0.00162338 |                                      | 3312.062256 | 2 | 566.7985229 | 566.7985427 |
| AAAKKAVLGPLVGAVDQGTSSSTR          | Q64516 | 0          | n +42.03 Da,K +34.06 Da,             | 3459.454346 | 3 | 769.7928467 | 769.7937566 |
| TTIAGVVYKDGIVLGADTR               | P70195 | 0          | n +34.06 Da,K +34.06 Da,             | 3580.702881 | 3 | 673.0706177 | 673.0703384 |
| LNFLSPELPAVAEFSTNETMGHSADR        | Q99JY0 | 0          | n +31.05 Da,                         | 4681.943848 | 3 | 955.460022  | 955.4693037 |
| DAFVGGFLSQLVSDKPLTECIR            | P55264 | 0          | n +34.06 Da,K +34.06 Da,             | 4592.911621 | 3 | 840.8000488 | 840.7982906 |
| ADEIAKAQVAQPGGDTIFGKIIR           | P70349 | 0.00765697 | n +42.03 Da,K +34.06 Da,             | 4885.254883 | 3 | 836.8200073 | 836.8200831 |
| GLVISPEGLSPAVR                    | Q8K370 | 0.00162338 |                                      | 3328.294922 | 2 | 697.8900146 | 697.9037372 |
| HQLIQGGLANCVLALGF EKMER           | P32020 | 0.04032258 | n +14.02 Da,K +28.03 Da,             | 3284.478027 | 3 | 842.7800293 | 842.7821699 |
| TDITYPAGFMDVISIDKTGENFR           | P62702 | 0          | n +17.03 Da,K +34.06 Da,             | 4314.094238 | 3 | 881.1199951 | 881.119541  |

|                               |         |            |                          |             |   |             |             |
|-------------------------------|---------|------------|--------------------------|-------------|---|-------------|-------------|
| MKPPGGESSLDFGSPEEGISSKPNR     | Q6PGH2  | 0.0147929  | n +42.03 Da,K +34.06 Da, | 3280.145508 | 3 | 934.1500244 | 934.1413344 |
| SSSRPVALVTGANKIGIFAIR         | P48758  | 0          | n +42.03 Da,K +34.06 Da, | 3278.005371 | 3 | 760.1099854 | 760.1078573 |
| IYEKQTEAPQVTGPIEVPVVR         | Q9DCT8  | 0          | n +34.06 Da,K +34.06 Da, | 3271.876953 | 3 | 840.1599731 | 840.1565838 |
| AAAKAVLGPLVGAVDQGTSSSTR       | Q64516  | 0          | n +42.03 Da,K +34.06 Da, | 3254.268311 | 3 | 769.789978  | 769.7937566 |
| SSSRPVALVTGANKIGIFAIR         | P48758  | 0          | n +42.03 Da,K +34.06 Da, | 3247.128662 | 4 | 570.3300171 | 570.3327121 |
| VSVVLGGDHS LAVGSISGH          | Q61176  | 0          |                          | 3243.93457  | 3 | 606.9954224 | 606.9951335 |
| DDEVVDV DGTVEEDLGKSR          | P08113  | 0          | n +34.06 Da,K +34.06 Da, | 3218.773438 | 3 | 682.6748657 | 682.6763835 |
| IAALVVDNGSGMCKAGFAGDDAPR      | P60710  | 0          | n +34.06 Da,K +34.06 Da, | 3187.858154 | 3 | 820.7700195 | 820.75973   |
| SGEDEQQEQTIAEDLVVTKYKMGGDIANR | P50580  | 0.00162338 | n +42.03 Da,K +34.06 Da, | 3187.083252 | 4 | 834.4199829 | 834.4240562 |
| DDEVVDV DGTVEEDLGKSR          | P08113  | 0          | n +17.03 Da,K +34.06 Da, | 3186.864258 | 3 | 677         | 676.9991972 |
| DDEVVDV DGTVEEDLGKSR          | P08113  | 0          | n +34.06 Da,K +34.06 Da, | 3177.857178 | 3 | 682.6799927 | 682.6763835 |
| AAKAVLGPLVGAVDQGTSSSTR        | Q64516  | 0.04138852 | n +42.03 Da,K +34.06 Da, | 3174.601074 | 3 | 746.1199951 | 746.1147186 |
| VSVVLGGDHS LAVGSISGH          | Q61176  | 0          |                          | 3170.591553 | 2 | 909.9899902 | 909.989062  |
| PGTLLDDIVAAGGKEQNLAQLR        | Q8VVCW8 | 0          | n +17.03 Da,K +34.06 Da, | 4184.752441 | 3 | 815.1400146 | 815.1428967 |
| AKKVAVIGAGVSGLSIK             | Q8VHG0  | 0          | n +42.03 Da,K +34.06 Da, | 3159.638184 | 3 | 663.7600098 | 663.759036  |
| PMTLGYWNTR                    | P19639  | 0          | n +17.03 Da,             | 3157.79248  | 2 | 628.3179321 | 628.3187472 |
| VSVVLGGDHS LAVGSISGH          | Q61176  | 0          |                          | 3151.719238 | 3 | 606.9951782 | 606.9951335 |
| DDEVVDV DGTVEEDLGKSR          | P08113  | 0          | n +34.06 Da,K +34.06 Da, | 3147.536377 | 2 | 1023.510925 | 1023.510937 |
| SSPAQPAVPAPLADLKIQHTK         | P24549  | 0.01603499 | n +42.03 Da,K +34.06 Da, | 3147.050537 | 3 | 760.4500122 | 760.4513306 |
| VSVVLGGDHS LAVGSISGH          | Q61176  | 0          | n +14.02 Da,             | 3145.409424 | 3 | 602.3200073 | 602.3232502 |
| DDEVVDV DGTVEEDLGKSR          | P08113  | 0          | n +34.06 Da,K +34.06 Da, | 3136.552002 | 3 | 682.6766357 | 682.6763835 |
| DDEVVDV DGTVEEDLGKSR          | P08113  | 0          | n +17.03 Da,K +34.06 Da, | 3134.932129 | 3 | 677         | 676.9991972 |
| KVISTTKAPAAIGPYSQAVQVDR       | P52760  | 0          | n +14.02 Da,K +28.03 Da, | 3127.379639 | 3 | 824.1500244 | 824.1391168 |
| TTITSVLPK PALVASR             | Q8C196  | 0          | n +34.06 Da,K +34.06 Da, | 3122.817139 | 3 | 574.710022  | 574.7101926 |
| VAATMCIGPEGDLHGVPGECAVR       | O35490  | 0          | n +34.06 Da,             | 3109.030518 | 3 | 843.0800171 | 843.0819977 |
| SSPAQPAVPAPLADLKIQHTK         | P24549  | 0          | n +42.03 Da,K +34.06 Da, | 3319.380615 | 3 | 760.4523926 | 760.4513306 |
| DDEVVDV DGTVEEDLGKSR          | P08113  | 0          | n +34.06 Da,K +34.06 Da, | 3106.744629 | 2 | 1023.51001  | 1023.510937 |
| TAVDNYGEMGQTLFEMAFDSIPAKR     | Q99MZ7  | 0          | n +34.06 Da,K +34.06 Da, | 4763.60498  | 3 | 953.8200073 | 953.8157933 |
| VSVVLGGDHS LAVGSISGH          | Q61176  | 0          |                          | 3100.043701 | 2 | 909.9928589 | 909.989062  |
| AAPAKGENLSLVHGPDIR            | Q64442  | 0.00314465 | n +42.03 Da,K +34.06 Da, | 3070.971436 | 3 | 693.0578613 | 693.0586147 |
| DDEVVDV DGTVEEDLGKSR          | P08113  | 0          | n +17.03 Da,K +34.06 Da, | 3227.467285 | 3 | 677         | 676.9991972 |
| PMFIVNTNVP                    | P34884  | 0          | n +17.03 Da,             | 3064.127686 | 2 | 652.8634644 | 652.8633218 |
| VASVGKDEYTFVVVGAGSAGCVLASR    | Q8BJ64  | 0          | n +34.06 Da,K +34.06 Da, | 3728.494141 | 4 | 667.6199951 | 667.6166351 |
| AAAKAVLGPLVGAVDQGTSSSTR       | Q64516  | 0          | n +42.03 Da,K +34.06 Da, | 3053.099365 | 3 | 769.789978  | 769.7937566 |
| ASGASDTPHHQSPSPSPVQPVGVGCSMMR | A2AS89  | 0          | n +42.03 Da,             | 3042.379883 | 3 | 1074.48999  | 1074.485142 |
| GTTITSVLPK PALVASR            | Q8C196  | 0          | n +34.06 Da,K +34.06 Da, | 3036.121582 | 3 | 593.7177124 | 593.7173473 |
| SGNFEQFLR                     | Q9D757  | 0.00162338 | n +34.06 Da,             | 3031.604004 | 2 | 566.3044434 | 566.3039166 |
| KVISTTKAPAAIGPYSQAVQVDR       | P52760  | 0.02121641 | n +17.03 Da,K +34.06 Da, | 3025.587402 | 3 | 829.1500244 | 829.1656308 |
| IIGGSM DAKGSFPWQAK            | Q61646  | 0.00765697 | n +34.06 Da,K +34.06 Da, | 3232.364258 | 3 | 632.3699951 | 632.3696598 |
| HVGD LGNVTAGKDG VANVSIEDR     | P08228  | 0          | n +17.03 Da,K +34.06 Da, | 3011.77417  | 3 | 792.0800171 | 792.0909729 |



|                                |        |            |                          |             |   |             |             |
|--------------------------------|--------|------------|--------------------------|-------------|---|-------------|-------------|
| KVISTTKAPAAIGPYSQAVQVDR        | P52760 | 0          | n +14.02 Da,K +28.03 Da, | 3000.214111 | 3 | 824.1500244 | 824.1391168 |
| DALAGLVASNPDLQLLQGH            | Q8VC30 | 0          | n +34.06 Da,             | 4163.850586 | 4 | 531.3029175 | 531.3011462 |
| AAPAKGENLSLVHGPDIR             | Q64442 | 0          | n +42.03 Da,K +34.06 Da, | 2992.623535 | 2 | 1039.079956 | 1039.084284 |
| DEVVDVGTVEEDLGKSR              | P08113 | 0          | n +34.06 Da,K +34.06 Da, | 2991.442383 | 3 | 644.3300171 | 644.3340688 |
| PSGEVTKQIGDTLPVSTISASR         | Q61490 | 0          | n +17.03 Da,K +34.06 Da, | 2988.232422 | 3 | 818.7800293 | 818.7758856 |
| FAVESMEDALKAADTIGYPMIR         | Q8C196 | 0          | n +34.06 Da,K +34.06 Da, | 4622.894043 | 3 | 865.7999878 | 865.7993029 |
| DEVVDVGTVEEDLGKSR              | P08113 | 0          | n +34.06 Da,K +34.06 Da, | 3046.655273 | 3 | 644.3300171 | 644.3340688 |
| GGAPLAGTNKETTIQGLDGLSER        | Q91Y97 | 0          | n +34.06 Da,K +34.06 Da, | 2977.943359 | 3 | 785.1099854 | 785.1046599 |
| AAAPATLALDPQPQEKQKDASESSELSR   | Q91WG2 | 0          | n +42.03 Da,K +34.06 Da, | 2972.761963 | 3 | 1016.869995 | 1016.875535 |
| VSVVLGGDHS LAVSGISGH           | Q61176 | 0.00314465 | n +42.03 Da,             | 3213.942871 | 3 | 611.6657104 | 611.6548885 |
| PVIDKTLNEADCATVPPAIR           | Q8K2B3 | 0          | n +17.03 Da,K +34.06 Da, | 2964.455078 | 3 | 744.4099731 | 744.4157398 |
| DPKEEEEEELVDPLTTVR             | P99028 | 0          | n +34.06 Da,K +34.06 Da, | 3714.525391 | 3 | 732.7245483 | 732.7233337 |
| AVFPWHSR                       | Q8BWQ6 | 0.00314465 | n +42.03 Da,             | 3067.167236 | 2 | 521.2675781 | 521.266878  |
| AAAKKAVLGPLVGAVDQGTSSSTR       | Q64516 | 0          | n +42.03 Da,K +34.06 Da, | 3213.022461 | 3 | 769.789978  | 769.7937566 |
| AAAKKAVLGPLVGAVDQGTSSSTR       | Q64516 | 0.00314465 | n +42.03 Da,K +34.06 Da, | 3202.512939 | 4 | 577.5999756 | 577.5971366 |
| GSYQLLVPPPEALSKPLSVPTR         | O35423 | 0          | n +34.06 Da,K +34.06 Da, | 3783.693604 | 4 | 605.1199951 | 605.1164334 |
| DDEVVDVGTVEEDLGKSR             | P08113 | 0          | n +34.06 Da,K +34.06 Da, | 2945.094971 | 3 | 682.6747437 | 682.6763835 |
| DLHGVPPGEC AVR                 | O35490 | 0.01043219 | n +42.03 Da,             | 2931.862305 | 2 | 724.8599854 | 724.8511788 |
| YGFEGHPFR                      | Q9DCT2 | 0.00162338 |                          | 2933.890137 | 2 | 569.2800293 | 569.2774431 |
| VAPEEHPTLLTEAPLNPK             | P62737 | 0          | n +34.06 Da,K +34.06 Da, | 2927.507568 | 3 | 675.4000244 | 675.394822  |
| EVQLQQSGPELVKPGASVKMSC         | P01756 | 0          | n +34.06 Da,K +34.06 Da, | 2927.397949 | 3 | 825.4699707 | 825.4662532 |
| PQSPAVAAAAATTTATTTTTSGGHPLEFLR | P54728 | 0          | n +14.02 Da,             | 3789.256592 | 3 | 980.8400269 | 980.8402366 |
| DDEVVDVGTVEEDLGKSR             | P08113 | 0          | n +34.06 Da,K +34.06 Da, | 2903.741943 | 3 | 682.6699829 | 682.6763835 |
| VPTQPTSGPVPTTQIQEASAEHPPAVAPR  | Q3U422 | 0          | n +17.03 Da,             | 2896.14624  | 3 | 994.1900024 | 994.1894173 |
| PVAATMCIGPEGDLHGVPPGEC AVR     | O35490 | 0          | n +31.05 Da,             | 2887.875    | 3 | 874.4199829 | 874.4276161 |
| TAVQEELEKGTPEPGPLGATDER        | Q9Z2W0 | 0.01881331 | n +34.06 Da,K +34.06 Da, | 2875.815674 | 3 | 831.4500122 | 831.4432303 |
| PMFIVNTNVPR                    | P34884 | 0.01603499 | n +17.03 Da,             | 2875.111328 | 2 | 652.8599854 | 652.8633218 |
| PSSGRVYNLDFNPPQVQEDDKPEAVAAR   | F6TEU8 | 0.01043219 | n +34.06 Da,K +34.06 Da, | 3498.093262 | 3 | 1056.560059 | 1056.551274 |
| PTPSKPVVGIHPPPEVR              | Q8K4Z5 | 0          | n +17.03 Da,K +34.06 Da, | 3039.781982 | 3 | 666.40802   | 666.4067324 |
| TGTAEMSSILEER                  | Q03265 | 0          |                          | 2853.095215 | 2 | 712.3408203 | 712.3403104 |
| FVNDIFER                       | P10853 | 0.03799186 |                          | 2837.19458  | 2 | 520.2641602 | 520.2640016 |
| SAPEGLGDAHGADRGDLSGDLR         | P58137 | 0          | n +42.03 Da,             | 2836.807129 | 3 | 775.0233765 | 775.0230293 |
| TTIAGVVYKDGIVLGADTR            | P70195 | 0          | n +34.06 Da,K +34.06 Da, | 3621.6875   | 3 | 673.0698242 | 673.0703384 |
| MEAKGGTVKAASGFNATEDAQTLR       | P97429 | 0          | n +42.03 Da,K +34.06 Da, | 2814.433838 | 3 | 855.1182861 | 855.1200929 |
| GFLQASASDVVVHGR                | Q8VCHO | 0          |                          | 2841.11084  | 3 | 547.9624634 | 547.9617637 |
| APAGILNGKLVSAQIR               | Q922D8 | 0          | n +34.06 Da,K +34.06 Da, | 2803.505615 | 3 | 559.3599854 | 559.3666485 |
| SLAEDFAEQPIKDAVITVPAFFNQAER    | Q9JKR6 | 0.00314465 | n +34.06 Da,K +34.06 Da, | 4643.553223 | 4 | 769.4199829 | 769.4172019 |
| SNLKPDEHCTGAGTGSPLLEEVR        | Q8VC52 | 0.00314465 | n +42.03 Da,K +34.06 Da, | 2847.233887 | 4 | 665.3300171 | 665.3276618 |
| AAPAKGENLSLVHGPDIR             | Q64442 | 0          | n +42.03 Da,K +34.06 Da, | 3163.458496 | 3 | 693.059082  | 693.0586147 |
| DEVVDVGTVEEDLGKSR              | P08113 | 0          | n +34.06 Da,K +34.06 Da, | 2751.881592 | 3 | 644.3400269 | 644.3340688 |

|                                     |        |            |                          |             |   |             |             |
|-------------------------------------|--------|------------|--------------------------|-------------|---|-------------|-------------|
| SETEHIASISSDATTEKSELR               | Q8C9S4 | 0          | n +42.03 Da,K +34.06 Da, | 2746.355713 | 3 | 823.4099731 | 823.4118896 |
| NVFTNAFR                            | P11247 | 0.00916031 | n +34.06 Da,             | 2746.133301 | 2 | 501.7832947 | 501.7826195 |
| PVAATMCIGPEGDLHGVPPECAVR            | O35490 | 0.00162338 | n +34.06 Da,             | 2740.891113 | 3 | 875.4199829 | 875.4329191 |
| DLSSSDLSTASKIVK                     | Q61838 | 0          | n +34.06 Da,K +34.06 Da, | 2785.296387 | 3 | 551.6799927 | 551.6770358 |
| CGFEPYHIR                           | O35490 | 0          |                          | 2735.481934 | 2 | 603.7896118 | 603.7898605 |
| EVQLQQSGPELVKPGASVKMS               | P01756 | 0          | n +34.06 Da,K +34.06 Da, | 2847.828369 | 3 | 772.1199951 | 772.1227035 |
| SNKSDVIVVGGISGMAAAKLLHD             | Q8BW75 | 0          | n +42.03 Da,K +34.06 Da, | 4060.197998 | 3 | 817.1400146 | 817.1300403 |
| KLKPNPSSLFSDVYQEMPAQLR              | P50136 | 0          | n +14.02 Da,K +28.03 Da, | 4422.296875 | 3 | 882.1699829 | 882.1558905 |
| VAPEEHPTLLTEAPLNPKANR               | P62737 | 0.00162338 | K +28.03 Da,             | 3164.453613 | 3 | 785.0999756 | 785.1006619 |
| AAAYLDPNLNHTPSSSTKTH                | P34152 | 0          | n +42.03 Da,K +34.06 Da, | 2699.997803 | 3 | 734.3699951 | 734.3730397 |
| TDDQDCAAELEKVDSSSEDGVDKAPDR         | P97864 | 0          | n +42.03 Da,K +34.06 Da, | 2970.006348 | 3 | 1021.469971 | 1021.472027 |
| ENYGELADCCTKQEPER                   | P07724 | 0          | n +42.03 Da,K +34.06 Da, | 2685.071777 | 3 | 725.6699829 | 725.6562307 |
| HTDNTVQWLR                          | Q3UQ44 | 0          |                          | 2677.816895 | 2 | 649.3300171 | 649.3360213 |
| PLPPLPEYGGKVR                       | Q9CQQ7 | 0.01043219 | n +17.03 Da,K +34.06 Da, | 2670.690918 | 3 | 491.9700012 | 491.9731986 |
| AAPAKGENLSLVVHGPGDIR                | Q64442 | 0.00162338 | n +42.03 Da,K +34.06 Da, | 2977.611816 | 3 | 693.0599976 | 693.0586147 |
| MENNKTSVDSKSINNFVK                  | P70677 | 0.01603499 | n +42.03 Da,K +34.06 Da, | 2655.227051 | 3 | 776.7600098 | 776.7582018 |
| ISFHLPVNSR                          | Q9D1D4 | 0          | n +34.06 Da,             | 2653.753418 | 3 | 401.9059143 | 401.9067477 |
| DEEDLSTPNEKLLGR                     | Q922B2 | 0          | n +34.06 Da,K +34.06 Da, | 2653.390381 | 3 | 595.3300171 | 595.3284774 |
| ASGADSKGDDLSTAILKQK                 | Q01853 | 0.00314465 | n +42.03 Da,K +34.06 Da, | 2652.087402 | 2 | 1025.099976 | 1025.099783 |
| LPESWDWR                            | P97821 | 0.00765697 | n +34.06 Da,             | 3259.907471 | 2 | 561.7937012 | 561.7931846 |
| AQEFVNCKIQSGKVVVFIKPTCPY            | Q9QUH0 | 0          | n +42.03 Da,K +34.06 Da, | 4048.22998  | 4 | 739.914856  | 739.9185533 |
| TDDQDCAAELEKVDSSSEDGVDKAPDR         | P97864 | 0          | n +42.03 Da,K +34.06 Da, | 3013.687988 | 3 | 1021.469971 | 1021.472027 |
| FNDPVHGGSWIR                        | O55143 | 0.04221636 |                          | 2629.033936 | 2 | 706.8599854 | 706.8571209 |
| WFAQNYMGR                           | Q99JY0 | 0          | n +34.06 Da,             | 2625.077637 | 2 | 603.7999878 | 603.8004865 |
| MIQNVGNHLR                          | Q8VHQ9 | 0          | n +42.03 Da,             | 2620.523193 | 2 | 612.3200073 | 612.3193167 |
| AGKPVLYFDGR                         | P30115 | 0          | n +42.03 Da,K +34.06 Da, | 2690.720947 | 2 | 718.4000244 | 718.39888   |
| SQAEFDKAAEEVKR                      | P31786 | 0          | n +42.03 Da,K +34.06 Da, | 2613.787598 | 3 | 573.3153687 | 573.3179124 |
| DDEVVDVGTVEEDLGKSR                  | P08113 | 0          | n +34.06 Da,K +34.06 Da, | 3389.706787 | 3 | 682.6772461 | 682.6763835 |
| MQPASAKWYDR                         | Q9R0Q7 | 0          | n +42.03 Da,K +34.06 Da, | 2773.210938 | 2 | 714.8624878 | 714.8612733 |
| MNQEKLAKLQAQVR                      | Q64152 | 0          | n +42.03 Da,K +34.06 Da, | 2604.003906 | 3 | 589.6900024 | 589.6909151 |
| SGPVPTTQIQEASAEHPPAVAPR             | Q3U422 | 0          | n +34.06 Da,             | 2601.803955 | 3 | 792.0900269 | 792.0906439 |
| TFEESFQKALR                         | Q8C196 | 0          | n +42.03 Da,K +34.06 Da, | 3455.584473 | 3 | 477.9299927 | 477.9278778 |
| GSYQLLVPPPEALSKPLSVPTR              | O35423 | 0          | n +34.06 Da,K +34.06 Da, | 3950.016113 | 4 | 605.1099854 | 605.1164334 |
| SVEGCADDALAGLVASNPDLQLLQGHR         | Q8VC30 | 0          |                          | 4419.674316 | 3 | 945.4899902 | 945.4749001 |
| PPVQVGIDDITGEPLVQQEDDKPEAVAAR       | Q9WUR9 | 0          | n +17.03 Da,K +34.06 Da, | 3506.814941 | 4 | 792.4194336 | 792.417684  |
| MDNKLDFVR                           | Q3UZZ6 | 0.04221636 | n +42.03 Da,K +34.06 Da, | 3320.154297 | 2 | 607.3258057 | 607.3265347 |
| QVMGPGSGPGFHGNVVSGHPPASAATTPGSPSLGR | E9Q0S6 | 0          |                          | 2842.117432 | 3 | 1038.829956 | 1038.843987 |
| GHFASVWQR                           | Q8BSY0 | 0.03163686 | n +42.03 Da,             | 2583.043213 | 2 | 565.289978  | 565.2805171 |
| DIISPVCEQPGQAKAFQGGGR               | Q8K3H0 | 0.00162338 | n +34.06 Da,K +34.06 Da, | 2914.152588 | 3 | 800.0800171 | 800.0867231 |
| EQIVVDLSHPGVSADDQVSR                | O70475 | 0          |                          | 2991.693604 | 3 | 727.0363159 | 727.037839  |

|                                    |        |             |                          |             |   |             |             |
|------------------------------------|--------|-------------|--------------------------|-------------|---|-------------|-------------|
| DDEVVDVDTVEEDLGKSR                 | P08113 | 0           | n +34.06 Da,K +34.06 Da, | 2651.574219 | 4 | 512.2589111 | 512.2591068 |
| TSVATKKTEQGPSSSEYIFER              | P29758 | 0.04336399  | K +28.03 Da,             | 2990.291016 | 3 | 813.7600098 | 813.763716  |
| LQIPGKPKVSSSELAFPSSEPGR            | Q6PGL7 | 0           | n +34.06 Da,K +34.06 Da, | 3605.869141 | 3 | 789.1199951 | 789.1181289 |
| MCHPSVDGFTPR                       | Q8C196 | 0           | n +42.03 Da,             | 2564.552002 | 2 | 723.3188477 | 723.3186571 |
| PFVELETNLPASR                      | O35215 | 0           | n +14.02 Da,             | 3262.88623  | 2 | 743.8980103 | 743.8986521 |
| VKYETELAMR                         | P05784 | 0.00162338  | n +42.03 Da,K +34.06 Da, | 2816.492432 | 2 | 658.3699951 | 658.3605748 |
| MCHPSVDGFTPR                       | Q8C196 | 0.00314465  | n +42.03 Da,             | 2542.982422 | 3 | 482.548645  | 482.5481969 |
| DDEVVDVDTVEEDLGKSR                 | P08113 | 0           | n +34.06 Da,K +34.06 Da, | 2536.980225 | 3 | 682.6799927 | 682.6763835 |
| TNVGIMFR                           | P35505 | 0.02253521  | n +34.06 Da,             | 2587.246338 | 2 | 486.2807007 | 486.2813979 |
| VAPVSDIIEIKSPDTFVR                 | Q99LC5 | 0           | n +34.06 Da,K +34.06 Da, | 3828.241943 | 3 | 685.4122314 | 685.4104721 |
| PSKGPLQSVQVFR                      | P14131 | 0           | n +17.03 Da,K +34.06 Da, | 2518.118652 | 3 | 517.6468506 | 517.6473743 |
| VAPEEHPVLLTEAPLNPK                 | P60710 | 0           | K +28.03 Da,             | 2933.511719 | 3 | 670.7137451 | 670.7138557 |
| DAGTEEEEEETEKESTEKDEL              | P08113 | 0           | n +34.06 Da,K +34.06 Da, | 2550.737305 | 3 | 843.7399902 | 843.7364042 |
| NGTFYEFR                           | Q9CQE1 | 0.01881331  | n +31.05 Da,             | 2495.76001  | 2 | 532.7700195 | 532.7641305 |
| PTGTAYGASIPLAR                     | Q8R086 | 0           |                          | 2491.960938 | 2 | 687.8699951 | 687.872437  |
| NINIENLFR                          | P27005 | 0.03542234  |                          | 3910.074707 | 2 | 566.8099976 | 566.8091078 |
| TDAAVSFAKDFLAGGVAAAISKTAVER        | P51881 | 0           | n +42.03 Da,K +34.06 Da, | 5001.467773 | 3 | 1019.913818 | 1019.913372 |
| PGYGLSER                           | Q05920 | 0.00314465  | n +17.03 Da,             | 2472.698975 | 2 | 521.7713623 | 521.7719556 |
| DLSGADIKAICTEAGLMALR               | P62192 | 0           | n +34.06 Da,K +34.06 Da, | 4288.296387 | 3 | 725.0700073 | 725.071245  |
| AVFPWHSR                           | Q8BWQ6 | 0.00314465  | n +42.03 Da,             | 3160.743896 | 2 | 521.2668457 | 521.266878  |
| DDEVVDVDTVEEDLGKSR                 | P08113 | 0           | n +17.03 Da,K +34.06 Da, | 3339.908691 | 3 | 677         | 676.9991972 |
| CLERSYASKPTLNEVVIVSAIR             | Q8QZT1 | 0           | n +31.05 Da,             | 3764.107178 | 4 | 634.8499756 | 634.8546049 |
| LEGVGHFFR                          | P29391 | 0.04138852  |                          | 2452.057129 | 3 | 354.5222778 | 354.5224159 |
| DDEVVDVDTVEEDLGKSR                 | P08113 | 0           | n +34.06 Da,K +34.06 Da, | 2426.729736 | 3 | 682.6749878 | 682.6763835 |
| NVLASEPEIPKGR                      | Q9WTP6 | 0           | n +17.03 Da,K +34.06 Da, | 2693.091309 | 3 | 525.3219604 | 525.3226681 |
| RPLGLNPR                           | O89023 | 0.042221636 | n +34.06 Da,             | 2415.248291 | 3 | 400.918457  | 400.9189874 |
| AAPSPSGGGGGGGTGPPIPPASGHPAVSSMQGKR | P47809 | 0           | n +42.03 Da,K +34.06 Da, | 2408.023193 | 3 | 1105.880005 | 1105.8831   |
| VISLSGEHSIIGR                      | P08228 | 0           |                          | 2397.688477 | 3 | 456.5899963 | 456.5928999 |
| VFTTQELVQAFTHAPAALADR              | Q8BK64 | 0           | n +14.02 Da,             | 4468.73291  | 3 | 810.4199829 | 810.4201719 |
| MEAKGGTVKAASGFNATEDAQLR            | P97429 | 0.00765697  | n +42.03 Da,K +34.06 Da, | 2389.926758 | 4 | 641.5900269 | 641.5918888 |
| MEAKGGTVKAASGFNATEDAQLR            | P97429 | 0           | n +42.03 Da,K +34.06 Da, | 2385.573975 | 3 | 855.1199951 | 855.1200929 |
| APTIVLEPAGGCLCDQPVHIAVR            | Q9QYR7 | 0           | n +34.06 Da,             | 3614.45459  | 3 | 836.4481201 | 836.4488975 |
| AAAKKAVLGPLVGAVDQGTSSSTR           | Q64516 | 0.03047091  | n +42.03 Da,K +34.06 Da, | 3102.645508 | 4 | 577.5999756 | 577.5971366 |
| AGKPVLYHFDGR                       | P30115 | 0.00162338  | n +42.03 Da,K +34.06 Da, | 2659.42334  | 3 | 479.269989  | 479.2683455 |
| DPDAANYKDISDVER                    | Q9D819 | 0           | n +34.06 Da,K +34.06 Da, | 2367.019287 | 2 | 888.456604  | 888.4577778 |
| DPDAANYKDISDVER                    | Q9D819 | 0           | n +34.06 Da,K +34.06 Da, | 2363.903809 | 3 | 592.6408081 | 592.640944  |
| MHPEPAPPPSHSNPELPSVSGSSTSGSR       | Q8BWG9 | 0           | n +42.03 Da,             | 2350.494629 | 3 | 946.7700195 | 946.7752383 |
| MEAKGGTVKAASGFNATEDAQLR            | P97429 | 0.0238764   | n +42.03 Da,K +34.06 Da, | 2349.05957  | 4 | 641.5900269 | 641.5918888 |
| SSSRPVALVTGANKIGFAITR              | P48758 | 0           | n +42.03 Da,K +34.06 Da, | 3515.934326 | 3 | 760.1077271 | 760.1078573 |
| SGSKYKAPLATLPSTLDAEYDVSPETR        | Q9CQC7 | 0           | n +42.03 Da,K +34.06 Da, | 3990.145996 | 4 | 800.9318237 | 800.9304082 |

|                                |        |            |                          |             |   |             |             |
|--------------------------------|--------|------------|--------------------------|-------------|---|-------------|-------------|
| TAGLKELSLPRRGSFCRTSNR          | Q60592 | 0.04221636 | n +42.03 Da,K +28.03 Da, | 2342.368652 | 3 | 826.1199951 | 826.1115666 |
| VSTSSMGTLPKQVKIVEVGPR          | P38060 | 0          | n +42.03 Da,K +34.06 Da, | 3629.056885 | 3 | 775.1300049 | 775.1278593 |
| DLEETGLHTGWIQNGGLFIASNQQR      | Q99LB7 | 0          | n +17.03 Da,             | 4203.894531 | 3 | 977.4799805 | 977.4862339 |
| DPDAANYKDISDVER                | Q9D819 | 0          | n +34.06 Da,K +34.06 Da, | 2323.258057 | 3 | 592.6400146 | 592.640944  |
| ATAATEEPFFPHGLLPKKTGAS         | Q64514 | 0.00162338 | n +42.03 Da,K +34.06 Da, | 3832.665039 | 3 | 837.1300049 | 837.1251723 |
| ITGEPLVQQEDDKPEAВАAR           | Q9WUR9 | 0          | n +34.06 Da,K +34.06 Da, | 2320.067627 | 3 | 745.4199829 | 745.4148341 |
| DDEEDLSTPNEKLLGR               | Q922B2 | 0.00765697 | n +34.06 Da,K +34.06 Da, | 2762.958984 | 3 | 633.6692505 | 633.6707921 |
| AMNYSAKDEVDDGGPAGPPGGAAKTR     | Q8VEK0 | 0          | n +42.03 Da,K +34.06 Da, | 2311.579834 | 4 | 632.5800171 | 632.57751   |
| VFDKDGNGYISAAELR               | P62204 | 0          | n +42.03 Da,K +34.06 Da, | 4298.550293 | 3 | 610.9899902 | 610.9863448 |
| AMNYSAKDEVDDGGPAGPPGGAAKTR     | Q8VEK0 | 0          | n +42.03 Da,K +34.06 Da, | 2294.639893 | 3 | 843.0999756 | 843.1009212 |
| FNPFVTSDR                      | P61255 | 0          |                          | 2479.177246 | 2 | 541.7670288 | 541.7669086 |
| PGVTVKDVENQEFVR                | Q9CZ8  | 0          | n +17.03 Da,K +34.06 Da, | 2288.341309 | 3 | 589.6699829 | 589.6722488 |
| STGSQAPDAPSGPGPSTSNQLTHVDSAGR  | Q5RKZ7 | 0          | n +31.05 Da,             | 2275.37915  | 3 | 908.4400024 | 908.4391723 |
| SSYWSQQLR                      | Q9DCG6 | 0.0147929  | n +34.06 Da,             | 2257.470703 | 2 | 594.8200073 | 594.8146487 |
| MNYSAKDEVDDGGPAGPPGGAAKTR      | Q8VEK0 | 0          | n +42.03 Da,K +34.06 Da, | 2245.923096 | 3 | 819.4199829 | 819.4218831 |
| ASGADSKGDDLSTAILKQK            | Q01853 | 0          | n +42.03 Da,K +34.06 Da, | 2241.80542  | 4 | 513.0499878 | 513.0535296 |
| GCSMGEYFR                      | Q03265 | 0.03918919 | n +34.06 Da,             | 2236.509766 | 2 | 570.75      | 570.7548878 |
| PVAAPVPTPQPVAPTSAAPAGPKGR      | Q8BMF4 | 0          | n +17.03 Da,K +34.06 Da, | 2490.904297 | 3 | 828.1500244 | 828.1516147 |
| PKVIQPEVDTPLGR                 | Q8VCU1 | 0          | n +17.03 Da,K +34.06 Da, | 2226.660645 | 3 | 533.9939575 | 533.9945514 |
| ATLKDQLIVNLLKEEQAPQNK          | P06151 | 0          | n +42.03 Da,K +34.06 Da, | 4195.415527 | 4 | 635.1400146 | 635.1404023 |
| DDEVVDVGTVEEDLGKSR             | P08113 | 0          | n +34.06 Da,K +34.06 Da, | 3027.397217 | 3 | 682.6799927 | 682.6763835 |
| IAALVVDNGSGMCKAGFAGDDAPR       | P60710 | 0          | n +34.06 Da,K +34.06 Da, | 3101.029541 | 3 | 820.7600098 | 820.75973   |
| SNLKPDEHCTGAGTGSPLLEEVV        | Q8VC52 | 0          | n +42.03 Da,K +34.06 Da, | 2851.488525 | 3 | 886.7671509 | 886.7677902 |
| DLDPNVTIILKEPVR                | Q99PL5 | 0          | n +34.06 Da,K +34.06 Da, | 3764.923096 | 3 | 597.3726807 | 597.3734692 |
| VPPVQVSPLIKFGR                 | Q06185 | 0          | n +34.06 Da,K +34.06 Da, | 3306.453857 | 3 | 535.6900024 | 535.6889511 |
| EQAGGDATENFEDVGHSTDAR          | P56395 | 0.03163686 | n +31.05 Da,             | 2172.501221 | 3 | 746.3200073 | 746.3298995 |
| TTGIVMDSGDGVTHTVPIYEGYALPH     | P60710 | 0          |                          | 3994.505615 | 3 | 920.1199951 | 920.117942  |
| AGLLKTTGLVGLAVCDTPHER          | Q9CPP6 | 0.00625    | n +42.03 Da,K +34.06 Da, | 4011.061768 | 4 | 612.3596802 | 612.3585291 |
| MESSTSSSGSALGAVDPQLQHIEVETQKQR | Q9WVA2 | 0          | n +42.03 Da,K +34.06 Da, | 4355.651855 | 3 | 1141.901123 | 1141.901826 |
| PVAATMCIGPEGDLHGVPPECAVR       | O35490 | 0          |                          | 3108.054688 | 3 | 873.4099731 | 873.4223134 |
| EVKCDMEVSCPEGYCCR              | P28798 | 0          | n +34.06 Da,K +34.06 Da, | 2341.044434 | 3 | 783.3400269 | 783.3422019 |
| PNNTFYATKR                     | P38647 | 0.01603499 | n +42.03 Da,K +34.06 Da, | 2153.424561 | 2 | 644.3557129 | 644.3488558 |
| DNIQGITKPAIR                   | P62806 | 0          | n +42.03 Da,K +34.06 Da, | 2168.273682 | 2 | 701.4177856 | 701.4172701 |
| STGSQAPDAPSGPGPSTSNQLTHVDSAGR  | Q5RKZ7 | 0          | n +34.06 Da,             | 2144.14502  | 3 | 909.4500122 | 909.4444753 |
| AVFPWHSR                       | Q8BWQ6 | 0.00314465 | n +42.03 Da,             | 3201.194092 | 2 | 521.2650146 | 521.266878  |
| HSFYNELR                       | P62737 | 0.03918919 | n +42.03 Da,             | 2347.130127 | 2 | 554.2639771 | 554.2645331 |
| ASGASDTPHHQSPSESPVQPVGVGVCMMR  | A2AS89 | 0          | n +42.03 Da,             | 3065.780518 | 3 | 1074.485474 | 1074.485142 |
| TWFNQPAR                       | P47963 | 0.00314465 | n +34.06 Da,             | 2102.311279 | 2 | 527.2846069 | 527.288069  |
| AGLGHPSAFGR                    | Q9CWS0 | 0.00162338 | n +42.03 Da,             | 2069.805664 | 2 | 556.2848511 | 556.2857996 |
| VSTSSMGTLPKQVKIVEVGPR          | P38060 | 0.01188707 | n +31.05 Da,             | 3904.109619 | 3 | 748.7600098 | 748.7646622 |

|                                      |        |            |                          |             |   |             |             |
|--------------------------------------|--------|------------|--------------------------|-------------|---|-------------|-------------|
| AVGSISGHAR                           | Q61176 | 0.04032258 | n +34.06 Da,             | 2065.339111 | 2 | 494.7900085 | 494.790976  |
| SGFNATEDAQLR                         | P97429 | 0          |                          | 2064.831055 | 2 | 705.3400269 | 705.3364164 |
| TAIYQPQTHPQPAPYGH                    | P11276 | 0          | n +34.06 Da,             | 2061.240479 | 3 | 647.3300171 | 647.3339671 |
| NEMGSFLR                             | O35403 | 0.04032258 |                          | 2263.137939 | 2 | 491.25      | 491.2447544 |
| GKPVAATMCIGPEGDLHGVPPEGCAVR          | O35490 | 0.02253521 | n +17.03 Da,K +34.06 Da, | 2854.80542  | 3 | 942.7999878 | 942.8155809 |
| ATQAVLDKPELSSDASTR                   | P50544 | 0          | n +34.06 Da,K +34.06 Da, | 2054.567627 | 3 | 686.7199707 | 686.716513  |
| MQDDLLMDKSKTQPQSQQQQR                | Q7TN99 | 0          | n +42.03 Da,K +34.06 Da, | 2557.38916  | 3 | 881.789978  | 881.7882375 |
| AALSAGKVPETIDSVIVGNVMQSSSDAAYLAR     | Q8BWT1 | 0          | n +17.03 Da,K +34.06 Da, | 4342.085938 | 3 | 1123.609985 | 1123.60461  |
| PSCLFPACR                            | P16015 | 0.02121641 | n +17.03 Da,             | 2048.356201 | 2 | 562.7732544 | 562.7731179 |
| DPAIYFKEQFLDGDAWTNR                  | P14211 | 0          | n +34.06 Da,K +34.06 Da, | 4400.010742 | 3 | 785.4057617 | 785.4077907 |
| DDEVVDVGTVEEDLGKSR                   | P08113 | 0          | n +34.06 Da,K +34.06 Da, | 2876.256836 | 2 | 1023.51001  | 1023.510937 |
| FGPGPGSNFR                           | O88569 | 0          | n +34.06 Da,             | 2030.835815 | 2 | 535.2854004 | 535.2855265 |
| ATQAVLDKPELSSDASTR                   | P50544 | 0.03799186 | n +34.06 Da,K +34.06 Da, | 2013.271973 | 3 | 686.710022  | 686.716513  |
| PDFQPELSGAGSR                        | Q8CDN6 | 0          |                          | 2265.953369 | 2 | 680.8300171 | 680.8282269 |
| SETAPVAQAASTATEKPAAAKK               | P43275 | 0          | n +42.03 Da,K +34.06 Da, | 2010.3125   | 3 | 758.1099854 | 758.1129732 |
| PSCLFPACR                            | P16015 | 0.01043219 | n +17.03 Da,             | 2006.499146 | 2 | 562.7731323 | 562.7731179 |
| PMFIVNTNVPR                          | P34884 | 0          | n +17.03 Da,             | 3023.606934 | 2 | 652.8623047 | 652.8633218 |
| PGCGNQNFAR                           | Q61545 | 0.01603499 | n +17.03 Da,             | 2005.322388 | 2 | 662.3099976 | 662.3067026 |
| VAPEEHPTLLTEAPLNPKANR                | P62737 | 0          | n +42.03 Da,K +34.06 Da, | 3241.501953 | 3 | 791.7700195 | 791.7710226 |
| FGPGPGSNFR                           | O88569 | 0          | n +34.06 Da,             | 1990.296021 | 2 | 535.2860718 | 535.2855265 |
| DSSFQIVKNPR                          | Q61176 | 0          | n +34.06 Da,K +34.06 Da, | 1986.457764 | 2 | 679.9067993 | 679.9067965 |
| DPDVEPLETPLSHVLR                     | Q922Y1 | 0          | n +34.06 Da,             | 4083.693359 | 3 | 675.0219116 | 675.0233476 |
| MNGGGKAEKENTPSEANLQEEEV              | Q9WVB0 | 0.03047091 | n +42.03 Da,K +34.06 Da, | 1978.631348 | 3 | 909.7800293 | 909.7890723 |
| GGGGNFGPGPGSNFR                      | O88569 | 0          |                          | 1973.609741 | 2 | 703.3319092 | 703.3340103 |
| MEAKGGTVKAASGFNATEDAQLR              | P97429 | 0          | n +42.03 Da,K +34.06 Da, | 3150.281982 | 3 | 855.1199951 | 855.1200929 |
| DDEVVDVGTVEEDLGKSR                   | P08113 | 0          | n +34.06 Da,K +34.06 Da, | 2916.65625  | 2 | 1023.51001  | 1023.510937 |
| MEDSAPDAVAAPSGTPKSKLETLP             | Q8CHG3 | 0          | n +42.03 Da,K +34.06 Da, | 3113.005859 | 4 | 688.1199951 | 688.1232877 |
| EHIRLEEELAR                          | Q69ZU8 | 0.04221636 | n +34.06 Da,             | 1947.94104  | 2 | 758.4299927 | 758.4205416 |
| SGCSMGEYFR                           | Q03265 | 0          |                          | 2225.410889 | 2 | 597.2382813 | 597.2393438 |
| SRPPPTGKMPGAPEAAPGDGAGAGR            | P70336 | 0          | n +42.03 Da,K +34.06 Da, | 1966.762329 | 3 | 793.4099731 | 793.4079784 |
| DDEVVDVGTVEEDLGKSR                   | P08113 | 0          | n +34.06 Da,K +34.06 Da, | 3231.020508 | 2 | 1023.51001  | 1023.510937 |
| DEKEEDEEESPGQAKDEL                   | P14211 | 0.03047091 | n +34.06 Da,K +34.06 Da, | 1921.738403 | 3 | 727.0255737 | 727.0255596 |
| GGGGNFGPGPGSNFR                      | O88569 | 0          |                          | 1915.698486 | 2 | 689.3171997 | 689.3183603 |
| ASGSPPSQPPASGSGYVPGSVAAFVTCNPKVAKIAR | Q9CQ89 | 0          | n +42.03 Da,K +34.06 Da, | 3792.875732 | 3 | 1355.709961 | 1355.705605 |
| SETAPAAPAAPAPVEKTPVKK                | P43277 | 0          | n +42.03 Da,K +34.06 Da, | 1907.008911 | 2 | 1102.670044 | 1102.672918 |
| LENYPIPELGPNDVLLKMH                  | Q64442 | 0          | n +17.03 Da,K +34.06 Da, | 4179.175293 | 3 | 748.4199829 | 748.4170804 |
| PGVTVKDVNQQEFVR                      | Q9CZX8 | 0          | n +17.03 Da,K +34.06 Da, | 2247.564941 | 3 | 589.6731567 | 589.6722488 |
| PEMWELLQR                            | Q9CZN7 | 0.00162338 |                          | 3820.317871 | 2 | 601.3075562 | 601.3053437 |
| EEDEKEEDEEESPGQAKDEL                 | P14211 | 0          | n +34.06 Da,K +34.06 Da, | 1885.514648 | 3 | 813.0499878 | 813.0539557 |
| AQAPAKCPSYPGSGDGEMGKLR               | Q8K0C9 | 0          | n +42.03 Da,K +34.06 Da, | 2496.162354 | 3 | 796.4099731 | 796.4088087 |

|                             |        |            |                          |             |   |             |             |
|-----------------------------|--------|------------|--------------------------|-------------|---|-------------|-------------|
| PVVTLPLPLKPGPEGLR           | Q6P9Q6 | 0          | n +17.03 Da,K +34.06 Da, | 3577.200195 | 3 | 644.4099731 | 644.4153391 |
| GVTKGAAELMQQKEATTEQQLR      | O35490 | 0          | K +28.03 Da,             | 1881.609985 | 4 | 626.0999756 | 626.0902603 |
| EDEEDEKEEDEEESPGQAKDEL      | P14211 | 0          | n +34.06 Da,K +34.06 Da, | 2135.193848 | 3 | 894.4099731 | 894.4104685 |
| DDEVVDVGTVEEDLGKSR          | P08113 | 0          | n +34.06 Da,K +34.06 Da, | 1878.783569 | 3 | 682.6799927 | 682.6763835 |
| LRPGDCEVCISYLGR             | Q9CXI5 | 0          | n +34.06 Da,             | 3034.538574 | 3 | 610.3138428 | 610.3134096 |
| DDEVVDVGTVEEDLGKSR          | P08113 | 0          | n +34.06 Da,K +34.06 Da, | 1877.887817 | 4 | 512.2600098 | 512.2591068 |
| AEMKSPTKAEPATPAEAAQSDR      | Q7TPV4 | 0          | n +42.03 Da,K +34.06 Da, | 1877.454956 | 3 | 799.4194946 | 799.4181388 |
| MEGKVIYGEDYEKEFTPK          | P40936 | 0.00625    | n +42.03 Da,K +34.06 Da, | 3698.990967 | 3 | 788.75      | 788.7557981 |
| EIENLILNDPDFQHEDYNFLTR      | Q9R0H0 | 0          | n +14.02 Da,             | 4354.615723 | 3 | 917.1079712 | 917.108323  |
| PKVTQPEVDTPLR               | Q63880 | 0.03163686 | n +17.03 Da,K +34.06 Da, | 1874.106812 | 2 | 794.4699707 | 794.4699963 |
| AGVSDGSEVAKAQAAPGGASPTIFSR  | Q9D0S9 | 0          | n +42.03 Da,K +34.06 Da, | 3117.105713 | 3 | 890.4799805 | 890.4891738 |
| DGTGGDAAAPGAAGTQALPHR       | Q9D0F3 | 0          | n +34.06 Da,             | 1864.626221 | 3 | 685.3499756 | 685.3418508 |
| YFQGS LPAR                  | P52760 | 0.00765697 |                          | 1856.227051 | 2 | 519.7754517 | 519.7719936 |
| TAEMSSILEER                 | Q03265 | 0          |                          | 2566.251221 | 2 | 633.3099976 | 633.3057387 |
| PFDYNGPR                    | P08003 | 0.01043219 | n +14.02 Da,             | 1845.623657 | 2 | 490.2344666 | 490.2352439 |
| DQGGAPLAGTNKETTIQGLDGLSER   | Q91Y97 | 0.00470958 | n +34.06 Da,K +34.06 Da, | 3059.009277 | 3 | 866.1300049 | 866.1331674 |
| DDEVVDVGTVEEDLGKSR          | P08113 | 0          | n +34.06 Da,K +34.06 Da, | 1837.174683 | 3 | 682.6752319 | 682.6763835 |
| MEAKGGTVKAASGFNATEDAQTLR    | P97429 | 0          | n +42.03 Da,K +34.06 Da, | 2895.926025 | 3 | 855.1177368 | 855.1200929 |
| GGGGNFGPGPGSNFR             | O88569 | 0          |                          | 1956.361572 | 2 | 689.3200073 | 689.3183603 |
| DDEVVDVGTVEEDLGKSR          | P08113 | 0.00162338 | n +34.06 Da,K +34.06 Da, | 1831.062622 | 4 | 512.25      | 512.2591068 |
| QKTGTAEMSSILEER             | Q03265 | 0          | n +31.05 Da,             | 3124.328125 | 2 | 855.9448242 | 855.9406852 |
| ASGASDTPHHQSPSESPVQPVGVCMMR | A2AS89 | 0          |                          | 3154.104492 | 3 | 1060.469971 | 1060.481621 |
| QGGAPLAGTNKETTIQGLDGLSER    | Q91Y97 | 0          | n +34.06 Da,K +34.06 Da, | 2941.880371 | 3 | 827.789978  | 827.7908526 |
| PTNPGPGSGYWR                | E9PV24 | 0.00765697 | n +17.03 Da,             | 1920.405151 | 2 | 681.8300171 | 681.8336078 |
| MEAKGGTVKAASGFNATEDAQTLR    | P97429 | 0          | n +42.03 Da,K +34.06 Da, | 2695.450439 | 3 | 855.1199951 | 855.1200929 |
| MNYSAKDEVDDGGPAGPPGGAAKTR   | Q8VEK0 | 0          | n +42.03 Da,K +34.06 Da, | 2286.727539 | 3 | 819.4199829 | 819.4218831 |
| TDTEDKGEFLSEGGVVR           | E9PV24 | 0          | n +17.03 Da,K +34.06 Da, | 2021.325806 | 3 | 616.6470337 | 616.6463174 |
| PEPWSGVR                    | Q8BK48 | 0.02924791 | n +17.03 Da,             | 1785.724487 | 2 | 472.7535095 | 472.7535655 |
| VVVVAKTTR                   | Q8C5H8 | 0.01043219 | n +42.03 Da,K +34.06 Da, | 1784.550171 | 2 | 524.8599854 | 524.8505023 |
| LEPDMEEDDDQKAVKDEL          | P09103 | 0          | n +34.06 Da,K +34.06 Da, | 2941.659424 | 3 | 741.0499878 | 741.0474183 |
| ASGADSKGDDLSTAILKQKN        | Q01853 | 0          | n +42.03 Da,K +34.06 Da, | 2595.050293 | 3 | 721.7488403 | 721.7499234 |
| AAQESLHVKTPLR               | Q8VBT2 | 0          | n +42.03 Da,K +34.06 Da, | 2042.862183 | 3 | 509.3021851 | 509.3018267 |
| SIGVSNFNR                   | P70694 | 0.00314465 | n +34.06 Da,             | 1760.495728 | 2 | 514.2908325 | 514.2908091 |
| DSGAPIKIPVGPETLGR           | P56480 | 0          | n +34.06 Da,K +34.06 Da, | 3253.300049 | 3 | 592.3499756 | 592.3614522 |
| MEAKGGTVKAASGFNATEDAQTLR    | P97429 | 0          | n +42.03 Da,K +34.06 Da, | 2978.64624  | 3 | 855.1199951 | 855.1200929 |
| SYGRPPDVEGMTSLKVDNLTYR      | Q62093 | 0          | n +42.03 Da,K +34.06 Da, | 3763.668457 | 3 | 891.1246948 | 891.1251373 |
| GQVGDLSPPQQEALAR            | Q8R0F9 | 0          |                          | 2183.609375 | 2 | 848.9400024 | 848.9342868 |
| GGNFGFGDSR                  | O88569 | 0          | n +34.06 Da,             | 1742.118164 | 2 | 524.2600098 | 524.2569664 |
| SQAPDAPSGPGPTSNQLTHVDSAGR   | Q5RKZ7 | 0          | n +34.06 Da,             | 2117.519531 | 3 | 827.7399902 | 827.7440845 |
| AAAKAVLGPLVGAVDQGTSSTR      | Q64516 | 0          | n +42.03 Da,K +34.06 Da, | 3336.636719 | 3 | 769.791748  | 769.7937566 |

|                                               |        |            |                          |             |   |             |             |
|-----------------------------------------------|--------|------------|--------------------------|-------------|---|-------------|-------------|
| ASGASDTPHHQSPSESPVQPVGVGVCMMR                 | A2AS89 | 0          |                          | 3019.762451 | 3 | 1069.810059 | 1069.825387 |
| GVQVETISPGDGR                                 | P26883 | 0          | n +34.06 Da,             | 1829.342529 | 2 | 674.8699951 | 674.8676104 |
| DGTGGDAAAPGAAGTQAEPLHR                        | Q9D0F3 | 0          | n +31.05 Da,             | 1710.067261 | 3 | 684.3300171 | 684.3365478 |
| VSVVLGGDHS LAVGSISGH                          | Q61176 | 0          | n +14.02 Da,             | 3062.204346 | 3 | 602.3200073 | 602.3232502 |
| MKSPTKAEPATPAEAAQSDR                          | Q7TPV4 | 0          | n +42.03 Da,K +34.06 Da, | 1708.665039 | 3 | 732.7199707 | 732.7249027 |
| GPLVGAVDQGTSSSTR                              | Q64516 | 0          |                          | 1705.666016 | 2 | 722.8699951 | 722.8731661 |
| SRPPPTGKMPGAPEAAPGDGAGAGR                     | P70336 | 0          | n +42.03 Da,K +34.06 Da, | 2007.566528 | 3 | 793.4077759 | 793.4079784 |
| VGEALVSHPEVPLISFTGSQPTAER                     | Q8BH00 | 0          | n +42.03 Da,             | 4115.108887 | 3 | 888.4699707 | 888.4606964 |
| AGTTTTIEAVKR                                  | D3Z2H9 | 0          | n +42.03 Da,K +34.06 Da, | 1684.584351 | 2 | 611.8599854 | 611.8643389 |
| AGMQLQGYR                                     | P05202 | 0.00162338 | n +34.06 Da,             | 1683.037598 | 2 | 529.2800293 | 529.2872119 |
| AMNYSAKDEVGGPAGPPGGAATR                       | Q8VEK0 | 0          | n +42.03 Da,K +34.06 Da, | 2254.941406 | 4 | 632.5800171 | 632.57751   |
| DPFNP FELTNHAVLLVGYGR                         | P97821 | 0          | n +34.06 Da,             | 4593.34375  | 3 | 765.0800171 | 765.0777864 |
| DTQVHTEYSSLR                                  | P49429 | 0.00162338 | n +34.06 Da,             | 1675.125366 | 2 | 735.3699951 | 735.3758    |
| SQAPDAPSGPGPTSNQLTHVDSAGR                     | Q5RKZ7 | 0          | n +31.05 Da,             | 2455.358398 | 3 | 826.7299805 | 826.7387815 |
| ASGADSKGDDLSTAILKQK                           | Q01853 | 0          | n +42.03 Da,K +34.06 Da, | 2608.468994 | 3 | 683.7299805 | 683.735614  |
| KGLKESPVVPLAESELLAEILEEAR                     | Q9DBB8 | 0          | n +14.02 Da,K +28.03 Da, | 4762.014648 | 3 | 930.8800049 | 930.8669521 |
| SETAPAAPAAPAPAEKTPVK                          | P43274 | 0          | n +34.06 Da,K +34.06 Da, | 1658.1604   | 3 | 669.4055786 | 669.4054277 |
| PSFVSAMR                                      | Q8VCT4 | 0.03918919 | n +14.02 Da,             | 1702.118408 | 2 | 454.7357788 | 454.7365648 |
| ASGADSKGDDLSTAILKQK                           | Q01853 | 0          | n +42.03 Da,K +34.06 Da, | 2691.518066 | 3 | 683.7399902 | 683.735614  |
| EALGQATPGTSSGPGASSGPGGDHSELIVR                | D3YZT9 | 0          | n +34.06 Da,             | 3046.171631 | 3 | 942.8200073 | 942.8074138 |
| SEPEIPK GIR                                   | Q9WTP6 | 0.04941482 | n +42.03 Da,K +34.06 Da, | 2352.578613 | 2 | 601.3599854 | 601.3536069 |
| SETAPAAPAAPAPVEKTPVKK                         | P43277 | 0          | n +42.03 Da,K +34.06 Da, | 1922.613892 | 3 | 735.451416  | 735.4510372 |
| SNLKP DVEHCTGAGTGSPL EEEVR                    | Q8VC52 | 0          | n +42.03 Da,K +34.06 Da, | 2892.747559 | 3 | 886.7600098 | 886.7677902 |
| ASGADSKGDDLSTAILKQK                           | Q01853 | 0          | n +42.03 Da,K +34.06 Da, | 2732.719727 | 3 | 683.7399902 | 683.735614  |
| VKVG VNGFGR                                   | P16858 | 0.00162338 | n +34.06 Da,K +34.06 Da, | 1640.491699 | 3 | 367.5781555 | 367.5785603 |
| PSCLFPACR                                     | P16015 | 0.04336399 |                          | 2003.921875 | 2 | 554.2548828 | 554.2573389 |
| AAPAKGENLSLVVHGPGDIR                          | Q64442 | 0          | n +42.03 Da,K +34.06 Da, | 3111.344727 | 3 | 693.0592041 | 693.0586147 |
| KVISTTKAPAAIGPYSQAVQVDR                       | P52760 | 0.00162338 | n +14.02 Da,K +28.03 Da, | 3168.651367 | 3 | 824.1400146 | 824.1391168 |
| MWYTSTR                                       | Q80W22 | 0.04221636 | n +34.06 Da,             | 1636.343994 | 2 | 489.7490845 | 489.7499308 |
| AAPAKGENLSLVVHGPGDIR                          | Q64442 | 0.00162338 | n +42.03 Da,K +34.06 Da, | 3018.435059 | 3 | 693.0580444 | 693.0586147 |
| TVL T N T A P S K L P S N S V Y A G T V P S R | Q8VCF0 | 0          | n +34.06 Da,K +34.06 Da, | 2856.431152 | 3 | 843.4899902 | 843.4833597 |
| DHPIVETLR                                     | P11499 | 0.00765697 | n +34.06 Da,             | 1603.447144 | 2 | 557.3300171 | 557.3273917 |
| DAVAVTMGPKGR                                  | P63038 | 0.02657343 | n +34.06 Da,K +34.06 Da, | 1597.455688 | 2 | 635.3800049 | 635.3846423 |
| VSVVLGGDHS LAVGSISGH                          | Q61176 | 0.00314465 | n +42.03 Da,             | 3173.054932 | 3 | 611.6668701 | 611.6548885 |
| SPVTFMNFPEDTLEQKAGSVGR                        | Q8VCW8 | 0          | n +34.06 Da,K +34.06 Da, | 3949.575928 | 3 | 826.7700195 | 826.7705122 |
| ATIPAALQAQESTEGPGTGQDRPR                      | Q9DBG1 | 0          | n +14.02 Da,             | 2437.55957  | 3 | 822.4199829 | 822.4174906 |
| TDAAVSF AKDFLAGGVA A A I S K T A V A P I E R  | P51881 | 0.00162338 | n +42.03 Da,K +34.06 Da, | 4863.590332 | 3 | 1019.909973 | 1019.913372 |
| SIVVTN Y E E S I K M P I N E P A P G R        | P49429 | 0          | n +34.06 Da,K +34.06 Da, | 3631.868896 | 3 | 838.1300049 | 838.1299289 |
| AAAKKAVLGPLVGAVDQGTSSSTR                      | Q64516 | 0.01043219 | n +42.03 Da,K +34.06 Da, | 3243.630615 | 4 | 577.5999756 | 577.5971366 |
| AAAKKAVLGPLVGAVDQGTSSSTR                      | Q64516 | 0.00162338 | n +42.03 Da,K +34.06 Da, | 3346.687988 | 2 | 1154.186279 | 1154.186997 |

|                                |        |            |                          |             |   |             |             |
|--------------------------------|--------|------------|--------------------------|-------------|---|-------------|-------------|
| FNATEDAQLR                     | P97429 | 0          |                          | 1817.801636 | 2 | 633.2999878 | 633.3096698 |
| MKFNPFVTSDR                    | P61255 | 0.00162338 | n +34.06 Da,K +34.06 Da, | 2706.207764 | 3 | 470.6003723 | 470.6009254 |
| AGDLEGGKSLGSLLSGLAQNAFHGH      | Q8K4M5 | 0          | n +42.03 Da,K +34.06 Da, | 4553.833496 | 3 | 838.0999756 | 838.1049533 |
| EATQAVLDKPKETLSSDASTR          | P50544 | 0          | n +34.06 Da,K +34.06 Da, | 2267.350098 | 3 | 729.7299805 | 729.7307111 |
| TTFSTNYR                       | P05784 | 0.01188707 | n +34.06 Da,             | 1528.65564  | 2 | 512.2689819 | 512.2695425 |
| PESQGGEAQPPECKQAEDVSSSGPR      | Q6P9Q6 | 0.04138852 | n +17.03 Da,K +34.06 Da, | 1633.059937 | 3 | 893.4299927 | 893.4243525 |
| ASGADSKGDDLSTAILKQK            | Q01853 | 0          | n +42.03 Da,K +34.06 Da, | 2649.971436 | 3 | 683.7399902 | 683.735614  |
| PAEYDVSPETR                    | Q9CQC7 | 0          |                          | 1517.382202 | 2 | 632.2954102 | 632.2962283 |
| DDEVVDVDTVEEDLGKSR             | P08113 | 0          | n +34.06 Da,K +34.06 Da, | 2986.40332  | 3 | 682.6799927 | 682.6763835 |
| PIPGAKPLVPPELAPFVGR            | Q8BKX1 | 0          | n +17.03 Da,K +34.06 Da, | 4110.561523 | 3 | 701.7700195 | 701.7698935 |
| SAWNLENR                       | Q9DBJ1 | 0.04842932 | n +34.06 Da,             | 1752.647461 | 2 | 512.2739258 | 512.275159  |
| ASLKDLEGKWR                    | Q05816 | 0.00162338 | n +42.03 Da,K +34.06 Da, | 3169.011719 | 3 | 471.6211853 | 471.6226066 |
| DYLLHLPPEIVPATLR               | P63325 | 0          | n +42.03 Da,             | 4168.478516 | 3 | 592.6699829 | 592.6612028 |
| MEAKGGTVKAASGFNATEDAQLR        | P97429 | 0          | n +42.03 Da,K +34.06 Da, | 2772.921143 | 3 | 855.1199951 | 855.1200929 |
| AAAKKAVLGLPLVGAVDQGTSSSTR      | Q64516 | 0          | n +42.03 Da,K +34.06 Da, | 3377.340332 | 3 | 769.7932739 | 769.7937566 |
| PGGYGYGYGR                     | O89086 | 0          | n +14.02 Da,             | 1459.11853  | 2 | 530.7479248 | 530.745976  |
| EALGQATPGTSSGPGASSGPGGDHSELIVR | D3YZT9 | 0          | n +31.05 Da,             | 2878.955811 | 3 | 941.8200073 | 941.8021108 |
| ASGADSKGDDLSTAILKQK            | Q01853 | 0          | n +42.03 Da,K +34.06 Da, | 2567.796387 | 3 | 683.7345581 | 683.735614  |
| PTAAPYVFHDDPYLIPTSALESR        | Q14C51 | 0          | n +17.03 Da,             | 4052.588135 | 3 | 859.7600098 | 859.7726517 |
| ATAPQTQHVSPMR                  | P57776 | 0          | n +42.03 Da,             | 1446.389893 | 2 | 733.3699951 | 733.3644534 |
| LPESWDWR                       | P97821 | 0.02121641 | n +31.05 Da,             | 3238.810303 | 2 | 560.289978  | 560.2852301 |
| SDPTAVVDAQTKVIGVENLR           | Q8BJ64 | 0          | n +34.06 Da,K +34.06 Da, | 3405.905762 | 3 | 727.4216309 | 727.4234408 |
| SSDTEQPSPTSGGGKVAAVQPPEEGPSR   | Q8BGD9 | 0          | n +34.06 Da,K +34.06 Da, | 1971.977905 | 3 | 940.8099976 | 940.8142751 |
| HGLVNAGYR                      | Q99LB7 | 0.00314465 |                          | 1423.5177   | 2 | 507.7825012 | 507.77761   |
| TAEGEVTFKSILFVPTSAPR           | P08113 | 0          | n +34.06 Da,K +34.06 Da, | 3944.883301 | 3 | 740.0900269 | 740.0966648 |
| LSPTNCDASEPLAEKVLDLINKGR       | Q9ESB3 | 0          | n +42.03 Da,K +34.06 Da, | 4720.549805 | 3 | 917.505249  | 917.5058361 |
| MLQAEKLTSSSEKALANQFLAPGR       | Q9CQ56 | 0          | n +42.03 Da,K +34.06 Da, | 4360.162109 | 3 | 900.8400269 | 900.8390378 |
| AFKDTGKTPVEPEVAIHR             | P60867 | 0          | n +42.03 Da,K +34.06 Da, | 2466.058105 | 3 | 702.4038696 | 702.4057211 |
| MEAKGGTVKAASGFNATEDAQLR        | P97429 | 0          | n +42.03 Da,K +34.06 Da, | 3233.180908 | 3 | 855.1199951 | 855.1200929 |
| SETAPAAPAAPAPAEKTPVKK          | P43274 | 0          | n +42.03 Da,K +34.06 Da, | 1741.937988 | 3 | 726.1061401 | 726.1072705 |
| SPECFVR                        | P16460 | 0.03415301 | n +34.06 Da,             | 1372.421997 | 2 | 529.2628174 | 529.2634029 |
| SETAPAAPAAPAPAEKTPVKK          | P43274 | 0          | n +42.03 Da,K +34.06 Da, | 1701.14856  | 3 | 726.1099854 | 726.1072705 |
| DDEVVDVDTVEEDLGKSR             | P08113 | 0          | n +34.06 Da,K +34.06 Da, | 3096.29126  | 3 | 682.6799927 | 682.6763835 |
| MKSDASTSAAPLKGLVGPLR           | Q8BG15 | 0          | n +42.03 Da,K +34.06 Da, | 3312.61084  | 3 | 703.75      | 703.7506114 |
| PGFGNQGGFGNSR                  | Q921F2 | 0.00162338 | n +17.03 Da,             | 1598.862183 | 2 | 684.8200073 | 684.8263143 |
| PGTSSSQGYWR                    | Q99M87 | 0          | n +17.03 Da,             | 1353.794189 | 2 | 650.3104248 | 650.3099657 |
| EVEMDAVGKEGR                   | Q8C196 | 0.02121641 | n +42.03 Da,K +34.06 Da, | 1352.044189 | 2 | 698.3499756 | 698.3534788 |
| SPVTFMNFPEDTLEQKAGSVGR         | Q8VCW8 | 0          | n +34.06 Da,K +34.06 Da, | 3889.43335  | 3 | 826.7700195 | 826.7705122 |
| MRGQVGDLSPPQQEALAR             | Q8R0F9 | 0.03415301 | n +42.03 Da,             | 2521.33667  | 2 | 1013.51001  | 1013.510368 |
| PQPYEEQMR                      | Q9EQZ7 | 0.00314465 | n +42.03 Da,             | 1338.116333 | 2 | 610.2637939 | 610.274241  |



|                           |        |            |                          |             |   |             |             |
|---------------------------|--------|------------|--------------------------|-------------|---|-------------|-------------|
| PNSAIFGGAR                | Q9WUK2 | 0.01043219 | n +14.02 Da,             | 1336.589966 | 2 | 502.2689514 | 502.2696181 |
| DLGNVTAGKDGVANVSIEDR      | P08228 | 0          | n +34.06 Da,K +34.06 Da, | 2967.029541 | 3 | 700.0499878 | 700.0518957 |
| DGEHFCFTR                 | Q9CZS1 | 0.0147929  | n +34.06 Da,             | 2058.200439 | 2 | 601.7800293 | 601.7772089 |
| GGPLSGPYR                 | P16015 | 0.00765697 |                          | 1331.427246 | 2 | 466.2540283 | 466.2534365 |
| NKELDPVQKLFVDKIR          | P97450 | 0          | n +34.06 Da,K +34.06 Da, | 3685.58252  | 4 | 520.3499756 | 520.3465825 |
| DLKVLQPTIFPVVPR           | P41216 | 0          | n +34.06 Da,K +34.06 Da, | 4094.817627 | 3 | 597.3921509 | 597.3906826 |
| FFYSAAAFIDSALR            | Q8BK84 | 0.00314465 | n +17.03 Da,             | 1327.091919 | 2 | 798.4299927 | 798.4169737 |
| ASGVQVADEVCR              | Q9R0P5 | 0          | n +42.03 Da,             | 2661.743652 | 2 | 666.8099976 | 666.8142622 |
| LEEALPDMEEDDQKAVKDEL      | P09103 | 0          | n +34.06 Da,K +34.06 Da, | 3409.736328 | 3 | 888.4500122 | 888.4495406 |
| VSVVLGGDHS LAVGSISGH      | Q61176 | 0          | n +42.03 Da,             | 3712.78418  | 3 | 611.6559448 | 611.6548885 |
| SETAAPAAPAPVEKTPVKK       | P43277 | 0          | n +42.03 Da,K +34.06 Da, | 1882.042114 | 3 | 735.460022  | 735.4510372 |
| VGVPVGSDFQPELSGAGSR       | Q8CDN6 | 0          | n +34.06 Da,K +34.06 Da, | 2802.480469 | 3 | 756.4199829 | 756.4149454 |
| SAGFLQASASDVVVHGR         | Q8VCH0 | 0          | n +34.06 Da,             | 2976.50293  | 3 | 612         | 612.0058505 |
| VSMNTVDTSHEDMIHDAQMDYYGTR | Q9D1M0 | 0          | n +42.03 Da,             | 3680.803223 | 3 | 1019.77002  | 1019.772289 |
| DGHTFNYQTR                | Q8BHN3 | 0          | n +34.06 Da,             | 1297.478271 | 2 | 636.8099976 | 636.8126377 |
| SYIEKPKQTEAPQVTGPIEVPVVR  | Q9DCT8 | 0          | n +34.06 Da,K +34.06 Da, | 3649.717285 | 3 | 923.5200195 | 923.5217032 |
| ASGVAVSDGVIKVFNDMKVR      | P18760 | 0          | n +42.03 Da,K +34.06 Da, | 4073.4646   | 3 | 734.7600098 | 734.7577661 |
| QGNDFGTQYR                | Q9D6Y7 | 0          |                          | 1286.399292 | 2 | 593.269165  | 593.2678046 |
| ADEIAKAQVAQPGGDTIFGKIIR   | P70349 | 0          | n +42.03 Da,K +34.06 Da, | 3956.813965 | 4 | 627.8599854 | 627.8668814 |
| CGDFYNSGDR                | Q91VA0 | 0.00162338 | n +34.06 Da,             | 1285.091187 | 2 | 612.7600098 | 612.7617564 |
| AAQGYGYR                  | Q9D1F9 | 0          | n +34.06 Da,             | 1282.060303 | 2 | 541.7772217 | 541.7775345 |
| GGNFGFGDSR                | O88569 | 0.01881331 |                          | 1651.946289 | 2 | 507.2249451 | 507.2254079 |
| DPTALMTDPKYIHWSPVCR       | P11352 | 0          | n +34.06 Da,K +34.06 Da, | 4328.558105 | 4 | 583.5700073 | 583.5682616 |
| DDEVVDVGTVEEDLGKSR        | P08113 | 0          | n +17.03 Da,K +34.06 Da, | 2939.182129 | 3 | 677         | 676.9991972 |
| AGLNSLEAVKR               | Q6IRU2 | 0.01603499 | n +42.03 Da,K +34.06 Da, | 2574.921631 | 2 | 617.3699951 | 617.3723309 |
| PAINEYLQR                 | Q9QXD6 | 0.01603499 | n +17.03 Da,             | 2189.481934 | 2 | 560.8092651 | 560.8116122 |
| VNQQEFVR                  | Q9CZX8 | 0.02121641 | n +34.06 Da,             | 1242.28894  | 2 | 527.2977295 | 527.2986341 |
| PLVGAVDQGTSSSTR           | Q64516 | 0.00765697 |                          | 1459.009033 | 2 | 694.3599854 | 694.362434  |
| GSNWGESGYFR               | P97821 | 0          | n +34.06 Da,             | 2672.835938 | 2 | 647.3067017 | 647.3071881 |
| IHTQPPPPPIPEVVATWEAISLGR  | Q8BGA8 | 0          | n +31.05 Da,             | 4840.178223 | 3 | 879.5       | 879.4918191 |
| DDEVVDVGTVEEDLGKSR        | P08113 | 0          | n +34.06 Da,K +34.06 Da, | 3301.038818 | 3 | 682.6757813 | 682.6763835 |
| DGTGGDAAAPGAAGTQALPHR     | Q9D0F3 | 0          | n +34.06 Da,             | 1917.289063 | 3 | 685.3428345 | 685.3418508 |
| TLNLNAINR                 | Q91Y97 | 0.01881331 | n +34.06 Da,             | 2230.368408 | 2 | 531.8278809 | 531.8275587 |
| SSYFVEWIPNNVKTAVCDIPPR    | P68372 | 0          | n +34.06 Da,K +34.06 Da, | 4235.089355 | 3 | 887.4799805 | 887.47744   |
| AVPIAQKSEPPQSLNEALMR      | Q9JIQ3 | 0          | n +34.06 Da,K +34.06 Da, | 2729.466797 | 3 | 746.4199829 | 746.4246758 |
| STSVPGQHNWTR              | Q8BT51 | 0          | n +42.03 Da,             | 1787.915161 | 2 | 706.3397217 | 706.3392929 |
| VSVVLGGDHS LAVGSISGH      | Q61176 | 0          |                          | 3084.211182 | 3 | 606.9979858 | 606.9951335 |
| DQGGAPLAGTNKETTIQGLDGLSER | Q91Y97 | 0          | n +34.06 Da,K +34.06 Da, | 3258.056885 | 3 | 866.1300049 | 866.1331674 |
| PVAATMCIGPEGDLHGVPPECAVR  | O35490 | 0          | n +31.05 Da,             | 2743.880371 | 3 | 874.4199829 | 874.4276161 |
| DNIQGITKPAIR              | P62806 | 0          | n +42.03 Da,K +34.06 Da, | 2170.775635 | 3 | 467.9473877 | 467.9472722 |

|                                  |        |            |                          |             |   |             |             |
|----------------------------------|--------|------------|--------------------------|-------------|---|-------------|-------------|
| MCHPSVDGFTPR                     | Q8C196 | 0          | n +42.03 Da,             | 2347.514893 | 2 | 723.3190308 | 723.3186571 |
| HSAQELAGSR                       | P54869 | 0.01603499 |                          | 1127.252075 | 2 | 542.2819214 | 542.2807146 |
| ALKQISSNR                        | Q9R0P3 | 0.04221636 | n +42.03 Da,K +34.06 Da, | 1355.338989 | 2 | 546.8300171 | 546.8328413 |
| DDEVVDVDTVEEDLGKSR               | P08113 | 0          | n +17.03 Da,K +34.06 Da, | 2884.258545 | 3 | 677         | 676.9991972 |
| YSEYWEGAR                        | Q05920 | 0.0238764  | n +34.06 Da,             | 2091.287842 | 2 | 597.7800293 | 597.7855571 |
| PGGFGNQGGFGNSR                   | Q921F2 | 0          | n +17.03 Da,             | 1639.382324 | 2 | 684.8259277 | 684.8263143 |
| DGPMCMHDNQGGAPNYYPNSFSAPEQQR     | P24270 | 0          | n +42.03 Da,             | 3384.203369 | 3 | 1070.780029 | 1070.774804 |
| ALKQISSNR                        | Q9R0P3 | 0.04221636 | n +42.03 Da,K +34.06 Da, | 1395.931152 | 2 | 546.8328857 | 546.8328413 |
| PVVAPSIVPLKDEVDR                 | Q99LI7 | 0          | n +17.03 Da,K +34.06 Da, | 3586.531982 | 3 | 628.7192993 | 628.7190877 |
| MVEGFFDR                         | P26443 | 0.01043219 |                          | 2752.884521 | 2 | 500.7321472 | 500.7314799 |
| SGQGAFGNMCR                      | Q9D8E6 | 0          |                          | 1264.129639 | 2 | 592.75      | 592.7504099 |
| SQYGWSGNMER                      | P08113 | 0.00162338 | n +34.06 Da,             | 2130.79541  | 2 | 674.8099976 | 674.8117806 |
| DDEVVDVDTVEEDLGKSR               | P08113 | 0          | n +34.06 Da,K +34.06 Da, | 3472.921875 | 3 | 682.6774292 | 682.6763835 |
| SGQGAFGNMCR                      | Q9D8E6 | 0          |                          | 1390.192139 | 2 | 606.765564  | 606.7660599 |
| PFDYNGPR                         | P08003 | 0.01043219 | n +14.02 Da,             | 1886.687744 | 2 | 490.2357788 | 490.2352439 |
| PKVTQPEVDTPGGR                   | Q63880 | 0          | n +17.03 Da,K +34.06 Da, | 1883.116699 | 3 | 529.9828491 | 529.982423  |
| DDEVVDVDTVEEDLGKSR               | P08113 | 0          | n +34.06 Da,K +34.06 Da, | 3259.978271 | 3 | 682.677002  | 682.6763835 |
| ASGGGVPTDEEQATGLER               | P19536 | 0          | n +14.02 Da,             | 2053.500977 | 2 | 894.4199829 | 894.4239498 |
| PSGTFVQCDAR                      | Q9Z2U1 | 0.00162338 |                          | 1089.208008 | 2 | 619.289978  | 619.2851401 |
| YRPGTVALR                        | P02301 | 0.00916031 | n +14.02 Da,             | 1137.841187 | 3 | 349.5415039 | 349.541699  |
| DGTGGDAAAPGAAGTQALPHR            | Q9D0F3 | 0          | n +17.03 Da,             | 1743.999634 | 3 | 679.6699829 | 679.6646645 |
| AAPTASKAASLGCNNKPAFPELDFR        | D32742 | 0          | n +42.03 Da,K +34.06 Da, | 3738.474854 | 3 | 915.1599731 | 915.1551374 |
| AQDQGEKENPMR                     | Q9CXW4 | 0          | n +42.03 Da,K +34.06 Da, | 1176.624268 | 2 | 739.8580933 | 739.8594598 |
| KVISTTKAPAAIGPYSQAVQVDR          | P52760 | 0          | n +14.02 Da,K +28.03 Da, | 3045.386475 | 3 | 824.1500244 | 824.1391168 |
| PLLAHMQLPPEIMPTVIDEYLDNGSDESATR  | Q63880 | 0          |                          | 4531.672363 | 3 | 1160.900024 | 1160.905702 |
| SAHLQWMVVR                       | P41105 | 0          | n +42.03 Da,             | 3393.729004 | 2 | 634.8307495 | 634.8320597 |
| PAEYDVSPETR                      | Q9CQC7 | 0          |                          | 1476.921143 | 2 | 632.2941895 | 632.2962283 |
| SPAVAAAAATTTATTTTTSGGHPLEFLR     | P54728 | 0          | n +34.06 Da,             | 3463.837891 | 3 | 912.4873047 | 912.4856115 |
| GNFGGSPGYGGGR                    | O88569 | 0          | n +34.06 Da,             | 1258.264893 | 2 | 608.7999878 | 608.7995301 |
| SNLKPVEHCTGAGTGSPLLEEVDR         | Q8VC52 | 0          | n +42.03 Da,K +34.06 Da, | 2540.92627  | 3 | 886.7700195 | 886.7677902 |
| ASKPTLNEVVIVSAIR                 | Q8QZT1 | 0          | n +34.06 Da,K +34.06 Da, | 3183.088135 | 3 | 589.0499878 | 589.0454639 |
| AVGSISGHAR                       | Q61176 | 0.03163686 |                          | 1694.424927 | 2 | 491.7742615 | 491.7750675 |
| LMSQPLAYHTPDCGKQGFIDLPEFPFGLLEPR | O35490 | 0.01043219 | n +42.03 Da,K +34.06 Da, | 4806.584473 | 4 | 909.960022  | 909.9574093 |
| PFVELETNLPASRIPAGLENR            | O35215 | 0          | n +17.03 Da,             | 3850.321533 | 3 | 780.7600098 | 780.7621979 |
| WCAVSSIR                         | Q8C196 | 0.04941482 | n +34.06 Da,             | 1896.061768 | 2 | 506.7770691 | 506.7764799 |
| AVPPTYADLGKSR                    | Q60932 | 0          | n +42.03 Da,K +34.06 Da, | 2778.615479 | 2 | 761.4284058 | 761.4278352 |
| PPFVAYPHLR                       | P43024 | 0          | n +14.02 Da,             | 3368.365479 | 2 | 605.8328857 | 605.8402103 |
| DEPEALGGPTHASPVLLEVR             | Q3U7R1 | 0          | n +34.06 Da,             | 2936.509766 | 3 | 702.3699951 | 702.3743803 |
| NVHYENYR                         | O55131 | 0.04032258 |                          | 1027.772217 | 2 | 547.7459717 | 547.7543325 |
| AMNYSAKDEVDDGGPAGPPGGAATR        | Q8VEK0 | 0          | n +42.03 Da,K +34.06 Da, | 2335.932373 | 3 | 843.1049194 | 843.1009212 |

|                               |        |            |                          |             |   |             |             |
|-------------------------------|--------|------------|--------------------------|-------------|---|-------------|-------------|
| GCALNFFR                      | Q9DCJ5 | 0.02121641 | n +34.06 Da,             | 3052.091553 | 2 | 509.770752  | 509.7711974 |
| TIQDSYWKEVAR                  | Q7TN89 | 0.03799186 | n +34.06 Da,K +34.06 Da, | 1000.952942 | 3 | 521.9699707 | 521.9649213 |
| DVQKSTSPAPADVAPAQEDLR         | P97855 | 0          | n +34.06 Da,K +34.06 Da, | 2248.11084  | 3 | 755.0800171 | 755.0782221 |
| PAFTPATGTPVLGGLSYR            | Q61176 | 0          |                          | 3778.128418 | 2 | 902.9846191 | 902.983248  |
| SNWGESGYFR                    | P97821 | 0.04941482 | n +34.06 Da,             | 2667.916748 | 2 | 618.7949219 | 618.7964561 |
| PETVSTDFDECDKLYFEELSLER       | Q8C196 | 0          | n +17.03 Da,K +34.06 Da, | 4165.305664 | 3 | 958.4500122 | 958.460181  |
| AAIVDMVPGKPMCVESFDYPPLGR      | P10126 | 0          | n +34.06 Da,K +34.06 Da, | 4197.443848 | 4 | 701.8699951 | 701.8668671 |
| SNKSDVIVVGGGIGSMAAAKLLH       | Q8BW75 | 0          | n +42.03 Da,K +34.06 Da, | 3989.553223 | 3 | 778.789978  | 778.7877256 |
| VNQQEFVR                      | Q9CZ8  | 0.02121641 |                          | 1031.527954 | 2 | 510.2678528 | 510.2670756 |
| PVAATMCIGPEGDLHGVPPECAVR      | O35490 | 0          |                          | 3040.000977 | 3 | 873.4099731 | 873.4223134 |
| PTGTYHGSDSLQLDR               | P99024 | 0.02121641 |                          | 1678.097778 | 3 | 558.928894  | 558.9287889 |
| DGGFVFALEKR                   | O35490 | 0          | n +34.06 Da,K +34.06 Da, | 3521.631592 | 2 | 653.8922119 | 653.8931574 |
| GGNFGPGPGSNFR                 | O88569 | 0          | n +34.06 Da,             | 1963.024536 | 2 | 649.3300171 | 649.3284547 |
| ASGADSKGDDLSTAILKQK           | Q01853 | 0          | n +42.03 Da,K +34.06 Da, | 2260.972168 | 3 | 683.7399902 | 683.735614  |
| EDFSLNDALDSSNSMQTVQKTTTR      | P05784 | 0          | n +34.06 Da,K +34.06 Da, | 3566.306641 | 3 | 919.460022  | 919.4608443 |
| SSVAVLTQESFAEHR               | Q8VDJ3 | 0          | n +42.03 Da,             | 3482.827637 | 2 | 851.9268188 | 851.9233878 |
| VRPASSAASVYAGAGGSGSR          | P05784 | 0          | n +14.02 Da,             | 1371.459961 | 3 | 607.977356  | 607.9782541 |
| DSSFQIVKNPR                   | Q61176 | 0          | n +34.06 Da,K +34.06 Da, | 1964.126465 | 3 | 453.6071167 | 453.6069565 |
| VLTGGGNPIGDKLNIMTAGSR         | P24270 | 0          | n +34.06 Da,K +34.06 Da, | 3367.286133 | 3 | 747.4285889 | 747.4283088 |
| GEDFSLNDALDSSNSMQTVQKTTTR     | P05784 | 0          | n +34.06 Da,K +34.06 Da, | 3469.465332 | 3 | 938.460022  | 938.467999  |
| AHYHDNYGKNDEVEFVR             | P25688 | 0          | n +42.03 Da,K +34.06 Da, | 2329.582764 | 4 | 543.0136719 | 543.0106663 |
| MEGKVYIGGEDYEKEFTPDK          | P40936 | 0          | n +42.03 Da,K +34.06 Da, | 3731.643311 | 3 | 827.0999756 | 827.0981128 |
| HNYVTAIR                      | Q92111 | 0.02121641 |                          | 1588.90979  | 2 | 501.279541  | 501.2799856 |
| GQSVMVPEGTTVLQACEKVGMIQIPR    | Q91VD9 | 0          | n +34.06 Da,K +34.06 Da, | 3875.446777 | 3 | 928.5       | 928.5011513 |
| SPAVAAAAATTTATTTTTSGGHLEFLR   | P54728 | 0.00314465 | n +34.06 Da,             | 3427.369141 | 3 | 912.4699707 | 912.4856115 |
| TDAAVSFAKDFLAGVAAAISKTAVAPIER | P51881 | 0          | n +42.03 Da,K +34.06 Da, | 4580.824219 | 4 | 765.1900024 | 765.186848  |
| AGKPVLYHFDGR                  | P30115 | 0.02924791 | n +42.03 Da,K +34.06 Da, | 2519.602051 | 3 | 479.2681885 | 479.2683455 |
| TEADVNPAYPLADAHLTK            | Q9D0T1 | 0          | n +42.03 Da,K +34.06 Da, | 3039.672363 | 3 | 722.0692749 | 722.0688864 |
| LFTVTTSLSPWPPVVDASFKV         | Q6ZPR5 | 0.02121641 | K +28.03 Da,             | 4510.44873  | 4 | 649.6199951 | 649.608183  |
| PTVNWSNER                     | Q8R050 | 0          | n +17.03 Da,             | 1382.002441 | 2 | 560.2830811 | 560.2832191 |
| MCHPSVDGFTPR                  | Q8C196 | 0          | n +42.03 Da,             | 2523.675537 | 2 | 723.3173218 | 723.3186571 |
| PTLTDDEINR                    | Q922D8 | 0.00162338 |                          | 1567.94519  | 2 | 637.8099976 | 637.8147854 |
| SSYFVEWIPNNVKTAVCDIPPR        | P68372 | 0.00162338 | n +34.06 Da,K +34.06 Da, | 4311.581055 | 3 | 887.4699707 | 887.47744   |
| PETITWQR                      | Q922D8 | 0.03542234 | n +17.03 Da,             | 1867.439575 | 2 | 524.2800293 | 524.2852301 |
| DDEVVDVGTVEEDLGKSR            | P08113 | 0          | n +17.03 Da,K +34.06 Da, | 3093.281738 | 3 | 677.0006104 | 676.9991972 |
| MNLSAAHHQISLSD                | Q8VXC1 | 0.02121641 | n +42.03 Da,             | 3099.828613 | 2 | 783.3712158 | 783.372476  |
| DDEVVDVGTVEEDLGKSR            | P08113 | 0          | n +34.06 Da,K +34.06 Da, | 3188.974854 | 2 | 1023.51001  | 1023.510937 |
| PAYKGQILTMANPIINGGAPDTTAR     | Q8C196 | 0          | n +34.06 Da,K +34.06 Da, | 3021.199707 | 3 | 899.1599731 | 899.1672657 |
| PLDLVALAEQVQKADEFIR           | Q5EBG8 | 0          | n +17.03 Da,K +34.06 Da, | 4696.977051 | 3 | 736.0900269 | 736.0949949 |
| DQDEIDCLPLAKQPSFR             | P16675 | 0          | n +34.06 Da,K +34.06 Da, | 3650.922852 | 3 | 719.7144775 | 719.7142262 |

|                                     |        |            |                          |             |   |             |             |
|-------------------------------------|--------|------------|--------------------------|-------------|---|-------------|-------------|
| TAASSSSLEKSYELPDGQVITIGNER          | P60710 | 0.00625    | n +34.06 Da,K +34.06 Da, | 3457.171875 | 3 | 940.8399658 | 940.8347875 |
| GGNFGFGDSR                          | O88569 | 0          |                          | 1745.455566 | 2 | 521.2399902 | 521.2410579 |
| WEGVNMER                            | Q921G7 | 0.00314465 |                          | 2015.116943 | 2 | 524.744812  | 524.7476614 |
| GPGFYTR                             | Q8BMS1 | 0.02121641 | n +34.06 Da,             | 1152.181519 | 2 | 466.7557678 | 466.7560704 |
| TVSGAQEMVSSSVSSAKETVATR             | Q9DBG5 | 0          | n +34.06 Da,K +34.06 Da, | 3097.58252  | 3 | 794.0999756 | 794.0935438 |
| GPLLVDVVFTDEMAHFDR                  | P24270 | 0          | n +42.03 Da,             | 4795.075684 | 3 | 744.3699951 | 744.3648983 |
| ATAASSSSLEKSYELPDGQVITIGNER         | P60710 | 0          | n +34.06 Da,K +34.06 Da, | 3514.793945 | 3 | 964.5100098 | 964.5138256 |
| AAAKKAVLGPLVGAVDQGTSSSTR            | Q64516 | 0          | n +42.03 Da,K +34.06 Da, | 3012.47998  | 3 | 769.793335  | 769.7937566 |
| SQAEFDKAAEEVKR                      | P31786 | 0          | n +42.03 Da,K +34.06 Da, | 2621.146484 | 2 | 859.4699707 | 859.4732303 |
| ATVNHTNCNTASPAALAEAKTSGGLR          | Q3TVI4 | 0          | n +42.03 Da,K +34.06 Da, | 2498.304688 | 3 | 916.1199951 | 916.126089  |
| APVAGKKAKKGILR                      | O35490 | 0          | n +34.06 Da,K +34.06 Da, | 1693.23645  | 4 | 434.8299866 | 434.8305984 |
| SYPADDYESEAAYPDYPGDYDMHTGDPKQDLAYER | Q8QZY1 | 0          | n +42.03 Da,K +34.06 Da, | 4126.936523 | 4 | 1089.469971 | 1089.465614 |
| APVAGKKAKKGILR                      | O35490 | 0          | n +34.06 Da,K +34.06 Da, | 1850.572021 | 5 | 348.0700073 | 348.065934  |
| APVAGKKAKKGILR                      | O35490 | 0.00162338 | n +34.06 Da,K +34.06 Da, | 1665.983765 | 5 | 348.0700073 | 348.065934  |
| APVAGKKAKKGILR                      | O35490 | 0          | n +34.06 Da,K +34.06 Da, | 1707.548096 | 5 | 348.0700073 | 348.065934  |
| VPPVQVSPLIKFGR                      | Q06185 | 0          | n +34.06 Da,K +34.06 Da, | 5053.554199 | 3 | 535.6907349 | 535.6889511 |
| PSKGPLQSVQVFGR                      | P14131 | 0          | n +17.03 Da,K +34.06 Da, | 5053.483398 | 3 | 517.6486206 | 517.6473743 |
| PAPATTFAHLDATTVLSR                  | P56480 | 0          | n +17.03 Da,             | 5052.719238 | 3 | 629.3448486 | 629.3442029 |
| ATSASSHLNKGIKQMY                    | P15105 | 0          | n +42.03 Da,K +34.06 Da, | 5052.609863 | 3 | 616.0106812 | 616.0103138 |
| AGKPVLYHFDGR                        | P30115 | 0.00049213 | n +42.03 Da,K +34.06 Da, | 5029.905273 | 3 | 479.2689209 | 479.2683455 |
| DPAIYFKEQLDGDWATNR                  | P14211 | 0.00049213 | n +42.03 Da,K +28.03 Da, | 5020.927734 | 3 | 786.0599976 | 786.0463344 |
| DPNFFKMVEGFFDR                      | P26443 | 0          | n +34.06 Da,K +34.06 Da, | 5016.219238 | 2 | 908.9699707 | 908.9718112 |
| KTVMDLAVVLFETATLR                   | P08113 | 0          | n +34.06 Da,K +34.06 Da, | 5002.608887 | 3 | 659.0684204 | 659.069281  |
| PLPPLPEYGGKVR                       | Q9CQQ7 | 0          | n +17.03 Da,K +34.06 Da, | 5053.845215 | 3 | 491.9747925 | 491.9731986 |
| SQAEFDKAAEEVKR                      | P31786 | 0          | n +42.03 Da,K +34.06 Da, | 4992.165039 | 3 | 573.3178711 | 573.3179124 |
| DPNFFKMVEGFFDR                      | P26443 | 0.00049213 | n +34.06 Da,K +34.06 Da, | 4981.004395 | 3 | 606.3170166 | 606.3169663 |
| SQAEFDKAAEEVKR                      | P31786 | 0.00225734 | n +42.03 Da,K +34.06 Da, | 4951.544434 | 3 | 573.3200073 | 573.3179124 |
| AGKPVLYHFDGR                        | P30115 | 0.03932179 | n +42.03 Da,K +34.06 Da, | 4945.29541  | 3 | 479.2688293 | 479.2683455 |
| ASGVAVSDGVIKVFNDMKVR                | P18760 | 0.00181242 | n +42.03 Da,K +34.06 Da, | 4927.776367 | 3 | 734.7580566 | 734.7577661 |
| MDVNTALQEVLTALIHDLGLAR              | P63323 | 0.00181242 | n +42.03 Da,K +34.06 Da, | 4893.52002  | 3 | 828.789978  | 828.794951  |
| SQAEFDKAAEEVKR                      | P31786 | 0.00749064 | n +42.03 Da,K +34.06 Da, | 4869.382813 | 3 | 573.3179321 | 573.3179124 |
| NPASMFVDVHKRIHEYKR                  | Q8CI94 | 0.03172261 | n +31.05 Da,K +31.05 Da, | 4862.46875  | 3 | 763.75      | 763.7547604 |
| PNFFKMVEGFFDR                       | P26443 | 0          | n +17.03 Da,K +34.06 Da, | 4839.744141 | 3 | 562.2999878 | 562.2974652 |
| SAGFLQASASDVVVVHGR                  | Q8VCHO | 0.01909855 | n +34.06 Da,             | 4820.834473 | 3 | 612.005127  | 612.0058505 |
| AGKPVLYHFDGR                        | P30115 | 0.00049213 | n +42.03 Da,K +34.06 Da, | 4799.145508 | 3 | 479.2689514 | 479.2683455 |
| GTADEMYKALLEVLGR                    | Q99KB8 | 0          | n +34.06 Da,K +34.06 Da, | 4745.768555 | 3 | 612.0200195 | 612.0186978 |
| PSELEKALSNIIDVYHNY                  | P27005 | 0.01005632 | n +17.03 Da,K +34.06 Da, | 4739.856934 | 2 | 1078.589966 | 1078.578462 |
| AKDLDELLDEVETKFCR                   | Q3UJP5 | 0.00049213 | n +42.03 Da,K +34.06 Da, | 4738.710938 | 3 | 731.0599976 | 731.0577703 |
| GSASGTTLLEALDCILPPTRPDKPLR          | P10126 | 0          | n +17.03 Da,K +34.06 Da, | 4707.679199 | 3 | 977.5300293 | 977.546254  |
| LMFNDFLSSSSDKQNNLYKGLEAFR           | P54869 | 0          | n +42.03 Da,K +34.06 Da, | 4714.09082  | 3 | 1012.190002 | 1012.192029 |

|                                 |        |            |                          |             |   |             |             |
|---------------------------------|--------|------------|--------------------------|-------------|---|-------------|-------------|
| PIHLSFDVDGLDPAFTPATGTPVLGGLSYR  | Q61176 | 0          | n +14.02 Da,             | 4695.717285 | 3 | 1043.209961 | 1043.208149 |
| LSPTNCDASEPLAEKVLDLINKGR        | Q9ESB3 | 0          | n +42.03 Da,K +34.06 Da, | 4685.217285 | 3 | 917.5       | 917.5058361 |
| MKLPIFIADAFTATAFR               | Q9CXN7 | 0          | n +34.06 Da,K +34.06 Da, | 4675.150391 | 3 | 661.0595093 | 661.0587159 |
| MKLPIFIADAFTATAFR               | Q9CXN7 | 0          | n +34.06 Da,K +34.06 Da, | 4715.624512 | 3 | 661.0587769 | 661.0587159 |
| MKLPIFIADAFTATAFR               | Q9CXN7 | 0.00181242 | n +34.06 Da,K +34.06 Da, | 4672.338379 | 4 | 496.0499878 | 496.0458561 |
| MTAMDNASKNASDMIDKLTTLTFNR       | Q91VR2 | 0          | n +42.03 Da,K +34.06 Da, | 4664.891602 | 3 | 933.4899902 | 933.4767833 |
| TDAAVSFAKDFLAGVAAAISKTAVAPIER   | P51881 | 0.01694263 | n +34.06 Da,K +34.06 Da, | 4651.193848 | 4 | 763.2009888 | 763.199986  |
| AVWPTLVDINSLDSLTEAYKLR          | Q9R0H0 | 0          | n +34.06 Da,K +34.06 Da, | 4643.354492 | 3 | 858.1599731 | 858.1601054 |
| GKAIPDLTAPVAAVQAAVSNLVR         | Q64727 | 0          | n +34.06 Da,K +34.06 Da, | 4634.472656 | 3 | 777.1500244 | 777.14613   |
| RREQEKKKRRTR                    | P22858 | 0.00939926 | n +31.05 Da,K +31.05 Da, | 4623.844727 | 3 | 588.7199707 | 588.7186378 |
| MKLPIFIADAFTATAFR               | Q9CXN7 | 0          | n +34.06 Da,K +34.06 Da, | 4675.261719 | 2 | 991.0842896 | 991.0844356 |
| SASFFKFLTEELSLDQDR              | O35215 | 0.01120897 | n +34.06 Da,K +34.06 Da, | 4609.39502  | 3 | 734.4000244 | 734.3968917 |
| CGKQGFIDLPEFPFGLR               | O35490 | 0.03138848 | n +42.03 Da,K +28.03 Da, | 4605.73584  | 4 | 570.0300293 | 570.0397729 |
| NINPSTANAPKCQELALR              | P46938 | 0.03567528 | n +17.03 Da,K +34.06 Da, | 4599.553711 | 3 | 683.3748779 | 683.3775076 |
| DPFNPFLTINHAVLLVGYGR            | P97821 | 0          | n +34.06 Da,             | 4587.007813 | 3 | 765.083313  | 765.0777864 |
| IVPLQGAQMLQMLEKSLR              | Q91XE0 | 0          | n +34.06 Da,K +34.06 Da, | 4571.21582  | 3 | 708.4284058 | 708.4287034 |
| DLTDYLMKILTER                   | P60710 | 0          | n +42.03 Da,K +34.06 Da, | 4754.744141 | 3 | 562.9785156 | 562.9780213 |
| GLLIAGGPGNPAQAQLIQNVKKILESDR    | Q8C196 | 0          | n +34.06 Da,K +34.06 Da, | 4572.583008 | 4 | 771.9799805 | 771.9802653 |
| DLTDYLMKILTER                   | P60710 | 0          | n +42.03 Da,K +34.06 Da, | 4834.430664 | 3 | 562.9699707 | 562.9780213 |
| IVPLQGAQMLQMLEKSLR              | Q91XE0 | 0          | n +34.06 Da,K +34.06 Da, | 4550.688965 | 2 | 1062.141113 | 1062.139417 |
| HGGEDYVFSLLTGYCEPPTGVSLR        | Q9D0M3 | 0          |                          | 4547.023438 | 3 | 894.7600098 | 894.7671319 |
| PVDFNGYWKMLSNENFEEYLR           | Q00915 | 0.04394427 | n +34.06 Da,K +34.06 Da, | 4545.099609 | 3 | 907.1099854 | 907.1214336 |
| IPLHFENIPLLYEIAENR              | Q8BWQ1 | 0          |                          | 4541.537598 | 3 | 813.7700195 | 813.768801  |
| PNFFKMVEGFFDR                   | P26443 | 0          | n +17.03 Da,K +34.06 Da, | 4540.39209  | 3 | 562.2999878 | 562.2974652 |
| DFLGDSWGILFSHPR                 | O08709 | 0          | n +34.06 Da,             | 4536.996094 | 3 | 594.3131714 | 594.312503  |
| IVPLQGAQMLQMLEKSLR              | Q91XE0 | 0          | n +34.06 Da,K +34.06 Da, | 4530.15918  | 3 | 708.4293823 | 708.4287034 |
| LGTQLAPIIQEFFHSEQYR             | Q78JT3 | 0          | n +34.06 Da,             | 4524.032227 | 3 | 771.0800171 | 771.0813081 |
| PGLTAFEPEALGNLVEGMDFHR          | Q6PHZ2 | 0          | n +17.03 Da,             | 4521.782715 | 3 | 806.4099731 | 806.4037934 |
| DPAIYFKEQFLDGDWNTNR             | P14211 | 0          | n +34.06 Da,K +34.06 Da, | 4511.194824 | 3 | 785.4099731 | 785.4077907 |
| SAGFLQASASDVVVVHGR              | Q8VCH0 | 0          | n +34.06 Da,             | 4507.639648 | 3 | 612.0100098 | 612.0058505 |
| AVWPTLVDINSLDSLTEAYKLR          | Q9R0H0 | 0          | n +34.06 Da,K +34.06 Da, | 4500.397949 | 3 | 858.1599731 | 858.1601054 |
| DASEPLAEKVLDLINKGR              | Q9ESB3 | 0          | n +17.03 Da,K +34.06 Da, | 4485.26416  | 3 | 685.0700073 | 685.0827958 |
| AATLAGLAGLAAAAGFHVQR            | P36552 | 0          | n +34.06 Da,             | 4482.741699 | 3 | 634.0371704 | 634.0373732 |
| MNVEHEVNLLVEIHR                 | Q4KML4 | 0          | n +42.03 Da,             | 4433.945801 | 3 | 668.3425903 | 668.3386832 |
| VHLTDAEKAASVCLWGKVNSEVGGALGR    | P02088 | 0          | n +17.03 Da,K +34.06 Da, | 4430.990234 | 4 | 814.2000122 | 814.1884689 |
| ANKAPSQMERSITTIIDTFHQYSR        | P31725 | 0.04457917 | n +42.03 Da,K +34.06 Da, | 4419.597168 | 4 | 718.3699951 | 718.3724035 |
| LTSDSQSGIMLSSVGTSKCNSPACVEARARR | P56974 | 0.03363803 | n +42.03 Da,K +28.03 Da, | 4410.823242 | 3 | 1132.560059 | 1132.553668 |
| AAAAVVPAEWIKNWEKSGR             | B1AZI6 | 0          | n +42.03 Da,K +34.06 Da, | 4405.021973 | 3 | 764.7745361 | 764.7760369 |
| GFEEMKELGVGLALR                 | Q05816 | 0          | n +34.06 Da,K +34.06 Da, | 4401.41748  | 3 | 627.3599854 | 627.3589428 |
| ELDPGVVDNFPLLKALR               | P30115 | 0          | n +34.06 Da,K +34.06 Da, | 4397.42041  | 3 | 655.4000244 | 655.399907  |

|                                         |        |            |                          |             |   |             |             |
|-----------------------------------------|--------|------------|--------------------------|-------------|---|-------------|-------------|
| MKIAVIGQSLFGQEVYQCQLR                   | Q8R0Y6 | 0          | n +34.06 Da,K +34.06 Da, | 4397.200684 | 3 | 803.4400024 | 803.4536891 |
| AAQESLHVKTPLR                           | Q8VBT2 | 0          | n +42.03 Da,K +34.06 Da, | 4460.981445 | 3 | 509.3022461 | 509.3018267 |
| SQAEFDKAAEEVKR                          | P31786 | 0          | n +42.03 Da,K +34.06 Da, | 4396.979004 | 3 | 573.3179321 | 573.3179124 |
| STLLIHPQYAWLQDLGLR                      | Q9DBF1 | 0          | n +42.03 Da,             | 4395.607422 | 2 | 1152.116455 | 1152.1184   |
| ASGVAVSDGVIKVFNDMKVR                    | P18760 | 0          | n +42.03 Da,K +34.06 Da, | 4391.393555 | 3 | 734.7600098 | 734.7577661 |
| DPAIYFKEQFLDGDWNTNR                     | P14211 | 0          | n +34.06 Da,K +34.06 Da, | 4384.54541  | 4 | 589.3081055 | 589.3076622 |
| DPAIYFKEQFLDGDWNTNR                     | P14211 | 0          | n +34.06 Da,K +34.06 Da, | 4384.361816 | 3 | 785.4078369 | 785.4077907 |
| SVADLAESIMKNLR                          | P06151 | 0          | n +34.06 Da,K +34.06 Da, | 4356.187988 | 3 | 538.9899902 | 538.9888496 |
| GKQGFDLPEFPFGLR                         | O35490 | 0          | n +34.06 Da,K +34.06 Da, | 4349.691895 | 3 | 705.7299805 | 705.7351784 |
| MNDFGTVNEIYKTYFQGSLLPAR                 | P52760 | 0          | n +34.06 Da,K +34.06 Da, | 4349.59375  | 3 | 873.789978  | 873.7897952 |
| PTVNLDKLWTLVSEQTR                       | P14115 | 0          | n +17.03 Da,K +34.06 Da, | 4344.925781 | 3 | 684.4000244 | 684.3967851 |
| DPAIYFKEQFLDGDWNTNR                     | P14211 | 0          | n +34.06 Da,K +34.06 Da, | 4343.942383 | 3 | 785.4099731 | 785.4077907 |
| AAVSFAKDFLAGGVAAAISKTAVAPIER            | P51881 | 0          | n +34.06 Da,K +34.06 Da, | 4340.550293 | 4 | 709.1799927 | 709.1813301 |
| EIENLILNDPDFQHEDYNFLR                   | Q9R0H0 | 0          | n +31.05 Da,             | 4340.149414 | 3 | 922.789978  | 922.785509  |
| VHLTDAEKSAVSLWAKVNPDEVGGEALGR           | P02089 | 0          | n +42.03 Da,K +34.06 Da, | 4407.645508 | 4 | 830.4400024 | 830.4410457 |
| MELGELLYNKSEYIETASGNKVS                 | Q9QZB9 | 0          | n +42.03 Da,K +34.06 Da, | 4335.46875  | 3 | 947.8383789 | 947.8373632 |
| ASGVAVSDGVIKVFNDMKVR                    | P18760 | 0          | n +42.03 Da,K +34.06 Da, | 4320.87207  | 3 | 734.7600098 | 734.7577661 |
| APAIIFIDELDAIAPKR                       | Q01853 | 0          | n +34.06 Da,K +34.06 Da, | 4315.479492 | 3 | 641.0621948 | 641.0646357 |
| TSASTPVFGGILSLINEHR                     | O89023 | 0.00049213 | n +34.06 Da,             | 4306.521973 | 3 | 678.3800049 | 678.3794653 |
| STLLIHPQYAWLQDLGLR                      | Q9DBF1 | 0          | n +42.03 Da,             | 4489.373535 | 3 | 768.4099731 | 768.4146918 |
| DPAIYFKEQFLDGDWNTNR                     | P14211 | 0          | n +34.06 Da,K +34.06 Da, | 4302.905273 | 3 | 785.4043579 | 785.4077907 |
| AGQAFRKFPLFDR                           | Q64433 | 0.00049213 | n +42.03 Da,K +34.06 Da, | 4297.13916  | 3 | 581.3300171 | 581.3368711 |
| LDWDVFTQHIEGAINR                        | Q99LB7 | 0          | n +34.06 Da,             | 4293.121582 | 3 | 650.0082397 | 650.0093722 |
| LDPGVVDNFPLLKALR                        | P30115 | 0          | n +34.06 Da,K +34.06 Da, | 4352.237305 | 3 | 612.3864136 | 612.3857089 |
| DLPALPGGPAGGTGELAKYGLPGVAQLR            | O08600 | 0          | n +34.06 Da,K +34.06 Da, | 4285.453613 | 3 | 915.1900024 | 915.1974422 |
| SSKMMVNSVEGCADDALAGLVASNPDLQLLQGH       | Q8VC30 | 0.00049213 | n +42.03 Da,K +34.06 Da, | 4281.754395 | 4 | 923.4799805 | 923.4858221 |
| ASGVAVSDGVIKVFNDMKVR                    | P18760 | 0          | n +42.03 Da,K +34.06 Da, | 4279.118164 | 3 | 734.7559814 | 734.7577661 |
| TSSLYGCLASLLSHSAQELAGSR                 | P54869 | 0          |                          | 4449.89502  | 3 | 858.4199829 | 858.4307425 |
| APDNAVQLLGELMNQSHR                      | Q68FH4 | 0.00049213 | n +34.06 Da,             | 4287.19043  | 3 | 676.3599854 | 676.3565548 |
| TLSEESYKDSTLIMQLLR                      | P62259 | 0          | n +34.06 Da,K +34.06 Da, | 4243.519531 | 3 | 732.4099731 | 732.4136654 |
| VLFDELDSIAKAR                           | Q01853 | 0          | n +34.06 Da,K +34.06 Da, | 4222.564453 | 3 | 564.6713257 | 564.6716264 |
| IPIHNEDITYDELVLMMQR                     | B8JJG6 | 0.0159409  | n +14.02 Da,             | 4218.663574 | 3 | 782.0499878 | 782.06071   |
| SAGFLQASASDVVVHGR                       | Q8VCH0 | 0          | n +34.06 Da,             | 4449.674316 | 3 | 612.0100098 | 612.0058505 |
| SKAMGIMNSFVNDIFER                       | P10853 | 0          | n +34.06 Da,K +34.06 Da, | 4356.29834  | 3 | 676.3625488 | 676.3623588 |
| GLILMGGQTALNCGVELFKR                    | Q8C196 | 0          | n +34.06 Da,K +34.06 Da, | 4204.491211 | 3 | 768.1099854 | 768.1064007 |
| ITYPAGFMDVISIDKTGENFR                   | P62702 | 0          | n +34.06 Da,K +34.06 Da, | 4228.536621 | 3 | 814.7732544 | 814.7718528 |
| PLVPPQLTIKDFYMTDSISR                    | Q91VD9 | 0          | n +17.03 Da,K +34.06 Da, | 4200.119629 | 3 | 791.4483032 | 791.4434069 |
| ASGVAVSDGVIKVFNDMKVR                    | P18760 | 0          | n +42.03 Da,K +34.06 Da, | 4198.491699 | 3 | 734.7578125 | 734.7577661 |
| ASEAIKGAVVGIDLGTTNSCVAVMEGKQAKVLENAEGAR | P38647 | 0          | n +42.03 Da,K +34.06 Da, | 4195.415039 | 4 | 1022.809998 | 1022.810836 |
| FDEC DKLYFEELSLE                        | Q8C196 | 0          | n +17.03 Da,K +34.06 Da, | 4191.081543 | 2 | 1072.540039 | 1072.527581 |

|                                    |        |            |                          |             |   |             |             |
|------------------------------------|--------|------------|--------------------------|-------------|---|-------------|-------------|
| SAGFLQASASDVVVHGR                  | Q8VCHO | 0          | n +34.06 Da,             | 4231.272949 | 3 | 612.0058594 | 612.0058505 |
| SMEDALKAADTIGYVPMIR                | Q8C196 | 0          | n +34.06 Da,K +34.06 Da, | 4184.001465 | 3 | 717.0599976 | 717.0604572 |
| PNAGPFADLPLSPVTIKR                 | P15116 | 0          | n +17.03 Da,K +34.06 Da, | 4179.964355 | 3 | 697.7473755 | 697.7456368 |
| MKIAVIGQSLFGQEVYQCRLR              | Q8R0Y6 | 0          | n +34.06 Da,K +34.06 Da, | 4178.364746 | 3 | 803.4598389 | 803.4536891 |
| PFTQNLGLEELGIELDPKGR               | O08749 | 0          | n +17.03 Da,K +34.06 Da, | 4177.221191 | 3 | 759.7600098 | 759.7619045 |
| LSAAATSAVPAPNHQPEVFCNQIFINNEWHDVSR | P47738 | 0.02728972 | n +31.05 Da,             | 4175.952637 | 4 | 981.2299805 | 981.2339469 |
| GDIKNFLYAWCGKR                     | O70133 | 0          | n +42.03 Da,K +34.06 Da, | 4172.370605 | 3 | 613.3400269 | 613.3399937 |
| ASGVTVNDEVIKVFNDMKVR               | P45591 | 0          | n +42.03 Da,K +34.06 Da, | 4167.022461 | 3 | 777.7700195 | 777.7719642 |
| DINKFLWMVR                         | P46978 | 0          | n +34.06 Da,K +34.06 Da, | 4165.794434 | 3 | 463.9515076 | 463.9497771 |
| PPADVAIELKAVFTDR                   | Q8VED9 | 0          | n +17.03 Da,K +34.06 Da, | 4159.100098 | 3 | 598.3540039 | 598.3525162 |
| SPASHEIATNLGDFAIISLYR              | P07758 | 0          | n +34.06 Da,             | 4157.746094 | 3 | 732.7202759 | 732.72178   |
| KGVGTLAVVLGTFGASWLPFAIYC           | Q6YNI2 | 0.0477538  | n +31.05 Da,             | 4157.442383 | 3 | 853.4699707 | 853.4678459 |
| SLGQWLQEEKVPPIYGVDR                | Q8C196 | 0          | n +34.06 Da,K +34.06 Da, | 4155.808594 | 3 | 786.4400024 | 786.4427239 |
| DEATIIDLTKR                        | P10107 | 0          | n +34.06 Da,K +34.06 Da, | 4153.303223 | 3 | 485.9763489 | 485.9733053 |
| DLITDLLNEAKQR                      | P50518 | 0          | n +34.06 Da,K +34.06 Da, | 4448.533691 | 3 | 532.9899902 | 532.9912477 |
| AILEDLVFPSEIVGKR                   | P62082 | 0          | n +34.06 Da,K +34.06 Da, | 4151.572754 | 3 | 618.7175293 | 618.717236  |
| PSKEVEEYKAFYKSF                    | P08113 | 0.00181242 | n +42.03 Da,K +34.06 Da, | 4139.753906 | 3 | 747.4000244 | 747.4001201 |
| SDKLPYKVADIGLAAWGR                 | P50247 | 0          | n +42.03 Da,K +34.06 Da, | 4135.10498  | 2 | 1035.610107 | 1035.604579 |
| TEDQTAEFKEAFQLFDR                  | Q60605 | 0          | n +34.06 Da,K +34.06 Da, | 4231.163086 | 3 | 715.0365601 | 715.0374749 |
| STLLIHPQYAWLQDLGLR                 | Q9DBF1 | 0.02159091 | n +42.03 Da,             | 4336.237793 | 3 | 768.4099731 | 768.4146918 |
| PPRLFTLPLHHYLEVSGGSLR              | Q505F5 | 0.0129768  |                          | 4125.546387 | 3 | 842.4699707 | 842.461425  |
| FKVDQEIIMNIIQER                    | Q9DCS9 | 0.00049213 | n +34.06 Da,K +34.06 Da, | 4118.479492 | 3 | 611.0200195 | 611.0188091 |
| AFDFKDVTLGSLVLR                    | Q9R0H0 | 0          | n +34.06 Da,K +34.06 Da, | 4148.297852 | 3 | 565         | 565.0033761 |
| CSEDEVIKNLILVVR                    | Q68FD5 | 0          | n +34.06 Da,K +34.06 Da, | 4112.522949 | 3 | 576.0200195 | 576.0237828 |
| LLNKLADLMER                        | O35945 | 0          | n +42.03 Da,K +34.06 Da, | 4104.614746 | 3 | 464.6099854 | 464.6094915 |
| SEESYKDSTLIMQLLR                   | P62259 | 0          | n +34.06 Da,K +34.06 Da, | 4101.114746 | 3 | 661.0367432 | 661.0364175 |
| DGSIDLVINLPNNNTKVFHDNYVIR          | Q8C196 | 0          | n +42.03 Da,K +34.06 Da, | 4102.436035 | 4 | 737.4000244 | 737.3937646 |
| SAGFLQASASDVVVHGR                  | Q8VCHO | 0          | n +34.06 Da,             | 4610.54248  | 3 | 612         | 612.0058505 |
| TQGIISAFSTIMSVHR                   | Q9DB20 | 0          | n +34.06 Da,             | 4091.725098 | 3 | 594.6660156 | 594.664548  |
| AKVAVLGASGGIGQPLSLLKNSPLVSR        | P08249 | 0          | n +34.06 Da,K +34.06 Da, | 4335.57666  | 4 | 712.7116699 | 712.711526  |
| TEFIDELEMLCQKR                     | P50431 | 0          | n +34.06 Da,K +34.06 Da, | 4108.823242 | 3 | 627.3410034 | 627.3358097 |
| FFDRDDVALEGVGHFFR                  | P29391 | 0.00049213 |                          | 4434.055176 | 3 | 685.666748  | 685.6742829 |
| DWVIPPINLPENSRGPFPPQLVLR           | P15116 | 0.00590468 | n +34.06 Da,             | 4429.956055 | 3 | 903.1657715 | 903.1641431 |
| FSLADAINTEFKNTR                    | P20152 | 0          | n +34.06 Da,K +34.06 Da, | 4086.498047 | 3 | 599.0068359 | 599.0055571 |
| ASGVTVNDEVIKVFNDMKVR               | P45591 | 0          | n +42.03 Da,K +34.06 Da, | 4082.569824 | 4 | 583.5800171 | 583.5807922 |
| CEAYLVGLFEDTNLCAIHAQR              | P68433 | 0          | n +42.03 Da,K +34.06 Da, | 4548.168945 | 3 | 852.7700195 | 852.7647745 |
| GPFTPDLAHPVADVGTVAEKEGWPLDIR       | Q99KI0 | 0          | n +34.06 Da,K +34.06 Da, | 4246.13916  | 4 | 764.6697388 | 764.6685566 |
| DHGDALFVDVDPNDSSFQIVKNPR           | Q61176 | 0          | n +42.03 Da,K +34.06 Da, | 4068.768799 | 3 | 882.7800293 | 882.78388   |
| GVDLLADAVAVTMGPKGR                 | P63038 | 0          | n +34.06 Da,K +34.06 Da, | 4145.587891 | 3 | 613.3599854 | 613.3662088 |
| SLAPGHVADFLVADFR                   | P97328 | 0          | n +34.06 Da,             | 4064.809326 | 3 | 583.6599731 | 583.6562697 |

|                                    |        |            |                          |             |   |             |             |
|------------------------------------|--------|------------|--------------------------|-------------|---|-------------|-------------|
| GLILMGGQTALNCGVELFKR               | Q8C196 | 0          | n +34.06 Da,K +34.06 Da, | 4186.646484 | 4 | 576.3301392 | 576.3316197 |
| AGQAFRKFPLFLDR                     | Q64433 | 0          | n +42.03 Da,K +34.06 Da, | 4054.766113 | 3 | 581.3400269 | 581.3368711 |
| AVTIQVLNQLIQKIR                    | Q9EQH3 | 0          | n +34.06 Da,K +34.06 Da, | 4319.247559 | 3 | 602.4099731 | 602.4051033 |
| DLAFVDVPNDSSFQIVKNPR               | Q61176 | 0          | n +34.06 Da,K +34.06 Da, | 4045.118164 | 3 | 777.0999756 | 777.0989572 |
| FGTVNEIYKTYFQGSPLAR                | P52760 | 0          | n +34.06 Da,K +34.06 Da, | 4042.131836 | 3 | 753.756958  | 753.7530094 |
| SAKVSDAISTQYPVVDHEFDVAVVVGAGGAGLR  | Q8K2B3 | 0          | n +34.06 Da,K +34.06 Da, | 4040.758545 | 3 | 1095.26001  | 1095.257979 |
| SGEDEQQEQTIAEDLVVTKYKMGGDIANR      | P50580 | 0          | n +42.03 Da,K +34.06 Da, | 4148.001953 | 4 | 834.4299927 | 834.4240562 |
| TTGIVMDSGDGVTHTVPIYEGYALPHAILR     | P60710 | 0          | n +34.06 Da,             | 4039.488281 | 4 | 805.1699829 | 805.1748184 |
| MLSLDFLDDVRR                       | Q9R0P6 | 0          | n +34.06 Da,             | 4038.451172 | 3 | 505.2792053 | 505.2800342 |
| YVWDRMLGGFKHKNFR                   | Q80TV8 | 0.02962963 | n +31.05 Da,K +31.05 Da, | 4065.677979 | 2 | 1058.569946 | 1058.577916 |
| PLILEEQLTADEKLIR                   | Q60759 | 0          | n +17.03 Da,K +34.06 Da, | 4021.286621 | 2 | 966.5858765 | 966.5855583 |
| MESSTSSSGSALGAVDPQLQHFIETQKQR      | Q9WVA2 | 0          | n +42.03 Da,K +34.06 Da, | 4319.4375   | 4 | 856.6845703 | 856.6781887 |
| PDQLLKELPFPLNTR                    | Q78JT3 | 0          | n +17.03 Da,K +34.06 Da, | 4018.611328 | 3 | 611.3687744 | 611.3682776 |
| DATLMLPTQTISQGAIEKVKDATR           | Q8C196 | 0          | n +34.06 Da,K +34.06 Da, | 4015.546143 | 4 | 673.1500244 | 673.1467932 |
| PLILEEQLTADEKLIR                   | Q60759 | 0          | n +17.03 Da,K +34.06 Da, | 4013.778076 | 3 | 644.7282715 | 644.726131  |
| AFVGGFLSQLVSDKPLTECIR              | P55264 | 0          | n +34.06 Da,K +34.06 Da, | 4342.842285 | 4 | 602.0900269 | 602.093801  |
| AMEKNLNQALLDLHALGSAR               | P29391 | 0.00306883 | n +17.03 Da,K +34.06 Da, | 4007.022461 | 3 | 739.4099731 | 739.4195954 |
| ASAKVSDAISTQYPVVDHEFDVAVVVGAGGAGLR | Q8K2B3 | 0.00590468 | n +34.06 Da,K +34.06 Da, | 4006.57959  | 4 | 839.460022  | 839.4545818 |
| PAGDWSTFPWLKSR                     | Q8R1G2 | 0          | n +17.03 Da,K +34.06 Da, | 4006.069824 | 3 | 590.6588745 | 590.6580507 |
| SGPVVAMVWVWGLNVVKTGR               | P15532 | 0          | n +34.06 Da,K +34.06 Da, | 4307.414551 | 3 | 689.7399902 | 689.7400463 |
| NLQALFVALNDQVFEIR                  | Q9JLN9 | 0.0201751  | n +14.02 Da,             | 3998.366455 | 3 | 668.6973267 | 668.70195   |
| ASGVAVSDGVIKVFNDMKVR               | P18760 | 0          | n +42.03 Da,K +34.06 Da, | 3997.161133 | 3 | 734.7591553 | 734.7577661 |
| PGVVDNFPLLKALR                     | P30115 | 0          | n +17.03 Da,K +34.06 Da, | 3992.691162 | 3 | 530.6721802 | 530.6715198 |
| PAETLYDVLHDIYR                     | Q9JMD3 | 0          | n +17.03 Da,             | 4294.727539 | 3 | 617.6500244 | 617.6492921 |
| DPSKTNVSGGAIALGHPLGGSGSR           | Q8BWT1 | 0.00096665 | n +31.05 Da,             | 4650.099121 | 2 | 1133.609985 | 1133.601065 |
| DLKVLQPTIFPVVPR                    | P41216 | 0          | n +34.06 Da,K +34.06 Da, | 4088.202637 | 3 | 597.3900146 | 597.3906826 |
| TDFDECDKLYFEELSLEIR                | Q8C196 | 0          | n +34.06 Da,K +34.06 Da, | 4113.072266 | 3 | 793.0599976 | 793.056207  |
| SATFIGNSTAIQELFKR                  | P68372 | 0.00049213 | n +34.06 Da,K +34.06 Da, | 3981.119385 | 3 | 651.0499878 | 651.0476449 |
| AKVAVLGASGGIGQPLSLLKNSPLVSR        | P08249 | 0          | n +34.06 Da,K +34.06 Da, | 4326.166504 | 3 | 949.9483643 | 949.9462759 |
| AGSNVMQTFTFYASEDKLENR              | O35490 | 0          | n +42.03 Da,K +34.06 Da, | 3977.068848 | 3 | 828.7456665 | 828.7356498 |
| ADKMDMSLDDIILNLR                   | O08583 | 0          | n +42.03 Da,K +34.06 Da, | 4188.419434 | 3 | 663.3599854 | 663.3657691 |
| STTSYGLTGAVFAQDKAIVQEATR           | Q8CHT0 | 0          | n +34.06 Da,K +34.06 Da, | 3957.732666 | 3 | 861.4699707 | 861.474753  |
| PALALLSDYVLHNSNTMR                 | Q8VDM4 | 0          | n +17.03 Da,             | 4049.670898 | 3 | 678.0200195 | 678.0279976 |
| PDVDEPLETPLSHVLGR                  | Q922Y1 | 0          | n +14.02 Da,             | 3954.709229 | 3 | 630         | 629.9985439 |
| SLVIPEKFQHILR                      | P62270 | 0          | n +42.03 Da,K +34.06 Da, | 3952.944092 | 3 | 552.6752319 | 552.6733718 |
| ASAKVSDAISTQYPVVDHEFDVAVVVGAGGAGLR | Q8K2B3 | 0          | n +42.03 Da,K +28.03 Da, | 3950.650391 | 4 | 839.9500122 | 839.9334896 |
| SAKAISEQTGKELLYKYIC                | Q91V92 | 0          | n +42.03 Da,K +34.06 Da, | 4071.349854 | 3 | 782.789978  | 782.7873209 |
| TSYGLTGAVFAQDKAIVQEATR             | Q8CHT0 | 0          | n +34.06 Da,K +34.06 Da, | 3947.842773 | 3 | 798.7800293 | 798.7815169 |
| MFVQEEKIFAGKVLR                    | Q8VDI7 | 0          | n +42.03 Da,K +34.06 Da, | 4184.51416  | 3 | 635.710022  | 635.7149492 |
| PEKIPSPFDLGFPER                    | Q9CR61 | 0.00049213 | n +17.03 Da,K +34.06 Da, | 3936.939697 | 3 | 626.3499756 | 626.3525162 |



|                                    |        |            |                          |             |   |             |             |
|------------------------------------|--------|------------|--------------------------|-------------|---|-------------|-------------|
| VVGDHADDVYSVFGAPILR                | Q91WU0 | 0          | n +34.06 Da,             | 4014.573242 | 3 | 688.710022  | 688.703949  |
| AGEVVIGDGGFVFALEKR                 | O35490 | 0          | n +34.06 Da,K +34.06 Da, | 3979.514404 | 3 | 644.7142334 | 644.7123736 |
| VTVVLAFKVTDPGR                     | D3Z6L3 | 0.03932179 | n +31.05 Da,             | 3924.19873  | 3 | 511.6551514 | 511.6451529 |
| LVDADFVKDVTLGSVLGR                 | Q9R0H0 | 0          | n +34.06 Da,K +34.06 Da, | 4370.165039 | 3 | 674.0499878 | 674.0631837 |
| AIYFKEQFLDGDWATNR                  | P14211 | 0          | n +34.06 Da,K +34.06 Da, | 3922.656006 | 2 | 1071.569946 | 1071.568194 |
| SHELSDFGLESTTGEVPPVAIR             | P27773 | 0          | n +34.06 Da,             | 3919.379395 | 3 | 793.0900269 | 793.0867882 |
| TIGKEIDLVLDR                       | P05213 | 0          | n +34.06 Da,K +34.06 Da, | 4243.62793  | 3 | 518.3300171 | 518.3363551 |
| SYGRPPDVEGMTSLKVDNLTYR             | Q62093 | 0.00788382 | n +42.03 Da,K +34.06 Da, | 3918.184814 | 3 | 891.1300049 | 891.1251373 |
| VMQLKFKTIEEVVGR                    | P47738 | 0.00181242 | n +42.03 Da,K +34.06 Da, | 4141.605957 | 3 | 667.4000244 | 667.413159  |
| SSRADSLEAEPPLPPPPPPPGESVLVPTSPRYR  | Q8CBH7 | 0.00049213 |                          | 3916.969971 | 3 | 1238.969971 | 1238.987853 |
| SKQQPTQFINPETPGYVGFANLPNQVHR       | P42208 | 0          | n +42.03 Da,K +34.06 Da, | 3916.528809 | 4 | 811.6699829 | 811.6744085 |
| SKQQPTQFINPETPGYVGFANLPNQVHR       | P42208 | 0          | n +42.03 Da,K +34.06 Da, | 3914.356201 | 3 | 1081.900024 | 1081.896786 |
| ASGVAVSDGVIKVFNDMKVR               | P18760 | 0.01798011 | n +42.03 Da,K +34.06 Da, | 4616.836914 | 3 | 734.7600098 | 734.7577661 |
| EEASQSLLFVDIPSKIICR                | Q64374 | 0          | n +34.06 Da,K +34.06 Da, | 4165.694336 | 3 | 758.43396   | 758.4330598 |
| SVVSLSQPKMDELQLFR                  | Q01853 | 0          | n +34.06 Da,K +34.06 Da, | 3934.935303 | 3 | 682.4000244 | 682.396057  |
| HTPDCGKQGFIDLPEFPFGLER             | O35490 | 0          | n +42.03 Da,K +34.06 Da, | 4416.555176 | 3 | 911.789978  | 911.7899773 |
| TEFLAAPSSYYKLLR                    | P49429 | 0          | n +34.06 Da,K +34.06 Da, | 3911.26123  | 3 | 609.6900024 | 609.6944312 |
| PGVVDNFPLLKALR                     | P30115 | 0          | n +17.03 Da,K +34.06 Da, | 3911.19043  | 3 | 530.6713257 | 530.6715198 |
| SLNEGYAKDFDPAINEYLQR               | Q9QXD6 | 0          | n +34.06 Da,K +34.06 Da, | 3909.242676 | 3 | 804.4199829 | 804.4219888 |
| ASGVAVSDGVIKVFNDMKVR               | P18760 | 0          | n +42.03 Da,K +34.06 Da, | 3903.650391 | 3 | 734.7631226 | 734.7577661 |
| PLPPLPEYGGKVR                      | Q9CQQ7 | 0.00049213 | n +17.03 Da,K +34.06 Da, | 4461.418945 | 3 | 491.97229   | 491.9731986 |
| PGVVDNFPLLKALR                     | P30115 | 0          | n +17.03 Da,K +34.06 Da, | 3952.396729 | 3 | 530.6697998 | 530.6715198 |
| SSRADSLEAEPPLPPPPPPPGESVLVPTSPRYR  | Q8CBH7 | 0.00939926 |                          | 3895.049805 | 4 | 929.4799805 | 929.4927088 |
| AFQDLLNLVGSNGR                     | E9Q6M5 | 0          | n +34.06 Da,             | 3894.938965 | 3 | 520.9615479 | 520.9616929 |
| PSFLTQDIHLGVNESLTDTR               | P11725 | 0.02159091 | n +17.03 Da,             | 3894.260742 | 3 | 811.4199829 | 811.4203896 |
| ATELDISHSFGSLDELSE                 | E9PV24 | 0          | n +34.06 Da,             | 3891.401611 | 3 | 743.039978  | 743.0360937 |
| METDVTSDTVEVLPQHKFDLR              | Q80XL6 | 0          | n +42.03 Da,K +34.06 Da, | 3888.634521 | 3 | 846.0999756 | 846.0985882 |
| TEEYIDGALSGHLGEVLIR                | P62307 | 0          | n +34.06 Da,             | 3987.212891 | 3 | 702.7199707 | 702.714514  |
| KENTLNQLVGAAGAAGQR                 | Q9EQ20 | 0          | n +34.06 Da,K +34.06 Da, | 3881.16748  | 3 | 671.7199707 | 671.721932  |
| TFVSITPAEVGLVVGKDR                 | P62962 | 0          | n +34.06 Da,K +34.06 Da, | 4038.592773 | 3 | 652.7299805 | 652.7315454 |
| ILEDLVFPSEIVGKR                    | P62082 | 0          | n +34.06 Da,K +34.06 Da, | 3877.759277 | 3 | 595.039978  | 595.0381979 |
| AAATSAPVAPNHHQPEVFCNQIFINNEWHDAVSR | P47738 | 0          | n +34.06 Da,             | 3876.992676 | 4 | 931.960022  | 931.9589008 |
| MDLVKSHLMYAVR                      | P62500 | 0          | n +42.03 Da,K +34.06 Da, | 3902.729736 | 3 | 546.9735718 | 546.9688025 |
| ALLRGVFIVAARK                      | Q8BWT1 | 0          | n +42.03 Da,K +34.06 Da, | 3961.744141 | 3 | 497.3302917 | 497.3311684 |
| PQEPIMKEEIFGPVLTYYVYVDDKYR         | Q8CHT0 | 0          | n +34.06 Da,K +34.06 Da, | 4058.099854 | 3 | 1076.920044 | 1076.929852 |
| VVIGDGGFVFALEKR                    | O35490 | 0          | n +34.06 Da,K +34.06 Da, | 3871.235596 | 3 | 559.0100098 | 559.0119828 |
| PGVVDNFPLLKALR                     | P30115 | 0          | n +17.03 Da,K +34.06 Da, | 3870.501709 | 3 | 530.6699829 | 530.6715198 |
| MSLDDIILNR                         | O08583 | 0.00049213 | n +34.06 Da,K +34.06 Da, | 3870.360352 | 3 | 462.6192322 | 462.6200971 |
| MNFSGKYQLQSQENFEPFMK               | P12710 | 0          | n +34.06 Da,K +34.06 Da, | 3862.97583  | 3 | 852.4400024 | 852.4434484 |
| CYSLAPQIKVIAPWR                    | P16460 | 0.01262327 | n +34.06 Da,K +34.06 Da, | 3862.64624  | 3 | 624.0300293 | 624.0396555 |

|                                   |        |            |                          |             |   |             |             |
|-----------------------------------|--------|------------|--------------------------|-------------|---|-------------|-------------|
| FEPSLDYMVTKIPR                    | Q8C196 | 0          | n +34.06 Da,K +34.06 Da, | 3861.313721 | 3 | 588.6706543 | 588.67275   |
| LAFVDVPNDSSFQIVKNPR               | Q61176 | 0          | n +34.06 Da,K +34.06 Da, | 3860.210693 | 3 | 738.7600098 | 738.7566425 |
| PVADVGTVAEKEGWPLDIR               | Q99K10 | 0          | n +17.03 Da,K +34.06 Da, | 3859.749268 | 3 | 701.7299805 | 701.7284234 |
| LIGDAAKNQVAMNPQNTVFDAGR           | P16627 | 0.037373   | n +42.03 Da,K +34.06 Da, | 3857.020752 | 3 | 871.1500244 | 871.148094  |
| PTLEPSMDIVLKLRL                   | Q99PL5 | 0          | n +17.03 Da,K +34.06 Da, | 3853.486816 | 3 | 555         | 555.0076921 |
| LLFKDSAFGLLR                      | Q92111 | 0          | n +34.06 Da,K +34.06 Da, | 3852.298584 | 3 | 483.3155823 | 483.3151136 |
| SQAPGPSGKTADYAFEMAVSNIR           | Q8R0N6 | 0          | n +34.06 Da,K +34.06 Da, | 3852.119385 | 3 | 822.4366455 | 822.4303785 |
| CGKQGFIDLPEFPFGLLEPR              | O35490 | 0          | n +34.06 Da,K +34.06 Da, | 4376.128418 | 3 | 759.0799561 | 759.078728  |
| TCYSLAPQIKVIAPWR                  | P16460 | 0          | n +34.06 Da,K +34.06 Da, | 3848.606934 | 3 | 657.7199707 | 657.7222152 |
| THLVEVDPNEEVQGEIHLR               | Q6PFQ7 | 0.04623044 |                          | 3877.430908 | 3 | 738.6991577 | 738.7098337 |
| KLVKEIIAVSCGSPQCQETIR             | Q9DCW4 | 0          | n +42.03 Da,K +34.06 Da, | 3842.344727 | 3 | 842.8099976 | 842.8066803 |
| QTAEFKEAFQLFDR                    | Q60605 | 0          | n +34.06 Da,K +34.06 Da, | 3840.818359 | 3 | 600         | 599.9984024 |
| SAAATSAVPAPNHQPEVFCNQIFINNEWHDVSR | P47738 | 0          | n +34.06 Da,             | 3840.001221 | 5 | 763.1699829 | 763.1749818 |
| SYGRPPPDVEGMTSLKVDNLTYR           | Q62093 | 0          | n +42.03 Da,K +34.06 Da, | 3876.770752 | 3 | 891.124939  | 891.1251373 |
| PFVELETNLPASRIPAGLENR             | O35215 | 0.01005632 | n +14.02 Da,             | 3844.587646 | 3 | 779.75      | 779.7568952 |
| DELEIIEGMKFDR                     | P63038 | 0          | n +34.06 Da,K +34.06 Da, | 4028.442383 | 3 | 554.9725952 | 554.9729769 |
| SAYQGFASGDLEKDAWAIR               | P05201 | 0.01159536 | n +34.06 Da,K +34.06 Da, | 3827.789063 | 3 | 718.3699951 | 718.3814643 |
| DNVIVDEHGNVKIVDFGLGAR             | Q8C0N0 | 0.01081731 | K +28.03 Da,             | 3834.33374  | 3 | 775.0800171 | 775.0850119 |
| PEKIPSPFDLGFPER                   | Q9CR61 | 0.00049213 | n +17.03 Da,K +34.06 Da, | 3821.43042  | 3 | 626.3535156 | 626.3525162 |
| SVTELNGDTITNTMTLGDIVYKR           | P12710 | 0          | n +17.03 Da,K +34.06 Da, | 4140.364258 | 3 | 864.7999878 | 864.798579  |
| PDANKENTLNQLVGAAFGAAGQR           | Q9EQ20 | 0.00181242 | n +17.03 Da,K +34.06 Da, | 4078.016846 | 3 | 798.4299927 | 798.4313292 |
| EAYLVGLFEDTNLCAIHAQR              | P02301 | 0.00049213 | n +42.03 Da,K +34.06 Da, | 4517.258789 | 3 | 799.4099731 | 799.4212248 |
| LAFVDVPNDSSFQIVKNPR               | Q61176 | 0          | n +34.06 Da,K +34.06 Da, | 3819.075439 | 3 | 738.7562866 | 738.7566425 |
| SDKLPYKVADIGLAAWGR                | P50247 | 0          | n +42.03 Da,K +34.06 Da, | 3818.186768 | 3 | 690.7399902 | 690.7388114 |
| SACFEPSLDYMVTKIPR                 | Q8C196 | 0          | n +34.06 Da,K +34.06 Da, | 3952.833984 | 3 | 694.7079468 | 694.7060141 |
| DELFSDIYKIR                       | P63028 | 0          | n +34.06 Da,K +34.06 Da, | 3813.527588 | 3 | 489.6199951 | 489.6223839 |
| TVINLNVPFVIKQR                    | Q9WTP7 | 0          | n +34.06 Da,K +34.06 Da, | 3921.951904 | 3 | 613.3900146 | 613.389342  |
| PPVQVSPLIKFR                      | Q06185 | 0.03198529 | n +14.02 Da,n +28.03 Da, | 3935.919189 | 3 | 493.980011  | 493.9730517 |
| PGVVDFNFPLLKALR                   | P30115 | 0          | n +17.03 Da,K +34.06 Da, | 4033.371338 | 3 | 530.6715088 | 530.6715198 |
| MQRFLNGNLVGSWFDHIR                | G5E904 | 0.00669176 |                          | 3801.476074 | 3 | 768.4099731 | 768.4003881 |
| SAGFLQASASDVVVHGR                 | Q8VCH0 | 0          | n +34.06 Da,             | 4287.630859 | 3 | 612.0059204 | 612.0058505 |
| DPGVVDNFPLLKALR                   | P30115 | 0          | n +34.06 Da,K +34.06 Da, | 4272.688965 | 3 | 574.6900024 | 574.6910208 |
| FEPSLDYMVTKIPR                    | Q8C196 | 0          | n +34.06 Da,K +34.06 Da, | 3902.620117 | 3 | 588.6766968 | 588.67275   |
| GKLFVGLDWSITTQETLR                | Q9J115 | 0          | n +34.06 Da,K +34.06 Da, | 3798.861084 | 3 | 692.7290039 | 692.7302047 |
| PSELEKALSNIIDVYHNY                | P27005 | 0.02514071 | n +17.03 Da,K +34.06 Da, | 4770.11084  | 3 | 719.3883057 | 719.388067  |
| MNPLTKVKLINELNER                  | Q8R0F5 | 0.00181242 | n +42.03 Da,K +34.06 Da, | 3798.714844 | 3 | 674.7399902 | 674.739935  |
| SLEKSYELPDGQVITIGNER              | P60710 | 0          | n +34.06 Da,K +34.06 Da, | 3798.644043 | 3 | 772.7619019 | 772.7621225 |
| CPTEKEQREWLESIR                   | Q8R2V5 | 0.03198529 | K +31.05 Da,             | 3980.718262 | 3 | 664.6780396 | 664.6721027 |
| PKSYEAYVLLNIIR                    | P14094 | 0.00181242 | n +17.03 Da,K +34.06 Da, | 3797.510254 | 3 | 539.6599731 | 539.6592801 |
| KQGFDLPEFPFGLLEPR                 | O35490 | 0.00096665 | n +34.06 Da,K +34.06 Da, | 4393.530273 | 3 | 686.7199707 | 686.7280237 |

|                                    |        |            |                          |             |   |             |             |
|------------------------------------|--------|------------|--------------------------|-------------|---|-------------|-------------|
| LEAWEKGVLFASGQNLAR                 | Q9CPY7 | 0          | n +34.06 Da,K +34.06 Da, | 3791.191895 | 3 | 686.4000244 | 686.3986777 |
| LLKDFSATDLTEFAAR                   | Q8BWT1 | 0          | n +34.06 Da,K +34.06 Da, | 3790.706299 | 3 | 622.6900024 | 622.6929792 |
| VHLTDAEKAASVCLWGKVNSEVGGALGR       | P02088 | 0          | n +42.03 Da,K +34.06 Da, | 4455.840332 | 4 | 820.4299927 | 820.4332207 |
| SAAATSAVPAPNHQPEVFCNQIFINNEWHDAVSR | P47738 | 0          | n +31.05 Da,             | 3997.664307 | 3 | 1270.27002  | 1270.281482 |
| MDEDGLPLMGSSGIDLTQVPAIQQKR         | Q9CR27 | 0          | n +42.03 Da,K +34.06 Da, | 4282.619141 | 3 | 941.5200195 | 941.5190881 |
| TGGDKAFAAGADIKEMQNR                | Q8BH95 | 0.00049213 | n +42.03 Da,K +34.06 Da, | 3780.039063 | 3 | 697.3699951 | 697.3705709 |
| ALNNKFASFIDKVR                     | Q6IME9 | 0          | n +42.03 Da,K +34.06 Da, | 3811.125244 | 3 | 578.3400269 | 578.3508871 |
| ADKMDMSLDDIILNR                    | O08583 | 0          | n +42.03 Da,K +34.06 Da, | 4142.419922 | 2 | 994.5499878 | 994.5450155 |
| PPKMLFLLGADGGCITR                  | Q91VD9 | 0.00049213 | n +17.03 Da,K +34.06 Da, | 3770.999023 | 3 | 633.0200195 | 633.0268694 |
| CYDVFGAQSPFGGYKMSGSGR              | P47738 | 0          | n +34.06 Da,K +34.06 Da, | 3766.602051 | 3 | 780.3800049 | 780.3788492 |
| PEFMLPVHIFYGR                      | Q9ET01 | 0          | n +14.02 Da,             | 3766.491455 | 3 | 502.9200134 | 502.9235921 |
| LLLQKCEDVLPDDTVSTLYNR              | Q8R0Y6 | 0          | n +34.06 Da,K +34.06 Da, | 3763.758545 | 3 | 854.1400146 | 854.1369723 |
| SLDYWTIHGLWPDPR                    | Q9CQ01 | 0          | n +34.06 Da,             | 4177.660645 | 3 | 598.3162231 | 598.312503  |
| YETATLSDIKALIR                     | P57780 | 0          | n +34.06 Da,K +34.06 Da, | 3757.646973 | 3 | 554.6799927 | 554.6751481 |
| MFEPKCLDAFPNLR                     | P10649 | 0          | n +42.03 Da,K +34.06 Da, | 3754.688477 | 3 | 605.3200073 | 605.3111173 |
| AASSSLEKSYELPDGQVITIGNER           | P60710 | 0          | n +34.06 Da,K +34.06 Da, | 3752.812988 | 3 | 907.1599731 | 907.1522278 |
| TALEKFGQAISLLPDR                   | Q8VBW8 | 0.00181242 | n +34.06 Da,K +34.06 Da, | 3751.706787 | 3 | 609.710022  | 609.7052189 |
| SSSSLEKSYELPDGQVITIGNER            | P60710 | 0          | n +34.06 Da,K +34.06 Da, | 3751.328857 | 3 | 859.7993164 | 859.7941517 |
| ASSSSLEKSYELPDGQVITIGNER           | P60710 | 0          | n +34.06 Da,K +34.06 Da, | 3749.591797 | 3 | 883.4699707 | 883.4731897 |
| TLNNFMGLGQAAWKEAR                  | P35505 | 0          | n +34.06 Da,K +34.06 Da, | 3744.273438 | 3 | 659.0300293 | 659.0333411 |
| SFFKFLTEELSLDQDR                   | O35215 | 0          | n +34.06 Da,K +34.06 Da, | 4473.708496 | 3 | 681.710022  | 681.7071773 |
| LTLEAPLDTINVHLR                    | P70699 | 0          | n +34.06 Da,             | 3920.032471 | 3 | 580.3499756 | 580.3473248 |
| PEKIPSPFDLGFPER                    | Q9CR61 | 0          | n +17.03 Da,K +34.06 Da, | 3739.36792  | 3 | 626.3499756 | 626.3525162 |
| HTPDCGKQGFIDLPEFPFGLEPR            | O35490 | 0          | n +17.03 Da,K +34.06 Da, | 4378.022949 | 3 | 903.4500122 | 903.4636416 |
| TPDCGKQGFIDLPEFPFGLEPR             | O35490 | 0          | n +34.06 Da,K +34.06 Da, | 4412.783203 | 3 | 863.460022  | 863.4545239 |
| PPTKTLWLFDINQDPEER                 | P50429 | 0          | n +17.03 Da,K +34.06 Da, | 3992.990967 | 3 | 750.7399902 | 750.7390998 |
| PAVGAVLTGGDKAFAAGADIKEMQNR         | Q8BH95 | 0          | n +17.03 Da,K +34.06 Da, | 3735.984131 | 4 | 697.1445923 | 697.148349  |
| RMNYGRNLERLGVGSRVIGR               | Q5NCX5 | 0.04943503 | n +14.02 Da,             | 3758.101318 | 3 | 773.0900269 | 773.0975912 |
| PEFTLPVHIFYGR                      | Q9WUB3 | 0.01005632 | n +42.03 Da,             | 3932.821289 | 3 | 502.25      | 502.2576285 |
| SKGPAVGIDLGTYSVCVGFQHGKVEIANDQGNR  | P63017 | 0          | n +42.03 Da,K +34.06 Da, | 4287.961426 | 4 | 950.2600098 | 950.2533542 |
| QWYESHYALPLGR                      | P62242 | 0          |                          | 3869.037598 | 3 | 540.6099854 | 540.6036876 |
| DRDDVALEGVGHFFR                    | P29391 | 0          |                          | 3732.186523 | 3 | 587.6199951 | 587.6286733 |
| SWAVPSLGLKTDIAPGR                  | P00405 | 0          | n +34.06 Da,K +34.06 Da, | 3730.895752 | 3 | 612.7000122 | 612.7053302 |
| SHTSAAAAGTMAGVPTVSFSELR            | E9PY03 | 0.00049213 |                          | 3724.887207 | 3 | 735.710022  | 735.7038026 |
| AGAESDQGQFTGIKKYFN                 | Q78IK2 | 0          | n +34.06 Da,K +34.06 Da, | 3721.755127 | 3 | 737.4017334 | 737.404087  |
| GTVNEIYKTYFQGSPLPAR                | P52760 | 0.02938988 | n +34.06 Da,K +34.06 Da, | 3718.425049 | 3 | 704.7299805 | 704.7302047 |
| GDPKQDILAIFKR                      | Q9D8S3 | 0          | n +42.03 Da,K +34.06 Da, | 3808.912842 | 3 | 566.6795044 | 566.6788925 |
| SKAAELIANSLATAGDGLIELR             | P67778 | 0          | n +34.06 Da,K +34.06 Da, | 4445.839844 | 3 | 761.1199951 | 761.1181289 |
| MVPPVQVSPLIKFGR                    | Q06185 | 0          | n +34.06 Da,K +34.06 Da, | 3717.247803 | 3 | 579.3721924 | 579.3691128 |
| ISFTVWDVGGQDKIR                    | P61205 | 0          | n +34.06 Da,K +34.06 Da, | 3712.616699 | 3 | 597.0100098 | 597.0141638 |

|                                    |         |            |                          |             |   |             |             |
|------------------------------------|---------|------------|--------------------------|-------------|---|-------------|-------------|
| PLVYNMSHEDPGNVSYSEIGGLSEQIR        | P62334  | 0          | n +34.06 Da,             | 3712.243896 | 3 | 1009.150024 | 1009.164321 |
| EDGPLTKKRDEATLNPPDTPDIR            | Q69ZK9  | 0.01262327 | n +31.05 Da,K +31.05 Da, | 3712.133057 | 3 | 848.4699707 | 848.4556521 |
| PSWATQESEAVAEKVL                   | Q9EPQ7  | 0          | n +17.03 Da,K +34.06 Da, | 3710.158447 | 3 | 651.3599854 | 651.3618519 |
| GPLGFYHGLSSTLLR                    | Q9WVVD5 | 0          | n +34.06 Da,             | 3707.013428 | 3 | 551.3189087 | 551.3174767 |
| DAKNAVEEYVYEMR                     | Q61316  | 0.00939926 | n +34.06 Da,K +34.06 Da, | 3706.640869 | 3 | 595.6400146 | 595.6435196 |
| EAPQEPDPFTYDYHTLR                  | Q9Z239  | 0          | n +31.05 Da,             | 3813.198975 | 3 | 704         | 704.0023945 |
| MDNKDEDIFKFKGY                     | G5E904  | 0.00049213 | n +42.03 Da,K +34.06 Da, | 3704.835693 | 3 | 632.0100098 | 632.0099091 |
| SQAEFDKAAEEVKR                     | P31786  | 0.00049213 | n +42.03 Da,K +34.06 Da, | 4828.781738 | 3 | 573.3186646 | 573.3179124 |
| ATSSEEVLLIVKKVR                    | Q9DBA9  | 0          | n +42.03 Da,K +34.06 Da, | 3741.149902 | 3 | 594.710022  | 594.717236  |
| TQLAPIIQEFFHSEQYR                  | Q78JT3  | 0.00049213 | n +34.06 Da,             | 4381.725098 | 3 | 714.3804932 | 714.3794653 |
| GSSTFQSEGSNSDMLHPVAMFR             | P15105  | 0          | n +34.06 Da,             | 3699.921631 | 3 | 861.4000244 | 861.4002727 |
| TDEATIIDIVTHR                      | P14824  | 0          | n +34.06 Da,             | 3699.510986 | 3 | 506.6199951 | 506.6175923 |
| EGPNGLKLISEVIGER                   | P13707  | 0          | n +34.06 Da,K +34.06 Da, | 4076.729248 | 3 | 593.6900024 | 593.6930905 |
| PEKIPSFPPDLGPFER                   | Q9CR61  | 0.00049213 | n +17.03 Da,K +34.06 Da, | 3698.412109 | 3 | 626.3499756 | 626.3525162 |
| STLLIHHPQYAWLQDLGLR                | Q9DBF1  | 0          | n +42.03 Da,             | 4417.259766 | 3 | 768.4154053 | 768.4146918 |
| PLPPLPEYGGKVR                      | Q9CQW7  | 0.00346921 | n +17.03 Da,K +34.06 Da, | 4402.522461 | 3 | 491.9725952 | 491.9731986 |
| IGGVQQDTILAEGLHFR                  | O35129  | 0          |                          | 3695.670166 | 3 | 628.0096436 | 628.0108949 |
| LSAAATSAPVAPNHQPEVFCNQIFINNEWHDVSR | P47738  | 0          | n +31.05 Da,             | 4135.254883 | 4 | 981.2299805 | 981.2339469 |
| SDPDPSTKDFLLQQTMLR                 | Q9CPU0  | 0          | n +34.06 Da,K +34.06 Da, | 3693.565186 | 3 | 720.7213135 | 720.7262433 |
| SSSSLEKSYELPDGQVITIGNER            | P60710  | 0          | n +34.06 Da,K +34.06 Da, | 3710.379395 | 3 | 859.789978  | 859.7941517 |
| LGPVGLAVPQHRIR                     | Q8BTN6  | 0.04159197 | n +31.05 Da,             | 3817.710938 | 3 | 515.3300171 | 515.324636  |
| FEVTALHTVFEEAR                     | Q91XD4  | 0          | n +34.06 Da,             | 3678.631592 | 3 | 561.6400146 | 561.6368753 |
| FRVPTPNVSVVDLTCR                   | P16858  | 0.01005632 | n +34.06 Da,             | 3678.082031 | 3 | 632.0300293 | 632.0191025 |
| PPFDAKNPFLAAVTTNR                  | P37040  | 0.00049213 | n +17.03 Da,K +34.06 Da, | 3677.972412 | 3 | 637.3599854 | 637.3634152 |
| LYCGVESNKQYQLADWRIR                | P56960  | 0.0477538  | n +34.06 Da,K +34.06 Da, | 3669.76709  | 3 | 823.1199951 | 823.1110912 |
| MDSVFAEAIKVR                       | Q9DBM2  | 0          | n +34.06 Da,K +34.06 Da, | 3668.811768 | 3 | 502.2997742 | 502.2991352 |
| VDSVYRTRSLGVAAEGLPDQYADGEAAR       | Q9QXF8  | 0          | n +42.03 Da,             | 3666.528076 | 3 | 1003.48999  | 1003.495129 |
| PDLPAFYFDPLINPISHR                 | Q99PV0  | 0          | n +17.03 Da,             | 4440.598145 | 3 | 710.3798828 | 710.379136  |
| DPNFFKMVEGFFDR                     | P26443  | 0          | n +34.06 Da,K +34.06 Da, | 4932.898438 | 2 | 908.9759521 | 908.9718112 |
| FCKASAELALGENNEVLKSGR              | P05202  | 0.00049213 | n +42.03 Da,K +34.06 Da, | 3661.465088 | 3 | 801.7600098 | 801.7706235 |
| MEWKDPSGSAYEAKTASFQDAVR            | A2AK70  | 0.01262327 | n +42.03 Da,K +34.06 Da, | 3658.744141 | 3 | 895.4481812 | 895.4480982 |
| HYFQNTQGLIFVDSNDR                  | P61205  | 0          |                          | 4083.86792  | 2 | 1091.060059 | 1091.039815 |
| TVTAMDVVYALKR                      | P62806  | 0          | K +28.03 Da,             | 3645.110596 | 3 | 508.2900085 | 508.2935739 |
| SCCSDPDPSTKDFLLQQTMLR              | Q9CPU0  | 0.01262327 | n +34.06 Da,K +34.06 Da, | 3643.973877 | 3 | 856.4199829 | 856.424019  |
| PGVVPVAAAAAAQKLMR                  | Q9JKP5  | 0          | n +17.03 Da,K +34.06 Da, | 3643.64917  | 3 | 590.6900024 | 590.6942188 |
| DSWLKGEFITTQQRR                    | P14152  | 0          | n +34.06 Da,K +34.06 Da, | 3643.134277 | 2 | 938.5300293 | 938.533622  |
| TIAQDYGVLKADEGISFR                 | P35700  | 0.04066211 | n +34.06 Da,K +34.06 Da, | 3637.758057 | 3 | 684.3800049 | 684.3863267 |
| SFPTLKFFPASADR                     | P09103  | 0.00049213 | n +34.06 Da,K +34.06 Da, | 3634.86377  | 2 | 826.4780273 | 826.4775863 |
| SAGGIIVSSLLSPMSAGLFHR              | Q63880  | 0          | n +34.06 Da,             | 4647.686523 | 4 | 562.5756226 | 562.5740105 |
| TGDIHAITAANNLVAAAIDAR              | Q922D8  | 0.00049213 | n +34.06 Da,             | 4099.672363 | 3 | 704.7299805 | 704.7255244 |

|                             |        |            |                          |             |   |             |             |
|-----------------------------|--------|------------|--------------------------|-------------|---|-------------|-------------|
| TVTAMDVVYALKR               | P62806 | 0          | n +34.06 Da,K +34.06 Da, | 3629.93335  | 3 | 512.3099976 | 512.3147853 |
| DVSPFLDGLERPQR              | Q9R1P4 | 0          | n +34.06 Da,             | 3624.996094 | 3 | 597.9899902 | 597.9864561 |
| SFPTLKFFPASADR              | P09103 | 0          | n +34.06 Da,K +34.06 Da, | 3624.60376  | 3 | 551.3199463 | 551.3208163 |
| PRNVTEAPLGTVLQRR            | Q3U3V8 | 0.0399568  | n +31.05 Da,             | 3621.611816 | 3 | 613.3699951 | 613.3638199 |
| VVDNFPLLKALR                | P30115 | 0          | n +34.06 Da,K +34.06 Da, | 3618.915039 | 3 | 484.9927368 | 484.990063  |
| ASGVAVSDGVIKVFNDMKVR        | P18760 | 0          | n +42.03 Da,K +34.06 Da, | 3862.865234 | 3 | 734.7600098 | 734.7577661 |
| MKLPIFIADAFTATAFR           | Q9CXN7 | 0.00669176 | n +34.06 Da,K +34.06 Da, | 4829.44043  | 3 | 661.0599976 | 661.0587159 |
| AEFGFDLSHIPR                | Q9DBB8 | 0          |                          | 3664.312988 | 3 | 472.9100037 | 472.9138618 |
| ATEGDVELELETETSGPERPPEKPR   | Q9CR41 | 0          | n +42.03 Da,K +34.06 Da, | 3685.046387 | 3 | 948.1400146 | 948.1436918 |
| KSTYSSLPDDYNCQVDLALTADGR    | Q9CPV3 | 0          | n +34.06 Da,K +34.06 Da, | 3607.608887 | 3 | 919.789978  | 919.7939346 |
| TFIADLVVGLCTGQIKTGAPCR      | P17182 | 0.01005632 | n +34.06 Da,K +34.06 Da, | 4162.350098 | 2 | 1223.189941 | 1223.185085 |
| RRYLGSIVSEKKNYVDALR         | Q8C033 | 0.0129768  | n +34.06 Da,K +34.06 Da, | 3604.960693 | 3 | 817.1599731 | 817.1447893 |
| PTGMDPDDIWQLSSSLKR          | Q9CYN2 | 0.00049213 | n +34.06 Da,K +34.06 Da, | 3604.406982 | 3 | 705.3699951 | 705.3789549 |
| APLDLDKYVEIAR               | Q9CQR6 | 0          | n +34.06 Da,K +34.06 Da, | 3603.73999  | 3 | 524.3215942 | 524.320705  |
| EPIQSVYFFSGDKYYR            | P29788 | 0          | n +34.06 Da,K +34.06 Da, | 3597.195801 | 3 | 689.7000122 | 689.7001339 |
| GVFQEDGPIVHQEMIGGFR         | P01027 | 0.01662157 | n +34.06 Da,             | 3596.086914 | 3 | 717.3699951 | 717.3685719 |
| EDALKAADTIGYPVMIR           | Q8C196 | 0          | n +34.06 Da,K +34.06 Da, | 3594.604492 | 3 | 644.3693848 | 644.3696192 |
| YMGLPIPEDNLDHYR             | P28843 | 0          | n +34.06 Da,             | 3594.533691 | 3 | 622.9799805 | 622.980425  |
| DKLYFEELSLER                | Q8C196 | 0          | n +34.06 Da,K +34.06 Da, | 3590.995361 | 2 | 805.460022  | 805.4590597 |
| GPPDPILGVTEAFKR             | P05202 | 0.00181242 | n +34.06 Da,K +34.06 Da, | 3590.698975 | 3 | 555.6748657 | 555.6717378 |
| ITLLSDITKQISR               | P20108 | 0          | n +34.06 Da,K +34.06 Da, | 3589.779541 | 3 | 519.3440552 | 519.3399881 |
| MLLGLDMLKR                  | A2ADY9 | 0.00049213 | n +34.06 Da,K +34.06 Da, | 3583.598389 | 3 | 419.9416199 | 419.940113  |
| PMQTGIKAVDSLVPPIGR          | Q03265 | 0          | n +17.03 Da,K +34.06 Da, | 3579.982666 | 3 | 611.7021484 | 611.7011509 |
| IIGGSMDAKGSFPWQAKM          | Q61646 | 0.00049213 | n +34.06 Da,K +34.06 Da, | 3577.230713 | 3 | 676.0499878 | 676.0498215 |
| PEYMLPVHFYGR                | Q8CI94 | 0          | n +14.02 Da,             | 3576.101807 | 3 | 508.2572327 | 508.2552305 |
| TTIAGVVYKDGIVLGADTR         | P70195 | 0          | n +34.06 Da,K +34.06 Da, | 3575.918457 | 3 | 673.0731201 | 673.0703384 |
| SAGFLQASASDVVVVHGR          | Q8VCHO | 0          | n +34.06 Da,             | 3653.578613 | 3 | 612.0083008 | 612.0058505 |
| VVDNFPLLKALR                | P30115 | 0          | n +34.06 Da,K +34.06 Da, | 3575.847656 | 3 | 484.9899902 | 484.990063  |
| LKGWKEIEYEVVR               | B2RQC6 | 0.01005632 | n +42.03 Da,K +34.06 Da, | 3570.758545 | 3 | 587.0200195 | 587.0190262 |
| DVALEGVGHFFR                | P29391 | 0          | n +34.06 Da,             | 3567.541748 | 3 | 460.9219666 | 460.9209458 |
| SAGFLQASASDVVVVHGR          | Q8VCHO | 0.00181242 | n +34.06 Da,             | 4712.448242 | 3 | 612.0100098 | 612.0058505 |
| IALMDEQGFCCKIVGR            | Q8VCW8 | 0          | n +34.06 Da,K +34.06 Da, | 3560.033691 | 3 | 602.3400269 | 602.341006  |
| TPDCGKQGFDLPEFFPGLLEPR      | O35490 | 0.00049213 | n +34.06 Da,K +34.06 Da, | 4456.061035 | 3 | 863.4500122 | 863.4545239 |
| PLQDVYKIGIGITVPVGR          | P10126 | 0          | n +17.03 Da,K +34.06 Da, | 3552.510742 | 3 | 640.7199707 | 640.722832  |
| TAVDSGIALLTNFQVTKLFAEAVQKSR | Q8C196 | 0.00939926 | n +42.03 Da,K +34.06 Da, | 4725.030762 | 4 | 755.1900024 | 755.1881192 |
| SGGTPYIGSKISLISKAIEIR       | Q8K2F8 | 0          | n +42.03 Da,K +34.06 Da, | 3545.233643 | 3 | 729.7700195 | 729.7721812 |
| HSILPVDDINGLNEEQKQLR        | Q9JHI5 | 0.01262327 | n +42.03 Da,K +34.06 Da, | 3544.787842 | 3 | 837.1099854 | 837.1083636 |
| ECDKLYFEELSLER              | Q8C196 | 0          | n +34.06 Da,K +34.06 Da, | 3538.1604   | 2 | 949.9899902 | 949.9956814 |
| AIKFLEVIKPF                 | P61620 | 0.00346921 | n +34.06 Da,K +34.06 Da, | 4031.333252 | 3 | 469.6700134 | 469.6671937 |
| ACGLVASNLNLKPGECKLVR        | P16045 | 0          | n +42.03 Da,K +34.06 Da, | 3535.605713 | 2 | 1155.150024 | 1155.15887  |

|                                    |        |            |                          |             |   |             |             |
|------------------------------------|--------|------------|--------------------------|-------------|---|-------------|-------------|
| ECDKLYFEELSLER                     | Q8C196 | 0          | n +34.06 Da,K +34.06 Da, | 3535.39917  | 3 | 633.6602783 | 633.6662131 |
| ARFPQASASDVVVVHGR                  | Q921H8 | 0.00181242 | n +34.06 Da,             | 3535.187012 | 3 | 610.6900024 | 610.6779565 |
| DQDEIDCLPLGAKQPSFR                 | P16675 | 0          | n +34.06 Da,K +34.06 Da, | 3583.892578 | 3 | 719.710022  | 719.7142262 |
| TIAQDYGVKKADEGISFR                 | P35700 | 0.00049213 | n +42.03 Da,K +34.06 Da, | 3532.559082 | 3 | 687.039978  | 687.035476  |
| PSITTEILKSVVAR                     | P67778 | 0          | n +17.03 Da,K +34.06 Da, | 3529.786865 | 3 | 522.3300171 | 522.3346851 |
| ANKENTLNQLVGAAFGAAGQR              | Q9EQ20 | 0.01081731 | n +34.06 Da,K +34.06 Da, | 3933.958252 | 3 | 733.4168091 | 733.4152794 |
| DQDEIDCLPLGAKQPSFR                 | P16675 | 0.01005632 | n +34.06 Da,K +34.06 Da, | 3523.952881 | 3 | 719.710022  | 719.7142262 |
| VYTGFWHSPECEFVR                    | P16460 | 0.01982463 | n +34.06 Da,             | 3522.846191 | 3 | 649.9799805 | 649.9805363 |
| ACGLVASNLNLKPGECKLVR               | P16045 | 0.00939926 | n +42.03 Da,K +34.06 Da, | 3521.008789 | 4 | 578.0800171 | 578.0830732 |
| PDPSTKDFLLQQTMLR                   | Q9CPU0 | 0          | n +17.03 Da,K +34.06 Da, | 3517.937988 | 3 | 647.7000122 | 647.6960659 |
| VEELDPGVVDNFPLLKALR                | P30115 | 0          | n +34.06 Da,K +34.06 Da, | 4448.972168 | 3 | 731.4400024 | 731.4369099 |
| TSIHVVHPLPGTEDQLNDR                | Q80TP3 | 0          | n +42.03 Da,             | 3524.839355 | 3 | 773.0516357 | 773.0572334 |
| GPITYSPDILPMVGP HQGVR              | Q9DBT9 | 0          | n +34.06 Da,             | 3602.791504 | 3 | 723.3983154 | 723.3963503 |
| ADLSNEAFPSTHQQLVR                  | Q99LB7 | 0.00181242 | n +34.06 Da,             | 3516.272705 | 3 | 656.0100098 | 656.0128938 |
| ACGLVASNLNLKPGECKLVR               | P16045 | 0          | n +42.03 Da,K +34.06 Da, | 3514.726807 | 3 | 770.4387207 | 770.4416721 |
| MDDREDLVYQAKLAEQAER                | P62259 | 0          | n +42.03 Da,K +34.06 Da, | 3676.603516 | 3 | 786.059021  | 786.0602447 |
| DVALEGVGHFFR                       | P29391 | 0          | n +34.06 Da,             | 3608.091064 | 3 | 460.9207153 | 460.9209458 |
| ATEGDVELELETETSGPERPPEKPR          | Q9CR41 | 0          | n +42.03 Da,K +34.06 Da, | 3505.003418 | 3 | 948.1397095 | 948.1436918 |
| GDPKEEEEEELVDPLTTVR                | P99028 | 0.00049213 | n +34.06 Da,K +34.06 Da, | 3504.892822 | 4 | 564.0502319 | 564.0496854 |
| AVALVDAFDFKDVTLGSLVLR              | Q9R0H0 | 0          | n +34.06 Da,K +34.06 Da, | 4581.830566 | 3 | 754.4500122 | 754.4440646 |
| SNYHLLMSVQESLER                    | P26443 | 0.00049213 | n +34.06 Da,             | 3494.483154 | 3 | 613.9899902 | 613.9875797 |
| VPPVQVSLIKFGR                      | Q06185 | 0          | n +34.06 Da,K +34.06 Da, | 3491.529541 | 3 | 535.6914063 | 535.6889511 |
| GQVVQFKLSDIGEGIR                   | P53395 | 0          | n +34.06 Da,K +34.06 Da, | 3490.427734 | 3 | 605.3599854 | 605.3650852 |
| VELGEELEAVTARPEAVER                | P59017 | 0.00049213 | n +34.06 Da,             | 3485.635986 | 3 | 754.0599976 | 754.0675051 |
| GLGPMNIPLISDPKR                    | P35700 | 0.01005632 | n +34.06 Da,K +34.06 Da, | 3484.837646 | 3 | 559.3400269 | 559.344856  |
| PSTDFLTITVENSHGLR                  | P01029 | 0          | n +14.02 Da,             | 3484.33374  | 3 | 634.3300171 | 634.3302935 |
| GQVVQFKLSDIGEGIR                   | P53395 | 0          | n +34.06 Da,K +34.06 Da, | 3531.44873  | 3 | 605.3612671 | 605.3650852 |
| WDVFTQHIEGAINR                     | Q99LB7 | 0          | n +34.06 Da,             | 3563.479492 | 3 | 573.9710693 | 573.9723693 |
| AEDVQETDTSQKQSPASHEIATNLGDF AISLYR | P07758 | 0          | n +31.05 Da,             | 4329.333984 | 4 | 942.7000122 | 942.7065858 |
| IHTQPPPPPIPEVVATWEAISLGR           | Q8BGA8 | 0          | n +34.06 Da,             | 4669.385254 | 3 | 880.4984741 | 880.4971221 |
| RAAEEAFVNDIDESSPGTEWER             | B1AWE0 | 0.00049213 | n +34.06 Da,             | 3469.897705 | 3 | 848.0599976 | 848.0683455 |
| PEIEEAYEKFCLESER                   | Q8VE62 | 0          | n +17.03 Da,K +34.06 Da, | 3467.556152 | 3 | 694.0100098 | 694.0103795 |
| RPESLHQVSLFSDR                     | P24270 | 0.00049213 |                          | 3563.97876  | 3 | 615.9799805 | 615.9917231 |
| TIAQDYGVKKADEGISFR                 | P35700 | 0          | n +34.06 Da,K +34.06 Da, | 3465.88623  | 3 | 684.3800049 | 684.3863267 |
| GDPKEEEEEELVDPLTTVR                | P99028 | 0.00049213 | n +34.06 Da,K +34.06 Da, | 3464.934082 | 3 | 751.7299805 | 751.7304884 |
| EALDTILPPTRPTDKPLR                 | P62631 | 0.03363803 | n +42.03 Da,K +34.06 Da, | 3461.317627 | 3 | 703.7299805 | 703.7424038 |
| DTHPALAIPELMR                      | Q9ET01 | 0.03963964 | n +34.06 Da,             | 3460.74292  | 3 | 499.9500122 | 499.9483958 |
| PFVELETNLPASRIPAGLENR              | O35215 | 0          | n +17.03 Da,             | 3831.269531 | 3 | 780.7632446 | 780.7621979 |
| VGVKPVGSDPDFQPELSGAGSR             | Q8CDN6 | 0.00181242 | n +42.03 Da,K +34.06 Da, | 3622.990967 | 3 | 759.0599976 | 759.0640948 |
| AIKFLEVIKPF                        | P61620 | 0.00749064 | n +34.06 Da,K +34.06 Da, | 4038.342773 | 2 | 703.9960938 | 703.9971523 |

|                               |        |            |                          |             |   |             |             |
|-------------------------------|--------|------------|--------------------------|-------------|---|-------------|-------------|
| TISPLDLAKLNQVAR               | P60335 | 0          | n +34.06 Da,K +34.06 Da, | 3481.828613 | 3 | 569.7000122 | 569.6981755 |
| SGPDLSTALMHFR                 | Q91VS7 | 0.00049213 | n +34.06 Da,             | 3456.088379 | 3 | 489.2622681 | 489.2608624 |
| VTEDSIKDFFR                   | Q8BGD9 | 0.00096665 | n +34.06 Da,K +34.06 Da, | 3455.878662 | 3 | 475.6099854 | 475.6067338 |
| ATEGDVELELETETSGPERPPEKPR     | Q9CR41 | 0          | n +42.03 Da,K +34.06 Da, | 3455.77002  | 3 | 948.1443481 | 948.1436918 |
| SSSRPVALVTGANKGIGFAITR        | P48758 | 0          | n +42.03 Da,K +34.06 Da, | 3453.39502  | 4 | 570.3339844 | 570.3327121 |
| PYLPNVDEEVQIGHVPR             | P11276 | 0          | n +14.02 Da,             | 3453.213623 | 2 | 988.5100098 | 988.5154441 |
| SAAEVDGLGVVRPHYGSVLDNER       | Q9JKF1 | 0          | n +42.03 Da,             | 3452.618164 | 3 | 871.0800171 | 871.0964173 |
| VPPVQVSPLIKFGR                | Q06185 | 0          | n +34.06 Da,K +34.06 Da, | 3450.7229   | 3 | 535.6901245 | 535.6889511 |
| SSSRPVALVTGANKGIGFAITR        | P48758 | 0          | n +42.03 Da,K +34.06 Da, | 3450.6521   | 3 | 760.1091309 | 760.1078573 |
| CISAKDIVYIGLR                 | Q61176 | 0          | n +34.06 Da,K +34.06 Da, | 3449.63501  | 3 | 525.9899902 | 525.9903016 |
| PAYKGQILTMANPIIGNGGAPDPTAR    | Q8C196 | 0          | n +17.03 Da,K +34.06 Da, | 3449.489258 | 3 | 893.5       | 893.4900794 |
| SLLFVDIPSKIICR                | Q64374 | 0          | n +34.06 Da,K +34.06 Da, | 4085.533691 | 3 | 577.0300293 | 577.0287565 |
| SLGGGTGSGMGMTLLISKIR          | P68372 | 0          | n +34.06 Da,K +34.06 Da, | 3440.94873  | 3 | 625.0455933 | 625.0452469 |
| TADGEMTKALLEVLGR              | Q99KB8 | 0          | n +34.06 Da,K +34.06 Da, | 4506.177734 | 3 | 593.0134888 | 593.0115431 |
| TPKIGFPWSEIR                  | P26040 | 0          | n +34.06 Da,K +34.06 Da, | 3439.770508 | 3 | 500.3071289 | 500.3066183 |
| SLKEALTYDGALLGDR              | Q9WUK2 | 0.00590468 | n +34.06 Da,K +34.06 Da, | 3438.592041 | 3 | 597.3520508 | 597.3492125 |
| APLDLDKYVEIAR                 | Q9CQR6 | 0          | n +34.06 Da,K +34.06 Da, | 3562.293945 | 3 | 524.3182983 | 524.320705  |
| PAPATTFAHLDAATTVLSR           | P56480 | 0.01518692 | n +34.06 Da,             | 3435.220459 | 3 | 635.0100098 | 635.0213892 |
| SIGVPIKVLHEAEGH               | P62320 | 0          | n +42.03 Da,K +34.06 Da, | 3434.89209  | 3 | 554.6541138 | 554.6526367 |
| TTIAGLVFRDGVILGADTR           | O35955 | 0.00181242 | n +34.06 Da,             | 4145.503418 | 3 | 670.3900146 | 670.3915937 |
| SFPTLKFFPASADR                | P09103 | 0          | n +34.06 Da,K +34.06 Da, | 3666.057129 | 3 | 551.324707  | 551.3208163 |
| SHMVPEDGTLTCEPGIYVLR          | Q99J08 | 0          | n +34.06 Da,             | 3424.692871 | 3 | 799.0700073 | 799.066342  |
| EKDGETFQLMGLYGR               | B5X0G2 | 0          | n +34.06 Da,K +34.06 Da, | 3422.480469 | 2 | 906.4899902 | 906.4852833 |
| PAGLHTLMPVLLR                 | Q3TL44 | 0.00181242 | n +17.03 Da,             | 3422.299316 | 3 | 478.9599915 | 478.9603062 |
| CPDLTKEPFTFPVR                | Q91V76 | 0          | n +34.06 Da,K +34.06 Da, | 3421.708008 | 3 | 592.3300171 | 592.3326163 |
| PIVDSIEGVTHALR                | Q8CGC7 | 0          | n +17.03 Da,             | 3419.640381 | 3 | 508.6254578 | 508.624529  |
| ARFPQASASDVVVVHGR             | Q921H8 | 0          | n +42.03 Da,             | 3417.898438 | 3 | 613.3200073 | 613.3271058 |
| TGSNEFKLNQPPEDGISSVKFSPN      | Q9WVA3 | 0          | n +34.06 Da,K +34.06 Da, | 3417.454346 | 3 | 898.8200073 | 898.8205187 |
| AGAFGYFEVTHDITR               | P24270 | 0          | n +34.06 Da,             | 3416.978516 | 3 | 573.2972412 | 573.2967416 |
| GCLQVLEDKFLR                  | G3UX05 | 0          | n +34.06 Da,K +34.06 Da, | 3594.018799 | 3 | 515.9699707 | 515.9746516 |
| ATEGDVELELETETSGPERPPEKPR     | Q9CR41 | 0          | n +42.03 Da,K +34.06 Da, | 3414.226563 | 3 | 948.1500244 | 948.1436918 |
| SSPAQPAVPAPLADLKIQHTK         | P24549 | 0.00049213 | n +42.03 Da,K +34.06 Da, | 3410.115967 | 3 | 760.4400024 | 760.4513306 |
| EKDGETFQLMGLYGR               | B5X0G2 | 0.00181242 | n +34.06 Da,K +34.06 Da, | 3406.121094 | 3 | 604.6635132 | 604.659281  |
| PLLYDFPKLR                    | Q60766 | 0.00049213 | n +17.03 Da,K +34.06 Da, | 3404.868408 | 3 | 438.2822876 | 438.2798512 |
| TTPEKYLGAEYMQSVGNMR           | Q921I1 | 0          | n +34.06 Da,K +34.06 Da, | 3402.237061 | 3 | 748.3900146 | 748.3872332 |
| TFPTVNPTTGEVIGHVAEGDR         | Q9CZS1 | 0          | n +34.06 Da,             | 3400.911377 | 3 | 744.3900146 | 744.3886897 |
| TVNEIKTYFQGSIPAR              | P52760 | 0          | n +34.06 Da,K +34.06 Da, | 3400.6604   | 3 | 685.7248535 | 685.72305   |
| MVPPVQVSPLIKFGR               | Q06185 | 0          | n +34.06 Da,K +34.06 Da, | 3635.983398 | 3 | 579.3709106 | 579.3691128 |
| EDVQETDTSQKQSPASHEIATNLGDFALR | Q00897 | 0          | n +34.06 Da,K +34.06 Da, | 3396.771729 | 3 | 1124.22998  | 1124.227185 |
| SEAAADREDDPNFFKMVEGFFDR       | P26443 | 0.00049213 | n +34.06 Da,K +34.06 Da, | 4663.90332  | 4 | 691.0903931 | 691.0854338 |

|                               |        |            |                          |             |   |             |             |
|-------------------------------|--------|------------|--------------------------|-------------|---|-------------|-------------|
| GDPKEEEEEELVDPLTTVR           | P99028 | 0          | n +34.06 Da,K +34.06 Da, | 3509.914307 | 2 | 1127.085693 | 1127.092094 |
| SSSSLEKSYELPDGQVITIGNER       | P60710 | 0          | n +34.06 Da,K +34.06 Da, | 3392.856689 | 3 | 859.7999878 | 859.7941517 |
| EKTLIEILATR                   | P14824 | 0.01909855 | n +34.06 Da,K +34.06 Da, | 3392.371826 | 3 | 452.2999878 | 452.3028739 |
| SVTGWKEIEYEVVR                | Q8C196 | 0          | n +34.06 Da,K +34.06 Da, | 3533.493896 | 3 | 588.3357544 | 588.3385361 |
| EAPQEPDPFTYDYHTLR             | Q9Z239 | 0          | n +34.06 Da,             | 3386.752197 | 2 | 1057.010132 | 1057.007908 |
| GQVVQFKLSDIGEGIR              | P53395 | 0          | n +34.06 Da,K +34.06 Da, | 3384.369629 | 3 | 605.3637085 | 605.3650852 |
| IIAEGANGPTTPEADKIFLER         | P26443 | 0.02159091 | n +17.03 Da,K +34.06 Da, | 3382.418457 | 3 | 765.0999756 | 765.0935429 |
| ACEAYLVGLFEDTNLCAIHAKR        | P68433 | 0          | n +42.03 Da,K +34.06 Da, | 4533.441895 | 3 | 876.4500122 | 876.4438125 |
| VISLSGEHSIIGR                 | P08228 | 0          | n +42.03 Da,             | 3379.162109 | 3 | 470.6000061 | 470.5964216 |
| SHQVENEILFPGCVLR              | Q8R0F9 | 0.01005632 | n +34.06 Da,             | 3378.352783 | 3 | 644.6699829 | 644.6788574 |
| FSLNDALDSSNSMQTVQKTTTR        | P05784 | 0.00553427 | n +34.06 Da,K +34.06 Da, | 3377.914307 | 3 | 838.0999756 | 838.1043315 |
| RVAGPQPAQTGAPQGSGLGEYLFER     | P29391 | 0.00049213 | n +31.05 Da,             | 3376.155518 | 3 | 854.1199951 | 854.1154116 |
| AEVSKSDIGEVLVGGMTR            | P38647 | 0.01081731 | n +42.03 Da,K +28.03 Da, | 3540.081787 | 3 | 677.7000122 | 677.6978773 |
| MYIKQVIIQGFR                  | Q9CW03 | 0          | n +34.06 Da,K +34.06 Da, | 3373.504639 | 3 | 522         | 521.9953866 |
| GFDDGIIWATWKS                 | Q8VCM7 | 0          | n +34.06 Da,K +34.06 Da, | 4055.500977 | 3 | 573.9899902 | 573.9878373 |
| VGVAVVNGLLYAIGGYDQQLR         | D3Z201 | 0.01335953 | n +34.06 Da,             | 4288.773438 | 3 | 723.4099731 | 723.4143985 |
| EDVQETDTSQKQSPASHEIATNLGDFALR | Q00897 | 0          | n +34.06 Da,K +34.06 Da, | 3368.412109 | 4 | 843.4199829 | 843.422208  |
| LGNTQGIISAFSTIMSVHR           | Q9DB20 | 0          | n +42.03 Da,             | 4714.421387 | 3 | 692.039978  | 692.0298496 |
| ILVTLHTLER                    | Q8CAY6 | 0.00049213 |                          | 3368.191162 | 3 | 445.9502258 | 445.9501356 |
| LIPGSLQNEPTASVPPQSDVYR        | O70209 | 0.03460838 | n +17.03 Da,             | 4362.859863 | 4 | 597.0599976 | 597.066929  |
| PFPDGLAEDIDKGEVSAR            | P58252 | 0.01262327 | n +34.06 Da,K +34.06 Da, | 3603.074463 | 3 | 662.0300293 | 662.0267986 |
| SAKAISEQTGKELLYKY             | Q91V92 | 0          | n +42.03 Da,K +34.06 Da, | 3367.084473 | 3 | 691.7486572 | 691.7490831 |
| AAAKKAVLGPLVGAVDQGTSSSTR      | Q64516 | 0          | n +42.03 Da,K +34.06 Da, | 3365.544434 | 3 | 769.7929688 | 769.7937566 |
| DDEVVDVDTVEEDLGKSR            | P08113 | 0          | n +34.06 Da,K +34.06 Da, | 3364.992188 | 3 | 682.6799927 | 682.6763835 |
| GYVKAGPWTPAAVEHPEAVR          | O35490 | 0.0194508  | n +17.03 Da,K +34.06 Da, | 3388.667725 | 3 | 772.4099731 | 772.4183605 |
| PIYEGYALPHAILR                | P60710 | 0.00049213 | n +17.03 Da,             | 3359.13916  | 3 | 543.9799805 | 543.9769024 |
| TPKVDFPQDQLATLTGR             | P08249 | 0.00049213 | n +34.06 Da,K +34.06 Da, | 3355.254883 | 3 | 652.3800049 | 652.3792833 |
| LAKVDATEESDLAQYGVVR           | P09103 | 0.01262327 | n +42.03 Da,K +34.06 Da, | 3354.322754 | 3 | 723.710022  | 723.713062  |
| AAVPELLEQQEEDRSKLR            | Q9D8U8 | 0          | n +42.03 Da,K +34.06 Da, | 3354.10376  | 3 | 729.7299805 | 729.7324564 |
| DFGVAIQEKVLER                 | P97372 | 0          | n +34.06 Da,K +34.06 Da, | 3353.208496 | 3 | 524.6500244 | 524.6524547 |
| DPQVLAVAAHDVGEYVR             | Q8BVE3 | 0          | n +34.06 Da,             | 4103.626465 | 3 | 625.0062866 | 625.0057392 |
| MDFSCLKPKIR                   | P50516 | 0.00049213 | n +42.03 Da,K +34.06 Da, | 3348.87793  | 3 | 448.9498291 | 448.9496658 |
| VMQFTTFYASEDKLENR             | O35490 | 0          | n +34.06 Da,K +34.06 Da, | 3347.007568 | 3 | 716.3800049 | 716.3753219 |
| VHQEIDEVIGHVR                 | Q8CIM7 | 0.04190544 |                          | 3346.788574 | 3 | 520.2730103 | 520.2827256 |
| TFVVQGGFNVGLHSMR              | P26443 | 0          | n +34.06 Da,             | 3489.469727 | 3 | 594.9893188 | 594.9892543 |
| GAFGYFEVTHDITR                | P24270 | 0.00049213 | n +34.06 Da,             | 3344.670166 | 3 | 549.6199951 | 549.6177036 |
| PESLHQVSFLFSR                 | P24270 | 0.00049213 | n +17.03 Da,             | 3344.599365 | 3 | 560.289978  | 560.2914387 |
| TAISENYQTMSDTTFKALR           | P47753 | 0          | n +34.06 Da,K +34.06 Da, | 3343.424316 | 3 | 749.0599976 | 749.0650363 |
| IINEPTAAAIAAYGLDKR            | P20029 | 0.00181242 | n +17.03 Da,K +34.06 Da, | 3341.995117 | 3 | 623.039978  | 623.0351873 |
| SHPAVIQAGLQTLLEFGAGLSSTR      | O88986 | 0          | n +34.06 Da,             | 4527.254395 | 3 | 835.1199951 | 835.1169703 |



|                                     |        |            |                          |             |   |             |             |
|-------------------------------------|--------|------------|--------------------------|-------------|---|-------------|-------------|
| VAPVSDIIEIKSPDTFVR                  | Q99LC5 | 0          | n +34.06 Da,K +34.06 Da, | 3742.742676 | 3 | 685.4159546 | 685.4104721 |
| IHTQPPPPPIPEVVATWEAISLGR            | Q8BGA8 | 0          | n +34.06 Da,             | 4752.813965 | 3 | 880.4970093 | 880.4971221 |
| EPEGKEVWDYVTVR                      | Q920A5 | 0          | n +34.06 Da,K +34.06 Da, | 3338.653564 | 2 | 887.9899902 | 887.9859734 |
| IGDGGFVFALEKR                       | O35490 | 0          | n +34.06 Da,K +34.06 Da, | 3337.851807 | 3 | 492.969635  | 492.9663732 |
| LFHIDAKGVLR                         | Q61171 | 0.00049213 | n +34.06 Da,K +34.06 Da, | 3336.994629 | 3 | 438.3099976 | 438.3044372 |
| SYGRPPPDVEGMTSLKVDNLTYS             | Q62093 | 0          | n +42.03 Da,K +34.06 Da, | 3335.744141 | 3 | 891.1300049 | 891.1251373 |
| PFLDIQKQLGISLDR                     | Q99LY9 | 0          | n +17.03 Da,K +34.06 Da, | 3671.544434 | 4 | 457.7999878 | 457.7989904 |
| TTGGESLLPEEYEQWKQR                  | Q91VA0 | 0          | n +34.06 Da,K +34.06 Da, | 3334.07959  | 3 | 740.3900146 | 740.3920294 |
| GDPKEEEEEELVDPLTTVR                 | P99028 | 0.00049213 | n +17.03 Da,K +34.06 Da, | 3481.757813 | 3 | 746.0499878 | 746.0533021 |
| PSIFTVLTAKSLR                       | O09173 | 0          | n +17.03 Da,K +34.06 Da, | 3591.282471 | 3 | 495.3200073 | 495.320487  |
| VLTGGGNPIGDKLNIMTAGSR               | P24270 | 0          | n +34.06 Da,K +34.06 Da, | 3331.547607 | 3 | 747.4299927 | 747.4283088 |
| LSAAATSAPVAPNHQPEVFCNQIFINNEWHDAVSR | P47738 | 0          | n +31.05 Da,             | 4141.180664 | 3 | 1307.969971 | 1307.97617  |
| PAYKGQILTMANPIIGNGGAPDPTAR          | Q8C196 | 0.00049213 | n +17.03 Da,K +34.06 Da, | 3612.604492 | 3 | 893.4799805 | 893.4900794 |
| VPPVQVSPLIKFR                       | Q06185 | 0          | n +34.06 Da,K +34.06 Da, | 3326.837402 | 3 | 535.6903076 | 535.6889511 |
| RVVLPMEPIR                          | P00405 | 0.00553427 | n +34.06 Da,             | 3325.894287 | 3 | 452.9586792 | 452.9584545 |
| AVRPLQLLGTCAELCR                    | Q8BTE6 | 0          | n +34.06 Da,             | 3323.618408 | 3 | 631.0205688 | 631.0203374 |
| LKVALIGSPVDLTYR                     | Q91VD9 | 0.00049213 | n +34.06 Da,K +34.06 Da, | 3715.851807 | 3 | 571.7000122 | 571.7030379 |
| EGYAKDFDPAINEYLQR                   | Q9QXD6 | 0          | n +34.06 Da,K +34.06 Da, | 3568.960449 | 3 | 699.7000122 | 699.7023149 |
| AAAKKAVLGPLVGAVDQGSSTR              | Q64516 | 0.01005632 | n +42.03 Da,K +34.06 Da, | 3321.282227 | 4 | 577.5996094 | 577.5971366 |
| MDDREDLVYQAKLAEQAER                 | P62259 | 0          | n +42.03 Da,K +34.06 Da, | 3594.463135 | 3 | 786.0606689 | 786.0602447 |
| PDPSTKDFLLQQTMLR                    | Q9CPU0 | 0          | n +17.03 Da,K +34.06 Da, | 3558.433838 | 3 | 647.6950684 | 647.6960659 |
| AEMVNLPLVHAAIR                      | Q64442 | 0.00144578 | n +34.06 Da,             | 3320.568604 | 3 | 523.3099976 | 523.3115569 |
| PGIDKLPHEETLEDSPQTR                 | Q8K3H0 | 0          | n +17.03 Da,K +34.06 Da, | 3316.470215 | 3 | 730.4055176 | 730.4022651 |
| PAPATTF AHL DATTVLSR                | P56480 | 0          | n +17.03 Da,             | 3315.354736 | 2 | 943.5187988 | 943.5126661 |
| IAQDYGV LKADEGISFR                  | P35700 | 0.00264434 | n +34.06 Da,K +34.06 Da, | 3315.133789 | 3 | 650.7002563 | 650.7037669 |
| WTTVGDLEGCVHYKVVKYER                | P97820 | 0.0471464  | n +42.03 Da,K +28.03 Da, | 4545.872559 | 3 | 846.4500122 | 846.4334239 |
| VGGEASAAVEKLVSGVR                   | Q9D211 | 0          | n +34.06 Da,K +34.06 Da, | 3345.513428 | 3 | 566.3464966 | 566.3458021 |
| LDPNVTIILKEPVR                      | Q99PL5 | 0          | n +34.06 Da,K +34.06 Da, | 3312.613037 | 3 | 559.0325928 | 559.0311545 |
| SPEDA EFIVAKAIR                     | P14685 | 0          | n +34.06 Da,K +34.06 Da, | 3312.363037 | 3 | 538.65802   | 538.6559764 |
| GGVDYSFECIGNVKVMR                   | P28474 | 0          | n +34.06 Da,K +34.06 Da, | 3466.897705 | 3 | 667.020752  | 667.0185921 |
| MDFSKLPKIR                          | P50516 | 0.00049213 | n +42.03 Da,K +34.06 Da, | 3307.774414 | 3 | 448.9510498 | 448.9496658 |
| PSTKDFLLQQTMLR                      | Q9CPU0 | 0          | n +17.03 Da,K +34.06 Da, | 3306.931641 | 3 | 577.0047607 | 577.0028297 |
| SHQTGIQASEDVKEIFAR                  | Q91YR1 | 0          | n +42.03 Da,K +34.06 Da, | 3303.513916 | 3 | 698.0357666 | 698.0342466 |
| ADEIAKAQVAQPGGDTIFGKIIR             | P70349 | 0          | n +42.03 Da,K +34.06 Da, | 4022.365967 | 2 | 1254.72998  | 1254.726486 |
| SSPAQPAVPAPLADLKIQHTK               | P24549 | 0          | n +42.03 Da,K +34.06 Da, | 3295.889404 | 3 | 760.4522095 | 760.4513306 |
| ATFEEVSVLGFEEFDKAVKEH               | Q9CQM5 | 0          | n +42.03 Da,K +34.06 Da, | 4809.018066 | 3 | 841.1107788 | 841.1092996 |
| HPDTGISSKAMGIMNSFVNDIFER            | P10853 | 0.03833635 | n +42.03 Da,K +34.06 Da, | 4747.803223 | 3 | 914.7999878 | 914.7861272 |
| TDPAPATTF AHL DATTVLSR              | P56480 | 0          | n +34.06 Da,             | 3580.263428 | 3 | 707.0499878 | 707.0462637 |
| MKPPAACAGDVVDAASPASTVNHLR           | Q8C1A5 | 0          | n +42.03 Da,K +34.06 Da, | 3333.207275 | 3 | 871.1099854 | 871.1108335 |
| VPVITGSKDLQNVNITLR                  | P67778 | 0          | n +34.06 Da,K +34.06 Da, | 3292.662109 | 3 | 679.0900269 | 679.0897328 |

|                         |        |            |                          |             |   |             |             |
|-------------------------|--------|------------|--------------------------|-------------|---|-------------|-------------|
| KVISTTKAPAAIGPYSQAVQVDR | P52760 | 0          | n +31.05 Da,             | 3291.322266 | 3 | 811.1300049 | 811.1287694 |
| ESFTPDHKPLMGEAPELR      | Q99LB7 | 0.00669176 | n +42.03 Da,K +34.06 Da, | 3290.54834  | 3 | 710.7000122 | 710.6964659 |
| PDDIWQLSSSLKR           | Q9CYN2 | 0          | n +17.03 Da,K +34.06 Da, | 3290.226318 | 3 | 532.6400146 | 532.6386563 |
| VPPVQVSPLIKFGR          | Q06185 | 0          | n +34.06 Da,K +34.06 Da, | 3285.821289 | 3 | 535.6886597 | 535.6889511 |
| PVTGSAHTVLSSYSWQQLR     | Q9DCG6 | 0          | n +17.03 Da,             | 3284.933105 | 3 | 712.039978  | 712.0411833 |
| TATLSDIKALIR            | P57780 | 0          | n +34.06 Da,K +34.06 Da, | 3282.324707 | 3 | 457.3099976 | 457.3065069 |
| SSPAQPAVPAPLADLKIQHTK   | P24549 | 0          | n +42.03 Da,K +34.06 Da, | 3282.212402 | 4 | 570.5912476 | 570.5903171 |
| FVEESVYDEFVKR           | P24549 | 0          | n +34.06 Da,K +34.06 Da, | 3384.51123  | 3 | 572.3200073 | 572.31562   |
| INNVAKAHGGYSVFAGVGER    | P56480 | 0.02759135 | n +42.03 Da,K +34.06 Da, | 3276.569824 | 3 | 708.039978  | 708.0465977 |
| ILVTLHTLER              | Q8CAY6 | 0.01662157 | n +14.02 Da,             | 3275.578613 | 3 | 441.2799988 | 441.2782523 |
| FPLLQAFKTR              | P24472 | 0.00049213 | n +34.06 Da,K +34.06 Da, | 3271.217285 | 3 | 430.2900085 | 430.2852655 |
| TVDIPENVEITLKGR         | P51410 | 0.00049213 | n +34.06 Da,K +34.06 Da, | 3270.335693 | 3 | 584.6900024 | 584.6894575 |
| AQTKLAELEAALQR          | P11679 | 0          | n +34.06 Da,K +34.06 Da, | 3267.627441 | 3 | 537.3357544 | 537.3351257 |
| PSTKDFLLQQTMLR          | Q9CPU0 | 0          | n +17.03 Da,K +34.06 Da, | 3266.459229 | 3 | 577.0036621 | 577.0028297 |
| NVDEEVQIGHVPR           | P11276 | 0.00181242 | n +31.05 Da,             | 3474.228516 | 3 | 508.269989  | 508.2722669 |
| YLGTQPEPDIVGLDSGHIR     | P52196 | 0.00049213 |                          | 3262.967285 | 3 | 699.039978  | 699.0321363 |
| AGASTYMYEFEYRPSFVSAMR   | Q8VCT4 | 0.02159091 | n +34.06 Da,             | 4048.102295 | 3 | 833.0599976 | 833.0628203 |
| GHSDVVMGLVSVNSDDLNSR    | Q8VCN5 | 0.00049213 | n +34.06 Da,             | 3260.373535 | 3 | 712.3599854 | 712.3585132 |
| PFEAFKDSEGYIYAR         | Q99JW2 | 0          | n +17.03 Da,K +34.06 Da, | 3256.615234 | 2 | 922.4699707 | 922.4780189 |
| EYCIQALPEFDGKR          | P08113 | 0.01005632 | n +34.06 Da,K +34.06 Da, | 3248.220459 | 3 | 598.6542358 | 598.6557593 |
| PVTQMLSCLSHPEHI         | Q3ULJ0 | 0          | n +14.02 Da,             | 3246.375244 | 2 | 945.960022  | 945.9636753 |
| GLKLISEVIGER            | P13707 | 0          | n +34.06 Da,K +34.06 Da, | 3245.269287 | 3 | 461.3099976 | 461.3065069 |
| PAPATTF AHL DATTVLSR    | P56480 | 0.00049213 | n +17.03 Da,             | 3242.462646 | 3 | 629.3429565 | 629.3442029 |
| PAPATTF AHL DATTVLSR    | P56480 | 0          | n +17.03 Da,             | 3283.248291 | 3 | 629.3440552 | 629.3442029 |
| PNTHENLTYLQLLER         | Q8R0W0 | 0.00096665 | n +17.03 Da,             | 3382.309082 | 3 | 620         | 620.0004362 |
| DAHFLMASLGAR            | A3KMP2 | 0.00049213 | n +34.06 Da,             | 3237.388184 | 3 | 441.5700073 | 441.574781  |
| GVVDNFPLLKALR           | P30115 | 0          | n +34.06 Da,K +34.06 Da, | 3994.311768 | 3 | 503.9980164 | 503.9977847 |
| PFEAFKDSEGYIYAR         | Q99JW2 | 0          | n +17.03 Da,K +34.06 Da, | 3235.074219 | 3 | 615.3231201 | 615.3211048 |
| HTSSLKVTNEPILAFSQGSPER  | Q8CHT0 | 0          | n +31.05 Da,             | 3232.37793  | 3 | 810.4400024 | 810.4326293 |
| ASGVAVSDGVIKVFNDMKVR    | P18760 | 0          | n +42.03 Da,K +34.06 Da, | 4204.05127  | 3 | 734.7579956 | 734.7577661 |
| SQAVEELADQLEQTKR        | Q8VDD5 | 0.00049213 | n +34.06 Da,K +34.06 Da, | 3226.525879 | 3 | 638.3598022 | 638.3585482 |
| AELGLNEHHQNEVINYMR      | Q9JHQ5 | 0          | n +42.03 Da,             | 3226.234863 | 3 | 737.0177612 | 737.0200136 |
| SAGFLQASASDVVVVHGR      | Q8VCH0 | 0          | n +34.06 Da,             | 3220.086914 | 3 | 612         | 612.0058505 |
| PDPI LGVTEAFKR          | P05202 | 0.00049213 | n +17.03 Da,K +34.06 Da, | 3219.494141 | 3 | 498.6400146 | 498.6364753 |
| ISSGTVLSDYVSGPPSGTGLHR  | P70296 | 0          | n +34.06 Da,             | 3214.549316 | 3 | 760.0700073 | 760.0677278 |
| AGKPV LHYFDGR           | P30115 | 0          | n +42.03 Da,K +34.06 Da, | 3212.147705 | 2 | 718.4001465 | 718.39888   |
| LTGAVFAQDKAIVQEATR      | Q8CHT0 | 0          | n +34.06 Da,K +34.06 Da, | 3205.123291 | 3 | 662.7299805 | 662.726683  |
| VPPVQVSPLIKFGR          | Q06185 | 0          | n +34.06 Da,K +34.06 Da, | 3203.614502 | 3 | 535.6879272 | 535.6889511 |
| YLGTQPEPDIVGLDSGHIR     | P52196 | 0          | n +31.05 Da,             | 3197.45874  | 3 | 700.039978  | 700.037439  |
| SAGLAGMGGIQTEKETMQDLNDR | P05784 | 0          | n +34.06 Da,K +34.06 Da, | 3188.071533 | 3 | 830.7600098 | 830.7581667 |

|                          |        |            |                          |             |   |             |             |
|--------------------------|--------|------------|--------------------------|-------------|---|-------------|-------------|
| ASLKDLEGKWR              | Q05816 | 0          | n +42.03 Da,K +34.06 Da, | 3186.499023 | 3 | 471.6244202 | 471.6226066 |
| LEIHGEMKFDR              | P63038 | 0.00049213 | n +34.06 Da,K +34.06 Da, | 3184.38501  | 3 | 473.6199951 | 473.6164641 |
| IIGGSMADAKGSPFWQAK       | Q61646 | 0          | n +34.06 Da,K +34.06 Da, | 3181.195068 | 3 | 632.371521  | 632.3696598 |
| ASKPTLNEVVIVSAIR         | Q8QZT1 | 0.00346921 | n +42.03 Da,K +28.03 Da, | 3211.629883 | 3 | 589.6730957 | 589.6840076 |
| AFCAPPAYLTHQQKVLRL       | Q9CQJ8 | 0          | n +42.03 Da,K +34.06 Da, | 3178.370605 | 2 | 1038.569946 | 1038.567215 |
| AAAAASRAVGAKLGLR         | Q9CQ75 | 0.00386432 | n +42.03 Da,K +34.06 Da, | 3174.7146   | 3 | 520.3254395 | 520.3248541 |
| DIKMTQSPSSMYASLGER       | P01637 | 0          | n +34.06 Da,K +34.06 Da, | 3265.594482 | 3 | 690.3499756 | 690.3607955 |
| AFCAPPAYLTHQQKVLRL       | Q9CQJ8 | 0          | n +42.03 Da,K +34.06 Da, | 3216.351563 | 3 | 692.7131958 | 692.7139019 |
| LFEENEINLTHIESR          | P16331 | 0.00181242 | n +14.02 Da,             | 3171.369629 | 3 | 619.9899902 | 619.9828938 |
| NDEELNKLGR               | P22752 | 0.00049213 | n +42.03 Da,K +34.06 Da, | 3166.163818 | 3 | 459.5899963 | 459.5912658 |
| LKVLQPTIFPVVPR           | P41216 | 0          | n +34.06 Da,K +34.06 Da, | 3628.462891 | 3 | 559.0499878 | 559.0483679 |
| DLPKNWDWR                | Q9WUU7 | 0.00669176 | n +34.06 Da,K +34.06 Da, | 3161.896973 | 3 | 433.249176  | 433.2489917 |
| APVEHVADAGAFRL           | Q8BW10 | 0          | n +34.06 Da,             | 3159.852539 | 3 | 529.3026123 | 529.3018266 |
| SQAEFDKAAEEVKR           | P31786 | 0.00049213 | n +42.03 Da,K +34.06 Da, | 4489.26416  | 3 | 573.3200073 | 573.3179124 |
| PAPATTFAHLDATTVLSR       | P56480 | 0.00049213 | n +17.03 Da,             | 3398.196533 | 3 | 629.3450928 | 629.3442029 |
| SVLTGDGYLSIHR            | Q9Z0M5 | 0.01262327 | n +34.06 Da,             | 3190.865723 | 3 | 522.2999878 | 522.3017153 |
| HVGDGLGNVTAGKDGVANVSIEDR | P08228 | 0          | n +42.03 Da,K +34.06 Da, | 3139.776855 | 3 | 800.4099731 | 800.4173085 |
| AFCAPPAYLTHQQKVLRL       | Q9CQJ8 | 0          | n +42.03 Da,K +34.06 Da, | 3136.658936 | 2 | 1038.560059 | 1038.567215 |
| PFLDIQKLGISLDR           | Q99LY9 | 0.00049213 | n +42.03 Da,K +34.06 Da, | 4488.005859 | 3 | 618.3900146 | 618.3892306 |
| AAKAVLGLPLGAVDQGTSSSTR   | Q64516 | 0          | n +42.03 Da,K +34.06 Da, | 3165.870605 | 3 | 746.1199951 | 746.1147186 |
| DVLKALALGAR              | Q9NYQ2 | 0.00346921 | n +34.06 Da,K +34.06 Da, | 3131.686523 | 3 | 398.9400024 | 398.9450205 |
| SAGFLQASASDVVVHGR        | Q8VCHO | 0          | n +34.06 Da,             | 3129.205566 | 3 | 612.0019531 | 612.0058505 |
| SGVSLAALKKAL             | P15864 | 0.00939926 | n +42.03 Da,K +34.06 Da, | 3128.762207 | 3 | 423.2999878 | 423.2921976 |
| SQAEFDKAAEEVKR           | P31786 | 0.01081731 | n +42.03 Da,K +34.06 Da, | 4786.878906 | 3 | 573.3200073 | 573.3179124 |
| TGLSIHEVYQSETGISSATLR    | Q91VA0 | 0.00181242 |                          | 3158.763672 | 3 | 769.3800049 | 769.3922822 |
| MKKLASDAGIFFTR           | Q8R3V5 | 0.00669176 | n +42.03 Da,K +34.06 Da, | 3965.430176 | 3 | 565.6689453 | 565.6693397 |
| ASLKDLEGKWR              | Q05816 | 0.00264434 | n +42.03 Da,K +34.06 Da, | 3114.998047 | 2 | 706.9259644 | 706.9302716 |
| SSPAQPAVPAPLADLKIQHTK    | P24549 | 0          | n +42.03 Da,K +34.06 Da, | 3112.649902 | 3 | 760.4500122 | 760.4513306 |
| ASKPTLNEVVIVSAIR         | Q8QZT1 | 0          | n +34.06 Da,K +34.06 Da, | 3112.148926 | 3 | 589.0430908 | 589.0454639 |
| PQDTFESEFYLDEKR          | P07759 | 0          | n +17.03 Da,K +34.06 Da, | 3111.229248 | 3 | 652.3200073 | 652.3266961 |
| YTPEQVAMATVTLHR          | Q91Y97 | 0.00049213 | n +34.06 Da,             | 3845.754883 | 3 | 608         | 607.9961864 |
| ASLKDLEGKWR              | Q05816 | 0          | n +42.03 Da,K +34.06 Da, | 3105.485107 | 3 | 471.6211243 | 471.6226066 |
| MDFNVKKLAADAGTFLSR       | Q9JK48 | 0          | n +42.03 Da,K +34.06 Da, | 4520.636719 | 3 | 698.7271729 | 698.7278066 |
| EATIIDIIVTHR             | P14824 | 0.00049213 | n +34.06 Da,             | 3104.42749  | 3 | 434.5899353 | 434.5927178 |
| AAPAKGENLSLVVHGPGDIR     | Q64442 | 0          | n +42.03 Da,K +34.06 Da, | 3102.020508 | 2 | 1039.079956 | 1039.084284 |
| DDEVVDVGTVEEDLGKSR       | P08113 | 0          | n +34.06 Da,K +34.06 Da, | 3101.386719 | 3 | 682.6699829 | 682.6763835 |
| TTCRAVLNPLCQVDYR         | Q01405 | 0.00181242 |                          | 3097.531494 | 3 | 665.3400269 | 665.3363964 |
| EGKEVWDYVTVR             | Q920A5 | 0.00049213 | n +34.06 Da,K +34.06 Da, | 3090.604492 | 3 | 516.960022  | 516.9612882 |
| TGLSIHEVYQSETGISSATLR    | Q91VA0 | 0.00264434 | n +17.03 Da,             | 3191.084717 | 3 | 775.0700073 | 775.0694682 |
| GVQGFQEFLEKR             | Q8C3F2 | 0          | n +34.06 Da,K +34.06 Da, | 3085.513672 | 3 | 502.6300049 | 502.6297612 |

|                           |        |            |                          |             |   |             |             |
|---------------------------|--------|------------|--------------------------|-------------|---|-------------|-------------|
| SHTSAAAGTMAGVPTVFSSELR    | E9PY03 | 0          | n +31.05 Da,             | 3710.946777 | 2 | 1104.550049 | 1104.56002  |
| AVFPWHSR                  | Q8BWQ6 | 0.00306883 | n +42.03 Da,             | 3114.124023 | 2 | 521.2644043 | 521.266878  |
| DLPKNWDWR                 | Q9WUU7 | 0.00049213 | n +34.06 Da,K +34.06 Da, | 3121.102539 | 3 | 433.2472229 | 433.2489917 |
| FIIDDKGILR                | P35700 | 0.00181242 | n +34.06 Da,K +34.06 Da, | 3077.215576 | 3 | 419.9400024 | 419.9449092 |
| TIPMDGEHFCFTR             | Q9CZS1 | 0          | n +34.06 Da,             | 3130.694824 | 3 | 548.9299927 | 548.9288957 |
| ASKPTLNEVVIVSAIR          | Q8QZT1 | 0          | n +17.03 Da,K +34.06 Da, | 3075.90625  | 2 | 874.539978  | 874.5487781 |
| STPQSQFQESSPVWKLGR        | Q9D1I5 | 0          | n +34.06 Da,K +34.06 Da, | 3075.303467 | 3 | 710.7225952 | 710.7253423 |
| ASLKDLEGKWR               | Q05816 | 0.00346921 | n +42.03 Da,K +34.06 Da, | 3074.432373 | 2 | 706.9275513 | 706.9302716 |
| SLDSLTEAYKLR              | Q9R0H0 | 0          | n +34.06 Da,K +34.06 Da, | 3073.049072 | 3 | 488.6278381 | 488.6295386 |
| ASKPTLNEVVIVSAIR          | Q8QZT1 | 0          | n +34.06 Da,K +34.06 Da, | 3070.757324 | 3 | 589.0437012 | 589.0454639 |
| TLGGVFTKLINR              | P38647 | 0.00049213 | n +34.06 Da,K +34.06 Da, | 3213.085693 | 3 | 462.9755859 | 462.9749799 |
| DVLFPGYTHLQR              | Q91YI0 | 0          |                          | 3067.69751  | 3 | 491.9299927 | 491.9331449 |
| IDAIFKDLSIR               | Q9WUK2 | 0.00049213 | n +34.06 Da,K +34.06 Da, | 3438.700684 | 3 | 453.6270142 | 453.6274689 |
| AKKVAVIGAGVSGLSSIKC       | Q8VHG0 | 0          | n +42.03 Da,K +34.06 Da, | 3086.599365 | 3 | 663.75      | 663.759036  |
| SAVSASSKWLDGFR            | Q9D855 | 0          | n +34.06 Da,K +34.06 Da, | 3079.143311 | 3 | 526.9699707 | 526.9685543 |
| NYPATVHGALLSGLR           | Q6ZQ88 | 0.01159536 | n +17.03 Da,             | 3059.639404 | 3 | 529.3099976 | 529.3001567 |
| SGPVVAMVWEGLVVKTGR        | P15532 | 0          | n +34.06 Da,K +34.06 Da, | 4348.035156 | 3 | 689.739563  | 689.7400463 |
| CAFLSAFGDLSKPER           | Q9D1Q6 | 0          | n +34.06 Da,K +34.06 Da, | 3714.923096 | 3 | 589.3200073 | 589.324121  |
| PELTIAHLPDR               | Q9Z2V4 | 0.00049213 | n +17.03 Da,             | 3050.139648 | 3 | 464.6099854 | 464.6066979 |
| VSQEHVVLTKFVEGAR          | Q8C196 | 0          | n +42.03 Da,K +34.06 Da, | 3216.932617 | 3 | 658.039978  | 658.0406723 |
| VPPVQVSPLIKFGR            | Q06185 | 0          | n +34.06 Da,K +34.06 Da, | 3244.941162 | 3 | 535.6889648 | 535.6889511 |
| SLMDEVVKATSR              | P09411 | 0          | n +34.06 Da,K +34.06 Da, | 3034.183838 | 3 | 468.610199  | 468.6114905 |
| STPQSQFQESSPVWKLGR        | Q9D1I5 | 0          | n +34.06 Da,K +34.06 Da, | 3034.018555 | 3 | 710.723999  | 710.7253423 |
| SIGVPIKVLHEAEGH           | P62320 | 0          | n +42.03 Da,K +34.06 Da, | 3475.85791  | 3 | 554.6522827 | 554.6526367 |
| KTVTAMDVVYALKR            | P62806 | 0.00264434 | n +42.03 Da,K +34.06 Da, | 3805.261719 | 3 | 569.0073853 | 569.0166281 |
| AGSNVMQFTFFYASEDKLENR     | O35490 | 0          | n +17.03 Da,K +34.06 Da, | 3350.471436 | 3 | 820.4000244 | 820.4093141 |
| ADKMDMSLDDIILNLR          | O08583 | 0          | n +42.03 Da,K +34.06 Da, | 4137.698242 | 3 | 663.3657227 | 663.3657691 |
| DVFAVYNATKEAR             | P50136 | 0          | n +34.06 Da,K +34.06 Da, | 3015.525879 | 2 | 776.4400024 | 776.4437437 |
| LVLEVAQHLGESTVR           | P56480 | 0          |                          | 3015.235107 | 3 | 550.9799805 | 550.9773024 |
| HVGDLGNVTAGKDGVANVSIEDR   | P08228 | 0.00049213 | n +42.03 Da,K +34.06 Da, | 3014.195557 | 3 | 800.4199829 | 800.4173085 |
| PDTPFDFTPENYKR            | Q9D6J6 | 0          | n +17.03 Da,K +34.06 Da, | 3064.780029 | 3 | 593.3047485 | 593.3054547 |
| GLTVVVKPIDFETNR           | P15116 | 0          | n +34.06 Da,K +34.06 Da, | 3149.337402 | 3 | 586.0200195 | 586.0261808 |
| VSLHLGVTSPVLR             | O89023 | 0.00049213 | n +34.06 Da,             | 3005.526855 | 3 | 471.2999878 | 471.2996456 |
| SDLELHPPSYPWSHR           | Q9D0M3 | 0          | n +34.06 Da,             | 3004.103027 | 4 | 464.488678  | 464.4891034 |
| PLENLEEEGLPKNPDLR         | Q99JI4 | 0          | n +17.03 Da,K +34.06 Da, | 3002.179932 | 3 | 672.0391235 | 672.0407787 |
| MLTLASKLKR                | Q9CY34 | 0.00181242 | n +42.03 Da,K +34.06 Da, | 3000.695557 | 3 | 424.2900085 | 424.2899108 |
| MEAPAPSLTEEDLTEVKKDALENLR | Q9Z0H7 | 0.00181242 | n +42.03 Da,K +34.06 Da, | 4275.07373  | 3 | 970.5200195 | 970.5198116 |
| PALPHAIDLLR               | Q8BUV3 | 0.00049213 | n +17.03 Da,             | 2991.74585  | 3 | 411.5899963 | 411.5889781 |
| SLDDIILNLR                | O08583 | 0.0329912  | n +34.06 Da,K +34.06 Da, | 2987.161621 | 3 | 418.9400024 | 418.9399355 |
| VAPGEVLMQAIQPAHADSR       | Q9DBK0 | 0          | n +34.06 Da,             | 2986.740479 | 3 | 704.3699951 | 704.3757266 |

|                           |        |            |                          |             |   |             |             |
|---------------------------|--------|------------|--------------------------|-------------|---|-------------|-------------|
| LRPGDCEVCISYLGR           | Q9CXI5 | 0          | n +34.06 Da,             | 2986.340576 | 3 | 610.3132324 | 610.3134096 |
| VTFSPATIEEELIKFCR         | Q9CXI5 | 0          | n +34.06 Da,K +34.06 Da, | 4473.267578 | 3 | 703.3956909 | 703.3959456 |
| EVELGVLLGKR               | Q8R0F8 | 0.00590468 | n +34.06 Da,K +34.06 Da, | 3009.898438 | 3 | 427.6199951 | 427.6239472 |
| ALGPDGQLLHSDAFPPPR        | P97328 | 0          | n +34.06 Da,             | 2978.462646 | 3 | 641.3499756 | 641.3496172 |
| PVTGSAHTVLSSYWSQQLR       | Q9DCG6 | 0.00049213 | n +17.03 Da,             | 3161.453125 | 3 | 712.039978  | 712.0411833 |
| EAYPGDVFYLHSR             | Q03265 | 0          |                          | 2974.532471 | 3 | 527.9299927 | 527.9280599 |
| PDVFAQFKDFTATFGPLDSLNT    | Q05920 | 0          | n +17.03 Da,K +34.06 Da, | 4725.958496 | 3 | 880.1300049 | 880.130657  |
| SAGFLQASASDVVVVHGR        | Q8VCH0 | 0          | n +34.06 Da,             | 2970.200684 | 2 | 917.5       | 917.5051375 |
| MEQVNELKEKGNKAL           | Q60864 | 0          | n +42.03 Da,K +34.06 Da, | 3045.049805 | 3 | 625.7070923 | 625.7083415 |
| PAPSPPNDFQNNVQVKLIR       | Q8K2C7 | 0          | n +17.03 Da,K +34.06 Da, | 2966.673096 | 3 | 729.0800171 | 729.0832005 |
| TTFAHLDATTVLSR            | P56480 | 0          | n +34.06 Da,             | 2962.297119 | 2 | 783.9299927 | 783.9385672 |
| SPGHVDFSEVTAALR           | P58252 | 0          | n +34.06 Da,             | 3237.75     | 3 | 569.6400146 | 569.6355347 |
| VALEQQSPDIAQCIVHLDR       | Q91X83 | 0          | n +34.06 Da,             | 2961.97998  | 3 | 705.0307617 | 705.0354816 |
| AGAESDGGQFQFTGIKKYFN      | Q78IK2 | 0          | n +34.06 Da,K +34.06 Da, | 3997.260986 | 3 | 820.7692261 | 820.7692065 |
| QKLKHMVLDKMHARARGPR       | P59470 | 0.04623044 | n +31.05 Da,K +31.05 Da, | 3209.922363 | 3 | 789.1500244 | 789.1438537 |
| DLKVELSQLR                | Q6ZVV7 | 0.00346921 | n +34.06 Da,K +34.06 Da, | 2956.483643 | 3 | 423.6099854 | 423.6118188 |
| PYTVSHYAIGEEWER           | P11276 | 0.00096665 | n +17.03 Da,             | 2954.547119 | 3 | 618.6300049 | 618.6337534 |
| TTFAHLDATTVLSR            | P56480 | 0          | n +34.06 Da,             | 2954.101318 | 3 | 522.958313  | 522.9614703 |
| ATEGDVELELETETSGPERPPEKPR | Q9CR41 | 0          | n +42.03 Da,K +34.06 Da, | 3496.689941 | 3 | 948.1400146 | 948.1436918 |
| PDGHEICFVGDEAFR           | Q9CPV4 | 0.00049213 | n +17.03 Da,             | 3053.449951 | 3 | 589.2716064 | 589.2719385 |
| VAPQAPVHFLVIPR            | Q9D0S9 | 0          | n +34.06 Da,             | 3233.692627 | 3 | 526.6629028 | 526.6628067 |
| ELFSDIYKIR                | P63028 | 0.00096665 | n +34.06 Da,K +34.06 Da, | 3275.143799 | 3 | 451.2796021 | 451.2800692 |
| NYVAEKISGQKVNAAACDIAR     | O35490 | 0.04623044 | n +42.03 Da,K +34.06 Da, | 2960.448975 | 3 | 816.0999756 | 816.1058948 |
| ILLRPELEELR               | Q9DCN2 | 0.00264434 | n +34.06 Da,             | 3047.109619 | 3 | 472.2987061 | 472.2995343 |
| ALGPDGQLLHSDAFPPPR        | P97328 | 0          | n +34.06 Da,             | 3081.37085  | 3 | 641.3400269 | 641.3496172 |
| AASLVGKKIVFVTGNAK         | Q9D892 | 0          | n +42.03 Da,K +34.06 Da, | 3262.748047 | 3 | 616.4099731 | 616.4119647 |
| HVGDLGNVTAGKDGVANVSIEDR   | P08228 | 0          | n +17.03 Da,K +34.06 Da, | 2940.646729 | 2 | 1187.609985 | 1187.632821 |
| DPSPKKEESYSDWGLR          | Q99P27 | 0          | n +34.06 Da,K +34.06 Da, | 2937.716064 | 3 | 654.9899902 | 654.9953871 |
| CAGWADKIHGQTIPSDGDIFTYTR  | P24549 | 0          | K +31.05 Da,             | 4211.737793 | 3 | 914.1099854 | 914.1114505 |
| ASLKDLEGKWR               | Q05816 | 0          | n +42.03 Da,K +34.06 Da, | 2941.881348 | 3 | 471.6193848 | 471.6226066 |
| STITEVALQSGKGTVSLPSR      | Q8BJ03 | 0          | n +34.06 Da,K +34.06 Da, | 3002.553711 | 3 | 700.4138794 | 700.4162861 |
| PNSNDGLVTVVKPIDFETNR      | P15116 | 0          | n +17.03 Da,K +34.06 Da, | 3351.581543 | 3 | 756.0800171 | 756.0815258 |
| TIGKEIIDPVLLDR            | P68368 | 0.03172261 | n +34.06 Da,K +34.06 Da, | 2932.051758 | 3 | 512.9899902 | 512.9925884 |
| TGIKAVDSLVIPIGR           | Q03265 | 0.00049213 | n +34.06 Da,K +34.06 Da, | 2929.406006 | 3 | 498.6600037 | 498.6610614 |
| FVIPALQVAHFQR             | Q8BK48 | 0          | n +34.06 Da,             | 3729.753418 | 3 | 520.6491089 | 520.6471567 |
| QDLSKIMADIR               | P05784 | 0.00096665 | n +34.06 Da,K +34.06 Da, | 2991.828857 | 3 | 453.269989  | 453.2763304 |
| IHTQPPPPPIPEVVATWEAISLGR  | Q8BGA8 | 0          | n +34.06 Da,             | 4628.115234 | 3 | 880.5       | 880.4971221 |
| VSGYPTLKIFR               | P08003 | 0          | n +34.06 Da,K +34.06 Da, | 2921.632568 | 3 | 450.2900085 | 450.2923089 |
| PSGVSYGYWGCAIGKAR         | O70435 | 0          | n +17.03 Da,K +34.06 Da, | 2920.286865 | 3 | 627.3275757 | 627.329717  |
| SAAEEVDGLGVVRPHYGSVLDNER  | Q9JKF1 | 0          | n +42.03 Da,             | 3588.416992 | 3 | 871.1118774 | 871.0964173 |

|                          |        |            |                          |             |   |             |             |
|--------------------------|--------|------------|--------------------------|-------------|---|-------------|-------------|
| DEELNLLGR                | P22752 | 0.00181242 | n +34.06 Da,K +34.06 Da, | 2948.77417  | 3 | 418.9250793 | 418.9278071 |
| PVEHVADAGAFRLR           | Q8BW10 | 0.00264434 | n +17.03 Da,             | 2916.293701 | 3 | 499.9400024 | 499.9456022 |
| PVLGSIKSLR               | P16331 | 0.00049213 | n +17.03 Da,K +34.06 Da, | 2990.05957  | 3 | 411.9599915 | 411.9553676 |
| AHGSVVKSEDYAFPTYADR      | P19783 | 0          | n +42.03 Da,K +34.06 Da, | 2913.556641 | 3 | 730.3581543 | 730.362252  |
| PEVVVFKDDQSIR            | Q6PDN3 | 0          | n +17.03 Da,K +34.06 Da, | 2920.357666 | 3 | 557.3099976 | 557.3105397 |
| TTITSVLPKALVASR          | Q8C196 | 0          | n +34.06 Da,K +34.06 Da, | 3046.233643 | 3 | 574.7102051 | 574.7101926 |
| LPFIIDDKGR               | O08709 | 0.00049213 | n +34.06 Da,K +34.06 Da, | 2907.688721 | 3 | 446.9500122 | 446.9520639 |
| FPSVVVGLGKR              | Q9CPY7 | 0          | n +34.06 Da,K +34.06 Da, | 2909.910889 | 3 | 442.6327515 | 442.6361869 |
| TMCIGPEGDLHGVPPECAVR     | O35490 | 0.00049213 | n +34.06 Da,             | 2902.332031 | 3 | 762.7000122 | 762.7011168 |
| DPSPKSEESYSDWGLR         | Q99P27 | 0          | n +34.06 Da,K +34.06 Da, | 2897.088135 | 3 | 654.9899902 | 654.9953871 |
| LTTGPAHWELLQR            | Q9JHW2 | 0          | n +34.06 Da,             | 2896.946777 | 3 | 519.2937012 | 519.2983049 |
| STALVHGILEGIR            | Q9Z0J0 | 0          | n +34.06 Da,             | 3049.783203 | 3 | 467.2861328 | 467.2875172 |
| PKEEEEEELVDPLTTVR        | P99028 | 0          | n +17.03 Da,K +34.06 Da, | 3072.978516 | 3 | 688.7016602 | 688.7038327 |
| ALKAADTIGYPMIR           | Q8C196 | 0.00264434 | n +34.06 Da,K +34.06 Da, | 2996.870117 | 3 | 563.0144043 | 563.0131064 |
| AHGSVVKSEDYAFPTYADR      | P19783 | 0          | n +42.03 Da,K +34.06 Da, | 2893.435303 | 2 | 1095.030029 | 1095.03974  |
| TAVYPIDLVKTR             | Q8BH59 | 0          | n +34.06 Da,K +34.06 Da, | 2887.445557 | 3 | 481.9746704 | 481.9783903 |
| YGLAATVWSKDVGR           | Q8BH00 | 0          | n +42.03 Da,K +34.06 Da, | 2883.781738 | 3 | 533.6400146 | 533.629832  |
| PAVLGFEGSANKIGVGVVR      | Q8BWU5 | 0          | n +17.03 Da,K +34.06 Da, | 3258.650635 | 3 | 641.0545044 | 641.0545817 |
| HVGD LGNV TAGDGVANVSIEDR | P08228 | 0          | n +17.03 Da,K +34.06 Da, | 2993.969482 | 3 | 792.0800171 | 792.0909729 |
| SVQSI VPALEIANAHR        | P63038 | 0.00346921 | n +34.06 Da,             | 3270.265137 | 3 | 580.3400269 | 580.3389408 |
| GKIS PQSNVDFDLTLR        | Q9DCS2 | 0.00939926 | n +34.06 Da,K +34.06 Da, | 3060.939453 | 2 | 929.539978  | 929.5389046 |
| AHGSVVKSEDYAFPTYADR      | P19783 | 0          | n +42.03 Da,K +34.06 Da, | 2872.818115 | 3 | 730.3581543 | 730.362252  |
| PELTS MHTLFVR            | P11247 | 0          | n +17.03 Da,             | 2872.497314 | 3 | 483.2600098 | 483.2640548 |
| MLTLASKLKR               | Q9CY34 | 0.00096665 | n +42.03 Da,K +34.06 Da, | 3041.070313 | 3 | 424.2888794 | 424.2899108 |
| SSHLQSPPHAPSNAAFGFPR     | P53566 | 0.00049213 | n +42.03 Da,             | 2869.362061 | 3 | 716.3400269 | 716.3520916 |
| GQVVQFKLSDIGEGIR         | P53395 | 0          | n +34.06 Da,K +34.06 Da, | 3494.704346 | 2 | 907.539978  | 907.5439896 |
| SQAEFDKAAEEVKR           | P31786 | 0.0329912  | n +42.03 Da,K +34.06 Da, | 3222.849365 | 3 | 573.3184204 | 573.3179124 |
| ARFPQASASDVVVVHGR        | Q921H8 | 0          | n +42.03 Da,             | 2863.376953 | 3 | 613.3300171 | 613.3271058 |
| LTPHYLTKQDVER            | Q9DBG6 | 0          | n +42.03 Da,K +34.06 Da, | 2861.430908 | 3 | 592.9899902 | 592.9949515 |
| SGTKPDILWAPHQVDR         | Q8VE19 | 0.00049213 | n +42.03 Da,K +34.06 Da, | 2861.165771 | 3 | 632.6744995 | 632.6777338 |
| SSIKVECLRENYR            | Q64374 | 0.00049213 | n +42.03 Da,K +34.06 Da, | 2860.880127 | 3 | 610.3286743 | 610.3314577 |
| APNVLASEPEIPKGR          | Q9WTP6 | 0          | n +34.06 Da,K +34.06 Da, | 2857.873535 | 2 | 880.039978  | 880.0410826 |
| VYHEGLPEPLTLR            | P01896 | 0.0201751  | n +14.02 Da,             | 2852.839355 | 3 | 513.2800293 | 513.283955  |
| VKLFIGNLPR               | Q8C7Q4 | 0.00049213 | n +34.06 Da,K +34.06 Da, | 2852.144531 | 3 | 408.952301  | 408.9536272 |
| SGAPIKIPVGPETLGR         | P56480 | 0.00669176 | n +34.06 Da,K +34.06 Da, | 2852.036133 | 2 | 830.5202637 | 830.525068  |
| PTAVVDAQTKVIGVENLR       | Q8BJ64 | 0          | n +17.03 Da,K +34.06 Da, | 2849.831299 | 3 | 654.3900146 | 654.3932634 |
| MTLGDIVYKR               | P12710 | 0.00049213 | n +34.06 Da,K +34.06 Da, | 2849.760742 | 3 | 421.9294434 | 421.9303827 |
| APNVLASEPEIPKGR          | Q9WTP6 | 0          | n +34.06 Da,K +34.06 Da, | 2849.336426 | 4 | 440.522583  | 440.5241795 |
| VYEDQVGKFDWR             | Q8C7X2 | 0          | n +34.06 Da,K +34.06 Da, | 2848.311523 | 2 | 805.4299927 | 805.4359186 |
| TALVHGILEGIR             | Q9Z0J0 | 0          | n +34.06 Da,             | 2895.805176 | 3 | 438.274353  | 438.2768409 |

|                       |        |            |                          |             |   |             |             |
|-----------------------|--------|------------|--------------------------|-------------|---|-------------|-------------|
| PSDYVAIKAPMFSWPR      | Q8C196 | 0          | n +17.03 Da,K +34.06 Da, | 3964.289307 | 3 | 639.3499756 | 639.3502295 |
| GSQITFEKLIATGGTPR     | Q9Z0X1 | 0          | n +34.06 Da,K +34.06 Da, | 2838.947998 | 3 | 668.710022  | 668.7121566 |
| SSPAQPAVPAPLADLKIQHTK | P24549 | 0          | n +42.03 Da,K +34.06 Da, | 2838.413818 | 4 | 570.5900269 | 570.5903171 |
| SDMIVAAIQAEKNR        | P10922 | 0          | n +34.06 Da,K +34.06 Da, | 2831.817383 | 3 | 538.6500244 | 538.6487159 |
| SAGFLQASASDVVVVHGR    | Q8VCHO | 0          | n +34.06 Da,             | 3178.622803 | 3 | 612.0081787 | 612.0058505 |
| TFAHLDATTVLSR         | P56480 | 0          | n +34.06 Da,             | 2831.676025 | 3 | 489.2767944 | 489.2789106 |
| AHGSVVKSEDYAFPTYADR   | P19783 | 0          | n +42.03 Da,K +34.06 Da, | 2829.851074 | 3 | 730.3599854 | 730.362252  |
| PKYLVVNADEGEPGTCKDR   | Q91YTO | 0          | n +42.03 Da,K +34.06 Da, | 2828.098633 | 3 | 753.3900146 | 753.396786  |
| GVDVHPGYGFLSER        | Q05920 | 0.00049213 | n +34.06 Da,             | 2822.205566 | 2 | 819.4290771 | 819.4283667 |
| SGGKYVDSEGHLYTVPIR    | P49817 | 0.00049213 | n +42.03 Da,K +34.06 Da, | 2821.984375 | 3 | 685.3615112 | 685.363704  |
| TLFTKELVLQR           | Q78PY7 | 0.00049213 | n +34.06 Da,K +34.06 Da, | 2817.182373 | 3 | 472.6462708 | 472.646752  |
| AGKKVCIVGSGNWGSAIAK   | P13707 | 0          | n +42.03 Da,K +34.06 Da, | 2817.111572 | 3 | 683.076355  | 683.0787686 |
| YFVSIDAHAECEFFER      | Q9R0Q3 | 0          | n +34.06 Da,             | 3962.752197 | 3 | 685.3200073 | 685.3227397 |
| TSIAIDTIINQKR         | Q03265 | 0          | n +34.06 Da,K +34.06 Da, | 2816.113281 | 3 | 514.3300171 | 514.327971  |
| STFVLDEFKR            | Q9D8N0 | 0.00049213 | n +34.06 Da,K +34.06 Da, | 2815.570313 | 3 | 437.2600098 | 437.2644191 |
| DALAGLVASNPDLQLLQGHR  | Q8VC30 | 0          | n +34.06 Da,             | 4160.006836 | 3 | 708.0700073 | 708.0657694 |
| PDDGFNYKQMMVVR        | O35887 | 0          | n +17.03 Da,K +34.06 Da, | 2813.428467 | 3 | 551.2767944 | 551.2779651 |
| APNVLASEPEIPK GIR     | Q9WTP6 | 0          | n +34.06 Da,K +34.06 Da, | 2810.820313 | 3 | 587.0284424 | 587.0298139 |
| ARFPQASASDVVVVHGR     | Q921H8 | 0          | n +42.03 Da,             | 3435.109619 | 3 | 613.3300171 | 613.3271058 |
| APNVLASEPEIPK GIR     | Q9WTP6 | 0          | n +34.06 Da,K +34.06 Da, | 2808.480469 | 4 | 440.5233154 | 440.5241795 |
| PKVQQTVDLFGFR         | P38647 | 0          | n +17.03 Da,K +34.06 Da, | 2804.137207 | 3 | 522.9778442 | 522.9790127 |
| SQAEFDKAAEEVK         | P31786 | 0          | n +42.03 Da,K +34.06 Da, | 2803.189941 | 2 | 781.4174805 | 781.4226746 |
| AELRALVAVKR           | Q9DCW4 | 0.00181242 | n +42.03 Da,K +34.06 Da, | 2798.974121 | 3 | 434.6194153 | 434.6207189 |
| DDEVVDVDTVEEDLGKSR    | P08113 | 0          | n +34.06 Da,K +34.06 Da, | 3142.564941 | 3 | 682.6699829 | 682.6763835 |
| LSVSLKGEQMSQAATICR    | P35505 | 0.0201751  | n +34.06 Da,K +34.06 Da, | 2794.202637 | 3 | 659.3699951 | 659.3695135 |
| AASPSKTEIQTIFKR       | Q99K28 | 0          | n +42.03 Da,K +34.06 Da, | 2791.44873  | 3 | 596.3594971 | 596.3614522 |
| VTLVAVGTQVHVIR        | Q6P3A8 | 0.00049213 | n +34.06 Da,             | 3394.83252  | 3 | 538.3300171 | 538.3297164 |
| PAPATTFAHLDATTVLSR    | P56480 | 0.00049213 | n +17.03 Da,             | 3201.541748 | 3 | 629.3400269 | 629.3442029 |
| VAAQAVEDVLHIAR        | Q8C5H8 | 0.00049213 | n +14.02 Da,             | 3240.196289 | 3 | 502.6199951 | 502.6193376 |
| SAGFLQASASDVVVVHGR    | Q8VCHO | 0          | n +34.06 Da,             | 2776.876221 | 3 | 612.0037842 | 612.0058505 |
| LTPHTHYLTKQDVER       | Q9DBG6 | 0          | n +42.03 Da,K +34.06 Da, | 2768.453369 | 3 | 592.9899902 | 592.9949515 |
| EIYKTYFQGS LPAR       | P52760 | 0          | n +34.06 Da,K +34.06 Da, | 2767.923828 | 3 | 581.0028687 | 581.0033761 |
| AACFYDIK LGR          | Q9Z0X1 | 0          | n +34.06 Da,K +34.06 Da, | 2797.668457 | 3 | 461.269989  | 461.2692871 |
| EIYKTYFQGS LPAR       | P52760 | 0          | n +34.06 Da,K +34.06 Da, | 2766.073242 | 2 | 871         | 871.0014259 |
| SLAGIGDVLSKR          | O54962 | 0.00049213 | n +34.06 Da,K +34.06 Da, | 2764.351563 | 3 | 428.6144104 | 428.6154518 |
| AHIFVYGT LKR          | Q923B0 | 0          | n +42.03 Da,K +34.06 Da, | 2762.416016 | 3 | 460.9436035 | 460.9452025 |
| SLAGIGDVLSKR          | O54962 | 0.00096665 | n +34.06 Da,K +34.06 Da, | 2761.567627 | 3 | 428.6142578 | 428.6154518 |
| MLKTPAQFDAELR         | P10107 | 0          | n +34.06 Da,K +34.06 Da, | 2761.459229 | 3 | 568.3192139 | 568.320488  |
| APAGILNGKLVSAQIR      | Q922D8 | 0          | n +34.06 Da,K +34.06 Da, | 2780.547607 | 3 | 559.364624  | 559.3666485 |
| TFLLDGDVEIITGHCQGDGYR | P35505 | 0          | n +14.02 Da,             | 3761.163818 | 3 | 794.0499878 | 794.0461174 |

|                            |        |            |                          |             |   |             |             |
|----------------------------|--------|------------|--------------------------|-------------|---|-------------|-------------|
| FTFYASEDKLENR              | Q35490 | 0.00096665 | n +34.06 Da,K +34.06 Da, | 2758.640869 | 3 | 563.3005371 | 563.303603  |
| GVDVHPGYGFLSER             | Q05920 | 0          | n +34.06 Da,             | 2825.762939 | 3 | 546.6193848 | 546.6213366 |
| QIFINNEWHDAVSR             | P47738 | 0.00386432 | n +34.06 Da,             | 2931.9104   | 3 | 588.3032227 | 588.3076407 |
| GREESPLIGQQATVSDIPR        | P11276 | 0          | n +34.06 Da,             | 2746.950439 | 3 | 728.7299805 | 728.7325677 |
| TPEQVAMATVTALHR            | Q91Y97 | 0          | n +34.06 Da,             | 2743.702637 | 2 | 829.960022  | 829.9589767 |
| VFGAQSPFGGYKMSGSGR         | P47738 | 0          | n +34.06 Da,K +34.06 Da, | 2755.591553 | 3 | 634.3400269 | 634.3385417 |
| VGVPVGSDFDFQPELSGASGR      | Q8CDN6 | 0.0129768  | n +34.06 Da,K +34.06 Da, | 2742.94458  | 4 | 567.5617065 | 567.5630282 |
| TPEQVAMATVTALHR            | Q91Y97 | 0          | n +34.06 Da,             | 2741.211426 | 3 | 553.6405029 | 553.6417433 |
| APAGILNGKLVSAQIR           | Q922D8 | 0          | n +34.06 Da,K +34.06 Da, | 2739.898926 | 3 | 559.3649292 | 559.3666485 |
| SQAEFDKAAEEVKR             | P31786 | 0          | n +42.03 Da,K +34.06 Da, | 2739.168213 | 3 | 573.3099976 | 573.3179124 |
| TKAFAMTNQILVER             | Q8C196 | 0          | n +34.06 Da,K +34.06 Da, | 2747.653809 | 2 | 845.5       | 845.5032783 |
| SVFAEAIKVR                 | Q9DBM2 | 0.00049213 | n +34.06 Da,K +34.06 Da, | 2824.806885 | 3 | 420.269989  | 420.2766588 |
| SSIKVECVLRENYR             | Q64374 | 0.00049213 | n +42.03 Da,K +34.06 Da, | 2735.602783 | 3 | 610.3302612 | 610.3314577 |
| MKVFTGPLPAEGR              | Q91Z53 | 0.00181242 | n +34.06 Da,K +34.06 Da, | 2735.240479 | 3 | 523.9869385 | 523.9867799 |
| VVFTDEMAHFDR               | P24270 | 0          | n +34.06 Da,             | 3054.28833  | 3 | 500.9200134 | 500.9169844 |
| PLENLEEEGLPKNPDLR          | Q99JI4 | 0          | n +17.03 Da,K +34.06 Da, | 3001.373291 | 2 | 1007.549988 | 1007.55753  |
| MEAKGGTVKAASGFNATEDAQLR    | P97429 | 0          | n +42.03 Da,K +34.06 Da, | 2732.403809 | 2 | 1282.170044 | 1282.176501 |
| TASAGIQVVGDDLTVTNPKR       | P17182 | 0          | n +34.06 Da,K +34.06 Da, | 2731.446289 | 3 | 704.0700073 | 704.0761524 |
| TTNTVPLHPYWPR              | P70245 | 0          | n +34.06 Da,             | 2731.121338 | 3 | 539.2966919 | 539.2983049 |
| MEANVTIPIWQNKPHGAAR        | Q9CWE0 | 0          | n +42.03 Da,K +34.06 Da, | 3437.245361 | 3 | 737.0622559 | 737.0634827 |
| SGYQQAASEHGLVVIAPDTSR      | Q9R0P3 | 0          | n +34.06 Da,             | 2724.149658 | 3 | 773.0700073 | 773.0713608 |
| AGKPVLHYFDGR               | P30115 | 0.00749064 | n +42.03 Da,K +34.06 Da, | 2783.246582 | 3 | 479.2657471 | 479.2683455 |
| GVSDGSEVAKAQKAAPGGASPTIFSR | Q9D0S9 | 0          | n +34.06 Da,K +34.06 Da, | 2721.269043 | 3 | 864.1500244 | 864.1609864 |
| AGDQPGADLGLITPQAKER        | Q9EQ20 | 0          | n +34.06 Da,K +34.06 Da, | 2718.315674 | 3 | 701.3900146 | 701.4007474 |
| TFNSIMKCDVDIR              | P60710 | 0          | n +34.06 Da,K +34.06 Da, | 2716.602783 | 2 | 833.9500122 | 833.9500215 |
| SLTFGAVTGPDPEEAGTKAR       | P21981 | 0          | n +34.06 Da,K +34.06 Da, | 2711.229004 | 3 | 720.3900146 | 720.3920294 |
| DFDFGTMSHVIR               | Q61941 | 0          | n +34.06 Da,             | 3673.377197 | 3 | 486.9137878 | 486.9134627 |
| SAGFLQASASDVVVVHGR         | Q8VCHO | 0          | n +34.06 Da,             | 2735.673584 | 3 | 612.0064697 | 612.0058505 |
| APNVLASEPEIPKIR            | Q9WTP6 | 0.00049213 | n +34.06 Da,K +34.06 Da, | 2710.860107 | 3 | 587.0266724 | 587.0298139 |
| LIGPKAPLVLEQGLR            | P54869 | 0          | n +34.06 Da,K +34.06 Da, | 3134.240234 | 3 | 558.0405273 | 558.0433942 |
| PQHWPEPEEFQPER             | Q64481 | 0.00590468 | n +17.03 Da,             | 2707.38916  | 3 | 608.2866211 | 608.290098  |
| IMDPNIVGNEHYDVAR           | P56480 | 0          | n +14.02 Da,             | 2693.348877 | 2 | 928.9400024 | 928.9516223 |
| VSELFADKVPKTAENFR          | P17742 | 0          | n +42.03 Da,K +34.06 Da, | 4115.48291  | 3 | 736.7600098 | 736.7493765 |
| PAHMLQEISSYTTTTITAPPSGNER  | P13516 | 0          | n +34.06 Da,             | 2801.055908 | 3 | 975.4699707 | 975.4888048 |
| FGNYNQPSNYGPMKSGNFGGSR     | O88569 | 0          | n +34.06 Da,K +34.06 Da, | 2687.725342 | 3 | 859.0800171 | 859.0854937 |
| SAMNVVFSEDEMCR             | Q8C196 | 0          | n +34.06 Da,K +34.06 Da, | 2686.848389 | 2 | 855.9400024 | 855.9449365 |
| ATLRVHPEAQAKVDVFR          | P97371 | 0          | n +42.03 Da,K +34.06 Da, | 2684.50293  | 4 | 504.0400696 | 504.0417689 |
| MLGGLGKLAAEGLAHR           | Q8CF02 | 0          | n +42.03 Da,K +34.06 Da, | 4106.34668  | 3 | 557.3271484 | 557.3258664 |
| GGQ TALNCGVELFKR           | Q8C196 | 0          | n +34.06 Da,K +34.06 Da, | 2813.890625 | 3 | 573.3300171 | 573.3278653 |
| FDRDDVALEGVGHFFR           | P29391 | 0          |                          | 4151.492676 | 3 | 636.638916  | 636.6514781 |



|                          |        |            |                          |             |   |             |             |
|--------------------------|--------|------------|--------------------------|-------------|---|-------------|-------------|
| NVLASEPEIPKGR            | Q9WTP6 | 0          | n +34.06 Da,K +34.06 Da, | 2667.780762 | 3 | 531         | 530.9998544 |
| ELLIGDVMEMKR             | Q922Q1 | 0          | n +34.06 Da,K +34.06 Da, | 2663.849121 | 3 | 457.6155701 | 457.6164641 |
| EVKEVYMGNVIQGGEGQAPTR    | Q8QZT1 | 0          | n +34.06 Da,K +34.06 Da, | 2660.895752 | 3 | 777.4199829 | 777.4197021 |
| TTIFEVLPEKADR            | Q921I1 | 0.01236045 | n +34.06 Da,K +34.06 Da, | 3194.981445 | 3 | 529.6560669 | 529.6523434 |
| APAGILNGKLVSAQIR         | Q922D8 | 0.00939926 | n +34.06 Da,K +34.06 Da, | 2657.944092 | 3 | 559.3651733 | 559.3666485 |
| SIVPALEIANAHR            | P63038 | 0.00049213 | n +34.06 Da,             | 2652.66626  | 3 | 475.6199951 | 475.6192669 |
| GVKIMGTSPLQIDR           | Q8C196 | 0          | n +34.06 Da,K +34.06 Da, | 2651.417969 | 2 | 791.9823608 | 791.9847212 |
| PVTGDLWVGCHPNGMR         | P52430 | 0          | n +17.03 Da,             | 2648.919434 | 3 | 604.9591064 | 604.9609295 |
| SFELTEQQKEFQATAR         | P45952 | 0          | n +34.06 Da,K +34.06 Da, | 2646.34082  | 3 | 661.0247803 | 661.0269099 |
| SITQVSIYEVDKQDCR         | Q9R0Q6 | 0          | n +34.06 Da,K +34.06 Da, | 2642.613281 | 3 | 670.3599854 | 670.3596718 |
| GVKIMGTSPLQIDR           | Q8C196 | 0          | n +34.06 Da,K +34.06 Da, | 2639.758301 | 3 | 528.324646  | 528.325573  |
| NDEELNKLLGR              | P22752 | 0.04159197 | n +42.03 Da,K +34.06 Da, | 2633.5625   | 3 | 459.6000061 | 459.5912658 |
| APQKVIAPWR               | P16460 | 0.01555815 | n +34.06 Da,K +34.06 Da, | 2631.200439 | 3 | 449.6400146 | 449.6362982 |
| ISTTKAPAAIGPYSQAVQVDR    | P52760 | 0          | n +34.06 Da,K +34.06 Da, | 2631.009277 | 3 | 747.7600098 | 747.7673188 |
| PSGVKVLETAEDIQER         | P16546 | 0.00096665 | n +17.03 Da,K +34.06 Da, | 2630.831543 | 3 | 608.0100098 | 608.0108192 |
| ATSASSHLNKGIKQMYM        | P15105 | 0          | n +42.03 Da,K +34.06 Da, | 2630.094971 | 2 | 989.0300293 | 989.0320749 |
| SLPTSCEHLGLGKVAR         | B1PSD9 | 0.01005632 | n +42.03 Da,K +34.06 Da, | 2629.361816 | 3 | 601         | 600.9998194 |
| ASGADSKGDDLSTAILKQK      | Q01853 | 0          | n +42.03 Da,K +34.06 Da, | 2627.827637 | 2 | 1025.099976 | 1025.099783 |
| PLDDHGDFIR               | E9PVU0 | 0          | n +17.03 Da,             | 2627.270996 | 3 | 438.8999939 | 438.8998814 |
| FIDELDAIAPKR             | Q01853 | 0.04876325 | n +34.06 Da,K +34.06 Da, | 2844.116699 | 3 | 485.9599915 | 485.9662619 |
| PTAAHTANFLLNASGSTSTPAPSR | Q91V92 | 0          | n +14.02 Da,             | 2625.286621 | 3 | 795.0700073 | 795.0715428 |
| SQAEFDKAAEEVKR           | P31786 | 0          | n +42.03 Da,K +34.06 Da, | 2623.634766 | 3 | 573.3173828 | 573.3179124 |
| ASGADSKGDDLSTAILKQK      | Q01853 | 0          | n +42.03 Da,K +34.06 Da, | 2623.454102 | 3 | 683.7344971 | 683.735614  |
| TGGGNPIGDKNIMTAGSR       | P24270 | 0          | n +34.06 Da,K +34.06 Da, | 2874.918213 | 3 | 643.0251465 | 643.0282561 |
| SGQAEFDKAAEEVKR          | F6WUQ1 | 0          | n +42.03 Da,K +34.06 Da, | 2618.561523 | 3 | 592.3240967 | 592.3250671 |
| NVLASEPEIPKGR            | Q9WTP6 | 0.00049213 | n +17.03 Da,K +34.06 Da, | 2615.87207  | 3 | 525.3200073 | 525.3226681 |
| AGKPVLYHFDGR             | P30115 | 0.00049213 | n +42.03 Da,K +34.06 Da, | 2615.478516 | 3 | 479.2683105 | 479.2683455 |
| AIYFKEQFLDGDWNTNR        | P14211 | 0          | n +34.06 Da,K +34.06 Da, | 3909.031982 | 3 | 714.710022  | 714.7145546 |
| PTPAPDDLAQLKNLR          | Q80WJ7 | 0.00049213 | n +17.03 Da,K +34.06 Da, | 2918.892334 | 3 | 567.3300171 | 567.3369775 |
| PLLVKSIIPR               | Q8JZQ2 | 0.01484375 | n +17.03 Da,K +34.06 Da, | 2626.325928 | 3 | 396.2898865 | 396.2884579 |
| TNTMTLGDIVYKR            | P12710 | 0.00049213 | n +34.06 Da,K +34.06 Da, | 2815.016846 | 3 | 527.3099976 | 527.3098116 |
| YGVLKADEGISFR            | P35700 | 0.00049213 | n +34.06 Da,K +34.06 Da, | 2768.241211 | 2 | 761.944397  | 761.9486617 |
| VDVSKPDLTAALR            | P20152 | 0.00049213 | n +34.06 Da,K +34.06 Da, | 2732.545166 | 3 | 484.9700012 | 484.9734166 |
| PGVTVKDVNQEFVR           | Q9CZ8  | 0          | n +17.03 Da,K +34.06 Da, | 2608.206543 | 3 | 589.6712036 | 589.6722488 |
| SIYHPSLLPR               | Q8K009 | 0.00049213 | n +34.06 Da,             | 2606.966064 | 3 | 443.9414978 | 443.9415695 |
| MNYIEGEKVVKR             | Q62417 | 0.00788382 | n +42.03 Da,K +34.06 Da, | 2605.820313 | 3 | 525.9782104 | 525.9781733 |
| PLDLAKLGLR               | Q9QZH6 | 0.01410106 | n +17.03 Da,K +34.06 Da, | 3067.555908 | 3 | 382.9315491 | 382.9325628 |
| AAPAKGENLSLVVHGPDIR      | Q64442 | 0.00553427 | n +42.03 Da,K +34.06 Da, | 2904.013428 | 3 | 693.0499878 | 693.0586147 |
| IIGGSMDAKGSFPWQAK        | Q61646 | 0          | n +34.06 Da,K +34.06 Da, | 3140.651367 | 3 | 632.3599854 | 632.3696598 |
| MQIFVKTLTGK              | POCG49 | 0          | n +34.06 Da,K +34.06 Da, | 2603.377197 | 3 | 456.6400146 | 456.6441719 |

|                          |        |            |                          |             |   |             |             |
|--------------------------|--------|------------|--------------------------|-------------|---|-------------|-------------|
| FPSVVVVLGKR              | Q9CPY7 | 0          | n +34.06 Da,K +34.06 Da, | 2810.044434 | 3 | 442.6300049 | 442.6361869 |
| SQAEFDKAAEEVKR           | P31786 | 0          | n +42.03 Da,K +34.06 Da, | 2600.790527 | 2 | 859.4728394 | 859.4732303 |
| ASGVTVNDEVIKVFNDMKVR     | P45591 | 0          | n +42.03 Da,K +34.06 Da, | 4357.335449 | 3 | 777.772644  | 777.7719642 |
| DPAIYFKEQFLDGDWNTNR      | P14211 | 0.00049213 | n +34.06 Da,K +34.06 Da, | 4173.700195 | 3 | 785.4099731 | 785.4077907 |
| DGDGKTELLVGSSEDFIR       | Q9CWF6 | 0.03703704 | n +42.03 Da,K +34.06 Da, | 2596.41333  | 3 | 681.3499756 | 681.3427462 |
| CWVLSTKAQDDCLPSR         | Q9ESB3 | 0          | n +34.06 Da,K +34.06 Da, | 2807.166748 | 3 | 668.6815796 | 668.68198   |
| PSVFPEPNSFQPHR           | Q9DBG1 | 0.00264434 | n +17.03 Da,             | 2594.913086 | 3 | 552.6199951 | 552.6161449 |
| GPTTPEADKIFLER           | P26443 | 0          | n +34.06 Da,K +34.06 Da, | 2594.370361 | 3 | 547.9872437 | 547.9876147 |
| LYLENPEIKIR              | P21981 | 0.00049213 | n +34.06 Da,K +34.06 Da, | 2819.597168 | 3 | 485.980011  | 485.9783903 |
| APLAGTNKETTIQGLDGLSER    | Q91Y97 | 0.02159091 | n +34.06 Da,K +34.06 Da, | 2816.818115 | 3 | 747.0872192 | 747.0903505 |
| GPTTPEADKIFLER           | P26443 | 0          | n +34.06 Da,K +34.06 Da, | 2591.702148 | 2 | 821.4769897 | 821.4777838 |
| GEKLTDEEVDEMIR           | P62204 | 0.03429405 | n +42.03 Da,K +34.06 Da, | 2692.326904 | 3 | 580.633667  | 580.624196  |
| TTQDIHLGVNESLTD TAR      | P11725 | 0          | n +34.06 Da,             | 2585.725342 | 3 | 669.0200195 | 669.0184852 |
| TVGGVMTKLIPR             | P20029 | 0.00181242 | n +34.06 Da,K +34.06 Da, | 2581.550049 | 3 | 447.2999878 | 447.2970655 |
| SVFLPAPKANNVLR           | Q9CQW3 | 0.00181242 | n +34.06 Da,K +34.06 Da, | 2579.367676 | 3 | 532.0100098 | 532.0085724 |
| TGDGKILYSQCGDVMR         | Q60605 | 0          | n +42.03 Da,K +34.06 Da, | 2577.856201 | 3 | 625.9799805 | 625.976575  |
| ANLEKAQSELSGAADAAR       | Q9D3D9 | 0          | n +42.03 Da,K +34.06 Da, | 2576.667725 | 3 | 669.6900024 | 669.6782402 |
| AGKPVLYHYFDGR            | P30115 | 0.00049213 | n +42.03 Da,K +34.06 Da, | 2575.25293  | 3 | 479.2678833 | 479.2683455 |
| ATSASSHLNKGIKQMYM        | P15105 | 0.00049213 | n +42.03 Da,K +34.06 Da, | 2571.326172 | 3 | 659.6900024 | 659.6904754 |
| QHATNVGIMFR              | P35505 | 0          |                          | 2567.720947 | 2 | 651.3400269 | 651.3427917 |
| PNIVLFGSSHQDLSQR         | Q9CS42 | 0          | n +17.03 Da,             | 2567.403809 | 3 | 634.6699829 | 634.6674572 |
| DDEVVDVGTVEEDLGKSR       | P08113 | 0          | n +34.06 Da,K +34.06 Da, | 3148.681641 | 2 | 1023.51001  | 1023.510937 |
| EEILNSLKYVR              | P11352 | 0          | n +34.06 Da,K +34.06 Da, | 2828.169189 | 3 | 477.9645386 | 477.9662619 |
| SDAPPLTLDGIKDR           | Q9CR21 | 0          | n +34.06 Da,K +34.06 Da, | 2565.675781 | 3 | 522.642395  | 522.643848  |
| TVESTSLYNKVAQAQGEVVR     | Q8CGC7 | 0          | n +34.06 Da,K +34.06 Da, | 2686.002197 | 3 | 707.0700073 | 707.0725194 |
| ASGVAVSDGVIKVFNDMKVR     | P18760 | 0.00049213 | n +42.03 Da,K +34.06 Da, | 4821.164063 | 3 | 734.7600098 | 734.7577661 |
| SQAEFDKAAEEVKR           | P31786 | 0          | n +42.03 Da,K +34.06 Da, | 2557.954102 | 3 | 573.3200073 | 573.3179124 |
| SDAPPLTLDGIKDR           | Q9CR21 | 0          | n +34.06 Da,K +34.06 Da, | 2556.231689 | 2 | 783.4594727 | 783.4621337 |
| GPTTPEADKIFLER           | P26443 | 0          | n +34.06 Da,K +34.06 Da, | 2553.908691 | 3 | 547.9865112 | 547.9876147 |
| LDGDEVIITGHCGQDGYR       | P35505 | 0.02962963 | n +34.06 Da,             | 2553.054688 | 3 | 680.3300171 | 680.3285537 |
| GPTTPEADKIFLER           | P26443 | 0          | n +34.06 Da,K +34.06 Da, | 2551.148438 | 2 | 821.4699707 | 821.4777838 |
| EVKATAGDTHLGGEDFDNR      | P16627 | 0          | n +42.03 Da,K +34.06 Da, | 2549.89624  | 3 | 703.3300171 | 703.3416282 |
| IHTQPPPPPIPEVVATWEAISLGR | Q8BGA8 | 0          | n +31.05 Da,             | 4909.80957  | 3 | 879.4899902 | 879.4918191 |
| AAAAYEHLKLH              | Q9EP69 | 0          | n +42.03 Da,K +34.06 Da, | 2549.6875   | 3 | 433.9100037 | 433.9137911 |
| PDSWDKDVYPEPPSR          | Q9DCS9 | 0          | n +17.03 Da,K +34.06 Da, | 2547.080322 | 3 | 613.6424561 | 613.6442477 |
| PLPLPEYGGKVR             | Q9CQQ7 | 0          | n +17.03 Da,K +34.06 Da, | 2545.425293 | 3 | 491.9712219 | 491.9731986 |
| PIDVCEIGSKV CAR          | Q9D819 | 0          | n +17.03 Da,K +34.06 Da, | 2543.160156 | 3 | 552.2998047 | 552.3007699 |
| GGFVFALEKR               | O35490 | 0.00049213 | n +34.06 Da,K +34.06 Da, | 2540.823975 | 2 | 596.37677   | 596.3796853 |
| GGFVFALEKR               | O35490 | 0.00049213 | n +34.06 Da,K +34.06 Da, | 2536.28418  | 3 | 397.9200134 | 397.9222157 |
| AGIAIKLAKDR              | O08529 | 0.00049213 | n +42.03 Da,K +34.06 Da, | 2627.716064 | 3 | 422.623291  | 422.6240585 |

|                                  |        |            |                          |             |   |             |             |
|----------------------------------|--------|------------|--------------------------|-------------|---|-------------|-------------|
| PGDKVIPLFSPQCCECR                | P00329 | 0          | n +17.03 Da,K +34.06 Da, | 2766.556152 | 3 | 671.0100098 | 671.0169221 |
| SDAPPLTLDGIKDR                   | Q9CR21 | 0          | n +34.06 Da,K +34.06 Da, | 2524.688965 | 3 | 522.6419678 | 522.643848  |
| SQAEFDKAAEEVKR                   | P31786 | 0          | n +42.03 Da,K +34.06 Da, | 2517.327637 | 3 | 573.3200073 | 573.3179124 |
| APNVLASEPEIPKGR                  | Q9WTP6 | 0          | n +34.06 Da,K +34.06 Da, | 2817.292725 | 2 | 880.0366821 | 880.0410826 |
| METDVTSDTVEVLPQHKFDLR            | Q80XL6 | 0          | n +42.03 Da,K +34.06 Da, | 3918.967773 | 2 | 1268.650024 | 1268.644244 |
| ADEIAKAQVAQPGGDTIFGKIIR          | P70349 | 0          | n +42.03 Da,K +34.06 Da, | 4023.755127 | 2 | 1254.727661 | 1254.726486 |
| DFKDVTLGSLVGR                    | Q9R0H0 | 0.02962963 | n +34.06 Da,K +34.06 Da, | 3746.299561 | 3 | 492.2999878 | 492.3015333 |
| MDDSEVESTASILASVKEQEAQFEKLR      | P30999 | 0          | n +42.03 Da,K +34.06 Da, | 4675.8125   | 3 | 1084.560059 | 1084.558995 |
| LGLEELGIELDPKGR                  | O08749 | 0          | n +34.06 Da,K +34.06 Da, | 4001.135986 | 3 | 569.6828613 | 569.6823028 |
| ASGVAVSDGVIKVFNDMKVR             | P18760 | 0          | n +42.03 Da,K +34.06 Da, | 4254.70459  | 2 | 1101.630005 | 1101.633011 |
| GMTAENLAAKYNISR                  | Q8BWT1 | 0          | n +34.06 Da,K +34.06 Da, | 2658.014893 | 3 | 569.6599731 | 569.6558706 |
| PAGILNGKLVSAQIR                  | Q922D8 | 0          | n +17.03 Da,K +34.06 Da, | 2510.052002 | 2 | 794.5085449 | 794.511998  |
| AAAAYEHLKLH                      | Q9EP69 | 0          | n +42.03 Da,K +34.06 Da, | 2508.604248 | 2 | 650.3599854 | 650.3670484 |
| AAAAYEHLKLH                      | Q9EP69 | 0          | n +42.03 Da,K +34.06 Da, | 2508.370605 | 3 | 433.9100037 | 433.9137911 |
| DKARRGKTCLVVVAHR                 | B5X0E4 | 0.02481203 | n +34.06 Da,K +34.06 Da, | 3207.127197 | 3 | 623.7399902 | 623.7319255 |
| PAGILNGKLVSAQIR                  | Q922D8 | 0          | n +17.03 Da,K +34.06 Da, | 2506.78833  | 3 | 530.0100098 | 530.0104241 |
| PDSWDKDVYPEPPSR                  | Q9DCS9 | 0          | n +17.03 Da,K +34.06 Da, | 2506.646729 | 3 | 613.6414795 | 613.6442477 |
| TTKDPSEHSPSVTLFR                 | Q99JW2 | 0.00049213 | n +42.03 Da,K +34.06 Da, | 2506.273926 | 3 | 640.6668091 | 640.6689045 |
| PIDVCEIGSKVCR                    | Q9D819 | 0          | n +17.03 Da,K +34.06 Da, | 2504.257813 | 2 | 827.9400024 | 827.9475166 |
| SAKAISEQTGKELLYKY                | Q91V92 | 0          | n +42.03 Da,K +34.06 Da, | 3377.43042  | 2 | 1037.119995 | 1037.119986 |
| TMCIGPEGDLHGVPPGECAVR            | O35490 | 0          | n +34.06 Da,             | 2820.439941 | 3 | 762.6984863 | 762.7011168 |
| AGAESDQQFQFTGIKKY                | Q78IK2 | 0          | n +34.06 Da,K +34.06 Da, | 2744.363525 | 3 | 650.364624  | 650.3669729 |
| VYKIGGIGTVPVGR                   | P10126 | 0          | n +34.06 Da,K +34.06 Da, | 2494.912842 | 3 | 495.3200073 | 495.3259013 |
| LDYMVTKIPR                       | Q8C196 | 0.00049213 | n +34.06 Da,K +34.06 Da, | 2493.833252 | 3 | 435.269989  | 435.2741494 |
| GPTKPDLLQELR                     | A0JNU3 | 0.00264434 | n +34.06 Da,K +34.06 Da, | 2491.074219 | 3 | 478.9682617 | 478.9698949 |
| DFSDAPFSAGKGV                    | Q99LV7 | 0.00049213 | n +34.06 Da,K +34.06 Da, | 2579.850342 | 3 | 507.9500122 | 507.9492712 |
| AGEESVMNLDKLR                    | Q8K2B3 | 0          | n +34.06 Da,K +34.06 Da, | 2490.932617 | 3 | 510.6199951 | 510.6257999 |
| LSLVVHGPDIR                      | Q64442 | 0          | n +34.06 Da,             | 2489.809814 | 3 | 432.9299927 | 432.9330741 |
| GKMIVECVMNNACTR                  | Q05816 | 0.00049213 | n +34.06 Da,K +34.06 Da, | 2489.626465 | 3 | 651.3300171 | 651.3334172 |
| IGLEEHLNALDR                     | Q8VC30 | 0.00049213 | n +34.06 Da,             | 2546.335693 | 3 | 471.9400024 | 471.9351438 |
| NISATPTLFFRNKVR                  | Q8CDN6 | 0.03363803 | n +42.03 Da,K +34.06 Da, | 4502.535645 | 3 | 663.0599976 | 663.0493903 |
| PILGVTEAFKR                      | P05202 | 0          | n +17.03 Da,K +34.06 Da, | 2484.776123 | 3 | 427.9417725 | 427.9432392 |
| SDAPPLTLDGIKDR                   | Q9CR21 | 0          | n +34.06 Da,K +34.06 Da, | 2606.670654 | 3 | 522.6444702 | 522.643848  |
| GTPPGGSITKVLIANR                 | Q99MR8 | 0          | n +34.06 Da,K +34.06 Da, | 2484.54834  | 3 | 551.682251  | 551.6825255 |
| TFAEDKTYKIR                      | Q8VCF0 | 0          | n +42.03 Da,K +34.06 Da, | 2484.176025 | 2 | 822.9699707 | 822.9670518 |
| LVVGLCTGQIKTGAPCR                | P17182 | 0          | n +34.06 Da,K +34.06 Da, | 2484.017578 | 3 | 633.3699951 | 633.3710768 |
| MIQTRWLNFLVR                     | Q8VHG0 | 0.03138848 | n +42.03 Da,             | 2483.663818 | 3 | 540.3099976 | 540.3010626 |
| SKGPAVGIDLTTYSVGVFQHGKVEIANDQGNR | P63017 | 0.01662157 | n +42.03 Da,K +34.06 Da, | 4125.768066 | 3 | 1266.671021 | 1266.668714 |
| GFSITLKEDGVR                     | Q8VEM8 | 0.00096665 | n +34.06 Da,K +34.06 Da, | 2482.969727 | 3 | 463.9500122 | 463.9506119 |
| GQVVQFKLSDIGEGIR                 | P53395 | 0          | n +34.06 Da,K +34.06 Da, | 3531.9104   | 3 | 605.3599854 | 605.3650852 |

|                             |        |            |                          |             |   |             |             |
|-----------------------------|--------|------------|--------------------------|-------------|---|-------------|-------------|
| ALSPQRRRELCAQLRQWQLKVIENVKR | Q3UHH1 | 0.01694263 | n +42.03 Da,K +34.06 Da, | 2482.449707 | 3 | 1162.670044 | 1162.684414 |
| GIQVVGDDLTVTNPKR            | P17182 | 0          | n +34.06 Da,K +34.06 Da, | 2479.012939 | 3 | 594.0231934 | 594.0248402 |
| QACIGCLEALLDYLHAR           | Q9D4I2 | 0.01798011 | n +34.06 Da,             | 2474.140625 | 3 | 679.7000122 | 679.6871358 |
| GIYIINLKR                   | P14206 | 0.03172261 | n +34.06 Da,K +34.06 Da, | 2473.555176 | 3 | 386.6062012 | 386.6062274 |
| SVACFSTQSPLLKR              | P21614 | 0.00869565 | n +34.06 Da,K +34.06 Da, | 2472.499756 | 3 | 554.6599731 | 554.6608443 |
| PGVVDNFPLLKALR              | P30115 | 0          | n +17.03 Da,K +34.06 Da, | 4014.946533 | 2 | 795.5055542 | 795.5036414 |
| GHCPLVLGTQAQVQEEYEGR        | O70570 | 0          | n +34.06 Da,             | 2472.14624  | 3 | 764.3900146 | 764.3814293 |
| AGILNGKLVSAQIR              | Q922D8 | 0          | n +34.06 Da,K +34.06 Da, | 2471.927246 | 2 | 754.5       | 754.5013953 |
| DFYKILGVPR                  | Q99KV1 | 0.00049213 | n +34.06 Da,K +34.06 Da, | 3530.342041 | 3 | 425.9400024 | 425.9413875 |
| AGILNGKLVSAQIR              | Q922D8 | 0          | n +34.06 Da,K +34.06 Da, | 2468.80542  | 3 | 503.3399963 | 503.3366891 |
| PEVLDATEQALHSR              | P14869 | 0          | n +17.03 Da,             | 3201.179199 | 2 | 812.9375    | 812.9388023 |
| MNQEKLAKLQAQVR              | Q64152 | 0          | n +42.03 Da,K +34.06 Da, | 2467.348877 | 3 | 589.692688  | 589.6909151 |
| LDDLTLKKR                   | Q8R3Q6 | 0.03268454 | n +34.06 Da,K +34.06 Da, | 2466.61499  | 3 | 385.5973511 | 385.5975094 |
| SGSSGTPYLGSKISLISKAQIR      | Q8CGC4 | 0          | n +42.03 Da,K +34.06 Da, | 3406.555908 | 3 | 787.4699707 | 787.4655287 |
| GPPTPEADKIFLER              | P26443 | 0          | n +34.06 Da,K +34.06 Da, | 2634.532471 | 3 | 547.9873047 | 547.9876147 |
| SAGIQVVGDDLTVTNPKR          | P17182 | 0          | n +34.06 Da,K +34.06 Da, | 2639.022949 | 3 | 646.710022  | 646.7145546 |
| PKVQQTVDLDFGR               | P38647 | 0          | n +17.03 Da,K +34.06 Da, | 2792.112793 | 2 | 783.960022  | 783.9648808 |
| GTTPGGSITKVLIANR            | Q99MR8 | 0          | n +34.06 Da,K +34.06 Da, | 2458.756104 | 2 | 827.0200195 | 827.02015   |
| ASLKDLEGKWR                 | Q05816 | 0.03198529 | n +42.03 Da,K +34.06 Da, | 2732.474609 | 3 | 471.620697  | 471.6226066 |
| TTLKSSENKILTSTPIR           | Q8R2X8 | 0          | n +42.03 Da,K +34.06 Da, | 2455.447021 | 3 | 686.0800171 | 686.0810148 |
| SIYHPSLLPR                  | Q8K009 | 0.00049213 | n +34.06 Da,             | 2648.545898 | 3 | 443.9407349 | 443.9415695 |
| EAPQEPDPFTYDYHTLR           | Q92239 | 0          | n +34.06 Da,             | 3408.360596 | 3 | 705.0115356 | 705.0076975 |
| TGFHETSININDFSAGVANR        | P15105 | 0          | n +34.06 Da,             | 2657.873535 | 3 | 691.0037231 | 691.0065795 |
| SLDYMVTKIPR                 | Q8C196 | 0          | n +34.06 Da,K +34.06 Da, | 2810.96167  | 3 | 464.2839355 | 464.2848258 |
| PVVLTKFVEGAR                | Q8C196 | 0          | n +17.03 Da,K +34.06 Da, | 2434.341309 | 2 | 683.9400024 | 683.9376027 |
| PSKGPLQSVQVFGR              | P14131 | 0          | n +17.03 Da,K +34.06 Da, | 2430.812256 | 2 | 775.9642944 | 775.9674233 |
| LVVDNGSGMCKAGFAGDDAPR       | P60710 | 0          | n +34.06 Da,K +34.06 Da, | 2429.637207 | 3 | 735.710022  | 735.7069658 |
| PDSWDKDVYPEPPSR             | Q9DCS9 | 0          | n +17.03 Da,K +34.06 Da, | 2425.200684 | 3 | 613.6400146 | 613.6442477 |
| APAGILNGKLVSAQIR            | Q922D8 | 0          | n +34.06 Da,K +34.06 Da, | 2699.141357 | 3 | 559.3649292 | 559.3666485 |
| PAQKLWIEGPPPEGQSIR          | Q9QZS7 | 0.04623044 | n +34.06 Da,K +34.06 Da, | 3695.297363 | 3 | 658.710022  | 658.7196396 |
| DIVAAGGKEQNLAQLR            | Q8VCW8 | 0          | n +34.06 Da,K +34.06 Da, | 2421.697266 | 2 | 876.0200195 | 876.025964  |
| TTPEADKIFLER                | P26443 | 0.00049213 | n +34.06 Da,K +34.06 Da, | 2501.245361 | 2 | 744.4393311 | 744.4406697 |
| SHTILLVQPTKRPEGR            | P84089 | 0.00049213 | n +42.03 Da,K +28.03 Da, | 2455.349609 | 3 | 634.6900024 | 634.7021726 |
| SSTSAVPQJTTHTYVHPR          | Q921G7 | 0.00049213 |                          | 2413.739258 | 3 | 670.6799927 | 670.6849592 |
| PDSWDKDVYPEPPSR             | Q9DCS9 | 0          | n +17.03 Da,K +34.06 Da, | 2467.790283 | 2 | 919.960022  | 919.9627333 |
| LQDVYKIGGIGTVPVGR           | P10126 | 0.01262327 | n +34.06 Da,K +34.06 Da, | 3189.947998 | 3 | 614.0499878 | 614.0490969 |
| SQAEFDKAAEEVKR              | P31786 | 0          | n +42.03 Da,K +34.06 Da, | 2598.191895 | 3 | 573.3200073 | 573.3179124 |
| DFDVFAHIGNDTSETR            | P21981 | 0          | n +34.06 Da,             | 3779.028564 | 3 | 619.960022  | 619.965721  |
| SNSDMYLHPVAMFR              | P15105 | 0          | n +34.06 Da,             | 3263.770996 | 3 | 567.9464722 | 567.9481788 |
| SGYLLPDTKAYGDR              | P08113 | 0.00181242 | n +34.06 Da,K +34.06 Da, | 2399.958496 | 2 | 812.4500122 | 812.4543087 |

|                              |        |            |                          |             |   |             |             |
|------------------------------|--------|------------|--------------------------|-------------|---|-------------|-------------|
| LGNVTAGKDGVANVSIEDR          | P08228 | 0          | n +34.06 Da,K +34.06 Da, | 2396.950439 | 3 | 661.7086182 | 661.7095809 |
| SSTQFNKGPSYGLSAEVKNR         | Q08093 | 0          | n +42.03 Da,K +34.06 Da, | 2395.615723 | 3 | 760.7399902 | 760.7466951 |
| TSKVALVYQGMNEPPGAR           | P56480 | 0.00049213 | n +34.06 Da,K +34.06 Da, | 2391.775635 | 3 | 662.7069092 | 662.7086349 |
| VISLSGEHSIIGR                | P08228 | 0          | n +14.02 Da,             | 2390.609619 | 2 | 691.3917847 | 691.3935366 |
| GLAGLAAAAGFHVQR              | P36552 | 0          | n +34.06 Da,             | 3431.251221 | 3 | 491.6199951 | 491.6230112 |
| SSMKSVGEVMAIGR               | Q8C196 | 0          | n +34.06 Da,K +34.06 Da, | 2386.983154 | 2 | 760.4342041 | 760.4340069 |
| TDYLMKILTER                  | P60710 | 0.00049213 | n +34.06 Da,K +34.06 Da, | 3865.500977 | 3 | 484.2900085 | 484.2918692 |
| TEATKIAIDAGFR                | P70694 | 0          | n +34.06 Da,K +34.06 Da, | 2383.455322 | 3 | 487.6287231 | 487.6296499 |
| SKGPLQSVQVFGFR               | P14131 | 0.00049213 | n +34.06 Da,K +34.06 Da, | 2381.731445 | 3 | 490.9729614 | 490.9736393 |
| ETDMTKLEECVR                 | O70251 | 0          | n +34.06 Da,K +34.06 Da, | 2380.490479 | 2 | 789.9099731 | 789.9105624 |
| TIPAAALQAQESTEGPGTGQDRPR     | Q9DBG1 | 0          | n +34.06 Da,             | 2378.716064 | 3 | 805.4199829 | 805.4209415 |
| ESAAKPPDDKKEVFR              | P97820 | 0.0299667  | n +31.05 Da,             | 2438.662354 | 3 | 593.6599731 | 593.6651648 |
| PIGDKLNIMTAGSR               | P24270 | 0          | n +17.03 Da,K +34.06 Da, | 2480.366943 | 2 | 762.4500122 | 762.4454666 |
| NAGFDATNINLKLK               | P80313 | 0          | n +34.06 Da,K +34.06 Da, | 3662.237305 | 3 | 538.9899902 | 538.9914704 |
| STVAAASPSHEAKGGLVISPEGLSPAVR | Q8K370 | 0          | n +34.06 Da,K +34.06 Da, | 2762.042969 | 3 | 919.5200195 | 919.5241069 |
| GDSASKVISAEALPGR             | Q9D6Y7 | 0          | n +34.06 Da,K +34.06 Da, | 2372.131836 | 2 | 877.9986572 | 877.9996124 |
| VSPFLDGLLEERPQR              | Q9R1P4 | 0.00181242 | n +34.06 Da,             | 2838.55542  | 3 | 559.6437378 | 559.6441414 |
| GPTTPEADKIFLER               | P26443 | 0.00049213 | n +34.06 Da,K +34.06 Da, | 2369.937744 | 3 | 547.9899902 | 547.9876147 |
| PSKGPLQSVQVFGFR              | P14131 | 0          | n +17.03 Da,K +34.06 Da, | 2369.465576 | 3 | 517.647644  | 517.6473743 |
| VSITPAEVGVLVGKDR             | P62962 | 0.00049213 | n +34.06 Da,K +34.06 Da, | 3419.56958  | 3 | 570.026062  | 570.0261808 |
| CIGPEGDLHGVPPEGCAVR          | O35490 | 0          | n +34.06 Da,             | 2368.303711 | 3 | 685.3400269 | 685.3383954 |
| MDTSRVQPIKLAR                | P62858 | 0          | n +42.03 Da,K +34.06 Da, | 2366.634521 | 3 | 530.9781494 | 530.9784666 |
| PGKAEFYQDRDPLR               | Q8BQ48 | 0.01694263 | n +14.02 Da,K +28.03 Da, | 2684.180176 | 3 | 578.6469727 | 578.6371687 |
| SSDTPAVVTTPPPPSMPHKER        | Q9QYB5 | 0          | n +42.03 Da,K +34.06 Da, | 2365.883301 | 3 | 798.7443848 | 798.7442565 |
| PVIDKTLNEADCATVPPAIR         | Q8K2B3 | 0.00049213 | n +17.03 Da,K +34.06 Da, | 3021.796631 | 3 | 744.4199829 | 744.4157398 |
| PGVTVKDVNQEFVR               | Q9CZX8 | 0          | n +42.03 Da,K +34.06 Da, | 2363.968262 | 2 | 896.4899902 | 896.4942385 |
| AGKPVLYHFDGR                 | P30115 | 0          | n +42.03 Da,K +34.06 Da, | 2543.603027 | 2 | 718.3962402 | 718.39888   |
| SAGFLQASASDVVVVHGR           | Q8VCHO | 0          | n +34.06 Da,             | 2901.099121 | 3 | 612.0018921 | 612.0058505 |
| PNVTIILKEPVR                 | Q99PL5 | 0.00049213 | n +17.03 Da,K +34.06 Da, | 2379.49707  | 2 | 715.4708862 | 715.4718098 |
| PEGTIVCCLEEKPGDR             | P62918 | 0          | n +17.03 Da,K +34.06 Da, | 2362.15918  | 3 | 637.6599731 | 637.6572827 |
| SQAEFDKAAAEVKKR              | P31786 | 0          | n +42.03 Da,K +34.06 Da, | 2641.084717 | 2 | 859.4699707 | 859.4732303 |
| FKDVTLGSVLGR                 | Q9R0H0 | 0.00264434 | n +34.06 Da,K +34.06 Da, | 2925.434082 | 3 | 453.9567261 | 453.9592185 |
| TVSLHLGVTPSVLR               | O89023 | 0          | n +34.06 Da,             | 3051.014404 | 3 | 504.9814453 | 504.9822054 |
| GGIPETTELLKQR                | P47740 | 0.00049213 | n +34.06 Da,K +34.06 Da, | 2356.843262 | 3 | 503.9799194 | 503.9805713 |
| MNHPDYKLNLR                  | Q8CI75 | 0          | n +42.03 Da,K +34.06 Da, | 2356.772461 | 3 | 492.9301758 | 492.9328571 |
| QKTGTAEMSSILEER              | Q03265 | 0          | n +34.06 Da,K +34.06 Da, | 2356.450684 | 3 | 583.3220215 | 583.3225577 |
| SQAEFDKAAAEVKKR              | P31786 | 0          | n +42.03 Da,K +34.06 Da, | 2354.152344 | 3 | 573.3184814 | 573.3179124 |
| SDAPPLTLDGIKDR               | Q9CR21 | 0.00346921 | n +34.06 Da,K +34.06 Da, | 2352.793701 | 3 | 522.6446533 | 522.643848  |
| LGNVTAGKDGVANVSIEDR          | P08228 | 0          | n +34.06 Da,K +34.06 Da, | 2350.708008 | 3 | 661.710022  | 661.7095809 |
| AFKDTGKTPVEPEVAIHR           | P60867 | 0          | n +42.03 Da,K +34.06 Da, | 2350.621582 | 3 | 702.4099731 | 702.4057211 |

|                                       |        |            |                          |             |   |             |             |
|---------------------------------------|--------|------------|--------------------------|-------------|---|-------------|-------------|
| PSKGPLQSVQVFGR                        | P14131 | 0          | n +17.03 Da,K +34.06 Da, | 2390.227539 | 2 | 775.9656982 | 775.9674233 |
| AGLVKSLGVSNFNR                        | Q8VCX1 | 0.00096665 | n +34.06 Da,K +34.06 Da, | 2349.13623  | 3 | 510.6499939 | 510.6526773 |
| LLSVAYKNVVGAR                         | P61982 | 0          | n +34.06 Da,K +34.06 Da, | 2348.981201 | 3 | 486.6540833 | 486.654018  |
| SQAEFDKAAEEVKR                        | P31786 | 0          | n +42.03 Da,K +34.06 Da, | 2374.520508 | 2 | 859.4733887 | 859.4732303 |
| AGKPVLYHFNAR                          | P10648 | 0          | n +42.03 Da,K +34.06 Da, | 2341.6521   | 3 | 483.6119995 | 483.6122235 |
| QKTGTAEMSILEER                        | Q03265 | 0          | n +34.06 Da,K +34.06 Da, | 2339.367432 | 2 | 874.4799805 | 874.4801983 |
| DGVNTFKVLTR                           | P42932 | 0.00049213 | n +34.06 Da,K +34.06 Da, | 2332.156494 | 3 | 439.9400024 | 439.9435685 |
| SPITPTPEQIGKLR                        | O88746 | 0.01081731 | n +34.06 Da,K +34.06 Da, | 2331.067383 | 3 | 535.6725464 | 535.6717378 |
| PVLLTEAPLNPKANR                       | P60710 | 0          | n +17.03 Da,K +34.06 Da, | 2357.905029 | 3 | 562.0200195 | 562.0174675 |
| IIDPAILRPGR                           | Q01853 | 0.01728774 | n +34.06 Da,             | 2342.005615 | 3 | 418.941864  | 418.9416808 |
| GPVFDLTTTPKGGTPAGSTR                  | Q62188 | 0          | n +34.06 Da,K +34.06 Da, | 2389.67627  | 3 | 676.7199707 | 676.7180763 |
| AAPSPSGGGGGGGGGTGPPIGPPASGHPAVSSMQGKR | P47809 | 0          | n +42.03 Da,K +34.06 Da, | 2323.300781 | 4 | 829.6699829 | 829.6641439 |
| SMYQNEKEVGLAIR                        | P70694 | 0          | n +34.06 Da,K +34.06 Da, | 2322.94043  | 3 | 569.3241577 | 569.324121  |
| VISLSGEHSIIGR                         | P08228 | 0          |                          | 2499.557861 | 2 | 698.3973999 | 698.4013616 |
| ASLKDLEGKWR                           | Q05816 | 0          | n +42.03 Da,K +34.06 Da, | 2558.801758 | 3 | 471.6199951 | 471.6226066 |
| SAGFLQASASDVVVVHGR                    | Q8VCHO | 0          | n +34.06 Da,             | 5046.965332 | 3 | 612.0100098 | 612.0058505 |
| DVYQKQJALMANHKKHR                     | Q6UY52 | 0.00939926 | n +31.05 Da,K +31.05 Da, | 2320.661865 | 3 | 672.039978  | 672.0457629 |
| TVSTEDQVKALSTQGSSVGR                  | P34927 | 0          | n +34.06 Da,K +34.06 Da, | 2342.107422 | 3 | 706.7299805 | 706.7273007 |
| DPDAANYKDISDVER                       | Q9D819 | 0          | n +34.06 Da,K +34.06 Da, | 2319.413086 | 3 | 592.6400146 | 592.640944  |
| AAKPKLYYFNGR                          | P24472 | 0.00049213 | n +42.03 Da,K +34.06 Da, | 2319.021484 | 2 | 769.4619141 | 769.4617387 |
| LIFLPLGFDKDGNR                        | Q9D110 | 0.00346921 | n +34.06 Da,K +34.06 Da, | 4012.229736 | 3 | 577.3499756 | 577.3472541 |
| TVHLPSGETLDVFDAER                     | P28271 | 0.00553427 | n +34.06 Da,             | 3708.764648 | 3 | 664.3400269 | 664.3479425 |
| AAKPKLYYFNGR                          | P24472 | 0          | n +42.03 Da,K +34.06 Da, | 2317.664307 | 3 | 513.3105469 | 513.3102513 |
| TFEESFQKALR                           | Q8C196 | 0.00264434 | n +42.03 Da,K +34.06 Da, | 2313.470703 | 3 | 477.9200134 | 477.9278778 |
| PVPALPVKVEPR                          | Q9D1H6 | 0.00049213 | n +17.03 Da,K +34.06 Da, | 2309.619385 | 3 | 451.634613  | 451.6344056 |
| SQAEFDKAAEEVKR                        | P31786 | 0          | n +42.03 Da,K +34.06 Da, | 2307.574463 | 2 | 859.4699707 | 859.4732303 |
| VLAASEIPKIGIR                         | Q9WTP6 | 0          | n +34.06 Da,K +34.06 Da, | 2307.027832 | 3 | 492.9845581 | 492.985545  |
| GAAELMQKKEATTEQQLR                    | O35490 | 0          | n +34.06 Da,K +34.06 Da, | 2306.290283 | 3 | 700.7199707 | 700.7178593 |
| TEATKIAIDAGFR                         | P70694 | 0          | n +34.06 Da,K +34.06 Da, | 2393.175781 | 2 | 730.9400024 | 730.9408366 |
| TTASPSQVRQNYHQDAEAAINR                | P09528 | 0.00049213 | n +42.03 Da,             | 2304.972412 | 3 | 833.7399902 | 833.7372232 |
| FPEDTLEQKAGSVGR                       | Q8VCW8 | 0          | n +34.06 Da,K +34.06 Da, | 2304.282471 | 3 | 567.9852905 | 567.986274  |
| AAAPPLTKAEYLKR                        | Q8R149 | 0.00049213 | n +42.03 Da,K +34.06 Da, | 2300.191895 | 3 | 547.0112305 | 547.0119828 |
| EGHELCPREAVEAEATLR                    | Q9EQF5 | 0          |                          | 2643.819092 | 3 | 698.9989624 | 699.0127475 |
| SGDHLHNDSQLIADFR                      | Q04750 | 0          | n +42.03 Da,             | 2295.908203 | 2 | 941.9199829 | 941.9193658 |
| TSSYGGYKEPAAPVSIQR                    | Q61792 | 0          | n +34.06 Da,K +34.06 Da, | 2294.219727 | 3 | 660.3699951 | 660.3671549 |
| AMNYSAKDEVGGPAGPPGGAAKTR              | Q8VEK0 | 0          | n +42.03 Da,K +34.06 Da, | 2283.92627  | 3 | 843.0978394 | 843.1009212 |
| EVKCDMEVSCPEGYTCCR                    | P28798 | 0          | n +17.03 Da,K +34.06 Da, | 2281.049561 | 3 | 777.6599731 | 777.6650156 |
| PASQFFKGSASSALELTHEELATAEAVR          | Q8R0Y6 | 0          | n +17.03 Da,K +34.06 Da, | 4442.402344 | 3 | 997.5300293 | 997.5241727 |
| TVFPKAQVEDAFR                         | P19096 | 0.00346921 | n +34.06 Da,K +34.06 Da, | 2804.490723 | 3 | 525.9799805 | 525.9770496 |
| PSKGPLQSVQVFGR                        | P14131 | 0.01798011 | n +17.03 Da,K +34.06 Da, | 2327.47876  | 2 | 775.9699707 | 775.9674233 |

|                        |        |            |                          |             |   |             |             |
|------------------------|--------|------------|--------------------------|-------------|---|-------------|-------------|
| VGLKAPGIIPR            | Q03265 | 0.01518692 | n +42.03 Da,K +34.06 Da, | 2277.381836 | 3 | 399.6099854 | 399.6027765 |
| ALKMVKGSIDR            | O54774 | 0.00181242 | n +42.03 Da,K +34.06 Da, | 2278.203613 | 2 | 664.4215698 | 664.4237675 |
| DPDAANYKDISDVER        | Q9D819 | 0          | n +34.06 Da,K +34.06 Da, | 2277.115479 | 3 | 592.6400146 | 592.640944  |
| AAKPKLYYFNGR           | P24472 | 0          | n +42.03 Da,K +34.06 Da, | 2277.044678 | 3 | 513.3091431 | 513.3102513 |
| TIMPKDIQLAR            | P02301 | 0          | n +34.06 Da,K +34.06 Da, | 2274.847412 | 3 | 451.9556885 | 451.9568205 |
| GTKLSMTNDPLEAAR        | P11725 | 0.00386432 | n +34.06 Da,K +34.06 Da, | 2274.617188 | 3 | 557.9828491 | 557.983876  |
| TNVPSQQEGSHFVLTR       | Q99PG0 | 0          | n +34.06 Da,             | 2369.645996 | 3 | 644.3442383 | 644.3446435 |
| EVKCDMEVSCPEGYTCRR     | P28798 | 0          | n +34.06 Da,K +34.06 Da, | 2269.436035 | 2 | 1174.51001  | 1174.509665 |
| PINPTYEATNAMYHR        | Q9WU79 | 0.00049213 | n +17.03 Da,             | 2350.853027 | 3 | 598.960022  | 598.9595833 |
| LTSKVSVISVEEPPQR       | Q9DCW4 | 0          | n +34.06 Da,K +34.06 Da, | 2261.636963 | 3 | 613.0409546 | 613.0403789 |
| MLTKFETKSAR            | Q8CIE6 | 0          | n +42.03 Da,K +34.06 Da, | 2259.378418 | 3 | 474.6214905 | 474.6200972 |
| AHYHDNYGKNDEVEFVR      | P25688 | 0.01372549 | n +42.03 Da,K +34.06 Da, | 2258.019043 | 3 | 723.6799927 | 723.6784629 |
| ATSASSHLNKGIKQMY       | P15105 | 0          | n +42.03 Da,K +34.06 Da, | 2257.602539 | 3 | 616.0108643 | 616.0103138 |
| LVVIPKSVTPVR           | P45376 | 0.03900325 | n +34.06 Da,K +34.06 Da, | 2294.631836 | 3 | 459.3259888 | 459.327242  |
| DYFNLTKTVR             | Q8BFS6 | 0.02159091 | n +34.06 Da,K +34.06 Da, | 2731.050537 | 3 | 442.2667236 | 442.2680521 |
| VKETTYDVLGVKPN         | P63037 | 0          | n +34.06 Da,K +34.06 Da, | 2831.605225 | 2 | 914.5499878 | 914.5512076 |
| PDVTAKVQEEIDR          | Q64458 | 0.03833635 | n +17.03 Da,K +34.06 Da, | 2255.375    | 3 | 517.6199951 | 517.6264166 |
| GIVTDLIKR              | P38647 | 0.01694263 | n +34.06 Da,K +34.06 Da, | 2254.530518 | 3 | 361.5905151 | 361.5904661 |
| TNKETTIQGLDGLSER       | Q91Y97 | 0.00386432 | n +34.06 Da,K +34.06 Da, | 2254.422119 | 3 | 610.6807251 | 610.6795102 |
| TTTATTTTTSGGHPLEFLR    | P54728 | 0.00181242 | n +34.06 Da,             | 2428.451416 | 3 | 676.0300293 | 676.0269806 |
| LVFPSEIVGKR            | P62082 | 0          | n +34.06 Da,K +34.06 Da, | 2761.208252 | 3 | 438.2906799 | 438.2923089 |
| TPEADKIFLER            | P26443 | 0          | n +34.06 Da,K +34.06 Da, | 2296.99585  | 3 | 462.9459229 | 462.9469789 |
| TKDAGTIAGLNVMR         | P20029 | 0.01484375 | n +34.06 Da,K +34.06 Da, | 2252.009033 | 3 | 505.6400146 | 505.6380396 |
| PSDVEVELLAHTR          | Q99LB7 | 0.00049213 | n +14.02 Da,             | 2660.239502 | 3 | 493.9307861 | 493.9315816 |
| GPPHFTSTVLPR           | Q8BJW6 | 0.00181242 | n +34.06 Da,             | 2265.494141 | 3 | 491.2799988 | 491.2753889 |
| PITLFEKER              | P07901 | 0.00181242 | n +17.03 Da,K +34.06 Da, | 2250.249023 | 3 | 428.269989  | 428.2712445 |
| PGVTVKDVNQEFVR         | Q9CZX8 | 0          | n +17.03 Da,K +34.06 Da, | 2248.02124  | 2 | 884         | 884.004735  |
| SQAEFDKAAEEVKR         | P31786 | 0          | n +42.03 Da,K +34.06 Da, | 2272.539551 | 3 | 573.3186035 | 573.3179124 |
| ADEEKLPPGWKR           | Q9QUR7 | 0.00590468 | n +42.03 Da,K +34.06 Da, | 2246.615967 | 2 | 832.96698   | 832.9675833 |
| YITGESKEQVANSFVER      | P11499 | 0          | n +34.06 Da,K +34.06 Da, | 2245.035889 | 3 | 699.3800049 | 699.381353  |
| PITLYLEKER             | P11499 | 0.00181242 | n +17.03 Da,K +34.06 Da, | 2242.958496 | 3 | 438.2748108 | 438.2747662 |
| PKVIQPEVDTPLR          | Q8VCU1 | 0          | n +17.03 Da,K +34.06 Da, | 2241.064697 | 3 | 533.9899902 | 533.9945514 |
| ATPEASGSGEKVEGSEPSVYYR | Q9CQX2 | 0.00049213 | n +42.03 Da,K +34.06 Da, | 2240.125732 | 3 | 826.4000244 | 826.4012132 |
| ATSASSHLNKGIKQMY       | P15105 | 0          | n +42.03 Da,K +34.06 Da, | 2239.361084 | 2 | 923.5111694 | 923.5118324 |
| SDAPPLTLDGIKDR         | Q9CR21 | 0          | n +34.06 Da,K +34.06 Da, | 2483.947021 | 3 | 522.6400146 | 522.643848  |
| SGYLLPDTKAYGDR         | P08113 | 0.01694263 | n +34.06 Da,K +34.06 Da, | 2398.718018 | 3 | 541.9699707 | 541.9719646 |
| ATSKVALVYGMNEPPGAR     | P56480 | 0          | n +34.06 Da,K +34.06 Da, | 2375.668701 | 3 | 686.3872681 | 686.3876729 |
| PPGIEPSPDKMLQGR        | P24270 | 0          | n +17.03 Da,K +34.06 Da, | 2356.52124  | 3 | 558.3114624 | 558.3152963 |
| LGDSVTTDHISPAGNIAR     | P28271 | 0.00939926 | n +34.06 Da,             | 2229.030029 | 3 | 619.9971924 | 620.0007655 |
| TPEADKIFLER            | P26443 | 0          | n +34.06 Da,K +34.06 Da, | 2285.459473 | 2 | 693.9128418 | 693.91683   |

|                                  |        |            |                          |             |   |             |             |
|----------------------------------|--------|------------|--------------------------|-------------|---|-------------|-------------|
| PDFQPELSGAGSR                    | Q8CDN6 | 0          |                          | 2227.004639 | 2 | 680.8300171 | 680.8282269 |
| VLSGEDKSNIKAAW                   | P01942 | 0          | n +34.06 Da,K +34.06 Da, | 2226.181152 | 3 | 540.6657715 | 540.666582  |
| SFPSLENSVKPR                     | Q8BHI7 | 0.00264434 | n +34.06 Da,K +34.06 Da, | 2224.327393 | 3 | 476.9500122 | 476.9542449 |
| GLGFGDNTKAAVIR                   | P13707 | 0          | n +34.06 Da,K +34.06 Da, | 2224.076172 | 3 | 496.3041992 | 496.3052776 |
| PGVTVKDVNQQEFVR                  | Q9CZX8 | 0          | n +17.03 Da,K +34.06 Da, | 2222.03833  | 3 | 589.6723022 | 589.6722488 |
| TLQVPGLHRTASGR                   | E9PWL1 | 0.01005632 | n +42.03 Da,             | 2220.793945 | 3 | 512.2869263 | 512.28647   |
| VDVDGTVEEDLGKSR                  | P08113 | 0          | n +34.06 Da,K +34.06 Da, | 2429.124268 | 3 | 562.9799805 | 562.977556  |
| TLLKDTTVTGLGR                    | Q8BMS1 | 0          | n +34.06 Da,K +34.06 Da, | 2218.119385 | 3 | 481.6400146 | 481.6453    |
| TFVLDEFKR                        | Q9D8N0 | 0.00346921 | n +34.06 Da,K +34.06 Da, | 2863.949219 | 3 | 408.25      | 408.2537427 |
| PPKPTVFISGVIR                    | Q91XC8 | 0          | n +17.03 Da,K +34.06 Da, | 2848.452881 | 3 | 511.662323  | 511.6643651 |
| ATSASSHLNKGIKQMY                 | P15105 | 0          | n +42.03 Da,K +34.06 Da, | 2216.984375 | 3 | 616.010498  | 616.0103138 |
| DPNVTKTLQFR                      | Q9Z0X1 | 0          | n +34.06 Da,K +34.06 Da, | 2215.260986 | 3 | 462.9499207 | 462.9507232 |
| PMISKLVTYGSDR                    | Q91ZA3 | 0.00181242 | n +17.03 Da,K +34.06 Da, | 2357.743164 | 3 | 506.6300049 | 506.6254706 |
| PGASPADTGDVNVHSGIIAAR            | F6XXE6 | 0          | n +17.03 Da,             | 2212.164795 | 3 | 674.6799927 | 674.6852883 |
| TLLKDTTVTGLGR                    | Q8BMS1 | 0.01909855 | n +42.03 Da,K +28.03 Da, | 2211.953857 | 3 | 482.2904663 | 482.2838436 |
| PLPPLPEYGGKVR                    | Q9CQQ7 | 0          | n +17.03 Da,K +34.06 Da, | 2567.333252 | 2 | 737.4539185 | 737.4561597 |
| GYFLPDNYKFKHDAFKASR              | Q8CDN1 | 0.03833635 | n +42.03 Da,K +28.03 Da, | 2762.63623  | 3 | 810.7700195 | 810.7583472 |
| TASSVLLHTGQKMPL                  | Q9JII6 | 0.00049213 | n +34.06 Da,K +34.06 Da, | 2517.256836 | 3 | 551.0001831 | 551.000978  |
| MDGEDDSNLVIKRR                   | Q91WE2 | 0          | n +42.03 Da,K +34.06 Da, | 2207.891846 | 3 | 577.3178101 | 577.319036  |
| TKDAGTIAGLNVMR                   | P20029 | 0          | n +34.06 Da,K +34.06 Da, | 2268.151367 | 2 | 757.9500122 | 757.9534211 |
| PGVTVKDVNQQEFVR                  | Q9CZX8 | 0          | n +17.03 Da,K +34.06 Da, | 2206.685547 | 2 | 884.0018921 | 884.004735  |
| PEWILVEKDR                       | Q8BP92 | 0.00181242 | n +17.03 Da,K +34.06 Da, | 2451.032471 | 3 | 445.9299927 | 445.9346325 |
| GLLIAGGPGNPALAAQPLIQNVKKILES DR  | Q8C196 | 0          | n +34.06 Da,K +34.06 Da, | 4625.371094 | 4 | 771.9899902 | 771.9802653 |
| SIHEVYQSETGISSATLR               | Q91VA0 | 0          | n +34.06 Da,             | 2449.556641 | 3 | 690.3599854 | 690.3622519 |
| MNYSAKDEVDDGGPAGPPGGAAKTR        | Q8VEK0 | 0          | n +42.03 Da,K +34.06 Da, | 2204.730713 | 3 | 819.4199829 | 819.4218831 |
| TFEQDPAVGAIVLTGGDKAFAAGADIKEMQNR | Q8BH95 | 0          | n +34.06 Da,K +34.06 Da, | 4123.10498  | 4 | 856.4740601 | 856.4672913 |
| AMNYSAKDEVDDGGPAGPPGGAAKTR       | Q8VEK0 | 0          | n +42.03 Da,K +34.06 Da, | 2202.105469 | 3 | 843.0999756 | 843.1009212 |
| PQGGKNSVELLED R                  | Q80X90 | 0.01372549 | n +17.03 Da,K +34.06 Da, | 2201.624756 | 3 | 545.6500244 | 545.6493327 |
| SVYDEFVKR                        | P24549 | 0.00096665 | n +34.06 Da,K +34.06 Da, | 2199.644775 | 3 | 404.2399902 | 404.2416143 |
| PGIEPSDKMLQGR                    | P24270 | 0          | n +17.03 Da,K +34.06 Da, | 2197.397949 | 3 | 525.960022  | 525.9643749 |
| DAETTLTELRR                      | P05784 | 0.00049213 | n +14.02 Da,             | 2193.219238 | 3 | 440.230011  | 440.2368935 |
| TTKSFLLLR                        | Q80XN0 | 0.00181242 | n +34.06 Da,K +34.06 Da, | 2788.194824 | 3 | 415.2832947 | 415.2851542 |
| VVLTKFVEGAR                      | Q8C196 | 0.00049213 | n +34.06 Da,K +34.06 Da, | 2191.170166 | 3 | 429.6188354 | 429.6204255 |
| DSVIVDLQDDSLR                    | Q3TDX8 | 0.03833635 | n +14.02 Da,             | 2191.061523 | 3 | 496.9200134 | 496.9228636 |
| ATNFLAHEKIWFDFK                  | P57776 | 0          | n +42.03 Da,K +34.06 Da, | 4396.650391 | 3 | 659.7000122 | 659.7016972 |
| AGKPVLYFDGR                      | P30115 | 0          | n +42.03 Da,K +34.06 Da, | 2583.895752 | 2 | 718.3968506 | 718.39888   |
| YSFECIGNVKVMR                    | P28474 | 0          | n +34.06 Da,K +34.06 Da, | 3024.044434 | 3 | 557.6343384 | 557.6391632 |
| AGKPVLYFDGR                      | P30115 | 0.00049213 | n +42.03 Da,K +34.06 Da, | 2189.245117 | 3 | 479.269989  | 479.2683455 |
| ALKMVKGSIDR                      | O54774 | 0          | n +42.03 Da,K +34.06 Da, | 2275.935791 | 3 | 443.2838135 | 443.2849371 |
| NPVDDICIAKPR                     | P32261 | 0          | n +34.06 Da,K +34.06 Da, | 2187.393311 | 3 | 489.2852173 | 489.2871181 |



|                        |        |            |                          |             |   |             |             |
|------------------------|--------|------------|--------------------------|-------------|---|-------------|-------------|
| VLSGEDKSNIAAW          | P01942 | 0.00181242 | n +34.06 Da,K +34.06 Da, | 2184.876465 | 3 | 540.6655884 | 540.666582  |
| PGVTVKDVNQEFVR         | Q9CZX8 | 0          | n +17.03 Da,K +34.06 Da, | 2181.157959 | 3 | 589.6699829 | 589.6722488 |
| MKQYHGSGGVVMDVER       | Q8BVA2 | 0          | n +42.03 Da,K +34.06 Da, | 2314.347168 | 3 | 623.6448364 | 623.6450479 |
| PSGTSQCEDGSAGGFQHLDMH  | Q91WT9 | 0          | n +17.03 Da,             | 2180.67627  | 3 | 745.6400146 | 745.6461767 |
| NLQLKEGLQNMEAR         | Q60864 | 0.00181242 | n +34.06 Da,K +34.06 Da, | 2463.94043  | 3 | 571.3300171 | 571.331387  |
| CKDLGTQLAPIIQEFFHSEQYR | Q78JT3 | 0.00049213 | K +31.05 Da,             | 4838.483398 | 3 | 904.460022  | 904.4601909 |
| PDLISSSEMVR            | Q8BK48 | 0          | n +17.03 Da,             | 2230.791504 | 3 | 492.25      | 492.2504744 |
| LPIPEDNLDHYR           | P28843 | 0.00049213 | n +34.06 Da,             | 2654.018311 | 3 | 505.9400024 | 505.9386655 |
| AELKALLQSSASR          | P50580 | 0.02159091 | n +34.06 Da,K +34.06 Da, | 2176.390137 | 2 | 721.4500122 | 721.4541112 |
| FAQLCEEHGILR           | B5X0G2 | 0          |                          | 2322.869629 | 3 | 500.9263916 | 500.9257731 |
| QPEVDTPLGRVR           | Q63880 | 0.00049213 | n +17.03 Da,             | 2174.74292  | 3 | 461.9266052 | 461.9299522 |
| NPVDDICIAKPR           | P32261 | 0          | n +34.06 Da,K +34.06 Da, | 2170.562988 | 2 | 733.4199829 | 733.427039  |
| SSTSAVPQITHTYTVHPR     | Q921G7 | 0.0194508  | n +42.03 Da,             | 2402.003662 | 3 | 675.3499756 | 675.3447142 |
| PPQFSYGLQQTGGPKR       | Q80VJ2 | 0          | n +17.03 Da,K +34.06 Da, | 2168.319824 | 3 | 638.3513184 | 638.3549199 |
| TITTKELGTVMR           | P62204 | 0.01005632 | n +34.06 Da,K +34.06 Da, | 2167.039551 | 2 | 709.4364624 | 709.4396151 |
| LLSAAYVDSHQWEAR        | Q8BK72 | 0          | n +34.06 Da,             | 2812.019775 | 2 | 890.4606323 | 890.4654808 |
| ASGADSKGDDLSTAILKQK    | Q01853 | 0          | n +42.03 Da,K +34.06 Da, | 2496.54126  | 3 | 683.7299805 | 683.735614  |
| TITTKELGTVMR           | P62204 | 0          | n +34.06 Da,K +34.06 Da, | 2163.478271 | 3 | 473.2947693 | 473.2955022 |
| KETTIQGLDGLSER         | Q91Y97 | 0          | n +34.06 Da,K +34.06 Da, | 2163.407471 | 3 | 538.9799805 | 538.982641  |
| GDSASKVISAEALPGR       | Q9D6Y7 | 0          | n +34.06 Da,K +34.06 Da, | 2370.941406 | 3 | 585.6685791 | 585.6688338 |
| HEIQRHLTAKSHGR         | Q921Z5 | 0.01262327 | n +17.03 Da,K +34.06 Da, | 2161.19458  | 2 | 917.5499878 | 917.5426841 |
| ASGADSKGDDLSTAILKQK    | Q01853 | 0.00264434 | n +42.03 Da,K +34.06 Da, | 2160.665039 | 3 | 683.7299805 | 683.735614  |
| PKVTQPEVDTPLGRVR       | Q63880 | 0          | n +17.03 Da,K +34.06 Da, | 2158.896729 | 4 | 461.5299988 | 461.5310178 |
| TGFHETSININDFSAGVANR   | P15105 | 0          | n +34.06 Da,             | 2664.03125  | 2 | 1036.00354  | 1036.006231 |
| PGIEPSDKMLQGR          | P24270 | 0          | n +17.03 Da,K +34.06 Da, | 2156.839844 | 3 | 525.9699707 | 525.9643749 |
| GTITTKELGTVMR          | P62204 | 0          | n +34.06 Da,K +34.06 Da, | 2156.304932 | 2 | 737.9487915 | 737.9503471 |
| ATGANATPLDFPSKRR       | Q64213 | 0          | n +42.03 Da,K +34.06 Da, | 2155.738281 | 2 | 892.5200195 | 892.5205145 |
| LLADAVAVTMGPKGR        | P63038 | 0          | n +34.06 Da,K +34.06 Da, | 2477.734619 | 2 | 783.9899902 | 783.9872637 |
| YGVLNDEGIAYR           | Q61171 | 0          | n +34.06 Da,K +34.06 Da, | 2154.675049 | 3 | 522.6400146 | 522.6368046 |
| GVLKADEGISFR           | P35700 | 0          | n +34.06 Da,K +34.06 Da, | 2223.842529 | 3 | 453.9459839 | 453.9470902 |
| MQLTVKALQGR            | P21126 | 0          | n +34.06 Da,K +34.06 Da, | 2152.772705 | 3 | 438.2842102 | 438.2850484 |
| GGTVAEKLDWAR           | P27659 | 0.01236045 | n +34.06 Da,K +34.06 Da, | 2152.340332 | 3 | 457.6061707 | 457.6069565 |
| ATGANATPLDFPSKRR       | Q64213 | 0          | n +42.03 Da,K +34.06 Da, | 2152.269531 | 3 | 595.3501587 | 595.3494352 |
| DNIQGITKPAIR           | P62806 | 0          | n +42.03 Da,K +34.06 Da, | 2151.340332 | 2 | 701.4199829 | 701.4172701 |
| AHYHDNYGKNDEVEFVR      | P25688 | 0          | n +42.03 Da,K +34.06 Da, | 2150.978516 | 4 | 543.0102539 | 543.0106663 |
| VISLSGEHSIIGR          | P08228 | 0.00264434 |                          | 2316.796387 | 3 | 465.9382019 | 465.9366666 |
| PKLAVLITNSNVR          | Q9R0N0 | 0.00049213 | n +17.03 Da,K +34.06 Da, | 2149.219238 | 3 | 492.6561279 | 492.6558697 |
| VDVPNDSSFQIVKNPR       | Q61176 | 0          | n +34.06 Da,K +34.06 Da, | 2793.772217 | 3 | 628.3569946 | 628.3601115 |
| PKAPLVLEQGLR           | P54869 | 0.01662157 | n +17.03 Da,K +34.06 Da, | 2145.722168 | 3 | 457.9696045 | 457.969677  |
| AELRALVAVKR            | Q9DCW4 | 0.00306883 | n +42.03 Da,K +34.06 Da, | 2337.307373 | 3 | 434.6213074 | 434.6207189 |

|                           |        |            |                          |             |   |             |             |
|---------------------------|--------|------------|--------------------------|-------------|---|-------------|-------------|
| TLKGLNSDSVTEETLR          | Q8C196 | 0          | n +34.06 Da,K +34.06 Da, | 2365.799316 | 3 | 611.0198364 | 611.0196439 |
| TDTEDKGEFLSEGGVVR         | E9PV24 | 0          | n +34.06 Da,K +34.06 Da, | 2144.138428 | 3 | 622.3220825 | 622.3235038 |
| TKAPAAIGPYSQAVQVDR        | P52760 | 0          | n +34.06 Da,K +34.06 Da, | 2309.800537 | 3 | 647.3800049 | 647.3793946 |
| PKAPLVLEQGLR              | P54869 | 0.00049213 | n +17.03 Da,K +34.06 Da, | 2142.854004 | 2 | 686.4500122 | 686.4508772 |
| DGGFVFALEKR               | O35490 | 0          | n +34.06 Da,K +34.06 Da, | 3136.729736 | 3 | 436.2626038 | 436.2645304 |
| QGGAPLAGTNKETTIQGLDGLSER  | Q91Y97 | 0          | n +34.06 Da,K +34.06 Da, | 2740.618164 | 3 | 827.789978  | 827.7908526 |
| PGVTVKDVNQQEFVR           | Q9CZ8  | 0          | n +17.03 Da,K +34.06 Da, | 2140.348877 | 3 | 589.6715698 | 589.6722488 |
| LVLEVAQHLGESTVR           | P56480 | 0          |                          | 2901.363281 | 3 | 560.3200073 | 560.3210691 |
| GTLPKQVKIVEVGPR           | P38060 | 0          | n +42.03 Da,K +34.06 Da, | 2650.425049 | 3 | 577.7089844 | 577.7103039 |
| GSIYNPEVLDITEQALHSR       | P14869 | 0          | n +34.06 Da,             | 4049.782715 | 3 | 726.0499878 | 726.0534184 |
| LGATWVVVLGHSER            | P17751 | 0.01005632 | n +34.06 Da,             | 2729.740479 | 3 | 486.9400024 | 486.9473835 |
| CTLKLDPIITGR              | Q60668 | 0.02759135 | n +34.06 Da,K +34.06 Da, | 2173.541992 | 3 | 447.9400024 | 447.9446921 |
| RSLGVAEGLPDQYADGEAAR      | Q9QXF8 | 0          | n +34.06 Da,             | 2662.503906 | 3 | 727.3800049 | 727.3766727 |
| GAGDAFVGGFLSQLVSDKPLTECIR | P55264 | 0          | n +34.06 Da,K +34.06 Da, | 4601.953613 | 4 | 677.1213989 | 677.1205477 |
| SQAEFDKAAEEVKR            | P31786 | 0          | n +42.03 Da,K +34.06 Da, | 2518.788086 | 2 | 859.4696655 | 859.4732303 |
| METDVTSDTVEVLPQHKFDLR     | Q8OXL6 | 0          | n +42.03 Da,K +34.06 Da, | 3930.024902 | 3 | 846.098877  | 846.0985882 |
| FLEEHPGGEEVLR             | P56395 | 0          | n +34.06 Da,             | 2135.7854   | 2 | 773.4088745 | 773.4096426 |
| PNVTIILKEPVR              | Q99PL5 | 0          | n +17.03 Da,K +34.06 Da, | 2393.922119 | 3 | 477.3149109 | 477.3169654 |
| DYLHLPPEIVPATLR           | P63325 | 0          |                          | 4117.821777 | 3 | 588.0049438 | 588.0014478 |
| TAASSSLEKSYELPDGQVITIGNER | P60710 | 0          | n +34.06 Da,K +34.06 Da, | 3760.239014 | 3 | 940.8300171 | 940.8347875 |
| MEAKGGTVKAASGFNATEDAQTLR  | P97429 | 0          | n +42.03 Da,K +34.06 Da, | 2716.493408 | 3 | 855.1199951 | 855.1200929 |
| DNYGKNDEVEFVR             | P25688 | 0          | n +34.06 Da,K +34.06 Da, | 2132.182129 | 3 | 551.6199951 | 551.6232242 |
| PSLGMIAKINR               | P97742 | 0.00049213 | n +17.03 Da,K +34.06 Da, | 2130.794434 | 3 | 417.6002808 | 417.6007074 |
| TDDRREGMTAFVEKR           | Q8BH95 | 0          | n +17.03 Da,K +34.06 Da, | 2269.919922 | 3 | 621.3400269 | 621.3318981 |
| NPVDDICIAKPR              | P32261 | 0          | n +34.06 Da,K +34.06 Da, | 2129.724365 | 2 | 733.4199829 | 733.427039  |
| VKATAGDTHLGGEDFDNR        | P16627 | 0.00264434 | n +42.03 Da,K +34.06 Da, | 2265.172363 | 3 | 660.3200073 | 660.3274301 |
| APPLTLDGIKDR              | Q9CR21 | 0.00096665 | n +34.06 Da,K +34.06 Da, | 2302.685547 | 3 | 455.2901306 | 455.2908569 |
| MTVKKIAIFGATGR            | Q923D2 | 0          | n +31.05 Da,             | 2126.221924 | 3 | 508.6499939 | 508.642866  |
| NALVSHLDGTTVPVCEDIGR      | Q9CZ13 | 0.00869565 |                          | 2881.162842 | 3 | 694.6699829 | 694.6809979 |
| APNVLASEPEIPKIR           | Q9WTP6 | 0          | n +34.06 Da,K +34.06 Da, | 2851.64917  | 3 | 587.027832  | 587.0298139 |
| LPSEGPQPAHVVVGVDR         | Q923D2 | 0          | n +14.02 Da,             | 2122.132568 | 3 | 590.9899902 | 590.9880901 |
| PLDLAKLNQVAR              | P60335 | 0.00669176 | n +17.03 Da,K +34.06 Da, | 2590.070557 | 3 | 463.6300049 | 463.6330649 |
| AHIFVYGTLLR               | Q923B0 | 0.00225734 | n +42.03 Da,K +34.06 Da, | 2699.392578 | 2 | 690.9111328 | 690.9141656 |
| FVDVPNDSSFQVKNPR          | Q61176 | 0.01909855 | n +34.06 Da,K +34.06 Da, | 2121.990967 | 3 | 677.3699951 | 677.3829163 |
| PVPEVAKLAVR               | Q8R0X7 | 0.0399568  | n +17.03 Da,K +34.06 Da, | 2117.423584 | 3 | 410.6099854 | 410.6116009 |
| ATGANATPLDFPSKRR          | Q64213 | 0          | n +42.03 Da,K +34.06 Da, | 2114.837646 | 2 | 892.5200195 | 892.5205145 |
| NPVDDICIAKPR              | P32261 | 0          | n +34.06 Da,K +34.06 Da, | 2113.631104 | 3 | 489.2900085 | 489.2871181 |
| TLKGLNSDSVTEETLR          | Q8C196 | 0.02409639 | n +42.03 Da,K +28.03 Da, | 2632.021729 | 3 | 611.6594849 | 611.6581875 |
| VKCDMEVSCPEGYTCCR         | P28798 | 0          | n +34.06 Da,K +34.06 Da, | 2112.683594 | 3 | 740.3300171 | 740.3280038 |
| EALVEPASESPRPALAR         | P70441 | 0.03635042 |                          | 2112.573975 | 3 | 607.6656494 | 607.6670168 |

|                                  |        |            |                          |             |   |             |             |
|----------------------------------|--------|------------|--------------------------|-------------|---|-------------|-------------|
| PLPLPEYGGKVR                     | Q9CQQ7 | 0          | n +17.03 Da,K +34.06 Da, | 2627.645264 | 3 | 491.9726563 | 491.9731986 |
| SEEVKAVETIR                      | Q80XN0 | 0          | n +34.06 Da,K +34.06 Da, | 2111.15918  | 3 | 486.620697  | 486.6209319 |
| SAMNVVSEDEMCR                    | Q8C196 | 0          | n +34.06 Da,K +34.06 Da, | 2683.025635 | 3 | 570.960022  | 570.9657165 |
| IMDPNIVGNEHYDVAR                 | P56480 | 0          |                          | 2743.086182 | 3 | 624.3065796 | 624.3087237 |
| IGPLDTQLKPR                      | Q920A5 | 0.00049213 | n +34.06 Da,K +34.06 Da, | 2109.13916  | 3 | 435.9599915 | 435.9556969 |
| STYSMSSTLTTLTKDEYER              | P01837 | 0          | n +34.06 Da,K +34.06 Da, | 3042.883545 | 3 | 727.3699951 | 727.3736473 |
| GLLSSLDHTSIR                     | Q9D0M3 | 0          |                          | 2471.30127  | 3 | 442.9174805 | 442.9173835 |
| TVEPDAIKPVGIR                    | P15116 | 0          | n +34.06 Da,K +34.06 Da, | 2107.760254 | 3 | 488.3099976 | 488.3136616 |
| LGPLPANPVKVCQR                   | Q9ET22 | 0.0129768  | n +34.06 Da,K +34.06 Da, | 2409.991455 | 3 | 558.6799927 | 558.676717  |
| LLHVTDGTGVMTR                    | P08113 | 0.01798011 | n +34.06 Da,             | 2103.595215 | 2 | 717.4099731 | 717.4033055 |
| SAGFLQASASDVVVVHGR               | Q8VCHO | 0          | n +34.06 Da,             | 3900.008789 | 3 | 612.0045776 | 612.0058505 |
| LLHVTDGTGVMTR                    | P08113 | 0          | n +34.06 Da,             | 2101.554199 | 3 | 478.6051331 | 478.6046291 |
| TFAHLDATTVLSR                    | P56480 | 0          | n +34.06 Da,             | 2834.390381 | 2 | 733.413147  | 733.4147276 |
| PPPQCLVWLPLMHR                   | O70585 | 0.00181242 | n +17.03 Da,             | 4067.549072 | 3 | 587.6599731 | 587.6548886 |
| SLEIIGAPFSKGQPR                  | Q61176 | 0          | n +34.06 Da,K +34.06 Da, | 2888.583496 | 3 | 556.6699829 | 556.6753708 |
| PKVIQPEVDTPLR                    | Q8VCU1 | 0          | n +17.03 Da,K +34.06 Da, | 2098.714355 | 3 | 533.9945068 | 533.9945514 |
| TGGKGGDYALAPGSQSSEMSLR           | P01896 | 0          | n +34.06 Da,K +34.06 Da, | 2326.340332 | 3 | 746.3900146 | 746.3882906 |
| SDAPPLTLDGIKDR                   | Q9CR21 | 0          | n +34.06 Da,K +34.06 Da, | 2393.548828 | 3 | 522.6415405 | 522.643848  |
| ATEGMILTNDHDHQR                  | Q8BUV3 | 0          | n +42.03 Da,             | 2412.159912 | 3 | 593.2904663 | 593.293185  |
| TEEDCTEELDFLHAR                  | P99028 | 0          | n +34.06 Da,             | 4190.969727 | 3 | 682.6500244 | 682.649293  |
| AAQESLHVKTPLR                    | Q8VBT2 | 0          | n +42.03 Da,K +34.06 Da, | 2095.769287 | 3 | 509.2999878 | 509.3018267 |
| PVYNWAEATTVYLDLCVHAVLDVDVQNKQKLT | Q9JHJ5 | 0.00939926 | n +42.03 Da,K +28.03 Da, | 4247.736328 | 4 | 951.0100098 | 950.9946558 |
| TQKAPQVSTPTLVEAAR                | P07724 | 0          | n +34.06 Da,K +34.06 Da, | 2089.842285 | 3 | 622.3760376 | 622.3757616 |
| TVNLDKLWTLVSEQTR                 | P14115 | 0          | n +34.06 Da,K +34.06 Da, | 4318.102539 | 3 | 657.7199707 | 657.72305   |
| ASSKKVTLVLSR                     | Q9D711 | 0          | n +42.03 Da,K +34.06 Da, | 2089.591064 | 3 | 495.9926758 | 495.9926997 |
| PVELVEKLLPR                      | Q9ET01 | 0.00181242 | n +17.03 Da,K +34.06 Da, | 3262.326416 | 3 | 448.6300049 | 448.6342943 |
| TTITSVLPKALVASR                  | Q8C196 | 0          | n +34.06 Da,K +34.06 Da, | 3087.44043  | 3 | 574.7062988 | 574.7101926 |
| GTLPKQVKIVEVGPR                  | P38060 | 0          | n +42.03 Da,K +34.06 Da, | 2657.203125 | 2 | 866.0599976 | 866.0618176 |
| PMNTGVEAGETACKLAR                | P29758 | 0.02938988 | n +17.03 Da,K +34.06 Da, | 2086.298096 | 3 | 619.3300171 | 619.3257557 |
| APAGILNGKLVSAQIR                 | Q922D8 | 0          | n +34.06 Da,K +34.06 Da, | 2702.246582 | 2 | 838.539978  | 838.5463345 |
| PLGGVISNYLLEKSR                  | P46735 | 0          | n +17.03 Da,K +34.06 Da, | 3593.797119 | 3 | 566.3499756 | 566.3454728 |
| ICTTLIGLEEHLNALDR                | Q8VC30 | 0          |                          | 4044.407227 | 3 | 666.0200195 | 666.0225836 |
| THTVPIYEGYALPHAILR               | P60710 | 0.00264434 |                          | 3791.726807 | 3 | 693.7299805 | 693.7177114 |
| FLELCSRKSLAHIWKAR                | Q60806 | 0.00869565 | K +28.03 Da,             | 2082.340576 | 3 | 733.7446289 | 733.7576238 |
| GIHETTFNSIMKC                    | P60710 | 0          | n +34.06 Da,K +34.06 Da, | 2424.135254 | 2 | 803.4199829 | 803.4236394 |
| TTKDPSEHPSVTLFR                  | Q99JW2 | 0.00096665 | n +42.03 Da,K +34.06 Da, | 2113.489746 | 3 | 640.6689453 | 640.6689045 |
| TFEESFQKALR                      | Q8C196 | 0          | n +34.06 Da,K +34.06 Da, | 2324.982422 | 3 | 475.2793274 | 475.2787285 |
| YTIISSKSLGLDR                    | Q8BMI4 | 0.04327611 | n +42.03 Da,K +28.03 Da, | 2426.278076 | 3 | 560.3200073 | 560.3294532 |
| GDAPSPEEKHLITR                   | Q91WQ3 | 0          | n +42.03 Da,K +34.06 Da, | 2654.199707 | 2 | 869.9760742 | 869.9809639 |
| AGLAKSIGVSNFNR                   | P70694 | 0          | n +34.06 Da,K +34.06 Da, | 2078.122803 | 2 | 751.460022  | 751.4597277 |

|                       |        |            |                          |             |   |             |             |
|-----------------------|--------|------------|--------------------------|-------------|---|-------------|-------------|
| PFTYDYHTLR            | Q9Z239 | 0.00096665 |                          | 2344.25708  | 3 | 438.2150574 | 438.2155407 |
| SSAEELKLATQLTGPVMPPIR | P47963 | 0          | n +34.06 Da,K +34.06 Da, | 3898.45166  | 3 | 737.0999756 | 737.1014215 |
| GKGILAADESVGTMGNR     | Q91Y97 | 0          | n +34.06 Da,K +34.06 Da, | 2075.15332  | 2 | 872.4859009 | 872.4883573 |
| GTGGDAAAPGAAGTQAEHPHR | Q9D0F3 | 0          | n +42.03 Da,             | 2073.593262 | 3 | 649.6400146 | 649.6486855 |
| VPNDSSFQIVKNPR        | Q61176 | 0          | n +34.06 Da,K +34.06 Da, | 2073.373291 | 3 | 556.9956055 | 556.994992  |
| GKGILAADESVGTMGNR     | Q91Y97 | 0.03460838 | n +34.06 Da,K +34.06 Da, | 2072.380127 | 3 | 581.9939575 | 581.9946637 |
| VAEDLGKAFGER          | Q8BMS1 | 0.00049213 | n +34.06 Da,K +34.06 Da, | 2093.512939 | 3 | 453.9299927 | 453.9349618 |
| VLLTEAPLNPKANR        | P60710 | 0.03963964 | n +34.06 Da,K +34.06 Da, | 2191.458984 | 3 | 535.3400269 | 535.3437324 |
| IGPEGDLHGVPPGCEAVR    | O35490 | 0          | n +34.06 Da,             | 2300.4729   | 3 | 631.9899902 | 631.9948457 |
| AGKPVLYHYFDGR         | P30115 | 0.00049213 | n +42.03 Da,K +34.06 Da, | 2656.331787 | 3 | 479.2671509 | 479.2683455 |
| VQQSTPASSKEEELR       | Q80VM7 | 0.04099245 | n +17.03 Da,K +34.06 Da, | 2066.675781 | 3 | 604.3200073 | 604.3304405 |
| AAPAKGENLSLVHGGPDIR   | Q64442 | 0.00049213 | n +42.03 Da,K +34.06 Da, | 2360.384277 | 3 | 693.0571899 | 693.0586147 |
| ATSASSHLNKGIKQMYM     | P15105 | 0          | n +42.03 Da,K +34.06 Da, | 2615.80127  | 3 | 659.6900024 | 659.6904754 |
| PQHWPEPEEFQPER        | Q64481 | 0.00049213 | n +17.03 Da,             | 2666.458252 | 3 | 608.2874146 | 608.290098  |
| TWSSELSKLAANAFLAQR    | O70475 | 0.00749064 | n +34.06 Da,K +34.06 Da, | 4183.249512 | 3 | 687.7299805 | 687.730316  |
| QFTTLPEVKDR           | P25688 | 0.00049213 | n +34.06 Da,K +34.06 Da, | 2064.85376  | 3 | 467.949585  | 467.9506119 |
| EQAGGDATENFEDVGHSTDAR | P56395 | 0          |                          | 2063.310547 | 3 | 745.3242188 | 745.3245969 |
| GQLLHSDAFPPPR         | P97328 | 0.00346921 | n +34.06 Da,             | 2078.966553 | 3 | 490.269989  | 490.2755002 |
| ASSKVTLSVLSR          | Q9D711 | 0.00049213 | n +42.03 Da,K +34.06 Da, | 2059.41626  | 2 | 743.4852905 | 743.4854113 |
| AAQESLHVKTPLR         | Q8VBT2 | 0          | n +42.03 Da,K +34.06 Da, | 2055.447021 | 3 | 509.3022156 | 509.3018267 |
| PAIMTMLADHAAR         | Q6P5F9 | 0          | n +17.03 Da,             | 2728.424072 | 3 | 472.2476501 | 472.2496397 |
| PGHLQEGFGCVVTNR       | Q9CY58 | 0          | n +17.03 Da,             | 2053.442871 | 3 | 563.2854614 | 563.2842896 |
| SEFLKAASNLR           | P27773 | 0.00049213 | n +34.06 Da,K +34.06 Da, | 2048.449463 | 2 | 652.4055176 | 652.4038895 |
| PPGGFAEVQFKDVR        | D3Z7X0 | 0          | n +17.03 Da,K +34.06 Da, | 2648.990234 | 3 | 533.3016968 | 533.3034963 |
| SSAADKVVAEIR          | P51660 | 0.0299667  | n +34.06 Da,K +34.06 Da, | 2048.17749  | 3 | 438.6076355 | 438.6068452 |
| TDTEDKGEFLSEGGVR      | E9PV24 | 0          | n +34.06 Da,K +34.06 Da, | 2048.035889 | 2 | 932.9799805 | 932.9816174 |
| VMEKPSPLLVR           | P97379 | 0          | n +34.06 Da,K +34.06 Da, | 2045.401978 | 3 | 465.3009949 | 465.3005872 |
| SQAEFDKAAEEVKR        | P31786 | 0          | n +42.03 Da,K +34.06 Da, | 2163.691895 | 3 | 573.3200073 | 573.3179124 |
| ESQEGKQQYLQSIEDR      | Q9CQA3 | 0          | n +34.06 Da,K +34.06 Da, | 2109.620361 | 3 | 669.3599854 | 669.3535745 |
| GCMTQLYKNTFFR         | P26262 | 0.00049213 | n +34.06 Da,K +34.06 Da, | 3173.432129 | 3 | 578.6483154 | 578.6427962 |
| ASGGGVPTDEEQATGLER    | P19536 | 0          | n +14.02 Da,             | 2038.062988 | 2 | 894.4199829 | 894.4239498 |
| GQLLHSDAFPPPR         | P97328 | 0.00264434 | n +34.06 Da,             | 2037.588623 | 3 | 490.2750854 | 490.2755002 |
| PFDDDLMKR             | Q8JZRO | 0.00049213 | n +17.03 Da,K +34.06 Da, | 2037.517944 | 3 | 396.5496521 | 396.5499016 |
| AGKPVLYHYFDGRGR       | P30115 | 0.00049213 | n +42.03 Da,K +34.06 Da, | 2178.056152 | 3 | 550.3068848 | 550.309204  |
| PDIVGLDSGHIR          | P52196 | 0          | n +17.03 Da,             | 2135.562256 | 3 | 432.5754089 | 432.5753978 |
| PSALLNPSKECEPYR       | Q8VEK0 | 0          | n +17.03 Da,K +34.06 Da, | 2025.962891 | 3 | 604.6566772 | 604.657611  |
| TVYVYPDDKYR           | Q8CHT0 | 0          | n +34.06 Da,K +34.06 Da, | 2025.053101 | 3 | 496.2773438 | 496.2786172 |
| SYGGYKEPAAPVSIQR      | Q61792 | 0          | n +34.06 Da,K +34.06 Da, | 2247.800293 | 3 | 597.6749268 | 597.6739188 |
| ATSASSHLNKGIKQMY      | P15105 | 0          | n +42.03 Da,K +34.06 Da, | 2021.051636 | 2 | 923.5100098 | 923.5118324 |
| TAIYQPQTHPQPAPYGH     | P11276 | 0          | n +34.06 Da,             | 2019.907104 | 3 | 647.3323975 | 647.3339671 |

|                                    |        |            |                          |             |   |             |             |
|------------------------------------|--------|------------|--------------------------|-------------|---|-------------|-------------|
| PVTGSAHTVLSSYWSQQLR                | Q9DCG6 | 0          | n +17.03 Da,             | 3325.598633 | 3 | 712.0435791 | 712.0411833 |
| MPQLVCPQVHSESR                     | Q60865 | 0.00909091 | n +34.06 Da,             | 2016.007202 | 3 | 567.9500122 | 567.9589665 |
| SEGDSVGDSDVHGKPSVVYR               | Q9CQU3 | 0.00049213 | n +42.03 Da,K +34.06 Da, | 2013.822266 | 2 | 1026.01001  | 1026.016265 |
| DNIQGITKPAIR                       | P62806 | 0.00049213 | n +42.03 Da,K +34.06 Da, | 2205.695313 | 3 | 467.9459839 | 467.9472722 |
| LTVVGKESDSVLR                      | P05201 | 0          | n +34.06 Da,K +34.06 Da, | 2013.273315 | 3 | 490.9764404 | 490.9769383 |
| ASSKKVTLVLSLR                      | Q9D711 | 0.02759135 | n +42.03 Da,K +34.06 Da, | 2048.106689 | 3 | 495.9927979 | 495.9926997 |
| MVPPVQVSPLIKFR                     | Q06185 | 0          | n +34.06 Da,K +34.06 Da, | 3668.721924 | 4 | 434.7799988 | 434.7786537 |
| QALLDLHALGSAR                      | P29391 | 0          | n +34.06 Da,             | 2959.26416  | 3 | 466.9440613 | 466.9473835 |
| PDSWDKDVYPEPPSR                    | Q9DCS9 | 0.00181242 | n +34.06 Da,K +34.06 Da, | 2288.455566 | 3 | 619.3099976 | 619.3214341 |
| VMLGETNPADSKPGTIR                  | P15532 | 0          | n +17.03 Da,K +34.06 Da, | 2005.439819 | 3 | 613.0100098 | 613.0085324 |
| VMEKPSPLLVGR                       | P97379 | 0          | n +34.06 Da,K +34.06 Da, | 2004.308838 | 3 | 465.2999573 | 465.3005872 |
| PTALMTDPKYIHWSPVCR                 | P11352 | 0          | n +17.03 Da,K +34.06 Da, | 4009.90332  | 3 | 733.7299805 | 733.7357556 |
| PAVAEFSTNETMGHSADR                 | Q99JY0 | 0          | n +17.03 Da,             | 2000.074707 | 3 | 646.2999878 | 646.300446  |
| PQVLVAHAHDVGEYVR                   | Q8BVE3 | 0          | n +17.03 Da,             | 3478.996826 | 3 | 580.9876099 | 580.9862381 |
| FVEDLNEFKDNR                       | Q8BXZ1 | 0          | n +34.06 Da,K +34.06 Da, | 2315.481201 | 2 | 840.9456177 | 840.9468482 |
| DYMTVKIPR                          | Q8C196 | 0.00049213 | n +34.06 Da,K +34.06 Da, | 2235.554688 | 3 | 397.579834  | 397.5794613 |
| PKVIQPEVDTPLR                      | Q8VCU1 | 0          | n +17.03 Da,K +34.06 Da, | 2167.644531 | 3 | 533.9942017 | 533.9945514 |
| PAVAEFSTNETMGHSADR                 | Q99JY0 | 0          | n +17.03 Da,             | 1994.349731 | 3 | 646.2978516 | 646.300446  |
| WSPRPQGKR                          | Q9D2G9 | 0.02409639 | n +42.03 Da,K +34.06 Da, | 2075.821533 | 3 | 396.5599976 | 396.5667253 |
| LVLEVAQHLGESTVR                    | P56480 | 0          |                          | 2899.616699 | 2 | 839.9718628 | 839.9779654 |
| DDEVVDVGTVEEDLGKSR                 | P08113 | 0          | n +34.06 Da,K +34.06 Da, | 3107.74707  | 2 | 1023.51001  | 1023.510937 |
| GPLINAPHLER                        | Q9JLJ2 | 0.00049213 | n +34.06 Da,             | 1987.55957  | 3 | 417.5899963 | 417.5857857 |
| SVDDTQVHTEYSSLR                    | P49429 | 0          | n +34.06 Da,             | 1985.221313 | 3 | 590.9613647 | 590.962088  |
| LPEYQGEPEDEISIQKCR                 | Q9D892 | 0          | n +34.06 Da,K +34.06 Da, | 2633.161377 | 3 | 710.710022  | 710.7105932 |
| PSALLNPSKECEPYR                    | Q8VEK0 | 0.00181242 | n +17.03 Da,K +34.06 Da, | 1985.542847 | 3 | 604.6500244 | 604.657611  |
| PDTSVVYVCGKGDSSIR                  | Q9WUM3 | 0          | n +17.03 Da,K +34.06 Da, | 1994.240234 | 3 | 631.0012207 | 630.9999258 |
| SETAPVAQAASTATEKPAAAKK             | P43275 | 0          | n +42.03 Da,K +34.06 Da, | 1982.356201 | 3 | 758.1099854 | 758.1129732 |
| SEGDSVGDSDVHGKPSVVYR               | Q9CQU3 | 0          | n +42.03 Da,K +34.06 Da, | 1980.633911 | 3 | 684.3458862 | 684.3466019 |
| RYIEGLQALLR                        | P10085 | 0.00264434 | n +17.03 Da,             | 1980.149902 | 3 | 450.2799988 | 450.2751709 |
| AGKPVLYHFDGRGR                     | P30115 | 0.00049213 | n +42.03 Da,K +34.06 Da, | 2111.088379 | 4 | 412.9837036 | 412.9837221 |
| SGDHLHNSQIEADFR                    | Q04750 | 0          | n +42.03 Da,             | 2326.122559 | 3 | 628.282959  | 628.2820027 |
| PSTKDFLLQQTMLR                     | Q9CPU0 | 0          | n +17.03 Da,K +34.06 Da, | 3270.08374  | 2 | 865.001709  | 865.0006064 |
| SAAATSAVPAPNHQPEVFCNQIFINNEWHDAVSR | P47738 | 0          | n +34.06 Da,             | 3815.268799 | 4 | 953.7207031 | 953.7169081 |
| ASLKDLEGKWR                        | Q05816 | 0.00096665 | n +42.03 Da,K +34.06 Da, | 1977.783325 | 3 | 471.6199951 | 471.6226066 |
| SIVPTPVKIR                         | P38060 | 0.00181242 | n +34.06 Da,K +34.06 Da, | 1977.604126 | 3 | 393.2809753 | 393.2816325 |
| IEVPFKPAR                          | P28271 | 0.00939926 | n +34.06 Da,K +34.06 Da, | 1995.974854 | 3 | 375.5863647 | 375.5869444 |
| PLVLIDEVDKIGR                      | Q8CGK3 | 0          | n +17.03 Da,K +34.06 Da, | 3650.375732 | 3 | 506.6600037 | 506.6556471 |
| ATSASSHLNKGKIQMY                   | P15105 | 0          | n +42.03 Da,K +34.06 Da, | 1973.791626 | 4 | 462.2595825 | 462.2595544 |
| SSTSAVPQITTHYTVHPR                 | Q921G7 | 0          |                          | 1972.580566 | 3 | 661.3400269 | 661.3411926 |
| ATKIAIDAGFR                        | P70694 | 0.00049213 | n +34.06 Da,K +34.06 Da, | 1971.476685 | 3 | 410.9299927 | 410.9328921 |

|                                   |        |            |                          |             |   |             |             |
|-----------------------------------|--------|------------|--------------------------|-------------|---|-------------|-------------|
| ADLPALPGGPAGGTGELAKYGLPGVAQLR     | O08600 | 0          | n +34.06 Da,K +34.06 Da, | 4195.525879 | 3 | 938.8800049 | 938.8764803 |
| ASAKVSDAISTQYPVVDHEFDAVVVGAGGAGLR | Q8K2B3 | 0.01447574 | n +34.06 Da,K +34.06 Da, | 4103.737305 | 4 | 839.4500122 | 839.4545818 |
| YTDNELEKITR                       | P26443 | 0          | n +34.06 Da,K +34.06 Da, | 1965.583252 | 3 | 483.9400024 | 483.9455269 |
| AAKPKLYYFNDR                      | P24472 | 0          | n +42.03 Da,K +34.06 Da, | 2278.365967 | 2 | 769.4591064 | 769.4617387 |
| SVELPETHQMLR                      | Q07417 | 0.02962963 | n +34.06 Da,             | 2217.60498  | 3 | 491.9299927 | 491.9362675 |
| GTTLDIKIKR                        | O35075 | 0.00181242 | n +42.03 Da,K +34.06 Da, | 1963.97998  | 3 | 418.9519653 | 418.9520639 |
| QLPSCESLKDTIAR                    | Q9DBJ1 | 0.02962963 | n +34.06 Da,K +34.06 Da, | 2651.708496 | 3 | 562.6567993 | 562.6557593 |
| YSPSTHPNEGLEENYCR                 | P20918 | 0          | n +34.06 Da,             | 1958.736328 | 3 | 696.3200073 | 696.3164254 |
| PDAPSPGPGPTSNQLTHVDSAGR           | Q5RKZ7 | 0          | n +17.03 Da,             | 1955.599365 | 3 | 726.6911011 | 726.690991  |
| LDTIKNLVR                         | P08113 | 0.01081731 | n +34.06 Da,K +34.06 Da, | 1951.559448 | 3 | 380.6000061 | 380.5976208 |
| SELDQLRQEAELKNQIR                 | P62874 | 0.00049213 | n +42.03 Da,K +34.06 Da, | 4271.426758 | 3 | 758.75      | 758.7468772 |
| PEAGSVTLDGHDLR                    | Q9CXJ4 | 0.00049213 | n +17.03 Da,             | 1948.216675 | 3 | 495.25      | 495.2565055 |
| PIPGAKPLPVPELAPFVGR               | Q8BKX1 | 0          | n +17.03 Da,K +34.06 Da, | 4104.146484 | 3 | 701.7700195 | 701.7698935 |
| ASSDIQVKELEKR                     | P54227 | 0          | n +42.03 Da,K +34.06 Da, | 2021.334595 | 3 | 538.3200073 | 538.3228861 |
| PVVLTKFVEGAR                      | Q8C196 | 0          | n +17.03 Da,K +34.06 Da, | 2432.445313 | 3 | 456.2929993 | 456.2941606 |
| DAFKDALQR                         | Q91WJ8 | 0.00264434 | n +34.06 Da,K +34.06 Da, | 1946.608032 | 3 | 377.8999939 | 377.897959  |
| SLLSPLKLEVDPNIAQVR                | P11679 | 0          | n +34.06 Da,K +34.06 Da, | 3917.853516 | 3 | 687.4299927 | 687.4298665 |
| VPNDSSFQIVKNPR                    | Q61176 | 0          | n +34.06 Da,K +34.06 Da, | 1944.377686 | 3 | 556.9944458 | 556.994992  |
| TTPEADKIFLER                      | P26443 | 0          | n +34.06 Da,K +34.06 Da, | 2491.144775 | 3 | 496.6300049 | 496.6295386 |
| EKEGYLQIGATTQQAQR                 | D3Z5G7 | 0          | n +34.06 Da,K +34.06 Da, | 1942.404541 | 3 | 663.7000122 | 663.7060593 |
| GVMTVLIKR                         | P16627 | 0.00386432 | n +34.06 Da,K +34.06 Da, | 1935.856689 | 3 | 362.2600098 | 362.2564297 |
| MNPQGSSEQDVEYSVVQHADGEKSNVLR      | P48437 | 0          | n +42.03 Da,K +34.06 Da, | 3663.984375 | 3 | 1031.48999  | 1031.498252 |
| ELIQTYTYEGVEAKR                   | P55050 | 0          | n +34.06 Da,K +34.06 Da, | 2597.293945 | 3 | 623.3499756 | 623.3527342 |
| TEELITPVYCTGVSAQVQKKR             | O35350 | 0          | n +42.03 Da,K +34.06 Da, | 3227.883545 | 3 | 839.7999878 | 839.8054453 |
| VSGGAIALGHPLGGSGSR                | Q8BWT1 | 0          | n +34.06 Da,             | 1935.347656 | 2 | 813.9588013 | 813.9603653 |
| PTPGSASSEAPPLVNEDVKR              | Q91YQ5 | 0          | n +17.03 Da,K +34.06 Da, | 1998.874268 | 3 | 701.3800049 | 701.3832047 |
| LTPTHYLTKQDVER                    | Q9DBG6 | 0          | n +34.06 Da,K +34.06 Da, | 1928.564209 | 3 | 590.3499756 | 590.3458021 |
| MEAAQDHGPGGLCCKPGGR               | Q149G0 | 0          | n +42.03 Da,K +34.06 Da, | 1924.71521  | 3 | 672.9799805 | 672.9802136 |
| PEQKGVPTGFVLPDR                   | Q922D8 | 0          | n +17.03 Da,K +34.06 Da, | 3073.778564 | 2 | 845.0100098 | 845.019656  |
| PGIEPQVDAVLHEFGFFYFFR             | O55123 | 0.03460838 | n +34.06 Da,             | 1923.784058 | 3 | 850.4299927 | 850.4407249 |
| APPQEVKGSVFLR                     | P01029 | 0.00346921 | n +34.06 Da,K +34.06 Da, | 2043.413574 | 3 | 518.3200073 | 518.3209277 |
| TDVVPDPGVVHR                      | Q9CYZ2 | 0          | n +34.06 Da,             | 1923.028809 | 3 | 442.25      | 442.2525841 |
| TTVIKEVLQR                        | Q8CAY6 | 0.00049213 | n +34.06 Da,K +34.06 Da, | 1923.170166 | 3 | 418.9500122 | 418.9520639 |
| EAYMKNKVELESR                     | P11679 | 0          | n +34.06 Da,K +34.06 Da, | 1920.54834  | 2 | 768.9199829 | 768.921787  |
| GDEVIITGHCQGDGYR                  | P35505 | 0          | n +34.06 Da,             | 1919.189331 | 2 | 905.9317627 | 905.9336881 |
| QPLEREAVRPGVLR                    | Q6PDY2 | 0.04159197 | n +17.03 Da,             | 3025.654053 | 3 | 546.3170166 | 546.3267058 |
| TLDPVEKALR                        | P63017 | 0.00181242 | n +34.06 Da,K +34.06 Da, | 1912.427979 | 3 | 403.9321899 | 403.9327808 |
| IDNGSGMCKAGFAGDDAPR               | P63260 | 0          | n +34.06 Da,K +34.06 Da, | 1917.343628 | 3 | 669.6599731 | 669.6613563 |
| TGYKPLYLSSR                       | O08795 | 0.01555815 | n +34.06 Da,K +34.06 Da, | 2749.186035 | 3 | 489.3099976 | 489.3065069 |
| LGPLITPQAKER                      | Q9EQ20 | 0.01798011 | n +34.06 Da,K +34.06 Da, | 1909.748047 | 3 | 464.3062744 | 464.3066183 |

|                                     |        |            |                          |             |   |             |             |
|-------------------------------------|--------|------------|--------------------------|-------------|---|-------------|-------------|
| KETTIQGLDGLSER                      | Q91Y97 | 0.01518692 | n +34.06 Da,K +34.06 Da, | 1986.638672 | 2 | 807.9699707 | 807.9703233 |
| SRPPTGKMPGAPEAAPGDGAGAGR            | P70336 | 0          | n +42.03 Da,K +34.06 Da, | 1907.436401 | 3 | 793.4071045 | 793.4079784 |
| PDAANYKDISDVER                      | Q9D819 | 0          | n +17.03 Da,K +34.06 Da, | 1945.85083  | 3 | 548.619812  | 548.621443  |
| PQGVYPPEAKIGR                       | Q61699 | 0          | n +17.03 Da,K +34.06 Da, | 1907.036133 | 3 | 488.2927856 | 488.2928199 |
| PEVLDIRTEQALHSR                     | P14869 | 0.04159197 | n +14.02 Da,             | 3249.866699 | 3 | 541.289978  | 541.2896577 |
| VPMILVGNKCDLEDER                    | P62835 | 0          | n +34.06 Da,K +34.06 Da, | 2935.215332 | 3 | 652.6900024 | 652.6903641 |
| SSIPVYKGEIQAR                       | Q9D2R0 | 0          | n +34.06 Da,K +34.06 Da, | 1905.930664 | 3 | 505.9792175 | 505.9770496 |
| PASPNLKSQLAAAAAR                    | P26039 | 0          | n +17.03 Da,K +34.06 Da, | 1904.505493 | 3 | 515.9832153 | 515.9826457 |
| HLMESPANEMTPTR                      | Q9CPY7 | 0.00049213 | n +42.03 Da,             | 1899.755493 | 2 | 828.3800049 | 828.3794439 |
| VISIDKTGENFR                        | P62702 | 0          | n +34.06 Da,K +34.06 Da, | 2035.243408 | 3 | 482.9570923 | 482.9577666 |
| AAETVELHKLK                         | Q9D1J3 | 0          | n +42.03 Da,K +34.06 Da, | 1899.244507 | 2 | 674.925293  | 674.9271976 |
| ANYEFSQVSGDRPGCR                    | P56528 | 0.02159091 | n +34.06 Da,             | 2007.302246 | 3 | 626.289978  | 626.2988169 |
| VEAGKYTVGLGQTR                      | P54869 | 0          | n +34.06 Da,K +34.06 Da, | 1897.787598 | 3 | 516.3128052 | 516.312321  |
| AAELMQQKEATTEQQLR                   | O35490 | 0          | n +34.06 Da,K +34.06 Da, | 1896.756714 | 3 | 681.7081909 | 681.7107046 |
| AAAKKAVLGPLVGAVDQGTSSSTR            | Q64516 | 0          | n +42.03 Da,K +34.06 Da, | 3405.979492 | 3 | 769.7977295 | 769.7937566 |
| PFIEKAVR                            | Q9QXE0 | 0.01005632 | n +17.03 Da,K +34.06 Da, | 1894.441162 | 3 | 375.2531433 | 375.2535247 |
| GAPLAGTNKETTIQGLDGLSER              | Q91Y97 | 0          | n +34.06 Da,K +34.06 Da, | 2878.944092 | 3 | 766.0900269 | 766.0975052 |
| DIGATVHELSE                         | P16331 | 0.00096665 | n +34.06 Da,             | 2248.46875  | 3 | 411.230011  | 411.233301  |
| PLPPLPEYGGKVR                       | Q9CQQ7 | 0.00386432 | n +17.03 Da,K +34.06 Da, | 2526.854004 | 2 | 737.460022  | 737.4561597 |
| LTPHYLTKQDVER                       | Q9DBG6 | 0          | n +34.06 Da,K +34.06 Da, | 1932.254517 | 4 | 443.0098267 | 443.0111707 |
| AAQESLHVKTPLR                       | Q8VBT2 | 0.00264434 | n +42.03 Da,K +34.06 Da, | 1889.756104 | 3 | 509.3000488 | 509.3018267 |
| FKDEENSGADRLMTER                    | Q61488 | 0.00939926 | n +34.06 Da,K +34.06 Da, | 1886.470215 | 3 | 656         | 656.0038881 |
| SSGYPGGGGQYFAKPR                    | P49312 | 0          | n +34.06 Da,K +34.06 Da, | 1885.747681 | 3 | 566.3052979 | 566.3074586 |
| SSSRPVALVTGANKGIGFAITR              | P48758 | 0          | n +42.03 Da,K +34.06 Da, | 3453.577148 | 2 | 1139.660156 | 1139.658148 |
| SQAEFDKAAEEVKR                      | P31786 | 0          | n +42.03 Da,K +34.06 Da, | 2559.623535 | 2 | 859.4701538 | 859.4732303 |
| PKVTQPEVDTPLGR                      | Q63880 | 0          | n +17.03 Da,K +34.06 Da, | 1881.351929 | 3 | 529.9824219 | 529.982423  |
| IEESTTVVTTKSAEIR                    | P05784 | 0          | n +34.06 Da,K +34.06 Da, | 1879.966309 | 3 | 611.3594971 | 611.3597776 |
| AGVRRRSRRGTGSSTSPQFPLPSYQVSPENEPAGT | O35161 | 0.01262327 | n +14.02 Da,             | 4527.90625  | 4 | 947.25      | 947.2384058 |
| SAGFLQASASDVVVVHGR                  | Q8VCH0 | 0.00049213 | n +31.05 Da,             | 3328.156982 | 3 | 611.0100098 | 611.0005475 |
| SDKSDLKAELER                        | O88485 | 0.00553427 | n +42.03 Da,K +34.06 Da, | 1876.917603 | 3 | 500.9559937 | 500.9562033 |
| AAAAAASSTSVKPIFSR                   | Q9CQZ5 | 0          | n +34.06 Da,K +34.06 Da, | 1918.147705 | 3 | 539.3300171 | 539.3316041 |
| TPATDVFSSSTEEGEKRR                  | Q9D8W5 | 0.02409639 | n +34.06 Da,K +34.06 Da, | 1875.214966 | 3 | 607.9899902 | 607.9882324 |
| SDMYLHPVAMFR                        | P15105 | 0          | n +34.06 Da,             | 3246.747803 | 3 | 500.9225159 | 500.923193  |
| AELKALLQSSASR                       | P50580 | 0.00049213 | n +34.06 Da,K +34.06 Da, | 2177.233154 | 3 | 481.2999878 | 481.3051663 |
| PLDAESQGGGGNPFHR                    | Q91YW3 | 0          | n +17.03 Da,             | 1870.956055 | 3 | 595.2875366 | 595.2888686 |
| SDKSDLKAELER                        | O88485 | 0.00049213 | n +42.03 Da,K +34.06 Da, | 1869.658325 | 2 | 750.9293823 | 750.9306667 |
| GVMTKLIPR                           | P20029 | 0.00386432 | n +34.06 Da,K +34.06 Da, | 1867.340454 | 3 | 361.584259  | 361.5845463 |
| PQGVYPPEAKIGR                       | Q61699 | 0.00264434 | n +17.03 Da,K +34.06 Da, | 1865.830444 | 3 | 488.2910461 | 488.2928199 |
| EVKCDMEVSCPEGYTCCR                  | P28798 | 0          | n +34.06 Da,K +34.06 Da, | 1865.38623  | 3 | 783.3300171 | 783.3422019 |
| SLHLGVTPSVLR                        | O89023 | 0          | n +34.06 Da,             | 2530.222168 | 3 | 438.2758179 | 438.2768409 |

|                             |        |            |                          |             |   |             |             |
|-----------------------------|--------|------------|--------------------------|-------------|---|-------------|-------------|
| PTGTYHGSDSLQLER             | P68372 | 0          | n +17.03 Da,             | 1864.214722 | 3 | 569.2700195 | 569.2778583 |
| ALSVETESHIYR                | Q9WUE3 | 0          | n +34.06 Da,             | 1934.099243 | 3 | 480.2623596 | 480.2631492 |
| LLVDLDHQR                   | Q8VDD5 | 0.037373   | n +34.06 Da,             | 1860.225708 | 3 | 381.5621948 | 381.5628697 |
| SVELYAEKVATR                | P62908 | 0.00049213 | n +34.06 Da,K +34.06 Da, | 2175.978516 | 3 | 478.6238098 | 478.6260169 |
| LITIIGKEDAVR                | Q8VDJ3 | 0.01628538 | n +34.06 Da,K +34.06 Da, | 2251.938232 | 3 | 465.9795837 | 465.9783903 |
| MDADKDNKIQACDER             | O35309 | 0.00049213 | n +42.03 Da,K +34.06 Da, | 1859.150024 | 3 | 640.3099976 | 640.3138453 |
| LLPAGTEDYIHIR               | P48024 | 0          | n +34.06 Da,             | 3122.132324 | 3 | 511.2922668 | 511.2945606 |
| AMLIEKFVDTPR                | Q99MR8 | 0          | n +34.06 Da,K +34.06 Da, | 3182.810303 | 3 | 496.635437  | 496.6357472 |
| MNVEHEVNLLVEEHR             | Q4KML4 | 0.00049213 | n +42.03 Da,             | 4476.936523 | 3 | 668.3400269 | 668.3386832 |
| PPKTVGIDDLTGEPLQR           | Q9WTP7 | 0          | n +17.03 Da,K +34.06 Da, | 3281.921631 | 3 | 667.3929443 | 667.393152  |
| PDAANYKDSDVER               | Q9D819 | 0          | n +17.03 Da,K +34.06 Da, | 1987.12146  | 3 | 548.6207275 | 548.621443  |
| AAQESLHVKTPLR               | Q8VBT2 | 0          | n +42.03 Da,K +34.06 Da, | 1848.16394  | 3 | 509.2999878 | 509.3018267 |
| FNVPMKNNQITNNQR             | P09041 | 0.01798011 | n +34.06 Da,K +34.06 Da, | 1962.803711 | 3 | 629.3499756 | 629.3494407 |
| SSTSAVPQITTHYTVHPR          | Q921G7 | 0.02159091 |                          | 2362.049561 | 3 | 670.6799927 | 670.6849592 |
| SEHGLVVIAPDTSPR             | Q9R0P3 | 0.00096665 | n +34.06 Da,             | 2098.975586 | 3 | 537.9699707 | 537.968625  |
| AVPPTYADLGKSAR              | Q60932 | 0          | n +34.06 Da,K +34.06 Da, | 1947.786011 | 3 | 505.3042908 | 505.3051663 |
| AENNAQNKAKLISETR            | Q9CWP6 | 0          | n +42.03 Da,K +34.06 Da, | 1845.261597 | 3 | 633.0286865 | 633.0306542 |
| YLMKILTER                   | P60710 | 0.00553427 | n +34.06 Da,K +34.06 Da, | 2460.255615 | 3 | 412.2672424 | 412.2669947 |
| MFQAAGAAQATPSHEAKGSSGSSTVQR | Q8BGB5 | 0.00049213 | n +42.03 Da,K +34.06 Da, | 2194.918457 | 4 | 685.3400269 | 685.3398321 |
| NDALDSSNSMQTVQKTTTR         | P05784 | 0.00181242 | n +34.06 Da,K +34.06 Da, | 1875.324463 | 3 | 722.3800049 | 722.3761622 |
| IPTNDLKPGELE                | P00405 | 0.01694263 | n +34.06 Da,K +34.06 Da, | 1841.603027 | 3 | 474.2999878 | 474.2980116 |
| PKVTQPEVDTPPLGR             | Q63880 | 0          | n +17.03 Da,K +34.06 Da, | 1840.800903 | 3 | 529.9799805 | 529.982423  |
| AGKPVVLYFDGR                | P30115 | 0.00590468 | n +42.03 Da,K +34.06 Da, | 2710.789307 | 3 | 479.2667847 | 479.2683455 |
| MEEEEQDLPEQPVKKAK           | A2A953 | 0          | n +42.03 Da,K +34.06 Da, | 2105.021484 | 3 | 681.7199707 | 681.7224283 |
| DVPVVLHHR                   | A2ARA8 | 0.00306883 | n +34.06 Da,             | 1984.064941 | 3 | 366.230011  | 366.2277096 |
| PDFQHEDYNFLTR               | Q9R0H0 | 0          | n +17.03 Da,             | 3141.417725 | 2 | 849.9000244 | 849.8996771 |
| AAPAKGENLSLVVHGPDIR         | Q64442 | 0          | n +42.03 Da,K +34.06 Da, | 2952.456299 | 2 | 1039.077881 | 1039.084284 |
| DLDSPSKEEAFR                | P36552 | 0.00939926 | n +34.06 Da,K +34.06 Da, | 1833.722168 | 2 | 731.3900146 | 731.3964595 |
| CAATATILDKPEDR              | O35215 | 0          | n +34.06 Da,K +34.06 Da, | 3089.260498 | 2 | 814.9500122 | 814.9510761 |
| DDYFNLTKTVR                 | Q8BFS6 | 0.00710702 | n +34.06 Da,K +34.06 Da, | 2878.621338 | 3 | 480.6099854 | 480.6103668 |
| PIDVCEIGSKVCAR              | Q9D819 | 0          | n +17.03 Da,K +34.06 Da, | 2502.634033 | 3 | 552.2984619 | 552.3007699 |
| SQAEFDKAAEEVKR              | P31786 | 0          | n +42.03 Da,K +34.06 Da, | 5053.774902 | 2 | 859.475647  | 859.4732303 |
| ATSASSHLNKGIKQMY            | P15105 | 0          | n +42.03 Da,K +34.06 Da, | 1830.010376 | 3 | 616.0072021 | 616.0103138 |
| MEKPAASTEPQGSRPALGR         | Q9JMD3 | 0.00181242 | n +42.03 Da,K +34.06 Da, | 1828.287109 | 2 | 1030.040039 | 1030.044302 |
| TPKVDFPQDQLATLTGR           | P08249 | 0          | n +34.06 Da,K +34.06 Da, | 3400.730957 | 3 | 652.3800049 | 652.3792833 |
| DKSTGSVVQQPPFGGAR           | Q8CHT0 | 0          | n +34.06 Da,K +34.06 Da, | 1826.110596 | 2 | 879.9899902 | 879.9921214 |
| AELDIGQHCQVQHCR             | Q8BFR6 | 0          | n +42.03 Da,             | 1914.067871 | 3 | 631.6204224 | 631.6211959 |
| ATSASSHLNKGIKQMY            | P15105 | 0          | n +42.03 Da,K +34.06 Da, | 1823.215454 | 4 | 462.2579346 | 462.2595544 |
| TFYASEDKLENR                | O35490 | 0          | n +34.06 Da,K +34.06 Da, | 1823.144653 | 3 | 514.2802734 | 514.2807982 |
| PGLLVIDHR                   | Q9QXF8 | 0.00096665 | n +14.02 Da,             | 1823.074097 | 3 | 364.2200012 | 364.217104  |



|                       |        |            |                          |             |   |             |             |
|-----------------------|--------|------------|--------------------------|-------------|---|-------------|-------------|
| STPQSQFQESSPVWKLGR    | Q9D1I5 | 0          | n +34.06 Da,K +34.06 Da, | 3057.431152 | 2 | 1065.579956 | 1065.584375 |
| TFYASEDKLENR          | O35490 | 0          | n +34.06 Da,K +34.06 Da, | 1822.49292  | 2 | 770.9199829 | 770.9175591 |
| SKVSVISVEEPPQR        | Q9DCW4 | 0.00049213 | n +34.06 Da,K +34.06 Da, | 1821.673584 | 3 | 541.6599731 | 541.6631311 |
| ATSASSHLNKGIKQMY      | P15105 | 0          | n +42.03 Da,K +34.06 Da, | 2053.192871 | 3 | 616.0102539 | 616.0103138 |
| LDPNEQHDHLLSEHVIAIR   | Q9CWW1 | 0.01005632 |                          | 3354.967041 | 3 | 779.75      | 779.7363828 |
| ALKAADTIGYPVMIR       | Q8C196 | 0          | n +34.06 Da,K +34.06 Da, | 3006.927002 | 2 | 844.0137939 | 844.0160214 |
| GDEVIITGHCQGDGYR      | P35505 | 0          | n +34.06 Da,             | 1821.08313  | 2 | 905.9299927 | 905.9336881 |
| TEAEALASSLMGLFEKR     | Q61598 | 0.00049213 | n +34.06 Da,K +34.06 Da, | 4497.836426 | 3 | 641.0292358 | 641.0293742 |
| GLPKGPEGQGLPEVETR     | Q7TQK5 | 0          | n +34.06 Da,K +34.06 Da, | 2406.899902 | 3 | 611.3499756 | 611.3564785 |
| TDTEDKGEFLSEGGGVR     | E9PV24 | 0          | n +34.06 Da,K +34.06 Da, | 2016.781128 | 3 | 622.3217163 | 622.3235038 |
| FEESFQKALR            | Q8C196 | 0.00096665 | n +34.06 Da,K +34.06 Da, | 1992.872437 | 3 | 441.5899963 | 441.5961688 |
| VTAGKDGVANVSIEDR      | P08228 | 0          | n +34.06 Da,K +34.06 Da, | 1813.154663 | 3 | 566.9915771 | 566.9934287 |
| DPCGPAGSLTSVEFCGGTHLR | Q8BGQ7 | 0          | n +34.06 Da,             | 3236.445557 | 3 | 751.3599854 | 751.3597482 |
| VVFESEDEMKR           | Q8C196 | 0.00590468 | n +34.06 Da,K +34.06 Da, | 1811.186401 | 3 | 436.5802612 | 436.581531  |
| SEPEIPK GIR           | Q9WTP6 | 0.00181242 | n +34.06 Da,K +34.06 Da, | 1809.722656 | 3 | 398.587738  | 398.5890141 |
| QLRGTLNQQDHQWLFSR     | E9Q7D5 | 0.04457917 |                          | 2100.849609 | 3 | 696.0300293 | 696.0240863 |
| TTKDPSEHPSVTLFR       | Q99JW2 | 0.00049213 | n +42.03 Da,K +34.06 Da, | 2546.708008 | 3 | 640.6699829 | 640.6689045 |
| SVVFPHDEPLAGR         | Q99LB7 | 0          | n +34.06 Da,             | 2327.657959 | 3 | 486.6036377 | 486.6035055 |
| PGIKVVIPR             | Q6P3A8 | 0.01628538 | n +17.03 Da,K +34.06 Da, | 1807.372559 | 3 | 343.9200134 | 343.9183647 |
| SETAAPAAPAPVEKTPVKK   | P43277 | 0          | n +42.03 Da,K +34.06 Da, | 1863.325684 | 3 | 735.4500122 | 735.4510372 |
| QKTGTAEMSSILEER       | Q03265 | 0          | n +31.05 Da,             | 3254.94458  | 2 | 855.9500122 | 855.9406855 |
| PEGIKGMVQAVR          | Q8R0Y6 | 0.00264434 | n +17.03 Da,K +34.06 Da, | 1940.710327 | 3 | 445.9385376 | 445.9395004 |
| SLADIMAKR             | Q8BP67 | 0.00669176 | n +34.06 Da,K +34.06 Da, | 2131.748779 | 3 | 358.230011  | 358.2321729 |
| SMYQNEKEVGLAIR        | P70694 | 0          | n +34.06 Da,K +34.06 Da, | 2329.613281 | 2 | 853.4899902 | 853.4825432 |
| NIELGTACGKYR          | P62889 | 0          | n +34.06 Da,K +34.06 Da, | 2146.796631 | 3 | 538.2978516 | 538.2977945 |
| TEDKGEFLSEGGGVR       | E9PV24 | 0          | n +34.06 Da,K +34.06 Da, | 1798.811279 | 3 | 550.2999878 | 550.2986293 |
| PNWGGGAKCGACEKTVY     | P50462 | 0          | n +17.03 Da,K +34.06 Da, | 1802.144043 | 2 | 970.4899902 | 970.4956212 |
| ATEGMILTNDHQIR        | Q8BUV3 | 0          | n +42.03 Da,             | 2359.772949 | 3 | 593.2921143 | 593.293185  |
| GGDATENFEDVGHSTDAR    | P56395 | 0          | n +34.06 Da,             | 1829.344116 | 3 | 637.9500122 | 637.9557737 |
| PYTNAVIHEVQR          | O54749 | 0          | n +17.03 Da,             | 1796.596924 | 3 | 481.9291382 | 481.9299522 |
| ADKPDMEIASFDKAK       | Q6ZWY8 | 0          | n +42.03 Da,K +34.06 Da, | 2905.724365 | 3 | 623.0100098 | 623.0170638 |
| FYTKVLNEEER           | P24270 | 0          | n +34.06 Da,K +34.06 Da, | 1794.386963 | 3 | 499.2799988 | 499.2857719 |
| EIIVLSQGKVAER         | Q61102 | 0.00939926 | n +34.06 Da,K +34.06 Da, | 2143.305176 | 3 | 503.992981  | 503.9926997 |
| VLLAAAVCTKAGK         | Q5XJY5 | 0          | n +34.06 Da,K +34.06 Da, | 1794.026367 | 3 | 468.6547241 | 468.6549596 |
| PSLDYMTKIPR           | Q8C196 | 0          | n +17.03 Da,K +34.06 Da, | 3036.574463 | 3 | 490.9577637 | 490.9585609 |
| LDLVEKGFSNLR          | Q922D8 | 0.00049213 | n +34.06 Da,K +34.06 Da, | 3038.907471 | 3 | 486.9700012 | 486.9698949 |
| PDFVNDVSEKEQR         | Q60598 | 0          | n +17.03 Da,K +34.06 Da, | 1791.813477 | 2 | 807.4199829 | 807.4232437 |
| PASP NLKSQLAAAAR      | P26039 | 0.00049213 | n +17.03 Da,K +34.06 Da, | 1911.841553 | 2 | 773.4699707 | 773.4703303 |
| QISKCLGLTEAQTR        | Q8C196 | 0          | n +34.06 Da,K +34.06 Da, | 1791.413086 | 3 | 558.3273926 | 558.327754  |
| GKPVLYHFDGR           | P30115 | 0.01262327 | n +42.03 Da,K +34.06 Da, | 2471.230469 | 3 | 455.5895691 | 455.5893075 |

|                          |        |            |                          |             |   |             |             |
|--------------------------|--------|------------|--------------------------|-------------|---|-------------|-------------|
| SEPKAIDPKLSTTDR          | P63328 | 0          | n +42.03 Da,K +34.06 Da, | 1875.698975 | 3 | 590.0082397 | 590.0089675 |
| VMLGETNPADSKPGTIR        | P15532 | 0          | n +17.03 Da,K +34.06 Da, | 1788.641846 | 3 | 613         | 613.0085324 |
| GTKLSMTNDPLEAAR          | P11725 | 0          | n +34.06 Da,K +34.06 Da, | 2238.435547 | 2 | 836.4706421 | 836.4721757 |
| PVDDICIAKPR              | P32261 | 0          | n +17.03 Da,K +34.06 Da, | 1787.990479 | 3 | 445.5948792 | 445.5956224 |
| TLCEEEDEGHIRPQQAAR       | Q99MS7 | 0.02481203 | n +31.05 Da,             | 1786.848633 | 3 | 747.710022  | 747.6957476 |
| LPETFDAREQWSNCPTIGQIR    | P10605 | 0          | n +34.06 Da,             | 3523.219971 | 3 | 851.4199829 | 851.4306718 |
| MEGHDPKEPEQLR            | B2RXM2 | 0          | n +42.03 Da,K +34.06 Da, | 1785.544312 | 3 | 547.9419556 | 547.9419702 |
| CAPNNKEEYNGYTGAFR        | Q921I1 | 0.01081731 | n +34.06 Da,K +34.06 Da, | 2086.117676 | 3 | 687.0038452 | 687.0039994 |
| PQPEDVDGGLKSWR           | P47753 | 0          | n +17.03 Da,K +34.06 Da, | 2270.314209 | 3 | 545.6308594 | 545.630161  |
| AGGEGGVTLGQPHLSR         | Q9Z0N1 | 0          | n +34.06 Da,             | 1781.322632 | 3 | 523.9567261 | 523.9567193 |
| SKPTLNEVVIVSAIR          | Q8QZT1 | 0.00181242 | n +34.06 Da,K +34.06 Da, | 3067.305908 | 3 | 565.3641968 | 565.3664259 |
| TDQGIKNLPGVEAGR          | P24270 | 0          | n +34.06 Da,K +34.06 Da, | 1780.353027 | 3 | 541.6599731 | 541.654747  |
| PLPPLPEYGGKVR            | Q9CQ07 | 0          | n +17.03 Da,K +34.06 Da, | 2586.392578 | 3 | 491.9720459 | 491.9731986 |
| TSKVALVYQGQMNPEPPGAR     | P56480 | 0          | n +34.06 Da,K +34.06 Da, | 2384.585938 | 2 | 993.5599976 | 993.5593141 |
| AGGEGGVTLGQPHLSR         | Q9Z0N1 | 0          | n +34.06 Da,             | 1791.020752 | 2 | 785.4298706 | 785.4314407 |
| TEEEEEETEKESTEKDEL       | P08113 | 0.00346921 | n +34.06 Da,K +34.06 Da, | 1778.871948 | 3 | 762.710022  | 762.7078967 |
| SQAEFDKAAEEVKR           | P31786 | 0          | n +42.03 Da,K +34.06 Da, | 1778.400146 | 2 | 859.4734497 | 859.4732303 |
| TDTEDKGEFLSEGGGVR        | E9PV24 | 0          | n +34.06 Da,K +34.06 Da, | 2102.751465 | 3 | 622.3238525 | 622.3235038 |
| ASASAAASTLSEPPRRQESR     | E9PVP0 | 0.00049213 | n +42.03 Da,             | 1884.084961 | 3 | 739.039978  | 739.0402427 |
| AAPAKGENLSLVVHGGPDIR     | Q64442 | 0.0233874  | n +42.03 Da,K +34.06 Da, | 2361.658203 | 4 | 520.0458984 | 520.0457802 |
| EFEDMVAEKR               | Q6ZVV3 | 0          | n +34.06 Da,K +34.06 Da, | 1776.238403 | 3 | 441.2418518 | 441.241286  |
| VTAGKDGVANVSIEDR         | P08228 | 0          | n +34.06 Da,K +34.06 Da, | 1795.131836 | 2 | 849.9899902 | 849.9865049 |
| LPPLPPREDGPR             | O88668 | 0.00049213 | n +34.06 Da,             | 1775.949219 | 3 | 459.9404907 | 459.9402288 |
| GSGEKVEGSEPSVYYR         | Q9CQX2 | 0          | n +34.06 Da,K +34.06 Da, | 1775.159668 | 3 | 638.3376465 | 638.3356321 |
| SQAEFDKAAEEVKR           | P31786 | 0          | n +42.03 Da,K +34.06 Da, | 2679.130371 | 3 | 573.3156738 | 573.3179124 |
| PPVQGEVMEGADNQGAGEQGRPVR | P62960 | 0.00553427 | n +17.03 Da,             | 1842.712036 | 3 | 832.4000244 | 832.4083781 |
| AAVKTLNPKAEVAR           | P80317 | 0          | n +42.03 Da,K +34.06 Da, | 1772.026001 | 3 | 526.6699829 | 526.6718491 |
| TSVVVYVCGKGDSSIR         | Q9WUM3 | 0.00049213 | n +34.06 Da,K +34.06 Da, | 1771.884521 | 3 | 565.9819946 | 565.983876  |
| TTGGGNPIGDKLNIMTAGSR     | P24270 | 0          | n +34.06 Da,K +34.06 Da, | 2883.027344 | 3 | 676.710022  | 676.7108159 |
| APDQDEIDCLPGLAKQPSFR     | P16675 | 0          | n +34.06 Da,K +34.06 Da, | 3518.311035 | 3 | 775.739563  | 775.7441857 |
| SHTILLVQPTKR             | P84089 | 0.00049213 | n +42.03 Da,K +34.06 Da, | 1948.145874 | 3 | 490.3099976 | 490.3068003 |
| YTDNELEKTR               | P26443 | 0.00049213 | n +34.06 Da,K +34.06 Da, | 1968.634277 | 2 | 725.4128418 | 725.4146521 |
| VDNGSGMCKAGFAGDDAPR      | P60710 | 0.01005632 | n +17.03 Da,K +34.06 Da, | 1880.147705 | 3 | 659.3127441 | 659.3122866 |
| SQAEFDKAAEEVKR           | P31786 | 0          | n +42.03 Da,K +34.06 Da, | 1769.874023 | 3 | 573.3200073 | 573.3179124 |
| NVVFSEDEMCR              | Q8C196 | 0          | n +34.06 Da,K +34.06 Da, | 1969.94812  | 3 | 474.6000061 | 474.5958404 |
| SEPEIPKGR                | Q9WTP6 | 0.00181242 | n +34.06 Da,K +34.06 Da, | 1768.729492 | 3 | 398.5890808 | 398.5890141 |
| VKATAGDTHLGGEDFDNR       | P16627 | 0.00264434 | n +42.03 Da,K +34.06 Da, | 2224.186035 | 3 | 660.3147583 | 660.3274301 |
| VISLSEHSIIGR             | P08228 | 0          |                          | 2383.384521 | 3 | 465.9355164 | 465.9366666 |
| AAETVELHKLK              | Q9D1J3 | 0          | n +42.03 Da,K +34.06 Da, | 1898.077393 | 3 | 450.2869263 | 450.2872239 |
| SVELPETHQMLR             | Q07417 | 0.01662157 | n +34.06 Da,             | 2258.823975 | 3 | 491.9356079 | 491.9362675 |

|                                      |        |            |                          |             |   |             |             |
|--------------------------------------|--------|------------|--------------------------|-------------|---|-------------|-------------|
| LNISLAVAKER                          | P70441 | 0.0265818  | n +34.06 Da,K +34.06 Da, | 2348.426514 | 3 | 427.9599915 | 427.9556969 |
| SEGDSVGDSDVHGKPSVVYR                 | Q9CQU3 | 0          | n +42.03 Da,K +34.06 Da, | 1939.589478 | 3 | 684.3400269 | 684.3466019 |
| STKVPIYLKR                           | Q8JZX9 | 0.01262327 | n +42.03 Da,K +34.06 Da, | 1974.993652 | 3 | 438.9639587 | 438.9641922 |
| SQAEFDKAAEEVKR                       | P31786 | 0          | n +42.03 Da,K +34.06 Da, | 1956.177856 | 4 | 430.2399902 | 430.2402534 |
| SSIKVECVLR                           | Q64374 | 0.02728972 | n +34.06 Da,K +34.06 Da, | 1761.892822 | 3 | 420.2649231 | 420.2656541 |
| SLVCKAGIIASAR                        | P58252 | 0.00049213 | n +34.06 Da,K +34.06 Da, | 1972.799683 | 2 | 707.4500122 | 707.4477741 |
| VMQVMGSCRTRGGR                       | Q9CR92 | 0.03769482 | n +17.03 Da,             | 1758.84668  | 3 | 537.9400024 | 537.939471  |
| LSTKPQAQEQPPASPEALR                  | Q9WU79 | 0.00049213 | n +34.06 Da,K +34.06 Da, | 1906.150146 | 3 | 706.0700073 | 706.0726307 |
| PGLLVIDHR                            | Q9QXF8 | 0.00096665 | n +14.02 Da,             | 1758.776001 | 2 | 545.8222046 | 545.8220178 |
| PKVTQPEVDTPLGR                       | Q63880 | 0          | n +17.03 Da,K +34.06 Da, | 1758.705322 | 3 | 529.982605  | 529.982423  |
| SETAAPAAPAPAEKTPVKK                  | P43274 | 0.00049213 | n +42.03 Da,K +34.06 Da, | 1757.846924 | 3 | 726.0999756 | 726.1072705 |
| CNLGKFDETTADGR                       | Q05816 | 0.00049213 | n +34.06 Da,K +34.06 Da, | 1923.382324 | 3 | 594.2999878 | 594.2984122 |
| PTGTYHGDSDLQLER                      | P68372 | 0          | n +17.03 Da,             | 1757.120728 | 3 | 569.2792969 | 569.2778583 |
| SPDIAQCVHLDR                         | Q91X83 | 0.0201751  | n +34.06 Da,             | 2128.204346 | 3 | 482.2525635 | 482.2523671 |
| SVLPKPALVASR                         | Q8C196 | 0          | n +34.06 Da,K +34.06 Da, | 1925.306641 | 3 | 435.9677429 | 435.9678252 |
| ENENITVVKGIR                         | Q9CRB9 | 0          | n +34.06 Da,K +34.06 Da, | 1753.540527 | 3 | 480.6300049 | 480.6332829 |
| TAVQKLQAEGLSPR                       | P48758 | 0          | n +34.06 Da,K +34.06 Da, | 1751.615601 | 3 | 522.6592407 | 522.6597207 |
| MDPGKDEESRPQSPGPTR                   | P07903 | 0.00264434 | n +42.03 Da,K +34.06 Da, | 1750.841431 | 3 | 719.6900024 | 719.6866299 |
| ASKPTLNEVVIVSAIR                     | Q8QZT1 | 0          | n +34.06 Da,K +34.06 Da, | 3117.189209 | 2 | 883.0599976 | 883.0645576 |
| PSKGPLQSVQVFGR                       | P14131 | 0.00144578 | n +17.03 Da,K +34.06 Da, | 4462.234375 | 3 | 517.6473999 | 517.6473743 |
| SHVAVENALGLDQQFAGLDLNSSDNQSGGSTASKGR | Q62167 | 0          | n +42.03 Da,K +34.06 Da, | 4052.412354 | 4 | 927.460022  | 927.4583544 |
| EVKCDMEVSCPEGYTCCR                   | P28798 | 0          | n +34.06 Da,K +34.06 Da, | 2318.911133 | 3 | 783.3424072 | 783.3422019 |
| VSGGAIALGHPGLGSGSR                   | Q8BWT1 | 0          | n +34.06 Da,             | 1934.028442 | 3 | 542.9758301 | 542.9760023 |
| MEVKPPPGRPQPDSDGR                    | Q8BG05 | 0          | n +42.03 Da,K +34.06 Da, | 1745.574585 | 3 | 608.6600342 | 608.6596857 |
| PIIFKAAYGGGGR                        | Q05920 | 0.00049213 | n +17.03 Da,K +34.06 Da, | 2039.6875   | 3 | 453.2799988 | 453.2786219 |
| APLAGTNKETTIQGLDGLSER                | Q91Y97 | 0.00346921 | n +34.06 Da,K +34.06 Da, | 2629.291016 | 3 | 747.0900269 | 747.0903505 |
| ISGQKVNEAACDIAR                      | O35490 | 0.04190544 | n +34.06 Da,K +34.06 Da, | 1744.830566 | 3 | 567.3200073 | 567.3192586 |
| TAENLAAKYNISR                        | Q8BWT1 | 0          | n +34.06 Da,K +34.06 Da, | 1902.666382 | 3 | 506.9700012 | 506.9685543 |
| AMHNKTAPPQIPDTR                      | Q2VPQ9 | 0.00669176 | n +42.03 Da,K +34.06 Da, | 1744.689087 | 3 | 584.9804688 | 584.9806477 |
| PTGTHFCEVEQMR                        | P25688 | 0.00346921 | n +17.03 Da,             | 1744.618408 | 3 | 536.9099731 | 536.9150974 |
| MEGHDPKEPEQLR                        | B2RXM2 | 0          | n +42.03 Da,K +34.06 Da, | 1744.429688 | 3 | 547.9431152 | 547.9419702 |
| KTAVVVGTVTDDVR                       | P35980 | 0          | n +34.06 Da,K +34.06 Da, | 1742.881958 | 2 | 764.4699707 | 764.4725013 |
| AEQHGAPEQAAAGKSHGGLGGSY              | Q9JJU9 | 0          | n +42.03 Da,K +34.06 Da, | 1742.28772  | 3 | 752.7000122 | 752.699927  |
| FPIQNLPHYGVFSTQSNPKPR                | P35505 | 0          | n +34.06 Da,K +34.06 Da, | 3808.62207  | 3 | 786.7808838 | 786.7795585 |
| PEGEEPASPQQSKSPR                     | Q9CSB4 | 0.0290611  | n +17.03 Da,K +34.06 Da, | 1741.601196 | 3 | 592.2999878 | 592.3112687 |
| DNFFEGKELR                           | Q8CI94 | 0.00049213 | n +34.06 Da,K +34.06 Da, | 2352.613525 | 3 | 441.5799866 | 441.5840404 |
| DDEVVDVDTVEEDLGKSR                   | P08113 | 0          | n +34.06 Da,K +34.06 Da, | 3183.550049 | 3 | 682.6799927 | 682.6763835 |
| PVLHYFDGR                            | P30115 | 0.00264434 |                          | 1982.933838 | 3 | 368.5299988 | 368.5259376 |
| AAVKTLNPKAEVAR                       | P80317 | 0          | n +42.03 Da,K +34.06 Da, | 1822.865967 | 3 | 526.6719971 | 526.6718491 |
| SGYAGPADGTQQPDAPEHAVAR               | Q9QZM2 | 0          | n +34.06 Da,             | 1738.839111 | 3 | 743.6900024 | 743.6962939 |

|                       |        |            |                          |             |   |             |             |
|-----------------------|--------|------------|--------------------------|-------------|---|-------------|-------------|
| AGVPAHVVDLR           | Q6XPS7 | 0.00181242 | n +34.06 Da,             | 1738.187622 | 3 | 389.9069824 | 389.9067477 |
| PTPQEKSEGYCCGPVSVR    | P21981 | 0          | n +17.03 Da,K +34.06 Da, | 1736.969116 | 3 | 735.0300293 | 735.0296682 |
| DESLHKFQIIR           | Q4U4S6 | 0.00181242 | n +31.05 Da,             | 2152.600342 | 3 | 472.9394226 | 472.9384477 |
| PKVIQPEVDTPLGR        | Q8VCU1 | 0.00049213 | n +14.02 Da,K +28.03 Da, | 2325.527588 | 3 | 530.9799805 | 530.9786431 |
| TLGDIVYKR             | P12710 | 0.00429185 | n +34.06 Da,K +34.06 Da, | 1735.205444 | 3 | 378.2497864 | 378.250221  |
| PKVIQPEVDTPLGR        | Q8VCU1 | 0.00049213 | n +17.03 Da,K +34.06 Da, | 2106.622559 | 2 | 800.4899902 | 800.4881889 |
| EQAGGDATENFEDVGHSTDR  | P56395 | 0          |                          | 2010.909546 | 3 | 735.9799805 | 735.9808302 |
| LPPLPPREDGPR          | O88668 | 0.00306883 | n +34.06 Da,             | 1734.947632 | 3 | 459.9394226 | 459.9402288 |
| PFYVPSAELKR           | O55060 | 0.00049213 | n +17.03 Da,K +34.06 Da, | 2413.520264 | 3 | 453.2799988 | 453.2748775 |
| SVFLPAPKANNVLR        | Q9CQW3 | 0          | n +34.06 Da,K +34.06 Da, | 2520.378906 | 3 | 532.0100098 | 532.0085724 |
| DPAIYFKEQFLDGDWNTNR   | P14211 | 0          | n +34.06 Da,K +34.06 Da, | 4262.041992 | 3 | 785.4000244 | 785.4077907 |
| IYFKEQFLDGDWNTNR      | P14211 | 0          | n +34.06 Da,K +34.06 Da, | 3898.751221 | 3 | 691.0300293 | 691.0355166 |
| GIHVEIPGAQAESLGPLQVAR | Q9DCW4 | 0          |                          | 3714.059814 | 3 | 724.0700073 | 724.0708138 |
| YQNEKEVGLAIR          | P70694 | 0.00096665 | n +34.06 Da,K +34.06 Da, | 1732.834961 | 3 | 496.6300049 | 496.6332829 |
| TSTAVSVSGPEDIGSSSSHER | Q91X51 | 0          | n +34.06 Da,             | 1815.116089 | 3 | 737.6900024 | 737.6909863 |
| GYAGPADGTQQPDAPEHAVAR | Q9QZM2 | 0.00049213 | n +34.06 Da,             | 1731.735229 | 3 | 714.6900024 | 714.6856176 |
| SQAEFDKAAEEVKR        | P31786 | 0          | n +42.03 Da,K +34.06 Da, | 2415.914551 | 2 | 859.4725952 | 859.4732303 |
| PLDAESQQGGGGNPFHR     | Q91YW3 | 0          | n +17.03 Da,             | 1830.332031 | 3 | 595.2800293 | 595.2888686 |
| MEKTELIQKAK           | P68254 | 0.00049213 | n +42.03 Da,K +34.06 Da, | 1794.135864 | 2 | 731.9725952 | 731.9735492 |
| LLTEAPLNPKANR         | P60710 | 0          | n +34.06 Da,K +34.06 Da, | 1731.221436 | 3 | 502.3204041 | 502.3209277 |
| SIMKCDVDIR            | P60710 | 0.00264434 | n +34.06 Da,K +34.06 Da, | 1730.777832 | 3 | 435.582428  | 435.5827659 |
| MKVFTVGPLPAEGR        | Q91Z53 | 0          | n +34.06 Da,K +34.06 Da, | 2661.558838 | 2 | 785.473877  | 785.4765317 |
| SAVSCLWAKVNPDEVGGALGR | P02089 | 0          | n +34.06 Da,K +34.06 Da, | 3958.804688 | 3 | 795.0900269 | 795.0952184 |
| SAKS AISKEIFAPLDER    | Q8R3T5 | 0          | n +42.03 Da,K +34.06 Da, | 3492.348877 | 2 | 986.5800171 | 986.5729448 |
| MRREKRDR              | Q99PV0 | 0.04327611 | n +31.05 Da,             | 1728.971558 | 2 | 589.3499756 | 589.3408792 |
| MTVKKIAIFGATGR        | Q923D2 | 0.01005632 | n +31.05 Da,K +31.05 Da, | 2202.176025 | 3 | 518.9899902 | 518.9919357 |
| PFDNSSRPSQVVAETR      | P58252 | 0          | n +17.03 Da,             | 1725.856934 | 3 | 602.973938  | 602.9762907 |
| PADDVYLDSEER          | P21981 | 0          | n +17.03 Da,             | 1857.188599 | 3 | 570.9400024 | 570.9375019 |
| AALRPLVKPK            | P17932 | 0.00386432 | n +42.03 Da,K +34.06 Da, | 1724.435303 | 3 | 401.6248474 | 401.6255105 |
| ATSASSHLNKGIKQMY      | P15105 | 0          | n +42.03 Da,K +34.06 Da, | 2175.656494 | 3 | 616.0097656 | 616.0103138 |
| EFEIIDDHR             | P62245 | 0.01798011 | n +34.06 Da,             | 2200.809082 | 3 | 403.2099915 | 403.2103849 |
| LVLEVAQHLGESTVR       | P56480 | 0          | n +14.02 Da,             | 2884.706543 | 2 | 832.960022  | 832.9701404 |
| PESEHPSVTLFR          | Q99JW2 | 0          |                          | 1991.345703 | 3 | 466.9043579 | 466.9052551 |
| DLHGVPPEGCAVR         | O35490 | 0.03333333 | n +34.06 Da,             | 1722.968872 | 3 | 480.9200134 | 480.9207287 |
| DIWQLSSSLKR           | Q9CYN2 | 0.00049213 | n +34.06 Da,K +34.06 Da, | 3366.171143 | 3 | 467.6199951 | 467.6226065 |
| DVYKIGGIGTVPVGR       | P10126 | 0          | n +34.06 Da,K +34.06 Da, | 3053.844482 | 3 | 533.6699829 | 533.6682161 |
| IQKTPQIQVYSR          | P01887 | 0          | n +34.06 Da,K +34.06 Da, | 1721.021606 | 3 | 510.3200073 | 510.3209277 |
| DYGVLKADEGISFR        | P35700 | 0          | n +34.06 Da,K +34.06 Da, | 3411.0896   | 3 | 546.6438599 | 546.643848  |
| SSMKSVGEVMAIGR        | Q8C196 | 0          | n +34.06 Da,K +34.06 Da, | 2398.178223 | 3 | 507.2913513 | 507.2917635 |
| MDADKDNKQACDER        | O35309 | 0          | n +42.03 Da,K +34.06 Da, | 1719.270142 | 3 | 640.3126831 | 640.3138453 |

|                              |        |            |                          |             |   |             |             |
|------------------------------|--------|------------|--------------------------|-------------|---|-------------|-------------|
| SIMKCDVDIR                   | P60710 | 0.00181242 | n +34.06 Da,K +34.06 Da, | 1719.170654 | 2 | 652.869873  | 652.8705107 |
| GNVTAGKDGVANVSIEDR           | P08228 | 0          | n +34.06 Da,K +34.06 Da, | 1877.644897 | 3 | 624.0100098 | 624.0148928 |
| KVISTTKAPAAIGPYSQAVQVDR      | P52760 | 0          | n +14.02 Da,K +28.03 Da, | 3007.845215 | 3 | 824.1500244 | 824.1391168 |
| VVDNGSGMCKAGFAGDDAPR         | P60710 | 0          | n +34.06 Da,K +34.06 Da, | 1905.155151 | 3 | 698.0100098 | 698.0122777 |
| AAPKSCAGRFSGR                | F6W8I0 | 0.01005632 | n +31.05 Da,             | 1718.096436 | 3 | 465.9173279 | 465.9156484 |
| ELSEEDKLTVSR                 | P56480 | 0          | n +34.06 Da,K +34.06 Da, | 1717.238525 | 3 | 491.953125  | 491.9525702 |
| PTGTYHGDSLQLER               | P68372 | 0          | n +17.03 Da,             | 1716.142334 | 3 | 569.2783203 | 569.2778583 |
| PSVGEHTVEVLR                 | O09174 | 0.03429405 | n +17.03 Da,             | 1715.280762 | 2 | 670.3699951 | 670.372566  |
| TITYGPKVVR                   | P12710 | 0.01005632 | n +42.03 Da,K +34.06 Da, | 1719.378662 | 3 | 403.9189758 | 403.9186534 |
| SAGFLQASASDVVVVHGR           | Q8VCH0 | 0          | n +34.06 Da,             | 4553.425781 | 3 | 612.0046997 | 612.0058505 |
| TPEASGSGEKVEGSEPSVTYYR       | Q9CQX2 | 0          | n +34.06 Da,K +34.06 Da, | 2021.649414 | 3 | 800.0700073 | 800.0730258 |
| AQESLHVKTPLR                 | Q8VBT2 | 0          | n +42.03 Da,K +34.06 Da, | 1934.942627 | 3 | 485.622406  | 485.6227886 |
| AIFKDLISR                    | Q9WUK2 | 0.01728774 | n +34.06 Da,K +34.06 Da, | 2418.796143 | 3 | 377.5899963 | 377.5904661 |
| SPKILQDIASGR                 | Q91VD9 | 0          | n +34.06 Da,K +34.06 Da, | 2233.524414 | 3 | 451.6220398 | 451.6226065 |
| VAPMKGQVCVVVTGASR            | Q99L04 | 0          | n +34.06 Da,K +34.06 Da, | 1755.69812  | 3 | 576.6676636 | 576.669234  |
| SIVPALEIANAHR                | P63038 | 0          | n +34.06 Da,             | 2693.238281 | 3 | 475.6169434 | 475.6192669 |
| TITSLPKPALVASR               | Q8C196 | 0          | n +34.06 Da,K +34.06 Da, | 2728.173096 | 3 | 541.0258179 | 541.0276328 |
| AFCAPPAYLTHQQKVLRL           | Q9CQJ8 | 0          | n +42.03 Da,K +34.06 Da, | 3175.707275 | 3 | 692.7149048 | 692.7139019 |
| MEGHDPKEPEQLR                | B2RXM2 | 0.00264434 | n +42.03 Da,K +34.06 Da, | 1702.920898 | 2 | 821.4099731 | 821.4093171 |
| MRPQQAPVSGKVFIQR             | Q91W53 | 0          | n +42.03 Da,K +34.06 Da, | 2410.885986 | 3 | 640.0319824 | 640.0349752 |
| LVSDKPLTECIR                 | P55264 | 0.00144578 | n +34.06 Da,K +34.06 Da, | 1885.818481 | 3 | 500.2999878 | 500.3026569 |
| QSSGPGASSGPGGDHSELIVR        | D3Z7N2 | 0          |                          | 1698.063232 | 3 | 675.0019531 | 674.9994955 |
| QQPSNYGPMKSGNFGGSR           | O88569 | 0          | n +34.06 Da,K +34.06 Da, | 1707.949463 | 3 | 660.6699829 | 660.6724724 |
| PAFKDGGSTTAGNSSQVSDGAAAVLLAR | Q8VCH0 | 0          | n +17.03 Da,K +34.06 Da, | 3130.876709 | 3 | 900.4699707 | 900.4788971 |
| PGLKTIQATLSR                 | Q9D826 | 0          | n +17.03 Da,K +34.06 Da, | 2092.285889 | 3 | 445.9584961 | 445.9575486 |
| TVAVYSEQDTGQMHR              | Q05920 | 0          |                          | 1695.719238 | 3 | 583.9436646 | 583.9456739 |
| TAENLAAKYNISR                | Q8BWT1 | 0          | n +34.06 Da,K +34.06 Da, | 1861.647949 | 3 | 506.967804  | 506.9685543 |
| PSKPSTGGWQPLR                | Q8VCZ9 | 0          | n +17.03 Da,K +34.06 Da, | 1693.975586 | 3 | 487.9500122 | 487.9526862 |
| TGGDAAAPGAAGTQAELPHR         | Q9D0F3 | 0          | n +34.06 Da,             | 1693.834229 | 3 | 627.9915771 | 627.9923814 |
| LLTEAPLNPKANR                | P60710 | 0          | n +34.06 Da,K +34.06 Da, | 1690.581055 | 3 | 502.3200073 | 502.3209277 |
| TITSAKVMMEGGR                | P29341 | 0.03032544 | n +34.06 Da,K +34.06 Da, | 1689.982422 | 3 | 483.6129456 | 483.6127254 |
| PTGSYHGDSLQLER               | Q7TMM9 | 0          | n +17.03 Da,             | 1688.796997 | 3 | 564.6062012 | 564.6059749 |
| SQAEFDKAAEEVKR               | P31786 | 0          | n +42.03 Da,K +34.06 Da, | 1688.726318 | 3 | 573.3187866 | 573.3179124 |
| VDLYTAKGLFR                  | P17182 | 0.00049213 | n +34.06 Da,K +34.06 Da, | 3147.19751  | 3 | 450.9500122 | 450.9520639 |
| NNQDFRGSAGAPSVENVKNGIR       | P49443 | 0.01484375 | n +31.05 Da,             | 2333.515381 | 3 | 787.7399902 | 787.7404563 |
| PTVPPGGDLAKVQR               | P05213 | 0          | n +17.03 Da,K +34.06 Da, | 1916.802246 | 3 | 496.6435852 | 496.6437413 |
| PPGIEPSPDKMLQGR              | P24270 | 0          | n +17.03 Da,K +34.06 Da, | 2315.152588 | 3 | 558.3156128 | 558.3152963 |
| AAVKTLNPKAEVAR               | P80317 | 0.00049213 | n +42.03 Da,K +34.06 Da, | 1683.773804 | 3 | 526.6699829 | 526.6718491 |
| GNADEPEWVKTER                | O35887 | 0.00049213 | n +34.06 Da,K +34.06 Da, | 1718.423462 | 3 | 533.6199951 | 533.6197026 |
| PTGSYHGDSLQLER               | Q7TMM9 | 0          | n +17.03 Da,             | 1747.700073 | 3 | 564.6099854 | 564.6059749 |

|                          |        |            |                          |             |   |             |             |
|--------------------------|--------|------------|--------------------------|-------------|---|-------------|-------------|
| PKVTQPEVDTPLR            | Q63880 | 0          | n +17.03 Da,K +34.06 Da, | 1755.989014 | 2 | 794.4699707 | 794.4699963 |
| AGNKVPPALASHQPDR         | Q9WU56 | 0          | n +42.03 Da,K +34.06 Da, | 1683.196289 | 3 | 578.6534424 | 578.6550404 |
| PNIVGNEHYDVAR            | P56480 | 0          |                          | 1682.345581 | 2 | 742.3699951 | 742.3680505 |
| MNQEKLAKLQAQVR           | Q64152 | 0          | n +42.03 Da,K +34.06 Da, | 2473.014648 | 3 | 589.690918  | 589.6909151 |
| ATEARPTTEKSVPYQR         | Q99LB7 | 0.0129768  | n +42.03 Da,K +34.06 Da, | 1680.55957  | 3 | 637.3450928 | 637.3445322 |
| MDADKDNKQACDER           | O35309 | 0          | n +42.03 Da,K +34.06 Da, | 1678.612793 | 3 | 640.3121948 | 640.3138453 |
| PEADKIFLER               | P26443 | 0.00749064 | n +17.03 Da,K +34.06 Da, | 2108.7854   | 3 | 423.586853  | 423.5872328 |
| AAQESLHVKTPLR            | Q8VBT2 | 0.01262327 | n +42.03 Da,K +34.06 Da, | 1677.441162 | 4 | 382.230011  | 382.2281891 |
| MEGHDPKEPEQLR            | B2RXM2 | 0.00049213 | n +42.03 Da,K +34.06 Da, | 1744.055908 | 2 | 821.4089966 | 821.4093171 |
| SGWNTCSSCFGSDTKSR        | P17563 | 0          | n +34.06 Da,K +34.06 Da, | 1884.569458 | 3 | 668.9799805 | 668.9773446 |
| PSVGEHTVEVLR             | O09174 | 0.00181242 | n +17.03 Da,             | 1709.262085 | 3 | 447.2506714 | 447.2508028 |
| PKVTQPEVDTPLR            | Q63880 | 0.00749064 | n +17.03 Da,K +34.06 Da, | 1712.276855 | 3 | 529.9799805 | 529.982423  |
| AAQESLHVKTPLR            | Q8VBT2 | 0          | n +42.03 Da,K +34.06 Da, | 1915.603149 | 2 | 763.4487915 | 763.4491017 |
| MEVKPPPGRPQPDSGR         | Q8BG05 | 0.00181242 | n +42.03 Da,K +34.06 Da, | 1675.796143 | 2 | 912.4849243 | 912.4858903 |
| PTGTYHGDSDLQLR           | P68372 | 0          | n +17.03 Da,             | 1675.685547 | 3 | 569.2789307 | 569.2778583 |
| PSVGEHTVEVLR             | O09174 | 0          | n +17.03 Da,             | 1674.429932 | 2 | 670.3699951 | 670.372566  |
| DSSFQIVKNPR              | Q61176 | 0          | n +34.06 Da,K +34.06 Da, | 1754.477905 | 3 | 453.6075439 | 453.6069565 |
| TGTYHGDSDLQLR            | P68372 | 0.02129278 | n +34.06 Da,             | 1673.291138 | 3 | 542.6099854 | 542.6041232 |
| PESEHPSVTLFR             | Q99JW2 | 0.00049213 | n +17.03 Da,             | 2009.388672 | 3 | 472.5813599 | 472.5824411 |
| PESNSAEGSDRSEEQVSGAKVIAQ | Q9QXE0 | 0          | n +17.03 Da,K +34.06 Da, | 1671.921631 | 3 | 842.7600098 | 842.7562079 |
| YEDSNLGTSHLLR            | Q9DB77 | 0          |                          | 2065.032959 | 3 | 549.6099854 | 549.6092789 |
| SQAEFDKAAEEVKR           | P31786 | 0          | n +42.03 Da,K +34.06 Da, | 1729.674194 | 3 | 573.3178101 | 573.3179124 |
| TRSDPVVIVSAAR            | F2Z459 | 0          | n +34.06 Da,             | 1670.434204 | 2 | 702.9224243 | 702.9227196 |
| TSACFEPSLDYMVTKIPR       | Q8C196 | 0          | n +34.06 Da,K +34.06 Da, | 3991.789307 | 3 | 728.3900146 | 728.3885739 |
| IVAAGGKEQNLAQLR          | Q8VCW8 | 0          | n +34.06 Da,K +34.06 Da, | 1797.841675 | 3 | 546.0096436 | 546.0107534 |
| TRSDPVVIVSAAR            | F2Z459 | 0.00181242 | n +34.06 Da,             | 1670.332153 | 3 | 468.9510193 | 468.9509052 |
| PLSCDEPILSNKSGDNR        | P70296 | 0.00181242 | n +17.03 Da,K +34.06 Da, | 1849.4729   | 3 | 651.6699829 | 651.6704684 |
| PDLMNPIKR                | P03921 | 0.00939926 | n +17.03 Da,K +34.06 Da, | 1668.394653 | 3 | 378.8999939 | 378.9023863 |
| NIQGITKPAIR              | P62806 | 0.00049213 | n +34.06 Da,K +34.06 Da, | 1667.553711 | 2 | 639.930542  | 639.930074  |
| PVGVRYFSDFLR             | Q8CGE9 | 0.04809052 | n +17.03 Da,             | 1876.057617 | 3 | 491.6080933 | 491.6068092 |
| MKIAVIGQSLFGQEVYQCLR     | Q8R0Y6 | 0          | n +34.06 Da,K +34.06 Da, | 4177.111328 | 2 | 1204.680054 | 1204.676895 |
| STFNQVVLKR               | P35980 | 0.00049213 | n +34.06 Da,K +34.06 Da, | 1663.834229 | 3 | 420.6099854 | 420.6084085 |
| PFTIKPLDR                | P40142 | 0.00590468 | n +17.03 Da,K +34.06 Da, | 2078.786377 | 3 | 379.9127502 | 379.9132797 |
| TGGDAAAPGAAGTQAELPHR     | Q9D0F3 | 0          | n +34.06 Da,             | 1662.221924 | 2 | 941.4799805 | 941.4849339 |
| SEPEIPK GIR              | Q9WTP6 | 0.00181242 | n +34.06 Da,K +34.06 Da, | 1662.111328 | 2 | 597.3795776 | 597.3798829 |
| EVIITGHCQGDGYR           | P35505 | 0          | n +34.06 Da,             | 1661.238037 | 3 | 546.9421997 | 546.9420815 |
| AGGDATENFEDVGHST DAR     | P56395 | 0          | n +34.06 Da,             | 1876.45813  | 3 | 661.6300049 | 661.6348117 |
| SAGFLQASASDVVVVHGR       | Q8VCHO | 0          | n +34.06 Da,             | 2914.554932 | 2 | 917.5       | 917.5051375 |
| YGVLKADEGISFR            | P35700 | 0.00590468 | n +34.06 Da,K +34.06 Da, | 2756.984375 | 3 | 508.2980652 | 508.3015333 |
| SAADKVVAEIR              | P51660 | 0.00049213 | n +34.06 Da,K +34.06 Da, | 1748.917603 | 3 | 409.6000061 | 409.5961688 |

|                           |        |            |                          |             |   |             |             |
|---------------------------|--------|------------|--------------------------|-------------|---|-------------|-------------|
| EQAGGDATENFEDVGHSTDR      | P56395 | 0          |                          | 2108.644043 | 3 | 745.3300171 | 745.3245969 |
| SSGALLPKPQMR              | Q9CPQ1 | 0.01662157 | n +34.06 Da,K +34.06 Da, | 1658.02002  | 2 | 676.9204712 | 676.9213919 |
| SGPGASSGPGGDHSELIVR       | P57776 | 0          | n +34.06 Da,             | 1657.035278 | 3 | 605.3128662 | 605.3132321 |
| SDKSDLKAELER              | O88485 | 0.00049213 | n +42.03 Da,K +34.06 Da, | 1835.66333  | 3 | 500.9551697 | 500.9562033 |
| GGAIALGHPLGASGCR          | Q8CAY6 | 0          | n +34.06 Da,             | 1761.822144 | 3 | 509.9467163 | 509.9472778 |
| SIDGNNQLVIKGR             | Q99L45 | 0.04190544 | n +34.06 Da,K +34.06 Da, | 1654.870605 | 3 | 494.6400146 | 494.6405489 |
| PEQKGVPTGFVLPPIR          | Q922D8 | 0          | n +17.03 Da,K +34.06 Da, | 3068.359375 | 3 | 563.6818848 | 563.6821962 |
| PSKPSTGGWQPLR             | Q8VCZ9 | 0.01005632 | n +17.03 Da,K +34.06 Da, | 1653.326416 | 3 | 487.9500122 | 487.9526862 |
| MGPLINAPHLER              | Q9JLJ2 | 0.02962963 |                          | 2378.276855 | 3 | 449.9100037 | 449.9115751 |
| AGKPVLYHYFDGR             | P30115 | 0.00181242 | n +42.03 Da,K +34.06 Da, | 4535.741211 | 3 | 479.269989  | 479.2683455 |
| SLVCKAGIIASAR             | P58252 | 0.00181242 | n +34.06 Da,K +34.06 Da, | 1973.862183 | 3 | 471.9685974 | 471.9676082 |
| PWTPEAAVEHPEAVR           | O35490 | 0          | n +17.03 Da,             | 2465.079346 | 3 | 569.2999878 | 569.2950717 |
| PDTIEVQQMKAQAR            | P26040 | 0          | n +17.03 Da,K +34.06 Da, | 1651.876221 | 3 | 555.9799805 | 555.9786843 |
| PLAAAKAIQGLR              | Q8BGQ7 | 0          | n +17.03 Da,K +34.06 Da, | 1992.801758 | 3 | 420.6175842 | 420.6188669 |
| ATEGASSELIEKKR            | D3YYK3 | 0          | n +42.03 Da,K +34.06 Da, | 1651.805542 | 3 | 543.654541  | 543.6545244 |
| GVSDGSEVAKAQAAPGGASPTIFSR | Q9D0S9 | 0          | n +34.06 Da,K +34.06 Da, | 2601.455078 | 4 | 648.3699951 | 648.3725589 |
| PEGDLHGVPPEGCAVR          | O35490 | 0.00049213 | n +17.03 Da,             | 1650.960327 | 3 | 569.614563  | 569.6158166 |
| ASDTPGFYMDKLNKYR          | Q03963 | 0          | n +42.03 Da,K +34.06 Da, | 3489.681885 | 3 | 672.6900024 | 672.6892405 |
| TALPGAFKTR                | Q8VDD5 | 0.00049213 | n +34.06 Da,K +34.06 Da, | 1649.892456 | 3 | 377.25      | 377.2503324 |
| SGSGEKVEGSEPSVTTYR        | Q9CQX2 | 0.00909091 | n +34.06 Da,K +34.06 Da, | 1775.378784 | 3 | 667.3499756 | 667.3463085 |
| SSGALLPKPQMR              | Q9CPQ1 | 0.01518692 | n +34.06 Da,K +34.06 Da, | 1649.713257 | 3 | 451.616333  | 451.6166868 |
| MEKPAASTEPQGSRPALGR       | Q9JMD3 | 0          | n +42.03 Da,K +34.06 Da, | 1858.11084  | 3 | 687.0300293 | 687.0319599 |
| PTGSYHGSDSLQLER           | Q7TMM9 | 0          | n +17.03 Da,             | 1647.834473 | 3 | 564.604248  | 564.6059749 |
| MYTITKGPSKLVQAR           | Q9CQB2 | 0          | n +42.03 Da,K +34.06 Da, | 2721.823242 | 3 | 601.6960449 | 601.6992992 |
| SEPEIPKGIR                | Q9WTP6 | 0.00939926 | n +17.03 Da,K +34.06 Da, | 1647.501831 | 3 | 392.9100037 | 392.9118277 |
| LLSAAYVDSHQWEAR           | Q8BK72 | 0          | n +34.06 Da,             | 2810.63916  | 2 | 890.460022  | 890.4654808 |
| AQEIADTPSGDKTSLETR        | F8WIT2 | 0          | n +34.06 Da,K +34.06 Da, | 1646.043091 | 3 | 663.0300293 | 663.0253466 |
| SEPEIPKGIR                | Q9WTP6 | 0.00514139 | n +34.06 Da,K +34.06 Da, | 1645.939087 | 3 | 398.589325  | 398.5890141 |
| APPLTLDGIKDR              | Q9CR21 | 0.00632111 | n +34.06 Da,K +34.06 Da, | 2343.69751  | 3 | 455.2911377 | 455.2908569 |
| PQHWSEPEEFQPER            | Q64459 | 0          | n +17.03 Da,             | 2249.404297 | 3 | 604.9511719 | 604.949853  |
| STAGDTHLGGEDFDNR          | P17156 | 0          | n +34.06 Da,             | 1642.266235 | 3 | 575.9352417 | 575.9344209 |
| AANYKDIDSDVER             | Q9D819 | 0          | n +34.06 Da,K +34.06 Da, | 1639.71228  | 2 | 724.9000244 | 724.9044515 |
| PFIIDDKGR                 | O08709 | 0.00049213 | n +17.03 Da,K +34.06 Da, | 2140.749512 | 3 | 403.5803833 | 403.5801894 |
| MATLKDITR                 | Q91VR2 | 0.00346921 | n +34.06 Da,K +34.06 Da, | 1639.264404 | 3 | 372.9100037 | 372.9075779 |
| PGLTALLSDHR               | Q91X72 | 0.02795378 | n +17.03 Da,             | 2312.013428 | 3 | 399.56427   | 399.5647214 |
| AAQESLHVKTPLR             | Q8VBT2 | 0          | n +42.03 Da,K +34.06 Da, | 2014.600708 | 3 | 509.3026428 | 509.3018267 |
| PGVTVKDVNQEFVR            | Q9CZX8 | 0          | n +17.03 Da,K +34.06 Da, | 1634.877808 | 3 | 589.6708984 | 589.6722488 |
| PTTGEVIGHVAEGDR           | Q9CZS1 | 0          | n +14.02 Da,             | 1634.284912 | 2 | 776.3900146 | 776.3917231 |
| DPVLCDVAKR                | Q9JLI0 | 0.02694611 | n +34.06 Da,K +34.06 Da, | 1633.589722 | 3 | 414.2511902 | 414.250004  |
| ATEARPTTEKSVPYQR          | Q99LB7 | 0.00049213 | n +42.03 Da,K +34.06 Da, | 1631.830322 | 3 | 637.3457031 | 637.3445322 |

|                       |        |            |                          |             |   |             |             |
|-----------------------|--------|------------|--------------------------|-------------|---|-------------|-------------|
| MMQICDTYNQKHSLFNAMNR  | Q9CQ20 | 0          | n +42.03 Da,K +34.06 Da, | 3910.155273 | 3 | 860.06427   | 860.0675826 |
| PGVTVKDVNQEFVR        | Q9CZX8 | 0.00049213 | n +31.05 Da,             | 2271.230957 | 2 | 873.9799805 | 873.9810014 |
| LQGVDLLADAVAVTMGPKGR  | P63038 | 0          | n +34.06 Da,K +34.06 Da, | 4428.150879 | 3 | 693.7399902 | 693.7470897 |
| TPATLGKASPVLQR        | P16882 | 0.00049213 | n +34.06 Da,K +34.06 Da, | 1627.108887 | 2 | 753.9899902 | 753.9855783 |
| SIGVPIKVLHEAEGH       | P62320 | 0          | n +42.03 Da,K +34.06 Da, | 3474.861572 | 2 | 831.4699707 | 831.4753169 |
| MEVKPPPGRPQPDSDGR     | Q8BG05 | 0          | n +42.03 Da,K +34.06 Da, | 1623.727051 | 3 | 608.6598511 | 608.6596857 |
| PSKGPLQSVQVFGR        | P14131 | 0          | n +17.03 Da,K +34.06 Da, | 2410.815186 | 3 | 517.6500244 | 517.6473743 |
| MEVKPPPGRPQPDSDGR     | Q8BG05 | 0.00225734 | n +42.03 Da,K +34.06 Da, | 1716.323486 | 2 | 912.4899902 | 912.4858903 |
| MDDREDLVYQAKLAEQAER   | P62259 | 0          | n +42.03 Da,K +34.06 Da, | 3156.478516 | 3 | 786.0599976 | 786.0602447 |
| ELAQFDPARRMRGR        | E9Q9U5 | 0.03429405 | n +17.03 Da,             | 1853.182861 | 3 | 573.9789429 | 573.9793116 |
| NVSGGAIALGHPLGGSGSR   | Q8BWT1 | 0.00049213 | n +34.06 Da,             | 2102.931641 | 3 | 580.9899902 | 580.9903117 |
| SNSFNADRNDKFNNTLWKGQL | Q69ZR9 | 0.04623044 | n +42.03 Da,K +34.06 Da, | 4776.523438 | 3 | 914.4799805 | 914.4821304 |
| DPDAANYKDISDVER       | Q9D819 | 0          | n +34.06 Da,K +34.06 Da, | 2286.317139 | 2 | 888.460022  | 888.4577778 |
| PETGKEMSVYEAYR        | Q9QXS1 | 0          | n +17.03 Da,K +34.06 Da, | 2118.354248 | 3 | 570.9574585 | 570.9591786 |
| SAGFLQASASDVVVVHGR    | Q8VCH0 | 0          | n +34.06 Da,             | 3787.350342 | 3 | 612.005249  | 612.0058505 |
| SAGFLQASASDVVVVHGR    | Q8VCH0 | 0          | n +34.06 Da,             | 2996.799316 | 3 | 612.0065308 | 612.0058505 |
| VKVGVNGFGR            | P16858 | 0          | n +34.06 Da,K +34.06 Da, | 1615.369507 | 3 | 367.5786438 | 367.5785603 |
| SGGAIALGHPLGGSGSR     | Q8BWT1 | 0          | n +34.06 Da,             | 1613.142822 | 3 | 509.9500122 | 509.9531976 |
| GVFYHQGCCVAASR        | P24549 | 0          | n +34.06 Da,             | 1612.963501 | 3 | 591.9512329 | 591.9505825 |
| GDEVIITGHCQGDGYR      | P35505 | 0          | n +34.06 Da,             | 1851.427612 | 3 | 604.2893066 | 604.2915509 |
| AEFIVAKAIR            | P14685 | 0.00096665 | n +34.06 Da,K +34.06 Da, | 2067.110596 | 3 | 395.9400024 | 395.9378658 |
| SPVQDPKTCSSGSAVLCR    | Q61207 | 0          | n +34.06 Da,K +34.06 Da, | 1604.894287 | 3 | 663.0182495 | 663.0172514 |
| TALMTDPKYIHWSPVCR     | P11352 | 0          | n +34.06 Da,K +34.06 Da, | 4026.3396   | 3 | 707.0599976 | 707.0620206 |
| PTGTYHGSDSLQLER       | P68372 | 0          | n +17.03 Da,             | 1682.235107 | 2 | 853.4099731 | 853.4131492 |
| IHAITAANNLVAAAIDAR    | Q922D8 | 0.01694263 | n +34.06 Da,             | 3818.992432 | 3 | 613.7000122 | 613.6934952 |
| DIVAAGGKEQNLAQLR      | Q8VCW8 | 0          | n +34.06 Da,K +34.06 Da, | 2421.431396 | 3 | 584.3499756 | 584.3530681 |
| DNELEKITR             | P26443 | 0.00749064 | n +34.06 Da,K +34.06 Da, | 1601.320801 | 3 | 395.9086304 | 395.908524  |
| SAGFLQASASDVVVVHGR    | Q8VCH0 | 0          | n +34.06 Da,             | 3832.710938 | 3 | 612.0049438 | 612.0058505 |
| SVTTDHISPAGNIAR       | P28271 | 0.00049213 | n +34.06 Da,             | 1615.917358 | 2 | 786.9299927 | 786.9312737 |
| TESFEDVGHSPDAR        | Q9CQX2 | 0.01005632 | n +34.06 Da,             | 1596.451294 | 3 | 527.5847168 | 527.5848401 |
| TPTGTHFCEVEQMR        | P25688 | 0          | n +34.06 Da,             | 1901.747925 | 3 | 576.2741699 | 576.2748434 |
| GLDILKCPVSR           | F6XXE6 | 0.00590468 | n +34.06 Da,K +34.06 Da, | 2373.613525 | 3 | 442.6099854 | 442.6130538 |
| AVPSLGLKTDPAIPGR      | P00405 | 0.00869565 | n +34.06 Da,K +34.06 Da, | 2770.83252  | 3 | 521.6699829 | 521.6682161 |
| GGAIALGHPLGGSGSR      | Q8BWT1 | 0          | n +34.06 Da,             | 1594.789917 | 3 | 480.9417419 | 480.9425212 |
| TDTEKGEFLSEGGVVR      | E9PV24 | 0          | n +34.06 Da,K +34.06 Da, | 2057.938232 | 3 | 622.3231201 | 622.3235038 |
| EVKCDMEVSCPEGYCCR     | P28798 | 0          | n +34.06 Da,K +34.06 Da, | 2277.936768 | 3 | 783.3399658 | 783.3422019 |
| MKLPIFIADAFTATAFR     | Q9CXN7 | 0.00346921 | n +34.06 Da,K +34.06 Da, | 4713.711426 | 4 | 496.0499878 | 496.0458561 |
| MPEDSDTYLHR           | Q8VDW0 | 0          | n +34.06 Da,             | 1585.647095 | 3 | 466.5562744 | 466.5574563 |
| PYTDAMIHEVQR          | P56654 | 0          | n +17.03 Da,             | 2183.454102 | 3 | 492.9100037 | 492.9153144 |
| TMDKSELVQKAK          | Q9CQV8 | 0          | n +42.03 Da,K +34.06 Da, | 1584.381226 | 3 | 507.9846191 | 507.9850346 |



|                       |        |            |                          |             |   |             |             |
|-----------------------|--------|------------|--------------------------|-------------|---|-------------|-------------|
| GAIALGHPLGGSGSR       | Q8BWT1 | 0.00669176 | n +34.06 Da,             | 1580.739746 | 3 | 461.9299927 | 461.9353665 |
| EVIITGHCQGDGYR        | P35505 | 0          | n +34.06 Da,             | 1578.095825 | 2 | 819.9099731 | 819.909484  |
| SKTQVTVQYMQDNGAVIPVR  | Q91X83 | 0          | n +34.06 Da,K +34.06 Da, | 2857.38916  | 3 | 768.0999756 | 768.1001921 |
| ELVPLFEKAGPIWDLR      | Q7TMK9 | 0          | n +34.06 Da,K +34.06 Da, | 4338.633301 | 3 | 651.0599976 | 651.061114  |
| VMEKPSPLLVGR          | P97379 | 0.00346921 | n +34.06 Da,K +34.06 Da, | 2088.342529 | 3 | 465.3007202 | 465.3005872 |
| QALLDLHALGSAR         | P29391 | 0.00264434 |                          | 2986.630371 | 3 | 464.9400024 | 464.9367779 |
| SSEAPPLVNEDVKR        | Q91YQ5 | 0          | n +34.06 Da,K +34.06 Da, | 1577.161987 | 3 | 536.9788208 | 536.9791193 |
| SLKIQTSNVTKND         | Q64012 | 0.00264434 | n +42.03 Da,K +34.06 Da, | 1990.258179 | 2 | 836.4799805 | 836.4810554 |
| SEGDSVGDSDVHGKPSVVYR  | Q9CQU3 | 0.00939926 | n +42.03 Da,K +34.06 Da, | 1575.096069 | 3 | 684.3499756 | 684.3466019 |
| EVIITGHCQGDGYR        | P35505 | 0          | n +34.06 Da,             | 1574.532227 | 3 | 546.9418335 | 546.9420815 |
| SSPAQPAVPAPLADLKIQHTK | P24549 | 0          | n +42.03 Da,K +34.06 Da, | 2855.663086 | 3 | 760.4500122 | 760.4513306 |
| TSEGHLYVVSNAQCR       | Q8CFA2 | 0          | n +34.06 Da,             | 1572.247437 | 3 | 561.9500122 | 561.9492362 |
| PTLKFFPASADR          | P09103 | 0          | n +17.03 Da,K +34.06 Da, | 2424.508301 | 3 | 467.6099854 | 467.6101489 |
| PTPQPVAPTPSAAPAGPKGR  | Q8BMF4 | 0          | n +17.03 Da,K +34.06 Da, | 1582.431152 | 3 | 650.039978  | 650.0460863 |
| ALDSSNSMQTVQKTTTR     | P05784 | 0          | n +34.06 Da,K +34.06 Da, | 1566.888184 | 2 | 968.5300293 | 968.525669  |
| AGKPVLYHYFDGR         | P30115 | 0.00749064 | n +42.03 Da,K +34.06 Da, | 3611.025879 | 3 | 479.2679138 | 479.2683455 |
| SEAPPLVNEDVKR         | Q91YQ5 | 0          | n +34.06 Da,K +34.06 Da, | 1565.746582 | 3 | 507.967865  | 507.9684429 |
| DSSFQIVKNPR           | Q61176 | 0          | n +34.06 Da,K +34.06 Da, | 1810.863892 | 3 | 453.6053772 | 453.6069565 |
| PDAAKPEDWDER          | P14211 | 0.00049213 | n +17.03 Da,K +34.06 Da, | 1562.310913 | 2 | 740.3707275 | 740.3704794 |
| APGPDGTAPDPAHYR       | Q8BJT9 | 0.02231467 | n +34.06 Da,             | 1558.414429 | 3 | 519.2612915 | 519.2619198 |
| TQASMQQVHQCIER        | Q9CR98 | 0          | n +34.06 Da,             | 1558.34375  | 3 | 583.960022  | 583.9576258 |
| TTIAGVYKDGIVLGADTR    | P70195 | 0          | n +34.06 Da,K +34.06 Da, | 3484.262939 | 2 | 1009.099976 | 1009.101869 |
| TVIKEVLQR             | Q8CAY6 | 0.01005632 | n +34.06 Da,K +34.06 Da, | 1557.718018 | 3 | 385.2691956 | 385.2695041 |
| PKLYCGADGDWLVLPLGR    | Q62413 | 0.03068392 | n +42.03 Da,K +34.06 Da, | 2949.755127 | 4 | 499.019989  | 499.0160625 |
| YSGQQQSNYGPMKGGSGFGR  | Q8BG05 | 0.00181242 | n +34.06 Da,K +34.06 Da, | 1962.102295 | 3 | 725.3599854 | 725.3621868 |
| SQEELSGNSELIQKYR      | Q9QYG0 | 0          | n +34.06 Da,K +34.06 Da, | 2402.638184 | 3 | 650.3599854 | 650.3585482 |
| APKVTSELLR            | Q6P1B1 | 0.00306883 | n +34.06 Da,K +34.06 Da, | 1556.043335 | 3 | 394.6000061 | 394.6011424 |
| AFGYFEVTHDITR         | P24270 | 0          | n +34.06 Da,             | 3257.058594 | 3 | 530.6107178 | 530.6105489 |
| PDAAKPEDWDER          | P14211 | 0.00181242 | n +17.03 Da,K +34.06 Da, | 1551.576904 | 3 | 493.9140015 | 493.9160785 |
| LPSDIEEYVHR           | P16381 | 0          | n +34.06 Da,             | 2630.760742 | 3 | 464.5837097 | 464.5841111 |
| TPVEVEVAIHR           | P60867 | 0          | n +34.06 Da,             | 1589.623657 | 3 | 427.9164734 | 427.9173128 |
| SASMYQNEKEVGLAIR      | P70694 | 0          | n +34.06 Da,K +34.06 Da, | 2412.018311 | 3 | 622.0130615 | 622.0138354 |
| PSNMPPGIEPSPDKMLQGR   | P24270 | 0          | n +17.03 Da,K +34.06 Da, | 2859.00708  | 3 | 701.367981  | 701.3713652 |
| LGEKFDETTADGR         | Q05816 | 0          | n +34.06 Da,K +34.06 Da, | 1548.334595 | 3 | 502.9405212 | 502.9405532 |
| MEKPAASTEPQGSRALGR    | Q9JMD3 | 0          | n +42.03 Da,K +34.06 Da, | 1548.263794 | 4 | 515.5251465 | 515.525789  |
| DEAIHCPPCSEEKLAR      | P47879 | 0.00049213 | n +34.06 Da,K +34.06 Da, | 1647.058105 | 3 | 660.6699829 | 660.6698517 |
| VAPMKGQVCVVTGASR      | Q99L04 | 0          | n +34.06 Da,K +34.06 Da, | 1719.803711 | 2 | 864.5       | 864.5002127 |
| SHTILLVQPTKR          | P84089 | 0.00049213 | n +42.03 Da,K +34.06 Da, | 1967.052124 | 2 | 734.960022  | 734.9565623 |
| EGDLHGVPPGEC AVR      | O35490 | 0.01372549 | n +34.06 Da,             | 1541.423218 | 3 | 542.9420776 | 542.9420815 |
| PAPATTF AHL DATTVLSR  | P56480 | 0          | n +17.03 Da,             | 3236.177002 | 2 | 943.5100098 | 943.5126661 |

|                                    |        |            |                          |             |   |             |             |
|------------------------------------|--------|------------|--------------------------|-------------|---|-------------|-------------|
| AAAMDVDTPSGTNSGAGKKR               | P62878 | 0          | n +42.03 Da,K +34.06 Da, | 1539.509033 | 3 | 682.02948   | 682.0303259 |
| GSLPKPILR                          | P97484 | 0.03635042 | n +34.06 Da,K +34.06 Da, | 1539.134399 | 3 | 350.25      | 350.255306  |
| LEKAQSELSGADEAAR                   | Q9D3D9 | 0.01518692 | n +34.06 Da,K +34.06 Da, | 1741.95813  | 3 | 605.3400269 | 605.3357434 |
| DLSKQAVAYR                         | Q03265 | 0.00049213 | n +34.06 Da,K +34.06 Da, | 1537.81897  | 3 | 406.9204102 | 406.9207637 |
| AAAAAGGLPGKGHDISLAALR              | Q3U564 | 0          | n +42.03 Da,K +34.06 Da, | 3231.674561 | 3 | 665.0499878 | 665.0515713 |
| TFAEDKTYKYIR                       | Q8VCF0 | 0.01081731 | n +42.03 Da,K +34.06 Da, | 1991.809326 | 3 | 548.9799805 | 548.98046   |
| PNLVPSISNKR                        | P19536 | 0.00049213 | n +17.03 Da,K +34.06 Da, | 1534.835449 | 2 | 638.4031982 | 638.403927  |
| PGNSGSGSDGNRRNP GTTGS DGTGDWGTGSPR | E9PV24 | 0          | n +14.02 Da,             | 1656.520752 | 3 | 973.75      | 973.7543313 |
| TLVVCVHAEASSTGR                    | B5X0G2 | 0          | n +34.06 Da,             | 1532.965332 | 3 | 550.9501953 | 550.9491249 |
| SLERSYELPDGQVITIGNER               | Q8BFZ3 | 0.00181242 | n +42.03 Da,             | 3763.868164 | 3 | 773.3800049 | 773.3922821 |
| PNLVPSISNKR                        | P19536 | 0.00049213 | n +17.03 Da,K +34.06 Da, | 1527.862427 | 3 | 425.9378662 | 425.9383768 |
| IIGGSM DAKGSFPWQAK                 | Q61646 | 0          | n +34.06 Da,K +34.06 Da, | 3222.597412 | 3 | 632.368042  | 632.3696598 |
| GDAAAPGAAGTQ AELPHR                | Q9D0F3 | 0.0129768  |                          | 1554.130371 | 3 | 563.9509888 | 563.9482947 |
| AELYVKPGNKER                       | Q80VJ2 | 0          | n +42.03 Da,K +34.06 Da, | 1522.902954 | 2 | 757.4541626 | 757.4541112 |
| MEETEKKVATQEGR                     | Q9QXZ6 | 0          | n +42.03 Da,K +34.06 Da, | 1836.587158 | 3 | 582.6484375 | 582.6506743 |
| ATENFEDVGHSTDAR                    | P56395 | 0          | n +34.06 Da,             | 1520.03894  | 2 | 841.9000244 | 841.8950861 |
| S LDMKEHPDAEVQKN                   | O55060 | 0          | n +42.03 Da,K +34.06 Da, | 1833.318237 | 3 | 617.6599731 | 617.657829  |
| TPATLGKASPV LQR                    | P16882 | 0          | n +34.06 Da,K +34.06 Da, | 1611.456055 | 3 | 502.9929504 | 502.992811  |
| TGGDAAAPGAAGTQ AELPHR              | Q9D0F3 | 0          | n +34.06 Da,             | 1621.47583  | 2 | 941.4899902 | 941.4849339 |
| SQA EFDKAAEEVKR                    | P31786 | 0          | n +42.03 Da,K +34.06 Da, | 2476.706787 | 3 | 573.3175659 | 573.3179124 |
| PELTGAKVVVSGGR                     | Q99LC5 | 0.00181242 | n +17.03 Da,K +34.06 Da, | 1512.511719 | 2 | 710.9400024 | 710.9408742 |
| LHLGVTPSVLR                        | O89023 | 0.00632111 | n +34.06 Da,             | 2512.798828 | 3 | 409.2600098 | 409.2661645 |
| AELYVKPGNKER                       | Q80VJ2 | 0.00181242 | n +42.03 Da,K +34.06 Da, | 1537.44458  | 3 | 505.3049927 | 505.3051663 |
| MDKNELVQKAK                        | P63101 | 0.00049213 | n +42.03 Da,K +34.06 Da, | 1599.610718 | 2 | 724.4500122 | 724.4555236 |
| STKPQAQEQPPASPEALR                 | Q9WU79 | 0          | n +34.06 Da,K +34.06 Da, | 1510.546143 | 3 | 668.3781738 | 668.3779426 |
| SVVVVGLGKR                         | Q9CPY7 | 0.03198529 | n +34.06 Da,K +34.06 Da, | 1509.269653 | 3 | 361.2624817 | 361.2624607 |
| EGLTIDLKNFR                        | Q99K48 | 0.00049213 | n +34.06 Da,K +34.06 Da, | 3168.258301 | 3 | 458.6194153 | 458.6189735 |
| KETTIQGLDGLSER                     | Q91Y97 | 0          | n +34.06 Da,K +34.06 Da, | 2164.761963 | 2 | 807.9699707 | 807.9703233 |
| ISSQQTIPPSAKYGG R                  | P70404 | 0.00181242 | n +34.06 Da,K +34.06 Da, | 1507.17981  | 3 | 586.6766968 | 586.6775518 |
| MDADKDNKQACDER                     | O35309 | 0          | n +42.03 Da,K +34.06 Da, | 1622.445313 | 3 | 640.3131714 | 640.3138453 |
| DFGNSNLKPAR                        | P34914 | 0.00181242 | n +34.06 Da,K +34.06 Da, | 1506.293579 | 3 | 391.5730591 | 391.5734753 |
| TFAEDKTYKYIR                       | Q8VCF0 | 0          | n +42.03 Da,K +34.06 Da, | 2482.757324 | 3 | 548.9799805 | 548.98046   |
| STKPQAQEQPPASPEALR                 | Q9WU79 | 0          | n +34.06 Da,K +34.06 Da, | 1505.446167 | 2 | 1002.059998 | 1002.063276 |
| SSEAPPLVNEDVKR                     | Q91YQ5 | 0.00939926 | n +34.06 Da,K +34.06 Da, | 1504.005615 | 3 | 536.9781494 | 536.9791193 |
| TEERLKALQR                         | Q8K4T3 | 0.02962963 | K +28.03 Da,             | 1503.934937 | 3 | 433.9341125 | 433.9296232 |
| DLSKQAVAYR                         | Q03265 | 0.00049213 | n +34.06 Da,K +34.06 Da, | 1502.5802   | 2 | 609.8775635 | 609.8775074 |
| AGKPV LHYFDGR                      | P30115 | 0          | n +42.03 Da,K +34.06 Da, | 2416.200928 | 2 | 718.3963013 | 718.39888   |
| PDGHEICFVGDEAFR                    | Q9CPV4 | 0.00049213 | n +17.03 Da,             | 3241.760742 | 3 | 589.2700195 | 589.2719385 |
| AAAMDVDTPSGTNSGAGKKR               | P62878 | 0          | n +42.03 Da,K +34.06 Da, | 1499.182373 | 3 | 682.0300293 | 682.0303259 |
| PSVALKSPRLR                        | P32020 | 0.00590468 | n +17.03 Da,K +34.06 Da, | 1499.001831 | 4 | 319.4680786 | 319.468694  |

|                              |        |            |                          |             |   |             |             |
|------------------------------|--------|------------|--------------------------|-------------|---|-------------|-------------|
| SSEAPPLVNEDVKR               | Q91YQ5 | 0          | n +34.06 Da,K +34.06 Da, | 1617.830688 | 3 | 536.9794312 | 536.9791193 |
| ASGPGGLHADLLR                | Q8BWF0 | 0          | n +14.02 Da,             | 1991.416504 | 3 | 426.5693359 | 426.5702064 |
| PVGGGCPVFEGHPR               | Q64471 | 0.00049213 | n +17.03 Da,             | 1497.799194 | 3 | 494.9143982 | 494.9155371 |
| DLKQAVAYR                    | Q03265 | 0.00049213 | n +34.06 Da,K +34.06 Da, | 1497.516357 | 3 | 406.9205322 | 406.9207637 |
| SEAAPAAPAAAPPAEKAPAKK        | P15864 | 0          | n +42.03 Da,K +34.06 Da, | 1493.459961 | 3 | 696.7554321 | 696.7564604 |
| EPEIPKGIR                    | Q9WTP6 | 0.02962963 | n +34.06 Da,K +34.06 Da, | 1491.538818 | 3 | 369.5782776 | 369.5783377 |
| LVSSVSDLPKR                  | P54869 | 0.00181242 | n +34.06 Da,K +34.06 Da, | 1491.376587 | 3 | 423.6115112 | 423.6118188 |
| FRVPTPNVSVVDLTCR             | P16858 | 0.02624672 | n +34.06 Da,             | 3691.949463 | 3 | 632.0273438 | 632.0191025 |
| ASGPGGLHADLLR                | Q8BWF0 | 0          | n +34.06 Da,             | 1997.551025 | 2 | 649.3728027 | 649.3754049 |
| PLSLLLKNSPLVSR               | P08249 | 0.00264434 | n +17.03 Da,K +34.06 Da, | 3329.767578 | 3 | 530.0200195 | 530.0188082 |
| AGKPVLYHYFDGR                | P30115 | 0.01236045 | n +42.03 Da,K +34.06 Da, | 2242.295166 | 3 | 479.269989  | 479.2683455 |
| MDFSKLPKIR                   | P50516 | 0.00049213 | n +42.03 Da,K +34.06 Da, | 3030.91748  | 3 | 448.9500122 | 448.9496658 |
| LVFPSEIVGKR                  | P62082 | 0.00049213 | n +34.06 Da,K +34.06 Da, | 2720.756104 | 3 | 438.2895508 | 438.2923089 |
| TENFEDVGHSTDAR               | P56395 | 0          | n +34.06 Da,             | 1482.343384 | 2 | 806.3699951 | 806.376529  |
| VRPASSAASVYAGAGGSGSR         | P05784 | 0.00049213 |                          | 1480.60144  | 3 | 612.6500244 | 612.6501374 |
| TENFEDVGHSTDAR               | P56395 | 0          | n +34.06 Da,             | 1480.488647 | 3 | 537.9197998 | 537.9201115 |
| LPIPEDNLDHYR                 | P28843 | 0.00049213 | n +34.06 Da,             | 2612.985107 | 3 | 505.9400024 | 505.9386655 |
| GDSASKVISAEALPGR             | Q9D6Y7 | 0          | n +34.06 Da,K +34.06 Da, | 2437.983154 | 3 | 585.6670532 | 585.6688338 |
| LEEHPGGEEVLR                 | P56395 | 0.00049213 | n +34.06 Da,             | 1478.388306 | 2 | 699.8800049 | 699.8754355 |
| ACGLVASNLNLKPGECKVR          | P16045 | 0          | n +42.03 Da,K +34.06 Da, | 3556.114258 | 3 | 770.437439  | 770.4416721 |
| PGVTVKDVNQEFVR               | Q9CZX8 | 0          | n +17.03 Da,K +34.06 Da, | 2432.818115 | 3 | 589.6799927 | 589.6722488 |
| KSTGSVVGQQPFGGAR             | Q8CHT0 | 0.00386432 | n +34.06 Da,K +34.06 Da, | 1476.313843 | 3 | 548.6566772 | 548.6548583 |
| EDTVYHLQPSGR                 | Q91X83 | 0          | n +34.06 Da,             | 1475.757935 | 2 | 718.3699951 | 718.3730599 |
| SQAEFDKAAEEVKR               | P31786 | 0          | n +42.03 Da,K +34.06 Da, | 2788.118896 | 3 | 573.315918  | 573.3179124 |
| GTITTKELGTVMR                | P62204 | 0          | n +34.06 Da,K +34.06 Da, | 2156.220703 | 3 | 492.3023682 | 492.3026569 |
| DSNYHLLMSVQESLER             | P26443 | 0          |                          | 3972.901367 | 3 | 650.3172607 | 650.3192887 |
| EAGKYTVGLGQTR                | P54869 | 0.00049213 | n +34.06 Da,K +34.06 Da, | 1472.537476 | 3 | 483.2900085 | 483.2895162 |
| MEPILGRAQYSQLR               | Q8CGN5 | 0.01262327 |                          | 3297.544922 | 2 | 845.4511719 | 845.4588852 |
| AGKPVLYHYFDGR                | P30115 | 0          | n +42.03 Da,K +34.06 Da, | 2534.908447 | 3 | 479.269989  | 479.2683455 |
| SVVAGGPEVTLTPERYPVQR         | Q8CIM3 | 0.00049213 | n +34.06 Da,             | 2795.777344 | 3 | 730.4099731 | 730.4094248 |
| STKPQAQEQPPASPEALR           | Q9WU79 | 0          | n +34.06 Da,K +34.06 Da, | 1469.991455 | 3 | 668.3770142 | 668.3779426 |
| TITYGPKVVR                   | P12710 | 0.00049213 | n +34.06 Da,K +34.06 Da, | 1468.36499  | 3 | 401.2696228 | 401.2695041 |
| SMEDIKFSTR                   | Q9QYB1 | 0.00049213 | n +34.06 Da,K +34.06 Da, | 1955.707886 | 3 | 427.9090271 | 427.9096476 |
| SQSLLFVDIPSKIICR             | Q64374 | 0          | n +34.06 Da,K +34.06 Da, | 4062.0896   | 3 | 648.7261963 | 648.7256256 |
| TAGKDGVANVSIEDR              | P08228 | 0          | n +34.06 Da,K +34.06 Da, | 1467.624146 | 3 | 533.9699707 | 533.970624  |
| TAGKDGVANVSIEDR              | P08228 | 0.03769482 | n +34.06 Da,K +34.06 Da, | 1466.775269 | 2 | 800.4500122 | 800.4522977 |
| NAGVSDGSEVAKAQKAAPGGASPTIFSR | Q9D0S9 | 0          | n +17.03 Da,K +34.06 Da, | 2500.105469 | 4 | 690.3800049 | 690.3846798 |
| PSFLTQDIHLGVNESLTDAR         | P11725 | 0          | n +14.02 Da,             | 3897.453125 | 3 | 810.4099731 | 810.4150869 |
| PGVVDNFPLLKALR               | P30115 | 0          | n +17.03 Da,K +34.06 Da, | 3828.971924 | 3 | 530.6699829 | 530.6715198 |
| MFSALKKLVGSEQAPGR            | Q5U3K5 | 0          | n +42.03 Da,K +34.06 Da, | 4169.43457  | 3 | 643.7174072 | 643.7136086 |

|                        |        |            |                          |             |   |             |             |
|------------------------|--------|------------|--------------------------|-------------|---|-------------|-------------|
| MEVKPPPGRPQPDSGRR      | Q8BG05 | 0.00049213 | n +42.03 Da,K +34.06 Da, | 1483.080811 | 4 | 495.7718201 | 495.7718612 |
| KVDATEESDLAQQYGVR      | P09103 | 0          | n +34.06 Da,K +34.06 Da, | 2658.93042  | 3 | 659.68927   | 659.6901865 |
| CSPVHLISEASLVDLNTR     | Q922Q1 | 0          | n +34.06 Da,             | 3665.683838 | 3 | 682.3699951 | 682.3684606 |
| GSDCLLSKEQLR           | Q6PAL0 | 0.04746723 | n +42.03 Da,K +28.03 Da, | 2825.974854 | 3 | 492.5899963 | 492.5889385 |
| FYASEDKLENR            | O35490 | 0          | n +34.06 Da,K +34.06 Da, | 1451.011963 | 3 | 480.598175  | 480.5982385 |
| EADKIFLER              | P26443 | 0.01662157 | n +34.06 Da,K +34.06 Da, | 1863.621826 | 3 | 396.9100037 | 396.9134977 |
| ASLKDLEGKWR            | Q05816 | 0.00049213 | n +42.03 Da,K +34.06 Da, | 3227.407715 | 3 | 471.6199951 | 471.6226066 |
| SAGFLQASASDVVVVHGR     | Q8VCHO | 0          | n +34.06 Da,             | 2941.508545 | 3 | 612.0025635 | 612.0058505 |
| SQAEFDKAAEEVKR         | P31786 | 0          | n +42.03 Da,K +34.06 Da, | 2394.813477 | 3 | 573.3166504 | 573.3179124 |
| STLTLTKDEYER           | P01837 | 0          | n +34.06 Da,K +34.06 Da, | 1808.995972 | 3 | 508.6199951 | 508.6244536 |
| AIALGHPLGGSGSR         | Q8BWT1 | 0.01728774 | n +34.06 Da,             | 1552.652832 | 2 | 663.8864136 | 663.8886795 |
| ACVITAGGAKLQR          | O35955 | 0.00514139 | n +34.06 Da,K +34.06 Da, | 1460.578491 | 3 | 471.6300049 | 471.6274745 |
| TITYGPKVVR             | P12710 | 0.00264434 | n +34.06 Da,K +34.06 Da, | 1435.042725 | 2 | 601.4003906 | 601.4006179 |
| TSNPENTVFDADR          | P20029 | 0          | n +34.06 Da,K +34.06 Da, | 1582.915527 | 2 | 773.9299927 | 773.9284581 |
| TITYGPKVVR             | P12710 | 0.00049213 | n +34.06 Da,K +34.06 Da, | 1427.849243 | 3 | 401.2691345 | 401.2695041 |
| PSKPSTGGWQPLR          | Q8VCZ9 | 0.0265818  | n +17.03 Da,K +34.06 Da, | 1591.620605 | 3 | 487.9533081 | 487.9526862 |
| SEPEIPK GIR            | Q9WTP6 | 0.00590468 | n +34.06 Da,K +34.06 Da, | 1687.029175 | 3 | 398.5884705 | 398.5890141 |
| GDLHGVPPGEC AVR        | O35490 | 0.00264434 | n +34.06 Da,             | 1423.433594 | 3 | 499.9281006 | 499.9278834 |
| SQAEFDKAAEEVKR         | P31786 | 0          | n +42.03 Da,K +34.06 Da, | 1696.614136 | 2 | 859.4734497 | 859.4732303 |
| TGLSIHEVYGQSETGISSATLR | Q91VA0 | 0.00049213 | n +42.03 Da,K +34.06 Da, | 3163.686279 | 2 | 1153.579956 | 1153.584785 |
| AGKPV LHYFDGR          | P30115 | 0          | n +42.03 Da,K +34.06 Da, | 2503.091064 | 2 | 718.3900146 | 718.39888   |
| TLASIIKSR              | Q8VE38 | 0.04653641 | n +34.06 Da,K +34.06 Da, | 1419.725464 | 3 | 352.9200134 | 352.9185827 |
| AAPAKGENLSLVVHGPDIR    | Q64442 | 0.00049213 | n +42.03 Da,K +34.06 Da, | 2985.200684 | 3 | 693.0580444 | 693.0586147 |
| TTKAPAAIGPYSQAVQVDR    | P52760 | 0          | n +34.06 Da,K +34.06 Da, | 2335.622314 | 3 | 681.0625    | 681.0619543 |
| PFDNSSRPSQVVAETR       | P58252 | 0.01628538 | n +17.03 Da,             | 1579.087769 | 3 | 602.9799805 | 602.9762907 |
| PQVQEAQVVGKDER         | Q8VCW8 | 0          | n +17.03 Da,K +34.06 Da, | 1554.05957  | 3 | 578.3300171 | 578.3320038 |
| SLAPQIKVIAPWR          | P16460 | 0          | n +34.06 Da,K +34.06 Da, | 3316.167969 | 3 | 516.3464355 | 516.3416627 |
| VTVKDVNQEFVR           | Q9CZ8  | 0.00049213 | n +34.06 Da,K +34.06 Da, | 2163.762695 | 3 | 543.9899902 | 543.991359  |
| AENNAQNKAKLISETR       | Q9CWP6 | 0          | n +42.03 Da,K +34.06 Da, | 1803.529175 | 3 | 633.0291748 | 633.0306542 |
| TEELDFLHAR             | P99028 | 0          | n +34.06 Da,             | 3809.463135 | 3 | 471.25      | 471.2524728 |
| DELSAKLLR              | Q9D8Y0 | 0.03865607 | n +34.06 Da,K +34.06 Da, | 2145.910645 | 3 | 371.5799866 | 371.5818594 |
| AVRPLQLLGTCAELCR       | Q8BTE6 | 0          | n +31.05 Da,             | 3853.848389 | 2 | 944.5100098 | 944.5189134 |
| PVPAGDLVKAR            | P21981 | 0.00049213 | n +17.03 Da,K +34.06 Da, | 1400.622803 | 3 | 391.9240417 | 391.9240674 |
| NHVLSLSFPIR            | P26443 | 0.00386432 | n +17.03 Da,             | 3053.198975 | 3 | 428.25      | 428.2470635 |
| ADEDEGEGIHPSAPHR       | Q3UHD6 | 0.00049213 | n +42.03 Da,             | 1393.516724 | 2 | 815.3699951 | 815.366237  |
| MDQQTQHPSKAAQPLR       | Q9JL3  | 0          | n +42.03 Da,K +34.06 Da, | 1392.303711 | 3 | 595.3156738 | 595.315919  |
| SAGFLQASASDVVVVHGR     | Q8VCHO | 0          | n +34.06 Da,             | 4993.384277 | 3 | 612.0100098 | 612.0058505 |
| PGLTALLSDHR            | Q91X72 | 0.00264434 | n +17.03 Da,             | 2389.416504 | 3 | 399.5640259 | 399.5647214 |
| FSIFFDHLR              | Q9DB00 | 0.01262327 | n +42.03 Da,             | 1425.223267 | 3 | 408.5386353 | 408.5451093 |
| SEYPLVDGKLSIQCYLR      | P54869 | 0          | n +34.06 Da,K +34.06 Da, | 3989.450684 | 3 | 703.7199707 | 703.7276953 |

|                            |        |            |                          |             |   |             |             |
|----------------------------|--------|------------|--------------------------|-------------|---|-------------|-------------|
| MQSAPLEQPAKRPR             | Q60710 | 0          | n +42.03 Da,K +34.06 Da, | 1621.005859 | 3 | 562.317749  | 562.317371  |
| PEGPATKVTTGGNQTPNSSIR      | Q8VCF0 | 0.00181242 | n +17.03 Da,K +34.06 Da, | 1389.806519 | 3 | 740.7299805 | 740.7328968 |
| ASSSQKFQDLGVKNSEPAAR       | Q80UG5 | 0.00669176 | n +42.03 Da,K +34.06 Da, | 2138.659912 | 3 | 744.0700073 | 744.0748118 |
| TAEFKEAFQLFDR              | Q60605 | 0          | n +34.06 Da,K +34.06 Da, | 3805.190918 | 3 | 557.3117065 | 557.3122097 |
| DHSLESLIHRLR               | Q9C282 | 0.01005632 | n +34.06 Da,             | 1608.611694 | 3 | 503.9670105 | 503.9618043 |
| AQERPSCAVEPEHVQR           | P56389 | 0.00909091 | n +42.03 Da,             | 1385.477539 | 3 | 645.6430054 | 645.6427657 |
| SLEKVCADLIR                | P60867 | 0.00181242 | n +34.06 Da,K +34.06 Da, | 2428.522217 | 3 | 457.9500122 | 457.9482138 |
| GRQPLHPHVQLEER             | Q61790 | 0.01662157 | n +17.03 Da,             | 1382.467407 | 3 | 571.6599731 | 571.6499601 |
| PKLGVIPNTEGR               | Q61578 | 0.00788382 | n +17.03 Da,K +34.06 Da, | 1564.465088 | 3 | 444.6139832 | 444.6137819 |
| PPHVVKVPASQPR              | P97855 | 0.01555815 | n +34.06 Da,K +34.06 Da, | 2693.631592 | 2 | 740.4771729 | 740.4751802 |
| MNYSAKDEVDDGGPAGPPGGAAKTR  | Q8VEK0 | 0          | n +42.03 Da,K +34.06 Da, | 2246.726563 | 3 | 819.4199829 | 819.4218831 |
| SCPGVPPGLETLKETPAPR        | P52840 | 0.00049213 | n +34.06 Da,K +34.06 Da, | 2784.906494 | 3 | 692.0599976 | 692.0594449 |
| MEETEKKVATQEGR             | Q9QXZ6 | 0          | n +42.03 Da,K +34.06 Da, | 1810.084229 | 2 | 873.4699707 | 873.4723733 |
| GTPATMSQVAKDVATFLR         | Q9D0M3 | 0          | n +34.06 Da,K +34.06 Da, | 4246.323242 | 3 | 654.3797607 | 654.3768852 |
| SQAEDFKAAEEVKR             | P31786 | 0          | n +42.03 Da,K +34.06 Da, | 1371.7854   | 3 | 573.3200073 | 573.3179124 |
| MDGEKPVDASEEKR             | Q9D0R2 | 0.00049213 | n +42.03 Da,K +34.06 Da, | 1370.45459  | 3 | 567.6300049 | 567.6313913 |
| TFEESFQKALR                | Q8C196 | 0.00939926 | n +34.06 Da,K +34.06 Da, | 2328.992676 | 2 | 712.4151001 | 712.4144545 |
| EATIIDLTKR                 | P10107 | 0.00049213 | n +34.06 Da,K +34.06 Da, | 3671.652832 | 3 | 447.6300049 | 447.6309906 |
| AAPGAAGTQAELPHR            | Q9D0F3 | 0.00049213 | n +34.06 Da,             | 1366.958252 | 3 | 494.269989  | 494.2741595 |
| LEEHPGGEEVLR               | P56395 | 0          | n +34.06 Da,             | 1484.217407 | 3 | 466.9196777 | 466.9193825 |
| WGSIAIKIVGSNAGR            | P13707 | 0          | n +34.06 Da,K +34.06 Da, | 2722.767578 | 3 | 518.9799805 | 518.984427  |
| EKPAASTEPQGSRPALGR         | Q9JMD3 | 0.00181242 | n +42.03 Da,K +34.06 Da, | 1364.143188 | 3 | 643.3499756 | 643.3517982 |
| PNIVGNEHYDVAR              | P56480 | 0          | n +17.03 Da,             | 1634.063843 | 2 | 750.8800049 | 750.8838295 |
| TITYGPKVVR                 | P12710 | 0.00590468 | n +34.06 Da,K +34.06 Da, | 1359.644287 | 3 | 401.269989  | 401.2695041 |
| DHGD LAFVDVPNDSSSFQJVK NPR | Q61176 | 0          | n +17.03 Da,K +34.06 Da, | 3847.99585  | 3 | 874.460022  | 874.4575443 |
| YEGYALPHAILR               | P60710 | 0.01120897 | n +34.06 Da,             | 2880.344482 | 3 | 479.6099854 | 479.6084792 |
| MEKPAASTEPQGSRPALGR        | Q9JMD3 | 0          | n +42.03 Da,K +34.06 Da, | 1545.857178 | 4 | 515.5250854 | 515.525789  |
| PAQAVATAVR SIPAREGDV LGRVR | Q8C3W3 | 0.01081731 | n +17.03 Da,             | 3893.708496 | 3 | 836.1599731 | 836.1506788 |
| TVWDVGGQDKIR               | P61205 | 0          | n +34.06 Da,K +34.06 Da, | 2171.80249  | 3 | 481.2841187 | 481.2859945 |
| ADEPEVVKTER                | O35887 | 0          | n +34.06 Da,K +34.06 Da, | 1717.901367 | 3 | 476.5980225 | 476.5982385 |
| TAGGVMTVLIKR               | P16627 | 0.00049213 | n +34.06 Da,K +34.06 Da, | 2346.499512 | 3 | 438.6300049 | 438.6251821 |
| SQAEDFKAAEEVKR             | P31786 | 0          | n +42.03 Da,K +34.06 Da, | 1355.798462 | 4 | 430.2400208 | 430.2402534 |
| AAMDVDTPSGTNSGAGKKR        | P62878 | 0.00181242 | n +42.03 Da,K +34.06 Da, | 1355.528931 | 3 | 658.3499756 | 658.3512878 |
| DQDEIDCLPLGLAKQPSFR        | P16675 | 0          | n +34.06 Da,K +34.06 Da, | 3624.674316 | 3 | 719.7130127 | 719.7142262 |
| PYSKGDPCSTICCR             | Q8VCI0 | 0.00049213 | n +17.03 Da,K +34.06 Da, | 1353.946045 | 3 | 584.6099854 | 584.6093864 |
| ALSDADVQKQIKH              | P50518 | 0          | n +42.03 Da,K +34.06 Da, | 2025.123779 | 3 | 521.6400146 | 521.6439593 |
| PTLKFFPASADR               | P09103 | 0          | n +17.03 Da,K +34.06 Da, | 2421.36084  | 2 | 700.9105225 | 700.9115851 |
| PVHGKVIPVWR                | Q91X43 | 0.02054013 | n +31.05 Da,             | 1352.279053 | 3 | 440.2797546 | 440.2767342 |
| AKPEVSSDEDVQYR             | Q8BMS1 | 0.01798011 | n +34.06 Da,K +34.06 Da, | 1393.297607 | 3 | 564.2999878 | 564.302151  |
| DAQEILHSR                  | Q01405 | 0.03865607 | n +34.06 Da,             | 1350.997192 | 3 | 368.2067871 | 368.2069746 |

|                                     |        |            |                          |             |   |             |             |
|-------------------------------------|--------|------------|--------------------------|-------------|---|-------------|-------------|
| PDFQHEDYNFLTR                       | Q9R0H0 | 0          | n +17.03 Da,             | 3151.901123 | 3 | 566.9355469 | 566.9355436 |
| KSDGMDPYIELR                        | Q9EQI5 | 0.01372549 | n +34.06 Da,K +34.06 Da, | 2454.586426 | 2 | 746.4086914 | 746.411055  |
| DALDSSNSMQTVQKTTTR                  | P05784 | 0          | n +34.06 Da,K +34.06 Da, | 1942.612427 | 3 | 684.3699951 | 684.3618529 |
| PDSWDKDVYPEPPSR                     | Q9DCS9 | 0          | n +17.03 Da,K +34.06 Da, | 2628.806885 | 3 | 613.6421509 | 613.6442477 |
| DVALEGVGHFFR                        | P29391 | 0          | n +34.06 Da,             | 3579.799316 | 2 | 690.8800049 | 690.8777804 |
| GDTHLGGEDFDQR                       | P20029 | 0          | n +34.06 Da,             | 1515.925049 | 2 | 740.8499756 | 740.8474069 |
| SKVISAEEALPGR                       | Q9D6Y7 | 0.02195307 | n +34.06 Da,K +34.06 Da, | 1764.932251 | 3 | 475.6317444 | 475.6296499 |
| SEGDSVGDSDVHGKPSVVYR                | Q9CQU3 | 0          | n +42.03 Da,K +34.06 Da, | 1640.944824 | 4 | 513.5119019 | 513.5117705 |
| SGMCKAGFAGDDAPR                     | P60710 | 0          | n +34.06 Da,K +34.06 Da, | 1343.644897 | 3 | 536.6026611 | 536.6028894 |
| PTKLADVYQAEIR                       | P03995 | 0.01005632 | n +14.02 Da,K +28.03 Da, | 2302.312256 | 3 | 515.9625854 | 515.95936   |
| TSEVIEDEKQFYSKAKTY                  | Q8R2U4 | 0.00181242 | n +42.03 Da,K +34.06 Da, | 3781.035889 | 3 | 770.7683716 | 770.7581962 |
| ALDSSNSMQTVQKTTTR                   | P05784 | 0.00181242 | n +34.06 Da,K +34.06 Da, | 1586.680786 | 3 | 646.0200195 | 646.0195381 |
| SDAPPLTLDGIKDR                      | Q9CR21 | 0          | n +34.06 Da,K +34.06 Da, | 2391.411133 | 2 | 783.4616699 | 783.4621337 |
| AGKPVLYHFDGR                        | P30115 | 0          | n +42.03 Da,K +34.06 Da, | 2457.590088 | 2 | 718.3984375 | 718.39888   |
| ADEDEGEGIHPSAPHR                    | Q3UHD6 | 0.00049213 | n +42.03 Da,             | 1377.216064 | 3 | 543.9099731 | 543.9132502 |
| SVAPGENLKIR                         | Q8R050 | 0.00181242 | n +34.06 Da,K +34.06 Da, | 1484.467407 | 3 | 417.9400024 | 417.9400468 |
| SETAPAAPAAPAPAEKTPVKK               | P43274 | 0.04909926 | n +42.03 Da,K +34.06 Da, | 1508.492676 | 3 | 726.1099854 | 726.1072705 |
| MEEESIKEGSEKPR                      | Q8K124 | 0          | n +42.03 Da,K +34.06 Da, | 1617.201904 | 3 | 586.9799805 | 586.9786797 |
| TFAEDKTYKY                          | Q8VCF0 | 0.00181242 | n +34.06 Da,K +34.06 Da, | 1718.206177 | 2 | 684.399353  | 684.4007399 |
| MDGKPVDAESEKR                       | Q9D0R2 | 0          | n +42.03 Da,K +34.06 Da, | 1329.009155 | 3 | 567.6300049 | 567.6313913 |
| EGSIVKLGR                           | O55029 | 0.00306883 | n +34.06 Da,K +34.06 Da, | 1839.855225 | 3 | 380.6000061 | 380.5976208 |
| ASGASDTPHHQSPSESVPVQVGVGCSMMR       | A2AS89 | 0          | n +42.03 Da,             | 3014.902344 | 3 | 1074.47998  | 1074.485142 |
| GKDGVANVSIEDR                       | P08228 | 0.00181242 | n +34.06 Da,K +34.06 Da, | 1345.227539 | 2 | 714.4118652 | 714.409901  |
| GSWKTGQSYLAAGLLKNQVAVVTGGGTGIGKAVSR | Q99MZ7 | 0          | n +42.03 Da,K +34.06 Da, | 4119.635254 | 5 | 716.0200195 | 716.0209603 |
| TDLLAHSIR                           | Q8JZZ0 | 0.00181242 | n +34.06 Da,             | 1993.042236 | 3 | 386.230011  | 386.234753  |
| ADEEKLPPGWEKR                       | Q9QUR7 | 0          | n +42.03 Da,K +34.06 Da, | 2239.289551 | 3 | 555.647644  | 555.647481  |
| SNLKPDEHCTGAGTGSPLEEEVR             | Q8VC52 | 0          | n +42.03 Da,K +34.06 Da, | 2778.757324 | 3 | 886.7600098 | 886.7677902 |
| AVHPGGDTVAVGGTDGNVR                 | O88342 | 0.00049213 | n +34.06 Da,             | 1430.193726 | 3 | 604.9899902 | 604.9852267 |
| ISSQQTIPPSAKYGGGR                   | P70404 | 0.00049213 | n +34.06 Da,K +34.06 Da, | 1518.360229 | 2 | 879.5100098 | 879.5126894 |
| ELAQFDPARRMRGR                      | E9Q9U5 | 0.04623044 | n +14.02 Da,             | 1851.760254 | 3 | 572.9645386 | 572.974009  |
| MQIFVKTLTGK                         | POCG49 | 0          | n +34.06 Da,K +34.06 Da, | 2644.753662 | 3 | 456.643158  | 456.6441719 |
| PATTFAHLDTTVLSR                     | P56480 | 0          | n +17.03 Da,             | 3010.271729 | 3 | 573.3099976 | 573.3142434 |
| ATSASSHLNKGIKQMY                    | P15105 | 0          | n +42.03 Da,K +34.06 Da, | 2011.719482 | 3 | 616.0090332 | 616.0103138 |
| VEPGSPAESGLLAGDR                    | P70441 | 0          | n +34.06 Da,K +34.06 Da, | 1889.897461 | 3 | 584.3400269 | 584.3371954 |
| MDLSGVKKK                           | Q99M28 | 0.03333333 | n +42.03 Da,K +34.06 Da, | 1365.369385 | 3 | 383.9299927 | 383.9302007 |
| TVSSDQMAKLR                         | P16015 | 0          | n +34.06 Da,K +34.06 Da, | 1309.453369 | 3 | 435.2602539 | 435.2606804 |
| PAVAESAVVSSPDKDR                    | Q91VA0 | 0          | n +17.03 Da,K +34.06 Da, | 1338.424438 | 3 | 560.3134766 | 560.3126094 |
| QTALNCGVELFKR                       | Q8C196 | 0.00264434 | n +34.06 Da,K +34.06 Da, | 2711.890381 | 3 | 535.3099976 | 535.3135559 |
| ELTAVVQKR                           | P62908 | 0.01005632 | n +42.03 Da,K +34.06 Da, | 1306.152344 | 3 | 373.9100037 | 373.9030034 |
| TTASPSQVRQNYHQDAEAAINR              | P09528 | 0          | n +42.03 Da,             | 2099.196777 | 3 | 833.7299805 | 833.7372232 |

|                            |        |            |                          |             |   |             |             |
|----------------------------|--------|------------|--------------------------|-------------|---|-------------|-------------|
| TDNELEKITR                 | P26443 | 0.00386432 | n +34.06 Da,K +34.06 Da, | 1544.61145  | 2 | 643.8826904 | 643.8829874 |
| LQDVTDDHIR                 | Q923D2 | 0.03635042 |                          | 1297.171509 | 3 | 413.8825684 | 413.8824503 |
| PIDVCEIGSKVCAR             | Q9D819 | 0.00049213 | n +17.03 Da,K +34.06 Da, | 1928.352051 | 4 | 414.480011  | 414.4773965 |
| GKVNSEVGGGEALGR            | P02088 | 0.00049213 | n +34.06 Da,K +34.06 Da, | 1296.202026 | 2 | 778.4400024 | 778.4391902 |
| SQAEFDKAAEEVKR             | P31786 | 0          | n +42.03 Da,K +34.06 Da, | 2435.183838 | 3 | 573.3157959 | 573.3179124 |
| GKVNSEVGGGEALGR            | P02088 | 0.00049213 | n +34.06 Da,K +34.06 Da, | 1295.578979 | 3 | 519.2942505 | 519.2952189 |
| EKEEDEEESPGQAKDEL          | P14211 | 0.02409639 | n +34.06 Da,K +34.06 Da, | 1593.748657 | 3 | 688.6809692 | 688.6832449 |
| TLVEKINYTGR                | P49429 | 0          | n +34.06 Da,K +34.06 Da, | 1820.470947 | 3 | 454.6173096 | 454.6189735 |
| MDPQGIVKAFPKR              | Q9QXE2 | 0          | n +42.03 Da,K +34.06 Da, | 3178.693359 | 3 | 532.9911499 | 532.990413  |
| ATSASSHLNKGIKQMY           | P15105 | 0          | n +42.03 Da,K +34.06 Da, | 2135.272461 | 3 | 616.0101929 | 616.0103138 |
| SQVLSDKPLTECIR             | P55264 | 0          | n +34.06 Da,K +34.06 Da, | 2224.499512 | 3 | 572         | 571.999526  |
| ADEIAKAQVAQPGGDTIFGKIIR    | P70349 | 0          | n +42.03 Da,K +34.06 Da, | 4021.040527 | 3 | 836.8200073 | 836.8200831 |
| YSLKESTTSEQSAR             | Q91VR2 | 0.0129768  | n +34.06 Da,K +34.06 Da, | 1353.726807 | 3 | 606.6599731 | 606.6565941 |
| PLFGDQMDNAKR               | P70691 | 0          | n +17.03 Da,K +34.06 Da, | 1835.002441 | 3 | 481.5899963 | 481.5942817 |
| SQAEFDKAAEEVKR             | P31786 | 0          | n +42.03 Da,K +34.06 Da, | 2638.629395 | 3 | 573.3200073 | 573.3179124 |
| DPAIYFKEQFLDGDWATNR        | P14211 | 0          | n +34.06 Da,K +34.06 Da, | 5032.352051 | 3 | 785.4000244 | 785.4077907 |
| GQTQVEIKVCQGER             | P38647 | 0          | n +34.06 Da,K +34.06 Da, | 1399.708496 | 3 | 567.3188477 | 567.3192586 |
| LLEEAQVFGQVER              | Q99K48 | 0.0471464  | n +17.03 Da,             | 2194.448486 | 3 | 547.6199951 | 547.6279393 |
| PVEYKYPYPER                | Q99K67 | 0          | n +17.03 Da,K +34.06 Da, | 1283.865356 | 3 | 454.2504272 | 454.2505094 |
| AGAESDGGQFQFTGIKKY         | Q78IK2 | 0.00049213 | n +34.06 Da,K +34.06 Da, | 2828.419434 | 3 | 650.3599854 | 650.3669729 |
| ADKEALPKLR                 | Q9Z2G9 | 0.00553427 | n +42.03 Da,K +34.06 Da, | 1781.060425 | 3 | 417.6083679 | 417.6082972 |
| PEVKLAGLAAR                | Q8CFA2 | 0.00264434 | n +17.03 Da,K +34.06 Da, | 1690.073242 | 3 | 392.5961609 | 392.5959508 |
| PDAAKPEDWDER               | P14211 | 0          | n +17.03 Da,K +34.06 Da, | 1436.664917 | 3 | 493.9163513 | 493.9160785 |
| ASDTPGFYMDKLNKYR           | Q03963 | 0          | n +42.03 Da,K +34.06 Da, | 3492.943848 | 2 | 1008.530029 | 1008.530222 |
| EVDVDGTV EEDLGKSR          | P08113 | 0          | n +34.06 Da,K +34.06 Da, | 2731.191895 | 3 | 605.9890137 | 605.9917541 |
| PASGPIRPIVR                | P47963 | 0.00264434 |                          | 1269.516357 | 3 | 397.5835876 | 397.5837868 |
| TATILDKPEDR                | O35215 | 0.00049213 | n +34.06 Da,K +34.06 Da, | 1268.846191 | 2 | 663.9000244 | 663.8986375 |
| PLPPLPEYGGKVR              | Q9CQQ7 | 0.00049213 | n +17.03 Da,K +34.06 Da, | 2743.015381 | 3 | 491.9722595 | 491.9731986 |
| SSPAQPAVPAPLANLKIQHTK      | O35945 | 0          | n +42.03 Da,K +34.06 Da, | 3153.068115 | 3 | 760.1218872 | 760.1233253 |
| TMDKSELVQKAK               | Q9CQV8 | 0.00049213 | n +42.03 Da,K +34.06 Da, | 1266.482422 | 3 | 507.9899902 | 507.9850346 |
| PSLDYMTKIPR                | Q8C196 | 0          | n +17.03 Da,K +34.06 Da, | 2995.255371 | 3 | 490.9578247 | 490.9585609 |
| AMNYSAKDEVDDGGPAGPPGGAAKTR | Q8VEK0 | 0          | n +42.03 Da,K +34.06 Da, | 2328.656494 | 3 | 843.0999756 | 843.1009212 |
| YSVVFPHDEPLAGR             | Q99LB7 | 0.00264434 | n +34.06 Da,             | 2847.395508 | 3 | 540.960022  | 540.9579486 |
| ATQAVLDKPE TLSSDASTR       | P50544 | 0          | n +34.06 Da,K +34.06 Da, | 1992.13916  | 3 | 686.7199707 | 686.716513  |
| IFIDSDHTDNQR               | P09103 | 0.00049213 |                          | 1265.200195 | 3 | 496.9065857 | 496.9074361 |
| AQAEGAYHRPLATSR            | Q9CQ56 | 0          | n +42.03 Da,             | 1392.785889 | 3 | 557.286438  | 557.285018  |
| SSAADKVVAEIR               | P51660 | 0.02266717 | n +34.06 Da,K +34.06 Da, | 2056.84082  | 2 | 657.4099731 | 657.4066295 |
| TAAATVLKEGVLEKR            | Q9WV95 | 0.00049213 | n +42.03 Da,K +34.06 Da, | 3047.731689 | 3 | 566.0200195 | 566.0261809 |
| STDEPSEKDALQPGR            | Q9QXD6 | 0          | n +34.06 Da,K +34.06 Da, | 1262.358398 | 3 | 566.6400146 | 566.6374223 |
| DEKVLQLYR                  | P19783 | 0.04457917 | n +34.06 Da,K +34.06 Da, | 1301.509033 | 3 | 373.5700073 | 373.5662093 |

|                             |        |            |                          |             |   |             |             |
|-----------------------------|--------|------------|--------------------------|-------------|---|-------------|-------------|
| PDDQYKLTEDTR                | Q9CQQ8 | 0.00049213 | n +17.03 Da,K +34.06 Da, | 1387.328247 | 2 | 766.4000244 | 766.3966946 |
| MEKAHADEFPLTTDSSEKQGVVC     | Q923B6 | 0          | n +42.03 Da,K +34.06 Da, | 3104.891846 | 3 | 897.0999756 | 897.1088655 |
| TLEEDAHQIAR                 | Q9DCG6 | 0          | n +14.02 Da,             | 1259.52771  | 3 | 475.5762329 | 475.5757978 |
| ELQATEDAKLR                 | Q61879 | 0.00049213 | n +34.06 Da,K +34.06 Da, | 1258.303711 | 2 | 671.4000244 | 671.404087  |
| PFIQDISKMYPGR               | Q6P6M7 | 0          | n +17.03 Da,K +34.06 Da, | 3344.199951 | 3 | 534.9699707 | 534.9693486 |
| ELQATEDAKLR                 | Q61879 | 0.00749064 | n +34.06 Da,K +34.06 Da, | 1257.786377 | 3 | 447.9388733 | 447.9384835 |
| TDLSGKETICR                 | P62264 | 0.00590468 | n +34.06 Da,K +34.06 Da, | 1256.608887 | 3 | 449.9299927 | 449.923957  |
| SQAEFDKAAEEVKR              | P31786 | 0          | n +42.03 Da,K +34.06 Da, | 1624.05542  | 3 | 573.3186646 | 573.3179124 |
| ATATILDKPEDR                | O35215 | 0.00049213 | n +34.06 Da,K +34.06 Da, | 1353.380127 | 3 | 466.6137695 | 466.6138885 |
| GDEVITGHCQGDGYR             | P35505 | 0          | n +34.06 Da,             | 1924.158325 | 3 | 604.2911377 | 604.2915509 |
| LAEDGAHVVVSSR               | Q99LB2 | 0.00096665 |                          | 1252.844482 | 2 | 684.3699951 | 684.367519  |
| TGVEAGETACKLAR              | P29758 | 0          | n +34.06 Da,K +34.06 Da, | 1478.207764 | 3 | 510.9599915 | 510.9575495 |
| AAYKPGMTPEECR               | P28076 | 0          | n +34.06 Da,K +34.06 Da, | 1252.626099 | 3 | 526.6099854 | 526.6077517 |
| LEKQPVLSTEAR                | P99026 | 0          | n +34.06 Da,K +34.06 Da, | 1266.733032 | 3 | 522.9899902 | 522.987726  |
| AEKISGQKVNEAACDIAR          | O35490 | 0          | n +42.03 Da,K +34.06 Da, | 2584.288574 | 3 | 690.710022  | 690.7143376 |
| PFDNSSRPSQVVAETR            | P58252 | 0          | n +17.03 Da,             | 1766.923828 | 3 | 602.9699707 | 602.9762907 |
| SNPPVQGEVMEGADNQGAGEQGRPRV  | P62960 | 0.01484375 | n +34.06 Da,             | 2015.23584  | 3 | 905.1099854 | 905.1105502 |
| SSEAPLVNEDVKR               | Q91YQ5 | 0.00346921 | n +17.03 Da,K +34.06 Da, | 1571.874756 | 2 | 796.4500122 | 796.4492613 |
| GFEKEGAVVAGSR               | P26638 | 0.00049213 | n +34.06 Da,K +34.06 Da, | 1249.708862 | 3 | 477.9424133 | 477.9457495 |
| LIAQQPVNEVEHR               | P52503 | 0          | n +34.06 Da,             | 1580.489746 | 3 | 522.9654541 | 522.9652146 |
| TSTICSDKTGTLTQNR            | Q6PIC6 | 0.01005632 | n +34.06 Da,K +34.06 Da, | 1278.545044 | 3 | 617.6699829 | 617.6686167 |
| GFEKSPEELR                  | P52196 | 0.00049213 | n +34.06 Da,K +34.06 Da, | 1383.061035 | 3 | 420.5804749 | 420.5804074 |
| LTEEEELKR                   | Q8QZR3 | 0.00749064 | n +34.06 Da,K +34.06 Da, | 1947.715332 | 3 | 443.274292  | 443.2749842 |
| VGVPVGSDDPDFQPELSGAGSR      | Q8CDN6 | 0          | n +34.06 Da,K +34.06 Da, | 2718.779297 | 3 | 756.4099731 | 756.4149454 |
| PIDVCEIGSKVCAR              | Q9D819 | 0          | n +17.03 Da,K +34.06 Da, | 2583.523438 | 3 | 552.2999878 | 552.3007699 |
| FKGDLEVELSFR                | Q9R1Z8 | 0.03833635 | n +14.02 Da,K +28.03 Da, | 1325.792725 | 3 | 494.6099854 | 494.6048056 |
| MGTPSGTAEPYDGTKAR           | Q80Y55 | 0          | n +34.06 Da,K +34.06 Da, | 1414.498413 | 3 | 602.9799805 | 602.982424  |
| PGVVDNFPLLKALR              | P30115 | 0          | n +17.03 Da,K +34.06 Da, | 4074.700928 | 3 | 530.6721802 | 530.6715198 |
| EKIHDLLVCKGENGQR            | E9Q3T3 | 0.03138848 | n +28.03 Da,K +28.03 Da, | 1480.417847 | 3 | 660.6900024 | 660.6946896 |
| LLDGDEVITGHCQGDGYR          | P35505 | 0.00049213 | n +34.06 Da,             | 2870.443115 | 3 | 718.0200195 | 718.0232419 |
| PTPQEKSEGTCCGPPSVR          | P21981 | 0          | n +17.03 Da,K +34.06 Da, | 1778.505737 | 3 | 735.0300293 | 735.0296682 |
| YNDFGNYSGQQQSNYGP MKGGSFGGR | Q8BG05 | 0          | n +34.06 Da,K +34.06 Da, | 2971.066895 | 3 | 962.1099854 | 962.1175229 |
| TTKAPAAIGPYSQAVQVDR         | P52760 | 0.03635042 | n +34.06 Da,K +34.06 Da, | 2283.059814 | 3 | 681.0499878 | 681.0619543 |
| METENQKTMEESTKR             | Q05CL8 | 0          | n +42.03 Da,K +34.06 Da, | 1463.692627 | 3 | 651.3300171 | 651.329384  |
| ELSEEDKLTISR                | P56480 | 0          | n +34.06 Da,K +34.06 Da, | 1754.024902 | 2 | 737.4199829 | 737.4252171 |
| LRPGDCEVCISYLGR             | Q9CXI5 | 0.00049213 | n +34.06 Da,             | 2946.02832  | 3 | 610.3099976 | 610.3134096 |
| DISSGTVLSDYVGSPPSGTGLHR     | P70296 | 0          | n +34.06 Da,             | 3641.900635 | 3 | 798.4099731 | 798.4100425 |
| ETDMTKLEECVR                | O70251 | 0          | n +34.06 Da,K +34.06 Da, | 2372.414551 | 3 | 526.9400024 | 526.9428004 |
| LNQALLDLHALGSAR             | P29391 | 0.00049213 | n +34.06 Da,             | 3266.530029 | 3 | 542.6583862 | 542.6563811 |
| YEESIKMPINEPAPGR            | P49429 | 0          | n +34.06 Da,K +34.06 Da, | 2594.621338 | 3 | 633.6817627 | 633.6820858 |



|                         |        |            |                          |             |   |             |             |
|-------------------------|--------|------------|--------------------------|-------------|---|-------------|-------------|
| TVSLHLGVTPSVLR          | O89023 | 0.00514139 | n +34.06 Da,             | 2819.526611 | 3 | 504.9810486 | 504.9822054 |
| TLEEDAHQQIAR            | Q9DCG6 | 0.00049213 |                          | 1265.129395 | 3 | 480.2472839 | 480.2476811 |
| DPLEAFKQR               | Q9D880 | 0.01372549 | n +34.06 Da,K +34.06 Da, | 2300.300293 | 3 | 391.2415466 | 391.2417257 |
| PLENLEEEGLPKNPDLR       | Q99JI4 | 0          | n +17.03 Da,K +34.06 Da, | 3043.658447 | 3 | 672.039978  | 672.0407787 |
| TATILDKPEDR             | O35215 | 0.00049213 | n +34.06 Da,K +34.06 Da, | 1266.198242 | 3 | 442.9350891 | 442.9348505 |
| TLVVCVHAEASSTGR         | B5X0G2 | 0          | n +34.06 Da,             | 1502.97937  | 2 | 825.9199829 | 825.9200491 |
| TPEAAVEHPEAVR           | O35490 | 0          |                          | 1238.239502 | 3 | 469.2405701 | 469.2405265 |
| AAAMDVDTPSGTNSGAGKKR    | P62878 | 0          | n +42.03 Da,K +34.06 Da, | 1579.792847 | 3 | 682.0302734 | 682.0303259 |
| GHHSPRGQTLDSIDPVAR      | Q3UPP8 | 0.04623044 |                          | 2087.594238 | 3 | 657.6699829 | 657.6766865 |
| MYTITKGPSKLVAQR         | Q9CQB2 | 0          | n +42.03 Da,K +34.06 Da, | 2702.07959  | 2 | 902.0423584 | 902.0453105 |
| TYKYPEGSPPEER           | P21981 | 0          | n +34.06 Da,K +34.06 Da, | 1288.892456 | 3 | 508.6053772 | 508.6052818 |
| DTQVHTEYSSLR            | P49429 | 0          | n +34.06 Da,             | 1540.043823 | 2 | 735.3800049 | 735.3758    |
| PSKTNVSGGAIALGHPLGGSGSR | Q8BWT1 | 0.00049213 | n +42.03 Da,K +34.06 Da, | 2674.722168 | 3 | 732.7399902 | 732.7363121 |
| DLDSPSKEEAFR            | P36552 | 0          | n +34.06 Da,K +34.06 Da, | 1831.961914 | 3 | 487.9299927 | 487.9333985 |
| VITGEEKDIQESR           | Q8BI84 | 0.01410106 | n +34.06 Da,K +34.06 Da, | 1241.655273 | 3 | 524.6400146 | 524.6352413 |
| TPEMVSMMLKR             | Q60759 | 0.00049213 | n +34.06 Da,K +34.06 Da, | 2058.226807 | 3 | 420.5877686 | 420.5877396 |
| EAQDKVAVLSQNR           | Q8CAY6 | 0          | n +34.06 Da,K +34.06 Da, | 1224.768433 | 3 | 509.2999878 | 509.3038256 |
| AAAKVALTKR              | Q9QXX4 | 0.00669176 | n +42.03 Da,K +34.06 Da, | 1241.584595 | 3 | 380.269928  | 380.2696155 |
| ATSASSHLNKGIKQMY        | P15105 | 0          | n +42.03 Da,K +34.06 Da, | 1970.654663 | 3 | 616.0096436 | 616.0103138 |
| PASGPIRPIVR             | P47963 | 0.00590468 | n +14.02 Da,             | 1220.463257 | 3 | 392.9122314 | 392.9119034 |
| AAQESLHVKTPLR           | Q8VBT2 | 0          | n +42.03 Da,K +34.06 Da, | 2013.006226 | 3 | 509.2983704 | 509.3018267 |
| IVQNSSLEDSQIEKER        | Q9CZ13 | 0          | n +34.06 Da,K +34.06 Da, | 1742.991333 | 3 | 648.3599854 | 648.3620699 |
| IFIDSDHTDNQR            | P09103 | 0.00181242 | n +14.02 Da,             | 1217.260132 | 3 | 492.2350464 | 492.2355528 |
| PDGHEICFVGDEAFR         | Q9CPV4 | 0          | n +17.03 Da,             | 3054.579346 | 2 | 883.4030762 | 883.4042696 |
| QPGADLGLIIPQAKER        | Q9EQ20 | 0          | n +34.06 Da,K +34.06 Da, | 2442.673584 | 3 | 620.3699951 | 620.3722399 |
| SEDEEKVKLR              | Q9D0I4 | 0.00049213 | n +42.03 Da,K +34.06 Da, | 1215.896362 | 3 | 448.2668762 | 448.2664888 |
| TLDEDAHQDIAR            | Q9CXN7 | 0          | n +14.02 Da,             | 1213.105347 | 2 | 699.3400269 | 699.3364164 |
| PDPSTKDFLLQQTMLR        | Q9CPU0 | 0          | n +17.03 Da,K +34.06 Da, | 3529.232178 | 2 | 971.0300293 | 971.0404606 |
| IFIDSDHTDNQR            | P09103 | 0          |                          | 1276.160156 | 2 | 744.8599854 | 744.857516  |
| MDDREDLVYQAKLAEQAER     | P62259 | 0          | n +42.03 Da,K +34.06 Da, | 3553.504883 | 3 | 786.0553589 | 786.0602447 |
| AQTKVIGVENLR            | Q8BJ64 | 0          | n +34.06 Da,K +34.06 Da, | 1660.947266 | 2 | 698.4500122 | 698.4513712 |
| VPNDSSFQIVKNPR          | Q61176 | 0          | n +34.06 Da,K +34.06 Da, | 2033.115845 | 3 | 556.9946899 | 556.994992  |
| AQERPSCAVEPEHVQR        | P56389 | 0          | n +42.03 Da,             | 1425.887939 | 3 | 645.6435547 | 645.6427657 |
| TTLPEVKDR               | P25688 | 0.00386432 | n +34.06 Da,K +34.06 Da, | 1206.299927 | 3 | 376.2416382 | 376.2416143 |
| SSIKVECVLR              | Q64374 | 0.00049213 | n +42.03 Da,K +34.06 Da, | 2037.843018 | 3 | 422.9100037 | 422.9148034 |
| SLEEIKALR               | P16546 | 0.0471464  | n +34.06 Da,K +34.06 Da, | 1981.579102 | 3 | 376.2533569 | 376.2537427 |
| SDATLDKIER              | Q91ZX7 | 0.04394427 | n +34.06 Da,K +34.06 Da, | 1204.650513 | 3 | 405.9100037 | 405.9120457 |
| ELTGAKVVVSGGR           | Q99LC5 | 0.00049213 | n +34.06 Da,K +34.06 Da, | 1342.894165 | 2 | 670.9299927 | 670.9302716 |
| GSGMCKAGFAGDDAPR        | P60710 | 0.00049213 | n +34.06 Da,K +34.06 Da, | 1363.627319 | 3 | 555.6090088 | 555.6100441 |
| VTIILKEPVR              | Q99PL5 | 0.02481203 | n +34.06 Da,K +34.06 Da, | 2138.267578 | 3 | 412.6289368 | 412.6289209 |

|                          |        |            |                          |             |   |             |             |
|--------------------------|--------|------------|--------------------------|-------------|---|-------------|-------------|
| AAAKVALTKR               | Q9QXX4 | 0.00049213 | n +42.03 Da,K +34.06 Da, | 1200.831787 | 3 | 380.2693176 | 380.2696155 |
| MEGHDPKEPEQLR            | B2RXM2 | 0          | n +42.03 Da,K +34.06 Da, | 1704.121338 | 3 | 547.9424438 | 547.9419702 |
| SETIITGKR                | Q8VDJ3 | 0.00264434 | n +34.06 Da,K +34.06 Da, | 1198.217163 | 3 | 395.9320374 | 395.9327808 |
| TIIDIVTHR                | P14824 | 0.00939926 | n +34.06 Da,             | 2069.961426 | 3 | 367.8988037 | 367.8994817 |
| PAQKSDIVQLR              | Q8VDJ3 | 0          | n +17.03 Da,K +34.06 Da, | 1196.876587 | 3 | 435.9419861 | 435.9418985 |
| TGKTPVEPEVAIHR           | P60867 | 0.00181242 | n +14.02 Da,K +28.03 Da, | 2889.891357 | 3 | 525.9699707 | 525.966626  |
| PAGGEDPLGAVHLR           | Q9JHK5 | 0.04428571 | n +17.03 Da,             | 2377.956299 | 3 | 469.2577515 | 469.2580688 |
| MEVKPPPGRPQPDSGR         | Q8BG05 | 0.00669176 | n +42.03 Da,K +34.06 Da, | 1433.962646 | 3 | 608.6599731 | 608.6596857 |
| PKVTQPEVDTPLGR           | Q63880 | 0          | n +17.03 Da,K +34.06 Da, | 1838.006104 | 2 | 794.4669189 | 794.4699963 |
| ELEIIEGMKFDR             | P63038 | 0.00264434 | n +34.06 Da,K +34.06 Da, | 3494.775146 | 3 | 516.6300049 | 516.6306622 |
| QEVDEPPQHALR             | P70296 | 0.00225734 | n +34.06 Da,             | 1191.212524 | 3 | 484.9299927 | 484.9266485 |
| GAGVGSMTKIYGG            | Q9CZX8 | 0          | n +34.06 Da,K +34.06 Da, | 1838.464111 | 3 | 474.6099854 | 474.6117131 |
| MEVKPPPGRPQPDSGR         | Q8BG05 | 0          | n +42.03 Da,K +34.06 Da, | 1705.23938  | 3 | 608.6598511 | 608.6596857 |
| SVQHADSLENIDESAVTESR     | Q9JMD3 | 0          | n +34.06 Da,             | 2416.543945 | 3 | 741.0300293 | 741.0312313 |
| SSPAQPAVPAPLADLKIQHTK    | P24549 | 0          | n +42.03 Da,K +34.06 Da, | 3271.691406 | 2 | 1140.170044 | 1140.173358 |
| MDDREDLVYQAKLAEQAER      | P62259 | 0          | n +42.03 Da,K +34.06 Da, | 3512.712158 | 3 | 786.0599976 | 786.0602447 |
| LADAVAVTMGPKGR           | P63038 | 0          | n +34.06 Da,K +34.06 Da, | 1853.867065 | 3 | 485.2980652 | 485.2992465 |
| LSQNAAAKASATAPEVR        | Q9D0G0 | 0          | n +34.06 Da,K +34.06 Da, | 1396.556763 | 3 | 585.0100098 | 585.0128231 |
| ASLKDLEGKWR              | Q05816 | 0          | n +42.03 Da,K +34.06 Da, | 2602.546387 | 3 | 471.6229858 | 471.6226066 |
| AMTGTSTPCSSMSNHTKER      | Q91VJ4 | 0          | n +42.03 Da,K +34.06 Da, | 1409.125366 | 3 | 686.6478271 | 686.6469006 |
| SAPPQEQKQMLGER           | P29341 | 0.03567528 | n +34.06 Da,K +34.06 Da, | 1185.541992 | 3 | 556.3099976 | 556.3121039 |
| GGGPTTTGGPPAGAEEAQRPR    | Q8R1S4 | 0.00346921 | n +34.06 Da,             | 1185.270386 | 3 | 666.6800537 | 666.6785742 |
| APQGRLLIR                | Q9EQF5 | 0.04259127 |                          | 1183.060791 | 3 | 341.8854065 | 341.885577  |
| TGGDAAAPGAAGTQALPHR      | Q9D0F3 | 0.00553427 | n +34.06 Da,             | 1281.120361 | 4 | 471.25      | 471.2461052 |
| PDQLLKELPFLNTR           | Q78JT3 | 0          | n +17.03 Da,K +34.06 Da, | 3977.139404 | 3 | 611.3690186 | 611.3682776 |
| ASGPGGLHADLLR            | Q8BWF0 | 0          | n +34.06 Da,             | 2002.507446 | 3 | 433.2515869 | 433.2526954 |
| ATSASSHLNKGIKQ           | P15105 | 0.00590468 | n +42.03 Da,K +34.06 Da, | 1181.661255 | 3 | 517.9755859 | 517.975709  |
| PASGPIRPIVR              | P47963 | 0.00264434 | n +14.02 Da,             | 1180.03772  | 3 | 392.9124451 | 392.9119034 |
| PDFQHEDYNFLTR            | Q9R0H0 | 0          | n +17.03 Da,             | 2965.732422 | 3 | 566.9299927 | 566.9355436 |
| PEQVAMATVTALHR           | Q91Y97 | 0          | n +17.03 Da,             | 2261.925293 | 3 | 514.2800293 | 514.2819972 |
| QSAYDVADMVKQFFR          | Q923Q2 | 0.00386432 | n +42.03 Da,K +34.06 Da, | 2437.429932 | 3 | 627.6500244 | 627.6523084 |
| MEGYHKPDQQLK             | P40142 | 0.04394427 | n +42.03 Da,K +34.06 Da, | 1800.933594 | 2 | 792.4299927 | 792.429779  |
| TEEEELKKR                | Q8QZR3 | 0.01628538 | n +34.06 Da,K +34.06 Da, | 1301.329834 | 3 | 405.5821228 | 405.5802961 |
| PGVPVSSPSQEPPTKR         | Q922Y1 | 0          | n +17.03 Da,K +34.06 Da, | 1175.685669 | 3 | 571.3300171 | 571.3248491 |
| CKDLGTQLAPIIQEFFHSEQYR   | Q78JT3 | 0.00225734 | n +42.03 Da,K +34.06 Da, | 4794.991211 | 3 | 919.4699707 | 919.4690154 |
| SEDEEKVKLR               | Q9D0I4 | 0.00049213 | n +42.03 Da,K +34.06 Da, | 1175.310059 | 3 | 448.2664795 | 448.2664888 |
| TTVVTTKSAEIR             | P05784 | 0          | n +34.06 Da,K +34.06 Da, | 1172.36084  | 3 | 458.625946  | 458.6260169 |
| ADEDEGEGIHPSAPHR         | Q3UHD6 | 0          | n +42.03 Da,             | 1417.824219 | 3 | 543.9136353 | 543.9132502 |
| SAAEEVDGLGVVRPHYGSVLDNER | Q9JKF1 | 0          | n +42.03 Da,             | 3476.882568 | 3 | 871.0999756 | 871.0964173 |
| TFVGQPECVVEGALHAAR       | Q91XD4 | 0.00096665 | n +34.06 Da,             | 3615.843506 | 3 | 659.0098267 | 659.0141288 |

|                           |        |            |                          |             |   |             |             |
|---------------------------|--------|------------|--------------------------|-------------|---|-------------|-------------|
| VMEKPSPLLVR               | P97379 | 0          | n +34.06 Da,K +34.06 Da, | 2051.898438 | 2 | 697.4471436 | 697.4472426 |
| AQRPDQGEKENPMR            | A2BH06 | 0          | n +42.03 Da,K +34.06 Da, | 1166.315552 | 3 | 620.6452026 | 620.6462167 |
| TTLPEVKDR                 | P25688 | 0.00386432 | n +34.06 Da,K +34.06 Da, | 1164.938721 | 3 | 376.2418213 | 376.2416143 |
| GVLKEYGVKVLGTSVESIMATEDR  | Q8C196 | 0          | n +14.02 Da,K +28.03 Da, | 4471.902832 | 3 | 884.4899902 | 884.4823325 |
| ASLKDLEGKWR               | Q05816 | 0.00181242 | n +42.03 Da,K +34.06 Da, | 2773.119873 | 3 | 471.6217041 | 471.6226066 |
| ALSDADVQKQIKH             | P50518 | 0.00181242 | n +42.03 Da,K +34.06 Da, | 2026.798706 | 2 | 781.960022  | 781.9623008 |
| AAAAGAVVASAASGPAEGKKITELR | Q8CH25 | 0          | n +42.03 Da,K +34.06 Da, | 3556.185791 | 3 | 802.7999268 | 802.804433  |
| PVPAGDLVKAR               | P21981 | 0.04623044 | n +17.03 Da,K +34.06 Da, | 1359.935425 | 3 | 391.9200134 | 391.9240674 |
| KETTIQGLDGLSER            | Q91Y97 | 0.00096665 | n +34.06 Da,K +34.06 Da, | 1994.065796 | 3 | 538.9821167 | 538.982641  |
| TEVKIDFPR                 | Q8CAY6 | 0.01262327 | n +34.06 Da,K +34.06 Da, | 2251.867432 | 3 | 434.5966187 | 434.5960574 |
| SSSPVNVKCLK               | Q8VEK3 | 0.00939926 | n +42.03 Da,K +34.06 Da, | 1236.637207 | 3 | 444.3096313 | 444.3099579 |
| TTSAVTVKSAIR              | P61514 | 0          | n +34.06 Da,K +34.06 Da, | 1152.21582  | 3 | 434.6199951 | 434.6189735 |
| TKLSMTNDPLEAAR            | P11725 | 0.00386432 | n +34.06 Da,K +34.06 Da, | 2360.780273 | 2 | 807.9595337 | 807.9614437 |
| PNLTLSSGKDGQCPLVVEQVR     | Q505F5 | 0          | n +17.03 Da,K +34.06 Da, | 2887.195557 | 3 | 783.4299927 | 783.4336822 |
| TPEAAVEHPEAVR             | O35490 | 0          | n +34.06 Da,             | 1142.131958 | 3 | 480.5956116 | 480.5948988 |
| GTVTLKDLR                 | Q3U1J4 | 0.0233874  | n +34.06 Da,K +34.06 Da, | 1525.545288 | 3 | 357.5799866 | 357.5783377 |
| SYGRPPDVEGMTSLKVDNLTYR    | Q62093 | 0          | n +42.03 Da,K +34.06 Da, | 3794.983154 | 3 | 891.1243286 | 891.1251373 |
| AALRPLVKPK                | P17932 | 0.00181242 | n +42.03 Da,K +34.06 Da, | 1766.003174 | 3 | 401.6254883 | 401.6255105 |
| CTKQESPKPTQSYR            | Q9D6U8 | 0.00590468 | n +42.03 Da,K +34.06 Da, | 1139.824829 | 3 | 673.3599854 | 673.3597832 |
| MDGEDDSNLVIKRR            | Q91WE2 | 0          | n +42.03 Da,K +34.06 Da, | 2205.980469 | 2 | 865.4699707 | 865.4749158 |
| SETAAPAAPAPAEKTPVKK       | P43274 | 0          | n +42.03 Da,K +34.06 Da, | 1712.206177 | 3 | 726.1075439 | 726.1072705 |
| TALLKIEGVYAR              | O55142 | 0.00181242 | n +34.06 Da,K +34.06 Da, | 2693.529053 | 3 | 467.973114  | 467.9748686 |
| MEKPAASTEPPQSRPALGR       | Q9JMD3 | 0          | n +42.03 Da,K +34.06 Da, | 1817.26062  | 3 | 687.0294189 | 687.0319599 |
| MKVFTVGLPLPAEGR           | Q91Z53 | 0          | n +34.06 Da,K +34.06 Da, | 2652.956787 | 3 | 523.9854736 | 523.9867799 |
| STGVVAKLSPANQR            | Q62318 | 0.0233874  | n +34.06 Da,K +34.06 Da, | 1358.384033 | 3 | 499.3131104 | 499.3124323 |
| MEVKPPPGRPQPDSGR          | Q8BG05 | 0.00869565 | n +42.03 Da,K +34.06 Da, | 1541.532715 | 3 | 608.6599731 | 608.6596857 |
| SPKEEESYSDWGLR            | Q99P27 | 0          | n +34.06 Da,K +34.06 Da, | 2408.797607 | 2 | 875.9500122 | 875.9495882 |
| ASGVAVSDGVIKVFNDMKVR      | P18760 | 0          | n +42.03 Da,K +34.06 Da, | 4238.87793  | 3 | 734.7540894 | 734.7577661 |
| NLDIERPTYTNLNR            | P05213 | 0          |                          | 2674.792969 | 3 | 582.9727783 | 582.9759617 |
| ISAKDIVYIGLR              | Q61176 | 0          | n +34.06 Da,K +34.06 Da, | 3554.206787 | 3 | 472.6400146 | 472.646752  |
| PNLVPSISNKR               | P19536 | 0.04842701 | n +17.03 Da,K +34.06 Da, | 1647.431152 | 3 | 425.9299927 | 425.9383768 |
| DEAEPAAKRRCLER            | P43247 | 0.02728972 | n +31.05 Da,             | 1883.278687 | 3 | 577.9799805 | 577.9704823 |
| SITTIIDTFHQYSR            | P31725 | 0          | n +34.06 Da,             | 4007.175049 | 3 | 572.6400146 | 572.644403  |
| TPVTVTLKENER              | Q9JKR6 | 0          | n +34.06 Da,K +34.06 Da, | 1425.005249 | 3 | 485.6335144 | 485.6331716 |
| MDQQTQHPSKAAQPLR          | Q9JL3  | 0          | n +42.03 Da,K +34.06 Da, | 1351.988281 | 3 | 595.3157349 | 595.315919  |
| AFALASQQKAASAQSR          | Q8VCHO | 0          | n +34.06 Da,K +34.06 Da, | 1372.374512 | 3 | 568.3400269 | 568.3338964 |
| AAAKVALTKR                | Q9QXX4 | 0.00049213 | n +42.03 Da,K +34.06 Da, | 1119.574341 | 3 | 380.2703552 | 380.2696155 |
| YNQQPSNYGPMKSGNFGGSR      | O88569 | 0.00181242 | n +34.06 Da,K +34.06 Da, | 2012.633179 | 3 | 753.039978  | 753.0412249 |
| SEGDSVGDVHGKPSVVYR        | Q9CQU3 | 0          | n +42.03 Da,K +34.06 Da, | 2022.022217 | 3 | 684.3447266 | 684.3466019 |
| AIIEPEKR                  | Q9QXD6 | 0.03703704 | n +34.06 Da,K +34.06 Da, | 1346.19812  | 3 | 379.5939026 | 379.5939877 |

|                           |        |            |                          |             |   |             |             |
|---------------------------|--------|------------|--------------------------|-------------|---|-------------|-------------|
| PAYKGQILTMANPIINGGAPDTTAR | Q8C196 | 0.00386432 | n +17.03 Da,K +34.06 Da, | 3055.385986 | 3 | 893.4799805 | 893.4900794 |
| TTAIDKEIAR                | P31809 | 0.00049213 | n +34.06 Da,K +34.06 Da, | 1116.662598 | 3 | 395.9206543 | 395.9206524 |
| PGVPVSSPSQEPPTKR          | Q922Y1 | 0          | n +17.03 Da,K +34.06 Da, | 1239.94458  | 3 | 571.3240967 | 571.3248491 |
| DDEVVDVGTVEEDLGKSR        | P08113 | 0          | n +34.06 Da,K +34.06 Da, | 2911.469482 | 3 | 682.6699829 | 682.6763835 |
| IFEPKCLDAFPNLKDFMGR       | P15626 | 0.00514139 | n +42.03 Da,K +34.06 Da, | 4743.09082  | 3 | 803.4400024 | 803.4307731 |
| TLVGVDLVPEPKIDAALR        | P12787 | 0          | n +34.06 Da,K +34.06 Da, | 4193.020508 | 3 | 717.7791138 | 717.7735219 |
| GIFKAELNEFLTR             | P62908 | 0          | n +34.06 Da,K +34.06 Da, | 3783.948242 | 3 | 535.9923706 | 535.9926997 |
| AKFEELNMDLFR              | P20029 | 0.03198529 | n +42.03 Da,K +34.06 Da, | 3793.080811 | 3 | 530.289978  | 530.2799229 |
| GVPVFKFPR                 | Q8R0Y6 | 0.00096665 | n +34.06 Da,K +34.06 Da, | 2650.604248 | 3 | 372.2506409 | 372.2517843 |
| TVYQSVELPETHQMLR          | Q07417 | 0          | n +34.06 Da,             | 2882.869141 | 3 | 655.6793213 | 655.6822678 |
| YQTMSDITTFKALR            | P47753 | 0.00590468 | n +34.06 Da,K +34.06 Da, | 2360.921631 | 3 | 543.9699707 | 543.9695666 |
| TAGKDGVANVSIEDR           | P08228 | 0          | n +34.06 Da,K +34.06 Da, | 1509.161133 | 3 | 533.9703979 | 533.970624  |
| HTEEDFIITTKTGR            | Q03311 | 0          | n +42.03 Da,K +34.06 Da, | 2291.335938 | 3 | 575.2999878 | 575.3073067 |
| AAAKVALTKR                | Q9QXX4 | 0.0477538  | n +42.03 Da,K +34.06 Da, | 1103.556885 | 2 | 569.9004517 | 569.9007849 |
| SARPLTGGEPVSLGSLR         | P11352 | 0.00306883 | n +34.06 Da,             | 2476.777588 | 3 | 577.6708374 | 577.6705791 |
| SASAGGSHQPSQSRAIPTR       | P70445 | 0.00386432 | n +42.03 Da,             | 1101.134155 | 3 | 646.3300171 | 646.3243132 |
| MPGVTVKDVNQQEFVR          | Q9CZ8  | 0.01728774 | n +34.06 Da,K +34.06 Da, | 2144.902344 | 3 | 639.0200195 | 639.0295968 |
| STTVVTTKSAEIR             | P05784 | 0          | n +34.06 Da,K +34.06 Da, | 1100.587036 | 2 | 730.9504395 | 730.9514017 |
| AAQESLHVKTPLR             | Q8VBT2 | 0          | n +42.03 Da,K +34.06 Da, | 1598.541016 | 4 | 382.230011  | 382.2281891 |
| PLPPLPEYGGKVR             | Q9CQQ7 | 0.02159091 | n +17.03 Da,K +34.06 Da, | 2486.144043 | 2 | 737.4500122 | 737.4561597 |
| PIEAVTSKTSNIR             | Q60598 | 0.00049213 | n +17.03 Da,K +34.06 Da, | 1336.838257 | 3 | 489.6300049 | 489.6315016 |
| PNIVGNEHYDVAR             | P56480 | 0          | n +17.03 Da,             | 1633.6604   | 3 | 500.9255066 | 500.9249785 |
| ERKEAVIQFLER              | Q571H0 | 0.02938988 | n +31.05 Da,             | 1097.869995 | 3 | 516.9659424 | 516.9684072 |
| PEPKIDAALR                | P12787 | 0.00049213 | n +17.03 Da,K +34.06 Da, | 2166.955078 | 3 | 425.2752991 | 425.2748775 |
| DPAIYFKEQFLDGDWATNR       | P14211 | 0          | n +34.06 Da,K +34.06 Da, | 4366.633789 | 2 | 1177.604736 | 1177.608048 |
| IGGLEDVKR                 | Q01853 | 0.01518692 | n +34.06 Da,K +34.06 Da, | 1264.939331 | 3 | 352.2341919 | 352.234571  |
| AEDIKTKIK                 | P56391 | 0.0194508  | n +42.03 Da,K +34.06 Da, | 1419.124146 | 3 | 397.280304  | 397.2798871 |
| YRPGTVALR                 | P02301 | 0.01262327 | n +14.02 Da,             | 1168.181274 | 3 | 349.5417786 | 349.541699  |
| ITPAEVLGVLGKDR            | P62962 | 0.01005632 | n +34.06 Da,K +34.06 Da, | 3074.749512 | 3 | 507.9899902 | 507.9926997 |
| VPPVQVSPLIKFGR            | Q06185 | 0          | n +34.06 Da,K +34.06 Da, | 3212.822998 | 4 | 402.019989  | 402.0185325 |
| PGLVDQLVKADSEWR           | P26638 | 0          | n +17.03 Da,K +34.06 Da, | 3797.833008 | 3 | 588.6699829 | 588.6686158 |
| DPGVVDFNPLKALR            | P30115 | 0          | n +34.06 Da,K +34.06 Da, | 4279.997559 | 3 | 574.6943359 | 574.6910208 |
| FALASQQKAASAQSR           | Q8VCHO | 0.00049213 | n +34.06 Da,K +34.06 Da, | 1277.764282 | 3 | 544.6500244 | 544.6548583 |
| AFCAPPAYLTHQQKVLRL        | Q9CQJ8 | 0.00553427 | n +42.03 Da,K +34.06 Da, | 3303.733887 | 3 | 692.7127686 | 692.7139019 |
| VEMDAVGKEGR               | Q8C196 | 0          | n +34.06 Da,K +34.06 Da, | 1087.471191 | 3 | 420.2414246 | 420.2413973 |
| SEFLKAASNLR               | P27773 | 0.00049213 | n +34.06 Da,K +34.06 Da, | 2037.376465 | 3 | 435.2719727 | 435.2716851 |
| ELSEEDKLTCSR              | P56480 | 0.00553427 | n +34.06 Da,K +34.06 Da, | 1621.147339 | 3 | 491.9500122 | 491.9525702 |
| PVEKDANNMPVTAR            | D3Z0Y2 | 0          | n +17.03 Da,K +34.06 Da, | 1082.872559 | 2 | 796.9400024 | 796.9380061 |
| PDSWDKDVPEPPSR            | Q9DCS9 | 0          | n +17.03 Da,K +34.06 Da, | 2466.183838 | 3 | 613.6449585 | 613.6442477 |
| LLVLDLHQRL                | Q8VDD5 | 0.00264434 | n +34.06 Da,             | 2848.525635 | 3 | 419.903656  | 419.9051844 |

|                                  |        |            |                          |             |   |             |             |
|----------------------------------|--------|------------|--------------------------|-------------|---|-------------|-------------|
| ELDAIAPKR                        | Q01853 | 0.01262327 | n +34.06 Da,K +34.06 Da, | 1082.543701 | 3 | 360.9065247 | 360.9064543 |
| SKEQVANSFAFVER                   | P11499 | 0          | n +34.06 Da,K +34.06 Da, | 1349.042358 | 2 | 766.9384155 | 766.9388256 |
| VVGDDLTVTNPKR                    | P17182 | 0          | n +34.06 Da,K +34.06 Da, | 1584.52478  | 3 | 494.6360168 | 494.6368046 |
| SQAPDAPSGPGPTSNQLTHVDSAGR        | Q5RKZ7 | 0          | n +34.06 Da,             | 2071.427002 | 3 | 827.7399902 | 827.7440845 |
| SKGPAVGIDLGTYSVGVFQHGKVEIANDQGNR | P63017 | 0          | n +42.03 Da,K +34.06 Da, | 4913.741211 | 4 | 950.25      | 950.2533542 |
| PKEEEVSLQGINTR                   | Q8BH43 | 0.00096665 | n +17.03 Da,K +34.06 Da, | 1894.621704 | 3 | 550.9799805 | 550.9809711 |
| LTGFHETSNINDFSAGVANR             | P15105 | 0.00181242 | n +31.05 Da,             | 2990.613281 | 3 | 727.6900024 | 727.6959646 |
| TELPPTHPIR                       | P62259 | 0.01694263 | n +34.06 Da,             | 1302.968872 | 3 | 398.9100037 | 398.9066364 |
| PLSASQIQVKR                      | P16546 | 0          | n +17.03 Da,K +34.06 Da, | 1368.506958 | 3 | 426.6105957 | 426.6102602 |
| GQAVEYLKR                        | P59481 | 0.01159536 | n +34.06 Da,K +34.06 Da, | 1071.601685 | 3 | 377.9100037 | 377.9100873 |
| PEVLDATEQALHSR                   | P14869 | 0.00181242 | n +17.03 Da,             | 3186.56958  | 3 | 542.2999878 | 542.2949603 |
| TALIHDGLAR                       | P63323 | 0.01728774 | n +34.06 Da,             | 1651.361694 | 3 | 367.5599976 | 367.559348  |
| TVQTESEGVPRPTAASEAR              | Q3V384 | 0.00049213 | n +34.06 Da,             | 1067.946411 | 3 | 598.6575317 | 598.6569988 |
| FVKGVVDSDDLPLNVSR                | P08113 | 0.04133717 | n +34.06 Da,K +34.06 Da, | 3082.984863 | 3 | 643.3699951 | 643.3756503 |
| ASGTEKAFEPATGR                   | Q9JLJ2 | 0.00049213 | n +34.06 Da,K +34.06 Da, | 1065.543457 | 3 | 497.2799988 | 497.2809095 |
| VAPMKGQVCVVTGASR                 | Q99L04 | 0          | n +34.06 Da,K +34.06 Da, | 1715.351563 | 3 | 576.6702271 | 576.669234  |
| AAPAKGENLSLVVHGPDIR              | Q64442 | 0          | n +42.03 Da,K +34.06 Da, | 2870.166748 | 2 | 1039.079956 | 1039.084284 |
| MNNQKQKQKPTLSGQR                 | Q9CQC6 | 0          | n +42.03 Da,K +34.06 Da, | 1131.787842 | 3 | 623.3526001 | 623.3529624 |
| DPNFFKMVEGFFDR                   | P26443 | 0          | n +34.06 Da,K +34.06 Da, | 4973.679688 | 2 | 908.9745483 | 908.9718112 |
| LPPLPPREDGPR                     | O88668 | 0.01005632 | n +34.06 Da,             | 1693.904907 | 3 | 459.9398804 | 459.9402288 |
| TQEIVAKVR                        | P08003 | 0.00909091 | n +34.06 Da,K +34.06 Da, | 1058.318604 | 3 | 414.2689514 | 414.2680521 |
| TPEAVVEHPSAVR                    | Q91WS4 | 0          | n +34.06 Da,             | 1178.710938 | 3 | 475.9342957 | 475.9351438 |
| CAATATILDKPEDR                   | O35215 | 0          | n +34.06 Da,K +34.06 Da, | 3089.101563 | 3 | 543.6400146 | 543.6364762 |
| ASKDLEKWR                        | Q05816 | 0          | n +42.03 Da,K +34.06 Da, | 3146.260742 | 3 | 471.6204529 | 471.6226066 |
| SGGGTETPVACDAAQGGKKR             | Q8R015 | 0          | n +42.03 Da,K +34.06 Da, | 1058.100586 | 3 | 686.3599854 | 686.3620755 |
| AVFPSIVGRPR                      | P60710 | 0          |                          | 2292.747559 | 3 | 409.5830383 | 409.5837868 |
| PFLDDSIKSR                       | P97501 | 0.00181242 | n +17.03 Da,K +34.06 Da, | 2992.944824 | 3 | 447.9400024 | 447.9381542 |
| PDAANYKDIDSDVER                  | Q9D819 | 0          | n +17.03 Da,K +34.06 Da, | 1956.965942 | 2 | 822.4300537 | 822.4285262 |
| TVLGPDKVPR                       | Q91WN4 | 0.00264434 | n +34.06 Da,K +34.06 Da, | 1406.366821 | 3 | 383.9265137 | 383.9257374 |
| VHLTDAEKAASVCLWGKVNSEVGGGALGR    | P02088 | 0          | n +17.03 Da,K +34.06 Da, | 4413.114746 | 3 | 1085.27002  | 1085.248866 |
| QKQDAFALASQQAASQSR               | Q8VCHO | 0          | n +42.03 Da,K +34.06 Da, | 1949.904297 | 3 | 748.7399902 | 748.7504395 |
| GDTHLGGEDFDQR                    | P20029 | 0.00049213 | n +34.06 Da,             | 1509.34021  | 3 | 494.230011  | 494.2340301 |
| SQAEFDKAAEEVKR                   | P31786 | 0          | n +42.03 Da,K +34.06 Da, | 1697.66333  | 4 | 430.2402954 | 430.2402534 |
| MDADKDNKQACDER                   | O35309 | 0.00049213 | n +42.03 Da,K +34.06 Da, | 1687.585327 | 2 | 959.9699707 | 959.9671297 |
| AAQESLHVKTPLR                    | Q8VBT2 | 0          | n +42.03 Da,K +34.06 Da, | 1978.981567 | 2 | 763.4500122 | 763.4491017 |
| SQAEFDKAAEEVKR                   | P31786 | 0          | n +42.03 Da,K +34.06 Da, | 2313.985596 | 3 | 573.3183594 | 573.3179124 |
| PVLCDAVAKR                       | Q9JLI0 | 0.00181242 | n +17.03 Da,K +34.06 Da, | 1048.758911 | 3 | 370.2302856 | 370.2305029 |
| MEHAGQGDKAAGEGSPSR               | Q920N2 | 0          | n +42.03 Da,K +34.06 Da, | 1267.219727 | 3 | 677.6500244 | 677.6458883 |
| PVEYKYPYPER                      | Q99K67 | 0.00096665 | n +17.03 Da,K +34.06 Da, | 1255.573364 | 2 | 680.873291  | 680.8721259 |
| LHTVYQSVELPETHQMLR               | Q07417 | 0          |                          | 3460.199707 | 3 | 737.0430908 | 737.0526543 |

|                        |        |            |                          |             |   |             |             |
|------------------------|--------|------------|--------------------------|-------------|---|-------------|-------------|
| TNKETTIQGLDGLSER       | Q91Y97 | 0          | n +34.06 Da,K +34.06 Da, | 2263.129883 | 2 | 915.5100098 | 915.515627  |
| STSTICSDKTGTLTQNR      | Q6PIC6 | 0.00590468 | n +34.06 Da,K +34.06 Da, | 1278.920776 | 3 | 646.6799927 | 646.6792931 |
| SEPEIPKGIR             | Q9WTP6 | 0.00225734 | n +34.06 Da,K +34.06 Da, | 1605.035767 | 3 | 398.5893555 | 398.5890141 |
| MEVKPPPGRQPDSGR        | Q8BG05 | 0.03833635 | n +42.03 Da,K +34.06 Da, | 1757.231323 | 2 | 912.4899902 | 912.4858903 |
| TFTFYASEDKLENR         | O35490 | 0          | n +34.06 Da,K +34.06 Da, | 2892.102783 | 3 | 596.9833984 | 596.9861627 |
| ISSQQTIPPSAKYGGRR      | P70404 | 0.00264434 | n +34.06 Da,K +34.06 Da, | 1612.778809 | 3 | 586.6777954 | 586.6775518 |
| MEKPAASTEPPQGSRPALGR   | Q9JMD3 | 0.00181242 | n +42.03 Da,K +34.06 Da, | 1474.980347 | 4 | 515.526001  | 515.525789  |
| DVPNDSSFQIVKNPR        | Q61176 | 0.00049213 | n +34.06 Da,K +34.06 Da, | 2630.9021   | 3 | 595.3300171 | 595.3373068 |
| SSLPSSEHQVVAVAAAR      | Q9DBB8 | 0.02962963 | n +34.06 Da,             | 1880.037842 | 3 | 557.9794922 | 557.9794127 |
| PDAAKPEDWDER           | P14211 | 0.00049213 | n +17.03 Da,K +34.06 Da, | 1461.28772  | 2 | 740.3696289 | 740.3704794 |
| GDGTITTKELGTVMR        | P62204 | 0          | n +34.06 Da,K +34.06 Da, | 2373.723877 | 2 | 823.9799805 | 823.9745512 |
| PELEAIKAR              | Q8CCS6 | 0.03460838 | n +17.03 Da,K +34.06 Da, | 1035.883545 | 3 | 359.8999939 | 359.9011513 |
| DIKAISFVGSNQAGEYIFER   | Q9EQ20 | 0          | n +34.06 Da,K +34.06 Da, | 4138.953125 | 3 | 771.4199829 | 771.4234408 |
| PEHLFETISQAMLNNAVDR    | Q9R1P1 | 0          | n +17.03 Da,             | 4488.226074 | 3 | 696.6900635 | 696.6912742 |
| PAQKSDIVQLR            | Q8VDJ3 | 0          | n +17.03 Da,K +34.06 Da, | 1237.75354  | 3 | 435.941925  | 435.9418985 |
| AAAKVALTKR             | Q9QXX4 | 0.00049213 | n +42.03 Da,K +34.06 Da, | 1145.317871 | 2 | 569.9009399 | 569.9007849 |
| TGEVIGHVAEGDR          | Q9CZS1 | 0          | n +34.06 Da,             | 1206.845093 | 3 | 458.5786133 | 458.5792488 |
| SKSESPKEPEQLR          | P49312 | 0          | n +42.03 Da,K +34.06 Da, | 1030.25708  | 2 | 812.9622192 | 812.9624983 |
| PKVTQPEVDTPLGR         | Q63880 | 0          | n +17.03 Da,K +34.06 Da, | 1879.485962 | 2 | 794.4688721 | 794.4699963 |
| PGDKGLVLMR             | P35564 | 0.00049213 | n +17.03 Da,K +34.06 Da, | 1650.358398 | 3 | 408.5799866 | 408.584946  |
| EQAGGDATENFEDVGHSTDR   | P56395 | 0          | n +31.05 Da,             | 2115.763672 | 3 | 746.3300171 | 746.3298995 |
| GFPGPQGPYYCGVGADKAYGR  | P15105 | 0          | n +34.06 Da,K +34.06 Da, | 2993.375977 | 3 | 762.3800049 | 762.3863322 |
| TVQTSEGVVRPTAASEAR     | Q3V384 | 0          | n +34.06 Da,             | 1026.672119 | 3 | 598.6574707 | 598.6569988 |
| SPAESGLLAGDR           | P70441 | 0          | n +34.06 Da,K +34.06 Da, | 1024.920166 | 3 | 456.9424133 | 456.9421165 |
| PEPQGDDEPDTPKSVR       | P51437 | 0          | n +17.03 Da,K +34.06 Da, | 1024.739502 | 3 | 606.6428833 | 606.6427957 |
| DPSPKKEESYSDWGLR       | Q99P27 | 0          | n +34.06 Da,K +34.06 Da, | 2907.046387 | 2 | 981.9799805 | 981.9894424 |
| MEDCNVHSAASILASVKEQEAR | P98203 | 0          | n +42.03 Da,K +34.06 Da, | 3840.999756 | 3 | 841.0800171 | 841.0793107 |
| SGAPIKIPVGPETLGR       | P56480 | 0          | n +34.06 Da,K +34.06 Da, | 2838.484619 | 3 | 554.0174561 | 554.0191375 |
| VVDNFPLLKALR           | P30115 | 0          | n +34.06 Da,K +34.06 Da, | 3661.091309 | 3 | 484.9899902 | 484.99063   |
| TIILASDKR              | B5X0G2 | 0.02759135 | n +34.06 Da,K +34.06 Da, | 1020.586792 | 3 | 362.2498779 | 362.250221  |
| SAGFLQASADVVVVHGR      | Q8VCH0 | 0.00049213 | n +34.06 Da,             | 3577.560303 | 3 | 612.0079346 | 612.0058505 |
| SDYVSGPPSGTGLHR        | P70296 | 0          | n +34.06 Da,             | 1642.659058 | 3 | 540.9400024 | 540.9444796 |
| DIIDPAILRPGR           | Q01853 | 0.02054013 | n +34.06 Da,             | 3135.843994 | 3 | 457.2799988 | 457.2839956 |
| MNYIEGKVVKR            | Q62417 | 0.00181242 | n +42.03 Da,K +34.06 Da, | 2565.130127 | 3 | 525.9799805 | 525.9781733 |
| GPTTPEADKIFLER         | P26443 | 0          | n +34.06 Da,K +34.06 Da, | 2632.942383 | 2 | 821.4783936 | 821.4777838 |
| SDKSDLKAELER           | O88485 | 0.00749064 | n +42.03 Da,K +34.06 Da, | 1828.880371 | 2 | 750.9299927 | 750.9306667 |
| KDDYYQILGVPR           | Q99M87 | 0.04746723 | n +34.06 Da,K +34.06 Da, | 3028.672607 | 3 | 512.300415  | 512.3015333 |
| SVQATQNSQVPAERPR       | Q9ER88 | 0.04457917 | n +34.06 Da,             | 1015.674683 | 3 | 601.3303223 | 601.3291048 |
| VDREQLVQKAR            | P61982 | 0          | n +42.03 Da,K +34.06 Da, | 1555.123901 | 3 | 473.2831421 | 473.2826549 |
| EEAPKGMALAR            | Q61599 | 0.00181242 | n +34.06 Da,K +34.06 Da, | 1015.46991  | 3 | 390.5708923 | 390.5709659 |

|                                    |        |            |                          |             |   |             |             |
|------------------------------------|--------|------------|--------------------------|-------------|---|-------------|-------------|
| EAPKVVEEQESR                       | P01029 | 0          | n +34.06 Da,K +34.06 Da, | 1015.178223 | 3 | 490.2807007 | 490.2807982 |
| LFHIDDKGILR                        | P35700 | 0.00049213 | n +34.06 Da,K +34.06 Da, | 3470.973877 | 3 | 457.6395569 | 457.6395973 |
| PVPAGDLVKAR                        | P21981 | 0          | n +17.03 Da,K +34.06 Da, | 1373.148193 | 2 | 587.3831177 | 587.3824629 |
| STTVVTTKSAEIR                      | P05784 | 0          | n +34.06 Da,K +34.06 Da, | 1116.581055 | 3 | 487.6365967 | 487.6366933 |
| APKVTSELLR                         | Q6P1B1 | 0.00346921 | n +34.06 Da,K +34.06 Da, | 1532.675293 | 2 | 591.397522  | 591.3980754 |
| MKHYEVEIR                          | Q9CY27 | 0.02962963 | n +42.03 Da,K +34.06 Da, | 1974.112305 | 3 | 427.5700073 | 427.567515  |
| SEPEIPKGIR                         | Q9WTP6 | 0.02962963 | n +34.06 Da,K +34.06 Da, | 1620.86438  | 2 | 597.3804932 | 597.3798829 |
| SAIAKIVGSNAGR                      | P13707 | 0.00181242 | n +34.06 Da,K +34.06 Da, | 1473.636719 | 3 | 437.950531  | 437.9508345 |
| SKSESPKEPEQLR                      | P49312 | 0          | n +42.03 Da,K +34.06 Da, | 1012.248657 | 3 | 542.3106689 | 542.3107577 |
| GLTLGGQKCSVIR                      | P62962 | 0          | n +34.06 Da,K +34.06 Da, | 1813.404663 | 3 | 486.3017273 | 486.3028795 |
| EESTTVVTTKSAEIR                    | P05784 | 0          | n +34.06 Da,K +34.06 Da, | 1472.387939 | 3 | 573.6655884 | 573.6650894 |
| PYNPSMSRPDAWGVTKGAAELMQQKEATTEQQLR | O35490 | 0          | n +42.03 Da,K +34.06 Da, | 4189.015625 | 4 | 983         | 983.0043792 |
| DLAQLKNLR                          | Q80WJ7 | 0.01081731 | n +34.06 Da,K +34.06 Da, | 2344.874512 | 3 | 380.2600098 | 380.2574871 |
| STKPQAQEQPPASPEALR                 | Q9WU79 | 0          | n +34.06 Da,K +34.06 Da, | 1551.204956 | 3 | 668.3778076 | 668.3779426 |
| PAPATTFAHLDATTVLSR                 | P56480 | 0          | n +17.03 Da,             | 2474.568115 | 3 | 629.3428345 | 629.3442029 |
| GEEEDGDEDEEAEAPTGKR                | P26350 | 0          | n +34.06 Da,K +34.06 Da, | 1113.56311  | 3 | 710.991333  | 710.9909198 |
| PVLCDVAKR                          | Q9JLI0 | 0.00181242 | n +17.03 Da,K +34.06 Da, | 1008.510254 | 3 | 370.2304688 | 370.2305029 |
| VTEDALKAJAR                        | Q9JHS4 | 0.00049213 | n +34.06 Da,K +34.06 Da, | 2129.61499  | 3 | 418.9400024 | 418.9399355 |
| PNIVGNEHYDVAR                      | P56480 | 0          | n +17.03 Da,             | 1584.595581 | 3 | 500.9240112 | 500.9249785 |
| MHTGGETSACKPSSVR                   | Q61214 | 0          | n +42.03 Da,K +34.06 Da, | 1034.845337 | 3 | 594.289978  | 594.2891529 |
| RDMEVALRKHINR                      | Q8VFM8 | 0.0471464  | n +31.05 Da,             | 2012.523682 | 2 | 834.9899902 | 834.9780726 |
| PKVIQPEVDTPGR                      | Q8VCU1 | 0          | n +17.03 Da,K +34.06 Da, | 2147.686523 | 2 | 800.4883423 | 800.4881889 |
| NVEAGKYTVGLGQTR                    | P54869 | 0          | n +34.06 Da,K +34.06 Da, | 1968.52478  | 3 | 554.3266602 | 554.3266304 |
| PMTVSSDQMAKLR                      | P16015 | 0          | n +17.03 Da,K +34.06 Da, | 2016.67395  | 3 | 505.6147156 | 505.6145771 |
| PEQVAMATVTALHR                     | Q91Y97 | 0.00181242 | n +34.06 Da,             | 1747.629272 | 3 | 519.9500122 | 519.9591835 |
| PQADAKSQLFAQSR                     | Q80XL6 | 0          | n +17.03 Da,K +34.06 Da, | 1543.224609 | 3 | 533.2999878 | 533.3021556 |
| AGKPVLYHYFDGR                      | P30115 | 0          | n +42.03 Da,K +34.06 Da, | 2453.806396 | 3 | 479.2694092 | 479.2683455 |
| MEVKPPPGRPQPDSGR                   | Q8BG05 | 0          | n +42.03 Da,K +34.06 Da, | 1582.805054 | 3 | 608.6585083 | 608.6596857 |
| AEIEALKGQR                         | P11679 | 0.03397881 | n +34.06 Da,K +34.06 Da, | 1000.416077 | 3 | 394.9200134 | 394.9207637 |
| PKEQQEVVVLGSPH                     | Q9D103 | 0.0329912  | n +17.03 Da,K +34.06 Da, | 1615.298828 | 3 | 533.3123779 | 533.3105397 |
| KVISTTKAPAAIGPYSQAVQVDR            | P52760 | 0          | n +14.02 Da,K +28.03 Da, | 2966.933838 | 3 | 824.1500244 | 824.1391168 |
| SSEAPPLVNEDVKR                     | Q91YQ5 | 0          | n +34.06 Da,K +34.06 Da, | 1581.773926 | 2 | 804.9649658 | 804.9650408 |
| GVAADLSHIETR                       | P08249 | 0.00049213 | n +34.06 Da,             | 1898.21875  | 3 | 434.9119263 | 434.9123391 |
| DATKEVVYR                          | Q9D2G2 | 0.00144578 | n +34.06 Da,K +34.06 Da, | 998.0662842 | 3 | 383.5696106 | 383.569731  |
| TDNELEKITR                         | P26443 | 0.00049213 | n +34.06 Da,K +34.06 Da, | 1548.051758 | 3 | 429.5900574 | 429.5910838 |
| GDTAKPYFVKR                        | Q5BLK4 | 0          | n +42.03 Da,K +34.06 Da, | 1597.928833 | 3 | 464.6151123 | 464.6154519 |
| PNDSSFQIVKNPR                      | Q61176 | 0          | n +17.03 Da,K +34.06 Da, | 1708.169556 | 2 | 776.9400024 | 776.9388632 |
| YLGTPPEPDI VGLDSGHIR               | P52196 | 0          |                          | 3199.92334  | 3 | 699.0300293 | 699.0321363 |
| TKDQVANSFAVER                      | P07901 | 0.00264434 | n +34.06 Da,K +34.06 Da, | 1328.293945 | 3 | 511.6300049 | 511.6283092 |
| DAPPLTLDGIKDR                      | Q9CR21 | 0          | n +34.06 Da,K +34.06 Da, | 2784.14502  | 3 | 493.6314392 | 493.6331716 |

|                         |        |            |                          |             |   |             |             |
|-------------------------|--------|------------|--------------------------|-------------|---|-------------|-------------|
| MNVEHEVNLLVEEIHR        | Q4KML4 | 0.00181242 | n +42.03 Da,             | 4435.156738 | 3 | 668.3386841 | 668.3386832 |
| PVDGSISKNQGLR           | Q9D0F9 | 0          | n +17.03 Da,K +34.06 Da, | 1056.568726 | 3 | 474.6159973 | 474.6159629 |
| PANDTVDFPKR             | P30999 | 0          | n +17.03 Da,K +34.06 Da, | 1327.478149 | 2 | 655.8699951 | 655.8699174 |
| PEPQGEDPDPKPSVR         | P51437 | 0          | n +17.03 Da,K +34.06 Da, | 1065.145142 | 3 | 606.6428833 | 606.6427957 |
| KTGVAPIIDVVR            | P14115 | 0.00386432 | n +34.06 Da,K +34.06 Da, | 2245.771973 | 3 | 445.9717712 | 445.9713469 |
| SNSETIIITGKR            | Q8VDJ3 | 0.00181242 | n +34.06 Da,K +34.06 Da, | 1335.790405 | 2 | 693.9299927 | 693.9330116 |
| PANDTVDFPKR             | P30999 | 0          | n +17.03 Da,K +34.06 Da, | 1312.705811 | 3 | 437.5829163 | 437.5823704 |
| VLIAAHGNSLR             | O70250 | 0.00049213 |                          | 1301.400513 | 3 | 393.5715637 | 393.5716584 |
| GPGGGPGGSHMGNGYGDDR     | P56959 | 0.00590468 | n +34.06 Da,             | 987.4991455 | 3 | 593.5999756 | 593.5956335 |
| TSAVTVKSAIR             | P61514 | 0.02624672 | n +34.06 Da,K +34.06 Da, | 1094.665527 | 3 | 400.936676  | 400.9364138 |
| GTVEEDLGKSR             | P08113 | 0          | n +34.06 Da,K +34.06 Da, | 987.3189697 | 3 | 420.2474976 | 420.2473171 |
| TSAVTVKSAIR             | P61514 | 0          | n +34.06 Da,K +34.06 Da, | 1110.679443 | 3 | 434.6199951 | 434.6189735 |
| DPILGVTEAFKR            | P05202 | 0.00049213 | n +34.06 Da,K +34.06 Da, | 3282.654297 | 3 | 471.9599915 | 471.9627402 |
| TPLDVIKTR               | F6VVY4 | 0.00909091 | n +34.06 Da,K +34.06 Da, | 1617.919922 | 3 | 370.9200134 | 370.9221044 |
| KSLNSEMDNILANLR         | Q8BMS1 | 0          | n +34.06 Da,K +34.06 Da, | 3939.932129 | 3 | 596.0100098 | 596.0103137 |
| GCKVDNSSLTGESEPPQTR     | Q64436 | 0.00049213 | n +34.06 Da,K +34.06 Da, | 1289.440674 | 3 | 678.3499756 | 678.3462028 |
| TPEAAVEHPEAVR           | O35490 | 0          | n +34.06 Da,             | 1101.884155 | 3 | 480.5950928 | 480.5948988 |
| LRPGDCEVCISYLGR         | Q9CXI5 | 0          | n +34.06 Da,             | 2987.606689 | 2 | 914.9639282 | 914.9664762 |
| SSLAAILHQHQRPR          | Q80W04 | 0.01694263 | n +42.03 Da,             | 1871.800537 | 3 | 571.6400146 | 571.6482904 |
| TGGVLYADKALR            | Q9D826 | 0.01236045 | n +34.06 Da,K +34.06 Da, | 1867.558838 | 3 | 444.6099854 | 444.6154518 |
| EVAQHLGESTVR            | P56480 | 0.01518692 | n +34.06 Da,             | 976.7963867 | 3 | 453.9200439 | 453.9194938 |
| MDVPNIKR                | P63242 | 0.02514071 | n +34.06 Da,K +34.06 Da, | 1573.537964 | 3 | 347.5599976 | 347.5567679 |
| PTAAAIAYGLDKR           | P20029 | 0          | n +17.03 Da,K +34.06 Da, | 2112.334229 | 3 | 466.6170654 | 466.6173036 |
| SALEKSMHLGR             | Q8BVQ5 | 0.01628538 | n +42.03 Da,K +34.06 Da, | 2284.180908 | 2 | 652.8599854 | 652.8638158 |
| ALGEEWKGYYVVR           | P62754 | 0.00049213 | n +34.06 Da,K +34.06 Da, | 2831.95874  | 3 | 492.2900085 | 492.2944899 |
| SSPAEVAEKADR            | Q99L13 | 0.00049213 | n +34.06 Da,K +34.06 Da, | 973.4929199 | 3 | 443.2600098 | 443.2544718 |
| HVGDLGNVTAGKDGVANVSIEDR | P08228 | 0          | n +17.03 Da,K +34.06 Da, | 2907.150635 | 3 | 792.0800171 | 792.0909729 |
| PGVTVKDVNQEFVR          | Q9CZX8 | 0          | n +17.03 Da,K +34.06 Da, | 2007.856934 | 3 | 589.6699829 | 589.6722488 |
| YGEEGTHVGSAAALER        | P50136 | 0          | n +34.06 Da,             | 1670.685181 | 3 | 560.9500122 | 560.9515229 |
| VSVVLGGDHS LAVGSISGH    | Q61176 | 0.00049213 |                          | 3049.601807 | 2 | 909.9799805 | 909.989062  |
| PTPEQWKQIAAVMQR         | P05201 | 0          | n +17.03 Da,K +34.06 Da, | 3520.734863 | 3 | 612.0100098 | 612.0137288 |
| VGVPVGSDFQPELSGAGSR     | Q8CDN6 | 0          | n +34.06 Da,K +34.06 Da, | 2759.446533 | 3 | 756.4119263 | 756.4149454 |
| ASGPGGLHADLLR           | Q8BWF0 | 0          | n +34.06 Da,             | 1961.748169 | 3 | 433.25      | 433.2526954 |
| LPALEEKPR               | Q61316 | 0.01628538 | n +34.06 Da,K +34.06 Da, | 1163.376099 | 3 | 374.25      | 374.250221  |
| ATSASSHLNKGIKQMY        | P15105 | 0          | n +42.03 Da,K +34.06 Da, | 2157.464844 | 2 | 923.5100098 | 923.5118324 |
| GETENQSPASEEEKEAKSD     | P18608 | 0.00181242 | n +34.06 Da,K +34.06 Da, | 965.9486694 | 3 | 723.0300293 | 723.0293039 |
| FQVGKFEEDLTGIDDR        | Q00915 | 0          | n +34.06 Da,K +34.06 Da, | 3825.228516 | 3 | 689.3607178 | 689.3619586 |
| PKESSYACYDEER           | O89017 | 0          | n +17.03 Da,K +34.06 Da, | 1878.598877 | 3 | 616.6199951 | 616.6174816 |
| SQAEFDKAAEEVKR          | P31786 | 0.00049213 | n +42.03 Da,K +34.06 Da, | 2117.352783 | 3 | 573.3200073 | 573.3179124 |
| AGKPVLYHFDGRGR          | P30115 | 0          | n +42.03 Da,K +34.06 Da, | 2174.589355 | 4 | 412.9822388 | 412.9837221 |



|                          |        |            |                          |             |   |              |             |
|--------------------------|--------|------------|--------------------------|-------------|---|--------------|-------------|
| MDKNELVQKAK              | P63101 | 0          | n +42.03 Da,K +34.06 Da, | 1604.823608 | 3 | 483.3065796  | 483.3061079 |
| PAQKIEEITR               | Q8BK48 | 0.02266717 | n +17.03 Da,K +34.06 Da, | 955.8709106 | 2 | 618.3800049  | 618.3826604 |
| SQAEFDKAAEEVKR           | P31786 | 0          | n +42.03 Da,K +34.06 Da, | 1656.964478 | 4 | 430.2398071  | 430.2402534 |
| PAQKIEEITR               | Q8BK48 | 0.00096665 | n +17.03 Da,K +34.06 Da, | 955.7611694 | 3 | 412.5908508  | 412.5908658 |
| ASCDEIKEHPR              | Q8C650 | 0          | n +42.03 Da,K +34.06 Da, | 961.3569946 | 3 | 473.2370605  | 473.2366057 |
| ASLKDLEGKWR              | Q05816 | 0          | n +42.03 Da,K +34.06 Da, | 1981.797852 | 4 | 353.9700012  | 353.968774  |
| TGAVFAQDKAIVQEATR        | Q8CHT0 | 0          | n +34.06 Da,K +34.06 Da, | 2685.650391 | 3 | 625.0290527  | 625.0319949 |
| GVTVKDVNQEFVR            | Q9CZX8 | 0          | n +34.06 Da,K +34.06 Da, | 2097.460938 | 3 | 562.9994507  | 562.9985137 |
| LDSSNSMQTVQKTTTR         | P05784 | 0.00181242 | n +34.06 Da,K +34.06 Da, | 1433.037598 | 3 | 622.3400269  | 622.3405001 |
| GTVEEDLGKSR              | P08113 | 0.00181242 | n +34.06 Da,K +34.06 Da, | 948.1043701 | 2 | 629.8699951  | 629.8673374 |
| YSHGSHETDEEFDAR          | P12787 | 0          |                          | 1568.419312 | 3 | 603.2438965  | 603.2554536 |
| ASSDIQVKELEKR            | P54227 | 0          | n +42.03 Da,K +34.06 Da, | 2062.107178 | 3 | 538.322876   | 538.3228861 |
| PPTPSEPSFKQFQAEER        | Q8QZR5 | 0.00144578 | n +17.03 Da,K +34.06 Da, | 2385.696045 | 3 | 633.0100098  | 633.0074088 |
| SHQTGIQASEDVKEIFAR       | Q91YR1 | 0          | n +42.03 Da,K +34.06 Da, | 3288.509277 | 2 | 1046.5500049 | 1046.547732 |
| GTVEEDLGKSR              | P08113 | 0.00049213 | n +34.06 Da,K +34.06 Da, | 946.8485107 | 3 | 420.2470703  | 420.2473171 |
| STDLVAKLR                | P11983 | 0.01262327 | n +34.06 Da,K +34.06 Da, | 1574.711426 | 3 | 357.5780029  | 357.5783377 |
| SSKVSRTLYEAVR            | P53026 | 0.00049213 | n +42.03 Da,K +34.06 Da, | 2050.209961 | 3 | 562.979187   | 562.9793014 |
| DKSENEPIEENEAR           | Q9Z2I8 | 0.00049213 | n +34.06 Da,K +34.06 Da, | 945.2252197 | 3 | 557.2904053  | 557.2936556 |
| AEMLEDEAGVGGAGPGGACKAEPR | Q00PI9 | 0          | n +34.06 Da,K +34.06 Da, | 2265.855225 | 3 | 799.7299805  | 799.7318403 |
| ATSASSHLNKGKIK           | P15105 | 0          | n +42.03 Da,K +34.06 Da, | 1138.464233 | 3 | 475.2899475  | 475.2895162 |
| VPPVQVSPLIKFR            | Q06185 | 0          | n +34.06 Da,K +34.06 Da, | 2906.934814 | 4 | 402.019989   | 402.0185325 |
| PKLAVLITNSNVR            | Q9R0N0 | 0.00049213 | n +17.03 Da,K +34.06 Da, | 2151.450928 | 2 | 738.4799805  | 738.4801663 |
| SHGSSETDEEFDAR           | P12787 | 0          | n +42.03 Da,             | 942.3084106 | 3 | 553.5599976  | 553.5607655 |
| MARGQVGDLSPPQQEALAR      | Q8R0F9 | 0.00181242 | n +34.06 Da,             | 2050.945313 | 3 | 673.3584595  | 673.3601878 |
| STAGKVIKCKAA             | P00329 | 0.01262327 | n +42.03 Da,K +34.06 Da, | 940.3707886 | 3 | 459.9703064  | 459.9709479 |
| SHTILLVQPTKRPEGR         | P84089 | 0.00386432 | n +42.03 Da,K +34.06 Da, | 1929.668579 | 4 | 477.7868042  | 477.7864028 |
| MEETEKKVATQEGR           | Q9QXZ6 | 0          | n +42.03 Da,K +34.06 Da, | 1851.538208 | 2 | 873.4710083  | 873.4723733 |
| TVSLHLGVTPSVLR           | O89023 | 0          | n +34.06 Da,             | 3068.44873  | 2 | 756.9677124  | 756.9696698 |
| SPPAPSDSESVKIEER         | Q9R257 | 0.00181242 | n +34.06 Da,K +34.06 Da, | 1607.970825 | 3 | 570.3200073  | 570.317801  |
| SSLEDSQIEKER             | Q9CZ13 | 0          | n +34.06 Da,K +34.06 Da, | 1208.478516 | 3 | 496.9442139  | 496.9440749 |
| IVAAIQAEKNR              | P10922 | 0          | n +34.06 Da,K +34.06 Da, | 935.8399658 | 3 | 427.6160583  | 427.6155632 |
| ALALIHPSKR               | Q5RJ54 | 0.00181242 | n +42.03 Da,K +34.06 Da, | 2139.250977 | 3 | 394.5899963  | 394.5907594 |
| PGHLQEGFGCVVTNR          | Q9CY58 | 0          | n +17.03 Da,             | 2055.848633 | 2 | 844.4240723  | 844.4227961 |
| PVTLDLVHAPR              | Q62230 | 0.00181242 | n +14.02 Da,             | 2478.871582 | 3 | 411.2399902  | 411.2434304 |
| VYEDQVGKFDWR             | Q8C7X2 | 0.0299667  | n +34.06 Da,K +34.06 Da, | 2835.718506 | 3 | 537.289978   | 537.2930379 |
| SQAEFDKAAEEVKR           | P31786 | 0          | n +42.03 Da,K +34.06 Da, | 1355.639282 | 2 | 859.4699707  | 859.4732303 |
| PAENSNSETIIITGKR         | Q8VDJ3 | 0          | n +17.03 Da,K +34.06 Da, | 1610.540894 | 3 | 594.3400269  | 594.3390472 |
| PVEKDANNMPVTAR           | D3Z0Y2 | 0          | n +17.03 Da,K +34.06 Da, | 1120.791504 | 3 | 531.6300049  | 531.6277629 |
| EDTVYHLQPSGR             | Q91X83 | 0.01005632 | n +34.06 Da,             | 1472.278564 | 3 | 479.2510681  | 479.2511321 |
| ELDSIAKAR                | Q01853 | 0.04159197 | n +34.06 Da,K +34.06 Da, | 930.703125  | 3 | 357.5700073  | 357.5662093 |

|                             |        |            |                          |             |   |             |             |
|-----------------------------|--------|------------|--------------------------|-------------|---|-------------|-------------|
| LGTTAKEEMER                 | Q9CZB0 | 0.00049213 | n +34.06 Da,K +34.06 Da, | 929.6391602 | 2 | 666.8766479 | 666.8768478 |
| SKSESPKEPEQLR               | P49312 | 0          | n +42.03 Da,K +34.06 Da, | 1052.749146 | 3 | 542.3121948 | 542.3107577 |
| EELNLLGR                    | P22752 | 0.03769482 | n +34.06 Da,K +34.06 Da, | 2002.726196 | 2 | 570.3743896 | 570.3746003 |
| VKLTAEELIEQAAQYTNVAVR       | P57784 | 0          | n +34.06 Da,K +34.06 Da, | 4111.412598 | 3 | 729.4345703 | 729.4320475 |
| TPEAAVEHPEAVR               | O35490 | 0          | n +34.06 Da,             | 1061.413208 | 3 | 480.5947571 | 480.5948988 |
| TPEAAVEHPEAVR               | O35490 | 0          | n +34.06 Da,             | 1120.237793 | 2 | 720.3900146 | 720.38871   |
| PEDTLEQKAGSVGR              | Q8VCW8 | 0          | n +17.03 Da,K +34.06 Da, | 1445.90564  | 3 | 513.2871704 | 513.2862829 |
| AAQESLHVKTPLR               | Q8VBT2 | 0          | n +42.03 Da,K +34.06 Da, | 2019.683716 | 2 | 763.4470825 | 763.4491017 |
| AVKTLNPKAEVAR               | P80317 | 0          | n +42.03 Da,K +34.06 Da, | 1653.11438  | 3 | 502.9916077 | 502.992811  |
| LTPVEEAPKGMILAR             | Q61599 | 0          | n +34.06 Da,K +34.06 Da, | 2323.855713 | 3 | 527.3200073 | 527.32194   |
| TGQTPVFSKAR                 | Q9CXW4 | 0.03963964 | n +34.06 Da,K +34.06 Da, | 927.2109985 | 3 | 420.6000061 | 420.5962801 |
| SDYLELDTIKNLVLR             | P08113 | 0          | n +34.06 Da,K +34.06 Da, | 4040.070801 | 3 | 583.0200195 | 583.0139411 |
| AHIFVYGLKLR                 | Q923B0 | 0          | n +42.03 Da,K +34.06 Da, | 2721.752441 | 3 | 460.9429016 | 460.9452025 |
| SHTILLVQPTKRPEGR            | P84089 | 0          | n +42.03 Da,K +34.06 Da, | 1936.637695 | 3 | 636.7141724 | 636.7127783 |
| PVEKDANNMPVTAR              | D320Y2 | 0          | n +17.03 Da,K +34.06 Da, | 1124.094604 | 2 | 796.9379272 | 796.9380061 |
| ASKCPKCDKTVY                | Q9DCT8 | 0.00049213 | n +42.03 Da,K +34.06 Da, | 969.9254761 | 3 | 534.3029175 | 534.3022578 |
| EIDAIATR                    | P54775 | 0.03198529 | n +34.06 Da,K +34.06 Da, | 924.7116089 | 3 | 362.2399902 | 362.2380927 |
| AGKPVLYHFNAR                | P10648 | 0          | n +42.03 Da,K +34.06 Da, | 2341.434082 | 2 | 724.9140625 | 724.9146971 |
| PALEIANAHR                  | P63038 | 0.00346921 | n +17.03 Da,             | 1055.052612 | 3 | 370.2136841 | 370.2139113 |
| QVKALSTQGSSVGR              | P34927 | 0.00049213 | n +34.06 Da,K +34.06 Da, | 922.829895  | 3 | 495.9717102 | 495.9721873 |
| TNAIIIEPEKR                 | Q9QXD6 | 0.00049213 | n +34.06 Da,K +34.06 Da, | 1564.323608 | 3 | 451.2904358 | 451.2908569 |
| INPSLGTSSSGKPR              | P16882 | 0          | n +34.06 Da,K +34.06 Da, | 1023.419678 | 3 | 490.2967834 | 490.2966709 |
| ASCDEIKEHPR                 | Q8C650 | 0          | n +42.03 Da,K +34.06 Da, | 919.9333496 | 3 | 473.2399902 | 473.2366057 |
| TVLSDYVVGSGPPSGTGLHR        | P70296 | 0          | n +34.06 Da,             | 2780.618164 | 3 | 645.3400269 | 645.3445322 |
| TILDKPEDR                   | O35215 | 0.01005632 | n +34.06 Da,K +34.06 Da, | 919.7531128 | 2 | 577.8551636 | 577.8562408 |
| FYSAAAFIDSALR               | Q8BK84 | 0.01766513 | n +31.05 Da,             | 919.5349731 | 2 | 731.9000244 | 731.8905915 |
| ASKPTLNEVVIVSAIR            | Q8QZT1 | 0          | n +34.06 Da,K +34.06 Da, | 3076.461182 | 2 | 883.0603638 | 883.0645576 |
| DSWLKGEFITTQQQR             | P14152 | 0          | n +34.06 Da,K +34.06 Da, | 3640.583252 | 3 | 626.0252075 | 626.0248402 |
| KTGTAEMSSILEER              | Q03265 | 0.00181242 | n +34.06 Da,K +34.06 Da, | 2264.233398 | 3 | 540.6373901 | 540.6363649 |
| SNLVGAAHEELQQR              | P48678 | 0          | n +34.06 Da,             | 1968.704956 | 3 | 558.2999878 | 558.299034  |
| SDAPPLTLDGIKDR              | Q9CR21 | 0          | n +34.06 Da,K +34.06 Da, | 2615.659912 | 2 | 783.4613647 | 783.4621337 |
| SDTKVKVAVR                  | Q9EQW7 | 0.02962963 | n +42.03 Da,K +34.06 Da, | 921.3168335 | 3 | 404.9364929 | 404.9364138 |
| LTEAPLNPKANR                | P60710 | 0.04653641 | n +34.06 Da,K +34.06 Da, | 1160.952881 | 3 | 464.6300049 | 464.6262395 |
| VAVEYEAKSGR                 | P37040 | 0          | n +34.06 Da,K +34.06 Da, | 918.3347168 | 3 | 426.2600098 | 426.2559237 |
| QSVESDIHGLR                 | P05784 | 0.00181242 |                          | 1569.513794 | 3 | 423.5578308 | 423.5579667 |
| MTENSTSAPAAKPKR             | P10922 | 0          | n +42.03 Da,K +34.06 Da, | 918.2445068 | 3 | 566.9876709 | 566.987509  |
| SKSESPKEPEQLR               | P49312 | 0          | n +42.03 Da,K +34.06 Da, | 1093.143921 | 3 | 542.3103638 | 542.3107577 |
| DDDIAALVVDNGSGMCKAGFAGDDAPR | P60710 | 0          | n +42.03 Da,K +34.06 Da, | 4283.773438 | 3 | 938.4402466 | 938.4358235 |
| SKSESPKEPEQLR               | P49312 | 0.01798011 | n +42.03 Da,K +34.06 Da, | 971.0463257 | 3 | 542.3099976 | 542.3107577 |
| IQGITKPAIR                  | P62806 | 0.00386432 | n +34.06 Da,K +34.06 Da, | 1499.88562  | 3 | 388.9411011 | 388.9414988 |

|                              |        |            |                          |             |   |             |             |
|------------------------------|--------|------------|--------------------------|-------------|---|-------------|-------------|
| TQVKVIAATNR                  | O88685 | 0.00049213 | n +34.06 Da,K +34.06 Da, | 951.5878906 | 3 | 423.6199951 | 423.6155632 |
| GKLVSESSDVVSK                | P11679 | 0.00264434 | n +34.06 Da,K +34.06 Da, | 1203.963135 | 3 | 479.6398315 | 479.6400329 |
| YGYNLLSIR                    | Q4VC33 | 0.00939926 | n +17.03 Da,             | 1983.744385 | 3 | 401.5599976 | 401.5574554 |
| KTGTAEMSSILEER               | Q03265 | 0.01262327 | n +34.06 Da,K +34.06 Da, | 2287.882568 | 3 | 540.633728  | 540.6363649 |
| TGGDAAAPGAAGTQAEIPHR         | Q9D0F3 | 0          | n +34.06 Da,             | 1572.357178 | 3 | 627.9899902 | 627.9923814 |
| TILDKPEDR                    | O35215 | 0.00939926 | n +34.06 Da,K +34.06 Da, | 914.5070801 | 3 | 385.5743408 | 385.5732527 |
| GEVDDDEEEAGEEEGSQKR          | O35381 | 0          | n +34.06 Da,K +34.06 Da, | 1572.467651 | 3 | 812.0200195 | 812.0264707 |
| ATEARPTTEKSVPYQR             | Q99LB7 | 0.00181242 | n +42.03 Da,K +34.06 Da, | 1591.408447 | 3 | 637.34375   | 637.3445322 |
| STAASRPPVTLR                 | P60335 | 0.00049213 | n +34.06 Da,             | 1072.864014 | 3 | 430.596405  | 430.5964621 |
| PMGMTAENLAAKYNISR            | Q8BWT1 | 0          | n +17.03 Da,K +34.06 Da, | 3101.622803 | 3 | 640.0100098 | 640.0097674 |
| SEKPPAIDWAYYR                | Q9DCX2 | 0.02266717 | n +34.06 Da,K +34.06 Da, | 2983.464355 | 3 | 555.3099976 | 555.308688  |
| PCEGMVTLDGHDIR               | Q9QY30 | 0.00590468 | n +17.03 Da,             | 2304.461426 | 3 | 539.5900269 | 539.5905024 |
| TAIQELFKR                    | P68372 | 0.00788382 | n +34.06 Da,K +34.06 Da, | 2411.05249  | 3 | 391.9246216 | 391.9257374 |
| GPLNMILDDGGDLNLIHTKYPQLLSGIR | P50247 | 0          | n +34.06 Da,K +34.06 Da, | 4689.219727 | 4 | 808.9586792 | 808.9563313 |
| SAGFLQASASDVVVVHGR           | Q8VCHO | 0          | n +34.06 Da,             | 4074.219727 | 3 | 612.0057373 | 612.0058505 |
| SVQCAVDVKR                   | P24270 | 0          | n +34.06 Da,K +34.06 Da, | 909.3271484 | 3 | 410.5820618 | 410.5817536 |
| SSNECFKCGR                   | P53996 | 0.00386432 | n +42.03 Da,K +34.06 Da, | 908.0413818 | 2 | 660.7999878 | 660.797816  |
| VAPMKGQVCVVTGASR             | Q99L04 | 0          | n +34.06 Da,K +34.06 Da, | 1798.113159 | 3 | 576.6677856 | 576.669234  |
| TDPEVFCFITKILCAHGGR          | Q3UPF5 | 0          | n +42.03 Da,K +34.06 Da, | 4831.802734 | 3 | 766.3938599 | 766.3925003 |
| SEPEIPK GIR                  | Q9WTP6 | 0.02759135 | n +34.06 Da,K +34.06 Da, | 1702.52356  | 2 | 597.3807373 | 597.3798829 |
| TAQDNPKSATEQSGTGIR           | Q9Z0X1 | 0          | n +34.06 Da,K +34.06 Da, | 904.8403931 | 3 | 643.6799927 | 643.6818025 |
| PLPPLPEYGGKVR                | Q9CQQ7 | 0          | n +17.03 Da,K +34.06 Da, | 2504.833008 | 3 | 491.9717407 | 491.9731986 |
| GIQTEKETMQDLNDR              | P05784 | 0.00181242 | n +34.06 Da,K +34.06 Da, | 1924.53479  | 3 | 615.9899902 | 615.9931004 |
| MLQMLEKSLR                   | Q1XE0  | 0.00049213 | n +34.06 Da,K +34.06 Da, | 2451.772217 | 3 | 439.6062317 | 439.6070227 |
| DVKFGADAR                    | P63038 | 0.00181242 | n +34.06 Da,K +34.06 Da, | 1038.768188 | 3 | 349.5471802 | 349.5470376 |
| ASNFKTTMASSAQR               | Q9R1K9 | 0          | n +42.03 Da,K +34.06 Da, | 1389.986694 | 3 | 579.9906006 | 579.991142  |
| PFKAPPLGSLR                  | P23953 | 0.00049213 | n +17.03 Da,K +34.06 Da, | 2099.893799 | 3 | 411.9361267 | 411.9361958 |
| MVPPVQVSPLIKFGR              | Q06185 | 0          | n +34.06 Da,K +34.06 Da, | 3676.493164 | 3 | 579.3695068 | 579.3691128 |
| DVKFGADAR                    | P63038 | 0.01262327 | n +34.06 Da,K +34.06 Da, | 1080.178711 | 3 | 349.5470581 | 349.5470376 |
| MDQTQHPSKAAQPLR              | Q9JL3  | 0          | n +42.03 Da,K +34.06 Da, | 1340.925537 | 2 | 892.4694824 | 892.4702403 |
| PSKGPLQSVQVFGR               | P14131 | 0          | n +17.03 Da,K +34.06 Da, | 2328.727295 | 3 | 517.647522  | 517.6473743 |
| KTGTAEMSSILEER               | Q03265 | 0.04159197 | n +34.06 Da,K +34.06 Da, | 2049.508789 | 3 | 540.6400146 | 540.6363649 |
| LEEKQGAIEDGR                 | P09405 | 0          | n +34.06 Da,K +34.06 Da, | 900.9497681 | 3 | 471.60495   | 471.6053932 |
| TITSVLPKALVASR               | Q8C196 | 0.03198529 | n +34.06 Da,K +34.06 Da, | 2709.486084 | 2 | 811.0300293 | 811.037811  |
| TDAVIHEIQR                   | O55071 | 0.02195307 | n +34.06 Da,             | 1380.675903 | 3 | 405.9008179 | 405.9016627 |
| SGLGDSSSDPANPDSHKR           | P70365 | 0.00049213 | n +42.03 Da,K +34.06 Da, | 1207.314331 | 3 | 634.9699707 | 634.9715351 |
| REQAGGDATENFEDVGHSTDR        | P56395 | 0          |                          | 2119.528076 | 3 | 797.3499756 | 797.3583007 |
| TEYPVEKLMR                   | P45952 | 0.00049213 | n +34.06 Da,K +34.06 Da, | 2369.092041 | 3 | 445.269989  | 445.2655427 |
| MNNQKQKPTLSGQR               | Q9CQC6 | 0          | n +42.03 Da,K +34.06 Da, | 1050.381958 | 3 | 623.3533936 | 623.3529624 |
| SIYPLHDVFR                   | P97351 | 0          | n +34.06 Da,             | 3129.276367 | 3 | 460.5995789 | 460.6013245 |

|                                         |        |            |                          |             |   |             |             |
|-----------------------------------------|--------|------------|--------------------------|-------------|---|-------------|-------------|
| TVGGVMTKLIPR                            | P20029 | 0          | n +34.06 Da,K +34.06 Da, | 2533.172119 | 3 | 447.2999878 | 447.2970655 |
| DATKEVVYR                               | Q9D2G2 | 0.00346921 | n +34.06 Da,K +34.06 Da, | 1005.779785 | 2 | 574.850647  | 574.8509583 |
| LTEAPLNPKANR                            | P60710 | 0.00181242 | n +34.06 Da,K +34.06 Da, | 1202.487793 | 3 | 464.6266174 | 464.6262395 |
| LDLDKYVEIAR                             | Q9CQR6 | 0.00049213 | n +34.06 Da,K +34.06 Da, | 3447.158936 | 3 | 468.2900085 | 468.2907456 |
| STLTFVTMSGELKAR                         | Q9CXN7 | 0          | n +34.06 Da,K +34.06 Da, | 3189.73584  | 3 | 570.340271  | 570.336138  |
| SLHQFLLPITCHAWNRR                       | Q9R0Q6 | 0          | n +42.03 Da,             | 4105.49707  | 3 | 722.0300293 | 722.0300722 |
| MERPPGLRPGAGGPWEMR                      | Q60680 | 0.00181242 | n +42.03 Da,             | 3289.795166 | 3 | 679.3400269 | 679.3366191 |
| VTGWKEIEYEVVR                           | Q8C196 | 0          | n +34.06 Da,K +34.06 Da, | 3415.689209 | 3 | 559.3312988 | 559.3278597 |
| SQTEEDCTEELFDLHAR                       | P99028 | 0          |                          | 4199.214844 | 3 | 752.3300171 | 752.3355565 |
| DLTVTNPKR                               | P17182 | 0.00181242 | n +34.06 Da,K +34.06 Da, | 912.987793  | 3 | 371.2417908 | 371.2417257 |
| VLTKFVEGAR                              | Q8C196 | 0.00049213 | n +34.06 Da,K +34.06 Da, | 1519.527588 | 3 | 396.5982056 | 396.5976208 |
| NEFEEVATQLLKR                           | Q8CHH5 | 0.0265818  | n +42.03 Da,K +28.03 Da, | 892.5170898 | 2 | 823.9400024 | 823.9410488 |
| PSKGPLQSVQVFR                           | P14131 | 0          | n +17.03 Da,K +34.06 Da, | 4402.414063 | 3 | 517.6468506 | 517.6473743 |
| SEDEEKVKLR                              | Q9D0I4 | 0.02759135 | n +42.03 Da,K +34.06 Da, | 1183.789795 | 2 | 671.8900146 | 671.896095  |
| SGEDVPHRAESSEAR                         | Q9CR00 | 0.01236045 | n +42.03 Da,             | 890.2824707 | 3 | 556.9247437 | 556.9239266 |
| PTTGEVIGHVAEGDR                         | Q9CZS1 | 0          | n +17.03 Da,             | 1762.406738 | 2 | 777.9000244 | 777.8996771 |
| IIGGSMDAKGSFPWQAK                       | Q61646 | 0.00181242 | n +34.06 Da,K +34.06 Da, | 3263.410645 | 3 | 632.3670044 | 632.3696598 |
| TNPADSKPGTIR                            | P15532 | 0.00306883 | n +34.06 Da,K +34.06 Da, | 888.4389648 | 3 | 442.2667542 | 442.2667115 |
| SITLKEDGVR                              | Q8VEM8 | 0.00669176 | n +34.06 Da,K +34.06 Da, | 1299.904419 | 3 | 395.92099   | 395.9206524 |
| DAKILNDVQDR                             | Q8VDW0 | 0.00181242 | n +34.06 Da,K +34.06 Da, | 1861.828491 | 2 | 677.8981323 | 677.9017115 |
| PENTVFDAGR                              | P20029 | 0          | n +17.03 Da,K +34.06 Da, | 932.4447632 | 3 | 409.9029541 | 409.9033324 |
| EPSEKDALQPGR                            | P70695 | 0          | n +34.06 Da,K +34.06 Da, | 886.6453247 | 3 | 465.6016541 | 465.6018715 |
| AGKPVVLYFDGR                            | P30115 | 0.00144578 | n +42.03 Da,K +34.06 Da, | 4331.492676 | 3 | 479.269989  | 479.2683455 |
| AGKPVVLYFDGR                            | P30115 | 0.00096665 | n +42.03 Da,K +34.06 Da, | 4757.498047 | 3 | 479.2689514 | 479.2683455 |
| MDQQTQHPSKAAQPLR                        | Q9JL3  | 0          | n +42.03 Da,K +34.06 Da, | 1381.49231  | 2 | 892.4694824 | 892.4702403 |
| PPSSSSVDTSSSQPKPFR                      | F6ZDS4 | 0          | n +17.03 Da,K +34.06 Da, | 1453.022827 | 3 | 648.0100098 | 648.0094785 |
| PKVTQPEVDTPLGR                          | Q63880 | 0          | n +17.03 Da,K +34.06 Da, | 1797.551025 | 2 | 794.4696655 | 794.4699963 |
| TVVTTKSAEIR                             | P05784 | 0.00306883 | n +34.06 Da,K +34.06 Da, | 980.7156372 | 3 | 424.9432373 | 424.9434572 |
| GEEEDGDEDEAEAPTGR                       | P26350 | 0          | n +34.06 Da,K +34.06 Da, | 1071.891846 | 3 | 710.9899902 | 710.9909198 |
| PPAPTSASDLHR                            | Q9WU42 | 0.00788382 | n +17.03 Da,             | 883.657959  | 3 | 422.5603333 | 422.5597477 |
| DAVYTEHAK                               | P62806 | 0.00264434 | n +28.03 Da,             | 882.3407593 | 3 | 397.5400085 | 397.539913  |
| SGYLLPDTKAYGDR                          | P08113 | 0          | n +42.03 Da,K +34.06 Da, | 2480.557373 | 2 | 816.4400024 | 816.4280327 |
| SSEAPPLVNEDVKR                          | Q91YQ5 | 0          | n +17.03 Da,K +34.06 Da, | 1562.381714 | 3 | 531.2999878 | 531.301933  |
| GKVEIIANDQGNR                           | P16627 | 0.03932179 | n +34.06 Da,K +34.06 Da, | 1021.994568 | 3 | 494.6300049 | 494.6284206 |
| TEAVEAKVAQQEAEAR                        | P67778 | 0          | n +34.06 Da,K +34.06 Da, | 1553.949951 | 3 | 619.008667  | 619.0112598 |
| TEAPLNPKANR                             | P60710 | 0.03703704 | n +34.06 Da,K +34.06 Da, | 878.0415039 | 3 | 426.931366  | 426.9315514 |
| PEAAVEHPEAVR                            | O35490 | 0.00049213 | n +17.03 Da,             | 891.5946045 | 3 | 441.235199  | 441.2351527 |
| SGGGTETPVACDAAQGGKRR                    | Q8R015 | 0          | n +42.03 Da,K +34.06 Da, | 1099.131592 | 3 | 686.3612671 | 686.3620755 |
| GDDLTVTNPKR                             | P17182 | 0          | n +34.06 Da,K +34.06 Da, | 914.2266235 | 3 | 428.5910339 | 428.5911951 |
| AAPGPVSPPEAFDPSKPPVIEGFSPTVYSNPEGFKEKFR | Q9CQJ1 | 0          | n +42.03 Da,K +34.06 Da, | 4320.983398 | 4 | 1108.349976 | 1108.350651 |

|                        |        |            |                          |             |   |             |             |
|------------------------|--------|------------|--------------------------|-------------|---|-------------|-------------|
| PCIFFEPKILYR           | Q6P3A8 | 0          | n +17.03 Da,K +34.06 Da, | 3780.81665  | 3 | 545.3200073 | 545.318089  |
| ASKCPKCDKTVY           | Q9DCT8 | 0.00096665 | n +42.03 Da,K +34.06 Da, | 970.737793  | 2 | 800.9494629 | 800.9497485 |
| PVEKDANNMPVTAR         | D3Z0Y2 | 0.00939926 | n +17.03 Da,K +34.06 Da, | 1325.394897 | 3 | 531.628418  | 531.6277629 |
| VPVDPGVVHR             | Q9CYZ2 | 0.0329912  | n +34.06 Da,             | 1249.455444 | 3 | 370.2277527 | 370.2277096 |
| SGTKEGASILLDGR         | Q9EQ20 | 0          | n +34.06 Da,K +34.06 Da, | 1861.203735 | 3 | 491.2953796 | 491.2965596 |
| SVDSQFTHLAWINTPR       | O08807 | 0.03268454 | n +34.06 Da,             | 3624.010986 | 3 | 636.0100098 | 636.0058505 |
| FVEGAREVEMDAVGKEGR     | Q8C196 | 0          | n +17.03 Da,K +34.06 Da, | 1162.929443 | 3 | 677.3499756 | 677.3581132 |
| LGTTAKEEMER            | Q9CZB0 | 0          | n +34.06 Da,K +34.06 Da, | 928.175354  | 3 | 444.9203796 | 444.920324  |
| ATGANATPLDFPSKKR       | Q64213 | 0.00181242 | n +42.03 Da,K +34.06 Da, | 2226.591064 | 3 | 595.3499756 | 595.3494352 |
| DPSYKENAMR             | Q8K154 | 0          | n +34.06 Da,K +34.06 Da, | 872.5789795 | 3 | 426.8982849 | 426.8976306 |
| GKTIQVDNTDAEGR         | Q9CPY7 | 0          | n +34.06 Da,K +34.06 Da, | 898.8676147 | 3 | 524.6276855 | 524.6268573 |
| TQAVLDPKPELSSDASTR     | P50544 | 0          | n +34.06 Da,K +34.06 Da, | 1957.357056 | 3 | 663.039978  | 663.0374749 |
| GAPIKIPVGPETLGR        | P56480 | 0          | n +34.06 Da,K +34.06 Da, | 2831.887939 | 3 | 525.0100098 | 525.0084611 |
| SLKDLDPVQELITQVR       | Q8BMA6 | 0.00049213 | n +34.06 Da,K +34.06 Da, | 4150.145996 | 3 | 641.3900146 | 641.3913003 |
| NDIGATVHELNR           | P16331 | 0.01447574 |                          | 1986.528076 | 3 | 447.230011  | 447.2370048 |
| GSVVKSEDYAFPTYADR      | P19783 | 0          | n +34.06 Da,K +34.06 Da, | 2728.243896 | 3 | 658.3442993 | 658.3477605 |
| DVPVDPGVVHR            | Q9CYZ2 | 0.04099245 | n +34.06 Da,             | 1883.568359 | 3 | 408.5699158 | 408.5700244 |
| TLDEDAHQDIAR           | Q9CXN7 | 0          | n +14.02 Da,             | 1204.033813 | 3 | 466.5597839 | 466.5600364 |
| GISQFKQLPEGNICR        | Q8R164 | 0          | n +34.06 Da,K +34.06 Da, | 2477.527344 | 2 | 908.0200195 | 908.0145419 |
| TSAHTSTGDGTAMVTR       | Q8K2B3 | 0          | n +34.06 Da,             | 906.1651001 | 3 | 542.9367676 | 542.9369965 |
| SSFQIVKNPR             | Q61176 | 0.00049213 | n +34.06 Da,K +34.06 Da, | 1377.102783 | 3 | 415.2600098 | 415.2646418 |
| PLLSAEAAKQR            | Q78PY7 | 0          | n +17.03 Da,K +34.06 Da, | 1444.196899 | 3 | 455.2764587 | 455.2770585 |
| TTAIDKEIAR             | P31809 | 0.00553427 | n +34.06 Da,K +34.06 Da, | 1159.668579 | 3 | 395.9200134 | 395.9206524 |
| MNQPPQIAPKR            | Q6NZJ6 | 0.00049213 | n +34.06 Da,K +34.06 Da, | 1107.418091 | 3 | 449.9500122 | 449.9449147 |
| DEPILSNKSGDNR          | P70296 | 0.00049213 | n +34.06 Da,K +34.06 Da, | 1060.051514 | 3 | 504.9473877 | 504.9478192 |
| LDKIDMSLDDIILNR        | Q91Z49 | 0          | n +17.03 Da,K +34.06 Da, | 4119.121582 | 3 | 663.0612183 | 663.06961   |
| MGPSGGEGVEPERR         | Q61792 | 0.01628538 |                          | 914.6156616 | 3 | 486.5599976 | 486.5649044 |
| NISLAVAKER             | P70441 | 0.046875   | n +17.03 Da,K +34.06 Da, | 1473.789429 | 3 | 384.5799866 | 384.5838224 |
| IVGNEHYDVAR            | P56480 | 0          | n +34.06 Da,             | 1153.606445 | 3 | 436.2379761 | 436.236934  |
| LADQLHAAVGASR          | Q99LC5 | 0.00264434 | n +34.06 Da,             | 1435.364624 | 3 | 448.2593689 | 448.2598501 |
| TACLTCLFPTR            | Q8K2B3 | 0.03268454 | n +34.06 Da,K +34.06 Da, | 2489.369629 | 3 | 459.2799988 | 459.2849371 |
| GDEVIIIGHCQGDGYR       | P35505 | 0          | n +34.06 Da,             | 1809.902954 | 3 | 604.2872314 | 604.2915509 |
| SITPAEVGLVVGKDR        | P62962 | 0          | n +34.06 Da,K +34.06 Da, | 2978.533447 | 3 | 537         | 537.0033761 |
| SAAQAAAQTNSNAAGQLR     | Q9CY58 | 0.00181242 | n +34.06 Da,K +34.06 Da, | 1020.298035 | 3 | 642.7000122 | 642.6977865 |
| SSPAQPAVPAPLANLKIHTKIF | O35945 | 0.00553427 | n +42.03 Da,K +34.06 Da, | 4007.395996 | 3 | 846.8400269 | 846.8408181 |
| MGPLINAPHLER           | Q9JLJ2 | 0.03363803 |                          | 2446.455078 | 3 | 459.25      | 459.2553418 |
| FAQLCEEHGILR           | B5X0G2 | 0.00553427 |                          | 2278.632568 | 3 | 491.5799561 | 491.5820065 |
| ATSASSHLNKGIKQMY       | P15105 | 0          | n +42.03 Da,K +34.06 Da, | 2062.215332 | 2 | 923.5100098 | 923.5118324 |
| AAAKVALTKR             | Q9QXX4 | 0.00049213 | n +42.03 Da,K +34.06 Da, | 1160.263916 | 3 | 380.2698975 | 380.2696155 |
| INLAAEPKVNR            | Q9Z204 | 0.00096665 | n +34.06 Da,K +34.06 Da, | 1577.270508 | 3 | 431.6151428 | 431.6155632 |

|                         |        |            |                          |             |   |             |             |
|-------------------------|--------|------------|--------------------------|-------------|---|-------------|-------------|
| TEDQVKALSTQGSSVGR       | P34927 | 0          | n +34.06 Da,K +34.06 Da, | 1577.765259 | 3 | 611.0100098 | 611.0112598 |
| EAPKVVVEEQESR           | P01029 | 0.00049213 | n +34.06 Da,K +34.06 Da, | 973.9280396 | 3 | 490.2799988 | 490.2807982 |
| TLKESFEGSVR             | P09405 | 0.00669176 | n +34.06 Da,K +34.06 Da, | 1460.147949 | 3 | 440.9317932 | 440.9313288 |
| GVMTKLIPR               | P20029 | 0.00386432 | n +34.06 Da,K +34.06 Da, | 1859.742798 | 3 | 361.5799866 | 361.5845463 |
| AGKPVLYHFDGR            | P30115 | 0.00049213 | n +42.03 Da,K +34.06 Da, | 2266.519531 | 2 | 718.3900146 | 718.39888   |
| ITYGPKVVR               | P12710 | 0.01335953 | n +34.06 Da,K +34.06 Da, | 1228.635742 | 3 | 367.5870056 | 367.5869444 |
| ATSASSHLNKGKIK          | P15105 | 0.02938988 | n +42.03 Da,K +34.06 Da, | 995.4476318 | 3 | 475.2885437 | 475.2895162 |
| ISYCHETMTGWVHDVLGR      | P97821 | 0          |                          | 4287.520996 | 3 | 730.3366089 | 730.3470728 |
| GPAAEQPGQKQSTTFR        | Q62448 | 0          | n +34.06 Da,K +34.06 Da, | 903.0560913 | 3 | 610         | 610.0043278 |
| RHHGHHCRLLGTPVLTTTHAR   | G3UYL2 | 0.03198529 | n +34.06 Da,             | 5005.422363 | 3 | 797.4400024 | 797.4401691 |
| TPGVAAADLSHIETR         | P08249 | 0          | n +34.06 Da,             | 2223.913086 | 3 | 500.9436646 | 500.9458202 |
| TNYGEEGTHVGSAAALER      | P50136 | 0          | n +34.06 Da,             | 1979.898926 | 3 | 632.6500244 | 632.6483921 |
| PFLPWKEQEQEVADR         | O88851 | 0.00096665 | n +17.03 Da,K +34.06 Da, | 2764.267334 | 3 | 598.6604004 | 598.6650941 |
| SDPVDGSISKNNQGLR        | Q9D0F9 | 0.00346921 | n +34.06 Da,K +34.06 Da, | 1555.450439 | 3 | 547.6500244 | 547.6461403 |
| MEQAVHGESKR             | Q9R1J0 | 0          | n +42.03 Da,K +34.06 Da, | 1009.640808 | 3 | 449.9014893 | 449.9014457 |
| STPLEAMKGPGR            | P17563 | 0          | n +34.06 Da,K +34.06 Da, | 1525.326904 | 3 | 418.9208069 | 418.9218873 |
| TVINQQTQKENLR           | Q6ZVW7 | 0.00553427 | n +34.06 Da,K +34.06 Da, | 1011.435181 | 3 | 504.6447449 | 504.6440706 |
| TGGDAAAPGAAGTQAELPHR    | Q9D0F3 | 0          | n +34.06 Da,             | 1653.043579 | 3 | 627.9921875 | 627.9923814 |
| GKDGVANVSIEDR           | P08228 | 0.04653641 | n +34.06 Da,K +34.06 Da, | 1338.60376  | 3 | 476.6099854 | 476.6090262 |
| AGKPVLYHFDGR            | P30115 | 0.00181242 | n +42.03 Da,K +34.06 Da, | 4447.164551 | 3 | 479.2680664 | 479.2683455 |
| GDVVKTEGATLR            | Q99KR3 | 0.00264434 | n +34.06 Da,K +34.06 Da, | 1107.488892 | 3 | 438.6099854 | 438.6068452 |
| ASKCPKCDKTVY            | Q9DCT8 | 0.00264434 | n +42.03 Da,K +34.06 Da, | 929.5296021 | 2 | 800.9489746 | 800.9497485 |
| PAQKSDIVQLR             | Q8VDJ3 | 0          | n +17.03 Da,K +34.06 Da, | 1201.316162 | 2 | 653.4081421 | 653.4092095 |
| ASKPTLNEVVIVSAIR        | Q8QZT1 | 0.0129768  | n +34.06 Da,K +34.06 Da, | 3153.138916 | 3 | 589.039978  | 589.0454639 |
| SQAPGPSGKTADYAFEMAVSNIR | Q8R0N6 | 0.01262327 | n +34.06 Da,K +34.06 Da, | 3817.821533 | 3 | 822.4199829 | 822.4303785 |
| PENSKLSDLSETR           | O35685 | 0.00049213 | n +17.03 Da,K +34.06 Da, | 1505.115967 | 3 | 547.9500122 | 547.9566603 |
| MLPNTGKLAGCTVFITGASR    | Q2TPA8 | 0          | n +34.06 Da,K +34.06 Da, | 3280.894531 | 3 | 721.4099731 | 721.4080796 |
| MDPSSKKVTR              | P17809 | 0          | n +42.03 Da,K +34.06 Da, | 915.6898804 | 3 | 439.2607422 | 439.2606804 |
| TVPIVKGGEATR            | O08663 | 0.01236045 | n +34.06 Da,K +34.06 Da, | 1182.467773 | 3 | 432.6199951 | 432.6154518 |
| ATENFEDVGHSTDAR         | P56395 | 0          | n +34.06 Da,             | 1516.700806 | 3 | 561.5982056 | 561.5991495 |
| AAVKTLNPKAEVAR          | P80317 | 0          | n +42.03 Da,K +34.06 Da, | 1491.447266 | 3 | 526.6755981 | 526.6718491 |
| SSDTSEELNSQDSPKR        | P70441 | 0.02409639 | n +34.06 Da,K +34.06 Da, | 870.0647583 | 3 | 616.6500244 | 616.6466467 |
| VGSMVADIHR              | Q9QXD6 | 0.01005632 | n +34.06 Da,             | 1420.539063 | 3 | 373.5499878 | 373.5448215 |
| MQTAHTGLSHTADGADGQTSR   | Q9CR70 | 0          | n +42.03 Da,             | 1625.610352 | 3 | 728.6599731 | 728.6626665 |
| PNVLAPEIPIKGIIR         | Q9WTP6 | 0          | n +17.03 Da,K +34.06 Da, | 2712.344482 | 4 | 418.5       | 418.5070112 |
| IGSSMKSVEVMAIGR         | Q8C196 | 0          | n +42.03 Da,K +34.06 Da, | 2838.626221 | 3 | 566.6500244 | 566.6427556 |
| MEQAVHGESKR             | Q9R1J0 | 0          | n +42.03 Da,K +34.06 Da, | 968.6997681 | 3 | 449.9013062 | 449.9014457 |
| PELEAIKAR               | Q8CCS6 | 0.01694263 | n +17.03 Da,K +34.06 Da, | 995.3390503 | 3 | 359.9014587 | 359.9011513 |
| GNKVDVVGATQGGAGSCSR     | Q8BGD9 | 0          | n +34.06 Da,K +34.06 Da, | 1242.09375  | 3 | 653.6799927 | 653.6831488 |
| TQQGPQVDKEQFER          | Q9CZS1 | 0          | n +34.06 Da,K +34.06 Da, | 1489.824829 | 3 | 586.6500244 | 586.653295  |

|                             |        |            |                          |             |   |             |             |
|-----------------------------|--------|------------|--------------------------|-------------|---|-------------|-------------|
| ATFEEVSVLGFEEFDKAVKEHEGKTIF | Q9CQM5 | 0          | n +42.03 Da,K +34.06 Da, | 5036.625977 | 4 | 808.4400024 | 808.439368  |
| AAPAKGENLSLVVHGPDIR         | Q64442 | 0          | n +42.03 Da,K +34.06 Da, | 2911.179932 | 2 | 1039.079956 | 1039.084284 |
| YDGPLMKTEVPGPR              | P61922 | 0.00049213 | n +34.06 Da,K +34.06 Da, | 2380.992676 | 3 | 543.3099976 | 543.3098116 |
| SQNAAAKASATAPEVR            | Q9D0G0 | 0          | n +34.06 Da,K +34.06 Da, | 909.1477051 | 3 | 547.3168335 | 547.318135  |
| RGRSVHFSEAEQRCISR           | Q61881 | 0.00306883 |                          | 882.4505005 | 3 | 692.3400269 | 692.3485755 |
| TEKETMQDLNDR                | P05784 | 0.0471464  | n +34.06 Da,K +34.06 Da, | 1023.636658 | 3 | 516.6099854 | 516.6050648 |
| IKIIPPER                    | P60710 | 0.0329912  | n +34.06 Da,K +34.06 Da, | 1637.788208 | 3 | 368.9308167 | 368.9307111 |
| DVEVHTAQTPR                 | P01868 | 0          | n +34.06 Da,             | 872.470459  | 3 | 472.2547913 | 472.2547651 |
| TFNPELITHILDGSPENTR         | Q9R0H0 | 0          | n +34.06 Da,             | 4159.626465 | 3 | 730.0599976 | 730.0534184 |
| TIEAEAAHGTVTR               | P54071 | 0          | n +34.06 Da,             | 909.2185059 | 3 | 463.92276   | 463.9230155 |
| PVLATEKINR                  | P11859 | 0.01005632 | n +17.03 Da,K +34.06 Da, | 1036.634399 | 3 | 397.9272156 | 397.9275891 |
| TEKETMQDLNDR                | P05784 | 0.01005632 | n +34.06 Da,K +34.06 Da, | 1065.363159 | 3 | 516.6099854 | 516.6050648 |
| ATSASSHLNKGIKQMY            | P15105 | 0          | n +42.03 Da,K +34.06 Da, | 2298.294678 | 3 | 616.0100098 | 616.0103138 |
| PDLSSDIKER                  | B5X0G2 | 0.00264434 | n +17.03 Da,K +34.06 Da, | 1226.830078 | 3 | 404.2343445 | 404.2348594 |
| ISSQQTIPPSAKYGGRR           | P70404 | 0          | n +34.06 Da,K +34.06 Da, | 1547.676758 | 3 | 586.6772461 | 586.6775518 |
| SAGFLQASASDVVVHGR           | Q8VCHO | 0          | n +34.06 Da,             | 4408.085449 | 3 | 612.0100098 | 612.0058505 |
| TENSTSAPAAKPKR              | P10922 | 0          | n +42.03 Da,K +34.06 Da, | 762.7618408 | 3 | 523.3074341 | 523.3073473 |
| PVEKDANNMPVTAR              | D3Z0Y2 | 0.00049213 | n +17.03 Da,K +34.06 Da, | 1327.36853  | 2 | 796.9400024 | 796.9380061 |
| PAEETSQPPPSEPKGDAAR         | Q9JKR6 | 0.00306883 | n +17.03 Da,K +34.06 Da, | 869.6263428 | 3 | 672.3499756 | 672.3482716 |
| AAVKTLNPKAEVAR              | P80317 | 0          | n +42.03 Da,K +34.06 Da, | 1829.939575 | 2 | 789.5006714 | 789.5041354 |
| YLELDTIKNLVR                | P08113 | 0.00049213 | n +34.06 Da,K +34.06 Da, | 3708.838135 | 3 | 515.6599731 | 515.66095   |
| MKVFTVGPLPAEGR              | Q91Z53 | 0          | n +34.06 Da,K +34.06 Da, | 2694.477539 | 3 | 523.9853516 | 523.9867799 |
| PAPATTFAHLDATTVLSR          | P56480 | 0          | n +17.03 Da,             | 3119.765869 | 3 | 629.338562  | 629.3442029 |
| AAADEPKPKKL                 | P55264 | 0.00049213 | n +42.03 Da,K +34.06 Da, | 999.3043213 | 3 | 437.9624329 | 437.9625582 |
| ASSSSVPASSTPSKKPR           | Q99JY1 | 0          | n +42.03 Da,K +34.06 Da, | 886.7546997 | 3 | 595.3459473 | 595.3443502 |
| PIDVCEIGSKVLSR              | Q91VM9 | 0          | n +17.03 Da,K +34.06 Da, | 3299.983887 | 3 | 541.9869385 | 541.9835467 |
| TSKVSVISVEEPPQR             | Q9DCW4 | 0          | n +34.06 Da,K +34.06 Da, | 1917.233643 | 3 | 575.3499756 | 575.3456908 |
| DSSFQIVKNPR                 | Q61176 | 0          | n +34.06 Da,K +34.06 Da, | 1793.885132 | 2 | 679.9071045 | 679.9067965 |
| ARFPQASASDVVVHGR            | Q921H8 | 0          | n +34.06 Da,             | 3253.138428 | 3 | 610.6900024 | 610.6779565 |
| GEWEAPQIANPKCESAPGCGVWQR    | P35564 | 0.00181242 | n +34.06 Da,K +34.06 Da, | 3369.289551 | 3 | 932.460022  | 932.4603435 |
| PLAEAGAAKGLR                | Q9D2G2 | 0          | n +17.03 Da,K +34.06 Da, | 1135.458252 | 3 | 402.2593079 | 402.2593388 |
| FRRWLGDPHTRALSHALR          | J3QNX1 | 0.02514071 |                          | 2974.281494 | 3 | 773.0800171 | 773.0894242 |
| ASVKGHTTGLSLNNER            | O08601 | 0          | n +42.03 Da,K +34.06 Da, | 1800.502319 | 3 | 587.3201904 | 587.3218388 |
| DPAIYFKEQFLDGDWATNR         | P14211 | 0          | n +34.06 Da,K +34.06 Da, | 4284.588379 | 2 | 1177.609985 | 1177.608048 |
| ATSASSHLNKGIKQMY            | P15105 | 0          | n +42.03 Da,K +34.06 Da, | 1929.838623 | 3 | 616.0116577 | 616.0103138 |
| VVFSEDEMKR                  | Q8C196 | 0          | n +34.06 Da,K +34.06 Da, | 1819.161377 | 2 | 654.3656616 | 654.3686583 |
| PVEKDANNMPVTAR              | D3Z0Y2 | 0          | n +17.03 Da,K +34.06 Da, | 1080.55542  | 3 | 531.6279297 | 531.6277629 |
| LPYGVFSTQSNPKPR             | P35505 | 0.00049213 | n +34.06 Da,K +34.06 Da, | 2248.179688 | 3 | 587.0106201 | 587.0106421 |
| MEQAVHGESKR                 | Q9R1J0 | 0.00181242 | n +42.03 Da,K +34.06 Da, | 976.6879272 | 2 | 674.3499756 | 674.3485303 |
| SLVVHGPDIR                  | Q64442 | 0.01199041 |                          | 1568.527832 | 3 | 383.8800049 | 383.8840137 |

|                      |        |            |                          |             |   |             |             |
|----------------------|--------|------------|--------------------------|-------------|---|-------------|-------------|
| PTIEDSYTKICTVDGIPAR  | P10833 | 0.01447574 | n +17.03 Da,K +34.06 Da, | 3206.433105 | 3 | 729.7299805 | 729.724462  |
| TDPEVFCFITKILCAHGGR  | Q3UPF5 | 0          | n +42.03 Da,K +34.06 Da, | 4872.896484 | 3 | 766.3900146 | 766.3925003 |
| MEVKPPPGRPQPDSGR     | Q8BG05 | 0          | n +42.03 Da,K +34.06 Da, | 1665.026367 | 3 | 608.6594849 | 608.6596857 |
| VTAKTAPDVLRL         | Q64487 | 0.00049213 | n +34.06 Da,K +34.06 Da, | 1318.121338 | 3 | 413.6099854 | 413.6082971 |
| SIKVECVLR            | Q64374 | 0.00788382 | n +34.06 Da,K +34.06 Da, | 1771.955322 | 3 | 391.2600098 | 391.2549777 |
| QLLKELPFLNTR         | Q78JT3 | 0          | n +34.06 Da,K +34.06 Da, | 3641.34668  | 3 | 546.3499756 | 546.3522278 |
| ISSQQTIPPSAKYGGGR    | P70404 | 0.01005632 | n +34.06 Da,K +34.06 Da, | 1654.203003 | 3 | 586.6779175 | 586.6775518 |
| ELTGAKVVVSGGR        | Q99LC5 | 0.00049213 | n +34.06 Da,K +34.06 Da, | 1342.240967 | 3 | 447.6223755 | 447.6226065 |
| EELNLLGR             | P22752 | 0.0194508  | n +34.06 Da,K +34.06 Da, | 1989.614624 | 3 | 380.5799866 | 380.5854924 |
| SDKPLTECIR           | P55264 | 0.00049213 | n +34.06 Da,K +34.06 Da, | 1107.30957  | 3 | 429.5799866 | 429.585164  |
| PSAFEKVVK            | Q9D8T2 | 0.00264434 | n +17.03 Da,K +34.06 Da, | 1115.394409 | 3 | 363.9200134 | 363.9166194 |
| SDAPPLTLDGIKDR       | Q9CR21 | 0.00049213 | n +34.06 Da,K +34.06 Da, | 1940.802002 | 4 | 392.2346497 | 392.2347051 |
| GIVPDIAVGTKR         | P17225 | 0.01410106 | n +34.06 Da,K +34.06 Da, | 2246.86792  | 3 | 431.9549561 | 431.9556969 |
| APAGILNGKLVSAQIR     | Q922D8 | 0          | n +34.06 Da,K +34.06 Da, | 2715.857422 | 3 | 559.364624  | 559.3666485 |
| MEESEYESVLCVKPEVHVYR | Q9D1J1 | 0          | n +42.03 Da,K +34.06 Da, | 3887.604004 | 3 | 853.75      | 853.7487904 |
| AGKPVLYHYFDGR        | P30115 | 0.00181242 | n +42.03 Da,K +34.06 Da, | 4986.520996 | 3 | 479.2687683 | 479.2683455 |
| PESEHPSVTLFR         | Q99JW2 | 0.00225734 |                          | 1996.254761 | 2 | 699.8499756 | 699.8542445 |
| PDAAKPEDWDER         | P14211 | 0.00049213 | n +17.03 Da,K +34.06 Da, | 1419.835938 | 2 | 740.3699951 | 740.3704794 |
| PKVTQPEVDTPGR        | Q63880 | 0          | n +17.03 Da,K +34.06 Da, | 1629.776367 | 3 | 529.9821777 | 529.982423  |
| RPQIMCIKPR           | P55066 | 0.04259127 | n +34.06 Da,K +34.06 Da, | 1504.865479 | 3 | 456.2799988 | 456.2863947 |
| YAGVTVDELGKVLTPQVMNR | P70296 | 0          | n +34.06 Da,K +34.06 Da, | 4017.794922 | 3 | 787.1099854 | 787.1157309 |
| AAQASAAPKAGTATGR     | P56480 | 0.01798011 | n +34.06 Da,K +34.06 Da, | 536.4550781 | 3 | 499.6300049 | 499.6320536 |
| SAVDITKVAR           | Q8BUV3 | 0.00181242 | n +34.06 Da,K +34.06 Da, | 1442.549805 | 3 | 376.5899963 | 376.5854924 |
| ASCHLAQAPNHVVVSR     | Q921I1 | 0.02514071 | n +42.03 Da,             | 1912.286499 | 3 | 596.6375732 | 596.6371743 |
| VMEKPSPLLGR          | P97379 | 0          | n +34.06 Da,K +34.06 Da, | 2010.729248 | 2 | 697.4500122 | 697.4472426 |
| TITNTMTLGDIVYKR      | P12710 | 0          | n +34.06 Da,K +34.06 Da, | 3211.559326 | 3 | 598.6877441 | 598.6870594 |
| AHIFVYGTALKR         | Q923B0 | 0.00049213 | n +42.03 Da,K +34.06 Da, | 2680.869141 | 3 | 460.9431458 | 460.9452025 |
| SQAEFDKAAEEVKR       | P31786 | 0          | n +42.03 Da,K +34.06 Da, | 4300.434082 | 3 | 573.3170166 | 573.3179124 |
| AGIAIKLAKDR          | O08529 | 0.00049213 | n +42.03 Da,K +34.06 Da, | 2586.765625 | 3 | 422.6231079 | 422.6240585 |
| SAGFLQASASDVVVHGR    | Q8VCH0 | 0          | n +34.06 Da,             | 3478.705811 | 3 | 612         | 612.0058505 |
| QLALESKGR            | P35980 | 0.00181242 | n +34.06 Da,K +34.06 Da, | 1060.250366 | 3 | 389.5899963 | 389.5891254 |
| TLGIETVGGVMTKLIPR    | P20029 | 0          | n +34.06 Da,K +34.06 Da, | 4199.410156 | 3 | 618.3900146 | 618.3903542 |
| SMSDSEVQAKEER        | Q6PB66 | 0.00264434 | n +34.06 Da,K +34.06 Da, | 885.126709  | 3 | 521.9373779 | 521.9367031 |
| GKLVSESSDVVSK        | P11679 | 0.00096665 | n +34.06 Da,K +34.06 Da, | 1200.237915 | 2 | 718.960022  | 718.9564112 |
| PKVTQPEVDTPGR        | Q63880 | 0          | n +17.03 Da,K +34.06 Da, | 1799.987427 | 3 | 529.9812012 | 529.982423  |
| AANYKDISDVER         | Q9D819 | 0          | n +34.06 Da,K +34.06 Da, | 1640.874146 | 3 | 483.6056213 | 483.6053932 |
| VPPVQVSPLIKFGR       | Q06185 | 0          | n +34.06 Da,K +34.06 Da, | 3409.610352 | 3 | 535.6897583 | 535.6889511 |
| ATSASSHLNKGIKQMY     | P15105 | 0          | n +42.03 Da,K +34.06 Da, | 2197.879883 | 2 | 923.5084229 | 923.5118324 |
| SHGSHTDEEFDAR        | P12787 | 0.00049213 | n +42.03 Da,             | 901.0593872 | 3 | 553.5608521 | 553.5607655 |
| AQERPSCAVEPEHVQR     | P56389 | 0          | n +42.03 Da,             | 1316.678833 | 3 | 645.642334  | 645.6427657 |



|                     |        |            |                          |             |   |             |             |
|---------------------|--------|------------|--------------------------|-------------|---|-------------|-------------|
| SEPEIPK GIR         | Q9WTP6 | 0.00181242 | n +34.06 Da,K +34.06 Da, | 1728.397095 | 3 | 398.588562  | 398.5890141 |
| MEANVTIPIWQNKPHGAAR | Q9CWE0 | 0          | n +42.03 Da,K +34.06 Da, | 3396.01123  | 3 | 737.0700073 | 737.0634827 |
| PEPAKSAPAPK         | P10853 | 0.00264434 | n +17.03 Da,K +34.06 Da, | 572.2754517 | 3 | 393.2588501 | 393.2590454 |
| DGKLVSESSDVVSK      | P11679 | 0.00225734 | n +42.03 Da,K +34.06 Da, | 1855.260742 | 3 | 520.6400146 | 520.631497  |
| LADQLHAAV GASR      | Q99LC5 | 0.01262327 | n +34.06 Da,             | 1443.08667  | 2 | 671.8900146 | 671.886137  |
| SEQKCIAMCMDR        | P62075 | 0          | n +34.06 Da,K +34.06 Da, | 1510.758423 | 3 | 532.9249878 | 532.9260986 |
| PQAPVIKSTAAER       | Q91VS8 | 0          | n +17.03 Da,K +34.06 Da, | 910.4492188 | 3 | 473.6242065 | 473.6244583 |
| AAKVALTKR           | Q9QXX4 | 0.00669176 | n +42.03 Da,K +34.06 Da, | 925.7315063 | 3 | 356.5902405 | 356.5905774 |
| ECHPYLNQGKLLDFCR    | P70694 | 0.00264434 | n +42.03 Da,K +34.06 Da, | 3521.260254 | 3 | 709.3499756 | 709.3505238 |
| TDPKYIIVSPVCR       | P11352 | 0          | n +34.06 Da,K +34.06 Da, | 3380.26001  | 3 | 568.3249512 | 568.325573  |
| GELGTVLKNLELAR      | P11247 | 0.0477538  | n +34.06 Da,K +34.06 Da, | 3710.016846 | 3 | 527.6696777 | 527.6717378 |
| MNQEKLAKLQAQVR      | Q64152 | 0          | n +42.03 Da,K +34.06 Da, | 2466.506348 | 2 | 884.0324707 | 884.0327344 |
| EPGKEVWDYVTVR       | Q920A5 | 0          | n +34.06 Da,K +34.06 Da, | 3339.319336 | 3 | 592.3283691 | 592.3264077 |
| TTYNNKGPKPER        | P49429 | 0          | n +42.03 Da,K +34.06 Da, | 854.6090088 | 3 | 505.6199951 | 505.6247876 |
| TVVKSQQEILR         | Q9D0F3 | 0.00181242 | n +34.06 Da,K +34.06 Da, | 1261.112427 | 3 | 456.967041  | 456.9663732 |
| YVGSPPSGTGLHR       | P70296 | 0.03198529 | n +34.06 Da,             | 1252.376221 | 3 | 473.5925903 | 473.5914885 |
| SEEDKLT VSR         | P56480 | 0.00049213 | n +34.06 Da,K +34.06 Da, | 897.335083  | 3 | 411.2399902 | 411.243684  |
| GDVVKTEGATLR        | Q99KR3 | 0.01005632 | n +34.06 Da,K +34.06 Da, | 1110.789185 | 2 | 657.4099731 | 657.4066295 |
| SGSQTCEDLTKCSVIACGR | P39039 | 0          | n +34.06 Da,K +34.06 Da, | 2104.803223 | 3 | 766.710022  | 766.7101591 |
| MDVDTPSGTNSGAGKKR   | P62878 | 0          | n +42.03 Da,K +34.06 Da, | 1241.984009 | 3 | 610.9899902 | 610.9932117 |
| PNLVPSISNKR         | P19536 | 0.00049213 | n +17.03 Da,K +34.06 Da, | 1569.19165  | 3 | 425.9380798 | 425.9383768 |
| TTIAGVVKDGI VLGADTR | P70195 | 0          | n +34.06 Da,K +34.06 Da, | 3572.172852 | 2 | 1009.099976 | 1009.101869 |
| LDEVIKVYR           | Q9CZS1 | 0.00939926 | n +34.06 Da,K +34.06 Da, | 2054.532471 | 3 | 401.5974731 | 401.5975094 |
| PEDTLEQKAGSVGR      | Q8VCW8 | 0          | n +17.03 Da,K +34.06 Da, | 1458.995605 | 2 | 769.4299927 | 769.4257862 |
| VGFEAGISKNGQTR      | P10126 | 0.01005632 | n +34.06 Da,K +34.06 Da, | 1552.543091 | 3 | 554.3099976 | 554.314502  |
| VLSGVDKMIR          | Q8C0D5 | 0.00049213 | n +34.06 Da,K +34.06 Da, | 1895.395996 | 3 | 395.9267883 | 395.926861  |
| PVLPPLPAKR          | Q4LDD4 | 0.01728774 | n +17.03 Da,K +34.06 Da, | 1855.369263 | 3 | 380.269989  | 380.2692861 |
| APLDTINVHLR         | P70699 | 0          | n +34.06 Da,             | 2391.500977 | 3 | 428.2600098 | 428.2611908 |
| TLTDSL VCKAGI HASAR | P58252 | 0.00939926 | n +34.06 Da,K +34.06 Da, | 3169.713135 | 3 | 615.3713379 | 615.3697305 |
| VDLAVKAAR           | Q9CZS1 | 0.00669176 | n +34.06 Da,K +34.06 Da, | 1074.552612 | 3 | 337.571106  | 337.5712943 |
| MNNQKQQKPTLSGQR     | Q9CQC6 | 0          | n +42.03 Da,K +34.06 Da, | 1091.446777 | 3 | 623.3527832 | 623.3529624 |
| MNHPDYKLNLR         | Q8CI75 | 0          | n +42.03 Da,K +34.06 Da, | 2363.083008 | 2 | 738.8929443 | 738.8956474 |
| PNWGGGAKCGACEKTVY   | P50462 | 0          | n +17.03 Da,K +34.06 Da, | 1809.651978 | 3 | 647.3305664 | 647.3328396 |
| REPEDRHGEPKRRER     | Q8C5N3 | 0.02759135 | K +28.03 Da,             | 3878.645752 | 3 | 720.4000244 | 720.4016681 |
| PHPEGASAAQAGGAAPPTR | Q9JHH9 | 0.0265818  | n +14.02 Da,             | 925.0402222 | 3 | 605.2999878 | 605.3028491 |
| TYSTEPNNLKAR        | P41105 | 0          | n +34.06 Da,K +34.06 Da, | 1029.279053 | 3 | 487.9500122 | 487.9492712 |
| ALDTKGPEIR          | P52480 | 0.00788382 | n +34.06 Da,K +34.06 Da, | 1156.828857 | 3 | 389.916626  | 389.9171307 |
| AADTVSETLKR         | E9PVA8 | 0          | n +34.06 Da,K +34.06 Da, | 1079.254883 | 3 | 462.9469299 | 462.9456382 |
| LGTTAKEEMER         | Q9CZB0 | 0.02514071 | n +34.06 Da,K +34.06 Da, | 968.5087891 | 3 | 444.9200134 | 444.920324  |
| TSNPENTV FDAKR      | P20029 | 0          | n +34.06 Da,K +34.06 Da, | 1573.244263 | 3 | 516.2886963 | 516.2880642 |

|                           |        |            |                          |             |   |             |             |
|---------------------------|--------|------------|--------------------------|-------------|---|-------------|-------------|
| VNQEFVR                   | Q9CZX8 | 0.01005632 |                          | 1047.421021 | 2 | 510.2677917 | 510.2670756 |
| SIRVTQKSYKMSTSGPR         | P11679 | 0.04159197 | n +42.03 Da,K +34.06 Da, | 1831.891357 | 4 | 509.7947083 | 509.7952986 |
| MFAKGKGSAPVPSDQGAR        | Q9D032 | 0          | n +42.03 Da,K +34.06 Da, | 1791.091431 | 3 | 606.3391724 | 606.3385417 |
| SGKEEIEAAVEAAR            | Q8BH00 | 0          | n +34.06 Da,K +34.06 Da, | 2419.329834 | 2 | 764.4400024 | 764.4361162 |
| STAGKVIKCK                | P00329 | 0.02481203 | n +42.03 Da,K +34.06 Da, | 880.7622681 | 2 | 618.4155273 | 618.4156694 |
| TVAVYSEQDTGQMHR           | Q05920 | 0          | n +14.02 Da,             | 1581.99292  | 3 | 579.2700195 | 579.2737906 |
| ANLKHYNQPSR               | Q9QXN0 | 0.03363803 | n +31.05 Da,             | 858.5878906 | 2 | 757.9299927 | 757.9210804 |
| VEKEEAGGGGGGISEEEAAQYDR   | Q9R1T2 | 0          | n +34.06 Da,K +34.06 Da, | 1926.219971 | 3 | 821.7399902 | 821.7350731 |
| TEPGASPEDPWVKASFADAHAGEGR | O08609 | 0          | n +42.03 Da,K +34.06 Da, | 3402.418701 | 3 | 886.7600098 | 886.7596233 |
| EKEEDEEESPGQAKDEL         | P14211 | 0          | n +34.06 Da,K +34.06 Da, | 1566.070313 | 2 | 1032.520874 | 1032.521229 |
| PTPQEKSEGTCCGPVSVR        | P21981 | 0          | n +17.03 Da,K +34.06 Da, | 1683.555664 | 3 | 735.0300293 | 735.0296682 |
| SKSESPKEPEQLR             | P49312 | 0          | n +42.03 Da,K +34.06 Da, | 1071.493164 | 2 | 812.9630737 | 812.9624983 |
| ASVKGHTTGLSLNNER          | O08601 | 0.03865607 | n +42.03 Da,K +34.06 Da, | 1738.363525 | 3 | 587.3200073 | 587.3218388 |
| IGSSMKSVGEVMAIGR          | Q8C196 | 0          | n +42.03 Da,K +34.06 Da, | 2853.343506 | 3 | 566.652832  | 566.6427556 |
| ISPNDRLVPAVTR             | Q80TH2 | 0.0399568  | n +31.05 Da,             | 968.9169922 | 3 | 490.2999878 | 490.2930019 |
| DDEVVDVDTVEEDLGKSR        | P08113 | 0.00049213 | n +34.06 Da,K +34.06 Da, | 101.1293793 | 3 | 682.6799927 | 682.6763835 |
| IFEGIKDSQAQR              | Q9Z2I8 | 0.00386432 | n +34.06 Da,K +34.06 Da, | 1357.881714 | 3 | 487.2884521 | 487.2895162 |
| MEQAVHGESKR               | Q9R1J0 | 0.00181242 | n +42.03 Da,K +34.06 Da, | 1018.357666 | 2 | 674.3499756 | 674.3485303 |
| ASGVTVNDEVIKVFNDMKVR      | P45591 | 0          | n +42.03 Da,K +34.06 Da, | 4316.736816 | 3 | 777.7747192 | 777.7719642 |
| KSTGSVVGQQPFGGAR          | Q8CHT0 | 0.01518692 | n +34.06 Da,K +34.06 Da, | 1435.693359 | 3 | 548.6599731 | 548.6548583 |
| SGMCKAGFAGDDAPR           | P60710 | 0.01262327 | n +34.06 Da,K +34.06 Da, | 1344.021118 | 2 | 804.4000244 | 804.4006958 |
| PFLDDSIKSR                | P97501 | 0.00049213 | n +17.03 Da,K +34.06 Da, | 2670.102295 | 3 | 447.9369507 | 447.9381542 |
| NLDIERPTYTNLNR            | P05213 | 0.03397881 |                          | 2516.441162 | 3 | 582.9699707 | 582.9759617 |
| TGGDAAAPGAAGTQALPHR       | Q9D0F3 | 0          | n +34.06 Da,             | 1612.637451 | 3 | 627.9923096 | 627.9923814 |
| SQTEEDCTEELFDLHAR         | P99028 | 0          | n +14.02 Da,             | 4195.721191 | 3 | 747.6630859 | 747.6636732 |
| MEAVPEKKK                 | P14148 | 0.00181242 | n +42.03 Da,K +34.06 Da, | 910.9555054 | 3 | 401.9299927 | 401.9337224 |
| TFVTMSGELKAR              | Q9CXN7 | 0.01262327 | n +34.06 Da,K +34.06 Da, | 2286.689697 | 3 | 469.9500122 | 469.9482138 |
| RKEREKEDYLHLR             | Q91V93 | 0.00669176 | n +34.06 Da,K +34.06 Da, | 4461.310547 | 3 | 625.3953857 | 625.3867012 |
| VKSCAEFVSGSGLR            | Q9DCX2 | 0.00181242 | n +34.06 Da,K +34.06 Da, | 1799.393921 | 2 | 818.460022  | 818.4616106 |
| SGPGGDHSELIVR             | P57776 | 0.02231467 | n +34.06 Da,             | 1322.551392 | 3 | 453.25      | 453.2476104 |
| PTGSYHGSDSLQLER           | Q7TMM9 | 0          | n +17.03 Da,             | 1654.313477 | 2 | 846.4099731 | 846.4053242 |
| IMDPNIVGNEHYDVAR          | P56480 | 0          |                          | 2756.692383 | 2 | 935.960022  | 935.9594473 |
| TSDQDAKVVAEPQAKR          | Q6A0A2 | 0          | n +34.06 Da,K +34.06 Da, | 1116.880737 | 3 | 604.3358765 | 604.3358548 |
| PSKGPLQSVQVFGFR           | P14131 | 0          | n +17.03 Da,K +34.06 Da, | 2451.405273 | 3 | 517.6461182 | 517.6473743 |
| EDSYKDSTLIMQLLR           | O70456 | 0          | n +34.06 Da,K +34.06 Da, | 4152.975098 | 3 | 627.359314  | 627.3538578 |
| PASGAKLGTVADCGVPEAR       | Q8BWF0 | 0          | n +17.03 Da,K +34.06 Da, | 1876.238159 | 3 | 636.3479614 | 636.3474368 |
| AAMDVDTPSGTNSGAGKKR       | P62878 | 0          | n +42.03 Da,K +34.06 Da, | 1395.902588 | 3 | 658.3499756 | 658.3512878 |
| EIGPLDTQLKPR              | Q920A5 | 0          | n +34.06 Da,K +34.06 Da, | 2219.73877  | 3 | 478.97052   | 478.9698949 |
| IEITIKSPER                | Q9QYB5 | 0.0233874  | n +34.06 Da,K +34.06 Da, | 1983.956543 | 3 | 418.6099854 | 418.6081858 |
| TTVVTTKSAEIR              | P05784 | 0.00049213 | n +34.06 Da,K +34.06 Da, | 1132.163086 | 3 | 458.6264038 | 458.6260169 |

|                                    |        |            |                          |             |   |             |             |
|------------------------------------|--------|------------|--------------------------|-------------|---|-------------|-------------|
| ASGNAQIGKSAPDFTATAVVDGAFKEIKLSDYR  | Q61171 | 0          | n +42.03 Da,K +34.06 Da, | 4203.09082  | 4 | 893.7399902 | 893.7427472 |
| LIQVAAGSSNLKR                      | P47738 | 0          | n +34.06 Da,K +34.06 Da, | 1447.863281 | 3 | 475.6453247 | 475.6455226 |
| SGVSLAALKKAL                       | P15864 | 0.00181242 | n +34.06 Da,K +34.06 Da, | 3044.979248 | 3 | 420.6400146 | 420.6430482 |
| MDPNCSCASDGCSCGAGACKQCK            | P02798 | 0          | n +42.03 Da,K +34.06 Da, | 1431.480957 | 3 | 1015.090027 | 1015.087592 |
| PIILKVVS                           | O09158 | 0.03429405 | n +17.03 Da,K +34.06 Da, | 2033.224365 | 3 | 359.269989  | 359.2656531 |
| APVAGKKAKKGILER                    | O35490 | 0          | n +34.06 Da,K +34.06 Da, | 1613.251343 | 5 | 348.0700073 | 348.065934  |
| MDPNCSCASDGCSCGAGACKQCKCTSC        | P02798 | 0          | n +42.03 Da,K +34.06 Da, | 1583.426514 | 3 | 1184.469971 | 1184.467927 |
| PTVIAENELGAAAIAEAAKKLEQLKPR        | P26039 | 0          | n +17.03 Da,K +34.06 Da, | 5034.554199 | 5 | 627.789978  | 627.7940254 |
| SSWWTHVEMGPPDPILGVTEAFKR           | P05202 | 0.01457286 | n +34.06 Da,K +34.06 Da, | 5019.003418 | 4 | 702.8800049 | 702.8758149 |
| KTVMDLAVVLFETATLR                  | P08113 | 0          | n +34.06 Da,K +34.06 Da, | 4974.319336 | 3 | 659.0700073 | 659.069281  |
| PTLGKTAEEVKSTVNTAVALTLACFGTQR      | Q61176 | 0          | n +17.03 Da,K +34.06 Da, | 4968.324707 | 3 | 1050.27002  | 1050.262224 |
| IHTQPPPPPIPEVVATWEAISLGR           | Q8BGA8 | 0          | n +31.05 Da,             | 4949.866211 | 3 | 879.4899902 | 879.4918191 |
| ASKDLEGGKWR                        | Q05816 | 0.00189873 | n +42.03 Da,K +34.06 Da, | 4876.074219 | 3 | 471.6199951 | 471.6226066 |
| SKGPAVGIDLGTYSYCVGFQHGKVEIIANDQGNR | P63017 | 0          | n +42.03 Da,K +34.06 Da, | 4834.884277 | 4 | 950.2600098 | 950.2533542 |
| ASSWWTHVEMGPPDPILGVTEAFKR          | P05202 | 0          | n +17.03 Da,K +34.06 Da, | 4772.687012 | 4 | 716.3699951 | 716.3772037 |
| DSMLQKMNKLR                        | Q6P9Q3 | 0.01836228 | n +31.05 Da,K +31.05 Da, | 4770.762207 | 2 | 713.4099731 | 713.4100759 |
| VNFTAEEKTLINGLWSKVNVEEVGGEALGR     | P02104 | 0.04652213 | n +31.05 Da,             | 4769.881836 | 4 | 823.4400024 | 823.4411968 |
| GVMDVNTALQEVLKTAIHDGLAR            | P63323 | 0          | n +34.06 Da,K +34.06 Da, | 4742.742676 | 4 | 658.882019  | 658.8836399 |
| SGICPNKETLIDLGTAFAMTNQILVER        | Q8C196 | 0          | n +34.06 Da,K +34.06 Da, | 4730.955078 | 4 | 806.210022  | 806.208491  |
| PGIVELPTLEELKVEEVKSSAVLKAAAH       | Q9DCJ5 | 0.02196193 | n +17.03 Da,K +34.06 Da, | 4710.858398 | 4 | 794.7399902 | 794.7417334 |
| AGKPVLHYFDGR                       | P30115 | 0.03529958 | n +42.03 Da,K +34.06 Da, | 4710.42041  | 3 | 479.2679749 | 479.2683455 |
| VHLTDAEKAASVSLWGKVNSEVGGGEALGR     | P02088 | 0          | n +42.03 Da,K +34.06 Da, | 4850.35791  | 4 | 820.4299927 | 820.4332207 |
| SSWWTHVEMGPPDPILGVTEAFKR           | P05202 | 0          | n +42.03 Da,K +34.06 Da, | 4680.610352 | 4 | 704.8699951 | 704.8626769 |
| PNFFKMVEGFFDR                      | P26443 | 0          | n +17.03 Da,K +34.06 Da, | 4670.480469 | 3 | 562.2978516 | 562.2974652 |
| SQAEDKAAEEVKR                      | P31786 | 0.00511364 | n +42.03 Da,K +34.06 Da, | 4668.196289 | 3 | 573.3200073 | 573.3179124 |
| AGLLEESVYDLLPKEL                   | D6RH97 | 0.00855158 | n +31.05 Da,             | 4645.391113 | 3 | 607.3300171 | 607.3415765 |
| PVFDWKDPLILEEQTLADEKLIR            | Q60759 | 0          | n +17.03 Da,K +34.06 Da, | 4612.70166  | 4 | 714.1599731 | 714.1666361 |
| RASEYMQPNWDTILGPLCMPLVDRFTSL       | A2AQW0 | 0.01836228 | n +14.02 Da,             | 4600.394043 | 4 | 860.1900024 | 860.1818242 |
| DSPLEAGLAFTCKLKTSPVFLGR            | Q99LB7 | 0          | n +34.06 Da,K +34.06 Da, | 4598.367188 | 3 | 870.5123901 | 870.5121911 |
| MEAALAMEKNLNQALLDLHALGSAR          | P29391 | 0.00189873 | n +34.06 Da,K +34.06 Da, | 4580.948242 | 4 | 687.8900146 | 687.8847484 |
| VHLTDAEKAASVSLWGKVNSEVGGGEALGR     | P02088 | 0.00189873 | n +42.03 Da,K +34.06 Da, | 4574.34375  | 3 | 1093.569946 | 1093.575202 |
| PTGAFGKATDLLLLDSSLVSLFGNRR         | P99029 | 0          | n +17.03 Da,K +34.06 Da, | 4568.38916  | 4 | 679.3844604 | 679.3829148 |
| MKLPIFIADAFTATAFR                  | Q9CXN7 | 0          | n +34.06 Da,K +34.06 Da, | 4664.214355 | 3 | 661.0586548 | 661.0587159 |
| DSPLEAGLAFTCKLKTSPVFLGR            | Q99LB7 | 0          | n +34.06 Da,K +34.06 Da, | 4520.601074 | 4 | 653.1400146 | 653.1359624 |
| SAFEKVVKNVIKEVSGSR                 | Q9D8T2 | 0          | n +42.03 Da,K +34.06 Da, | 4518.947754 | 4 | 531.0859985 | 531.0836267 |
| RNVQDNLEDFKNKYEDEINKR              | Q8VED5 | 0.03493246 | n +17.03 Da,K +34.06 Da, | 4516.441895 | 4 | 697.3800049 | 697.3887215 |
| DPAIYFKEQFLDGDWATNR                | P14211 | 0          | n +34.06 Da,K +34.06 Da, | 4483.566895 | 3 | 785.4071045 | 785.4077907 |
| PDELETITMHKILETTTTFFQR             | Q6P5E4 | 0          | n +17.03 Da,K +34.06 Da, | 4454.939453 | 4 | 651.0999756 | 651.1018424 |
| AGKPVLHYFDGR                       | P30115 | 0.00189873 | n +42.03 Da,K +34.06 Da, | 4667.759766 | 3 | 479.2702026 | 479.2683455 |
| PNLTYAADLVETMKSGEHDFGAFFDGDGR      | Q9D0F9 | 0          | n +17.03 Da,K +34.06 Da, | 4427.571777 | 4 | 813.3900146 | 813.3859553 |

|                                       |        |            |                          |             |   |             |             |
|---------------------------------------|--------|------------|--------------------------|-------------|---|-------------|-------------|
| GVMDVNTALQEVLKTAIHDLGLAR              | P63323 | 0.00189873 | n +34.06 Da,K +34.06 Da, | 4752.485352 | 3 | 878.1813354 | 878.1757611 |
| QRLPCVEDYLSAILNR                      | P07724 | 0.00599455 | n +34.06 Da,             | 4415.39502  | 3 | 661.0331421 | 661.0297789 |
| DPAIYFKEQFLDGDWATNR                   | P14211 | 0          | n +34.06 Da,K +34.06 Da, | 4400.228027 | 3 | 785.4099731 | 785.4077907 |
| ASGNAQIGKSAPDFTATAVVDGAFKEIKLSDYR     | Q61171 | 0          | n +42.03 Da,K +34.06 Da, | 4392.976074 | 4 | 893.7399902 | 893.7427472 |
| ASGVTVNDEVIKVFNDMKVR                  | P45591 | 0          | n +42.03 Da,K +34.06 Da, | 4391.105469 | 2 | 1166.150024 | 1166.154308 |
| HIDDKVFLTTAEVISQQVSDKHLQEGR           | P06801 | 0          | n +17.03 Da,K +34.06 Da, | 4389.848633 | 4 | 795.4400024 | 795.4439978 |
| SSWWTHVEMGPPDPILGVTEAFKR              | P05202 | 0          | n +34.06 Da,K +34.06 Da, | 4382.763184 | 3 | 936.8327026 | 936.8319944 |
| SSWWTHVEMGPPDPILGVTEAFKR              | P05202 | 0          | n +34.06 Da,K +34.06 Da, | 4367.342773 | 4 | 702.8783569 | 702.8758149 |
| AFVGGFLSQLVSDKPLTECIR                 | P55264 | 0          | n +34.06 Da,K +34.06 Da, | 4364.969238 | 3 | 802.4632568 | 802.4559759 |
| VDFIDVATKVMIGESIDEKR                  | Q8C196 | 0          | n +34.06 Da,K +34.06 Da, | 4364.26416  | 4 | 592.5999756 | 592.5976758 |
| CGKQGFIDLPEFPFGLLEPR                  | O35490 | 0          | n +34.06 Da,K +34.06 Da, | 4363.710449 | 3 | 759.0800171 | 759.078728  |
| YHVEELDPGVVDNFPLLKALR                 | P30115 | 0          | n +34.06 Da,K +34.06 Da, | 4353.363281 | 4 | 623.8630981 | 623.8600619 |
| SSWWTHVEMGPPDPILGVTEAFKR              | P05202 | 0          | n +34.06 Da,K +34.06 Da, | 4341.10498  | 3 | 936.8369751 | 936.8319944 |
| PLFGISTGNIITGLAAGAKSYKMSMANR          | Q8C196 | 0.00136986 | n +17.03 Da,K +34.06 Da, | 4328.964355 | 4 | 739.4299927 | 739.4214791 |
| TTLLEALDCILPPTRPDKPLR                 | P10126 | 0.00189873 | n +34.06 Da,K +34.06 Da, | 4378.110352 | 5 | 518.5100098 | 518.5081546 |
| DPAIYFKEQFLDGDWATNR                   | P14211 | 0          | n +34.06 Da,K +34.06 Da, | 4316.73877  | 3 | 785.4099731 | 785.4077907 |
| GFEELLHKVGGFGFPQLR                    | Q91WU2 | 0          | n +34.06 Da,K +34.06 Da, | 4286.632324 | 4 | 525.5599976 | 525.5572824 |
| ASGVAVSDGVIKVFNDMKVR                  | P18760 | 0          | n +42.03 Da,K +34.06 Da, | 4276.432129 | 2 | 1101.630005 | 1101.633011 |
| GQVELHEFLQLMSAVQKGR                   | Q64521 | 0          | n +34.06 Da,K +34.06 Da, | 4260.367676 | 4 | 560.3200073 | 560.3229519 |
| LMFNDFLSSSSDKQNNLYKGLEAFR             | P54869 | 0          | n +17.03 Da,K +34.06 Da, | 4450.839844 | 4 | 753.1500244 | 753.151089  |
| EEVEFEWNNEVKQGLSSSIFTKDLGR            | Q9DBF1 | 0          | n +34.06 Da,K +34.06 Da, | 4259.142578 | 4 | 786.6699829 | 786.6740672 |
| AKVAVLGASGGIGQPLSLLKNSPLVSR           | P08249 | 0          | n +34.06 Da,K +34.06 Da, | 4254.88916  | 3 | 949.9400024 | 949.9462759 |
| LSPTNCDASEPLAEKVLDLINKGR              | Q9ESB3 | 0          | n +34.06 Da,K +34.06 Da, | 4244.612305 | 4 | 686.3900146 | 686.3943342 |
| EVGVDVAQHVAEDLGKAFGER                 | Q8BMS1 | 0          | n +34.06 Da,K +34.06 Da, | 4241.411133 | 4 | 574.3200073 | 574.315753  |
| TEKNHFESSPLPTSPKFLRPNVCVYA            | Q03717 | 0.01232666 | n +34.06 Da,K +34.06 Da, | 4230.490234 | 4 | 756.1699829 | 756.164246  |
| GDIKNFLYAWCGKR                        | O70133 | 0          | n +42.03 Da,K +34.06 Da, | 4189.378418 | 3 | 613.3400269 | 613.3399937 |
| VVITEKGISDLAQHYLMR                    | P80318 | 0.00068776 | n +34.06 Da,K +34.06 Da, | 4186.178711 | 4 | 536.0700073 | 536.0660489 |
| TGEISPGMIKDLGATWVVLGHSER              | P17751 | 0          | n +34.06 Da,K +34.06 Da, | 4182.054199 | 4 | 656.1150513 | 656.1152651 |
| CNQTGQMTAGLLDWPQGTAFASQVTEGDKVKVER    | Q9DCW4 | 0          | n +34.06 Da,K +34.06 Da, | 4175.534668 | 4 | 967.5100098 | 967.5120677 |
| LSPTNCDASEPLAEKVLDLINKGR              | Q9ESB3 | 0          | n +34.06 Da,K +34.06 Da, | 4285.387695 | 4 | 686.3939819 | 686.3943342 |
| PPQLHNGLDFAKVIQGSLSLSPQAVR            | Q922V4 | 0          | n +17.03 Da,K +34.06 Da, | 4174.412598 | 3 | 980.2199707 | 980.2172364 |
| SKDSEGSWFR                            | O55125 | 0.01836228 | n +34.06 Da,K +34.06 Da, | 4403.762207 | 3 | 422.8999939 | 422.896507  |
| AFDFKDVTLGSLVLR                       | Q9R0H0 | 0          | n +34.06 Da,K +34.06 Da, | 4170.92041  | 3 | 565         | 565.0033761 |
| EQIHVLENSLVLFHTVR                     | P02762 | 0          | n +42.03 Da,K +34.06 Da, | 4156.309082 | 4 | 560.3300171 | 560.3258925 |
| TTTLAFKFLHGVIWAADSR                   | O55234 | 0          | n +34.06 Da,K +34.06 Da, | 4155.759277 | 3 | 705.7600098 | 705.7580944 |
| MDSSKTEVVLLACGSFNIPITNMHLR            | Q9EPA7 | 0.00805585 | n +42.03 Da,K +34.06 Da, | 4155.67041  | 4 | 765.4199829 | 765.4094307 |
| HVEELDPGVVDNFPLLKALR                  | P30115 | 0          | n +34.06 Da,K +34.06 Da, | 4266.344727 | 3 | 777.1230469 | 777.1232139 |
| SDKLPYKVADIGLAAWGR                    | P50247 | 0          | n +42.03 Da,K +34.06 Da, | 4147.919922 | 3 | 690.7399902 | 690.7388114 |
| HEYLPILGLAEFR                         | P05201 | 0          | n +34.06 Da,             | 4145.594727 | 3 | 531.3099976 | 531.306689  |
| IARQVADEGDALVAGGVSQTPSYLSCKSEVEVKKIFR | O35490 | 0          | n +42.03 Da,K +34.06 Da, | 4144.717773 | 4 | 1038.819946 | 1038.826915 |

|                                    |        |            |                          |             |   |             |             |
|------------------------------------|--------|------------|--------------------------|-------------|---|-------------|-------------|
| FEWLKLNHNHSYGR                     | P26443 | 0          | n +42.03 Da,K +34.06 Da, | 4352.567871 | 3 | 613.6699829 | 613.6635358 |
| DGGDLTNIHTKYPQLLSGIR               | P50247 | 0          | n +34.06 Da,K +34.06 Da, | 4134.387207 | 3 | 793.789978  | 793.7937566 |
| GEMAIKDAQTKLAELEAALQR              | P11679 | 0          | n +34.06 Da,K +34.06 Da, | 4257.89209  | 3 | 796.7999878 | 796.8053746 |
| DGGDLTNIHTKYPQLLSGIR               | P50247 | 0          | n +34.06 Da,K +34.06 Da, | 4124.72998  | 4 | 595.5956421 | 595.5971366 |
| GILEKISEIEKEIAR                    | Q9QXB9 | 0          | n +34.06 Da,K +34.06 Da, | 4123.838379 | 4 | 458.2999878 | 458.3003416 |
| DIGNIISDAMKKVGR                    | P63038 | 0          | n +34.06 Da,K +34.06 Da, | 4098.173828 | 4 | 430.519989  | 430.5225102 |
| ASGVAVSDGVIKVFNDMKVR               | P18760 | 0          | n +42.03 Da,K +34.06 Da, | 4089.412109 | 2 | 1101.640015 | 1101.633011 |
| LTLYDIAHTPGVAADLSHIETR             | P08249 | 0          |                          | 4087.837158 | 4 | 606.0800171 | 606.0747731 |
| VNTALQEVLTALIHGDLAR                | P63323 | 0          | n +34.06 Da,K +34.06 Da, | 4086.64209  | 4 | 558.3400269 | 558.3443131 |
| ILKAGGKILTFDQLALESPKGR             | P35980 | 0.00136986 | n +42.03 Da,K +34.06 Da, | 4083.901367 | 4 | 625.6400146 | 625.6493998 |
| SEAYLVGLFEDTNLCAIHAKR              | P02301 | 0          | n +34.06 Da,K +34.06 Da, | 4083.570801 | 4 | 619.5890503 | 619.588883  |
| DLSGTLESIPDKLKEFGNTLEDKAR          | P34928 | 0          | n +34.06 Da,K +34.06 Da, | 4467.263672 | 5 | 583.3400269 | 583.343584  |
| SPEMWSEAIKILKGEYAVR                | Q91VR5 | 0          | n +34.06 Da,K +34.06 Da, | 4342.119141 | 4 | 578.0900269 | 578.0910232 |
| PIEDPDPEVMKVKVLFVR                 | Q7TMK9 | 0          | n +17.03 Da,K +34.06 Da, | 4075.673584 | 4 | 567.5957031 | 567.5934175 |
| SVEAGEKLVKTALDTFGR                 | P51660 | 0          | n +34.06 Da,K +34.06 Da, | 4059.55957  | 3 | 675.0817871 | 675.080944  |
| ASLKDLEGKWR                        | Q05816 | 0          | n +42.03 Da,K +34.06 Da, | 4399.524414 | 3 | 471.6199951 | 471.6226066 |
| ASASYHISNLEKMTSSDKDFR              | Q6ZQ38 | 0          | n +42.03 Da,K +34.06 Da, | 4050.016113 | 4 | 653.3430176 | 653.3430766 |
| ADEIAKAQVAQPGGDTIFGKIIR            | P70349 | 0          | n +42.03 Da,K +34.06 Da, | 4046.762207 | 2 | 1254.719971 | 1254.726486 |
| DETKGKELVLALYDYQEKSPPR             | P16546 | 0.00599455 | n +34.06 Da,K +34.06 Da, | 4042.518555 | 4 | 614.8400269 | 614.8496566 |
| PGVVDNFPLLKALR                     | P30115 | 0          | n +17.03 Da,K +34.06 Da, | 4038.10376  | 3 | 530.6714478 | 530.6715198 |
| GDNMLEPSANMPWFKGWKVTR              | P10126 | 0          | n +34.06 Da,K +34.06 Da, | 4028.181885 | 4 | 642.3505859 | 642.350306  |
| AIKFLEVIKPF                        | P61620 | 0.00511364 | n +34.06 Da,K +34.06 Da, | 4025.62915  | 3 | 469.6670837 | 469.6671937 |
| PEEEAPSTVLSQSLFTPKQEIQHLFR         | Q9DBG6 | 0          | n +17.03 Da,K +34.06 Da, | 4204.911621 | 4 | 766.4199829 | 766.4159494 |
| TQSGFEGFLKQDFTTLPEVKDR             | P25688 | 0          | n +34.06 Da,K +34.06 Da, | 4005.878418 | 4 | 662.1228638 | 662.1222097 |
| ASGVAVSDGVIKVFNDMKVR               | P18760 | 0          | n +42.03 Da,K +34.06 Da, | 4084.893311 | 3 | 734.7600098 | 734.7577661 |
| QTGQMTAGLLDWPQGTFAQSVTLLEGDKVKVER  | Q9DCW4 | 0          | n +34.06 Da,K +34.06 Da, | 4162.924316 | 4 | 898.9899902 | 898.9936734 |
| PGVVDNFPLLKALR                     | P30115 | 0          | n +17.03 Da,K +34.06 Da, | 3997.614502 | 3 | 530.6729736 | 530.6715198 |
| FDRDDVALEGVGHFFR                   | P29391 | 0          |                          | 4176.936523 | 3 | 636.6400146 | 636.6514781 |
| SASGTTLEALDCILPPTRPDKPLR           | P10126 | 0.00649702 | n +34.06 Da,K +34.06 Da, | 4263.836426 | 3 | 964.2199707 | 964.2162856 |
| PKYLNFKVGVVDSDDLPLNVS              | P08113 | 0          | n +17.03 Da,K +34.06 Da, | 3995.074951 | 3 | 854.1699829 | 854.1655195 |
| GKTLNDELEIIEGMKDFR                 | P63038 | 0          | n +34.06 Da,K +34.06 Da, | 4024.487549 | 4 | 553.3200073 | 553.3201059 |
| SLFSSAENEPPVPLVGNWRPPQPVKGR        | P16015 | 0.00900424 | n +42.03 Da,K +34.06 Da, | 3991.074951 | 4 | 759.4000244 | 759.4134942 |
| AGKPVLHYFDGR                       | P30115 | 0.00068776 | n +42.03 Da,K +34.06 Da, | 4400.748047 | 3 | 479.2703247 | 479.2683455 |
| PSKNLLLAEVINIIR                    | P61922 | 0          | n +17.03 Da,K +34.06 Da, | 4233.408203 | 4 | 477.3280029 | 477.327915  |
| AELMQQKEATTEQQLR                   | O35490 | 0.00240674 | n +42.03 Da,K +34.06 Da, | 3982.522217 | 2 | 990.5200195 | 990.5175855 |
| SFFTTLTAELWKGALAEAGAR              | Q99N87 | 0          | n +34.06 Da,K +34.06 Da, | 4334.362305 | 3 | 886.1838989 | 886.1779771 |
| SAAATSAVPAPNHQPEVFCNQIFINNEWHDAVSR | P47738 | 0          | n +31.05 Da,             | 3978.053467 | 4 | 952.960022  | 952.9629309 |
| SAAATSAVPAPNHQPEVFCNQIFINNEWHDAVSR | P47738 | 0          | n +31.05 Da,             | 3975.131592 | 3 | 1270.27002  | 1270.281482 |
| TELTGAWTIEGNKLGKFR                 | P55050 | 0          | n +34.06 Da,K +34.06 Da, | 3973.58374  | 4 | 585.1099854 | 585.1060963 |
| ASAKVSDAISTQYPVVDHEFADAVVVGAGGLR   | Q8K2B3 | 0.03204524 | n +34.06 Da,K +34.06 Da, | 3972.768799 | 4 | 839.460022  | 839.4545818 |

|                                         |        |            |                          |             |   |             |             |
|-----------------------------------------|--------|------------|--------------------------|-------------|---|-------------|-------------|
| AIYFKEQFLDGDAWTNR                       | P14211 | 0          | n +34.06 Da,K +34.06 Da, | 3968.619873 | 3 | 714.7163086 | 714.7145546 |
| PAYHSSLMDPDTKLIGNMALLPLR                | Q9JM76 | 0          | n +17.03 Da,K +34.06 Da, | 4106.056152 | 4 | 676.8800049 | 676.8751394 |
| VHLTDAEKAASVSLWGKVNSEVGGALGR            | P02088 | 0          | n +42.03 Da,K +34.06 Da, | 4460.178223 | 4 | 820.4299927 | 820.4332207 |
| PGVVDNFPLLKALR                          | P30115 | 0          | n +17.03 Da,K +34.06 Da, | 3956.729248 | 3 | 530.6716309 | 530.6715198 |
| SRGPLLVQDVVFTDEMAHFDR                   | P24270 | 0          | n +34.06 Da,             | 4038.404053 | 4 | 617.3216553 | 617.321916  |
| DDVVIGKVFQMKEKEGR                       | Q9CVB6 | 0          | n +34.06 Da,K +34.06 Da, | 3950.078125 | 4 | 525.5580444 | 525.5568161 |
| SLFSSAENEPPVPLVGNWRPPQPVKGR             | P16015 | 0.02469734 | n +42.03 Da,K +34.06 Da, | 3947.869385 | 4 | 759.4199829 | 759.4134942 |
| MEEIYAKFVSQKISKTR                       | P59235 | 0          | n +42.03 Da,K +34.06 Da, | 3943.46582  | 3 | 734.7744751 | 734.7732341 |
| ASVGTLAFDEYGRPFLLIKDQDR                 | P80316 | 0          | n +42.03 Da,K +34.06 Da, | 4419.648926 | 3 | 896.4799805 | 896.4799088 |
| VYDLTKFLEEHPGGEEVLR                     | P56395 | 0.01652479 | n +34.06 Da,K +34.06 Da, | 3938.796143 | 4 | 575.5700073 | 575.5705875 |
| HGVVMPDANKENTLNQLVGAAGAQR               | Q9EQ20 | 0          | n +34.06 Da,K +34.06 Da, | 4075.564941 | 4 | 734.1513062 | 734.1476283 |
| MKFNPFVTSDR                             | P61255 | 0          | n +34.06 Da,K +34.06 Da, | 4400.856445 | 3 | 470.6030579 | 470.6009254 |
| SLFSSAENEPPVPLVGNWRPPQPVKGR             | P16015 | 0.00068776 | n +17.03 Da,K +34.06 Da, | 3931.572754 | 4 | 753.1599731 | 753.1687424 |
| MEAIKDYDFKATADDELSFKR                   | Q60631 | 0          | n +42.03 Da,K +34.06 Da, | 4146.484375 | 4 | 649.1105347 | 649.1071366 |
| MEHSGTSEVTGADTAGPDPQLAVTMGFTGFGKKAR     | Q3TWF6 | 0          | n +42.03 Da,K +34.06 Da, | 3930.652588 | 4 | 916.2000122 | 916.2119978 |
| LGLAAADPAIYFKEQLDGDWNTNR                | P14211 | 0          | n +42.03 Da,K +34.06 Da, | 3929.695801 | 4 | 715.3800049 | 715.369758  |
| GVLKEYGVKVLGTSVESIMATEDR                | Q8C196 | 0          | n +14.02 Da,K +28.03 Da, | 4492.244629 | 3 | 884.4899902 | 884.4823325 |
| SSRADSLEAEPLPPPPPPPPGESVLVPTSPRYR       | Q8CBH7 | 0.02196193 |                          | 3924.374023 | 4 | 929.4799805 | 929.4927088 |
| ASSWVTHVEMGPPDPILGVTEAFKR               | P05202 | 0.03851444 | n +17.03 Da,K +34.06 Da, | 4243.046387 | 4 | 716.3800049 | 716.3772037 |
| VHLTDAEKSAVSLWAKVNPDEVGGALGR            | P02089 | 0          | n +34.06 Da,K +34.06 Da, | 4472.282227 | 4 | 828.4400024 | 828.4541837 |
| MDGEEKTYGGCEGPDAMYVKLISSDGHEFIVKR       | P83940 | 0          | n +42.03 Da,K +34.06 Da, | 4024.927246 | 4 | 966.4799805 | 966.4850901 |
| GGDLTNLIHTKYPQLLSGIR                    | P50247 | 0          | n +34.06 Da,K +34.06 Da, | 3930.468506 | 4 | 566.8390503 | 566.8404005 |
| ELLEDPKAEVVDEIAAKGLLR                   | P60670 | 0.00599455 | n +17.03 Da,K +34.06 Da, | 3911.550049 | 4 | 599.1199951 | 599.1138719 |
| GSIDLVINLPNNNTKFVHDNYVIR                | Q8C196 | 0          | n +34.06 Da,K +34.06 Da, | 3911.118652 | 3 | 941.8599854 | 941.8644632 |
| FFKMVEGFFDR                             | P26443 | 0          | n +34.06 Da,K +34.06 Da, | 3907.789551 | 3 | 497.6086121 | 497.6094208 |
| PGVVDNFPLLKALR                          | P30115 | 0          | n +17.03 Da,K +34.06 Da, | 3906.532959 | 3 | 530.6699829 | 530.6715198 |
| MLSLDFLDDVRR                            | Q9R0P6 | 0          | n +34.06 Da,             | 4060.871582 | 3 | 505.2801208 | 505.2800342 |
| ASEAIKGAVVIGIDLTTNSCVAVMEGKQAKVLENAEGAR | P38647 | 0          | n +17.03 Da,K +34.06 Da, | 3900.036377 | 4 | 1016.559998 | 1016.566084 |
| PALAQPLIQNVKKILESDR                     | Q8C196 | 0          | n +17.03 Da,K +34.06 Da, | 4035.800049 | 3 | 740.1383057 | 740.1371233 |
| QGQIINPSEDPHLPQEEVLKFYR                 | P50136 | 0          | n +42.03 Da,K +34.06 Da, | 3914.030273 | 4 | 704.1300049 | 704.1224828 |
| AGLLKKTTLVGLAVCDTPHER                   | Q9CPP6 | 0.01279427 | n +42.03 Da,K +34.06 Da, | 3893.796631 | 4 | 612.3574219 | 612.3585291 |
| LKSYENQKPPFDKPNFLAAVTTNR                | P37040 | 0          | n +42.03 Da,K +34.06 Da, | 3890.997314 | 4 | 749.1799927 | 749.1790534 |
| EGVDKVAFTGSTEVGHLIQVAAGSSNLKR           | P47738 | 0.00189873 | n +42.03 Da,K +34.06 Da, | 4343.994629 | 4 | 770.9199829 | 770.9307422 |
| LQTVKLPVDKTTSCFCGGKDYSEMYVTCAR          | Q64374 | 0          | n +42.03 Da,K +34.06 Da, | 3878.115479 | 4 | 915.4699707 | 915.467277  |
| VAQPNLEGYVGFANLPNQVYR                   | E9Q1G8 | 0          | n +34.06 Da,K +34.06 Da, | 3872.994385 | 3 | 849.1400146 | 849.1447893 |
| ISQAAAKVDIEFDYDGPLMKTEVPGPR             | P61922 | 0          | n +34.06 Da,K +34.06 Da, | 3870.105957 | 4 | 763.1699829 | 763.1745454 |
| DLPQFTSAGESFNKLVSGKLR                   | Q9CPY7 | 0          | n +34.06 Da,K +34.06 Da, | 4092.586182 | 4 | 599.8562012 | 599.8562786 |
| LLFKDSAFGLLR                            | Q921I1 | 0.00068776 | n +34.06 Da,K +34.06 Da, | 3867.206055 | 3 | 483.3099976 | 483.3151136 |
| VPIYADKDVFHMMVVEVPR                     | Q9D819 | 0          | n +34.06 Da,K +34.06 Da, | 3860.610352 | 4 | 546.3148193 | 546.3145954 |
| CDLNKAVQMGMSVFFNKGENCIAAGR              | Q8R0Y6 | 0          | n +34.06 Da,K +34.06 Da, | 4045.131104 | 4 | 777.4000244 | 777.4002021 |

|                                   |        |            |                          |             |   |             |             |
|-----------------------------------|--------|------------|--------------------------|-------------|---|-------------|-------------|
| TAVHAGNINFKWDPKSLEIR              | P26231 | 0.01147626 | n +42.03 Da,K +34.06 Da, | 3847.662842 | 4 | 602.3439941 | 602.3445788 |
| HLTDAEKSAVSLWAKVNPDEVGGEALGR      | P02089 | 0.01926877 | n +17.03 Da,K +34.06 Da, | 4185.696777 | 3 | 1065.569946 | 1065.569828 |
| LPAAGVGDMMVATVKKGKPELR            | P62830 | 0          | n +42.03 Da,K +34.06 Da, | 4075.382568 | 4 | 603.8737793 | 603.8696028 |
| AEEEVAKLEKHLMLLR                  | Q810B6 | 0          | n +42.03 Da,K +34.06 Da, | 4206.711426 | 4 | 505.5553589 | 505.5540456 |
| SIGVPIKVLHEAEGHIVTCETNTGEVYR      | P62320 | 0          | n +42.03 Da,K +34.06 Da, | 4088.542236 | 3 | 1062.222046 | 1062.22217  |
| SGYPKSYNPFDDVEEDTRPAPWKDVR        | Q9ERB0 | 0          | n +42.03 Da,K +34.06 Da, | 3826.60791  | 4 | 856.4099731 | 856.4166597 |
| SSWWTHVEMGPPDPILGVTEAFKR          | P05202 | 0          | n +34.06 Da,K +34.06 Da, | 4446.966797 | 4 | 702.8699951 | 702.8758149 |
| QAPGVEPGDIVLLQKEKEHEVFQR          | Q9QYJ0 | 0          | n +34.06 Da,K +34.06 Da, | 4444.786621 | 4 | 700.6500244 | 700.6473583 |
| GPKFLKSGDAAIVDMVPGKPMCVESFSDYPPGR | P10126 | 0          | n +34.06 Da,K +34.06 Da, | 4076.935303 | 4 | 951.2700195 | 951.2726934 |
| MKTILSNQTVDIPENVEITLKGR           | P51410 | 0          | n +34.06 Da,K +34.06 Da, | 3818.351563 | 2 | 1351.300049 | 1351.304503 |
| DFLSSSSDKQNNLYKGLEAFR             | P54869 | 0          | n +34.06 Da,K +34.06 Da, | 3817.691895 | 4 | 631.0981445 | 631.1000058 |
| MKTILSNQTVDIPENVEITLKGR           | P51410 | 0          | n +34.06 Da,K +34.06 Da, | 3810.822021 | 4 | 676.1541748 | 676.1558895 |
| SKGPAVGIDLGTYSVGVFQHGKVEIANDQGNR  | P63017 | 0          | n +42.03 Da,K +34.06 Da, | 3990.04248  | 5 | 760.4099731 | 760.4041387 |
| FSLPGMEHVYGIPEHADSLR              | Q8BHN3 | 0          | n +34.06 Da,             | 3809.70166  | 4 | 573.039978  | 573.0440804 |
| PIGGLAEFCKASAELALGENNEVLKSGR      | P05202 | 0          | n +17.03 Da,K +34.06 Da, | 4081.883789 | 4 | 754.6699829 | 754.6709174 |
| TALQEVLTALIHDLGLAR                | P63323 | 0          | n +34.06 Da,K +34.06 Da, | 3804.08374  | 4 | 505.0700073 | 505.0664774 |
| SAKVSDAISTQYPVVDHEFDVAVVGAGGAGLR  | Q8K2B3 | 0          | n +34.06 Da,K +34.06 Da, | 3803.709717 | 4 | 821.6900024 | 821.6953033 |
| TLMLPTQTISQGAIEKVKDATR            | Q8C196 | 0          | n +34.06 Da,K +34.06 Da, | 3801.757813 | 4 | 626.6300049 | 626.6307787 |
| ADKMDMSLDDIIKLNLR                 | O08583 | 0          | n +42.03 Da,K +34.06 Da, | 4168.956055 | 3 | 663.3655396 | 663.3657691 |
| EPVLLPEPVVLAALAEKHGR              | Q9JII6 | 0          | n +34.06 Da,K +34.06 Da, | 3923.078125 | 4 | 542.5800171 | 542.5834975 |
| SLVDLGGKLLAAR                     | Q00420 | 0          | n +42.03 Da,K +34.06 Da, | 4530.631836 | 3 | 541.6900024 | 541.6873878 |
| PNNLAVPLYKNGVKIMGTSPQLIDR         | Q8C196 | 0          | n +17.03 Da,K +34.06 Da, | 3785.655273 | 4 | 706.6699829 | 706.6704541 |
| GAWQKFTASAGIQVVGDDLTVTNPKR        | P17182 | 0.00240674 | n +34.06 Da,K +34.06 Da, | 3783.202637 | 4 | 716.1599731 | 716.1646746 |
| TLMLPTQTISQGAIEKVKDATR            | Q8C196 | 0          | n +34.06 Da,K +34.06 Da, | 3783.093262 | 3 | 835.1699829 | 835.171946  |
| AKDILGEAGLHFDENKLR                | Q61025 | 0.00464037 | n +42.03 Da,K +34.06 Da, | 3981.773926 | 4 | 563.0800171 | 563.0785795 |
| PVLLPEPVVLAALAEKHGR               | Q9JII6 | 0          | n +17.03 Da,K +34.06 Da, | 3780.161865 | 4 | 506.0700073 | 506.0649592 |
| TITLEVEPSDTIENVKAKIQDKEGIPPDQQR   | P0CG49 | 0          | n +34.06 Da,K +34.06 Da, | 3777.395508 | 5 | 726.4199829 | 726.4208755 |
| FPNTSVYPEATQRITTR                 | P81270 | 0.01457286 |                          | 3777.177246 | 2 | 991         | 991.0105262 |
| TPGFGDKTFVVQGFNGVLHSMR            | P26443 | 0          | n +34.06 Da,K +34.06 Da, | 3777.065918 | 4 | 630.5900269 | 630.5929625 |
| IYIVMELVQGGDFLTLFLR               | P16879 | 0.01457286 |                          | 3775.844971 | 2 | 1057.569946 | 1057.571373 |
| PNPANFVGAGIIHTKTTQIGCLLR          | P17427 | 0          | n +17.03 Da,K +34.06 Da, | 3775.733398 | 4 | 658.12677   | 658.1271884 |
| LTDAAKAAVSLWGWKVNADDEVGGEALGR     | A8DUK4 | 0.01378958 | n +42.03 Da,K +34.06 Da, | 3768.905029 | 4 | 731.6400146 | 731.6503641 |
| IKALNDKFASFIDKVR                  | Q6IFZ9 | 0.00189873 | n +42.03 Da,K +34.06 Da, | 3764.970947 | 4 | 503.0700073 | 503.0715247 |
| FLSEHPGGEVLEQAGADATESFEDVGHSPDAR  | Q9CQX2 | 0          | n +31.05 Da,             | 4216.073242 | 4 | 907.6799927 | 907.6775623 |
| PIHLSFDVDGLDPAFTPATGTPVLGGLSYR    | Q61176 | 0.02601156 | n +14.02 Da,             | 4708.919922 | 3 | 1043.209961 | 1043.208149 |
| DPYTTFVKMLPKDKDCR                 | P18760 | 0          | n +34.06 Da,K +34.06 Da, | 3761.709961 | 4 | 522.7883911 | 522.789284  |
| PNPANFVGAGIIHTKTTQIGCLLR          | P17427 | 0          | n +17.03 Da,K +34.06 Da, | 3761.337158 | 3 | 877.1699829 | 877.1671591 |
| TLMLPTQTISQGAIEKVKDATR            | Q8C196 | 0          | n +34.06 Da,K +34.06 Da, | 3761.226807 | 4 | 626.6300049 | 626.6307787 |
| TALQEVLTALIHDLGLAR                | P63323 | 0          | n +34.06 Da,K +34.06 Da, | 3921.852539 | 4 | 505.0599976 | 505.0664774 |
| DVVIGKVFMEFKEGR                   | Q9CVB6 | 0.00189873 | n +34.06 Da,K +34.06 Da, | 3751.695068 | 4 | 496.7999878 | 496.80008   |

|                                       |        |            |                          |             |   |             |             |
|---------------------------------------|--------|------------|--------------------------|-------------|---|-------------|-------------|
| SPNKGVLSDFMTDVPVDPGVVHR               | Q9CYZ2 | 0.01457286 | n +34.06 Da,K +34.06 Da, | 3826.167725 | 4 | 634.3499756 | 634.3481616 |
| FRMPOLIDIR                            | P41216 | 0.00068776 | n +34.06 Da,             | 3743.504639 | 3 | 441.9200134 | 441.9270431 |
| ASPGSPLEKLVSSVSDLPKR                  | P54869 | 0          | n +34.06 Da,K +34.06 Da, | 3742.743408 | 4 | 543.0873413 | 543.0889093 |
| TPFGFDKTFVVQGFNGVLHSMR                | P26443 | 0          | n +34.06 Da,K +34.06 Da, | 3736.45752  | 4 | 630.5907593 | 630.5929625 |
| ASPGSPLEKLVSSVSDLPKR                  | P54869 | 0          | n +34.06 Da,K +34.06 Da, | 3733.986816 | 3 | 723.7800293 | 723.7827869 |
| PLTKDNHLLGTFDLTGIPPAPR                | P20029 | 0          | n +17.03 Da,K +34.06 Da, | 3734.172607 | 3 | 808.789978  | 808.800582  |
| SLHQFLLLEPITCHAWNRR                   | Q9R0Q6 | 0          | n +42.03 Da,             | 4129.033203 | 3 | 722.0300293 | 722.0300722 |
| ASGANFQYIITEKKGKNSVGLIQLNR            | Q8BH95 | 0          | n +42.03 Da,K +34.06 Da, | 3716.299805 | 4 | 770.9500122 | 770.9542478 |
| SGVAVSDGVIKVFNMDMKVR                  | P18760 | 0          | n +34.06 Da,K +34.06 Da, | 3785.327881 | 4 | 531.5736084 | 531.5740031 |
| ISQAAAKVDIEFDYDGLPMKTEVPGPR           | P61922 | 0          | n +34.06 Da,K +34.06 Da, | 3921.781738 | 4 | 763.1699829 | 763.1745454 |
| LAVPLYKNGVKIMGTSPLQIDR                | Q8C196 | 0          | n +34.06 Da,K +34.06 Da, | 3702.418213 | 4 | 629.6400146 | 629.6436887 |
| ASPGSPLEKLVSSVSDLPKR                  | P54869 | 0          | n +34.06 Da,K +34.06 Da, | 3701.775391 | 4 | 543.0900269 | 543.0889093 |
| VEADRPGLKFIGLNTETNEKALEAVFGKY         | Q91VM5 | 0          | n +42.03 Da,K +34.06 Da, | 4466.338867 | 4 | 853.4799805 | 853.4818329 |
| ASSWWTHVEMGPPDPILGVTEAFKR             | P05202 | 0.00464037 | n +17.03 Da,K +34.06 Da, | 4443.904297 | 4 | 716.3699951 | 716.3772037 |
| SSWWTHVEMGPPDPILGVTEAFKR              | P05202 | 0          | n +17.03 Da,K +34.06 Da, | 4347.832031 | 4 | 698.6218262 | 698.6179252 |
| GLIKAVGPAAVIQKQFSGETFEER              | Q9DBA8 | 0          | n +34.06 Da,K +34.06 Da, | 3691.254639 | 4 | 670.1500244 | 670.1497643 |
| TLLMNKSTEPCAHLLVSSIGVVGTAEQNR         | O35215 | 0.03851444 | n +34.06 Da,K +34.06 Da, | 3826.277344 | 4 | 799.1799927 | 799.1890649 |
| VTAGNASGVSDGAGAVIIASEDAVKKHNFPLAR     | Q8BWT1 | 0          | n +42.03 Da,K +34.06 Da, | 4198.342285 | 4 | 859.210022  | 859.2232224 |
| MNVEHEVNLLVEEIHRR                     | Q4KML4 | 0          | n +42.03 Da,             | 4457.778809 | 3 | 668.3400269 | 668.3386832 |
| VKVGVNGFGR                            | P16858 | 0          | n +34.06 Da,K +34.06 Da, | 4394.531738 | 3 | 367.5799866 | 367.5785603 |
| SPGSPLEKLVSSVSDLPKR                   | P54869 | 0          | n +34.06 Da,K +34.06 Da, | 3671.478027 | 4 | 525.3287964 | 525.3296307 |
| MVPPVQVSPLIKFGR                       | Q06185 | 0          | n +34.06 Da,K +34.06 Da, | 3669.177246 | 3 | 579.3679199 | 579.3691128 |
| GSPLKLVSSVSDLPKR                      | P54869 | 0          | n +34.06 Da,K +34.06 Da, | 3664.935791 | 4 | 479.3099976 | 479.3084324 |
| MQKDAASLSGFLPSFQHFATQAIHVGQEPEQWNSR   | Q8VCN5 | 0          | n +42.03 Da,K +34.06 Da, | 4557.585938 | 4 | 987.7399902 | 987.739112  |
| PFLDIQKKGISLDR                        | Q99LY9 | 0          | n +17.03 Da,K +34.06 Da, | 3657.392334 | 4 | 457.7973938 | 457.7989904 |
| DLSGTLESIPDKLKEFGNTLEDKAR             | P34928 | 0.00189873 | n +34.06 Da,K +34.06 Da, | 4422.005371 | 5 | 583.3400269 | 583.343584  |
| PQAQEKQDLGAAYEVLSDSEKR                | Q99KV1 | 0          | n +17.03 Da,K +34.06 Da, | 3640.687012 | 3 | 898.8200073 | 898.8188488 |
| KSNIRKSVQIAYHRALQHRSK                 | B2RRD7 | 0.04149567 | n +14.02 Da,K +28.03 Da, | 3638.967285 | 3 | 873.5100098 | 873.5207769 |
| PLGLEAEKDGVPVFKFPR                    | Q8R0Y6 | 0          | n +17.03 Da,K +34.06 Da, | 3642.804443 | 4 | 521.819397  | 521.8201887 |
| GSPLEKLVSSVSDLPKR                     | P54869 | 0          | n +34.06 Da,K +34.06 Da, | 3619.493896 | 4 | 479.3079834 | 479.3084324 |
| SGIALLTNFQVTKLFAEAVQKSR               | Q8C196 | 0          | n +34.06 Da,K +34.06 Da, | 4476.76123  | 4 | 656.65802   | 656.6562193 |
| PFLDIQKKGISLDR                        | Q99LY9 | 0          | n +17.03 Da,K +34.06 Da, | 3616.865479 | 4 | 457.7984924 | 457.7989904 |
| DKLYFEELSRLR                          | Q8C196 | 0          | n +34.06 Da,K +34.06 Da, | 3616.756836 | 2 | 805.4625244 | 805.4590597 |
| IELVNSAALIQQATTVKNKDIR                | P51410 | 0          | n +34.06 Da,K +34.06 Da, | 3615.831543 | 3 | 872.210022  | 872.2044149 |
| ASAEKLGKYQLAQEYSKLR                   | Q3TDD9 | 0          | n +42.03 Da,K +34.06 Da, | 3605.945557 | 3 | 819.1500244 | 819.1516507 |
| TTIAGVVYKDGIVLGADTR                   | P70195 | 0          | n +34.06 Da,K +34.06 Da, | 3600.950195 | 2 | 1009.099915 | 1009.101869 |
| AAADREDDPNFFKMVEGFFDR                 | P26443 | 0          | n +34.06 Da,K +34.06 Da, | 4615.148926 | 4 | 637.0672607 | 637.0667779 |
| SAKVSDAISTQYPVVDHEFDVAVVGAGGAGLR      | Q8K2B3 | 0          | n +34.06 Da,K +34.06 Da, | 4088.058105 | 3 | 1095.25     | 1095.257979 |
| METEQPEETFPNTEGFEFGKRP AEDMEEEQAFKR   | P61979 | 0          | n +42.03 Da,K +34.06 Da, | 3592.233154 | 4 | 1061.23999  | 1061.244224 |
| SEAIKAVVGIDLGTTNSCVAVMEGKQAKVLENAEGAR | P38647 | 0          | n +34.06 Da,K +34.06 Da, | 3870.217529 | 5 | 802.6500244 | 802.6532116 |



|                                       |        |            |                          |             |   |             |             |
|---------------------------------------|--------|------------|--------------------------|-------------|---|-------------|-------------|
| PFLDIQKKGISLDR                        | Q99LY9 | 0          | n +17.03 Da,K +34.06 Da, | 3626.354492 | 3 | 610.0630493 | 610.062895  |
| TTIAGVVYKDGIVLGADTR                   | P70195 | 0          | n +34.06 Da,K +34.06 Da, | 3587.478271 | 3 | 673.0686035 | 673.0703384 |
| ACGLVASNLNLKPGECKLVR                  | P16045 | 0          | n +42.03 Da,K +34.06 Da, | 3584.056396 | 3 | 770.4400024 | 770.4416721 |
| TSGPPVSELITKAVAASKER                  | P43274 | 0          | n +34.06 Da,K +34.06 Da, | 3579.887451 | 4 | 536.5837402 | 536.5849967 |
| SGDGVTHTVPIYEGYALPHAILR               | P60710 | 0          | n +34.06 Da,             | 3579.81665  | 3 | 834.1099854 | 834.1184223 |
| GSPLEKLVSSVSDLPKR                     | P54869 | 0          | n +34.06 Da,K +34.06 Da, | 3578.801758 | 4 | 479.3099976 | 479.3084324 |
| ECDKLYFEELSLER                        | Q8C196 | 0          | n +34.06 Da,K +34.06 Da, | 3570.425293 | 2 | 949.9899902 | 949.9956814 |
| VASVGKDEYTFVVVVGAGSAGCVLASR           | Q8BJ64 | 0          | n +34.06 Da,K +34.06 Da, | 3958.581299 | 3 | 889.8200073 | 889.8197547 |
| PSFPALPSSLGKELGPYSSKTR                | O08529 | 0          | n +17.03 Da,K +34.06 Da, | 3559.655029 | 4 | 642.6199951 | 642.6193214 |
| MESGFTSKDTYLSHFNPR                    | O55239 | 0          | n +42.03 Da,K +34.06 Da, | 3595.365479 | 3 | 731.6863403 | 731.6879705 |
| RLVTMASAQPWLLHSMRLR                   | Q8K284 | 0.03373946 | n +34.06 Da,             | 3548.354736 | 5 | 460.8599854 | 460.8669148 |
| SEAAADREDDPNFFKMVEGFFDR               | P26443 | 0          | n +34.06 Da,K +34.06 Da, | 4660.228516 | 4 | 691.0858765 | 691.0854338 |
| AAAAGAVVASAASGPAEGKKITELR             | Q8CH25 | 0          | n +42.03 Da,K +34.06 Da, | 3546.437012 | 3 | 802.7999878 | 802.804433  |
| TLYDIAHTPGVAADLSHIETR                 | P08249 | 0.00240674 | n +34.06 Da,             | 3545.116455 | 3 | 772.0700073 | 772.0798561 |
| PLGLEAEKDGVPVFKFPR                    | Q8R0Y6 | 0          | n +17.03 Da,K +34.06 Da, | 3608.375    | 3 | 695.4232788 | 695.4244928 |
| FEKFLWLAR                             | P62827 | 0.00599455 | n +34.06 Da,K +34.06 Da, | 3544.795166 | 3 | 458.9562683 | 458.9571489 |
| ACGLVASNLNLKPGECKLVR                  | P16045 | 0          | n +42.03 Da,K +34.06 Da, | 3543.017578 | 3 | 770.4400024 | 770.4416721 |
| PSIFTVLTAKSLR                         | O09173 | 0          | n +17.03 Da,K +34.06 Da, | 3592.671387 | 3 | 495.3200073 | 495.320487  |
| CSLRFSPALKQEHR                        | E9Q3R9 | 0.02063882 | n +14.02 Da,K +28.03 Da, | 4691.89502  | 2 | 1081.560059 | 1081.54421  |
| AKYGDLEARPDGQNEFSDIKSR                | E9Q6R7 | 0          | n +42.03 Da,K +34.06 Da, | 3529.758057 | 4 | 709.3699951 | 709.3702517 |
| APDQDEIDCLPLGAKQPSFR                  | P16675 | 0          | n +34.06 Da,K +34.06 Da, | 3519.47998  | 3 | 775.7399902 | 775.7441857 |
| AHRFPALTPEQKKELSIAQR                  | Q91Y97 | 0.01457286 | n +34.06 Da,K +34.06 Da, | 3517.076172 | 3 | 851.1699829 | 851.1783111 |
| ASDTPGFYMDKLNKYR                      | Q03963 | 0          | n +42.03 Da,K +34.06 Da, | 3516.523438 | 3 | 672.6881714 | 672.6892405 |
| VLHSWAVPSLGLKTDIIPGR                  | P00405 | 0          | n +34.06 Da,K +34.06 Da, | 3514.523926 | 4 | 547.0800171 | 547.0836645 |
| CDKLYFEELSLER                         | Q8C196 | 0          | n +34.06 Da,K +34.06 Da, | 3510.378662 | 3 | 590.6489258 | 590.652015  |
| TVMPAWVIDKYGKNEVLR                    | Q924D0 | 0          | n +34.06 Da,K +34.06 Da, | 3508.784424 | 4 | 556.0900269 | 556.0870119 |
| SLAHALAHNTNLVFLNLR                    | A6H639 | 0.04774775 | n +42.03 Da,             | 3507.723877 | 3 | 682.7000122 | 682.7129604 |
| GIVPIVEPEILPDGDHDLKR                  | P05063 | 0.00353565 | n +34.06 Da,K +34.06 Da, | 3507.168945 | 4 | 570.8331299 | 570.836321  |
| GDPKEEEEEELVDPLTTVR                   | P99028 | 0          | n +34.06 Da,K +34.06 Da, | 3532.615967 | 3 | 751.729126  | 751.7304884 |
| SIGVPIKVLHEAEGH                       | P62320 | 0.00649702 | n +42.03 Da,K +34.06 Da, | 3496.238037 | 3 | 554.6525269 | 554.6526367 |
| SWGEPWGEKGWMR                         | Q9WUU7 | 0          | n +34.06 Da,K +34.06 Da, | 3493.691895 | 3 | 558.6221924 | 558.6225008 |
| ENAKTQQATVASGIPAGWMGLDCGTESSKKYAEAVGR | P09411 | 0          | n +34.06 Da,K +34.06 Da, | 3492.836182 | 5 | 787.6099854 | 787.6207487 |
| AKVEQVLSLEPQHCLKFR                    | Q9QY76 | 0          | n +42.03 Da,K +34.06 Da, | 3577.119141 | 4 | 566.0861206 | 566.0876758 |
| GLGRLCERFPVVVHSHVTPSLR                | E9Q3L2 | 0.02557915 | n +31.05 Da,             | 3482.530273 | 4 | 603.3499756 | 603.3442068 |
| RVLVDSLIPDVTYFAVRISQGERDGKW           | E9Q043 | 0.02196193 | n +14.02 Da,K +28.03 Da, | 4385.796387 | 4 | 823.4299927 | 823.4437583 |
| SSSLEKSYELPDGQVITIGNER                | P60710 | 0.02289333 | n +34.06 Da,K +34.06 Da, | 3788.463867 | 3 | 830.7800293 | 830.7834753 |
| ASASSTNLKDVLSNLIPKEQAR                | Q9CZU6 | 0.00068776 | n +34.06 Da,K +34.06 Da, | 3473.640869 | 4 | 611.8701172 | 611.8696519 |
| SNYHLLMSVQESLER                       | P26443 | 0          | n +34.06 Da,             | 3472.211426 | 3 | 613.9859619 | 613.9875797 |
| TVPVHEMGTTVIKEVLQR                    | Q8CAY6 | 0          | n +34.06 Da,K +34.06 Da, | 3467.978271 | 4 | 527.0646362 | 527.0660489 |
| SSSRPVALVTGANKGIGFAITR                | P48758 | 0          | n +42.03 Da,K +34.06 Da, | 3467.32251  | 3 | 760.104126  | 760.1078573 |

|                                 |        |            |                          |             |   |             |             |
|---------------------------------|--------|------------|--------------------------|-------------|---|-------------|-------------|
| AEPSAPESKHKSSLNSSPWGLMALGNSR    | Q3TDQ1 | 0          | n +42.03 Da,K +34.06 Da, | 3502.770752 | 3 | 1045.880005 | 1045.876992 |
| VFPHPDELAGRNMRDPLHEELLGQGCVFQER | Q99LB7 | 0.01836228 | n +42.03 Da,             | 3464.006348 | 4 | 961.960022  | 961.9744259 |
| STVPVHEMGTTVIKEVLQR             | Q8CAY6 | 0          | n +34.06 Da,K +34.06 Da, | 3461.474609 | 4 | 548.8200073 | 548.8240562 |
| PGSPLEKLVSSVSDLPKR              | P54869 | 0          | n +17.03 Da,K +34.06 Da, | 3678.10083  | 4 | 499.3138733 | 499.3137337 |
| PSVSLQTVKLMKEGLEAAR             | O35490 | 0          | n +17.03 Da,K +34.06 Da, | 3453.692139 | 2 | 1071.650024 | 1071.653708 |
| AEPDYIEDDNPELIRPQKLINPVKSSR     | Q3TGF2 | 0          | n +42.03 Da,K +34.06 Da, | 3649.424561 | 3 | 1082.920044 | 1082.926229 |
| EDVQETDTSQKDQSPASHEIATNLGDFALR  | Q00897 | 0          | n +34.06 Da,K +34.06 Da, | 3441.978516 | 4 | 843.4199829 | 843.422208  |
| AYHSFLVEPISCHAWNKDR             | Q9WV32 | 0          | n +42.03 Da,K +34.06 Da, | 3439.18457  | 3 | 802.7299805 | 802.733914  |
| PKDIDDDLEGEVTEECGKFGAVNR        | Q3UEB3 | 0          | n +17.03 Da,K +34.06 Da, | 3424.979004 | 3 | 926.7999878 | 926.802759  |
| DYFFIVHR                        | P36552 | 0.00599455 | n +34.06 Da,             | 3422.192871 | 3 | 377.5400085 | 377.5450386 |
| PLLYDFPKLR                      | Q60766 | 0.00136986 | n +17.03 Da,K +34.06 Da, | 3421.63916  | 3 | 438.2799988 | 438.2798512 |
| PFLDIQKLGISLDR                  | Q99LY9 | 0          | n +17.03 Da,K +34.06 Da, | 3421.366455 | 4 | 457.7999878 | 457.7989904 |
| ASGVTVNDEVIKVFNDMKVR            | P45591 | 0          | n +42.03 Da,K +34.06 Da, | 4399.232422 | 3 | 777.7700195 | 777.7719642 |
| CDILIPAASEKQLTKSNAPR            | P26443 | 0          | n +17.03 Da,K +34.06 Da, | 3459.907227 | 4 | 575.0800171 | 575.0887653 |
| PSVSLQTVKLMKEGLEAAR             | O35490 | 0          | n +17.03 Da,K +34.06 Da, | 3416.587646 | 3 | 714.7681274 | 714.7715641 |
| DDLQFTSAGESFNKLVSGKLR           | Q9CPY7 | 0          | n +34.06 Da,K +34.06 Da, | 4094.230469 | 4 | 628.6099854 | 628.6130146 |
| SVFGKLFAGGGKAGKGGPTPQEAIR       | Q9D8B3 | 0          | n +42.03 Da,K +34.06 Da, | 3410.03418  | 4 | 690.6540527 | 690.6567508 |
| SEAAADREDDPNFFKMVEGFFDR         | P26443 | 0          | n +34.06 Da,K +34.06 Da, | 4700.480469 | 4 | 691.0853882 | 691.0854338 |
| ASASSTNLKDVLSNLIPEQAR           | Q9CZU6 | 0          | n +34.06 Da,K +34.06 Da, | 3793.318359 | 4 | 611.8699951 | 611.8696519 |
| MFSWLKGGGAR                     | Q8BH64 | 0.00068776 | n +42.03 Da,K +34.06 Da, | 3402.744873 | 3 | 464.2799988 | 464.2815268 |
| DINRTGKTPEVSTMDAMLDIR           | P51906 | 0.01279427 | n +17.03 Da,K +34.06 Da, | 3399.673096 | 4 | 632.5999756 | 632.5924845 |
| EKTLIEILATR                     | P14824 | 0.01232666 | n +34.06 Da,K +34.06 Da, | 3396.724365 | 3 | 452.2999878 | 452.3028739 |
| SVFGKLFAGGGKAGKGGPTPQEAIR       | Q9D8B3 | 0          | n +42.03 Da,K +34.06 Da, | 3392.230957 | 3 | 920.539978  | 920.5399089 |
| AQKKYLQAKLTQFLR                 | P54729 | 0          | n +42.03 Da,K +34.06 Da, | 3391.06958  | 3 | 660.7650757 | 660.7666304 |
| ASPGSPLEKLVSSVSDLPKR            | P54869 | 0          | n +34.06 Da,K +34.06 Da, | 3774.543457 | 3 | 723.7803345 | 723.7827869 |
| GAYKYIQELWR                     | Q9CZM2 | 0          | n +34.06 Da,K +34.06 Da, | 3387.418701 | 3 | 498.9599915 | 498.9628516 |
| GPAGAGESKCLPMVKVLDVAVR          | P07309 | 0          | n +34.06 Da,K +34.06 Da, | 3382.853271 | 4 | 565.0900269 | 565.0868492 |
| SPVLLDNPVLGSMAKKYNR             | P70694 | 0          | n +34.06 Da,K +34.06 Da, | 3380.507813 | 4 | 551.8400269 | 551.8384655 |
| LVINLPNNNTKFVHDNYVIR            | Q8C196 | 0          | n +34.06 Da,K +34.06 Da, | 3378.855469 | 4 | 613.6057739 | 613.6090411 |
| PSVSLQTVKLMKEGLEAAR             | O35490 | 0          | n +17.03 Da,K +34.06 Da, | 3376.282471 | 3 | 714.7698975 | 714.7715641 |
| SEAAADREDDPNFFKMVEGFFDR         | P26443 | 0          | n +34.06 Da,K +34.06 Da, | 4568.720215 | 3 | 921.1099854 | 921.1114862 |
| SVSLQTVKLMKEGLEAAR              | O35490 | 0          | n +34.06 Da,K +34.06 Da, | 3371.085938 | 4 | 516.3200073 | 516.3251909 |
| VLEEPVVLALAEKHGR                | Q9JII6 | 0          | n +34.06 Da,K +34.06 Da, | 3566.788818 | 4 | 486.0596619 | 486.0596579 |
| GNWGYLDQVAALR                   | Q8BK48 | 0.00353565 |                          | 3367.264893 | 3 | 488.2557373 | 488.2527662 |
| AELMQQKEATTEQQLR                | O35490 | 0.01232666 | n +42.03 Da,K +28.03 Da, | 3359.103516 | 2 | 987.5       | 987.501677  |
| LTIVLAHKLNTR                    | Q91X83 | 0.00997375 | n +42.03 Da,K +34.06 Da, | 3358.619385 | 3 | 485.6400146 | 485.6470454 |
| FQVTKLFAEAVQKSR                 | Q8C196 | 0          | n +34.06 Da,K +34.06 Da, | 3355.482422 | 4 | 464.2999878 | 464.2978673 |
| TVTEEITDVDLVHAQIHVSEGR          | Q05920 | 0          | n +34.06 Da,             | 3353.373535 | 4 | 621.3300171 | 621.3303671 |
| TVTEEITDVDLVHAQIHVSEGR          | Q05920 | 0          | n +34.06 Da,             | 3350.266113 | 3 | 828.1030884 | 828.1047306 |
| MAGKKVICVGSNWSAISAKIVGSNAGR     | P13707 | 0          | n +17.03 Da,K +34.06 Da, | 4561.569824 | 5 | 582.3499756 | 582.3441853 |

|                                        |        |            |                          |             |   |             |             |
|----------------------------------------|--------|------------|--------------------------|-------------|---|-------------|-------------|
| SEPEIPK GIR                            | Q9WTP6 | 0.00353565 | n +34.06 Da,K +34.06 Da, | 4415.503418 | 3 | 398.5910034 | 398.5890141 |
| SQRPDVLTGGGNGPIGDKLNIMTAGSR            | P24270 | 0          | n +34.06 Da,K +34.06 Da, | 3345.789795 | 3 | 941.8499756 | 941.8521178 |
| TDTADQVIASFVKVLAGDKNFITAEELR           | P57780 | 0          | n +34.06 Da,K +34.06 Da, | 4560.42334  | 4 | 764.4400024 | 764.4356225 |
| DLPKNWDWR                              | Q9WUU7 | 0.01457286 | n +34.06 Da,K +34.06 Da, | 3344.168213 | 3 | 433.25      | 433.2489917 |
| GYVKAGPWTPAAAVEHPEAVR                  | O35490 | 0          | n +42.03 Da,K +34.06 Da, | 3343.177246 | 3 | 780.75      | 780.7446961 |
| GPPVSELITKAVAASKER                     | P15864 | 0          | n +34.06 Da,K +34.06 Da, | 3340.60083  | 4 | 489.5630798 | 489.5650697 |
| PSVSLQTVKLMKEGLEAAR                    | O35490 | 0          | n +17.03 Da,K +34.06 Da, | 3334.65918  | 3 | 714.7700195 | 714.7715641 |
| AKVAVLGASGGIGQPLSLLLKNSPLVSR           | P08249 | 0          | n +34.06 Da,K +34.06 Da, | 4313.76123  | 4 | 712.7129517 | 712.711526  |
| MKKKVAIIGAGVSGLAAIR                    | P97501 | 0          | n +42.03 Da,K +34.06 Da, | 3333.963867 | 2 | 1014.183044 | 1014.184742 |
| TVPVHEMGTTVIKEVLQR                     | Q8CAY6 | 0          | n +34.06 Da,K +34.06 Da, | 3470.682617 | 4 | 527.0599976 | 527.0660489 |
| RVDILDPELLR                            | O88685 | 0.03566466 | n +34.06 Da,             | 3331.37793  | 3 | 438.9500122 | 438.9487242 |
| YNVSPVELPFGGYYKSGFGR                   | Q9JLJ2 | 0          | n +34.06 Da,K +34.06 Da, | 3390.746094 | 4 | 576.8400269 | 576.8363515 |
| AKVEQVLSLEPQHELKFR                     | Q9QY76 | 0          | n +42.03 Da,K +34.06 Da, | 3575.823486 | 3 | 754.4459839 | 754.4478089 |
| ASASYHISNLEKMTSSDKDFR                  | Q6ZQ38 | 0          | n +42.03 Da,K +34.06 Da, | 4043.333252 | 3 | 870.7879028 | 870.7883433 |
| CWQNYLDFHR                             | P56391 | 0.00240674 | n +34.06 Da,             | 3325.343994 | 3 | 491.5700073 | 491.5699186 |
| PSSLEQMAKLPAPIKPY                      | Q99JY0 | 0.00189873 | n +17.03 Da,K +34.06 Da, | 3633.402344 | 4 | 542.5999756 | 542.591911  |
| TGWKEIEYEVVR                           | Q8C196 | 0          | n +34.06 Da,K +34.06 Da, | 3321.935791 | 3 | 526.3048706 | 526.305055  |
| GPAGAGESKCLPMVKVLD AVR                 | P07309 | 0          | n +34.06 Da,K +34.06 Da, | 3505.116211 | 4 | 565.0848999 | 565.0868492 |
| RFEYEDPFFNR                            | Q8CIM7 | 0.00855158 |                          | 3369.841553 | 3 | 516.5800171 | 516.5807715 |
| SPLEKLVSSVSDLPKR                       | P54869 | 0          | n +34.06 Da,K +34.06 Da, | 3316.178955 | 3 | 619.7299805 | 619.7349963 |
| GQLLPDNFIAACTEKKIPVVFR                 | Q9R0P3 | 0.01457286 | n +34.06 Da,K +34.06 Da, | 4024.81665  | 4 | 655.3900146 | 655.3951422 |
| SHQTGIQASEDVKEIFAR                     | Q91YR1 | 0          | n +42.03 Da,K +34.06 Da, | 3313.381104 | 3 | 698.0314941 | 698.0342466 |
| PVLLDDPVLGSMACKYNR                     | Q8VC77 | 0          | n +17.03 Da,K +34.06 Da, | 3312.297119 | 4 | 526.0700073 | 526.0685724 |
| PKIGFPWSEIR                            | P26040 | 0.01378958 | n +17.03 Da,K +34.06 Da, | 3311.04541  | 3 | 460.9400024 | 460.9468722 |
| EGNDLYHEMIESGVINLKDATSKVALVYQGMNEPPGAR | P56480 | 0.00189873 | n +42.03 Da,K +28.03 Da, | 4820.280273 | 5 | 849.6400146 | 849.6258698 |
| CGIVNVNIPTSGAEIGGAFGGEKHTGGGR          | Q9DBF1 | 0          | n +34.06 Da,K +34.06 Da, | 3310.669922 | 4 | 720.87854   | 720.8818947 |
| PVTGSAHTVLSYWSQQLR                     | Q9DCG6 | 0          | n +17.03 Da,             | 3308.828613 | 3 | 712.039978  | 712.0411833 |
| TLSDYNIQKESTLHLVLR                     | P0CG49 | 0.00353565 | n +42.03 Da,K +34.06 Da, | 3308.34668  | 4 | 552.3200073 | 552.3127167 |
| TSLSLFGDSYETQVIAHGQGSSK GPR            | Q78JT3 | 0          | n +34.06 Da,K +34.06 Da, | 3308.012451 | 4 | 698.3699951 | 698.3727942 |
| DPESVKIIFKLPNDSR                       | Q3TDN2 | 0          | n +34.06 Da,K +34.06 Da, | 3307.640381 | 4 | 490.7999878 | 490.8045199 |
| STQAAEDKEEESLHSISNTEAVR                | Q9CQN1 | 0.00464037 | n +34.06 Da,K +34.06 Da, | 3302.789063 | 3 | 904.7999878 | 904.8034874 |
| TGNIITGLAAGAKSYKMSMANR                 | Q8C196 | 0          | n +34.06 Da,K +34.06 Da, | 3301.594482 | 4 | 590.0900269 | 590.0936687 |
| ADDLTD PAPATTF AHDATTVLSR              | P56480 | 0          | n +14.02 Da,             | 3299.308838 | 4 | 629.0700073 | 629.0684168 |
| PNFFKMVEGFFDR                          | P26443 | 0          | n +17.03 Da,K +34.06 Da, | 4746.125977 | 2 | 842.9434204 | 842.9425596 |
| ASLKDLEGKWR                            | Q05816 | 0.01974334 | n +42.03 Da,K +34.06 Da, | 3296.826172 | 3 | 471.6218872 | 471.6226066 |
| TPETPAEILALEHKETR                      | Q80W22 | 0          | n +42.03 Da,K +34.06 Da, | 4341.637207 | 2 | 1006.039978 | 1006.049576 |
| SPLEKLVSSVSDLPKR                       | P54869 | 0          | n +34.06 Da,K +34.06 Da, | 3296.191895 | 4 | 465.0499878 | 465.0530664 |
| TRYSPIADMLCEAGR                        | Q9DBM2 | 0          | n +34.06 Da,             | 3354.261719 | 3 | 591.9650879 | 591.9660099 |
| MKFNPFVTS DR                           | P61255 | 0.03566466 | n +34.06 Da,K +34.06 Da, | 3291.275391 | 3 | 470.6000061 | 470.6009254 |
| PDPEVMAKVKVLFVR                        | Q7TMK9 | 0          | n +17.03 Da,K +34.06 Da, | 3515.659912 | 4 | 454.0400085 | 454.0418258 |

|                              |        |            |                          |             |   |             |             |
|------------------------------|--------|------------|--------------------------|-------------|---|-------------|-------------|
| VHLTDAEKAASVSLWGKVNSEVGGALGR | P02088 | 0          | n +42.03 Da,K +28.03 Da, | 4660.339844 | 3 | 1089.560059 | 1089.553991 |
| WPQGTAFASQVTLEGGDKVKVER      | Q9DCW4 | 0          | n +34.06 Da,K +34.06 Da, | 3288.342529 | 4 | 620.1092529 | 620.1116446 |
| MDNKDEDIFKFKGYNFLR           | G5E904 | 0          | n +42.03 Da,K +34.06 Da, | 4085.20874  | 4 | 606.8300171 | 606.8333805 |
| NREEQIISLFR                  | Q99KR3 | 0.00353565 | n +34.06 Da,             | 3316.357422 | 3 | 480.2799377 | 480.2790219 |
| AWGVTKGAAELMQQKEATTEQQLR     | O35490 | 0          | n +34.06 Da,K +34.06 Da, | 3287.13916  | 4 | 694.8900146 | 694.89323   |
| QLMTFSGTNDPCALCSLHIGKIGGAQNR | P34884 | 0          | n +34.06 Da,K +34.06 Da, | 3634.51123  | 4 | 801.1599731 | 801.1614157 |
| DVALEGVGHFFR                 | P29391 | 0          | n +34.06 Da,             | 3598.114746 | 3 | 460.9200134 | 460.9209458 |
| AGKKVICVSGSNWGSIAIKIVGSNAGR  | P13707 | 0          | n +42.03 Da,K +34.06 Da, | 4051.34082  | 4 | 701.1630859 | 701.163043  |
| AAAKKAVLGPLVGAVDQGTSSSTR     | Q64516 | 0          | n +42.03 Da,K +34.06 Da, | 3370.543945 | 3 | 769.789978  | 769.7937566 |
| IGIPHGGFPEPFR                | Q05920 | 0          |                          | 3280.544189 | 3 | 475.25      | 475.2542182 |
| PAPATTFAHLDAATTVLSR          | P56480 | 0          | n +17.03 Da,             | 3276.51709  | 2 | 943.5100098 | 943.5126661 |
| PAPATTFAHLDAATTVLSR          | P56480 | 0          |                          | 3276.044922 | 3 | 623.6635132 | 623.6670169 |
| AQTKLAELEAALQR               | P11679 | 0          | n +34.06 Da,K +34.06 Da, | 3272.025146 | 3 | 537.3347168 | 537.3351257 |
| PAPATTFAHLDAATTVLSR          | P56480 | 0          | n +17.03 Da,             | 3269.396729 | 3 | 629.3426514 | 629.3442029 |
| ALEKEVESIGAHNLNAVSTR         | Q9CZ13 | 0.00464037 | n +34.06 Da,K +34.06 Da, | 3263.772461 | 4 | 539.7999878 | 539.8050209 |
| SGYVPGSVSAAFVTCPNKVAKEIAR    | Q9CQ89 | 0          | n +34.06 Da,K +34.06 Da, | 3263.521484 | 4 | 710.6500244 | 710.6522427 |
| NRVVLPMELPIR                 | P00405 | 0.00464037 | n +34.06 Da,             | 3258.150391 | 3 | 490.9709473 | 490.9727639 |
| SPGSPLEKLVSSVSDLPKR          | P54869 | 0          | n +34.06 Da,K +34.06 Da, | 3254.551758 | 4 | 525.3300171 | 525.3296307 |
| WGKVNSEVGGALGR               | P02088 | 0.02289333 | n +31.05 Da,             | 4639.73291  | 2 | 852.9400024 | 852.9393341 |
| ASLKDLEGKWR                  | Q05816 | 0.00240674 | n +42.03 Da,K +34.06 Da, | 3251.515381 | 3 | 471.6199951 | 471.6226066 |
| RLLVVYPWTQR                  | P02088 | 0.03416004 | n +34.06 Da,             | 3241.111572 | 3 | 488.9662781 | 488.9681186 |
| SPAQLGTTIYKEFEKR             | Q9WUM5 | 0          | n +34.06 Da,K +34.06 Da, | 3239.09668  | 4 | 493.2999878 | 493.3006073 |
| TSTKTPILLGSLAHQIYR           | Q99L13 | 0          | n +34.06 Da,K +34.06 Da, | 3224.668701 | 4 | 517.5700073 | 517.57039   |
| DEIMLTIKPGEHGSTYGGNPLGCR     | P29758 | 0.00189873 | n +34.06 Da,K +34.06 Da, | 3222.085938 | 4 | 668.3400269 | 668.3467275 |
| SLPPHQKVPPLSLPTMQAGTIAR      | Q8BMF4 | 0.00189873 | n +34.06 Da,K +34.06 Da, | 3220.435303 | 4 | 649.3800049 | 649.3835412 |
| AEKAAVSLWGKVNSEVGGALGR       | P02088 | 0          | n +34.06 Da,K +34.06 Da, | 3207.898926 | 3 | 902.5       | 902.4973814 |
| GPAGAGESKCLPMVKVLDVAVR       | P07309 | 0          | n +34.06 Da,K +34.06 Da, | 3423.84668  | 4 | 565.0836182 | 565.0868492 |
| TETNEKALEAVFGKYGR            | Q91VM5 | 0          | n +34.06 Da,K +34.06 Da, | 3202.105225 | 4 | 504.5499878 | 504.5468771 |
| METASTPEATGTGKYIASTQRPDGTWR  | Q8CHP5 | 0          | n +42.03 Da,K +34.06 Da, | 3187.271484 | 3 | 996.8200073 | 996.8241875 |
| CNLLFDIVAIVLSYIQLR           | Q8VG8  | 0.00649702 | n +42.03 Da,             | 3185.702393 | 4 | 577.0801392 | 577.0801693 |
| AQASPKKECALEIIKGTALR         | P50172 | 0          | n +34.06 Da,K +34.06 Da, | 3176.703857 | 3 | 763.1199951 | 763.1228148 |
| DLFSDGHSEFLKAASNLR           | P27773 | 0          | n +42.03 Da,K +34.06 Da, | 3961.794922 | 4 | 521.5300293 | 521.5221381 |
| KHTSSLKVTNEPILAFSQGSPER      | Q8CHT0 | 0.00240674 | n +42.03 Da,K +34.06 Da, | 3165.444336 | 3 | 879.4799805 | 879.4941475 |
| AFCAPPAYLTHQQKVLR            | Q9CQJ8 | 0          | n +42.03 Da,K +34.06 Da, | 3165.050781 | 3 | 692.7125244 | 692.7139019 |
| AHRFPALTPQKKEISEIAQR         | Q91Y97 | 0.00068776 | n +42.03 Da,K +34.06 Da, | 3160.217041 | 3 | 853.8200073 | 853.8274604 |
| AGPEWQSLQCLEKHLPPDQLAQVGR    | Q8VC97 | 0          | n +42.03 Da,K +34.06 Da, | 4365.38916  | 3 | 1052.22998  | 1052.225733 |
| AQASPKKECALEIIKGTALR         | P50172 | 0.02601156 | n +34.06 Da,K +34.06 Da, | 3158.711914 | 4 | 572.5949707 | 572.5939302 |
| AEKAAVSLWGKVNSEVGGALGR       | P02088 | 0          | n +34.06 Da,K +34.06 Da, | 3200.806152 | 4 | 677.1199951 | 677.1248551 |
| VIGGKPANVGDYPWQVAIKDGQR      | Q61129 | 0.00900424 | n +34.06 Da,K +34.06 Da, | 3148.616699 | 4 | 643.3699951 | 643.3789152 |
| ASLKDLEGKWR                  | Q05816 | 0          | n +42.03 Da,K +34.06 Da, | 3148.058105 | 3 | 471.6231079 | 471.6226066 |

|                                |        |            |                                      |             |   |             |             |
|--------------------------------|--------|------------|--------------------------------------|-------------|---|-------------|-------------|
| TALVDQEEKEDVKSCAEFVSGSQLR      | Q9DCX2 | 0          | n +34.06 Da,K +34.06 Da,             | 3139.385254 | 3 | 976.5200195 | 976.5220332 |
| DLSVVTDCMEHALTACHPR            | O88451 | 0          | n +34.06 Da,                         | 4030.747803 | 4 | 562.270752  | 562.2698317 |
| PFADASKGDDLLPAGTEDYIHIR        | P48024 | 0.00353565 | n +17.03 Da,K +34.06 Da,             | 3747.826416 | 4 | 638.8300171 | 638.8368031 |
| GYVKAGPWTEAAVEHPEAVR           | O35490 | 0.00599455 | n +42.03 Da,K +34.06 Da,             | 3134.529541 | 3 | 780.7399902 | 780.7446961 |
| AHRFPALTPEQKKEELSEIAQR         | Q91Y97 | 0          | n +42.03 Da,K +34.06 Da,             | 3136.294189 | 5 | 512.7000122 | 512.6993868 |
| GKFMKPGKVVLVLAGR               | P61358 | 0.00599455 | n +42.03 Da,K +34.06 Da,             | 3114.789551 | 3 | 615.4140625 | 615.4182846 |
| KTYTAMDVVYALKR                 | P62806 | 0.00068776 | n +42.03 Da,K +34.06 Da,             | 3111.723145 | 3 | 569.0131836 | 569.0166281 |
| EAAADREDDPNFFKMVEGFFDR         | P26443 | 0.00189873 | n +34.06 Da,K +34.06 Da,             | 4691.012695 | 4 | 669.3300171 | 669.3274265 |
| NHVLSLSPFIR                    | P26443 | 0.00511364 |                                      | 3100.115234 | 3 | 437.5899963 | 437.5908301 |
| SLPPHQKVLPLPSLPTMQAGTIAR       | Q8BMF4 | 0          | n +34.06 Da,K +34.06 Da,             | 3098.758789 | 4 | 649.3827515 | 649.3835412 |
| SGPKAKPVVFSFIAGITAPPGR         | Q9WUM5 | 0          | n +34.06 Da,K +34.06 Da,             | 3094.212402 | 3 | 718.1265869 | 718.1282282 |
| ALGEAINDYKGAIVIVSHDAR          | Q6P542 | 0.00855158 | n +34.06 Da,K +34.06 Da,             | 3268.401123 | 4 | 567.3200073 | 567.3261205 |
| SDMYLHPVAMFR                   | P15105 | 0          | n +34.06 Da,                         | 3261.910645 | 3 | 500.9222107 | 500.923193  |
| SLPPHQKVLPLPSLPTMQAGTIAR       | Q8BMF4 | 0          | n +34.06 Da,K +34.06 Da,             | 3091.91748  | 3 | 865.5072021 | 865.5089627 |
| PDGHEICFVGDEAFR                | Q9CPV4 | 0          | n +17.03 Da,                         | 3100.186035 | 3 | 589.2697754 | 589.2719385 |
| PMLQTVAKNKDQGTIEDYVEGLR        | Q60605 | 0.00511364 | n +42.03 Da,n +28.03 Da,K +28.03 Da, | 3089.003662 | 4 | 689.1099854 | 689.1008254 |
| VLTKCQEEVSHIPAVYPGAFR          | P04441 | 0          | n +34.06 Da,K +34.06 Da,             | 3084.919434 | 4 | 618.0900269 | 618.095338  |
| STPQSQFQESSPVWKLGR             | Q9D1I5 | 0          | n +34.06 Da,K +34.06 Da,             | 3082.094727 | 3 | 710.7199707 | 710.7253423 |
| FVNMVEKGIIDPTKVVR              | P63038 | 0.00068776 | n +34.06 Da,K +34.06 Da,             | 3229.411377 | 4 | 512.5700073 | 512.5762799 |
| VAHFTFHPDPESLQYGQTQKMN         | Q6P3A8 | 0          | n +34.06 Da,K +34.06 Da,             | 3070.25     | 3 | 881.7800293 | 881.7814112 |
| PAYHSSLMDPDTKLIGNMALLPLR       | Q9JM76 | 0          | n +17.03 Da,K +34.06 Da,             | 4147.384277 | 4 | 676.8699951 | 676.8751394 |
| LSVVTDCMEHALTACHPR             | O88451 | 0          | n +34.06 Da,                         | 3059.572266 | 4 | 533.5143433 | 533.5130956 |
| MKPLVVFLVGGPGAGKGTQCAR         | Q9DBP5 | 0          | n +34.06 Da,K +34.06 Da,             | 3059.430908 | 4 | 587.1054688 | 587.1065787 |
| SAAAVDPVSATPMTGSKEMSLEPKKMTR   | Q8BHJ9 | 0          | n +42.03 Da,K +34.06 Da,             | 3058.277832 | 4 | 799.1799927 | 799.1805078 |
| GETPTEKLPFPIIDDKGR             | O08709 | 0          | n +34.06 Da,K +34.06 Da,             | 3055.394287 | 4 | 529.5683594 | 529.5690809 |
| MDKNELVQKAKLAEQAER             | P63101 | 0          | n +42.03 Da,K +34.06 Da,             | 3051.994141 | 3 | 749.105896  | 749.1071648 |
| PDFQHEDYNFLTR                  | Q9R0H0 | 0          | n +17.03 Da,                         | 3185.98999  | 3 | 566.9350586 | 566.9355436 |
| RTELGFTSFIR                    | Q921X9 | 0.00564972 | n +34.06 Da,                         | 3050.992188 | 3 | 454.2600098 | 454.2647125 |
| GTGTVTTANATGMNDGAAAVVLMKKTEAER | Q80X81 | 0.00855158 | n +17.03 Da,K +34.06 Da,             | 3209.225342 | 4 | 763.4099731 | 763.4128461 |
| KSTEPCAHLLVSSIGVVGTAEQNR       | O35215 | 0          | n +34.06 Da,K +34.06 Da,             | 3045.511719 | 4 | 656.1099854 | 656.1142596 |
| TGSTEVGHLIQVAAGSSNLKR          | P47738 | 0          | n +34.06 Da,K +34.06 Da,             | 3041.434082 | 4 | 549.0682983 | 549.0710202 |
| SEDKGALAKLVEAIR                | P12970 | 0          | n +34.06 Da,K +34.06 Da,             | 3314.339111 | 4 | 426.2799988 | 426.279409  |
| IHTQPPPPPIPEVVATWEAISLGR       | Q8BGA8 | 0          | n +31.05 Da,                         | 5031.717773 | 3 | 879.4899902 | 879.4918191 |
| KDDYYQILGVPR                   | Q99M87 | 0.00189873 | n +34.06 Da,K +34.06 Da,             | 3035.824219 | 2 | 767.9465332 | 767.9486617 |
| QFLVSFKDVGR                    | Q91VR2 | 0.00599455 | n +34.06 Da,K +34.06 Da,             | 3034.456299 | 3 | 455.2799988 | 455.2838135 |
| HVGDLGNVTAGKDGVANVSIEDR        | P08228 | 0          | n +17.03 Da,K +34.06 Da,             | 3033.789795 | 3 | 792.0800171 | 792.0909729 |
| VALEGVGHFFR                    | P29391 | 0          | n +34.06 Da,                         | 3059.715576 | 3 | 422.5776367 | 422.578631  |
| GIHETTFNSIMKCDVDIR             | P60710 | 0.00189873 | n +34.06 Da,K +34.06 Da,             | 3025.59668  | 3 | 735.3800049 | 735.3873445 |
| KVISTTKAPAAIGPYSQAVQVDR        | P52760 | 0.00189873 | n +14.02 Da,K +28.03 Da,             | 3024.602783 | 3 | 824.1500244 | 824.1391168 |
| HSILPVDDDINGLNEEQKQLR          | Q9JH15 | 0          | n +34.06 Da,K +34.06 Da,             | 3120.006104 | 3 | 834.4500122 | 834.4592143 |

|                              |        |            |                                      |             |   |             |             |
|------------------------------|--------|------------|--------------------------------------|-------------|---|-------------|-------------|
| GETPTEKLPFPIIDDKGR           | O08709 | 0          | n +34.06 Da,K +34.06 Da,             | 3019.534668 | 3 | 705.7568359 | 705.7563491 |
| HVLSLSFPIR                   | P26443 | 0.00411523 | n +34.06 Da,                         | 3019.212891 | 2 | 601.8781128 | 601.8770514 |
| GETPTEKLPFPIIDDKGR           | O08709 | 0          | n +34.06 Da,K +34.06 Da,             | 3014.157471 | 4 | 529.5692749 | 529.5690809 |
| SLKDLEGKWR                   | Q05816 | 0          | n +42.03 Da,K +34.06 Da,             | 3013.002197 | 3 | 447.943512  | 447.9435685 |
| PLHEELLGQGCVFQER             | Q99LB7 | 0          | n +17.03 Da,                         | 3009.418945 | 3 | 643.6616821 | 643.6614261 |
| DLSGTLESIPDKLKEFGNTLEDKAR    | P34928 | 0          | n +34.06 Da,K +34.06 Da,             | 4442.053223 | 3 | 971.5700073 | 971.567789  |
| LPDVSAKDFEKVDLTR             | P97328 | 0          | n +34.06 Da,K +34.06 Da,             | 3135.600342 | 4 | 484.5400085 | 484.5466113 |
| WSHINTVLQDQEFR               | Q99LB7 | 0.00599455 | n +34.06 Da,                         | 2999.732422 | 3 | 602.9835205 | 602.9830457 |
| EVLGVSVD SQFTHLAWINTPR       | Q61171 | 0.01232666 | n +42.03 Da,                         | 2998.595459 | 3 | 804.4099731 | 804.4166502 |
| DEELNKLLGR                   | P22752 | 0.00240674 | n +34.06 Da,K +34.06 Da,             | 2997.202148 | 3 | 418.9281616 | 418.9278071 |
| SDNHILIMDLR                  | P50431 | 0          | n +34.06 Da,                         | 3018.438232 | 3 | 454.25      | 454.2537077 |
| GKTLGECGFTSQTRPQAPATVGLAFR   | P62869 | 0          | n +34.06 Da,K +34.06 Da,             | 3061.054443 | 4 | 723.1500244 | 723.1473625 |
| LRPGDCEVCISYLR               | Q9CXI5 | 0          | n +34.06 Da,                         | 2994.823975 | 3 | 610.3127441 | 610.3134096 |
| GVFPQAQLEHASKALELQGVR        | Q8VBW8 | 0          | n +34.06 Da,K +34.06 Da,             | 2991.508301 | 3 | 759.1099854 | 759.1113082 |
| HVGDLDGNVTAGKDGVANVSIEDR     | P08228 | 0          | n +17.03 Da,K +34.06 Da,             | 2991.289307 | 3 | 792.0800171 | 792.0909729 |
| RAPFDLFENR                   | P07901 | 0.02646776 |                                      | 2990.090576 | 3 | 431.5599976 | 431.5630517 |
| TFSGTNDPCALCSLHSGKIGGAQNR    | P34884 | 0          | n +34.06 Da,K +34.06 Da,             | 3010.58252  | 4 | 708.1139526 | 708.1156338 |
| SWGILFSHPR                   | O08709 | 0          | n +34.06 Da,                         | 2986.128662 | 3 | 411.8999939 | 411.903226  |
| SIALKQVFNKDKTFR              | Q8VE04 | 0.00068776 | n +42.03 Da,K +34.06 Da,             | 2980.746094 | 4 | 485.5599976 | 485.5610584 |
| KVTAMDVVYALKR                | P62806 | 0          | n +42.03 Da,K +34.06 Da,             | 3191.963135 | 4 | 427.019989  | 427.0142902 |
| MDKNELVQKAKLAEQAER           | P63101 | 0          | n +42.03 Da,K +34.06 Da,             | 2977.709717 | 3 | 749.1099854 | 749.1071648 |
| RPTLFLEVIQR                  | P49429 | 0.02289333 | n +34.06 Da,                         | 3161.426025 | 3 | 469.296051  | 469.2961239 |
| PKEEEEEELVDPLTTVR            | P99028 | 0          | n +17.03 Da,K +34.06 Da,             | 3111.917969 | 3 | 688.7000122 | 688.7038327 |
| YSPDISPPIFRR                 | Q60898 | 0.04458599 | n +31.05 Da,                         | 4557.149414 | 3 | 525.9713135 | 525.9612523 |
| LRVNAGDQPGADLGLITPQAKER      | Q9EQ20 | 0.00855158 | n +34.06 Da,K +34.06 Da,             | 2971.100098 | 4 | 646.8800049 | 646.8765092 |
| SCGIHETTFNSIMKCDVDIR         | P60710 | 0          | n +34.06 Da,K +34.06 Da,             | 3102.404053 | 4 | 613.5599976 | 613.5579971 |
| DPSPKKEESYSDWGLR             | Q99P27 | 0          | n +34.06 Da,K +34.06 Da,             | 2968.65918  | 3 | 654.9899902 | 654.9953871 |
| TDSHISEVLEENYR               | Q6ZQ06 | 0.02731193 | n +34.06 Da,                         | 2966.918701 | 3 | 575.960022  | 575.9549333 |
| GHVKTISNLKQEVKDTVDGQR        | Q8VD04 | 0.02063882 | n +14.02 Da,n +28.03 Da,K +28.03 Da, | 2962.134277 | 3 | 817.4699707 | 817.4623711 |
| APAREPALRCCIRLAR             | Q8R0F3 | 0.01926877 | n +34.06 Da,                         | 2960.798584 | 3 | 648.7000122 | 648.7033424 |
| ESLHSIISNTEAVR               | Q9CQN1 | 0          | n +42.03 Da,                         | 3132.711182 | 2 | 799.4199829 | 799.4126557 |
| DDEVDVDGTVEEDLGKSR           | P08113 | 0          | n +34.06 Da,K +34.06 Da,             | 2958.049072 | 3 | 682.6699829 | 682.6763835 |
| IVGGSDTLGAIHIIHEVYEEGAACKDGR | Q8VBX6 | 0.03089354 | n +31.05 Da,                         | 2956.343018 | 4 | 744.3800049 | 744.3892753 |
| TYKLFFDTER                   | Q9CRB3 | 0          | n +34.06 Da,K +34.06 Da,             | 2954.057861 | 3 | 463.2667236 | 463.2679408 |
| TVKTTVFSCNLGKFDETTADGR       | Q05816 | 0          | n +34.06 Da,K +34.06 Da,             | 2952.139893 | 4 | 670.3599854 | 670.3602258 |
| INKFLWMVR                    | P46978 | 0.00068776 | n +34.06 Da,K +34.06 Da,             | 3185.919434 | 3 | 425.6099854 | 425.6074624 |
| QGILQPEKPIVLKVVPR            | Q9EQW4 | 0          | n +42.03 Da,K +34.06 Da,             | 2948.952881 | 3 | 675.460022  | 675.4470799 |
| KSSAARKREYHQKLQELSERSR       | Q6PG04 | 0.03851444 | n +17.03 Da,K +34.06 Da,             | 4092.661865 | 4 | 702.4199829 | 702.4218926 |
| SAGFLQASASDVVVVHGR           | Q8VCHO | 0          | n +34.06 Da,                         | 2938.351807 | 3 | 612.0031738 | 612.0058505 |
| SPTNCDAEPLAEKVLDLINKGR       | Q9ESB3 | 0          | n +34.06 Da,K +34.06 Da,             | 4240.436523 | 4 | 658.1199951 | 658.1233181 |

|                            |        |            |                                      |             |   |             |             |
|----------------------------|--------|------------|--------------------------------------|-------------|---|-------------|-------------|
| FKDVTLGSVLGR               | Q9R0H0 | 0.00189873 | n +34.06 Da,K +34.06 Da,             | 2930.600586 | 3 | 453.9578552 | 453.9592185 |
| SSSRPVALVTGANKGIGFAITR     | P48758 | 0.03044719 | n +42.03 Da,K +34.06 Da,             | 3477.026367 | 4 | 570.3300171 | 570.3327121 |
| NKELDPVQKLFVDKIR           | P97450 | 0          | n +34.06 Da,K +34.06 Da,             | 3061.273438 | 5 | 416.480011  | 416.4787213 |
| SAGFLQASASDVVVVHGR         | Q8VCHO | 0          | n +34.06 Da,                         | 2925.672363 | 2 | 917.5       | 917.5051375 |
| VKGVVNGFGR                 | P16858 | 0.00189873 | n +34.06 Da,K +34.06 Da,             | 2923.54834  | 3 | 367.5780945 | 367.5785603 |
| PSNMPPGIEPSPDKMLQGR        | P24270 | 0          | n +17.03 Da,K +34.06 Da,             | 2923.175293 | 3 | 701.3668823 | 701.3713652 |
| MYLHPVAMFR                 | P15105 | 0.00599455 | n +34.06 Da,                         | 2926.705322 | 3 | 433.5687866 | 433.5702019 |
| MQKIKSLMTR                 | Q8CI71 | 0.02601156 | n +42.03 Da,K +34.06 Da,             | 2948.811035 | 3 | 449.2800598 | 449.2825391 |
| GFWHSPCECFVR               | P16460 | 0          | n +34.06 Da,                         | 2921.851074 | 3 | 528.9197388 | 528.9207287 |
| ASSWVTHVEMGPPDPILGVTEAFKR  | P05202 | 0          | n +17.03 Da,K +34.06 Da,             | 4541.416504 | 4 | 716.3699951 | 716.3772037 |
| LTTGPAHWELLQR              | Q9JHW2 | 0          | n +34.06 Da,                         | 2917.497314 | 3 | 519.2999878 | 519.2983049 |
| PADSVVSVLNKEKGSTASQVLQR    | Q8VEM8 | 0          | n +17.03 Da,K +34.06 Da,             | 2913.916992 | 4 | 625.3699951 | 625.3710407 |
| PKFYCDYCDTYLTHDSPSVR       | Q62241 | 0          | n +17.03 Da,K +34.06 Da,             | 2913.212646 | 4 | 644.5502319 | 644.5518224 |
| PAINVNDSVTKSKFDNLYGCR      | P50247 | 0          | n +17.03 Da,K +34.06 Da,             | 2908.361572 | 4 | 621.5900269 | 621.590401  |
| GHSLLPTTPEAHTDGSVPVFIR     | Q3URE1 | 0.00353565 | n +31.05 Da,                         | 3224.579834 | 4 | 591.3300171 | 591.319555  |
| PMLQTVAKNKDQGTIEDYVEGLR    | Q60605 | 0.00189873 | n +42.03 Da,n +28.03 Da,K +28.03 Da, | 2901.682861 | 4 | 689.1099854 | 689.1008254 |
| HVGDLGNVTAGKDGVANVSIEDR    | P08228 | 0          | n +42.03 Da,K +34.06 Da,             | 3176.995605 | 3 | 800.4199829 | 800.4173085 |
| QSVFVLAMVDEDKKNR           | Q64374 | 0          | n +34.06 Da,K +34.06 Da,             | 2897.278076 | 4 | 524.5536499 | 524.5570818 |
| PKYIIWSPVCR                | P11352 | 0.00068776 | n +17.03 Da,K +34.06 Da,             | 2897.065918 | 3 | 490.6222839 | 490.6235122 |
| SSLEKSYELPDGQVITIGNER      | P60710 | 0          | n +34.06 Da,K +34.06 Da,             | 3793.85498  | 3 | 801.7700195 | 801.7727989 |
| ASLKDLEGKWR                | Q05816 | 0.01046572 | n +42.03 Da,K +34.06 Da,             | 3103.905762 | 2 | 706.928772  | 706.9302716 |
| MQNQSSTSHPGASISLSRPSLTKDFR | Q3TXT3 | 0          | n +42.03 Da,K +34.06 Da,             | 2890.359863 | 4 | 727.8800049 | 727.8753105 |
| ASLKDLEGKWR                | Q05816 | 0          | n +42.03 Da,K +34.06 Da,             | 2969.977295 | 3 | 471.6218567 | 471.6226066 |
| MEKTELIQKAKLAEQAER         | P68254 | 0          | n +42.03 Da,K +34.06 Da,             | 2888.26001  | 3 | 754.1176758 | 754.1191818 |
| LHTVYQSVLPETHQMLR          | Q07417 | 0          | n +34.06 Da,                         | 2888.189453 | 4 | 554.5487061 | 554.5492641 |
| SIVEDKLVEDLKTR             | P26443 | 0          | n +34.06 Da,K +34.06 Da,             | 2887.526855 | 3 | 583.0386963 | 583.0401969 |
| TFVLDEFKR                  | Q9D8N0 | 0.00353565 | n +34.06 Da,K +34.06 Da,             | 2883.289551 | 3 | 408.2524719 | 408.2537427 |
| LHTVYQSVLPETHQMLR          | Q07417 | 0          | n +34.06 Da,                         | 2883.102051 | 4 | 554.5487061 | 554.5492641 |
| TPTEKLPFPIIDDKGR           | O08709 | 0.00189873 | n +34.06 Da,K +34.06 Da,             | 2878.249023 | 4 | 483.0514221 | 483.0530664 |
| GIFEVKSTAGDTHLGGEDFDNR     | P17156 | 0          | n +34.06 Da,K +34.06 Da,             | 2877.545654 | 3 | 811.75      | 811.7487648 |
| SIVEDKLVEDLKTR             | P26443 | 0          | n +34.06 Da,K +34.06 Da,             | 2876.434814 | 4 | 437.5299988 | 437.5319668 |
| YHLLMSVQESLER              | P26443 | 0          | n +34.06 Da,                         | 3212.822021 | 3 | 546.960022  | 546.9625939 |
| APIAKVGVLAASMEAKASSQR      | Q9ERGO | 0          | n +34.06 Da,K +34.06 Da,             | 2869.532227 | 3 | 729.7800293 | 729.7841331 |
| PWYQWDHSELR                | Q9D6J5 | 0          | n +17.03 Da,                         | 2981.790771 | 3 | 511.9100037 | 511.9143021 |
| MEKTELIQKAKLAEQAER         | P68254 | 0          | n +42.03 Da,K +34.06 Da,             | 2866.180664 | 2 | 1130.670044 | 1130.675135 |
| DFLSSSSDKQNLYKGLEAFR       | P54869 | 0          | n +34.06 Da,K +34.06 Da,             | 3816.697021 | 3 | 841.1300049 | 841.1309156 |
| ALGEEWKGYVVR               | P62754 | 0          | n +34.06 Da,K +34.06 Da,             | 2862.369629 | 3 | 492.2937012 | 492.2944899 |
| IGFVFLKTR                  | Q8R0F9 | 0.00068776 | n +34.06 Da,K +34.06 Da,             | 3174.059814 | 3 | 402.6000061 | 402.6062274 |
| VKLFIGNLPR                 | Q8C7Q4 | 0.00189873 | n +34.06 Da,K +34.06 Da,             | 2857.387695 | 3 | 408.9526978 | 408.9536272 |
| AEKTQKSVKIAPGAVVCVESEIR    | Q9WUB4 | 0          | n +42.03 Da,K +34.06 Da,             | 2855.283691 | 3 | 881.8599854 | 881.8581388 |

|                             |        |            |                          |             |   |             |             |
|-----------------------------|--------|------------|--------------------------|-------------|---|-------------|-------------|
| APNVLASEPEIPKGR             | Q9WTP6 | 0          | n +34.06 Da,K +34.06 Da, | 2852.964355 | 4 | 440.5241699 | 440.5241795 |
| MEKTELIQKAKLAEQAER          | P68254 | 0          | n +42.03 Da,K +34.06 Da, | 2847.415527 | 3 | 754.1099854 | 754.1191818 |
| PPVPLVGNWRPPQPVKGR          | P16015 | 0.00189873 | n +17.03 Da,K +34.06 Da, | 2845.676758 | 4 | 512.0599976 | 512.0652932 |
| LHTVYQSVLPEHQMLR            | Q07417 | 0          | n +17.03 Da,             | 2822.304443 | 4 | 550.289978  | 550.2913744 |
| SGKPVAATMCIGPEGDLHGVPPECAVR | O35490 | 0          | n +34.06 Da,K +34.06 Da, | 2821.389893 | 4 | 733.3800049 | 733.3794019 |
| TMDKSELVQKAKLAEQAER         | Q9CQV8 | 0          | n +42.03 Da,K +34.06 Da, | 2818.721191 | 3 | 773.78479   | 773.7860915 |
| MDKNELVQKAKLAEQAER          | P63101 | 0          | n +42.03 Da,K +34.06 Da, | 2817.987793 | 3 | 749.1099854 | 749.1071648 |
| VKLFIGNLPR                  | Q8C7Q4 | 0.00189873 | n +34.06 Da,K +34.06 Da, | 2816.344727 | 3 | 408.9500122 | 408.9536272 |
| MDKNELVQKAKLAEQAER          | P63101 | 0          | n +42.03 Da,K +34.06 Da, | 2814.667725 | 4 | 562.0800171 | 562.0821927 |
| PNFKLFVIR                   | Q3U0V1 | 0.00411523 | n +17.03 Da,K +34.06 Da, | 3057.838623 | 3 | 395.6000061 | 395.5974028 |
| IGAFGYMECSAKTKDQVGR         | Q9QU10 | 0          | n +42.03 Da,K +34.06 Da, | 2801.541748 | 3 | 700.710022  | 700.7011518 |
| TMTLGDIVYKR                 | P12710 | 0          | n +34.06 Da,K +34.06 Da, | 2799.650146 | 3 | 455.6127014 | 455.6129424 |
| APNVLASEPEIPKGR             | Q9WTP6 | 0          | n +34.06 Da,K +34.06 Da, | 2858.772217 | 3 | 587.0283203 | 587.0298139 |
| FHAWWHILTLGSGYLHILFSLYTR    | Q9D099 | 0.04570136 | n +34.06 Da,             | 4320.124512 | 4 | 742.1599731 | 742.1576648 |
| AGKRCLLSAAYVDSHQWEAR        | Q8BK72 | 0          | K +28.03 Da,             | 2837.549805 | 4 | 594.3099976 | 594.3075749 |
| ATGMNDGAAAVVLMKKTEAER       | Q8OX81 | 0          | n +34.06 Da,K +34.06 Da, | 2784.939697 | 4 | 567.0700073 | 567.0752104 |
| TVEKADNFEYSDPDVGSISKNQGLR   | Q9D0F9 | 0          | n +34.06 Da,K +34.06 Da, | 2783.952393 | 4 | 718.6400146 | 718.6359475 |
| ASLVPLKEKKLMEVK             | P56135 | 0          | n +42.03 Da,K +34.06 Da, | 2776.287109 | 3 | 631.1019897 | 631.1039614 |
| PEDPFVEKAKGILR              | Q9JMA7 | 0.00189873 | n +17.03 Da,K +34.06 Da, | 2858.70166  | 4 | 421.769989  | 421.7674245 |
| GWKEIEYEVVR                 | Q8C196 | 0          | n +34.06 Da,K +34.06 Da, | 3031.875977 | 2 | 738.4299927 | 738.4301046 |
| AVRPLQLLGTCAELCR            | Q8BTE6 | 0          | n +34.06 Da,             | 3319.221436 | 3 | 631.0182495 | 631.0203374 |
| SICEEFSQQADDKGCFR           | Q61838 | 0          | n +34.06 Da,K +34.06 Da, | 2764.349854 | 3 | 715.6709595 | 715.6719214 |
| SEAYLVGLFEDTNLCAIHAQR       | P02301 | 0          | n +34.06 Da,K +34.06 Da, | 4089.081543 | 3 | 825.7800293 | 825.7827519 |
| LPTQTISQGAIEKVKDATR         | Q8C196 | 0          | n +34.06 Da,K +34.06 Da, | 2821.460449 | 4 | 540.3400269 | 540.3377215 |
| TPAQYFHLLR                  | A2ATU0 | 0          | n +34.06 Da,             | 2747.9104   | 3 | 427.25      | 427.2505144 |
| SSSPVNVKCLKVSELKEEL         | Q8VEK3 | 0          | n +42.03 Da,K +34.06 Da, | 3064.390381 | 3 | 764.8300171 | 764.828103  |
| TMDKSELVQKAKLAEQAER         | Q9CQV8 | 0          | n +42.03 Da,K +34.06 Da, | 2819.891602 | 4 | 580.5903931 | 580.5913878 |
| GKLVINGKPIITIFQER           | P16858 | 0          | n +34.06 Da,K +34.06 Da, | 2842.418213 | 3 | 639.0895996 | 639.091114  |
| VSTSSMGTLPKQVKIVEGPR        | P38060 | 0          | n +34.06 Da,K +34.06 Da, | 2744.47998  | 4 | 579.6099854 | 579.6108516 |
| PSLDYMTKIPR                 | Q8C196 | 0          | n +17.03 Da,K +34.06 Da, | 3013.072998 | 3 | 490.9584961 | 490.9585609 |
| MLENSGCKALKEGVLEKR          | Q62392 | 0.02063882 | n +42.03 Da,K +34.06 Da, | 2742.51709  | 3 | 736.0999756 | 736.097612  |
| FDLRPGVIVR                  | Q3THS6 | 0.00599455 | n +34.06 Da,             | 2741.620605 | 3 | 402.5896912 | 402.5907594 |
| TTNTVPLHPYWPR               | P70245 | 0          | n +34.06 Da,             | 2739.488525 | 3 | 539.2999878 | 539.2983049 |
| MKFNPFVTSR                  | P61255 | 0.01457286 | n +34.06 Da,K +34.06 Da, | 2736.322021 | 3 | 470.6000061 | 470.6009254 |
| AAAPFLKHWR                  | Q91W89 | 0          | n +42.03 Da,K +34.06 Da, | 2827.307129 | 3 | 424.9200134 | 424.9189874 |
| PSVSLQTVKLMKEGLEAAR         | O35490 | 0          | n +17.03 Da,K +34.06 Da, | 3457.689697 | 3 | 714.7700195 | 714.7715641 |
| TEKLPFPIIDDKGR              | O08709 | 0          | n +34.06 Da,K +34.06 Da, | 2734.14624  | 4 | 433.5269775 | 433.5279555 |
| MVRVLPALPPVPQPVCTYR         | O09108 | 0.01194185 | n +17.03 Da,             | 2732.060791 | 4 | 571.0700073 | 571.0735019 |
| MKFNPFVTSR                  | P61255 | 0          | n +34.06 Da,K +34.06 Da, | 2830.874268 | 3 | 470.6002808 | 470.6009254 |
| SSPKSLEIIGAPFSKQPR          | Q61176 | 0          | n +42.03 Da,K +34.06 Da, | 2728.930176 | 4 | 568.6029663 | 568.6034551 |



|                              |        |            |                          |             |   |             |             |
|------------------------------|--------|------------|--------------------------|-------------|---|-------------|-------------|
| TVSLHLGVTPSVLR               | O89023 | 0          | n +34.06 Da,             | 3072.969727 | 3 | 504.9801941 | 504.9822054 |
| RFTDEEVDLYR                  | Q3THE2 | 0          | n +34.06 Da,             | 2725.513672 | 3 | 535.9363403 | 535.9371022 |
| VSQEHPVLTKFVEGAR             | Q8C196 | 0          | n +42.03 Da,K +34.06 Da, | 2818.866943 | 4 | 493.7799988 | 493.7823233 |
| PMLQTVAKNKDQGTYYDYVEGLR      | Q60605 | 0.01147626 | n +17.03 Da,K +34.06 Da, | 3159.885498 | 4 | 685.8699951 | 685.8719822 |
| VKVPDFSDYR                   | Q9CR68 | 0          | n +34.06 Da,K +34.06 Da, | 2718.977539 | 3 | 431.9198914 | 431.9206524 |
| APAGILNGKLVSAQIR             | Q922D8 | 0          | n +34.06 Da,K +34.06 Da, | 2717.770508 | 3 | 559.366333  | 559.3666485 |
| PESDELTAEKITEFCHR            | P09103 | 0          | n +17.03 Da,K +34.06 Da, | 2715.566162 | 4 | 529.0200195 | 529.017778  |
| LKGPKAISGFEGDVTSLR           | Q1ERP8 | 0          | n +34.06 Da,K +34.06 Da, | 2715.391846 | 3 | 679.0772095 | 679.080944  |
| PRPYEAENAIESWR               | P47754 | 0.00240674 | n +17.03 Da,             | 2707.478516 | 2 | 867.9299927 | 867.9340513 |
| TVPLHPYWPR                   | P70245 | 0          | n +34.06 Da,             | 2702.028809 | 3 | 433.9180908 | 433.9188761 |
| YIDQEELNKTPIWTR              | P07901 | 0.00189873 | n +34.06 Da,K +34.06 Da, | 2699.387207 | 4 | 534.8188477 | 534.8191644 |
| GASDTPHHQSPSESPVQPVGVGVCMMR  | A2AS89 | 0          | n +31.05 Da,             | 2695.869141 | 3 | 1018.140015 | 1018.140976 |
| PQHWPEPEEFQPER               | Q64481 | 0          | n +17.03 Da,             | 2692.516357 | 3 | 608.2894287 | 608.290098  |
| FDLRPGVIVR                   | Q3THS6 | 0.03775322 | n +34.06 Da,             | 2700.378906 | 3 | 402.5899963 | 402.5907594 |
| GVPVFKFPR                    | Q8R0Y6 | 0.00189873 | n +34.06 Da,K +34.06 Da, | 2692.265381 | 3 | 372.2511597 | 372.2517843 |
| MDASLEKIADPTLAEMGKNLKEAMR    | Q99K01 | 0          | n +42.03 Da,K +34.06 Da, | 4473.922363 | 4 | 727.4000244 | 727.4025734 |
| GISFHLPVNSR                  | Q9D1D4 | 0.04487761 | n +17.03 Da,             | 2994.932617 | 3 | 415.2358704 | 415.2367161 |
| MKVFTVGPLPAEGR               | Q91Z53 | 0          | n +34.06 Da,K +34.06 Da, | 2687.234863 | 2 | 785.4753418 | 785.4765317 |
| SPKEECALEIIKGTALR            | P50172 | 0          | n +34.06 Da,K +34.06 Da, | 3020.378662 | 4 | 505.0599976 | 505.0607286 |
| GVSDGSEVAKAQKAAPGGASPTIFSR   | Q9D0S9 | 0          | n +34.06 Da,K +34.06 Da, | 2682.258545 | 4 | 648.3712769 | 648.3725589 |
| LFAYPDTHR                    | P24270 | 0.00189873 | n +42.03 Da,             | 2680.970703 | 3 | 387.8603516 | 387.8610976 |
| AGVSDGSEVAKAQKAAPGGASPTIFSR  | Q9D0S9 | 0          | n +34.06 Da,K +34.06 Da, | 2680.233887 | 4 | 666.1300049 | 666.1318375 |
| GVDVHPGYGFLSER               | Q05920 | 0          | n +34.06 Da,             | 2850.269287 | 3 | 546.6199951 | 546.6213366 |
| AIAPEKDVDGLTSVSAGKLAR        | Q922D8 | 0          | n +34.06 Da,K +34.06 Da, | 2679.912109 | 4 | 550.8400269 | 550.8403628 |
| GSPIEVTLAKPVDKDSYVR          | Q5YD48 | 0.00240674 | n +34.06 Da,K +34.06 Da, | 2679.672119 | 3 | 726.1099854 | 726.1072705 |
| AASKVKQDMPPPGGYGPIDYKR       | Q9ERS2 | 0          | n +42.03 Da,K +34.06 Da, | 2678.178711 | 4 | 630.6096191 | 630.6098461 |
| VPPPPMEPDHPFYSNISKDR         | Q9DBJ1 | 0          | n +34.06 Da,K +34.06 Da, | 2676.0979   | 4 | 598.5661011 | 598.5664134 |
| MKFNPFVTSR                   | P61255 | 0.03456329 | n +34.06 Da,K +34.06 Da, | 2675.766113 | 3 | 470.6008606 | 470.6009254 |
| DPCALCSLHSIGKIGGAQNR         | P34884 | 0          | n +34.06 Da,K +34.06 Da, | 2670.800293 | 3 | 741.3974609 | 741.3983549 |
| SVFVLAMVDEDKKNR              | Q64374 | 0          | n +34.06 Da,K +34.06 Da, | 2823.657471 | 4 | 492.5400085 | 492.5424373 |
| SIVEDKLVEDLKTR               | P26443 | 0.00240674 | n +34.06 Da,K +34.06 Da, | 2669.58252  | 4 | 437.5299988 | 437.5319668 |
| SIQIMKVEEIAAGKCR             | P62717 | 0          | n +34.06 Da,K +34.06 Da, | 2758.16626  | 4 | 484.5400085 | 484.5458225 |
| WGHLQVAAALR                  | Q8VCT4 | 0.00599455 | n +34.06 Da,             | 2661.192627 | 3 | 433.917572  | 433.9175354 |
| ASGADSKGDDLSTAILKQK          | Q01853 | 0          | n +42.03 Da,K +34.06 Da, | 2659.618896 | 3 | 683.7299805 | 683.735614  |
| KLALFYNVVSAFLNPIIYSLR        | Q8VYF3 | 0.03775322 | n +42.03 Da,K +34.06 Da, | 2831.30249  | 4 | 630.1300049 | 630.1227592 |
| TSVLICPDGKTVEAAAHGTVTR       | O88844 | 0          | n +34.06 Da,K +34.06 Da, | 2655.904541 | 3 | 827.4500122 | 827.4531832 |
| MKPPGGESSDLFGSPEEGISSKPNR    | Q6PGH2 | 0          | n +34.06 Da,K +34.06 Da, | 2655.723389 | 4 | 698.8699951 | 698.8709579 |
| SGASDTPHHQSPSESPVQPVGVGVCMMR | A2AS89 | 0.01457286 | n +31.05 Da,             | 2755.133301 | 4 | 785.6099854 | 785.6155581 |
| PVSAQHAKLSLDGQNIYNACCTLR     | P17225 | 0.00189873 | n +17.03 Da,K +34.06 Da, | 2842.589355 | 4 | 692.6099854 | 692.6114743 |
| GDTIFGKIIR                   | P70349 | 0.00240674 | n +34.06 Da,K +34.06 Da, | 2651.952393 | 3 | 396.6000061 | 396.5976208 |

|                          |        |            |                          |             |   |             |             |
|--------------------------|--------|------------|--------------------------|-------------|---|-------------|-------------|
| AGIAIKLAKDR              | O08529 | 0          | n +42.03 Da,K +34.06 Da, | 2648.859131 | 3 | 422.6238098 | 422.6240585 |
| PNSKLFDPHEVPTPPESASVSR   | P19096 | 0.01046572 | n +17.03 Da,K +34.06 Da, | 2647.614502 | 4 | 611.3271484 | 611.327608  |
| CLTNFHGMDLTR             | P97351 | 0.00464037 | n +34.06 Da,             | 2693.682861 | 3 | 500.25      | 500.249969  |
| LGATWVVVLGHSER           | P17751 | 0.00511364 | n +34.06 Da,             | 2751.417969 | 3 | 486.945282  | 486.9473835 |
| GPAGAGESKCPMLMVKVLDAVR   | P07309 | 0          | n +34.06 Da,K +34.06 Da, | 2729.491455 | 4 | 565.0900269 | 565.0868492 |
| PYKALWFER                | Q3B7Z2 | 0.00189873 | n +17.03 Da,K +34.06 Da, | 2790.105225 | 3 | 420.9147644 | 420.9169127 |
| MDFSKLPKIR               | P50516 | 0.00068776 | n +42.03 Da,K +34.06 Da, | 3338.081299 | 3 | 448.9500122 | 448.9496658 |
| AGKPVLYFDGR              | P30115 | 0          | n +42.03 Da,K +34.06 Da, | 2639.15625  | 3 | 479.268219  | 479.2683455 |
| SLPPLNLKELEKDLIDR        | Q05920 | 0          | n +34.06 Da,K +34.06 Da, | 4250.699219 | 4 | 524.5861816 | 524.5860022 |
| VSTSSMGTLPKQVKIVEGPR     | P38060 | 0          | n +34.06 Da,K +34.06 Da, | 2766.958008 | 3 | 772.4699707 | 772.4787099 |
| DIVMTQSHKFMSTSVGDR       | P01633 | 0.03373946 | n +34.06 Da,K +34.06 Da, | 2633.575195 | 4 | 527.5300293 | 527.5291365 |
| VILFHETLYQKDSQGNLFR      | Q91Y97 | 0.00464037 | n +34.06 Da,K +34.06 Da, | 3401.680908 | 3 | 792.7800293 | 792.7830802 |
| SVQTVGQIELCFKEDLHLR      | Q9CQ01 | 0          | n +34.06 Da,K +34.06 Da, | 3873.981201 | 4 | 611.0936279 | 611.0927955 |
| GPTTPEADKIFLER           | P26443 | 0          | n +34.06 Da,K +34.06 Da, | 2624.114014 | 3 | 547.9880371 | 547.9876147 |
| TFTLSNLPHFR              | A2ATU0 | 0          | n +34.06 Da,             | 3456.985596 | 3 | 456.2600098 | 456.2611908 |
| SIYHPSLLPR               | Q8K009 | 0          | n +34.06 Da,             | 2615.182861 | 3 | 443.9411011 | 443.9415695 |
| HVLSLSFPIR               | P26443 | 0.03373946 | n +34.06 Da,             | 3014.08667  | 3 | 401.5899963 | 401.5871264 |
| KHTSSLKVTNEPILAFSQGSPER  | Q8CHT0 | 0.00068776 | n +42.03 Da,K +34.06 Da, | 2820.365234 | 4 | 659.8699951 | 659.8724297 |
| AHGSVVKSSEDYAFPTYADRR    | P19783 | 0          | n +42.03 Da,K +34.06 Da, | 2608.92627  | 4 | 587.0466919 | 587.0487859 |
| AGIAIKLAKDR              | O08529 | 0.00900424 | n +42.03 Da,K +34.06 Da, | 2607.983154 | 3 | 422.6235657 | 422.6240585 |
| LNLDSLKFR                | Q8BK30 | 0.01194185 | n +34.06 Da,K +34.06 Da, | 3125.05127  | 3 | 391.9200134 | 391.9257374 |
| PLDRPTFSVLR              | Q60805 | 0.00511364 | n +17.03 Da,             | 2606.555664 | 3 | 439.9299927 | 439.9277712 |
| TGFHETSININDFSAGVANR     | P15105 | 0          | n +34.06 Da,             | 2684.900391 | 3 | 691.0100098 | 691.0065795 |
| AGKPVLYFDGR              | P30115 | 0          | n +42.03 Da,K +34.06 Da, | 2601.871582 | 2 | 718.3959961 | 718.39888   |
| TNSCVAVMEGKQAKVLENAEGAR  | P38647 | 0          | n +34.06 Da,K +34.06 Da, | 2600.962891 | 4 | 641.8499756 | 641.855953  |
| SHPSWLPPKSTGEPLGHVPAR    | Q8BFW7 | 0          | n +42.03 Da,K +34.06 Da, | 2600.865234 | 4 | 582.3152466 | 582.3183332 |
| SGYPTLKIFR               | P08003 | 0.0188212  | n +34.06 Da,K +34.06 Da, | 2739.417725 | 3 | 417.2679138 | 417.2695041 |
| PLPPLPEYGGKVR            | Q9CQQ7 | 0.00754717 | n +17.03 Da,K +34.06 Da, | 2597.137451 | 2 | 737.4500122 | 737.4561597 |
| TEADVNPKAYPLADAHLTKK     | Q9D0T1 | 0          | n +42.03 Da,K +34.06 Da, | 2595.519775 | 3 | 776.1199951 | 776.1215799 |
| NFGGMKDLIAR              | P33267 | 0.00599455 | n +42.03 Da,K +34.06 Da, | 2867.878662 | 3 | 433.25      | 433.2430314 |
| LDPKNTVSGGAIALGHPLGGSGSR | Q8BWT1 | 0          | n +34.06 Da,K +34.06 Da, | 2591.612061 | 4 | 604.8400269 | 604.8449433 |
| RHEEFDIFSGR              | O88428 | 0.00511364 |                          | 2589.810059 | 3 | 507.9100037 | 507.9196758 |
| VSVVLGGDHSLSAVGSIHGHR    | Q61176 | 0          |                          | 2587.721436 | 3 | 682.7000122 | 682.7078753 |
| LPTQTISQGAIEKVKDATR      | Q8C196 | 0          | n +34.06 Da,K +34.06 Da, | 2835.192383 | 3 | 720.1099854 | 720.1145365 |
| SQAEFDKAAEEVKR           | P31786 | 0          | n +42.03 Da,K +34.06 Da, | 2585.180664 | 2 | 859.4692993 | 859.4732303 |
| TRYGLAAAVFTR             | Q9CZ51 | 0.02469734 | n +34.06 Da,             | 2580.979736 | 3 | 453.9299927 | 453.9367072 |
| GFNPAHVEAGLYGSR          | P17563 | 0          | n +34.06 Da,             | 2578.170166 | 3 | 536.960022  | 536.9495646 |
| GNVYAEKISGQKVNAAACDIAR   | O35490 | 0.00599455 | n +42.03 Da,K +34.06 Da, | 2588.094482 | 4 | 626.5900269 | 626.5866063 |
| PLPPLPEYGGKVR            | Q9CQQ7 | 0          | n +17.03 Da,K +34.06 Da, | 2576.701904 | 3 | 491.9708252 | 491.9731986 |
| GGFVFALEKR               | O35490 | 0          | n +34.06 Da,K +34.06 Da, | 2572.708008 | 2 | 596.3800049 | 596.3796853 |

|                                   |        |            |                          |             |   |             |             |
|-----------------------------------|--------|------------|--------------------------|-------------|---|-------------|-------------|
| GFNPAHVEAGLYGSR                   | P17563 | 0          | n +34.06 Da,             | 2570.029541 | 3 | 536.9400024 | 536.9495646 |
| SLHLGVTPSVLR                      | O89023 | 0.00564972 | n +34.06 Da,             | 2569.419678 | 3 | 438.2755432 | 438.2768409 |
| GGFVFALEKR                        | O35490 | 0          | n +34.06 Da,K +34.06 Da, | 2566.225342 | 3 | 397.9200134 | 397.9222157 |
| SSKPKSLEIIGAPFSKGQPR              | Q61176 | 0          | n +42.03 Da,K +34.06 Da, | 2566.046143 | 5 | 455.0799866 | 455.0842194 |
| ALEGVGHFFR                        | P29391 | 0          | n +34.06 Da,             | 2564.697754 | 3 | 389.5499878 | 389.5558263 |
| VSVVLGGDHS LAVGSISGHAR            | Q61176 | 0          |                          | 2669.40332  | 4 | 512.2836304 | 512.2827256 |
| AAPAKGENLSLVVHGPGDIR              | Q64442 | 0          | n +42.03 Da,K +34.06 Da, | 2972.319336 | 2 | 1039.079956 | 1039.084284 |
| GVSDGSEVAKAQAAPGGASPTIFSR         | Q9D0S9 | 0          | n +34.06 Da,K +34.06 Da, | 2752.767578 | 4 | 648.3699951 | 648.3725589 |
| FAKLVRPPVQVYVYIEGR                | Q9DB20 | 0          | n +34.06 Da,K +34.06 Da, | 2842.128418 | 3 | 666.4138184 | 666.415891  |
| TEVGHLIQVAAGSSNLKR                | P47738 | 0          | n +34.06 Da,K +34.06 Da, | 2558.115479 | 4 | 487.7900085 | 487.7957271 |
| KTVGVPEAADGKGVVVMKR               | P41105 | 0          | n +42.03 Da,K +34.06 Da, | 2557.341797 | 4 | 546.8400269 | 546.8462905 |
| IAYNLVHELK                        | B2RXC1 | 0.00805585 |                          | 2553.946289 | 3 | 409.9016113 | 409.8996638 |
| KPDIDAWELR                        | P12787 | 0.00947368 | n +34.06 Da,K +34.06 Da, | 2553.361084 | 3 | 437.5899963 | 437.5961688 |
| TTKDPESEHPSVTLFR                  | Q99JW2 | 0          | n +42.03 Da,K +34.06 Da, | 2551.985596 | 3 | 640.6644897 | 640.6689045 |
| TYGDTHTLVEKINYTGR                 | P49429 | 0          | n +34.06 Da,K +34.06 Da, | 2549.681152 | 3 | 713.0599976 | 713.0568693 |
| RITPSYVAFTPEGER                   | P20029 | 0          | n +34.06 Da,             | 2549.316162 | 3 | 586.3157959 | 586.3195464 |
| STSSMGTLPKQVKIVEVGPR              | P38060 | 0          | n +34.06 Da,K +34.06 Da, | 2549.104004 | 4 | 554.8400269 | 554.843748  |
| STSSMGTLPKQVKIVEVGPR              | P38060 | 0          | n +17.03 Da,K +34.06 Da, | 2545.296631 | 4 | 550.5900269 | 550.5858582 |
| SQAEFDKAAEEVKR                    | P31786 | 0          | n +42.03 Da,K +34.06 Da, | 2544.409668 | 2 | 859.4699707 | 859.4732303 |
| ISLGLPVGAVINCADNTGAKNLYIISVKGIKGR | P62830 | 0          | n +42.03 Da,K +34.06 Da, | 4584.931641 | 4 | 889.789978  | 889.7840546 |
| FEIGHFLR                          | P28656 | 0.03493246 | n +34.06 Da,             | 2988.761963 | 3 | 351.5405579 | 351.5415169 |
| SSKPKSLEIIGAPFSKGQPR              | Q61176 | 0          | n +42.03 Da,K +34.06 Da, | 2565.725586 | 4 | 568.6009521 | 568.6034551 |
| PFLPWKEQEQEVADR                   | O88851 | 0          | n +17.03 Da,K +34.06 Da, | 2792.864502 | 3 | 598.6641846 | 598.6650941 |
| RWDIQKYAR                         | O35490 | 0.00353565 | n +42.03 Da,K +34.06 Da, | 2534.966309 | 3 | 437.9129333 | 437.9175354 |
| RLLLPQQAGFGECDR                   | Q8C522 | 0          | n +34.06 Da,             | 2746.419189 | 3 | 598.6549072 | 598.656164  |
| LSLVVHGPGDIR                      | Q64442 | 0.03456329 | n +34.06 Da,             | 2533.206055 | 3 | 432.9313049 | 432.9330741 |
| SVLICPDGKTVEAAAHGTVTR             | O88844 | 0          | n +34.06 Da,K +34.06 Da, | 2533.135498 | 4 | 595.5800171 | 595.5797867 |
| SGASDTPHHQSPSESPVQPVGVGVCMMR      | A2AS89 | 0          | n +34.06 Da,             | 2619.973633 | 4 | 786.3699951 | 786.3695354 |
| TSSMGTLPKQVKIVEVGPR               | P38060 | 0          | n +34.06 Da,K +34.06 Da, | 2531.766113 | 4 | 533.0800171 | 533.0857407 |
| GFVKLGLINR                        | Q99K67 | 0.00240674 | n +34.06 Da,K +34.06 Da, | 2530.801758 | 3 | 395.6099854 | 395.6098605 |
| EYLAWQHTGLR                       | Q64471 | 0.00068776 | n +34.06 Da,             | 2530.614258 | 3 | 469.9200134 | 469.9245788 |
| LAYCVPVVQSLQALTSKIQR              | Q6NZQ2 | 0.01926877 | n +42.03 Da,K +34.06 Da, | 2675.841064 | 4 | 588.3300171 | 588.3398428 |
| SHPSWLPKSTGEPLGHVPAR              | Q8BFW7 | 0          | n +42.03 Da,K +34.06 Da, | 2681.853027 | 4 | 582.3174438 | 582.3183332 |
| MDDREDLVYQAKLAEQAER               | P62259 | 0          | n +42.03 Da,K +34.06 Da, | 3555.243896 | 3 | 786.0599976 | 786.0602447 |
| SSKPKSLEIIGAPFSKGQPR              | Q61176 | 0          | n +42.03 Da,K +34.06 Da, | 2524.842041 | 5 | 455.0822144 | 455.0842194 |
| FAKLVRPPVQVYVYIEGR                | Q9DB20 | 0.00511364 | n +34.06 Da,K +34.06 Da, | 2855.063477 | 4 | 500.0625916 | 500.0637374 |
| ISFHLPVNSR                        | Q9D1D4 | 0.00511364 | n +34.06 Da,             | 2524.544434 | 2 | 602.3536377 | 602.3564833 |
| ASLKDLEGKWR                       | Q05816 | 0          | n +42.03 Da,K +34.06 Da, | 3107.566162 | 3 | 471.6219177 | 471.6226066 |
| SNIKIFSGSSHQDLSQKIADR             | G3UXL2 | 0          | n +42.03 Da,K +34.06 Da, | 2760.354248 | 3 | 814.4500122 | 814.4521709 |
| GVSDGSEVAKAQAAPGGASPTIFSR         | Q9D0S9 | 0          | n +34.06 Da,K +34.06 Da, | 2523.460449 | 4 | 648.369812  | 648.3725589 |

|                             |        |            |                          |             |   |             |             |
|-----------------------------|--------|------------|--------------------------|-------------|---|-------------|-------------|
| GFVFALEKR                   | Q35490 | 0.00353565 | n +34.06 Da,K +34.06 Da, | 2522.727295 | 3 | 378.9136963 | 378.915061  |
| PLEKLVSSVSDLPKR             | P54869 | 0          | n +17.03 Da,K +34.06 Da, | 2521.577637 | 3 | 585.0441895 | 585.0471336 |
| FSVLLHIGIR                  | Q8VCR7 | 0.01457286 |                          | 3188.781006 | 3 | 385.5700073 | 385.5729991 |
| NKELDPVQKLFVDKIR            | P97450 | 0.00599455 | n +42.03 Da,K +34.06 Da, | 3390.81665  | 4 | 522.3400269 | 522.3334445 |
| PILGVTEAFKR                 | P05202 | 0          | n +17.03 Da,K +34.06 Da, | 2515.593506 | 2 | 641.4091797 | 641.4112205 |
| NAGVSDGSEVAKAQAAPGGASPTIFSR | Q9D0S9 | 0          | n +34.06 Da,K +34.06 Da, | 2536.538086 | 4 | 694.6400146 | 694.6425695 |
| GELQKAILFTDAIKLNPR          | Q99L47 | 0          | n +34.06 Da,K +34.06 Da, | 4406.255859 | 4 | 561.8499756 | 561.8507303 |
| MNQEKLAKLQAQVR              | Q64152 | 0          | n +42.03 Da,K +34.06 Da, | 2511.831299 | 3 | 589.6900024 | 589.6909151 |
| AHIFVYGTLLKR                | Q923B0 | 0          | n +42.03 Da,K +34.06 Da, | 2712.913818 | 2 | 690.9124146 | 690.9141656 |
| DLPKNWDWR                   | Q9WUU7 | 0.00240674 | n +34.06 Da,K +34.06 Da, | 3177.697021 | 3 | 433.2481995 | 433.2489917 |
| MQIFVKTLTGK                 | P0CG49 | 0          | n +34.06 Da,K +34.06 Da, | 2649.417969 | 3 | 456.6400146 | 456.6441719 |
| MKFNPFVTSR                  | P61255 | 0          | n +17.03 Da,K +34.06 Da, | 2508.583984 | 2 | 696.8800049 | 696.8819704 |
| VGDLSPKQEEALAKFR            | Q99J08 | 0          | n +42.03 Da,K +34.06 Da, | 2506.262451 | 4 | 475.2900085 | 475.2809156 |
| TKYPQLLSGIR                 | P50247 | 0.01457286 | n +34.06 Da,K +34.06 Da, | 2505.864014 | 3 | 448.6268616 | 448.6275802 |
| PSNMPPGIEPSPDKMLQGR         | P24270 | 0.00189873 | n +34.06 Da,K +34.06 Da, | 2503.095703 | 3 | 707.039978  | 707.0485515 |
| TMDKSELVQKAKLAEQAER         | Q9CQV8 | 0          | n +42.03 Da,K +34.06 Da, | 2861.125977 | 4 | 580.5900269 | 580.5913878 |
| EHLELFWSR                   | Q68FD5 | 0.00599455 |                          | 3146.430664 | 3 | 415.5499878 | 415.552264  |
| EWIKFAAACR                  | Q61495 | 0.02384428 | n +34.06 Da,K +34.06 Da, | 2498.971436 | 3 | 440.5899963 | 440.5903603 |
| AFCAPPAYLTHQQKVLIR          | Q9CQJ8 | 0          | n +34.06 Da,K +34.06 Da, | 2498.759277 | 4 | 517.8001099 | 517.8003836 |
| TWEKLLAAR                   | P14206 | 0.00189873 | n +34.06 Da,K +34.06 Da, | 2906.760498 | 3 | 423.6199951 | 423.6169038 |
| AFKDTGKTPVEPEVAIHR          | P60867 | 0          | n +42.03 Da,K +34.06 Da, | 2529.758789 | 3 | 702.4099731 | 702.4057211 |
| TFAEDKTYKYIR                | Q8VCF0 | 0          | n +42.03 Da,K +34.06 Da, | 2537.893555 | 3 | 548.9799805 | 548.98046   |
| PFFCLIDHR                   | Q64726 | 0.00511364 | n +17.03 Da,             | 2918.267578 | 3 | 407.8790588 | 407.8797636 |
| TFAHLDATTVLSR               | P56480 | 0          | n +34.06 Da,             | 2856.513184 | 3 | 489.2782898 | 489.2789106 |
| LQTVKLMKEGLEAAR             | O35490 | 0.00189873 | n +34.06 Da,K +34.06 Da, | 2566.983398 | 3 | 597.0499878 | 597.0536715 |
| AFKDTGKTPVEPEVAIHR          | P60867 | 0          | n +42.03 Da,K +34.06 Da, | 2488.832031 | 3 | 702.4050903 | 702.4057211 |
| MKLNISFPATGCQKLVIEDDER      | P62754 | 0          | n +34.06 Da,K +34.06 Da, | 3526.585693 | 3 | 889.4899902 | 889.4962126 |
| AGKPVLYHYFDGR               | P30115 | 0          | n +42.03 Da,K +34.06 Da, | 2485.637207 | 3 | 479.2674561 | 479.2683455 |
| SSKPKSLEIIGAPFSKGQPR        | Q61176 | 0.00189873 | n +42.03 Da,K +34.06 Da, | 2485.154785 | 4 | 568.5999756 | 568.6034551 |
| VVHSYEELEENYTR              | Q05920 | 0.00068776 | n +14.02 Da,             | 2483.666748 | 3 | 594.6153564 | 594.616211  |
| GQVVQFKLSDIGEGIR            | P53395 | 0          | n +34.06 Da,K +34.06 Da, | 3510.307861 | 3 | 605.3639526 | 605.3650852 |
| LHTVYQSVLEPETHQMLR          | Q07417 | 0          | n +31.05 Da,             | 3439.477295 | 2 | 1106.569946 | 1106.583297 |
| TSSMGTLPKQVKIVEVGPR         | P38060 | 0          | n +34.06 Da,K +34.06 Da, | 2511.347168 | 3 | 710.4400024 | 710.4452288 |
| SMGTLPKQVKIVEVGPR           | P38060 | 0.01232666 | n +34.06 Da,K +34.06 Da, | 2478.417725 | 4 | 486.0599976 | 486.0658136 |
| HTEAAEVLLER                 | Q8QZS1 | 0          | n +31.05 Da,             | 2501.086182 | 2 | 649.8499756 | 649.8592914 |
| MKFNPFVTSR                  | P61255 | 0          | n +34.06 Da,K +34.06 Da, | 2543.749023 | 2 | 705.3900146 | 705.3977499 |
| SSMGTLPKQVKIVEVGPR          | P38060 | 0          | n +34.06 Da,K +34.06 Da, | 2475.769043 | 4 | 507.8238831 | 507.8238209 |
| VSVVLGGDHS LAVGSISGHAR      | Q61176 | 0          | n +14.02 Da,             | 2567.355713 | 4 | 508.7799988 | 508.7788131 |
| CDILIPAASEKQLTKSNAPR        | P26443 | 0          | n +34.06 Da,K +34.06 Da, | 2473.064453 | 4 | 579.3499756 | 579.346655  |
| TVKKIAIFGATGR               | Q923D2 | 0          | n +42.03 Da,K +34.06 Da, | 2517.261963 | 3 | 491.3247681 | 491.3259014 |

|                                 |        |            |                          |             |   |             |             |
|---------------------------------|--------|------------|--------------------------|-------------|---|-------------|-------------|
| GTTPGGSITKVLIANR                | Q99MR8 | 0          | n +34.06 Da,K +34.06 Da, | 2469.825439 | 3 | 551.682312  | 551.6825255 |
| HEEFDFIGTR                      | O88428 | 0          |                          | 2573.241699 | 2 | 683.3200073 | 683.3253198 |
| MLQMLEKSLR                      | Q91XE0 | 0.00068776 | n +34.06 Da,K +34.06 Da, | 2468.588379 | 3 | 439.6070251 | 439.6070227 |
| PEWILVEKDR                      | Q8BP92 | 0.00068776 | n +17.03 Da,K +34.06 Da, | 2467.924072 | 3 | 445.9299927 | 445.9346325 |
| ASGASDTPHHQSPSESPVQPVGVGVCSSMMR | A2AS89 | 0.01232666 | n +34.06 Da,             | 2466.406738 | 4 | 804.1300049 | 804.1288139 |
| FRPTLVFR                        | P61922 | 0.02557915 |                          | 2465.678467 | 3 | 355.2200012 | 355.218556  |
| MKFNPFVTSDR                     | P61255 | 0          | n +34.06 Da,K +34.06 Da, | 2581.861084 | 3 | 470.6005249 | 470.6009254 |
| STPTGITDHIAQGPEPNLEESPKR        | Q9CRD0 | 0.00189873 | n +34.06 Da,K +34.06 Da, | 2464.195801 | 4 | 661.3599854 | 661.3568784 |
| RPTLFLEVIQR                     | P49429 | 0.03416004 | n +34.06 Da,             | 3202.8396   | 3 | 469.2999878 | 469.2961239 |
| GEVICQVAEGNKEDVDKAVKAAR         | P47738 | 0.01698302 | n +42.03 Da,K +34.06 Da, | 3463.587646 | 4 | 658.3599854 | 658.3721304 |
| ISFHLPVNSR                      | Q9D1D4 | 0.00068776 | n +34.06 Da,             | 2462.839111 | 3 | 401.9067078 | 401.9067477 |
| TKCTKCGPGYSTPLEAMKGPR           | P17563 | 0.0030012  | n +34.06 Da,K +34.06 Da, | 2461.470459 | 4 | 619.5999756 | 619.6011944 |
| SDAPPLTLDGIKDR                  | Q9CR21 | 0          | n +34.06 Da,K +34.06 Da, | 2622.534424 | 3 | 522.6437988 | 522.643848  |
| VSTSSMGTLPKQVKIVEVGPR           | P38060 | 0          | n +34.06 Da,K +34.06 Da, | 2785.75293  | 4 | 579.6090088 | 579.6108516 |
| GNWGHLDQVAALR                   | Q8VCT4 | 0.00189873 |                          | 2817.486084 | 3 | 488.9274597 | 488.9283938 |
| PVSAIKPTAAPPLAEAGAAGKLR         | Q9D2G2 | 0          | n +17.03 Da,K +34.06 Da, | 2458.120361 | 4 | 568.6099854 | 568.6112989 |
| IGDAAKNQVAMNPTNTVFDAGR          | P63017 | 0.00947368 | n +34.06 Da,K +34.06 Da, | 2453.031006 | 4 | 616.5999756 | 616.6022868 |
| STAIQELFKR                      | P68372 | 0.01232666 | n +34.06 Da,K +34.06 Da, | 2533.596924 | 3 | 420.9400024 | 420.9364138 |
| AFKDTGKTPVEPEVAIHR              | P60867 | 0          | n +42.03 Da,K +34.06 Da, | 2448.229004 | 3 | 702.4000244 | 702.4057211 |
| SSTQFNKGPSYGLSAEVKNR            | Q08093 | 0          | n +42.03 Da,K +34.06 Da, | 2447.676758 | 3 | 760.7399902 | 760.7466951 |
| ECGAGVFMGSHFDR                  | P62983 | 0          | n +34.06 Da,             | 2444.785889 | 3 | 535.2445679 | 535.2449953 |
| SSKPKSLEIIGAPFSKGQPR            | Q61176 | 0          | n +42.03 Da,K +34.06 Da, | 2552.539551 | 2 | 1136.195801 | 1136.199634 |
| SSLMPQKKNPDSLELIR               | Q91YI0 | 0          | n +34.06 Da,K +34.06 Da, | 2443.60791  | 3 | 686.75      | 686.7540623 |
| SSLMPQKKNPDSLELIR               | Q91YI0 | 0          | n +34.06 Da,K +34.06 Da, | 2436.325684 | 4 | 515.3200073 | 515.3173659 |
| NHQGLLLMDTTFR                   | Q05920 | 0.00068776 |                          | 3137.2854   | 3 | 525.2700195 | 525.2766945 |
| NLYKGLEAFR                      | P54869 | 0          | n +34.06 Da,K +34.06 Da, | 2612.939209 | 3 | 426.9327698 | 426.9328921 |
| MKETIMNQEKLAKLQAQVR             | Q64152 | 0          | n +42.03 Da,K +34.06 Da, | 3130.0354   | 3 | 801.8099976 | 801.8152162 |
| TDYGFEGHPFR                     | Q9DCT2 | 0.00511364 | n +34.06 Da,             | 2423.931641 | 3 | 453.8900146 | 453.8895343 |
| KDASVVGFFR                      | P27773 | 0.00754717 | n +34.06 Da,K +34.06 Da, | 2423.520264 | 3 | 398.5807495 | 398.5819707 |
| MYVLPNSFHSPR                    | Q9EPF7 | 0.01194185 | n +34.06 Da,             | 2423.438477 | 3 | 494.5964966 | 494.5975858 |
| KSTPECAHLLVSSIGVVGTAEQNR        | O35215 | 0          | n +34.06 Da,K +34.06 Da, | 3043.791748 | 3 | 874.4799805 | 874.483254  |
| PAKPVIPATAAKRIDLYAR             | P48168 | 0.02426007 | n +14.02 Da,K +28.03 Da, | 2417.873047 | 4 | 513.3099976 | 513.318845  |
| VLLAAAVCTKAGKAIYSR              | Q5XJY5 | 0          | n +34.06 Da,K +34.06 Da, | 2411.77832  | 4 | 483.3226318 | 483.3237221 |
| LKVEEAYDLAR                     | O55234 | 0          | n +34.06 Da,K +34.06 Da, | 2410.491211 | 3 | 458.9500122 | 458.9469789 |
| TAIQELFKR                       | P68372 | 0.02731193 | n +34.06 Da,K +34.06 Da, | 2409.160889 | 3 | 391.9248047 | 391.9257374 |
| LLNPKPKSEMTPPEELQKR             | P62317 | 0          | n +42.03 Da,K +34.06 Da, | 2405.049805 | 2 | 1136.670044 | 1136.675135 |
| PFTYDYHTLR                      | Q9Z239 | 0          | n +17.03 Da,             | 2404.10376  | 3 | 443.8917542 | 443.8927267 |
| SKDSTYSMSSTLTLTKDEYER           | P01837 | 0          | n +34.06 Da,K +34.06 Da, | 2805.618896 | 3 | 848.7800293 | 848.7793319 |
| MIGGLFIYNHKGEVLISR              | P84091 | 0          | n +34.06 Da,K +34.06 Da, | 3422.926514 | 4 | 529.5599976 | 529.5659501 |
| TSVLICPDGKTVEAAAHGTVTR          | O88844 | 0          | n +34.06 Da,K +34.06 Da, | 2804.094482 | 4 | 620.8376465 | 620.8417065 |

|                                 |        |            |                                      |             |   |             |             |
|---------------------------------|--------|------------|--------------------------------------|-------------|---|-------------|-------------|
| GLLSSLDHTSIR                    | Q9D0M3 | 0          |                                      | 2622.160645 | 3 | 433.5700073 | 433.5736168 |
| PDDIWQLSSSLKR                   | Q9CYN2 | 0          | n +17.03 Da,K +34.06 Da,             | 3319.479004 | 3 | 532.6400146 | 532.6386563 |
| SSKPKSLEIIGAPFSKGQPR            | Q61176 | 0          | n +42.03 Da,K +34.06 Da,             | 2543.224609 | 3 | 757.7984619 | 757.8021813 |
| LLVSYNLLFR                      | Q8BGX7 | 0.01836228 |                                      | 2497.762939 | 3 | 413.25      | 413.2482928 |
| PVVLTKFVEGAR                    | Q8C196 | 0          | n +17.03 Da,K +34.06 Da,             | 2436.396484 | 3 | 456.2900085 | 456.2941606 |
| LGNVTAGKDGVANVSIEDR             | P08228 | 0          | n +34.06 Da,K +34.06 Da,             | 2392.467041 | 3 | 661.7109375 | 661.7095809 |
| SLLNPKSEMTPPEELQKR              | P62317 | 0          | n +42.03 Da,K +34.06 Da,             | 2390.640381 | 3 | 758.1199951 | 758.1191818 |
| GVSDGSEVAKAQAAPGGASPTIFSR       | Q9D0S9 | 0          | n +34.06 Da,K +34.06 Da,             | 2614.131592 | 4 | 648.3699951 | 648.3725589 |
| PNVTIILKEPVR                    | Q99PL5 | 0          | n +17.03 Da,K +34.06 Da,             | 2385.270996 | 3 | 477.3154602 | 477.3169654 |
| LEGVGHFFR                       | P29391 | 0.00240674 | n +34.06 Da,                         | 2383.943848 | 3 | 365.8800049 | 365.8767882 |
| APLDTINVHLR                     | P70699 | 0          | n +34.06 Da,                         | 2413.74292  | 3 | 428.2596436 | 428.2611908 |
| PSKGPLQSQVQVFR                  | P14131 | 0          | n +17.03 Da,K +34.06 Da,             | 2380.811279 | 3 | 517.6469116 | 517.6473743 |
| DIKPIWQR                        | P08113 | 0.02731193 | n +34.06 Da,K +34.06 Da,             | 2380.368164 | 3 | 375.25      | 375.2468107 |
| VLLAAAVCTKAGKAIIVSR             | Q5XJY5 | 0          | n +34.06 Da,K +34.06 Da,             | 2371.333496 | 4 | 483.3217163 | 483.3237221 |
| ASLKDLLEGKWR                    | Q05816 | 0.00240674 | n +42.03 Da,K +34.06 Da,             | 3144.427246 | 2 | 706.9282227 | 706.9302716 |
| SLLNPKSEMTPPEELQKR              | P62317 | 0          | n +42.03 Da,K +34.06 Da,             | 2431.436523 | 3 | 758.1176758 | 758.1191818 |
| PFLDIQKKLGLSLDR                 | Q99LY9 | 0          | n +17.03 Da,K +34.06 Da,             | 3738.867676 | 4 | 457.7999878 | 457.7989904 |
| QKTGTAEMSSILEER                 | Q03265 | 0          | n +34.06 Da,K +34.06 Da,             | 2351.471191 | 3 | 583.3197021 | 583.3225577 |
| TVGVEPAADGKGVVVVMKR             | P41105 | 0          | n +34.06 Da,K +34.06 Da,             | 2349.156738 | 4 | 504.317627  | 504.3199084 |
| SLEITNTYKLVKSR                  | Q4LDG0 | 0          | n +34.06 Da,K +34.06 Da,             | 2343.557617 | 4 | 439.2799988 | 439.287234  |
| FVEDLINESFKDNR                  | Q8BXZ1 | 0          | n +34.06 Da,K +34.06 Da,             | 2339.60498  | 3 | 560.960022  | 560.966991  |
| SCVAVMEGKQAKVLENAEGAR           | P38647 | 0          | n +34.06 Da,K +34.06 Da,             | 2338.2854   | 4 | 588.0783691 | 588.0833012 |
| AGKPVLYHFNAR                    | P10648 | 0          | n +42.03 Da,K +34.06 Da,             | 2337.5896   | 2 | 724.9118042 | 724.9146971 |
| DHGDALAFVDVPNDSSFIQVKNPR        | Q61176 | 0          | n +42.03 Da,K +34.06 Da,             | 3827.800537 | 3 | 882.789978  | 882.78388   |
| AGKPVLYHFNAR                    | P10648 | 0          | n +42.03 Da,K +34.06 Da,             | 2335.356445 | 3 | 483.6108093 | 483.6122235 |
| TGPNLHGLFGR                     | P62897 | 0          | n +34.06 Da,                         | 2655.321777 | 3 | 401.5661621 | 401.566614  |
| FAQLCEEHGILR                    | B5X0G2 | 0.00189873 |                                      | 2332.36499  | 2 | 750.8800049 | 750.8850214 |
| SKWLDGFR                        | Q9D855 | 0.01194185 | n +34.06 Da,K +34.06 Da,             | 2331.876709 | 3 | 359.5549316 | 359.5556442 |
| QIKVIAPWR                       | P16460 | 0.00754717 | n +34.06 Da,K +34.06 Da,             | 2330.391113 | 3 | 393.6099854 | 393.6063388 |
| ASGADSKGDDLSTAILKQKNRPN         | Q01853 | 0          | n +42.03 Da,K +34.06 Da,             | 2330.320557 | 4 | 633.3599854 | 633.3634626 |
| GVQVSPSGEKITHGTQVYDEKDYR        | P52503 | 0.00900424 | n +42.03 Da,n +28.03 Da,K +28.03 Da, | 2328.615479 | 4 | 698.6099854 | 698.6028897 |
| TTKAPAAIGPYSQAVQVDR             | P52760 | 0          | n +34.06 Da,K +34.06 Da,             | 2325.848877 | 3 | 681.0599976 | 681.0619543 |
| TFASQVTLGDKVKVVER               | Q9DCW4 | 0          | n +34.06 Da,K +34.06 Da,             | 2323.361084 | 4 | 503.0599976 | 503.0586146 |
| ISTNYYASQKKTFEINPR              | P08113 | 0          | n +34.06 Da,K +34.06 Da,             | 2323.290527 | 4 | 566.3300171 | 566.3298965 |
| SHPSWLPPKSTGEPLGHVPAR           | Q8BFW7 | 0          | n +42.03 Da,K +34.06 Da,             | 2599.093994 | 3 | 776.0800171 | 776.0886855 |
| SAKVSDAISTQYPVVDHEFDVVVGAGGAGLR | Q8K2B3 | 0          | n +34.06 Da,K +34.06 Da,             | 4083.237793 | 4 | 821.6958008 | 821.6953033 |
| TGKTSIAIDTIINQKR                | Q03265 | 0          | n +34.06 Da,K +34.06 Da,             | 2313.075195 | 3 | 621.0700073 | 621.070379  |
| PEKVNIDGGAIALGHPLGASGCR         | Q8CAY6 | 0          | n +17.03 Da,K +34.06 Da,             | 2658.665039 | 4 | 585.8227539 | 585.8233352 |
| PADLPKNWDWR                     | Q9WUU7 | 0          | n +17.03 Da,K +34.06 Da,             | 2880.241211 | 3 | 483.6008606 | 483.6017648 |
| RAHSILPVDDINGLNEEQKQLR          | Q9JHI5 | 0.01232666 | n +34.06 Da,K +34.06 Da,             | 3384.953613 | 4 | 682.8900146 | 682.8807862 |

|                            |        |            |                          |             |   |             |             |
|----------------------------|--------|------------|--------------------------|-------------|---|-------------|-------------|
| GNVYAEKISGQKVNEAACDIAR     | O35490 | 0          | n +42.03 Da,K +34.06 Da, | 2566.322998 | 3 | 835.1199951 | 835.1130495 |
| GNVYAEKISGQKVNEAACDIAR     | O35490 | 0          | n +34.06 Da,K +34.06 Da, | 2520.350098 | 3 | 832.460022  | 832.4639002 |
| DPAIYFKEQFLDGDWATNR        | P14211 | 0          | n +34.06 Da,K +34.06 Da, | 4313.387695 | 2 | 1177.609985 | 1177.608048 |
| VSMVMTVDTSHEDMIHDAQMDYYGTR | Q9D1M0 | 0          | n +42.03 Da,             | 4138.421875 | 3 | 1019.767883 | 1019.772289 |
| LTDYLMKILTER               | P60710 | 0          | n +34.06 Da,K +34.06 Da, | 4087.455078 | 3 | 521.9899902 | 521.9865573 |
| NSRDTIFQKER                | P28867 | 0.01652479 | n +17.03 Da,K +34.06 Da, | 2302.412598 | 3 | 482.2848206 | 482.2758292 |
| DRDEAVNKAMKLSLELSR         | Q8CHW5 | 0.04487761 | n +17.03 Da,K +34.06 Da, | 2297.507324 | 2 | 1080.640015 | 1080.628222 |
| ATKCTKCGPGYSTPLEAMKGR      | P17563 | 0          | n +42.03 Da,K +34.06 Da, | 2295.606689 | 4 | 639.3400269 | 639.3473349 |
| TPEADKIFLER                | P26443 | 0.0188212  | n +34.06 Da,K +34.06 Da, | 2294.489502 | 2 | 693.9199829 | 693.91683   |
| ASGADSKGDDLSTAILKQKNR      | Q01853 | 0          | n +42.03 Da,K +34.06 Da, | 2293.463867 | 4 | 580.5900269 | 580.5895395 |
| SSKPKSLEIIGAPFSKGQPR       | Q61176 | 0          | n +42.03 Da,K +34.06 Da, | 2293.275391 | 2 | 1136.189941 | 1136.199634 |
| PLFTQHPVFR                 | Q5BL07 | 0          | n +17.03 Da,             | 2289.685547 | 3 | 420.241394  | 420.2416897 |
| IFSSEHDIFR                 | P51174 | 0.00068776 |                          | 2364.742676 | 3 | 426.8853149 | 426.887424  |
| TPDFFTPENYKR               | Q9D6J6 | 0          | n +34.06 Da,K +34.06 Da, | 2744.005127 | 3 | 528.2872925 | 528.2894049 |
| PLHPPPPPPVQPPPHPR          | Q9JIX8 | 0          | n +14.02 Da,             | 2287.998535 | 3 | 624.3499756 | 624.3528145 |
| AVFPSIVGRPR                | P60710 | 0          |                          | 2287.904297 | 3 | 409.5837097 | 409.5837868 |
| GQFKTYGICGAIR              | Q9CQR2 | 0.00240674 | n +34.06 Da,K +34.06 Da, | 2286.947754 | 2 | 769.9400024 | 769.942856  |
| PNDNFFEGKELR               | Q8CI94 | 0          | n +17.03 Da,K +34.06 Da, | 2285.960693 | 3 | 506.269989  | 506.2720849 |
| TPEADKIFLER                | P26443 | 0.02469734 | n +34.06 Da,K +34.06 Da, | 2285.807373 | 3 | 462.9460754 | 462.9469789 |
| SLPPHQKVPLPSLPTMQAGTIAR    | Q8BMF4 | 0.00240674 | n +34.06 Da,K +34.06 Da, | 3261.697754 | 4 | 649.381897  | 649.3835412 |
| SDAAVDTSEITTKDLKEKKEV      | P26350 | 0.00240674 | n +42.03 Da,K +34.06 Da, | 2284.88623  | 4 | 643.8800049 | 643.877371  |
| GQFKTYGICGAIR              | Q9CQR2 | 0          | n +34.06 Da,K +34.06 Da, | 2281.103516 | 3 | 513.6309204 | 513.6309962 |
| IFSSEHDIFR                 | P51174 | 0.00068776 |                          | 2280.057373 | 3 | 426.8868103 | 426.887424  |
| GLLSSLDHTSIR               | Q9D0M3 | 0.00599455 |                          | 2466.54834  | 3 | 442.9184265 | 442.9173835 |
| MDALEKGAVTSGPAPRGR         | Q99KK2 | 0.02063882 | n +42.03 Da,K +34.06 Da, | 2478.796387 | 3 | 630.3400269 | 630.3422455 |
| LPKNWDWR                   | Q9WUU7 | 0.01457286 | n +34.06 Da,K +34.06 Da, | 2278.450439 | 3 | 394.9063721 | 394.906677  |
| PVVPFHLGR                  | Q99LR1 | 0.00240674 | n +17.03 Da,             | 2277.858398 | 3 | 346.8796692 | 346.8800919 |
| AFKDTGKTPVEPEVAIHR         | P60867 | 0          | n +42.03 Da,K +34.06 Da, | 2370.960693 | 2 | 1053.10022  | 1053.104943 |
| AKINFDDNAEFR               | Q9Z2I8 | 0          | n +34.06 Da,K +34.06 Da, | 2276.753418 | 2 | 754.4117432 | 754.4124435 |
| SSKPKSLEIIGAPFSKGQPR       | Q61176 | 0          | n +42.03 Da,K +34.06 Da, | 2276.194824 | 5 | 455.0842285 | 455.0842194 |
| AREQWSNCPITGQIR            | P10605 | 0          | n +34.06 Da,             | 2275.821533 | 2 | 925.4799805 | 925.4811393 |
| LDLVEKGFNSLR               | Q922D8 | 0.00855158 | n +34.06 Da,K +34.06 Da, | 3078.212158 | 3 | 486.9700012 | 486.9698949 |
| TMKLELAQYR                 | Q03265 | 0.00068776 | n +34.06 Da,K +34.06 Da, | 2272.830322 | 2 | 660.9005737 | 660.9026679 |
| TSVATKKTEQPPSSEYIFER       | P29758 | 0          | n +34.06 Da,K +34.06 Da, | 2435.970703 | 4 | 615.0999756 | 615.0984688 |
| TLGVDFIDVATKVMIGESIDEKR    | Q8C196 | 0          | n +34.06 Da,K +34.06 Da, | 4572.864746 | 4 | 660.3900146 | 660.3859777 |
| KDDGNQPQDQITITGYEKNTEAAR   | Q8VDJ3 | 0          | n +34.06 Da,K +34.06 Da, | 2270.829346 | 4 | 699.3699951 | 699.3730222 |
| AIDMEKAQQALVQKR            | Q9CQQ7 | 0          | n +34.06 Da,K +34.06 Da, | 2270.731689 | 3 | 611.0499878 | 611.0488092 |
| LVIAGHLLR                  | Q07417 | 0.03566466 |                          | 2269.581787 | 3 | 340.5599976 | 340.5623227 |
| MKLNFSLR                   | O70572 | 0.03204524 | n +34.06 Da,K +34.06 Da, | 2520.670898 | 3 | 359.5700073 | 359.5688962 |
| TASKSAPSIPKENFSLTR         | P14152 | 0          | n +34.06 Da,K +34.06 Da, | 2265.507568 | 4 | 549.8181152 | 549.8190016 |

|                           |        |            |                          |             |   |             |             |
|---------------------------|--------|------------|--------------------------|-------------|---|-------------|-------------|
| PPGPEEAQRKLR              | B2RXC2 | 0.03972603 | n +17.03 Da,K +34.06 Da, | 2263.250977 | 3 | 476.9542236 | 476.9563192 |
| GAIIPLGAAEKDGR            | Q9EQJ9 | 0.00947368 | n +14.02 Da,K +28.03 Da, | 2262.156982 | 3 | 470.5996094 | 470.6085499 |
| PKALKPPCDLSMQSVEIAGTTDGIR | P41216 | 0.02813543 | n +42.03 Da,K +28.03 Da, | 2991.178711 | 4 | 696.3800049 | 696.3674017 |
| LPPAAAPPTPLAKRGMVR        | E9PZJ2 | 0.00599455 | n +42.03 Da,K +34.06 Da, | 2942.882324 | 3 | 640.3800049 | 640.3872373 |
| AGKPVVLYFDGR              | P30115 | 0.02384428 | n +42.03 Da,K +34.06 Da, | 2259.762207 | 3 | 479.2654724 | 479.2683455 |
| LDPSTNVSGGAIALGHPLGGSGSR  | Q8BWT1 | 0          | n +34.06 Da,K +34.06 Da, | 2602.546387 | 3 | 806.1199951 | 806.1241656 |
| SQAEFDKAAEEVKR            | P31786 | 0          | n +42.03 Da,K +34.06 Da, | 2438.832031 | 3 | 573.3168335 | 573.3179124 |
| PKYIIWSPVCR               | P11352 | 0.00068776 | n +17.03 Da,K +34.06 Da, | 2895.302002 | 2 | 735.4290771 | 735.43163   |
| GWKEIEYEVVR               | Q8C196 | 0          | n +34.06 Da,K +34.06 Da, | 3026.912842 | 3 | 492.6199951 | 492.6224952 |
| AEGKLWVACYNGGR            | Q64374 | 0          | n +34.06 Da,K +34.06 Da, | 2250.375732 | 2 | 824.9500122 | 824.9486701 |
| PQHWSEPEEFQPER            | Q64459 | 0          | n +17.03 Da,             | 2249.011475 | 2 | 906.9199829 | 906.9211412 |
| VGVIDLSPFGKFNKGR          | Q9DBT9 | 0          | n +42.03 Da,K +34.06 Da, | 3840.9375   | 4 | 490.0599976 | 490.0531041 |
| PQHWSEPEEFQPER            | Q64459 | 0          | n +17.03 Da,             | 2244.23999  | 3 | 604.9475098 | 604.949853  |
| PITLYLEKER                | P11499 | 0.00353565 | n +17.03 Da,K +34.06 Da, | 2243.957031 | 3 | 438.2744446 | 438.2747662 |
| GVNAVHWFR                 | P97784 | 0.00240674 | n +34.06 Da,             | 2243.513428 | 3 | 373.8800049 | 373.8805326 |
| REQWSNCPGTIGQIR           | P10605 | 0          | n +34.06 Da,             | 2242.544189 | 3 | 593.644165  | 593.644147  |
| GVAGVHFYTR                | Q9Z2X1 | 0.01232666 | n +34.06 Da,             | 2237.976074 | 3 | 418.5799866 | 418.578631  |
| SSKPKSLEIIGAPFSKGQPR      | Q61176 | 0          | n +42.03 Da,K +34.06 Da, | 2235.101074 | 5 | 455.0828247 | 455.0842194 |
| TIIDTFHQYSR               | P31725 | 0          | n +34.06 Da,             | 2230.623047 | 3 | 472.2547913 | 472.2561058 |
| DWGIKVER                  | P54116 | 0.01457286 | n +34.06 Da,K +34.06 Da, | 2229.766113 | 3 | 357.5599976 | 357.5591659 |
| DGTSRDPYSHALVAGIDR        | P61358 | 0          | n +34.06 Da,             | 2229.174805 | 3 | 655.3400269 | 655.3396698 |
| KLYFEELSLER               | Q8C196 | 0.01698302 | n +34.06 Da,K +34.06 Da, | 3301.41333  | 2 | 747.9400024 | 747.9455877 |
| SQEHPVVLTKFVEGAR          | Q8C196 | 0          | n +34.06 Da,K +34.06 Da, | 2227.926758 | 4 | 467.0299988 | 467.0283578 |
| PFLDLAHPR                 | P55096 | 0.00464037 | n +14.02 Da,             | 2223.741455 | 3 | 360.5368347 | 360.5380659 |
| SPKILQDIASGR              | Q91VD9 | 0.00240674 | n +34.06 Da,K +34.06 Da, | 2223.633057 | 2 | 676.9285889 | 676.9302716 |
| MMGHRPVLVLSQNTKR          | P80318 | 0          | n +42.03 Da,K +34.06 Da, | 2221.890869 | 4 | 486.5264893 | 486.5277055 |
| SDAPPLTLDGIKDR            | Q9CR21 | 0          | n +34.06 Da,K +34.06 Da, | 2401.602051 | 2 | 783.460022  | 783.4621337 |
| PLDLAKLGLR                | Q9QZH6 | 0.00511364 | n +17.03 Da,K +34.06 Da, | 3095.179443 | 3 | 382.9299927 | 382.9325628 |
| TFASQVTLGDKVKVER          | Q9DCW4 | 0          | n +34.06 Da,K +34.06 Da, | 2325.763184 | 3 | 670.4099731 | 670.4090607 |
| SPKILQDIASGR              | Q91VD9 | 0          | n +34.06 Da,K +34.06 Da, | 2217.639893 | 3 | 451.6214294 | 451.6226065 |
| TVDVDPKSPQYSQVIHR         | P17563 | 0          | n +34.06 Da,K +34.06 Da, | 2216.240479 | 4 | 510.0397949 | 510.0404598 |
| MMGHRPVLVLSQNTKR          | P80318 | 0          | n +42.03 Da,K +34.06 Da, | 2216.169678 | 3 | 648.3657837 | 648.3678485 |
| ATKCTKCGPGYSTPLEAMKGPR    | P17563 | 0          | n +42.03 Da,K +34.06 Da, | 2215.811279 | 3 | 852.1248169 | 852.1273544 |
| AVHPGYGFLSER              | Q05920 | 0          | n +34.06 Da,             | 2211.752441 | 2 | 683.8699951 | 683.8699554 |
| AHYHDNYGKNDEVEFVR         | P25688 | 0          | n +42.03 Da,K +34.06 Da, | 2209.814453 | 3 | 723.6799927 | 723.6784629 |
| AVHPGYGFLSER              | Q05920 | 0          | n +34.06 Da,             | 2208.402832 | 3 | 456.2481384 | 456.2490624 |
| PTLKFFPASADR              | P09103 | 0          | n +17.03 Da,K +34.06 Da, | 2444.465332 | 3 | 467.6098328 | 467.6101489 |
| TFYTKVLNEEER              | P24270 | 0.00189873 | n +34.06 Da,K +34.06 Da, | 2206.152588 | 3 | 532.9699707 | 532.9683316 |
| LSPTNCDASEPLAEKVLDLINKGR  | Q9ESB3 | 0          | n +42.03 Da,K +34.06 Da, | 4711.897461 | 3 | 917.5100098 | 917.5058361 |
| PQDAVVANQYKQNPMEFKQTAR    | P61087 | 0.00240674 | n +17.03 Da,K +34.06 Da, | 2268.388672 | 4 | 662.8699951 | 662.8629541 |



|                             |        |            |                          |             |   |             |             |
|-----------------------------|--------|------------|--------------------------|-------------|---|-------------|-------------|
| PEYDQKEGYLKIGASTQAAQR       | Q8VCT4 | 0          | n +17.03 Da,K +34.06 Da, | 2205.754639 | 4 | 610.3400269 | 610.3394748 |
| SDVGVLKWR                   | Q5XJY5 | 0.00464037 | n +34.06 Da,K +34.06 Da, | 2202.844238 | 3 | 376.5799866 | 376.578449  |
| TPGVAADLSHIETR              | P08249 | 0          | n +34.06 Da,             | 2255.418945 | 3 | 500.9400024 | 500.9458202 |
| PSQNPFSEDKTDKGIYVTR         | Q9DBG9 | 0          | n +17.03 Da,K +34.06 Da, | 2199.064941 | 3 | 756.4099731 | 756.4166151 |
| QEEKEDVKSCAEFVSGSCLR        | Q9DCX2 | 0          | n +34.06 Da,K +34.06 Da, | 2247.821777 | 3 | 810.0999756 | 810.1006278 |
| ATKCTKCGPGYSTPLEAMKGP       | P17563 | 0          | n +42.03 Da,K +34.06 Da, | 2198.333008 | 2 | 1277.680054 | 1277.687393 |
| GDNGFFKILR                  | P10605 | 0.00189873 | n +34.06 Da,K +34.06 Da, | 2974.110596 | 3 | 412.2575378 | 412.2574871 |
| PANLDLKKELSEPSSTR           | Q8C196 | 0          | n +17.03 Da,K +34.06 Da, | 2195.388184 | 4 | 493.294281  | 493.2955411 |
| MFQAAGAAQATPSHEAKGSSGSSTVQR | Q8BGB5 | 0          | n +42.03 Da,K +34.06 Da, | 2195.015625 | 3 | 913.4500122 | 913.450684  |
| HQGVMMVGMGQKDSYVGDQEAQSKR   | P60710 | 0          | n +42.03 Da,K +34.06 Da, | 2194.905029 | 3 | 873.0999756 | 873.1093108 |
| PGVTVKDVNQEFVR              | Q9CZX8 | 0          | n +17.03 Da,K +34.06 Da, | 2194.653076 | 3 | 589.6721802 | 589.6722488 |
| SGGIERPFVLSR                | Q8BHN3 | 0          |                          | 2193.749512 | 3 | 449.2600098 | 449.2577398 |
| VYEDQVGVKFDWR               | Q8C7X2 | 0          | n +34.06 Da,K +34.06 Da, | 2886.162842 | 3 | 537.2930908 | 537.2930379 |
| GYFEVTHDITR                 | P24270 | 0          | n +34.06 Da,             | 2347.885254 | 3 | 457.9100037 | 457.9087061 |
| CDILIPAASEKQLTKSNAPR        | P26443 | 0          | n +34.06 Da,K +34.06 Da, | 2366.112061 | 3 | 772.1199951 | 772.1264478 |
| EVAKAQKAAPGGASPTIFSR        | Q9D0S9 | 0.04693141 | K +28.03 Da,             | 2406.630615 | 3 | 690.7299805 | 690.7283877 |
| SSEAESGSSEVKKPAFMDDEEVQR    | Q9CXW2 | 0          | n +34.06 Da,K +34.06 Da, | 2185.116943 | 4 | 658.0913696 | 658.093221  |
| VSELITKAVAASKER             | P15864 | 0          | n +34.06 Da,K +34.06 Da, | 2180.481689 | 4 | 426.7830505 | 426.7833215 |
| MLTKFETKSAR                 | Q8CIE6 | 0          | n +42.03 Da,K +34.06 Da, | 2272.736816 | 3 | 474.6202087 | 474.6200972 |
| GLAFNALIHR                  | P57780 | 0.01232666 | n +34.06 Da,             | 2714.54834  | 3 | 382.5700073 | 382.5715877 |
| MNHPDYKLNLR                 | Q8CI75 | 0          | n +42.03 Da,K +34.06 Da, | 2373.343994 | 2 | 738.8900146 | 738.8956474 |
| KDGDGTITTKELGTVMR           | P62204 | 0          | n +34.06 Da,K +34.06 Da, | 2173.527344 | 3 | 642.0474243 | 642.0471345 |
| PDYWEKLLR                   | Q6PDQ2 | 0.00240674 | n +17.03 Da,K +34.06 Da, | 3267.099609 | 3 | 424.25      | 424.2520728 |
| PAVSLPPKENALFKR             | Q80UM3 | 0          | n +17.03 Da,K +34.06 Da, | 2172.303711 | 3 | 584.710144  | 584.7120849 |
| PAVSLPPKENALFKR             | Q80UM3 | 0          | n +17.03 Da,K +34.06 Da, | 2169.902832 | 4 | 438.7900085 | 438.7858828 |
| YVAEKISGQKVNEAACDIAR        | O35490 | 0          | n +34.06 Da,K +34.06 Da, | 2169.54126  | 4 | 581.833252  | 581.8336462 |
| TVDVDPKSPQYSQVIHR           | P17563 | 0.00189873 | n +34.06 Da,K +34.06 Da, | 2213.676758 | 3 | 679.710022  | 679.7181876 |
| GKDYQTLGLAR                 | Q9QYJ3 | 0.00240674 | n +34.06 Da,K +34.06 Da, | 2355.550537 | 3 | 484.9516602 | 484.9542449 |
| GKFMKPGKVVLVLAGR            | P61358 | 0          | n +42.03 Da,K +34.06 Da, | 3155.554443 | 3 | 615.4178467 | 615.4182846 |
| PKVIQPEVDTPLGR              | Q8VCU1 | 0          | n +17.03 Da,K +34.06 Da, | 2166.147705 | 2 | 800.4884033 | 800.4881889 |
| AYKIYQELWR                  | Q9CZM2 | 0          | n +34.06 Da,K +34.06 Da, | 3218.922363 | 3 | 479.9561462 | 479.9556969 |
| KEEPPSLRPAPPPISGGGYR        | Q8K0E8 | 0.00068776 | n +34.06 Da,K +34.06 Da, | 2162.253174 | 4 | 544.0599976 | 544.0654719 |
| MEVHELFR                    | P41216 | 0.01194185 | n +34.06 Da,             | 2161.738281 | 3 | 365.5334473 | 365.5340338 |
| SGYFHPLLR                   | P10518 | 0.02771142 | n +34.06 Da,             | 2161.432617 | 3 | 375.2202454 | 375.2205549 |
| GTITTKELGTVMR               | P62204 | 0          | n +34.06 Da,K +34.06 Da, | 2156.859619 | 2 | 737.9500122 | 737.9503471 |
| PWKLSFSYGR                  | Q91Y97 | 0          | n +17.03 Da,K +34.06 Da, | 2579.80249  | 3 | 431.25      | 431.2521841 |
| PDIVGLDSGHIR                | P52196 | 0.02693603 | n +17.03 Da,             | 2156.670654 | 2 | 648.3585205 | 648.3594584 |
| CQVAEGNKDVKAVKAAR           | D3YFF3 | 0.00240674 | n +42.03 Da,K +34.06 Da, | 2155.569824 | 3 | 701.7399902 | 701.7407046 |
| PGVTVKDVNQEFVR              | Q9CZX8 | 0          | n +17.03 Da,K +34.06 Da, | 2204.138672 | 2 | 884.0010376 | 884.004735  |
| SSKPKSLEIIGAPFSKGQPR        | Q61176 | 0          | n +42.03 Da,K +34.06 Da, | 2525.581543 | 4 | 568.6005859 | 568.6034551 |

|                                    |        |            |                          |             |   |             |             |
|------------------------------------|--------|------------|--------------------------|-------------|---|-------------|-------------|
| TSVATKKTEQPPSSEYIFER               | P29758 | 0          | n +34.06 Da,K +34.06 Da, | 2151.267334 | 3 | 819.7938843 | 819.7955329 |
| EPTAAAIAYGLDKKVGAEER               | P63017 | 0          | n +34.06 Da,K +34.06 Da, | 2866.805176 | 3 | 688.0800171 | 688.0845771 |
| MPFMDFLTKDGFESPEELR                | P52196 | 0          | n +34.06 Da,K +34.06 Da, | 4193.46582  | 4 | 630.5900269 | 630.5906935 |
| DIAFHFNPR                          | O08573 | 0.00599455 | n +34.06 Da,             | 2667.827148 | 3 | 384.2112732 | 384.2120596 |
| DPSKTNVSGGAIALGHPLGGSGSR           | Q8BWT1 | 0          | n +34.06 Da,K +34.06 Da, | 2214.830811 | 3 | 768.4299927 | 768.4294775 |
| PITLFVEKER                         | P07901 | 0.00599455 | n +17.03 Da,K +34.06 Da, | 2258.65625  | 3 | 428.269989  | 428.2712445 |
| EDEEDVKLLGMSGKR                    | Q61937 | 0          | n +34.06 Da,K +34.06 Da, | 2142.258301 | 4 | 452.7600098 | 452.7634292 |
| SLAVCKAGAVEKGVPLR                  | P17182 | 0          | n +34.06 Da,K +34.06 Da, | 2325.421143 | 4 | 505.8170471 | 505.8172671 |
| VSDGSEVAKAQKAAPGGASPTIFSR          | Q9D0S9 | 0          | n +34.06 Da,K +34.06 Da, | 2393.646729 | 4 | 634.1199951 | 634.1171929 |
| RFVIGGPQGDAGVTGR                   | Q91X83 | 0          | n +34.06 Da,             | 2139.1875   | 3 | 540.9729004 | 540.9724806 |
| SAGFLQASASDVVVVHGR                 | Q8VCH0 | 0          | n +34.06 Da,             | 2897.546631 | 3 | 612         | 612.0058505 |
| MGDHLWIAR                          | P15105 | 0.01457286 |                          | 2134.526611 | 3 | 376.1974792 | 376.1990558 |
| SSKPKSLEIIGAPFSKGQPR               | Q61176 | 0          | n +42.03 Da,K +34.06 Da, | 2133.503174 | 3 | 757.7999878 | 757.8021813 |
| ADEEKLPFGWEKR                      | Q9QUR7 | 0          | n +42.03 Da,K +34.06 Da, | 2243.88623  | 3 | 555.6452026 | 555.647481  |
| YVAEKISGQKVNEAACDIAR               | O35490 | 0          | n +34.06 Da,K +34.06 Da, | 2130.67334  | 3 | 775.4400024 | 775.4424361 |
| PANLDLKKELSEPSSTR                  | Q8C196 | 0          | n +17.03 Da,K +34.06 Da, | 2129.538818 | 2 | 985.5800171 | 985.5838058 |
| YVAEKISGQKVNEAACDIAR               | O35490 | 0          | n +34.06 Da,K +34.06 Da, | 2129.057861 | 4 | 581.8336792 | 581.8336462 |
| ATKCTKCGPGYSTPLEAMKGPR             | P17563 | 0          | n +42.03 Da,K +34.06 Da, | 2127.499512 | 4 | 639.345459  | 639.3473349 |
| SEEVEKAVETIR                       | Q80XN0 | 0          | n +34.06 Da,K +34.06 Da, | 2126.856689 | 3 | 486.6199951 | 486.6209319 |
| TWVVLGHSER                         | P17751 | 0          | n +34.06 Da,             | 2126.497314 | 3 | 406.5657654 | 406.5665027 |
| LFGDSYETQVIAHQGSSKGPR              | Q78JT3 | 0.00068776 | n +34.06 Da,K +34.06 Da, | 2432.380371 | 4 | 601.3200073 | 601.3238437 |
| PVSNAQPAGAEEKPEAKVLFDR             | Q8CGC7 | 0          | n +17.03 Da,K +34.06 Da, | 2123.450439 | 4 | 578.0900269 | 578.0879225 |
| QPAEAIHNWIR                        | Q8R0Y6 | 0          | n +34.06 Da,             | 2123.177002 | 3 | 456.9236755 | 456.9246901 |
| AAAAYEHLKLH                        | Q9EP69 | 0          | n +42.03 Da,K +34.06 Da, | 2573.986816 | 3 | 433.9128113 | 433.9137911 |
| PYTTFFVKMLPKDKCR                   | P18760 | 0          | n +17.03 Da,K +34.06 Da, | 2717.841309 | 4 | 489.7723694 | 489.7746582 |
| MKTILSNQTVDIPENVEITLKGR            | P51410 | 0          | n +34.06 Da,K +34.06 Da, | 3851.202637 | 4 | 676.1500244 | 676.1558895 |
| VISLSGEHSIIGR                      | P08228 | 0          | n +14.02 Da,             | 2402.988037 | 3 | 461.2641296 | 461.2647832 |
| AKVAVLGASGGIGQPLSLLLKNSPLVSR       | P08249 | 0          | n +34.06 Da,K +34.06 Da, | 4295.690918 | 3 | 949.9500122 | 949.9462759 |
| AAKPKLYYFNDR                       | P24472 | 0          | n +42.03 Da,K +34.06 Da, | 2293.163818 | 2 | 769.460022  | 769.4617387 |
| MIHMLNAAAYR                        | Q61285 | 0          | n +34.06 Da,             | 2201.213867 | 3 | 442.2394104 | 442.2407446 |
| ATSASSHLNKGIKQMY                   | P15105 | 0          | n +42.03 Da,K +34.06 Da, | 2111.801514 | 2 | 923.5100098 | 923.5118324 |
| PEADKIFLER                         | P26443 | 0.00189873 | n +17.03 Da,K +34.06 Da, | 2110.820557 | 3 | 423.5878296 | 423.5872328 |
| PYNPSMSRPDAWGVTKGAAELMQQKEATTEQQLR | O35490 | 0          | n +17.03 Da,K +34.06 Da, | 3869.222412 | 5 | 781.5999756 | 781.6091573 |
| FLSSSDKQNNLYKLEAFR                 | P54869 | 0          | n +34.06 Da,K +34.06 Da, | 3179.300293 | 4 | 602.3400269 | 602.3432698 |
| GNPTKVVAVDCGKNNVIR                 | Q8C196 | 0          | n +34.06 Da,K +34.06 Da, | 2108.471924 | 4 | 539.8300171 | 539.8321774 |
| GPAGAGESKCLMVKVLDVLR               | P07309 | 0          | n +34.06 Da,K +34.06 Da, | 3474.563232 | 3 | 753.1099854 | 753.1133734 |
| YGVLKADEGISFR                      | P35700 | 0.00240674 | n +34.06 Da,K +34.06 Da, | 2786.125732 | 3 | 508.2994995 | 508.3015333 |
| HVPGASFFDIEECR                     | P52196 | 0          |                          | 3345.244629 | 3 | 564.598938  | 564.5997262 |
| GVTGSQDEEDSKPKAEDEILNR             | P35564 | 0          | n +34.06 Da,K +34.06 Da, | 2100.109863 | 4 | 662.8499756 | 662.8491144 |
| LYKGLEAFR                          | P54869 | 0.00564972 | n +34.06 Da,K +34.06 Da, | 2099.291992 | 3 | 388.9180603 | 388.9185827 |

|                                |        |            |                          |             |   |             |             |
|--------------------------------|--------|------------|--------------------------|-------------|---|-------------|-------------|
| DWTFHYLR                       | Q99LC3 | 0.00240674 | n +34.06 Da,             | 3451.117676 | 3 | 391.2099915 | 391.2084266 |
| VHLTDAEKAASVCLWGKVNSEVGGGEALGR | P02088 | 0          | n +42.03 Da,K +34.06 Da, | 4325.201172 | 4 | 820.4400024 | 820.4332207 |
| MDNLSDTLKKLKITAADR             | E9Q6Q4 | 0          | n +42.03 Da,K +34.06 Da, | 4037.027832 | 4 | 545.0800171 | 545.081927  |
| IINEPTAAAIAYGLDKKVGAEAR        | P63017 | 0          | n +42.03 Da,K +34.06 Da, | 4550.883789 | 4 | 603.3599854 | 603.3548781 |
| FPRTVENIFHVSFIIR               | E0CY57 | 0.02196193 |                          | 2093.128906 | 4 | 494.5226746 | 494.5282664 |
| SHPSWLPPKSTGEPLGHVPAR          | Q8BFW7 | 0          | n +42.03 Da,K +34.06 Da, | 2641.361084 | 4 | 582.3181152 | 582.3183332 |
| TMKLELAQYR                     | Q03265 | 0          | n +34.06 Da,K +34.06 Da, | 2264.330566 | 3 | 440.9363403 | 440.9375374 |
| TDTEDKGEFLSEGGGVR              | E9PV24 | 0          | n +34.06 Da,K +34.06 Da, | 2081.850586 | 3 | 622.3200073 | 622.3235038 |
| MKHYEVEIR                      | Q9CY27 | 0.00900424 | n +42.03 Da,K +34.06 Da, | 2079.754883 | 3 | 427.5700073 | 427.567515  |
| IHLGVNESLTD TAR                | P11725 | 0          | n +34.06 Da,             | 2359.93457  | 3 | 520.625     | 520.6248583 |
| MRGQVGDLSPPQQEALAR             | Q8R0F9 | 0          | n +34.06 Da,             | 2074.721924 | 2 | 1009.530029 | 1009.536644 |
| PYTDAMIHEVQR                   | P56654 | 0.00900424 | n +17.03 Da,             | 2221.517578 | 3 | 492.9100037 | 492.9153144 |
| SGPKAKPVVFSFIAGITAPPGR         | Q9WUM5 | 0          | n +34.06 Da,K +34.06 Da, | 3053.807617 | 3 | 718.1300049 | 718.1282282 |
| SKWPEPVFGR                     | Q91WP0 | 0.00189873 | n +34.06 Da,K +34.06 Da, | 2475.090088 | 3 | 424.2570496 | 424.2574871 |
| KDGDGTITTKELGTVMR              | P62204 | 0          | n +34.06 Da,K +34.06 Da, | 2274.381348 | 3 | 642.039978  | 642.0471345 |
| IELGTACGYR                     | P62889 | 0.00240674 | n +34.06 Da,K +34.06 Da, | 2072.141113 | 3 | 500.2826843 | 500.2834851 |
| DPSKTNVSGGAIALGHPLGGSGSR       | Q8BWT1 | 0          | n +34.06 Da,K +34.06 Da, | 2218.951172 | 4 | 576.5700073 | 576.5739272 |
| KHTSSLKVTNEPILAFSQGSPER        | Q8CHT0 | 0          | n +31.05 Da,K +31.05 Da, | 3408.031006 | 3 | 863.4799805 | 863.4800201 |
| STALVHGILEGIR                  | Q9Z0J0 | 0.00136986 | n +34.06 Da,             | 3034.865967 | 3 | 467.2900085 | 467.2875172 |
| PQIKVIAPWR                     | P16460 | 0.00189873 | n +17.03 Da,K +34.06 Da, | 2425.117676 | 3 | 420.2799988 | 420.2800738 |
| SDSRDPASDQMKQWKEQR             | P24270 | 0          | n +42.03 Da,K +34.06 Da, | 2066.18042  | 4 | 576.2918091 | 576.2933863 |
| MRGQVGDLSPPQQEALAR             | Q8R0F9 | 0          | n +34.06 Da,             | 2065.337891 | 3 | 673.3599854 | 673.3601878 |
| LDTINVHLR                      | P70699 | 0.03647276 | n +34.06 Da,             | 2065.258789 | 3 | 372.2303772 | 372.2312313 |
| TKGAAELMQKKEATTEQQLR           | Q35490 | 0          | n +34.06 Da,K +34.06 Da, | 2125.151367 | 4 | 591.5912476 | 591.5916535 |
| MGTLPKQVKIVEVGPR               | P38060 | 0          | n +34.06 Da,K +34.06 Da, | 2392.00708  | 3 | 618.7393799 | 618.7413163 |
| GSLDLNAAESGVQHKPSAPQGGR        | Q91V41 | 0          | n +34.06 Da,K +34.06 Da, | 2054.489014 | 4 | 586.8200073 | 586.8214682 |
| TALVDQEEKEDVKSCAEFVSGSQLR      | Q9DCX2 | 0          | n +34.06 Da,K +34.06 Da, | 3124.968506 | 4 | 732.6400146 | 732.643344  |
| RTTPSYVAFTDTER                 | P16627 | 0.00068776 | n +34.06 Da,             | 2053.356934 | 3 | 559.960022  | 559.9600183 |
| VLSGEDKSNIAAWGK                | P01942 | 0.00189873 | n +34.06 Da,K +34.06 Da, | 2053.215332 | 4 | 460.5451965 | 460.5466418 |
| VPNDSSFQIVKNPR                 | Q61176 | 0          | n +34.06 Da,K +34.06 Da, | 2052.936035 | 3 | 556.9899902 | 556.994992  |
| FKMVEGFFDR                     | P26443 | 0          | n +34.06 Da,K +34.06 Da, | 3331.269531 | 3 | 448.5899963 | 448.586616  |
| SIEIEVAPPKAHEVR                | P28474 | 0          | n +34.06 Da,K +34.06 Da, | 2050.786621 | 3 | 624.7000122 | 624.7002452 |
| EALAMQKQSEGLTKEYDR             | Q61335 | 0          | n +34.06 Da,K +34.06 Da, | 2050.680908 | 3 | 733.7399902 | 733.7440037 |
| ISFHLPVNSR                     | Q9D1D4 | 0.01232666 | n +34.06 Da,             | 2050.571533 | 3 | 401.9055481 | 401.9067477 |
| ASLKDLEGKWR                    | Q05816 | 0.00464037 | n +42.03 Da,K +34.06 Da, | 3206.276123 | 3 | 471.6225586 | 471.6226066 |
| AITATQKTVDGSPGKLWR             | P16858 | 0          | n +34.06 Da,K +34.06 Da, | 2048.056885 | 4 | 508.5652161 | 508.5666067 |
| ASSDIQVKELEKR                  | P54227 | 0.00353565 | n +42.03 Da,K +34.06 Da, | 2045.600464 | 3 | 538.3200073 | 538.3228861 |
| SKLVPVGYGIR                    | P57776 | 0.03167849 | n +34.06 Da,K +34.06 Da, | 2045.059692 | 3 | 419.6199951 | 419.6169038 |
| RYLLGTSLAR                     | P16460 | 0.00353565 | n +34.06 Da,             | 2039.188965 | 3 | 395.2498779 | 395.2505144 |
| VEDHMYIAKEESFGPIMIISR          | Q8R0Y6 | 0.00353565 | n +34.06 Da,K +34.06 Da, | 3879.437012 | 4 | 634.0900269 | 634.0921012 |

|                           |        |            |                          |             |   |             |             |
|---------------------------|--------|------------|--------------------------|-------------|---|-------------|-------------|
| ALECLPEDKEALTEEKCLPR      | Q02053 | 0          | n +34.06 Da,K +34.06 Da, | 2886.343506 | 4 | 626.5900269 | 626.5962417 |
| VMEKPSPLLVR               | P97379 | 0          | n +34.06 Da,K +34.06 Da, | 2034.937622 | 2 | 697.4463501 | 697.4472426 |
| ILIPAASEKQLTKSNAPR        | P26443 | 0          | n +34.06 Da,K +34.06 Da, | 2034.835449 | 3 | 680.4387817 | 680.4405835 |
| SGPKAKPVVFSFIAGITAPPGR    | Q9WUM5 | 0.00189873 | n +34.06 Da,K +34.06 Da, | 3096.326904 | 4 | 538.8473511 | 538.8479903 |
| LAYLDEQRHTPLRTSLRMPR      | A2A690 | 0.03893724 | n +42.03 Da,             | 2136.064941 | 4 | 624.5822144 | 624.5879531 |
| GTLPKQVKIVEVGPR           | P38060 | 0          | n +34.06 Da,K +34.06 Da, | 2029.854248 | 4 | 431.5474854 | 431.5476851 |
| PFTIKPLDR                 | P40142 | 0.00599455 | n +17.03 Da,K +34.06 Da, | 2029.783569 | 3 | 379.9112854 | 379.9132797 |
| ILIPAASEKQLTKSNAPR        | P26443 | 0          | n +34.06 Da,K +34.06 Da, | 2027.038818 | 4 | 510.5808411 | 510.5822567 |
| MCHPSVDGFTPR              | Q8C196 | 0          |                          | 2023.998535 | 3 | 477.8877869 | 477.8884419 |
| AGKPVLYHYFDGR             | P30115 | 0          | n +42.03 Da,K +34.06 Da, | 2441.609375 | 2 | 718.4004517 | 718.39888   |
| AAQESLHVKTPLR             | Q8VBT2 | 0          | n +42.03 Da,K +34.06 Da, | 2019.156494 | 2 | 763.4467163 | 763.4491017 |
| AIKPTAAPPLAEAGAAKGLR      | Q9D2G2 | 0.00189873 | n +34.06 Da,K +34.06 Da, | 2118.154785 | 4 | 502.0799866 | 502.0808867 |
| AAGFNKLGMLR               | Q9D855 | 0.00240674 | n +34.06 Da,K +34.06 Da, | 2212.960693 | 3 | 415.9299927 | 415.9306054 |
| GPVVERPAEPGTSSAAELELLKR   | A3KG59 | 0          | n +34.06 Da,K +34.06 Da, | 2848.552002 | 4 | 619.3599854 | 619.3616977 |
| PASAHMAGMKIQPEVDNR        | Q91W43 | 0          | n +17.03 Da,K +34.06 Da, | 2016.140503 | 4 | 497.7698669 | 497.7724192 |
| CRVVFDDTYDR               | P16015 | 0.00599455 | n +34.06 Da,             | 2012.865601 | 3 | 493.9060974 | 493.908489  |
| FQHEDYNFLTR               | Q9R0H0 | 0          | n +34.06 Da,             | 2604.468262 | 3 | 501.9200134 | 501.9194938 |
| TGPNLHGLFGR               | P62897 | 0.00564972 | n +34.06 Da,             | 2607.06665  | 3 | 401.5700073 | 401.566614  |
| KGSSETPATDVFSSTEEGEKR     | Q9D8W5 | 0          | n +42.03 Da,K +34.06 Da, | 2004.70105  | 3 | 784.7399902 | 784.7327808 |
| PTQTISQGAIEKVKDATR        | Q8C196 | 0          | n +17.03 Da,K +34.06 Da, | 2316.813232 | 2 | 1014.609985 | 1014.610355 |
| EDQKIGIEIKR               | P63038 | 0.00599455 | n +34.06 Da,K +34.06 Da, | 2000.37085  | 4 | 386.7600098 | 386.7621232 |
| LTTGSGGEYKTHFAASVADPER    | Q14DH7 | 0          | n +34.06 Da,K +34.06 Da, | 2207.053711 | 4 | 591.31073   | 591.3132105 |
| SVYDEFVKR                 | P24549 | 0.00189873 | n +34.06 Da,K +34.06 Da, | 2214.917725 | 2 | 605.8561401 | 605.8587833 |
| ATSASSHLNKGIKQMY          | P15105 | 0          | n +42.03 Da,K +34.06 Da, | 1994.233276 | 3 | 616.0079346 | 616.0103138 |
| ILIPAASEKQLTKSNAPR        | P26443 | 0          | n +34.06 Da,K +34.06 Da, | 1993.518433 | 3 | 680.4384155 | 680.4405835 |
| PGHLQEGFGCVVTNR           | Q9CY58 | 0          | n +17.03 Da,             | 1993.435181 | 3 | 563.2825928 | 563.2842896 |
| TIEDIEVAPPKAHEVR          | P00329 | 0          | n +34.06 Da,K +34.06 Da, | 1993.183105 | 2 | 936.539978  | 936.5467296 |
| TTITSVLPKALVASR           | Q8C196 | 0.00189873 | n +34.06 Da,K +34.06 Da, | 3102.694824 | 3 | 574.7088013 | 574.7101926 |
| LHVDPENFR                 | P02088 | 0.04570136 | n +34.06 Da,             | 1988.83252  | 3 | 387.5458679 | 387.5472196 |
| LGKHPVSCKDTPGFIVNR        | Q61425 | 0.00240674 | n +14.02 Da,K +28.03 Da, | 2288.611084 | 3 | 699.0599976 | 699.0542177 |
| SDSRDPASDQMKQWKEQR        | P24270 | 0          | n +42.03 Da,K +34.06 Da, | 1987.628906 | 3 | 768.0499878 | 768.055423  |
| PDAANYKDISDVER            | Q9D819 | 0          | n +17.03 Da,K +34.06 Da, | 1986.405518 | 3 | 548.6199951 | 548.621443  |
| PRPAVQFSNLPR              | A2ADY9 | 0.00599455 | n +17.03 Da,             | 1984.403564 | 2 | 699.9000244 | 699.9043671 |
| KATIPAAALQAQESTEGPGTQDRPR | Q9DBG1 | 0          | n +34.06 Da,K +34.06 Da, | 1984.316284 | 4 | 662.6099854 | 662.6163239 |
| PRPAVQFSNLPR              | A2ADY9 | 0          | n +17.03 Da,             | 1983.785522 | 3 | 466.9373169 | 466.9386702 |
| EELNKLGR                  | P22752 | 0.02196193 | n +34.06 Da,K +34.06 Da, | 1982.430786 | 3 | 380.5844116 | 380.5854924 |
| DTLHETEDVKEAIR            | Q9D855 | 0          | n +34.06 Da,K +34.06 Da, | 1981.532959 | 2 | 862.4699707 | 862.4785128 |
| TIEDIEVAPPKAHEVR          | P00329 | 0          | n +34.06 Da,K +34.06 Da, | 1981.427979 | 4 | 468.7799988 | 468.777003  |
| VKIVTVKTQAYPDQKPGTSGLR    | Q9D0F9 | 0          | n +34.06 Da,K +34.06 Da, | 1980.09021  | 5 | 505.3235168 | 505.3253713 |
| DTLHETEDVKEAIR            | Q9D855 | 0          | n +34.06 Da,K +34.06 Da, | 1974.088623 | 3 | 575.3195801 | 575.3214341 |

|                             |        |            |                          |             |   |             |             |
|-----------------------------|--------|------------|--------------------------|-------------|---|-------------|-------------|
| TELFYKGIR                   | Q03265 | 0.00599455 | n +34.06 Da,K +34.06 Da, | 2174.423828 | 3 | 398.921875  | 398.9221044 |
| AAFSKYLTAR                  | P55096 | 0          | n +34.06 Da,K +34.06 Da, | 1969.415649 | 3 | 399.252655  | 399.253854  |
| SVMNLDKLR                   | Q8K2B3 | 0.03167849 | n +34.06 Da,K +34.06 Da, | 1969.344849 | 3 | 381.909668  | 381.911211  |
| KGEYLPLLQKGLSMIFEKR         | P11725 | 0.00189873 | n +42.03 Da,K +34.06 Da, | 4217.748535 | 4 | 613.6199951 | 613.6277729 |
| AEDIKTKIKNYK                | P56391 | 0          | n +42.03 Da,K +34.06 Da, | 1966.853027 | 4 | 408.0299988 | 408.027819  |
| ASIVEDKLVEDLKTR             | P26443 | 0          | n +34.06 Da,K +34.06 Da, | 2895.372803 | 4 | 455.2897644 | 455.2912453 |
| AEGKLWVACYNGGR              | Q64374 | 0          | n +34.06 Da,K +34.06 Da, | 2214.097168 | 3 | 550.2999878 | 550.3015389 |
| EPEGKEVWDYVTVR              | Q920A5 | 0          | n +34.06 Da,K +34.06 Da, | 3381.4646   | 3 | 592.3200073 | 592.3264077 |
| SPKILPDILR                  | Q91WT9 | 0.00599455 | n +34.06 Da,K +34.06 Da, | 2704.454346 | 3 | 407.2799988 | 407.2851542 |
| AREATQAVLDKPELTSSDASTR      | P50544 | 0          | n +34.06 Da,K +34.06 Da, | 1962.504639 | 3 | 805.4400024 | 805.4434529 |
| TLPKQVKIVEVGR               | P38060 | 0.00189873 | n +34.06 Da,K +34.06 Da, | 2169.973389 | 4 | 417.2900085 | 417.292319  |
| KGYQPKLHGHLR                | Q3TVW5 | 0.03972603 | n +31.05 Da,K +31.05 Da, | 1955.192627 | 3 | 499.3099976 | 499.3071343 |
| AQESLHVKTPLR                | Q8VBT2 | 0.02771142 | n +42.03 Da,K +34.06 Da, | 1948.494141 | 2 | 727.9400024 | 727.9305447 |
| GYEFFAKR                    | P62137 | 0.00855158 | n +34.06 Da,K +34.06 Da, | 1946.335205 | 3 | 362.5499878 | 362.5520112 |
| GAFTGEISPGMIKDLGATWVVLGHSER | P17751 | 0          | n +34.06 Da,K +34.06 Da, | 4385.099609 | 3 | 966.1799927 | 966.1935922 |
| SFSEAQSLMSSNPAAFKHLVQESLR   | Q8VC12 | 0          | n +34.06 Da,K +34.06 Da, | 4126.787109 | 4 | 708.8800049 | 708.8800919 |
| LTDAAKAAVSCLWGKVNSEVGGALGR  | P02088 | 0          | n +34.06 Da,K +34.06 Da, | 4095.561768 | 4 | 759.4199829 | 759.4145271 |
| THFNKGPSYGLSAEVKNK          | Q9DAW9 | 0          | n +42.03 Da,K +34.06 Da, | 1939.460083 | 3 | 707.7399902 | 707.7444434 |
| GALFVEKFIEKPR               | Q05920 | 0          | n +34.06 Da,K +34.06 Da, | 3008.299316 | 4 | 409.769989  | 409.7724907 |
| MCHPSVDGFTPR                | Q8C196 | 0          |                          | 1983.714722 | 3 | 477.8868408 | 477.8884419 |
| FVFALEKR                    | O35490 | 0.03493246 | n +34.06 Da,K +34.06 Da, | 2367.072266 | 3 | 359.9100037 | 359.9079063 |
| LELHPPSYPWVSHR              | Q9D0M3 | 0          |                          | 2760.74585  | 4 | 405.4564514 | 405.4585808 |
| MCHPSVDGFTPR                | Q8C196 | 0          |                          | 1978.403931 | 2 | 716.3300171 | 716.3290246 |
| SNNYLHLSVSR                 | P01027 | 0.03204524 | n +34.06 Da,             | 1937.037842 | 3 | 441.9100037 | 441.9124504 |
| ALSVETESHIYR                | Q9WUE3 | 0.01279427 | n +34.06 Da,             | 1936.896362 | 3 | 480.2616272 | 480.2631492 |
| ASGPGGLHADLLR               | Q8BWF0 | 0          | n +34.06 Da,             | 1936.036255 | 3 | 433.25      | 433.2526954 |
| TISQGAIEKVKDATR             | Q8C196 | 0          | n +34.06 Da,K +34.06 Da, | 1934.914673 | 2 | 860.039978  | 860.0466235 |
| TAFFKTLR                    | Q9ESW4 | 0.02771142 | n +34.06 Da,K +34.06 Da, | 1934.804077 | 3 | 351.2399902 | 351.236023  |
| SSTSAVPQITHTYTVHPR          | Q921G7 | 0          | n +34.06 Da,             | 1934.187744 | 3 | 672.6934814 | 672.6955649 |
| MEGYHKPDQQLQALKDTANR        | P40142 | 0          | n +42.03 Da,K +34.06 Da, | 2252.858398 | 4 | 654.6199951 | 654.6169314 |
| PNFFKMGVEGFFDR              | P26443 | 0          | n +17.03 Da,K +34.06 Da, | 4732.20459  | 3 | 562.298645  | 562.2974652 |
| GSEVAKAQKAAPGGASPTIFSR      | Q9D0S9 | 0          | n +34.06 Da,K +34.06 Da, | 1930.510254 | 3 | 744.7800293 | 744.7780358 |
| VSLHLGVTPSVLR               | O89023 | 0.02160039 | n +34.06 Da,             | 3024.101807 | 3 | 471.2999878 | 471.2996456 |
| TNFGMDLTR                   | P97351 | 0          | n +34.06 Da,             | 1929.584351 | 3 | 409.2109375 | 409.2117312 |
| PTKVAVDCGKNNVIR             | Q8C196 | 0          | n +17.03 Da,K +34.06 Da, | 1929.203857 | 4 | 492.8099976 | 492.8081896 |
| PDIVGLDSGHIR                | P52196 | 0          | n +17.03 Da,             | 2156.49707  | 3 | 432.5747986 | 432.5753978 |
| SSTSAVPQITHTYTVHPR          | Q921G7 | 0          | n +34.06 Da,             | 1927.995605 | 4 | 504.7724609 | 504.7734928 |
| SSSSSSPKEETYEEDREFESQAKR    | Q921F4 | 0          | n +42.03 Da,K +34.06 Da, | 2027.675049 | 3 | 997.4699707 | 997.4759885 |
| PILKQLVSSVNSKR              | Q9JM96 | 0          | n +17.03 Da,K +34.06 Da, | 1924.555786 | 3 | 581.0499878 | 581.0508779 |
| AAKNKTGVAPIIDVVR            | P14115 | 0          | n +34.06 Da,K +34.06 Da, | 1923.797119 | 3 | 585.3953247 | 585.3964259 |

|                                |        |            |                          |             |   |             |             |
|--------------------------------|--------|------------|--------------------------|-------------|---|-------------|-------------|
| SDSRDPASDQMKQWKEQR             | P24270 | 0.03851444 | n +42.03 Da,K +34.06 Da, | 1922.818481 | 2 | 1151.579956 | 1151.579496 |
| VKVGVNGFGRIGR                  | P16858 | 0          | n +34.06 Da,K +34.06 Da, | 1921.526855 | 4 | 357.486908  | 357.4873993 |
| PANLDLKKELSEPSSTR              | Q8C196 | 0          | n +17.03 Da,K +34.06 Da, | 2121.669678 | 4 | 493.2900085 | 493.2955411 |
| SDSRDPASDQMKQWKEQR             | P24270 | 0          | n +42.03 Da,K +34.06 Da, | 1984.776245 | 4 | 576.2911377 | 576.2933863 |
| ADTAAGPGGSGTRPGSKQSTNPADNYHLAR | Q9EQH4 | 0          | n +42.03 Da,K +34.06 Da, | 1915.467163 | 4 | 758.3699951 | 758.3763693 |
| VSTSSMGTLPKQVKIVEVGPR          | P38060 | 0          | n +17.03 Da,K +34.06 Da, | 2672.3479   | 4 | 575.3499756 | 575.3529618 |
| MKLTDSVLR                      | Q8BFQ4 | 0.01457286 | n +34.06 Da,K +34.06 Da, | 1906.792236 | 3 | 377.57901   | 377.5794613 |
| SSTSAVPQITTHYTVHPR             | Q921G7 | 0          | n +14.02 Da,             | 1902.963257 | 4 | 499.7617493 | 499.7616261 |
| SDSRDPASDQMKQWKEQR             | P24270 | 0          | n +42.03 Da,K +34.06 Da, | 1902.892456 | 4 | 576.293396  | 576.2933863 |
| SDSRDPASDQMKQWKEQR             | P24270 | 0          | n +42.03 Da,K +34.06 Da, | 2119.343506 | 4 | 576.289978  | 576.2933863 |
| AVGPFQTHTFR                    | Q9JM99 | 0          | n +34.06 Da,             | 1964.546875 | 3 | 432.2399902 | 432.242019  |
| PAFFEHLR                       | Q8CC86 | 0.01836228 | n +17.03 Da,             | 2052.014404 | 3 | 345.1918335 | 345.1924472 |
| AAFSKYLAR                      | P55096 | 0          | n +34.06 Da,K +34.06 Da, | 1986.193237 | 2 | 598.3748169 | 598.3771428 |
| SGNNIELGTACGKYR                | P62889 | 0          | n +34.06 Da,K +34.06 Da, | 2078.291992 | 3 | 624.3312378 | 624.329935  |
| AAETVELHKLK                    | Q9D1J3 | 0.00240674 | n +42.03 Da,K +34.06 Da, | 1895.456421 | 3 | 450.2900085 | 450.2872239 |
| VEDGLMVQITPETMEGLRLALR         | Q8OU44 | 0.03529958 | n +34.06 Da,             | 3154.541748 | 3 | 835.7800293 | 835.7924416 |
| TTGSGGEYKTHFAASVADPER          | Q14DH7 | 0.01926877 | n +34.06 Da,K +34.06 Da, | 1889.312134 | 2 | 1125.079956 | 1125.077112 |
| PTKVVAVDGCIKNNVIR              | Q8C196 | 0          | n +17.03 Da,K +34.06 Da, | 1888.717041 | 4 | 492.8099976 | 492.8081896 |
| DSPLEAGLAFTCKLKTSPFLGR         | Q99LB7 | 0          | n +34.06 Da,K +34.06 Da, | 4571.499023 | 4 | 653.135437  | 653.1359624 |
| EINLTHIESR                     | P16331 | 0.00240674 | n +34.06 Da,             | 1888.072388 | 3 | 415.9100037 | 415.9051844 |
| VYVNDAFGTAHR                   | P09041 | 0          | n +34.06 Da,             | 1884.896362 | 3 | 461.9100037 | 461.9124504 |
| AAFEMTLTEGNKLEKR               | Q8BH95 | 0.00947368 | n +34.06 Da,K +34.06 Da, | 2446.511963 | 4 | 485.7900085 | 485.7897125 |
| SGPGLHADLLR                    | Q8BWF0 | 0          | n +34.06 Da,             | 1884.71582  | 2 | 613.8578491 | 613.8568478 |
| VLSGEDKSNKAAWVK                | P01942 | 0          | n +34.06 Da,K +34.06 Da, | 1882.747559 | 4 | 460.5468445 | 460.5466418 |
| ICPDGKTVEAAHGTVTR              | O88844 | 0          | n +34.06 Da,K +34.06 Da, | 1882.373413 | 3 | 694.039978  | 694.0424542 |
| SALEKSMHLGR                    | Q8BVQ5 | 0          | n +42.03 Da,K +34.06 Da, | 2292.29126  | 3 | 435.5776367 | 435.5783027 |
| SGPGLHADLLR                    | Q8BWF0 | 0.00240674 | n +34.06 Da,             | 1880.525757 | 3 | 409.5736694 | 409.5736574 |
| GVMTVLIKR                      | P16627 | 0.01926877 | n +34.06 Da,K +34.06 Da, | 1880.345459 | 3 | 362.2600098 | 362.2564297 |
| THFNKGPSYGLSAEVKNK             | Q9DAW9 | 0          | n +42.03 Da,K +34.06 Da, | 1945.080322 | 4 | 531.0599976 | 531.0601516 |
| PEFTLPVHFYGR                   | Q9WUB3 | 0.00900424 | n +42.03 Da,             | 3951.51123  | 3 | 502.2514648 | 502.2576285 |
| TLDPVEKALR                     | P63017 | 0.00189873 | n +34.06 Da,K +34.06 Da, | 1879.202393 | 3 | 403.9299927 | 403.9327808 |
| IAHTPGVAADLSHIETR              | P08249 | 0          | n +34.06 Da,             | 2189.878906 | 4 | 456.2557068 | 456.256207  |
| IPTSGAEIGGAFGGEKHTGGGR         | Q9DBF1 | 0          | n +34.06 Da,K +34.06 Da, | 1877.860352 | 3 | 708.7199707 | 708.72048   |
| SGMGTLISKIR                    | P68372 | 0          | n +34.06 Da,K +34.06 Da, | 2809.009277 | 3 | 448.6300049 | 448.6287038 |
| DTLHETEDVKEAIR                 | Q9D855 | 0          | n +34.06 Da,K +34.06 Da, | 1972.75708  | 4 | 431.7419739 | 431.7428947 |
| SHTILLVQPTKRPEGR               | P84089 | 0.00947368 | n +42.03 Da,K +34.06 Da, | 1871.59668  | 4 | 477.7861023 | 477.7864028 |
| SAALIQQATTVKNKDIR              | P51410 | 0          | n +34.06 Da,K +34.06 Da, | 1919.215332 | 4 | 490.5700073 | 490.5666067 |
| FYVTLVVHR                      | Q8BGM5 | 0.01232666 |                          | 1870.329834 | 3 | 387.894928  | 387.8974827 |
| CKDMGLLVGR                     | Q3UEG6 | 0.02813543 | n +34.06 Da,K +34.06 Da, | 1869.790405 | 3 | 406.2432556 | 406.2440842 |
| PKESSYACYDEER                  | O89017 | 0          | n +17.03 Da,K +34.06 Da, | 1869.417358 | 2 | 924.4199829 | 924.4225841 |

|                       |        |            |                          |             |   |             |             |
|-----------------------|--------|------------|--------------------------|-------------|---|-------------|-------------|
| TRENMAYTVEGIR         | Q9DB77 | 0.01457286 | n +31.05 Da,             | 2047.986206 | 3 | 524.2700195 | 524.2733905 |
| SDKSDLKAELER          | O88485 | 0.00068776 | n +42.03 Da,K +34.06 Da, | 1869.056519 | 3 | 500.9561157 | 500.9562033 |
| TTGSGGEYKTHFAASVADPER | Q14DH7 | 0.00240674 | n +34.06 Da,K +34.06 Da, | 1868.222534 | 4 | 563.039978  | 563.0421944 |
| PKVTQPEVDTPPLGR       | Q63880 | 0          | n +17.03 Da,K +34.06 Da, | 1866.21875  | 3 | 529.9812622 | 529.982423  |
| PLAGTNKETTIQGLDGLSER  | Q91Y97 | 0          | n +17.03 Da,K +34.06 Da, | 2792.009521 | 3 | 717.7299805 | 717.7341261 |
| AEGKLWVACYNGGR        | Q64374 | 0          | n +34.06 Da,K +34.06 Da, | 2255.098389 | 3 | 550.3002319 | 550.3015389 |
| PTQTISQGAIEKVKDATR    | Q8C196 | 0          | n +17.03 Da,K +34.06 Da, | 2306.295166 | 3 | 676.7399902 | 676.7426621 |
| SSKPKSLEIIGAPFSKGQPR  | Q61176 | 0.01457286 | n +42.03 Da,K +34.06 Da, | 2987.277832 | 4 | 568.5999756 | 568.6034551 |
| PKVTQPEVDTPPLGR       | Q63880 | 0          | n +17.03 Da,K +34.06 Da, | 1863.140747 | 2 | 794.4672852 | 794.4699963 |
| ASKPTLNEVVIVSAIR      | Q8QZT1 | 0          | n +34.06 Da,K +34.06 Da, | 3111.83374  | 2 | 883.0592651 | 883.0645576 |
| TAENLAAKYNISR         | Q8BWT1 | 0          | n +34.06 Da,K +34.06 Da, | 1856.697266 | 3 | 506.9671631 | 506.9685543 |
| PAQYFHLLR             | A2ATU0 | 0.00464037 | n +17.03 Da,             | 2408.776855 | 3 | 387.8900146 | 387.8907683 |
| VPLFTAAFTGR           | A2AHA7 | 0.01232666 | n +14.02 Da,             | 1866.733643 | 3 | 398.5635986 | 398.5607594 |
| VLSGEDKSNIKAAAWGK     | P01942 | 0          | n +34.06 Da,K +34.06 Da, | 1849.572998 | 2 | 920.0800171 | 920.0860071 |
| TEVGHLIQVAAGSSNLKR    | P47738 | 0          | n +34.06 Da,K +34.06 Da, | 2617.725098 | 4 | 487.7947388 | 487.7957271 |
| SHTILLVQPTKRPEGR      | P84089 | 0          | n +42.03 Da,K +34.06 Da, | 1845.915405 | 2 | 954.5635376 | 954.5655292 |
| PVIEWAEKR             | Q91YY4 | 0.00599455 | n +17.03 Da,K +34.06 Da, | 1844.966553 | 3 | 393.5763855 | 393.5766677 |
| TKYLVEFR              | Q9JKV1 | 0.02196193 | n +34.06 Da,K +34.06 Da, | 2100.327881 | 3 | 375.2399902 | 375.2430663 |
| YGHDLASVQALQR         | P16546 | 0.0030012  | n +34.06 Da,             | 2099.666016 | 3 | 497.9400024 | 497.9424099 |
| FAKPPLGSLR            | P23953 | 0.03289474 | n +34.06 Da,K +34.06 Da, | 1841.886475 | 3 | 385.2612    | 385.2624607 |
| TFGELKVPTDKYYGAQTVR   | P97807 | 0          | n +34.06 Da,K +34.06 Da, | 2905.270264 | 3 | 759.1099854 | 759.1109035 |
| FHQLDIDNPQSIR         | P48758 | 0.00599455 |                          | 2392.537842 | 3 | 537.6099854 | 537.6143639 |
| ELAPGLHLR             | Q99JR5 | 0.01698302 | n +34.06 Da,             | 1834.46106  | 3 | 347.2200623 | 347.2205549 |
| APKSQDLSKIMADIR       | P05784 | 0.00189873 | n +34.06 Da,K +34.06 Da, | 2742.103027 | 4 | 444.5282898 | 444.529064  |
| HTEAAEVLLER           | Q8QZS1 | 0.00189873 | n +34.06 Da,             | 1838.616821 | 2 | 651.3699951 | 651.3672459 |
| SVKIFDVR              | Q9D1M0 | 0.04860486 | n +34.06 Da,K +34.06 Da, | 1833.251343 | 3 | 344.5667114 | 344.5676613 |
| MEETEKKVATQEGR        | Q9QXZ6 | 0.00997375 | n +42.03 Da,K +34.06 Da, | 1832.284912 | 2 | 873.4699707 | 873.4723733 |
| SVEAGEKLVKLTALDTFGR   | P51660 | 0          | n +34.06 Da,K +34.06 Da, | 4064.831055 | 4 | 506.5599976 | 506.5625272 |
| PGLQKSFLDSEYR         | Q64727 | 0          | n +17.03 Da,K +34.06 Da, | 2339.962646 | 3 | 506.9500122 | 506.9560966 |
| AQKKYLQAKLTQFLR       | P54729 | 0          | n +42.03 Da,K +34.06 Da, | 3389.813477 | 4 | 495.8251038 | 495.8267919 |
| ATSASSHLNKGIKQMY      | P15105 | 0          | n +42.03 Da,K +34.06 Da, | 2034.756226 | 3 | 616.0090332 | 616.0103138 |
| MKLELAQYR             | Q03265 | 0.00353565 | n +34.06 Da,K +34.06 Da, | 2218.405029 | 3 | 407.25      | 407.2549777 |
| HVEEGDKADVVKAVKAAR    | O35945 | 0.01836228 | n +34.06 Da,K +34.06 Da, | 1825.972656 | 4 | 519.3099976 | 519.3195594 |
| MKVTVCFGR             | Q99NH2 | 0.00947368 | n +34.06 Da,K +34.06 Da, | 1945.243164 | 3 | 389.230011  | 389.2334078 |
| SVYDEFVKR             | P24549 | 0.00189873 | n +34.06 Da,K +34.06 Da, | 2201.426025 | 3 | 404.2402649 | 404.2416143 |
| PDHSIIETLR            | P07901 | 0.00189873 | n +17.03 Da,             | 1832.958984 | 2 | 599.3359375 | 599.3354518 |
| AAVKTLNPKAEVAR        | P80317 | 0          | n +42.03 Da,K +34.06 Da, | 1816.789551 | 3 | 526.6699829 | 526.6718491 |
| SALGCYDGHVYQR         | Q9QXD1 | 0          | n +34.06 Da,             | 1814.96228  | 3 | 520.5900269 | 520.5876384 |
| DVSHGYVTVKPGIR        | P34914 | 0          | n +34.06 Da,K +34.06 Da, | 1814.714111 | 4 | 399.7399902 | 399.7439684 |
| DVSHGYVTVKPGIR        | P34914 | 0          | n +34.06 Da,K +34.06 Da, | 1812.128662 | 3 | 532.6500244 | 532.656199  |

|                         |        |            |                          |             |   |             |             |
|-------------------------|--------|------------|--------------------------|-------------|---|-------------|-------------|
| TFIHEDIWNIR             | Q9JH1  | 0          | n +34.06 Da,             | 3500.606201 | 3 | 493.269989  | 493.2718672 |
| TEELITPVYCTGVSAQVQKKR   | O35350 | 0          | n +42.03 Da,K +34.06 Da, | 3273.991943 | 3 | 839.7999878 | 839.8054453 |
| VSHIEDPALIR             | Q9CQC7 | 0.00947368 |                          | 1842.052002 | 3 | 426.5799866 | 426.5785904 |
| SDSRDPASDQMKQWKEQR      | P24270 | 0          | n +42.03 Da,K +34.06 Da, | 1806.030273 | 4 | 576.289978  | 576.2933863 |
| ISMADFKNSR              | O70570 | 0.00599455 | n +34.06 Da,K +34.06 Da, | 2038.090942 | 3 | 412.9100037 | 412.9062373 |
| PGLLVIDHR               | Q9QXF8 | 0.00189873 | n +14.02 Da,             | 1801.82605  | 2 | 545.8196411 | 545.8220178 |
| EAPQEPDPFTYDYHTLR       | Q9Z239 | 0          | n +34.06 Da,             | 3423.256104 | 3 | 705.0100098 | 705.0076975 |
| QPAEAIHNWIR             | Q8R0Y6 | 0.00189873 | n +34.06 Da,             | 2133.721436 | 2 | 684.8800049 | 684.8833969 |
| PDFVNDVSEKEQR           | Q60598 | 0          | n +17.03 Da,K +34.06 Da, | 1800.669312 | 3 | 538.6199951 | 538.6179213 |
| LHTVYQSVELPETHQMLR      | Q07417 | 0          | n +34.06 Da,             | 2864.659668 | 3 | 739.0619507 | 739.06326   |
| DVGIQKDGAPKTTFFER       | Q921G7 | 0          | n +34.06 Da,K +34.06 Da, | 1794.974854 | 4 | 466.7789612 | 466.7810448 |
| VISLSGEHSIIGR           | P08228 | 0          |                          | 2328.222412 | 3 | 456.5918884 | 456.5928999 |
| PISAGLFHR               | Q8VCU1 | 0.03529958 | n +17.03 Da,             | 1792.480225 | 3 | 338.8699951 | 338.8679636 |
| AGKPVLHYFDGR            | P30115 | 0          | n +42.03 Da,K +34.06 Da, | 2561.0625   | 2 | 718.4000244 | 718.39888   |
| APVLHFVVR               | Q5SUR0 | 0.00189873 | n +34.06 Da,             | 2230.699219 | 3 | 379.2304688 | 379.2326833 |
| FVAYPHLR                | P43024 | 0.01194185 | n +34.06 Da,             | 1790.483887 | 3 | 346.2099915 | 346.2098786 |
| SHTILLVQPTKRPEGR        | P84089 | 0.00189873 | n +42.03 Da,K +34.06 Da, | 1790.328369 | 4 | 477.7845154 | 477.7864028 |
| YGKNDEVFVVR             | P25688 | 0          | n +34.06 Da,K +34.06 Da, | 1789.836182 | 3 | 475.2654419 | 475.2666001 |
| EEALHYLTR               | Q9EQU5 | 0.0188212  | n +34.06 Da,             | 1789.178467 | 2 | 583.3253784 | 583.3248492 |
| EEALHYLTR               | Q9EQU5 | 0.01457286 | n +34.06 Da,             | 1787.461792 | 3 | 389.2184143 | 389.2189916 |
| TRPTVAAGAVGLAQR         | P45952 | 0.01279427 | n +34.06 Da,             | 1786.630859 | 3 | 501.3099976 | 501.305571  |
| PLGKDLLFKDSAFGLLR       | Q921I1 | 0          | n +17.03 Da,K +34.06 Da, | 3990.480713 | 4 | 494.5700073 | 494.5660939 |
| AKGISQEQMQEFR           | P57780 | 0          | n +34.06 Da,K +34.06 Da, | 1785.066772 | 2 | 810.4500122 | 810.4459606 |
| TFGELKVPTDKYYGAQTVR     | P97807 | 0.00511364 | n +34.06 Da,K +34.06 Da, | 2888.982422 | 4 | 569.5800171 | 569.5849967 |
| VEVELLAHTR              | Q99LB7 | 0.03690037 | n +34.06 Da,             | 2066.668213 | 3 | 400.9100037 | 400.9101581 |
| PSKTNVSGGAIALGHPLGGSGSR | Q8BWT1 | 0          | n +17.03 Da,K +34.06 Da, | 1783.140869 | 4 | 543.5593872 | 543.5593014 |
| MKFNPFVTSDR             | P61255 | 0          | n +34.06 Da,K +34.06 Da, | 2585.109131 | 2 | 705.3945923 | 705.3977499 |
| LADFGVLHR               | Q9D0R2 | 0.00511364 |                          | 2284.367432 | 3 | 352.5400085 | 352.5380659 |
| AHYHDNYGKNDEVFVVR       | P25688 | 0          | n +42.03 Da,K +34.06 Da, | 2252.296631 | 4 | 543.0093994 | 543.0106663 |
| GALVQHQQWDGKESTITR      | Q05816 | 0          | n +34.06 Da,K +34.06 Da, | 1778.904297 | 4 | 531.2976074 | 531.2973629 |
| SAIQKVAKDIAYLGITDVR     | P41317 | 0          | n +34.06 Da,K +34.06 Da, | 3879.327637 | 3 | 721.789978  | 721.7913935 |
| AKINFDDNAEFR            | Q9Z2I8 | 0          | n +34.06 Da,K +34.06 Da, | 2273.995117 | 3 | 503.2772827 | 503.2773878 |
| PGHLQEGFGCVVTNR         | Q9CY58 | 0          |                          | 2102.862549 | 3 | 566.9500122 | 566.9508702 |
| SIQQQHTISPLDLAKLNQVAR   | P60335 | 0          | n +34.06 Da,K +34.06 Da, | 3261.768555 | 4 | 590.1025391 | 590.1038573 |
| SSVEYEPKEKTFDKILIANR    | Q91ZA3 | 0          | n +42.03 Da,K +34.06 Da, | 3114.648193 | 4 | 628.6199951 | 628.6193027 |
| YGKNDEVFVVR             | P25688 | 0          | n +34.06 Da,K +34.06 Da, | 1774.676636 | 2 | 712.394165  | 712.396262  |
| KYDQKEGYLHIGGTTQQAQR    | Q91WU0 | 0.00189873 | n +42.03 Da,K +28.03 Da, | 2007.354492 | 4 | 605.5700073 | 605.5645725 |
| SDSRDPASDQMKQWKEQR      | P24270 | 0          | n +42.03 Da,K +34.06 Da, | 1767.196167 | 3 | 768.0499878 | 768.055423  |
| KETTIQGLDGLSER          | Q91Y97 | 0          | n +34.06 Da,K +34.06 Da, | 2175.858887 | 3 | 538.9840088 | 538.982641  |
| ATSASSHLNKGIKQMY        | P15105 | 0          | n +42.03 Da,K +34.06 Da, | 2107.355469 | 3 | 616.0094604 | 616.0103138 |



|                              |        |            |                          |             |   |             |             |
|------------------------------|--------|------------|--------------------------|-------------|---|-------------|-------------|
| SQAEFDKAAEEVKR               | P31786 | 0          | n +42.03 Da,K +34.06 Da, | 1762.221313 | 2 | 859.4699707 | 859.4732303 |
| ARFEELNADLFR                 | P17156 | 0.00511364 |                          | 3315.982178 | 3 | 503.5979614 | 503.6000545 |
| IAFHLNPR                     | O08573 | 0.03333333 | n +34.06 Da,             | 1762.022583 | 3 | 334.5410767 | 334.5416282 |
| PSKTNVSGGAIALGHPLGGSGSR      | Q8BWT1 | 0          | n +17.03 Da,K +34.06 Da, | 1758.423096 | 2 | 1086.109985 | 1086.111326 |
| SIDLVINLPNNNTKVFHDNVYVIR     | Q8C196 | 0          | n +34.06 Da,K +34.06 Da, | 3919.697998 | 3 | 922.8499756 | 922.8573085 |
| ILMAINGKVFVDTKGR             | O55022 | 0.00189873 | n +42.03 Da,K +34.06 Da, | 4624.76416  | 3 | 624.7199707 | 624.7185822 |
| NPLQYYLCREGIRPR              | O88852 | 0.00599455 | n +14.02 Da,             | 1755.300781 | 3 | 702.3800049 | 702.3776946 |
| GDVEKGKKIFVQKCAQ             | P62897 | 0.02731193 | n +42.03 Da,K +34.06 Da, | 1752.56604  | 3 | 671.75      | 671.7539916 |
| SPLEKLVSSVSDLPKR             | P54869 | 0          | n +34.06 Da,K +34.06 Da, | 3337.644043 | 4 | 465.0518188 | 465.0530664 |
| SQAEFDKAAEEVKR               | P31786 | 0          | n +42.03 Da,K +34.06 Da, | 1751.421631 | 3 | 573.3200073 | 573.3179124 |
| MQPASAKWYDR                  | Q9R0Q7 | 0          | n +34.06 Da,K +34.06 Da, | 1749.106079 | 3 | 474.2585144 | 474.2607917 |
| LAGLDVGVKVR                  | Q9DBM2 | 0          | n +34.06 Da,K +34.06 Da, | 2970.407227 | 3 | 427.9500122 | 427.9486535 |
| TQTATQQAQLAAAAEIDEEPVSKAKQSR | P70670 | 0          | n +34.06 Da,K +34.06 Da, | 2661.05127  | 4 | 768.9299927 | 768.9309702 |
| TVAASPSHEAKGGLVISPEGLSPAVR   | Q8K370 | 0          | n +34.06 Da,K +34.06 Da, | 2749.97168  | 3 | 890.5100098 | 890.5134305 |
| SDSRDPASDQMKQWKEQR           | P24270 | 0          | n +42.03 Da,K +34.06 Da, | 1765.636108 | 4 | 576.291626  | 576.2933863 |
| MKLNISFPATGCQKLIIEVDDER      | P62754 | 0          | n +34.06 Da,K +34.06 Da, | 3766.463379 | 4 | 667.3699951 | 667.3739786 |
| ATSASSHLNKGIKQMY             | P15105 | 0          | n +42.03 Da,K +34.06 Da, | 2181.544189 | 3 | 616.0095215 | 616.0103138 |
| SSKPKSLEIIGAPFSKGQPR         | Q61176 | 0          | n +42.03 Da,K +34.06 Da, | 2592.800049 | 2 | 1136.195068 | 1136.199634 |
| PFAEYIYKR                    | Q9EQF5 | 0.00189873 | n +17.03 Da,K +34.06 Da, | 2225.266357 | 3 | 413.2444763 | 413.2449181 |
| TALAPSTMKIKIAPPER            | P60710 | 0          | n +34.06 Da,K +34.06 Da, | 2784.697754 | 4 | 510.582489  | 510.5841049 |
| SSKPKSLEIIGAPFSKGQPR         | Q61176 | 0          | n +42.03 Da,K +34.06 Da, | 2292.000488 | 4 | 568.602417  | 568.6034551 |
| VKLEDTYFDR                   | Q8JZK9 | 0.00599455 | n +34.06 Da,K +34.06 Da, | 2380.143799 | 3 | 451.9259644 | 451.9276958 |
| NIELGTACGKYR                 | P62889 | 0          | n +34.06 Da,K +34.06 Da, | 2157.702148 | 3 | 538.2966309 | 538.2977945 |
| SLKIQTSNVTNKNDPKSINSR        | Q64012 | 0          | n +42.03 Da,K +34.06 Da, | 1892.218262 | 4 | 622.8699951 | 622.8699177 |
| ASGVAVSDGVIKVFNDMKVIR        | P18760 | 0          | n +42.03 Da,K +34.06 Da, | 4291.329102 | 3 | 734.7561646 | 734.7577661 |
| VLICPDGKTVEAAAHGTVTR         | O88844 | 0          | n +34.06 Da,K +34.06 Da, | 2460.400879 | 4 | 573.8215942 | 573.8217794 |
| ELSEEDKLTVSR                 | P56480 | 0.00564972 | n +34.06 Da,K +34.06 Da, | 1734.74353  | 3 | 491.9500122 | 491.9525702 |
| AAKNQVAMNPTNTVFDAKR          | P63017 | 0          | n +34.06 Da,K +34.06 Da, | 1927.300049 | 3 | 726.7546997 | 726.756466  |
| GASIVEDKLVEDLKTR             | P26443 | 0          | n +42.03 Da,K +34.06 Da, | 3088.09082  | 4 | 471.5400085 | 471.5334733 |
| LTPTHYLTQDVER                | Q9DBG6 | 0          | n +34.06 Da,K +34.06 Da, | 1782.263916 | 3 | 590.3452759 | 590.3458021 |
| ALALIHPSKR                   | Q5RJ54 | 0.00240674 | n +42.03 Da,K +34.06 Da, | 2125.001709 | 3 | 394.59021   | 394.5907594 |
| SLDYMVTKIPR                  | Q8C196 | 0.00754717 | n +34.06 Da,K +34.06 Da, | 2835.502197 | 3 | 464.2799988 | 464.2848258 |
| SLGTADVHFER                  | O08583 | 0          | n +34.06 Da,             | 1908.098145 | 3 | 422.5610046 | 422.5614177 |
| QHATNVGIMFR                  | P35505 | 0.00240674 |                          | 1727.253662 | 2 | 651.3400269 | 651.3427917 |
| LDLHALGSAR                   | P29391 | 0.00353565 | n +34.06 Da,             | 2157.520996 | 3 | 362.8900146 | 362.8874646 |
| MREIVHIQAGQCNG               | P99024 | 0.02515723 | n +34.06 Da,             | 1724.461914 | 2 | 823.9199829 | 823.9193284 |
| AGKPVLYHFDGRGR               | P30115 | 0          | n +42.03 Da,K +34.06 Da, | 2141.053223 | 3 | 550.3078613 | 550.309204  |
| TFAHLIVLR                    | Q60590 | 0.02063882 | n +34.06 Da,             | 2624.043457 | 3 | 368.5799866 | 368.57645   |
| SAEETWMVIHGR                 | Q9CQX2 | 0          | n +34.06 Da,             | 2413.460205 | 3 | 483.9159241 | 483.9170957 |
| ASDTPHHQSPSESVPVQVGVGCSMMR   | A2AS89 | 0          | n +31.05 Da,             | 2755.832275 | 3 | 999.1300049 | 999.1338209 |

|                          |        |            |                          |             |   |             |             |
|--------------------------|--------|------------|--------------------------|-------------|---|-------------|-------------|
| SAGGESVSVLVLSPKLNLFHR    | Q8VCC2 | 0          | n +34.06 Da,K +34.06 Da, | 4131.401855 | 4 | 588.0999756 | 588.1035916 |
| VISLSGEHSIIGR            | P08228 | 0          |                          | 2403.129395 | 3 | 465.9400024 | 465.9366666 |
| MQPASAKWYDR              | Q9R0Q7 | 0          | n +34.06 Da,K +34.06 Da, | 1708.312378 | 3 | 474.258606  | 474.2607917 |
| NTPDFGFGGQKR             | Q3U0V1 | 0.00805585 | n +34.06 Da,K +34.06 Da, | 1851.836304 | 3 | 464.5899963 | 464.5949394 |
| APKGGSKQSEEDLLLQDFSR     | Q9DCF9 | 0          | n +34.06 Da,K +34.06 Da, | 2950.270264 | 2 | 1218.180054 | 1218.18491  |
| DIVMTQSHKFMSTSVGDR       | P01633 | 0          | n +34.06 Da,K +34.06 Da, | 2633.688721 | 3 | 703.0300293 | 703.0364231 |
| AKIAKTHEDIAQIR           | Q99NB9 | 0          | n +42.03 Da,K +34.06 Da, | 1969.203491 | 3 | 611.6992798 | 611.7003566 |
| PSKTNVSGGAIALGHPLGGSGSR  | Q8BWT1 | 0          | n +17.03 Da,K +34.06 Da, | 1701.205933 | 4 | 543.5571899 | 543.5593014 |
| AKGISQEQMQEFR            | P57780 | 0          | n +34.06 Da,K +34.06 Da, | 1784.956299 | 3 | 540.6326904 | 540.6330659 |
| VMEKPSPLLVGR             | P97379 | 0          | n +34.06 Da,K +34.06 Da, | 2011.643677 | 3 | 465.2991943 | 465.3005872 |
| STSSMGTLPKQVKIVEVGPR     | P38060 | 0          | n +34.06 Da,K +34.06 Da, | 2508.490723 | 4 | 554.8400269 | 554.843748  |
| PTGTYHGDSLQLER           | P68372 | 0          | n +17.03 Da,             | 1699.497314 | 3 | 569.2767944 | 569.2778583 |
| VAPMKGQVCVVTGASR         | Q99L04 | 0          | n +34.06 Da,K +34.06 Da, | 1698.849731 | 2 | 864.5       | 864.5002127 |
| HLDATTVLSR               | P56480 | 0.02426007 | n +34.06 Da,             | 1698.353027 | 2 | 573.8352051 | 573.8381238 |
| DLQWVGSGAQGAVFLGR        | Q60700 | 0.04014599 | n +31.05 Da,             | 4186.289551 | 2 | 896.4699707 | 896.4811684 |
| AMNYSAKDEVGPGAGPPGGAAKTR | Q8VEK0 | 0          | n +34.06 Da,K +34.06 Da, | 1789.092529 | 4 | 630.5883789 | 630.590648  |
| PGLLVIDHR                | Q9QXF8 | 0.00240674 | n +14.02 Da,             | 1696.888428 | 2 | 545.8208008 | 545.8220178 |
| MREIVHIQAGQCGN           | P99024 | 0          | n +34.06 Da,             | 1765.262939 | 2 | 823.9182129 | 823.9193284 |
| MKTPEDPGSPKQHEVVDSAGTSTR | Q9Z2J0 | 0          | n +42.03 Da,K +34.06 Da, | 1789.946777 | 3 | 888.789978  | 888.7905243 |
| SAALIQQATTVKNKDIR        | P51410 | 0          | n +34.06 Da,K +34.06 Da, | 1919.286133 | 3 | 653.75      | 653.75305   |
| SIKVECVLR                | Q64374 | 0.00805585 | n +34.06 Da,K +34.06 Da, | 1693.741577 | 2 | 586.3776855 | 586.3788283 |
| EHPVLLTEAPLNPKANR        | P60710 | 0          | n +34.06 Da,K +34.06 Da, | 2150.893555 | 3 | 656.4000244 | 656.395156  |
| PTGTHFCEVEQMR            | P25688 | 0          | n +17.03 Da,             | 1690.934937 | 3 | 536.9099731 | 536.9150974 |
| TTIAGVVYKDGIVLGADTR      | P70195 | 0          | n +34.06 Da,K +34.06 Da, | 3505.844971 | 3 | 673.0671387 | 673.0703384 |
| VGVPVGSDFQPELSGAGSR      | Q8CDN6 | 0          | n +34.06 Da,K +34.06 Da, | 2770.418213 | 3 | 756.4126587 | 756.4149454 |
| GTPPGGSITKVLIANR         | Q99MR8 | 0          | n +34.06 Da,K +34.06 Da, | 2479.918945 | 2 | 827.0200195 | 827.02015   |
| SIKVECVLR                | Q64374 | 0.00805585 | n +34.06 Da,K +34.06 Da, | 1690.281128 | 3 | 391.2538452 | 391.2549777 |
| VMQILKFKTIEEVVGR         | P47738 | 0          | n +34.06 Da,K +34.06 Da, | 3725.313965 | 4 | 498.8200073 | 498.8248264 |
| FPSIVGRPR                | P60710 | 0.02469734 | n +34.06 Da,             | 1688.109497 | 3 | 354.8911438 | 354.8925496 |
| FKAFLGPR                 | Q8BHI7 | 0.03289474 | n +34.06 Da,K +34.06 Da, | 1685.865234 | 3 | 335.2280884 | 335.2289796 |
| PIQSVKGKVVIDAFR          | O35593 | 0          | n +17.03 Da,K +34.06 Da, | 2345.044678 | 4 | 436.2900085 | 436.2897953 |
| TRPTVAAGAVGLAQR          | P45952 | 0.00189873 |                          | 1685.686035 | 3 | 499.2935791 | 499.2949653 |
| SEPEIPKIR                | Q9WTP6 | 0.00240674 | n +34.06 Da,K +34.06 Da, | 1685.544556 | 3 | 398.5879822 | 398.5890141 |
| SKTNVSGGAIALGHPLGGSGSR   | Q8BWT1 | 0.00805585 | n +34.06 Da,K +34.06 Da, | 1683.138306 | 3 | 697.734436  | 697.7362414 |
| IIDTFHQYSR               | P31725 | 0          | n +34.06 Da,             | 1681.703857 | 3 | 438.572052  | 438.573546  |
| TGGDKAFAAGADIKEMQNR      | Q8BH95 | 0          | n +34.06 Da,K +34.06 Da, | 2088.013916 | 3 | 694.7205811 | 694.7214215 |
| ERVGCDLQPVDPTR           | Q63961 | 0.03606103 | n +34.06 Da,             | 1821.608521 | 3 | 559.289978  | 559.2930029 |
| LSLFGDSYETQVIAHQGSSKGPR  | Q78JT3 | 0.00189873 | n +34.06 Da,K +34.06 Da, | 3190.312744 | 4 | 651.3499756 | 651.3528671 |
| SETAAPAAPAPVEKTPVKK      | P43277 | 0          | n +42.03 Da,K +34.06 Da, | 1915.255127 | 3 | 735.4500122 | 735.4510372 |
| PGHLQEGFGCVVTNR          | Q9CY58 | 0          | n +17.03 Da,             | 2075.205322 | 3 | 563.2832031 | 563.2842896 |

|                              |        |            |                          |             |   |             |             |
|------------------------------|--------|------------|--------------------------|-------------|---|-------------|-------------|
| DSSFQIVKNPR                  | Q61176 | 0          | n +34.06 Da,K +34.06 Da, | 1771.911499 | 3 | 453.6062927 | 453.6069565 |
| TGTHFCEVEQMR                 | P25688 | 0          | n +34.06 Da,             | 1671.943359 | 3 | 510.2411804 | 510.2413623 |
| SEPEIPK GIR                  | Q9WTP6 | 0.00240674 | n +34.06 Da,K +34.06 Da, | 1725.946045 | 3 | 398.586792  | 398.5890141 |
| FAQLCEEHGILR                 | B5X0G2 | 0          |                          | 2320.608154 | 3 | 500.9243164 | 500.9257731 |
| DLPALPGGPAGGTGELAKYGLPGVAQLR | O08600 | 0          | n +34.06 Da,K +34.06 Da, | 4315.194824 | 3 | 915.2000122 | 915.1974422 |
| PNEVKVVYLR                   | P35979 | 0          | n +17.03 Da,K +34.06 Da, | 1670.648438 | 3 | 423.2710571 | 423.2713558 |
| MKLTDSVLR                    | Q8BFQ4 | 0.00564972 | n +34.06 Da,K +34.06 Da, | 1929.442871 | 2 | 565.864502  | 565.8655537 |
| KPDIDAWELR                   | P12787 | 0.00649702 | n +34.06 Da,K +34.06 Da, | 2555.254883 | 2 | 655.8900146 | 655.8906149 |
| PTGTYHGSDQLQLDR              | P99024 | 0          | n +17.03 Da,             | 1669.16272  | 3 | 564.6099854 | 564.6059749 |
| AELDIGQHCQVQHCR              | Q8BFR6 | 0          | n +42.03 Da,             | 1924.85437  | 3 | 631.6209717 | 631.6211959 |
| TFVHVTDLSGKETICR             | P62264 | 0          | n +34.06 Da,K +34.06 Da, | 2452.738281 | 4 | 483.5213318 | 483.5227455 |
| PSGFNCKDETEFR                | Q9CQE8 | 0.01232666 | n +17.03 Da,K +34.06 Da, | 1666.302734 | 3 | 546.5999756 | 546.5998731 |
| EEDSKPKAEDEILNR              | P35564 | 0          | n +34.06 Da,K +34.06 Da, | 1662.284912 | 3 | 668.7000122 | 668.7042026 |
| GDEVIITGHCQGDGYR             | P35505 | 0          | n +34.06 Da,             | 1834.546143 | 3 | 604.289978  | 604.2915509 |
| GLWGKINAR                    | Q8R0Y6 | 0.01652479 | n +34.06 Da,K +34.06 Da, | 1661.835815 | 3 | 361.5700073 | 361.570386  |
| GDVEKGKKIFVQKC               | P62897 | 0.00900424 | n +42.03 Da,K +34.06 Da, | 1661.765015 | 4 | 454.2927551 | 454.2933897 |
| MEGHDPKEPEQLR                | B2RXM2 | 0          | n +42.03 Da,K +34.06 Da, | 1730.301025 | 3 | 547.9390259 | 547.9419702 |
| SYDPGSAKTILNNGKTCR           | P16015 | 0          | n +34.06 Da,K +34.06 Da, | 1958.452637 | 3 | 695.3900146 | 695.3933049 |
| SDLELHPPSYPWVSHR             | Q9D0M3 | 0          | n +14.02 Da,             | 2981.970947 | 4 | 459.480011  | 459.4772366 |
| PSKTNVSGGAIALGHPLGGSGSR      | Q8BWT1 | 0          | n +17.03 Da,K +34.06 Da, | 1659.73291  | 4 | 543.5599976 | 543.5593014 |
| GDVEKGKKIFVQKC               | P62897 | 0.00240674 | n +42.03 Da,K +34.06 Da, | 1659.411499 | 3 | 605.3885498 | 605.3887608 |
| TTGTYHGSDQLQLER              | J3QNR5 | 0          | n +14.02 Da,             | 1658.481689 | 3 | 569.6099854 | 569.604194  |
| TPTGTHFCEVEQMR               | P25688 | 0          | n +34.06 Da,             | 1891.949463 | 3 | 576.276123  | 576.2748434 |
| TGGDAAAPGAAGTQAELEPHR        | Q9D0F3 | 0          | n +34.06 Da,             | 1657.83374  | 3 | 627.9899902 | 627.9923814 |
| SLKIQTSNVTKNDPKSINSR         | Q64012 | 0          | n +42.03 Da,K +34.06 Da, | 1851.463257 | 4 | 622.8699951 | 622.8699177 |
| ATEDPWKANYR                  | Q9R0P3 | 0.00564972 | n +34.06 Da,K +34.06 Da, | 1656.738159 | 3 | 473.5899963 | 473.5948281 |
| IHLGVNESLTD TAR              | P11725 | 0          | n +34.06 Da,             | 2362.516602 | 2 | 780.4299927 | 780.4336492 |
| VKAPAMFNIR                   | P97351 | 0          | n +34.06 Da,K +34.06 Da, | 2341.877686 | 3 | 405.5930786 | 405.595334  |
| LLTEAPLNPKANR                | P60710 | 0.00649702 | n +34.06 Da,K +34.06 Da, | 1675.366455 | 3 | 502.3207397 | 502.3209277 |
| AGLESMQKYGKAAPGDR            | Q8VC30 | 0          | n +34.06 Da,K +34.06 Da, | 1652.035645 | 4 | 471.0227051 | 471.0241459 |
| MQPASAKWYDRR                 | Q9R0Q7 | 0.03127962 | n +42.03 Da,K +34.06 Da, | 1650.298462 | 3 | 528.9400024 | 528.9436448 |
| PDLMNPIKR                    | P03921 | 0.00511364 | n +17.03 Da,K +34.06 Da, | 1649.406616 | 3 | 378.9017029 | 378.9023863 |
| KTGTAEMSSILEER               | Q03265 | 0.00068776 | n +34.06 Da,K +34.06 Da, | 2256.728027 | 3 | 540.6342773 | 540.6363649 |
| PSVGEHTVEVLR                 | O09174 | 0          | n +17.03 Da,             | 1647.02478  | 2 | 670.3699951 | 670.372566  |
| TRSDPVVIVSAAR                | F2Z459 | 0          | n +34.06 Da,             | 1646.274536 | 3 | 468.9506836 | 468.9509052 |
| LKGEFITTVQQR                 | P14152 | 0.00511364 | n +34.06 Da,K +34.06 Da, | 1923.938477 | 3 | 496.6453857 | 496.6454113 |
| LLNPKSEMTPPEELQKR            | P62317 | 0          | n +42.03 Da,K +34.06 Da, | 2386.395508 | 4 | 568.8386841 | 568.8412055 |
| FASQVTLLEGDKVKVER            | Q9DCW4 | 0          | n +34.06 Da,K +34.06 Da, | 2160.304688 | 4 | 477.7999878 | 477.7966948 |
| PPEPTAGDKQPLPGAEGYVGGHR      | Q6ZPJ0 | 0          | n +17.03 Da,K +34.06 Da, | 2019.227295 | 4 | 596.0656128 | 596.0672252 |
| LHTVYQSVLELPETHQMLR          | Q07417 | 0          | n +34.06 Da,             | 2877.657227 | 2 | 1108.089966 | 1108.091252 |

|                                |        |            |                          |             |   |             |             |
|--------------------------------|--------|------------|--------------------------|-------------|---|-------------|-------------|
| SQAEFDKAAEEVKR                 | P31786 | 0          | n +42.03 Da,K +34.06 Da, | 1641.518311 | 2 | 859.4725952 | 859.4732303 |
| VKVGVNGFGR                     | P16858 | 0.00240674 | n +34.06 Da,K +34.06 Da, | 1641.407837 | 3 | 367.5780029 | 367.5785603 |
| FEESFQKALR                     | Q8C196 | 0.00189873 | n +34.06 Da,K +34.06 Da, | 1976.511353 | 3 | 441.5949707 | 441.5961688 |
| PSKTNVSGGAIALGHPLGGSGSR        | Q8BWT1 | 0          | n +17.03 Da,K +34.06 Da, | 1788.281006 | 3 | 724.4089355 | 724.4099764 |
| ETEFYLGKR                      | O55142 | 0.00240674 | n +34.06 Da,K +34.06 Da, | 1639.827148 | 3 | 404.2409973 | 404.2416143 |
| MNHPDYKLNLR                    | Q8CI75 | 0.00240674 | n +42.03 Da,K +34.06 Da, | 2368.550537 | 3 | 492.9299927 | 492.9328571 |
| MGTLPKQVKIVEVGPR               | P38060 | 0          | n +34.06 Da,K +34.06 Da, | 2403.922607 | 4 | 464.3099976 | 464.3078063 |
| VSGGAIALGHPLGGSGSR             | Q8BWT1 | 0          | n +34.06 Da,             | 1935.64856  | 3 | 542.9746704 | 542.9760023 |
| PSVGEHTVEVLR                   | O09174 | 0          | n +17.03 Da,             | 1639.054565 | 3 | 447.25      | 447.2508028 |
| PNIVGNEHYDVAR                  | P56480 | 0          | n +17.03 Da,             | 1638.644409 | 3 | 500.9237366 | 500.9249785 |
| GKLVINGKPITIFQER               | P16858 | 0.00240674 | n +34.06 Da,K +34.06 Da, | 2838.012451 | 4 | 479.5700073 | 479.5701547 |
| GYLKMDNYR                      | Q9R0H0 | 0          | n +34.06 Da,K +34.06 Da, | 1637.78418  | 2 | 614.3433838 | 614.3449856 |
| MEKTELIQKAK                    | P68254 | 0          | n +42.03 Da,K +34.06 Da, | 1779.193359 | 3 | 488.3180237 | 488.3181249 |
| GADFAKWR                       | P05063 | 0.00599455 | n +34.06 Da,K +34.06 Da, | 1633.25647  | 3 | 340.2077942 | 340.2083558 |
| TVHFTLCR                       | Q9WU79 | 0.02063882 | n +34.06 Da,             | 1631.206665 | 3 | 356.5299988 | 356.5341451 |
| EALAMQKQSEGLTKEYDR             | Q61335 | 0          | n +34.06 Da,K +34.06 Da, | 2052.39209  | 4 | 550.5599976 | 550.5598219 |
| SVESDIHGLR                     | P05784 | 0.00189873 | n +34.06 Da,             | 1629.366333 | 3 | 382.8815308 | 382.8823796 |
| NFFEGKELR                      | Q8CI94 | 0.01457286 | n +34.06 Da,K +34.06 Da, | 1976.582031 | 3 | 403.2405701 | 403.2417257 |
| RNLSIYDGPEQR                   | Q921G7 | 0.0030012  | n +34.06 Da,             | 1637.494141 | 3 | 494.6000061 | 494.6021648 |
| LFAYPDTHR                      | P24270 | 0.00189873 |                          | 1627.613159 | 3 | 383.2004089 | 383.2013426 |
| PSNMPPGIEPSDKMLQGR             | P24270 | 0          | n +17.03 Da,K +34.06 Da, | 2864.367432 | 3 | 701.3699951 | 701.3713652 |
| LYQKDSQGNLFR                   | Q91Y97 | 0.01232666 | n +34.06 Da,K +34.06 Da, | 1626.866577 | 2 | 768.9400024 | 768.9439106 |
| YKGLEAFR                       | P54869 | 0.02813543 | n +34.06 Da,K +34.06 Da, | 1626.549561 | 3 | 351.223877  | 351.2238946 |
| GHQQLYWSHPR                    | P62274 | 0          | n +42.03 Da,             | 1624.280029 | 2 | 725.8484497 | 725.8523699 |
| SQAEFDKAAEEVKR                 | P31786 | 0          | n +42.03 Da,K +34.06 Da, | 1622.299561 | 3 | 573.3165894 | 573.3179124 |
| FGIVTSSAGTGTTEDEAKKR           | Q9D1J3 | 0          | n +42.03 Da,K +34.06 Da, | 1620.393433 | 4 | 567.3190918 | 567.3104022 |
| SEAAADREDDPNFFKMVEGFFDR        | P26443 | 0          | n +34.06 Da,K +34.06 Da, | 4869.106445 | 4 | 691.0900269 | 691.0854338 |
| TGGDAAAPGAAGTQAELPHR           | Q9D0F3 | 0          | n +34.06 Da,             | 1616.69812  | 3 | 627.9899902 | 627.9923814 |
| PLPEIKNVVSGKTSACFEPGLDYMVTKIPR | Q8C196 | 0          | n +17.03 Da,K +34.06 Da, | 4091.991211 | 4 | 874.75      | 874.7517754 |
| GHQQLYWSHPR                    | P62274 | 0          | n +42.03 Da,             | 1616.190552 | 3 | 484.2360535 | 484.2373387 |
| FEIGHFFR                       | Q78ZA7 | 0.01046572 | n +34.06 Da,             | 3255.513916 | 3 | 362.8699951 | 362.8696335 |
| MESNHKSGDGLSGTQKEAALR          | Q5YD48 | 0          | n +42.03 Da,K +34.06 Da, | 1614.878174 | 4 | 582.2999878 | 582.3077652 |
| TSVATKKTEQGPPSSEYIFER          | P29758 | 0          | n +17.03 Da,K +34.06 Da, | 2082.681641 | 3 | 814.1199951 | 814.1183466 |
| GQVVQFKLSDIGEGIR               | P53395 | 0          | n +34.06 Da,K +34.06 Da, | 3520.661133 | 2 | 907.5424194 | 907.5439896 |
| SKDSEGSWFR                     | O55125 | 0.03167849 | n +34.06 Da,K +34.06 Da, | 1611.987183 | 2 | 633.8392334 | 633.8411222 |
| AFCAPPAYLTHQKQVLR              | Q9CQJ8 | 0          | n +34.06 Da,K +34.06 Da, | 2497.251465 | 3 | 690.0628662 | 690.0647526 |
| LETSHTSKVSEPSKSPDGIR           | Q8C4A5 | 0.03493246 | n +17.03 Da,K +34.06 Da, | 2468.658936 | 4 | 560.8197632 | 560.8196465 |
| SLHQVSFLFSDR                   | P24270 | 0          | n +34.06 Da,             | 3152.092041 | 3 | 490.6034546 | 490.6035055 |
| LGNVTAGKDGVANVSIEDR            | P08228 | 0          | n +34.06 Da,K +34.06 Da, | 2397.057617 | 3 | 661.710022  | 661.7095809 |
| VKVGVNGFGR                     | P16858 | 0.00189873 | n +34.06 Da,K +34.06 Da, | 1599.693115 | 3 | 367.5784607 | 367.5785603 |

|                        |        |            |                          |             |   |             |             |
|------------------------|--------|------------|--------------------------|-------------|---|-------------|-------------|
| PYVGIHLR               | Q91ZW2 | 0.03647276 | n +14.02 Da,             | 1599.177856 | 3 | 323.5270691 | 323.5273896 |
| ADEPEVVKTER            | O35887 | 0          | n +34.06 Da,K +34.06 Da, | 1701.607178 | 3 | 476.6000061 | 476.5982385 |
| PSKSTGGWQPLR           | Q8VCZ9 | 0          | n +17.03 Da,K +34.06 Da, | 1598.819336 | 3 | 487.953186  | 487.9526862 |
| PDIAQCVHLDR            | Q91X83 | 0          | n +14.02 Da,             | 1963.477905 | 3 | 446.5599976 | 446.5592017 |
| THFCEVEQMR             | P25688 | 0          | n +34.06 Da,             | 1596.598877 | 2 | 685.8209839 | 685.8238336 |
| EPPVPLVGNWRPPQPVKGR    | P16015 | 0          | n +34.06 Da,K +34.06 Da, | 3062.401611 | 4 | 548.5800171 | 548.5838315 |
| TEPLPAIEKTGKVR         | Q9CXN7 | 0          | n +34.06 Da,K +34.06 Da, | 1636.256226 | 3 | 547.7000122 | 547.6979935 |
| SSGALLPKPQMR           | Q9CPQ1 | 0.00511364 | n +34.06 Da,K +34.06 Da, | 1594.755859 | 3 | 451.6162415 | 451.6166868 |
| AATTGSGVKVPRNFR        | Q9CZY3 | 0          | n +42.03 Da,K +34.06 Da, | 1880.994629 | 3 | 546.3200073 | 546.3162474 |
| PLPPLPEYGGKVR          | Q9CQW7 | 0.00464037 | n +17.03 Da,K +34.06 Da, | 2535.037109 | 3 | 491.9700012 | 491.9731986 |
| MDNKDEDIFKFKGYNFLR     | G5E904 | 0          | n +42.03 Da,K +34.06 Da, | 4041.040527 | 3 | 808.7740479 | 808.7754151 |
| MQSAPLEQPAKRPR         | Q60710 | 0          | n +42.03 Da,K +34.06 Da, | 1592.98938  | 2 | 842.9699707 | 842.9724183 |
| AGGEGGVTLGQPHLSR       | Q9Z0N1 | 0          | n +34.06 Da,             | 1765.799194 | 3 | 523.960022  | 523.9567193 |
| SETAAPAAPAPAVEKTPVKKKA | P43277 | 0          | n +42.03 Da,K +34.06 Da, | 1592.335327 | 4 | 610.1397705 | 610.1388957 |
| GAAAVVLMKKTAEAR        | Q8CAY6 | 0          | n +34.06 Da,K +34.06 Da, | 1589.644531 | 4 | 419.7712708 | 419.7710567 |
| FASFDKVR               | P04104 | 0.00353565 | n +34.06 Da,K +34.06 Da, | 2352.058594 | 3 | 384.2399902 | 384.2466993 |
| IPTSGAEIGGAFGGKHTGGGR  | Q9DBF1 | 0          | n +34.06 Da,K +34.06 Da, | 1883.232666 | 4 | 531.7929077 | 531.7921791 |
| IYFKEQFLDGDWNTNR       | P14211 | 0          | n +34.06 Da,K +34.06 Da, | 3911.012939 | 3 | 691.0300293 | 691.0355166 |
| SKDSEGSWFR             | O55125 | 0.02771142 | n +34.06 Da,K +34.06 Da, | 1582.428955 | 3 | 422.8999939 | 422.896507  |
| DWTFHYLR               | Q99LC3 | 0.00240674 | n +34.06 Da,             | 3466.385254 | 3 | 391.2073975 | 391.2084266 |
| FIKEAMQIR              | Q99LB2 | 0.01096606 | n +34.06 Da,K +34.06 Da, | 1580.270752 | 3 | 401.9200134 | 401.9233393 |
| SQAEFDKAAEEVKR         | P31786 | 0          | n +42.03 Da,K +34.06 Da, | 2585.84082  | 3 | 573.3151245 | 573.3179124 |
| PNLHGLFGR              | P62897 | 0.00511364 | n +17.03 Da,             | 1988.605957 | 3 | 343.1980286 | 343.1997132 |
| SRAEACFVNCVER          | Q9WVA2 | 0.00189873 | n +34.06 Da,             | 1879.314941 | 3 | 544.5999756 | 544.5995497 |
| SDSRDPASDQMKQWKEQR     | P24270 | 0.02731193 | n +42.03 Da,K +34.06 Da, | 2060.0896   | 2 | 1151.579956 | 1151.579496 |
| MESNHKSGDGLSGTQKEAALR  | Q5YD48 | 0          | n +42.03 Da,K +34.06 Da, | 1570.828735 | 3 | 776.0700073 | 776.0745947 |
| FEVTHDITR              | P24270 | 0.00240674 | n +34.06 Da,             | 1567.336182 | 3 | 384.5457458 | 384.5471083 |
| GVPVFKFPR              | Q8R0Y6 | 0.00189873 | n +34.06 Da,K +34.06 Da, | 2651.730469 | 3 | 372.2510376 | 372.2517843 |
| LHGVPPGEC AVR          | O35490 | 0.02196193 | n +34.06 Da,             | 1564.905884 | 3 | 442.5799866 | 442.578414  |
| AAAGVEFEKFLKTR         | P30115 | 0.00189873 | n +34.06 Da,K +34.06 Da, | 2829.252441 | 4 | 450.2799988 | 450.279409  |
| SEPEIPK GIR            | Q9WTP6 | 0.00511364 | n +34.06 Da,K +34.06 Da, | 1659.070435 | 2 | 597.3793335 | 597.3798829 |
| FKEQFLDGDWNTNR         | P14211 | 0          | n +34.06 Da,K +34.06 Da, | 3204.135742 | 3 | 598.9858398 | 598.9863854 |
| SEPEIPK GIR            | Q9WTP6 | 0.00240674 | n +34.06 Da,K +34.06 Da, | 1563.479004 | 3 | 398.5874939 | 398.5890141 |
| GNLHGLFGR              | P62897 | 0.00189873 | n +34.06 Da,             | 2233.872803 | 3 | 367.8800049 | 367.8840543 |
| AGKPVLYFDGR            | P30115 | 0          | n +42.03 Da,K +34.06 Da, | 2444.715332 | 3 | 479.2677917 | 479.2683455 |
| SSEAPLVNEDV KR         | Q91YQ5 | 0          | n +34.06 Da,K +34.06 Da, | 1563.334229 | 3 | 536.9776001 | 536.9791193 |
| ASKPTLNEVVIVSAIR       | Q8QZT1 | 0.00599455 | n +34.06 Da,K +34.06 Da, | 3150.516113 | 3 | 589.045166  | 589.0454639 |
| TEVVAKAGAGSATLSMAYAGAR | P08249 | 0          | n +34.06 Da,K +34.06 Da, | 2242.353516 | 3 | 771.4500122 | 771.4545645 |
| GKALEQLQEYFDGNLKR      | P27773 | 0.00189873 | n +34.06 Da,K +34.06 Da, | 4089.300781 | 4 | 565.3300171 | 565.3311677 |
| GDVEKGKIFVQK           | P62897 | 0          | n +42.03 Da,K +34.06 Da, | 1557.976929 | 2 | 827.5598145 | 827.5641785 |

|                              |        |            |                          |             |   |             |             |
|------------------------------|--------|------------|--------------------------|-------------|---|-------------|-------------|
| MKIAVIGQSLFGQEVYQCQLR        | Q8R0Y6 | 0          | n +34.06 Da,K +34.06 Da, | 4179.989746 | 3 | 803.4500122 | 803.4536891 |
| SDSRDPASDQMKQWKEQR           | P24270 | 0.00947368 | n +42.03 Da,K +34.06 Da, | 1556.965332 | 4 | 576.289978  | 576.2933863 |
| ATMDAPKTCSPKQFACR            | Q91ZX7 | 0          | n +34.06 Da,K +34.06 Da, | 1556.798218 | 4 | 518.5300293 | 518.5300096 |
| PNIVGNEHYDVAR                | P56480 | 0          | n +17.03 Da,             | 1556.716675 | 3 | 500.9200134 | 500.9249785 |
| VALEGVGHFFR                  | P29391 | 0          | n +34.06 Da,             | 3101.216553 | 3 | 422.5773621 | 422.578631  |
| SAPSASGTPNKETAGLKVGVSRR      | D3Z6I7 | 0.00599455 | n +34.06 Da,K +34.06 Da, | 1551.700317 | 4 | 576.5900269 | 576.5908108 |
| FQHAIEVGSTNVR                | Q9Z2Y8 | 0          | n +34.06 Da,             | 1586.316284 | 3 | 497.9424438 | 497.9424099 |
| TEIGEALKESVSGKAVPR           | Q9JII6 | 0          | n +34.06 Da,K +34.06 Da, | 2506.111572 | 4 | 508.3099976 | 508.3139807 |
| SEGDSVGDSDVHGKPSVVYR         | Q9CQU3 | 0          | n +34.06 Da,K +34.06 Da, | 1544.478271 | 3 | 681.6900024 | 681.6974526 |
| SIGVPIKVLHEAEGHIVTCETNTGEVYR | P62320 | 0          | n +42.03 Da,K +34.06 Da, | 4073.920898 | 4 | 796.9212036 | 796.9184469 |
| EVIITGHCQGDGYR               | P35505 | 0          | n +34.06 Da,             | 1542.217651 | 3 | 546.9400024 | 546.9420815 |
| MQLTVKALQGR                  | P21126 | 0          | n +34.06 Da,K +34.06 Da, | 2150.657471 | 3 | 438.2799988 | 438.2850484 |
| SETAPAAPAAPAPVEKTPVKKK       | P43277 | 0          | n +42.03 Da,K +34.06 Da, | 1534.756104 | 4 | 592.3773804 | 592.3796172 |
| THFDPSCLFPACR                | P16015 | 0          | n +34.06 Da,             | 3380.437012 | 3 | 547.9299927 | 547.929007  |
| SMHTEAAEVLLER                | Q8QZS1 | 0.00189873 | n +34.06 Da,             | 2518.152832 | 3 | 507.269989  | 507.2714275 |
| AEQVSQGSSEDQVCTFLFKKPGR      | Q14B01 | 0          | n +42.03 Da,K +34.06 Da, | 3227.36792  | 3 | 928.5100098 | 928.5130314 |
| MKFNPFVTSR                   | P61255 | 0          | n +34.06 Da,K +34.06 Da, | 2752.692383 | 2 | 705.397522  | 705.3977499 |
| PSKTNVSGGAIALGHPLGGSGSR      | Q8BWT1 | 0          | n +17.03 Da,K +34.06 Da, | 1531.089111 | 4 | 543.5568848 | 543.5593014 |
| LEQQSPDIAQCVHLDR             | Q91X83 | 0          | n +17.03 Da,             | 2134.75293  | 4 | 482.25      | 482.2441584 |
| ANVSKVSWSGR                  | O70496 | 0          | n +42.03 Da,K +34.06 Da, | 1529.233765 | 3 | 476.9599915 | 476.9579892 |
| PDAGLFSDDKKVSETR             | Q3TC93 | 0          | n +17.03 Da,K +34.06 Da, | 1549.617554 | 3 | 608.0200195 | 608.0179032 |
| TGKLNTLLQR                   | Q8VEK3 | 0.00240674 | n +34.06 Da,K +34.06 Da, | 1527.651978 | 2 | 606.4051514 | 606.4089745 |
| YTTVLVLCYAIYLIQLLR           | Q8C3B8 | 0.04613297 | n +17.03 Da,             | 3346.119629 | 3 | 744.7700195 | 744.7673435 |
| SSPKSLEIIGAPFSKGQPR          | Q61176 | 0          | n +42.03 Da,K +34.06 Da, | 2126.644531 | 4 | 568.6022339 | 568.6034551 |
| DELTAEKITEFCHR               | P09103 | 0.01046572 | n +34.06 Da,K +34.06 Da, | 2648.48584  | 4 | 454.9899902 | 454.9938209 |
| TGKLNTLLQR                   | Q8VEK3 | 0.01046572 | n +34.06 Da,K +34.06 Da, | 1523.892944 | 3 | 404.6099854 | 404.6084085 |
| ASSSGSKAEFIVGGKYKLVLR        | Q8BK63 | 0          | n +42.03 Da,K +34.06 Da, | 2627.880615 | 4 | 557.8441162 | 557.8429053 |
| YLMKILTR                     | P60710 | 0.00599455 | n +34.06 Da,K +34.06 Da, | 2443.246338 | 3 | 412.269989  | 412.2669947 |
| NIQGITKPAIR                  | P62806 | 0          | n +34.06 Da,K +34.06 Da, | 1626.323975 | 3 | 426.9547119 | 426.9558082 |
| GAIALGHPLGGSGSR              | Q8BWT1 | 0.01279427 | n +34.06 Da,             | 1519.259277 | 3 | 461.9335327 | 461.9353665 |
| MDVPNIKR                     | P63242 | 0.01457286 | n +34.06 Da,K +34.06 Da, | 1516.551147 | 3 | 347.5556335 | 347.5567679 |
| YSHVSEQYSALGGTAKSSVEWQIR     | Q91YI0 | 0.01232666 | n +34.06 Da,K +34.06 Da, | 3097.012939 | 4 | 688.6099854 | 688.6147869 |
| LTNEGLEKSP EEIKR             | Q99J99 | 0          | n +34.06 Da,K +34.06 Da, | 1508.956909 | 3 | 615.7105713 | 615.7107396 |
| GKFMKPGKVVLVLAGR             | P61358 | 0.00068776 | n +42.03 Da,K +34.06 Da, | 3148.199463 | 4 | 461.8156433 | 461.8155326 |
| SKDSEGSWFR                   | O55125 | 0.00068776 | n +34.06 Da,K +34.06 Da, | 1508.473145 | 2 | 633.8397217 | 633.8411222 |
| SHTILLVQPTKRPEGR             | P84089 | 0.03204524 | n +42.03 Da,K +34.06 Da, | 1922.927979 | 3 | 636.7199707 | 636.7127783 |
| LRPGDCEVCISYLGR              | Q9CXI5 | 0          | n +34.06 Da,             | 2993.724609 | 2 | 914.9632568 | 914.9664762 |
| PKESSYACYDEER                | O89017 | 0          | n +17.03 Da,K +34.06 Da, | 1856.85791  | 3 | 616.6199951 | 616.6174816 |
| YTDNELEKITR                  | P26443 | 0          | n +34.06 Da,K +34.06 Da, | 1975.420044 | 3 | 483.9443054 | 483.9455269 |
| PSKPSTGGWQPLR                | Q8VCZ9 | 0          | n +17.03 Da,K +34.06 Da, | 1498.235718 | 3 | 487.9500122 | 487.9526862 |

|                              |        |            |                          |             |   |             |             |
|------------------------------|--------|------------|--------------------------|-------------|---|-------------|-------------|
| GVQVSPSGEKITHTGQVYDEKDYR     | P52503 | 0          | n +34.06 Da,K +34.06 Da, | 2020.374023 | 5 | 559.9059448 | 559.9070043 |
| LVEKGFNSLR                   | Q922D8 | 0.00189873 | n +34.06 Da,K +34.06 Da, | 1496.794189 | 3 | 410.9299927 | 410.9328921 |
| PGLAAASPAPPEAQEKKPLKPC       | P56394 | 0          | n +17.03 Da,K +34.06 Da, | 1776.15686  | 4 | 594.8599854 | 594.8609161 |
| GKIVTEKSTVPVR                | O70475 | 0          | n +34.06 Da,K +34.06 Da, | 1495.468628 | 3 | 560.3678589 | 560.3698768 |
| APKGGSKQSQSEEDLLLQDFSR       | Q9DCF9 | 0          | n +34.06 Da,K +34.06 Da, | 2965.048584 | 3 | 812.4556885 | 812.4590323 |
| VEEVPWKR                     | P25688 | 0.00947368 | n +34.06 Da,K +34.06 Da, | 1495.372681 | 3 | 370.9011841 | 370.9029326 |
| GDTHLGGEDFDQR                | P20029 | 0          | n +34.06 Da,             | 1492.401123 | 2 | 740.8499756 | 740.8474069 |
| MQPASAKWYDRR                 | Q9R0Q7 | 0          | n +42.03 Da,K +34.06 Da, | 2270.065918 | 3 | 528.9435425 | 528.9436448 |
| PIDVCEIGSKVCR                | Q9D819 | 0          | n +17.03 Da,K +34.06 Da, | 2606.807617 | 3 | 552.2999878 | 552.3007699 |
| GDTHLGGEDFDQR                | P20029 | 0.00411523 | n +34.06 Da,             | 1490.369873 | 3 | 494.2323914 | 494.2340301 |
| FVYFHDR                      | O35488 | 0.03167849 | n +34.06 Da,             | 1489.096802 | 3 | 339.8490906 | 339.8503505 |
| LHLGVTPSVLR                  | O89023 | 0.00240674 | n +34.06 Da,             | 2521.648193 | 3 | 409.2646179 | 409.2661645 |
| SKLVIITAGAR                  | P00342 | 0          | n +34.06 Da,K +34.06 Da, | 1515.338501 | 2 | 598.9193726 | 598.9217175 |
| DPYTTFVKMLPDKDCR             | P18760 | 0          | n +34.06 Da,K +34.06 Da, | 3720.175781 | 4 | 522.7877197 | 522.789284  |
| GSWKWVDGTDYR                 | P24721 | 0.01974334 | n +34.06 Da,K +34.06 Da, | 2773.328369 | 3 | 513.2700195 | 513.2738662 |
| ASKPTLNEVVIVSAIR             | Q8QZT1 | 0.00353565 | n +34.06 Da,K +34.06 Da, | 3110.283936 | 3 | 589.0426636 | 589.0454639 |
| TLGDIVYKR                    | P12710 | 0.00511364 | n +34.06 Da,K +34.06 Da, | 1689.281006 | 2 | 566.8701782 | 566.8716933 |
| SNYGPMKGGSGFGR               | Q8BG05 | 0          | n +34.06 Da,K +34.06 Da, | 1482.040161 | 3 | 494.9302368 | 494.9313344 |
| SSPPEGKLETKAGHPPAVK          | Q91XC8 | 0.03456329 | n +42.03 Da,K +34.06 Da, | 1481.426147 | 4 | 519.3099976 | 519.3152519 |
| MPLFEHYTR                    | Q9CPY7 | 0.00564972 |                          | 2218.694824 | 3 | 407.8732605 | 407.8743496 |
| PLGLEAEKDGVPVFKFPR           | Q8R0Y6 | 0          | n +17.03 Da,K +34.06 Da, | 3601.866699 | 4 | 521.8187866 | 521.8201887 |
| GDVEKGGKIFVQK                | P62897 | 0          | n +42.03 Da,K +34.06 Da, | 1578.22229  | 4 | 414.285675  | 414.2857275 |
| ATKCTKCGPGYSTPLEAMKGR        | P17563 | 0          | n +42.03 Da,K +34.06 Da, | 2250.154053 | 4 | 639.3450928 | 639.3473349 |
| EKFVEGVYR                    | P07309 | 0.03493246 | n +34.06 Da,K +34.06 Da, | 1475.977783 | 2 | 597.8580322 | 597.8613258 |
| ASSDIQVKELEKR                | P54227 | 0.00599455 | n +42.03 Da,K +34.06 Da, | 2057.741699 | 2 | 806.9799805 | 806.9806909 |
| SEAAADREDDPNFFKMVEGFFDR      | P26443 | 0          | n +17.03 Da,K +34.06 Da, | 4617.087402 | 4 | 686.8300171 | 686.827544  |
| MESNHKSGDGLSGTQKEAALR        | Q5YD48 | 0          | n +42.03 Da,K +34.06 Da, | 1470.136963 | 3 | 776.0700073 | 776.0745947 |
| PVNEHMLNTR                   | O70133 | 0          | n +17.03 Da,             | 1781.90979  | 3 | 447.5765686 | 447.5766327 |
| YPNSSEDIHR                   | Q61656 | 0          | n +34.06 Da,             | 1465.66272  | 3 | 472.230011  | 472.231849  |
| HREPEEAVVWTRSSLRLLR          | Q924A2 | 0.03851444 |                          | 2837.368652 | 3 | 788.1099854 | 788.1082619 |
| RASSIVVSGTPIR                | P35505 | 0          | n +34.06 Da,             | 1462.202515 | 2 | 688.9199829 | 688.9252621 |
| VVFTDEMAHFDR                 | P24270 | 0          | n +34.06 Da,             | 3096.538818 | 3 | 500.9161987 | 500.9169844 |
| ASGASDTPHHQSPSPSPVQVGVGVCMMR | A2AS89 | 0.00240674 | n +34.06 Da,             | 2571.076416 | 4 | 804.1199951 | 804.1288139 |
| MEVKPPPGRPQPDSGR             | Q8BG05 | 0          | n +42.03 Da,K +34.06 Da, | 1753.965332 | 3 | 608.6571655 | 608.6596857 |
| RPLRPALR                     | Q8CCJ9 | 0.02196193 | n +34.06 Da,             | 2396.903564 | 3 | 381.2502441 | 381.250737  |
| SDSRDPASDQMKQWKEQR           | P24270 | 0          | n +42.03 Da,K +34.06 Da, | 1598.528564 | 4 | 576.289978  | 576.2933863 |
| MESNHKSGDGLSGTQKEAALR        | Q5YD48 | 0          | n +42.03 Da,K +34.06 Da, | 1508.543945 | 4 | 582.3099976 | 582.3077652 |
| SEAAADREDDPNFFKMVEGFFDR      | P26443 | 0          | n +34.06 Da,K +34.06 Da, | 4692.27002  | 3 | 921.1102905 | 921.1114862 |
| SLGMIFEKR                    | P11725 | 0.00599455 | n +34.06 Da,K +34.06 Da, | 2360.553467 | 3 | 383.5700073 | 383.5759396 |
| PANLDLKKELSEPSSTR            | Q8C196 | 0          | n +17.03 Da,K +34.06 Da, | 2120.25415  | 3 | 657.3900146 | 657.3916293 |

|                           |        |            |                          |             |   |             |             |
|---------------------------|--------|------------|--------------------------|-------------|---|-------------|-------------|
| THFCEVEQMR                | P25688 | 0          | n +34.06 Da,             | 1599.905273 | 3 | 457.5515442 | 457.5516479 |
| ATEGMILTNHHDHQIR          | Q8BUV3 | 0          | n +42.03 Da,             | 2363.625244 | 2 | 889.4299927 | 889.4361392 |
| NLQGQFLEFLR               | Q9D9S3 | 0.03647276 | n +31.05 Da,             | 2825.897461 | 3 | 423.2399902 | 423.2451001 |
| SSIFTKDLGR                | Q9DBF1 | 0.00189873 | n +34.06 Da,K +34.06 Da, | 1863.513306 | 3 | 397.9163208 | 397.9171307 |
| SETAPAAPAAPAPAEKTPVKKK    | P43274 | 0          | n +42.03 Da,K +34.06 Da, | 1444.690552 | 4 | 585.3699951 | 585.3717921 |
| PVGGGCPVFEHPR             | Q64471 | 0.00068776 | n +17.03 Da,             | 1439.181396 | 3 | 494.9176025 | 494.9155371 |
| SLWFDHIR                  | O35403 | 0.01232666 | n +34.06 Da,             | 2929.866211 | 3 | 369.8800049 | 369.8767882 |
| GIFEVKSTAGDTHLGGEDFDNR    | P17156 | 0          | n +34.06 Da,K +34.06 Da, | 2920.478027 | 3 | 811.75      | 811.7487648 |
| KLYFEELSLE                | Q8C196 | 0.01046572 | n +34.06 Da,K +34.06 Da, | 3316.249512 | 3 | 498.9664612 | 498.9661506 |
| PSSTPTKALNGAEPNYHSLPSAR   | Q9CQ22 | 0.03893724 | n +17.03 Da,K +34.06 Da, | 2168.987793 | 4 | 612.3300171 | 612.329145  |
| GWTVIQKR                  | Q640P2 | 0.01457286 | n +34.06 Da,K +34.06 Da, | 1436.057251 | 3 | 352.5726624 | 352.5714056 |
| PNLVPSISNKR               | P19536 | 0.00136986 | n +17.03 Da,K +34.06 Da, | 1435.471191 | 3 | 425.9397278 | 425.9383768 |
| PKCESAPGCGVWQR            | P35564 | 0          | n +17.03 Da,K +34.06 Da, | 1432.877319 | 3 | 561.6199951 | 561.6169808 |
| SETAPAAPAAPAPVEKTPVKKK    | P43277 | 0          | n +42.03 Da,K +34.06 Da, | 1616.049194 | 4 | 592.3786621 | 592.3796172 |
| PSSDELDKAQHDVTNATR        | Q8CCJ3 | 0.00068776 | n +17.03 Da,K +34.06 Da, | 1601.226807 | 4 | 524.0164185 | 524.0146585 |
| CSSTSAPVQITTHYTVHPR       | Q921G7 | 0          | n +34.06 Da,             | 2266.933838 | 3 | 726.039978  | 726.0391146 |
| PTDHLITAYR                | P35486 | 0.00599455 | n +17.03 Da,             | 1427.262329 | 3 | 401.8901367 | 401.889205  |
| PDIAQCVHLDR               | Q91X83 | 0          | n +17.03 Da,             | 1966.923828 | 3 | 447.5700073 | 447.5645043 |
| PKALKPPCDLSMQSVEIAGTTDGIR | P41216 | 0          | K +28.03 Da,             | 3335.756104 | 3 | 923.5100098 | 923.4943551 |
| PPPLPSALSTSSLR            | Q8R5H6 | 0.02063882 |                          | 1622.559204 | 3 | 507.2862549 | 507.2874767 |
| SSPPEGKLETKAGHPPAVK       | Q91XC8 | 0          | n +42.03 Da,K +34.06 Da, | 1426.598511 | 3 | 692.0900269 | 692.0845771 |
| PKIIDAALR                 | P12787 | 0.02731193 | n +17.03 Da,K +34.06 Da, | 1426.061768 | 2 | 524.3627319 | 524.3609988 |
| LHGVPPEGCAVR              | O35490 | 0.01194185 | n +34.06 Da,             | 1425.970215 | 3 | 442.5799866 | 442.578414  |
| VKGVVNGFGR                | P16858 | 0.00189873 | n +34.06 Da,K +34.06 Da, | 1472.556274 | 3 | 367.5777893 | 367.5785603 |
| PGLAAASPAPPEAQEKPLKPC     | P56394 | 0          | n +17.03 Da,K +34.06 Da, | 1816.940918 | 4 | 594.8599854 | 594.8609161 |
| PEEYEQWKQR                | Q91VA0 | 0.00240674 | n +17.03 Da,K +34.06 Da, | 1421.143433 | 3 | 481.9220581 | 481.9211635 |
| PLNKEAAEVLQNNR            | P61082 | 0          | n +17.03 Da,K +34.06 Da, | 1951.345947 | 3 | 549.6500244 | 549.6530771 |
| SIEEVHKEIR                | P97930 | 0.00599455 | n +42.03 Da,K +34.06 Da, | 1419.524292 | 3 | 439.2467957 | 439.2524728 |
| DPEATSHSTQDPLEAQAKSR      | P97290 | 0          | n +34.06 Da,K +34.06 Da, | 1419.008911 | 3 | 746.0560303 | 746.0540767 |
| MDIAIHPWIR                | P23927 | 0          | n +42.03 Da,             | 3445.23291  | 3 | 477.5818787 | 477.5835697 |
| SPESHVGVAWR               | Q91WT9 | 0.02196193 | n +34.06 Da,             | 1412.262085 | 2 | 629.84198   | 629.8411978 |
| TAGDTHLGGEDFDNR           | P16627 | 0.00564972 | n +34.06 Da,             | 1564.984741 | 3 | 546.921875  | 546.9237445 |
| RWDTVSNQVQR               | Q64374 | 0          | n +34.06 Da,             | 1409.150757 | 2 | 711.8900146 | 711.8866685 |
| DPEATSHSTQDPLEAQAKSR      | P97290 | 0          | n +34.06 Da,K +34.06 Da, | 1419.665649 | 4 | 559.789978  | 559.7923766 |
| TLGDIVYKR                 | P12710 | 0.00754717 | n +34.06 Da,K +34.06 Da, | 1685.615234 | 3 | 378.2489014 | 378.250221  |
| PDAAKPEDWDER              | P14211 | 0          | n +17.03 Da,K +34.06 Da, | 1407.701538 | 2 | 740.3699951 | 740.3704794 |
| RVGGVQSLGGTGALR           | P05201 | 0.00511364 | n +34.06 Da,             | 1637.854858 | 3 | 487.9599915 | 487.9618043 |
| LTNEGLEKSPPEIKR           | Q99J99 | 0          | n +34.06 Da,K +34.06 Da, | 1504.717896 | 4 | 462.0344849 | 462.0348738 |
| MESNHKSGDGLSGTQKEAALR     | Q5YD48 | 0          | n +42.03 Da,K +34.06 Da, | 1570.34375  | 4 | 582.3070068 | 582.3077652 |
| FYASEDKLENR               | O35490 | 0          | n +34.06 Da,K +34.06 Da, | 1403.008911 | 2 | 720.4000244 | 720.3937195 |



|                          |        |            |                          |             |   |             |             |
|--------------------------|--------|------------|--------------------------|-------------|---|-------------|-------------|
| FYASEDKLENR              | Q35490 | 0          | n +34.06 Da,K +34.06 Da, | 1400.956177 | 3 | 480.5985107 | 480.5982385 |
| PILGVTEAFKR              | P05202 | 0          | n +17.03 Da,K +34.06 Da, | 2498.61792  | 3 | 427.9439697 | 427.9432392 |
| EDEEDVKLLGMSGKR          | Q61937 | 0.00189873 | n +34.06 Da,K +34.06 Da, | 2145.047852 | 3 | 603.3499756 | 603.3488134 |
| VTAEDKGTGNKNKINITNDQNR   | P20029 | 0          | n +42.03 Da,K +34.06 Da, | 1479.036987 | 4 | 641.1199951 | 641.1149162 |
| GDFVDVDDAKVLLGLKER       | Q8BSY0 | 0          | n +34.06 Da,K +34.06 Da, | 3902.571289 | 4 | 498.7999878 | 498.8019774 |
| FGGVKPVGSEPVPKSR         | Q9QXX4 | 0.00464037 | n +34.06 Da,K +34.06 Da, | 1398.288208 | 4 | 436.5314636 | 436.5307637 |
| SLKIQTSNVTKNKNDPKSINSR   | Q64012 | 0.00240674 | n +42.03 Da,K +34.06 Da, | 1394.660889 | 4 | 622.8699951 | 622.8699177 |
| SHTILLVQPTKRPEGR         | P84089 | 0          | n +42.03 Da,K +34.06 Da, | 1839.609131 | 3 | 636.711731  | 636.7127783 |
| KEEPPSLRPAPPPISGGGYR     | Q8K0E8 | 0.0030012  | n +34.06 Da,K +34.06 Da, | 2162.498047 | 3 | 725.081543  | 725.0848704 |
| STSSMGTLPKQVKIVEVGPR     | P38060 | 0          | n +34.06 Da,K +34.06 Da, | 2548.048096 | 2 | 1108.670044 | 1108.68022  |
| PKLAVLITNSNVR            | Q9R0N0 | 0.01652479 | n +17.03 Da,K +34.06 Da, | 2129.643311 | 2 | 738.4799805 | 738.4801663 |
| KEIEYEVVR                | Q8C196 | 0.02196193 | n +34.06 Da,K +34.06 Da, | 1386.412354 | 2 | 616.8814087 | 616.8797159 |
| PYAPTMHFNYR              | P36552 | 0          | n +17.03 Da,             | 2355.178223 | 3 | 471.8900146 | 471.8975947 |
| MGTLPKQVKIVEVGPR         | P38060 | 0          | n +34.06 Da,K +34.06 Da, | 2363.237549 | 4 | 464.3053894 | 464.3078063 |
| GDTAKPYFVKR              | Q5BLK4 | 0          | n +42.03 Da,K +34.06 Da, | 1564.835083 | 3 | 464.6146851 | 464.6154519 |
| PAQQKVDSPKATR            | Q8BN21 | 0.03089354 | n +34.06 Da,K +34.06 Da, | 4777.344238 | 3 | 510         | 509.9949213 |
| KSTGSVVGQQPFGGAR         | Q8CHT0 | 0          | n +34.06 Da,K +34.06 Da, | 1376.618164 | 3 | 548.6556396 | 548.6548583 |
| FYDIKLR                  | Q9Z0X1 | 0.03775322 | n +34.06 Da,K +34.06 Da, | 2147.311035 | 3 | 360.5700073 | 360.5676613 |
| TENFEDVGHSTDR            | P56395 | 0.03127962 | n +34.06 Da,             | 1461.103638 | 3 | 537.921875  | 537.9201115 |
| TITYGPKVVR               | P12710 | 0.00240674 | n +34.06 Da,K +34.06 Da, | 1373.776611 | 3 | 401.2695923 | 401.2695041 |
| TPHHQSPSESVPQVGVGCSMMR   | A2AS89 | 0.00189873 |                          | 2466.051758 | 4 | 673.5700073 | 673.5663609 |
| AMTGSTPCSSMSNHTKER       | Q91VJ4 | 0          | n +42.03 Da,K +34.06 Da, | 1372.767334 | 3 | 686.6500244 | 686.6469006 |
| GVDGKWR                  | Q91Y97 | 0.00511364 | n +34.06 Da,K +34.06 Da, | 2142.116943 | 3 | 344.8800049 | 344.8802392 |
| SEKFDCHYCR               | P97447 | 0          | n +42.03 Da,K +34.06 Da, | 1372.29126  | 2 | 739.3200073 | 739.3241981 |
| DSCQLHETKR               | P51174 | 0.00240674 | n +42.03 Da,K +34.06 Da, | 1371.003296 | 3 | 488.2600098 | 488.2558888 |
| SIMKCDVDIR               | P60710 | 0.00464037 | n +34.06 Da,K +34.06 Da, | 1678.936646 | 3 | 435.5819092 | 435.5827659 |
| TPVSEHVTKCCSGSLVER       | P07724 | 0          | n +34.06 Da,K +34.06 Da, | 1369.091553 | 4 | 529.2806396 | 529.28059   |
| EDDDEEEEEEPVKAAPGKR      | P09405 | 0          | n +34.06 Da,K +34.06 Da, | 1368.730103 | 3 | 801.7399902 | 801.7346684 |
| NVVSCMINGEWYTIILASDKR    | A2ANT6 | 0.01457286 | n +34.06 Da,K +34.06 Da, | 4031.718262 | 4 | 635.0999756 | 635.0936382 |
| FAQLCEEHGILR             | B5X0G2 | 0          |                          | 2276.515625 | 3 | 491.5829163 | 491.5820065 |
| KGMNLTLVGYDLVPEPKIIDAALR | P12787 | 0          | n +42.03 Da,K +34.06 Da, | 4212.541504 | 4 | 656.6400146 | 656.634562  |
| DGAGAVIIASEDAVKKHNFTPLAR | Q8BWT1 | 0          | n +34.06 Da,K +34.06 Da, | 3900.145996 | 4 | 646.3800049 | 646.3841977 |
| LPQFTSAGESFNKLVSGKLR     | Q9CPY7 | 0          | n +34.06 Da,K +34.06 Da, | 3733.588135 | 4 | 571.0999756 | 571.0995425 |
| VSFELFADKVPKTAENFR       | P17742 | 0          | n +42.03 Da,K +34.06 Da, | 3704.626953 | 4 | 552.8200073 | 552.8138515 |
| MKFNPVFTSDR              | P61255 | 0          | n +34.06 Da,K +34.06 Da, | 2634.423584 | 3 | 470.6010132 | 470.6009254 |
| QNYHQDAEAANR             | P09528 | 0          |                          | 1357.173096 | 3 | 519.9199829 | 519.9183352 |
| PSKTNVSGGAIALGHPLGGSGSR  | Q8BWT1 | 0          | n +17.03 Da,K +34.06 Da, | 1707.242676 | 3 | 724.4065552 | 724.4099764 |
| SALEKSMHLGR              | Q8BVQ5 | 0.00068776 | n +42.03 Da,K +34.06 Da, | 2296.211426 | 2 | 652.8599854 | 652.8638158 |
| EVKQGLSSSIFTKDLGR        | Q9DBF1 | 0          | n +34.06 Da,K +34.06 Da, | 2678.568848 | 3 | 656.4099731 | 656.405539  |
| AQAEGAYHRPLATSR          | Q9CQ56 | 0          | n +42.03 Da,             | 1353.658203 | 3 | 557.2854004 | 557.285018  |

|                          |        |            |                          |             |   |             |             |
|--------------------------|--------|------------|--------------------------|-------------|---|-------------|-------------|
| SNPENTVFDAGR             | P20029 | 0          | n +34.06 Da,K +34.06 Da, | 1396.960083 | 3 | 482.6099854 | 482.6055045 |
| THVEMGPPDPILGVTEAFKR     | P05202 | 0          | n +34.06 Da,K +34.06 Da, | 3719.976807 | 4 | 566.3168945 | 566.3201437 |
| PKIIDAALR                | P12787 | 0.02731193 | n +17.03 Da,K +34.06 Da, | 1418.194702 | 3 | 349.9104309 | 349.909758  |
| TISQGAIEKVKDATR          | Q8C196 | 0          | n +34.06 Da,K +34.06 Da, | 1936.485718 | 4 | 430.5260315 | 430.52695   |
| ASGPGGLHADLLR            | Q8BWF0 | 0          | n +34.06 Da,             | 1988.761963 | 2 | 649.3699951 | 649.3754049 |
| VLSGEDKSNIKAAAWGK        | P01942 | 0          | n +34.06 Da,K +34.06 Da, | 1876.00769  | 3 | 613.7299805 | 613.7264302 |
| IPLDKTVVVKDVR            | P61358 | 0          | n +34.06 Da,K +34.06 Da, | 2491.764893 | 4 | 437.2900085 | 437.2897765 |
| VFYHQGCCVAASR            | P24549 | 0          | n +34.06 Da,             | 1339.765869 | 3 | 572.9440308 | 572.9434278 |
| GPAGAGESKCLPMVKVLDVAVR   | P07309 | 0          | n +34.06 Da,K +34.06 Da, | 3523.172363 | 3 | 753.1112671 | 753.1133734 |
| STSAVPQITTHYTVHPR        | Q921G7 | 0          | n +34.06 Da,             | 1903.478638 | 4 | 483.019989  | 483.0154855 |
| ATSPQKSPLVPKSPTPKSPPSR   | Q9EPC1 | 0          | n +42.03 Da,K +34.06 Da, | 1728.219482 | 4 | 608.6199951 | 608.6246534 |
| PDFQHEDYNFLTR            | Q9R0H0 | 0          | n +17.03 Da,             | 3181.0979   | 2 | 849.9000244 | 849.8996771 |
| SETAPAAPAAPAPAEKTPVKKK   | P43274 | 0          | n +42.03 Da,K +34.06 Da, | 1488.813721 | 3 | 780.1599731 | 780.159964  |
| SHTILLVQPTKRPEGR         | P84089 | 0          | n +42.03 Da,K +34.06 Da, | 1513.844482 | 3 | 636.7120972 | 636.7127783 |
| SYHGSDSLQLER             | Q7TMM9 | 0.00068776 | n +34.06 Da,             | 1501.639893 | 2 | 727.3599854 | 727.3601499 |
| PGLLLTKVR                | Q4LDG0 | 0.02515723 | n +17.03 Da,K +34.06 Da, | 1576.354858 | 3 | 349.9212036 | 349.9218864 |
| IAFEVEDCDHIVQKAR         | P49429 | 0          | n +34.06 Da,K +34.06 Da, | 2529.2771   | 3 | 666.6900024 | 666.6965065 |
| PVPAGDLVKAR              | P21981 | 0          | n +17.03 Da,K +34.06 Da, | 1324.372681 | 3 | 391.9240723 | 391.9240674 |
| LDLKKELSEPSSTR           | Q8C196 | 0          | n +34.06 Da,K +34.06 Da, | 2096.986572 | 3 | 569.026062  | 569.0245468 |
| DLSKQAVAYR               | Q03265 | 0.00240674 | n +34.06 Da,K +34.06 Da, | 1486.060425 | 2 | 609.874939  | 609.8775074 |
| PQNEYIELHR               | Q9CR47 | 0          | n +17.03 Da,             | 1520.019043 | 2 | 658.3404541 | 658.3438084 |
| EVKQGLSSSIFTKDLGR        | Q9DBF1 | 0          | n +34.06 Da,K +34.06 Da, | 2658.91626  | 4 | 492.5599976 | 492.5559734 |
| TAGKDGVANVSIEDR          | P08228 | 0          | n +34.06 Da,K +34.06 Da, | 1442.111084 | 3 | 533.9708862 | 533.970624  |
| YGPMMKGGSFGR             | Q8BG05 | 0.00189873 | n +34.06 Da,K +34.06 Da, | 1318.247925 | 3 | 427.9064636 | 427.9063486 |
| YPKCFIVGADNVGSKMQMQIR    | P14869 | 0          | n +34.06 Da,K +34.06 Da, | 2765.532715 | 4 | 636.0999756 | 636.1095845 |
| IIGGSMDAKGSFPWQAKMISR    | Q61646 | 0          | n +34.06 Da,K +34.06 Da, | 3412.296875 | 4 | 596.3400269 | 596.3434864 |
| MKNPFAH                  | P28271 | 0.03529958 | n +34.06 Da,K +34.06 Da, | 1312.037109 | 2 | 456.7723694 | 456.7734668 |
| GFEKSPEELR               | P52196 | 0.00599455 | n +34.06 Da,K +34.06 Da, | 1310.356567 | 2 | 630.3664551 | 630.3669728 |
| TAIKHALQR                | Q8R3S6 | 0.00599455 | n +42.03 Da,K +34.06 Da, | 1310.26123  | 3 | 371.9025574 | 371.903226  |
| SSFQIVKNPR               | Q61176 | 0          | n +34.06 Da,K +34.06 Da, | 1308.730835 | 3 | 415.2638855 | 415.2646418 |
| SETAPAAPAAPAPAEKTPVKKKAR | P43274 | 0          | n +42.03 Da,K +34.06 Da, | 1308.3573   | 4 | 642.1500244 | 642.1563485 |
| PDHPIVETLR               | P11499 | 0.00353565 | n +17.03 Da,             | 1305.867432 | 3 | 398.5603943 | 398.5610884 |
| FPAAVGSPSAFAPGHNIPIHGLR  | Q8VCF0 | 0.03204524 | n +34.06 Da,             | 3022.936279 | 4 | 588.0638428 | 588.063233  |
| NPTKVVAVDGKIKNNVIR       | Q8C196 | 0          | n +34.06 Da,K +34.06 Da, | 2095.559814 | 3 | 700.4400024 | 700.433323  |
| MEKPAASTEPQGSRALGR       | Q9JMD3 | 0          | n +42.03 Da,K +34.06 Da, | 1835.779053 | 3 | 687.0305786 | 687.0319599 |
| MEEESIKEGSEKPR           | Q8K124 | 0          | n +42.03 Da,K +34.06 Da, | 1611.716919 | 3 | 586.9778442 | 586.9786797 |
| AAPAKGENLSLVVHGPDIR      | Q64442 | 0.00068776 | n +42.03 Da,K +34.06 Da, | 2974.819336 | 3 | 693.0562744 | 693.0586147 |
| VRPASSAASVYAGAGGSGSR     | P05784 | 0          | n +14.02 Da,             | 1303.224487 | 3 | 607.9799805 | 607.9782541 |
| TTGVLKQTKGVGASGSFR       | P10922 | 0.00599455 | n +34.06 Da,K +34.06 Da, | 1429.921631 | 4 | 474.8017273 | 474.7995031 |
| MDQQTQHPSKAAQPLR         | Q9JL3  | 0          | n +42.03 Da,K +34.06 Da, | 1349.720459 | 3 | 595.3157349 | 595.315919  |

|                          |        |            |                          |             |   |             |             |
|--------------------------|--------|------------|--------------------------|-------------|---|-------------|-------------|
| GRPPLGFLNPR              | O89023 | 0.00599455 | n +34.06 Da,             | 2351.541992 | 3 | 419.9241333 | 419.9261421 |
| MESNHSKSGDLSGTQKEAALR    | Q5YD48 | 0          | n +42.03 Da,K +34.06 Da, | 1506.736938 | 3 | 776.0755615 | 776.0745947 |
| SLSIEKGYR                | Q99LB7 | 0.02426007 | n +34.06 Da,K +34.06 Da, | 1300.436279 | 3 | 374.2373352 | 374.2380927 |
| TKVSSLIER                | Q921X9 | 0.0300286  | n +34.06 Da,K +34.06 Da, | 1299.63208  | 2 | 550.8687134 | 550.8691508 |
| PSVSLQTVKLMKEGLEAAR      | O35490 | 0          | n +17.03 Da,K +34.06 Da, | 3383.994385 | 4 | 536.3279419 | 536.3304922 |
| AQERPSCAVEPEHVQR         | P56389 | 0          | n +42.03 Da,             | 1389.911377 | 3 | 645.6436157 | 645.6427657 |
| PGDFVYLHSR               | Q03265 | 0.00511364 | n +14.02 Da,             | 1840.292725 | 3 | 402.2099915 | 402.2084973 |
| ISFHLPVNSR               | Q9D1D4 | 0.00189873 | n +34.06 Da,             | 2108.148193 | 3 | 401.9060669 | 401.9067477 |
| GFVVLKGR                 | P63242 | 0.04774775 | n +34.06 Da,K +34.06 Da, | 1297.165527 | 3 | 315.2284546 | 315.2289796 |
| SDSRDPASDQMKQWKEQR       | P24270 | 0          | n +42.03 Da,K +34.06 Da, | 1944.289307 | 4 | 576.291748  | 576.2933863 |
| ADEDEGEGIHPSAPHR         | Q3UHD6 | 0          | n +42.03 Da,             | 1385.15625  | 3 | 543.9099731 | 543.9132502 |
| VYKIGGIGTVPVGR           | P10126 | 0          | n +34.06 Da,K +34.06 Da, | 2560.984863 | 3 | 495.3200073 | 495.3259013 |
| AITATQKTVDGPGSKLWR       | P16858 | 0          | n +34.06 Da,K +34.06 Da, | 2057.376221 | 3 | 677.7523804 | 677.75305   |
| GKLTGMAFR                | P16858 | 0.00240674 | n +34.06 Da,K +34.06 Da, | 1389.318481 | 2 | 524.8355713 | 524.8340561 |
| AEKISGQKVNEAACDIAR       | O35490 | 0          | n +34.06 Da,K +34.06 Da, | 1631.862549 | 3 | 688.0599976 | 688.0651883 |
| SSPPEGKLETKAGHPPAVKAGGMR | Q91XC8 | 0          | n +42.03 Da,K +34.06 Da, | 1646.697021 | 5 | 510.1000061 | 510.0979846 |
| ISSQQTIPPSAKYGGGR        | P70404 | 0          | n +34.06 Da,K +34.06 Da, | 1486.14978  | 3 | 586.6799927 | 586.6775518 |
| IHTQPPPPPIPEVVATWEAISLGR | Q8BGA8 | 0          | n +34.06 Da,             | 4695.773926 | 3 | 880.5       | 880.4971221 |
| PNVTKTLQFR               | Q9Z0X1 | 0          | n +17.03 Da,K +34.06 Da, | 1519.55542  | 2 | 627.8911133 | 627.893195  |
| PRDNMASLIQR              | Q6PDY2 | 0          | n +17.03 Da,             | 1705.161377 | 2 | 659.3552246 | 659.3589353 |
| AELYVKPGNKER             | Q80VJ2 | 0          | n +42.03 Da,K +34.06 Da, | 1469.776367 | 2 | 757.4500122 | 757.4541112 |
| ESVFTVEGGHR              | O35129 | 0.00649702 | n +31.05 Da,             | 1401.305054 | 3 | 416.8800049 | 416.8842313 |
| DEAIHCPCSEEKLR           | P47879 | 0          | n +34.06 Da,K +34.06 Da, | 1567.709961 | 4 | 495.7530823 | 495.7542079 |
| MKIEEVKSTTKTQR           | P60122 | 0.00240674 | n +42.03 Da,K +34.06 Da, | 1294.601807 | 3 | 608.3800049 | 608.3767032 |
| VYIEIKFTLR               | Q03137 | 0.04652213 | K +28.03 Da,             | 2749.40332  | 3 | 446.6099854 | 446.6112312 |
| PSKGPLQSVQVFGFR          | P14131 | 0          | n +17.03 Da,K +34.06 Da, | 2403.851807 | 2 | 775.9649658 | 775.9674233 |
| SQAEFDKAAEEVKR           | P31786 | 0.01457286 | n +42.03 Da,K +34.06 Da, | 1271.796265 | 3 | 573.3200073 | 573.3179124 |
| TQVNSEDKGALAKLVEAIR      | P12970 | 0          | n +34.06 Da,K +34.06 Da, | 3529.513916 | 4 | 536.8300171 | 536.833809  |
| GGAGVQHIALKTEDIITAIR     | P49429 | 0          | n +34.06 Da,K +34.06 Da, | 3452.918457 | 3 | 711.0999756 | 711.1005205 |
| VDREQLVQKAR              | P61982 | 0.00240674 | n +42.03 Da,K +34.06 Da, | 1513.110718 | 2 | 709.4199829 | 709.4203441 |
| TVSSDQMAKLR              | P16015 | 0          | n +34.06 Da,K +34.06 Da, | 1265.561401 | 3 | 435.2602539 | 435.2606804 |
| TGKTSIAIDTIINQKR         | Q03265 | 0          | n +34.06 Da,K +34.06 Da, | 2302.931641 | 4 | 466.0499878 | 466.0546034 |
| SPGSPLEKLVSSVSDLPKR      | P54869 | 0          | n +34.06 Da,K +34.06 Da, | 3712.082031 | 4 | 525.3300171 | 525.3296307 |
| PNLVPSISNKR              | P19536 | 0.00068776 | n +17.03 Da,K +34.06 Da, | 1475.788574 | 3 | 425.9364929 | 425.9383768 |
| KEDQTEYLEER              | P07901 | 0.00900424 | n +34.06 Da,K +34.06 Da, | 1262.16748  | 2 | 754.4000244 | 754.3991995 |
| PKDKVQGWGENDR            | P62137 | 0.00189873 | n +17.03 Da,K +34.06 Da, | 1262.057007 | 2 | 783.8900146 | 783.8921105 |
| TVSSDQMAKLR              | P16015 | 0.00599455 | n +34.06 Da,K +34.06 Da, | 1259.918701 | 2 | 652.3867798 | 652.3873823 |
| SVFAEAIKVR               | Q9DBM2 | 0          | n +34.06 Da,K +34.06 Da, | 2832.525391 | 3 | 420.2799988 | 420.2766588 |
| PDSHQGQIVFNR             | Q8BML9 | 0          | n +17.03 Da,             | 1258.339355 | 3 | 472.2461548 | 472.2460518 |
| HPSVDGFTPR               | Q8C196 | 0          |                          | 1256.934326 | 2 | 556.7769165 | 556.7778076 |

|                                    |        |            |                          |             |   |             |             |
|------------------------------------|--------|------------|--------------------------|-------------|---|-------------|-------------|
| IQGITKPAIR                         | P62806 | 0.01096606 | n +34.06 Da,K +34.06 Da, | 1410.543457 | 3 | 388.9418945 | 388.9414988 |
| GFVVLKGR                           | P63242 | 0.04774775 | n +34.06 Da,K +34.06 Da, | 1256.640259 | 3 | 315.2289429 | 315.2289796 |
| GPTTPEADKIFLER                     | P26443 | 0.00240674 | n +34.06 Da,K +34.06 Da, | 2637.08667  | 2 | 821.4699707 | 821.4777838 |
| PDSHQGQIVFNR                       | Q8BML9 | 0          | n +17.03 Da,             | 1254.861572 | 2 | 707.8699951 | 707.8654394 |
| PKDQVQGWGENDR                      | P62137 | 0          | n +17.03 Da,K +34.06 Da, | 1254.088989 | 3 | 522.9299927 | 522.9304992 |
| GSCSYKDFSESER                      | Q8R081 | 0          | n +34.06 Da,K +34.06 Da, | 1253.210327 | 2 | 745.8599854 | 745.8644693 |
| MKFNFVTSDR                         | P61255 | 0          | n +34.06 Da,K +34.06 Da, | 2777.503174 | 3 | 470.5999146 | 470.6009254 |
| ATSASSHLNKGIKQMY                   | P15105 | 0          | n +42.03 Da,K +34.06 Da, | 1690.602905 | 3 | 616.0078125 | 616.0103138 |
| DIAWNFEKFLVGPDPVPRR                | P11352 | 0          | n +34.06 Da,K +34.06 Da, | 4338.378418 | 4 | 596.598999  | 596.5943965 |
| GEMAIKDAQTKLAELEAALQR              | P11679 | 0          | n +42.03 Da,K +34.06 Da, | 4726.470215 | 3 | 799.460022  | 799.4545239 |
| PGHLQEGFGCVVTNR                    | Q9CY58 | 0.02426007 |                          | 2066.597656 | 3 | 557.6099854 | 557.6071036 |
| AFKDTGKTPVEPEVAIHR                 | P60867 | 0          | n +42.03 Da,K +34.06 Da, | 2330.502686 | 2 | 1053.109985 | 1053.104943 |
| PNSLKFIPGKPVLETR                   | Q9QZ23 | 0          | n +17.03 Da,K +34.06 Da, | 2465.280029 | 4 | 471.0569153 | 471.0556276 |
| SHTILLVQPTKRPEGR                   | P84089 | 0          | n +42.03 Da,K +34.06 Da, | 1798.813965 | 3 | 636.7093506 | 636.7127783 |
| PSTKDFLLQQTMLR                     | Q9CPU0 | 0          | n +17.03 Da,K +34.06 Da, | 3284.868896 | 3 | 577.0014648 | 577.0028297 |
| SSTSAVPQJITHTYTVHPR                | Q921G7 | 0          | n +31.05 Da,             | 2251.044434 | 2 | 1007.02002  | 1007.031755 |
| SKDSEGSWFR                         | O55125 | 0          | n +34.06 Da,K +34.06 Da, | 1467.228516 | 2 | 633.8399048 | 633.8411222 |
| KSDGMDPYIELR                       | Q9EQI5 | 0.03606103 | n +34.06 Da,K +34.06 Da, | 2465.040039 | 2 | 746.4099731 | 746.411055  |
| FSLEDPQTHSNR                       | P11499 | 0.01232666 | n +34.06 Da,             | 1664.458008 | 3 | 488.9100037 | 488.9145201 |
| PQAQEKFDLGAAYEVLSDEKR              | Q99KV1 | 0.00240674 | n +17.03 Da,K +34.06 Da, | 3629.369629 | 4 | 674.3599854 | 674.3659557 |
| SEAAPAAPAAAPPAEKAPAKKKAA           | P15864 | 0          | n +42.03 Da,K +34.06 Da, | 1240.814697 | 3 | 798.1699829 | 798.16723   |
| SETAPAETAAPAPVEKSPAKKKT            | P43276 | 0          | n +42.03 Da,K +34.06 Da, | 1240.011841 | 3 | 863.5200195 | 863.5199985 |
| GVMVGMGQKDSYVGDQAQSKR              | P60710 | 0          | n +34.06 Da,K +34.06 Da, | 1969.794556 | 4 | 586.8200073 | 586.8175676 |
| STSSMGTLPKQVKIVEVGPR               | P38060 | 0          | n +34.06 Da,K +34.06 Da, | 2546.598389 | 3 | 739.4500122 | 739.4559052 |
| NPVDDICIAKPR                       | P32261 | 0          | n +34.06 Da,K +34.06 Da, | 2220.742188 | 3 | 489.2850342 | 489.2871181 |
| VQQPVHLLMGGTKEQR                   | O88587 | 0          | n +34.06 Da,K +34.06 Da, | 1716.68457  | 4 | 501.5395203 | 501.5427408 |
| QQQIQEHEEEARR                      | F6U775 | 0.00189873 | n +42.03 Da,             | 1382.011719 | 3 | 574.9500122 | 574.943321  |
| AFDGTWKVDR                         | P55050 | 0.00353565 | n +34.06 Da,K +34.06 Da, | 2115.5354   | 3 | 421.5765076 | 421.576997  |
| PFADASKGDDLLPAGTEDYIHIR            | P48024 | 0          | n +17.03 Da,K +34.06 Da, | 3763.70752  | 3 | 851.4400024 | 851.4466453 |
| SETAPAAPAAPAPAEKTPVKKAR            | P43274 | 0          | n +42.03 Da,K +34.06 Da, | 1267.21582  | 4 | 642.1599731 | 642.1563485 |
| DAKLDKSQIHDIVLVGGSTR               | P63017 | 0          | n +42.03 Da,K +34.06 Da, | 2994.611816 | 3 | 754.7800293 | 754.7744736 |
| PPKGSFLEGPR                        | Q9R017 | 0.00649702 | n +17.03 Da,K +34.06 Da, | 1228.095093 | 3 | 412.5848083 | 412.5838224 |
| YQKDSQGNLFR                        | Q91Y97 | 0          | n +34.06 Da,K +34.06 Da, | 1253.099854 | 3 | 475.2708435 | 475.2703445 |
| FTDVHPDYGAR                        | P24270 | 0          | n +34.06 Da,             | 1367.661255 | 3 | 437.8893738 | 437.8895343 |
| AAPAKGENLSLVVHGPDIR                | Q64442 | 0.00464037 | n +42.03 Da,K +34.06 Da, | 3015.42627  | 3 | 693.0571289 | 693.0586147 |
| LSQDQTVSVPCKSDQSKAR                | P18242 | 0          | n +34.06 Da,K +34.06 Da, | 1221.714844 | 4 | 527.7999878 | 527.8020803 |
| TYKYPEGSPEER                       | P21981 | 0          | n +34.06 Da,K +34.06 Da, | 1237.723999 | 3 | 508.6099854 | 508.6052818 |
| PYNPSMSRPDAWGVTKGAAELMQQKEATTEQQLR | O35490 | 0          | n +42.03 Da,K +34.06 Da, | 4222.427734 | 3 | 1310.339966 | 1310.336747 |
| GLTSVSAGKLAR                       | Q922D8 | 0.00900424 | n +34.06 Da,K +34.06 Da, | 1302.924072 | 3 | 409.9400024 | 409.9400468 |
| GFNYKQMMVVR                        | O35887 | 0.00900424 | n +34.06 Da,K +34.06 Da, | 2429.393311 | 3 | 447.9204102 | 447.9196006 |

|                              |        |            |                          |             |   |             |             |
|------------------------------|--------|------------|--------------------------|-------------|---|-------------|-------------|
| TGDWKGLR                     | P35979 | 0.01652479 | n +34.06 Da,K +34.06 Da, | 1211.77771  | 3 | 334.2099915 | 334.2118775 |
| GRGDDVINASGYR                | Q91VA0 | 0.03493246 | n +34.06 Da,             | 1474.293335 | 3 | 471.9100037 | 471.9146314 |
| NLGTSHLLR                    | Q9DB77 | 0.02601156 | n +34.06 Da,             | 1205.846436 | 3 | 348.8800049 | 348.8839429 |
| TFYASEDKLENR                 | O35490 | 0          | n +34.06 Da,K +34.06 Da, | 1834.224731 | 3 | 514.2800293 | 514.2807982 |
| MQPASAKWYDR                  | Q9R0Q7 | 0          | n +34.06 Da,K +34.06 Da, | 1745.616333 | 2 | 710.8845825 | 710.8875493 |
| ITAHLVHELK                   | Q8BWT1 | 0.00599455 | n +14.02 Da,             | 1334.587036 | 4 | 301.4308472 | 301.4305629 |
| MDKNELVQKAKLAEQAER           | P63101 | 0          | n +42.03 Da,K +34.06 Da, | 2887.236084 | 2 | 1123.150024 | 1123.157109 |
| SEAAPAAPAAAPPAEKAPAKKAA      | P15864 | 0          | n +42.03 Da,K +34.06 Da, | 1199.640381 | 3 | 798.1699829 | 798.16723   |
| YRPGTVALR                    | P02301 | 0.00599455 |                          | 1198.419312 | 3 | 354.2139893 | 354.2135823 |
| AYHFLPHR                     | P70324 | 0.01457286 | n +42.03 Da,             | 2173.979736 | 3 | 393.8699951 | 393.8734486 |
| HGSIIYHPSLLPR                | Q8K009 | 0          |                          | 2236.557617 | 3 | 497.2799988 | 497.2806559 |
| VNVHSGIIAAR                  | F6XXE6 | 0.03416004 | n +34.06 Da,             | 1283.824829 | 3 | 390.9092712 | 390.9103807 |
| YRPGTVALR                    | P02301 | 0.00353565 | n +34.06 Da,             | 1193.212036 | 3 | 356.2245789 | 356.224188  |
| VKVGVNGFGR                   | P16858 | 0.00189873 | n +34.06 Da,K +34.06 Da, | 4629.957031 | 3 | 367.5789795 | 367.5785603 |
| TRPFQLVTGR                   | P28474 | 0.04570136 | n +34.06 Da,             | 1938.079956 | 3 | 403.5799866 | 403.5822641 |
| AHYHDNYGKNDEVEFVR            | P25688 | 0          | n +42.03 Da,K +34.06 Da, | 2257.924561 | 3 | 723.6763306 | 723.6784629 |
| HEDELLAKEAELTKVR             | Q8VDD5 | 0          | n +42.03 Da,K +34.06 Da, | 3472.140625 | 4 | 498.5499878 | 498.5415641 |
| ICPDGKTVEAAHGTVTR            | O88844 | 0          | n +34.06 Da,K +34.06 Da, | 1886.16626  | 4 | 520.7800293 | 520.7836598 |
| GVATEKAVELAANTKGICFIR        | P40142 | 0          | n +34.06 Da,K +34.06 Da, | 3367.374268 | 4 | 588.3499756 | 588.3557513 |
| LFASEGQPGKVIIEVQAKR          | Q91V76 | 0.00189873 | n +34.06 Da,K +34.06 Da, | 2059.165283 | 4 | 515.5700073 | 515.5744317 |
| HPSVDGFTPR                   | Q8C196 | 0.00240674 | n +34.06 Da,             | 1215.311768 | 2 | 573.8093262 | 573.8093661 |
| IFIDSDHTDNQR                 | P09103 | 0          | n +14.02 Da,             | 1183.014648 | 3 | 492.2399902 | 492.2355528 |
| IIGELHPDDR                   | P56395 | 0.00511364 |                          | 1214.619263 | 3 | 398.2200012 | 398.2155407 |
| MKVFTVGLPLPAEGR              | Q91Z53 | 0.00189873 | n +34.06 Da,K +34.06 Da, | 2669.473877 | 3 | 523.9867554 | 523.9867799 |
| TGKTPVEPEVAIHR               | P60867 | 0.00189873 | n +34.06 Da,K +34.06 Da, | 1331.473267 | 3 | 534.6599731 | 534.6597207 |
| ANNRNLVLLVSLKLCFFCSLMFIGEPR  | D3YUK6 | 0.01096606 | n +31.05 Da,             | 4596.298828 | 4 | 877.460022  | 877.4685395 |
| QRLRFAGPR                    | A2AG58 | 0.03127962 | n +34.06 Da,             | 1396.559937 | 3 | 378.9100037 | 378.9070817 |
| EKTSAEHKHQLAEQKR             | Q8BH75 | 0.04487761 | n +31.05 Da,K +31.05 Da, | 2062.439941 | 3 | 671.7299805 | 671.7202622 |
| HPSVDGFTPR                   | Q8C196 | 0.02731193 | n +34.06 Da,             | 1173.898682 | 2 | 573.8096924 | 573.8093661 |
| SQAEFDKAAEEVKR               | P31786 | 0          | n +42.03 Da,K +34.06 Da, | 1646.555542 | 4 | 430.2397156 | 430.2402534 |
| MDFSKLPKIR                   | P50516 | 0          | n +42.03 Da,K +34.06 Da, | 3378.412354 | 3 | 448.9476929 | 448.9496658 |
| GFKSPPELR                    | P52196 | 0.00189873 | n +34.06 Da,K +34.06 Da, | 1307.152832 | 3 | 420.5795288 | 420.5804074 |
| GVFPQAQLEHASKALELQGV         | Q8VBW8 | 0          | n +34.06 Da,K +34.06 Da, | 2984.479736 | 4 | 569.5900269 | 569.5853003 |
| YEKIDIAAYR                   | P30681 | 0.00947368 | n +34.06 Da,K +34.06 Da, | 1170.58374  | 3 | 399.5706482 | 399.569731  |
| YVGSPPSGTGLHR                | P70296 | 0.00189873 | n +34.06 Da,             | 1212.151855 | 3 | 473.5899963 | 473.5914885 |
| ANEANPCPCDIGHKLEYGGMGHEVQVEH | Q8R1G2 | 0          | n +42.03 Da,K +34.06 Da, | 3188.340332 | 3 | 1075.47998  | 1075.485072 |
| TFPAWLKSR                    | Q8R1G2 | 0.02557915 | n +34.06 Da,K +34.06 Da, | 2806.490967 | 3 | 391.9178162 | 391.918694  |
| LHGVPPEGCAVR                 | O35490 | 0.00189873 | n +34.06 Da,             | 1168.077759 | 3 | 442.5788574 | 442.578414  |
| AMKAVCVLKGDPVQGTIHFEQK       | P08228 | 0          | n +42.03 Da,K +34.06 Da, | 3421.749512 | 3 | 886.5       | 886.5049307 |
| MLTLASKLKR                   | Q9CY34 | 0.00189873 | n +42.03 Da,K +34.06 Da, | 3023.00708  | 3 | 424.2893066 | 424.2899108 |

|                            |        |            |                          |             |   |             |             |
|----------------------------|--------|------------|--------------------------|-------------|---|-------------|-------------|
| EAKSEAQKQSDDELALVR         | Q99PL5 | 0.03204524 | n +34.06 Da,K +34.06 Da, | 1627.86438  | 3 | 668.7287598 | 668.7322037 |
| AQDQGEKENPMR               | Q9CXW4 | 0          | n +42.03 Da,K +34.06 Da, | 1161.450073 | 2 | 739.8599854 | 739.8594598 |
| SETAAPAAPAPAEKTPVKKK       | P43274 | 0          | n +42.03 Da,K +34.06 Da, | 1374.363892 | 2 | 1169.736694 | 1169.736308 |
| RLTPEEIER                  | P20029 | 0.03529958 | n +34.06 Da,             | 1176.645996 | 3 | 392.8981628 | 392.8980297 |
| SLAVGSISGHAR               | Q61176 | 0          | n +34.06 Da,             | 1156.796753 | 3 | 396.9018555 | 396.901774  |
| ASKANPQGVQAAGLGTQAPR       | Q8CBY0 | 0          | n +34.06 Da,K +34.06 Da, | 1155.953491 | 3 | 718.1099854 | 718.1063751 |
| PTPQEKSEGTGCCPVSVR         | P21981 | 0          | n +17.03 Da,K +34.06 Da, | 1746.221924 | 3 | 735.0300293 | 735.0296682 |
| VLHDIEYR                   | Q9JMD3 | 0.03289474 | n +34.06 Da,             | 1202.534668 | 3 | 360.2082825 | 360.2083152 |
| ASKANPQGVQAAGLGTQAPR       | Q8CBY0 | 0          | n +34.06 Da,K +34.06 Da, | 1155.44104  | 4 | 538.8306885 | 538.8316005 |
| NLYKGLEAFR                 | P54869 | 0.00068776 | n +34.06 Da,K +34.06 Da, | 2653.744141 | 3 | 426.9326172 | 426.9328921 |
| VKLIESKEAFQEAL             | P10639 | 0.03851444 | n +34.06 Da,K +34.06 Da, | 3065.011963 | 2 | 854.039978  | 854.043018  |
| NKRLGLYRHFDETVNR           | Q91YQ5 | 0.00805585 | n +42.03 Da,K +28.03 Da, | 1153.116089 | 4 | 522.7800293 | 522.7828926 |
| AGPEWQSLEQCLEKHLPPDDLAQVKR | Q8VC97 | 0          | n +42.03 Da,K +34.06 Da, | 4376.015625 | 4 | 789.421936  | 789.4211186 |
| FQIVKNPR                   | Q61176 | 0.03972603 | n +34.06 Da,K +34.06 Da, | 1149.208984 | 3 | 357.2426147 | 357.243289  |
| SFIDLGGKR                  | Q71KU9 | 0.01652479 | n +34.06 Da,K +34.06 Da, | 1748.358887 | 3 | 354.230011  | 354.2310493 |
| AFKDTGKTPVEPEVAIHR         | P60867 | 0          | n +42.03 Da,K +34.06 Da, | 2407.209473 | 3 | 702.4031372 | 702.4057211 |
| ELFSDIYKIR                 | P63028 | 0.00189873 | n +34.06 Da,K +34.06 Da, | 3302.872559 | 3 | 451.2801208 | 451.2800692 |
| PMSAGLFHR                  | Q63880 | 0.00189873 | n +17.03 Da,             | 1529.163086 | 3 | 344.851532  | 344.8534371 |
| PKVTQPEVDTPLR              | Q63880 | 0          | n +17.03 Da,K +34.06 Da, | 1821.8125   | 2 | 794.4699707 | 794.4699963 |
| FYTKVLNEEER                | P24270 | 0          | n +34.06 Da,K +34.06 Da, | 1746.426392 | 2 | 748.4199829 | 748.4250196 |
| DDEVVDVGTVEEDLGKSR         | P08113 | 0          | n +34.06 Da,K +34.06 Da, | 2963.833496 | 3 | 682.6740723 | 682.6763835 |
| PDSWDKDVYPEPPSR            | Q9DCS9 | 0          | n +17.03 Da,K +34.06 Da, | 2571.146973 | 3 | 613.6400146 | 613.6442477 |
| TQVHTEYSSLR                | P49429 | 0          | n +34.06 Da,             | 1145.07959  | 2 | 677.8630371 | 677.8623279 |
| SHTILLVQPTKRPEGR           | P84089 | 0          | n +42.03 Da,K +34.06 Da, | 1804.907837 | 2 | 954.5599976 | 954.5655292 |
| PGHLQEGFGCVVTNR            | Q9CY58 | 0          | n +17.03 Da,             | 2034.685425 | 3 | 563.2832031 | 563.2842896 |
| MKNPFAH                    | P28271 | 0.04652213 | n +34.06 Da,K +34.06 Da, | 1313.454468 | 3 | 304.8508301 | 304.8514034 |
| EIAKAQVAQPGGDTIFGKIIR      | P70349 | 0.00464037 | n +34.06 Da,K +34.06 Da, | 3187.381348 | 3 | 772.1500244 | 772.149581  |
| PLITHVLPFEKINEAFDLLR       | P00329 | 0.00511364 | n +17.03 Da,K +34.06 Da, | 4618.672363 | 4 | 604.8599854 | 604.8610862 |
| AHIFVYGTLLR                | Q923B0 | 0          | n +42.03 Da,K +34.06 Da, | 2744.853027 | 3 | 460.9433289 | 460.9452025 |
| LWFKGGPGGGLIIDSMPDIR       | Q4KUS2 | 0.01836228 | n +42.03 Da,K +34.06 Da, | 4225.688477 | 4 | 580.3300171 | 580.3251982 |
| VPNDSSFQIVKNPR             | Q61176 | 0          | n +34.06 Da,K +34.06 Da, | 2011.855835 | 3 | 556.9945679 | 556.994992  |
| SKNKDDAPHELESQFILR         | Q9R1C0 | 0          | n +42.03 Da,K +34.06 Da, | 2865.181885 | 3 | 746.4099731 | 746.4114238 |
| TQVHTEYSSLR                | P49429 | 0.00240674 | n +34.06 Da,             | 1134.432373 | 3 | 452.2452698 | 452.2439774 |
| PFIREHIEELLRNIR            | P61202 | 0.03606103 | n +17.03 Da,             | 1134.081421 | 4 | 488.7900085 | 488.7864216 |
| LSTALMHFR                  | Q91VS7 | 0.00855158 | n +34.06 Da,             | 2316.191162 | 3 | 370.5484314 | 370.5497952 |
| TFQDQALVQHQQWDGKESTIR      | Q05816 | 0          | n +34.06 Da,K +34.06 Da, | 2643.351074 | 4 | 654.0999756 | 654.0977668 |
| SSKWLDGFR                  | Q9D855 | 0.00464037 | n +34.06 Da,K +34.06 Da, | 2377.72876  | 3 | 388.5700073 | 388.5663206 |
| VTNEPILAFSQGSPER           | Q8CHT0 | 0.00599455 | n +14.02 Da,             | 2907.573975 | 2 | 879.9500122 | 879.9546879 |
| SIVQHACELEGDR              | P40936 | 0          | n +34.06 Da,             | 1689.463989 | 3 | 516.5900269 | 516.5946818 |
| GLQNEKSIVTPVKIR            | P38060 | 0.03373946 | n +34.06 Da,K +34.06 Da, | 2175.929688 | 4 | 471.0599976 | 471.0649709 |

|                           |        |            |                          |             |   |             |             |
|---------------------------|--------|------------|--------------------------|-------------|---|-------------|-------------|
| MQAFLKGTSVSAKAQLTKDR      | Q99J62 | 0          | n +42.03 Da,K +34.06 Da, | 3295.292725 | 4 | 581.8500977 | 581.8518388 |
| KATIPAALQAQESTEGPGTGQDRPR | Q9DBG1 | 0          | n +34.06 Da,K +34.06 Da, | 2049.791504 | 5 | 530.2935791 | 530.2945144 |
| SGTQSTITDRFPLKPIR         | Q8R4H2 | 0.03972603 | n +42.03 Da,K +34.06 Da, | 2503.996338 | 3 | 719.0999756 | 719.1005205 |
| SETAAPAAPAPAEKTPVKKK      | P43274 | 0          | n +42.03 Da,K +34.06 Da, | 1125.091675 | 5 | 468.4997559 | 468.498889  |
| NPPFKNADGTVR              | Q9JII6 | 0.00599455 | n +34.06 Da,K +34.06 Da, | 1123.989502 | 3 | 461.9400024 | 461.9387061 |
| RPPQECCPELGR              | Q99K41 | 0          | n +34.06 Da,             | 1312.145996 | 3 | 543.9400024 | 543.9397947 |
| VSFELFADKVPKTAENFR        | P17742 | 0          | n +42.03 Da,K +34.06 Da, | 3633.588867 | 4 | 552.8200073 | 552.8138515 |
| TNEEPLPKKVR               | Q9ER69 | 0.00189873 | n +42.03 Da,K +34.06 Da, | 1122.469727 | 2 | 710.9400024 | 710.9433792 |
| YEALKDFFR                 | P16675 | 0.00189873 | n +34.06 Da,K +34.06 Da, | 3064.087402 | 3 | 419.5799866 | 419.5818594 |
| SPFGGYKMSGGR              | P47738 | 0          | n +34.06 Da,K +34.06 Da, | 1479.845337 | 3 | 466.9188232 | 466.9205467 |
| VLSGVDKMIR                | Q8COD5 | 0.00649702 | n +34.06 Da,K +34.06 Da, | 1854.849365 | 3 | 395.9255981 | 395.926861  |
| GVKGLTGLRVGIFENQER        | Q9JII6 | 0.02771142 | n +34.06 Da,K +34.06 Da, | 2406.089355 | 3 | 681.0900269 | 681.077827  |
| ICFTSVQKR                 | Q9DBJ1 | 0.00240674 | n +34.06 Da,K +34.06 Da, | 1325.42627  | 3 | 402.9100037 | 402.914844  |
| SQTKEDKQLQDKPDLEER        | Q8K1N1 | 0          | n +42.03 Da,K +34.06 Da, | 1524.947021 | 3 | 777.7600098 | 777.7677545 |
| LAVGSISGHAR               | Q61176 | 0          | n +34.06 Da,             | 1118.282227 | 3 | 367.8900146 | 367.8910976 |
| VGMGQKDSYVGDEAQSKR        | P60710 | 0.00511364 | n +34.06 Da,K +34.06 Da, | 1278.280396 | 4 | 515.0300293 | 515.0349768 |
| GDLHGVPPGEC AVR           | O35490 | 0.00353565 | n +34.06 Da,             | 1394.338867 | 3 | 499.9287109 | 499.9278834 |
| TDLEKFNNEAGKYTVGLGQTR     | P54869 | 0          | n +34.06 Da,K +34.06 Da, | 3103.320801 | 3 | 848.1500244 | 848.1501987 |
| HAPFETDISTLTR             | Q9QXD6 | 0          | n +34.06 Da,             | 2766.668213 | 2 | 761.4051514 | 761.4096426 |
| PKHEFSVDMTCEGCAEAVSR      | O08997 | 0.00511364 | n +14.02 Da,K +28.03 Da, | 1954.856201 | 3 | 784.6900024 | 784.6854261 |
| GSPGFSKFR                 | Q9QXF8 | 0.00240674 | n +34.06 Da,K +34.06 Da, | 1116.401855 | 3 | 350.8800049 | 350.8837609 |
| AVKSAEAAA EATKNMEAGAGR    | Q8VC30 | 0          | n +34.06 Da,K +34.06 Da, | 1893.96167  | 3 | 712.4000244 | 712.4039813 |
| GLTSPLTEPVVVLEGH TKR      | Q9WUM3 | 0          | n +34.06 Da,K +34.06 Da, | 3199.670654 | 4 | 526.0700073 | 526.07176   |
| SLHLGVTPSVLR              | O89023 | 0.00464037 | n +34.06 Da,             | 2574.058838 | 2 | 656.9099731 | 656.911623  |
| EKEVGLAIR                 | P70694 | 0.01836228 | n +34.06 Da,K +34.06 Da, | 1105.053223 | 3 | 361.5779724 | 361.5783377 |
| GVFVDKEEHAQVVELVR         | Q9JIL4 | 0          | n +34.06 Da,K +34.06 Da, | 2662.434814 | 4 | 506.2999878 | 506.2968314 |
| EKEVGLAIR                 | P70694 | 0.01836228 | n +34.06 Da,K +34.06 Da, | 1103.881714 | 2 | 541.8638916 | 541.8638863 |
| GAGGALFVHR                | Q9D6J6 | 0          | n +34.06 Da,             | 1103.805054 | 2 | 509.8036499 | 509.8038861 |
| SETIIITGKR                | Q8VDJ3 | 0.0481765  | n +34.06 Da,K +34.06 Da, | 1102.181274 | 3 | 395.9324646 | 395.9327808 |
| PEDDVYLKR                 | Q99N96 | 0.02557915 | n +17.03 Da,K +34.06 Da, | 1115.810791 | 3 | 395.8969727 | 395.8960663 |
| ASGPGGLHADLLR             | Q8BWF0 | 0          | n +34.06 Da,             | 2005.074097 | 3 | 433.2518311 | 433.2526954 |
| WPQGT FASQVTLEGDKVKVER    | Q9DCW4 | 0          | n +34.06 Da,K +34.06 Da, | 3295.003906 | 3 | 826.4776611 | 826.4797673 |
| PSKTNVSGGAIALGHPLGSGSR    | Q8BWT1 | 0          | n +17.03 Da,K +34.06 Da, | 1741.93103  | 4 | 543.5571899 | 543.5593014 |
| GYVEHLVR                  | Q61646 | 0.03529958 | n +34.06 Da,             | 1165.56604  | 3 | 336.2010498 | 336.2012719 |
| RPLPPSPVVR                | Q9ESY9 | 0.02771142 | n +34.06 Da,             | 1098.641846 | 3 | 383.9156494 | 383.9153544 |
| AGKPVLYHFDGR              | P30115 | 0.00240674 | n +42.03 Da,K +34.06 Da, | 2556.89502  | 3 | 479.269989  | 479.2683455 |
| AHEFTVYR                  | Q8VCM8 | 0.02243902 | n +34.06 Da,             | 1096.990601 | 3 | 352.8599854 | 352.8610268 |
| TEETILYSIDILKKLAEIR       | Q9JHW2 | 0          | n +34.06 Da,K +34.06 Da, | 4042.626709 | 4 | 588.8599854 | 588.8584871 |
| SDSRDPASDQMKQWKEQR        | P24270 | 0          | n +42.03 Da,K +34.06 Da, | 1945.820923 | 3 | 768.0499878 | 768.055423  |
| GLLGEEHVR                 | Q6P9Q6 | 0.03935927 | n +34.06 Da,             | 1096.920044 | 3 | 348.5396423 | 348.5400649 |

|                                     |        |            |                          |             |   |             |             |
|-------------------------------------|--------|------------|--------------------------|-------------|---|-------------|-------------|
| ATKCTKCGPGYPTPLEAMKGP               | Q63836 | 0.00189873 | n +42.03 Da,K +34.06 Da, | 2385.341553 | 4 | 641.8499756 | 641.8525187 |
| SEAAPAAPAAAPAEKAPAKKAA              | P15864 | 0          | n +42.03 Da,K +34.06 Da, | 1235.778687 | 4 | 598.8800049 | 598.8772416 |
| ETEIGEALKESVGSKAVPR                 | Q9JII6 | 0          | n +34.06 Da,K +34.06 Da, | 2707.36792  | 3 | 720.4299927 | 720.4304135 |
| EESFQKALR                           | Q8C196 | 0.00599455 | n +34.06 Da,K +34.06 Da, | 1092.780151 | 3 | 392.5726624 | 392.573364  |
| GDVEKGKKIFVQK                       | P62897 | 0          | n +42.03 Da,K +34.06 Da, | 1537.758179 | 4 | 414.2799988 | 414.2857275 |
| FKDVTLGSLGR                         | Q9R0H0 | 0.00353565 | n +34.06 Da,K +34.06 Da, | 2938.571777 | 2 | 680.4299927 | 680.4351896 |
| PVEKDANNMPVTAR                      | D3Z0Y2 | 0          | n +17.03 Da,K +34.06 Da, | 1087.38623  | 3 | 531.6278076 | 531.6277629 |
| GSPGFSKFR                           | Q9QXF8 | 0.00240674 | n +34.06 Da,K +34.06 Da, | 1086.466064 | 2 | 525.8223877 | 525.8220031 |
| IVGNEHYDVAR                         | P56480 | 0          | n +34.06 Da,             | 1086.285889 | 3 | 436.2368469 | 436.236934  |
| PGHLQEGFGCVVTR                      | Q9CY58 | 0          | n +17.03 Da,             | 2073.98291  | 2 | 844.4193115 | 844.4227961 |
| GLTLGGQKCSVIR                       | P62962 | 0.01378958 | n +34.06 Da,K +34.06 Da, | 1763.585205 | 3 | 486.3027649 | 486.3028795 |
| RSRSRSRHSR                          | Q8VE97 | 0.04191344 | n +42.03 Da,             | 1157.015137 | 2 | 663.8599854 | 663.8641344 |
| TITYGPKVVR                          | P12710 | 0.00240674 | n +34.06 Da,K +34.06 Da, | 1332.658081 | 3 | 401.2697449 | 401.2695041 |
| TVKWFNVVR                           | P62960 | 0.01698302 | n +34.06 Da,K +34.06 Da, | 2223.477295 | 3 | 373.2421265 | 373.243289  |
| LVKAGASIVGVNCHFDPSVSLQTVKLMKEGLEAAR | O35490 | 0          | n +42.03 Da,K +34.06 Da, | 4438.998047 | 5 | 774.6500244 | 774.6433476 |
| IVGNEHYDVAR                         | P56480 | 0.00189873 | n +34.06 Da,             | 1083.095337 | 2 | 653.8505249 | 653.8517628 |
| MEKTELIQAKLAEQAER                   | P68254 | 0          | n +42.03 Da,K +34.06 Da, | 2845.496338 | 4 | 565.8400269 | 565.8412055 |
| DDEESEEAKLR                         | O70251 | 0          | n +34.06 Da,K +34.06 Da, | 1078.271484 | 3 | 560.6450195 | 560.6442837 |
| TPEELQHSLR                          | Q9QXE0 | 0.00599455 | n +14.02 Da,             | 1078.158081 | 3 | 408.5508728 | 408.550812  |
| SSTSAVPQITTHYTVHPR                  | Q921G7 | 0          | n +34.06 Da,             | 1887.086304 | 4 | 504.7742004 | 504.7734928 |
| CDILIPAAASEKQTKSNAPR                | P26443 | 0          | n +34.06 Da,K +34.06 Da, | 2383.656006 | 4 | 579.3447266 | 579.346655  |
| SSTSAVPQITTHYTVHPR                  | Q921G7 | 0          | n +34.06 Da,             | 1968.650391 | 4 | 504.7739563 | 504.7734928 |
| PVLHYFDGR                           | P30115 | 0.00754717 | n +17.03 Da,             | 1975.065918 | 3 | 374.2020569 | 374.2031236 |
| MQPASAKWYDRR                        | Q9R0Q7 | 0          | n +42.03 Da,K +34.06 Da, | 2228.973633 | 3 | 528.9421387 | 528.9436448 |
| TGVLKQTKGVGASGSFR                   | P10922 | 0          | n +34.06 Da,K +34.06 Da, | 1380.27771  | 4 | 449.5383911 | 449.5375833 |
| TWYGEQDQAVHLWR                      | O55125 | 0          | n +34.06 Da,             | 3395.067627 | 3 | 608.3057251 | 608.3076407 |
| LSGEHSIIGR                          | P08228 | 0.02557915 | n +34.06 Da,             | 1072.706177 | 3 | 368.2192383 | 368.219103  |
| SPEASPIRNTHTGQVR                    | Q6PDB7 | 0          |                          | 1258.940063 | 3 | 583.9605713 | 583.9712107 |
| SSIFLKGAR                           | Q9JKR6 | 0.01457286 | n +34.06 Da,K +34.06 Da, | 1141.900024 | 3 | 349.5703125 | 349.5712943 |
| STKPQAQEQPPASPEALR                  | Q9WU79 | 0          | n +34.06 Da,K +34.06 Da, | 1468.795166 | 3 | 668.3771362 | 668.3779426 |
| YRPGTVALR                           | P02301 | 0.00353565 | n +14.02 Da,             | 1070.664307 | 3 | 349.5414734 | 349.541699  |
| GKLTVGWLGR                          | P35492 | 0.03127962 | n +34.06 Da,K +34.06 Da, | 2410.254639 | 3 | 385.5934753 | 385.5942104 |
| SYDVPPPPMEPDHPFYSNISKDR             | Q9DBJ1 | 0          | n +34.06 Da,K +34.06 Da, | 3271.542236 | 4 | 689.8499756 | 689.8469891 |
| QTDLEKFNNEAGKYTVGLGQTR              | P54869 | 0          | n +34.06 Da,K +34.06 Da, | 3128.891113 | 4 | 668.3699951 | 668.3791127 |
| LELQRQQARRRALAR                     | Q3UFY4 | 0.00599455 | n +17.03 Da,             | 3188.870117 | 4 | 503.2999878 | 503.3043072 |
| SETAPAAPAAPAEKTPVKKK                | P43274 | 0          | n +42.03 Da,K +34.06 Da, | 1067.294189 | 4 | 585.3699951 | 585.3717921 |
| LQTVKLMKEGLEAAR                     | O35490 | 0          | n +34.06 Da,K +34.06 Da, | 2567.798828 | 4 | 448.0403748 | 448.0420728 |
| MKTPEDPGSPKQHEVDSAGTSTR             | Q9Z2J0 | 0.00599455 | n +42.03 Da,K +34.06 Da, | 1770.330322 | 4 | 666.8429565 | 666.8447123 |
| VVGSWFDHIR                          | O35403 | 0          | n +34.06 Da,             | 3286.766602 | 3 | 454.9299927 | 454.9295525 |
| SAGFLQASASDVVVHGR                   | Q8VCHO | 0          | n +34.06 Da,             | 2981.900391 | 3 | 612.00354   | 612.0058505 |



|                             |        |            |                          |             |   |             |             |
|-----------------------------|--------|------------|--------------------------|-------------|---|-------------|-------------|
| SRIPAGLENR                  | O35215 | 0.00511364 | n +34.06 Da,             | 1064.637695 | 2 | 573.8428955 | 573.8437403 |
| PGHLQEGFGCVVTRN             | Q9CY58 | 0          | n +17.03 Da,             | 2032.801025 | 2 | 844.4223633 | 844.4227961 |
| TPEAAVEHPEAVR               | O35490 | 0          |                          | 1175.35022  | 3 | 469.2409058 | 469.2405265 |
| LVIAGHLLR                   | Q07417 | 0.03289474 |                          | 2310.760986 | 3 | 340.5599976 | 340.5623227 |
| LF AEAVQKSR                 | Q8C196 | 0.0188212  | n +34.06 Da,K +34.06 Da, | 1063.436646 | 3 | 406.2618408 | 406.2610087 |
| AKILNDVQDR                  | Q8VDW0 | 0.02196193 | n +34.06 Da,K +34.06 Da, | 1063.366089 | 3 | 413.9280701 | 413.9279184 |
| GKGILAADESVGTMGNR           | Q91Y97 | 0          | n +34.06 Da,K +34.06 Da, | 2071.999512 | 3 | 581.9942017 | 581.9946637 |
| PQHWPEPEEFQPER              | Q64481 | 0          | n +17.03 Da,             | 2651.626221 | 3 | 608.2896118 | 608.290098  |
| WAKVNPDEVGG EALGR           | P02089 | 0.00189873 | n +31.05 Da,             | 4527.744141 | 2 | 864.9500122 | 864.9575266 |
| PREPGEFALLR                 | Q8BWP8 | 0          | n +17.03 Da,             | 2351.612549 | 3 | 434.5815735 | 434.5840045 |
| SETAAPAAPAPAEKTPVKKK        | P43274 | 0          | n +42.03 Da,K +34.06 Da, | 1362.093506 | 3 | 780.1599731 | 780.159964  |
| PSPKSEITPPPPQPKDR           | P53395 | 0.03972603 | n +17.03 Da,K +34.06 Da, | 1062.055786 | 4 | 489.7900085 | 489.7954424 |
| AKILNDVQDR                  | Q8VDW0 | 0.01457286 | n +34.06 Da,K +34.06 Da, | 1061.977661 | 2 | 620.3900146 | 620.3882394 |
| MDDTLFQLKFTAKQLEKLAK        | Q921W0 | 0          | n +42.03 Da,K +34.06 Da, | 4409.891113 | 4 | 637.4000244 | 637.3948387 |
| PVEKDANNMPVTAR              | D3Z0Y2 | 0          | n +17.03 Da,K +34.06 Da, | 1060.767944 | 2 | 796.9373169 | 796.9380061 |
| TFYGLHQDFPSVVVVGLGKR        | Q9CPY7 | 0          | n +34.06 Da,K +34.06 Da, | 3874.284668 | 4 | 572.5800171 | 572.5863058 |
| SGPPVSELITKAVAASKER         | P15864 | 0          | n +34.06 Da,K +34.06 Da, | 3489.416992 | 4 | 511.3200073 | 511.3230769 |
| NVEAGKYTVGLGQTR             | P54869 | 0          | n +34.06 Da,K +34.06 Da, | 1982.501465 | 3 | 554.324707  | 554.3266304 |
| PELEKAQP GALKSER            | Q8VCW8 | 0          | n +17.03 Da,K +34.06 Da, | 1060.478271 | 4 | 435.2689819 | 435.2690602 |
| PPREVTTFKELR                | Q8BG26 | 0.04487761 | n +42.03 Da,K +34.06 Da, | 1334.861938 | 2 | 774.9500122 | 774.9514773 |
| SKDSEGSWFR                  | O55125 | 0          | n +34.06 Da,K +34.06 Da, | 1493.366089 | 3 | 422.8962097 | 422.896507  |
| PVEKDANNMPVTAR              | D3Z0Y2 | 0.00599455 | n +17.03 Da,K +34.06 Da, | 1321.578125 | 3 | 531.6282349 | 531.6277629 |
| KLTGMAFR                    | P16858 | 0.03167849 | n +34.06 Da,K +34.06 Da, | 1270.755249 | 3 | 331.2174988 | 331.2179748 |
| GIIWATWKS R                 | Q8VCM7 | 0          | n +34.06 Da,K +34.06 Da, | 2852.883789 | 3 | 429.2721252 | 429.2732484 |
| SPVTFMNFPEDTLEQKAGSVGR      | Q8VCW8 | 0          | n +34.06 Da,K +34.06 Da, | 3985.914795 | 3 | 826.7734375 | 826.7705122 |
| SRIPAGLENR                  | O35215 | 0.00189873 | n +34.06 Da,             | 1057.952148 | 3 | 382.8974915 | 382.8982523 |
| SPESHVGV AWR                | Q91WT9 | 0.03606103 | n +34.06 Da,             | 1401.026733 | 3 | 420.230072  | 420.2298907 |
| ATGANATPLDFPSKRR            | Q64213 | 0          | n +42.03 Da,K +34.06 Da, | 2132.431396 | 3 | 595.3480835 | 595.3494352 |
| SIEEVHKEIR                  | P97930 | 0.00511364 | n +42.03 Da,K +34.06 Da, | 1049.434204 | 3 | 439.243866  | 439.2524728 |
| STKPQAQEPPASPEALR           | Q9WU79 | 0          | n +34.06 Da,K +34.06 Da, | 1509.584351 | 3 | 668.3800049 | 668.3779426 |
| PSVLHTEEMR                  | Q99L47 | 0.00136986 | n +17.03 Da,             | 1050.533081 | 2 | 608.3099976 | 608.3136622 |
| SDKQISKCLGLTEAQTR           | Q8C196 | 0          | n +34.06 Da,K +34.06 Da, | 1715.432617 | 3 | 679.7299805 | 679.7334386 |
| MNQEKLAKLQAQVR              | Q64152 | 0          | n +42.03 Da,K +34.06 Da, | 2522.640625 | 2 | 884.0283813 | 884.0327344 |
| PAYKGQILTMANPIIGNGGAPD TTAR | Q8C196 | 0          | n +17.03 Da,K +34.06 Da, | 3492.946533 | 3 | 893.4899902 | 893.4900794 |
| ASEPLAEKVLDLINKGR           | Q9ESB3 | 0          | n +34.06 Da,K +34.06 Da, | 4112.38623  | 4 | 489.5700073 | 489.5650697 |
| MDEPSPLAKTLELNQHSR          | Q5SWU9 | 0          | n +42.03 Da,K +34.06 Da, | 3306.963379 | 3 | 714.710022  | 714.7072536 |
| AAAKVALTKR                  | Q9QXX4 | 0.00900424 | n +42.03 Da,K +34.06 Da, | 1057.05481  | 2 | 569.9007568 | 569.9007849 |
| SEAAPAAPAAAPAEKAPAKKK       | P15864 | 0          | n +42.03 Da,K +34.06 Da, | 1224.375977 | 4 | 563.3599854 | 563.3586846 |
| SVDRPIIER                   | Q9CY58 | 0.01457286 | n +34.06 Da,             | 1042.994873 | 3 | 373.5628052 | 373.5628697 |
| VVHSYEELEENYTR              | Q05920 | 0.00464037 |                          | 2480.974854 | 3 | 599.2884521 | 599.2880943 |

|                                |        |            |                          |             |   |             |             |
|--------------------------------|--------|------------|--------------------------|-------------|---|-------------|-------------|
| RTTPSYVAFTDTER                 | P16627 | 0.01457286 | n +34.06 Da,             | 2054.708008 | 2 | 839.4400024 | 839.4363892 |
| ATDISSESSGADCKGDTKNSAKLDADYPLR | Q9CQJ6 | 0          | n +42.03 Da,K +34.06 Da, | 2830.73291  | 4 | 808.1599731 | 808.1649069 |
| VCYDTCGANKYR                   | Q99P27 | 0.01457286 | n +34.06 Da,K +34.06 Da, | 1256.748779 | 3 | 525.59552   | 525.5957347 |
| FTDVHPDYGAR                    | P24270 | 0          | n +34.06 Da,             | 1374.162476 | 2 | 656.3321533 | 656.3306632 |
| SSPPEGKLETKAGHPPAVK            | Q91XC8 | 0          | n +42.03 Da,K +34.06 Da, | 1440.711182 | 4 | 519.3200073 | 519.3152519 |
| SEGDSVGDSDVHGKPSVVYR           | Q9CQU3 | 0          | n +34.06 Da,K +34.06 Da, | 1537.6875   | 4 | 511.5230408 | 511.5249085 |
| RPPLGFLNPR                     | O89023 | 0.00068776 | n +34.06 Da,             | 2214.650635 | 3 | 400.9177246 | 400.9189874 |
| ASASSTNLKDVLSNLIPEQAR          | Q9CZU6 | 0          | n +17.03 Da,K +34.06 Da, | 3831.467529 | 4 | 607.6099854 | 607.6117621 |
| MATVTALHR                      | Q91Y97 | 0.03819604 | n +34.06 Da,             | 1040.149414 | 3 | 345.2058411 | 345.2060285 |
| PAKYLDEDTIYHLQPSGR             | Q3THS6 | 0.00900424 | n +31.05 Da,             | 2798.98584  | 4 | 534.2800293 | 534.2798984 |
| PLHPPPPPPVQPPPHPR              | Q9JIX8 | 0          | n +14.02 Da,             | 1871.738159 | 4 | 468.519989  | 468.51643   |
| SSSSSSSPKEETYEEDREFESQAKR      | Q921F4 | 0          | n +42.03 Da,K +34.06 Da, | 2017.659546 | 4 | 748.3599854 | 748.3588105 |
| RPLPPSPVVR                     | Q9ESY9 | 0.00240674 | n +34.06 Da,             | 1038.090454 | 3 | 383.9151917 | 383.9153544 |
| PSVSLQTVKLMKEGLEAAR            | O35490 | 0          | n +17.03 Da,K +34.06 Da, | 3470.611816 | 4 | 536.3308105 | 536.3304922 |
| TGPPVSELITKAVSASKER            | P43276 | 0          | n +34.06 Da,K +34.06 Da, | 3459.765625 | 4 | 518.8239746 | 518.8257182 |
| CGVELFKR                       | Q8C196 | 0.02196193 | n +34.06 Da,K +34.06 Da, | 1609.135376 | 3 | 359.5555115 | 359.5567679 |
| SAGGIIVSLLLLSPMSAGLFHR         | Q63880 | 0          | n +34.06 Da,             | 4653.29248  | 3 | 749.7600098 | 749.7629218 |
| SGQVNEAACDIAR                  | O35490 | 0          | n +34.06 Da,K +34.06 Da, | 1035.342285 | 3 | 529.6235962 | 529.6245705 |
| SGDGDKDAWAVR                   | P05202 | 0          | n +34.06 Da,K +34.06 Da, | 1206.207275 | 3 | 448.9100037 | 448.9108164 |
| PGPTPSGTNVGSSGRSPSKAVAAR       | Q9CQS8 | 0          | n +17.03 Da,K +34.06 Da, | 1048.552002 | 4 | 573.0700073 | 573.0687622 |
| MKDSLVLQSR                     | Q99KN2 | 0.00068776 | n +34.06 Da,K +34.06 Da, | 1322.560547 | 2 | 622.8900146 | 622.8870178 |
| SEKFDCHYCR                     | P97447 | 0          | n +42.03 Da,K +34.06 Da, | 1376.403687 | 3 | 493.2195129 | 493.2185576 |
| TPKTQFSGLR                     | O09159 | 0.04487761 | n +34.06 Da,K +34.06 Da, | 1028.975952 | 3 | 401.5892944 | 401.5891254 |
| SGMCKAGFAGDDAPR                | P60710 | 0          | n +34.06 Da,K +34.06 Da, | 1276.570679 | 3 | 536.6018066 | 536.6028894 |
| PLAKVDATEQTDLAKR               | P08003 | 0          | n +17.03 Da,K +34.06 Da, | 1529.455322 | 4 | 461.0299988 | 461.0348926 |
| SDLKKSIDEIVLVGGSTR             | P20029 | 0.00947368 | n +34.06 Da,K +34.06 Da, | 2975.677734 | 3 | 712.0999756 | 712.0986638 |
| MDQTQHPSKAAQPLR                | Q9JL3  | 0          | n +42.03 Da,K +34.06 Da, | 1309.150269 | 3 | 595.3143311 | 595.315919  |
| PVDGSISKNGQLR                  | Q9D0F9 | 0.00189873 | n +17.03 Da,K +34.06 Da, | 1025.802979 | 3 | 474.6199951 | 474.6159629 |
| SSTSAVPQITHTYTVHPR             | Q921G7 | 0          | n +34.06 Da,             | 1916.062134 | 2 | 1008.539978 | 1008.539709 |
| MNWNKGGPGTKR                   | Q810A7 | 0.00464037 | n +42.03 Da,K +34.06 Da, | 1405.269531 | 2 | 728.4099731 | 728.4117229 |
| IAYNLVHELK                     | B2RXC1 | 0.00240674 |                          | 2556.824219 | 2 | 614.3488159 | 614.3458574 |
| TVWEKPLR                       | P24456 | 0.03289474 | n +34.06 Da,K +34.06 Da, | 1416.909058 | 3 | 366.2435913 | 366.2431777 |
| TPEELQHSLR                     | Q9QXE0 | 0.00189873 | n +14.02 Da,             | 1093.272827 | 2 | 612.3221436 | 612.3225798 |
| PANDTVDFPKR                    | P30999 | 0          | n +17.03 Da,K +34.06 Da, | 1276.332275 | 3 | 437.5813904 | 437.5823704 |
| STAASRPPVTLR                   | P60335 | 0.00754717 | n +34.06 Da,             | 1022.532837 | 3 | 430.5963135 | 430.5964621 |
| SKSESPKEPEQLR                  | P49312 | 0          | n +42.03 Da,K +34.06 Da, | 1022.462097 | 3 | 542.3104248 | 542.3107577 |
| TILAEGLHFR                     | O35129 | 0.00189873 | n +34.06 Da,             | 2592.870605 | 3 | 397.5700073 | 397.574998  |
| AGKPVLYHFDGR                   | P30115 | 0          | n +42.03 Da,K +34.06 Da, | 2598.433105 | 3 | 479.269989  | 479.2683455 |
| DKDYFLFR                       | Q64433 | 0.00997375 | n +34.06 Da,K +34.06 Da, | 3042.749512 | 3 | 391.2298889 | 391.230938  |
| TVYHLQPSGR                     | Q91X83 | 0          | n +34.06 Da,             | 1020.883667 | 3 | 397.8948059 | 397.8946193 |

|                           |        |            |                          |             |   |             |             |
|---------------------------|--------|------------|--------------------------|-------------|---|-------------|-------------|
| SPEASPIRINTHTGQVR         | Q6PDB7 | 0          |                          | 1040.69519  | 3 | 583.960022  | 583.9712107 |
| PKVTQPEVDTPLGR            | Q63880 | 0          | n +17.03 Da,K +34.06 Da, | 1825.726929 | 3 | 529.9806519 | 529.982423  |
| AGACGKPHMSPASLPGKR        | P97452 | 0          | n +42.03 Da,K +34.06 Da, | 1447.633423 | 3 | 644.6900024 | 644.6908094 |
| SKLVIITAGAR               | P00342 | 0.00599455 | n +34.06 Da,K +34.06 Da, | 1512.639771 | 3 | 399.6163025 | 399.6169038 |
| ASLKDLEGKWR               | Q05816 | 0.00240674 | n +42.03 Da,K +34.06 Da, | 2621.651855 | 3 | 471.6199951 | 471.6226066 |
| TVMPAWVIDKYGKNEVLR        | Q924D0 | 0          | n +34.06 Da,K +34.06 Da, | 3528.262695 | 3 | 741.1099854 | 741.1135904 |
| DEESEEAKKLR               | O70251 | 0          | n +34.06 Da,K +34.06 Da, | 1017.72467  | 3 | 522.3022461 | 522.3019689 |
| KDDYYQILGVPR              | Q99M87 | 0          | n +34.06 Da,K +34.06 Da, | 3077.366943 | 2 | 767.9470825 | 767.9486617 |
| TKSLDNNYSTLNER            | P30999 | 0.00900424 | n +34.06 Da,K +34.06 Da, | 1442.511475 | 3 | 574.9799805 | 574.9813004 |
| AFKDTGKTPVEPEVAIHR        | P60867 | 0          | n +42.03 Da,K +34.06 Da, | 2366.699951 | 3 | 702.4024048 | 702.4057211 |
| IGGHGAEYGAEALER           | P01942 | 0          | n +34.06 Da,             | 1830.071777 | 3 | 521.9338989 | 521.9373249 |
| SFQIVKNPR                 | Q61176 | 0.00353565 | n +34.06 Da,K +34.06 Da, | 1307.223511 | 3 | 386.2532654 | 386.2539654 |
| AMNYSAKDEVGGPAGPPGGAAKTR  | Q8VEK0 | 0          | n +42.03 Da,K +34.06 Da, | 2308.134766 | 3 | 843.0999756 | 843.1009212 |
| SEPEIPKGR                 | Q9WTP6 | 0.00240674 | n +34.06 Da,K +34.06 Da, | 1604.822754 | 3 | 398.5888977 | 398.5890141 |
| HVLSLSFPIR                | P26443 | 0.00240674 | n +34.06 Da,             | 3062.077637 | 2 | 601.8759766 | 601.8770514 |
| KPQLQGIPVLVLGNKR          | Q8VEH3 | 0          | n +34.06 Da,K +34.06 Da, | 2821.280273 | 4 | 466.3200073 | 466.3254219 |
| IIGGSMDAKGSFPWQAKMISR     | Q61646 | 0          | n +34.06 Da,K +34.06 Da, | 3363.738037 | 4 | 596.3409424 | 596.3434864 |
| PYIQVTSHQNR               | Q02053 | 0.00997375 | n +14.02 Da,             | 1105.124023 | 3 | 452.9076233 | 452.9054778 |
| ATEGASSELIEKKR            | D3YYK3 | 0          | n +42.03 Da,K +34.06 Da, | 1614.425537 | 3 | 543.6500244 | 543.6545244 |
| AAEIDEEPVSKAKQSR          | P70670 | 0          | n +34.06 Da,K +34.06 Da, | 1031.316772 | 4 | 465.7799988 | 465.7785023 |
| MKFNPFVTSDR               | P61255 | 0.00353565 | n +34.06 Da,K +34.06 Da, | 2268.289063 | 2 | 705.4000244 | 705.3977499 |
| MEKPAASTEPPQSRPALGR       | Q9JMD3 | 0          | n +42.03 Da,K +34.06 Da, | 1795.434082 | 3 | 687.0300293 | 687.0319599 |
| MKDVP AFLQSSQSSGPGQAAVWHR | Q9WVJ2 | 0          | n +34.06 Da,K +34.06 Da, | 3249.313721 | 4 | 674.1105347 | 674.1117853 |
| PLHDV FVR                 | P97351 | 0.01836228 | n +17.03 Da,             | 1623.440308 | 3 | 333.8630981 | 333.8643306 |
| PERDDVAAMAR               | Q8VCL2 | 0          | n +17.03 Da,             | 1008.731323 | 3 | 416.5499878 | 416.5452213 |
| SLQPAPVKKIPNR             | B7ZMP1 | 0          | n +34.06 Da,K +34.06 Da, | 1082.875977 | 4 | 388.2711792 | 388.2713864 |
| TSIAIDTIINQKR             | Q03265 | 0          | n +34.06 Da,K +34.06 Da, | 2859.280518 | 3 | 514.3300171 | 514.327971  |
| GWLHTGDIGR                | Q8JZR0 | 0.00649702 | n +34.06 Da,             | 1930.581055 | 3 | 382.5463562 | 382.5473309 |
| SKDSEGSWFR                | O55125 | 0          | n +34.06 Da,K +34.06 Da, | 1637.385498 | 3 | 422.8957825 | 422.896507  |
| IIGGSMDAKGSFPWQAK         | Q61646 | 0          | n +34.06 Da,K +34.06 Da, | 3202.9104   | 3 | 632.3690796 | 632.3696598 |
| SSKPKSLEIIGAPFSKGQPR      | Q61176 | 0          | n +42.03 Da,K +34.06 Da, | 2719.795898 | 3 | 757.7999878 | 757.8021813 |
| SQEASSPSGKMDGKVPDASEEKR   | Q9D0R2 | 0.00599455 | n +42.03 Da,K +34.06 Da, | 1110.976074 | 5 | 571.9099731 | 571.9131039 |
| TKVSSLIER                 | Q921X9 | 0.04191344 | n +34.06 Da,K +34.06 Da, | 1084.779297 | 3 | 367.5799866 | 367.5818594 |
| PVNEHMLNTR                | O70133 | 0          | n +17.03 Da,             | 1783.52417  | 2 | 670.8598633 | 670.8613108 |
| AHGSVVKSEDYAFPTYADRR      | P19783 | 0.04693141 | n +42.03 Da,K +34.06 Da, | 2567.728027 | 4 | 587.0465088 | 587.0487859 |
| GVDGKWR                   | Q91Y97 | 0.00511364 | n +34.06 Da,K +34.06 Da, | 2183.657959 | 3 | 344.8797607 | 344.8802392 |
| AGVPAHVVDLR               | Q6XPS7 | 0.00511364 | n +34.06 Da,             | 1712.776978 | 3 | 389.8999939 | 389.9067477 |
| IAFHFNPR                  | O08573 | 0.00947368 | n +34.06 Da,             | 2091.290771 | 3 | 345.8699951 | 345.8697449 |
| HVLQQFADNDVSR             | P51660 | 0          |                          | 1699.053833 | 2 | 778.8900146 | 778.8944326 |
| PQGATKINITEMHKSNNYLALR    | Q3UTY6 | 0.00599455 | n +31.05 Da,             | 2599.002686 | 4 | 633.3400269 | 633.3456756 |

|                        |        |            |                          |             |   |             |             |
|------------------------|--------|------------|--------------------------|-------------|---|-------------|-------------|
| TLEGELHDLR             | P48678 | 0.01698302 | n +14.02 Da,             | 2063.455566 | 3 | 399.5499878 | 399.547179  |
| VLTKFVEGAR             | Q8C196 | 0.03289474 | n +34.06 Da,K +34.06 Da, | 1398.429688 | 3 | 396.6000061 | 396.5976208 |
| EPPVPLVGNWRPPQPVKGR    | P16015 | 0          | n +34.06 Da,K +34.06 Da, | 3020.126709 | 4 | 548.5836792 | 548.5838315 |
| FWHSPECEFVR            | P16460 | 0          | n +34.06 Da,             | 2553.053711 | 3 | 509.9100037 | 509.913574  |
| SNPGDVRPVPHR           | P39689 | 0          | n +42.03 Da,             | 1000.189941 | 3 | 458.2399902 | 458.2408604 |
| TKYPQLLSGIR            | P50247 | 0          | n +34.06 Da,K +34.06 Da, | 2479.591064 | 2 | 672.4400024 | 672.4377321 |
| DTFVHVTDLSGKETICR      | P62264 | 0          | n +34.06 Da,K +34.06 Da, | 2796.946533 | 4 | 512.2775879 | 512.2794815 |
| LHGVPPEGCAVR           | O35490 | 0.00599455 | n +34.06 Da,             | 1289.047241 | 3 | 442.5799866 | 442.578414  |
| DDEEEEEEPVKAAPGKR      | P09405 | 0          | n +34.06 Da,K +34.06 Da, | 1262.276978 | 3 | 720.3800049 | 720.3781556 |
| LRPGDCEVCISYLGR        | Q9CXI5 | 0.04014599 | n +34.06 Da,             | 2911.08374  | 3 | 610.3121948 | 610.3134096 |
| SLAVGSISGHAR           | Q61176 | 0          | n +34.06 Da,             | 1198.48999  | 3 | 396.9020691 | 396.901774  |
| PNFFKMVEGFFDR          | P26443 | 0          | n +17.03 Da,K +34.06 Da, | 4773.836426 | 3 | 562.2975464 | 562.2974652 |
| ANYKDISDVER            | Q9D819 | 0.00900424 | n +34.06 Da,K +34.06 Da, | 1581.540527 | 3 | 459.9282227 | 459.9263551 |
| ATEARPTTEKSVPYQR       | Q99LB7 | 0          | n +34.06 Da,K +34.06 Da, | 1004.353699 | 4 | 476.2738037 | 476.2733563 |
| PLHDVFR                | P97351 | 0.01836228 | n +17.03 Da,             | 1582.643066 | 3 | 333.8599854 | 333.8643306 |
| IHNPATNEVVGR           | Q9EQ20 | 0.03333333 | n +34.06 Da,             | 1133.085938 | 2 | 670.8800049 | 670.8783119 |
| KLNIMTAGSR             | P24270 | 0.00599455 | n +34.06 Da,K +34.06 Da, | 1131.986328 | 3 | 386.9100037 | 386.914844  |
| QELTCQPEPLVVKGR        | P17563 | 0          | n +34.06 Da,K +34.06 Da, | 1637.012085 | 4 | 496.8099976 | 496.8081708 |
| PNILYGPLHTKQAVSMFVR    | Q9DBF1 | 0          | n +17.03 Da,K +34.06 Da, | 3546.917725 | 4 | 556.3222046 | 556.3239762 |
| SPFHCTMEEAR            | Q91VM9 | 0.01652479 | n +34.06 Da,             | 1183.228882 | 3 | 466.8823242 | 466.8832862 |
| TFLHCLPR               | P11725 | 0.03566466 | n +34.06 Da,             | 1792.763062 | 3 | 359.8699951 | 359.8743902 |
| SGPGGLHADLLR           | Q8BWF0 | 0          | n +34.06 Da,             | 1921.087891 | 3 | 409.5735474 | 409.5736574 |
| PILKQLVSSSVNSKR        | Q9JM96 | 0          | n +17.03 Da,K +34.06 Da, | 1925.933472 | 4 | 436.039032  | 436.0399776 |
| TEPLPAIEKTGKVR         | Q9CXN7 | 0          | n +34.06 Da,K +34.06 Da, | 1636.48877  | 4 | 411.0244751 | 411.0253142 |
| SQAEDKAAEEVKR          | P31786 | 0          | n +42.03 Da,K +34.06 Da, | 2545.22583  | 3 | 573.3133545 | 573.3179124 |
| PLPLPEYGGKVR           | Q9CQQ7 | 0          | n +17.03 Da,K +34.06 Da, | 2617.434814 | 3 | 491.9729614 | 491.9731986 |
| DFKKMVTTECPQFVQNIENLFR | P27005 | 0.02646776 | n +34.06 Da,K +34.06 Da, | 4424.851074 | 4 | 769.1748657 | 769.1729138 |
| MKHYEVEIR              | Q9CY27 | 0.00997375 | n +42.03 Da,K +34.06 Da, | 1946.193726 | 3 | 427.5665283 | 427.567515  |
| VKVGVNGFGR             | P16858 | 0.00189873 | n +34.06 Da,K +34.06 Da, | 1558.834473 | 3 | 367.5799866 | 367.5785603 |
| LHGVPPEGCAVR           | O35490 | 0.00068776 | n +34.06 Da,             | 1085.841309 | 3 | 442.5777283 | 442.578414  |
| IPKSDWR                | P06797 | 0.03127962 | n +34.06 Da,K +34.06 Da, | 1403.58374  | 3 | 356.8999023 | 356.8994109 |
| PFDNSSRPSQVVAETR       | P58252 | 0          | n +17.03 Da,             | 1722.068115 | 3 | 602.9699707 | 602.9762907 |
| PVDGSISKNGQLR          | Q9D0F9 | 0.00068776 | n +17.03 Da,K +34.06 Da, | 1108.205811 | 3 | 474.6199951 | 474.6159629 |
| AGACGKPHMSPASLPGR      | P97452 | 0          | n +42.03 Da,K +34.06 Da, | 1436.234741 | 4 | 483.769989  | 483.7699262 |
| SLKIQTSNVTNKND         | Q64012 | 0          | n +42.03 Da,K +34.06 Da, | 2000.118286 | 2 | 836.4799805 | 836.4810554 |
| TPEELQHSLR             | Q9QXE0 | 0.00511364 |                          | 1203.673584 | 3 | 413.2234802 | 413.2226954 |
| PELEKAQPALKSER         | Q8VCW8 | 0          | n +17.03 Da,K +34.06 Da, | 1063.224487 | 3 | 580.0237427 | 580.0229882 |
| VKVGVNGFGR             | P16858 | 0          | n +34.06 Da,K +34.06 Da, | 1561.839233 | 2 | 550.8622437 | 550.8642023 |
| VDREQLVQKAR            | P61982 | 0          | n +42.03 Da,K +34.06 Da, | 1509.831543 | 3 | 473.2827759 | 473.2826549 |
| QGILQPEKPIVLKVVPR      | Q9EQW4 | 0          | n +42.03 Da,K +34.06 Da, | 2955.5979   | 4 | 506.84375   | 506.837129  |

|                                 |        |            |                          |             |   |             |             |
|---------------------------------|--------|------------|--------------------------|-------------|---|-------------|-------------|
| LEEHPGGEEVLR                    | P56395 | 0          | n +34.06 Da,             | 1438.89856  | 3 | 466.9217529 | 466.9193825 |
| SHPSWLPPKSTGEPLGHVPAR           | Q8BFW7 | 0          | n +42.03 Da,K +34.06 Da, | 2640.407471 | 3 | 776.0900269 | 776.0886855 |
| PIKVSFATR                       | P56959 | 0.03851444 | n +17.03 Da,K +34.06 Da, | 1496.864868 | 3 | 357.2399902 | 357.2378747 |
| TRPTVAAGAVGLAQR                 | P45952 | 0.03044719 |                          | 1578.596802 | 3 | 489.9513245 | 489.9511986 |
| HQGVMMVGMGQKDSYVVGDEAQSQR       | P60710 | 0          | n +17.03 Da,K +34.06 Da, | 2025.732422 | 4 | 648.8300171 | 648.8390505 |
| MTKLEECVR                       | O70251 | 0.04487761 | n +34.06 Da,K +34.06 Da, | 1046.723511 | 3 | 411.8999939 | 411.9037279 |
| KNNIHCONTIAPNAGSR               | P51660 | 0          | n +42.03 Da,K +34.06 Da, | 1076.216919 | 3 | 614.9899902 | 614.986573  |
| PFDDDLMKR                       | Q8JZRO | 0.00189873 | n +17.03 Da,K +34.06 Da, | 2038.161621 | 3 | 396.5499878 | 396.5499016 |
| PDAAKPEDWDER                    | P14211 | 0          | n +17.03 Da,K +34.06 Da, | 1403.86731  | 3 | 493.9166565 | 493.9160785 |
| SQAEFDKAAEEVKR                  | P31786 | 0          | n +42.03 Da,K +34.06 Da, | 2446.441162 | 2 | 859.4724121 | 859.4732303 |
| STEVGHLIQVAAGSSNLKR             | P47738 | 0          | n +34.06 Da,K +34.06 Da, | 2813.349365 | 4 | 509.5499878 | 509.5537344 |
| VKIDEFPR                        | Q8CAY6 | 0.03935927 | n +34.06 Da,K +34.06 Da, | 1834.29541  | 3 | 357.8973083 | 357.8992996 |
| PLDLVALAEQVQKADEFIR             | Q5EBG8 | 0          | n +17.03 Da,K +34.06 Da, | 4702.292969 | 3 | 736.0999756 | 736.0949949 |
| TPVQSQPSATTPSGADEKSSGKER        | Q8VDM4 | 0          | n +34.06 Da,K +34.06 Da, | 974.6094971 | 4 | 669.6099854 | 669.6137437 |
| SLVVHGGPDIR                     | Q64442 | 0.0473613  | n +34.06 Da,             | 1618.472778 | 3 | 395.2399902 | 395.238386  |
| TYSTEPNNLKR                     | P41105 | 0          | n +34.06 Da,K +34.06 Da, | 1011.654541 | 3 | 487.9500122 | 487.9492712 |
| PNVTKTLQFR                      | Q9Z0X1 | 0          | n +17.03 Da,K +34.06 Da, | 1518.97644  | 3 | 418.9298706 | 418.9312221 |
| GRVEIIANDQGNR                   | P20029 | 0          | n +34.06 Da,             | 1038.773071 | 2 | 738.4099731 | 738.4105081 |
| SSLEDSQIEKER                    | Q9CZ13 | 0          | n +34.06 Da,K +34.06 Da, | 1159.464111 | 3 | 496.9400024 | 496.9440749 |
| ASCDEIKEHPR                     | Q8C650 | 0          | n +42.03 Da,K +34.06 Da, | 970.8531494 | 3 | 473.2367554 | 473.2366057 |
| SEAAPAAPAAAPPAEKAPAKKK          | P15864 | 0          | n +42.03 Da,K +34.06 Da, | 1216.46814  | 3 | 750.8093262 | 750.8091539 |
| SSFQIVKNPR                      | Q61176 | 0          | n +34.06 Da,K +34.06 Da, | 1281.553833 | 2 | 622.3900146 | 622.3933244 |
| SMKSVGEVMAIGR                   | Q8C196 | 0.00564972 | n +34.06 Da,K +34.06 Da, | 2413.601563 | 3 | 478.2786255 | 478.2810871 |
| RVVLPMEPIR                      | P00405 | 0.00240674 | n +34.06 Da,             | 3314.519287 | 3 | 452.9569092 | 452.9584545 |
| TVIKEVLQR                       | Q8CAY6 | 0.02063882 | n +34.06 Da,K +34.06 Da, | 1448.541504 | 3 | 385.270752  | 385.2695041 |
| NPPYDKGAFR                      | P68037 | 0.00240674 | n +34.06 Da,K +34.06 Da, | 1151.021973 | 3 | 411.5727234 | 411.5734753 |
| IKPTAAPPLAEAGAAKGLR             | Q9D2G2 | 0          | n +34.06 Da,K +34.06 Da, | 2083.960449 | 4 | 484.321106  | 484.3216082 |
| MGPSGGEGVEPERR                  | Q61792 | 0.00855158 |                          | 989.2128296 | 3 | 495.9100037 | 495.9086711 |
| DAVAKGATVVTGGKR                 | Q8BWF0 | 0          | n +34.06 Da,K +34.06 Da, | 1044.016357 | 3 | 511.3386536 | 511.338688  |
| VPPVQVSPLIKFGR                  | Q06185 | 0          | n +34.06 Da,K +34.06 Da, | 3233.577148 | 3 | 535.6883545 | 535.6889511 |
| RDDGSWEVIEGYR                   | P26443 | 0          |                          | 3016.637207 | 2 | 805.3849487 | 805.3838981 |
| GVSDGSEVAKAQKAAPGGASPTIFSR      | Q9D0S9 | 0          | n +34.06 Da,K +34.06 Da, | 2489.051025 | 3 | 864.1599731 | 864.1609864 |
| GSHETDEEFDAR                    | P12787 | 0          | n +34.06 Da,             | 965.727417  | 2 | 713.8200073 | 713.8183153 |
| IAKMDSTANEVEAVKVHSFPTLKFFPASADR | P09103 | 0.00189873 | n +42.03 Da,K +34.06 Da, | 4048.798828 | 5 | 710.9899902 | 710.9950854 |
| GAYKIYQELWR                     | Q9CZM2 | 0          | n +34.06 Da,K +34.06 Da, | 3390.998779 | 2 | 747.9381714 | 747.9406391 |
| VEPEILPDGDHDLKR                 | P05063 | 0.00189873 | n +34.06 Da,K +34.06 Da, | 2162.568604 | 4 | 451.0100098 | 451.0086282 |
| SIDLVINLPNNNTKFVHDNYVIR         | Q8C196 | 0          | n +34.06 Da,K +34.06 Da, | 3918.061279 | 4 | 692.3900146 | 692.3948005 |
| MDFQHRPGGKTGSGGVASSSESNR        | Q62203 | 0          | n +42.03 Da,K +34.06 Da, | 1521.262207 | 3 | 842.4000244 | 842.4051858 |
| TQTISQGAIEKVKDATR               | Q8C196 | 0          | n +34.06 Da,K +34.06 Da, | 2276.658203 | 4 | 487.8039246 | 487.8035144 |
| PDHPIVETLR                      | P11499 | 0.00068776 | n +17.03 Da,             | 1309.255737 | 2 | 597.3362427 | 597.3379943 |

|                               |        |            |                          |             |   |             |             |
|-------------------------------|--------|------------|--------------------------|-------------|---|-------------|-------------|
| TINLIHTFR                     | Q9CVB6 | 0.00511364 | n +34.06 Da,             | 2404.564941 | 3 | 383.5700073 | 383.5714763 |
| VDLAVKAAR                     | Q9CZS1 | 0.00599455 | n +34.06 Da,K +34.06 Da, | 1043.391113 | 3 | 337.5700073 | 337.5712943 |
| SGDSAPLQEAMAVLQHHDAVSGTAR     | O09159 | 0          | n +34.06 Da,             | 3842.576172 | 4 | 646.3242798 | 646.3264588 |
| VLSGEDKSNIKAAWGWK             | P01942 | 0          | n +34.06 Da,K +34.06 Da, | 1841.634399 | 4 | 460.5499878 | 460.5466418 |
| MEQAVHGESKR                   | Q9R1J0 | 0          | n +42.03 Da,K +34.06 Da, | 991.9916382 | 3 | 449.9012756 | 449.9014457 |
| PSVSLQTVKLMKEGLEAAR           | O35490 | 0          | n +17.03 Da,K +34.06 Da, | 3430.28418  | 4 | 536.3278809 | 536.3304922 |
| AEIDEEPVSQKAKQSR              | P70670 | 0          | n +34.06 Da,K +34.06 Da, | 1011.094788 | 4 | 448.0200806 | 448.0192237 |
| PLHEELLGQGCVFQER              | Q99LB7 | 0          | n +17.03 Da,             | 3011.909668 | 2 | 964.9890747 | 964.9885009 |
| GSHETDEEFDAR                  | P12787 | 0          |                          | 962.8930054 | 2 | 696.7871094 | 696.7867568 |
| ASLVPLKEKKLMEVK               | P56135 | 0          | n +42.03 Da,K +34.06 Da, | 2764.240234 | 4 | 473.5784912 | 473.5797901 |
| GSHETDEEFDAR                  | P12787 | 0.00189873 | n +34.06 Da,             | 961.7850342 | 3 | 476.2200012 | 476.2146357 |
| PVVLTKFVEGAR                  | Q8C196 | 0          | n +17.03 Da,K +34.06 Da, | 2444.998291 | 2 | 683.9400024 | 683.9376027 |
| RLLEFQNDR                     | P29391 | 0.00649702 | n +34.06 Da,             | 1547.287598 | 2 | 612.8484497 | 612.8490228 |
| PDLSSDIKER                    | B5X0G2 | 0.00240674 | n +17.03 Da,K +34.06 Da, | 1187.494263 | 2 | 605.8499756 | 605.8486508 |
| CKDLGTQLAPIHQEFFHSEQYR        | Q78JT3 | 0          | K +31.05 Da,             | 4854.339355 | 3 | 904.460022  | 904.4601909 |
| SVVAGGPEVTLTPERYPVQR          | Q8CIM3 | 0          | n +34.06 Da,             | 2845.78833  | 3 | 730.4099731 | 730.4094248 |
| MQSAPLEQPAKRPR                | Q60710 | 0          | n +42.03 Da,K +34.06 Da, | 1613.878174 | 3 | 562.315918  | 562.317371  |
| EAYPGDVFYLSHR                 | Q03265 | 0          |                          | 2973.657227 | 3 | 527.9260864 | 527.9280599 |
| MTMDKSELVQKAKLAEQAER          | Q9CQV8 | 0          | n +42.03 Da,K +34.06 Da, | 3224.346436 | 4 | 613.3499756 | 613.351509  |
| MVEKIIDPTKVVR                 | P63038 | 0.01378958 | n +34.06 Da,K +34.06 Da, | 2259.69165  | 4 | 422.5301819 | 422.5313407 |
| ENAVEKVNIPQVDR                | P50247 | 0          | n +34.06 Da,K +34.06 Da, | 1542.497803 | 3 | 614.3800049 | 614.3828456 |
| MGDHLWIAR                     | P15105 | 0.00240674 | n +42.03 Da,             | 2301.123779 | 3 | 380.8599854 | 380.8588108 |
| DVKFGADAR                     | P63038 | 0.00240674 | n +34.06 Da,K +34.06 Da, | 1029.301514 | 3 | 349.5473328 | 349.5470376 |
| WPQGTAFASQVTLEGDKVKVER        | Q9DCW4 | 0          | n +34.06 Da,K +34.06 Da, | 3253.998047 | 3 | 826.4799805 | 826.4797673 |
| AELYVKPGNKER                  | Q80VJ2 | 0.00353565 | n +42.03 Da,K +34.06 Da, | 1463.699707 | 3 | 505.3048706 | 505.3051663 |
| ATKCTKCGPGYSTPLEAMKGPR        | P17563 | 0          | n +42.03 Da,K +34.06 Da, | 2209.594238 | 4 | 639.3449707 | 639.3473349 |
| AHGSVVKSEDYAFPTYADRR          | P19783 | 0          | n +42.03 Da,K +34.06 Da, | 2596.654785 | 3 | 782.3932495 | 782.3959558 |
| ASGASDTPHHQSPSESVPVQVGVGCSMMR | A2AS89 | 0          | n +31.05 Da,             | 2721.309814 | 3 | 1070.819946 | 1070.83069  |
| SEALIHCLR                     | Q8QZR3 | 0.00900424 | n +34.06 Da,             | 1481.966797 | 2 | 566.8189697 | 566.8214191 |
| PEHLDLPNVTIILKEPVR            | Q99PL5 | 0          | n +17.03 Da,K +34.06 Da, | 3126.824219 | 4 | 534.8099976 | 534.812599  |
| SKSESPKEPEQLR                 | P49312 | 0          | n +42.03 Da,K +34.06 Da, | 981.989624  | 3 | 542.3101196 | 542.3107577 |
| SKDSEGSWFR                    | O55125 | 0          | n +34.06 Da,K +34.06 Da, | 1453.00415  | 3 | 422.8978577 | 422.896507  |
| SGGGTETPVACDAAQGGKKR          | Q8R015 | 0          | n +42.03 Da,K +34.06 Da, | 1030.700806 | 3 | 686.3616333 | 686.3620755 |
| ASGASDTPHHQSPSESVPVQVGVGCSMMR | A2AS89 | 0          | n +34.06 Da,             | 2575.829834 | 3 | 1071.829956 | 1071.835993 |
| LAAKYNISR                     | Q8BWT1 | 0.00599455 | n +34.06 Da,K +34.06 Da, | 1044.170532 | 3 | 368.5783386 | 368.578449  |
| SLSGEHSIIGR                   | P08228 | 0.00189873 | n +34.06 Da,             | 1305.575806 | 3 | 397.2289124 | 397.2297793 |
| PMTVSSDQMAKLR                 | P16015 | 0          | n +17.03 Da,K +34.06 Da, | 2020.85437  | 3 | 505.6099854 | 505.6145771 |
| SEFLKAASNLR                   | P27773 | 0.00511364 | n +34.06 Da,K +34.06 Da, | 1995.155762 | 3 | 435.269989  | 435.2716851 |
| GGPERSALSQPPARR               | A2AGX3 | 0.04417122 | n +42.03 Da,             | 1440.806152 | 3 | 540.9491577 | 540.9570126 |
| RGEGGILINSQGER                | Q8K2B3 | 0.02111984 | n +34.06 Da,             | 1242.495972 | 3 | 507.2900085 | 507.2848359 |

|                                |        |            |                          |             |   |             |             |
|--------------------------------|--------|------------|--------------------------|-------------|---|-------------|-------------|
| GMCKAGFAGDDAPR                 | P60710 | 0          | n +34.06 Da,K +34.06 Da, | 1242.784302 | 3 | 507.5899963 | 507.592213  |
| SPFHCTMEEAR                    | Q91VM9 | 0.00599455 | n +34.06 Da,             | 1198.046021 | 2 | 699.8200073 | 699.8212911 |
| DQPAHLTLKDDSI PVNR             | Q921G7 | 0          | n +34.06 Da,K +34.06 Da, | 2316.427979 | 4 | 497.5299988 | 497.5365473 |
| EPEWVKTER                      | O35887 | 0.00189873 | n +34.06 Da,K +34.06 Da, | 1123.808716 | 3 | 414.5799866 | 414.5768857 |
| MLMPKKNR                       | P63325 | 0.00649702 | n +42.03 Da,K +34.06 Da, | 1089.052002 | 2 | 564.3590088 | 564.3568411 |
| SLDKFLASVSTVLT SKYR            | P01942 | 0          | n +34.06 Da,K +34.06 Da, | 4323.609375 | 4 | 530.0845337 | 530.0820897 |
| ATSASSHLNKGIKQMY               | P15105 | 0          | n +42.03 Da,K +34.06 Da, | 2182.957031 | 2 | 923.5100098 | 923.5118324 |
| TKVKAAP EESAQAEGCSEER          | Q9CRB2 | 0.00240674 | n +34.06 Da,K +34.06 Da, | 1162.832153 | 4 | 602.8173828 | 602.8169224 |
| TTYNNKGPKPER                   | P49429 | 0.04487761 | n +42.03 Da,K +34.06 Da, | 922.5947266 | 3 | 505.6199951 | 505.6247876 |
| TSVLHLVGDNFR                   | Q921X9 | 0          | n +34.06 Da,             | 2985.690674 | 3 | 464.6000061 | 464.5999838 |
| YMVTKIPR                       | Q8C196 | 0.01232666 | n +34.06 Da,K +34.06 Da, | 1454.758667 | 2 | 538.3530273 | 538.3520816 |
| MKPLVVFLVGGPGAGKGTQCAR         | Q9DBP5 | 0          | n +34.06 Da,K +34.06 Da, | 3099.924316 | 4 | 587.1099854 | 587.1065787 |
| SEPEIPKGIR                     | Q9WTP6 | 0.00599455 | n +34.06 Da,K +34.06 Da, | 1645.152832 | 3 | 398.5883179 | 398.5890141 |
| SLLNKPKSEMTPPELQKR             | P62317 | 0          | n +42.03 Da,K +34.06 Da, | 1937.86145  | 4 | 568.8406372 | 568.8412055 |
| VKVG VNGFGR                    | P16858 | 0          | n +34.06 Da,K +34.06 Da, | 4436.054688 | 3 | 367.5799866 | 367.5785603 |
| LFAYPDTHR                      | P24270 | 0.00189873 |                          | 1667.968628 | 3 | 383.2010498 | 383.2013426 |
| VYDEFV KR                      | P24549 | 0.00900424 | n +34.06 Da,K +34.06 Da, | 1388.163574 | 3 | 375.2319946 | 375.230938  |
| SKDSEGSWFR                     | O55125 | 0.00599455 | n +34.06 Da,K +34.06 Da, | 1426.16687  | 2 | 633.8418579 | 633.8411222 |
| PCTDLFKR                       | Q9D8Z2 | 0.01279427 | n +17.03 Da,K +34.06 Da, | 1297.930908 | 3 | 363.2103882 | 363.2112199 |
| PLAKDLLHPSPEEKR                | Q6ZWU9 | 0          | n +17.03 Da,K +34.06 Da, | 1596.387695 | 4 | 486.7954407 | 486.7954424 |
| HSILPVDDINGLNEEQKQLR           | Q9JHI5 | 0          | n +34.06 Da,K +34.06 Da, | 3271.652588 | 3 | 834.4500122 | 834.4592143 |
| PVMQILKFKTIEEVVGR              | P47738 | 0          | n +34.06 Da,K +34.06 Da, | 3484.181152 | 4 | 523.0800171 | 523.0880174 |
| SEQKCIAMCMDR                   | P62075 | 0          | n +34.06 Da,K +34.06 Da, | 1450.436157 | 3 | 532.9299927 | 532.9260986 |
| MEETEKVATQEGR                  | Q9QXZ6 | 0          | n +42.03 Da,K +34.06 Da, | 1827.45752  | 3 | 582.6483765 | 582.6506743 |
| YMVTKIPR                       | Q8C196 | 0.01232666 | n +34.06 Da,K +34.06 Da, | 1437.578735 | 3 | 359.2384338 | 359.2371466 |
| GTEIHEASAILVHLSR               | Q9D172 | 0          | n +34.06 Da,             | 2934.924805 | 4 | 442.5039978 | 442.5047535 |
| PNSKLFDHPEVPTPPESASVSR         | P19096 | 0          | n +17.03 Da,K +34.06 Da, | 2638.782959 | 3 | 814.7600098 | 814.7677186 |
| PLYNHPAGPR                     | Q9D023 | 0.04458599 | n +14.02 Da,             | 975.4821777 | 3 | 379.2056274 | 379.2050869 |
| SQAEFDKAAEEVKR                 | P31786 | 0          | n +42.03 Da,K +34.06 Da, | 1663.730225 | 3 | 573.3171387 | 573.3179124 |
| SQTKEDKQLQDKPDLEER             | Q8K1N1 | 0          | n +42.03 Da,K +34.06 Da, | 1519.047119 | 4 | 583.5761108 | 583.577635  |
| ASGASDTPHHQSPSES PVQPVGVGVCMMR | A2AS89 | 0.00464037 | n +17.03 Da,             | 2572.265137 | 4 | 799.8699951 | 799.8709242 |
| MKGQVCVV TGASR                 | Q99L04 | 0.00703463 | n +34.06 Da,K +34.06 Da, | 1038.481934 | 3 | 487.6199951 | 487.6164697 |
| PSKTNVSGGAIALGHPLGGSGSR        | Q8BWT1 | 0          | n +17.03 Da,K +34.06 Da, | 1717.020752 | 2 | 1086.109985 | 1086.111326 |
| SSSRPVALVTGANKGIGFAITR         | P48758 | 0.00189873 | n +42.03 Da,K +34.06 Da, | 3428.808838 | 3 | 760.1099854 | 760.1078573 |
| AGKPV LH YFDGR                 | P30115 | 0          | n +42.03 Da,K +34.06 Da, | 2648.415039 | 2 | 718.4000244 | 718.39888   |
| PGIKVVIPR                      | Q6P3A8 | 0.01232666 | n +17.03 Da,K +34.06 Da, | 1708.491699 | 3 | 343.9200134 | 343.9183647 |
| PQFITKLLR                      | P23249 | 0.03690037 | n +17.03 Da,K +34.06 Da, | 2458.296143 | 3 | 389.6000061 | 389.6009245 |
| TWMVIHGR                       | Q9CQX2 | 0.00353565 | n +34.06 Da,             | 1911.457275 | 3 | 345.2000122 | 345.1989851 |
| LIGIQSFRPR                     | Q8C196 | 0          | n +34.06 Da,             | 2208.030273 | 3 | 450.2789001 | 450.2805852 |
| TTYNNKGPKPER                   | P49429 | 0.00353565 | n +42.03 Da,K +34.06 Da, | 882.1251221 | 3 | 505.6259155 | 505.6247876 |

|                             |        |            |                          |             |   |             |             |
|-----------------------------|--------|------------|--------------------------|-------------|---|-------------|-------------|
| MEEIYAKFVSQKISKTR           | P59235 | 0          | n +42.03 Da,K +34.06 Da, | 3936.963623 | 4 | 551.3306885 | 551.3317447 |
| PGASLPLNLKELEKDLDR          | Q05920 | 0          | n +17.03 Da,K +34.06 Da, | 4171.908203 | 4 | 576.5999756 | 576.6059481 |
| GPSGKLWR                    | P16858 | 0.04570136 | n +34.06 Da,K +34.06 Da, | 1004.68042  | 3 | 323.5492859 | 323.5486009 |
| TENSTSAPAAKPKR              | P10922 | 0          | n +42.03 Da,K +34.06 Da, | 756.9935913 | 3 | 523.307312  | 523.3073473 |
| MNNQKQQKPTLSGQR             | Q9CQC6 | 0          | n +42.03 Da,K +34.06 Da, | 1035.125366 | 3 | 623.3499756 | 623.3529624 |
| ISFHLPVNSR                  | Q9D1D4 | 0.00240674 | n +34.06 Da,             | 4413.114258 | 3 | 401.9100037 | 401.9067477 |
| TNEEPLPKKVR                 | Q9ER69 | 0.00189873 | n +42.03 Da,K +34.06 Da, | 1119.90918  | 3 | 474.2990112 | 474.2980116 |
| PPFVAYPHLR                  | P43024 | 0.00068776 | n +17.03 Da,             | 2442.4021   | 3 | 405.230011  | 405.234535  |
| SSGPGGDHSELIVR              | P57776 | 0          | n +34.06 Da,             | 1304.590332 | 3 | 482.2600098 | 482.2582868 |
| IVGLDSGHIR                  | P52196 | 0.01457286 | n +34.06 Da,             | 1499.420898 | 3 | 367.5586853 | 367.559348  |
| SLNNPEDPFEKAKGILR           | Q9JMA7 | 0          | n +34.06 Da,K +34.06 Da, | 3378.48291  | 4 | 533.0700073 | 533.0758017 |
| PMYHAVTTR                   | P47791 | 0.00353565 | n +14.02 Da,             | 1047.494385 | 3 | 363.8500061 | 363.8551778 |
| PVEKDANNMPVTAR              | D320Y2 | 0          | n +17.03 Da,K +34.06 Da, | 1047.012207 | 3 | 531.6273193 | 531.6277629 |
| DKTLKGLNSDSVTEETLR          | Q8C196 | 0          | n +34.06 Da,K +34.06 Da, | 2325.935791 | 3 | 703.4099731 | 703.4146521 |
| ASGVAVSDGVKVFNDMKVR         | P18760 | 0          | n +42.03 Da,K +34.06 Da, | 4250.799805 | 3 | 734.7600098 | 734.7577661 |
| PDKAQYQQR                   | P70168 | 0.02426007 | n +17.03 Da,K +34.06 Da, | 959.5487671 | 3 | 433.25      | 433.2543651 |
| ATFEEVSVLGFEEFDKAVKEHEGKTIF | Q9CQM5 | 0          | n +42.03 Da,K +34.06 Da, | 4506.814453 | 4 | 808.4400024 | 808.439368  |
| PCVQLPAKESALFKR             | Q9DBB4 | 0.00353565 | n +17.03 Da,K +34.06 Da, | 2357.354004 | 4 | 458.0299988 | 458.0342665 |
| MESPAASPPASLPQTKGKSKR       | O09110 | 0          | n +42.03 Da,K +34.06 Da, | 1741.448242 | 3 | 771.4500122 | 771.4545645 |
| LRPGDCEVCISYLGR             | Q9CXI5 | 0.03044719 | n +34.06 Da,             | 2918.378418 | 2 | 914.9646606 | 914.9664762 |
| SKCLGLTEAQTR                | Q8C196 | 0.03127962 | n +34.06 Da,K +34.06 Da, | 1044.087036 | 3 | 477.946106  | 477.9468731 |
| QGSRRRNPAILQPWLPGLGR        | F6QM68 | 0.00649702 | n +14.02 Da,             | 3237.878174 | 3 | 767.0999756 | 767.0975856 |
| MNVNDLKQR                   | Q91YN5 | 0.00240674 | n +34.06 Da,K +34.06 Da, | 1264.125732 | 3 | 395.9064941 | 395.9063486 |
| SLAVGSISGHAR                | Q61176 | 0.00068776 | n +34.06 Da,             | 1184.639038 | 2 | 594.8483276 | 594.8490228 |
| NIDEHANEDVER                | P61027 | 0          |                          | 973.4680176 | 3 | 490.2262573 | 490.2269461 |
| PKVIQPEVDTPLGR              | Q8VCU1 | 0          | n +17.03 Da,K +34.06 Da, | 2196.51416  | 3 | 533.9924927 | 533.9945514 |
| PFLDIQKKGISLDR              | Q99LY9 | 0          | n +17.03 Da,K +34.06 Da, | 3782.613281 | 4 | 457.7999878 | 457.7989904 |
| PTGSYHGSDSLQLER             | Q7TMM9 | 0          | n +17.03 Da,             | 1628.041016 | 3 | 564.6099854 | 564.6059749 |
| ISFHLPVNSR                  | Q9D1D4 | 0          | n +34.06 Da,             | 2545.155273 | 3 | 401.9048767 | 401.9067477 |
| RAPQTGIVDECCFR              | P05017 | 0.00189873 | n +34.06 Da,             | 2036.905029 | 3 | 581.6199951 | 581.6223545 |
| ATSASSHLNKGIKQMY            | P15105 | 0.02813543 | n +42.03 Da,K +34.06 Da, | 1510.681519 | 3 | 616.0100098 | 616.0103138 |
| GYPTLKIFR                   | P08003 | 0.00464037 | n +34.06 Da,K +34.06 Da, | 2726.396484 | 3 | 388.2582092 | 388.2588277 |
| ATEARPTTEKSVPYQR            | Q99LB7 | 0.00068776 | n +34.06 Da,K +34.06 Da, | 1004.46344  | 3 | 634.6949463 | 634.6953829 |
| TVDGPSGKLWR                 | P16858 | 0          | n +34.06 Da,K +34.06 Da, | 1766.837646 | 3 | 428.5955811 | 428.5962801 |
| PYSHALVAGIDR                | P61358 | 0.01279427 | n +14.02 Da,             | 1757.531372 | 3 | 438.2366028 | 438.2384568 |
| VKVGVNGFGR                  | P16858 | 0.00189873 | n +34.06 Da,K +34.06 Da, | 1517.55896  | 3 | 367.57724   | 367.5785603 |
| VSQHEPVVLTKFVEGAR           | Q8C196 | 0          | n +42.03 Da,K +34.06 Da, | 2403.200195 | 4 | 493.7900085 | 493.7823233 |
| DLEKDKGLQTSQDAR             | P14211 | 0.01457286 | n +34.06 Da,K +34.06 Da, | 1057.34375  | 3 | 602.6869507 | 602.6865941 |
| PYEIKVFASTLPQVER            | O88342 | 0          | n +17.03 Da,K +34.06 Da, | 3267.845947 | 3 | 663.7433472 | 663.7454547 |
| EATSHSTQDPLEAQAKSR          | P97290 | 0          | n +34.06 Da,K +34.06 Da, | 1002.335815 | 4 | 506.769989  | 506.7724495 |



|                                     |        |            |                          |             |   |             |             |
|-------------------------------------|--------|------------|--------------------------|-------------|---|-------------|-------------|
| SYQGKKNIPR                          | O08553 | 0          | n +42.03 Da,K +34.06 Da, | 969.3807373 | 3 | 434.271759  | 434.2717965 |
| STEVGHLIQVAAGSSNLKR                 | P47738 | 0          | n +34.06 Da,K +34.06 Da, | 2807.031738 | 3 | 679.0700073 | 679.0692204 |
| EPPVIQNPEYKGEWKPR                   | P14211 | 0          | n +34.06 Da,K +34.06 Da, | 2309.492188 | 4 | 543.0675049 | 543.0692479 |
| HTFYNELR                            | P60710 | 0.01096606 | n +34.06 Da,             | 1332.833008 | 2 | 557.2999878 | 557.2986341 |
| DQEQALRESQR                         | Q8CJ40 | 0.03456329 | n +17.03 Da,             | 2078.19873  | 3 | 540.269165  | 540.2779696 |
| VGAFTVVCKDAEEAKR                    | P05202 | 0          | n +42.03 Da,K +34.06 Da, | 2106.223633 | 4 | 473.2750854 | 473.2661082 |
| PALEIANHR                           | P63038 | 0.00068776 | n +17.03 Da,             | 1032.412109 | 3 | 370.2099915 | 370.2139113 |
| TVQTSSEGRPTAASEAR                   | Q3V384 | 0.00240674 | n +34.06 Da,             | 1004.899414 | 3 | 598.6599731 | 598.6569988 |
| TPETAKEAELAAR                       | Q9QYGO | 0          | n +34.06 Da,K +34.06 Da, | 1076.107178 | 3 | 485.6199951 | 485.6210432 |
| PSVLHTEEMR                          | Q99L47 | 0.00240674 | n +17.03 Da,             | 1048.255859 | 3 | 405.8777161 | 405.8782003 |
| PFEVIKQR                            | Q9WTP7 | 0.04487761 | n +17.03 Da,K +34.06 Da, | 1136.962402 | 3 | 356.5700073 | 356.5659913 |
| EALDCILPPTRPDKPLR                   | P10126 | 0          | n +34.06 Da,K +34.06 Da, | 2748.979736 | 4 | 540.8156738 | 540.8175024 |
| PAQKSDIVQLR                         | Q8VDJ3 | 0          | n +17.03 Da,K +34.06 Da, | 1107.719727 | 3 | 435.9420471 | 435.9418985 |
| SETAPAAPAAPAEKTPVKKK                | P43274 | 0.00189873 | n +42.03 Da,K +34.06 Da, | 1167.273315 | 4 | 585.3724976 | 585.3717921 |
| DVFKVDLR                            | Q6PE84 | 0.02426007 | n +42.03 Da,K +28.03 Da, | 2204.368652 | 3 | 387.5599976 | 387.5606481 |
| LSAAATSAVPAPNHQPEVFCNQIFINNEWHDAVSR | P47738 | 0          | n +31.05 Da,             | 4167.030273 | 4 | 981.2299805 | 981.2339469 |
| SAVSGPAEYLQHSIVPTMHYQDSLPR          | P52825 | 0          | n +34.06 Da,             | 3893.506836 | 4 | 730.1211548 | 730.1235912 |
| PDAGLFSSDKKVSETR                    | Q3TC93 | 0          | n +17.03 Da,K +34.06 Da, | 1548.651978 | 4 | 456.2600098 | 456.2652465 |
| AREQWSNCPITIGQIR                    | P10605 | 0          | n +34.06 Da,             | 2279.915771 | 3 | 617.3225708 | 617.323185  |
| AAAKVALTKR                          | Q9QXX4 | 0.03204524 | n +42.03 Da,K +34.06 Da, | 1049.504883 | 3 | 380.2690125 | 380.2696155 |
| VQIGDIVTVEGCRPLSKTVR                | P62281 | 0.00411523 | n +34.06 Da,K +34.06 Da, | 3122.75708  | 3 | 765.7800293 | 765.7878369 |
| ASSKKVTLVLSR                        | Q9D711 | 0.03566466 | n +42.03 Da,K +34.06 Da, | 2055.780029 | 3 | 495.9911499 | 495.9926997 |
| VKMAAAGGGGGGGR                      | Q8R081 | 0.03775322 | n +34.06 Da,K +34.06 Da, | 682.3138428 | 3 | 405.2419434 | 405.2417313 |
| SHTILLVQPTKRPEGR                    | P84089 | 0.00189873 | n +42.03 Da,K +34.06 Da, | 1933.287354 | 4 | 477.7859497 | 477.7864028 |
| GTKLSMTNDPLEAAR                     | P11725 | 0.00599455 | n +34.06 Da,K +34.06 Da, | 2263.321777 | 3 | 557.9822388 | 557.983876  |
| STFNQVVLKR                          | P35980 | 0          | n +34.06 Da,K +34.06 Da, | 1614.251953 | 3 | 420.6071167 | 420.6084085 |
| TEWEKAGEVSR                         | P51174 | 0.03851444 | n +34.06 Da,K +34.06 Da, | 1261.244873 | 3 | 453.9200134 | 453.9228334 |
| PKLQGFEFWSR                         | Q8C2P3 | 0          | n +17.03 Da,K +34.06 Da, | 3332.996338 | 3 | 482.6099854 | 482.6102602 |
| AVEKVNIPQVDR                        | P50247 | 0          | n +34.06 Da,K +34.06 Da, | 1176.716675 | 4 | 400.267334  | 400.2675727 |
| GLLSDPVRR                           | Q9WTK3 | 0.03566466 | n +34.06 Da,             | 1402.901245 | 3 | 349.5599976 | 349.5558263 |
| PSPDKMLQGR                          | P24270 | 0.00068776 | n +17.03 Da,K +34.06 Da, | 1017.83313  | 3 | 393.8976746 | 393.8974126 |
| GPGGPGGSHMGGNYGDDR                  | P56959 | 0          | n +34.06 Da,             | 976.8426514 | 3 | 593.5999756 | 593.5956335 |
| VKGVNGFGR                           | P16858 | 0.00599455 | n +34.06 Da,K +34.06 Da, | 1521.081055 | 2 | 550.8621826 | 550.8642023 |
| PSKGPLQSVQVFR                       | P14131 | 0          | n +17.03 Da,K +34.06 Da, | 2421.44165  | 3 | 517.6466064 | 517.6473743 |
| DGTGGDAAAAPGAAGTQAELPHRR            | Q9D0F3 | 0          | n +34.06 Da,             | 1603.81311  | 3 | 737.3800049 | 737.3755546 |
| GWGVMVSHR                           | P17182 | 0          | n +34.06 Da,             | 1545.767944 | 2 | 531.788208  | 531.7899214 |
| LHGVPGECAVR                         | O35490 | 0          | n +34.06 Da,             | 1126.940186 | 3 | 442.5794983 | 442.578414  |
| FNPDAKALR                           | P14824 | 0.02063882 | n +34.06 Da,K +34.06 Da, | 1655.305176 | 3 | 429.2555542 | 429.2560351 |
| PGSPQLQVLKHDLMNVYR                  | P19096 | 0          | n +17.03 Da,K +34.06 Da, | 3718.211426 | 4 | 594.3300171 | 594.334807  |
| SASSTNLKDVLSNLIPEQAR                | Q9CZU6 | 0          | n +34.06 Da,K +34.06 Da, | 3823.163574 | 4 | 594.1099854 | 594.1103734 |

|                                         |        |            |                          |             |   |             |             |
|-----------------------------------------|--------|------------|--------------------------|-------------|---|-------------|-------------|
| AEDIKTIKINY                             | P56391 | 0.01836228 | n +42.03 Da,K +34.06 Da, | 2294.669678 | 3 | 489.6481934 | 489.6486396 |
| SHTILLVQPTKRPEGR                        | P84089 | 0.00189873 | n +42.03 Da,K +34.06 Da, | 1509.976318 | 4 | 477.7853088 | 477.7864028 |
| SHGSHTDEEFDAR                           | P12787 | 0          | n +42.03 Da,             | 978.9926147 | 3 | 553.5596313 | 553.5607655 |
| TSVATKKTEQGPPSSEYIFER                   | P29758 | 0.00189873 | n +34.06 Da,K +34.06 Da, | 1922.317505 | 4 | 615.0999756 | 615.0984688 |
| MKKKVAIIGAGVSGLAAIR                     | P97501 | 0          | n +42.03 Da,K +34.06 Da, | 3324.771729 | 3 | 676.456665  | 676.4589205 |
| MDVPSNIKR                               | P63242 | 0.01457286 | n +34.06 Da,K +34.06 Da, | 1557.550049 | 3 | 347.5555115 | 347.5567679 |
| DASPGSPLEKLVSSVSDLPKR                   | P54869 | 0          | n +34.06 Da,K +34.06 Da, | 4065.368652 | 4 | 571.8499756 | 571.8456453 |
| TITYGPKVVR                              | P12710 | 0.00464037 | n +34.06 Da,K +34.06 Da, | 1348.874268 | 2 | 601.4001465 | 601.4006179 |
| TEAASNKLQSSNIFTVAKR                     | O35643 | 0          | n +34.06 Da,K +34.06 Da, | 2191.144043 | 4 | 542.5800171 | 542.5787087 |
| TDLLAHSIR                               | Q8JZZ0 | 0.01194185 |                          | 4129.583496 | 2 | 575.8400269 | 575.8325828 |
| GNPDNETYLHR                             | Q61655 | 0.01194185 | n +34.06 Da,             | 1008.00885  | 3 | 450.5599976 | 450.560077  |
| SETAPAAPAAPAPAEKTPVKKK                  | P43274 | 0          | n +42.03 Da,K +34.06 Da, | 1444.801025 | 3 | 780.1599731 | 780.159964  |
| SQLQVSKPADEKETESGR                      | A3KGB4 | 0          | n +34.06 Da,K +34.06 Da, | 1008.514221 | 4 | 523.5510864 | 523.5498829 |
| PGLAAASPAPPEAQEKPLKPC                   | P56394 | 0          | n +17.03 Da,K +34.06 Da, | 1805.018433 | 3 | 792.8099976 | 792.8121293 |
| VVEGEGKAEANVTGPGGVPVQGSKYAADR           | P62960 | 0          | n +34.06 Da,K +34.06 Da, | 2222.304688 | 4 | 754.6699829 | 754.6703216 |
| AAAAYEHLKLHITPEKF                       | Q9EP69 | 0          | n +42.03 Da,K +34.06 Da, | 3532.686768 | 4 | 513.0499878 | 513.0505616 |
| GVVQSIKLITEEASKR                        | Q9D6R2 | 0          | n +34.06 Da,K +34.06 Da, | 2934.635498 | 4 | 465.7999878 | 465.8057911 |
| SAFGKNLLPR                              | Q99LC5 | 0.00189873 | n +34.06 Da,K +34.06 Da, | 1985.052979 | 3 | 390.9245605 | 390.9258487 |
| CGAGVFMGSHFDR                           | P62983 | 0          | n +34.06 Da,             | 2271.491211 | 3 | 492.2315674 | 492.2307972 |
| PKVIQPEVDTPLR                           | Q8VCU1 | 0          | n +17.03 Da,K +34.06 Da, | 2155.744141 | 3 | 533.9899902 | 533.9945514 |
| APLDLDKYVEIAR                           | Q9CQR6 | 0          | n +34.06 Da,K +34.06 Da, | 3597.341553 | 3 | 524.3200073 | 524.320705  |
| VSTSSMGTLPKQVKIVEVGPR                   | P38060 | 0          | n +34.06 Da,K +34.06 Da, | 2703.401611 | 4 | 579.6099854 | 579.6108516 |
| GVQVSPSGEKITHTGQVYDEKDYR                | P52503 | 0          | n +34.06 Da,K +34.06 Da, | 2022.002563 | 4 | 699.6300049 | 699.6319362 |
| EAPKVVEEQESR                            | P01029 | 0          | n +34.06 Da,K +34.06 Da, | 987.5790405 | 3 | 490.2799988 | 490.2807982 |
| ASGASDTPHHQSPSESPVQPVGVGCSMMR           | A2AS89 | 0          | n +31.05 Da,             | 2741.247559 | 2 | 1605.72998  | 1605.742397 |
| MNWNKGGPGTKR                            | Q810A7 | 0          | n +42.03 Da,K +34.06 Da, | 1396.077759 | 3 | 485.9400024 | 485.9435741 |
| SIMKCDVDIR                              | P60710 | 0.03044719 | n +34.06 Da,K +34.06 Da, | 1672.953125 | 2 | 652.8692017 | 652.8705107 |
| GHLQEGFGCVVTNR                          | Q9CY58 | 0          | n +34.06 Da,             | 1966.71167  | 3 | 536.6104126 | 536.6105545 |
| RTEGSFLLADGLPVEDSGPFREKTKHLRMESRPDRCLSE | B2RQC2 | 0.00511364 | n +34.06 Da,K +34.06 Da, | 4417.731445 | 5 | 955.7199707 | 955.7131165 |
| PKHEFSVDMTCEGCAEAVSR                    | O08997 | 0          | n +17.03 Da,K +34.06 Da, | 5046.817871 | 4 | 591.0285645 | 591.02782   |
| PKHEFSVDMTCEGCAEAVSR                    | O08997 | 0          | n +17.03 Da,K +34.06 Da, | 5008.357422 | 3 | 787.7000122 | 787.7013345 |
| PNFFKMVEGFFDR                           | P26443 | 0          | n +17.03 Da,K +34.06 Da, | 4808.687988 | 3 | 562.2975464 | 562.2974652 |
| PKHEFSVDMTCEGCAEAVSR                    | O08997 | 0          | n +17.03 Da,K +34.06 Da, | 4855.975098 | 4 | 591.0300293 | 591.02782   |
| PKHEFSVDMTCEGCAEAVSR                    | O08997 | 0          | n +17.03 Da,K +34.06 Da, | 4681.652344 | 4 | 591.0282593 | 591.02782   |
| AVWPTLVDINSLDSLTEAYKLR                  | Q9R0H0 | 0          | n +34.06 Da,K +34.06 Da, | 4660.949219 | 3 | 858.1599731 | 858.1601054 |
| SEAAADREDDPNFFKMVEGFFDR                 | P26443 | 0          | n +34.06 Da,K +34.06 Da, | 4694.38916  | 4 | 691.0862427 | 691.0854338 |
| PSELEKALSNIIDVYHNYSNIQGNHH              | P27005 | 0.00151286 | n +17.03 Da,K +34.06 Da, | 4657.906738 | 3 | 1015.190002 | 1015.188006 |
| PSELEKALSNIIDVYHNYSNIQGNHH              | P27005 | 0          | n +17.03 Da,K +34.06 Da, | 4623.329102 | 4 | 761.6436157 | 761.6428236 |
| PKHEFSVDMTCEGCAEAVSR                    | O08997 | 0          | n +17.03 Da,K +34.06 Da, | 4615.506836 | 4 | 591.0300293 | 591.02782   |
| PKHEFSVDMTCEGCAEAVSR                    | O08997 | 0          | n +17.03 Da,K +34.06 Da, | 4766.555664 | 4 | 591.0300293 | 591.02782   |

|                                         |        |            |                          |             |   |             |             |
|-----------------------------------------|--------|------------|--------------------------|-------------|---|-------------|-------------|
| SSPKSLEIIGAPFSKGQPR                     | Q61176 | 0          | n +42.03 Da,K +34.06 Da, | 4586.140625 | 4 | 568.5999756 | 568.6034551 |
| AGKPVLYHYFDGR                           | P30115 | 0          | n +42.03 Da,K +34.06 Da, | 4584.487305 | 3 | 479.2684937 | 479.2683455 |
| SEAAADREDDPNFFKMVEGFFDR                 | P26443 | 0          | n +34.06 Da,K +34.06 Da, | 4653.052734 | 4 | 691.0900269 | 691.0854338 |
| DGKALEQLQEYFDGNLKR                      | P27773 | 0.00151286 | n +42.03 Da,K +34.06 Da, | 4524.953125 | 3 | 794.4299927 | 794.4305955 |
| RRYWGRSGT                               | Q6PDJ1 | 0.01612903 | n +31.05 Da,             | 4519.104492 | 2 | 585.3099976 | 585.3204697 |
| VHLTDAEKAASVCLWGKVNSEVGGALGR            | P02088 | 0.02347128 | n +14.02 Da,K +28.03 Da, | 4484.990723 | 4 | 810.4299927 | 810.4185835 |
| DLSGTLESIPDKLKEFGNTLEDKAR               | P34928 | 0          | n +34.06 Da,K +34.06 Da, | 4452.9375   | 3 | 971.5700073 | 971.567789  |
| PVGDIVSFMHSFEEKYGR                      | Q3TDN2 | 0          | n +17.03 Da,K +34.06 Da, | 4451.386719 | 4 | 538.0300293 | 538.030688  |
| TPAVHASLDKFLASVSTVLTSKYR                | P01942 | 0          | n +34.06 Da,K +34.06 Da, | 4402.947266 | 5 | 539.5300293 | 539.5275267 |
| DPAIYFKEQFLDGDWNTNR                     | P14211 | 0          | n +34.06 Da,K +34.06 Da, | 4377.730469 | 2 | 1177.609985 | 1177.608048 |
| VHLTDAEKAASVCLWGKVNSEVGGALGR            | P02088 | 0          | n +34.06 Da,K +34.06 Da, | 4376.961914 | 4 | 818.4400024 | 818.4463587 |
| ADIQLFAEFGTLKKAHVHYDR                   | O08583 | 0          | n +34.06 Da,K +34.06 Da, | 4338.820313 | 5 | 525.7046509 | 525.7044538 |
| GKLIYDAVDICDTWEAMEKCKDAGLAKSIGVSNFNR    | P70694 | 0          | n +34.06 Da,K +34.06 Da, | 4336.749512 | 6 | 708.3800049 | 708.3873621 |
| TASSVLLHTGQKMPILGLGTWKSEPGQVKAALKHAL    | Q9JII6 | 0.02234637 | n +42.03 Da,K +34.06 Da, | 4318.564941 | 5 | 790.0700073 | 790.0782907 |
| GGEVGSATLAPKIRPLDLSPKKVGDIIAKATGDWKGRLR | F8VQK7 | 0.00080064 | n +17.03 Da,K +34.06 Da, | 4318.236328 | 6 | 696.7600098 | 696.7635618 |
| SPLAAGLAFCTCKLTSVPLFLGR                 | Q99LB7 | 0          | n +34.06 Da,K +34.06 Da, | 4313.869629 | 4 | 624.3800049 | 624.3792264 |
| GFEELLHKVGGFGPFQLR                      | Q91WU2 | 0          | n +34.06 Da,K +34.06 Da, | 4312.717773 | 4 | 525.5599976 | 525.5572824 |
| ATNFLAHEKIWFDFKFKY                      | P57776 | 0          | n +42.03 Da,K +34.06 Da, | 4303.180176 | 4 | 576.3342285 | 576.3334445 |
| VKVGVNGFGR                              | P16858 | 0.00080064 | n +34.06 Da,K +34.06 Da, | 4584.416504 | 3 | 367.5785828 | 367.5785603 |
| HNHQFGGAGNFNSLFAFEEEQALR                | P49429 | 0          | n +17.03 Da,K +34.06 Da, | 4263.575195 | 3 | 967.1400146 | 967.1547474 |
| AAAAVVPAEWIKNWEKSGR                     | B1AZI6 | 0.00498575 | n +42.03 Da,K +34.06 Da, | 4432.212402 | 3 | 764.7800293 | 764.7760369 |
| TKGLVLGIYAKDKDDDLQPFTSAGESFNKLVSGKLR    | Q9CPY7 | 0          | n +42.03 Da,K +34.06 Da, | 4249.408203 | 6 | 688.0800171 | 688.0756412 |
| PKHEFSVDMTCEGCAEAVSR                    | O08997 | 0          | n +17.03 Da,K +34.06 Da, | 4236.635742 | 4 | 591.0300293 | 591.02782   |
| RSLEPLQLPDPFAAVSGPSAFAPGHNIPDHGLR       | Q8VCF0 | 0.00151286 | n +31.05 Da,             | 4228.192383 | 5 | 699.7700195 | 699.7726556 |
| AEEEVAKLEKHLMLLR                        | Q810B6 | 0          | n +42.03 Da,K +34.06 Da, | 4218.665039 | 4 | 505.5499878 | 505.5540456 |
| SLASDPFADASKGDDLLPAGTEDYIHIR            | J3QPZ8 | 0          | n +42.03 Da,K +34.06 Da, | 4185.545898 | 5 | 610.9099731 | 610.9091354 |
| MKIAVIGQSLFGQEVYCQLR                    | Q8R0Y6 | 0          | n +34.06 Da,K +34.06 Da, | 4184.297363 | 3 | 803.460022  | 803.4536891 |
| ATNFLAHEKIWFDFKFKYDDAER                 | P57776 | 0          | n +42.03 Da,K +34.06 Da, | 4183.966797 | 4 | 722.8949585 | 722.8921215 |
| NIISYTGCAVQLTFFEIFIITELFILSAMAYDR       | Q7TR79 | 0.02694427 | n +42.03 Da,             | 4174.532715 | 5 | 781.210022  | 781.2017217 |
| TGKPNPDQLLKELPPLNTR                     | Q78JT3 | 0.02407407 | n +42.03 Da,K +34.06 Da, | 4154.514648 | 4 | 597.8599854 | 597.8535081 |
| VHLTDAEKAASVCLWGKVNSEVGGALGR            | P02088 | 0.01019022 | n +34.06 Da,K +34.06 Da, | 4149.091309 | 5 | 654.958374  | 654.9585423 |
| SLYGCLASLLSHHSQAQELAGSR                 | P54869 | 0          | n +34.06 Da,             | 4142.022461 | 4 | 598.5657959 | 598.5629032 |
| SDKLPYKVADIGLAAWGR                      | P50247 | 0          | n +42.03 Da,K +34.06 Da, | 4138.803711 | 3 | 690.7403564 | 690.7388114 |
| MLGGLGKLAEEGLAHR                        | Q8CF02 | 0          | n +42.03 Da,K +34.06 Da, | 4122.078125 | 3 | 557.3300171 | 557.3258664 |
| VHLTDAEKAASVCLWGKVNSEVGGALGR            | P02088 | 0          | n +17.03 Da,K +34.06 Da, | 4119.125488 | 4 | 814.1900024 | 814.1884689 |
| IGTVAVAFNKELDPVQKLFVDKIR                | P97450 | 0          | n +34.06 Da,K +34.06 Da, | 4113.711914 | 5 | 568.1599731 | 568.1652571 |
| EPQSQWQDKVKDFANVYVDAVKDSGR              | Q00623 | 0          | n +34.06 Da,K +34.06 Da, | 4110.304688 | 4 | 755.1699829 | 755.1714563 |
| PSKNLLAEVINIIR                          | P61922 | 0          | n +17.03 Da,K +34.06 Da, | 4285.166016 | 4 | 477.3299866 | 477.327915  |
| GQDILENKENWDKILALVPETIHDELQR            | P20664 | 0.04497664 | n +17.03 Da,K +34.06 Da, | 4105.746094 | 5 | 681.1799927 | 681.1808224 |
| AKHEQILVLDPPSDLKFKGPFDTVVTTNLKLNPSDR    | Q9WV55 | 0          | n +42.03 Da,K +34.06 Da, | 4101.127441 | 6 | 724.0900269 | 724.0889512 |

|                                        |        |            |                          |             |   |             |             |
|----------------------------------------|--------|------------|--------------------------|-------------|---|-------------|-------------|
| ASSTGRNFNVQKINGEWHTIILASDKR            | A2AKN9 | 0.00080064 | n +17.03 Da,K +34.06 Da, | 4090.24585  | 5 | 626.3599854 | 626.3547409 |
| SEAYLVGLFEDTNLCAIHAKR                  | P02301 | 0          | n +34.06 Da,K +34.06 Da, | 4084.480957 | 4 | 619.5900269 | 619.588883  |
| VHLTDAEKA AVSCLWGKVN SDEVGGEALGR       | P02088 | 0          | n +34.06 Da,K +34.06 Da, | 4083.008301 | 3 | 1090.920044 | 1090.926053 |
| SSPAQPAVPAPLADLKIQHTKIF                | P24549 | 0          | n +42.03 Da,K +34.06 Da, | 4078.69043  | 3 | 847.1709595 | 847.1688235 |
| PEKYEELLQVIKQFR                        | P97478 | 0          | n +17.03 Da,K +34.06 Da, | 4103.73291  | 4 | 502.0599976 | 502.0596389 |
| PSAFEKVVKNIKEVSGSR                     | Q9D8T2 | 0          | n +17.03 Da,K +34.06 Da, | 4065.666504 | 5 | 439.480011  | 439.4831081 |
| PSAFEKVVKNIKEVSGSR                     | Q9D8T2 | 0          | n +17.03 Da,K +34.06 Da, | 4059.67334  | 4 | 549.0999756 | 549.1020661 |
| PHSPVHSEAEAVLRPLYMDVQATTPLDPR          | Q9Z1J3 | 0.02180685 | n +14.02 Da,             | 4043.917969 | 3 | 1080.890015 | 1080.887192 |
| ADEIAKAQVAQPGGDTIFGKIIR                | P70349 | 0          | n +42.03 Da,K +34.06 Da, | 4040.526123 | 2 | 1254.719971 | 1254.726486 |
| PALAQPLIQNVKKILES DR                   | Q8C196 | 0          | n +17.03 Da,K +34.06 Da, | 4038.985352 | 4 | 555.3499756 | 555.3546616 |
| AIKFLEVIKPF                            | P61620 | 0.00365764 | n +34.06 Da,K +34.06 Da, | 4032.385742 | 3 | 469.6668396 | 469.6671937 |
| DIIPTDTIKNTVHVLAKLR                    | P25688 | 0.00080064 | n +34.06 Da,K +34.06 Da, | 4028.367676 | 4 | 563.1166992 | 563.1164639 |
| AELMQQKEATTEQQLR                       | O35490 | 0          | n +42.03 Da,K +34.06 Da, | 4026.195801 | 2 | 990.5       | 990.5175855 |
| ADEIAKAQVAQPGGDTIFGKIIR                | P70349 | 0          | n +42.03 Da,K +34.06 Da, | 4024.175537 | 3 | 836.8244629 | 836.8200831 |
| AVDICDTWEAMEKCKDAGLAKSIGVSNFNR         | P70694 | 0          | n +34.06 Da,K +34.06 Da, | 4070.224365 | 5 | 705.1699829 | 705.1757898 |
| VHLTDAEKA AVSCLWGKVN SDEVGGEALGR       | P02088 | 0          | n +34.06 Da,K +34.06 Da, | 4019.968506 | 4 | 818.4400024 | 818.4463587 |
| LTFGKEFTEAVEAKQVAQQAER                 | P67778 | 0.01794872 | n +17.03 Da,K +34.06 Da, | 4017.677002 | 4 | 674.3699951 | 674.375052  |
| PYPQEVGATVHKVMEKLGYPNPNYR              | P22315 | 0          | n +17.03 Da,K +34.06 Da, | 4016.355713 | 5 | 572.5200195 | 572.5199887 |
| MELGELLYNKSEYIETASGNKVS R              | Q9QZB9 | 0          | n +42.03 Da,K +34.06 Da, | 4352.680664 | 3 | 947.8400269 | 947.8373632 |
| DEPQSQWDKVKDFANVYVDAVKDSGR             | Q00623 | 0          | n +34.06 Da,K +34.06 Da, | 4239.475586 | 5 | 627.3400269 | 627.3440092 |
| ASQQDFENALNQVLLKKDPGNEVKLR             | Q9WUR2 | 0          | n +42.03 Da,K +34.06 Da, | 4005.095703 | 5 | 652.9899902 | 652.9913056 |
| PNSIIAGMPVLEVWKSQVIVMKR                | Q61941 | 0          | n +17.03 Da,K +34.06 Da, | 3987.643555 | 5 | 569.3599854 | 569.3592644 |
| PGVVDNFP LLKALR                        | P30115 | 0          | n +17.03 Da,K +34.06 Da, | 3983.347656 | 3 | 530.6745605 | 530.6715198 |
| TVTAGNASGVSDGAGAVIIASEDAVKKHNFTPLAR    | Q8BWT1 | 0.00365764 | n +34.06 Da,K +34.06 Da, | 3974.955566 | 4 | 882.5       | 882.4982802 |
| SIVGVNCHFDPVSLQTVKLMKEGLEAAR           | O35490 | 0          | n +34.06 Da,K +34.06 Da, | 4163.281738 | 5 | 658.3800049 | 658.3726077 |
| HATCKVNEAEEERLR                        | Q99LH9 | 0.02347128 | n +17.03 Da,K +34.06 Da, | 3958.032715 | 2 | 947         | 946.9971159 |
| KKRPIHLSFDVDGLDPAFTPATGTPVLGGLSYR      | Q61176 | 0          | n +14.02 Da,K +28.03 Da, | 4249.188477 | 4 | 899.7600098 | 899.7463403 |
| MQQKEATTEQQLR                          | O35490 | 0.02132999 | n +34.06 Da,K +34.06 Da, | 3940.031738 | 2 | 829.9500122 | 829.9619752 |
| VHLTDAEKA AVSCLWGKVN SDEVGGEALGR       | P02088 | 0          | n +34.06 Da,K +34.06 Da, | 3937.937012 | 4 | 818.4500122 | 818.4463587 |
| AAATS AVPAPNHQPEVFCNQIFINNEWHDAVSR     | P47738 | 0          | n +31.05 Da,             | 3934.513184 | 4 | 931.2199707 | 931.2049236 |
| PLGKDLLFKDSAFGLLR                      | Q92111 | 0          | n +17.03 Da,K +34.06 Da, | 3994.65625  | 4 | 494.5700073 | 494.5660939 |
| SDIIPDTIKNTVHVLAKLR                    | P25688 | 0          | n +34.06 Da,K +34.06 Da, | 3918.874023 | 5 | 468.1000061 | 468.1010322 |
| NSDIIPDTIKNTVHVLAKLR                   | P25688 | 0          | n +34.06 Da,K +34.06 Da, | 3916.924561 | 5 | 490.9100037 | 490.9096179 |
| VKLTGTGKTITLEVPSDTIENVKAKIQDKEGIPPDQQR | POCG49 | 0          | n +42.03 Da,K +34.06 Da, | 3911.733643 | 5 | 887.1300049 | 887.1274576 |
| MLVVLVGLDLHIPHR                        | Q9QZ88 | 0          | n +34.06 Da,             | 3910.095459 | 4 | 412.5060425 | 412.5051329 |
| AGLLKTTGLVGLAVCDTPHER                  | Q9CPP6 | 0.00296736 | n +42.03 Da,K +34.06 Da, | 3903.649658 | 4 | 612.3599243 | 612.3585291 |
| ATNFLAHEKIWFDFKDYDAER                  | P57776 | 0          | n +42.03 Da,K +34.06 Da, | 3931.68042  | 4 | 722.9000244 | 722.8921215 |
| FFDRDDVALEGVGHFFR                      | P29391 | 0.01019022 | n +34.06 Da,             | 3899.89624  | 4 | 516.0189209 | 516.0154855 |
| HIDDKVFLTTAEVISQQVSDKHLQEGR            | P06801 | 0          | n +17.03 Da,K +34.06 Da, | 4143.714355 | 5 | 636.5499878 | 636.5566535 |
| NASGVSDGAGAVIIASEDAVKKHNFTPLAR         | Q8BWT1 | 0.00563777 | n +34.06 Da,K +34.06 Da, | 3892.049805 | 5 | 620.3499756 | 620.3556093 |

|                                      |        |            |                          |             |   |             |             |
|--------------------------------------|--------|------------|--------------------------|-------------|---|-------------|-------------|
| LIQGDLLTAYYDVDYEKNAKGSNYWR           | P27773 | 0.01250823 | n +34.06 Da,K +34.06 Da, | 3887.792969 | 4 | 840.710022  | 840.7200423 |
| LSFQDLWLKFR                          | D3YZB3 | 0.0130719  | n +31.05 Da,             | 3882.997559 | 3 | 495.2799988 | 495.2871881 |
| PNAGDKFKEISFAYEVLNPEKR               | Q9QYJ0 | 0.00080064 | n +17.03 Da,K +34.06 Da, | 3877.713867 | 5 | 552.5200195 | 552.5192843 |
| PYNPSMSRPDAWGVTKGAAELMQQKEATTEQQLR   | O35490 | 0          | n +17.03 Da,K +34.06 Da, | 3861.593506 | 4 | 976.7600098 | 976.7596275 |
| ASEEQVLEEIVKHVR                      | Q14DH7 | 0          | n +34.06 Da,K +34.06 Da, | 3855.496338 | 4 | 459.2731934 | 459.2730905 |
| DPAlYFKEQFLDGDWNTNR                  | P14211 | 0          | n +34.06 Da,K +34.06 Da, | 4376.887695 | 3 | 785.4078369 | 785.4077907 |
| TASSVLLHTGQKMPLIGLGTWKPQVKAIAIKHAL   | Q9JII6 | 0          | n +42.03 Da,K +34.06 Da, | 4429.037109 | 6 | 658.5675659 | 658.566455  |
| DKLLVVPQDGSWLSMKEIVEHLSEK            | Q64435 | 0.03479304 | n +34.06 Da,K +34.06 Da, | 4436.687988 | 4 | 787.6900024 | 787.6984532 |
| VHLTDAEKSAVSLWAKVNPDEVGGEALGR        | P02089 | 0.01145553 | n +17.03 Da,K +34.06 Da, | 4114.305664 | 3 | 1098.599976 | 1098.592633 |
| ASASSTNLKDVLSNLIPEQAR                | Q9CZU6 | 0          | n +34.06 Da,K +34.06 Da, | 3821.227295 | 4 | 611.8699951 | 611.8696519 |
| PEIKNVVSGKTSACFEPSLDYMVTKIPR         | Q8C196 | 0          | n +17.03 Da,K +34.06 Da, | 3817.095215 | 5 | 657.9799805 | 657.9755099 |
| CTGNFLCFKSTTKDLLFR                   | Q921I1 | 0          | n +34.06 Da,K +34.06 Da, | 3798.567871 | 4 | 578.3200073 | 578.3262994 |
| PELAVQKVVVHPLVLLSVVDHFNR             | P26516 | 0.04286553 | n +17.03 Da,K +34.06 Da, | 4401.470215 | 5 | 552.7399902 | 552.736962  |
| VQLKLEKWQNNLLPSR                     | P62245 | 0          | n +34.06 Da,K +34.06 Da, | 3792.512939 | 4 | 546.5900269 | 546.5903475 |
| TALQEVLKTALIHDLGLAR                  | P63323 | 0          | n +34.06 Da,K +34.06 Da, | 3931.350342 | 4 | 505.0675354 | 505.0664774 |
| SYAEKPEITKDEWMEKLNHLHVQR             | Q9D7M1 | 0.01435095 | n +42.03 Da,K +34.06 Da, | 3787.700928 | 5 | 644.3499756 | 644.3467598 |
| GSEAAQLLEAADFAAHKHR                  | Q9D114 | 0          | n +42.03 Da,K +34.06 Da, | 3786.889404 | 4 | 525.2800293 | 525.2776711 |
| ASGVTVNDEVIKVFNDMKVR                 | P45591 | 0          | n +42.03 Da,K +34.06 Da, | 4375.591309 | 3 | 777.7700195 | 777.7719642 |
| TPGFGDKTFVVQGFQGNVGLHSMR             | P26443 | 0          | n +34.06 Da,K +34.06 Da, | 3754.926025 | 4 | 630.5999756 | 630.5929625 |
| GGEVGSALAPKIRPLDLSPKKGDDIAKATGDWKGLR | F8VQK7 | 0          | n +17.03 Da,K +34.06 Da, | 4359.79541  | 6 | 696.7600098 | 696.7635618 |
| ASGVSAGAVIIASEDAVKKHNFPLAR           | Q8BWT1 | 0          | n +34.06 Da,K +34.06 Da, | 3860.297363 | 5 | 597.5499878 | 597.5470236 |
| KPLRLPLQDVYKIGGIGTVPVGR              | P10126 | 0          | n +34.06 Da,K +34.06 Da, | 3747.812256 | 4 | 645.4237061 | 645.4218541 |
| DLENALKTVINNKSYKENIMR                | P70691 | 0          | n +34.06 Da,K +34.06 Da, | 3746.710449 | 4 | 658.1500244 | 658.1468237 |
| TLDMVFLDHWKDR                        | O88587 | 0          | n +34.06 Da,K +34.06 Da, | 3746.530273 | 4 | 436.7451172 | 436.7435398 |
| GSEAAQLLEAADFAAHKHR                  | Q9D114 | 0          | n +42.03 Da,K +34.06 Da, | 3746.312012 | 4 | 525.2800293 | 525.2776711 |
| NKILGLIESGKKEGAKLECGGGR              | O35945 | 0.0130719  | n +17.03 Da,K +34.06 Da, | 3744.909424 | 5 | 514.3200073 | 514.3263097 |
| GSEAAQLLEAADFAAHKHR                  | Q9D114 | 0          | n +42.03 Da,K +34.06 Da, | 3744.473389 | 3 | 700.0344238 | 700.0344693 |
| PYNPSMSRPDAWGVTKGAAELMQQKEATTEQQLR   | O35490 | 0          | n +17.03 Da,K +34.06 Da, | 3743.990479 | 5 | 781.5999756 | 781.6091573 |
| EKVLVFPVGGSHWLSMR                    | B2RT14 | 0          | n +34.06 Da,K +34.06 Da, | 3741.603271 | 4 | 503.2999878 | 503.2962053 |
| VHLTDAEKSAVSLWAKVNPDEVGGEALGR        | P02089 | 0          | n +34.06 Da,K +34.06 Da, | 4225.468262 | 4 | 828.4500122 | 828.4541837 |
| SPGSPLKLVSSVSDLPKR                   | P54869 | 0          | n +34.06 Da,K +34.06 Da, | 3737.453857 | 4 | 525.3300171 | 525.3296307 |
| TIFWNTLSPKGGGEPKGELLEAIKR            | P09671 | 0          | n +34.06 Da,K +34.06 Da, | 3736.798828 | 5 | 576.3599854 | 576.3560128 |
| PKHEFSVDMTCEGCAEAVSR                 | O08997 | 0          | n +17.03 Da,K +34.06 Da, | 4810.322266 | 4 | 591.0300293 | 591.02782   |
| DLPALPGGPAGGTGELAKYGLPGVAQLR         | O08600 | 0          | n +34.06 Da,K +34.06 Da, | 4304.133301 | 3 | 915.2000122 | 915.1974422 |
| TISANGDKDIGNIISDAMKKVGR              | P63038 | 0.00563777 | n +34.06 Da,K +34.06 Da, | 3890.948242 | 5 | 508.7099915 | 508.7095242 |
| VHLTDAEKSAVSLWAKVNPDEVGGEALGR        | P02089 | 0          | n +17.03 Da,K +34.06 Da, | 4117.085449 | 4 | 824.1900024 | 824.196294  |
| PSQMEHAMETMMLTFHR                    | P08207 | 0.00080064 | n +17.03 Da,             | 3993.189941 | 4 | 524.2399902 | 524.241404  |
| PGFGDKTFVVQGFQGNVGLHSMR              | P26443 | 0.01250823 | n +17.03 Da,K +34.06 Da, | 3705.925781 | 4 | 601.0718994 | 601.073153  |
| KGIKSVTELNQDITNTMTLGDIVYKR           | P12710 | 0          | n +42.03 Da,K +34.06 Da, | 4041.229736 | 5 | 623.1599731 | 623.1621973 |
| DLTADALAALKVSIKQKVR                  | P26638 | 0          | n +34.06 Da,K +34.06 Da, | 3735.435303 | 4 | 544.8699951 | 544.8729646 |

|                                    |        |            |                          |             |   |             |             |
|------------------------------------|--------|------------|--------------------------|-------------|---|-------------|-------------|
| HTISKFLQENLAPKAQEIDQTNDFKNLR       | Q9JHI5 | 0.01667736 | n +17.03 Da,K +34.06 Da, | 3740.681641 | 5 | 684.3900146 | 684.3935794 |
| EKVLVFPVGGSHWLSMR                  | B2RT14 | 0          | n +34.06 Da,K +34.06 Da, | 3700.528076 | 4 | 503.2900085 | 503.2962053 |
| RFLFPEGIKGMVQAVR                   | Q8R0Y6 | 0          | n +34.06 Da,K +34.06 Da, | 3698.299316 | 4 | 479.7955017 | 479.7948353 |
| EEFPFHGLLPKKGASSFLCR               | Q64514 | 0          | n +34.06 Da,K +34.06 Da, | 3695.293213 | 4 | 688.1395264 | 688.1362282 |
| DIAWNFEKFLVGPDPVPRR                | P11352 | 0.03367408 | n +34.06 Da,K +34.06 Da, | 4343.413574 | 4 | 596.5999756 | 596.5943965 |
| PLNLKELEKDLIDR                     | Q05920 | 0          | n +17.03 Da,K +34.06 Da, | 3970.337158 | 4 | 446.0400085 | 446.0358981 |
| AKMKRLESKYAPLHLVPLIER              | Q7TMB8 | 0.0274056  | n +31.05 Da,             | 3685.49585  | 5 | 505.5100098 | 505.5059411 |
| GSEAAQLLEAADFAAHKHR                | Q9D114 | 0          | n +42.03 Da,K +34.06 Da, | 3680.275635 | 3 | 700.039978  | 700.0344693 |
| HVKLPMGMTAENLAAKYNISR              | Q8BWT1 | 0.00296736 | n +17.03 Da,K +34.06 Da, | 3666.373535 | 4 | 608.1099854 | 608.1015125 |
| PPQLHNGLDFAKVIQGSLSLPQAVR          | Q9Z2V4 | 0          | n +17.03 Da,K +34.06 Da, | 4181.233887 | 4 | 735.4099731 | 735.4147464 |
| IIPDTIKNTVHVLAKLK                  | P25688 | 0          | n +34.06 Da,K +34.06 Da, | 3639.412109 | 4 | 534.3599854 | 534.3597278 |
| PLGLEAEKDGVPVFKFPR                 | Q8R0Y6 | 0          | n +17.03 Da,K +34.06 Da, | 3628.124268 | 4 | 521.8210449 | 521.8201887 |
| PYNPMSRPPDAWGVTKGAAELMQQKEATTEQQLR | O35490 | 0          | n +17.03 Da,K +34.06 Da, | 3615.815674 | 4 | 976.7600098 | 976.7596275 |
| PFLDIQKKLGISLDR                    | Q99LY9 | 0          | n +17.03 Da,K +34.06 Da, | 3614.8479   | 4 | 457.7999878 | 457.7989904 |
| KTWKFVEGLPINDFSR                   | P14152 | 0.0130719  | n +34.06 Da,K +34.06 Da, | 3609.897949 | 4 | 510.5599976 | 510.5597871 |
| ETHGHVGDALALCSEAALQAIR             | Q01853 | 0          | n +34.06 Da,             | 3608.762451 | 3 | 808.7600098 | 808.7552668 |
| LISHDELFSDIYKIR                    | P63028 | 0          | n +34.06 Da,K +34.06 Da, | 3597.400879 | 4 | 480.0299988 | 480.0333746 |
| DVALEGVGHFFR                       | P29391 | 0.00080064 | n +34.06 Da,             | 3594.505615 | 3 | 460.9211731 | 460.9209458 |
| TTIAGVVYKDGIVLGADTR                | P70195 | 0.01838935 | n +34.06 Da,K +34.06 Da, | 3592.00293  | 2 | 1009.104431 | 1009.101869 |
| SSFQGFVDHVKEDCDR                   | Q61207 | 0          | n +34.06 Da,K +34.06 Da, | 3589.475586 | 4 | 527.5198975 | 527.5191975 |
| GILKVPAINVNDSVTKSKFDNLGCR          | P50247 | 0          | n +34.06 Da,K +34.06 Da, | 3587.862549 | 4 | 761.960022  | 761.9523127 |
| GKALEQFLQEYFDGNLKR                 | P27773 | 0          | n +34.06 Da,K +34.06 Da, | 4150.939941 | 3 | 753.4400024 | 753.4391315 |
| LNVEKINGKWF SILLASDKR              | B5TE77 | 0.02910855 | n +42.03 Da,K +34.06 Da, | 3557.73584  | 5 | 495.8999939 | 495.9094721 |
| HQPEVFCNQIFINNEWHDAVSR             | P47738 | 0          | n +34.06 Da,             | 3665.936279 | 3 | 925.4500122 | 925.4487256 |
| PFLDIQKKLGISLDR                    | Q99LY9 | 0          | n +17.03 Da,K +34.06 Da, | 3632.800781 | 3 | 610.0631104 | 610.062895  |
| PEHIDVIYLHGYGWPR                   | Q9DBM2 | 0.00151286 | n +17.03 Da,             | 3519.804199 | 4 | 493.0100098 | 493.0086848 |
| MESHKPSTSKDDLINISR                 | Q9D8Y1 | 0.01019022 | n +42.03 Da,K +34.06 Da, | 3493.933838 | 4 | 599.3400269 | 599.3387995 |
| FCLFKSTTKDLLFR                     | Q921I1 | 0.04393673 | n +34.06 Da,K +34.06 Da, | 3690.3125   | 4 | 470.2900085 | 470.2906192 |
| NYKSSMLQHFPDILPR                   | Q8BWP5 | 0.01145553 | n +34.06 Da,K +34.06 Da, | 3490.440674 | 4 | 504.2799988 | 504.2858378 |
| GSPLEKLVSSVSDLPKR                  | P54869 | 0          | n +34.06 Da,K +34.06 Da, | 3630.182129 | 4 | 479.3099976 | 479.3084324 |
| TSIDKWFLYKMR                       | Q8C196 | 0          | n +34.06 Da,K +34.06 Da, | 3475.318604 | 4 | 423.2612915 | 423.2615959 |
| PMVGSKLVIFLENYR                    | Q9ET01 | 0          | n +17.03 Da,K +34.06 Da, | 3469.797607 | 4 | 495.5608521 | 495.5603829 |
| ELDPVQKLFVDKIR                     | P97450 | 0          | n +34.06 Da,K +34.06 Da, | 3465.387207 | 4 | 451.2999878 | 451.2963303 |
| KVAFTGSTEVGHLIQVAAGSSNLKR          | P47738 | 0          | n +34.06 Da,K +34.06 Da, | 3525.011475 | 5 | 535.3200073 | 535.3246761 |
| PSVSLQTVKLMKEGLEAAR                | O35490 | 0          | n +17.03 Da,K +34.06 Da, | 3457.992188 | 4 | 536.3327637 | 536.3304922 |
| KAKEALELTDGLLSGSEER                | Q9JHU4 | 0.03423423 | n +17.03 Da,K +34.06 Da, | 3464.525146 | 4 | 558.8300171 | 558.8246633 |
| AYHSFLVEPISCHAWNKDR                | Q9WV32 | 0          | n +42.03 Da,K +34.06 Da, | 3440.191162 | 3 | 802.7299805 | 802.733914  |
| SAGFLQASASDVVVVHGR                 | Q8VCH0 | 0.01371653 |                          | 3432.791748 | 2 | 914.4899902 | 914.489229  |
| PNPFEKFLFKSAENR                    | G3X9G9 | 0          | n +17.03 Da,K +34.06 Da, | 3424.319824 | 3 | 708.0789185 | 708.0758637 |
| EVEAVKVHSFPTLKFFPASADR             | P09103 | 0          | n +34.06 Da,K +34.06 Da, | 3422.946289 | 4 | 645.1300049 | 645.1285659 |

|                               |        |            |                          |             |   |             |             |
|-------------------------------|--------|------------|--------------------------|-------------|---|-------------|-------------|
| PSLRPPIDHLCCELLPR             | P37040 | 0.00365764 | n +14.02 Da,             | 3609.353271 | 4 | 482.519989  | 482.5200128 |
| EVEAVKVHSFPTLKFFPASADR        | P09103 | 0          | n +34.06 Da,K +34.06 Da, | 3416.592529 | 5 | 516.3049316 | 516.304308  |
| YNVSPVELPFGGKYGKSGFGR         | Q9JLJ2 | 0.00365764 | n +34.06 Da,K +34.06 Da, | 3415.074463 | 4 | 576.8400269 | 576.8363515 |
| LVINLPNNNTKVFVHDNYVIR         | Q8C196 | 0          | n +34.06 Da,K +34.06 Da, | 3411.824951 | 4 | 613.6085205 | 613.6090411 |
| FDRDDVALEGVGHFFR              | P29391 | 0          | n +34.06 Da,             | 3661.702637 | 3 | 638.6645508 | 638.6620838 |
| SVFGKLFAGGGKAGKGGPTPQEAIQR    | Q9D8B3 | 0          | n +42.03 Da,K +34.06 Da, | 3400.726318 | 4 | 690.6599731 | 690.6567508 |
| IRKDLYANTVLSGGTMYPGIADR       | P60710 | 0          | n +34.06 Da,K +34.06 Da, | 3396.489746 | 3 | 894.1699829 | 894.1636327 |
| KASGPPVSELITKAVAASKER         | P15864 | 0          | n +42.03 Da,K +34.06 Da, | 3391.604248 | 4 | 571.6099854 | 571.6087376 |
| DRDDVALEGVGHFFR               | P29391 | 0          | n +34.06 Da,             | 3391.495605 | 3 | 589.6393433 | 589.639279  |
| DRDDVALEGVGHFFR               | P29391 | 0.00498575 | n +34.06 Da,             | 3390.243652 | 4 | 442.480011  | 442.4812784 |
| PVQKVLSDSLKKSIDEIVLVGGSTR     | P20029 | 0          | n +17.03 Da,K +34.06 Da, | 3479.444336 | 3 | 1020.609985 | 1020.608096 |
| TGSTEVGHLIQVAAGSSNLKR         | P47738 | 0.04080426 | n +42.03 Da,K +34.06 Da, | 3389.211426 | 3 | 734.4199829 | 734.4080841 |
| DLGGDFKIGKGSAAADKVVAEIR       | P51660 | 0          | n +34.06 Da,K +34.06 Da, | 3420.025879 | 4 | 632.3800049 | 632.3854312 |
| AYHSFLVEPISCHAWNKDR           | Q9WV32 | 0          | n +42.03 Da,K +34.06 Da, | 3431.541992 | 4 | 602.3014526 | 602.3022546 |
| MDFSKLPKIR                    | P50516 | 0          | n +42.03 Da,K +34.06 Da, | 3354.772217 | 3 | 448.9500122 | 448.9496658 |
| GDLVEELKKGIR                  | Q80Y14 | 0          | n +34.06 Da,K +34.06 Da, | 3831.381836 | 4 | 393.769989  | 393.7699482 |
| FQVTKLFAEAVQKSR               | Q8C196 | 0          | n +34.06 Da,K +34.06 Da, | 3350.78125  | 3 | 618.7299805 | 618.7280643 |
| RGIHVEIPGAQESLGPLQVAR         | Q9DCW4 | 0          | n +34.06 Da,             | 3346.077393 | 4 | 583.838623  | 583.8381616 |
| AMNAAEITDKLGLHSLR             | P61205 | 0          | n +34.06 Da,K +34.06 Da, | 3343.532227 | 4 | 477.7824097 | 477.780654  |
| PSVSLQTVKLMKEGLEAAR           | O35490 | 0          | n +17.03 Da,K +34.06 Da, | 3334.679199 | 4 | 536.3300171 | 536.3304922 |
| SEDKGALAKLVEAIR               | P12970 | 0          | n +34.06 Da,K +34.06 Da, | 3331.147461 | 4 | 426.2801514 | 426.279409  |
| ALVAGGVSQTPSYLSCKSEVEVKKIFR   | O35490 | 0          | n +34.06 Da,K +34.06 Da, | 3330.661133 | 5 | 618.7700195 | 618.7726287 |
| PSGIQPDLLISLTAPKKSATHFTGR     | Q8K4Z3 | 0          | n +17.03 Da,K +34.06 Da, | 3330.225098 | 4 | 680.9094849 | 680.9090616 |
| PYTTVTPQIINSKWEKVQLVPKR       | P57780 | 0          | n +17.03 Da,K +34.06 Da, | 3650.312256 | 5 | 595.3699951 | 595.3697107 |
| SPLKLVSSVSDLPKR               | P54869 | 0          | n +34.06 Da,K +34.06 Da, | 3325.135986 | 3 | 619.7399902 | 619.7349963 |
| IPVFQEYKNKGIIFNNGPTWKDVR      | Q05421 | 0.00563777 | n +34.06 Da,K +34.06 Da, | 3565.785889 | 5 | 600.7600098 | 600.7613894 |
| SDLPQEELVDQKCLLQKYTHR         | Q61129 | 0          | n +34.06 Da,K +34.06 Da, | 3297.307373 | 5 | 541.3099976 | 541.3064366 |
| AATMKKAAAEDVNVTFEDQQKINKFAR   | E9Q6U4 | 0          | n +42.03 Da,K +34.06 Da, | 3423.634521 | 5 | 641.3800049 | 641.3698571 |
| PTVTMMQVEEKPDVTYSVGGCKEQIEKLR | P46471 | 0          | n +17.03 Da,K +34.06 Da, | 3294.56665  | 5 | 718.1799927 | 718.1871075 |
| MNDVAIVKEGWLHHR               | P31750 | 0          | n +42.03 Da,K +34.06 Da, | 3279.632813 | 4 | 477.2799988 | 477.2805552 |
| KLDGGQLVWETLMDSR              | P60882 | 0.02526186 | n +34.06 Da,K +34.06 Da, | 3248.624756 | 3 | 639.3699951 | 639.3576021 |
| SSLAGKIQKLDKDFGKHALR          | Q812F8 | 0.01019022 | n +31.05 Da,K +31.05 Da, | 3247.825439 | 4 | 624.6400146 | 624.6522269 |
| PSFIKTHEDILENLDR              | Q99J99 | 0          | n +17.03 Da,K +34.06 Da, | 3216.971436 | 3 | 683.7103271 | 683.7127733 |
| PSFIKTHEDILENLDR              | Q99J99 | 0          | n +17.03 Da,K +34.06 Da, | 3216.378906 | 3 | 683.710022  | 683.7127733 |
| KHTSSLKVTNEPILAFSQGSPER       | Q8CHT0 | 0.00365764 | n +42.03 Da,K +34.06 Da, | 3183.025146 | 4 | 659.8599854 | 659.8724297 |
| PPSADKTLLEEKAKLEEQLR          | Q99LP6 | 0          | n +17.03 Da,K +34.06 Da, | 3177.681152 | 5 | 483.7000122 | 483.701096  |
| RDDVALEGVGHFFR                | P29391 | 0          | n +34.06 Da,             | 3176.244629 | 4 | 413.730011  | 413.7245423 |
| VVEHPEFLKAGKEPGLQIWR          | P13020 | 0          | n +34.06 Da,K +34.06 Da, | 3169.783203 | 5 | 487.8999939 | 487.898986  |
| MESFSSKSLALQAEKLLSKMAGR       | Q9D8Y7 | 0          | n +42.03 Da,K +34.06 Da, | 4058.421875 | 5 | 564.539978  | 564.5426613 |
| GAYKYIQELWR                   | Q9CZM2 | 0          | n +34.06 Da,K +34.06 Da, | 3404.856934 | 3 | 498.9623108 | 498.9628516 |

|                             |        |            |                          |             |   |             |             |
|-----------------------------|--------|------------|--------------------------|-------------|---|-------------|-------------|
| DAEKAAVSLWGKVNSEVGGALGR     | P02088 | 0          | n +34.06 Da,K +34.06 Da, | 4505.213379 | 3 | 940.8300171 | 940.8396961 |
| AATMKKAAAEVDNVTFEDQQKINKFAR | E9Q6U4 | 0          | n +42.03 Da,K +34.06 Da, | 3371.78833  | 4 | 801.460022  | 801.4605022 |
| GTVKAENGKLVINGKPITIFQER     | P16858 | 0          | n +34.06 Da,K +34.06 Da, | 3299.734131 | 5 | 530.539978  | 530.541234  |
| DSFTTFFCETGAGKHVPR          | P68368 | 0          | n +34.06 Da,K +34.06 Da, | 3272.975586 | 4 | 532.0300293 | 532.0256525 |
| AAETVELHKLKLAELKQECLAR      | Q9D1J3 | 0          | n +42.03 Da,K +34.06 Da, | 3136.229736 | 3 | 898.8760986 | 898.8739002 |
| ASKPTLNEVVIVSAIR            | Q8QZT1 | 0          | n +34.06 Da,K +34.06 Da, | 3121.556641 | 3 | 589.0455322 | 589.0454639 |
| PEASIDSYAKSLLHGR            | P97742 | 0          | n +17.03 Da,K +34.06 Da, | 3125.977295 | 4 | 449.5057983 | 449.5047345 |
| SEKDILLRPELEELR             | Q9DCN2 | 0          | n +34.06 Da,K +34.06 Da, | 3103.171387 | 4 | 477.7900085 | 477.7913818 |
| SFRVASAIEDLHRSLAR           | Q3V0C3 | 0.0362448  | n +31.05 Da,             | 3101.441162 | 4 | 490.519989  | 490.5287788 |
| PGVVDNFPLLKALR              | P30115 | 0          | n +17.03 Da,K +34.06 Da, | 4023.844971 | 3 | 530.6741333 | 530.6715198 |
| ASLKDLEGKWR                 | Q05816 | 0          | n +42.03 Da,K +34.06 Da, | 3094.091064 | 3 | 471.6238708 | 471.6226066 |
| VISKHDLGHFMLR               | Q923D2 | 0          | n +42.03 Da,K +34.06 Da, | 3440.080811 | 4 | 407.9899902 | 407.9842991 |
| PEASIDSYAKSLLHGR            | P97742 | 0          | n +17.03 Da,K +34.06 Da, | 3083.674316 | 4 | 449.504303  | 449.5047345 |
| SDLELHPPSPWWSHR             | Q9D0M3 | 0          | n +34.06 Da,             | 3074.133789 | 4 | 464.4899902 | 464.4891034 |
| GTLEDQLSHLKQYER             | P57780 | 0          | n +34.06 Da,K +34.06 Da, | 3066.079834 | 3 | 629.0184937 | 629.0198665 |
| VNTALQEVLKTALIHDLGLAR       | P63323 | 0          | n +34.06 Da,K +34.06 Da, | 4090.463867 | 4 | 558.3499756 | 558.3443131 |
| GSWGSGLDMHTKPWIR            | O35490 | 0.00080064 | n +34.06 Da,K +34.06 Da, | 3055.362549 | 4 | 474.7600098 | 474.7609927 |
| RDDVALEGVGHFFR              | P29391 | 0          | n +34.06 Da,             | 3048.080078 | 4 | 413.7244873 | 413.7245423 |
| WLHNEQMAVEKLSDGIR           | Q93092 | 0.02234637 | n +42.03 Da,K +34.06 Da, | 3037.906006 | 4 | 555.0328369 | 555.0349841 |
| AASAASSEHFEKLHEIFR          | O88384 | 0          | n +42.03 Da,K +34.06 Da, | 3037.382568 | 4 | 527.2767944 | 527.2761341 |
| SDLELHPPSPWWSHR             | Q9D0M3 | 0          | n +34.06 Da,             | 3033.472412 | 4 | 464.4896545 | 464.4891034 |
| HVLSLSFPIR                  | P26443 | 0.0362448  | n +34.06 Da,             | 3032.98877  | 3 | 401.5899963 | 401.5871264 |
| TNTCNKYGVSGYPTLKIFR         | P27773 | 0          | n +34.06 Da,K +34.06 Da, | 3027.218994 | 4 | 581.0900269 | 581.0847352 |
| AHRFPALTPQKKEELSEIAQR       | Q91Y97 | 0          | n +42.03 Da,K +34.06 Da, | 3155.920166 | 5 | 512.6987915 | 512.6993868 |
| ADLANEEKPAVAPSVFVFKDKGQKR   | Q9CT10 | 0          | n +42.03 Da,K +34.06 Da, | 3024.00293  | 5 | 610.960022  | 610.9647443 |
| LCVEVQEQPQTSVELVIYR         | Q8VHN7 | 0.04183854 | n +34.06 Da,             | 3022.958252 | 3 | 775.4099731 | 775.4174805 |
| GVKHSMNPFCEIAVEEAVR         | Q9DCW4 | 0          | n +34.06 Da,K +34.06 Da, | 3118.014648 | 3 | 747.7199707 | 747.7312226 |
| IIGGSMDAKGSFPWQAK           | Q61646 | 0          | n +34.06 Da,K +34.06 Da, | 3181.885498 | 3 | 632.3699951 | 632.3696598 |
| DLAEDAPWKKIQNTFTFR          | Q80X90 | 0.01250823 | n +17.03 Da,K +34.06 Da, | 3020.538086 | 4 | 562.3200073 | 562.320819  |
| LMQQKEATTEQQLR              | O35490 | 0.00151286 | n +42.03 Da,K +28.03 Da, | 3060.799316 | 2 | 887.4699707 | 887.4618228 |
| PATEKDLAEDAPWKKIQNTFTFR     | Q8BTM8 | 0          | n +17.03 Da,K +34.06 Da, | 3018.839844 | 4 | 702.4099731 | 702.405377  |
| LHTVYQSVELPETHQMRLR         | Q07417 | 0          | n +14.02 Da,             | 3018.510254 | 3 | 732.3800049 | 732.380771  |
| PECVYNSLPKELEVKR            | Q71RI9 | 0          | n +17.03 Da,K +34.06 Da, | 3014.880371 | 4 | 524.2988892 | 524.2989263 |
| SIDNSPVKWCALSHLER           | Q92111 | 0          | n +34.06 Da,K +34.06 Da, | 3010.35083  | 4 | 520.7895508 | 520.7874735 |
| PSAFEKVVKNIKEVSGSR          | Q9D8T2 | 0          | n +17.03 Da,K +34.06 Da, | 4080.168945 | 3 | 731.7999878 | 731.8003292 |
| KECGKFYRLNTLLIR             | Q3UVF6 | 0.03479304 | n +42.03 Da,K +28.03 Da, | 3008.842773 | 4 | 503.0299988 | 503.0395754 |
| NKELDPVQKLFVDKIR            | P97450 | 0          | n +17.03 Da,K +34.06 Da, | 3000.131836 | 5 | 413.0700073 | 413.0724095 |
| PGDKVPSIKANAGEESVMNLDKLR    | Q8K2B3 | 0          | n +17.03 Da,K +34.06 Da, | 3000.023193 | 5 | 538.3099976 | 538.3190083 |
| TCNKYGVSGYPTLKIFR           | P27773 | 0          | n +34.06 Da,K +34.06 Da, | 2999.832764 | 4 | 527.3099976 | 527.3120833 |
| LRPGDCEVCISYLGR             | Q9CXI5 | 0          | n +34.06 Da,             | 2996.496826 | 3 | 610.3126831 | 610.3134096 |



|                               |        |            |                                      |             |   |             |             |
|-------------------------------|--------|------------|--------------------------------------|-------------|---|-------------|-------------|
| IQFHFLPSQVIDHGR               | Q8BJ64 | 0          | n +34.06 Da,                         | 3266.38623  | 4 | 457.7600098 | 457.7573795 |
| AAAAVGSGSKDPLARKMRLR          | Q9JJ28 | 0.01667736 | n +14.02 Da,n +28.03 Da,K +28.03 Da, | 2986.783691 | 4 | 532.0700073 | 532.0651189 |
| SDLELHPPSYPWWSHR              | Q9D0M3 | 0          | n +34.06 Da,                         | 2986.008057 | 3 | 618.9835205 | 618.9830457 |
| AKNHYEVLVLGGGAGGITMATR        | Q9R112 | 0.00296736 | n +34.06 Da,K +34.06 Da,             | 3077.518311 | 4 | 571.5700073 | 571.5783179 |
| AAPAKGENLSLVVHGPGDIR          | Q64442 | 0          | n +42.03 Da,K +34.06 Da,             | 2982.630859 | 3 | 693.0593262 | 693.0586147 |
| VLSGEDKSNIAAWGKIGGHGAEGAEALER | P01942 | 0          | n +34.06 Da,K +34.06 Da,             | 3247.405518 | 5 | 670.7800293 | 670.7820613 |
| ASLKDLEGKWR                   | Q05816 | 0          | n +42.03 Da,K +34.06 Da,             | 2977.368652 | 3 | 471.6231079 | 471.6226066 |
| PSVSLQTVKLMKEGLEAAR           | O35490 | 0          | n +17.03 Da,K +34.06 Da,             | 3421.60083  | 3 | 714.7700195 | 714.7715641 |
| PVLTKAVKSAEAAAATKNMEAGAGR     | Q8VC30 | 0          | n +17.03 Da,K +34.06 Da,             | 3226.686035 | 5 | 538.9199829 | 538.9211881 |
| PDKFQGMISELKVR                | P39061 | 0          | n +17.03 Da,K +34.06 Da,             | 2972.718994 | 4 | 434.0184631 | 434.0170794 |
| TSEDMKVLDDLKNKNI              | P70694 | 0.01838935 | n +34.06 Da,K +34.06 Da,             | 2969.999512 | 4 | 499.0400085 | 499.042536  |
| NVGVVVFVGNDKLIKEGDVVKR        | Q03265 | 0          | n +34.06 Da,K +34.06 Da,             | 2965.794678 | 5 | 485.1199951 | 485.1158354 |
| SLRPESLHQVSFLFSR              | P24270 | 0          | n +34.06 Da,                         | 3465.316406 | 3 | 684.7064819 | 684.7076933 |
| SLRPLDIEFMKR                  | Q80UG5 | 0          | n +34.06 Da,K +34.06 Da,             | 2958.902588 | 4 | 393.9899902 | 393.9946288 |
| APKGGSKQSEEDLLLQDFSR          | Q9DCF9 | 0.00080064 | n +17.03 Da,K +34.06 Da,             | 2964.81665  | 3 | 806.7800293 | 806.7818459 |
| SDLELHPPSYPWWSHR              | Q9D0M3 | 0          | n +34.06 Da,                         | 2952.410645 | 4 | 464.4877625 | 464.4891034 |
| ASGANFQYIITEKKGKNSVGLIQLNR    | Q8BH95 | 0          | n +34.06 Da,K +34.06 Da,             | 3133.220947 | 5 | 615.3699951 | 615.3753639 |
| GILEKISEIEKEIAR               | Q9QXB9 | 0          | n +34.06 Da,K +34.06 Da,             | 4118.905762 | 4 | 458.3012695 | 458.3003416 |
| GVKHSMNPFCEIAVEEAVR           | Q9DCW4 | 0.01612903 | n +34.06 Da,K +34.06 Da,             | 3111.422852 | 4 | 561.0499878 | 561.0502361 |
| KGGSKQSEEDLLLQDFSR            | Q9DCF9 | 0          | n +34.06 Da,K +34.06 Da,             | 2947.417969 | 3 | 756.4299927 | 756.4290728 |
| KAVIVKNIDDGTSRDPYSHALVAGIDR   | P61358 | 0.00151286 | n +14.02 Da,K +28.03 Da,             | 3055.956055 | 4 | 745.9199829 | 745.9108224 |
| PNPNFEEKFLTKSMAENR            | Q9DD20 | 0          | n +17.03 Da,K +34.06 Da,             | 2942.723389 | 3 | 703.3900146 | 703.3929756 |
| AAPAKGENLSLVVHGPGDIR          | Q64442 | 0.00498575 | n +42.03 Da,K +34.06 Da,             | 2942.229004 | 3 | 693.0550537 | 693.0586147 |
| PTTGEVIGHVAEGDRADVDLAVKAAR    | Q9CZS1 | 0          | n +17.03 Da,K +34.06 Da,             | 3022.848633 | 4 | 675.3699951 | 675.3740842 |
| LNLQEYQSKKLMSEHGVR            | Q9Z2I8 | 0.00080064 | n +42.03 Da,K +34.06 Da,             | 2934.946533 | 4 | 568.3200073 | 568.3204094 |
| QVECHPYLNQGGKLLDFCR           | P70694 | 0          | n +34.06 Da,K +34.06 Da,             | 2975.81665  | 4 | 587.0599976 | 587.0595981 |
| PGGGFEPNFTLFKCEVNGEKAHPLFTFLR | P11352 | 0          | n +17.03 Da,K +34.06 Da,             | 4392.709473 | 5 | 705.5700073 | 705.5761745 |
| PYEIKKVFASLPQVER              | O88342 | 0          | n +17.03 Da,K +34.06 Da,             | 3259.507568 | 3 | 663.7399902 | 663.7454547 |
| ALFVEKFIKPR                   | Q05920 | 0          | n +34.06 Da,K +34.06 Da,             | 2933.184814 | 4 | 395.519989  | 395.5171247 |
| WSCDLEDIFRKVR                 | P29452 | 0.02180685 | n +34.06 Da,K +34.06 Da,             | 2923.865967 | 3 | 597.9899902 | 597.9997487 |
| VALEGVGHFFR                   | P29391 | 0          | n +34.06 Da,                         | 3066.351807 | 3 | 422.5776367 | 422.578631  |
| FTGSVPTFKHLWR                 | Q8CHT0 | 0          | n +34.06 Da,K +34.06 Da,             | 2949.94873  | 4 | 411.75      | 411.7477821 |
| MDKNELVQKAKLAEQAER            | P63101 | 0          | n +42.03 Da,K +34.06 Da,             | 2917.924072 | 4 | 562.0800171 | 562.0821927 |
| SDLELHPPSYPWWSHR              | Q9D0M3 | 0          | n +34.06 Da,                         | 2945.178711 | 3 | 618.9805298 | 618.9830457 |
| TIFWTNLSPKGGGEPKGELLEAIKR     | P09671 | 0          | n +34.06 Da,K +34.06 Da,             | 3689.175537 | 5 | 576.3599854 | 576.3560128 |
| GTEIHEASAILVHLSR              | Q9D172 | 0          | n +34.06 Da,                         | 2906.733887 | 4 | 442.5029297 | 442.5047535 |
| ETFQLEIDRDRKCAFR              | Q61553 | 0.01612903 | n +31.05 Da,                         | 3406.322998 | 3 | 739.3699951 | 739.3812115 |
| PAPATTF AHL DATTVLSR          | P56480 | 0          | n +17.03 Da,                         | 3259.217041 | 3 | 629.3430176 | 629.3442029 |
| MKVELCSFSGYKIYPGHGR           | Q8BP67 | 0          | n +42.03 Da,K +34.06 Da,             | 2896.343506 | 3 | 780.4099731 | 780.4152343 |
| LHTVYQSVELPETHQMLR            | Q07417 | 0          | n +34.06 Da,                         | 2894.32373  | 4 | 554.5484619 | 554.5492641 |

|                                    |        |            |                                      |             |   |             |             |
|------------------------------------|--------|------------|--------------------------------------|-------------|---|-------------|-------------|
| SPKECALEIHKGTALR                   | P50172 | 0.00151286 | n +34.06 Da,K +34.06 Da,             | 3031.470459 | 4 | 505.0599976 | 505.0607286 |
| RRTPLGPMNPEDIDVSNLER               | Q8K2M0 | 0          | n +34.06 Da,                         | 2999.582764 | 3 | 814.0999756 | 814.0990335 |
| PSFTEADTFHLDKYR                    | Q8R121 | 0.00296736 | n +17.03 Da,K +34.06 Da,             | 2889.286621 | 4 | 470.25      | 470.2468259 |
| MEKTELIQKAKLAEQAER                 | P68254 | 0.00080064 | n +42.03 Da,K +34.06 Da,             | 2887.454102 | 3 | 754.1199951 | 754.1191818 |
| MDKNELVQKAKLAEQAER                 | P63101 | 0          | n +42.03 Da,K +34.06 Da,             | 2880.185547 | 3 | 749.1057129 | 749.1071648 |
| MEKTELIQKAKLAEQAER                 | P68254 | 0          | n +42.03 Da,K +34.06 Da,             | 2879.931396 | 4 | 565.84198   | 565.8412055 |
| EVNGEKAHPLFTFLR                    | P11352 | 0.00960219 | n +34.06 Da,K +34.06 Da,             | 2879.051758 | 4 | 457.2728271 | 457.2703505 |
| DVVPKDVNAAIATIKTKR                 | P05213 | 0.00151286 | n +34.06 Da,K +34.06 Da,             | 3018.215332 | 4 | 519.6026001 | 519.6019485 |
| PSVSLQTVKLMKEGLEAAR                | O35490 | 0          | n +17.03 Da,K +34.06 Da,             | 3416.700928 | 4 | 536.3300171 | 536.3304922 |
| GLLEKLEKETEYDVR                    | Q61176 | 0          | n +34.06 Da,K +34.06 Da,             | 2877.698486 | 3 | 599.039978  | 599.0401969 |
| WGDVPCDTTTTKPGVYTKVCSYLEWIWENVRR   | Q8CGR4 | 0.02132999 | K +28.03 Da,                         | 3820.088135 | 4 | 975.75      | 975.7366527 |
| MDKNELVQKAKLAEQAER                 | P63101 | 0          | n +42.03 Da,K +34.06 Da,             | 2877.337891 | 4 | 562.081604  | 562.0821927 |
| QHSKAAHKQEPGLGFSFELTEQQKEFQATAR    | P45952 | 0          | n +17.03 Da,K +34.06 Da,             | 3264.378662 | 5 | 730.3900146 | 730.4023777 |
| PKLLAKILNMSSGR                     | Q99L13 | 0.01560468 | n +17.03 Da,K +34.06 Da,             | 2875.544189 | 3 | 538.3584595 | 538.3587654 |
| FLSSSDKQNNLYKGLEAFR                | P54869 | 0          | n +34.06 Da,K +34.06 Da,             | 3176.89917  | 4 | 602.3400269 | 602.3432698 |
| SIVEDKLVEDLKTR                     | P26443 | 0          | n +34.06 Da,K +34.06 Da,             | 2871.645264 | 4 | 437.5299988 | 437.5319668 |
| SDLELHPPSYPWHR                     | Q9D0M3 | 0.00296736 | n +34.06 Da,                         | 2871.172852 | 4 | 464.4899902 | 464.4891034 |
| PNPNFEKFLTKSMAENR                  | Q9DD20 | 0          | n +17.03 Da,K +34.06 Da,             | 2981.384277 | 4 | 527.7999878 | 527.7965508 |
| SLGKLSVPGWVSSSHGKR                 | Q91W92 | 0          | n +42.03 Da,K +34.06 Da,             | 2870.216553 | 4 | 498.7972412 | 498.7969984 |
| PVSELITKAVAASKER                   | P15864 | 0          | n +17.03 Da,K +34.06 Da,             | 2868.808594 | 4 | 446.7900085 | 446.7886228 |
| GLLEKLEKETEYDVR                    | Q61176 | 0          | n +34.06 Da,K +34.06 Da,             | 2867.649658 | 4 | 449.5299988 | 449.5319668 |
| TAEVLELAGNASKDLKVKR                | P0C0S6 | 0          | n +34.06 Da,K +34.06 Da,             | 2865.241455 | 4 | 545.3599854 | 545.3586846 |
| AGQSDKDVKYTYLLEEIQKH               | P56395 | 0.01838935 | n +42.03 Da,K +34.06 Da,             | 2862.81665  | 3 | 799.4500122 | 799.4446116 |
| PKFYCDYCDTYLTHDPSVSR               | Q62241 | 0          | n +17.03 Da,K +34.06 Da,             | 2860.100586 | 4 | 644.5499878 | 644.5518224 |
| ASQTEGELKVTQVLKEKFPFR              | Q8CEI1 | 0          | n +34.06 Da,K +34.06 Da,             | 2855.266846 | 5 | 485.7099915 | 485.7084916 |
| PHNDPNAQGDFAKTLFVAR                | Q62376 | 0          | n +17.03 Da,K +34.06 Da,             | 2854.052734 | 4 | 538.039978  | 538.0407444 |
| TNEKALEAVFGKYGR                    | Q91VM5 | 0          | n +34.06 Da,K +34.06 Da,             | 2853.222656 | 4 | 447.019989  | 447.0243087 |
| VKLFIGNLPR                         | Q8C7Q4 | 0.00225394 | n +34.06 Da,K +34.06 Da,             | 2846.850098 | 3 | 408.9500122 | 408.9536272 |
| MEKTELIQKAKLAEQAER                 | P68254 | 0          | n +42.03 Da,K +34.06 Da,             | 2846.55957  | 3 | 754.1199951 | 754.1191818 |
| SDAAVDTSEITTKDLKEKKEVVEEAENGR      | P26350 | 0          | n +42.03 Da,K +34.06 Da,             | 2838.030762 | 4 | 864.9696045 | 864.9770747 |
| AAAKAVLGPLVGAVDQGTSSSTR            | Q64516 | 0.01838935 | n +42.03 Da,K +34.06 Da,             | 3336.143799 | 3 | 769.789978  | 769.7937566 |
| DLRSRDFKHLQEAEAEMEALQLLHRIRTWLESHQ | Q61789 | 0.01145553 | n +17.03 Da,K +34.06 Da,             | 4331.243164 | 5 | 913.1300049 | 913.1152533 |
| PTLAEMGKNLKEAMR                    | Q99K01 | 0          | n +17.03 Da,K +34.06 Da,             | 2830.527588 | 4 | 444.269989  | 444.2654631 |
| AGVKINPKNYTDNELEKITR               | P26443 | 0          | n +42.03 Da,K +34.06 Da,             | 2828.048584 | 4 | 612.6199951 | 612.6142859 |
| LHTVYQSVLPEHQMLR                   | Q07417 | 0          | n +14.02 Da,                         | 2826.604492 | 3 | 732.3800049 | 732.380771  |
| SQTPSYLSCKSEVEVKIFR                | O35490 | 0          | n +34.06 Da,K +34.06 Da,             | 2826.495117 | 5 | 505.2999878 | 505.3050188 |
| IGFSKQISKCLGLTEAQTR                | Q8C196 | 0.02694427 | n +14.02 Da,n +28.03 Da,K +28.03 Da, | 2859.664063 | 4 | 581.3200073 | 581.3176085 |
| SVFVLAMVDEDKNNR                    | Q64374 | 0          | n +34.06 Da,K +34.06 Da,             | 2819.132568 | 3 | 656.3900146 | 656.3874909 |
| AILPFSFIHSQKR                      | P24270 | 0          | n +34.06 Da,K +34.06 Da,             | 2818.616943 | 4 | 403.7562561 | 403.7556072 |
| LNLQEYQSKKLMSEHGVR                 | Q9Z2I8 | 0          | n +42.03 Da,K +34.06 Da,             | 3070.084717 | 4 | 568.3200073 | 568.3204094 |

|                              |        |            |                          |             |   |             |             |
|------------------------------|--------|------------|--------------------------|-------------|---|-------------|-------------|
| ASEIKKLFWR                   | Q02013 | 0          | n +42.03 Da,K +34.06 Da, | 2818.243408 | 4 | 388.2600098 | 388.2632957 |
| LHTVYQSVLPETHQMLR            | Q07417 | 0          | n +34.06 Da,             | 2813.133301 | 4 | 554.5499878 | 554.5492641 |
| CRRRRRRCRRR                  | P02319 | 0.00628053 | n +14.02 Da,             | 4856.306641 | 2 | 959.539978  | 959.5213587 |
| TKVLGTVKWFNVR                | P62960 | 0          | n +34.06 Da,K +34.06 Da, | 2805.923584 | 4 | 413.2795715 | 413.2792115 |
| SAMSAAKAIADHIR               | P14152 | 0          | n +34.06 Da,K +34.06 Da, | 2803.001465 | 4 | 378.230011  | 378.2265198 |
| GKLVINGKPITIFQER             | P16858 | 0          | n +34.06 Da,K +34.06 Da, | 2830.04541  | 3 | 639.0900269 | 639.091114  |
| KEEVLLPLDNPYGKITGTVKR        | P25688 | 0          | n +34.06 Da,K +34.06 Da, | 3063.640625 | 5 | 502.1199951 | 502.1241417 |
| PKLANSEFLKFVR                | O09012 | 0          | n +17.03 Da,K +34.06 Da, | 2790.48877  | 4 | 409.2687378 | 409.2673257 |
| TGAAKAVGKVIPELNGKLTGMAFR     | P16858 | 0          | n +34.06 Da,K +34.06 Da, | 3388.778809 | 5 | 513.9337158 | 513.9302593 |
| AQEEEDVRDYNLTTEEKATKDKYPPVNR | Q505B7 | 0          | n +42.03 Da,K +34.06 Da, | 2774.935303 | 5 | 702.7700195 | 702.770692  |
| NIISDAMKKVGR                 | P63038 | 0          | n +34.06 Da,K +34.06 Da, | 2774.825439 | 4 | 359.2399902 | 359.239392  |
| SSAMSAAKAIADHIR              | P14152 | 0          | n +34.06 Da,K +34.06 Da, | 2770.448486 | 4 | 399.980011  | 399.984527  |
| ENLSNDLKLLSHGGR              | P47199 | 0          | n +34.06 Da,K +34.06 Da, | 2769.149902 | 3 | 574.3400269 | 574.3374181 |
| GVSDGAGAVIIASEDAVKKHNFTPLAR  | Q8BWT1 | 0          | n +34.06 Da,K +34.06 Da, | 3898.209473 | 5 | 565.9400024 | 565.933195  |
| SAMSAAKAIADHIR               | P14152 | 0          | n +34.06 Da,K +34.06 Da, | 2762.214111 | 4 | 378.230011  | 378.2265198 |
| ASLVPLKEKKLMEVK              | P56135 | 0.00498575 | n +42.03 Da,K +34.06 Da, | 2748.310303 | 3 | 631.0999756 | 631.1039614 |
| AKHKELAPYDENWIFYTR           | Q9CZ8  | 0.04889406 | n +14.02 Da,K +28.03 Da, | 3086.80249  | 3 | 746.7299805 | 746.7162594 |
| MLENSGCKALKEGVLEKR           | Q62392 | 0          | n +42.03 Da,K +34.06 Da, | 2739.01001  | 3 | 736.0999756 | 736.097612  |
| PSLRPPIDHLCCELLPR            | P37040 | 0.03423423 | n +17.03 Da,             | 3594.614258 | 4 | 483.275116  | 483.2739898 |
| GPAGAGESKCLMVKVLDVAVR        | P07309 | 0          | n +34.06 Da,K +34.06 Da, | 3496.864502 | 4 | 565.0899048 | 565.0868492 |
| APKSQDLSKIMADIR              | P05784 | 0          | n +34.06 Da,K +34.06 Da, | 2731.783691 | 2 | 888.0499878 | 888.0508514 |
| PNFEKFLTKSMAENR              | Q9DD20 | 0          | n +17.03 Da,K +34.06 Da, | 2721.717041 | 3 | 633.0200195 | 633.0277448 |
| VGVVVFGNDKLIKEGDVVKR         | Q03265 | 0          | n +34.06 Da,K +34.06 Da, | 2825.093506 | 5 | 462.3099976 | 462.3072498 |
| PNFEKFLTKSMAENR              | Q9DD20 | 0          | n +17.03 Da,K +34.06 Da, | 2719.431396 | 4 | 475.019989  | 475.0226277 |
| APKSQDLSKIMADIR              | P05784 | 0.0274056  | n +34.06 Da,K +34.06 Da, | 2717.926758 | 4 | 444.5299988 | 444.529064  |
| AFLGAMVALAFVVQSKAKSR         | Q9WTZ2 | 0.04286553 | n +31.05 Da,             | 2712.071289 | 3 | 795.7999878 | 795.8011586 |
| SDLELHPPSYPWSHR              | Q9D0M3 | 0          | n +34.06 Da,             | 2761.293701 | 4 | 464.4899902 | 464.4891034 |
| APAGILNGKLVSAQIR             | Q922D8 | 0          | n +34.06 Da,K +34.06 Da, | 2710.259033 | 3 | 559.3641968 | 559.3666485 |
| TGFKIPQKILIGIQQSFPR          | Q8C196 | 0          | n +34.06 Da,K +34.06 Da, | 3675.745117 | 5 | 498.1238708 | 498.1221925 |
| GVPVFKFPR                    | Q8R0Y6 | 0.00080064 | n +34.06 Da,K +34.06 Da, | 2702.288574 | 3 | 372.25      | 372.2517843 |
| PQKILIGIQQSFPR               | Q8C196 | 0          | n +17.03 Da,K +34.06 Da, | 2697.574463 | 4 | 473.0463562 | 473.0481061 |
| FLFHESIHNVEVDR               | Q9DBF1 | 0          | n +31.05 Da,             | 3455.526611 | 3 | 580.3200073 | 580.3143547 |
| VLSGEDKSNIAAWGKIGGH          | P01942 | 0          | n +34.06 Da,K +34.06 Da, | 2694.240234 | 5 | 441.4751892 | 441.4759497 |
| ASLFKKKTVDVVIKEQNR           | Q8BJF9 | 0          | n +42.03 Da,K +34.06 Da, | 2691.263916 | 4 | 575.1165771 | 575.1179631 |
| SDLELHPPSYPWSHR              | Q9D0M3 | 0          | n +34.06 Da,             | 2993.024658 | 4 | 464.489502  | 464.4891034 |
| PNLSKITTEEEIEFYIQQFKKTGFR    | P34914 | 0          | n +17.03 Da,K +34.06 Da, | 4330.80127  | 5 | 633.9699707 | 633.9676889 |
| TDFILKFPHSAR                 | Q9CR57 | 0          | n +34.06 Da,K +34.06 Da, | 2685.084473 | 4 | 375.730011  | 375.7305951 |
| KGIGKSSAADKVVAEIR            | P51660 | 0.0362448  | n +42.03 Da,K +34.06 Da, | 2987.001709 | 4 | 483.3099976 | 483.3099694 |
| PSKLDGKELKIDIIPNPQER         | P11499 | 0.00628053 | n +17.03 Da,K +34.06 Da, | 2681.045166 | 4 | 624.8900146 | 624.8878255 |
| LHTVYQSVLPETHQMLR            | Q07417 | 0          | n +34.06 Da,             | 2863.941406 | 3 | 739.0599976 | 739.06326   |

|                               |        |            |                          |             |   |             |             |
|-------------------------------|--------|------------|--------------------------|-------------|---|-------------|-------------|
| PKYWPEPEEFRPER                | Q64464 | 0          | n +17.03 Da,K +34.06 Da, | 2675.325195 | 4 | 478.5061646 | 478.5060057 |
| TGPNLHGLFGR                   | P62897 | 0.00498575 | n +34.06 Da,             | 2668.908936 | 3 | 401.565918  | 401.566614  |
| GVKDIAFEVEDCDHIVQKAR          | P49429 | 0          | n +34.06 Da,K +34.06 Da, | 2871.546631 | 4 | 608.5930176 | 608.5929247 |
| KSGVVTDGVKHSMNPFCEIAVEEAVR    | Q9DCW4 | 0.02180685 | n +34.06 Da,K +34.06 Da, | 3331.910889 | 4 | 741.1500244 | 741.1559925 |
| SILDRDDLTIMKR                 | Q8VCB3 | 0          | n +34.06 Da,K +34.06 Da, | 2661.695801 | 4 | 411.7505493 | 411.7500936 |
| PLVHESLLTIKLSLEKR             | Q9QXM0 | 0          | n +17.03 Da,K +34.06 Da, | 2839.375977 | 5 | 427.2760315 | 427.2755819 |
| PHLPQEEVLKFYR                 | P50136 | 0          | n +17.03 Da,K +34.06 Da, | 2718.506348 | 4 | 427.5       | 427.5017287 |
| RLVLEVAQHLGESTVR              | P56480 | 0          | n +34.06 Da,             | 2682.929688 | 3 | 614.3656006 | 614.3653786 |
| PHVILENFTAANLGHR              | E9Q6M5 | 0.02234637 | n +17.03 Da,             | 2652.647461 | 4 | 452.2499084 | 452.2509432 |
| YNIQKESTLHLVLR                | P0CG49 | 0          | n +34.06 Da,K +34.06 Da, | 2650.971924 | 3 | 594.7000122 | 594.7018085 |
| ILFPSFIHSQKR                  | P24270 | 0          | n +34.06 Da,K +34.06 Da, | 2650.417725 | 4 | 385.9899902 | 385.9963286 |
| THICAGASAFGNLLPR              | Q99LC5 | 0          | n +34.06 Da,K +34.06 Da, | 2646.716064 | 4 | 471.0240173 | 471.025455  |
| PKHEFSVDMTCCECAEAVSR          | O08997 | 0          | n +17.03 Da,K +34.06 Da, | 2641.551758 | 3 | 787.7000122 | 787.7013345 |
| SSVEYEPKEKTFDKILIANR          | Q91ZA3 | 0.01250823 | n +17.03 Da,K +34.06 Da, | 2635.089844 | 5 | 498.1000061 | 498.101096  |
| PMVGSKLVIFLENYR               | Q9ET01 | 0          | n +17.03 Da,K +34.06 Da, | 3428.378174 | 4 | 495.5603333 | 495.5603829 |
| NCEVTSSGIVKLACSLGYIYVDRLSR    | Q00651 | 0.00563777 | n +42.03 Da,K +28.03 Da, | 2832.119141 | 5 | 632.7199707 | 632.7220838 |
| SSVEYEPKEKTFDKILIANR          | Q91ZA3 | 0          | n +34.06 Da,K +34.06 Da, | 2642.216309 | 5 | 501.5064087 | 501.5074078 |
| PCFQPDGYEQTYAEMPKEKNTISHR     | Q9D892 | 0          | n +17.03 Da,K +34.06 Da, | 2626.271484 | 5 | 640.5169678 | 640.5192121 |
| PRDADDAVYELDGKELCSEK          | O35326 | 0          | n +17.03 Da,K +34.06 Da, | 2624.343262 | 4 | 598.039978  | 598.0445246 |
| TGEVICQVAEKNKEDVDKAVKAAR      | P47738 | 0          | n +34.06 Da,K +34.06 Da, | 2710.452393 | 5 | 545.5200195 | 545.5192059 |
| PAIHPIFPKLSAYVDEAKR           | Q5YD48 | 0          | n +17.03 Da,K +34.06 Da, | 3330.333496 | 5 | 467.6876221 | 467.6862016 |
| PMDLHVFFHALR                  | Q91ZX7 | 0          | n +14.02 Da,             | 2618.596924 | 4 | 338.1831055 | 338.1841304 |
| TEDLVAKLKEVGR                 | Q9DCW4 | 0          | n +34.06 Da,K +34.06 Da, | 2618.488525 | 4 | 390.7601318 | 390.7608519 |
| SNPAAFKHLVQESLR               | Q8VC12 | 0          | n +34.06 Da,K +34.06 Da, | 2615.83374  | 4 | 442.019989  | 442.0152502 |
| VLSGEDKSNIAAWGKIGGHGAEGAEALER | P01942 | 0          | n +42.03 Da,K +34.06 Da, | 3793.212646 | 5 | 672.3699951 | 672.3715509 |
| FAKLVRRPPVQVYIGIEGR           | Q9DB20 | 0          | n +34.06 Da,K +34.06 Da, | 2802.19043  | 3 | 666.4199829 | 666.415891  |
| ALHVPKAPGFAQMLKDGAKEHF        | P42932 | 0          | n +42.03 Da,K +34.06 Da, | 3866.264648 | 5 | 482.2890015 | 482.2891741 |
| ASSSGSKAEFIVGGKYKLVLR         | Q8BK63 | 0.00151286 | n +42.03 Da,K +34.06 Da, | 2611.108398 | 4 | 557.8400269 | 557.8429053 |
| PDSNFQGLQAHLQHVLR             | Q8CFX1 | 0          | n +17.03 Da,             | 2925.743896 | 3 | 659.6900024 | 659.6869629 |
| TVKKIFVGGIKEDTEEYNLR          | Q8BG05 | 0          | n +34.06 Da,K +34.06 Da, | 2608.921875 | 4 | 619.6300049 | 619.6337119 |
| SQTEGELKVTQVLKEKFPFR          | Q8CEI1 | 0          | n +34.06 Da,K +34.06 Da, | 2858.742432 | 5 | 471.5       | 471.5010688 |
| AKGLLFSASKQDLLR               | Q99J08 | 0          | n +34.06 Da,K +34.06 Da, | 2602.539307 | 4 | 438.0400085 | 438.0425013 |
| DLPKNWDWR                     | Q9WUU7 | 0.00151286 | n +34.06 Da,K +34.06 Da, | 3145.241211 | 3 | 433.25      | 433.2489917 |
| AEMGSKGVTAGKIASNVQKLLTR       | O08539 | 0          | n +42.03 Da,K +34.06 Da, | 2598.911865 | 5 | 511.3200073 | 511.3231281 |
| CAQYKQDGADFAKWR               | A6ZI47 | 0.00960219 | n +17.03 Da,K +34.06 Da, | 2598.654785 | 4 | 483.0167542 | 483.0085147 |
| VLSGEDKSNIAAWGKIGGH           | P01942 | 0          | n +34.06 Da,K +34.06 Da, | 2597.107178 | 5 | 441.4700012 | 441.4759497 |
| SQAEFDKAAEEVKR                | P31786 | 0          | n +42.03 Da,K +34.06 Da, | 2597.036377 | 3 | 573.3162231 | 573.3179124 |
| LNLQEYQSKKLMSEHGVR            | Q9Z2I8 | 0.02694427 | n +42.03 Da,K +34.06 Da, | 2845.15625  | 4 | 568.3200073 | 568.3204094 |
| KGALAKLVEAIR                  | P12970 | 0          | n +34.06 Da,K +34.06 Da, | 2594.154053 | 4 | 343.5       | 343.5040171 |
| MKFNPFVTSR                    | P61255 | 0          | n +34.06 Da,K +34.06 Da, | 2594.224854 | 3 | 470.5993347 | 470.6009254 |

|                                   |        |            |                          |             |   |             |             |
|-----------------------------------|--------|------------|--------------------------|-------------|---|-------------|-------------|
| AGKPVLYHFDGR                      | P30115 | 0          | n +42.03 Da,K +34.06 Da, | 2591.799316 | 3 | 479.2668152 | 479.2683455 |
| VKNLISYVVTKTR                     | Q924L1 | 0          | n +34.06 Da,K +34.06 Da, | 2590.690186 | 4 | 406.5299988 | 406.5317692 |
| PKHEFSVDMTCEGCAEAVSR              | O08997 | 0          | n +17.03 Da,K +34.06 Da, | 2589.877793 | 3 | 787.7000122 | 787.7013345 |
| SLFFPDEAINKHPR                    | P97494 | 0.00151286 | n +34.06 Da,K +34.06 Da, | 2589.547119 | 4 | 435.5       | 435.5032469 |
| LDPSTKNTVSGGAIALGHPLGGSGSR        | Q8BWT1 | 0.01250823 | n +34.06 Da,K +34.06 Da, | 2589.329102 | 4 | 604.8400269 | 604.8449433 |
| VEEVQKHSVHTLVFR                   | Q922V4 | 0          | n +42.03 Da,K +34.06 Da, | 2669.018799 | 3 | 628.6900024 | 628.6898622 |
| PELTIAHLPPDRR                     | Q9Z2V4 | 0.00296736 | n +17.03 Da,             | 2582.254883 | 4 | 387.730011  | 387.7321204 |
| TPKKQGGGLGPMNIPLISDPKR            | P35700 | 0.01250823 | n +34.06 Da,K +34.06 Da, | 2579.059326 | 4 | 596.6300049 | 596.6346229 |
| SSKPKSLEIIGAPFSKQQR               | Q61176 | 0          | n +42.03 Da,K +34.06 Da, | 2605.430664 | 4 | 568.6021118 | 568.6034551 |
| SVLHSGYFHPLLR                     | P10518 | 0          | n +34.06 Da,             | 2577.994141 | 4 | 390.7253113 | 390.7280903 |
| DSDLKKSIDEIVLVGGSTR               | P20029 | 0.01838935 | n +34.06 Da,K +34.06 Da, | 2575.740234 | 4 | 563.0900269 | 563.082553  |
| TEVGHLIQVAAGSSNLKR                | P47738 | 0          | n +34.06 Da,K +34.06 Da, | 2592.089355 | 3 | 650.0562134 | 650.058544  |
| AHGSVVKSEDYAFPTYADRR              | P19783 | 0          | n +42.03 Da,K +34.06 Da, | 2573.141846 | 3 | 782.3900146 | 782.3959558 |
| GIGALAEVAKKSLR                    | Q60936 | 0          | n +34.06 Da,K +34.06 Da, | 2567.637695 | 4 | 379.519989  | 379.5173904 |
| SQAEDKAAEEVVKR                    | P31786 | 0          | n +42.03 Da,K +34.06 Da, | 2565.277344 | 2 | 859.4718628 | 859.4732303 |
| PSSVDIKVLEMR                      | P35821 | 0.00080064 | n +17.03 Da,K +34.06 Da, | 3392.040771 | 4 | 425.7799988 | 425.7760922 |
| GEKAHPLFTFLR                      | P11352 | 0.00563777 | n +34.06 Da,K +34.06 Da, | 2558.781006 | 3 | 495.3041687 | 495.3067296 |
| TSSMGTLPKQVKIVEVGPR               | P38060 | 0          | n +34.06 Da,K +34.06 Da, | 2555.994385 | 4 | 533.0800171 | 533.0857407 |
| VDMKAFKQLQR                       | Q99JW2 | 0          | n +34.06 Da,K +34.06 Da, | 2554.341064 | 4 | 399.5       | 399.5013118 |
| RQAQIEVVPASALIIKALKEPPR           | P35979 | 0          | n +34.06 Da,K +34.06 Da, | 3898.865723 | 5 | 544.1500244 | 544.1517502 |
| PSKQDILAIFKR                      | Q9D8S3 | 0.02969697 | n +17.03 Da,K +34.06 Da, | 2880.599121 | 4 | 376         | 376.0041347 |
| FEKFLVGPDPVPRR                    | P11352 | 0          | n +34.06 Da,K +34.06 Da, | 2552.210449 | 4 | 446.7754211 | 446.7768055 |
| PYNPMSRPDAWGVTKGAAELMQQKEATTEQQLR | O35490 | 0          | n +42.03 Da,K +34.06 Da, | 4047.5      | 4 | 983.0200195 | 983.0043792 |
| RPDIIDPAILRPGR                    | Q01853 | 0.01250823 | n +34.06 Da,             | 2548.483398 | 4 | 406.5       | 406.5032847 |
| TKDIEDVFYKYGAIR                   | Q6PDM2 | 0          | n +34.06 Da,K +34.06 Da, | 3342.717285 | 4 | 480.7900085 | 480.788604  |
| SSSDKQNNLYKGLEAFR                 | P54869 | 0          | n +34.06 Da,K +34.06 Da, | 2545.59082  | 3 | 687.0599976 | 687.0604316 |
| PKHEFSVDMTCEGCAEAVSR              | O08997 | 0          | n +17.03 Da,K +34.06 Da, | 2542.856445 | 3 | 787.7000122 | 787.7013345 |
| SKLGDVYVNDAFGTAHR                 | P09041 | 0          | n +34.06 Da,K +34.06 Da, | 2541.144775 | 3 | 640.0202026 | 640.0199778 |
| IAFEVEDCDHIVQKAR                  | P49429 | 0          | n +34.06 Da,K +34.06 Da, | 2539.801025 | 4 | 500.2727661 | 500.274199  |
| VLSGEDKSNIKAAWGKIGGH              | P01942 | 0          | n +34.06 Da,K +34.06 Da, | 2591.174072 | 4 | 551.5900269 | 551.593118  |
| EMIDVIGVTKGKGYKGVTSR              | P27659 | 0.00080064 | n +34.06 Da,K +34.06 Da, | 2538.418945 | 5 | 455.6900024 | 455.6890771 |
| KGFVEDLNESEFKDNR                  | Q8BXZ1 | 0          | n +34.06 Da,K +34.06 Da, | 2538.167969 | 3 | 634.0237427 | 634.0268392 |
| STSSMGTLPKQVKIVEVGPR              | P38060 | 0          | n +34.06 Da,K +34.06 Da, | 2536.702393 | 4 | 554.8400269 | 554.843748  |
| TGSTEVGHLIQKAAGESNLKR             | Q9CZS1 | 0          | n +34.06 Da,K +34.06 Da, | 2535.60376  | 5 | 460.480011  | 460.4783177 |
| SDLELHPPSPWVSHR                   | Q9D0M3 | 0          | n +34.06 Da,             | 2911.73584  | 4 | 464.4873962 | 464.4891034 |
| AHGSVVKSEDYAFPTYADRR              | P19783 | 0.0130719  | n +42.03 Da,K +34.06 Da, | 2530.903809 | 3 | 782.3900146 | 782.3959558 |
| SVEYEPKEKTFDKILIANR               | Q91ZA3 | 0          | n +34.06 Da,K +34.06 Da, | 2669.348389 | 3 | 806.1599731 | 806.1634857 |
| VGVVVFGNDKLIKEGDVVKR              | Q03265 | 0          | n +34.06 Da,K +34.06 Da, | 2829.245605 | 4 | 577.6300049 | 577.6322431 |
| SDAAVDTSSEITTKDLKEKKEVVEEAENGR    | P26350 | 0          | n +42.03 Da,K +34.06 Da, | 3179.897217 | 3 | 1152.969971 | 1152.967007 |
| VVVFVFGNDKLIKEGDVVKR              | Q03265 | 0          | n +34.06 Da,K +34.06 Da, | 2523.997559 | 5 | 431.0899963 | 431.0892741 |

|                               |        |            |                          |             |   |             |             |
|-------------------------------|--------|------------|--------------------------|-------------|---|-------------|-------------|
| ICEHFLSSFNVHTR                | P25688 | 0.00498575 | n +34.06 Da,             | 2538.623047 | 4 | 445.980011  | 445.9807511 |
| SFNFFFSETGAGKHVPR             | P05213 | 0          | n +34.06 Da,K +34.06 Da, | 2632.807617 | 4 | 488.269989  | 488.2680737 |
| SKPVLGSIKSLR                  | P16331 | 0          | n +34.06 Da,K +34.06 Da, | 2517.563965 | 4 | 375.769989  | 375.773762  |
| PFLDIQKKGISLDR                | Q99LY9 | 0          | n +17.03 Da,K +34.06 Da, | 3424.428467 | 4 | 457.8003845 | 457.7989904 |
| SSDKQNNLYKGLEAFR              | P54869 | 0.04725788 | n +34.06 Da,K +34.06 Da, | 2515.703857 | 4 | 493.7900085 | 493.7891355 |
| VGKHGYPIDLLSSR                | P97872 | 0          | n +42.03 Da,K +34.06 Da, | 3425.878906 | 3 | 577.6799927 | 577.6719198 |
| AFCAPPAYLTHQQKVLR             | Q9CQJ8 | 0          | n +34.06 Da,K +34.06 Da, | 2513.192383 | 4 | 517.8008423 | 517.8003836 |
| PMNKEWPANLDLKKELSEPSTR        | Q8C196 | 0          | n +34.06 Da,K +34.06 Da, | 2853.81665  | 4 | 702.4000244 | 702.4074722 |
| PHLNKDLAFTLEER                | P06801 | 0          | n +17.03 Da,K +34.06 Da, | 2511.825684 | 3 | 578.6599731 | 578.6650941 |
| LDPskTnVSGGAIAlGHPLGGSGSR     | Q8BWT1 | 0          | n +34.06 Da,K +34.06 Da, | 2599.877686 | 3 | 806.1199951 | 806.1241656 |
| GKHLEGLLPVGVPTTDTQR           | Q9DCP2 | 0          | n +34.06 Da,K +34.06 Da, | 2686.185547 | 3 | 696.0800171 | 696.0812374 |
| EVKQGLSSSIFTKDLGR             | Q9DBF1 | 0          | n +34.06 Da,K +34.06 Da, | 2649.351074 | 4 | 492.5599976 | 492.5559734 |
| GLLVYQKKGKFAIR                | Q9DCN2 | 0          | n +34.06 Da,K +34.06 Da, | 2510.386719 | 4 | 413.783844  | 413.783124  |
| DEdGLPEKLAQKNPMYQKER          | Q8VIJ6 | 0          | n +34.06 Da,K +34.06 Da, | 2509.224609 | 4 | 632.1099854 | 632.1139866 |
| AGAESDGGQFQFTGIKKYFNSYTLTGR   | Q78IK2 | 0          | n +34.06 Da,K +34.06 Da, | 4017.895996 | 4 | 747.9099731 | 747.9042236 |
| PSAFEKVVKNVIKEVSGSR           | Q9D8T2 | 0          | n +17.03 Da,K +34.06 Da, | 4106.48291  | 5 | 439.480011  | 439.4831081 |
| AGKPVLHYFDGR                  | P30115 | 0          | n +42.03 Da,K +34.06 Da, | 2605.359863 | 2 | 718.3960571 | 718.39888   |
| HVLSLSFPIRR                   | P26443 | 0.00151286 | n +34.06 Da,             | 2506.45459  | 3 | 453.6204834 | 453.6208302 |
| MKPLVVFVLGGPGAGKGTQCAR        | Q9DBP5 | 0          | n +34.06 Da,K +34.06 Da, | 3079.246338 | 4 | 587.0999756 | 587.1065787 |
| SVLKDETVWEKPLR                | P24456 | 0.00151286 | n +34.06 Da,K +34.06 Da, | 2500.672607 | 4 | 451.2900085 | 451.287234  |
| PKHEFSVDMTCEGCAEAVSR          | O08997 | 0.0130719  | n +17.03 Da,K +34.06 Da, | 2659.948242 | 4 | 591.0300293 | 591.02782   |
| AGVEFEFKLKTR                  | P30115 | 0.01667736 | n +34.06 Da,K +34.06 Da, | 2535.291016 | 4 | 414.7600403 | 414.7608519 |
| TILVKWLPQNDLLGHPKTR           | P70691 | 0          | n +34.06 Da,K +34.06 Da, | 3275.684326 | 5 | 467.1021423 | 467.10102   |
| SEKDIVHSGLAYTMER              | P26443 | 0          | n +34.06 Da,K +34.06 Da, | 2580.084961 | 3 | 635.3400269 | 635.3454738 |
| SLGQMPVILAGNDQQKKKYLGR        | P45952 | 0          | n +34.06 Da,K +34.06 Da, | 2746.029541 | 5 | 516.9199829 | 516.925162  |
| GTPPGGSITKVLIANR              | Q99MR8 | 0          | n +34.06 Da,K +34.06 Da, | 2495.008057 | 3 | 551.6785278 | 551.6825255 |
| GKNEEILNSLKYVR                | P11352 | 0          | n +34.06 Da,K +34.06 Da, | 2566.803711 | 3 | 589.039978  | 589.0404195 |
| PEASIDSYAKSLLHGR              | P97742 | 0          | n +17.03 Da,K +34.06 Da, | 2489.447998 | 4 | 449.5100098 | 449.5047345 |
| ASLFKKKTVDVIKEQNR             | Q8BJF9 | 0          | n +42.03 Da,K +34.06 Da, | 2693.181152 | 3 | 766.4899902 | 766.488192  |
| LAALGGNSSPSAKDIKILDSVGIEADDDR | P99027 | 0.00762829 | n +34.06 Da,K +34.06 Da, | 4177.306152 | 4 | 798.7199707 | 798.7162286 |
| MEGYHKPDQQLKALQKDTANR         | P40142 | 0          | n +42.03 Da,K +34.06 Da, | 2490.71875  | 4 | 654.6199951 | 654.6169314 |
| MKVELCSFSGYKIYPGHGR           | Q8BP67 | 0          | n +42.03 Da,K +34.06 Da, | 2849.562744 | 4 | 585.5599976 | 585.5632449 |
| SQAEDFKAAEEVKR                | P31786 | 0          | n +42.03 Da,K +34.06 Da, | 2555.60083  | 3 | 573.3151245 | 573.3179124 |
| AEKdGVpVfKfPR                 | Q8R0Y6 | 0.00080064 | n +34.06 Da,K +34.06 Da, | 2479.452881 | 4 | 398.7572632 | 398.7568406 |
| SKSYDILGVPKSASER              | Q9QYI6 | 0          | n +34.06 Da,K +34.06 Da, | 2583.0271   | 4 | 501.2999878 | 501.2980648 |
| GLFEDTNLCAIHAQR               | P02301 | 0          | n +34.06 Da,K +34.06 Da, | 2477.814941 | 3 | 605.0055542 | 605.0069034 |
| PNPNFEKFLTKSMAENR             | Q9DD20 | 0          | n +17.03 Da,K +34.06 Da, | 2940.543213 | 4 | 527.7948608 | 527.7965508 |
| PILGVTEAFKR                   | P05202 | 0          | n +17.03 Da,K +34.06 Da, | 2522.522949 | 3 | 427.9425049 | 427.9432392 |
| AFKDTGKTPVEPEVAIHRIR          | P60867 | 0.01957071 | n +42.03 Da,K +34.06 Da, | 2473.468994 | 5 | 475.6832275 | 475.6833784 |
| GLFEDTNLCAIHAQR               | P02301 | 0          | n +34.06 Da,K +34.06 Da, | 2473.398193 | 4 | 454.006073  | 454.0069966 |

|                                |        |            |                          |             |   |             |             |
|--------------------------------|--------|------------|--------------------------|-------------|---|-------------|-------------|
| FHQDQSSVGLTAEDIEKAR            | Q60936 | 0          | n +34.06 Da,K +34.06 Da, | 2472.625    | 3 | 752.7299805 | 752.7345667 |
| PHLPQEEVLKFYR                  | P50136 | 0          | n +17.03 Da,K +34.06 Da, | 2756.942871 | 3 | 569.6599731 | 569.6665461 |
| MNLSAAHHQISLSDGNNIPLIGLTYS DPR | Q8VCX1 | 0          | n +42.03 Da,             | 4246.412598 | 3 | 1078.540039 | 1078.538452 |
| PTTFMGHYLHEVAR                 | P07724 | 0          | n +17.03 Da,             | 2472.107178 | 4 | 419.715332  | 419.7160418 |
| LEKFNNVEAGKYTVGLGQTR           | P54869 | 0          | n +34.06 Da,K +34.06 Da, | 2618.7771   | 4 | 582.3400269 | 582.3458123 |
| KDEPWLVRPPEPQR                 | Q9QZH6 | 0.00151286 | n +34.06 Da,K +34.06 Da, | 2470.902344 | 3 | 638.039978  | 638.0407129 |
| VLSSGKFYGDLEKDKGLQTSQDAR       | P14211 | 0.00151286 | n +34.06 Da,K +34.06 Da, | 2470.651123 | 5 | 556.5237427 | 556.5247249 |
| SSTQFNKGPSYGLSAEVKNR           | Q08093 | 0.01250823 | n +42.03 Da,K +34.06 Da, | 2469.986572 | 3 | 760.7399902 | 760.7466951 |
| VSAKDFEKVDLTR                  | P97328 | 0          | n +34.06 Da,K +34.06 Da, | 2472.036621 | 3 | 537.3381348 | 537.3384654 |
| GGGVLGAFHMTKMDLPGSYPR          | E9Q9J5 | 0.00151286 | n +34.06 Da,K +34.06 Da, | 2597.177734 | 4 | 583.3099976 | 583.3159696 |
| DIEGIQYKTLRTHHGVV              | Q9CWU9 | 0.04286553 | n +42.03 Da,K +34.06 Da, | 2497.664551 | 4 | 562.3099976 | 562.3117795 |
| SDAEVYSIIKESNR                 | P50431 | 0.00080064 | n +34.06 Da,K +34.06 Da, | 2549.682617 | 3 | 614.3599854 | 614.3669729 |
| HIDGAYVYHNEHEVGEAIR            | Q8VXC1 | 0          | n +17.03 Da,             | 2464.60376  | 3 | 742.6900024 | 742.696076  |
| SPSKESDELIFVNGKKVTER           | G3X982 | 0.02292441 | n +34.06 Da,K +34.06 Da, | 2752.878662 | 5 | 510.1090393 | 510.1085706 |
| PEASIDSYAKSLLHGR               | P97742 | 0          | n +17.03 Da,K +34.06 Da, | 2491.785645 | 4 | 449.5       | 449.5047345 |
| TTVMLKDKLAE LR                 | Q9JKR6 | 0          | n +34.06 Da,K +34.06 Da, | 2459.58667  | 4 | 405.769989  | 405.7707909 |
| SKATEATKIAIDAGFR               | P70694 | 0.00151286 | n +34.06 Da,K +34.06 Da, | 2451.655273 | 3 | 594.3731079 | 594.3720579 |
| YDYYGAYGNQAHKDYTYSR            | Q99LB7 | 0.0362448  | n +34.06 Da,K +34.06 Da, | 2440.495117 | 3 | 801.7199707 | 801.7152837 |
| PVWAIGTGKTATPQQAEVHEKLR        | P17751 | 0          | n +17.03 Da,K +34.06 Da, | 2439.155273 | 5 | 546.9199829 | 546.9205441 |
| SESPMVKEILKEQESR               | Q99LX0 | 0          | n +34.06 Da,K +34.06 Da, | 2435.494141 | 4 | 498.7932129 | 498.7937238 |
| SHTDVKVPDFSDYR                 | Q9CR68 | 0          | n +34.06 Da,K +34.06 Da, | 2431.286621 | 3 | 578.6426392 | 578.6425073 |
| KGLTEVKIDFPR                   | Q8CAY6 | 0          | n +42.03 Da,K +34.06 Da, | 2437.165283 | 3 | 548.0100098 | 547.9997431 |
| VAQHVAEDLGKAFGER               | Q8BMS1 | 0          | n +34.06 Da,K +34.06 Da, | 2430.144775 | 4 | 449.5090942 | 449.5087952 |
| VAFVKHTTIFEVLPEKADR            | Q921I1 | 0          | n +34.06 Da,K +34.06 Da, | 2951.300049 | 5 | 461.2799988 | 461.2861865 |
| LTKFLEEHPGGEEVLR               | P56395 | 0.00080064 | n +34.06 Da,K +34.06 Da, | 2423.150635 | 4 | 481.2810059 | 481.2809155 |
| PSKGPLQSVQVFGFR                | P14131 | 0.01145553 | n +17.03 Da,K +34.06 Da, | 2420.563477 | 2 | 775.9699707 | 775.9674233 |
| MGTLPKQVKIVEVGPR               | P38060 | 0.0274056  | n +34.06 Da,K +34.06 Da, | 2419.036377 | 4 | 464.3079529 | 464.3078063 |
| AHGSVVKSEDYAFPTYADR            | P19783 | 0.01250823 | n +34.06 Da,K +34.06 Da, | 2417.774658 | 3 | 727.710022  | 727.7131026 |
| CLFKSTTKDLLFR                  | Q921I1 | 0          | n +34.06 Da,K +34.06 Da, | 2892.717529 | 4 | 433.519989  | 433.5235157 |
| NKFASFIDKVR                    | P07744 | 0          | n +34.06 Da,K +34.06 Da, | 2407.081543 | 4 | 357.4899902 | 357.4870958 |
| RDAILFPSFIHSQKR                | P24270 | 0.00498575 | n +42.03 Da,K +34.06 Da, | 3214.763672 | 4 | 473.5299988 | 473.524483  |
| MPWFKGWKVTR                    | P10126 | 0          | n +34.06 Da,K +34.06 Da, | 2975.630371 | 4 | 385.2448425 | 385.244477  |
| FHFVHSSADVDSVSVGTLR            | Q8CHT0 | 0          | n +34.06 Da,             | 3212.619385 | 3 | 698.7000122 | 698.6990866 |
| ATEGMILTINHHDHQR               | Q8BUV3 | 0          | n +42.03 Da,             | 2377.005859 | 3 | 593.2885132 | 593.293185  |
| PANLDLKKELSEPSSTR              | Q8C196 | 0          | n +17.03 Da,K +34.06 Da, | 2376.260498 | 3 | 657.3800049 | 657.3916293 |
| KGIKSVTELNGDTITNTMTLGDIVYKR    | P12710 | 0          | n +42.03 Da,K +34.06 Da, | 4102.158203 | 4 | 778.710022  | 778.7009275 |
| GSVVKSEDYAFPTYADRR             | P19783 | 0          | n +34.06 Da,K +34.06 Da, | 2374.537354 | 4 | 533.0300293 | 533.0379173 |
| SLSNKLTLDKLDVKGKR              | P09411 | 0          | n +42.03 Da,K +34.06 Da, | 2374.35791  | 3 | 698.4699707 | 698.4703609 |
| GKIPEHDLDPNVTHILKEPVR          | Q99PL5 | 0          | n +34.06 Da,K +34.06 Da, | 3057.663086 | 5 | 497.9100037 | 497.9105681 |
| TRAQFEGIVTDLIKR                | P38647 | 0.00365764 | n +34.06 Da,K +34.06 Da, | 3371.896973 | 4 | 454.5299988 | 454.5335415 |

|                               |        |            |                          |             |             |             |             |
|-------------------------------|--------|------------|--------------------------|-------------|-------------|-------------|-------------|
| AHGSVVKSEDYAFPTYADR           | P19783 | 0          | n +34.06 Da,K +34.06 Da, | 2369.709717 | 3           | 727.710022  | 727.7131026 |
| FLTKDGFESPEELR                | P52196 | 0          | n +34.06 Da,K +34.06 Da, | 2367.223877 | 4           | 475.2815552 | 475.2834203 |
| SLSNKLTLDKLDVKGKR             | P09411 | 0          | n +42.03 Da,K +34.06 Da, | 2364.448486 | 4           | 524.0999756 | 524.1045898 |
| KEKAIKELEEYAR                 | O08585 | 0          | n +42.03 Da,K +34.06 Da, | 3613.006104 | 4           | 485.0400085 | 485.0452413 |
| SVVKSEDYAFPTYADRR             | P19783 | 0.03738872 | n +34.06 Da,K +34.06 Da, | 2360.061768 | 4           | 518.7800293 | 518.7825513 |
| SVGICGSDVHYWEHGR              | Q64442 | 0          | n +34.06 Da,             | 2358.904053 | 3           | 631.6300049 | 631.6355403 |
| PKHEFSVDMTCEGCAEAVSR          | O08997 | 0          | n +17.03 Da,K +34.06 Da, | 2371.697998 | 3           | 787.7000122 | 787.7013345 |
| FIVRKSMDHDEVLVSSMDTSR         | Q70FJ1 | 0.02694427 | n +42.03 Da,K +34.06 Da, | 3492.314697 | 3           | 805.0800171 | 805.0857364 |
| DFGTVNEIYKTYFQGSLPAR          | P52760 | 0          | n +34.06 Da,K +34.06 Da, | 4457.955078 | 3           | 792.095459  | 792.0953242 |
| VPTSQVTGPPPPPIR               | E9Q4N6 | 0.00498575 | n +34.06 Da,             | 2347.256104 | 4           | 451.269989  | 451.2650375 |
| AKLVRPPVQVYIEGR               | Q9DB20 | 0          | n +34.06 Da,K +34.06 Da, | 2344.420654 | 3           | 617.3884277 | 617.3930863 |
| TVNPSTGEVICQVAEGNKEDVDKAVKAAR | P47738 | 0          | n +34.06 Da,K +34.06 Da, | 3294.347656 | 5           | 645.1599731 | 645.1679689 |
| MDFNVKLAADAGTFLSR             | Q9JK48 | 0.00080064 | n +42.03 Da,K +34.06 Da, | 4548.458984 | 3           | 698.7299805 | 698.7278066 |
| PEDGALLGKIEKVR                | Q6PB93 | 0          | n +17.03 Da,K +34.06 Da, | 2337.418945 | 4           | 403.2600098 | 403.263512  |
| PKHEFSVDMTCEGCAEAVSR          | O08997 | 0          | n +17.03 Da,K +34.06 Da, | 2330.470947 | 3           | 787.7000122 | 787.7013345 |
| SEKDILLRPELEELR               | Q9DCN2 | 0          | n +34.06 Da,K +34.06 Da, | 3101.6604   | 3           | 636.7188721 | 636.719417  |
| ERPPFVAYPHLR                  | P43024 | 0          | n +34.06 Da,             | 2327.854736 | 4           | 379.7207642 | 379.7215365 |
| PFLDIQKGLGISLDR               | Q99LY9 | 0          | n +17.03 Da,K +34.06 Da, | 3655.164307 | 4           | 457.7986755 | 457.7989904 |
| SLSNKLTLDKLDVKGKR             | P09411 | 0          | n +42.03 Da,K +34.06 Da, | 2324.175537 | 4           | 524.1032715 | 524.1045898 |
| PKHEFSVDMTCEGCAEAVSR          | O08997 | 0          | n +17.03 Da,K +34.06 Da, | 2320.325928 | 4           | 591.0267334 | 591.02782   |
| REDLVYQAKLAEQAER              | P62259 | 0          | n +34.06 Da,K +34.06 Da, | 2317.65625  | 3           | 663.039978  | 663.0463043 |
| PNIKIFSGSSHQDLSQKIADR         | Q9D7G0 | 0          | n +17.03 Da,K +34.06 Da, | 2316.074463 | 4           | 607.348877  | 607.3513793 |
| GVKDIAFEVEDCDHIVQKAR          | P49429 | 0          | n +34.06 Da,K +34.06 Da, | 2893.530762 | 3           | 811.1199951 | 811.1214742 |
| ADDIVNWLKRR                   | P09103 | 0.00563777 | n +34.06 Da,K +34.06 Da, | 2808.237549 | 4           | 365.7399902 | 365.7424618 |
| EVKCDMEVSCPEGYTCRR            | P28798 | 0          | n +34.06 Da,K +34.06 Da, | 2313.265625 | 3           | 783.3400269 | 783.3422019 |
| TGKTSIAIDTIINQKR              | Q03265 | 0          | n +34.06 Da,K +34.06 Da, | 2312.866455 | 4           | 466.0499878 | 466.0546034 |
| TPIFSKMAHWSNK                 | P10649 | 0          | n +34.06 Da,K +34.06 Da, | 2309.01416  | 4           | 412.9981079 | 412.9986706 |
| PHAFKPGDLVFAK                 | Q3UMU9 | 0          | n +17.03 Da,K +34.06 Da, | 2357.270996 | 3           | 504.6499634 | 504.652166  |
| KTVTAMDVVYALKR                | P62806 | 0          | n +42.03 Da,K +34.06 Da, | 3175.871582 | 4           | 427.019989  | 427.0142902 |
| PMFPNDYKVVKR                  | Q8JZX4 | 0          | n +17.03 Da,K +34.06 Da, | 2301.667725 | 4           | 427.75      | 427.7538884 |
| ASKLSLCGEESFGTGS DHIR         | Q9D0F9 | 0.00151286 | n +34.06 Da,K +34.06 Da, | 2361.459717 | 4           | 555.539978  | 555.5403958 |
| HAMNLEAVNTYEGTHDIH            | Q60759 | 0          | 2200.078857              | 3           | 693.9877319 | 693.9899428 |             |
| PCALCSLHSIGKIGGAQNR           | P34884 | 0          | n +17.03 Da,K +34.06 Da, | 2299.198242 | 3           | 697.3800049 | 697.3788538 |
| PKPVGALAGHQDGITFIDSKGDAR      | Q91VU6 | 0          | n +17.03 Da,K +34.06 Da, | 2298.978271 | 4           | 634.6199951 | 634.6145704 |
| ASLKDLEGKWR                   | Q05816 | 0          | n +42.03 Da,K +34.06 Da, | 3134.594727 | 3           | 471.6221924 | 471.6226066 |
| MKVLDDLKNIR                   | P70694 | 0.00296736 | n +34.06 Da,K +34.06 Da, | 2298.432129 | 4           | 391.0050049 | 391.0052243 |
| SVFGPDGSLLVKHR                | Q9JHW2 | 0          | n +34.06 Da,K +34.06 Da, | 2296.00293  | 4           | 395.7399902 | 395.7452396 |
| HGSVVKSEDYAFPTYADR            | P19783 | 0          | n +34.06 Da,K +34.06 Da, | 2294.944336 | 3           | 704.0300293 | 704.0340646 |
| SSKPKSLEIIGAPFSKGQPR          | Q61176 | 0          | n +42.03 Da,K +34.06 Da, | 2523.917969 | 4           | 568.5999756 | 568.6034551 |
| PKHEFSVDMTCEGCAEAVSR          | O08997 | 0          | n +17.03 Da,K +34.06 Da, | 2289.770996 | 3           | 787.7000122 | 787.7013345 |



|                         |        |            |                          |             |   |             |             |
|-------------------------|--------|------------|--------------------------|-------------|---|-------------|-------------|
| PNYGVHLPVAVKLR          | Q9DBS1 | 0          | n +17.03 Da,K +34.06 Da, | 2485.98584  | 4 | 379.4899902 | 379.4911636 |
| ALSTGEKGFYKGSFHR        | P17742 | 0          | n +42.03 Da,K +34.06 Da, | 2322.023193 | 3 | 680.3800049 | 680.3708993 |
| PKHEFSVDMTCGCAEAVSR     | O08997 | 0          | n +17.03 Da,K +34.06 Da, | 2279.566162 | 4 | 591.0268555 | 591.02782   |
| PIQSVKGVVIDAFR          | O35593 | 0.00960219 | n +17.03 Da,K +34.06 Da, | 2363.356201 | 4 | 436.2900085 | 436.2897953 |
| GETPTEKLPFPIIDDKGR      | O08709 | 0          | n +34.06 Da,K +34.06 Da, | 3031.329102 | 4 | 529.5700073 | 529.5690809 |
| SPVKWCALSHLER           | Q92111 | 0          | n +34.06 Da,K +34.06 Da, | 2271.70166  | 3 | 550.9854126 | 550.9855506 |
| PKDISEFQHEEFYR          | Q9CQN1 | 0          | n +17.03 Da,K +34.06 Da, | 2405.454834 | 3 | 625.9899902 | 625.9881258 |
| MQPASAKWYDRR            | Q9R0Q7 | 0.02132999 | n +42.03 Da,K +34.06 Da, | 2269.594971 | 3 | 528.9440918 | 528.9436448 |
| IAYNLVHELK              | B2RXC1 | 0.01667736 |                          | 2573.741455 | 3 | 409.9014282 | 409.8996638 |
| DIVNWLKLR               | P09103 | 0.00151286 | n +34.06 Da,K +34.06 Da, | 2736.158936 | 3 | 425.2999878 | 425.2995042 |
| AHYHDNYGKNDEVEFVR       | P25688 | 0          | n +42.03 Da,K +34.06 Da, | 2263.088623 | 3 | 723.6751709 | 723.6784629 |
| SEKSVEAAAELSAKDLKEKK    | Q9D0J8 | 0.00080064 | n +42.03 Da,K +34.06 Da, | 2676.720215 | 4 | 594.1300049 | 594.1297617 |
| LPKNWDWR                | Q9WUU7 | 0.04183854 | n +34.06 Da,K +34.06 Da, | 2260.189697 | 3 | 394.9061279 | 394.906677  |
| SGTQSTITDRFPLKPIR       | Q8R4H2 | 0          | n +42.03 Da,K +34.06 Da, | 2508.895996 | 3 | 719.0999756 | 719.1005205 |
| TDLTKVNKECCHGDLLCADDR   | P07724 | 0          | n +34.06 Da,K +34.06 Da, | 2259.597168 | 4 | 688.5900269 | 688.5953392 |
| PVTGSTHTLLGPYWSEELGKEMR | Q9CXN7 | 0          | n +17.03 Da,K +34.06 Da, | 3172.129883 | 5 | 561.1099854 | 561.1126449 |
| SDLELHPPSYPWSHR         | Q9D0M3 | 0          | n +34.06 Da,             | 3026.708984 | 3 | 618.9829712 | 618.9830457 |
| GSKGYGFVHFETQEAER       | P29341 | 0          | n +34.06 Da,K +34.06 Da, | 2256.25293  | 3 | 694.3599854 | 694.3622925 |
| SSKPKSLEIIGAPFSKGQPR    | Q61176 | 0          | n +42.03 Da,K +34.06 Da, | 2254.359863 | 5 | 455.0799866 | 455.0842194 |
| AHYHDNYGKNDEVEFVR       | P25688 | 0          | n +42.03 Da,K +34.06 Da, | 2252.868896 | 2 | 1085.01001  | 1085.014056 |
| PKHEFSVDMTCGCAEAVSR     | O08997 | 0          | n +17.03 Da,K +34.06 Da, | 2248.529053 | 3 | 787.7000122 | 787.7013345 |
| SFDCFKKVLK              | Q8BH59 | 0          | n +34.06 Da,K +34.06 Da, | 2244.560059 | 4 | 351.2200012 | 351.2247475 |
| HSILPVDDINGLNNEEQKQLR   | Q9JH15 | 0          | n +34.06 Da,K +34.06 Da, | 3137.369141 | 3 | 834.460022  | 834.4592143 |
| VSAKDFEKVDLTR           | P97328 | 0          | n +34.06 Da,K +34.06 Da, | 2460.721191 | 4 | 403.2600098 | 403.2556682 |
| SLSNKLTLDKLD            | P09411 | 0.00151286 | n +42.03 Da,K +34.06 Da, | 3342.281006 | 2 | 728.9478149 | 728.9483277 |
| RPLGLNPR                | O89023 | 0          | n +34.06 Da,             | 2234.291992 | 3 | 400.918335  | 400.9189874 |
| AWKSGGASHSELIHNLR       | P23506 | 0.00365764 | n +42.03 Da,K +34.06 Da, | 2226.062256 | 4 | 485.5151062 | 485.5143813 |
| TKKEIDQEAAVEVSQLR       | Q9CR68 | 0          | n +34.06 Da,K +34.06 Da, | 2223.620361 | 3 | 682.75      | 682.7478537 |
| AHYHDNYGKNDEVEFVR       | P25688 | 0          | n +42.03 Da,K +34.06 Da, | 2223.024902 | 4 | 543.0101929 | 543.0106663 |
| AHYHDNYGKNDEVEFVR       | P25688 | 0          | n +42.03 Da,K +34.06 Da, | 2222.650635 | 3 | 723.6782837 | 723.6784629 |
| DRLLIEKFIDNPR           | Q91ZA3 | 0          | n +34.06 Da,K +34.06 Da, | 3452.40332  | 4 | 425.0100098 | 425.0149845 |
| MEGYHHPDQKQLQALKDTANR   | P40142 | 0          | n +42.03 Da,K +34.06 Da, | 2220.428955 | 3 | 872.4799805 | 872.4868163 |
| PVTGSTHTLLGPYWSEELGKEMR | Q9CXN7 | 0          | n +17.03 Da,K +34.06 Da, | 3213.517822 | 5 | 561.1099854 | 561.1126449 |
| AELGEISDIHTKLLR         | Q9WUN2 | 0.01612903 | n +42.03 Da,K +28.03 Da, | 3253.849854 | 4 | 442         | 442.001816  |
| PGVTVKDVNQQEFVR         | Q9CZ8  | 0          | n +17.03 Da,K +34.06 Da, | 2214.249756 | 2 | 884         | 884.004735  |
| IAHTPGVAADLSHIETR       | P08249 | 0          | n +31.05 Da,             | 2211.922119 | 4 | 455.4943542 | 455.5022297 |
| WELTILHTNDVHSR          | Q61503 | 0          | n +34.06 Da,             | 2775.37207  | 4 | 439.4899902 | 439.4903746 |
| ATKCTKCGPGYSTPLEAMKGPR  | P17563 | 0          | n +42.03 Da,K +34.06 Da, | 2207.188232 | 4 | 639.3475342 | 639.3473349 |
| ATSASSHLNKGIKQMY        | P15105 | 0          | n +42.03 Da,K +34.06 Da, | 2203.929199 | 2 | 923.5100098 | 923.5118324 |
| SHTDVKVPDFSDYR          | Q9CR68 | 0          | n +34.06 Da,K +34.06 Da, | 2202.737305 | 3 | 578.6437988 | 578.6425073 |

|                                        |        |            |                          |             |   |             |             |
|----------------------------------------|--------|------------|--------------------------|-------------|---|-------------|-------------|
| ATSASSHLNKGKIQMY                       | P15105 | 0          | n +42.03 Da,K +34.06 Da, | 2195.090332 | 3 | 616.0114136 | 616.0103138 |
| PTQTISQGAIEKVKDATR                     | Q8C196 | 0.01145553 | n +17.03 Da,K +34.06 Da, | 2316.691162 | 3 | 676.7399902 | 676.7426621 |
| AQEEEDVRDYNLTEEQKATKDKYPPVNR           | Q505B7 | 0          | n +42.03 Da,K +34.06 Da, | 2726.514893 | 4 | 878.210022  | 878.2115459 |
| TRMGPLINAPHLER                         | Q9JLJ2 | 0.02910855 | n +34.06 Da,             | 2212.107422 | 4 | 410.4899902 | 410.4884773 |
| AHYHDNYGKNDEVEFVR                      | P25688 | 0          | n +42.03 Da,K +34.06 Da, | 2182.557617 | 4 | 543.010498  | 543.0106663 |
| GSEAAQLLEADFAAHKHR                     | Q9D114 | 0          | n +42.03 Da,K +34.06 Da, | 3784.775635 | 3 | 700.0317993 | 700.0344693 |
| GVVLFKKFDEGR                           | P09103 | 0          | n +34.06 Da,K +34.06 Da, | 2175.206055 | 3 | 499.6600037 | 499.6609906 |
| TKKEIDQEAAVEVSQLR                      | Q9CR68 | 0.03522388 | n +34.06 Da,K +34.06 Da, | 2228.858154 | 4 | 512.3099976 | 512.3127094 |
| SFIQGFVDHVKEDCDR                       | Q61207 | 0          | n +34.06 Da,K +34.06 Da, | 3186.099854 | 4 | 505.7598267 | 505.7611902 |
| GAFKEIKLSDYR                           | Q61171 | 0.00151286 | n +34.06 Da,K +34.06 Da, | 2171.7854   | 3 | 510.3240967 | 510.3242673 |
| TAEEMKAAENGAQSAPLPLEGVDISPKQDEGLVKVIKR | P30416 | 0          | n +34.06 Da,K +34.06 Da, | 3590.793457 | 6 | 699.0758057 | 699.0772936 |
| MMGHRPVLVLSQNTKR                       | P80318 | 0          | n +42.03 Da,K +34.06 Da, | 2217.617188 | 3 | 648.3674927 | 648.3678485 |
| KQNNLYKGLEAFR                          | P54869 | 0          | n +34.06 Da,K +34.06 Da, | 2176.407959 | 4 | 421.5171509 | 421.5163849 |
| SEKKISSVQSIVPALEIANARH                 | P63038 | 0          | n +34.06 Da,K +34.06 Da, | 2933.364014 | 5 | 496.7049255 | 496.7076506 |
| MMGHRPVLVLSQNTKR                       | P80318 | 0          | n +42.03 Da,K +34.06 Da, | 2217.687988 | 4 | 486.5275879 | 486.5277055 |
| SKSAPSIPKENFSCLTR                      | P14152 | 0.00498575 | n +34.06 Da,K +34.06 Da, | 2214.734375 | 3 | 675.394104  | 675.3946456 |
| AGKPVLYHFDGRGR                         | P30115 | 0          | n +42.03 Da,K +34.06 Da, | 2148.591553 | 4 | 412.9820862 | 412.9837221 |
| HQDQSSVGGTLAEDIEKAR                    | Q60936 | 0          | n +34.06 Da,K +34.06 Da, | 2144.590576 | 3 | 703.710022  | 703.711762  |
| SAFHPDTGKMTLIGR                        | Q99JR1 | 0.00628053 | n +34.06 Da,K +34.06 Da, | 2287.349365 | 4 | 457.7600098 | 457.7569132 |
| LLNPKPKSEMTPPEELQKR                    | P62317 | 0          | n +42.03 Da,K +34.06 Da, | 2428.319336 | 3 | 758.1199951 | 758.1191818 |
| LHTVYQSVLPETHQMLR                      | Q07417 | 0          | n +34.06 Da,             | 2853.707031 | 4 | 554.5502319 | 554.5492641 |
| AHYHDNYGKNDEVEFVR                      | P25688 | 0          | n +42.03 Da,K +34.06 Da, | 2140.883301 | 3 | 723.6760254 | 723.6784629 |
| TSVATKKTEQPPSSEYIFER                   | P29758 | 0          | n +34.06 Da,K +34.06 Da, | 2140.510498 | 3 | 819.789978  | 819.7955329 |
| YVAEKISGQKVNEAACDIAR                   | O35490 | 0          | n +34.06 Da,K +34.06 Da, | 2140.181641 | 4 | 581.8318481 | 581.8336462 |
| EDEEDVKLLGMSGKR                        | Q61937 | 0          | n +34.06 Da,K +34.06 Da, | 2137.796143 | 3 | 603.3499756 | 603.3488134 |
| EHGIDPTGTYHGSDSLQLER                   | P68372 | 0          | n +34.06 Da,             | 2471.216064 | 3 | 758.7000122 | 758.6997043 |
| FFISPENTLDCEQPIR                       | P48725 | 0.04449649 |                          | 2136.690918 | 3 | 665.3400269 | 665.3277841 |
| AHYHDNYGKNDEVEFVR                      | P25688 | 0          | n +42.03 Da,K +34.06 Da, | 2132.739014 | 2 | 1085.01001  | 1085.014056 |
| PVEIQALVNAKAR                          | Q8K215 | 0          | n +17.03 Da,K +34.06 Da, | 2130.499268 | 4 | 388.5100098 | 388.516138  |
| SGLDMHTKPWIR                           | O35490 | 0          | n +34.06 Da,K +34.06 Da, | 2130.428711 | 3 | 503.6263123 | 503.6274745 |
| PYTTVTPQIINSKWEKVQLVPKR                | P57780 | 0.04834013 | n +17.03 Da,K +34.06 Da, | 3651.492432 | 5 | 595.3701782 | 595.3697107 |
| PQQHKVALLDFGATR                        | Q60936 | 0          | n +17.03 Da,K +34.06 Da, | 2129.16748  | 3 | 578.0076294 | 578.0090835 |
| EWHTIILASDKR                           | B5X0G2 | 0          | n +34.06 Da,K +34.06 Da, | 2138.891357 | 3 | 512.9752808 | 512.977161  |
| WTFHYLR                                | Q99LC3 | 0.03021148 | n +34.06 Da,             | 2673.871338 | 3 | 352.8699951 | 352.8661118 |
| PALDSELTSKLKR                          | Q99KK7 | 0          | n +17.03 Da,K +34.06 Da, | 2121.521484 | 3 | 515         | 515.0015241 |
| DSDLKSDIDEIVLVGGSTR                    | P20029 | 0.00960219 | n +34.06 Da,K +34.06 Da, | 2586.121582 | 3 | 750.4500122 | 750.4409785 |
| PPVIQNPEYKGEWKPR                       | P14211 | 0          | n +17.03 Da,K +34.06 Da, | 2116.82959  | 3 | 675.0700073 | 675.0651873 |
| EITDKLGLHSLR                           | P61205 | 0          | n +34.06 Da,K +34.06 Da, | 2116.64917  | 4 | 363.230011  | 363.2319651 |
| PSTGEVICQAEGNKEDVDKAVKAAR              | P47738 | 0.00080064 | n +17.03 Da,K +34.06 Da, | 3090.39502  | 5 | 578.9299927 | 578.9298527 |
| EVKSCEFPQFKYGR                         | E9PUM5 | 0          | n +34.06 Da,K +34.06 Da, | 2347.326904 | 4 | 470.0168457 | 470.0173264 |

|                           |        |            |                          |             |   |             |             |
|---------------------------|--------|------------|--------------------------|-------------|---|-------------|-------------|
| GKYSQVLANGLDNKLR          | P62270 | 0          | n +34.06 Da,K +34.06 Da, | 2327.746094 | 3 | 626.7247925 | 626.7267236 |
| LPKNWDWR                  | Q9WUU7 | 0.00960219 | n +34.06 Da,K +34.06 Da, | 2219.036865 | 3 | 394.9067383 | 394.906677  |
| TFVHVTDLSGKETICR          | P62264 | 0          | n +34.06 Da,K +34.06 Da, | 2450.920166 | 4 | 483.519989  | 483.5227455 |
| AGKPVVLFHYFDGRGR          | P30115 | 0.00296736 | n +42.03 Da,K +34.06 Da, | 2108.095459 | 4 | 412.980011  | 412.9837221 |
| AELMQQKEATTEQQLR          | O35490 | 0.01145553 | n +42.03 Da,K +28.03 Da, | 3139.793945 | 2 | 987.5       | 987.501677  |
| DSVTKSKFDNLYGCR           | P50247 | 0          | n +34.06 Da,K +34.06 Da, | 2103.572998 | 4 | 473.7600098 | 473.7662374 |
| PANLDLKKELSEPSSTR         | Q8C196 | 0          | n +17.03 Da,K +34.06 Da, | 2102.146729 | 3 | 657.3892212 | 657.3916293 |
| SQEHPVVLTKFVEGAR          | Q8C196 | 0          | n +34.06 Da,K +34.06 Da, | 2231.96167  | 4 | 467.0281372 | 467.0283578 |
| TPKEKEESYDLILSR           | P24472 | 0.00365764 | n +34.06 Da,K +34.06 Da, | 2098.872559 | 3 | 637.3800049 | 637.3825116 |
| TVHAITATQKTVDGSPGKLWR     | P16858 | 0.00151286 | n +34.06 Da,K +34.06 Da, | 2093.976807 | 5 | 474.4899902 | 474.4897418 |
| IDLKKLAEIR                | Q9JHW2 | 0.00498575 | n +34.06 Da,K +34.06 Da, | 2718.317139 | 4 | 325.9899902 | 325.9907426 |
| PGDKVPSIKANAGEESVMNLDKLR  | Q8K2B3 | 0          | n +17.03 Da,K +34.06 Da, | 2916.786865 | 4 | 672.6400146 | 672.6469412 |
| PLTIVLAHKLNTR             | Q91X83 | 0          | n +17.03 Da,K +34.06 Da, | 2092.511963 | 4 | 382.5       | 382.5055424 |
| RPGSSYALRRLLGDPGLR        | Q8BLS7 | 0.01612903 | n +31.05 Da,             | 2449.716064 | 4 | 504.5400085 | 504.5472371 |
| SYLDKVKSLLETENR           | P05784 | 0.00151286 | n +34.06 Da,K +34.06 Da, | 2368.827637 | 4 | 446.7697754 | 446.7716827 |
| SDSRDPASDQMKQWKEQR        | P24270 | 0          | n +42.03 Da,K +34.06 Da, | 2080.563965 | 4 | 576.289978  | 576.2933863 |
| GVVLFKKFDEGR              | P09103 | 0          | n +34.06 Da,K +34.06 Da, | 2211.632324 | 4 | 374.9978333 | 374.9975621 |
| DDDDFDEEETEKVVPKKSVR      | Q61937 | 0          | n +34.06 Da,K +34.06 Da, | 2073.232178 | 4 | 662.1099854 | 662.1079906 |
| DGVKDIAFEVEDCDHIVQKAR     | P49429 | 0.00498575 | n +34.06 Da,K +34.06 Da, | 3190.038574 | 4 | 637.3499756 | 637.3496608 |
| TLASAAVLFHKKIQR           | Q9DCG6 | 0.00563777 | n +34.06 Da,K +34.06 Da, | 2848.783691 | 4 | 435.0299988 | 435.0256177 |
| GDTTHTLVEKINYTGR          | P49429 | 0          | n +34.06 Da,K +34.06 Da, | 2120.21167  | 3 | 625.0100098 | 625.0198665 |
| SHSNPVSNAQPAGAEKPEAKVLFDR | Q8CGC7 | 0.00080064 | n +34.06 Da,K +34.06 Da, | 2058.633545 | 4 | 688.6373901 | 688.637287  |
| AEDIKTKIKNYKTAPFDSR       | P56391 | 0.02132999 | n +42.03 Da,K +34.06 Da, | 2661.369873 | 5 | 481.4956055 | 481.4969218 |
| ASGADSKGDDLSTAILKQKNRPNR  | Q01853 | 0.01838935 | n +42.03 Da,K +34.06 Da, | 2054.171875 | 3 | 896.1799927 | 896.1825618 |
| TVGKSSKMLQHIDYR           | P27048 | 0.01667736 | n +42.03 Da,K +34.06 Da, | 2049.443115 | 3 | 625.0300293 | 625.0260751 |
| PCALCSLHSIGKIGGAQNR       | P34884 | 0          | n +17.03 Da,K +34.06 Da, | 2174.517822 | 4 | 523.2859497 | 523.2859595 |
| ASGGGVPTDEEQATGLER        | P19536 | 0          | n +14.02 Da,             | 2046.797363 | 2 | 894.4199829 | 894.4239498 |
| SIVEDKLVEDLKTR            | P26443 | 0          | n +34.06 Da,K +34.06 Da, | 2889.178223 | 3 | 583.039978  | 583.0401969 |
| SIKELGDHVTNLR             | P09528 | 0.00151286 | n +34.06 Da,K +34.06 Da, | 2044.490967 | 3 | 517.3200073 | 517.315954  |
| IPLDKTVVNKDVFR            | P61358 | 0          | n +34.06 Da,K +34.06 Da, | 2503.595459 | 4 | 437.2900085 | 437.2897765 |
| AITATQKTVDGSPGKLWR        | P16858 | 0          | n +34.06 Da,K +34.06 Da, | 2042.223511 | 4 | 508.5669861 | 508.5666067 |
| PFTIKPLDR                 | P40142 | 0.01145553 | n +17.03 Da,K +34.06 Da, | 2042.15271  | 3 | 379.9125061 | 379.9132797 |
| SDSRDPASDQMKQWKEQR        | P24270 | 0          | n +42.03 Da,K +34.06 Da, | 2039.386475 | 4 | 576.289978  | 576.2933863 |
| SDSRDPASDQMKQWKEQR        | P24270 | 0          | n +42.03 Da,K +34.06 Da, | 2038.292603 | 3 | 768.0545654 | 768.055423  |
| SSSDKQNNLYKGLEAFR         | P54869 | 0          | n +34.06 Da,K +34.06 Da, | 2546.445068 | 4 | 515.539978  | 515.5471428 |
| PGHLQEGFGCVVTNR           | Q9CY58 | 0          | n +17.03 Da,             | 2029.614502 | 3 | 563.2843628 | 563.2842896 |
| PAFFEHLR                  | Q8CC86 | 0.01612903 | n +17.03 Da,             | 2029.363281 | 3 | 345.1924744 | 345.1924472 |
| GEWHTIILASDKR             | B5X0G2 | 0.04497664 | n +34.06 Da,K +34.06 Da, | 2146.308594 | 4 | 399.2399902 | 399.2400559 |
| KASGPPVSELITKAVAASKER     | P15864 | 0          | n +42.03 Da,K +34.06 Da, | 3272.423828 | 4 | 571.6099854 | 571.6087376 |
| DIVNWLKKR                 | P09103 | 0.00225394 | n +34.06 Da,K +34.06 Da, | 2747.69165  | 4 | 319.2258301 | 319.2264472 |

|                               |        |            |                          |             |   |             |             |
|-------------------------------|--------|------------|--------------------------|-------------|---|-------------|-------------|
| PKVTQPEVDTPLGRVR              | Q63880 | 0          | n +17.03 Da,K +34.06 Da, | 2087.697266 | 4 | 461.5288696 | 461.5310178 |
| WVLDKKAER                     | P10126 | 0.00151286 | n +34.06 Da,K +34.06 Da, | 2019.139404 | 4 | 340.735321  | 340.7356423 |
| GVQVSPSGEKITHTGQVYDEKDYR      | P52503 | 0          | n +34.06 Da,K +34.06 Da, | 2016.942261 | 3 | 932.5100098 | 932.5068228 |
| VETLEWSKKVFR                  | Q14DH7 | 0.0130719  | n +34.06 Da,K +34.06 Da, | 2597.580078 | 4 | 406.7600098 | 406.7633944 |
| PNPNFEKFLFKSVAENR             | G3X9G9 | 0          | n +17.03 Da,K +34.06 Da, | 3455.043945 | 4 | 531.3099976 | 531.3087169 |
| DDDFDEEETEKVVPVKKSVR          | Q61937 | 0          | n +34.06 Da,K +34.06 Da, | 2013.136841 | 5 | 506.8800049 | 506.882459  |
| GVDFGKWR                      | Q91Y97 | 0.00498575 | n +34.06 Da,K +34.06 Da, | 2144.809326 | 3 | 344.8800049 | 344.8802392 |
| PALDSELTSKLKR                 | Q99KK7 | 0.0362448  | n +17.03 Da,K +34.06 Da, | 2119.82959  | 4 | 386.5012207 | 386.5029622 |
| VKIVTVKTQAYPDQKPGTSGLR        | Q9D0F9 | 0          | n +34.06 Da,K +34.06 Da, | 2011.066162 | 5 | 505.3228455 | 505.3253713 |
| SAASSKELLMKLR                 | Q9CZR8 | 0          | n +34.06 Da,K +34.06 Da, | 2007.255493 | 4 | 384.7552795 | 384.7564121 |
| SSMGSYPKKPMSSYL               | P40630 | 0          | n +34.06 Da,K +34.06 Da, | 2007.076294 | 3 | 641.0293579 | 641.0305384 |
| TAKGEKFMQEEFSR                | P27773 | 0          | n +34.06 Da,K +34.06 Da, | 2004.400635 | 3 | 630.3599854 | 630.3610531 |
| SSMGSYPKKPMSSYL               | P40630 | 0          | n +34.06 Da,K +34.06 Da, | 2004.287231 | 4 | 481.019989  | 481.0247229 |
| MEGYHKPDQKQLKALDNTANR         | P40142 | 0          | n +42.03 Da,K +34.06 Da, | 2002.520752 | 4 | 654.6199951 | 654.6169314 |
| SVKPTTTPPNSKALNLLDTKAR        | Q8JZY4 | 0          | n +34.06 Da,K +34.06 Da, | 2077.5271   | 5 | 478.3099976 | 478.3116884 |
| ATGANATPLDFPSKRR              | Q64213 | 0          | n +42.03 Da,K +34.06 Da, | 2122.9729   | 3 | 595.3477783 | 595.3494352 |
| EKVLKSHGQDYLVGNR              | P10648 | 0.01435095 | n +42.03 Da,K +28.03 Da, | 1993.068115 | 3 | 647.7000122 | 647.6899329 |
| PVIQNPEYKGEWKPR               | P14211 | 0          | n +17.03 Da,K +34.06 Da, | 1991.471802 | 3 | 642.710022  | 642.7142659 |
| AHYHDNYGKNDEVEFVR             | P25688 | 0          | n +42.03 Da,K +34.06 Da, | 2181.236572 | 3 | 723.6781006 | 723.6784629 |
| PVIQNPEYKGEWKPR               | P14211 | 0          | n +17.03 Da,K +34.06 Da, | 1990.999512 | 4 | 482.2900085 | 482.2875186 |
| ARFPQASASDVVVVHGR             | Q921H8 | 0.04781341 | n +34.06 Da,             | 1988.460815 | 4 | 458.2587585 | 458.2602865 |
| GGSLDQVLKEAKR                 | Q63932 | 0.01019022 | n +34.06 Da,K +34.06 Da, | 1986.508545 | 4 | 376.5       | 376.4991979 |
| SDAAVDTSEITTKDLKEKKEVVEEAENGR | P26350 | 0          | n +42.03 Da,K +34.06 Da, | 3243.462158 | 5 | 692.1783447 | 692.183115  |
| MVNHFIAEFKR                   | P63017 | 0          | n +34.06 Da,K +34.06 Da, | 2096.708984 | 4 | 365.7200012 | 365.7183302 |
| KFASFIDKVR                    | P04104 | 0.00151286 | n +34.06 Da,K +34.06 Da, | 1977.141724 | 4 | 328.9764709 | 328.9763638 |
| TIEDIEVAPKAHEVR               | P00329 | 0          | n +34.06 Da,K +34.06 Da, | 1974.419556 | 4 | 468.7799988 | 468.777003  |
| VVIGKVFMQEFKEGR               | Q9CVB6 | 0          | n +34.06 Da,K +34.06 Da, | 3110.032471 | 4 | 468.0400085 | 468.043344  |
| DLEALKKKGCQPSDIENPR           | P09055 | 0          | n +34.06 Da,K +34.06 Da, | 1972.51062  | 4 | 584.3499756 | 584.3494255 |
| ASGVAVSDGVIKVFNDMKVR          | P18760 | 0          | n +42.03 Da,K +34.06 Da, | 4285.057617 | 3 | 734.7575073 | 734.7577661 |
| AFKDTGKTPVEPEVAIHR            | P60867 | 0          | n +42.03 Da,K +34.06 Da, | 2364.306885 | 3 | 702.4008179 | 702.4057211 |
| GNIISDAMKKVGR                 | P63038 | 0          | n +34.06 Da,K +34.06 Da, | 2636.710205 | 4 | 373.4899902 | 373.494758  |
| AEDIKTKIKNYK                  | P56391 | 0.02180685 | n +42.03 Da,K +34.06 Da, | 1960.115967 | 4 | 408.0299988 | 408.027819  |
| WELTILHTNDVHSR                | Q61503 | 0.01250823 | n +31.05 Da,             | 3305.74707  | 4 | 438.730011  | 438.7363974 |
| HPVVLTKFVEGAR                 | Q8C196 | 0          | n +34.06 Da,K +34.06 Da, | 1956.337524 | 3 | 507.6557312 | 507.657651  |
| TDQHVKLPMGMTAENLAAYNISR       | Q8BWT1 | 0          | n +34.06 Da,K +34.06 Da, | 3376.025635 | 5 | 558.9199829 | 558.9156174 |
| STQSAVSKAGAGAVVPKLSHLPR       | Q9DC70 | 0          | n +34.06 Da,K +34.06 Da, | 2202.557129 | 5 | 473.4992676 | 473.4981816 |
| FWCGKPVQSQVQLKGR              | P11725 | 0          | n +34.06 Da,K +34.06 Da, | 1952.084595 | 3 | 674.0700073 | 674.0718366 |
| SDGHSEFLKAASNLR               | P27773 | 0          | n +34.06 Da,K +34.06 Da, | 2104.914307 | 4 | 425.7390442 | 425.7404204 |
| AKIAKTHEDIEAQIR               | Q99NB9 | 0          | n +42.03 Da,K +34.06 Da, | 1943.651245 | 3 | 611.699646  | 611.7003566 |
| DDFDEEETEKVVPVKKSVR           | Q61937 | 0          | n +34.06 Da,K +34.06 Da, | 1938.469482 | 5 | 483.8764648 | 483.8770701 |

|                              |        |            |                          |             |   |             |             |
|------------------------------|--------|------------|--------------------------|-------------|---|-------------|-------------|
| PLAKDLLHPSPEEEKR             | Q6ZWU9 | 0.01667736 | n +17.03 Da,K +34.06 Da, | 1937.612915 | 4 | 486.7900085 | 486.7954424 |
| YEVVRNFGNVLR                 | A2A654 | 0.03522388 |                          | 1937.215332 | 3 | 489.269989  | 489.2685276 |
| PSVSLQTVKLMKEGLEAAR          | O35490 | 0          | n +17.03 Da,K +34.06 Da, | 3461.953857 | 3 | 714.7700195 | 714.7715641 |
| VVLFKKFDEGR                  | D3Z6P0 | 0.01838935 | n +34.06 Da,K +34.06 Da, | 2060.282471 | 4 | 360.7399902 | 360.7421961 |
| GFVKVVKNKAYF                 | P47962 | 0.00563777 | n +34.06 Da,K +34.06 Da, | 2073.051514 | 3 | 512.690979  | 512.69222   |
| IDKFGEILKR                   | P55264 | 0.00563777 | n +34.06 Da,K +34.06 Da, | 1923.501709 | 4 | 330.9817505 | 330.9829175 |
| GTSDRPYSHALVAGIDR            | P61358 | 0          | n +34.06 Da,             | 1921.49585  | 3 | 616.9959106 | 616.9973551 |
| SEDAKGLIKSAIR                | Q9D051 | 0.00296736 | n +34.06 Da,K +34.06 Da, | 1920.905884 | 4 | 373.25      | 373.2503856 |
| EYRTKYEDEINKR                | P04104 | 0.0130719  | n +17.03 Da,K +34.06 Da, | 2107.916016 | 4 | 458.0108337 | 458.0114175 |
| SSGKFYGDLEKDKGLQTSQDAR       | P14211 | 0          | n +34.06 Da,K +34.06 Da, | 1914.396729 | 4 | 642.3599854 | 642.3659674 |
| SKLEPQIATASEYHR              | Q9DBG5 | 0          | n +34.06 Da,K +34.06 Da, | 1942.146851 | 3 | 623.6900024 | 623.6882282 |
| LYFHIGETEKR                  | Q8R1V4 | 0.00498575 | n +34.06 Da,K +34.06 Da, | 1906.173218 | 4 | 365.9678345 | 365.968774  |
| TKVVAVDCGIKNNVIR             | Q8C196 | 0          | n +34.06 Da,K +34.06 Da, | 1903.136597 | 4 | 472.7999878 | 472.8028883 |
| AREATQAVLDKPPETLSSDASTR      | P50544 | 0          | n +34.06 Da,K +34.06 Da, | 1958.344849 | 4 | 604.3300171 | 604.3344088 |
| SAALIQQATTVKNNKDIR           | P51410 | 0          | n +34.06 Da,K +34.06 Da, | 1901.386353 | 4 | 490.5700073 | 490.5666067 |
| TGFGGYDKVKLQSR               | Q62465 | 0.00762829 | n +34.06 Da,K +34.06 Da, | 1900.309814 | 3 | 553.3400269 | 553.3422097 |
| SAASSKELLMKLR                | Q9CZR8 | 0.01019022 | n +34.06 Da,K +34.06 Da, | 1898.748657 | 4 | 384.7600098 | 384.7564121 |
| SSAAAAESAALKVRPER            | Q8BGT5 | 0          | n +34.06 Da,K +34.06 Da, | 1894.525269 | 4 | 446.2673035 | 446.2680737 |
| KEVKCDMEVSCPEGYTCCR          | P28798 | 0          | n +34.06 Da,K +34.06 Da, | 1891.739624 | 3 | 837.3900146 | 837.3948954 |
| TSAVPQITTHYTVHPR             | Q921G7 | 0          | n +34.06 Da,             | 1889.572998 | 4 | 461.2583923 | 461.2574782 |
| IRNDEELNKLGR                 | P22752 | 0          | n +34.06 Da,K +34.06 Da, | 2519.310059 | 4 | 410.2535706 | 410.2547004 |
| STSAVPQITTHYTVHPR            | Q921G7 | 0          | n +34.06 Da,             | 1885.702637 | 3 | 643.6799927 | 643.6848885 |
| RYQKSTELLIR                  | P02301 | 0.00296736 | n +42.03 Da,K +34.06 Da, | 1885.588623 | 3 | 494.9654846 | 494.9665553 |
| VKGVVNGFGRIGR                | P16858 | 0.01019022 | n +34.06 Da,K +34.06 Da, | 1884.379272 | 4 | 357.4899902 | 357.4873993 |
| ASGVSDGAGAVIIASEDAVKKHNTPLAR | Q8BWT1 | 0          | n +17.03 Da,K +34.06 Da, | 3851.633301 | 5 | 594.1400146 | 594.1407118 |
| SGPGLHADLLR                  | Q8BWF0 | 0          | n +34.06 Da,             | 1879.162476 | 3 | 409.5700073 | 409.5736574 |
| SALEHSVQCAVDVVKR             | P24270 | 0          | n +34.06 Da,K +34.06 Da, | 1879.020996 | 3 | 589.6699829 | 589.6666583 |
| TAVFITQEEAHGLHR              | P70375 | 0          | n +34.06 Da,             | 2491.966064 | 4 | 461.2560425 | 461.2574782 |
| SHTILLVQPTKRPEGR             | P84089 | 0.00960219 | n +42.03 Da,K +34.06 Da, | 1878.40918  | 4 | 477.7900085 | 477.7864028 |
| SDSRDPASDQMKQWKEQR           | P24270 | 0.00080064 | n +42.03 Da,K +34.06 Da, | 1875.786743 | 3 | 768.0599976 | 768.055423  |
| SKSLKKLVEESR                 | Q01730 | 0          | n +42.03 Da,K +34.06 Da, | 1875.051147 | 2 | 774.5129395 | 774.5144274 |
| PGVTVKDQVQEFVR               | Q9CZX8 | 0          | n +17.03 Da,K +34.06 Da, | 2205.480713 | 3 | 589.6723633 | 589.6722488 |
| KTPWQCPDPSQWWKTLR            | Q9QXE0 | 0.01145553 | n +34.06 Da,K +34.06 Da, | 3531.277832 | 4 | 579.8300171 | 579.8256236 |
| DFDEEETEEKVPVKKSVR           | Q61937 | 0          | n +34.06 Da,K +34.06 Da, | 1873.137329 | 5 | 460.8699951 | 460.8716813 |
| TTFVKMLPKDKCR                | P18760 | 0          | n +34.06 Da,K +34.06 Da, | 2038.183105 | 4 | 429.0032654 | 429.0035246 |
| YRTDISMADFKNSR               | O70570 | 0.00080064 | n +34.06 Da,K +34.06 Da, | 2244.130859 | 4 | 443.7399902 | 443.7412631 |
| SSTSAVPQITTHYTVHPR           | Q921G7 | 0          | n +34.06 Da,             | 1868.401733 | 3 | 672.6951294 | 672.6955649 |
| SALEHSVQCAVDVVKR             | P24270 | 0          | n +17.03 Da,K +34.06 Da, | 1866.026978 | 3 | 583.9899902 | 583.989472  |
| ENPKQHVPLDEYSANLR            | Q9DB29 | 0          | n +34.06 Da,K +34.06 Da, | 2109.868896 | 3 | 693.3800049 | 693.3815756 |
| PTKVVAVDCGIKNNVIR            | Q8C196 | 0          | n +17.03 Da,K +34.06 Da, | 1865.80896  | 4 | 492.8088074 | 492.8081896 |

|                               |        |            |                          |             |   |             |             |
|-------------------------------|--------|------------|--------------------------|-------------|---|-------------|-------------|
| LYFHIGETEKR                   | Q8R1V4 | 0          | n +34.06 Da,K +34.06 Da, | 1865.738281 | 4 | 365.968811  | 365.968774  |
| ASVNFSEFSKCKSER               | P63158 | 0          | n +34.06 Da,K +34.06 Da, | 1865.487305 | 3 | 626.6799927 | 626.6806744 |
| STSAVPQITTHYTVHPR             | Q921G7 | 0          | n +34.06 Da,             | 1863.116577 | 4 | 483.0148621 | 483.0154855 |
| GAGGALFVHRDTPENNPDPDFDTPENYKR | Q9D6J6 | 0          | n +34.06 Da,K +34.06 Da, | 3344.673096 | 4 | 858.4299927 | 858.4326437 |
| PVQKLFVDKIR                   | P97450 | 0          | n +17.03 Da,K +34.06 Da, | 2075.462891 | 4 | 357.75      | 357.7500399 |
| SKSLKLVVEESR                  | Q01730 | 0.01560468 | n +42.03 Da,K +34.06 Da, | 1862.974976 | 3 | 516.678894  | 516.6787104 |
| PVQKLFVDKIR                   | P97450 | 0          | n +17.03 Da,K +34.06 Da, | 1862.684692 | 4 | 357.7499084 | 357.7500399 |
| PKHEFSVDMTCEGCAEAVSR          | O08997 | 0          | n +17.03 Da,K +34.06 Da, | 2238.74292  | 4 | 591.0261841 | 591.02782   |
| SSAAAESAALKVRPER              | Q8BGT5 | 0          | n +34.06 Da,K +34.06 Da, | 1861.797363 | 3 | 594.6900024 | 594.6883395 |
| IPTSGAEIGGAFGGEKHTGGGR        | Q9DBF1 | 0          | n +34.06 Da,K +34.06 Da, | 1861.687866 | 4 | 531.7913818 | 531.7921791 |
| VGGLWKFSDHIEEGR               | P97501 | 0.00563777 | n +34.06 Da,K +34.06 Da, | 2839.455811 | 4 | 450.25      | 450.2534292 |
| PKESSYACYDEER                 | O89017 | 0          | n +17.03 Da,K +34.06 Da, | 1857.337524 | 3 | 616.6199951 | 616.6174816 |
| KATIPAAALQAQESTEGPGTGQDRPR    | Q9DBG1 | 0          | n +34.06 Da,K +34.06 Da, | 2039.206299 | 4 | 662.6156616 | 662.6163239 |
| AEDIKTIKKNYKTAPFDSR           | P56391 | 0          | n +42.03 Da,K +34.06 Da, | 2707.876465 | 2 | 1202.22998  | 1202.23139  |
| TRKPVVDQYEDCYLAR              | Q921I1 | 0          | n +34.06 Da,K +34.06 Da, | 1855.301514 | 3 | 661.3499756 | 661.3527398 |
| RVISLSEHSIIGR                 | P08228 | 0.00498575 | n +34.06 Da,             | 1995.649658 | 2 | 779.460022  | 779.4678258 |
| GTLPKQVKIVEVGPR               | P38060 | 0          | n +34.06 Da,K +34.06 Da, | 2014.200439 | 4 | 431.5464478 | 431.5476851 |
| PVQKLFVDKIR                   | P97450 | 0          | n +17.03 Da,K +34.06 Da, | 1852.264282 | 3 | 476.6640625 | 476.6642944 |
| YKDTLLPKLPR                   | P49429 | 0          | n +34.06 Da,K +34.06 Da, | 2219.466309 | 4 | 362.25      | 362.2539336 |
| SDSRDPASDQMKQWKEQR            | P24270 | 0          | n +42.03 Da,K +34.06 Da, | 1999.010498 | 4 | 576.2906494 | 576.2933863 |
| SHTILLVQPTKRPEGR              | P84089 | 0          | n +42.03 Da,K +34.06 Da, | 1851.81958  | 3 | 636.710022  | 636.7127783 |
| LEPDNVGVVVFNGDKLIKEGDVVKR     | Q03265 | 0          | n +34.06 Da,K +34.06 Da, | 3551.672607 | 4 | 719.7000122 | 719.6945669 |
| GMQLGDKKLLVQR                 | P26369 | 0          | n +34.06 Da,K +34.06 Da, | 1849.11145  | 4 | 397.7668152 | 397.7670454 |
| FGKHGGTIPVVPTAEFQDR           | P26443 | 0          | n +34.06 Da,K +34.06 Da, | 2637.326172 | 3 | 708.7299805 | 708.733949  |
| PKFYCDYCDTYLTHDSPSVR          | Q62241 | 0          | n +17.03 Da,K +34.06 Da, | 2900.855469 | 4 | 644.5494995 | 644.5518224 |
| SPMVKEILKEQESR                | Q99LX0 | 0.01250823 | n +34.06 Da,K +34.06 Da, | 1841.594482 | 4 | 444.769989  | 444.7750679 |
| GVKLEVFR                      | P0DJE0 | 0.04393673 | n +34.06 Da,K +34.06 Da, | 1839.408813 | 3 | 339.2358704 | 339.236023  |
| VLSGEDKSNIAAWGK               | P01942 | 0          | n +34.06 Da,K +34.06 Da, | 1837.754761 | 3 | 613.7299805 | 613.7264302 |
| SDGHSEFLKAASNLR               | P27773 | 0.00498575 | n +34.06 Da,K +34.06 Da, | 2278.723389 | 4 | 425.7399902 | 425.7404204 |
| AAKNQLTSPENTVFDKAKR           | P20029 | 0          | n +34.06 Da,K +34.06 Da, | 1877.74646  | 4 | 552.3200073 | 552.3223372 |
| PDGNPKCLTKINYGGEVPKR          | Q8R0F9 | 0          | n +17.03 Da,K +34.06 Da, | 1836.14209  | 4 | 591.3499756 | 591.3507155 |
| SSTSAVPQITTHYTVHPR            | Q921G7 | 0          | n +34.06 Da,             | 1889.199341 | 4 | 504.7725525 | 504.7734928 |
| MLENSGCKALKEGVLEKR            | Q62392 | 0.0130719  | n +34.06 Da,K +34.06 Da, | 1834.835693 | 4 | 550.3400269 | 550.3381661 |
| IHSLAEGAERPAEISEPR            | Q9DCU6 | 0          | n +34.06 Da,             | 1871.600952 | 4 | 499.769989  | 499.7722216 |
| PILKQLVSSVNSKR                | Q9JM96 | 0          | n +17.03 Da,K +34.06 Da, | 1896.551147 | 4 | 436.0397644 | 436.0399776 |
| TVVTGIEMFHKSLER               | Q8BFR5 | 0          | n +34.06 Da,K +34.06 Da, | 2848.862793 | 4 | 454.519989  | 454.5171972 |
| EKNDAAKGIADLLSNGRMR           | O70157 | 0.03021148 | n +42.03 Da,K +34.06 Da, | 1831.549316 | 3 | 723.7299805 | 723.7408867 |
| YNIQKESTLHLVLR                | P0CG49 | 0.00365764 | n +34.06 Da,K +34.06 Da, | 2642.287109 | 4 | 446.2768555 | 446.2781755 |
| LYFHIGETEKR                   | Q8R1V4 | 0.00080064 | n +34.06 Da,K +34.06 Da, | 1879.716919 | 2 | 730.9299927 | 730.9302716 |
| EVNYYWDKQDHPISR               | P50136 | 0          | n +34.06 Da,K +34.06 Da, | 1826.17749  | 3 | 618.9966431 | 618.9971731 |

|                                          |        |            |                          |             |   |             |             |
|------------------------------------------|--------|------------|--------------------------|-------------|---|-------------|-------------|
| AHIFVYGLTKR                              | Q923B0 | 0          | n +34.06 Da,K +34.06 Da, | 1824.761353 | 4 | 343.9733887 | 343.973859  |
| EYKALLQCYGR                              | Q8C6S9 | 0.02180685 | n +34.06 Da,K +34.06 Da, | 2356.112549 | 4 | 396.2399902 | 396.2328078 |
| DDFDEEETEEKVPVKKSVR                      | Q61937 | 0          | n +34.06 Da,K +34.06 Da, | 1923.791382 | 4 | 604.5900269 | 604.5945185 |
| PKVQTQPEVDTPLGR                          | Q63880 | 0          | n +17.03 Da,K +34.06 Da, | 1820.410889 | 3 | 529.9799805 | 529.982423  |
| IHGGAVSLGHPIGMSGAR                       | Q8QZT1 | 0          | n +34.06 Da,             | 1820.302246 | 3 | 584.3225708 | 584.324637  |
| KEDVKSCAEFVSGSQLR                        | Q9DCX2 | 0          | n +34.06 Da,K +34.06 Da, | 2025.998169 | 3 | 681.3800049 | 681.3860389 |
| AHGSVVKSEDYAFPTYADR                      | P19783 | 0          | n +34.06 Da,K +34.06 Da, | 2328.66333  | 3 | 727.7111206 | 727.7131026 |
| VSLQTVKLMKEGLEAAR                        | O35490 | 0          | n +34.06 Da,K +34.06 Da, | 3189.490723 | 4 | 494.569519  | 494.5671836 |
| KTGPNLHGLFGR                             | P62897 | 0.00563777 | n +34.06 Da,K +34.06 Da, | 1839.627197 | 4 | 341.9655762 | 341.9662997 |
| PYVEITGTAGKKFR                           | Q60710 | 0.00151286 | n +17.03 Da,K +34.06 Da, | 1811.636353 | 4 | 413.7598572 | 413.7608707 |
| SSVQQFKEEISKR                            | Q8R317 | 0          | n +34.06 Da,K +34.06 Da, | 1810.717163 | 4 | 417.7600098 | 417.7598464 |
| SDSRDPASDQMKQWKEQR                       | P24270 | 0          | n +42.03 Da,K +34.06 Da, | 1806.678589 | 4 | 576.2977295 | 576.2933863 |
| GVLVFKKFDEGR                             | P09103 | 0          | n +34.06 Da,K +34.06 Da, | 2170.290039 | 4 | 375         | 374.9975621 |
| STTDIKADINKAYR                           | P11438 | 0.02694427 | n +34.06 Da,K +34.06 Da, | 1990.820313 | 4 | 425.2600098 | 425.2624877 |
| THINYGVKGDVAVIR                          | Q8BMS1 | 0          | n +34.06 Da,K +34.06 Da, | 2025.044922 | 4 | 428.2638245 | 428.2637967 |
| TFAEDKTYKYIR                             | Q8VCF0 | 0          | n +34.06 Da,K +34.06 Da, | 1803.949707 | 4 | 410.0029907 | 410.0003021 |
| TTDIKADINKAYR                            | P11438 | 0.01612903 | n +34.06 Da,K +34.06 Da, | 1813.066406 | 4 | 403.5036316 | 403.5044804 |
| TIENVKAKIQDKEGIPPDQQR                    | P0CG49 | 0          | n +34.06 Da,K +34.06 Da, | 1799.588257 | 3 | 848.5200195 | 848.5203324 |
| AGKPVLYHFDGR                             | P30115 | 0.00151286 | n +42.03 Da,K +34.06 Da, | 2456.579346 | 3 | 479.2694092 | 479.2683455 |
| MQSNKAFNLEKQNHTPR                        | Q99K48 | 0          | n +42.03 Da,K +34.06 Da, | 1794.367798 | 3 | 718.3944092 | 718.3900766 |
| MEAVPEKVKVATVPGLK                        | P14148 | 0          | n +42.03 Da,K +34.06 Da, | 1791.671387 | 4 | 567.3903198 | 567.3880496 |
| SHAISEHVEDAGVHSGDATLMLPTQTISQGAIEKVKDATR | Q8C196 | 0.00762829 | n +42.03 Da,K +34.06 Da, | 3748.253174 | 6 | 719.210022  | 719.21203   |
| GVTPIKDLTAHFR                            | P97864 | 0.00080064 | n +34.06 Da,K +34.06 Da, | 2521.730225 | 4 | 381.4899902 | 381.4898736 |
| SLSNKLTLDKLDVKGKR                        | P09411 | 0          | n +42.03 Da,K +34.06 Da, | 2333.331543 | 3 | 698.4699707 | 698.4703609 |
| TYKALKEIVER                              | Q60865 | 0.04497664 | n +34.06 Da,K +34.06 Da, | 1788.116455 | 4 | 363.75      | 363.7474786 |
| SDSRDPASDQMKQWKEQR                       | P24270 | 0          | n +42.03 Da,K +34.06 Da, | 1786.020142 | 3 | 768.0599976 | 768.055423  |
| PAPLQHQVDIYQKR                           | P40142 | 0.00365764 | n +17.03 Da,K +34.06 Da, | 1784.570313 | 4 | 436.75      | 436.7586317 |
| PSFIKTHEDILENLDR                         | Q99J99 | 0          | n +17.03 Da,K +34.06 Da, | 3192.061279 | 2 | 1025.060059 | 1025.065522 |
| MEGYHKPDQKQLKALQKDTANR                   | P40142 | 0          | n +42.03 Da,K +34.06 Da, | 2201.445068 | 4 | 654.6199951 | 654.6169314 |
| MFKQIHKLNR                               | Q62417 | 0          | n +42.03 Da,K +34.06 Da, | 1783.592773 | 4 | 356.980011  | 356.9762387 |
| GKSDFLSPKAIANR                           | Q8K339 | 0          | n +34.06 Da,K +34.06 Da, | 1780.437622 | 3 | 536.0100098 | 536.0105714 |
| ATSASSHLNKGIKQMY                         | P15105 | 0          | n +42.03 Da,K +34.06 Da, | 2093.694092 | 3 | 616.0100098 | 616.0103138 |
| PSGIQPDLLISLTAPKKSATHFTGR                | Q8K4Z3 | 0          | n +17.03 Da,K +34.06 Da, | 3357.020508 | 5 | 544.9299927 | 544.9287046 |
| RDLDYLMKILTER                            | P60710 | 0          | n +34.06 Da,K +34.06 Da, | 4423.895996 | 3 | 612.3599854 | 612.3625758 |
| PKHEFVDMTCEGCAEAVSR                      | O08997 | 0.02180685 | n +17.03 Da,K +34.06 Da, | 2360.434326 | 4 | 591.0200195 | 591.02782   |
| MLKAVLKKSR                               | Q0VGY8 | 0.00151286 | n +42.03 Da,K +34.06 Da, | 1880.237915 | 4 | 330.2399902 | 330.24294   |
| SDSRDPASDQMKQWKEQR                       | P24270 | 0          | n +42.03 Da,K +34.06 Da, | 1877.261719 | 4 | 576.2930298 | 576.2933863 |
| PKNYTDNELEKTR                            | P26443 | 0          | n +17.03 Da,K +34.06 Da, | 1772.953491 | 3 | 602.6900024 | 602.6862648 |
| MQSNKAFNLEKQNHTPR                        | Q99K48 | 0          | n +42.03 Da,K +34.06 Da, | 1772.590942 | 4 | 539.0464478 | 539.0443766 |
| PNNPFKFLTKSMAENR                         | Q9DD20 | 0          | n +17.03 Da,K +34.06 Da, | 2991.763184 | 3 | 703.3900146 | 703.3929756 |

|                          |        |            |                          |             |   |             |             |
|--------------------------|--------|------------|--------------------------|-------------|---|-------------|-------------|
| DFDEEETEKVVKKSVR         | Q61937 | 0          | n +34.06 Da,K +34.06 Da, | 1860.391479 | 4 | 575.8400269 | 575.8377825 |
| SLVLKFHTVR               | P02762 | 0.00365764 | n +34.06 Da,K +34.06 Da, | 1771.484131 | 4 | 317.7200012 | 317.718493  |
| DSAFVLKKAGR              | Q8VC30 | 0          | n +34.06 Da,K +34.06 Da, | 1770.414551 | 3 | 465.6459656 | 465.6453406 |
| YAIKKQAEILQESR           | P48428 | 0          | n +34.06 Da,K +34.06 Da, | 1770.235352 | 3 | 593.7199707 | 593.7123029 |
| GEWHTIILASDKR            | B5X0G2 | 0          | n +34.06 Da,K +34.06 Da, | 2070.187988 | 4 | 399.2384949 | 399.2400559 |
| LTPTHYLTKQDVER           | Q9DBG6 | 0          | n +34.06 Da,K +34.06 Da, | 1767.609619 | 2 | 885.0100098 | 885.015065  |
| ARKRSVSHGSNHAQNAEEQR     | Q3TLH4 | 0.01838935 | n +42.03 Da,K +28.03 Da, | 1765.994629 | 3 | 778.0599976 | 778.0586304 |
| SQAEFDKAAEEVKR           | P31786 | 0          | n +42.03 Da,K +34.06 Da, | 1765.465454 | 3 | 573.3193359 | 573.3179124 |
| SALIIKALKEPPR            | P35979 | 0.00080064 | n +34.06 Da,K +34.06 Da, | 2041.890137 | 4 | 385.2799988 | 385.2776745 |
| LTPTHYLTKQDVER           | Q9DBG6 | 0          | n +34.06 Da,K +34.06 Da, | 1764.763428 | 4 | 443.0119324 | 443.0111707 |
| PTPQEKSEGTCCGPVSVR       | P21981 | 0.01145553 | n +17.03 Da,K +34.06 Da, | 1762.475098 | 3 | 735.0300293 | 735.0296682 |
| RVEAAVKGDLFR             | Q64471 | 0.02234637 | n +34.06 Da,K +34.06 Da, | 1792.17749  | 4 | 357.980011  | 357.9794073 |
| GVAVLKVGGTSDVEVNEKKDR    | P63038 | 0          | n +34.06 Da,K +34.06 Da, | 1754.408325 | 4 | 584.8599854 | 584.8668741 |
| HFMFLSAEQPYKNAAR         | Q99LY9 | 0          | n +42.03 Da,K +34.06 Da, | 2923.756592 | 3 | 662.6699829 | 662.6753358 |
| TGHSLHTLYGR              | Q8K2B3 | 0.03367408 |                          | 1765.775635 | 4 | 339.4400024 | 339.4361112 |
| LTPTHYLTKQDVER           | Q9DBG6 | 0          | n +34.06 Da,K +34.06 Da, | 1748.576904 | 3 | 590.3499756 | 590.3458021 |
| PPLGKKQMLFR              | Q8CHQ9 | 0.00080064 | n +17.03 Da,K +34.06 Da, | 1747.416016 | 3 | 509.999115  | 510.0008006 |
| CILPPTRPDKPLR            | P10126 | 0          | n +34.06 Da,K +34.06 Da, | 1746.45105  | 4 | 433.7690125 | 433.7698232 |
| FADKVPKTAENFR            | P17742 | 0          | n +34.06 Da,K +34.06 Da, | 1745.455566 | 4 | 407.0023193 | 407.0031104 |
| EWHTIILASDKR             | B5X0G2 | 0          | n +34.06 Da,K +34.06 Da, | 2143.74707  | 4 | 384.9832153 | 384.9846898 |
| SHTILLVQPTKRPEGR         | P84089 | 0.00225394 | n +42.03 Da,K +34.06 Da, | 1837.574463 | 4 | 477.7868042 | 477.7864028 |
| GVTKGAAELMQQKEATTEQQLR   | O35490 | 0.00960219 | K +28.03 Da,             | 1742.751587 | 4 | 626.0999756 | 626.0902603 |
| KLITYGPKVVR              | P12710 | 0.00151286 | n +34.06 Da,K +34.06 Da, | 1742.270386 | 3 | 493.0100098 | 493.0168857 |
| PTPVDLHEQQLSLNQHSR       | Q8C5H8 | 0          | n +17.03 Da,             | 2092.40332  | 4 | 529.7800293 | 529.7790599 |
| PCALCSLHSIGKIGGAQNR      | P34884 | 0          | n +17.03 Da,K +34.06 Da, | 2086.191406 | 4 | 523.289978  | 523.2859595 |
| GVQVSPSGEKITHTGQVYDEKDYR | P52503 | 0          | n +34.06 Da,K +34.06 Da, | 2069.095215 | 5 | 559.9031372 | 559.9070043 |
| SSMGSYPKPMSSYLK          | P40630 | 0          | n +34.06 Da,K +34.06 Da, | 2047.978394 | 3 | 641.0305176 | 641.0305384 |
| AIDMEKAQQALVQKR          | Q9CQQ7 | 0          | n +34.06 Da,K +34.06 Da, | 2268.708252 | 4 | 458.5397339 | 458.538426  |
| KSELPEPKEALLATSQLR       | Q9WUF3 | 0.0274056  | n +31.05 Da,             | 2295.537842 | 3 | 681.0700073 | 681.0615844 |
| NTKRVHDNYVIR             | Q8C196 | 0          | n +34.06 Da,K +34.06 Da, | 1739.176758 | 3 | 525.3099976 | 525.3089106 |
| PDGNPKCLTKINYGGEVPKR     | Q8R0F9 | 0.00960219 | n +17.03 Da,K +34.06 Da, | 1825.833984 | 5 | 473.2799988 | 473.2820277 |
| PPLGKKQMLFR              | Q8CHQ9 | 0          | n +17.03 Da,K +34.06 Da, | 1737.662354 | 4 | 382.7513123 | 382.7524196 |
| MQPASAKWYDR              | Q9R0Q7 | 0          | n +34.06 Da,K +34.06 Da, | 1740.761108 | 3 | 474.2600098 | 474.2607917 |
| PHLPQEEVLKFYR            | P50136 | 0          | n +17.03 Da,K +34.06 Da, | 2799.936279 | 4 | 427.5019836 | 427.5017287 |
| CILPPTRPDKPLR            | P10126 | 0          | n +34.06 Da,K +34.06 Da, | 1736.109741 | 4 | 433.7687073 | 433.7698232 |
| MESPAASPPASLPQTKGKSKR    | O09110 | 0          | n +42.03 Da,K +34.06 Da, | 1732.498169 | 4 | 578.8417358 | 578.8427425 |
| MQSNKAFNLEKQNHTPR        | Q99K48 | 0          | n +42.03 Da,K +34.06 Da, | 1731.501587 | 4 | 539.039978  | 539.0443766 |
| PIKTAQGSLSLKAYR          | Q91WK2 | 0          | n +17.03 Da,K +34.06 Da, | 1731.393066 | 4 | 430.2801819 | 430.280699  |
| PSKTNVSGGAIALGHPLGGSGSR  | Q8BWT1 | 0          | n +17.03 Da,K +34.06 Da, | 1731.322266 | 4 | 543.5587158 | 543.5593014 |
| TPFCKMVQKSLAR            | P54869 | 0          | n +34.06 Da,K +34.06 Da, | 2056.668457 | 4 | 417.7599487 | 417.7600631 |



|                                |        |            |                          |             |   |             |             |
|--------------------------------|--------|------------|--------------------------|-------------|---|-------------|-------------|
| HTEEDFIITKTGR                  | Q03311 | 0          | n +34.06 Da,K +34.06 Da, | 1730.125366 | 3 | 572.6599731 | 572.6581574 |
| LKGGMLFPKESPSR                 | P12265 | 0.00151286 | n +34.06 Da,K +34.06 Da, | 1730.029053 | 4 | 413.0134888 | 413.0130494 |
| GHSEFLKAASNLR                  | P27773 | 0          | n +34.06 Da,K +34.06 Da, | 1728.991699 | 3 | 499.9645996 | 499.9651439 |
| APSRDFTVEHDSLR                 | Q6GQT9 | 0.02180685 | n +34.06 Da,             | 1818.596069 | 4 | 444.9899902 | 444.9917447 |
| SDSRDPASDQMKQWKEQR             | P24270 | 0          | n +42.03 Da,K +34.06 Da, | 1958.023071 | 4 | 576.2927856 | 576.2933863 |
| SHTDVKVPDFSDYR                 | Q9CR68 | 0.03021148 | n +34.06 Da,K +34.06 Da, | 2431.216064 | 4 | 434.2344666 | 434.2336996 |
| LPTVKKFLQPGSQR                 | P30115 | 0.02910855 | n +34.06 Da,K +34.06 Da, | 1916.878906 | 3 | 567.710022  | 567.7138662 |
| GHSEFLKAASNLR                  | P27773 | 0          | n +34.06 Da,K +34.06 Da, | 1721.841187 | 4 | 375.2253418 | 375.225677  |
| TFDRDWWAMQTKR                  | P19783 | 0          | n +34.06 Da,K +34.06 Da, | 2450.708008 | 4 | 431.2399902 | 431.2411643 |
| MEGHDPKEPEQLR                  | B2RXM2 | 0.00628053 | n +42.03 Da,K +34.06 Da, | 1719.402954 | 3 | 547.9422607 | 547.9419702 |
| AEITDKLGLHSLR                  | P61205 | 0          | n +34.06 Da,K +34.06 Da, | 2399.729736 | 4 | 380.9899902 | 380.9912436 |
| LSPKQEEALAKFR                  | Q99J08 | 0          | n +34.06 Da,K +34.06 Da, | 2087.626709 | 4 | 405.513855  | 405.5148479 |
| PEVQKDTKNVPFKIVR               | P38647 | 0          | n +17.03 Da,K +34.06 Da, | 1713.083496 | 5 | 404.2674561 | 404.2671665 |
| SPFGKFNIGR                     | Q9DBT9 | 0.03522388 | n +34.06 Da,K +34.06 Da, | 1712.418945 | 4 | 338.980011  | 338.9779008 |
| PSKTNVSGGAIALGHPLGGSGSR        | Q8BWT1 | 0          | n +17.03 Da,K +34.06 Da, | 1772.520264 | 4 | 543.560791  | 543.5593014 |
| IGNISDAMKKVGR                  | P63038 | 0          | n +34.06 Da,K +34.06 Da, | 2912.480957 | 4 | 401.7640076 | 401.7657741 |
| VEFEEKFLKTR                    | P30115 | 0          | n +34.06 Da,K +34.06 Da, | 2293.58252  | 4 | 382.75      | 382.7462074 |
| CILPPTRPDKPLR                  | P10126 | 0          | n +34.06 Da,K +34.06 Da, | 1705.291626 | 4 | 433.7695313 | 433.7698232 |
| SQAEFDKAAEEVKR                 | P31786 | 0          | n +34.06 Da,K +34.06 Da, | 1704.846558 | 4 | 428.2532349 | 428.2533914 |
| PVFAEKVMKIR                    | P45700 | 0          | n +17.03 Da,K +34.06 Da, | 1944.230835 | 4 | 351.4899902 | 351.4876915 |
| VAPMKGQVCVVTGASR               | Q99L04 | 0          | n +34.06 Da,K +34.06 Da, | 1703.707764 | 3 | 576.6699829 | 576.669234  |
| DMMTPISVGKTIYLVSFEGLR          | Q5H8C4 | 0.02694427 | n +28.03 Da,K +28.03 Da, | 4353.491211 | 3 | 948.8599854 | 948.8515909 |
| SEPEIPKIR                      | Q9WTP6 | 0.00498575 | n +34.06 Da,K +34.06 Da, | 1698.9198   | 3 | 398.5889893 | 398.5890141 |
| LNLQEYQSKKLMSEHGVR             | Q9Z2I8 | 0          | n +34.06 Da,K +34.06 Da, | 2262.318115 | 4 | 566.3300171 | 566.3335474 |
| LTPHYLTKQDVER                  | Q9DBG6 | 0          | n +17.03 Da,K +34.06 Da, | 1694.359863 | 3 | 584.6699829 | 584.6686158 |
| MVHLTDAEKAAVSGLWGVNADEVGGEALGR | A8DUK4 | 0.04286553 | n +17.03 Da,K +34.06 Da, | 4465.669434 | 5 | 653.9526367 | 653.9595075 |
| SSPPEGKLETKAGHPPAVKAGGMR       | Q91XC8 | 0.01499348 | n +42.03 Da,K +34.06 Da, | 1691.232178 | 4 | 637.3699951 | 637.3706616 |
| SEDAKGLIKSAIR                  | Q9D051 | 0.04497664 | n +34.06 Da,K +34.06 Da, | 1928.387939 | 3 | 497.3313904 | 497.331422  |
| GIDKFGEILKR                    | P55264 | 0.00498575 | n +34.06 Da,K +34.06 Da, | 2237.185059 | 4 | 345.2399902 | 345.2382836 |
| CNGCQETKYASGRVR                | E9PYJ0 | 0.0274056  | n +42.03 Da,K +34.06 Da, | 1690.724854 | 4 | 466.2344666 | 466.226858  |
| SQAEFDKAAEEVKR                 | P31786 | 0          | n +34.06 Da,K +34.06 Da, | 1690.544556 | 3 | 570.6699829 | 570.668763  |
| TVFFHPLLIHGSGR                 | O35386 | 0          | n +34.06 Da,             | 2722.008301 | 4 | 404.4899902 | 404.4886401 |
| AAVKTLNPKAEVAR                 | P80317 | 0          | n +42.03 Da,K +34.06 Da, | 1810.505127 | 3 | 526.6711426 | 526.6718491 |
| VKGGTLTQYEGKLR                 | Q91ZJ5 | 0.00960219 | n +34.06 Da,K +34.06 Da, | 1689.842529 | 4 | 413.769989  | 413.770214  |
| FAKLVRRPPVQYVYIEGR             | Q9DB20 | 0          | n +34.06 Da,K +34.06 Da, | 2842.668457 | 3 | 666.4171753 | 666.415891  |
| FADKVPKTAENFR                  | P17742 | 0          | n +34.06 Da,K +34.06 Da, | 1686.223755 | 3 | 542.3343506 | 542.335055  |
| VDYEKNAKGSNYWR                 | P27773 | 0.00080064 | n +34.06 Da,K +34.06 Da, | 1692.32605  | 3 | 611.3400269 | 611.3443907 |
| TIEDIEVAPKAHEVR                | P00329 | 0          | n +34.06 Da,K +34.06 Da, | 1991.180054 | 3 | 624.7000122 | 624.7002452 |
| SKTNVSGGAIALGHPLGGSGSR         | Q8BWT1 | 0          | n +34.06 Da,K +34.06 Da, | 1685.169312 | 4 | 523.5536499 | 523.5540001 |
| VDYEKNAKGSNYWR                 | P27773 | 0.00365764 | n +34.06 Da,K +34.06 Da, | 1683.729004 | 4 | 458.7600098 | 458.7601122 |

|                                  |        |            |                          |             |   |             |             |
|----------------------------------|--------|------------|--------------------------|-------------|---|-------------|-------------|
| PYNPMSRPDAWGVTGAAELMQQKEATTEQQLR | O35490 | 0          | n +34.06 Da,K +34.06 Da, | 3691.325928 | 5 | 785.0100098 | 785.0154691 |
| PPSADKTLLEEKAKLEEQLR             | Q99LP6 | 0          | n +17.03 Da,K +34.06 Da, | 3136.119141 | 5 | 483.7029724 | 483.701096  |
| TNLSPKGGGEPKGGLEIAIKR            | P09671 | 0.02694427 | n +34.06 Da,K +34.06 Da, | 2293.150879 | 5 | 466.8999939 | 466.9001186 |
| AKHHPDLIFCR                      | P83870 | 0.00080064 | n +42.03 Da,K +34.06 Da, | 1679.144775 | 3 | 490.6009827 | 490.6013301 |
| AHYHDNYGKNDEVEFVR                | P25688 | 0          | n +42.03 Da,K +34.06 Da, | 2100.613281 | 3 | 723.675354  | 723.6784629 |
| PASAHMAGMKIQPVEVDR               | Q91W43 | 0          | n +17.03 Da,K +34.06 Da, | 2002.702515 | 4 | 497.769989  | 497.7724192 |
| PSGTSQCEDGSAGGFQHLDMHSEKR        | Q91WT9 | 0          | n +17.03 Da,K +34.06 Da, | 1676.763916 | 4 | 693.0700073 | 693.0699055 |
| PAYFQRPENALKR                    | P23116 | 0          | n +17.03 Da,K +34.06 Da, | 1676.216797 | 4 | 410.9899902 | 410.9927994 |
| LRENYGELADCCTKQEPER              | P07724 | 0          | n +34.06 Da,K +34.06 Da, | 1866.207397 | 4 | 609.7999878 | 609.8034241 |
| REQAGGDATENFEDVGHSTDR            | P56395 | 0          | n +34.06 Da,             | 1671.388428 | 3 | 799.3699951 | 799.3689063 |
| ALCTVKCDEKVKVFSVR                | Q99LC5 | 0.00498575 | n +34.06 Da,K +34.06 Da, | 2044.561646 | 4 | 544.5900269 | 544.5879839 |
| HQVRPIQKELILR                    | E9PUD6 | 0.0130719  | n +31.05 Da,             | 1829.522095 | 4 | 416.0100098 | 416.0150411 |
| TTHTLVEKINYTGR                   | P49429 | 0          | n +34.06 Da,K +34.06 Da, | 1667.630859 | 4 | 426         | 426.0046169 |
| KNTVHVLAKLR                      | P25688 | 0.00628053 | n +42.03 Da,K +34.06 Da, | 1661.274658 | 4 | 347.9899902 | 347.9897748 |
| SEPEIPK GIR                      | Q9WTP6 | 0.00151286 | n +34.06 Da,K +34.06 Da, | 1658.677246 | 3 | 398.5889587 | 398.5890141 |
| GRLEVTSDESASEVPEWLR              | E9Q4K7 | 0.04183854 |                          | 1657.58667  | 4 | 576.539978  | 576.5342097 |
| TLDEWKAIQNKDR                    | Q9CY58 | 0          | n +34.06 Da,K +34.06 Da, | 2010.184814 | 4 | 430.5100098 | 430.5125712 |
| LLLPGLAKHAVSEGKAVTKY             | P10853 | 0          | n +42.03 Da,K +34.06 Da, | 4015.102539 | 4 | 618.1400146 | 618.134854  |
| TILLVQPTKRPEGR                   | P84089 | 0          | n +34.06 Da,K +34.06 Da, | 1652.886963 | 4 | 419.7758484 | 419.7768055 |
| FADKVPKTAENFR                    | P17742 | 0          | n +34.06 Da,K +34.06 Da, | 1650.173096 | 4 | 407.0023193 | 407.0031104 |
| DPHAMQRRTRHLLR                   | Q6P4U0 | 0.04393673 | n +34.06 Da,             | 2325.93335  | 4 | 456.0100098 | 456.0141879 |
| SDRPELTGAKVVVSGGR                | Q99LC5 | 0          | n +34.06 Da,K +34.06 Da, | 1649.253784 | 4 | 449.7709045 | 449.7719863 |
| MDSVEEPQKKVFKAR                  | Q7TT18 | 0          | n +42.03 Da,K +34.06 Da, | 2007.522705 | 3 | 646.0499878 | 646.0522195 |
| LTPTHYLTQDVER                    | Q9DBG6 | 0.00080064 | n +34.06 Da,K +34.06 Da, | 1731.572266 | 4 | 443.0100098 | 443.0111707 |
| ISKQEYDESGPSIVHR                 | P60710 | 0.01019022 | n +34.06 Da,K +34.06 Da, | 1647.530396 | 4 | 479.0148621 | 479.0154477 |
| PKHEFSVDMTCEGCAEAVSR             | O08997 | 0          | n +17.03 Da,K +34.06 Da, | 3060.362061 | 4 | 591.0300293 | 591.02782   |
| TVKKIAIFGATGR                    | Q923D2 | 0          | n +34.06 Da,K +34.06 Da, | 1645.380371 | 2 | 732.5100098 | 732.5114898 |
| TVKKIAIFGATGR                    | Q923D2 | 0          | n +34.06 Da,K +34.06 Da, | 1645.129517 | 3 | 488.6760864 | 488.676752  |
| FADKVPKTAENFR                    | P17742 | 0          | n +34.06 Da,K +34.06 Da, | 1644.87854  | 3 | 542.3348389 | 542.335055  |
| AKHHPDLIFCR                      | P83870 | 0.00296736 | n +42.03 Da,K +34.06 Da, | 1643.956909 | 2 | 735.399292  | 735.3983569 |
| RVAPEEHPTLLTEAPLNPKANR           | P62737 | 0          | n +34.06 Da,K +34.06 Da, | 2273.326904 | 4 | 631.1300049 | 631.1185019 |
| TVKLMKEGLEAAR                    | O35490 | 0          | n +34.06 Da,K +34.06 Da, | 1640.477661 | 3 | 516.6723633 | 516.6727906 |
| PNNNTK FVHDNYVIR                 | Q8C196 | 0          | n +17.03 Da,K +34.06 Da, | 1639.104614 | 3 | 628.0100098 | 628.0112645 |
| MYLNEVAGKHGVGR                   | P16460 | 0.01250823 | n +34.06 Da,K +34.06 Da, | 1637.591553 | 4 | 400.480011  | 400.483157  |
| SQAEFDKAAEEVKR                   | P31786 | 0          | n +42.03 Da,K +34.06 Da, | 1633.55542  | 3 | 573.3200073 | 573.3179124 |
| MVGMGQKDSYVGDEAQSKR              | P60710 | 0          | n +34.06 Da,K +34.06 Da, | 1633.071899 | 4 | 547.789978  | 547.795098  |
| LYIISVKG IGR                     | P62830 | 0.00151286 | n +34.06 Da,K +34.06 Da, | 2305.820801 | 4 | 363.0150452 | 363.0157547 |
| PLIQNVKKILESDR                   | Q8C196 | 0          | n +17.03 Da,K +34.06 Da, | 3013.256348 | 4 | 435.2900085 | 435.2872528 |
| PYADDP I RHPALR                  | Q8R086 | 0          | n +17.03 Da,             | 1628.718384 | 4 | 385.2109375 | 385.2125578 |
| NTK FVHDNYVIR                    | Q8C196 | 0          | n +34.06 Da,K +34.06 Da, | 1623.619385 | 2 | 787.460022  | 787.4597277 |

|                                  |         |            |                          |             |   |             |             |
|----------------------------------|---------|------------|--------------------------|-------------|---|-------------|-------------|
| PSVGPQIPQALEKILQLKESR            | Q3UJB0  | 0          | n +17.03 Da,K +34.06 Da, | 3819.008545 | 5 | 490.9299927 | 490.9251737 |
| TIHLSSIRPPR                      | Q78PY7  | 0.00080064 | n +34.06 Da,             | 1623.288818 | 4 | 328.4599915 | 328.4583455 |
| SKSLKLVVEESR                     | Q01730  | 0          | n +42.03 Da,K +34.06 Da, | 1834.648682 | 2 | 774.5134277 | 774.5144274 |
| SEFTVQSTTGHCVHMR                 | Q92Z2X1 | 0.00365764 | n +34.06 Da,             | 1619.705688 | 4 | 478.480011  | 478.4819583 |
| SAAAEASAALKVRPER                 | Q8BGT5  | 0          | n +34.06 Da,K +34.06 Da, | 1790.401001 | 4 | 424.5124817 | 424.5100664 |
| PEDPFVEKAKGILR                   | Q9JMA7  | 0.00151286 | n +17.03 Da,K +34.06 Da, | 2878.943115 | 4 | 421.7680359 | 421.7674245 |
| THTLVEKINYTGR                    | P49429  | 0          | n +34.06 Da,K +34.06 Da, | 1618.271484 | 3 | 533.9862671 | 533.9878373 |
| LRTRPNDSEMKYALKRLITGLGVGREEAR    | Q77PV4  | 0.03138202 | n +31.05 Da,             | 4033.287842 | 5 | 661.3699951 | 661.3786274 |
| DFQNRRLQDFPR                     | O08969  | 0.02234637 | n +31.05 Da,             | 3258.097656 | 2 | 847.4400024 | 847.4502022 |
| SSSEDKITVHFKNR                   | P46656  | 0          | n +42.03 Da,K +34.06 Da, | 1616.143799 | 4 | 440.25      | 440.2508867 |
| GAYVYHNEHEVGEAIR                 | Q8VCX1  | 0          | n +34.06 Da,             | 1614.241577 | 3 | 626.6491699 | 626.6499554 |
| GKPVLYHFDGR                      | P30115  | 0.00498575 | n +34.06 Da,K +34.06 Da, | 1613.913818 | 4 | 339.9599915 | 339.9569377 |
| VLSGEDKSNIAAWGKIGGH              | P01942  | 0.00225394 | n +34.06 Da,K +34.06 Da, | 2555.85083  | 5 | 441.4741516 | 441.4759497 |
| MNQEKLAKLQAQVR                   | Q64152  | 0          | n +34.06 Da,K +34.06 Da, | 1605.562378 | 4 | 440.531311  | 440.5331435 |
| QAEFDKAAEEVKR                    | P31786  | 0.00151286 | n +34.06 Da,K +34.06 Da, | 1604.276978 | 3 | 541.6599731 | 541.6580867 |
| SDSRDPASDQMKQWKEQR               | P24270  | 0          | n +42.03 Da,K +34.06 Da, | 1602.103394 | 4 | 576.2924194 | 576.2933863 |
| SKPPPKPVKPGQVKVFR                | Q62422  | 0.00151286 | n +42.03 Da,K +34.06 Da, | 1601.217529 | 5 | 414.2870789 | 414.2880991 |
| PWPVPQGRPLR                      | Q01405  | 0          | n +17.03 Da,K +34.06 Da, | 1601.146729 | 4 | 371.2375488 | 371.2386059 |
| PEIEEKLHEEIDR                    | Q05421  | 0          | n +17.03 Da,K +34.06 Da, | 2281.760498 | 3 | 563.3093262 | 563.3089764 |
| SVVDIGLIKLR                      | Q61646  | 0          | n +34.06 Da,K +34.06 Da, | 2732.835938 | 4 | 393.53125   | 393.5330405 |
| PRKIEIKDFLLTAR                   | Q9JJI8  | 0.00080064 | n +34.06 Da,K +34.06 Da, | 3493.123047 | 4 | 483.5599976 | 483.5688834 |
| YSHGSHETDEEFDAR                  | P12787  | 0          | n +31.05 Da,             | 1596.892578 | 3 | 604.2600098 | 604.2607562 |
| NNTKRVHNDNYVIR                   | Q8C196  | 0          | n +34.06 Da,K +34.06 Da, | 1596.105713 | 3 | 563.3221436 | 563.32322   |
| AQPGKILKEQKYDR                   | Q8VBW6  | 0.02910855 | n +42.03 Da,K +34.06 Da, | 1594.823364 | 3 | 606.7199707 | 606.7159359 |
| HMPPEEKEASLAKIKEQTR              | P30115  | 0          | n +42.03 Da,K +34.06 Da, | 1594.713867 | 5 | 474.0700073 | 474.0777623 |
| SDSRDPASDQMKQWKEQR               | P24270  | 0          | n +42.03 Da,K +34.06 Da, | 1593.834229 | 3 | 768.0499878 | 768.055423  |
| PEIEEKLHEEIDR                    | Q05421  | 0.00080064 | n +17.03 Da,K +34.06 Da, | 2281.831299 | 4 | 422.730011  | 422.7335514 |
| HVGDGLGNVTAGKDGVANVSIEDR         | P08228  | 0          | n +34.06 Da,K +34.06 Da, | 2594.524902 | 4 | 598.5700073 | 598.5779385 |
| ANEANPCPCDIGHKLEYGGMGHEVQVEHIKAY | Q8R1G2  | 0          | n +42.03 Da,K +34.06 Da, | 3410.361328 | 4 | 934.2000122 | 934.2012699 |
| KHTSSLKVTNEPILAFSQGSPER          | Q8CHT0  | 0          | n +42.03 Da,K +34.06 Da, | 3059.80127  | 3 | 879.4899902 | 879.4941475 |
| QSEKDILLRPELEELR                 | Q9DCN2  | 0          | n +34.06 Da,K +34.06 Da, | 3101.985352 | 3 | 679.4099731 | 679.4056097 |
| KAKIHDIIVLVGGSTR                 | P16627  | 0.00080064 | K +28.03 Da,             | 1628.859863 | 3 | 560.0134888 | 560.0173205 |
| QPDNINHIVAKGA AVR                | Q8R084  | 0.00080064 | n +34.06 Da,K +34.06 Da, | 1564.156982 | 4 | 443.519989  | 443.5206997 |
| TASLKLLPHQPR                     | Q9JIL4  | 0.02347128 | n +34.06 Da,K +34.06 Da, | 1559.522583 | 4 | 357.9877319 | 357.9885036 |
| PNIVGNEHYDVAR                    | P56480  | 0          | n +17.03 Da,             | 1624.367554 | 3 | 500.9246521 | 500.9249785 |
| GDVEKGKKIFVQK                    | P62897  | 0          | n +42.03 Da,K +34.06 Da, | 1556.465576 | 4 | 414.2900085 | 414.2857275 |
| TSLSLFHDDIHSVR                   | P50172  | 0          | n +34.06 Da,             | 2613.163574 | 4 | 415.980011  | 415.9771001 |
| SSPPEGKLETKAGHPPAVKAG            | Q91XC8  | 0.0494186  | n +42.03 Da,K +34.06 Da, | 1552.564209 | 4 | 551.3300171 | 551.3298965 |
| FVEKFIKPR                        | Q05920  | 0.03522388 | n +34.06 Da,K +34.06 Da, | 1552.455566 | 4 | 349.4899902 | 349.4868301 |
| SEGDSVGDVHGKPSVVYR               | Q9CQU3  | 0.00151286 | n +34.06 Da,K +34.06 Da, | 1551.48938  | 3 | 681.7000122 | 681.6974526 |

|                             |        |            |                          |             |   |             |             |
|-----------------------------|--------|------------|--------------------------|-------------|---|-------------|-------------|
| SLKPANEDQKIGIEIIR           | P63038 | 0          | n +34.06 Da,K +34.06 Da, | 2217.506592 | 4 | 547.8638916 | 547.8638683 |
| YEHIHKDELGTR                | O35403 | 0          | n +34.06 Da,K +34.06 Da, | 1547.692505 | 3 | 514.6400146 | 514.6368046 |
| DYNLSDDDITKIPVSERR          | H9KV04 | 0.02132999 | n +42.03 Da,n +28.03 Da, | 1541.958496 | 4 | 523.5300293 | 523.5233789 |
| PSKLDGKELKIDIIPNPQER        | P11499 | 0          | n +17.03 Da,K +34.06 Da, | 2697.201904 | 3 | 832.8400269 | 832.8480085 |
| FHMTKDMLPGSYPR              | Q9D6J5 | 0          | n +34.06 Da,K +34.06 Da, | 2555.923584 | 3 | 583.3104248 | 583.3146795 |
| RMPEFYNR                    | P16460 | 0.01560468 | n +34.06 Da,             | 1654.474243 | 3 | 382.8691711 | 382.8694165 |
| TKFLEEHPGGEEVLR             | P56395 | 0.00080064 | n +34.06 Da,K +34.06 Da, | 2097.564453 | 4 | 453.0082092 | 453.0098995 |
| YYASQKKTFEINPR              | P08113 | 0          | n +34.06 Da,K +34.06 Da, | 1539.117188 | 3 | 616.3699951 | 616.3685362 |
| GKPVLYHYFDGR                | P30115 | 0.00365764 | n +34.06 Da,K +34.06 Da, | 1538.681641 | 4 | 339.9599915 | 339.9569377 |
| VPIDVDKTKVHNTEPVENAR        | P81117 | 0          | n +34.06 Da,K +34.06 Da, | 1538.137207 | 4 | 591.5999756 | 591.5999071 |
| AGKPVLYHYFNAR               | P10648 | 0.00151286 | n +42.03 Da,K +34.06 Da, | 2363.087646 | 3 | 483.6097717 | 483.6122235 |
| SKKVDQSVPANAEISQKAAESQGR    | Q61733 | 0          | n +34.06 Da,K +34.06 Da, | 1531.313354 | 4 | 649.1300049 | 649.1358792 |
| YYASQKKTFEINPR              | P08113 | 0          | n +34.06 Da,K +34.06 Da, | 1529.652466 | 4 | 462.5272217 | 462.5282212 |
| PAPLQHQVDIYQKR              | P40142 | 0          | n +17.03 Da,K +34.06 Da, | 1528.877686 | 4 | 436.7600098 | 436.7586317 |
| MEGYHKPDQQKLQALKDTANR       | P40142 | 0          | n +42.03 Da,K +34.06 Da, | 2207.407471 | 4 | 654.6152954 | 654.6169314 |
| PQKVNIGHGAVSLGHPIGMSGAR     | Q8QZT1 | 0.00296736 | n +17.03 Da,K +34.06 Da, | 2048.55957  | 3 | 778.7700195 | 778.7743725 |
| PSSMFDVHVKR                 | Q9ET01 | 0.01212121 | n +17.03 Da,K +34.06 Da, | 1524.315063 | 4 | 339.1900024 | 339.1947069 |
| HSYPLKGPPLPPWPGR            | D3Z0P8 | 0.01250823 | n +17.03 Da,K +34.06 Da, | 1751.578247 | 3 | 636.3699951 | 636.3686116 |
| DINAHACVTGKPISQGGIHR        | P26443 | 0          | n +34.06 Da,K +34.06 Da, | 1522.237305 | 4 | 564.8099976 | 564.8130171 |
| PDIKYPLR                    | Q9DCN2 | 0.04991294 | n +17.03 Da,K +34.06 Da, | 1521.91272  | 3 | 351.5620117 | 351.5623583 |
| SHTDVKVPDFSDYR              | Q9CR68 | 0          | n +17.03 Da,K +34.06 Da, | 2420.233643 | 3 | 572.960022  | 572.965321  |
| MQKEIVTLAPSTMKIKIAPPER      | Q8BFZ3 | 0          | n +17.03 Da,K +34.06 Da, | 2947.097412 | 5 | 543.539978  | 543.5454479 |
| TRVDNGKELIAVR               | P55050 | 0.03138202 | n +34.06 Da,K +34.06 Da, | 1509.748169 | 4 | 385.5       | 385.4966931 |
| AAAMDVDTPSGTNSGAGKKR        | P62878 | 0.00151286 | n +42.03 Da,K +34.06 Da, | 1505.088135 | 3 | 682.0300293 | 682.0303259 |
| PQHWSEPEEFQPER              | Q64459 | 0          | n +17.03 Da,             | 2273.122559 | 3 | 604.9494629 | 604.949853  |
| GYKIVTEKSTVPVR              | O70475 | 0          | n +34.06 Da,K +34.06 Da, | 1504.978394 | 3 | 560.3699951 | 560.3698768 |
| SKDSEGSWFR                  | O55125 | 0          | n +34.06 Da,K +34.06 Da, | 1501.673218 | 3 | 422.8963623 | 422.896507  |
| LTPHYLTKQDVER               | Q9DBG6 | 0          | n +34.06 Da,K +34.06 Da, | 1805.5177   | 4 | 443.0139771 | 443.0111707 |
| GGFVFALEKR                  | O35490 | 0          | n +34.06 Da,K +34.06 Da, | 2606.064209 | 3 | 397.9200134 | 397.9222157 |
| SHTILLVQPTKRPEGR            | P84089 | 0.01957071 | n +42.03 Da,K +34.06 Da, | 1495.592041 | 4 | 477.7900085 | 477.7864028 |
| EELSSLHGQLKEAR              | Q99PL5 | 0.01250823 | n +34.06 Da,K +34.06 Da, | 1484.736694 | 4 | 417         | 416.9955206 |
| AHGSVVKSEDYAFPTYADRR        | P19783 | 0          | n +42.03 Da,K +34.06 Da, | 2579.50293  | 4 | 587.0499878 | 587.0487859 |
| WPQGTAFASQVTLLEGDKVKVER     | Q9DCW4 | 0          | n +34.06 Da,K +34.06 Da, | 3259.72583  | 4 | 620.1099854 | 620.1116446 |
| IQKESTLHLVLR                | POCG49 | 0          | n +34.06 Da,K +34.06 Da, | 1880.971924 | 3 | 502.3312683 | 502.333056  |
| AEPDYIEDDNPELIRPQKLINPVKSSR | Q3TGF2 | 0.01957071 | n +42.03 Da,K +34.06 Da, | 3617.02124  | 4 | 812.4400024 | 812.446491  |
| KKAEGAGSATEFQFR             | P63325 | 0          | n +34.06 Da,K +34.06 Da, | 1465.897827 | 3 | 600.6900024 | 600.6881574 |
| FEEKFLKTR                   | P30115 | 0.01667736 | n +34.06 Da,K +34.06 Da, | 1462.344727 | 4 | 325.7180481 | 325.7184552 |
| HDNYGKNDEVEFVR              | P25688 | 0          | n +34.06 Da,K +34.06 Da, | 1569.298828 | 3 | 597.3099976 | 597.3095283 |
| PFVENAKKVLRL                | Q64481 | 0          | n +17.03 Da,K +34.06 Da, | 1460.927734 | 4 | 347.2399902 | 347.2383023 |
| FQGSKLKVSRLAR               | Q61545 | 0.00080064 | n +34.06 Da,K +34.06 Da, | 1498.83374  | 4 | 359.75      | 359.7515581 |

|                         |        |            |                          |             |   |             |             |
|-------------------------|--------|------------|--------------------------|-------------|---|-------------|-------------|
| SKDSEGSWFR              | O55125 | 0.00225394 | n +34.06 Da,K +34.06 Da, | 1460.709717 | 3 | 422.8960266 | 422.896507  |
| SSTSAVPQITTHYTVHPR      | Q921G7 | 0          | n +34.06 Da,             | 1909.071655 | 3 | 672.6937866 | 672.6955649 |
| KNFDLRPGVIVR            | Q3THS6 | 0.00225394 | n +34.06 Da,K +34.06 Da, | 2118.293945 | 4 | 371.2399902 | 371.2451409 |
| EDQKIGIEIKR             | P63038 | 0          | n +34.06 Da,K +34.06 Da, | 2005.852783 | 3 | 515.3499756 | 515.3470721 |
| IPIKSDPVVSYR            | P58252 | 0.03522388 | n +34.06 Da,K +34.06 Da, | 1479.349487 | 4 | 401.769989  | 401.7712195 |
| ELLAKEAELTKVR           | Q8VDD5 | 0.00628053 | n +34.06 Da,K +34.06 Da, | 2009.486938 | 3 | 534.6900024 | 534.6943605 |
| VDLVHAQIHVSEGR          | Q05920 | 0          | n +34.06 Da,             | 2005.961304 | 3 | 531.9699707 | 531.9688476 |
| RPPLGFLNPR              | O89023 | 0          | n +34.06 Da,             | 2193.269775 | 3 | 400.9192505 | 400.9189874 |
| PFVAFHINKGLVR           | Q920L1 | 0          | n +17.03 Da,K +34.06 Da, | 2675.836182 | 4 | 388         | 387.9963474 |
| PNIKIFSGSSHQDLSQKIADR   | Q9D7G0 | 0          | n +17.03 Da,K +34.06 Da, | 2324.934326 | 3 | 809.460022  | 809.4660803 |
| KIGGHGAEYGAEALER        | P01942 | 0          | n +34.06 Da,K +34.06 Da, | 1544.184082 | 3 | 575.9899902 | 575.9900184 |
| TKVMIGESIDEKR           | Q8C196 | 0          | n +34.06 Da,K +34.06 Da, | 1445.694824 | 3 | 536.6677856 | 536.6677056 |
| PHEELPSLQRPR            | Q3UQ44 | 0.01250823 | n +17.03 Da,             | 1442.467163 | 3 | 492.6099854 | 492.6091016 |
| TKVMIGESIDEKR           | Q8C196 | 0          | n +34.06 Da,K +34.06 Da, | 1441.243042 | 4 | 402.7528381 | 402.7525984 |
| ATSPQKSPLVPKSPTPKSPPSR  | Q9EPC1 | 0          | n +42.03 Da,K +34.06 Da, | 1708.492188 | 4 | 608.6246338 | 608.6246534 |
| TISQGAIEKVKDATR         | Q8C196 | 0          | n +34.06 Da,K +34.06 Da, | 1920.353394 | 4 | 430.5256348 | 430.52695   |
| SEVEVKKIFR              | O35490 | 0          | n +34.06 Da,K +34.06 Da, | 1433.277954 | 4 | 334.980011  | 334.9816463 |
| MDSVEEPQKVKFKAR         | Q7TT18 | 0          | n +42.03 Da,K +34.06 Da, | 2009.011963 | 4 | 484.7900085 | 484.7909838 |
| GVDFGKWR                | Q91Y97 | 0.00437956 | n +34.06 Da,K +34.06 Da, | 2185.05835  | 3 | 344.8807678 | 344.8802392 |
| SSMGSYPKPMSSYL          | P40630 | 0          | n +34.06 Da,K +34.06 Da, | 2045.446289 | 4 | 481.0242615 | 481.0247229 |
| AFKDTGKTPVEPEVAIHR      | P60867 | 0          | n +42.03 Da,K +34.06 Da, | 2404.592041 | 3 | 702.4054565 | 702.4057211 |
| YSKNPSNKDAALMEAAR       | Q60649 | 0          | n +34.06 Da,K +34.06 Da, | 1437.387451 | 4 | 492.7799988 | 492.7821532 |
| TVKKIAIFGATGR           | Q923D2 | 0          | n +34.06 Da,K +34.06 Da, | 1686.082275 | 3 | 488.6764832 | 488.676752  |
| AIGTGKTATPQQAQEVHEKLR   | P17751 | 0          | n +34.06 Da,K +34.06 Da, | 1441.172241 | 4 | 592.1099854 | 592.1066278 |
| EEDVKLLGMSGKR           | Q61937 | 0          | n +34.06 Da,K +34.06 Da, | 1696.984131 | 4 | 391.7460938 | 391.7460446 |
| KLVRPPVQVYIEGR          | Q9DB20 | 0.04991294 | n +34.06 Da,K +34.06 Da, | 2309.341797 | 3 | 593.710022  | 593.7140482 |
| PDPEVMAKVKLVFVR         | Q7TMK9 | 0          | n +17.03 Da,K +34.06 Da, | 3545.489258 | 4 | 454.0400085 | 454.0418258 |
| MEVKPPPGRPQPDSGRR       | Q8BG05 | 0          | n +42.03 Da,K +34.06 Da, | 1409.862915 | 4 | 495.7727661 | 495.7718612 |
| PAISSAGPAGSYRPHYDEGLRR  | P70699 | 0          | n +17.03 Da,             | 2214.913574 | 4 | 560.0422974 | 560.0422509 |
| TELKGLSKIER             | O55143 | 0.03522388 | n +34.06 Da,K +34.06 Da, | 1406.569336 | 4 | 344.7398376 | 344.7396536 |
| VLSGEDKSNIAAWGK         | P01942 | 0.01612903 | n +34.06 Da,K +34.06 Da, | 1833.585205 | 4 | 460.5499878 | 460.5466418 |
| PSGKGIVEFSGKPAAR        | Q99K48 | 0.01957071 | n +17.03 Da,K +34.06 Da, | 1406.086182 | 4 | 422.269989  | 422.265049  |
| SETAPAAPAAPAEKTPVKKK    | P43274 | 0          | n +42.03 Da,K +34.06 Da, | 1406.015503 | 4 | 585.3719482 | 585.3717921 |
| SKPPPKVPKPGQVKVFR       | Q62422 | 0.04080426 | n +42.03 Da,K +34.06 Da, | 1405.532104 | 4 | 517.6099854 | 517.6083048 |
| MKSLKAKFR               | Q9EP71 | 0.00296736 | n +42.03 Da,K +34.06 Da, | 1541.845581 | 3 | 418.2938843 | 418.2934731 |
| DPEATSHSTQDPLEAQAKSR    | P97290 | 0.00151286 | n +34.06 Da,K +34.06 Da, | 1403.496948 | 3 | 746.0599976 | 746.0540767 |
| YSKNPSNKDAALMEAAR       | Q60649 | 0.01250823 | n +34.06 Da,K +34.06 Da, | 1402.794189 | 3 | 656.710022  | 656.7071122 |
| ADEIAKAQVAQPGGDTIFGKIIR | P70349 | 0          | n +42.03 Da,K +34.06 Da, | 4032.27417  | 4 | 627.8682861 | 627.8668814 |
| EVEVKKIFR               | O35490 | 0.00960219 | n +34.06 Da,K +34.06 Da, | 1402.291626 | 3 | 417.2958069 | 417.2957598 |
| WPGQTFASQVTLEGDKVKVER   | Q9DCW4 | 0          | n +34.06 Da,K +34.06 Da, | 3302.302979 | 4 | 620.1099854 | 620.1116446 |

|                                    |        |            |                          |             |   |             |             |
|------------------------------------|--------|------------|--------------------------|-------------|---|-------------|-------------|
| GDVEKGKKIFVQK                      | P62897 | 0          | n +42.03 Da,K +34.06 Da, | 1556.004639 | 3 | 552.045105  | 552.0452112 |
| GILSYPFDTVRR                       | Q3V132 | 0.01838935 | n +34.06 Da,             | 1492.104248 | 3 | 486.6199951 | 486.6156339 |
| TFGGGTKLEIKR                       | P01630 | 0.01957071 | n +34.06 Da,K +34.06 Da, | 1394.443115 | 4 | 352.9899902 | 352.9897371 |
| LASLLSHSAQELAGSR                   | P54869 | 0          | n +34.06 Da,             | 2019.359131 | 3 | 604.3400269 | 604.3376001 |
| VLSSGKFGDLEKDKGLQTSQDAR            | P14211 | 0          | n +34.06 Da,K +34.06 Da, | 2464.119873 | 4 | 695.4000244 | 695.404087  |
| KFGKHGGTIPVVPTAEFQDR               | P26443 | 0.00628053 | n +14.02 Da,K +28.03 Da, | 2800.00708  | 4 | 564.3200073 | 564.3140258 |
| SLPKELEVKR                         | Q71RI9 | 0.00151286 | n +34.06 Da,K +34.06 Da, | 1382.138916 | 4 | 325.9810486 | 325.9816463 |
| ITTSEYEKELNER                      | P63038 | 0          | n +34.06 Da,K +34.06 Da, | 1414.826294 | 4 | 461.2729187 | 461.2730527 |
| TQKTVDGPSTGKLR                     | P16858 | 0          | n +34.06 Da,K +34.06 Da, | 1378.875122 | 3 | 559.0200195 | 559.0177261 |
| ITAHLVHELK                         | Q8BWT1 | 0.02180685 |                          | 1377.311401 | 4 | 304.9339294 | 304.9344754 |
| SKPPPKPVKPGQVKVFR                  | Q62422 | 0          | n +42.03 Da,K +34.06 Da, | 1512.046997 | 5 | 414.2881165 | 414.2880991 |
| IPEGKNMAFKWR                       | Q9CR68 | 0.00151286 | n +34.06 Da,K +34.06 Da, | 2090.673096 | 4 | 395.4958801 | 395.4973005 |
| DLSGTLLESIPDKLKEFGNTLEDKAR         | P34928 | 0          | n +34.06 Da,K +34.06 Da, | 4478.304199 | 5 | 583.3400269 | 583.343584  |
| PYNPSMSRPDAWGVTKGAAELMQQKEATTEQQLR | O35490 | 0          | n +42.03 Da,K +34.06 Da, | 4218.555664 | 4 | 983.0100098 | 983.0043792 |
| KTLKGLNSDSVTEETLR                  | Q8C196 | 0          | n +34.06 Da,K +34.06 Da, | 1870.206421 | 3 | 665.0700073 | 665.0723374 |
| SEVEVKKIFR                         | O35490 | 0          | n +34.06 Da,K +34.06 Da, | 1474.885864 | 4 | 334.9812622 | 334.9816463 |
| MLENSGCKALKEGVLEKR                 | Q62392 | 0.01250823 | n +42.03 Da,K +34.06 Da, | 2721.936279 | 4 | 552.3200073 | 552.3250281 |
| MDVPSNIKR                          | P63242 | 0.01250823 | n +34.06 Da,K +34.06 Da, | 1572.105713 | 3 | 347.5562134 | 347.5567679 |
| GTSRDPYSHALVAGIDR                  | P61358 | 0.01838935 | n +34.06 Da,             | 1898.49585  | 4 | 462.9993896 | 462.9998354 |
| MEVKPPGPRPQPSGRR                   | Q8BG05 | 0.00151286 | n +42.03 Da,K +34.06 Da, | 1369.320313 | 4 | 495.7721252 | 495.7718612 |
| APDLSGTLLESIPDKLKEFGNTLEDKAR       | P34928 | 0          | n +34.06 Da,K +34.06 Da, | 4363.890625 | 5 | 616.960022  | 616.9615597 |
| HPDIKAISFVGSNQAGEYIFER             | Q9EQ20 | 0.00498575 | n +34.06 Da,K +34.06 Da, | 3753.679443 | 4 | 637.3470459 | 637.3473188 |
| RDDVALEGVGHFFR                     | P29391 | 0          | n +34.06 Da,             | 3045.459229 | 3 | 551.2971191 | 551.2969643 |
| KATIPAAALQAQESTEGPGTGQDRPR         | Q9DBG1 | 0.00296736 | n +34.06 Da,K +34.06 Da, | 2020.017578 | 3 | 883.1500244 | 883.1526731 |
| KAFAAGADIKEMQNR                    | Q8BH95 | 0          | n +34.06 Da,K +34.06 Da, | 1611.411865 | 4 | 438.7600098 | 438.7634974 |
| GHTNSFPSELSVKPR                    | Q8BHI7 | 0.01145553 | n +34.06 Da,K +34.06 Da, | 1816.260498 | 4 | 460.2600098 | 460.2602487 |
| STSAVPQITTHYTVHPR                  | Q921G7 | 0          | n +31.05 Da,             | 2104.360596 | 3 | 642.6699829 | 642.6795855 |
| HTFYNELR                           | P60710 | 0.03966844 | n +34.06 Da,             | 1355.152344 | 2 | 557.2991333 | 557.2986341 |
| KFGKHGGTIPVVPTAEFQDR               | P26443 | 0.02347128 | n +14.02 Da,K +28.03 Da, | 2758.951172 | 4 | 564.3200073 | 564.3140258 |
| PSGTYHAWKANAIGR                    | Q9CWH6 | 0          | n +17.03 Da,K +34.06 Da, | 1348.541382 | 4 | 420.7354736 | 420.7364279 |
| SKEAALSTALSEKR                     | P48678 | 0.02132999 | n +34.06 Da,K +34.06 Da, | 1345.170166 | 3 | 531.6732788 | 531.6737367 |
| TQPPVALKKEGIR                      | Q9CY58 | 0          | n +34.06 Da,K +34.06 Da, | 1343.458008 | 4 | 385.5170288 | 385.5173904 |
| LPNNNTKFDVHDNYVIR                  | Q8C196 | 0          | n +34.06 Da,K +34.06 Da, | 2050.663574 | 4 | 503.7889099 | 503.7891733 |
| VRYSLDPENPTKSCK                    | Q9CPR4 | 0.01250823 | n +34.06 Da,K +34.06 Da, | 1339.169556 | 3 | 632.6900024 | 632.6963244 |
| TPSAKKLTDVGIR                      | P51174 | 0          | n +34.06 Da,K +34.06 Da, | 1337.692871 | 4 | 372.7550049 | 372.7555694 |
| QKTVDGPSTGKLR                      | P16858 | 0          | n +34.06 Da,K +34.06 Da, | 1336.165771 | 4 | 394.2528992 | 394.2531939 |
| EDVKLLGMSGKR                       | Q61937 | 0.00080064 | n +34.06 Da,K +34.06 Da, | 1572.495605 | 4 | 359.480011  | 359.485396  |
| PAPLQHQQVDIYQKR                    | P40142 | 0          | n +17.03 Da,K +34.06 Da, | 1569.891235 | 4 | 436.7581787 | 436.7586317 |
| QPAHLTLKDDSIQVNR                   | Q921G7 | 0          | n +34.06 Da,K +34.06 Da, | 1911.01062  | 3 | 624.7000122 | 624.7039896 |
| SFSGYKIYPGHGR                      | Q8BP67 | 0.00151286 | n +34.06 Da,K +34.06 Da, | 1630.691528 | 3 | 512.960022  | 512.9579892 |

|                               |        |            |                          |             |   |             |             |
|-------------------------------|--------|------------|--------------------------|-------------|---|-------------|-------------|
| GKVSDEKAAAQR                  | P16546 | 0          | n +34.06 Da,K +34.06 Da, | 1330.791138 | 3 | 492.3200073 | 492.319405  |
| EVKDYVAKGEDVNR                | P62774 | 0.00151286 | n +34.06 Da,K +34.06 Da, | 1512.7052   | 3 | 575.3439331 | 575.3406464 |
| LVINLPNNNTKFDVHDNYVIR         | Q8C196 | 0          | n +34.06 Da,K +34.06 Da, | 3403.560303 | 3 | 817.8049316 | 817.8096293 |
| PPEEKEASLAKIKEQTR             | P30115 | 0          | n +17.03 Da,K +34.06 Da, | 1328.239014 | 4 | 519.0800171 | 519.0757827 |
| TKFVHDNYVIR                   | Q8C196 | 0          | n +34.06 Da,K +34.06 Da, | 1584.074585 | 2 | 730.4376221 | 730.4382636 |
| SKDSEGSWFR                    | O55125 | 0          | n +34.06 Da,K +34.06 Da, | 1504.23291  | 2 | 633.8411255 | 633.8411222 |
| PAFYEECKLEYLKER               | Q9CPZ8 | 0          | n +17.03 Da,K +34.06 Da, | 2838.209961 | 4 | 515.789978  | 515.7856518 |
| SPKQEEALAKFR                  | Q99J08 | 0          | n +34.06 Da,K +34.06 Da, | 1325.519043 | 4 | 377.2429199 | 377.2438318 |
| NKELDPVQKLFVDKIR              | P97450 | 0          | n +17.03 Da,K +34.06 Da, | 3010.912109 | 4 | 516.0900879 | 516.0886927 |
| KHTSSLKVTNEPILAFSQGSPER       | Q8CHT0 | 0.00080064 | n +42.03 Da,K +34.06 Da, | 3083.565674 | 4 | 659.8699951 | 659.8724297 |
| AHGSSVKSSEDYAFPTYADR          | P19783 | 0          | n +34.06 Da,K +34.06 Da, | 2323.088135 | 2 | 1091.060059 | 1091.066016 |
| MDQQTQHPSKAAQPLR              | Q9JL3  | 0          | n +42.03 Da,K +34.06 Da, | 1315.329834 | 3 | 595.3200073 | 595.315919  |
| PMAMTQKYEEHVR                 | Q3UJB0 | 0          | n +17.03 Da,K +34.06 Da, | 1314.999878 | 4 | 418.4716797 | 418.4708427 |
| ISFHLPVNSR                    | Q9D1D4 | 0          | n +34.06 Da,             | 2576.519043 | 3 | 401.9045715 | 401.9067477 |
| KNFDLRPGVIVR                  | Q3THS6 | 0.02180685 | n +34.06 Da,K +34.06 Da, | 2126.046387 | 3 | 494.6600037 | 494.6577623 |
| GKADPLGLEAEKDGVPVFKFPR        | Q8R0Y6 | 0          | n +34.06 Da,K +34.06 Da, | 3537.666016 | 5 | 502.1199951 | 502.1126386 |
| RVISLSGEHSIIGR                | P08228 | 0.00498575 | n +34.06 Da,             | 1983.957397 | 3 | 519.9793701 | 519.980976  |
| KQISKCLGLTEAQTR               | Q8C196 | 0          | n +34.06 Da,K +34.06 Da, | 1308.074707 | 3 | 612.3808594 | 612.3804475 |
| VKVGVNGFGR                    | P16858 | 0          | n +34.06 Da,K +34.06 Da, | 1548.978027 | 3 | 367.5785828 | 367.5785603 |
| SKAHPPELKKF                   | P62309 | 0.02180685 | n +42.03 Da,K +34.06 Da, | 1303.740723 | 4 | 357.2381897 | 357.2382836 |
| MVPPVQVSPLIKFGR               | Q06185 | 0          | n +34.06 Da,K +34.06 Da, | 3680.714844 | 3 | 579.3699951 | 579.3691128 |
| SPLEKLVSSVSDLPKR              | P54869 | 0.01250823 | n +34.06 Da,K +34.06 Da, | 3310.001709 | 4 | 465.0560608 | 465.0530664 |
| FFKLISQYVWR                   | Q91VB4 | 0.03852993 | n +42.03 Da,K +34.06 Da, | 1405.200439 | 4 | 419.75      | 419.7500284 |
| SLSNKLTLDKLDVKGKR             | P09411 | 0.03194696 | n +42.03 Da,K +34.06 Da, | 1901.598511 | 4 | 524.1040649 | 524.1045898 |
| ATAVVVNIGKKLYEGKTKVEYELLDTPGR | Q9DCL9 | 0          | n +42.03 Da,K +34.06 Da, | 4920.750488 | 4 | 843.2600098 | 843.26308   |
| PNDVSHGYVTVKPGIR              | P34914 | 0          | n +17.03 Da,K +34.06 Da, | 1649.073486 | 3 | 597.3400269 | 597.3442435 |
| TKVSSLIER                     | Q921X9 | 0.02132999 | n +34.06 Da,K +34.06 Da, | 1289.651001 | 2 | 550.8695679 | 550.8691508 |
| STKAEMDAAVESCKR               | Q9EQ20 | 0          | n +34.06 Da,K +34.06 Da, | 1288.353516 | 3 | 595.6633301 | 595.6625149 |
| SSKPKSLEIIGAPFSKGQPR          | Q61176 | 0          | n +34.06 Da,K +34.06 Da, | 2121.417725 | 5 | 453.4930115 | 453.4947298 |
| MDKTLKGLNSDSVTEETLR           | Q8C196 | 0          | n +34.06 Da,K +34.06 Da, | 2499.700439 | 3 | 747.0900269 | 747.0948138 |
| DVDFKAKVTR                    | Q9JKR6 | 0          | n +34.06 Da,K +34.06 Da, | 1285.684692 | 3 | 427.6192627 | 427.6189028 |
| STKAEMDAAVESCKR               | Q9EQ20 | 0          | n +34.06 Da,K +34.06 Da, | 1283.88147  | 4 | 446.9988708 | 446.9987053 |
| PPLKSPAAFHEQR                 | Q8K4J6 | 0.0274056  | n +17.03 Da,K +34.06 Da, | 1986.591675 | 4 | 382.9700012 | 382.9768836 |
| SVEYEPKEKTFDKILIANR           | Q91ZA3 | 0          | n +34.06 Da,K +34.06 Da, | 2656.731201 | 5 | 484.1000061 | 484.101002  |
| VLSGEDKSNIAAWGKIGGH           | P01942 | 0          | n +34.06 Da,K +34.06 Da, | 2567.165283 | 3 | 735.1199951 | 735.1217318 |
| SETAPAAPAAPAPAEKTPVKKKAR      | P43274 | 0          | n +42.03 Da,K +34.06 Da, | 1277.904053 | 3 | 855.8740234 | 855.8727059 |
| DVDFKAKVTR                    | Q9JKR6 | 0.00151286 | n +34.06 Da,K +34.06 Da, | 1275.258179 | 4 | 320.9700012 | 320.9659962 |
| GDQLVVLTESPFRPHQR             | Q8CFX1 | 0          | n +34.06 Da,             | 2920.583496 | 4 | 504.0299988 | 504.0326726 |
| VAQHVADLGKAFGER               | Q8BMS1 | 0          | n +34.06 Da,K +34.06 Da, | 2441.587158 | 3 | 599.0078735 | 599.0093014 |
| RPELTGAKVVVSGGR               | Q99LC5 | 0          | n +34.06 Da,K +34.06 Da, | 1268.181763 | 4 | 399.2574463 | 399.2572429 |

|                               |        |            |                          |             |   |             |             |
|-------------------------------|--------|------------|--------------------------|-------------|---|-------------|-------------|
| PFAPKTDSEKPFRR                | Q569Z6 | 0.01838935 | n +17.03 Da,K +34.06 Da, | 1347.440186 | 4 | 401.9899902 | 401.9924959 |
| TSGAEIGGAFGGEKHTGGGR          | Q9DBF1 | 0          | n +34.06 Da,K +34.06 Da, | 1264.228882 | 4 | 479.2600098 | 479.257972  |
| TVTLEDIKEHVR                  | P14685 | 0          | n +34.06 Da,K +34.06 Da, | 2377.223877 | 4 | 377.730011  | 377.7333351 |
| LDELVKHGLR                    | Q9R1P4 | 0.00563777 | n +34.06 Da,K +34.06 Da, | 1261.545776 | 4 | 312.7099915 | 312.7081255 |
| SYETQVIAHGQSSSKGPR            | Q78JT3 | 0          | n +34.06 Da,K +34.06 Da, | 1259.950562 | 4 | 493.2738342 | 493.273622  |
| SYETQVIAHGQSSSKGPR            | Q78JT3 | 0          | n +34.06 Da,K +34.06 Da, | 1283.991211 | 3 | 657.3599854 | 657.3624039 |
| LYFHIGETEKRR                  | Q8R1V4 | 0          | n +34.06 Da,K +34.06 Da, | 1872.99585  | 3 | 487.6222534 | 487.6226065 |
| LVINLPNNNTKFVHDNYVIR          | Q8C196 | 0          | n +34.06 Da,K +34.06 Da, | 3458.4729   | 4 | 613.6099854 | 613.6090411 |
| ALFNRVNLKEYPALR               | Q3UTB2 | 0.03966844 | n +14.02 Da,K +28.03 Da, | 1250.793701 | 3 | 616.0200195 | 616.0281083 |
| TGGDAAAPGAAGTQAELPHRR         | Q9D0F3 | 0          | n +34.06 Da,             | 1289.167358 | 3 | 680.0267944 | 680.0260852 |
| SKPPPKPVKPGQVKVFR             | Q62422 | 0          | n +42.03 Da,K +34.06 Da, | 1446.727661 | 4 | 517.6080933 | 517.6083048 |
| SLSNKLTLDKLDVKGKR             | P09411 | 0.01019022 | n +42.03 Da,K +34.06 Da, | 2330.2771   | 5 | 419.4842529 | 419.4851271 |
| RPELTGAKVVVSGGR               | Q99LC5 | 0          | n +34.06 Da,K +34.06 Da, | 1247.308838 | 3 | 532.006897  | 532.0072317 |
| GKADPLGLEAEKDGVPVFKFPR        | Q8R0Y6 | 0          | n +34.06 Da,K +34.06 Da, | 3555.515137 | 4 | 627.3900146 | 627.3889792 |
| GVPIHVGLHTLR                  | Q9R1S7 | 0          | n +34.06 Da,             | 1909.867676 | 4 | 359.2237244 | 359.2254491 |
| SSPEGKLETKAGHPPAVKAGGMR       | Q91XC8 | 0          | n +42.03 Da,K +34.06 Da, | 1502.193848 | 5 | 510.1000061 | 510.0979846 |
| AGVKELDSLKSDR                 | Q80XN0 | 0.01145553 | n +34.06 Da,K +34.06 Da, | 1431.511963 | 3 | 507.323761  | 507.3228153 |
| TGGDAAAPGAAGTQAELPHRR         | Q9D0F3 | 0          | n +34.06 Da,             | 1248.675659 | 3 | 680.0259399 | 680.0260852 |
| PQKVNIIHGGAVSLGHPIGMSGAR      | Q8QZT1 | 0          | n +17.03 Da,K +34.06 Da, | 2043.466919 | 4 | 584.3300171 | 584.3325985 |
| TPSYLSCKSEVEVKKIFR            | O35490 | 0          | n +34.06 Da,K +34.06 Da, | 2699.351807 | 4 | 577.5999756 | 577.6068025 |
| SLVLKFHTVR                    | P02762 | 0          | n +34.06 Da,K +34.06 Da, | 1812.768555 | 4 | 317.717804  | 317.718493  |
| GKLVINGKPITIFQER              | P16858 | 0          | n +34.06 Da,K +34.06 Da, | 2826.304199 | 4 | 479.5700073 | 479.5701547 |
| AEFDKAAEEVKR                  | P31786 | 0          | n +34.06 Da,K +34.06 Da, | 1239.151978 | 4 | 374.47995   | 374.4807396 |
| VHLTDAEKAASVSLWGKVN           | P02088 | 0          | n +34.06 Da,K +34.06 Da, | 3927.835205 | 3 | 734.0900269 | 734.0929667 |
| PKTPGEKQFAYQCSWGLTTR          | Q8CGC7 | 0          | n +17.03 Da,K +34.06 Da, | 2665.086914 | 3 | 814.1099854 | 814.1091278 |
| TIFWTLNLSPKGGGEPKGELLEAIKR    | P09671 | 0.01838935 | n +34.06 Da,K +34.06 Da, | 3712.267578 | 4 | 720.2000122 | 720.1931969 |
| RPELNTLTHNRDKR                | G3UWA2 | 0.0274056  | n +42.03 Da,K +28.03 Da, | 1236.900635 | 3 | 607.3400269 | 607.3343718 |
| KGIKSVTELNGDTITNTMTLGDIVYKR   | P12710 | 0          | n +42.03 Da,K +34.06 Da, | 4037.48291  | 3 | 1037.939941 | 1037.932144 |
| TFMGHYLHEVAR                  | P07724 | 0          | n +34.06 Da,             | 2133.112305 | 3 | 498.9268494 | 498.9293354 |
| SEAAPAAPAAAPPAEKAPAKKK        | P15864 | 0          | n +42.03 Da,K +34.06 Da, | 1228.702637 | 4 | 563.3599854 | 563.3586846 |
| GKSDFLSPKAIANR                | Q8K339 | 0.00151286 | n +34.06 Da,K +34.06 Da, | 1770.713501 | 4 | 402.2600098 | 402.2597477 |
| RPELTGAKVVVSGGR               | Q99LC5 | 0          | n +34.06 Da,K +34.06 Da, | 1227.474365 | 4 | 399.2600098 | 399.2572429 |
| AKEALNSCNKMEIEGR              | P09405 | 0          | n +34.06 Da,K +34.06 Da, | 1224.770874 | 4 | 488.7756653 | 488.7751709 |
| KIMSSPLSKELR                  | P61255 | 0.01838935 | n +34.06 Da,K +34.06 Da, | 1632.011841 | 4 | 373.5       | 373.5010461 |
| VHLTDAEKASVSLWAKVNPDEVGGEALGR | P02089 | 0          | n +34.06 Da,K +34.06 Da, | 4037.993652 | 4 | 828.4500122 | 828.4541837 |
| STGPSEPGGFKPPPKPVIVDRR        | Q9D338 | 0          | n +34.06 Da,K +34.06 Da, | 1992.758423 | 4 | 605.8699951 | 605.8681831 |
| SYETQVIAHGQSSSKGPR            | Q78JT3 | 0          | n +34.06 Da,K +34.06 Da, | 1219.427856 | 4 | 493.2799988 | 493.273622  |
| PMTKEPKLEAAVR                 | Q6P5E4 | 0          | n +17.03 Da,K +34.06 Da, | 1219.319336 | 4 | 389.5       | 389.4985224 |
| MEETEKKVATQEGR                | Q9QXZ6 | 0          | n +42.03 Da,K +34.06 Da, | 1829.446899 | 3 | 582.6500244 | 582.6506743 |
| AISYCHETMTGWVHVDLGR           | P97821 | 0.00151286 | n +34.06 Da,             | 3940.699951 | 4 | 567.2803955 | 567.2793565 |



|                           |        |            |                          |             |   |             |             |
|---------------------------|--------|------------|--------------------------|-------------|---|-------------|-------------|
| SYCAEIAHNVSSKNR           | P62911 | 0.01250823 | n +34.06 Da,K +34.06 Da, | 1379.124878 | 4 | 451.7399902 | 451.7415288 |
| PKHEFSVDMTCEGCAEAVSR      | O08997 | 0          | n +17.03 Da,K +34.06 Da, | 2994.062012 | 4 | 591.0300293 | 591.02782   |
| FDVIKGPVR                 | P29341 | 0.00437956 | n +34.06 Da,K +34.06 Da, | 1227.581909 | 4 | 315.980011  | 315.977635  |
| YGDLEKDKGLQTSQDAR         | P14211 | 0          | n +34.06 Da,K +34.06 Da, | 1479.677124 | 3 | 676.0499878 | 676.0481919 |
| ATPLDFPSKRR               | Q64213 | 0.01838935 | n +34.06 Da,K +34.06 Da, | 1209.864868 | 4 | 341.230011  | 341.2304585 |
| TYAPQEVPKSKATEATKIAIDAGFR | P70694 | 0          | n +34.06 Da,K +34.06 Da, | 3035.984375 | 4 | 707.9299927 | 707.9261921 |
| SQEKASSPSGKMDGEKVPD       | Q9D0R2 | 0.00960219 | n +42.03 Da,K +34.06 Da, | 1240.51062  | 3 | 707.710022  | 707.7124809 |
| TFFSETGAGKHVPR            | P05213 | 0          | n +34.06 Da,K +34.06 Da, | 1614.022217 | 3 | 534.6399536 | 534.6405489 |
| AHYHDNYGKNDEVEFVR         | P25688 | 0          | n +42.03 Da,K +34.06 Da, | 2263.57251  | 4 | 543.008728  | 543.0106663 |
| TNSKMMNLGVGAYR            | P05202 | 0          | n +34.06 Da,K +34.06 Da, | 1195.857056 | 3 | 547.6699829 | 547.6715613 |
| PKNYTDNELEKTR             | P26443 | 0          | n +17.03 Da,K +34.06 Da, | 1768.646729 | 4 | 452.269989  | 452.2665177 |
| ASGADSKGDDLSTAILKQKNRPNR  | Q01853 | 0          | n +42.03 Da,K +34.06 Da, | 2144.229736 | 4 | 672.3900146 | 672.3887405 |
| AEVYSIIKKESNR             | P50431 | 0.00628053 | n +34.06 Da,K +34.06 Da, | 1859.961182 | 4 | 410.5128784 | 410.5123054 |
| SEAAPAAPAAAPPAEKAPAKKK    | P15864 | 0          | n +42.03 Da,K +34.06 Da, | 1188.213745 | 4 | 563.3599854 | 563.3586846 |
| TYKDTLLPKLPR              | P49429 | 0          | n +34.06 Da,K +34.06 Da, | 2336.892578 | 4 | 387.5100098 | 387.5158534 |
| LQILAEFHEKTR              | P07759 | 0          | n +34.06 Da,K +34.06 Da, | 2420.015625 | 4 | 388.9899902 | 388.9925149 |
| SAFTVLKKAGR               | Q8VC30 | 0          | n +34.06 Da,K +34.06 Da, | 1190.095825 | 4 | 320.730011  | 320.7290885 |
| MKPILLQGHER               | Q9QZD9 | 0.02234637 | n +34.06 Da,K +34.06 Da, | 1184.788208 | 4 | 348.2216492 | 348.2222427 |
| PHLPQEEVLKFYR             | P50136 | 0          | n +17.03 Da,K +34.06 Da, | 2759.65332  | 4 | 427.5006714 | 427.5017287 |
| DLKLLSHGGR                | P47199 | 0.00080064 | n +34.06 Da,K +34.06 Da, | 1323.841919 | 3 | 388.589386  | 388.5892367 |
| PSTHNMDVPNIKR             | P63242 | 0          | n +17.03 Da,K +34.06 Da, | 1178.831421 | 4 | 390.7200012 | 390.7200835 |
| PDVVVKEDEEYKR             | Q8QZT1 | 0          | n +17.03 Da,K +34.06 Da, | 1177.570801 | 3 | 564.3200073 | 564.3280774 |
| VKAEPKIDAFR               | P09411 | 0          | n +34.06 Da,K +34.06 Da, | 1378.34375  | 4 | 362.4928589 | 362.4936496 |
| SQEHPVVLTKFVEGAR          | Q8C196 | 0          | n +34.06 Da,K +34.06 Da, | 2226.501953 | 3 | 622.3699951 | 622.3687182 |
| KTLKGLNSDSVTEETLR         | Q8C196 | 0          | n +34.06 Da,K +34.06 Da, | 1910.720825 | 3 | 665.0700073 | 665.0723374 |
| ERPIHAEPQYPVR             | P15116 | 0          | n +34.06 Da,             | 1185.299561 | 3 | 542.6400146 | 542.6372093 |
| PQKGILIGIQSFRPR           | Q8C196 | 0          | n +17.03 Da,K +34.06 Da, | 2697.755127 | 3 | 630.3900146 | 630.3950493 |
| GQVVQFKLSDIGEGIR          | P53395 | 0          | n +34.06 Da,K +34.06 Da, | 3512.655273 | 3 | 605.3699951 | 605.3650852 |
| GNKFTVKESSNFR             | P55050 | 0          | n +34.06 Da,K +34.06 Da, | 1172.469971 | 4 | 404.7399902 | 404.7467389 |
| ADSQIKLSIKR               | P10922 | 0          | n +34.06 Da,K +34.06 Da, | 1171.412354 | 4 | 340.9899902 | 340.9897371 |
| DKPGGPHYILR               | Q8CHT0 | 0          | n +34.06 Da,K +34.06 Da, | 1169.902954 | 3 | 440.9403381 | 440.9401581 |
| YRPGTVALR                 | P02301 | 0.01019022 |                          | 1195.638916 | 3 | 354.2123718 | 354.2135823 |
| MNQEKLAKLQAQVR            | Q64152 | 0          | n +34.06 Da,K +34.06 Da, | 1608.710938 | 3 | 587.0389404 | 587.0417658 |
| KTSKDTTASAVAVGLR          | Q8BMS1 | 0          | n +34.06 Da,K +34.06 Da, | 1167.103394 | 3 | 569.6985474 | 569.7001745 |
| ADHPGFKDPVYR              | P16331 | 0.01019022 | n +34.06 Da,K +34.06 Da, | 1372.447021 | 4 | 368.2099304 | 368.2097612 |
| PTSGAEIGGAFGGEKHTGGGR     | Q9DBF1 | 0          | n +17.03 Da,K +34.06 Da, | 1216.910156 | 4 | 499.2600098 | 499.2632733 |
| VATVPIKDKGTQVTEEKPR       | P27546 | 0.02910855 | n +34.06 Da,K +34.06 Da, | 1163.318848 | 5 | 447.2900085 | 447.2905159 |
| SYETQVIAHGQSSKGPR         | Q78JT3 | 0          | n +34.06 Da,K +34.06 Da, | 1242.917358 | 3 | 657.3599854 | 657.3624039 |
| PYTTVTPQIINSKWEKVQLVPR    | P57780 | 0.0494186  | n +17.03 Da,K +34.06 Da, | 3608.651855 | 5 | 595.3699951 | 595.3697107 |
| KNGGLGHMNIITLLSDITKQISR   | P20108 | 0.00151286 | n +42.03 Da,K +34.06 Da, | 3896.357178 | 4 | 627.3599854 | 627.3666199 |

|                            |        |            |                          |             |   |             |             |
|----------------------------|--------|------------|--------------------------|-------------|---|-------------|-------------|
| PVELPFGGYKKSFGFR           | Q9JLJ2 | 0          | n +17.03 Da,K +34.06 Da, | 2758.405762 | 4 | 456.769989  | 456.7767865 |
| RTGDGKILYSQCGDVMR          | Q60605 | 0.03852993 | n +34.06 Da,K +34.06 Da, | 1835.103638 | 3 | 675.3599854 | 675.3611294 |
| AELYVKPGNKER               | Q80VJ2 | 0.00080064 | n +42.03 Da,K +34.06 Da, | 1500.828857 | 3 | 505.3099976 | 505.3051663 |
| RVISLSGEHSIIGR             | P08228 | 0          | n +34.06 Da,             | 1982.519653 | 4 | 390.2399902 | 390.2375511 |
| GTLEDQLSHLKQYER            | P57780 | 0          | n +34.06 Da,K +34.06 Da, | 3066.260498 | 4 | 472.019989  | 472.016719  |
| SKITKFENAFLSHVISHQHSLLGNIR | Q03265 | 0.00563777 | n +42.03 Da,K +28.03 Da, | 4332.496582 | 5 | 613.9500122 | 613.9437171 |
| QAEFDKAAEEVKR              | P31786 | 0          | n +34.06 Da,K +34.06 Da, | 1601.396729 | 4 | 406.4899902 | 406.4953841 |
| SQVKSEAQQPMHPKPLSPDAR      | Q9ERGO | 0.00628053 | n +34.06 Da,K +34.06 Da, | 1153.770386 | 4 | 609.0900269 | 609.0996455 |
| SQVKSEAQQPMHPKPLSPDAR      | Q9ERGO | 0          | n +34.06 Da,K +34.06 Da, | 1153.441895 | 5 | 487.4814148 | 487.4811717 |
| SVEYEPKEKTFDKILIANR        | Q91ZA3 | 0          | n +34.06 Da,K +34.06 Da, | 2661.47876  | 4 | 604.8699951 | 604.8744334 |
| TGGDAAAPGAAGTQAEPLPHRR     | Q9D0F3 | 0          | n +34.06 Da,             | 1278.567749 | 4 | 510.2720947 | 510.271383  |
| SGWYDADLSPAGHEEAKR         | Q9DBJ1 | 0          | n +34.06 Da,K +34.06 Da, | 2272.200195 | 4 | 515.0100098 | 515.0144422 |
| PKVIQPEVDTPPLGR            | Q8VCU1 | 0          | n +17.03 Da,K +34.06 Da, | 2164.068604 | 3 | 533.9971313 | 533.9945514 |
| LRELISNASDALDKIR           | P08113 | 0.00080064 | n +34.06 Da,K +34.06 Da, | 3025.719727 | 4 | 471.2904968 | 471.2902776 |
| PPSYKVGDKIATR              | P40142 | 0.00151286 | n +17.03 Da,K +34.06 Da, | 1142.724365 | 4 | 379.9937439 | 379.9937671 |
| SLNNKFASFDKVR              | P11679 | 0          | n +34.06 Da,K +34.06 Da, | 3066.188232 | 4 | 436.0253296 | 436.0268512 |
| VNDSVTKSKFDNLYGCR          | P50247 | 0          | n +34.06 Da,K +34.06 Da, | 2191.737549 | 4 | 527.039978  | 527.044073  |
| KATIPAALQAQESTEGPGTQDRPR   | Q9DBG1 | 0          | n +34.06 Da,K +34.06 Da, | 1998.117554 | 4 | 662.6099854 | 662.6163239 |
| SETAPAAPAAPAPAEKTPVKKKAR   | P43274 | 0.00628053 | n +42.03 Da,K +34.06 Da, | 1138.355469 | 5 | 513.9299927 | 513.9265341 |
| AVEKVNIPQVDR               | P50247 | 0          | n +34.06 Da,K +34.06 Da, | 1171.662476 | 4 | 400.269989  | 400.2675727 |
| DKPGGPHYILR                | Q8CHT0 | 0          | n +34.06 Da,K +34.06 Da, | 1136.081665 | 4 | 330.9599915 | 330.9569377 |
| DGKYHSIKEVATSVQLTLR        | P25688 | 0          | n +42.03 Da,K +34.06 Da, | 3232.311279 | 3 | 752.4400024 | 752.4392022 |
| RLCAATATILDKPEDR           | O35215 | 0          | n +34.06 Da,K +34.06 Da, | 1928.969971 | 3 | 633.3599854 | 633.3648682 |
| PSKGPLQSVQVFGFR            | P14131 | 0          | n +17.03 Da,K +34.06 Da, | 2410.226074 | 3 | 517.6490479 | 517.6473743 |
| TPEQKKEELSEIAQR            | Q91Y97 | 0          | n +34.06 Da,K +34.06 Da, | 1133.109497 | 4 | 440.5299988 | 440.5256787 |
| SETAPAAPAAPAPVEKTPVKKK     | P43277 | 0          | n +42.03 Da,K +34.06 Da, | 1564.446899 | 3 | 789.5       | 789.5037307 |
| PVRTAPKKTSGSLKDEDR         | D3YUM1 | 0.01957071 | K +28.03 Da,             | 1322.626709 | 4 | 561.8300171 | 561.8232208 |
| AWKSGGASHSELIHNLR          | P23506 | 0          | n +42.03 Da,K +34.06 Da, | 2234.580811 | 3 | 647.015564  | 647.0167495 |
| ADSQIKLSIKR                | P10922 | 0.00151286 | n +34.06 Da,K +34.06 Da, | 1130.980591 | 4 | 340.9898987 | 340.9897371 |
| GKLTGMAFR                  | P16858 | 0.0362448  | n +34.06 Da,K +34.06 Da, | 1382.041138 | 3 | 350.2246704 | 350.2251295 |
| TKVSSLIER                  | Q921X9 | 0.04393673 | n +34.06 Da,K +34.06 Da, | 1275.328857 | 3 | 367.5820007 | 367.5818594 |
| TPEQKKEELSEIAQR            | Q91Y97 | 0          | n +34.06 Da,K +34.06 Da, | 1127.229004 | 3 | 587.0300293 | 587.0318128 |
| SIEFFKFFVNR                | Q9JMA7 | 0.00080064 | n +34.06 Da,K +34.06 Da, | 3077.89502  | 4 | 380         | 379.9988333 |
| RDPLHEELLGQGCVFQER         | Q99LB7 | 0.00080064 |                          | 3042.64502  | 4 | 553.5300293 | 553.5298381 |
| KESKNEVALLER               | P24668 | 0.03194696 | n +34.06 Da,K +34.06 Da, | 1121.126709 | 3 | 506.6600037 | 506.6630603 |
| TQKGPVAILKR                | Q99PL5 | 0.02347128 | n +34.06 Da,K +34.06 Da, | 1263.038208 | 4 | 357.7502441 | 357.7502869 |
| LFEDTNLCAIHAKR             | P02301 | 0          | n +34.06 Da,K +34.06 Da, | 2022.894165 | 4 | 439.75      | 439.7516306 |
| MESNHKSGDGLSGTQKEAALR      | Q5YD48 | 0          | n +42.03 Da,K +34.06 Da, | 1493.699341 | 3 | 776.0700073 | 776.0745947 |
| TAKGEKFMQEEFSR             | P27773 | 0.00080064 | K +28.03 Da,             | 1971.345459 | 3 | 624.3400269 | 624.3292361 |
| SHPSWLPPKSTGEPLGHVPAR      | Q8BFW7 | 0          | n +42.03 Da,K +34.06 Da, | 2610.142334 | 3 | 776.0900269 | 776.0886855 |

|                           |        |            |                          |             |   |             |             |
|---------------------------|--------|------------|--------------------------|-------------|---|-------------|-------------|
| SVVKSEDYAFPTYADRR         | P19783 | 0.00628053 | n +34.06 Da,K +34.06 Da, | 2400.818359 | 4 | 518.7841187 | 518.7825513 |
| SLSNKLTLDKLDVKGKR         | P09411 | 0          | n +42.03 Da,K +34.06 Da, | 2405.074951 | 4 | 524.1099854 | 524.1045898 |
| TCSVFGPDGSLLVKHR          | Q9JHW2 | 0          | n +34.06 Da,K +34.06 Da, | 2464.010254 | 3 | 614.3499756 | 614.3506701 |
| MENNKTSVDSKSIINNFVKTIHGSK | P70677 | 0.03522388 | n +42.03 Da,K +34.06 Da, | 2480.482666 | 5 | 597.9400024 | 597.9382776 |
| SDSRDPASDQMKQWKEQR        | P24270 | 0          | n +42.03 Da,K +34.06 Da, | 1957.577393 | 3 | 768.0535889 | 768.055423  |
| SDSRDPASDQMKQWKEQR        | P24270 | 0          | n +42.03 Da,K +34.06 Da, | 1765.355835 | 4 | 576.289978  | 576.2933863 |
| SNELGTFLQAFKTALENFSR      | Q3UJB3 | 0.03311258 | n +17.03 Da,K +34.06 Da, | 2936.928467 | 3 | 813.1199951 | 813.116459  |
| TSAGESFNKLVSGKLR          | Q9CPY7 | 0          | n +34.06 Da,K +34.06 Da, | 2550.989014 | 4 | 449.7817078 | 449.7835873 |
| SLPKELEVKR                | Q71RI9 | 0.00151286 | n +34.06 Da,K +34.06 Da, | 1422.643677 | 4 | 325.9816895 | 325.9816463 |
| MESNHSKSGDLSGTQKEAALR     | Q5YD48 | 0          | n +42.03 Da,K +34.06 Da, | 1504.607788 | 4 | 582.3078003 | 582.3077652 |
| TTQLKAKDILYR              | Q91VA0 | 0          | n +34.06 Da,K +34.06 Da, | 1620.9198   | 4 | 388.7644043 | 388.7633944 |
| SHTILLVQPTKRPEGR          | P84089 | 0          | n +42.03 Da,K +34.06 Da, | 1818.04187  | 2 | 954.5599976 | 954.5655292 |
| SPGEKINLLKR               | Q9WTX2 | 0          | n +34.06 Da,K +34.06 Da, | 1238.777954 | 4 | 339.9899902 | 339.9910083 |
| SSAASSKELLMKLR            | Q9CZR8 | 0          | n +34.06 Da,K +34.06 Da, | 2042.919434 | 4 | 406.513916  | 406.5144194 |
| ECELLGHNKNIR              | Q8BFR5 | 0          | n +34.06 Da,K +34.06 Da, | 1097.443848 | 4 | 388.4700012 | 388.4740608 |
| SSSEDKITVHFKNR            | P46656 | 0          | n +34.06 Da,K +34.06 Da, | 1097.373169 | 4 | 438.2600098 | 438.2640247 |
| AKIAKTHEDIAQIR            | Q99NB9 | 0          | n +42.03 Da,K +34.06 Da, | 1929.298462 | 2 | 917.039978  | 917.0468966 |
| ASPHQECEYLQMIKQR          | P97751 | 0          | n +34.06 Da,K +34.06 Da, | 2757.815674 | 4 | 554.539978  | 554.5372273 |
| SYETQVIAHGQGSSKGPR        | Q78JT3 | 0          | n +34.06 Da,K +34.06 Da, | 1094.247192 | 3 | 657.3621216 | 657.3624039 |
| TPEQKELSEIAQR             | Q91Y97 | 0          | n +34.06 Da,K +34.06 Da, | 1092.078979 | 4 | 440.5262146 | 440.5256787 |
| SQEASSPSGKMDGEKPVDASEEKR  | Q9D0R2 | 0.00080064 | n +42.03 Da,K +34.06 Da, | 1155.515625 | 5 | 571.9099731 | 571.9131039 |
| DHHDVSGTDSFPR             | Q8VC12 | 0          |                          | 1089.933716 | 3 | 499.8999939 | 499.8954191 |
| SDSRDPASDQMKQWKEQR        | P24270 | 0          | n +42.03 Da,K +34.06 Da, | 1997.714355 | 3 | 768.0512695 | 768.055423  |
| SYETQVIAHGQGSSKGPR        | Q78JT3 | 0          | n +34.06 Da,K +34.06 Da, | 1089.754395 | 4 | 493.269989  | 493.273622  |
| DHHDVSGTDSFPR             | Q8VC12 | 0          | n +31.05 Da,             | 1088.491699 | 3 | 500.8999939 | 500.9007217 |
| IEVAPPKAHEVR              | P00329 | 0          | n +34.06 Da,K +34.06 Da, | 1088.057129 | 3 | 471.9664001 | 471.9664846 |
| KKVDLSQPLIATCR            | P52196 | 0.00762829 | n +34.06 Da,K +34.06 Da, | 1877.371216 | 3 | 577.7070313 | 577.7063831 |
| REQAGGDATENFEDVGHSTDR     | P56395 | 0          | n +34.06 Da,             | 1666.347168 | 4 | 599.7800293 | 599.7784989 |
| PASDQMKQWKEQR             | P24270 | 0          | n +17.03 Da,K +34.06 Da, | 1084.393555 | 3 | 572.989563  | 572.9894013 |
| PDVVVKEDEEYKR             | Q8QZT1 | 0          | n +17.03 Da,K +34.06 Da, | 1175.500488 | 4 | 423.4967651 | 423.4978772 |
| GKIGGHGAEYGAEALER         | P01942 | 0          | n +34.06 Da,K +34.06 Da, | 1552.890747 | 3 | 595         | 594.9971731 |
| ASLVPLKEKKLMEVK           | P56135 | 0          | n +42.03 Da,K +34.06 Da, | 2742.877686 | 4 | 473.5799866 | 473.5797901 |
| KVLDDLKNKNIR              | P70694 | 0.00080064 | n +34.06 Da,K +34.06 Da, | 1348.833862 | 3 | 477.3200073 | 477.3243786 |
| ATFGTAVTSAKVAVNGVHLHYQR   | Q8R164 | 0          | n +34.06 Da,K +34.06 Da, | 3204.072998 | 4 | 624.5999756 | 624.6093069 |
| HETLYQKDSQGNLFR           | Q91Y97 | 0          | n +34.06 Da,K +34.06 Da, | 1855.595337 | 3 | 635.3474121 | 635.3480945 |
| TVKKIAIFGATGR             | Q923D2 | 0.00365764 | n +34.06 Da,K +34.06 Da, | 1726.630005 | 3 | 488.6762085 | 488.676752  |
| EKISGQKVNEAACDIAR         | O35490 | 0          | n +34.06 Da,K +34.06 Da, | 1617.53772  | 3 | 664.3800049 | 664.3861502 |
| GDHSLAVGSISGHAR           | Q61176 | 0.01019022 | n +34.06 Da,             | 1076.47583  | 4 | 375.2000122 | 375.2049797 |
| SKPVSAIKPTAAPPLAEAGAAKGLR | Q9D2G2 | 0          | n +34.06 Da,K +34.06 Da, | 2184.486084 | 5 | 508.3299866 | 508.3348281 |
| IEVAPPKAHEVR              | P00329 | 0          | n +34.06 Da,K +34.06 Da, | 1073.364502 | 4 | 354.2266541 | 354.2266825 |

|                                   |        |            |                          |             |   |             |             |
|-----------------------------------|--------|------------|--------------------------|-------------|---|-------------|-------------|
| SEPEIPK GIR                       | Q9WTP6 | 0.00762829 | n +34.06 Da,K +34.06 Da, | 1618.200928 | 3 | 398.5884705 | 398.5890141 |
| SSAAAAESAALKVRPER                 | Q8BGT5 | 0          | n +34.06 Da,K +34.06 Da, | 1657.477173 | 4 | 446.2688904 | 446.2680737 |
| PCALCSLHSIGKIGGAQNR               | P34884 | 0          | n +17.03 Da,K +34.06 Da, | 2150.924561 | 3 | 697.3800049 | 697.3788538 |
| SKPPPKPVKPGQVKVFR                 | Q62422 | 0          | n +42.03 Da,K +34.06 Da, | 1471.611328 | 5 | 414.2881775 | 414.2880991 |
| TLTGVPEEHIKTR                     | Q9CXZ1 | 0          | n +34.06 Da,K +34.06 Da, | 1447.053467 | 4 | 387.9905701 | 387.9899724 |
| MKPILLQGHER                       | Q9QZD9 | 0          | n +34.06 Da,K +34.06 Da, | 1186.566604 | 3 | 463.9598083 | 463.9605648 |
| FIDTTSKFGHGR                      | P27659 | 0          | n +34.06 Da,K +34.06 Da, | 1104.133301 | 4 | 359.2099915 | 359.2097612 |
| DTFVHVTDLSGKETICR                 | P62264 | 0.00151286 | n +34.06 Da,K +34.06 Da, | 2789.163086 | 4 | 512.2800293 | 512.2794815 |
| TYLENEKLSSGKR                     | Q91YQ5 | 0.0362448  | n +34.06 Da,K +34.06 Da, | 1067.607544 | 4 | 407.5       | 407.5032091 |
| HMPPEEKEASLAKIKEQTR               | P30115 | 0          | n +42.03 Da,K +34.06 Da, | 1590.602905 | 4 | 592.3400269 | 592.3453838 |
| TRETDLQELFRPFGSISR                | Q9Z1D1 | 0          | n +34.06 Da,             | 3925.755371 | 4 | 547.2999878 | 547.2998749 |
| SSKEVKTALKSAR                     | F8VPK0 | 0          | n +42.03 Da,K +34.06 Da, | 1064.40918  | 4 | 388.0094604 | 388.0096642 |
| PPSDLKFKGPFDTDVVTNLKLQNPSTR       | Q9WV55 | 0          | n +17.03 Da,K +34.06 Da, | 3774.058105 | 5 | 627.572876  | 627.5689185 |
| TQKTVDPGSPGKLR                    | P16858 | 0.00498575 | n +34.06 Da,K +34.06 Da, | 1354.873169 | 4 | 419.5148315 | 419.5151137 |
| SSGTTAPKKTSTFGSLKDEDR             | Q91YTO | 0          | n +34.06 Da,K +34.06 Da, | 1063.006714 | 3 | 750.1099854 | 750.1079288 |
| SQVESGSLEDDWDFLPPKIKDPDAAKPEDWDER | P14211 | 0.00831601 | n +34.06 Da,K +34.06 Da, | 3725.075439 | 5 | 823.4400024 | 823.4423094 |
| SHTILLVQPTKRPEGR                  | P84089 | 0          | n +42.03 Da,K +34.06 Da, | 1810.396729 | 3 | 636.711731  | 636.7127783 |
| PKHEFSVDMTCEGCAEAVSR              | O08997 | 0          | n +34.06 Da,K +34.06 Da, | 1653.398804 | 3 | 793.3699951 | 793.3785208 |
| KEWIPVTKLGR                       | P25444 | 0          | n +34.06 Da,K +34.06 Da, | 2140.072021 | 4 | 358         | 358.0001046 |
| DTTYCIKKLR                        | Q99KR3 | 0          | n +34.06 Da,K +34.06 Da, | 1297.796509 | 3 | 467.2987061 | 467.2990645 |
| SSGTTAPKKTSTFGSLKDEDR             | Q91YTO | 0          | n +34.06 Da,K +34.06 Da, | 1056.442383 | 4 | 562.8300171 | 562.8327657 |
| SETAAPAAPAPVEKTPVKKK              | P43277 | 0          | n +34.06 Da,K +34.06 Da, | 1223.498169 | 4 | 590.3900146 | 590.3927552 |
| ATLMLPTQTISQGAIEKVKDATR           | Q8C196 | 0          | n +34.06 Da,K +34.06 Da, | 3825.199463 | 4 | 644.3909912 | 644.3900572 |
| PLGLEAEKDGVPVFKFPR                | Q8R0Y6 | 0          | n +17.03 Da,K +34.06 Da, | 3587.537354 | 4 | 521.8197021 | 521.8201887 |
| YVAESFNDAKEKVR                    | P16331 | 0.00080064 | n +34.06 Da,K +34.06 Da, | 1587.671387 | 4 | 440.2600098 | 440.2624877 |
| AKHHPDLIFCR                       | P83870 | 0          | n +42.03 Da,K +34.06 Da, | 1638.73999  | 3 | 490.600647  | 490.6013301 |
| SETAPAETAAPAPVEKSPAKKKTTK         | P43276 | 0          | n +42.03 Da,K +34.06 Da, | 1052.28833  | 4 | 688.4299927 | 688.4313381 |
| SSGTTAPKKTSTFGSLKDEDR             | Q91YTO | 0          | n +34.06 Da,K +34.06 Da, | 1062.30603  | 5 | 450.4700012 | 450.4676679 |
| MKPILLQGHER                       | Q9QZD9 | 0.00296736 | n +34.06 Da,K +34.06 Da, | 1225.796753 | 4 | 348.2200012 | 348.2222427 |
| SETAAPAAPAPAEKTPVKKK              | P43274 | 0          | n +34.06 Da,K +34.06 Da, | 1047.153198 | 5 | 466.9100037 | 466.9093994 |
| SSGTTAPKKTSTFGSLKDEDR             | Q91YTO | 0          | n +34.06 Da,K +34.06 Da, | 1104.215698 | 5 | 450.4700012 | 450.4676679 |
| NKELDPVQKLFVVKIR                  | P97450 | 0          | n +17.03 Da,K +34.06 Da, | 3008.771973 | 3 | 687.7813721 | 687.7824982 |
| PKNYTDNELEKTR                     | P26443 | 0          | n +17.03 Da,K +34.06 Da, | 1789.473267 | 2 | 903.5300293 | 903.525759  |
| LPTVKKFLQPGSQR                    | P30115 | 0          | n +34.06 Da,K +34.06 Da, | 1918.134399 | 4 | 426.0358582 | 426.0372188 |
| SKPKAEDEILNR                      | P35564 | 0          | n +34.06 Da,K +34.06 Da, | 1122.046997 | 3 | 544.3331909 | 544.3334917 |
| SLQPAPVKKIPNR                     | B7ZMP1 | 0          | n +34.06 Da,K +34.06 Da, | 1037.893188 | 3 | 517.3585815 | 517.3594231 |
| SGLDMHTKPWIR                      | O35490 | 0          | n +34.06 Da,K +34.06 Da, | 2215.904785 | 4 | 377.9700012 | 377.972425  |
| TFDNTSDGTIDFREFIALSVTSRGRLEQ      | P84075 | 0.0130719  | n +17.03 Da,             | 4503.249023 | 4 | 827.1699829 | 827.175729  |
| TMVVHEKQDDLKGGNEESTKTGNAGSR       | P08228 | 0          | n +42.03 Da,K +34.06 Da, | 1442.576782 | 4 | 773.1599731 | 773.1558788 |
| TKVSSLIER                         | Q921X9 | 0.01957071 | n +34.06 Da,K +34.06 Da, | 1315.893677 | 3 | 367.5819092 | 367.5818594 |

|                               |        |            |                          |             |   |             |             |
|-------------------------------|--------|------------|--------------------------|-------------|---|-------------|-------------|
| TRDGLVSESSDVVSK               | P11679 | 0          | n +34.06 Da,K +34.06 Da, | 1217.019775 | 3 | 603.7000122 | 603.6986112 |
| PNASKFAQKIGGSER               | P97315 | 0          | n +17.03 Da,K +34.06 Da, | 1036.409546 | 4 | 419.5       | 419.5047649 |
| AGKPVLLHFFNAR                 | E9Q6L7 | 0.02910855 | n +42.03 Da,K +34.06 Da, | 1034.771973 | 4 | 356.4599915 | 356.4598825 |
| MNILPKKSWHVR                  | Q9DB98 | 0          | n +42.03 Da,K +34.06 Da, | 2616.388184 | 4 | 405.5       | 405.5026209 |
| THNMDVPNIKR                   | P63242 | 0.00498575 | n +34.06 Da,K +34.06 Da, | 1033.213989 | 3 | 464.9400024 | 464.9399411 |
| IEVAPPKAHEVR                  | P00329 | 0.00498575 | n +34.06 Da,K +34.06 Da, | 1032.964111 | 4 | 354.230011  | 354.2266825 |
| GALFVEKFIKPR                  | Q05920 | 0          | n +34.06 Da,K +34.06 Da, | 2991.871582 | 4 | 409.769989  | 409.7724907 |
| STIPEVKALKR                   | Q9DBT9 | 0          | n +34.06 Da,K +34.06 Da, | 1335.791504 | 4 | 336.7399902 | 336.7421961 |
| AGIAIKLAKDR                   | O08529 | 0          | n +42.03 Da,K +34.06 Da, | 2652.887451 | 3 | 422.6227417 | 422.6240585 |
| LHTVYQSVLPETHQMLR             | Q07417 | 0          | n +31.05 Da,             | 3449.044922 | 4 | 553.789978  | 553.7952869 |
| TGDHIQQAQYR                   | Q80WA3 | 0.01250823 | n +42.03 Da,K +28.03 Da, | 1737.483032 | 4 | 347.4400024 | 347.4335687 |
| HVDTAYAYQVEEIEGQAIQSKIKAGVVKR | Q8VC28 | 0          | n +17.03 Da,K +34.06 Da, | 4408.720215 | 5 | 670.789978  | 670.7933668 |
| AAAKVALTKR                    | Q9QXX4 | 0          | n +42.03 Da,K +34.06 Da, | 1027.786499 | 3 | 380.2692261 | 380.2696155 |
| ELTAEKITEFCHR                 | P09103 | 0          | n +34.06 Da,K +34.06 Da, | 2228.125244 | 3 | 567.9798584 | 567.9803543 |
| SETAPAAPAAPAPAEKTPVKKKAR      | P43274 | 0          | n +42.03 Da,K +34.06 Da, | 1237.494019 | 3 | 855.8723145 | 855.8727059 |
| LKSHGQDYLVGNR                 | P10648 | 0.00365764 | n +34.06 Da,K +34.06 Da, | 1027.624756 | 3 | 518.9699707 | 518.9722986 |
| SDSRDPASDQMKQWKEQR            | P24270 | 0          | n +42.03 Da,K +34.06 Da, | 1325.700073 | 4 | 576.2936401 | 576.2933863 |
| PMIPAKHAPLAR                  | A2AAY5 | 0.00498575 | n +17.03 Da,K +34.06 Da, | 1024.925293 | 4 | 338.9700012 | 338.9668955 |
| DGTGGDAAAPGAAGTQAEIPHRR       | Q9D0F3 | 0          | n +34.06 Da,             | 1503.529785 | 4 | 553.2800293 | 553.2834851 |
| SLQPAPVKKIPNR                 | B7ZMP1 | 0          | n +34.06 Da,K +34.06 Da, | 1050.55835  | 4 | 388.2711792 | 388.2713864 |
| SEGDSVGDVHGKPSVVYR            | Q9CQU3 | 0          | n +42.03 Da,K +34.06 Da, | 1994.380005 | 3 | 684.3499756 | 684.3466019 |
| KISGQKVNEAACDIAR              | O35490 | 0          | n +34.06 Da,K +34.06 Da, | 1439.765747 | 3 | 621.3699951 | 621.3719521 |
| THNMDVPNIKR                   | P63242 | 0.00225394 | n +34.06 Da,K +34.06 Da, | 1021.98999  | 4 | 348.9564209 | 348.9567749 |
| TAEKITEFCHR                   | P09103 | 0          | n +34.06 Da,K +34.06 Da, | 1018.947571 | 3 | 487.2717285 | 487.2714681 |
| ASASYHISNLEKMTSSDKDFR         | Q6ZQ38 | 0          | n +42.03 Da,K +34.06 Da, | 4037.773682 | 4 | 653.3400269 | 653.3430766 |
| PFVEKAKGILR                   | Q9JMA7 | 0.00296736 | n +17.03 Da,K +34.06 Da, | 1608.311279 | 3 | 448.3126526 | 448.3133729 |
| YGDLEKDKGLQTSQDAR             | P14211 | 0          | n +34.06 Da,K +34.06 Da, | 1476.354736 | 4 | 507.2900085 | 507.2879631 |
| HPVGGGCPVFEHGPR               | Q64471 | 0.00563777 | n +34.06 Da,             | 1016.204346 | 3 | 546.2800293 | 546.2790275 |
| GGAFSGKDYTKVDR                | Q3THS6 | 0.00960219 | n +34.06 Da,K +34.06 Da, | 1219.210693 | 4 | 401.4880981 | 401.4888303 |
| PKEEVKSFLDR                   | D3Z6I7 | 0          | n +17.03 Da,K +34.06 Da, | 1506.291016 | 4 | 358.980011  | 358.9765801 |
| PASGPIRPIVR                   | P47963 | 0.01612903 | n +14.02 Da,             | 1020.465576 | 3 | 392.9120483 | 392.9119034 |
| PKPVGALAGHQDGITFIDSKGDAR      | Q91VU6 | 0          | n +17.03 Da,K +34.06 Da, | 2313.046631 | 5 | 507.8926697 | 507.8931116 |
| SLQPAPVKKIPNR                 | B7ZMP1 | 0          | n +34.06 Da,K +34.06 Da, | 1010.042358 | 4 | 388.2719727 | 388.2713864 |
| TNYASQKKTFEINPR               | P08113 | 0          | n +34.06 Da,K +34.06 Da, | 1999.554077 | 3 | 688.0599976 | 688.0654053 |
| SIDKWFLYKMR                   | Q8C196 | 0          | n +34.06 Da,K +34.06 Da, | 3313.99292  | 4 | 398         | 397.9996761 |
| LAVIEEQHKEIR                  | Q5I012 | 0          | n +34.06 Da,K +34.06 Da, | 1308.886719 | 4 | 383.9899902 | 383.9912436 |
| SSAAAESAALKVRPER              | Q8BGT5 | 0.00563777 | n +34.06 Da,K +34.06 Da, | 1853.883301 | 4 | 446.269989  | 446.2680737 |
| SSPPEGKLETKAGHPPAVKAGGMR      | Q91XC8 | 0          | n +42.03 Da,K +34.06 Da, | 1521.804199 | 4 | 637.3712158 | 637.3706616 |
| DVLHAENVKAGR                  | P26043 | 0          | n +34.06 Da,K +34.06 Da, | 1023.439087 | 4 | 344.9625549 | 344.962486  |
| TATPQQAQEVHEKLR               | P17751 | 0          | n +34.06 Da,K +34.06 Da, | 1186.495361 | 4 | 451.7631226 | 451.7641612 |

|                               |        |            |                          |             |   |             |             |
|-------------------------------|--------|------------|--------------------------|-------------|---|-------------|-------------|
| SFNKLVSGKLR                   | Q9CPY7 | 0.00151286 | n +34.06 Da,K +34.06 Da, | 1568.900635 | 4 | 338.4876099 | 338.4883671 |
| DKLHVDPENFR                   | P02088 | 0.01250823 | n +34.06 Da,K +34.06 Da, | 1858.391968 | 3 | 479.942627  | 479.9422278 |
| AEFDKAAEEVKR                  | P31786 | 0.01019022 | n +34.06 Da,K +34.06 Da, | 1239.730957 | 3 | 498.9700012 | 498.9718939 |
| DVLHAENVKAGR                  | P26043 | 0          | n +34.06 Da,K +34.06 Da, | 1003.332703 | 3 | 459.6143494 | 459.6142225 |
| PKVGFTNISHMLTPR               | Q9DBT9 | 0.01250823 | n +17.03 Da,K +34.06 Da, | 2733.126953 | 3 | 583.6699829 | 583.6749357 |
| EASVLHNLKER                   | Q8VDD5 | 0.00080064 | n +34.06 Da,K +34.06 Da, | 1040.748413 | 3 | 455.2815247 | 455.2824728 |
| EVNYWDKQDHPISR                | P50136 | 0          | n +34.06 Da,K +34.06 Da, | 1821.65271  | 4 | 464.5       | 464.4996989 |
| LTPTHYLTKQDVER                | Q9DBG6 | 0          | n +34.06 Da,K +34.06 Da, | 1789.846802 | 3 | 590.348877  | 590.3458021 |
| TGMLEDGKFKDSSR                | P26883 | 0.00151286 | n +34.06 Da,K +34.06 Da, | 1467.290161 | 4 | 418.9899902 | 418.9910431 |
| PELMQHLGASKR                  | P99025 | 0          | n +17.03 Da,K +34.06 Da, | 1001.946228 | 3 | 473.2783813 | 473.2784048 |
| GREPDLSSDIKER                 | B5X0G2 | 0.00762829 | n +34.06 Da,K +34.06 Da, | 1283.772949 | 4 | 393.230011  | 393.2271458 |
| SHTDVKVPDFSDYR                | Q9CR68 | 0          | n +34.06 Da,K +34.06 Da, | 2389.637207 | 3 | 578.6404419 | 578.6425073 |
| IISDAMKKVGR                   | P63038 | 0.00080064 | n +34.06 Da,K +34.06 Da, | 999.2767334 | 4 | 330.730011  | 330.72866   |
| PDGKTVEAEAAHGTVTR             | O88844 | 0.00151286 | n +17.03 Da,K +34.06 Da, | 1165.70813  | 3 | 597.3300171 | 597.3270301 |
| VNAAIATIKTKR                  | P05213 | 0          | n +34.06 Da,K +34.06 Da, | 998.6237793 | 4 | 347.75177   | 347.7515581 |
| PCALCSLHSIGKIGGAQNR           | P34884 | 0          | n +17.03 Da,K +34.06 Da, | 2093.47583  | 3 | 697.3752441 | 697.3788538 |
| SLEITNTYKLVKSR                | Q4LDG0 | 0.04286553 | n +34.06 Da,K +34.06 Da, | 2359.013672 | 3 | 585.3800049 | 585.3805532 |
| YEHIKDELGTR                   | O35403 | 0          | n +34.06 Da,K +34.06 Da, | 1550.832153 | 4 | 386.2294922 | 386.2294226 |
| PVVLAALAEKHGR                 | Q9JII6 | 0.00080064 | n +17.03 Da,K +34.06 Da, | 1363.008789 | 4 | 335.9700012 | 335.9713353 |
| TKFVHDNYVIR                   | Q8C196 | 0.03253012 | n +34.06 Da,K +34.06 Da, | 1577.918335 | 3 | 487.2941284 | 487.2946012 |
| AEDIKTIKIKNYK                 | P56391 | 0.01250823 | n +42.03 Da,K +34.06 Da, | 2000.450439 | 4 | 408.0299988 | 408.027819  |
| IISDAMKKVGR                   | P63038 | 0          | n +34.06 Da,K +34.06 Da, | 1005.093384 | 3 | 440.6400146 | 440.6357878 |
| GAGDAFVGGFSLQLVSDKPLTECIR     | P55264 | 0.00151286 | n +34.06 Da,K +34.06 Da, | 4609.001953 | 3 | 902.4899902 | 902.4916381 |
| AWKSGGASHSELIHNLR             | P23506 | 0.01250823 | n +42.03 Da,K +34.06 Da, | 2266.570557 | 4 | 485.5100098 | 485.5143813 |
| SALEHSVQCAVDVKR               | P24270 | 0          | n +34.06 Da,K +34.06 Da, | 1620.101318 | 3 | 589.6699829 | 589.6666583 |
| SLKPANEDQKIGIEIIR             | P63038 | 0          | n +34.06 Da,K +34.06 Da, | 2215.131836 | 5 | 438.4899902 | 438.4925499 |
| SSEEQKQPPHSSSQHSETQGPEFSRPPPR | Q8K1Z0 | 0          | n +17.03 Da,K +34.06 Da, | 1097.769531 | 6 | 595.1300049 | 595.1273505 |
| MQSNKAFNLEKQNHTPR             | Q99K48 | 0          | n +42.03 Da,K +34.06 Da, | 1814.061768 | 4 | 539.0445557 | 539.0443766 |
| PAAPAAPAPAEKTPVKKKAR          | P43274 | 0.00498575 | n +17.03 Da,K +34.06 Da, | 1153.989746 | 3 | 718.1500244 | 718.1598979 |
| SYLDKVKLETENR                 | P05784 | 0          | n +34.06 Da,K +34.06 Da, | 2381.365234 | 3 | 595.3557739 | 595.3598182 |
| HLIQVAAGSSNLKR                | P47738 | 0          | n +34.06 Da,K +34.06 Da, | 1253.590454 | 3 | 521.331543  | 521.3318267 |
| DEEETEELKVPVKKSVR             | Q61937 | 0          | n +34.06 Da,K +34.06 Da, | 982.3900757 | 4 | 510.3137512 | 510.3139429 |
| AKVEQVLSLEPQHELKFR            | Q9QY76 | 0          | n +42.03 Da,K +34.06 Da, | 3579.344727 | 4 | 566.0856323 | 566.0876758 |
| ISFHLPVNSR                    | Q9D1D4 | 0          | n +34.06 Da,             | 2535.462158 | 3 | 401.905426  | 401.9067477 |
| AAEITDKLGLHSLR                | P61205 | 0          | n +34.06 Da,K +34.06 Da, | 2371.259521 | 4 | 398.7490234 | 398.7505222 |
| YDGKLSFFKR                    | P09103 | 0.00151286 | n +34.06 Da,K +34.06 Da, | 1045.755249 | 4 | 326.4599915 | 326.4620837 |
| TKEDPNLVPSISNKR               | P19536 | 0.00498575 | n +34.06 Da,K +34.06 Da, | 1547.58606  | 4 | 450.7799988 | 450.782316  |
| PYSSAEPHVSGMKR                | Q62318 | 0          | n +17.03 Da,K +34.06 Da, | 977.3693237 | 4 | 399.9664917 | 399.9660875 |
| PPDDPKEYIHR                   | Q8K363 | 0.00498575 | n +17.03 Da,K +34.06 Da, | 1512.96936  | 4 | 355.2000122 | 355.1978755 |
| PASDQMKQWKEQR                 | P24270 | 0          | n +17.03 Da,K +34.06 Da, | 1062.897339 | 4 | 429.9933472 | 429.9938701 |

|                           |        |            |                          |             |   |             |             |
|---------------------------|--------|------------|--------------------------|-------------|---|-------------|-------------|
| VVVLAKSFSEKR              | P70694 | 0          | n +34.06 Da,K +34.06 Da, | 1486.142944 | 4 | 367.0057678 | 367.0053871 |
| VDTVCKSVIKTGR             | Q6P3A8 | 0          | n +34.06 Da,K +34.06 Da, | 986.3419189 | 4 | 392.0045166 | 392.0039531 |
| TPEQKKEELSEIAQR           | Q91Y97 | 0          | n +34.06 Da,K +34.06 Da, | 1086.295898 | 3 | 587.0322876 | 587.0318128 |
| PTAIIAKTFKGR              | P40142 | 0          | n +17.03 Da,K +34.06 Da, | 1126.544189 | 4 | 347.7399902 | 347.7422148 |
| SKPKAEDEILNR              | P35564 | 0          | n +34.06 Da,K +34.06 Da, | 1080.667358 | 3 | 544.3300171 | 544.3334917 |
| IEEAIDKLSKR               | P15105 | 0.01250823 | n +34.06 Da,K +34.06 Da, | 1297.518799 | 4 | 351.7384949 | 351.7383823 |
| MDKLLKVLGSGQDTEDR         | Q8VD57 | 0.00628053 | n +42.03 Da,K +34.06 Da, | 3120.632324 | 3 | 669.7199707 | 669.7261726 |
| SQAEFDKAAEEVKRL           | P31786 | 0.01612903 | n +42.03 Da,K +34.06 Da, | 2164.39624  | 4 | 458.5100098 | 458.5112695 |
| PSKTNVSGGAIALGHPLGGSGSR   | Q8BWT1 | 0.02018927 | n +17.03 Da,K +34.06 Da, | 1717.575073 | 3 | 724.4099731 | 724.4099764 |
| DEEETEEKVPVKKSVR          | Q61937 | 0          | n +34.06 Da,K +34.06 Da, | 972.9807129 | 3 | 680.0800171 | 680.0828317 |
| DEEETEEKVPVKKSVR          | Q61937 | 0          | n +34.06 Da,K +34.06 Da, | 972.6576538 | 5 | 408.4500122 | 408.4526096 |
| ASVKGHTTGLSLNNER          | O08601 | 0          | n +34.06 Da,K +34.06 Da, | 999.9780884 | 3 | 584.6699829 | 584.6726894 |
| SGAEIGGAFGGEKHTGGGR       | Q9DBF1 | 0          | n +34.06 Da,K +34.06 Da, | 998.7324829 | 4 | 453.9952087 | 453.9960521 |
| PQKVNIIHGGAVSLGHPIGMSGAR  | Q8QZT1 | 0          | n +17.03 Da,K +34.06 Da, | 2042.071655 | 5 | 467.6672363 | 467.6675341 |
| ILPPTRPDKPLR              | P10126 | 0.04553415 | n +34.06 Da,K +34.06 Da, | 1523.259521 | 4 | 393.7600098 | 393.7621609 |
| GAEIGGAFGGEKHTGGGR        | Q9DBF1 | 0          | n +34.06 Da,K +34.06 Da, | 970.2536011 | 4 | 432.2399902 | 432.2380449 |
| TSYDTNKKQINVAR            | Q91ZX7 | 0.04286553 | n +34.06 Da,K +34.06 Da, | 970.1120605 | 4 | 435.7675476 | 435.7679372 |
| HTLVEKINYTGR              | P49429 | 0          | n +34.06 Da,K +34.06 Da, | 1405.423584 | 3 | 500.3099976 | 500.3052776 |
| YAKDVKFGADAR              | P63038 | 0          | n +34.06 Da,K +34.06 Da, | 968.8972168 | 4 | 361.480011  | 361.4767283 |
| PHKLVGCLVGGR              | Q91YTO | 0          | n +17.03 Da,K +34.06 Da, | 1138.246948 | 3 | 491.6300049 | 491.6258045 |
| RLCAATATILDKPEDR          | O35215 | 0          | n +34.06 Da,K +34.06 Da, | 1930.770264 | 4 | 475.269989  | 475.2754702 |
| TGKGSVSLKELNAR            | Q9CQC9 | 0          | n +34.06 Da,K +34.06 Da, | 1192.638306 | 4 | 391.2582092 | 391.2584764 |
| SPHAVDGNVELKR             | Q9CX86 | 0          | n +34.06 Da,K +34.06 Da, | 967.5766602 | 4 | 398.4868469 | 398.4863256 |
| TTDHISAAGPWLFKR           | Q99KI0 | 0          | n +34.06 Da,K +34.06 Da, | 2859.990723 | 4 | 442.7600098 | 442.7598842 |
| PAPLQHQVDIYQKR            | P40142 | 0          | n +17.03 Da,K +34.06 Da, | 1536.131836 | 3 | 582.0100098 | 582.0090835 |
| SYETQVIAHGQGSSKGP         | Q78JT3 | 0          | n +34.06 Da,K +34.06 Da, | 1300.729614 | 4 | 493.269989  | 493.273622  |
| SSAPDPPTVKKEPLKEKNFENPGLR | Q9CQQ0 | 0.00151286 | n +42.03 Da,K +34.06 Da, | 2259.487549 | 4 | 739.9400024 | 739.9408367 |
| ASPGSPLEKLVSSVSDLPKR      | P54869 | 0          | n +34.06 Da,K +34.06 Da, | 3743.397949 | 4 | 543.0900269 | 543.0889093 |
| PGKPGLLTKVR               | Q4LDG0 | 0          | n +17.03 Da,K +34.06 Da, | 1457.514526 | 4 | 341.7513733 | 341.7513111 |
| KGEVLYILDATNPR            | Q9CXE0 | 0.02694427 | n +42.03 Da,K +34.06 Da, | 961.4519653 | 4 | 416.9899902 | 416.9912132 |
| SAAGMAIKNPKATLR           | Q9JKR6 | 0          | n +34.06 Da,K +34.06 Da, | 1326.655884 | 4 | 408.51828   | 408.5184989 |
| TTGKGSVSLKELNAR           | Q9CQC9 | 0          | n +34.06 Da,K +34.06 Da, | 1242.519775 | 4 | 416.520752  | 416.5203962 |
| AGACGKPHMSPASLPGKR        | P97452 | 0          | n +42.03 Da,K +34.06 Da, | 1454.84668  | 4 | 483.7705688 | 483.7699262 |
| TLHETEDVKEAIR             | Q9D855 | 0          | n +34.06 Da,K +34.06 Da, | 1390.83667  | 3 | 536.9788208 | 536.9791193 |
| DEEETEEKVPVKKSVR          | Q61937 | 0          | n +34.06 Da,K +34.06 Da, | 982.7179565 | 3 | 680.0838623 | 680.0828317 |
| NKELDPVQKLFVDKIR          | P97450 | 0          | n +17.03 Da,K +34.06 Da, | 3051.74585  | 4 | 516.0889893 | 516.0886927 |
| PAYFQRPENALKR             | P23116 | 0          | n +17.03 Da,K +34.06 Da, | 1716.746216 | 4 | 410.9924622 | 410.9927994 |
| EEELGSKAKFAGR             | P17182 | 0.01250823 | n +34.06 Da,K +34.06 Da, | 974.637085  | 4 | 381.7399902 | 381.7373768 |
| GKIPEHDLDPNVTIILKEPVR     | Q99PL5 | 0          | n +34.06 Da,K +34.06 Da, | 3057.440674 | 4 | 622.1353149 | 622.136391  |
| SSKEVKTALKSAR             | F8VPK0 | 0.00151286 | n +42.03 Da,K +34.06 Da, | 1059.524902 | 3 | 517.0100098 | 517.0104601 |

|                           |        |            |                          |             |   |             |             |
|---------------------------|--------|------------|--------------------------|-------------|---|-------------|-------------|
| TTHTLVEKINYTGR            | P49429 | 0          | n +34.06 Da,K +34.06 Da, | 1624.43811  | 4 | 426.0049438 | 426.0046169 |
| TSDEEIKDLHQ               | Q9D379 | 0          | n +34.06 Da,K +34.06 Da, | 956.4169312 | 3 | 513.6199951 | 513.6197026 |
| FKSVDVVIKR                | P24549 | 0.00151286 | n +34.06 Da,K +34.06 Da, | 1489.174438 | 4 | 327.9700012 | 327.9738213 |
| VPPVQVSPLIKFR             | Q06185 | 0          | n +34.06 Da,K +34.06 Da, | 3229.429199 | 3 | 535.6895142 | 535.6889511 |
| EVEDCDHIVQKAR             | P49429 | 0          | n +34.06 Da,K +34.06 Da, | 955.0209961 | 4 | 417.476532  | 417.4768008 |
| LPPTRPDKPLR               | P10126 | 0.02526186 | n +34.06 Da,K +34.06 Da, | 954.8505859 | 4 | 365.4910278 | 365.4911449 |
| PKHEFSVDMTCEGCAEAVSR      | O08997 | 0.00498575 | n +17.03 Da,K +34.06 Da, | 4558.553711 | 4 | 591.0300293 | 591.02782   |
| SAAKAIADHIR               | P14152 | 0          | n +34.06 Da,K +34.06 Da, | 1101.267944 | 3 | 407.5969238 | 407.5963914 |
| ELTAEKITEFCHR             | P09103 | 0          | n +34.06 Da,K +34.06 Da, | 2187.645752 | 3 | 567.9799805 | 567.9803543 |
| IPAASEKQLTKSNAPR          | P26443 | 0          | n +34.06 Da,K +34.06 Da, | 959.979187  | 4 | 454.0413818 | 454.0402245 |
| PYTTVTPQIINSKWEKVQLVPKR   | P57780 | 0.01250823 | n +17.03 Da,K +34.06 Da, | 3753.898438 | 5 | 595.3699951 | 595.3697107 |
| GVSQTPSYLSCKSEVEVKKIFR    | O35490 | 0          | n +34.06 Da,K +34.06 Da, | 3026.008789 | 4 | 670.4000244 | 670.401924  |
| AVKEALVDHAEFEFSGR         | P56593 | 0          | n +34.06 Da,K +34.06 Da, | 2225.883057 | 3 | 609.3387451 | 609.3408284 |
| SDSRDPASDQMKQWKEQR        | P24270 | 0          | n +42.03 Da,K +34.06 Da, | 1561.129028 | 4 | 576.289978  | 576.2933863 |
| PSHLEAVNPVAVGKTR          | A2ATU0 | 0.02132999 | n +17.03 Da,K +34.06 Da, | 1522.797241 | 4 | 432.2600098 | 432.261273  |
| PKSPQYSQVIHR              | P17563 | 0.02292441 | n +17.03 Da,K +34.06 Da, | 968.7179565 | 4 | 373.4727478 | 373.4729711 |
| GHRPVLVLSQNTKR            | P80318 | 0.00151286 | n +42.03 Da,K +34.06 Da, | 1212.389404 | 4 | 421.0075073 | 421.007463  |
| AEIDEPEVSKAKQSR           | P70670 | 0          | n +34.06 Da,K +34.06 Da, | 951.2592163 | 4 | 448.019989  | 448.0192237 |
| TGGDAAAPGAAGTQAEPLPHRR    | Q9D0F3 | 0          | n +34.06 Da,             | 1319.048828 | 4 | 510.271759  | 510.271383  |
| AAISLLLNILEIFHLGIR        | Q9WUS4 | 0.04991294 |                          | 2962.310547 | 4 | 502.3099976 | 502.309483  |
| DSFNFFFSETGAGKHVPR        | P05213 | 0          | n +34.06 Da,K +34.06 Da, | 3041.069092 | 3 | 689.0300293 | 689.0306542 |
| TEARPTTEKSVPPYQR          | Q99LB7 | 0          | n +34.06 Da,K +34.06 Da, | 949.6204224 | 3 | 611.0161743 | 611.0163448 |
| AGLGHPSAFGRATHAVVR        | Q9CWS0 | 0.01145553 | n +42.03 Da,             | 1882.312134 | 4 | 462.25      | 462.251228  |
| FADKVPKTAENFR             | P17742 | 0          | n +34.06 Da,K +34.06 Da, | 1690.435059 | 4 | 407.0037231 | 407.0031104 |
| DVVDLFETYTKRPLR           | Q6YGZ1 | 0          | n +34.06 Da,K +34.06 Da, | 3287.023926 | 4 | 455.519989  | 455.5241795 |
| PKHEFSVDMTCEGCAEAVSR      | O08997 | 0          | n +17.03 Da,K +34.06 Da, | 2939.128418 | 4 | 591.0300293 | 591.02782   |
| TQKTVDGSPGKLR             | P16858 | 0          | n +34.06 Da,K +34.06 Da, | 1395.143188 | 4 | 419.5151672 | 419.5151137 |
| PFVEKAKGILR               | Q9JMA7 | 0.00080064 | n +17.03 Da,K +34.06 Da, | 1601.32605  | 4 | 336.4861755 | 336.4868488 |
| EGAKYVSHGATGKGNQVQR       | P16460 | 0          | n +42.03 Da,K +34.06 Da, | 1036.808105 | 3 | 695.3800049 | 695.3767133 |
| PHEELPSLQRR               | Q3UQ44 | 0.00960219 | n +17.03 Da,             | 1430.29248  | 4 | 369.7088013 | 369.7086453 |
| TEEPFPFHGLLPKQKGTGASSFLCR | Q64514 | 0          | n +34.06 Da,K +34.06 Da, | 3704.563721 | 4 | 713.4000244 | 713.398148  |
| RPPPPFGMMRGP PPPPR        | Q8CGF7 | 0.03021148 | n +34.06 Da,             | 943.8180542 | 4 | 480.269989  | 480.2683282 |
| LRDNIQGITKPAIR            | P62806 | 0          | n +34.06 Da,K +34.06 Da, | 1859.883057 | 4 | 416.5213013 | 416.5217052 |
| KYGVSGYPTLKIFR            | P27773 | 0          | n +34.06 Da,K +34.06 Da, | 2949.035889 | 4 | 433.530365  | 433.5317692 |
| RPELTGAKVVVSGGR           | Q99LC5 | 0          | n +34.06 Da,K +34.06 Da, | 1287.970093 | 3 | 532.0071411 | 532.0072317 |
| GMGQKDSYVGDQAQSKR         | P60710 | 0          | n +34.06 Da,K +34.06 Da, | 940.842041  | 3 | 653.3499756 | 653.3547388 |
| AHYHDNYGKNDEVEFVR         | P25688 | 0          | n +42.03 Da,K +34.06 Da, | 2059.908447 | 4 | 543.008728  | 543.0106663 |
| LDLKKELSEPSSTR            | Q8C196 | 0          | n +34.06 Da,K +34.06 Da, | 2064.386475 | 3 | 569.0200195 | 569.0245468 |
| GEWHTIILASDKR             | B5X0G2 | 0          | n +34.06 Da,K +34.06 Da, | 2073.554688 | 3 | 531.9799805 | 531.9843157 |
| PPTIHW SKLR               | Q05793 | 0          | n +17.03 Da,K +34.06 Da, | 1888.234619 | 4 | 346.4700012 | 346.468694  |



|                                 |        |            |                          |             |   |             |             |
|---------------------------------|--------|------------|--------------------------|-------------|---|-------------|-------------|
| APTTEGEQKSHEVIKFMVDVYQR         | Q00731 | 0.00960219 | n +34.06 Da,K +34.06 Da, | 2848.494873 | 5 | 539.9000244 | 539.8979968 |
| HHPIVFWNLVWYFR                  | E9Q8V6 | 0.00498575 | n +31.05 Da,             | 956.6360474 | 3 | 701.039978  | 701.053028  |
| PDIHPEPTAFKYDR                  | O88962 | 0.01250823 | n +17.03 Da,K +34.06 Da, | 1964.640747 | 4 | 434.9864197 | 434.9861774 |
| SWGSGGLDMHTKPWIR                | O35490 | 0          | n +34.06 Da,K +34.06 Da, | 3018.073975 | 3 | 613.6731567 | 613.6717433 |
| SASEWYLNKLNQFHR                 | P49429 | 0          | n +34.06 Da,K +34.06 Da, | 3062.946289 | 4 | 462.5100098 | 462.5113377 |
| GFVKVVKNKAY                     | P47962 | 0.00080064 | n +34.06 Da,K +34.06 Da, | 1147.555908 | 2 | 695.0005493 | 695.0004847 |
| SSGKEITQLKER                    | Q99PL5 | 0.00080064 | n +34.06 Da,K +34.06 Da, | 984.5115356 | 3 | 536.3334961 | 536.3334917 |
| SEVEVKKIFR                      | O35490 | 0.00151286 | n +34.06 Da,K +34.06 Da, | 1515.075928 | 4 | 334.980011  | 334.9816463 |
| IKLGVIEDHSNR                    | P08113 | 0          | n +34.06 Da,K +34.06 Da, | 1491.810791 | 3 | 483.6325378 | 483.6333942 |
| TEARPTTEKSVPYQR                 | Q99LB7 | 0          | n +34.06 Da,K +34.06 Da, | 935.9403076 | 4 | 458.5144958 | 458.5140777 |
| PKQHVPLDEYSANLR                 | Q9DB29 | 0          | n +17.03 Da,K +34.06 Da, | 1861.436646 | 3 | 606.675415  | 606.6758818 |
| TIVLAHKLNTR                     | Q91X83 | 0          | n +34.06 Da,K +34.06 Da, | 1090.259277 | 4 | 334.230011  | 334.229225  |
| MKPILLQGH                       | Q9QZD9 | 0.00151286 | n +34.06 Da,K +34.06 Da, | 1187.03772  | 2 | 695.4400024 | 695.437209  |
| GHLIQAAGESNLKR                  | Q9CZS1 | 0          | n +42.03 Da,K +34.06 Da, | 1786.941406 | 4 | 433.769989  | 433.767975  |
| AGKPVLYHYFDGRGR                 | P30115 | 0          | n +42.03 Da,K +34.06 Da, | 2024.864502 | 4 | 412.9829407 | 412.9837221 |
| MEQAVHGESKR                     | Q9R1J0 | 0.01250823 | n +42.03 Da,K +34.06 Da, | 943.4904175 | 2 | 674.3499756 | 674.3485303 |
| DSSLKDENPKQHVPLDEYSANLR         | Q9DB29 | 0.01838935 | n +34.06 Da,K +34.06 Da, | 2524.779053 | 4 | 690.1300049 | 690.1280237 |
| PTTQQSPQDEQEKLLEDAIQAVKVQSFQMKR | Q9EQH3 | 0          | n +17.03 Da,K +34.06 Da, | 4255.342773 | 5 | 744.8099976 | 744.8165343 |
| TEQEDAAVAKSKLR                  | Q99PL5 | 0          | n +34.06 Da,K +34.06 Da, | 954.0067749 | 4 | 412.7600098 | 412.7585752 |
| REPDLSDDIKER                    | B5X0G2 | 0          | n +34.06 Da,K +34.06 Da, | 1292.499023 | 4 | 378.9700012 | 378.9717798 |
| LGCPPPEGKDNSDRPR                | Q9ESB3 | 0.00151286 | n +34.06 Da,K +34.06 Da, | 933.2965088 | 4 | 490.7600098 | 490.7639984 |
| AAQESLHVKTPLR                   | Q8VBT2 | 0          | n +42.03 Da,K +34.06 Da, | 1990.67627  | 3 | 509.3009949 | 509.3018267 |
| SSAASSKELLMKLR                  | Q9CZR8 | 0          | n +34.06 Da,K +34.06 Da, | 2002.34021  | 4 | 406.5100098 | 406.5144194 |
| LSGTLESIPDKLKEFGNTLEDKAR        | P34928 | 0          | n +34.06 Da,K +34.06 Da, | 4068.53125  | 5 | 560.3400269 | 560.3381952 |
| ATEARPTTEKSVPYQR                | Q99LB7 | 0          | n +34.06 Da,K +34.06 Da, | 937.0283813 | 4 | 476.2738342 | 476.2733563 |
| TCPGDKSALRPSGLR                 | P50431 | 0          | n +34.06 Da,K +34.06 Da, | 1221.582397 | 4 | 421.5       | 421.4965303 |
| GFVKVVKNKAY                     | P47962 | 0          | n +34.06 Da,K +34.06 Da, | 1174.017212 | 3 | 463.6682434 | 463.6694153 |
| VFAVESIEKKRIR                   | O55187 | 0.02132999 | n +42.03 Da,K +34.06 Da, | 2833.922852 | 4 | 422.019989  | 422.0240808 |
| SEDKGALAKLVEAIR                 | P12970 | 0          | n +34.06 Da,K +34.06 Da, | 3309.746582 | 3 | 568.0389404 | 568.0367865 |
| SLGQMPVILAGNDQKKKYLGR           | P45952 | 0          | n +34.06 Da,K +34.06 Da, | 2787.128418 | 5 | 516.9257202 | 516.925162  |
| SVGICGSDVHYWEHGR                | Q64442 | 0.00151286 | n +34.06 Da,             | 2354.349121 | 4 | 473.980011  | 473.9784743 |
| KIQDKGIPPDQQR                   | POCG49 | 0          | n +34.06 Da,K +34.06 Da, | 930.1641846 | 3 | 585.359375  | 585.3600408 |
| REPDLSDDIKER                    | B5X0G2 | 0          | n +34.06 Da,K +34.06 Da, | 1316.182495 | 3 | 504.9610596 | 504.9599476 |
| PSFIKTHEDILENLDR                | Q99J99 | 0          | n +17.03 Da,K +34.06 Da, | 3175.218994 | 3 | 683.7158203 | 683.7127733 |
| EVEVKKIFR                       | O35490 | 0.0274056  | n +34.06 Da,K +34.06 Da, | 1387.389526 | 4 | 313.2200012 | 313.223639  |
| SVHICAVAVEYEAKSGR               | P37040 | 0          | n +34.06 Da,K +34.06 Da, | 2274.601318 | 4 | 486.7724304 | 486.7715577 |
| EPVLLLEPVVLAALAEKHGR            | Q9JII6 | 0          | n +34.06 Da,K +34.06 Da, | 3948.242676 | 4 | 542.5800171 | 542.5834975 |
| MEAVPEKSKK                      | P14148 | 0.02799757 | n +42.03 Da,K +34.06 Da, | 927.6734619 | 3 | 455.9899902 | 455.9864159 |
| PSVSLQTVKLMKEGLEAAR             | O35490 | 0          | n +17.03 Da,K +34.06 Da, | 3375.322021 | 4 | 536.3300171 | 536.3304922 |
| DSVTKSKFDNLYGCR                 | P50247 | 0          | n +34.06 Da,K +34.06 Da, | 2105.094971 | 3 | 631.3504028 | 631.3525577 |

|                                   |        |            |                          |             |   |             |             |
|-----------------------------------|--------|------------|--------------------------|-------------|---|-------------|-------------|
| PQKGLIGIQQSFPR                    | Q8C196 | 0.00498575 | n +17.03 Da,K +34.06 Da, | 2683.039063 | 3 | 630.3987427 | 630.3950493 |
| THTLVEKINYTGR                     | P49429 | 0          | n +34.06 Da,K +34.06 Da, | 1620.849121 | 4 | 400.7427979 | 400.7426971 |
| DKVPKTAENFR                       | P17742 | 0          | n +34.06 Da,K +34.06 Da, | 963.7183228 | 3 | 469.6328735 | 469.6332122 |
| AKDVKFGADAR                       | P63038 | 0.00080064 | n +34.06 Da,K +34.06 Da, | 925.6832886 | 4 | 320.7099915 | 320.7108959 |
| FAKLVRRPPVQVYIEGR                 | Q9DB20 | 0.03522388 | n +34.06 Da,K +34.06 Da, | 2845.966553 | 4 | 500.0632935 | 500.0637374 |
| KTETVCTFQDQALVQHQWWDGKESTITR      | Q05816 | 0          | n +17.03 Da,K +34.06 Da, | 2748.091064 | 5 | 670.5499878 | 670.5523763 |
| EEIVPQIKEGKR                      | Q9DBJ1 | 0          | n +34.06 Da,K +34.06 Da, | 1247.39624  | 4 | 382.7546387 | 382.7542981 |
| YVAEKISGQKVNEAACDIAR              | O35490 | 0          | n +34.06 Da,K +34.06 Da, | 2146.006836 | 4 | 581.8300171 | 581.8336462 |
| SDPYADDPHHPALR                    | Q8R086 | 0          | n +34.06 Da,             | 1981.449707 | 4 | 439.980011  | 439.9851909 |
| GSPGFSKFR                         | Q9QXF8 | 0.00151286 | n +34.06 Da,K +34.06 Da, | 1059.724121 | 3 | 350.8839417 | 350.8837609 |
| CGTESSKYAEAVGR                    | P09411 | 0          | n +34.06 Da,K +34.06 Da, | 962.5579224 | 4 | 436.9989014 | 436.9991338 |
| TEVGHLIQVAAGSSNLKR                | P47738 | 0          | n +34.06 Da,K +34.06 Da, | 2579.866699 | 4 | 487.7900085 | 487.7957271 |
| TGGDAAAPGAAGTQALPHR               | Q9D0F3 | 0          | n +34.06 Da,             | 1671.168457 | 3 | 627.9899902 | 627.9923814 |
| PLLLGQLQLHLHR                     | Q6NSR8 | 0          | n +14.02 Da,             | 3271.953125 | 4 | 388.742157  | 388.7425069 |
| SPGFSKFR                          | Q9QXF8 | 0.02526186 | n +34.06 Da,K +34.06 Da, | 991.4728394 | 3 | 331.8800049 | 331.8766062 |
| DITDGNSEHLKR                      | Q9DBH5 | 0.01019022 | n +34.06 Da,K +34.06 Da, | 922.477417  | 4 | 363.9599915 | 363.957401  |
| EATSHSTQDPLEAQAKSR                | P97290 | 0          | n +34.06 Da,K +34.06 Da, | 934.6515503 | 4 | 506.769989  | 506.7724495 |
| SEVEVKKIFR                        | O35490 | 0          | n +34.06 Da,K +34.06 Da, | 1481.100952 | 3 | 446.3059082 | 446.3064362 |
| PVTEKDLAEDAPWKIKQNTFTR            | Q80X90 | 0          | n +17.03 Da,K +34.06 Da, | 3260.864502 | 4 | 709.4099731 | 709.4132021 |
| AKHLKFIAR                         | P58059 | 0.00628053 | n +42.03 Da,K +34.06 Da, | 1184.717407 | 3 | 398.6090698 | 398.6099718 |
| TMDKSELVQKAKLAEQAER               | Q9CQV8 | 0          | n +42.03 Da,K +34.06 Da, | 2811.530029 | 4 | 580.5900269 | 580.5913878 |
| MLMPKKNR                          | P63325 | 0.00762829 | n +34.06 Da,K +34.06 Da, | 925.9943848 | 3 | 373.924469  | 373.9245036 |
| DEESEEAKKLR                       | O70251 | 0          | n +34.06 Da,K +34.06 Da, | 923.7282715 | 3 | 522.3009644 | 522.3019689 |
| TTHFVEGGDAGNREDQINR               | P14148 | 0          | n +34.06 Da,             | 1347.548706 | 4 | 538.2700195 | 538.266298  |
| EGLEKSPEEIKR                      | Q99J99 | 0.00080064 | n +34.06 Da,K +34.06 Da, | 955.2003174 | 3 | 506.3200073 | 506.3191823 |
| PTKPCVHFLTATPDPSR                 | Q8VCA8 | 0.00080064 | n +17.03 Da,K +34.06 Da, | 2075.090088 | 3 | 659.0300293 | 659.0279268 |
| AQERPSCAVEPEHVQR                  | P56389 | 0.00080064 | n +42.03 Da,             | 1404.950439 | 3 | 645.6400146 | 645.6427657 |
| EATRSEFQPMIATDTELLR               | P20181 | 0.04183854 | n +34.06 Da,             | 4087.80249  | 4 | 561.289978  | 561.2953669 |
| EHGIDPTGTYHGSDSLQLER              | P68372 | 0          | n +34.06 Da,             | 2467.978516 | 4 | 569.2800293 | 569.2765973 |
| PVLGSMMAKKYNR                     | P70694 | 0          | n +17.03 Da,K +34.06 Da, | 1106.474487 | 4 | 362.982605  | 362.9827735 |
| LKPGECLKVR                        | P16045 | 0          | n +34.06 Da,K +34.06 Da, | 1028.004517 | 4 | 326.230011  | 326.2260187 |
| KVWFPHELDGQGAR                    | Q9QYR6 | 0.0362448  | n +42.03 Da,K +34.06 Da, | 919.0980835 | 3 | 572.6400146 | 572.640731  |
| TNIKLGVIEDHSNR                    | P08113 | 0          | n +34.06 Da,K +34.06 Da, | 1757.487671 | 3 | 555.3289185 | 555.3302634 |
| ATKCTKCGPGYSTPLEAMKGPR            | P17563 | 0          | n +42.03 Da,K +34.06 Da, | 2257.655762 | 4 | 639.3499756 | 639.3473349 |
| AQKKYLQAKLTQFLR                   | P54729 | 0.01667736 | n +42.03 Da,K +34.06 Da, | 3391.713379 | 4 | 495.8299866 | 495.8267919 |
| PYNPSMSRPDAWGVTGAAELMQQKEATTEQQLR | O35490 | 0          | n +42.03 Da,K +34.06 Da, | 3945.94751  | 4 | 983.0062256 | 983.0043792 |
| FAPEVDREINGLEATWDDTRR             | Q6ZWR6 | 0.02694427 | n +34.06 Da,             | 917.6265259 | 4 | 631.8300171 | 631.8214378 |
| SDPELMQHLGASKR                    | P99025 | 0          | n +34.06 Da,K +34.06 Da, | 1596.395508 | 3 | 546.3082275 | 546.3085822 |
| DTLHETEDVKEAIR                    | Q9D855 | 0.01838935 | n +34.06 Da,K +34.06 Da, | 1957.093262 | 4 | 431.7399902 | 431.7428947 |
| TVKKIAIFGATGR                     | Q923D2 | 0          | n +34.06 Da,K +34.06 Da, | 1686.333252 | 2 | 732.5116577 | 732.5114898 |

|                                   |        |            |                          |             |   |             |             |
|-----------------------------------|--------|------------|--------------------------|-------------|---|-------------|-------------|
| HSVSTACTTGAHAVGDSFR               | Q9D404 | 0.01612903 | n +34.06 Da,             | 1379.234741 | 3 | 665.6500244 | 665.656893  |
| ELTAEKITEFCHR                     | P09103 | 0          | n +34.06 Da,K +34.06 Da, | 2224.10376  | 4 | 426.2369995 | 426.2370848 |
| GSGGLDMHTKPWIR                    | O35490 | 0          | n +34.06 Da,K +34.06 Da, | 2103.768555 | 3 | 522.6300049 | 522.6346292 |
| LKKSIDEIVLVGGSTR                  | P20029 | 0.01612903 | n +34.06 Da,K +34.06 Da, | 2875.834717 | 3 | 644.7399902 | 644.7456727 |
| IKLGIHEDSQNR                      | P07901 | 0.01560468 | n +34.06 Da,K +34.06 Da, | 1024.02356  | 3 | 493.2999878 | 493.2967822 |
| RSLEPLQLPDFPAAVSGPSAFAPGHNIPDHGLR | Q8VCF0 | 0          | n +31.05 Da,             | 4215.06543  | 4 | 874.460022  | 874.4640004 |
| PEKQTLPGSKAAFR                    | Q8CC86 | 0          | n +17.03 Da,K +34.06 Da, | 1011.62439  | 3 | 539.0100098 | 539.0052684 |
| VVHIDSEKDFR                       | Q921X9 | 0          | n +34.06 Da,K +34.06 Da, | 1317.483765 | 4 | 353.9589233 | 353.9596777 |
| SGLDMHTKPWIR                      | O35490 | 0          | n +34.06 Da,K +34.06 Da, | 2125.975586 | 4 | 377.9709473 | 377.972425  |
| DSAFTVLKAGR                       | Q8VC30 | 0          | n +34.06 Da,K +34.06 Da, | 1760.951172 | 4 | 349.4899902 | 349.4858246 |
| ITAHLVHELK                        | Q8BWT1 | 0.01838935 |                          | 1229.292603 | 4 | 304.934082  | 304.9344754 |
| HQGVMMVGMGQKDSYVGDEAQSQR          | P60710 | 0          | n +42.03 Da,K +34.06 Da, | 2036.886353 | 4 | 655.0900269 | 655.0838022 |
| DPSNQIKITGTKEGIEKAR               | Q8VDJ3 | 0          | n +34.06 Da,K +34.06 Da, | 1677.691406 | 4 | 556.0999756 | 556.1010418 |
| GPLAYFDKADKKNR                    | Q9QZW0 | 0.00365764 | n +34.06 Da,K +34.06 Da, | 1934.157959 | 3 | 532.9899902 | 532.9912883 |
| TLSDYNIQKESTLHLVLR                | POCG49 | 0          | n +34.06 Da,K +34.06 Da, | 3238.985107 | 4 | 550.3300171 | 550.3258547 |
| YAKDVKFGADAR                      | P63038 | 0          | n +34.06 Da,K +34.06 Da, | 969.0056763 | 3 | 481.6300049 | 481.6332122 |
| PSKTNVSGGAIALGHPLGGSGSR           | Q8BWT1 | 0          | n +17.03 Da,K +34.06 Da, | 1757.860962 | 3 | 724.4089966 | 724.4099764 |
| SDSRDPASDQMKQWKEQR                | P24270 | 0          | n +42.03 Da,K +34.06 Da, | 1916.325806 | 3 | 768.0526733 | 768.055423  |
| TADRPPLHFNLLGFGPR                 | Q9JKY7 | 0.03021148 | n +34.06 Da,             | 3716.385742 | 4 | 515.0343018 | 515.0339438 |
| LLSHSAQELAGSR                     | P54869 | 0          | n +34.06 Da,             | 1005.311584 | 3 | 513.9500122 | 513.9531976 |
| PVEKDANNMPVTAR                    | D3Z0Y2 | 0          | n +17.03 Da,K +34.06 Da, | 1060.688477 | 3 | 531.6280518 | 531.6277629 |
| PPLGKKQMLFR                       | Q8CHQ9 | 0          | n +17.03 Da,K +34.06 Da, | 1778.43042  | 4 | 382.7539673 | 382.7524196 |
| LKGGMLFPKESPSR                    | P12265 | 0          | n +34.06 Da,K +34.06 Da, | 1771.267822 | 4 | 413.0142822 | 413.0130494 |
| PSSDELKQHDVNTNATR                 | Q8CCJ3 | 0          | n +17.03 Da,K +34.06 Da, | 1601.730347 | 3 | 698.3499756 | 698.3504526 |
| EVEDCDHIVQKAR                     | P49429 | 0          | n +34.06 Da,K +34.06 Da, | 956.3084106 | 3 | 556.2999878 | 556.2999756 |
| TIEITGTFKHR                       | O35488 | 0          | n +34.06 Da,K +34.06 Da, | 1470.840698 | 4 | 343.4659424 | 343.4661328 |
| ASVNFSEFSKCCSER                   | P63158 | 0.00296736 | n +34.06 Da,K +34.06 Da, | 1846.064087 | 4 | 470.2600098 | 470.2623249 |
| IRAQYEALAQKNR                     | P05784 | 0.00365764 | n +34.06 Da,K +34.06 Da, | 1177.262451 | 4 | 408         | 408.0021426 |
| SLPHAVTCDIKFR                     | Q64458 | 0          | n +34.06 Da,K +34.06 Da, | 2315.890869 | 4 | 403.736969  | 403.7382573 |
| PKPHSEAGTAFIQTQQLH                | P52480 | 0.0130719  | n +17.03 Da,K +34.06 Da, | 1703.926147 | 3 | 681.0408936 | 681.0411126 |
| PELMQHLGASKR                      | P99025 | 0          | n +17.03 Da,K +34.06 Da, | 999.1681519 | 4 | 355.2099915 | 355.2106227 |
| TCSVFGPDGSLLVKHR                  | Q9JHW2 | 0          | n +34.06 Da,K +34.06 Da, | 2471.96582  | 4 | 461.0145874 | 461.0148217 |
| TICPKAPKLEER                      | Q9CQM9 | 0          | n +34.06 Da,K +34.06 Da, | 1234.078369 | 4 | 386.75      | 386.7485871 |
| SSSSDKQNNLYKGLEAFR                | P54869 | 0.01667736 | n +34.06 Da,K +34.06 Da, | 2557.387451 | 4 | 537.2999878 | 537.3051501 |
| LDLKKELSEPSSTR                    | Q8C196 | 0          | n +34.06 Da,K +34.06 Da, | 2081.31665  | 2 | 853.0300293 | 853.033182  |
| GPAGAGESKCLPMVKVLDVAVR            | P07309 | 0          | n +34.06 Da,K +34.06 Da, | 3538.040283 | 4 | 565.0900269 | 565.0868492 |
| VDLVHAQIHVSEGR                    | Q05920 | 0          | n +34.06 Da,             | 2000.52124  | 4 | 399.2274475 | 399.2284548 |
| AKDVKFGADAR                       | P63038 | 0.00151286 | n +34.06 Da,K +34.06 Da, | 924.6524658 | 3 | 427.2788086 | 427.2787691 |
| SPMVKEILKEQESR                    | Q99LX0 | 0          | n +34.06 Da,K +34.06 Da, | 1850.7146   | 3 | 592.696106  | 592.6976651 |
| AVEAKKTYVR                        | Q8BFR5 | 0          | n +34.06 Da,K +34.06 Da, | 919.2055054 | 4 | 317.4711609 | 317.47118   |

|                                |        |            |                          |             |   |             |             |
|--------------------------------|--------|------------|--------------------------|-------------|---|-------------|-------------|
| SEAAPAAPAAAPPAEKAPAKKAA        | P15864 | 0          | n +42.03 Da,K +34.06 Da, | 1204.582031 | 4 | 598.8800049 | 598.8772416 |
| MIKRELAKDSELSRSQSWER           | Q8BGA5 | 0.01250823 | n +17.03 Da,K +34.06 Da, | 1548.229248 | 4 | 612.6099854 | 612.6023055 |
| PSNQIKITGTKEGIEKAR             | Q8VDJ3 | 0          | n +17.03 Da,K +34.06 Da, | 1171.733032 | 5 | 418.6700134 | 418.6705881 |
| TIENVKAKIQDKEGIPPDQQR          | POCG49 | 0          | n +34.06 Da,K +34.06 Da, | 1779.157471 | 4 | 636.6400146 | 636.6420685 |
| TKSLMDEVVKATSR                 | P09411 | 0          | n +34.06 Da,K +34.06 Da, | 2487.299316 | 4 | 417.5101624 | 417.5118769 |
| ESPTKVQLVGGGAHR                | Q9QWK4 | 0.00080064 | n +34.06 Da,K +34.06 Da, | 982.9006958 | 3 | 516.3164063 | 516.3160653 |
| KMKDTSDEEIEIR                  | P62204 | 0          | n +42.03 Da,K +34.06 Da, | 955.1295776 | 3 | 530.949707  | 530.9487202 |
| PNAFVEGSHGIHR                  | Q9DBG3 | 0.00762829 | n +17.03 Da,             | 1009.388672 | 4 | 360.1900024 | 360.190354  |
| ATNFLAHEKIWFDFKFDYDAER         | P57776 | 0          | n +42.03 Da,K +34.06 Da, | 4136.216309 | 5 | 578.5100098 | 578.5151525 |
| PGSPELQQVLKHDLMVNVYR           | P19096 | 0          | n +17.03 Da,K +34.06 Da, | 3739.870605 | 4 | 594.3400269 | 594.334807  |
| AALAPLPLPAQFKSIQHHLR           | Q9CR26 | 0          | n +42.03 Da,K +34.06 Da, | 3931.132324 | 3 | 794.4761963 | 794.4724703 |
| PPSNSQELKGQYHR                 | Q9ESB3 | 0.00151286 | n +17.03 Da,K +34.06 Da, | 923.619751  | 4 | 423.732666  | 423.7326141 |
| GAEIGGAFGGEKHTGGGR             | Q9DBF1 | 0          | n +34.06 Da,K +34.06 Da, | 968.090332  | 3 | 575.9799805 | 575.9816343 |
| SLRPESLHQVSFLFSDR              | P24270 | 0.01250823 | n +34.06 Da,             | 3444.480713 | 4 | 513.7800293 | 513.7825891 |
| GPAGAGESKCLPMVKVLDVAVR         | P07309 | 0          | n +34.06 Da,K +34.06 Da, | 3525.229492 | 3 | 753.1099854 | 753.1133734 |
| PTKICTGKGTVTLR                 | Q62417 | 0.00225394 | n +17.03 Da,K +34.06 Da, | 1175.668213 | 4 | 405.0100098 | 405.0105257 |
| TVGQEKKGYFEDR                  | P15105 | 0          | n +34.06 Da,K +34.06 Da, | 967.5059204 | 4 | 415.4952393 | 415.4953841 |
| RHEAFESDLAAHQDR                | O88990 | 0          | n +34.06 Da,             | 1412.898315 | 4 | 454.730011  | 454.7290851 |
| RGGGGGGGGPGGEQETQELASKR        | O35295 | 0          | n +34.06 Da,K +34.06 Da, | 1019.056091 | 4 | 553.289978  | 553.2940806 |
| AGKPVLYHFDGR                   | P30115 | 0          | n +42.03 Da,K +34.06 Da, | 2632.447021 | 3 | 479.2679138 | 479.2683455 |
| PKSPQYSQVIHR                   | P17563 | 0.00225394 | n +17.03 Da,K +34.06 Da, | 973.8380737 | 3 | 497.6281738 | 497.6282026 |
| STLLIHPQYAWLQDLGLR             | Q9DBF1 | 0.00762829 | n +34.06 Da,             | 4050.880127 | 4 | 574.5800171 | 574.575976  |
| PKSGFDIKVPR                    | Q7TMB8 | 0.04834013 | n +17.03 Da,K +34.06 Da, | 1565.664063 | 4 | 332.9736938 | 332.97384   |
| VHLTDAEKAADVSLWGKVNSEVGGGEALGR | P02088 | 0          | n +34.06 Da,K +34.06 Da, | 4184.076172 | 4 | 818.4500122 | 818.4463587 |
| DKPGGPHYILR                    | Q8CHT0 | 0          | n +34.06 Da,K +34.06 Da, | 1176.562866 | 4 | 330.9555969 | 330.9569377 |
| SKPPPKPVKPGQVKVFR              | Q62422 | 0          | n +42.03 Da,K +34.06 Da, | 1390.08667  | 5 | 414.2900085 | 414.2880991 |
| PNLVPSISNKR                    | P19536 | 0.0368171  | n +17.03 Da,K +34.06 Da, | 1491.702393 | 3 | 425.9379272 | 425.9383768 |
| MHHGSGPQNVQHQLQR               | Q8CHI8 | 0          | n +42.03 Da,             | 1039.157349 | 4 | 474.730011  | 474.7315026 |
| SGLDMHTKPWIR                   | O35490 | 0          | n +34.06 Da,K +34.06 Da, | 2167.168213 | 4 | 377.9710999 | 377.972425  |
| SDAAVDTSEITTKDLKEKKEVVEEAENGR  | P26350 | 0          | n +42.03 Da,K +34.06 Da, | 2998.468506 | 5 | 692.1803589 | 692.183115  |
| PASDQMKQWKEQR                  | P24270 | 0          | n +17.03 Da,K +34.06 Da, | 1103.508667 | 4 | 429.9937439 | 429.9938701 |
| AGKPVLYHFDGRGR                 | P30115 | 0.04183854 | n +42.03 Da,K +34.06 Da, | 2203.046875 | 4 | 412.980011  | 412.9837221 |
| HGSIYHPSLLPR                   | Q8K009 | 0.00151286 |                          | 2198.927002 | 3 | 506.6199951 | 506.6244226 |
| AHGSVVKSEDYAFPTYADR            | P19783 | 0          | n +34.06 Da,K +34.06 Da, | 2283.922119 | 3 | 727.710022  | 727.7131026 |
| PKNYTDNELEKTR                  | P26443 | 0          | n +17.03 Da,K +34.06 Da, | 1810.022461 | 4 | 452.269989  | 452.2665177 |
| FVYFHDR                        | O35488 | 0.02694427 | n +34.06 Da,             | 1514.108154 | 3 | 339.8500061 | 339.8503505 |
| PKFYCDYCDTYLTHDSPSVR           | Q62241 | 0          | n +17.03 Da,K +34.06 Da, | 2918.768799 | 3 | 859.0599976 | 859.066671  |
| SKPPPKPVKPGQVKVFR              | Q62422 | 0          | n +42.03 Da,K +34.06 Da, | 1431.136108 | 5 | 414.2881165 | 414.2880991 |
| TLPKQVKIVEVGPR                 | P38060 | 0          | n +34.06 Da,K +34.06 Da, | 2164.248047 | 4 | 417.2929382 | 417.292319  |
| TFFSETGAGKHVPR                 | P05213 | 0          | n +34.06 Da,K +34.06 Da, | 1599.608521 | 4 | 401.230835  | 401.2322308 |

|                                 |        |            |                          |             |   |             |             |
|---------------------------------|--------|------------|--------------------------|-------------|---|-------------|-------------|
| KQISKCLGLTEAQTR                 | Q8C196 | 0.04183854 | n +34.06 Da,K +34.06 Da, | 1267.405518 | 3 | 612.3815308 | 612.3804475 |
| AEDIKTKIKNYKTAPFDSR             | P56391 | 0          | n +42.03 Da,K +34.06 Da, | 2573.514893 | 4 | 601.6199951 | 601.6193331 |
| SKSLKLVESR                      | Q01730 | 0.00151286 | n +42.03 Da,K +34.06 Da, | 1756.312134 | 3 | 516.6799927 | 516.6787104 |
| FGVQVSPSGEKITHTGQVYDEKDYR       | P52503 | 0          | n +34.06 Da,K +34.06 Da, | 2538.842285 | 3 | 981.5300293 | 981.5296276 |
| EELHPTAATLKAR                   | Q91X91 | 0.00960219 | n +34.06 Da,K +34.06 Da, | 1116.727661 | 4 | 376.980011  | 376.9834186 |
| MEQAVHGESKR                     | Q9R1J0 | 0          | n +42.03 Da,K +34.06 Da, | 935.6146851 | 3 | 449.9021301 | 449.9014457 |
| IGIDKFGELKR                     | P55264 | 0          | n +34.06 Da,K +34.06 Da, | 2909.042236 | 4 | 373.5100098 | 373.5092996 |
| NKELDPVQKLFVDKIR                | P97450 | 0          | n +17.03 Da,K +34.06 Da, | 3040.532471 | 5 | 413.0725098 | 413.0724095 |
| PTLPSAQMSHGLGATLPIGQHAAGDHEVR   | P98083 | 0          | n +14.02 Da,             | 2852.428223 | 4 | 748.8800049 | 748.881902  |
| MKSLKAKFR                       | Q9EP71 | 0.00151286 | n +42.03 Da,K +34.06 Da, | 1540.217896 | 4 | 313.9717712 | 313.9719239 |
| VKVGVNGFGR                      | P16858 | 0.00080064 | n +34.06 Da,K +34.06 Da, | 1589.732422 | 3 | 367.5785217 | 367.5785603 |
| PQLQHFIETVETQKQR                | Q9VWA2 | 0          | n +17.03 Da,K +34.06 Da, | 2324.246338 | 4 | 483.7799988 | 483.7785588 |
| PNETNEIANANSR                   | P84099 | 0.02292441 |                          | 910.3950195 | 2 | 715.3400269 | 715.3369479 |
| DQENWHEGKENIR                   | Q9CPY7 | 0          | n +34.06 Da,K +34.06 Da, | 1075.312744 | 3 | 574.9699707 | 574.9658729 |
| AEDIKTKIKNYKTAPFDSR             | P56391 | 0.0274056  | n +42.03 Da,K +34.06 Da, | 2482.515625 | 5 | 481.4964294 | 481.4969218 |
| ELPETHQMLR                      | Q07417 | 0          |                          | 2873.45752  | 2 | 627.3200073 | 627.3189827 |
| ELLAKEAELTKVR                   | Q8VDD5 | 0          | n +34.06 Da,K +34.06 Da, | 2010.114014 | 4 | 401.2719421 | 401.2725895 |
| VEEVQKHSVHTLVFR                 | Q922V4 | 0          | n +42.03 Da,K +34.06 Da, | 2688.102295 | 4 | 471.7683411 | 471.7692158 |
| DITDGNSEHLKR                    | Q9DBH5 | 0.01250823 | n +34.06 Da,K +34.06 Da, | 920.8937988 | 3 | 484.9421997 | 484.9407758 |
| EGNHKPGTDYKPPK                  | Q61176 | 0          | n +42.03 Da,K +34.06 Da, | 1534.024902 | 3 | 609.0300293 | 609.0282912 |
| PALTPEQKKELSEIAQR               | Q91Y97 | 0          | n +17.03 Da,K +34.06 Da, | 2522.632813 | 3 | 675.0759888 | 675.0792741 |
| PQGALGKATMEVKKR                 | Q8R0W0 | 0          | n +17.03 Da,K +34.06 Da, | 1137.221069 | 4 | 393.5       | 393.5000594 |
| APKSQDLSKIMADIR                 | P05784 | 0          | n +34.06 Da,K +34.06 Da, | 2727.928955 | 3 | 592.3678589 | 592.3696598 |
| AEVEQKKKR                       | P62843 | 0.00437956 | n +42.03 Da,K +34.06 Da, | 833.7844238 | 3 | 420.622406  | 420.6225358 |
| AVEKVNIPQVDR                    | P50247 | 0.00628053 | n +34.06 Da,K +34.06 Da, | 1167.920044 | 4 | 400.2663879 | 400.2675727 |
| PPPSQSKPATFRPPTTR               | P39447 | 0.00365764 | n +17.03 Da,K +34.06 Da, | 1127.598633 | 4 | 454.5185547 | 454.5179103 |
| SSSEDKITVHFKNR                  | P46656 | 0.02180685 | n +42.03 Da,K +34.06 Da, | 1615.161133 | 3 | 586.6599731 | 586.6654234 |
| LVEELKKGIR                      | Q80Y14 | 0.00151286 | n +34.06 Da,K +34.06 Da, | 2157.469971 | 4 | 350.7600098 | 350.7578461 |
| QKIGIEIKR                       | P63038 | 0.00498575 | n +34.06 Da,K +34.06 Da, | 1682.005371 | 4 | 325.7449646 | 325.7447386 |
| QKIGIEIKR                       | P63038 | 0.00498575 | n +34.06 Da,K +34.06 Da, | 1640.58606  | 4 | 325.7448425 | 325.7447386 |
| RIPVIGPLKIR                     | Q8VEB4 | 0          | n +34.06 Da,K +34.06 Da, | 2536.521484 | 4 | 333.25      | 333.2486889 |
| LWCWWKRR                        | Q99246 | 0.00498575 | n +34.06 Da,K +34.06 Da, | 4928.527832 | 2 | 679.8900146 | 679.9005958 |
| ALHVPKAPGFAQMLKDGAKHFSGLEEAAYR  | P42932 | 0          | n +42.03 Da,K +34.06 Da, | 4969.952148 | 5 | 683.1900024 | 683.1877172 |
| LYKEKPSTQPVKR                   | P11531 | 0.01966874 | K +28.03 Da,             | 4785.11377  | 2 | 843.5200195 | 843.5192686 |
| EGTLESIVEKKVKELLANR             | Q8K426 | 0          | n +34.06 Da,K +34.06 Da, | 4646.979004 | 4 | 573.8800049 | 573.8757046 |
| EGTLESIVEKKVKELLANR             | Q8K426 | 0.03634578 | n +34.06 Da,K +34.06 Da, | 4613.600098 | 5 | 459.2999878 | 459.302019  |
| EGTLESIVEKKVKELLANR             | Q8K426 | 0          | n +34.06 Da,K +34.06 Da, | 4606.507324 | 4 | 573.8759766 | 573.8757046 |
| EGTLESIVEKKVKELLANR             | Q8K426 | 0.01680672 | n +34.06 Da,K +34.06 Da, | 4565.198242 | 4 | 573.8769531 | 573.8757046 |
| MVHLTDAEKAASGLWGKVNADVEVGGEALGR | A8DUK4 | 0.00960512 | n +34.06 Da,K +34.06 Da, | 4562.421875 | 5 | 657.3599854 | 657.3658193 |
| IVPLQGAQMLQMLEKSLR              | Q91XE0 | 0          | n +34.06 Da,K +34.06 Da, | 4553.80127  | 3 | 708.4199829 | 708.4287034 |

|                                       |        |            |                          |             |   |             |             |
|---------------------------------------|--------|------------|--------------------------|-------------|---|-------------|-------------|
| EGTLESIVEKKVKELLANR                   | Q8K426 | 0.00960512 | n +34.06 Da,K +34.06 Da, | 4662.44043  | 5 | 459.2999878 | 459.302019  |
| KGGKAVANYDSVEAGEKLVTALDTFGR           | P51660 | 0.01880878 | n +42.03 Da,K +34.06 Da, | 4482.997559 | 4 | 776.460022  | 776.4581225 |
| IPAGTVLEIavgALHHDPEHWP                | P36423 | 0.01680672 | n +17.03 Da,             | 4438.666992 | 3 | 792.7600098 | 792.7551545 |
| KGWLLKWTNYLKGYQRR                     | Q5QNQ6 | 0.04966571 | n +42.03 Da,K +28.03 Da, | 4434.945801 | 3 | 779.4400024 | 779.4511883 |
| TEADVNPkayPLADahlTKLLDLVQQSCNYKQLR    | Q9D0T1 | 0          | n +42.03 Da,K +34.06 Da, | 4390.937988 | 6 | 704.0708618 | 704.0703412 |
| EDEKPKAIFHEEPRHTRRR                   | O54774 | 0.01062699 | n +17.03 Da,K +34.06 Da, | 4372.797852 | 3 | 882.4799805 | 882.4950331 |
| ASFVTEVLAHSGSLEKEDLGR                 | O54692 | 0          | n +42.03 Da,K +34.06 Da, | 4421.06543  | 3 | 808.0900269 | 808.0939429 |
| MESSTSSSGSALGAVDPQLQHfIEVETQKQR       | Q9WVA2 | 0.01269841 | n +42.03 Da,K +34.06 Da, | 4315.614746 | 4 | 856.6757202 | 856.6781887 |
| AKVAVLGASGGIGQPLSLLKNSPLVSR           | P08249 | 0          | n +34.06 Da,K +34.06 Da, | 4302.553223 | 3 | 949.9400024 | 949.9462759 |
| LDWDVFTQHIEGAINR                      | Q99LB7 | 0.02724521 | n +34.06 Da,             | 4302.442383 | 3 | 650.0100098 | 650.0093722 |
| MNLSAAHHQISLSDGNNIPLIGLTYS DPR        | Q8VCX1 | 0          | n +42.03 Da,             | 4289.699219 | 3 | 1078.530029 | 1078.538452 |
| LSPTNCDASEPLAEKVLDLINKGR              | Q9ESB3 | 0          | n +34.06 Da,K +34.06 Da, | 4282.565918 | 4 | 686.3956299 | 686.3943342 |
| NFTAEEKTLINGLWskVNVEEVGGEALGR         | P02104 | 0.03359684 | n +42.03 Da,K +34.06 Da, | 4349.537598 | 5 | 654.960022  | 654.9586481 |
| DDESLLGHLMIvGKKCAADLGLKR              | P70349 | 0          | n +34.06 Da,K +34.06 Da, | 4277.30127  | 5 | 555.9299927 | 555.9364681 |
| ASGVAVSDGVikVFNDMKVr                  | P18760 | 0          | n +42.03 Da,K +34.06 Da, | 4267.493652 | 3 | 734.7574463 | 734.7577661 |
| ASGVAVSDGVikVFNDMKVr                  | P18760 | 0          | n +42.03 Da,K +34.06 Da, | 4226.518555 | 3 | 734.7600098 | 734.7577661 |
| PPSAKAAIDWFDGKEFSGNPIKVSFATR          | P56959 | 0          | n +34.06 Da,K +34.06 Da, | 4210.061523 | 6 | 529.6400146 | 529.641108  |
| DDKdGFVTvDELKGWIKFAQKR                | O35887 | 0          | n +34.06 Da,K +34.06 Da, | 4206.51709  | 5 | 553.9400024 | 553.9402535 |
| LYHLDISYNHLR                          | Q3TAA7 | 0.00224719 | n +34.06 Da,             | 4198.293457 | 2 | 789.4299927 | 789.4359942 |
| VHLTDAEKSAVSLWAKVNPDEVGGEALGR         | P02089 | 0.02724521 | n +42.03 Da,K +34.06 Da, | 4233.947266 | 5 | 664.5599976 | 664.5542919 |
| ATNFLAHEKIWFDFKfKYDdaER               | P57776 | 0          | n +42.03 Da,K +34.06 Da, | 4173.210449 | 4 | 722.8924561 | 722.8921215 |
| ATNFLAHEKIWFDFKfKYDdaER               | P57776 | 0          | n +42.03 Da,K +34.06 Da, | 4171.354492 | 5 | 578.5155029 | 578.5151525 |
| PSLPPFERPEAEAMCTSFKENPTTFMGHYLHEVAR   | P07724 | 0          | n +17.03 Da,K +34.06 Da, | 4169.242676 | 6 | 688.8400269 | 688.8400445 |
| TLEELRLDDNRISTIPLHAFKGLNSLR           | Q6RKD8 | 0.00659341 | n +42.03 Da,K +34.06 Da, | 4167.879883 | 5 | 640.3599854 | 640.3628922 |
| LSMAGLKELLRDSVVQAE LR                 | Q8VC16 | 0.02979146 | n +31.05 Da,             | 4152.664063 | 4 | 565.5800171 | 565.5780405 |
| GILEKISEIEKEIAR                       | Q9QXB9 | 0          | n +34.06 Da,K +34.06 Da, | 4127.438965 | 4 | 458.2999878 | 458.3003416 |
| VHLTDAEKSAVSLWAKVNPDEVGGEALGR         | P02089 | 0          | n +17.03 Da,K +34.06 Da, | 4116.494141 | 3 | 1098.589966 | 1098.592633 |
| MLGGLGLKAAEGLAHR                      | Q8CF02 | 0          | n +42.03 Da,K +34.06 Da, | 4115.349121 | 3 | 557.3256836 | 557.3258664 |
| PTNIKWGEAGAEYVVSTGVFTTMEKAGAHKGGAKR   | P16858 | 0          | n +17.03 Da,K +34.06 Da, | 4109.479492 | 7 | 578.6199951 | 578.6162126 |
| VHLTDAEKSAVSLWAKVNPDEVGGEALGR         | P02089 | 0          | n +34.06 Da,K +34.06 Da, | 4161.978027 | 3 | 1104.27002  | 1104.269819 |
| RNDIAWNFEKFLVGPDPVPRR                 | P11352 | 0          | n +34.06 Da,K +34.06 Da, | 4077.011963 | 5 | 531.5100098 | 531.5057804 |
| DEPQSQWdKVKDFANVYVDAVKDdSGR           | Q00623 | 0          | n +34.06 Da,K +34.06 Da, | 4248.489746 | 5 | 627.3400269 | 627.3440092 |
| AGNASGVSDGAGAVIIASEDAVKKHNF TPLAR     | Q8BWT1 | 0          | n +17.03 Da,K +34.06 Da, | 4067.789307 | 4 | 802.9500122 | 802.9494473 |
| ASGVAVSDGVikVFNDMKVr                  | P18760 | 0          | n +42.03 Da,K +34.06 Da, | 4312.913574 | 3 | 734.7600098 | 734.7577661 |
| VHLTDAEKAAVSLWGKVNDSDEVGGEALGR        | P02088 | 0.02897103 | n +34.06 Da,K +34.06 Da, | 4048.133789 | 5 | 654.960022  | 654.9585423 |
| ATNFLAHEKIWFDFKfKYDdaERR              | P57776 | 0          | n +42.03 Da,K +34.06 Da, | 4044.573486 | 5 | 609.7366333 | 609.7353748 |
| MDNKDEDIFKfKGYNFLR                    | G5E904 | 0          | n +42.03 Da,K +34.06 Da, | 4024.199219 | 4 | 606.8300171 | 606.8333805 |
| ADEIAKAQVAQPGGD TIFGKIIR              | P70349 | 0          | n +42.03 Da,K +34.06 Da, | 4024.089355 | 4 | 627.8674927 | 627.8668814 |
| PSGKVRPEIINESGNPSYKYFVSAEQVVQGMKEAQER | Q9CQU0 | 0          | n +17.03 Da,K +34.06 Da, | 4189.851074 | 6 | 739.9000244 | 739.9004186 |
| AIKFLEVIKPF                           | P61620 | 0.00224719 | n +34.06 Da,K +34.06 Da, | 4017.104492 | 3 | 469.6700134 | 469.6671937 |

|                                        |        |            |                          |             |   |             |             |
|----------------------------------------|--------|------------|--------------------------|-------------|---|-------------|-------------|
| VHLTDAEKA AVSCLWGK VNSDEVGGEALGR       | P02088 | 0          | n +34.06 Da,K +34.06 Da, | 4013.342773 | 4 | 818.4400024 | 818.4463587 |
| PGVVDNFP LLKALR                        | P30115 | 0          | n +17.03 Da,K +34.06 Da, | 4009.198486 | 3 | 530.671814  | 530.6715198 |
| ATAATEEPFFPHGLLPK KETGASSFLCR          | Q64514 | 0.00763359 | n +42.03 Da,K +34.06 Da, | 4001.030518 | 4 | 793.9199829 | 793.9247654 |
| DKLLVVPQD GSHWLSMKEIVEHLSER            | Q64435 | 0          | n +34.06 Da,K +34.06 Da, | 4258.82373  | 5 | 630.3599854 | 630.3602178 |
| PGVVDNFP LLKALR                        | P30115 | 0          | n +17.03 Da,K +34.06 Da, | 3968.829102 | 3 | 530.6699829 | 530.6715198 |
| SAAATS AVPAPNHQPEVFCNQIFINNEWHDAVSR    | P47738 | 0          | n +31.05 Da,             | 3967.797852 | 4 | 952.960022  | 952.9629309 |
| STAGKVIKCAAVLWELHKPFTIEDIEVAPPKAHEVR   | P00329 | 0.00118624 | n +42.03 Da,K +34.06 Da, | 3916.553223 | 8 | 548.460022  | 548.456384  |
| ISYCHETMTGWVHDV LGR                    | P97821 | 0          | n +34.06 Da,             | 3892.364502 | 4 | 549.5200195 | 549.520078  |
| DYKWF AFFKYEV RGHTAISYCHETMTGWVHDV LGR | P97821 | 0          | K +28.03 Da,             | 3881.775146 | 8 | 549.7700195 | 549.7728363 |
| LLLRHAPQLSALDLSHCAHVGD                 | Q6PB97 | 0.01680672 | n +17.03 Da,             | 3867.203369 | 4 | 610.8300171 | 610.8286555 |
| FYVPGVAPINFHQNDPVEIKAVKLTSSR           | Q8BH24 | 0          | n +34.06 Da,K +34.06 Da, | 3843.936768 | 5 | 646.5800171 | 646.5783905 |
| VKEVVKKHSQFIGYPITLYLEKER               | P11499 | 0          | n +42.03 Da,K +34.06 Da, | 3827.498779 | 5 | 617.3800049 | 617.3853458 |
| MGKITSEELHYFVQNHFTSAR                  | Q9DB77 | 0          | n +42.03 Da,K +34.06 Da, | 3827.015137 | 4 | 643.5800171 | 643.577282  |
| ASASSTNLKDVLSNLPKEQAR                  | Q9CZU6 | 0.02251791 | n +34.06 Da,K +34.06 Da, | 3810.624023 | 4 | 611.8699951 | 611.8696519 |
| LPEDLYHLIKKAVAVR                       | P62301 | 0          | n +34.06 Da,K +34.06 Da, | 3803.79248  | 4 | 492.5799866 | 492.5779797 |
| MENAHKTVEEVLGHFGVNESTGLSLEQVKKLKER     | O55143 | 0.00118624 | n +42.03 Da,K +34.06 Da, | 4028.514648 | 7 | 588.9099731 | 588.9072485 |
| LPEDLYHLIKKAVAVR                       | P62301 | 0          | n +34.06 Da,K +34.06 Da, | 3765.928955 | 5 | 394.2644043 | 394.263839  |
| PSAFEKVVKNIKEVSGSR                     | Q9D8T2 | 0          | n +17.03 Da,K +34.06 Da, | 4025.228027 | 5 | 439.480011  | 439.4831081 |
| GSEAAQLLEAADFAAHKHR                    | Q9D114 | 0          | n +42.03 Da,K +34.06 Da, | 3735.300781 | 3 | 700.0300293 | 700.0344693 |
| SEHLGINFTG SVPTFKHLWR                  | Q8CHT0 | 0          | n +34.06 Da,K +34.06 Da, | 3732.657715 | 5 | 511.6799927 | 511.6790221 |
| TKGLVLGIYAKDKDDDL PQFTSAGESFNKLVSGKLR  | Q9CPY7 | 0          | n +34.06 Da,K +34.06 Da, | 4064.35498  | 7 | 588.789978  | 588.787668  |
| VEADRP GKLFIGGLN TETNEKALEAVFGKYGR     | Q91VM5 | 0          | n +34.06 Da,K +34.06 Da, | 4112.399902 | 6 | 603.5200195 | 603.519502  |
| RQVADEGDALVAGGV SQTPSYLSCKSEVEVKIFR    | O35490 | 0          | n +34.06 Da,K +34.06 Da, | 3680.188721 | 6 | 660.8800049 | 660.8755974 |
| GDKDIGNIISDAMKKVGR                     | P63038 | 0          | n +34.06 Da,K +34.06 Da, | 3653.954102 | 4 | 514.0700073 | 514.0741324 |
| AKEWGYASHNGPDHWHEL YPIAKGDNQSPIELH     | P16015 | 0          | n +42.03 Da,K +34.06 Da, | 3649.948486 | 4 | 977.4863281 | 977.486945  |
| SGRPYNPSMSRPDAWGVTKGAELMQQKEATTEQQLR   | O35490 | 0          | n +34.06 Da,K +34.06 Da, | 3630.960205 | 6 | 704.3699951 | 704.3732044 |
| KLSSAMSAAKAIADHIR                      | P14152 | 0          | n +42.03 Da,K +34.06 Da, | 3611.088135 | 4 | 470.7799988 | 470.7819253 |
| NFNVEKINGEWHTIILASDKR                  | B5X0G2 | 0          | n +42.03 Da,K +34.06 Da, | 3605.084961 | 5 | 519.7000122 | 519.69306   |
| PLGLEAEKDGVPVFKFPR                     | Q8R0Y6 | 0          | n +17.03 Da,K +34.06 Da, | 3564.716064 | 4 | 521.8200073 | 521.8201887 |
| TTIAGVVYKDGIVLGADTR                    | P70195 | 0          | n +34.06 Da,K +34.06 Da, | 3553.012695 | 3 | 673.0690308 | 673.0703384 |
| FRDLFSDGHSEFLKAASNLR                   | P27773 | 0          | n +34.06 Da,K +34.06 Da, | 3659.757568 | 5 | 476.4599915 | 476.4635813 |
| VRMNVLADALKSINNAEKR                    | P62245 | 0          | n +34.06 Da,K +34.06 Da, | 3490.653076 | 4 | 561.8494263 | 561.8480932 |
| GQVVQFKLSDIGEGIR                       | P53395 | 0          | n +34.06 Da,K +34.06 Da, | 3488.917969 | 3 | 605.3651733 | 605.3650852 |
| DLPGALSALSDLHAHKLR                     | P01942 | 0          | n +34.06 Da,K +34.06 Da, | 3487.181152 | 4 | 496.3004761 | 496.3009109 |
| CDKSLHTLFGDKLCAIPNLR                   | P07724 | 0          | n +34.06 Da,K +34.06 Da, | 3478.464111 | 4 | 615.8499756 | 615.8542185 |
| AVWPTLV DINSLSL TEAYKLR                | Q9R0H0 | 0          | n +34.06 Da,K +34.06 Da, | 4654.987793 | 3 | 858.1599731 | 858.1601054 |
| FNVEKINGEWHTIILASDKR                   | B5X0G2 | 0.03634578 | n +34.06 Da,K +34.06 Da, | 3474.739502 | 4 | 618.869812  | 618.8669119 |
| ANEANPCPCDIGHKLEYGGMGHEVQVEHIKAYVTR    | Q8R1G2 | 0          | n +42.03 Da,K +34.06 Da, | 3474.037598 | 6 | 682.5063477 | 682.5061396 |
| PFLDIQK KLGISLDR                       | Q99LY9 | 0          | n +17.03 Da,K +34.06 Da, | 3592.157715 | 4 | 457.7999878 | 457.7989904 |
| DLPGALSALSDLHAHKLR                     | P01942 | 0          | n +34.06 Da,K +34.06 Da, | 3446.703125 | 4 | 496.3009949 | 496.3009109 |

|                                       |        |            |                          |             |   |             |             |
|---------------------------------------|--------|------------|--------------------------|-------------|---|-------------|-------------|
| ASKCPKCDKTVYFAEKVSSLGKDWHKF           | Q9DCT8 | 0          | n +42.03 Da,K +34.06 Da, | 3438.263428 | 7 | 495.5799866 | 495.5756898 |
| GDKDIGNIISDAMKKVGR                    | P63038 | 0          | n +34.06 Da,K +34.06 Da, | 3652.327637 | 5 | 411.4599915 | 411.4607612 |
| SSSRPVALVTGANKGIGFAITR                | P48758 | 0          | n +42.03 Da,K +34.06 Da, | 3435.459717 | 3 | 760.1099854 | 760.1078573 |
| VRMNVLADALKSINNAEKR                   | P62245 | 0          | n +34.06 Da,K +34.06 Da, | 3518.306641 | 5 | 449.6796265 | 449.6799299 |
| AHQGTGIHATEELKEFFAKAR                 | Q9Z0P5 | 0          | n +42.03 Da,K +34.06 Da, | 3418.646484 | 4 | 599.3300171 | 599.3354825 |
| DDLPGALSALSDLHAHKLRL                  | P01942 | 0          | n +34.06 Da,K +34.06 Da, | 3399.915283 | 4 | 525.0599976 | 525.0576469 |
| DWDFLPPKKIKDPDAAKPEDWDER              | P14211 | 0          | n +34.06 Da,K +34.06 Da, | 3396.616455 | 5 | 617.1500244 | 617.1541612 |
| GFLKLIIEIENFKSYKGR                    | Q9CU62 | 0          | n +34.06 Da,K +34.06 Da, | 3393.871338 | 5 | 436.480011  | 436.4849813 |
| FCLFKSTTKDLLFR                        | Q92111 | 0          | n +34.06 Da,K +34.06 Da, | 3652.22876  | 4 | 470.2915039 | 470.2906192 |
| SLDMKEHPDAEVQKNQVLTLEDWKEKWVTR        | O55060 | 0          | n +42.03 Da,K +34.06 Da, | 3892.473877 | 5 | 767.0300293 | 767.0269931 |
| AAIFPGGGFAAKNLSTFAVDGKDKCKVNEVER      | Q9D172 | 0.04966571 | n +34.06 Da,K +34.06 Da, | 3382.817383 | 6 | 595.3499756 | 595.3481451 |
| TDHPKYSDMIVAAIQAEKNR                  | P10922 | 0          | n +34.06 Da,K +34.06 Da, | 3381.411621 | 4 | 598.0901489 | 598.0902835 |
| ANEANPCPCDIGHKLEYGGMGHEVQVEHIKAY      | Q8R1G2 | 0          | n +42.03 Da,K +34.06 Da, | 3376.4104   | 5 | 747.5599976 | 747.5624713 |
| VRDHGDLAFVDVVPNDSSFQIVKNPR            | Q61176 | 0          | n +34.06 Da,K +34.06 Da, | 3367.488525 | 5 | 579.5200195 | 579.5176541 |
| STEASAIKDYVVKHALPLVGHRR               | P08003 | 0.02066116 | n +34.06 Da,K +34.06 Da, | 3515.588135 | 6 | 416.4200134 | 416.4233416 |
| SVEDILKDHWWQKFR                       | Q9D0F9 | 0          | n +34.06 Da,K +34.06 Da, | 3355.814697 | 4 | 490.7900085 | 490.7929493 |
| STDHPKYSDMIVAAIQAEKNR                 | P10922 | 0          | n +34.06 Da,K +34.06 Da, | 3352.836426 | 5 | 496.0799866 | 496.0800879 |
| TSFKENPTTFMGHYLHEVAR                  | P07724 | 0          | n +34.06 Da,K +34.06 Da, | 3348.365479 | 5 | 487.4599915 | 487.4589456 |
| NKELDPVQKLFVDKIR                      | P97450 | 0          | n +34.06 Da,K +34.06 Da, | 3326.803223 | 4 | 520.34729   | 520.3465825 |
| SGVSLAALKKALAAAGYDVEKNNSR             | P15864 | 0          | n +34.06 Da,K +34.06 Da, | 3946.831055 | 5 | 534.7338257 | 534.7309727 |
| NKELDPVQKLFVDKIR                      | P97450 | 0          | n +17.03 Da,K +34.06 Da, | 3320.189697 | 5 | 413.0700073 | 413.0724095 |
| TFASLSELHCDKLHVDPENFR                 | P02088 | 0          | n +34.06 Da,K +34.06 Da, | 3376.628662 | 4 | 646.5900269 | 646.5878775 |
| GLKCIEEAIDKLSKR                       | P15105 | 0          | n +34.06 Da,K +34.06 Da, | 3316.244873 | 5 | 380.0499878 | 380.0510127 |
| GLKCIEEAIDKLSKR                       | P15105 | 0          | n +34.06 Da,K +34.06 Da, | 3307.582275 | 4 | 474.8121948 | 474.8119468 |
| SSPRNHLMAGEERTLGKSNKIR                | Q8CGE9 | 0.03808594 | n +31.05 Da,             | 3297.870117 | 5 | 543.2999878 | 543.3005436 |
| EKVLVFPVGGSHWLSMR                     | B2RT14 | 0          | n +34.06 Da,K +34.06 Da, | 3661.220215 | 4 | 503.2958069 | 503.2962053 |
| SNMEKHLFNLKFAAKELNR                   | Q99LU0 | 0          | n +42.03 Da,K +34.06 Da, | 3278.870605 | 5 | 487.6882935 | 487.6883029 |
| GLKCIEEAIDKLSKR                       | P15105 | 0          | n +34.06 Da,K +34.06 Da, | 3274.457275 | 5 | 380.0499878 | 380.0510127 |
| TVTSSEHLGINFTGSVPTFKHLWR              | Q8CHT0 | 0          | n +34.06 Da,K +34.06 Da, | 3760.928955 | 5 | 589.3200073 | 589.3181825 |
| VQGSTEASAIKDYVVKHALPLVGHRR            | P08003 | 0          | n +34.06 Da,K +34.06 Da, | 3751.561523 | 5 | 556.3400269 | 556.336246  |
| SGVSLAALKKALAAAGYDVEKNNSR             | P15864 | 0          | n +42.03 Da,K +34.06 Da, | 3990.385254 | 5 | 536.3302612 | 536.3204623 |
| KDIGNIISDAMKKVGR                      | P63038 | 0          | n +34.06 Da,K +34.06 Da, | 3227.422852 | 4 | 471.0599976 | 471.0620303 |
| TILVKWLPQNDLLGHKPKTR                  | P70691 | 0          | n +34.06 Da,K +34.06 Da, | 3234.951904 | 5 | 467.1000061 | 467.10102   |
| VPPVQVSPLIKFR                         | Q06185 | 0          | n +34.06 Da,K +34.06 Da, | 3216.52417  | 3 | 535.6896362 | 535.6889511 |
| DMEKIWHHTFYNELR                       | P60710 | 0          | n +34.06 Da,K +34.06 Da, | 3232.588379 | 4 | 522.5300293 | 522.5255537 |
| GVGDMVMATVKKGKPELR                    | P62830 | 0          | n +34.06 Da,K +34.06 Da, | 3203.675049 | 4 | 513.8200073 | 513.8299766 |
| KDIGNIISDAMKKVGR                      | P63038 | 0          | n +34.06 Da,K +34.06 Da, | 3196.681885 | 4 | 471.0599976 | 471.0620303 |
| PFAHLPKSTFVLDEFKR                     | Q9D8N0 | 0          | n +17.03 Da,K +34.06 Da, | 3190.653564 | 5 | 424.2600098 | 424.257673  |
| STAGKVIKCKAAVLWELHKPFTIEDIEVAPPKAHEVR | P00329 | 0          | n +42.03 Da,K +34.06 Da, | 3869.781006 | 8 | 548.4500122 | 548.456384  |
| KSLHTLFGDKLCAIPNLR                    | P07724 | 0          | n +34.06 Da,K +34.06 Da, | 3171.127686 | 4 | 547.0900269 | 547.0898202 |



|                                     |        |            |                          |             |   |             |             |
|-------------------------------------|--------|------------|--------------------------|-------------|---|-------------|-------------|
| AKEWGYASHNGPDHWHELYPIAK             | P16015 | 0          | n +42.03 Da,K +34.06 Da, | 3243.505859 | 4 | 704.8599854 | 704.8608591 |
| KTQDPAKAPNTPDVLEIEFKKGVVVKVNIKDGTTT | J3QNGO | 0          | n +34.06 Da,K +34.06 Da, | 3146.776611 | 6 | 696.4299927 | 696.4397108 |
| PPSADKTLLEEKAKLEEQLR                | Q99LP6 | 0          | n +17.03 Da,K +34.06 Da, | 3122.277832 | 5 | 483.7000122 | 483.701096  |
| GKWEVDEMKETKLPDGKGLVLMRSR           | P35564 | 0          | n +34.06 Da,K +34.06 Da, | 3185.451904 | 5 | 584.1500244 | 584.1542677 |
| VVEHPEFLKAGKEPGLQIWR                | P13020 | 0          | n +34.06 Da,K +34.06 Da, | 3106.595459 | 5 | 487.8999939 | 487.898986  |
| AHRFPALTPQKKELEIAQR                 | Q91Y97 | 0          | n +42.03 Da,K +34.06 Da, | 3093.331055 | 4 | 640.6224365 | 640.6224144 |
| PPSADKTLLEEKAKLEEQLR                | Q99LP6 | 0          | n +17.03 Da,K +34.06 Da, | 3081.514893 | 5 | 483.7000122 | 483.701096  |
| AAETVELHKLKLAELKQECLAR              | Q9D1J3 | 0          | n +42.03 Da,K +34.06 Da, | 3077.56665  | 4 | 674.4042358 | 674.4072443 |
| MLKKFDKKDEESGGSNPLQHLEKSAVLQEAR     | Q9QZE5 | 0          | n +42.03 Da,K +34.06 Da, | 3198.206055 | 5 | 757.2399902 | 757.2386663 |
| PNSPDVLEIEFKKGVVVKVNIKDGTTT         | P16460 | 0.00118624 | n +17.03 Da,K +34.06 Da, | 3099.107422 | 5 | 647.7999878 | 647.8014848 |
| VLSGEDKSNIKAAWGKIGGHAEGYGAELER      | P01942 | 0          | n +34.06 Da,K +34.06 Da, | 3070.39917  | 4 | 838.2199707 | 838.2257576 |
| EENGLKCIEEAIDKLSKR                  | P15105 | 0          | n +17.03 Da,K +34.06 Da, | 4034.064209 | 5 | 451.0700073 | 451.0703243 |
| VVEHPEFLKAGKEPGLQIWR                | P13020 | 0          | n +34.06 Da,K +34.06 Da, | 3066        | 5 | 487.8999939 | 487.898986  |
| AVSESQKMKMMSKYKYR                   | Q61187 | 0          | n +42.03 Da,K +34.06 Da, | 3064.442871 | 4 | 564.5900269 | 564.5945377 |
| MHHQSVLHSGYFHPLLR                   | P10518 | 0.02251791 | n +42.03 Da,             | 3327.020264 | 5 | 421.019989  | 421.0167947 |
| TKKYTPPEQVAMATVTALHR                | Q91Y97 | 0          | n +34.06 Da,K +34.06 Da, | 3044.760254 | 5 | 450.2726746 | 450.2733905 |
| VALEGVGHFFR                         | P29391 | 0          | n +34.06 Da,             | 3035.896484 | 3 | 422.5799866 | 422.578631  |
| MLKKFDKKDEESGGSNPLQHLEKSAVLQEAR     | Q9QZE5 | 0          | n +42.03 Da,K +34.06 Da, | 3161.486572 | 7 | 541.1699829 | 541.172555  |
| GKIPEHDLDPNVTIILKEPVR               | Q99PL5 | 0          | n +34.06 Da,K +34.06 Da, | 3021.92041  | 5 | 497.9100037 | 497.9105681 |
| AASAASSEHFEKLHEIFR                  | O88384 | 0          | n +42.03 Da,K +34.06 Da, | 3020.010742 | 4 | 527.2755737 | 527.2761341 |
| PMNKEWPANLDLKKELSEPSSTR             | Q8C196 | 0          | n +17.03 Da,K +34.06 Da, | 3019.090088 | 4 | 698.1500244 | 698.1495825 |
| REDSWLKSLFVR                        | O55126 | 0          | n +34.06 Da,K +34.06 Da, | 3457.343018 | 4 | 401.7454224 | 401.7452396 |
| RDDVALEGVGHFFR                      | P29391 | 0          | n +34.06 Da,             | 2997.171387 | 3 | 551.2944336 | 551.2969643 |
| TKKYTPPEQVAMATVTALHR                | Q91Y97 | 0.00118624 | n +34.06 Da,K +34.06 Da, | 2995.986816 | 4 | 562.5900269 | 562.589919  |
| SDLELHPPSYPWWSHR                    | Q9D0M3 | 0          | n +34.06 Da,             | 2993.510498 | 4 | 464.4890137 | 464.4891034 |
| SEDKGALAKLVEAIR                     | P12970 | 0.00118624 | n +34.06 Da,K +34.06 Da, | 3268.878662 | 4 | 426.2799988 | 426.279409  |
| SWGSGLDMHTKPWIR                     | O35490 | 0          | n +34.06 Da,K +34.06 Da, | 2961.837402 | 4 | 460.5       | 460.5056266 |
| NKELDPVQKLFVDKIR                    | P97450 | 0          | n +34.06 Da,K +34.06 Da, | 2958.606201 | 4 | 520.3499756 | 520.3465825 |
| PSVSLQTVKLMKEGLEAAR                 | O35490 | 0          | n +17.03 Da,K +34.06 Da, | 3385.321045 | 4 | 536.3308716 | 536.3304922 |
| NKELDPVQKLFVDKIR                    | P97450 | 0          | n +34.06 Da,K +34.06 Da, | 2956.393799 | 5 | 416.4780579 | 416.4787213 |
| SDLELHPPSYPWWSHR                    | Q9D0M3 | 0          | n +34.06 Da,             | 2952.36499  | 4 | 464.4899902 | 464.4891034 |
| GSEAAQLLEAADFAAHKHR                 | Q9D114 | 0          | n +34.06 Da,K +34.06 Da, | 2951.114258 | 5 | 418.8340149 | 418.8341026 |
| SQQDFENALNQVLLKKDPPGNEVKLR          | Q9WUR2 | 0          | n +34.06 Da,K +34.06 Da, | 3522.33667  | 6 | 531.1599731 | 531.163207  |
| ASLKDLEGKWR                         | Q05816 | 0          | n +42.03 Da,K +34.06 Da, | 3103.894287 | 3 | 471.6219177 | 471.6226066 |
| GYVFLINLIPLHLVLMMLTGR               | P46978 | 0.00960512 | n +42.03 Da,             | 3242.368164 | 4 | 606.6051025 | 606.6116364 |
| NKELDPVQKLFVDKIR                    | P97450 | 0          | n +34.06 Da,K +34.06 Da, | 2915.776123 | 5 | 416.480011  | 416.4787213 |
| FENKVPEKQLFQEDNGMPVHLKGGASDALLYR    | P48771 | 0          | n +34.06 Da,K +34.06 Da, | 2910.281738 | 6 | 655.710022  | 655.7140462 |
| PHSYPALSAEQKKELSIALR                | P05063 | 0          | n +17.03 Da,K +34.06 Da, | 2904.766357 | 3 | 813.4799805 | 813.4744643 |
| AAPAKGENLSLVVHGPDIR                 | Q64442 | 0.0055371  | n +42.03 Da,K +34.06 Da, | 2946.4375   | 3 | 693.0581665 | 693.0586147 |
| AKEWGYASHNGPDHWHELYPIAKGDNQSPIELH   | P16015 | 0.00224719 | n +42.03 Da,K +34.06 Da, | 3464.219971 | 5 | 782.1900024 | 782.1910113 |

|                                    |        |            |                          |             |   |             |             |
|------------------------------------|--------|------------|--------------------------|-------------|---|-------------|-------------|
| TKNCWQNYLDFHR                      | P56391 | 0.00118624 | n +34.06 Da,K +34.06 Da, | 2885.622314 | 4 | 463.2408752 | 463.2414301 |
| PKPHSEAGTAFIQTLQQLHAAMADTFLEHMCR   | P52480 | 0.0055371  | n +34.06 Da,K +34.06 Da, | 3400.834473 | 5 | 719.1599731 | 719.1644262 |
| MKVELCSFSGYKIYPGHGR                | Q8BP67 | 0          | n +34.06 Da,K +34.06 Da, | 2882.155273 | 5 | 467.0625916 | 467.0625616 |
| NKELDPVQKLFVDKIR                   | P97450 | 0          | n +17.03 Da,K +34.06 Da, | 2932.482422 | 4 | 516.090271  | 516.0886927 |
| MKVELCSFSGYKIYPGHGR                | Q8BP67 | 0          | n +34.06 Da,K +34.06 Da, | 2862.303467 | 3 | 777.7700195 | 777.766085  |
| VKETTYDVLGVKPNATQEELKKAYR          | P63037 | 0          | n +34.06 Da,K +34.06 Da, | 2855.027588 | 5 | 643.5900269 | 643.590917  |
| MDKNELVQKAKLAEQAER                 | P63101 | 0.04966571 | n +42.03 Da,K +34.06 Da, | 2851.986572 | 3 | 749.1099854 | 749.1071648 |
| KELDPVQKLFVDKIR                    | P97450 | 0          | n +34.06 Da,K +34.06 Da, | 2849.623779 | 5 | 393.6700134 | 393.6701356 |
| GVKDIAFEVEDCDHIVQKAR               | P49429 | 0          | n +34.06 Da,K +34.06 Da, | 2846.561523 | 4 | 608.5900269 | 608.5929247 |
| MKVELCSFSGYKIYPGHGR                | Q8BP67 | 0          | n +34.06 Da,K +34.06 Da, | 2845.050781 | 4 | 583.5800171 | 583.5763829 |
| NKELDPVQKLFVDKIR                   | P97450 | 0          | n +17.03 Da,K +34.06 Da, | 3264.761719 | 4 | 516.0906372 | 516.0886927 |
| EYAAEEFGNETWGVTKAAEQMKDKQDEEQR     | P14211 | 0          | n +34.06 Da,K +34.06 Da, | 3628.746338 | 6 | 636.8400269 | 636.8380308 |
| KELDPVQKLFVDKIR                    | P97450 | 0          | n +34.06 Da,K +34.06 Da, | 3310.951416 | 4 | 491.8389893 | 491.8358504 |
| MAKEWGYASHNGPDHWHELYPIAKGDNQSPIELH | P16015 | 0          | n +17.03 Da,K +34.06 Da, | 4249.415039 | 5 | 803.4000244 | 803.4033069 |
| MKNPFAHLAEPLDAAQPGKR               | P28271 | 0          | n +34.06 Da,K +34.06 Da, | 2801.377441 | 3 | 765.1199951 | 765.1159941 |
| KVHSFPTLKFFPASADR                  | P09103 | 0          | n +34.06 Da,K +34.06 Da, | 2795.070068 | 4 | 513.3200073 | 513.3137831 |
| RILEFFGLKKEECPAVR                  | P09103 | 0          | n +34.06 Da,K +34.06 Da, | 2787.849365 | 5 | 439.6710815 | 439.6711316 |
| GKHVVFGKVLEGMDEVVR                 | P24369 | 0          | n +34.06 Da,K +34.06 Da, | 2784.242676 | 4 | 493.8146667 | 493.8119846 |
| AILPFSFIHSQKR                      | P24270 | 0          | n +34.06 Da,K +34.06 Da, | 2771.29834  | 4 | 403.7600098 | 403.7556072 |
| HLMHLELDISDSKIR                    | P37040 | 0          | n +42.03 Da,K +34.06 Da, | 2769.174561 | 4 | 471.5114746 | 471.51215   |
| PLVHESLLTIPKLSSEKR                 | Q9QXM0 | 0          | n +17.03 Da,K +34.06 Da, | 2767.793701 | 5 | 427.2767334 | 427.2755819 |
| GEAGAEEVVESTGVFTTMEKAGAHKGGAKR     | P16858 | 0          | n +34.06 Da,K +34.06 Da, | 3635.686035 | 6 | 548.8099976 | 548.8121568 |
| TDHPKYSDMIVAAIQAEKNR               | P10922 | 0          | n +34.06 Da,K +34.06 Da, | 3377.816406 | 5 | 478.6700134 | 478.6736821 |
| LRPGDCEVCISYLR                     | Q9CXI5 | 0          | n +34.06 Da,             | 2945.737549 | 3 | 610.3099976 | 610.3134096 |
| SPSKESDELIFFVNGKKVTER              | G3X982 | 0.00224719 | n +34.06 Da,K +34.06 Da, | 2757.413086 | 5 | 510.1091309 | 510.1085706 |
| SPSKESDELIFFVNGKKVTER              | G3X982 | 0          | n +34.06 Da,K +34.06 Da, | 2749.628906 | 4 | 637.3800049 | 637.3838942 |
| LPDAMKPHEIQEKLGLTR                 | P62331 | 0          | n +34.06 Da,K +34.06 Da, | 2749.254395 | 5 | 436.4700012 | 436.4690976 |
| PFYFQHLDHIGR                       | Q6NXL1 | 0.00960512 | n +17.03 Da,             | 2747.678711 | 4 | 387.4599915 | 387.4545505 |
| AEDIKTIKIKNYKTAPFDSR               | P56391 | 0.01062699 | n +42.03 Da,K +34.06 Da, | 2742.253662 | 3 | 801.8200073 | 801.823352  |
| SDFGKFLVSSGKFYGDLEKDKGLQTSQDAR     | P14211 | 0          | n +34.06 Da,K +34.06 Da, | 3696.506592 | 5 | 699.5999756 | 699.5997942 |
| THFNKGPSYGLSAEVKNKIASKYDQQAEEEDLR  | Q9DAW9 | 0          | n +42.03 Da,K +34.06 Da, | 3205.99707  | 6 | 634.5200195 | 634.51805   |
| LPGALSALSDLHAHKLR                  | P01942 | 0          | n +34.06 Da,K +34.06 Da, | 2717.719971 | 4 | 467.543457  | 467.5441748 |
| ELHKPFTIEDIEVAPPKAHEVR             | P00329 | 0          | n +34.06 Da,K +34.06 Da, | 2714.578125 | 5 | 532.3153076 | 532.3160237 |
| VVPKDVNAIAIAIKTKR                  | P68368 | 0.01269841 | n +34.06 Da,K +34.06 Da, | 2713.612793 | 5 | 386.8699951 | 386.8755123 |
| NKELDPVQKLFVDKIR                   | P97450 | 0          | n +17.03 Da,K +34.06 Da, | 2713.067871 | 5 | 413.0724487 | 413.0724095 |
| FAKLVRPPVQVYVYIEGR                 | Q9DB20 | 0          | n +34.06 Da,K +34.06 Da, | 2796.711426 | 3 | 666.4141846 | 666.415891  |
| PKLKAFLESPEHVNRPLAAC               | F6RWR5 | 0          | K +28.03 Da,             | 2696.540039 | 3 | 787.789978  | 787.7752322 |
| LPGALSALSDLHAHKLR                  | P01942 | 0          | n +34.06 Da,K +34.06 Da, | 2695.232666 | 5 | 374.2399902 | 374.2367952 |
| PEDPFVEKAKLLR                      | Q64459 | 0          | n +17.03 Da,K +34.06 Da, | 2694.203857 | 5 | 358.6424561 | 358.6427182 |
| VLSGEDKSNIAAWGKIGG                 | P01942 | 0.03451677 | n +34.06 Da,K +34.06 Da, | 2688.401611 | 4 | 517.3300171 | 517.3283899 |

|                                |        |            |                          |             |   |             |             |
|--------------------------------|--------|------------|--------------------------|-------------|---|-------------|-------------|
| HAHLDIEAFTMDR                  | P16460 | 0          | n +34.06 Da,             | 2701.665527 | 3 | 530.5999756 | 530.6032885 |
| RSPSASDLPQEELVDQKCLLQKYTHR     | Q61129 | 0          | n +34.06 Da,K +34.06 Da, | 3157.599854 | 5 | 640.960022  | 640.9574462 |
| GKHVVFGKVLGEMDVVR              | P24369 | 0          | n +34.06 Da,K +34.06 Da, | 2791.481689 | 3 | 658.0800171 | 658.0802206 |
| PSKESDELIFVNGKKVTER            | G3X982 | 0.04966571 | n +17.03 Da,K +34.06 Da, | 2667.487793 | 4 | 611.3599854 | 611.3679971 |
| SLSELHCCLKHVDPENFR             | P02088 | 0          | n +34.06 Da,K +34.06 Da, | 2667.159912 | 4 | 566.7999878 | 566.7995756 |
| THLVLVDLRPKGLDGAR              | Q9CZ7  | 0          | n +34.06 Da,K +34.06 Da, | 2661.034912 | 5 | 386.4500122 | 386.447348  |
| KGNNGVYGVWDLKRKIISR            | O70152 | 0.00224719 | n +42.03 Da,K +34.06 Da, | 2658.315186 | 5 | 439.0700073 | 439.0769969 |
| KEWPANLDLKKELSEPSSTR           | Q8C196 | 0          | n +34.06 Da,K +34.06 Da, | 2656.790039 | 5 | 493.7000122 | 493.7001976 |
| KEWPANLDLKKELSEPSSTR           | Q8C196 | 0          | n +34.06 Da,K +34.06 Da, | 2653.753906 | 3 | 822.1599731 | 822.162145  |
| SLDMKEHPDAEVQKNQVLTLEDWKEKWVTR | O55060 | 0          | n +42.03 Da,K +34.06 Da, | 3923.273193 | 4 | 958.5300293 | 958.5319223 |
| ASLFKKKTVDVVIKEQNR             | Q8BJF9 | 0          | n +42.03 Da,K +34.06 Da, | 2649.250244 | 4 | 575.1199951 | 575.1179631 |
| ASLFKKKTVDVVIKEQNR             | Q8BJF9 | 0          | n +42.03 Da,K +34.06 Da, | 2647.609863 | 5 | 460.2999878 | 460.2958258 |
| FRDLFSDGHSEFLKAASNLR           | P27773 | 0          | n +34.06 Da,K +34.06 Da, | 3593.668457 | 5 | 476.4632874 | 476.4635813 |
| KEWPANLDLKKELSEPSSTR           | Q8C196 | 0          | n +34.06 Da,K +34.06 Da, | 2644.9021   | 4 | 616.8699951 | 616.8734279 |
| SPDVLEIEFKKGVPVKVTNIKDGTR      | P16460 | 0          | n +34.06 Da,K +34.06 Da, | 3056.567139 | 4 | 760.9799805 | 760.9840036 |
| GAVIASEDAVKKHNFPLAR            | Q8BWT1 | 0          | n +34.06 Da,K +34.06 Da, | 2641.46582  | 4 | 585.6099854 | 585.6128171 |
| SSPAQPAVPAPLADLKIQHTK          | P24549 | 0          | n +42.03 Da,K +34.06 Da, | 3265.743896 | 3 | 760.4500122 | 760.4513306 |
| PVGIGIYGHPSHHESDFEMR           | Q9DAY5 | 0          | n +14.02 Da,             | 2627.050781 | 3 | 760.3599854 | 760.3602586 |
| MHHQSVLHSGYFHPLLR              | P10518 | 0          | n +42.03 Da,             | 2625.784424 | 4 | 526.019165  | 526.0191743 |
| SHYEEGPGKNLPPFSVENKWR          | P17665 | 0          | n +34.06 Da,K +34.06 Da, | 2623.121582 | 5 | 496.0700073 | 496.0751877 |
| GKFVESKSDKWIDHNPATNEVVGR       | Q9EQ20 | 0.02351738 | n +34.06 Da,K +34.06 Da, | 2634.418213 | 4 | 741.4299927 | 741.4319074 |
| MHHQSVLHSGYFHPLLR              | P10518 | 0          | n +42.03 Da,             | 2618.116943 | 5 | 421.0180664 | 421.0167947 |
| SEKSVAAAELSAKDLKEKDKVEEKAGR    | Q9D0J8 | 0          | n +42.03 Da,K +34.06 Da, | 2781.586182 | 5 | 691.6300049 | 691.6365441 |
| MHHQSVLHSGYFHPLLR              | P10518 | 0          | n +42.03 Da,             | 2615.574707 | 3 | 701.0223389 | 701.0231402 |
| GRDFYKILGVPR                   | Q99KV1 | 0          | n +34.06 Da,K +34.06 Da, | 2614.278564 | 3 | 496.9822693 | 496.982246  |
| AEDIKTIKINYKTAPFDSR            | P56391 | 0          | n +42.03 Da,K +34.06 Da, | 2662.013916 | 4 | 601.6188354 | 601.6193331 |
| AGKPVLYHFDGR                   | P30115 | 0          | n +42.03 Da,K +34.06 Da, | 2596.534424 | 3 | 479.2685547 | 479.2683455 |
| AGIIKKQILKHLR                  | A2RSJ4 | 0          | n +42.03 Da,K +34.06 Da, | 2794.96167  | 4 | 438.0599976 | 438.0635021 |
| SSVEYEPKEKTFDKILIANR           | Q91ZA3 | 0          | n +34.06 Da,K +34.06 Da, | 2594.017822 | 4 | 626.6300049 | 626.6324407 |
| PHPYPALTPPEQKKELSIAHR          | P05064 | 0          | n +17.03 Da,K +34.06 Da, | 2593.425781 | 5 | 503.2900085 | 503.2929658 |
| SAGFLQASASDVVVVHGR             | Q8VCHO | 0          | n +34.06 Da,             | 2899.122559 | 3 | 612.0053101 | 612.0058505 |
| LPDAMKPHEIQEKLGLTR             | P62331 | 0          | n +34.06 Da,K +34.06 Da, | 2750.439697 | 4 | 545.3400269 | 545.3345529 |
| KGGKAVANYDSVEAGEKLVKALTDFGR    | P51660 | 0          | n +42.03 Da,K +34.06 Da, | 4494.46582  | 5 | 621.3699951 | 621.3679533 |
| GGFVFALEKR                     | O35490 | 0          | n +34.06 Da,K +34.06 Da, | 2586.460693 | 3 | 397.9215393 | 397.9222157 |
| RISGASEKDIVHSGLAYTMER          | P26443 | 0.01880878 | n +34.06 Da,K +34.06 Da, | 2666.071289 | 3 | 796.7700195 | 796.7707348 |
| RDAMDKAQIHDLVLVGGSTR           | P17879 | 0.00224719 | n +42.03 Da,K +34.06 Da, | 2584.573975 | 4 | 605.8515625 | 605.8483285 |
| MHHQSVLHSGYFHPLLR              | P10518 | 0          | n +42.03 Da,             | 2584.4646   | 4 | 526.0186157 | 526.0191743 |
| MHHQSVLHSGYFHPLLR              | P10518 | 0          | n +42.03 Da,             | 2577.738037 | 5 | 421.0167542 | 421.0167947 |
| AGKPVLYHFDGR                   | P30115 | 0          | n +42.03 Da,K +34.06 Da, | 2576.42627  | 2 | 718.4000244 | 718.39888   |
| PMDLHVHFALR                    | Q91ZX7 | 0.01269841 | n +14.02 Da,             | 2570.923096 | 4 | 338.1799927 | 338.1841304 |

|                                  |        |            |                          |             |   |             |             |
|----------------------------------|--------|------------|--------------------------|-------------|---|-------------|-------------|
| PFGGAKAGVKINPKNYTDNELEKTR        | P26443 | 0          | n +17.03 Da,K +34.06 Da, | 2754.146729 | 6 | 503.1400146 | 503.1419985 |
| AKVEQVLSLEPQHELKFR               | Q9QY76 | 0          | n +42.03 Da,K +34.06 Da, | 3529.38916  | 3 | 754.4517212 | 754.4478089 |
| MKFNPFVTSDR                      | P61255 | 0          | n +34.06 Da,K +34.06 Da, | 2565.450928 | 3 | 470.6010132 | 470.6009254 |
| KELDPVQKLFVDKIR                  | P97450 | 0          | n +34.06 Da,K +34.06 Da, | 2808.595947 | 5 | 393.6700134 | 393.6701356 |
| ASQQDFENALNQVLLKDD               | Q9WUR2 | 0          | n +34.06 Da,K +34.06 Da, | 3686.65625  | 4 | 582.1099854 | 582.1075956 |
| YHMGITAENVAKKWQVSR               | Q8CAY6 | 0          | n +34.06 Da,K +34.06 Da, | 2555.323242 | 4 | 555.8240356 | 555.8256236 |
| RPLTLSEKIVYGHLLDDPANQEIER        | Q99KIO | 0.04352031 | n +34.06 Da,K +34.06 Da, | 3076.369629 | 4 | 716.1500244 | 716.1502653 |
| YHMGITAENVAKKWQVSR               | Q8CAY6 | 0          | n +34.06 Da,K +34.06 Da, | 2552.730957 | 5 | 444.8599854 | 444.8619542 |
| PHPYPALTPAQKKELSIAHR             | P05064 | 0          | n +17.03 Da,K +34.06 Da, | 2552.512451 | 5 | 503.2900085 | 503.2929658 |
| PHLPQEEVLKFYR                    | P50136 | 0          | n +17.03 Da,K +34.06 Da, | 2739.283936 | 4 | 427.5       | 427.5017287 |
| EASKKEIKDILIQYDR                 | P14131 | 0          | n +34.06 Da,K +34.06 Da, | 2548.148682 | 3 | 695.7800293 | 695.7790831 |
| MDKNELVQKAKLAEQAER               | P63101 | 0          | n +42.03 Da,K +34.06 Da, | 2848.307617 | 4 | 562.0830688 | 562.0821927 |
| SSKPKSLEIIGAPFSKGQPR             | Q61176 | 0          | n +42.03 Da,K +34.06 Da, | 2543.566162 | 4 | 568.6038818 | 568.6034551 |
| SSKPKSLEIIGAPFSKGQPR             | Q61176 | 0          | n +42.03 Da,K +34.06 Da, | 2542.364014 | 3 | 757.7999878 | 757.8021813 |
| REELDKYWSQQIEESTTVVTTKSAEIR      | P05784 | 0.00224719 | n +34.06 Da,K +34.06 Da, | 3844.921631 | 4 | 832.960022  | 832.9584566 |
| MHHQSVLHSGYFHPLLR                | P10518 | 0.00867679 | n +42.03 Da,             | 2537.39917  | 5 | 421.0170898 | 421.0167947 |
| SQAEFDKAAEEVKR                   | P31786 | 0          | n +42.03 Da,K +34.06 Da, | 2535.652344 | 3 | 573.3186646 | 573.3179124 |
| TPSYLSCKSEVEVKKIFR               | O35490 | 0          | n +34.06 Da,K +34.06 Da, | 2532.043457 | 5 | 462.2900085 | 462.2868973 |
| VDKVAFTGSTEVGHLIQKAAGESNLKR      | Q9CZS1 | 0          | n +34.06 Da,K +34.06 Da, | 3239.805908 | 6 | 499.4700012 | 499.4710411 |
| VEKINGEWHTIILASDKR               | B5X0G2 | 0.00960512 | n +34.06 Da,K +34.06 Da, | 2518.917969 | 4 | 553.5900269 | 553.5890762 |
| VFGGAKAGVKINPKNYTDNELEKTR        | P26443 | 0          | n +34.06 Da,K +34.06 Da, | 2895.395752 | 6 | 522.4899902 | 522.491994  |
| GLLTDKYKYIQKLR                   | Q99K67 | 0          | n +34.06 Da,K +34.06 Da, | 2508.041748 | 5 | 375.8599854 | 375.8605998 |
| PLIQNVKKILESDR                   | Q8C196 | 0          | n +17.03 Da,K +34.06 Da, | 2918.890625 | 4 | 435.2900085 | 435.2872528 |
| PELFKEWKGNVKTMDR                 | P05201 | 0          | n +17.03 Da,K +34.06 Da, | 2501.866211 | 5 | 434.4599915 | 434.4617264 |
| AVNAGGEAHVDVHGIHFR               | Q6ZQI3 | 0          | n +31.05 Da,             | 2501.421387 | 3 | 639.6599731 | 639.6677911 |
| ASGANFQYIITEKKGKNSVGLIQLNR       | Q8BH95 | 0          | n +34.06 Da,K +34.06 Da, | 3116.41333  | 5 | 615.3800049 | 615.3753639 |
| ADEKPEKGVKTENNDHINLKVAGQDGSVVQFK | P61957 | 0          | n +42.03 Da,K +34.06 Da, | 2493.901367 | 5 | 742.2299805 | 742.2285353 |
| APKSQDLSKIMADIR                  | P05784 | 0          | n +34.06 Da,K +34.06 Da, | 2691.536377 | 4 | 444.5295105 | 444.529064  |
| PRPVPKTYVAVKTAIDEGYR             | Q8VCX1 | 0          | n +17.03 Da,K +34.06 Da, | 2481.210205 | 4 | 601.3599854 | 601.3614811 |
| PFGGAKAGVKINPKNYTDNELEKTR        | P26443 | 0          | n +17.03 Da,K +34.06 Da, | 2757.739746 | 5 | 603.5700073 | 603.5689429 |
| TEEVICHVEEGDKADVDAKVAAR          | O35945 | 0.00763359 | n +34.06 Da,K +34.06 Da, | 2475.009766 | 5 | 561.9210205 | 561.9203019 |
| SKESDELIFVNGKVKTER               | G3X982 | 0          | n +34.06 Da,K +34.06 Da, | 2891.957031 | 5 | 473.2900085 | 473.291612  |
| NKELDPVQKLFVDKIR                 | P97450 | 0          | n +17.03 Da,K +34.06 Da, | 3273.647949 | 5 | 413.0700073 | 413.0724095 |
| KPFDDAKCVESAKKIFS                | P30115 | 0          | n +17.03 Da,K +34.06 Da, | 2460.962158 | 4 | 531.5800171 | 531.5777601 |
| LPGALSALSDLHAHKLKLR              | P01942 | 0          | n +34.06 Da,K +34.06 Da, | 2677.133057 | 4 | 467.5400085 | 467.5441748 |
| PRPVPKTYVAVKTAIDEGYR             | Q8VCX1 | 0          | n +17.03 Da,K +34.06 Da, | 2478.681641 | 3 | 801.4799805 | 801.4795493 |
| AGQSKDKVKYTYLEEIQKHKDSK          | P56395 | 0.03808594 | n +42.03 Da,K +34.06 Da, | 2427.946533 | 4 | 731.4299927 | 731.4290614 |
| HVLSLSPIRR                       | P26443 | 0          | n +34.06 Da,             | 2424.437012 | 3 | 453.6209717 | 453.6208302 |
| AGKPVLHYFDGR                     | P30115 | 0          | n +42.03 Da,K +34.06 Da, | 2424.351074 | 3 | 479.2678833 | 479.2683455 |
| GAGAVIIASEDAVKKHNTPLAR           | Q8BWT1 | 0          | n +34.06 Da,K +34.06 Da, | 3169.605225 | 5 | 494.3019409 | 494.3034246 |

|                           |        |            |                          |             |   |             |             |
|---------------------------|--------|------------|--------------------------|-------------|---|-------------|-------------|
| VKVFQGNPTKVVAVDCGIKNNVIR  | Q8C196 | 0          | n +34.06 Da,K +34.06 Da, | 2418.488281 | 4 | 721.4699707 | 721.4678944 |
| LHTVYQSVLPETHQMLR         | Q07417 | 0          | n +31.05 Da,             | 3423.220215 | 3 | 738.0499878 | 738.057957  |
| GKFMKPGKVVVLVLAGR         | P61358 | 0.00763359 | n +34.06 Da,K +34.06 Da, | 2405.216064 | 4 | 459.8286743 | 459.8286706 |
| VDSLVIHQVKNKAPKMR         | Q9CPR4 | 0          | n +34.06 Da,K +34.06 Da, | 2397.056641 | 5 | 436.6799927 | 436.6754245 |
| FAVFSLSQQNLPFSVENKWR      | B8JJA9 | 0.02979146 | n +42.03 Da,K +34.06 Da, | 3066.328857 | 3 | 825.1099854 | 825.1077459 |
| PVKKIFVGGNLPPEATEEKIR     | Q99020 | 0.00224719 | n +17.03 Da,K +34.06 Da, | 2391.129395 | 5 | 469.7000122 | 469.703051  |
| SSPSAKDIKKILDSVIEADDDR    | P99027 | 0          | n +34.06 Da,K +34.06 Da, | 3897.220459 | 4 | 649.6342163 | 649.6341752 |
| NYVAEKISGQKVNEAACDIAR     | O35490 | 0          | n +42.03 Da,K +34.06 Da, | 2976.651611 | 3 | 816.0999756 | 816.1058948 |
| PSANMGALISKAHLEKVR        | Q8BH00 | 0          | n +17.03 Da,K +34.06 Da, | 2365.295654 | 4 | 502.5597534 | 502.5609144 |
| ATTHFETTCDDIKDIYKR        | Q61598 | 0          | n +34.06 Da,K +34.06 Da, | 2363.917725 | 5 | 464.0499878 | 464.0536056 |
| AFKDTGKTPVEPEVAIHR        | P60867 | 0          | n +42.03 Da,K +34.06 Da, | 2346.382813 | 3 | 702.4000244 | 702.4057211 |
| AVSESQKMKMMSKYKR          | Q61187 | 0          | n +42.03 Da,K +34.06 Da, | 3061.606934 | 5 | 451.8800049 | 451.8770854 |
| TMDKSELVQKAKLAEQAER       | Q9CQV8 | 0          | n +34.06 Da,K +34.06 Da, | 2334.156982 | 4 | 578.5999756 | 578.6045258 |
| AKEWGYASHNGPDHWHELYPIAKGD | P16015 | 0          | n +42.03 Da,K +34.06 Da, | 3508.613525 | 4 | 747.8599854 | 747.8729612 |
| FTGSVPTFKHLWR             | Q8CHT0 | 0          | n +34.06 Da,K +34.06 Da, | 2907.104004 | 4 | 411.7486267 | 411.7477821 |
| TYGGWGAHGGGAFSGKDYTKVDR   | Q3THS6 | 0.00118624 | n +34.06 Da,K +34.06 Da, | 2308.980713 | 4 | 623.0800171 | 623.0818815 |
| SLAGGIIGVKGAKIKELR        | P61979 | 0          | n +34.06 Da,K +34.06 Da, | 2289.552734 | 5 | 390.0799866 | 390.0817723 |
| MKFQYKEDHPFEYR            | Q8R3R8 | 0.03808594 | n +34.06 Da,K +34.06 Da, | 2285.299805 | 5 | 404.8221436 | 404.8227393 |
| AGIIKKQILKHLSR            | A2RSJ4 | 0          | n +42.03 Da,K +34.06 Da, | 2790.561523 | 5 | 350.6499939 | 350.652257  |
| CGKKKVVWLDPNETNEIANANSR   | P84099 | 0          | n +42.03 Da,K +34.06 Da, | 2351.783203 | 4 | 672.8800049 | 672.8710261 |
| AKLDSQIHIDIVLVGGSTR       | P63017 | 0          | n +34.06 Da,K +34.06 Da, | 2277.483398 | 3 | 713.7800293 | 713.7830095 |
| DECNKLKEEISKMR            | P38647 | 0.01966874 | n +34.06 Da,K +34.06 Da, | 2272.975342 | 4 | 479.7900085 | 479.7867719 |
| SLSNKLTLDKLDVKGKR         | P09411 | 0          | n +42.03 Da,K +34.06 Da, | 2342.864014 | 4 | 524.1099854 | 524.1045898 |
| MKETIMNQEKLAKLQQAQVR      | Q64152 | 0          | n +17.03 Da,K +34.06 Da, | 2271.664551 | 4 | 595.3699951 | 595.3684795 |
| PWFKGWKVTR                | P10126 | 0.00118624 | n +17.03 Da,K +34.06 Da, | 2261.262695 | 3 | 463.9599915 | 463.9661959 |
| KQIDLSTVDLKKLR            | Q3TMX5 | 0          | n +34.06 Da,K +34.06 Da, | 2296.693848 | 4 | 449.0700073 | 449.0687469 |
| PKLKAFLESPEHVNRLAA        | F6RWR5 | 0          | n +17.03 Da,K +34.06 Da, | 2446.717529 | 3 | 734.7800293 | 734.7863132 |
| PFAHLPKSTFVLDEFKR         | Q9D8N0 | 0          | n +17.03 Da,K +34.06 Da, | 3232.369873 | 5 | 424.2600098 | 424.257673  |
| PWFKGWKVTR                | P10126 | 0          | n +17.03 Da,K +34.06 Da, | 2243.659668 | 4 | 348.2251892 | 348.226466  |
| PDVHFYIQAACKTGQIKEVER     | Q68FD5 | 0          | n +17.03 Da,K +34.06 Da, | 2232.394043 | 4 | 684.9000244 | 684.8995672 |
| MKETIMNQEKLAKLQQAQVR      | Q64152 | 0          | n +34.06 Da,K +34.06 Da, | 2298.993408 | 3 | 799.1699829 | 799.1660669 |
| TADGIVSHLKKQAGPASVPLR     | P27773 | 0          | n +34.06 Da,K +34.06 Da, | 2214.408936 | 4 | 562.6099854 | 562.6062633 |
| MKKKVAIIGAGVSLAAIR        | P97501 | 0          | n +34.06 Da,K +34.06 Da, | 2523.765137 | 3 | 673.8099976 | 673.8097711 |
| NKELDPVQKLFVDKIR          | P97450 | 0          | n +34.06 Da,K +34.06 Da, | 2997.241943 | 3 | 693.460022  | 693.4596845 |
| VPDKTVKWCAVSEHENTKCISFR   | Q92111 | 0          | n +34.06 Da,K +34.06 Da, | 2401.19043  | 4 | 732.6599731 | 732.6599354 |
| MKFQYKEDHPFEYR            | Q8R3R8 | 0.00224719 | n +34.06 Da,K +34.06 Da, | 2197.16748  | 4 | 505.7764282 | 505.7766049 |
| PSANMGALISKAHLEKVR        | Q8BH00 | 0          | n +17.03 Da,K +34.06 Da, | 2392.637207 | 5 | 402.2498474 | 402.2501868 |
| SLSNKLTLDKLDVKGKR         | P09411 | 0          | n +42.03 Da,K +34.06 Da, | 2334.047363 | 3 | 698.4699707 | 698.4703609 |
| PKGHELETPIEWIER           | Q8BHN3 | 0          | n +17.03 Da,K +34.06 Da, | 2184.121094 | 3 | 542.9907227 | 542.9911411 |
| ATKCTKCGPGYSTPLEAMKGP     | P17563 | 0          | n +42.03 Da,K +34.06 Da, | 2177.58252  | 4 | 639.3457031 | 639.3473349 |

|                                      |        |            |                          |             |   |             |             |
|--------------------------------------|--------|------------|--------------------------|-------------|---|-------------|-------------|
| PGVTVKDVNQEFVR                       | Q9CZX8 | 0          | n +17.03 Da,K +34.06 Da, | 2174.515625 | 3 | 589.6711426 | 589.6722488 |
| HKILQGELGRRALLQQALR                  | E9PX29 | 0.00118624 | n +42.03 Da,K +28.03 Da, | 3446.485107 | 4 | 582.6099854 | 582.6000204 |
| FANDATFEIKKCDLHR                     | P35486 | 0          | n +34.06 Da,K +34.06 Da, | 2171.737305 | 4 | 517.539978  | 517.5439743 |
| TGYGKDMVKVLHIQR                      | P25688 | 0.00224719 | n +42.03 Da,K +34.06 Da, | 2171.439941 | 5 | 371.8299866 | 371.8237197 |
| HGLNKNLGFSAAGREENIR                  | O88428 | 0          | n +42.03 Da,K +34.06 Da, | 2170.456299 | 4 | 551.5499878 | 551.5411279 |
| EFKHGKAPILIATDVASR                   | Q61656 | 0          | n +34.06 Da,K +34.06 Da, | 2170.3479   | 3 | 685.7700195 | 685.7651784 |
| SQAEFDKAAEEVKR                       | P31786 | 0          | n +42.03 Da,K +34.06 Da, | 2552.949951 | 2 | 859.4699707 | 859.4732303 |
| EFKHGKAPILIATDVASR                   | Q61656 | 0.03168317 | n +34.06 Da,K +34.06 Da, | 2168.388184 | 4 | 514.5800171 | 514.5757029 |
| LNLQEYQSKKLMSEHGVR                   | Q9Z2I8 | 0          | n +34.06 Da,K +34.06 Da, | 2211.586426 | 4 | 566.3300171 | 566.3335474 |
| TKDYQDFQHLNDNDHHLQR                  | P34927 | 0.00960512 | n +42.03 Da,K +34.06 Da, | 2163.071777 | 4 | 654.5592041 | 654.557507  |
| MKVELCSFSGYKIYPGHR                   | Q8BP67 | 0          | n +34.06 Da,K +34.06 Da, | 2885.303711 | 4 | 583.576355  | 583.5763829 |
| HMGITAENVAKKWQVSR                    | Q8CAY6 | 0          | n +34.06 Da,K +34.06 Da, | 2159.962402 | 4 | 515.0599976 | 515.0597913 |
| HQCLCEEYILERGQHCXSNDSLLGIEPKATSLRFSP | Q3V346 | 0.04966571 | n +34.06 Da,K +34.06 Da, | 4137.247559 | 6 | 739.5599976 | 739.5509878 |
| STQSAVSKAGAGAVVPKLSHLPR              | Q9DC70 | 0          | n +34.06 Da,K +34.06 Da, | 2149.725586 | 4 | 591.6199951 | 591.6209079 |
| ATSASSHLNKGIKQMY                     | P15105 | 0          | n +42.03 Da,K +34.06 Da, | 2149.54126  | 3 | 616.0107422 | 616.0103138 |
| RHVGDLGNVTAGKDGVANVSIEDR             | P08228 | 0          | n +34.06 Da,K +34.06 Da, | 2233.362549 | 4 | 637.5999756 | 637.6032164 |
| TGAKNLIISVKGIKGR                     | P62830 | 0.00118624 | n +34.06 Da,K +34.06 Da, | 2142.686768 | 5 | 391.6799927 | 391.6755123 |
| SGEESYKGFHFGPIHCVR                   | Q9Z1Z2 | 0          | n +34.06 Da,K +34.06 Da, | 2209.17334  | 4 | 568.289978  | 568.2969343 |
| TSDRPYSHALVAGIDRYPR                  | P61358 | 0          | n +34.06 Da,             | 2170.238281 | 4 | 552.789978  | 552.7987706 |
| PKGDHFLYTNGKCVILR                    | O88342 | 0          | n +17.03 Da,K +34.06 Da, | 2123.576416 | 5 | 421.4500122 | 421.4501868 |
| IAVEFAHHGVFYHQGCCVAASR               | P24549 | 0          | n +34.06 Da,             | 2423.314941 | 4 | 670.3300171 | 670.3286409 |
| MMGHRPVLVLSQNTKR                     | P80318 | 0          | n +42.03 Da,K +34.06 Da, | 2179.231934 | 4 | 486.5299988 | 486.5277055 |
| ATTHFETTCDDIKDIYKR                   | Q61598 | 0          | n +34.06 Da,K +34.06 Da, | 2373.290283 | 4 | 579.8099976 | 579.8151879 |
| FDKYHPGYFGKVGMR                      | P14115 | 0          | n +34.06 Da,K +34.06 Da, | 2113.127197 | 4 | 476.7799988 | 476.7738649 |
| MHHQSVLHSGYFHPLLR                    | P10518 | 0          | n +42.03 Da,             | 2658.906738 | 5 | 421.0168152 | 421.0167947 |
| VPNLHVMKAMQSLKSR                     | P63325 | 0          | n +34.06 Da,K +34.06 Da, | 2182.204102 | 5 | 389.0447083 | 389.0455239 |
| PPLKFMSVQRPGPYDRPGTAR                | Q9Z2X1 | 0          | n +17.03 Da,K +34.06 Da, | 2171.369141 | 5 | 485.0700073 | 485.0747443 |
| DKEKNLLHVTDTGVGMTR                   | P08113 | 0.00224719 | n +34.06 Da,K +34.06 Da, | 2108.196533 | 3 | 706.0800171 | 706.0808383 |
| WLHLPVGYHGR                          | P35505 | 0          | n +34.06 Da,             | 2198.747559 | 4 | 342.9500122 | 342.9491504 |
| PAIAQFSVQKVTQPQSDGSSSKVKVKVR         | Q61316 | 0          | n +17.03 Da,K +34.06 Da, | 2102.874023 | 5 | 605.7800293 | 605.7836427 |
| PKHEFSVDMTCEGCAEAVSR                 | O08997 | 0          | n +17.03 Da,K +34.06 Da, | 2200.272949 | 4 | 591.0259399 | 591.02782   |
| GLDMHTKPVIR                          | O35490 | 0          | n +34.06 Da,K +34.06 Da, | 2101.431396 | 4 | 356.2141113 | 356.2144177 |
| MKETIMNQEKLAQLQAQVR                  | Q64152 | 0          | n +34.06 Da,K +34.06 Da, | 2293.207764 | 5 | 479.8999939 | 479.9025507 |
| HLKPFETLLAQNR                        | F6RWRS | 0.02724521 | n +34.06 Da,K +34.06 Da, | 2455.913086 | 3 | 545.6699829 | 545.6719604 |
| SKPKSLEIIGAPFSKGQPR                  | Q61176 | 0          | n +34.06 Da,K +34.06 Da, | 2096.454834 | 4 | 544.8582764 | 544.8585858 |
| FANDATFEIKKCDLHR                     | P35486 | 0          | n +34.06 Da,K +34.06 Da, | 2096.077881 | 4 | 517.5430298 | 517.5439743 |
| STQSAVSKAGAGAVVPKLSHLPR              | Q9DC70 | 0          | n +34.06 Da,K +34.06 Da, | 2092.321045 | 5 | 473.5       | 473.4981816 |
| SKPKSLEIIGAPFSKGQPR                  | Q61176 | 0          | n +34.06 Da,K +34.06 Da, | 2087.202881 | 5 | 436.0882568 | 436.0883239 |
| ASGADSKGDDLSTAILKQKNRPNR             | Q01853 | 0          | n +42.03 Da,K +34.06 Da, | 2084.705322 | 4 | 672.3900146 | 672.3887405 |
| GTSDRPYSHALVAGIDRYPR                 | P61358 | 0          | n +34.06 Da,             | 2220.568359 | 4 | 567.0536499 | 567.0541367 |

|                                     |        |            |                          |             |   |             |             |
|-------------------------------------|--------|------------|--------------------------|-------------|---|-------------|-------------|
| MKLLTHNLLSSHVR                      | Q9DCG9 | 0          | n +34.06 Da,K +34.06 Da, | 2067.336426 | 4 | 430.0204468 | 430.0199067 |
| RVSQEHVVLTKFVEGAR                   | Q8C196 | 0          | n +34.06 Da,K +34.06 Da, | 2056.161377 | 5 | 424.8599854 | 424.8580466 |
| FANDATFEIKKCDLHR                    | P35486 | 0          | n +34.06 Da,K +34.06 Da, | 2055.010742 | 4 | 517.5499878 | 517.5439743 |
| HAHLDIEAFTMDR                       | P16460 | 0          |                          | 2696.320313 | 3 | 528.5925903 | 528.5926828 |
| PQGGQLQNIATGKHNLLGGWTKR             | P04227 | 0          | n +17.03 Da,K +34.06 Da, | 2052.559082 | 5 | 464.4761963 | 464.4763533 |
| PKPIPGNWNAGAGCHTNFSTKAMR            | P15105 | 0          | n +17.03 Da,K +34.06 Da, | 2051.359375 | 4 | 657.3499756 | 657.3508562 |
| TFMGHYLHEVAR                        | P07724 | 0          | n +34.06 Da,             | 2035.762573 | 4 | 374.4489136 | 374.4488207 |
| TRTHINYGVKGDVAVIR                   | Q8BMS1 | 0          | n +34.06 Da,K +34.06 Da, | 2025.932495 | 4 | 492.5499878 | 492.5509944 |
| AHYHDNYGKNDEVEFVR                   | P25688 | 0          | n +42.03 Da,K +34.06 Da, | 2092.913574 | 4 | 543.0109253 | 543.0106663 |
| MKLLTHNLLSSHVR                      | Q9DCG9 | 0          | n +34.06 Da,K +34.06 Da, | 2017.568115 | 5 | 344.2171936 | 344.2173806 |
| SLVIEHIQVKNKAPKMR                   | Q9CPR4 | 0          | n +34.06 Da,K +34.06 Da, | 2016.602783 | 5 | 393.8563538 | 393.8563528 |
| KATIPAALQAQESTEGPGTQDRPR            | Q9DBG1 | 0          | n +34.06 Da,K +34.06 Da, | 2015.564575 | 4 | 662.6199951 | 662.6163239 |
| GLKCIEEAIDKLSKR                     | P15105 | 0          | n +34.06 Da,K +34.06 Da, | 3263.950195 | 4 | 474.8099976 | 474.8119468 |
| PKPIPGNWNAGAGCHTNFSTKAMR            | P15105 | 0          | n +17.03 Da,K +34.06 Da, | 2012.216309 | 5 | 526.0800171 | 526.0821403 |
| TVHAITATQKTVDGSPGKLWR               | P16858 | 0          | n +34.06 Da,K +34.06 Da, | 2010.7771   | 5 | 474.4899902 | 474.4897418 |
| AGQSDKDKVYYTLEEIQKHKDSKS            | P56395 | 0          | n +42.03 Da,K +34.06 Da, | 2439.967041 | 5 | 602.75      | 602.7511102 |
| FANDATFEIKKCDLHR                    | P35486 | 0          | n +34.06 Da,K +34.06 Da, | 2001.573853 | 4 | 517.539978  | 517.5439743 |
| TKKYTPQVAMATVTALHR                  | Q91Y97 | 0          | n +34.06 Da,K +34.06 Da, | 3036.490479 | 4 | 562.5895996 | 562.589919  |
| PTKHAGPPFYVPSAELKR                  | O55060 | 0          | n +17.03 Da,K +34.06 Da, | 1996.299561 | 4 | 520.8099976 | 520.8151719 |
| STFSELFKKEHPDR                      | P40142 | 0          | n +34.06 Da,K +34.06 Da, | 1992.015747 | 4 | 456.5181885 | 456.519125  |
| SLSNKLTLDKLDVKGKR                   | P09411 | 0          | n +42.03 Da,K +34.06 Da, | 2308.607666 | 5 | 419.4845886 | 419.4851271 |
| MFNLMMKKDKDKDGGGR                   | Q9JMH9 | 0          | n +42.03 Da,K +34.06 Da, | 1983.339355 | 5 | 393.0383606 | 393.0382167 |
| SSGKFYGDLEKDKGLQTSQDAR              | P14211 | 0          | n +34.06 Da,K +34.06 Da, | 1982.190552 | 4 | 642.3699951 | 642.3659674 |
| KPKSLEIIGAPFSKGQPR                  | Q61176 | 0          | n +34.06 Da,K +34.06 Da, | 1979.428467 | 4 | 523.0999756 | 523.1005785 |
| AHGSVVKSSEDYAFPTYADRR               | P19783 | 0          | n +17.03 Da,K +34.06 Da, | 1977.291992 | 4 | 580.7999878 | 580.8040342 |
| MKLLTHNLLSSHVR                      | Q9DCG9 | 0.02446483 | n +34.06 Da,K +34.06 Da, | 1977.182617 | 5 | 344.2181702 | 344.2173806 |
| VHLTDAEKAASVCLWGKVNSEVGGALGR        | P02088 | 0          | n +34.06 Da,K +34.06 Da, | 4055.135742 | 4 | 818.4500122 | 818.4463587 |
| EDQKIGIEIIR                         | P63038 | 0.01062699 | n +34.06 Da,K +34.06 Da, | 1972.60376  | 4 | 386.7600098 | 386.7621232 |
| ISLEGVHVIDNREKHVLLGLR               | Q3UFK8 | 0.01582278 | n +34.06 Da,K +34.06 Da, | 2330.15918  | 4 | 617.1300049 | 617.1301407 |
| SWEKFFVHGVR                         | P11276 | 0          | n +34.06 Da,K +34.06 Da, | 1958.943604 | 4 | 328.9499207 | 328.9503839 |
| KDGVVLFKFDGR                        | P09103 | 0          | n +34.06 Da,K +34.06 Da, | 1946.561279 | 4 | 444.2900085 | 444.2938183 |
| IPAHPDPVFSSEHAHQVLR                 | P33587 | 0          | n +34.06 Da,             | 1981.64563  | 5 | 452.4446411 | 452.4436018 |
| TRTHINYGVKGDVAVIR                   | Q8BMS1 | 0          | n +34.06 Da,K +34.06 Da, | 1936.175781 | 4 | 492.5499878 | 492.5509944 |
| GPAGAGESKCPMLMVKVLDVAVR             | P07309 | 0          | n +34.06 Da,K +34.06 Da, | 3464.873047 | 4 | 565.0900269 | 565.0868492 |
| PSLPPFERPEAEAMCTSFKENPTTFMGHYLHEVAR | P07724 | 0          | n +34.06 Da,K +34.06 Da, | 3945.31958  | 6 | 691.6699829 | 691.6786376 |
| NRDIALLKLSR                         | P20918 | 0          | n +34.06 Da,K +34.06 Da, | 1912.786743 | 4 | 342.480011  | 342.4845911 |
| RVISLSGEHSIIGR                      | P08228 | 0          | n +34.06 Da,             | 1912.026733 | 4 | 390.2371521 | 390.2375511 |
| IPAHPDPVFSSEHAHQVLR                 | P33587 | 0          | n +34.06 Da,             | 1911.652466 | 5 | 452.4432373 | 452.4436018 |
| FKLDNQDFGDHATLKR                    | Q61247 | 0.02897103 | n +34.06 Da,K +34.06 Da, | 2188.501953 | 5 | 402.230011  | 402.2359605 |
| RVISLSGEHSIIGR                      | P08228 | 0.00224719 | n +34.06 Da,             | 1910.805298 | 3 | 519.9800415 | 519.980976  |

|                             |        |            |                          |             |   |             |             |
|-----------------------------|--------|------------|--------------------------|-------------|---|-------------|-------------|
| GTAVTSAKVAVNGVHLHYQR        | Q8R164 | 0          | n +34.06 Da,K +34.06 Da, | 1908.050781 | 3 | 726.0910034 | 726.0922478 |
| SDSRDPASDQMKQWKEQR          | P24270 | 0          | n +42.03 Da,K +34.06 Da, | 1907.758423 | 4 | 576.289978  | 576.2933863 |
| SNMEKHLFNLKFAAKELNR         | Q99LU0 | 0          | n +42.03 Da,K +34.06 Da, | 3281.852051 | 4 | 609.3587036 | 609.3585595 |
| SELHCDKLHVDPENFR            | P02088 | 0          | n +34.06 Da,K +34.06 Da, | 2098.184326 | 4 | 516.7710571 | 516.7705522 |
| GSVPTFKHLWR                 | Q8CHT0 | 0          | n +34.06 Da,K +34.06 Da, | 2228.304932 | 4 | 349.7200012 | 349.7187587 |
| TIHCDHLIEAQVGGKDLR          | Q99KI0 | 0          | n +34.06 Da,K +34.06 Da, | 2029.214844 | 4 | 565.5599976 | 565.5601254 |
| GTAVTSAKVAVNGVHLHYQR        | Q8R164 | 0          | n +34.06 Da,K +34.06 Da, | 1900.838745 | 4 | 544.8200073 | 544.8210049 |
| GGVVKGFKFFQKDR              | P17225 | 0          | n +34.06 Da,K +34.06 Da, | 1895.75354  | 4 | 438.0407104 | 438.0425317 |
| RQTGKTSIAIDIINQKR           | Q03265 | 0          | n +34.06 Da,K +34.06 Da, | 1894.563965 | 4 | 537.0900269 | 537.0945258 |
| TISQGAIEKVKDATR             | Q8C196 | 0.04444444 | n +34.06 Da,K +34.06 Da, | 1892.85083  | 4 | 430.519989  | 430.52695   |
| EHLSSFNVHTR                 | P25688 | 0          | n +34.06 Da,             | 1891.470703 | 4 | 377.7000122 | 377.7020727 |
| YTPGKKEDLYLKIQR             | P58252 | 0          | n +34.06 Da,K +34.06 Da, | 1888.745972 | 5 | 417.8699951 | 417.8734115 |
| LNLQEQSKKLMSEHGVR           | Q9Z2I8 | 0          | n +34.06 Da,K +34.06 Da, | 2171.202881 | 4 | 566.3300171 | 566.3335474 |
| AKIAKTHEDIEAQIR             | Q99NB9 | 0          | n +42.03 Da,K +34.06 Da, | 1883.316162 | 3 | 611.6981201 | 611.7003566 |
| AGKTTLLHMLKDDR              | Q9CQC9 | 0          | n +34.06 Da,K +34.06 Da, | 1877.328125 | 5 | 341.019989  | 341.0173504 |
| VHAFLIHLR                   | Q9D742 | 0.00118624 | n +34.06 Da,             | 1875.360352 | 4 | 310.9482117 | 310.9488847 |
| AAETVELHKLKLAELKQECLAR      | Q9D1J3 | 0          | n +42.03 Da,K +34.06 Da, | 3090.998291 | 3 | 898.8800049 | 898.8739002 |
| PTPGLTLGKKEDKLGIR           | Q07417 | 0          | n +17.03 Da,K +34.06 Da, | 1865.769165 | 5 | 389.269989  | 389.2649867 |
| TRTHINYGKGDVAVIR            | Q8BMS1 | 0          | n +34.06 Da,K +34.06 Da, | 1862.166016 | 4 | 492.5504456 | 492.5509944 |
| PHFIYLPKSKR                 | Q61703 | 0          | n +17.03 Da,K +34.06 Da, | 1861.197754 | 5 | 317.6099854 | 317.6152368 |
| CTSIITEDEKGHLLHGR           | Q9WV54 | 0          | n +34.06 Da,K +34.06 Da, | 1859.37915  | 3 | 678.710022  | 678.7072942 |
| PHFIYLPKSKR                 | Q61703 | 0          | n +17.03 Da,K +34.06 Da, | 1859.052246 | 4 | 396.7669983 | 396.7672269 |
| FKLDNQDFGDHATLKR            | Q61247 | 0          | n +34.06 Da,K +34.06 Da, | 2182.3125   | 4 | 502.5421448 | 502.5431316 |
| PAFEKVLKSHGQDYLVGNR         | P10648 | 0.03808594 | n +17.03 Da,K +34.06 Da, | 2416.356934 | 4 | 561.5800171 | 561.5799987 |
| DFDEEETEEKVPVKKSVR          | Q61937 | 0          | n +34.06 Da,K +34.06 Da, | 1855.888672 | 4 | 575.8400269 | 575.8377825 |
| PKIQQLVKEFFNGKEPSR          | P20029 | 0          | n +17.03 Da,K +34.06 Da, | 3342.18335  | 5 | 453.6900024 | 453.6863049 |
| IAVEFAHHGVFYHQGCCVAASR      | P24549 | 0          | n +34.06 Da,             | 2426.094971 | 4 | 670.328125  | 670.3286409 |
| ASQQDFENALNQVLLKKDPGNEVKLR  | Q9WUR2 | 0          | n +34.06 Da,K +34.06 Da, | 3571.514893 | 4 | 814         | 814.0004509 |
| GKFMKPGKVVLVLAGR            | P61358 | 0          | n +34.06 Da,K +34.06 Da, | 2357.69043  | 3 | 612.769165  | 612.7691353 |
| LSCKSEVEVKKIFR              | O35490 | 0.00763359 | n +34.06 Da,K +34.06 Da, | 1845.890503 | 4 | 465.5599976 | 465.557852  |
| MHHQSVLHSGYFHPLLR           | P10518 | 0          | n +42.03 Da,             | 2699.164307 | 5 | 421.019989  | 421.0167947 |
| PKYHVPLDEYSANLR             | Q9DB29 | 0          | n +17.03 Da,K +34.06 Da, | 1843.670898 | 3 | 606.6799927 | 606.6758818 |
| LYFHIGETEKR                 | Q8R1V4 | 0          | n +34.06 Da,K +34.06 Da, | 1838.708008 | 4 | 365.9689331 | 365.968774  |
| LREVVKIQEGKTTVIEGR          | Q99N85 | 0          | n +34.06 Da,K +34.06 Da, | 1836.412598 | 4 | 540.0999756 | 540.1008138 |
| STIGHYDINAHACVTGKPISQGGIHGR | P26443 | 0          | n +34.06 Da,K +34.06 Da, | 1989.910278 | 6 | 486.5899963 | 486.5956833 |
| SLSNKLTLDKLDVKGKR           | P09411 | 0          | n +42.03 Da,K +34.06 Da, | 2383.218506 | 4 | 524.0999756 | 524.1045898 |
| SGKFGDLEKDKLQTSQDAR         | P14211 | 0          | n +34.06 Da,K +34.06 Da, | 1829.214478 | 4 | 620.5999756 | 620.6079601 |
| TKDYQDFQHLDNDNDHHQLR        | P34927 | 0          | n +42.03 Da,K +34.06 Da, | 1827.376831 | 5 | 523.8499756 | 523.8474609 |
| SDSRDPASDQMKQWKEQR          | P24270 | 0          | n +42.03 Da,K +34.06 Da, | 1948.558594 | 4 | 576.289978  | 576.2933863 |
| TVVNKDVFRDPALKR             | P61358 | 0          | n +34.06 Da,K +34.06 Da, | 1823.713501 | 5 | 372.8439026 | 372.8441088 |



|                            |        |            |                          |             |   |             |             |
|----------------------------|--------|------------|--------------------------|-------------|---|-------------|-------------|
| PQKVNIIHGGAVSLGHPIGMSGAR   | Q8QZT1 | 0          | n +17.03 Da,K +34.06 Da, | 1823.497559 | 4 | 584.3311768 | 584.3325985 |
| PKVTQPEVDTPLR              | Q63880 | 0          | n +17.03 Da,K +34.06 Da, | 1821.751099 | 3 | 529.9816284 | 529.982423  |
| WEAGKPLSIEEIEVAPPKAHEVR    | P28474 | 0.00763359 | n +34.06 Da,K +34.06 Da, | 3935.166992 | 5 | 538.3200073 | 538.3181367 |
| YLSCKSEVEVKKIFR            | O35490 | 0          | n +34.06 Da,K +34.06 Da, | 2049.84375  | 5 | 405.2600098 | 405.2604028 |
| TRTHINYGVKGDVAVIR          | Q8BMS1 | 0          | n +34.06 Da,K +34.06 Da, | 1821.496216 | 4 | 492.5502319 | 492.5509944 |
| TEHYSPLSLLKQELQHR          | D3YVV0 | 0          | n +34.06 Da,K +34.06 Da, | 3282.992676 | 5 | 430.25      | 430.2507028 |
| LKFIDTTSKFGHGR             | P27659 | 0          | n +34.06 Da,K +34.06 Da, | 1808.363037 | 5 | 342.6199951 | 342.6176932 |
| TIGHYDINAHACVTGKPISQGGIHGR | P26443 | 0          | n +34.06 Da,K +34.06 Da, | 1975.689575 | 6 | 472.0906982 | 472.0903451 |
| PKLQEYLGKFRRLDFR           | Q6ZQ58 | 0.02251791 | n +31.05 Da,K +31.05 Da, | 2896.423828 | 4 | 565.0761108 | 565.0811598 |
| ITLEEMTKYKPEDELTAEKITEFCHR | P09103 | 0          | n +34.06 Da,K +34.06 Da, | 3937.418945 | 5 | 713.5900269 | 713.5842385 |
| ASVGTLAFDEYGRPFLLIKDQDR    | P80316 | 0          | n +42.03 Da,K +34.06 Da, | 4403.287598 | 3 | 896.4799805 | 896.4799088 |
| MKETIMNQEKLAKLQAQVR        | Q64152 | 0          | n +34.06 Da,K +34.06 Da, | 2331.644531 | 5 | 479.9019165 | 479.9025507 |
| LREVVKIQEGKTTVIEGR         | Q99N85 | 0          | n +34.06 Da,K +34.06 Da, | 1795.324219 | 4 | 540.0991211 | 540.1008138 |
| MEMKKKINMELKNR             | P97822 | 0          | n +42.03 Da,K +34.06 Da, | 2066.418457 | 4 | 493.5599976 | 493.5610745 |
| NRGNVVAEKISGQKVNEAACDIAR   | O35490 | 0.0055371  | n +34.06 Da,K +34.06 Da, | 2205.654541 | 5 | 553.9099731 | 553.9100586 |
| AVLWELHKPFTIEDIEVAPPKAHEVR | P00329 | 0          | n +34.06 Da,K +34.06 Da, | 4075.429688 | 5 | 626.1799927 | 626.1698049 |
| MEKPAASTEPPGSRPALGR        | Q9JMD3 | 0          | n +42.03 Da,K +34.06 Da, | 1784.521362 | 3 | 687.0300293 | 687.0319599 |
| DNKKLGEWVVLCKIDR           | P63323 | 0          | n +34.06 Da,K +34.06 Da, | 2653.643555 | 3 | 689.7600098 | 689.7612576 |
| DVAECDLVCTFFHPLL           | Q61194 | 0.0055371  | n +42.03 Da,             | 2343.674316 | 5 | 427.6099854 | 427.6077449 |
| LREVVKIQEGKTTVIEGR         | Q99N85 | 0          | n +34.06 Da,K +34.06 Da, | 1823.784302 | 5 | 432.2799988 | 432.2821063 |
| GLTDVYNKIHMGNCAENTAKKMNISR | Q8QZT1 | 0          | n +34.06 Da,K +34.06 Da, | 2955.582764 | 5 | 621.1500244 | 621.1451361 |
| GIFLYPANKKSPSGKLR          | Q9QXD6 | 0          | n +34.06 Da,K +34.06 Da, | 1771.396118 | 4 | 503.8399963 | 503.8386587 |
| AETTAKAWPHMAKVSVTGR        | Q8VC30 | 0          | n +34.06 Da,K +34.06 Da, | 1846.216309 | 5 | 429.458374  | 429.4566444 |
| LTPTHYLTKQDVER             | Q9DBG6 | 0          | n +34.06 Da,K +34.06 Da, | 1766.299683 | 4 | 443.0111694 | 443.0111707 |
| FGGSFTHQASVAKVVGKQGR       | O89023 | 0          | n +34.06 Da,K +34.06 Da, | 1764.784058 | 4 | 541.5800171 | 541.5775057 |
| PSNLQGVKQKHQAFEELSANSR     | P16546 | 0          | n +17.03 Da,K +34.06 Da, | 1764.409424 | 4 | 688.8800049 | 688.8848467 |
| GTAVTSAKVAVNGVHLHYQR       | Q8R164 | 0          | n +34.06 Da,K +34.06 Da, | 2027.075928 | 5 | 436.0499878 | 436.0582592 |
| ALSALSDLHAHKLR             | P01942 | 0          | n +34.06 Da,K +34.06 Da, | 1759.876587 | 4 | 400.75      | 400.7546017 |
| KEKNLLHVTDGVMTR            | P08113 | 0          | n +34.06 Da,K +34.06 Da, | 1758.569824 | 4 | 501.0550537 | 501.0557118 |
| LHVDVPKDVTRPTITTSDEPDTLYKR | Q80ZK0 | 0          | n +34.06 Da,K +34.06 Da, | 2885.413574 | 5 | 620.5599976 | 620.5574429 |
| PKHEFSVDMTCEGCAEAVSR       | O08997 | 0          | n +34.06 Da,K +34.06 Da, | 1754.508545 | 3 | 793.3699951 | 793.3785208 |
| FGGSFTHQASVAKVVGKQGR       | O89023 | 0          | n +34.06 Da,K +34.06 Da, | 1766.769531 | 5 | 433.4641724 | 433.4634598 |
| RGNYVAEKISGQKVNEAACDIAR    | O35490 | 0          | n +34.06 Da,K +34.06 Da, | 2135.96875  | 4 | 663.6239014 | 663.6250221 |
| ALKSWNETFHAR               | Q9DCX2 | 0.01966874 | n +34.06 Da,K +34.06 Da, | 1752.03064  | 4 | 382.7228088 | 382.7230358 |
| SQAEFDKAAEEVKR             | P31786 | 0          | n +42.03 Da,K +34.06 Da, | 1749.01355  | 3 | 573.3164673 | 573.3179124 |
| MEGYHKPDQKQLQALKDTANR      | P40142 | 0          | n +42.03 Da,K +34.06 Da, | 2197.278076 | 3 | 872.4799805 | 872.4868163 |
| GIVSHLKKQAGPASVPLR         | P27773 | 0.00224719 | n +34.06 Da,K +34.06 Da, | 1747.751831 | 3 | 654.0999756 | 654.1020131 |
| TIENVKAKIQDKEGIPPDQQR      | P0CG49 | 0.00960512 | n +34.06 Da,K +34.06 Da, | 1747.533447 | 4 | 636.6400146 | 636.6420685 |
| GFMIIHMGKMNR               | P58710 | 0          | n +34.06 Da,K +34.06 Da, | 1831.391968 | 4 | 348.1900024 | 348.1951705 |
| PQKVNIIHGGAVSLGHPIGMSGAR   | Q8QZT1 | 0          | n +17.03 Da,K +34.06 Da, | 1744.359375 | 4 | 584.3300171 | 584.3325985 |

|                                  |        |            |                          |             |   |             |             |
|----------------------------------|--------|------------|--------------------------|-------------|---|-------------|-------------|
| PQKVNHHGGAVSLGHPIGMSGAR          | Q8QZT1 | 0          | n +17.03 Da,K +34.06 Da, | 1742.680542 | 5 | 467.6676636 | 467.6675341 |
| TRTHINYGVKGDVAVIR                | Q8BMS1 | 0          | n +34.06 Da,K +34.06 Da, | 1738.637695 | 4 | 492.5515442 | 492.5509944 |
| MQSNKAFNLEKQNHTPR                | Q99K48 | 0          | n +42.03 Da,K +34.06 Da, | 1737.54126  | 4 | 539.039978  | 539.0443766 |
| PNIKIFSGSSHQDLSQKIADR            | Q9D7G0 | 0          | n +17.03 Da,K +34.06 Da, | 2276.354248 | 5 | 486.0799866 | 486.0825588 |
| PQSNLNDDGFTEVSVSKKQQR            | Q3TLH4 | 0          | n +17.03 Da,K +34.06 Da, | 1779.180786 | 5 | 508.2999878 | 508.297441  |
| TKDYQDFQHLDNDNDHHLQR             | P34927 | 0          | n +42.03 Da,K +34.06 Da, | 2237.96582  | 4 | 654.555603  | 654.557507  |
| RTKLPWDAVGR                      | P54869 | 0          | n +34.06 Da,K +34.06 Da, | 1894.238159 | 3 | 456.2900085 | 456.2911909 |
| SPSKESDELIFVNGKKVTER             | G3X982 | 0          | n +34.06 Da,K +34.06 Da, | 2708.342285 | 4 | 637.3849487 | 637.3838942 |
| PSCLFPACR                        | P16015 | 0.00960512 |                          | 1971.638062 | 2 | 554.2583008 | 554.2573389 |
| PSKTNVSGGAIALGHPLGGSGSR          | Q8BWT1 | 0.00867679 | n +17.03 Da,K +34.06 Da, | 1723.04248  | 3 | 724.4099731 | 724.4099764 |
| GVTKGAAELMQQKEATTEQQLR           | O35490 | 0          | n +17.03 Da,K +34.06 Da, | 1720.521606 | 4 | 626.3499756 | 626.3562333 |
| NKELDPVQKLFVDKIR                 | P97450 | 0          | n +34.06 Da,K +34.06 Da, | 2739.5979   | 4 | 520.3499756 | 520.3465825 |
| SSAAAESAALKVRPER                 | Q8BGT5 | 0          | n +34.06 Da,K +34.06 Da, | 1838.925049 | 4 | 446.2688293 | 446.2680737 |
| AELQEVQITEEKPLPGQTPETAKEAELAAR   | Q9QYG0 | 0          | n +42.03 Da,K +34.06 Da, | 3942.446533 | 3 | 1167.310059 | 1167.310409 |
| KNFDLRPGVIVR                     | Q3THS6 | 0          | n +34.06 Da,K +34.06 Da, | 2096.780273 | 4 | 371.2460022 | 371.2451409 |
| MEMKKKINMELKNR                   | P97822 | 0.0033557  | n +42.03 Da,K +34.06 Da, | 2038.234497 | 3 | 657.75      | 657.7456738 |
| FKTPEDAR                         | Q5H8C4 | 0.04081633 | K +28.03 Da,             | 1716.865845 | 2 | 510.2845154 | 510.2796516 |
| SPKGGGEPKGELEIAIKR               | P09671 | 0          | n +34.06 Da,K +34.06 Da, | 1712.556885 | 4 | 501.3299866 | 501.3296612 |
| DLFKGAKEHGAVAVER                 | Q9CZ44 | 0          | n +34.06 Da,K +34.06 Da, | 1717.8573   | 4 | 458.0299988 | 458.0336708 |
| ASGADSKGDDLSTAILKQKNRPNR         | Q01853 | 0          | n +42.03 Da,K +34.06 Da, | 2004.153809 | 4 | 672.3900146 | 672.3887405 |
| SPKGGGEPKGELEIAIKR               | P09671 | 0          | n +34.06 Da,K +34.06 Da, | 1702.997681 | 5 | 401.2600098 | 401.2651842 |
| MEGHDPKEPEQLR                    | B2RXM2 | 0          | n +42.03 Da,K +34.06 Da, | 1700.261475 | 3 | 547.9400024 | 547.9419702 |
| SLVLKFHTVR                       | P02762 | 0          | n +34.06 Da,K +34.06 Da, | 1765.11084  | 3 | 423.2884521 | 423.2888985 |
| SQFEQVTSNEDLPVPMENPYKEPLKCVLCEKR | Q8R2L5 | 0          | n +34.06 Da,K +34.06 Da, | 3241.664063 | 5 | 833.460022  | 833.4600366 |
| TEMKLEENKSLKNDLR                 | Q61335 | 0.00224719 | n +34.06 Da,K +34.06 Da, | 1694.951294 | 4 | 521.8226318 | 521.8227776 |
| GVAVLKVGGTSDVEVNEKKDR            | P63038 | 0          | n +34.06 Da,K +34.06 Da, | 1724.572388 | 4 | 584.8699951 | 584.8668741 |
| ALSTGEKGFYKGSFHR                 | P17742 | 0          | n +42.03 Da,K +34.06 Da, | 1729.346802 | 5 | 408.6330566 | 408.6254501 |
| PMGSSSFQHLKQLPNHR                | Q8VCR7 | 0          | n +17.03 Da,K +34.06 Da, | 1692.97998  | 5 | 403.8235779 | 403.8231429 |
| AGKPVLHYFDGR                     | P30115 | 0.00867679 | n +34.06 Da,K +34.06 Da, | 1691.197876 | 4 | 357.716095  | 357.7162162 |
| PGAKDVVHIDSEKDFR                 | Q921X9 | 0          | n +17.03 Da,K +34.06 Da, | 1690.979736 | 4 | 475.2799988 | 475.2758798 |
| PAYFQRPENALKR                    | P23116 | 0          | n +17.03 Da,K +34.06 Da, | 1690.871216 | 4 | 410.9923401 | 410.9927994 |
| VAPMKGQVCVVTGASR                 | Q99L04 | 0          | n +34.06 Da,K +34.06 Da, | 1699.934448 | 3 | 576.6699829 | 576.669234  |
| KAGLLEKLEKETEYDVR                | Q61176 | 0          | n +42.03 Da,K +34.06 Da, | 2689.762207 | 3 | 679.4329834 | 679.4210778 |
| ASDKMLKYALKER                    | Q9QXF8 | 0          | n +34.06 Da,K +34.06 Da, | 1684.584351 | 4 | 423.0317383 | 423.0314699 |
| PGAKDVVHIDSEKDFR                 | Q921X9 | 0          | n +17.03 Da,K +34.06 Da, | 1683.429932 | 5 | 380.4200134 | 380.4221591 |
| PEVQKDTKNVFPKIVR                 | P38647 | 0          | n +17.03 Da,K +34.06 Da, | 1682.192993 | 5 | 404.2672729 | 404.2671665 |
| FQVTKLFAEAVQKSR                  | Q8C196 | 0          | n +34.06 Da,K +34.06 Da, | 3318.567871 | 4 | 464.2984009 | 464.2978673 |
| ASSWVTHVEMGPPDPILGVTEAFKR        | P05202 | 0          | n +17.03 Da,K +34.06 Da, | 4197.963867 | 4 | 716.3800049 | 716.3772037 |
| TRTHINYGVKGDVAVIR                | Q8BMS1 | 0.01582278 | n +17.03 Da,K +34.06 Da, | 1677.390015 | 4 | 488.2999878 | 488.2931046 |
| MEVKPPPGRPPQDSGR                 | Q8BG05 | 0          | n +42.03 Da,K +34.06 Da, | 1674.185425 | 3 | 608.6589355 | 608.6596857 |

|                               |        |            |                          |             |   |             |             |
|-------------------------------|--------|------------|--------------------------|-------------|---|-------------|-------------|
| VEKGVYVCLIKVR                 | Q9D2F7 | 0.04966571 | n +31.05 Da,K +31.05 Da, | 2596.049805 | 4 | 407         | 407.0062372 |
| TSDSEKIHLDEKAFR               | Q93092 | 0          | n +34.06 Da,K +34.06 Da, | 1668.931885 | 5 | 376.4200134 | 376.4221441 |
| MEGYHKPDQKQLQALKDTANR         | P40142 | 0          | n +42.03 Da,K +34.06 Da, | 2174.406006 | 4 | 654.6199951 | 654.6169314 |
| ADLPALPGGPAGGTGELAKYGLPGVAQLR | O08600 | 0          | n +34.06 Da,K +34.06 Da, | 4199.546875 | 3 | 938.8800049 | 938.8764803 |
| AHGSVVKSEDYAFPTYADRR          | P19783 | 0          | n +34.06 Da,K +34.06 Da, | 1966.790649 | 4 | 585.0599976 | 585.0619239 |
| PKLDGVKEKALVSSVR              | P07724 | 0          | n +17.03 Da,K +34.06 Da, | 1663.557617 | 3 | 615.75      | 615.7525387 |
| SHYEEGPGKNLPPFVENKWR          | P17665 | 0          | n +34.06 Da,K +34.06 Da, | 2618.335205 | 4 | 619.8400269 | 619.8421655 |
| AEDIKTKIKNYKTAPFDSR           | P56391 | 0.02251791 | n +42.03 Da,K +34.06 Da, | 2659.017334 | 3 | 801.8200073 | 801.823352  |
| PQKVNIGHGGAVSLGHPIGMSGAR      | Q8QZT1 | 0          | n +17.03 Da,K +34.06 Da, | 1918.706787 | 5 | 467.6680908 | 467.6675341 |
| LNLQEYQSKKLMSEHGVR            | Q9Z2I8 | 0          | n +34.06 Da,K +34.06 Da, | 1846.650269 | 5 | 453.269989  | 453.2682932 |
| TRTHINYGKGDVAVIR              | Q8BMS1 | 0          | n +34.06 Da,K +34.06 Da, | 1780.209839 | 4 | 492.5509033 | 492.5509944 |
| AKHHPDLIFCR                   | P83870 | 0          | n +42.03 Da,K +34.06 Da, | 1650.031738 | 3 | 490.6018066 | 490.6013301 |
| LPGALSALSDLHAHKLR             | P01942 | 0          | n +34.06 Da,K +34.06 Da, | 2706.488525 | 3 | 623.0588379 | 623.0564743 |
| PGAKDVVHIDSEKDFR              | Q921X9 | 0.01966874 | n +17.03 Da,K +34.06 Da, | 1649.107422 | 4 | 475.2799988 | 475.2758798 |
| ERPPFVAYPHLR                  | P43024 | 0.00224719 | n +34.06 Da,             | 2253.32959  | 4 | 379.7200012 | 379.7215365 |
| VPDKTVKWCVAVSEHENTKICISFR     | Q921I1 | 0.00224719 | n +34.06 Da,K +34.06 Da, | 2152.848877 | 6 | 488.7776489 | 488.7757158 |
| KQIDLSTVDLKKLR                | Q3TMX5 | 0          | n +34.06 Da,K +34.06 Da, | 2302.018555 | 5 | 359.4599915 | 359.4564528 |
| ECNKLKEEISKMR                 | P38647 | 0          | n +34.06 Da,K +34.06 Da, | 1645.982422 | 4 | 451.030426  | 451.0300359 |
| ASDKMLKYALKER                 | Q9QXF8 | 0.00224719 | n +34.06 Da,K +34.06 Da, | 1644.324951 | 4 | 423.0314331 | 423.0314699 |
| TPGIHIGKELNMGQR               | P45952 | 0          | n +34.06 Da,K +34.06 Da, | 1643.838501 | 5 | 377.0400085 | 377.0375727 |
| GHSEFLKAASNLR                 | P27773 | 0          | n +34.06 Da,K +34.06 Da, | 1642.806641 | 4 | 375.2258606 | 375.225677  |
| PSLAEHWKSIR                   | O08601 | 0          | n +17.03 Da,K +34.06 Da, | 1636.929077 | 4 | 344.4599915 | 344.4583265 |
| TVKKIAIFGATGR                 | Q923D2 | 0          | n +34.06 Da,K +34.06 Da, | 1651.667969 | 3 | 488.6766663 | 488.676752  |
| PQKVNIGHGGAVSLGHPIGMSGAR      | Q8QZT1 | 0          | n +17.03 Da,K +34.06 Da, | 1920.459595 | 4 | 584.3334961 | 584.3325985 |
| RIIAAKDHASIQMNVAEVDR          | Q9CQR2 | 0.01966874 | n +34.06 Da,K +34.06 Da, | 2023.051147 | 4 | 577.0800171 | 577.0824962 |
| SQAEFDKAAEEVKR                | P31786 | 0          | n +42.03 Da,K +34.06 Da, | 1616.144409 | 3 | 573.3170776 | 573.3179124 |
| TTHTLVEKINYTGR                | P49429 | 0          | n +34.06 Da,K +34.06 Da, | 1614.721191 | 4 | 426         | 426.0046169 |
| PVQKLFVDKIR                   | P97450 | 0          | n +17.03 Da,K +34.06 Da, | 1793.59314  | 4 | 357.7497253 | 357.7500399 |
| TDKHWRHRRREFLLR               | Q8BI72 | 0.02251791 | n +17.03 Da,K +34.06 Da, | 2590.728271 | 5 | 401.0400085 | 401.038386  |
| NLPNNNTKRVHDNYVIR             | Q8C196 | 0          | n +14.02 Da,K +28.03 Da, | 1608.25354  | 4 | 525.789978  | 525.7800844 |
| LNLQEYQSKKLMSEHGVR            | Q9Z2I8 | 0          | n +34.06 Da,K +34.06 Da, | 2216.213623 | 5 | 453.2687378 | 453.2682932 |
| TPGIHIGKELNMGQR               | P45952 | 0          | n +34.06 Da,K +34.06 Da, | 1602.197144 | 5 | 377.0400085 | 377.0375727 |
| PGLTLGKKEDKLGIR               | Q07417 | 0          | n +17.03 Da,K +34.06 Da, | 1599.247681 | 5 | 349.6499939 | 349.644898  |
| SLVLFHTVR                     | P02762 | 0          | n +34.06 Da,K +34.06 Da, | 1739.401855 | 4 | 317.7200012 | 317.718493  |
| SFSGYKIYPGHGR                 | Q8BP67 | 0          | n +34.06 Da,K +34.06 Da, | 1598.376343 | 4 | 384.970459  | 384.970311  |
| MKNPFHAHLAEPLDAAQPGKR         | P28271 | 0          | n +34.06 Da,K +34.06 Da, | 2805.681396 | 4 | 574.0895386 | 574.0888147 |
| NTKRVHDNYVIR                  | Q8C196 | 0          | n +34.06 Da,K +34.06 Da, | 1591.323242 | 3 | 525.3088379 | 525.3089106 |
| APAGILNGKLVSAQIR              | Q922D8 | 0          | n +34.06 Da,K +34.06 Da, | 2681.780762 | 3 | 559.3699951 | 559.3666485 |
| SSPPEGKLETKAGHPPAVKAGGMR      | Q91XC8 | 0          | n +42.03 Da,K +34.06 Da, | 1580.748901 | 5 | 510.0982971 | 510.0979846 |
| PAPATTF AHL DATTVLSR          | P56480 | 0          | n +17.03 Da,             | 3227.825684 | 3 | 629.3499756 | 629.3442029 |

|                                 |        |            |                          |             |   |             |             |
|---------------------------------|--------|------------|--------------------------|-------------|---|-------------|-------------|
| GKPVLYHFDGR                     | P30115 | 0          | n +34.06 Da,K +34.06 Da, | 1578.84668  | 4 | 339.9567871 | 339.9569377 |
| MVNDAEKFAEEDKLLKER              | P20029 | 0.04816956 | n +42.03 Da,K +34.06 Da, | 2919.700439 | 4 | 590.3400269 | 590.3466172 |
| PSGTSQCEDGSAGGFQHLDMHSEKR       | Q91WT9 | 0          | n +17.03 Da,K +34.06 Da, | 1591.252441 | 5 | 554.6565552 | 554.6573797 |
| PLAKDLLHPSPEEEKR                | Q6ZWU9 | 0          | n +17.03 Da,K +34.06 Da, | 1556.921631 | 4 | 486.7955017 | 486.7954424 |
| TPPQPIKVPQFIPPPR                | Q6ZPK0 | 0.0055371  | n +42.03 Da,K +34.06 Da, | 2446.121094 | 5 | 378.4299927 | 378.4311694 |
| TFSELFKKEHPDR                   | P40142 | 0.00960512 | n +34.06 Da,K +34.06 Da, | 1641.051147 | 4 | 434.7615051 | 434.7611177 |
| AGQSDKDKVYTTLEEIQKHKDSK         | P56395 | 0          | n +42.03 Da,K +34.06 Da, | 2449.231689 | 5 | 585.3438721 | 585.3447044 |
| GLFSGDPNWFPPKSKENPR             | Q9WVA4 | 0          | n +34.06 Da,K +34.06 Da, | 2560.266846 | 5 | 468.8800049 | 468.8812595 |
| AHRFPALTPEQKKEELSEIAQR          | Q91Y97 | 0          | n +42.03 Da,K +34.06 Da, | 3152.158447 | 5 | 512.6997681 | 512.6993868 |
| TMVVHEKQDDLGGGNEESTKTGNAGSR     | P08228 | 0.04966571 | n +42.03 Da,K +34.06 Da, | 1547.292358 | 5 | 618.7299805 | 618.7261583 |
| FDEEETEKVVPVKKSVR               | Q61937 | 0          | n +34.06 Da,K +34.06 Da, | 1544.61792  | 5 | 437.8699951 | 437.8662925 |
| PLAKDLLHPSPEEEKR                | Q6ZWU9 | 0          | n +17.03 Da,K +34.06 Da, | 1541.744995 | 5 | 389.6400146 | 389.6378092 |
| NNTKFFVHDNYVIR                  | Q8C196 | 0          | n +34.06 Da,K +34.06 Da, | 1539.931274 | 3 | 563.3200073 | 563.32322   |
| PLIPPLPPR                       | Q12384 | 0.02446483 | n +34.06 Da,             | 2200.381592 | 3 | 377.5812378 | 377.5884671 |
| TKFVHDNYVIR                     | Q8C196 | 0          | n +34.06 Da,K +34.06 Da, | 1533.874634 | 2 | 730.4400024 | 730.4382636 |
| PQAIHWIDILTGHHKR                | Q8JZQ9 | 0          | n +17.03 Da,K +34.06 Da, | 3708.718262 | 4 | 494.3200073 | 494.3228982 |
| PHFNDILGQHSR                    | O54833 | 0          | n +17.03 Da,             | 1522.659546 | 4 | 360.1900024 | 360.190354  |
| MDFQHRPGGKTGSGGVASSSESNR        | Q62203 | 0          | n +42.03 Da,K +34.06 Da, | 1518.610596 | 4 | 632.0599976 | 632.0557084 |
| TVHAITATQKTVDGSPGKLR            | P16858 | 0.00224719 | n +34.06 Da,K +34.06 Da, | 2013.942627 | 4 | 592.8599854 | 592.8603581 |
| PAPLQHQQVDIYQKR                 | P40142 | 0          | n +17.03 Da,K +34.06 Da, | 1514.373047 | 4 | 436.7600098 | 436.7586317 |
| PGIHIGKKELNMGQR                 | P45952 | 0          | n +17.03 Da,K +34.06 Da, | 1504.976563 | 4 | 441.5245667 | 441.5253372 |
| SKKVDQSVANEISQKAAESQGR          | Q61733 | 0          | n +34.06 Da,K +34.06 Da, | 1503.686035 | 5 | 519.5100098 | 519.5101586 |
| PLAKDLLHPSPEEEKR                | Q6ZWU9 | 0          | n +17.03 Da,K +34.06 Da, | 1501.033081 | 5 | 389.6400146 | 389.6378092 |
| RRLEDILTGLGLR                   | Q9CYW4 | 0.00763359 | n +34.06 Da,             | 3700.292236 | 3 | 515.9937134 | 515.9931044 |
| APPWKDSKKFKDAPDGPTVVLTVDGR      | Q80YCS | 0          | n +34.06 Da,K +34.06 Da, | 2762.580811 | 4 | 749.4500122 | 749.4591584 |
| VDADNNPAAPARSWKRKMPKQR          | Q9CVN6 | 0.02897103 | n +42.03 Da,K +34.06 Da, | 1477.89978  | 5 | 536.9099731 | 536.9120804 |
| SGKHIGVCISVANNR                 | Q7TMK9 | 0.0055371  | K +28.03 Da,             | 1469.708252 | 3 | 556.6455688 | 556.638515  |
| AAQESLHVKTPLR                   | Q8VBT2 | 0          | n +42.03 Da,K +34.06 Da, | 1955.698364 | 3 | 509.3027954 | 509.3018267 |
| SSPSAKDIKILDSVGIADDDR           | P99027 | 0          | n +34.06 Da,K +34.06 Da, | 3899.242188 | 3 | 865.8499756 | 865.8431414 |
| TRVSQEHPVVLTKFVEGAR             | Q8C196 | 0          | n +34.06 Da,K +34.06 Da, | 2173.114014 | 5 | 445.0700073 | 445.0675825 |
| VRMNVLADALKSINNAEKR             | P62245 | 0          | n +34.06 Da,K +34.06 Da, | 3388.439941 | 5 | 449.6799927 | 449.6799299 |
| PEFTLPVHFYGR                    | Q9WUB3 | 0.00659341 | n +42.03 Da,             | 3930.58667  | 3 | 502.2557373 | 502.2576285 |
| AGKFASEITPITISVKGKPDVVVKEDEEYKR | Q8QZT1 | 0          | n +34.06 Da,K +34.06 Da, | 2879.942627 | 6 | 607.210022  | 607.2121359 |
| PNASEPKHLLVMKGAPEP              | Q8VDN2 | 0          | n +17.03 Da,K +34.06 Da, | 1443.807495 | 5 | 412.6496277 | 412.6491698 |
| NKELDPVQKLFVDKIR                | P97450 | 0          | n +34.06 Da,K +34.06 Da, | 2998.974121 | 4 | 520.3499756 | 520.3465825 |
| KTLKGLNSDSVTEETLR               | Q8C196 | 0          | n +34.06 Da,K +34.06 Da, | 1864.325439 | 3 | 665.0800171 | 665.0723374 |
| LKHPEALDEETEHDYQNH              | P08101 | 0.03546798 | n +34.06 Da,K +34.06 Da, | 2051.46875  | 4 | 597.2999878 | 597.3041142 |
| GKDFQGSGLKVLAR                  | Q61545 | 0          | n +34.06 Da,K +34.06 Da, | 1435.319824 | 4 | 443.3022766 | 443.3031803 |
| PVILAGNDQKKKYLGR                | P45952 | 0          | n +17.03 Da,K +34.06 Da, | 1433.556396 | 5 | 410.269989  | 410.2715261 |
| GKDFQGSGLKVLAR                  | Q61545 | 0          | n +34.06 Da,K +34.06 Da, | 1431.686768 | 5 | 354.8442078 | 354.8439995 |

|                                |        |            |                          |             |   |             |             |
|--------------------------------|--------|------------|--------------------------|-------------|---|-------------|-------------|
| ISFHLPVNSR                     | Q9D1D4 | 0          | n +34.06 Da,             | 2507.607666 | 3 | 401.9100037 | 401.9067477 |
| MKNPFAHLAEPLDAAQPGKR           | P28271 | 0          | n +34.06 Da,K +34.06 Da, | 2794.750977 | 5 | 459.4730225 | 459.472507  |
| PEHNDFLKLRL                    | P42208 | 0.01880878 | n +17.03 Da,K +34.06 Da, | 1507.069092 | 4 | 330.7000122 | 330.6977767 |
| EAQLATFMKKEKR                  | P31725 | 0          | n +34.06 Da,K +34.06 Da, | 1425.71167  | 3 | 572.7113647 | 572.7098341 |
| IPKDKSEKTAWTFSR                | Q9CPU0 | 0          | n +34.06 Da,K +34.06 Da, | 1420.942505 | 4 | 483.3099976 | 483.3071916 |
| KKAEAGAGSATEFQFR               | P63325 | 0.0055371  | n +34.06 Da,K +34.06 Da, | 1419.735718 | 3 | 600.6900024 | 600.6881574 |
| VDADNNPAAPARSWKRKMPKQR         | Q9CVN6 | 0.0254065  | n +42.03 Da,K +34.06 Da, | 1416.681885 | 4 | 670.8900146 | 670.8882814 |
| AELKGLDVLDSLVIHQVKNKAPKMR      | Q9CPR4 | 0          | n +34.06 Da,K +34.06 Da, | 3488.821045 | 6 | 490.8076172 | 490.8064541 |
| MQPASAKWYDRR                   | Q9R0Q7 | 0.00118624 | n +34.06 Da,K +34.06 Da, | 1407.746704 | 3 | 526.2950439 | 526.2944955 |
| GLLTPTLKAARPELR                | P41216 | 0.02724521 | n +34.06 Da,K +34.06 Da, | 1884.130737 | 4 | 449.5599976 | 449.5648721 |
| PKVKEALSPIKFNR                 | Q8CHR6 | 0          | n +17.03 Da,K +34.06 Da, | 1562.571411 | 5 | 350.0400085 | 350.0438019 |
| GKEKTHINIVVIGHVDSGKSTTTG       | P10126 | 0.00118624 | n +42.03 Da,K +34.06 Da, | 1754.179077 | 5 | 525.3200073 | 525.3120225 |
| FDRDDVALEGVGHFFR               | P29391 | 0          | n +34.06 Da,             | 3615.602539 | 4 | 479.25      | 479.2483819 |
| MFNLMMKKDKDKDGGGR              | Q9JMH9 | 0          | n +42.03 Da,K +34.06 Da, | 2061.706299 | 4 | 491.0456543 | 491.0459517 |
| SSVEYEPKEKTFDKILIANR           | Q91ZA3 | 0          | n +34.06 Da,K +34.06 Da, | 2606.715088 | 3 | 835.1799927 | 835.1741621 |
| MQPASAKWYDRR                   | Q9R0Q7 | 0          | n +34.06 Da,K +34.06 Da, | 1400.662598 | 4 | 394.973114  | 394.9726907 |
| SEPEIPK GIR                    | Q9WTP6 | 0          | n +34.06 Da,K +34.06 Da, | 1601.663696 | 3 | 398.5895996 | 398.5890141 |
| AIGTGKTATPQQAQEVHEKLR          | P17751 | 0          | n +34.06 Da,K +34.06 Da, | 1389.491089 | 5 | 473.8900146 | 473.8867576 |
| PQKVNIGHGGAIVSLGHPIGMSGAR      | Q8QZT1 | 0          | n +17.03 Da,K +34.06 Da, | 1960.714233 | 4 | 584.3324585 | 584.3325985 |
| KNELVQKAKLAEQAER               | P63101 | 0.01582278 | n +34.06 Da,K +34.06 Da, | 1376.326416 | 4 | 498.5799866 | 498.5784734 |
| SKPPPKPVKPGQVKVFR              | Q62422 | 0.00659341 | n +42.03 Da,K +34.06 Da, | 1375.951294 | 4 | 517.6099854 | 517.6083048 |
| RTFEESFQKALR                   | Q8C196 | 0          | n +34.06 Da,K +34.06 Da, | 2090.02124  | 4 | 395.7399902 | 395.7361433 |
| TVGKSSKMLQHIDYR                | P27048 | 0          | n +34.06 Da,K +34.06 Da, | 1368.139404 | 3 | 622.3800049 | 622.3769258 |
| RLFAYPDTHR                     | P24270 | 0.00659341 | n +34.06 Da,             | 1421.051025 | 4 | 328.1900024 | 328.1860582 |
| PDDVPHGHITSLAVKR               | Q3UX61 | 0.01781971 | n +17.03 Da,K +34.06 Da, | 1363.864014 | 5 | 359.4100037 | 359.4116365 |
| DLSTAILKQKNRPNR                | Q01853 | 0.00224719 | n +34.06 Da,K +34.06 Da, | 1519.807983 | 4 | 464.8032532 | 464.8035826 |
| SEDKDKEGKPLLKAVMR              | P58252 | 0          | n +34.06 Da,K +34.06 Da, | 1360.946899 | 5 | 423.6799927 | 423.6805948 |
| MQPASAKWYDRR                   | Q9R0Q7 | 0          | n +34.06 Da,K +34.06 Da, | 1359.52063  | 4 | 394.9700012 | 394.9726907 |
| SLVIEHQVKNKAPKMR               | Q9CPR4 | 0          | n +34.06 Da,K +34.06 Da, | 2019.608032 | 4 | 492.0700073 | 492.0686218 |
| SCKSEVEVKKIFR                  | O35490 | 0          | n +34.06 Da,K +34.06 Da, | 1359.126343 | 5 | 350.0316467 | 350.0309241 |
| GKFMKPGKVVVLVLAGR              | P61358 | 0          | n +34.06 Da,K +34.06 Da, | 2364.840576 | 4 | 459.8283691 | 459.8286706 |
| EAQLATFMKKEKR                  | P31725 | 0          | n +34.06 Da,K +34.06 Da, | 1410.885864 | 4 | 429.7799988 | 429.7841947 |
| SETAPAAPAAPAPVEKTPVKKKAKKTGAAA | P43277 | 0          | n +42.03 Da,K +34.06 Da, | 1357.547485 | 5 | 627.4099731 | 627.4119012 |
| PSGTSQCEDGSAGGFQHLDMHSEKR      | Q91WT9 | 0          | n +17.03 Da,K +34.06 Da, | 1592.234863 | 4 | 693.0696411 | 693.0699055 |
| SQKHIDFSLR                     | Q6ZWN5 | 0          | n +34.06 Da,K +34.06 Da, | 1346.030884 | 3 | 433.6004639 | 433.5999131 |
| KDGVVLFKFDDEGR                 | P09103 | 0          | n +34.06 Da,K +34.06 Da, | 1934.756836 | 5 | 355.6400146 | 355.6365099 |
| TKSDRPELTGAKVVVSGGR            | Q99LC5 | 0          | n +34.06 Da,K +34.06 Da, | 1345.254272 | 4 | 515.5744629 | 515.5734262 |
| SHTDVKVPDFSDYR                 | Q9CR68 | 0          | n +34.06 Da,K +34.06 Da, | 2388.10498  | 3 | 578.6419678 | 578.6425073 |
| FKGIGKSSAADKVVAEIR             | P51660 | 0          | n +34.06 Da,K +34.06 Da, | 2260.937012 | 4 | 518.0900269 | 518.090211  |
| SRDPASDQMKQWKEQR               | P24270 | 0          | n +34.06 Da,K +34.06 Da, | 1333.395264 | 4 | 523.7928467 | 523.791781  |

|                             |        |            |                          |             |   |             |             |
|-----------------------------|--------|------------|--------------------------|-------------|---|-------------|-------------|
| SSAASSKELLMKLR              | Q9CZR8 | 0          | n +34.06 Da,K +34.06 Da, | 1987.945679 | 4 | 406.5100098 | 406.5144194 |
| RVSFELFADKVPKTAENFR         | P17742 | 0          | n +34.06 Da,K +34.06 Da, | 3325.218018 | 4 | 589.8499756 | 589.8522673 |
| SLVLKFHTVR                  | P02762 | 0          | n +34.06 Da,K +34.06 Da, | 1780.317383 | 4 | 317.7200012 | 317.718493  |
| PKLKAFLESPEHVNRPLAAC        | F6RWR5 | 0          | K +28.03 Da,             | 2465.070313 | 3 | 787.789978  | 787.7752322 |
| AHRFPALTPEQKKEELSEIAQR      | Q91Y97 | 0          | n +42.03 Da,K +34.06 Da, | 3070.619141 | 3 | 853.8200073 | 853.8274604 |
| SCKSEVEVKKIFR               | O35490 | 0.00224719 | n +34.06 Da,K +34.06 Da, | 1318.867676 | 5 | 350.0299988 | 350.0309241 |
| FVLLGLTETPVLR               | Q7TRX3 | 0.00118624 | n +42.03 Da,             | 1317.338013 | 3 | 500.6400146 | 500.632584  |
| TTVHVGIHPSKVVITR            | P61255 | 0          | n +34.06 Da,K +34.06 Da, | 1787.29834  | 5 | 363.2399902 | 363.2356323 |
| MDQQTQHPSKAAQPLR            | Q9JL3  | 0.00224719 | n +42.03 Da,K +34.06 Da, | 1312.262939 | 3 | 595.3200073 | 595.315919  |
| TWISMGQEDEKKKR              | P11725 | 0          | n +34.06 Da,K +34.06 Da, | 1310.375366 | 4 | 468.7900085 | 468.7884717 |
| GTTVHVGIHPSKVVITR           | P61255 | 0          | n +34.06 Da,K +34.06 Da, | 1591.640991 | 5 | 374.6400146 | 374.6399252 |
| KFVHDNYVIR                  | Q8C196 | 0          | n +34.06 Da,K +34.06 Da, | 1310.087646 | 3 | 453.61203   | 453.6120415 |
| PLAKDLLHPSPEEEKR            | Q6ZWU9 | 0          | n +17.03 Da,K +34.06 Da, | 1516.141113 | 4 | 486.7947083 | 486.7954424 |
| IASEDAVKKHNFPTPLAR          | Q8BWT1 | 0.01781971 | n +34.06 Da,K +34.06 Da, | 1718.340088 | 4 | 500.5595398 | 500.5600529 |
| PKSVSDYDGLKSSFKR            | P09103 | 0          | n +17.03 Da,K +34.06 Da, | 1751.780396 | 5 | 387.4400024 | 387.4388628 |
| PSGTYHAWKANAIGR             | Q9CWH6 | 0.00960512 | n +17.03 Da,K +34.06 Da, | 1300.206909 | 4 | 420.7399902 | 420.7364279 |
| PLAKDLLHPSPEEEKR            | Q6ZWU9 | 0          | n +17.03 Da,K +34.06 Da, | 1521.463379 | 3 | 648.7244873 | 648.724831  |
| ADCFEKASKAKLEPER            | O09173 | 0          | n +34.06 Da,K +34.06 Da, | 1298.029297 | 4 | 504.5499878 | 504.5530328 |
| PLAKDLLHPSPEEEKR            | Q6ZWU9 | 0          | n +17.03 Da,K +34.06 Da, | 1582.90332  | 5 | 389.6400146 | 389.6378092 |
| DIISHHLPR                   | Q9DBA8 | 0.03634578 | n +34.06 Da,             | 1273.11853  | 3 | 374.5588684 | 374.5594593 |
| LAFIAHPKLGKR                | P47915 | 0          | n +42.03 Da,K +34.06 Da, | 1908.377319 | 4 | 366         | 365.9988711 |
| ITAHLVHELRL                 | Q8BWT1 | 0.02724521 |                          | 1264.567017 | 4 | 304.9342041 | 304.9344754 |
| EHSDELMLQHLGASKR            | P99025 | 0          | n +34.06 Da,K +34.06 Da, | 1264.459473 | 4 | 476.5079041 | 476.5086324 |
| MDALDKVLKPKTKR              | Q9JJ80 | 0          | n +42.03 Da,K +34.06 Da, | 2518.543457 | 4 | 456.0599976 | 456.0630358 |
| TRVIWGVTR                   | O55142 | 0          | n +34.06 Da,K +34.06 Da, | 1259.28772  | 4 | 321.7200012 | 321.72003   |
| RTRPTVAAGAVGLAQR            | P45952 | 0          | n +34.06 Da,             | 1258.374878 | 3 | 553.3383179 | 553.3392748 |
| TGSTQVGLIKEAAGKSNLKR        | P24549 | 0.04966571 | n +34.06 Da,K +34.06 Da, | 2167.292236 | 6 | 393.6000061 | 393.6022533 |
| PATEEVICHVEEGDKADVDKAVKAAR  | O35945 | 0          | n +17.03 Da,K +34.06 Da, | 2869.276611 | 5 | 592.1300049 | 592.1319657 |
| SLYKNKEIFLR                 | P08113 | 0          | n +34.06 Da,K +34.06 Da, | 1882.943237 | 4 | 379         | 379.0053871 |
| KGDAGVKELDSLKSDR            | Q80XN0 | 0          | n +34.06 Da,K +34.06 Da, | 1424.172974 | 4 | 464.2999878 | 464.2955528 |
| EKHGSWGSGLDMHTKPWIR         | O35490 | 0          | n +42.03 Da,K +34.06 Da, | 2841.625977 | 5 | 467.2600098 | 467.2516564 |
| FKVVGQEGKSHYEVIR            | Q99KK7 | 0          | n +34.06 Da,K +34.06 Da, | 1208.408936 | 5 | 373.8299866 | 373.8283919 |
| MAPVAGKKAKKGLER             | O35490 | 0          | n +42.03 Da,K +34.06 Da, | 1280.579834 | 4 | 469.5799866 | 469.5775816 |
| TMVVHEKQDDLKGGNEESTKTGNAGSR | P08228 | 0          | n +42.03 Da,K +34.06 Da, | 1202.312988 | 5 | 618.7299805 | 618.7261583 |
| AKVEQVLSLEPQHELKFR          | Q9QY76 | 0          | n +42.03 Da,K +34.06 Da, | 3532.101318 | 4 | 566.0865479 | 566.0876758 |
| FKVVGQEGKSHYEVIR            | Q99KK7 | 0.00118624 | n +34.06 Da,K +34.06 Da, | 1248.873169 | 4 | 467.0338745 | 467.0336708 |
| LTPHYLTKQDVER               | Q9DBG6 | 0          | n +34.06 Da,K +34.06 Da, | 1725.852417 | 4 | 443.0111389 | 443.0111707 |
| SEAAPAAPAAAPAEKAPAKKK       | P15864 | 0          | n +42.03 Da,K +34.06 Da, | 1198.275879 | 4 | 563.3599854 | 563.3586846 |
| SYKIGDKWR                   | P11276 | 0.04267701 | n +34.06 Da,K +34.06 Da, | 1298.354736 | 4 | 314.4599915 | 314.4568012 |
| TDGMVKILGHKSTDR             | O08749 | 0.0033557  | n +34.06 Da,K +34.06 Da, | 1195.69043  | 5 | 352.8200073 | 352.8174962 |

|                                      |        |            |                          |             |   |             |             |
|--------------------------------------|--------|------------|--------------------------|-------------|---|-------------|-------------|
| ADCFEKASKAKLEPER                     | O09173 | 0          | n +34.06 Da,K +34.06 Da, | 1280.782959 | 5 | 403.8432007 | 403.8438815 |
| RFAQLCEEHGILR                        | B5X0G2 | 0          | n +34.06 Da,             | 2035.980957 | 4 | 416.480011  | 416.4793811 |
| PKPIPGNWNGAGCHTNFSTKAMR              | P15105 | 0          | n +17.03 Da,K +34.06 Da, | 2053.259766 | 5 | 526.0825806 | 526.0821403 |
| NKELDPVQKLFVDKIR                     | P97450 | 0          | n +17.03 Da,K +34.06 Da, | 2935.720947 | 3 | 687.7844238 | 687.7824982 |
| CLNYILAQKPDRLR                       | Q3U0V2 | 0.00224719 | n +14.02 Da,K +28.03 Da, | 1305.72229  | 4 | 451.2600098 | 451.258093  |
| STFAVDGKDCKVNKEVER                   | Q9D172 | 0.01966874 | n +34.06 Da,K +34.06 Da, | 1352.476685 | 4 | 555.3242798 | 555.3256846 |
| NKELDPVQKLFVDKIR                     | P97450 | 0          | n +34.06 Da,K +34.06 Da, | 2996.798096 | 5 | 416.480011  | 416.4787213 |
| SEETKQNEAFSLTAKGKGR                  | P01027 | 0          | n +34.06 Da,K +34.06 Da, | 1174.847412 | 5 | 444.269043  | 444.2687517 |
| SEVEVKKIFR                           | O35490 | 0          | n +34.06 Da,K +34.06 Da, | 1419.40918  | 4 | 334.980011  | 334.9816463 |
| SVSGKKFPVLNPATEEVICHVEEGDKADVDAVKAAR | P24549 | 0          | n +34.06 Da,K +34.06 Da, | 3722.806885 | 7 | 600.6400146 | 600.6418034 |
| ASQTEGELKVTQVLKEKFPR                 | Q8CEI1 | 0          | n +34.06 Da,K +34.06 Da, | 2811.372803 | 5 | 485.7099915 | 485.7084916 |
| EWNPNVKEIKVLQR                       | P51557 | 0.02446483 | n +17.03 Da,K +34.06 Da, | 2441.174072 | 4 | 460.2799988 | 460.2887898 |
| ADTDGMVKILGHKSTDR                    | O08749 | 0          | n +34.06 Da,K +34.06 Da, | 1766.564819 | 4 | 487.2847595 | 487.2860657 |
| SLKAWLDGHSR                          | Q78JT3 | 0.03729146 | n +34.06 Da,K +34.06 Da, | 2131.439453 | 4 | 335.2000122 | 335.2044787 |
| STFHRPELVR                           | Q91WT7 | 0.00224719 | n +34.06 Da,             | 1148.669189 | 4 | 319.6902466 | 319.6899707 |
| PHEELPSLQRPR                         | Q3UQ44 | 0.04081633 | n +17.03 Da,             | 1396.491577 | 4 | 369.7087708 | 369.7086453 |
| INAHACVTGKPISSGGIHR                  | P26443 | 0          | n +34.06 Da,K +34.06 Da, | 1142.536499 | 4 | 536.0570679 | 536.0562811 |
| PKCPKCDKEVYFAER                      | P63254 | 0          | n +17.03 Da,K +34.06 Da, | 1141.110596 | 3 | 682.7189941 | 682.7185121 |
| VRYSLDPENPTKSKSKR                    | Q9CPR4 | 0.00118624 | n +34.06 Da,K +34.06 Da, | 1333.612183 | 4 | 535.5599976 | 535.5573476 |
| GEWHTIILASDKR                        | B5X0G2 | 0.00960512 | n +34.06 Da,K +34.06 Da, | 2045.435547 | 4 | 399.2399902 | 399.2400559 |
| PSSMFDVHVKRR                         | Q9ET01 | 0.00960512 | n +17.03 Da,K +34.06 Da, | 1498.413574 | 4 | 339.1936951 | 339.1947069 |
| PKCPKCDKEVYFAER                      | P63254 | 0          | n +17.03 Da,K +34.06 Da, | 1135.504761 | 4 | 512.2906494 | 512.2907032 |
| SETAAPAAPAPAEKTPVKKKAR               | P43274 | 0          | n +42.03 Da,K +34.06 Da, | 1140.893311 | 5 | 513.9299927 | 513.9265341 |
| TVGKSSKMLQHIDYR                      | P27048 | 0          | n +34.06 Da,K +34.06 Da, | 1390.084595 | 4 | 467.0343323 | 467.0345135 |
| HDPATVDEVLR                          | D3YU06 | 0.02897103 | n +31.05 Da,             | 1456.547729 | 4 | 321.4200134 | 321.4254589 |
| MVMATVKKGKPELR                       | P62830 | 0          | n +34.06 Da,K +34.06 Da, | 1125.898193 | 4 | 431.7900085 | 431.7954049 |
| SSEEQKQPPHSSSQHSETQGPEFSRPPPR        | Q8K1Z0 | 0          | n +34.06 Da,K +34.06 Da, | 1124.737061 | 6 | 597.9644775 | 597.9659437 |
| YKGNVLINKDIR                         | P14211 | 0          | n +34.06 Da,K +34.06 Da, | 1123.817627 | 5 | 340.2399902 | 340.2407237 |
| TGGDAAAPGAAGTQAELPHRR                | Q9D0F3 | 0.00224719 | n +34.06 Da,             | 1273.444214 | 4 | 510.2724304 | 510.271383  |
| ASGNKVKAEPAKIDAFR                    | P09411 | 0          | n +34.06 Da,K +34.06 Da, | 1119.640869 | 4 | 485.3200073 | 485.3165536 |
| SKPPPKPVKPGQVKVFR                    | Q62422 | 0          | n +42.03 Da,K +34.06 Da, | 1413.341919 | 5 | 414.2884521 | 414.2880991 |
| SIDKWFYKMR                           | Q8C196 | 0          | n +34.06 Da,K +34.06 Da, | 3273.756348 | 4 | 398         | 397.9996761 |
| PEEKEASLAKIKEQTR                     | P30115 | 0          | n +17.03 Da,K +34.06 Da, | 1117.89563  | 4 | 494.8099976 | 494.8125916 |
| TFTYKKKLAER                          | P21614 | 0          | n +34.06 Da,K +34.06 Da, | 1116.693359 | 4 | 413.2775574 | 413.2779024 |
| PEEKEASLAKIKEQTR                     | P30115 | 0          | n +17.03 Da,K +34.06 Da, | 1114.158203 | 5 | 396.0499878 | 396.0515286 |
| SDAAVDTSEITTKDLKEKKEVVEEAENGR        | P26350 | 0.00224719 | n +42.03 Da,K +34.06 Da, | 3088.9646   | 5 | 692.1799927 | 692.183115  |
| GVDFGKWR                             | Q91Y97 | 0.00224719 | n +34.06 Da,K +34.06 Da, | 2125.40625  | 3 | 344.8805237 | 344.8802392 |
| HEEHERPPFVAYPHLR                     | P43024 | 0.02251791 | n +17.03 Da,             | 2088.824951 | 5 | 407.0100098 | 407.0129753 |
| DKTSAQVSLTEGHKFDNR                   | Q99KC8 | 0.01062699 | n +34.06 Da,K +34.06 Da, | 1471.01123  | 4 | 506.0400085 | 506.0432303 |
| SSSEDKITVHFKNR                       | P46656 | 0          | n +34.06 Da,K +34.06 Da, | 1103.158813 | 4 | 438.2639771 | 438.2640247 |

|                           |        |            |                          |             |   |             |             |
|---------------------------|--------|------------|--------------------------|-------------|---|-------------|-------------|
| PKCPKCDKEVYFAER           | P63254 | 0          | n +17.03 Da,K +34.06 Da, | 1095.11792  | 4 | 512.2910767 | 512.2907032 |
| NFKPEELHPTAATLKAR         | Q91X91 | 0          | n +34.06 Da,K +34.06 Da, | 1885.315552 | 5 | 405.8500061 | 405.8526276 |
| SSSEDKITVHFKNR            | P46656 | 0          | n +34.06 Da,K +34.06 Da, | 1094.005615 | 5 | 350.8131409 | 350.812675  |
| GTTVHVGIHPSKVIVITR        | P61255 | 0          | n +34.06 Da,K +34.06 Da, | 1601.762939 | 4 | 468.0499878 | 468.0480873 |
| IPAHPDPVFSSEHAHQVLR       | P33587 | 0.01269841 | n +34.06 Da,             | 1871.079468 | 5 | 452.4400024 | 452.4436018 |
| ASLFKKKTVDVVIKEQNR        | Q8BJF9 | 0          | n +42.03 Da,K +34.06 Da, | 2650.983398 | 3 | 766.4899902 | 766.488192  |
| LNLQEQYSKKLMSEHGVR        | Q9Z2I8 | 0          | n +34.06 Da,K +34.06 Da, | 2211.96167  | 3 | 754.7700195 | 754.7756378 |
| TRTHINYGVKGDVAVIR         | Q8BMS1 | 0          | n +34.06 Da,K +34.06 Da, | 1783.718994 | 3 | 656.4000244 | 656.3989003 |
| SKKVDQSVANEISQKAAESQGR    | Q61733 | 0          | n +34.06 Da,K +34.06 Da, | 1393.175415 | 4 | 649.1400146 | 649.1358792 |
| SFAHLPDCKGDQSEHR          | Q9QXF8 | 0          | n +34.06 Da,K +34.06 Da, | 1094.148193 | 4 | 488.75      | 488.7483484 |
| GVQVSPSGEKITHTGQVYDEKDYR  | P52503 | 0          | n +34.06 Da,K +34.06 Da, | 1945.109619 | 3 | 932.5100098 | 932.5068228 |
| PEEKEASLAKIKEQTR          | P30115 | 0          | n +17.03 Da,K +34.06 Da, | 1077.53418  | 4 | 494.8099976 | 494.8125916 |
| PKDVNAAIATIKTKR           | P05213 | 0.03808594 | n +17.03 Da,K +34.06 Da, | 1491.948853 | 4 | 437.0529785 | 437.0531156 |
| MKLLTHNLLSSHVR            | Q9DCG9 | 0          | n +34.06 Da,K +34.06 Da, | 2058.5271   | 5 | 344.2172241 | 344.2173806 |
| PKKSLDFYTR                | Q9CPU0 | 0          | n +17.03 Da,K +34.06 Da, | 1069.80835  | 3 | 447.2857361 | 447.2854832 |
| PKGPLWEEDPGAKDVVHIDSEKDFR | Q921X9 | 0          | n +17.03 Da,K +34.06 Da, | 2977.397461 | 6 | 514.289978  | 514.2885699 |
| RVISLSGEHSIIGR            | P08228 | 0.02897103 | n +34.06 Da,             | 1954.391357 | 3 | 519.9818115 | 519.980976  |
| VRYSLDPENPTKSCSKSR        | Q9CPR4 | 0          | n +34.06 Da,K +34.06 Da, | 1069.361328 | 4 | 535.5571899 | 535.5573476 |
| PQKVNIIHGGAVSLGHPIGMSGAR  | Q8QZT1 | 0          | n +17.03 Da,K +34.06 Da, | 1811.574463 | 5 | 467.6700134 | 467.6675341 |
| SFAHLPDCKGDQSEHR          | Q9QXF8 | 0          | n +34.06 Da,K +34.06 Da, | 1064.735107 | 5 | 391.1999512 | 391.200134  |
| GVQVSPSGEKITHTGQVYDEKDYR  | P52503 | 0          | n +34.06 Da,K +34.06 Da, | 1925.4198   | 5 | 559.9068604 | 559.9070043 |
| GFVKVVKNKAY               | P47962 | 0.00118624 | n +34.06 Da,K +34.06 Da, | 1059.759888 | 3 | 463.6691589 | 463.6694153 |
| SFAHLPDCKGDQSEHR          | Q9QXF8 | 0          | n +34.06 Da,K +34.06 Da, | 1105.375244 | 5 | 391.1998291 | 391.200134  |
| THTLVEKINYTGR             | P49429 | 0          | n +34.06 Da,K +34.06 Da, | 1598.595093 | 4 | 400.7431335 | 400.7426971 |
| GPVGLVHVGAHTNTTDKPR       | A2AS89 | 0.00224719 | n +34.06 Da,K +34.06 Da, | 1110.953369 | 5 | 405.6400146 | 405.6392666 |
| VLHPGKATVPKTEIR           | P62849 | 0          | n +34.06 Da,K +34.06 Da, | 1053.044556 | 5 | 350.438446  | 350.4386531 |
| SPVKWCALSHLER             | Q92111 | 0          | n +34.06 Da,K +34.06 Da, | 2196.986816 | 4 | 413.4899902 | 413.4909821 |
| FKVVGQEGKSHYEVR           | Q99KK7 | 0          | n +34.06 Da,K +34.06 Da, | 1208.190918 | 4 | 467.0343933 | 467.0336708 |
| MINVEHEVNLLVEEIHRR        | Q4KML4 | 0          | n +42.03 Da,             | 4447.901367 | 3 | 668.3383179 | 668.3386832 |
| MLENSGCKALKEGVLEKR        | Q62392 | 0.00224719 | n +34.06 Da,K +34.06 Da, | 1760.18103  | 5 | 440.4700012 | 440.4719882 |
| TGGFFHKEEFRPSAPYR         | P61922 | 0.01680672 | n +34.06 Da,K +34.06 Da, | 2225.944336 | 5 | 419.629425  | 419.6296639 |
| GVVLFKKFDEGR              | P09103 | 0          | n +34.06 Da,K +34.06 Da, | 2154.352051 | 4 | 374.9983215 | 374.9975621 |
| IEEKSCDLVGEKDKESKNEVALLER | P24668 | 0          | n +34.06 Da,K +34.06 Da, | 2416.138916 | 4 | 772.9500122 | 772.9537437 |
| MKFNPFVTSDRSKNR           | P61255 | 0          | n +34.06 Da,K +34.06 Da, | 1679.051147 | 4 | 483.0352783 | 483.0360505 |
| DGTSDRPYSHALVAGIDRYPR     | P61358 | 0          | n +17.03 Da,             | 2279.348877 | 4 | 591.5599976 | 591.552983  |
| CDFNPKSSKQAKDVSR          | O08585 | 0          | n +34.06 Da,K +34.06 Da, | 1546.999878 | 3 | 668.3984985 | 668.3932342 |
| AFVGGFLSQLVSDKPLTECIR     | P55264 | 0          | n +34.06 Da,K +34.06 Da, | 4357.257324 | 3 | 802.4616699 | 802.4559759 |
| KPVLHYFDGR                | P30115 | 0          | n +34.06 Da,K +34.06 Da, | 1455.299683 | 3 | 433.9337158 | 433.9330034 |
| SEDAVKKHNFPTLAR           | Q8BWT1 | 0          | n +34.06 Da,K +34.06 Da, | 1169.175171 | 3 | 605.7000122 | 605.7039188 |
| IEVAPPKAHEVR              | P00329 | 0          | n +34.06 Da,K +34.06 Da, | 1037.352661 | 4 | 354.2269897 | 354.2266825 |



|                                  |        |            |                          |             |   |             |             |
|----------------------------------|--------|------------|--------------------------|-------------|---|-------------|-------------|
| TFRPPYYHR                        | O09173 | 0.02724521 | n +34.06 Da,             | 1362.297729 | 4 | 318.4299927 | 318.4280509 |
| PPEEKEASLAKIKEQTR                | P30115 | 0          | n +17.03 Da,K +34.06 Da, | 1292.689453 | 4 | 519.0759277 | 519.0757827 |
| SLFHDDIHSVR                      | P50172 | 0.04816956 | n +34.06 Da,             | 1613.301392 | 4 | 340.6900024 | 340.6861569 |
| SFTHQASVAKVVGKQGR                | O89023 | 0          | n +34.06 Da,K +34.06 Da, | 1058.460938 | 5 | 381.2403259 | 381.2411913 |
| SEEQKQQPPHSSSQHSETQGPEFSRPPPR    | Q8K1Z0 | 0.02251791 | n +34.06 Da,K +34.06 Da, | 1034.61853  | 5 | 699.9500122 | 699.9512713 |
| LGLDNAGKTTLHMLKDDR               | Q9CQC9 | 0          | n +34.06 Da,K +34.06 Da, | 3409.631592 | 4 | 554.0800171 | 554.0847352 |
| ASGADSKGDDLSTAILKQKNRPNR         | Q01853 | 0          | n +42.03 Da,K +34.06 Da, | 1922.736328 | 4 | 672.3897095 | 672.3887405 |
| ITAHLVHELRL                      | Q8BWT1 | 0.02897103 | n +14.02 Da,             | 1119.422485 | 4 | 301.4303284 | 301.4305629 |
| IDANGIVHVSADKDKGTGR              | P38647 | 0.0033557  | n +34.06 Da,K +34.06 Da, | 1447.644531 | 4 | 485.7999878 | 485.7997688 |
| SSSEDKITVHFKNR                   | P46656 | 0          | n +34.06 Da,K +34.06 Da, | 1062.569824 | 4 | 438.2635803 | 438.2640247 |
| PSKFSAKFGESEKCPR                 | P50462 | 0          | n +17.03 Da,K +34.06 Da, | 1032.172363 | 5 | 395.6300049 | 395.6333437 |
| VRYSLDPENPTKSKCSR                | Q9CPR4 | 0.04352031 | n +34.06 Da,K +34.06 Da, | 1032.101563 | 5 | 428.6499939 | 428.6473334 |
| MKCHYEALGVR                      | E9Q8D0 | 0.02897103 | n +34.06 Da,K +34.06 Da, | 1030.68457  | 3 | 477.9299927 | 477.93391   |
| MAPVAGKKAKKAGILER                | O35490 | 0.02897103 | n +42.03 Da,K +34.06 Da, | 1302.474487 | 3 | 625.7678223 | 625.7676833 |
| EEKEASLAKIKEQTR                  | P30115 | 0          | n +34.06 Da,K +34.06 Da, | 1030.359131 | 4 | 474.807312  | 474.8072903 |
| EGNHKPGTDYDLKPPK                 | Q61176 | 0          | n +42.03 Da,K +34.06 Da, | 1125.680176 | 4 | 457.0299988 | 457.0230375 |
| STGEKFGYKGSFHR                   | P17742 | 0          | n +34.06 Da,K +34.06 Da, | 1029.187378 | 4 | 462.5100098 | 462.5128369 |
| TKHMLPSGFR                       | P62911 | 0          | n +34.06 Da,K +34.06 Da, | 1028.615723 | 3 | 414.5899963 | 414.5868386 |
| PSGTSQCEGDSAGGFQHLDMHSEKR        | Q91WT9 | 0          | n +17.03 Da,K +34.06 Da, | 1563.275879 | 3 | 923.7600098 | 923.7574484 |
| SSSEDKITVHFKNR                   | P46656 | 0          | n +34.06 Da,K +34.06 Da, | 1021.491028 | 4 | 438.2641602 | 438.2640247 |
| FEEKFLKTR                        | P30115 | 0.00118624 | n +34.06 Da,K +34.06 Da, | 1419.517578 | 4 | 325.7187805 | 325.7184552 |
| SEWYLKNLQFHR                     | P49429 | 0          | n +34.06 Da,K +34.06 Da, | 2933.678711 | 4 | 423         | 422.9940519 |
| PKLDGVKEKALVSSVR                 | P07724 | 0          | n +17.03 Da,K +34.06 Da, | 1665.871338 | 4 | 462.0700073 | 462.0662231 |
| VAAKTKKSLESINSR                  | P62889 | 0.00224719 | n +42.03 Da,K +34.06 Da, | 1075.629028 | 4 | 485.3299866 | 485.3309324 |
| TAKLFDSTTLEHQKTR                 | Q9QZD9 | 0          | n +34.06 Da,K +34.06 Da, | 2168.169922 | 5 | 425.8561707 | 425.8558366 |
| FENKVPEKQLFQEDNGMPVHLKGGASDALLYR | P48771 | 0          | n +34.06 Da,K +34.06 Da, | 2907.870117 | 5 | 786.6500244 | 786.6554002 |
| LHHKPVMLR                        | Q99K67 | 0          | n +42.03 Da,K +34.06 Da, | 1444.024536 | 3 | 426.6000061 | 426.5956274 |
| PELFKEWKGNVKTMADR                | P05201 | 0          | n +17.03 Da,K +34.06 Da, | 2473.372803 | 4 | 542.8300171 | 542.8253389 |
| EYAEFEFGNETWGVTKAAEQMKDKQDEEQR   | P14211 | 0          | n +34.06 Da,K +34.06 Da, | 3612.3396   | 5 | 764.0100098 | 764.0041816 |
| GYGFNLHSDKSKPGQFIR               | P70441 | 0          | n +34.06 Da,K +34.06 Da, | 2247.86792  | 5 | 431.450592  | 431.4528402 |
| KVKAEPKIDAFR                     | P09411 | 0          | n +34.06 Da,K +34.06 Da, | 1006.987976 | 4 | 403.0299988 | 403.0331697 |
| PASDQMKQWKEQR                    | P24270 | 0          | n +17.03 Da,K +34.06 Da, | 1066.724976 | 4 | 429.9934692 | 429.9938701 |
| TFFDRDHFGR                       | Q3ULD5 | 0          | n +34.06 Da,             | 1498.033447 | 4 | 321.1700134 | 321.1691368 |
| SSEEKQQPPHSSSQHSETQGPEFSRPPPR    | Q8K1Z0 | 0          | n +34.06 Da,K +34.06 Da, | 1002.627869 | 6 | 597.960022  | 597.9659437 |
| GHSEFLKAASNLRL                   | P27773 | 0          | n +34.06 Da,K +34.06 Da, | 1654.782349 | 3 | 499.9659119 | 499.9651439 |
| SETAPAETAAPAPVEKSPAKKTKTKAGA     | P43276 | 0          | n +42.03 Da,K +34.06 Da, | 1000.460571 | 4 | 778.75      | 778.7447813 |
| VKKENPLQFKFR                     | P26043 | 0.04081633 | n +34.06 Da,K +34.06 Da, | 1811.382935 | 4 | 418.2908936 | 418.2910782 |
| EGAKYVSHGATGKGNQVRL              | P16460 | 0          | n +42.03 Da,K +34.06 Da, | 997.3081665 | 4 | 521.789978  | 521.7843541 |
| FHMTKDMLPGSYPR                   | Q9D6J5 | 0          | n +34.06 Da,K +34.06 Da, | 2524.964355 | 3 | 583.3148193 | 583.3146795 |
| ESVEDGMLQLSEFHPLLR               | Q924T7 | 0.04352031 | n +14.02 Da,             | 2582.845459 | 5 | 423.6099854 | 423.6175567 |

|                        |        |            |                          |             |   |             |             |
|------------------------|--------|------------|--------------------------|-------------|---|-------------|-------------|
| TGYGKDMVKVLHIQR        | P25688 | 0          | n +34.06 Da,K +34.06 Da, | 2177.472656 | 4 | 462.5400085 | 462.5409685 |
| VRYSLPENPTKSKCSR       | Q9CPR4 | 0          | n +34.06 Da,K +34.06 Da, | 1028.724121 | 4 | 535.5599976 | 535.5573476 |
| TKAVKSAEAAAATKNMEAGAGR | Q8VC30 | 0          | n +34.06 Da,K +34.06 Da, | 1841.214722 | 4 | 600.3599854 | 600.356245  |
| SYETQVIAHGQSSKGR       | Q78JT3 | 0          | n +34.06 Da,K +34.06 Da, | 1236.302124 | 4 | 493.269989  | 493.273622  |
| AKHLKFIAR              | P58059 | 0.00659341 | n +42.03 Da,K +34.06 Da, | 1089.44519  | 3 | 398.6101685 | 398.6099718 |
| WRPPQPVKGR             | P16015 | 0          | n +34.06 Da,K +34.06 Da, | 1017.231506 | 3 | 430.2799988 | 430.2806258 |
| SSGTTAPKKTSGSLKDEDR    | Q91YTO | 0          | n +34.06 Da,K +34.06 Da, | 1009.681519 | 5 | 450.4700012 | 450.4676679 |
| MKHYEVEIR              | Q9CY27 | 0          | n +34.06 Da,K +34.06 Da, | 987.2613525 | 3 | 424.918335  | 424.9183657 |
| SETAAPAAPAPAEKTPVKKAR  | P43274 | 0          | n +42.03 Da,K +34.06 Da, | 1119.750732 | 4 | 642.1599731 | 642.1563485 |
| GTTAPKKTSGSLKDEDR      | Q91YTO | 0.00118624 | n +34.06 Da,K +34.06 Da, | 985.6787109 | 5 | 415.6499939 | 415.6548562 |
| SWGSGLDMHTKPWIR        | O35490 | 0          | n +34.06 Da,K +34.06 Da, | 3002.175049 | 4 | 460.506012  | 460.5056266 |
| SGNKVKAEPKIDAFR        | P09411 | 0          | n +34.06 Da,K +34.06 Da, | 1076.005249 | 4 | 467.5570984 | 467.5572751 |
| NKELDPVQKLFVDKIR       | P97450 | 0          | n +17.03 Da,K +34.06 Da, | 2973.253906 | 4 | 516.0900269 | 516.0886927 |
| SSSEDKITVHFKNR         | P46656 | 0          | n +34.06 Da,K +34.06 Da, | 981.7772217 | 5 | 350.8099976 | 350.812675  |
| SSSEDKITVHFKNR         | P46656 | 0          | n +34.06 Da,K +34.06 Da, | 980.1270752 | 4 | 438.2600098 | 438.2640247 |
| SVPTFKHLWR             | Q8CHT0 | 0          | n +34.06 Da,K +34.06 Da, | 2294.337646 | 4 | 335.4621277 | 335.4633927 |
| FKPEELHPTAATLKR        | Q91X91 | 0          | n +34.06 Da,K +34.06 Da, | 1808.082153 | 5 | 383.0400085 | 383.044042  |
| PAYFQRPENALKR          | P23116 | 0          | n +17.03 Da,K +34.06 Da, | 1649.21582  | 4 | 410.9899902 | 410.9927994 |
| SSSEDKITVHFKNR         | P46656 | 0          | n +34.06 Da,K +34.06 Da, | 1022.082092 | 5 | 350.8126526 | 350.812675  |
| KSEVEVKIFR             | O35490 | 0          | n +34.06 Da,K +34.06 Da, | 1027.269409 | 4 | 375.519989  | 375.5211664 |
| NKELDPVQKLFVDKIR       | P97450 | 0          | n +34.06 Da,K +34.06 Da, | 2956.877686 | 3 | 693.4591064 | 693.4596845 |
| ALYLVHYCGWNVNR         | A2CG63 | 0.01966874 | n +34.06 Da,             | 1060.463379 | 3 | 562.289978  | 562.2995399 |
| WRPPQPVKGR             | P16015 | 0.00224719 | n +34.06 Da,K +34.06 Da, | 968.8309326 | 4 | 322.9599915 | 322.9622885 |
| GHQQLYWSHPR            | P62274 | 0          | n +34.06 Da,             | 962.2154541 | 2 | 721.8800049 | 721.8786459 |
| PRDNHLAPGQQTTLR        | P01027 | 0.00867679 | n +14.02 Da,             | 960.7140503 | 3 | 573.3099976 | 573.3079341 |
| GHQQLYWSHPR            | P62274 | 0          | n +17.03 Da,             | 957.2713013 | 3 | 475.9100037 | 475.9110031 |
| GHQQLYWSHPR            | P62274 | 0          | n +17.03 Da,             | 952.6817017 | 4 | 357.184906  | 357.1850714 |
| DEEETEEKVPVKKSVR       | Q61937 | 0.0254065  | n +34.06 Da,K +34.06 Da, | 951.644043  | 3 | 680.0800171 | 680.0828317 |
| AMKPHEIQEKLGLTR        | P62331 | 0          | n +34.06 Da,K +34.06 Da, | 1847.702881 | 4 | 464.0400085 | 464.0436098 |
| IKVDVGGDKCVHLR         | Q62426 | 0          | n +34.06 Da,K +34.06 Da, | 1680.675049 | 5 | 340.4174194 | 340.4174172 |
| AGKPVLLHFFNAR          | E9Q6L7 | 0.01966874 | n +42.03 Da,K +34.06 Da, | 948.0389404 | 4 | 356.4593506 | 356.4598825 |
| EKKVFSVR               | Q99LC5 | 0.00118624 | n +34.06 Da,K +34.06 Da, | 947.9304199 | 3 | 398.6205139 | 398.6203548 |
| PILISLKHGYIPGKNR       | Q9WUM4 | 0          | n +17.03 Da,K +34.06 Da, | 2141.101563 | 5 | 379.0499878 | 379.052351  |
| SSSEDKITVHFKNR         | P46656 | 0          | n +34.06 Da,K +34.06 Da, | 945.2990112 | 4 | 416.5061035 | 416.5060174 |
| KPVLHYFDGR             | P30115 | 0.0055371  | n +34.06 Da,K +34.06 Da, | 1435.241699 | 4 | 325.7019043 | 325.7015717 |
| VRDHASVYLR             | Q99LB7 | 0          | n +34.06 Da,             | 945.2149048 | 3 | 455.5893555 | 455.5879668 |
| SKPPPKPVKPGQVKVFR      | Q62422 | 0.02251791 | n +42.03 Da,K +34.06 Da, | 1334.362061 | 4 | 517.6074219 | 517.6083048 |
| MFNLMKKDKDKDGGGR       | Q9JMH9 | 0          | n +42.03 Da,K +34.06 Da, | 1982.9646   | 4 | 491.0469055 | 491.0459517 |
| PKCPKCDKEVYFAER        | P63254 | 0          | n +34.06 Da,K +34.06 Da, | 943.9003296 | 4 | 516.539978  | 516.548593  |
| SETAAPAAPAPAEKTPVKKAR  | P43274 | 0          | n +42.03 Da,K +34.06 Da, | 943.4661865 | 5 | 513.9268188 | 513.9265341 |

|                                     |        |            |                          |             |   |             |             |
|-------------------------------------|--------|------------|--------------------------|-------------|---|-------------|-------------|
| VKVGVNGFGR                          | P16858 | 0          | n +34.06 Da,K +34.06 Da, | 1546.890015 | 3 | 367.5791931 | 367.5785603 |
| KEEAAEYAKLLAKR                      | P62754 | 0          | n +34.06 Da,K +34.06 Da, | 1838.816406 | 5 | 352.0389099 | 352.0386229 |
| CTSIIETEKGHLLHGR                    | Q9WV54 | 0          | n +34.06 Da,K +34.06 Da, | 1851.369507 | 4 | 509.2799988 | 509.2822898 |
| TFTEYKKKLAER                        | P21614 | 0.04081633 | n +34.06 Da,K +34.06 Da, | 1142.64502  | 4 | 413.269989  | 413.2779024 |
| YDINAHACVTGKPISQGGIHGR              | P26443 | 0          | n +34.06 Da,K +34.06 Da, | 1851.298706 | 5 | 484.664032  | 484.6645349 |
| LKFIDTTSKFGHGR                      | P27659 | 0          | n +34.06 Da,K +34.06 Da, | 1806.452271 | 4 | 428.019989  | 428.0202974 |
| IDANGIVHVSADKDKGTGR                 | P38647 | 0          | n +34.06 Da,K +34.06 Da, | 1441.973755 | 5 | 388.8408813 | 388.8412704 |
| MKPILLQGHER                         | Q9QZD9 | 0.00960512 | n +34.06 Da,K +34.06 Da, | 1107.501099 | 4 | 348.2200012 | 348.2222427 |
| TATEHIPSPAKKVPR                     | Q8JZK9 | 0          | n +34.06 Da,K +34.06 Da, | 934.4129639 | 5 | 347.6283875 | 347.6282461 |
| DKQGFPKQGVLTGHR                     | P62754 | 0          | n +34.06 Da,K +34.06 Da, | 1445.890137 | 5 | 381.0312805 | 381.0313127 |
| TFHRPELVR                           | P70694 | 0          | n +34.06 Da,             | 1212.335327 | 3 | 396.9068909 | 396.906859  |
| LTIKLPDGHEFKFNR                     | P16045 | 0.00118624 | n +34.06 Da,K +34.06 Da, | 3661.111816 | 5 | 403.6499939 | 403.6524818 |
| MKCHYEALGVR                         | E9Q8D0 | 0          | n +34.06 Da,K +34.06 Da, | 1049.835693 | 3 | 477.9350586 | 477.93391   |
| AKFVSWKSR                           | Q9D773 | 0          | n +34.06 Da,K +34.06 Da, | 940.046814  | 3 | 404.2767639 | 404.2766994 |
| GLKCIEEAIDKLSKR                     | P15105 | 0          | n +34.06 Da,K +34.06 Da, | 3284.180908 | 3 | 632.75      | 632.7468369 |
| FIKVDVGGDKCVHLR                     | Q62426 | 0          | n +34.06 Da,K +34.06 Da, | 1920.676514 | 5 | 369.8299866 | 369.8311001 |
| KPLRPLQDVYKIGGIGTVPVGR              | P10126 | 0          | n +34.06 Da,K +34.06 Da, | 3609.840576 | 4 | 645.4268188 | 645.4218541 |
| PNIVGNEHYDVAR                       | P56480 | 0          | n +17.03 Da,             | 1610.758057 | 3 | 500.925293  | 500.9249785 |
| AKEWGYASHNGPDHWHELYPIAKGDNQSPIELHTK | P16015 | 0.00224719 | n +42.03 Da,K +34.06 Da, | 3372.932129 | 7 | 596.5999756 | 596.5964813 |
| HPFYSNISKDR                         | Q9DBJ1 | 0          | n +34.06 Da,K +34.06 Da, | 928.1047974 | 3 | 477.9400024 | 477.9387061 |
| SEAAPAAPAAAPPAEKAPAKKKAAPKAGVR      | P15864 | 0          | n +42.03 Da,K +34.06 Da, | 1265.487671 | 5 | 640.2199707 | 640.2226544 |
| SSGTTAPKKTSGSLKDEDR                 | Q91YT0 | 0          | n +34.06 Da,K +34.06 Da, | 926.4891357 | 5 | 450.467865  | 450.4676679 |
| SETAAPAAPAPAEKTPVKKKAR              | P43274 | 0          | n +42.03 Da,K +34.06 Da, | 1347.279419 | 4 | 642.1500244 | 642.1563485 |
| PTPGLTLGKKEDKLGIR                   | Q07417 | 0          | n +17.03 Da,K +34.06 Da, | 1865.405884 | 4 | 486.3299866 | 486.3294142 |
| PNIKIFSGSSHQDLSQKIADR               | Q9D7G0 | 0          | n +17.03 Da,K +34.06 Da, | 2254.854004 | 4 | 607.3492432 | 607.3513793 |
| AKFVSWKSR                           | Q9D773 | 0          | n +34.06 Da,K +34.06 Da, | 936.0727539 | 4 | 303.459137  | 303.4593437 |
| TVGKSSKMLQHIDYR                     | P27048 | 0          | n +34.06 Da,K +34.06 Da, | 1408.542358 | 3 | 622.3768311 | 622.3769258 |
| SLVDLGKLLLEAAR                      | Q00420 | 0.02979146 | n +42.03 Da,K +34.06 Da, | 4522.715332 | 3 | 541.6900024 | 541.6873878 |
| AAKGAHGTHLKVSEVER                   | Q8BGB2 | 0          | n +42.03 Da,K +34.06 Da, | 994.8929443 | 4 | 508.0420837 | 508.0419969 |
| DKLIKEGDVVKR                        | Q03265 | 0          | n +34.06 Da,K +34.06 Da, | 924.2095947 | 4 | 384.7755432 | 384.7752612 |
| KPEELHPTAATLKAR                     | Q91X91 | 0          | n +34.06 Da,K +34.06 Da, | 923.2247925 | 4 | 441.7900085 | 441.7861298 |
| SPKGGGEPKGELLEAIKR                  | P09671 | 0          | n +34.06 Da,K +34.06 Da, | 1744.179077 | 5 | 401.2600098 | 401.2651842 |
| TVHVGIHPSKVVITR                     | P61255 | 0          | n +34.06 Da,K +34.06 Da, | 1533.220337 | 5 | 343.0299988 | 343.0260965 |
| HRLSPADDELYQR                       | Q9JKL4 | 0          | n +34.06 Da,             | 1424.102295 | 3 | 545.2883301 | 545.2883576 |
| EKHIIYLLPSGR                        | P05201 | 0.04081633 | n +34.06 Da,K +34.06 Da, | 1538.515869 | 3 | 460.959137  | 460.9593299 |
| PCALCSLHSIGKIGGAQNR                 | P34884 | 0          | n +17.03 Da,K +34.06 Da, | 2120.53418  | 4 | 523.2800293 | 523.2859595 |
| GEFGKRAPAEDMEEQAFKR                 | P61979 | 0.04633205 | n +34.06 Da,K +34.06 Da, | 1923.997681 | 5 | 472.0499878 | 472.0548352 |
| PELMQHLGASKR                        | P99025 | 0          | n +17.03 Da,K +34.06 Da, | 918.0805054 | 3 | 473.2799988 | 473.2784048 |
| SGSKAASLHWTSER                      | Q9CXV1 | 0.02251791 | n +34.06 Da,K +34.06 Da, | 917.9720459 | 4 | 396.9746094 | 396.9745881 |
| MKLLTHNLLSSHVR                      | Q9DCG9 | 0          | n +34.06 Da,K +34.06 Da, | 2026.625854 | 4 | 430.0197754 | 430.0199067 |

|                               |        |            |                          |             |   |             |             |
|-------------------------------|--------|------------|--------------------------|-------------|---|-------------|-------------|
| SSGKFYGDLEKDKGLQTSQDAR        | P14211 | 0          | n +34.06 Da,K +34.06 Da, | 1889.894287 | 4 | 642.3599854 | 642.3659674 |
| PELMQHLGASKR                  | P99025 | 0          | n +17.03 Da,K +34.06 Da, | 916.656189  | 4 | 355.2106934 | 355.2106227 |
| TREDGLKYR                     | P35486 | 0.00118624 | n +34.06 Da,K +34.06 Da, | 914.7171631 | 4 | 342.9500122 | 342.953124  |
| SETAAPAAPAPAEKTPVKKKAR        | P43274 | 0          | n +17.03 Da,K +34.06 Da, | 918.5170288 | 4 | 635.9099731 | 635.9115968 |
| TRVSQEHPPVLTKFVEGAR           | Q8C196 | 0          | n +34.06 Da,K +34.06 Da, | 2163.399414 | 3 | 741.1099854 | 741.1077865 |
| PHYPALTPEQKKELSIAHR           | P05064 | 0          | n +17.03 Da,K +34.06 Da, | 2604.393066 | 4 | 628.8649902 | 628.8643881 |
| PKCPKCDKEVYFAER               | P63254 | 0          | n +17.03 Da,K +34.06 Da, | 1100.105469 | 3 | 682.7199707 | 682.7185121 |
| DPVLCDAKKNR                   | Q8VC28 | 0          | n +34.06 Da,K +34.06 Da, | 912.0521851 | 4 | 420.5299988 | 420.5290944 |
| MEKTELIQKAKLAEQAER            | P68254 | 0          | n +42.03 Da,K +34.06 Da, | 2825.185547 | 4 | 565.8442993 | 565.8412055 |
| GHQQLYWSHPR                   | P62274 | 0.02897103 | n +34.06 Da,             | 945.5160522 | 4 | 361.4432983 | 361.4429612 |
| AGQSDKDKVYTYLEEQKHKDSKS       | P56395 | 0.00867679 | n +42.03 Da,K +34.06 Da, | 2443.500732 | 4 | 753.1900024 | 753.1870687 |
| GEFGKRAEDMEEEQAFKR            | P61979 | 0          | n +34.06 Da,K +34.06 Da, | 1932.012207 | 4 | 589.8200073 | 589.8167249 |
| TAPAAPAAPAPAEKTPVKKKAR        | P43274 | 0          | n +34.06 Da,K +34.06 Da, | 910.0700684 | 5 | 469.1199951 | 469.1221198 |
| KPLRLPLQDVYKIGGIVPVGR         | P10126 | 0          | n +34.06 Da,K +34.06 Da, | 3651.19751  | 4 | 645.4221802 | 645.4218541 |
| GHQQLYWSHPR                   | P62274 | 0          | n +34.06 Da,             | 952.6110229 | 3 | 481.5880432 | 481.5881894 |
| KIPKSVDR                      | P06797 | 0.00224719 | n +34.06 Da,K +34.06 Da, | 1362.475952 | 3 | 410.9546204 | 410.9521045 |
| TPKDIEIIDLKAGKVPKPGPR         | Q9D6J6 | 0          | n +34.06 Da,K +34.06 Da, | 3904.876709 | 5 | 540.960022  | 540.9537238 |
| SETAAPAAPAPAEKTPVKKKAR        | P43274 | 0          | n +34.06 Da,K +34.06 Da, | 978.8327026 | 5 | 512.3400269 | 512.3370445 |
| YAKDVKFGADAR                  | P63038 | 0.00224719 | n +34.06 Da,K +34.06 Da, | 904.8598633 | 3 | 481.6300049 | 481.6332122 |
| THFVDSKLR                     | Q8QZ51 | 0.00224719 | n +34.06 Da,K +34.06 Da, | 974.0889893 | 4 | 325.6972961 | 325.6977579 |
| AKHHPDLIFCR                   | P83870 | 0          | n +42.03 Da,K +34.06 Da, | 1609.353149 | 3 | 490.6009216 | 490.6013301 |
| HLNKLAEKEETGVAMR              | P21981 | 0          | n +34.06 Da,K +34.06 Da, | 1278.12085  | 4 | 482.7919922 | 482.7925208 |
| YAKDVKFGADAR                  | P63038 | 0.04966571 | n +34.06 Da,K +34.06 Da, | 902.3217773 | 4 | 361.4766541 | 361.4767283 |
| MPWFKGWKVTR                   | P10126 | 0          | n +34.06 Da,K +34.06 Da, | 2909.081543 | 4 | 385.2399902 | 385.244477  |
| HTEWEKAGEVSR                  | P51174 | 0          | n +34.06 Da,K +34.06 Da, | 902.2132568 | 3 | 499.6087646 | 499.6091375 |
| KDIGNIISDAMKKVGR              | P63038 | 0.00224719 | n +34.06 Da,K +34.06 Da, | 3212.0979   | 3 | 627.7399902 | 627.7469482 |
| SGNYATVISHNPETKKTR            | P62918 | 0          | n +34.06 Da,K +34.06 Da, | 1004.261597 | 4 | 527.0599976 | 527.0604174 |
| GKPADAVYGQKEIHR               | P97855 | 0          | n +34.06 Da,K +34.06 Da, | 899.5753784 | 4 | 443.519989  | 443.5232045 |
| PILLTNSHDGLDGPTYKRR           | P61290 | 0          | n +17.03 Da,K +34.06 Da, | 1895.955322 | 5 | 442.8599854 | 442.8653875 |
| ATTLDLKSKEEKDAELDKR           | Q8VC31 | 0          | n +42.03 Da,K +34.06 Da, | 1971.334717 | 4 | 592.8599854 | 592.8615234 |
| SKPKSLEIIGAPFSKGQPR           | Q61176 | 0          | n +34.06 Da,K +34.06 Da, | 2107.359375 | 4 | 544.8599854 | 544.8585858 |
| SEAAPAAPAAAPAEKAPAKKAAKPPAGVR | P15864 | 0          | n +42.03 Da,K +34.06 Da, | 1173.060547 | 4 | 800.0300293 | 800.0264989 |
| TLGKHPVSCKDTPGFIVNR           | Q61425 | 0          | n +34.06 Da,K +34.06 Da, | 1773.017578 | 4 | 557.8300171 | 557.8321774 |
| TAPAAPAAPAPAEKTPVKKKAR        | P43274 | 0.00118624 | n +34.06 Da,K +34.06 Da, | 918.4071655 | 4 | 586.1500244 | 586.1508307 |
| SVPTFKHLWR                    | Q8CHT0 | 0          | n +34.06 Da,K +34.06 Da, | 2253.763672 | 4 | 335.4599915 | 335.4633927 |
| LVIEHIQVKNKAPKMR              | Q9CPR4 | 0          | n +34.06 Da,K +34.06 Da, | 1902.786255 | 5 | 376.4500122 | 376.4499469 |
| TTAQAAWPEVLELVRVR             | Q3UIZ8 | 0.02066116 | n +34.06 Da,             | 1996.408203 | 4 | 511.7999878 | 511.7995104 |
| SKDSEGSWFR                    | O55125 | 0.00224719 | n +34.06 Da,K +34.06 Da, | 1469.273315 | 3 | 422.8963318 | 422.896507  |
| YEHIKDELGTR                   | O35403 | 0          | n +34.06 Da,K +34.06 Da, | 1511.716553 | 3 | 514.6370239 | 514.6368046 |
| TVKCEKVKVFSVR                 | Q99LC5 | 0          | n +34.06 Da,K +34.06 Da, | 1354.280884 | 5 | 367.0400085 | 367.0414769 |

|                             |        |            |                          |             |   |             |             |
|-----------------------------|--------|------------|--------------------------|-------------|---|-------------|-------------|
| IPVPDPVKEKEEER              | P97371 | 0          | n +34.06 Da,K +34.06 Da, | 1565.673584 | 5 | 386.6499939 | 386.6523848 |
| STFSELFKKEHPDR              | P40142 | 0          | n +34.06 Da,K +34.06 Da, | 1979.536987 | 5 | 365.4200134 | 365.4167553 |
| MKPILLQGHHER                | Q9QZD9 | 0.00224719 | n +34.06 Da,K +34.06 Da, | 1148.077515 | 4 | 348.2217712 | 348.2222427 |
| WKHYLTVDQSER                | O35403 | 0.00224719 | n +34.06 Da,K +34.06 Da, | 1578.56604  | 3 | 543.9699707 | 543.9721873 |
| PEYKGEWKPR                  | P14211 | 0.00118624 | n +17.03 Da,K +34.06 Da, | 891.8239136 | 4 | 344.4602966 | 344.4608312 |
| TKVSSLIER                   | Q921X9 | 0.0254065  | n +34.06 Da,K +34.06 Da, | 1271.724731 | 3 | 367.5799866 | 367.5818594 |
| PTYKEVCSEKTGHAEVVR          | Q9D6Y7 | 0          | n +17.03 Da,K +34.06 Da, | 1005.708862 | 4 | 544.5543823 | 544.5532869 |
| TAEVLELAGNASKDLKVKR         | POC0S6 | 0          | n +34.06 Da,K +34.06 Da, | 2822.80249  | 5 | 436.4899902 | 436.4884029 |
| PPSADKTLLEEKAKLEEQLR        | Q99LP6 | 0          | n +17.03 Da,K +34.06 Da, | 3097.57959  | 4 | 604.3753052 | 604.3745509 |
| GTTVHVGIHPSKVVITR           | P61255 | 0          | n +34.06 Da,K +34.06 Da, | 1633.241455 | 5 | 374.639801  | 374.6399252 |
| TEARPTTEKSVPYQR             | Q99LB7 | 0          | n +34.06 Da,K +34.06 Da, | 886.5739136 | 4 | 458.5100098 | 458.5140777 |
| KAHPLFTFLR                  | P11352 | 0.00960512 | n +34.06 Da,K +34.06 Da, | 2306.320557 | 3 | 433.2866821 | 433.2853768 |
| SIAKEGFEEKISKGANPVEIR       | P63038 | 0          | n +34.06 Da,K +34.06 Da, | 2531.934814 | 4 | 578.1199951 | 578.1179631 |
| SSGTTAPKKTSGSLKDEDR         | Q91YT0 | 0          | n +34.06 Da,K +34.06 Da, | 969.048645  | 5 | 450.4700012 | 450.4676679 |
| TMVVHEKQDDLGGNEESTKTGNAGSR  | P08228 | 0          | n +42.03 Da,K +34.06 Da, | 1212.444824 | 4 | 773.1599731 | 773.1558788 |
| SHGSHETDEEFDAR              | P12787 | 0          | n +34.06 Da,             | 878.826355  | 3 | 550.9121094 | 550.9116161 |
| AKDVKFGADAR                 | P63038 | 0          | n +34.06 Da,K +34.06 Da, | 878.4179077 | 4 | 320.710907  | 320.7108959 |
| MIKAILIFNNHGKPR             | Q9DCR2 | 0.00224719 | n +34.06 Da,K +34.06 Da, | 2080.490967 | 4 | 464.3099976 | 464.305332  |
| MKPILLQGHHER                | Q9QZD9 | 0          | n +34.06 Da,K +34.06 Da, | 1127.859741 | 3 | 463.9604492 | 463.9605648 |
| MKHYEVEIR                   | Q9CY27 | 0.00224719 | n +34.06 Da,K +34.06 Da, | 996.9105835 | 2 | 636.8748779 | 636.8739102 |
| ASKPTLNEVVIVSAIR            | Q8QZT1 | 0          | n +34.06 Da,K +34.06 Da, | 3077.854492 | 3 | 589.0432129 | 589.0454639 |
| FLLQHVKGSR                  | Q8R164 | 0          | n +34.06 Da,K +34.06 Da, | 950.8787842 | 4 | 313.9595337 | 313.9594802 |
| SSSEDKITVHFKNR              | P46656 | 0          | n +34.06 Da,K +34.06 Da, | 973.0842285 | 3 | 584.0200195 | 584.0162741 |
| AKHLKFIAR                   | P58059 | 0.00224719 | n +42.03 Da,K +34.06 Da, | 1130.484497 | 3 | 398.6098022 | 398.6099718 |
| ERYDEEEEAERDR               | Q8VCB3 | 0.00118624 | n +34.06 Da,             | 881.973999  | 4 | 440.7036743 | 440.7040048 |
| PKSPQYSQVIHR                | P17563 | 0          | n +17.03 Da,K +34.06 Da, | 908.0336304 | 3 | 497.6283264 | 497.6282026 |
| PSYVLSGSAMNVVSEDEMKR        | Q8C196 | 0          | n +17.03 Da,K +34.06 Da, | 3902.273682 | 3 | 799.7399902 | 799.739895  |
| DITDGNSEHLKR                | Q9DBH5 | 0          | n +34.06 Da,K +34.06 Da, | 881.5394897 | 4 | 363.957428  | 363.957401  |
| WRPPQPVKGR                  | P16015 | 0          | n +34.06 Da,K +34.06 Da, | 1009.308105 | 4 | 322.9619141 | 322.9622885 |
| TPGIHIGKKELNMGQR            | P45952 | 0          | n +34.06 Da,K +34.06 Da, | 1618.167114 | 4 | 471.0447388 | 471.0451468 |
| AKDVKFGADAR                 | P63038 | 0          | n +34.06 Da,K +34.06 Da, | 878.6082764 | 3 | 427.2788086 | 427.2787691 |
| SLKDLEGKWR                  | Q05816 | 0          | n +34.06 Da,K +34.06 Da, | 2109.182861 | 3 | 445.294281  | 445.2944192 |
| LPTNRENYIHR                 | P10630 | 0.00763359 | n +34.06 Da,             | 900.9041138 | 4 | 362.4599915 | 362.4560687 |
| SGTTAPKKTSGSLKDEDR          | Q91YT0 | 0          | n +34.06 Da,K +34.06 Da, | 1002.84491  | 4 | 541.0700073 | 541.0747584 |
| PHEELPSLQRPR                | Q3UQ44 | 0.00224719 | n +17.03 Da,             | 1436.847046 | 4 | 369.7085876 | 369.7086453 |
| PQKVNIHGGAVSLGHPIGMSGAR     | Q8QZT1 | 0          | n +17.03 Da,K +34.06 Da, | 1958.834473 | 5 | 467.6677856 | 467.6675341 |
| TGKTATPQQAQEVHEKLR          | P17751 | 0          | n +34.06 Da,K +34.06 Da, | 911.3128662 | 4 | 531.8191528 | 531.8209672 |
| PTSKAECSAEQCYKVTKGR         | P06801 | 0          | n +17.03 Da,K +34.06 Da, | 897.0872192 | 4 | 580.5700073 | 580.5728159 |
| AEDIKTIKINYKTAPFDSRFPNQNTKN | P56391 | 0          | n +42.03 Da,K +34.06 Da, | 2904.112061 | 5 | 702.6099854 | 702.6114977 |
| SKKMNLGVGAYR                | P05202 | 0          | n +34.06 Da,K +34.06 Da, | 1046.266479 | 3 | 475.9745178 | 475.9746922 |

|                                |        |            |                          |             |   |             |             |
|--------------------------------|--------|------------|--------------------------|-------------|---|-------------|-------------|
| LNALRFTTKHLNDESTSKQIR          | Q8BHZ0 | 0.00224719 | n +31.05 Da,             | 3216.70459  | 4 | 626.6099854 | 626.6001989 |
| VPDKTVKWCVAVENTKCSIFR          | Q921I1 | 0          | n +34.06 Da,K +34.06 Da, | 2334.484131 | 5 | 586.3300171 | 586.3294036 |
| ERYDEEEEAERDR                  | Q8VCB3 | 0.00118624 | n +34.06 Da,             | 883.9224243 | 3 | 587.2700195 | 587.2695809 |
| TRETWKDIER                     | Q9DD20 | 0          | n +34.06 Da,K +34.06 Da, | 1167.480957 | 4 | 351.2085876 | 351.20849   |
| FIMLKGCVVGTKKR                 | P27659 | 0          | n +34.06 Da,K +34.06 Da, | 1511.608032 | 4 | 444.0499878 | 444.0533135 |
| MKETIMNQEKLAKLQAQVR            | Q64152 | 0          | n +34.06 Da,K +34.06 Da, | 2343.238281 | 3 | 799.1699829 | 799.1660669 |
| PPEEKEASLAKIKEQTR              | P30115 | 0.00224719 | n +17.03 Da,K +34.06 Da, | 1252.126953 | 4 | 519.078064  | 519.0757827 |
| GQEKGSAEVRGKVPALGR             | E9QP49 | 0.02979146 | n +17.03 Da,K +34.06 Da, | 1461.103149 | 5 | 385.6400146 | 385.6412854 |
| GHQQLYWSHPR                    | P62274 | 0          | n +34.06 Da,             | 986.8148193 | 4 | 361.4433594 | 361.4429612 |
| SEETKQNEAFSLTAGKGR             | P01027 | 0          | n +34.06 Da,K +34.06 Da, | 1171.443481 | 4 | 555.0800171 | 555.0841205 |
| AHRFPALTPQKKEELSEIAQR          | Q91Y97 | 0          | n +42.03 Da,K +34.06 Da, | 3111.612549 | 3 | 853.8275757 | 853.8274604 |
| PGHLQEGFGCVVTNR                | Q9CY58 | 0          | n +17.03 Da,             | 2003.064331 | 3 | 563.289978  | 563.2842896 |
| SQIKYLDIFAVKNEKR               | P17047 | 0.02897103 | n +34.06 Da,K +34.06 Da, | 3649.353271 | 5 | 447.8900146 | 447.8892741 |
| YDINAHACVTGKPISQGGIHR          | P26443 | 0          | n +34.06 Da,K +34.06 Da, | 1856.217163 | 4 | 605.5700073 | 605.5788494 |
| SETAAPAAPAPAEKTPVKKKAR         | P43274 | 0          | n +42.03 Da,K +34.06 Da, | 915.2340698 | 4 | 642.1599731 | 642.1563485 |
| RVNVDKVLER                     | P63024 | 0.04174757 | n +34.06 Da,K +34.06 Da, | 1128.185669 | 4 | 324.7200012 | 324.7162162 |
| VDADNPAAPARSWKRKMPKQR          | Q9CVN6 | 0.02979146 | n +42.03 Da,K +34.06 Da, | 1498.631958 | 4 | 670.8900146 | 670.8882814 |
| TVHVGHPKVVITR                  | P61255 | 0.0033557  | n +34.06 Da,K +34.06 Da, | 1573.890625 | 5 | 343.0264587 | 343.0260965 |
| SDSRDPASDQMKQWKEQR             | P24270 | 0          | n +42.03 Da,K +34.06 Da, | 1865.954102 | 4 | 576.289978  | 576.2933863 |
| PVTVEPMDQLDDEEGLPEKLVIKNQFHKER | Q99K48 | 0          | n +17.03 Da,K +34.06 Da, | 3464.439209 | 5 | 757.0200195 | 757.0206145 |
| VKAKIQDKEGIPPDQQR              | POCG49 | 0          | n +34.06 Da,K +34.06 Da, | 900.6871948 | 4 | 522.3377075 | 522.337752  |
| IITEDEKGHLLHGR                 | Q9WV54 | 0          | n +34.06 Da,K +34.06 Da, | 1228.872925 | 5 | 338.0050354 | 338.0052156 |
| TIKNTVHVLAKLR                  | P25688 | 0          | n +34.06 Da,K +34.06 Da, | 1560.368652 | 4 | 399.5365906 | 399.5358487 |
| YDGKLSFKR                      | P09103 | 0.02724521 | n +34.06 Da,K +34.06 Da, | 1023.181458 | 4 | 326.4599915 | 326.4620837 |
| HSSAAAESAALKVRPER              | Q8BGT5 | 0          | n +34.06 Da,K +34.06 Da, | 1495.931885 | 4 | 480.5299988 | 480.5328018 |
| READDIVNWLKKR                  | P09103 | 0          | n +34.06 Da,K +34.06 Da, | 2713.284912 | 4 | 437.0299988 | 437.0283882 |
| SCKSEVEVKKIFR                  | O35490 | 0.00960512 | n +34.06 Da,K +34.06 Da, | 1365.879639 | 4 | 437.2869873 | 437.2868359 |
| RDDVALEGVGHFFR                 | P29391 | 0          | n +34.06 Da,             | 3028.790771 | 4 | 413.7242737 | 413.7245423 |
| PAVLQVECHPYLAQNELIAHCHAR       | Q9JII6 | 0          | n +14.02 Da,             | 2841.517578 | 4 | 710.8499756 | 710.8575351 |
| PEVQKDTKNVFPKIVR               | P38647 | 0          | n +17.03 Da,K +34.06 Da, | 1650.359009 | 4 | 505.082428  | 505.082139  |
| PMGSSSFQHLKQLPNHR              | Q8VCR7 | 0          | n +17.03 Da,K +34.06 Da, | 1699.716431 | 4 | 504.5271301 | 504.5271095 |
| TRWDIQYAR                      | O35490 | 0          | n +34.06 Da,K +34.06 Da, | 1880.106689 | 4 | 351.9638062 | 351.9650285 |
| FADKVPKTAENFR                  | P17742 | 0.03359684 | n +34.06 Da,K +34.06 Da, | 1655.865479 | 4 | 407.0028381 | 407.0031104 |
| SSMGSYPKKPMSSYL                | P40630 | 0          | n +34.06 Da,K +34.06 Da, | 1967.489624 | 4 | 481.019989  | 481.0247229 |
| MAPVAGKKAKKGILR                | O35490 | 0          | n +42.03 Da,K +34.06 Da, | 1285.923584 | 5 | 375.8628845 | 375.8635206 |
| DITDGNSEHLKR                   | Q9DBH5 | 0          | n +34.06 Da,K +34.06 Da, | 880.1875    | 3 | 484.9411011 | 484.9407758 |
| ACGLVASNLNPKPGECLKVR           | P16045 | 0          | n +42.03 Da,K +34.06 Da, | 3520.697266 | 3 | 770.4400024 | 770.4416721 |
| MLMPKKNR                       | P63325 | 0.00446927 | n +34.06 Da,K +34.06 Da, | 878.4997559 | 3 | 373.924408  | 373.9245036 |
| VPDKTVKWCVAVENTKCSIFR          | Q921I1 | 0          | n +34.06 Da,K +34.06 Da, | 2406.673584 | 6 | 488.7752686 | 488.7757158 |
| AGAVIIASEDAVKKHNFPLAR          | Q8BWT1 | 0.00224719 | n +42.03 Da,K +34.06 Da, | 1162.183105 | 4 | 605.3499756 | 605.3589576 |

|                                      |        |            |                          |             |   |             |             |
|--------------------------------------|--------|------------|--------------------------|-------------|---|-------------|-------------|
| PEELKSESAKEKWR                       | Q9D0B6 | 0          | n +17.03 Da,K +34.06 Da, | 909.4557495 | 4 | 459.7832642 | 459.7835683 |
| DNEALIEKLKHGQFTLR                    | P14576 | 0          | n +34.06 Da,K +34.06 Da, | 3402.77124  | 4 | 529.3200073 | 529.3258852 |
| TEVGHLIQKAAGESNLKR                   | Q9CZS1 | 0          | n +34.06 Da,K +34.06 Da, | 2009.143677 | 4 | 514.0700073 | 514.0707849 |
| HGSIYHPSLLPR                         | Q8K009 | 0          |                          | 2091.95752  | 3 | 497.2799072 | 497.2806559 |
| MHHQSVLHSGYFHPLLR                    | P10518 | 0          | n +14.02 Da,             | 2237.261963 | 5 | 415.4200134 | 415.4178117 |
| ICEHFLSSFNVTR                        | P25688 | 0          | n +34.06 Da,             | 2495.210449 | 4 | 445.9803772 | 445.9807511 |
| SWQDLKDHMR                           | Q6PDM2 | 0.01966874 | n +34.06 Da,K +34.06 Da, | 1906.778442 | 4 | 346.691864  | 346.6923126 |
| ITAHLVHELRL                          | Q8BWT1 | 0          |                          | 1171.069946 | 4 | 304.9343262 | 304.9344754 |
| RPLPENPYHSR                          | Q9DCJ5 | 0          | n +34.06 Da,             | 893.65979   | 4 | 350.7000122 | 350.6967902 |
| VPDKTVKWCVAUSEHENTKCISFR             | Q921I1 | 0          | n +34.06 Da,K +34.06 Da, | 2325.327148 | 6 | 488.769989  | 488.7757158 |
| ANDATFEIKKCDLHR                      | P35486 | 0          | n +34.06 Da,K +34.06 Da, | 1548.81897  | 4 | 480.7783508 | 480.7768707 |
| DHAGGNEKLVKLEPGLKVYGGDDR             | Q99KB8 | 0.00659341 | n +34.06 Da,K +34.06 Da, | 2244.42334  | 4 | 676.6500244 | 676.648888  |
| TMVVHEKQDDLKGGNEESTKTGNAGSR          | P08228 | 0.00224719 | n +42.03 Da,K +34.06 Da, | 1123.675415 | 5 | 618.7299805 | 618.7261583 |
| SLHTAHATKDMENLFQLVR                  | Q9CZ42 | 0          | n +34.06 Da,K +34.06 Da, | 3409.523438 | 4 | 570.5700073 | 570.5704929 |
| SGSNPKAATAGSQAGPGGLVAGKEEKKKAGGGVLNR | Q8C4B4 | 0          | n +42.03 Da,K +34.06 Da, | 1660.521973 | 5 | 713.2299805 | 713.2297527 |
| PLYLSTKNTILKKYDGR                    | O88844 | 0          | n +17.03 Da,K +34.06 Da, | 2389.971436 | 5 | 426.6799927 | 426.6776525 |
| SSGTTAPKKTSGSLKDEDRL                 | Q91YTO | 0          | n +34.06 Da,K +34.06 Da, | 1010.441956 | 3 | 750.1099854 | 750.1079288 |
| HMPPEEKEASLAKIKEQTR                  | P30115 | 0          | n +42.03 Da,K +34.06 Da, | 1554.047363 | 5 | 474.0700073 | 474.0777623 |
| APVAGKKAKKGILER                      | O35490 | 0          | n +42.03 Da,K +34.06 Da, | 949.3488159 | 4 | 436.8175049 | 436.8174604 |
| DPGAAPLKSGGTHMNDKDKNVR               | P18572 | 0          | n +34.06 Da,K +34.06 Da, | 902.8560791 | 5 | 489.6900024 | 489.6855679 |
| SSSEDKITVHFKNR                       | P46656 | 0          | n +34.06 Da,K +34.06 Da, | 1013.455383 | 3 | 584.0159302 | 584.0162741 |
| SLSNKLTLDKLDVKGKRL                   | P09411 | 0.00224719 | n +42.03 Da,K +34.06 Da, | 2262.452393 | 4 | 524.1099854 | 524.1045898 |
| SEPTEDAEGHKPKLCR                     | Q9JIL4 | 0          | n +34.06 Da,K +34.06 Da, | 893.1774292 | 4 | 489.769989  | 489.7730569 |
| IKVDVGGDKCVHLR                       | Q62426 | 0          | n +34.06 Da,K +34.06 Da, | 1660.303589 | 4 | 425.2702942 | 425.2699524 |
| HVVHKWHYKLTKASVH                     | B1AZI6 | 0.03168317 | n +31.05 Da,             | 1289.572021 | 4 | 501.0400085 | 501.0390476 |
| ATEARPTTEKSVPYQR                     | Q99LB7 | 0          | n +34.06 Da,K +34.06 Da, | 884.135376  | 4 | 476.2734985 | 476.2733563 |
| GAYKYIQELWR                          | Q9CZM2 | 0          | n +34.06 Da,K +34.06 Da, | 3361.9375   | 3 | 498.9599915 | 498.9628516 |
| GAHGGGAFSGKDYTEKVDRL                 | Q3THS6 | 0          | n +34.06 Da,K +34.06 Da, | 957.1628418 | 5 | 385.8200073 | 385.8203105 |
| EVKCDMEVSCPEGYTCR                    | P28798 | 0          | n +34.06 Da,K +34.06 Da, | 2283.896729 | 3 | 783.3400269 | 783.3422019 |
| GQVAWARVDPNEGIR                      | Q8R007 | 0.02979146 | n +17.03 Da,             | 1054.889526 | 4 | 421.9707336 | 421.9786559 |
| PAAPAPAEKTPVKKAR                     | P43274 | 0.00118624 | n +42.03 Da,K +34.06 Da, | 1039.750366 | 3 | 646.7700195 | 646.7772361 |
| PATEEVICHVEEGDKADVDAVKAAR            | O35945 | 0          | n +17.03 Da,K +34.06 Da, | 2862.083252 | 6 | 493.6099854 | 493.6111842 |
| PFVEKAKLLR                           | Q64459 | 0.00659341 | n +17.03 Da,K +34.06 Da, | 1455.191162 | 4 | 362.7708435 | 362.7710029 |
| APVAGKKAKKGILER                      | O35490 | 0          | n +42.03 Da,K +34.06 Da, | 948.5771484 | 5 | 349.6600037 | 349.6554236 |
| IVNWLKKR                             | P09103 | 0.03168317 | n +34.06 Da,K +34.06 Da, | 1158.845947 | 3 | 386.9599915 | 386.9571895 |
| VKVFVGKGNPTKVVAVDCGKNNVIR            | Q8C196 | 0          | n +34.06 Da,K +34.06 Da, | 2422.909912 | 5 | 577.3776855 | 577.3757708 |
| MEAVPEKKKKVVATVPGTLKK                | P14148 | 0.03451677 | n +42.03 Da,K +34.06 Da, | 1497.221313 | 4 | 607.9299927 | 607.9275697 |
| AALRPLVKPKIVK                        | P17932 | 0          | n +34.06 Da,K +34.06 Da, | 1366.944946 | 5 | 314.6511536 | 314.6508391 |
| AALRPLVKPKIVK                        | P17932 | 0          | n +34.06 Da,K +34.06 Da, | 1328.914673 | 4 | 393.0623169 | 393.0617298 |
| DPAIYFKEQFLDGDWNTNR                  | P14211 | 0          | n +34.06 Da,K +34.06 Da, | 4379.325195 | 3 | 785.4099731 | 785.4077907 |

|                                    |        |            |                          |             |   |             |             |
|------------------------------------|--------|------------|--------------------------|-------------|---|-------------|-------------|
| RCQCEGKAFKR                        | P10751 | 0.03133903 | n +28.03 Da,K +28.03 Da, | 4268.37793  | 2 | 762.4099731 | 762.4003154 |
| PTALMTDPKYIIVSPVCR                 | P11352 | 0          | n +17.03 Da,K +34.06 Da, | 4068.800293 | 3 | 733.7399902 | 733.7357556 |
| ASPGSPLEKLVSSVSLPKR                | P54869 | 0          | n +34.06 Da,K +34.06 Da, | 4059.697998 | 4 | 543.0894165 | 543.0889093 |
| PGVVDNFPLLKALR                     | P30115 | 0          | n +17.03 Da,K +34.06 Da, | 4100.47998  | 3 | 530.6715088 | 530.6715198 |
| SAAATSAVPAPNHQPEVFCNQIFINNEWHDAVSR | P47738 | 0.01775148 | n +34.06 Da,             | 3950.533203 | 4 | 953.7199707 | 953.7169081 |
| NKELDPVQKLFVDKIR                   | P97450 | 0          | n +34.06 Da,K +34.06 Da, | 3867.49585  | 5 | 416.4789124 | 416.4787213 |
| AKVEQVLSLEPQHELKFR                 | Q9QY76 | 0          | n +42.03 Da,K +34.06 Da, | 3860.846924 | 4 | 566.0900269 | 566.0876758 |
| SYGRPPDVEGMLTSLKVDNLTYR            | Q62093 | 0          | n +42.03 Da,K +34.06 Da, | 3845.915283 | 3 | 891.1199951 | 891.1251373 |
| AHRFPALTPQKKEELSEIAQR              | Q91Y97 | 0          | n +42.03 Da,K +34.06 Da, | 3821.739258 | 5 | 512.7000122 | 512.6993868 |
| AHRFPALTPQKKEELSEIAQR              | Q91Y97 | 0          | n +42.03 Da,K +34.06 Da, | 3781.03125  | 5 | 512.7000122 | 512.6993868 |
| NKELDPVQKLFVDKIR                   | P97450 | 0          | n +34.06 Da,K +34.06 Da, | 3769.349121 | 5 | 416.480011  | 416.4787213 |
| PDVDEPLETPLSHVLGR                  | Q922Y1 | 0          | n +17.03 Da,             | 3889.785645 | 3 | 631.0043945 | 631.0038465 |
| MHHQSVLHSGYFHPLLR                  | P10518 | 0          | n +42.03 Da,             | 3719.621094 | 5 | 421.019989  | 421.0167947 |
| ACGLVASNLNLKPGECKLVR               | P16045 | 0          | n +42.03 Da,K +34.06 Da, | 3657.611572 | 3 | 770.4416504 | 770.4416721 |
| NKELDPVQKLFVDKIR                   | P97450 | 0          | n +17.03 Da,K +34.06 Da, | 3643.361572 | 4 | 516.0883179 | 516.0886927 |
| GQVVQFKLSDIGEGIR                   | P53395 | 0          | n +34.06 Da,K +34.06 Da, | 3627.859619 | 3 | 605.3648682 | 605.3650852 |
| PDPSTKDFLLQQTMLR                   | Q9CPU0 | 0.01246106 | n +17.03 Da,K +34.06 Da, | 3622.526855 | 3 | 647.7000122 | 647.6960659 |
| MDDREDLVYQAKLAEQAER                | P62259 | 0          | n +42.03 Da,K +34.06 Da, | 3585.769775 | 3 | 786.0599976 | 786.0602447 |
| GDPKEEEEEELVDPLTTVR                | P99028 | 0          | n +34.06 Da,K +34.06 Da, | 3575.185547 | 3 | 751.7307129 | 751.7304884 |
| SSSRPVALVTGANKGIGFAITR             | P48758 | 0          | n +42.03 Da,K +34.06 Da, | 3575.075928 | 3 | 760.107666  | 760.1078573 |
| SGSKYKPAPLATLPSTLDPAEYDVSPETR      | Q9CQC7 | 0          | n +42.03 Da,K +34.06 Da, | 4005.675781 | 4 | 800.9299927 | 800.9304082 |
| AVRPLQLLGTCAELCR                   | Q8BTE6 | 0          | n +34.06 Da,             | 3506.327637 | 3 | 631.0203247 | 631.0203374 |
| PGVVDNFPLLKALR                     | P30115 | 0          | n +17.03 Da,K +34.06 Da, | 4140.876465 | 3 | 530.6716919 | 530.6715198 |
| PAPATTFAHLDATTVLSR                 | P56480 | 0          | n +14.02 Da,             | 3495.584717 | 3 | 628.3400269 | 628.3389002 |
| AAAKKAVLGPLVGAVDQGTSSSTR           | Q64516 | 0          | n +42.03 Da,K +34.06 Da, | 3450.632324 | 3 | 769.789978  | 769.7937566 |
| NKELDPVQKLFVDKIR                   | P97450 | 0          | n +34.06 Da,K +34.06 Da, | 3684.205566 | 4 | 520.3460083 | 520.3465825 |
| ASGVAVSDGVIKVFNDMKVR               | P18760 | 0.01775148 | n +42.03 Da,K +34.06 Da, | 4099.041016 | 3 | 734.7600098 | 734.7577661 |
| SSPAQPAVPAPLADLKIQHTK              | P24549 | 0          | n +42.03 Da,K +34.06 Da, | 3412.552246 | 3 | 760.4500122 | 760.4513306 |
| KELDPVQKLFVDKIR                    | P97450 | 0          | n +34.06 Da,K +34.06 Da, | 3410.179688 | 4 | 491.8399963 | 491.8358504 |
| ACGLVASNLNLKPGECKLVR               | P16045 | 0.046875   | n +42.03 Da,K +34.06 Da, | 3616.836426 | 3 | 770.4400024 | 770.4416721 |
| SSPAQPAVPAPLADLKIQHTK              | P24549 | 0          | n +42.03 Da,K +34.06 Da, | 3372.099854 | 3 | 760.4500122 | 760.4513306 |
| KELDPVQKLFVDKIR                    | P97450 | 0          | n +34.06 Da,K +34.06 Da, | 3367.027588 | 4 | 491.8399963 | 491.8358504 |
| PAPATTFAHLDATTVLSR                 | P56480 | 0          | n +17.03 Da,             | 3360.837646 | 3 | 629.3441772 | 629.3442029 |
| MKVELCSFSGYKIYPGHGR                | Q8BP67 | 0          | n +34.06 Da,K +34.06 Da, | 3353.258057 | 5 | 467.0630798 | 467.0625616 |
| SDAAVDTSEITTKDLKEKKEVVEEAENGR      | P26350 | 0.00949367 | n +42.03 Da,K +34.06 Da, | 3335.025635 | 4 | 864.9799805 | 864.9770747 |
| VPPVQVSPLIKFRG                     | Q06185 | 0.0033557  | n +34.06 Da,K +34.06 Da, | 3326.648438 | 3 | 535.6893921 | 535.6889511 |
| ASGVTVNDEVIKVFNDMKVR               | P45591 | 0          | n +42.03 Da,K +34.06 Da, | 4407.82666  | 3 | 777.7700195 | 777.7719642 |
| LFHPEQNVPKRKR                      | Q68EF4 | 0.04143646 | n +31.05 Da,             | 3282.461426 | 3 | 560.6699829 | 560.6670621 |
| PEVLDITEQALHSR                     | P14869 | 0          | n +17.03 Da,             | 3280.526123 | 3 | 542.2999878 | 542.2949603 |
| ASKPTLNEVVIVSAIR                   | Q8QZT1 | 0          | n +34.06 Da,K +34.06 Da, | 3246.951904 | 3 | 589.0453491 | 589.0454639 |



|                               |        |            |                          |             |   |             |             |
|-------------------------------|--------|------------|--------------------------|-------------|---|-------------|-------------|
| ASLKDLEGKWR                   | Q05816 | 0          | n +42.03 Da,K +34.06 Da, | 3223.816162 | 3 | 471.6225891 | 471.6226066 |
| SKPTLNEVVIVSAIR               | Q8QZT1 | 0          | n +34.06 Da,K +34.06 Da, | 3211.049805 | 3 | 565.3699951 | 565.3664259 |
| PKEEEEEELVDPLTTVR             | P99028 | 0          | n +17.03 Da,K +34.06 Da, | 3161.163818 | 3 | 688.7000122 | 688.7038327 |
| VSLHLGVTPSVLR                 | O89023 | 0          | n +34.06 Da,             | 3160.945313 | 3 | 471.2996521 | 471.2996456 |
| SEKSVEAAAELSAKDLKEKKDKVEEKAGR | Q9D0J8 | 0          | n +42.03 Da,K +34.06 Da, | 3155.491455 | 6 | 576.5300293 | 576.5316662 |
| SDLELHPPSYPWVSHR              | Q9D0M3 | 0          | n +34.06 Da,             | 3149.326172 | 4 | 464.4893799 | 464.4891034 |
| HVGDGLGNVTAGKDGVANVSIEDR      | P08228 | 0          | n +17.03 Da,K +34.06 Da, | 3048.60791  | 3 | 792.0800171 | 792.0909729 |
| LRPGDCEVCISYLGR               | Q9CXI5 | 0.00949367 | n +34.06 Da,             | 3037.688965 | 3 | 610.3099976 | 610.3134096 |
| PHPYPALTPPEQKKELSAIAHR        | P05064 | 0          | n +17.03 Da,K +34.06 Da, | 3032.290771 | 5 | 503.2929382 | 503.2929658 |
| TVSLHLGVTPSVLR                | O89023 | 0.0033557  | n +34.06 Da,             | 3189.27124  | 3 | 504.9825134 | 504.9822054 |
| ASKPTLNEVVIVSAIR              | Q8QZT1 | 0.01246106 | n +34.06 Da,K +34.06 Da, | 3004.571289 | 3 | 589.0499878 | 589.0454639 |
| SAGFLQASASDVVVVHGR            | Q8VCHO | 0          | n +34.06 Da,             | 2997.787598 | 3 | 612.0100098 | 612.0058505 |
| AAPAKGENLSLVVHGPDIR           | Q64442 | 0          | n +42.03 Da,K +34.06 Da, | 2994.748291 | 3 | 693.0599976 | 693.0586147 |
| VPPVQVSPLIKFGR                | Q06185 | 0          | n +34.06 Da,K +34.06 Da, | 3367.519287 | 3 | 535.689209  | 535.6889511 |
| MEKTELIQKAKLAEQAER            | P68254 | 0          | n +42.03 Da,K +34.06 Da, | 2974.096191 | 4 | 565.8400269 | 565.8412055 |
| PHPYPALTPPEQKKELSAIAHR        | P05064 | 0          | n +17.03 Da,K +34.06 Da, | 2951.30127  | 5 | 503.2924194 | 503.2929658 |
| TMDKSELVQKAKLAEQAER           | Q9CQV8 | 0          | n +42.03 Da,K +34.06 Da, | 2943.320801 | 4 | 580.5900269 | 580.5913878 |
| DDEVVDVGTVEEDLGKSR            | P08113 | 0          | n +34.06 Da,K +34.06 Da, | 2933.197754 | 3 | 682.6799927 | 682.6763835 |
| NKELDPVQKLFVDKIR              | P97450 | 0          | n +34.06 Da,K +34.06 Da, | 3845.695313 | 4 | 520.3499756 | 520.3465825 |
| FKQHLLQSR                     | A8C756 | 0.046875   | n +42.03 Da,K +34.06 Da, | 2885.894043 | 2 | 616.8814697 | 616.8697579 |
| PHPYPALTPPEQKKELSAIAHR        | P05064 | 0          | n +17.03 Da,K +34.06 Da, | 2993.311279 | 6 | 419.5787354 | 419.5786842 |
| AAPAKGENLSLVVHGPDIR           | Q64442 | 0.00660066 | n +42.03 Da,K +34.06 Da, | 3075.505859 | 3 | 693.0586548 | 693.0586147 |
| AGAESDGGQFQFTGIKKY            | Q78IK2 | 0          | n +34.06 Da,K +34.06 Da, | 2863.63208  | 3 | 650.3699951 | 650.3669729 |
| AAPAKGENLSLVVHGPDIR           | Q64442 | 0          | n +42.03 Da,K +34.06 Da, | 3035.309326 | 3 | 693.0585327 | 693.0586147 |
| AHIFVYGTLLKR                  | Q923B0 | 0          | n +42.03 Da,K +34.06 Da, | 2846.886475 | 3 | 460.9400024 | 460.9452025 |
| PLHEELLGQGCVFQER              | Q99LB7 | 0          | n +17.03 Da,             | 3090.756104 | 3 | 643.6599731 | 643.6614261 |
| IVANGKGIILAADESVGTMGNR        | Q91Y97 | 0          | n +17.03 Da,K +34.06 Da, | 3052.996094 | 3 | 708.7199707 | 708.7283177 |
| MKVFTVGLPAEGR                 | Q91Z53 | 0          | n +34.06 Da,K +34.06 Da, | 2803.815674 | 3 | 523.9868774 | 523.9867799 |
| SSKPKSLEIIGAPFSKGQPR          | Q61176 | 0.01775148 | n +42.03 Da,K +34.06 Da, | 2751.717773 | 4 | 568.5999756 | 568.6034551 |
| GVKIMGTSPLQIDR                | Q8C196 | 0.01529052 | n +34.06 Da,K +34.06 Da, | 2741.187256 | 3 | 528.3200073 | 528.325573  |
| PVTGDLVVGCHPNGMR              | P52430 | 0.02046784 | n +17.03 Da,             | 2733.193359 | 3 | 604.960022  | 604.9609295 |
| AEDIKTIKIKNYKTAPFDSR          | P56391 | 0          | n +42.03 Da,K +34.06 Da, | 2727.049072 | 4 | 601.6168213 | 601.6193331 |
| SLHLGVTPSVLR                  | O89023 | 0          | n +34.06 Da,             | 2725.737549 | 3 | 438.2768555 | 438.2768409 |
| MKFNPVFTSDR                   | P61255 | 0          | n +34.06 Da,K +34.06 Da, | 2721.233643 | 3 | 470.6010437 | 470.6009254 |
| GGVFVALEKR                    | O35490 | 0.046875   | n +34.06 Da,K +34.06 Da, | 2718.974121 | 3 | 397.9220276 | 397.9222157 |
| TKYKPESDELTAEKITEFCHR         | P09103 | 0          | n +34.06 Da,K +34.06 Da, | 2706.261719 | 5 | 544.5078735 | 544.5074234 |
| SSKPKSLEIIGAPFSKGQPR          | Q61176 | 0          | n +42.03 Da,K +34.06 Da, | 2703.269775 | 3 | 757.8035278 | 757.8021813 |
| AGKPVLYHFDGR                  | P30115 | 0          | n +42.03 Da,K +34.06 Da, | 2701.335938 | 3 | 479.2686768 | 479.2683455 |
| MKFNPVFTSDR                   | P61255 | 0          | n +34.06 Da,K +34.06 Da, | 2700.406738 | 3 | 470.6000671 | 470.6009254 |
| MKVFTVGLPAEGR                 | Q91Z53 | 0          | n +34.06 Da,K +34.06 Da, | 2763.41748  | 3 | 523.9899902 | 523.9867799 |

|                              |        |            |                          |             |   |             |             |
|------------------------------|--------|------------|--------------------------|-------------|---|-------------|-------------|
| TPEQVAMATVTALHR              | Q91Y97 | 0          | n +34.06 Da,             | 2829.44873  | 3 | 553.6400146 | 553.6417433 |
| LDPskTNVSGGAIAlGHPLGGSGSR    | Q8BWT1 | 0          | n +34.06 Da,K +34.06 Da, | 2683.556641 | 4 | 604.845459  | 604.8449433 |
| TRVSEQHPVVLTKFVEGAR          | Q8C196 | 0.00949367 | n +34.06 Da,K +34.06 Da, | 2682.235596 | 4 | 556.0837402 | 556.082659  |
| AAAAYEHLKLH                  | Q9EP69 | 0.00949367 | n +42.03 Da,K +34.06 Da, | 2682.016602 | 3 | 433.9135437 | 433.9137911 |
| LHLGVTPSVLR                  | O89023 | 0.00660066 | n +34.06 Da,             | 2677.07959  | 3 | 409.2669678 | 409.2661645 |
| MNQEKLAKLQAQVR               | Q64152 | 0          | n +42.03 Da,K +34.06 Da, | 2654.686768 | 3 | 589.6900024 | 589.6909151 |
| SDAPPLTDGIKDR                | Q9CR21 | 0          | n +34.06 Da,K +34.06 Da, | 2651.549561 | 3 | 522.6436768 | 522.643848  |
| ISFHLPVNSR                   | Q9D1D4 | 0          | n +34.06 Da,             | 2649.59082  | 3 | 401.9066162 | 401.9067477 |
| PIDVCEIGSKVCAR               | Q9D819 | 0          | n +17.03 Da,K +34.06 Da, | 2640.242432 | 3 | 552.2999878 | 552.3007699 |
| STSSMGTLPKQVKIVEVGPR         | P38060 | 0          | n +34.06 Da,K +34.06 Da, | 2716.366211 | 4 | 554.8400269 | 554.843748  |
| PHYPALTPeQKkELSDIAHR         | P05064 | 0          | n +17.03 Da,K +34.06 Da, | 3002.641602 | 4 | 628.8599854 | 628.8643881 |
| SLSNKLTLDKLDVKGKR            | P09411 | 0          | n +42.03 Da,K +34.06 Da, | 2593.162354 | 4 | 524.1048584 | 524.1045898 |
| SLSNKLTLDKLDVKGKR            | P09411 | 0          | n +42.03 Da,K +34.06 Da, | 2554.959961 | 5 | 419.4899902 | 419.4851271 |
| VGVKPVGSDPDFQPELSGAGSR       | Q8CDN6 | 0          | n +34.06 Da,K +34.06 Da, | 2819.500488 | 3 | 756.4199829 | 756.4149454 |
| AGKPVLHYFDGR                 | P30115 | 0          | n +42.03 Da,K +34.06 Da, | 2553.141846 | 3 | 479.2686768 | 479.2683455 |
| SLSNKLTLDKLDVKGKR            | P09411 | 0          | n +42.03 Da,K +34.06 Da, | 2552.660645 | 4 | 524.1045532 | 524.1045898 |
| MKFQYKEDHPFEYR               | Q8R3R8 | 0          | n +34.06 Da,K +34.06 Da, | 2547.853516 | 4 | 505.7767639 | 505.7766049 |
| LLNKPKESEMTPeELQKR           | P62317 | 0          | n +42.03 Da,K +34.06 Da, | 2538.56543  | 4 | 568.8412476 | 568.8412055 |
| PCLKDLKKGDIQLQR              | Q8CGC7 | 0          | n +17.03 Da,K +34.06 Da, | 2590.980957 | 4 | 511.8399963 | 511.8357064 |
| AGKPVLHYFDGR                 | P30115 | 0          | n +42.03 Da,K +34.06 Da, | 2512.398682 | 3 | 479.2688904 | 479.2683455 |
| MKFQYKEDHPFEYR               | Q8R3R8 | 0.01246106 | n +34.06 Da,K +34.06 Da, | 2588.742188 | 4 | 505.7766724 | 505.7766049 |
| APLDTINVHLR                  | P70699 | 0          | n +34.06 Da,             | 2498.869385 | 3 | 428.2600098 | 428.2611908 |
| SLSNKLTLDKLDVKGKR            | P09411 | 0          | n +42.03 Da,K +34.06 Da, | 2514.435059 | 5 | 419.4899902 | 419.4851271 |
| AFKDTGKTPVEPEVAIHR           | P60867 | 0          | n +42.03 Da,K +34.06 Da, | 2475.877441 | 3 | 702.4000244 | 702.4057211 |
| LNLQEQSKKLMSEHGVR            | Q9Z2I8 | 0          | n +34.06 Da,K +34.06 Da, | 2471.503906 | 4 | 566.333374  | 566.3335474 |
| STQSAVSKAGAGAVVPKLSHLPR      | Q9DC70 | 0          | n +34.06 Da,K +34.06 Da, | 2464.270996 | 5 | 473.5       | 473.4981816 |
| SKPKSLEIIGAPFSKGQPR          | Q61176 | 0          | n +34.06 Da,K +34.06 Da, | 2449.12793  | 5 | 436.0899963 | 436.0883239 |
| QKTGTAEMSSILEER              | Q03265 | 0          | n +34.06 Da,K +34.06 Da, | 2448.01416  | 3 | 583.3200073 | 583.3225577 |
| PHYPALTPeQKkELSDIAHR         | P05064 | 0          | n +17.03 Da,K +34.06 Da, | 2991.800781 | 5 | 503.2929688 | 503.2929658 |
| NKELDPVQKLFVDKIR             | P97450 | 0.01775148 | n +34.06 Da,K +34.06 Da, | 3801.87915  | 3 | 693.460022  | 693.4596845 |
| VLSGEDKSNIAAWGKIGGH          | P01942 | 0          | n +34.06 Da,K +34.06 Da, | 2719.191162 | 5 | 441.480011  | 441.4759497 |
| RCAQYKKGVDGFGKWR             | Q91Y97 | 0          | n +42.03 Da,K +34.06 Da, | 2389.770996 | 5 | 432.4400024 | 432.4473212 |
| LNLQEQSKKLMSEHGVR            | Q9Z2I8 | 0.01775148 | n +17.03 Da,K +34.06 Da, | 2365.140625 | 5 | 449.8599854 | 449.8619814 |
| AMNYSAKDEVdGGPAGPPGGAakTR    | Q8VEK0 | 0          | n +42.03 Da,K +34.06 Da, | 2358.831299 | 3 | 843.0999756 | 843.1009212 |
| ATKCTKCGPGYSTPLEAMKGR        | P17563 | 0          | n +42.03 Da,K +34.06 Da, | 2337.581543 | 4 | 639.3499756 | 639.3473349 |
| STESESAKEKELHPKTQSVLKDVGAEER | Q3U422 | 0.00949367 | n +34.06 Da,K +34.06 Da, | 2325.085938 | 6 | 575.0100098 | 575.0142906 |
| PKGHLETPIWIER                | Q8BHN3 | 0          | n +17.03 Da,K +34.06 Da, | 2456.42627  | 3 | 542.9899902 | 542.9911411 |
| SSTSAVPQITTHYTVHPR           | Q921G7 | 0          | n +31.05 Da,             | 2311.709717 | 3 | 671.6900024 | 671.6902619 |
| TKDYQDFQHLDNDNDHHQLR         | P34927 | 0          | n +42.03 Da,K +34.06 Da, | 2311.600098 | 5 | 523.8499756 | 523.8474609 |
| ATSASSHLNKGiQkMY             | P15105 | 0          | n +42.03 Da,K +34.06 Da, | 2308.827148 | 3 | 616.0101929 | 616.0103138 |

|                         |        |            |                          |             |   |             |             |
|-------------------------|--------|------------|--------------------------|-------------|---|-------------|-------------|
| PGVTVKDVNQEFVR          | Q9CZX8 | 0          | n +17.03 Da,K +34.06 Da, | 2296.611084 | 3 | 589.6721802 | 589.6722488 |
| ASKPTLNEVVIVSAIR        | Q8QZT1 | 0.04557641 | n +34.06 Da,K +34.06 Da, | 3206.296631 | 3 | 589.0499878 | 589.0454639 |
| PQKVNIHGGAVSLGHPIGMSGAR | Q8QZT1 | 0          | n +17.03 Da,K +34.06 Da, | 2258.236084 | 5 | 467.6700134 | 467.6675341 |
| AAPAKGENLSLVVHGPDIR     | Q64442 | 0.02046784 | n +42.03 Da,K +34.06 Da, | 2943.810059 | 3 | 693.0599976 | 693.0586147 |
| PGVTVKDVNQEFVR          | Q9CZX8 | 0          | n +17.03 Da,K +34.06 Da, | 2256.08667  | 3 | 589.6699829 | 589.6722488 |
| AHYHDNYGKNDEVEFVR       | P25688 | 0.01775148 | n +42.03 Da,K +34.06 Da, | 2237.543945 | 3 | 723.6799927 | 723.6784629 |
| FANDATFEIKKCDLHR        | P35486 | 0          | n +34.06 Da,K +34.06 Da, | 2224.386963 | 4 | 517.539978  | 517.5439743 |
| PQKVNIHGGAVSLGHPIGMSGAR | Q8QZT1 | 0          | n +17.03 Da,K +34.06 Da, | 2217.221924 | 5 | 467.6673279 | 467.6675341 |
| PLPPLPEYGGKVR           | Q9CQO7 | 0          | n +17.03 Da,K +34.06 Da, | 2689.506348 | 3 | 491.9726257 | 491.9731986 |
| AHYHDNYGKNDEVEFVR       | P25688 | 0          | n +42.03 Da,K +34.06 Da, | 2193.852539 | 4 | 543.010498  | 543.0106663 |
| AISGNCLILIIKTNPR        | F8VPJ9 | 0.04347826 | n +31.05 Da,             | 2182.391846 | 5 | 386.2399902 | 386.2372474 |
| MDKNELVQAKLAEAQER       | P63101 | 0          | n +42.03 Da,K +34.06 Da, | 3016.35376  | 4 | 562.081543  | 562.0821927 |
| GDTKNSTFSELFKKEHPDR     | P40142 | 0          | n +34.06 Da,K +34.06 Da, | 2149.955811 | 4 | 593.8400269 | 593.843399  |
| PQLQHFIETVETQKQR        | Q9WVA2 | 0          | n +17.03 Da,K +34.06 Da, | 2482.322021 | 4 | 483.7791443 | 483.7785588 |
| PGHLQEGFGCVVTNR         | Q9CY58 | 0          | n +17.03 Da,             | 2138.667969 | 3 | 563.2832031 | 563.2842896 |
| RAKVAMSHFEPSEYIR        | Q99KI0 | 0          | n +34.06 Da,K +34.06 Da, | 2705.039551 | 4 | 498.0299988 | 498.0307375 |
| FLFCRTLNHKKSR           | Q9D8H7 | 0.02305476 | n +28.03 Da,K +28.03 Da, | 2628.099365 | 3 | 597.6900024 | 597.6785331 |
| TDTEDKGEFLSEGGVVR       | E9PV24 | 0          | n +34.06 Da,K +34.06 Da, | 2096.996826 | 3 | 622.3200073 | 622.3235038 |
| SYQEGKPEPAKQALKSKLPLGR  | Q8BTE0 | 0          | n +34.06 Da,K +34.06 Da, | 2101.474609 | 6 | 460.4778442 | 460.4777049 |
| ASSKKVTLVSLSR           | Q9D711 | 0.0492228  | n +42.03 Da,K +34.06 Da, | 2148.841064 | 3 | 495.9920959 | 495.9926997 |
| PKVIQPEVDTPLGR          | Q8VCU1 | 0          | n +17.03 Da,K +34.06 Da, | 2232.595459 | 3 | 533.9946899 | 533.9945514 |
| ASSDIQVKELEKR           | P54227 | 0          | n +42.03 Da,K +34.06 Da, | 2086.795166 | 3 | 538.3200073 | 538.3228861 |
| NVEHGNQYQIKLMEYHHLQR    | Q811G0 | 0.046875   | n +42.03 Da,K +28.03 Da, | 2069.533936 | 5 | 522.2600098 | 522.2635237 |
| AAQESLHVKTPLR           | Q8VBT2 | 0          | n +42.03 Da,K +34.06 Da, | 2036.775269 | 3 | 509.302063  | 509.3018267 |
| SSKFLSHWDHITR           | Q8BH95 | 0.04143646 | n +34.06 Da,K +34.06 Da, | 2542.260498 | 4 | 421.240448  | 421.2415929 |
| SQAEFDKAAEEVKR          | P31786 | 0          | n +42.03 Da,K +34.06 Da, | 2645.114014 | 3 | 573.3184814 | 573.3179124 |
| SSTSAVPQITTHYTVHPR      | Q921G7 | 0          | n +34.06 Da,             | 2017.331665 | 4 | 504.7737122 | 504.7734928 |
| VSGGAIALGHPLGGSGSR      | Q8BWT1 | 0          | n +34.06 Da,             | 2006.403931 | 3 | 542.9799805 | 542.9760023 |
| AHYHDNYGKNDEVEFVR       | P25688 | 0          | n +42.03 Da,K +34.06 Da, | 2234.447021 | 4 | 543.0106201 | 543.0106663 |
| AHGSVVKSEDYAFPTYADRR    | P19783 | 0          | n +34.06 Da,K +34.06 Da, | 2222.962158 | 4 | 585.0599976 | 585.0619239 |
| SDSRDPASDQMKQWKEQR      | P24270 | 0          | n +42.03 Da,K +34.06 Da, | 1984.807007 | 4 | 576.293335  | 576.2933863 |
| PTKVVAVDGCIKNNVIR       | Q8C196 | 0          | n +17.03 Da,K +34.06 Da, | 1984.211426 | 4 | 492.8099976 | 492.8081896 |
| PNIVLFGSSHQDLSQR        | Q9CS42 | 0          | n +17.03 Da,             | 2700.516602 | 3 | 634.6674805 | 634.6674572 |
| MKFVYKKEHPFEKR          | Q9DCD6 | 0          | n +34.06 Da,K +34.06 Da, | 2234.55542  | 4 | 501.8099976 | 501.8066643 |
| SHTILLVQPTKRPEGR        | P84089 | 0          | n +42.03 Da,K +34.06 Da, | 1918.414429 | 4 | 477.7865601 | 477.7864028 |
| TKDYQDFQHLDNDNDHHLQR    | P34927 | 0          | n +34.06 Da,K +34.06 Da, | 1881.337158 | 5 | 522.2575684 | 522.2579713 |
| TKDYQDFQHLDNDNDHHLQR    | P34927 | 0          | n +34.06 Da,K +34.06 Da, | 1858.280151 | 4 | 652.5712891 | 652.570645  |
| PKHEFSVDMTCEGCAEAVSR    | O08997 | 0          | n +34.06 Da,K +34.06 Da, | 1851.356934 | 3 | 793.3699951 | 793.3785208 |
| PSKTNVSGGAIALGHPLGGSGSR | Q8BWT1 | 0          | n +17.03 Da,K +34.06 Da, | 1850.869019 | 4 | 543.5599976 | 543.5593014 |
| GDEVIITGHCQGDGYR        | P35505 | 0          | n +34.06 Da,             | 1863.986328 | 3 | 604.289978  | 604.2915509 |

|                          |        |            |                          |             |   |             |             |
|--------------------------|--------|------------|--------------------------|-------------|---|-------------|-------------|
| MKFNPFVTSDRSKNR          | P61255 | 0          | n +34.06 Da,K +34.06 Da, | 1952.873535 | 4 | 483.0361938 | 483.0360505 |
| TKDYQDFQHLNDNDHHLR       | P34927 | 0          | n +34.06 Da,K +34.06 Da, | 1817.719727 | 4 | 652.5704956 | 652.570645  |
| HIGCCRSKDYKVR            | Q3U6K5 | 0.04347826 | n +31.05 Da,             | 1817.337402 | 4 | 456.4977722 | 456.4948871 |
| SQAEFDKAAEEVKR           | P31786 | 0          | n +42.03 Da,K +34.06 Da, | 2454.897217 | 3 | 573.3158569 | 573.3179124 |
| DDEVVDVGTVEEDLGKSR       | P08113 | 0          | n +34.06 Da,K +34.06 Da, | 3159.282715 | 3 | 682.6799927 | 682.6763835 |
| DSSFQIVKNPR              | Q61176 | 0          | n +34.06 Da,K +34.06 Da, | 1834.902954 | 3 | 453.6099854 | 453.6069565 |
| GPTTPEADKIFLER           | P26443 | 0          | n +34.06 Da,K +34.06 Da, | 2703.1604   | 3 | 547.9883423 | 547.9876147 |
| PILGVTEAFKR              | P05202 | 0.01246106 | n +17.03 Da,K +34.06 Da, | 2611.381348 | 3 | 427.9428406 | 427.9432392 |
| TKDYQDFQHLNDNDHHLR       | P34927 | 0.03399433 | n +34.06 Da,K +34.06 Da, | 1816.029541 | 6 | 435.3831177 | 435.3828555 |
| FANDATFEIKKCDLHR         | P35486 | 0          | n +34.06 Da,K +34.06 Da, | 2226.028076 | 5 | 414.2399902 | 414.2366347 |
| MEGHDPKEPEQLR            | B2RXM2 | 0          | n +42.03 Da,K +34.06 Da, | 1754.765137 | 3 | 547.9420166 | 547.9419702 |
| AKHHPDLIFCR              | P83870 | 0          | n +42.03 Da,K +34.06 Da, | 1753.022949 | 3 | 490.6025085 | 490.6013301 |
| MHHQSVLHSGYFHPLLR        | P10518 | 0          | n +42.03 Da,             | 3702.709961 | 4 | 526.0200195 | 526.0191743 |
| SETAPAAPAAPAEKTPVKK      | P43274 | 0.01529052 | n +42.03 Da,K +34.06 Da, | 1752.111084 | 3 | 726.1099854 | 726.1072705 |
| SEPEIPK GIR              | Q9WTP6 | 0          | n +34.06 Da,K +34.06 Da, | 1744.803955 | 3 | 398.588623  | 398.5890141 |
| TTGTYHGDSDLQLER          | J3QNR5 | 0.01775148 | n +14.02 Da,             | 1738.579468 | 3 | 569.6099854 | 569.604194  |
| SSPPEGKLETKAGHPPAVKAGGMR | Q91XC8 | 0          | n +42.03 Da,K +34.06 Da, | 1710.562622 | 5 | 510.0982361 | 510.0979846 |
| DDEVVDVGTVEEDLGKSR       | P08113 | 0          | n +34.06 Da,K +34.06 Da, | 2647.038818 | 3 | 682.6799927 | 682.6763835 |
| SHTILLVQPTKRPEGR         | P84089 | 0.00949367 | n +42.03 Da,K +34.06 Da, | 1927.479126 | 3 | 636.710022  | 636.7127783 |
| PKVTQPEVDTP LGR          | Q63880 | 0          | n +17.03 Da,K +34.06 Da, | 1899.05188  | 3 | 529.9827881 | 529.982423  |
| LRPGDCEVCISYLGR          | Q9CXI5 | 0          | n +34.06 Da,             | 3078.349121 | 3 | 610.3130493 | 610.3134096 |
| MNQEKLAKLQAQVR           | Q64152 | 0          | n +42.03 Da,K +34.06 Da, | 2613.937256 | 3 | 589.6904907 | 589.6909151 |
| NKELDPVQKLFVDKIR         | P97450 | 0          | n +17.03 Da,K +34.06 Da, | 3683.823242 | 4 | 516.088562  | 516.0886927 |
| DKTVKWCAVSEHENTKCISFR    | Q92111 | 0          | n +34.06 Da,K +34.06 Da, | 2472.207764 | 6 | 456.0899963 | 456.0888527 |
| PKVTQPEVDTP LGR          | Q63880 | 0          | n +17.03 Da,K +34.06 Da, | 1858.765747 | 3 | 529.9821167 | 529.982423  |
| PLAKDLLHPSPEEKR          | Q6ZWU9 | 0          | n +17.03 Da,K +34.06 Da, | 1628.339722 | 5 | 389.6400146 | 389.6378092 |
| SSEAPPLVNEDV KR          | Q91YQ5 | 0          | n +34.06 Da,K +34.06 Da, | 1624.054565 | 3 | 536.979126  | 536.9791193 |
| VKIVTVKTQAYPDQKPGTSGLR   | Q9D0F9 | 0          | n +34.06 Da,K +34.06 Da, | 2052.804443 | 5 | 505.3299866 | 505.3253713 |
| LHHKPV MALR              | Q99K67 | 0          | n +42.03 Da,K +34.06 Da, | 1621.037598 | 3 | 426.5960693 | 426.5956274 |
| LTPTHYLTQDVER            | Q9DBG6 | 0          | n +34.06 Da,K +34.06 Da, | 1830.635864 | 4 | 443.0114746 | 443.0111707 |
| SKLVIITAGAR              | P00342 | 0.01775148 | n +34.06 Da,K +34.06 Da, | 1610.544189 | 3 | 399.6199951 | 399.6169038 |
| VKGVNGFGR                | P16858 | 0          | n +34.06 Da,K +34.06 Da, | 1607.546875 | 3 | 367.5791016 | 367.5785603 |
| EGNHKPGTDY LKPPK         | Q61176 | 0.046875   | n +42.03 Da,K +34.06 Da, | 1606.262573 | 4 | 457.0299988 | 457.0230375 |
| PLAKDLLHPSPEEKR          | Q6ZWU9 | 0          | n +17.03 Da,K +34.06 Da, | 1669.460083 | 5 | 389.6378479 | 389.6378092 |
| PLGLEAEKDGVPVFKFPR       | Q8R0Y6 | 0.01246106 | n +17.03 Da,K +34.06 Da, | 3922.356689 | 4 | 521.8214111 | 521.8201887 |
| TVGSSKMLQHIDYR           | P27048 | 0.03399433 | n +34.06 Da,K +34.06 Da, | 1574.617676 | 4 | 467.0360107 | 467.0345135 |
| SDLELHPPSY PWSHR         | Q9D0M3 | 0          | n +34.06 Da,             | 3108.604004 | 4 | 464.4890442 | 464.4891034 |
| VDREQLVQKAR              | P61982 | 0.04347826 | n +42.03 Da,K +34.06 Da, | 1559.015259 | 3 | 473.2822876 | 473.2826549 |
| LHTVYQSVELPETHQMLR       | Q07417 | 0          | n +34.06 Da,             | 3059.756104 | 3 | 739.0700073 | 739.06326   |
| AHYHDNYGKNDEVEFVR        | P25688 | 0          | n +42.03 Da,K +34.06 Da, | 2335.850098 | 4 | 543.0100098 | 543.0106663 |

|                                 |        |            |                          |             |   |             |             |
|---------------------------------|--------|------------|--------------------------|-------------|---|-------------|-------------|
| SQAEFDKAAEEVKR                  | P31786 | 0.00660066 | n +42.03 Da,K +34.06 Da, | 2685.970459 | 3 | 573.3185425 | 573.3179124 |
| PIGDKLNIMTAGSR                  | P24270 | 0          | n +17.03 Da,K +34.06 Da, | 2592.344727 | 3 | 508.6327515 | 508.6327366 |
| SDSRDPASDQMKQWKEQR              | P24270 | 0          | n +42.03 Da,K +34.06 Da, | 1944.476074 | 4 | 576.2921143 | 576.2933863 |
| ATEGMILTINHHDHQIR               | Q8BUV3 | 0          | n +42.03 Da,             | 2459.184814 | 3 | 593.2926636 | 593.293185  |
| GPEAGQTVKHHVHVHVLPR             | O89106 | 0          | n +34.06 Da,K +34.06 Da, | 1808.820557 | 5 | 406.6499939 | 406.6476274 |
| SKKVDQSVPANIEISQKAAESQGR        | Q61733 | 0          | n +34.06 Da,K +34.06 Da, | 1575.726685 | 4 | 649.1400146 | 649.1358792 |
| PLAKDLLHPSPEEEKR                | Q6ZWU9 | 0          | n +17.03 Da,K +34.06 Da, | 1660.411011 | 4 | 486.7953796 | 486.7954424 |
| RKEPLETLKSYR                    | Q922Q1 | 0          | n +34.06 Da,K +34.06 Da, | 1438.865723 | 4 | 406.2676086 | 406.2675727 |
| SRDPASDQMKQWKEQR                | P24270 | 0          | n +34.06 Da,K +34.06 Da, | 1431.603271 | 4 | 523.7919312 | 523.791781  |
| TSIAIDTIINQKR                   | Q03265 | 0.01775148 | n +34.06 Da,K +34.06 Da, | 2918.934814 | 3 | 514.3300171 | 514.327971  |
| MFNLMKKDKDKDGGGR                | Q9JMH9 | 0          | n +42.03 Da,K +34.06 Da, | 2203.28833  | 4 | 491.0499878 | 491.0459517 |
| SHTDVKVPDFSDYRR                 | Q9CR68 | 0          | n +34.06 Da,K +34.06 Da, | 2199.259521 | 5 | 378.8085938 | 378.8086373 |
| SQAEFDKAAEEVKR                  | P31786 | 0          | n +42.03 Da,K +34.06 Da, | 2496.008789 | 3 | 573.317749  | 573.3179124 |
| SDAPPLTLDGIKDR                  | Q9CR21 | 0          | n +34.06 Da,K +34.06 Da, | 2692.154297 | 3 | 522.644104  | 522.643848  |
| SKAHPPELKKFMDKK                 | P62309 | 0.0492228  | n +42.03 Da,K +34.06 Da, | 1764.310547 | 5 | 400.0700073 | 400.0688002 |
| DAEKFAEEDKLLKER                 | P20029 | 0          | n +34.06 Da,K +34.06 Da, | 1390.422363 | 4 | 502.3200073 | 502.3217984 |
| ELSEEDKLTYSR                    | P56480 | 0          | n +34.06 Da,K +34.06 Da, | 1759.634766 | 3 | 491.9500122 | 491.9525702 |
| NKELDPVQKLFVDKIR                | P97450 | 0          | n +34.06 Da,K +34.06 Da, | 3691.407715 | 5 | 416.480011  | 416.4787213 |
| LNLQEYQSKKLMSEHGVR              | Q9Z2I8 | 0          | n +34.06 Da,K +34.06 Da, | 2467.55957  | 5 | 453.2680359 | 453.2682932 |
| PPEEKEASLAKIKEQTR               | P30115 | 0          | n +17.03 Da,K +34.06 Da, | 1361.401611 | 5 | 415.4599915 | 415.4620815 |
| YFHTAVSRPGLGKPR                 | P03991 | 0.046875   | n +34.06 Da,K +34.06 Da, | 1360.313599 | 4 | 439.2683105 | 439.2678762 |
| EDDDEGGEELLHHR                  | P48678 | 0.04557641 | n +34.06 Da,             | 1398.222168 | 4 | 470.7110901 | 470.7120956 |
| SLSNKLTLDKLDVKGKR               | P09411 | 0          | n +42.03 Da,K +34.06 Da, | 2471.882324 | 4 | 524.1049194 | 524.1045898 |
| PKLQEYLGKFRRLDFR                | Q6ZQ58 | 0.01529052 | n +31.05 Da,K +31.05 Da, | 3136.48999  | 4 | 565.0757446 | 565.0811598 |
| SLSNKLTLDKLDVKGKR               | P09411 | 0          | n +42.03 Da,K +34.06 Da, | 2541.933838 | 3 | 698.4707031 | 698.4703609 |
| PSGTSQCEDGSAGGFQHLDMHSEKR       | Q91WT9 | 0          | n +17.03 Da,K +34.06 Da, | 1678.721313 | 4 | 693.0700073 | 693.0699055 |
| SETAPAAPAAPAPAEKTPVKKKAR        | P43274 | 0          | n +42.03 Da,K +34.06 Da, | 1279.73291  | 5 | 513.9299927 | 513.9265341 |
| SETAPAAPAAPAPAEKTPVKKKAR        | P43274 | 0          | n +42.03 Da,K +34.06 Da, | 1276.36731  | 3 | 855.8699951 | 855.8727059 |
| AAPAKGENLSLVVHGPDIR             | Q64442 | 0          | n +42.03 Da,K +34.06 Da, | 3199.287354 | 3 | 693.0576782 | 693.0586147 |
| SHFNWDKEKLMER                   | Q9Z1K5 | 0.046875   | n +42.03 Da,K +34.06 Da, | 1235.820801 | 3 | 610.6500244 | 610.6595037 |
| PSVGEHTVEVLR                    | O09174 | 0.04143646 | n +17.03 Da,             | 1724.984131 | 3 | 447.25      | 447.2508028 |
| ADEIAKAQVAQPGGDTIFGKIIR         | P70349 | 0          | n +42.03 Da,K +34.06 Da, | 4080.266113 | 3 | 836.8203735 | 836.8200831 |
| MKPILLQGHER                     | Q9QZD9 | 0.01775148 | n +34.06 Da,K +34.06 Da, | 1219.91687  | 4 | 348.2200012 | 348.2222427 |
| SEAAPAAPAAAPPAEKAPAKKKAACKPAGVR | P15864 | 0.00949367 | n +42.03 Da,K +34.06 Da, | 1302.387939 | 4 | 800.0300293 | 800.0264989 |
| TRETAQAIGMHIR                   | Q9CPR4 | 0          | n +34.06 Da,K +34.06 Da, | 1199.942017 | 4 | 420.7558594 | 420.7557101 |
| YKKDGVDFGKWR                    | Q91Y97 | 0          | n +34.06 Da,K +34.06 Da, | 2048.007813 | 4 | 409.5100098 | 409.5136071 |
| IIGGSMDAKGSFPWQAK               | Q61646 | 0          | n +34.06 Da,K +34.06 Da, | 3260.750732 | 3 | 632.3699951 | 632.3696598 |
| SALSDLHAHKLR                    | P01942 | 0          | n +34.06 Da,K +34.06 Da, | 1197.300659 | 4 | 354.7245483 | 354.724307  |
| SFAHLPDCKGDQSEHR                | Q9QXF8 | 0          | n +34.06 Da,K +34.06 Da, | 1189.798706 | 4 | 488.747467  | 488.7483484 |
| PPEEKEASLAKIKEQTR               | P30115 | 0          | n +17.03 Da,K +34.06 Da, | 1362.514893 | 4 | 519.0766602 | 519.0757827 |

|                                |        |            |                          |             |   |             |             |
|--------------------------------|--------|------------|--------------------------|-------------|---|-------------|-------------|
| PSGTSQCEDGSAGGFQHLDMHSEKR      | Q91WT9 | 0          | n +17.03 Da,K +34.06 Da, | 1635.048096 | 5 | 554.6599731 | 554.6573797 |
| TITYGPKVVR                     | P12710 | 0.046875   | n +34.06 Da,K +34.06 Da, | 1419.853638 | 3 | 401.2692871 | 401.2695041 |
| GEPLTEYDHHYLR                  | P36371 | 0.04347826 | n +34.06 Da,             | 1905.418335 | 4 | 450.980011  | 450.9773659 |
| STFSELFKKEHPDR                 | P40142 | 0          | n +34.06 Da,K +34.06 Da, | 2252.625732 | 4 | 456.519989  | 456.519125  |
| PASDQMKQWKEQR                  | P24270 | 0          | n +17.03 Da,K +34.06 Da, | 1151.931152 | 4 | 429.9899902 | 429.9938701 |
| RPELTGAKVVVSGGR                | Q99LC5 | 0          | n +34.06 Da,K +34.06 Da, | 1328.925659 | 4 | 399.2571106 | 399.2572429 |
| VRYSLDPENPTKSKSR               | Q9CPR4 | 0.0033557  | n +34.06 Da,K +34.06 Da, | 1143.329712 | 5 | 428.647583  | 428.6473334 |
| SSVEYEPKEKTFDKILIANR           | Q91ZA3 | 0          | n +34.06 Da,K +34.06 Da, | 2904.686768 | 4 | 626.6300049 | 626.6324407 |
| AAQESLHVKTPLR                  | Q8VBT2 | 0          | n +42.03 Da,K +34.06 Da, | 2077.328125 | 3 | 509.3021545 | 509.3018267 |
| PDTQWITKPVHKHR                 | Q9CZM2 | 0          | n +17.03 Da,K +34.06 Da, | 1130.661743 | 5 | 366.4299927 | 366.4263607 |
| PSVSLQTVKLMKEGLEAAR            | O35490 | 0          | n +17.03 Da,K +34.06 Da, | 4017.333984 | 4 | 536.3309937 | 536.3304922 |
| PDTQWITKPVHKHR                 | Q9CZM2 | 0          | n +17.03 Da,K +34.06 Da, | 1128.25     | 4 | 457.7799988 | 457.7811318 |
| TKEDVFBVHQTAIKKNNPR            | P62960 | 0          | n +34.06 Da,K +34.06 Da, | 1122.879028 | 5 | 453.0899963 | 453.0865693 |
| DAMLLKGGDKAHIEKR               | P63038 | 0          | n +34.06 Da,K +34.06 Da, | 1120.036865 | 4 | 520.8499756 | 520.8503627 |
| AAAKVALTKR                     | Q9QXX4 | 0          | n +42.03 Da,K +34.06 Da, | 1120.849609 | 3 | 380.2697754 | 380.2696155 |
| SSSEDKITVHFKNR                 | P46656 | 0          | n +34.06 Da,K +34.06 Da, | 1117.898682 | 5 | 350.8128967 | 350.812675  |
| TKEDVFBVHQTAIKKNNPR            | P62960 | 0          | n +34.06 Da,K +34.06 Da, | 1115.297119 | 6 | 377.7399902 | 377.7400205 |
| PHPYPALTPAQKKEKLSIAHR          | P05064 | 0          | n +17.03 Da,K +34.06 Da, | 2962.239258 | 4 | 628.8641968 | 628.8643881 |
| MKHYEVEIR                      | Q9CY27 | 0.02305476 | n +34.06 Da,K +34.06 Da, | 1112.595947 | 3 | 424.9181519 | 424.9183657 |
| SSGTTAPKTSFGSLKDEDR            | Q91YT0 | 0          | n +34.06 Da,K +34.06 Da, | 1103.601807 | 5 | 450.4677429 | 450.4676679 |
| SSSEDKITVHFKNR                 | P46656 | 0          | n +34.06 Da,K +34.06 Da, | 1116.219849 | 4 | 438.2640991 | 438.2640247 |
| GTAVTSAKVAVNGVHLHYQR           | Q8R164 | 0          | n +34.06 Da,K +34.06 Da, | 2148.133301 | 5 | 436.0599976 | 436.0582592 |
| SFAHLPDCKGDQSEHR               | Q9QXF8 | 0.00949367 | n +34.06 Da,K +34.06 Da, | 1148.157593 | 4 | 488.75      | 488.7483484 |
| HHTFYNELR                      | P60710 | 0          | n +34.06 Da,             | 1096.592041 | 3 | 417.5546875 | 417.5544856 |
| VHAEVFTISKELVPR                | Q9D4H1 | 0.02305476 | n +42.03 Da,K +34.06 Da, | 1094.289429 | 5 | 361.019989  | 361.0144355 |
| SETAPAETAAPAPVEKSPAKKTKKAGAAKR | P43276 | 0          | n +42.03 Da,K +34.06 Da, | 1206.176147 | 7 | 501.0400085 | 501.0424658 |
| ASEIKKLFWR                     | Q02013 | 0          | n +34.06 Da,K +34.06 Da, | 2050.677734 | 4 | 386.2766113 | 386.2764337 |
| AAAKVALTKR                     | Q9QXX4 | 0          | n +42.03 Da,K +34.06 Da, | 1080.14502  | 3 | 380.269989  | 380.2696155 |
| SEPEIPK GIR                    | Q9WTP6 | 0          | n +34.06 Da,K +34.06 Da, | 1703.567993 | 3 | 398.5891724 | 398.5890141 |
| AHYHDNYGKNDEVEFVR              | P25688 | 0          | n +42.03 Da,K +34.06 Da, | 2196.715088 | 3 | 723.6763916 | 723.6784629 |
| KMLKYALKER                     | Q9QXF8 | 0          | n +34.06 Da,K +34.06 Da, | 1075.617554 | 4 | 354.7600098 | 354.7574481 |
| SSSEDKITVHFKNR                 | P46656 | 0          | n +34.06 Da,K +34.06 Da, | 1075.508911 | 4 | 438.2600098 | 438.2640247 |
| TKEDVFBVHQTAIKKNNPR            | P62960 | 0          | n +34.06 Da,K +34.06 Da, | 1121.22876  | 4 | 566.1099854 | 566.1063925 |
| RFALTEKHR                      | Q921G7 | 0.02578797 | n +34.06 Da,K +34.06 Da, | 1106.802734 | 4 | 335.4716797 | 335.4714835 |
| GHQQLYWSHPR                    | P62274 | 0.04143646 | n +17.03 Da,             | 1063.808228 | 4 | 357.1853027 | 357.1850714 |
| RAKVAMSHFEPSEYIR               | Q99KI0 | 0          | n +34.06 Da,K +34.06 Da, | 2745.621338 | 4 | 498.0299988 | 498.0307375 |
| GHQQLYWSHPR                    | P62274 | 0          | n +34.06 Da,             | 1059.021118 | 4 | 361.4430542 | 361.4429612 |
| TRLNKAVWAKGIR                  | P62900 | 0          | n +34.06 Da,K +34.06 Da, | 1990.475952 | 4 | 404.5299988 | 404.530832  |
| SETAAPAAPAPAEKTPVKKAR          | P43274 | 0          | n +42.03 Da,K +34.06 Da, | 1223.180908 | 5 | 513.9263306 | 513.9265341 |
| APVAGKKAKKGILER                | O35490 | 0          | n +42.03 Da,K +34.06 Da, | 1037.305176 | 5 | 349.6553955 | 349.6554236 |

|                                  |        |            |                          |             |   |             |             |
|----------------------------------|--------|------------|--------------------------|-------------|---|-------------|-------------|
| RRLPPLPPR                        | O88668 | 0.02305476 | n +34.06 Da,             | 1043.550415 | 3 | 379.2611084 | 379.2593437 |
| APVAGKKAKKGILER                  | O35490 | 0          | n +42.03 Da,K +34.06 Da, | 1022.25708  | 4 | 436.8200073 | 436.8174604 |
| YKEPGIWKGKR                      | P97501 | 0          | n +34.06 Da,K +34.06 Da, | 1012.833374 | 4 | 375.2606812 | 375.2607836 |
| PSKGPLQSVQVFGR                   | P14131 | 0          | n +17.03 Da,K +34.06 Da, | 2492.713379 | 3 | 517.6473999 | 517.6473743 |
| SALSDLHAHKLR                     | P01942 | 0          | n +34.06 Da,K +34.06 Da, | 1000.120178 | 4 | 354.7243347 | 354.724307  |
| AAAMDVDTPSGTNSGAGKKR             | P62878 | 0          | n +42.03 Da,K +34.06 Da, | 1542.573364 | 3 | 682.0300293 | 682.0303259 |
| SETAPVAQAASTATEKPAAAKTKKPAKAAAPR | P43275 | 0          | n +42.03 Da,K +34.06 Da, | 1826.182007 | 5 | 699.6400146 | 699.646098  |
| SSSLGKEKDSKEKDPKVPSEKER          | O88520 | 0.04557641 | n +42.03 Da,K +34.06 Da, | 980.7121582 | 6 | 463.6300049 | 463.6287976 |
| SQKHIDFSLR                       | Q6ZWN5 | 0.01775148 | n +34.06 Da,K +34.06 Da, | 1437.664185 | 3 | 433.5995483 | 433.5999131 |
| YHKVVDHYENPR                     | Q9D7P6 | 0.04347826 | n +42.03 Da,K +34.06 Da, | 1189.416504 | 4 | 449.5       | 449.5035127 |
| KLYFEELSRLR                      | Q8C196 | 0.00949367 | n +34.06 Da,K +34.06 Da, | 3458.122314 | 3 | 498.9663086 | 498.9661506 |
| PLPPLPEYGGKVR                    | Q9CQQ7 | 0          | n +17.03 Da,K +34.06 Da, | 2730.052002 | 3 | 491.9726563 | 491.9731986 |
| AKFVSWKSR                        | Q9D773 | 0          | n +34.06 Da,K +34.06 Da, | 1001.858337 | 3 | 404.2776794 | 404.2766994 |
| PSDSAATTEKAKKIKNLR               | Q8CHP5 | 0.03133903 | n +17.03 Da,K +34.06 Da, | 972.6192017 | 4 | 528.5999756 | 528.6021953 |
| APVAGKKAKKGILER                  | O35490 | 0.04557641 | n +42.03 Da,K +34.06 Da, | 1028.915894 | 3 | 582.0875854 | 582.0875217 |
| YMLVDPKHHR                       | Q8VDJ3 | 0.046875   | n +34.06 Da,K +34.06 Da, | 968.9902344 | 4 | 341.7099915 | 341.7039514 |
| ALSDLHAHKLR                      | P01942 | 0          | n +34.06 Da,K +34.06 Da, | 965.8782959 | 4 | 332.966095  | 332.9662997 |
| PTWKHIGDGCCHLTR                  | Q9DD20 | 0.01529052 | n +17.03 Da,K +34.06 Da, | 1544.045776 | 5 | 346.5899963 | 346.5903216 |
| QASGLGRMKPNILVVGFKR              | P59158 | 0.02046784 | n +17.03 Da,K +34.06 Da, | 1603.610229 | 4 | 539.8499756 | 539.843835  |
| SLSNKLTLDKLDVKGKR                | P09411 | 0          | n +42.03 Da,K +34.06 Da, | 2512.072998 | 4 | 524.1047363 | 524.1045898 |
| QSPTLNLLPSNRTSGLPTTK             | Q80WC1 | 0.00949367 | n +42.03 Da,K +34.06 Da, | 4134.278809 | 3 | 734.4199829 | 734.4164682 |
| PKKIKDPDAAKPEDWDER               | P14211 | 0          | n +17.03 Da,K +34.06 Da, | 1369.779541 | 5 | 459.0799866 | 459.0801605 |
| DVGKSVHELEKSR                    | Q8VDD5 | 0          | n +34.06 Da,K +34.06 Da, | 993.8439331 | 4 | 437.7891541 | 437.7889002 |
| TQEVWVGQGVKR                     | Q6PDZ2 | 0.00949367 | n +34.06 Da,K +34.06 Da, | 2365.250488 | 2 | 678.4000244 | 678.4069635 |
| PMKLKTQLER                       | Q99PL5 | 0.04143646 | n +17.03 Da,K +34.06 Da, | 947.6365967 | 4 | 332.9746399 | 332.9746827 |
| ETKKTQNDVLHAENVKAGR              | P26043 | 0          | n +34.06 Da,K +34.06 Da, | 947.4207764 | 5 | 455.6799927 | 455.6825681 |
| DAEKFAEEDKLLKER                  | P20029 | 0.00660066 | n +34.06 Da,K +34.06 Da, | 1403.035156 | 5 | 402.0599976 | 402.058894  |
| PLNPIKQDVKKGKLR                  | Q9D819 | 0          | n +17.03 Da,K +34.06 Da, | 1191.348389 | 4 | 472.5953064 | 472.5951782 |
| VKAKIQDKEGIPPDQQR                | P0CG49 | 0.02305476 | n +34.06 Da,K +34.06 Da, | 937.3031006 | 4 | 522.3400269 | 522.337752  |
| AGKPVLYHYFDGR                    | P30115 | 0          | n +42.03 Da,K +34.06 Da, | 2709.859863 | 2 | 718.3982544 | 718.39888   |
| TQGCTSAGPHFNPHSKKHGGPADEER       | P08228 | 0          | n +34.06 Da,K +34.06 Da, | 1071.968384 | 5 | 581.6900024 | 581.698914  |
| ATEARPTTEKSVPYQR                 | Q99LB7 | 0.046875   | n +34.06 Da,K +34.06 Da, | 950.9223022 | 4 | 476.269989  | 476.2733563 |
| HSLAVGSISGHAR                    | Q61176 | 0.04557641 | n +34.06 Da,             | 927.0574951 | 3 | 442.5879822 | 442.5880781 |
| PHYPALTPPEQKKELSDIAHR            | P05064 | 0          | n +17.03 Da,K +34.06 Da, | 2910.459961 | 5 | 503.2900085 | 503.2929658 |
| FKNKYEDEINKR                     | P11679 | 0          | n +34.06 Da,K +34.06 Da, | 1328.546021 | 4 | 430.769989  | 430.7729844 |
| HWPDEGIRLKAGR                    | Q9QYC1 | 0.02046784 | n +14.02 Da,n +28.03 Da, | 921.0726318 | 4 | 394.980011  | 394.9731266 |
| TGEKGFYKGSFHR                    | P17742 | 0.02578797 | n +34.06 Da,K +34.06 Da, | 1184.217773 | 5 | 352.8052063 | 352.805319  |
| SEDKITVHFKNR                     | P46656 | 0          | n +34.06 Da,K +34.06 Da, | 973.8167114 | 4 | 394.7476807 | 394.7480101 |
| SKDSEGSWFR                       | O55125 | 0          | n +34.06 Da,K +34.06 Da, | 1566.190918 | 3 | 422.8979187 | 422.896507  |
| AAQESLHVKTPLR                    | Q8VBT2 | 0          | n +42.03 Da,K +34.06 Da, | 2051.497559 | 2 | 763.4494629 | 763.4491017 |

|                                |        |            |                          |             |   |             |             |
|--------------------------------|--------|------------|--------------------------|-------------|---|-------------|-------------|
| PEYKGEWKPR                     | P14211 | 0          | n +17.03 Da,K +34.06 Da, | 909.6342163 | 4 | 344.4611206 | 344.4608312 |
| PDTQWITKPVHKHR                 | Q9CZM2 | 0          | n +17.03 Da,K +34.06 Da, | 1168.598755 | 4 | 457.7799988 | 457.7811318 |
| GHQQLYWSHPR                    | P62274 | 0          | n +34.06 Da,             | 1067.479858 | 3 | 481.5878906 | 481.5881894 |
| PNWFPKKSSENPR                  | Q9WVA4 | 0          | n +17.03 Da,K +34.06 Da, | 1014.245178 | 4 | 437.5299988 | 437.5282705 |
| PKLMDHGQSHPPDDKMYSTR           | Q78IK4 | 0.01529052 | n +17.03 Da,K +34.06 Da, | 1217.830811 | 4 | 611.5599976 | 611.5599436 |
| PSKGPLQSVQVFGFR                | P14131 | 0          | n +17.03 Da,K +34.06 Da, | 2533.285889 | 3 | 517.6477661 | 517.6473743 |
| EVKCDMEVSCPEGYTCRR             | P28798 | 0          | n +34.06 Da,K +34.06 Da, | 2345.739502 | 3 | 783.3400269 | 783.3422019 |
| SGPGLHADLLR                    | Q8BWF0 | 0.04143646 | n +34.06 Da,             | 1953.255859 | 3 | 409.5731201 | 409.5736574 |
| TKDYQDFQHLNDNDHHLR             | P34927 | 0          | n +34.06 Da,K +34.06 Da, | 1800.673706 | 5 | 522.2582397 | 522.2579713 |
| AKFVSWKSR                      | Q9D773 | 0          | n +34.06 Da,K +34.06 Da, | 998.3573608 | 4 | 303.4599915 | 303.4593437 |
| DLDRFHGTSSR                    | Q8C196 | 0.04143646 | n +34.06 Da,             | 898.9310303 | 3 | 442.232605  | 442.2320717 |
| PEYKGEWKPR                     | P14211 | 0          | n +17.03 Da,K +34.06 Da, | 914.2198486 | 3 | 458.9454651 | 458.9453495 |
| ASKATSSPFYR                    | Q9CQ06 | 0          | n +34.06 Da,K +34.06 Da, | 898.7140503 | 3 | 428.2525635 | 428.2524021 |
| SETAPAAPAAPAEKTPVKKKAR         | P43274 | 0          | n +42.03 Da,K +34.06 Da, | 1239.155762 | 5 | 513.9299927 | 513.9265341 |
| AASAASSEHFEKLHEIFR             | O88384 | 0          | n +42.03 Da,K +34.06 Da, | 3206.187012 | 4 | 527.2800293 | 527.2761341 |
| SQAEFDKAAEEVKR                 | P31786 | 0          | n +42.03 Da,K +34.06 Da, | 2604.656982 | 3 | 573.3200073 | 573.3179124 |
| DAMLLKGGDKAHIEKR               | P63038 | 0          | n +34.06 Da,K +34.06 Da, | 1124.732666 | 5 | 416.8800049 | 416.8817454 |
| RKEPLETLKSYR                   | Q922Q1 | 0          | n +34.06 Da,K +34.06 Da, | 1479.809937 | 4 | 406.267395  | 406.2675727 |
| SETAPAETAAPAPVEKSPAKKTTKAGAAKR | P43276 | 0          | n +42.03 Da,K +34.06 Da, | 1124.422852 | 7 | 501.0400085 | 501.0424658 |
| GHQQLYWSHPR                    | P62274 | 0          | n +34.06 Da,             | 977.4728394 | 4 | 361.4425964 | 361.4429612 |
| DAEKFAEEDKLLKER                | P20029 | 0          | n +34.06 Da,K +34.06 Da, | 1401.014038 | 3 | 669.4299927 | 669.426639  |
| PTNTVFDAGR                     | P63017 | 0          | n +17.03 Da,K +34.06 Da, | 887.9718628 | 3 | 400.5718079 | 400.571694  |
| DEESEEAKKLR                    | O70251 | 0          | n +34.06 Da,K +34.06 Da, | 885.9837646 | 3 | 522.302002  | 522.3019689 |
| TRTHINYGVKGDVAVIR              | Q8BMS1 | 0          | n +34.06 Da,K +34.06 Da, | 1931.126099 | 4 | 492.5515137 | 492.5509944 |
| GHRPVLVLSQNTKR                 | P80318 | 0          | n +34.06 Da,K +34.06 Da, | 1014.57135  | 4 | 419.0208435 | 419.020601  |
| PQKVNIHGGAVSLGHPIGMSGAR        | Q8QZT1 | 0          | n +17.03 Da,K +34.06 Da, | 2227.326904 | 4 | 584.3326416 | 584.3325985 |
| PENTVFDAGR                     | P20029 | 0          | n +17.03 Da,K +34.06 Da, | 893.2754517 | 3 | 409.903595  | 409.9033324 |
| AGKPVLYHFDGR                   | P30115 | 0          | n +42.03 Da,K +34.06 Da, | 2660.774902 | 3 | 479.2700806 | 479.2683455 |
| PKCPKCDKEVYFAER                | P63254 | 0          | n +17.03 Da,K +34.06 Da, | 1197.736694 | 4 | 512.289978  | 512.2907032 |
| SSSRPVALVTGANKIGGIFAIR         | P48758 | 0.04143646 | n +42.03 Da,K +34.06 Da, | 3615.503662 | 3 | 760.1099854 | 760.1078573 |
| SETAPAAPAAPAEKTPVKKKAR         | P43274 | 0          | n +42.03 Da,K +34.06 Da, | 1445.098633 | 4 | 585.3699951 | 585.3717921 |
| PPSHVSQAEQVKEAKAKEER           | P51125 | 0          | n +17.03 Da,K +34.06 Da, | 929.2584229 | 6 | 395.3999939 | 395.404223  |
| TKDYQDFQHLNDNDHHLR             | P34927 | 0          | n +34.06 Da,K +34.06 Da, | 1759.851807 | 5 | 522.2592163 | 522.2579713 |
| KLIFACHEKLHENNPR               | P31725 | 0          | n +34.06 Da,K +34.06 Da, | 1528.593384 | 5 | 422.4500122 | 422.4514682 |
| TVKKIAIFGATGR                  | Q923D2 | 0          | n +34.06 Da,K +34.06 Da, | 1785.651367 | 3 | 488.6769104 | 488.676752  |
| DKLIKEGDVVKR                   | Q03265 | 0.046875   | n +34.06 Da,K +34.06 Da, | 1005.128113 | 4 | 384.7752075 | 384.7752612 |
| FKPEELHPTAATLKR                | Q91X91 | 0          | n +34.06 Da,K +34.06 Da, | 1987.817749 | 5 | 383.0400085 | 383.044042  |
| DITDGNSEHLKR                   | Q9DBH5 | 0.00949367 | n +34.06 Da,K +34.06 Da, | 891.3172607 | 4 | 363.9572754 | 363.957401  |
| TGEKGFYKGSFFHR                 | P17742 | 0          | n +34.06 Da,K +34.06 Da, | 1193.005981 | 4 | 440.7546082 | 440.7548296 |
| EPEKGEVWDYVTVR                 | Q920A5 | 0          | n +34.06 Da,K +34.06 Da, | 3431.919189 | 3 | 592.3300171 | 592.3264077 |



|                                     |        |            |                          |             |   |             |             |
|-------------------------------------|--------|------------|--------------------------|-------------|---|-------------|-------------|
| MKPILLQGHER                         | Q9QZD9 | 0          | n +34.06 Da,K +34.06 Da, | 1245.65271  | 3 | 463.9617615 | 463.9605648 |
| PAYFQRPENALKR                       | P23116 | 0          | n +17.03 Da,K +34.06 Da, | 1790.766113 | 4 | 410.9899902 | 410.9927994 |
| GVDGKWR                             | Q91Y97 | 0.00949367 | n +34.06 Da,K +34.06 Da, | 2231.038818 | 3 | 344.8797913 | 344.8802392 |
| APVAGKKAKKGILER                     | O35490 | 0          | n +42.03 Da,K +34.06 Da, | 1062.57959  | 4 | 436.817627  | 436.8174604 |
| LHTVYQSVLPEHQMLR                    | Q07417 | 0          | n +31.05 Da,             | 3543.45752  | 3 | 738.0499878 | 738.057957  |
| PAPATTFAHLDATTVLSR                  | P56480 | 0          | n +17.03 Da,             | 3401.69165  | 3 | 629.3400269 | 629.3442029 |
| VKVGVNGFGR                          | P16858 | 0          | n +34.06 Da,K +34.06 Da, | 1648.076416 | 3 | 367.5784607 | 367.5785603 |
| MQPASAKWYDRR                        | Q9R0Q7 | 0          | n +34.06 Da,K +34.06 Da, | 1502.194824 | 4 | 394.9725342 | 394.9726907 |
| HPFYSNISKDR                         | Q9DBJ1 | 0.04143646 | n +34.06 Da,K +34.06 Da, | 1017.390503 | 3 | 477.9400024 | 477.9387061 |
| HVKSVTAPYKYPR                       | Q8K0L3 | 0          | n +34.06 Da,K +34.06 Da, | 1115.622559 | 4 | 412.769989  | 412.7662027 |
| SHGSHETDEEFDAR                      | P12787 | 0          | n +34.06 Da,             | 891.5352783 | 3 | 550.9099731 | 550.9116161 |
| CFEKASKAKLEPER                      | O09173 | 0          | n +34.06 Da,K +34.06 Da, | 983.9328613 | 4 | 458.0400085 | 458.0370182 |
| SHFSWAKEAEKR                        | Q7TNG8 | 0.00660066 | n +34.06 Da,K +34.06 Da, | 1217.504272 | 4 | 395.2399902 | 395.2375438 |
| PVWGGGNKCGACGR                      | P97314 | 0          | n +17.03 Da,K +34.06 Da, | 888.6242065 | 3 | 509.5899963 | 509.5907657 |
| PHLPQEEVLKFYR                       | P50136 | 0          | n +17.03 Da,K +34.06 Da, | 2991.093506 | 4 | 427.5       | 427.5017287 |
| EMFARNVQTADLGILESPRPGTLQVCMSLRGPGQR | A6PWQ2 | 0.01529052 | n +34.06 Da,             | 3448.828369 | 5 | 784.5999756 | 784.6120567 |
| PLNPIKQDVKKGKLR                     | Q9D819 | 0          | n +17.03 Da,K +34.06 Da, | 1246.576416 | 5 | 378.2799988 | 378.2775979 |
| PLNPIKQDVKKGKLR                     | Q9D819 | 0          | n +17.03 Da,K +34.06 Da, | 1205.577759 | 5 | 378.2799988 | 378.2775979 |
| PLNPIKQDVKKGKLR                     | Q9D819 | 0          | n +17.03 Da,K +34.06 Da, | 1232.543579 | 4 | 472.6000061 | 472.5951782 |
| SEAAPAAPAAAPPAEKAPAKKKAAKKPAGVR     | P15864 | 0          | n +42.03 Da,K +34.06 Da, | 1298.714111 | 7 | 457.5899963 | 457.5896893 |
| APVAGKKAKKGILER                     | O35490 | 0          | n +34.06 Da,K +34.06 Da, | 977.2556763 | 5 | 348.0658569 | 348.065934  |
| APVAGKKAKKGILER                     | O35490 | 0          | n +34.06 Da,K +34.06 Da, | 936.5440674 | 5 | 348.0660095 | 348.065934  |
| APVAGKKAKKGILER                     | O35490 | 0          | n +34.06 Da,K +34.06 Da, | 939.5501709 | 4 | 434.8306274 | 434.8305984 |
| AALRPLVKPKIVKKR                     | P17932 | 0.04347826 | n +42.03 Da,K +34.06 Da, | 2012.848389 | 5 | 379.8920898 | 379.8921671 |
| AALRPLVKPKIVK                       | P17932 | 0          | n +34.06 Da,K +34.06 Da, | 1538.134033 | 5 | 314.6517029 | 314.6508391 |
