# Supplementary material
Source: PubMed Central journal article supplement (PMC5083106)
Supplement: 10.1074_O115.056515_mcp.O115.056515-10.pdf [file 10.1074_O115.056515_mcp.O115.056515-10.pdf]

**Supplementary Table 9:** List of N-termini identified in FFPE liver tissue comparing C57BL/6 wild type mouse and *Ctsf*<sup>-/-</sup> (replicate 1). This is a comprehensive listing of all identified peptides.

| Peptide Sequence      | UniProt ID | MSGF+ score<br>(E-value) | Modification             | Retention<br>Time (s) | Charge | M/Z      | Abundance<br>(L) | Abundance<br>(H) |
|-----------------------|------------|--------------------------|--------------------------|-----------------------|--------|----------|------------------|------------------|
| AAQASAAPKAGTATGR      | P56480     | 0                        | n +42.03 Da,K +28.03 Da, | 443.5394034           | 3      | 500.2707 | 235699008        | n.d.             |
| ATSASSHLNK            | P15105     | 0.00040437               | n +42.03 Da,n +34.06 Da, | 522.207443            | 2      | 546.2989 | 340315008        | n.d.             |
| SANEDNVTQVR           | P24270     | 0                        | n +28.03 Da,             | 525.3584994           | 2      | 630.8131 | 27400200         | n.d.             |
| SSPPEGKLETK           | Q91XC8     | 0.01323007               | n +42.03 Da,K +28.03 Da, | 530.5697787           | 3      | 424.2344 | 119389000        | n.d.             |
| SAPAGSPHPAAGAR        | Q80ZX0     | 0                        | n +42.03 Da,             | 564.4219837           | 2      | 644.8232 | 4.184E+09        | n.d.             |
| AATTGSGVKVPR          | Q9CZY3     | 0.00079777               | n +42.03 Da,K +28.03 Da, | 569.1054584           | 2      | 607.3494 | 40350700         | n.d.             |
| AADTQVSETLKR          | E9PVA8     | 0                        | n +42.03 Da,K +34.06 Da, | 574.93293             | 3      | 465.595  | 55053100         | n.d.             |
| DPANQEIER             | Q99K10     | 0.00112402               | n +28.03 Da,             | 578.9271522           | 2      | 550.2725 | 25758900         | n.d.             |
| PDPAKSAPAPK           | Q64525     | 0                        | n +42.03 Da,K +28.03 Da, | 585.1889176           | 2      | 588.8347 | 9.466E+09        | n.d.             |
| AGTTTIEAVKR           | D3Z2H9     | 0                        | n +42.03 Da,n +34.06 Da, | 595.9437024           | 3      | 408.2454 | 2.271E+09        | n.d.             |
| MDSKQQTVR             | P70694     | 0                        | n +42.03 Da,K +28.03 Da, | 598.3248859           | 2      | 581.7985 | 2.393E+09        | n.d.             |
| PASAAEPGGSLR          | Q80X80     | 0                        | n +14.02 Da,             | 598.7058467           | 2      | 563.7967 | 83463904         | n.d.             |
| PGTPSGTNGVSSGR        | Q9CQS8     | 0.00112402               | n +28.03 Da,             | 599.8698129           | 2      | 699.8514 | 1.383E+09        | n.d.             |
| TEVEAAVNR             | P29391     | 0.00112402               | n +34.06 Da,             | 600.4256211           | 2      | 511.2729 | 46457600         | n.d.             |
| SSKTASTNSIAQAR        | Q9DAS9     | 0.03588235               | n +42.03 Da,K +34.06 Da, | 605.598025            | 2      | 749.4094 | 57712000         | n.d.             |
| ASNVTNKTD             | Q9Z204     | 0.00040437               | n +42.03 Da,K +28.03 Da, | 606.6651804           | 2      | 510.254  | 152364000        | n.d.             |
| AQASAAPKAGTATGR       | P56480     | 0                        | n +42.03 Da,K +34.06 Da, | 609.0341683           | 2      | 717.3988 | 74322496         | n.d.             |
| ADTPGEATPPPR          | Q9ERE7     | 0                        | n +34.06 Da,             | 609.3005131           | 2      | 621.8308 | 329927008        | n.d.             |
| PDPAKSAPAPK           | Q64525     | 0                        | n +42.03 Da,K +28.03 Da, | 611.2628334           | 3      | 392.8924 | 99034304         | n.d.             |
| ADTPGEATPPPR          | Q9ERE7     | 0.02416641               | n +42.03 Da,             | 619.0057984           | 2      | 624.816  | 17458500         | n.d.             |
| ASAGGGGSESAAPEADRPQPR | P52623     | 0                        | n +42.03 Da,             | 620.9621486           | 3      | 670.6471 | 103490000        | n.d.             |
| SVTEETLR              | Q8C196     | 0.04423244               | n +34.06 Da,             | 624.2628295           | 2      | 483.778  | 68049504         | n.d.             |
| SSSAPVASPNVR          | Q05920     | 0.00112402               | n +14.02 Da,             | 627.7619161           | 2      | 593.3161 | 401748000        | n.d.             |
| GAAAVSSAASETGTR       | D3YXK2     | 0                        | n +34.06 Da,             | 632.3753571           | 2      | 685.3605 | 84113000         | n.d.             |
| SSAPVASPNVR           | Q05920     | 0                        | n +28.03 Da,             | 636.1588055           | 2      | 556.8078 | 215340992        | n.d.             |
| SAPVASPNVR            | Q05920     | 0.00488656               | n +34.06 Da,             | 641.0733683           | 2      | 516.3065 | 4.447E+09        | n.d.             |
| ADTPGEATPPPR          | Q9ERE7     | 0                        | n +28.03 Da,             | 642.7508188           | 2      | 618.8138 | 35983500         | n.d.             |
| PLEPQPAPH             | O08810     | 0.03006615               | n +14.02 Da,             | 655.2736735           | 2      | 500.2671 | 207290000        | n.d.             |
| LIAEGTAPR             | Q8R0Y6     | 0.02758412               | n +28.03 Da,             | 656.421309            | 2      | 478.2819 | 687068032        | n.d.             |
| SSKTASTNSIAQAR        | Q9DAS9     | 0.00518852               | n +42.03 Da,K +28.03 Da, | 656.865432            | 3      | 497.9293 | 20464500         | n.d.             |
| PGTPSGTNGVSSGR        | Q9CQS8     | 0                        | n +42.03 Da,             | 660.0980024           | 2      | 706.8594 | 2.496E+09        | n.d.             |
| MEKEEETTR             | E9Q616     | 0.00112402               | n +42.03 Da,K +34.06 Da, | 664.0650153           | 2      | 614.7913 | 9926990          | n.d.             |
| AAVTVNSAKR            | Q9D110     | 0                        | n +42.03 Da,K +28.03 Da, | 667.0776522           | 2      | 543.8161 | 87282096         | n.d.             |
| PAAAAAATPAVR          | P29341     | 0                        | n +14.02 Da,             | 669.3664259           | 2      | 576.3297 | 1.322E+09        | n.d.             |

|                   |        |            |                                      |             |   |          |           |      |
|-------------------|--------|------------|--------------------------------------|-------------|---|----------|-----------|------|
| STAGKVIKC         | P00329 | 0.00387597 | n +42.03 Da,K +28.03 Da,C +57.02 Da, | 673.5493209 | 2 | 531.3046 | 1.529E+09 | n.d. |
| AQAVEGPESENV      | Q9CZ13 | 0.01323007 | n +28.03 Da,                         | 678.7118397 | 2 | 642.8306 | 91533800  | n.d. |
| MDAQSSAKVNSR      | P49586 | 0.00146897 | n +42.03 Da,K +28.03 Da,             | 679.6027525 | 2 | 682.3331 | 34455100  | n.d. |
| SSKTASTNSIAQAR    | Q9DAS9 | 0          | n +42.03 Da,K +28.03 Da,             | 680.6820447 | 2 | 746.3931 | 1.83E+09  | n.d. |
| AAQASAAPKAGTATGR  | P56480 | 0          | n +42.03 Da,K +34.06 Da,             | 680.6931187 | 2 | 752.9174 | 1.379E+09 | n.d. |
| DAVYTEH           | P62806 | 0.00180375 | n +28.03 Da,                         | 690.517028  | 2 | 482.2244 | 1.719E+09 | n.d. |
| DPPTTNPPTAR       | Q7TMF3 | 0.0184953  | n +28.03 Da,                         | 690.8256241 | 2 | 597.8095 | 296551008 | n.d. |
| PVSGQESSQSPYER    | Q3UPL0 | 0          | n +17.03 Da,                         | 693.7020174 | 2 | 782.8648 | 30666100  | n.d. |
| SSSAPVASPNVR      | Q05920 | 0          | n +28.03 Da,                         | 702.1034792 | 2 | 600.306  | 259431008 | n.d. |
| SAASVYAGAGGSGSR   | P05784 | 0.00040437 | n +28.03 Da,                         | 721.6847332 | 2 | 663.324  | 154224992 | n.d. |
| SENEPIENEAAR      | Q9Z2I8 | 0          | n +34.06 Da,                         | 727.614256  | 2 | 696.8443 | 226668000 | n.d. |
| GTTTATVLAR        | P63038 | 0          | n +28.03 Da,                         | 738.0830456 | 2 | 509.7983 | 25751200  | n.d. |
| TTTATVLAR         | P63038 | 0.00518852 | n +28.03 Da,                         | 740.0583252 | 2 | 481.2872 | 91437200  | n.d. |
| AGQSDKDKVKYY      | P56395 | 0.00712347 | n +42.03 Da,K +28.03 Da,             | 752.4559571 | 3 | 457.898  | 272753984 | n.d. |
| SSPPEGKLETK       | Q91XC8 | 0          | n +42.03 Da,K +28.03 Da,             | 755.9669185 | 2 | 635.8479 | 649420992 | n.d. |
| PGSEETQTLVR       | Q9D8N0 | 0          | n +14.02 Da,                         | 756.2979454 | 2 | 615.8153 | 21545900  | n.d. |
| GPGGGGSGGLSPEPSDR | Q8C7E7 | 0          | n +34.06 Da,                         | 760.8843726 | 2 | 759.3727 | 8988930   | n.d. |
| METAPKPGR         | Q9Z0H1 | 0.0067981  | n +42.03 Da,K +28.03 Da,             | 761.9789775 | 2 | 528.7791 | 413455008 | n.d. |
| PSTTMQGLAK        | Q8VCH0 | 0          | n +14.02 Da,n +28.03 Da,             | 763.8651914 | 1 | 537.7747 | 223646000 | n.d. |
| PSTTMQGLAK        | Q8VCH0 | 0          | n +14.02 Da,n +28.03 Da,             | 772.2000365 | 2 | 537.7747 | 147515008 | n.d. |
| GATTVQEQLR        | Q8BG07 | 0          | n +28.03 Da,                         | 774.4298315 | 2 | 565.8069 | 156724000 | n.d. |
| SSPPEGKLETK       | Q91XC8 | 0          | n +42.03 Da,K +34.06 Da,             | 777.2319474 | 2 | 641.8795 | 1.777E+09 | n.d. |
| MNQEKLAK          | Q64152 | 0.02876173 | n +42.03 Da,K +34.06 Da,             | 791.5378612 | 2 | 536.3289 | 93856096  | n.d. |
| GVQVETISPGDGR     | P26883 | 0.02818182 | n +28.03 Da,                         | 799.8801965 | 3 | 448.237  | 240412992 | n.d. |
| SELSGAADEAAR      | Q9D3D9 | 0          | n +28.03 Da,                         | 808.265913  | 2 | 602.7927 | 128211000 | n.d. |
| SEGDSVGDSDVHGKPS  | Q9CQU3 | 0          | n +42.03 Da,K +28.03 Da,             | 812.1562688 | 2 | 764.3486 | 213299008 | n.d. |
| TNEEAGDGTTTATVLAR | P63038 | 0.00040437 | n +28.03 Da,                         | 812.9925777 | 3 | 578.9545 | 65696600  | n.d. |
| AQDQGEKENPMR      | Q9CXW4 | 0          | n +42.03 Da,K +34.06 Da,             | 823.5743769 | 2 | 738.3797 | 17629000  | n.d. |
| ATNDAVLKR         | P31230 | 0.00180375 | n +42.03 Da,K +28.03 Da,             | 824.0355333 | 2 | 529.3036 | 927299008 | n.d. |
| GVQVETISPGDGR     | P26883 | 0          | n +28.03 Da,                         | 828.0221563 | 2 | 671.8449 | 131702000 | n.d. |
| GETVVVGGGTPSR     | Q99LB2 | 0          | n +34.06 Da,                         | 830.6725272 | 2 | 625.3516 | 36755800  | n.d. |
| AATQQLLSR         | Q03265 | 0.00551914 | n +34.06 Da,                         | 831.0766952 | 2 | 511.3144 | 195500000 | n.d. |
| QLEEAEEEEAQR      | Q8VDD5 | 0          | n +28.03 Da,                         | 832.6655109 | 2 | 680.3226 | 178848992 | n.d. |
| SVSLNDTETR        | Q9WV55 | 0          | n +28.03 Da,                         | 841.7908372 | 2 | 575.3068 | 273111008 | n.d. |
| SGYTPDEKLR        | Q3UIU2 | 0.00962496 | n +42.03 Da,K +34.06 Da,             | 851.9205349 | 3 | 414.5575 | 31623800  | n.d. |
| SDEVGGEALGR       | P02088 | 0.01766562 | n +34.06 Da,                         | 853.9168143 | 2 | 562.2882 | 117465000 | n.d. |
| TTITAPPSGNER      | P13516 | 0.03153823 | n +34.06 Da,                         | 855.8949507 | 2 | 639.3502 | 41508400  | n.d. |
| KYDNFAHRTAVR      | Q9CQE1 | 0.04373009 | n +42.03 Da,K +34.06 Da,             | 859.5933709 | 2 | 777.4061 | 209416992 | n.d. |
| SSITNSQLDAR       | Q4LDG0 | 0          | n +34.06 Da,                         | 861.4216968 | 2 | 613.3141 | 95750800  | n.d. |
| SDSVTEETLR        | Q8C196 | 0          | n +34.06 Da,                         | 861.7105415 | 2 | 585.8067 | 402788000 | n.d. |

|                      |        |            |                          |             |   |          |           |      |
|----------------------|--------|------------|--------------------------|-------------|---|----------|-----------|------|
| TDPPTAPTTAER         | Q8VD31 | 0.00647139 | n +28.03 Da,             | 865.6456375 | 2 | 642.8249 | 391244992 | n.d. |
| PNPPPPPPR            | A3KMN5 | 0.03828171 | n +17.03 Da,             | 871.5639903 | 1 | 493.2879 | 54473600  | n.d. |
| ALKQISSNR            | Q9R0P3 | 0.02980132 | n +42.03 Da,K +28.03 Da, | 880.071793  | 2 | 543.8167 | 75647504  | n.d. |
| PNPPPPPPR            | A3KMN5 | 0.03828171 | n +17.03 Da,             | 881.4784893 | 2 | 493.2862 | 111984000 | n.d. |
| MEAVPEKK             | P14148 | 0.00903614 | n +42.03 Da,K +34.06 Da, | 882.316711  | 2 | 521.3193 | 106783000 | n.d. |
| PEYQEVSTEEQR         | Q9JKR6 | 0          | n +14.02 Da,             | 887.9946591 | 2 | 754.8435 | 174428000 | n.d. |
| VEIANDQGNR           | P16627 | 0          | n +28.03 Da,             | 889.577018  | 2 | 628.8325 | 169840992 | n.d. |
| MNLSAAHH             | Q8VCX1 | 0.00215363 | n +42.03 Da,             | 890.458859  | 2 | 461.7136 | 477558016 | n.d. |
| ASAGGGSESAAPEADRPQPR | P52623 | 0          | n +42.03 Da,             | 891.5539983 | 3 | 670.6471 | 1.255E+09 | n.d. |
| EYLDNGSDESATR        | Q63880 | 0          | n +34.06 Da,             | 894.227194  | 2 | 745.8573 | 13643600  | n.d. |
| SDSVTEETLR           | Q8C196 | 0.00112402 | n +28.03 Da,             | 894.8300207 | 2 | 582.7922 | 9.178E+09 | n.d. |
| VEIANDQGNR           | P16627 | 0.03153823 | n +14.02 Da,             | 895.0492323 | 2 | 621.3156 | 58344700  | n.d. |
| PASSAASVYAGAGGSGSR   | P05784 | 0.00518852 | n +14.02 Da,             | 895.6695349 | 3 | 522.9219 | 532160000 | n.d. |
| AVPAPPPTSQR          | Q9JIY5 | 0.00079777 | n +34.06 Da,             | 896.7088816 | 2 | 562.3366 | 471352992 | n.d. |
| TEPELSETQR           | Q9DD06 | 0.00079777 | n +34.06 Da,             | 898.1338208 | 2 | 612.3185 | 280344992 | n.d. |
| PGTNSTGPGPMAPPR      | Q62318 | 0          | n +14.02 Da,             | 899.1582612 | 2 | 725.8578 | 39529000  | n.d. |
| SASNVLLHETSR         | Q8BZ09 | 0          | n +42.03 Da,             | 906.7925325 | 3 | 481.5798 | 300103008 | n.d. |
| SASNVLLHETSR         | Q8BZ09 | 0          | n +42.03 Da,             | 909.2081003 | 2 | 721.8659 | 189368000 | n.d. |
| SETGISSATLR          | Q91VA0 | 0.03084756 | n +28.03 Da,             | 912.495184  | 2 | 575.3051 | 42565900  | n.d. |
| SAINEVVTR            | P62900 | 0.00991736 | n +28.03 Da,             | 912.7500411 | 2 | 508.7909 | 61331500  | n.d. |
| GDGTTTATVLAR         | P63038 | 0          | n +28.03 Da,             | 913.0802718 | 2 | 595.8223 | 163736992 | n.d. |
| DGEEAGAYDGPR         | P27773 | 0.01379532 | n +14.02 Da,             | 913.9727121 | 2 | 625.7693 | 605526976 | n.d. |
| AIQENANALAR          | Q91Y97 | 0.0184953  | n +28.03 Da,             | 914.0691946 | 2 | 599.3151 | 4.965E+09 | n.d. |
| AATTGSGVKVPR         | Q9CZY3 | 0          | n +42.03 Da,K +34.06 Da, | 916.5439298 | 2 | 609.3496 | 1.501E+09 | n.d. |
| DAAQSSPAFGDR         | P10518 | 0.0028399  | n +28.03 Da,             | 918.5533831 | 2 | 625.2935 | 118036000 | n.d. |
| SSGGPAVPTVQR         | Q78PY7 | 0.00903614 | n +34.06 Da,             | 920.9038973 | 2 | 595.3411 | 91464800  | n.d. |
| TNDPLEAAR            | P11725 | 0.00146897 | n +28.03 Da,             | 923.7462814 | 2 | 507.7649 | 406497984 | n.d. |
| MEAVPEKK             | P14148 | 0.00903614 | n +42.03 Da,K +28.03 Da, | 924.3409227 | 2 | 515.2871 | 1.766E+09 | n.d. |
| TIEVVGR              | P47738 | 0.0380117  | n +28.03 Da,             | 924.8139173 | 2 | 465.7643 | 96915600  | n.d. |
| SGSSGGPAVPTVQR       | Q78PY7 | 0          | n +34.06 Da,             | 925.0311117 | 2 | 667.3695 | 20041100  | n.d. |
| DGEEAGAYDGPR         | P27773 | 0          | n +28.03 Da,             | 939.264573  | 2 | 632.7754 | 218524992 | n.d. |
| VVAANDGPMPQTR        | Q8BFR5 | 0          | n +34.06 Da,             | 939.8176964 | 2 | 695.3715 | 169620992 | n.d. |
| DEVGGEALGR           | P02088 | 0          | n +28.03 Da,             | 943.8987966 | 2 | 515.7629 | 175628000 | n.d. |
| PAINVGLSVSR          | Q03265 | 0.03153823 | n +14.02 Da,             | 946.7488776 | 3 | 376.224  | 53593800  | n.d. |
| ALKQISSNR            | Q9R0P3 | 0.00903614 | n +42.03 Da,K +34.06 Da, | 954.8038324 | 2 | 546.8323 | 1.806E+10 | n.d. |
| SSGALLPKPQ           | Q9CPQ1 | 0.02275523 | n +34.06 Da,K +34.06 Da, | 962.5924117 | 2 | 533.351  | 333590016 | n.d. |
| SAINEVVTR            | P62900 | 0.00488656 | n +34.06 Da,             | 968.3985162 | 2 | 511.8063 | 134038000 | n.d. |
| ITAASGGQPPNYER       | Q9CQW9 | 0          | n +34.06 Da,             | 972.7828648 | 2 | 747.8914 | 33095300  | n.d. |
| MNLSAAHH             | Q8VCX1 | 0.00215363 | n +42.03 Da,             | 984.6587943 | 2 | 461.7136 | 8.436E+09 | n.d. |
| SSGSSGGPAVPTVQR      | Q78PY7 | 0          | n +34.06 Da,             | 985.159707  | 2 | 710.8933 | 442484000 | n.d. |

|                         |        |            |                          |             |   |          |           |      |
|-------------------------|--------|------------|--------------------------|-------------|---|----------|-----------|------|
| SSGALLPKPQ              | Q9CPQ1 | 0.03928987 | n +28.03 Da,K +28.03 Da, | 995.377998  | 2 | 527.3187 | 3.362E+09 | n.d. |
| DQVSGPPSAPTEDR          | B8JG3  | 0          | n +34.06 Da,             | 1001.150357 | 2 | 745.3682 | 66380200  | n.d. |
| SDSSDSMDTGAGSIR         | O35143 | 0          | n +28.03 Da,             | 1001.555011 | 2 | 756.8249 | 81340704  | n.d. |
| SKSFQQSSLGR             | Q8K310 | 0.00146897 | n +42.03 Da,K +34.06 Da, | 1002.917382 | 2 | 650.8592 | 38206400  | n.d. |
| AGELTEDEVER             | P62270 | 0          | n +28.03 Da,             | 1005.715226 | 2 | 638.3066 | 1.34E+09  | n.d. |
| AIVQSVGVSGGR            | Q9Z0X1 | 0          | n +34.06 Da,             | 1008.260645 | 2 | 582.3506 | 75699904  | n.d. |
| PVTLPDGR                | P06801 | 0.02393372 | n +14.02 Da,             | 1008.690709 | 1 | 434.748  | 18464100  | n.d. |
| AEVQTLVSR               | Q8BJ64 | 0.00319375 | n +28.03 Da,             | 1010.280322 | 2 | 515.7985 | 202848000 | n.d. |
| PVTLPDGR                | P06801 | 0.02393372 | n +14.02 Da,             | 1022.205262 | 2 | 434.7479 | 40350900  | n.d. |
| VCVHAEASSTGR            | B5X0G2 | 0          | n +42.03 Da,C +57.02 Da, | 1024.962748 | 2 | 722.8272 | 294159008 | n.d. |
| SSLGDQRPAAGEQPGAR       | Q9CX98 | 0          | n +42.03 Da,             | 1029.382244 | 3 | 580.2867 | 1.805E+09 | n.d. |
| TEPSSGSDVASIR           | P50544 | 0          | n +28.03 Da,             | 1030.639249 | 2 | 667.3321 | 137872992 | n.d. |
| MENQLTKSVEER            | Q9DC50 | 0.00040437 | n +42.03 Da,K +28.03 Da, | 1032.79465  | 3 | 511.9242 | 17993900  | n.d. |
| AGGEAGVTLGQPH           | Q9Z0N2 | 0          | n +28.03 Da,             | 1033.024215 | 2 | 610.7973 | 37981900  | n.d. |
| AVQSSALYEDR             | P16460 | 0.00112402 | n +28.03 Da,             | 1033.81609  | 2 | 633.819  | 46065700  | n.d. |
| SASNVLLHETSR            | Q8BZ09 | 0          | n +42.03 Da,             | 1033.866514 | 3 | 481.5793 | 861441024 | n.d. |
| TEPSSGSDVASIR           | P50544 | 0          | n +34.06 Da,             | 1037.948507 | 1 | 670.3492 | 16895500  | n.d. |
| TSSYSALSEPSR            | Q9DCS3 | 0          | n +34.06 Da,             | 1038.239298 | 2 | 659.8209 | 2.179E+09 | n.d. |
| ADADKSEAAAGDDGSQQQPAEPR | Q8C854 | 0          | n +42.03 Da,K +28.03 Da, | 1040.884659 | 1 | 795.3589 | 8303610   | n.d. |
| TVPLSTVNR               | Q8VCH0 | 0.00112402 | n +34.06 Da,             | 1040.943252 | 2 | 510.8168 | 354556000 | n.d. |
| SSIAVPGTSNPQQR          | A2ADY9 | 0.00079777 | n +28.03 Da,             | 1041.13225  | 2 | 735.3948 | 37072600  | n.d. |
| SKSFQQSSLGR             | Q8K310 | 0          | n +42.03 Da,K +28.03 Da, | 1046.10743  | 2 | 647.8404 | 667979008 | n.d. |
| PVDTDDTATALR            | Q99P30 | 0          | n +14.02 Da,             | 1049.381893 | 2 | 644.8235 | 174404992 | n.d. |
| ASGGGVPTDEEQATGLER      | P19536 | 0          | n +28.03 Da,             | 1049.75502  | 3 | 601.2897 | 757187968 | n.d. |
| TSSYSALSEPSR            | Q9DCS3 | 0          | n +28.03 Da,             | 1051.82145  | 2 | 656.8209 | 365649984 | n.d. |
| ASGGGVPTDEEQATGLER      | P19536 | 0.01235772 | n +14.02 Da,             | 1053.10622  | 3 | 596.6172 | 208020992 | n.d. |
| TGEPDEEEGTFR            | Q9Z239 | 0          | n +28.03 Da,             | 1054.38193  | 2 | 697.8081 | 256284992 | n.d. |
| AAATASSALKR             | Q9Z160 | 0          | n +42.03 Da,n +28.03 Da, | 1056.481714 | 2 | 558.8234 | 1.855E+09 | n.d. |
| PASPATETVPAFSER         | Q78PY7 | 0.03509289 | n +14.02 Da,             | 1056.877997 | 3 | 525.2672 | 247444000 | n.d. |
| GVGGGGGTAGPGSGAGTLPR    | Q9CZW5 | 0          | n +34.06 Da,             | 1061.713174 | 2 | 808.9306 | 44356900  | n.d. |
| TSVDLEETGR              | Q03265 | 0          | n +28.03 Da,             | 1066.815107 | 2 | 567.7892 | 275808000 | n.d. |
| LDNQSVGIEGGAR           | Q8JZR0 | 0.01078079 | n +28.03 Da,             | 1068.058225 | 2 | 672.329  | 1.961E+09 | n.d. |
| PGLTDTTVP               | P62754 | 0          | n +14.02 Da,             | 1069.011511 | 2 | 535.7955 | 70729504  | n.d. |
| PFATVGSSTSGEGTQPSR      | Q9QZM0 | 0          | n +14.02 Da,             | 1071.005965 | 2 | 933.9484 | 38519600  | n.d. |
| EDIVAVTR                | F6XXE6 | 0.02957151 | n +28.03 Da,             | 1078.865256 | 2 | 464.2502 | 193368000 | n.d. |
| MNKAPQTPPPPAR           | Q6NZJ6 | 0          | n +42.03 Da,K +34.06 Da, | 1078.946097 | 2 | 769.4218 | 204272000 | n.d. |
| PAQPQEQPFVSSR           | Q9D662 | 0          | n +14.02 Da,             | 1080.403624 | 2 | 742.8804 | 831537984 | n.d. |
| SAPEGLGDAHGDADR         | P58137 | 0          | n +42.03 Da,             | 1088.290395 | 2 | 755.3317 | 7.351E+09 | n.d. |
| SEPEEVIPSR              | Q91WQ3 | 0.01379532 | n +34.06 Da,             | 1088.868621 | 2 | 587.8034 | 175350000 | n.d. |
| TSGMALAEQAR             | Q8QZY2 | 0          | n +34.06 Da,             | 1097.192774 | 2 | 584.8135 | 653136000 | n.d. |



|                    |        |            |                                      |             |   |          |           |      |
|--------------------|--------|------------|--------------------------------------|-------------|---|----------|-----------|------|
| SLTSAASIDGSR       | Q9QYG0 | 0.00215363 | n +28.03 Da,                         | 1097.21791  | 2 | 596.2875 | 127641000 | n.d. |
| SKSESPKEPEQLR      | P49312 | 0.01491117 | n +42.03 Da,K +28.03 Da,             | 1098.119078 | 2 | 806.9135 | 169543008 | n.d. |
| PATGISQPPTTPTGQATR | Q6ZQ58 | 0          | n +14.02 Da,                         | 1099.793249 | 2 | 897.9704 | 369875008 | n.d. |
| VSDSSDSMDTGAGSIR   | O35143 | 0          | n +34.06 Da,                         | 1100.595821 | 2 | 809.8737 | 108295000 | n.d. |
| DFSAGVANR          | P15105 | 0.00180375 | n +34.06 Da,                         | 1100.938608 | 2 | 485.762  | 29717200  | n.d. |
| QEQQNPSLSSIR       | Q8C196 | 0.02056715 | n +34.06 Da,                         | 1101.546646 | 2 | 675.3698 | 320403008 | n.d. |
| AQEQPPASPEALR      | Q9WU79 | 0          | n +34.06 Da,                         | 1101.786558 | 2 | 714.3889 | 377088000 | n.d. |
| EAGDGTATVLR        | P63038 | 0          | n +34.06 Da,                         | 1102.549039 | 2 | 698.8772 | 56404100  | n.d. |
| PSQEQQNPSLSSIR     | Q8C196 | 0          | n +14.02 Da,                         | 1105.726292 | 2 | 757.3836 | 2.314E+09 | n.d. |
| YSTEVEAAVNR        | P29391 | 0.00647139 | n +34.06 Da,                         | 1110.417967 | 3 | 424.893  | 23983300  | n.d. |
| MGNVIQGGEGQAPTR    | Q8QZT1 | 0          | n +28.03 Da,                         | 1111.393853 | 2 | 771.8884 | 174819008 | n.d. |
| MGNVIQGGEGQAPTR    | Q8QZT1 | 0          | n +42.03 Da,                         | 1113.338316 | 2 | 778.8763 | 175159008 | n.d. |
| EETAPAVLER         | Q64374 | 0.00387597 | n +34.06 Da,                         | 1118.429045 | 2 | 574.8211 | 448963008 | n.d. |
| EEPATPEPEAEPPR     | Q91W90 | 0          | n +34.06 Da,                         | 1123.352974 | 2 | 791.8938 | 47964800  | n.d. |
| PVEGSGSDTVVIR      | Q8VDJ3 | 0.01880288 | n +14.02 Da,                         | 1124.825425 | 2 | 665.3545 | 502423008 | n.d. |
| GSLDLGGDAAGR       | Q8VEK3 | 0          | n +34.06 Da,                         | 1127.471864 | 2 | 561.7992 | 98402096  | n.d. |
| LVQLVWQR           | P49194 | 0.03983716 | n +14.02 Da,                         | 1129.771791 | 2 | 528.3319 | 68200000  | n.d. |
| PTETGALTLNR        | Q8BWT1 | 0          | n +14.02 Da,                         | 1132.698839 | 2 | 593.3339 | 49087300  | n.d. |
| IAGITAPPGR         | Q9WUM5 | 0.00112402 | n +34.06 Da,                         | 1145.192985 | 2 | 493.8145 | 558587008 | n.d. |
| ADEDEGEGIHPSAPH    | Q3UHD6 | 0          | n +42.03 Da,                         | 1145.802312 | 2 | 737.3152 | 1.264E+09 | n.d. |
| PSQEQQNPSLSSIR     | Q8C196 | 0          | n +14.02 Da,                         | 1146.863122 | 2 | 756.3698 | 2.52E+09  | n.d. |
| DFSAGVANR          | P15105 | 0.00079777 | n +28.03 Da,                         | 1147.004225 | 2 | 482.7445 | 47982100  | n.d. |
| MGNVIQGGEGQAPTR    | Q8QZT1 | 0          | n +42.03 Da,                         | 1149.913421 | 2 | 778.8967 | 1.05E+09  | n.d. |
| MEEEVQQHSH         | Q8BJL1 | 0          | n +42.03 Da,                         | 1150.070897 | 2 | 648.2703 | 332344000 | n.d. |
| SAPPGVPEGQIR       | O09131 | 0.00112402 | n +28.03 Da,                         | 1155.437466 | 2 | 666.3452 | 552945024 | n.d. |
| PAVDPLDSTR         | P56480 | 0          | n +14.02 Da,                         | 1157.923552 | 2 | 586.3019 | 7.555E+09 | n.d. |
| AGEEAADSPVLR       | Q9CPW2 | 0          | n +34.06 Da,                         | 1160.213762 | 2 | 688.3494 | 220486000 | n.d. |
| EEAGDGTATVLR       | P63038 | 0          | n +34.06 Da,                         | 1161.208094 | 2 | 763.3783 | 3.305E+09 | n.d. |
| PAVQSSALYEDR       | P16460 | 0          | n +14.02 Da,                         | 1161.396809 | 2 | 675.3385 | 2.623E+10 | n.d. |
| AGTTTIEAVKR        | D3Z2H9 | 0          | n +42.03 Da,n +28.03 Da,             | 1162.818402 | 2 | 607.3281 | 59409100  | n.d. |
| VSDSSDSMDTGAGSIR   | O35143 | 0.00112402 | n +34.06 Da,                         | 1166.316087 | 2 | 809.8752 | 20780900  | n.d. |
| SSGALLPKPQMR       | Q9CPQ1 | 0          | n +42.03 Da,K +28.03 Da,             | 1168.859468 | 3 | 452.2555 | 2.426E+09 | n.d. |
| PEGSTSDTQEQAIRL    | Q9DBG6 | 0          | n +14.02 Da,                         | 1172.950764 | 2 | 823.405  | 522015008 | n.d. |
| TPSEANLQEEVLR      | Q9WVBO | 0.00146897 | n +34.06 Da,                         | 1174.263656 | 2 | 768.3889 | 20522600  | n.d. |
| AGYLTEPVNR         | Q64521 | 0.00112402 | n +34.06 Da,                         | 1175.963451 | 2 | 577.325  | 389756992 | n.d. |
| PVQYVESTPDPR       | Q9CQB2 | 0.00180375 | n +14.02 Da,                         | 1177.699116 | 2 | 701.3407 | 848740992 | n.d. |
| FSTSQSLPASQTR      | P28665 | 0          | n +28.03 Da,                         | 1178.684173 | 2 | 719.3691 | 70380896  | n.d. |
| SSIKVECVLR         | Q64374 | 0          | n +42.03 Da,K +34.06 Da,C +57.02 Da, | 1178.856471 | 3 | 422.9147 | 108081000 | n.d. |
| PETVPLSTVNR        | Q8VCHO | 0.00112402 | n +14.02 Da,                         | 1185.70048  | 2 | 613.8406 | 3.143E+09 | n.d. |
| TGLNISQLR          | Q8K3N2 | 0.03231545 | n +34.06 Da,                         | 1194.858239 | 2 | 518.3163 | 575843968 | n.d. |

|                        |        |            |                          |             |   |          |           |      |
|------------------------|--------|------------|--------------------------|-------------|---|----------|-----------|------|
| MEEAPHGCPGADSAQAGR     | Q9R060 | 0          | n +42.03 Da,C +57.02 Da, | 1195.255018 | 2 | 941.8938 | 1.382E+09 | n.d. |
| AETTLTELRL             | P05784 | 0.00991736 | n +28.03 Da,             | 1197.342513 | 2 | 531.296  | 116190000 | n.d. |
| SDHGDVSLPPQDR          | Q9CQ26 | 0          | n +42.03 Da,             | 1198.892851 | 2 | 732.8387 | 197616000 | n.d. |
| AGQSDKDKVKYY           | P56395 | 0.01404853 | n +42.03 Da,K +28.03 Da, | 1206.906886 | 2 | 686.3447 | 7.417E+10 | n.d. |
| CTSATESEVTR            | Q9CZ13 | 0          | n +34.06 Da,C +57.02 Da, | 1211.717113 | 2 | 637.8138 | 386128992 | n.d. |
| VSAVAVAPTSVH           | Q99PL5 | 0          | n +28.03 Da,             | 1213.155732 | 2 | 582.3211 | 216727008 | n.d. |
| ATVNQVLASR             | Q922R8 | 0.01204035 | n +28.03 Da,             | 1238.971773 | 2 | 543.3195 | 21778300  | n.d. |
| NTNEEAGDGGTTTATVLAR    | P63038 | 0          | n +34.06 Da,             | 1242.790692 | 2 | 927.9592 | 56310800  | n.d. |
| PPLEDGAMPSAR           | P47757 | 0.00810537 | n +14.02 Da,             | 1245.089239 | 2 | 626.8219 | 1.145E+09 | n.d. |
| DQGVLLGR               | P21981 | 0.04771429 | n +28.03 Da,             | 1248.206637 | 2 | 443.2613 | 50143200  | n.d. |
| SGYTPDEKLR             | Q3UIU2 | 0.00146897 | n +42.03 Da,K +34.06 Da, | 1250.686888 | 2 | 621.3324 | 560422976 | n.d. |
| SAADSEDSPTIEAVR        | P10518 | 0          | n +34.06 Da,             | 1250.967982 | 2 | 791.3936 | 345614016 | n.d. |
| TEELSLDQDR             | O35215 | 0.00112402 | n +34.06 Da,             | 1252.013501 | 2 | 620.3193 | 246588000 | n.d. |
| GSAADSEDSPTIEAVR       | P10518 | 0          | n +34.06 Da,             | 1252.422787 | 2 | 819.9039 | 13650400  | n.d. |
| GVQVETISPGDGR          | P26883 | 0          | n +28.03 Da,             | 1254.456071 | 2 | 671.8521 | 1.984E+09 | n.d. |
| SEQLLQTN SGAVAR        | Q8VCF0 | 0          | n +34.06 Da,             | 1254.860964 | 2 | 754.413  | 373771008 | n.d. |
| SAADSEDSPTIEAVR        | P10518 | 0          | n +28.03 Da,             | 1257.411656 | 2 | 788.3754 | 59677000  | n.d. |
| NDDDEPPPLPR            | O55022 | 0.00387597 | n +34.06 Da,             | 1258.839787 | 2 | 649.8289 | 159988000 | n.d. |
| DDEPPPLPR              | O55022 | 0.00146897 | n +34.06 Da,             | 1262.293321 | 2 | 535.2901 | 97295296  | n.d. |
| PLAQAVEGPEENVR         | Q9CZ13 | 0          | n +14.02 Da,             | 1266.919937 | 3 | 494.262  | 153670000 | n.d. |
| TNEEAGDGGTTTATVLAR     | P63038 | 0          | n +28.03 Da,             | 1268.471677 | 2 | 867.9282 | 182958000 | n.d. |
| PLAQAVEGPEENVR         | Q9CZ13 | 0          | n +14.02 Da,             | 1269.247138 | 2 | 740.8909 | 3.008E+09 | n.d. |
| GASGDNDDEPPPLPR        | O55022 | 0          | n +28.03 Da,             | 1269.759821 | 2 | 840.3778 | 34910300  | n.d. |
| PANYADAPTEGIR          | Q8K010 | 0          | n +14.02 Da,             | 1270.053994 | 2 | 694.8427 | 44321000  | n.d. |
| SEPELKLVAR             | P08030 | 0.01204035 | n +42.03 Da,K +28.03 Da, | 1273.885477 | 3 | 404.5714 | 38644400  | n.d. |
| PVLTSPAPADSTPGDSSR     | P54728 | 0.00112402 | n +14.02 Da,             | 1276.73976  | 2 | 884.9386 | 104670000 | n.d. |
| ASGGGVPTDEEQATGLER     | P19536 | 0.00112402 | n +34.06 Da,             | 1278.520324 | 3 | 603.2993 | 354875008 | n.d. |
| GVQVETISPGDGR          | P26883 | 0          | n +34.06 Da,             | 1284.852916 | 2 | 674.8685 | 1.789E+09 | n.d. |
| MNVGTAHSEVNPNTNR       | Q9CPZ6 | 0.03907845 | n +42.03 Da,             | 1286.908992 | 2 | 834.8911 | 419492000 | n.d. |
| DDEPPPLPR              | O55022 | 0.0028399  | n +28.03 Da,             | 1289.487357 | 2 | 532.2745 | 285217984 | n.d. |
| AGGEGGVTLGQPHLSR       | Q9Z0N1 | 0          | n +42.03 Da,             | 1291.47128  | 3 | 526.6062 | 538259968 | n.d. |
| PTVAAGAVGLAQR          | P45952 | 0.04373009 | n +14.02 Da,             | 1292.508807 | 3 | 408.9067 | 858520000 | n.d. |
| MGESDDSI LR            | Q9CQR2 | 0          | n +42.03 Da,             | 1293.670481 | 2 | 582.7636 | 379364000 | n.d. |
| MHG GGPSPGDSACPLR      | P08775 | 0          | n +42.03 Da,C +57.02 Da, | 1300.305028 | 2 | 819.3614 | 166052992 | n.d. |
| VMQSSDAAYLAR           | Q8BWT1 | 0          | n +28.03 Da,             | 1303.329462 | 2 | 713.8528 | 990060032 | n.d. |
| GASGDNDDEPPPLPR        | O55022 | 0          | n +34.06 Da,             | 1309.544635 | 2 | 843.3942 | 23198300  | n.d. |
| SASVSVISR              | P61804 | 0.00146897 | n +34.06 Da,             | 1310.173956 | 2 | 519.8219 | 842222016 | n.d. |
| AADTQVSETLKR           | E9PVA8 | 0          | n +42.03 Da,K +34.06 Da, | 1311.079338 | 2 | 697.8878 | 4.32E+09  | n.d. |
| GQNQPVLNITNR           | Q8C196 | 0          | n +28.03 Da,             | 1312.582347 | 2 | 691.3805 | 1.408E+09 | n.d. |
| SGEGENPASKPTPVQDVQGDGR | Q61205 | 0          | n +42.03 Da,n +34.06 Da, | 1314.126822 | 2 | 1151.061 | 11977900  | n.d. |

|                         |        |            |                          |             |   |          |           |      |
|-------------------------|--------|------------|--------------------------|-------------|---|----------|-----------|------|
| TEQGPQVDETQFK           | P47738 | 0          | n +34.06 Da,K +34.06 Da, | 1321.467846 | 2 | 787.9201 | 184336992 | n.d. |
| ASGGGVPTDEEQATGLER      | P19536 | 0          | n +28.03 Da,             | 1324.932532 | 2 | 901.4313 | 115547000 | n.d. |
| MNSIKNVPAR              | Q9JKY5 | 0.00215363 | n +42.03 Da,K +28.03 Da, | 1326.946531 | 2 | 599.3348 | 207344000 | n.d. |
| SAGSAAAGPVEAAIR         | Q9D8S9 | 0          | n +34.06 Da,             | 1327.839175 | 2 | 681.3825 | 471251008 | n.d. |
| NTNEEAGDGTTTATVLR       | P63038 | 0          | n +28.03 Da,             | 1333.765373 | 2 | 924.9504 | 75910896  | n.d. |
| TMLGQSTEEIR             | P08226 | 0.00903614 | n +34.06 Da,             | 1333.840878 | 2 | 649.8459 | 43019000  | n.d. |
| AIAEELAPER              | O35490 | 0.00112402 | n +28.03 Da,             | 1340.615251 | 2 | 563.8084 | 2.8E+09   | n.d. |
| AQNLKDLAGR              | O35129 | 0.04617149 | n +42.03 Da,K +34.06 Da, | 1344.828589 | 2 | 581.34   | 113158000 | n.d. |
| MVQESSSGLLDR            | Q571F8 | 0          | n +28.03 Da,             | 1348.511774 | 2 | 703.8532 | 177480000 | n.d. |
| GVPTDEEQATGLER          | P19536 | 0          | n +34.06 Da,             | 1349.924559 | 2 | 768.3941 | 35109900  | n.d. |
| AAQESLHVKTPLR           | Q8VBT2 | 0          | n +42.03 Da,K +34.06 Da, | 1350.16008  | 3 | 509.3008 | 38487300  | n.d. |
| EEAGDGTTTATVLR          | P63038 | 0          | n +34.06 Da,             | 1350.922122 | 2 | 763.3863 | 1.205E+09 | n.d. |
| MEDPGEDTSIHR            | Q80X98 | 0          | n +42.03 Da,             | 1354.711167 | 2 | 714.8066 | 555409984 | n.d. |
| DDDEPPPLPR              | O55022 | 0          | n +28.03 Da,             | 1354.895062 | 2 | 589.7885 | 939585024 | n.d. |
| SSIVVSGTPIR             | P35505 | 0.00040437 | n +34.06 Da,             | 1356.266917 | 2 | 575.3562 | 43390600  | n.d. |
| PDGQVITIGNER            | P60710 | 0          | n +14.02 Da,             | 1357.715693 | 2 | 656.8472 | 9.787E+09 | n.d. |
| PITDSPVIGAQR            | Q99LB6 | 0.03907845 | n +14.02 Da,             | 1358.641597 | 2 | 634.352  | 53039100  | n.d. |
| TQPEVDTPLGR             | Q63880 | 0          | n +34.06 Da,             | 1365.212185 | 2 | 623.8453 | 131656000 | n.d. |
| MDQQTQHPSKAAQPLR        | Q9JL3  | 0          | n +42.03 Da,K +28.03 Da, | 1369.023864 | 2 | 889.4383 | 457963008 | n.d. |
| DTLYEAVR                | P53026 | 0.01323007 | n +28.03 Da,             | 1375.187897 | 2 | 497.7641 | 332060000 | n.d. |
| LAQEDPDYGLR             | P24270 | 0          | n +28.03 Da,             | 1375.967074 | 2 | 652.8277 | 3.009E+09 | n.d. |
| SASNVSLHETS             | Q8BZ09 | 0          | n +42.03 Da,             | 1376.839738 | 2 | 721.8643 | 178063008 | n.d. |
| PDDTVSTLYNR             | Q8R0Y6 | 0          | n +14.02 Da,             | 1380.124787 | 2 | 647.818  | 674496000 | n.d. |
| PAINVGLSVSR             | Q03265 | 0          | n +14.02 Da,             | 1380.194224 | 2 | 563.8332 | 573654976 | n.d. |
| GTTMYPGIADR             | P60710 | 0          | n +28.03 Da,             | 1384.316003 | 2 | 605.3001 | 1.927E+09 | n.d. |
| PNDQEEDGANIDLSQR        | O88685 | 0.00146897 | n +14.02 Da,             | 1395.041574 | 3 | 643.9523 | 30149800  | n.d. |
| TTGIVMDSGDGVTH          | P60710 | 0          | n +14.02 Da,             | 1395.757572 | 2 | 702.3352 | 569382976 | n.d. |
| DDDEPPPLPR              | O55022 | 0          | n +34.06 Da,             | 1396.387503 | 2 | 592.8048 | 543430016 | n.d. |
| SEEALALPR               | P34914 | 0.02138872 | n +34.06 Da,             | 1399.135464 | 2 | 510.3009 | 96262096  | n.d. |
| GGGVPTDEEQATGLER        | P19536 | 0          | n +28.03 Da,             | 1399.367515 | 2 | 822.3959 | 52639900  | n.d. |
| ATPEASGSGEKVEGSEPSVTYYR | Q9CQX2 | 0          | n +42.03 Da,K +34.06 Da, | 1401.25866  | 3 | 826.4028 | 107384000 | n.d. |
| PNDQEEDGANIDLSQR        | O88685 | 0          | n +14.02 Da,             | 1404.322828 | 2 | 965.425  | 187712992 | n.d. |
| ASGGGVPTDEEQATGLER      | P19536 | 0          | n +34.06 Da,             | 1406.956575 | 2 | 904.4475 | 2.339E+09 | n.d. |
| QPGASGDNDDEPPPLPR       | O55022 | 0          | n +34.06 Da,             | 1407.255564 | 2 | 955.9497 | 32712500  | n.d. |
| PNVNPVIVTR              | Q99PT1 | 0.02957151 | n +14.02 Da,             | 1408.935621 | 2 | 561.8241 | 341952992 | n.d. |
| TTGIVMDSGDGVTH          | P60710 | 0          | n +28.03 Da,             | 1408.979964 | 2 | 709.3344 | 361937984 | n.d. |
| ATPEASGSGEKVEGSEPSVTYYR | Q9CQX2 | 0          | n +42.03 Da,K +28.03 Da, | 1410.528498 | 3 | 824.3911 | 110148000 | n.d. |
| CLFRMSEIQAHAR           | Q9QZC2 | 0.0084317  | n +14.02 Da,             | 1410.81772  | 2 | 816.8984 | 111936000 | n.d. |
| PPILEGAVGGNEAR          | Q6PAR5 | 0.00215363 | n +17.03 Da,             | 1412.54999  | 2 | 698.883  | 55910500  | n.d. |
| PSSNDPLTETIR            | P28665 | 0          | n +14.02 Da,             | 1415.974237 | 2 | 672.3433 | 756761024 | n.d. |

|                         |        |            |                                      |             |   |          |           |      |
|-------------------------|--------|------------|--------------------------------------|-------------|---|----------|-----------|------|
| AEASAAGADAGSAVAHR       | Q9D0C1 | 0          | n +42.03 Da,                         | 1417.739594 | 2 | 812.887  | 1.317E+09 | n.d. |
| ASGGGVPTDEEQATGLER      | P19536 | 0          | n +28.03 Da,                         | 1417.821603 | 2 | 901.4314 | 2.605E+09 | n.d. |
| SEEALALPR               | P34914 | 0.01173785 | n +28.03 Da,                         | 1419.07115  | 2 | 507.2848 | 648900992 | n.d. |
| TPEAAVEHPEAVR           | O35490 | 0.04291099 | n +28.03 Da,                         | 1421.567668 | 2 | 717.3635 | 88539504  | n.d. |
| ATVAATTKVPEIR           | Q9WTM5 | 0.04499567 | n +42.03 Da,K +28.03 Da,             | 1429.179674 | 3 | 476.2799 | 35802100  | n.d. |
| MEHSPEEGASPEPSQPPATDSTR | Q3U7R1 | 0          | n +42.03 Da,                         | 1429.30314  | 3 | 846.0343 | 551004992 | n.d. |
| DDDEPPPLPR              | O55022 | 0          | n +28.03 Da,                         | 1429.642233 | 2 | 589.7891 | 131563000 | n.d. |
| DNDDEPPPLPR             | O55022 | 0          | n +28.03 Da,                         | 1430.367188 | 2 | 704.3221 | 31963100  | n.d. |
| GTGVTPPTPLGTR           | Q99K01 | 0.04617149 | n +34.06 Da,                         | 1436.262528 | 2 | 692.9036 | 245058000 | n.d. |
| GGTMYPGIADR             | P60710 | 0          | n +28.03 Da,                         | 1437.366325 | 2 | 633.8212 | 32183800  | n.d. |
| GVPTDEEQATGLER          | P19536 | 0          | n +34.06 Da,                         | 1445.911285 | 2 | 768.3907 | 174472000 | n.d. |
| AGAVAADSPGFVEDR         | Q8BUY5 | 0          | n +28.03 Da,                         | 1451.157094 | 2 | 745.3667 | 471171008 | n.d. |
| SGGGVPTDEEQATGLER       | P19536 | 0          | n +34.06 Da,                         | 1453.498156 | 2 | 868.9244 | 80633296  | n.d. |
| AAPSDPVPASLR            | Q4LDG0 | 0.00112402 | n +34.06 Da,                         | 1462.957426 | 2 | 607.8497 | 554390976 | n.d. |
| ATIGPSGLHPGER           | Q3TRM8 | 0          | n +42.03 Da,                         | 1464.937555 | 2 | 667.3471 | 955217984 | n.d. |
| AVPPTYADLGKSAR          | Q60932 | 0          | n +42.03 Da,K +34.06 Da,             | 1466.280245 | 3 | 507.9545 | 466176000 | n.d. |
| GVPTDEEQATGLER          | P19536 | 0          | n +28.03 Da,                         | 1467.060268 | 2 | 765.374  | 119532000 | n.d. |
| AVPPTYADLGKSAR          | Q60932 | 0.0024911  | n +42.03 Da,K +28.03 Da,             | 1467.420981 | 3 | 505.9436 | 567468992 | n.d. |
| DAGMQLQGYR              | P05202 | 0          | n +28.03 Da,                         | 1467.499674 | 2 | 583.2781 | 120460000 | n.d. |
| TDDLITPTDTR             | Q91YY5 | 0.00040437 | n +34.06 Da,                         | 1469.109301 | 2 | 691.8731 | 286436992 | n.d. |
| TVPDPTGIIDR             | Q922Q1 | 0.00112402 | n +28.03 Da,                         | 1470.100786 | 2 | 615.3227 | 290351008 | n.d. |
| SASNVSLHETSAR           | Q8BZ09 | 0          | n +42.03 Da,                         | 1474.335058 | 2 | 720.3687 | 95806704  | n.d. |
| MAEETAPAVLER            | Q64374 | 0          | n +34.06 Da,                         | 1476.436103 | 3 | 450.9095 | 23690300  | n.d. |
| SETAPAAPAAPAPAEKTPVKK   | P43274 | 0          | n +42.03 Da,n +28.03 Da,K +28.03 Da, | 1476.610895 | 3 | 720.0629 | 502414016 | n.d. |
| APELLTEHQHQPTSN         | Q8R409 | 0          | n +42.03 Da,                         | 1478.288896 | 2 | 936.4477 | 101609000 | n.d. |
| ATPEASGSGEKVEGSEPSVTYYR | Q9CQX2 | 0          | n +42.03 Da,K +28.03 Da,             | 1478.485326 | 2 | 1236.081 | 22691900  | n.d. |
| PGEPGPSTSIPENDTVDGR     | F6QJV5 | 0          | n +14.02 Da,                         | 1478.781764 | 2 | 969.957  | 26616400  | n.d. |
| MDMGNQHPSISR            | Q8CI32 | 0          | n +42.03 Da,                         | 1479.351631 | 2 | 707.8129 | 384324992 | n.d. |
| FSAQNLDFAQLR            | Q6L8S8 | 0.03111909 | n +14.02 Da,                         | 1482.299144 | 2 | 712.3808 | 109587000 | n.d. |
| SSSNDHVLVPMMSQR         | Q7TMS5 | 0          | n +42.03 Da,                         | 1482.600656 | 2 | 799.8819 | 759697984 | n.d. |
| ALDPAEQHLR              | Q9CPZ8 | 0          | n +42.03 Da,                         | 1482.649047 | 2 | 596.3094 | 2.002E+09 | n.d. |
| TAAAVAAQSGILDR          | Q9R112 | 0          | n +28.03 Da,                         | 1484.490275 | 2 | 686.3875 | 228500000 | n.d. |
| GLNSDSVTEETLR           | Q8C196 | 0          | n +34.06 Da,                         | 1487.390801 | 2 | 727.8776 | 58576200  | n.d. |
| FTEQVVTAAHAVR           | Q8OUK8 | 0.03928987 | n +17.03 Da,                         | 1489.118961 | 3 | 458.9134 | 12344500  | n.d. |
| AEVEETLKR               | P62627 | 0.03395335 | n +42.03 Da,K +34.06 Da,             | 1493.124163 | 2 | 575.8278 | 91797904  | n.d. |
| MHATGLAAPAGTPR          | Q9CX30 | 0          | n +42.03 Da,                         | 1496.489841 | 2 | 696.8559 | 1.869E+09 | n.d. |
| DDMLITGGR               | G3X982 | 0.00112402 | n +28.03 Da,                         | 1496.535181 | 2 | 503.2551 | 75906400  | n.d. |
| VGVPPTETGALTLNR         | Q8BWT1 | 0.00112402 | n +28.03 Da,                         | 1501.751249 | 3 | 485.9436 | 932988032 | n.d. |
| VDHLANTEINSQR           | Q3TB82 | 0          | n +42.03 Da,                         | 1501.962521 | 2 | 769.8736 | 96933696  | n.d. |
| SASNVSLHETSAR           | Q8BZ09 | 0          | n +42.03 Da,                         | 1509.342105 | 2 | 721.8654 | 2.106E+10 | n.d. |

|                        |        |            |                          |             |   |          |           |      |
|------------------------|--------|------------|--------------------------|-------------|---|----------|-----------|------|
| MEKGSSELTVDGDSR        | Q8CHY6 | 0          | n +42.03 Da,K +28.03 Da, | 1510.978274 | 2 | 840.8895 | 81952496  | n.d. |
| EQAGGDATENFEDVGH       | P56395 | 0          | n +28.03 Da,             | 1512.426393 | 2 | 852.3591 | 45485400  | n.d. |
| GQVGDLSPPQQEALAR       | Q8R0F9 | 0          | n +34.06 Da,             | 1514.956394 | 2 | 864.9302 | 495456000 | n.d. |
| AEVEETLKR              | P62627 | 0.0024911  | n +42.03 Da,K +34.06 Da, | 1520.856185 | 2 | 574.3478 | 469172992 | n.d. |
| ANHAPFETDISTLTR        | Q9QXD6 | 0.02980132 | n +42.03 Da,             | 1521.245225 | 3 | 572.2851 | 1.135E+09 | n.d. |
| SVVAGGPEVTLTPER        | Q8CIM3 | 0.01204035 | n +28.03 Da,             | 1521.98902  | 3 | 513.9515 | 32237400  | n.d. |
| GQVGDLSPPQQEALAR       | Q8R0F9 | 0          | n +34.06 Da,             | 1522.117568 | 2 | 865.967  | 145167008 | n.d. |
| DIDTAAKF               | P56383 | 0.01379532 | n +34.06 Da,K +34.06 Da, | 1522.585082 | 2 | 474.2737 | 135946000 | n.d. |
| GEPVSLGSLR             | P11352 | 0.00112402 | n +28.03 Da,             | 1526.097686 | 2 | 521.7967 | 8464950   | n.d. |
| PDLPEDELAR             | Q9JKR6 | 0.00810537 | n +14.02 Da,             | 1529.33167  | 2 | 584.796  | 376332000 | n.d. |
| DEVFYSR                | P11725 | 0.00618132 | n +34.06 Da,             | 1529.835253 | 2 | 523.7725 | 32886300  | n.d. |
| GLTDDQVSGPPSAPTEDR     | B8JG3  | 0          | n +34.06 Da,             | 1530.188835 | 2 | 938.4607 | 34387200  | n.d. |
| AESCEALGTVPEHER        | Q8R313 | 0          | n +42.03 Da,             | 1530.751644 | 2 | 863.8869 | 46757800  | n.d. |
| MNVGVVAHSEVNPTR        | Q92110 | 0          | n +42.03 Da,             | 1533.967494 | 2 | 833.9014 | 876715008 | n.d. |
| TSVESIMATEDR           | Q8C196 | 0          | n +28.03 Da,             | 1536.850437 | 2 | 683.8299 | 192136000 | n.d. |
| EIPPLEGDEDASR          | P11499 | 0          | n +28.03 Da,             | 1539.164433 | 3 | 728.3435 | 47823000  | n.d. |
| AEGQVLVLDGR            | P19253 | 0          | n +28.03 Da,             | 1543.664229 | 2 | 592.8345 | 432227008 | n.d. |
| SNFGAPSASVAAAPAPAR     | O35643 | 0          | n +34.06 Da,             | 1544.775983 | 2 | 838.4502 | 34326200  | n.d. |
| DIDTAAKF               | P56383 | 0.01379532 | n +28.03 Da,K +28.03 Da, | 1545.572903 | 2 | 468.7558 | 265216000 | n.d. |
| PLEEFTTDNQEEAR         | P61922 | 0          | n +14.02 Da,             | 1545.852662 | 2 | 910.917  | 507192000 | n.d. |
| AGSDPVVIVSAAR          | Q8CAY6 | 0          | n +34.06 Da,             | 1546.543349 | 2 | 638.3782 | 163239008 | n.d. |
| AAAGAAATDLEVVR         | Q6PD26 | 0          | n +28.03 Da,             | 1549.138061 | 2 | 671.8773 | 689484032 | n.d. |
| GLNSDSVTEETLR          | Q8C196 | 0.00518852 | n +28.03 Da,             | 1549.425296 | 2 | 724.3536 | 81843200  | n.d. |
| AEGQVLVLDGR            | P19253 | 0          | n +14.02 Da,             | 1550.310211 | 2 | 585.8269 | 64726000  | n.d. |
| ANSANTNTVPKLYR         | Q99PM3 | 0          | n +42.03 Da,K +28.03 Da, | 1551.532888 | 2 | 809.9313 | 8651430   | n.d. |
| MNHSAPGIPPPPR          | P56477 | 0.0184953  | n +42.03 Da,             | 1552.089345 | 2 | 706.857  | 177554000 | n.d. |
| GPVPGYQQAPPQGVPR       | G3X972 | 0.03030303 | n +34.06 Da,             | 1554.206952 | 2 | 841.4651 | 31002400  | n.d. |
| METMASPGKDNYSR         | O35345 | 0          | n +42.03 Da,K +28.03 Da, | 1564.619534 | 2 | 785.3557 | 43556900  | n.d. |
| MQNQSSSTSHPGASISLSR    | Q3TXT3 | 0          | n +42.03 Da,             | 1564.780624 | 2 | 965.4592 | 115871000 | n.d. |
| PAINVGLSVSR            | Q03265 | 0.00146897 | n +14.02 Da,             | 1566.126908 | 2 | 563.8328 | 842569024 | n.d. |
| MASGGGVPTDEEQATGLER    | P19536 | 0          | n +14.02 Da,             | 1568.719142 | 2 | 959.9436 | 67682896  | n.d. |
| SESGHSQPGLYGIER        | Q9DB90 | 0          | n +42.03 Da,             | 1571.978125 | 2 | 829.8912 | 34128900  | n.d. |
| PLEMIEPR               | P14131 | 0.0353461  | n +14.02 Da,             | 1572.589963 | 2 | 499.7705 | 769001984 | n.d. |
| ADIVENQVMDTR           | P10649 | 0          | n +14.02 Da,             | 1575.056267 | 2 | 702.8431 | 2.652E+09 | n.d. |
| FVSSGPTNASAFTR         | P27546 | 0          | n +34.06 Da,             | 1576.486253 | 2 | 801.8973 | 38487100  | n.d. |
| SDDLPLNYSR             | P08113 | 0.00810537 | n +34.06 Da,             | 1578.137013 | 2 | 575.3202 | 118012000 | n.d. |
| ADKEAAFDDAVEER         | Q60972 | 0          | n +42.03 Da,K +28.03 Da, | 1578.214118 | 2 | 816.8987 | 1.248E+09 | n.d. |
| ATPEASGSGEKVEGSEPSVYYR | Q9CQX2 | 0          | n +42.03 Da,K +28.03 Da, | 1579.797809 | 3 | 824.3904 | 30657400  | n.d. |
| SSVAVLQESFAEHR         | Q8VDJ3 | 0          | n +42.03 Da,             | 1581.778869 | 3 | 568.2845 | 358577984 | n.d. |
| MDPSAALHR              | P35283 | 0.00040437 | n +42.03 Da,             | 1584.076842 | 2 | 520.2532 | 814348992 | n.d. |

|                       |        |            |                                      |             |   |          |           |      |
|-----------------------|--------|------------|--------------------------------------|-------------|---|----------|-----------|------|
| HADDDICTNIAR          | Q3URY6 | 0.04318841 | n +17.03 Da,K +34.06 Da,             | 1587.737329 | 2 | 790.3969 | 121909000 | n.d. |
| MNHSAPGIPPPPR         | P56477 | 0.0184953  | n +42.03 Da,                         | 1589.722898 | 2 | 706.8443 | 67970200  | n.d. |
| SASNVSLHETSR          | Q8BZ09 | 0          | n +42.03 Da,                         | 1590.849852 | 2 | 721.8656 | 405201984 | n.d. |
| VVFDITYDR             | P16015 | 0.03371783 | n +28.03 Da,                         | 1601.241239 | 2 | 579.2769 | 129494000 | n.d. |
| SAGVSVPGPMGSPGR       | P11087 | 0          | n +34.06 Da,                         | 1602.829987 | 2 | 743.8955 | 114635000 | n.d. |
| LSQQSASGAPVLLR        | Q9DCM0 | 0          | n +28.03 Da,                         | 1603.94673  | 3 | 485.6159 | 140911008 | n.d. |
| DPVPTPGPASAQLR        | Q920L1 | 0.00146897 | n +34.06 Da,                         | 1606.043994 | 3 | 480.6074 | 20097000  | n.d. |
| AQNLKDLAGR            | O35129 | 0          | n +42.03 Da,K +28.03 Da,             | 1611.966012 | 2 | 578.3273 | 99058304  | n.d. |
| MASGGGVPTDEEQATGLER   | P19536 | 0          | n +28.03 Da,                         | 1621.41333  | 3 | 644.9709 | 51795200  | n.d. |
| APDPVPTPGPASAQLR      | Q920L1 | 0.00112402 | n +28.03 Da,                         | 1623.210064 | 2 | 801.4345 | 56730700  | n.d. |
| MEEPQKNDLSMR          | Q8R079 | 0.02589095 | n +42.03 Da,K +28.03 Da,             | 1626.799432 | 2 | 774.3629 | 52516700  | n.d. |
| VVLVTGAGGGLGR         | P51660 | 0.00903614 | n +28.03 Da,                         | 1627.07846  | 2 | 592.3608 | 1.904E+09 | n.d. |
| LVCVHAEASSTGR         | B5X0G2 | 0.00040437 | n +42.03 Da,                         | 1627.095091 | 2 | 779.3683 | 91633696  | n.d. |
| DIDTAAKF              | P56383 | 0.01379532 | n +28.03 Da,K +28.03 Da,             | 1629.887929 | 2 | 468.7555 | 3.056E+09 | n.d. |
| TMAEETAPAVLER         | Q64374 | 0          | n +34.06 Da,                         | 1630.281707 | 3 | 484.5921 | 205522000 | n.d. |
| SEASGPQLLPVR          | Q8C5H8 | 0          | n +28.03 Da,                         | 1632.634196 | 2 | 641.3603 | 230036992 | n.d. |
| SLVIPEKFQH            | P62270 | 0.02028714 | n +42.03 Da,K +28.03 Da,             | 1632.799781 | 3 | 423.2407 | 159395008 | n.d. |
| LSQQSASGAPVLLR        | Q9DCM0 | 0          | n +28.03 Da,                         | 1633.363048 | 2 | 727.9177 | 369286016 | n.d. |
| SSGALLPKPQMR          | Q9CPQ1 | 0.0380117  | n +42.03 Da,K +28.03 Da,             | 1638.577475 | 2 | 676.3484 | 39386700  | n.d. |
| MDAQKDVQPPKQPPM       | Q63871 | 0          | n +42.03 Da,K +28.03 Da,             | 1640.449954 | 2 | 919.9558 | 78349696  | n.d. |
| ITEIYEGTSEIQR         | Q07417 | 0          | n +14.02 Da,                         | 1642.635459 | 2 | 776.8977 | 69302400  | n.d. |
| PAASDLPVPAEGVR        | D3Z6I7 | 0          | n +14.02 Da,                         | 1644.651046 | 2 | 696.8707 | 213512992 | n.d. |
| SETAPAAPAAPAPVEKTPVKK | P43277 | 0          | n +42.03 Da,n +28.03 Da,K +28.03 Da, | 1647.448801 | 3 | 729.4068 | 167703008 | n.d. |
| TAVVVGTVTDDVR         | P35980 | 0          | n +34.06 Da,                         | 1654.284066 | 2 | 683.3937 | 505220992 | n.d. |
| DIDTAAKF              | P56383 | 0.04373009 | n +34.06 Da,K +34.06 Da,             | 1654.365503 | 2 | 473.2718 | 796987008 | n.d. |
| APDPVPTPGPASAQLR      | Q920L1 | 0          | n +34.06 Da,                         | 1656.27336  | 3 | 536.6374 | 260332992 | n.d. |
| ELAEDGYSGVEVR         | P62908 | 0          | n +28.03 Da,                         | 1657.712145 | 2 | 726.3532 | 927065024 | n.d. |
| PLTGGEVPSLGLSR        | P11352 | 0.00180375 | n +14.02 Da,                         | 1659.093338 | 3 | 466.265  | 1.122E+09 | n.d. |
| TSVESIMATEDR          | Q8C196 | 0.00934268 | n +34.06 Da,                         | 1659.475524 | 2 | 686.8452 | 127148000 | n.d. |
| SGTQTNMNVNEVISNR      | P97807 | 0          | n +28.03 Da,                         | 1661.252522 | 2 | 896.4413 | 124111000 | n.d. |
| ESTSEVECGDFYNSGDR     | Q91VA0 | 0.02109836 | n +28.03 Da,                         | 1665.140951 | 2 | 990.4168 | 15003800  | n.d. |
| TSVLDPDEGIR           | Q9CZU6 | 0          | n +34.06 Da,                         | 1668.422301 | 2 | 618.3383 | 206182000 | n.d. |
| PASPATETVPAFSER       | Q78PY7 | 0          | n +14.02 Da,                         | 1670.08094  | 2 | 787.3963 | 9.69E+09  | n.d. |
| TVLSGGTTMYPGIADR      | P60710 | 0.00146897 | n +34.06 Da,                         | 1670.187035 | 3 | 558.2969 | 1.114E+09 | n.d. |
| MASGGGVPTDEEQATGLER   | P19536 | 0          | n +34.06 Da,                         | 1670.966852 | 2 | 969.9679 | 73955600  | n.d. |
| PASPATETVPAFSER       | Q78PY7 | 0.0353461  | n +14.02 Da,                         | 1671.261151 | 3 | 525.267  | 370558016 | n.d. |
| TSVLDPDEGIR           | Q9CZU6 | 0.00112402 | n +28.03 Da,                         | 1672.81175  | 2 | 615.3231 | 26911100  | n.d. |
| PGSAATISSASNIVPPR     | E9Q740 | 0          | n +14.02 Da,                         | 1672.99278  | 3 | 575.9763 | 448518016 | n.d. |
| GGDATENFEDVGHSTDR     | P56395 | 0          | n +28.03 Da,                         | 1673.988762 | 2 | 953.3959 | 68568600  | n.d. |
| APDPVPTPGPASAQLR      | Q920L1 | 0          | n +34.06 Da,                         | 1675.498564 | 2 | 804.452  | 2.711E+09 | n.d. |

|                       |        |            |                                      |             |   |          |           |      |
|-----------------------|--------|------------|--------------------------------------|-------------|---|----------|-----------|------|
| APDPVPTPGPASAQLR      | Q920L1 | 0          | n +28.03 Da,                         | 1675.80789  | 3 | 534.6271 | 906129024 | n.d. |
| ASLVPLKEK             | P56135 | 0.00962496 | n +42.03 Da,K +28.03 Da,             | 1677.526257 | 2 | 541.8462 | 3.705E+10 | n.d. |
| SEVPGAAAEGPGGSGVGLGDR | Q9EP72 | 0          | n +28.03 Da,                         | 1679.592787 | 2 | 623.2973 | 21452200  | n.d. |
| TDVPVDPGVVHR          | Q9CYZ2 | 0.00647139 | n +42.03 Da,                         | 1680.631076 | 2 | 666.8515 | 55463600  | n.d. |
| TVLSGGTTMYPGIADR      | P60710 | 0.0104918  | n +28.03 Da,                         | 1683.677258 | 3 | 556.2835 | 10753900  | n.d. |
| EEAPDFEANTTIGR        | Q8BG37 | 0          | n +42.03 Da,                         | 1684.040075 | 2 | 796.3716 | 2.331E+10 | n.d. |
| PAINVGLSVSR           | Q03265 | 0          | n +14.02 Da,                         | 1687.339363 | 2 | 563.8328 | 5.256E+09 | n.d. |
| QPTLATDMGTMQER        | P56480 | 0.00647139 | n +28.03 Da,                         | 1688.242429 | 2 | 803.8838 | 127859000 | n.d. |
| PLDTEVPLER            | Q05920 | 0.01432209 | n +14.02 Da,                         | 1688.561712 | 2 | 590.2989 | 2.212E+09 | n.d. |
| SLAIQENANALAR         | Q91Y97 | 0          | n +34.06 Da,                         | 1692.126053 | 2 | 702.9035 | 221430000 | n.d. |
| VAAEGLPDQYADGEAAR     | Q9QXF8 | 0          | n +34.06 Da,                         | 1693.09053  | 2 | 883.9413 | 13576200  | n.d. |
| MENQLTKSVEER          | Q9DC50 | 0.00040437 | n +42.03 Da,K +34.06 Da,             | 1694.296003 | 2 | 770.4017 | 282068000 | n.d. |
| ASASGAMAKHEQIL        | Q9WV55 | 0          | n +42.03 Da,K +34.06 Da,             | 1697.241765 | 2 | 745.3934 | 205184992 | n.d. |
| ASLVPLKEK             | P56135 | 0.02645985 | n +42.03 Da,K +34.06 Da,             | 1698.082572 | 2 | 547.8772 | 1.187E+10 | n.d. |
| IYTSIGEDYDER          | P67778 | 0          | n +28.03 Da,                         | 1699.30459  | 2 | 744.8465 | 281272000 | n.d. |
| SSVAVLTKESFAEHR       | Q8VDJ3 | 0          | n +42.03 Da,                         | 1703.707705 | 3 | 568.2862 | 1.858E+09 | n.d. |
| PASPATETVPAFSER       | Q78PY7 | 0          | n +28.03 Da,                         | 1704.012143 | 2 | 794.4043 | 181798000 | n.d. |
| AGGEGGVTLGQPHLSR      | Q9Z0N1 | 0          | n +42.03 Da,                         | 1704.780145 | 3 | 526.6062 | 1.248E+09 | n.d. |
| PAINVGLSVSR           | Q03265 | 0          | n +14.02 Da,                         | 1707.960679 | 1 | 563.8325 | 1.099E+09 | n.d. |
| PSQEISDSSTPIFR        | Q6P5E4 | 0          | n +14.02 Da,                         | 1708.056418 | 2 | 789.4049 | 2.023E+09 | n.d. |
| TIQGLDGLSER           | Q91Y97 | 0          | n +34.06 Da,                         | 1708.5757   | 2 | 611.8374 | 892633984 | n.d. |
| PSSLAIQENANALAR       | Q91Y97 | 0          | n +14.02 Da,                         | 1710.103127 | 2 | 784.9226 | 9.699E+09 | n.d. |
| ATDMSQGELIHPK         | Q3TEA8 | 0          | n +42.03 Da,K +34.06 Da,             | 1711.217387 | 2 | 751.8928 | 504558016 | n.d. |
| PSSLAIQENANALAR       | Q91Y97 | 0          | n +14.02 Da,                         | 1711.657347 | 3 | 523.6183 | 640705024 | n.d. |
| ATEESDLAQYGVV         | P09103 | 0          | n +34.06 Da,                         | 1712.592752 | 2 | 800.9263 | 176711008 | n.d. |
| PAVLQVECHPY           | Q9JII6 | 0          | n +14.02 Da,                         | 1712.774552 | 2 | 663.8289 | 1.303E+09 | n.d. |
| TDAELDLVSR            | Q922D8 | 0.00040437 | n +28.03 Da,                         | 1716.395756 | 2 | 573.8087 | 39479700  | n.d. |
| QNYSTEVEAAVNR         | P29391 | 0          | n +28.03 Da,                         | 1718.049618 | 3 | 503.5829 | 64118500  | n.d. |
| QPTLATDMGTMQER        | P56480 | 0.00647139 | n +28.03 Da,                         | 1719.547446 | 1 | 803.8775 | 92580200  | n.d. |
| AGKPVLYHYFDGR         | P30115 | 0.00040437 | n +42.03 Da,K +34.06 Da,             | 1721.205054 | 3 | 479.2675 | 482998016 | n.d. |
| TIQGLDGLSER           | Q91Y97 | 0          | n +34.06 Da,                         | 1721.833558 | 1 | 611.8383 | 129189000 | n.d. |
| VAVLVGSMR             | P14152 | 0.0380117  | n +34.06 Da,                         | 1726.759624 | 2 | 531.8342 | 103085000 | n.d. |
| ATAVVVNIGKK           | Q9DCL9 | 0.00079777 | n +42.03 Da,n +28.03 Da,K +28.03 Da, | 1727.159917 | 2 | 599.3765 | 2.539E+09 | n.d. |
| ATEGMILTNHDH          | Q8BUV3 | 0          | n +42.03 Da,                         | 1732.131059 | 2 | 690.8137 | 685214016 | n.d. |
| ASKEMFEDTVEER         | Q60973 | 0.03907845 | n +42.03 Da,K +28.03 Da,             | 1732.648496 | 2 | 820.8781 | 135310000 | n.d. |
| EIDGGLETLR            | Q9DCW4 | 0.01022765 | n +28.03 Da,                         | 1733.929501 | 2 | 565.8058 | 650648000 | n.d. |
| LYASVLTAQPR           | P58252 | 0.00962496 | n +28.03 Da,                         | 1738.131536 | 2 | 623.8554 | 915844992 | n.d. |
| PLTGGEVPSLGLR         | P11352 | 0.01404853 | n +28.03 Da,                         | 1739.171476 | 3 | 470.9368 | 281776992 | n.d. |
| GVAEGLPDQYADGEAAR     | Q9QXF8 | 0          | n +28.03 Da,                         | 1740.230351 | 2 | 909.4358 | 240530000 | n.d. |
| SSVAVLTKESFAEHR       | Q8VDJ3 | 0          | n +42.03 Da,                         | 1741.256921 | 2 | 851.924  | 313064000 | n.d. |

|                         |        |            |                                      |             |   |          |           |      |
|-------------------------|--------|------------|--------------------------------------|-------------|---|----------|-----------|------|
| FVIGGPQGDAGVTGR         | Q91X83 | 0          | n +28.03 Da,                         | 1747.117458 | 2 | 729.8895 | 113421000 | n.d. |
| ANHAPFETDISTLTR         | Q9QXD6 | 0          | n +42.03 Da,                         | 1748.288503 | 2 | 857.9228 | 295476992 | n.d. |
| SEGDSVGD SVHGKPSVVY     | Q9CQU3 | 0          | n +42.03 Da,K +28.03 Da,             | 1751.109587 | 2 | 944.9497 | 6652850   | n.d. |
| ANHAPFETDISTLTR         | Q9QXD6 | 0          | n +42.03 Da,                         | 1753.268148 | 3 | 572.286  | 5.432E+10 | n.d. |
| QGTPLAQAVEGPESENV       | Q9CZ13 | 0          | n +42.03 Da,                         | 1761.270182 | 2 | 897.9703 | 87298600  | n.d. |
| ATPEASGSGEKVEGSEPSVTYYR | Q9CQX2 | 0          | n +42.03 Da,K +28.03 Da,             | 1761.971432 | 2 | 1236.079 | 52256700  | n.d. |
| ATPEASGSGEKVEGSEPSVTYYR | Q9CQX2 | 0          | n +42.03 Da,K +34.06 Da,             | 1765.133002 | 2 | 826.413  | 120852000 | n.d. |
| IYVVDVGSEPR             | P17563 | 0.0067981  | n +14.02 Da,                         | 1765.368067 | 2 | 624.3367 | 235404000 | n.d. |
| ESVQVPDDQDFR            | Q9JMD3 | 0          | n +28.03 Da,                         | 1767.141919 | 2 | 731.8377 | 484763008 | n.d. |
| DELGLNKY                | Q8C196 | 0.04821683 | n +28.03 Da,K +28.03 Da,             | 1767.459643 | 2 | 504.2681 | 421852992 | n.d. |
| PGAQAESLGPLQVAR         | Q9DCW4 | 0          | n +14.02 Da,                         | 1776.802931 | 3 | 503.2789 | 601393984 | n.d. |
| FAVTVAPPGAR             | Q8VEK3 | 0.00618132 | n +34.06 Da,                         | 1777.642971 | 2 | 560.3404 | 6.234E+09 | n.d. |
| PEGPTLTQLNSVQSSER       | P19096 | 0          | n +14.02 Da,                         | 1778.164534 | 2 | 928.9684 | 47926400  | n.d. |
| AGGEAGVTLGQPHLSR        | Q9Z0N2 | 0          | n +42.03 Da,                         | 1778.666613 | 2 | 796.4126 | 9.468E+09 | n.d. |
| PGAQAESLGPLQVAR         | Q9DCW4 | 0          | n +14.02 Da,                         | 1779.984474 | 2 | 754.4155 | 1.356E+09 | n.d. |
| PALSPTMTMGTVQR          | Q8BMF4 | 0.04904477 | n +14.02 Da,                         | 1783.50899  | 2 | 752.3832 | 274376000 | n.d. |
| GISEETTTGVHNLV          | P50247 | 0          | n +28.03 Da,                         | 1785.81788  | 2 | 774.8834 | 862448000 | n.d. |
| TPSYVAFTDTER            | P16627 | 0          | n +28.03 Da,                         | 1786.141078 | 2 | 707.8461 | 271632000 | n.d. |
| MEEAELVKGR              | Q9JHU2 | 0          | n +42.03 Da,K +28.03 Da,             | 1786.308317 | 2 | 616.3249 | 148216000 | n.d. |
| TGQECNVLLQLPR           | A2ANN9 | 0.04771429 | n +28.03 Da,                         | 1788.00821  | 2 | 778.4201 | 189499008 | n.d. |
| SQFTITPGSEQIR           | Q99KI0 | 0.0028399  | n +34.06 Da,                         | 1788.353263 | 2 | 749.41   | 29840000  | n.d. |
| SEDIPLNLSR              | Q9CQN1 | 0.03983716 | n +34.06 Da,                         | 1790.101811 | 2 | 589.346  | 96962496  | n.d. |
| TICFCSALYHQIR           | A2ASX9 | 0.00518852 | n +42.03 Da,                         | 1790.411323 | 3 | 570.9432 | 40963200  | n.d. |
| GAAQVVVTDLSASR          | Q64442 | 0          | n +34.06 Da,                         | 1791.941203 | 2 | 704.405  | 66076300  | n.d. |
| TDLTEFAAR               | Q8BWT1 | 0.00112402 | n +28.03 Da,                         | 1794.225203 | 2 | 526.2744 | 190615008 | n.d. |
| ESEVASSVLER             | Q9CYR0 | 0          | n +34.06 Da,                         | 1794.7888   | 2 | 676.8782 | 859891968 | n.d. |
| GTSVESIMATEDR           | Q8C196 | 0          | n +28.03 Da,                         | 1797.463359 | 2 | 712.3399 | 146660992 | n.d. |
| ENIIDLSNANR             | B5X0G2 | 0          | n +28.03 Da,                         | 1801.158773 | 2 | 643.8386 | 9.617E+09 | n.d. |
| QMREVERQQR              | Q8BRE0 | 0.03732001 | n +28.03 Da,                         | 1811.113596 | 2 | 694.3596 | 72152400  | n.d. |
| AVPPTYADLGKSAR          | Q60932 | 0          | n +42.03 Da,K +28.03 Da,             | 1811.309869 | 2 | 758.41   | 53543200  | n.d. |
| MYPPPAPPPAPHR           | A2AJ15 | 0.00146897 | n +42.03 Da,                         | 1811.723107 | 2 | 735.3721 | 150150000 | n.d. |
| EEATGTIQEDYLR           | Q3THE2 | 0.00518852 | n +28.03 Da,                         | 1814.879566 | 2 | 776.8891 | 147863008 | n.d. |
| VAVDAPVSSVALR           | Q64374 | 0.00180375 | n +28.03 Da,                         | 1815.045546 | 2 | 656.3807 | 3.871E+09 | n.d. |
| PTEIIAFSDR              | P35700 | 0.01969365 | n +14.02 Da,                         | 1822.680923 | 2 | 581.8082 | 787745984 | n.d. |
| DEAPNFEANTTIGR          | O08709 | 0          | n +28.03 Da,                         | 1823.109176 | 2 | 781.8756 | 63636000  | n.d. |
| MDPEPTEHSTDGVSVP        | G3UWA6 | 0          | n +42.03 Da,                         | 1823.796091 | 2 | 948.4264 | 31921100  | n.d. |
| MEQVNELKEKGN            | Q60864 | 0          | n +42.03 Da,n +34.06 Da,K +34.06 Da, | 1830.533458 | 2 | 764.919  | 214467008 | n.d. |
| DITGEPLIR               | Q9WTP6 | 0.0104918  | n +34.06 Da,                         | 1830.922349 | 2 | 524.3137 | 14527400  | n.d. |
| TAEMSSILEER             | Q03265 | 0.00112402 | n +28.03 Da,                         | 1835.791152 | 2 | 647.3214 | 2.422E+09 | n.d. |
| VLAELYVSDR              | Q8BP47 | 0.02160494 | n +28.03 Da,                         | 1837.155145 | 2 | 595.3121 | 286398016 | n.d. |



|                         |        |            |                          |             |   |          |           |      |
|-------------------------|--------|------------|--------------------------|-------------|---|----------|-----------|------|
| AAVTTYR                 | Q62293 | 0.04583453 | n +42.03 Da,             | 1844.847243 | 1 | 885.4403 | 14002500  | n.d. |
| TAEMSSILEER             | Q03265 | 0          | n +34.06 Da,             | 1846.809738 | 2 | 650.337  | 88211600  | n.d. |
| ASLPPHAGPATPLSPTR       | P21619 | 0          | n +42.03 Da,             | 1852.061448 | 2 | 856.459  | 1.332E+10 | n.d. |
| FVIGGPQGDAGVTGR         | Q91X83 | 0.01432209 | n +42.03 Da,             | 1853.7668   | 2 | 736.8572 | 172348000 | n.d. |
| VLAELYVSDR              | Q8BP47 | 0.04960091 | n +28.03 Da,             | 1855.757025 | 2 | 596.8319 | 859881024 | n.d. |
| AAQESLHVKTPL            | Q8VBT2 | 0          | n +42.03 Da,K +34.06 Da, | 1856.720537 | 2 | 685.3985 | 115675000 | n.d. |
| GTLDPSSLDETAYER         | O35943 | 0          | n +34.06 Da,             | 1861.237072 | 2 | 901.4348 | 33424200  | n.d. |
| TIAMDGTEGLVR            | P56480 | 0          | n +34.06 Da,             | 1861.99522  | 2 | 648.8547 | 1.845E+09 | n.d. |
| SAGLLHGPGSIAGR          | Q3UQD6 | 0.03030303 | n +28.03 Da,             | 1866.684283 | 2 | 660.8851 | 273464992 | n.d. |
| ASLPPHAGPATPLSPTR       | P21619 | 0.00112402 | n +42.03 Da,             | 1869.477287 | 3 | 571.3095 | 108379000 | n.d. |
| PEQSLDTSLR              | Q91XD4 | 0.00215363 | n +14.02 Da,             | 1870.001899 | 2 | 636.8576 | 441137984 | n.d. |
| DITGEPLIR               | Q9WTP6 | 0.04617149 | n +28.03 Da,             | 1872.53284  | 2 | 521.3004 | 88209200  | n.d. |
| SSVAVLTKESFAEHR         | Q8VDJ3 | 0          | n +42.03 Da,             | 1873.521677 | 3 | 568.2843 | 2.321E+09 | n.d. |
| TEDPETLQAQFR            | Q8BK48 | 0          | n +28.03 Da,             | 1874.671665 | 2 | 731.8647 | 73437504  | n.d. |
| SSVAVLTKESFAEHR         | Q8VDJ3 | 0          | n +42.03 Da,             | 1878.30979  | 2 | 851.9224 | 1.359E+09 | n.d. |
| SAQLTSLVDADAR           | Q91XD4 | 0          | n +28.03 Da,             | 1879.9471   | 2 | 687.8665 | 193327008 | n.d. |
| MAEESQNTVLTR            | G3X982 | 0.00146897 | n +28.03 Da,             | 1887.488583 | 2 | 777.3842 | 674777024 | n.d. |
| PSDSISETVILR            | Q8VDJ3 | 0.00040437 | n +14.02 Da,             | 1887.639021 | 2 | 665.864  | 193163008 | n.d. |
| MENQLTKSVEER            | Q9DC50 | 0          | n +42.03 Da,K +34.06 Da, | 1891.83077  | 2 | 770.3984 | 1.238E+09 | n.d. |
| MENQLTKSVEER            | Q9DC50 | 0          | n +42.03 Da,K +28.03 Da, | 1892.109386 | 2 | 767.3629 | 4.858E+09 | n.d. |
| DFTPAELR                | O55022 | 0.01969365 | n +28.03 Da,             | 1892.435367 | 2 | 488.7587 | 760742976 | n.d. |
| PAAPSVAR                | Q8BU85 | 0.02758412 | n +17.03 Da,             | 1899.80823  | 2 | 393.2292 | 1.593E+09 | n.d. |
| PITPVYTVAPNVQR          | Q91WT8 | 0          | n +14.02 Da,             | 1901.21688  | 2 | 784.9441 | 1.415E+09 | n.d. |
| TDTDAELDLVSR            | Q922D8 | 0.03203797 | n +34.06 Da,             | 1901.318398 | 2 | 684.8484 | 370083008 | n.d. |
| YTMGDAPDFDR             | P10649 | 0.00518852 | n +42.03 Da,             | 1901.707199 | 2 | 665.2933 | 149248000 | n.d. |
| ATPEASGSGEKVEGSEPSVTTYR | Q9CQX2 | 0          | n +42.03 Da,K +34.06 Da, | 1901.888269 | 2 | 1239.1   | 11580000  | n.d. |
| SGEVPPNINIKEPR          | Q99JR1 | 0.03153823 | n +42.03 Da,K +28.03 Da, | 1902.651744 | 3 | 540.6301 | 433780992 | n.d. |
| NAVTKQEFQVDPDTR         | Q99KI0 | 0          | n +28.03 Da,             | 1906.111873 | 2 | 815.4151 | 18081300  | n.d. |
| AVPPTYADLGKSAR          | Q60932 | 0          | n +42.03 Da,K +34.06 Da, | 1908.060334 | 2 | 761.4275 | 2.007E+10 | n.d. |
| EDATLNLNAINR            | Q91Y97 | 0          | n +28.03 Da,             | 1909.706484 | 2 | 686.3603 | 69922096  | n.d. |
| ATPEASGSGEKVEGSEPSVTTYR | Q9CQX2 | 0          | n +42.03 Da,K +28.03 Da, | 1910.723865 | 3 | 824.3909 | 68589296  | n.d. |
| METQSTGTEDGFTPVTHR      | Q9CPS7 | 0          | n +42.03 Da,             | 1914.613663 | 2 | 1018.454 | 819779968 | n.d. |
| AAVPSAVHLPR             | Q3UFF7 | 0          | n +42.03 Da,             | 1919.594366 | 2 | 580.3331 | 231575008 | n.d. |
| GVEMLNNMPSPR            | Q3UZZ6 | 0.00079777 | n +34.06 Da,             | 1920.23785  | 2 | 689.854  | 41028900  | n.d. |
| PFVELETNLPASR           | O35215 | 0          | n +17.03 Da,             | 1920.757272 | 2 | 745.3863 | 259954000 | n.d. |
| ADIVENQVMDTR            | P10649 | 0          | n +42.03 Da,             | 1924.635108 | 2 | 716.8499 | 218178000 | n.d. |
| TTIQGLDGLSER            | Q91Y97 | 0          | n +34.06 Da,             | 1926.641446 | 2 | 662.3692 | 821556992 | n.d. |
| EDATLNLNAINR            | Q91Y97 | 0          | n +34.06 Da,             | 1929.317728 | 2 | 689.3841 | 48459600  | n.d. |
| DLTGEPLIQR              | Q9WTP7 | 0.02416641 | n +28.03 Da,             | 1929.924595 | 2 | 585.3475 | 2.511E+09 | n.d. |
| ALETVPKDLR              | P63271 | 0.00180375 | n +42.03 Da,K +34.06 Da, | 1931.687617 | 4 | 609.3699 | 56127000  | n.d. |

|                          |        |            |                          |             |   |          |           |      |
|--------------------------|--------|------------|--------------------------|-------------|---|----------|-----------|------|
| AGQSDKDKVYYTLE           | P56395 | 0.02056715 | n +42.03 Da,K +34.06 Da, | 1933.450955 | 2 | 863.9636 | 249528992 | n.d. |
| VGVPPTETGALTLNR          | Q8BWT1 | 0          | n +14.02 Da,             | 1935.670467 | 2 | 721.4037 | 2.401E+09 | n.d. |
| SQGDSNPAAI PHAAEDIQGD DR | Q61206 | 0          | n +42.03 Da,             | 1936.187388 | 2 | 1153.518 | 399279008 | n.d. |
| TLIGIPPAPR               | P38647 | 0.00518852 | n +28.03 Da,             | 1936.462013 | 2 | 531.8365 | 305990016 | n.d. |
| MASGGGVPTDEEQATGLER      | P19536 | 0          | n +42.03 Da,             | 1937.052315 | 2 | 973.9407 | 421424000 | n.d. |
| ALETVPKDLR               | P63271 | 0.00079777 | n +42.03 Da,K +28.03 Da, | 1937.839353 | 2 | 606.3468 | 55697800  | n.d. |
| SGEVPPNINIKEPR           | Q99JR1 | 0          | n +42.03 Da,K +34.06 Da, | 1941.448428 | 3 | 542.6409 | 261800000 | n.d. |
| PILNALEVQGR              | P56480 | 0          | n +14.02 Da,             | 1942.26671  | 2 | 612.3595 | 248362000 | n.d. |
| PQEDAPSVDIANIR           | P40142 | 0          | n +14.02 Da,             | 1942.5989   | 3 | 513.5994 | 112108000 | n.d. |
| PQEDAPSVDIANIR           | P40142 | 0          | n +14.02 Da,             | 1945.148932 | 2 | 769.8932 | 2.391E+09 | n.d. |
| TEVPGNFQGPDPYR           | Q91XE8 | 0.00146897 | n +34.06 Da,             | 1945.677578 | 2 | 805.9049 | 287609984 | n.d. |
| AVPPTYADLGKSAR           | Q60932 | 0          | n +42.03 Da,K +28.03 Da, | 1946.366562 | 2 | 758.4122 | 1.339E+10 | n.d. |
| YTMGDAPDFDR              | P10649 | 0.00518852 | n +42.03 Da,             | 1947.539255 | 2 | 665.2742 | 336158016 | n.d. |
| AEAEQAEELSFPR            | Q05920 | 0          | n +28.03 Da,             | 1948.439597 | 2 | 788.3855 | 1.81E+09  | n.d. |
| DCELITVIDIIPGR           | E9PV03 | 0.04771429 | n +42.03 Da,             | 1949.239805 | 2 | 828.4212 | 495744992 | n.d. |
| AVTLDKDAYYR              | Q920B9 | 0          | n +42.03 Da,K +28.03 Da, | 1949.715411 | 2 | 692.8583 | 2.169E+09 | n.d. |
| ANHAPFETDISTLTR          | Q9QXD6 | 0.00040437 | n +42.03 Da,             | 1950.602124 | 2 | 857.9261 | 7.512E+09 | n.d. |
| STGTFVVSQPLNYR           | Q9JLJ2 | 0          | n +34.06 Da,             | 1952.225505 | 2 | 801.9171 | 235900000 | n.d. |
| VLSMTDAVLAR              | P11725 | 0          | n +28.03 Da,             | 1953.922616 | 2 | 645.8392 | 1.403E+09 | n.d. |
| PAVPPAPGPGQLTLR          | Q62465 | 0.01404853 | n +14.02 Da,             | 1954.477855 | 2 | 742.9358 | 1.239E+09 | n.d. |
| PAVPPAPGPGQLTLR          | Q62465 | 0          | n +14.02 Da,             | 1956.571362 | 3 | 495.6247 | 1.054E+09 | n.d. |
| AEAEQAEELSFPR            | Q05920 | 0          | n +28.03 Da,             | 1957.264748 | 3 | 525.9267 | 211899008 | n.d. |
| TQVEGDEEAALLER           | D3Z6I7 | 0          | n +34.06 Da,             | 1958.431506 | 2 | 797.4182 | 921275008 | n.d. |
| ADKEAAFDDAVEER           | Q60972 | 0          | n +42.03 Da,K +28.03 Da, | 1960.506724 | 2 | 818.3784 | 907652992 | n.d. |
| EEDATLNLNAINR            | Q91Y97 | 0          | n +28.03 Da,             | 1963.197195 | 2 | 750.8879 | 63654000  | n.d. |
| PATGTPVLGGLSYR           | Q61176 | 0          | n +14.02 Da,             | 1965.098722 | 2 | 701.8868 | 937348992 | n.d. |
| PLDATQEYTEDLR            | Q80V26 | 0.00146897 | n +17.03 Da,             | 1965.313546 | 2 | 784.3909 | 376648992 | n.d. |
| SSAPTPPSVDKVDGFSR        | Q61151 | 0          | n +42.03 Da,K +34.06 Da, | 1965.884019 | 2 | 962.4878 | 45880000  | n.d. |
| VGVPPTETGALTLNR          | Q8BWT1 | 0          | n +28.03 Da,             | 1968.811319 | 2 | 728.4116 | 8.933E+09 | n.d. |
| ASLPPHAGPATPLSPTR        | P21619 | 0          | n +42.03 Da,             | 1970.132042 | 2 | 856.46   | 4.617E+09 | n.d. |
| PLTGGEPEVSLGSLR          | P11352 | 0          | n +14.02 Da,             | 1971.313623 | 2 | 698.8931 | 915361984 | n.d. |
| VGVPPTETGALTLNR          | Q8BWT1 | 0          | n +28.03 Da,             | 1973.986852 | 3 | 485.9438 | 1.574E+09 | n.d. |
| SEEDATLNLNAINR           | Q91Y97 | 0          | n +28.03 Da,             | 1976.43783  | 3 | 529.937  | 122652000 | n.d. |
| DATLNLNAINR              | Q91Y97 | 0          | n +28.03 Da,             | 1976.542255 | 2 | 621.8429 | 107725000 | n.d. |
| MEELGAAASGAGGGGGGEEHGGGR | O70566 | 0          | n +42.03 Da,             | 1980.732871 | 3 | 723.9781 | 230548992 | n.d. |
| MEELGAAASGAGGGGGGEEHGGGR | O70566 | 0          | n +42.03 Da,             | 1983.832914 | 2 | 1085.463 | 234484992 | n.d. |
| ANHAPFETDISTLTR          | Q9QXD6 | 0          | n +42.03 Da,             | 1984.08659  | 3 | 572.2852 | 3.557E+10 | n.d. |
| DPAINYLQR                | Q9QXD6 | 0          | n +28.03 Da,             | 1987.418623 | 2 | 623.8254 | 218811008 | n.d. |
| PATGTPVLGGLSYR           | Q61176 | 0.00112402 | n +14.02 Da,             | 1987.902497 | 3 | 468.2619 | 199294000 | n.d. |
| VTGAPVPAVSEPDGDDFQSR     | Q924T2 | 0          | n +28.03 Da,             | 1994.453988 | 2 | 1100.53  | 39058000  | n.d. |

|                               |        |            |                                      |             |   |          |           |      |
|-------------------------------|--------|------------|--------------------------------------|-------------|---|----------|-----------|------|
| SSQVSDGAAAVLLAR               | Q8VCHO | 0          | n +34.06 Da,                         | 1995.131695 | 3 | 493.6187 | 122611000 | n.d. |
| ETTIQGLDGLSER                 | Q91Y97 | 0.00180375 | n +28.03 Da,                         | 1995.575525 | 2 | 723.8731 | 895030016 | n.d. |
| SDPTGTAYGASIPLAR              | Q8R086 | 0          | n +34.06 Da,                         | 1996.36144  | 2 | 805.9356 | 57835500  | n.d. |
| ILGADTSVDLEETGR               | Q03265 | 0          | n +14.02 Da,                         | 1999.884498 | 2 | 795.4006 | 1.024E+09 | n.d. |
| PPQEDAPSVDIANIR               | P40142 | 0          | n +14.02 Da,                         | 2001.711361 | 2 | 818.42   | 1.417E+09 | n.d. |
| PGASLPLPLNLK                  | Q05920 | 0.01265002 | n +14.02 Da,K +28.03 Da,             | 2002.439207 | 2 | 574.8645 | 982188992 | n.d. |
| VMAAIEKVR                     | Q921K9 | 0.02416641 | n +17.03 Da,K +34.06 Da,             | 2005.086982 | 2 | 534.3511 | 184182000 | n.d. |
| SGEVPPNINIKEPR                | Q99JR1 | 0          | n +42.03 Da,K +28.03 Da,             | 2007.409468 | 2 | 808.9082 | 57559900  | n.d. |
| SPDFTNENPLETR                 | Q8VDN2 | 0          | n +34.06 Da,                         | 2008.234758 | 2 | 777.3889 | 27506700  | n.d. |
| TEADVNPAYPLADAH               | Q9D0T1 | 0          | n +42.03 Da,K +28.03 Da,             | 2009.428726 | 3 | 594.2926 | 6457820   | n.d. |
| PSVAGLETIPTATGR               | Q71KT5 | 0          | n +17.03 Da,                         | 2011.463602 | 2 | 743.9057 | 71625504  | n.d. |
| ILGADTSVDLEETGR               | Q03265 | 0          | n +28.03 Da,                         | 2014.630733 | 2 | 802.4109 | 1.566E+09 | n.d. |
| PAVPPAPGPGQLTLR               | Q62465 | 0.01404853 | n +14.02 Da,                         | 2017.300268 | 2 | 742.9326 | 27696100  | n.d. |
| ENIIDLSNANR                   | B5X0G2 | 0.00112402 | n +42.03 Da,                         | 2025.205266 | 2 | 650.8278 | 535063008 | n.d. |
| SLDAAPSDPVPASLR               | Q4LDG0 | 0.00146897 | n +34.06 Da,                         | 2029.525437 | 2 | 765.423  | 159482000 | n.d. |
| SAGFLQASASDVVVVHGR            | Q8VCHO | 0          | n +34.06 Da,                         | 2031.712493 | 3 | 612.0048 | 13408800  | n.d. |
| ETTIQGLDGLSER                 | Q91Y97 | 0.00180375 | n +28.03 Da,                         | 2038.141311 | 1 | 723.8848 | 27494700  | n.d. |
| LGDEAPNFEANTTIGR              | O08709 | 0.00180375 | n +28.03 Da,                         | 2039.546587 | 2 | 866.933  | 346894016 | n.d. |
| SSAAPIQIPAPASVAR              | P28843 | 0          | n +34.06 Da,                         | 2041.692834 | 2 | 785.462  | 149130000 | n.d. |
| PEEVDDEVFYSPR                 | P11725 | 0          | n +14.02 Da,                         | 2043.207419 | 2 | 798.3646 | 638561984 | n.d. |
| MDDREDLVYQAK                  | P62259 | 0.00112402 | n +42.03 Da,K +34.06 Da,             | 2045.609579 | 2 | 779.8832 | 110669000 | n.d. |
| ENAQLELVLEVDGLR               | Q9R1R2 | 0.0184953  | n +14.02 Da,                         | 2047.420209 | 3 | 571.3063 | 193115008 | n.d. |
| PALPVEDAAEDYAR                | Q9CQ60 | 0          | n +14.02 Da,                         | 2048.653611 | 2 | 765.8701 | 191942000 | n.d. |
| AAAAGAVVASAASGPAEGKK          | Q8CH25 | 0          | n +42.03 Da,n +28.03 Da,K +28.03 Da, | 2052.857577 | 3 | 594.6645 | 129339000 | n.d. |
| DLSPTTVMSEGTR                 | Q923D2 | 0          | n +34.06 Da,                         | 2053.743778 | 2 | 714.3875 | 87823800  | n.d. |
| PSTGALPFQSLR                  | A2AS89 | 0          | n +14.02 Da,                         | 2056.761207 | 2 | 642.8429 | 170800000 | n.d. |
| SAAAAPAAEGEDAPVPPSSEKEPEMPGPR | Q7TNV0 | 0          | n +42.03 Da,K +28.03 Da,             | 2058.985368 | 3 | 972.4652 | 148428000 | n.d. |
| TTFNVQDGPDFQDR                | P97493 | 0          | n +28.03 Da,                         | 2059.563886 | 2 | 834.3871 | 1.294E+09 | n.d. |
| IAESLVAEGLATR                 | Q78PY7 | 0.03907845 | n +34.06 Da,                         | 2061.003469 | 2 | 682.4062 | 108604000 | n.d. |
| EALGLCEPQGGLLVDR              | P32020 | 0          | n +28.03 Da,                         | 2062.852508 | 2 | 900.455  | 118230000 | n.d. |
| PNPDDPLVPEIAR                 | P61079 | 0          | n +14.02 Da,                         | 2062.988228 | 2 | 723.8853 | 133023000 | n.d. |
| SAKAISEQTGKELL                | Q91V92 | 0.01379532 | n +42.03 Da,K +34.06 Da,             | 2063.144042 | 2 | 792.9776 | 185447008 | n.d. |
| PVVPLAENPNTFGSSR              | Q3UZ09 | 0          | n +14.02 Da,                         | 2063.743874 | 3 | 566.2945 | 87292496  | n.d. |
| ASLPPHAGPATPLSPTR             | P21619 | 0          | n +42.03 Da,                         | 2064.385122 | 2 | 856.4601 | 1.261E+09 | n.d. |
| ENIIDLSNANR                   | B5X0G2 | 0.00112402 | n +42.03 Da,                         | 2065.608649 | 2 | 650.8093 | 29898800  | n.d. |
| PASAPPPLSASVPPQATAGPSYPR      | Q8BKZ9 | 0          | n +14.02 Da,                         | 2069.299763 | 3 | 806.4171 | 122331000 | n.d. |
| SDLTTDLIVQR                   | Q922E4 | 0.00040437 | n +34.06 Da,                         | 2071.813627 | 2 | 647.8737 | 50549800  | n.d. |
| STGTFVVSQPLNYR                | Q9JLJ2 | 0          | n +28.03 Da,                         | 2072.480375 | 2 | 798.9184 | 35316600  | n.d. |
| PPASVVVGPVVVPR                | P29699 | 0          | n +17.03 Da,                         | 2075.288753 | 3 | 463.9591 | 158735008 | n.d. |
| SDVLELTDENFESR                | P27773 | 0.00962496 | n +28.03 Da,                         | 2082.890724 | 3 | 561.2691 | 5302190   | n.d. |

|                     |        |            |                          |             |   |          |           |      |
|---------------------|--------|------------|--------------------------|-------------|---|----------|-----------|------|
| ASGADSKGDDLSTAILK   | Q01853 | 0.00112402 | n +42.03 Da,K +28.03 Da, | 2083.445986 | 2 | 873.959  | 431636992 | n.d. |
| MNTRSDPVVIVSAAR     | F2Z459 | 0.0184953  | n +42.03 Da,             | 2084.72919  | 2 | 829.439  | 2.155E+09 | n.d. |
| AIMPISLQGR          | P97872 | 0          | n +28.03 Da,             | 2086.90558  | 2 | 621.849  | 258182000 | n.d. |
| ATVQSVLLDSAGR       | Q64FW2 | 0          | n +42.03 Da,             | 2087.847595 | 1 | 679.8667 | 4767870   | n.d. |
| TGTAEMSSILEER       | Q03265 | 0          | n +28.03 Da,             | 2091.087877 | 2 | 726.3556 | 1.521E+09 | n.d. |
| TVLSGGTTMYPGIADR    | P60710 | 0.00079777 | n +28.03 Da,             | 2092.369649 | 3 | 556.2868 | 25493500  | n.d. |
| PTIFPVVPR           | P41216 | 0.00112402 | n +14.02 Da,             | 2093.381221 | 2 | 520.3191 | 848081984 | n.d. |
| PGVLIQVYEGER        | P16627 | 0.00215363 | n +14.02 Da,             | 2094.80556  | 2 | 687.3759 | 403953984 | n.d. |
| LLLGPGPSNLAPR       | O35423 | 0.00112402 | n +28.03 Da,             | 2095.055504 | 2 | 666.9031 | 348785984 | n.d. |
| ANHAPFETDISTLTR     | Q9QXD6 | 0.00488656 | n +42.03 Da,             | 2095.555724 | 3 | 572.2854 | 6.513E+10 | n.d. |
| SSQVSDGAAAVLLAR     | Q8VCH0 | 0          | n +34.06 Da,             | 2097.474333 | 2 | 738.8932 | 139630000 | n.d. |
| PLTGGEPVSLGSLR      | P11352 | 0          | n +14.02 Da,             | 2102.309915 | 2 | 698.8942 | 1.333E+11 | n.d. |
| TVLSGGTTMYPGIADR    | P60710 | 0          | n +34.06 Da,             | 2102.989509 | 2 | 836.9429 | 838971008 | n.d. |
| AVPPTYADLGKSAR      | Q60932 | 0          | n +42.03 Da,K +28.03 Da, | 2103.864514 | 2 | 758.3822 | 248964992 | n.d. |
| QASGGPVDIGPEYQQDLDR | P97450 | 0          | n +28.03 Da,             | 2106.13586  | 2 | 1036.998 | 6066810   | n.d. |
| TSQIRQNYSTEVEAAVNR  | P29391 | 0.02980132 | n +42.03 Da,             | 2108.386001 | 2 | 1054.528 | 859950016 | n.d. |
| PPILNALEVQGR        | P56480 | 0          | n +14.02 Da,             | 2109.8296   | 2 | 660.8854 | 1.454E+09 | n.d. |
| STGTFFVVSQPLNYR     | Q9JLJ2 | 0          | n +34.06 Da,             | 2115.398961 | 2 | 801.9397 | 704732032 | n.d. |
| IAATILTSPDLR        | P05202 | 0          | n +14.02 Da,             | 2123.346905 | 2 | 642.8803 | 634416000 | n.d. |
| SGEVPPNINIKEPR      | Q99JR1 | 0          | n +42.03 Da,K +34.06 Da, | 2123.582366 | 2 | 813.4576 | 224918000 | n.d. |
| SGEVPPNINIKEPR      | Q99JR1 | 0.03928987 | n +42.03 Da,K +28.03 Da, | 2123.671539 | 3 | 540.6296 | 48887700  | n.d. |
| TGTFVVSQPLNYR       | Q9JLJ2 | 0          | n +28.03 Da,             | 2124.122805 | 2 | 755.4054 | 834441984 | n.d. |
| SAAEEVDGLGVVRPH     | Q9JKF1 | 0          | n +42.03 Da,             | 2125.173334 | 2 | 789.3995 | 346384000 | n.d. |
| ELPDGQVITIGNER      | P60710 | 0          | n +28.03 Da,             | 2126.288114 | 2 | 784.9112 | 39710100  | n.d. |
| AQQAADKYLYVDKN      | Q8VDD5 | 0          | n +42.03 Da,K +34.06 Da, | 2126.871539 | 2 | 868.9592 | 1.709E+09 | n.d. |
| PFDPVTLPDGR         | P06801 | 0.00040437 | n +14.02 Da,             | 2127.881068 | 2 | 614.3222 | 668457984 | n.d. |
| AQQAADKYLYVDKN      | Q8VDD5 | 0          | n +42.03 Da,K +28.03 Da, | 2130.498497 | 2 | 862.9459 | 2.979E+09 | n.d. |
| ANHAPFETDISTLTR     | Q9QXD6 | 0          | n +42.03 Da,             | 2130.565886 | 2 | 857.9334 | 1.135E+10 | n.d. |
| FSEGNNQEVIDAISR     | Q91XD4 | 0          | n +28.03 Da,             | 2131.206457 | 2 | 853.9141 | 977560000 | n.d. |
| VSYPHISPAR          | G3X982 | 0.02160494 | n +28.03 Da,             | 2131.289434 | 2 | 622.3744 | 198760000 | n.d. |
| AAPAKGENLSLVHGPGR   | Q64442 | 0.00112402 | n +42.03 Da,K +28.03 Da, | 2132.233943 | 3 | 601.314  | 39044200  | n.d. |
| TVEQIENLR           | Q8QZS1 | 0.00040437 | n +34.06 Da,             | 2134.18095  | 2 | 624.8715 | 26658600  | n.d. |
| PGVTVKDQVNVQEFVR    | Q9CZX8 | 0          | n +28.03 Da,K +28.03 Da, | 2135.578876 | 2 | 886.4509 | 271208992 | n.d. |
| ALHVPKAPGFAQ        | P42932 | 0.0028399  | n +42.03 Da,K +34.06 Da, | 2137.452983 | 2 | 656.3802 | 66405700  | n.d. |
| PEYAVTQLAQTMR       | Q99JB2 | 0.01404853 | n +14.02 Da,             | 2141.206609 | 2 | 811.9067 | 99746000  | n.d. |
| MGFPEAASSFR         | P32020 | 0.00112402 | n +42.03 Da,             | 2142.649073 | 2 | 621.2841 | 1.101E+09 | n.d. |
| DLGSFYAPR           | P52196 | 0.00112402 | n +34.06 Da,             | 2143.918245 | 2 | 530.2873 | 298492992 | n.d. |
| PAFTPATGTPVLGGLSYR  | Q61176 | 0.0084317  | n +17.03 Da,             | 2144.440736 | 3 | 608.0006 | 25683300  | n.d. |
| PMFIVNTNVPR         | P34884 | 0.0067981  | n +28.03 Da,             | 2147.550021 | 2 | 658.3452 | 22705400  | n.d. |
| DGLNAEGLLR          | Q64374 | 0.00079777 | n +28.03 Da,             | 2151.896244 | 2 | 543.301  | 2.374E+09 | n.d. |

|                           |        |            |                          |             |   |          |           |      |
|---------------------------|--------|------------|--------------------------|-------------|---|----------|-----------|------|
| FADGDVDAVLSR              | Q8R0Y6 | 0.00112402 | n +28.03 Da,             | 2152.316446 | 2 | 646.8323 | 1.762E+09 | n.d. |
| SAPLLEQVMR                | Q9DBG1 | 0.00146897 | n +34.06 Da,             | 2154.603041 | 2 | 589.35   | 90096000  | n.d. |
| IAATILTSPDLR              | P05202 | 0          | n +28.03 Da,             | 2155.051672 | 2 | 649.8873 | 1.346E+09 | n.d. |
| DLGSFYAPR                 | P52196 | 0.00112402 | n +34.06 Da,             | 2167.384455 | 1 | 530.2982 | 67240600  | n.d. |
| PNVTDIVSIAR               | Q8CHR6 | 0          | n +14.02 Da,             | 2167.407931 | 2 | 599.8426 | 176094000 | n.d. |
| VLPDDTVSTLYNR             | Q8R0Y6 | 0.00962496 | n +28.03 Da,             | 2168.006414 | 3 | 507.6034 | 14867800  | n.d. |
| FAGTMAEETAPAVLER          | Q64374 | 0          | n +34.06 Da,             | 2170.949988 | 3 | 576.302  | 180022000 | n.d. |
| VLPDDTVSTLYNR             | Q8R0Y6 | 0.00040437 | n +34.06 Da,             | 2174.593998 | 2 | 763.917  | 304864000 | n.d. |
| VLPDDTVSTLYNR             | Q8R0Y6 | 0          | n +34.06 Da,             | 2176.822912 | 3 | 509.6147 | 26860600  | n.d. |
| TLGTEITVEDQLAR            | Q60932 | 0          | n +34.06 Da,             | 2176.827015 | 2 | 790.4411 | 113620000 | n.d. |
| PMFIVNTNVP                | P34884 | 0.0067981  | n +28.03 Da,             | 2176.86958  | 2 | 658.3627 | 23643400  | n.d. |
| QASGGPVDIGPEYQQDLDR       | P97450 | 0          | n +42.03 Da,             | 2179.745711 | 2 | 1044.006 | 194604000 | n.d. |
| PLTGGEPVSLGSLR            | P11352 | 0          | n +14.02 Da,             | 2182.180508 | 2 | 698.8936 | 655408000 | n.d. |
| SLGPAGWSAGR               | P97364 | 0.00903614 | n +28.03 Da,             | 2182.676982 | 2 | 543.7876 | 119982000 | n.d. |
| ITPSYVAFTPEGER            | P20029 | 0          | n +28.03 Da,             | 2184.468537 | 2 | 797.9114 | 205578000 | n.d. |
| DEVLVAGFGR                | P62267 | 0          | n +28.03 Da,             | 2185.056683 | 2 | 545.7985 | 504001984 | n.d. |
| AADTIGYPVMIR              | Q8C196 | 0          | n +34.06 Da,             | 2186.678407 | 2 | 670.862  | 743657024 | n.d. |
| SSEPPPPPLQPPTHQTSVGLLDTPR | Q9CR86 | 0          | n +42.03 Da,             | 2188.931916 | 3 | 897.4629 | 22920600  | n.d. |
| LTELLKQGQYSPM             | Q03265 | 0.03203797 | n +28.03 Da,K +28.03 Da, | 2189.342151 | 2 | 782.4259 | 100632000 | n.d. |
| LVAEGLSPAGWSAGR           | P97364 | 0          | n +34.06 Da,             | 2193.671566 | 2 | 816.9526 | 169499008 | n.d. |
| PVYPDVEPGYLR              | O88533 | 0          | n +14.02 Da,             | 2195.58873  | 2 | 709.8687 | 4.062E+09 | n.d. |
| PLTGGEPVSLGSLR            | P11352 | 0          | n +28.03 Da,             | 2203.974942 | 2 | 705.9008 | 4.94E+09  | n.d. |
| FAGTMAEETAPAVLER          | Q64374 | 0          | n +28.03 Da,             | 2206.23378  | 1 | 860.9305 | 22829200  | n.d. |
| ASLQNLLSASQAR             | P35505 | 0          | n +28.03 Da,             | 2206.589987 | 2 | 693.8892 | 484956992 | n.d. |
| IADQCPSLAIQENANALAR       | Q91Y97 | 0          | n +28.03 Da,             | 2209.924495 | 2 | 1085.548 | 73208600  | n.d. |
| IADQCPSLAIQENANALAR       | Q91Y97 | 0          | n +28.03 Da,             | 2211.954333 | 3 | 724.0364 | 235646000 | n.d. |
| TDPQFTELMR                | Q9CZU6 | 0.02275523 | n +28.03 Da,             | 2213.13617  | 2 | 633.3011 | 361735008 | n.d. |
| LGTLDNPSSLDETAYER         | O35943 | 0          | n +28.03 Da,             | 2217.925938 | 2 | 954.9638 | 25251100  | n.d. |
| VAVDAPVSSVALR             | Q64374 | 0          | n +42.03 Da,             | 2218.840514 | 2 | 663.3793 | 103239000 | n.d. |
| AADTIGYPVMIR              | Q8C196 | 0          | n +34.06 Da,             | 2221.884232 | 2 | 670.8764 | 101708000 | n.d. |
| PKVIQPEVDTPLGR            | Q8VCU1 | 0          | n +28.03 Da,K +28.03 Da, | 2226.060228 | 2 | 801.4296 | 131969000 | n.d. |
| LGTSVESIMATEDR            | Q8C196 | 0          | n +28.03 Da,             | 2226.528329 | 1 | 768.8835 | 39990800  | n.d. |
| MLVQEEELQEIR              | Q61694 | 0          | n +28.03 Da,             | 2231.577152 | 2 | 772.9048 | 42016800  | n.d. |
| ANTVLSGGTTMYPGIADR        | P60710 | 0          | n +28.03 Da,             | 2235.177736 | 2 | 926.4677 | 207207008 | n.d. |
| AVSESQKKMM                | Q61187 | 0.03907845 | n +42.03 Da,K +34.06 Da, | 2235.249273 | 2 | 681.394  | 928534016 | n.d. |
| LGTSVESIMATEDR            | Q8C196 | 0          | n +28.03 Da,             | 2236.041494 | 2 | 768.8788 | 17182200  | n.d. |
| SAAEEVDGLGVVRPH           | Q9JKF1 | 0          | n +42.03 Da,             | 2238.619578 | 2 | 789.3989 | 2.777E+09 | n.d. |
| MDFSKLPK                  | P50516 | 0.00903614 | n +42.03 Da,K +34.06 Da, | 2239.455923 | 2 | 538.3291 | 19602000  | n.d. |
| ALQALHSSGVGLR             | Q3TUH1 | 0          | n +42.03 Da,             | 2241.381234 | 2 | 675.8809 | 1.507E+09 | n.d. |
| PFVELETNLPASR             | O35215 | 0          | n +14.02 Da,             | 2242.075097 | 2 | 743.8989 | 1.768E+09 | n.d. |

|                                  |        |            |                          |             |   |          |           |      |
|----------------------------------|--------|------------|--------------------------|-------------|---|----------|-----------|------|
| FAGTMAEETAPAVLER                 | Q64374 | 0          | n +28.03 Da,             | 2243.2029   | 2 | 860.926  | 371056000 | n.d. |
| PLTPILLGNPGR                     | P50172 | 0.0024911  | n +14.02 Da,             | 2244.975856 | 2 | 631.3852 | 212184000 | n.d. |
| EAAQMDMVDNGVEDLR                 | P19157 | 0.03137138 | n +17.03 Da,             | 2248.752495 | 2 | 905.4286 | 158024000 | n.d. |
| PVYDPVEPGYLR                     | O88533 | 0          | n +28.03 Da,             | 2251.660768 | 2 | 716.8765 | 561497984 | n.d. |
| PFVELETNLPASR                    | O35215 | 0          | n +14.02 Da,             | 2254.493925 | 1 | 743.8984 | 235324000 | n.d. |
| VMEKPSPLLVGR                     | P97379 | 0.03260225 | n +42.03 Da,K +34.06 Da, | 2255.553634 | 2 | 701.4214 | 367711008 | n.d. |
| SLGVAAEGLPDQYADGEAAR             | Q9QXF8 | 0          | n +28.03 Da,             | 2259.354557 | 3 | 673.3309 | 799630016 | n.d. |
| SSEPPPPPLQPPTHQTSVGLLDTPR        | Q9CR86 | 0          | n +42.03 Da,             | 2260.837582 | 3 | 897.4662 | 7.651E+09 | n.d. |
| LGVAAEGLPDQYADGEAAR              | Q9QXF8 | 0.00180375 | n +34.06 Da,             | 2262.347854 | 2 | 968.9979 | 12785000  | n.d. |
| PVVVVPEGSTSDTQEAILR              | Q9DBG6 | 0          | n +14.02 Da,             | 2267.231524 | 3 | 713.7152 | 817913024 | n.d. |
| TTKDPESEHPSVTLFR                 | Q99JW2 | 0          | n +42.03 Da,K +28.03 Da, | 2267.260556 | 1 | 957.4817 | 30136500  | n.d. |
| KTGTAEMSSILEER                   | Q03265 | 0          | n +42.03 Da,K +28.03 Da, | 2269.327882 | 2 | 811.4075 | 537729024 | n.d. |
| AAVGVGGSTAAAGAGAVSSGALEPGSTTAAHR | Q9R0M8 | 0          | n +42.03 Da,             | 2269.377438 | 3 | 917.7931 | 183156000 | n.d. |
| QITINDLPVGR                      | P35700 | 0          | n +28.03 Da,             | 2270.836743 | 2 | 627.3639 | 875185984 | n.d. |
| DVQLVESGGGLVQPGGSR               | P01783 | 0          | n +34.06 Da,             | 2280.868581 | 3 | 596.9939 | 24938900  | n.d. |
| MNRPAPEISYENMR                   | O70274 | 0          | n +42.03 Da,             | 2282.508785 | 2 | 924.9393 | 832259968 | n.d. |
| MNRPAPEISYENMR                   | O70274 | 0          | n +42.03 Da,             | 2283.746114 | 3 | 616.9627 | 403323008 | n.d. |
| IGPGIDVPAPDMSTGER                | P26443 | 0.00422386 | n +14.02 Da,             | 2283.961785 | 2 | 863.438  | 424272000 | n.d. |
| PLIPIVVEQTGR                     | O88696 | 0.00040437 | n +14.02 Da,             | 2287.227756 | 2 | 668.4058 | 35899000  | n.d. |
| AVVTVPAYFNDSQR                   | P63017 | 0          | n +28.03 Da,             | 2288.893449 | 2 | 797.9156 | 502276992 | n.d. |
| GTIPVVPTAEFQDR                   | P26443 | 0          | n +28.03 Da,             | 2290.414693 | 2 | 779.4176 | 40013000  | n.d. |
| AKCLLTSSLSVR                     | Q9D9V3 | 0          | n +42.03 Da,K +28.03 Da, | 2292.254192 | 2 | 701.8705 | 177668992 | n.d. |
| ASLEAAIADAEQR                    | P11679 | 0          | n +28.03 Da,             | 2292.586835 | 2 | 686.8565 | 267588000 | n.d. |
| PDSGPEQSLLDTSLR                  | Q91XD4 | 0          | n +14.02 Da,             | 2293.701289 | 2 | 814.9102 | 521868000 | n.d. |
| SLVIPEKFQH                       | P62270 | 0.02275523 | n +42.03 Da,K +34.06 Da, | 2297.240884 | 2 | 637.3722 | 414913984 | n.d. |
| MHFSIPETESR                      | Q8BVL3 | 0.01323007 | n +42.03 Da,             | 2299.815968 | 2 | 688.3194 | 380579008 | n.d. |
| GTIPVVPTAEFQDR                   | P26443 | 0          | n +34.06 Da,             | 2305.736311 | 3 | 521.9582 | 79974704  | n.d. |
| MQNVINTVKGK                      | Q9CPX6 | 0          | n +42.03 Da,K +28.03 Da, | 2306.956183 | 2 | 665.3823 | 841316992 | n.d. |
| DIFESIGDR                        | Q9D0F3 | 0.00647139 | n +34.06 Da,             | 2307.3236   | 2 | 542.2929 | 4.945E+09 | n.d. |
| GDSASKVISAEALPGR                 | Q9D6Y7 | 0          | n +42.03 Da,K +34.06 Da, | 2311.299729 | 2 | 588.3054 | 256275008 | n.d. |
| QATKDAGQISGLNVLK                 | P38647 | 0.0104918  | n +28.03 Da,K +28.03 Da, | 2313.702109 | 2 | 863.9815 | 138244992 | n.d. |
| AGPELLDSNIR                      | Q99KI3 | 0          | n +28.03 Da,             | 2315.56215  | 2 | 663.3749 | 72538400  | n.d. |
| SLGVAAEGLPDQYADGEAAR             | Q9QXF8 | 0          | n +28.03 Da,             | 2316.334249 | 2 | 673.3451 | 68847800  | n.d. |
| SLVIPEKFQH                       | P62270 | 0.00112402 | n +42.03 Da,K +28.03 Da, | 2320.993666 | 2 | 634.3564 | 2.861E+10 | n.d. |
| PFVELETNLPASR                    | O35215 | 0.0067981  | n +14.02 Da,             | 2326.266883 | 3 | 496.2681 | 2.361E+09 | n.d. |
| GLGTEVPGNFQGPDPYR                | Q91XE8 | 0          | n +28.03 Da,             | 2328.80644  | 2 | 916.4525 | 18448900  | n.d. |
| SLGVAAEGLPDQYADGEAAR             | Q9QXF8 | 0          | n +28.03 Da,             | 2328.844818 | 2 | 1009.494 | 583873024 | n.d. |
| PVALVTGANKGIGF                   | P48758 | 0.00215363 | n +14.02 Da,n +28.03 Da, | 2330.214666 | 2 | 693.411  | 1.693E+09 | n.d. |
| PGPMTLQGTNTYLVGTGSR              | Q99KR3 | 0          | n +17.03 Da,             | 2331.568919 | 2 | 984.0012 | 377552000 | n.d. |
| MDGIVPDIAVGTKR                   | P17225 | 0          | n +42.03 Da,K +34.06 Da, | 2332.52119  | 3 | 516.6274 | 71641504  | n.d. |

|                                     |        |            |                          |             |   |          |           |      |
|-------------------------------------|--------|------------|--------------------------|-------------|---|----------|-----------|------|
| SLGVAAEGLPDQYADGEAAR                | Q9QXF8 | 0          | n +28.03 Da,             | 2334.178596 | 1 | 1009.497 | 24723900  | n.d. |
| MDGIVPDIAGVTKR                      | P17225 | 0          | n +42.03 Da,K +28.03 Da, | 2337.15507  | 3 | 514.6168 | 155495008 | n.d. |
| DTIGYPMIR                           | Q8C196 | 0.00040437 | n +34.06 Da,             | 2339.002091 | 2 | 599.8402 | 103071000 | n.d. |
| ANHAPFETDISTLTR                     | Q9QXD6 | 0          | n +42.03 Da,             | 2340.425106 | 2 | 857.9233 | 8.75E+09  | n.d. |
| ANHAPFETDISTLTR                     | Q9QXD6 | 0          | n +42.03 Da,             | 2340.517134 | 3 | 572.2848 | 1.203E+09 | n.d. |
| PSAVGYQPTLATDMGMTMQR                | P56480 | 0          | n +14.02 Da,             | 2340.764101 | 2 | 1084.011 | 757436992 | n.d. |
| PAQTLNSNAEFQMLR                     | Q8C196 | 0          | n +17.03 Da,             | 2342.579628 | 2 | 811.938  | 328334016 | n.d. |
| PAQTLNSNAEFQMLR                     | Q8C196 | 0          | n +14.02 Da,             | 2346.168996 | 2 | 810.4142 | 2.21E+09  | n.d. |
| AGVDQHEGTIQVQGQNLFFR                | Q8VCR7 | 0          | n +42.03 Da,             | 2346.494121 | 2 | 1143.569 | 971516032 | n.d. |
| SDAPPLTLDGKDR                       | Q9CR21 | 0.00040437 | n +42.03 Da,K +28.03 Da, | 2346.681453 | 2 | 784.4206 | 112789000 | n.d. |
| AVVTVPAYFNDAQR                      | P20029 | 0.00962496 | n +28.03 Da,             | 2347.528779 | 2 | 789.9179 | 71147104  | n.d. |
| AGVDQHEGTIQVQGQNLFFR                | Q8VCR7 | 0          | n +42.03 Da,             | 2347.877211 | 3 | 762.7138 | 1.207E+10 | n.d. |
| SPLTPILLGNPGR                       | P50172 | 0          | n +28.03 Da,             | 2348.611764 | 2 | 681.9089 | 67553600  | n.d. |
| PYLIPTSALESR                        | Q14C51 | 0.01379532 | n +14.02 Da,             | 2354.738802 | 1 | 680.8761 | 52308200  | n.d. |
| DGLNAEGLLR                          | Q64374 | 0.00934268 | n +42.03 Da,             | 2355.094632 | 2 | 550.291  | 56998900  | n.d. |
| SSPAQPAVPAPLADLKIQHTK               | P24549 | 0          | n +42.03 Da,K +34.06 Da, | 2356.851888 | 3 | 760.4518 | 21443700  | n.d. |
| QGEIFLLPAR                          | Q78JT3 | 0.00040437 | n +28.03 Da,             | 2359.610267 | 2 | 586.3461 | 36493900  | n.d. |
| TSQSGDEMTSLSEYVSR                   | P11499 | 0          | n +28.03 Da,             | 2360.500703 | 2 | 952.9342 | 437241984 | n.d. |
| IGPGIDVPAPDMSTGER                   | P26443 | 0          | n +28.03 Da,             | 2364.285541 | 2 | 870.4342 | 819203008 | n.d. |
| IIDVVYNASNELVR                      | P62242 | 0          | n +28.03 Da,             | 2367.011899 | 3 | 582.9838 | 74892600  | n.d. |
| SMHTEAAEVLLER                       | Q8QZS1 | 0.00040437 | n +42.03 Da,             | 2367.218432 | 3 | 509.9211 | 335398016 | n.d. |
| SSPAQPAVPAPLADLKIQHTK               | P24549 | 0          | n +42.03 Da,K +28.03 Da, | 2369.042828 | 3 | 756.4263 | 50083800  | n.d. |
| EAAQMDMVNDGVEDLR                    | P19157 | 0          | n +28.03 Da,             | 2370.503772 | 3 | 607.6101 | 1.755E+09 | n.d. |
| AASAAATAAASAATAASAASGSPGSGEGSAGGEKR | Q62318 | 0          | n +42.03 Da,K +34.06 Da, | 2373.793077 | 3 | 985.1502 | 37599600  | n.d. |
| DDEVVDVGTVEEDLGKSR                  | P08113 | 0          | n +28.03 Da,K +28.03 Da, | 2374.961291 | 2 | 1017.461 | 37124500  | n.d. |
| PSPATPDESIVAMER                     | P42859 | 0.04771429 | n +14.02 Da,             | 2376.297392 | 1 | 900.442  | 35777800  | n.d. |
| ISVAGVTSGNVGYLAH                    | P05202 | 0          | n +28.03 Da,             | 2378.834157 | 2 | 786.9228 | 509040992 | n.d. |
| DVLVIECNLR                          | Q8C196 | 0.00112402 | n +28.03 Da,             | 2380.231405 | 2 | 629.8615 | 193632992 | n.d. |
| SSVAVLTQESFAEHR                     | Q8VDJ3 | 0          | n +42.03 Da,             | 2382.875295 | 2 | 851.9226 | 350257984 | n.d. |
| SAAGEFADDPCCSSVKR                   | P26231 | 0.01404853 | n +42.03 Da,K +28.03 Da, | 2384.505992 | 2 | 883.916  | 149718000 | n.d. |
| EAAQMDMVNDGVEDLR                    | P19157 | 0          | n +28.03 Da,             | 2387.925679 | 2 | 910.9113 | 3.698E+09 | n.d. |
| EAAQMDMVNDGVEDLR                    | P19157 | 0          | n +42.03 Da,             | 2391.655441 | 2 | 917.9177 | 390139008 | n.d. |
| MSTGTFVVSQPLNYR                     | Q9JLJ2 | 0.00040437 | n +34.06 Da,             | 2401.206949 | 3 | 578.6419 | 11301600  | n.d. |
| PFVELETNLPASR                       | O35215 | 0.0104918  | n +28.03 Da,             | 2401.520821 | 3 | 500.9399 | 277583008 | n.d. |
| SLVIPEKFQH                          | P62270 | 0.00112402 | n +42.03 Da,K +28.03 Da, | 2403.924559 | 2 | 634.3437 | 214784000 | n.d. |
| SLVIPEKFQH                          | P62270 | 0.00112402 | n +42.03 Da,K +28.03 Da, | 2408.704683 | 2 | 634.3722 | 3.17E+09  | n.d. |
| TPVAWPSQEGQNPSLSSIR                 | Q8C196 | 0          | n +28.03 Da,             | 2408.909106 | 3 | 694.6922 | 220948992 | n.d. |
| GTITGLNVLR                          | P17156 | 0.01265002 | n +42.03 Da,             | 2413.926157 | 2 | 543.3202 | 1.055E+09 | n.d. |
| GEEATAVAAGVRPELVR                   | Q8BR37 | 0          | n +42.03 Da,             | 2419.970715 | 3 | 613.33   | 177486000 | n.d. |
| GVVDESDIPLNLSR                      | Q9CQN1 | 0          | n +28.03 Da,             | 2424.143342 | 2 | 771.412  | 2.238E+09 | n.d. |

|                        |        |            |                          |             |   |          |           |      |
|------------------------|--------|------------|--------------------------|-------------|---|----------|-----------|------|
| ADLEEQLSDEEKVR         | P47754 | 0          | n +42.03 Da,K +28.03 Da, | 2425.7929   | 2 | 864.4441 | 500379008 | n.d. |
| MSTGTFFVVSQPLNYR       | Q9JLJ2 | 0          | n +28.03 Da,             | 2428.425766 | 3 | 576.6304 | 64214600  | n.d. |
| APAQTLNSNAEFQMLR       | Q8C196 | 0          | n +28.03 Da,             | 2432.275135 | 2 | 852.9401 | 132554000 | n.d. |
| APAQTLNSNAEFQMLR       | Q8C196 | 0.00112402 | n +28.03 Da,             | 2435.04594  | 3 | 568.9622 | 135344992 | n.d. |
| SLGVAAEGLPDQYADGAAAR   | Q9QXF8 | 0.00079777 | n +42.03 Da,             | 2435.314941 | 3 | 678.0035 | 732982976 | n.d. |
| SLGVAAEGLPDQYADGAAAR   | Q9QXF8 | 0          | n +42.03 Da,             | 2435.844776 | 2 | 1016.503 | 5.541E+09 | n.d. |
| ASQSQGIQQLLQAEKR       | Q9CR51 | 0          | n +42.03 Da,K +28.03 Da, | 2436.271545 | 3 | 619.0061 | 71976304  | n.d. |
| AGVDQHEGTIQVQGQNLFFR   | Q8VCR7 | 0          | n +42.03 Da,             | 2437.49393  | 3 | 762.7136 | 688355968 | n.d. |
| DVLVIECNLR             | Q8C196 | 0.00112402 | n +28.03 Da,             | 2438.816451 | 2 | 629.844  | 105303000 | n.d. |
| GLLSQGSPLSWEETQR       | P97494 | 0          | n +34.06 Da,             | 2439.747257 | 2 | 911.4802 | 68359296  | n.d. |
| YFAGTMAEETAPAVLER      | Q64374 | 0          | n +34.06 Da,             | 2443.989606 | 1 | 945.4774 | 70432200  | n.d. |
| AAAEPDADPKAAIPVDLR     | Q8R2T8 | 0.00647139 | n +42.03 Da,n +34.06 Da, | 2444.792635 | 2 | 948.5187 | 220835008 | n.d. |
| YFAGTMAEETAPAVLER      | Q64374 | 0          | n +28.03 Da,             | 2450.215621 | 3 | 628.6454 | 1.255E+09 | n.d. |
| MEKTLTVPLER            | O88569 | 0.01432209 | n +42.03 Da,K +28.03 Da, | 2450.674335 | 3 | 505.6154 | 164619008 | n.d. |
| DEFDIVGDVR             | Q3UEG6 | 0          | n +28.03 Da,             | 2455.115733 | 2 | 596.8013 | 261440992 | n.d. |
| STDITSLDQYVER          | P08113 | 0          | n +28.03 Da,             | 2457.328988 | 2 | 777.8858 | 1.586E+09 | n.d. |
| TFIGGQEPALPLR          | Q60597 | 0.01323007 | n +28.03 Da,             | 2462.381803 | 2 | 712.3878 | 234392000 | n.d. |
| MMGIEFNPR              | O88455 | 0.02443494 | n +17.03 Da,             | 2467.578523 | 1 | 1111.558 | 33420100  | n.d. |
| FTQAGSEVSALLGR         | P56480 | 0          | n +28.03 Da,             | 2469.049848 | 2 | 732.3904 | 1.9E+09   | n.d. |
| SHQTGIQASEDVKEIF       | Q91YR1 | 0          | n +42.03 Da,K +34.06 Da, | 2469.744356 | 2 | 932.9552 | 227232992 | n.d. |
| AASAIKGLSALR           | Q9D8T7 | 0.00112402 | n +42.03 Da,K +28.03 Da, | 2471.992538 | 2 | 614.375  | 271032000 | n.d. |
| ASYFDEHDCEPLNPER       | Q9CY62 | 0          | n +42.03 Da,             | 2473.964147 | 2 | 1010.923 | 96502400  | n.d. |
| PATIGDYTDFYSSR         | P35505 | 0          | n +14.02 Da,             | 2474.626598 | 2 | 803.8726 | 129316000 | n.d. |
| MNHTSQAFITAASGGQPPNYER | Q9CQW9 | 0          | n +42.03 Da,             | 2483.339793 | 3 | 807.0418 | 1.486E+09 | n.d. |
| DEFDIVGDVR             | Q3UEG6 | 0          | n +14.02 Da,             | 2486.327155 | 2 | 589.7881 | 95477000  | n.d. |
| MEKTLTVPLER            | O88569 | 0          | n +42.03 Da,K +34.06 Da, | 2487.096284 | 2 | 761.4237 | 278088000 | n.d. |
| ADLEEQLSDEEKVR         | P47754 | 0          | n +42.03 Da,K +28.03 Da, | 2489.567464 | 2 | 865.9233 | 230156992 | n.d. |
| VDLEPTVIDEVR           | P05213 | 0          | n +34.06 Da,             | 2489.614328 | 2 | 709.8943 | 607078016 | n.d. |
| ALDGPEQMELEEGKAGSGLR   | P62196 | 0          | n +42.03 Da,K +28.03 Da, | 2489.751186 | 3 | 719.6862 | 319640000 | n.d. |
| SSGLQAVANIAGGIR        | Q8VCH0 | 0.04617149 | n +28.03 Da,             | 2494.590126 | 2 | 721.4112 | 592614976 | n.d. |
| TAFQGTPLAQAVEGPSNVNR   | Q9CZ13 | 0          | n +28.03 Da,             | 2495.959548 | 2 | 1050.535 | 82745904  | n.d. |
| TVEEPLDLIR             | P62311 | 0.03030303 | n +34.06 Da,             | 2498.050704 | 2 | 609.8614 | 6248430   | n.d. |
| GASTGIYEALER           | P17182 | 0          | n +28.03 Da,             | 2498.190069 | 3 | 704.394  | 93613600  | n.d. |
| SSVAVLTQESFAEHR        | Q8VDJ3 | 0          | n +42.03 Da,             | 2501.57778  | 3 | 568.2851 | 1.644E+09 | n.d. |
| DIQMTQTSSLSASLGDR      | P01643 | 0          | n +34.06 Da,             | 2501.752888 | 2 | 972.9916 | 171399008 | n.d. |
| DIQMTQTSSLSASLGDR      | P01643 | 0          | n +34.06 Da,             | 2502.847205 | 3 | 648.997  | 25850800  | n.d. |
| PADDIFESIGDR           | Q9D0F3 | 0          | n +14.02 Da,             | 2502.863678 | 2 | 674.823  | 418659008 | n.d. |
| MLHLPSEQGTPETLQR       | O88522 | 0          | n +42.03 Da,             | 2504.556574 | 2 | 939.9712 | 113463000 | n.d. |
| SSVAVLTQESFAEHR        | Q8VDJ3 | 0          | n +42.03 Da,             | 2504.998887 | 2 | 851.9238 | 8.537E+09 | n.d. |
| LEAALADVPELAR          | Q9D6Y9 | 0          | n +28.03 Da,             | 2514.911716 | 2 | 698.3964 | 21631800  | n.d. |



|                           |        |            |                          |             |   |          |           |      |
|---------------------------|--------|------------|--------------------------|-------------|---|----------|-----------|------|
| SDVLELTDENFESR            | P27773 | 0          | n +34.06 Da,             | 2523.890726 | 2 | 844.4157 | 256471008 | n.d. |
| SVIVGNVMQSSSDAAYLAR       | Q8BWT1 | 0          | n +28.03 Da,             | 2526.636894 | 3 | 666.0157 | 11321200  | n.d. |
| YFAGTMAEETAPAVLER         | Q64374 | 0          | n +28.03 Da,             | 2530.856031 | 3 | 628.645  | 172342000 | n.d. |
| DDEVVDVGTVEEDLGKSR        | P08113 | 0          | n +28.03 Da,K +28.03 Da, | 2533.254622 | 2 | 1017.459 | 198736000 | n.d. |
| PGGLLGDEAPNFEANTTIGR      | O08709 | 0          | n +17.03 Da,             | 2535.807052 | 3 | 720.3829 | 48519400  | n.d. |
| ALDGPEQMELEEGKAGSGLR      | P62196 | 0          | n +42.03 Da,K +34.06 Da, | 2537.348361 | 3 | 721.698  | 1.743E+09 | n.d. |
| YFAGTMAEETAPAVLER         | Q64374 | 0          | n +28.03 Da,             | 2539.758896 | 2 | 942.4589 | 73085696  | n.d. |
| ANHAPFETDISTLTR           | Q9QXD6 | 0          | n +42.03 Da,             | 2539.804966 | 1 | 1714.839 | 331368992 | n.d. |
| GASTGIYEALER              | P17182 | 0          | n +34.06 Da,             | 2541.975087 | 2 | 707.3912 | 96081904  | n.d. |
| ANHAPFETDISTLTR           | Q9QXD6 | 0          | n +42.03 Da,             | 2542.050035 | 3 | 572.2851 | 9.653E+10 | n.d. |
| ANHAPFETDISTLTR           | Q9QXD6 | 0          | n +42.03 Da,             | 2542.101667 | 2 | 857.924  | 9.069E+11 | n.d. |
| TDITSLDQYVER              | P08113 | 0.00934268 | n +34.06 Da,             | 2547.080875 | 2 | 737.3838 | 720576000 | n.d. |
| SSSRPVALVTGANKGIGF        | P48758 | 0          | n +42.03 Da,K +34.06 Da, | 2547.307888 | 3 | 613.0191 | 124857000 | n.d. |
| TASAQPVSSVGLGLGTMR        | Q9DBM2 | 0          | n +34.06 Da,             | 2556.562955 | 2 | 641.3763 | 109185000 | n.d. |
| PMNIQLVTSQIDTQR           | O08583 | 0          | n +14.02 Da,             | 2559.715881 | 3 | 586.6452 | 505534016 | n.d. |
| ALHVPKAPGFAQM             | P42932 | 0          | n +42.03 Da,K +28.03 Da, | 2559.886214 | 1 | 718.8922 | 15816400  | n.d. |
| SVIVGNVMQSSSDAAYLAR       | Q8BWT1 | 0          | n +28.03 Da,             | 2562.012805 | 2 | 998.5164 | 31982900  | n.d. |
| PFVTVAPLGSPLR             | Q8CC88 | 0.00040437 | n +14.02 Da,             | 2564.51995  | 2 | 684.4076 | 1.05E+09  | n.d. |
| ALDGPEQMELEEGKAGSGLR      | P62196 | 0          | n +42.03 Da,K +34.06 Da, | 2569.124649 | 2 | 1082.035 | 602454016 | n.d. |
| TVDADFYDLQTGGQISNR        | Q64374 | 0          | n +34.06 Da,             | 2569.318336 | 2 | 988.9929 | 127144000 | n.d. |
| SDVLELTDENFESR            | P27773 | 0          | n +14.02 Da,             | 2570.663467 | 2 | 834.3916 | 313227008 | n.d. |
| GVIAPVEGTAFDLR            | Q8K157 | 0          | n +34.06 Da,             | 2572.827561 | 2 | 739.9234 | 215356000 | n.d. |
| GASTGIYEALER              | P17182 | 0          | n +28.03 Da,             | 2573.011462 | 3 | 704.3893 | 19121700  | n.d. |
| SSSRPVALVTGANKGIGF        | P48758 | 0          | n +42.03 Da,K +34.06 Da, | 2574.801863 | 2 | 919.0245 | 51626700  | n.d. |
| IPSAVGYQPTLATDMGTMQER     | P56480 | 0          | n +28.03 Da,             | 2583.540251 | 1 | 1147.566 | 26682300  | n.d. |
| ILATPPQEDAPSVDIANIR       | P40142 | 0          | n +28.03 Da,             | 2586.079554 | 3 | 683.3736 | 77754000  | n.d. |
| TDITSLDQYVER              | P08113 | 0          | n +28.03 Da,             | 2588.698243 | 2 | 734.367  | 615043008 | n.d. |
| TIPSDGDIFTYTR             | P24549 | 0          | n +28.03 Da,             | 2595.953372 | 2 | 757.3799 | 79686000  | n.d. |
| SILYVSPHPDAFPPLR          | Q9Z1Q9 | 0          | n +42.03 Da,             | 2597.917921 | 3 | 614.3268 | 335873984 | n.d. |
| PTELMNSNPQFIVDGATR        | O35350 | 0.00903614 | n +14.02 Da,             | 2599.379044 | 2 | 945.4742 | 46275900  | n.d. |
| SVIVGNVMQSSSDAAYLAR       | Q8BWT1 | 0          | n +34.06 Da,             | 2599.604969 | 3 | 668.0206 | 65570000  | n.d. |
| MVTLDYTVQVPGTGR           | Q9QXF8 | 0.00180375 | n +28.03 Da,             | 2603.673116 | 2 | 832.933  | 42996700  | n.d. |
| SSEPPPPPLQPPTHQTSVGLLDTPR | Q9CR86 | 0          | n +42.03 Da,             | 2606.129734 | 2 | 1345.694 | 8.167E+09 | n.d. |
| TASSVLLHTGQKMPL           | Q9JII6 | 0          | n +42.03 Da,K +34.06 Da, | 2607.14309  | 2 | 829.9713 | 1.214E+09 | n.d. |
| SSEPPPPPLQPPTHQTSVGLLDTPR | Q9CR86 | 0          | n +42.03 Da,             | 2608.284956 | 3 | 897.4651 | 1.833E+10 | n.d. |
| TLNQLVGAAFGAAGQR          | Q9EQ20 | 0          | n +34.06 Da,             | 2608.995475 | 3 | 536.6414 | 43893000  | n.d. |
| GGGSVLVAASSDIGDPLR        | O54734 | 0.01521395 | n +28.03 Da,             | 2612.023639 | 2 | 849.9606 | 643041984 | n.d. |
| VAFGVPSVIVSR              | Q91WU0 | 0          | n +28.03 Da,             | 2614.261017 | 2 | 629.8816 | 893406976 | n.d. |
| SSVAVLQESFAEHR            | Q8VDJ3 | 0          | n +42.03 Da,             | 2616.77761  | 2 | 851.9216 | 217048000 | n.d. |
| SYELPDGQVITIGNER          | P60710 | 0          | n +34.06 Da,             | 2617.797592 | 2 | 912.9727 | 252380000 | n.d. |

|                       |        |            |                                      |             |   |          |           |      |
|-----------------------|--------|------------|--------------------------------------|-------------|---|----------|-----------|------|
| GAAALVLMTAEAAQR       | Q8QZT1 | 0          | n +28.03 Da,                         | 2618.451089 | 2 | 750.9113 | 646547968 | n.d. |
| IPSAVGYQPTLATDMGTMQER | P56480 | 0          | n +28.03 Da,                         | 2619.022087 | 2 | 1147.562 | 1.788E+09 | n.d. |
| VDAFDYDLQGTQISNR      | Q64374 | 0          | n +28.03 Da,                         | 2619.564733 | 2 | 935.4831 | 91621200  | n.d. |
| GAPQGSLSGEYLFER       | P29391 | 0          | n +34.06 Da,                         | 2620.941583 | 2 | 779.4114 | 89972200  | n.d. |
| IPSAVGYQPTLATDMGTMQER | P56480 | 0          | n +28.03 Da,                         | 2621.848696 | 3 | 765.3748 | 1.967E+09 | n.d. |
| PAFTPATGTPVLGGLSYR    | Q61176 | 0          | n +14.02 Da,                         | 2624.313921 | 3 | 606.9941 | 17912900  | n.d. |
| AFTPATGTPVLGGLSYR     | Q61176 | 0          | n +28.03 Da,                         | 2627.874317 | 2 | 868.4717 | 178763008 | n.d. |
| IMNVIGEPIDER          | P56480 | 0.00180375 | n +42.03 Da,                         | 2632.379527 | 2 | 714.3629 | 417700992 | n.d. |
| AAPAKGENLSLVVHGPDIR   | Q64442 | 0          | n +42.03 Da,K +28.03 Da,             | 2636.064688 | 2 | 1036.049 | 8.197E+09 | n.d. |
| DIDLPEFDAR            | P10605 | 0          | n +28.03 Da,                         | 2637.733011 | 2 | 660.3279 | 40947900  | n.d. |
| PTGVIAPVEGTAFLDR      | Q8K157 | 0.00551914 | n +14.02 Da,                         | 2639.91409  | 2 | 828.9493 | 729734016 | n.d. |
| AAPAKGENLSLVVHGPDIR   | Q64442 | 0          | n +42.03 Da,K +28.03 Da,             | 2640.090021 | 3 | 691.0356 | 9.228E+09 | n.d. |
| STNTDLSLSYDEGQGSKFIR  | Q9JLR9 | 0          | n +42.03 Da,K +28.03 Da,             | 2642.779064 | 2 | 1188.068 | 10100400  | n.d. |
| AASLVGKKIVF           | Q9D892 | 0.01379532 | n +42.03 Da,K +28.03 Da,             | 2649.668286 | 2 | 615.8943 | 2.4E+09   | n.d. |
| LYSSDDVIELTPSNFNR     | Q922R8 | 0          | n +28.03 Da,                         | 2652.738509 | 3 | 695.6754 | 148426000 | n.d. |
| IATSPAELSPTELTEMR     | Q9JKF7 | 0          | n +34.06 Da,                         | 2653.540397 | 2 | 976.0005 | 219003008 | n.d. |
| VSMNTVDTSHEDMIH       | Q9D1M0 | 0          | n +42.03 Da,                         | 2654.504505 | 2 | 928.9114 | 233560992 | n.d. |
| LYSSDDVIELTPSNFNR     | Q922R8 | 0          | n +14.02 Da,                         | 2660.240313 | 2 | 1036.001 | 461184000 | n.d. |
| GLAASAMDELLR          | Q99J39 | 0          | n +28.03 Da,                         | 2662.160464 | 2 | 637.8421 | 143243008 | n.d. |
| PAVPVPIGPPAPAGFR      | Q05920 | 0.00112402 | n +28.03 Da,                         | 2667.337617 | 3 | 533.6522 | 114504000 | n.d. |
| FIGPGIDVPAPDMSTGER    | P26443 | 0          | n +34.06 Da,                         | 2667.403292 | 2 | 946.9852 | 34757000  | n.d. |
| MESMLNKLK             | Q8CFE4 | 0.00112402 | n +42.03 Da,K +28.03 Da,             | 2668.534645 | 2 | 596.3402 | 273718016 | n.d. |
| VSMLNDIAATPTAAMPFR    | P19096 | 0          | n +14.02 Da,                         | 2671.21853  | 2 | 960.4765 | 1.14E+09  | n.d. |
| SSPAQPAVPAPLANLKIQH   | O35945 | 0          | n +42.03 Da,K +34.06 Da,             | 2674.691929 | 2 | 672.3865 | 186051008 | n.d. |
| DIDTAAKFIGAGAA        | P56383 | 0          | n +28.03 Da,K +28.03 Da,             | 2682.077316 | 2 | 688.8752 | 3.568E+09 | n.d. |
| DIDTAAKFIGAGA         | P56383 | 0          | n +28.03 Da,K +28.03 Da,             | 2682.479274 | 2 | 653.3573 | 1.797E+09 | n.d. |
| MKVFTVGPLPAEGR        | Q91Z53 | 0          | n +42.03 Da,K +34.06 Da,             | 2682.658076 | 3 | 526.6361 | 38993500  | n.d. |
| LTVEDPVTVEYITR        | Q9CWH6 | 0.0170778  | n +28.03 Da,                         | 2685.799327 | 2 | 831.9509 | 205868992 | n.d. |
| LHTVYQSVLPETH         | Q07417 | 0          | n +42.03 Da,                         | 2687.492669 | 2 | 847.9218 | 26299700  | n.d. |
| MEDIMQLPKAR           | Q9CQ71 | 0          | n +42.03 Da,K +28.03 Da,             | 2689.819866 | 3 | 701.352  | 32709100  | n.d. |
| MKVFTVGPLPAEGR        | Q91Z53 | 0          | n +42.03 Da,K +34.06 Da,             | 2690.033438 | 2 | 789.4486 | 6.525E+09 | n.d. |
| IPSAVGYQPTLATDMGTMQER | P56480 | 0          | n +42.03 Da,                         | 2690.088661 | 2 | 1154.569 | 70941696  | n.d. |
| IPSAVGYQPTLATDMGTMQER | P56480 | 0          | n +42.03 Da,                         | 2690.460017 | 3 | 770.0496 | 1.934E+09 | n.d. |
| MDSSAVITQJSKEEAR      | P58466 | 0          | n +42.03 Da,K +34.06 Da,             | 2694.667803 | 2 | 920.9816 | 195316000 | n.d. |
| EAYPGDVFYLH           | Q03265 | 0          | n +28.03 Da,                         | 2699.903829 | 2 | 669.8223 | 1.078E+09 | n.d. |
| AAAAAASHLNLDALR       | Q8CH72 | 0          | n +42.03 Da,                         | 2700.051329 | 2 | 753.9062 | 1.972E+09 | n.d. |
| MDHTGAIDTEELGPLAH     | G3X8R8 | 0          | n +42.03 Da,                         | 2704.594395 | 2 | 989.4483 | 63198200  | n.d. |
| AELKYISGFGNECASEDPR   | O09173 | 0.01969365 | n +42.03 Da,K +28.03 Da,             | 2705.215027 | 3 | 738.3442 | 38489200  | n.d. |
| IPSAVGYQPTLATDMGTMQER | P56480 | 0          | n +42.03 Da,                         | 2707.087934 | 1 | 1154.569 | 7701000   | n.d. |
| ADEIAKAQVAQPGGDTIFGK  | P70349 | 0          | n +42.03 Da,n +28.03 Da,K +28.03 Da, | 2710.653416 | 2 | 1057.561 | 3.121E+09 | n.d. |

|                              |        |            |                          |             |   |          |           |      |
|------------------------------|--------|------------|--------------------------|-------------|---|----------|-----------|------|
| VLSNEPAASAAEEVEEDDALVR       | Q8BYA0 | 0          | n +28.03 Da,             | 2718.422227 | 3 | 781.3854 | 137043008 | n.d. |
| TTYSDNQPGVLIQVYEGER          | P16627 | 0          | n +28.03 Da,             | 2720.227657 | 2 | 1099.041 | 37286100  | n.d. |
| DQTLQEELAR                   | O88990 | 0.00146897 | n +14.02 Da,             | 2720.489904 | 1 | 1216.599 | 12193200  | n.d. |
| YELPDGQVITIGNER              | P60710 | 0          | n +28.03 Da,             | 2722.139647 | 2 | 866.4524 | 114081000 | n.d. |
| PALQPPLTSGLVGGQEETVQEGGLSTR  | P97364 | 0          | n +14.02 Da,             | 2723.975124 | 3 | 912.476  | 464383008 | n.d. |
| ASKPTLNEVVIVSAIR             | Q8QZT1 | 0          | n +28.03 Da,K +28.03 Da, | 2725.565986 | 3 | 585.0042 | 162792000 | n.d. |
| MEDIMQLPKAR                  | Q9CQ71 | 0          | n +42.03 Da,K +28.03 Da, | 2732.626641 | 2 | 701.3642 | 710067968 | n.d. |
| LQGDVAGALEDLER               | Q8VBW8 | 0          | n +28.03 Da,             | 2738.665653 | 2 | 755.8669 | 170022000 | n.d. |
| PAFTPATGTPVLGGLSYR           | Q61176 | 0          | n +28.03 Da,             | 2741.877619 | 3 | 611.6688 | 1.042E+09 | n.d. |
| PAFTPATGTPVLGGLSYR           | Q61176 | 0          | n +28.03 Da,             | 2742.236141 | 2 | 917.0008 | 810155008 | n.d. |
| PNIVPDGDFSSLVR               | P01029 | 0.02416641 | n +14.02 Da,             | 2751.875681 | 2 | 765.4042 | 63284000  | n.d. |
| ASLSLAPVNIKAGADEER           | P80314 | 0          | n +42.03 Da,K +28.03 Da, | 2757.633884 | 3 | 686.6979 | 103308000 | n.d. |
| LGALSGAGALGLASYGAH           | Q5F285 | 0          | n +28.03 Da,             | 2760.22464  | 3 | 538.6265 | 135726000 | n.d. |
| DSLVSFLGNR                   | P99029 | 0.00180375 | n +34.06 Da,             | 2767.390504 | 2 | 571.3257 | 754488000 | n.d. |
| MEDSHELDLTYVTER              | Q5SSZ5 | 0          | n +42.03 Da,             | 2768.117681 | 2 | 940.4222 | 120284000 | n.d. |
| MEKVLVTGGAGYIGSH             | Q8R059 | 0          | n +42.03 Da,K +28.03 Da, | 2768.282133 | 3 | 563.6278 | 235096992 | n.d. |
| AAAAAASHLNLDALR              | Q8CH72 | 0          | n +42.03 Da,             | 2768.609543 | 2 | 753.9026 | 63289200  | n.d. |
| SSPAQPAVPAPLADLKIQHTK        | P24549 | 0          | n +42.03 Da,K +28.03 Da, | 2769.466524 | 2 | 1134.124 | 52871900  | n.d. |
| MEKVLVTGGAGYIGSH             | Q8R059 | 0.00040437 | n +42.03 Da,K +28.03 Da, | 2769.80831  | 2 | 844.9369 | 210871008 | n.d. |
| LYSSDDVIELTPSNFNR            | Q922R8 | 0          | n +34.06 Da,             | 2769.924209 | 2 | 1046.026 | 7009700   | n.d. |
| MPFVELETNLPASR               | O35215 | 0.00180375 | n +34.06 Da,             | 2770.031766 | 3 | 546.6314 | 147176992 | n.d. |
| DDGSWEVIEGYR                 | P26443 | 0          | n +28.03 Da,             | 2780.961527 | 2 | 727.3333 | 1.377E+09 | n.d. |
| TLVLLDNLNVR                  | O54734 | 0.0024911  | n +28.03 Da,             | 2781.305619 | 2 | 648.8797 | 1.58E+09  | n.d. |
| VAGPQPAQTGAPQGSLGEYLFER      | P29391 | 0          | n +14.02 Da,             | 2781.589889 | 2 | 1194.102 | 53740700  | n.d. |
| TLEAVQDLLEQGR                | P19096 | 0          | n +34.06 Da,             | 2782.131911 | 2 | 753.4254 | 52703700  | n.d. |
| SNEPPPPYGGPTAPLLEEKSGAPLTPGR | Q9DB75 | 0          | n +42.03 Da,n +28.03 Da, | 2786.901202 | 3 | 999.5219 | 28963600  | n.d. |
| SSVAVLTQESFAEHR              | Q8VDJ3 | 0          | n +42.03 Da,             | 2788.003641 | 2 | 851.923  | 33745000  | n.d. |
| MLGPEGGEGYVVKLR              | Q9Z2X1 | 0          | n +42.03 Da,K +34.06 Da, | 2790.937163 | 2 | 840.4309 | 39155600  | n.d. |
| AAPAKGENLSLVVHGPDIR          | Q64442 | 0          | n +42.03 Da,K +28.03 Da, | 2793.81517  | 2 | 1036.05  | 68395904  | n.d. |
| LGALSGAGALGLASYGAH           | Q5F285 | 0          | n +28.03 Da,             | 2793.993797 | 2 | 807.4474 | 313376992 | n.d. |
| STINDLFGAGTETTSTTLR          | Q64458 | 0          | n +28.03 Da,             | 2797.759966 | 3 | 671.6782 | 46351700  | n.d. |
| AAQIPESDQIKQKKEF             | Q9WV98 | 0          | n +42.03 Da,K +28.03 Da, | 2799.462724 | 2 | 989.0459 | 88304400  | n.d. |
| MHSLATAAPVPTALAQVDR          | Q9JKY0 | 0          | n +42.03 Da,             | 2800.267491 | 2 | 996.0224 | 25553500  | n.d. |
| VAGPQPAQTGAPQGSLGEYLFER      | P29391 | 0          | n +28.03 Da,             | 2800.860156 | 2 | 1201.112 | 750670976 | n.d. |
| VAGPQPAQTGAPQGSLGEYLFER      | P29391 | 0          | n +28.03 Da,             | 2801.01734  | 3 | 801.0768 | 3.503E+09 | n.d. |
| SSPAQPAVPAPLADLKIQHT         | P24549 | 0          | n +42.03 Da,K +34.06 Da, | 2802.511373 | 3 | 706.3831 | 24330300  | n.d. |
| PGLLLGDEAPNFEANTTIGR         | O08709 | 0          | n +14.02 Da,             | 2808.530542 | 2 | 1078.554 | 1.021E+09 | n.d. |
| MPFVELETNLPASR               | O35215 | 0.00112402 | n +34.06 Da,             | 2811.125968 | 2 | 819.4419 | 2.979E+09 | n.d. |
| MLGPEGGEGYVVKLR              | Q9Z2X1 | 0          | n +42.03 Da,K +28.03 Da, | 2812.358448 | 2 | 837.9503 | 17130400  | n.d. |
| SDSEKLNLDIIIGR               | P62137 | 0          | n +42.03 Da,K +28.03 Da, | 2815.880568 | 3 | 539.6213 | 7822320   | n.d. |

|                          |        |            |                          |             |   |          |           |      |
|--------------------------|--------|------------|--------------------------|-------------|---|----------|-----------|------|
| TLEAVQDLLEQGR            | P19096 | 0          | n +28.03 Da,             | 2816.806437 | 2 | 750.4068 | 292307008 | n.d. |
| ASKPTLNEVVIVSAIR         | Q8QZT1 | 0.01323007 | n +42.03 Da,K +28.03 Da, | 2817.907457 | 3 | 589.6835 | 450524992 | n.d. |
| VAGPQPAQTGAPQGSGLGEYLFER | P29391 | 0          | n +42.03 Da,             | 2820.23473  | 2 | 1208.118 | 77836496  | n.d. |
| VAGPQPAQTGAPQGSGLGEYLFER | P29391 | 0          | n +42.03 Da,             | 2825.249228 | 3 | 805.7485 | 1.526E+09 | n.d. |
| SSPAQPAVPAPLADLKIQHT     | P24549 | 0          | n +42.03 Da,K +28.03 Da, | 2826.001329 | 2 | 1056.076 | 8899480   | n.d. |
| LTAEILELAGNAAR           | P22752 | 0.01379532 | n +34.06 Da,             | 2837.987731 | 2 | 738.4356 | 79163400  | n.d. |
| AAQIPESDQIKQFKEF         | Q9WV98 | 0          | n +42.03 Da,K +28.03 Da, | 2844.714594 | 3 | 659.6838 | 1.247E+09 | n.d. |
| SSPAQPAVPAPLADLKIQH      | P24549 | 0          | n +42.03 Da,K +34.06 Da, | 2847.137751 | 2 | 1008.57  | 1.112E+11 | n.d. |
| PAGIDPTPTLTLTGQDEFER     | P11688 | 0.00180375 | n +14.02 Da,             | 2849.737502 | 2 | 1065.538 | 25330100  | n.d. |
| YTVDAFDYDLQGTGQISNR      | Q64374 | 0          | n +28.03 Da,             | 2856.373621 | 2 | 1067.506 | 41273600  | n.d. |
| PAFTPATGTPVLGGLSYR       | Q61176 | 0.00112402 | n +14.02 Da,             | 2858.922598 | 3 | 606.9973 | 13683400  | n.d. |
| VVLPMELPIR               | P00405 | 0.00146897 | n +28.03 Da,             | 2861.223069 | 2 | 597.8676 | 1.879E+09 | n.d. |
| NDVITVQTPAFAESVTEGDVR    | Q9D2G2 | 0          | n +28.03 Da,             | 2867.479514 | 1 | 1138.573 | 17542000  | n.d. |
| AELKYISGFGNECASEDPR      | O09173 | 0          | n +42.03 Da,K +28.03 Da, | 2868.018304 | 3 | 738.3453 | 38674800  | n.d. |
| PAPATTFAHLDATTVLSR       | P56480 | 0          | n +14.02 Da,             | 2868.6687   | 2 | 941.9975 | 64552700  | n.d. |
| NDVITVQTPAFAESVTEGDVR    | Q9D2G2 | 0          | n +28.03 Da,             | 2869.979025 | 2 | 1138.575 | 543248000 | n.d. |
| SVAGITSDANVLTNELR        | Q9R1P0 | 0          | n +28.03 Da,             | 2875.446314 | 2 | 894.4885 | 40921500  | n.d. |
| PGLLLGDEAPNFEANTTIGR     | O08709 | 0          | n +17.03 Da,             | 2876.670867 | 3 | 720.3755 | 70142600  | n.d. |
| METDVTSDTVEVLPQHKF       | Q80XL6 | 0          | n +42.03 Da,K +34.06 Da, | 2879.277386 | 3 | 718.0254 | 370692992 | n.d. |
| METDVTSDTVEVLPQHKF       | Q80XL6 | 0          | n +42.03 Da,K +34.06 Da, | 2881.066724 | 2 | 1076.536 | 755577024 | n.d. |
| PTDNILIPQLIR             | Q8VHE0 | 0.00040437 | n +14.02 Da,             | 2882.09828  | 2 | 703.9222 | 1.935E+09 | n.d. |
| SYELPDGQVITIGNER         | P60710 | 0          | n +34.06 Da,             | 2882.21365  | 2 | 912.9821 | 198580992 | n.d. |
| PTQEPIFPPELLR            | Q00519 | 0          | n +14.02 Da,             | 2886.167572 | 2 | 775.9375 | 27405600  | n.d. |
| VVAPAQTLNSNAEFQMLR       | Q8C196 | 0          | n +28.03 Da,             | 2890.036682 | 2 | 952.0102 | 96812000  | n.d. |
| TTGIVMDSGDGVTHTVPIYEGY   | P60710 | 0          | n +28.03 Da,             | 2890.762532 | 2 | 1170.56  | 104944000 | n.d. |
| VVAPAQTLNSNAEFQMLR       | Q8C196 | 0          | n +28.03 Da,             | 2892.610409 | 3 | 635.0074 | 250668000 | n.d. |
| AGVDQHEGTIQVQGNLFFR      | Q8VCR7 | 0          | n +42.03 Da,             | 2895.73894  | 2 | 1143.568 | 7.286E+10 | n.d. |
| AGVDQHEGTIQVQGNLFFR      | Q8VCR7 | 0          | n +42.03 Da,             | 2901.505722 | 3 | 762.7146 | 7.77E+10  | n.d. |
| GSWKTGQSYLAAGLLKN        | Q99MZ7 | 0.00079777 | n +42.03 Da,K +34.06 Da, | 2902.211835 | 2 | 952.5522 | 1.562E+09 | n.d. |
| PESSFNDELLMVVR           | P11714 | 0          | n +14.02 Da,             | 2906.124792 | 2 | 882.4365 | 119969000 | n.d. |
| PGLLLGEEAPDFEANTTIGR     | Q8BG37 | 0.03285968 | n +17.03 Da,             | 2907.217692 | 2 | 1087.542 | 116170000 | n.d. |
| DGLEDLFR                 | F6RWR5 | 0.03203797 | n +34.06 Da,             | 2908.461126 | 2 | 499.7721 | 89823600  | n.d. |
| PFDLIEDPNR               | Q9DBT9 | 0          | n +14.02 Da,             | 2908.852615 | 2 | 671.854  | 456440992 | n.d. |
| AAVPSGASTGIYEALELR       | P17182 | 0          | n +28.03 Da,             | 2913.413377 | 3 | 611.6633 | 549342016 | n.d. |
| GDPKEEEEEELVDPLTTVR      | P99028 | 0          | n +28.03 Da,K +28.03 Da, | 2915.025183 | 2 | 1121.041 | 255084992 | n.d. |
| PFDLIEDPNR               | Q9DBT9 | 0          | n +14.02 Da,             | 2915.538385 | 1 | 671.8537 | 186868000 | n.d. |
| GDPKEEEEEELVDPLTTVR      | P99028 | 0          | n +42.03 Da,K +28.03 Da, | 2920.150238 | 2 | 1128.05  | 70442896  | n.d. |
| MQETSLTPAHLSSAAQQR       | P54869 | 0          | n +42.03 Da,             | 2924.390561 | 3 | 675.3459 | 863238976 | n.d. |
| TGELTNLNVPGELYIR         | Q8VCW8 | 0          | n +34.06 Da,             | 2926.634595 | 2 | 912.0082 | 18691000  | n.d. |
| TGAIVDVPVGEELLGR         | Q03265 | 0          | n +34.06 Da,             | 2929.019369 | 2 | 829.9667 | 31195000  | n.d. |

|                            |        |            |                          |             |   |          |           |      |
|----------------------------|--------|------------|--------------------------|-------------|---|----------|-----------|------|
| ATESSPLTTHVLDTASGLPAQGLCLR | Q9CRB3 | 0          | n +42.03 Da,             | 2929.850539 | 3 | 913.1327 | 772870976 | n.d. |
| SGEDEQQEQTIAEDLVVTKYK      | P50580 | 0          | n +42.03 Da,K +28.03 Da, | 2932.976857 | 3 | 836.7499 | 1.576E+09 | n.d. |
| MQETSLTPAHLLSAAQQR         | P54869 | 0          | n +42.03 Da,             | 2933.749151 | 2 | 1012.515 | 1.187E+09 | n.d. |
| PVDPAPVVPVPIGPPAGFR        | Q05920 | 0          | n +14.02 Da,             | 2937.524594 | 2 | 948.5418 | 504312000 | n.d. |
| AAVPSGASTGIYEALELR         | P17182 | 0          | n +28.03 Da,             | 2937.612663 | 2 | 917.0061 | 1.425E+09 | n.d. |
| PVDPAPVVPVPIGPPAGFR        | Q05920 | 0          | n +14.02 Da,             | 2938.599653 | 3 | 632.6967 | 1.404E+09 | n.d. |
| PLLDTGDIIDGGNSEYR          | Q9DCD0 | 0          | n +14.02 Da,             | 2939.442167 | 2 | 981.4978 | 260735008 | n.d. |
| GAIVDVPVGEELLGR            | Q03265 | 0          | n +28.03 Da,             | 2939.447689 | 2 | 776.4296 | 315604992 | n.d. |
| SDFGLESTTGEVPVVAIR         | P27773 | 0          | n +34.06 Da,             | 2939.556268 | 2 | 955.9973 | 19474200  | n.d. |
| APVIEPSGPELVVEPGETVTLR     | P09581 | 0          | n +28.03 Da,             | 2939.707305 | 3 | 773.0913 | 36783700  | n.d. |
| SHQTGIQASEDVKEIFAR         | Q91YR1 | 0          | n +42.03 Da,K +28.03 Da, | 2941.758883 | 2 | 1043.513 | 672172992 | n.d. |
| SHQTGIQASEDVKEIFAR         | Q91YR1 | 0          | n +42.03 Da,K +28.03 Da, | 2944.760218 | 3 | 696.01   | 303281984 | n.d. |
| EGDVLTLLESER               | P62858 | 0.02416641 | n +28.03 Da,             | 2948.35515  | 2 | 694.8665 | 1.546E+09 | n.d. |
| PGGLLLGDEAPNFEANTTIGR      | O08709 | 0          | n +28.03 Da,             | 2962.515672 | 2 | 1085.56  | 1.28E+09  | n.d. |
| MERQVLLSEPEQEAALYR         | Q8R146 | 0.00745005 | n +42.03 Da,             | 2963.41065  | 3 | 716.0371 | 75558000  | n.d. |
| PGGLLLGDEAPNFEANTTIGR      | O08709 | 0          | n +28.03 Da,             | 2964.093109 | 3 | 724.0426 | 2.022E+09 | n.d. |
| AAAKKAVLGPLVGAVDQGSSTYR    | Q64516 | 0          | n +42.03 Da,K +28.03 Da, | 2966.67984  | 1 | 765.7606 | 26459300  | n.d. |
| TTGMSPEGHPTSLVSKLSLR       | Q8BYI8 | 0.00618132 | n +14.02 Da,K +28.03 Da, | 2967.502246 | 3 | 747.0693 | 14512000  | n.d. |
| MNTGEYNKLGSAIEEVS          | Q8BNX1 | 0          | n +42.03 Da,K +28.03 Da, | 2967.900949 | 2 | 1034.503 | 10301500  | n.d. |
| WGITDQFATMCHGYTLDPDR       | E9Q5L8 | 0.00745005 | n +28.03 Da,             | 2969.771925 | 3 | 812.054  | 84818400  | n.d. |
| GSLPEEKDSALWSDTPKGPL       | Q9EPL9 | 0          | n +42.03 Da,K +28.03 Da, | 2970.484298 | 2 | 1113.071 | 90196096  | n.d. |
| TGAIVDVPVGEELLGR           | Q03265 | 0          | n +28.03 Da,             | 2971.677429 | 2 | 826.9644 | 721454976 | n.d. |
| IFFYDAENPPGSEVLR           | P52430 | 0          | n +28.03 Da,             | 2972.664966 | 2 | 941.4767 | 66381700  | n.d. |
| PSNIGQAQPIIDQLAEAR         | Q3UEB3 | 0.00040437 | n +14.02 Da,             | 2975.199932 | 3 | 688.6967 | 287360992 | n.d. |
| PYITNVLQNPDLALR            | Q68FD5 | 0          | n +14.02 Da,             | 2977.172915 | 2 | 870.9882 | 61487900  | n.d. |
| TGAIVDVPVGEELLGR           | Q03265 | 0          | n +42.03 Da,             | 2984.165643 | 3 | 556.3154 | 161420992 | n.d. |
| TTGIVMDSGDGVHTVPIYEGY      | P60710 | 0          | n +28.03 Da,             | 2984.636819 | 2 | 1170.555 | 47723500  | n.d. |
| GGQSFIVGDQISFADYR          | F6RWR5 | 0          | n +28.03 Da,             | 2988.503553 | 2 | 944.4677 | 133072000 | n.d. |
| LEQYAAEFAAR                | Q8K070 | 0.04617149 | n +34.06 Da,             | 2988.916113 | 2 | 651.8399 | 75530400  | n.d. |
| TAAYVNAIEKVF               | P26443 | 0          | n +28.03 Da,             | 2992.429207 | 2 | 691.3906 | 198567008 | n.d. |
| MNTGEYNKLGSAIEEVS          | Q8BNX1 | 0          | n +42.03 Da,K +34.06 Da, | 2992.636798 | 3 | 1037.52  | 16250900  | n.d. |
| TFVQENVYDEFVER             | P47738 | 0          | n +42.03 Da,             | 2993.400689 | 2 | 908.9409 | 1.113E+09 | n.d. |
| PNALFPPVEFPAPR             | P19096 | 0          | n +14.02 Da,             | 2996.083735 | 3 | 522.6209 | 34521900  | n.d. |
| NDVITVQTPAFAESVTEGDVR      | Q9D2G2 | 0.04499567 | n +14.02 Da,             | 2997.667807 | 3 | 754.7195 | 73921696  | n.d. |
| PGGLLLGDEAPNFEANTTIGR      | O08709 | 0          | n +42.03 Da,             | 2998.373678 | 2 | 1092.566 | 998696000 | n.d. |
| SGGNFFTEPILLSNVTR          | Q8BWF0 | 0          | n +34.06 Da,             | 2999.531704 | 2 | 886.9854 | 14334000  | n.d. |
| PGGLLLGDEAPNFEANTTIGR      | O08709 | 0          | n +42.03 Da,             | 3003.214363 | 3 | 728.7151 | 3.348E+09 | n.d. |
| NDVITVQTPAFAESVTEGDVR      | Q9D2G2 | 0.00112402 | n +14.02 Da,             | 3003.64675  | 2 | 1131.574 | 86025504  | n.d. |
| PSPVDPAPVVPVPIGPPAGFR      | Q05920 | 0          | n +14.02 Da,             | 3006.479493 | 2 | 1040.585 | 661443968 | n.d. |
| PAPATTF AHLDATTVLSR        | P56480 | 0          | n +28.03 Da,             | 3010.796887 | 3 | 633.021  | 122888000 | n.d. |

|                          |        |            |                                      |             |   |          |           |      |
|--------------------------|--------|------------|--------------------------------------|-------------|---|----------|-----------|------|
| DKLFTQYSHLR              | E9PW05 | 0.04208999 | n +34.06 Da,K +34.06 Da,             | 3012.14045  | 2 | 738.4444 | 208736992 | n.d. |
| SELEEDIPEEDIISR          | P01027 | 0.00354108 | n +17.03 Da,                         | 3014.09487  | 2 | 952.474  | 66004300  | n.d. |
| SVVVAPAQTLNSNAEFQMLR     | Q8C196 | 0          | n +28.03 Da,                         | 3015.535385 | 3 | 697.0426 | 40328500  | n.d. |
| AMGDVAFGVPSVIVSR         | Q91WU0 | 0          | n +34.06 Da,                         | 3020.188134 | 3 | 546.9753 | 10639100  | n.d. |
| SLDMDGIIAEVR             | P11679 | 0          | n +28.03 Da,                         | 3020.636356 | 2 | 673.853  | 1.007E+09 | n.d. |
| ATAVVVNIGKKLY            | Q9DCL9 | 0          | n +42.03 Da,n +34.06 Da,K +34.06 Da, | 3022.009148 | 2 | 743.4871 | 25834500  | n.d. |
| SGGNFFEPTLLSNVTR         | Q8BWF0 | 0.00488656 | n +28.03 Da,                         | 3024.329736 | 3 | 589.6382 | 2666490   | n.d. |
| SVVVAPAQTLNSNAEFQMLR     | Q8C196 | 0          | n +34.06 Da,                         | 3026.563652 | 3 | 699.0504 | 16452600  | n.d. |
| PSPVDPVAVPVVPIGPPAGFR    | Q05920 | 0.00040437 | n +14.02 Da,                         | 3027.829994 | 3 | 694.0595 | 70847400  | n.d. |
| AEMDLVAELPRPAGAAR        | Q8VDG5 | 0.00387597 | n +42.03 Da,                         | 3029.104917 | 3 | 603.6495 | 62217400  | n.d. |
| GVIPTLTLFLR              | Q9DCT2 | 0.00040437 | n +28.03 Da,                         | 3030.593931 | 2 | 572.8582 | 14414700  | n.d. |
| DFTPSGIAGAFR             | P56135 | 0          | n +28.03 Da,                         | 3045.018596 | 2 | 633.828  | 88307000  | n.d. |
| TGAIVDVPVGEELLGR         | Q03265 | 0          | n +42.03 Da,                         | 3048.678562 | 2 | 833.9654 | 11666100  | n.d. |
| AQEFVNCKIQSGKVVVF        | Q9QUH0 | 0          | n +42.03 Da,K +28.03 Da,             | 3051.673005 | 3 | 684.3728 | 485847008 | n.d. |
| PSIAYFPQIVSVAAR          | P85094 | 0          | n +14.02 Da,                         | 3067.233886 | 3 | 544.9754 | 1.33E+09  | n.d. |
| PSIAYFPQIVSVAAR          | P85094 | 0          | n +14.02 Da,                         | 3068.401931 | 2 | 816.9592 | 5.017E+09 | n.d. |
| AQFGSDLDAATQQLSR         | Q03265 | 0          | n +28.03 Da,                         | 3068.799466 | 3 | 616.9872 | 13385200  | n.d. |
| IFFYDAENPPGSEVLR         | P52430 | 0          | n +42.03 Da,                         | 3070.941292 | 2 | 948.4801 | 203584992 | n.d. |
| AMVSEFLKQAR              | P10107 | 0.0024911  | n +42.03 Da,K +28.03 Da,             | 3073.084278 | 2 | 675.3658 | 91234800  | n.d. |
| IFFYDAENPPGSEVLR         | P52430 | 0.00112402 | n +42.03 Da,                         | 3074.874449 | 3 | 632.6561 | 125576000 | n.d. |
| ATQVEPLLPAAGAPLLQAEHGLAR | Q6ZQ58 | 0          | n +42.03 Da,                         | 3075.941447 | 3 | 841.7918 | 71411000  | n.d. |
| PGGLLLGDEAPNFEANTTIGR    | O08709 | 0          | n +42.03 Da,                         | 3079.279455 | 2 | 1092.568 | 59356200  | n.d. |
| PGAAAIAVLPVTLDTPMNR      | Q8BVI4 | 0          | n +14.02 Da,                         | 3080.056216 | 3 | 641.0247 | 162928992 | n.d. |
| VSPSPVDPVAVPVVPIGPPAGFR  | Q05920 | 0          | n +28.03 Da,                         | 3081.062224 | 3 | 760.7635 | 98493800  | n.d. |
| AFQELLNQVGSGLR           | B2RT89 | 0          | n +28.03 Da,                         | 3081.075887 | 1 | 780.4199 | 15542900  | n.d. |
| PTQELIFPPELMR            | O54754 | 0          | n +14.02 Da,                         | 3081.114911 | 3 | 528.9532 | 93196096  | n.d. |
| ASSFVLALEPELESR          | Q91YQ5 | 0          | n +28.03 Da,                         | 3086.195672 | 2 | 838.4616 | 8393180   | n.d. |
| PTPGVEALGASLDAAPSDPVASLR | Q4LDG0 | 0          | n +14.02 Da,                         | 3087.051962 | 3 | 801.4262 | 321016992 | n.d. |
| RQARMDYSDITAEDPWVR       | O54824 | 0.0170778  | n +34.06 Da,                         | 3093.152336 | 3 | 797.4046 | 83475600  | n.d. |
| GENIAESLVAEGLATR         | Q78PY7 | 0          | n +28.03 Da,                         | 3093.75071  | 2 | 829.4394 | 54859800  | n.d. |
| PGFETIPYNDLPALER         | P29758 | 0.01265002 | n +14.02 Da,                         | 3101.730918 | 2 | 923.4723 | 67939600  | n.d. |
| ASQQDFENALNQVKL          | Q9WUR2 | 0          | n +28.03 Da,K +28.03 Da,             | 3102.171318 | 3 | 587.6441 | 1.272E+09 | n.d. |
| MDPSGVKVLTAEDIQER        | P16546 | 0          | n +42.03 Da,K +28.03 Da,             | 3102.218211 | 3 | 696.3495 | 577468992 | n.d. |
| ASQQDFENALNQVKL          | Q9WUR2 | 0          | n +28.03 Da,K +28.03 Da,             | 3103.178518 | 2 | 880.9621 | 445971008 | n.d. |
| SAIPAEESDQLLIRPLGAGQEVGR | Q9QXK7 | 0          | n +42.03 Da,                         | 3107.530964 | 3 | 850.1164 | 776521024 | n.d. |
| SQDLLTSLTKL              | P33267 | 0.04797259 | n +28.03 Da,                         | 3112.070889 | 2 | 637.8822 | 47575700  | n.d. |
| MMLGAEGGEGFVVKVR         | O35737 | 0.00647139 | n +42.03 Da,K +28.03 Da,             | 3113.468236 | 2 | 875.457  | 17033600  | n.d. |
| DAGEFVDLYVPR             | Q9CQR2 | 0          | n +34.06 Da,                         | 3114.331689 | 2 | 707.8739 | 72538704  | n.d. |
| PLGIELPLQTLR             | Q9D826 | 0.0353461  | n +14.02 Da,                         | 3122.088015 | 2 | 682.4178 | 150992992 | n.d. |
| LDPAFTPATGTPVLGGLSYR     | Q61176 | 0.02219482 | n +28.03 Da,                         | 3123.639775 | 3 | 687.7048 | 32506600  | n.d. |

|                            |        |            |                          |             |   |          |           |      |
|----------------------------|--------|------------|--------------------------|-------------|---|----------|-----------|------|
| YFAGTMAEETAPAVLER          | Q64374 | 0          | n +42.03 Da,             | 3124.210366 | 2 | 949.4535 | 443596000 | n.d. |
| LDPAFTPATGTPVLGGLSYR       | Q61176 | 0.02645985 | n +34.06 Da,             | 3125.311639 | 3 | 689.7172 | 20547400  | n.d. |
| YFAGTMAEETAPAVLER          | Q64374 | 0          | n +42.03 Da,             | 3128.843626 | 3 | 633.3066 | 38798800  | n.d. |
| GLDPAFTPATGTPVLGGLSYR      | Q61176 | 0          | n +34.06 Da,             | 3143.305245 | 3 | 708.7227 | 454424992 | n.d. |
| PTQELIFPPELMR              | O54754 | 0          | n +14.02 Da,             | 3162.099525 | 2 | 792.9251 | 531700992 | n.d. |
| PTQELIFPPELMR              | O54754 | 0          | n +14.02 Da,             | 3164.246425 | 3 | 528.9535 | 21254100  | n.d. |
| DILLTQSPAILSVPGER          | P01642 | 0          | n +34.06 Da,             | 3170.292223 | 2 | 965.5585 | 15593200  | n.d. |
| FIDLLPTSLPH                | Q64458 | 0          | n +28.03 Da,             | 3171.421088 | 2 | 640.866  | 2.757E+09 | n.d. |
| SVVVAPAQTLSSNAEFQMLR       | Q8C196 | 0          | n +28.03 Da,             | 3173.596298 | 3 | 697.0481 | 6.36E+09  | n.d. |
| INVLPGLSGAIAGNPLGVDR       | Q91Y10 | 0          | n +28.03 Da,             | 3174.023735 | 2 | 981.063  | 1.322E+09 | n.d. |
| INVLPGLSGAIAGNPLGVDR       | Q91Y10 | 0.00112402 | n +28.03 Da,             | 3175.943326 | 3 | 654.3772 | 1.02E+09  | n.d. |
| PASPAEPPFQALVEAAGGR        | Q9CYS6 | 0          | n +14.02 Da,             | 3179.043539 | 2 | 939.9901 | 370667008 | n.d. |
| LEGLTDEINFLR               | P11679 | 0          | n +28.03 Da,             | 3182.300982 | 2 | 724.3935 | 421872000 | n.d. |
| SAELTEEELATAEAVR           | Q8R0Y6 | 0          | n +28.03 Da,             | 3183.175787 | 3 | 620.6581 | 1.058E+09 | n.d. |
| VQEAGVPQTPQPLTDAFLLR       | Q8BWP5 | 0.01204035 | n +28.03 Da,             | 3185.940637 | 3 | 736.7194 | 475156992 | n.d. |
| PPGAAAIAPVPLTLDTPMNR       | Q8BVI4 | 0.00146897 | n +14.02 Da,             | 3187.008536 | 3 | 673.3762 | 30679900  | n.d. |
| ASLSLAPVNIKAGADEER         | P80314 | 0          | n +42.03 Da,K +34.06 Da, | 3188.787319 | 2 | 1032.574 | 35490000  | n.d. |
| INVLPGLSGAIAGNPLGVDR       | Q91Y10 | 0          | n +42.03 Da,             | 3188.955043 | 3 | 659.0497 | 5.52E+09  | n.d. |
| GVQPPNFVWVLPGR             | Q6NT99 | 0.00180375 | n +28.03 Da,             | 3189.959019 | 2 | 791.4337 | 92642304  | n.d. |
| INVLPGLSGAIAGNPLGVDR       | Q91Y10 | 0          | n +42.03 Da,             | 3190.729525 | 2 | 988.0706 | 2.726E+09 | n.d. |
| PASPAEPPFQALVEAAGGR        | Q9CYS6 | 0          | n +14.02 Da,             | 3191.06988  | 3 | 626.996  | 196019008 | n.d. |
| PIPDIGGGYIPTEEEWR          | Q9CRD0 | 0          | n +14.02 Da,             | 3192.136874 | 2 | 971.9807 | 463619008 | n.d. |
| TGIGMTQEELVSNLGTIAR        | Q9CQN1 | 0.00112402 | n +34.06 Da,             | 3193.802501 | 2 | 1012.535 | 6633860   | n.d. |
| TIPIDGDFFSYTR              | P47738 | 0          | n +28.03 Da,             | 3198.848117 | 2 | 779.4095 | 316750016 | n.d. |
| IAQFLSGIPETVPLSTVNR        | Q8VCH0 | 0.00647139 | n +14.02 Da,             | 3205.003864 | 3 | 686.0623 | 66757200  | n.d. |
| MEDIDQSSLVSSADSPPRPPPAFKY  | Q99P72 | 0          | n +42.03 Da,K +28.03 Da, | 3206.814485 | 3 | 964.4623 | 42982100  | n.d. |
| PEDIDLTPSSGLGNLPR          | P33267 | 0          | n +14.02 Da,             | 3207.825287 | 2 | 954.5086 | 18079200  | n.d. |
| DVAPQAPVHFLVIPR            | Q9D0S9 | 0          | n +42.03 Da,             | 3210.382017 | 3 | 567.6576 | 23008700  | n.d. |
| SHLNKDDDEGLYTLRIVSR        | Q14BI5 | 0.01265002 | n +42.03 Da,K +34.06 Da, | 3216.17899  | 3 | 730.3857 | 6304690   | n.d. |
| PEQLGDISVGNVLQPGAGAIMAR    | Q8VCH0 | 0          | n +14.02 Da,             | 3218.427427 | 3 | 769.7444 | 24035200  | n.d. |
| SLHQFLLLEPITCH             | Q9R0Q6 | 0.00040437 | n +42.03 Da,             | 3218.938262 | 3 | 546.2771 | 15671000  | n.d. |
| MDVLRPQIVTFDGR             | Q9D8Z1 | 0.0024911  | n +42.03 Da,             | 3219.126791 | 3 | 563.6234 | 694545024 | n.d. |
| ASLSLAPVNIKAGADEER         | P80314 | 0          | n +42.03 Da,K +34.06 Da, | 3225.251491 | 3 | 688.7108 | 133859000 | n.d. |
| LGIPFAQAPLGLPLR            | Q63880 | 0.00079777 | n +34.06 Da,             | 3232.870004 | 2 | 742.4663 | 72011200  | n.d. |
| AELEEVTLDGKPLQALR          | Q9JIX8 | 0          | n +42.03 Da,K +28.03 Da, | 3233.189607 | 2 | 976.5394 | 269876000 | n.d. |
| INVLPGLSGAIAGNPLGVDR       | Q91Y10 | 0          | n +42.03 Da,             | 3236.037712 | 3 | 659.0261 | 48869400  | n.d. |
| GVLALPSIAGAFR              | P34914 | 0          | n +28.03 Da,             | 3238.921693 | 2 | 650.3912 | 795736000 | n.d. |
| PVNVSPSPVDPAPVPPVPIGPPAGFR | Q05920 | 0          | n +14.02 Da,             | 3241.051321 | 2 | 1288.717 | 8379160   | n.d. |
| GLSPIWAINSPATAEVIR         | G3X982 | 0          | n +28.03 Da,             | 3248.562863 | 2 | 962.0424 | 92053400  | n.d. |
| PDQDILIGLLR                | Q9CZX0 | 0.0024911  | n +14.02 Da,             | 3249.860253 | 2 | 633.874  | 10678600  | n.d. |

|                            |        |            |                                      |             |   |          |           |      |
|----------------------------|--------|------------|--------------------------------------|-------------|---|----------|-----------|------|
| PGSISWDGLDPGKLY            | Q8VIN1 | 0          | n +42.03 Da,K +28.03 Da,             | 3250.653435 | 1 | 837.9216 | 157944000 | n.d. |
| AIAELGIYPVDPLDSTSR         | P56480 | 0          | n +28.03 Da,                         | 3252.021764 | 3 | 672.6943 | 199608992 | n.d. |
| AAKVFESIGKF                | P67778 | 0.00079777 | n +42.03 Da,n +28.03 Da,K +28.03 Da, | 3253.023648 | 2 | 647.8739 | 1.535E+09 | n.d. |
| GPSQMALEDLAMFR             | P40142 | 0          | n +28.03 Da,                         | 3253.058491 | 2 | 797.3903 | 200384000 | n.d. |
| ADIDKLNIDSIIQR             | P63087 | 0.01404853 | n +42.03 Da,K +34.06 Da,             | 3253.828179 | 2 | 845.4832 | 1.604E+09 | n.d. |
| AIAELGIYPVDPLDSTSR         | P56480 | 0          | n +28.03 Da,                         | 3259.663657 | 2 | 1008.538 | 2.082E+09 | n.d. |
| MDNSGKQAEAMALLAEAER        | Q9DB05 | 0          | n +42.03 Da,K +28.03 Da,             | 3264.130418 | 3 | 702.3404 | 42068400  | n.d. |
| IAQFLSGIPETVPLSTVNR        | Q8VCH0 | 0          | n +28.03 Da,                         | 3266.760451 | 2 | 1035.585 | 799662016 | n.d. |
| GLPPILNALEVQGR             | P56480 | 0.02876173 | n +34.06 Da,                         | 3268.261591 | 2 | 755.9592 | 45371900  | n.d. |
| FIDLPTSLPH                 | Q64458 | 0          | n +28.03 Da,                         | 3270.41374  | 2 | 640.866  | 768392000 | n.d. |
| PLPGAELVQTPQLYR            | Q3UN90 | 0          | n +17.03 Da,                         | 3272.393137 | 3 | 604.6866 | 11723700  | n.d. |
| TGDSVVVAPAQTLNAEFQMLR      | Q8C196 | 0          | n +28.03 Da,                         | 3275.44962  | 3 | 788.0731 | 35295900  | n.d. |
| PSEEDINFILNEVR             | Q64521 | 0          | n +14.02 Da,                         | 3276.486473 | 2 | 843.9548 | 2.471E+09 | n.d. |
| TTYLEFIQQNEERDGV           | Q01405 | 0          | n +42.03 Da,                         | 3280.160072 | 3 | 714.0158 | 634592000 | n.d. |
| AGYEYVSPEQLSGFDKYYK        | Q80TA1 | 0          | n +42.03 Da,K +28.03 Da,             | 3286.845245 | 1 | 1171.599 | 133352000 | n.d. |
| ACANPAAGTVILLENLR          | P09411 | 0          | n +34.06 Da,                         | 3292.256143 | 2 | 909.0089 | 75266800  | n.d. |
| SILYVSPHPDAFPSLR           | Q9Z1Q9 | 0          | n +42.03 Da,                         | 3296.331881 | 2 | 920.9837 | 1.635E+10 | n.d. |
| SILYVSPHPDAFPSLR           | Q9Z1Q9 | 0          | n +42.03 Da,                         | 3298.479252 | 3 | 614.3248 | 1.745E+09 | n.d. |
| AGYEYVSPEQLSGFDKYYK        | Q80TA1 | 0          | n +42.03 Da,K +34.06 Da,             | 3306.281756 | 3 | 785.4024 | 341764000 | n.d. |
| SILYVSPHPDAFPSLR           | Q9Z1Q9 | 0          | n +42.03 Da,                         | 3309.686243 | 1 | 920.9827 | 268611008 | n.d. |
| GDSVVVAPAQTLNAEFQMLR       | Q8C196 | 0          | n +28.03 Da,                         | 3310.038278 | 3 | 754.392  | 488843008 | n.d. |
| VVGVPVALDLITSGR            | Q9DBM2 | 0          | n +28.03 Da,                         | 3311.151355 | 3 | 508.6435 | 77577104  | n.d. |
| AGYEYVSPEQLSGFDKYYK        | Q80TA1 | 0          | n +42.03 Da,K +28.03 Da,             | 3315.495602 | 2 | 1171.565 | 1.563E+09 | n.d. |
| IAQFLSGIPETVPLSTVNR        | Q8VCH0 | 0          | n +42.03 Da,                         | 3315.86199  | 3 | 695.3961 | 602963008 | n.d. |
| VVGVPVALDLITSGR            | Q9DBM2 | 0          | n +28.03 Da,                         | 3319.428451 | 2 | 762.4614 | 715268992 | n.d. |
| TPEIAGLTSPQALEIIR          | A2AS89 | 0          | n +28.03 Da,                         | 3336.339729 | 3 | 613.0195 | 19180200  | n.d. |
| TGDSVVVAPAQTLNAEFQMLR      | Q8C196 | 0          | n +34.06 Da,                         | 3338.282268 | 3 | 790.0847 | 583625984 | n.d. |
| MDILKSEILR                 | Q8BM39 | 0.00112402 | n +42.03 Da,K +28.03 Da,             | 3348.396036 | 2 | 644.3717 | 177023008 | n.d. |
| AAAQQLSLTLSSGNPVYKYYR      | P42567 | 0          | n +42.03 Da,n +34.06 Da,             | 3350.849113 | 3 | 869.4344 | 1.066E+09 | n.d. |
| GDALFVDVPNDSSFQIVKNPR      | Q61176 | 0          | n +28.03 Da,K +28.03 Da,             | 3352.544847 | 3 | 792.0728 | 9806290   | n.d. |
| DVEAFVIDAVR                | Q99JX4 | 0.00934268 | n +28.03 Da,                         | 3355.251669 | 2 | 631.3382 | 36871200  | n.d. |
| ATESSPLTTHVLDTASGLPAQGLCLR | Q9CRB3 | 0          | n +42.03 Da,                         | 3356.531977 | 2 | 1369.198 | 1.048E+09 | n.d. |
| YEPIDATGFININSLR           | P16460 | 0          | n +28.03 Da,                         | 3358.522278 | 3 | 617.6597 | 17314700  | n.d. |
| AAAKKAVLGPLVGAVDQGTSSTR    | Q64516 | 0          | n +42.03 Da,K +28.03 Da,             | 3365.632995 | 3 | 765.7602 | 20388700  | n.d. |
| MDASLEKIADPTLAEMGKN        | Q99K01 | 0          | n +42.03 Da,K +34.06 Da,             | 3370.723    | 3 | 715.3813 | 8554920   | n.d. |
| SSALELTHEELATAEA VR        | Q8R0Y6 | 0          | n +34.06 Da,                         | 3372.726576 | 2 | 977.0163 | 74931696  | n.d. |
| EGLPPILNALEVQGR            | P56480 | 0          | n +34.06 Da,                         | 3373.790012 | 3 | 547.3246 | 342076992 | n.d. |
| SSALELTHEELATAEA VR        | Q8R0Y6 | 0.00488656 | n +34.06 Da,                         | 3375.168581 | 3 | 651.6782 | 56851600  | n.d. |
| ASSALELTHEELATAEA VR       | Q8R0Y6 | 0          | n +34.06 Da,                         | 3377.05371  | 3 | 675.3566 | 10663900  | n.d. |
| PLPPSYVPVVMSELSDR          | E9PZ30 | 0          | n +14.02 Da,                         | 3377.460247 | 3 | 634.0029 | 28559800  | n.d. |



|                                  |        |            |                                      |             |   |          |           |      |
|----------------------------------|--------|------------|--------------------------------------|-------------|---|----------|-----------|------|
| VGLLEALLPGQPEAVAR                | P51855 | 0          | n +28.03 Da,                         | 3378.004874 | 3 | 587.6811 | 27976400  | n.d. |
| TGDSVVVAPAQTLNAEFQMLR            | Q8C196 | 0          | n +34.06 Da,                         | 3378.666703 | 2 | 1184.622 | 11808700  | n.d. |
| AAAAQLSLTLQLSSGNPVYEKYRR         | P42567 | 0          | n +42.03 Da,n +34.06 Da,             | 3383.158518 | 3 | 869.46   | 87867504  | n.d. |
| PYLPNFVFGGLH                     | Q6PDD0 | 0.00647139 | n +14.02 Da,                         | 3384.34115  | 2 | 752.3844 | 35874600  | n.d. |
| ATESSPLTHVLDTASGLPAQGLCLR        | Q9CRB3 | 0          | n +42.03 Da,                         | 3384.537773 | 3 | 912.0946 | 594438016 | n.d. |
| TGTPEIAGLTPSQALEIIR              | A2AS89 | 0          | n +34.06 Da,                         | 3384.891443 | 2 | 1001.078 | 23427100  | n.d. |
| TFVQENVYDEFVER                   | P47738 | 0          | n +42.03 Da,                         | 3390.205729 | 2 | 908.9227 | 168022000 | n.d. |
| MNFSGKYQLQSQENFEPFMK             | P12710 | 0          | n +42.03 Da,n +28.03 Da,K +28.03 Da, | 3391.018121 | 3 | 851.071  | 1.625E+09 | n.d. |
| SSALELTHEELATAEAVR               | Q8R0Y6 | 0          | n +28.03 Da,                         | 3405.888858 | 2 | 973.9979 | 13544900  | n.d. |
| ASLSLAPVNIKAGADEER               | P80314 | 0          | n +42.03 Da,K +28.03 Da,             | 3407.758919 | 2 | 1029.548 | 1.793E+09 | n.d. |
| QAAFPLSTSENVLSR                  | E9PVZ8 | 0.01766562 | n +42.03 Da,                         | 3408.68114  | 3 | 554.6188 | 61981600  | n.d. |
| PEDVSEELIQEITQR                  | P26043 | 0          | n +14.02 Da,                         | 3411.327111 | 2 | 900.4517 | 105342000 | n.d. |
| PEDVSEELIQEITQR                  | P26043 | 0.01646091 | n +14.02 Da,                         | 3413.784103 | 3 | 600.6382 | 127383000 | n.d. |
| TSDWLNANNVPATPVAVWPSQEGQNPSLSSIR | Q8C196 | 0          | n +34.06 Da,                         | 3416.362771 | 3 | 1124.232 | 62282500  | n.d. |
| DWVIPPINLPENSR                   | P15116 | 0          | n +28.03 Da,                         | 3429.12399  | 2 | 839.4497 | 309059008 | n.d. |
| ASLSLAPVNIKAGADEER               | P80314 | 0          | n +42.03 Da,K +34.06 Da,             | 3432.880982 | 3 | 688.711  | 1.05E+09  | n.d. |
| SSPVPEFPLAYLTSENR                | P52825 | 0.01552106 | n +28.03 Da,                         | 3438.616619 | 2 | 967.9977 | 59374600  | n.d. |
| VEEFIWPAVQSSALYEDR               | P16460 | 0          | n +28.03 Da,                         | 3441.617249 | 3 | 723.0297 | 10446800  | n.d. |
| GPPPIQDGEFTFLPAGR                | Q3V009 | 0.00146897 | n +34.06 Da,                         | 3449.471518 | 2 | 973.5342 | 403816000 | n.d. |
| PLAVCENGWRCCLINRDR               | Q8CB44 | 0.0380117  | n +17.03 Da,                         | 3451.707666 | 4 | 577.2934 | 60000000  | n.d. |
| AALIFFAIWHIIAFDEL                | Q6ZWS4 | 0.04499567 | n +28.03 Da,                         | 3457.899257 | 3 | 725.4162 | 1.056E+09 | n.d. |
| IFPGDTILETGEVIPP                 | Q3UIU2 | 0.00518852 | n +28.03 Da,                         | 3463.521659 | 3 | 671.6965 | 26796700  | n.d. |
| AETHYAPLSSAFPVTSYQTGSSR          | Q60766 | 0          | n +42.03 Da,                         | 3467.183214 | 3 | 882.754  | 844576000 | n.d. |
| VNPTVFFDITADDEPLGR               | P17742 | 0          | n +34.06 Da,                         | 3467.785316 | 2 | 1020.522 | 33614400  | n.d. |
| LYSSDDVIELTPSNFNR                | Q922R8 | 0          | n +28.03 Da,                         | 3469.566206 | 2 | 1042.995 | 32692500  | n.d. |
| TSAIQDYLLQQLTGAR                 | Q9QUH0 | 0          | n +34.06 Da,                         | 3478.152815 | 2 | 849.9659 | 34005100  | n.d. |
| PIPVNVSPSPVDPVAVPVVPIGPPAGFR     | Q05920 | 0          | n +14.02 Da,                         | 3483.694904 | 3 | 929.5258 | 477935008 | n.d. |
| MNNAGLNSEKVSALIQKL               | Q8R016 | 0          | n +42.03 Da,n +34.06 Da,K +34.06 Da, | 3484.573124 | 3 | 680.732  | 392936000 | n.d. |
| SGMPPGAAAIAVLPVTLDTMNR           | Q8BVI4 | 0          | n +34.06 Da,                         | 3496.920776 | 3 | 771.7583 | 5110950   | n.d. |
| AADISQWAGPLCLQEVDPPQHALR         | P70296 | 0          | n +42.03 Da,                         | 3498.746809 | 3 | 948.4633 | 168987008 | n.d. |
| TATFAQALQSVPETQVSILDNGLR         | Q9CZ13 | 0          | n +34.06 Da,                         | 3500.760146 | 3 | 865.1344 | 14635500  | n.d. |
| FTPDLSDFTFTLPAGR                 | Q9CXE7 | 0.00146897 | n +34.06 Da,                         | 3508.866142 | 3 | 636.0015 | 11436800  | n.d. |
| TKGCIQALEGWLPR                   | Q8QZY6 | 0.02443494 | n +34.06 Da,K +34.06 Da,             | 3511.447061 | 2 | 848.9861 | 651094976 | n.d. |
| FTPDLSDFTFTLPAGR                 | Q9CXE7 | 0          | n +34.06 Da,                         | 3520.074327 | 2 | 953.4933 | 36429900  | n.d. |
| AKLTAVPLSALVDEPVHIQ              | Q91X34 | 0.00079777 | n +42.03 Da,K +28.03 Da,             | 3523.791621 | 3 | 691.0665 | 40594500  | n.d. |
| ISSVQSIVPALEIANHR                | P63038 | 0.01738306 | n +28.03 Da,                         | 3525.234373 | 2 | 967.029  | 18305800  | n.d. |
| PIFVTDVPPDDVQPIASLPGVAR          | P10518 | 0          | n +14.02 Da,                         | 3525.752006 | 3 | 774.0835 | 57674200  | n.d. |
| MLAANPGKTPISLLQEYGR              | P97473 | 0          | n +42.03 Da,K +34.06 Da,             | 3533.915824 | 3 | 746.0781 | 84838400  | n.d. |
| ATQVEPLLPAGAPLLQAEHGLAR          | Q6ZQ58 | 0          | n +42.03 Da,                         | 3534.956727 | 2 | 1262.183 | 1.542E+09 | n.d. |
| ATQVEPLLPAGAPLLQAEHGLAR          | Q6ZQ58 | 0          | n +42.03 Da,                         | 3536.023047 | 3 | 841.7906 | 6.093E+09 | n.d. |

|                             |        |            |                          |             |   |          |           |      |
|-----------------------------|--------|------------|--------------------------|-------------|---|----------|-----------|------|
| PSLEQLAQEVTYANLR            | Q9QYC7 | 0          | n +14.02 Da,             | 3539.126948 | 3 | 615.9959 | 395719008 | n.d. |
| PILDPSDFLGLQDR              | Q61578 | 0          | n +14.02 Da,             | 3542.395035 | 2 | 800.4232 | 57056400  | n.d. |
| ASQQDFENALNQKLL             | Q9WUR2 | 0          | n +34.06 Da,K +34.06 Da, | 3542.44099  | 2 | 943.5371 | 645062976 | n.d. |
| AGSAVDSANHLTYFFGNITR        | P48025 | 0          | n +42.03 Da,             | 3542.783817 | 3 | 728.3556 | 143268000 | n.d. |
| PAYAPGTGTPEIAGLTPSQALEIIR   | A2AS89 | 0          | n +17.03 Da,             | 3543.471547 | 3 | 847.4631 | 1.989E+09 | n.d. |
| PAYAPGTGTPEIAGLTPSQALEIIR   | A2AS89 | 0          | n +14.02 Da,             | 3544.151666 | 3 | 846.4573 | 966614016 | n.d. |
| IAPLEEGMLPFNLAEQR           | Q9QXX4 | 0          | n +42.03 Da,             | 3544.95683  | 3 | 681.0279 | 10540600  | n.d. |
| PSATIGELSESLWPIEAR          | Q8VC97 | 0.03153823 | n +17.03 Da,             | 3549.889622 | 3 | 658.3485 | 41688500  | n.d. |
| FLSQPFQVAEVFTGH             | P56480 | 0          | n +28.03 Da,             | 3557.217649 | 2 | 867.9446 | 73462200  | n.d. |
| MESMVAPGEVLMQAIQPAHADSR     | Q9DBK0 | 0          | n +42.03 Da,             | 3561.552725 | 3 | 866.4075 | 50916200  | n.d. |
| FLSQPFQVAEVFTGH             | P56480 | 0          | n +28.03 Da,             | 3561.981901 | 1 | 867.944  | 30087100  | n.d. |
| EEEIAALVIDNGSGMCKAGFAGDDAPR | P63260 | 0          | n +42.03 Da,K +28.03 Da, | 3563.801054 | 3 | 955.1282 | 427912000 | n.d. |
| MEEGMNILDHDFGIQSTR          | P35576 | 0          | n +42.03 Da,             | 3568.064441 | 3 | 673.9792 | 58594000  | n.d. |
| MEEGMNILDHDFGIQSTR          | P35576 | 0          | n +42.03 Da,             | 3569.678272 | 2 | 1010.465 | 115066000 | n.d. |
| GALNVDLTEFQTNLVPYPR         | P05213 | 0.00112402 | n +34.06 Da,             | 3572.705731 | 3 | 727.7285 | 13893400  | n.d. |
| VNPTVFFDITADDEPLGR          | P17742 | 0          | n +28.03 Da,             | 3580.414403 | 2 | 1017.509 | 31086300  | n.d. |
| GLPTLEFSDSYLDSPDFR          | B2RQE8 | 0          | n +28.03 Da,             | 3593.295334 | 2 | 1043.995 | 22318200  | n.d. |
| QQLIEDIVR                   | Q6NZL8 | 0.00991736 | n +17.03 Da,             | 3597.483307 | 2 | 565.8237 | 991188992 | n.d. |
| ASGVAVSDGVIKVFNDMK          | P18760 | 0          | n +42.03 Da,K +28.03 Da, | 3601.188617 | 3 | 645.687  | 54496700  | n.d. |
| ASTLNDGAAALVLMTAEAAQR       | Q8QZT1 | 0          | n +34.06 Da,             | 3601.852657 | 3 | 703.3783 | 12000200  | n.d. |
| TEGAELVDSVLDVVR             | P68372 | 0          | n +28.03 Da,             | 3604.834812 | 2 | 815.4385 | 340182016 | n.d. |
| AHLLTSGPPPDEQDFIQAYEEVR     | E9QLJ5 | 0          | n +42.03 Da,             | 3617.367051 | 3 | 885.4288 | 705817024 | n.d. |
| PSLLFSDVYQEMPAQLR           | P50136 | 0          | n +14.02 Da,             | 3618.139472 | 3 | 670.0135 | 12719900  | n.d. |
| RAFPPGAAGHDLAPR             | Q6PB51 | 0.04982916 | n +14.02 Da,             | 3620.788608 | 2 | 773.9248 | 39496100  | n.d. |
| LPTLEQIIPSDYVAIKAPM         | Q8C196 | 0          | n +42.03 Da,K +28.03 Da, | 3622.245511 | 3 | 756.1001 | 12302300  | n.d. |
| VNPTVFFDITADDEPLGR          | P17742 | 0.00079777 | n +34.06 Da,             | 3623.223973 | 3 | 679.7118 | 381636000 | n.d. |
| VNPTVFFDITADDEPLGR          | P17742 | 0          | n +34.06 Da,             | 3626.731043 | 2 | 1020.528 | 3.803E+09 | n.d. |
| AADISQWAGPLCLQEVDEPPQHALR   | P70296 | 0          | n +42.03 Da,             | 3631.032647 | 3 | 948.4641 | 1.537E+10 | n.d. |
| AADISQWAGPLCLQEVDEPPQHALR   | P70296 | 0          | n +42.03 Da,             | 3631.941516 | 2 | 1422.193 | 1.161E+09 | n.d. |
| APPVPGAVSGGSGEVDLFDVKNAP    | O89079 | 0          | n +28.03 Da,K +28.03 Da, | 3640.934572 | 3 | 839.0954 | 2.355E+09 | n.d. |
| QQLIEDIVR                   | Q6NZL8 | 0.03453365 | n +14.02 Da,             | 3643.779478 | 2 | 564.3158 | 2.728E+09 | n.d. |
| IMSAGQEEGIGDFGTALNALR       | Q9DBT9 | 0          | n +28.03 Da,             | 3649.235239 | 3 | 781.0553 | 29395800  | n.d. |
| STLNDGAAALVLMTAEAAQR        | Q8QZT1 | 0          | n +28.03 Da,             | 3663.103181 | 2 | 1016.047 | 12361900  | n.d. |
| TTSYPPMCSQDAVGGQVLSLFTNR    | Q8VCT4 | 0.0024911  | n +34.06 Da,             | 3668.473961 | 3 | 931.4554 | 7916410   | n.d. |
| LPTLEQIIPSDYVAIKAPM         | Q8C196 | 0          | n +42.03 Da,K +34.06 Da, | 3671.040182 | 3 | 758.1074 | 262194000 | n.d. |
| LDGVLALPSIAGAFR             | P34914 | 0          | n +28.03 Da,             | 3672.587503 | 2 | 764.4488 | 182756992 | n.d. |
| PQTGLSFLGPEPEDLEDLYSR       | P54775 | 0          | n +14.02 Da,             | 3677.789584 | 3 | 793.0563 | 59210100  | n.d. |
| EEMLQEQELSR                 | O35711 | 0.01265002 | n +34.06 Da,             | 3682.455835 | 2 | 705.3928 | 31434900  | n.d. |
| DLPEFPFGLPR                 | O35490 | 0          | n +28.03 Da,             | 3697.313165 | 2 | 722.8771 | 371924992 | n.d. |
| IAIPGLAGAGNSVLLVSNLNP       | P17225 | 0          | n +42.03 Da,             | 3697.361896 | 3 | 773.1114 | 15396100  | n.d. |

|                              |        |            |                                      |             |   |          |           |      |
|------------------------------|--------|------------|--------------------------------------|-------------|---|----------|-----------|------|
| MESMVAPGEVLSQAIQPAHADSR      | Q9DBK0 | 0          | n +42.03 Da,                         | 3700.058484 | 2 | 1299.112 | 943516992 | n.d. |
| EEIIPVAPEYDKSGEYPPFL         | P45952 | 0          | n +28.03 Da,K +28.03 Da,             | 3702.421378 | 2 | 1175.102 | 15779500  | n.d. |
| MESMVAPGEVLSQAIQPAHADSR      | Q9DBK0 | 0          | n +42.03 Da,                         | 3702.492622 | 3 | 866.4101 | 6.319E+09 | n.d. |
| MEHAAPLAVPLGQAEVFAQLR        | Q5U4D9 | 0          | n +42.03 Da,                         | 3707.747536 | 3 | 806.7589 | 602684032 | n.d. |
| SYVTEELPQLINANFPVDPQR        | Q9R0P3 | 0.00112402 | n +28.03 Da,                         | 3710.852408 | 3 | 820.0887 | 15258900  | n.d. |
| PQTGLSFLGPEPEDLEDLYSR        | P54775 | 0          | n +14.02 Da,                         | 3717.135071 | 3 | 793.0731 | 4677150   | n.d. |
| AIPENTNIGSLFPIPLATDR         | E0CXD4 | 0          | n +34.06 Da,                         | 3725.155916 | 3 | 725.0764 | 49903000  | n.d. |
| PTSTNPIASIFAWTR              | P54071 | 0          | n +14.02 Da,                         | 3727.950324 | 2 | 838.4438 | 34955600  | n.d. |
| PFVELETNLPASRIPAGLENR        | O35215 | 0          | n +42.03 Da,                         | 3743.583425 | 3 | 789.0887 | 231472000 | n.d. |
| SSITPGTVLIILTGR              | P47911 | 0          | n +28.03 Da,                         | 3746.952127 | 2 | 778.4742 | 77927904  | n.d. |
| VPPETIDSVIVGNVMQSSSDAAYLAR   | Q8BWT1 | 0          | n +28.03 Da,                         | 3764.689097 | 3 | 916.4817 | 37464000  | n.d. |
| SFDVDGLDPAFTPATGTPVLGGLSYR   | Q61176 | 0          | n +34.06 Da,                         | 3768.548477 | 3 | 896.4637 | 70644800  | n.d. |
| YTEGAELVDSVLDVVR             | P68372 | 0          | n +28.03 Da,                         | 3780.528433 | 3 | 598.3148 | 16379400  | n.d. |
| AGGVDGPIGIPFDHSSDILSGLNEQR   | O88939 | 0          | n +42.03 Da,                         | 3780.890526 | 3 | 930.7935 | 639763008 | n.d. |
| AADISQWAGPLCLQEVDPEPPQHALR   | P70296 | 0.00180375 | n +14.02 Da,                         | 3781.776159 | 3 | 939.1212 | 443776000 | n.d. |
| PGFFFQPTVFTDVEDH             | Q8R0Y6 | 0          | n +14.02 Da,                         | 3797.4211   | 3 | 632.9652 | 593185024 | n.d. |
| PGFFFQPTVFTDVEDH             | Q8R0Y6 | 0          | n +14.02 Da,                         | 3797.888865 | 2 | 948.9433 | 3.186E+09 | n.d. |
| YTPEQVAMATVTALHR             | Q91Y97 | 0          | n +28.03 Da,                         | 3800.096412 | 2 | 908.4689 | 29962700  | n.d. |
| APPVPGAVSGSGEVDLFDVKNAFY     | O89079 | 0          | n +28.03 Da,K +28.03 Da,             | 3800.446271 | 3 | 893.4462 | 23601400  | n.d. |
| DVDFEAIWGAVR                 | P25688 | 0          | n +28.03 Da,                         | 3802.749636 | 2 | 703.3584 | 213388992 | n.d. |
| AAKVFESIGKFGL                | P67778 | 0.02443494 | n +42.03 Da,n +28.03 Da,K +28.03 Da, | 3803.96516  | 2 | 732.927  | 2.837E+09 | n.d. |
| VLLDDNFASIVTGVVEGR           | Q9Z1W8 | 0          | n +14.02 Da,                         | 3813.884202 | 2 | 974.5062 | 2794140   | n.d. |
| AEYLASIFGTEKDKNV             | Q8BGJ9 | 0.00040437 | n +42.03 Da,K +34.06 Da,             | 3830.7207   | 2 | 948.0184 | 16952000  | n.d. |
| IDLPEFPFGLPR                 | O35490 | 0          | n +28.03 Da,                         | 3834.780132 | 2 | 779.4186 | 465439008 | n.d. |
| AELQMLLEEEIPSGKR             | Q8CBW3 | 0          | n +42.03 Da,K +34.06 Da,             | 3836.880411 | 2 | 960.0091 | 6080260   | n.d. |
| PVGGLLPLFSSPGGGGLGSLGGGLGGGR | P45700 | 0          | n +14.02 Da,                         | 3848.050477 | 3 | 822.1147 | 681651968 | n.d. |
| GDKPIWEQIGSSFIQH             | P61971 | 0.00040437 | n +42.03 Da,K +34.06 Da,             | 3850.107581 | 3 | 640.003  | 36401100  | n.d. |
| PVDETLIPTGVIAPVEGTAFLDR      | Q8K157 | 0          | n +14.02 Da,                         | 3851.853244 | 3 | 808.7713 | 65106800  | n.d. |
| LKSFIAEFMESLQDPLNVR          | Q6ZQ73 | 0.04609623 | n +34.06 Da,K +34.06 Da,             | 3856.176574 | 3 | 859.4641 | 265330000 | n.d. |
| PEVLNMFPIILLR                | P24456 | 0          | n +14.02 Da,                         | 3867.538758 | 2 | 728.4246 | 41351600  | n.d. |
| ASGVAVSDGVIKVFNDMKVR         | P18760 | 0          | n +42.03 Da,K +28.03 Da,             | 3868.425614 | 3 | 730.7263 | 242823008 | n.d. |
| MQKDASLSGFLPSFQHF            | Q8VCN5 | 0          | n +42.03 Da,K +34.06 Da,             | 3873.224445 | 3 | 672.6742 | 16371000  | n.d. |
| PGFFFQPTVFTDVEDH             | Q8R0Y6 | 0          | n +42.03 Da,                         | 3885.830151 | 2 | 962.9576 | 63441400  | n.d. |
| PLFLEFPEDPSTWSVDR            | P70699 | 0          | n +14.02 Da,                         | 3888.410011 | 2 | 1025.003 | 77612096  | n.d. |
| SALKAVFQYIDENQDR             | Q9D1A2 | 0          | n +42.03 Da,K +28.03 Da,             | 3889.068998 | 2 | 656.3219 | 159224000 | n.d. |
| AGVLSRDAPDIESILALNPR         | Q8CHR6 | 0.00040437 | n +42.03 Da,                         | 3899.445349 | 3 | 717.0598 | 121958000 | n.d. |
| PPNAQNLSMNPMLLLLGR           | P00329 | 0          | n +14.02 Da,                         | 3903.826448 | 3 | 665.0292 | 15537600  | n.d. |
| VQLENQMVLVQTTLPSQEVQALLESTGR | Q9WU84 | 0          | n +17.03 Da,                         | 3907.179501 | 3 | 1043.553 | 13875500  | n.d. |
| ASTLNDGAAALVLMTAEAAQR        | Q8QZT1 | 0          | n +34.06 Da,                         | 3909.052736 | 3 | 703.371  | 10721900  | n.d. |
| VQLENQMVLVQTTLPSQEVQALLESTGR | Q9WU84 | 0          | n +17.03 Da,                         | 3910.342607 | 2 | 1043.565 | 140672000 | n.d. |

|                           |        |            |                          |             |   |          |           |      |
|---------------------------|--------|------------|--------------------------|-------------|---|----------|-----------|------|
| ASGVAVSDGVIKVFNDMKVR      | P18760 | 0          | n +42.03 Da,K +28.03 Da, | 3917.885252 | 2 | 1095.583 | 10148100  | n.d. |
| AEYLASIFGTEKDKVNC         | Q8BGJ9 | 0          | n +42.03 Da,K +28.03 Da, | 3918.953678 | 3 | 681.6762 | 37746800  | n.d. |
| MQKDasLSGFLPSFQHF         | Q8VCN5 | 0          | n +42.03 Da,K +28.03 Da, | 3933.946692 | 3 | 670.6725 | 138759008 | n.d. |
| IFFYDAENPPGSEVLR          | P52430 | 0          | n +42.03 Da,             | 3943.06695  | 2 | 948.4665 | 18848000  | n.d. |
| AATSEGPLFAASIEKTWGSVVR    | Q80YV2 | 0          | n +42.03 Da,K +28.03 Da, | 3944.037065 | 3 | 783.0722 | 24018800  | n.d. |
| PTGGAGAVAMLIGPKAPLVLEQGLR | P54869 | 0          | n +14.02 Da,K +28.03 Da, | 3947.087384 | 4 | 615.352  | 26875200  | n.d. |
| MELSDANLQTLTEYLKK         | Q9ERK4 | 0          | n +42.03 Da,K +28.03 Da, | 3950.23595  | 3 | 699.0291 | 4982120   | n.d. |
| ANPDNGSIILLENLR           | P09041 | 0.0024911  | n +42.03 Da,             | 3950.285331 | 3 | 560.9752 | 279804000 | n.d. |
| KQGFDLPEFPFGLLEPR         | O35490 | 0.00112402 | n +28.03 Da,K +28.03 Da, | 3999.853605 | 2 | 1023.563 | 55413900  | n.d. |
| ADLSLVDALTEPPPEIEGEIKR    | P27546 | 0          | n +42.03 Da,K +28.03 Da, | 4000.187176 | 3 | 821.4418 | 1.241E+09 | n.d. |
| LASSAGLLACIFFPKCYILR      | E9Q280 | 0.02617164 | n +42.03 Da,K +34.06 Da, | 4008.245318 | 3 | 830.4757 | 45392500  | n.d. |
| HPDEPVLLLEPVVLAALAEKH     | Q9JII6 | 0          | n +17.03 Da,K +34.06 Da, | 4025.444781 | 3 | 762.757  | 3277920   | n.d. |
| MEEGMNHLHDFGIQSTR         | P35576 | 0          | n +42.03 Da,             | 4031.190459 | 2 | 1010.467 | 899494016 | n.d. |
| MEEGMNHLHDFGIQSTR         | P35576 | 0          | n +42.03 Da,             | 4031.947555 | 3 | 673.9805 | 1.502E+09 | n.d. |
| GKQGFIDLPEFPFGLLEPR       | O35490 | 0.00112402 | n +42.03 Da,K +34.06 Da, | 4045.427003 | 2 | 708.3996 | 35972600  | n.d. |
| ENVQDVLPTLPNPDYFLLR       | Q99J08 | 0          | n +28.03 Da,             | 4052.929817 | 3 | 796.0815 | 15755000  | n.d. |
| AETLEFNDIFQEVKGSMDNDR     | Q08943 | 0          | n +42.03 Da,K +28.03 Da, | 4053.257773 | 2 | 1235.582 | 4214500   | n.d. |
| QGFIDLPEFPFGLLEPR         | O35490 | 0          | n +28.03 Da,             | 4070.016952 | 2 | 945.4936 | 7819210   | n.d. |
| GFIDLPEFPFGLLEPR          | O35490 | 0          | n +28.03 Da,             | 4096.020196 | 2 | 881.4675 | 4704000   | n.d. |
| WRGLSALVTQAAWAPLR         | Q923K4 | 0.04752362 | n +14.02 Da,             | 4107.134862 | 3 | 637.3532 | 25434900  | n.d. |
| MLSLDFLDDVR               | Q9R0P6 | 0          | n +42.03 Da,             | 4136.472891 | 2 | 683.3402 | 30022700  | n.d. |
| CTLAIDPGDSDIIR            | P62889 | 0          | n +34.06 Da,             | 4179.515473 | 2 | 846.9624 | 51124600  | n.d. |
| SSAGLPPLSATSFLEDLMDR      | Q75N73 | 0          | n +34.06 Da,             | 4197.119321 | 2 | 1071.053 | 13287400  | n.d. |
| ADLLGSILSSMEKPPSLGDQESR   | Q7TNE3 | 0          | n +42.03 Da,K +28.03 Da, | 4367.590149 | 3 | 834.0915 | 9467360   | n.d. |
| SAPAGSPHPAAGAR            | Q80ZX0 | 0.00245499 | n +42.03 Da,             | 568.8238531 | 2 | 644.8234 | 90956096  | n.d. |
| PEGQGGTLVDR               | P32020 | 0.00469116 | n +14.02 Da,             | 582.157874  | 2 | 571.7941 | 618801984 | n.d. |
| YALQSQQR                  | Q8BWT1 | 0.02465023 | n +28.03 Da,             | 583.4238402 | 2 | 511.2754 | 126358000 | n.d. |
| PAPDMSTGER                | P26443 | 0.01119664 | n +14.02 Da,             | 584.5403662 | 2 | 537.7482 | 147387008 | n.d. |
| FQEAPPEGR                 | P97872 | 0.04128158 | n +28.03 Da,             | 586.9007665 | 2 | 545.7613 | 389222016 | n.d. |
| SANEDNVTQVR               | P24270 | 0          | n +34.06 Da,             | 589.2949696 | 2 | 633.8286 | 569617024 | n.d. |
| AGTTTIEAVKR               | D322H9 | 0          | n +42.03 Da,n +28.03 Da, | 593.3335086 | 3 | 406.2349 | 119283000 | n.d. |
| PYNPSMSR                  | O35490 | 0.03784119 | n +14.02 Da,             | 604.4336722 | 2 | 483.2291 | 416824000 | n.d. |
| MDSKQQTVR                 | P70694 | 0          | n +42.03 Da,K +34.06 Da, | 604.5478968 | 2 | 584.8137 | 420127008 | n.d. |
| PGAGSDLQGVDR              | P51174 | 0.00819672 | n +14.02 Da,             | 671.1798627 | 2 | 535.783  | 141895008 | n.d. |
| AENPGLENHR                | O35344 | 0          | n +42.03 Da,             | 682.715039  | 2 | 589.7809 | 2.136E+09 | n.d. |
| SAASVYAGAGGSGSR           | P05784 | 0          | n +28.03 Da,             | 683.2849106 | 2 | 663.3231 | 168522000 | n.d. |
| GEEAGAYDGPR               | P27773 | 0          | n +34.06 Da,             | 689.8657673 | 2 | 578.2774 | 128506000 | n.d. |
| PSNMEPLR                  | Q91W19 | 0.0417434  | n +14.02 Da,             | 691.6498625 | 1 | 479.245  | 169323008 | n.d. |
| SSAPVASPNVR               | Q05920 | 0          | n +28.03 Da,             | 705.840438  | 2 | 600.308  | 211724000 | n.d. |
| SDAAYLAR                  | Q8BWT1 | 0.03441802 | n +28.03 Da,             | 707.5502539 | 2 | 447.7376 | 298175008 | n.d. |

|                          |        |            |                                      |             |   |          |           |      |
|--------------------------|--------|------------|--------------------------------------|-------------|---|----------|-----------|------|
| SFSAPEQQR                | P24270 | 0.009299   | n +28.03 Da,                         | 729.0912679 | 2 | 539.27   | 84366000  | n.d. |
| PNSFSAPEQQR              | P24270 | 0          | n +14.02 Da,                         | 748.4788375 | 2 | 637.8083 | 292175008 | n.d. |
| METAPKPGR                | Q9Z0H1 | 0.03333333 | n +42.03 Da,K +28.03 Da,             | 774.8730787 | 2 | 528.779  | 117105000 | n.d. |
| GDAPDFDR                 | P10649 | 0.00883652 | n +34.06 Da,                         | 824.3762702 | 2 | 463.7261 | 116680000 | n.d. |
| VQVYEGER                 | P17156 | 0.02509908 | n +14.02 Da,                         | 842.719868  | 2 | 497.2512 | 135804992 | n.d. |
| ADTPGEATPPPR             | Q9ERE7 | 0          | n +28.03 Da,                         | 843.637358  | 2 | 617.8075 | 43200600  | n.d. |
| PYSQAVQVDR               | P52760 | 0          | n +14.02 Da,                         | 848.8157737 | 2 | 588.2792 | 121200000 | n.d. |
| PLTQEEMAQR               | Q8C0D5 | 0.01315789 | n +14.02 Da,                         | 854.4209915 | 2 | 608.8041 | 39593300  | n.d. |
| PTIEDSYR                 | P08556 | 0.04736211 | n +14.02 Da,                         | 874.0061185 | 2 | 497.7445 | 23529800  | n.d. |
| CFGPVLLNQR               | E9PUP1 | 0.03333333 | n +42.03 Da,                         | 878.9678153 | 2 | 623.3154 | 158172000 | n.d. |
| SGSMAALPR                | D6RDC9 | 0.02991725 | n +28.03 Da,                         | 886.7052428 | 2 | 459.2472 | 94812496  | n.d. |
| PAVYAGEVER               | Q9D142 | 0.0240481  | n +14.02 Da,                         | 937.7521792 | 2 | 552.7867 | 43044800  | n.d. |
| MEAVPEKK                 | P14148 | 0.04606061 | n +42.03 Da,K +28.03 Da,             | 943.4629245 | 2 | 515.2866 | 1.089E+09 | n.d. |
| TNDPLEAAR                | P11725 | 0.03784119 | n +34.06 Da,                         | 944.4419419 | 2 | 510.7804 | 86791104  | n.d. |
| ASSHTVLMR                | Q9Z0S1 | 0          | n +42.03 Da,                         | 954.005837  | 2 | 520.7807 | 91764304  | n.d. |
| ALKQSSNR                 | Q9R0P3 | 0.00674157 | n +42.03 Da,K +28.03 Da,             | 961.4431195 | 2 | 543.8169 | 621811968 | n.d. |
| PTVNDLPPNR               | P97872 | 0          | n +14.02 Da,                         | 961.9224404 | 2 | 577.7988 | 406944992 | n.d. |
| SDSVTEETLR               | Q8C196 | 0.03039899 | n +34.06 Da,                         | 962.8966381 | 2 | 584.2939 | 276176000 | n.d. |
| PYADDPPIR                | Q8R086 | 0.04649758 | n +14.02 Da,                         | 982.9438431 | 2 | 480.7424 | 113559000 | n.d. |
| AATTGSGVKVPR             | Q9CZY3 | 0          | n +42.03 Da,K +28.03 Da,             | 983.9090562 | 2 | 607.3485 | 1.288E+09 | n.d. |
| MNLSAAHH                 | Q8VXC1 | 0.00469116 | n +42.03 Da,                         | 1013.98678  | 2 | 461.7137 | 617921024 | n.d. |
| VNDLPVGR                 | P20108 | 0.02634961 | n +14.02 Da,                         | 1017.082905 | 2 | 442.2537 | 688275008 | n.d. |
| QPSSQHAQMGR              | Q8CDN1 | 0          | n +17.03 Da,                         | 1017.207337 | 2 | 622.3144 | 89493504  | n.d. |
| AGELTEDEVER              | P62270 | 0          | n +28.03 Da,                         | 1040.609611 | 2 | 638.3058 | 77441904  | n.d. |
| SKSFQQSSLGR              | Q8K310 | 0          | n +42.03 Da,K +28.03 Da,             | 1058.556134 | 2 | 647.8412 | 17375300  | n.d. |
| TVIATGGYGR               | Q8K2B3 | 0          | n +28.03 Da,                         | 1065.000517 | 2 | 511.7856 | 153380000 | n.d. |
| SEAAPAAPAAAPPAEKAPAKKK   | P15864 | 0          | n +42.03 Da,n +28.03 Da,K +28.03 Da, | 1097.366373 | 3 | 742.7541 | 343008992 | n.d. |
| AAGNFISPSE               | Q9CQ62 | 0          | n +34.06 Da,                         | 1100.130552 | 2 | 591.8193 | 155978000 | n.d. |
| SEAAPAAPAAAPPAEKAPAKKKAA | P15864 | 0          | n +42.03 Da,n +28.03 Da,K +28.03 Da, | 1102.959816 | 3 | 790.111  | 31971500  | n.d. |
| TMLADHAAR                | Q6P5F9 | 0.02871729 | n +42.03 Da,                         | 1111.789686 | 2 | 514.2527 | 1.054E+09 | n.d. |
| VGYYVGDSTSGQR            | P32020 | 0.04606061 | n +42.03 Da,                         | 1115.742892 | 2 | 715.839  | 229943008 | n.d. |
| PSSFNDENLR               | P24457 | 0          | n +17.03 Da,                         | 1119.036374 | 2 | 662.8111 | 4483310   | n.d. |
| GTSPLQIDR                | Q8C196 | 0.00532725 | n +28.03 Da,                         | 1123.334692 | 2 | 507.7826 | 164808992 | n.d. |
| PVDTDDTATALR             | Q99P30 | 0          | n +14.02 Da,                         | 1123.83465  | 2 | 644.8246 | 73297104  | n.d. |
| PAQPQEQPFVSSR            | Q9D662 | 0          | n +14.02 Da,                         | 1125.522637 | 2 | 742.8801 | 45632000  | n.d. |
| FNSANEDNVTQVR            | P24270 | 0          | n +28.03 Da,                         | 1128.634316 | 2 | 761.3681 | 446657984 | n.d. |
| GQVITIGNER               | P60710 | 0.03333333 | n +34.06 Da,                         | 1132.404779 | 2 | 560.8227 | 1.194E+10 | n.d. |
| NDQVVTDLR                | Q91YI0 | 0          | n +28.03 Da,                         | 1132.924395 | 2 | 544.2908 | 75461600  | n.d. |
| TSVDLEETGR               | Q03265 | 0          | n +28.03 Da,                         | 1134.019487 | 2 | 567.7809 | 939905024 | n.d. |
| SETAPAAPAAAPPAEKTPVKK    | P43274 | 0          | n +42.03 Da,n +28.03 Da,K +28.03 Da, | 1141.922328 | 3 | 720.0755 | 916451008 | n.d. |

|                           |        |            |                                      |             |   |          |           |      |
|---------------------------|--------|------------|--------------------------------------|-------------|---|----------|-----------|------|
| PSQEGQNPSLSSIR            | Q8C196 | 0          | n +14.02 Da,                         | 1150.905545 | 2 | 757.3834 | 599684992 | n.d. |
| AESSFNENLR                | P24456 | 0          | n +28.03 Da,                         | 1161.39526  | 2 | 655.3187 | 12658400  | n.d. |
| TETDGFYKSR                | O08738 | 0.00469116 | n +42.03 Da,K +34.06 Da,             | 1162.740797 | 2 | 640.3229 | 47593600  | n.d. |
| PTETGALTLNR               | Q8BWT1 | 0          | n +14.02 Da,                         | 1172.634617 | 2 | 593.8255 | 332736992 | n.d. |
| PAVQSSALYEDR              | P16460 | 0          | n +14.02 Da,                         | 1189.314039 | 2 | 675.3382 | 2.615E+09 | n.d. |
| AGMQLQGYR                 | P05202 | 0          | n +28.03 Da,                         | 1194.823165 | 2 | 526.2718 | 60843300  | n.d. |
| PSEPLVQNYR                | Q9WVT6 | 0.02084734 | n +17.03 Da,                         | 1198.175012 | 2 | 610.3397 | 103782000 | n.d. |
| GSLDLGGDAAGR              | Q8VEK3 | 0          | n +34.06 Da,                         | 1208.255835 | 2 | 561.8106 | 46915900  | n.d. |
| PETLQAQFR                 | Q8BK48 | 0          | n +14.02 Da,                         | 1209.918703 | 2 | 552.2978 | 68802400  | n.d. |
| STSVPGHWNWTR              | Q8BT51 | 0.0039968  | n +42.03 Da,                         | 1212.695963 | 2 | 706.3376 | 178646000 | n.d. |
| PSFVSAMR                  | Q8VCT4 | 0.009299   | n +14.02 Da,                         | 1214.102006 | 1 | 454.7366 | 6.619E+09 | n.d. |
| TWDPDQPPR                 | P24456 | 0.00883652 | n +28.03 Da,                         | 1226.993803 | 2 | 570.2778 | 69101000  | n.d. |
| PSFVSAMR                  | Q8VCT4 | 0.009299   | n +14.02 Da,                         | 1227.476281 | 2 | 454.7364 | 1.305E+09 | n.d. |
| PPLEDGAMPSAR              | P47757 | 0.00883652 | n +17.03 Da,                         | 1245.112708 | 2 | 629.3147 | 44698200  | n.d. |
| TETDGFYKSR                | O08738 | 0          | n +42.03 Da,K +34.06 Da,             | 1250.542262 | 2 | 640.3035 | 72056400  | n.d. |
| SETAPAAPAAPAPAEKTPVKKK    | P43274 | 0          | n +42.03 Da,n +28.03 Da,K +28.03 Da, | 1251.291464 | 3 | 772.1052 | 2.112E+09 | n.d. |
| SGYTPDEKLR                | Q3UIU2 | 0          | n +42.03 Da,K +34.06 Da,             | 1257.167243 | 2 | 621.3325 | 4.672E+09 | n.d. |
| SVAMVDYQR                 | Q91X83 | 0          | n +28.03 Da,                         | 1268.151101 | 2 | 548.7871 | 87479296  | n.d. |
| MFQGADSQAGKSGSR           | Q6PGH2 | 0          | n +42.03 Da,K +28.03 Da,             | 1268.797771 | 2 | 798.8746 | 5956410   | n.d. |
| GTVPAAMLR                 | Q9D404 | 0.0039968  | n +34.06 Da,                         | 1271.816417 | 2 | 475.2886 | 66598700  | n.d. |
| SQQSASGAPVLLR             | Q9DCM0 | 0          | n +28.03 Da,                         | 1274.150199 | 2 | 671.3776 | 21292000  | n.d. |
| PETLQAQFR                 | Q8BK48 | 0          | n +14.02 Da,                         | 1274.918944 | 2 | 552.2955 | 28572700  | n.d. |
| SETAPAAPAAPAPVEKTPVKK     | P43277 | 0          | n +42.03 Da,n +28.03 Da,K +28.03 Da, | 1278.345885 | 3 | 729.4183 | 776784000 | n.d. |
| IQTQPGYANTLR              | Q8VEM8 | 0.03843769 | n +28.03 Da,                         | 1284.893134 | 2 | 695.3776 | 104521000 | n.d. |
| TQINNSWGQEER              | O08573 | 0          | n +28.03 Da,                         | 1289.856202 | 2 | 745.356  | 7317760   | n.d. |
| PAVQSSALYEDR              | P16460 | 0          | n +14.02 Da,                         | 1297.262496 | 2 | 675.3377 | 170632992 | n.d. |
| MVNDGVEDLR                | P19157 | 0          | n +34.06 Da,                         | 1306.70443  | 2 | 589.8124 | 512339008 | n.d. |
| MVNDGVEDLR                | P19157 | 0          | n +28.03 Da,                         | 1308.597465 | 2 | 588.2897 | 1.293E+09 | n.d. |
| SRPPPTGKMPGAPEAAPGDGAGAGR | P70336 | 0.00981079 | n +42.03 Da,K +28.03 Da,             | 1312.036191 | 3 | 791.3954 | 28182000  | n.d. |
| PETLQAQFR                 | Q8BK48 | 0          | n +14.02 Da,                         | 1321.296457 | 2 | 552.283  | 385644992 | n.d. |
| PFDYNGPR                  | P08003 | 0.01505818 | n +14.02 Da,                         | 1323.793291 | 2 | 490.2349 | 1.19E+09  | n.d. |
| MHAFTTQNPNR               | Q9QYR7 | 0          | n +42.03 Da,                         | 1327.916461 | 2 | 679.8161 | 162216000 | n.d. |
| SGYTPDEKLR                | Q3UIU2 | 0.04128158 | n +42.03 Da,K +28.03 Da,             | 1332.353489 | 2 | 616.7878 | 37563400  | n.d. |
| AIAEELAPER                | O35490 | 0.0008285  | n +28.03 Da,                         | 1336.059311 | 2 | 563.8087 | 563286976 | n.d. |
| PTVAAGAVGLAQR             | P45952 | 0          | n +14.02 Da,                         | 1341.818347 | 2 | 612.8547 | 54074700  | n.d. |
| MQSAPLEQPAKR              | Q60710 | 0.0008285  | n +42.03 Da,K +28.03 Da,             | 1342.45098  | 2 | 713.3827 | 28202200  | n.d. |
| NVIGEPIDER                | P56480 | 0          | n +34.06 Da,                         | 1342.961381 | 2 | 588.3276 | 205923008 | n.d. |
| GQNQPVLNITNR              | Q8C196 | 0          | n +28.03 Da,                         | 1361.735777 | 2 | 691.3809 | 257531008 | n.d. |
| KCPSTSIR                  | P40694 | 0.03160556 | n +34.06 Da,K +34.06 Da,             | 1373.62437  | 2 | 508.8029 | 132119000 | n.d. |
| SETAPAAPAAPAPVEKTPVKKK    | P43277 | 0          | n +42.03 Da,n +28.03 Da,K +28.03 Da, | 1381.866859 | 3 | 781.4489 | 255102000 | n.d. |

|                       |        |            |                          |             |   |          |           |      |
|-----------------------|--------|------------|--------------------------|-------------|---|----------|-----------|------|
| YYPTEDVPR             | P47911 | 0.00532725 | n +28.03 Da,             | 1403.380012 | 2 | 584.2917 | 9166870   | n.d. |
| AGLGHPSAFGR           | Q9CWS0 | 0          | n +42.03 Da,             | 1409.596392 | 2 | 556.286  | 1.03E+09  | n.d. |
| ASGGGVPTDEEQATGLER    | P19536 | 0          | n +14.02 Da,             | 1412.356749 | 2 | 894.4236 | 32036900  | n.d. |
| YQSETGISSATLR         | Q91VA0 | 0          | n +28.03 Da,             | 1417.495785 | 2 | 749.3769 | 43911800  | n.d. |
| YDLQTGQISNR           | Q64374 | 0          | n +34.06 Da,             | 1419.391002 | 2 | 664.8531 | 5250330   | n.d. |
| LAQEDPDYGLR           | P24270 | 0          | n +28.03 Da,             | 1425.926885 | 2 | 652.827  | 352971008 | n.d. |
| DGTGGDAAAPGAAGTQALPHR | Q9D0F3 | 0          | n +28.03 Da,             | 1434.433853 | 2 | 683.3298 | 181900000 | n.d. |
| MKPLEGVR              | Q7TNE1 | 0.02509908 | n +34.06 Da,K +34.06 Da, | 1441.779801 | 2 | 499.3215 | 86105800  | n.d. |
| AMTNQILVER            | Q8C196 | 0.03441802 | n +28.03 Da,             | 1460.138475 | 2 | 601.8311 | 175396992 | n.d. |
| AGLGHPSAFGR           | Q9CWS0 | 0          | n +42.03 Da,             | 1464.255612 | 2 | 556.2861 | 2.635E+09 | n.d. |
| PLYSNPPLNGAR          | P05202 | 0          | n +14.02 Da,             | 1465.284106 | 2 | 656.8536 | 1.975E+09 | n.d. |
| AGLGHPSAFGR           | Q9CWS0 | 0          | n +42.03 Da,             | 1466.498169 | 1 | 556.2865 | 7.174E+09 | n.d. |
| NPLLPVTNR             | A2AJ76 | 0.00532725 | n +28.03 Da,             | 1472.511609 | 2 | 526.3126 | 68956200  | n.d. |
| QAFITAQNHGY           | Q8C196 | 0          | n +28.03 Da,             | 1475.19085  | 2 | 639.3184 | 100552000 | n.d. |
| VESDIHGLR             | P05784 | 0.02022927 | n +28.03 Da,             | 1482.240639 | 2 | 527.2812 | 126160000 | n.d. |
| PSQALEIIR             | A2AS89 | 0.0417434  | n +14.02 Da,             | 1494.019485 | 2 | 520.8084 | 12978700  | n.d. |
| HPSVDGFTPR            | Q8C196 | 0          | n +28.03 Da,             | 1497.199447 | 2 | 570.8037 | 378876992 | n.d. |
| TTMYPGIADR            | P60710 | 0.00981079 | n +28.03 Da,             | 1501.644396 | 2 | 576.7894 | 331543008 | n.d. |
| DAGMQLQGYR            | P05202 | 0          | n +28.03 Da,             | 1514.900058 | 2 | 583.7842 | 157075008 | n.d. |
| MDMGNQHPSISR          | Q8CI32 | 0          | n +42.03 Da,             | 1518.899141 | 2 | 707.8132 | 387008992 | n.d. |
| PFQLVTGR              | P28474 | 0.04649758 | n +14.02 Da,             | 1519.775607 | 2 | 466.2724 | 7.11E+09  | n.d. |
| HPSVDGFTPR            | Q8C196 | 0          | n +28.03 Da,             | 1520.988825 | 2 | 570.8182 | 68673000  | n.d. |
| PFLAAVTTNR            | P37040 | 0          | n +14.02 Da,             | 1533.788406 | 2 | 552.3159 | 246452992 | n.d. |
| SNINDFSAGVANR         | P15105 | 0          | n +28.03 Da,             | 1537.445646 | 2 | 696.8584 | 15519300  | n.d. |
| SASNVLLHETSR          | Q8BZ09 | 0          | n +42.03 Da,             | 1540.120239 | 2 | 721.8652 | 1.999E+09 | n.d. |
| PAINEYLQR             | Q9QXD6 | 0.00981079 | n +17.03 Da,             | 1546.686134 | 2 | 559.7945 | 133981000 | n.d. |
| EATQAVLDKPETLSSDASTR  | P50544 | 0          | n +34.06 Da,K +34.06 Da, | 1547.05549  | 3 | 729.7302 | 181610000 | n.d. |
| VVFDITYDR             | P16015 | 0.00532725 | n +28.03 Da,             | 1557.93001  | 2 | 579.2771 | 2.162E+09 | n.d. |
| AESCEALGTVPEHER       | Q8R313 | 0          | n +42.03 Da,             | 1558.447515 | 2 | 863.8878 | 13946500  | n.d. |
| MNVGVAHSEVNPNTR       | Q92110 | 0          | n +42.03 Da,             | 1562.778386 | 2 | 833.9013 | 114075000 | n.d. |
| SNINDFSAGVANR         | P15105 | 0          | n +28.03 Da,             | 1570.776999 | 2 | 696.8433 | 16862200  | n.d. |
| PNAQELPSMYQR          | O35129 | 0          | n +14.02 Da,             | 1576.948197 | 2 | 724.3532 | 606017024 | n.d. |
| PGGFAWGEQGR           | Q8BNI4 | 0          | n +14.02 Da,             | 1583.286168 | 2 | 588.2821 | 37316200  | n.d. |
| ANSANTNTVPKLYR        | Q99PM3 | 0          | n +42.03 Da,K +28.03 Da, | 1587.906933 | 2 | 809.9321 | 16527600  | n.d. |
| SVEGQLEFR             | P07901 | 0.009299   | n +28.03 Da,             | 1589.693158 | 2 | 545.2945 | 58925900  | n.d. |
| AEGQVLVDGR            | P19253 | 0          | n +34.06 Da,             | 1600.003387 | 2 | 595.8513 | 861510016 | n.d. |
| ADIVENQVMDTR          | P10649 | 0          | n +14.02 Da,             | 1603.316854 | 2 | 702.8425 | 143007008 | n.d. |
| ASLNLNAINR            | P05063 | 0          | n +14.02 Da,             | 1605.749239 | 2 | 550.315  | 358844000 | n.d. |
| MDPSAALHR             | P35283 | 0.0008285  | n +42.03 Da,             | 1612.66944  | 2 | 520.2535 | 242212992 | n.d. |
| ASESGKLWGGR           | Q91YI0 | 0          | n +42.03 Da,K +28.03 Da, | 1613.027325 | 2 | 609.3169 | 128865000 | n.d. |

|                      |        |            |                          |             |   |          |           |      |
|----------------------|--------|------------|--------------------------|-------------|---|----------|-----------|------|
| ADIVENQVMDTR         | P10649 | 0          | n +28.03 Da,             | 1633.711819 | 2 | 709.8515 | 138239008 | n.d. |
| SEPEIPK GIR          | Q9WTP6 | 0.0060652  | n +42.03 Da,K +28.03 Da, | 1644.400501 | 2 | 598.337  | 32576700  | n.d. |
| SNDYSFIR             | Q8R0I0 | 0.01837985 | n +42.03 Da,             | 1649.812631 | 2 | 522.2505 | 21427500  | n.d. |
| LSQQSASGAPVLLR       | Q9DCM0 | 0          | n +34.06 Da,             | 1653.316586 | 2 | 730.935  | 57426000  | n.d. |
| VVFD DTYDR           | P16015 | 0          | n +28.03 Da,             | 1656.261188 | 2 | 579.2791 | 91579000  | n.d. |
| GFPEAASSFR           | P32020 | 0          | n +34.06 Da,             | 1660.691138 | 2 | 551.7918 | 81717000  | n.d. |
| DIDTAAKF             | P56383 | 0.02509908 | n +28.03 Da,K +28.03 Da, | 1661.436008 | 2 | 468.7557 | 378588000 | n.d. |
| RKINMCYQEELEATLTKADR | Q9EPQ2 | 0.02022927 | n +42.03 Da,K +34.06 Da, | 1661.608966 | 3 | 860.4465 | 7617370   | n.d. |
| SYDYHQSWSR           | Q8VHK9 | 0          | n +42.03 Da,             | 1672.86985  | 2 | 685.7909 | 260618000 | n.d. |
| SNAEFQMLR            | Q8C196 | 0          | n +28.03 Da,             | 1675.849199 | 2 | 562.2819 | 155240992 | n.d. |
| PYVLP SVR            | P05202 | 0.03039899 | n +14.02 Da,             | 1683.540042 | 2 | 472.7828 | 69060496  | n.d. |
| ATLQSEVVKVDGGEQKLSKN | Q99MN1 | 0          | n +42.03 Da,K +34.06 Da, | 1683.547772 | 3 | 749.769  | 31912900  | n.d. |
| ASQPPPPK PWESR       | Q9D0K1 | 0          | n +42.03 Da,K +28.03 Da, | 1685.182133 | 2 | 822.432  | 90030800  | n.d. |
| AQNLKDLAGR           | O35129 | 0.00532725 | n +42.03 Da,K +34.06 Da, | 1687.008271 | 2 | 581.343  | 6.248E+09 | n.d. |
| PVNYVDTAVR           | P62908 | 0          | n +14.02 Da,             | 1689.405956 | 2 | 655.8458 | 4.658E+09 | n.d. |
| PAVQFSNLPR           | A2ADY9 | 0          | n +14.02 Da,             | 1691.407784 | 2 | 571.8192 | 1.202E+09 | n.d. |
| SYPFDTVR             | P48962 | 0.00532725 | n +34.06 Da,             | 1695.843491 | 2 | 509.7742 | 71041696  | n.d. |
| ATLQSEVVKVDGGEQKLSKN | Q99MN1 | 0          | n +42.03 Da,K +28.03 Da, | 1698.185919 | 3 | 743.7371 | 55957600  | n.d. |
| PNDSSFQIVKNPR        | Q61176 | 0.00674157 | n +14.02 Da,n +28.03 Da, | 1702.139154 | 2 | 772.4191 | 45531200  | n.d. |
| PGVTVKDVNQQEF        | Q9CZX8 | 0.03441802 | n +17.03 Da,K +34.06 Da, | 1707.533157 | 2 | 756.4217 | 28055000  | n.d. |
| PLTGGEVPSLGLSLR      | P11352 | 0.00469116 | n +14.02 Da,             | 1710.383655 | 3 | 466.2643 | 215430000 | n.d. |
| PASPATETVPAF SER     | Q78PY7 | 0          | n +14.02 Da,             | 1710.767073 | 2 | 787.3955 | 168730000 | n.d. |
| LAQEDPDYGLR          | P24270 | 0.035625   | n +14.02 Da,             | 1718.997555 | 2 | 645.8191 | 262104000 | n.d. |
| PAINVGLSVSR          | Q03265 | 0          | n +14.02 Da,             | 1729.131152 | 2 | 563.8323 | 680086976 | n.d. |
| IYTSIGEDYDER         | P67778 | 0          | n +28.03 Da,             | 1739.883402 | 2 | 744.846  | 508446016 | n.d. |
| YVLDDSDGLGR          | P54818 | 0          | n +34.06 Da,             | 1740.18155  | 2 | 622.3221 | 9298460   | n.d. |
| VDHLANTEINSQR        | Q3TB82 | 0          | n +42.03 Da,             | 1745.918927 | 2 | 769.8826 | 150886000 | n.d. |
| AGGEGGVTLGQPHLSR     | Q9Z0N1 | 0          | n +42.03 Da,             | 1746.031024 | 2 | 789.405  | 2.401E+09 | n.d. |
| AGGEGGVTLGQPHLSR     | Q9Z0N1 | 0          | n +42.03 Da,             | 1746.345592 | 3 | 526.6059 | 352830016 | n.d. |
| SSGALLPKPQMR         | Q9CPQ1 | 0          | n +42.03 Da,K +28.03 Da, | 1749.79333  | 2 | 677.8791 | 3.993E+09 | n.d. |
| PLVLEQGLR            | P54869 | 0.01962111 | n +14.02 Da,             | 1754.964392 | 2 | 519.8192 | 593427968 | n.d. |
| SSGALLPKPQMR         | Q9CPQ1 | 0          | n +42.03 Da,K +34.06 Da, | 1755.512225 | 2 | 680.894  | 528854016 | n.d. |
| PAVLQVECHPY          | Q9JII6 | 0.00748503 | n +14.02 Da,             | 1755.609103 | 2 | 663.8259 | 130122000 | n.d. |
| PSSLAIQENANALAR      | Q91Y97 | 0          | n +14.02 Da,             | 1760.6793   | 2 | 784.9223 | 866646976 | n.d. |
| SLVFPEAENR           | P11725 | 0.009299   | n +28.03 Da,             | 1761.411388 | 2 | 595.3146 | 234064000 | n.d. |
| EIDGGLETLR           | Q9DCW4 | 0.0008285  | n +28.03 Da,             | 1769.242626 | 2 | 565.8037 | 538361984 | n.d. |
| MQPKVPQLR            | O88908 | 0          | n +42.03 Da,K +28.03 Da, | 1777.398361 | 2 | 582.3108 | 5849860   | n.d. |
| TIQGLDGLSER          | Q91Y97 | 0.00327065 | n +34.06 Da,             | 1778.64157  | 2 | 611.8394 | 1.2E+09   | n.d. |
| TSYPFDTVR            | P51881 | 0          | n +28.03 Da,             | 1778.992948 | 2 | 557.2931 | 252984992 | n.d. |
| AGKPVLHYFDGR         | P30115 | 0.00532725 | n +42.03 Da,K +28.03 Da, | 1780.208227 | 3 | 477.2582 | 19684100  | n.d. |



|                     |        |            |                          |             |   |          |           |      |
|---------------------|--------|------------|--------------------------|-------------|---|----------|-----------|------|
| SLVFPEAENR          | P11725 | 0.00469116 | n +34.06 Da,             | 1781.036139 | 2 | 598.3298 | 516849984 | n.d. |
| SVESIMATEDR         | Q8C196 | 0          | n +28.03 Da,             | 1802.473534 | 2 | 633.3064 | 815100032 | n.d. |
| ANHAPFETDISTLTR     | Q9QXD6 | 0.00981079 | n +42.03 Da,             | 1805.049826 | 3 | 572.2845 | 816251008 | n.d. |
| PITSTFLER           | Q8BW75 | 0.00981079 | n +14.02 Da,             | 1807.850465 | 2 | 539.3003 | 477248992 | n.d. |
| FIHYGIYLGENDR       | Q9JI60 | 0.009299   | n +28.03 Da,             | 1808.058977 | 2 | 755.3983 | 295445500 | n.d. |
| SATDLTEFAAR         | Q8BWT1 | 0          | n +28.03 Da,             | 1808.756981 | 2 | 604.8313 | 27323000  | n.d. |
| FAVTVAPPGAR         | Q8VEK3 | 0          | n +34.06 Da,             | 1810.51343  | 2 | 560.3399 | 162592000 | n.d. |
| MLGSGFKAER          | Q9CX00 | 0          | n +42.03 Da,K +28.03 Da, | 1811.249509 | 2 | 583.3003 | 463601984 | n.d. |
| TFAEDKTYKY          | Q8VCF0 | 0.04440389 | n +42.03 Da,K +28.03 Da, | 1819.072311 | 2 | 682.3422 | 170211008 | n.d. |
| AGGEGAVTLGQPHLSR    | Q9Z0N2 | 0          | n +42.03 Da,             | 1822.585497 | 2 | 796.413  | 781360000 | n.d. |
| EDVAQYIER           | Q8QZR5 | 0.00674157 | n +28.03 Da,             | 1829.470149 | 2 | 575.797  | 341979008 | n.d. |
| ANHAPFETDISTLTR     | Q9QXD6 | 0.00981079 | n +42.03 Da,             | 1831.302508 | 2 | 572.2988 | 81827904  | n.d. |
| TQTTPLVEYYR         | Q9WTP6 | 0          | n +28.03 Da,             | 1831.468156 | 2 | 698.3824 | 38643700  | n.d. |
| MELEEGKAGSGLR       | P62196 | 0.01184669 | n +42.03 Da,K +34.06 Da, | 1836.139621 | 2 | 726.8781 | 535603300 | n.d. |
| PITSTFLER           | Q8BW75 | 0.00981079 | n +14.02 Da,             | 1840.608166 | 2 | 539.3136 | 45788200  | n.d. |
| TEAAEVLLER          | Q8QZS1 | 0.009299   | n +34.06 Da,             | 1840.787278 | 2 | 582.8376 | 205310000 | n.d. |
| ASGADSKGDDLSTAILKQK | Q01853 | 0          | n +42.03 Da,K +34.06 Da, | 1841.621895 | 3 | 683.7353 | 373208000 | n.d. |
| VNFTVDQIR           | P58252 | 0          | n +34.06 Da,             | 1843.316005 | 2 | 562.3452 | 122572000 | n.d. |
| ENIIDLSNANR         | B5X0G2 | 0          | n +28.03 Da,             | 1845.019817 | 2 | 643.8388 | 1.008E+09 | n.d. |
| GLNAEGLLR           | Q64374 | 0.02509908 | n +28.03 Da,             | 1845.630813 | 2 | 485.791  | 109798000 | n.d. |
| AGLNSLEAVKR         | Q6IRU2 | 0          | n +42.03 Da,n +34.06 Da, | 1850.321445 | 2 | 617.3719 | 101358000 | n.d. |
| TDLTEFAAR           | Q8BWT1 | 0.00883652 | n +28.03 Da,             | 1852.232129 | 2 | 526.2738 | 455411008 | n.d. |
| TQTTPLVEYYR         | Q9WTP6 | 0          | n +34.06 Da,             | 1858.381925 | 2 | 702.8822 | 58800100  | n.d. |
| ATVAATTKVPEIR       | Q9WTM5 | 0.0008285  | n +42.03 Da,K +28.03 Da, | 1859.141511 | 2 | 713.9162 | 44623900  | n.d. |
| SFSDYPPPLGR         | P10126 | 0          | n +28.03 Da,             | 1864.735849 | 2 | 583.7988 | 70090496  | n.d. |
| YVGEGMEEGEFSEAR     | P05213 | 0          | n +34.06 Da,             | 1867.082847 | 2 | 862.3873 | 47351700  | n.d. |
| SLVFPEAENR          | P11725 | 0.009299   | n +28.03 Da,             | 1894.502659 | 2 | 595.3136 | 299316992 | n.d. |
| TTNTVPLHPYWPR       | P70245 | 0          | n +42.03 Da,             | 1895.121761 | 3 | 541.948  | 880931968 | n.d. |
| ASLPPHAGPATPLSPTR   | P21619 | 0          | n +42.03 Da,             | 1901.673883 | 2 | 856.4604 | 158082000 | n.d. |
| PYNPSMSRPDAWG       | O35490 | 0          | n +14.02 Da,             | 1908.364651 | 2 | 746.3384 | 31742200  | n.d. |
| PTNFTVVPVEAR        | Q9WVL3 | 0          | n +14.02 Da,             | 1909.487669 | 2 | 672.3687 | 26825600  | n.d. |
| VLAELVSDR           | Q8BP47 | 0          | n +28.03 Da,             | 1911.236885 | 2 | 596.8317 | 248028000 | n.d. |
| SEDIPLNLSR          | Q9CQN1 | 0.0060652  | n +34.06 Da,             | 1913.13019  | 2 | 589.3337 | 49374100  | n.d. |
| MENQLTKSVEER        | Q9DC50 | 0          | n +42.03 Da,K +28.03 Da, | 1915.505446 | 2 | 767.3636 | 196691008 | n.d. |
| SFSDYPPPLGR         | P10126 | 0          | n +34.06 Da,             | 1916.639856 | 2 | 586.8112 | 89393200  | n.d. |
| ASGADSKGDDLSTAILKQK | Q01853 | 0          | n +42.03 Da,K +28.03 Da, | 1916.765734 | 3 | 677.7032 | 324559008 | n.d. |
| PFETLLAQR           | F6RWR5 | 0          | n +14.02 Da,             | 1920.47027  | 2 | 601.8311 | 511448000 | n.d. |
| GTLDNPSSLDETAYR     | O35943 | 0          | n +34.06 Da,             | 1921.865065 | 2 | 901.4376 | 8443920   | n.d. |
| TVFSNVTDEMR         | O35945 | 0          | n +28.03 Da,             | 1926.044557 | 2 | 662.8192 | 223110000 | n.d. |
| YTMGDAPDFDR         | P10649 | 0          | n +28.03 Da,             | 1933.377967 | 2 | 658.284  | 246279008 | n.d. |

|                              |        |            |                          |             |   |          |           |      |
|------------------------------|--------|------------|--------------------------|-------------|---|----------|-----------|------|
| SSIKVECVLR                   | Q64374 | 0.02634961 | n +42.03 Da,K +34.06 Da, | 1938.99855  | 2 | 633.8678 | 87742200  | n.d. |
| AAVPSAVHLPR                  | Q3UFF7 | 0          | n +42.03 Da,             | 1939.666695 | 2 | 580.3325 | 2.581E+09 | n.d. |
| YTMGDAPDFDR                  | P10649 | 0          | n +42.03 Da,             | 1946.522502 | 2 | 665.2923 | 5.147E+09 | n.d. |
| VNFTVDQIR                    | P58252 | 0          | n +34.06 Da,             | 1951.422645 | 2 | 563.3267 | 4.432E+09 | n.d. |
| MEAKGGTVKAASGFNATEDAQLTR     | P97429 | 0          | n +42.03 Da,K +28.03 Da, | 1951.625003 | 3 | 851.0989 | 3.133E+09 | n.d. |
| VNFTVDQIR                    | P58252 | 0          | n +28.03 Da,             | 1960.210449 | 2 | 560.3136 | 2.498E+10 | n.d. |
| PYNPSMSRPDAWG                | O35490 | 0          | n +14.02 Da,             | 1962.65293  | 2 | 746.3377 | 829281984 | n.d. |
| YTMGDAPDFDR                  | P10649 | 0          | n +42.03 Da,             | 1975.657064 | 2 | 665.2731 | 230544000 | n.d. |
| AVTLDKDAYR                   | Q920B9 | 0          | n +42.03 Da,K +28.03 Da, | 1975.936039 | 2 | 692.8511 | 49573800  | n.d. |
| ALETVPKDLR                   | P63271 | 0          | n +42.03 Da,K +28.03 Da, | 1981.58584  | 2 | 606.3536 | 191776000 | n.d. |
| AVPPTYADLGKSAR               | Q60932 | 0          | n +42.03 Da,K +28.03 Da, | 1985.870736 | 2 | 758.4118 | 418294016 | n.d. |
| AEAEQAEELSFPR                | Q05920 | 0          | n +28.03 Da,             | 2000.11559  | 2 | 788.3851 | 9017090   | n.d. |
| GDDLGSFYAPR                  | P52196 | 0          | n +28.03 Da,             | 2016.822968 | 2 | 613.2958 | 265727008 | n.d. |
| AYLQYQDAANNLR                | P08003 | 0          | n +28.03 Da,             | 2030.043119 | 2 | 784.3866 | 231328000 | n.d. |
| LSQGSPLSWEETQR               | P97494 | 0          | n +34.06 Da,             | 2031.287678 | 2 | 826.4285 | 90259800  | n.d. |
| FIAATSLYSER                  | Q80XN0 | 0          | n +34.06 Da,             | 2031.649161 | 2 | 694.8853 | 68263000  | n.d. |
| TGTPVLGGLSYR                 | Q61176 | 0.00245499 | n +34.06 Da,             | 2032.37411  | 2 | 627.8667 | 115177000 | n.d. |
| SSPAQPAVPAPLADLKIQHTK        | P24549 | 0          | n +42.03 Da,K +34.06 Da, | 2043.003902 | 4 | 570.5903 | 39197300  | n.d. |
| TTNTVPLHPYWPR                | P70245 | 0          | n +42.03 Da,             | 2043.384451 | 2 | 812.4175 | 233204992 | n.d. |
| PLTGGEVPSLGLSLR              | P11352 | 0.0240481  | n +14.02 Da,             | 2044.184758 | 2 | 698.8929 | 214628000 | n.d. |
| TTNTVPLHPYWPR                | P70245 | 0          | n +42.03 Da,             | 2045.483718 | 3 | 541.9476 | 1.64E+09  | n.d. |
| ANHAPFETDISTLTR              | Q9QXD6 | 0          | n +42.03 Da,             | 2047.302839 | 3 | 572.2845 | 2.045E+09 | n.d. |
| VGVPTETGALTLNR               | Q8BWT1 | 0.009299   | n +28.03 Da,             | 2050.178213 | 2 | 728.4113 | 171944000 | n.d. |
| PFAQAPLGLR                   | Q63880 | 0.0039968  | n +14.02 Da,             | 2053.753522 | 2 | 590.8455 | 134670000 | n.d. |
| SNEIFTQLYR                   | Q4VA53 | 0.0361596  | n +14.02 Da,             | 2058.590556 | 2 | 642.8294 | 5.591E+09 | n.d. |
| DDEVVDVGTVEEDLGKSR           | P08113 | 0          | n +28.03 Da,K +28.03 Da, | 2064.645667 | 3 | 678.6549 | 517228992 | n.d. |
| TYEDYVEGLR                   | Q60605 | 0          | n +34.06 Da,             | 2070.325972 | 2 | 639.8228 | 320961984 | n.d. |
| MEGPLNLAHQQSR                | Q8VCQ3 | 0          | n +42.03 Da,             | 2072.024606 | 2 | 761.8753 | 274423008 | n.d. |
| AAAPATLALDPQPQEKQKDASESSELSR | Q91WG2 | 0          | n +42.03 Da,K +34.06 Da, | 2075.781468 | 3 | 1016.876 | 10502800  | n.d. |
| YFHLFYR                      | Q811H0 | 0.0435049  | n +28.03 Da,             | 2084.655895 | 2 | 537.279  | 355745984 | n.d. |
| DLGNVTAGKDVANVSIEDR          | P08228 | 0          | n +28.03 Da,K +28.03 Da, | 2100.803296 | 3 | 696.0302 | 3069400   | n.d. |
| YSQGFVNEEMIR                 | Q9DCN2 | 0.01184669 | n +28.03 Da,             | 2103.80937  | 2 | 750.8592 | 9657810   | n.d. |
| IMNVIGEPIDER                 | P56480 | 0          | n +14.02 Da,             | 2105.401593 | 2 | 700.3657 | 20447800  | n.d. |
| QGGAPLAGTNKETTIIQGLDGLSER    | Q91Y97 | 0          | n +34.06 Da,K +34.06 Da, | 2113.632039 | 3 | 827.7901 | 126019000 | n.d. |
| SSDAQWLTAEEER                | Q9CZL5 | 0          | n +28.03 Da,             | 2118.419076 | 2 | 709.8372 | 67931696  | n.d. |
| PEEFTEIMNQR                  | P54869 | 0          | n +14.02 Da,             | 2118.684339 | 2 | 704.3308 | 147762000 | n.d. |
| IMNVIGEPIDER                 | P56480 | 0          | n +28.03 Da,             | 2127.134076 | 2 | 707.3757 | 190855008 | n.d. |
| PLTGGEVPSLGLSLR              | P11352 | 0          | n +14.02 Da,             | 2129.635248 | 2 | 697.8674 | 43381800  | n.d. |
| TFIQNVPLEDR                  | Q8VEK3 | 0.03394092 | n +28.03 Da,             | 2131.411522 | 2 | 680.3628 | 11201300  | n.d. |
| IFEGANDILR                   | P50544 | 0          | n +28.03 Da,             | 2131.646313 | 2 | 588.3251 | 115838000 | n.d. |

|                             |        |            |                          |             |   |          |           |      |
|-----------------------------|--------|------------|--------------------------|-------------|---|----------|-----------|------|
| SSQVSDGAAAVLLAR             | Q8VCHO | 0          | n +34.06 Da,             | 2143.158913 | 2 | 739.9258 | 17364900  | n.d. |
| GYINDFPMGR                  | Q9JHI5 | 0.01184669 | n +28.03 Da,             | 2144.712522 | 2 | 599.2895 | 55150200  | n.d. |
| SGEVPPNINIKEPR              | Q99JR1 | 0          | n +42.03 Da,K +28.03 Da, | 2150.516961 | 2 | 810.4411 | 147315008 | n.d. |
| RQHATNVGIMFR                | P35505 | 0          | n +14.02 Da,             | 2153.642837 | 2 | 722.3906 | 66550500  | n.d. |
| TTFNVQDGPDPFQDR             | P97493 | 0          | n +28.03 Da,             | 2154.142367 | 2 | 834.387  | 1.129E+09 | n.d. |
| PTIFPVVPR                   | P41216 | 0.04649758 | n +14.02 Da,             | 2159.723524 | 2 | 520.3183 | 83652800  | n.d. |
| ANHAPFETDISTLTR             | Q9QXD6 | 0.00245499 | n +42.03 Da,             | 2163.860558 | 3 | 572.2849 | 1.681E+09 | n.d. |
| MEAADVFHR                   | Q8BFS6 | 0          | n +42.03 Da,             | 2177.380094 | 2 | 559.2582 | 345135008 | n.d. |
| TTFNVQDGPDPFQDR             | P97493 | 0          | n +34.06 Da,             | 2182.002201 | 2 | 837.4035 | 35946500  | n.d. |
| SALVFGIIGR                  | P51660 | 0.01962111 | n +28.03 Da,             | 2186.006318 | 2 | 538.2934 | 1.769E+09 | n.d. |
| MHTEAAEVLLER                | Q8QZS1 | 0          | n +42.03 Da,             | 2186.372342 | 2 | 720.8603 | 436424000 | n.d. |
| MGFPEAASSFR                 | P32020 | 0          | n +42.03 Da,             | 2191.652489 | 2 | 621.2823 | 54876000  | n.d. |
| DGLNAEGLLR                  | Q64374 | 0          | n +28.03 Da,             | 2195.539956 | 2 | 543.3016 | 263840000 | n.d. |
| PLVALLDGR                   | O88712 | 0.03950617 | n +14.02 Da,             | 2195.586736 | 2 | 484.3004 | 54390300  | n.d. |
| AQQAADKYLYVDKN              | Q8VDD5 | 0.0008285  | n +42.03 Da,K +28.03 Da, | 2202.550588 | 2 | 862.9467 | 343566016 | n.d. |
| AADVSVTHRPPLSPEAEAEETPETVDR | Q9CW46 | 0          | n +42.03 Da,             | 2204.960267 | 3 | 1006.154 | 121717000 | n.d. |
| PTVFSNVTDENR                | O35945 | 0          | n +17.03 Da,             | 2205.056004 | 2 | 705.3401 | 94694096  | n.d. |
| MGFPEAASSFR                 | P32020 | 0          | n +28.03 Da,             | 2207.935622 | 2 | 614.295  | 220120992 | n.d. |
| VNPLSSDRPR                  | Q7TQG1 | 0.04440389 | n +42.03 Da,             | 2222.476991 | 2 | 591.8204 | 9650010   | n.d. |
| NVLSGGTTMYPGIADR            | P62737 | 0          | n +14.02 Da,             | 2223.447775 | 2 | 833.4307 | 3972000   | n.d. |
| VSVVLGGDHS LAVGSISGH        | Q61176 | 0          | n +28.03 Da,             | 2230.303923 | 3 | 606.9951 | 498486016 | n.d. |
| FPQDQLATLTGR                | P08249 | 0          | n +34.06 Da,             | 2238.011784 | 2 | 690.8883 | 670539008 | n.d. |
| STGTFVVSQPLNYR              | Q9JLJ2 | 0          | n +28.03 Da,             | 2239.028805 | 2 | 798.9198 | 8855740   | n.d. |
| WPAVQSSALYEDR               | P16460 | 0          | n +28.03 Da,             | 2239.759162 | 2 | 775.3846 | 322558016 | n.d. |
| DDEVVDVGTVEEDLGKSR          | P08113 | 0          | n +28.03 Da,K +28.03 Da, | 2243.096746 | 3 | 678.655  | 869081984 | n.d. |
| IAATILTSPDLR                | P05202 | 0          | n +28.03 Da,             | 2249.390485 | 2 | 649.8879 | 17417600  | n.d. |
| TLNNDIMLIK                  | Q792Y8 | 0.0008285  | n +28.03 Da,             | 2250.864646 | 2 | 615.8601 | 164795008 | n.d. |
| GSWEVIEGYR                  | P26443 | 0          | n +28.03 Da,             | 2252.531148 | 2 | 612.3156 | 240527008 | n.d. |
| TIVYFPVR                    | P19157 | 0.03221731 | n +34.06 Da,             | 2253.751359 | 2 | 514.8244 | 27687300  | n.d. |
| SWEVIEGYR                   | P26443 | 0.02509908 | n +28.03 Da,             | 2261.863254 | 2 | 582.3071 | 110999000 | n.d. |
| GIYEALRL                    | P17182 | 0.00981079 | n +28.03 Da,             | 2263.930173 | 2 | 546.3151 | 7368080   | n.d. |
| SAMEAADVFHR                 | Q8BFS6 | 0          | n +42.03 Da,             | 2273.834968 | 2 | 638.2924 | 1.831E+09 | n.d. |
| SSPAQPAVPAPLADLKIQHTK       | P24549 | 0          | n +42.03 Da,K +34.06 Da, | 2275.551247 | 3 | 760.453  | 15121900  | n.d. |
| PTFLNQLQSGVNR               | Q9JHU4 | 0          | n +14.02 Da,             | 2282.949709 | 2 | 744.4005 | 9049620   | n.d. |
| AFDYDLQTGQISNR              | Q64374 | 0          | n +34.06 Da,             | 2289.244074 | 3 | 554.6163 | 47296700  | n.d. |
| GYLDQVAALR                  | Q8BK48 | 0          | n +28.03 Da,             | 2295.857685 | 2 | 567.3235 | 81341200  | n.d. |
| AFDYDLQTGQISNR              | Q64374 | 0          | n +34.06 Da,             | 2295.938584 | 2 | 831.4162 | 26480300  | n.d. |
| PMTLGYWNTR                  | P19639 | 0          | n +14.02 Da,             | 2298.421008 | 2 | 626.8108 | 173227008 | n.d. |
| GDDIQLEFVR                  | O54734 | 0          | n +28.03 Da,             | 2300.543112 | 2 | 610.317  | 28213700  | n.d. |
| PVYDPVEPGYLR                | O88533 | 0          | n +28.03 Da,             | 2305.68059  | 2 | 716.8762 | 70073600  | n.d. |

|                          |        |            |                          |             |   |          |           |      |
|--------------------------|--------|------------|--------------------------|-------------|---|----------|-----------|------|
| AYDILDQYR                | P10649 | 0          | n +28.03 Da,             | 2307.322064 | 2 | 592.8007 | 214578000 | n.d. |
| MNLSAAHHQISL             | Q8VCX1 | 0.00981079 | n +42.03 Da,             | 2315.720863 | 2 | 682.3421 | 409023008 | n.d. |
| TDLTDYLNLR               | Q9CZ13 | 0.0039968  | n +28.03 Da,             | 2317.368613 | 2 | 568.81   | 16922400  | n.d. |
| TDLTDYLNLR               | Q9CZ13 | 0.00532725 | n +34.06 Da,             | 2318.549331 | 2 | 572.8071 | 25235200  | n.d. |
| TIGDYTDFYSSR             | P35505 | 0          | n +34.06 Da,             | 2330.745047 | 2 | 729.8511 | 337020000 | n.d. |
| AVFPWHSR                 | Q8BWQ6 | 0          | n +42.03 Da,             | 2332.915383 | 2 | 521.267  | 413496992 | n.d. |
| AQTLSNAEFQMLR            | Q8C196 | 0          | n +28.03 Da,             | 2342.709152 | 2 | 768.8957 | 194223008 | n.d. |
| IQFNESFAEMNR             | P19783 | 0          | n +28.03 Da,             | 2344.939847 | 2 | 757.3576 | 59731700  | n.d. |
| PAFTPATGTPVLGGLSYR       | Q61176 | 0          | n +14.02 Da,             | 2350.240501 | 3 | 606.9956 | 43461300  | n.d. |
| MHFSIPETESR              | Q8BVL3 | 0.009299   | n +42.03 Da,             | 2354.659104 | 2 | 688.3197 | 15634100  | n.d. |
| PEYLNfir                 | P07901 | 0.02509908 | n +14.02 Da,             | 2359.800996 | 2 | 533.2899 | 766288000 | n.d. |
| PPANVQLFQEVKQSEEDMVGR    | Q00519 | 0.00883652 | n +14.02 Da,K +28.03 Da, | 2366.047372 | 3 | 866.4368 | 19961600  | n.d. |
| FDITADDEPLGR             | P17742 | 0          | n +34.06 Da,             | 2379.389547 | 2 | 691.854  | 61899900  | n.d. |
| ANHAPFETDISTLTR          | Q9QXD6 | 0          | n +42.03 Da,             | 2379.670387 | 2 | 857.9229 | 684518016 | n.d. |
| PFDLFENR                 | P07901 | 0.009299   | n +14.02 Da,             | 2386.353606 | 2 | 526.2644 | 47821200  | n.d. |
| AGVDQHEGTIQVQGNLFFR      | Q8VCR7 | 0          | n +42.03 Da,             | 2395.275544 | 3 | 762.7132 | 317948992 | n.d. |
| PAQTLNSNAEFQMLR          | Q8C196 | 0          | n +14.02 Da,             | 2406.444082 | 2 | 810.4125 | 1.155E+09 | n.d. |
| PFVELETNLPASR            | O35215 | 0          | n +14.02 Da,             | 2407.56459  | 2 | 743.8983 | 116533000 | n.d. |
| VQEEAQCCLVEELR           | P56656 | 0          | n +28.03 Da,             | 2418.529908 | 2 | 815.9107 | 44871200  | n.d. |
| GFGDLKTPAGL              | O70251 | 0          | n +28.03 Da,K +28.03 Da, | 2420.638581 | 2 | 566.3243 | 1.451E+09 | n.d. |
| SSPAQPAVPAPLADLKIHTK     | P24549 | 0          | n +42.03 Da,K +28.03 Da, | 2424.922164 | 3 | 756.4304 | 1.612E+09 | n.d. |
| AAAKKAVLGPLVGAVDQGTSSSTR | Q64516 | 0          | n +42.03 Da,K +28.03 Da, | 2434.713565 | 3 | 765.7722 | 6.587E+09 | n.d. |
| SSWMDTVIR                | Q8BMF4 | 0          | n +28.03 Da,             | 2435.996759 | 2 | 561.7888 | 45413700  | n.d. |
| PLIPIVVEQTGR             | O88696 | 0          | n +14.02 Da,             | 2436.887707 | 2 | 668.4021 | 28204800  | n.d. |
| MEVHELFR                 | P41216 | 0.00532725 | n +42.03 Da,             | 2440.904194 | 2 | 551.772  | 7.902E+10 | n.d. |
| PFVELETNLPASR            | O35215 | 0          | n +28.03 Da,             | 2441.204578 | 2 | 750.9082 | 239502000 | n.d. |
| SSPAQPAVPAPLADLKIQH      | P24549 | 0          | n +28.03 Da,K +28.03 Da, | 2444.371186 | 3 | 666.0447 | 16633000  | n.d. |
| TPVAWPSQEGQNPSLSSIR      | Q8C196 | 0          | n +28.03 Da,             | 2444.92781  | 3 | 694.6916 | 179394000 | n.d. |
| MEVHELFR                 | P41216 | 0.00532725 | n +42.03 Da,             | 2446.032872 | 2 | 550.2722 | 510054016 | n.d. |
| FDPAINYLQR               | Q9QXD6 | 0          | n +34.06 Da,             | 2449.389337 | 3 | 700.3549 | 11659800  | n.d. |
| SLVSLFGNR                | P99029 | 0.01375516 | n +28.03 Da,             | 2451.484593 | 2 | 510.7957 | 24707800  | n.d. |
| AAAKKAVLGPLVGAVDQGTSSSTR | Q64516 | 0          | n +42.03 Da,K +28.03 Da, | 2451.900543 | 4 | 574.5813 | 57914800  | n.d. |
| SSPAQPAVPAPLADLKIQH      | P24549 | 0          | n +42.03 Da,K +34.06 Da, | 2453.53512  | 3 | 672.7162 | 60308900  | n.d. |
| GFGDLKTPAGL              | O70251 | 0          | n +28.03 Da,K +28.03 Da, | 2453.792893 | 1 | 566.317  | 271800992 | n.d. |
| NEEEDLDSTKAAPR           | Q9CX97 | 0.03950617 | n +17.03 Da,n +34.06 Da, | 2454.548171 | 2 | 813.4034 | 18599100  | n.d. |
| GMVALLDYR                | P63028 | 0          | n +34.06 Da,             | 2457.69934  | 2 | 536.3082 | 27896500  | n.d. |
| SFVNDIFER                | P10853 | 0.00532725 | n +34.06 Da,             | 2467.348298 | 2 | 580.814  | 36748300  | n.d. |
| SSPAQPAVPAPLADLKIQH      | P24549 | 0          | n +42.03 Da,K +28.03 Da, | 2481.451295 | 3 | 670.7053 | 319585984 | n.d. |
| TAFNQDSFLLR              | Q63886 | 0.01773533 | n +28.03 Da,             | 2483.868466 | 2 | 670.3412 | 85014096  | n.d. |
| SAHLQWMMVVR              | P41105 | 0          | n +42.03 Da,             | 2484.021892 | 2 | 634.8323 | 7.352E+09 | n.d. |

|                                |        |            |                          |             |   |          |           |      |
|--------------------------------|--------|------------|--------------------------|-------------|---|----------|-----------|------|
| PMFIVNTNVPR                    | P34884 | 0          | n +14.02 Da,             | 2486.714322 | 2 | 650.3476 | 2.667E+10 | n.d. |
| PVFTKIAQWGTD                   | P19639 | 0.00245499 | n +14.02 Da,K +28.03 Da, | 2499.619396 | 2 | 702.8797 | 677715008 | n.d. |
| SLGVAAEGLPDQYADGEAAR           | Q9QXF8 | 0          | n +42.03 Da,             | 2511.09423  | 2 | 1016.469 | 60937300  | n.d. |
| DLSPPQQEALAR                   | Q8R0F9 | 0.02634961 | n +17.03 Da,             | 2514.683191 | 2 | 686.86   | 219616992 | n.d. |
| TNLNVPGELYIR                   | Q8VCW8 | 0          | n +28.03 Da,             | 2525.898107 | 2 | 708.8967 | 5051270   | n.d. |
| TAASSSSLEKSYELPDGQVITIGNER     | P60710 | 0          | n +34.06 Da,             | 2526.619615 | 3 | 940.8354 | 51218300  | n.d. |
| STGIYEALELR                    | P17182 | 0          | n +28.03 Da,             | 2532.007239 | 2 | 640.3425 | 600963968 | n.d. |
| SDVLELTDENFESR                 | P27773 | 0          | n +34.06 Da,             | 2543.613841 | 2 | 844.4136 | 34757500  | n.d. |
| SSVAVLTQESFAEHR                | Q8VDJ3 | 0          | n +42.03 Da,             | 2548.084863 | 2 | 851.923  | 5.969E+09 | n.d. |
| SSVAVLTQESFAEHR                | Q8VDJ3 | 0          | n +42.03 Da,             | 2548.123315 | 3 | 568.2845 | 488409984 | n.d. |
| TTNTVPLHPYWPR                  | P70245 | 0          | n +42.03 Da,             | 2560.933151 | 3 | 541.9476 | 1.592E+09 | n.d. |
| TTNTVPLHPYWPR                  | P70245 | 0          | n +42.03 Da,             | 2561.583219 | 2 | 812.4179 | 2.677E+10 | n.d. |
| FLDFQGSAIPR                    | Q8BGC4 | 0          | n +34.06 Da,             | 2568.175144 | 2 | 642.8629 | 21782300  | n.d. |
| ALDGPEQMELEEGKAGSGLR           | P62196 | 0          | n +42.03 Da,K +34.06 Da, | 2568.489319 | 2 | 1082.044 | 13515100  | n.d. |
| PMFIVNTNVPR                    | P34884 | 0          | n +14.02 Da,             | 2574.26067  | 2 | 650.3464 | 219878000 | n.d. |
| MNVVFEDEMKR                    | Q8C196 | 0.00883652 | n +28.03 Da,K +28.03 Da, | 2582.647893 | 2 | 770.8923 | 42570200  | n.d. |
| AELQEVQITEEKPLPGQTPETAKEAELAAR | Q9QYG0 | 0          | n +42.03 Da,K +28.03 Da, | 2583.140239 | 4 | 872.7182 | 58371300  | n.d. |
| VDYYEVLGVQR                    | O54946 | 0.03039899 | n +28.03 Da,             | 2585.239237 | 2 | 684.8624 | 78154096  | n.d. |
| ANHAFETDISTLTR                 | Q9QXD6 | 0          | n +42.03 Da,             | 2591.2902   | 2 | 857.9232 | 3.203E+10 | n.d. |
| ANHAFETDISTLTR                 | Q9QXD6 | 0          | n +42.03 Da,             | 2595.915446 | 3 | 572.2849 | 5.978E+09 | n.d. |
| TASSVLLHTGQKMPL                | Q9JII6 | 0.0039968  | n +42.03 Da,K +28.03 Da, | 2605.891059 | 2 | 826.9309 | 34333700  | n.d. |
| TIQVQGQNLFFR                   | Q8VCR7 | 0          | n +34.06 Da,             | 2614.999753 | 2 | 742.9256 | 237028992 | n.d. |
| PPYTIYFPSR                     | F6RWR5 | 0.009299   | n +14.02 Da,             | 2619.142195 | 2 | 677.3639 | 36219900  | n.d. |
| APQGSLSGEYLFER                 | P29391 | 0          | n +34.06 Da,             | 2627.463444 | 2 | 750.8984 | 1.237E+09 | n.d. |
| AEFNSNLNRERMEER                | Q9D8M7 | 0.009299   | n +17.03 Da,             | 2629.565028 | 2 | 956.4668 | 7546830   | n.d. |
| PGFWDPIGR                      | Q5XG73 | 0          | n +14.02 Da,             | 2634.871693 | 2 | 529.7744 | 540038976 | n.d. |
| NWGYLDQVAALR                   | Q8BK48 | 0.0435049  | n +14.02 Da,             | 2650.487491 | 2 | 710.3596 | 724059008 | n.d. |
| SDEFSLADALPEQSSAKPPAVTNTKAGH   | Q8BH93 | 0          | n +42.03 Da,K +28.03 Da, | 2651.269763 | 3 | 989.4965 | 19151600  | n.d. |
| TAELFFEDVR                     | P51174 | 0          | n +34.06 Da,             | 2656.085015 | 2 | 630.8359 | 20055100  | n.d. |
| FMPGFAPLTSR                    | P68372 | 0.00981079 | n +34.06 Da,             | 2659.335956 | 2 | 627.8289 | 210628000 | n.d. |
| TIPSDGDIFTYTR                  | P24549 | 0          | n +28.03 Da,             | 2659.465822 | 2 | 757.3799 | 64433900  | n.d. |
| DFISYLQR                       | P27773 | 0.04973357 | n +34.06 Da,             | 2663.004357 | 2 | 538.3289 | 9099380   | n.d. |
| SSEPPPPPLQPPTHQTSVGLLDTPR      | Q9CR86 | 0          | n +42.03 Da,             | 2665.645223 | 3 | 897.4651 | 346728992 | n.d. |
| TFAATIPRPF                     | P16331 | 0          | n +28.03 Da,             | 2673.709127 | 2 | 574.8272 | 84537904  | n.d. |
| GAPQGSLSGEYLFER                | P29391 | 0          | n +34.06 Da,             | 2676.320627 | 2 | 779.4097 | 185904000 | n.d. |
| TPWIEFENNYR                    | E9QAK1 | 0          | n +28.03 Da,             | 2681.018669 | 2 | 748.8605 | 24553100  | n.d. |
| AAPAKGENLSLVVHGGPDIR           | Q64442 | 0          | n +42.03 Da,K +28.03 Da, | 2700.707831 | 3 | 691.0363 | 240844000 | n.d. |
| DFISYLQR                       | P27773 | 0.04973357 | n +34.06 Da,             | 2701.398463 | 2 | 538.3132 | 24522300  | n.d. |
| PSENLGQVLFGER                  | P58021 | 0          | n +14.02 Da,             | 2712.585871 | 2 | 730.3809 | 656550016 | n.d. |
| TALAEFGYIR                     | Q8C165 | 0.03950617 | n +28.03 Da,             | 2718.027426 | 2 | 649.3425 | 37723700  | n.d. |

|                          |        |            |                                      |             |   |          |           |      |
|--------------------------|--------|------------|--------------------------------------|-------------|---|----------|-----------|------|
| GLLSQGSPLSWEETQR         | P97494 | 0          | n +28.03 Da,                         | 2719.686705 | 2 | 908.4652 | 231152000 | n.d. |
| EFFPGLLEPR               | O35490 | 0          | n +34.06 Da,                         | 2724.576123 | 2 | 563.3115 | 11127900  | n.d. |
| ADEIAKAQVAQPGGDTIFGK     | P70349 | 0          | n +42.03 Da,n +28.03 Da,K +28.03 Da, | 2724.815181 | 2 | 705.3562 | 213147008 | n.d. |
| ADEIAKAQVAQPGGDTIFGK     | P70349 | 0          | n +42.03 Da,n +34.06 Da,K +34.06 Da, | 2725.000625 | 2 | 709.379  | 31659400  | n.d. |
| EAYPGDVFYLH              | Q03265 | 0          | n +28.03 Da,                         | 2726.667515 | 2 | 669.8212 | 266396992 | n.d. |
| PAFTPATGTPVLGGLSYR       | Q61176 | 0          | n +14.02 Da,                         | 2735.861014 | 3 | 606.9961 | 14466900  | n.d. |
| PAFTPATGTPVLGGLSYR       | Q61176 | 0          | n +14.02 Da,                         | 2736.749641 | 1 | 909.9924 | 26154900  | n.d. |
| SEMDNILANLR              | Q8BMS1 | 0          | n +28.03 Da,                         | 2740.455709 | 2 | 652.3327 | 13607400  | n.d. |
| PDFSSYDFTSIR             | Q8VCW8 | 0          | n +14.02 Da,                         | 2742.297503 | 2 | 724.8381 | 100083000 | n.d. |
| SSQFDWALMR               | Q6PB66 | 0          | n +34.06 Da,                         | 2750.813006 | 2 | 637.8238 | 57322700  | n.d. |
| MKVFTVGLPLPAEGR          | Q91Z53 | 0          | n +42.03 Da,K +34.06 Da,             | 2759.198458 | 2 | 789.4501 | 50536900  | n.d. |
| PEFPFGLLEPR              | O35490 | 0          | n +14.02 Da,                         | 2778.274131 | 2 | 601.8141 | 5.551E+09 | n.d. |
| MEDIMQLPKAR              | Q9CQ71 | 0          | n +42.03 Da,K +34.06 Da,             | 2779.960219 | 2 | 704.3813 | 87068304  | n.d. |
| GVLEEFGR                 | Q9DBM2 | 0          | n +34.06 Da,                         | 2781.073188 | 2 | 544.3034 | 38866900  | n.d. |
| PEMWELLQR                | Q9CZ7  | 0          | n +14.02 Da,                         | 2786.657505 | 2 | 607.3242 | 953012992 | n.d. |
| MLGPEGGEGYVVKLR          | Q9Z2X1 | 0          | n +42.03 Da,K +34.06 Da,             | 2787.816772 | 2 | 839.9269 | 271568000 | n.d. |
| MFQPAGHGQDWAMEGPR        | Q9Z1E3 | 0          | n +42.03 Da,                         | 2794.822726 | 3 | 652.9532 | 3081020   | n.d. |
| PDGMVALLDYR              | P63028 | 0          | n +17.03 Da,                         | 2801.312604 | 2 | 633.8305 | 13266900  | n.d. |
| MDGIVPDIAGVTKR           | P17225 | 0          | n +42.03 Da,K +28.03 Da,             | 2805.612335 | 2 | 771.422  | 162811008 | n.d. |
| MLGAEGGEGFVVKVR          | O35737 | 0          | n +42.03 Da,K +28.03 Da,             | 2811.972981 | 2 | 809.9365 | 90709504  | n.d. |
| GFILDGFPR                | G3UYQ4 | 0.0008285  | n +34.06 Da,                         | 2820.892439 | 2 | 528.3086 | 22399300  | n.d. |
| DSLVSIFGNR               | P99029 | 0          | n +34.06 Da,                         | 2823.031331 | 2 | 571.3249 | 120923000 | n.d. |
| PEMWELLQR                | Q9CZ7  | 0          | n +14.02 Da,                         | 2825.196824 | 3 | 607.3297 | 69814000  | n.d. |
| SIVPALEIANAHR            | P63038 | 0          | n +28.03 Da,                         | 2837.497319 | 2 | 709.912  | 36661200  | n.d. |
| FSATDLTEFAAR             | Q8BWT1 | 0.00245499 | n +28.03 Da,                         | 2839.651056 | 2 | 678.843  | 807804992 | n.d. |
| MLGPEGGEGYVVKLR          | Q9Z2X1 | 0          | n +42.03 Da,K +34.06 Da,             | 2840.942186 | 2 | 840.9636 | 145172992 | n.d. |
| SFVSDDIFLR               | Q9ET01 | 0.03333333 | n +28.03 Da,                         | 2842.5824   | 2 | 613.8247 | 312374016 | n.d. |
| IVLDNSVFSEHR             | Q68FD5 | 0.04736211 | n +28.03 Da,                         | 2851.002088 | 2 | 722.3719 | 101405000 | n.d. |
| LGDFAIPLYR               | P07758 | 0          | n +34.06 Da,                         | 2854.095378 | 2 | 594.8457 | 331108000 | n.d. |
| LLVVPWTQR                | P02088 | 0.01119664 | n +28.03 Da,                         | 2859.886211 | 2 | 651.8838 | 33743400  | n.d. |
| PVTLGYWDIR               | O35660 | 0          | n +14.02 Da,                         | 2863.792709 | 2 | 615.8386 | 91950400  | n.d. |
| VAGPQPAQTGAPQGSLEGEYLFER | P29391 | 0          | n +28.03 Da,                         | 2868.183624 | 3 | 801.0755 | 15737700  | n.d. |
| MEETFSYLLGR              | Q61176 | 0.00532725 | n +28.03 Da,                         | 2879.520788 | 2 | 687.3403 | 30090800  | n.d. |
| GLTDEINFLR               | P11679 | 0          | n +34.06 Da,                         | 2888.102682 | 2 | 606.3532 | 31600200  | n.d. |
| VFDYSEYWEGAR             | Q05920 | 0.00883652 | n +28.03 Da,                         | 2892.618436 | 2 | 775.3505 | 424240000 | n.d. |
| MPFVELETNLPASR           | O35215 | 0          | n +34.06 Da,                         | 2896.726575 | 2 | 819.4425 | 37426300  | n.d. |
| MSPEEFTEIMNQR            | P54869 | 0.02634961 | n +28.03 Da,                         | 2902.055221 | 3 | 547.2539 | 35494600  | n.d. |
| LQFWTETLPR               | Q63880 | 0          | n +28.03 Da,                         | 2904.273634 | 2 | 659.8617 | 287246016 | n.d. |
| VYSVFGAPILR              | D32298 | 0          | n +14.02 Da,                         | 2907.566124 | 2 | 618.3596 | 50617300  | n.d. |
| PPFPGLVKY                | Q01768 | 0.04128158 | n +28.03 Da,K +28.03 Da,             | 2909.29861  | 2 | 562.3315 | 96316304  | n.d. |

|                                 |        |            |                                      |             |   |          |           |      |
|---------------------------------|--------|------------|--------------------------------------|-------------|---|----------|-----------|------|
| LYFEELSLER                      | Q8C196 | 0          | n +28.03 Da,                         | 2918.882764 | 2 | 663.8513 | 86694496  | n.d. |
| SEEDLLLQDFSR                    | Q9DCF9 | 0.02694035 | n +34.06 Da,                         | 2919.349795 | 2 | 743.3875 | 5809140   | n.d. |
| SFFEGEDFSETLTR                  | P20029 | 0          | n +28.03 Da,                         | 2932.627596 | 2 | 846.8914 | 8499910   | n.d. |
| MSPEEFTEIMNQR                   | P54869 | 0          | n +28.03 Da,                         | 2943.960949 | 2 | 820.3531 | 521816000 | n.d. |
| AELQEVQITEEKPLLPGQTPETAKEAELAAR | Q9QYG0 | 0          | n +42.03 Da,K +28.03 Da,             | 2945.311713 | 3 | 1163.29  | 1.317E+10 | n.d. |
| AELQEVQITEEKPLLPGQTPETAKEAELAAR | Q9QYG0 | 0          | n +42.03 Da,K +28.03 Da,             | 2946.011114 | 4 | 872.7201 | 1.704E+10 | n.d. |
| VVLPMELPIR                      | P00405 | 0.04880952 | n +28.03 Da,                         | 2950.319591 | 2 | 597.8682 | 102663000 | n.d. |
| AGVDQHEGTIQVQGQNLFFR            | Q8VCR7 | 0          | n +42.03 Da,                         | 2952.336579 | 2 | 1143.568 | 917780992 | n.d. |
| AGVDQHEGTIQVQGQNLFFR            | Q8VCR7 | 0.0008285  | n +42.03 Da,                         | 2953.691128 | 3 | 762.714  | 7.623E+09 | n.d. |
| HQIEYYFGDFNLPR                  | P32067 | 0.01375516 | n +17.03 Da,                         | 2954.128371 | 2 | 908.4608 | 106208000 | n.d. |
| ADEIAKAQVAQPGGDTIFGKIIR         | P70349 | 0          | n +42.03 Da,n +28.03 Da,K +28.03 Da, | 2954.605516 | 3 | 832.7988 | 125380000 | n.d. |
| ADEIAKAQVAQPGGDTIFGKIIR         | P70349 | 0          | n +42.03 Da,n +34.06 Da,K +34.06 Da, | 2959.960042 | 3 | 836.8199 | 781395968 | n.d. |
| SGEDEQQEQTIAEDLVVTKYK           | P50580 | 0          | n +42.03 Da,K +28.03 Da,             | 2979.466724 | 3 | 836.7507 | 11485500  | n.d. |
| SGSKYKAPLATLPSTLDPAEYDVPETR     | Q9CQC7 | 0          | n +42.03 Da,K +28.03 Da,             | 2981.312232 | 3 | 1063.551 | 7.319E+09 | n.d. |
| TTGIVMDSGDGVTHTVPIYEGYALPH      | P60710 | 0          | n +28.03 Da,                         | 2981.547144 | 3 | 920.1173 | 150410000 | n.d. |
| PLYGLGELPQGFAR                  | P50396 | 0          | n +14.02 Da,                         | 2986.220376 | 2 | 766.4396 | 102826000 | n.d. |
| MSPEEFTEIMNQR                   | P54869 | 0.0039968  | n +28.03 Da,                         | 2990.53404  | 3 | 547.2537 | 564748992 | n.d. |
| LGPNYLQIPVNCPIYR                | P24270 | 0.04830054 | n +42.03 Da,                         | 3001.815219 | 3 | 615.9867 | 87346304  | n.d. |
| LGPNYLQIPVNCPIYR                | P24270 | 0          | n +42.03 Da,                         | 3002.691998 | 2 | 923.4774 | 75757400  | n.d. |
| TTGIVMDSGDGVTHTVPIYEGYALPH      | P60710 | 0          | n +42.03 Da,                         | 3006.591194 | 3 | 924.7898 | 26673600  | n.d. |
| METQVLTPHVYWAQR                 | Q8K2C9 | 0          | n +42.03 Da,                         | 3032.724757 | 2 | 950.9724 | 541382976 | n.d. |
| PFEPQTLGFSPSWR                  | P97364 | 0          | n +14.02 Da,                         | 3034.426465 | 3 | 554.9475 | 118642000 | n.d. |
| TFVQENVYDEFVER                  | P47738 | 0          | n +42.03 Da,                         | 3034.531136 | 2 | 908.9364 | 94321504  | n.d. |
| PLYGLGELPQGFAR                  | P50396 | 0          | n +14.02 Da,                         | 3035.81831  | 2 | 766.4209 | 97698704  | n.d. |
| METQVLTPHVYWAQR                 | Q8K2C9 | 0          | n +42.03 Da,                         | 3036.25199  | 3 | 634.3175 | 288748992 | n.d. |
| SLDMDGIIAEVR                    | P11679 | 0          | n +34.06 Da,                         | 3048.258899 | 2 | 676.8736 | 7366700   | n.d. |
| PADDLTPAPATTFAHLDATTVLSR        | P56480 | 0          | n +14.02 Da,                         | 3049.888787 | 3 | 870.7728 | 634995008 | n.d. |
| GNWGYLDQVAALR                   | Q8BK48 | 0          | n +28.03 Da,                         | 3056.776155 | 2 | 745.8918 | 58483200  | n.d. |
| TTGIVMDSGDGVTHTVPIYEGYALPH      | P60710 | 0          | n +28.03 Da,                         | 3061.033601 | 3 | 920.1186 | 22797700  | n.d. |
| VSMNTVDTSHEDMIHDAQMDYYGTR       | Q9D1M0 | 0          | n +42.03 Da,                         | 3070.385139 | 3 | 1019.772 | 82714200  | n.d. |
| GNLEEDFITWR                     | P37040 | 0          | n +34.06 Da,                         | 3075.497466 | 2 | 707.3638 | 11022300  | n.d. |
| ADEIAKAQVAQPGGDTIFGKIIR         | P70349 | 0          | n +42.03 Da,n +28.03 Da,K +28.03 Da, | 3075.618606 | 4 | 624.8516 | 326295008 | n.d. |
| LKYPLEEFTTDNQEEAR               | P61922 | 0.0008285  | n +42.03 Da,K +34.06 Da,             | 3079.506384 | 3 | 763.0425 | 133464000 | n.d. |
| SFIVGDQISFADYR                  | F6RWR5 | 0          | n +34.06 Da,                         | 3094.073186 | 2 | 826.4283 | 4257930   | n.d. |
| PNIPFQMLLR                      | Q05920 | 0.01837985 | n +14.02 Da,                         | 3116.264437 | 2 | 621.8547 | 553099008 | n.d. |
| MQAGKPILYSYFR                   | Q9WVLO | 0          | n +42.03 Da,K +28.03 Da,             | 3122.320792 | 2 | 822.4348 | 157980992 | n.d. |
| FIWPAVQSSALYEDR                 | P16460 | 0          | n +34.06 Da,                         | 3124.561519 | 2 | 908.4772 | 15473000  | n.d. |
| AMVSEFLKQAR                     | P10107 | 0          | n +42.03 Da,K +34.06 Da,             | 3127.653995 | 2 | 678.3796 | 79613000  | n.d. |
| DLTDPAPATTFAHLDATTVLSR          | P56480 | 0          | n +28.03 Da,                         | 3147.483905 | 3 | 781.0743 | 8837660   | n.d. |
| SSPAQPAVPAPLADLKIQHTKIF         | P24549 | 0          | n +42.03 Da,K +28.03 Da,             | 3167.147918 | 3 | 843.1477 | 525294016 | n.d. |

|                                 |        |            |                                      |             |   |          |           |      |
|---------------------------------|--------|------------|--------------------------------------|-------------|---|----------|-----------|------|
| TFLGGEDFDQALLR                  | P38647 | 0          | n +34.06 Da,                         | 3174.783366 | 2 | 808.4317 | 193991008 | n.d. |
| MPPYTIYVFPVR                    | P19157 | 0          | n +34.06 Da,                         | 3184.259905 | 2 | 758.9265 | 559324992 | n.d. |
| LALFNPDVSWDR                    | Q62425 | 0          | n +28.03 Da,                         | 3185.466552 | 2 | 730.8802 | 41986000  | n.d. |
| VSVMNTVDTSHEDMIHDAQMDYYGTR      | Q9D1M0 | 0          | n +42.03 Da,                         | 3192.201928 | 3 | 1019.773 | 1.131E+09 | n.d. |
| SVVVAPAQTLNSAEFQMLR             | Q8C196 | 0          | n +28.03 Da,                         | 3195.91439  | 3 | 697.0494 | 5.353E+09 | n.d. |
| LPEFPFGLR                       | O35490 | 0.00674157 | n +34.06 Da,                         | 3197.746652 | 2 | 668.3783 | 104418000 | n.d. |
| NPNWQQSDLRLRTRIDPR              | B2KF50 | 0.02634961 | n +42.03 Da,                         | 3199.932554 | 3 | 751.3856 | 133148000 | n.d. |
| AFPAWADTSILSR                   | Q9EQ20 | 0          | n +28.03 Da,                         | 3210.174357 | 2 | 731.8876 | 88918600  | n.d. |
| APPPLLPVAASTPILHGEFGSYPANGPR    | Q9JIA7 | 0          | n +34.06 Da,                         | 3211.246697 | 4 | 715.893  | 36665400  | n.d. |
| GAGAVAMLIGPKAPLVLEQGLR          | P54869 | 0          | n +28.03 Da,K +28.03 Da,             | 3212.028013 | 3 | 739.7763 | 26105500  | n.d. |
| SSLQELCSGLPLRPLPENR             | Q8VC12 | 0          | n +42.03 Da,                         | 3214.5465   | 3 | 736.7192 | 20156300  | n.d. |
| PIPDIGGGYIPTEEEW                | Q9CRD0 | 0          | n +14.02 Da,                         | 3216.619142 | 2 | 971.978  | 232428000 | n.d. |
| LEGLTDEINFLR                    | P11679 | 0          | n +28.03 Da,                         | 3235.681423 | 2 | 724.3941 | 443608992 | n.d. |
| CSPFILQFLRGR                    | Q9JIB3 | 0.02634961 | n +17.03 Da,                         | 3256.83275  | 2 | 755.9096 | 28342500  | n.d. |
| TNLGDFALSYR                     | P07758 | 0          | n +34.06 Da,                         | 3263.012982 | 2 | 702.3908 | 39005600  | n.d. |
| TTYLEFIQQNEERDGV                | Q01405 | 0          | n +42.03 Da,                         | 3300.611352 | 3 | 714.0155 | 161324992 | n.d. |
| PFLQLAESAYR                     | Q9QXX4 | 0          | n +14.02 Da,                         | 3303.346767 | 2 | 711.3937 | 1.097E+09 | n.d. |
| SILYVSPHPDAFPSLR                | Q9Z1Q9 | 0          | n +42.03 Da,                         | 3326.304496 | 3 | 614.324  | 90155200  | n.d. |
| WKAANEAGYFNEEMAPIEVK            | Q8BWT1 | 0          | n +34.06 Da,K +34.06 Da,             | 3327.173392 | 3 | 800.4428 | 12456500  | n.d. |
| VSDAISTQYPVVDHEFDVAVVGAGGAGLR   | Q8K2B3 | 0          | n +34.06 Da,                         | 3330.532885 | 3 | 988.5151 | 41741200  | n.d. |
| SILYVSPHPDAFPSLR                | Q9Z1Q9 | 0          | n +42.03 Da,                         | 3330.601048 | 2 | 920.9833 | 525299008 | n.d. |
| PGSISWDGLDPGKLY                 | Q8VIN1 | 0          | n +42.03 Da,K +34.06 Da,             | 3332.303605 | 2 | 840.94   | 37909000  | n.d. |
| MFSWLGNDRR                      | Q9QXY6 | 0          | n +42.03 Da,                         | 3337.607699 | 2 | 719.8306 | 1.723E+09 | n.d. |
| MEFAELIKTPR                     | Q9Z2D0 | 0          | n +42.03 Da,K +34.06 Da,             | 3337.952699 | 2 | 705.898  | 72197800  | n.d. |
| PMFLDFPLSER                     | Q8VCC2 | 0          | n +14.02 Da,                         | 3338.605129 | 2 | 683.3473 | 229236992 | n.d. |
| ILNLPEPWDWR                     | P97821 | 0.00981079 | n +34.06 Da,                         | 3340.898845 | 2 | 731.8978 | 101883000 | n.d. |
| SAGKVPETIDSIVGNVMQSSDAAYLAR     | Q8BWT1 | 0          | n +28.03 Da,K +28.03 Da,             | 3377.549804 | 3 | 1040.21  | 6709140   | n.d. |
| MNLSAAHHQISLSDGNINPLIGLGTYS DPR | Q8VCX1 | 0.02929936 | n +42.03 Da,                         | 3387.658497 | 3 | 1078.537 | 23891900  | n.d. |
| ATESSPLTTHVLDTASGLPAQGLCLR      | Q9CRB3 | 0          | n +42.03 Da,                         | 3390.86401  | 3 | 913.1314 | 156710000 | n.d. |
| YEPIDATGFININSLR                | P16460 | 0          | n +28.03 Da,                         | 3393.964395 | 2 | 925.9873 | 13043700  | n.d. |
| TLVGYDLVPEPKIIDAALR             | P12787 | 0          | n +28.03 Da,K +28.03 Da,             | 3399.137985 | 3 | 713.7311 | 18354500  | n.d. |
| ASLSLAPVNIKAGADEER              | P80314 | 0          | n +42.03 Da,K +28.03 Da,             | 3445.940955 | 2 | 1029.547 | 26686000  | n.d. |
| ASLSLAPVNIKAGADEER              | P80314 | 0          | n +42.03 Da,K +28.03 Da,             | 3468.388555 | 3 | 686.6996 | 10639000  | n.d. |
| HFTQQLYTAYIPENR                 | Q91XW9 | 0.00469116 | n +42.03 Da,                         | 3486.201372 | 2 | 961.9775 | 31431300  | n.d. |
| MFSWLGNDRR                      | Q9QXY6 | 0          | n +42.03 Da,                         | 3499.590679 | 2 | 719.8293 | 180180992 | n.d. |
| VDFAIWGAVR                      | P25688 | 0          | n +34.06 Da,                         | 3507.720807 | 2 | 648.8615 | 207870000 | n.d. |
| GIMNSFVNDIFER                   | P10853 | 0          | n +28.03 Da,                         | 3514.750346 | 2 | 785.3899 | 9440880   | n.d. |
| DLPALPGGPAGGTGELAKYGLPGVAQLR    | O08600 | 0.00674157 | n +28.03 Da,K +28.03 Da,             | 3523.821523 | 3 | 911.1767 | 921006016 | n.d. |
| SWLFGIKGPKGEGTGPPLPPAQPAGGEGDR  | Q925I1 | 0.02570864 | n +42.03 Da,n +28.03 Da,K +28.03 Da, | 3524.166577 | 4 | 835.4435 | 242926000 | n.d. |
| AASAALILPESPSMKKAVPLINAIDTGR    | Q8JZY2 | 0.0039968  | n +42.03 Da,K +28.03 Da,             | 3527.946704 | 3 | 978.2208 | 3430590   | n.d. |



|                                   |        |            |                                      |             |   |          |           |      |
|-----------------------------------|--------|------------|--------------------------------------|-------------|---|----------|-----------|------|
| MNILHDFGIQSTR                     | P35576 | 0          | n +42.03 Da,                         | 3541.776714 | 2 | 787.3938 | 179147008 | n.d. |
| LQFWTETLPR                        | Q63880 | 0          | n +42.03 Da,                         | 3542.843693 | 2 | 666.8506 | 36366300  | n.d. |
| SWLFGIKGPKGEGTGPPLPLPPAQPGEAGGGDR | Q92511 | 0          | n +42.03 Da,n +28.03 Da,K +28.03 Da, | 3545.998827 | 3 | 1113.59  | 129817000 | n.d. |
| LTSIDKWFLY                        | Q8C196 | 0.03333333 | n +28.03 Da,K +28.03 Da,             | 3562.610729 | 2 | 671.3752 | 2797630   | n.d. |
| PSLEQLAQEVTYANLR                  | Q9QYC7 | 0          | n +14.02 Da,                         | 3586.743688 | 3 | 615.9954 | 16717300  | n.d. |
| SNMDNMFESYINLR                    | P11679 | 0          | n +28.03 Da,                         | 3628.288143 | 2 | 938.4208 | 15517700  | n.d. |
| AADISQWAGPLCLQEVDPEPPQHALR        | P70296 | 0          | n +42.03 Da,                         | 3658.777891 | 3 | 948.4634 | 477292992 | n.d. |
| VNPTVFFDITADDEPLGR                | P17742 | 0          | n +28.03 Da,                         | 3679.557671 | 2 | 1017.529 | 43326800  | n.d. |
| FSPPGDTSNLFPGTWYLER               | P54869 | 0          | n +28.03 Da,                         | 3690.998822 | 3 | 738.0283 | 9376120   | n.d. |
| FSPPGDTSNLFPGTWYLER               | P54869 | 0          | n +28.03 Da,                         | 3691.944678 | 2 | 1106.538 | 12662200  | n.d. |
| MLWFQGAIPAAIASAKR                 | Q8VCH8 | 0          | n +42.03 Da,K +28.03 Da,             | 3730.8631   | 3 | 634.3546 | 46540200  | n.d. |
| MESMVAPGEVLMSEQIAQPAHADSR         | Q9DBK0 | 0          | n +42.03 Da,                         | 3736.223467 | 3 | 866.4096 | 83207000  | n.d. |
| VLGELWPLFGGR                      | P55096 | 0.00245499 | n +28.03 Da,                         | 3741.560536 | 2 | 686.3936 | 66974000  | n.d. |
| SGTLAKIAEIEAEMAR                  | P32233 | 0          | n +42.03 Da,K +28.03 Da,             | 3765.044293 | 3 | 587.3132 | 12018900  | n.d. |
| PTSTNPIASFATR                     | P54071 | 0          | n +14.02 Da,                         | 3772.613013 | 2 | 838.443  | 39664400  | n.d. |
| DGTPATMSQVAKDVATFLR               | Q9D0M3 | 0.00469116 | n +28.03 Da,K +28.03 Da,             | 3822.957908 | 3 | 688.6967 | 2691990   | n.d. |
| MFSFNMFDPHPIPR                    | P70362 | 0          | n +42.03 Da,                         | 3919.598854 | 2 | 840.8864 | 338836992 | n.d. |
| MFSFNMFDPHPIPR                    | P70362 | 0          | n +42.03 Da,                         | 3921.502293 | 3 | 560.9266 | 12846100  | n.d. |
| FSISQIFSQAMAAR                    | P34914 | 0.02509908 | n +28.03 Da,                         | 3925.645715 | 2 | 792.9162 | 6698380   | n.d. |
| DFLIPVAWYEDR                      | O09173 | 0          | n +28.03 Da,                         | 3928.976811 | 2 | 776.3939 | 154455008 | n.d. |
| FGDMQEIQNFVR                      | Q9QYG0 | 0          | n +28.03 Da,                         | 3936.474945 | 2 | 812.9129 | 30727700  | n.d. |
| MEEGMNILHDFGIQSTR                 | P35576 | 0          | n +42.03 Da,                         | 4032.705388 | 3 | 673.9804 | 42771200  | n.d. |
| HTVVYWLGRR                        | Q3V0D6 | 0.02634961 | n +14.02 Da,                         | 4054.289745 | 2 | 650.8746 | 30089600  | n.d. |
| AKPLTDQEKR                        | Q9ET01 | 0.00543281 | n +42.03 Da,K +28.03 Da,             | 462.4150254 | 3 | 428.5827 | 799385984 | n.d. |
| GHGEQQSQPPAAAAQQPQQQR             | Q8VEK3 | 0          | n +34.06 Da,                         | 477.8564817 | 3 | 788.3937 | 29157600  | n.d. |
| TEAPLNPKANR                       | P60710 | 0.00152323 | n +28.03 Da,K +28.03 Da,             | 513.7399672 | 3 | 422.9101 | 34542000  | n.d. |
| PENVASRSGAPTAGPGR                 | P80315 | 0.00337838 | n +14.02 Da,                         | 522.9819233 | 3 | 575.6273 | 46642500  | n.d. |
| ATSAEAPAKEAQKR                    | Q8BGA5 | 0.00115785 | n +42.03 Da,K +34.06 Da,             | 527.2710371 | 3 | 523.3068 | 5819670   | n.d. |
| SSEVKTEDEL                        | Q9JLZ3 | 0.00406654 | n +34.06 Da,K +34.06 Da,             | 529.7076704 | 3 | 454.2574 | 19893300  | n.d. |
| TSAHTSTGDGTAMVTR                  | Q8K2B3 | 0          | n +34.06 Da,                         | 556.3117277 | 3 | 542.9531 | 226063008 | n.d. |
| PEAAVEHPEAVR                      | O35490 | 0          | n +14.02 Da,                         | 561.7053339 | 3 | 440.2298 | 1.157E+09 | n.d. |
| PHPGEGASAAQAGGAAPPTR              | Q9JHH9 | 0.00040096 | n +14.02 Da,                         | 566.1507153 | 3 | 605.303  | 127085000 | n.d. |
| PAEETSQPPPSEPKGDAAR               | Q9JKR6 | 0.00040096 | n +14.02 Da,K +28.03 Da,             | 577.0806652 | 3 | 669.3315 | 194675008 | n.d. |
| PEGQGGTLVDR                       | P32020 | 0.00711744 | n +14.02 Da,                         | 586.5285092 | 2 | 571.7937 | 133759000 | n.d. |
| AVAVTMGPKGR                       | P63038 | 0          | n +28.03 Da,K +28.03 Da,             | 595.9739959 | 3 | 380.9042 | 262040000 | n.d. |
| EPSEKDALQPGR                      | P70695 | 0.00040096 | n +28.03 Da,K +28.03 Da,             | 599.3319322 | 3 | 461.5805 | 165263008 | n.d. |
| MEAVPEKKK                         | P14148 | 0.00040096 | n +42.03 Da,K +34.06 Da,             | 604.6283302 | 3 | 401.9373 | 155259008 | n.d. |
| PAPVTSLKPR                        | Q9DBT9 | 0.00040096 | n +14.02 Da,K +28.03 Da,             | 605.3258904 | 3 | 369.9009 | 178294000 | n.d. |
| EAQEEVGLPHH                       | Q99P30 | 0.00264151 | n +28.03 Da,                         | 610.9574198 | 3 | 425.2104 | 968745024 | n.d. |
| GDDLTVTNPKR                       | P17182 | 0          | n +28.03 Da,                         | 614.9185982 | 3 | 424.5697 | 8615510   | n.d. |

|                       |         |            |                                      |             |   |          |           |      |
|-----------------------|---------|------------|--------------------------------------|-------------|---|----------|-----------|------|
| IQEAGTEVVKAK          | P08249  | 0          | n +28.03 Da,K +28.03 Da,             | 616.9727617 | 3 | 452.9433 | 13548100  | n.d. |
| TSAHTSTGDGTAMVTR      | Q8K2B3  | 0          | n +28.03 Da,                         | 622.0324041 | 3 | 540.927  | 39357200  | n.d. |
| DSYVGDEAQSKR          | P60710  | 0          | n +34.06 Da,K +34.06 Da,             | 624.9788339 | 3 | 473.9162 | 704705984 | n.d. |
| PPAEETSQPPPSEPKGDAAR  | Q9JKR6  | 0.00901838 | n +14.02 Da,K +28.03 Da,             | 630.2821561 | 3 | 701.6826 | 113852000 | n.d. |
| DLTVTNPKR             | P17182  | 0.01970443 | n +28.03 Da,K +28.03 Da,             | 635.3869417 | 3 | 367.2111 | 113718000 | n.d. |
| SGTEKAFEPATGR         | Q9JLJ2  | 0.04362624 | n +34.06 Da,K +34.06 Da,             | 641.8033244 | 3 | 473.602  | 75059296  | n.d. |
| TENSTSAPAAKPKR        | P10922  | 0.00078339 | n +28.03 Da,K +28.03 Da,             | 642.3750294 | 3 | 513.9416 | 56673000  | n.d. |
| TVINQTKENLR           | Q6ZWW7  | 0.03461296 | n +34.06 Da,K +34.06 Da,             | 643.4385902 | 3 | 504.6439 | 17367200  | n.d. |
| SKSESPKEPEQLR         | P49312  | 0.01740295 | n +42.03 Da,K +28.03 Da,             | 649.6445666 | 3 | 538.2893 | 514484992 | n.d. |
| LLPQDPQKR             | Q9WVVL0 | 0.01326531 | n +28.03 Da,K +28.03 Da,             | 649.7369089 | 3 | 384.2362 | 98213400  | n.d. |
| SSSAPVASPNVR          | Q05920  | 0.00040096 | n +34.06 Da,                         | 652.9358176 | 2 | 603.3382 | 65238300  | n.d. |
| DLTVTNPKR             | P17182  | 0.01970443 | n +28.03 Da,K +28.03 Da,             | 657.5660597 | 3 | 367.221  | 2.385E+09 | n.d. |
| PSIQPTLEGGKR          | Q921G7  | 0.00040096 | n +14.02 Da,K +28.03 Da,             | 664.9408722 | 2 | 442.2536 | 225950000 | n.d. |
| AENPGLNHR             | O35344  | 0.00040096 | n +42.03 Da,                         | 665.4835951 | 2 | 589.7806 | 605982016 | n.d. |
| DKSENEPIEENEAR        | Q9Z2I8  | 0.00475494 | n +34.06 Da,K +34.06 Da,             | 666.7456043 | 3 | 557.2922 | 56256900  | n.d. |
| MNNQKQKPTLSGQR        | Q9CQC6  | 0          | n +42.03 Da,K +34.06 Da,             | 668.7250188 | 3 | 623.3526 | 1.825E+09 | n.d. |
| SSLGDRPAAGEQPGAR      | Q9CX98  | 0.00040096 | n +28.03 Da,                         | 670.9224648 | 3 | 575.6266 | 9886940   | n.d. |
| DLTVTNPKR             | P17182  | 0.03978862 | n +28.03 Da,K +28.03 Da,             | 672.1183538 | 2 | 550.3272 | 85756200  | n.d. |
| MNNQKQKPTLSGQR        | Q9CQC6  | 0          | n +42.03 Da,K +28.03 Da,             | 676.9253519 | 3 | 619.3315 | 4.308E+09 | n.d. |
| ATSASSHLNKGK          | P15105  | 0          | n +42.03 Da,n +28.03 Da,K +28.03 Da, | 687.2359978 | 3 | 471.2685 | 467699008 | n.d. |
| RLEQERAQWAQYR         | O35551  | 0.03978862 | n +28.03 Da,                         | 689.111314  | 2 | 881.4691 | 197548992 | n.d. |
| VSSVSDLPKR            | P54869  | 0.00374251 | n +28.03 Da,K +28.03 Da,             | 694.7457906 | 3 | 380.8988 | 99631904  | n.d. |
| TQEIVAKVR             | P08003  | 0.00040096 | n +34.06 Da,K +34.06 Da,             | 697.9347145 | 3 | 414.2676 | 54441100  | n.d. |
| SEITPPPQPKDR          | P53395  | 0.00475494 | n +34.06 Da,K +34.06 Da,             | 701.3077199 | 3 | 510.6359 | 55361000  | n.d. |
| PVEKDANNMPVTAR        | D3Z0Y2  | 0          | n +14.02 Da,K +28.03 Da,             | 707.8543647 | 2 | 792.4142 | 832465984 | n.d. |
| PVEKDANNMPVTAR        | D3Z0Y2  | 0          | n +14.02 Da,K +28.03 Da,             | 710.5518889 | 3 | 528.6129 | 1.393E+10 | n.d. |
| GAVTGDPDSEEAGTKAR     | P21981  | 0.0298318  | n +28.03 Da,K +28.03 Da,             | 712.1099524 | 3 | 566.96   | 372207008 | n.d. |
| ALQAQESTEGPGTGQDRPR   | Q9DBG1  | 0          | n +34.06 Da,                         | 713.3030773 | 3 | 678.0132 | 194923008 | n.d. |
| TPEAAVEHPEAVR         | O35490  | 0          | n +28.03 Da,                         | 720.9421889 | 3 | 478.5844 | 1.835E+09 | n.d. |
| TPETAKEAELAAR         | Q9QYG0  | 0.00040096 | n +34.06 Da,K +34.06 Da,             | 724.6216416 | 3 | 485.6214 | 845648000 | n.d. |
| AADTQVSETLKR          | E9PVA8  | 0.00040096 | n +28.03 Da,K +28.03 Da,             | 730.1529402 | 3 | 458.9231 | 79071800  | n.d. |
| AAAKVALTKR            | Q9QXX4  | 0.00040096 | n +42.03 Da,K +28.03 Da,             | 736.4716442 | 3 | 376.2494 | 2.668E+10 | n.d. |
| ATSASSHLNKGKIQ        | P15105  | 0.00040096 | n +42.03 Da,n +28.03 Da,K +28.03 Da, | 745.4026831 | 3 | 513.9547 | 468657984 | n.d. |
| GGGPTTTGGPPAGAEAAQRPR | Q8R1S4  | 0          | n +34.06 Da,                         | 752.540834  | 3 | 666.6793 | 34149700  | n.d. |
| PMIDNPNYK GK          | P35564  | 0.00040096 | n +14.02 Da,K +28.03 Da,             | 759.8038627 | 3 | 449.576  | 531131008 | n.d. |
| PVDGSISKNGQLR         | Q9D0F9  | 0          | n +14.02 Da,K +28.03 Da,             | 765.2849091 | 3 | 471.5999 | 1.334E+09 | n.d. |
| LTEAPLNPKANR          | P60710  | 0.00040096 | n +34.06 Da,K +34.06 Da,             | 770.5398971 | 3 | 464.6263 | 571657024 | n.d. |
| PDTGIHDR              | Q922Q1  | 0.04662577 | n +14.02 Da,                         | 777.1804389 | 2 | 450.7431 | 591713024 | n.d. |
| PGPVPSSPSQEPPTKR      | Q922Y1  | 0          | n +14.02 Da,K +28.03 Da,             | 777.8591144 | 3 | 568.3064 | 86310800  | n.d. |
| SETIITGKR             | Q8VDJ3  | 0.01795213 | n +34.06 Da,K +34.06 Da,             | 780.1783299 | 3 | 395.9328 | 66809100  | n.d. |

|                       |        |            |                                      |             |   |          |           |      |
|-----------------------|--------|------------|--------------------------------------|-------------|---|----------|-----------|------|
| YLQKQPQPQPPEGR        | Q68FL6 | 0          | n +34.06 Da,K +34.06 Da,             | 791.4152944 | 2 | 643.3809 | 65082400  | n.d. |
| GDGEEEDGDEDEEAEPTGKR  | P26350 | 0          | n +34.06 Da,                         | 794.9201515 | 3 | 768.339  | 41648800  | n.d. |
| SETIITGKR             | Q8VDJ3 | 0.01883053 | n +28.03 Da,K +28.03 Da,             | 796.1309059 | 3 | 391.9111 | 56254800  | n.d. |
| TVTNDPSYKENAMR        | Q8K154 | 0.00605629 | n +28.03 Da,K +28.03 Da,             | 796.2677547 | 3 | 561.2803 | 229231008 | n.d. |
| TATILDKPEDR           | O35215 | 0          | n +28.03 Da,K +28.03 Da,             | 801.9783701 | 3 | 438.926  | 155575008 | n.d. |
| PAQKSDIVQLR           | Q8VDJ3 | 0          | n +14.02 Da,K +28.03 Da,             | 803.5062562 | 3 | 432.9262 | 1.744E+09 | n.d. |
| ELVAEVEKR             | Q68FD5 | 0.00605629 | n +34.06 Da,K +34.06 Da,             | 806.3436595 | 3 | 380.9078 | 51442000  | n.d. |
| SSLEDSQIEKER          | Q9CZ13 | 0.00040096 | n +34.06 Da,                         | 808.8829398 | 3 | 496.9402 | 118123000 | n.d. |
| FEELTVSQQLLCLR        | Q8K3K8 | 0.02056807 | n +42.03 Da,                         | 814.6514716 | 3 | 588.2907 | 40522900  | n.d. |
| AALQAQESTEGPGTGQDRPR  | Q9DBG1 | 0          | n +34.06 Da,                         | 816.8077904 | 3 | 701.6913 | 36718000  | n.d. |
| THQVSAAPTSSAGDGFKAN   | P32020 | 0          | n +42.03 Da,K +28.03 Da,             | 817.0676759 | 2 | 639.3338 | 141664000 | n.d. |
| SEELQKVVSR            | P50172 | 0.00078339 | n +28.03 Da,K +28.03 Da,             | 823.6557203 | 3 | 429.5977 | 7759020   | n.d. |
| EVEMDAVGKEGR          | Q8C196 | 0          | n +28.03 Da,K +28.03 Da,             | 831.1822995 | 3 | 459.2428 | 16914300  | n.d. |
| TPEEGKQSQAVIEDAR      | Q3UQ44 | 0          | n +28.03 Da,K +28.03 Da,             | 831.2329576 | 2 | 605.3217 | 159860000 | n.d. |
| LAEDGAHVVSRR          | Q99LB2 | 0          | n +28.03 Da,                         | 843.8600662 | 3 | 456.5811 | 136752992 | n.d. |
| YLQKQPQPQPPEGR        | Q68FL6 | 0          | n +34.06 Da,K +34.06 Da,             | 846.0359826 | 3 | 643.3742 | 111733000 | n.d. |
| MEAVPEKPPP            | P14148 | 0.01326531 | n +42.03 Da,n +28.03 Da,K +28.03 Da, | 846.4721174 | 3 | 447.9356 | 198314000 | n.d. |
| TPEEGKQSQAVIEDAR      | Q3UQ44 | 0          | n +28.03 Da,K +28.03 Da,             | 848.464995  | 3 | 605.3154 | 374062016 | n.d. |
| TDEPSEKDALQPGR        | Q9QXD6 | 0.00152323 | n +28.03 Da,K +28.03 Da,             | 851.8972561 | 3 | 533.6048 | 422742016 | n.d. |
| MDGKPVDASEEKR         | Q9D0R2 | 0          | n +42.03 Da,K +28.03 Da,             | 855.609785  | 3 | 562.6188 | 105526000 | n.d. |
| PAALQAQESTEGPGTGQDRPR | Q9DBG1 | 0          | n +14.02 Da,                         | 859.9154909 | 3 | 727.3617 | 76060496  | n.d. |
| TATILDKPEDR           | O35215 | 0          | n +28.03 Da,K +28.03 Da,             | 860.8981719 | 3 | 438.9135 | 266440000 | n.d. |
| MDQQTQHPSKAAQPLR      | Q9JL3  | 0          | n +42.03 Da,K +28.03 Da,             | 869.6701097 | 3 | 593.3052 | 1.51E+09  | n.d. |
| ATATILDKPEDR          | O35215 | 0.00040096 | n +34.06 Da,K +34.06 Da,             | 869.7218343 | 3 | 466.6084 | 133163000 | n.d. |
| AFALASQQAASAQSR       | Q8VCH0 | 0          | n +28.03 Da,K +28.03 Da,             | 872.450691  | 3 | 564.3137 | 293200000 | n.d. |
| ASNFKTTMASSAQR        | Q9R1K9 | 0          | n +42.03 Da,K +28.03 Da,             | 877.6574529 | 3 | 575.9705 | 283112000 | n.d. |
| LSQNAAAKASATAPEVR     | Q9D0G0 | 0.01795213 | n +34.06 Da,K +34.06 Da,             | 877.6827906 | 3 | 585.0129 | 173567008 | n.d. |
| PAVAESAVVSSPDKDR      | Q91VA0 | 0          | n +14.02 Da,K +28.03 Da,             | 878.9806644 | 3 | 557.2962 | 1.879E+09 | n.d. |
| PVEKDANNMPVTAR        | D3Z0Y2 | 0          | n +14.02 Da,K +28.03 Da,             | 879.3852057 | 3 | 528.6121 | 1.256E+09 | n.d. |
| TVQQHAGETDPVTTMR      | Q99KB8 | 0          | n +28.03 Da,                         | 880.1900926 | 3 | 600.2967 | 111264000 | n.d. |
| TVSSDQMAKLR           | P16015 | 0          | n +28.03 Da,K +28.03 Da,             | 884.4203418 | 3 | 431.2395 | 199226000 | n.d. |
| MEKPAASTEPEQSRPALGR   | Q9JMD3 | 0          | n +42.03 Da,K +28.03 Da,             | 888.9735204 | 4 | 514.0174 | 47550200  | n.d. |
| NLNTVLEER             | D6RET8 | 0.01260647 | n +14.02 Da,                         | 889.4224961 | 2 | 551.3002 | 77449800  | n.d. |
| LSQNAAAKASATAPEVR     | Q9D0G0 | 0.00115785 | n +28.03 Da,K +28.03 Da,             | 893.0234958 | 3 | 580.9926 | 93459200  | n.d. |
| KPQAQEQPPASPEALR      | Q9WU79 | 0.00078339 | n +34.06 Da,K +34.06 Da,             | 893.5387211 | 3 | 605.6843 | 202818000 | n.d. |
| ADEDEGEGIHPSAPHR      | Q3UHD6 | 0          | n +42.03 Da,                         | 910.8959852 | 3 | 543.9133 | 3.539E+09 | n.d. |
| PEDTLEQKAGSVGR        | Q8VCW8 | 0          | n +14.02 Da,K +28.03 Da,             | 915.433601  | 2 | 764.9001 | 32978000  | n.d. |
| PVPAGDLVKAR           | P21981 | 0.00406654 | n +14.02 Da,K +28.03 Da,             | 918.2618299 | 3 | 388.9079 | 849036032 | n.d. |
| MDQQTQHPSKAAQPLR      | Q9JL3  | 0          | n +42.03 Da,K +28.03 Da,             | 920.6763007 | 3 | 593.3055 | 79612600  | n.d. |
| PKVTQPEVDTPLGR        | Q63880 | 0          | n +17.03 Da,K +34.06 Da,             | 921.6778652 | 3 | 529.9829 | 55836700  | n.d. |

|                        |        |            |                                      |             |   |          |           |      |
|------------------------|--------|------------|--------------------------------------|-------------|---|----------|-----------|------|
| SAIAKIVGSNAGR          | P13707 | 0.00807868 | n +28.03 Da,K +28.03 Da,             | 924.2289288 | 3 | 433.9316 | 70941104  | n.d. |
| PQLQEKPLQLEQPQQR       | Q2TPA8 | 0          | n +14.02 Da,K +28.03 Da,             | 933.0799255 | 3 | 673.033  | 172526000 | n.d. |
| ALKQISSNR              | Q9R0P3 | 0.02367824 | n +42.03 Da,K +28.03 Da,             | 942.8588058 | 2 | 543.8167 | 547788032 | n.d. |
| ISSQQTIPPSAKYGGGR      | P70404 | 0.00040096 | n +34.06 Da,K +34.06 Da,             | 947.2281401 | 3 | 586.6771 | 216723008 | n.d. |
| ASSHTVLMR              | Q9Z0S1 | 0.00040096 | n +42.03 Da,                         | 953.1337342 | 2 | 522.269  | 323484000 | n.d. |
| EVEMDAVGKEGR           | Q8C196 | 0          | n +28.03 Da,K +28.03 Da,             | 954.080068  | 2 | 459.2485 | 6556350   | n.d. |
| AATTGSGVKVPR           | Q9CZY3 | 0.00078339 | n +42.03 Da,K +28.03 Da,             | 961.4459037 | 2 | 607.3473 | 22373500  | n.d. |
| PEINTSHLDEKQVQ         | P58044 | 0.03008233 | n +17.03 Da,K +34.06 Da,             | 962.5412113 | 3 | 563.6336 | 15575700  | n.d. |
| TNAVIHEVQR             | O54749 | 0.00040096 | n +42.03 Da,                         | 968.1053335 | 2 | 604.823  | 179632992 | n.d. |
| ATSASSHLNKGIKQMY       | P15105 | 0.00078339 | n +42.03 Da,n +34.06 Da,K +34.06 Da, | 974.2824756 | 3 | 462.2651 | 60887500  | n.d. |
| TAGKDGVANVSIEDR        | P08228 | 0          | n +34.06 Da,K +34.06 Da,             | 977.0287462 | 3 | 533.9685 | 679740032 | n.d. |
| VNDLPVGR               | P20108 | 0.01883053 | n +14.02 Da,                         | 978.4124196 | 2 | 442.2539 | 162759008 | n.d. |
| SSEAPPLVNEDVKR         | Q91YQ5 | 0          | n +14.02 Da,K +28.03 Da,             | 978.567597  | 3 | 528.2735 | 180068992 | n.d. |
| ATSASSHLNKGIKQMY       | P15105 | 0          | n +42.03 Da,n +28.03 Da,K +28.03 Da, | 979.1649021 | 3 | 611.9893 | 512904992 | n.d. |
| LVSSVSDLPKR            | P54869 | 0.00040096 | n +28.03 Da,                         | 980.0203807 | 3 | 419.5906 | 63963800  | n.d. |
| AAAMDVDTPSGTNSGAGKKR   | P62878 | 0          | n +42.03 Da,K +28.03 Da,             | 981.94253   | 3 | 678.009  | 1.528E+10 | n.d. |
| DDEEEEEEPVKAAPGKR      | P09405 | 0          | n +28.03 Da,K +28.03 Da,             | 987.7982644 | 3 | 714.3333 | 43777700  | n.d. |
| PELTGAKVVVSGGR         | Q99LC5 | 0          | n +14.02 Da,K +28.03 Da,             | 990.1072085 | 2 | 706.4157 | 153836000 | n.d. |
| PELTGAKVVVSGGR         | Q99LC5 | 0          | n +14.02 Da,K +28.03 Da,             | 990.6081891 | 3 | 471.2803 | 1.945E+09 | n.d. |
| AELYVKPGNKER           | Q80VJ2 | 0.00605629 | n +42.03 Da,n +34.06 Da,K +34.06 Da, | 999.0249445 | 3 | 505.3058 | 394747008 | n.d. |
| DLSSDIKER              | B5X0G2 | 0.02602828 | n +34.06 Da,K +34.06 Da,             | 999.2615812 | 3 | 377.5611 | 233500992 | n.d. |
| PSNLAKNTILVK           | P70691 | 0.00115785 | n +14.02 Da,K +28.03 Da,             | 1002.521167 | 3 | 456.6256 | 1.583E+09 | n.d. |
| AAVTTVEGIGSTKTR        | G3X982 | 0.00264151 | n +28.03 Da,K +28.03 Da,             | 1004.947532 | 3 | 516.3006 | 250039008 | n.d. |
| PNLVPSISNKR            | P19536 | 0          | n +14.02 Da,n +28.03 Da,             | 1006.295902 | 3 | 422.9222 | 1.278E+09 | n.d. |
| PVTLPDGR               | P06801 | 0.04937519 | n +17.03 Da,                         | 1006.856784 | 2 | 436.2559 | 92111200  | n.d. |
| VDDICIAKPR             | P32261 | 0.01389831 | n +34.06 Da,K +34.06 Da,             | 1007.501103 | 3 | 418.9217 | 16793800  | n.d. |
| ALDSSNSMQTVQKTTTR      | P05784 | 0          | n +28.03 Da,K +28.03 Da,             | 1009.772026 | 3 | 641.9987 | 93557800  | n.d. |
| TEDQVKALSTQGSSVGR      | P34927 | 0          | n +34.06 Da,K +34.06 Da,             | 1013.959929 | 3 | 611.0113 | 86951104  | n.d. |
| MQTAHTGLSHTADGADGQTSR  | Q9CR70 | 0          | n +42.03 Da,                         | 1017.293942 | 3 | 728.6624 | 948092992 | n.d. |
| VVGDDLTVTNPKR          | P17182 | 0          | n +34.06 Da,K +34.06 Da,             | 1018.615944 | 3 | 494.6358 | 209975008 | n.d. |
| PELTGAKVVVSGGR         | Q99LC5 | 0          | n +14.02 Da,K +28.03 Da,             | 1021.210317 | 2 | 471.2801 | 350460000 | n.d. |
| SEAAPAAPAAAPPAEKAPAKKK | P15864 | 0          | n +42.03 Da,n +28.03 Da,K +28.03 Da, | 1029.597564 | 3 | 742.7541 | 605206016 | n.d. |
| SPPAPSDSVKIEER         | Q9R257 | 0.01970443 | n +34.06 Da,K +34.06 Da,             | 1034.988079 | 3 | 570.3186 | 17963100  | n.d. |
| ISSQQTIPPSAKYGGGR      | P70404 | 0.00040096 | n +34.06 Da,K +34.06 Da,             | 1036.955907 | 3 | 586.6773 | 139092000 | n.d. |
| TMDKSELVQKAK           | Q9CQV8 | 0.00406654 | n +42.03 Da,n +28.03 Da,K +28.03 Da, | 1038.758244 | 2 | 752.4259 | 434867008 | n.d. |
| SSEAPPLVNEDVKR         | Q91YQ5 | 0          | n +28.03 Da,K +28.03 Da,             | 1042.433845 | 3 | 532.9586 | 5.062E+10 | n.d. |
| TMDKSELVQKAK           | Q9CQV8 | 0          | n +42.03 Da,n +28.03 Da,K +28.03 Da, | 1043.443085 | 3 | 501.953  | 1.38E+10  | n.d. |
| SSEAPPLVNEDVKR         | Q91YQ5 | 0          | n +28.03 Da,K +28.03 Da,             | 1044.799992 | 2 | 798.9329 | 519104000 | n.d. |
| SQAEFDKAAEEVKR         | P31786 | 0          | n +42.03 Da,K +28.03 Da,             | 1048.500893 | 3 | 569.2968 | 232166000 | n.d. |
| PAENSNETIIITGKR        | Q8VDJ3 | 0.02543464 | n +14.02 Da,K +28.03 Da,             | 1053.320227 | 3 | 591.3231 | 628108992 | n.d. |

|                       |        |            |                                      |             |   |          |           |      |
|-----------------------|--------|------------|--------------------------------------|-------------|---|----------|-----------|------|
| EPDSSDIKER            | B5X0G2 | 0.00040096 | n +14.02 Da,K +28.03 Da,             | 1056.366086 | 3 | 444.2335 | 221448000 | n.d. |
| SSEAPLVNEDVKR         | Q91YQ5 | 0          | n +34.06 Da,K +34.06 Da,             | 1056.37866  | 3 | 536.9786 | 1.532E+09 | n.d. |
| SKSFQSSSLGR           | Q8K310 | 0.00901838 | n +42.03 Da,K +28.03 Da,             | 1056.549987 | 2 | 647.8363 | 705489984 | n.d. |
| SGALLPKPQMR           | Q9CPQ1 | 0.00839161 | n +28.03 Da,K +28.03 Da,             | 1057.579123 | 3 | 418.5845 | 311335008 | n.d. |
| MEVKPPPGRPQPDSGR      | Q8BG05 | 0          | n +42.03 Da,K +34.06 Da,             | 1062.056005 | 3 | 608.6593 | 3.3E+09   | n.d. |
| TMLADHAAR             | Q6P5F9 | 0.00040096 | n +42.03 Da,                         | 1063.314921 | 2 | 514.253  | 925350016 | n.d. |
| SQAEFDKAAEEVKR        | P31786 | 0          | n +42.03 Da,K +34.06 Da,             | 1067.709696 | 3 | 573.3171 | 3.096E+09 | n.d. |
| MDKNELVQKAK           | P63101 | 0.00040096 | n +42.03 Da,K +28.03 Da,             | 1069.612928 | 3 | 477.2744 | 7.734E+09 | n.d. |
| SEPEEFQPER            | Q64459 | 0.00040096 | n +28.03 Da,                         | 1074.264414 | 2 | 638.2926 | 685393024 | n.d. |
| SSGALLPKPQMR          | Q9CPQ1 | 0.01002073 | n +28.03 Da,K +28.03 Da,             | 1075.207444 | 3 | 447.5954 | 4.705E+09 | n.d. |
| ATEGASSELIEKRR        | D3YYK3 | 0          | n +42.03 Da,K +28.03 Da,             | 1077.163303 | 3 | 539.633  | 144299008 | n.d. |
| SPPAPSDSEVKIEER       | Q9R257 | 0.00901838 | n +28.03 Da,K +28.03 Da,             | 1077.277186 | 3 | 566.2969 | 466873984 | n.d. |
| SSGALLPKPQMR          | Q9CPQ1 | 0.01795213 | n +34.06 Da,K +34.06 Da,             | 1084.344542 | 3 | 451.6166 | 208923008 | n.d. |
| PTTLTDEINR            | Q922D8 | 0.00776562 | n +14.02 Da,                         | 1084.931013 | 3 | 644.3217 | 14717600  | n.d. |
| PVLNITNR              | Q8C196 | 0.04004967 | n +14.02 Da,                         | 1087.47093  | 2 | 470.7821 | 164102000 | n.d. |
| ATSASSHLNKGIKQM       | P15105 | 0          | n +42.03 Da,n +28.03 Da,K +28.03 Da, | 1087.80933  | 3 | 556.644  | 50177000  | n.d. |
| SSGPGASSGPGGDHSELIVR  | P57776 | 0.00040096 | n +28.03 Da,                         | 1088.220857 | 3 | 632.3124 | 202692000 | n.d. |
| PKEQQEVVVLGSPH        | Q9D103 | 0.00040096 | n +14.02 Da,K +28.03 Da,             | 1088.644973 | 3 | 530.295  | 604161984 | n.d. |
| GQVITIGNER            | P60710 | 0.04544059 | n +34.06 Da,                         | 1088.696672 | 2 | 560.8236 | 1.961E+09 | n.d. |
| GAQKVSNSQSFTEIER      | Q99K28 | 0.00078339 | n +34.06 Da,K +34.06 Da,             | 1089.781038 | 3 | 587.9973 | 150304992 | n.d. |
| SEPEIPK GIR           | Q9WTP6 | 0.00078339 | n +28.03 Da,K +28.03 Da,             | 1091.256321 | 3 | 394.5674 | 496640992 | n.d. |
| PSVGEHTVEVLR          | O09174 | 0.00040096 | n +14.02 Da,                         | 1091.281221 | 3 | 446.2437 | 209904992 | n.d. |
| TEEEEEETEKESTEKDEL    | P08113 | 0          | n +34.06 Da,K +34.06 Da,             | 1091.488427 | 3 | 762.6945 | 44993600  | n.d. |
| SSMTNSTAASRPPVTLR     | P60335 | 0.00605629 | n +28.03 Da,                         | 1092.767158 | 3 | 601.9814 | 192980000 | n.d. |
| TITSAKVMMEGGR         | P29341 | 0.00934903 | n +34.06 Da,K +34.06 Da,             | 1092.860783 | 3 | 483.6115 | 53147800  | n.d. |
| PSVVVVGLGKR           | Q9CPY7 | 0.00040096 | n +14.02 Da,n +28.03 Da,             | 1094.03061  | 3 | 384.92   | 248364000 | n.d. |
| PKDEQGSAADESDSPTIEAVR | P10518 | 0          | n +14.02 Da,K +28.03 Da,             | 1095.314947 | 3 | 748.6928 | 32432000  | n.d. |
| MDADKDNKQACDER        | O35309 | 0          | n +42.03 Da,K +28.03 Da,             | 1095.594438 | 3 | 636.2918 | 601368000 | n.d. |
| PSEGPPAHVVVGDVR       | Q923D2 | 0.0123119  | n +14.02 Da,                         | 1097.660977 | 3 | 553.2942 | 45990100  | n.d. |
| PSVDGFTPR             | Q8C196 | 0.00115785 | n +14.02 Da,                         | 1105.655654 | 3 | 495.2477 | 338588000 | n.d. |
| MKPILLQGH             | Q9QZD9 | 0.00152323 | n +28.03 Da,K +28.03 Da,             | 1105.921114 | 3 | 364.8852 | 584073984 | n.d. |
| TGGDAAAPGAAGTQALPHR   | Q9D0F3 | 0          | n +34.06 Da,                         | 1113.40357  | 3 | 627.9915 | 523255008 | n.d. |
| PTTLTDEINR            | Q922D8 | 0.00776562 | n +14.02 Da,                         | 1114.605041 | 3 | 644.2983 | 202511008 | n.d. |
| EGQESPASPEWKDR        | Q9DBT9 | 0          | n +28.03 Da,K +28.03 Da,             | 1114.781249 | 3 | 590.2881 | 54172400  | n.d. |
| VAPMKGQVCVVTGASR      | Q99L04 | 0          | n +34.06 Da,K +34.06 Da,             | 1117.00569  | 3 | 576.6698 | 30198700  | n.d. |
| ALSQHPTVNDL PNR       | P97872 | 0          | n +28.03 Da,                         | 1121.21705  | 3 | 568.276  | 21380400  | n.d. |
| VAPMKGQVCVVTGASR      | Q99L04 | 0          | n +34.06 Da,K +34.06 Da,             | 1123.594114 | 3 | 576.6441 | 64396000  | n.d. |
| LLTEAPLNPKANR         | P60710 | 0          | n +28.03 Da,                         | 1123.925318 | 3 | 497.6209 | 10722200  | n.d. |
| PKEQQEVVVLGSPH        | Q9D103 | 0.00040096 | n +14.02 Da,K +28.03 Da,             | 1124.3789   | 2 | 530.2862 | 160192000 | n.d. |
| LLTEAPLNPKANR         | P60710 | 0.00040096 | n +34.06 Da,                         | 1125.997151 | 3 | 502.3207 | 373576000 | n.d. |

|                       |        |            |                                      |             |   |          |           |      |
|-----------------------|--------|------------|--------------------------------------|-------------|---|----------|-----------|------|
| SAQESVITRDIHR         | A6H6A9 | 0.00078339 | n +42.03 Da,                         | 1135.085473 | 3 | 518.6087 | 1.028E+09 | n.d. |
| SGSGEKVEGSEPSVTTYR    | Q9CQX2 | 0.00374251 | n +34.06 Da,K +34.06 Da,             | 1135.170854 | 3 | 667.347  | 79729400  | n.d. |
| SSGALLPKPQMR          | Q9CPQ1 | 0.00152323 | n +42.03 Da,K +28.03 Da,             | 1135.408627 | 3 | 452.261  | 4.651E+09 | n.d. |
| SVDEGLLDSKR           | A2AS89 | 0.00040096 | n +28.03 Da,                         | 1136.334018 | 3 | 425.5696 | 57626700  | n.d. |
| METKNSDVGKPKQR        | Q8CHT1 | 0.00040096 | n +42.03 Da,K +28.03 Da,             | 1138.985872 | 3 | 601.9624 | 238892992 | n.d. |
| SQAEFDKAAEEVKR        | P31786 | 0          | n +42.03 Da,K +28.03 Da,             | 1141.212519 | 2 | 853.4413 | 880854976 | n.d. |
| PAVQSSALYEDR          | P16460 | 0          | n +14.02 Da,                         | 1141.363045 | 2 | 675.3381 | 1.021E+09 | n.d. |
| ELSEEDKLTVSR          | P56480 | 0          | n +34.06 Da,K +34.06 Da,             | 1142.082356 | 3 | 491.9525 | 206192000 | n.d. |
| KVTQPEVDTPLGR         | Q63880 | 0.00040096 | n +28.03 Da,K +28.03 Da,             | 1145.677249 | 3 | 499.2888 | 666425984 | n.d. |
| TEEEEEETEKESTEKDEL    | P08113 | 0          | n +28.03 Da,K +28.03 Da,             | 1149.673604 | 3 | 756.6766 | 40333600  | n.d. |
| ELSEEDKLTVSR          | P56480 | 0.00152323 | n +28.03 Da,K +28.03 Da,             | 1149.735389 | 3 | 487.9315 | 1.858E+09 | n.d. |
| AENNAQNKAKLISETR      | Q9CWP6 | 0          | n +42.03 Da,n +28.03 Da,K +28.03 Da, | 1151.409589 | 3 | 629.0096 | 212970000 | n.d. |
| PKVTQPEVDTPLGR        | Q63880 | 0          | n +14.02 Da,K +28.03 Da,             | 1154.887114 | 3 | 526.9666 | 1.284E+10 | n.d. |
| AAVKTLNPKAEVAR        | P80317 | 0.00040096 | n +42.03 Da,K +34.06 Da,             | 1157.369327 | 3 | 526.6718 | 923896000 | n.d. |
| VPKDEQGSAAEDSPTSIEAVR | P10518 | 0          | n +28.03 Da,K +28.03 Da,             | 1159.200451 | 2 | 786.3982 | 40191700  | n.d. |
| MEETEKKVATQEGR        | Q9QXZ6 | 0.00744681 | n +42.03 Da,K +34.06 Da,             | 1163.377685 | 2 | 873.4717 | 10827300  | n.d. |
| SEPEIPK GIR           | Q9WTP6 | 0.00078339 | n +28.03 Da,K +28.03 Da,             | 1164.288393 | 3 | 394.5677 | 71530896  | n.d. |
| PKVIQPEVDTPLGR        | Q8VCU1 | 0.00440852 | n +42.03 Da,K +28.03 Da,             | 1173.886717 | 3 | 540.3121 | 148022000 | n.d. |
| MEETEKKVATQEGR        | Q9QXZ6 | 0          | n +42.03 Da,K +28.03 Da,             | 1178.568434 | 2 | 867.4407 | 4.68E+09  | n.d. |
| MEETEKKVATQEGR        | Q9QXZ6 | 0          | n +42.03 Da,K +28.03 Da,             | 1179.517714 | 3 | 578.63   | 7.641E+10 | n.d. |
| VTAGKDG VANVSIEDR     | P08228 | 0          | n +28.03 Da,K +28.03 Da,             | 1180.862321 | 3 | 562.9723 | 1.287E+09 | n.d. |
| VTAGKDG VANVSIEDR     | P08228 | 0          | n +34.06 Da,K +34.06 Da,             | 1181.520022 | 3 | 566.9939 | 867718016 | n.d. |
| MEKTELIQKAK           | P68254 | 0.00040096 | n +42.03 Da,K +28.03 Da,             | 1183.59742  | 2 | 722.9258 | 888483008 | n.d. |
| AAVKTLNPKAEVAR        | P80317 | 0.00040096 | n +42.03 Da,K +28.03 Da,             | 1185.914721 | 2 | 783.4728 | 2.346E+09 | n.d. |
| AAVKTLNPKAEVAR        | P80317 | 0          | n +42.03 Da,K +28.03 Da,             | 1191.168323 | 3 | 522.6532 | 1.105E+10 | n.d. |
| SQAEFDKAAEEVKR        | P31786 | 0          | n +42.03 Da,K +34.06 Da,             | 1197.597614 | 2 | 573.3121 | 76955000  | n.d. |
| SQQSASGAPVLLR         | Q9DCM0 | 0          | n +28.03 Da,                         | 1204.299404 | 2 | 671.3796 | 382776992 | n.d. |
| PKVTQPEVDTPLGR        | Q63880 | 0          | n +14.02 Da,K +28.03 Da,             | 1207.156061 | 3 | 526.9705 | 5.945E+11 | n.d. |
| PKVTQPEVDTPLGR        | Q63880 | 0          | n +14.02 Da,K +28.03 Da,             | 1207.706692 | 2 | 789.9468 | 5.251E+10 | n.d. |
| VEAGKYTVGLGQTR        | P54869 | 0.00475494 | n +34.06 Da,K +34.06 Da,             | 1210.334386 | 3 | 515.6297 | 57085700  | n.d. |
| SDKSDLKAELE R         | O88485 | 0.00406654 | n +42.03 Da,K +34.06 Da,             | 1213.073004 | 3 | 500.9566 | 470580000 | n.d. |
| PKVTQPEVDTPLGR        | Q63880 | 0          | n +17.03 Da,K +34.06 Da,             | 1214.785375 | 3 | 529.9822 | 2.702E+10 | n.d. |
| SGYTPDEKLR            | Q3UIU2 | 0.00040096 | n +42.03 Da,K +34.06 Da,             | 1216.795245 | 2 | 621.3326 | 534376000 | n.d. |
| GVQVETISPGDGR         | P26883 | 0          | n +28.03 Da,                         | 1218.183813 | 2 | 671.851  | 91943000  | n.d. |
| SPVDTL PGR            | Q499E5 | 0.03978862 | n +42.03 Da,                         | 1219.107386 | 2 | 492.2543 | 21968700  | n.d. |
| SLDMKEHPDAEVQKN       | O55060 | 0          | n +42.03 Da,K +28.03 Da,             | 1220.819395 | 3 | 613.6372 | 4.374E+09 | n.d. |
| G DATENFEDVGHST DAR   | P56395 | 0          | n +34.06 Da,                         | 1220.929041 | 3 | 618.9485 | 64343000  | n.d. |
| SETAAPAAPAPAEKTPVKKK  | P43274 | 0          | n +42.03 Da,n +28.03 Da,K +28.03 Da, | 1221.208983 | 3 | 772.1057 | 3.027E+09 | n.d. |
| DNIQGITKPAIR          | P62806 | 0.00115785 | n +28.03 Da,K +28.03 Da,             | 1221.703414 | 2 | 691.417  | 333862016 | n.d. |
| DSSFQIVKNPR           | Q61176 | 0          | n +34.06 Da,K +34.06 Da,             | 1222.667292 | 3 | 453.6069 | 97045904  | n.d. |

|                        |        |            |                                      |             |   |          |           |      |
|------------------------|--------|------------|--------------------------------------|-------------|---|----------|-----------|------|
| GNVTAGKDGVANVSIEDR     | P08228 | 0          | n +34.06 Da,K +34.06 Da,             | 1224.369777 | 3 | 623.6557 | 83194496  | n.d. |
| SGYTPDEKLR             | Q3UIU2 | 0.00040096 | n +42.03 Da,K +34.06 Da,             | 1225.949814 | 3 | 621.3337 | 508247008 | n.d. |
| SDKSDLKAELER           | O88485 | 0.00040096 | n +42.03 Da,K +34.06 Da,             | 1225.992819 | 2 | 750.9302 | 356076992 | n.d. |
| SNLVGAAHEELQQSR        | P48678 | 0.00040096 | n +28.03 Da,                         | 1227.321141 | 2 | 556.2747 | 2.222E+09 | n.d. |
| TTVIKEVLQR             | Q8CAY6 | 0.00475494 | n +34.06 Da,K +34.06 Da,             | 1231.408942 | 3 | 418.9523 | 70408200  | n.d. |
| PKVIQPEVDTPLGR         | Q8VCU1 | 0.00440852 | n +42.03 Da,K +28.03 Da,             | 1232.103592 | 3 | 540.2999 | 130779000 | n.d. |
| LSTKPQAQEQPPASPEALR    | Q9WU79 | 0          | n +28.03 Da,K +28.03 Da,             | 1236.085457 | 3 | 702.0516 | 1.57E+09  | n.d. |
| RIQEEQRKAEMER          | Q8CFB4 | 0.01970443 | n +34.06 Da,K +34.06 Da,             | 1245.571362 | 3 | 590.9855 | 38962400  | n.d. |
| SOLDMKEHPDAEVQKNQ      | O55060 | 0          | n +42.03 Da,K +28.03 Da,             | 1246.954961 | 3 | 656.3219 | 193172992 | n.d. |
| AAETVELHKLK            | Q9D1J3 | 0          | n +42.03 Da,K +34.06 Da,             | 1246.96002  | 3 | 450.2865 | 77089200  | n.d. |
| SQQSASGAPVLLR          | Q9DCM0 | 0          | n +28.03 Da,                         | 1249.484808 | 3 | 671.3643 | 14240300  | n.d. |
| AAQESLHVKTPLR          | Q8VBT2 | 0          | n +42.03 Da,K +34.06 Da,             | 1252.102414 | 3 | 509.3026 | 954563968 | n.d. |
| AAETVELHKLK            | Q9D1J3 | 0.00040096 | n +42.03 Da,K +28.03 Da,             | 1256.648447 | 3 | 446.2664 | 13705800  | n.d. |
| TLDPVEKALR             | P63017 | 0.00040096 | n +28.03 Da,K +28.03 Da,             | 1256.84276  | 3 | 399.9114 | 75335104  | n.d. |
| AAQESLHVKTPLR          | Q8VBT2 | 0.00152323 | n +42.03 Da,K +28.03 Da,             | 1257.917957 | 2 | 507.281  | 1.29E+09  | n.d. |
| YTAAVEAKQVAQEAQR       | O35129 | 0          | n +28.03 Da,K +28.03 Da,             | 1257.925061 | 3 | 649.6743 | 22658600  | n.d. |
| PLVTLGGNKESQPEVR       | Q9DCN1 | 0.01970443 | n +17.03 Da,K +34.06 Da,             | 1259.64719  | 3 | 664.0377 | 14982300  | n.d. |
| PEQLITGKEDAANNYAR      | P05213 | 0.00040096 | n +14.02 Da,K +28.03 Da,             | 1261.347439 | 3 | 644.6718 | 146995008 | n.d. |
| VSGGAIALGHPLGGSGSR     | Q8BWT1 | 0.00040096 | n +34.06 Da,                         | 1263.826537 | 3 | 542.9775 | 248388992 | n.d. |
| NVTAGKDGVANVSIEDR      | P08228 | 0          | n +34.06 Da,K +34.06 Da,             | 1269.632047 | 3 | 605.008  | 186636000 | n.d. |
| ATSASSHLNKGIKQMY       | P15105 | 0          | n +42.03 Da,n +28.03 Da,K +28.03 Da, | 1278.361037 | 3 | 611.9887 | 3.984E+09 | n.d. |
| PKVTQPEVDTPLGR         | Q63880 | 0.00040096 | n +17.03 Da,K +34.06 Da,             | 1278.682365 | 3 | 529.9833 | 199172992 | n.d. |
| PKVTQPEVDTPLGR         | Q63880 | 0          | n +28.03 Da,K +28.03 Da,             | 1280.36605  | 3 | 531.6412 | 185783008 | n.d. |
| VPNDSSFQIVKNPR         | Q61176 | 0          | n +34.06 Da,K +34.06 Da,             | 1282.186113 | 3 | 556.9941 | 151419008 | n.d. |
| PDGQVITIGNER           | P60710 | 0          | n +14.02 Da,                         | 1284.066955 | 2 | 656.8458 | 48944100  | n.d. |
| PADTGDVNVHSGIIAAR      | F6XXE6 | 0          | n +14.02 Da,                         | 1284.700971 | 3 | 569.6321 | 720497024 | n.d. |
| SVLPKPALVASR           | Q8C196 | 0.00300865 | n +28.03 Da,K +28.03 Da,             | 1288.53082  | 3 | 431.9465 | 937196992 | n.d. |
| SASVVSIVSR             | P61804 | 0.03612944 | n +28.03 Da,                         | 1295.24924  | 2 | 516.8062 | 18438300  | n.d. |
| PLAAAKAIQGLR           | Q8BGQ7 | 0.00040096 | n +14.02 Da,K +28.03 Da,             | 1299.017159 | 3 | 417.603  | 128689000 | n.d. |
| LPAKPEVSSDEDVQYR       | Q8BMS1 | 0          | n +28.03 Da,K +28.03 Da,             | 1308.57077  | 3 | 630.3267 | 45966700  | n.d. |
| EILLESHMVMIR           | Q8BGQ4 | 0.04544059 | n +14.02 Da,                         | 1310.448213 | 3 | 495.6076 | 102854000 | n.d. |
| AAQESLHVKTPLR          | Q8VBT2 | 0          | n +42.03 Da,K +28.03 Da,             | 1314.623871 | 3 | 507.2929 | 1.162E+10 | n.d. |
| TPEASGSGEKVEGSEPSVTYYR | Q9CQX2 | 0          | n +28.03 Da,                         | 1319.396707 | 3 | 796.0513 | 865785024 | n.d. |
| PTPGSASSEAPPLVNEDVKR   | Q91YQ5 | 0          | n +14.02 Da,K +28.03 Da,             | 1325.597974 | 3 | 698.367  | 341632992 | n.d. |
| DISSHPPEVGSYAPR        | Q78PY7 | 0          | n +34.06 Da,                         | 1326.03843  | 3 | 549.2836 | 290286016 | n.d. |
| PMTVSSDQMAKLR          | P16015 | 0          | n +14.02 Da,K +28.03 Da,             | 1329.11542  | 3 | 502.5988 | 2.164E+09 | n.d. |
| TPGVAADLSHIETR         | P08249 | 0.00078339 | n +34.06 Da,                         | 1330.544056 | 3 | 500.9529 | 55358400  | n.d. |
| ASSDIQVKELEKR          | P54227 | 0          | n +42.03 Da,K +34.06 Da,             | 1331.063795 | 3 | 538.322  | 336860000 | n.d. |
| SIKMPINEPAPGR          | P49429 | 0.00901838 | n +28.03 Da,K +28.03 Da,             | 1332.306027 | 3 | 489.2763 | 143075008 | n.d. |
| VPNDSSFQIVKNPR         | Q61176 | 0          | n +28.03 Da,K +28.03 Da,             | 1334.632191 | 3 | 552.973  | 2.047E+09 | n.d. |

|                        |        |            |                                      |             |   |          |           |      |
|------------------------|--------|------------|--------------------------------------|-------------|---|----------|-----------|------|
| YDLQTGQISNR            | Q64374 | 0.00040096 | n +28.03 Da,                         | 1335.33959  | 2 | 661.8424 | 48482000  | n.d. |
| SSAADKVVAEIR           | P51660 | 0.04362624 | n +28.03 Da,K +28.03 Da,             | 1344.919269 | 3 | 434.5854 | 180550000 | n.d. |
| AAQESLHVKTPLR          | Q8VBT2 | 0          | n +42.03 Da,K +34.06 Da,             | 1345.802418 | 3 | 509.3021 | 206810000 | n.d. |
| EQAGGDATENFEDVGHSTДАР  | P56395 | 0          | n +28.03 Da,                         | 1351.810039 | 3 | 745.3237 | 5.836E+09 | n.d. |
| SEGDSVGDsvHGKPSVVYR    | Q9CQU3 | 0          | n +42.03 Da,K +34.06 Da,             | 1351.84334  | 3 | 684.3452 | 52924400  | n.d. |
| EVLEKQPVLsqTEAR        | P99026 | 0.04004967 | n +42.03 Da,K +28.03 Da,             | 1353.077731 | 3 | 599.674  | 14680900  | n.d. |
| KIQGGSVVEMQGDemTR      | O88844 | 0          | n +28.03 Da,K +28.03 Da,             | 1355.040916 | 3 | 640.9882 | 202402000 | n.d. |
| ALSDADVQKQIKH          | P50518 | 0.00440852 | n +42.03 Da,K +34.06 Da,             | 1355.320818 | 3 | 521.6452 | 1.377E+09 | n.d. |
| VEELMEDTQHKLr          | Q9QUN9 | 0.01449764 | n +34.06 Da,K +34.06 Da,             | 1355.558343 | 3 | 565.9756 | 24757400  | n.d. |
| GADATESFEDVGHSPDAR     | Q9CQX2 | 0          | n +34.06 Da,                         | 1356.321717 | 3 | 632.2924 | 60795800  | n.d. |
| SPADTGDVNVHSGIIAR      | F6XXE6 | 0          | n +28.03 Da,                         | 1360.601871 | 3 | 603.3172 | 169982000 | n.d. |
| TTASPSQVRQNYHQDAEAAINR | P09528 | 0          | n +42.03 Da,                         | 1362.434377 | 3 | 833.736  | 423520992 | n.d. |
| ATSASSHLNKGIKQMY       | P15105 | 0.00040096 | n +42.03 Da,n +28.03 Da,K +28.03 Da, | 1365.115878 | 3 | 611.9895 | 5.051E+09 | n.d. |
| PKVTQPEVDTPlGRVR       | Q63880 | 0.00040096 | n +14.02 Da,K +28.03 Da,             | 1367.927659 | 4 | 459.2683 | 64008400  | n.d. |
| VKSTAGDTHLGGEDFDNR     | P17156 | 0.00040096 | n +28.03 Da,K +28.03 Da,             | 1368.313605 | 3 | 658.9758 | 96292304  | n.d. |
| TDTEdKGEFLSEGgVr       | E9PV24 | 0          | n +28.03 Da,K +28.03 Da,             | 1370.524821 | 3 | 618.3018 | 594948992 | n.d. |
| TTKDPeseHPSVTLFR       | Q99JW2 | 0          | n +42.03 Da,K +34.06 Da,             | 1370.972348 | 3 | 640.6669 | 228434000 | n.d. |
| MLRPVNLsgWRAPGMRAPR    | Q9CQL2 | 0.0177139  | n +42.03 Da,                         | 1372.146234 | 3 | 736.3925 | 60782900  | n.d. |
| PKVIQPEVDTPlGR         | Q8VCU1 | 0.00040096 | n +14.02 Da,K +28.03 Da,             | 1374.654495 | 3 | 530.9711 | 53235400  | n.d. |
| PKVIQPEVDTPlGR         | Q8VCU1 | 0.00040096 | n +17.03 Da,K +34.06 Da,             | 1375.011835 | 3 | 533.9949 | 28691700  | n.d. |
| TDTEdKGEFLSEGgVr       | E9PV24 | 0          | n +34.06 Da,K +34.06 Da,             | 1376.330281 | 3 | 622.323  | 2.721E+09 | n.d. |
| PLPNVVTlQEDITTERCR     | Q9DBE9 | 0.01418919 | n +17.03 Da,                         | 1377.825978 | 3 | 720.0399 | 170026000 | n.d. |
| GTNKETTIQGLDGLSER      | Q91Y97 | 0.00040096 | n +28.03 Da,K +28.03 Da,             | 1379.659052 | 3 | 625.6653 | 150628000 | n.d. |
| TNKETTIQGLDGLSER       | Q91Y97 | 0.00040096 | n +34.06 Da,K +34.06 Da,             | 1381.444438 | 3 | 609.9976 | 33569400  | n.d. |
| PGVAADLSHIETR          | P08249 | 0.00040096 | n +14.02 Da,                         | 1384.059361 | 3 | 460.5807 | 176695008 | n.d. |
| KIQGGSVVEMQGDemTR      | O88844 | 0          | n +34.06 Da,K +34.06 Da,             | 1385.435139 | 3 | 645.0221 | 40043900  | n.d. |
| VPNDSSFQIVKNPR         | Q61176 | 0          | n +34.06 Da,K +34.06 Da,             | 1386.816964 | 3 | 556.9961 | 75507800  | n.d. |
| PLYSNPPLNGAR           | P05202 | 0          | n +14.02 Da,                         | 1390.262045 | 2 | 656.8525 | 190908000 | n.d. |
| EQAGGDATENFEDVGHSTДАР  | P56395 | 0          | n +42.03 Da,                         | 1395.271211 | 3 | 749.996  | 1.016E+09 | n.d. |
| GVTVKDVNQQEFVR         | Q9CZX8 | 0.00040096 | n +28.03 Da,K +28.03 Da,             | 1395.903976 | 3 | 558.9777 | 1.675E+09 | n.d. |
| ASSDIQVKELEKR          | P54227 | 0          | n +42.03 Da,K +28.03 Da,             | 1397.338942 | 3 | 534.2947 | 621753984 | n.d. |
| TSVLPKPalVASR          | Q8C196 | 0.01260647 | n +34.06 Da,K +34.06 Da,             | 1399.391946 | 3 | 469.6506 | 165231008 | n.d. |
| ATSASSHLNKGIKQMY       | P15105 | 0          | n +42.03 Da,n +34.06 Da,K +34.06 Da, | 1405.436782 | 1 | 616.0103 | 7.655E+09 | n.d. |
| PTSKTAAAVAAQSGILDR     | Q9R112 | 0.00040096 | n +14.02 Da,K +28.03 Da,             | 1410.954597 | 3 | 600.3401 | 129409000 | n.d. |
| GVAaAISKTAVAPIER       | P51881 | 0          | n +34.06 Da,K +34.06 Da,             | 1413.295091 | 3 | 541.3467 | 630252992 | n.d. |
| DNYGKNDEVEFVR          | P25688 | 0.04362624 | n +28.03 Da,K +28.03 Da,             | 1415.054587 | 3 | 547.603  | 34963000  | n.d. |
| ATSASSHLNKGIKQMY       | P15105 | 0          | n +42.03 Da,n +34.06 Da,K +34.06 Da, | 1418.82609  | 3 | 616.0099 | 3.053E+10 | n.d. |
| SQAeFDKAAEEVkr         | P31786 | 0.00374251 | n +42.03 Da,K +28.03 Da,             | 1419.1771   | 3 | 569.2961 | 135254000 | n.d. |
| ATSASSHLNKGIKQMY       | P15105 | 0          | n +42.03 Da,n +28.03 Da,K +28.03 Da, | 1424.010417 | 2 | 917.4793 | 1.082E+09 | n.d. |
| GTLDPVEKALR            | P63017 | 0.00406654 | n +28.03 Da,K +28.03 Da,             | 1426.476995 | 3 | 418.9269 | 120855000 | n.d. |



|                         |        |            |                                      |             |   |          |           |      |
|-------------------------|--------|------------|--------------------------------------|-------------|---|----------|-----------|------|
| GTITTKELGTVMR           | P62204 | 0.00605629 | n +28.03 Da,K +28.03 Da,             | 1426.798972 | 3 | 488.2814 | 1.958E+09 | n.d. |
| ATSASSHLNKGIKQMY        | P15105 | 0          | n +42.03 Da,n +28.03 Da,K +28.03 Da, | 1428.386693 | 3 | 611.9892 | 1.04E+10  | n.d. |
| VPNDSSFQIVKNPR          | Q61176 | 0          | n +28.03 Da,K +28.03 Da,             | 1430.459035 | 3 | 552.9729 | 101080000 | n.d. |
| YGGYKEPAAPVSIQR         | Q61792 | 0.00776562 | n +34.06 Da,K +34.06 Da,             | 1442.464476 | 3 | 568.6619 | 33393600  | n.d. |
| ALDPAEQHLR              | Q9CPZ8 | 0.00040096 | n +42.03 Da,                         | 1443.23728  | 2 | 596.3094 | 2.318E+09 | n.d. |
| PKVIQPEVDTPLGR          | Q8VCU1 | 0          | n +14.02 Da,K +28.03 Da,             | 1444.814273 | 3 | 530.9811 | 1.219E+11 | n.d. |
| DNIQGITKPAIR            | P62806 | 0.00040096 | n +42.03 Da,K +34.06 Da,             | 1445.073846 | 3 | 467.9482 | 43546700  | n.d. |
| ASESGKLWGGGR            | Q91YI0 | 0.00040096 | n +42.03 Da,K +28.03 Da,             | 1446.41973  | 2 | 609.3177 | 3.364E+09 | n.d. |
| ASESGKLWGGGR            | Q91YI0 | 0.00040096 | n +42.03 Da,K +28.03 Da,             | 1447.348051 | 1 | 609.3181 | 4.192E+09 | n.d. |
| PKVIQPEVDTPLGR          | Q8VCU1 | 0          | n +17.03 Da,K +34.06 Da,             | 1448.084638 | 3 | 533.9939 | 3.404E+09 | n.d. |
| ATSASSHLNKGIKQMY        | P15105 | 0          | n +42.03 Da,n +28.03 Da,K +28.03 Da, | 1449.930878 | 1 | 611.9897 | 1.631E+10 | n.d. |
| PKVIQPEVDTPLGR          | Q8VCU1 | 0          | n +14.02 Da,K +28.03 Da,             | 1450.004953 | 2 | 795.9641 | 4.061E+09 | n.d. |
| CKQSTKTEEKLRPTR         | E9Q9C0 | 0.04444444 | n +14.02 Da,n +28.03 Da,K +28.03 Da, | 1458.26533  | 3 | 654.0455 | 28590100  | n.d. |
| VGLKAPGIIPR             | Q03265 | 0.00227187 | n +28.03 Da,K +28.03 Da,             | 1458.455991 | 3 | 392.9322 | 234867008 | n.d. |
| GTLDPVKEKALR            | P63017 | 0.00406654 | n +28.03 Da,K +28.03 Da,             | 1461.289603 | 3 | 418.9188 | 176886000 | n.d. |
| PGIEPSDKMLQGR           | P24270 | 0          | n +14.02 Da,K +28.03 Da,             | 1461.595726 | 3 | 522.9492 | 3.532E+09 | n.d. |
| KATIPAALQAQESTEGPGTGQDR | Q9DBG1 | 0          | n +28.03 Da,K +28.03 Da,             | 1462.179522 | 3 | 794.7465 | 176492992 | n.d. |
| SASNVSLHETSR            | Q8BZ09 | 0          | n +42.03 Da,                         | 1467.488181 | 2 | 721.8648 | 601345984 | n.d. |
| KATIPAALQAQESTEGPGTGQDR | Q9DBG1 | 0          | n +34.06 Da,K +34.06 Da,             | 1467.701547 | 3 | 798.7665 | 53105200  | n.d. |
| PGASPADTGDVNVHSGIIAAR   | F6XXE6 | 0          | n +14.02 Da,                         | 1479.739369 | 3 | 673.68   | 210939008 | n.d. |
| PSGTSQCEDGSAGGFQHLDMH   | Q91WT9 | 0          | n +14.02 Da,                         | 1483.364365 | 3 | 744.64   | 302150016 | n.d. |
| ATPEASGSGEKVEGSEPSVTTYR | Q9CQX2 | 0          | n +42.03 Da,K +34.06 Da,             | 1484.739977 | 3 | 826.4013 | 29886900  | n.d. |
| PGVTVKDVNQQEFVR         | Q9CZX8 | 0          | n +14.02 Da,K +28.03 Da,             | 1485.596828 | 2 | 879.4806 | 3.024E+09 | n.d. |
| PGVTVKDVNQQEFVR         | Q9CZX8 | 0          | n +14.02 Da,K +28.03 Da,             | 1485.684871 | 3 | 586.6592 | 1.733E+11 | n.d. |
| SKTNVSGGAIALGHPLGGSGSR  | Q8BWT1 | 0.0202946  | n +28.03 Da,K +28.03 Da,             | 1485.790603 | 3 | 693.702  | 278760000 | n.d. |
| ATGANATPLDFPSKRR        | Q64213 | 0          | n +42.03 Da,K +34.06 Da,             | 1487.492747 | 3 | 595.3495 | 139440992 | n.d. |
| TLSDYNIQKESTLH          | P0CG49 | 0          | n +28.03 Da,K +28.03 Da,             | 1500.707447 | 3 | 568.9647 | 677827968 | n.d. |
| YDKSEVDGAAAMLNYTH       | Q8VDB2 | 0.0485348  | n +34.06 Da,K +34.06 Da,             | 1500.872202 | 3 | 651.6519 | 266256000 | n.d. |
| EIAQDFKTDLR             | P02301 | 0          | n +28.03 Da,K +28.03 Da,             | 1503.172802 | 3 | 464.5898 | 13141800  | n.d. |
| PGIEPSDKMLQGR           | P24270 | 0          | n +14.02 Da,K +28.03 Da,             | 1505.720294 | 3 | 522.9483 | 384182016 | n.d. |
| YITGESKEQVANSAFVER      | P11499 | 0          | n +28.03 Da,K +28.03 Da,             | 1508.012675 | 3 | 695.3592 | 138094000 | n.d. |
| TNVSGGAIALGHPLGGSGSR    | Q8BWT1 | 0          | n +34.06 Da,                         | 1508.706104 | 2 | 921.5052 | 17518300  | n.d. |
| PKVIQPEVDTPLGR          | Q8VCU1 | 0          | n +14.02 Da,K +28.03 Da,             | 1519.096803 | 3 | 530.9788 | 63481800  | n.d. |
| ADEEKLPPGWEKR           | Q9QUR7 | 0          | n +42.03 Da,K +28.03 Da,             | 1519.193992 | 3 | 551.6265 | 4.75E+09  | n.d. |
| SFPSLENSVKPR            | Q8BHI7 | 0.00040096 | n +28.03 Da,                         | 1519.793177 | 3 | 472.9328 | 236036992 | n.d. |
| MDGEDDSNLVIKRR          | Q91WE2 | 0          | n +42.03 Da,K +34.06 Da,             | 1523.897471 | 3 | 577.3159 | 110458000 | n.d. |
| TTASPSQVRQNYHQDAEAAINR  | P09528 | 0          | n +42.03 Da,                         | 1525.459511 | 3 | 833.7377 | 69279904  | n.d. |
| FPEDTLEQKAGSVGR         | Q8VCW8 | 0.00189681 | n +28.03 Da,K +28.03 Da,             | 1527.871779 | 3 | 563.9654 | 200090000 | n.d. |
| DPNVTKTLQFR             | Q9Z0X1 | 0          | n +28.03 Da,K +28.03 Da,             | 1531.801563 | 3 | 458.9294 | 484008000 | n.d. |
| TLLKDTTVTGLGR           | Q8BMS1 | 0          | n +34.06 Da,K +34.06 Da,             | 1532.520315 | 3 | 480.9576 | 5946050   | n.d. |

|                      |        |            |                                      |             |   |          |           |      |
|----------------------|--------|------------|--------------------------------------|-------------|---|----------|-----------|------|
| TKDAGTIAGLNVMR       | P20029 | 0.00543281 | n +34.06 Da,K +34.06 Da,             | 1538.753134 | 3 | 505.6375 | 299388000 | n.d. |
| PDVTAKVQEEIDR        | Q64458 | 0          | n +14.02 Da,K +28.03 Da,             | 1539.567404 | 3 | 514.6108 | 572526976 | n.d. |
| TNKETTIQGLDGLSER     | Q91Y97 | 0          | n +28.03 Da,K +28.03 Da,             | 1539.955591 | 3 | 606.6579 | 1.725E+09 | n.d. |
| IYDDLKQAVAYR         | Q03265 | 0.00040096 | n +28.03 Da,K +28.03 Da,             | 1541.291387 | 3 | 533.2912 | 281176992 | n.d. |
| TTKAPAAIGPYSQAVQVDR  | P52760 | 0          | n +34.06 Da,K +34.06 Da,             | 1542.972867 | 3 | 681.0544 | 92991696  | n.d. |
| VAFPQKVMPPQAR        | Q3U422 | 0.00040096 | n +34.06 Da,K +34.06 Da,             | 1544.866588 | 3 | 545.3336 | 414260000 | n.d. |
| SVLGEADQKGSVLVAPDR   | Q8BGQ7 | 0.04544059 | n +28.03 Da,K +28.03 Da,             | 1547.81793  | 3 | 599.66   | 116774000 | n.d. |
| FPEDTLEQKAGSVGR      | Q8VCW8 | 0.0051039  | n +34.06 Da,K +34.06 Da,             | 1548.858825 | 3 | 567.3173 | 551529984 | n.d. |
| PEQVAMATVTALHR       | Q91Y97 | 0          | n +14.02 Da,                         | 1548.967062 | 3 | 513.2768 | 3.205E+09 | n.d. |
| TKAPAAIGPYSQAVQVDR   | P52760 | 0          | n +28.03 Da,K +28.03 Da,             | 1552.644895 | 3 | 643.3722 | 1.044E+09 | n.d. |
| DIGATVHELRSR         | P16331 | 0          | n +34.06 Da,                         | 1552.702863 | 3 | 411.2331 | 78654400  | n.d. |
| SKVALVYGQMNEPPGAR    | P56480 | 0.02423263 | n +28.03 Da,K +28.03 Da,             | 1557.981178 | 3 | 625.0076 | 92712304  | n.d. |
| TFIAIKPDGVQR         | P15532 | 0.00040096 | n +34.06 Da,K +34.06 Da,             | 1561.342559 | 3 | 471.635  | 382479008 | n.d. |
| TNKETTIQGLDGLSER     | Q91Y97 | 0          | n +34.06 Da,K +34.06 Da,             | 1561.662537 | 3 | 610.6815 | 5.686E+09 | n.d. |
| VLASEPEIPK GIR       | Q9WTP6 | 0          | n +34.06 Da,                         | 1563.49213  | 3 | 492.9857 | 259642000 | n.d. |
| TKAPAAIGPYSQAVQVDR   | P52760 | 0          | n +34.06 Da,K +34.06 Da,             | 1565.2901   | 3 | 647.3785 | 686153984 | n.d. |
| QVAMNPTNTVDFAKR      | P63017 | 0          | n +28.03 Da,K +28.03 Da,             | 1565.599226 | 3 | 583.3106 | 272564000 | n.d. |
| PPGIEPSPDKMLQGR      | P24270 | 0          | n +14.02 Da,n +28.03 Da,             | 1567.289597 | 3 | 555.3022 | 492516992 | n.d. |
| TTKAPAAIGPYSQAVQVDR  | P52760 | 0          | n +28.03 Da,K +28.03 Da,             | 1571.969675 | 3 | 677.041  | 517748000 | n.d. |
| DPDAANYKDISDVER      | Q9D819 | 0.00440852 | n +28.03 Da,K +28.03 Da,             | 1575.871693 | 3 | 588.62   | 1.083E+09 | n.d. |
| VLASEPEIPK GIR       | Q9WTP6 | 0          | n +28.03 Da,                         | 1576.613743 | 3 | 488.9645 | 869516992 | n.d. |
| PEGAKNIQVDSPYDISR    | Q91YQ5 | 0.00040096 | n +14.02 Da,K +28.03 Da,             | 1584.140607 | 3 | 644.3351 | 662950976 | n.d. |
| PVPALPVKVEPR         | Q9D1H6 | 0.00078339 | n +14.02 Da,K +28.03 Da,             | 1585.435724 | 3 | 448.6185 | 53979100  | n.d. |
| YTQKAPQVSTPTLVEAAR   | P07724 | 0          | n +28.03 Da,K +28.03 Da,             | 1594.145414 | 3 | 672.7101 | 213544000 | n.d. |
| IQALSDSEEEHDSA WDGR  | Q91VU6 | 0          | n +34.06 Da,                         | 1597.028495 | 3 | 693.657  | 41055500  | n.d. |
| SVVFPHDEPLAGR        | Q99LB7 | 0.00040096 | n +28.03 Da,                         | 1597.712359 | 3 | 484.5925 | 23144000  | n.d. |
| TQDKLYQPEYQEVSTEEQR  | Q9JKR6 | 0          | n +28.03 Da,K +28.03 Da,             | 1597.872942 | 3 | 809.7277 | 90438496  | n.d. |
| TENKGPVNIITPSR       | Q9CXF0 | 0.00605629 | n +28.03 Da,K +28.03 Da,             | 1601.658844 | 3 | 565.6652 | 255031008 | n.d. |
| APPLTLDG IKDR        | Q9CR21 | 0          | n +28.03 Da,                         | 1604.040412 | 3 | 451.2698 | 120169000 | n.d. |
| NVVLVGS LQDRYVPYHSAR | Q6NS59 | 0.01883053 | n +17.03 Da,                         | 1607.101993 | 3 | 730.7191 | 871414016 | n.d. |
| SAELALGENNEVLKSGR    | P05202 | 0          | n +34.06 Da,K +34.06 Da,             | 1607.171102 | 3 | 619.0229 | 101252000 | n.d. |
| LGNVTAGKDG VANVSIEDR | P08228 | 0          | n +34.06 Da,K +34.06 Da,             | 1608.896859 | 3 | 661.7087 | 696561984 | n.d. |
| GGDVLET LQEKGER      | P97494 | 0          | n +34.06 Da,K +34.06 Da,             | 1610.126812 | 3 | 533.6401 | 88588400  | n.d. |
| AEEEVAKLEKH          | Q810B6 | 0.00040096 | n +42.03 Da,n +28.03 Da,K +28.03 Da, | 1610.693892 | 3 | 460.9171 | 962374016 | n.d. |
| ATLQSESEVKVDGEQKLSKN | Q99MN1 | 0.00078339 | n +42.03 Da,K +28.03 Da,             | 1612.906867 | 3 | 743.7365 | 30190200  | n.d. |
| PTVNPTTGEVIGHVAEGDR  | Q9CZS1 | 0          | n +14.02 Da,                         | 1613.061079 | 3 | 654.9989 | 81886096  | n.d. |
| PNVTIILKEPVR         | Q99PL5 | 0          | n +17.03 Da,K +34.06 Da,             | 1614.011592 | 3 | 477.3173 | 22816300  | n.d. |
| ADAEVITFPKKH         | Q9ESX5 | 0          | n +42.03 Da,n +34.06 Da,K +34.06 Da, | 1614.479899 | 3 | 489.2948 | 70162600  | n.d. |
| AQNLKDLAGR           | O35129 | 0.00040096 | n +42.03 Da,K +34.06 Da,             | 1620.72437  | 2 | 581.3439 | 108235000 | n.d. |
| SAELALGENNEVLKSGR    | P05202 | 0          | n +28.03 Da,K +28.03 Da,             | 1622.740392 | 3 | 615.001  | 230795008 | n.d. |

|                         |        |            |                                      |             |   |          |           |      |
|-------------------------|--------|------------|--------------------------------------|-------------|---|----------|-----------|------|
| APPLTLDGIKDR            | Q9CR21 | 0.03847357 | n +34.06 Da,                         | 1624.095686 | 3 | 455.2904 | 635435008 | n.d. |
| SSMKSVGEVMAIGR          | Q8C196 | 0.00078339 | n +34.06 Da,K +34.06 Da,             | 1625.406343 | 3 | 507.2919 | 1.71E+09  | n.d. |
| SSMKSVGEVMAIGR          | Q8C196 | 0          | n +28.03 Da,K +28.03 Da,             | 1627.016701 | 3 | 503.2708 | 318361984 | n.d. |
| GTPPGGSITKVLIANR        | Q99MR8 | 0          | n +34.06 Da,                         | 1628.847664 | 3 | 551.6821 | 69000600  | n.d. |
| ATLQESEVKVDGEQKLSKN     | Q99MN1 | 0          | n +42.03 Da,K +34.06 Da,             | 1630.929494 | 3 | 749.7685 | 13792900  | n.d. |
| LLLPGELAKH              | P10853 | 0.00337838 | n +28.03 Da,K +28.03 Da,             | 1631.210654 | 3 | 382.913  | 69578896  | n.d. |
| YDGPLMKTEVPGPR          | P61922 | 0.00605629 | n +34.06 Da,K +34.06 Da,             | 1631.682708 | 3 | 543.3085 | 48184800  | n.d. |
| QKTGTAEMSSILEER         | Q03265 | 0          | n +34.06 Da,K +34.06 Da,             | 1632.680041 | 2 | 583.3138 | 1.166E+09 | n.d. |
| SQAEFDKAAEEVKR          | P31786 | 0          | n +42.03 Da,K +28.03 Da,             | 1633.22767  | 2 | 853.4413 | 13477500  | n.d. |
| SSMKSVGEVMAIGR          | Q8C196 | 0          | n +28.03 Da,K +28.03 Da,             | 1633.650806 | 2 | 754.4024 | 203162000 | n.d. |
| PVLLTEAPLNPKANR         | P60710 | 0          | n +14.02 Da,K +28.03 Da,             | 1637.919978 | 3 | 559.0018 | 5.914E+09 | n.d. |
| PSKTNVSGGAIALGHPLGGSGSR | Q8BWT1 | 0          | n +14.02 Da,K +28.03 Da,             | 1638.333443 | 3 | 721.3804 | 248032992 | n.d. |
| SQAEFDKAAEEVKR          | P31786 | 0          | n +42.03 Da,K +28.03 Da,             | 1639.405519 | 3 | 569.297  | 1.859E+10 | n.d. |
| SASMYQNEKEVGLAIR        | P70694 | 0.03847357 | n +28.03 Da,K +28.03 Da,             | 1642.46074  | 3 | 617.991  | 573659008 | n.d. |
| PSKGPLQSVQVFGR          | P14131 | 0.00040096 | n +14.02 Da,K +28.03 Da,             | 1648.158691 | 3 | 514.6329 | 1.477E+10 | n.d. |
| VLSGEDKSNIAAW           | P01942 | 0.00152323 | n +28.03 Da,K +28.03 Da,             | 1654.195195 | 3 | 534.6354 | 117270000 | n.d. |
| PSKGPLQSVQVFGR          | P14131 | 0          | n +14.02 Da,K +28.03 Da,             | 1654.893986 | 2 | 771.4436 | 6.877E+09 | n.d. |
| VVVGDLVEVKGGDR          | Q6PIE5 | 0.00040096 | n +28.03 Da,                         | 1655.423425 | 3 | 499.9603 | 100184000 | n.d. |
| SDAPPLTLDGIKDR          | Q9CR21 | 0.00040096 | n +28.03 Da,K +28.03 Da,             | 1658.444501 | 3 | 518.6224 | 1.054E+10 | n.d. |
| EEAPDFEANTTIGR          | Q8BG37 | 0          | n +42.03 Da,                         | 1658.530773 | 2 | 796.3709 | 579100032 | n.d. |
| ATEGMILTNDHDHQR         | Q8BUV3 | 0          | n +42.03 Da,                         | 1664.172282 | 3 | 593.293  | 884145984 | n.d. |
| VISLSGEHSIIGR           | P08228 | 0          | n +14.02 Da,                         | 1664.441069 | 3 | 461.265  | 497091008 | n.d. |
| ANLEKAQSELSGADEAAR      | Q9D3D9 | 0          | n +42.03 Da,K +34.06 Da,             | 1674.141247 | 3 | 669.6893 | 51636800  | n.d. |
| AGGEGGVTLGQPHLSR        | Q9Z0N1 | 0          | n +42.03 Da,                         | 1676.554914 | 2 | 789.4053 | 687929024 | n.d. |
| LEEETGQVGFHQPGSIR       | Q9DBT9 | 0          | n +28.03 Da,                         | 1689.428849 | 3 | 671.0132 | 715905024 | n.d. |
| MNQEKLAKLQAQVR          | Q64152 | 0.0154518  | n +42.03 Da,K +34.06 Da,             | 1689.883755 | 3 | 589.69   | 3.21E+10  | n.d. |
| MNQEKLAKLQAQVR          | Q64152 | 0          | n +42.03 Da,K +34.06 Da,             | 1690.509866 | 2 | 884.0317 | 196940000 | n.d. |
| PVLLTKFVEGAR            | Q8C196 | 0          | n +14.02 Da,K +28.03 Da,             | 1690.65789  | 3 | 453.2781 | 1.891E+09 | n.d. |
| SLVTPADVIKTR            | Q8BH59 | 0          | n +34.06 Da,                         | 1694.892287 | 3 | 456.6296 | 468516992 | n.d. |
| ATSASSHLNKGIKQMYM       | P15105 | 0          | n +42.03 Da,n +28.03 Da,K +28.03 Da, | 1695.829417 | 3 | 655.6688 | 639480000 | n.d. |
| AATTTATTTTTSGGHPLFLR    | P54728 | 0          | n +34.06 Da,                         | 1701.464251 | 3 | 723.3845 | 41510700  | n.d. |
| SLVFPEAENR              | P11725 | 0.0154518  | n +28.03 Da,                         | 1704.690257 | 2 | 595.3154 | 449276992 | n.d. |
| PLPPLPEYGGKVR           | Q9CQQ7 | 0          | n +14.02 Da,K +28.03 Da,             | 1705.089776 | 3 | 488.9564 | 1.696E+09 | n.d. |
| VISLSGEHSIIGR           | P08228 | 0          | n +28.03 Da,                         | 1705.532767 | 3 | 465.9368 | 1.743E+09 | n.d. |
| ATSASSHLNKGIKQMYM       | P15105 | 0.00040096 | n +42.03 Da,n +34.06 Da,K +34.06 Da, | 1707.06103  | 3 | 659.6892 | 258692000 | n.d. |
| SQAEFDKAAEEVKR          | P31786 | 0          | n +42.03 Da,K +28.03 Da,             | 1708.430058 | 2 | 853.4406 | 5.337E+10 | n.d. |
| GIQVVGDDLTVTNPKR        | P17182 | 0          | n +34.06 Da,K +34.06 Da,             | 1709.025461 | 3 | 594.0236 | 71570000  | n.d. |
| TVKKIAIFGATGR           | Q923D2 | 0          | n +42.03 Da,K +28.03 Da,             | 1709.068704 | 3 | 486.6539 | 175423008 | n.d. |
| SQAEFDKAAEEVKR          | P31786 | 0          | n +42.03 Da,K +28.03 Da,             | 1715.746964 | 3 | 569.299  | 1.172E+12 | n.d. |
| PIGDKLNIMTAGSR          | P24270 | 0          | n +14.02 Da,K +28.03 Da,             | 1716.73497  | 3 | 505.6167 | 4.621E+09 | n.d. |

|                             |        |            |                          |             |   |          |           |      |
|-----------------------------|--------|------------|--------------------------|-------------|---|----------|-----------|------|
| MLGSGFKAER                  | Q9CX00 | 0.0177139  | n +42.03 Da,K +28.03 Da, | 1718.143164 | 2 | 583.3014 | 26897000  | n.d. |
| GELKPTAPPIFTGR              | O35632 | 0.01795213 | n +28.03 Da,K +28.03 Da, | 1721.539077 | 3 | 513.9608 | 77647504  | n.d. |
| PIGDKLNIMTAGSR              | P24270 | 0          | n +17.03 Da,K +34.06 Da, | 1723.48156  | 3 | 508.6323 | 1.047E+09 | n.d. |
| SDAPPLTLDGIKDR              | Q9CR21 | 0          | n +28.03 Da,K +28.03 Da, | 1726.333374 | 3 | 518.6227 | 194074000 | n.d. |
| TKDAGTIAGLNVLR              | P63017 | 0.00115785 | n +28.03 Da,K +28.03 Da, | 1729.287331 | 3 | 495.6316 | 464148000 | n.d. |
| PDSWDKDVPEPPSR              | Q9DCS9 | 0          | n +14.02 Da,K +28.03 Da, | 1730.353812 | 3 | 610.6276 | 2.61E+10  | n.d. |
| PDSWDKDVPEPPSR              | Q9DCS9 | 0          | n +14.02 Da,K +28.03 Da, | 1732.622485 | 2 | 915.4377 | 236296992 | n.d. |
| SVESIMATEDR                 | Q8C196 | 0.00605629 | n +28.03 Da,             | 1733.268392 | 2 | 633.3037 | 101713000 | n.d. |
| VYKIGGIGTVPVGR              | P10126 | 0.00152323 | n +34.06 Da,K +34.06 Da, | 1734.549123 | 3 | 495.3253 | 645836992 | n.d. |
| PFAAASIGQVHLAR              | Q60936 | 0          | n +14.02 Da,             | 1735.044907 | 3 | 484.6074 | 455512992 | n.d. |
| APLPLPEYGGKVR               | Q9CQQ7 | 0.00040096 | n +28.03 Da,K +28.03 Da, | 1735.224754 | 3 | 517.3075 | 755297984 | n.d. |
| PAGILNGKLVSAQIR             | Q922D8 | 0.00078339 | n +17.03 Da,K +34.06 Da, | 1739.611186 | 3 | 530.0103 | 33549900  | n.d. |
| TQDIHLGVNESLTDSTAR          | P11725 | 0          | n +34.06 Da,             | 1739.778536 | 3 | 635.337  | 83853600  | n.d. |
| KATIPAAALQAQESTEGPQTGGQDRPR | Q9DBG1 | 0          | n +28.03 Da,K +28.03 Da, | 1740.555758 | 1 | 659.5916 | 91188000  | n.d. |
| ESMPYTNNAVIHEVQR            | O54749 | 0.02056807 | n +17.03 Da,             | 1743.486768 | 3 | 597.6284 | 89171400  | n.d. |
| SAMNVVFEDEMQR               | Q8C196 | 0          | n +28.03 Da,K +28.03 Da, | 1745.280609 | 3 | 566.9463 | 739644032 | n.d. |
| PAGILNGKLVSAQIR             | Q922D8 | 0.00040096 | n +14.02 Da,K +28.03 Da, | 1745.96043  | 3 | 526.9947 | 714099968 | n.d. |
| PVAIALDTKGPEIR              | P53657 | 0          | n +14.02 Da,K +28.03 Da, | 1751.838854 | 3 | 507.9693 | 1.005E+09 | n.d. |
| SDAPPLTLDGIKDR              | Q9CR21 | 0          | n +34.06 Da,K +34.06 Da, | 1752.003387 | 3 | 522.6427 | 73487600  | n.d. |
| PLPPLPEYGGKVR               | Q9CQQ7 | 0          | n +17.03 Da,K +34.06 Da, | 1752.820779 | 3 | 490.9678 | 3.603E+09 | n.d. |
| SAGIQVVGDDLTVTNPKR          | P17182 | 0.00040096 | n +28.03 Da,K +28.03 Da, | 1755.111098 | 3 | 642.7058 | 82807904  | n.d. |
| PLPPLPEYGGKVR               | Q9CQQ7 | 0.00040096 | n +14.02 Da,K +28.03 Da, | 1757.762736 | 4 | 366.9693 | 47136500  | n.d. |
| TTKDPSEHPSVTLFR             | Q99JW2 | 0          | n +42.03 Da,K +28.03 Da, | 1757.891472 | 2 | 957.4817 | 30758000  | n.d. |
| AGGEAGVTLGQPHLSR            | Q9Z0N2 | 0          | n +42.03 Da,             | 1759.975938 | 2 | 796.412  | 51059600  | n.d. |
| MLLEYTDSSYDEKR              | P10649 | 0          | n +28.03 Da,K +28.03 Da, | 1759.997743 | 3 | 602.625  | 1.126E+09 | n.d. |
| PLPPLPEYGGKVR               | Q9CQQ7 | 0          | n +17.03 Da,K +34.06 Da, | 1760.071827 | 3 | 491.9726 | 1.968E+10 | n.d. |
| PLGGAIALGHPLGCTGAR          | Q8VCH0 | 0          | n +14.02 Da,             | 1762.463551 | 3 | 577.9801 | 143659008 | n.d. |
| TLASAAVLFQKR                | Q9CXN7 | 0          | n +28.03 Da,K +28.03 Da, | 1763.208367 | 3 | 454.2814 | 105419000 | n.d. |
| YEESIKMPINEPAPGR            | P49429 | 0          | n +28.03 Da,K +28.03 Da, | 1765.190832 | 3 | 628.6468 | 60821000  | n.d. |
| PLPPLPEYGGKVR               | Q9CQQ7 | 0          | n +14.02 Da,K +28.03 Da, | 1765.280438 | 3 | 488.9587 | 1.042E+11 | n.d. |
| LHTVYQSVLPEPTH              | Q07417 | 0          | n +28.03 Da,             | 1768.131705 | 3 | 560.9584 | 858993024 | n.d. |
| AGKPVLYHYFDGR               | P30115 | 0          | n +42.03 Da,K +28.03 Da, | 1769.795699 | 3 | 477.2582 | 3.574E+09 | n.d. |
| AGKPVLYHYFDGR               | P30115 | 0          | n +42.03 Da,K +34.06 Da, | 1770.746954 | 3 | 479.2686 | 71892800  | n.d. |
| ENIIDLNANR                  | B5X0G2 | 0.00040096 | n +28.03 Da,             | 1773.162408 | 2 | 643.8373 | 223232000 | n.d. |
| SVFLPAPKANNVLR              | Q9CQW3 | 0.01260647 | n +28.03 Da,K +28.03 Da, | 1777.723533 | 3 | 527.9873 | 114564000 | n.d. |
| AGIAIKLAKDR                 | O08529 | 0.00040096 | n +42.03 Da,K +28.03 Da, | 1779.018557 | 3 | 418.6025 | 182772992 | n.d. |
| ASGADSKGDDLSTAILKQK         | Q01853 | 0          | n +42.03 Da,K +28.03 Da, | 1792.714762 | 1 | 677.7033 | 191268992 | n.d. |
| PSGVKVLTAEDIQER             | P16546 | 0.00040096 | n +17.03 Da,K +34.06 Da, | 1792.726879 | 3 | 608.0105 | 49037400  | n.d. |
| GPTTPEADKIFLER              | P26443 | 0          | n +34.06 Da,K +34.06 Da, | 1793.404566 | 3 | 547.9866 | 2.805E+09 | n.d. |
| SDAPPLTLDGIKDR              | Q9CR21 | 0          | n +28.03 Da,K +28.03 Da, | 1797.896019 | 2 | 777.4298 | 1.209E+09 | n.d. |

|                         |        |            |                                      |             |   |          |           |      |
|-------------------------|--------|------------|--------------------------------------|-------------|---|----------|-----------|------|
| KATIPALQAQESTEGPGTQDRPR | Q9DBG1 | 0          | n +42.03 Da,K +28.03 Da,             | 1798.289506 | 4 | 663.0946 | 43236600  | n.d. |
| SDAPPLTLDGIKDR          | Q9CR21 | 0          | n +28.03 Da,K +28.03 Da,             | 1800.271731 | 3 | 518.6237 | 4.726E+10 | n.d. |
| GPTTPEADKIFLER          | P26443 | 0          | n +28.03 Da,K +28.03 Da,             | 1802.014769 | 3 | 543.9667 | 1.333E+10 | n.d. |
| ASGADSKGDDLSTAILKQK     | Q01853 | 0          | n +42.03 Da,K +34.06 Da,             | 1806.328114 | 3 | 683.7351 | 6.334E+09 | n.d. |
| ASGADSKGDDLSTAILKQK     | Q01853 | 0          | n +42.03 Da,K +28.03 Da,             | 1808.217154 | 3 | 677.7038 | 1.001E+10 | n.d. |
| ASNIFGPTTEPKNIPKR       | Q6PGH2 | 0          | n +42.03 Da,K +28.03 Da,             | 1810.59402  | 3 | 666.038  | 117939000 | n.d. |
| SDAPPLTLDGIKDR          | Q9CR21 | 0          | n +34.06 Da,K +34.06 Da,             | 1813.465336 | 3 | 522.644  | 3.284E+09 | n.d. |
| SIAIDIINQKR             | Q03265 | 0.00040096 | n +34.06 Da,K +34.06 Da,             | 1815.023021 | 3 | 480.6452 | 176646000 | n.d. |
| GVKIMGTSPLQIDR          | Q8C196 | 0.02394047 | n +34.06 Da,K +34.06 Da,             | 1817.510661 | 2 | 791.9842 | 626550976 | n.d. |
| TGAVFAQDKAIVQEATR       | Q8CHT0 | 0          | n +28.03 Da,K +28.03 Da,             | 1819.58757  | 3 | 621.0111 | 1.004E+09 | n.d. |
| VTIMPKDIQLAR            | P02301 | 0.01970443 | n +28.03 Da,K +28.03 Da,             | 1822.045285 | 3 | 480.9584 | 66848800  | n.d. |
| SAMNVVSEDEMCR           | Q8C196 | 0          | n +28.03 Da,K +28.03 Da,             | 1823.816607 | 3 | 566.9614 | 214795008 | n.d. |
| SAGIQVVGDDLTVTNPKR      | P17182 | 0          | n +34.06 Da,K +34.06 Da,             | 1832.632433 | 3 | 646.7175 | 342555008 | n.d. |
| MKVFTGTGLPAEGR          | Q91Z53 | 0.00040096 | n +28.03 Da,K +28.03 Da,             | 1835.972632 | 3 | 519.9663 | 7.403E+09 | n.d. |
| MKVFTGTGLPAEGR          | Q91Z53 | 0.01002073 | n +34.06 Da,K +34.06 Da,             | 1842.060985 | 3 | 523.9863 | 1.626E+09 | n.d. |
| MKVFTGTGLPAEGR          | Q91Z53 | 0          | n +28.03 Da,K +28.03 Da,             | 1843.788901 | 2 | 779.4445 | 590742976 | n.d. |
| IMDPNIVGNEHYDVAR        | P56480 | 0          | n +14.02 Da,                         | 1844.898883 | 3 | 619.6358 | 347297984 | n.d. |
| TGAVFAQDKAIVQEATR       | Q8CHT0 | 0          | n +28.03 Da,K +28.03 Da,             | 1846.575463 | 3 | 620.9991 | 357300000 | n.d. |
| SAMNVVSEDEMCR           | Q8C196 | 0          | n +28.03 Da,K +28.03 Da,             | 1850.573559 | 3 | 566.945  | 4.563E+09 | n.d. |
| APAGILNGKLVSAQIR        | Q922D8 | 0          | n +34.06 Da,K +34.06 Da,             | 1850.798514 | 3 | 559.3667 | 1.223E+09 | n.d. |
| TRSLGVAAEGLPDQYADGEAAR  | Q9QXF8 | 0          | n +28.03 Da,                         | 1851.99615  | 3 | 759.0494 | 97357800  | n.d. |
| GSVVKSEDYAFPTYADR       | P19783 | 0          | n +34.06 Da,K +34.06 Da,             | 1856.381191 | 2 | 987.0177 | 961011968 | n.d. |
| SAPEGLGDAHGDADRGLSDGLR  | P58137 | 0          | n +42.03 Da,                         | 1858.56704  | 3 | 775.0225 | 717390976 | n.d. |
| PIKIPVGPETLGR           | P56480 | 0          | n +14.02 Da,K +28.03 Da,             | 1860.168868 | 3 | 473.6282 | 23311700  | n.d. |
| SVVKSEDYAFPTYADR        | P19783 | 0.01945269 | n +28.03 Da,K +28.03 Da,             | 1860.700988 | 3 | 635.3188 | 2.29E+09  | n.d. |
| TQPEPDIVGLDSGHIR        | P52196 | 0          | n +34.06 Da,                         | 1860.878611 | 3 | 589.9863 | 61590200  | n.d. |
| MPGVTVKDVNQEQFVR        | Q9CZ8  | 0.00152323 | n +34.06 Da,K +34.06 Da,             | 1861.817715 | 3 | 639.0299 | 229486000 | n.d. |
| MYTITKGPSKLVQAR         | Q9CQB2 | 0          | n +42.03 Da,n +28.03 Da,K +28.03 Da, | 1865.76162  | 3 | 597.6785 | 1.154E+09 | n.d. |
| TALLKIEGVYAR            | O55142 | 0.00406654 | n +28.03 Da,K +28.03 Da,             | 1868.879403 | 3 | 463.9539 | 30493700  | n.d. |
| SIVPALEIANHR            | P63038 | 0          | n +28.03 Da,                         | 1872.883268 | 3 | 473.6089 | 1.177E+09 | n.d. |
| AGDQPGADLGLITPQAKER     | Q9EQ20 | 0          | n +34.06 Da,K +34.06 Da,             | 1876.270845 | 3 | 701.3985 | 182780992 | n.d. |
| GSVVKSEDYAFPTYADR       | P19783 | 0          | n +34.06 Da,K +34.06 Da,             | 1876.278545 | 3 | 658.347  | 578800000 | n.d. |
| TITSVLPKPALVASR         | Q8C196 | 0          | n +34.06 Da,K +34.06 Da,             | 1878.400756 | 3 | 541.0276 | 1.592E+09 | n.d. |
| VGVKPVGSDPDFQPELSGAGSR  | Q8CDN6 | 0          | n +28.03 Da,K +28.03 Da,             | 1878.658035 | 3 | 752.3935 | 5.491E+09 | n.d. |
| VTIMPKDIQLAR            | P02301 | 0.00901838 | n +28.03 Da,K +28.03 Da,             | 1880.80726  | 3 | 480.9423 | 74576704  | n.d. |
| SGSAMNVVSEDEMCR         | Q8C196 | 0          | n +28.03 Da,K +28.03 Da,             | 1882.848082 | 3 | 614.9624 | 1.287E+09 | n.d. |
| IGSSMKSVEVMAIGR         | Q8C196 | 0          | n +14.02 Da,K +28.03 Da,             | 1882.966173 | 3 | 555.3127 | 139812992 | n.d. |
| VVITDPEKLDQIR           | P11983 | 0          | n +34.06 Da,K +34.06 Da,             | 1884.420736 | 3 | 532.0001 | 175220992 | n.d. |
| PAPDDLAQLKNLR           | Q80WJ7 | 0          | n +14.02 Da,n +28.03 Da,             | 1886.398964 | 3 | 498.2875 | 124449000 | n.d. |
| SYTVILTMLRSHTGEGR       | Q8VFU9 | 0.03612944 | n +42.03 Da,                         | 1887.125691 | 3 | 655.0189 | 25955800  | n.d. |

|                      |        |            |                          |             |   |          |           |      |
|----------------------|--------|------------|--------------------------|-------------|---|----------|-----------|------|
| PLAGTNKETTIQGLDGLSER | Q91Y97 | 0          | n +17.03 Da,K +34.06 Da, | 1887.155863 | 3 | 717.7362 | 85231000  | n.d. |
| PLPPLPEYGGKVR        | Q9CQQ7 | 0          | n +28.03 Da,K +28.03 Da, | 1888.704232 | 3 | 493.63   | 217788000 | n.d. |
| PLAGTNKETTIQGLDGLSER | Q91Y97 | 0          | n +14.02 Da,K +28.03 Da, | 1892.826198 | 3 | 714.7181 | 1.426E+09 | n.d. |
| GIDPTGTYHGSDSLQLER   | P68372 | 0.00040096 | n +34.06 Da,             | 1895.442522 | 3 | 670.0021 | 41969000  | n.d. |
| IMDPNIVGNEHYDVAR     | P56480 | 0          | n +28.03 Da,             | 1896.902208 | 3 | 624.309  | 2.114E+09 | n.d. |
| SLDMKEHPDAEVQKNQVL   | O55060 | 0.00189681 | n +42.03 Da,K +34.06 Da, | 1900.596626 | 3 | 731.0616 | 382891008 | n.d. |
| VMEKPSPLLVGR         | P97379 | 0.00744681 | n +42.03 Da,K +28.03 Da, | 1901.548916 | 3 | 465.9392 | 1.143E+09 | n.d. |
| DNVGFNVKKNVSVKDIR    | P62631 | 0.00605629 | n +28.03 Da,K +28.03 Da, | 1905.751128 | 3 | 630.0169 | 268764992 | n.d. |
| AGAESDGGQFQFTGIKKY   | Q78IK2 | 0          | n +34.06 Da,K +34.06 Da, | 1906.027833 | 3 | 650.3671 | 227280992 | n.d. |
| PLPPLPEYGGKVR        | Q9CQQ7 | 0.00475494 | n +14.02 Da,K +28.03 Da, | 1906.32214  | 3 | 488.9576 | 378447008 | n.d. |
| TASAGIQVVGDDLTVTNPKR | P17182 | 0          | n +34.06 Da,K +34.06 Da, | 1906.827305 | 3 | 704.0731 | 719022976 | n.d. |
| IGSSMKSVGEVMAIGR     | Q8C196 | 0          | n +14.02 Da,K +28.03 Da, | 1906.828746 | 3 | 555.2993 | 102698000 | n.d. |
| AAPAKGENLSLVHGGPGDIR | Q64442 | 0.00040096 | n +42.03 Da,K +34.06 Da, | 1908.460135 | 3 | 692.3758 | 332132992 | n.d. |
| IVALFPKDISR          | Q9ET01 | 0.00040096 | n +28.03 Da,K +28.03 Da, | 1913.256344 | 3 | 438.9432 | 24740300  | n.d. |
| AGAESDGGQFQFTGIKKY   | Q78IK2 | 0          | n +28.03 Da,K +28.03 Da, | 1918.497569 | 2 | 965.998  | 58690900  | n.d. |
| TANTVQPLAETGLQLSKR   | Q80XL6 | 0.00040096 | n +28.03 Da,K +28.03 Da, | 1921.149448 | 3 | 661.7029 | 27429000  | n.d. |
| AASPSKTEIQTIFKR      | Q99K28 | 0.01945269 | n +42.03 Da,K +28.03 Da, | 1922.596848 | 3 | 592.3408 | 1.775E+09 | n.d. |
| AHGSVVKSEDYAFPTYADR  | P19783 | 0          | n +42.03 Da,K +28.03 Da, | 1922.779509 | 3 | 727.3272 | 197070000 | n.d. |
| IAPEKIENIYLR         | P41216 | 0.01970443 | n +34.06 Da,K +34.06 Da, | 1923.162682 | 3 | 509.657  | 33739400  | n.d. |
| AGKKVCIVGSGNWGSAIAK  | P13707 | 0          | n +42.03 Da,K +28.03 Da, | 1925.18926  | 3 | 677.0385 | 61258400  | n.d. |
| YGTTPGGSSITKVLIANR   | Q99MR8 | 0.02367824 | n +28.03 Da,K +28.03 Da, | 1926.650157 | 3 | 602.0165 | 1.317E+09 | n.d. |
| VLSGEDKSNIAAWGK      | P01942 | 0.00839161 | n +28.03 Da,K +28.03 Da, | 1927.45694  | 3 | 605.6724 | 519300992 | n.d. |
| PMALQPGDKLFPR        | Q91WT7 | 0.00040096 | n +17.03 Da,K +34.06 Da, | 1930.318892 | 3 | 507.6379 | 42150500  | n.d. |
| SAPPKETSIGILSAAVSR   | Q8C165 | 0.00040096 | n +28.03 Da,K +28.03 Da, | 1933.141478 | 3 | 614.0265 | 94365104  | n.d. |
| AVPSLGLKTDIPIGR      | P00405 | 0          | n +28.03 Da,K +28.03 Da, | 1939.840225 | 3 | 517.6475 | 592342976 | n.d. |
| PANLDLKKELSEPSSTR    | Q8C196 | 0.00440852 | n +14.02 Da,K +28.03 Da, | 1941.236968 | 3 | 652.3524 | 363353984 | n.d. |
| PGFDGVVKDADEAVR      | Q91ZA3 | 0          | n +14.02 Da,K +28.03 Da, | 1948.674271 | 3 | 539.6139 | 666529984 | n.d. |
| APNVLASEPEIPKIR      | Q9WTP6 | 0          | n +34.06 Da,K +34.06 Da, | 1949.71204  | 3 | 587.0295 | 5.009E+09 | n.d. |
| SAKAISEQTGKELLYK     | Q91V92 | 0.0449369  | n +42.03 Da,K +28.03 Da, | 1953.919968 | 3 | 631.3649 | 635406976 | n.d. |
| TNTMTLGDIVYKR        | P12710 | 0          | n +34.06 Da,K +34.06 Da, | 1954.091941 | 3 | 527.3229 | 4.778E+09 | n.d. |
| IGPKAPLVLEQGLR       | P54869 | 0.00374251 | n +28.03 Da,K +28.03 Da, | 1955.259673 | 3 | 516.3284 | 229088000 | n.d. |
| GGNPIGDKLNIMTAGSR    | P24270 | 0          | n +28.03 Da,K +28.03 Da, | 1961.564557 | 3 | 586.3174 | 332624000 | n.d. |
| AFKDTGKTPVEPEVAIHR   | P60867 | 0          | n +42.03 Da,K +28.03 Da, | 1965.233852 | 3 | 698.356  | 1.2E+10   | n.d. |
| GGNPIGDKLNIMTAGSR    | P24270 | 0          | n +34.06 Da,K +34.06 Da, | 1967.529453 | 3 | 590.3371 | 897454016 | n.d. |
| IMDPNIVGNEHYDVAR     | P56480 | 0          | n +42.03 Da,             | 1968.078779 | 3 | 628.9809 | 3.273E+09 | n.d. |
| ATEGGGKEMNEIKQFTTR   | Q3UWE6 | 0.00040096 | n +42.03 Da,K +34.06 Da, | 1968.878207 | 3 | 736.7241 | 9479610   | n.d. |
| TTGGGNPIGDKLNIMTAGSR | P24270 | 0          | n +28.03 Da,K +28.03 Da, | 1970.719129 | 1 | 672.6969 | 27773000  | n.d. |
| SAPPKETSIGILSAAVSR   | Q8C165 | 0.00040096 | n +34.06 Da,K +34.06 Da, | 1977.36424  | 3 | 618.0434 | 404040992 | n.d. |
| DLADQLHAAVGASR       | Q99LC5 | 0.00040096 | n +28.03 Da,             | 1978.738775 | 3 | 484.5914 | 144840992 | n.d. |
| ANHAPFETDISTLTR      | Q9QXD6 | 0.00264151 | n +42.03 Da,             | 1986.099205 | 2 | 572.2963 | 29887800  | n.d. |

|                         |        |            |                          |             |   |          |           |      |
|-------------------------|--------|------------|--------------------------|-------------|---|----------|-----------|------|
| RRMELWLR                | Q8VHE6 | 0.03978862 | n +42.03 Da,             | 1986.202833 | 3 | 601.34   | 33532800  | n.d. |
| TGGGNPIGDKLNIMTAGSR     | P24270 | 0.0123119  | n +28.03 Da,             | 1987.530757 | 3 | 639.0079 | 686497984 | n.d. |
| GGNPIGDKLNIMTAGSR       | P24270 | 0          | n +28.03 Da,K +28.03 Da, | 1988.119537 | 2 | 586.3345 | 366963008 | n.d. |
| TTGGGNPIGDKLNIMTAGSR    | P24270 | 0.00040096 | n +34.06 Da,K +34.06 Da, | 1989.696225 | 3 | 676.7077 | 1.613E+09 | n.d. |
| VNAGDQPGADLGLPLITPQAKER | Q9EQ20 | 0          | n +28.03 Da,             | 1992.579696 | 3 | 768.4172 | 70050896  | n.d. |
| AVPPTYADLGKSAR          | Q60932 | 0          | n +42.03 Da,K +28.03 Da, | 1997.547735 | 2 | 758.4119 | 370777984 | n.d. |
| PASELLDAKILSR           | Q9QXS1 | 0.00078339 | n +14.02 Da,K +28.03 Da, | 1999.565181 | 3 | 485.6167 | 27895000  | n.d. |
| AAPAKGENLSLVVHGPDIR     | Q64442 | 0.00578662 | n +42.03 Da,K +28.03 Da, | 2003.317623 | 3 | 691.0478 | 2.232E+09 | n.d. |
| AHGSVVKSEDYAFPTYADR     | P19783 | 0          | n +42.03 Da,K +34.06 Da, | 2006.56563  | 3 | 730.3616 | 1.47E+09  | n.d. |
| SAGFLQASASDVVVHGR       | Q8VCHO | 0          | n +28.03 Da,             | 2014.604023 | 3 | 609.9959 | 2.267E+10 | n.d. |
| VNAGDQPGADLGLPLITPQAKER | Q9EQ20 | 0          | n +28.03 Da,             | 2017.264686 | 1 | 768.4186 | 46904100  | n.d. |
| LNPANVPTHLMVLCVLR       | Q6A0A9 | 0.02966507 | n +34.06 Da,             | 2023.151769 | 3 | 714.386  | 359371008 | n.d. |
| LVLEVAQHLGESTVR         | P56480 | 0          | n +28.03 Da,             | 2025.098489 | 3 | 560.3217 | 3.498E+09 | n.d. |
| SAGFLQASASDVVVHGR       | Q8VCHO | 0          | n +28.03 Da,             | 2029.040793 | 2 | 914.4903 | 66488800  | n.d. |
| AAPAKGENLSLVVHGPDIR     | Q64442 | 0.00543281 | n +28.03 Da,K +28.03 Da, | 2030.146316 | 3 | 686.3759 | 559704000 | n.d. |
| DDEVVDVDGTVEEDLGKSR     | P08113 | 0          | n +34.06 Da,K +34.06 Da, | 2031.054168 | 3 | 682.6782 | 121525000 | n.d. |
| TGSGMGTLISKIR           | P68372 | 0          | n +34.06 Da,K +34.06 Da, | 2031.260778 | 3 | 501.319  | 237131008 | n.d. |
| TESIVAATQWVKER          | O88451 | 0          | n +34.06 Da,K +34.06 Da, | 2035.061204 | 3 | 562.6675 | 532715008 | n.d. |
| DPSPKKEESYSWGLR         | Q99P27 | 0          | n +28.03 Da,K +28.03 Da, | 2037.256292 | 3 | 650.9747 | 128727000 | n.d. |
| TIGKEIHPVLR             | P68368 | 0          | n +28.03 Da,K +28.03 Da, | 2049.440129 | 3 | 508.972  | 609929024 | n.d. |
| AAPAKGENLSLVVHGPDIR     | Q64442 | 0          | n +42.03 Da,K +34.06 Da, | 2052.233792 | 4 | 520.0464 | 162087008 | n.d. |
| AAPAKGENLSLVVHGPDIR     | Q64442 | 0          | n +42.03 Da,K +28.03 Da, | 2056.709271 | 4 | 518.5384 | 170682000 | n.d. |
| LVLEVAQHLGESTVR         | P56480 | 0.00040096 | n +42.03 Da,             | 2059.963667 | 2 | 846.9822 | 39574300  | n.d. |
| EHPDLLTEAPLNPKANR       | P62737 | 0.02367824 | n +42.03 Da,K +28.03 Da, | 2070.686647 | 3 | 657.6924 | 13449600  | n.d. |
| TTFAHLDATTVLSR          | P56480 | 0          | n +28.03 Da,             | 2074.967116 | 3 | 520.9516 | 515260000 | n.d. |
| PLTGGEVPSVLSLR          | P11352 | 0          | n +14.02 Da,             | 2075.782209 | 1 | 698.8929 | 477337984 | n.d. |
| DPSPKKEESYSWGLR         | Q99P27 | 0          | n +34.06 Da,K +34.06 Da, | 2076.823773 | 3 | 654.9937 | 169166000 | n.d. |
| DLTDPAPATTFAHLDATTVLSR  | P56480 | 0.00578662 | n +28.03 Da,             | 2085.906485 | 3 | 781.0774 | 488756992 | n.d. |
| PLTGGEVPSVLSLR          | P11352 | 0          | n +14.02 Da,             | 2088.389798 | 2 | 698.8927 | 3.539E+09 | n.d. |
| QLQEELRQEHERELQAR       | Q61043 | 0.00901838 | n +34.06 Da,             | 2090.514705 | 3 | 742.7256 | 3.147E+10 | n.d. |
| RQETNMVNLMEKQYQER       | Q70FJ1 | 0.03038936 | n +17.03 Da,K +34.06 Da, | 2094.403667 | 3 | 750.0534 | 232467008 | n.d. |
| GTTITSVLPKALVASR        | Q8C196 | 0          | n +28.03 Da,             | 2096.163783 | 3 | 589.6956 | 88814304  | n.d. |
| SGVSLAALKKAL            | P15864 | 0.02394047 | n +28.03 Da,K +28.03 Da, | 2101.248606 | 3 | 414.6108 | 108600000 | n.d. |
| TFVAELKGLDPAR           | P08249 | 0.00901838 | n +34.06 Da,K +34.06 Da, | 2103.14027  | 3 | 495.6419 | 172687008 | n.d. |
| LTGFHETSNINDFSAGVANR    | P15105 | 0.01740295 | n +42.03 Da,             | 2106.577296 | 3 | 731.3632 | 253002000 | n.d. |
| TSMPTYDAVIHEVQR         | P33267 | 0          | n +42.03 Da,             | 2108.569544 | 3 | 596.9661 | 203378000 | n.d. |
| PMTLGYWNTR              | P19639 | 0.03790727 | n +14.02 Da,             | 2114.234293 | 2 | 626.8108 | 355057984 | n.d. |
| STITEVALQSGKGTVSLPSR    | Q8BJ03 | 0          | n +34.06 Da,K +34.06 Da, | 2122.60013  | 3 | 700.4167 | 94263000  | n.d. |
| PSNMPPGIEPSDKMLQGR      | P24270 | 0          | n +17.03 Da,K +34.06 Da, | 2123.698457 | 3 | 701.3697 | 187288000 | n.d. |
| TEHVPSMVLPALER          | Q8VCX1 | 0.00040096 | n +34.06 Da,             | 2123.980055 | 2 | 538.2919 | 12155300  | n.d. |

|                           |        |            |                          |             |   |          |           |      |
|---------------------------|--------|------------|--------------------------|-------------|---|----------|-----------|------|
| PSLDYMTKIPR               | Q8C196 | 0          | n +14.02 Da,K +28.03 Da, | 2126.429121 | 3 | 487.9428 | 7.968E+09 | n.d. |
| ALKAADTIGYPVMIR           | Q8C196 | 0          | n +34.06 Da,K +34.06 Da, | 2127.020201 | 2 | 844.0155 | 357976992 | n.d. |
| FFNMNQRQHVDRQR            | Q9CWT3 | 0.0472103  | n +42.03 Da,             | 2129.287084 | 3 | 678      | 228452000 | n.d. |
| AASKVKQDMPPPGYGPIDYKR     | Q9ERS2 | 0.00078339 | n +42.03 Da,K +28.03 Da, | 2132.460176 | 3 | 834.4326 | 125730000 | n.d. |
| PLENLEEEGLPKNPDLR         | Q99J14 | 0          | n +14.02 Da,K +28.03 Da, | 2132.685474 | 2 | 1003.031 | 30797300  | n.d. |
| ALKAADTIGYPVMIR           | Q8C196 | 0          | n +28.03 Da,K +28.03 Da, | 2133.362622 | 3 | 558.9925 | 5.07E+09  | n.d. |
| PLENLEEEGLPKNPDLR         | Q99J14 | 0          | n +14.02 Da,K +28.03 Da, | 2133.770763 | 3 | 669.0249 | 2.395E+10 | n.d. |
| GQQASSQNEGLTIDLKNFR       | Q99K48 | 0          | n +34.06 Da,K +34.06 Da, | 2135.386322 | 3 | 725.4001 | 56897100  | n.d. |
| VAPGEVLMISQAIQPAHADSR     | Q9DBK0 | 0.00040096 | n +34.06 Da,             | 2137.659979 | 3 | 704.374  | 143494000 | n.d. |
| PSDATNSSNLDALSSNTSLKLR    | Q8K273 | 0          | n +14.02 Da,n +28.03 Da, | 2139.20626  | 3 | 778.3849 | 2.051E+09 | n.d. |
| TDVKVPDFSDYR              | Q9CR68 | 0.00776562 | n +28.03 Da,K +28.03 Da, | 2142.275538 | 3 | 499.9243 | 269660000 | n.d. |
| PDTPFDFTPENYKR            | Q9D6J6 | 0.04964971 | n +17.03 Da,K +34.06 Da, | 2147.347281 | 3 | 593.3226 | 83051504  | n.d. |
| STPQSQFQESSPVWKLGR        | Q9D1I5 | 0          | n +28.03 Da,K +28.03 Da, | 2153.36989  | 3 | 706.7034 | 1.872E+09 | n.d. |
| TTFAHLDATTVLSR            | P56480 | 0          | n +34.06 Da,             | 2154.189277 | 3 | 522.9598 | 196103008 | n.d. |
| FINLVPSNLPHEATR           | Q05421 | 0          | n +28.03 Da,             | 2156.954653 | 3 | 579.3233 | 97573200  | n.d. |
| MGDSASKVISAEALPGR         | Q9D6Y7 | 0          | n +42.03 Da,K +28.03 Da, | 2158.550757 | 3 | 629.9853 | 12904500  | n.d. |
| SAGFLQASASDVVVVHGR        | Q8VCHO | 0          | n +34.06 Da,             | 2159.838661 | 3 | 612.006  | 1.17E+09  | n.d. |
| SLMDEVVKATSR              | P09411 | 0          | n +34.06 Da,K +34.06 Da, | 2160.227007 | 3 | 468.6107 | 17105900  | n.d. |
| PAHMLQEISSYTTTTITAPPSGNER | P13516 | 0          | n +28.03 Da,             | 2160.793621 | 3 | 973.4658 | 720876032 | n.d. |
| SLSILPAALGKPV             | Q9DB60 | 0.00040096 | n +28.03 Da,K +28.03 Da, | 2162.597322 | 3 | 493.3284 | 819819008 | n.d. |
| PSNMPPGIEPSDKMLQGR        | P24270 | 0          | n +14.02 Da,K +28.03 Da, | 2163.403687 | 3 | 697.7058 | 1.024E+09 | n.d. |
| PDIIDPAILRPGR             | Q01853 | 0.00040096 | n +14.02 Da,             | 2163.469804 | 3 | 482.9521 | 175291008 | n.d. |
| TVSLHLGVTPSVLR            | O89023 | 0          | n +34.06 Da,             | 2165.060789 | 3 | 504.9828 | 45360700  | n.d. |
| SLSILPAALGKPV             | Q9DB60 | 0.00040096 | n +34.06 Da,K +34.06 Da, | 2166.389452 | 3 | 497.3343 | 101855000 | n.d. |
| SKPTLNEVVIVSAIR           | Q8QZT1 | 0.00873515 | n +28.03 Da,K +28.03 Da, | 2174.833702 | 3 | 561.3455 | 2.946E+09 | n.d. |
| STPQSQFQESSPVWKLGR        | Q9D1I5 | 0          | n +34.06 Da,K +34.06 Da, | 2176.737128 | 3 | 709.7017 | 175616992 | n.d. |
| ALGPDGQLLHSDAFPPPR        | P97328 | 0.0051039  | n +28.03 Da,             | 2176.932774 | 3 | 639.3528 | 107957000 | n.d. |
| ASKPTLNEVVIVSAIR          | Q8QZT1 | 0.02149837 | n +14.02 Da,K +28.03 Da, | 2179.436856 | 3 | 580.3523 | 164174000 | n.d. |
| ASKPTLNEVVIVSAIR          | Q8QZT1 | 0.00040096 | n +28.03 Da,K +28.03 Da, | 2193.14816  | 2 | 877.032  | 4.692E+09 | n.d. |
| AFDGTWKVDR                | P55050 | 0          | n +42.03 Da,K +28.03 Da, | 2194.178491 | 2 | 632.8188 | 252224992 | n.d. |
| APATTFAHLDATTVLSR         | P56480 | 0          | n +28.03 Da,             | 2194.281862 | 3 | 600.6594 | 449015008 | n.d. |
| PVYDPVEPGYLR              | O88533 | 0          | n +14.02 Da,             | 2195.228669 | 2 | 709.8678 | 442003008 | n.d. |
| SAGFLQASASDVVVVHGR        | Q8VCHO | 0          | n +28.03 Da,             | 2203.800995 | 3 | 609.3496 | 73883696  | n.d. |
| ASKPTLNEVVIVSAIR          | Q8QZT1 | 0          | n +28.03 Da,K +28.03 Da, | 2205.678564 | 3 | 585.0246 | 1.946E+09 | n.d. |
| KAPTASSFTRTAQCR           | Q7SIG6 | 0.00744681 | n +42.03 Da,K +34.06 Da, | 2208.842094 | 3 | 620.3246 | 3.459E+09 | n.d. |
| PMTLGYWNTR                | P19639 | 0          | n +14.02 Da,             | 2209.385162 | 4 | 626.8088 | 232028000 | n.d. |
| SAMEAADVFHR               | Q8BFS6 | 0          | n +42.03 Da,             | 2214.47875  | 2 | 638.292  | 1.109E+09 | n.d. |
| DDEVVDVGTVEEDLGKSR        | P08113 | 0          | n +28.03 Da,K +28.03 Da, | 2217.927315 | 3 | 678.6552 | 2.686E+09 | n.d. |
| SKPTLNEVVIVSAIR           | Q8QZT1 | 0.00040096 | n +34.06 Da,K +34.06 Da, | 2218.48121  | 3 | 565.3665 | 82571800  | n.d. |
| VSVVLGGDHS LAVGSISGH      | Q61176 | 0.00040096 | n +28.03 Da,             | 2223.067973 | 2 | 909.9893 | 234628992 | n.d. |



|                            |        |            |                                      |             |   |          |           |      |
|----------------------------|--------|------------|--------------------------------------|-------------|---|----------|-----------|------|
| TILDKVDGVAEPTPESWR         | O35488 | 0.00406654 | n +28.03 Da,K +28.03 Da,             | 2225.469843 | 3 | 719.3783 | 291655008 | n.d. |
| VSVVLGGDHS LAVGSISGH       | Q61176 | 0          | n +28.03 Da,                         | 2226.867076 | 3 | 606.9955 | 656977024 | n.d. |
| SLSILPAALGKPV R            | Q9DB60 | 0.00040096 | n +34.06 Da,K +34.06 Da,             | 2228.040147 | 3 | 497.3278 | 82921400  | n.d. |
| EHPVVLT K FVEGAR           | Q8C196 | 0.00040096 | n +42.03 Da,K +28.03 Da,             | 2234.453398 | 3 | 551.3037 | 12293400  | n.d. |
| SSPAQPAVPAPLANLKI QHTK     | O35945 | 0.00776562 | n +42.03 Da,K +28.03 Da,             | 2236.185638 | 3 | 756.1029 | 575180032 | n.d. |
| AHGSVVKSE DYAFPTYADR       | P19783 | 0.0123119  | n +42.03 Da,K +28.03 Da,             | 2236.240923 | 3 | 728.3512 | 80916096  | n.d. |
| PQDTFESEFYLDEKR            | P07759 | 0          | n +14.02 Da,K +28.03 Da,             | 2241.235249 | 3 | 649.3105 | 39617300  | n.d. |
| SAGFLQASASDVVVVHGR         | Q8VCH0 | 0          | n +28.03 Da,                         | 2241.82953  | 3 | 609.9954 | 1.737E+09 | n.d. |
| PAPATTF AHL DATTVLSR       | P56480 | 0          | n +14.02 Da,                         | 2242.333031 | 3 | 628.3383 | 3.165E+09 | n.d. |
| AASKVKQDMPPPGGYGPIDYKR     | Q9ERS2 | 0          | n +42.03 Da,K +28.03 Da,             | 2242.898656 | 3 | 834.4334 | 1.869E+09 | n.d. |
| LPPPGPSPAAAPG SWRP LPPPR   | Q9ERQ3 | 0.02453988 | n +34.06 Da,                         | 2243.48325  | 3 | 782.7846 | 2.393E+09 | n.d. |
| GQVVQFKLSDIGEGIR           | P53395 | 0          | n +28.03 Da,K +28.03 Da,             | 2247.308216 | 3 | 601.3443 | 127864000 | n.d. |
| ISSGTVLSDYVGS GPPSGTGLHR   | P70296 | 0          | n +28.03 Da,                         | 2263.197398 | 3 | 758.0716 | 392232000 | n.d. |
| QGPSRRNPAILQPWLPELGR       | F6QM68 | 0.00605629 | n +14.02 Da,                         | 2266.495258 | 3 | 767.1023 | 533416992 | n.d. |
| STLTFVTMSGELKAR            | Q9CXN7 | 0          | n +28.03 Da,K +28.03 Da,             | 2270.829853 | 3 | 566.3177 | 284128992 | n.d. |
| PEYLN FIR                  | P07901 | 0.01795213 | n +14.02 Da,                         | 2276.048717 | 2 | 533.2904 | 140970000 | n.d. |
| QTGIKAVDSLVP IGR           | Q03265 | 0.00040096 | n +28.03 Da,K +28.03 Da,             | 2276.053148 | 3 | 537.3263 | 252732992 | n.d. |
| IYEKQTEAPQVTGPIEVPVVR      | Q9DCT8 | 0.00040096 | n +34.06 Da,K +34.06 Da,             | 2277.974672 | 3 | 840.1583 | 44269100  | n.d. |
| MKVFTG PLPAEGR             | Q91Z53 | 0          | n +42.03 Da,K +28.03 Da,             | 2280.631085 | 3 | 524.6253 | 34609000  | n.d. |
| SGLSLSGIVHPELSR            | P50544 | 0          | n +34.06 Da,                         | 2280.94173  | 3 | 529.3087 | 134914000 | n.d. |
| PVTGSAHTV LSSYSWQQLR       | Q9DCG6 | 0.03583779 | n +14.02 Da,                         | 2280.947197 | 3 | 711.053  | 204986000 | n.d. |
| MKVFTG PLPAEGR             | Q91Z53 | 0          | n +42.03 Da,K +28.03 Da,             | 2282.479102 | 2 | 786.436  | 437643008 | n.d. |
| SQAVEELADQLEQTKR           | Q8VDD5 | 0.00040096 | n +28.03 Da,K +28.03 Da,             | 2283.080122 | 3 | 634.3394 | 85453904  | n.d. |
| PKTVGIDDLTGPELIQR          | Q9WTP7 | 0.02662817 | n +14.02 Da,K +28.03 Da,             | 2283.401361 | 3 | 632.0271 | 37991200  | n.d. |
| DPEIFDAPKEFR               | Q60991 | 0.00040096 | n +28.03 Da,K +28.03 Da,             | 2283.943179 | 3 | 507.2652 | 32570700  | n.d. |
| TGLSIHEVYQSETGISSATLR      | Q91VA0 | 0.00040096 | n +14.02 Da,                         | 2285.316125 | 3 | 774.0623 | 176627008 | n.d. |
| TGLSIHEVYQSETGISSATLR      | Q91VA0 | 0          | n +42.03 Da,                         | 2289.985592 | 3 | 783.4084 | 436720000 | n.d. |
| SHQTGIQASEDVKEIFAR         | Q91YR1 | 0          | n +42.03 Da,K +28.03 Da,             | 2290.825623 | 3 | 696.0172 | 439743008 | n.d. |
| TITNTMTLGDIVYKR            | P12710 | 0          | n +34.06 Da,K +34.06 Da,             | 2297.116674 | 3 | 598.6864 | 7.726E+09 | n.d. |
| TVPWFPR                    | P16331 | 0.02752881 | n +28.03 Da,                         | 2299.671179 | 2 | 465.7635 | 51958200  | n.d. |
| TITNTMTLGDIVYKR            | P12710 | 0          | n +28.03 Da,K +28.03 Da,             | 2302.497443 | 3 | 594.6659 | 1.194E+10 | n.d. |
| VPPVQVSPLIKFGR             | Q06185 | 0          | n +34.06 Da,K +34.06 Da,             | 2303.579474 | 3 | 535.6887 | 4.848E+09 | n.d. |
| SPGHVDFSSSEVTAALR          | P58252 | 0.00078339 | n +28.03 Da,                         | 2311.220461 | 3 | 567.6239 | 45772500  | n.d. |
| PAHMLQEISSYTTTTITAPP SGNER | P13516 | 0          | n +14.02 Da,                         | 2312.222539 | 3 | 968.8021 | 72048800  | n.d. |
| PFVELETNLPASR              | O35215 | 0.0051039  | n +17.03 Da,                         | 2314.082394 | 3 | 497.2726 | 324044992 | n.d. |
| YDLADQLHAAV GASR           | Q99LC5 | 0          | n +28.03 Da,                         | 2318.541633 | 3 | 538.945  | 30401700  | n.d. |
| PSTKDFLLQQTMLR             | Q9CPU0 | 0          | n +14.02 Da,K +28.03 Da,             | 2320.989097 | 2 | 860.4766 | 1.28E+09  | n.d. |
| PSTKDFLLQQTMLR             | Q9CPU0 | 0          | n +14.02 Da,K +28.03 Da,             | 2323.292659 | 3 | 573.9864 | 9.543E+09 | n.d. |
| PFVELETNLPASR              | O35215 | 0          | n +14.02 Da,                         | 2324.121248 | 1 | 743.8974 | 2.081E+09 | n.d. |
| SGSSSVAAMKVVQQLR           | Q80S27 | 0          | n +42.03 Da,n +28.03 Da,K +28.03 Da, | 2325.410718 | 3 | 624.3712 | 462967008 | n.d. |

|                           |        |            |                                      |             |   |          |           |      |
|---------------------------|--------|------------|--------------------------------------|-------------|---|----------|-----------|------|
| YWSQQIEESTTVTTKSAEIR      | P05784 | 0          | n +28.03 Da,K +28.03 Da,             | 2325.476451 | 3 | 838.1011 | 51661000  | n.d. |
| PDPILGVTEAFKR             | P05202 | 0          | n +14.02 Da,K +28.03 Da,             | 2326.754277 | 3 | 495.62   | 635790016 | n.d. |
| SSKPKSLEIIGAPFSKGQPR      | Q61176 | 0          | n +42.03 Da,K +28.03 Da,             | 2327.083931 | 3 | 751.7586 | 7.511E+09 | n.d. |
| SQAVEELADQLEQTKR          | Q8VDD5 | 0.00040096 | n +28.03 Da,K +28.03 Da,             | 2331.345787 | 2 | 634.3547 | 2.179E+09 | n.d. |
| IGVINAPQEVIIISHYR         | P14246 | 0          | n +34.06 Da,                         | 2342.334949 | 3 | 615.027  | 163639008 | n.d. |
| SHQTGIQASEDVKEIFAR        | Q91YR1 | 0          | n +42.03 Da,K +34.06 Da,             | 2342.456571 | 3 | 698.0336 | 1.051E+10 | n.d. |
| LNQALLDLHALGSAR           | P29391 | 0          | n +34.06 Da,                         | 2344.912494 | 3 | 542.657  | 119504000 | n.d. |
| SSPAQPAVPAPLADLKIQHTK     | P24549 | 0          | n +42.03 Da,K +34.06 Da,             | 2351.024915 | 3 | 760.4507 | 5.06E+10  | n.d. |
| PVTGSAHTVLSYWSQQLR        | Q9DCG6 | 0.03583779 | n +14.02 Da,                         | 2351.784142 | 3 | 711.0333 | 99541504  | n.d. |
| SSPAQPAVPAPLADLKIQHTK     | P24549 | 0          | n +42.03 Da,K +28.03 Da,             | 2351.995446 | 3 | 756.4293 | 4.415E+09 | n.d. |
| PPKTVGIDDLTGEPLIQR        | Q9WTP7 | 0.00040096 | n +17.03 Da,K +34.06 Da,             | 2353.473852 | 3 | 667.3932 | 303540000 | n.d. |
| PVELVEKLLPR               | Q9ET01 | 0.00040096 | n +14.02 Da,K +28.03 Da,             | 2353.776807 | 3 | 445.6183 | 558560000 | n.d. |
| AAAKKAVLGPLVGAVDQGTSSSTR  | Q64516 | 0.03008233 | n +42.03 Da,K +34.06 Da,             | 2357.031232 | 4 | 577.598  | 30498900  | n.d. |
| PPKTVGIDDLTGEPLIQR        | Q9WTP7 | 0.00040096 | n +14.02 Da,K +28.03 Da,             | 2364.056874 | 3 | 664.3787 | 69101296  | n.d. |
| ESGLVHFNFENHIKSFMR        | Q69ZA1 | 0.01853691 | n +28.03 Da,K +28.03 Da,             | 2368.668995 | 3 | 701.0295 | 348030016 | n.d. |
| SLAPQKVIAPWR              | P16460 | 0          | n +28.03 Da,K +28.03 Da,             | 2371.792478 | 3 | 512.3206 | 811294976 | n.d. |
| MAAPAKGENLSLVHGPDIR       | Q64442 | 0.02342225 | n +28.03 Da,K +28.03 Da,             | 2372.116124 | 3 | 730.0631 | 110608000 | n.d. |
| TPAITLENPDIKYPLR          | Q9DCN2 | 0          | n +28.03 Da,K +28.03 Da,             | 2372.154473 | 3 | 633.0329 | 539660992 | n.d. |
| AKVEQVLSLEPQHELK          | Q9QY76 | 0.00040096 | n +42.03 Da,K +28.03 Da,             | 2373.584931 | 3 | 648.7144 | 44263400  | n.d. |
| AAAKKAVLGPLVGAVDQGTSSSTR  | Q64516 | 0.02813299 | n +42.03 Da,K +28.03 Da,             | 2374.16656  | 4 | 574.5818 | 18628900  | n.d. |
| VLTGGGNPIGDKNIMTAGSR      | P24270 | 0          | n +34.06 Da,K +34.06 Da,             | 2375.777948 | 3 | 747.4282 | 875790016 | n.d. |
| AAAKKAVLGPLVGAVDQGTSSSTR  | Q64516 | 0          | n +42.03 Da,K +28.03 Da,             | 2377.079034 | 3 | 765.7721 | 1.106E+10 | n.d. |
| TTGGESLLPEEYEQWKQR        | Q91VA0 | 0          | n +28.03 Da,K +28.03 Da,             | 2377.257663 | 3 | 736.3716 | 366136000 | n.d. |
| VPPVQVSPLIKFR             | Q06185 | 0          | n +28.03 Da,K +28.03 Da,             | 2378.972541 | 3 | 531.6682 | 464838016 | n.d. |
| PYLPNVDEEVQIGHVPR         | P11276 | 0          | n +14.02 Da,                         | 2380.468443 | 3 | 659.3451 | 741342976 | n.d. |
| EPSLDYMTKIPR              | Q8C196 | 0          | n +28.03 Da,                         | 2382.844595 | 3 | 535.6294 | 1.383E+09 | n.d. |
| MEVHELFR                  | P41216 | 0.00605629 | n +42.03 Da,                         | 2382.896163 | 2 | 551.7712 | 2.536E+10 | n.d. |
| PDDYFLLR                  | Q99J08 | 0.01642091 | n +14.02 Da,                         | 2386.100691 | 2 | 526.7745 | 31443700  | n.d. |
| MEVHELFR                  | P41216 | 0.00605629 | n +42.03 Da,                         | 2389.578272 | 2 | 550.2717 | 828564992 | n.d. |
| SVGSAGLAGMGGIQTEKTMQDLNDR | P05784 | 0          | n +34.06 Da,K +34.06 Da,             | 2390.977101 | 3 | 911.798  | 84465296  | n.d. |
| PSVPFDPKLGVIPNTEGR        | Q61578 | 0          | n +17.03 Da,K +34.06 Da,             | 2393.018615 | 3 | 658.715  | 417430016 | n.d. |
| PGIDKLPHEETLEDSPQTR       | Q8K3H0 | 0          | n +14.02 Da,K +28.03 Da,             | 2396.414044 | 3 | 727.3865 | 668243008 | n.d. |
| SAKAISEQTGKELLYKY         | Q91V92 | 0.01201923 | n +42.03 Da,K +34.06 Da,             | 2398.173926 | 3 | 691.7469 | 193587008 | n.d. |
| DLVFPSEIVGKR              | P62082 | 0.00040096 | n +28.03 Da,K +28.03 Da,             | 2400.556728 | 3 | 472.6099 | 1.262E+09 | n.d. |
| ASASDVVVVHGR              | Q8VCHO | 0          | n +17.03 Da,                         | 2407.182823 | 3 | 607.3103 | 155896992 | n.d. |
| MDNKLDFR                  | Q3UZZ6 | 0.02983318 | n +42.03 Da,K +28.03 Da,             | 2407.580059 | 2 | 604.3102 | 15687900  | n.d. |
| PFPDGLAEDIDKGEVSAR        | P58252 | 0          | n +14.02 Da,K +28.03 Da,             | 2408.670458 | 3 | 653.3339 | 1.084E+10 | n.d. |
| AQNLKDLAGRLPAGPR          | Q35129 | 0.01418919 | n +42.03 Da,K +28.03 Da,             | 2409.662866 | 3 | 583.0036 | 333668000 | n.d. |
| AEEEVAKLEKHL              | Q810B6 | 0.03583779 | n +42.03 Da,n +34.06 Da,K +34.06 Da, | 2418.870726 | 3 | 502.6336 | 18541400  | n.d. |
| STPAITLENPDIKYPLR         | Q9DCN2 | 0          | n +34.06 Da,K +34.06 Da,             | 2421.346061 | 3 | 666.0626 | 685430016 | n.d. |

|                           |        |            |                                      |             |   |          |           |      |
|---------------------------|--------|------------|--------------------------------------|-------------|---|----------|-----------|------|
| LVTGWVKPIIIGR             | O88844 | 0.00040096 | n +28.03 Da,K +28.03 Da,             | 2422.036775 | 3 | 503.3292 | 17558700  | n.d. |
| SAHLQWMVVR                | P41105 | 0          | n +42.03 Da,                         | 2422.096922 | 2 | 634.8317 | 3.177E+09 | n.d. |
| TLTFLGSTATPDDPYEVKR       | Q91XE4 | 0.00040096 | n +28.03 Da,K +28.03 Da,             | 2430.616139 | 3 | 723.0429 | 72117904  | n.d. |
| TIPVVPTAEFQDR             | P26443 | 0.0298318  | n +34.06 Da,                         | 2430.969884 | 2 | 753.9226 | 124882000 | n.d. |
| GQVVQFKLSDIGEGIR          | P53395 | 0          | n +34.06 Da,K +34.06 Da,             | 2431.296441 | 3 | 605.3645 | 552801984 | n.d. |
| TPKVDFPQDQLATLTGR         | P08249 | 0          | n +34.06 Da,K +34.06 Da,             | 2439.578051 | 3 | 652.3783 | 1.04E+09  | n.d. |
| PASVPHGAGYDVLIQKF         | Q91V64 | 0.00227187 | n +14.02 Da,K +28.03 Da,             | 2441.020604 | 3 | 614.3409 | 261594000 | n.d. |
| PFPDGLAEDIDKGEVSAR        | P58252 | 0          | n +28.03 Da,K +28.03 Da,             | 2454.715072 | 3 | 658.0031 | 308217984 | n.d. |
| SAGFLQASASDVVVHGR         | Q8VCH0 | 0.00040096 | n +34.06 Da,                         | 2456.651832 | 3 | 612.0062 | 394280992 | n.d. |
| PGQVSQQELDTVVKSQQEILR     | Q9D0F3 | 0          | n +14.02 Da,K +28.03 Da,             | 2463.117966 | 3 | 808.7755 | 481937984 | n.d. |
| SLGGGTGSGMGTLISKIR        | P68372 | 0          | n +28.03 Da,K +28.03 Da,             | 2464.657075 | 3 | 621.0253 | 512440000 | n.d. |
| PFPDGLAEDIDKGEVSAR        | P58252 | 0          | n +14.02 Da,K +28.03 Da,             | 2465.590199 | 3 | 653.3333 | 528878016 | n.d. |
| PIVDSIEGVTHALR            | Q8CGC7 | 0          | n +14.02 Da,                         | 2467.576081 | 3 | 507.619  | 114506000 | n.d. |
| PGLLASVAAVAAQKTGR         | G3X982 | 0          | n +14.02 Da,K +28.03 Da,             | 2469.560791 | 3 | 551.3337 | 733961984 | n.d. |
| SSSRPVALVTGANKGIGFAITR    | P48758 | 0          | n +42.03 Da,K +34.06 Da,             | 2470.244193 | 3 | 760.1077 | 4.119E+09 | n.d. |
| APKGGSKQSEEDLLLQDFSR      | Q9DCF9 | 0          | n +28.03 Da,K +28.03 Da,             | 2471.035217 | 3 | 806.4181 | 447828992 | n.d. |
| RVAGPQPAQTGAPQGSLEYLFR    | P29391 | 0          | n +42.03 Da,                         | 2474.086508 | 3 | 857.7838 | 174748992 | n.d. |
| PFPDGLAEDIDKGEVSAR        | P58252 | 0.02693171 | n +42.03 Da,K +28.03 Da,             | 2484.108286 | 3 | 662.6763 | 308009984 | n.d. |
| SSVAVLTQESFAEHR           | Q8VDJ3 | 0          | n +42.03 Da,                         | 2484.241777 | 2 | 851.9226 | 1.374E+09 | n.d. |
| TTNTVPLHPYWPR             | P70245 | 0          | n +42.03 Da,                         | 2489.421088 | 3 | 541.9479 | 86320600  | n.d. |
| APDQDEIDCLPGLAKQPSFR      | P16675 | 0          | n +28.03 Da,K +28.03 Da,             | 2489.89784  | 3 | 771.721  | 910908032 | n.d. |
| TIAQDYGVKKADEGISFR        | P35700 | 0          | n +28.03 Da,                         | 2491.97537  | 3 | 680.3635 | 560153024 | n.d. |
| ATEGDVELELETETSGPERPPEKPR | Q9CR41 | 0          | n +42.03 Da,K +28.03 Da,             | 2493.73087  | 3 | 946.1317 | 15268400  | n.d. |
| GDPKEEEEEELVDPLTTVR       | P99028 | 0.00040096 | n +28.03 Da,K +28.03 Da,             | 2493.807907 | 1 | 747.7088 | 1.814E+09 | n.d. |
| TTNTVPLHPYWPR             | P70245 | 0          | n +42.03 Da,                         | 2496.748753 | 2 | 812.4154 | 2.777E+09 | n.d. |
| TTIAGVVYKDGIVLGADTR       | P70195 | 0          | n +34.06 Da,K +34.06 Da,             | 2500.0213   | 3 | 673.0696 | 530131008 | n.d. |
| GDPKEEEEEELVDPLTTVR       | P99028 | 0          | n +28.03 Da,K +28.03 Da,             | 2500.490788 | 2 | 1121.059 | 6.44E+09  | n.d. |
| PEVAIGALGAIKALPR          | P53395 | 0.00406654 | n +14.02 Da,K +28.03 Da,             | 2501.717722 | 3 | 540.0066 | 94727000  | n.d. |
| SIGVPIKVLHEAEGH           | P62320 | 0.00040096 | n +42.03 Da,K +28.03 Da,             | 2502.722226 | 2 | 828.4586 | 374372992 | n.d. |
| GDPKEEEEEELVDPLTTVR       | P99028 | 0.00040096 | n +28.03 Da,K +28.03 Da,             | 2507.282041 | 3 | 747.7084 | 4.612E+10 | n.d. |
| AEVSKSDIGEVLVGGMTR        | P38647 | 0.00189681 | n +34.06 Da,K +34.06 Da,             | 2512.543611 | 3 | 677.0577 | 87615296  | n.d. |
| GQVVQFKLSDIGEGIR          | P53395 | 0          | n +28.03 Da,K +28.03 Da,             | 2513.226942 | 3 | 601.3428 | 6.237E+09 | n.d. |
| TSIHVVHPLPGTEDQLNDR       | Q80TP3 | 0          | n +42.03 Da,                         | 2516.601712 | 3 | 773.0581 | 24631500  | n.d. |
| MDDREDLVYQAKLAEQAER       | P62259 | 0          | n +42.03 Da,K +34.06 Da,             | 2518.413615 | 2 | 1178.587 | 83659296  | n.d. |
| AAAAGAVVASAASGPAEGKKITELR | Q8CH25 | 0          | n +42.03 Da,n +34.06 Da,K +34.06 Da, | 2520.330968 | 3 | 802.803  | 689956992 | n.d. |
| AAAAGAVVASAASGPAEGKKITELR | Q8CH25 | 0          | n +42.03 Da,n +28.03 Da,K +28.03 Da, | 2520.375243 | 3 | 798.7823 | 1.285E+09 | n.d. |
| ANHAPFETDISTLTR           | Q9QXD6 | 0          | n +42.03 Da,                         | 2520.882023 | 1 | 857.9216 | 5.288E+09 | n.d. |
| LHTVYQSVELPETHQMLR        | Q07417 | 0          | n +28.03 Da,                         | 2522.039885 | 3 | 737.0405 | 3.332E+09 | n.d. |
| LDLTEEEELKR               | Q8QZR3 | 0          | n +34.06 Da,K +34.06 Da,             | 2523.080475 | 3 | 519.3183 | 557078016 | n.d. |
| VLYPNDNFFEGKELR           | Q8CI94 | 0          | n +42.03 Da,K +28.03 Da,             | 2527.04028  | 3 | 637.6717 | 529636992 | n.d. |

|                          |        |            |                                      |             |   |          |           |      |
|--------------------------|--------|------------|--------------------------------------|-------------|---|----------|-----------|------|
| ANHAPFETDISTLTR          | Q9QXD6 | 0.00040096 | n +42.03 Da,                         | 2527.154411 | 3 | 572.2839 | 7.721E+09 | n.d. |
| PPSVMLPPRRRLQTLR         | Q8C6G8 | 0.0177139  | n +34.06 Da,                         | 2528.407989 | 3 | 636.7436 | 68930600  | n.d. |
| ANHAPFETDISTLTR          | Q9QXD6 | 0          | n +42.03 Da,                         | 2529.233896 | 2 | 857.922  | 2.403E+10 | n.d. |
| TTIAGVVYKDGIVLGADTR      | P70195 | 0          | n +28.03 Da,K +28.03 Da,             | 2531.074027 | 3 | 669.049  | 364088000 | n.d. |
| PDPSTKDFLLQQTMLR         | Q9CPU0 | 0          | n +14.02 Da,K +28.03 Da,             | 2536.192176 | 3 | 644.6813 | 8.73E+09  | n.d. |
| TIAQDYGVLKADEGISFR       | P35700 | 0          | n +42.03 Da,n +34.06 Da,             | 2538.708295 | 3 | 687.0485 | 57366600  | n.d. |
| TIAQDYGVLKADEGISFR       | P35700 | 0          | n +42.03 Da,n +28.03 Da,             | 2540.234515 | 3 | 685.0482 | 175460000 | n.d. |
| EGYAKDFDPAINELYQR        | Q9QXD6 | 0.0177139  | n +34.06 Da,K +34.06 Da,             | 2541.546483 | 3 | 699.7038 | 38259900  | n.d. |
| TMDKSELVQKAKLAEQAER      | Q9CQV8 | 0.00711744 | n +42.03 Da,n +28.03 Da,K +28.03 Da, | 2542.281011 | 1 | 767.7424 | 398924000 | n.d. |
| APDQDEIDCLPGLAKQPSFR     | P16675 | 0          | n +34.06 Da,K +34.06 Da,             | 2542.294196 | 1 | 775.7439 | 44728600  | n.d. |
| MDDREDLVYQAKLAEQAER      | P62259 | 0          | n +42.03 Da,K +34.06 Da,             | 2552.204255 | 3 | 786.0582 | 237591008 | n.d. |
| GDTITNTMTLGDIVYKR        | P12710 | 0          | n +28.03 Da,K +28.03 Da,             | 2553.355381 | 3 | 652.0169 | 2.286E+09 | n.d. |
| LHTVYQSVELPETHQMLR       | Q07417 | 0          | n +28.03 Da,                         | 2553.781181 | 2 | 1105.055 | 51238500  | n.d. |
| PGFWDPIGR                | Q5XG73 | 0.01418919 | n +14.02 Da,                         | 2554.073039 | 2 | 529.775  | 583744000 | n.d. |
| TMDKSELVQKAKLAEQAER      | Q9CQV8 | 0.00711744 | n +42.03 Da,n +28.03 Da,K +28.03 Da, | 2554.235101 | 3 | 767.7425 | 158456992 | n.d. |
| FLTTSMEQPEMLEKVSFR       | Q9DCM2 | 0          | n +28.03 Da,K +28.03 Da,             | 2554.500732 | 3 | 727.7351 | 1.227E+09 | n.d. |
| PLQDVYKIGIGITVPVGR       | P10126 | 0.00040096 | n +14.02 Da,K +28.03 Da,             | 2559.742819 | 3 | 637.7074 | 121717000 | n.d. |
| GLGPMNIPLISDPKR          | P35700 | 0          | n +28.03 Da,K +28.03 Da,             | 2560.81097  | 2 | 555.3075 | 10558700  | n.d. |
| SAAEEVDGLGVVRPHYGSVLDNER | Q9JKF1 | 0          | n +42.03 Da,                         | 2566.66338  | 3 | 871.0966 | 209928992 | n.d. |
| AKGAGAFGYFEVTHDITR       | P24270 | 0          | n +28.03 Da,K +28.03 Da,             | 2568.917625 | 3 | 666.0017 | 90218496  | n.d. |
| IAKEEIFGPVQQIMK          | O35945 | 0          | n +28.03 Da,K +28.03 Da,             | 2570.416542 | 3 | 605.6869 | 175739008 | n.d. |
| YTIVYFPVR                | P19157 | 0.00440852 | n +28.03 Da,                         | 2572.138814 | 2 | 593.3373 | 380848992 | n.d. |
| PSIFTVLTAKSLR            | O09173 | 0          | n +17.03 Da,n +34.06 Da,             | 2575.515419 | 3 | 495.3203 | 47836500  | n.d. |
| TTIAGVVYKDGIVLGADTR      | P70195 | 0          | n +34.06 Da,K +34.06 Da,             | 2581.877796 | 3 | 673.0702 | 425632000 | n.d. |
| PSIFTVLTAKSLR            | O09173 | 0          | n +14.02 Da,n +28.03 Da,             | 2584.421454 | 3 | 492.3044 | 218180992 | n.d. |
| PMQTGIKAVDSLVIPIGR       | Q03265 | 0          | n +14.02 Da,K +28.03 Da,             | 2585.217291 | 2 | 912.5244 | 119520000 | n.d. |
| PMQTGIKAVDSLVIPIGR       | Q03265 | 0          | n +14.02 Da,K +28.03 Da,             | 2586.352347 | 3 | 608.6852 | 3.813E+09 | n.d. |
| LASARLAAASDVLELTDENFESR  | P27773 | 0.00040096 | n +42.03 Da,                         | 2587.371365 | 3 | 840.7564 | 130803000 | n.d. |
| APLDLDKYVEIAR            | Q9CQR6 | 0.00040096 | n +28.03 Da,K +28.03 Da,             | 2588.701852 | 2 | 779.9454 | 702972992 | n.d. |
| GLLSQGSPLSWEETQR         | P97494 | 0          | n +28.03 Da,                         | 2588.937035 | 3 | 605.9792 | 9949910   | n.d. |
| APLDLDKYVEIAR            | Q9CQR6 | 0          | n +28.03 Da,K +28.03 Da,             | 2591.222782 | 3 | 520.2996 | 3.76E+09  | n.d. |
| IMGLDLPDGGHLTHGY         | Q9CZN7 | 0.00040096 | n +28.03 Da,                         | 2592.184374 | 3 | 575.2864 | 371052992 | n.d. |
| DQDEIDCLPGLAKQPSFR       | P16675 | 0          | n +34.06 Da,K +34.06 Da,             | 2600.424277 | 3 | 719.7147 | 350865984 | n.d. |
| SDVLELTDENFESR           | P27773 | 0          | n +28.03 Da,                         | 2602.452136 | 2 | 841.3967 | 299993984 | n.d. |
| SFPTLKFFPASADR           | PO9103 | 0          | n +28.03 Da,K +28.03 Da,             | 2603.511928 | 3 | 547.2994 | 136278000 | n.d. |
| FLTTSMEQPEMLEKVSFR       | Q9DCM2 | 0          | n +42.03 Da,K +28.03 Da,             | 2609.106828 | 2 | 732.3849 | 179158000 | n.d. |
| GVLYDLSSPIQTTSTLYER      | Q8BM55 | 0          | n +34.06 Da,K +34.06 Da,             | 2609.494855 | 3 | 780.4441 | 17494400  | n.d. |
| MDKNELVQKAKLAEQAER       | P63101 | 0          | n +42.03 Da,K +28.03 Da,             | 2613.63096  | 3 | 743.0631 | 58929300  | n.d. |
| DALKAADTIGYPVMIR         | Q8C196 | 0.00264151 | n +28.03 Da,K +28.03 Da,             | 2615.549845 | 3 | 597.3344 | 532959008 | n.d. |
| TVTAMDVVYALKR            | P62806 | 0          | n +34.06 Da,K +34.06 Da,             | 2624.769388 | 3 | 512.3147 | 16083900  | n.d. |

|                        |        |            |                          |             |   |          |           |      |
|------------------------|--------|------------|--------------------------|-------------|---|----------|-----------|------|
| VVVPDVESLPSWAQKR       | P41216 | 0          | n +34.06 Da,K +34.06 Da, | 2625.934722 | 3 | 626.7091 | 3.874E+09 | n.d. |
| PSWATQESEAVAEKVL       | Q9EPQ7 | 0          | n +17.03 Da,K +34.06 Da, | 2632.42934  | 3 | 651.369  | 37834300  | n.d. |
| GIHVEIPGAQAESLGPLQVAR  | Q9DCW4 | 0          | n +28.03 Da,             | 2633.508322 | 3 | 724.0878 | 1.017E+09 | n.d. |
| PFTIEDIEVAPPKAHEVR     | P00329 | 0          | n +14.02 Da,K +28.03 Da, | 2637.994782 | 3 | 697.3779 | 66450500  | n.d. |
| VVVPDVESLPSWAQKR       | P41216 | 0          | n +28.03 Da,K +28.03 Da, | 2642.091741 | 3 | 622.0041 | 178634000 | n.d. |
| AGQSDKDKVYYTLEEIQKH    | P56395 | 0.00040096 | n +42.03 Da,K +28.03 Da, | 2646.937556 | 3 | 793.3993 | 276465984 | n.d. |
| IGGVQQDTILAEGLHFR      | O35129 | 0          | n +42.03 Da,             | 2647.58503  | 3 | 632.6808 | 92303904  | n.d. |
| PYYGSESASITPLEDLYKR    | Q61598 | 0.00040096 | n +17.03 Da,K +34.06 Da, | 2650.750008 | 3 | 737.3908 | 59890900  | n.d. |
| DVSPFLDGLLEERPQR       | Q9R1P4 | 0.00040096 | n +34.06 Da,             | 2650.865072 | 3 | 597.9866 | 13303900  | n.d. |
| IHVEIPGAQAESLGPLQVAR   | Q9DCW4 | 0.00040096 | n +34.06 Da,             | 2655.271512 | 3 | 707.072  | 14429100  | n.d. |
| TGIGSGLSLGIVHPPEL      | P50544 | 0          | n +28.03 Da,             | 2658.054599 | 3 | 636.6895 | 47485800  | n.d. |
| PMILGYWNV              | P10649 | 0          | n +17.03 Da,             | 2658.681619 | 3 | 633.3282 | 40098200  | n.d. |
| PLVLIDEVDKIGR          | Q8CGK3 | 0          | n +14.02 Da,n +28.03 Da, | 2662.190534 | 3 | 503.6399 | 86287104  | n.d. |
| SSSLEKSYELPDGQVITIGNER | P60710 | 0          | n +28.03 Da,K +28.03 Da, | 2663.862165 | 3 | 826.7535 | 1.32E+09  | n.d. |
| EFFPGLLEPR             | O35490 | 0.00115785 | n +28.03 Da,             | 2670.135657 | 2 | 560.2962 | 58829400  | n.d. |
| PAFTPATGTPVLGGLSYR     | Q61176 | 0.00040096 | n +14.02 Da,             | 2671.589771 | 3 | 606.9971 | 15427900  | n.d. |
| VVDALGNAIDGKPIGSKTR    | Q03265 | 0          | n +28.03 Da,K +28.03 Da, | 2675.317213 | 3 | 684.7232 | 204738000 | n.d. |
| SDPDPSTKDFLLQQTMLR     | Q9CPU0 | 0          | n +28.03 Da,K +28.03 Da, | 2676.408046 | 3 | 716.7051 | 1.578E+09 | n.d. |
| MVPPVQVSPLIKFGR        | Q06185 | 0          | n +34.06 Da,K +34.06 Da, | 2677.396093 | 1 | 579.3675 | 20911900  | n.d. |
| SSSLEKSYELPDGQVITIGNER | P60710 | 0          | n +34.06 Da,K +34.06 Da, | 2677.981088 | 3 | 859.7944 | 304945984 | n.d. |
| TFQSEGSNSDMYHPVAMFR    | P15105 | 0          | n +34.06 Da,             | 2681.307258 | 3 | 784.3798 | 26356900  | n.d. |
| PAFTPATGTPVLGGLSYR     | Q61176 | 0.00040096 | n +17.03 Da,             | 2684.350834 | 3 | 608.015  | 434004000 | n.d. |
| SFPTLKFFPASADR         | P09103 | 0          | n +34.06 Da,K +34.06 Da, | 2684.473447 | 3 | 551.3198 | 218904992 | n.d. |
| SSSLEKSYELPDGQVITIGNER | P60710 | 0          | n +34.06 Da,K +34.06 Da, | 2685.335462 | 2 | 1289.187 | 19037100  | n.d. |
| YGVKVLGTSVESIMATEDR    | Q8C196 | 0.00040096 | n +28.03 Da,K +28.03 Da, | 2686.501976 | 3 | 704.3759 | 46772200  | n.d. |
| GTGESLDLPARLIFQSPSQNR  | Q8K1G2 | 0.01853691 | n +42.03 Da,             | 2686.618174 | 3 | 776.7318 | 10498500  | n.d. |
| TALEKFGQAISSLPDR       | Q8VBW8 | 0          | n +28.03 Da,K +28.03 Da, | 2688.700557 | 3 | 605.6856 | 291028000 | n.d. |
| TIPGFDGVVKDADEAVR      | Q91ZA3 | 0          | n +28.03 Da,             | 2693.231929 | 3 | 615.6629 | 58880600  | n.d. |
| PEKIPSFPPDLGFPER       | Q9CR61 | 0.00040096 | n +14.02 Da,K +28.03 Da, | 2698.282041 | 3 | 623.336  | 334838016 | n.d. |
| SSSLEKSYELPDGQVITIGNER | P60710 | 0.00040096 | n +28.03 Da,K +28.03 Da, | 2703.115443 | 3 | 855.772  | 357521984 | n.d. |
| SWAVPSLGLKTDIPIGR      | P00405 | 0          | n +34.06 Da,             | 2704.443005 | 3 | 612.7043 | 1.163E+09 | n.d. |
| TEVAADALGEEWKGYVVR     | P62754 | 0          | n +34.06 Da,K +34.06 Da, | 2705.322273 | 3 | 687.7054 | 14570800  | n.d. |
| SLERSYELPDGQVITIGNER   | Q8BFZ3 | 0.01326531 | n +28.03 Da,             | 2707.570697 | 3 | 768.7402 | 76850200  | n.d. |
| PEFPGLLEPR             | O35490 | 0.01201923 | n +14.02 Da,             | 2714.162044 | 2 | 601.8139 | 155959008 | n.d. |
| SSLEKSYELPDGQVITIGNER  | P60710 | 0          | n +34.06 Da,K +34.06 Da, | 2715.749164 | 3 | 801.7724 | 1.063E+09 | n.d. |
| PSGGPVSLDFVKNGEYALR    | Q99LB7 | 0.00040096 | n +17.03 Da,K +34.06 Da, | 2717.630082 | 3 | 729.3925 | 176106000 | n.d. |
| EPMQTGIKAVDSLPIGR      | Q03265 | 0          | n +28.03 Da,K +28.03 Da, | 2721.674107 | 3 | 656.3712 | 614268992 | n.d. |
| EELLKDPLYIGLR          | P06801 | 0          | n +34.06 Da,K +34.06 Da, | 2722.061541 | 3 | 543.006  | 191932000 | n.d. |
| LINEKDGETFQLMGLYGR     | B5X0G2 | 0          | n +28.03 Da,K +28.03 Da, | 2722.631376 | 1 | 714.0434 | 15776900  | n.d. |
| MVPPVQVSPLIKFGR        | Q06185 | 0          | n +28.03 Da,K +28.03 Da, | 2723.624348 | 3 | 575.3494 | 2.809E+09 | n.d. |

|                                 |        |            |                                      |             |   |          |           |      |
|---------------------------------|--------|------------|--------------------------------------|-------------|---|----------|-----------|------|
| TLFEMAFDSIPAKR                  | Q99MZ7 | 0          | n +34.06 Da,K +34.06 Da,             | 2728.080926 | 3 | 565.3266 | 15233300  | n.d. |
| TPFTATAEVDYGKLEENLNR            | Q9DCU9 | 0.00605629 | n +34.06 Da,K +34.06 Da,             | 2730.004983 | 3 | 779.4144 | 53908100  | n.d. |
| AEQEPTAEQLAQIAAENEDEHSVNYKPPAQK | Q99PT1 | 0          | n +42.03 Da,K +34.06 Da,             | 2733.097326 | 4 | 919.4551 | 31428400  | n.d. |
| SYGRPPPVEGMTSLKVDNLTYR          | Q62093 | 0          | n +42.03 Da,K +28.03 Da,             | 2735.208264 | 3 | 889.1149 | 416140992 | n.d. |
| PGEFFLITGSGSELHDLR              | Q9DBT9 | 0          | n +14.02 Da,                         | 2735.318772 | 3 | 652.3455 | 1.095E+09 | n.d. |
| LVQALGAHLR                      | Q922D8 | 0.00040096 | n +34.06 Da,                         | 2743.095155 | 2 | 556.3653 | 44783900  | n.d. |
| TAASSSSLEKSYELPDGQVITIGNER      | P60710 | 0          | n +28.03 Da,                         | 2743.515591 | 3 | 936.8133 | 85691600  | n.d. |
| SAGFLQASASDVVVHGR               | Q8VCHO | 0          | n +28.03 Da,                         | 2745.646636 | 3 | 609.9937 | 64511400  | n.d. |
| SLEKSYELPDGQVITIGNER            | P60710 | 0          | n +34.06 Da,K +34.06 Da,             | 2747.31669  | 3 | 772.7614 | 149764000 | n.d. |
| FPIQNLPGYGVFSTQSNPKPR           | P35505 | 0          | n +34.06 Da,K +34.06 Da,             | 2749.711835 | 3 | 786.7787 | 251523008 | n.d. |
| PTGTDPTPEQWKQIAAVMQR            | P05201 | 0          | n +14.02 Da,K +28.03 Da,             | 2750.393611 | 3 | 766.0614 | 191556000 | n.d. |
| NEFTLGECELEMTGKVK               | P12710 | 0          | n +42.03 Da,n +34.06 Da,K +34.06 Da, | 2761.319888 | 3 | 818.7458 | 110237000 | n.d. |
| SEVYYDKSPLTPILLGNPGR            | P50172 | 0.01449764 | n +28.03 Da,K +28.03 Da,             | 2765.602925 | 3 | 759.0791 | 1.269E+09 | n.d. |
| PFVELETNLPASRIPAGLENR           | O35215 | 0          | n +14.02 Da,                         | 2766.851377 | 3 | 779.7569 | 1.383E+10 | n.d. |
| DTITNTMTLGDIVYKR                | P12710 | 0          | n +28.03 Da,K +28.03 Da,             | 2769.298002 | 3 | 633.008  | 263786000 | n.d. |
| PITPQFVTEVIKAER                 | Q8C196 | 0          | n +14.02 Da,K +28.03 Da,             | 2771.694281 | 3 | 590.6769 | 1.065E+09 | n.d. |
| AAQKDQKDAEAGEGLSATTLLPKLIPSGAGR | Q920S9 | 0.0202946  | n +42.03 Da,K +28.03 Da,             | 2772.343475 | 4 | 819.951  | 724459008 | n.d. |
| SQAPGPSKGTADYAFEMAVSNIR         | Q8R0N6 | 0          | n +28.03 Da,K +28.03 Da,             | 2783.009484 | 3 | 818.4085 | 1.658E+09 | n.d. |
| PIDPSVPFDPKLGVIPNTEGR           | Q61578 | 0.00901838 | n +14.02 Da,K +28.03 Da,             | 2783.408449 | 3 | 764.1129 | 455764992 | n.d. |
| PFVELETNLPASRIPAGLENR           | O35215 | 0          | n +14.02 Da,                         | 2789.819513 | 1 | 779.7567 | 222122000 | n.d. |
| YTPEQVAMATVTALHR                | Q91Y97 | 0          | n +28.03 Da,                         | 2791.092094 | 3 | 605.9908 | 418492000 | n.d. |
| LLKDFSATDLTEFAAR                | Q8BWT1 | 0.01513623 | n +42.03 Da,K +28.03 Da,             | 2792.819948 | 3 | 623.3376 | 65215200  | n.d. |
| GDPSKQDILAIFKR                  | Q9D8S3 | 0.00078339 | n +42.03 Da,K +28.03 Da,             | 2806.812562 | 3 | 562.6583 | 456051008 | n.d. |
| SYGRPPPVEGMTSLKVDNLTYR          | Q62093 | 0          | n +42.03 Da,K +34.06 Da,             | 2810.844482 | 3 | 891.1267 | 148732992 | n.d. |
| MELFQAKDHYILQQGER               | Q8CDA1 | 0          | n +42.03 Da,K +34.06 Da,             | 2811.120266 | 3 | 728.0517 | 36030800  | n.d. |
| TGGMLDNILASKLYR                 | Q91V92 | 0          | n +28.03 Da,K +28.03 Da,             | 2814.941692 | 3 | 569.9884 | 13153100  | n.d. |
| GFILDGFPR                       | G3UYQ4 | 0.00543281 | n +34.06 Da,                         | 2823.955904 | 2 | 528.3086 | 5945980   | n.d. |
| TENEELLDPLYIGLR                 | P06801 | 0          | n +34.06 Da,K +34.06 Da,             | 2824.01498  | 3 | 657.7186 | 18342200  | n.d. |
| GSLPEEKDSALWSDTPKGPLSAYR        | Q9EPL9 | 0          | n +42.03 Da,K +28.03 Da,             | 2824.940916 | 3 | 901.4605 | 130131000 | n.d. |
| PNEVVFLDDFGSNLKPAP              | P34914 | 0          | n +14.02 Da,K +28.03 Da,             | 2826.701393 | 3 | 687.3676 | 884502976 | n.d. |
| SIKDLLNHAFEAEDTGLR              | Q80XP9 | 0.01201923 | n +28.03 Da,K +28.03 Da,             | 2830.494836 | 3 | 701.7238 | 63382200  | n.d. |
| MEDALKAADTIGYPVMIR              | Q8C196 | 0          | n +28.03 Da,K +28.03 Da,             | 2834.572888 | 3 | 684.0281 | 57776200  | n.d. |
| LQNRTSVLPEDQDVAEERSR            | Q8R420 | 0.00605629 | n +17.03 Da,                         | 2840.604932 | 3 | 787.072  | 290004992 | n.d. |
| FEPSLDYMVTKIPR                  | Q8C196 | 0          | n +28.03 Da,K +28.03 Da,             | 2842.113815 | 3 | 584.6511 | 2.603E+09 | n.d. |
| ASGVAVSDGVIKVFNDMKVVR           | P18760 | 0          | n +42.03 Da,K +28.03 Da,             | 2863.033971 | 3 | 730.7365 | 270520000 | n.d. |
| PIDPSVPFDPKLGVIPNTEGR           | Q61578 | 0.00901838 | n +14.02 Da,K +28.03 Da,             | 2873.341415 | 3 | 764.0841 | 63386100  | n.d. |
| PGVVDNFPLLKALR                  | P30115 | 0          | n +17.03 Da,K +34.06 Da,             | 2874.399118 | 3 | 530.671  | 43589000  | n.d. |
| MEGKVYIGGEDYEKEFTPDKDY          | P40936 | 0          | n +42.03 Da,K +28.03 Da,             | 2875.82687  | 3 | 875.4208 | 122258000 | n.d. |
| TGAVRVNSLLDVLDDSTKVR            | Q6P1E8 | 0.0202946  | n +42.03 Da,K +34.06 Da,             | 2877.140935 | 3 | 745.4111 | 31303200  | n.d. |
| PVTFMNFPEDTLEQKAGSVGR           | Q8VCW8 | 0          | n +14.02 Da,K +28.03 Da,             | 2877.702189 | 3 | 789.0642 | 504777984 | n.d. |

|                                    |        |            |                                      |             |   |          |           |      |
|------------------------------------|--------|------------|--------------------------------------|-------------|---|----------|-----------|------|
| TSYGLTGAVFAQDKAIVQEATR             | Q8CHT0 | 0          | n +28.03 Da,K +28.03 Da,             | 2878.520306 | 3 | 794.7609 | 175060992 | n.d. |
| LITLEQGKTLADAEGDVFR                | Q9EQ20 | 0          | n +28.03 Da,K +28.03 Da,             | 2879.860798 | 3 | 711.3945 | 162795008 | n.d. |
| VLPATEFLDQNRGGR                    | Q8K3G9 | 0.03245117 | n +17.03 Da,                         | 2881.984122 | 3 | 563.9694 | 44257300  | n.d. |
| MGPPDPILGVTEAFKR                   | P05202 | 0          | n +34.06 Da,K +34.06 Da,             | 2887.144136 | 3 | 599.3516 | 78395200  | n.d. |
| MLPTQTISQGAIEKVKDATR               | Q8C196 | 0.04385423 | n +28.03 Da,K +28.03 Da,             | 2891.259381 | 3 | 757.7512 | 19568300  | n.d. |
| GDIAFVDVVPNDSSFQIVKNPR             | Q61176 | 0          | n +34.06 Da,K +34.06 Da,             | 2892.831602 | 3 | 796.107  | 135874000 | n.d. |
| HTGDSVVVAPAQTLNAEFQMLR             | Q8C196 | 0          | n +28.03 Da,                         | 2899.483909 | 3 | 833.7609 | 214224000 | n.d. |
| GVDTILDKVDGVS AEPTPE SWR           | O35488 | 0          | n +34.06 Da,K +34.06 Da,             | 2903.296796 | 3 | 813.7749 | 110170000 | n.d. |
| AGVDQHEGTIQVQGQNLFFR               | Q8VCR7 | 0.00152323 | n +42.03 Da,                         | 2906.217467 | 3 | 762.714  | 2.987E+09 | n.d. |
| AGVDQHEGTIQVQGQNLFFR               | Q8VCR7 | 0          | n +42.03 Da,                         | 2906.24908  | 2 | 1143.568 | 1.849E+09 | n.d. |
| ADEIAKAQVAQPGGDTIFGKIIR            | P70349 | 0          | n +42.03 Da,n +34.06 Da,K +34.06 Da, | 2907.858667 | 3 | 836.8231 | 256146000 | n.d. |
| SPVTFMNFPEDTLEQKAGSVGR             | Q8VCW8 | 0          | n +34.06 Da,K +34.06 Da,             | 2909.814211 | 3 | 826.7741 | 17830200  | n.d. |
| SNVMQTFTFYASEDKLENR                | O35490 | 0          | n +28.03 Da,K +28.03 Da,             | 2909.945497 | 3 | 779.3855 | 34189500  | n.d. |
| PKDIDLSPVTIGFSGSIPR                | Q05421 | 0          | n +14.02 Da,K +28.03 Da,             | 2910.147977 | 3 | 652.0389 | 3.399E+09 | n.d. |
| SKPEDVDGVLEEFGR                    | Q9DBM2 | 0.0298318  | n +34.06 Da,K +34.06 Da,             | 2914.697873 | 3 | 631.345  | 17907200  | n.d. |
| PEKIPSPFDLGFPER                    | Q9CR61 | 0.01389831 | n +17.03 Da,K +34.06 Da,             | 2919.207667 | 3 | 626.353  | 286006016 | n.d. |
| SVVLSQPKMDELQLFR                   | Q01853 | 0          | n +28.03 Da,K +28.03 Da,             | 2920.326268 | 3 | 678.3745 | 46045300  | n.d. |
| TMHLPATIGDYDFYSSR                  | P35505 | 0          | n +28.03 Da,                         | 2921.40442  | 3 | 701.6677 | 83780400  | n.d. |
| IIPPGSGIIHQVNLEYLAR                | P28271 | 0.00040096 | n +28.03 Da,                         | 2923.714456 | 3 | 706.7418 | 803377024 | n.d. |
| SPVTFMNFPEDTLEQKAGSVGR             | Q8VCW8 | 0          | n +28.03 Da,K +28.03 Da,             | 2928.865057 | 3 | 822.7494 | 211696000 | n.d. |
| IFVEESVYDEFVKKR                    | P24549 | 0          | n +28.03 Da,K +28.03 Da,             | 2932.290986 | 3 | 605.9899 | 67937104  | n.d. |
| DSLHVGHLLTLGLFHFQR                 | Q8BYL4 | 0.00543281 | n +28.03 Da,                         | 2932.70273  | 3 | 744.4092 | 77987296  | n.d. |
| DSNYHLLMSVQESLER                   | P26443 | 0          | n +28.03 Da,                         | 2936.226604 | 3 | 650.3193 | 79999400  | n.d. |
| SACFEPSLDYMVTKIPR                  | Q8C196 | 0          | n +34.06 Da,K +34.06 Da,             | 2945.831872 | 3 | 694.7055 | 76407104  | n.d. |
| SACFEPSLDYMVTKIPR                  | Q8C196 | 0          | n +28.03 Da,K +28.03 Da,             | 2948.267965 | 3 | 690.6849 | 118682000 | n.d. |
| TSQASATMHLPATIGDYDFYSSR            | P35505 | 0          | n +28.03 Da,                         | 2949.079673 | 3 | 883.4147 | 26622200  | n.d. |
| DHGDLAFVDVVPNDSSFQIVKNPR           | Q61176 | 0          | n +28.03 Da,                         | 2949.919355 | 3 | 876.1019 | 52551000  | n.d. |
| SAGFLQASASDVVVVHGR                 | Q8VCH0 | 0.00040096 | n +28.03 Da,                         | 2957.974461 | 3 | 609.9911 | 28153800  | n.d. |
| TVINLNVPPFEVIKQR                   | Q9WTP7 | 0          | n +28.03 Da,K +28.03 Da,             | 2962.400018 | 1 | 609.3537 | 17994900  | n.d. |
| IFVEESVYDEFVKKR                    | P24549 | 0          | n +42.03 Da,K +34.06 Da,             | 2966.09573  | 3 | 612.6715 | 254604000 | n.d. |
| TVDTQFIDENPELFLRPAQNR              | Q05920 | 0          | n +28.03 Da,                         | 2975.579015 | 1 | 887.1143 | 11536900  | n.d. |
| TSACFEPSLDYMVTKIPR                 | Q8C196 | 0          | n +28.03 Da,K +28.03 Da,             | 2976.363501 | 3 | 724.3668 | 1.037E+09 | n.d. |
| AGVDQHEGTIQVQGQNLFFR               | Q8VCR7 | 0          | n +42.03 Da,                         | 2983.661905 | 2 | 1143.565 | 27665400  | n.d. |
| FLFPEGKGMVQAVR                     | Q8R0Y6 | 0.01513623 | n +28.03 Da,K +28.03 Da,             | 2984.880081 | 3 | 583.3219 | 10873400  | n.d. |
| AGAESDQQFQFTGIKKYFNSY              | Q78IK2 | 0          | n +34.06 Da,K +34.06 Da,             | 2985.777079 | 3 | 820.7672 | 190424000 | n.d. |
| TGAIVDVPVGEELLGR                   | Q03265 | 0          | n +28.03 Da,                         | 2987.575394 | 2 | 826.9652 | 392007008 | n.d. |
| IIPPGSGIIHQVNLEYLAR                | P28271 | 0          | n +42.03 Da,                         | 2988.692615 | 3 | 711.4127 | 319892992 | n.d. |
| NLQALFVALNDQVFEIR                  | Q9JLN9 | 0.00115785 | n +14.02 Da,                         | 2990.601813 | 3 | 668.6971 | 1.153E+09 | n.d. |
| AGAESDQQFQFTGIKKYFNSY              | Q78IK2 | 0          | n +28.03 Da,K +28.03 Da,             | 2993.426142 | 1 | 814.7365 | 319724992 | n.d. |
| ASGNAIQIGKSAPDFTATAVVDGAFKEIKLSDYR | Q61171 | 0          | n +42.03 Da,K +34.06 Da,             | 2995.558088 | 2 | 893.743  | 14352100  | n.d. |

|                                    |        |            |                                      |             |   |          |           |      |
|------------------------------------|--------|------------|--------------------------------------|-------------|---|----------|-----------|------|
| AELVQQQSAPVGMKAEGFVDALHR           | A2AJ71 | 0          | n +42.03 Da,K +34.06 Da,             | 2997.959507 | 3 | 862.7839 | 22980800  | n.d. |
| ASGVAVSDGVIKVFNDMKVR               | P18760 | 0          | n +42.03 Da,K +34.06 Da,             | 3002.6016   | 3 | 734.7583 | 70368600  | n.d. |
| PDQLLKELPFPLNTR                    | QD7JT3 | 0          | n +14.02 Da,K +28.03 Da,             | 3006.624878 | 3 | 608.3523 | 2.279E+09 | n.d. |
| PGVVDNFPLLKALR                     | P30115 | 0          | n +14.02 Da,K +28.03 Da,             | 3007.161245 | 3 | 527.6554 | 1.159E+10 | n.d. |
| PGVVDNFPLLKALR                     | P30115 | 0          | n +14.02 Da,K +28.03 Da,             | 3008.116087 | 1 | 527.6559 | 526129984 | n.d. |
| PLILEEQTLADEKLIR                   | Q60759 | 0          | n +14.02 Da,K +28.03 Da,             | 3012.130344 | 3 | 641.7088 | 434100000 | n.d. |
| PGVVDNFPLLKALR                     | P30115 | 0          | n +14.02 Da,K +28.03 Da,             | 3012.984254 | 2 | 790.9791 | 446316000 | n.d. |
| PGVVDNFPLLKALR                     | P30115 | 0          | n +17.03 Da,K +34.06 Da,             | 3017.470266 | 3 | 530.6717 | 1.292E+09 | n.d. |
| FLFPEGIKGMVQAVR                    | Q8R0Y6 | 0.01513623 | n +28.03 Da,K +28.03 Da,             | 3018.879023 | 3 | 583.3355 | 65879800  | n.d. |
| PLLLTPVLSHPIFDNR                   | Q04207 | 0          | n +14.02 Da,                         | 3019.673612 | 3 | 616.0241 | 255283008 | n.d. |
| LPSITTEILKSVVAR                    | P67778 | 0          | n +28.03 Da,                         | 3019.687026 | 3 | 561.6846 | 40474600  | n.d. |
| AGAESDGGQFQFTGIKKYFNSY             | Q78IK2 | 0          | n +28.03 Da,K +28.03 Da,             | 3022.929913 | 3 | 814.7371 | 510032992 | n.d. |
| TFVSITPAEVLVGVKDR                  | P62962 | 0          | n +28.03 Da,K +28.03 Da,             | 3024.546629 | 3 | 648.7088 | 171576992 | n.d. |
| QESTGGIVEVLHKVDSEGSPNR             | P51660 | 0.01002073 | n +42.03 Da,K +28.03 Da,             | 3029.631736 | 3 | 841.0972 | 70350800  | n.d. |
| ADEIAKAQVAQPPGGDTIFGKIIR           | P70349 | 0          | n +42.03 Da,n +28.03 Da,K +28.03 Da, | 3030.002119 | 4 | 624.8509 | 4.499E+09 | n.d. |
| AIKFLEVIKPF                        | P61620 | 0.00040096 | n +28.03 Da,K +28.03 Da,             | 3030.02421  | 3 | 463.6351 | 4.933E+09 | n.d. |
| PALALLSDYVLHNSNTMR                 | Q8VDM4 | 0          | n +17.03 Da,                         | 3031.889308 | 3 | 678.0234 | 15906300  | n.d. |
| YLEEVAVNFAKGLADR                   | Q8BMS1 | 0          | n +28.03 Da,K +28.03 Da,             | 3034.895487 | 3 | 617.6734 | 137719008 | n.d. |
| ADEIAKAQVAQPPGGDTIFGKIIR           | P70349 | 0          | n +42.03 Da,n +34.06 Da,K +34.06 Da, | 3039.414364 | 4 | 627.8672 | 8553130   | n.d. |
| ADEIAKAQVAQPPGGDTIFGKIIR           | P70349 | 0          | n +42.03 Da,n +28.03 Da,K +28.03 Da, | 3040.340066 | 3 | 832.7986 | 7.409E+09 | n.d. |
| MDPSGVKVLTAEDIQER                  | P16546 | 0          | n +42.03 Da,K +34.06 Da,             | 3040.436869 | 3 | 698.359  | 143556992 | n.d. |
| SIYNPEVLDITEQALHSR                 | P14869 | 0          | n +28.03 Da,                         | 3048.300473 | 3 | 705.0349 | 158476992 | n.d. |
| LIPPFHAASAQLTSLVDADAR              | Q91XD4 | 0          | n +28.03 Da,                         | 3057.22925  | 3 | 741.0711 | 379439008 | n.d. |
| VSMVMTVDTSHEDMIHDAQMDYYGTR         | Q9D1M0 | 0          | n +42.03 Da,                         | 3058.049636 | 3 | 1019.772 | 252227008 | n.d. |
| AMGVHTGDSVVAPAQTLNSAEFQMLR         | Q8C196 | 0          | n +34.06 Da,                         | 3058.694557 | 3 | 955.1572 | 97056800  | n.d. |
| DLAFVDVPNDSSFQIVKNPR               | Q61176 | 0          | n +34.06 Da,K +34.06 Da,             | 3062.195045 | 3 | 777.0963 | 338182016 | n.d. |
| ASAKVSDAISTQYPVVDHEFDVAVVVGAGGAGLR | Q8K2B3 | 0          | n +28.03 Da,K +28.03 Da,             | 3063.142792 | 4 | 836.4407 | 56250800  | n.d. |
| LKTLPLVPTFENVSIPER                 | Q99N93 | 0          | n +28.03 Da,K +28.03 Da,             | 3063.227217 | 3 | 703.7493 | 2.95E+09  | n.d. |
| YLNFBKGVVSDDLPLNVSR                | P08113 | 0          | n +28.03 Da,K +28.03 Da,             | 3071.553301 | 3 | 769.4211 | 62134700  | n.d. |
| SSPAQPAVPAPLADLKIQHTKIF            | P24549 | 0          | n +42.03 Da,K +34.06 Da,             | 3072.563808 | 2 | 1270.25  | 22461800  | n.d. |
| ASGVAVSDGVIKVFNDMKVR               | P18760 | 0          | n +42.03 Da,K +34.06 Da,             | 3076.549148 | 3 | 734.758  | 1.401E+09 | n.d. |
| SSPAQPAVPAPLADLKIQHTKIF            | P24549 | 0          | n +42.03 Da,K +34.06 Da,             | 3079.964565 | 3 | 847.1692 | 3.972E+09 | n.d. |
| SMEDALKAADTIGYPVMIR                | Q8C196 | 0.00040096 | n +34.06 Da,K +34.06 Da,             | 3085.839947 | 3 | 717.0585 | 11823500  | n.d. |
| LNLPEPWDWR                         | P97821 | 0.00901838 | n +34.06 Da,                         | 3087.16453  | 2 | 675.3569 | 1.163E+09 | n.d. |
| PFSEEAFLTKELVLQR                   | Q78PY7 | 0          | n +14.02 Da,K +28.03 Da,             | 3088.985307 | 3 | 683.3932 | 86333000  | n.d. |
| PDANKENTLNQLVGAAFGAAGQR            | Q9EQ20 | 0.00115785 | n +14.02 Da,K +28.03 Da,             | 3091.126708 | 3 | 795.4174 | 290292992 | n.d. |
| ASGVAVSDGVIKVFNDMKVR               | P18760 | 0          | n +42.03 Da,K +28.03 Da,             | 3096.773146 | 3 | 730.7368 | 1.187E+10 | n.d. |
| SVVAPAQTLNSAEFQMLR                 | Q8C196 | 0          | n +28.03 Da,                         | 3101.623189 | 3 | 697.0499 | 156390000 | n.d. |
| SSPAQPAVPAPLADLKIQHTKIF            | P24549 | 0          | n +42.03 Da,K +28.03 Da,             | 3105.223254 | 3 | 843.1481 | 886174976 | n.d. |
| ILNMDKTLKGLNSDSVTEETLR             | Q8C196 | 0.01795213 | n +28.03 Da,K +28.03 Da,             | 3106.8036   | 3 | 854.4542 | 18197300  | n.d. |



|                                  |        |            |                                      |             |   |          |           |      |
|----------------------------------|--------|------------|--------------------------------------|-------------|---|----------|-----------|------|
| SLVSLDQDMQTKVRDLPR               | Q91VW9 | 0.00152323 | n +42.03 Da,K +28.03 Da,             | 3110.091624 | 3 | 724.3848 | 1.858E+09 | n.d. |
| YFDSFGDLSSASAIMGNAKVK            | P02088 | 0.00040096 | n +42.03 Da,K +28.03 Da,             | 3114.457819 | 3 | 769.3818 | 20747300  | n.d. |
| PSVSLQTVKLMKEGLEAAR              | O35490 | 0          | n +14.02 Da,K +28.03 Da,             | 3116.317082 | 3 | 709.7356 | 105009000 | n.d. |
| LIPPFHAASAQLTSLVDADAR            | Q91XD4 | 0          | n +42.03 Da,                         | 3124.067224 | 3 | 745.7426 | 850382016 | n.d. |
| DLKVLQPTIFPVVPR                  | P41216 | 0          | n +28.03 Da,K +28.03 Da,             | 3128.293079 | 3 | 593.3694 | 186443008 | n.d. |
| SSLQELCSGLPLRPLPENR              | Q8VC12 | 0          | n +42.03 Da,                         | 3132.612044 | 3 | 736.7153 | 7595040   | n.d. |
| PTGGAGAVAMLIIGPKAPLVLEQGLR       | P54869 | 0          | n +28.03 Da,K +28.03 Da,             | 3136.938804 | 4 | 618.8562 | 26341500  | n.d. |
| TDFDECDKLYFEELSLE                | Q8C196 | 0          | n +28.03 Da,K +28.03 Da,             | 3137.184234 | 3 | 789.0338 | 138823008 | n.d. |
| AESPAFLSAKDEGSFAYLTIKDR          | A6H630 | 0          | n +42.03 Da,n +28.03 Da,K +28.03 Da, | 3138.217964 | 3 | 872.1193 | 1.459E+09 | n.d. |
| VSMNNTVDTSHEDMIHDAQMDYYGTR       | Q9D1M0 | 0          | n +42.03 Da,                         | 3140.275562 | 3 | 1019.773 | 1.263E+10 | n.d. |
| VSMNNTVDTSHEDMIHDAQMDYYGTR       | Q9D1M0 | 0          | n +42.03 Da,                         | 3141.04367  | 4 | 765.0813 | 731004992 | n.d. |
| GISDQVLKEYLDNVQLGH               | P55096 | 0          | n +14.02 Da,K +28.03 Da,             | 3159.737047 | 3 | 690.7006 | 94494304  | n.d. |
| LQQLDLDLLVDLDHQR                 | Q8VDD5 | 0          | n +28.03 Da,                         | 3161.152278 | 3 | 660.0134 | 75707296  | n.d. |
| SAVLEDDKLLVYYDDVVR               | P41216 | 0          | n +28.03 Da,K +28.03 Da,             | 3180.783139 | 3 | 744.7204 | 97173800  | n.d. |
| INVLPLGSGAIAGNPLGVDR             | Q91Y10 | 0.00040096 | n +42.03 Da,                         | 3182.593126 | 3 | 659.0484 | 99189600  | n.d. |
| IYSLNEGYAKDFDPAINEYLQR           | Q9QXD6 | 0          | n +28.03 Da,                         | 3185.343433 | 3 | 892.4504 | 19967200  | n.d. |
| AKVEQVLSLEPQHELKFR               | Q9QY76 | 0.00040096 | n +14.02 Da,K +28.03 Da,             | 3189.532394 | 3 | 741.0822 | 14225100  | n.d. |
| TVSTDFDECDKLYFEELSLE             | Q8C196 | 0          | n +28.03 Da,K +28.03 Da,             | 3194.334497 | 3 | 884.7526 | 6606050   | n.d. |
| APSQLALFSVSDKTGLVEFAR            | Q9CWJ9 | 0          | n +28.03 Da,K +28.03 Da,             | 3197.693392 | 3 | 764.758  | 1.472E+09 | n.d. |
| IYSLNEGYAKDFDPAINEYLQR           | Q9QXD6 | 0          | n +34.06 Da,                         | 3203.734886 | 3 | 896.4668 | 11107400  | n.d. |
| GVDLLADAVAVTMGPKGR               | P63038 | 0          | n +34.06 Da,K +34.06 Da,             | 3204.121975 | 3 | 613.3662 | 13470000  | n.d. |
| SDKLPYKVADIGLAAWGR               | P50247 | 0.00040096 | n +42.03 Da,K +28.03 Da,             | 3207.006989 | 3 | 686.7184 | 97692304  | n.d. |
| SGEDEQQEQTI AEDLVVTKYKMGGDIANR   | P50580 | 0          | n +42.03 Da,K +28.03 Da,             | 3210.326932 | 4 | 831.4087 | 321055008 | n.d. |
| SDKLPYKVADIGLAAWGR               | P50247 | 0          | n +42.03 Da,K +34.06 Da,             | 3210.798931 | 3 | 690.7396 | 94127200  | n.d. |
| PIVSVKNVDEAINFINDR               | P47740 | 0          | n +14.02 Da,K +28.03 Da,             | 3211.679276 | 3 | 695.7159 | 262911008 | n.d. |
| ASGVAVSDGVIKVFNDMKVR             | P18760 | 0          | n +42.03 Da,K +34.06 Da,             | 3212.122185 | 3 | 734.7581 | 63006200  | n.d. |
| PGNALEKEVESIGAHNLAY              | Q9CZ13 | 0.0298318  | n +14.02 Da,K +28.03 Da,             | 3216.296205 | 3 | 685.3564 | 704337024 | n.d. |
| EDVQETDTSQKQSPASHEIATNLGDFAISLYR | P07758 | 0          | n +34.06 Da,K +34.06 Da,             | 3218.803434 | 4 | 934.2188 | 11311300  | n.d. |
| ASGVAVSDGVIKVFNDMKVR             | P18760 | 0          | n +42.03 Da,K +28.03 Da,             | 3219.789128 | 3 | 730.738  | 36055100  | n.d. |
| ADKMDMSLDDIIKLN                  | O08583 | 0          | n +42.03 Da,K +34.06 Da,             | 3221.452456 | 3 | 663.3655 | 2.677E+09 | n.d. |
| EGDVVKRTGAIVDPVGEELLGR           | Q03265 | 0.00040096 | n +34.06 Da,K +34.06 Da,             | 3227.985539 | 3 | 826.1647 | 44051700  | n.d. |
| EDVQETDTSQKQSPASHEIATNLGDFAISLYR | P07758 | 0          | n +28.03 Da,K +28.03 Da,             | 3228.535734 | 4 | 931.2023 | 229534000 | n.d. |
| TLMLPTQTISQGAIEKVKDATR           | Q8C196 | 0          | n +28.03 Da,K +28.03 Da,             | 3229.892248 | 3 | 829.127  | 6212130   | n.d. |
| FTGSTEVGHLIQVAAGSSNLKR           | P47738 | 0          | n +28.03 Da,K +28.03 Da,             | 3236.811274 | 3 | 776.7514 | 9725050   | n.d. |
| DALAGLVASNPDLQLLQGHR             | Q8VC30 | 0          | n +34.06 Da,                         | 3239.932971 | 3 | 708.0651 | 10401300  | n.d. |
| ADKMDMSLDDIIKLN                  | O08583 | 0          | n +42.03 Da,K +28.03 Da,             | 3248.881474 | 3 | 659.3447 | 577809984 | n.d. |
| PFLQLAESAYR                      | Q9QXX4 | 0          | n +14.02 Da,                         | 3252.248941 | 2 | 711.3912 | 102136000 | n.d. |
| SGDATLMLPTQTISQGAIEKVKDATR       | Q8C196 | 0.04544059 | n +28.03 Da,K +28.03 Da,             | 3269.544973 | 3 | 939.1668 | 7388200   | n.d. |
| MKIAVIGQSLFGQEVYQCLR             | Q8R0Y6 | 0.00040096 | n +34.06 Da,K +34.06 Da,             | 3271.260826 | 3 | 803.4575 | 155238000 | n.d. |
| ASGVTVNDEVIKVFNDMKVR             | P45591 | 0          | n +42.03 Da,K +28.03 Da,             | 3276.528796 | 3 | 773.7497 | 146468992 | n.d. |

|                                |        |            |                                      |             |   |          |           |      |
|--------------------------------|--------|------------|--------------------------------------|-------------|---|----------|-----------|------|
| SLPEETVDLIVHHTSF               | P52840 | 0.00040096 | n +28.03 Da,                         | 3283.402043 | 3 | 617.9869 | 70438096  | n.d. |
| SGDLEAWEKGVLFASGQNLAR          | Q9CPY7 | 0          | n +34.06 Da,K +34.06 Da,             | 3288.260287 | 3 | 772.763  | 13958100  | n.d. |
| PFTQNLGLEELGIELDPKGR           | O08749 | 0          | n +14.02 Da,K +28.03 Da,             | 3290.07856  | 3 | 756.7465 | 352127008 | n.d. |
| PNAGPFPAFDLPLSPVTIKR           | P15116 | 0          | n +14.02 Da,K +28.03 Da,             | 3292.973468 | 3 | 694.7298 | 62107000  | n.d. |
| ASASSTNLKDVLSNLIPEQAR          | Q9CZU6 | 0.00040096 | n +28.03 Da,K +28.03 Da,             | 3296.889979 | 3 | 809.4451 | 297180992 | n.d. |
| TPATMSQVAKDVATFLR              | Q9D0M3 | 0.00040096 | n +28.03 Da,                         | 3297.829006 | 3 | 631.336  | 22929500  | n.d. |
| MFSWLGNDRR                     | Q9QXY6 | 0.00040096 | n +42.03 Da,                         | 3298.49003  | 2 | 719.8303 | 1.058E+09 | n.d. |
| VLPSTITELKSVVAR                | P67778 | 0          | n +28.03 Da,K +28.03 Da,             | 3301.317439 | 3 | 594.7091 | 40733000  | n.d. |
| SILYVSPHPDAFPSLR               | Q9Z1Q9 | 0          | n +42.03 Da,                         | 3303.582364 | 2 | 920.9833 | 512636000 | n.d. |
| SNDVMEIIFAKAVER                | D3YUP6 | 0          | n +34.06 Da,K +34.06 Da,             | 3305.537062 | 3 | 597.3431 | 8762480   | n.d. |
| GLDFSAKVIQGSLSLPPQAVR          | Q9Z2V4 | 0          | n +34.06 Da,K +34.06 Da,             | 3307.251692 | 3 | 757.1132 | 258888000 | n.d. |
| MNLSAAHHQISLSDGNNIPLIGLGTYSDDR | Q8VCX1 | 0          | n +42.03 Da,                         | 3307.325745 | 3 | 1078.539 | 237823008 | n.d. |
| PETVSTDFDECDKLYFEELSRLR        | Q8C196 | 0          | n +14.02 Da,K +28.03 Da,             | 3310.175089 | 3 | 955.4416 | 22291900  | n.d. |
| PEGLFPEHLIDVLR                 | Q60936 | 0          | n +14.02 Da,                         | 3310.49823  | 3 | 550.3152 | 37667100  | n.d. |
| IAKEEIFGPVQIMKF                | O35945 | 0          | n +28.03 Da,K +28.03 Da,             | 3326.186366 | 3 | 654.7098 | 79660496  | n.d. |
| SGGIGQLSLLKNSPLVSR             | P08249 | 0.00040096 | n +28.03 Da,K +28.03 Da,             | 3332.819891 | 3 | 698.0867 | 18657200  | n.d. |
| DYLELDTIKNLVR                  | P08113 | 0          | n +28.03 Da,K +28.03 Da,             | 3334.280303 | 3 | 549.9823 | 20087500  | n.d. |
| TLVGYDLVPEPKIIDAALR            | P12787 | 0.00040096 | n +34.06 Da,K +34.06 Da,             | 3336.227604 | 3 | 717.7735 | 100876000 | n.d. |
| DGGDLTNLIHTKYPQLLSGIR          | P50247 | 0          | n +34.06 Da,K +34.06 Da,             | 3339.11943  | 3 | 793.7952 | 312564992 | n.d. |
| IAKEEIFGPVQIMKF                | O35945 | 0          | n +42.03 Da,K +34.06 Da,             | 3340.803557 | 3 | 663.4026 | 23555400  | n.d. |
| PLILEEQTLADEKLIR               | Q60759 | 0.00807868 | n +14.02 Da,K +28.03 Da,             | 3355.815344 | 3 | 641.6977 | 5963830   | n.d. |
| ASVALSEAEKVYIVHGVQEDLR         | Q9D0M0 | 0          | n +42.03 Da,n +28.03 Da,             | 3358.722903 | 3 | 828.4559 | 379776000 | n.d. |
| MNYMPGTASLIEDIDKKH             | Q8VC85 | 0          | n +42.03 Da,K +28.03 Da,             | 3364.349366 | 3 | 721.029  | 9513640   | n.d. |
| ATESSPLTTHVLDTASGLPAQGLCLR     | Q9CRB3 | 0          | n +42.03 Da,                         | 3376.644558 | 3 | 913.1321 | 125666000 | n.d. |
| ASGVAVSDGVIKVFNDMKVR           | P18760 | 0          | n +42.03 Da,K +34.06 Da,             | 3376.674658 | 3 | 734.7578 | 378376992 | n.d. |
| MNLSAAHHQISLSDGNNIPLIGLGTYSDDR | Q8VCX1 | 0          | n +42.03 Da,                         | 3388.282309 | 3 | 1078.539 | 5.887E+09 | n.d. |
| GTPATMSQVAKDVATFLR             | Q9D0M3 | 0          | n +34.06 Da,K +34.06 Da,             | 3390.211959 | 3 | 654.3746 | 40710900  | n.d. |
| TLSEESYKDSTLIMQLLR             | P62259 | 0          | n +34.06 Da,K +34.06 Da,             | 3395.707406 | 3 | 732.4136 | 374651008 | n.d. |
| PVLGFLGALAVGTLCGDALLHLLPHA     | Q9D856 | 0.04472548 | n +14.02 Da,                         | 3399.512968 | 3 | 880.4799 | 1.755E+09 | n.d. |
| TPVVVLSGLNTIKQALVR             | P00184 | 0.00040096 | n +28.03 Da,K +28.03 Da,             | 3404.266269 | 3 | 655.4134 | 67547904  | n.d. |
| SCTNSPEAVKKLLENMQSDLR          | Q80TL7 | 0.00040096 | n +42.03 Da,n +28.03 Da,K +28.03 Da, | 3409.536554 | 3 | 840.0928 | 44773900  | n.d. |
| TLNEDSYKDSTLIMQLLR             | P61982 | 0.01795213 | n +34.06 Da,K +34.06 Da,             | 3409.759667 | 3 | 736.7446 | 143232992 | n.d. |
| ITYPAGFMDVISIDKTGENFR          | P62702 | 0          | n +34.06 Da,K +34.06 Da,             | 3415.117912 | 3 | 814.7722 | 194154000 | n.d. |
| KEPLFGISTGNIITGLAAGAKSY        | Q8C196 | 0.00337838 | n +28.03 Da,K +28.03 Da,             | 3421.624169 | 3 | 798.1208 | 25963200  | n.d. |
| PNPDQLKELPFLNTR                | Q78JT3 | 0.00040096 | n +14.02 Da,K +28.03 Da,             | 3422.77894  | 3 | 678.7171 | 135618000 | n.d. |
| ASGVAVSDGVIKVFNDMKVR           | P18760 | 0          | n +42.03 Da,K +28.03 Da,             | 3425.904986 | 3 | 730.7376 | 3.734E+10 | n.d. |
| DPAIYFKEQFLDGDWATNR            | P14211 | 0          | n +28.03 Da,K +28.03 Da,             | 3426.509165 | 3 | 781.3861 | 493696000 | n.d. |
| ASGVAVSDGVIKVFNDMKVR           | P18760 | 0          | n +42.03 Da,K +34.06 Da,             | 3445.919827 | 3 | 734.7574 | 6.911E+09 | n.d. |
| AGLLKTTGLVGLAVCDTPHER          | Q9CPP6 | 0.00543281 | n +42.03 Da,K +28.03 Da,             | 3446.31205  | 3 | 812.1171 | 13107000  | n.d. |
| GPLLVDVVFTDEMAHFDR             | P24270 | 0          | n +28.03 Da,                         | 3448.826692 | 3 | 739.7033 | 325643008 | n.d. |

|                                 |        |            |                                      |             |   |          |           |      |
|---------------------------------|--------|------------|--------------------------------------|-------------|---|----------|-----------|------|
| STLLIHPQYAWLQDLGLR              | Q9DBF1 | 0          | n +42.03 Da,                         | 3449.47307  | 3 | 768.4136 | 64364300  | n.d. |
| DPAIYFKEQFLDGDWNTNR             | P14211 | 0          | n +34.06 Da,K +34.06 Da,             | 3457.586119 | 3 | 785.4078 | 442295008 | n.d. |
| DPAIYFKEQFLDGDWNTNR             | P14211 | 0.00040096 | n +28.03 Da,K +28.03 Da,             | 3460.26394  | 4 | 586.2917 | 29017800  | n.d. |
| YGTTVDEEKVRVLELARQR             | Q3UHK6 | 0.0499239  | n +34.06 Da,K +34.06 Da,             | 3462.352284 | 3 | 777.4478 | 113340000 | n.d. |
| LCRQEEMALSVDVAHVREKLIWLR        | Q8BGX0 | 0.0298318  | n +14.02 Da,K +28.03 Da,             | 3463.218529 | 3 | 998.5337 | 190911008 | n.d. |
| ALLGEENKGFYYLMQELPQER           | P51174 | 0          | n +28.03 Da,K +28.03 Da,             | 3465.91105  | 3 | 862.1154 | 44798300  | n.d. |
| DPAIYFKEQFLDGDWNTNR             | P14211 | 0          | n +28.03 Da,K +28.03 Da,             | 3467.77947  | 2 | 1171.577 | 210128000 | n.d. |
| PEDAIAVAIEKYLR                  | Q64176 | 0          | n +14.02 Da,K +28.03 Da,             | 3468.347905 | 3 | 543.9807 | 50466700  | n.d. |
| MNLSAAHHQISLSDGNNIPLIGLTYSDPR   | Q8VCX1 | 0          | n +42.03 Da,                         | 3473.552408 | 3 | 1078.539 | 1.107E+09 | n.d. |
| GSYQLLVPPPEALSKPLSVPTR          | O35423 | 0.00839161 | n +42.03 Da,K +28.03 Da,             | 3495.814015 | 3 | 807.1156 | 25964800  | n.d. |
| DPAIYFKEQFLDGDWNTNR             | P14211 | 0          | n +28.03 Da,K +28.03 Da,             | 3500.396822 | 3 | 781.3866 | 2.802E+09 | n.d. |
| DLPALPGGPAGGTGELAKYGLPGVAQLR    | O08600 | 0          | n +28.03 Da,K +28.03 Da,             | 3506.17442  | 3 | 911.1753 | 53985200  | n.d. |
| SWLFGIKGPKGEGTGPPLPPAQPAGGEGGDR | Q92511 | 0          | n +42.03 Da,n +28.03 Da,K +28.03 Da, | 3513.774658 | 3 | 1113.59  | 19747500  | n.d. |
| DPAIYFKEQFLDGDWNTNR             | P14211 | 0          | n +34.06 Da,K +34.06 Da,             | 3514.187194 | 3 | 785.4061 | 323371008 | n.d. |
| ASGVAVSDGVIKVFNDMKVR            | P18760 | 0          | n +42.03 Da,K +28.03 Da,             | 3515.607345 | 3 | 730.7383 | 18057200  | n.d. |
| SWLFGIKGPKGEGTGPPLPPAQPAGGEGGDR | Q92511 | 0          | n +42.03 Da,n +34.06 Da,K +34.06 Da, | 3516.546399 | 3 | 1117.617 | 9446220   | n.d. |
| WGIYLCYAVRTVPSAFHEPR            | Q8C419 | 0.01389831 | n +14.02 Da,                         | 3518.153537 | 3 | 812.7566 | 79996200  | n.d. |
| PSDDTKGFFDPNTEENLTYLQLMER       | Q9QXS1 | 0          | n +14.02 Da,K +28.03 Da,             | 3528.663929 | 3 | 1001.471 | 13494500  | n.d. |
| SGPVVAMVWEGLNVVKTGR             | P15532 | 0          | n +28.03 Da,K +28.03 Da,             | 3532.303259 | 3 | 685.7204 | 271892000 | n.d. |
| MWAWGWAAAALLWLQTAGAGARQELK      | Q8R2Z0 | 0.01823003 | n +28.03 Da,K +28.03 Da,             | 3546.116363 | 3 | 971.5183 | 22487900  | n.d. |
| EMSWIADTYASTIGHYDINAH           | P26443 | 0          | n +28.03 Da,                         | 3557.112065 | 3 | 808.3704 | 38765500  | n.d. |
| DPAIYFKEQFLDGDWNTNR             | P14211 | 0          | n +34.06 Da,K +34.06 Da,             | 3557.484086 | 4 | 589.3067 | 8351790   | n.d. |
| SQKDQSPASHEIATNLGDFAIISLYR      | P07758 | 0          | n +17.03 Da,K +34.06 Da,             | 3562.658496 | 3 | 933.825  | 7.494E+09 | n.d. |
| QKVRIQETQALPRGSIPR              | P97311 | 0.00968523 | n +42.03 Da,K +28.03 Da,             | 3569.663839 | 3 | 759.429  | 75243200  | n.d. |
| EIENLILNDPDFQHEDYNFLTR          | Q9R0H0 | 0          | n +28.03 Da,                         | 3569.943409 | 3 | 921.7802 | 1.808E+09 | n.d. |
| MELGELLYNKSEYIETASGNKVS         | Q9QZB9 | 0          | n +42.03 Da,n +28.03 Da,K +28.03 Da, | 3570.059772 | 3 | 943.812  | 1.137E+09 | n.d. |
| AQQAADKYLYVDKNFINNPLAQADWAAK    | Q8VDD5 | 0.00040096 | n +42.03 Da,K +28.03 Da,             | 3586.582915 | 3 | 1098.238 | 54647900  | n.d. |
| ESMEDALKAADTIGYPVMIR            | Q8C196 | 0          | n +28.03 Da,K +28.03 Da,             | 3597.545566 | 3 | 756.0528 | 16515100  | n.d. |
| LDPGVVDNFPLLKALR                | P30115 | 0          | n +28.03 Da,K +28.03 Da,             | 3599.915309 | 3 | 608.3647 | 40445600  | n.d. |
| DPAIYFKEQFLDGDWNTNR             | P14211 | 0          | n +28.03 Da,K +28.03 Da,             | 3603.056475 | 4 | 586.291  | 19373900  | n.d. |
| ASGVTVNDVIKVFNDMKVR             | P45591 | 0          | n +42.03 Da,K +28.03 Da,             | 3614.228361 | 3 | 773.7538 | 1.834E+09 | n.d. |
| GKQGFIDLPEFPFGLEPR              | O35490 | 0.00040096 | n +28.03 Da,K +28.03 Da,             | 3615.908087 | 3 | 701.7134 | 227752992 | n.d. |
| PSLPNMDSVFAEIAKVR               | Q9DBM2 | 0          | n +14.02 Da,K +28.03 Da,             | 3621.90817  | 3 | 663.0289 | 68809696  | n.d. |
| DMGMVTILVHNTASALR               | P34914 | 0          | n +28.03 Da,                         | 3623.765874 | 3 | 619.6626 | 346532992 | n.d. |
| DPAIYFKEQFLDGDWNTNR             | P14211 | 0          | n +28.03 Da,K +28.03 Da,             | 3625.499181 | 3 | 781.387  | 2.445E+10 | n.d. |
| DIGNIISDAMKKVGR                 | P63038 | 0.00189681 | n +28.03 Da,K +28.03 Da,             | 3631.874431 | 3 | 567.6547 | 2998760   | n.d. |
| LGNTQGIISAFSTIMSVHR             | Q9DB20 | 0.01642091 | n +42.03 Da,                         | 3634.210111 | 3 | 692.0415 | 304091008 | n.d. |
| MLSLDFLDDVR                     | Q9R0P6 | 0.00605629 | n +28.03 Da,                         | 3645.203125 | 3 | 676.3532 | 11452400  | n.d. |
| AADISQWAGPLCLQEVEPPQHALR        | P70296 | 0          | n +42.03 Da,                         | 3660.43088  | 3 | 948.4631 | 483460992 | n.d. |
| LHFFMPGFAPLTSR                  | P68372 | 0          | n +42.03 Da,                         | 3664.601354 | 3 | 554.954  | 54968100  | n.d. |

|                             |        |            |                                      |             |   |          |           |      |
|-----------------------------|--------|------------|--------------------------------------|-------------|---|----------|-----------|------|
| ASGVTVNDEVIVKVFNDMKVR       | P45591 | 0          | n +42.03 Da,K +28.03 Da,             | 3664.706881 | 3 | 773.7517 | 165782000 | n.d. |
| PPENFVDKQLQESLMSVAPR        | P61922 | 0.0123119  | n +14.02 Da,K +28.03 Da,             | 3666.075877 | 3 | 733.7208 | 114339000 | n.d. |
| APPVPGAVSGSGSEVDELDFVKNAF   | O89079 | 0          | n +34.06 Da,K +34.06 Da,             | 3669.005667 | 3 | 843.117  | 15491100  | n.d. |
| EIENLILNDPDFQHEDYNFLTR      | Q9R0H0 | 0          | n +28.03 Da,                         | 3670.659602 | 3 | 921.7803 | 334633984 | n.d. |
| TPDCGKQGFIDLPEFPFGLLEPR     | O35490 | 0          | n +28.03 Da,K +28.03 Da,             | 3684.698339 | 3 | 859.4334 | 327473984 | n.d. |
| AAAAVVVPAEWIKNWEKSGR        | B1AZI6 | 0.0123119  | n +42.03 Da,K +28.03 Da,             | 3703.878144 | 3 | 760.7546 | 252640000 | n.d. |
| PDCGKQGFIDLPEFPFGLLEPR      | O35490 | 0          | n +14.02 Da,K +28.03 Da,             | 3714.892881 | 3 | 821.078  | 140010000 | n.d. |
| MESMVAPGEVLMQAIQPAHADSR     | Q9DBK0 | 0          | n +42.03 Da,                         | 3723.386242 | 3 | 866.4063 | 206907008 | n.d. |
| VDVAQHVAEDLGKAFGER          | Q8BMS1 | 0          | n +28.03 Da,K +28.03 Da,             | 3731.865986 | 3 | 666.3415 | 10097800  | n.d. |
| LSNEERNLLSVAYKNVVGRRSAWR    | P68254 | 0.04544059 | n +14.02 Da,K +28.03 Da,             | 3749.71347  | 3 | 972.8847 | 70847904  | n.d. |
| EYLEEVAVNFAKGLADR           | Q8BMS1 | 0.00374251 | n +28.03 Da,K +28.03 Da,             | 3752.192929 | 3 | 660.686  | 5855460   | n.d. |
| DPAIYFKEQFLDGDATWNR         | P14211 | 0          | n +28.03 Da,K +28.03 Da,             | 3754.520955 | 3 | 781.3865 | 1.088E+09 | n.d. |
| EIENLILNDPDFQHEDYNFLTR      | Q9R0H0 | 0          | n +42.03 Da,                         | 3757.686404 | 3 | 926.4521 | 735025984 | n.d. |
| MNVEHEVNLLVEEIHRR           | Q4KML4 | 0          | n +42.03 Da,                         | 3759.34729  | 3 | 668.3388 | 777340032 | n.d. |
| SSLSGKVQTVLGLVPSQLGR        | Q60866 | 0.00839161 | n +42.03 Da,K +28.03 Da,             | 3760.448411 | 3 | 742.4289 | 14381100  | n.d. |
| MEGLKDKTLQELEEMQNDPEAIAR    | Q8R105 | 0.04691812 | n +42.03 Da,K +28.03 Da,             | 3762.864935 | 3 | 962.8124 | 79148496  | n.d. |
| GFGDLKTPAGLQVLDYADKSY       | O70251 | 0          | n +28.03 Da,K +28.03 Da,             | 3774.944791 | 3 | 857.1225 | 56413900  | n.d. |
| MQKDasLSGFLPSFQHFATQAIH     | Q8VCN5 | 0.00040096 | n +42.03 Da,K +34.06 Da,             | 3779.689151 | 3 | 879.7819 | 68092896  | n.d. |
| SAGADEIGKLVGGDWSSTTQETLR    | Q9JII5 | 0          | n +34.06 Da,K +34.06 Da,             | 3800.871179 | 3 | 907.1592 | 18495800  | n.d. |
| GFGDLKTPAGLQVLDYADKSY       | O70251 | 0          | n +34.06 Da,K +34.06 Da,             | 3803.241153 | 3 | 863.1595 | 33097700  | n.d. |
| GNPALAQPLIQNVKKILES DR      | Q8C196 | 0.01389831 | n +28.03 Da,K +28.03 Da,             | 3810.942652 | 3 | 796.7951 | 3960880   | n.d. |
| PGFFFQPTVFTDVEDH            | Q8R0Y6 | 0          | n +14.02 Da,                         | 3820.31286  | 2 | 948.9434 | 45171500  | n.d. |
| HTIQGDYIDTMEEIADLVGVRPN     | P97872 | 0.00040096 | n +42.03 Da,                         | 3834.339577 | 3 | 876.7571 | 105451000 | n.d. |
| SLVDLGKKLLEAAR              | Q00420 | 0          | n +42.03 Da,K +34.06 Da,             | 3854.56567  | 3 | 541.6875 | 41945400  | n.d. |
| PTTQQSPQDEQEKLLDEAIQAVKVQSF | Q9EQH3 | 0          | n +14.02 Da,K +28.03 Da,             | 3887.829349 | 3 | 1043.21  | 630561984 | n.d. |
| MDFNVKKLAADAGTFLSR          | Q9JK48 | 0.00040096 | n +42.03 Da,K +28.03 Da,             | 3904.764306 | 3 | 694.7066 | 77028496  | n.d. |
| PVPSLPNMDSVFAEAIKVR         | Q9DBM2 | 0.00078339 | n +14.02 Da,K +28.03 Da,             | 3910.889147 | 3 | 728.3983 | 49896100  | n.d. |
| VFTTQELVQAFTHAPAALADR       | Q8BK64 | 0.00078339 | n +42.03 Da,                         | 3947.168842 | 3 | 819.7646 | 13265100  | n.d. |
| DPENAVFYVGGYPPGFELPR        | Q61789 | 0.01945269 | n +42.03 Da,                         | 4002.824279 | 4 | 567.276  | 69991600  | n.d. |
| FAVESMEDALKAADTIGYPVMIR     | Q8C196 | 0          | n +34.06 Da,K +34.06 Da,             | 4002.918508 | 3 | 865.8004 | 80136704  | n.d. |
| IFDFQGLQHVAQVATQLEATR       | Q9DBL1 | 0          | n +28.03 Da,                         | 4009.326306 | 3 | 843.448  | 93524800  | n.d. |
| ADLSLVDALTEPPPEIEGIEIKR     | P27546 | 0.00040096 | n +42.03 Da,K +34.06 Da,             | 4012.509973 | 3 | 823.4443 | 2235800   | n.d. |
| IHTQPPPPPIPEVVATWEAISLGR    | Q8BGA8 | 0          | n +28.03 Da,                         | 4069.823914 | 3 | 878.4872 | 96877296  | n.d. |
| PLDLVALAEQVQKAEFIR          | Q5EBG8 | 0          | n +14.02 Da,K +28.03 Da,             | 4076.627629 | 3 | 733.0795 | 145650000 | n.d. |
| VDPSPRPMTPQRRR              | Q640N1 | 0.02367824 | n +14.02 Da,                         | 4114.842043 | 2 | 791.4084 | 3998850   | n.d. |
| SETAPAAPAAPAPAECTPVKKK      | P43274 | 0          | n +42.03 Da,n +28.03 Da,K +28.03 Da, | 584.4597096 | 4 | 579.3405 | 234898000 | n.d. |
| SETAPAAPAAPAPAECTPVKKK      | P43274 | 0          | n +42.03 Da,n +34.06 Da,K +34.06 Da, | 589.5562613 | 4 | 585.3718 | 51911600  | n.d. |
| RPLPPSPVVR                  | Q9ESY9 | 0.00093985 | n +34.06 Da,                         | 600.8816681 | 3 | 383.9154 | 96854896  | n.d. |
| IVGNEHYDVAR                 | P56480 | 0          | n +34.06 Da,                         | 663.328087  | 3 | 436.2349 | 164963008 | n.d. |
| PALEIANAHR                  | P63038 | 0          | n +14.02 Da,                         | 664.1819767 | 2 | 553.3097 | 102027000 | n.d. |

|                          |        |            |                                      |             |   |          |           |      |
|--------------------------|--------|------------|--------------------------------------|-------------|---|----------|-----------|------|
| PVEKDANNMPVTAR           | D3Z0Y2 | 0          | n +14.02 Da,K +28.03 Da,             | 668.976514  | 3 | 528.6119 | 2.047E+09 | n.d. |
| PASGPIRPIVR              | P47963 | 0          | n +14.02 Da,                         | 677.2066124 | 3 | 392.9122 | 4.551E+09 | n.d. |
| DVKFGADAR                | P63038 | 0.02782258 | n +28.03 Da,K +28.03 Da,             | 686.3025955 | 3 | 345.5259 | 363991008 | n.d. |
| RPLPPSPVVR               | Q9E5Y9 | 0.01672241 | n +34.06 Da,                         | 688.30711   | 3 | 383.9156 | 151324992 | n.d. |
| SEAAPAAPAAAPPAEKAPAKKK   | P15864 | 0          | n +42.03 Da,n +28.03 Da,K +28.03 Da, | 711.4900724 | 4 | 557.3272 | 314523008 | n.d. |
| SEAAPAAPAAAPPAEKAPAKKK   | P15864 | 0          | n +42.03 Da,n +34.06 Da,K +34.06 Da, | 713.2771773 | 3 | 750.8091 | 278911008 | n.d. |
| SEAAPAAPAAAPPAEKAPAKKKAA | P15864 | 0          | n +42.03 Da,n +28.03 Da,K +28.03 Da, | 713.6708168 | 3 | 790.1247 | 143204000 | n.d. |
| SEAAPAAPAAAPPAEKAPAKKK   | P15864 | 0          | n +42.03 Da,n +28.03 Da,K +28.03 Da, | 714.4448512 | 3 | 742.767  | 604756992 | n.d. |
| GSPGFSKFR                | Q9QXF8 | 0.00582698 | n +28.03 Da,K +28.03 Da,             | 715.3351629 | 3 | 346.8629 | 52342100  | n.d. |
| SEAAPAAPAAAPPAEKAPAKKKAA | P15864 | 0          | n +42.03 Da,n +34.06 Da,K +34.06 Da, | 715.74643   | 4 | 598.8769 | 25386100  | n.d. |
| SEAAPAAPAAAPPAEKAPAKKKAA | P15864 | 0          | n +42.03 Da,n +34.06 Da,K +34.06 Da, | 718.4845579 | 3 | 798.1675 | 56417900  | n.d. |
| VHLTDAEKAA               | P02088 | 0          | n +28.03 Da,K +28.03 Da,             | 722.3819685 | 3 | 370.8771 | 171620992 | n.d. |
| EKEVGLAIR                | P70694 | 0.02333197 | n +34.06 Da,K +34.06 Da,             | 729.2802786 | 3 | 361.5785 | 59930600  | n.d. |
| SSLEDSQIEKER             | Q9CZ13 | 0          | n +28.03 Da,                         | 744.9285945 | 3 | 492.9216 | 226663008 | n.d. |
| AQDQGEKENPMR             | Q9CXW4 | 0          | n +42.03 Da,K +34.06 Da,             | 745.5487205 | 2 | 739.8585 | 16982500  | n.d. |
| TNRPPLSLR                | P35980 | 0          | n +28.03 Da,                         | 779.5177925 | 3 | 390.2314 | 27783100  | n.d. |
| PLIKSAYEEQR              | P23116 | 0          | n +14.02 Da,K +28.03 Da,             | 780.0727388 | 3 | 459.2576 | 137294000 | n.d. |
| PVEYKYPER                | Q99K67 | 0          | n +14.02 Da,K +28.03 Da,             | 782.4552661 | 3 | 451.2355 | 655889984 | n.d. |
| DDEEEEEEPVKAAPGKR        | P09405 | 0          | n +28.03 Da,K +28.03 Da,             | 782.5069469 | 4 | 536.0117 | 34019900  | n.d. |
| SGDGDKDAWAVR             | P05202 | 0.04818813 | n +28.03 Da,K +28.03 Da,             | 783.7662146 | 3 | 444.9015 | 57079800  | n.d. |
| PQYEHSVVVGR              | Q8R0F9 | 0.03954132 | n +14.02 Da,                         | 789.106886  | 3 | 428.8897 | 207636000 | n.d. |
| PDLSSDIKER               | B5X0G2 | 0          | n +14.02 Da,K +28.03 Da,             | 790.8051297 | 3 | 401.219  | 830203008 | n.d. |
| PFSTHQLVR                | Q99LB7 | 0          | n +14.02 Da,                         | 806.4270633 | 3 | 366.8741 | 66591000  | n.d. |
| PTLLHQATEEQQER           | A2A848 | 0          | n +14.02 Da,                         | 824.7122048 | 3 | 565.2879 | 107928000 | n.d. |
| THLGGEDFDNR              | P16627 | 0.00582698 | n +28.03 Da,                         | 828.5575793 | 2 | 644.7997 | 37623500  | n.d. |
| TNAVIHEVQR               | O54749 | 0          | n +42.03 Da,                         | 829.3586243 | 2 | 604.8235 | 39741400  | n.d. |
| EVEMDAVGKEGR             | Q8C196 | 0          | n +28.03 Da,K +28.03 Da,             | 839.3326347 | 3 | 459.2344 | 354151008 | n.d. |
| LQGPWKWAGAR              | P97872 | 0          | n +28.03 Da,K +28.03 Da,             | 844.6368886 | 3 | 399.572  | 62416300  | n.d. |
| TKVSSLIER                | Q921X9 | 0.02055076 | n +28.03 Da,K +28.03 Da,             | 847.5983625 | 3 | 363.561  | 9.956E+09 | n.d. |
| ALHDQLGLR                | O35488 | 0.00988397 | n +28.03 Da,                         | 854.7123711 | 3 | 350.8729 | 176378000 | n.d. |
| SETAAPAAPAPAPAEKTPVKKK   | P43274 | 0          | n +42.03 Da,n +34.06 Da,K +34.06 Da, | 854.9336748 | 2 | 1169.737 | 46998300  | n.d. |
| SFQIVKNPR                | Q61176 | 0.01672241 | n +34.06 Da,K +34.06 Da,             | 855.6965137 | 3 | 386.2537 | 76173600  | n.d. |
| IFIDSDHTDNQR             | P09103 | 0          | n +28.03 Da,                         | 857.2663493 | 3 | 496.9076 | 149998000 | n.d. |
| SETAAPAAPAPAPAEKTPVKKK   | P43274 | 0          | n +42.03 Da,n +28.03 Da,K +28.03 Da, | 857.868113  | 2 | 1157.673 | 83839400  | n.d. |
| SETAAPAAPAPAPAEKTPVKKK   | P43274 | 0          | n +42.03 Da,n +28.03 Da,K +28.03 Da, | 859.1100603 | 3 | 772.1181 | 8.985E+09 | n.d. |
| SETAAPAAPAPAPAEKTPVKKK   | P43274 | 0          | n +42.03 Da,n +34.06 Da,K +34.06 Da, | 859.1430433 | 3 | 780.1601 | 6.907E+09 | n.d. |
| MHHQSVLHSGY              | P10518 | 0          | n +42.03 Da,                         | 859.4790246 | 3 | 446.5401 | 3.837E+09 | n.d. |
| AQAEGAYHRPLATSR          | Q9CQ56 | 0          | n +42.03 Da,                         | 860.3053787 | 3 | 557.285  | 2.241E+09 | n.d. |
| FEKVDLTR                 | P97328 | 0.01743462 | n +34.06 Da,K +34.06 Da,             | 861.8434831 | 3 | 358.2246 | 99004200  | n.d. |
| TVSSDQMAKLR              | P16015 | 0          | n +28.03 Da,K +28.03 Da,             | 864.1122624 | 3 | 431.2392 | 79093400  | n.d. |

|                           |        |            |                                      |             |   |          |           |      |
|---------------------------|--------|------------|--------------------------------------|-------------|---|----------|-----------|------|
| SSFQIVKNPR                | Q61176 | 0          | n +28.03 Da,K +28.03 Da,             | 867.3886227 | 3 | 411.2438 | 184467008 | n.d. |
| PDGKTVAEAAHGTVTR          | O88844 | 0          | n +14.02 Da,K +28.03 Da,             | 878.3841054 | 4 | 445.9851 | 108074000 | n.d. |
| SETAAPAAPAPAEKTPVKKK      | P43274 | 0          | n +42.03 Da,n +28.03 Da,K +28.03 Da, | 880.9918022 | 4 | 579.3405 | 1.715E+09 | n.d. |
| PDGKTVAEAAHGTVTR          | O88844 | 0.00949914 | n +14.02 Da,K +28.03 Da,             | 882.9214079 | 3 | 594.3102 | 144971008 | n.d. |
| GIKNLPVGEAGR              | P24270 | 0          | n +34.06 Da,K +34.06 Da,             | 884.1238516 | 3 | 426.944  | 6081490   | n.d. |
| TITYGPKVVR                | P12710 | 0          | n +28.03 Da,K +28.03 Da,             | 888.8560773 | 2 | 595.3688 | 173319008 | n.d. |
| TITYGPKVVR                | P12710 | 0.00582698 | n +28.03 Da,K +28.03 Da,             | 893.7205666 | 3 | 397.2489 | 7.015E+09 | n.d. |
| ADEDEGEGIHPSAPHR          | Q3UHD6 | 0          | n +42.03 Da,                         | 906.5574398 | 3 | 543.9133 | 317035008 | n.d. |
| PGELEENNAIGVKR            | P58044 | 0.00623053 | n +14.02 Da,K +28.03 Da,             | 911.9956141 | 4 | 523.2993 | 91032000  | n.d. |
| MKNPFAH                   | P28271 | 0.01708333 | n +28.03 Da,K +28.03 Da,             | 915.2800094 | 3 | 300.8302 | 3.663E+09 | n.d. |
| MFLNNTTNR                 | Q61313 | 0.02678571 | n +34.06 Da,                         | 916.5144596 | 3 | 382.2048 | 159344000 | n.d. |
| GKLTGMAFR                 | P16858 | 0.00186829 | n +28.03 Da,K +28.03 Da,             | 917.7285926 | 3 | 346.2041 | 3.784E+09 | n.d. |
| MKNPFAH                   | P28271 | 0.01708333 | n +28.03 Da,K +28.03 Da,             | 919.502358  | 2 | 450.7418 | 306659008 | n.d. |
| TVWEKPLR                  | P24456 | 0.00666667 | n +28.03 Da,K +28.03 Da,             | 923.1982929 | 2 | 362.2146 | 316473984 | n.d. |
| PGELEENNAIGVKR            | P58044 | 0.00623053 | n +14.02 Da,K +28.03 Da,             | 925.4568015 | 2 | 523.2744 | 459408000 | n.d. |
| TVWEKPLR                  | P24456 | 0.01149425 | n +34.06 Da,K +34.06 Da,             | 944.5943409 | 3 | 366.2431 | 13947000  | n.d. |
| TVWEKPLR                  | P24456 | 0.00666667 | n +28.03 Da,K +28.03 Da,             | 949.0298626 | 3 | 362.2197 | 125198000 | n.d. |
| PGELEENNAIGVKR            | P58044 | 0.00623053 | n +14.02 Da,K +28.03 Da,             | 953.3464985 | 3 | 523.2864 | 45663800  | n.d. |
| TALIHDLAR                 | P63323 | 0.00093985 | n +28.03 Da,                         | 959.9373078 | 3 | 365.5538 | 50984000  | n.d. |
| SLGLYGKNQR                | P19157 | 0.02370249 | n +42.03 Da,K +34.06 Da,             | 961.9256194 | 3 | 404.5705 | 20283100  | n.d. |
| EPDSSDIKER                | B5X0G2 | 0          | n +28.03 Da,K +28.03 Da,             | 964.971446  | 3 | 448.903  | 15431200  | n.d. |
| ISSQQTIPPSAKYGGGR         | P70404 | 0.00582698 | n +34.06 Da,K +34.06 Da,             | 966.3805574 | 3 | 586.6771 | 61787200  | n.d. |
| YMVTKIPR                  | Q8C196 | 0.00458926 | n +28.03 Da,K +28.03 Da,             | 977.8874761 | 3 | 355.2161 | 993342976 | n.d. |
| YRIVGVNSR                 | Q6ZQ82 | 0.01672241 | n +17.03 Da,                         | 983.3868634 | 2 | 540.815  | 393904000 | n.d. |
| AAAMDVDTPSGTNSGAGKKR      | P62878 | 0          | n +42.03 Da,K +28.03 Da,             | 985.4072689 | 3 | 678.0091 | 61512200  | n.d. |
| TVIKEVLQR                 | Q8CAY6 | 0.00743007 | n +28.03 Da,K +28.03 Da,             | 987.7568567 | 3 | 381.2484 | 111462000 | n.d. |
| SETAAPAAPAPVEKTPVKKK      | P43277 | 0          | n +42.03 Da,n +34.06 Da,K +34.06 Da, | 992.5625437 | 4 | 592.3796 | 45134400  | n.d. |
| TVIKEVLQR                 | Q8CAY6 | 0.00232234 | n +34.06 Da,K +34.06 Da,             | 997.3104783 | 3 | 385.2698 | 104538000 | n.d. |
| SETAAPAAPAPVEKTPVKKK      | P43277 | 0          | n +42.03 Da,n +34.06 Da,K +34.06 Da, | 998.7540153 | 3 | 789.5033 | 293136000 | n.d. |
| PNLVPSISNKR               | P19536 | 0          | n +14.02 Da,n +28.03 Da,             | 999.7670655 | 3 | 422.9226 | 2.724E+09 | n.d. |
| SETAAPAAPAPVEKTPVKKKA     | P43277 | 0          | n +42.03 Da,n +34.06 Da,K +34.06 Da, | 1000.147979 | 4 | 610.1384 | 137476992 | n.d. |
| ATSPQKSPVPSPTPKSPPSR      | Q9EPC1 | 0          | n +42.03 Da,K +28.03 Da,             | 1001.29058  | 2 | 604.1071 | 116368000 | n.d. |
| SETAAPAAPAPVEKTPVKKK      | P43277 | 0          | n +42.03 Da,n +28.03 Da,K +28.03 Da, | 1002.917102 | 4 | 586.3484 | 3.449E+09 | n.d. |
| SETAAPAAPAPVEKTPVKKK      | P43277 | 0          | n +42.03 Da,n +28.03 Da,K +28.03 Da, | 1004.118429 | 3 | 781.4614 | 1.592E+09 | n.d. |
| VKVGVNGFGR                | P16858 | 0          | n +28.03 Da,K +28.03 Da,             | 1005.397527 | 3 | 363.5574 | 2.403E+09 | n.d. |
| TSNPENTVFDAGR             | P20029 | 0          | n +34.06 Da,K +34.06 Da,             | 1009.037656 | 2 | 516.299  | 64402100  | n.d. |
| SQEKASSPSGKMDGEKPVDASEEKR | Q9D0R2 | 0          | n +42.03 Da,K +28.03 Da,             | 1011.436927 | 4 | 708.599  | 309923008 | n.d. |
| SSGTTAPKTSFGSLKDEDR       | Q91YTO | 0          | n +28.03 Da,K +28.03 Da,             | 1013.437231 | 4 | 556.7915 | 41427600  | n.d. |
| SETAAPAAPAPAEKTPVKKKAR    | P43274 | 0          | n +42.03 Da,n +28.03 Da,K +28.03 Da, | 1018.647717 | 4 | 636.1156 | 4.833E+09 | n.d. |
| PDIKYPLR                  | Q9DCN2 | 0.03500398 | n +14.02 Da,K +28.03 Da,             | 1022.458706 | 3 | 347.5344 | 85952000  | n.d. |

|                          |        |            |                                      |             |   |          |           |      |
|--------------------------|--------|------------|--------------------------------------|-------------|---|----------|-----------|------|
| SETAPAAPAAPAPAEKTPVKKKAR | P43274 | 0          | n +42.03 Da,n +28.03 Da,K +28.03 Da, | 1024.501454 | 3 | 847.8178 | 684979968 | n.d. |
| VTVKTQAYPDQKPGTSGLR      | Q9D0F9 | 0          | n +34.06 Da,K +34.06 Da,             | 1024.631318 | 4 | 537.827  | 184344000 | n.d. |
| AELYVKPGNKER             | Q80VJ2 | 0          | n +42.03 Da,n +34.06 Da,K +34.06 Da, | 1027.925314 | 3 | 505.2904 | 15463200  | n.d. |
| PNIVGNEHYDVAR            | P56480 | 0          | n +14.02 Da,                         | 1032.969498 | 3 | 499.9194 | 269236000 | n.d. |
| GELSKHEELIR              | Q9DBG7 | 0          | n +34.06 Da,K +34.06 Da,             | 1037.116935 | 3 | 413.5774 | 228954000 | n.d. |
| TDNELEKITR               | P26443 | 0          | n +34.06 Da,K +34.06 Da,             | 1040.517806 | 3 | 429.5918 | 135224000 | n.d. |
| PSKPSTGGWQPLR            | Q8VCZ9 | 0.00093985 | n +14.02 Da,K +28.03 Da,             | 1044.8361   | 3 | 483.9417 | 330955008 | n.d. |
| PAPRRPPR                 | Q3TYP4 | 0.03840063 | n +34.06 Da,                         | 1048.872598 | 3 | 327.5503 | 1.902E+09 | n.d. |
| SYAKNMGLYGER             | P05202 | 0          | n +28.03 Da,K +28.03 Da,             | 1053.987843 | 3 | 482.2471 | 284631008 | n.d. |
| PSKPSTGGWQPLR            | Q8VCZ9 | 0          | n +14.02 Da,K +28.03 Da,             | 1056.304972 | 3 | 484.9371 | 1.371E+10 | n.d. |
| YTNAVIHEVQR              | O54749 | 0          | n +28.03 Da,                         | 1059.22578  | 3 | 453.262  | 1.86E+09  | n.d. |
| PKFEVIDK PQS             | P97450 | 0          | n +14.02 Da,K +28.03 Da,             | 1059.823597 | 2 | 679.3897 | 172216000 | n.d. |
| MESNHKSGDGLSGTQKEAALR    | Q5YD48 | 0          | n +42.03 Da,K +34.06 Da,             | 1060.395175 | 3 | 582.2935 | 343358016 | n.d. |
| SQAEFDKAAEEVKR           | P31786 | 0          | n +42.03 Da,K +28.03 Da,             | 1060.879907 | 3 | 569.2965 | 2.565E+09 | n.d. |
| PMSAGLFHR                | Q63880 | 0.00582698 | n +14.02 Da,                         | 1062.227294 | 3 | 343.8492 | 374585984 | n.d. |
| TRSDPVVIVSAAR            | F2Z459 | 0          | n +34.06 Da,                         | 1068.992391 | 3 | 468.9504 | 585308032 | n.d. |
| PFLDIQKK                 | Q99LY9 | 0.03730159 | n +14.02 Da,K +28.03 Da,             | 1073.944938 | 3 | 353.5582 | 235799008 | n.d. |
| PAPRRPPR                 | Q3TYP4 | 0.03840063 | n +34.06 Da,                         | 1074.0509   | 1 | 327.5595 | 9723920   | n.d. |
| NAPRNNVLR                | P97445 | 0.01783492 | n +17.03 Da,                         | 1074.742573 | 3 | 357.5427 | 440278016 | n.d. |
| SQAEFDKAAEEVKR           | P31786 | 0          | n +42.03 Da,K +34.06 Da,             | 1077.145185 | 3 | 573.3179 | 187375008 | n.d. |
| STFNQVVLKR               | P35980 | 0          | n +34.06 Da,K +34.06 Da,             | 1078.060993 | 3 | 420.6078 | 28273500  | n.d. |
| MEVKPPPGRPQPDSGR         | Q8BG05 | 0          | n +42.03 Da,K +34.06 Da,             | 1078.723659 | 3 | 608.659  | 31143400  | n.d. |
| PNIVGNEHYDVAR            | P56480 | 0          | n +28.03 Da,                         | 1079.513844 | 3 | 504.591  | 338540992 | n.d. |
| AGVPAHVVDLR              | Q6XPS7 | 0          | n +28.03 Da,                         | 1079.793753 | 3 | 387.2332 | 203144992 | n.d. |
| SETAPAAPAAPAPVEKTPVKKKAK | P43277 | 0          | n +42.03 Da,n +28.03 Da,K +28.03 Da, | 1080.268899 | 4 | 643.1279 | 5843070   | n.d. |
| TFAEDKTYKY               | Q8VCF0 | 0          | n +28.03 Da,K +28.03 Da,             | 1085.310617 | 2 | 675.3519 | 206918000 | n.d. |
| PSKTNVSGGAIALGHPLGGSGSR  | Q8BWT1 | 0          | n +14.02 Da,K +28.03 Da,             | 1087.602444 | 3 | 721.3939 | 3.423E+09 | n.d. |
| PSKTNVSGGAIALGHPLGGSGSR  | Q8BWT1 | 0          | n +14.02 Da,K +28.03 Da,             | 1087.751145 | 4 | 541.298  | 3.289E+10 | n.d. |
| PLHDVFVR                 | P97351 | 0.01672241 | n +14.02 Da,                         | 1088.126435 | 3 | 332.8588 | 106759000 | n.d. |
| LFAYPDTHR                | P24270 | 0          | n +28.03 Da,                         | 1089.15064  | 3 | 383.2013 | 876331008 | n.d. |
| SEPEIPK GIR              | Q9WTP6 | 0          | n +28.03 Da,K +28.03 Da,             | 1091.505456 | 3 | 394.5679 | 7.649E+09 | n.d. |
| VPALAIANAHR              | P63038 | 0.00623053 | n +28.03 Da,                         | 1093.667356 | 3 | 406.903  | 140587008 | n.d. |
| YQNEKEVGLAIR             | P70694 | 0          | n +28.03 Da,K +28.03 Da,             | 1100.542735 | 3 | 491.9524 | 33609400  | n.d. |
| MQPASAKWYDR              | Q9R0Q7 | 0          | n +28.03 Da,K +28.03 Da,             | 1100.601135 | 3 | 470.2395 | 3.047E+09 | n.d. |
| TGTYHGSDQLQLER           | P68372 | 0          | n +34.06 Da,                         | 1104.051918 | 3 | 542.6143 | 92377904  | n.d. |
| MEGHDPKEPEQLR            | B2RXM2 | 0          | n +42.03 Da,K +28.03 Da,             | 1104.056583 | 3 | 545.9311 | 1.168E+09 | n.d. |
| TRPTVAAGAVGLAQR          | P45952 | 0          | n +28.03 Da,                         | 1110.588572 | 3 | 499.2927 | 98572800  | n.d. |
| PDLMNPIKR                | P03921 | 0          | n +17.03 Da,K +34.06 Da,             | 1111.043398 | 3 | 377.8858 | 145132000 | n.d. |
| PTGTYHGSDQLQLER          | P68372 | 0          | n +14.02 Da,                         | 1112.849037 | 3 | 568.2715 | 408782016 | n.d. |
| MEGHDPKEPEQLR            | B2RXM2 | 0          | n +42.03 Da,K +34.06 Da,             | 1113.412636 | 3 | 547.9414 | 3.065E+09 | n.d. |

|                       |        |            |                          |             |   |          |           |      |
|-----------------------|--------|------------|--------------------------|-------------|---|----------|-----------|------|
| PTGTYHGSDSLQLDR       | P99024 | 0          | n +17.03 Da,             | 1115.260427 | 3 | 564.6087 | 236762000 | n.d. |
| PVNEHMLNTIR           | O70133 | 0          | n +14.02 Da,             | 1117.077023 | 3 | 446.5577 | 538913984 | n.d. |
| GPGLHADLLR            | Q8BWF0 | 0          | n +34.06 Da,             | 1121.710088 | 3 | 380.5555 | 14137200  | n.d. |
| GKPITIFQER            | P16858 | 0.00988397 | n +28.03 Da,K +28.03 Da, | 1124.577008 | 2 | 622.8704 | 624510016 | n.d. |
| METKNSDVGKPKR         | Q8CHT1 | 0          | n +42.03 Da,K +34.06 Da, | 1136.289938 | 3 | 605.9813 | 65965100  | n.d. |
| PVNEHMLNTIR           | O70133 | 0          | n +14.02 Da,             | 1138.360703 | 3 | 446.5705 | 152796000 | n.d. |
| ELSEEDKLTVSR          | P56480 | 0.00743007 | n +28.03 Da,K +28.03 Da, | 1139.52985  | 3 | 487.9301 | 55775900  | n.d. |
| PSSGERTCSRLTRQR       | E9PVA2 | 0.04434072 | n +17.03 Da,             | 1140.464188 | 2 | 603.3215 | 360420992 | n.d. |
| TVDGPGSKLWR           | P16858 | 0.0118997  | n +34.06 Da,K +34.06 Da, | 1152.375726 | 3 | 428.5953 | 116763000 | n.d. |
| AALSGLLHR             | Q99JY0 | 0.00866176 | n +28.03 Da,             | 1156.669809 | 3 | 322.5341 | 203644992 | n.d. |
| RVVFDITYDR            | P16015 | 0          | n +34.06 Da,             | 1158.0115   | 3 | 440.5636 | 77537104  | n.d. |
| PISAGLFHR             | Q8VCU1 | 0.01433994 | n +14.02 Da,             | 1161.46818  | 3 | 337.8632 | 238304000 | n.d. |
| SLKIQTSNVTNKNDPKSINSR | Q64012 | 0.00186829 | n +42.03 Da,K +28.03 Da, | 1168.205275 | 4 | 618.3451 | 61240500  | n.d. |
| SLKIQTSNVTNKNDPKSINSR | Q64012 | 0          | n +42.03 Da,K +34.06 Da, | 1168.604864 | 4 | 622.8687 | 21492900  | n.d. |
| TLVEKINYTGR           | P49429 | 0          | n +34.06 Da,K +34.06 Da, | 1175.137685 | 3 | 454.6189 | 368059008 | n.d. |
| SAALIQQATTVKNKDIR     | P51410 | 0          | n +34.06 Da,K +34.06 Da, | 1175.81997  | 4 | 490.566  | 82417696  | n.d. |
| MEETEKKVATQEGR        | Q9QXZ6 | 0          | n +42.03 Da,K +28.03 Da, | 1176.861729 | 3 | 578.6295 | 6.772E+09 | n.d. |
| LKEDQTEYLEER          | P07901 | 0.00093985 | n +34.06 Da,K +34.06 Da, | 1181.042829 | 3 | 540.9628 | 76534200  | n.d. |
| AAVKTLNPKAEVAR        | P80317 | 0.02370249 | n +42.03 Da,K +28.03 Da, | 1182.371852 | 3 | 522.6509 | 851588992 | n.d. |
| TLVEKINYTGR           | P49429 | 0          | n +28.03 Da,K +28.03 Da, | 1183.233317 | 3 | 450.5978 | 414953984 | n.d. |
| YGKNDVEVFVR           | P25688 | 0          | n +28.03 Da,K +28.03 Da, | 1183.970609 | 2 | 706.365  | 83356600  | n.d. |
| TAENLAAKYNISR         | Q8BWT1 | 0          | n +28.03 Da,K +28.03 Da, | 1188.057418 | 3 | 502.9361 | 525060000 | n.d. |
| SGTKEGASILLDGR        | Q9EQ20 | 0.04988488 | n +34.06 Da,K +34.06 Da, | 1197.721883 | 3 | 491.2961 | 218684992 | n.d. |
| TFYASEDKLENR          | O35490 | 0          | n +34.06 Da,K +34.06 Da, | 1200.06519  | 3 | 514.2807 | 1.696E+09 | n.d. |
| DSSFQIVKNPR           | Q61176 | 0          | n +28.03 Da,K +28.03 Da, | 1205.241735 | 3 | 449.5852 | 372867008 | n.d. |
| PKVTQPEVDTPLGR        | Q63880 | 0          | n +14.02 Da,K +28.03 Da, | 1206.997634 | 3 | 526.967  | 5.163E+10 | n.d. |
| PDHSIETLR             | P07901 | 0.04262808 | n +17.03 Da,             | 1214.469465 | 3 | 399.8947 | 26964000  | n.d. |
| PKVTQPEVDTPLGR        | Q63880 | 0          | n +14.02 Da,K +28.03 Da, | 1214.768497 | 2 | 789.9461 | 6.203E+09 | n.d. |
| PGDVFYLHSR            | Q03265 | 0.02603743 | n +14.02 Da,             | 1218.374989 | 3 | 402.2076 | 92567296  | n.d. |
| GVKLEVFR              | P0DJE0 | 0.02782258 | n +28.03 Da,K +28.03 Da, | 1219.716472 | 3 | 335.2148 | 340716000 | n.d. |
| PLFGDQMDNAKR          | P70691 | 0          | n +14.02 Da,K +28.03 Da, | 1223.231535 | 3 | 478.5787 | 199172000 | n.d. |
| PTKVVAVDGCGIKNNVIR    | Q8C196 | 0          | n +14.02 Da,K +28.03 Da, | 1223.921045 | 4 | 489.0386 | 5.082E+09 | n.d. |
| SLDMKEHPDAEVQKN       | O55060 | 0          | n +42.03 Da,K +28.03 Da, | 1225.170767 | 3 | 613.6365 | 348948000 | n.d. |
| GLVGEIIR              | P15532 | 0.01516428 | n +28.03 Da,K +28.03 Da, | 1226.448569 | 3 | 347.5658 | 102695000 | n.d. |
| VSGGAIALGHPLGGSGSR    | Q8BWT1 | 0          | n +34.06 Da,             | 1226.828167 | 1 | 542.9645 | 25191100  | n.d. |
| VEAGKYTVGLGQTR        | P54869 | 0          | n +34.06 Da,K +34.06 Da, | 1228.653682 | 3 | 516.3131 | 375459008 | n.d. |
| PIVVKGILR             | Q9WU19 | 0.01783492 | n +14.02 Da,K +28.03 Da, | 1234.701276 | 3 | 346.2464 | 76004896  | n.d. |
| SLGTADVHFER           | O08583 | 0          | n +28.03 Da,             | 1235.558355 | 3 | 419.5223 | 139706000 | n.d. |
| YDDLKQAVAYR           | Q03265 | 0          | n +28.03 Da,K +28.03 Da, | 1238.225191 | 3 | 495.5973 | 608240000 | n.d. |
| ELAPGLHLR             | Q99JR5 | 0.01598654 | n +28.03 Da,             | 1249.129149 | 3 | 345.2096 | 10284600  | n.d. |



|                           |        |            |                                      |             |   |          |           |      |
|---------------------------|--------|------------|--------------------------------------|-------------|---|----------|-----------|------|
| RRAPPGRQLEER              | E9Q1Q1 | 0.03009631 | n +42.03 Da,                         | 1250.838271 | 3 | 539.9667 | 124540000 | n.d. |
| AREATQAVLDKPETLSSDASTR    | P50544 | 0          | n +28.03 Da,K +28.03 Da,             | 1256.014663 | 4 | 601.3179 | 36330600  | n.d. |
| SLGTADVHFER               | O08583 | 0          | n +28.03 Da,                         | 1261.489284 | 3 | 419.5345 | 11972500  | n.d. |
| TLQTEMWKEGNER             | P51660 | 0          | n +34.06 Da,K +34.06 Da,             | 1261.946671 | 3 | 520.9532 | 31607400  | n.d. |
| SGPGGLHADLLR              | Q8BWF0 | 0          | n +34.06 Da,                         | 1262.964857 | 3 | 409.5733 | 1.095E+09 | n.d. |
| SEGDSVGDVSHGKPSVVYR       | Q9CQU3 | 0          | n +42.03 Da,K +28.03 Da,             | 1263.590489 | 3 | 682.3351 | 14449600  | n.d. |
| AGVLAHLEER                | Q61879 | 0.04818813 | n +28.03 Da,                         | 1270.538019 | 3 | 417.896  | 17537200  | n.d. |
| PGVARPVRPLR               | Q7TPM1 | 0.00866176 | n +42.03 Da,                         | 1283.124048 | 3 | 420.5912 | 415904000 | n.d. |
| VYYNEATGGKYVPR            | P68372 | 0          | n +34.06 Da,                         | 1284.917066 | 3 | 562.3161 | 31875800  | n.d. |
| KATIPAAALQAQESTEGPGTQDRPR | Q9DBG1 | 0          | n +28.03 Da,K +28.03 Da,             | 1291.708531 | 4 | 659.6013 | 1.063E+10 | n.d. |
| DTLHETEDVKEAIR            | Q9D855 | 0          | n +34.06 Da,                         | 1293.293432 | 3 | 575.3221 | 160224992 | n.d. |
| FNVPMKNNQITNNQR           | P09041 | 0          | n +34.06 Da,K +34.06 Da,             | 1294.205223 | 3 | 629.3497 | 235591008 | n.d. |
| ASGPGGLHADLLR             | Q8BWF0 | 0          | n +28.03 Da,                         | 1294.275569 | 3 | 430.2247 | 28119900  | n.d. |
| KATIPAAALQAQESTEGPGTQDRPR | Q9DBG1 | 0          | n +28.03 Da,K +28.03 Da,             | 1297.465475 | 3 | 879.132  | 2.392E+09 | n.d. |
| MKLTDSVLR                 | Q8BFQ4 | 0.01937345 | n +28.03 Da,K +28.03 Da,             | 1298.973839 | 3 | 373.56   | 2.377E+09 | n.d. |
| VMEKPSLLVGR               | P97379 | 0          | n +34.06 Da,K +34.06 Da,             | 1303.48989  | 3 | 465.3086 | 49996700  | n.d. |
| TVAEKLDWAR                | P27659 | 0          | n +34.06 Da,K +34.06 Da,             | 1304.188574 | 3 | 419.5933 | 75728896  | n.d. |
| PASDQMKQWKEQR             | P24270 | 0          | n +14.02 Da,n +28.03 Da,K +28.03 Da, | 1308.243635 | 3 | 567.9505 | 174966000 | n.d. |
| MCHPSVDGFTPR              | Q8C196 | 0          | n +28.03 Da,                         | 1309.430587 | 3 | 477.8885 | 268580992 | n.d. |
| ASGPGGLHADLLR             | Q8BWF0 | 0          | n +34.06 Da,                         | 1310.017944 | 2 | 432.2404 | 374467008 | n.d. |
| LAQIHFPFR                 | P07758 | 0.04818813 | n +28.03 Da,                         | 1310.401076 | 3 | 337.2035 | 195991008 | n.d. |
| AAQESLHVKTPLR             | Q8VBT2 | 0          | n +42.03 Da,K +34.06 Da,             | 1317.264569 | 3 | 509.3022 | 1.66E+10  | n.d. |
| VPNDSSFQIVKNPR            | Q61176 | 0          | n +28.03 Da,K +28.03 Da,             | 1324.567979 | 3 | 552.9732 | 789596032 | n.d. |
| AGLAKSIGVSNFNR            | P70694 | 0          | n +34.06 Da,K +34.06 Da,             | 1337.85693  | 3 | 500.6414 | 31280200  | n.d. |
| YVEEVPWKR                 | P25688 | 0.00743007 | n +28.03 Da,K +28.03 Da,             | 1339.367195 | 3 | 421.2365 | 310948992 | n.d. |
| PSKEVEEDEYKAF             | P08113 | 0.00501825 | n +14.02 Da,K +28.03 Da,             | 1339.653694 | 3 | 547.6068 | 409556000 | n.d. |
| LRPVAGLLSSR               | P16331 | 0          | n +28.03 Da,                         | 1339.747294 | 3 | 399.5873 | 225188992 | n.d. |
| GKGILAADESVGTMGNER        | Q91Y97 | 0          | n +34.06 Da,K +34.06 Da,             | 1341.291152 | 3 | 581.9949 | 71031400  | n.d. |
| PSKSNPGDFTLSVR            | P35235 | 0          | n +14.02 Da,K +28.03 Da,             | 1345.502492 | 1 | 516.2784 | 9429930   | n.d. |
| MEAVPEKKKVVATVPRTL        | P14148 | 0          | n +42.03 Da,n +34.06 Da,K +34.06 Da, | 1350.803501 | 3 | 702.1287 | 2.135E+09 | n.d. |
| VMEKPSLLVGR               | P97379 | 0          | n +28.03 Da,K +28.03 Da,             | 1355.272887 | 2 | 461.2799 | 34694200  | n.d. |
| LLHVTDTGVGMTR             | P08113 | 0          | n +34.06 Da,                         | 1359.827646 | 3 | 478.5993 | 770950976 | n.d. |
| GKGILAADESVGTMGNER        | Q91Y97 | 0          | n +28.03 Da,K +28.03 Da,             | 1360.736072 | 3 | 577.9735 | 431953984 | n.d. |
| TSVATKKTEQGPPSSEYIFER     | P29758 | 0          | n +28.03 Da,K +28.03 Da,             | 1360.935653 | 4 | 610.5744 | 1.133E+09 | n.d. |
| SSKPKSLEIIGAPFSKQPR       | Q61176 | 0          | n +42.03 Da,K +28.03 Da,             | 1360.975141 | 5 | 451.4652 | 36207700  | n.d. |
| SPISAGLFHR                | Q8VCU1 | 0.04467754 | n +28.03 Da,                         | 1361.058612 | 3 | 371.5447 | 74400600  | n.d. |
| YEDSNNLGTSHLLR            | Q9DB77 | 0          | n +28.03 Da,                         | 1361.613498 | 3 | 549.6086 | 542088000 | n.d. |
| GKGILAADESVGTMGNER        | Q91Y97 | 0          | n +28.03 Da,K +28.03 Da,             | 1363.676216 | 2 | 866.4565 | 45202200  | n.d. |
| PFAPPLGSLR                | P23953 | 0          | n +14.02 Da,K +28.03 Da,             | 1366.246303 | 3 | 408.9198 | 129806000 | n.d. |
| ESQEGKQQYLQSIEDR          | Q9CQA3 | 0          | n +34.06 Da,K +34.06 Da,             | 1369.778364 | 3 | 669.3473 | 79787696  | n.d. |

|                          |        |            |                                      |             |   |          |           |      |
|--------------------------|--------|------------|--------------------------------------|-------------|---|----------|-----------|------|
| FSFTSPAVKR               | P70340 | 0.02211302 | n +34.06 Da,K +34.06 Da,             | 1374.921466 | 3 | 403.2532 | 12554600  | n.d. |
| PFDDDLMKR                | Q8JZR0 | 0          | n +14.02 Da,K +28.03 Da,             | 1379.537051 | 3 | 393.534  | 750497984 | n.d. |
| PFTIKPLDR                | P40142 | 0.01271186 | n +14.02 Da,K +28.03 Da,             | 1380.755905 | 3 | 376.8975 | 1.613E+09 | n.d. |
| ISFHLPVNSR               | Q9D1D4 | 0          | n +28.03 Da,                         | 1392.175492 | 3 | 399.8959 | 51596700  | n.d. |
| LDTINVHLR                | P70699 | 0          | n +34.06 Da,                         | 1394.361596 | 3 | 372.2312 | 112131000 | n.d. |
| ATKCTKCGPGYSTPLEAMKGP    | P17563 | 0          | n +42.03 Da,K +34.06 Da,             | 1396.171827 | 4 | 639.3464 | 26131500  | n.d. |
| TKIAIDAGFR               | P70694 | 0.00988397 | n +28.03 Da,K +28.03 Da,             | 1396.461704 | 3 | 383.2325 | 916804992 | n.d. |
| LYGGLEAFR                | P54869 | 0.02757502 | n +34.06 Da,K +34.06 Da,             | 1400.003376 | 3 | 388.9067 | 53014200  | n.d. |
| LYGGLEAFR                | P54869 | 0.00093985 | n +28.03 Da,K +28.03 Da,             | 1402.76514  | 3 | 384.8972 | 145179008 | n.d. |
| PVSNAQPAGAЕКPEAKVLFDR    | Q8CGC7 | 0          | n +14.02 Da,K +28.03 Da,             | 1403.456586 | 3 | 574.3044 | 416961984 | n.d. |
| PKVIQPEVDTPLGR           | Q8VCU1 | 0          | n +17.03 Da,K +34.06 Da,             | 1405.889516 | 3 | 533.3088 | 36177000  | n.d. |
| TKIAIDTGFR               | Q91WT7 | 0          | n +28.03 Da,K +28.03 Da,             | 1407.611347 | 3 | 392.9153 | 23544400  | n.d. |
| ATSASSHLNKGIKQMY         | P15105 | 0          | n +42.03 Da,n +28.03 Da,K +28.03 Da, | 1409.490297 | 3 | 611.9897 | 3.645E+09 | n.d. |
| PVSNAQPAGAЕКPEAKVLFDR    | Q8CGC7 | 0          | n +14.02 Da,K +28.03 Da,             | 1414.186853 | 4 | 574.3214 | 107032000 | n.d. |
| VESLPSWAQKR              | P41216 | 0.00743007 | n +28.03 Da,                         | 1430.786845 | 3 | 452.9266 | 58932400  | n.d. |
| MQPASAKWYDRR             | Q9R0Q7 | 0          | n +42.03 Da,K +34.06 Da,             | 1435.015282 | 3 | 528.948  | 237822000 | n.d. |
| TFYTKVLNEEER             | P24270 | 0          | n +28.03 Da,K +28.03 Da,             | 1436.997776 | 2 | 792.9165 | 51803000  | n.d. |
| PYEIKKVF                 | O88342 | 0.04227006 | n +14.02 Da,K +28.03 Da,             | 1437.938497 | 3 | 365.2268 | 1.231E+09 | n.d. |
| PKVIQPEVDTPLGR           | Q8VCU1 | 0          | n +14.02 Da,K +28.03 Da,             | 1438.620695 | 3 | 530.9792 | 1.257E+10 | n.d. |
| PKVIQPEVDTPLGR           | Q8VCU1 | 0          | n +14.02 Da,K +28.03 Da,             | 1441.186657 | 2 | 795.9648 | 719545984 | n.d. |
| DWPANPLQYIAVLFRLR        | Q14C51 | 0.04434072 | n +42.03 Da,                         | 1441.770511 | 3 | 653.3614 | 29133900  | n.d. |
| SQIHDIIVLVGGSTR          | P63017 | 0.00826446 | n +28.03 Da,                         | 1444.449936 | 3 | 503.9513 | 52413500  | n.d. |
| PGVTVKDVNQQEFVR          | Q9CZX8 | 0          | n +14.02 Da,K +28.03 Da,             | 1447.717733 | 2 | 879.4808 | 460812992 | n.d. |
| PGVTVKDVNQQEFVR          | Q9CZX8 | 0          | n +14.02 Da,K +28.03 Da,             | 1450.299762 | 3 | 586.6568 | 2.869E+10 | n.d. |
| FYDIKLGR                 | Q9Z0X1 | 0.04058314 | n +28.03 Da,K +28.03 Da,             | 1454.545403 | 3 | 356.5461 | 53872500  | n.d. |
| DPSKTNVSGGAIALGHPLGGSGSR | Q8BWT1 | 0          | n +28.03 Da,K +28.03 Da,             | 1457.291886 | 4 | 573.5584 | 205223008 | n.d. |
| TPGVAADLSHIETR           | P08249 | 0          | n +28.03 Da,                         | 1458.567387 | 3 | 498.9355 | 15257800  | n.d. |
| TPGVAADLSHIETR           | P08249 | 0          | n +28.03 Da,                         | 1465.345026 | 1 | 498.9349 | 27577600  | n.d. |
| GTITTKELGTVMR            | P62204 | 0.00093985 | n +28.03 Da,K +28.03 Da,             | 1465.474552 | 2 | 488.2725 | 194835008 | n.d. |
| RPPLGFLNPR               | O89023 | 0.01975309 | n +28.03 Da,                         | 1465.565575 | 3 | 398.908  | 71291200  | n.d. |
| PGIEPSDKMLQGR            | P24270 | 0          | n +14.02 Da,K +28.03 Da,             | 1467.469655 | 3 | 522.9475 | 365996992 | n.d. |
| SVYDEFVKR                | P24549 | 0          | n +28.03 Da,K +28.03 Da,             | 1468.828987 | 3 | 399.2037 | 87940200  | n.d. |
| ALDEATKYALDR             | P45952 | 0.02782258 | n +28.03 Da,K +28.03 Da,             | 1469.571575 | 3 | 474.2583 | 60002000  | n.d. |
| VGLKAPGIIPR              | Q03265 | 0          | n +28.03 Da,K +28.03 Da,             | 1469.658501 | 3 | 392.9327 | 31630300  | n.d. |
| SVYDEFVKR                | P24549 | 0.00140647 | n +34.06 Da,K +34.06 Da,             | 1472.103726 | 3 | 404.2399 | 17712400  | n.d. |
| ADEEKLPPGWEKR            | Q9QUR7 | 0          | n +42.03 Da,K +34.06 Da,             | 1475.153706 | 3 | 555.6472 | 510528992 | n.d. |
| SPKIQDIASGR              | Q91VD9 | 0          | n +34.06 Da,K +34.06 Da,             | 1485.455428 | 2 | 676.9293 | 180642000 | n.d. |
| PMLLHLVR                 | O08601 | 0.03768346 | n +14.02 Da,                         | 1486.775407 | 3 | 331.5403 | 1.372E+09 | n.d. |
| VVLTKFVEGAR              | Q8C196 | 0          | n +28.03 Da,K +28.03 Da,             | 1488.106273 | 3 | 425.599  | 34305600  | n.d. |
| KTGTAEMSSILEER           | Q03265 | 0.04849885 | n +28.03 Da,K +28.03 Da,             | 1489.969076 | 3 | 536.6158 | 1.171E+10 | n.d. |

|                          |        |            |                          |             |   |          |           |      |
|--------------------------|--------|------------|--------------------------|-------------|---|----------|-----------|------|
| KTGTAEMSSILEER           | Q03265 | 0          | n +28.03 Da,K +28.03 Da, | 1492.096315 | 2 | 804.4178 | 3.526E+09 | n.d. |
| EVIDSIKER                | P35492 | 0.00093985 | n +28.03 Da,K +28.03 Da, | 1497.770932 | 3 | 419.9185 | 540515008 | n.d. |
| DYMTVKIPR                | Q8C196 | 0          | n +34.06 Da,K +34.06 Da, | 1501.185245 | 3 | 397.2373 | 29314700  | n.d. |
| PEEHPVLLTEAPLNPKANR      | P60710 | 0          | n +14.02 Da,K +28.03 Da, | 1504.780332 | 4 | 542.5518 | 604150016 | n.d. |
| SVELPETHQMLR             | Q07417 | 0          | n +34.06 Da,             | 1505.622944 | 3 | 491.9359 | 27097200  | n.d. |
| PTQTISQGAIEKVKDATR       | Q8C196 | 0          | n +14.02 Da,K +28.03 Da, | 1506.105995 | 2 | 1007.07  | 134819008 | n.d. |
| PTQTISQGAIEKVKDATR       | Q8C196 | 0          | n +14.02 Da,K +28.03 Da, | 1506.911132 | 4 | 504.0396 | 8.756E+09 | n.d. |
| PTQTISQGAIEKVKDATR       | Q8C196 | 0          | n +14.02 Da,K +28.03 Da, | 1508.320176 | 3 | 671.7155 | 5.603E+09 | n.d. |
| PITLYLEKER               | P11499 | 0.00324675 | n +14.02 Da,K +28.03 Da, | 1509.297391 | 3 | 435.2582 | 1.023E+09 | n.d. |
| KIQGGSVVEMQGDENR         | O88844 | 0          | n +42.03 Da,K +28.03 Da, | 1509.338845 | 3 | 645.6611 | 31484700  | n.d. |
| TMKLELAQYR               | Q03265 | 0          | n +34.06 Da,K +34.06 Da, | 1509.43843  | 3 | 440.9371 | 27115100  | n.d. |
| PFLDLAHPR                | P55096 | 0          | n +14.02 Da,             | 1510.499003 | 3 | 360.5378 | 1.604E+09 | n.d. |
| PMIHELLTEGR              | P70168 | 0          | n +14.02 Da,             | 1511.386663 | 2 | 655.3488 | 450536000 | n.d. |
| KTGTAEMSSILEER           | Q03265 | 0.00186829 | n +34.06 Da,K +34.06 Da, | 1514.307525 | 3 | 540.6373 | 60839500  | n.d. |
| SMYQNEKEVGLAIR           | P70694 | 0          | n +28.03 Da,K +28.03 Da, | 1515.021841 | 3 | 565.3023 | 532579008 | n.d. |
| TFEESFQKALR              | Q8C196 | 0          | n +28.03 Da,K +28.03 Da, | 1515.655858 | 3 | 471.259  | 1.1E+09   | n.d. |
| EEHPVLLTEAPLNPKANR       | P60710 | 0          | n +28.03 Da,K +28.03 Da, | 1518.535488 | 4 | 521.7924 | 34348500  | n.d. |
| IKVIAPWR                 | P16460 | 0.04849885 | n +28.03 Da,K +28.03 Da, | 1521.670553 | 3 | 346.8989 | 341911008 | n.d. |
| TLKFFPASADR              | P09103 | 0          | n +28.03 Da,K +28.03 Da, | 1522.789999 | 3 | 436.9162 | 145722000 | n.d. |
| SGDHLHNSQIEADFR          | Q04750 | 0          | n +42.03 Da,             | 1525.011401 | 2 | 941.9199 | 340649984 | n.d. |
| TFEESFQKALR              | Q8C196 | 0          | n +34.06 Da,K +34.06 Da, | 1525.62842  | 2 | 712.4132 | 410867008 | n.d. |
| SGDHLHNSQIEADFR          | Q04750 | 0          | n +42.03 Da,             | 1527.968437 | 3 | 628.2816 | 4.649E+09 | n.d. |
| TFEESFQKALR              | Q8C196 | 0          | n +28.03 Da,K +28.03 Da, | 1532.769367 | 2 | 706.3815 | 186800000 | n.d. |
| LEVGTETIIDKSKAVK         | P54869 | 0          | n +42.03 Da,K +28.03 Da, | 1533.765141 | 4 | 465.0381 | 1.1E+09   | n.d. |
| VLASEPEIPKIR             | Q9WTP6 | 0          | n +34.06 Da,             | 1536.786489 | 3 | 492.9847 | 636897024 | n.d. |
| AGKPVLYHFNAR             | P10648 | 0          | n +42.03 Da,K +34.06 Da, | 1537.771878 | 2 | 724.9172 | 594404992 | n.d. |
| SHYEEGPGKNLRF            | P17665 | 0          | n +28.03 Da,K +28.03 Da, | 1539.651895 | 2 | 765.8817 | 3.489E+09 | n.d. |
| GNDIAFHFNPR              | O08573 | 0          | n +28.03 Da,             | 1543.81111  | 3 | 439.2219 | 342739008 | n.d. |
| VKIVTVKTQAYPDQKPGTSGLR   | Q9D0F9 | 0          | n +28.03 Da,K +28.03 Da, | 1543.915451 | 4 | 625.3631 | 1.03E+09  | n.d. |
| QKTGTAEMSSILEER          | Q03265 | 0          | n +28.03 Da,K +28.03 Da, | 1545.970249 | 3 | 579.3005 | 4.857E+09 | n.d. |
| PSKGPLQSVQVFR            | P14131 | 0          | n +17.03 Da,K +34.06 Da, | 1548.38723  | 3 | 517.6475 | 121938000 | n.d. |
| AGKPVLYHFNAR             | P10648 | 0          | n +42.03 Da,K +34.06 Da, | 1550.074369 | 3 | 483.6115 | 3.047E+10 | n.d. |
| MGTLPKQVKIVEVGPR         | P38060 | 0          | n +28.03 Da,K +28.03 Da, | 1551.583155 | 4 | 459.7839 | 394371008 | n.d. |
| FVEDLNEFKDNR             | Q8BXZ1 | 0          | n +28.03 Da,             | 1553.0181   | 3 | 556.9445 | 617523968 | n.d. |
| GVTKGAAELMQKEATTEQQLR    | O35490 | 0          | n +28.03 Da,K +28.03 Da, | 1553.211959 | 3 | 626.0945 | 401222016 | n.d. |
| GVQVSPSGEKITHTGQVYDEKDYR | P52503 | 0          | n +28.03 Da,K +28.03 Da, | 1553.640786 | 4 | 695.0971 | 109890000 | n.d. |
| SKGPLQSVQVFR             | P14131 | 0          | n +34.06 Da,K +34.06 Da, | 1554.717704 | 3 | 490.9709 | 583966016 | n.d. |
| VSQEHPPVLTKFVEGAR        | Q8C196 | 0          | n +42.03 Da,K +28.03 Da, | 1555.056257 | 3 | 656.0411 | 67869000  | n.d. |
| VSQEHPPVLTKFVEGAR        | Q8C196 | 0          | n +42.03 Da,K +34.06 Da, | 1555.235373 | 3 | 658.0506 | 33280300  | n.d. |
| SLLNPKKSEMTPPELQKR       | P62317 | 0          | n +42.03 Da,K +34.06 Da, | 1556.640846 | 4 | 568.8407 | 294940000 | n.d. |

|                          |        |            |                                      |             |   |          |           |      |
|--------------------------|--------|------------|--------------------------------------|-------------|---|----------|-----------|------|
| AAQSAPKVVLKSTTKMSLNER    | Q9CY57 | 0.00093985 | n +42.03 Da,K +34.06 Da,             | 1556.851004 | 2 | 601.6162 | 52315600  | n.d. |
| ATEGMILTNDHDHQR          | Q8BUV3 | 0          | n +42.03 Da,                         | 1560.059632 | 2 | 889.4351 | 412131008 | n.d. |
| VKIVTVKTQAYPDQKPGTSGLR   | Q9D0F9 | 0          | n +28.03 Da,K +28.03 Da,             | 1560.749964 | 3 | 833.4813 | 68601000  | n.d. |
| ATEGMILTNDHDHQR          | Q8BUV3 | 0          | n +42.03 Da,                         | 1560.861296 | 3 | 593.2924 | 2.901E+10 | n.d. |
| VSQEHPPVLTKFVEGAR        | Q8C196 | 0          | n +42.03 Da,K +34.06 Da,             | 1561.038061 | 4 | 493.7911 | 70717904  | n.d. |
| SGKEEIEAAVEAAR           | Q8BH00 | 0          | n +34.06 Da,K +34.06 Da,             | 1563.932496 | 2 | 764.4418 | 54126400  | n.d. |
| QIKVIAPWR                | P16460 | 0.00458926 | n +28.03 Da,K +28.03 Da,             | 1565.639489 | 3 | 389.5849 | 211000000 | n.d. |
| VDREQLVQKARLAEQAER       | P61982 | 0          | n +28.03 Da,K +28.03 Da,             | 1567.952131 | 4 | 549.5559 | 356859008 | n.d. |
| AFKDTGKTPVEPEVAIHR       | P60867 | 0          | n +42.03 Da,K +34.06 Da,             | 1568.36317  | 3 | 702.4054 | 2.521E+09 | n.d. |
| IHLGVNESLTD TAR          | P11725 | 0          | n +34.06 Da,                         | 1570.052984 | 3 | 520.625  | 678096000 | n.d. |
| PMISKLVTYGSDR            | Q91ZA3 | 0          | n +14.02 Da,K +28.03 Da,             | 1571.855801 | 3 | 503.6068 | 184515008 | n.d. |
| GVTKGAAELMQQKEATTEQQLR   | O35490 | 0          | n +28.03 Da,K +28.03 Da,             | 1577.207674 | 4 | 626.089  | 94959104  | n.d. |
| KPEEVDDEVFYSR            | P11725 | 0.01672241 | n +28.03 Da,K +28.03 Da,             | 1577.960275 | 3 | 589.2923 | 471417984 | n.d. |
| TMDKSELVQKAKLAEQAER      | Q9CQV8 | 0          | n +42.03 Da,n +28.03 Da,K +28.03 Da, | 1581.881047 | 4 | 576.065  | 70158000  | n.d. |
| SLLNPKSEMTPPEELQKR       | P62317 | 0          | n +42.03 Da,K +28.03 Da,             | 1586.194278 | 4 | 564.3183 | 6.63E+09  | n.d. |
| IFSSEHDIFR               | P51174 | 0          | n +28.03 Da,                         | 1587.920873 | 3 | 426.8874 | 453617984 | n.d. |
| TLKGLNSDSVTEETLR         | Q8C196 | 0          | n +28.03 Da,K +28.03 Da,             | 1590.26527  | 3 | 606.9984 | 524880000 | n.d. |
| SLGMIFEKR                | P11725 | 0          | n +34.06 Da,K +34.06 Da,             | 1591.548869 | 3 | 383.5747 | 29485600  | n.d. |
| SSMKSVGEVMAIGR           | Q8C196 | 0          | n +28.03 Da,K +28.03 Da,             | 1592.830997 | 2 | 754.4014 | 29757700  | n.d. |
| TEYPVEKL MR              | P45952 | 0.00743007 | n +34.06 Da,K +34.06 Da,             | 1593.818252 | 3 | 445.2651 | 26948500  | n.d. |
| DILIPAASEKQLTKSNAPR      | P26443 | 0          | n +34.06 Da,K +34.06 Da,             | 1597.590049 | 4 | 539.3387 | 392755008 | n.d. |
| ASGADSKGDDLSTAILKQKNRPNR | Q01853 | 0          | n +42.03 Da,K +28.03 Da,             | 1599.845425 | 4 | 667.8561 | 1.475E+09 | n.d. |
| PVLLTEAPLNPKANR          | P60710 | 0          | n +14.02 Da,K +28.03 Da,             | 1600.35212  | 3 | 559.0022 | 470063008 | n.d. |
| PQFVTEVIK AER            | Q8C196 | 0          | n +14.02 Da,K +28.03 Da,             | 1600.603301 | 3 | 486.95   | 2.618E+09 | n.d. |
| SQAEFDKAAEEVKR           | P31786 | 0          | n +42.03 Da,K +34.06 Da,             | 1601.172345 | 3 | 573.3182 | 454820000 | n.d. |
| SASMYQNEKEVGLAIR         | P70694 | 0          | n +34.06 Da,K +34.06 Da,             | 1602.648345 | 3 | 622.0129 | 144967008 | n.d. |
| PSKGPLQSVQVFGR           | P14131 | 0          | n +14.02 Da,K +28.03 Da,             | 1610.870737 | 2 | 771.4438 | 7.908E+09 | n.d. |
| PSKGPLQSVQVFGR           | P14131 | 0          | n +14.02 Da,K +28.03 Da,             | 1616.168619 | 3 | 514.6326 | 5.552E+10 | n.d. |
| SSMGTLPKQVKIVEVGPR       | P38060 | 0.02211302 | n +42.03 Da,K +28.03 Da,             | 1616.353906 | 3 | 675.3902 | 53959800  | n.d. |
| SQAEFDKAAEEVKR           | P31786 | 0          | n +42.03 Da,K +28.03 Da,             | 1622.153617 | 3 | 569.2965 | 597432000 | n.d. |
| VISLSGEHSIIGR            | P08228 | 0          | n +14.02 Da,                         | 1622.960146 | 3 | 461.2649 | 732833024 | n.d. |
| EEKPLLPGQTPETAKEAEL AAR  | Q9QYGO | 0          | n +34.06 Da,K +34.06 Da,             | 1624.384024 | 4 | 620.8669 | 565870016 | n.d. |
| SVVSVLNKEKGSTASQVLQR     | Q8VEM8 | 0.00866176 | n +34.06 Da,K +34.06 Da,             | 1627.469217 | 4 | 558.85   | 433031008 | n.d. |
| SSMGTLPKQVKIVEVGPR       | P38060 | 0          | n +28.03 Da,K +28.03 Da,             | 1630.52871  | 4 | 503.3003 | 1.007E+09 | n.d. |
| VVHSYEELEENYTR           | Q05920 | 0          | n +28.03 Da,                         | 1635.277194 | 3 | 599.2887 | 276928992 | n.d. |
| APLDTINVHLR              | P70699 | 0          | n +28.03 Da,                         | 1638.551121 | 3 | 426.2553 | 42989800  | n.d. |
| GNVVAEKISGQKVNEAACDIAR   | O35490 | 0          | n +28.03 Da,K +28.03 Da,             | 1643.944673 | 4 | 620.0761 | 223679008 | n.d. |
| PQIKVIAPWR               | P16460 | 0          | n +14.02 Da,K +28.03 Da,             | 1644.741837 | 3 | 417.2641 | 2.958E+09 | n.d. |
| GTTPGGSITKVLIANR         | Q99MR8 | 0          | n +34.06 Da,                         | 1645.548216 | 3 | 551.6826 | 503625984 | n.d. |
| PVVLTKFVEGAR             | Q8C196 | 0          | n +14.02 Da,K +28.03 Da,             | 1646.440596 | 3 | 453.2784 | 2.554E+09 | n.d. |

|                              |        |            |                                      |             |   |          |           |      |
|------------------------------|--------|------------|--------------------------------------|-------------|---|----------|-----------|------|
| PIMEKFNSSISYDR               | Q91Y10 | 0          | n +14.02 Da,K +28.03 Da,             | 1647.517696 | 3 | 576.959  | 273920992 | n.d. |
| WKEIEYEVVR                   | Q8C196 | 0          | n +34.06 Da,K +34.06 Da,             | 1650.306848 | 3 | 473.6172 | 53276300  | n.d. |
| MLQMLEKSLR                   | Q91XE0 | 0          | n +34.06 Da,K +34.06 Da,             | 1651.854805 | 3 | 439.607  | 343724992 | n.d. |
| TKYPQLLSGIR                  | P50247 | 0          | n +34.06 Da,K +34.06 Da,             | 1651.875902 | 3 | 448.6275 | 269959008 | n.d. |
| AGKPVVLYHFDGR                | P30115 | 0          | n +42.03 Da,K +34.06 Da,             | 1652.428588 | 3 | 479.2677 | 1.235E+10 | n.d. |
| PVVLTKFVEGAR                 | Q8C196 | 0          | n +14.02 Da,K +28.03 Da,             | 1653.266851 | 2 | 679.4133 | 299992992 | n.d. |
| AGKPVVLYHFDGR                | P30115 | 0          | n +42.03 Da,K +28.03 Da,             | 1660.410432 | 3 | 477.2601 | 4.462E+10 | n.d. |
| VLFPGYTHLQR                  | Q91Y10 | 0          | n +28.03 Da,                         | 1664.556198 | 3 | 453.583  | 28697400  | n.d. |
| TKYPQLLSGIR                  | P50247 | 0          | n +28.03 Da,K +28.03 Da,             | 1676.131347 | 3 | 444.6065 | 1.095E+09 | n.d. |
| AGEESVMNLDKLR                | Q8K2B3 | 0          | n +34.06 Da,K +34.06 Da,             | 1677.278132 | 3 | 509.6173 | 2.588E+09 | n.d. |
| TSSMGTLPKQVKIVEVGPR          | P38060 | 0          | n +34.06 Da,K +34.06 Da,             | 1681.331336 | 3 | 710.445  | 31796200  | n.d. |
| TSSMGTLPKQVKIVEVGPR          | P38060 | 0          | n +34.06 Da,K +34.06 Da,             | 1683.600101 | 4 | 533.0859 | 578907008 | n.d. |
| LSNHYPGPGFVNILGFPVGNR        | Q8BHC7 | 0.00232234 | n +42.03 Da,                         | 1684.756195 | 3 | 800.7502 | 1.231E+09 | n.d. |
| STSSMGTLPKQVKIVEVGPR         | P38060 | 0          | n +28.03 Da,K +28.03 Da,             | 1689.191317 | 4 | 550.3195 | 1.92E+09  | n.d. |
| PLEKLVSSVSDLPKR              | P54869 | 0          | n +14.02 Da,K +28.03 Da,             | 1690.214027 | 3 | 580.0194 | 1.231E+09 | n.d. |
| MLQMLEKSLR                   | Q91XE0 | 0          | n +28.03 Da,K +28.03 Da,             | 1691.763302 | 3 | 435.5851 | 543126016 | n.d. |
| SQAEFDKAAEEVKR               | P31786 | 0          | n +42.03 Da,K +34.06 Da,             | 1694.245436 | 3 | 573.316  | 1.453E+09 | n.d. |
| NAGVSDGSEVAKAQKAAPGGASPTIFSR | Q9D0S9 | 0          | n +28.03 Da,K +28.03 Da,             | 1694.41924  | 4 | 690.1183 | 430076000 | n.d. |
| MNQEKLAKLQAQVR               | Q64152 | 0          | n +42.03 Da,K +28.03 Da,             | 1695.456718 | 3 | 585.669  | 764220032 | n.d. |
| SSKPKSLEIIGAPFSKGQPR         | Q61176 | 0          | n +42.03 Da,K +28.03 Da,             | 1697.55432  | 4 | 564.0819 | 4.95E+10  | n.d. |
| MKFNPFVTSR                   | P61255 | 0.04988488 | n +14.02 Da,K +28.03 Da,             | 1701.921423 | 2 | 692.3575 | 170091008 | n.d. |
| TEIGEALKEVSGSGKAVPR          | Q9JII6 | 0.0078534  | n +28.03 Da,K +28.03 Da,             | 1702.505439 | 3 | 503.2961 | 2.666E+09 | n.d. |
| SSKPKSLEIIGAPFSKGQPR         | Q61176 | 0          | n +42.03 Da,K +28.03 Da,             | 1702.742927 | 3 | 751.7701 | 1.134E+10 | n.d. |
| ATSASSHLNKGIKQMYM            | P15105 | 0          | n +42.03 Da,n +28.03 Da,K +28.03 Da, | 1703.463765 | 3 | 655.6692 | 117407000 | n.d. |
| VLFPGYTHLQR                  | Q91Y10 | 0          | n +28.03 Da,                         | 1704.891626 | 3 | 453.5945 | 33274100  | n.d. |
| SMTEEILNPKIR                 | Q8CHT1 | 0.04818813 | n +34.06 Da,                         | 1708.222012 | 3 | 499.6522 | 874675968 | n.d. |
| PILGVTEAFKR                  | P05202 | 0          | n +14.02 Da,n +28.03 Da,             | 1708.717567 | 3 | 424.9274 | 1.241E+10 | n.d. |
| SVQKLEELTLR                  | Q9JKR6 | 0          | n +28.03 Da,K +28.03 Da,             | 1710.959324 | 3 | 457.9456 | 130189000 | n.d. |
| PIGDKLNIMTAGSR               | P24270 | 0          | n +14.02 Da,K +28.03 Da,             | 1711.926003 | 3 | 505.6167 | 5.489E+09 | n.d. |
| PLPPLPEYGGKVR                | Q9CQQ7 | 0          | n +17.03 Da,K +34.06 Da,             | 1713.435222 | 3 | 491.9731 | 542017024 | n.d. |
| EYLAHQHTGLR                  | Q64471 | 0          | n +28.03 Da,                         | 1719.061072 | 3 | 467.9141 | 387572000 | n.d. |
| ISFHLPVNSR                   | Q9D1D4 | 0          | n +28.03 Da,                         | 1725.054989 | 3 | 399.896  | 3.863E+09 | n.d. |
| AASKVKQDMPPPGYGGPIDYKR       | Q9ERS2 | 0          | n +42.03 Da,K +28.03 Da,             | 1729.977721 | 4 | 626.086  | 220222000 | n.d. |
| AAAAYEHLKLH                  | Q9EP69 | 0          | n +42.03 Da,K +28.03 Da,             | 1729.980889 | 3 | 431.9032 | 1.422E+09 | n.d. |
| SQAEFDKAAEEVKR               | P31786 | 0          | n +42.03 Da,K +28.03 Da,             | 1730.27914  | 3 | 569.2964 | 1.687E+11 | n.d. |
| GFNPAHVEAGLYGSR              | P17563 | 0          | n +34.06 Da,                         | 1733.042295 | 3 | 536.9503 | 101223000 | n.d. |
| AAAAYEHLKLH                  | Q9EP69 | 0          | n +42.03 Da,K +28.03 Da,             | 1733.501385 | 2 | 647.3425 | 4.304E+09 | n.d. |
| PDSWDKDVYEPSPR               | Q9DCS9 | 0          | n +14.02 Da,K +28.03 Da,             | 1734.68248  | 3 | 610.6278 | 6.442E+09 | n.d. |
| SQAEFDKAAEEVKR               | P31786 | 0          | n +42.03 Da,K +28.03 Da,             | 1734.877315 | 2 | 853.4401 | 7.462E+09 | n.d. |
| SIYHPSLLPR                   | Q8K009 | 0          | n +34.06 Da,                         | 1738.479176 | 3 | 443.9413 | 608243968 | n.d. |

|                          |        |            |                                      |             |   |          |           |      |
|--------------------------|--------|------------|--------------------------------------|-------------|---|----------|-----------|------|
| MKFNPVFTSDR              | P61255 | 0          | n +34.06 Da,K +34.06 Da,             | 1739.06406  | 3 | 470.6019 | 3.89E+09  | n.d. |
| MKFNPVFTSDR              | P61255 | 0.00743007 | n +28.03 Da,K +28.03 Da,             | 1739.105005 | 2 | 699.3652 | 2.111E+10 | n.d. |
| SLHLGVTPSVLR             | O89023 | 0          | n +34.06 Da,                         | 1740.206467 | 2 | 656.9111 | 396076000 | n.d. |
| MKFNPVFTSDR              | P61255 | 0          | n +28.03 Da,K +28.03 Da,             | 1742.718337 | 3 | 466.5806 | 4.811E+10 | n.d. |
| SLHLGVTPSVLR             | O89023 | 0.00582698 | n +28.03 Da,                         | 1744.838967 | 3 | 436.2659 | 107014000 | n.d. |
| SIYHPSLLPR               | Q8K009 | 0          | n +28.03 Da,                         | 1746.492114 | 3 | 441.9316 | 141559008 | n.d. |
| SEPELKLVAR               | P08030 | 0.00232234 | n +42.03 Da,K +28.03 Da,             | 1747.996541 | 2 | 606.3525 | 86438600  | n.d. |
| TEADVNPKayPLADAHLTKK     | Q9D0T1 | 0          | n +42.03 Da,n +28.03 Da,K +28.03 Da, | 1751.522195 | 4 | 577.8182 | 56351600  | n.d. |
| NLYKGLEAFR               | P54869 | 0          | n +34.06 Da,K +34.06 Da,             | 1753.209766 | 3 | 426.9334 | 340928992 | n.d. |
| GGFVFALEKR               | O35490 | 0          | n +28.03 Da,K +28.03 Da,             | 1753.597668 | 3 | 393.9012 | 110580000 | n.d. |
| AAAAYEHLKLH              | Q9EP69 | 0          | n +42.03 Da,K +34.06 Da,             | 1755.275692 | 3 | 433.9139 | 58651000  | n.d. |
| AGKPVLYHYFDGR            | P30115 | 0          | n +42.03 Da,K +28.03 Da,             | 1760.030673 | 3 | 477.2607 | 7.26E+10  | n.d. |
| NLYKGLEAFR               | P54869 | 0          | n +28.03 Da,K +28.03 Da,             | 1767.248313 | 3 | 422.9122 | 529448992 | n.d. |
| AASKVKQDMPPPGGYGPIDYKR   | Q9ERS2 | 0          | n +42.03 Da,K +28.03 Da,             | 1774.052658 | 3 | 834.4456 | 471128992 | n.d. |
| PLPPLPEYGGKVR            | Q9CQQ7 | 0          | n +14.02 Da,K +28.03 Da,             | 1774.764401 | 3 | 488.9564 | 5.582E+10 | n.d. |
| TTKDPSEHPSVTLFR          | Q99JW2 | 0          | n +42.03 Da,K +34.06 Da,             | 1777.269845 | 3 | 640.6673 | 44343800  | n.d. |
| IGLEEHLNALDR             | Q8VC30 | 0          | n +34.06 Da,                         | 1785.192727 | 3 | 471.9364 | 90747200  | n.d. |
| ITEEKPLPGQTPETAKEAELAAR  | Q9QYG0 | 0          | n +34.06 Da,K +34.06 Da,             | 1789.960164 | 4 | 674.3991 | 321624992 | n.d. |
| AASKVKQDMPPPGGYGPIDYKR   | Q9ERS2 | 0          | n +42.03 Da,K +34.06 Da,             | 1790.175684 | 5 | 504.6895 | 28165600  | n.d. |
| SSKPKSLEIIGAPFSKGQPR     | Q61176 | 0.01708333 | n +42.03 Da,K +28.03 Da,             | 1790.360179 | 3 | 751.7708 | 84867904  | n.d. |
| TYIIGELHPDDR             | P56395 | 0          | n +28.03 Da,                         | 1794.430423 | 3 | 486.2518 | 2.186E+09 | n.d. |
| TSVLICPDGKTVEAAAHGTVTR   | O88844 | 0          | n +28.03 Da,                         | 1796.218575 | 4 | 617.8256 | 24611800  | n.d. |
| AASKVKQDMPPPGGYGPIDYKR   | Q9ERS2 | 0          | n +42.03 Da,K +28.03 Da,             | 1797.868245 | 5 | 501.07   | 127500000 | n.d. |
| LDPSTNVSGGAIALGHPLGGSGSR | Q8BWT1 | 0          | n +34.06 Da,K +34.06 Da,             | 1799.477937 | 4 | 604.8444 | 50892400  | n.d. |
| PTEKNVDLSTFYQNR          | Q9CZW5 | 0          | n +14.02 Da,K +28.03 Da,             | 1801.102577 | 3 | 618.6519 | 236616992 | n.d. |
| APQIKVIAPWR              | P16460 | 0          | n +28.03 Da,K +28.03 Da,             | 1804.726224 | 3 | 445.615  | 320079008 | n.d. |
| SDAPPLTLDGIKDR           | Q9CR21 | 0          | n +34.06 Da,K +34.06 Da,             | 1805.622578 | 3 | 522.6437 | 1.375E+09 | n.d. |
| AHYHDNYGKNDEVEFVR        | P25688 | 0          | n +42.03 Da,K +28.03 Da,             | 1808.719317 | 3 | 721.6556 | 2.378E+10 | n.d. |
| AHYHDNYGKNDEVEFVR        | P25688 | 0          | n +42.03 Da,K +28.03 Da,             | 1809.279602 | 2 | 1081.98  | 1.372E+09 | n.d. |
| AGIAIKLAKDR              | O08529 | 0          | n +42.03 Da,K +28.03 Da,             | 1812.351623 | 3 | 418.6027 | 97153104  | n.d. |
| IRADIVENQVMDTR           | P10649 | 0          | n +28.03 Da,                         | 1813.426164 | 3 | 563.2982 | 348168000 | n.d. |
| GMGTLISKIR               | P68372 | 0          | n +28.03 Da,K +28.03 Da,             | 1815.352364 | 3 | 415.5963 | 29585600  | n.d. |
| LWGVKNSDEVGGEALGR        | P02088 | 0.00623053 | n +28.03 Da,K +28.03 Da,             | 1815.885942 | 3 | 614.9956 | 255798000 | n.d. |
| IRADIVENQVMDTR           | P10649 | 0          | n +28.03 Da,                         | 1816.73918  | 2 | 844.4435 | 305203008 | n.d. |
| PSKEVEEYKAFY             | P08113 | 0          | n +14.02 Da,K +28.03 Da,             | 1820.444488 | 2 | 902.425  | 237119008 | n.d. |
| SSIKVECVLR               | Q64374 | 0.00582698 | n +42.03 Da,K +34.06 Da,             | 1820.524305 | 2 | 633.8674 | 2.487E+09 | n.d. |
| SDAPPLTLDGIKDR           | Q9CR21 | 0          | n +28.03 Da,K +28.03 Da,             | 1821.410075 | 3 | 518.6233 | 968179968 | n.d. |
| GPTTPEADKIFLER           | P26443 | 0          | n +28.03 Da,K +28.03 Da,             | 1823.912906 | 3 | 543.9686 | 3.807E+09 | n.d. |
| GSVVKSEDYAFPTYADR        | P19783 | 0          | n +34.06 Da,K +34.06 Da,             | 1825.183149 | 3 | 658.3514 | 9576490   | n.d. |
| TGFHETSININDFSAGVANR     | P15105 | 0          | n +34.06 Da,                         | 1826.87218  | 3 | 691.0048 | 8813790   | n.d. |

|                              |        |            |                                      |             |   |          |           |      |
|------------------------------|--------|------------|--------------------------------------|-------------|---|----------|-----------|------|
| ASGADSKGDDLSTAILKQK          | Q01853 | 0          | n +42.03 Da,K +28.03 Da,             | 1827.795314 | 3 | 677.6988 | 186090000 | n.d. |
| AASKVKQDMPPPGGYGPIDYKR       | Q9ERS2 | 0          | n +42.03 Da,K +28.03 Da,             | 1829.598655 | 2 | 626.0858 | 781632000 | n.d. |
| PEIFDAPKEFR                  | Q60991 | 0          | n +14.02 Da,K +28.03 Da,             | 1830.054017 | 3 | 464.2504 | 2.923E+09 | n.d. |
| PPGGFAEVQFKDVR               | D3Z7X0 | 0          | n +14.02 Da,K +28.03 Da,             | 1830.64113  | 3 | 530.2879 | 964273024 | n.d. |
| GVPVFKFPR                    | Q8R0Y6 | 0          | n +28.03 Da,K +28.03 Da,             | 1831.295984 | 3 | 368.2305 | 948110016 | n.d. |
| VSTSSMGTLPKQVKIVEVGPR        | P38060 | 0          | n +28.03 Da,K +28.03 Da,             | 1840.853524 | 4 | 575.086  | 1.041E+09 | n.d. |
| NLDIERPTYTNLNR               | P05213 | 0          | n +28.03 Da,                         | 1841.909857 | 3 | 582.9782 | 278084992 | n.d. |
| MKVFTGTLPLAEGR               | Q91Z53 | 0.00414365 | n +28.03 Da,K +28.03 Da,             | 1843.349367 | 3 | 519.9658 | 4.269E+09 | n.d. |
| PLPLPEYGGKVR                 | Q9CQQ7 | 0          | n +14.02 Da,K +28.03 Da,             | 1843.535448 | 3 | 488.9576 | 102170000 | n.d. |
| MKVFTGTLPLAEGR               | Q91Z53 | 0          | n +28.03 Da,K +28.03 Da,             | 1845.564935 | 2 | 779.4447 | 238652000 | n.d. |
| PTIGFNNLDEAHVDR              | Q3UQ44 | 0          | n +14.02 Da,                         | 1850.690921 | 3 | 570.9665 | 596275008 | n.d. |
| SAMNVVSEDEMCR                | Q8C196 | 0          | n +28.03 Da,K +28.03 Da,             | 1850.694068 | 3 | 566.9439 | 1.727E+09 | n.d. |
| VSTSSMGTLPKQVKIVEVGPR        | P38060 | 0          | n +34.06 Da,K +34.06 Da,             | 1855.420578 | 4 | 579.6102 | 37698800  | n.d. |
| STVAAASPSHEAKGGLVISPEGLSPAVR | Q8K370 | 0.02444988 | n +28.03 Da,K +28.03 Da,             | 1860.910134 | 4 | 686.8789 | 776284992 | n.d. |
| AGKPVLYHYFDGR                | P30115 | 0          | n +42.03 Da,K +34.06 Da,             | 1861.345968 | 3 | 479.2685 | 755307008 | n.d. |
| LIGDAAKNQVAMNPTNTVFDKR       | P63017 | 0          | n +28.03 Da,K +28.03 Da,             | 1861.66118  | 2 | 640.3422 | 45963300  | n.d. |
| TVEKADNFEYSDPVDGSISKQGLR     | Q9D0F9 | 0          | n +34.06 Da,K +34.06 Da,             | 1864.497103 | 4 | 718.6369 | 12076100  | n.d. |
| GSVVKSEDYAFPTYADR            | P19783 | 0.00501825 | n +28.03 Da,K +28.03 Da,             | 1865.251879 | 3 | 654.3262 | 382179008 | n.d. |
| SNIKIFSGSSHQDLSQKIADR        | G3UXL2 | 0          | n +42.03 Da,K +28.03 Da,             | 1866.35713  | 4 | 608.0746 | 1.169E+09 | n.d. |
| GYVKAGPWTPEAAVEHPEAVR        | O35490 | 0          | n +28.03 Da,K +28.03 Da,             | 1872.897192 | 4 | 580.812  | 187168992 | n.d. |
| VKVPDFSDYR                   | Q9CR68 | 0          | n +28.03 Da,K +28.03 Da,             | 1877.810236 | 3 | 427.8995 | 64299500  | n.d. |
| ASLVPLKEKKLMEVK              | P56135 | 0          | n +42.03 Da,n +34.06 Da,K +34.06 Da, | 1878.450292 | 2 | 946.1526 | 217568992 | n.d. |
| VSTSSMGTLPKQVKIVEVGPR        | P38060 | 0          | n +28.03 Da,K +28.03 Da,             | 1882.022837 | 2 | 575.0869 | 181032000 | n.d. |
| FTMELAKKGF                   | P26443 | 0          | n +28.03 Da,K +28.03 Da,             | 1882.910505 | 3 | 419.2421 | 175992000 | n.d. |
| ASLVPLKEKKLMEVK              | P56135 | 0          | n +42.03 Da,n +28.03 Da,K +28.03 Da, | 1882.93792  | 3 | 623.0614 | 7.633E+09 | n.d. |
| TPFDFTPENYKR                 | Q9D6J6 | 0          | n +34.06 Da,K +34.06 Da,             | 1884.54323  | 3 | 528.2899 | 36803100  | n.d. |
| TPFDFTPENYKR                 | Q9D6J6 | 0          | n +28.03 Da,K +28.03 Da,             | 1884.678194 | 3 | 524.268  | 285409984 | n.d. |
| IMDPNIVGNEHYDVAR             | P56480 | 0          | n +28.03 Da,                         | 1885.089534 | 3 | 624.309  | 1.463E+09 | n.d. |
| MGTLPKQVKIVEVGPR             | P38060 | 0.00093985 | n +42.03 Da,K +28.03 Da,             | 1885.803736 | 3 | 617.3695 | 294224992 | n.d. |
| SPKILPDILR                   | Q91WT9 | 0          | n +34.06 Da,K +34.06 Da,             | 1886.687948 | 3 | 407.2851 | 170680992 | n.d. |
| TMDKSELVQKAKLAEQAER          | Q9CQV8 | 0          | n +42.03 Da,n +34.06 Da,K +34.06 Da, | 1891.555583 | 3 | 580.5905 | 340360992 | n.d. |
| LVPFSEIVGKR                  | P62082 | 0          | n +28.03 Da,                         | 1900.002649 | 1 | 434.2713 | 6247510   | n.d. |
| TMDKSELVQKAKLAEQAER          | Q9CQV8 | 0          | n +42.03 Da,n +34.06 Da,K +34.06 Da, | 1901.563609 | 2 | 580.5909 | 444612992 | n.d. |
| EESVYDEFVKR                  | P24549 | 0          | n +28.03 Da,                         | 1906.671713 | 3 | 486.2483 | 213031008 | n.d. |
| VSTSSMGTLPKQVKIVEVGPR        | P38060 | 0          | n +28.03 Da,K +28.03 Da,             | 1915.385933 | 4 | 575.0884 | 7.449E+09 | n.d. |
| TMDKSELVQKAKLAEQAER          | Q9CQV8 | 0          | n +42.03 Da,n +34.06 Da,K +34.06 Da, | 1915.495785 | 3 | 773.7856 | 984846016 | n.d. |
| MKFNPFVTSR                   | P61255 | 0.00093985 | n +34.06 Da,K +34.06 Da,             | 1917.625498 | 3 | 470.6065 | 198688000 | n.d. |
| PFLPWKEQQEVADR               | O88851 | 0          | n +14.02 Da,K +28.03 Da,             | 1919.833023 | 3 | 595.649  | 289239008 | n.d. |
| EESVYDEFVKR                  | P24549 | 0          | n +28.03 Da,                         | 1920.027284 | 1 | 486.2457 | 9429430   | n.d. |
| TMDKSELVQKAKLAEQAER          | Q9CQV8 | 0          | n +42.03 Da,n +28.03 Da,K +28.03 Da, | 1920.384106 | 4 | 576.0687 | 7.553E+09 | n.d. |

|                        |        |            |                                      |             |   |          |           |      |
|------------------------|--------|------------|--------------------------------------|-------------|---|----------|-----------|------|
| TMDKSELVQKAKLAEQAER    | Q9CQV8 | 0          | n +42.03 Da,n +28.03 Da,K +28.03 Da, | 1920.471418 | 3 | 767.7541 | 2.042E+09 | n.d. |
| PKVQQTVDLFGFR          | P38647 | 0          | n +14.02 Da,K +28.03 Da,             | 1921.520151 | 3 | 519.9637 | 718436992 | n.d. |
| AVPPTYADLGKSAR         | Q60932 | 0          | n +42.03 Da,K +28.03 Da,             | 1921.767145 | 2 | 758.4126 | 149583008 | n.d. |
| PKVQQTVDLFGFR          | P38647 | 0.00093985 | n +14.02 Da,K +28.03 Da,             | 1922.603413 | 2 | 779.4412 | 392979008 | n.d. |
| SLSNKLTLDKLDVKGKR      | P09411 | 0          | n +42.03 Da,n +28.03 Da,K +28.03 Da, | 1924.670659 | 4 | 518.0641 | 427124000 | n.d. |
| DIAHTPGVAADLSHIETR     | P08249 | 0          | n +28.03 Da,                         | 1926.699731 | 3 | 644.3347 | 330715008 | n.d. |
| LALKNIASMVR            | Q9QXF8 | 0          | n +28.03 Da,K +28.03 Da,             | 1927.978678 | 3 | 424.5882 | 4748000   | n.d. |
| LPTQTISQGAIEKVKDATR    | Q8C196 | 0          | n +34.06 Da,K +34.06 Da,             | 1929.425206 | 4 | 540.338  | 279414016 | n.d. |
| TTKSFLPLLR             | Q80XN0 | 0          | n +34.06 Da,K +34.06 Da,             | 1932.484818 | 3 | 415.2851 | 52112500  | n.d. |
| LPTQTISQGAIEKVKDATR    | Q8C196 | 0          | n +28.03 Da,K +28.03 Da,             | 1933.298258 | 4 | 535.8134 | 143046000 | n.d. |
| MEGYHKPDQKQLKALQKDTANR | P40142 | 0          | n +42.03 Da,K +28.03 Da,             | 1933.601035 | 4 | 650.0822 | 474772992 | n.d. |
| MKFNPFVTSR             | P61255 | 0.00093985 | n +28.03 Da,K +28.03 Da,             | 1936.11088  | 3 | 466.5797 | 149963008 | n.d. |
| PYPAHYMDTAIQTYR        | E9PWG2 | 0          | n +14.02 Da,                         | 1938.832468 | 3 | 614.2936 | 152311008 | n.d. |
| MEKTELIQKAKLAEQAER     | P68254 | 0          | n +42.03 Da,K +34.06 Da,             | 1940.537367 | 4 | 565.841  | 1.775E+09 | n.d. |
| VSTSSMGTLPKQVKIVEVGPR  | P38060 | 0          | n +42.03 Da,K +28.03 Da,             | 1941.313624 | 3 | 771.1059 | 1.199E+09 | n.d. |
| AHYHDNYGKNDEVEFVR      | P25688 | 0          | n +42.03 Da,K +28.03 Da,             | 1941.714635 | 3 | 721.6567 | 526809984 | n.d. |
| MDKNELVQKAKLAEQAER     | P63101 | 0          | n +42.03 Da,K +34.06 Da,             | 1947.131417 | 3 | 748.0856 | 1.786E+09 | n.d. |
| TMTLGDIVYKR            | P12710 | 0          | n +28.03 Da,                         | 1948.61409  | 3 | 451.5912 | 7.156E+09 | n.d. |
| LLSAAYVDSHQWEAR        | Q8BK72 | 0          | n +28.03 Da,                         | 1948.779157 | 3 | 591.9688 | 223560000 | n.d. |
| SMKNQNINLENSLGDVEAR    | P05784 | 0          | n +34.06 Da,K +34.06 Da,             | 1949.262381 | 3 | 734.0676 | 266207008 | n.d. |
| MEKTELIQKAKLAEQAER     | P68254 | 0          | n +42.03 Da,K +28.03 Da,             | 1949.340198 | 4 | 561.3161 | 1.473E+10 | n.d. |
| MEKTELIQKAKLAEQAER     | P68254 | 0          | n +42.03 Da,K +34.06 Da,             | 1952.299813 | 3 | 754.1157 | 154627008 | n.d. |
| AGQSDKDKVYYTLEEIQKH    | P56395 | 0.012309   | n +42.03 Da,K +28.03 Da,             | 1954.693386 | 3 | 793.4097 | 4.543E+09 | n.d. |
| SLDYMVTKIPR            | Q8C196 | 0.00093985 | n +34.06 Da,K +34.06 Da,             | 1954.829826 | 3 | 464.2836 | 766569024 | n.d. |
| SVFAEAIKVR             | Q9DBM2 | 0          | n +28.03 Da,K +28.03 Da,             | 1959.457463 | 3 | 416.2539 | 111264000 | n.d. |
| TNTMTLGDIVYKR          | P12710 | 0          | n +34.06 Da,K +34.06 Da,             | 1964.173092 | 3 | 527.322  | 73025200  | n.d. |
| SLSNKLTLDKLDVKGKR      | P09411 | 0          | n +42.03 Da,n +28.03 Da,K +28.03 Da, | 1965.118775 | 2 | 518.0637 | 2.432E+09 | n.d. |
| ANHAPFETDISTLTR        | Q9QXD6 | 0          | n +42.03 Da,                         | 1966.178939 | 3 | 572.2845 | 458244992 | n.d. |
| AHGSVVKSEDYAFPTYADR    | P19783 | 0          | n +28.03 Da,K +28.03 Da,             | 1966.943324 | 3 | 723.68   | 57786100  | n.d. |
| AYVYFEKLVLQGLNKQNR     | Q8K3M5 | 0          | n +42.03 Da,K +28.03 Da,             | 1967.470407 | 3 | 813.1307 | 93221696  | n.d. |
| MDKNELVQKAKLAEQAER     | P63101 | 0          | n +42.03 Da,K +28.03 Da,             | 1971.419135 | 4 | 557.5584 | 6.998E+09 | n.d. |
| VYEDQVGFDFWR           | Q8C7X2 | 0.00414365 | n +28.03 Da,K +28.03 Da,             | 1973.031008 | 3 | 533.2719 | 1.8E+09   | n.d. |
| MDKNELVQKAKLAEQAER     | P63101 | 0          | n +42.03 Da,K +28.03 Da,             | 1974.217749 | 3 | 743.0749 | 5.905E+09 | n.d. |
| GKSMTFNPDSGPVWAAR      | P00184 | 0.00623053 | n +34.06 Da,K +34.06 Da,             | 1976.070449 | 3 | 630.3351 | 18007200  | n.d. |
| PGAQDSKDDFPLR          | Q99N13 | 0.04058314 | n +17.03 Da,K +34.06 Da,             | 1980.569132 | 3 | 499.6128 | 291151008 | n.d. |
| STFVLDEFKR             | Q9D8N0 | 0          | n +28.03 Da,K +28.03 Da,             | 1984.804191 | 3 | 433.2437 | 168048992 | n.d. |
| PSNMPPGIEPSDKMLQGR     | P24270 | 0          | n +14.02 Da,K +28.03 Da,             | 1995.399152 | 3 | 698.3544 | 25038100  | n.d. |
| TSIAIDTIINQKR          | Q03265 | 0          | n +28.03 Da,K +28.03 Da,             | 1997.001923 | 3 | 510.3072 | 60838400  | n.d. |
| IMDPNIVGNEHYDVAR       | P56480 | 0          | n +42.03 Da,                         | 2001.508302 | 3 | 628.981  | 351246016 | n.d. |
| YSVVFPHDEPLAGR         | Q99LB7 | 0          | n +34.06 Da,                         | 2007.860145 | 3 | 540.9603 | 147804000 | n.d. |



|                           |        |            |                                      |             |   |          |           |      |
|---------------------------|--------|------------|--------------------------------------|-------------|---|----------|-----------|------|
| MTLGDIVYKR                | P12710 | 0          | n +28.03 Da,K +28.03 Da,             | 2009.908089 | 3 | 417.9089 | 65099700  | n.d. |
| FPSVVVVLGKR               | Q9CPY7 | 0          | n +28.03 Da,K +28.03 Da,             | 2014.612354 | 3 | 438.6149 | 24436900  | n.d. |
| TVAEKEGWPLDIR             | Q99K10 | 0.01937345 | n +28.03 Da,K +28.03 Da,             | 2014.686882 | 3 | 523.9601 | 409254016 | n.d. |
| STQAAEDKEEESLHSINTEAVR    | Q9CQN1 | 0.00093985 | n +28.03 Da,K +28.03 Da,             | 2022.539524 | 4 | 675.8384 | 468731008 | n.d. |
| AAPAKGENLSLVVHGPDIR       | Q64442 | 0          | n +42.03 Da,K +28.03 Da,             | 2023.114295 | 3 | 691.0465 | 41362100  | n.d. |
| DDEVVDVDTVEEDLGKSR        | P08113 | 0          | n +34.06 Da,K +34.06 Da,             | 2025.336145 | 3 | 682.6773 | 101825000 | n.d. |
| TFTFYASEDKLENR            | O35490 | 0          | n +28.03 Da,                         | 2026.384297 | 3 | 592.9648 | 71084800  | n.d. |
| VSQEHPPVLTKFVEGAR         | Q8C196 | 0          | n +42.03 Da,K +28.03 Da,             | 2027.570421 | 3 | 656.0225 | 22335500  | n.d. |
| AKKYVLGNPLTPGINQGPQIDKEQH | P24549 | 0.04695382 | n +42.03 Da,K +28.03 Da,             | 2031.888996 | 4 | 718.6585 | 11178300  | n.d. |
| VSQEHPPVLTKFVEGAR         | Q8C196 | 0.00582698 | n +42.03 Da,K +34.06 Da,             | 2032.81564  | 3 | 658.0394 | 28416800  | n.d. |
| PGGDTIFGKIIR              | P70349 | 0.00623053 | n +17.03 Da,K +34.06 Da,             | 2035.64679  | 3 | 442.2677 | 153222000 | n.d. |
| QGILQPEKPIVLKVVPR         | Q9EQW4 | 0          | n +42.03 Da,K +28.03 Da,             | 2039.790248 | 4 | 503.83   | 661785024 | n.d. |
| SLSNKLTLDKLDVKGKR         | P09411 | 0          | n +42.03 Da,n +28.03 Da,K +28.03 Da, | 2043.298896 | 4 | 518.0638 | 6.669E+09 | n.d. |
| GASIVEDKLVEDLKTR          | P26443 | 0          | n +28.03 Da,K +28.03 Da,             | 2047.432873 | 4 | 465.0227 | 441963008 | n.d. |
| DDEVVDVDTVEEDLGKSR        | P08113 | 0          | n +28.03 Da,K +28.03 Da,             | 2054.870769 | 3 | 678.642  | 3.658E+09 | n.d. |
| YHTSQSGDEMTSLSEYVSR       | P11499 | 0          | n +42.03 Da,                         | 2061.006309 | 3 | 740.335  | 1.844E+09 | n.d. |
| TSVLHLVGDNFR              | Q921X9 | 0          | n +28.03 Da,                         | 2061.167598 | 3 | 462.5916 | 95577696  | n.d. |
| TGSTVEGHLIQVAAGSSNLKR     | P47738 | 0          | n +34.06 Da,                         | 2061.214399 | 4 | 549.0707 | 138062000 | n.d. |
| FKDVTLGSVLGR              | Q9R0H0 | 0.00501825 | n +28.03 Da,K +28.03 Da,             | 2061.232614 | 3 | 449.9382 | 615329024 | n.d. |
| PVLGSIKSLR                | P16331 | 0          | n +14.02 Da,K +28.03 Da,             | 2062.058233 | 3 | 408.9392 | 281220000 | n.d. |
| TVIIEQSWGSPKVTKDGVTVAK    | P63038 | 0          | n +28.03 Da,K +28.03 Da,             | 2070.256964 | 4 | 614.6099 | 191116992 | n.d. |
| MARGQVGDLSPOQQEALAR       | Q8R0F9 | 0.00414365 | n +28.03 Da,                         | 2071.80111  | 2 | 1005.512 | 114211000 | n.d. |
| YHTSQSGDEMTSLSEYVSR       | P11499 | 0          | n +28.03 Da,                         | 2072.971831 | 3 | 735.6621 | 1.096E+09 | n.d. |
| TGSTVEGHLIQVAAGSSNLKR     | P47738 | 0          | n +28.03 Da,                         | 2074.682409 | 4 | 546.056  | 128399000 | n.d. |
| VSVEDLKNFER               | Q9CQ92 | 0          | n +28.03 Da,K +28.03 Da,             | 2075.344442 | 3 | 464.588  | 329593984 | n.d. |
| ASLKDLEGKWR               | Q05816 | 0          | n +42.03 Da,K +34.06 Da,             | 2077.325678 | 3 | 471.6229 | 574067968 | n.d. |
| EAYPGDVFYLHSR             | Q03265 | 0          | n +28.03 Da,                         | 2079.766592 | 3 | 527.95   | 73557904  | n.d. |
| EAYPGDVFYLHSR             | Q03265 | 0          | n +28.03 Da,                         | 2082.060083 | 3 | 527.928  | 507160992 | n.d. |
| VDEYLAWQHTALR             | G3UX05 | 0          | n +28.03 Da,                         | 2092.195537 | 3 | 543.952  | 66287000  | n.d. |
| PLHPDIFPGLR               | Q8R0X7 | 0          | n +14.02 Da,                         | 2098.623892 | 3 | 425.9116 | 86856200  | n.d. |
| SWLKGEFITTQQQR            | P14152 | 0          | n +34.06 Da,K +34.06 Da,             | 2102.365373 | 3 | 587.6828 | 338376992 | n.d. |
| PDFQHEHDYNFLTR            | Q9R0H0 | 0          | n +14.02 Da,                         | 2102.857107 | 3 | 565.9298 | 40616600  | n.d. |
| LAVYIDKVR                 | P14733 | 0.00414365 | n +14.02 Da,K +28.03 Da,             | 2106.708346 | 3 | 373.5686 | 244795008 | n.d. |
| TTFAHLDATTVLSR            | P56480 | 0          | n +34.06 Da,                         | 2107.087982 | 3 | 522.9619 | 269574016 | n.d. |
| PLTGGEPVSLGSLR            | P11352 | 0          | n +14.02 Da,                         | 2116.66447  | 2 | 698.8934 | 313660000 | n.d. |
| SGPKAKPVVVSFIAGITAPPGR    | Q9WUM5 | 0          | n +28.03 Da,K +28.03 Da,             | 2117.119511 | 3 | 712.0967 | 124566000 | n.d. |
| SGPKAKPVVVSFIAGITAPPGR    | Q9WUM5 | 0.0118997  | n +28.03 Da,K +28.03 Da,             | 2118.116771 | 4 | 534.3249 | 215390000 | n.d. |
| ISDEDWDIIHR               | P51660 | 0          | n +28.03 Da,                         | 2121.439631 | 3 | 476.2369 | 157480000 | n.d. |
| GWKEIEYEVVR               | Q8C196 | 0          | n +34.06 Da,K +34.06 Da,             | 2122.869011 | 3 | 492.6223 | 311542016 | n.d. |
| SPADLPKNWDWR              | Q9WUU7 | 0          | n +28.03 Da,K +28.03 Da,             | 2123.871623 | 3 | 514.2688 | 294535008 | n.d. |

|                             |        |            |                                      |             |   |          |           |      |
|-----------------------------|--------|------------|--------------------------------------|-------------|---|----------|-----------|------|
| GETPTEKLPFPIIDDKGR          | O08709 | 0          | n +28.03 Da,K +28.03 Da,             | 2124.451685 | 4 | 525.0453 | 1.39E+09  | n.d. |
| PSLDYMVTKIPR                | Q8C196 | 0          | n +14.02 Da,K +28.03 Da,             | 2127.202922 | 3 | 487.9426 | 4.224E+09 | n.d. |
| TFEESFQKALR                 | Q8C196 | 0.00743007 | n +42.03 Da,K +28.03 Da,             | 2127.357717 | 3 | 713.38   | 181127008 | n.d. |
| PKDFLSKIFY                  | Q9CQZ5 | 0.04988488 | n +14.02 Da,K +28.03 Da,             | 2132.399671 | 3 | 405.5653 | 438409984 | n.d. |
| TDVKVPDFSDYR                | Q9CR68 | 0          | n +34.06 Da,K +34.06 Da,             | 2137.651069 | 3 | 503.9456 | 720241024 | n.d. |
| GQKVLDSGAPIKIPVGPETLGR      | P56480 | 0          | n +28.03 Da,K +28.03 Da,             | 2141.191488 | 2 | 579.8481 | 58150900  | n.d. |
| SLEDWVTKEAR                 | P24456 | 0.00582698 | n +28.03 Da,K +28.03 Da,             | 2141.360556 | 3 | 463.9177 | 56870100  | n.d. |
| ELISNASDALDKIR              | P08113 | 0.00743007 | n +28.03 Da,K +28.03 Da,             | 2147.944029 | 3 | 534.3024 | 99197000  | n.d. |
| MEEDSIHLPTHLR               | P97360 | 0          | n +42.03 Da,                         | 2148.599661 | 3 | 540.6    | 217903008 | n.d. |
| LLNKLADLMER                 | O35945 | 0          | n +28.03 Da,K +28.03 Da,             | 2149.040578 | 3 | 457.939  | 187284000 | n.d. |
| PEAPLPVPCNPNDVSHGYVTVKPGIR  | P34914 | 0          | n +14.02 Da,K +28.03 Da,             | 2150.28148  | 4 | 714.6277 | 189892000 | n.d. |
| LLNKLADLMER                 | O35945 | 0          | n +28.03 Da,K +28.03 Da,             | 2155.345817 | 3 | 457.9211 | 30545000  | n.d. |
| SLPPHQKVPLPSLSPTMQAGTIAR    | Q8BMF4 | 0          | n +28.03 Da,K +28.03 Da,             | 2157.637072 | 4 | 646.3678 | 3.976E+09 | n.d. |
| SSVEYEPKEKTFDKILIANR        | Q91ZA3 | 0          | n +42.03 Da,n +34.06 Da,K +34.06 Da, | 2159.079692 | 4 | 628.6208 | 105405000 | n.d. |
| PSLDYMVTKIPR                | Q8C196 | 0          | n +17.03 Da,K +34.06 Da,             | 2162.021563 | 3 | 490.9695 | 3.341E+09 | n.d. |
| PDIVNFVHTNLR                | Q9D8E6 | 0          | n +14.02 Da,                         | 2165.159751 | 3 | 480.2651 | 150486000 | n.d. |
| SDAAVDTSEITTKDLKEKKEVVEEAEN | P26350 | 0          | n +42.03 Da,n +34.06 Da,K +34.06 Da, | 2165.819694 | 4 | 811.6957 | 199362000 | n.d. |
| SGIIHQVNLEYLAR              | P28271 | 0          | n +28.03 Da,                         | 2166.480779 | 3 | 547.6421 | 122160000 | n.d. |
| SAVSASSKWLDGFR              | Q9D855 | 0          | n +28.03 Da,K +28.03 Da,             | 2166.481913 | 3 | 522.9596 | 250078000 | n.d. |
| QTDLEKFNNVEAGKYTVGLGQTR     | P54869 | 0          | n +28.03 Da,K +28.03 Da,             | 2167.005464 | 4 | 663.8538 | 164351008 | n.d. |
| TYSISHTLEDLDR               | Q62452 | 0.02782258 | n +34.06 Da,                         | 2168.622705 | 3 | 528.6094 | 411464000 | n.d. |
| MKETIMNQEKLAKLQAQVR         | Q64152 | 0          | n +42.03 Da,n +28.03 Da,K +28.03 Da, | 2168.847    | 4 | 597.0892 | 2.195E+09 | n.d. |
| SLPPHQKVPLPSLSPTMQAGTIAR    | Q8BMF4 | 0          | n +28.03 Da,K +28.03 Da,             | 2174.264391 | 3 | 861.4863 | 28012300  | n.d. |
| AAEDKEEESLHSISNTEAVR        | Q9CQN1 | 0          | n +34.06 Da,K +34.06 Da,             | 2174.299474 | 3 | 799.4225 | 38192700  | n.d. |
| IIGIDINKDKF                 | P28474 | 0.00414365 | n +28.03 Da,K +28.03 Da,             | 2176.100068 | 3 | 453.9464 | 26768100  | n.d. |
| SLPPHQKVPLPSLSPTMQAGTIAR    | Q8BMF4 | 0          | n +34.06 Da,K +34.06 Da,             | 2189.315026 | 4 | 649.3832 | 314844992 | n.d. |
| GVQGFQEFLEKR                | Q8C3F2 | 0          | n +28.03 Da,K +28.03 Da,             | 2191.586557 | 3 | 498.6084 | 118594000 | n.d. |
| GQKVLDSGAPIKIPVGPETLGR      | P56480 | 0          | n +28.03 Da,K +28.03 Da,             | 2192.886961 | 4 | 579.8463 | 895193984 | n.d. |
| DVLFPGYTHLQR                | Q91Y10 | 0          | n +28.03 Da,                         | 2193.348556 | 3 | 491.9326 | 472844000 | n.d. |
| ASLKDLEGKWR                 | Q05816 | 0          | n +42.03 Da,K +28.03 Da,             | 2197.670989 | 3 | 467.6026 | 4.271E+10 | n.d. |
| ASKPTLNEVVIVSAIR            | Q8QZT1 | 0.01393581 | n +28.03 Da,K +28.03 Da,             | 2205.458974 | 3 | 585.0242 | 2.656E+09 | n.d. |
| IRVDTLENQVMDTR              | P19639 | 0.00501825 | n +28.03 Da,                         | 2206.487485 | 2 | 573.2903 | 249187008 | n.d. |
| AAPAKGENLSLVVHGPDIR         | Q64442 | 0          | n +42.03 Da,K +34.06 Da,             | 2207.73837  | 3 | 693.0561 | 175332992 | n.d. |
| EGKEVWDYVTVR                | Q920A5 | 0          | n +34.06 Da,K +34.06 Da,             | 2210.11186  | 3 | 516.9614 | 710084992 | n.d. |
| SSAENEPVPLVGNWRPPQPVKGR     | P16015 | 0          | n +34.06 Da,K +34.06 Da,             | 2210.530551 | 4 | 670.6297 | 58711900  | n.d. |
| PGFGKELFESDLDR              | Q9DBT9 | 0          | n +14.02 Da,K +28.03 Da,             | 2218.750144 | 3 | 551.2823 | 1.193E+09 | n.d. |
| PLDLAKLGLR                  | Q9QZH6 | 0.03161265 | n +14.02 Da,K +28.03 Da,             | 2221.818917 | 3 | 379.9168 | 23794500  | n.d. |
| PGFGKELFESDLDR              | Q9DBT9 | 0          | n +14.02 Da,K +28.03 Da,             | 2224.931854 | 2 | 826.4189 | 183806000 | n.d. |
| PQDTFESEFYLDKGR             | P07759 | 0          | n +17.03 Da,K +34.06 Da,             | 2229.296523 | 3 | 652.3255 | 115958000 | n.d. |
| DDEVVDVGTVEEDLGKSR          | P08113 | 0          | n +28.03 Da,K +28.03 Da,             | 2232.460542 | 3 | 678.6541 | 72699504  | n.d. |

|                                |        |            |                                      |             |   |          |           |      |
|--------------------------------|--------|------------|--------------------------------------|-------------|---|----------|-----------|------|
| GQKVLDSGAPIKIPVGPETLGR         | P56480 | 0          | n +42.03 Da,K +28.03 Da,             | 2239.569706 | 4 | 583.3515 | 58089300  | n.d. |
| DLPKNWDWR                      | Q9WUU7 | 0          | n +34.06 Da,K +34.06 Da,             | 2242.692301 | 3 | 433.2487 | 345792000 | n.d. |
| QEAGNKSISGSRRLWHLRAR           | Q6U7H8 | 0.00743007 | n +28.03 Da,K +28.03 Da,             | 2249.252847 | 4 | 659.6119 | 5738440   | n.d. |
| IIGGSMDAKGSFPWQAK              | Q61646 | 0          | n +28.03 Da,K +28.03 Da,             | 2249.528618 | 3 | 626.3369 | 716462976 | n.d. |
| SLPPHQKVPLPSLPTMQAGTIAR        | Q8BMF4 | 0.00582698 | n +28.03 Da,K +28.03 Da,             | 2252.110372 | 2 | 646.3686 | 91432096  | n.d. |
| KALDIAENEMPGLMR                | P50247 | 0          | n +28.03 Da,K +28.03 Da,             | 2257.698898 | 3 | 581.9756 | 226131008 | n.d. |
| DLPKNWDWR                      | Q9WUU7 | 0          | n +28.03 Da,K +28.03 Da,             | 2259.642104 | 3 | 429.2279 | 1.666E+09 | n.d. |
| EIAKAQVAQPGGDTIFGKIIR          | P70349 | 0          | n +34.06 Da,K +34.06 Da,             | 2262.528128 | 4 | 579.3564 | 227238000 | n.d. |
| SLPPHQKVPLPSLPTMQAGTIAR        | Q8BMF4 | 0          | n +34.06 Da,K +34.06 Da,             | 2265.679371 | 2 | 649.3677 | 470479008 | n.d. |
| EIAKAQVAQPGGDTIFGKIIR          | P70349 | 0          | n +28.03 Da,K +28.03 Da,             | 2268.029063 | 4 | 574.8322 | 449924992 | n.d. |
| SAEVEAASAEQKEMEDKVTSPKAEAEAKLK | P56212 | 0.01023891 | n +42.03 Da,n +28.03 Da,K +28.03 Da, | 2272.779947 | 5 | 734.9773 | 175626000 | n.d. |
| IIGGSMDAKGSFPWQAK              | Q61646 | 0          | n +34.06 Da,K +34.06 Da,             | 2281.067737 | 3 | 632.3662 | 129060000 | n.d. |
| LFEENEINLTHIESR                | P16331 | 0          | n +28.03 Da,                         | 2283.345837 | 3 | 624.6547 | 139686000 | n.d. |
| STQAAEDKEEESLHSISNTEAVR        | Q9CQN1 | 0          | n +28.03 Da,K +28.03 Da,             | 2284.726987 | 4 | 675.8377 | 5.393E+09 | n.d. |
| STQAAEDKEEESLHSISNTEAVR        | Q9CQN1 | 0          | n +28.03 Da,K +28.03 Da,             | 2285.788478 | 3 | 900.7809 | 638153024 | n.d. |
| AEDIKTKIKNYKTAPFDSR            | P56391 | 0          | n +42.03 Da,K +28.03 Da,             | 2290.165713 | 4 | 595.5783 | 4.636E+09 | n.d. |
| SPGHVDFSSEVTAALR               | P58252 | 0          | n +34.06 Da,                         | 2291.371265 | 3 | 569.6302 | 69257904  | n.d. |
| AWGVTKGAAELMQKEATTEQQLR        | O35490 | 0.01743462 | n +28.03 Da,K +28.03 Da,             | 2299.177244 | 4 | 690.3689 | 35097100  | n.d. |
| SNSDMYLHPVAMFR                 | P15105 | 0          | n +28.03 Da,                         | 2301.071743 | 3 | 565.9349 | 238400992 | n.d. |
| SLPPHQKVPLPSLPTMQAGTIAR        | Q8BMF4 | 0          | n +34.06 Da,K +34.06 Da,             | 2301.442387 | 4 | 649.3861 | 59604600  | n.d. |
| GLKLISEVIGER                   | P13707 | 0          | n +28.03 Da,K +28.03 Da,             | 2313.759193 | 3 | 457.2856 | 61007800  | n.d. |
| GEVGLLDKTTGGVLYADKALR          | Q9D826 | 0          | n +28.03 Da,K +28.03 Da,             | 2316.747627 | 4 | 540.566  | 180295008 | n.d. |
| SDQFLVSFKDVGR                  | Q91VR2 | 0          | n +28.03 Da,K +28.03 Da,             | 2316.777583 | 3 | 518.6156 | 129286000 | n.d. |
| AQTKLAELEAALQR                 | P11679 | 0          | n +34.06 Da,K +34.06 Da,             | 2317.858307 | 3 | 537.3353 | 116221000 | n.d. |
| ALDLPSTKTNVSGGAIALGHLGGSGSR    | Q8BWT1 | 0          | n +28.03 Da,K +28.03 Da,             | 2329.284741 | 4 | 676.6178 | 102380000 | n.d. |
| PSTKDFLLQQTMLR                 | Q9CPU0 | 0          | n +14.02 Da,K +28.03 Da,             | 2329.320734 | 3 | 573.9873 | 3.849E+09 | n.d. |
| VPPVQVSPLIKFR                  | Q06185 | 0          | n +28.03 Da,K +28.03 Da,             | 2333.334232 | 3 | 531.6677 | 127788000 | n.d. |
| SSPAQPAVPAPLADLKIHTK           | P24549 | 0          | n +42.03 Da,K +34.06 Da,             | 2335.560482 | 3 | 760.4511 | 227334000 | n.d. |
| PSTKDFLLQQTMLR                 | Q9CPU0 | 0          | n +14.02 Da,K +28.03 Da,             | 2338.837001 | 2 | 860.4769 | 2.364E+09 | n.d. |
| PQETAQVLDYDYGGAYGNQAHKDYTYSR   | Q99LB7 | 0          | n +14.02 Da,K +28.03 Da,             | 2339.599047 | 4 | 840.3884 | 56086500  | n.d. |
| IPKEQGVLSFWR                   | P51881 | 0          | n +28.03 Da,K +28.03 Da,             | 2343.001733 | 3 | 505.9606 | 45064300  | n.d. |
| SLFKAFEEEQALR                  | P49429 | 0          | n +28.03 Da,K +28.03 Da,             | 2345.994853 | 3 | 541.9629 | 506448992 | n.d. |
| SSKPKSLEIIGAPFSKGQPR           | Q61176 | 0          | n +42.03 Da,K +28.03 Da,             | 2350.71952  | 3 | 751.7643 | 223912992 | n.d. |
| SPLKLVSSVSDLPKR                | P54869 | 0          | n +28.03 Da,K +28.03 Da,             | 2354.619903 | 4 | 460.5292 | 1.654E+09 | n.d. |
| SSPAQPAVPAPLADLKIHTK           | P24549 | 0          | n +42.03 Da,K +28.03 Da,             | 2363.754865 | 3 | 756.4304 | 144996000 | n.d. |
| AAAKAVLGPLVGAVDQGTSSSTR        | Q64516 | 0          | n +42.03 Da,K +28.03 Da,             | 2367.601526 | 3 | 765.7748 | 4.419E+09 | n.d. |
| GAYKYIQELWR                    | Q9CZM2 | 0          | n +28.03 Da,K +28.03 Da,             | 2368.099012 | 2 | 741.9141 | 1.573E+09 | n.d. |
| SQRPDVLTGGGNPIGDKLNIMTAGSR     | P24270 | 0          | n +28.03 Da,K +28.03 Da,             | 2368.970423 | 4 | 703.6253 | 138278000 | n.d. |
| GAYKYIQELWR                    | Q9CZM2 | 0          | n +28.03 Da,K +28.03 Da,             | 2369.361363 | 3 | 494.945  | 2.297E+09 | n.d. |
| VTKGRKFYGPVGFVAGR              | O55022 | 0.00988397 | n +42.03 Da,K +28.03 Da,             | 2369.877227 | 4 | 571.8134 | 4328880   | n.d. |

|                              |        |            |                                      |             |   |          |           |      |
|------------------------------|--------|------------|--------------------------------------|-------------|---|----------|-----------|------|
| VLSGEDKSNIAAWGKIGGH          | P01942 | 0          | n +28.03 Da,K +28.03 Da,             | 2370.730358 | 4 | 545.5526 | 773532032 | n.d. |
| PSVSLQTVKLMKEGLEAAR          | O35490 | 0          | n +17.03 Da,K +34.06 Da,             | 2371.926378 | 4 | 536.3313 | 103004000 | n.d. |
| ASQRPDVLTTGGGNPIGDKLNIMTAGSR | P24270 | 0          | n +28.03 Da,K +28.03 Da,             | 2380.105137 | 4 | 721.3827 | 57702100  | n.d. |
| GPPVSELITKAVAASKER           | P15864 | 0          | n +34.06 Da,K +34.06 Da,             | 2381.889041 | 4 | 489.5649 | 39566500  | n.d. |
| EPSLDYMVTKIPR                | Q8C196 | 0          | n +28.03 Da,                         | 2385.441751 | 3 | 535.6285 | 148284992 | n.d. |
| PQTTLEQLQLKPSVFKK            | Q8BWT1 | 0          | n +14.02 Da,n +28.03 Da,K +28.03 Da, | 2387.865754 | 4 | 521.5688 | 55987400  | n.d. |
| MEVHELFR                     | P41216 | 0.00414365 | n +42.03 Da,                         | 2388.832557 | 2 | 551.7713 | 1.561E+09 | n.d. |
| MEVHELFR                     | P41216 | 0.00414365 | n +42.03 Da,                         | 2389.514052 | 1 | 551.771  | 906398016 | n.d. |
| PLVGNFGHLLVPR                | Q9CX98 | 0          | n +14.02 Da,                         | 2391.585402 | 3 | 478.2856 | 418871008 | n.d. |
| PIIQEFFHSEQYR                | Q78JT3 | 0          | n +14.02 Da,                         | 2391.786107 | 3 | 569.954  | 269076992 | n.d. |
| EPEGKEVWDYVTVR               | Q920A5 | 0          | n +34.06 Da,K +34.06 Da,             | 2391.926784 | 2 | 887.9858 | 183520000 | n.d. |
| ELFSDIYKIR                   | P63028 | 0          | n +28.03 Da,K +28.03 Da,             | 2392.817958 | 3 | 447.2722 | 468272000 | n.d. |
| PESLHQVSFLFSDR               | P24270 | 0          | n +14.02 Da,                         | 2394.094059 | 3 | 559.2857 | 1.246E+09 | n.d. |
| LCLFSFFCLFLR                 | Q8BJE4 | 0.04467754 | n +14.02 Da,                         | 2394.986143 | 3 | 546.2905 | 1.354E+09 | n.d. |
| IGIPHGGFPEPFR                | Q05920 | 0          | n +28.03 Da,                         | 2398.168599 | 3 | 484.598  | 139368000 | n.d. |
| PSVSLQTVKLMKEGLEAAR          | O35490 | 0          | n +14.02 Da,K +28.03 Da,             | 2398.581461 | 3 | 709.7448 | 8.343E+09 | n.d. |
| PSVSLQTVKLMKEGLEAAR          | O35490 | 0          | n +14.02 Da,K +28.03 Da,             | 2400.52204  | 4 | 532.5607 | 1.212E+10 | n.d. |
| EPEGKEVWDYVTVR               | Q920A5 | 0          | n +34.06 Da,K +34.06 Da,             | 2403.01716  | 3 | 592.3278 | 13195500  | n.d. |
| VLYPNDNFFEGKELR              | Q8CI94 | 0          | n +28.03 Da,K +28.03 Da,             | 2403.862846 | 3 | 632.9996 | 642209984 | n.d. |
| ALHVPKAPGFAQMLKDGAK          | P42932 | 0          | n +42.03 Da,K +28.03 Da,             | 2405.203371 | 4 | 527.0546 | 316451008 | n.d. |
| VTGWKEIEYEVVR                | Q8C196 | 0          | n +34.06 Da,K +34.06 Da,             | 2408.967265 | 3 | 559.3272 | 221296000 | n.d. |
| PGFEPTYKDTLLPKLPR            | P49429 | 0          | n +14.02 Da,K +28.03 Da,             | 2413.908418 | 4 | 529.0571 | 1.298E+09 | n.d. |
| TGAGFYVNATEDPWKANYR          | Q9R0P3 | 0          | n +28.03 Da,K +28.03 Da,             | 2419.764981 | 3 | 739.3646 | 64212200  | n.d. |
| MDFSKLPKIR                   | P50516 | 0          | n +42.03 Da,K +28.03 Da,             | 2420.743342 | 3 | 444.9284 | 7.844E+09 | n.d. |
| SAHLQWMVVR                   | P41105 | 0          | n +42.03 Da,                         | 2427.102209 | 2 | 634.8317 | 1.867E+09 | n.d. |
| FVEESVYDEFVKR                | P24549 | 0          | n +28.03 Da,K +28.03 Da,             | 2430.354383 | 3 | 568.2943 | 107968000 | n.d. |
| SFVNDIFER                    | P10853 | 0.00826446 | n +28.03 Da,                         | 2445.638513 | 2 | 577.7954 | 49563800  | n.d. |
| MFLGIQHPDSAVSFR              | Q60991 | 0          | n +42.03 Da,                         | 2448.424523 | 3 | 582.9682 | 2.586E+09 | n.d. |
| MFLSKPPRPSFR                 | Q7TPM9 | 0.02211302 | n +42.03 Da,K +28.03 Da,             | 2449.037068 | 3 | 511.6181 | 61463200  | n.d. |
| AEDIKTIKIKNYKTAPFDSR         | P56391 | 0          | n +42.03 Da,K +28.03 Da,             | 2453.257459 | 3 | 793.7683 | 417972000 | n.d. |
| AEDIKTIKIKNYKTAPFDSR         | P56391 | 0          | n +42.03 Da,K +28.03 Da,             | 2453.988388 | 2 | 595.5783 | 162140992 | n.d. |
| PNKIFGVTTLDIVR               | P08249 | 0          | n +14.02 Da,K +28.03 Da,             | 2454.553104 | 3 | 538.9918 | 1.237E+09 | n.d. |
| AGAFGYFEVTHDITR              | P24270 | 0          | n +28.03 Da,                         | 2455.969711 | 3 | 571.2865 | 18011100  | n.d. |
| PLLYDFPKLR                   | Q60766 | 0          | n +14.02 Da,K +28.03 Da,             | 2458.598173 | 3 | 435.2641 | 225896992 | n.d. |
| SVYGNETEIGEALKESVSGKAVPR     | Q9JII6 | 0          | n +34.06 Da,K +34.06 Da,             | 2458.79363  | 4 | 670.6317 | 56599300  | n.d. |
| PALDSLKPANEDQKIGIEIIR        | P63038 | 0.00743007 | n +14.02 Da,K +28.03 Da,             | 2467.347056 | 2 | 637.3692 | 68842400  | n.d. |
| TEAPDYLATVDVDPKSPQSQVIHR     | P17563 | 0          | n +28.03 Da,K +28.03 Da,             | 2472.272991 | 4 | 722.1234 | 116411000 | n.d. |
| MESHKPTSKDDLILNIISR          | Q9D8Y1 | 0          | n +42.03 Da,n +34.06 Da,K +34.06 Da, | 2473.229157 | 3 | 798.7867 | 47914900  | n.d. |
| AEDIKTIKIKNYKTAPFDSR         | P56391 | 0          | n +42.03 Da,K +28.03 Da,             | 2474.036184 | 4 | 595.5786 | 1.583E+09 | n.d. |
| GPAGAGESKCPLMVKVLDAVR        | P07309 | 0.02782258 | n +28.03 Da,K +28.03 Da,             | 2476.803577 | 2 | 560.5621 | 5931730   | n.d. |

|                             |        |            |                                      |             |   |          |           |      |
|-----------------------------|--------|------------|--------------------------------------|-------------|---|----------|-----------|------|
| MESHKPTSKDDLILNIISR         | Q9D8Y1 | 0.00048077 | n +42.03 Da,n +28.03 Da,K +28.03 Da, | 2481.33887  | 3 | 794.7621 | 50899400  | n.d. |
| SSDLRNKWHLVIDR              | Q8CD54 | 0.00093985 | n +34.06 Da,K +34.06 Da,             | 2482.706305 | 3 | 603.0292 | 95267696  | n.d. |
| PALDSLKPANEDQKIGIEIKR       | P63038 | 0.00743007 | n +14.02 Da,K +28.03 Da,             | 2483.800804 | 4 | 637.3684 | 155982000 | n.d. |
| SAGFLQASASDVVVVHGR          | Q8VCHO | 0          | n +28.03 Da,                         | 2484.168137 | 3 | 609.3235 | 346380992 | n.d. |
| SGPPVSELITKAVAASKER         | P15864 | 0          | n +28.03 Da,K +28.03 Da,             | 2486.196037 | 4 | 506.7994 | 62386500  | n.d. |
| DKLLVYYYDDVR                | P41216 | 0          | n +34.06 Da,K +34.06 Da,             | 2487.601605 | 2 | 815.4607 | 88701904  | n.d. |
| REPPDAVDVAELLR              | Q8R3F5 | 0.04405458 | n +34.06 Da,                         | 2487.850461 | 3 | 570.9921 | 22344400  | n.d. |
| SSVAVLTKESFAEHR             | Q8VDJ3 | 0          | n +42.03 Da,                         | 2490.736153 | 2 | 851.9234 | 787235968 | n.d. |
| LHTVYQSVLPETHQMLR           | Q07417 | 0          | n +28.03 Da,                         | 2491.697405 | 3 | 737.0409 | 151392992 | n.d. |
| DKLLVYYYDDVR                | P41216 | 0          | n +34.06 Da,K +34.06 Da,             | 2492.481858 | 3 | 543.9772 | 44134900  | n.d. |
| GQVVQFKLSDIGEGIR            | P53395 | 0          | n +28.03 Da,K +28.03 Da,             | 2497.783815 | 3 | 600.6565 | 227614000 | n.d. |
| GPAGAGESKCLPMVKVLDVAVR      | P07309 | 0.02782258 | n +28.03 Da,K +28.03 Da,             | 2516.359388 | 4 | 560.5633 | 187224000 | n.d. |
| TFVVQGFQNVGLHSMR            | P26443 | 0          | n +34.06 Da,                         | 2518.425538 | 3 | 594.989  | 144854000 | n.d. |
| SVTGWKEIEYEVVR              | Q8C196 | 0          | n +34.06 Da,K +34.06 Da,             | 2520.482601 | 3 | 588.3387 | 2.402E+09 | n.d. |
| GDPKEEEEEELVDPLTTVR         | P99028 | 0.00743007 | n +28.03 Da,K +28.03 Da,             | 2528.193441 | 3 | 747.7094 | 2.965E+09 | n.d. |
| AATMKAAAEDVNVTFEDQQKINKF    | E9Q6U4 | 0          | n +42.03 Da,K +28.03 Da,             | 2535.312509 | 4 | 738.6446 | 158776992 | n.d. |
| SVTGWKEIEYEVVR              | Q8C196 | 0          | n +28.03 Da,K +28.03 Da,             | 2535.365971 | 2 | 875.9732 | 110000000 | n.d. |
| TSGPPVSELITKAVAASKER        | P43274 | 0          | n +34.06 Da,K +34.06 Da,             | 2538.330723 | 3 | 536.5863 | 34081900  | n.d. |
| VLYPNDNFFEGKELR             | Q8CI94 | 0          | n +42.03 Da,K +34.06 Da,             | 2543.245046 | 3 | 639.6818 | 487937984 | n.d. |
| PTPEQWKQIAAVMQR             | P05201 | 0          | n +14.02 Da,K +28.03 Da,             | 2545.228385 | 3 | 608.9977 | 1.065E+09 | n.d. |
| ANHAPFETDISTLTR             | Q9QXD6 | 0          | n +42.03 Da,                         | 2549.39018  | 3 | 572.2844 | 2.96E+09  | n.d. |
| ANHAPFETDISTLTR             | Q9QXD6 | 0          | n +42.03 Da,                         | 2551.855652 | 2 | 857.9228 | 1.395E+10 | n.d. |
| AEPDYIEDDNPELIRPQKLINPVKSSR | Q3TGF2 | 0          | n +42.03 Da,K +34.06 Da,             | 2560.95767  | 4 | 812.447  | 10431900  | n.d. |
| SVTGWKEIEYEVVR              | Q8C196 | 0          | n +28.03 Da,K +28.03 Da,             | 2563.382041 | 3 | 584.317  | 827353024 | n.d. |
| TTIAGVVYKDGIVLGADTR         | P70195 | 0          | n +28.03 Da,K +28.03 Da,             | 2564.232722 | 3 | 669.0497 | 81651000  | n.d. |
| YTIVYFPVR                   | P19157 | 0.00278552 | n +28.03 Da,                         | 2565.029266 | 1 | 593.3456 | 7545140   | n.d. |
| PDPSTKDFLLQQTMLR            | Q9CPU0 | 0          | n +14.02 Da,K +28.03 Da,             | 2569.75023  | 3 | 644.6801 | 77322400  | n.d. |
| RPESLHQVSLFSDR              | P24270 | 0          | n +28.03 Da,                         | 2571.94665  | 3 | 615.98   | 16673500  | n.d. |
| AEPDYIEDDNPELIRPQKLINPVKSSR | Q3TGF2 | 0          | n +42.03 Da,K +28.03 Da,             | 2576.240878 | 4 | 809.4282 | 27383700  | n.d. |
| MKDVP AFLQQSQSSGPGQA AVWHR  | Q9WVJ2 | 0          | n +42.03 Da,K +28.03 Da,             | 2580.883293 | 3 | 899.1181 | 104700000 | n.d. |
| TTIAGVVYKDGIVLGADTR         | P70195 | 0          | n +34.06 Da,K +34.06 Da,             | 2581.263675 | 3 | 673.0695 | 250250000 | n.d. |
| TSGPPVSELITKAVAASKER        | P43274 | 0          | n +28.03 Da,K +28.03 Da,             | 2583.659908 | 4 | 532.0612 | 129092000 | n.d. |
| AKVEQVLSLEPQHELKFR          | Q9QY76 | 0          | n +42.03 Da,K +28.03 Da,             | 2587.042481 | 4 | 563.0718 | 31652700  | n.d. |
| PAFDQIVNEAAKYR              | Q6P3A8 | 0          | n +14.02 Da,K +28.03 Da,             | 2590.752596 | 3 | 555.2984 | 945897024 | n.d. |
| IELVNSAALIQATTVKNKDIR       | P51410 | 0          | n +28.03 Da,K +28.03 Da,             | 2591.17005  | 4 | 649.8804 | 45899200  | n.d. |
| PQAQEKQDLGAAYEVLSDSEKR      | Q99KV1 | 0.00743007 | n +17.03 Da,K +34.06 Da,             | 2598.647407 | 4 | 674.3647 | 166024000 | n.d. |
| EPIQSVYFFSGDKYYR            | P29788 | 0          | n +34.06 Da,K +34.06 Da,             | 2599.494133 | 3 | 689.6982 | 14332600  | n.d. |
| PEYMLPVHIFYGR               | Q8CI94 | 0          | n +14.02 Da,                         | 2609.264655 | 3 | 508.2555 | 7.28E+09  | n.d. |
| PLGLEAEKDGVPVFKFPR          | Q8R0Y6 | 0          | n +14.02 Da,K +28.03 Da,             | 2610.19155  | 4 | 518.0506 | 2.899E+09 | n.d. |
| PYVIAGLHFDQEVNR             | Q922E4 | 0          | n +14.02 Da,                         | 2615.760964 | 3 | 591.3256 | 71397400  | n.d. |

|                                |        |            |                                      |             |   |          |           |      |
|--------------------------------|--------|------------|--------------------------------------|-------------|---|----------|-----------|------|
| TQFPEAPLPVPCNPNDVSHGYVTVKPGIR  | P34914 | 0          | n +28.03 Da,K +28.03 Da,             | 2619.263648 | 4 | 812.1757 | 39609900  | n.d. |
| DKLYFEELSLER                   | Q8C196 | 0.03470283 | n +28.03 Da,K +28.03 Da,             | 2624.268246 | 3 | 533.2877 | 2.313E+09 | n.d. |
| WDQPAEAIHNWIR                  | Q8R0Y6 | 0          | n +34.06 Da,                         | 2625.335256 | 3 | 557.2949 | 76178600  | n.d. |
| DKLYFEELSLER                   | Q8C196 | 0          | n +28.03 Da,K +28.03 Da,             | 2625.647498 | 2 | 799.4277 | 716644992 | n.d. |
| MFEPKCLDAFPNLR                 | P10649 | 0          | n +28.03 Da,K +28.03 Da,             | 2636.332478 | 3 | 598.6402 | 26989300  | n.d. |
| SEIEVTPSVLR                    | Q99NH2 | 0.03470283 | n +34.06 Da,                         | 2641.16447  | 3 | 421.9128 | 98461800  | n.d. |
| GSPLEKLVSSVSDLPKR              | P54869 | 0          | n +28.03 Da,K +28.03 Da,             | 2643.156241 | 4 | 474.7847 | 25825800  | n.d. |
| PYVIAGLHFDQEVNR                | Q922E4 | 0          | n +14.02 Da,                         | 2643.643385 | 1 | 591.3046 | 102884000 | n.d. |
| PEYMLPVHIFYGR                  | Q8CI94 | 0          | n +28.03 Da,                         | 2647.150056 | 3 | 512.9271 | 133673000 | n.d. |
| SPGSPLEKLVSSVSDLPKR            | P54869 | 0          | n +28.03 Da,K +28.03 Da,             | 2647.347743 | 4 | 520.8059 | 83744896  | n.d. |
| PAVGAIVLTGGDKAFAAGADIKEMQNR    | Q8BH95 | 0          | n +14.02 Da,K +28.03 Da,             | 2649.360249 | 2 | 693.366  | 11081000  | n.d. |
| YTIVYFPVR                      | P19157 | 0.00278552 | n +28.03 Da,                         | 2649.728    | 3 | 593.3299 | 110524000 | n.d. |
| YTIVYFPVR                      | P19157 | 0          | n +34.06 Da,                         | 2649.96306  | 3 | 596.3556 | 42835100  | n.d. |
| PDYMKLILGR                     | Q91WL5 | 0          | n +14.02 Da,K +28.03 Da,             | 2653.72987  | 3 | 416.5776 | 25157200  | n.d. |
| ATAVVVNIIGKKLYEGKTK            | Q9DCL9 | 0          | n +42.03 Da,n +34.06 Da,K +34.06 Da, | 2656.67754  | 4 | 525.1047 | 19089400  | n.d. |
| PGSPLEKLVSSVSDLPKR             | P54869 | 0          | n +14.02 Da,K +28.03 Da,             | 2661.158222 | 4 | 495.5439 | 496579008 | n.d. |
| GPLGFYHGLSSTLLR                | Q9WVD5 | 0          | n +34.06 Da,                         | 2662.214988 | 3 | 551.3193 | 161706000 | n.d. |
| LMLPTQTISQGAIEKVKDATR          | Q8C196 | 0          | n +28.03 Da,K +28.03 Da,             | 2668.238053 | 4 | 596.8456 | 110547000 | n.d. |
| PAQYVDQTDLEKFNNEAGKYTVGLGQTR   | P54869 | 0          | n +14.02 Da,n +28.03 Da,K +28.03 Da, | 2676.429338 | 4 | 828.6781 | 464073984 | n.d. |
| FEKINEAFDLLR                   | P00329 | 0          | n +28.03 Da,K +28.03 Da,             | 2678.289876 | 3 | 517.6248 | 72351600  | n.d. |
| AEFGFDLSHIPR                   | Q9DBB8 | 0          | n +28.03 Da,                         | 2681.100752 | 3 | 472.9139 | 20481000  | n.d. |
| SGSKYKPAPLATLPSTLDPAEYDVSPETRR | Q9CQC7 | 0.00093985 | n +42.03 Da,K +28.03 Da,             | 2682.516552 | 4 | 836.9435 | 43925600  | n.d. |
| MSPSKESDELIFVNGKKVTER          | G3X982 | 0          | n +42.03 Da,K +28.03 Da,             | 2687.751231 | 4 | 667.6074 | 959948992 | n.d. |
| PAVGAIVLTGGDKAFAAGADIKEMQNR    | Q8BH95 | 0          | n +14.02 Da,K +28.03 Da,             | 2696.495419 | 4 | 693.3782 | 395724000 | n.d. |
| PLTKDNHLLGTFDLTGIPPAPR         | P20029 | 0          | n +14.02 Da,K +28.03 Da,             | 2698.851596 | 3 | 805.7848 | 19735300  | n.d. |
| SPGSPLEKLVSSVSDLPKR            | P54869 | 0          | n +28.03 Da,K +28.03 Da,             | 2703.298643 | 4 | 520.8063 | 218620992 | n.d. |
| SGYPKSYNPFDDVEEEDTRPAPWKDVR    | Q9ERB0 | 0          | n +42.03 Da,K +28.03 Da,             | 2708.913046 | 4 | 853.4005 | 74140096  | n.d. |
| TLYDVLHDIEYR                   | Q9JMD3 | 0.00582698 | n +34.06 Da,                         | 2735.01031  | 3 | 524.2805 | 48631800  | n.d. |
| PSIGEFIMVDR                    | Q9QXD6 | 0          | n +14.02 Da,                         | 2735.702583 | 2 | 639.332  | 62234400  | n.d. |
| TLMLPTQTISQGAIEKVKDATR         | Q8C196 | 0          | n +28.03 Da,K +28.03 Da,             | 2737.477619 | 4 | 622.1072 | 1.435E+09 | n.d. |
| LPGFAPTYKDTLLPKLPR             | P49429 | 0          | n +28.03 Da,K +28.03 Da,             | 2740.937441 | 4 | 560.8324 | 84210000  | n.d. |
| SSLEKSYELPDGQVITIGNER          | P60710 | 0          | n +28.03 Da,K +28.03 Da,             | 2742.355522 | 3 | 797.7492 | 76657400  | n.d. |
| TLNNFMGLGQAAWKEAR              | P35505 | 0          | n +34.06 Da,K +34.06 Da,             | 2744.122541 | 1 | 659.0284 | 6571030   | n.d. |
| ASPGSPLEKLVSSVSDLPKR           | P54869 | 0          | n +28.03 Da,K +28.03 Da,             | 2746.437558 | 4 | 538.5654 | 1.256E+09 | n.d. |
| SYGRPPPDVEGMTSLKVDNLTYR        | Q62093 | 0          | n +42.03 Da,K +28.03 Da,             | 2750.128849 | 3 | 889.1141 | 36678600  | n.d. |
| DHGDLAFVDVDPNDSSFQIVKNPR       | Q61176 | 0          | n +28.03 Da,                         | 2750.313008 | 3 | 876.1129 | 73317200  | n.d. |
| TLMLPTQTISQGAIEKVKDATR         | Q8C196 | 0          | n +34.06 Da,K +34.06 Da,             | 2752.14703  | 3 | 835.1721 | 64091400  | n.d. |
| TLMLPTQTISQGAIEKVKDATR         | Q8C196 | 0          | n +34.06 Da,K +34.06 Da,             | 2753.231217 | 4 | 626.6304 | 383836992 | n.d. |
| GLFIHDDKGILR                   | P35700 | 0          | n +28.03 Da,K +28.03 Da,             | 2761.953114 | 3 | 472.6258 | 124873000 | n.d. |
| ATLMLPTQTISQGAIEKVKDATR        | Q8C196 | 0          | n +34.06 Da,K +34.06 Da,             | 2762.066686 | 4 | 644.39   | 1.038E+10 | n.d. |

|                                   |        |            |                          |             |   |          |           |      |
|-----------------------------------|--------|------------|--------------------------|-------------|---|----------|-----------|------|
| PDAWGVTKGAAELMQQKEATTEQQLR        | Q35490 | 0          | n +14.02 Da,K +28.03 Da, | 2767.448223 | 4 | 739.8851 | 1.294E+09 | n.d. |
| ASASSTNLKDVLSNLIPEQAR             | Q9CZU6 | 0          | n +34.06 Da,K +34.06 Da, | 2768.371511 | 4 | 611.8716 | 48115800  | n.d. |
| PEFMLPVHIFYGR                     | Q9ET01 | 0          | n +14.02 Da,             | 2768.994582 | 3 | 502.9236 | 1.004E+10 | n.d. |
| SGFGKDLGEAALNEYLR                 | Q8R0Y6 | 0          | n +28.03 Da,K +28.03 Da, | 2771.594229 | 3 | 632.6661 | 212330000 | n.d. |
| RLEGLTDEINFLR                     | P11679 | 0          | n +28.03 Da,             | 2772.235878 | 3 | 535.2988 | 39007800  | n.d. |
| SASSTNLKDVLSNLIPEQAR              | Q9CZU6 | 0.04227006 | n +28.03 Da,K +28.03 Da, | 2789.123621 | 3 | 785.7788 | 104020000 | n.d. |
| SSTNLKDVLSNLIPEQAR                | Q9CZU6 | 0.03353293 | n +28.03 Da,K +28.03 Da, | 2789.368157 | 4 | 550.0696 | 162850000 | n.d. |
| SASSTNLKDVLSNLIPEQAR              | Q9CZU6 | 0          | n +28.03 Da,K +28.03 Da, | 2790.628438 | 4 | 589.5869 | 799161984 | n.d. |
| PEFMLPVHIFYGR                     | Q9ET01 | 0          | n +28.03 Da,             | 2797.246253 | 3 | 507.596  | 81926304  | n.d. |
| ASASSTNLKDVLSNLIPEQAR             | Q9CZU6 | 0          | n +28.03 Da,K +28.03 Da, | 2798.537311 | 4 | 607.3455 | 6.514E+09 | n.d. |
| SGDSAPLQEAMAVLQHHDVAVSGTAR        | O09159 | 0          | n +28.03 Da,             | 2801.583336 | 4 | 644.8185 | 29517100  | n.d. |
| SGFGKDLGEAALNEYLR                 | Q8R0Y6 | 0          | n +34.06 Da,K +34.06 Da, | 2805.582488 | 3 | 636.7025 | 16538200  | n.d. |
| DPSVSLQTVKLMKEGLEAAR              | O35490 | 0.00582698 | n +28.03 Da,K +28.03 Da, | 2816.661426 | 3 | 752.7589 | 76669504  | n.d. |
| ASASSTNLKDVLSNLIPEQAR             | Q9CZU6 | 0          | n +14.02 Da,K +28.03 Da, | 2821.528616 | 4 | 603.8437 | 9225170   | n.d. |
| ASASSTNLKDVLSNLIPEQAR             | Q9CZU6 | 0          | n +28.03 Da,K +28.03 Da, | 2823.759122 | 3 | 809.4585 | 101290000 | n.d. |
| GALSTVPVHEMGTTVIKEVLQR            | Q8CAY6 | 0          | n +34.06 Da,K +34.06 Da, | 2849.959443 | 4 | 609.1099 | 11663700  | n.d. |
| SGDATLMLPTQTISQGAIEKVKDATR        | Q8C196 | 0          | n +34.06 Da,K +34.06 Da, | 2866.241028 | 4 | 709.1601 | 620099008 | n.d. |
| MVGPiEEAVAKADKLAEEHGS             | P56480 | 0          | n +28.03 Da,K +28.03 Da, | 2866.296522 | 4 | 567.0502 | 30999000  | n.d. |
| AAEHPEPPKQELQPPPPPGHYGAWAAQELQAR  | Q3UJBO | 0          | n +42.03 Da,K +28.03 Da, | 2871.622908 | 4 | 927.4796 | 25221000  | n.d. |
| GDATLMLPTQTISQGAIEKVKDATR         | Q8C196 | 0          | n +28.03 Da,K +28.03 Da, | 2880.797286 | 4 | 682.8774 | 38338000  | n.d. |
| GDATLMLPTQTISQGAIEKVKDATR         | Q8C196 | 0          | n +34.06 Da,K +34.06 Da, | 2883.109203 | 4 | 687.4029 | 293155008 | n.d. |
| FNSLFKAFEEEEQALR                  | P49429 | 0          | n +28.03 Da,K +28.03 Da, | 2885.921326 | 3 | 629.0006 | 15084200  | n.d. |
| SGDATLMLPTQTISQGAIEKVKDATR        | Q8C196 | 0          | n +28.03 Da,K +28.03 Da, | 2887.329641 | 4 | 704.636  | 5.629E+09 | n.d. |
| FFKMVEGFFDR                       | P26443 | 0          | n +34.06 Da,K +34.06 Da, | 2888.551477 | 3 | 497.6093 | 89449904  | n.d. |
| TWDELLIGDVEMKR                    | Q922Q1 | 0          | n +28.03 Da,K +28.03 Da, | 2894.423699 | 3 | 587.6457 | 28800700  | n.d. |
| FFKMVEGFFDR                       | P26443 | 0          | n +28.03 Da,K +28.03 Da, | 2897.690732 | 3 | 493.5882 | 29107800  | n.d. |
| PQTIQESTGGIVEVLHKVDSEGISPNR       | P51660 | 0          | n +14.02 Da,K +28.03 Da, | 2907.679059 | 4 | 733.8891 | 281510016 | n.d. |
| DHGDLAFVDVDPNDSSFQIVKNPR          | Q61176 | 0          | n +28.03 Da,             | 2907.959072 | 3 | 876.1163 | 23643300  | n.d. |
| MHLPATIGDYTDFYSSR                 | P35505 | 0          | n +34.06 Da,             | 2915.549379 | 3 | 669.9949 | 108842000 | n.d. |
| AGVDQHEGTIQVQGNLFFR               | Q8VCR7 | 0          | n +42.03 Da,             | 2919.558453 | 2 | 1143.567 | 776940992 | n.d. |
| AGVDQHEGTIQVQGNLFFR               | Q8VCR7 | 0          | n +42.03 Da,             | 2935.518934 | 3 | 762.7138 | 1.142E+09 | n.d. |
| EPVLLLEPVLALAEKHGR                | Q9JII6 | 0          | n +34.06 Da,K +34.06 Da, | 2936.93275  | 4 | 542.5832 | 16581400  | n.d. |
| ARPTGGAGAVAMLIGPKAPLVLEQGLR       | P54869 | 0          | n +28.03 Da,K +28.03 Da, | 2941.620323 | 4 | 675.6484 | 258904000 | n.d. |
| SAKVSDAISTQYPVVDHEFDVAVVVGAGGAGLR | Q8K2B3 | 0          | n +28.03 Da,K +28.03 Da, | 2943.113579 | 4 | 818.6776 | 60980400  | n.d. |
| PEFTLPVHIFYGR                     | Q9WUB3 | 0.01023891 | n +42.03 Da,             | 2946.874318 | 3 | 502.2517 | 4.081E+09 | n.d. |
| PFEKINEAFDLLR                     | P00329 | 0          | n +14.02 Da,K +28.03 Da, | 2952.989855 | 3 | 545.3027 | 140554000 | n.d. |
| GVHSGDATLMLPTQTISQGAIEKVKDATR     | Q8C196 | 0          | n +28.03 Da,K +28.03 Da, | 2965.280083 | 4 | 777.9146 | 66467800  | n.d. |
| LVGNTTGEVYKELMSR                  | Q8CDL9 | 0.04923077 | n +34.06 Da,K +34.06 Da, | 2968.938132 | 3 | 622.3446 | 16023900  | n.d. |
| DPQAQEKFQDLGAAAYEVLSDEKR          | Q99KV1 | 0          | n +34.06 Da,K +34.06 Da, | 2971.489587 | 4 | 707.3781 | 19976200  | n.d. |
| TSACFEPSLDYMVTKIPR                | Q8C196 | 0          | n +28.03 Da,K +28.03 Da, | 2983.931085 | 3 | 724.3729 | 48974500  | n.d. |

|                                    |        |            |                                      |             |   |          |           |      |
|------------------------------------|--------|------------|--------------------------------------|-------------|---|----------|-----------|------|
| SGDATLMLPTQTISQGAIEKVKDATR         | Q8C196 | 0          | n +34.06 Da,K +34.06 Da,             | 2988.728239 | 4 | 709.1562 | 31964500  | n.d. |
| ANVADTKLYDILGVPPGASENELKKAYR       | Q9QYJ0 | 0          | n +42.03 Da,K +34.06 Da,             | 2989.359258 | 4 | 794.9579 | 104174000 | n.d. |
| TFPTFKFDDPKFEVDKPKQS               | P97450 | 0.00743007 | n +28.03 Da,K +28.03 Da,             | 2991.962976 | 4 | 625.3385 | 113039000 | n.d. |
| EGETDVKVIAINVDDPDAANYKDSDVER       | Q9D819 | 0          | n +34.06 Da,K +34.06 Da,             | 3002.150654 | 4 | 845.6897 | 8416460   | n.d. |
| GPYSGSDSAPLQEQAMAVLQHHDAVSGTAR     | O09159 | 0          | n +34.06 Da,                         | 3007.887034 | 4 | 739.8657 | 45609600  | n.d. |
| PAGDWSSTFFPAWLKSR                  | Q8R1G2 | 0          | n +14.02 Da,K +28.03 Da,             | 3017.041438 | 3 | 587.6422 | 1.541E+09 | n.d. |
| TASSVLLHTGQKMPLIGLGTWKSEPGQVK      | Q9JII6 | 0          | n +42.03 Da,K +28.03 Da,             | 3023.720526 | 4 | 798.1971 | 31898200  | n.d. |
| TTQSGFEGFLKDQFTLLPEVKDR            | P25688 | 0          | n +28.03 Da,K +28.03 Da,             | 3026.376433 | 4 | 682.8595 | 331307008 | n.d. |
| DILNMDKTLKGLNSDSVTEETLR            | Q8C196 | 0.02782258 | n +42.03 Da,n +28.03 Da,K +28.03 Da, | 3026.462445 | 4 | 673.3635 | 129955000 | n.d. |
| PGVVDNFPLLKALR                     | P30115 | 0          | n +14.02 Da,K +28.03 Da,             | 3027.955816 | 3 | 527.6558 | 1.89E+09  | n.d. |
| DGGDLTNLIHTKYPQLLSGIR              | P50247 | 0          | n +17.03 Da,K +34.06 Da,             | 3029.300849 | 3 | 788.122  | 57162300  | n.d. |
| PVEEAIKFAQTIVIGKPIEPR              | Q9DBM2 | 0          | n +14.02 Da,K +28.03 Da,             | 3029.610231 | 4 | 573.8389 | 2.378E+09 | n.d. |
| PVEEAIKFAQTIVIGKPIEPR              | Q9DBM2 | 0          | n +14.02 Da,K +28.03 Da,             | 3033.607331 | 3 | 764.7829 | 639577024 | n.d. |
| TASSVLLHTGQKMPLIGLGTWKSEPGQVKAA    | Q9JII6 | 0          | n +42.03 Da,K +34.06 Da,             | 3038.959536 | 4 | 838.2407 | 128055000 | n.d. |
| DATLMLPTQTISQGAIEKVKDATR           | Q8C196 | 0          | n +34.06 Da,K +34.06 Da,             | 3044.648068 | 4 | 673.1468 | 75806896  | n.d. |
| SEHPGGEVLELQAGADATESFEDVGHSPDAR    | Q9CQX2 | 0          | n +28.03 Da,                         | 3047.787286 | 4 | 841.8859 | 7906400   | n.d. |
| TGKPNPDQLLKELPPLNTR                | Q78JT3 | 0          | n +34.06 Da,K +34.06 Da,             | 3048.762884 | 4 | 595.8685 | 194794000 | n.d. |
| ASASYHISNLEKMTSSDKDFR              | Q6ZQ38 | 0          | n +42.03 Da,K +28.03 Da,             | 3050.596475 | 4 | 650.3281 | 2.064E+09 | n.d. |
| ANVADTKLYDILGVPPGASENELKKAYR       | Q9QYJ0 | 0          | n +42.03 Da,K +28.03 Da,             | 3051.44154  | 3 | 1053.576 | 1.595E+09 | n.d. |
| TGKPNPDQLLKELPPLNTR                | Q78JT3 | 0          | n +42.03 Da,K +34.06 Da,             | 3052.004638 | 4 | 597.8628 | 346467008 | n.d. |
| DAGVHSGDATLMLPTQTISQGAIEKVKDATR    | Q8C196 | 0          | n +28.03 Da,K +28.03 Da,             | 3055.204221 | 4 | 824.4399 | 20617500  | n.d. |
| ADEIAKAQVAQPGGDTIFGKIIR            | P70349 | 0          | n +42.03 Da,n +28.03 Da,K +28.03 Da, | 3056.316826 | 3 | 832.7988 | 7.122E+09 | n.d. |
| ASAKVSDAISTQYPVVDHEFDVAVVVGAGGAGLR | Q8K2B3 | 0          | n +34.06 Da,K +34.06 Da,             | 3062.841409 | 4 | 839.4552 | 35047200  | n.d. |
| AIKFLEVIKPF                        | P61620 | 0          | n +28.03 Da,K +28.03 Da,             | 3062.978722 | 3 | 463.6355 | 775187968 | n.d. |
| PALAQPLIQNVKKILES DR               | Q8C196 | 0          | n +14.02 Da,K +28.03 Da,             | 3065.33741  | 4 | 551.5852 | 4.996E+09 | n.d. |
| DAGVHSGDATLMLPTQTISQGAIEKVKDATR    | Q8C196 | 0          | n +28.03 Da,K +28.03 Da,             | 3065.513542 | 2 | 824.4256 | 17508100  | n.d. |
| SAKVSDAISTQYPVVDHEFDVAVVVGAGGAGLR  | Q8K2B3 | 0          | n +34.06 Da,K +34.06 Da,             | 3076.623184 | 4 | 821.6959 | 436500992 | n.d. |
| HSGDATLMLPTQTISQGAIEKVKDATR        | Q8C196 | 0          | n +42.03 Da,K +28.03 Da,             | 3086.338072 | 3 | 989.5318 | 63913200  | n.d. |
| AAATSAVPAPNHQPEVFCNQIFINNEWHDAVSR  | P47738 | 0          | n +34.06 Da,                         | 3087.296127 | 4 | 931.9758 | 20056100  | n.d. |
| ANVADTKLYDILGVPPGASENELKKAYR       | Q9QYJ0 | 0          | n +42.03 Da,K +28.03 Da,             | 3087.637623 | 4 | 790.4336 | 8.78E+09  | n.d. |
| LATKSLGQWLQEEKVPAIYGV DTR          | Q8C196 | 0          | n +28.03 Da,K +28.03 Da,             | 3090.046415 | 4 | 697.3887 | 68760704  | n.d. |
| VIQCSFRRNITLPEAKNR                 | Q8K385 | 0.03123748 | n +42.03 Da,K +34.06 Da,             | 3091.488465 | 3 | 760.1039 | 11119800  | n.d. |
| SIGVPIKVLHEAEGHIVTCETNTGEVYR       | P62320 | 0          | n +42.03 Da,K +34.06 Da,             | 3094.122367 | 4 | 796.9189 | 49166200  | n.d. |
| FDDAVVQSDMKHWPF                    | P63017 | 0.00988397 | n +42.03 Da,K +34.06 Da,             | 3097.873632 | 3 | 633.3171 | 25959800  | n.d. |
| SAKVSDAISTQYPVVDHEFDVAVVVGAGGAGLR  | Q8K2B3 | 0          | n +28.03 Da,K +28.03 Da,             | 3099.630943 | 3 | 1091.237 | 10536200  | n.d. |
| GKGGFVDLPEYFPLEPR                  | Q91WS4 | 0          | n +28.03 Da,K +28.03 Da,             | 3100.111578 | 3 | 678.6948 | 104855000 | n.d. |
| PDEPVLLLEPVVLAELAEKHGR             | Q9JII6 | 0          | n +14.02 Da,K +28.03 Da,             | 3102.819133 | 4 | 589.0837 | 58694000  | n.d. |
| LTLYDIAHTPGVAADLSHIETR             | P08249 | 0          | n +42.03 Da,                         | 3107.257009 | 4 | 609.5786 | 301928000 | n.d. |
| TWKVEGLPINDFSR                     | P14152 | 0          | n +28.03 Da,K +28.03 Da,             | 3111.701843 | 3 | 622.3375 | 63831200  | n.d. |
| DIELVSNAAALIQATTVKNKDIR            | P51410 | 0          | n +34.06 Da,K +34.06 Da,             | 3114.422501 | 4 | 683.1618 | 282144992 | n.d. |



|                                     |        |            |                          |             |   |          |           |      |
|-------------------------------------|--------|------------|--------------------------|-------------|---|----------|-----------|------|
| DASPGSPLEKLVSSVSDLPKR               | P54869 | 0          | n +28.03 Da,             | 3117.87701  | 4 | 567.3222 | 58620500  | n.d. |
| LTDYLMKILTER                        | P60710 | 0          | n +34.06 Da,K +34.06 Da, | 3119.718663 | 3 | 521.9868 | 114512000 | n.d. |
| SSPAQPAVPAPLADLKIQHTKIFINNEWHN      | P24549 | 0          | n +42.03 Da,K +34.06 Da, | 3121.82582  | 4 | 862.4773 | 885265984 | n.d. |
| LKTLPLVPTFENVISIPER                 | Q99N93 | 0          | n +28.03 Da,K +28.03 Da, | 3127.684448 | 3 | 703.7487 | 72967504  | n.d. |
| FLPGFEAPTYKDTLLPKLPR                | P49429 | 0          | n +42.03 Da,K +34.06 Da, | 3128.724219 | 4 | 604.1201 | 72135504  | n.d. |
| FDDAVVQSDMKHWP                      | P63017 | 0.01708333 | n +42.03 Da,K +28.03 Da, | 3141.228348 | 3 | 631.3074 | 5974470   | n.d. |
| LTYDIAHTPGVAADLSHIETR               | P08249 | 0          | n +42.03 Da,             | 3141.969745 | 4 | 609.5929 | 6897020   | n.d. |
| AKDILGEAGLHFDLNLKLR                 | Q61025 | 0          | n +42.03 Da,K +28.03 Da, | 3148.512236 | 4 | 560.0623 | 58941300  | n.d. |
| DLPQFTSAGESFNKLVSGKLR               | Q9CPY7 | 0          | n +28.03 Da,K +28.03 Da, | 3152.469797 | 4 | 595.3325 | 999249984 | n.d. |
| DDLQFTSAGESFNKLVSGKLR               | Q9CPY7 | 0          | n +28.03 Da,K +28.03 Da, | 3156.052286 | 4 | 624.0898 | 162672992 | n.d. |
| ASGVAVSDGVIKVFNDMKVR                | P18760 | 0          | n +42.03 Da,K +34.06 Da, | 3157.741512 | 3 | 734.7582 | 259147008 | n.d. |
| SSPAQPAVPAPLADLKIQHTKIFINNEWHN      | P24549 | 0          | n +42.03 Da,K +28.03 Da, | 3159.979048 | 4 | 859.4631 | 132771000 | n.d. |
| VSMVMTVDTSHEDMIIHDAQMDYYGTR         | Q9D1M0 | 0          | n +42.03 Da,             | 3177.615478 | 3 | 1019.774 | 648460032 | n.d. |
| SLHQFLLPITCHAWNRR                   | Q9R0Q6 | 0          | n +42.03 Da,             | 3179.030411 | 3 | 722.0316 | 185988992 | n.d. |
| AKVEQVLSLEPQHELKFR                  | Q9QY76 | 0          | n +42.03 Da,K +28.03 Da, | 3189.564801 | 3 | 750.4168 | 10227000  | n.d. |
| LTYDIAHTPGVAADLSHIETR               | P08249 | 0          | n +28.03 Da,             | 3197.696308 | 4 | 606.074  | 279767008 | n.d. |
| DGGDLTNLIHTKYPQLLSGIR               | P50247 | 0          | n +28.03 Da,K +28.03 Da, | 3199.173391 | 4 | 592.5818 | 1.813E+09 | n.d. |
| ANVADTKLYDILGPPGASENELKKAYR         | Q9QYJ0 | 0          | n +42.03 Da,K +34.06 Da, | 3200.220252 | 4 | 794.9535 | 62968300  | n.d. |
| SVVVAQAQTLNAEFQMLR                  | Q8C196 | 0          | n +28.03 Da,             | 3202.023559 | 2 | 1045.072 | 660958976 | n.d. |
| MELVEVLKR                           | Q7TMF3 | 0          | n +42.03 Da,K +28.03 Da, | 3204.766049 | 2 | 593.8478 | 696529024 | n.d. |
| GSWKTGQSYLAAGLLKNQVAVVTGGGTGIGKAVSR | Q99MZ7 | 0          | n +42.03 Da,K +28.03 Da, | 3207.318717 | 4 | 890.2521 | 2.297E+09 | n.d. |
| INVLPPLGSGAIAGNPLGVDR               | Q91YI0 | 0          | n +42.03 Da,             | 3212.783716 | 3 | 659.0495 | 112516000 | n.d. |
| INVLPPLGSGAIAGNPLGVDR               | Q91YI0 | 0          | n +42.03 Da,             | 3215.220442 | 2 | 988.0715 | 88997296  | n.d. |
| MLSQPLKDSDAEVYSIIKKESNR             | P50431 | 0          | n +42.03 Da,K +28.03 Da, | 3223.18971  | 4 | 695.1219 | 60611200  | n.d. |
| INVLPPLGSGAIAGNPLGVDR               | Q91YI0 | 0          | n +28.03 Da,             | 3231.08172  | 3 | 654.3774 | 29175200  | n.d. |
| PGNPALAQPLIQNVKKILESDR              | Q8C196 | 0          | n +14.02 Da,K +28.03 Da, | 3233.067039 | 4 | 618.614  | 152876000 | n.d. |
| MDNSGKQAEAMALLAEAER                 | Q9DB05 | 0          | n +42.03 Da,K +34.06 Da, | 3233.306199 | 3 | 704.3479 | 12482300  | n.d. |
| ADIDKLNIDSIQR                       | P63087 | 0          | n +42.03 Da,K +34.06 Da, | 3235.72904  | 3 | 563.9915 | 168296000 | n.d. |
| MERPQPDSMPQDLSEALKEATKEVH           | P14901 | 0          | n +42.03 Da,K +28.03 Da, | 3253.082937 | 4 | 741.8652 | 95195400  | n.d. |
| PPFALDGSNDKGLDEAKAILLR              | Q8VE09 | 0          | n +14.02 Da,K +28.03 Da, | 3263.384193 | 4 | 630.0978 | 99246000  | n.d. |
| GGPGNPALAQPLIQNVKKILESDR            | Q8C196 | 0          | n +34.06 Da,K +34.06 Da, | 3292.321503 | 4 | 655.1533 | 79968496  | n.d. |
| SGDLEAWEKGVLFASGQNLAR               | Q9CPY7 | 0          | n +34.06 Da,K +34.06 Da, | 3305.045547 | 3 | 772.7619 | 8340870   | n.d. |
| MFSWLGNDRR                          | Q9QXY6 | 0          | n +42.03 Da,             | 3311.541191 | 2 | 719.83   | 174172000 | n.d. |
| SKPEDVDGVLEEFGR                     | Q9DBM2 | 0          | n +34.06 Da,K +34.06 Da, | 3317.20399  | 2 | 631.3584 | 231879008 | n.d. |
| SILYVSPHPDAFPSLR                    | Q9Z1Q9 | 0          | n +42.03 Da,             | 3317.88364  | 2 | 920.9831 | 517951008 | n.d. |
| PYNPMSRPAWGVTKGAAELMQQKEATTEQQLR    | O35490 | 0.00093985 | n +28.03 Da,K +28.03 Da, | 3334.199342 | 4 | 976.4745 | 38233800  | n.d. |
| PYNPMSRPAWGVTKGAAELMQQKEATTEQQLR    | O35490 | 0          | n +14.02 Da,K +28.03 Da, | 3347.355866 | 4 | 972.9798 | 24796400  | n.d. |
| FLSEHPGGEEVLLQAGADATESFEDVGHSPDAR   | Q9CQX2 | 0          | n +28.03 Da,             | 3360.240626 | 4 | 906.9239 | 232180992 | n.d. |
| ASGNAQIGKSAPDFTATAVVDGAFKEIKLSDYR   | Q61171 | 0          | n +42.03 Da,K +28.03 Da, | 3363.221011 | 4 | 889.2138 | 14424800  | n.d. |
| SKPEDVDGVLEEFGR                     | Q9DBM2 | 0          | n +34.06 Da,K +34.06 Da, | 3363.709489 | 3 | 631.3428 | 50544600  | n.d. |

|                                      |        |            |                          |             |   |          |           |      |
|--------------------------------------|--------|------------|--------------------------|-------------|---|----------|-----------|------|
| EVGVDVAQHV AEDLGKAFGER               | Q8BMS1 | 0.00501825 | n +28.03 Da,K +28.03 Da, | 3397.633538 | 3 | 761.3983 | 12071700  | n.d. |
| FLSEHPGGEEVLLQAGADATESFEDVGHSPDAR    | Q9CQX2 | 0          | n +42.03 Da,             | 3404.666118 | 4 | 910.4209 | 15406800  | n.d. |
| MNLSAAHHQISLSDGNINPLIGLGTYS DPR      | Q8VCX1 | 0.04227006 | n +42.03 Da,             | 3405.005002 | 3 | 1078.542 | 24948700  | n.d. |
| PRRPQVSGSGAE EPR                     | Q3ULZ2 | 0.01023891 | n +17.03 Da,             | 3428.688207 | 2 | 820.4458 | 22726600  | n.d. |
| FASDVL DYWAQMEEEGKR                  | Q91VA0 | 0          | n +34.06 Da,K +34.06 Da, | 3432.66391  | 3 | 748.0411 | 59944900  | n.d. |
| FASDVL DYWAQMEEEGKR                  | Q91VA0 | 0          | n +28.03 Da,K +28.03 Da, | 3438.172371 | 3 | 744.0205 | 220846000 | n.d. |
| ASGVAVSDGVIKVFNDMKVR                 | P18760 | 0          | n +42.03 Da,K +28.03 Da, | 3452.01511  | 3 | 730.7381 | 6.978E+09 | n.d. |
| GPFTPD LAHPVADVGTVAEKEGWPLDIR        | Q99KIO | 0          | n +28.03 Da,             | 3452.713749 | 4 | 761.6534 | 12844800  | n.d. |
| LGKKT VV VNCNPETVSTDFDECDKLYFEELSLER | Q8C196 | 0          | n +17.03 Da,K +34.06 Da, | 3457.27862  | 4 | 1039.28  | 1.063E+09 | n.d. |
| LGKKT VV VNCNPETVSTDFDECDKLYFEELSLER | Q8C196 | 0.0118997  | n +28.03 Da,K +28.03 Da, | 3460.663761 | 4 | 1037.535 | 32104500  | n.d. |
| ASGVAVSDGVIKVFNDMKVR                 | P18760 | 0          | n +42.03 Da,K +34.06 Da, | 3465.163868 | 3 | 734.7581 | 460625984 | n.d. |
| GPFTPD LAHPVADVGTVAEKEGWPLDIR        | Q99KIO | 0          | n +34.06 Da,             | 3485.427813 | 4 | 764.6688 | 72825696  | n.d. |
| PAETLYDVLHDIEYR                      | Q9JMD3 | 0          | n +14.02 Da,             | 3489.732892 | 3 | 616.6438 | 272296992 | n.d. |
| DPAIYFKEQFLDGD AWTNR                 | P14211 | 0          | n +28.03 Da,K +28.03 Da, | 3492.445912 | 3 | 781.3859 | 232936000 | n.d. |
| DPAIYFKEQFLDGD AWTNR                 | P14211 | 0          | n +34.06 Da,K +34.06 Da, | 3493.885956 | 3 | 785.4077 | 108974000 | n.d. |
| LSPTNCDASEPLAEKVL DLINKGR            | Q9ESB3 | 0          | n +28.03 Da,K +28.03 Da, | 3504.971643 | 4 | 681.8711 | 1.199E+09 | n.d. |
| LDWDVFTQHIEGAINR                     | Q99LB7 | 0          | n +34.06 Da,             | 3529.449428 | 3 | 650.0093 | 6043730   | n.d. |
| IAWNFEKFLVGP DGPVVR                  | P11352 | 0          | n +34.06 Da,K +34.06 Da, | 3549.012756 | 3 | 704.7482 | 17591200  | n.d. |
| ASGNAQIGKSAPDFTATAVVDGAFKEIKLS DYR   | Q61171 | 0          | n +42.03 Da,K +28.03 Da, | 3574.990221 | 4 | 889.2201 | 2.878E+09 | n.d. |
| LSPTNCDASEPLAEKVL DLINKGR            | Q9ESB3 | 0          | n +28.03 Da,K +28.03 Da, | 3575.330731 | 4 | 681.8758 | 41099800  | n.d. |
| ATQVEPLL PAGA PLLQAEHGLAR            | Q6ZQ58 | 0          | n +42.03 Da,             | 3590.147672 | 3 | 841.7905 | 273372000 | n.d. |
| ASQQDFENALNQKLL                      | Q9WUR2 | 0.00743007 | n +28.03 Da,K +28.03 Da, | 3591.101006 | 3 | 625.3393 | 18169100  | n.d. |
| DPAIYFKEQFLDGD AWTNR                 | P14211 | 0          | n +28.03 Da,K +28.03 Da, | 3610.517762 | 3 | 781.387  | 219940992 | n.d. |
| MLSLDFLDDVR                          | Q9R0P6 | 0          | n +28.03 Da,             | 3616.372766 | 2 | 676.3498 | 22834800  | n.d. |
| STLLIHPQYAWLQDLGLR                   | Q9DBF1 | 0          | n +42.03 Da,             | 3624.661554 | 2 | 768.4166 | 7480280   | n.d. |
| KQGFIDLPEFPFGL EPR                   | O35490 | 0          | n +34.06 Da,K +34.06 Da, | 3636.958811 | 3 | 686.731  | 21510900  | n.d. |
| DPAIYFKEQFLDGD AWTNR                 | P14211 | 0          | n +28.03 Da,K +28.03 Da, | 3648.097754 | 3 | 781.3863 | 1.359E+09 | n.d. |
| GKQGFIDLPEFPFGL EPR                  | O35490 | 0          | n +28.03 Da,K +28.03 Da, | 3650.103604 | 3 | 700.7284 | 36218600  | n.d. |
| MNVLADALKSINNAEKR                    | P62245 | 0          | n +42.03 Da,K +34.06 Da, | 3659.275224 | 3 | 666.3914 | 27705000  | n.d. |
| AADISQWAGPLCLQEVD EPPQHALR           | P70296 | 0          | n +42.03 Da,             | 3671.163383 | 3 | 948.4637 | 809454976 | n.d. |
| MKTADHFWDPSADELVQR                   | Q8BPQ7 | 0.00866176 | n +34.06 Da,K +34.06 Da, | 3672.125831 | 3 | 772.3815 | 5192910   | n.d. |
| APPVPGA VSGSGEVD ELDVKN AF           | O89079 | 0          | n +34.06 Da,K +34.06 Da, | 3676.153018 | 3 | 843.1174 | 4361850   | n.d. |
| VHLTDAEKA AVSCLWGK VNSDEVGGEALGR     | P02088 | 0          | n +28.03 Da,K +28.03 Da, | 3680.478301 | 4 | 813.9134 | 203355008 | n.d. |
| KQGFIDLPEFPFGL EPR                   | O35490 | 0          | n +28.03 Da,K +28.03 Da, | 3684.767942 | 3 | 682.7078 | 31629300  | n.d. |
| LHFFMPGFAPLTSR                       | P68372 | 0          | n +42.03 Da,             | 3686.703646 | 3 | 554.9538 | 94711104  | n.d. |
| VHLTDAEKSA V SCLWAKVNPDEVGGEALGR     | P02089 | 0          | n +28.03 Da,K +28.03 Da, | 3690.009571 | 4 | 823.9232 | 8635610   | n.d. |
| STLLIHPQYAWLQDLGLR                   | Q9DBF1 | 0          | n +42.03 Da,             | 3730.042292 | 3 | 768.4153 | 4.174E+09 | n.d. |
| MESMVAPGEV LMSQAIQPAHADSR            | Q9DBK0 | 0          | n +42.03 Da,             | 3743.829645 | 3 | 866.4093 | 366816992 | n.d. |
| ADSVKTF LQDLGR                       | Q61070 | 0          | n +42.03 Da,K +28.03 Da, | 3760.917505 | 2 | 760.4113 | 5858190   | n.d. |
| MDASLEKIADPTLAEMGKNLKEAMR            | Q99K01 | 0          | n +42.03 Da,K +34.06 Da, | 3792.738335 | 4 | 727.4026 | 46824700  | n.d. |

|                             |        |            |                                      |             |   |          |           |      |
|-----------------------------|--------|------------|--------------------------------------|-------------|---|----------|-----------|------|
| PTSTNPIASIFAWTR             | P54071 | 0.01672241 | n +14.02 Da,                         | 3829.954712 | 2 | 838.4352 | 9784480   | n.d. |
| PGFFFQPTVFVDVEDH            | Q8R0Y6 | 0          | n +14.02 Da,                         | 3833.530231 | 2 | 948.9433 | 70759104  | n.d. |
| SLELFMYLNEVAGKHGVR          | P16460 | 0.00582698 | n +42.03 Da,K +28.03 Da,             | 3973.072621 | 3 | 730.7084 | 35580400  | n.d. |
| MDPSWATQSEAVAQKVL           | Q9EPQ7 | 0          | n +42.03 Da,K +34.06 Da,             | 4003.834062 | 3 | 741.7114 | 7366510   | n.d. |
| SALKAVFQYIDENQDR            | Q9D1A2 | 0          | n +42.03 Da,K +28.03 Da,             | 4004.373825 | 3 | 656.335  | 8328010   | n.d. |
| RFTLPQGLLAGDPRVER           | Q6PAJ3 | 0.02444988 | n +34.06 Da,                         | 4017.672919 | 3 | 653.7059 | 49972500  | n.d. |
| DPENAVFYVGGYPPGFELPR        | Q61789 | 0.00988397 | n +42.03 Da,                         | 4022.052207 | 4 | 567.2768 | 12177800  | n.d. |
| PAAADTHEAGDQNEAEKSHLR       | P70441 | 0          | n +14.02 Da,K +28.03 Da,             | 479.5419406 | 5 | 458.6229 | 36652000  | n.d. |
| GENVEKETHQQVVS              | P70441 | 0.02478952 | n +28.03 Da,K +28.03 Da,             | 502.2311901 | 4 | 449.7378 | 32741200  | n.d. |
| GKTIEAEEAAHGTVTR            | P54071 | 0          | n +28.03 Da,K +28.03 Da,             | 532.7128861 | 4 | 399.9653 | 142490000 | n.d. |
| THGPVDPKDNIR                | O70310 | 0          | n +34.06 Da,K +34.06 Da,             | 535.4318825 | 4 | 387.2225 | 15024200  | n.d. |
| DITDGNSEHLKR                | Q9DBH5 | 0.00111732 | n +34.06 Da,K +34.06 Da,             | 544.21573   | 4 | 363.957  | 27434600  | n.d. |
| GEGKCCLDEEKNEPER            | G3X982 | 0.00422833 | n +28.03 Da,K +28.03 Da,             | 544.3365747 | 4 | 509.2372 | 197276992 | n.d. |
| PKSEITPPPPQPKDR             | P53395 | 0.00662589 | n +14.02 Da,K +28.03 Da,             | 550.633905  | 4 | 440.0044 | 66898600  | n.d. |
| YLNEVAGKHGVR                | P16460 | 0          | n +34.06 Da,K +34.06 Da,             | 553.4765611 | 4 | 367.723  | 536190016 | n.d. |
| LPPTRPDKPLR                 | P10126 | 0.00996512 | n +28.03 Da,K +28.03 Da,             | 557.6273117 | 4 | 362.4753 | 217108992 | n.d. |
| SETAPAAPAAPAPAEKTPVKKKAR    | P43274 | 0          | n +42.03 Da,n +34.06 Da,K +34.06 Da, | 559.672529  | 4 | 642.1563 | 200031008 | n.d. |
| SETAPAAPAAPAPAEKTPVKKKAR    | P43274 | 0          | n +42.03 Da,n +28.03 Da,K +28.03 Da, | 566.0397498 | 4 | 636.1242 | 398720000 | n.d. |
| FTNEVLTKTYR                 | P28656 | 0.03089505 | n +28.03 Da,K +28.03 Da,             | 569.2537406 | 4 | 357.7078 | 25920400  | n.d. |
| SETAPAETAAPAPVEKSPAKKTKKAGA | P43276 | 0          | n +42.03 Da,n +28.03 Da,K +28.03 Da, | 572.3168776 | 5 | 615.959  | 229236992 | n.d. |
| VDREQLVQKAR                 | P61982 | 0          | n +28.03 Da,K +28.03 Da,             | 574.1889288 | 4 | 349.7063 | 2.27E+09  | n.d. |
| ESAAADRPTVRPR               | Q9DCT2 | 0.01996198 | n +42.03 Da,K +28.03 Da,             | 575.0884476 | 4 | 406.7288 | 158680000 | n.d. |
| MLTKFETKSAR                 | Q8CIE6 | 0          | n +34.06 Da,K +34.06 Da,             | 578.2712202 | 4 | 354.2159 | 90486304  | n.d. |
| DEESEEAKKLR                 | O70251 | 0.01996198 | n +28.03 Da,K +28.03 Da,             | 579.1526028 | 3 | 516.2697 | 380732992 | n.d. |
| SVKGHTTGLSLNNER             | O08601 | 0          | n +28.03 Da,K +28.03 Da,             | 582.1866977 | 3 | 556.9727 | 19643800  | n.d. |
| YLNEVAGKHGVR                | P16460 | 0          | n +28.03 Da,K +28.03 Da,             | 586.1711081 | 3 | 485.9437 | 39274700  | n.d. |
| SSSSLQKQKTVSVD              | Q9CWX2 | 0.00422833 | n +28.03 Da,K +28.03 Da,             | 587.7075048 | 3 | 535.9775 | 42875100  | n.d. |
| PVKVTNIKDGTT                | P16460 | 0          | n +14.02 Da,K +28.03 Da,             | 587.9011431 | 4 | 375.483  | 123841000 | n.d. |
| DITDGNSEHLKR                | Q9DBH5 | 0          | n +28.03 Da,K +28.03 Da,             | 590.3063867 | 3 | 480.9197 | 4.065E+09 | n.d. |
| QVQQQYEHTVQVSR              | Q99J08 | 0.0297619  | n +28.03 Da,K +28.03 Da,             | 592.192578  | 4 | 447.248  | 8050350   | n.d. |
| PIKSDPVVS                   | P58252 | 0.00858586 | n +14.02 Da,K +28.03 Da,             | 597.1158739 | 3 | 486.9653 | 981433024 | n.d. |
| DITDGNSEHLKR                | Q9DBH5 | 0          | n +28.03 Da,K +28.03 Da,             | 597.266677  | 4 | 360.9415 | 1.413E+09 | n.d. |
| ESAAADRPTVRPR               | Q9DCT2 | 0.02614379 | n +42.03 Da,K +34.06 Da,             | 598.3481759 | 4 | 408.2358 | 57956800  | n.d. |
| IPAASEKQLTKSNAPR            | P26443 | 0          | n +28.03 Da,K +28.03 Da,             | 601.6794827 | 4 | 449.5163 | 801302016 | n.d. |
| LGTTAKEEMER                 | Q9CZB0 | 0          | n +28.03 Da,K +28.03 Da,             | 603.0948183 | 2 | 660.8443 | 93331400  | n.d. |
| DITDGNSEHLKR                | Q9DBH5 | 0          | n +34.06 Da,K +34.06 Da,             | 610.69867   | 3 | 484.9405 | 16350600  | n.d. |
| TGKTATPQQAQEVHEKLR          | P17751 | 0          | n +28.03 Da,K +28.03 Da,             | 610.7211494 | 4 | 527.2968 | 165279008 | n.d. |
| GVIKTSTAETKEEEEEKEDR        | Q61655 | 0          | n +34.06 Da,K +34.06 Da,             | 614.2063247 | 4 | 604.848  | 72325296  | n.d. |
| LPPTRPDKPLR                 | P10126 | 0.00996512 | n +28.03 Da,K +28.03 Da,             | 616.7493449 | 4 | 362.4752 | 574033984 | n.d. |
| SSGTTAPKKTSGSLKDEDR         | Q91YT0 | 0          | n +34.06 Da,K +34.06 Da,             | 623.6423412 | 4 | 562.8325 | 126006000 | n.d. |

|                                |        |            |                                      |             |   |          |           |      |
|--------------------------------|--------|------------|--------------------------------------|-------------|---|----------|-----------|------|
| PKSPQYSQVIHR                   | P17563 | 0.02433318 | n +17.03 Da,K +34.06 Da,             | 625.883693  | 3 | 497.2824 | 512542016 | n.d. |
| TSDEEIKDLHQ                    | Q9D379 | 0          | n +34.06 Da,K +34.06 Da,             | 635.2822458 | 3 | 513.6192 | 115287000 | n.d. |
| AAKLAPFAKR                     | O08709 | 0          | n +28.03 Da,K +28.03 Da,             | 636.0948894 | 4 | 322.205  | 78680200  | n.d. |
| YAKDVVFGADAR                   | P63038 | 0          | n +28.03 Da,K +28.03 Da,             | 643.747094  | 3 | 475.6011 | 1.299E+09 | n.d. |
| SSGTTAPKKTSGSLKDEDR            | Q91YT0 | 0          | n +28.03 Da,K +28.03 Da,             | 647.8297346 | 5 | 445.6421 | 2.981E+09 | n.d. |
| MEQAVHGESKR                    | Q9R1J0 | 0          | n +42.03 Da,n +34.06 Da,             | 648.1980313 | 3 | 449.9013 | 413679008 | n.d. |
| SSGTTAPKKTSGSLKDEDR            | Q91YT0 | 0          | n +34.06 Da,K +34.06 Da,             | 652.1399636 | 5 | 450.4672 | 1.493E+09 | n.d. |
| SETAPAETAAPAPVEKSPAkkkTKK      | P43276 | 0          | n +42.03 Da,n +28.03 Da,K +28.03 Da, | 652.3538643 | 4 | 680.891  | 513520992 | n.d. |
| SLQPAPVKKIPNR                  | B7ZMP1 | 0          | n +34.06 Da,K +34.06 Da,             | 653.8942383 | 3 | 517.3594 | 270751008 | n.d. |
| PENTVFDADR                     | P20029 | 0          | n +14.02 Da,K +28.03 Da,             | 661.1816684 | 3 | 406.8881 | 531683008 | n.d. |
| PASDQMKQWKEQR                  | P24270 | 0          | n +17.03 Da,n +34.06 Da,K +34.06 Da, | 662.8137691 | 3 | 573.0015 | 207464992 | n.d. |
| SSGTTAPKKTSGSLKDEDR            | Q91YT0 | 0          | n +28.03 Da,K +28.03 Da,             | 663.0071311 | 4 | 556.8007 | 6.846E+09 | n.d. |
| SSGTTAPKKTSGSLKDEDR            | Q91YT0 | 0          | n +28.03 Da,K +28.03 Da,             | 664.1078348 | 3 | 742.065  | 1.018E+09 | n.d. |
| PELMOHLGASKR                   | P99025 | 0          | n +17.03 Da,K +34.06 Da,             | 664.4230483 | 3 | 473.288  | 218284992 | n.d. |
| SETAPAAPAAPAPAEKTPVKKK         | P43274 | 0          | n +34.06 Da,K +34.06 Da,             | 665.6460028 | 5 | 466.9091 | 155180000 | n.d. |
| SETAPAAPAAPAPAEKTPVKKK         | P43274 | 0          | n +28.03 Da,K +28.03 Da,             | 665.803604  | 4 | 575.8449 | 1.312E+09 | n.d. |
| SETAPAAPAAPAPAEKTPVKKK         | P43274 | 0          | n +28.03 Da,K +28.03 Da,             | 665.9394887 | 5 | 460.8773 | 679819008 | n.d. |
| GFVKVVKNKAY                    | P47962 | 0          | n +34.06 Da,K +34.06 Da,             | 672.2890938 | 3 | 463.669  | 8.048E+09 | n.d. |
| GFVKVVKNKAY                    | P47962 | 0.00759494 | n +34.06 Da,K +34.06 Da,             | 674.8062724 | 2 | 694.9998 | 2.911E+09 | n.d. |
| SGAEIGGAFGGEKHTGGGR            | Q9DBF1 | 0          | n +28.03 Da,K +28.03 Da,             | 676.478166  | 4 | 450.9779 | 26702700  | n.d. |
| GFVKVVKNKAY                    | P47962 | 0.00111732 | n +28.03 Da,K +28.03 Da,             | 678.9477989 | 2 | 682.9363 | 3.414E+09 | n.d. |
| IEVAPPKAHEVR                   | P00329 | 0          | n +28.03 Da,K +28.03 Da,             | 681.3301621 | 3 | 351.2036 | 27418300  | n.d. |
| SQGAIEKVKDATR                  | Q8C196 | 0.00858586 | n +28.03 Da,K +28.03 Da,             | 683.4811488 | 3 | 496.2913 | 370156992 | n.d. |
| SQEKASSPSGKMDGEKPVDAEEKR       | Q9D0R2 | 0          | n +42.03 Da,K +34.06 Da,             | 684.1546839 | 5 | 571.9126 | 2.347E+10 | n.d. |
| SQEKASSPSGKMDGEKPVDAEEKR       | Q9D0R2 | 0          | n +42.03 Da,K +28.03 Da,             | 686.0225184 | 3 | 944.4736 | 299275008 | n.d. |
| SQEKASSPSGKMDGEKPVDAEEKR       | Q9D0R2 | 0          | n +42.03 Da,K +28.03 Da,             | 686.4167367 | 5 | 567.0876 | 3.046E+10 | n.d. |
| SPGFSKFR                       | Q9QXF8 | 0.01361868 | n +28.03 Da,K +28.03 Da,             | 688.7589632 | 3 | 327.8553 | 768710976 | n.d. |
| SLQPAPVKKIPNR                  | B7ZMP1 | 0.00902256 | n +28.03 Da,K +28.03 Da,             | 688.7951656 | 3 | 511.3272 | 195764000 | n.d. |
| PVLGSMAKKYNR                   | P70694 | 0          | n +14.02 Da,K +28.03 Da,             | 692.6076535 | 4 | 359.2128 | 194899008 | n.d. |
| TKVKAPEESEQAEGCSEER            | Q9CRB2 | 0.04388298 | n +28.03 Da,K +28.03 Da,             | 693.9791798 | 4 | 598.2929 | 242112992 | n.d. |
| SETAPAAPAAPAPVEKTPVKKKAKKTGAAA | P43277 | 0.00111732 | n +42.03 Da,n +34.06 Da,K +34.06 Da, | 694.2081007 | 5 | 627.4114 | 122742000 | n.d. |
| SETAPAAPAAPAPVEKTPVKKKAKKTGAAA | P43277 | 0          | n +42.03 Da,n +28.03 Da,K +28.03 Da, | 697.091747  | 5 | 620.1728 | 108207000 | n.d. |
| PHPGAWLR                       | _sp Q9 | 0.01043738 | n +14.02 Da,                         | 698.2208266 | 3 | 316.5118 | 749300992 | n.d. |
| DVLHAENVKAGR                   | P26043 | 0.0062273  | n +34.06 Da,K +34.06 Da,             | 699.8110557 | 3 | 459.6134 | 7532304   | n.d. |
| SETAPAAPAAPAPAEKTPVKKKAR       | P43274 | 0          | n +42.03 Da,n +28.03 Da,K +28.03 Da, | 709.3982525 | 5 | 509.1019 | 2.873E+10 | n.d. |
| SETAPAAPAAPAPAEKTPVKKKAR       | P43274 | 0          | n +42.03 Da,n +34.06 Da,K +34.06 Da, | 711.8223231 | 4 | 642.1566 | 1.172E+10 | n.d. |
| DDEESEEAKLR                    | O70251 | 0          | n +34.06 Da,K +34.06 Da,             | 715.4789679 | 3 | 560.6444 | 80562200  | n.d. |
| PALEIANHR                      | P63038 | 0.02645012 | n +14.02 Da,                         | 715.6964437 | 3 | 369.2088 | 284286016 | n.d. |
| PASDQMKQWKEQR                  | P24270 | 0          | n +17.03 Da,n +34.06 Da,K +34.06 Da, | 717.585735  | 4 | 429.2397 | 705140992 | n.d. |
| PEEKEASLAKIKEQTR               | P30115 | 0.00473934 | n +14.02 Da,n +28.03 Da,K +28.03 Da, | 718.592978  | 4 | 489.5351 | 2.197E+09 | n.d. |

|                                 |        |            |                                      |             |   |          |           |      |
|---------------------------------|--------|------------|--------------------------------------|-------------|---|----------|-----------|------|
| SETAPAAPAAPAPAEKTPVKKKAR        | P43274 | 0          | n +42.03 Da,n +34.06 Da,K +34.06 Da, | 719.9895099 | 5 | 513.9265 | 3.636E+10 | n.d. |
| IEVAPPKAHEVR                    | P00329 | 0          | n +28.03 Da,K +28.03 Da,             | 720.7876197 | 4 | 351.2108 | 4.137E+09 | n.d. |
| PASDQMKQWKEQR                   | P24270 | 0.00111732 | n +14.02 Da,n +28.03 Da,K +28.03 Da, | 721.0937436 | 3 | 567.9631 | 3.472E+09 | n.d. |
| TYTQAGSHMAAKGKANL               | P24270 | 0          | n +34.06 Da,K +34.06 Da,             | 722.7450129 | 4 | 463.5214 | 484369984 | n.d. |
| IEVAPPKAHEVR                    | P00329 | 0          | n +28.03 Da,K +28.03 Da,             | 722.747754  | 3 | 467.9451 | 83883600  | n.d. |
| PASGPIRPIVR                     | P47963 | 0.03354488 | n +14.02 Da,                         | 723.6186956 | 3 | 392.9118 | 1.018E+09 | n.d. |
| SETAPAAPAAPAPAEKTPVKKKAR        | P43274 | 0          | n +42.03 Da,n +34.06 Da,K +34.06 Da, | 724.0839511 | 3 | 855.8725 | 1.566E+10 | n.d. |
| IEVAPPKAHEVR                    | P00329 | 0.00321888 | n +34.06 Da,K +34.06 Da,             | 724.3350921 | 3 | 471.9663 | 124969000 | n.d. |
| TPEQKKEELSEIAQR                 | Q91Y97 | 0          | n +28.03 Da,K +28.03 Da,             | 724.4378953 | 4 | 436.0018 | 712985984 | n.d. |
| SETAPAAPAAPAPAEKTPVKKKAR        | P43274 | 0          | n +42.03 Da,n +28.03 Da,K +28.03 Da, | 727.8854251 | 3 | 847.8302 | 1.716E+10 | n.d. |
| PASDQMKQWKEQR                   | P24270 | 0          | n +14.02 Da,n +28.03 Da,K +28.03 Da, | 729.4189672 | 4 | 426.2235 | 542046976 | n.d. |
| PGATVAEIKKQYR                   | Q8VHE0 | 0          | n +14.02 Da,n +28.03 Da,K +28.03 Da, | 741.2732128 | 4 | 383.4802 | 49016300  | n.d. |
| YKNPVFTGKR                      | P97872 | 0          | n +28.03 Da,K +28.03 Da,             | 748.0740192 | 4 | 355.6964 | 98597800  | n.d. |
| VSHGYVTVKPGIR                   | P34914 | 0          | n +28.03 Da,K +28.03 Da,             | 751.5220345 | 4 | 367.9714 | 55047400  | n.d. |
| SETAPAAPAAPAPAEKTPVKKKAR        | P43274 | 0          | n +42.03 Da,n +28.03 Da,K +28.03 Da, | 751.6752914 | 5 | 509.1016 | 3.376E+09 | n.d. |
| DHHDVSGTDSFPR                   | Q8VC12 | 0          | n +28.03 Da,                         | 756.8977093 | 3 | 499.8953 | 394092992 | n.d. |
| PPSYKVGDKIATR                   | P40142 | 0.01321586 | n +14.02 Da,K +28.03 Da,             | 758.8807291 | 4 | 376.2241 | 553228032 | n.d. |
| PDGKTVEAEEAHGTVTR               | O88844 | 0          | n +14.02 Da,K +28.03 Da,             | 760.5156853 | 3 | 594.3112 | 2.378E+09 | n.d. |
| PTAIIAKTFKGR                    | P40142 | 0.00111732 | n +14.02 Da,n +28.03 Da,K +28.03 Da, | 761.5915413 | 4 | 343.9726 | 238458000 | n.d. |
| PDGKTVEAEEAHGTVTR               | O88844 | 0          | n +14.02 Da,K +28.03 Da,             | 763.3271198 | 4 | 445.9852 | 2.154E+09 | n.d. |
| SEAAPAAPAAPAPAEKAPAKKK          | P15864 | 0          | n +42.03 Da,n +34.06 Da,K +34.06 Da, | 768.6014544 | 4 | 563.3587 | 225192992 | n.d. |
| TNSKMMNLGVGAYR                  | P05202 | 0.00111732 | n +28.03 Da,K +28.03 Da,             | 771.3149233 | 3 | 541.6399 | 130645000 | n.d. |
| SEAAPAAPAAPAPAEKAPAKKKAA        | P15864 | 0          | n +42.03 Da,n +28.03 Da,K +28.03 Da, | 774.6438347 | 4 | 592.8451 | 136182000 | n.d. |
| DTQPVNAASFQKIIR                 | Q7TNK1 | 0.00996512 | n +42.03 Da,K +28.03 Da,             | 774.835688  | 3 | 562.9817 | 88446800  | n.d. |
| SETAPAAPAAPAPAEKTPVKKKAR        | P43274 | 0          | n +42.03 Da,n +34.06 Da,K +34.06 Da, | 781.9339519 | 4 | 642.156  | 285692000 | n.d. |
| SETAPAAPAAPAPAEKTPVKKKAR        | P43274 | 0          | n +42.03 Da,n +28.03 Da,K +28.03 Da, | 783.2848447 | 4 | 636.1244 | 1.156E+09 | n.d. |
| MKPILLQGHER                     | Q9QZD9 | 0          | n +28.03 Da,K +28.03 Da,             | 788.9171419 | 4 | 345.2063 | 29168100  | n.d. |
| PDVVVKEDEEYKR                   | Q8QZT1 | 0          | n +14.02 Da,K +28.03 Da,             | 791.0714054 | 4 | 419.7279 | 606763008 | n.d. |
| PLPAIEKTGKVR                    | Q9CXN7 | 0.03813369 | n +14.02 Da,n +28.03 Da,K +28.03 Da, | 796.8541946 | 4 | 345.4748 | 280824000 | n.d. |
| KTSKDTTASAVAVGLR                | Q8BMS1 | 0          | n +34.06 Da,K +34.06 Da,             | 799.5967774 | 3 | 569.6978 | 59703100  | n.d. |
| GKTVASLGGQTRPDPVR               | Q80Y44 | 0          | n +34.06 Da,K +34.06 Da,             | 801.5439083 | 4 | 452.5261 | 188784992 | n.d. |
| SEAAPAAPAAPAPAEKAPAKKKAAKPPAGVR | P15864 | 0          | n +42.03 Da,n +28.03 Da,K +28.03 Da, | 806.4996569 | 4 | 790.9701 | 333023008 | n.d. |
| PTSGAEIGGAFGGKHTGGGR            | Q9DBF1 | 0          | n +14.02 Da,K +28.03 Da,             | 806.6370071 | 4 | 497.0015 | 729089984 | n.d. |
| SEAAPAAPAAPAPAEKAPAKKKAAKPPAGVR | P15864 | 0          | n +42.03 Da,n +28.03 Da,K +28.03 Da, | 807.3373473 | 5 | 632.977  | 6.937E+09 | n.d. |
| TKDGFESPEELR                    | P52196 | 0.00217391 | n +34.06 Da,K +34.06 Da,             | 811.8937745 | 3 | 546.6585 | 77769800  | n.d. |
| AHYHDNYGKNDEVE                  | P25688 | 0.00902256 | n +42.03 Da,K +28.03 Da,             | 812.8558088 | 2 | 880.8829 | 14516700  | n.d. |
| RPELTGAKVVVSGGR                 | Q99LC5 | 0          | n +28.03 Da,K +28.03 Da,             | 820.9326259 | 4 | 396.2414 | 1.084E+09 | n.d. |
| AALRPLVKPKIVK                   | P17932 | 0.00712468 | n +34.06 Da,K +34.06 Da,             | 822.9232351 | 5 | 314.6507 | 538379008 | n.d. |
| AALRPLVKPKIVK                   | P17932 | 0          | n +28.03 Da,K +28.03 Da,             | 826.5987586 | 5 | 309.8253 | 665131008 | n.d. |
| PPEEKEASLAKIKEQTR               | P30115 | 0          | n +17.03 Da,K +34.06 Da,             | 833.6969625 | 4 | 519.0756 | 714155008 | n.d. |

|                         |        |            |                                      |             |   |          |           |      |
|-------------------------|--------|------------|--------------------------------------|-------------|---|----------|-----------|------|
| PPEEKEASLAKIKEQTR       | P30115 | 0          | n +14.02 Da,K +28.03 Da,             | 835.1418729 | 4 | 513.7979 | 3.709E+09 | n.d. |
| YRPGTVALR               | P02301 | 0.02861098 | n +28.03 Da,                         | 835.6999806 | 3 | 354.2128 | 212863008 | n.d. |
| PPEEKEASLAKIKEQTR       | P30115 | 0          | n +14.02 Da,K +28.03 Da,             | 836.1349442 | 5 | 411.2397 | 1.225E+09 | n.d. |
| SETAAPAAPAPAVEKTPVKKKAK | P43277 | 0          | n +42.03 Da,n +28.03 Da,K +28.03 Da, | 837.0548005 | 4 | 643.1388 | 3.575E+09 | n.d. |
| TGVLKQTKGVGASGSFR       | P10922 | 0          | n +28.03 Da,K +28.03 Da,             | 838.232766  | 4 | 445.0139 | 121810000 | n.d. |
| RPELTGAKVVVSGGR         | Q99LC5 | 0          | n +34.06 Da,K +34.06 Da,             | 840.3934422 | 4 | 399.2572 | 74415696  | n.d. |
| YSKNPSNKDAALMEEAR       | Q60649 | 0          | n +28.03 Da,K +28.03 Da,             | 849.9527067 | 4 | 650.6757 | 76342896  | n.d. |
| SKPPPKPVKPGQVKVFR       | Q62422 | 0.04623514 | n +42.03 Da,K +28.03 Da,             | 859.7353934 | 5 | 409.4626 | 2.813E+09 | n.d. |
| REPDLSDDIKER            | B5X0G2 | 0          | n +34.06 Da,                         | 862.2170415 | 4 | 378.2333 | 24780600  | n.d. |
| SKPPPKPVKPGQVKVFR       | Q62422 | 0.01231527 | n +42.03 Da,K +34.06 Da,             | 868.3923589 | 4 | 517.6084 | 1.072E+09 | n.d. |
| SKPPPKPVKPGQVKVFR       | Q62422 | 0.00902256 | n +42.03 Da,K +34.06 Da,             | 870.9015168 | 5 | 414.2879 | 2.731E+09 | n.d. |
| FLATQNAVSYWPFGSFLCR     | O08858 | 0.04763986 | n +42.03 Da,                         | 875.7142401 | 3 | 769.3652 | 72114896  | n.d. |
| NFGRTCPR                | Q8BGE5 | 0.00520562 | n +14.02 Da,                         | 876.6161396 | 3 | 341.1728 | 99090000  | n.d. |
| SKPPPKPVKPGQVKVFR       | Q62422 | 0          | n +42.03 Da,K +28.03 Da,             | 878.4468025 | 4 | 511.5765 | 2.172E+09 | n.d. |
| FRVPGQPR                | Q9CW42 | 0.00902256 | n +28.03 Da,                         | 880.764751  | 3 | 328.8627 | 491384000 | n.d. |
| YSKNPSNKDAALMEEAR       | Q60649 | 0          | n +28.03 Da,K +28.03 Da,             | 881.669108  | 4 | 488.2578 | 314646016 | n.d. |
| YSKNPSNKDAALMEEAR       | Q60649 | 0.00111732 | n +34.06 Da,K +34.06 Da,             | 883.3993557 | 4 | 492.7814 | 85693000  | n.d. |
| SETAAPAAPAPAEKTPVKKK    | P43274 | 0          | n +42.03 Da,n +34.06 Da,K +34.06 Da, | 889.4396213 | 3 | 780.1598 | 1.361E+09 | n.d. |
| REPDLSDDIKER            | B5X0G2 | 0          | n +34.06 Da,                         | 889.6652613 | 3 | 504.9612 | 748441984 | n.d. |
| YSKNPSNKDAALMEEAR       | Q60649 | 0          | n +28.03 Da,K +28.03 Da,             | 889.7575038 | 3 | 650.6755 | 165642000 | n.d. |
| SKKVDQSVANEISQKAAESQGR  | Q61733 | 0          | n +34.06 Da,K +34.06 Da,             | 890.603397  | 4 | 649.1352 | 25612500  | n.d. |
| SETAAPAAPAPAEKTPVKKK    | P43274 | 0          | n +42.03 Da,n +28.03 Da,K +28.03 Da, | 893.0461766 | 3 | 772.1176 | 2.84E+09  | n.d. |
| GREPDLSDDIKER           | B5X0G2 | 0.01361868 | n +34.06 Da,K +34.06 Da,             | 895.4456726 | 4 | 393.2271 | 40818900  | n.d. |
| SKPPPKPVKPGQVKVFR       | Q62422 | 0.04623514 | n +42.03 Da,K +28.03 Da,             | 904.076508  | 5 | 409.4627 | 3.468E+09 | n.d. |
| PDGKTVEAEAAHGTVTR       | O88844 | 0.02082347 | n +14.02 Da,K +28.03 Da,             | 908.7395027 | 3 | 594.3109 | 168402000 | n.d. |
| VGNWRPPQPVKGR           | P16015 | 0          | n +28.03 Da,K +28.03 Da,             | 909.8394648 | 4 | 387.4793 | 269820992 | n.d. |
| PNASEPKHLLVMKGAPER      | Q8VDN2 | 0          | n +14.02 Da,K +28.03 Da,             | 926.2940867 | 4 | 511.7905 | 59464500  | n.d. |
| SKKVDQSVANEISQKAAESQGR  | Q61733 | 0          | n +28.03 Da,K +28.03 Da,             | 928.2898048 | 4 | 643.1143 | 876416000 | n.d. |
| ATQKTVDGPGSKLWR         | P16858 | 0          | n +28.03 Da,K +28.03 Da,             | 937.5396877 | 4 | 432.7501 | 757129024 | n.d. |
| PIAKPPVFTGKDR           | P53395 | 0          | n +14.02 Da,K +28.03 Da,             | 940.644752  | 4 | 374.7299 | 33426400  | n.d. |
| TITYGPKVVR              | P12710 | 0.02388759 | n +28.03 Da,K +28.03 Da,             | 940.732257  | 3 | 397.2486 | 1.08E+09  | n.d. |
| GYKIVTEKSTVPVR          | O70475 | 0          | n +34.06 Da,K +34.06 Da,             | 950.578169  | 4 | 420.5206 | 237863008 | n.d. |
| PTPPSYKVGDKIATR         | P40142 | 0          | n +14.02 Da,K +28.03 Da,             | 955.1382334 | 4 | 425.2504 | 100661000 | n.d. |
| SLPKELEVKR              | Q71R19 | 0.01726619 | n +28.03 Da,K +28.03 Da,             | 963.8813202 | 4 | 321.4578 | 267346000 | n.d. |
| FKSVDDVIKR              | P24549 | 0          | n +28.03 Da,K +28.03 Da,             | 964.4564906 | 4 | 323.4497 | 176579008 | n.d. |
| MKNPFAH                 | P28271 | 0.02082347 | n +28.03 Da,K +28.03 Da,             | 965.8721318 | 3 | 300.8303 | 168191008 | n.d. |
| IEEELGSKAKFAGR          | P17182 | 0.00662589 | n +28.03 Da,K +28.03 Da,             | 965.9899533 | 4 | 405.4848 | 699510016 | n.d. |
| SKKVDQSVANEISQKAAESQGR  | Q61733 | 0          | n +34.06 Da,K +34.06 Da,             | 966.6524693 | 4 | 649.135  | 92748600  | n.d. |
| SKKVDQSVANEISQKAAESQGR  | Q61733 | 0          | n +28.03 Da,K +28.03 Da,             | 966.9974644 | 4 | 643.1036 | 1.18E+09  | n.d. |
| PHEELPSLQRPR            | Q3UQ44 | 0.04090707 | n +14.02 Da,                         | 970.4250049 | 3 | 491.6043 | 78221904  | n.d. |

|                                      |        |            |                                      |             |   |          |           |      |
|--------------------------------------|--------|------------|--------------------------------------|-------------|---|----------|-----------|------|
| PDGKTIEAEAAHGTVTR                    | P54071 | 0.02388759 | n +14.02 Da,K +28.03 Da,             | 970.5335374 | 3 | 598.982  | 245928992 | n.d. |
| GKIVTEKSTVPVR                        | O70475 | 0          | n +34.06 Da,K +34.06 Da,             | 971.0795375 | 3 | 560.3705 | 242892000 | n.d. |
| TEKKIPVVFR                           | Q9R0P3 | 0.00111732 | n +28.03 Da,K +28.03 Da,             | 974.430767  | 3 | 433.9558 | 139739008 | n.d. |
| GKIGGHGAEYGAEALER                    | P01942 | 0          | n +28.03 Da,K +28.03 Da,             | 978.5247255 | 3 | 590.9772 | 175430000 | n.d. |
| PSHLEAVNPVAVGKTR                     | A2ATU0 | 0          | n +14.02 Da,K +28.03 Da,             | 985.2344556 | 3 | 572.9974 | 74260400  | n.d. |
| MDFQHRPQGGKTSVSSSESNR                | Q62203 | 0          | n +42.03 Da,n +28.03 Da,             | 994.8951696 | 4 | 630.5466 | 405262016 | n.d. |
| PLAKDLLHPSPEEKR                      | Q6ZWU9 | 0          | n +14.02 Da,K +28.03 Da,             | 999.1511399 | 5 | 386.6214 | 2.229E+09 | n.d. |
| PLAKDLLHPSPEEKR                      | Q6ZWU9 | 0          | n +14.02 Da,K +28.03 Da,             | 999.9173105 | 3 | 643.6967 | 114566000 | n.d. |
| SSPPEGKLETKAGHPPAVKAGGMR             | Q91XC8 | 0          | n +42.03 Da,K +28.03 Da,             | 1003.715275 | 3 | 843.4605 | 52447300  | n.d. |
| SETAAPAAPAPVEKTPVKKK                 | P43277 | 0          | n +42.03 Da,n +34.06 Da,K +34.06 Da, | 1005.246402 | 4 | 592.3786 | 273044992 | n.d. |
| SETAAPAAPAPVEKTPVKKK                 | P43277 | 0          | n +42.03 Da,n +28.03 Da,K +28.03 Da, | 1006.872568 | 4 | 586.3473 | 460863008 | n.d. |
| SKDSEGSWFR                           | O55125 | 0          | n +34.06 Da,K +34.06 Da,             | 1007.377737 | 3 | 422.8956 | 269716992 | n.d. |
| DKTMILWAPDEESGVWLEQVR                | Q91WG4 | 0.04048043 | n +34.06 Da,K +34.06 Da,             | 1007.683056 | 4 | 643.3503 | 113004000 | n.d. |
| PAPLQHQVDIYQKR                       | P40142 | 0          | n +14.02 Da,K +28.03 Da,             | 1008.200406 | 3 | 578.9923 | 523376000 | n.d. |
| HLIEAQVGGKDLR                        | Q99KI0 | 0          | n +28.03 Da,K +28.03 Da,             | 1011.120371 | 3 | 540.3241 | 402496000 | n.d. |
| SSPPEGKLETKAGHPPAVKAGGMR             | Q91XC8 | 0          | n +42.03 Da,K +28.03 Da,             | 1012.913036 | 5 | 506.4785 | 7.691E+09 | n.d. |
| PKNFGIGQDIQPKR                       | P12970 | 0          | n +14.02 Da,K +28.03 Da,             | 1014.50565  | 4 | 417.7449 | 2.844E+09 | n.d. |
| PKNFGIGQDIQPKR                       | P12970 | 0          | n +14.02 Da,K +28.03 Da,             | 1016.229774 | 2 | 834.4814 | 26201600  | n.d. |
| GDVEKGKKIFVQK                        | P62897 | 0          | n +42.03 Da,K +34.06 Da,             | 1016.818378 | 4 | 414.2856 | 4.086E+09 | n.d. |
| SSPPEGKLETKAGHPPAVKAGGMR             | Q91XC8 | 0          | n +42.03 Da,K +28.03 Da,             | 1017.341378 | 4 | 632.8473 | 51281100  | n.d. |
| KFKRQIFEKR                           | A2A9H6 | 0.02645012 | n +17.03 Da,K +34.06 Da,             | 1022.156697 | 4 | 375.5134 | 32568500  | n.d. |
| AQPGKILKEQKYDR                       | Q8VBW6 | 0.01407084 | n +42.03 Da,K +34.06 Da,             | 1026.639386 | 4 | 455.2887 | 1.317E+09 | n.d. |
| GDVEKGKKIFVQK                        | P62897 | 0          | n +42.03 Da,K +28.03 Da,             | 1026.719913 | 4 | 407.5139 | 474775008 | n.d. |
| SSEAPLVNEDVKR                        | Q91YQ5 | 0.00111732 | n +34.06 Da,K +34.06 Da,             | 1028.827173 | 3 | 536.9841 | 493663008 | n.d. |
| YVAESFNDAKEKVR                       | P16331 | 0          | n +28.03 Da,K +28.03 Da,             | 1032.685703 | 4 | 435.7383 | 199667008 | n.d. |
| GHSEFLKAASNLR                        | P27773 | 0          | n +28.03 Da,K +28.03 Da,             | 1034.339598 | 4 | 495.2857 | 74202200  | n.d. |
| SQVTLEGDKVKVER                       | Q9DCW4 | 0          | n +34.06 Da,K +34.06 Da,             | 1036.272235 | 3 | 564.0248 | 90395000  | n.d. |
| SGSNPKAATAGSQAGPGGLVAGKEEKKKAGGGVLNR | Q8C4B4 | 0          | n +42.03 Da,K +34.06 Da,             | 1036.878658 | 5 | 713.2299 | 354596992 | n.d. |
| PSGTSQCEDGSAGGFQHLDMHSEKR            | Q91WT9 | 0          | n +14.02 Da,K +28.03 Da,             | 1037.404065 | 4 | 690.8078 | 143411008 | n.d. |
| TIRPASIFTKR                          | P52825 | 0.0212766  | n +34.06 Da,                         | 1037.676267 | 4 | 340.2296 | 32303800  | n.d. |
| GLLAKPTHGDIIR                        | P29758 | 0.00111732 | n +34.06 Da,K +34.06 Da,             | 1040.507672 | 4 | 364.9768 | 11967600  | n.d. |
| NTKFVHDNYVIR                         | Q8C196 | 0.04724409 | n +34.06 Da,K +34.06 Da,             | 1041.378893 | 4 | 394.2342 | 128732000 | n.d. |
| SKDSEGSWFR                           | O55125 | 0          | n +28.03 Da,K +28.03 Da,             | 1050.202215 | 2 | 627.8096 | 1.278E+10 | n.d. |
| SKDSEGSWFR                           | O55125 | 0          | n +28.03 Da,K +28.03 Da,             | 1051.86405  | 3 | 418.8761 | 2.183E+10 | n.d. |
| PAYFQRPENALKR                        | P23116 | 0          | n +14.02 Da,K +28.03 Da,             | 1052.436234 | 4 | 407.9773 | 214126000 | n.d. |
| GKPVLYHFDGR                          | P30115 | 0.00166759 | n +28.03 Da,K +28.03 Da,             | 1053.272574 | 3 | 448.9188 | 38192200  | n.d. |
| NTKFVHDNYVIR                         | Q8C196 | 0          | n +28.03 Da,K +28.03 Da,             | 1060.288179 | 3 | 521.2879 | 1.52E+09  | n.d. |
| SETAAPAAPAPAEKTPVKKKAR               | P43274 | 0          | n +42.03 Da,n +28.03 Da,K +28.03 Da, | 1065.50231  | 4 | 636.1153 | 1.457E+09 | n.d. |
| VLLGETGKEKLPR                        | P62281 | 0          | n +28.03 Da,K +28.03 Da,             | 1065.659986 | 4 | 381.7435 | 899913984 | n.d. |
| GHSEFLKAASNLR                        | P27773 | 0          | n +28.03 Da,K +28.03 Da,             | 1065.867792 | 3 | 495.2941 | 145758000 | n.d. |

|                                 |        |            |                                      |             |   |          |           |      |
|---------------------------------|--------|------------|--------------------------------------|-------------|---|----------|-----------|------|
| SETAAPAAPAPAEKTPVKKKAR          | P43274 | 0          | n +42.03 Da,n +28.03 Da,K +28.03 Da, | 1066.634231 | 3 | 847.8174 | 217262000 | n.d. |
| TDEEIAKHKGPPVFTQEER             | Q922E4 | 0          | n +28.03 Da,K +28.03 Da,             | 1070.739015 | 4 | 574.5543 | 23463500  | n.d. |
| GKPVLYHFDGR                     | P30115 | 0          | n +28.03 Da,K +28.03 Da,             | 1071.868076 | 4 | 336.9409 | 416392992 | n.d. |
| SDFDPGQDTYQHPPKDSGGQR           | Q99K10 | 0          | n +28.03 Da,K +28.03 Da,             | 1075.02641  | 4 | 605.279  | 330447008 | n.d. |
| VKGVVNGFGR                      | P16858 | 0          | n +28.03 Da,K +28.03 Da,             | 1075.712396 | 3 | 363.5571 | 1.298E+09 | n.d. |
| PNNNTKRVHDNYVIR                 | Q8C196 | 0          | n +14.02 Da,K +28.03 Da,             | 1077.100083 | 3 | 624.9955 | 389039008 | n.d. |
| MYLNEVAGKHGVGR                  | P16460 | 0          | n +28.03 Da,K +28.03 Da,             | 1080.694448 | 3 | 529.6207 | 274315008 | n.d. |
| THTLVEKINYTGR                   | P49429 | 0          | n +34.06 Da,K +34.06 Da,             | 1080.92031  | 4 | 400.7433 | 373347008 | n.d. |
| MYLNEVAGKHGVGR                  | P16460 | 0.00473934 | n +28.03 Da,K +28.03 Da,             | 1081.697565 | 4 | 397.4671 | 1.621E+09 | n.d. |
| SEPEIPKGR                       | Q9WTP6 | 0.03354488 | n +34.06 Da,K +34.06 Da,             | 1084.595622 | 3 | 398.588  | 29114300  | n.d. |
| SETAPVAQAASATEKPAAAKTKKPAKAAAPR | P43275 | 0          | n +42.03 Da,K +28.03 Da,             | 1084.915199 | 5 | 692.4004 | 428003008 | n.d. |
| PNDVSHGYVTVKPGIR                | P34914 | 0          | n +14.02 Da,K +28.03 Da,             | 1085.496117 | 3 | 594.3274 | 287398016 | n.d. |
| TEPLPAIEKTGKVR                  | Q9CXN7 | 0.00217391 | n +34.06 Da,K +34.06 Da,             | 1087.003767 | 3 | 547.6975 | 1.607E+09 | n.d. |
| MEAVPEKKKKVATVPGLK              | P14148 | 0          | n +42.03 Da,n +34.06 Da,K +34.06 Da, | 1089.05546  | 3 | 756.1804 | 254752992 | n.d. |
| LREGQESPAASPPEWKDR              | Q9DBT9 | 0.00759494 | n +34.06 Da,K +34.06 Da,             | 1089.167824 | 4 | 513.2791 | 352111008 | n.d. |
| PAYFQRPENALKR                   | P23116 | 0          | n +17.03 Da,K +34.06 Da,             | 1089.486855 | 4 | 410.9936 | 85337200  | n.d. |
| PNDVSHGYVTVKPGIR                | P34914 | 0          | n +14.02 Da,K +28.03 Da,             | 1091.230577 | 4 | 445.9979 | 1.878E+09 | n.d. |
| VQQPVHLLMGGTKEQR                | O88587 | 0          | n +28.03 Da,K +28.03 Da,             | 1092.205964 | 2 | 664.3603 | 193220000 | n.d. |
| TEPLPAIEKTGKVR                  | Q9CXN7 | 0.00111732 | n +34.06 Da,K +34.06 Da,             | 1092.561422 | 4 | 411.0249 | 1.332E+09 | n.d. |
| MEAVPEKKKKVATVPGLK              | P14148 | 0          | n +42.03 Da,n +28.03 Da,K +28.03 Da, | 1095.160679 | 3 | 746.128  | 482896992 | n.d. |
| THTLVEKINYTGR                   | P49429 | 0          | n +34.06 Da,K +34.06 Da,             | 1097.028968 | 3 | 533.9867 | 993988992 | n.d. |
| VISHAISEHVEDAGVH                | Q8C196 | 0          | n +28.03 Da,                         | 1100.531472 | 3 | 576.6282 | 269318016 | n.d. |
| HQGVVMVGMGQKDSYVGDQAQSKR        | P60710 | 0          | n +42.03 Da,K +28.03 Da,             | 1105.012892 | 4 | 652.0678 | 1.173E+09 | n.d. |
| TVKKIAIFGATGR                   | Q923D2 | 0.0297619  | n +28.03 Da,K +28.03 Da,             | 1107.419594 | 4 | 362.2358 | 1.727E+10 | n.d. |
| TILLVQPTKRPEGR                  | P84089 | 0.00217391 | n +34.06 Da,K +34.06 Da,             | 1107.638185 | 4 | 419.7766 | 165828992 | n.d. |
| TVKKIAIFGATGR                   | Q923D2 | 0          | n +28.03 Da,K +28.03 Da,             | 1107.706617 | 3 | 482.645  | 2.226E+09 | n.d. |
| TVKKIAIFGATGR                   | Q923D2 | 0          | n +28.03 Da,K +28.03 Da,             | 1110.620845 | 2 | 723.464  | 886387968 | n.d. |
| SVTKSKFDNLYGCR                  | P50247 | 0.0225458  | n +34.06 Da,K +34.06 Da,             | 1112.175045 | 3 | 593.0101 | 25614000  | n.d. |
| TVKKIAIFGATGR                   | Q923D2 | 0          | n +34.06 Da,K +34.06 Da,             | 1116.303479 | 3 | 488.677  | 659166976 | n.d. |
| MESPAASPPASLPQTKGKSKR           | O09110 | 0          | n +42.03 Da,n +28.03 Da,K +28.03 Da, | 1122.114162 | 4 | 574.3185 | 212102000 | n.d. |
| SAAAEASAALKVRPER                | Q8BGT5 | 0          | n +34.06 Da,K +34.06 Da,             | 1128.700624 | 4 | 424.5028 | 35818000  | n.d. |
| LFAYPDTHR                       | P24270 | 0.00662589 | n +28.03 Da,                         | 1132.516449 | 3 | 382.8816 | 55938100  | n.d. |
| VQQPVHLLMGGTKEQR                | O88587 | 0          | n +28.03 Da,K +28.03 Da,             | 1133.404118 | 4 | 498.5273 | 245892000 | n.d. |
| IEDIEVAPPKAHEVR                 | P00329 | 0          | n +14.02 Da,n +28.03 Da,             | 1135.967231 | 4 | 437.0025 | 19947700  | n.d. |
| AGKPVLYHFDGR                    | P30115 | 0.00217391 | n +28.03 Da,K +28.03 Da,             | 1137.359939 | 4 | 354.7003 | 756649024 | n.d. |
| AGKPVLYHFDGR                    | P30115 | 0.00111732 | n +28.03 Da,K +28.03 Da,             | 1137.455287 | 3 | 472.5985 | 350980000 | n.d. |
| LTPHYLTKQDVER                   | Q9DBG6 | 0          | n +28.03 Da,K +28.03 Da,             | 1138.140278 | 4 | 439.9958 | 6.725E+09 | n.d. |
| KNYTDNELEKITR                   | P26443 | 0          | n +28.03 Da,K +28.03 Da,             | 1139.072888 | 3 | 569.9805 | 229380000 | n.d. |
| MQSNKAFNLEKQNHTPR               | Q99K48 | 0          | n +42.03 Da,K +34.06 Da,             | 1140.851395 | 4 | 539.0441 | 26755400  | n.d. |
| RMPEFYNR                        | P16460 | 0.02645012 | n +28.03 Da,                         | 1141.800177 | 3 | 380.859  | 471654016 | n.d. |



|                                  |        |            |                                      |             |   |          |           |      |
|----------------------------------|--------|------------|--------------------------------------|-------------|---|----------|-----------|------|
| TIENVKAKIQDKEGIPPDQQR            | P0CG49 | 0.01092896 | n +34.06 Da,K +34.06 Da,             | 1147.619277 | 4 | 636.6425 | 893841984 | n.d. |
| LTPHTYLTKQDVER                   | Q9DBG6 | 0          | n +28.03 Da,K +28.03 Da,             | 1148.199209 | 3 | 586.3251 | 1.592E+10 | n.d. |
| PSKTNVSGGAIALGHPLGGSGSR          | Q8BWT1 | 0          | n +14.02 Da,K +28.03 Da,             | 1149.298664 | 3 | 721.3947 | 7.508E+09 | n.d. |
| MQSNKAFNLEKQNHTPR                | Q99K48 | 0          | n +42.03 Da,K +28.03 Da,             | 1151.135605 | 4 | 536.0295 | 1.7E+09   | n.d. |
| PSKTNVSGGAIALGHPLGGSGSR          | Q8BWT1 | 0          | n +14.02 Da,K +28.03 Da,             | 1153.160845 | 4 | 541.2984 | 4.962E+10 | n.d. |
| TIENVKAKIQDKEGIPPDQQR            | P0CG49 | 0          | n +28.03 Da,K +28.03 Da,             | 1153.707824 | 4 | 630.6107 | 603715968 | n.d. |
| MESPAASPPASLPQTKGKSKR            | O09110 | 0          | n +42.03 Da,n +34.06 Da,K +34.06 Da, | 1154.876943 | 4 | 578.8367 | 541822976 | n.d. |
| GVAVLKVGGTSDVEVNEKKDR            | P63038 | 0          | n +28.03 Da,K +28.03 Da,             | 1155.311241 | 5 | 463.2702 | 914985024 | n.d. |
| SEPEIPK GIR                      | Q9WTP6 | 0          | n +34.06 Da,K +34.06 Da,             | 1157.297101 | 3 | 398.5893 | 140563008 | n.d. |
| VATKVMIGESIDEKR                  | Q8C196 | 0.00902256 | n +34.06 Da,K +34.06 Da,             | 1157.411817 | 4 | 445.2794 | 383412000 | n.d. |
| PNPSHLEAVNPVAVGKTR               | A2ATU0 | 0          | n +14.02 Da,K +28.03 Da,             | 1158.552411 | 4 | 482.7742 | 1.105E+09 | n.d. |
| DVSHGYVTVKPGIR                   | P34914 | 0          | n +34.06 Da,                         | 1159.574284 | 4 | 399.7465 | 23094800  | n.d. |
| SKSLKLLVEESR                     | Q01730 | 0.04424779 | n +42.03 Da,K +34.06 Da,             | 1162.070576 | 3 | 516.6794 | 2.756E+09 | n.d. |
| SAAAEASAALKVRPER                 | Q8BGT5 | 0          | n +34.06 Da,K +34.06 Da,             | 1167.646553 | 4 | 424.5104 | 368313984 | n.d. |
| LTPHTYLTKQDVER                   | Q9DBG6 | 0          | n +34.06 Da,K +34.06 Da,             | 1168.781179 | 3 | 590.3463 | 6.809E+09 | n.d. |
| MQPASAKWYDR                      | Q9R0Q7 | 0.02082347 | n +28.03 Da,K +28.03 Da,             | 1171.519286 | 3 | 470.24   | 134185000 | n.d. |
| PKNYTDNELEK ITR                  | P26443 | 0          | n +14.02 Da,K +28.03 Da,             | 1171.70405  | 4 | 448.4969 | 1.886E+09 | n.d. |
| SDSRDPASDQMKQWKEQR               | P24270 | 0.02209685 | n +42.03 Da,K +34.06 Da,             | 1171.925068 | 4 | 576.2895 | 105302000 | n.d. |
| SETAPVAQAASTATEKPAAAKTKKPAKAAAPR | P43275 | 0          | n +42.03 Da,K +28.03 Da,             | 1172.234402 | 5 | 692.4008 | 146694000 | n.d. |
| SAAAEASAALKVRPER                 | Q8BGT5 | 0.01726619 | n +34.06 Da,K +34.06 Da,             | 1174.174447 | 3 | 565.6776 | 178496992 | n.d. |
| PKNYTDNELEK ITR                  | P26443 | 0          | n +14.02 Da,K +28.03 Da,             | 1174.260293 | 3 | 597.6596 | 9.043E+09 | n.d. |
| PKNYTDNELEK ITR                  | P26443 | 0          | n +14.02 Da,K +28.03 Da,             | 1177.906216 | 2 | 895.9858 | 162262000 | n.d. |
| PFVFRPER                         | P00186 | 0.0297619  | n +14.02 Da,                         | 1181.627698 | 3 | 354.5346 | 980104000 | n.d. |
| KEYWQNL R                        | O35490 | 0.03851321 | n +28.03 Da,K +28.03 Da,             | 1183.581633 | 3 | 398.2202 | 307332992 | n.d. |
| SDSRDPASDQMKQWKEQR               | P24270 | 0          | n +42.03 Da,K +28.03 Da,             | 1192.496027 | 4 | 573.2762 | 61762300  | n.d. |
| DSAFTVLK KAGR                    | Q8VC30 | 0.00111732 | n +28.03 Da,K +28.03 Da,             | 1195.167793 | 3 | 459.6125 | 395148992 | n.d. |
| VLSGEDKSNIAAWGK                  | P01942 | 0          | n +28.03 Da,K +28.03 Da,             | 1196.682096 | 4 | 454.5136 | 99431104  | n.d. |
| MEAVPEK KKVATVPGLKK              | P14148 | 0          | n +42.03 Da,n +28.03 Da,K +28.03 Da, | 1203.128335 | 4 | 598.87   | 467404000 | n.d. |
| PYVEITGTAGKKFR                   | Q60710 | 0.00217391 | n +14.02 Da,K +28.03 Da,             | 1206.75762  | 4 | 409.9838 | 74403296  | n.d. |
| TAEAQPLQPTSDLKEDHHEIGAR          | Q8BYU6 | 0          | n +28.03 Da,K +28.03 Da,             | 1214.078796 | 5 | 520.6712 | 214312000 | n.d. |
| SHTILLVQPTKRPEGR                 | P84089 | 0          | n +42.03 Da,K +34.06 Da,             | 1215.531999 | 4 | 477.7862 | 3.088E+09 | n.d. |
| DVSHGYVTVKPGIR                   | P34914 | 0          | n +28.03 Da,                         | 1217.243563 | 4 | 396.7281 | 1.087E+09 | n.d. |
| PPEEK EASLAKIKEQTR               | P30115 | 0          | n +14.02 Da,K +28.03 Da,             | 1217.993361 | 4 | 513.7892 | 310504992 | n.d. |
| DVSHGYVTVKPGIR                   | P34914 | 0          | n +34.06 Da,                         | 1222.945586 | 4 | 399.7432 | 45034200  | n.d. |
| TLGDIVYKR                        | PL2710 | 0.01231527 | n +34.06 Da,K +34.06 Da,             | 1229.606193 | 4 | 378.2499 | 47697200  | n.d. |
| DAEKFAEEDK KLER                  | P20029 | 0          | n +28.03 Da,K +28.03 Da,             | 1230.463263 | 4 | 494.7729 | 442731008 | n.d. |
| PVQKLFVDKIR                      | P97450 | 0          | n +14.02 Da,K +28.03 Da,             | 1232.359099 | 4 | 353.9797 | 3.299E+09 | n.d. |
| SSTSAVPQITTHYTVHPR               | Q921G7 | 0          | n +28.03 Da,                         | 1238.395718 | 4 | 503.2648 | 1.802E+09 | n.d. |
| VKIVTVKTQAYPDQKPGTSGLR           | Q9D0F9 | 0          | n +34.06 Da,K +34.06 Da,             | 1239.075834 | 5 | 505.325  | 1.823E+10 | n.d. |
| PKVTQPEVDTP LGR                  | Q63880 | 0          | n +17.03 Da,K +34.06 Da,             | 1239.082774 | 3 | 529.9823 | 321166016 | n.d. |

|                          |        |            |                          |             |   |          |           |      |
|--------------------------|--------|------------|--------------------------|-------------|---|----------|-----------|------|
| VKIVTVKTQAYPDQKPGTSGLR   | Q9D0F9 | 0          | n +34.06 Da,K +34.06 Da, | 1240.202823 | 3 | 841.5361 | 1.286E+09 | n.d. |
| PLHPPPPPVQPPPHPR         | Q9JIX8 | 0          | n +14.02 Da,             | 1241.80968  | 4 | 468.5165 | 534588992 | n.d. |
| KFLEEHPGGEVL             | P56395 | 0          | n +28.03 Da,K +28.03 Da, | 1242.918532 | 3 | 565.9726 | 90818496  | n.d. |
| SSAAAESAALKVRRPER        | Q8BGT5 | 0.02345216 | n +34.06 Da,K +34.06 Da, | 1243.307439 | 2 | 446.2678 | 245324992 | n.d. |
| VKIVTVKTQAYPDQKPGTSGLR   | Q9D0F9 | 0          | n +28.03 Da,K +28.03 Da, | 1244.212094 | 3 | 833.4941 | 1.786E+09 | n.d. |
| VLSGEDKSNIAAWGK          | P01942 | 0          | n +28.03 Da,K +28.03 Da, | 1244.477676 | 4 | 454.5147 | 4.827E+09 | n.d. |
| VKIVTVKTQAYPDQKPGTSGLR   | Q9D0F9 | 0          | n +34.06 Da,K +34.06 Da, | 1244.489299 | 4 | 631.4044 | 508952992 | n.d. |
| VKIVTVKTQAYPDQKPGTSGLR   | Q9D0F9 | 0          | n +28.03 Da,K +28.03 Da, | 1247.719064 | 4 | 625.3728 | 2.707E+10 | n.d. |
| REATQAVLDKPELSSDASTR     | P50544 | 0          | n +28.03 Da,             | 1254.866426 | 4 | 583.5597 | 68084704  | n.d. |
| KTLKGLNSDSVTEETLR        | Q8C196 | 0          | n +28.03 Da,K +28.03 Da, | 1256.284236 | 3 | 659.0404 | 1.867E+09 | n.d. |
| PTKVVAVDCGKINNVR         | Q8C196 | 0          | n +14.02 Da,K +28.03 Da, | 1257.721256 | 3 | 651.7151 | 3.151E+09 | n.d. |
| TVDSKSLFHHR              | Q8C196 | 0.011846   | n +34.06 Da,K +34.06 Da, | 1260.66701  | 4 | 355.9621 | 658673984 | n.d. |
| PDVEAKVHEEIDR            | P56593 | 0.00950951 | n +14.02 Da,K +28.03 Da, | 1263.903919 | 4 | 395.4583 | 84011000  | n.d. |
| VKIVTVKTQAYPDQKPGTSGLR   | Q9D0F9 | 0          | n +28.03 Da,K +28.03 Da, | 1267.535658 | 5 | 500.5003 | 2.376E+10 | n.d. |
| TVPFDKETGFHR             | Q9D8T7 | 0          | n +28.03 Da,K +28.03 Da, | 1274.571039 | 4 | 373.201  | 155532992 | n.d. |
| PDVEAKVHEEIDR            | P56593 | 0.00950951 | n +14.02 Da,K +28.03 Da, | 1275.796067 | 4 | 395.4693 | 827033024 | n.d. |
| LYFHIGETEK               | Q8R1V4 | 0          | n +34.06 Da,             | 1276.385213 | 3 | 487.6226 | 118584000 | n.d. |
| DKLHVDPENFR              | P02088 | 0.04266667 | n +28.03 Da,K +28.03 Da, | 1277.871604 | 3 | 475.9212 | 90710096  | n.d. |
| TVKEALVDKGEEFSGR         | P33267 | 0          | n +28.03 Da,K +28.03 Da, | 1278.405631 | 4 | 462.9987 | 133283000 | n.d. |
| LYFHIGETEK               | Q8R1V4 | 0          | n +28.03 Da,             | 1280.425917 | 4 | 362.9531 | 4.067E+09 | n.d. |
| TVDSKSLFHHR              | Q8C196 | 0.011846   | n +34.06 Da,K +34.06 Da, | 1280.446695 | 4 | 355.9535 | 28296100  | n.d. |
| SSTSAVPQITTHYTVHPR       | Q921G7 | 0          | n +34.06 Da,             | 1282.83216  | 2 | 504.7743 | 598672000 | n.d. |
| AASKVKQDMPPPGYGPIDYKR    | Q9ERS2 | 0          | n +28.03 Da,K +28.03 Da, | 1289.272603 | 4 | 622.591  | 229832992 | n.d. |
| AASKVKQDMPPPGYGPIDYKR    | Q9ERS2 | 0          | n +34.06 Da,K +34.06 Da, | 1289.723689 | 4 | 628.6221 | 231351008 | n.d. |
| AKIAKTHEDIAQIR           | Q99NB9 | 0          | n +42.03 Da,K +28.03 Da, | 1292.004345 | 2 | 911.0144 | 17387800  | n.d. |
| SDSRDPASDQMKQWKEQR       | P24270 | 0          | n +42.03 Da,K +28.03 Da, | 1292.050616 | 4 | 573.2774 | 607838016 | n.d. |
| TVKEALVDKGEEFSGR         | P33267 | 0          | n +28.03 Da,K +28.03 Da, | 1296.368144 | 4 | 463.0074 | 266999008 | n.d. |
| PVPRVHPRQRSGR            | J3QM90 | 0.04724409 | n +17.03 Da,             | 1301.326298 | 3 | 520.3039 | 8.737E+09 | n.d. |
| DDFDEEETEEKVPVKKSVR      | Q61937 | 0          | n +34.06 Da,K +34.06 Da, | 1304.401649 | 4 | 604.5939 | 277899008 | n.d. |
| KATIPAALQAQESTEGPGTQDRPR | Q9DBG1 | 0          | n +34.06 Da,K +34.06 Da, | 1307.092056 | 4 | 662.6153 | 10209100  | n.d. |
| HPVVLTKFVEGAR            | Q8C196 | 0          | n +34.06 Da,K +34.06 Da, | 1307.769704 | 3 | 507.6576 | 242608000 | n.d. |
| VKIVTVKTQAYPDQKPGTSGLR   | Q9D0F9 | 0          | n +34.06 Da,K +34.06 Da, | 1308.239764 | 5 | 505.3242 | 2.132E+09 | n.d. |
| ASGADSKGDDLSTAILKQKNRPNR | Q01853 | 0.01540684 | n +42.03 Da,K +34.06 Da, | 1310.929641 | 5 | 538.1121 | 196240000 | n.d. |
| HPVLLTEAPLNPKANR         | P60710 | 0          | n +34.06 Da,K +34.06 Da, | 1315.206576 | 3 | 613.3804 | 120212000 | n.d. |
| PQKVNIHGGAIVSLGHPIGMSGAR | Q8QZT1 | 0          | n +14.02 Da,K +28.03 Da, | 1316.052982 | 5 | 465.858  | 805894016 | n.d. |
| GVQVSPSGEKITHTGQVYDEKDYR | P52503 | 0          | n +28.03 Da,K +28.03 Da, | 1321.070524 | 5 | 556.2884 | 6.623E+09 | n.d. |
| PQKVNIHGGAIVSLGHPIGMSGAR | Q8QZT1 | 0          | n +14.02 Da,K +28.03 Da, | 1322.697949 | 4 | 582.0699 | 294796992 | n.d. |
| GVQVSPSGEKITHTGQVYDEKDYR | P52503 | 0          | n +28.03 Da,K +28.03 Da, | 1323.763807 | 4 | 695.1078 | 8.278E+09 | n.d. |
| TIEDIEVAPPKAHEVR         | P00329 | 0          | n +34.06 Da,K +34.06 Da, | 1324.217101 | 4 | 468.7721 | 168091008 | n.d. |
| VATKKTEQGPPSSEYIFER      | P29758 | 0          | n +34.06 Da,K +34.06 Da, | 1326.323182 | 3 | 757.1019 | 89421504  | n.d. |

|                          |        |            |                                      |             |   |          |           |      |
|--------------------------|--------|------------|--------------------------------------|-------------|---|----------|-----------|------|
| FWCGKPVQSQVQLKGR         | P11725 | 0.03851321 | n +28.03 Da,K +28.03 Da,             | 1333.871374 | 4 | 501.2813 | 1.174E+09 | n.d. |
| HPVVLTKFVEGAR            | Q8C196 | 0.00111732 | n +28.03 Da,K +28.03 Da,             | 1335.052364 | 3 | 503.6362 | 560576000 | n.d. |
| THINYGVKGDVAVIR          | Q8BMS1 | 0          | n +34.06 Da,K +34.06 Da,             | 1335.392659 | 4 | 428.2753 | 276380000 | n.d. |
| SDSRDPASDQMKQWKEQR       | P24270 | 0          | n +42.03 Da,K +34.06 Da,             | 1338.196978 | 4 | 576.2929 | 414385984 | n.d. |
| SGPGGLHADLLR             | Q8BWF0 | 0          | n +28.03 Da,                         | 1345.413867 | 3 | 407.5552 | 244496992 | n.d. |
| MDERRTIKLECYR            | Q8K012 | 0.02164706 | n +14.02 Da,K +28.03 Da,             | 1346.147683 | 3 | 633.6574 | 334217984 | n.d. |
| TIEDIEVAPPKAHEVR         | P00329 | 0.00217391 | n +14.02 Da,K +28.03 Da,             | 1352.961326 | 3 | 616.0083 | 28080700  | n.d. |
| SLHGAAVTTVEGIGSTKTR      | G3X982 | 0          | n +28.03 Da,K +28.03 Da,             | 1353.271289 | 3 | 647.6969 | 56983500  | n.d. |
| SSAASSKELLMKLR           | Q9CZR8 | 0          | n +28.03 Da,K +28.03 Da,             | 1354.122807 | 4 | 401.9961 | 3.521E+09 | n.d. |
| ATTLDLKSKEEKDAELDKR      | Q8VC31 | 0.00111732 | n +42.03 Da,K +34.06 Da,             | 1356.617994 | 4 | 592.8608 | 610888000 | n.d. |
| PAAFKHLVQESLR            | Q8VC12 | 0          | n +14.02 Da,K +28.03 Da,             | 1357.106804 | 2 | 513.2984 | 281744992 | n.d. |
| AEDIKTKIKNYK             | P56391 | 0.00111732 | n +42.03 Da,K +28.03 Da,             | 1358.761638 | 3 | 535.6577 | 1.806E+09 | n.d. |
| ATTLDLKSKEEKDAELDKR      | Q8VC31 | 0.00111732 | n +42.03 Da,K +34.06 Da,             | 1359.311004 | 5 | 474.4906 | 1.031E+09 | n.d. |
| TIEDIEVAPPKAHEVR         | P00329 | 0          | n +28.03 Da,K +28.03 Da,             | 1362.481765 | 4 | 465.7615 | 386451008 | n.d. |
| KATIPAALQAQESTEGPGTQDRPR | Q9DBG1 | 0          | n +28.03 Da,K +28.03 Da,             | 1369.065343 | 4 | 659.6007 | 4.109E+09 | n.d. |
| DDDFDEEETEKVVPKKSVR      | Q61937 | 0          | n +34.06 Da,K +34.06 Da,             | 1369.163433 | 4 | 633.3513 | 195363008 | n.d. |
| ASGADSKGDDLSTAILKQKNRPNR | Q01853 | 0          | n +42.03 Da,K +34.06 Da,             | 1370.624744 | 4 | 672.388  | 2.204E+09 | n.d. |
| DDDFDEEETEKVVPKKSVR      | Q61937 | 0          | n +28.03 Da,K +28.03 Da,             | 1371.016259 | 4 | 627.3186 | 205776000 | n.d. |
| ASGADSKGDDLSTAILKQKNRPNR | Q01853 | 0          | n +42.03 Da,K +28.03 Da,             | 1372.60227  | 5 | 534.4946 | 6.671E+09 | n.d. |
| PHGGFPEPFR               | Q05920 | 0.02082347 | n +14.02 Da,                         | 1376.20462  | 3 | 385.5294 | 770686016 | n.d. |
| VLSGEDKSNIKAAWGK         | P01942 | 0.00111732 | n +28.03 Da,K +28.03 Da,             | 1385.601656 | 4 | 454.5142 | 686696000 | n.d. |
| LVEIAAKNLQAQVSHR         | Q9R0H0 | 0          | n +28.03 Da,K +28.03 Da,             | 1388.988992 | 3 | 611.6939 | 116108000 | n.d. |
| LSPKQEEALAKFR            | Q99J08 | 0.00111732 | n +28.03 Da,K +28.03 Da,             | 1393.941954 | 4 | 400.9912 | 159372000 | n.d. |
| GDTTHTLVKINYTGR          | P49429 | 0.00111732 | n +28.03 Da,                         | 1395.922965 | 3 | 620.9964 | 506836992 | n.d. |
| ASGADSKGDDLSTAILKQKNRPNR | Q01853 | 0          | n +42.03 Da,K +28.03 Da,             | 1396.649749 | 4 | 667.8646 | 5.349E+09 | n.d. |
| LRVESELGSLPKR            | P42925 | 0.0297619  | n +28.03 Da,K +28.03 Da,             | 1400.121473 | 4 | 385.7351 | 66249200  | n.d. |
| STQSAVSKAGAGAVPKLSHLPR   | Q9DC70 | 0          | n +28.03 Da,K +28.03 Da,             | 1400.32347  | 5 | 469.8786 | 43895600  | n.d. |
| LDLKKELSEPSSTR           | Q8C196 | 0          | n +34.06 Da,K +34.06 Da,             | 1400.708949 | 4 | 569.0391 | 381656000 | n.d. |
| STQSAVSKAGAGAVPKLSHLPR   | Q9DC70 | 0          | n +28.03 Da,K +28.03 Da,             | 1407.150915 | 4 | 587.096  | 143128992 | n.d. |
| YSKDSEGSWFR              | O55125 | 0          | n +28.03 Da,K +28.03 Da,             | 1418.404911 | 3 | 473.2291 | 900083008 | n.d. |
| YSKDSEGSWFR              | O55125 | 0          | n +28.03 Da,K +28.03 Da,             | 1423.962046 | 2 | 709.3396 | 428155008 | n.d. |
| RYQKSTELLIR              | P02301 | 0.04499338 | n +28.03 Da,K +28.03 Da,             | 1427.272869 | 3 | 488.2926 | 547315968 | n.d. |
| PANEDQKIGIEIKR           | P63038 | 0          | n +14.02 Da,K +28.03 Da,             | 1432.517358 | 3 | 598.6868 | 424355008 | n.d. |
| PANEDQKIGIEIKR           | P63038 | 0          | n +14.02 Da,K +28.03 Da,             | 1433.984454 | 4 | 449.2672 | 2.112E+09 | n.d. |
| FVQQPVHNLLMGGTKEQR       | O88587 | 0          | n +28.03 Da,K +28.03 Da,             | 1436.71746  | 4 | 535.2944 | 811516992 | n.d. |
| PPVIQNPEYKGEWKPR         | P14211 | 0          | n +14.02 Da,n +28.03 Da,K +28.03 Da, | 1438.619716 | 4 | 502.7807 | 364740000 | n.d. |
| FVQQPVHNLLMGGTKEQR       | O88587 | 0          | n +28.03 Da,K +28.03 Da,             | 1442.21181  | 2 | 535.2939 | 137648000 | n.d. |
| PANLDLKKELSEPSSTR        | Q8C196 | 0          | n +14.02 Da,K +28.03 Da,             | 1448.572178 | 3 | 652.3647 | 1.47E+10  | n.d. |
| PPVIQNPEYKGEWKPR         | P14211 | 0          | n +17.03 Da,n +34.06 Da,K +34.06 Da, | 1449.998866 | 4 | 506.5503 | 88460600  | n.d. |
| TSVATKKTEQPPSSEYIFER     | P29758 | 0          | n +28.03 Da,K +28.03 Da,             | 1451.079675 | 3 | 813.7642 | 324636000 | n.d. |

|                           |        |            |                                      |             |   |          |           |      |
|---------------------------|--------|------------|--------------------------------------|-------------|---|----------|-----------|------|
| LDLKKELSEPSSTR            | Q8C196 | 0          | n +34.06 Da,K +34.06 Da,             | 1453.524526 | 3 | 569.0246 | 128306000 | n.d. |
| PANLDLKKELSEPSSTR         | Q8C196 | 0          | n +14.02 Da,K +28.03 Da,             | 1453.936158 | 4 | 489.526  | 1.811E+10 | n.d. |
| TSVATKKTEQGPPSSEYIFER     | P29758 | 0.00217391 | n +28.03 Da,K +28.03 Da,             | 1455.398338 | 4 | 610.5745 | 3.371E+09 | n.d. |
| PFTIKPLDR                 | P40142 | 0.01321586 | n +14.02 Da,K +28.03 Da,             | 1456.325739 | 3 | 376.8979 | 72749200  | n.d. |
| SVKGIATNDVGIQKDGAPKTTFER  | Q921G7 | 0          | n +28.03 Da,K +28.03 Da,             | 1463.629759 | 4 | 661.8718 | 159584000 | n.d. |
| SVKGIATNDVGIQKDGAPKTTFER  | Q921G7 | 0.00662589 | n +28.03 Da,K +28.03 Da,             | 1464.133126 | 5 | 529.6993 | 83287800  | n.d. |
| TMNFDVIKGPVPR             | P29341 | 0          | n +34.06 Da,K +34.06 Da,             | 1465.684405 | 4 | 402.5102 | 144592000 | n.d. |
| PALDSELTSLKLR             | Q99KK7 | 0          | n +14.02 Da,n +28.03 Da,K +28.03 Da, | 1466.218207 | 4 | 382.7329 | 977208000 | n.d. |
| EWHTIILASDKR              | B5X0G2 | 0          | n +28.03 Da,K +28.03 Da,             | 1469.313727 | 4 | 381.9674 | 92574600  | n.d. |
| PANLDLKKELSEPSSTR         | Q8C196 | 0          | n +17.03 Da,K +34.06 Da,             | 1469.936956 | 4 | 493.2952 | 330168000 | n.d. |
| PEADKIFLER                | P26443 | 0.00809717 | n +14.02 Da,K +28.03 Da,             | 1473.814051 | 3 | 420.5713 | 312236000 | n.d. |
| STQSAVSKAGAGAVPKLSHLPR    | Q9DC70 | 0          | n +28.03 Da,K +28.03 Da,             | 1479.728428 | 5 | 469.8792 | 1.364E+09 | n.d. |
| STQSAVSKAGAGAVPKLSHLPR    | Q9DC70 | 0          | n +28.03 Da,K +28.03 Da,             | 1480.414432 | 4 | 587.0967 | 2.299E+09 | n.d. |
| VLSAPPHFHFGQTNR           | Q9D8N0 | 0          | n +28.03 Da,                         | 1481.801031 | 4 | 434.7332 | 440241984 | n.d. |
| SLKPANEDQKIGIEIIKR        | P63038 | 0          | n +34.06 Da,K +34.06 Da,             | 1484.102635 | 4 | 547.8632 | 355052000 | n.d. |
| SLKPANEDQKIGIEIIKR        | P63038 | 0          | n +34.06 Da,K +34.06 Da,             | 1486.318343 | 5 | 438.492  | 370460992 | n.d. |
| SLKPANEDQKIGIEIIKR        | P63038 | 0          | n +28.03 Da,K +28.03 Da,             | 1487.916468 | 5 | 433.6669 | 216716000 | n.d. |
| KHGGTIPVPTAEFQDR          | P26443 | 0.01771182 | n +34.06 Da,K +34.06 Da,             | 1488.781466 | 3 | 640.703  | 80387400  | n.d. |
| KAGPWTPEAAVEHPEAVR        | O35490 | 0.03013699 | n +28.03 Da,K +28.03 Da,             | 1488.948406 | 4 | 501.0214 | 53734600  | n.d. |
| VLSAPPHFHFGQTNR           | Q9D8N0 | 0          | n +28.03 Da,                         | 1488.997051 | 2 | 434.7312 | 11630200  | n.d. |
| PGLGVREPVFMRLR            | Q91ZIO | 0.04048043 | n +34.06 Da,                         | 1490.129958 | 4 | 415.9968 | 122829000 | n.d. |
| SGKYDLDFKSPDDPSR          | P17182 | 0.00111732 | n +28.03 Da,K +28.03 Da,             | 1493.812364 | 4 | 478.4925 | 1.132E+09 | n.d. |
| YQQLIKENLKEIAR            | Q9EQ20 | 0.00759494 | n +28.03 Da,K +28.03 Da,             | 1494.593988 | 4 | 458.2763 | 271673984 | n.d. |
| MEGYHKPDQQKLQALKDTANR     | P40142 | 0          | n +42.03 Da,K +28.03 Da,             | 1495.129113 | 3 | 866.454  | 5.005E+09 | n.d. |
| ATSASSHLNKGIKQMY          | P15105 | 0          | n +42.03 Da,n +28.03 Da,K +28.03 Da, | 1496.309454 | 3 | 611.9883 | 1.379E+09 | n.d. |
| MEGYHKPDQQKLQALKDTANR     | P40142 | 0          | n +42.03 Da,K +28.03 Da,             | 1496.847381 | 4 | 650.0925 | 4.472E+09 | n.d. |
| MEGYHKPDQQKLQALKDTANR     | P40142 | 0          | n +42.03 Da,K +28.03 Da,             | 1497.153011 | 5 | 520.2763 | 4.105E+09 | n.d. |
| MEGYHKPDQQKLQALKDTANR     | P40142 | 0.02082347 | n +42.03 Da,K +34.06 Da,             | 1497.83706  | 5 | 523.8946 | 771548032 | n.d. |
| SSAPDPPTVKKEPLKEKNFENPGLR | Q9CQQ0 | 0.00166759 | n +42.03 Da,n +34.06 Da,K +34.06 Da, | 1498.385104 | 4 | 739.939  | 38504400  | n.d. |
| PSWGNHTPIFR               | P05202 | 0.0062273  | n +14.02 Da,                         | 1500.87332  | 3 | 442.5631 | 328366016 | n.d. |
| HAMNLEAVNTYEGTHDIH        | Q60759 | 0          | n +42.03 Da,                         | 1502.345879 | 3 | 698.6506 | 511937984 | n.d. |
| SGYFHPLLR                 | P10518 | 0.00111732 | n +28.03 Da,                         | 1507.349778 | 3 | 373.2094 | 99157600  | n.d. |
| MMGHRPVLVLSQNTKR          | P80318 | 0          | n +42.03 Da,K +34.06 Da,             | 1510.841542 | 4 | 486.5288 | 1.03E+09  | n.d. |
| GVDGKWR                   | Q91Y97 | 0.03611738 | n +28.03 Da,K +28.03 Da,             | 1514.203924 | 2 | 510.7851 | 88617800  | n.d. |
| PKVIQPEVDTPLR             | Q8VCU1 | 0          | n +14.02 Da,K +28.03 Da,             | 1514.477244 | 3 | 530.9794 | 630814976 | n.d. |
| GVDGKWR                   | Q91Y97 | 0.02164706 | n +28.03 Da,K +28.03 Da,             | 1518.403587 | 3 | 340.8589 | 2.633E+09 | n.d. |
| AWKSGGASHSELIHNL          | P23506 | 0          | n +42.03 Da,K +28.03 Da,             | 1521.3856   | 4 | 484.006  | 131690000 | n.d. |
| PPKEPMKDDITGEPLIR         | Q9WTP6 | 0.0057232  | n +14.02 Da,K +28.03 Da,             | 1527.552698 | 4 | 502.2803 | 389809984 | n.d. |
| RPPLGFLNPR                | O89023 | 0.00111732 | n +34.06 Da,                         | 1529.404625 | 3 | 400.919  | 387598016 | n.d. |
| QEHPVVLTKFVEGAR           | Q8C196 | 0          | n +28.03 Da,K +28.03 Da,             | 1529.781717 | 4 | 442.2543 | 50365700  | n.d. |

|                                |        |            |                                      |             |   |          |           |      |
|--------------------------------|--------|------------|--------------------------------------|-------------|---|----------|-----------|------|
| SRVDPDLSSFDSAPSEPKSR           | Q9R182 | 0.0062273  | n +28.03 Da,K +28.03 Da,             | 1529.92867  | 4 | 559.0346 | 33802800  | n.d. |
| SQEHPVVLTKFVEGAR               | Q8C196 | 0          | n +28.03 Da,                         | 1530.061931 | 4 | 464.0125 | 1.389E+09 | n.d. |
| SQEHPVVLTKFVEGAR               | Q8C196 | 0          | n +28.03 Da,                         | 1534.264342 | 3 | 618.3467 | 408801984 | n.d. |
| PQHWSEPEEFQPER                 | Q64459 | 0          | n +14.02 Da,                         | 1541.660313 | 3 | 603.9445 | 488188992 | n.d. |
| RPPLGFLNPR                     | O89023 | 0          | n +28.03 Da,                         | 1544.163978 | 3 | 398.9082 | 49965800  | n.d. |
| HGSIIYHPSLLPR                  | Q8K009 | 0          | n +42.03 Da,                         | 1551.347035 | 3 | 511.2837 | 792115968 | n.d. |
| SAGESFNKLVSGLR                 | Q9CPY7 | 0.00759494 | n +28.03 Da,K +28.03 Da,             | 1555.315411 | 4 | 419.9937 | 140984000 | n.d. |
| QTISQGAIEKVKDATR               | Q8C196 | 0          | n +28.03 Da,K +28.03 Da,             | 1555.430557 | 4 | 458.0199 | 152731008 | n.d. |
| ATLQESEVKVDGGEQKLSKNELKR       | Q99MN1 | 0          | n +42.03 Da,K +34.06 Da,             | 1556.308715 | 2 | 702.6751 | 16133200  | n.d. |
| PNIKIFSGSSHQDLSQKIADR          | Q9D7G0 | 0          | n +14.02 Da,K +28.03 Da,             | 1556.953291 | 5 | 483.0669 | 2.439E+09 | n.d. |
| TKKEIDQEAAVEVSQLR              | Q9CR68 | 0          | n +28.03 Da,K +28.03 Da,             | 1558.923832 | 3 | 676.7141 | 2.293E+09 | n.d. |
| TQTISQGAIEKVKDATR              | Q8C196 | 0          | n +28.03 Da,K +28.03 Da,             | 1559.833754 | 3 | 644.0369 | 144931008 | n.d. |
| ATLQESEVKVDGGEQKLSKNELKR       | Q99MN1 | 0          | n +42.03 Da,K +34.06 Da,             | 1560.011309 | 5 | 562.3409 | 1.417E+09 | n.d. |
| TVKWFFNVR                      | P62960 | 0.00422833 | n +34.06 Da,K +34.06 Da,             | 1562.208811 | 3 | 373.2431 | 153444992 | n.d. |
| ATLQESEVKVDGGEQKLSKNELKR       | Q99MN1 | 0          | n +42.03 Da,K +34.06 Da,             | 1563.818188 | 4 | 702.6749 | 860564992 | n.d. |
| SHTDVKVPDFSDYR                 | Q9CR68 | 0          | n +28.03 Da,K +28.03 Da,             | 1565.367044 | 3 | 574.6209 | 139016992 | n.d. |
| LPKNWDWR                       | Q9WUU7 | 0.00111732 | n +28.03 Da,K +28.03 Da,             | 1566.505273 | 3 | 390.8856 | 1.101E+10 | n.d. |
| AIDMEKAQALVQKR                 | Q9CQQ7 | 0          | n +28.03 Da,K +28.03 Da,             | 1567.011332 | 4 | 454.0147 | 259048000 | n.d. |
| IIAVDINKDKFAK                  | P00329 | 0          | n +28.03 Da,K +28.03 Da,             | 1569.891293 | 4 | 397.5022 | 204008000 | n.d. |
| AHGSVVKSEDYAFPTYADR            | P19783 | 0          | n +14.02 Da,K +28.03 Da,             | 1571.205987 | 3 | 719.0197 | 666353984 | n.d. |
| SDGHSEFLKAASNLR                | P27773 | 0          | n +34.06 Da,K +34.06 Da,             | 1574.859661 | 4 | 425.7398 | 108426000 | n.d. |
| HAMNLEAVNTYEGTHDIH             | Q60759 | 0          | n +28.03 Da,                         | 1576.061618 | 3 | 693.9897 | 313848992 | n.d. |
| AHYHDNYGKNDEVEFVR              | P25688 | 0          | n +42.03 Da,K +34.06 Da,             | 1576.143457 | 2 | 1085.035 | 725086016 | n.d. |
| PTTPSGDESMEEHLAVMHER           | B8JJ66 | 0          | n +14.02 Da,                         | 1577.088521 | 4 | 567.5066 | 469945984 | n.d. |
| SLSNKLTLDKLDVKGKR              | P09411 | 0.00422833 | n +42.03 Da,n +34.06 Da,K +34.06 Da, | 1577.33752  | 4 | 524.1058 | 604225024 | n.d. |
| AHYHDNYGKNDEVEFVR              | P25688 | 0          | n +42.03 Da,K +34.06 Da,             | 1577.612447 | 4 | 543.0218 | 2.82E+10  | n.d. |
| AHGSVVKSEDYAFPTYADR            | P19783 | 0          | n +28.03 Da,K +28.03 Da,             | 1577.867715 | 3 | 723.6916 | 3.579E+10 | n.d. |
| TYKDTLLPKLPR                   | P49429 | 0.04048043 | n +34.06 Da,K +34.06 Da,             | 1581.212628 | 4 | 387.5109 | 125314000 | n.d. |
| PGDNVGFNVKNVSVKDIR             | P62631 | 0          | n +14.02 Da,n +28.03 Da,K +28.03 Da, | 1588.194377 | 2 | 507.7867 | 443222016 | n.d. |
| PQLQHFIETQKQR                  | Q9WVA2 | 0          | n +14.02 Da,K +28.03 Da,             | 1592.226563 | 3 | 641.6859 | 241794000 | n.d. |
| SSSSTSQETPSEKKEETDPLQDKSISLYQR | Q8BGY7 | 0          | n +34.06 Da,K +34.06 Da,             | 1592.372753 | 5 | 705.1811 | 201991008 | n.d. |
| VSQEHPVVLTKFVEGAR              | Q8C196 | 0          | n +14.02 Da,K +28.03 Da,             | 1594.24202  | 4 | 485.2751 | 451908000 | n.d. |
| ATLQESEVKVDGGEQKLSKNELKR       | Q99MN1 | 0          | n +42.03 Da,K +28.03 Da,             | 1594.257294 | 4 | 696.643  | 769140992 | n.d. |
| PGDNVGFNVKNVSVKDIR             | P62631 | 0          | n +14.02 Da,n +28.03 Da,K +28.03 Da, | 1596.497504 | 4 | 507.7868 | 731622976 | n.d. |
| SSSSTSQETPSEKKEETDPLQDKSISLYQR | Q8BGY7 | 0          | n +28.03 Da,K +28.03 Da,             | 1596.961835 | 5 | 700.3525 | 294731008 | n.d. |
| MKETIMNQEKLAKLQAQVR            | Q64152 | 0          | n +28.03 Da,K +28.03 Da,             | 1599.742511 | 4 | 593.5947 | 138995008 | n.d. |
| SGDHLHNSQIEADFR                | Q04750 | 0.00373134 | n +42.03 Da,                         | 1609.148942 | 3 | 628.2819 | 51730700  | n.d. |
| PTQTISQGAIEKVKDATR             | Q8C196 | 0          | n +14.02 Da,K +28.03 Da,             | 1609.458613 | 3 | 671.7157 | 972593024 | n.d. |
| SLSNKLTLDKLDVKGKR              | P09411 | 0          | n +42.03 Da,n +34.06 Da,K +34.06 Da, | 1611.582304 | 3 | 698.4696 | 2.373E+09 | n.d. |
| PTQTISQGAIEKVKDATR             | Q8C196 | 0          | n +14.02 Da,K +28.03 Da,             | 1611.804312 | 4 | 504.0387 | 855097984 | n.d. |

|                          |        |            |                                      |             |   |          |           |      |
|--------------------------|--------|------------|--------------------------------------|-------------|---|----------|-----------|------|
| IQRIENLACITSLRFLSLAR     | Q9DAP0 | 0.04836601 | n +14.02 Da,                         | 1616.32469  | 4 | 597.8495 | 29281500  | n.d. |
| TFASQVTLGDKVKVER         | Q9DCW4 | 0          | n +28.03 Da,K +28.03 Da,             | 1619.110744 | 4 | 498.5346 | 515686016 | n.d. |
| TVEVLPQHKFDLR            | Q80XL6 | 0.00373134 | n +28.03 Da,K +28.03 Da,             | 1629.598819 | 4 | 410.2444 | 192540000 | n.d. |
| HYLFDVQR                 | Q9CQQ7 | 0.00422833 | n +28.03 Da,                         | 1629.790209 | 2 | 553.2911 | 80544200  | n.d. |
| SKATEATKIAIDAGFR         | P70694 | 0.0466139  | n +34.06 Da,K +34.06 Da,             | 1630.813917 | 3 | 594.3705 | 673985024 | n.d. |
| GSVVKSEDYAFPTYADRR       | P19783 | 0          | n +34.06 Da,K +34.06 Da,             | 1632.584726 | 4 | 533.0371 | 805944000 | n.d. |
| AHGSVVKSEDYAFPTYADR      | P19783 | 0          | n +34.06 Da,K +34.06 Da,             | 1635.64775  | 3 | 727.7111 | 364140992 | n.d. |
| SLSNKLTLDKLDVKGKR        | P09411 | 0.02645012 | n +42.03 Da,n +28.03 Da,K +28.03 Da, | 1637.03351  | 4 | 518.0737 | 1.224E+11 | n.d. |
| SLSNKLTLDKLDVKGKR        | P09411 | 0.00422833 | n +42.03 Da,n +34.06 Da,K +34.06 Da, | 1637.605335 | 2 | 524.1035 | 2.421E+10 | n.d. |
| PEEGGASKSLFFPDEAINKHPR   | P97494 | 0          | n +14.02 Da,K +28.03 Da,             | 1640.272296 | 4 | 624.8264 | 125835000 | n.d. |
| SLSNKLTLDKLDVKGKR        | P09411 | 0.03523035 | n +42.03 Da,n +28.03 Da,K +28.03 Da, | 1641.98525  | 5 | 414.6594 | 5.565E+10 | n.d. |
| SLSNKLTLDKLDVKGKR        | P09411 | 0          | n +42.03 Da,n +34.06 Da,K +34.06 Da, | 1643.544554 | 2 | 1047.199 | 783492992 | n.d. |
| SLSNKLTLDKLDVKGKR        | P09411 | 0.00111732 | n +42.03 Da,n +28.03 Da,K +28.03 Da, | 1644.678865 | 3 | 690.4267 | 5.708E+10 | n.d. |
| ATLQESEVKVDGGEQKLSKNELKR | Q99MN1 | 0          | n +42.03 Da,K +28.03 Da,             | 1645.596921 | 5 | 557.5153 | 1.879E+10 | n.d. |
| SLSNKLTLDKLDVKGKR        | P09411 | 0          | n +42.03 Da,n +28.03 Da,K +28.03 Da, | 1646.161217 | 2 | 1035.137 | 1.659E+09 | n.d. |
| ATLQESEVKVDGGEQKLSKNELKR | Q99MN1 | 0          | n +42.03 Da,K +34.06 Da,             | 1652.002753 | 5 | 562.3401 | 1.033E+10 | n.d. |
| SLSNKLTLDKLDVKGKR        | P09411 | 0.02645012 | n +42.03 Da,n +28.03 Da,K +28.03 Da, | 1652.820184 | 2 | 518.0737 | 2.47E+10  | n.d. |
| SLSNKLTLDKLDVKGKR        | P09411 | 0          | n +42.03 Da,n +34.06 Da,K +34.06 Da, | 1655.066831 | 3 | 698.4687 | 9.575E+09 | n.d. |
| ALTPEQKELSEIAQR          | Q91Y97 | 0          | n +34.06 Da,K +34.06 Da,             | 1660.222242 | 3 | 648.4045 | 2.54E+09  | n.d. |
| VSQEHPPVLTKFVEGAR        | Q8C196 | 0          | n +28.03 Da,K +28.03 Da,             | 1660.377072 | 3 | 651.3696 | 437609984 | n.d. |
| ATEGMILTNDHDHQR          | Q8BUV3 | 0          | n +42.03 Da,                         | 1664.306778 | 3 | 593.2925 | 1.197E+09 | n.d. |
| PKDISEFQHEEFYR           | Q9CQN1 | 0          | n +14.02 Da,K +28.03 Da,             | 1666.368645 | 4 | 467.481  | 201748000 | n.d. |
| SLMPQKKNPDSLELIR         | Q91Y10 | 0.01497585 | n +34.06 Da,K +34.06 Da,             | 1672.776705 | 4 | 493.5603 | 89615800  | n.d. |
| SVDEVNYYWDKQDHPISR       | P50136 | 0          | n +28.03 Da,                         | 1674.488022 | 4 | 536.7646 | 19180500  | n.d. |
| SLMPQKKNPDSLELIR         | Q91Y10 | 0.02082347 | n +28.03 Da,K +28.03 Da,             | 1675.906755 | 4 | 489.035  | 355988000 | n.d. |
| VSQEHPPVLTKFVEGAR        | Q8C196 | 0          | n +42.03 Da,K +28.03 Da,             | 1681.600883 | 4 | 492.2828 | 54116400  | n.d. |
| SHMPYTDAMIHEVQR          | Q64458 | 0          | n +28.03 Da,                         | 1684.534819 | 3 | 614.9589 | 392312992 | n.d. |
| SHMPYTDAMIHEVQR          | Q64458 | 0          | n +28.03 Da,                         | 1691.31224  | 4 | 461.4713 | 258659008 | n.d. |
| IDQEELNKTKPIWTR          | P07901 | 0.03089505 | n +28.03 Da,K +28.03 Da,             | 1692.485905 | 2 | 489.5363 | 19519900  | n.d. |
| SHTDVKVPDFSDYR           | Q9CR68 | 0          | n +28.03 Da,K +28.03 Da,             | 1696.456028 | 3 | 574.621  | 2.02E+10  | n.d. |
| SHTDVKVPDFSDYR           | Q9CR68 | 0          | n +28.03 Da,K +28.03 Da,             | 1696.858506 | 2 | 861.4279 | 31992700  | n.d. |
| LFSKYTDTMTFKER           | L62452 | 0          | n +28.03 Da,K +28.03 Da,             | 1701.409287 | 4 | 463.4979 | 479566016 | n.d. |
| PSKGPLQSVQVFGR           | P14131 | 0          | n +14.02 Da,K +28.03 Da,             | 1702.657194 | 3 | 514.6308 | 1.905E+09 | n.d. |
| FHQDQSSVGGTLAEDIEKAR     | Q60936 | 0          | n +28.03 Da,K +28.03 Da,             | 1706.716148 | 4 | 561.7865 | 2.552E+09 | n.d. |
| LTKFLEEHPGGEVLR          | P56395 | 0          | n +34.06 Da,K +34.06 Da,             | 1707.756342 | 5 | 481.2829 | 23325300  | n.d. |
| GVEFEKFLKTR              | P30115 | 0          | n +34.06 Da,K +34.06 Da,             | 1709.179248 | 4 | 397.0012 | 108979000 | n.d. |
| FHQDQSSVGGTLAEDIEKAR     | Q60936 | 0          | n +28.03 Da,K +28.03 Da,             | 1711.178322 | 3 | 748.7124 | 48230600  | n.d. |
| VLVNTTHKPFDIHVLHPYR      | A2ARV4 | 0.01953311 | n +14.02 Da,K +28.03 Da,             | 1712.936692 | 4 | 582.8305 | 52022900  | n.d. |
| IDQEELNKTKPIWTR          | P07901 | 0.03089505 | n +28.03 Da,K +28.03 Da,             | 1713.480736 | 4 | 489.536  | 227770000 | n.d. |
| PHLNKDLAFTLEER           | P06801 | 0          | n +14.02 Da,K +28.03 Da,             | 1722.018135 | 3 | 575.6487 | 1.906E+09 | n.d. |

|                           |        |            |                                      |             |   |          |           |      |
|---------------------------|--------|------------|--------------------------------------|-------------|---|----------|-----------|------|
| SLAKEGFEKISKGANPVEIR      | P63038 | 0.03732014 | n +28.03 Da,K +28.03 Da,             | 1723.625669 | 4 | 572.0861 | 842873024 | n.d. |
| FGVQVSPSGEKITHTGQVYDEKDYR | P52503 | 0          | n +28.03 Da,K +28.03 Da,             | 1725.13411  | 4 | 731.8743 | 5.561E+09 | n.d. |
| FGVQVSPSGEKITHTGQVYDEKDYR | P52503 | 0          | n +28.03 Da,K +28.03 Da,             | 1726.111243 | 5 | 585.7012 | 4.282E+09 | n.d. |
| SLAKEGFEKISKGANPVEIR      | P63038 | 0          | n +28.03 Da,K +28.03 Da,             | 1727.533922 | 3 | 762.4456 | 312163008 | n.d. |
| AEDIKTKIKNYKTAPFDSR       | P56391 | 0          | n +42.03 Da,K +34.06 Da,             | 1734.92328  | 3 | 801.8217 | 455016000 | n.d. |
| MHHQSVLHSGYFHPL           | P10518 | 0          | n +42.03 Da,                         | 1738.725755 | 2 | 916.4373 | 1.748E+09 | n.d. |
| PAKYLDEDTVYHLQPSGR        | Q91X83 | 0.011846   | n +14.02 Da,K +28.03 Da,             | 1740.03382  | 4 | 533.5244 | 633364992 | n.d. |
| MHHQSVLHSGYFHPL           | P10518 | 0          | n +42.03 Da,                         | 1740.075572 | 3 | 611.2938 | 1.811E+10 | n.d. |
| STSSMGTLPKQVKIVEVGPR      | P38060 | 0.03438914 | n +28.03 Da,K +28.03 Da,             | 1740.169574 | 3 | 550.3138 | 192455008 | n.d. |
| VLSGEDKSNIKAAWGKIGGH      | P01942 | 0          | n +28.03 Da,K +28.03 Da,             | 1749.13511  | 3 | 727.0783 | 2.165E+09 | n.d. |
| VLSGEDKSNIKAAWGKIGGH      | P01942 | 0.0005963  | n +34.06 Da,K +34.06 Da,             | 1749.690269 | 5 | 441.4757 | 282836992 | n.d. |
| FHMTKDMLPGSYPR            | Q9D6J5 | 0          | n +34.06 Da,K +34.06 Da,             | 1751.811592 | 3 | 583.3142 | 198972992 | n.d. |
| VLSGEDKSNIKAAWGKIGGH      | P01942 | 0          | n +28.03 Da,K +28.03 Da,             | 1757.191571 | 4 | 545.5612 | 4.607E+09 | n.d. |
| GIGALAEVAKKSLR            | Q60936 | 0          | n +34.06 Da,K +34.06 Da,             | 1758.704109 | 4 | 379.5173 | 27720900  | n.d. |
| AEDIKTKIKNYKTAPFDSR       | P56391 | 0.0212766  | n +42.03 Da,K +34.06 Da,             | 1762.96579  | 4 | 601.6188 | 186964000 | n.d. |
| GKNEEILNSLKYVR            | P11352 | 0          | n +34.06 Da,K +34.06 Da,             | 1764.024411 | 4 | 442.0316 | 795340992 | n.d. |
| TEVGHLIQVAAGSSNLKR        | P47738 | 0          | n +34.06 Da,K +34.06 Da,             | 1764.244017 | 4 | 487.7956 | 193870000 | n.d. |
| SSSDKQNNLYKLEAFR          | P54869 | 0.00217391 | n +34.06 Da,K +34.06 Da,             | 1764.58895  | 4 | 515.5467 | 72960496  | n.d. |
| FHMTKDMLPGSYPR            | Q9D6J5 | 0          | n +28.03 Da,K +28.03 Da,             | 1769.757325 | 3 | 579.2928 | 2.592E+09 | n.d. |
| VAPEEHPVLLTEAPLNPKANR     | P60710 | 0          | n +28.03 Da,K +28.03 Da,             | 1770.333403 | 4 | 588.5769 | 198290000 | n.d. |
| SSKPKSLEIIGAPFSKGQPR      | Q61176 | 0          | n +42.03 Da,K +28.03 Da,             | 1772.642276 | 4 | 564.0787 | 2.968E+09 | n.d. |
| GKNEEILNSLKYVR            | P11352 | 0.00111732 | n +28.03 Da,K +28.03 Da,             | 1772.965538 | 3 | 583.008  | 393896992 | n.d. |
| VEYEPKEKTFDKILIANR        | Q91ZA3 | 0.00217391 | n +34.06 Da,K +34.06 Da,             | 1775.295802 | 5 | 466.6942 | 236455008 | n.d. |
| AGKPVVLYHFDGR             | P30115 | 0          | n +42.03 Da,K +34.06 Da,             | 1776.397413 | 2 | 479.2678 | 55839500  | n.d. |
| GEKAHPLFTFLR              | P11352 | 0.01321586 | n +34.06 Da,K +34.06 Da,             | 1780.867664 | 4 | 371.7312 | 292996000 | n.d. |
| SSKPKSLEIIGAPFSKGQPR      | Q61176 | 0          | n +42.03 Da,K +34.06 Da,             | 1784.448936 | 4 | 568.6024 | 4.864E+09 | n.d. |
| SSKPKSLEIIGAPFSKGQPR      | Q61176 | 0          | n +42.03 Da,K +34.06 Da,             | 1788.703723 | 3 | 757.8011 | 105057000 | n.d. |
| PILGVTEAFKR               | P05202 | 0          | n +14.02 Da,n +28.03 Da,             | 1803.901989 | 3 | 424.9272 | 1.744E+09 | n.d. |
| LEKFNNVEAGKYTVGLGQTR      | P54869 | 0          | n +28.03 Da,K +28.03 Da,             | 1807.662907 | 4 | 577.8185 | 4387260   | n.d. |
| TEVGHLIQVAAGSSNLKR        | P47738 | 0          | n +28.03 Da,K +28.03 Da,             | 1814.463914 | 4 | 484.7799 | 70952400  | n.d. |
| PLPPLPEYGGKVR             | Q9CQQ7 | 0.02164706 | n +17.03 Da,K +34.06 Da,             | 1816.270375 | 2 | 491.9729 | 25836100  | n.d. |
| TLNIYTWIR                 | E9QAB5 | 0.04724409 | n +42.03 Da,                         | 1821.831569 | 2 | 611.323  | 9179980   | n.d. |
| PLDKHEGALETLR             | Q9WU78 | 0          | n +14.02 Da,K +28.03 Da,             | 1823.725759 | 3 | 545.3148 | 341696992 | n.d. |
| AGQSDKDKVKYYTLEEIQKHK     | P56395 | 0          | n +42.03 Da,n +28.03 Da,K +28.03 Da, | 1824.72279  | 5 | 507.6765 | 458784000 | n.d. |
| AGQSDKDKVKYYTLEEIQKHK     | P56395 | 0          | n +42.03 Da,n +28.03 Da,K +28.03 Da, | 1826.284547 | 4 | 634.3425 | 594440000 | n.d. |
| LEKFNNVEAGKYTVGLGQTR      | P54869 | 0.00111732 | n +28.03 Da,K +28.03 Da,             | 1829.486388 | 3 | 770.0938 | 86801104  | n.d. |
| SSVEYEPKEKTFDKILIANR      | Q91ZA3 | 0          | n +34.06 Da,K +34.06 Da,             | 1830.965024 | 5 | 501.5076 | 746875008 | n.d. |
| SSVEYEPKEKTFDKILIANR      | Q91ZA3 | 0          | n +34.06 Da,K +34.06 Da,             | 1831.612835 | 3 | 835.1747 | 356316992 | n.d. |
| SSVEYEPKEKTFDKILIANR      | Q91ZA3 | 0          | n +28.03 Da,K +28.03 Da,             | 1832.627808 | 3 | 827.1317 | 617508992 | n.d. |
| SIKVVGYDMSKEAAR           | P32020 | 0          | n +28.03 Da,K +28.03 Da,             | 1832.73223  | 3 | 617.6853 | 103949000 | n.d. |

|                            |        |            |                                      |             |   |          |           |      |
|----------------------------|--------|------------|--------------------------------------|-------------|---|----------|-----------|------|
| SSVEYEPKEKTFDKILIANR       | Q91ZA3 | 0          | n +28.03 Da,K +28.03 Da,             | 1832.855853 | 5 | 496.6821 | 2.154E+09 | n.d. |
| SSVEYEPKEKTFDKILIANR       | Q91ZA3 | 0          | n +28.03 Da,K +28.03 Da,             | 1833.803853 | 4 | 620.6009 | 6.038E+09 | n.d. |
| LEKFNNVEAGKYTVGLGQTR       | P54869 | 0          | n +34.06 Da,K +34.06 Da,             | 1833.855452 | 4 | 582.3459 | 195739008 | n.d. |
| PLPPLPEYGGKVR              | Q9CQQ7 | 0.00111732 | n +14.02 Da,K +28.03 Da,             | 1841.361675 | 3 | 488.9571 | 1.27E+09  | n.d. |
| PYNMLPPKAASGTKEPNLVPSISNKR | P19536 | 0          | n +14.02 Da,K +28.03 Da,             | 1846.350843 | 5 | 605.3336 | 398545984 | n.d. |
| AASKVKQDMPPPGGYGPIDYKR     | Q9ERS2 | 0          | n +42.03 Da,K +28.03 Da,             | 1847.748893 | 4 | 626.0858 | 1.3E+09   | n.d. |
| AGQSDKDKVYYTLEEIQKHKD      | P56395 | 0          | n +42.03 Da,n +28.03 Da,K +28.03 Da, | 1850.595141 | 5 | 530.681  | 1.022E+09 | n.d. |
| AGQSDKDKVYYTLEEIQKHKD      | P56395 | 0          | n +42.03 Da,n +28.03 Da,K +28.03 Da, | 1850.916614 | 4 | 663.0993 | 1.213E+09 | n.d. |
| AGQSDKDKVYYTLEEIQKHKD      | P56395 | 0.00217391 | n +42.03 Da,n +28.03 Da,K +28.03 Da, | 1850.928762 | 3 | 883.7983 | 41024100  | n.d. |
| AGKPVLYHFDGR               | P30115 | 0          | n +42.03 Da,K +28.03 Da,             | 1855.374875 | 3 | 477.2587 | 6.108E+09 | n.d. |
| MKFNPFVTSR                 | P61255 | 0          | n +34.06 Da,K +34.06 Da,             | 1861.76272  | 3 | 470.6011 | 513305984 | n.d. |
| ASLFKKTVDVVIKEQNR          | Q8BJF9 | 0          | n +42.03 Da,K +28.03 Da,             | 1866.252953 | 3 | 758.4445 | 141622000 | n.d. |
| ASGADSKGDDLSTAILKQKNRPNR   | Q01853 | 0          | n +42.03 Da,K +28.03 Da,             | 1879.466216 | 4 | 667.8556 | 101284000 | n.d. |
| GKHLEGLLPVGVPTTDTQR        | Q9DCP2 | 0          | n +34.06 Da,K +34.06 Da,             | 1882.148796 | 3 | 696.0803 | 919548992 | n.d. |
| AEDIKTKIKNYKTAPFDSR        | P56391 | 0          | n +42.03 Da,K +34.06 Da,             | 1883.652441 | 2 | 1202.229 | 17121700  | n.d. |
| VLSGEDKSNIAAWGKIGGH        | P01942 | 0.00520562 | n +28.03 Da,K +28.03 Da,             | 1885.287291 | 5 | 436.65   | 433662016 | n.d. |
| LNLQEYQSKKLMSEHGVR         | Q9Z2I8 | 0          | n +28.03 Da,K +28.03 Da,             | 1891.352432 | 4 | 561.8015 | 504340000 | n.d. |
| AEDIKTKIKNYKTAPFDSR        | P56391 | 0          | n +42.03 Da,K +34.06 Da,             | 1893.923005 | 4 | 601.6181 | 8.01E+09  | n.d. |
| AEDIKTKIKNYKTAPFDSR        | P56391 | 0          | n +42.03 Da,K +34.06 Da,             | 1896.519224 | 3 | 801.8218 | 6.482E+09 | n.d. |
| PKVGFNTNISHMLTPR           | Q9DBT9 | 0.00662589 | n +14.02 Da,K +28.03 Da,             | 1897.137637 | 3 | 580.6588 | 385336992 | n.d. |
| PKVGFNTNISHMLTPR           | Q9DBT9 | 0          | n +14.02 Da,K +28.03 Da,             | 1897.91587  | 4 | 435.7453 | 829060992 | n.d. |
| AEDIKTKIKNYKTAPFDSR        | P56391 | 0          | n +42.03 Da,K +28.03 Da,             | 1903.198702 | 3 | 793.7799 | 3.073E+10 | n.d. |
| AEDIKTKIKNYKTAPFDSR        | P56391 | 0          | n +42.03 Da,K +28.03 Da,             | 1904.100978 | 4 | 595.5875 | 1.429E+11 | n.d. |
| MKVFTGGLPAEGR              | Q91Z53 | 0          | n +28.03 Da,K +28.03 Da,             | 1910.698504 | 3 | 519.9655 | 299110016 | n.d. |
| KFGKHGGTIPVVPTAEFQDR       | P26443 | 0          | n +28.03 Da,K +28.03 Da,             | 1911.551328 | 3 | 756.7422 | 112656000 | n.d. |
| TVPLHPYWPR                 | P70245 | 0          | n +34.06 Da,                         | 1911.618778 | 3 | 433.9184 | 52717100  | n.d. |
| TGPNLHGLFGR                | P62897 | 0          | n +34.06 Da,                         | 1915.124614 | 3 | 401.5666 | 26495000  | n.d. |
| SLGQMPVILAGNDQKKKYLGR      | P45952 | 0.01361868 | n +28.03 Da,K +28.03 Da,             | 1928.409734 | 5 | 512.0999 | 748222976 | n.d. |
| TSYKDLMPHDLAR              | Q99JY0 | 0          | n +28.03 Da,K +28.03 Da,             | 1931.998685 | 4 | 401.4632 | 41850900  | n.d. |
| PLLIIGKGAAYSHAEDSIR        | Q9QXE0 | 0          | n +14.02 Da,K +28.03 Da,             | 1938.552261 | 4 | 514.0414 | 383344992 | n.d. |
| SPSKESDELIFVNGKKVTER       | G3X982 | 0          | n +28.03 Da,K +28.03 Da,             | 1940.204979 | 3 | 841.4677 | 64091700  | n.d. |
| YKPPAQKSIQEIQLDKDDESLR     | Q99PT1 | 0          | n +34.06 Da,K +34.06 Da,             | 1945.652251 | 4 | 717.4177 | 57887800  | n.d. |
| TEKLPFPIIDDKGR             | O08709 | 0          | n +34.06 Da,K +34.06 Da,             | 1946.393765 | 4 | 433.5281 | 153507008 | n.d. |
| ASLVPLKEKKLMEVK            | P56135 | 0          | n +42.03 Da,n +28.03 Da,K +28.03 Da, | 1948.148361 | 3 | 623.0618 | 3.467E+09 | n.d. |
| PTEKLPFPIIDDKGR            | O08709 | 0          | n +14.02 Da,K +28.03 Da,             | 1957.404148 | 4 | 449.7566 | 427564992 | n.d. |
| FAKLVRRPPVQVYIEGR          | Q9DB20 | 0.00520562 | n +28.03 Da,K +28.03 Da,             | 1959.670012 | 4 | 497.0477 | 169952000 | n.d. |
| FGQQQQTTLQVTVNVIKEDLI      | Q0KL02 | 0.04048043 | n +34.06 Da,K +34.06 Da,             | 1969.985734 | 5 | 532.0882 | 8.119E+09 | n.d. |
| DIVNWLKGR                  | P09103 | 0.00111732 | n +28.03 Da,K +28.03 Da,             | 1983.268803 | 3 | 419.2677 | 1.007E+09 | n.d. |
| VSTSSMGTLPKQVKIVEVGPR      | P38060 | 0          | n +28.03 Da,K +28.03 Da,             | 1983.915224 | 4 | 575.0876 | 1.38E+09  | n.d. |
| TMDKSELVQKAKLAEQAE         | Q9CQV8 | 0          | n +42.03 Da,n +34.06 Da,K +34.06 Da, | 1986.321395 | 4 | 580.5916 | 386222016 | n.d. |



|                                |        |            |                                      |             |   |          |           |      |
|--------------------------------|--------|------------|--------------------------------------|-------------|---|----------|-----------|------|
| TMDKSELVQKAKLAEQAER            | Q9CQV8 | 0          | n +42.03 Da,n +28.03 Da,K +28.03 Da, | 1990.597148 | 4 | 576.0681 | 1.44E+09  | n.d. |
| MDKNELVQKAKLAEQAER             | P63101 | 0          | n +42.03 Da,K +28.03 Da,             | 1992.269135 | 3 | 743.0756 | 472190016 | n.d. |
| VGVVVFGNDKLIKEGDVVKR           | Q03265 | 0          | n +34.06 Da,K +34.06 Da,             | 1992.699532 | 5 | 462.3079 | 351484000 | n.d. |
| VGVVVFGNDKLIKEGDVVKR           | Q03265 | 0.00217391 | n +28.03 Da,K +28.03 Da,             | 1994.774786 | 5 | 457.4822 | 760275008 | n.d. |
| LHTVYQSVLPEPTHQMLR             | Q07417 | 0          | n +14.02 Da,                         | 1998.284989 | 4 | 549.537  | 100175000 | n.d. |
| SIVEDKLVEDLKTR                 | P26443 | 0          | n +34.06 Da,K +34.06 Da,             | 2006.302746 | 4 | 583.043  | 33263800  | n.d. |
| NKEWPANLDLKKELSEPSSTR          | Q8C196 | 0          | n +42.03 Da,K +28.03 Da,             | 2006.48664  | 4 | 642.8568 | 528736000 | n.d. |
| AILFPSFIHSQKR                  | P24270 | 0          | n +28.03 Da,K +28.03 Da,             | 2011.16537  | 4 | 400.7398 | 565144000 | n.d. |
| TMTLGDIVYKR                    | P12710 | 0          | n +28.03 Da,                         | 2013.656105 | 3 | 451.5917 | 138263008 | n.d. |
| MEKTELIQKAKLAEQAER             | P68254 | 0          | n +42.03 Da,K +34.06 Da,             | 2016.163994 | 4 | 565.8414 | 655736000 | n.d. |
| LHTVYQSVLPEPTHQMLR             | Q07417 | 0          | n +28.03 Da,                         | 2033.080064 | 3 | 737.0518 | 104388000 | n.d. |
| ASIVEDKLVEDLKTR                | P26443 | 0          | n +28.03 Da,K +28.03 Da,             | 2033.708094 | 4 | 450.7727 | 135788000 | n.d. |
| SLSNKLTLDKLDVKGKR              | P09411 | 0          | n +42.03 Da,n +28.03 Da,K +28.03 Da, | 2033.748941 | 4 | 518.0636 | 2.073E+09 | n.d. |
| ASQTEGELKVTQVLKEKFPFR          | Q8CEI1 | 0          | n +28.03 Da,K +28.03 Da,             | 2034.4763   | 5 | 480.8827 | 1.232E+09 | n.d. |
| ASQTEGELKVTQVLKEKFPFR          | Q8CEI1 | 0.00902256 | n +28.03 Da,K +28.03 Da,             | 2037.553753 | 4 | 600.8514 | 646465984 | n.d. |
| MDKNELVQKAKLAEQAER             | P63101 | 0          | n +42.03 Da,K +28.03 Da,             | 2038.627451 | 4 | 557.5585 | 1.508E+09 | n.d. |
| GIFEVKSTAGDTHLGGEDFDNR         | P17156 | 0          | n +28.03 Da,K +28.03 Da,             | 2039.092676 | 4 | 606.0464 | 1.351E+09 | n.d. |
| MDKNELVQKAKLAEQAER             | P63101 | 0          | n +42.03 Da,K +34.06 Da,             | 2041.384717 | 4 | 562.0823 | 1.737E+09 | n.d. |
| GIFEVKSTAGDTHLGGEDFDNR         | P17156 | 0          | n +34.06 Da,K +34.06 Da,             | 2041.596883 | 4 | 609.0672 | 37100500  | n.d. |
| SIVEDKLVEDLKTR                 | P26443 | 0          | n +28.03 Da,K +28.03 Da,             | 2050.001618 | 4 | 433.0081 | 993955008 | n.d. |
| SIVEDKLVEDLKTR                 | P26443 | 0          | n +28.03 Da,K +28.03 Da,             | 2055.037791 | 3 | 577.0084 | 3.14E+09  | n.d. |
| PKSMSTGLMKFVDSK                | Q9CZU6 | 0          | n +14.02 Da,K +28.03 Da,             | 2055.939693 | 4 | 468.0023 | 1.743E+09 | n.d. |
| LHTVYQSVLPEPTHQMLR             | Q07417 | 0.02388759 | n +28.03 Da,                         | 2061.535921 | 4 | 553.0412 | 10217200  | n.d. |
| SIVEDKLVEDLKTR                 | P26443 | 0          | n +34.06 Da,K +34.06 Da,             | 2062.228013 | 3 | 583.0553 | 61840800  | n.d. |
| PAINVNDSVTKSKFDNLYGCR          | P50247 | 0          | n +14.02 Da,K +28.03 Da,             | 2062.67577  | 4 | 617.8198 | 621865984 | n.d. |
| LHTVYQSVLPEPTHQMLR             | Q07417 | 0.02388759 | n +28.03 Da,                         | 2077.749902 | 1 | 553.0419 | 4059480   | n.d. |
| LASYLDKVKSLLETENR              | P05784 | 0          | n +42.03 Da,K +28.03 Da,             | 2077.925031 | 4 | 491.7816 | 89255504  | n.d. |
| LSSVEYEPKEKTFDKILIANR          | Q91ZA3 | 0.00111732 | n +28.03 Da,K +28.03 Da,             | 2088.034953 | 5 | 519.2984 | 3.142E+09 | n.d. |
| GIVGVENVAELKKGFNFR             | Q9ET01 | 0          | n +28.03 Da,K +28.03 Da,             | 2093.424683 | 4 | 479.2841 | 87377504  | n.d. |
| AHSEDWKLWRCR                   | P97946 | 0.04836601 | n +42.03 Da,K +34.06 Da,             | 2093.526968 | 3 | 573.949  | 6.43E+10  | n.d. |
| SDLELHPPSPWWSHR                | Q9D0M3 | 0          | n +28.03 Da,                         | 2093.719747 | 4 | 462.9806 | 1.373E+09 | n.d. |
| PNPNFKFLTKSMAENR               | Q9DD20 | 0          | n +14.02 Da,K +28.03 Da,             | 2093.923352 | 3 | 698.3652 | 1.433E+09 | n.d. |
| SDLELHPPSPWWSHR                | Q9D0M3 | 0          | n +28.03 Da,                         | 2094.060913 | 3 | 616.9712 | 104807000 | n.d. |
| PLIQNVKILESDDR                 | Q8C196 | 0          | n +14.02 Da,K +28.03 Da,             | 2097.17297  | 4 | 431.5155 | 730902976 | n.d. |
| APKGGSKQQSEEDLLQDQFSR          | Q9DCF9 | 0          | n +28.03 Da,K +28.03 Da,             | 2101.569958 | 3 | 806.426  | 1.111E+10 | n.d. |
| PNPNFKFLTKSMAENR               | Q9DD20 | 0          | n +14.02 Da,K +28.03 Da,             | 2102.086084 | 4 | 524.0261 | 4.015E+09 | n.d. |
| SAGFLQASASDVVVVHGR             | Q8VCHO | 0          | n +34.06 Da,                         | 2103.07937  | 3 | 612.0041 | 1.682E+09 | n.d. |
| NVGVVFGNDKLIKEGDVVKR           | Q03265 | 0.0062273  | n +28.03 Da,K +28.03 Da,             | 2103.222444 | 4 | 600.1106 | 585054016 | n.d. |
| SDLELHPPSPWWSHR                | Q9D0M3 | 0          | n +34.06 Da,                         | 2103.88989  | 4 | 464.4886 | 1.021E+09 | n.d. |
| PSPSPSPSLSTQSAVSKAGAVVPKLSHLPR | Q9DC70 | 0          | n +14.02 Da,K +28.03 Da,             | 2108.0432   | 4 | 817.7055 | 26507500  | n.d. |

|                                  |        |            |                                      |             |   |          |           |      |
|----------------------------------|--------|------------|--------------------------------------|-------------|---|----------|-----------|------|
| GVFPQAQLEHSCALELQGV              | Q8VBW8 | 0          | n +34.06 Da,K +34.06 Da,             | 2118.749543 | 4 | 569.5857 | 367585984 | n.d. |
| GASIVEDKLVEDLKTR                 | P26443 | 0          | n +28.03 Da,K +28.03 Da,             | 2119.550974 | 4 | 465.0224 | 80730704  | n.d. |
| ISGASEKDIVHSGLAYTMER             | P26443 | 0          | n +42.03 Da,K +28.03 Da,             | 2120.618881 | 4 | 559.2928 | 56496900  | n.d. |
| KYIDQEELNKTPIWTR                 | P07901 | 0          | n +28.03 Da,K +28.03 Da,             | 2121.827586 | 4 | 569.3178 | 32346100  | n.d. |
| CEEVSMKHVGGKQQYNVTVVVKER         | Q80X90 | 0.02164706 | n +42.03 Da,K +28.03 Da,             | 2123.33834  | 4 | 735.1373 | 139671008 | n.d. |
| TYAPQEVPKSKATEATKIAIDAGFR        | P70694 | 0          | n +34.06 Da,K +34.06 Da,             | 2128.068267 | 4 | 707.9259 | 364684000 | n.d. |
| TYAPQEVPKSKATEATKIAIDAGFR        | P70694 | 0.04836601 | n +28.03 Da,K +28.03 Da,             | 2129.35639  | 4 | 701.8934 | 425804000 | n.d. |
| SVQKALDLDPSKTNVSGGAIALGHPLGGSGSR | Q8BWT1 | 0          | n +34.06 Da,K +34.06 Da,             | 2131.223809 | 4 | 798.7101 | 669902976 | n.d. |
| TSEDMKVLDDLKNIR                  | P70694 | 0          | n +28.03 Da,K +28.03 Da,             | 2134.065013 | 4 | 494.5183 | 58929100  | n.d. |
| SLSNKLTLDKLDVKGKR                | P09411 | 0          | n +42.03 Da,n +28.03 Da,K +28.03 Da, | 2135.01865  | 3 | 690.4152 | 1.141E+09 | n.d. |
| SLSNKLTLDKLDVKGKR                | P09411 | 0          | n +42.03 Da,n +28.03 Da,K +28.03 Da, | 2141.164115 | 4 | 518.0633 | 4.954E+09 | n.d. |
| AKGAGAFGYFEVTHDITR               | P24270 | 0          | n +28.03 Da,K +28.03 Da,             | 2141.44375  | 4 | 499.762  | 276446016 | n.d. |
| KYIDQEELNKTPIWTR                 | P07901 | 0          | n +28.03 Da,K +28.03 Da,             | 2141.823691 | 2 | 569.3155 | 90113296  | n.d. |
| PALDSLKPANEDQKIGIEIKR            | P63038 | 0          | n +14.02 Da,K +28.03 Da,             | 2147.318332 | 5 | 510.1042 | 1.003E+09 | n.d. |
| PPKFDPNNEVKVVYLR                 | P35979 | 0          | n +28.03 Da,K +28.03 Da,             | 2149.186387 | 4 | 472.0288 | 189858000 | n.d. |
| PSPSPSPSLSTQSAVSKAGAGAVVPKLSHLPR | Q9DC70 | 0          | n +14.02 Da,K +28.03 Da,             | 2149.396679 | 5 | 654.3662 | 5.699E+09 | n.d. |
| PMNKEWPANLDLKKELSEPSSTR          | Q8C196 | 0          | n +17.03 Da,K +34.06 Da,             | 2156.336578 | 4 | 698.148  | 53794600  | n.d. |
| PMNKEWPANLDLKKELSEPSSTR          | Q8C196 | 0.00217391 | n +14.02 Da,K +28.03 Da,             | 2157.742299 | 5 | 554.4988 | 2.16E+09  | n.d. |
| PHPYPALTPQKKELSIDIAHR            | P05064 | 0          | n +28.03 Da,K +28.03 Da,             | 2158.646125 | 4 | 628.5884 | 113247000 | n.d. |
| VSNLPTVKKFLQPGSQR                | P30115 | 0.01231527 | n +42.03 Da,K +28.03 Da,             | 2158.759663 | 3 | 666.3896 | 35968100  | n.d. |
| SPKEECALEIHKGTALR                | P50172 | 0          | n +28.03 Da,K +28.03 Da,             | 2163.488555 | 4 | 500.5368 | 106383000 | n.d. |
| DSFNTEFFSETGAGKHVPR              | P05213 | 0          | n +34.06 Da,K +34.06 Da,             | 2169.053187 | 4 | 517.0247 | 89053504  | n.d. |
| SVQKALDLDPSKTNVSGGAIALGHPLGGSGSR | Q8BWT1 | 0          | n +34.06 Da,K +34.06 Da,             | 2173.455729 | 5 | 639.1699 | 971036032 | n.d. |
| AASAASSEHFEKLHEIFR               | O88384 | 0          | n +42.03 Da,K +28.03 Da,             | 2174.433692 | 3 | 700.6874 | 71298600  | n.d. |
| SDLELHPPSYPWVSHR                 | Q9D0M3 | 0          | n +28.03 Da,                         | 2176.578264 | 4 | 462.9806 | 445227008 | n.d. |
| DSFNTEFFSETGAGKHVPR              | P05213 | 0          | n +28.03 Da,K +28.03 Da,             | 2178.034586 | 4 | 514.009  | 76615696  | n.d. |
| SWGILFSHPR                       | O08709 | 0          | n +28.03 Da,                         | 2178.476222 | 3 | 409.8921 | 59490200  | n.d. |
| SVQKALDLDPSKTNVSGGAIALGHPLGGSGSR | Q8BWT1 | 0.00520562 | n +28.03 Da,K +28.03 Da,             | 2185.668247 | 4 | 794.1865 | 5.298E+09 | n.d. |
| AASAASSEHFEKLHEIFR               | O88384 | 0          | n +42.03 Da,K +34.06 Da,             | 2185.693957 | 3 | 702.7001 | 14654100  | n.d. |
| SVQKALDLDPSKTNVSGGAIALGHPLGGSGSR | Q8BWT1 | 0          | n +28.03 Da,K +28.03 Da,             | 2187.949351 | 5 | 635.5513 | 5.048E+09 | n.d. |
| AKNHYEVLVLGGGAGGITMATR           | Q9R112 | 0.01726619 | n +42.03 Da,K +28.03 Da,             | 2189.695211 | 3 | 762.4066 | 424768992 | n.d. |
| PSTGEVICQVAEGNKEDVDKAVKAAR       | P47738 | 0.00269687 | n +17.03 Da,n +34.06 Da,K +34.06 Da, | 2191.892137 | 5 | 578.9296 | 156575008 | n.d. |
| PDNVGVVVFQNDKLIKEDVVVKR          | Q03265 | 0.02209685 | n +14.02 Da,K +28.03 Da,             | 2193.941957 | 5 | 519.9031 | 1.206E+09 | n.d. |
| PSPSPSPSLSTQSAVSKAGAGAVVPKLSHLPR | Q9DC70 | 0          | n +14.02 Da,K +28.03 Da,             | 2194.178041 | 4 | 817.7065 | 1.79E+09  | n.d. |
| PMNKEWPANLDLKKELSEPSSTR          | Q8C196 | 0          | n +17.03 Da,K +34.06 Da,             | 2197.259432 | 4 | 698.1323 | 42253300  | n.d. |
| TDLEKFNNVEAGKYTVGLGQTR           | P54869 | 0          | n +28.03 Da,K +28.03 Da,             | 2198.824481 | 4 | 631.8413 | 279928000 | n.d. |
| PFTIEDIEVAPPKAHEVR               | P00329 | 0.00217391 | n +14.02 Da,K +28.03 Da,             | 2200.458122 | 4 | 523.2875 | 41484300  | n.d. |
| PSTGEVICQVAEGNKEDVDKAVKAAR       | P47738 | 0          | n +14.02 Da,n +28.03 Da,K +28.03 Da, | 2202.462412 | 5 | 574.7081 | 982867968 | n.d. |
| TPDVLEIEFKKGVVVKVTKNIKDGTTTR     | J3QNGO | 0.02082347 | n +14.02 Da,n +28.03 Da,K +28.03 Da, | 2204.411456 | 5 | 602.9569 | 643297984 | n.d. |
| SGPKAKPVVSIAGITAPPGR             | Q9WUM5 | 0          | n +34.06 Da,K +34.06 Da,             | 2206.425873 | 4 | 718.1344 | 521422016 | n.d. |

|                                  |        |            |                                      |             |   |          |           |      |
|----------------------------------|--------|------------|--------------------------------------|-------------|---|----------|-----------|------|
| KTSGPPVSELITKAVAASKER            | P43274 | 0          | n +28.03 Da,K +28.03 Da,             | 2208.676227 | 5 | 457.0755 | 52741000  | n.d. |
| AHRFPALTPEQKKESEIAQR             | Q91Y97 | 0          | n +42.03 Da,K +28.03 Da,             | 2215.420309 | 4 | 637.6075 | 141940000 | n.d. |
| ASGANFQYIITEKKGKNSVGLIQLNR       | Q8BH95 | 0          | n +28.03 Da,K +28.03 Da,             | 2223.955424 | 4 | 762.9346 | 198476992 | n.d. |
| PPSADKTLLEEKAKLEEQLR             | Q99LP6 | 0          | n +14.02 Da,K +28.03 Da,             | 2224.844452 | 4 | 599.0966 | 328532000 | n.d. |
| PPSADKTLLEEKAKLEEQLR             | Q99LP6 | 0          | n +14.02 Da,K +28.03 Da,             | 2230.882915 | 5 | 479.4786 | 1.016E+09 | n.d. |
| PLLQGKSLGMIFEKR                  | P11725 | 0          | n +14.02 Da,K +28.03 Da,             | 2232.816896 | 4 | 447.5204 | 253487008 | n.d. |
| GLEAEKDGVPVFKFPR                 | Q8R0Y6 | 0          | n +34.06 Da,K +34.06 Da,             | 2233.144799 | 4 | 473.5435 | 115482000 | n.d. |
| PPSADKTLLEEKAKLEEQLR             | Q99LP6 | 0          | n +17.03 Da,K +34.06 Da,             | 2234.690112 | 5 | 483.7008 | 692304000 | n.d. |
| MKETIMNQEKLAKLQAQVR              | Q64152 | 0          | n +42.03 Da,n +28.03 Da,K +28.03 Da, | 2235.518174 | 4 | 597.0888 | 19023400  | n.d. |
| PPSADKTLLEEKAKLEEQLR             | Q99LP6 | 0          | n +14.02 Da,K +28.03 Da,             | 2235.935044 | 3 | 798.4578 | 173600000 | n.d. |
| PLIHNDPEIFDAPKEFR                | Q60991 | 0          | n +14.02 Da,K +28.03 Da,             | 2245.574685 | 4 | 520.7771 | 91745296  | n.d. |
| ALEKEVESIGAHNLAYSTR              | Q9CZ13 | 0          | n +28.03 Da,K +28.03 Da,             | 2246.378804 | 4 | 536.7902 | 5679690   | n.d. |
| SVQKALDLDPSKTNVSGGAIALGHPGGSGSR  | Q8BWT1 | 0          | n +34.06 Da,K +34.06 Da,             | 2250.963141 | 5 | 639.1703 | 240552000 | n.d. |
| SAEVPEAASAEQKEMEDKVTSPKAEAEAKLKR | P56212 | 0          | n +42.03 Da,n +28.03 Da,K +28.03 Da, | 2252.071709 | 5 | 780.4049 | 1.509E+09 | n.d. |
| SDAAVDTSSSEITTKDLKEKKEVVEEAENGR  | P26350 | 0          | n +42.03 Da,n +34.06 Da,K +34.06 Da, | 2255.387163 | 5 | 692.1827 | 1.233E+09 | n.d. |
| NCICANISVAKLSCGDIR               | F6WSL7 | 0.01540684 | n +14.02 Da,K +28.03 Da,             | 2256.878597 | 4 | 524.0148 | 534732992 | n.d. |
| PSKEVEEDEYKAFYKSF                | P08113 | 0          | n +14.02 Da,K +28.03 Da,             | 2260.71324  | 4 | 549.2793 | 3.024E+09 | n.d. |
| SDAAVDTSSSEITTKDLKEKKEVVEEAENGR  | P26350 | 0          | n +42.03 Da,n +28.03 Da,K +28.03 Da, | 2262.002426 | 5 | 687.3582 | 410199008 | n.d. |
| TAVVDGAFKEIKLSDYR                | Q61171 | 0          | n +28.03 Da,K +28.03 Da,             | 2262.595567 | 2 | 499.7837 | 17334800  | n.d. |
| RALAGGPMISIYDAKTEQLR             | Q64311 | 0.04724409 | n +17.03 Da,K +34.06 Da,             | 2290.741298 | 4 | 561.0631 | 176231008 | n.d. |
| DLPKNWDWR                        | Q9WUU7 | 0.00321888 | n +34.06 Da,K +34.06 Da,             | 2302.105917 | 3 | 433.2488 | 692764992 | n.d. |
| GAGAVIIASEDAVKKHNFPLAR           | Q8BWT1 | 0          | n +28.03 Da,K +28.03 Da,             | 2308.122978 | 4 | 613.103  | 40484500  | n.d. |
| PSEDPHLPQEEVLKFYR                | P50136 | 0          | n +14.02 Da,K +28.03 Da,             | 2311.634655 | 4 | 532.2782 | 141863008 | n.d. |
| GAGAVIIASEDAVKKHNFPLAR           | Q8BWT1 | 0          | n +34.06 Da,K +34.06 Da,             | 2313.942984 | 4 | 617.6264 | 377327008 | n.d. |
| PPLIHNDPEIFDAPKEFR               | Q60991 | 0          | n +14.02 Da,K +28.03 Da,             | 2315.254515 | 4 | 545.0398 | 62231600  | n.d. |
| GEWEPPIQNPEYKGEWKPR              | P14211 | 0          | n +34.06 Da,K +34.06 Da,             | 2317.684265 | 4 | 636.1044 | 721070016 | n.d. |
| DLPKNWDWR                        | Q9WUU7 | 0          | n +28.03 Da,K +28.03 Da,             | 2320.847957 | 3 | 429.2275 | 181228992 | n.d. |
| GEWEPPIQNPEYKGEWKPR              | P14211 | 0          | n +28.03 Da,K +28.03 Da,             | 2325.98811  | 4 | 631.5806 | 409577984 | n.d. |
| TLSDYNIQKESTLHLVLR               | P0CG49 | 0          | n +28.03 Da,K +28.03 Da,             | 2339.006258 | 4 | 547.3104 | 406188992 | n.d. |
| VKETTYDVLGVKPNATQEELKKAYR        | P63037 | 0          | n +28.03 Da,K +28.03 Da,             | 2349.327659 | 5 | 637.5521 | 439118016 | n.d. |
| IWHHSFYNELR                      | P62737 | 0.03013699 | n +42.03 Da,                         | 2352.77062  | 3 | 515.2534 | 370121984 | n.d. |
| HALIYDDLKQAVAYR                  | Q03265 | 0          | n +28.03 Da,K +28.03 Da,             | 2354.387673 | 3 | 678.0545 | 209327008 | n.d. |
| PYEIKKVFASLPQVER                 | O88342 | 0          | n +14.02 Da,K +28.03 Da,             | 2355.073594 | 3 | 658.7188 | 1.13E+09  | n.d. |
| PNVFKDGFNPAHVEAGLYGSR            | P17563 | 0          | n +14.02 Da,K +28.03 Da,             | 2355.595344 | 4 | 580.0648 | 12540900  | n.d. |
| TLLGPYWSEELGKKEMR                | Q9CXN7 | 0          | n +34.06 Da,K +34.06 Da,             | 2364.420053 | 4 | 535.5629 | 71576304  | n.d. |
| LATALQKLEEAKEAADESER             | P21107 | 0          | n +28.03 Da,K +28.03 Da,             | 2367.039434 | 3 | 762.7332 | 70714400  | n.d. |
| AATMKKAAAEVDNVTFEDQQKINKFAR      | E9Q6U4 | 0.04424779 | n +42.03 Da,K +28.03 Da,             | 2367.67082  | 5 | 636.5438 | 503972000 | n.d. |
| AGQSDKDKVYYTLEEIQKHKDSKSTW       | P56395 | 0          | n +42.03 Da,n +28.03 Da,K +28.03 Da, | 2367.880992 | 4 | 817.4172 | 59821200  | n.d. |
| AGQSDKDKVYYTLEEIQKHKDSKSTW       | P56395 | 0          | n +42.03 Da,n +28.03 Da,K +28.03 Da, | 2371.553459 | 5 | 654.1374 | 401120000 | n.d. |
| PSGIQPDLLISLTAPKKSATHFTGR        | Q8K4Z3 | 0          | n +17.03 Da,K +34.06 Da,             | 2383.710764 | 5 | 544.9282 | 47817300  | n.d. |

|                                   |        |            |                                      |             |   |          |           |      |
|-----------------------------------|--------|------------|--------------------------------------|-------------|---|----------|-----------|------|
| SSPAQPAVPAPLADLKIQHTK             | P24549 | 0          | n +42.03 Da,K +34.06 Da,             | 2392.348663 | 3 | 760.4502 | 54385700  | n.d. |
| SEDKGALAKLVEAIR                   | P12970 | 0          | n +28.03 Da,K +28.03 Da,             | 2412.043822 | 4 | 421.7555 | 83248304  | n.d. |
| PNVFKDGFNPAHVEAGLYGSR             | P17563 | 0          | n +14.02 Da,K +28.03 Da,             | 2416.321718 | 4 | 580.0542 | 19570600  | n.d. |
| IPALDSLKPANEDQKIGIEIKR            | P63038 | 0          | n +28.03 Da,K +28.03 Da,             | 2425.664437 | 5 | 535.5232 | 415879008 | n.d. |
| GAYKYIQELWR                       | Q9CZM2 | 0.00111732 | n +28.03 Da,K +28.03 Da,             | 2427.00411  | 3 | 494.9442 | 124344000 | n.d. |
| VLSGEDKSNIAAWGKIGGGH              | P01942 | 0.00473934 | n +28.03 Da,K +28.03 Da,             | 2431.966478 | 4 | 545.5525 | 23930900  | n.d. |
| SKPTVILHGYEAVKEALIDR              | Q64458 | 0          | n +34.06 Da,K +34.06 Da,             | 2432.291034 | 4 | 586.0961 | 45900900  | n.d. |
| MEVHELFR                          | P41216 | 0.00662589 | n +42.03 Da,                         | 2432.422416 | 2 | 551.7713 | 403124000 | n.d. |
| SFELFADKVPKTAENFR                 | P17742 | 0.00217391 | n +28.03 Da,K +28.03 Da,             | 2436.587491 | 4 | 521.5362 | 203867008 | n.d. |
| PGLLASVAAVAQAQTKGRPIR             | G3X982 | 0          | n +14.02 Da,K +28.03 Da,             | 2437.268884 | 4 | 505.3115 | 264746000 | n.d. |
| AQKKYLQAKLTQFLR                   | P54729 | 0.00662589 | n +42.03 Da,K +28.03 Da,             | 2441.138862 | 4 | 491.3032 | 388932000 | n.d. |
| LGIGALAEVAKKSLR                   | Q60936 | 0          | n +34.06 Da,K +34.06 Da,             | 2443.032016 | 4 | 407.7881 | 54862900  | n.d. |
| NIDVLKATAEEISSKTKGNKVH            | Q9CQ62 | 0          | n +28.03 Da,K +28.03 Da,             | 2444.391546 | 3 | 592.3259 | 158246000 | n.d. |
| PSVSLQTVKLMKEGLEAAR               | O35490 | 0          | n +14.02 Da,K +28.03 Da,             | 2450.275563 | 4 | 532.5609 | 5.84E+09  | n.d. |
| PNPNFEKFLFKSVAENR                 | G3X9G9 | 0          | n +14.02 Da,K +28.03 Da,             | 2454.836185 | 4 | 527.539  | 3.103E+09 | n.d. |
| PSVSLQTVKLMKEGLEAAR               | O35490 | 0          | n +14.02 Da,K +28.03 Da,             | 2455.543388 | 3 | 709.7449 | 8.295E+09 | n.d. |
| LVINLPNNNTKFVHDNYVIR              | Q8C196 | 0          | n +28.03 Da,K +28.03 Da,             | 2460.995196 | 4 | 610.5938 | 774457984 | n.d. |
| LVINLPNNNTKFVHDNYVIR              | Q8C196 | 0          | n +28.03 Da,K +28.03 Da,             | 2463.88067  | 3 | 813.7887 | 12817600  | n.d. |
| LVINLPNNNTKFVHDNYVIR              | Q8C196 | 0          | n +34.06 Da,K +34.06 Da,             | 2467.426177 | 4 | 613.6096 | 1.035E+09 | n.d. |
| AGQSDKDKVYYTLEEIQKHKDSKSTW        | P56395 | 0          | n +42.03 Da,n +28.03 Da,K +28.03 Da, | 2467.940782 | 4 | 817.4205 | 1.503E+09 | n.d. |
| PNGGGLPHWPEYDQKEGYLKIGASTQAAQR    | Q8VCT4 | 0          | n +14.02 Da,n +28.03 Da,K +28.03 Da, | 2472.257312 | 2 | 835.4294 | 61227600  | n.d. |
| PSVSLQTVKLMKEGLEAAR               | O35490 | 0          | n +17.03 Da,K +34.06 Da,             | 2472.412923 | 4 | 536.3309 | 492752000 | n.d. |
| PNGGGLPHWPEYDQKEGYLKIGASTQAAQR    | Q8VCT4 | 0          | n +14.02 Da,n +28.03 Da,K +28.03 Da, | 2474.522932 | 4 | 835.4292 | 218219008 | n.d. |
| NIDVLKATAEEISSKTKGNKVH            | Q9CQ62 | 0          | n +28.03 Da,K +28.03 Da,             | 2476.13115  | 4 | 592.3382 | 82665800  | n.d. |
| AGQSDKDKVYYTLEEIQKHKDSKSTW        | P56395 | 0          | n +42.03 Da,n +28.03 Da,K +28.03 Da, | 2478.034243 | 5 | 654.1393 | 2.479E+09 | n.d. |
| TIGGGDDSFNTFFSETGAGKHVPR          | P05213 | 0          | n +34.06 Da,                         | 2483.198807 | 4 | 642.0801 | 57010200  | n.d. |
| SAHLQWMVVR                        | P41105 | 0          | n +42.03 Da,                         | 2483.202026 | 2 | 634.8318 | 555417024 | n.d. |
| FPALTPEQKKELSEIAQR                | Q91Y97 | 0          | n +28.03 Da,K +28.03 Da,             | 2490.027301 | 4 | 543.0625 | 3.13E+09  | n.d. |
| TWYGEQDQAVHLWR                    | O55125 | 0          | n +28.03 Da,                         | 2496.518115 | 2 | 606.2977 | 9631870   | n.d. |
| FPALTPEQKKELSEIAQR                | Q91Y97 | 0.00759494 | n +42.03 Da,n +34.06 Da,K +34.06 Da, | 2498.408041 | 4 | 549.5816 | 92751296  | n.d. |
| PVQKVLSDSKSDIDEIVLVGGSTR          | P20029 | 0          | n +14.02 Da,K +28.03 Da,             | 2509.822363 | 3 | 1013.573 | 69667504  | n.d. |
| AEDIKTKIKNYKTAPFDSR               | P56391 | 0          | n +42.03 Da,K +28.03 Da,             | 2513.826435 | 4 | 595.5792 | 913344000 | n.d. |
| FPALTPEQKKELSEIAQR                | Q91Y97 | 0.00759494 | n +42.03 Da,n +34.06 Da,K +34.06 Da, | 2523.504213 | 2 | 549.5826 | 21542900  | n.d. |
| TIGGGDDSFNTFFSETGAGKHVPR          | P05213 | 0          | n +34.06 Da,                         | 2531.403053 | 2 | 642.0848 | 11454900  | n.d. |
| TKVVLDDKDYFLFR                    | Q64433 | 0          | n +28.03 Da,K +28.03 Da,             | 2531.962037 | 4 | 461.5141 | 16674500  | n.d. |
| SVTGWKEIEYEVVR                    | Q8C196 | 0          | n +34.06 Da,K +34.06 Da,             | 2546.237563 | 1 | 588.3359 | 10852400  | n.d. |
| TVMPAWVIDKYGKNEVLR                | Q924D0 | 0          | n +28.03 Da,K +28.03 Da,             | 2562.11383  | 4 | 551.5634 | 1.095E+09 | n.d. |
| PYNPSMSRPDAWGVTGAAELMQQKEATTEQQLR | O35490 | 0.00422833 | n +34.06 Da,K +34.06 Da,             | 2563.897165 | 5 | 785.0037 | 1.264E+09 | n.d. |
| LEPDNVGVVVFGNDKLIKEGDVVKR         | Q03265 | 0          | n +28.03 Da,K +28.03 Da,             | 2577.656647 | 5 | 571.1315 | 847107968 | n.d. |
| GKADPLGLEAEKDGVPVFKFPR            | Q8R0Y6 | 0          | n +28.03 Da,K +28.03 Da,             | 2579.369814 | 4 | 620.5822 | 199671008 | n.d. |

|                                   |        |            |                                      |             |   |          |           |      |
|-----------------------------------|--------|------------|--------------------------------------|-------------|---|----------|-----------|------|
| LEPDNVGVVFGNDKLIKEGDVVKR          | Q03265 | 0.04388298 | n +34.06 Da,K +34.06 Da,             | 2579.958734 | 5 | 575.9568 | 414415008 | n.d. |
| GKADPLGLEAEKDGVPVFKFPR            | Q8R0Y6 | 0          | n +28.03 Da,K +28.03 Da,             | 2582.49863  | 5 | 497.2878 | 1.333E+09 | n.d. |
| GKADPLGLEAEKDGVPVFKFPR            | Q8R0Y6 | 0          | n +34.06 Da,K +34.06 Da,             | 2582.825048 | 5 | 502.1126 | 523568000 | n.d. |
| FPALTPPEQKKELSEIAQR               | Q91Y97 | 0          | n +42.03 Da,n +34.06 Da,K +34.06 Da, | 2585.919146 | 4 | 549.5824 | 100033000 | n.d. |
| KELDPVQKLFVDKIR                   | P97450 | 0          | n +28.03 Da,K +28.03 Da,             | 2586.296229 | 4 | 485.7948 | 77350800  | n.d. |
| GKADPLGLEAEKDGVPVFKFPR            | Q8R0Y6 | 0          | n +34.06 Da,K +34.06 Da,             | 2589.708625 | 4 | 627.3886 | 243180000 | n.d. |
| ANHAPFETDISTLTR                   | Q9QXD6 | 0          | n +42.03 Da,                         | 2591.975124 | 2 | 857.9226 | 1.361E+09 | n.d. |
| NKELDPVQKLFVDKIR                  | P97450 | 0          | n +28.03 Da,K +28.03 Da,             | 2594.468793 | 4 | 514.3063 | 2.62E+09  | n.d. |
| PLGLEAEKDGVPVFKFPR                | Q8R0Y6 | 0          | n +14.02 Da,K +28.03 Da,             | 2601.641437 | 4 | 517.3102 | 28316400  | n.d. |
| VSKDASPGSPLEKLVSSVSDLPKR          | P54869 | 0          | n +28.03 Da,K +28.03 Da,             | 2612.992462 | 4 | 652.878  | 75528400  | n.d. |
| GILKVPAINVNDVTKSKFDONLYGCR        | P50247 | 0          | n +28.03 Da,K +28.03 Da,             | 2613.719481 | 5 | 604.9366 | 414721984 | n.d. |
| GILKVPAINVNDVTKSKFDONLYGCR        | P50247 | 0          | n +34.06 Da,K +34.06 Da,             | 2614.401938 | 5 | 609.7633 | 287156992 | n.d. |
| PLGLEAEKDGVPVFKFPR                | Q8R0Y6 | 0          | n +14.02 Da,K +28.03 Da,             | 2618.451981 | 3 | 690.3974 | 2.101E+09 | n.d. |
| PLGLEAEKDGVPVFKFPR                | Q8R0Y6 | 0          | n +14.02 Da,K +28.03 Da,             | 2622.731837 | 4 | 518.0504 | 5.775E+09 | n.d. |
| PAAFKELFPDWKEKGAPLNTPTVEDR        | Q921G7 | 0.01497585 | n +17.03 Da,K +34.06 Da,             | 2623.73817  | 5 | 615.9543 | 122496000 | n.d. |
| NKELDPVQKLFVDKIR                  | P97450 | 0          | n +28.03 Da,K +28.03 Da,             | 2627.318691 | 3 | 685.4052 | 933366976 | n.d. |
| PEYMLPVHFYGR                      | Q8CI94 | 0          | n +14.02 Da,                         | 2652.827683 | 3 | 508.2555 | 386328992 | n.d. |
| PLGLEAEKDGVPVFKFPR                | Q8R0Y6 | 0          | n +17.03 Da,K +34.06 Da,             | 2667.36262  | 4 | 521.8209 | 44903500  | n.d. |
| VSEFELFADKVPKTAENFR               | P17742 | 0          | n +42.03 Da,K +34.06 Da,             | 2669.521251 | 4 | 552.8236 | 53041400  | n.d. |
| PYNPMSRPDAWGVTKGAAELMQQKEATTEQQLR | O35490 | 0.00111732 | n +14.02 Da,K +28.03 Da,             | 2673.234732 | 5 | 778.5928 | 293699008 | n.d. |
| GVHSGDATLMLPTQTISQGAIEKVKDATR     | Q8C196 | 0          | n +28.03 Da,K +28.03 Da,             | 2673.679991 | 4 | 777.9269 | 424308000 | n.d. |
| TIFWTNLSPKGGGEPKGELLEAIKR         | P09671 | 0          | n +28.03 Da,K +28.03 Da,             | 2674.202995 | 5 | 571.5306 | 247016000 | n.d. |
| PFLDIQKKLGISLDR                   | Q99LY9 | 0          | n +14.02 Da,K +28.03 Da,             | 2675.92244  | 4 | 454.0291 | 305857984 | n.d. |
| TIFWTNLSPKGGGEPKGELLEAIKR         | P09671 | 0          | n +34.06 Da,K +34.06 Da,             | 2677.028063 | 5 | 576.3568 | 339465984 | n.d. |
| AGQSDKDKVYYTLEEIQKHKDKSKSTW       | P56395 | 0          | n +42.03 Da,n +28.03 Da,K +28.03 Da, | 2679.483239 | 4 | 817.4214 | 309401984 | n.d. |
| AGQSDKDKVYYTLEEIQKHKDKSKSTW       | P56395 | 0          | n +42.03 Da,n +28.03 Da,K +28.03 Da, | 2680.427106 | 5 | 654.1369 | 1.319E+09 | n.d. |
| LVEDFKNKYEDEINKR                  | P11679 | 0.0297619  | n +28.03 Da,K +28.03 Da,             | 2681.706108 | 4 | 538.7875 | 118937000 | n.d. |
| AGVHSGDATLMLPTQTISQGAIEKVKDATR    | Q8C196 | 0          | n +34.06 Da,K +34.06 Da,             | 2682.332378 | 4 | 800.2055 | 15791600  | n.d. |
| AGVHSGDATLMLPTQTISQGAIEKVKDATR    | Q8C196 | 0.00111732 | n +28.03 Da,K +28.03 Da,             | 2682.894851 | 5 | 636.7475 | 2.104E+09 | n.d. |
| VLSGEDKSNIAAWGKIGGHGAEYGAELER     | P01942 | 0          | n +28.03 Da,K +28.03 Da,             | 2686.362717 | 4 | 832.1831 | 407911008 | n.d. |
| VSEFELFADKVPKTAENFR               | P17742 | 0          | n +28.03 Da,K +28.03 Da,             | 2691.306    | 4 | 546.3037 | 186144992 | n.d. |
| GDKDIGNIISDAMKKVGR                | P63038 | 0          | n +34.06 Da,K +34.06 Da,             | 2693.100267 | 5 | 411.4605 | 459400000 | n.d. |
| GDKDIGNIISDAMKKVGR                | P63038 | 0          | n +28.03 Da,K +28.03 Da,             | 2696.047314 | 5 | 406.6351 | 523488992 | n.d. |
| GDKDIGNIISDAMKKVGR                | P63038 | 0          | n +28.03 Da,K +28.03 Da,             | 2697.750941 | 4 | 508.0424 | 2.802E+09 | n.d. |
| PSMSRPDAWGVTKGAAELMQQKEATTEQQLR   | O35490 | 0          | n +14.02 Da,K +28.03 Da,             | 2703.850407 | 5 | 703.761  | 3.882E+09 | n.d. |
| PSMSRPDAWGVTKGAAELMQQKEATTEQQLR   | O35490 | 0          | n +14.02 Da,K +28.03 Da,             | 2705.849308 | 4 | 879.4503 | 660563968 | n.d. |
| PGFGDKTFVVQGGFNVGLHSMR            | P26443 | 0.00662589 | n +14.02 Da,K +28.03 Da,             | 2708.196588 | 4 | 598.8109 | 136348000 | n.d. |
| PGSPLEKLVSSVSDLPKR                | P54869 | 0          | n +14.02 Da,K +28.03 Da,             | 2711.230913 | 4 | 495.544  | 126168000 | n.d. |
| PPSDLKFKGPFTDVVTTNLKLNPSDR        | Q9WV55 | 0          | n +17.03 Da,n +34.06 Da,K +34.06 Da, | 2715.71773  | 5 | 627.5687 | 1.728E+09 | n.d. |
| THVEMGPPDPILGVTEAFKR              | P05202 | 0          | n +28.03 Da,K +28.03 Da,             | 2717.343975 | 2 | 563.3144 | 21971500  | n.d. |

|                                    |        |            |                                      |             |   |          |           |      |
|------------------------------------|--------|------------|--------------------------------------|-------------|---|----------|-----------|------|
| VLSGEDKSNIAAWGKIGGHGAEGAEALER      | P01942 | 0          | n +28.03 Da,K +28.03 Da,             | 2719.059904 | 5 | 665.9495 | 7.652E+09 | n.d. |
| LPSTFEEKSIKVVGYDMSKEAAR            | P32020 | 0          | n +28.03 Da,K +28.03 Da,             | 2722.079599 | 5 | 562.9124 | 152608992 | n.d. |
| PPSDLKFKGPFDTVVTTNLKLNQNSDR        | Q9WV55 | 0          | n +14.02 Da,n +28.03 Da,K +28.03 Da, | 2729.032552 | 5 | 623.3466 | 1.805E+09 | n.d. |
| PGSPQLQVVKHDLVMNVYR                | P19096 | 0          | n +14.02 Da,K +28.03 Da,             | 2731.094935 | 4 | 592.0728 | 530840992 | n.d. |
| ALHVPKAPGFAQMLKDGAKHF              | P42932 | 0          | n +42.03 Da,K +28.03 Da,             | 2741.84537  | 5 | 478.6701 | 99568200  | n.d. |
| THVEMGPPDPILGVTEAFKR               | P05202 | 0          | n +28.03 Da,K +28.03 Da,             | 2752.837893 | 4 | 563.303  | 261400992 | n.d. |
| THVEMGPPDPILGVTEAFKR               | P05202 | 0          | n +28.03 Da,K +28.03 Da,             | 2753.229053 | 3 | 750.7356 | 28289100  | n.d. |
| DKVFLTTAEVISQVSDKHLQEGR            | P06801 | 0          | n +28.03 Da,K +28.03 Da,             | 2754.981315 | 4 | 703.8854 | 109799000 | n.d. |
| PYNPSMSRPDAWGVTKGAAELMQQKEATTEQQLR | O35490 | 0          | n +14.02 Da,K +28.03 Da,             | 2758.86432  | 1 | 778.5929 | 74945200  | n.d. |
| LPQFTSAGESFNKLVSGKLR               | Q9CPY7 | 0          | n +34.06 Da,K +34.06 Da,             | 2763.143146 | 4 | 571.1085 | 492300000 | n.d. |
| FIPLSQKDLENLKAEEVAR                | Q55W19 | 0          | n +34.06 Da,K +34.06 Da,             | 2766.745227 | 4 | 544.0916 | 126022000 | n.d. |
| EEASSTGRNFNVEKINGEWHTIILASDKR      | B5X0G2 | 0.00662589 | n +28.03 Da,K +28.03 Da,             | 2774.083361 | 5 | 677.9468 | 237156992 | n.d. |
| PSVGPKIPQALEKILQLKESR              | Q3UJB0 | 0          | n +14.02 Da,K +28.03 Da,             | 2780.422743 | 5 | 486.7029 | 6503140   | n.d. |
| FIPLSQKDLENLKAEEVAR                | Q55W19 | 0          | n +28.03 Da,K +28.03 Da,             | 2781.234392 | 4 | 539.5673 | 16104200  | n.d. |
| PVLLLEPVLALAEKHGR                  | Q9JII6 | 0          | n +14.02 Da,K +28.03 Da,             | 2789.842836 | 4 | 503.8022 | 44863000  | n.d. |
| PYNPSMSRPDAWGVTKGAAELMQQKEATTEQQLR | O35490 | 0          | n +14.02 Da,K +28.03 Da,             | 2796.42956  | 5 | 778.5919 | 436868992 | n.d. |
| TLMLPTQTISQGAIEKVKDATR             | Q8C196 | 0          | n +34.06 Da,K +34.06 Da,             | 2798.843517 | 4 | 626.6319 | 112838000 | n.d. |
| VQLKDLEKWNLLPSR                    | P62245 | 0.02522186 | n +34.06 Da,K +34.06 Da,             | 2801.504243 | 4 | 546.5909 | 42295100  | n.d. |
| PYNPSMSRPDAWGVTKGAAELMQQKEATTEQQLR | O35490 | 0          | n +28.03 Da,K +28.03 Da,             | 2808.247765 | 4 | 976.4843 | 8.59E+09  | n.d. |
| PYNPSMSRPDAWGVTKGAAELMQQKEATTEQQLR | O35490 | 0          | n +28.03 Da,K +28.03 Da,             | 2811.443107 | 5 | 781.3899 | 1.023E+10 | n.d. |
| ASPGSPLEKLVSSVSLPKR                | P54869 | 0          | n +34.06 Da,K +34.06 Da,             | 2811.586316 | 4 | 543.0891 | 105677000 | n.d. |
| KDDDLQPFTSAGESFNKLVSGKLR           | Q9CPY7 | 0          | n +34.06 Da,K +34.06 Da,             | 2814.895096 | 4 | 697.9084 | 14784000  | n.d. |
| ATLMLPTQTISQGAIEKVKDATR            | Q8C196 | 0          | n +34.06 Da,K +34.06 Da,             | 2816.675736 | 4 | 644.389  | 5301860   | n.d. |
| PDWGVTKGAAELMQQKEATTEQQLR          | O35490 | 0          | n +14.02 Da,K +28.03 Da,             | 2825.625427 | 4 | 739.8846 | 40921800  | n.d. |
| PEFMLPVHFYGR                       | Q9ET01 | 0          | n +14.02 Da,                         | 2827.575667 | 3 | 502.9238 | 311540000 | n.d. |
| ASGVSDGAGAVIIASEDAVKKHNFPLAR       | Q8BWT1 | 0          | n +34.06 Da,K +34.06 Da,             | 2828.711189 | 5 | 597.5467 | 57392100  | n.d. |
| PYNPSMSRPDAWGVTKGAAELMQQKEATTEQQLR | O35490 | 0          | n +14.02 Da,K +28.03 Da,             | 2851.817528 | 4 | 972.9909 | 5.405E+09 | n.d. |
| ASASSTNLKDVLSNLIPEQAR              | Q9CZU6 | 0          | n +34.06 Da,K +34.06 Da,             | 2853.681313 | 4 | 611.8693 | 12848900  | n.d. |
| PYNPSMSRPDAWGVTKGAAELMQQKEATTEQQLR | O35490 | 0          | n +14.02 Da,K +28.03 Da,             | 2855.367079 | 5 | 778.5952 | 1.604E+10 | n.d. |
| FYVPGVAPINFHQNDPVEIKAVKLTSSR       | Q8BH24 | 0          | n +28.03 Da,K +28.03 Da,             | 2861.623918 | 5 | 642.9583 | 183148000 | n.d. |
| GVSDGAGAVIIASEDAVKKHNFPLAR         | Q8BWT1 | 0          | n +28.03 Da,K +28.03 Da,             | 2863.321028 | 5 | 562.3143 | 39198900  | n.d. |
| ASGVSDGAGAVIIASEDAVKKHNFPLAR       | Q8BWT1 | 0          | n +28.03 Da,K +28.03 Da,             | 2867.662435 | 5 | 593.9281 | 886462016 | n.d. |
| GNASGVSDGAGAVIIASEDAVKKHNFPLAR     | Q8BWT1 | 0          | n +28.03 Da,K +28.03 Da,             | 2867.694162 | 5 | 628.1416 | 34070200  | n.d. |
| ASASSTNLKDVLSNLIPEQAR              | Q9CZU6 | 0          | n +28.03 Da,K +28.03 Da,             | 2878.961665 | 4 | 607.3462 | 867886016 | n.d. |
| AALAPLPPLPAQFKSIQHHLR              | Q9CR26 | 0          | n +42.03 Da,K +34.06 Da,             | 2888.392137 | 4 | 596.1064 | 34214400  | n.d. |
| TFPTVNPSTGEVICQVAEGNKEDVDKAVKAAR   | P47738 | 0          | n +34.06 Da,K +34.06 Da,             | 2897.003473 | 5 | 714.2012 | 207708000 | n.d. |
| VHLTDAEKAASVCLWGKVN                | P02088 | 0          | n +28.03 Da,K +28.03 Da,             | 2899.476633 | 3 | 728.0614 | 368132992 | n.d. |
| VRMNVLADALKSINNAEKR                | P62245 | 0          | n +42.03 Da,K +28.03 Da,             | 2900.064446 | 4 | 560.8192 | 387550016 | n.d. |
| PSAFEKVVKNVIKEVSGSR                | Q9D8T2 | 0          | n +14.02 Da,K +28.03 Da,             | 2906.008859 | 4 | 543.8242 | 110032000 | n.d. |
| SPSAKDIKKILDSVGIADDOR              | P99027 | 0.02164706 | n +28.03 Da,K +28.03 Da,             | 2910.679266 | 4 | 621.846  | 51818800  | n.d. |

|                                    |        |            |                                      |             |   |          |           |      |
|------------------------------------|--------|------------|--------------------------------------|-------------|---|----------|-----------|------|
| SGDATLMLPTQTISQGAIEKVKDATR         | Q8C196 | 0          | n +34.06 Da,K +34.06 Da,             | 2913.092651 | 4 | 709.1599 | 24872800  | n.d. |
| SLNLEPDNVGVVFGNDKLIKEGDVVKR        | Q03265 | 0          | n +28.03 Da,K +28.03 Da,             | 2914.612438 | 5 | 633.9634 | 353239008 | n.d. |
| GGDLTNLIHTKYPQLLSGIR               | P50247 | 0          | n +34.06 Da,K +34.06 Da,             | 2916.50874  | 4 | 566.8403 | 16372300  | n.d. |
| SSPSAKDIKKILDSVGEIADDDR            | P99027 | 0.01996198 | n +28.03 Da,K +28.03 Da,             | 2926.994807 | 4 | 643.6021 | 267863008 | n.d. |
| PYNPSMSRPDAWGVTKGAAELMQQKEATTEQQLR | O35490 | 0          | n +14.02 Da,K +28.03 Da,             | 2928.072666 | 2 | 972.988  | 6.376E+09 | n.d. |
| SGFEGFLKDQFTTLPEVKDR               | P25688 | 0          | n +28.03 Da,K +28.03 Da,             | 2929.824854 | 1 | 600.3162 | 8483920   | n.d. |
| PLNELLPLAYIEDPKKNR                 | P28665 | 0          | n +14.02 Da,K +28.03 Da,             | 2935.179821 | 4 | 549.0715 | 32492600  | n.d. |
| SSPSAKDIKKILDSVGEIADDDR            | P99027 | 0.01996198 | n +28.03 Da,K +28.03 Da,             | 2940.621223 | 2 | 643.6024 | 255578000 | n.d. |
| GGDLTNLIHTKYPQLLSGIR               | P50247 | 0          | n +34.06 Da,K +34.06 Da,             | 2950.977338 | 3 | 755.4514 | 116424000 | n.d. |
| SGFEGFLKDQFTTLPEVKDR               | P25688 | 0          | n +34.06 Da,K +34.06 Da,             | 2953.470067 | 4 | 604.8448 | 23192300  | n.d. |
| AGVDQHEGTIQVQGQNLFFR               | Q8VCR7 | 0          | n +42.03 Da,                         | 2956.255947 | 3 | 762.7138 | 1.427E+09 | n.d. |
| AGVDQHEGTIQVQGQNLFFR               | Q8VCR7 | 0          | n +42.03 Da,                         | 2958.15086  | 2 | 1143.566 | 166946000 | n.d. |
| GGDLTNLIHTKYPQLLSGIR               | P50247 | 0          | n +28.03 Da,K +28.03 Da,             | 2962.851138 | 4 | 563.8253 | 732961024 | n.d. |
| SGFEGFLKDQFTTLPEVKDR               | P25688 | 0          | n +28.03 Da,K +28.03 Da,             | 2967.72058  | 3 | 800.0937 | 70943696  | n.d. |
| PEFLEDPSVLTKDKLKSSELVANNVTLPAGEQR  | Q61029 | 0          | n +14.02 Da,K +28.03 Da,             | 2969.133891 | 4 | 909.7535 | 956846016 | n.d. |
| TKSLGQWLQEEKVPAIYGVDTR             | Q8C196 | 0          | n +34.06 Da,K +34.06 Da,             | 2978.589384 | 4 | 655.8859 | 65431500  | n.d. |
| SGFEGFLKDQFTTLPEVKDR               | P25688 | 0          | n +28.03 Da,K +28.03 Da,             | 2983.861511 | 4 | 600.3216 | 1.594E+09 | n.d. |
| PEFTLPVHFYGR                       | Q9WUB3 | 0.00217391 | n +42.03 Da,                         | 2988.608312 | 3 | 502.2517 | 363455008 | n.d. |
| PMILGYWNVNR                        | P10649 | 0          | n +14.02 Da,                         | 2990.239269 | 1 | 631.8385 | 9343460   | n.d. |
| DLFSDGHSEFLKAASNLR                 | P27773 | 0          | n +28.03 Da,K +28.03 Da,             | 2992.218655 | 4 | 516.5198 | 27155000  | n.d. |
| PEFTLPVHFYGR                       | Q9WUB3 | 0.02164706 | n +42.03 Da,                         | 2992.690281 | 2 | 752.8737 | 94505696  | n.d. |
| GTVTASNAGVSDGAGAVIIASEDAVKKHNFPLAR | Q8BWT1 | 0          | n +28.03 Da,K +28.03 Da,             | 3000.250783 | 5 | 713.9854 | 1.508E+09 | n.d. |
| GTVTASNAGVSDGAGAVIIASEDAVKKHNFPLAR | Q8BWT1 | 0          | n +28.03 Da,K +28.03 Da,             | 3001.061831 | 4 | 892.2255 | 15073700  | n.d. |
| PLNLKELEKDLIDR                     | Q05920 | 0          | n +14.02 Da,K +28.03 Da,             | 3001.765924 | 3 | 589.3526 | 330857984 | n.d. |
| PLNLKELEKDLIDR                     | Q05920 | 0          | n +14.02 Da,K +28.03 Da,             | 3002.84766  | 4 | 442.2658 | 415359008 | n.d. |
| TVTASNAGVSDGAGAVIIASEDAVKKHNFPLAR  | Q8BWT1 | 0          | n +34.06 Da,K +34.06 Da,             | 3004.652458 | 4 | 882.4966 | 23966600  | n.d. |
| TKSLGQWLQEEKVPAIYGVDTR             | Q8C196 | 0          | n +28.03 Da,K +28.03 Da,             | 3005.111936 | 4 | 651.3626 | 43372200  | n.d. |
| TVTASNAGVSDGAGAVIIASEDAVKKHNFPLAR  | Q8BWT1 | 0          | n +28.03 Da,K +28.03 Da,             | 3005.183837 | 5 | 702.5807 | 199616992 | n.d. |
| PPLNLKELEKDLIDR                    | Q05920 | 0          | n +14.02 Da,n +28.03 Da,K +28.03 Da, | 3013.836948 | 4 | 466.5292 | 487032000 | n.d. |
| TVTASNAGVSDGAGAVIIASEDAVKKHNFPLAR  | Q8BWT1 | 0          | n +34.06 Da,K +34.06 Da,             | 3024.538334 | 5 | 706.1995 | 127414000 | n.d. |
| AGVDQHEGTIQVQGQNLFFR               | Q8VCR7 | 0          | n +42.03 Da,                         | 3025.328047 | 3 | 762.7139 | 19641300  | n.d. |
| NFNVQKINGEWHHTIILASDKR             | A2AKN9 | 0          | n +28.03 Da,K +28.03 Da,             | 3043.93524  | 4 | 642.5962 | 1.283E+09 | n.d. |
| ASASYHISNLLKMTSSDKDFR              | Q6ZQ38 | 0          | n +42.03 Da,K +34.06 Da,             | 3080.634335 | 2 | 653.3427 | 29146800  | n.d. |
| TGKPNPDQLLKELPPLNTR                | Q78JT3 | 0          | n +28.03 Da,K +28.03 Da,             | 3082.256693 | 4 | 591.343  | 61598100  | n.d. |
| TNLKDVLSNLIPEQAR                   | Q9CZU6 | 0          | n +34.06 Da,K +34.06 Da,             | 3083.282412 | 4 | 511.077  | 9944090   | n.d. |
| PVEEAIKFAQTVIGKPIEPR               | Q9DBM2 | 0          | n +14.02 Da,K +28.03 Da,             | 3086.056451 | 4 | 573.8401 | 23044900  | n.d. |
| TNLKDVLSNLIPEQAR                   | Q9CZU6 | 0          | n +28.03 Da,K +28.03 Da,             | 3086.881021 | 4 | 506.554  | 23267500  | n.d. |
| PGVVDNFPLLKALR                     | P30115 | 0          | n +17.03 Da,K +34.06 Da,             | 3087.41879  | 3 | 530.6717 | 37836800  | n.d. |
| HIFHFDPEHIMELELNT                  | D3YX91 | 0.01540684 | n +34.06 Da,                         | 3089.22165  | 4 | 568.0405 | 289347008 | n.d. |
| PNIVKLAEQYAKENGTKLSMTNDPleaAR      | P11725 | 0          | n +17.03 Da,K +34.06 Da,             | 3090.847834 | 4 | 830.9697 | 106184000 | n.d. |

|                                   |        |            |                                      |             |   |          |           |      |
|-----------------------------------|--------|------------|--------------------------------------|-------------|---|----------|-----------|------|
| GDNMLEPSANMPWFKGWKVTR             | P10126 | 0          | n +34.06 Da,K +34.06 Da,             | 3100.016613 | 2 | 642.3512 | 5485030   | n.d. |
| ASASYHISNLEKMTSSDKDFR             | Q6ZQ38 | 0          | n +42.03 Da,K +28.03 Da,             | 3107.254305 | 4 | 650.3275 | 1.246E+09 | n.d. |
| MDNLSDTLKKLITAADR                 | E9Q6Q4 | 0          | n +42.03 Da,n +28.03 Da,K +28.03 Da, | 3112.765901 | 4 | 540.5581 | 39020200  | n.d. |
| PGVVDNFPLLKALR                    | P30115 | 0          | n +14.02 Da,K +28.03 Da,             | 3114.642642 | 3 | 527.6559 | 60495700  | n.d. |
| ASASYHISNLEKMTSSDKDFR             | Q6ZQ38 | 0          | n +42.03 Da,K +34.06 Da,             | 3117.45927  | 4 | 653.3433 | 146716000 | n.d. |
| GDNMLEPSANMPWFKGWKVTR             | P10126 | 0          | n +34.06 Da,K +34.06 Da,             | 3118.456487 | 4 | 642.3526 | 40902200  | n.d. |
| SVEAGEKLVKTALDTFGR                | P51660 | 0          | n +28.03 Da,K +28.03 Da,             | 3121.050345 | 3 | 669.0494 | 87810800  | n.d. |
| PALAQPLIQNVKKILESDR               | Q8C196 | 0          | n +14.02 Da,K +28.03 Da,             | 3124.07931  | 3 | 735.1105 | 100288000 | n.d. |
| AKEWGYASHNGPDHWHELYPIAKGDNQSPIELH | P16015 | 0          | n +34.06 Da,K +34.06 Da,             | 3139.301065 | 5 | 780.6029 | 115724000 | n.d. |
| NFNVQKINGEWHTIILASDKR             | A2AKN9 | 0          | n +42.03 Da,n +34.06 Da,K +34.06 Da, | 3140.032463 | 4 | 649.1157 | 54995700  | n.d. |
| ANVADTKLYDILGVP GASENELKKAYR      | Q9QYJ0 | 0.00111732 | n +42.03 Da,K +34.06 Da,             | 3141.430245 | 4 | 794.9562 | 69632600  | n.d. |
| YTWSDVGLVEKLR                     | E0CYU6 | 0          | n +28.03 Da,K +28.03 Da,             | 3144.51314  | 4 | 477.2752 | 16835900  | n.d. |
| TKPNLNLQVLSNPEFLAEGTAIKDLKNPDR    | O70475 | 0          | n +28.03 Da,K +28.03 Da,             | 3150.017053 | 5 | 690.3929 | 8635880   | n.d. |
| SSPAQPAVPAPLADLKIHTKIF            | P24549 | 0          | n +42.03 Da,K +28.03 Da,             | 3191.462079 | 3 | 843.1461 | 19891400  | n.d. |
| AKDILGEAGLHFDLNLKLR               | Q61025 | 0          | n +42.03 Da,K +28.03 Da,             | 3192.991812 | 4 | 560.0629 | 106295000 | n.d. |
| DDLQPFTSAGESFNKLVSGKLR            | Q9CPY7 | 0          | n +28.03 Da,K +28.03 Da,             | 3198.36339  | 4 | 624.0911 | 8020200   | n.d. |
| DLPQFTSAGESFNKLVSGKLR             | Q9CPY7 | 0.00269687 | n +28.03 Da,K +28.03 Da,             | 3199.278263 | 4 | 595.3331 | 95662600  | n.d. |
| VHLTDAEKA AVSCLWGK VNSDEVGGEALGR  | P02088 | 0          | n +28.03 Da,K +28.03 Da,             | 3209.840404 | 5 | 651.3401 | 44917600  | n.d. |
| VSMNTVDTSHEDMIHDAQMDYYGTR         | Q9D1M0 | 0          | n +42.03 Da,                         | 3214.497691 | 3 | 1019.772 | 104549000 | n.d. |
| VHLTDAEKA AVSCLWGK VNSDEVGGEALGR  | P02088 | 0          | n +28.03 Da,K +28.03 Da,             | 3220.703103 | 4 | 813.9225 | 763305984 | n.d. |
| GILEKISEIEKEIAR                   | Q9QXB9 | 0          | n +28.03 Da,K +28.03 Da,             | 3241.982422 | 4 | 453.7764 | 349136992 | n.d. |
| GILEKISEIEKEIAR                   | Q9QXB9 | 0          | n +28.03 Da,K +28.03 Da,             | 3245.789552 | 3 | 604.6996 | 741577984 | n.d. |
| SVVVAQAQTL SNAEFQMLR              | Q8C196 | 0          | n +28.03 Da,                         | 3248.481309 | 3 | 697.0489 | 37259600  | n.d. |
| MLGGLGKLA AEGLAHR                 | Q8CF02 | 0          | n +42.03 Da,K +28.03 Da,             | 3250.654472 | 3 | 555.3158 | 5973180   | n.d. |
| DGGDLTNIHTKYPQLLSGIR              | P50247 | 0          | n +28.03 Da,K +28.03 Da,             | 3251.841889 | 4 | 592.5815 | 31023200  | n.d. |
| SILYVSPHPDAFPSLR                  | Q9Z1Q9 | 0          | n +42.03 Da,                         | 3355.756262 | 2 | 920.9837 | 91262304  | n.d. |
| MPFMDFLTKDGFESPEELR               | P52196 | 0          | n +34.06 Da,K +34.06 Da,             | 3380.099301 | 4 | 630.5908 | 10916700  | n.d. |
| ATESSPLTTHVLDTASGLPAQGLCLR        | Q9CRB3 | 0          | n +42.03 Da,                         | 3421.385302 | 3 | 913.1324 | 92283904  | n.d. |
| DEPQSQWDKVKDFANVYVDAVKDSGR        | Q00623 | 0          | n +28.03 Da,K +28.03 Da,             | 3464.119677 | 5 | 622.5189 | 173230000 | n.d. |
| DEPQSQWDKVKDFANVYVDAVKDSGR        | Q00623 | 0          | n +28.03 Da,K +28.03 Da,             | 3468.286779 | 4 | 777.8973 | 300152000 | n.d. |
| DDDIAALVVDNGSGMCKAGFAGDDAPR       | P60710 | 0          | n +42.03 Da,K +28.03 Da,             | 3482.712794 | 3 | 936.4244 | 13773200  | n.d. |
| PTTQQSPQDEQEKLLEAIAQAVKVSFQMKR    | Q9EQH3 | 0          | n +14.02 Da,n +28.03 Da,K +28.03 Da, | 3494.23073  | 5 | 740.5938 | 832134016 | n.d. |
| PTTQQSPQDEQEKLLEAIAQAVKVSFQMKR    | Q9EQH3 | 0          | n +17.03 Da,n +34.06 Da,K +34.06 Da, | 3498.598436 | 5 | 744.816  | 27405600  | n.d. |
| HVEELDPGVVDNFPLLKALR              | P30115 | 0          | n +28.03 Da,K +28.03 Da,             | 3498.756961 | 3 | 773.1013 | 75998896  | n.d. |
| GSYQLLVPPPEALSKPLSVPTR            | O35423 | 0.00422833 | n +42.03 Da,K +28.03 Da,             | 3499.655686 | 3 | 807.1241 | 17299700  | n.d. |
| HVEELDPGVVDNFPLLKALR              | P30115 | 0          | n +28.03 Da,K +28.03 Da,             | 3505.067787 | 4 | 580.0785 | 21179400  | n.d. |
| ASGVAVSDGVKVFNDMKVR               | P18760 | 0          | n +42.03 Da,K +28.03 Da,             | 3506.04106  | 3 | 730.7369 | 168886000 | n.d. |
| DPAIYFKEQFLDGDWATNR               | P14211 | 0          | n +34.06 Da,K +34.06 Da,             | 3510.267687 | 3 | 785.4084 | 23477300  | n.d. |
| PGASLPLNLKELEKDLDR                | Q05920 | 0          | n +14.02 Da,K +28.03 Da,             | 3521.49704  | 4 | 572.8355 | 14156600  | n.d. |
| VHLTDAEKA AVSCLWGK VNSDEVGGEALGR  | P02088 | 0          | n +28.03 Da,K +28.03 Da,             | 3558.416434 | 4 | 813.9129 | 12676400  | n.d. |



|                                 |        |            |                                      |             |   |          |           |      |
|---------------------------------|--------|------------|--------------------------------------|-------------|---|----------|-----------|------|
| ATQVEPLLAPAGAPLLQAEHGLAR        | Q6ZQ58 | 0          | n +42.03 Da,                         | 3609.123516 | 3 | 841.7908 | 160920000 | n.d. |
| AADISQWAGPLCLQEVDEPPQHALR       | P70296 | 0          | n +42.03 Da,                         | 3684.693433 | 3 | 948.4643 | 327076000 | n.d. |
| VNPTVFFDITADDEPLGR              | P17742 | 0.00111732 | n +28.03 Da,                         | 3694.201639 | 3 | 678.6786 | 4933000   | n.d. |
| STLLIHPQYAWLQDLGLR              | Q9DBF1 | 0          | n +42.03 Da,                         | 3714.841424 | 3 | 768.4152 | 2602770   | n.d. |
| MESMVAPGEVLMSEQIAQPAHADSR       | Q9DBK0 | 0          | n +42.03 Da,                         | 3757.082172 | 3 | 866.4085 | 233383008 | n.d. |
| SSWWTHVEMGPPDPILGVTEAFKR        | P05202 | 0          | n +42.03 Da,K +28.03 Da,             | 3771.632787 | 4 | 703.3548 | 79842704  | n.d. |
| SSWWTHVEMGPPDPILGVTEAFKR        | P05202 | 0          | n +42.03 Da,K +28.03 Da,             | 3781.768376 | 3 | 937.4706 | 86729800  | n.d. |
| ADQLTEEQIAEFKEAF                | P62204 | 0          | n +42.03 Da,K +28.03 Da,             | 4076.745583 | 2 | 969.9705 | 19179200  | n.d. |
| SETAPAETAAPAPVEKSPAKKTTTKAGAAKR | P43276 | 0          | n +42.03 Da,n +34.06 Da,K +34.06 Da, | 380.3042319 | 5 | 701.056  | 6.485E+09 | n.d. |
| SETAPAETAAPAPVEKSPAKKTTTKAGAAKR | P43276 | 0          | n +42.03 Da,n +28.03 Da,K +28.03 Da, | 384.3187651 | 5 | 692.612  | 8.547E+09 | n.d. |
| GAAVAATTEKVHHAKTTPQAQPER        | P22315 | 0.00682594 | n +28.03 Da,K +28.03 Da,             | 385.5139216 | 5 | 548.7113 | 1.057E+09 | n.d. |
| SETAPAETAAPAPVEKSPAKKTTTKAGAAKR | P43276 | 0.01138716 | n +42.03 Da,n +28.03 Da,K +28.03 Da, | 387.0396489 | 4 | 865.5129 | 410692000 | n.d. |
| GAAVAATTEKVHHAKTTPQAQPER        | P22315 | 0          | n +28.03 Da,K +28.03 Da,             | 389.5700851 | 4 | 685.637  | 97601800  | n.d. |
| APAAPAAPAPAEKTPVKKKAR           | P43274 | 0          | n +28.03 Da,K +28.03 Da,             | 393.2232853 | 5 | 442.8808 | 109144000 | n.d. |
| APQPDVKDEEGKEEKNKR              | P35564 | 0          | n +28.03 Da,K +28.03 Da,             | 408.5853627 | 4 | 592.3193 | 307454016 | n.d. |
| APQPDVKDEEGKEEKNKR              | P35564 | 0.00483092 | n +34.06 Da,K +34.06 Da,             | 410.4156971 | 5 | 480.0889 | 513478016 | n.d. |
| APQPDVKDEEGKEEKNKR              | P35564 | 0          | n +28.03 Da,K +28.03 Da,             | 411.4444011 | 5 | 474.0572 | 1.061E+09 | n.d. |
| TKHHPEDVEPALR                   | Q9JII6 | 0          | n +28.03 Da,K +28.03 Da,             | 414.6891249 | 3 | 528.9549 | 42136300  | n.d. |
| KKSTDEPSEKDALQPGR               | Q9QXD6 | 0.00682594 | n +28.03 Da,K +28.03 Da,             | 415.373669  | 4 | 500.2774 | 383079008 | n.d. |
| TTKAVVVKIETR                    | P11679 | 0.00860215 | n +28.03 Da,K +28.03 Da,             | 419.0369304 | 4 | 397.016  | 165054000 | n.d. |
| AAKTKKSLESINSR                  | P62889 | 0.01229508 | n +42.03 Da,K +34.06 Da,             | 425.3952694 | 3 | 613.7491 | 610060992 | n.d. |
| TEPIPVTAHHVSGNR                 | Q9D6Y7 | 0.01527495 | n +28.03 Da,K +28.03 Da,             | 453.051066  | 5 | 360.6042 | 64969100  | n.d. |
| MKIEEVKSTTKTQR                  | P60122 | 0.00135501 | n +34.06 Da,K +34.06 Da,             | 459.6219957 | 4 | 454.5474 | 1.36E+09  | n.d. |
| LHHAVIPHGKGR                    | Q9DC69 | 0          | n +42.03 Da,n +28.03 Da,             | 466.7959891 | 4 | 362.9543 | 50493700  | n.d. |
| MKIEEVKSTTKTQR                  | P60122 | 0.00135501 | n +28.03 Da,K +28.03 Da,             | 470.1269079 | 4 | 448.5157 | 3.543E+09 | n.d. |
| MKIEEVKSTTKTQR                  | P60122 | 0.00135501 | n +28.03 Da,K +28.03 Da,             | 473.3685396 | 5 | 359.0139 | 1.231E+09 | n.d. |
| TEPIPVTAHHVSGNR                 | Q9D6Y7 | 0          | n +28.03 Da,K +28.03 Da,             | 477.0681064 | 4 | 450.5035 | 58970500  | n.d. |
| TLGKKEDKLGIR                    | Q07417 | 0.00682594 | n +28.03 Da,K +28.03 Da,             | 485.5426512 | 4 | 368.2409 | 1.097E+09 | n.d. |
| APVAGKAKKGILR                   | O35490 | 0.00776915 | n +42.03 Da,n +34.06 Da,K +34.06 Da, | 487.2132396 | 4 | 436.8173 | 966297024 | n.d. |
| PPSHVSQAEQVKEAKAKEER            | P51125 | 0          | n +14.02 Da,K +28.03 Da,             | 491.5045307 | 5 | 470.0614 | 535735008 | n.d. |
| GHRPVLVLSQNTKR                  | P80318 | 0          | n +28.03 Da,K +28.03 Da,             | 492.7325945 | 4 | 416.0049 | 801043968 | n.d. |
| AEKFAEEDKLLKER                  | P20029 | 0.04640582 | n +28.03 Da,K +28.03 Da,             | 496.3057864 | 4 | 466.0255 | 681345984 | n.d. |
| IEEHNAKQPLPQKVR                 | P97328 | 0.00263505 | n +28.03 Da,K +28.03 Da,             | 499.7579158 | 5 | 375.0236 | 220328000 | n.d. |
| SYAIKKKDELER                    | P97461 | 0.0395853  | n +28.03 Da,K +28.03 Da,             | 513.2539232 | 4 | 398.7413 | 380979008 | n.d. |
| IKYHEFEKSR                      | Q61792 | 0          | n +34.06 Da,K +34.06 Da,             | 521.8986647 | 4 | 392.7384 | 49792900  | n.d. |
| SRDEKVQLYR                      | P19783 | 0.00776915 | n +28.03 Da,K +28.03 Da,             | 523.3429156 | 4 | 338.1938 | 35740400  | n.d. |
| PSVALKSPR                       | P32020 | 0.00860215 | n +14.02 Da,K +28.03 Da,             | 528.100681  | 3 | 332.8782 | 1.145E+09 | n.d. |
| SGAAVAATTEKVHHAKTTPQAQPER       | P22315 | 0.00263505 | n +34.06 Da,K +34.06 Da,             | 535.7180996 | 4 | 713.4266 | 57773700  | n.d. |
| SGAAVAATTEKVHHAKTTPQAQPER       | P22315 | 0          | n +34.06 Da,K +34.06 Da,             | 536.4308109 | 5 | 570.943  | 958512000 | n.d. |
| SGAAVAATTEKVHHAKTTPQAQPER       | P22315 | 0          | n +28.03 Da,K +28.03 Da,             | 537.1525827 | 5 | 566.1176 | 2.43E+09  | n.d. |

|                                   |        |            |                                      |             |   |          |           |      |
|-----------------------------------|--------|------------|--------------------------------------|-------------|---|----------|-----------|------|
| APVAGKKAKKGILER                   | O35490 | 0.03867925 | n +42.03 Da,n +34.06 Da,K +34.06 Da, | 538.0670872 | 5 | 349.6559 | 261380992 | n.d. |
| EGAKYVSHGATGKNDQVR                | P16460 | 0          | n +42.03 Da,K +28.03 Da,             | 539.1531246 | 4 | 518.7683 | 192750000 | n.d. |
| SGAAVAATTEKVHHAKTTPQAQPER         | P22315 | 0          | n +28.03 Da,K +28.03 Da,             | 539.8102932 | 4 | 707.395  | 376470016 | n.d. |
| MVQEAKEYKAEDEKQR                  | P63017 | 0.00860215 | n +28.03 Da,K +28.03 Da,             | 540.1279745 | 3 | 419.6242 | 61411300  | n.d. |
| HKRDQQKSTNVVYQAHHVS               | O88428 | 0.04972875 | n +42.03 Da,K +34.06 Da,             | 547.4224135 | 5 | 506.4837 | 56706300  | n.d. |
| LHHAVIPHGKGG                      | Q9DC69 | 0          | n +42.03 Da,n +34.06 Da,             | 547.5824535 | 4 | 364.4659 | 21997800  | n.d. |
| VAAKTKKSLESINSR                   | P62889 | 0          | n +28.03 Da,K +28.03 Da,             | 547.7333241 | 4 | 475.7954 | 4.732E+09 | n.d. |
| GNKEDVDKAVKAAR                    | P47738 | 0.04805077 | n +34.06 Da,K +34.06 Da,             | 552.7867348 | 4 | 410.0223 | 76902600  | n.d. |
| SETAPAETAAPAPVEKSPAKKKTTKK        | P43276 | 0.00682594 | n +42.03 Da,n +28.03 Da,K +28.03 Da, | 569.4238194 | 5 | 576.1407 | 192778000 | n.d. |
| TAPAAPAAPAPAEKTPVKKKAR            | P43274 | 0          | n +34.06 Da,K +34.06 Da,             | 571.9157251 | 5 | 469.1219 | 119031000 | n.d. |
| FQRPENALKR                        | P23116 | 0.0037594  | n +34.06 Da,K +34.06 Da,             | 573.4413138 | 4 | 332.4628 | 139967008 | n.d. |
| TKELPSGKKYLR                      | O08709 | 0.01039501 | n +28.03 Da,K +28.03 Da,             | 579.3265646 | 4 | 383.7447 | 174831008 | n.d. |
| APVAGKKAKKGILER                   | O35490 | 0          | n +42.03 Da,n +28.03 Da,K +28.03 Da, | 587.3251994 | 5 | 344.8301 | 1.022E+10 | n.d. |
| SETAPAAPAAPAPAEKTPVKKKAR          | P43274 | 0.00483092 | n +34.06 Da,K +34.06 Da,             | 588.1555003 | 5 | 512.3374 | 458364000 | n.d. |
| SETAPAAPAAPAPAEKTPVKKKAR          | P43274 | 0          | n +34.06 Da,K +34.06 Da,             | 588.9495925 | 4 | 640.1697 | 342545984 | n.d. |
| APVAGKKAKKGILER                   | O35490 | 0          | n +42.03 Da,n +28.03 Da,K +28.03 Da, | 590.1697747 | 4 | 430.786  | 1.929E+10 | n.d. |
| APVAGKKAKKGILER                   | O35490 | 0          | n +42.03 Da,n +28.03 Da,K +28.03 Da, | 590.904864  | 3 | 574.0454 | 3.148E+09 | n.d. |
| SETAPAAPAAPAPAEKTPVKKKAR          | P43274 | 0          | n +28.03 Da,K +28.03 Da,             | 592.9680021 | 5 | 506.3053 | 3.406E+09 | n.d. |
| SETAPAAPAAPAPVEKTPVKKKAKKTGAAAGKR | P43277 | 0          | n +42.03 Da,n +28.03 Da,K +28.03 Da, | 593.7574548 | 5 | 694.0235 | 1.402E+10 | n.d. |
| SETAPAAPAAPAPVEKTPVKKKAKKTGAAAGKR | P43277 | 0          | n +42.03 Da,n +28.03 Da,K +28.03 Da, | 596.6876403 | 4 | 867.2773 | 1.459E+09 | n.d. |
| SETAPAAPAAPAPAEKTPVKKKAR          | P43274 | 0          | n +28.03 Da,K +28.03 Da,             | 597.3516137 | 4 | 632.6297 | 627219008 | n.d. |
| GDKADVVDKAVKAAR                   | O35945 | 0          | n +28.03 Da,K +28.03 Da,             | 598.4879614 | 4 | 389.7345 | 428868000 | n.d. |
| SETAPAETAAPAPVEKSPAKKKTTKKAGAAKR  | P43276 | 0          | n +42.03 Da,n +28.03 Da,K +28.03 Da, | 606.3125387 | 5 | 692.6047 | 3.68E+09  | n.d. |
| SETAPAETAAPAPVEKSPAKKKTTKKAGAAKR  | P43276 | 0          | n +42.03 Da,n +28.03 Da,K +28.03 Da, | 609.9951587 | 4 | 865.504  | 67504896  | n.d. |
| PLNPIKQDVKKGKLR                   | Q9D819 | 0.04423963 | n +14.02 Da,n +28.03 Da,K +28.03 Da, | 620.1463947 | 5 | 372.8489 | 1.309E+09 | n.d. |
| YSHGSHETDEEFDAR                   | P12787 | 0.0037594  | n +14.02 Da,                         | 621.0354381 | 3 | 598.5833 | 101438000 | n.d. |
| DITDGNSEHLKR                      | Q9DBH5 | 0          | n +28.03 Da,K +28.03 Da,             | 622.3318318 | 3 | 480.9193 | 50426200  | n.d. |
| SEAAPAAPAAAPAEKAPAKKKAAKKPAGVR    | P15864 | 0          | n +42.03 Da,n +28.03 Da,K +28.03 Da, | 624.874219  | 4 | 790.9784 | 2.636E+09 | n.d. |
| DITDGNSEHLKR                      | Q9DBH5 | 0.0037594  | n +28.03 Da,K +28.03 Da,             | 625.5380355 | 4 | 360.9333 | 57767100  | n.d. |
| SEAAPAAPAAAPAEKAPAKKKAAKKPAGVR    | P15864 | 0          | n +42.03 Da,n +34.06 Da,K +34.06 Da, | 625.6469779 | 5 | 640.2221 | 3.09E+10  | n.d. |
| VAAKTKKSLESINSR                   | P62889 | 0.04640582 | n +28.03 Da,K +28.03 Da,             | 627.255728  | 4 | 475.7951 | 924091008 | n.d. |
| PEYKGEWKPR                        | P14211 | 0          | n +14.02 Da,K +28.03 Da,             | 627.5632122 | 4 | 340.6909 | 598052992 | n.d. |
| SEAAPAAPAAAPAEKAPAKKKAAKKPAGVR    | P15864 | 0          | n +42.03 Da,n +28.03 Da,K +28.03 Da, | 628.7529745 | 5 | 632.9846 | 3.584E+10 | n.d. |
| PEYKGEWKPR                        | P14211 | 0.0037594  | n +17.03 Da,K +34.06 Da,             | 629.3576127 | 4 | 344.4606 | 145852992 | n.d. |
| THQEIKGQKTLATPAVR                 | P53395 | 0          | n +28.03 Da,K +28.03 Da,             | 639.2115739 | 4 | 491.2886 | 9697170   | n.d. |
| THQEIKGQKTLATPAVR                 | P53395 | 0          | n +34.06 Da,K +34.06 Da,             | 640.6705556 | 4 | 495.8163 | 75216200  | n.d. |
| GKGDVPTKRPPVLR                    | P12970 | 0.02167488 | n +34.06 Da,K +34.06 Da,             | 642.0354328 | 4 | 405.5147 | 647308032 | n.d. |
| RRLPPLPPR                         | O88668 | 0.04640582 | n +34.06 Da,                         | 652.1317948 | 3 | 378.5779 | 4.539E+09 | n.d. |
| TMVVHEKQDDLGGKNEESTKTGNAGSR       | P08228 | 0          | n +28.03 Da,K +28.03 Da,             | 664.4875691 | 5 | 612.3106 | 1.089E+09 | n.d. |
| TMVVHEKQDDLGGKNEESTKTGNAGSR       | P08228 | 0          | n +28.03 Da,K +28.03 Da,             | 664.6757941 | 4 | 765.1367 | 376879008 | n.d. |

|                                   |        |            |                                      |             |   |          |           |      |
|-----------------------------------|--------|------------|--------------------------------------|-------------|---|----------|-----------|------|
| TDAPQPDVKDEEGKEEKNR               | P35564 | 0.0037594  | n +28.03 Da,K +28.03 Da,             | 667.5367079 | 5 | 517.2714 | 246427008 | n.d. |
| GHQQLYWSHPR                       | P62274 | 0          | n +28.03 Da,                         | 673.5965992 | 4 | 359.9346 | 145096992 | n.d. |
| SSEEQKQPPHSSSQHSETQGPEFSRPPPR     | Q8K1Z0 | 0          | n +28.03 Da,K +28.03 Da,             | 675.1963077 | 5 | 714.9444 | 181666000 | n.d. |
| SSGTTAPKKTSGSLKDEDR               | Q91YT0 | 0.00682594 | n +34.06 Da,K +34.06 Da,             | 677.0999702 | 4 | 562.8322 | 39977800  | n.d. |
| SEEQKQPPHSSSQHSETQGPEFSRPPPR      | Q8K1Z0 | 0          | n +34.06 Da,K +34.06 Da,             | 679.1849145 | 5 | 699.9504 | 17499100  | n.d. |
| SAKKEKTTQPETAEVTDLKR              | Q8K2Q9 | 0.00135501 | n +34.06 Da,K +34.06 Da,             | 682.2186958 | 5 | 512.7197 | 222436992 | n.d. |
| KSEVEVKKIFR                       | O35490 | 0.018      | n +34.06 Da,K +34.06 Da,             | 687.1223727 | 4 | 375.5212 | 456097984 | n.d. |
| YAKDVKFGADAR                      | P63038 | 0          | n +28.03 Da,K +28.03 Da,             | 687.226319  | 4 | 356.9525 | 1.055E+09 | n.d. |
| AKFVSWKSR                         | Q9D773 | 0.00135501 | n +34.06 Da,K +34.06 Da,             | 687.7937408 | 4 | 303.4592 | 346523008 | n.d. |
| PTYKEVCSEKTHAEVVR                 | Q9D6Y7 | 0          | n +14.02 Da,n +28.03 Da,K +28.03 Da, | 688.5612851 | 4 | 540.7826 | 150664000 | n.d. |
| SGSKAASLHWTSE                     | Q9CXV1 | 0.02606178 | n +28.03 Da,K +28.03 Da,             | 692.0948401 | 3 | 524.9428 | 15418900  | n.d. |
| KSEVEVKKIFR                       | O35490 | 0          | n +28.03 Da,K +28.03 Da,             | 692.6172684 | 4 | 369.4894 | 1.041E+09 | n.d. |
| SSGTTAPKKTSGSLKDEDR               | Q91YT0 | 0          | n +28.03 Da,K +28.03 Da,             | 699.3853088 | 3 | 742.0655 | 55083800  | n.d. |
| SSGTTAPKKTSGSLKDEDR               | Q91YT0 | 0.00860215 | n +34.06 Da,K +34.06 Da,             | 700.7378095 | 5 | 450.4672 | 161326000 | n.d. |
| SETAPAAPAAPAPVEKTPVKKKAKK         | P43277 | 0          | n +42.03 Da,n +34.06 Da,K +34.06 Da, | 701.6382792 | 4 | 691.2177 | 16987100  | n.d. |
| SSGTTAPKKTSGSLKDEDR               | Q91YT0 | 0.018      | n +28.03 Da,K +28.03 Da,             | 702.910756  | 5 | 445.6419 | 580969984 | n.d. |
| SETAPVAQAASTATEKPAAAKTKKPAKAAAAPR | P43275 | 0          | n +42.03 Da,K +34.06 Da,             | 704.1538121 | 5 | 699.645  | 39033700  | n.d. |
| SETAPVAQAASTATEKPAAAKTKKPAKAAAAPR | P43275 | 0          | n +42.03 Da,K +28.03 Da,             | 708.6685009 | 5 | 692.4075 | 151399008 | n.d. |
| GHQQLYWSHPR                       | P62274 | 0.00135501 | n +34.06 Da,                         | 712.8095773 | 4 | 361.4428 | 348631008 | n.d. |
| RRLPPLPPR                         | O88668 | 0.01039501 | n +34.06 Da,                         | 723.711692  | 3 | 379.2595 | 1.414E+09 | n.d. |
| WRPPQPVKGR                        | P16015 | 0          | n +28.03 Da,K +28.03 Da,             | 724.632446  | 3 | 426.2593 | 1.811E+09 | n.d. |
| SSGTTAPKKTSGSLKDEDR               | Q91YT0 | 0.018      | n +28.03 Da,K +28.03 Da,             | 729.7063234 | 5 | 445.6548 | 153516992 | n.d. |
| SQEKASSPSGKMDGEKPDASEEKR          | Q9D0R2 | 0.00860215 | n +42.03 Da,K +34.06 Da,             | 730.1873783 | 5 | 571.9132 | 451142016 | n.d. |
| WRPPQPVKGR                        | P16015 | 0.00135501 | n +28.03 Da,K +28.03 Da,             | 730.3296581 | 4 | 319.9463 | 142819008 | n.d. |
| SQEKASSPSGKMDGEKPDASEEKR          | Q9D0R2 | 0.02079208 | n +42.03 Da,K +28.03 Da,             | 730.852269  | 5 | 567.0877 | 1.517E+09 | n.d. |
| SSSEDKITVHFKNR                    | P46656 | 0          | n +28.03 Da,K +28.03 Da,             | 735.3600504 | 4 | 433.7402 | 1.934E+09 | n.d. |
| SSSEDKITVHFKNR                    | P46656 | 0          | n +34.06 Da,K +34.06 Da,             | 738.8683516 | 4 | 438.2639 | 1.086E+09 | n.d. |
| TRGSNLQQPRARESNIR                 | Q3UP11 | 0.02972196 | n +14.02 Da,                         | 739.7291001 | 4 | 500.0242 | 4856890   | n.d. |
| SETAPAAPAAPAPVEKTPVKKKAKKTGAAAGKR | P43277 | 0          | n +42.03 Da,n +28.03 Da,K +28.03 Da, | 739.7375201 | 5 | 694.0164 | 2.879E+09 | n.d. |
| MKHYEVEIR                         | Q9CY27 | 0.00682594 | n +28.03 Da,K +28.03 Da,             | 747.6377171 | 2 | 630.842  | 137003008 | n.d. |
| TGEGKGFYKGSFHR                    | P17742 | 0.00956429 | n +28.03 Da,K +28.03 Da,             | 749.0472885 | 5 | 349.1864 | 233940992 | n.d. |
| MKHYEVEIR                         | Q9CY27 | 0.00135501 | n +28.03 Da,K +28.03 Da,             | 749.1239186 | 3 | 420.8973 | 4.111E+09 | n.d. |
| GKPDVVVKEDEEYKR                   | Q8QZT1 | 0          | n +28.03 Da,K +28.03 Da,             | 749.2436586 | 4 | 476.519  | 113691000 | n.d. |
| SETAPAAPAAPAPVEKTPVKKKAKKTGAAAGKR | P43277 | 0          | n +42.03 Da,n +28.03 Da,K +28.03 Da, | 750.1021181 | 4 | 867.269  | 64624400  | n.d. |
| TKHMLPSGFR                        | P62911 | 0.00135501 | n +34.06 Da,K +34.06 Da,             | 754.0095177 | 3 | 414.5843 | 5228360   | n.d. |
| SETAPAAPAAPAPAEKTPVKKKAR          | P43274 | 0          | n +42.03 Da,n +34.06 Da,K +34.06 Da, | 767.0429737 | 5 | 513.9266 | 5.267E+09 | n.d. |
| SETAPAAPAAPAPAEKTPVKKKAR          | P43274 | 0          | n +42.03 Da,n +34.06 Da,K +34.06 Da, | 767.1557347 | 3 | 855.8725 | 679176000 | n.d. |
| SETAPAAPAAPAPAEKTPVKKKAR          | P43274 | 0          | n +42.03 Da,n +34.06 Da,K +34.06 Da, | 769.6076238 | 4 | 642.1563 | 149767008 | n.d. |
| SETAPAAPAAPAPAEKTPVKKKAR          | P43274 | 0          | n +42.03 Da,n +28.03 Da,K +28.03 Da, | 770.5720767 | 3 | 847.8301 | 930817984 | n.d. |
| PFKKSANVEAVDVAKR                  | Q91W43 | 0.0037594  | n +14.02 Da,K +28.03 Da,             | 772.3437553 | 3 | 619.7025 | 8801720   | n.d. |

|                                   |        |            |                                      |             |   |          |           |      |
|-----------------------------------|--------|------------|--------------------------------------|-------------|---|----------|-----------|------|
| WRTGAISTARWAGAR                   | Q8R086 | 0.00135501 | n +42.03 Da,                         | 773.2652378 | 3 | 567.9631 | 127747000 | n.d. |
| SETAPAAPAAPAPAIEKTPVKKKAR         | P43274 | 0          | n +42.03 Da,n +28.03 Da,K +28.03 Da, | 774.1060842 | 5 | 509.1013 | 4.929E+09 | n.d. |
| SFAHLPDCKGDQSEHR                  | Q9QXF8 | 0          | n +28.03 Da,K +28.03 Da,             | 793.860402  | 5 | 388.7875 | 31990000  | n.d. |
| NGPSPEELEQKQR                     | P70460 | 0.04805077 | n +14.02 Da,K +28.03 Da,             | 804.5959577 | 4 | 389.2038 | 260691008 | n.d. |
| PKKIKDPDAAKPEDWDER                | P14211 | 0.00956429 | n +14.02 Da,K +28.03 Da,             | 804.8780608 | 5 | 453.6512 | 704134976 | n.d. |
| PKKIKDPDAAKPEDWDER                | P14211 | 0.018      | n +14.02 Da,K +28.03 Da,             | 805.5470051 | 4 | 566.8126 | 815372032 | n.d. |
| SETAPAAPAAPAPVEKTPVKKKAKKTGAAAGKR | P43277 | 0          | n +42.03 Da,n +28.03 Da,K +28.03 Da, | 814.4967569 | 5 | 694.0164 | 7.034E+09 | n.d. |
| DAGRLGTQGYALSVDGAGETFR            | E9PVD3 | 0.01327886 | n +14.02 Da,                         | 814.7031815 | 4 | 554.0299 | 8231420   | n.d. |
| SETAPAAPAAPAPVEKTPVKKKAKKTGAAAGKR | P43277 | 0          | n +42.03 Da,n +28.03 Da,K +28.03 Da, | 823.4008866 | 4 | 867.2683 | 339364992 | n.d. |
| HVEEGDKADVDKAVKAAR                | O35945 | 0.00682594 | n +34.06 Da,K +34.06 Da,             | 832.9904819 | 4 | 519.3191 | 390404992 | n.d. |
| MAPVAGKKAKKGILER                  | O35490 | 0.00483092 | n +42.03 Da,n +34.06 Da,K +34.06 Da, | 833.4678183 | 4 | 469.5778 | 156063008 | n.d. |
| FKVVGQEGKSHYEV                    | Q99KK7 | 0          | n +34.06 Da,K +34.06 Da,             | 838.4914657 | 5 | 373.8285 | 42348700  | n.d. |
| TFHRPELVR                         | P70694 | 0.01527495 | n +34.06 Da,                         | 839.4216541 | 3 | 396.9072 | 114318000 | n.d. |
| RRLPPLPPR                         | O88668 | 0.00860215 | n +34.06 Da,                         | 841.1486187 | 3 | 379.2594 | 2.287E+09 | n.d. |
| TLVVAQQLLVQWKQR                   | Q8R1Z9 | 0.02972196 | n +28.03 Da,K +28.03 Da,             | 841.2723469 | 5 | 371.0381 | 270497984 | n.d. |
| MAPVAGKKAKKGILER                  | O35490 | 0.00682594 | n +42.03 Da,n +34.06 Da,K +34.06 Da, | 841.901759  | 5 | 375.8634 | 77953904  | n.d. |
| HVEEGDKADVDKAVKAAR                | O35945 | 0.00483092 | n +28.03 Da,K +28.03 Da,             | 842.8331418 | 5 | 410.8315 | 366435008 | n.d. |
| SEAAPAAPAAPAPAEKAPAKKKAACKPAGVR   | P15864 | 0          | n +42.03 Da,n +28.03 Da,K +28.03 Da, | 843.1260835 | 4 | 790.9695 | 165002000 | n.d. |
| HVEEGDKADVDKAVKAAR                | O35945 | 0          | n +28.03 Da,K +28.03 Da,             | 843.96592   | 4 | 513.2878 | 484411008 | n.d. |
| SEAAPAAPAAPAPAEKAPAKKKAACKPAGVR   | P15864 | 0          | n +42.03 Da,n +28.03 Da,K +28.03 Da, | 844.2316297 | 5 | 632.9773 | 1.908E+09 | n.d. |
| MKPILLQGH                         | Q9QZD9 | 0.00682594 | n +28.03 Da,K +28.03 Da,             | 849.5952018 | 3 | 459.9392 | 145715008 | n.d. |
| HFIAEFKR                          | P63017 | 0.01039501 | n +28.03 Da,K +28.03 Da,             | 866.3381258 | 3 | 368.5505 | 183887008 | n.d. |
| AALRPLVKPKIVK                     | P17932 | 0.00860215 | n +34.06 Da,K +34.06 Da,             | 871.6185916 | 5 | 314.6508 | 107682000 | n.d. |
| AALRPLVKPKIVK                     | P17932 | 0          | n +28.03 Da,K +28.03 Da,             | 874.1064439 | 5 | 309.8253 | 224807008 | n.d. |
| TKSDRPELTGAKVVVSGGR               | Q99LC5 | 0.00956429 | n +34.06 Da,K +34.06 Da,             | 879.5871339 | 4 | 515.5738 | 28798300  | n.d. |
| SETAPVAQAASTATEKPAAAKTKKPAKAAAPR  | P43275 | 0          | n +42.03 Da,K +34.06 Da,             | 883.3785599 | 5 | 699.6457 | 1.465E+09 | n.d. |
| SETAPVAQAASTATEKPAAAKTKKPAKAAAPR  | P43275 | 0          | n +42.03 Da,K +28.03 Da,             | 886.1664285 | 5 | 692.4078 | 5.457E+09 | n.d. |
| SETAPVAQAASTATEKPAAAKTKKPAKAAAPR  | P43275 | 0          | n +42.03 Da,K +34.06 Da,             | 886.800609  | 4 | 874.3054 | 26125800  | n.d. |
| SETAPVAQAASTATEKPAAAKTKKPAKAAAPR  | P43275 | 0          | n +42.03 Da,K +28.03 Da,             | 890.1747054 | 4 | 865.2578 | 49475700  | n.d. |
| DAEKFAEEDKLLKER                   | P20029 | 0          | n +28.03 Da,K +28.03 Da,             | 895.1256452 | 4 | 494.7821 | 4.415E+09 | n.d. |
| PFVEKAKLLR                        | Q64459 | 0          | n +14.02 Da,K +28.03 Da,             | 909.0017999 | 4 | 357.493  | 2.707E+09 | n.d. |
| GDLPDDREEGTSSTAEAAKRR             | O08663 | 0.00860215 | n +34.06 Da,K +34.06 Da,             | 915.6203323 | 5 | 549.109  | 58706300  | n.d. |
| YLKLNQFHR                         | P49429 | 0.00135501 | n +28.03 Da,K +28.03 Da,             | 918.1533624 | 3 | 425.5847 | 799593984 | n.d. |
| TWISMGQEDEKRR                     | P11725 | 0          | n +34.06 Da,K +34.06 Da,             | 924.549242  | 4 | 468.7878 | 154956000 | n.d. |
| SETAPAAPAAPAPAIEKTPVKKK           | P43274 | 0          | n +42.03 Da,n +34.06 Da,K +34.06 Da, | 927.1469024 | 4 | 585.3717 | 312523008 | n.d. |
| SETAPAAPAAPAPAIEKTPVKKK           | P43274 | 0          | n +42.03 Da,n +28.03 Da,K +28.03 Da, | 928.1675793 | 4 | 579.3398 | 435447008 | n.d. |
| YLKLNQFHR                         | P49429 | 0.02167488 | n +28.03 Da,K +28.03 Da,             | 930.1074208 | 4 | 319.44   | 632451968 | n.d. |
| MEAVPEKKKVVATVPGLKK               | P14148 | 0.018      | n +42.03 Da,n +34.06 Da,K +34.06 Da, | 950.1583396 | 5 | 486.5431 | 7.958E+09 | n.d. |
| MEAVPEKKKVVATVPGLKK               | P14148 | 0.02788462 | n +42.03 Da,n +28.03 Da,K +28.03 Da, | 953.1543706 | 5 | 479.3054 | 1.324E+10 | n.d. |
| FQNVAKGKVFDESEKTESR               | P08113 | 0          | n +28.03 Da,K +28.03 Da,             | 962.0180341 | 4 | 649.8553 | 24400400  | n.d. |

|                                      |        |            |                          |             |   |          |           |      |
|--------------------------------------|--------|------------|--------------------------|-------------|---|----------|-----------|------|
| PTFKHLWR                             | Q8CHT0 | 0.00483092 | n +14.02 Da,K +28.03 Da, | 970.9957683 | 3 | 376.2221 | 183067008 | n.d. |
| PNASEPKHLLVMKGAPER                   | Q8VDN2 | 0          | n +14.02 Da,K +28.03 Da, | 974.809687  | 4 | 511.7904 | 80061904  | n.d. |
| PVILAGNDQQKKKYLGR                    | P45952 | 0          | n +14.02 Da,K +28.03 Da, | 976.159573  | 4 | 507.3098 | 334073984 | n.d. |
| PVILAGNDQQKKKYLGR                    | P45952 | 0          | n +14.02 Da,K +28.03 Da, | 979.1472975 | 5 | 406.0494 | 897912000 | n.d. |
| MESNHKSGDGLSGTQKEAALR                | Q5YD48 | 0          | n +42.03 Da,K +28.03 Da, | 979.3129259 | 3 | 579.3011 | 155788000 | n.d. |
| TQKHLDLYAR                           | B1AWN4 | 0.04423963 | n +14.02 Da,K +28.03 Da, | 984.4751102 | 3 | 429.5792 | 262663008 | n.d. |
| PFKFNKIKGR                           | Q9DBT9 | 0.00263505 | n +14.02 Da,K +28.03 Da, | 986.7103709 | 4 | 309.1922 | 186292992 | n.d. |
| SKKVDQSVANEISQKAAESQGR               | Q61733 | 0.00135501 | n +34.06 Da,K +34.06 Da, | 989.4217054 | 4 | 649.1355 | 32258900  | n.d. |
| LKKKDESEQGKQQYLQSIEDR                | Q9CQA3 | 0.00776915 | n +28.03 Da,K +28.03 Da, | 993.4264023 | 4 | 673.3732 | 122793000 | n.d. |
| HSSAAAEASAALKVRPER                   | Q8BGT5 | 0          | n +34.06 Da,K +34.06 Da, | 1004.555849 | 4 | 480.5332 | 777360000 | n.d. |
| MESNHKSGDGLSGTQKEAALR                | Q5YD48 | 0          | n +42.03 Da,K +28.03 Da, | 1008.520961 | 4 | 579.2921 | 112527000 | n.d. |
| HSSAAAEASAALKVRPER                   | Q8BGT5 | 0          | n +28.03 Da,K +28.03 Da, | 1017.288553 | 4 | 477.5171 | 904793024 | n.d. |
| ASEIKKLFWR                           | Q02013 | 0.00860215 | n +28.03 Da,K +28.03 Da, | 1034.228542 | 4 | 380.2445 | 424811008 | n.d. |
| PKDVNAAIATIKTKR                      | P05213 | 0.018      | n +14.02 Da,K +28.03 Da, | 1036.26133  | 4 | 431.7753 | 271319008 | n.d. |
| PLAKDLLHPSPEEKR                      | Q6ZWU9 | 0          | n +14.02 Da,K +28.03 Da, | 1049.046344 | 4 | 483.0257 | 4.45E+09  | n.d. |
| PLAKDLLHPSPEEKR                      | Q6ZWU9 | 0          | n +14.02 Da,K +28.03 Da, | 1049.515004 | 3 | 643.6975 | 1.137E+09 | n.d. |
| CKLDHAFLEFRILQR                      | Q8BYR5 | 0.04640582 | n +14.02 Da,K +28.03 Da, | 1053.304015 | 5 | 372.6172 | 33003700  | n.d. |
| PLAKDLLHPSPEEKR                      | Q6ZWU9 | 0          | n +14.02 Da,K +28.03 Da, | 1054.436507 | 2 | 483.0258 | 6.393E+09 | n.d. |
| PLAKDLLHPSPEEKR                      | Q6ZWU9 | 0          | n +14.02 Da,K +28.03 Da, | 1054.444328 | 5 | 386.6224 | 5.098E+10 | n.d. |
| PAPLQHQQVDIYQKR                      | P40142 | 0          | n +14.02 Da,K +28.03 Da, | 1070.060035 | 4 | 434.4964 | 64601000  | n.d. |
| TPGIHIGKKELNMGQR                     | P45952 | 0          | n +28.03 Da,K +28.03 Da, | 1075.398079 | 5 | 373.4185 | 17028000  | n.d. |
| PSGTSQCEDGSAGGFQHLDMHSEKR            | Q91WT9 | 0          | n +14.02 Da,K +28.03 Da, | 1076.422885 | 5 | 552.8479 | 6.041E+09 | n.d. |
| TPGIHIGKKELNMGQR                     | P45952 | 0.0037594  | n +28.03 Da,K +28.03 Da, | 1077.066515 | 4 | 466.5204 | 52449300  | n.d. |
| PSGTSQCEDGSAGGFQHLDMHSEKR            | Q91WT9 | 0          | n +14.02 Da,K +28.03 Da, | 1077.162422 | 4 | 690.8075 | 2.649E+09 | n.d. |
| PKNFGIGQDIQPKR                       | P12970 | 0          | n +14.02 Da,K +28.03 Da, | 1083.936412 | 4 | 417.7451 | 340033984 | n.d. |
| PKNFGIGQDIQPKR                       | P12970 | 0          | n +14.02 Da,K +28.03 Da, | 1094.017363 | 3 | 556.6622 | 92473000  | n.d. |
| DLSTAILKQKNRPNR                      | Q01853 | 0.04640582 | n +28.03 Da,K +28.03 Da, | 1094.260828 | 4 | 460.2804 | 14890400  | n.d. |
| SGSNPKAATAGSQAGPGGLVAGKEEKKKAGGGVLNR | Q8C4B4 | 0.00776915 | n +42.03 Da,K +34.06 Da, | 1098.621975 | 5 | 713.2293 | 111511000 | n.d. |
| SGSNPKAATAGSQAGPGGLVAGKEEKKKAGGGVLNR | Q8C4B4 | 0          | n +42.03 Da,K +28.03 Da, | 1101.452221 | 5 | 707.1976 | 260951008 | n.d. |
| PGLTLGKKEDKLGIR                      | Q07417 | 0          | n +14.02 Da,K +28.03 Da, | 1106.052113 | 5 | 345.4225 | 278440000 | n.d. |
| SKDSEGSWFR                           | O55125 | 0.00135501 | n +28.03 Da,K +28.03 Da, | 1108.992401 | 3 | 418.8753 | 2.274E+09 | n.d. |
| ALSTGEKGFYKGSFFHR                    | P17742 | 0          | n +28.03 Da,K +28.03 Da, | 1112.006973 | 5 | 403.4165 | 150898000 | n.d. |
| VKGVNMGFGR                           | P16858 | 0.0037594  | n +28.03 Da,K +28.03 Da, | 1121.509756 | 3 | 363.5572 | 834489984 | n.d. |
| HQGVMMVGMGQKDSYVGDQAQSKR             | P60710 | 0          | n +28.03 Da,K +28.03 Da, | 1124.631621 | 4 | 648.5725 | 509291008 | n.d. |
| PNDVSHGYVTVKPGIR                     | P34914 | 0          | n +14.02 Da,K +28.03 Da, | 1124.72827  | 3 | 594.3275 | 15195600  | n.d. |
| HQGVMMVGMGQKDSYVGDQAQSKR             | P60710 | 0.0450782  | n +28.03 Da,K +28.03 Da, | 1125.290412 | 5 | 519.0584 | 16839900  | n.d. |
| PNDVSHGYVTVKPGIR                     | P34914 | 0          | n +14.02 Da,K +28.03 Da, | 1130.627413 | 4 | 445.9978 | 477176992 | n.d. |
| HEHDQPAHLTLKDDSIQVNR                 | Q921G7 | 0          | n +28.03 Da,K +28.03 Da, | 1135.10995  | 4 | 595.3102 | 22829500  | n.d. |
| TKDYQDFQHLNDNDHHLQR                  | P34927 | 0          | n +28.03 Da,K +28.03 Da, | 1142.87741  | 4 | 649.5539 | 68706800  | n.d. |
| PRPDDPSNIQKITGTKEGIEKAR              | Q8VDJ3 | 0.02079208 | n +14.02 Da,K +28.03 Da, | 1143.274243 | 5 | 530.5011 | 240210000 | n.d. |

|                           |        |            |                                      |             |   |          |           |      |
|---------------------------|--------|------------|--------------------------------------|-------------|---|----------|-----------|------|
| PGAKDVVHIDSEKDFR          | Q921X9 | 0          | n +17.03 Da,K +34.06 Da,             | 1145.52866  | 4 | 475.2909 | 102744000 | n.d. |
| TKNSTFSELFKKEHPDR         | P40142 | 0.00135501 | n +28.03 Da,K +28.03 Da,             | 1146.973847 | 4 | 544.8    | 63782800  | n.d. |
| HQGVVMVGMGQKDSYVVGDEAQSQR | P60710 | 0          | n +42.03 Da,K +34.06 Da,             | 1150.078308 | 4 | 655.0908 | 365488000 | n.d. |
| HAITATQKTVDGPGSGKLWR      | P16858 | 0          | n +28.03 Da,K +28.03 Da,             | 1150.242605 | 4 | 538.3073 | 91212800  | n.d. |
| PKLKAFLESPHEVNR           | F6RWR5 | 0.00135501 | n +14.02 Da,K +28.03 Da,             | 1151.60759  | 5 | 367.8169 | 6912030   | n.d. |
| PGAKDVVHIDSEKDFR          | Q921X9 | 0          | n +14.02 Da,K +28.03 Da,             | 1154.701376 | 4 | 471.5061 | 844579008 | n.d. |
| PGAKDVVHIDSEKDFR          | Q921X9 | 0          | n +14.02 Da,K +28.03 Da,             | 1155.419229 | 5 | 377.4062 | 936752000 | n.d. |
| TKDYQDFQHLDNDNDHHLR       | P34927 | 0          | n +28.03 Da,K +28.03 Da,             | 1166.875684 | 5 | 519.8455 | 214199008 | n.d. |
| TVKKIAIFGATGR             | Q923D2 | 0.00135501 | n +28.03 Da,K +28.03 Da,             | 1169.718448 | 3 | 482.6449 | 742331008 | n.d. |
| PSLAEHWKSIR               | O08601 | 0          | n +14.02 Da,K +28.03 Da,             | 1170.017805 | 4 | 342.1963 | 227339008 | n.d. |
| PSLAEHWKSIR               | O08601 | 0          | n +14.02 Da,K +28.03 Da,             | 1170.721161 | 3 | 455.926  | 52783200  | n.d. |
| ALSTGEKGFYKGSFHR          | P17742 | 0.04343808 | n +28.03 Da,K +28.03 Da,             | 1172.696056 | 5 | 403.4169 | 9423440   | n.d. |
| VQQPVHNLMLGGTKEQR         | O88587 | 0          | n +28.03 Da,K +28.03 Da,             | 1183.508501 | 4 | 498.527  | 4896120   | n.d. |
| SEPEIPKIR                 | Q9WTP6 | 0.00682594 | n +28.03 Da,K +28.03 Da,             | 1194.552754 | 3 | 394.5678 | 45535800  | n.d. |
| TKDYQDFQHLDNDNDHHLR       | P34927 | 0          | n +34.06 Da,K +34.06 Da,             | 1201.273695 | 4 | 652.5674 | 38848800  | n.d. |
| PSKTNVSGGAIALGHPLGGSGSR   | Q8BWT1 | 0.00135501 | n +14.02 Da,K +28.03 Da,             | 1205.358956 | 3 | 721.3938 | 42654800  | n.d. |
| PSKTNVSGGAIALGHPLGGSGSR   | Q8BWT1 | 0          | n +14.02 Da,K +28.03 Da,             | 1206.018381 | 4 | 541.2977 | 2.9E+09   | n.d. |
| LTPHYLTKQDVER             | Q9DBG6 | 0          | n +28.03 Da,K +28.03 Da,             | 1208.648701 | 4 | 439.9952 | 1.796E+09 | n.d. |
| PKSVSDYDGLSSFKR           | P09103 | 0          | n +14.02 Da,n +28.03 Da,K +28.03 Da, | 1210.782173 | 5 | 383.2164 | 871166976 | n.d. |
| SAAAEASAALKVRPER          | Q8BGT5 | 0.01138716 | n +34.06 Da,K +34.06 Da,             | 1213.987861 | 4 | 424.2722 | 162876992 | n.d. |
| VAEELALEQAKKESEHQR        | Q9CRB9 | 0          | n +28.03 Da,K +28.03 Da,             | 1224.175825 | 4 | 545.5489 | 27304800  | n.d. |
| IKDPKSLDFYTR              | Q9CPU0 | 0          | n +28.03 Da,K +28.03 Da,             | 1228.568206 | 4 | 431.5093 | 1.345E+09 | n.d. |
| PKNYTDNELEKTR             | P26443 | 0.00263505 | n +14.02 Da,K +28.03 Da,             | 1230.848041 | 3 | 597.6582 | 22656100  | n.d. |
| GKFYGDLEKDKGLQTSQDAR      | P14211 | 0.00483092 | n +34.06 Da,K +34.06 Da,             | 1232.772024 | 4 | 598.8495 | 291216992 | n.d. |
| GKFYGDLEKDKGLQTSQDAR      | P14211 | 0.0037594  | n +28.03 Da,K +28.03 Da,             | 1234.255847 | 4 | 592.8176 | 281872000 | n.d. |
| RHVFGESEDELIGQKVSH        | P17751 | 0.00956429 | n +28.03 Da,K +28.03 Da,             | 1235.840528 | 4 | 499.2669 | 101534000 | n.d. |
| PFVFRPER                  | P00186 | 0.03867925 | n +14.02 Da,                         | 1240.377091 | 3 | 354.5342 | 87577200  | n.d. |
| RVVFDDTYDR                | P16015 | 0.00860215 | n +28.03 Da,                         | 1262.904126 | 3 | 438.5538 | 94305104  | n.d. |
| SHTILLVQPTKRPEGR          | P84089 | 0          | n +42.03 Da,K +34.06 Da,             | 1272.339949 | 3 | 636.7125 | 32096700  | n.d. |
| SGKFYGDLEKDKGLQTSQDAR     | P14211 | 0.02606178 | n +28.03 Da,K +28.03 Da,             | 1280.116623 | 5 | 491.862  | 530136000 | n.d. |
| LKFIDTTSKFGHGR            | P27659 | 0.00135501 | n +28.03 Da,K +28.03 Da,             | 1284.404547 | 4 | 423.4963 | 24838000  | n.d. |
| VLSGEDKSNIAAWGK           | P01942 | 0.00956429 | n +28.03 Da,K +28.03 Da,             | 1294.246337 | 3 | 605.684  | 897612032 | n.d. |
| VLSGEDKSNIAAWGK           | P01942 | 0          | n +28.03 Da,K +28.03 Da,             | 1295.796151 | 4 | 454.5152 | 1.57E+09  | n.d. |
| VKIVTVKTQAYPDQKPGTSGLR    | Q9D0F9 | 0          | n +28.03 Da,K +28.03 Da,             | 1305.095612 | 4 | 625.3735 | 440987008 | n.d. |
| VKIVTVKTQAYPDQKPGTSGLR    | Q9D0F9 | 0.00956429 | n +28.03 Da,K +28.03 Da,             | 1309.3413   | 5 | 500.5005 | 3.075E+09 | n.d. |
| VKIVTVKTQAYPDQKPGTSGLR    | Q9D0F9 | 0.00135501 | n +34.06 Da,K +34.06 Da,             | 1309.678536 | 5 | 505.3253 | 5.199E+09 | n.d. |
| PTKVAVDCGIKNNVIR          | Q8C196 | 0          | n +14.02 Da,K +28.03 Da,             | 1312.781117 | 4 | 489.0383 | 48117200  | n.d. |
| SSGKFYGDLEKDKGLQTSQDAR    | P14211 | 0.02606178 | n +34.06 Da,K +34.06 Da,             | 1312.88082  | 4 | 642.3661 | 95485800  | n.d. |
| GDTKNSTFSELFKKEHPDR       | P40142 | 0          | n +34.06 Da,K +34.06 Da,             | 1323.692148 | 5 | 475.2761 | 260608000 | n.d. |
| GDTKNSTFSELFKKEHPDR       | P40142 | 0          | n +28.03 Da,K +28.03 Da,             | 1324.420537 | 4 | 587.8108 | 43061200  | n.d. |

|                            |        |            |                          |             |   |          |           |      |
|----------------------------|--------|------------|--------------------------|-------------|---|----------|-----------|------|
| YTPGKKEDLYLKPIQR           | P58252 | 0.00483092 | n +34.06 Da,K +34.06 Da, | 1326.043309 | 5 | 417.8733 | 349846016 | n.d. |
| IPAHPDPVFSSEHAHQVLR        | P33587 | 0          | n +28.03 Da,             | 1329.041832 | 5 | 451.2372 | 324140992 | n.d. |
| YTPGKKEDLYLKPIQR           | P58252 | 0.00860215 | n +28.03 Da,K +28.03 Da, | 1329.057464 | 4 | 516.0579 | 537667968 | n.d. |
| YTPGKKEDLYLKPIQR           | P58252 | 0          | n +28.03 Da,K +28.03 Da, | 1329.501664 | 5 | 413.0478 | 703667008 | n.d. |
| TGVFTTMEKAGAHKGGAKR        | P16858 | 0.00682594 | n +34.06 Da,K +34.06 Da, | 1331.164643 | 4 | 549.8451 | 81327104  | n.d. |
| IPAHPDPVFSSEHAHQVLR        | P33587 | 0          | n +28.03 Da,             | 1332.467056 | 4 | 563.7942 | 168695008 | n.d. |
| EHLSSFNVHTR                | P25688 | 0          | n +28.03 Da,             | 1341.793893 | 4 | 376.1941 | 102531000 | n.d. |
| LYFHIGETEKR                | Q8R1V4 | 0.00135501 | n +28.03 Da,             | 1343.000556 | 4 | 362.9529 | 225304000 | n.d. |
| GVQVSPSGEKITHTGQVYDEKDYR   | P52503 | 0          | n +28.03 Da,K +28.03 Da, | 1352.67723  | 4 | 695.1081 | 315816000 | n.d. |
| SDSRDPASDQMKQWKEQR         | P24270 | 0          | n +42.03 Da,K +28.03 Da, | 1359.228604 | 4 | 573.2772 | 33122800  | n.d. |
| PQKVNIHGGAVSLGHPIGMSGAR    | Q8QZT1 | 0          | n +14.02 Da,K +28.03 Da, | 1361.480025 | 5 | 465.858  | 676396992 | n.d. |
| TISQGAIEKVKDATR            | Q8C196 | 0          | n +28.03 Da,K +28.03 Da, | 1367.657065 | 4 | 426.0031 | 56551500  | n.d. |
| ASGADSKGDDLSTAILKQKNRPNR   | Q01853 | 0          | n +42.03 Da,K +28.03 Da, | 1368.131197 | 4 | 667.8651 | 17413900  | n.d. |
| KATIPAAALQAQESTEGPQTGQDRPR | Q9DBG1 | 0          | n +34.06 Da,K +34.06 Da, | 1387.813869 | 4 | 662.6165 | 26767200  | n.d. |
| PVIQNPEYKGEWKPR            | P14211 | 0          | n +14.02 Da,K +28.03 Da, | 1394.516806 | 4 | 478.5181 | 27302300  | n.d. |
| TVHAITATQKTVDGSPGKLWR      | P16858 | 0.03336511 | n +34.06 Da,K +34.06 Da, | 1398.853948 | 4 | 592.8607 | 85913000  | n.d. |
| STGVFTTMEKAGAHKGGAKR       | P16858 | 0.00776915 | n +28.03 Da,K +28.03 Da, | 1403.382452 | 5 | 452.6593 | 209307008 | n.d. |
| AHGSVVKSEDYAFPTYADRR       | P19783 | 0          | n +28.03 Da,K +28.03 Da, | 1406.484224 | 4 | 582.0459 | 4.144E+09 | n.d. |
| PTKHAGPPFYVPSAELKR         | O55060 | 0          | n +14.02 Da,K +28.03 Da, | 1410.859793 | 4 | 517.0454 | 114515000 | n.d. |
| STFSELFKKEHPDR             | P40142 | 0          | n +28.03 Da,K +28.03 Da, | 1428.39016  | 4 | 451.9953 | 612694016 | n.d. |
| AHGSVVKSEDYAFPTYADRR       | P19783 | 0.01229508 | n +34.06 Da,K +34.06 Da, | 1432.079838 | 5 | 468.2505 | 51363000  | n.d. |
| PTKHAGPPFYVPSAELKR         | O55060 | 0.00860215 | n +14.02 Da,K +28.03 Da, | 1432.095637 | 5 | 413.8374 | 12045000  | n.d. |
| HGAKIGFFQGDIDR             | P41216 | 0          | n +28.03 Da,K +28.03 Da, | 1440.44884  | 5 | 501.2818 | 195528000 | n.d. |
| IQLQDEEELEKLLKKR           | Q91WL5 | 0.00956429 | n +28.03 Da,K +28.03 Da, | 1441.543237 | 5 | 434.2668 | 284668000 | n.d. |
| ASGADSKGDDLSTAILKQKNRPNR   | Q01853 | 0          | n +42.03 Da,K +28.03 Da, | 1445.130928 | 4 | 667.8652 | 59890200  | n.d. |
| ASGADSKGDDLSTAILKQKNRPNR   | Q01853 | 0          | n +42.03 Da,K +28.03 Da, | 1450.099261 | 5 | 534.4931 | 407119008 | n.d. |
| SKSLFFPDEAINKHPR           | P97494 | 0          | n +34.06 Da,K +34.06 Da, | 1456.196411 | 5 | 398.4417 | 11747200  | n.d. |
| HGAKIGFFQGDIDR             | P41216 | 0          | n +28.03 Da,K +28.03 Da, | 1465.998261 | 3 | 501.2797 | 812569024 | n.d. |
| PEQWKEIASVVKKK             | P05202 | 0          | n +14.02 Da,K +28.03 Da, | 1473.62981  | 4 | 449.7811 | 235340000 | n.d. |
| SKPKSLEIIGAPFSKGQPR        | Q61176 | 0          | n +28.03 Da,K +28.03 Da, | 1475.643533 | 4 | 538.8268 | 139007008 | n.d. |
| AHYHDNYGKNDEVEFVR          | P25688 | 0          | n +42.03 Da,K +28.03 Da, | 1481.224058 | 2 | 1081.997 | 33646300  | n.d. |
| TRVSQEHPVLTKFVEGAR         | Q8C196 | 0          | n +28.03 Da,K +28.03 Da, | 1494.193052 | 4 | 553.0781 | 18768200  | n.d. |
| STFHRPELVR                 | Q91WT7 | 0.00483092 | n +42.03 Da,             | 1504.641914 | 3 | 428.5605 | 213692000 | n.d. |
| PANLDLKKELSEPSSTR          | Q8C196 | 0          | n +14.02 Da,K +28.03 Da, | 1507.569963 | 4 | 489.5252 | 1.175E+09 | n.d. |
| TSVATKKTEQPPSSEYIFER       | P29758 | 0.0037594  | n +28.03 Da,K +28.03 Da, | 1509.755403 | 4 | 610.5745 | 20954000  | n.d. |
| PSKLDGKELHINLIPSKQDR       | P07901 | 0.00483092 | n +17.03 Da,K +34.06 Da, | 1511.862488 | 5 | 499.7104 | 273656992 | n.d. |
| PGALSALSDLHAHKLR           | P01942 | 0          | n +14.02 Da,K +28.03 Da, | 1521.282483 | 4 | 432.7533 | 600857024 | n.d. |
| AHYHDNYGKNDEVEFVR          | P25688 | 0          | n +42.03 Da,K +28.03 Da, | 1524.61912  | 2 | 541.5018 | 50591100  | n.d. |
| AHYHDNYGKNDEVEFVR          | P25688 | 0          | n +42.03 Da,K +28.03 Da, | 1527.939968 | 3 | 721.6678 | 18513400  | n.d. |
| GVDFGKWR                   | Q91Y97 | 0.00682594 | n +34.06 Da,K +34.06 Da, | 1554.513916 | 3 | 344.8813 | 40099500  | n.d. |

|                          |        |            |                                      |             |   |          |           |      |
|--------------------------|--------|------------|--------------------------------------|-------------|---|----------|-----------|------|
| MEGYHHPDQQKLQALKDTANR    | P40142 | 0          | n +42.03 Da,K +28.03 Da,             | 1555.358706 | 4 | 650.0921 | 1.176E+09 | n.d. |
| LNLQEYQSKKLMSEHGVR       | Q9Z2I8 | 0          | n +34.06 Da,K +34.06 Da,             | 1565.007193 | 4 | 566.3328 | 5.159E+09 | n.d. |
| LNLQEYQSKKLMSEHGVR       | Q9Z2I8 | 0          | n +28.03 Da,K +28.03 Da,             | 1565.785227 | 3 | 748.7426 | 920129024 | n.d. |
| LNLQEYQSKKLMSEHGVR       | Q9Z2I8 | 0          | n +28.03 Da,K +28.03 Da,             | 1569.121972 | 5 | 449.6494 | 1.954E+10 | n.d. |
| LNLQEYQSKKLMSEHGVR       | Q9Z2I8 | 0          | n +28.03 Da,K +28.03 Da,             | 1570.531105 | 4 | 561.8093 | 1.569E+10 | n.d. |
| PGVTVKDVNQQEFVR          | Q9CZX8 | 0          | n +14.02 Da,K +28.03 Da,             | 1580.510321 | 3 | 586.6557 | 353086016 | n.d. |
| PHPYPALTPPEQKKELSDIAHR   | P05064 | 0          | n +14.02 Da,K +28.03 Da,             | 1583.135174 | 4 | 625.094  | 8257500   | n.d. |
| FKGIGKSSAADKVVAEIR       | P51660 | 0.00483092 | n +34.06 Da,K +34.06 Da,             | 1595.464193 | 4 | 518.09   | 195274000 | n.d. |
| KFGKHGGTIPVVPVPTAEFQDR   | P26443 | 0          | n +28.03 Da,K +28.03 Da,             | 1611.517927 | 4 | 567.8168 | 2.354E+09 | n.d. |
| KFGKHGGTIPVVPVPTAEFQDR   | P26443 | 0          | n +28.03 Da,K +28.03 Da,             | 1620.843131 | 3 | 756.7537 | 38730900  | n.d. |
| SSSPVNVKLLKVSSELKEELKRR  | Q8VEK3 | 0.00956429 | n +42.03 Da,n +34.06 Da,K +34.06 Da, | 1633.86166  | 4 | 693.9768 | 124485000 | n.d. |
| PNIKIFSGSSHQDLSQKIADR    | Q9D7G0 | 0          | n +14.02 Da,K +28.03 Da,             | 1635.460161 | 5 | 483.0669 | 811488000 | n.d. |
| SSSPVNVKLLKVSSELKEELKRR  | Q8VEK3 | 0          | n +42.03 Da,n +28.03 Da,K +28.03 Da, | 1636.106289 | 4 | 684.9294 | 1.297E+09 | n.d. |
| LPKNWDWR                 | Q9WUU7 | 0.02079208 | n +34.06 Da,K +34.06 Da,             | 1636.977458 | 3 | 394.9069 | 29898400  | n.d. |
| KESVVFVQTDKPVYKPGQSVKFR  | P28665 | 0          | n +28.03 Da,K +28.03 Da,             | 1641.365146 | 5 | 562.1306 | 126547000 | n.d. |
| AHGSVVKSEDYAFPTYADR      | P19783 | 0          | n +28.03 Da,K +28.03 Da,             | 1646.377318 | 3 | 723.6919 | 1.951E+09 | n.d. |
| TYGGWGAHGGGAFSGKDYTKVDR  | Q3THS6 | 0          | n +34.06 Da,K +34.06 Da,             | 1648.287692 | 5 | 498.667  | 377660000 | n.d. |
| PKLKAFLESPHVNRPL         | F6RWR5 | 0.00956429 | n +14.02 Da,K +28.03 Da,             | 1649.587017 | 4 | 512.0538 | 4.877E+09 | n.d. |
| AHGSVVKSEDYAFPTYADR      | P19783 | 0          | n +34.06 Da,K +34.06 Da,             | 1650.386463 | 3 | 727.7122 | 47988600  | n.d. |
| AHYHDNYGKNDEVEFVR        | P25688 | 0          | n +42.03 Da,K +34.06 Da,             | 1651.86597  | 4 | 543.0208 | 1.484E+09 | n.d. |
| PTQISQGAIEKVKDATR        | Q8C196 | 0          | n +14.02 Da,K +28.03 Da,             | 1659.094094 | 4 | 504.0392 | 125130000 | n.d. |
| MKETIMNQEKLAKLQAQVR      | Q64152 | 0.03787879 | n +28.03 Da,K +28.03 Da,             | 1677.70201  | 5 | 475.0773 | 1.555E+09 | n.d. |
| ATLQESEVKVDGGEQLSKNELKR  | Q99MN1 | 0.018      | n +42.03 Da,K +28.03 Da,             | 1691.294288 | 5 | 557.5169 | 1.408E+09 | n.d. |
| AYPTITPLVQISSDNRIINR     | Q8R2D3 | 0.04805077 | n +28.03 Da,                         | 1698.412461 | 4 | 575.5829 | 261762000 | n.d. |
| SVPTFKHLWR               | Q8CHT0 | 0          | n +28.03 Da,K +28.03 Da,             | 1705.654581 | 4 | 332.4471 | 74131400  | n.d. |
| PYDNTVVLEELRAGTTYR       | Q60847 | 0.00483092 | n +42.03 Da,                         | 1711.04933  | 3 | 713.7077 | 96298704  | n.d. |
| SLSNKLTLDKLDVKGKR        | P09411 | 0          | n +42.03 Da,n +28.03 Da,K +28.03 Da, | 1713.615948 | 4 | 518.0739 | 4.204E+10 | n.d. |
| SLSNKLTLDKLDVKGKR        | P09411 | 0.00682594 | n +42.03 Da,n +28.03 Da,K +28.03 Da, | 1715.368172 | 3 | 690.4275 | 5.811E+09 | n.d. |
| SLSNKLTLDKLDVKGKR        | P09411 | 0.04343808 | n +42.03 Da,n +28.03 Da,K +28.03 Da, | 1715.569881 | 5 | 414.6598 | 1.417E+10 | n.d. |
| IEEKSCDLVGEKDKEKNEVALLER | P24668 | 0          | n +28.03 Da,K +28.03 Da,             | 1725.319451 | 5 | 612.5326 | 2.062E+09 | n.d. |
| IEEKSCDLVGEKDKEKNEVALLER | P24668 | 0          | n +28.03 Da,K +28.03 Da,             | 1729.046467 | 4 | 765.4133 | 152804000 | n.d. |
| TEDILAKSKKGIEESLKR       | Q61425 | 0.0037594  | n +28.03 Da,K +28.03 Da,             | 1731.013113 | 5 | 437.869  | 143064992 | n.d. |
| PSANMGALISKAHLEKVR       | Q8BH00 | 0          | n +14.02 Da,K +28.03 Da,             | 1739.604583 | 5 | 399.2342 | 60780500  | n.d. |
| PSANMGALISKAHLEKVR       | Q8BH00 | 0          | n +14.02 Da,K +28.03 Da,             | 1741.021101 | 4 | 498.7899 | 51108100  | n.d. |
| PAFEKVLKSHGQDYLVGNR      | P10648 | 0          | n +14.02 Da,K +28.03 Da,             | 1743.410674 | 3 | 743.4097 | 176440992 | n.d. |
| MHHQSVLHSGYFHPLLR        | P10518 | 0          | n +42.03 Da,                         | 1746.873814 | 5 | 421.0166 | 11508000  | n.d. |
| SHTDVKVPDFSDYR           | Q9CR68 | 0          | n +28.03 Da,K +28.03 Da,             | 1754.423202 | 3 | 574.6216 | 1.101E+09 | n.d. |
| AGQSDKDKVYYTLEEIQKHKDSK  | P56395 | 0          | n +42.03 Da,n +34.06 Da,K +34.06 Da, | 1755.027326 | 5 | 585.3437 | 7.703E+09 | n.d. |
| PLIPPLPPR                | Q02384 | 0.04197761 | n +34.06 Da,                         | 1756.705372 | 3 | 377.5819 | 1.262E+09 | n.d. |
| AGQSDKDKVYYTLEEIQKHKDSK  | P56395 | 0          | n +42.03 Da,n +28.03 Da,K +28.03 Da, | 1761.251186 | 5 | 579.3131 | 1.371E+10 | n.d. |



|                              |        |            |                                      |             |   |          |           |      |
|------------------------------|--------|------------|--------------------------------------|-------------|---|----------|-----------|------|
| AGQSDKDKVYYTLEEQKHKDSK       | P56395 | 0          | n +42.03 Da,n +28.03 Da,K +28.03 Da, | 1764.809482 | 4 | 723.8891 | 709862976 | n.d. |
| PSKGPLQSVQVFGR               | P14131 | 0.0037594  | n +14.02 Da,K +28.03 Da,             | 1772.777068 | 3 | 514.6318 | 197011008 | n.d. |
| TEEVICHVEEGDKADVDAKVAAR      | O35945 | 0          | n +28.03 Da,K +28.03 Da,             | 1789.806598 | 4 | 696.1158 | 152112992 | n.d. |
| TEEVICHVEEGDKADVDAKVAAR      | O35945 | 0          | n +28.03 Da,K +28.03 Da,             | 1790.614652 | 5 | 557.0957 | 1.477E+09 | n.d. |
| MHHQSVLHSGYFHPLLR            | P10518 | 0          | n +42.03 Da,                         | 1807.286761 | 3 | 701.0227 | 260055008 | n.d. |
| MHHQSVLHSGYFHPLLR            | P10518 | 0          | n +42.03 Da,                         | 1809.015004 | 5 | 421.0166 | 3.747E+09 | n.d. |
| MHHQSVLHSGYFHPLLR            | P10518 | 0          | n +42.03 Da,                         | 1813.151073 | 4 | 526.0191 | 2.404E+09 | n.d. |
| PPSLETGVQDKEMLKYGKSF         | Q6P9R2 | 0.00483092 | n +17.03 Da,K +34.06 Da,             | 1821.174267 | 5 | 539.1295 | 109156000 | n.d. |
| PPSLETGVQDKEMLKYGKSF         | Q6P9R2 | 0.00135501 | n +14.02 Da,K +28.03 Da,             | 1825.400033 | 5 | 533.7017 | 93439904  | n.d. |
| KFGKHGGTIPVVPVTAEFQDR        | P26443 | 0.02431907 | n +42.03 Da,K +34.06 Da,             | 1831.700184 | 4 | 574.3221 | 29272600  | n.d. |
| MHHQSVLHSGYFHP               | P10518 | 0          | n +42.03 Da,                         | 1834.523801 | 4 | 458.723  | 1.782E+09 | n.d. |
| MHHQSVLHSGYFHP               | P10518 | 0.02972196 | n +42.03 Da,                         | 1835.986435 | 3 | 611.2947 | 896748032 | n.d. |
| AGKPVLYHFDGR                 | P30115 | 0          | n +42.03 Da,K +34.06 Da,             | 1841.270753 | 3 | 479.2678 | 7903000   | n.d. |
| VLSGEDKSNIAAWGKIGGH          | P01942 | 0          | n +28.03 Da,K +28.03 Da,             | 1848.270003 | 5 | 436.6506 | 1.588E+09 | n.d. |
| RGASIVEDKLVDELKTR            | P26443 | 0.00483092 | n +28.03 Da,K +28.03 Da,             | 1851.294632 | 4 | 504.0481 | 465451008 | n.d. |
| RGASIVEDKLVDELKTR            | P26443 | 0.00135501 | n +28.03 Da,K +28.03 Da,             | 1852.377942 | 5 | 403.4398 | 27758400  | n.d. |
| FHMTKDMPLGSIYR               | Q9D6J5 | 0          | n +34.06 Da,K +34.06 Da,             | 1854.935758 | 3 | 583.3146 | 504264000 | n.d. |
| PHPYPALTPPEQKKELSIAHR        | P05064 | 0          | n +14.02 Da,K +28.03 Da,             | 1874.370695 | 4 | 625.0945 | 9.844E+09 | n.d. |
| SSKPKSLEIIGAPFSKGQPR         | Q61176 | 0          | n +42.03 Da,K +28.03 Da,             | 1878.7744   | 4 | 564.0793 | 97792896  | n.d. |
| PHPYPALTPPEQKKELSIAHR        | P05064 | 0          | n +14.02 Da,K +28.03 Da,             | 1880.589338 | 3 | 833.1224 | 72550496  | n.d. |
| SSKPKSLEIIGAPFSKGQPR         | Q61176 | 0.00682594 | n +42.03 Da,K +34.06 Da,             | 1883.762963 | 4 | 568.603  | 196058000 | n.d. |
| PHPYPALTPPEQKKELSIAHR        | P05064 | 0          | n +14.02 Da,K +28.03 Da,             | 1886.803935 | 5 | 500.2775 | 1.772E+10 | n.d. |
| PHPYPALTPPEQKKELSIAHR        | P05064 | 0          | n +17.03 Da,K +34.06 Da,             | 1887.106672 | 4 | 628.8641 | 150851008 | n.d. |
| SSVEYEPKEKTFDKILIANR         | Q91ZA3 | 0.00135501 | n +28.03 Da,K +28.03 Da,             | 1890.11502  | 4 | 620.5971 | 116441000 | n.d. |
| AASKVKQDMPPPGYGPIDYKR        | Q9ERS2 | 0.00682594 | n +42.03 Da,K +34.06 Da,             | 1900.961267 | 4 | 630.6102 | 236708992 | n.d. |
| PHPYPALTPPEQKKELSIAHR        | P05064 | 0          | n +14.02 Da,K +28.03 Da,             | 1906.882945 | 4 | 625.0944 | 1.665E+09 | n.d. |
| SEKSVEAAAELSAKDLKEKDKVEEKAGR | Q9D0J8 | 0.018      | n +42.03 Da,n +28.03 Da,K +28.03 Da, | 1915.121464 | 5 | 683.1893 | 146255008 | n.d. |
| AGQSDKDKVYYTLEEQKHKHD        | P56395 | 0.00860215 | n +42.03 Da,n +34.06 Da,K +34.06 Da, | 1919.566074 | 5 | 535.5065 | 314558016 | n.d. |
| AHYHDNYGKNDEVEFVR            | P25688 | 0          | n +42.03 Da,K +28.03 Da,             | 1920.850926 | 3 | 721.6553 | 51266000  | n.d. |
| PLPPLPEYGGKVR                | Q9CQQ7 | 0.0037594  | n +14.02 Da,K +28.03 Da,             | 1924.347388 | 3 | 488.9569 | 324791008 | n.d. |
| SHYEEGPGKNLPFSVENKWR         | P17665 | 0          | n +28.03 Da,K +28.03 Da,             | 1925.165674 | 5 | 492.4557 | 1.686E+09 | n.d. |
| RQLFHPEQLITGKEDAANNYAR       | P05213 | 0.00776915 | n +28.03 Da,K +28.03 Da,             | 1925.926946 | 4 | 657.5968 | 98694600  | n.d. |
| MKFNPFTVSDR                  | P61255 | 0          | n +34.06 Da,K +34.06 Da,             | 1927.76083  | 3 | 470.6007 | 11795800  | n.d. |
| SHYEEGPGKNLPFSVENKWR         | P17665 | 0          | n +28.03 Da,K +28.03 Da,             | 1928.439878 | 3 | 820.0883 | 64586000  | n.d. |
| IYKWLQPNDLLGHPKTK            | D3YUP6 | 0.00483092 | n +28.03 Da,K +28.03 Da,             | 1932.261173 | 5 | 433.4593 | 20129500  | n.d. |
| KEWPANLDLKKELSEPSSTR         | Q8C196 | 0.00776915 | n +28.03 Da,K +28.03 Da,             | 1964.280982 | 5 | 488.8747 | 53758200  | n.d. |
| SHYEEGPGKNLPFSVENKWR         | P17665 | 0          | n +28.03 Da,K +28.03 Da,             | 1964.883016 | 4 | 615.3179 | 5903400   | n.d. |
| KEWPANLDLKKELSEPSSTR         | Q8C196 | 0          | n +34.06 Da,K +34.06 Da,             | 1968.007402 | 5 | 493.7007 | 57805000  | n.d. |
| KEWPANLDLKKELSEPSSTR         | Q8C196 | 0          | n +34.06 Da,K +34.06 Da,             | 1968.53234  | 3 | 822.1605 | 131046000 | n.d. |
| KEWPANLDLKKELSEPSSTR         | Q8C196 | 0          | n +28.03 Da,K +28.03 Da,             | 1972.688682 | 3 | 814.1203 | 233408992 | n.d. |

|                               |        |            |                                      |             |   |          |           |      |
|-------------------------------|--------|------------|--------------------------------------|-------------|---|----------|-----------|------|
| AEDIKTIKIKNYKTAPFDSR          | P56391 | 0.00483092 | n +42.03 Da,K +34.06 Da,             | 1979.029127 | 3 | 801.8227 | 1.37E+09  | n.d. |
| AEDIKTIKIKNYKTAPFDSR          | P56391 | 0.00263505 | n +42.03 Da,K +28.03 Da,             | 1980.994571 | 3 | 793.7807 | 1.903E+09 | n.d. |
| PSKESDELIFVNGKKVTER           | G3X982 | 0          | n +17.03 Da,K +34.06 Da,             | 1989.173355 | 4 | 611.3683 | 312008000 | n.d. |
| PSKESDELIFVNGKKVTER           | G3X982 | 0.0370019  | n +14.02 Da,K +28.03 Da,             | 1989.568107 | 4 | 606.0896 | 1.8E+09   | n.d. |
| PSKESDELIFVNGKKVTER           | G3X982 | 0.00135501 | n +17.03 Da,K +34.06 Da,             | 1991.324418 | 5 | 489.2958 | 190100992 | n.d. |
| PEDPFVEKAKKLLR                | Q64459 | 0.0037594  | n +17.03 Da,n +34.06 Da,K +34.06 Da, | 2005.017069 | 5 | 358.6425 | 115999000 | n.d. |
| PEDPFVEKAKKLLR                | Q64459 | 0          | n +14.02 Da,n +28.03 Da,K +28.03 Da, | 2009.87405  | 4 | 442.7738 | 1.72E+09  | n.d. |
| PEDPFVEKAKKLLR                | Q64459 | 0          | n +14.02 Da,n +28.03 Da,K +28.03 Da, | 2009.9656   | 5 | 354.4203 | 452305984 | n.d. |
| SNIKIFSGSSHQDLSQKIADR         | G3UXL2 | 0.00135501 | n +42.03 Da,K +34.06 Da,             | 2010.219387 | 4 | 611.0966 | 378344992 | n.d. |
| SEKSVEAAAELSADLKEKKDKVVEEK    | Q9D0J8 | 0.00135501 | n +42.03 Da,n +34.06 Da,K +34.06 Da, | 2016.830475 | 5 | 634.8042 | 745204992 | n.d. |
| LPGALSALSDLHAHKLR             | P01942 | 0          | n +34.06 Da,K +34.06 Da,             | 2024.882456 | 4 | 467.5483 | 136110000 | n.d. |
| GVEHQQLDLAQKHLSSVSR           | Q9CZ13 | 0          | n +34.06 Da,K +34.06 Da,             | 2027.44067  | 4 | 579.0876 | 21936800  | n.d. |
| PTQRFWPNSIAAGVLQQQ            | Q8BG99 | 0.0427907  | n +42.03 Da,                         | 2038.861316 | 4 | 521.5292 | 325240992 | n.d. |
| SEKSVEAAAELSADLKEKKDKVVEEKAGR | Q9D0J8 | 0          | n +42.03 Da,n +34.06 Da,K +34.06 Da, | 2041.738673 | 5 | 691.6361 | 1.723E+10 | n.d. |
| SEKSVEAAAELSADLKEKKDKVVEEKAGR | Q9D0J8 | 0          | n +42.03 Da,n +28.03 Da,K +28.03 Da, | 2043.236398 | 5 | 683.1918 | 9.355E+09 | n.d. |
| NKELDPVQKLFVDKIR              | P97450 | 0.00776915 | n +34.06 Da,K +34.06 Da,             | 2043.660677 | 4 | 520.348  | 39726800  | n.d. |
| NKELDPVQKLFVDKIR              | P97450 | 0          | n +28.03 Da,K +28.03 Da,             | 2049.848289 | 4 | 514.3145 | 206302000 | n.d. |
| VLSGEDKSNIKAAWGKIGGHGAEY      | P01942 | 0.01896208 | n +28.03 Da,K +28.03 Da,             | 2071.03574  | 4 | 650.6022 | 264406000 | n.d. |
| TMTLGDIVYKR                   | P12710 | 0          | n +28.03 Da,                         | 2081.122231 | 3 | 451.5916 | 55271100  | n.d. |
| VKETTYDVLGVKPNATQEELKKAYR     | P63037 | 0          | n +28.03 Da,K +28.03 Da,             | 2088.324047 | 5 | 637.5591 | 6.864E+09 | n.d. |
| PATEEVICHVEEGDKADVVDKAVKAAR   | O35945 | 0          | n +17.03 Da,n +34.06 Da,K +34.06 Da, | 2089.701076 | 5 | 592.1317 | 807889024 | n.d. |
| KELDPVQKLFVDKIR               | P97450 | 0          | n +34.06 Da,K +34.06 Da,             | 2089.75836  | 4 | 491.8361 | 195604000 | n.d. |
| VKETTYDVLGVKPNATQEELKKAYR     | P63037 | 0          | n +28.03 Da,K +28.03 Da,             | 2092.906151 | 4 | 796.6968 | 348623008 | n.d. |
| PATEEVICHVEEGDKADVVDKAVKAAR   | O35945 | 0          | n +14.02 Da,n +28.03 Da,K +28.03 Da, | 2093.417988 | 4 | 734.6352 | 75835504  | n.d. |
| PATEEVICHVEEGDKADVVDKAVKAAR   | O35945 | 0          | n +14.02 Da,n +28.03 Da,K +28.03 Da, | 2095.513796 | 5 | 587.9094 | 2.338E+09 | n.d. |
| KELDPVQKLFVDKIR               | P97450 | 0          | n +34.06 Da,K +34.06 Da,             | 2096.969058 | 5 | 393.6699 | 148974000 | n.d. |
| MDKNELVQKAKLAEQAER            | P63101 | 0          | n +42.03 Da,K +28.03 Da,             | 2096.987074 | 4 | 557.5586 | 482857984 | n.d. |
| TQFGDKIHNFVGIQEKLAR           | P50544 | 0          | n +28.03 Da,K +28.03 Da,             | 2099.836221 | 5 | 457.8612 | 96297200  | n.d. |
| KELDPVQKLFVDKIR               | P97450 | 0          | n +28.03 Da,K +28.03 Da,             | 2100.894709 | 5 | 388.8445 | 282872000 | n.d. |
| KELDPVQKLFVDKIR               | P97450 | 0          | n +28.03 Da,K +28.03 Da,             | 2102.458586 | 4 | 485.8042 | 2.953E+09 | n.d. |
| VKETTYDVLGVKPNATQEELKKAYR     | P63037 | 0          | n +34.06 Da,K +34.06 Da,             | 2103.290743 | 5 | 643.5905 | 379604992 | n.d. |
| SKESDELIFVNGKKVTER            | G3X982 | 0.00135501 | n +34.06 Da,K +34.06 Da,             | 2125.618552 | 4 | 591.3623 | 214132000 | n.d. |
| SLSNKLTLDKLDVKGKR             | P09411 | 0          | n +42.03 Da,n +28.03 Da,K +28.03 Da, | 2131.5822   | 4 | 518.0651 | 68102000  | n.d. |
| SKESDELIFVNGKKVTER            | G3X982 | 0          | n +28.03 Da,K +28.03 Da,             | 2134.093745 | 4 | 585.3313 | 269331008 | n.d. |
| SSSPVNVKCLKVSELKEELKKR        | Q8VEK3 | 0          | n +42.03 Da,n +28.03 Da,K +28.03 Da, | 2137.241317 | 5 | 548.1382 | 938846976 | n.d. |
| PKGPPLEEDPGAKDVVHIDSEKDFR     | Q921X9 | 0          | n +17.03 Da,K +34.06 Da,             | 2153.285751 | 5 | 616.9416 | 356867008 | n.d. |
| PHSYPALSAEQKKELSIALR          | P05063 | 0          | n +14.02 Da,K +28.03 Da,             | 2160.76453  | 5 | 485.4719 | 313136000 | n.d. |
| PKGPPLEEDPGAKDVVHIDSEKDFR     | Q921X9 | 0          | n +14.02 Da,K +28.03 Da,             | 2179.034535 | 5 | 612.7214 | 71567904  | n.d. |
| GASIVEDKLVLDKTR               | P26443 | 0.04197761 | n +28.03 Da,K +28.03 Da,             | 2184.534989 | 4 | 465.0228 | 19111700  | n.d. |
| PLIQNVKKILESDR                | Q8C196 | 0.00682594 | n +14.02 Da,K +28.03 Da,             | 2189.23051  | 4 | 431.5172 | 28963400  | n.d. |

|                                 |        |            |                                      |             |   |          |           |      |
|---------------------------------|--------|------------|--------------------------------------|-------------|---|----------|-----------|------|
| AASAASSEHFEKLHEIFR              | O88384 | 0          | n +42.03 Da,K +34.06 Da,             | 2191.11928  | 3 | 527.2776 | 45687500  | n.d. |
| APKGGSKQQSEEDLLQDFSR            | Q9DCF9 | 0          | n +28.03 Da,K +28.03 Da,             | 2193.032625 | 3 | 806.4271 | 789982976 | n.d. |
| NKELDPVQKLFVDKIR                | P97450 | 0          | n +34.06 Da,K +34.06 Da,             | 2193.546645 | 4 | 520.347  | 87173504  | n.d. |
| AGQSDKDKVYYTLEEIQKHKDSKSTW      | P56395 | 0          | n +42.03 Da,n +34.06 Da,K +34.06 Da, | 2202.081928 | 2 | 824.9683 | 57882700  | n.d. |
| SDLELHPPSYPWSHR                 | Q9D0M3 | 0          | n +34.06 Da,                         | 2211.614439 | 4 | 464.4892 | 84871600  | n.d. |
| PGKLSDYFPPYPNPEAAR              | Q9D0M3 | 0.00135501 | n +14.02 Da,n +28.03 Da,K +28.03 Da, | 2215.877111 | 4 | 555.0481 | 314900000 | n.d. |
| NKELDPVQKLFVDKIR                | P97450 | 0.0037594  | n +14.02 Da,K +28.03 Da,             | 2216.200552 | 4 | 510.8115 | 35599800  | n.d. |
| PGKLSDYFPPYPNPEAAR              | Q9D0M3 | 0.00135501 | n +14.02 Da,n +28.03 Da,K +28.03 Da, | 2220.120329 | 2 | 555.0477 | 82469200  | n.d. |
| NKELDPVQKLFVDKIR                | P97450 | 0.00263505 | n +28.03 Da,K +28.03 Da,             | 2226.661645 | 3 | 685.4168 | 3.331E+09 | n.d. |
| AGQSDKDKVYYTLEEIQKHKDSKSTW      | P56395 | 0          | n +42.03 Da,n +34.06 Da,K +34.06 Da, | 2227.470629 | 5 | 660.176  | 1.579E+10 | n.d. |
| NKELDPVQKLFVDKIR                | P97450 | 0          | n +28.03 Da,K +28.03 Da,             | 2228.618698 | 4 | 514.3154 | 1.384E+10 | n.d. |
| NKELDPVQKLFVDKIR                | P97450 | 0          | n +28.03 Da,K +28.03 Da,             | 2232.575061 | 5 | 411.6533 | 4.32E+09  | n.d. |
| AGQSDKDKVYYTLEEIQKHKDSKSTW      | P56395 | 0.0037594  | n +42.03 Da,n +34.06 Da,K +34.06 Da, | 2233.276604 | 3 | 1099.623 | 28432200  | n.d. |
| NKELDPVQKLFVDKIR                | P97450 | 0.0037594  | n +34.06 Da,K +34.06 Da,             | 2234.312525 | 3 | 693.4584 | 309444000 | n.d. |
| PSPSPSLSSTQSAVSKAGAGAVVPKLSHLPR | Q9DC70 | 0          | n +14.02 Da,K +28.03 Da,             | 2234.843203 | 5 | 654.1453 | 4.443E+10 | n.d. |
| AGQSDKDKVYYTLEEIQKHKDSKSTW      | P56395 | 0          | n +42.03 Da,n +28.03 Da,K +28.03 Da, | 2238.462838 | 3 | 1089.568 | 319904000 | n.d. |
| SEKSVEAAAELSAKDLKEKKDKVEEKAGR   | Q9D0J8 | 0          | n +42.03 Da,n +28.03 Da,K +28.03 Da, | 2240.509581 | 4 | 853.7263 | 64377100  | n.d. |
| SVQKALDLDPSTKNVSGGAIAGHPLGGSGSR | Q8BWT1 | 0.0037594  | n +28.03 Da,K +28.03 Da,             | 2246.186877 | 5 | 635.5514 | 401308000 | n.d. |
| AASAASSEHFEKLHEIFR              | O88384 | 0          | n +42.03 Da,K +34.06 Da,             | 2247.26112  | 4 | 527.2765 | 12798500  | n.d. |
| SLSNKLTLDKLDVKGKR               | P09411 | 0.00135501 | n +42.03 Da,n +28.03 Da,K +28.03 Da, | 2250.702356 | 4 | 518.0649 | 89364000  | n.d. |
| PNLEESPKRKGVTYEELR              | Q9CRD0 | 0.00860215 | n +42.03 Da,n +28.03 Da,K +28.03 Da, | 2253.314018 | 4 | 561.5519 | 150168992 | n.d. |
| SEKSVEAAAELSAKDLKEKKDKVEEKAGR   | Q9D0J8 | 0          | n +42.03 Da,n +28.03 Da,K +28.03 Da, | 2272.312452 | 5 | 683.1846 | 1.028E+10 | n.d. |
| AHRFPALTPEQKKEELSEIAQR          | Q91Y97 | 0          | n +42.03 Da,K +34.06 Da,             | 2276.318918 | 5 | 512.6993 | 418640992 | n.d. |
| AHRFPALTPEQKKEELSEIAQR          | Q91Y97 | 0          | n +42.03 Da,K +34.06 Da,             | 2278.743282 | 4 | 640.6224 | 919273984 | n.d. |
| AHRFPALTPEQKKEELSEIAQR          | Q91Y97 | 0          | n +42.03 Da,K +28.03 Da,             | 2279.697516 | 3 | 849.8068 | 63239000  | n.d. |
| AHRFPALTPEQKKEELSEIAQR          | Q91Y97 | 0          | n +42.03 Da,K +28.03 Da,             | 2284.016995 | 4 | 637.6065 | 5.041E+09 | n.d. |
| HPVLDSNAVEEVEKWLPR              | Q9CZ42 | 0.02431907 | n +28.03 Da,K +28.03 Da,             | 2284.086774 | 3 | 754.403  | 44227000  | n.d. |
| AHRFPALTPEQKKEELSEIAQR          | Q91Y97 | 0          | n +42.03 Da,K +28.03 Da,             | 2290.689928 | 5 | 510.287  | 2.131E+09 | n.d. |
| AGQSDKDKVYYTLEEIQKHKDSKSTW      | P56395 | 0          | n +42.03 Da,n +34.06 Da,K +34.06 Da, | 2320.568946 | 5 | 660.1767 | 955590016 | n.d. |
| ASLKDLEGKWR                     | Q05816 | 0.00135501 | n +42.03 Da,K +28.03 Da,             | 2322.924019 | 3 | 467.6014 | 29167100  | n.d. |
| AGQSDKDKVYYTLEEIQKHKDSKSTW      | P56395 | 0.0037594  | n +42.03 Da,n +28.03 Da,K +28.03 Da, | 2324.490789 | 4 | 817.4272 | 499984992 | n.d. |
| AGQSDKDKVYYTLEEIQKHKDSKSTW      | P56395 | 0          | n +42.03 Da,n +28.03 Da,K +28.03 Da, | 2327.009355 | 5 | 654.1432 | 2.584E+09 | n.d. |
| PSKEVEEDEYKAFYKSF               | P08113 | 0.00263505 | n +14.02 Da,K +28.03 Da,             | 2337.624871 | 2 | 549.2809 | 7915540   | n.d. |
| SEKSVEAAAELSAKDLKEKKDKVEEKAGR   | Q9D0J8 | 0          | n +42.03 Da,n +28.03 Da,K +28.03 Da, | 2389.99624  | 5 | 683.1853 | 3.847E+09 | n.d. |
| AKEWGYASHNGPDHWHELYPIAK         | P16015 | 0          | n +42.03 Da,K +34.06 Da,             | 2413.301508 | 4 | 704.8587 | 19512900  | n.d. |
| KDIGNIISDAMKKVGR                | P63038 | 0.01229508 | n +28.03 Da,K +28.03 Da,             | 2438.170504 | 4 | 465.0303 | 130571000 | n.d. |
| PVTVEPMDQLDDEEGLPEKLVIKNQFHKER  | Q99K48 | 0.00135501 | n +28.03 Da,K +28.03 Da,             | 2457.021382 | 5 | 755.5912 | 139608000 | n.d. |
| PEQWKEIASVVKKNLF                | P05202 | 0          | n +14.02 Da,K +28.03 Da,             | 2477.365352 | 5 | 434.866  | 150474000 | n.d. |
| MEVHELFR                        | P41216 | 0.00860215 | n +42.03 Da,                         | 2483.677712 | 2 | 551.7714 | 14230500  | n.d. |
| VRDHGDLAFVDVNDSSFQIVKNPR        | Q61176 | 0          | n +34.06 Da,K +34.06 Da,             | 2510.426901 | 5 | 579.5178 | 16660000  | n.d. |

|                                   |        |            |                                      |             |   |          |           |           |
|-----------------------------------|--------|------------|--------------------------------------|-------------|---|----------|-----------|-----------|
| SEKSVEAAAELSAKDLKEKKDKVEEKAGR     | Q9D0J8 | 0          | n +42.03 Da,n +28.03 Da,K +28.03 Da, | 2558.327819 | 5 | 683.1846 | 3.456E+09 | n.d.      |
| FPALTPQKKELSEIAQR                 | Q91Y97 | 0          | n +28.03 Da,K +28.03 Da,             | 2568.46365  | 4 | 543.0616 | 28715900  | n.d.      |
| TDHPKYSDMIVAAIQAEKNR              | P10922 | 0          | n +34.06 Da,K +34.06 Da,             | 2570.421733 | 4 | 598.0897 | 5373420   | n.d.      |
| AEDIKTKIKNYKTAPFDSR               | P56391 | 0.01138716 | n +42.03 Da,K +28.03 Da,             | 2574.507595 | 4 | 595.5784 | 125039000 | n.d.      |
| SSVAVLTQESFAEHR                   | Q8VDJ3 | 0          | n +42.03 Da,                         | 2586.800636 | 2 | 851.9232 | 791452032 | n.d.      |
| ANHAPFETDISTLTR                   | Q9QXD6 | 0.00135501 | n +42.03 Da,                         | 2632.630325 | 3 | 572.2835 | 128318000 | n.d.      |
| ANHAPFETDISTLTR                   | Q9QXD6 | 0          | n +42.03 Da,                         | 2633.54885  | 2 | 857.9233 | 881790016 | n.d.      |
| PSTAYADEVKKIIIEAHSSGR             | Q8BWU8 | 0          | n +14.02 Da,n +28.03 Da,K +28.03 Da, | 2639.755351 | 5 | 472.4517 | 98020600  | n.d.      |
| SEKSVEAAAELSAKDLKEKKDKVEEKAGR     | Q9D0J8 | 0.00135501 | n +42.03 Da,n +28.03 Da,K +28.03 Da, | 2644.646105 | 5 | 683.1848 | 831208000 | n.d.      |
| AKEWGYASHNGPDHWHELYPIAKGDNQSPIELH | P16015 | 0          | n +42.03 Da,K +28.03 Da,             | 2666.812691 | 5 | 779.7737 | 320128000 | n.d.      |
| DLPGALSALSDLHAHKLR                | P01942 | 0          | n +28.03 Da,K +28.03 Da,             | 2676.433601 | 4 | 493.285  | 232024992 | n.d.      |
| ASQQDFENALNQVKLLKDPGNEVKLR        | Q9WUR2 | 0          | n +28.03 Da,K +28.03 Da,             | 2678.66024  | 5 | 645.372  | 898899968 | n.d.      |
| NKELDPVQKLFVDKIR                  | P97450 | 0          | n +28.03 Da,K +28.03 Da,             | 2684.228931 | 4 | 514.3057 | 142336000 | n.d.      |
| ASQQDFENALNQVKLLKDPGNEVKLR        | Q9WUR2 | 0          | n +28.03 Da,K +28.03 Da,             | 2693.645529 | 4 | 645.3554 | 3605380   | n.d.      |
| PLGLEAEKDGVPVFKFPR                | Q8R0Y6 | 0          | n +14.02 Da,K +28.03 Da,             | 2699.775032 | 4 | 518.0504 | 25454000  | n.d.      |
| AKVEQVLSLEPQHELKFR                | Q9QY76 | 0          | n +42.03 Da,K +28.03 Da,             | 2708.921058 | 4 | 563.0717 | 26493500  | n.d.      |
| SEKSVEAAAELSAKDLKEKKDKVEEKAGR     | Q9D0J8 | 0.00135501 | n +42.03 Da,n +28.03 Da,K +28.03 Da, | 2709.027736 | 5 | 683.1849 | 25795300  | n.d.      |
| PLGLEAEKDGVPVFKFPR                | Q8R0Y6 | 0          | n +17.03 Da,K +34.06 Da,             | 2717.345582 | 4 | 521.8199 | 10336200  | n.d.      |
| AAPAKGENLSLVVHGPDIR               | Q64442 | 0          | n +42.03 Da,K +28.03 Da,             | 2739.468889 | 3 | 691.0357 | 31424000  | n.d.      |
| GDKDIGNIISDAMKKVGR                | P63038 | 0          | n +34.06 Da,K +34.06 Da,             | 2780.671084 | 4 | 514.0743 | 66315200  | n.d.      |
| GDKDIGNIISDAMKKVGR                | P63038 | 0          | n +28.03 Da,K +28.03 Da,             | 2780.856854 | 4 | 508.0425 | 165752992 | n.d.      |
| ASQQDFENALNQVKLLKDPGNEVKLR        | Q9WUR2 | 0          | n +28.03 Da,K +28.03 Da,             | 2810.02648  | 5 | 645.3705 | 1.144E+09 | n.d.      |
| VNESSWHEECLQCAACQALTTSCYFR        | O88609 | 0.04197761 | n +17.03 Da,                         | 2877.497723 | 4 | 838.8533 | 2.196E+09 | n.d.      |
| GSEAAQLLEAADFAAHKHR               | Q9D114 | 0.00776915 | n +42.03 Da,K +34.06 Da,             | 2889.50612  | 3 | 700.0347 | 3413540   | n.d.      |
| GSEAAQLLEAADFAAHKHR               | Q9D114 | 0          | n +42.03 Da,K +28.03 Da,             | 2899.148033 | 3 | 698.024  | 6526800   | n.d.      |
| KHMLAASTGEVVAQLIR                 | Q5U680 | 0.04197761 | n +42.03 Da,K +28.03 Da,             | 2902.938224 | 3 | 642.6891 | 70864000  | n.d.      |
| VRMNVLADALKSINNAEKR               | P62245 | 0          | n +42.03 Da,K +28.03 Da,             | 2952.0452   | 4 | 560.8194 | 75315200  | n.d.      |
| AGVDQHEGTIQVQQNLFFR               | Q8VCR7 | 0          | n +42.03 Da,                         | 2982.399624 | 3 | 762.7145 | 744078976 | n.d.      |
| SOLDMKEHPDAEVQKNQVLTLEDWKEKWVTR   | O55060 | 0.00682594 | n +42.03 Da,K +34.06 Da,             | 3150.383789 | 5 | 767.0264 | 372564992 | n.d.      |
| SOLDMKEHPDAEVQKNQVLTLEDWKEKWVTR   | O55060 | 0          | n +42.03 Da,K +28.03 Da,             | 3156.590476 | 5 | 762.2016 | 235306000 | n.d.      |
| VRMNVLADALKSINNAEKR               | P62245 | 0          | n +42.03 Da,K +28.03 Da,             | 3164.565014 | 4 | 560.8193 | 138116992 | n.d.      |
| AAQASAAPKAGTATGR                  | P56480 | 0          | n +42.03 Da,K +28.03 Da,             | 479.2964473 | 3 | 500.2707 | 180820000 | 111781000 |
| PEYWFVAVPR                        | Q6DFV7 | 0.04499567 | n +14.02 Da,                         | 509.8204694 | 2 | 589.7947 | 786572992 | 697705024 |
| SSSAPVASPNVR                      | Q05920 | 0          | n +34.06 Da,                         | 513.8182939 | 2 | 600.3224 | 234091008 | 140082000 |
| MEKPAASTEPQGSR                    | Q9JMD3 | 0.02957151 | n +42.03 Da,K +28.03 Da,             | 513.9220922 | 3 | 520.2562 | 2.212E+09 | 2.104E+09 |
| SSPPEGKLETK                       | Q91XC8 | 0.01323007 | n +42.03 Da,K +28.03 Da,             | 519.7106023 | 3 | 424.2343 | 164644992 | 120352000 |
| SQPPAAAAQQPSQQR                   | Q8VEK3 | 0          | n +28.03 Da,                         | 519.994599  | 3 | 574.2968 | 61915600  | 63391000  |
| ATSASSHLNK                        | P15105 | 0          | n +42.03 Da,n +28.03 Da,             | 533.3832423 | 2 | 543.2832 | 603769984 | 563260992 |
| ATSASSHLNKG                       | P15105 | 0          | n +42.03 Da,n +28.03 Da,             | 546.5499349 | 2 | 571.7942 | 76256800  | 65332000  |
| MDSKQQTVR                         | P70694 | 0          | n +42.03 Da,K +34.06 Da,             | 547.3971438 | 2 | 581.7994 | 9.505E+10 | 8.36E+10  |

|                             |        |            |                          |             |   |          |           |           |
|-----------------------------|--------|------------|--------------------------|-------------|---|----------|-----------|-----------|
| AAEKQIPGGGSGGGGSGGGGGGGGGGR | Q8BMA6 | 0          | n +42.03 Da,K +34.06 Da, | 553.389876  | 3 | 767.3582 | 891705984 | 753305984 |
| PGPTPSGTNVGSSGR             | Q9CQS8 | 0          | n +14.02 Da,             | 561.5000852 | 2 | 692.8453 | 5.473E+10 | 4.034E+10 |
| DPANQEIER                   | Q99KI0 | 0.00112402 | n +28.03 Da,             | 566.4563129 | 2 | 550.2727 | 569246016 | 528329984 |
| AATTGSGVKVPR                | Q9CZY3 | 0          | n +42.03 Da,K +28.03 Da, | 566.6809597 | 3 | 405.2348 | 735310976 | 740150976 |
| SANEDNVTQVR                 | P24270 | 0          | n +34.06 Da,             | 580.369195  | 2 | 632.3142 | 1.517E+09 | 2.227E+09 |
| SANEDNVTQVR                 | P24270 | 0          | n +28.03 Da,             | 582.9676477 | 2 | 629.2983 | 2.423E+09 | 5.263E+09 |
| PGPTPSGTNVGSSGR             | Q9CQS8 | 0          | n +17.03 Da,             | 585.2465944 | 2 | 694.3524 | 55824300  | 18619100  |
| PDPAKSAPAPK                 | Q64525 | 0          | n +42.03 Da,K +28.03 Da, | 586.5161957 | 3 | 392.8923 | 729350976 | 646091008 |
| AGTTTIEAVKR                 | D3Z2H9 | 0          | n +42.03 Da,n +34.06 Da, | 593.5570489 | 3 | 406.235  | 648924032 | 612729984 |
| MKAQGETEDSER                | Q925J9 | 0.00146897 | n +42.03 Da,K +28.03 Da, | 595.8992733 | 2 | 718.2925 | 60961400  | 4972770   |
| PDPAKSAPAPK                 | Q64525 | 0          | n +42.03 Da,K +28.03 Da, | 596.746835  | 2 | 579.7902 | 47437900  | 1.21E+09  |
| PDPAKSAPAPK                 | Q64525 | 0          | n +42.03 Da,K +34.06 Da, | 597.7448749 | 2 | 593.3583 | 1.531E+09 | 1.101E+10 |
| ADTPGEATPPPR                | Q9ERE7 | 0          | n +34.06 Da,             | 601.9130134 | 2 | 620.3237 | 10001300  | 23857200  |
| SANEDNVTQVR                 | P24270 | 0          | n +28.03 Da,             | 602.2929891 | 2 | 630.8122 | 641494016 | 457572000 |
| ADTPGEATPPPR                | Q9ERE7 | 0          | n +28.03 Da,             | 606.5505873 | 2 | 617.3073 | 637747968 | 720876032 |
| CLRERWGCPRR                 | Q3TYX2 | 0.0184953  | n +17.03 Da,             | 606.6245298 | 2 | 778.8727 | 36778100  | 43709400  |
| ADTPGEATPPPR                | Q9ERE7 | 0.00991736 | n +28.03 Da,             | 609.7227639 | 3 | 412.8786 | 166176000 | 97380800  |
| PGVTVKDVN                   | Q9CZX8 | 0.02957151 | n +17.03 Da,K +34.06 Da, | 618.5098456 | 2 | 485.7824 | 136771008 | 111137000 |
| PDPAKSAPAPK                 | Q64525 | 0          | n +42.03 Da,K +28.03 Da, | 618.9519254 | 2 | 588.835  | 1.181E+09 | 51631300  |
| SSKTASTNSIAQAR              | Q9DAS9 | 0.00518852 | n +42.03 Da,K +28.03 Da, | 624.5296656 | 3 | 495.9268 | 311128000 | 195499008 |
| MEKEEETTR                   | E9Q616 | 0.00112402 | n +42.03 Da,K +34.06 Da, | 626.0733094 | 2 | 611.7844 | 315656992 | 291638016 |
| SSLTGESEPOTR                | Q64436 | 0          | n +34.06 Da,             | 631.0699415 | 2 | 660.3256 | 315326016 | 330548992 |
| ADTPGEATPPPR                | Q9ERE7 | 0.02416641 | n +42.03 Da,             | 638.8327997 | 2 | 624.817  | 709766016 | 726508992 |
| ATAQEAQSLGGR                | Q99L04 | 0          | n +28.03 Da,             | 640.5743732 | 2 | 608.8182 | 184036992 | 288321984 |
| PNETNEIANANSR               | P84099 | 0          | n +14.02 Da,             | 642.158029  | 2 | 722.3447 | 1.979E+09 | 1.253E+09 |
| SSSAPVASPNVR                | Q05920 | 0.00112402 | n +14.02 Da,             | 642.1615049 | 2 | 591.8094 | 60015000  | 156214000 |
| TVTTGASTGADVNGR             | G3X982 | 0          | n +28.03 Da,             | 644.5231212 | 2 | 717.8624 | 243596000 | 217380992 |
| AAVTVNSAKR                  | Q9D110 | 0          | n +42.03 Da,K +28.03 Da, | 646.3395158 | 2 | 543.817  | 462580992 | 434460000 |
| SSAPVASPNVR                 | Q05920 | 0          | n +28.03 Da,             | 650.6292135 | 2 | 556.8067 | 2.259E+09 | 1.894E+09 |
| SSSAPVASPNVR                | Q05920 | 0          | n +34.06 Da,             | 652.8716894 | 2 | 600.3228 | 2.902E+09 | 1.725E+09 |
| STAGKVIK                    | P00329 | 0.00387597 | n +42.03 Da,K +28.03 Da, | 654.2829365 | 2 | 531.3045 | 462104000 | 6226540   |
| STAGKVIK                    | P00329 | 0.00647139 | n +42.03 Da,K +34.06 Da, | 656.0956626 | 2 | 535.8288 | 382556000 | 2.603E+09 |
| AGTTTIEAVKR                 | D3Z2H9 | 0          | n +42.03 Da,n +34.06 Da, | 661.8638354 | 3 | 406.2346 | 868676992 | 864353024 |
| SEETQLVLR                   | Q9D8N0 | 0.00488656 | n +28.03 Da,             | 662.9170124 | 2 | 545.7902 | 80053104  | 273286016 |
| STAGKVIK                    | P00329 | 0.00387597 | n +42.03 Da,K +28.03 Da, | 664.8055597 | 2 | 531.3055 | 5.223E+10 | 4.638E+10 |
| STAGKVIK                    | P00329 | 0.00647139 | n +42.03 Da,K +34.06 Da, | 666.5620312 | 2 | 534.3206 | 505868992 | 6.595E+09 |
| STEVEAAVNR                  | P29391 | 0          | n +34.06 Da,             | 668.0730119 | 2 | 555.3039 | 918716032 | 542520000 |
| SSSAPVASPNVR                | Q05920 | 0          | n +34.06 Da,             | 668.9950592 | 2 | 595.7938 | 1.244E+09 | 2.562E+10 |
| STEVEAAVNR                  | P29391 | 0.00112402 | n +28.03 Da,             | 669.0396822 | 2 | 552.2876 | 715404992 | 315799008 |
| SSSAPVASPNVR                | Q05920 | 0          | n +28.03 Da,             | 669.4578343 | 2 | 598.8097 | 1.754E+09 | 5.584E+10 |

|                            |        |            |                          |             |   |          |           |           |
|----------------------------|--------|------------|--------------------------|-------------|---|----------|-----------|-----------|
| TESDLTVSR                  | Q99LB7 | 0.0024911  | n +28.03 Da,             | 672.9036007 | 2 | 518.2677 | 960419008 | 704065024 |
| STEVEAAVNR                 | P29391 | 0          | n +34.06 Da,             | 682.6389363 | 2 | 552.2883 | 2.951E+09 | 2.895E+09 |
| SSKTASTNSIAQAR             | Q9DAS9 | 0.00215363 | n +42.03 Da,K +34.06 Da, | 684.1539062 | 3 | 497.9304 | 1.491E+09 | 1.373E+09 |
| SSKTASTNSIAQAR             | Q9DAS9 | 0          | n +42.03 Da,K +28.03 Da, | 685.0002965 | 2 | 746.3917 | 5.652E+09 | 5.823E+09 |
| SVTEETLR                   | Q8C196 | 0.04423244 | n +34.06 Da,             | 687.0737693 | 2 | 484.7773 | 159520992 | 317174016 |
| AAQASAAPKAGTATGR           | P56480 | 0          | n +42.03 Da,K +34.06 Da, | 691.345814  | 2 | 749.9023 | 6.074E+09 | 3.824E+09 |
| PAVPPGEDPDGR               | Q9Z1Q9 | 0.0104918  | n +14.02 Da,             | 696.9452298 | 2 | 610.7983 | 72652800  | 37782100  |
| ATTAQQSPQPVAGKR            | Q99J36 | 0          | n +42.03 Da,K +28.03 Da, | 704.4753524 | 2 | 805.4359 | 2.141E+09 | 1.993E+09 |
| SSKTASTNSIAQAR             | Q9DAS9 | 0          | n +42.03 Da,K +28.03 Da, | 704.8285325 | 2 | 743.3865 | 2.618E+09 | 1.984E+09 |
| ATTAQQSPQPVAGKR            | Q99J36 | 0          | n +42.03 Da,K +34.06 Da, | 706.5328789 | 3 | 537.2935 | 669438976 | 613734976 |
| GTTTATVLR                  | P63038 | 0          | n +28.03 Da,             | 711.1115226 | 2 | 509.7987 | 3.748E+09 | 3.612E+09 |
| EAGPETESPVR                | Q9D1M7 | 0          | n +34.06 Da,             | 712.5711126 | 2 | 600.3041 | 1.191E+09 | 288364992 |
| PVDTDDTATALR               | Q99P30 | 0.01404853 | n +17.03 Da,             | 716.5213127 | 3 | 430.2177 | 1.16E+09  | 672603008 |
| SENEPIENEAAAR              | Q9Z2I8 | 0          | n +28.03 Da,             | 727.2674273 | 2 | 692.3284 | 136570000 | 187838000 |
| PDSPAEASGLR                | P70441 | 0.00146897 | n +14.02 Da,             | 732.3850724 | 2 | 557.2988 | 131532000 | 213736992 |
| AEKQIPGGGSGGGGSGGGGGGSGGGR | Q8BMA6 | 0          | n +42.03 Da,K +34.06 Da, | 733.0868038 | 3 | 743.6795 | 1.08E+09  | 882486976 |
| CSGIASAAATAVEVAR           | Q91X91 | 0          | n +34.06 Da,             | 733.426842  | 3 | 520.5972 | 891787008 | 809883008 |
| SSAASVYAGAGGSGSR           | P05784 | 0          | n +28.03 Da,             | 733.9175856 | 2 | 703.8278 | 39361200  | 78058600  |
| MDAQSSAKVNSR               | P49586 | 0          | n +42.03 Da,K +28.03 Da, | 735.3264393 | 2 | 682.3339 | 876075008 | 723657984 |
| PGSEETQTLVR                | Q9D8N0 | 0          | n +14.02 Da,             | 740.3727452 | 2 | 612.7973 | 549801024 | 507431008 |
| SVVPGAEDQR                 | Q6P6J9 | 0          | n +28.03 Da,             | 744.4586785 | 2 | 578.8015 | 546316992 | 838264000 |
| SETPAQSSIKQER              | P97360 | 0          | n +42.03 Da,n +28.03 Da, | 744.9289374 | 2 | 762.8783 | 39200800  | 49857200  |
| SSAASVYAGAGGSGSR           | P05784 | 0          | n +28.03 Da,             | 746.0062159 | 2 | 706.8418 | 123972000 | 104478000 |
| EAGPETESPVR                | Q9D1M7 | 0          | n +34.06 Da,             | 747.8605177 | 2 | 603.3038 | 2.324E+09 | 515288000 |
| NVIQGGEGQAPTR              | Q8QZT1 | 0          | n +34.06 Da,             | 751.3208683 | 2 | 677.8551 | 83344304  | 72804704  |
| TTTATVLR                   | P63038 | 0.00146897 | n +34.06 Da,             | 755.1203088 | 2 | 481.2874 | 2.312E+09 | 2.402E+09 |
| SSPPEGKLETK                | Q91XC8 | 0          | n +42.03 Da,K +34.06 Da, | 755.6051536 | 2 | 640.3683 | 53419000  | 499745984 |
| AGQSDKDKVKYY               | P56395 | 0.00712347 | n +42.03 Da,K +28.03 Da, | 758.382508  | 3 | 457.8979 | 322705984 | 239222000 |
| GATTVQEQLR                 | Q8BG07 | 0          | n +28.03 Da,             | 763.8827555 | 2 | 565.8075 | 832398976 | 840024000 |
| GPGGGGSGGLSPEPSDR          | Q8C7E7 | 0          | n +34.06 Da,             | 765.9200328 | 2 | 756.3568 | 107501000 | 116538000 |
| SETPAQSSIKQER              | P97360 | 0          | n +42.03 Da,n +28.03 Da, | 767.047701  | 2 | 765.8915 | 290908992 | 265180992 |
| PDSPAEASGLR                | P70441 | 0          | n +14.02 Da,             | 771.78279   | 2 | 557.2802 | 2.996E+09 | 2.074E+09 |
| SVGIEADDDR                 | P99027 | 0.00079777 | n +28.03 Da,             | 772.2265787 | 2 | 552.7618 | 251652992 | 274038016 |
| SELSGAADEAAR               | Q9D3D9 | 0          | n +28.03 Da,             | 774.7799583 | 2 | 602.7932 | 275238016 | 239100000 |
| AAQASAAPKAGTATGR           | P56480 | 0          | n +42.03 Da,K +28.03 Da, | 782.0101225 | 2 | 749.9001 | 3.937E+09 | 2.172E+09 |
| PGSEETQTLVR                | Q9D8N0 | 0          | n +14.02 Da,             | 785.5532374 | 2 | 615.8198 | 5.101E+09 | 3.932E+09 |
| TNEEAGDGTTTATVLR           | P63038 | 0.00040437 | n +28.03 Da,             | 787.1987842 | 3 | 578.9546 | 626598976 | 566849984 |
| SSPPEGKLETK                | Q91XC8 | 0          | n +42.03 Da,K +34.06 Da, | 792.8583811 | 2 | 635.848  | 1.721E+10 | 1.163E+10 |
| AQDQGEKENPMR               | Q9CXW4 | 0          | n +42.03 Da,K +28.03 Da, | 795.7812412 | 2 | 736.8445 | 1.077E+11 | 1.009E+11 |
| SVSLNDTETR                 | Q9WV55 | 0          | n +28.03 Da,             | 800.8557822 | 2 | 575.2904 | 83950600  | 64507000  |

|                            |        |            |                          |             |   |          |           |           |
|----------------------------|--------|------------|--------------------------|-------------|---|----------|-----------|-----------|
| MEKPAASTEPPQGSR            | Q9JMD3 | 0          | n +42.03 Da,K +28.03 Da, | 801.0224177 | 2 | 778.9036 | 1.16E+09  | 826259968 |
| GVQVETISPGDGR              | P26883 | 0.02818182 | n +28.03 Da,             | 801.3041794 | 3 | 448.237  | 401883008 | 396456000 |
| AAEQIPGGGSGGGGSGGGGGGGGGGR | Q8BMA6 | 0          | n +42.03 Da,K +28.03 Da, | 801.3334064 | 2 | 1150.534 | 607326976 | 581520000 |
| AAEQIPGGGSGGGGSGGGGGGGGGGR | Q8BMA6 | 0          | n +42.03 Da,K +28.03 Da, | 803.1506685 | 3 | 767.358  | 5.005E+09 | 4.417E+09 |
| PNASPGDAGEQAIR             | Q64727 | 0          | n +17.03 Da,             | 806.8806347 | 2 | 698.844  | 458457984 | 250216992 |
| GETVVVGGGTPSR              | Q99LB2 | 0          | n +34.06 Da,             | 826.0669074 | 2 | 622.3351 | 135436000 | 99613296  |
| SVTSSVPSR                  | Q8VCF0 | 0          | n +34.06 Da,             | 826.9069118 | 2 | 573.3117 | 30885600  | 53673400  |
| VEIANDQGNR                 | P16627 | 0          | n +28.03 Da,             | 827.340752  | 2 | 628.8458 | 1.027E+09 | 830592000 |
| GVQVETISPGDGR              | P26883 | 0          | n +28.03 Da,             | 829.5283652 | 2 | 668.8243 | 489236000 | 386776992 |
| SSDSMDTGAGSIR              | O35143 | 0.00387597 | n +34.06 Da,             | 830.1325278 | 2 | 656.2978 | 163702000 | 151062000 |
| ATNDAVLKR                  | P31230 | 0.00180375 | n +42.03 Da,K +28.03 Da, | 830.4783975 | 2 | 529.3037 | 454614016 | 342383008 |
| SDSMDTGAGSIR               | O35143 | 0          | n +34.06 Da,             | 830.9822099 | 2 | 612.7796 | 278577984 | 224144000 |
| MEKPAASTEPPQGSR            | Q9JMD3 | 0          | n +42.03 Da,K +28.03 Da, | 833.3182796 | 2 | 779.8807 | 8.912E+10 | 8.828E+10 |
| VEIANDQGNR                 | P16627 | 0          | n +28.03 Da,             | 840.7877996 | 2 | 628.8241 | 850905024 | 906697024 |
| GVNESLDTAR                 | P11725 | 0          | n +28.03 Da,             | 844.9618681 | 2 | 595.7961 | 1.064E+09 | 765844992 |
| PNPPPPPPR                  | A3KMN5 | 0.03828171 | n +17.03 Da,             | 853.6059658 | 2 | 493.2875 | 1.132E+09 | 987585024 |
| AVSTGVKVR                  | Q9D2M8 | 0.00387597 | n +42.03 Da,K +34.06 Da, | 856.2077628 | 3 | 361.557  | 170268992 | 169191008 |
| TIQVDNTDAEGR               | Q9CPY7 | 0          | n +34.06 Da,             | 858.0439143 | 2 | 673.8302 | 556140032 | 477592000 |
| TTITAPPSGNER               | P13516 | 0.03153823 | n +34.06 Da,             | 874.8618185 | 2 | 636.3325 | 1.05E+09  | 1.331E+09 |
| SPEEDSTRTAAR               | O35231 | 0.02443494 | n +42.03 Da,             | 886.1204704 | 2 | 704.8183 | 37645300  | 35186400  |
| AAQESLHVK                  | Q8VBT2 | 0.00551914 | n +42.03 Da,K +28.03 Da, | 886.5855292 | 2 | 522.7883 | 14430800  | 14335000  |
| SDEVGGEALGR                | P02088 | 0.00112402 | n +28.03 Da,             | 888.3035684 | 2 | 559.2784 | 4.503E+09 | 1.846E+09 |
| TDPPTAPTTAER               | Q8VD31 | 0.00647139 | n +28.03 Da,             | 889.6718161 | 2 | 642.8251 | 2.289E+09 | 1.961E+09 |
| SVDLEETGR                  | Q03265 | 0.01078079 | n +34.06 Da,             | 891.379     | 2 | 517.2616 | 184558000 | 165232000 |
| QAFITAQNH                  | Q8C196 | 0.00040437 | n +28.03 Da,             | 892.1108666 | 2 | 529.2749 | 168174000 | 105886000 |
| DGEEAGAYDGPR               | P27773 | 0.01379532 | n +14.02 Da,             | 897.7056091 | 2 | 625.7706 | 246868992 | 169238000 |
| RYPVLM SHR                 | Q9QZ18 | 0.02443494 | n +42.03 Da,             | 901.0034264 | 2 | 599.315  | 1.595E+10 | 1.098E+10 |
| SDSVTEETLR                 | Q8C196 | 0.00112402 | n +28.03 Da,             | 903.7180302 | 2 | 582.7919 | 1.051E+10 | 131333000 |
| PEYQEVSTEEQR               | Q9JKR6 | 0          | n +14.02 Da,             | 903.9154196 | 2 | 754.8454 | 13596400  | 10123000  |
| PASSAASVYAGAGGSGSR         | P05784 | 0          | n +14.02 Da,             | 904.8333249 | 2 | 780.3715 | 4.366E+09 | 4.321E+09 |
| PTVNDDL PNR                | P97872 | 0          | n +14.02 Da,             | 904.8399687 | 2 | 577.7932 | 211192000 | 71952000  |
| AVPAPPPTS PR               | Q9JIY5 | 0.00079777 | n +34.06 Da,             | 906.867441  | 2 | 559.3222 | 4.627E+09 | 4.815E+09 |
| PNPPPPPPR                  | A3KMN5 | 0.03828171 | n +17.03 Da,             | 907.0178276 | 2 | 493.2876 | 190576992 | 218888992 |
| TNDPLEAAR                  | P11725 | 0.00146897 | n +28.03 Da,             | 910.7103702 | 2 | 507.765  | 403734016 | 408520000 |
| SDSVTEETLR                 | Q8C196 | 0          | n +34.06 Da,             | 917.1059175 | 2 | 584.2952 | 355900000 | 482900992 |
| ASLVLKEK                   | P56135 | 0.03181683 | n +42.03 Da,K +34.06 Da, | 919.0353739 | 3 | 361.5657 | 197530000 | 135462000 |
| DLQTQGISNR                 | Q64374 | 0          | n +34.06 Da,             | 919.2513772 | 2 | 583.324  | 133747000 | 119433000 |
| PGQTVPLR                   | Q8CHC8 | 0.04423244 | n +17.03 Da,             | 919.7015604 | 2 | 442.7635 | 486817984 | 504519008 |
| TIEVVGR                    | P47738 | 0.0380117  | n +28.03 Da,             | 929.0999768 | 2 | 465.7663 | 425928992 | 357588992 |
| TIEVVGR                    | P47738 | 0.0380117  | n +28.03 Da,             | 930.6799087 | 2 | 465.7663 | 77439904  | 12489000  |

|                      |        |            |                          |             |   |          |           |           |
|----------------------|--------|------------|--------------------------|-------------|---|----------|-----------|-----------|
| SAINEVVTR            | P62900 | 0.00488656 | n +34.06 Da,             | 936.1250214 | 2 | 508.7905 | 578572032 | 308876000 |
| GDGTTTATVLAR         | P63038 | 0          | n +28.03 Da,             | 936.5306713 | 2 | 592.8032 | 73830200  | 66756400  |
| ALKQISSNR            | Q9R0P3 | 0.03153823 | n +42.03 Da,K +28.03 Da, | 943.3612409 | 2 | 542.3115 | 1.242E+09 | 3.796E+10 |
| SDSVTEETLR           | Q8C196 | 0          | n +34.06 Da,             | 945.2105903 | 2 | 582.7905 | 2.296E+09 | 2.669E+09 |
| VPAPDMSTGER          | P26443 | 0.0184953  | n +34.06 Da,             | 951.5957505 | 2 | 594.2896 | 8.632E+09 | 8.472E+09 |
| MEAVPEKK             | P14148 | 0.00903614 | n +42.03 Da,K +34.06 Da, | 951.6291209 | 2 | 519.8125 | 26123900  | 228576000 |
| AATTGSGVKVPR         | Q9CZY3 | 0          | n +42.03 Da,K +34.06 Da, | 955.2933321 | 2 | 607.3482 | 4.466E+10 | 4.451E+10 |
| DGEEAGAYDGPR         | P27773 | 0          | n +28.03 Da,             | 957.4427632 | 2 | 632.7753 | 309294016 | 654297984 |
| PGNPTGQVQSR          | Q8BGT5 | 0.04617149 | n +17.03 Da,             | 960.2249924 | 3 | 579.2965 | 1.362E+09 | 1.403E+09 |
| VEIANDQGNR           | P16627 | 0.0184953  | n +28.03 Da,             | 960.829699  | 2 | 625.823  | 70655400  | 301155008 |
| SSGALLPKPQ           | Q9CPQ1 | 0.02275523 | n +34.06 Da,K +34.06 Da, | 961.3769342 | 2 | 527.3188 | 200816992 | 217340000 |
| AGDGTATATVLAR        | P63038 | 0.01463104 | n +34.06 Da,             | 961.4556404 | 2 | 631.3412 | 26369300  | 16066600  |
| SDSSDSMDTGAGSIR      | O35143 | 0          | n +34.06 Da,             | 962.7056723 | 2 | 757.3248 | 544371008 | 461937984 |
| ALKQISSNR            | Q9R0P3 | 0.00903614 | n +42.03 Da,K +34.06 Da, | 964.1044055 | 2 | 545.3235 | 1.61E+09  | 8.217E+09 |
| ATPEASGSGEKVEG       | Q9CQX2 | 0.00387597 | n +42.03 Da,K +28.03 Da, | 968.3563587 | 2 | 694.8307 | 263824992 | 370476992 |
| SETGISSATLR          | Q91VA0 | 0.00040437 | n +28.03 Da,             | 972.5867398 | 2 | 573.7947 | 59357100  | 241607008 |
| SSGALLPKPQ           | Q9CPQ1 | 0.03928987 | n +28.03 Da,K +28.03 Da, | 974.8665461 | 2 | 521.2893 | 34858900  | 224028992 |
| TDESLRNDESS          | E9PUZ9 | 0.01379532 | n +34.06 Da,             | 976.7547017 | 2 | 640.7863 | 144912000 | 104915000 |
| ALKQISSNR            | Q9R0P3 | 0.00903614 | n +42.03 Da,K +34.06 Da, | 979.3461291 | 2 | 543.8172 | 1.579E+10 | 1.284E+10 |
| SETGISSATLR          | Q91VA0 | 0.00040437 | n +28.03 Da,             | 983.9894233 | 2 | 575.3091 | 217814000 | 216826000 |
| DEVGGEALGR           | P02088 | 0          | n +28.03 Da,             | 986.8006748 | 2 | 515.7657 | 233404000 | 344108000 |
| DEVGGEALGR           | P02088 | 0          | n +28.03 Da,             | 988.0847617 | 2 | 515.7656 | 192274000 | 44806600  |
| IAEELAPER            | O35490 | 0.01078079 | n +34.06 Da,             | 988.7510279 | 2 | 529.795  | 184812992 | 226494000 |
| AGEGLGQQGASATAAPETR  | Q9CZE3 | 0          | n +28.03 Da,             | 991.606094  | 2 | 900.448  | 262266000 | 247366000 |
| PVSPEAQADLQR         | A2A7S8 | 0.00712347 | n +14.02 Da,             | 992.2610622 | 2 | 661.3442 | 311476992 | 373201984 |
| ASGGGVPTDEEQATGLER   | P19536 | 0          | n +34.06 Da,             | 992.5441316 | 2 | 601.7953 | 37547800  | 28187700  |
| PADVSVISSR           | P14206 | 0.00112402 | n +14.02 Da,             | 992.7252049 | 2 | 522.7888 | 1.288E+09 | 646699008 |
| SSGALLPKPQ           | Q9CPQ1 | 0.02275523 | n +34.06 Da,K +34.06 Da, | 993.0049729 | 2 | 531.8423 | 333195008 | 3.808E+09 |
| GDAPSPEEKHLH         | Q91WQ3 | 0          | n +42.03 Da,K +28.03 Da, | 993.7303534 | 2 | 625.3067 | 1.919E+10 | 1.759E+10 |
| IAEELAPER            | O35490 | 0.01078079 | n +34.06 Da,             | 998.8378656 | 2 | 531.3058 | 299774016 | 469136000 |
| HNPATNEVVGR          | Q9EQ20 | 0.00180375 | n +42.03 Da,             | 998.883235  | 2 | 616.801  | 226856000 | 1.096E+09 |
| DQVSGPPSAPTEDR       | B8JJG3 | 0          | n +28.03 Da,             | 999.3639155 | 2 | 740.8433 | 37036600  | 21077800  |
| ASEAGIGGGGGGKIR      | E9Q3G8 | 0.0104918  | n +42.03 Da,K +28.03 Da, | 1001.369955 | 2 | 735.8867 | 56920600  | 57241300  |
| PVTLPDGR             | P06801 | 0.02393372 | n +14.02 Da,             | 1001.462205 | 2 | 434.7481 | 820982016 | 564251008 |
| SKSFQQSSSLGR         | Q8K310 | 0          | n +42.03 Da,K +28.03 Da, | 1001.529346 | 2 | 646.3298 | 101462000 | 131434000 |
| AAAAATAVGPGAGSAGVAGP | Q9WVG6 | 0.02275523 | n +42.03 Da,             | 1002.743986 | 3 | 520.5973 | 820028992 | 799867008 |
| SGGGVPTDEEQATGLER    | P19536 | 0          | n +34.06 Da,             | 1003.753446 | 3 | 577.6114 | 534852992 | 614326016 |
| AIDAALAAR            | Q8CHT0 | 0.01078079 | n +14.02 Da,             | 1006.708432 | 2 | 440.2505 | 210864000 | 214384992 |
| HNPATNEVVGR          | Q9EQ20 | 0.00180375 | n +42.03 Da,             | 1010.264952 | 2 | 618.3042 | 71109904  | 16691300  |
| AGTTTIEAVKR          | D3Z2H9 | 0.00112402 | n +42.03 Da,n +28.03 Da, | 1015.147336 | 2 | 606.3213 | 51691600  | 130170000 |



|                        |        |            |                          |             |   |          |           |           |
|------------------------|--------|------------|--------------------------|-------------|---|----------|-----------|-----------|
| TEPSSGSDVASIR          | P50544 | 0          | n +34.06 Da,             | 1016.516003 | 2 | 667.3322 | 224588992 | 225788000 |
| ADADKSEAAAGDDGSQQPAEPR | Q8C854 | 0          | n +42.03 Da,K +28.03 Da, | 1017.850485 | 3 | 795.3577 | 591667968 | 501454016 |
| SGPAAAAVPTAGR          | E9Q343 | 0.02080745 | n +42.03 Da,             | 1018.666866 | 2 | 584.3189 | 503833984 | 448459008 |
| SSGALLPKPQ             | Q9CPQ1 | 0.02275523 | n +34.06 Da,K +34.06 Da, | 1021.811366 | 2 | 527.3188 | 248604000 | 148675008 |
| AAAAATAVGPGAGSAGVAGP   | Q9WVG6 | 0.02275523 | n +42.03 Da,             | 1025.388901 | 3 | 522.6082 | 217599008 | 565640000 |
| ASGGGVPTDEEQATGLER     | P19536 | 0          | n +34.06 Da,             | 1028.368473 | 3 | 601.2904 | 1.011E+10 | 8.332E+09 |
| PAPPPISGGGYR           | Q8K0E8 | 0.00488656 | n +14.02 Da,             | 1030.029633 | 2 | 591.8272 | 244980992 | 118936000 |
| STSDTQEQAIR            | Q9DBG6 | 0          | n +34.06 Da,             | 1030.085129 | 2 | 688.855  | 434727008 | 378179008 |
| SKSFQQSSLGR            | Q8K310 | 0          | n +42.03 Da,K +28.03 Da, | 1030.158079 | 2 | 647.8406 | 6.759E+09 | 6.252E+09 |
| MENQLTKSVEER           | Q9DC50 | 0.00040437 | n +42.03 Da,K +28.03 Da, | 1030.869074 | 3 | 511.9243 | 214746000 | 165860000 |
| ASGGGVPTDEEQATGLER     | P19536 | 0.01235772 | n +14.02 Da,             | 1034.381486 | 3 | 596.6179 | 347464992 | 222135008 |
| AEVQTLVSR              | Q8BJ64 | 0.00319375 | n +28.03 Da,             | 1036.202761 | 2 | 515.7989 | 231488000 | 98911200  |
| PIINGGAPDITAR          | Q8C196 | 0          | n +14.02 Da,             | 1045.034256 | 2 | 677.359  | 3.151E+09 | 2.13E+09  |
| AVQSSALYEDR            | P16460 | 0.00112402 | n +28.03 Da,             | 1048.21491  | 2 | 633.8194 | 118674000 | 43995900  |
| AGTTTIEAVKR            | D3Z2H9 | 0.00618132 | n +42.03 Da,n +34.06 Da, | 1048.512061 | 2 | 608.8295 | 119728000 | 74156304  |
| TEPGAGSDLQGVR          | P51174 | 0          | n +34.06 Da,             | 1050.772508 | 2 | 660.8508 | 184784992 | 103640000 |
| PEAVEAEATLR            | Q9EQF5 | 0          | n +14.02 Da,             | 1054.124169 | 2 | 598.8169 | 225808992 | 209680000 |
| SVTEQGAELSNEER         | P63101 | 0          | n +28.03 Da,             | 1054.216593 | 2 | 788.8749 | 156804000 | 208056992 |
| GAAAEPPGGSGVGLGDR      | Q9EP72 | 0          | n +34.06 Da,             | 1055.598923 | 2 | 728.3719 | 1.718E+09 | 1.531E+09 |
| SDTPCDDFTR             | P28798 | 0          | n +34.06 Da,             | 1058.877271 | 2 | 621.2591 | 67727904  | 66087700  |
| IVENQVMDTR             | P10649 | 0          | n +34.06 Da,             | 1059.221078 | 2 | 616.8179 | 1.93E+09  | 2.392E+09 |
| ATDELASKLSR            | Q9D8Y0 | 0          | n +42.03 Da,K +34.06 Da, | 1061.192103 | 3 | 420.898  | 472631008 | 418438016 |
| ASGGGVPTDEEQATGLER     | P19536 | 0          | n +34.06 Da,             | 1066.332292 | 2 | 601.7937 | 205883008 | 90917296  |
| ADIVENQVMDTR           | P10649 | 0          | n +28.03 Da,             | 1066.586517 | 2 | 709.831  | 8.796E+09 | 6.902E+09 |
| SAPEGLGDAHGDADR        | P58137 | 0          | n +42.03 Da,             | 1067.005287 | 2 | 755.3318 | 1.17E+09  | 41867500  |
| STSPAGQGILAQR          | Q9CPW5 | 0          | n +34.06 Da,             | 1068.854146 | 2 | 685.8726 | 445556000 | 414486016 |
| LDNQSVGIEGGAR          | Q8JZR0 | 0.01078079 | n +28.03 Da,             | 1069.300198 | 2 | 672.3283 | 1.102E+09 | 1.11E+09  |
| TSSYSALSEPSR           | Q9DCS3 | 0          | n +34.06 Da,             | 1071.62292  | 2 | 656.8214 | 1.61E+09  | 1.572E+09 |
| TGSEGSSITNSQLDAR       | Q4LDG0 | 0          | n +28.03 Da,             | 1071.9556   | 2 | 825.8999 | 160760992 | 135410000 |
| EPAPAVPQAAGSGGPTSR     | Q8C0K5 | 0          | n +34.06 Da,             | 1074.76061  | 2 | 839.4329 | 189168992 | 156508000 |
| TSVDLEETGR             | Q03265 | 0          | n +28.03 Da,             | 1076.985405 | 2 | 567.7861 | 5.659E+09 | 5.781E+09 |
| PTETGALTLNR            | Q8BWT1 | 0          | n +14.02 Da,             | 1077.345899 | 2 | 588.8092 | 21704500  | 16704200  |
| DQVVTDLR               | Q91YI0 | 0.01404853 | n +34.06 Da,             | 1080.904774 | 2 | 490.2785 | 78346896  | 12824100  |
| SLTSAASIDGSR           | Q9QYG0 | 0.00215363 | n +28.03 Da,             | 1081.193806 | 2 | 596.2873 | 265740992 | 207743008 |
| MNKAPQTPPPPAR          | Q6NZJ6 | 0          | n +42.03 Da,K +34.06 Da, | 1081.980601 | 2 | 766.4062 | 2.705E+09 | 1.74E+09  |
| GQVITIGNER             | P60710 | 0.00962496 | n +28.03 Da,             | 1083.780264 | 2 | 557.8142 | 1.224E+09 | 1.114E+09 |
| PVDTDDTATALR           | Q99P30 | 0          | n +14.02 Da,             | 1086.693383 | 2 | 644.8227 | 2.962E+10 | 1.782E+10 |
| PAVDPLDSTSR            | P56480 | 0          | n +14.02 Da,             | 1088.457111 | 2 | 584.7873 | 414345984 | 389772992 |
| TSGMALAEQAR            | Q8QZY2 | 0          | n +28.03 Da,             | 1100.639936 | 2 | 580.2862 | 93243504  | 1.602E+09 |
| TLENQVMDTR             | P19639 | 0          | n +34.06 Da,             | 1101.892935 | 2 | 619.317  | 77796200  | 76188000  |

|                     |        |            |                          |             |   |          |           |           |
|---------------------|--------|------------|--------------------------|-------------|---|----------|-----------|-----------|
| SKSESPKEPEQLR       | P49312 | 0.01491117 | n +42.03 Da,K +28.03 Da, | 1106.363686 | 2 | 806.9121 | 220179008 | 101817000 |
| PEAVEAEATLR         | Q9EQF5 | 0          | n +14.02 Da,             | 1109.975721 | 2 | 600.3165 | 168154000 | 72347504  |
| SAPEGLGDAHGDADR     | P58137 | 0          | n +42.03 Da,             | 1114.002368 | 2 | 755.3312 | 173278000 | 65970600  |
| MNKAPQQTGPPPAR      | Q6NZJ6 | 0.00387597 | n +42.03 Da,K +34.06 Da, | 1115.393893 | 3 | 511.2733 | 1.199E+09 | 909001024 |
| VSDSSDSMDTGAGSIR    | O35143 | 0          | n +34.06 Da,             | 1116.167912 | 2 | 806.8573 | 186388992 | 215667008 |
| YSTEVEAAVNR         | P29391 | 0          | n +28.03 Da,             | 1117.105049 | 2 | 633.82   | 1.325E+09 | 2.311E+09 |
| DEPPPLPR            | O55022 | 0.02980132 | n +28.03 Da,             | 1118.922509 | 2 | 471.7436 | 537011968 | 2.394E+09 |
| SDHGDVSLPPQDR       | Q9CQ26 | 0          | n +42.03 Da,             | 1122.297341 | 2 | 725.2995 | 1.246E+09 | 852113984 |
| TSAPGQGGILAQR       | Q9CPW5 | 0          | n +28.03 Da,             | 1124.512416 | 2 | 642.3571 | 492959008 | 559857024 |
| DEPPPLPR            | O55022 | 0.02980132 | n +28.03 Da,             | 1124.783753 | 2 | 474.7613 | 3.851E+09 | 3.932E+09 |
| AGEEAADSPELPR       | Q9CPW2 | 0          | n +34.06 Da,             | 1125.830591 | 2 | 685.33   | 1.435E+09 | 1.389E+09 |
| DFSAGVANR           | P15105 | 0.00180375 | n +34.06 Da,             | 1127.653439 | 2 | 485.7621 | 498916000 | 301472000 |
| LVQLVWQR            | P49194 | 0.03983716 | n +14.02 Da,             | 1127.984088 | 2 | 528.3319 | 177804992 | 113533000 |
| DFSAGVANR           | P15105 | 0.00079777 | n +28.03 Da,             | 1128.023369 | 2 | 482.7459 | 427936000 | 458720000 |
| FSTSQSLPASQTR       | P28665 | 0.00180375 | n +28.03 Da,             | 1130.834005 | 2 | 717.8479 | 478304000 | 424560000 |
| GSLDLGGDAAGR        | Q8VEK3 | 0          | n +34.06 Da,             | 1138.042897 | 2 | 558.7862 | 699432000 | 1.553E+09 |
| DQVVTDLR            | Q91YI0 | 0.01404853 | n +28.03 Da,             | 1142.188968 | 2 | 487.2696 | 318366016 | 261780992 |
| GADTSVDLEETGR       | Q03265 | 0          | n +34.06 Da,             | 1143.468069 | 2 | 689.3265 | 136244000 | 238732992 |
| TQSCTMASTKPLSR      | Q8R0F8 | 0          | n +42.03 Da,n +34.06 Da, | 1148.394897 | 2 | 819.4022 | 787150976 | 756814976 |
| AGTTTIEAVKR         | D3Z2H9 | 0          | n +42.03 Da,n +28.03 Da, | 1149.084015 | 2 | 608.8508 | 2.196E+11 | 2.101E+11 |
| GDIAYVPSGNAR        | P54869 | 0          | n +28.03 Da,             | 1149.679268 | 2 | 624.3215 | 1.097E+09 | 420028000 |
| SSGALLPKPQMR        | Q9CPQ1 | 0          | n +42.03 Da,K +28.03 Da, | 1154.781651 | 3 | 452.2553 | 5.595E+09 | 5.122E+09 |
| MLGSEQDPPAKR        | Q9JK81 | 0          | n +42.03 Da,K +34.06 Da, | 1155.358503 | 2 | 699.8561 | 1.565E+09 | 1.551E+09 |
| TTPTGAAPPAGMTSTR    | P27546 | 0.00112402 | n +34.06 Da,             | 1156.176901 | 2 | 772.882  | 159171008 | 145783008 |
| AEPAPAVPQAAGSGGPTSR | Q8C0K5 | 0          | n +34.06 Da,             | 1160.820967 | 2 | 874.9517 | 83311696  | 93271504  |
| SDHGDVSLPPQDR       | Q9CQ26 | 0          | n +42.03 Da,             | 1162.422433 | 2 | 731.3422 | 131519000 | 85983696  |
| PAVDPLDSTR          | P56480 | 0          | n +14.02 Da,             | 1163.284071 | 2 | 586.3015 | 638172032 | 24030100  |
| AGTTTIEAVKR         | D3Z2H9 | 0          | n +42.03 Da,n +28.03 Da, | 1173.301772 | 2 | 607.3258 | 375095008 | 1.605E+09 |
| TGLNISQLR           | Q8K3N2 | 0.03231545 | n +34.06 Da,             | 1174.742161 | 2 | 515.3022 | 30275700  | 217466000 |
| AVSTGVKVR           | Q9D2M8 | 0          | n +42.03 Da,K +28.03 Da, | 1175.17669  | 2 | 542.3299 | 1.106E+10 | 1.105E+10 |
| PVQYVESTPDR         | Q9CQB2 | 0.00180375 | n +14.02 Da,             | 1181.716795 | 2 | 701.341  | 278888992 | 40364400  |
| SQQSASGAPVLLR       | Q9DCM0 | 0          | n +28.03 Da,             | 1189.973644 | 2 | 668.8461 | 1.579E+09 | 913641024 |
| SSIKVECVLR          | Q64374 | 0          | n +42.03 Da,K +34.06 Da, | 1192.102598 | 3 | 420.9041 | 316480000 | 309484992 |
| SVTLTSVKR           | Q3UTJ2 | 0.01491117 | n +42.03 Da,K +34.06 Da, | 1195.792346 | 2 | 530.8217 | 383247008 | 374366016 |
| GPPPTGEEDTSEKDEL    | P20029 | 0          | n +28.03 Da,K +28.03 Da, | 1204.981497 | 2 | 875.4194 | 377916992 | 261547008 |
| AVVVGAGGAGLR        | Q8K2B3 | 0          | n +28.03 Da,             | 1206.055193 | 2 | 527.8226 | 734556032 | 732708992 |
| DTPCDDFTR           | P28798 | 0          | n +28.03 Da,             | 1207.637067 | 2 | 577.7429 | 2.207E+09 | 1.204E+09 |
| AGQSKDKVKYY         | P56395 | 0.00934268 | n +42.03 Da,K +28.03 Da, | 1208.510191 | 3 | 457.8977 | 34371900  | 23221600  |
| SLKPQPQPAPATGR      | O70305 | 0.00112402 | n +42.03 Da,K +34.06 Da, | 1208.532868 | 3 | 538.9705 | 1.754E+09 | 1.378E+09 |
| EEAGDGTTTATVLAR     | P63038 | 0          | n +34.06 Da,             | 1209.206585 | 2 | 760.3822 | 1.116E+09 | 1.032E+09 |

|                         |        |            |                          |             |   |          |           |           |
|-------------------------|--------|------------|--------------------------|-------------|---|----------|-----------|-----------|
| SLKPQPQPAPATGR          | O70305 | 0          | n +42.03 Da,K +28.03 Da, | 1209.467303 | 2 | 807.9513 | 3.951E+09 | 3.254E+09 |
| ASSVGNVADSTEPTKR        | Q8CGY8 | 0          | n +42.03 Da,K +34.06 Da, | 1221.036925 | 2 | 844.9264 | 879324032 | 794484992 |
| ATPEASGSGEKVEGSEPSVTYYR | Q9CQX2 | 0          | n +42.03 Da,K +28.03 Da, | 1221.166832 | 3 | 824.3907 | 310276000 | 264523008 |
| MFQGADSQAGKSGSR         | Q6PGH2 | 0          | n +42.03 Da,K +34.06 Da, | 1222.749963 | 2 | 798.8747 | 876035968 | 809212992 |
| MASGGGVPTDEEQATGLER     | P19536 | 0.00146897 | n +34.06 Da,             | 1223.587778 | 3 | 644.9703 | 1.116E+09 | 941761024 |
| GVQVETISPGDGR           | P26883 | 0          | n +34.06 Da,             | 1224.677567 | 2 | 671.3787 | 2.024E+10 | 1.981E+10 |
| GTVPAAMLR               | Q9D404 | 0.00180375 | n +34.06 Da,             | 1225.025599 | 2 | 475.2901 | 661980032 | 283124000 |
| SGYTPDEKLR              | Q3UIU2 | 0          | n +42.03 Da,K +28.03 Da, | 1225.148382 | 2 | 618.3169 | 1.353E+09 | 1.356E+09 |
| SEQLLQTNNGAVAR          | Q8VCF0 | 0          | n +34.06 Da,             | 1227.92602  | 2 | 751.4019 | 120196000 | 134564000 |
| PVQYVESTPDPDR           | Q9CQB2 | 0.00180375 | n +14.02 Da,             | 1228.734157 | 2 | 699.8376 | 199200000 | 93582800  |
| PANYADAPTEGIR           | Q8K010 | 0          | n +14.02 Da,             | 1230.859567 | 2 | 691.8255 | 618603008 | 682211008 |
| ASLPPHAGPATPLSPTR       | P21619 | 0          | n +42.03 Da,             | 1235.192859 | 2 | 568.3093 | 204160992 | 178136992 |
| TQGVSTTDLVGR            | Q922E4 | 0.00962496 | n +34.06 Da,             | 1236.856204 | 2 | 631.3405 | 413072000 | 202040992 |
| AGQSDKDKVKYY            | P56395 | 0.01404853 | n +42.03 Da,K +28.03 Da, | 1237.328808 | 2 | 686.3415 | 912398976 | 792302976 |
| SAADSEDSPTIEAVR         | P10518 | 0          | n +28.03 Da,             | 1239.391497 | 2 | 788.377  | 450903008 | 478830016 |
| GTVPAAMLR               | Q9D404 | 0.00180375 | n +34.06 Da,             | 1240.724088 | 2 | 475.2953 | 107359000 | 96482200  |
| GVQVETISPGDGR           | P26883 | 0          | n +34.06 Da,             | 1245.331751 | 2 | 671.8529 | 1.68E+10  | 1.642E+10 |
| TNEEAGDGTATTATVLAR      | P63038 | 0          | n +34.06 Da,             | 1250.390777 | 2 | 867.9287 | 3.649E+09 | 3.059E+09 |
| TNEEAGDGTATTATVLAR      | P63038 | 0          | n +34.06 Da,             | 1250.506218 | 3 | 578.955  | 958444032 | 870249984 |
| SMTDAVLAR               | P11725 | 0.03030303 | n +28.03 Da,             | 1255.405712 | 2 | 496.2654 | 38410100  | 35543700  |
| SAADSEDSPTIEAVR         | P10518 | 0          | n +28.03 Da,             | 1255.56098  | 2 | 786.8737 | 182763008 | 286064992 |
| SGGPPPTGEEDTSEKDEL      | P20029 | 0          | n +28.03 Da,K +28.03 Da, | 1257.00427  | 2 | 950.9361 | 234515008 | 191682000 |
| SEPELKLVAR              | P08030 | 0.01204035 | n +42.03 Da,K +28.03 Da, | 1261.578324 | 3 | 404.5713 | 87609200  | 84419696  |
| AEFPSKVSTR              | Q9DCU2 | 0.0028399  | n +42.03 Da,K +34.06 Da, | 1266.34406  | 2 | 596.3223 | 3.973E+09 | 3.622E+09 |
| MLMQSTVESAQVR           | Q922D8 | 0          | n +34.06 Da,             | 1267.072939 | 2 | 704.85   | 62369500  | 59859500  |
| PEATGLTAEEDSVR          | Q9R1S7 | 0          | n +17.03 Da,             | 1267.431497 | 2 | 744.8616 | 427996992 | 348140992 |
| AIAEELAPER              | O35490 | 0.00112402 | n +28.03 Da,             | 1267.884704 | 2 | 563.809  | 798584000 | 242292000 |
| MQSAPLEQPAKR            | Q60710 | 0.00040437 | n +42.03 Da,K +34.06 Da, | 1268.727521 | 2 | 713.3795 | 1.528E+09 | 1.323E+09 |
| NTNEEAGDGTATTATVLAR     | P63038 | 0          | n +34.06 Da,             | 1268.863924 | 2 | 924.9501 | 675772032 | 590553024 |
| DTVSTLYNR               | Q8R0Y6 | 0.00040437 | n +28.03 Da,             | 1269.277816 | 2 | 548.7855 | 1.142E+09 | 1.182E+09 |
| SGYTPDEKLR              | Q3UIU2 | 0.00146897 | n +42.03 Da,K +34.06 Da, | 1269.609272 | 2 | 621.3321 | 118751000 | 65262100  |
| GVQVETISPGDGR           | P26883 | 0          | n +34.06 Da,             | 1270.60984  | 2 | 673.3607 | 135150000 | 352256000 |
| ETLYAQVDR               | O35488 | 0.00180375 | n +34.06 Da,             | 1274.5312   | 2 | 612.3161 | 111169000 | 112416000 |
| SGDNDDDEPPPLPR          | O55022 | 0          | n +34.06 Da,             | 1277.139094 | 2 | 776.349  | 1.027E+09 | 942072000 |
| MNVGTAHSEVNPNTNR        | Q9CPZ6 | 0.03907845 | n +42.03 Da,             | 1278.040531 | 2 | 834.8906 | 55735700  | 16153800  |
| PFVTTQGSQQTQPPQR        | Q61183 | 0          | n +14.02 Da,             | 1278.411573 | 3 | 637.6616 | 79094896  | 44269200  |
| VMQSSDAAYLAR            | Q8BWT1 | 0          | n +34.06 Da,             | 1284.210069 | 2 | 713.8529 | 845515008 | 813513024 |
| GASGDNDDEPPPLPR         | O55022 | 0          | n +28.03 Da,             | 1284.483367 | 2 | 840.3767 | 123372000 | 116681000 |
| ASGGGVPTDEEQATGLER      | P19536 | 0          | n +34.06 Da,             | 1289.835083 | 2 | 901.4316 | 492559008 | 333990016 |
| PDGQVITIGNER            | P60710 | 0          | n +14.02 Da,             | 1292.512056 | 2 | 653.8367 | 1.002E+09 | 1.769E+09 |

|                        |        |            |                                      |             |   |          |           |           |
|------------------------|--------|------------|--------------------------------------|-------------|---|----------|-----------|-----------|
| VMQSSDAAYLAR           | Q8BWT1 | 0          | n +34.06 Da,                         | 1297.102281 | 2 | 716.8696 | 727198016 | 982644992 |
| SASVSVISR              | P61804 | 0.00079777 | n +28.03 Da,                         | 1297.718955 | 2 | 515.3006 | 428736000 | 709972992 |
| NVIGEPIDER             | P56480 | 0          | n +34.06 Da,                         | 1299.811858 | 2 | 585.3131 | 39938400  | 19220100  |
| DDEPPPLPR              | O55022 | 0.00146897 | n +34.06 Da,                         | 1301.375023 | 2 | 532.2745 | 3.416E+09 | 3.365E+09 |
| ETSSIPEAGEGQIR         | Q9DCB8 | 0          | n +28.03 Da,                         | 1303.645692 | 2 | 801.9015 | 1.08E+09  | 780409984 |
| SVVEMQGDDEMTR          | O88844 | 0          | n +34.06 Da,                         | 1303.812458 | 2 | 706.8524 | 124499000 | 156340000 |
| EALDSGLVSR             | O35459 | 0.00180375 | n +34.06 Da,                         | 1304.291955 | 2 | 540.809  | 107526000 | 33638500  |
| TEELATAEAVR            | Q8R0Y6 | 0          | n +34.06 Da,                         | 1304.398462 | 2 | 673.8437 | 654534976 | 746060032 |
| SGEGENPASKPTPVQDVQGDGR | Q61205 | 0          | n +42.03 Da,n +34.06 Da,             | 1308.099099 | 3 | 765.6996 | 211666000 | 215856992 |
| SGEGENPASKPTPVQDVQGDGR | Q61205 | 0          | n +42.03 Da,n +28.03 Da,             | 1308.17571  | 2 | 1148.045 | 93078496  | 84721200  |
| DGVANVSIEDR            | P08228 | 0          | n +34.06 Da,                         | 1308.296407 | 2 | 604.3137 | 92552496  | 45432600  |
| TDEMVELR               | P61979 | 0.02589095 | n +34.06 Da,                         | 1308.504032 | 2 | 510.7557 | 203228992 | 207688992 |
| AADTQVSETLKR           | E9PVA8 | 0          | n +42.03 Da,K +28.03 Da,             | 1309.436335 | 2 | 692.8646 | 102424000 | 147868000 |
| DEVGPDPNQLR            | O09173 | 0.00040437 | n +28.03 Da,                         | 1311.463069 | 2 | 634.3163 | 50004700  | 59529000  |
| ATVDLEKLR              | P12382 | 0.00962496 | n +42.03 Da,K +34.06 Da,             | 1316.175755 | 3 | 372.2203 | 186004000 | 163600000 |
| AVPPTYADLGKSAR         | Q60932 | 0.00112402 | n +42.03 Da,K +28.03 Da,             | 1317.716023 | 3 | 505.9441 | 793644032 | 747043968 |
| TASLTSAAIDGSR          | Q9QYG0 | 0          | n +28.03 Da,                         | 1317.975116 | 2 | 682.8578 | 122776000 | 177716992 |
| EQGSAADSEDSPTIEAVR     | P10518 | 0          | n +28.03 Da,                         | 1318.593405 | 2 | 945.438  | 135960000 | 123480000 |
| TEQGPQVDETQFK          | P47738 | 0          | n +28.03 Da,K +28.03 Da,             | 1318.599409 | 2 | 781.888  | 1.057E+09 | 521672992 |
| SAGSAAAGPVEAAIR        | Q9D8S9 | 0          | n +34.06 Da,                         | 1318.947116 | 2 | 679.8789 | 126538000 | 177298000 |
| EIVLVGGSTR             | P17156 | 0.01265002 | n +28.03 Da,                         | 1323.516119 | 2 | 529.8137 | 326104000 | 298212000 |
| SASVSVISR              | P61804 | 0.00079777 | n +28.03 Da,                         | 1329.756972 | 2 | 516.8064 | 2.375E+09 | 1.781E+09 |
| TNEEAGDGTTTATVLR       | P63038 | 0          | n +28.03 Da,                         | 1331.900534 | 2 | 867.9297 | 1.203E+09 | 1.117E+09 |
| DMLITGGR               | O54754 | 0.02080745 | n +34.06 Da,                         | 1339.441383 | 2 | 445.7417 | 182816992 | 116329000 |
| GVPTDEEQATGLER         | P19536 | 0          | n +28.03 Da,                         | 1339.642629 | 2 | 761.3496 | 575155008 | 502852992 |
| TASLTSAAIDGSR          | Q9QYG0 | 0          | n +28.03 Da,                         | 1345.382353 | 2 | 679.8436 | 89578600  | 97581200  |
| TGTAEMSSILEER          | Q03265 | 0.00112402 | n +34.06 Da,                         | 1345.554849 | 3 | 484.5734 | 80751504  | 95938304  |
| SVVEMQGDDEMTR          | O88844 | 0          | n +28.03 Da,                         | 1352.954101 | 2 | 705.3239 | 1.678E+09 | 1.639E+09 |
| TMVADTPENLR            | Q61792 | 0          | n +34.06 Da,                         | 1358.246658 | 2 | 637.8226 | 277216000 | 259047008 |
| SAGSAAAGPVEAAIR        | Q9D8S9 | 0          | n +34.06 Da,                         | 1360.507396 | 2 | 678.3681 | 747665984 | 693785984 |
| SSIVVSGTPIR            | P35505 | 0.00040437 | n +34.06 Da,                         | 1364.400407 | 2 | 572.3412 | 873096000 | 1.011E+09 |
| TQPEVDTPLGR            | Q63880 | 0          | n +34.06 Da,                         | 1364.446578 | 2 | 620.8309 | 137451008 | 238932992 |
| TTPALTIER              | Q8VBT2 | 0.03153823 | n +34.06 Da,                         | 1366.459917 | 2 | 515.3005 | 1.439E+09 | 1.299E+09 |
| VANNTNEEAGDGTTTATVLR   | P63038 | 0          | n +34.06 Da,                         | 1366.85148  | 3 | 711.6852 | 142836000 | 159699008 |
| VANNTNEEAGDGTTTATVLR   | P63038 | 0          | n +34.06 Da,                         | 1368.134871 | 2 | 1067.025 | 105544000 | 87977296  |
| GGGVPTDEEQATGLER       | P19536 | 0          | n +28.03 Da,                         | 1369.675192 | 2 | 822.398  | 2.315E+09 | 2.353E+09 |
| AQNLKDLAGR             | O35129 | 0.04617149 | n +42.03 Da,K +34.06 Da,             | 1371.560403 | 2 | 578.3278 | 1.612E+09 | 1.477E+09 |
| SAGSAAAGPVEAAIR        | Q9D8S9 | 0          | n +28.03 Da,                         | 1371.88883  | 3 | 452.5811 | 47262200  | 40892100  |
| SETAPAAPAAPAPAEKTPVK   | P43274 | 0          | n +42.03 Da,n +34.06 Da,K +34.06 Da, | 1372.275749 | 3 | 668.0337 | 816830976 | 669204992 |
| EKEEDEESPGQAKDEL       | P14211 | 0          | n +28.03 Da,K +28.03 Da,             | 1373.241086 | 2 | 1023.454 | 30861800  | 15922000  |

|                        |        |            |                                      |             |   |          |           |           |
|------------------------|--------|------------|--------------------------------------|-------------|---|----------|-----------|-----------|
| SETAAPAAPAPAEKTPVK     | P43274 | 0          | n +42.03 Da,n +34.06 Da,K +34.06 Da, | 1374.913712 | 2 | 1001.547 | 486692992 | 369230016 |
| SGGGVPTDEEQATGLER      | P19536 | 0          | n +34.06 Da,                         | 1376.322497 | 2 | 865.9123 | 1.12E+10  | 1.118E+10 |
| GGVPTDEEQATGLER        | P19536 | 0          | n +34.06 Da,                         | 1376.506314 | 2 | 796.9011 | 2.223E+09 | 1.762E+10 |
| ASGGGVPTDEEQATGLER     | P19536 | 0          | n +14.02 Da,                         | 1377.137153 | 2 | 894.424  | 4.864E+09 | 3.146E+09 |
| DDDEPPPLPR             | O55022 | 0          | n +28.03 Da,                         | 1377.569697 | 2 | 589.7889 | 917497984 | 788150016 |
| GGVPTDEEQATGLER        | P19536 | 0          | n +28.03 Da,                         | 1377.927868 | 2 | 793.885  | 2.11E+09  | 1.651E+10 |
| GVPTDEEQATGLER         | P19536 | 0          | n +28.03 Da,                         | 1382.121429 | 2 | 765.377  | 1.712E+09 | 1.706E+09 |
| TGTPVLGGLSYR           | Q61176 | 0.00991736 | n +28.03 Da,                         | 1382.364341 | 3 | 414.9003 | 281255008 | 271936000 |
| QPGASGDNDDEPPPLPR      | O55022 | 0          | n +28.03 Da,                         | 1382.729429 | 2 | 952.934  | 369833984 | 291622016 |
| SVEIAGTTDGIR           | P41216 | 0          | n +34.06 Da,                         | 1385.509856 | 2 | 623.8346 | 1.214E+09 | 915782016 |
| ATDELASKLSR            | Q9D8Y0 | 0          | n +42.03 Da,K +34.06 Da,             | 1385.565254 | 3 | 420.904  | 940708992 | 1.146E+09 |
| DDDEPPPLPR             | O55022 | 0          | n +28.03 Da,                         | 1387.220283 | 2 | 589.7905 | 764334016 | 2.674E+09 |
| GGTTMYPGIADR           | P60710 | 0          | n +28.03 Da,                         | 1390.907472 | 2 | 633.8119 | 286723008 | 336275008 |
| GSVVEMQGDENR           | O88844 | 0          | n +34.06 Da,                         | 1391.060881 | 2 | 733.8338 | 42079000  | 57380600  |
| ASGGGVPTDEEQATGLER     | P19536 | 0          | n +28.03 Da,                         | 1394.071612 | 2 | 901.432  | 8.578E+10 | 7.223E+10 |
| ASGGGVPTDEEQATGLER     | P19536 | 0          | n +34.06 Da,                         | 1394.84342  | 3 | 601.2896 | 7.43E+09  | 5.378E+09 |
| ATPEASGSSEKVEGSEPSVYYR | Q9CQX2 | 0          | n +42.03 Da,K +34.06 Da,             | 1395.051863 | 3 | 824.3914 | 154831008 | 148828992 |
| ASSIVSGTPIR            | P35505 | 0.00180375 | n +28.03 Da,                         | 1398.051067 | 2 | 607.8592 | 119951000 | 36487800  |
| PSSNDPLTETIR           | P28665 | 0          | n +14.02 Da,                         | 1398.170839 | 2 | 672.3406 | 62706500  | 118163000 |
| DIDTAAKF               | P56383 | 0.01379532 | n +28.03 Da,K +28.03 Da,             | 1399.702875 | 2 | 468.7554 | 132613000 | 100853000 |
| LAQEDPDYGLR            | P24270 | 0          | n +28.03 Da,                         | 1403.312478 | 2 | 652.8277 | 1.149E+10 | 5.091E+09 |
| GGTTMYPGIADR           | P60710 | 0          | n +28.03 Da,                         | 1405.763305 | 2 | 633.8112 | 342696000 | 361468000 |
| SEEALALPR              | P34914 | 0.01173785 | n +28.03 Da,                         | 1408.168511 | 2 | 507.2851 | 1.229E+09 | 379201984 |
| AQNLKDLAGR             | O35129 | 0.04617149 | n +42.03 Da,K +34.06 Da,             | 1410.386033 | 2 | 581.3379 | 390416000 | 342974016 |
| CLFRMSEIQAHAR          | Q9QZC2 | 0.0084317  | n +14.02 Da,                         | 1411.914373 | 2 | 816.8985 | 4.478E+09 | 4.228E+09 |
| TTGIVMDSGDGVTH         | P60710 | 0          | n +34.06 Da,                         | 1414.592179 | 2 | 709.3388 | 3.749E+09 | 1.09E+09  |
| PPILEGAVGGNEAR         | Q6PAR5 | 0.00215363 | n +17.03 Da,                         | 1415.349379 | 2 | 697.3732 | 118219000 | 134744000 |
| ASSIVSGTPIR            | P35505 | 0.00180375 | n +28.03 Da,                         | 1417.406055 | 2 | 601.8319 | 79106704  | 47124700  |
| VGDLSPPQQEALAR         | Q8R0F9 | 0.02056715 | n +34.06 Da,                         | 1418.178062 | 2 | 770.4102 | 66776600  | 58542000  |
| AGAVAADSPGFVEDR        | Q8BUY5 | 0          | n +34.06 Da,                         | 1449.00039  | 2 | 748.3822 | 252756000 | 48671300  |
| PLYSNPPLNGAR           | P05202 | 0.00040437 | n +14.02 Da,                         | 1452.422069 | 2 | 655.3407 | 123686000 | 244606000 |
| SASNVLLHETSAR          | Q8BZ09 | 0          | n +42.03 Da,                         | 1453.400748 | 2 | 717.3603 | 106508000 | 91711104  |
| SSEVPPNINIKEPR         | Q99JR1 | 0          | n +42.03 Da,K +28.03 Da,             | 1455.417615 | 3 | 540.6301 | 2.12E+09  | 1.934E+09 |
| SDPVVIVSAAR            | Q8CAY6 | 0.01432209 | n +28.03 Da,                         | 1455.620876 | 2 | 571.3328 | 2.653E+09 | 1.813E+09 |
| LGVNESLTDAR            | P11725 | 0          | n +28.03 Da,                         | 1456.82181  | 2 | 652.3459 | 168756000 | 157111008 |
| AGAVAADSPGFVEDR        | Q8BUY5 | 0          | n +34.06 Da,                         | 1460.11791  | 2 | 745.3654 | 274145984 | 243148992 |
| AVPPTYADLGKSAR         | Q60932 | 0.00387597 | n +42.03 Da,K +34.06 Da,             | 1465.039386 | 2 | 758.4104 | 237920992 | 203356000 |
| TVDPTGIHDR             | Q922Q1 | 0.00112402 | n +28.03 Da,                         | 1465.597725 | 2 | 615.3222 | 99675696  | 73605200  |
| PNVNPVIVTR             | Q99PT1 | 0.02957151 | n +14.02 Da,                         | 1468.787457 | 2 | 561.8351 | 2.661E+09 | 1.723E+09 |
| PSSNDPLTETIR           | P28665 | 0          | n +14.02 Da,                         | 1468.926058 | 2 | 672.3406 | 2.801E+09 | 1.339E+09 |

|                        |        |            |                                      |             |   |          |           |           |
|------------------------|--------|------------|--------------------------------------|-------------|---|----------|-----------|-----------|
| SVVAGGPEVTLTPER        | Q8CIM3 | 0          | n +34.06 Da,                         | 1471.120394 | 3 | 513.951  | 972260992 | 852771968 |
| TDDLITPTDTR            | Q91YY5 | 0.00040437 | n +34.06 Da,                         | 1473.282836 | 2 | 688.8488 | 241376000 | 285836000 |
| GEVPVVAIR              | P27773 | 0.0184953  | n +28.03 Da,                         | 1474.053622 | 2 | 484.3    | 76491400  | 70936896  |
| MAEETAPAVLER           | Q64374 | 0          | n +34.06 Da,                         | 1475.435817 | 2 | 672.846  | 385859008 | 237128000 |
| FSAQNLDQFQALR          | Q6L8S8 | 0.03111909 | n +14.02 Da,                         | 1479.87559  | 2 | 703.3357 | 44961600  | 38477900  |
| AEGLPDQYADGEAAR        | Q9QXF8 | 0          | n +28.03 Da,                         | 1485.514826 | 2 | 795.8752 | 159702000 | 258602000 |
| AGAVAAADSPGFVEDR       | Q8BUY5 | 0          | n +28.03 Da,                         | 1486.59674  | 2 | 742.3565 | 243124000 | 268164000 |
| ATSASSHLNKGKIQMY       | P15105 | 0          | n +42.03 Da,n +28.03 Da,K +28.03 Da, | 1487.476516 | 3 | 611.9888 | 176936000 | 224960000 |
| ATSASSHLNKGKIQMY       | P15105 | 0          | n +42.03 Da,n +28.03 Da,K +28.03 Da, | 1488.019782 | 3 | 611.9771 | 842675968 | 1.062E+09 |
| MDMGNQHPSISR           | Q8CI32 | 0          | n +42.03 Da,                         | 1489.274672 | 2 | 707.8136 | 129150000 | 27433100  |
| SETAPAAPAAPAPAEKTPVKK  | P43274 | 0          | n +42.03 Da,n +28.03 Da,K +28.03 Da, | 1489.835524 | 3 | 720.063  | 50914800  | 22082200  |
| SSSNDHVLVPMMSQR        | Q7TMS5 | 0          | n +42.03 Da,                         | 1490.634    | 2 | 799.8826 | 1.058E+09 | 402193984 |
| SGEVPPNINIKEPR         | Q99JR1 | 0          | n +42.03 Da,K +28.03 Da,             | 1494.431154 | 3 | 538.6134 | 559011968 | 421632000 |
| AVPPTYADLGKSAR         | Q60932 | 0.0024911  | n +42.03 Da,K +28.03 Da,             | 1495.088929 | 3 | 504.9424 | 165719008 | 285233984 |
| FSAQNLDQFQALR          | Q6L8S8 | 0.03111909 | n +14.02 Da,                         | 1495.194771 | 2 | 712.3801 | 367080992 | 277660000 |
| TAAAVAAQSGILDR         | Q9R112 | 0          | n +28.03 Da,                         | 1496.27602  | 2 | 683.3721 | 3.783E+09 | 3.676E+09 |
| DDMLITGGR              | G3X982 | 0.00112402 | n +28.03 Da,                         | 1497.395719 | 2 | 503.2552 | 166000000 | 287440000 |
| FTEQVVAHAVR            | Q8OUK8 | 0.03928987 | n +17.03 Da,                         | 1498.410518 | 3 | 458.9134 | 76839696  | 93845600  |
| AEVEETLKR              | P62627 | 0.00518852 | n +42.03 Da,K +28.03 Da,             | 1499.451239 | 2 | 572.8144 | 2.024E+10 | 1.821E+10 |
| TPLAQAVEGPSNVR         | Q9CZ13 | 0          | n +28.03 Da,                         | 1502.593948 | 2 | 798.4291 | 2.849E+09 | 2.9E+09   |
| LENIDESAVTESR          | Q9JMD3 | 0          | n +34.06 Da,                         | 1502.714823 | 2 | 745.8745 | 93575600  | 94423696  |
| FVSDSSDSMDTGAGSIR      | O35143 | 0          | n +28.03 Da,                         | 1507.40693  | 2 | 880.3891 | 154308992 | 207548992 |
| AVPPTYADLGKSAR         | Q60932 | 0          | n +42.03 Da,K +34.06 Da,             | 1508.141348 | 3 | 505.943  | 2.308E+09 | 2.059E+09 |
| SALLEQKEQQER           | Q5SUE8 | 0.00112402 | n +42.03 Da,K +28.03 Da,             | 1510.056598 | 2 | 764.9016 | 963323008 | 919825984 |
| ATPEASGSGEKVEGSEPSVYYR | Q9CQX2 | 0          | n +42.03 Da,K +34.06 Da,             | 1511.8759   | 3 | 824.3908 | 4.53E+10  | 4.098E+10 |
| ATPEASGSGEKVEGSEPSVYYR | Q9CQX2 | 0          | n +42.03 Da,K +28.03 Da,             | 1511.972639 | 2 | 1236.083 | 612150976 | 498366016 |
| PDLPEDELAR             | Q9JKR6 | 0.00810537 | n +14.02 Da,                         | 1515.286054 | 2 | 584.7957 | 341480000 | 113482000 |
| TDDLITPTDTR            | Q91YY5 | 0.00040437 | n +28.03 Da,                         | 1516.066259 | 2 | 688.8684 | 60720400  | 479700992 |
| AAPSDPVPASLR           | Q4LDG0 | 0.04479769 | n +28.03 Da,                         | 1518.675509 | 2 | 604.8434 | 329492992 | 382096992 |
| VDHLANTEINSQR          | Q3TB82 | 0          | n +42.03 Da,                         | 1520.905059 | 2 | 768.3733 | 28997600  | 37990800  |
| PAQLPQDPIGR            | O54754 | 0.00112402 | n +17.03 Da,                         | 1521.127042 | 2 | 601.8312 | 473884992 | 401355008 |
| QAVGDLSPQQQEALAR       | Q8R0F9 | 0          | n +34.06 Da,                         | 1523.9985   | 2 | 862.952  | 110200000 | 648873984 |
| TAAAVAAQSGILDR         | Q9R112 | 0          | n +28.03 Da,                         | 1524.965816 | 2 | 686.3829 | 104768000 | 119661000 |
| TSVESIMATEDR           | Q8C196 | 0          | n +28.03 Da,                         | 1527.512673 | 2 | 683.8307 | 161332000 | 176415008 |
| DEVFYSPR               | P11725 | 0.00618132 | n +34.06 Da,                         | 1530.009814 | 2 | 520.7562 | 261992992 | 305376000 |
| GLTDDQVSGPPSAPTEDR     | B8JG3  | 0          | n +34.06 Da,                         | 1531.994264 | 2 | 935.4455 | 96080096  | 172874000 |
| GLNSDSVTEETLR          | Q8C196 | 0          | n +34.06 Da,                         | 1535.123315 | 2 | 724.8635 | 1.325E+09 | 726752000 |
| AGSDPVVIVSAAR          | Q8CAY6 | 0          | n +34.06 Da,                         | 1536.676947 | 2 | 635.3623 | 289377984 | 497247008 |
| AEVEETLKR              | P62627 | 0.0024911  | n +42.03 Da,K +34.06 Da,             | 1537.16596  | 2 | 571.3326 | 67096000  | 98529504  |
| AELTNYKDAASN           | Q8R4U7 | 0          | n +42.03 Da,K +28.03 Da,             | 1553.726429 | 2 | 761.3483 | 110909000 | 107922000 |

|                     |        |            |                          |             |   |          |           |           |
|---------------------|--------|------------|--------------------------|-------------|---|----------|-----------|-----------|
| TPLAQAVEGPSENV      | Q9CZ13 | 0.00146897 | n +28.03 Da,             | 1554.49292  | 3 | 532.6183 | 157962000 | 177960000 |
| METMASPGKDNYR       | O35345 | 0          | n +42.03 Da,K +34.06 Da, | 1555.292636 | 2 | 785.3549 | 498472992 | 643257024 |
| SALLEQKEQQER        | Q5SUE8 | 0.00112402 | n +42.03 Da,K +28.03 Da, | 1555.420334 | 2 | 761.8797 | 560697024 | 465542016 |
| GEPVSLGSLR          | P11352 | 0.00112402 | n +28.03 Da,             | 1556.474193 | 2 | 521.7987 | 163503008 | 207412000 |
| DIDTAAKF            | P56383 | 0.01379532 | n +28.03 Da,K +28.03 Da, | 1556.939287 | 2 | 468.7556 | 197024000 | 211484000 |
| AQDQVELEKSVR        | Q8CAK3 | 0          | n +42.03 Da,K +34.06 Da, | 1559.346308 | 2 | 700.8729 | 5.535E+09 | 5.105E+09 |
| AEVEETLKR           | P62627 | 0.0024911  | n +42.03 Da,K +34.06 Da, | 1560.005677 | 2 | 572.8402 | 207955008 | 3.912E+09 |
| PVADIATLR           | Q9JIY5 | 0.00518852 | n +14.02 Da,             | 1565.520869 | 2 | 485.2899 | 158620000 | 131667000 |
| ADIVENQVMDTR        | P10649 | 0          | n +14.02 Da,             | 1566.367878 | 2 | 702.8429 | 451838016 | 56236000  |
| DPVPTPGPASAQLR      | Q920L1 | 0          | n +34.06 Da,             | 1566.581615 | 2 | 714.3899 | 970697984 | 844348032 |
| ATDELASKLSR         | Q9D8Y0 | 0          | n +42.03 Da,K +28.03 Da, | 1568.337552 | 2 | 630.8436 | 1.548E+09 | 1.086E+09 |
| STGTFVVSQPLNYR      | Q9JLJ2 | 0.00040437 | n +34.06 Da,             | 1568.542452 | 3 | 532.9515 | 136923008 | 133507000 |
| AEGQVLVLDGR         | P19253 | 0          | n +28.03 Da,             | 1569.182604 | 2 | 592.8356 | 2.243E+10 | 1.94E+10  |
| TSNINDFSAGVANR      | P15105 | 0          | n +28.03 Da,             | 1570.078546 | 2 | 747.3701 | 843744000 | 1.07E+09  |
| SDNGELEDKPPAPPVR    | Q8CIN4 | 0          | n +42.03 Da,K +34.06 Da, | 1571.906953 | 2 | 895.9489 | 124692000 | 116237000 |
| FVSSGPTNASAFTR      | P27546 | 0          | n +28.03 Da,             | 1572.728418 | 2 | 799.8952 | 591500032 | 748014976 |
| TAAAVAAQSGILDR      | Q9R112 | 0          | n +28.03 Da,             | 1573.709908 | 2 | 683.3565 | 230764000 | 19615100  |
| SDDLPLNVS           | P08113 | 0.00810537 | n +34.06 Da,             | 1574.016491 | 2 | 572.3031 | 207219008 | 214252000 |
| AVDAPVSSVALR        | Q64374 | 0.01766562 | n +28.03 Da,             | 1574.755355 | 2 | 606.8506 | 200071008 | 138020000 |
| TTGEVPVVAIR         | P27773 | 0.0380117  | n +34.06 Da,             | 1575.760863 | 2 | 586.8431 | 392236992 | 151324000 |
| AAAGAAATDLEVV       | Q6PD26 | 0          | n +28.03 Da,             | 1577.534192 | 2 | 670.3703 | 5.216E+09 | 6.087E+09 |
| LEVSESPGSVQVAR      | POC673 | 0          | n +28.03 Da,             | 1578.205852 | 2 | 743.3953 | 1.132E+09 | 867308032 |
| PDPVPTPGPASAQLR     | Q920L1 | 0          | n +17.03 Da,             | 1584.666276 | 2 | 758.9093 | 538849984 | 353105984 |
| TPATGTPVLGGLSYR     | Q61176 | 0          | n +34.06 Da,             | 1586.988894 | 3 | 506.6157 | 199727008 | 175858000 |
| PTLATDMGTMQER       | P56480 | 0          | n +14.02 Da,             | 1587.299544 | 2 | 732.844  | 292011008 | 162106000 |
| EIPPLEGDEEDASR      | P11499 | 0          | n +28.03 Da,             | 1588.2116   | 2 | 728.3512 | 398112992 | 363560992 |
| VGAENVAIVEPSE       | Q9R112 | 0          | n +28.03 Da,             | 1588.528891 | 2 | 749.3987 | 253667008 | 401720000 |
| ADDDYDEPTDSLDR      | Q8K0E8 | 0          | n +28.03 Da,             | 1595.336411 | 2 | 863.3572 | 541288000 | 513844000 |
| MASGGGVPTDEEQATGLER | P19536 | 0          | n +34.06 Da,             | 1595.942148 | 3 | 644.9703 | 1.819E+09 | 1.539E+09 |
| TGEVPVVAIR          | P27773 | 0          | n +34.06 Da,             | 1597.829635 | 2 | 534.8245 | 464985984 | 398496992 |
| ADIVENQVMDTR        | P10649 | 0          | n +28.03 Da,             | 1602.767381 | 2 | 706.8442 | 95070704  | 5.66E+09  |
| MASGGGVPTDEEQATGLER | P19536 | 0          | n +28.03 Da,             | 1602.849851 | 2 | 966.9515 | 9.515E+09 | 8.001E+09 |
| DPVPTPGPASAQLR      | Q920L1 | 0          | n +28.03 Da,             | 1603.68818  | 3 | 478.5964 | 220308000 | 294256992 |
| ADKEAAFDDAVEER      | Q60972 | 0          | n +42.03 Da,K +34.06 Da, | 1605.025877 | 2 | 818.3768 | 2.284E+09 | 1.129E+09 |
| SVGEVMAIGR          | Q8C196 | 0          | n +28.03 Da,             | 1605.875161 | 2 | 523.7869 | 1.586E+09 | 1.569E+09 |
| TEAAAATGVIGGIR      | P07759 | 0          | n +28.03 Da,             | 1606.177924 | 2 | 650.3412 | 7326350   | 14092600  |
| DPVPTPGPASAQLR      | Q920L1 | 0          | n +34.06 Da,             | 1607.201806 | 2 | 717.3908 | 8.262E+09 | 8.207E+09 |
| LSQQSASGAPVLLR      | Q9DCM0 | 0          | n +28.03 Da,             | 1607.239651 | 2 | 727.92   | 6.948E+09 | 4.07E+09  |
| TTGEVPVVAIR         | P27773 | 0.0380117  | n +34.06 Da,             | 1610.581146 | 2 | 585.3484 | 2.551E+09 | 2.575E+09 |
| PYAVTEAIVR          | P15105 | 0          | n +17.03 Da,             | 1612.159801 | 2 | 568.345  | 5.647E+09 | 5.084E+09 |

|                       |        |            |                          |             |   |          |           |           |
|-----------------------|--------|------------|--------------------------|-------------|---|----------|-----------|-----------|
| STTGEVPVVAIR          | P27773 | 0          | n +28.03 Da,             | 1612.912477 | 2 | 628.865  | 211259008 | 193956000 |
| AAAPFLKH              | Q91W89 | 0.01323007 | n +42.03 Da,K +34.06 Da, | 1613.50758  | 2 | 462.769  | 126279000 | 110182000 |
| SEVASSLVLER           | Q9CYR0 | 0.01204035 | n +34.06 Da,             | 1614.815486 | 2 | 603.3231 | 213975008 | 1.409E+09 |
| TLQGTNTYLVGTGSR       | Q99KR3 | 0          | n +28.03 Da,             | 1618.200859 | 2 | 798.4237 | 181362000 | 285056992 |
| PDPVPTPGPASAQLR       | Q920L1 | 0          | n +17.03 Da,             | 1623.893392 | 2 | 760.3979 | 3.745E+09 | 4.014E+09 |
| MLPDGLSAEDEQR         | Q9CR24 | 0          | n +28.03 Da,             | 1625.669784 | 2 | 744.8526 | 206062000 | 315784992 |
| TMAEETAPAVLER         | Q64374 | 0          | n +28.03 Da,             | 1626.211201 | 2 | 723.3683 | 5.174E+09 | 7.186E+09 |
| SLVIPEKFQH            | P62270 | 0.00488656 | n +42.03 Da,K +34.06 Da, | 1628.898069 | 3 | 423.2397 | 699577984 | 611507968 |
| SEVASSLVLER           | Q9CYR0 | 0          | n +28.03 Da,             | 1630.727396 | 2 | 609.3399 | 7.014E+09 | 6.011E+09 |
| TGGEVPSLGLSLR         | P11352 | 0.00551914 | n +34.06 Da,             | 1631.447904 | 2 | 600.8327 | 2.107E+09 | 2.838E+09 |
| TANLGAGAAQPLR         | P08226 | 0.02080745 | n +28.03 Da,             | 1632.220214 | 2 | 634.3553 | 2.998E+09 | 2.519E+09 |
| DIDTAAKF              | P56383 | 0.01379532 | n +28.03 Da,K +28.03 Da, | 1632.222374 | 2 | 468.7556 | 2.366E+09 | 194684000 |
| AQNLKDLAGR            | O35129 | 0          | n +42.03 Da,K +28.03 Da, | 1636.36711  | 2 | 578.3284 | 2.146E+11 | 1.86E+11  |
| TMAEETAPAVLER         | Q64374 | 0          | n +28.03 Da,             | 1637.063722 | 2 | 721.864  | 165347008 | 753203968 |
| TEAAAATGVIGGIR        | P07759 | 0.00112402 | n +34.06 Da,             | 1639.418555 | 2 | 657.871  | 693625024 | 555390016 |
| MDAQKDVQPPKQPPM       | Q63871 | 0          | n +42.03 Da,K +28.03 Da, | 1639.938419 | 2 | 915.4287 | 308812992 | 140390000 |
| MDASPEPQQKGGTLVLVR    | P58735 | 0.02305564 | n +42.03 Da,n +34.06 Da, | 1642.382368 | 3 | 666.0225 | 1.38E+09  | 1.131E+09 |
| AHATPPSALEQGGPIR      | Q9DBW3 | 0.00040437 | n +42.03 Da,             | 1644.424518 | 2 | 822.4385 | 977332992 | 147251008 |
| PEDTLLENEVR           | Q9EPC1 | 0          | n +17.03 Da,             | 1646.173301 | 2 | 729.3576 | 574542976 | 471191008 |
| VVAGGPEVTLTPER        | Q8CIM3 | 0          | n +28.03 Da,             | 1651.138886 | 2 | 726.9075 | 1.697E+09 | 2.194E+09 |
| AHATPPSALEQGGPIR      | Q9DBW3 | 0.00040437 | n +42.03 Da,             | 1653.662393 | 2 | 822.4332 | 2.08E+09  | 1.301E+09 |
| SEVPGAAAEGPGGSGVGLGDR | Q9EP72 | 0          | n +28.03 Da,             | 1656.491305 | 2 | 934.4611 | 3.701E+09 | 3.256E+09 |
| APDPVPTPGPASAQLR      | Q920L1 | 0          | n +28.03 Da,             | 1656.702142 | 3 | 534.6267 | 197732000 | 158596000 |
| TVLSGGTMYPGIADR       | P60710 | 0.00146897 | n +34.06 Da,             | 1657.639647 | 3 | 556.2879 | 2.116E+09 | 2.127E+09 |
| SEVPGAAAEGPGGSGVGLGDR | Q9EP72 | 0          | n +28.03 Da,             | 1659.165544 | 3 | 623.3079 | 1.411E+09 | 1.392E+09 |
| APDPVPTPGPASAQLR      | Q920L1 | 0          | n +34.06 Da,             | 1660.496531 | 2 | 801.436  | 5.997E+09 | 4.664E+09 |
| TASSVLLHTGQKMPL       | Q9JII6 | 0          | n +42.03 Da,K +28.03 Da, | 1662.122425 | 3 | 551.6401 | 515376000 | 444337984 |
| SGTQTNMNVNEVISNR      | P97807 | 0          | n +28.03 Da,             | 1663.847894 | 2 | 896.4415 | 2.27E+09  | 1.744E+09 |
| ELAEDGYSGVEVR         | P62908 | 0          | n +28.03 Da,             | 1664.01847  | 2 | 717.3018 | 74160496  | 73562600  |
| TVLPEALER             | Q8CI94 | 0.02160494 | n +34.06 Da,             | 1665.415554 | 2 | 528.3087 | 901225024 | 890464000 |
| TSVLDPDEGIR           | Q9CZU6 | 0.00112402 | n +28.03 Da,             | 1666.500644 | 2 | 612.3062 | 164968992 | 240963008 |
| TANLGAGAAQPLR         | P08226 | 0.02080745 | n +28.03 Da,             | 1667.602914 | 2 | 634.3669 | 244276992 | 109694000 |
| PYAVTEAIVR            | P15105 | 0          | n +17.03 Da,             | 1668.84213  | 2 | 566.8219 | 3.893E+09 | 2.907E+09 |
| AEAGDNLGALVR          | Q8BFR5 | 0.04617149 | n +28.03 Da,             | 1670.271506 | 2 | 607.3322 | 279908000 | 275387008 |
| AQNLKDLAGR            | O35129 | 0          | n +42.03 Da,K +34.06 Da, | 1671.21844  | 2 | 577.3048 | 181132992 | 179803008 |
| SSLAIQENANALAR        | Q91Y97 | 0          | n +34.06 Da,             | 1674.117933 | 2 | 743.408  | 645513984 | 444057984 |
| PLTGGEVPSLGLSLR       | P11352 | 0.00180375 | n +14.02 Da,             | 1674.412744 | 3 | 465.2565 | 443944000 | 1.899E+09 |
| AGGPPKALPSTGPQSLR     | Q8CE50 | 0.00112402 | n +42.03 Da,K +28.03 Da, | 1680.481318 | 2 | 852.4767 | 780489024 | 689675008 |
| ASLVPLKEK             | P56135 | 0.02645985 | n +42.03 Da,K +34.06 Da, | 1681.564241 | 2 | 546.3696 | 1.794E+09 | 1.73E+10  |
| TVLSGGTMYPGIADR       | P60710 | 0.0104918  | n +28.03 Da,             | 1682.086437 | 3 | 554.2809 | 577024000 | 623905984 |



|                           |        |            |                          |             |   |          |           |           |
|---------------------------|--------|------------|--------------------------|-------------|---|----------|-----------|-----------|
| SLAIQENANALAR             | Q91Y97 | 0          | n +34.06 Da,             | 1682.562625 | 2 | 696.8683 | 1.098E+09 | 1.716E+09 |
| ASLVPLKEK                 | P56135 | 0.00962496 | n +42.03 Da,K +28.03 Da, | 1684.016279 | 2 | 541.8462 | 2.955E+10 | 2.679E+10 |
| TANLGAGAAQPLR             | P08226 | 0.02080745 | n +28.03 Da,             | 1684.81466  | 2 | 629.844  | 10595900  | 11585100  |
| APDPVPTPGPASAQLR          | Q920L1 | 0          | n +28.03 Da,             | 1686.184097 | 2 | 799.925  | 1.192E+09 | 3.885E+09 |
| ATDMSQGELIHPK             | Q3TEA8 | 0          | n +42.03 Da,K +34.06 Da, | 1687.314311 | 2 | 750.3922 | 34524100  | 183383008 |
| SLAIQENANALAR             | Q91Y97 | 0          | n +34.06 Da,             | 1691.180429 | 2 | 699.8892 | 1.181E+09 | 1.654E+09 |
| AQNLKDLAGR                | O35129 | 0          | n +42.03 Da,K +28.03 Da, | 1691.67789  | 2 | 576.8198 | 239210000 | 114218000 |
| MEPKAPCPAAVPSEER          | Q8BZB2 | 0.00112402 | n +42.03 Da,K +34.06 Da, | 1694.258361 | 2 | 919.9418 | 152856000 | 117775000 |
| LYASVLTAQPR               | P58252 | 0.00962496 | n +28.03 Da,             | 1694.389271 | 2 | 622.3548 | 535945984 | 299105984 |
| SSGALLPKPQMR              | Q9CPQ1 | 0          | n +42.03 Da,K +34.06 Da, | 1694.896964 | 2 | 677.8806 | 3.111E+11 | 2.776E+11 |
| SSGNAKIGYPAPNFKAT         | P35700 | 0.00991736 | n +42.03 Da,K +28.03 Da, | 1696.049106 | 2 | 910.97   | 770720000 | 875256000 |
| VAAEGLPDQYADGEAAR         | Q9QXF8 | 0          | n +34.06 Da,             | 1702.588813 | 2 | 880.9266 | 438308992 | 398060000 |
| AVTQEFQVPVDTAR            | Q99KI0 | 0          | n +28.03 Da,             | 1702.742646 | 2 | 758.3955 | 215972000 | 145424000 |
| TEITVEDQLAR               | Q60932 | 0          | n +34.06 Da,             | 1707.003845 | 2 | 651.8491 | 1.241E+09 | 950300992 |
| GDEAPNFANTTIGR            | O08709 | 0          | n +34.06 Da,             | 1711.353767 | 2 | 810.3851 | 135411008 | 198607008 |
| AASSLEQKLSR               | Q8CE90 | 0.03928987 | n +42.03 Da,K +28.03 Da, | 1711.487943 | 2 | 630.3519 | 882937024 | 669905984 |
| PETSVLILR                 | Q8BHN3 | 0.01491117 | n +14.02 Da,             | 1712.716606 | 2 | 521.3193 | 480272992 | 344416992 |
| AGKPVLYHFDGR              | P30115 | 0.00040437 | n +42.03 Da,K +34.06 Da, | 1714.531739 | 3 | 478.2614 | 79870704  | 592662016 |
| QNYSTEVEAAVNR             | P29391 | 0          | n +28.03 Da,             | 1715.761481 | 2 | 754.8704 | 524111008 | 245983008 |
| AGKPVLYHFDGR              | P30115 | 0          | n +42.03 Da,K +28.03 Da, | 1716.715485 | 3 | 477.2578 | 682860992 | 670491008 |
| VAVLVGSMR                 | P14152 | 0.0380117  | n +34.06 Da,             | 1717.450469 | 2 | 528.8147 | 369464000 | 327056992 |
| TSGLVGGQEETVQEGGLSTR      | P97364 | 0          | n +28.03 Da,             | 1719.139552 | 2 | 1017.009 | 1.265E+09 | 1.436E+09 |
| SVESIMATEDR               | Q8C196 | 0          | n +28.03 Da,             | 1719.482706 | 2 | 627.2815 | 122425000 | 368116992 |
| MQPKVPQLR                 | O88908 | 0.00112402 | n +42.03 Da,K +28.03 Da, | 1719.727378 | 2 | 583.8393 | 9.249E+09 | 8.784E+09 |
| PSSLAIQENANALAR           | Q91Y97 | 0          | n +14.02 Da,             | 1720.068276 | 2 | 780.4    | 55429300  | 2.333E+09 |
| SSVAVLTQESFAEHR           | Q8VDJ3 | 0          | n +42.03 Da,             | 1720.944519 | 2 | 851.9233 | 440057984 | 308771008 |
| VSEGAAMAAGESMAQR          | Q9D8S4 | 0          | n +28.03 Da,             | 1721.103228 | 2 | 840.8859 | 321062016 | 348803008 |
| ASLVPLKEK                 | P56135 | 0.00962496 | n +42.03 Da,K +28.03 Da, | 1722.187382 | 2 | 537.3243 | 943526976 | 1.459E+09 |
| SPESTSEVECGDFYNSGDR       | Q91VA0 | 0          | n +34.06 Da,             | 1722.863456 | 2 | 1082.442 | 576614976 | 589356992 |
| GAQAESLGPLQVAR            | Q9DCW4 | 0          | n +28.03 Da,             | 1724.148808 | 2 | 711.3851 | 17199400  | 61500800  |
| AAAALAAEPAPAVPQAAGSGGPTSR | Q8C0K5 | 0          | n +28.03 Da,             | 1726.039412 | 3 | 739.7267 | 150274000 | 149608000 |
| TDAELDLVSR                | Q922D8 | 0.00040437 | n +28.03 Da,             | 1726.703012 | 2 | 573.8085 | 287294016 | 247918000 |
| ATPEASGSGEKVEGSEPSVTYYR   | Q9CQX2 | 0          | n +42.03 Da,K +28.03 Da, | 1727.551819 | 2 | 1236.082 | 196655008 | 163942000 |
| GAQAESLGPLQVAR            | Q9DCW4 | 0          | n +28.03 Da,             | 1729.174696 | 2 | 712.897  | 73185296  | 44827100  |
| ATEESDLAQQYGVV            | P09103 | 0          | n +34.06 Da,             | 1729.290079 | 2 | 797.8891 | 1.285E+09 | 1.41E+09  |
| MESPAASPPASLPQTKGK        | O09110 | 0          | n +42.03 Da,K +28.03 Da, | 1730.435909 | 3 | 632.3365 | 935305984 | 705489024 |
| ATPEASGSGEKVEGSEPSVTYYR   | Q9CQX2 | 0          | n +42.03 Da,K +28.03 Da, | 1731.46024  | 3 | 824.3904 | 1.282E+09 | 928344000 |
| MELEEGKAGSGLR             | P62196 | 0.02980132 | n +42.03 Da,K +28.03 Da, | 1731.636607 | 2 | 722.378  | 79018096  | 45410500  |
| TMANPIIGNGGAPDPTAR        | Q8C196 | 0          | n +28.03 Da,             | 1732.840161 | 2 | 892.9516 | 381356992 | 451561984 |
| MESPAASPPASLPQTKGK        | O09110 | 0          | n +42.03 Da,K +28.03 Da, | 1733.871919 | 2 | 948.0015 | 262544000 | 194174000 |

|                       |        |            |                                      |             |   |          |           |           |
|-----------------------|--------|------------|--------------------------------------|-------------|---|----------|-----------|-----------|
| ATAVVNIIGKK           | Q9DCL9 | 0.00079777 | n +42.03 Da,n +28.03 Da,K +28.03 Da, | 1735.453447 | 2 | 593.3452 | 251726000 | 182408992 |
| YVLDDSDGLGR           | P54818 | 0.00112402 | n +34.06 Da,                         | 1736.595811 | 2 | 619.306  | 469204992 | 781398016 |
| TIQGLDGLSER           | Q91Y97 | 0          | n +34.06 Da,                         | 1740.416135 | 2 | 608.8305 | 805729024 | 598888000 |
| TDPILSTIR             | Q8VCB3 | 0.02080745 | n +28.03 Da,                         | 1742.530501 | 2 | 522.3081 | 14988600  | 22016200  |
| PAVLQVECHPY           | Q9JII6 | 0          | n +14.02 Da,                         | 1746.004657 | 2 | 663.8378 | 1.566E+09 | 1.319E+09 |
| ANHAPFETDISTLTR       | Q9QXD6 | 0          | n +42.03 Da,                         | 1747.546268 | 2 | 854.9189 | 351112000 | 980449984 |
| ATAVVNIIGKK           | Q9DCL9 | 0.00079777 | n +42.03 Da,n +28.03 Da,K +28.03 Da, | 1748.357621 | 2 | 599.3825 | 100559000 | 119028000 |
| QMREVERQQR            | Q8BRE0 | 0.03732001 | n +28.03 Da,                         | 1749.251068 | 2 | 691.3125 | 104919000 | 77306304  |
| GTSVESIMATEDR         | Q8C196 | 0          | n +34.06 Da,                         | 1750.232797 | 2 | 715.3721 | 218744000 | 62728600  |
| SVESIMATEDR           | Q8C196 | 0          | n +28.03 Da,                         | 1750.790325 | 2 | 633.3057 | 322879008 | 289440000 |
| SEGDSVGDSDVHGKPSVVY   | Q9CQU3 | 0          | n +42.03 Da,K +34.06 Da,             | 1752.865426 | 2 | 944.95   | 108569000 | 68061800  |
| SSGALLPKPQMR          | Q9CPQ1 | 0.02758412 | n +42.03 Da,K +28.03 Da,             | 1756.377367 | 2 | 677.8796 | 226928000 | 253331008 |
| MELEEGKAGSGLR         | P62196 | 0.02980132 | n +42.03 Da,K +28.03 Da,             | 1760.366574 | 2 | 722.3554 | 223196000 | 671352000 |
| FAVTVAPPGAR           | Q8VEK3 | 0.00618132 | n +34.06 Da,                         | 1761.292601 | 2 | 557.3242 | 440115008 | 1.443E+09 |
| MYPPAPPAPHR           | A2AJ15 | 0          | n +42.03 Da,                         | 1767.728972 | 2 | 730.8724 | 5.745E+09 | 5.308E+09 |
| TPAFAESVTEGDVR        | Q9D2G2 | 0          | n +34.06 Da,                         | 1770.347865 | 2 | 753.8759 | 491395008 | 483057984 |
| GVAAEGLPDQYADGEAAR    | Q9QXF8 | 0          | n +28.03 Da,                         | 1771.693218 | 2 | 909.438  | 407161984 | 896694016 |
| TQTTPLVEYYR           | Q9WTP6 | 0.00112402 | n +34.06 Da,                         | 1774.064731 | 2 | 699.8658 | 2.995E+09 | 2.713E+09 |
| TPSYVAFTDTER          | P16627 | 0          | n +34.06 Da,                         | 1774.891308 | 2 | 707.8457 | 1.241E+09 | 1.083E+09 |
| MLKPQPPQTSQPQPPTQAVAR | Q7TQH0 | 0          | n +42.03 Da,K +28.03 Da,             | 1775.363441 | 3 | 951.168  | 391312000 | 355896992 |
| ANHAPFETDISTLTR       | Q9QXD6 | 0          | n +42.03 Da,                         | 1776.119888 | 3 | 572.2848 | 897131008 | 245719008 |
| ESEVASSLVLER          | Q9CYR0 | 0          | n +34.06 Da,                         | 1778.091985 | 2 | 673.8605 | 2.253E+09 | 2.142E+09 |
| ADLEEQLSDEEKVR        | P47754 | 0          | n +42.03 Da,K +28.03 Da,             | 1778.496016 | 3 | 577.6281 | 1.059E+09 | 904115008 |
| MEEAELVKGR            | Q9JHU2 | 0          | n +42.03 Da,K +28.03 Da,             | 1778.795194 | 2 | 614.8063 | 643049984 | 3.247E+09 |
| SEKSVEAAAELSAK        | Q9D0J8 | 0          | n +42.03 Da,K +34.06 Da,             | 1781.845658 | 2 | 763.9299 | 540377024 | 1.306E+09 |
| ATDELASKLSR           | Q9D8Y0 | 0          | n +42.03 Da,K +28.03 Da,             | 1784.643775 | 2 | 630.8437 | 2.925E+10 | 2.583E+10 |
| GTSVESIMATEDR         | Q8C196 | 0          | n +28.03 Da,                         | 1785.73546  | 2 | 712.3397 | 610812032 | 421537984 |
| SATDLTEFAAR           | Q8BWT1 | 0          | n +28.03 Da,                         | 1785.922924 | 2 | 605.3092 | 1.35E+09  | 1.127E+09 |
| QMREVERQQR            | Q8BRE0 | 0.03732001 | n +28.03 Da,                         | 1787.364252 | 2 | 691.3413 | 59834700  | 71047600  |
| AGLNSLEAVKR           | Q6IRU2 | 0          | n +42.03 Da,n +28.03 Da,             | 1788.659724 | 2 | 614.3562 | 1.195E+10 | 1.075E+10 |
| TASSVLLHTGQKMPL       | Q9JII6 | 0          | n +42.03 Da,K +34.06 Da,             | 1790.172365 | 3 | 551.6396 | 1.06E+09  | 959289024 |
| PLIPIVVEQTGR          | O88696 | 0.00146897 | n +17.03 Da,                         | 1790.390497 | 3 | 445.9378 | 901993024 | 607886976 |
| MQESQTKSMFVSR         | A2A5R2 | 0          | n +42.03 Da,K +28.03 Da,             | 1793.736829 | 2 | 814.8911 | 593433984 | 697713984 |
| SVVAGGPEVTLTPER       | Q8CIM3 | 0          | n +34.06 Da,                         | 1794.724514 | 2 | 770.4222 | 11893500  | 17710200  |
| TEAAEVLLER            | Q8QZS1 | 0.00079777 | n +34.06 Da,                         | 1801.169589 | 2 | 579.821  | 1.469E+09 | 4.194E+09 |
| MEEAELVKGR            | Q9JHU2 | 0          | n +42.03 Da,K +28.03 Da,             | 1801.818155 | 2 | 616.3318 | 738731008 | 798139008 |
| VAVDAPVSSVALR         | Q64374 | 0          | n +14.02 Da,                         | 1801.870636 | 2 | 649.3532 | 2.781E+09 | 2.925E+09 |
| AGGEGGVTLGQPHLSR      | Q9Z0N1 | 0          | n +42.03 Da,                         | 1801.89269  | 2 | 786.3883 | 838219008 | 133205000 |
| SVVAGGPEVTLTPER       | Q8CIM3 | 0          | n +28.03 Da,                         | 1804.732431 | 2 | 770.4224 | 1.556E+10 | 9.951E+09 |
| SEPELKLVAR            | P08030 | 0.02957151 | n +42.03 Da,K +28.03 Da,             | 1810.01486  | 2 | 606.3536 | 2.88E+10  | 2.898E+10 |

|                         |        |            |                          |             |   |          |           |           |
|-------------------------|--------|------------|--------------------------|-------------|---|----------|-----------|-----------|
| TDLTEFAAR               | Q8BWT1 | 0.00112402 | n +28.03 Da,             | 1811.286732 | 2 | 526.2747 | 174779008 | 141983008 |
| SIVSTVEPALR             | Q9D0F9 | 0          | n +34.06 Da,             | 1813.918968 | 2 | 600.3524 | 71865696  | 198019008 |
| ASLPPHAGPATPLSPTR       | P21619 | 0          | n +42.03 Da,             | 1813.921723 | 2 | 850.4235 | 188420000 | 716648000 |
| ATVAATTKVPEIR           | Q9WTM5 | 0          | n +42.03 Da,K +34.06 Da, | 1815.36445  | 2 | 713.9169 | 1.825E+10 | 1.629E+10 |
| PTVDQVDDTSIVVR          | P11276 | 0          | n +14.02 Da,             | 1815.387074 | 2 | 779.4073 | 167726000 | 128696000 |
| PALSPTMTMGTVQR          | Q8BMF4 | 0.04904477 | n +14.02 Da,             | 1816.095027 | 2 | 752.3822 | 3.331E+09 | 4.239E+09 |
| EEATGTIQEDYLR           | Q3THE2 | 0.00518852 | n +28.03 Da,             | 1818.120753 | 2 | 772.3631 | 74047400  | 94626600  |
| AVDSLVIPIGR             | Q03265 | 0.01491117 | n +28.03 Da,             | 1819.098341 | 2 | 527.8169 | 118346000 | 96427296  |
| VVVIPAGVPR              | P08249 | 0.04752362 | n +28.03 Da,             | 1823.38046  | 2 | 517.8399 | 763654016 | 838515008 |
| ADLEEQLSDEEKVR          | P47754 | 0          | n +42.03 Da,K +28.03 Da, | 1823.762456 | 3 | 576.6125 | 463262016 | 682966016 |
| DEAPNFEANTTIGR          | O08709 | 0          | n +28.03 Da,             | 1825.479274 | 2 | 781.8753 | 544203008 | 729382976 |
| SSGNAKIGYPAPNFK         | P35700 | 0.00712347 | n +42.03 Da,K +34.06 Da, | 1826.259424 | 2 | 829.4614 | 561713984 | 2.238E+09 |
| AGKPVLYHFDGR            | P30115 | 0          | n +42.03 Da,K +28.03 Da, | 1826.672306 | 3 | 477.2581 | 1.115E+09 | 1.147E+09 |
| SSGNAKIGYPAPNFK         | P35700 | 0          | n +42.03 Da,K +34.06 Da, | 1827.339162 | 3 | 553.3119 | 272284992 | 955080000 |
| ASLPPHAGPATPLSPTR       | P21619 | 0.00112402 | n +42.03 Da,             | 1829.139708 | 2 | 571.3105 | 92183200  | 276576000 |
| VAVDAPVSSVALR           | Q64374 | 0.00180375 | n +28.03 Da,             | 1829.585422 | 2 | 656.3857 | 2.244E+09 | 920652992 |
| PVAVGPGYQSQSPCFDR       | P60603 | 0          | n +14.02 Da,             | 1831.086978 | 2 | 939.9418 | 161647008 | 129361000 |
| SSGNAKIGYPAPNFK         | P35700 | 0.00712347 | n +42.03 Da,K +34.06 Da, | 1833.6663   | 2 | 824.9385 | 2.638E+09 | 2.064E+09 |
| VDLEPGTMDSVR            | P68372 | 0.0184953  | n +34.06 Da,             | 1833.688597 | 2 | 673.8344 | 918108992 | 1.804E+09 |
| AVPPTYADLGKSAR          | Q60932 | 0          | n +42.03 Da,K +28.03 Da, | 1838.248303 | 2 | 758.4124 | 351358016 | 342696000 |
| ASLPPHAGPATPLSPTR       | P21619 | 0.00112402 | n +42.03 Da,             | 1840.789813 | 2 | 571.3097 | 18866100  | 7246960   |
| SEDIPLNLSR              | Q9CQN1 | 0.03983716 | n +34.06 Da,             | 1841.297526 | 2 | 586.3194 | 2.708E+09 | 2.624E+09 |
| AAVPSAVHLPR             | Q3UFF7 | 0          | n +42.03 Da,             | 1842.698991 | 2 | 578.8196 | 9.511E+09 | 8.248E+09 |
| SGEVPPNINIKEPR          | Q99JR1 | 0          | n +42.03 Da,K +34.06 Da, | 1845.26394  | 3 | 540.6302 | 4.071E+09 | 2.532E+09 |
| ATPEASGSGEKVEGSEPSVTYYR | Q9CQX2 | 0          | n +42.03 Da,K +34.06 Da, | 1846.48534  | 2 | 1236.083 | 6.463E+10 | 5.827E+10 |
| SGEVPPNINIKEPR          | Q99JR1 | 0          | n +42.03 Da,K +28.03 Da, | 1847.053306 | 2 | 810.4416 | 4.415E+10 | 3.91E+10  |
| ATPEASGSGEKVEGSEPSVTYYR | Q9CQX2 | 0          | n +42.03 Da,K +34.06 Da, | 1847.103507 | 3 | 824.3908 | 1.161E+11 | 1.042E+11 |
| GLLSQGSPLSWEETQR        | P97494 | 0          | n +34.06 Da,             | 1851.341292 | 3 | 606.9967 | 219268992 | 226283008 |
| LEPTVIDEVR              | P05213 | 0.00146897 | n +34.06 Da,             | 1851.517077 | 2 | 599.8378 | 1.517E+09 | 1.506E+09 |
| TVFSNVTDEMR             | O35945 | 0          | n +34.06 Da,             | 1854.171926 | 2 | 663.8226 | 428427008 | 423312992 |
| APAAIGPYQAVQVDR         | P52760 | 0          | n +34.06 Da,             | 1857.2142   | 2 | 838.938  | 61902500  | 95392600  |
| DDELDETLSEK             | Q9CPQ3 | 0          | n +34.06 Da,             | 1857.784856 | 2 | 678.3321 | 98938000  | 734705984 |
| PSPEAAVVGGNVLTQSQR      | Q8K010 | 0          | n +17.03 Da,             | 1860.45946  | 2 | 843.9518 | 488860000 | 249814000 |
| SSIKVECVLR              | Q64374 | 0.0104918  | n +42.03 Da,K +34.06 Da, | 1864.575944 | 2 | 630.8531 | 1.19E+11  | 1.352E+11 |
| DAETTLTELK              | P05784 | 0          | n +28.03 Da,             | 1864.876317 | 2 | 587.3184 | 340393984 | 203027008 |
| ASLPPHAGPATPLSPTR       | P21619 | 0          | n +42.03 Da,             | 1866.92579  | 2 | 851.9233 | 1.18E+09  | 5.5E+09   |
| AAQESLHVKTPL            | Q8VBT2 | 0          | n +42.03 Da,K +34.06 Da, | 1867.388539 | 2 | 682.3825 | 4.313E+09 | 4.317E+09 |
| DITGEPLIR               | Q9WTP6 | 0.0104918  | n +34.06 Da,             | 1867.75846  | 2 | 521.3008 | 1.021E+09 | 1.012E+09 |
| AVPPTYADLGKSAR          | Q60932 | 0          | n +42.03 Da,K +28.03 Da, | 1868.578476 | 2 | 755.4004 | 23886100  | 146360000 |
| VLAELYVSDR              | Q8BP47 | 0.04960091 | n +28.03 Da,             | 1870.840631 | 2 | 596.8319 | 1.694E+09 | 1.439E+09 |

|                     |        |            |                          |             |   |          |           |           |
|---------------------|--------|------------|--------------------------|-------------|---|----------|-----------|-----------|
| TASSVLLHTGQKMPL     | Q9JII6 | 0          | n +42.03 Da,K +34.06 Da, | 1872.704242 | 2 | 826.9557 | 2.505E+09 | 2.569E+09 |
| TEDPETLQAQFR        | Q8BK48 | 0          | n +28.03 Da,             | 1873.380669 | 2 | 731.8621 | 2.773E+09 | 2.482E+09 |
| SADVSVVSGTLR        | Q8CHT0 | 0          | n +28.03 Da,             | 1873.794182 | 2 | 662.8206 | 163548000 | 40368000  |
| TIAMDGTEGLVR        | P56480 | 0          | n +28.03 Da,             | 1875.356387 | 2 | 645.839  | 1.621E+09 | 536763008 |
| PEQSLDTSLR          | Q91XD4 | 0.00215363 | n +14.02 Da,             | 1875.647042 | 2 | 636.8256 | 236376000 | 204151008 |
| AAVPSAVHLPR         | Q3UFF7 | 0          | n +42.03 Da,             | 1877.502665 | 2 | 578.8189 | 1.601E+09 | 1.578E+10 |
| AVPPTYADLGKSAR      | Q60932 | 0          | n +42.03 Da,K +34.06 Da, | 1878.257838 | 2 | 751.3647 | 48381900  | 1.084E+09 |
| SSIKVECVLR          | Q64374 | 0.01379532 | n +42.03 Da,K +28.03 Da, | 1880.149527 | 2 | 629.3492 | 137936000 | 7.952E+09 |
| SPSVEASDPYADDPPIR   | Q8R086 | 0          | n +28.03 Da,             | 1881.30092  | 2 | 873.9124 | 337704000 | 378356992 |
| PSDSISETVILR        | Q8VDJ3 | 0.00040437 | n +14.02 Da,             | 1882.243674 | 2 | 664.3555 | 28162400  | 59723700  |
| GLLSQGSPLSWEETQR    | P97494 | 0          | n +34.06 Da,             | 1885.863067 | 3 | 605.9797 | 647340992 | 435260000 |
| VAVDAPVSSVALR       | Q64374 | 0          | n +28.03 Da,             | 1886.851239 | 2 | 656.3852 | 1.125E+10 | 4.687E+09 |
| GTLDNPSLDEYAYER     | O35943 | 0          | n +28.03 Da,             | 1887.268726 | 2 | 898.4207 | 3.862E+09 | 4.031E+09 |
| TDTDAELDLVSR        | Q922D8 | 0.03203797 | n +34.06 Da,             | 1888.545138 | 2 | 681.8395 | 36382400  | 54113300  |
| NAVTQEFGPVPDTPAR    | Q99KI0 | 0          | n +28.03 Da,             | 1888.813975 | 2 | 812.3967 | 42110800  | 104493000 |
| PSPEAAVVGGNVLTSQLR  | Q8K010 | 0          | n +14.02 Da,             | 1891.78486  | 3 | 565.9724 | 1.769E+09 | 1.165E+09 |
| LEPTVIDEVR          | P05213 | 0.00146897 | n +34.06 Da,             | 1891.852496 | 2 | 602.85   | 190528000 | 140842000 |
| ADKEAAFDDAVEER      | Q60972 | 0          | n +42.03 Da,K +34.06 Da, | 1892.13406  | 2 | 818.4135 | 1.107E+09 | 1.065E+10 |
| PSPEAAVVGGNVLTSQLR  | Q8K010 | 0          | n +17.03 Da,             | 1895.8654   | 2 | 848.4554 | 685678016 | 527719008 |
| VLSGGTTPYGIADR      | P60710 | 0          | n +28.03 Da,             | 1903.523678 | 2 | 781.8902 | 39241000  | 33482700  |
| TPVPGYMNNTVNTMR     | Q9ET01 | 0          | n +34.06 Da,             | 1903.917958 | 3 | 574.9473 | 492560000 | 513276992 |
| TPVPGYMNNTVNTMR     | Q9ET01 | 0          | n +28.03 Da,             | 1904.473577 | 2 | 861.9179 | 1.054E+09 | 1.104E+09 |
| DLTGEPLIQR          | Q9WTP7 | 0.00079777 | n +34.06 Da,             | 1904.6981   | 2 | 585.33   | 344614016 | 433831008 |
| AAVPSAVHLPR         | Q3UFF7 | 0          | n +42.03 Da,             | 1905.727834 | 2 | 575.8129 | 216863008 | 9.655E+09 |
| AAAFHPGLAAAASAR     | P05202 | 0.01022765 | n +42.03 Da,             | 1910.602045 | 2 | 710.8605 | 987196032 | 1.785E+09 |
| AKTEEMVQTEEMETPR    | Q60739 | 0          | n +42.03 Da,K +28.03 Da, | 1912.373843 | 2 | 989.9569 | 318043008 | 320756000 |
| TASSVLLHTGQKMPL     | Q9JII6 | 0          | n +42.03 Da,K +28.03 Da, | 1914.774371 | 3 | 551.6396 | 6.197E+09 | 5.903E+09 |
| MASGGGVPTDEEQATGLER | P19536 | 0          | n +42.03 Da,             | 1915.018211 | 2 | 973.9412 | 401896000 | 406553984 |
| MENQLTKSVEER        | Q9DC50 | 0          | n +42.03 Da,K +34.06 Da, | 1917.659965 | 2 | 767.3814 | 4.508E+10 | 3.511E+10 |
| ADKEAAFDDAVEER      | Q60972 | 0          | n +42.03 Da,K +28.03 Da, | 1919.325031 | 3 | 545.9207 | 1.312E+09 | 965350016 |
| AGQSDKDKVYYTLE      | P56395 | 0.02056715 | n +42.03 Da,K +34.06 Da, | 1921.036239 | 2 | 862.4548 | 364132000 | 3.424E+09 |
| ADKEAAFDDAVEER      | Q60972 | 0          | n +42.03 Da,K +34.06 Da, | 1921.052615 | 2 | 819.9118 | 1.161E+10 | 1.098E+10 |
| SADVSVVSGTLR        | Q8CHT0 | 0          | n +34.06 Da,             | 1921.098286 | 2 | 667.3511 | 2.501E+09 | 2.695E+09 |
| ALETVPKDLR          | P63271 | 0.00079777 | n +42.03 Da,K +28.03 Da, | 1921.393305 | 2 | 606.3534 | 5.222E+09 | 4.296E+09 |
| STGTFVVSQPLNYR      | Q9JLJ2 | 0          | n +34.06 Da,             | 1921.523121 | 2 | 794.4008 | 74949800  | 111351000 |
| PFVELETNLPASR       | O35215 | 0          | n +17.03 Da,             | 1921.75205  | 2 | 743.9032 | 224808992 | 127903000 |
| EEDATLNLNAINR       | Q91Y97 | 0          | n +28.03 Da,             | 1922.050815 | 2 | 750.9031 | 44534500  | 50001500  |
| STGTFVVSQPLNYR      | Q9JLJ2 | 0          | n +34.06 Da,             | 1922.595414 | 2 | 801.9336 | 62112200  | 23793000  |
| ASLPPHAGPATPLSPTR   | P21619 | 0          | n +42.03 Da,             | 1922.796253 | 2 | 854.943  | 80206000  | 748355008 |
| SGEVPPNINIKEPR      | Q99JR1 | 0          | n +42.03 Da,K +34.06 Da, | 1925.631998 | 2 | 810.4413 | 3.041E+10 | 2.56E+10  |

|                                 |        |            |                          |             |   |          |           |           |
|---------------------------------|--------|------------|--------------------------|-------------|---|----------|-----------|-----------|
| TQVEGDEEAALLER                  | D3Z6I7 | 0          | n +34.06 Da,             | 1926.119374 | 2 | 797.4109 | 1.524E+09 | 1.075E+09 |
| GTAEMSSILEER                    | Q03265 | 0          | n +34.06 Da,             | 1928.509826 | 2 | 675.8311 | 937049984 | 990604992 |
| SQGDSNPAAIPHAAEDIQGDDR          | Q61206 | 0          | n +42.03 Da,             | 1929.170496 | 2 | 1153.518 | 322067008 | 42916400  |
| PILNALEVQGR                     | P56480 | 0          | n +14.02 Da,             | 1930.625008 | 2 | 609.3472 | 195043008 | 286473984 |
| SGIPETVPLSTVNR                  | Q8VCHO | 0          | n +34.06 Da,             | 1931.905307 | 2 | 749.4156 | 363011008 | 244679008 |
| ADKEAAFDDAVEER                  | Q60972 | 0          | n +42.03 Da,K +28.03 Da, | 1933.506669 | 2 | 818.3775 | 1.879E+10 | 1.594E+10 |
| DLTGEPLIQR                      | Q9WTP7 | 0.00079777 | n +34.06 Da,             | 1935.638398 | 2 | 585.3481 | 4.872E+09 | 4.85E+09  |
| AVTLDKDAYYR                     | Q920B9 | 0          | n +42.03 Da,K +28.03 Da, | 1937.199924 | 2 | 691.3515 | 36185800  | 406680000 |
| EPILAFSQGSPER                   | Q8CHT0 | 0          | n +28.03 Da,             | 1942.32684  | 2 | 729.8846 | 194075008 | 218764000 |
| MDDREDLVYQAK                    | P62259 | 0.03084756 | n +42.03 Da,K +28.03 Da, | 1942.492762 | 2 | 776.8681 | 4.344E+09 | 4.74E+09  |
| AVPPTYADLGKSAR                  | Q60932 | 0          | n +42.03 Da,K +28.03 Da, | 1943.910659 | 2 | 758.4127 | 3.348E+11 | 3.15E+11  |
| PEDFADEQSLVGR                   | Q9EQH3 | 0          | n +14.02 Da,             | 1947.710765 | 2 | 738.852  | 1.843E+09 | 1.313E+09 |
| STSPAFAEVLR                     | Q9CY28 | 0          | n +28.03 Da,             | 1948.064951 | 2 | 603.3286 | 345280000 | 353096992 |
| TNLSGRSDKLR                     | Q8CGY6 | 0.02160494 | n +28.03 Da,K +28.03 Da, | 1949.149159 | 2 | 651.8866 | 2.544E+09 | 136972992 |
| GTAEMSSILEER                    | Q03265 | 0          | n +34.06 Da,             | 1949.336136 | 2 | 678.8631 | 163138000 | 131784000 |
| TTIQGLDGLSER                    | Q91Y97 | 0          | n +34.06 Da,             | 1949.622778 | 2 | 659.354  | 7.6E+09   | 7.143E+09 |
| PLTGGEPVSLGSLR                  | P11352 | 0          | n +14.02 Da,             | 1950.419581 | 2 | 695.8746 | 1.706E+09 | 664656000 |
| SGEVPPNINIKEPR                  | Q99JR1 | 0          | n +42.03 Da,K +34.06 Da, | 1950.46187  | 3 | 540.6302 | 708316032 | 499996000 |
| PGASLPLNLK                      | Q05920 | 0.01265002 | n +14.02 Da,K +28.03 Da, | 1950.695637 | 2 | 573.3551 | 562708992 | 4.975E+09 |
| DATLNLNAINR                     | Q91Y97 | 0          | n +34.06 Da,             | 1952.137415 | 2 | 624.8513 | 6.395E+09 | 6.508E+09 |
| PITGESVLSAEAVR                  | Q571F8 | 0          | n +14.02 Da,             | 1955.173288 | 2 | 715.8722 | 103847000 | 170847008 |
| TNLSGRSDKLR                     | Q8CGY6 | 0.02160494 | n +28.03 Da,K +28.03 Da, | 1956.34415  | 2 | 648.8709 | 1.688E+10 | 1.524E+10 |
| AAGGDVVKLSTLGGESGGDGSPPGAGATAAR | Q80UU9 | 0          | n +42.03 Da,K +28.03 Da, | 1957.615247 | 3 | 958.4546 | 588326976 | 503663008 |
| TQVEGDEEAALLER                  | D3Z6I7 | 0.00040437 | n +28.03 Da,             | 1957.687743 | 2 | 793.4087 | 1.789E+09 | 969072000 |
| TNLSGRSDKLR                     | Q8CGY6 | 0.02160494 | n +28.03 Da,K +28.03 Da, | 1957.795724 | 2 | 651.8863 | 557406976 | 351315008 |
| EMTSLSEYVSR                     | P11499 | 0          | n +28.03 Da,             | 1960.019843 | 2 | 665.3207 | 334776000 | 328225984 |
| TSVESIMATEDR                    | Q8C196 | 0          | n +28.03 Da,             | 1961.200386 | 2 | 683.8294 | 1.131E+10 | 1.225E+10 |
| ATVDLEKLR                       | P12382 | 0.00488656 | n +42.03 Da,K +34.06 Da, | 1962.966432 | 2 | 557.8273 | 2.143E+10 | 2.016E+10 |
| IPEEDIISR                       | P01027 | 0.00586207 | n +34.06 Da,             | 1963.080647 | 2 | 606.8454 | 373951008 | 419270016 |
| SEEDATLNLNAINR                  | Q91Y97 | 0          | n +28.03 Da,             | 1963.880904 | 3 | 529.937  | 107962000 | 120026000 |
| DATLNLNAINR                     | Q91Y97 | 0          | n +34.06 Da,             | 1965.170851 | 2 | 621.844  | 338643008 | 338433984 |
| TQVEGDEEAALLER                  | D3Z6I7 | 0          | n +34.06 Da,             | 1966.286864 | 2 | 794.4016 | 3.676E+09 | 3.569E+09 |
| PSVAGLETIPTATGR                 | Q71KT5 | 0          | n +17.03 Da,             | 1967.873023 | 2 | 742.4092 | 901777984 | 441096992 |
| AQDLSEKELLR                     | Q61017 | 0          | n +42.03 Da,K +28.03 Da, | 1969.080023 | 2 | 686.3759 | 601929024 | 465257984 |
| AVDITYIPVPTR                    | Q8BFR5 | 0.01354402 | n +34.06 Da,             | 1970.491882 | 2 | 630.3481 | 592100992 | 340379008 |
| VTGAPVPAVSEPQDGDDFQSR           | Q924T2 | 0          | n +34.06 Da,             | 1970.756435 | 2 | 1100.528 | 168232992 | 110943000 |
| ANHAPFETDISTLTR                 | Q9QXD6 | 0          | n +42.03 Da,             | 1971.115003 | 3 | 572.2849 | 1.27E+09  | 31874900  |
| SQAEFDKAAEEVK                   | P31786 | 0.00040437 | n +42.03 Da,K +28.03 Da, | 1972.653645 | 2 | 775.3897 | 468766016 | 384968992 |
| AATEPELLEDEDAKR                 | Q9QYI3 | 0          | n +42.03 Da,K +28.03 Da, | 1977.204796 | 2 | 878.9337 | 396812000 | 290839008 |
| VTGAPVPAVSEPQDGDDFQSR           | Q924T2 | 0          | n +34.06 Da,             | 1978.975733 | 3 | 734.021  | 897064000 | 664926976 |

|                      |        |            |                                      |             |   |          |           |           |
|----------------------|--------|------------|--------------------------------------|-------------|---|----------|-----------|-----------|
| SSQVSDGAAAVLLAR      | Q8VCHO | 0          | n +34.06 Da,                         | 1979.856118 | 3 | 491.6056 | 34845600  | 29599700  |
| STAPVGGGSFPTITPR     | Q922R8 | 0          | n +28.03 Da,                         | 1981.614983 | 2 | 785.417  | 155659008 | 301120000 |
| SSAPTTPPSVDKVDGFSR   | Q61151 | 0          | n +42.03 Da,K +34.06 Da,             | 1983.147205 | 2 | 959.4827 | 862854976 | 812945024 |
| IDEIVLVGGSTR         | P20029 | 0.02758412 | n +34.06 Da,                         | 1985.913206 | 2 | 643.87   | 469300000 | 408516000 |
| SDPTGTAYGASIPLAR     | Q8R086 | 0          | n +34.06 Da,                         | 1990.585859 | 1 | 802.9118 | 110703000 | 30508500  |
| TSVESIMATEDR         | Q8C196 | 0          | n +34.06 Da,                         | 1991.799738 | 2 | 686.8504 | 180652992 | 171239008 |
| PATGTPVLGGLSYR       | Q61176 | 0          | n +14.02 Da,                         | 1994.344073 | 2 | 697.3627 | 120880000 | 783422016 |
| PDQALQQLDR           | Q3KNM2 | 0          | n +14.02 Da,                         | 1995.380614 | 2 | 664.8341 | 853507008 | 806014976 |
| AGQSDKDKVYYTLEE      | P56395 | 0.02080745 | n +42.03 Da,K +28.03 Da,             | 1996.036421 | 2 | 922.4505 | 1.07E+09  | 963129024 |
| PGVTVKDVNQEFVR       | Q9CZX8 | 0          | n +14.02 Da,K +28.03 Da,             | 1996.664636 | 2 | 876.4681 | 479064000 | 405265984 |
| EQEVSDNELQELSTQGSR   | Q06890 | 0          | n +34.06 Da,                         | 1999.040885 | 2 | 1038.987 | 121613000 | 98915696  |
| ATSASSHLNKGIKQMY     | P15105 | 0.01432209 | n +42.03 Da,n +28.03 Da,K +28.03 Da, | 2003.975215 | 3 | 611.9775 | 2.011E+10 | 2.452E+10 |
| SAAEEVDGLGVVVRPH     | Q9JKF1 | 0          | n +42.03 Da,                         | 2004.246825 | 2 | 789.3974 | 515206016 | 379190016 |
| SPDFTNENPLETR        | Q8VDN2 | 0          | n +34.06 Da,                         | 2004.56013  | 2 | 774.3686 | 2.247E+09 | 1.847E+09 |
| PSTGALPFQSLR         | A2AS89 | 0          | n +14.02 Da,                         | 2009.144129 | 2 | 639.8256 | 193063008 | 228054000 |
| TEADVNPAYPLADAH      | Q9D0T1 | 0.02416641 | n +42.03 Da,K +28.03 Da,             | 2009.918943 | 2 | 891.4389 | 5.902E+09 | 5.339E+09 |
| VLSSMTDAVLAR         | P11725 | 0          | n +28.03 Da,                         | 2010.662692 | 2 | 645.858  | 2.023E+09 | 565088000 |
| TEADVNPAYPLADAH      | Q9D0T1 | 0          | n +42.03 Da,K +34.06 Da,             | 2011.273824 | 3 | 594.6287 | 1.024E+09 | 899054976 |
| PAQPMDENEFIDASR      | P26231 | 0          | n +14.02 Da,                         | 2013.365276 | 2 | 867.3921 | 376649984 | 305343008 |
| ILGADTSVDLEETGR      | Q03265 | 0          | n +14.02 Da,                         | 2018.131276 | 2 | 792.3886 | 585006016 | 631606016 |
| LGDEAPNFEANTTIGR     | O08709 | 0          | n +34.06 Da,                         | 2020.10706  | 2 | 868.4417 | 159255008 | 136654000 |
| DLSPTTVMSEGTR        | Q923D2 | 0.00112402 | n +28.03 Da,                         | 2020.763309 | 2 | 709.8437 | 69765000  | 141726000 |
| TAPVGGGSFPTITPR      | Q922R8 | 0          | n +34.06 Da,                         | 2023.231282 | 2 | 743.4057 | 548585984 | 471035008 |
| VSEPTTVPFDVR         | Q9CPT4 | 0          | n +28.03 Da,                         | 2025.24515  | 2 | 687.867  | 1.313E+10 | 1.293E+10 |
| SGEVPPNINIKEPR       | Q99JR1 | 0          | n +42.03 Da,K +28.03 Da,             | 2029.017431 | 2 | 810.4416 | 1.135E+10 | 9.026E+09 |
| SDASQPLESQNFSPVVR    | Q99K67 | 0          | n +34.06 Da,                         | 2034.432968 | 2 | 944.9743 | 99716096  | 71159696  |
| ASKEMFEDTVEER        | Q60973 | 0.01078079 | n +42.03 Da,K +28.03 Da,             | 2039.060271 | 2 | 820.8775 | 6.212E+09 | 5.706E+09 |
| GEALSTLVLNR          | P63038 | 0          | n +34.06 Da,                         | 2041.638884 | 2 | 600.8511 | 1.456E+09 | 1.337E+09 |
| SAGFLQASASDVVVVHGR   | Q8VCHO | 0          | n +34.06 Da,                         | 2042.428265 | 3 | 609.9955 | 114183000 | 89819000  |
| TPATGTPVLGGLSYR      | Q61176 | 0          | n +28.03 Da,                         | 2046.951772 | 3 | 506.6158 | 506844000 | 506968992 |
| SDVLELTDENFESR       | P27773 | 0.00962496 | n +28.03 Da,                         | 2047.252251 | 3 | 561.269  | 4.445E+09 | 3.8E+09   |
| TPNLSPEEQQLAR        | Q8VC12 | 0          | n +28.03 Da,                         | 2048.574829 | 2 | 812.9309 | 2.255E+09 | 867307008 |
| AVPPTYADLGKSAR       | Q60932 | 0          | n +42.03 Da,K +34.06 Da,             | 2049.664846 | 2 | 759.9203 | 10668300  | 199708000 |
| GPVVIGSTSAPGQGGILAQR | Q9CPW5 | 0          | n +34.06 Da,                         | 2050.063837 | 2 | 947.0312 | 1.235E+09 | 1.302E+09 |
| GPVVIGSTSAPGQGGILAQR | Q9CPW5 | 0          | n +28.03 Da,                         | 2050.942492 | 3 | 631.6901 | 3.456E+09 | 3.592E+09 |
| AAPAKGENLSLVVHGPDIR  | Q64442 | 0.0024911  | n +42.03 Da,K +28.03 Da,             | 2051.349366 | 3 | 691.0479 | 2.467E+09 | 2.333E+09 |
| VLSSMTDAVLAR         | P11725 | 0          | n +28.03 Da,                         | 2058.646743 | 2 | 644.3552 | 3.185E+09 | 2.631E+09 |
| TPPQEDAPSVDIANIR     | P40142 | 0          | n +28.03 Da,                         | 2064.992351 | 3 | 584.304  | 425704000 | 527552992 |
| TGTAEMSSILEER        | Q03265 | 0          | n +34.06 Da,                         | 2066.029702 | 2 | 726.3558 | 6.218E+09 | 7.799E+09 |
| PGVTVKDVNQEFVR       | Q9CZX8 | 0          | n +28.03 Da,K +28.03 Da,             | 2066.686242 | 3 | 589.3074 | 84770800  | 10474200  |

|                       |        |            |                          |             |   |          |           |           |
|-----------------------|--------|------------|--------------------------|-------------|---|----------|-----------|-----------|
| PSTGALPFQSLR          | A2AS89 | 0          | n +14.02 Da,             | 2067.434296 | 2 | 638.3096 | 599646016 | 183783008 |
| STGTFVVSQPLNYR        | Q9JLJ2 | 0          | n +34.06 Da,             | 2067.444613 | 2 | 795.9207 | 88761696  | 67787000  |
| PLTGGEVPSLGLSLR       | P11352 | 0.01969365 | n +14.02 Da,             | 2067.749833 | 2 | 697.4122 | 2.633E+09 | 2.116E+09 |
| PGVTVKDVNQQEFVR       | Q9CZX8 | 0          | n +28.03 Da,K +28.03 Da, | 2068.325706 | 2 | 883.4552 | 1.647E+09 | 386740992 |
| SAKAISEQTGKELL        | Q91V92 | 0.01379532 | n +42.03 Da,K +34.06 Da, | 2068.471375 | 2 | 791.4719 | 417908992 | 2.343E+09 |
| PMFIVNTNVPR           | P34884 | 0          | n +14.02 Da,             | 2070.56287  | 2 | 651.3382 | 104719000 | 105037000 |
| SSQVSDGAAAVLLAR       | Q8VCHO | 0.00079777 | n +34.06 Da,             | 2074.529021 | 3 | 491.6073 | 910649024 | 733688000 |
| ELSSPVTFPDGR          | O35728 | 0.00962496 | n +28.03 Da,             | 2076.599774 | 2 | 666.8439 | 273003008 | 183323008 |
| PPASVVVGPVVVPR        | P29699 | 0          | n +17.03 Da,             | 2077.479166 | 2 | 693.9275 | 4.801E+09 | 5.476E+09 |
| SDVLELTDENFESR        | P27773 | 0.00962496 | n +28.03 Da,             | 2080.127363 | 3 | 561.269  | 764747008 | 1.46E+09  |
| SSQVSDGAAAVLLAR       | Q8VCHO | 0          | n +28.03 Da,             | 2081.927739 | 2 | 736.9071 | 1.369E+10 | 1.051E+10 |
| ASGADSKGDDLSTAILK     | Q01853 | 0          | n +42.03 Da,K +34.06 Da, | 2082.987    | 3 | 582.9772 | 1.334E+09 | 1.224E+09 |
| TPPQEDAPSVDIANIR      | P40142 | 0          | n +28.03 Da,             | 2083.660525 | 2 | 584.3017 | 132678000 | 143624000 |
| PNPDDPLVPEIAR         | P61079 | 0          | n +17.03 Da,             | 2084.009297 | 2 | 720.8865 | 666289984 | 376052992 |
| ASGADSKGDDLSTAILK     | Q01853 | 0.00112402 | n +42.03 Da,K +28.03 Da, | 2084.968303 | 2 | 873.9598 | 2.286E+09 | 1.628E+09 |
| DFTNENPLETR           | Q8VDN2 | 0          | n +28.03 Da,             | 2087.382731 | 2 | 682.3288 | 32014600  | 13677500  |
| GGVIAGSPAPPELIR       | Q8VCW8 | 0          | n +28.03 Da,             | 2088.044553 | 2 | 731.4253 | 868278976 | 409415008 |
| MEKVPGDMEIER          | Q9CX80 | 0.00488656 | n +42.03 Da,K +28.03 Da, | 2089.314225 | 2 | 752.3623 | 2.213E+09 | 2.441E+09 |
| AVPPTYADLGKSAR        | Q60932 | 0          | n +42.03 Da,K +34.06 Da, | 2090.199111 | 2 | 758.412  | 1.81E+10  | 1.725E+10 |
| DFTNENPLETR           | Q8VDN2 | 0          | n +34.06 Da,             | 2090.808824 | 2 | 682.3275 | 293700000 | 329083008 |
| STNTDLSLSSYDEGQGSKFIR | Q9JLR9 | 0          | n +42.03 Da,K +34.06 Da, | 2091.100645 | 3 | 792.3839 | 498300000 | 568720000 |
| PGVTVKDVNQQEFVR       | Q9CZX8 | 0          | n +28.03 Da,K +28.03 Da, | 2091.202526 | 2 | 886.4716 | 2.829E+09 | 2.335E+09 |
| TTFNVQDGPDPFQDR       | P97493 | 0          | n +34.06 Da,             | 2095.946337 | 2 | 834.3875 | 1.675E+10 | 1.542E+10 |
| PPILNALEVQGR          | P56480 | 0          | n +14.02 Da,             | 2096.555489 | 2 | 656.3545 | 18232400  | 157063008 |
| PGVTVKDVNQQEFVR       | Q9CZX8 | 0          | n +28.03 Da,K +28.03 Da, | 2097.578645 | 3 | 591.3205 | 124944000 | 98925400  |
| PEGSFVDYQTTMVR        | P26039 | 0          | n +17.03 Da,             | 2100.29844  | 2 | 822.3915 | 173006000 | 408680992 |
| STGTFVVSQPLNYR        | Q9JLJ2 | 0          | n +28.03 Da,             | 2100.417767 | 2 | 798.9226 | 904209024 | 962312000 |
| AAPAKGENLSLVVHGPGD    | Q64442 | 0.00112402 | n +42.03 Da,K +28.03 Da, | 2101.328531 | 2 | 598.3102 | 792913024 | 831345024 |
| SGGPVDIGPEYQQDLDR     | P97450 | 0          | n +28.03 Da,             | 2103.498356 | 2 | 937.4512 | 210399008 | 170518000 |
| TVLSGGTTMYPGIADR      | P60710 | 0          | n +34.06 Da,             | 2107.997071 | 3 | 556.2877 | 1.909E+09 | 1.698E+09 |
| SRRPALAKRYDR          | P86174 | 0.0380117  | n +42.03 Da,K +34.06 Da, | 2108.527698 | 2 | 782.9569 | 1.729E+09 | 1.62E+09  |
| PNPDDPLVPEIAR         | P61079 | 0          | n +17.03 Da,             | 2110.318081 | 2 | 723.8833 | 4.795E+09 | 3.847E+09 |
| TVLSGGTTMYPGIADR      | P60710 | 0          | n +28.03 Da,             | 2115.756333 | 2 | 833.9276 | 1.592E+10 | 1.304E+10 |
| IAATILTSPDLR          | P05202 | 0          | n +14.02 Da,             | 2115.886432 | 2 | 638.3537 | 15006900  | 146095008 |
| STGTFVVSQPLNYR        | Q9JLJ2 | 0          | n +28.03 Da,             | 2116.028469 | 2 | 797.4234 | 517617984 | 6.446E+09 |
| STGTFVVSQPLNYR        | Q9JLJ2 | 0          | n +34.06 Da,             | 2116.197723 | 2 | 801.9387 | 2.595E+09 | 112438000 |
| STGTFVVSQPLNYR        | Q9JLJ2 | 0          | n +28.03 Da,             | 2117.076925 | 3 | 532.9513 | 477524992 | 506124992 |
| TSQIRQNYSTEVEAAVNR    | P29391 | 0.02980132 | n +42.03 Da,             | 2117.856997 | 2 | 1054.529 | 3.905E+09 | 2.97E+09  |
| PMFIVNTNVPR           | P34884 | 0          | n +14.02 Da,             | 2119.662943 | 3 | 434.5728 | 140042000 | 114197000 |
| PMFIVNTNVPR           | P34884 | 0          | n +14.02 Da,             | 2122.297971 | 2 | 651.3559 | 3.838E+10 | 2.759E+10 |

|                     |        |            |                          |             |   |          |           |           |
|---------------------|--------|------------|--------------------------|-------------|---|----------|-----------|-----------|
| TFVVSQPLNYR         | Q9JLJ2 | 0.00488656 | n +28.03 Da,             | 2122.950604 | 2 | 673.3589 | 1.126E+09 | 445809984 |
| AQQAADKYLVDKN       | Q8VDD5 | 0          | n +42.03 Da,K +34.06 Da, | 2123.699097 | 2 | 865.9387 | 2.165E+09 | 1.773E+09 |
| SGEVPPNINIKEPR      | Q99JR1 | 0          | n +42.03 Da,K +28.03 Da, | 2123.855535 | 2 | 810.4416 | 3.368E+09 | 2.4E+09   |
| ANHAPFETDISTLTR     | Q9QXD6 | 0          | n +42.03 Da,             | 2124.283041 | 2 | 856.4296 | 26955400  | 302195008 |
| ALHVPKAPGFAQ        | P42932 | 0.0028399  | n +42.03 Da,K +34.06 Da, | 2126.519825 | 3 | 656.3715 | 58597600  | 29439800  |
| SGDPVNYVDTAVR       | P62908 | 0          | n +34.06 Da,             | 2130.927056 | 2 | 792.388  | 226055008 | 216947008 |
| ATVQSVLLDSAGR       | Q64FW2 | 0          | n +42.03 Da,             | 2132.325742 | 2 | 679.8693 | 433147008 | 290252992 |
| TAGNSSQVSDGAAVLLAR  | Q8VCH0 | 0          | n +34.06 Da,             | 2132.74585  | 2 | 908.4848 | 383104000 | 251039008 |
| SQVSDGAAVLLAR       | Q8VCH0 | 0          | n +28.03 Da,             | 2134.154864 | 2 | 693.3912 | 977744000 | 730291008 |
| AQQAADKYLVDKN       | Q8VDD5 | 0          | n +42.03 Da,K +34.06 Da, | 2142.579566 | 2 | 867.4715 | 1.645E+09 | 5.958E+09 |
| IAATILTSPDLR        | P05202 | 0          | n +28.03 Da,             | 2143.75689  | 2 | 649.8869 | 2.203E+09 | 125659000 |
| AQQAADKYLVDKN       | Q8VDD5 | 0          | n +42.03 Da,K +28.03 Da, | 2144.39346  | 3 | 573.6188 | 1.048E+10 | 1.222E+09 |
| AQQAADKYLVDKN       | Q8VDD5 | 0          | n +42.03 Da,K +28.03 Da, | 2149.449026 | 2 | 859.9215 | 2.686E+09 | 8.345E+09 |
| PIMVDDIMR           | Q8WUR0 | 0.00040437 | n +17.03 Da,             | 2158.105186 | 2 | 552.2831 | 2.531E+09 | 1.566E+09 |
| FSEGNQEVDAISR       | Q91XD4 | 0          | n +28.03 Da,             | 2158.414436 | 2 | 853.9171 | 484553984 | 425633984 |
| FADGDVDAVLSR        | Q8R0Y6 | 0.00112402 | n +28.03 Da,             | 2160.388722 | 2 | 646.8322 | 5.49E+09  | 5.537E+09 |
| AADTIGYPVMIR        | Q8C196 | 0          | n +34.06 Da,             | 2163.325183 | 2 | 670.8627 | 1.057E+09 | 787212032 |
| VSYPHISPAR          | G3X982 | 0.02160494 | n +28.03 Da,             | 2163.516576 | 2 | 622.3737 | 613240000 | 455524000 |
| ALHVPKAPGFAQ        | P42932 | 0.0028399  | n +42.03 Da,K +34.06 Da, | 2165.462289 | 2 | 653.3692 | 2.521E+09 | 2.418E+09 |
| PNVTDIVSIAR         | Q8CHR6 | 0          | n +14.02 Da,             | 2165.982084 | 2 | 599.8428 | 222387008 | 77838496  |
| ELPDGQVITIGNER      | P60710 | 0          | n +34.06 Da,             | 2166.402605 | 2 | 784.9181 | 576265024 | 451604992 |
| PLTGGEVPSLGLSLR     | P11352 | 0          | n +28.03 Da,             | 2168.900887 | 2 | 702.8659 | 223231008 | 158308992 |
| PMLAPASSEGPTVDLPR   | Q8CC86 | 0          | n +14.02 Da,             | 2171.560371 | 2 | 910.4544 | 9843330   | 15217300  |
| DEVLVAGFGR          | P62267 | 0          | n +28.03 Da,             | 2172.69583  | 2 | 545.7983 | 424564000 | 660115968 |
| VLPDDTVSTLYNR       | Q8R0Y6 | 0.00040437 | n +34.06 Da,             | 2175.311625 | 2 | 763.9165 | 40149100  | 30807100  |
| FAGTMAEETAPAVLER    | Q64374 | 0          | n +28.03 Da,             | 2182.947685 | 2 | 860.9267 | 128410000 | 92737296  |
| PMFIVNTNVPR         | P34884 | 0.0067981  | n +28.03 Da,             | 2187.902706 | 2 | 653.8426 | 2.334E+09 | 154075008 |
| AAVQVAALPR          | P52760 | 0          | n +42.03 Da,             | 2188.351144 | 2 | 549.8064 | 921475008 | 362488000 |
| VLPDDTVSTLYNR       | Q8R0Y6 | 0.00040437 | n +34.06 Da,             | 2188.780657 | 2 | 760.8992 | 546811008 | 80506496  |
| TTAGNSSQVSDGAAVLLAR | Q8VCH0 | 0          | n +34.06 Da,             | 2189.472076 | 3 | 639.6729 | 435020992 | 321604992 |
| TLGTEITVEDQLAR      | Q60932 | 0          | n +34.06 Da,             | 2190.025601 | 2 | 787.4233 | 916267008 | 885523008 |
| PLTGGEVPSLGLSLR     | P11352 | 0          | n +28.03 Da,             | 2190.443387 | 1 | 687.8129 | 564273024 | 770692992 |
| TTAGNSSQVSDGAAVLLAR | Q8VCH0 | 0          | n +28.03 Da,             | 2191.278395 | 2 | 959.008  | 269072992 | 179608000 |
| QKTGTAEMSSILEER     | Q03265 | 0          | n +42.03 Da,K +28.03 Da, | 2191.818009 | 2 | 875.438  | 201455008 | 160976992 |
| IAATILTSPDLR        | P05202 | 0          | n +28.03 Da,             | 2194.538125 | 2 | 649.8877 | 8.031E+09 | 3.731E+09 |
| MDASPEPQQKGGTLVLVR  | P58735 | 0          | n +42.03 Da,n +34.06 Da, | 2196.273636 | 3 | 666.0228 | 8.368E+09 | 8.306E+09 |
| MDASPEPQQKGGTLVLVR  | P58735 | 0          | n +42.03 Da,n +34.06 Da, | 2197.68485  | 2 | 998.5307 | 6.894E+09 | 6.938E+09 |
| ADTIGYPVMIR         | Q8C196 | 0.00518852 | n +28.03 Da,             | 2199.834372 | 2 | 632.3418 | 310054016 | 399982016 |
| TGVAPIIDVVR         | P14115 | 0          | n +34.06 Da,             | 2201.437534 | 2 | 584.3581 | 1.65E+09  | 1.47E+09  |
| PAFTPATGTPVLGGLSYR  | Q61176 | 0          | n +14.02 Da,             | 2201.494153 | 3 | 606.9969 | 4.048E+10 | 3.516E+10 |



|                      |        |            |                          |             |   |          |           |           |
|----------------------|--------|------------|--------------------------|-------------|---|----------|-----------|-----------|
| FADGDVDAVLSR         | Q8R0Y6 | 0.00112402 | n +28.03 Da,             | 2206.008663 | 2 | 646.8275 | 233750000 | 59473400  |
| VAVDAPVSSVALR        | Q64374 | 0          | n +42.03 Da,             | 2209.933016 | 2 | 663.382  | 3.109E+09 | 2.571E+09 |
| SQAEFDKAAEEVKR       | P31786 | 0          | n +42.03 Da,K +28.03 Da, | 2212.693253 | 3 | 568.6396 | 1.242E+10 | 1.111E+10 |
| AADTIGYPVMIR         | Q8C196 | 0          | n +34.06 Da,             | 2213.601139 | 2 | 670.8767 | 520172000 | 129407000 |
| STNTDLSLSYDEGQGSKFIR | Q9JLR9 | 0          | n +42.03 Da,K +34.06 Da, | 2216.209916 | 3 | 792.3825 | 3.218E+09 | 3.348E+09 |
| PVYPDVEPGYLR         | O88533 | 0          | n +14.02 Da,             | 2217.170756 | 2 | 709.8686 | 1.244E+09 | 656870016 |
| SGNLLNDMTPPVNPSR     | P35564 | 0.01463104 | n +34.06 Da,             | 2219.823062 | 2 | 870.4406 | 767342016 | 515891008 |
| SLGVAAEGLPDQYADGEEAR | Q9QXF8 | 0          | n +34.06 Da,             | 2220.769991 | 2 | 675.3617 | 663088000 | 620953024 |
| PFVELETNLPASR        | O35215 | 0          | n +17.03 Da,             | 2226.478363 | 2 | 743.8994 | 955766976 | 460240992 |
| LGTLDNPSSLDETAYER    | O35943 | 0          | n +28.03 Da,             | 2232.880125 | 2 | 954.9622 | 663830016 | 739235008 |
| PVALDLITSGR          | Q9DBM2 | 0.00112402 | n +14.02 Da,             | 2235.981127 | 2 | 572.3143 | 649286016 | 670472000 |
| EAAQMDMVNDGVEDLR     | P19157 | 0.03137138 | n +17.03 Da,             | 2237.11385  | 2 | 905.4265 | 125880000 | 204648000 |
| PFCEIAVEEAVR         | Q9DCW4 | 0          | n +17.03 Da,             | 2244.539463 | 2 | 717.3556 | 176406000 | 164836000 |
| SGGMSEEDATLNLNAINR   | Q91Y97 | 0          | n +34.06 Da,             | 2246.932635 | 2 | 960.4593 | 507814016 | 558184000 |
| MDFSKLPK             | P50516 | 0.00903614 | n +42.03 Da,K +34.06 Da, | 2251.61729  | 2 | 532.2968 | 2.745E+09 | 2.588E+09 |
| LYSSDDVIELTPSNFNR    | Q922R8 | 0.02160494 | n +34.06 Da,             | 2251.75457  | 3 | 695.6762 | 1.076E+09 | 877164032 |
| GMSEEDATLNLNAINR     | Q91Y97 | 0          | n +28.03 Da,             | 2252.568633 | 2 | 888.4323 | 560444992 | 792953024 |
| GMSEEDATLNLNAINR     | Q91Y97 | 0.00112402 | n +28.03 Da,             | 2253.338699 | 3 | 592.6249 | 78002200  | 117553000 |
| AFDYDLQTGQISNR       | Q64374 | 0          | n +28.03 Da,             | 2261.764949 | 3 | 552.6061 | 297763008 | 436100992 |
| PAFTPATGTPVLGGLSYR   | Q61176 | 0          | n +14.02 Da,             | 2262.272242 | 3 | 606.9966 | 5.619E+09 | 4.659E+09 |
| AFDYDLQTGQISNR       | Q64374 | 0          | n +28.03 Da,             | 2263.520246 | 2 | 828.4048 | 1.221E+09 | 1.59E+09  |
| KIVVQPETQHR          | Q9WV30 | 0.03644915 | n +42.03 Da,K +34.06 Da, | 2265.150384 | 2 | 705.9133 | 1.917E+09 | 1.888E+09 |
| GTIPVVPTAEFQDR       | P26443 | 0          | n +28.03 Da,             | 2266.731752 | 2 | 779.4184 | 2.185E+10 | 1.843E+10 |
| AVVTPPAYFNDSQR       | P63017 | 0          | n +34.06 Da,             | 2270.734077 | 2 | 797.9157 | 229916992 | 206791008 |
| SLGVAAEGLPDQYADGEEAR | Q9QXF8 | 0          | n +28.03 Da,             | 2271.336313 | 2 | 1009.495 | 1.267E+10 | 5.504E+09 |
| SGNLLNDMTPPVNPSR     | P35564 | 0          | n +28.03 Da,             | 2272.062536 | 2 | 868.9409 | 332968992 | 269505984 |
| SLGVAAEGLPDQYADGEEAR | Q9QXF8 | 0          | n +28.03 Da,             | 2281.482648 | 3 | 673.3319 | 2.334E+09 | 911846016 |
| AQTLNAEFQMLR         | Q8C196 | 0          | n +28.03 Da,             | 2282.230019 | 2 | 767.3874 | 19262100  | 192160992 |
| GGTIPVVPTAEFQDR      | P26443 | 0.00146897 | n +34.06 Da,             | 2282.591629 | 2 | 807.9294 | 730291968 | 596499008 |
| GGTIPVVPTAEFQDR      | P26443 | 0.00518852 | n +34.06 Da,             | 2283.343785 | 3 | 538.9565 | 454520000 | 477329984 |
| AVVTPPAYFNDSQR       | P63017 | 0          | n +34.06 Da,             | 2283.925117 | 3 | 532.279  | 421502016 | 333788992 |
| AVVTPPAYFNDSQR       | P63017 | 0          | n +34.06 Da,             | 2285.123107 | 2 | 800.9289 | 427900992 | 185362000 |
| DVQLVESGGGLVQPGGSR   | P01783 | 0          | n +34.06 Da,             | 2289.72868  | 3 | 594.9838 | 392747008 | 461996000 |
| GDSASKVISAEEALPGR    | Q9D6Y7 | 0          | n +42.03 Da,K +28.03 Da, | 2296.193148 | 3 | 586.3072 | 917849984 | 961257984 |
| SLVIPEKFQH           | P62270 | 0.00962496 | n +42.03 Da,K +28.03 Da, | 2296.557721 | 2 | 632.8485 | 99612600  | 338888000 |
| GDSASKVISAEEALPGR    | Q9D6Y7 | 0          | n +42.03 Da,K +34.06 Da, | 2297.062383 | 2 | 878.9574 | 1.139E+09 | 983102976 |
| DLFGAGTETTSTTLR      | Q64458 | 0          | n +34.06 Da,             | 2297.738071 | 2 | 799.4071 | 327462016 | 257095008 |
| IGPGIDVPAPDMSTGER    | P26443 | 0.00422386 | n +14.02 Da,             | 2299.90882  | 2 | 860.4259 | 33975100  | 107479000 |
| VLESTMVCVDNSEYMR     | O35226 | 0          | n +34.06 Da,             | 2301.431564 | 2 | 980.9441 | 382820992 | 281080000 |
| PGPMTLQGTNTYLVGTGSR  | Q99KR3 | 0          | n +17.03 Da,             | 2302.730417 | 2 | 982.4981 | 118221000 | 95076096  |

|                       |        |            |                          |             |   |          |           |           |
|-----------------------|--------|------------|--------------------------|-------------|---|----------|-----------|-----------|
| MQNVINTVKGK           | Q9CPX6 | 0          | n +42.03 Da,K +34.06 Da, | 2305.469639 | 2 | 669.9074 | 464471008 | 4.119E+09 |
| SPLTPILLGNPGR         | P50172 | 0          | n +28.03 Da,             | 2306.469182 | 2 | 678.8775 | 2.374E+09 | 2.149E+09 |
| PSAMEVEEDDPVPEIR      | Q01853 | 0          | n +14.02 Da,             | 2308.197851 | 3 | 609.6197 | 139548992 | 119428000 |
| PSAMEVEEDDPVPEIR      | Q01853 | 0          | n +14.02 Da,             | 2310.964343 | 2 | 913.9241 | 153055008 | 151307008 |
| DVQPIASLPGVAR         | P10518 | 0          | n +28.03 Da,             | 2312.220061 | 2 | 675.8895 | 2.257E+09 | 2.458E+09 |
| PFVELETNLPASR         | O35215 | 0.0067981  | n +14.02 Da,             | 2313.290178 | 3 | 496.268  | 9.042E+09 | 5.662E+09 |
| SMHTEAAEVLLER         | Q8QZS1 | 0.00040437 | n +42.03 Da,             | 2313.564157 | 3 | 508.9171 | 242731008 | 150530000 |
| GGTIPVVPTAEFQDR       | P26443 | 0.00146897 | n +34.06 Da,             | 2314.957246 | 2 | 810.9569 | 1.111E+09 | 978900992 |
| MDGIVPDIAGVTKR        | P17225 | 0          | n +42.03 Da,K +34.06 Da, | 2316.36524  | 3 | 514.6169 | 361961984 | 285336000 |
| SAKAISEQTGKELLY       | Q91V92 | 0.01022765 | n +42.03 Da,K +34.06 Da, | 2316.501246 | 2 | 868.4767 | 381460000 | 278048992 |
| AGPELLLDSNIR          | Q99KI3 | 0          | n +28.03 Da,             | 2320.459376 | 2 | 663.3744 | 791537984 | 667950976 |
| QATKDAGTIAGLNVMR      | P20029 | 0          | n +28.03 Da,K +28.03 Da, | 2321.413848 | 2 | 848.4451 | 1.098E+09 | 1.28E+09  |
| PFVELETNLPASR         | O35215 | 0          | n +14.02 Da,             | 2322.622126 | 2 | 743.8993 | 5.077E+11 | 3.188E+11 |
| QATKDAGTIAGLNVMR      | P20029 | 0.00146897 | n +28.03 Da,K +28.03 Da, | 2324.880399 | 3 | 565.9661 | 481175008 | 402879008 |
| PVALVTGANKGIGF        | P48758 | 0.00215363 | n +14.02 Da,n +28.03 Da, | 2327.463466 | 2 | 693.4118 | 6.396E+09 | 7.721E+09 |
| QATKDAGQISGLNVLR      | P38647 | 0.0104918  | n +28.03 Da,K +28.03 Da, | 2327.865567 | 2 | 860.9709 | 373036992 | 244132992 |
| FDITADDEPLGR          | P17742 | 0          | n +34.06 Da,             | 2329.354039 | 2 | 691.854  | 515627008 | 1.406E+09 |
| PNPEIPALLDGR          | P19096 | 0          | n +17.03 Da,             | 2329.831796 | 2 | 653.3597 | 2.198E+09 | 999171008 |
| SLVIPEKFQH            | P62270 | 0.00112402 | n +42.03 Da,K +28.03 Da, | 2332.568999 | 2 | 634.356  | 3.362E+11 | 2.926E+11 |
| IDLPETFDAR            | P10605 | 0          | n +34.06 Da,             | 2332.649231 | 2 | 602.8143 | 1.272E+10 | 1.617E+10 |
| DTIGYPVMIR            | Q8C196 | 0.00040437 | n +34.06 Da,             | 2335.599489 | 2 | 596.8236 | 100224000 | 146208992 |
| SDAPPLTLDGIKDR        | Q9CR21 | 0.00040437 | n +42.03 Da,K +28.03 Da, | 2341.416786 | 2 | 784.4167 | 53442800  | 63097600  |
| PYLIPTSALESR          | Q14C51 | 0.01379532 | n +14.02 Da,             | 2342.246743 | 2 | 674.8416 | 97584704  | 78261200  |
| MLDLEVPPER            | Q922R1 | 0.01738306 | n +34.06 Da,             | 2342.2687   | 2 | 617.862  | 1.631E+11 | 1.53E+11  |
| SLGVAAEGLPDQYADGEAAR  | Q9QXF8 | 0          | n +28.03 Da,             | 2342.268936 | 2 | 1001.957 | 671745024 | 583756032 |
| DGLNAEGLLR            | Q64374 | 0.00934268 | n +42.03 Da,             | 2342.804376 | 2 | 550.2875 | 32123400  | 104236000 |
| SDSEKLNLDISIIGR       | P62137 | 0          | n +42.03 Da,K +34.06 Da, | 2344.309143 | 3 | 539.6218 | 77116000  | 71750896  |
| SGDEMDSLSEYVSR        | P11499 | 0          | n +34.06 Da,             | 2345.392287 | 2 | 794.8618 | 239587008 | 201999008 |
| PDPEDFADEQSLVGR       | Q9EQH3 | 0          | n +17.03 Da,             | 2345.93434  | 2 | 845.8969 | 307191008 | 270028992 |
| TSQSGDEMDSLSEYVSR     | P11499 | 0          | n +28.03 Da,             | 2346.632691 | 2 | 952.9331 | 241924000 | 81281904  |
| PLIPIVVEQTGR          | O88696 | 0          | n +14.02 Da,             | 2351.843266 | 2 | 668.4038 | 7.167E+10 | 4.982E+10 |
| FDITADDEPLGR          | P17742 | 0          | n +28.03 Da,             | 2352.224329 | 2 | 688.8385 | 3.278E+09 | 7.463E+09 |
| EAAQMDMVNDGVEDLR      | P19157 | 0          | n +28.03 Da,             | 2352.23921  | 2 | 910.9115 | 655734016 | 551500032 |
| SIGVPIKVLH            | P62320 | 0.00422386 | n +42.03 Da,K +34.06 Da, | 2352.911291 | 2 | 566.8584 | 9.424E+09 | 8.806E+09 |
| PLPLPEYGGKVR          | Q9CQQ7 | 0          | n +14.02 Da,K +28.03 Da, | 2353.489763 | 3 | 488.9454 | 776502976 | 496158016 |
| EAAQMDMVNDGVEDLR      | P19157 | 0          | n +28.03 Da,             | 2354.988541 | 2 | 910.9112 | 1.638E+09 | 158104000 |
| SPLTPILLGNPGR         | P50172 | 0          | n +28.03 Da,             | 2357.47939  | 2 | 681.9085 | 777475008 | 759780992 |
| SSPAQPAVPAPLADLKIQHTK | P24549 | 0          | n +42.03 Da,K +34.06 Da, | 2359.199903 | 3 | 756.4292 | 190530000 | 168022000 |
| MLDLEVPPER            | Q922R1 | 0.01738306 | n +34.06 Da,             | 2360.680835 | 2 | 616.3518 | 1.144E+09 | 1.215E+10 |
| SDLDAATQQLLSR         | Q03265 | 0          | n +28.03 Da,             | 2365.00844  | 3 | 482.5906 | 238355008 | 237192000 |

|                       |        |            |                          |             |   |          |           |           |
|-----------------------|--------|------------|--------------------------|-------------|---|----------|-----------|-----------|
| PNPEIPALLDGR          | P19096 | 0.00457103 | n +14.02 Da,             | 2373.869818 | 2 | 650.3423 | 1.226E+09 | 1.062E+09 |
| DVPVGEELLGR           | Q03265 | 0          | n +28.03 Da,             | 2377.26778  | 3 | 605.3153 | 39390800  | 357462016 |
| VQEEAQCLVEELR         | P56656 | 0          | n +28.03 Da,             | 2377.377504 | 2 | 812.9026 | 357324992 | 1.244E+09 |
| AAAAYEHLKL            | Q9EP69 | 0          | n +42.03 Da,K +28.03 Da, | 2378.247269 | 2 | 578.8227 | 43673400  | 149976000 |
| AQNLKDLAQRPLPAGPR     | O35129 | 0.00146897 | n +42.03 Da,K +34.06 Da, | 2379.630846 | 3 | 583.0044 | 2.08E+09  | 1.584E+09 |
| EAAQMDMVDNGVEDLR      | P19157 | 0          | n +42.03 Da,             | 2381.617663 | 2 | 917.9189 | 503003008 | 388680000 |
| GDIDAATEQKRR          | Q8R2T7 | 0.01491117 | n +42.03 Da,n +28.03 Da, | 2383.8582   | 2 | 714.9006 | 128038000 | 116428000 |
| SGSPFDVPTLPDGR        | P06801 | 0          | n +34.06 Da,             | 2384.135717 | 2 | 736.8727 | 225516992 | 245568000 |
| TPVAWPSQEGQNPSLSSIR   | Q8C196 | 0          | n +34.06 Da,             | 2394.349126 | 3 | 694.6921 | 4.649E+09 | 5.407E+09 |
| TPVAWPSQEGQNPSLSSIR   | Q8C196 | 0          | n +34.06 Da,             | 2396.199823 | 2 | 1041.534 | 3.469E+09 | 3.574E+09 |
| PFVELETNLPASR         | O35215 | 0          | n +28.03 Da,             | 2397.615085 | 2 | 749.4295 | 346184000 | 991529984 |
| DSDILGKYVD            | Q64433 | 0.01235772 | n +28.03 Da,K +28.03 Da, | 2401.059145 | 2 | 590.8123 | 845672000 | 733675008 |
| VGVPTEGTALTLNR        | Q8BWT1 | 0          | n +42.03 Da,             | 2401.187352 | 2 | 732.3858 | 5.978E+09 | 5.397E+09 |
| SAAGEFADDPCCSSVKR     | P26231 | 0.01404853 | n +42.03 Da,K +28.03 Da, | 2402.495032 | 2 | 883.9159 | 2.017E+09 | 1.657E+09 |
| SSPAQPAVPAPLADLKIQH   | P24549 | 0          | n +42.03 Da,K +28.03 Da, | 2412.605856 | 3 | 670.7056 | 4.586E+10 | 4.141E+10 |
| PFVELETNLPASR         | O35215 | 0          | n +14.02 Da,             | 2412.871766 | 2 | 743.8984 | 3.121E+09 | 2.744E+09 |
| MEKLETVPPLER          | O88569 | 0          | n +42.03 Da,K +28.03 Da, | 2413.04894  | 3 | 505.9415 | 1.432E+09 | 1.209E+09 |
| MEKLETVPPLER          | O88569 | 0          | n +42.03 Da,K +28.03 Da, | 2414.831127 | 2 | 758.4074 | 6.799E+10 | 6.107E+10 |
| SSPAQPAVPAPLADLKIQH   | P24549 | 0          | n +42.03 Da,K +34.06 Da, | 2417.845763 | 2 | 1005.554 | 1.843E+09 | 1.71E+09  |
| TFDLTGIPPAPR          | P20029 | 0          | n +34.06 Da,             | 2418.047417 | 2 | 656.8668 | 532268992 | 348926016 |
| ADLEEQLSDEEKVR        | P47754 | 0          | n +42.03 Da,K +28.03 Da, | 2418.706274 | 2 | 864.4428 | 1.954E+09 | 1.887E+09 |
| TIPVPTAEFQDR          | P26443 | 0          | n +34.06 Da,             | 2423.170668 | 2 | 750.9068 | 2.793E+10 | 2.114E+10 |
| MSTGTFVVSQPLNYR       | Q9JLJ2 | 0          | n +28.03 Da,             | 2428.556426 | 3 | 576.631  | 624478976 | 489422016 |
| DVLVIECNLR            | Q8C196 | 0.00112402 | n +34.06 Da,             | 2429.825473 | 2 | 629.8442 | 398071008 | 321744992 |
| YFAGTMAEETAPAVLER     | Q64374 | 0.03395335 | n +34.06 Da,             | 2444.047387 | 3 | 629.6494 | 22442200  | 28259400  |
| ADLEEQLSDEEKVR        | P47754 | 0          | n +42.03 Da,K +28.03 Da, | 2445.067811 | 2 | 865.9259 | 2.295E+10 | 2.176E+10 |
| AASAIKLSALR           | Q9D8T7 | 0.00040437 | n +42.03 Da,K +34.06 Da, | 2448.606209 | 2 | 614.3749 | 1.133E+10 | 1.082E+10 |
| ISVAGVTSGNVGYLAH      | P05202 | 0          | n +28.03 Da,             | 2450.272879 | 2 | 786.9223 | 810990016 | 649582976 |
| YFAGTMAEETAPAVLER     | Q64374 | 0          | n +28.03 Da,             | 2451.130531 | 2 | 942.4646 | 1.937E+09 | 1.202E+09 |
| GEEATAVAAGVRPELVR     | Q8BR37 | 0          | n +42.03 Da,             | 2454.765055 | 3 | 611.3114 | 108505000 | 89131200  |
| AVITVPAYFNDSQR        | P16627 | 0          | n +28.03 Da,             | 2455.946224 | 2 | 801.9247 | 314921984 | 222946000 |
| STDITSLDQYVER         | P08113 | 0          | n +34.06 Da,             | 2457.101922 | 2 | 780.9015 | 976334016 | 617792000 |
| ASQSQGIQQLLQAEKR      | Q9CR51 | 0          | n +42.03 Da,K +34.06 Da, | 2459.592394 | 3 | 619.0061 | 4.324E+09 | 4.681E+09 |
| ASQSQGIQQLLQAEKR      | Q9CR51 | 0          | n +42.03 Da,K +34.06 Da, | 2460.368854 | 2 | 928.0053 | 3.919E+09 | 4.154E+09 |
| VDFQQLQDPIGR          | G3X982 | 0          | n +28.03 Da,             | 2461.557433 | 2 | 770.9108 | 327448000 | 230584992 |
| PGLLLLGDEAPNFEANTTIGR | O08709 | 0          | n +14.02 Da,             | 2462.090751 | 3 | 719.3715 | 1.32E+09  | 1.24E+09  |
| SDIDEIVLVGGSTR        | P20029 | 0          | n +28.03 Da,             | 2463.40271  | 2 | 744.39   | 5.052E+09 | 2.829E+09 |
| ASGADSKGDDLSTAILKQK   | Q01853 | 0          | n +42.03 Da,K +28.03 Da, | 2466.728451 | 3 | 677.6913 | 160543008 | 99612096  |
| VDLEPTVIDEVR          | P05213 | 0          | n +34.06 Da,             | 2468.75324  | 2 | 706.8845 | 867745024 | 1.596E+09 |
| GGGGASALLIEKL         | Q8QZT1 | 0          | n +34.06 Da,K +34.06 Da, | 2472.792439 | 2 | 621.377  | 610161024 | 559081024 |

|                      |        |            |                          |             |   |          |           |           |
|----------------------|--------|------------|--------------------------|-------------|---|----------|-----------|-----------|
| LEAALADVPELAR        | Q9D6Y9 | 0          | n +28.03 Da,             | 2473.719763 | 3 | 696.3803 | 1.725E+09 | 1.778E+09 |
| TASSVLLHTGQKMPL      | Q9JII6 | 0.00712347 | n +42.03 Da,K +34.06 Da, | 2475.189473 | 2 | 826.9668 | 4.101E+09 | 3.119E+09 |
| PEQVVGGIYGLNR        | P58252 | 0.00112402 | n +14.02 Da,             | 2475.613563 | 2 | 756.426  | 453343008 | 363326016 |
| AASKVKQDMPPPGGYGPIDY | Q9ERS2 | 0          | n +42.03 Da,K +28.03 Da, | 2476.51538  | 2 | 1095.051 | 304582016 | 141882000 |
| TDNTLGTEITVEDQLAR    | Q60932 | 0          | n +34.06 Da,             | 2476.661003 | 2 | 952.4834 | 94719696  | 70421296  |
| DIQLEFVR             | O54734 | 0.03153823 | n +34.06 Da,             | 2476.737634 | 2 | 524.2957 | 289488992 | 235848000 |
| EEEAIQDGLNASQIR      | P08113 | 0          | n +14.02 Da,             | 2482.765399 | 2 | 900.4454 | 75361104  | 82245904  |
| TFDLTGIPPAPR         | P20029 | 0          | n +34.06 Da,             | 2482.931413 | 1 | 656.8665 | 53824100  | 37540300  |
| TINDLFAGAGTETSTTLR   | Q64458 | 0          | n +28.03 Da,             | 2484.137915 | 2 | 960.4763 | 189738000 | 14588200  |
| TVEEPLDIR            | P62311 | 0.03030303 | n +34.06 Da,             | 2486.690774 | 2 | 608.3467 | 26777800  | 31902500  |
| AELKYISGFGNECASEDPR  | O09173 | 0.00040437 | n +42.03 Da,K +34.06 Da, | 2487.912498 | 3 | 738.3422 | 866193024 | 842328000 |
| PATIGDYTDFYSSR       | P35505 | 0          | n +14.02 Da,             | 2488.286341 | 2 | 803.8778 | 44615200  | 20659800  |
| TSPAELSPTELTEMR      | Q9JKF7 | 0          | n +28.03 Da,             | 2490.881479 | 2 | 880.9401 | 227359008 | 222414000 |
| SAVYPTSAVQMEAAALR    | Q9D6Y7 | 0          | n +34.06 Da,             | 2493.16564  | 2 | 861.4496 | 318944000 | 141984000 |
| DIQMTQTSSLSASLGDR    | P01643 | 0          | n +34.06 Da,             | 2498.317826 | 3 | 646.9867 | 68145600  | 83467600  |
| SHQTGIQASEDVKEIF     | Q91YR1 | 0          | n +42.03 Da,K +34.06 Da, | 2498.612825 | 2 | 929.9612 | 727515008 | 611246976 |
| DEFDIVGDVR           | Q3UEG6 | 0          | n +28.03 Da,             | 2499.966587 | 2 | 596.7957 | 125672000 | 72084600  |
| TGVVWVGSGSEALSRL     | P19096 | 0          | n +28.03 Da,             | 2500.278207 | 2 | 910.4598 | 30566200  | 17175500  |
| TGITPMLQVIR          | Q9DCN2 | 0.00079777 | n +34.06 Da,             | 2501.831418 | 2 | 628.8738 | 87199800  | 81095000  |
| ADLEEQLSDEEKVR       | P47754 | 0          | n +42.03 Da,K +28.03 Da, | 2504.090837 | 2 | 862.9125 | 412140000 | 258352992 |
| AELKYISGFGNECASEDPR  | O09173 | 0.00040437 | n +42.03 Da,K +34.06 Da, | 2508.66967  | 3 | 738.3654 | 351696000 | 321270016 |
| SSVAVLTQESFAEHR      | Q8VDJ3 | 0          | n +42.03 Da,             | 2511.705523 | 2 | 848.9172 | 985910016 | 6.659E+10 |
| SSGLQAVANIAGGIR      | Q8VCH0 | 0.04617149 | n +28.03 Da,             | 2512.936    | 2 | 718.3844 | 537628032 | 637481984 |
| SSVAVLTQESFAEHR      | Q8VDJ3 | 0          | n +42.03 Da,             | 2516.345746 | 3 | 566.2804 | 22223500  | 458983008 |
| ALDGPEQMELEEGKAGSGLR | P62196 | 0          | n +42.03 Da,K +28.03 Da, | 2522.660346 | 3 | 719.6863 | 2.183E+09 | 1.952E+09 |
| AVITVPAYFNDSQR       | P16627 | 0          | n +28.03 Da,             | 2523.617365 | 2 | 804.9373 | 221400000 | 1.091E+09 |
| SSGLQAVANIAGGIR      | Q8VCH0 | 0.04617149 | n +28.03 Da,             | 2529.07944  | 2 | 721.3964 | 812542016 | 491792000 |
| PSDLSRYR             | Q8VHB5 | 0.03285968 | n +14.02 Da,             | 2531.531551 | 1 | 1167.574 | 28251800  | 26813500  |
| ALDGPEQMELEEGKAGSGLR | P62196 | 0          | n +42.03 Da,K +34.06 Da, | 2534.40719  | 2 | 1079.028 | 1.042E+10 | 9.536E+09 |
| SSSRPVALVTGANKGIGF   | P48758 | 0          | n +42.03 Da,K +34.06 Da, | 2535.245963 | 3 | 611.0078 | 5.271E+09 | 6E+09     |
| SSSRPVALVTGANKGIGF   | P48758 | 0          | n +42.03 Da,K +34.06 Da, | 2537.117284 | 2 | 916.0075 | 1.376E+10 | 1.61E+10  |
| PGGLLLGEAPNFEANTTIGR | O08709 | 0          | n +17.03 Da,             | 2539.196244 | 3 | 719.3699 | 1.33E+09  | 1.267E+09 |
| SSVAVLTQESFAEHR      | Q8VDJ3 | 0          | n +42.03 Da,             | 2547.386403 | 2 | 850.4119 | 864099968 | 3.202E+09 |
| VAFGVPSVIVSR         | Q91WU0 | 0          | n +28.03 Da,             | 2560.964401 | 2 | 629.8809 | 149454000 | 116053000 |
| YFAGTMAEETAPAVLER    | Q64374 | 0          | n +28.03 Da,             | 2562.191014 | 3 | 626.6533 | 519454016 | 433560000 |
| TDITSLDQYVER         | P08113 | 0.00934268 | n +34.06 Da,             | 2570.681288 | 2 | 735.8697 | 240004000 | 362686016 |
| MVTLDYTVQVPGTGR      | Q9QXF8 | 0.00180375 | n +28.03 Da,             | 2571.590032 | 2 | 831.4112 | 153903008 | 87629296  |
| SVIVGNVMQSSSDAAYLAR  | Q8BWT1 | 0          | n +34.06 Da,             | 2572.41768  | 2 | 998.5137 | 814088000 | 740550976 |
| SVIVGNVMQSSSDAAYLAR  | Q8BWT1 | 0          | n +34.06 Da,             | 2573.261575 | 3 | 666.0109 | 1.912E+09 | 2.138E+09 |
| SFVTAVLAEETR         | O08601 | 0          | n +34.06 Da,             | 2575.826947 | 2 | 675.866  | 205364000 | 119409000 |

|                                |        |            |                          |             |   |          |           |           |
|--------------------------------|--------|------------|--------------------------|-------------|---|----------|-----------|-----------|
| ADTATTASAAAASAPNASTDAPPFQLGKPR | Q925N0 | 0          | n +42.03 Da,n +28.03 Da, | 2586.682548 | 3 | 1028.846 | 2.471E+09 | 2.331E+09 |
| STNTDLSLSSYDEGQGSKFIR          | Q9JLR9 | 0          | n +42.03 Da,K +34.06 Da, | 2590.864359 | 3 | 792.3833 | 5.022E+09 | 4.832E+09 |
| SDVLELTDENFESR                 | P27773 | 0          | n +28.03 Da,             | 2591.435793 | 3 | 561.2694 | 1.373E+09 | 1.19E+09  |
| VPATPVAWPSQEQGNPSLSSIR         | Q8C196 | 0          | n +28.03 Da,             | 2591.509361 | 3 | 783.745  | 2.021E+09 | 2.227E+09 |
| TASSVLLHTGQKMPL                | Q9JII6 | 0          | n +42.03 Da,K +28.03 Da, | 2591.978252 | 2 | 826.957  | 1.391E+11 | 1.388E+11 |
| STNTDLSLSSYDEGQGSKFIR          | Q9JLR9 | 0          | n +42.03 Da,K +28.03 Da, | 2592.375948 | 2 | 1188.072 | 8.445E+09 | 8.297E+09 |
| SDVLELTDENFESR                 | P27773 | 0          | n +34.06 Da,             | 2593.445686 | 2 | 841.3992 | 1.11E+11  | 9.244E+10 |
| TASSVLLHTGQKMPL                | Q9JII6 | 0          | n +42.03 Da,K +34.06 Da, | 2594.094558 | 3 | 551.64   | 2.956E+09 | 3.054E+09 |
| ALHVPKAPGFAQM                  | P42932 | 0          | n +42.03 Da,K +28.03 Da, | 2596.927708 | 2 | 718.8895 | 3.705E+09 | 3.613E+09 |
| GLLSQGSPLSWEETQR               | P97494 | 0          | n +34.06 Da,             | 2599.352898 | 2 | 908.4656 | 1.492E+10 | 1.279E+10 |
| GLLSQGSPLSWEETQR               | P97494 | 0          | n +28.03 Da,             | 2599.987177 | 3 | 605.9799 | 5.45E+09  | 4.727E+09 |
| ALHVPKAPGFAQM                  | P42932 | 0          | n +42.03 Da,K +28.03 Da, | 2603.903832 | 1 | 718.89   | 50854900  | 50888200  |
| TSSMTEGLQPASVVVLP              | Q8BH86 | 0          | n +34.06 Da,             | 2605.878947 | 2 | 950.517  | 88175800  | 100288000 |
| GAAALVLMTAEAAQR                | Q8QZT1 | 0          | n +28.03 Da,             | 2605.903698 | 2 | 750.9138 | 383100000 | 253292992 |
| TSSMTEGLQPASVVVLP              | Q8BH86 | 0.01323007 | n +34.06 Da,             | 2607.022016 | 3 | 634.0128 | 194204000 | 417897984 |
| TLNQLVGAAGAAGQR                | Q9EQ20 | 0          | n +34.06 Da,             | 2608.09777  | 2 | 801.4431 | 1.021E+09 | 957020032 |
| TLNQLVGAAGAAGQR                | Q9EQ20 | 0          | n +28.03 Da,             | 2609.268151 | 3 | 534.6308 | 769036992 | 656126016 |
| SVIVGNVMQSSSDAAYLAR            | Q8BWT1 | 0          | n +34.06 Da,             | 2611.431126 | 3 | 668.0213 | 84021296  | 45524500  |
| VDGEALSTLVNLR                  | P63038 | 0          | n +28.03 Da,             | 2611.640187 | 3 | 472.2683 | 225786000 | 265338000 |
| TIPSDGDIFTYTR                  | P24549 | 0          | n +34.06 Da,             | 2611.85673  | 2 | 757.3801 | 1.558E+09 | 1.348E+09 |
| VDGEALSTLVNLR                  | P63038 | 0          | n +28.03 Da,             | 2613.954669 | 2 | 707.8989 | 2.481E+09 | 2.185E+09 |
| ANHAPFETDISTLTR                | Q9QXD6 | 0          | n +42.03 Da,             | 2615.034373 | 2 | 856.4067 | 14701300  | 88109504  |
| SVLAPFTPVDR                    | Q9D6Y9 | 0.01379532 | n +28.03 Da,             | 2620.571646 | 2 | 671.8899 | 387793984 | 402732000 |
| GAPQGSGLGEYLFER                | P29391 | 0          | n +34.06 Da,             | 2621.620953 | 2 | 776.3932 | 126360000 | 464780992 |
| GAPQGSGLGEYLFER                | P29391 | 0          | n +34.06 Da,             | 2625.229895 | 2 | 779.4248 | 382947008 | 317907008 |
| IATSPAELSPTELTEMR              | Q9JKF7 | 0          | n +34.06 Da,             | 2631.436897 | 2 | 972.9979 | 392631008 | 319844992 |
| DIDLPEFDAR                     | P10605 | 0          | n +34.06 Da,             | 2633.185143 | 2 | 660.3276 | 1.256E+09 | 1.507E+09 |
| IATSPAELSPTELTEMR              | Q9JKF7 | 0          | n +28.03 Da,             | 2636.34274  | 3 | 649.0017 | 446247008 | 408672992 |
| PAVPVPIGPPAGFR                 | Q05920 | 0          | n +14.02 Da,             | 2638.138782 | 2 | 792.9659 | 2.896E+10 | 2.268E+10 |
| PAVPVPIGPPAGFR                 | Q05920 | 0          | n +14.02 Da,             | 2644.581611 | 3 | 528.9802 | 1.111E+10 | 8.695E+09 |
| MRPDSLVMMAPEGSLR               | Q3U3R4 | 0          | n +42.03 Da,             | 2645.513733 | 2 | 881.9166 | 378048000 | 151252000 |
| ISVGNVLQPGAGAIMAR              | Q8VCH0 | 0          | n +28.03 Da,             | 2646.329972 | 2 | 841.4746 | 730401024 | 530929984 |
| MKVFTVGTGPLPAEGR               | Q91Z53 | 0          | n +42.03 Da,K +28.03 Da, | 2651.610221 | 2 | 784.9065 | 120941000 | 48054400  |
| ASLSLAPVNIKAGADEER             | P80314 | 0          | n +42.03 Da,K +34.06 Da, | 2654.376974 | 3 | 686.7007 | 124800000 | 122282000 |
| PVTGQIVNDLLTNR                 | Q64176 | 0          | n +17.03 Da,             | 2655.413604 | 3 | 518.6267 | 432348992 | 295166016 |
| MEPLYQQTNKQVQEIQSH             | O35166 | 0.0184953  | n +42.03 Da,n +28.03 Da, | 2657.334042 | 2 | 1136.059 | 695598016 | 651569984 |
| MEPLYQQTNKQVQEIQSH             | O35166 | 0          | n +42.03 Da,n +34.06 Da, | 2658.313775 | 3 | 757.7071 | 1.644E+09 | 1.589E+09 |
| AASLVGKKIVF                    | Q9D892 | 0.01379532 | n +42.03 Da,K +28.03 Da, | 2658.417343 | 2 | 615.8943 | 277180992 | 182752992 |
| VSMLNDIAATPTAAMPFR             | P19096 | 0          | n +14.02 Da,             | 2659.848204 | 2 | 960.4755 | 425144000 | 460456000 |
| TGAPQGSGLGEYLFER               | P29391 | 0          | n +28.03 Da,             | 2661.039129 | 2 | 826.9172 | 478151008 | 583563008 |

|                                    |        |            |                                      |             |   |          |           |           |
|------------------------------------|--------|------------|--------------------------------------|-------------|---|----------|-----------|-----------|
| AASAAATAASAATAASAASGSPGSGEGSAGGEKR | Q62318 | 0          | n +42.03 Da,K +28.03 Da,             | 2663.233901 | 3 | 983.138  | 656216000 | 454507008 |
| DIDTAAKFIGAGAA                     | P56383 | 0          | n +28.03 Da,K +28.03 Da,             | 2665.450818 | 2 | 687.3578 | 34564000  | 1.262E+09 |
| DIDTAAKFIGA                        | P56383 | 0.00040437 | n +34.06 Da,K +34.06 Da,             | 2670.349704 | 2 | 592.3451 | 1.884E+09 | 388940000 |
| NVPATPVAWPSQEGQNPLSSIR             | Q8C196 | 0          | n +34.06 Da,                         | 2674.183553 | 2 | 1232.134 | 87448304  | 86336096  |
| MKVFTGTGPLPAEGR                    | Q91Z53 | 0          | n +42.03 Da,K +34.06 Da,             | 2675.376262 | 2 | 786.432  | 2.182E+09 | 2.783E+09 |
| DVDFDIAGPSIR                       | Q60932 | 0          | n +28.03 Da,                         | 2676.955669 | 2 | 666.843  | 138522000 | 140476000 |
| PAAGTVILLENLR                      | P09411 | 0.01766562 | n +14.02 Da,                         | 2677.606424 | 3 | 460.9454 | 251828992 | 172352992 |
| NVPATPVAWPSQEGQNPLSSIR             | Q8C196 | 0          | n +28.03 Da,                         | 2678.800715 | 3 | 821.759  | 512048000 | 498512992 |
| PAAGTVILLENLR                      | P09411 | 0          | n +14.02 Da,                         | 2679.063184 | 2 | 690.9142 | 9.864E+09 | 6.94E+09  |
| VVFGVPSVIVSR                       | Q64176 | 0.0104918  | n +28.03 Da,                         | 2679.09539  | 2 | 643.8951 | 1.868E+09 | 1.865E+09 |
| ADIVIWDPEATR                       | Q9EQF5 | 0.00112402 | n +28.03 Da,                         | 2680.18995  | 2 | 707.3731 | 434203008 | 489920992 |
| LYSSDDVIELTPSNFNFR                 | Q922R8 | 0          | n +28.03 Da,                         | 2685.492229 | 3 | 695.6762 | 8.662E+09 | 6.726E+09 |
| DIDTAAKFIGAGA                      | P56383 | 0.00112402 | n +34.06 Da,K +34.06 Da,             | 2687.799818 | 2 | 659.3883 | 158220992 | 78547200  |
| LYSSDDVIELTPSNFNFR                 | Q922R8 | 0          | n +34.06 Da,                         | 2689.155304 | 2 | 1043.011 | 1.303E+10 | 9.861E+09 |
| DIDTAAKFIGAGAA                     | P56383 | 0          | n +28.03 Da,K +28.03 Da,             | 2690.349031 | 2 | 688.8753 | 1.513E+09 | 512206016 |
| SSQALQVLENSLR                      | Q9DCY0 | 0.00112402 | n +28.03 Da,                         | 2691.253485 | 2 | 736.9024 | 106455000 | 72591904  |
| PAFTPATGTPVLGGLSYR                 | Q61176 | 0          | n +14.02 Da,                         | 2693.39436  | 3 | 606.9973 | 1.091E+11 | 9.521E+10 |
| PAFTPATGTPVLGGLSYR                 | Q61176 | 0          | n +14.02 Da,                         | 2693.620887 | 2 | 909.9918 | 1.602E+11 | 1.406E+11 |
| ADEIAKAQVAQPGGDTIFGK               | P70349 | 0          | n +42.03 Da,n +34.06 Da,K +34.06 Da, | 2712.27709  | 2 | 1062.084 | 135992992 | 1.496E+09 |
| PSIGEFIMVDR                        | Q9QXD6 | 0          | n +14.02 Da,                         | 2713.733139 | 2 | 639.3317 | 1.583E+09 | 1.177E+09 |
| ADEIAKAQVAQPGGDTIFGK               | P70349 | 0          | n +42.03 Da,n +34.06 Da,K +34.06 Da, | 2715.290002 | 3 | 705.3766 | 8.704E+09 | 8.288E+09 |
| VGGGGSGGGLLENANPLIYER              | Q9D187 | 0          | n +34.06 Da,                         | 2715.427864 | 2 | 1028.015 | 85573696  | 91181400  |
| ADEIAKAQVAQPGGDTIFGK               | P70349 | 0          | n +42.03 Da,n +28.03 Da,K +28.03 Da, | 2718.920298 | 2 | 1057.561 | 1.147E+09 | 931926976 |
| MKETDLEAVATAVQR                    | Q6KAR6 | 0.01491117 | n +42.03 Da,K +28.03 Da,             | 2721.453806 | 3 | 577.9707 | 151076000 | 158816000 |
| FVQPTVFSNVTDEMR                    | O35945 | 0          | n +28.03 Da,                         | 2729.573956 | 2 | 899.4455 | 834801984 | 1.802E+09 |
| VAPAQTLNAEFQMLR                    | Q8C196 | 0          | n +28.03 Da,                         | 2729.618507 | 3 | 599.9666 | 116524000 | 288940992 |
| SSPAQPAVPAPLANLKIQH                | O35945 | 0          | n +42.03 Da,K +28.03 Da,             | 2731.416558 | 3 | 670.3777 | 5.555E+09 | 4.588E+09 |
| SSPAQPAVPAPLANLKIQH                | O35945 | 0          | n +42.03 Da,K +28.03 Da,             | 2732.654764 | 2 | 1005.063 | 4.032E+09 | 3.241E+09 |
| MDSSAVITQISKEEAR                   | P58466 | 0          | n +42.03 Da,K +28.03 Da,             | 2735.309528 | 2 | 917.9635 | 1.449E+09 | 1.497E+09 |
| ASLSLAPVNIKAGADEER                 | P80314 | 0          | n +42.03 Da,K +28.03 Da,             | 2738.417619 | 3 | 686.7011 | 532840992 | 589238016 |
| TTVITSLSSVLR                       | Q6XVG2 | 0.00079777 | n +34.06 Da,                         | 2738.884131 | 2 | 652.8936 | 129015000 | 151734000 |
| PDAVDVAELLR                        | Q8R3F5 | 0          | n +14.02 Da,                         | 2747.140932 | 2 | 606.3356 | 88191904  | 58648500  |
| AAAAAASHLNLDALR                    | Q8CH72 | 0          | n +42.03 Da,                         | 2748.247344 | 1 | 741.8419 | 465419008 | 77984096  |
| MDGIVPDIAVGTKR                     | P17225 | 0          | n +42.03 Da,K +34.06 Da,             | 2748.597665 | 2 | 771.4217 | 1.005E+10 | 8.442E+09 |
| SSVAULTQESFAEHR                    | Q8VDJ3 | 0          | n +42.03 Da,                         | 2755.476676 | 2 | 848.9195 | 523196000 | 525496000 |
| ASKPTLNEVVIVSAIR                   | Q8QZT1 | 0          | n +28.03 Da,K +28.03 Da,             | 2756.118484 | 3 | 585.0124 | 1.842E+09 | 1.326E+09 |
| MLGPEGGEGYVVKLR                    | Q9Z2X1 | 0          | n +42.03 Da,K +28.03 Da,             | 2765.351552 | 3 | 558.9679 | 56634900  | 59781100  |
| MLGPEGGEGYVVKLR                    | Q9Z2X1 | 0          | n +42.03 Da,K +28.03 Da,             | 2765.743197 | 2 | 837.9483 | 3.952E+10 | 3.736E+10 |
| PDIPQLEPSDYLR                      | Q9DBM2 | 0          | n +14.02 Da,                         | 2766.76305  | 2 | 775.888  | 935430016 | 537740992 |
| SSPAQPAVPAPLANLKIQH                | O35945 | 0          | n +42.03 Da,K +28.03 Da,             | 2767.785049 | 3 | 669.695  | 455255008 | 316713984 |

|                       |         |            |                          |             |   |          |           |           |
|-----------------------|---------|------------|--------------------------|-------------|---|----------|-----------|-----------|
| DLTDYLMK              | P60710  | 0.02109836 | n +28.03 Da,K +28.03 Da, | 2767.95504  | 2 | 527.7759 | 84570704  | 61832800  |
| ASKPTLNEVVIVSAIR      | Q8QZT1  | 0.0028399  | n +42.03 Da,K +34.06 Da, | 2770.59159  | 2 | 877.9987 | 1.769E+09 | 47542300  |
| VTTPRKQGRAFRGRSEFSSR  | E9QP09  | 0.00518852 | n +14.02 Da,K +28.03 Da, | 2771.767826 | 3 | 787.0837 | 105085000 | 88197600  |
| MEKVLVTGGAGYIGSH      | Q8R059  | 0.00040437 | n +42.03 Da,K +28.03 Da, | 2774.829718 | 2 | 844.9374 | 532928992 | 431006016 |
| MEKVLVTGGAGYIGSH      | Q8R059  | 0          | n +42.03 Da,K +28.03 Da, | 2781.627691 | 3 | 563.6273 | 58248200  | 55089200  |
| TLEAVQDLLEQGR         | P19096  | 0          | n +28.03 Da,             | 2781.955622 | 2 | 750.4098 | 91417000  | 49860000  |
| TEYKLVVVGAGGVGKSAL    | P08556  | 0.00112402 | n +42.03 Da,K +28.03 Da, | 2782.721483 | 2 | 917.496  | 2.14E+09  | 295598016 |
| FSATDLTEFAAR          | Q8BWT1  | 0          | n +28.03 Da,             | 2784.877204 | 2 | 678.8432 | 3.171E+09 | 3.22E+09  |
| TEYKLVVVGAGGVGKSAL    | P08556  | 0.00903614 | n +42.03 Da,K +28.03 Da, | 2784.972968 | 3 | 616.0279 | 404494016 | 369196000 |
| SSPAQPAVPAPLADLKIQHT  | P24549  | 0          | n +42.03 Da,K +28.03 Da, | 2785.29275  | 2 | 704.3915 | 107985000 | 64311400  |
| SSPAQPAVPAPLADLKIQHTK | P24549  | 0          | n +42.03 Da,K +28.03 Da, | 2785.308033 | 2 | 1134.124 | 95804096  | 53161500  |
| ATSTLPQVPYKVGVVGYGR   | Q9DCQ2  | 0          | n +42.03 Da,K +28.03 Da, | 2787.036018 | 3 | 688.0499 | 94645296  | 84985904  |
| PGGLLLGDEAPNFEANTTIGR | O08709  | 0          | n +14.02 Da,             | 2787.62032  | 2 | 1078.558 | 1.52E+09  | 1.137E+09 |
| PPYTIVYFPVR           | P19157  | 0.00488656 | n +17.03 Da,             | 2795.912076 | 2 | 683.3836 | 184324992 | 137410000 |
| MHSLATAAPVPTALAQVDR   | Q9JKY0  | 0          | n +42.03 Da,             | 2800.495961 | 2 | 993.0104 | 379171008 | 513604992 |
| MHSLATAAPVPTALAQVDR   | Q9JKY0  | 0.00040437 | n +42.03 Da,             | 2802.902742 | 3 | 662.3428 | 198236992 | 307968000 |
| PQLVPILIDAAR          | Q9R1J0  | 0.00112402 | n +14.02 Da,             | 2808.691656 | 2 | 660.4061 | 2.524E+09 | 1.539E+09 |
| VPGVPLPPEIQLAQR       | P56183  | 0          | n +34.06 Da,             | 2809.380794 | 3 | 547.9945 | 106640000 | 65596700  |
| MPFVELETNLPASR        | O35215  | 0          | n +34.06 Da,             | 2816.930182 | 3 | 544.6204 | 653878976 | 889249984 |
| VGSLNLEELSEMR         | Q8K2C7  | 0          | n +34.06 Da,             | 2817.919458 | 2 | 752.8865 | 2.046E+09 | 1.677E+09 |
| MDGIVPDIAVGTKR        | P17225  | 0          | n +42.03 Da,K +34.06 Da, | 2819.698354 | 2 | 771.4214 | 3.13E+10  | 2.52E+10  |
| ASKPTLNEVVIVSAIR      | Q8QZT1  | 0.0028399  | n +42.03 Da,K +34.06 Da, | 2822.062019 | 2 | 884.0221 | 2.363E+09 | 1.938E+09 |
| SSPAQPAVPAPLADLKIQHT  | P24549  | 0          | n +42.03 Da,K +28.03 Da, | 2831.630547 | 2 | 1056.078 | 486855008 | 349335008 |
| SSPAQPAVPAPLADLKIQHT  | P24549  | 0          | n +42.03 Da,K +28.03 Da, | 2831.75276  | 3 | 704.3877 | 547129024 | 496963008 |
| ASKPTLNEVVIVSAIR      | Q8QZT1  | 0.01323007 | n +42.03 Da,K +28.03 Da, | 2832.073884 | 3 | 589.6842 | 296599008 | 230360992 |
| AAQIPESDQIKQKFEF      | Q9VWV98 | 0.00518852 | n +42.03 Da,K +34.06 Da, | 2835.83793  | 3 | 663.7052 | 136268992 | 51934500  |
| GPKVIQPEVDTPVLR       | Q8VCU1  | 0          | n +14.02 Da,K +28.03 Da, | 2836.236907 | 2 | 824.4751 | 1.451E+10 | 1.508E+10 |
| MDEPSPLAKTLELNQH      | Q5SWU9  | 0          | n +42.03 Da,K +28.03 Da, | 2838.963683 | 3 | 631.6529 | 277712992 | 229239008 |
| REHVLRHQR             | Q3TDV8  | 0.04617149 | n +17.03 Da,             | 2839.114495 | 2 | 624.3719 | 1.232E+09 | 559788992 |
| MDEPSPLAKTLELNQH      | Q5SWU9  | 0          | n +42.03 Da,K +28.03 Da, | 2839.266599 | 2 | 946.9748 | 2.126E+09 | 1.739E+09 |
| AAQIPESDQIKQKFEF      | Q9VWV98 | 0          | n +42.03 Da,K +28.03 Da, | 2839.551655 | 2 | 989.0219 | 1.264E+09 | 1.16E+09  |
| SSPAQPAVPAPLADLKIQH   | P24549  | 0          | n +42.03 Da,K +28.03 Da, | 2843.285458 | 2 | 1004.043 | 405926016 | 3.961E+10 |
| SSPAQPAVPAPLADLKIQH   | P24549  | 0          | n +42.03 Da,K +34.06 Da, | 2844.182241 | 2 | 1005.555 | 2.772E+10 | 2.491E+10 |
| SSPAQPAVPAPLADLKIQH   | P24549  | 0          | n +42.03 Da,K +28.03 Da, | 2847.32987  | 3 | 670.7073 | 2.419E+11 | 2.17E+11  |
| SLPFLVAPGSQLR         | Q8VCR7  | 0          | n +28.03 Da,             | 2847.429882 | 2 | 706.917  | 235204992 | 134114000 |
| AELKYISGFGNECASEDPR   | O09173  | 0          | n +42.03 Da,K +34.06 Da, | 2861.393437 | 2 | 1107.013 | 1.68E+10  | 1.531E+10 |
| AELKYISGFGNECASEDPR   | O09173  | 0          | n +42.03 Da,K +28.03 Da, | 2861.632144 | 3 | 738.3444 | 3.557E+10 | 3.196E+10 |
| PQDALEGVILSPSLEAR     | Q925I1  | 0          | n +14.02 Da,             | 2862.013137 | 2 | 905.0084 | 17316500  | 79582496  |
| ATDMSQGELIHPKALPL     | Q3TEA8  | 0          | n +42.03 Da,K +34.06 Da, | 2868.832938 | 2 | 946.0062 | 602531968 | 332915008 |
| PQDALEGVILSPSLEAR     | Q925I1  | 0          | n +14.02 Da,             | 2872.347654 | 2 | 905.0197 | 677214016 | 584696000 |

|                             |        |            |                          |             |   |          |           |           |
|-----------------------------|--------|------------|--------------------------|-------------|---|----------|-----------|-----------|
| PTQEPIFPPELLR               | Q00519 | 0          | n +14.02 Da,             | 2877.307966 | 2 | 775.9338 | 71590600  | 533647008 |
| METDVTSDTVEVLPQHKF          | Q80XL6 | 0          | n +42.03 Da,K +28.03 Da, | 2881.952315 | 2 | 1070.515 | 491329984 | 1.694E+09 |
| ALKAADTIGYPVMIR             | Q8C196 | 0          | n +28.03 Da,K +28.03 Da, | 2883.019587 | 2 | 837.9682 | 869724032 | 859598976 |
| METDVTSDTVEVLPQHKF          | Q80XL6 | 0          | n +42.03 Da,K +28.03 Da, | 2883.888356 | 3 | 714.0115 | 958337024 | 1.678E+09 |
| PDSIPSIQVIENDR              | Q6NXL1 | 0          | n +17.03 Da,             | 2885.588427 | 2 | 847.4432 | 142814000 | 106921000 |
| ADPDVLTEVPAALKR             | Q9D0D5 | 0          | n +42.03 Da,K +34.06 Da, | 2887.487909 | 2 | 832.9635 | 733550016 | 639542016 |
| VPPVQVSPLIKF                | Q06185 | 0          | n +28.03 Da,K +28.03 Da, | 2892.731794 | 3 | 460.6271 | 310880992 | 325281984 |
| PQDALEGVILSPLEAR            | Q925I1 | 0          | n +14.02 Da,             | 2895.588536 | 2 | 901.9945 | 211952992 | 332544000 |
| GSWKTGQSYLAAGLLKN           | Q99MZ7 | 0          | n +42.03 Da,K +28.03 Da, | 2898.615117 | 2 | 941.9871 | 507628000 | 1.312E+09 |
| GSWKTGQSYLAAGLLKN           | Q99MZ7 | 0.00112402 | n +42.03 Da,K +34.06 Da, | 2900.95119  | 3 | 634.3634 | 16653500  | 212007008 |
| MQETSLTPAHLSSAAQQR          | P54869 | 0          | n +42.03 Da,             | 2901.532717 | 1 | 675.3425 | 189632992 | 309128000 |
| PFDLIEDPNR                  | Q9DBT9 | 0          | n +14.02 Da,             | 2903.127807 | 2 | 671.8541 | 530391008 | 104548000 |
| DDDIAALVVDNGSGMCKAGFAGDDAPR | P60710 | 0          | n +42.03 Da,K +28.03 Da, | 2903.419894 | 3 | 936.4248 | 77756096  | 63259400  |
| TFVQENVYDEFVER              | P47738 | 0          | n +28.03 Da,             | 2904.057691 | 2 | 901.9323 | 2.827E+09 | 1.01E+09  |
| TFVQENVYDEFVER              | P47738 | 0          | n +28.03 Da,             | 2904.182098 | 3 | 601.6242 | 508409984 | 202388992 |
| SDFGLESTTGEVPVVAIR          | P27773 | 0          | n +28.03 Da,             | 2905.12098  | 2 | 953.0052 | 312840992 | 271831008 |
| TIYPLPETLNFR                | P47199 | 0.04499567 | n +34.06 Da,             | 2906.23716  | 3 | 749.4215 | 117336000 | 385291008 |
| PTGGAGAVAMLIGPKAPL          | P54869 | 0          | n +14.02 Da,K +28.03 Da, | 2908.199509 | 2 | 831.985  | 3.572E+09 | 2.814E+09 |
| SLVIPEKFQHILR               | P62270 | 0.00112402 | n +42.03 Da,K +28.03 Da, | 2908.947897 | 3 | 550.6628 | 211046000 | 249236000 |
| GGLLLGDEAPNFEANTTIGR        | O08709 | 0          | n +28.03 Da,             | 2908.994773 | 2 | 1037.036 | 638100992 | 574924992 |
| SVTAVAGLTSYPFDTVR           | P51881 | 0          | n +28.03 Da,             | 2914.861884 | 2 | 906.4668 | 2.375E+09 | 2.372E+09 |
| MQETSLTPAHLSSAAQQR          | P54869 | 0          | n +42.03 Da,             | 2916.478516 | 2 | 1009.509 | 44846900  | 168396000 |
| ADMILLDDNFASIVTGVEEGR       | Q6PIC6 | 0          | n +17.03 Da,             | 2918.046403 | 3 | 757.3683 | 445839008 | 378128992 |
| GAIVDVPVGEELLGR             | Q03265 | 0          | n +28.03 Da,             | 2921.550319 | 2 | 776.4396 | 1.94E+09  | 1.698E+09 |
| SGEDEQQEQTIAEDLVVTKYK       | P50580 | 0          | n +42.03 Da,K +34.06 Da, | 2925.177531 | 2 | 1254.621 | 1.709E+09 | 1.422E+09 |
| SGEDEQQEQTIAEDLVVTKYK       | P50580 | 0          | n +42.03 Da,K +28.03 Da, | 2925.599651 | 3 | 836.7496 | 6.977E+09 | 6.126E+09 |
| PGLLLLGDEAPNFEANTTIGR       | O08709 | 0          | n +14.02 Da,             | 2927.528429 | 2 | 1078.552 | 5.09E+10  | 4.538E+10 |
| PGLLLLGDEAPNFEANTTIGR       | O08709 | 0          | n +14.02 Da,             | 2929.059906 | 3 | 719.3718 | 5.835E+10 | 5.222E+10 |
| PVDPAVPVPIGPPAGFR           | Q05920 | 0          | n +14.02 Da,             | 2930.332433 | 3 | 627.6716 | 40335600  | 264472000 |
| TGELTNLNVPGELYIR            | Q8VCW8 | 0          | n +34.06 Da,             | 2930.567806 | 2 | 912.0025 | 521849984 | 423152992 |
| SDFGLESTTGEVPVVAIR          | P27773 | 0          | n +28.03 Da,             | 2931.606103 | 2 | 952.9838 | 60225300  | 67742600  |
| SHQTGIQASEDVKEIFAR          | Q91YR1 | 0          | n +42.03 Da,K +28.03 Da, | 2932.449257 | 3 | 695.0042 | 285316992 | 473294016 |
| FVGAVDPIMEKF                | Q91YI0 | 0.04982916 | n +28.03 Da,K +28.03 Da, | 2932.740879 | 2 | 704.8807 | 209370000 | 173372000 |
| APVIEPSGPELVVEPGETVTLR      | P09581 | 0          | n +34.06 Da,             | 2932.951373 | 2 | 1159.137 | 71396400  | 51056900  |
| APVIEPSGPELVVEPGETVTLR      | P09581 | 0          | n +28.03 Da,             | 2934.868141 | 3 | 773.0931 | 357660992 | 408455008 |
| PALQEFQLVDSL                | Q05793 | 0          | n +17.03 Da,             | 2938.720874 | 2 | 765.4249 | 21904000  | 22840200  |
| PGLLLLGDEAPNFEANTTIGR       | O08709 | 0          | n +28.03 Da,             | 2940.978547 | 3 | 724.0407 | 63743300  | 232136000 |
| PSILDSLNLNEDER              | Q6ZWX6 | 0          | n +14.02 Da,             | 2950.74383  | 2 | 815.4007 | 494358016 | 282288992 |
| MNTGEYNKLGSAIEEVS           | Q8BNX1 | 0          | n +42.03 Da,K +28.03 Da, | 2958.364186 | 2 | 1034.502 | 232122000 | 246326000 |
| SVVVAQAQTLNSNAEFQMLR        | Q8C196 | 0.00180375 | n +34.06 Da,             | 2958.812858 | 3 | 697.042  | 32659200  | 19719600  |



|                          |        |            |                                      |             |   |          |           |           |
|--------------------------|--------|------------|--------------------------------------|-------------|---|----------|-----------|-----------|
| TGAIVDVPVGEELLGR         | Q03265 | 0          | n +34.06 Da,                         | 2960.781583 | 2 | 826.9645 | 1.06E+10  | 4.253E+09 |
| TAAYVNAIEKVF             | P26443 | 0          | n +28.03 Da,                         | 2961.554808 | 2 | 691.3981 | 30913400  | 32773500  |
| TGAIVDVPVGEELLGR         | Q03265 | 0          | n +28.03 Da,                         | 2963.807508 | 3 | 551.6455 | 1.47E+09  | 648470976 |
| GLDEIIMAAPLR             | O70362 | 0          | n +34.06 Da,                         | 2964.526459 | 2 | 663.8873 | 742361024 | 614878016 |
| AVGGQVLSLFTNR            | Q8VCT4 | 0          | n +28.03 Da,                         | 2984.619101 | 2 | 759.9171 | 767833024 | 750854976 |
| AVGGQVLSLFTNR            | Q8VCT4 | 0.00079777 | n +34.06 Da,                         | 2986.457511 | 3 | 506.9482 | 181623008 | 173900992 |
| AFQELLNQVGSGLR           | B2RT89 | 0          | n +34.06 Da,                         | 2999.37408  | 2 | 783.4267 | 704956992 | 651921024 |
| GTAEDFADQFLR             | Q64310 | 0          | n +28.03 Da,                         | 3001.067039 | 2 | 699.3386 | 280555008 | 237280992 |
| TGAIVDVPVGEELLGR         | Q03265 | 0          | n +42.03 Da,                         | 3005.709078 | 3 | 554.3203 | 1.017E+09 | 664697024 |
| AVEELQSIKR               | Q8BZM1 | 0          | n +42.03 Da,n +34.06 Da,             | 3012.047738 | 2 | 678.3958 | 1.691E+09 | 1.462E+09 |
| PSPVDPVAVPVVPIGPPAGFR    | Q05920 | 0.00040437 | n +14.02 Da,                         | 3015.496833 | 3 | 692.0452 | 379180992 | 1.153E+09 |
| PAPATTF AHLDATTVLSR      | P56480 | 0          | n +28.03 Da,                         | 3018.09443  | 2 | 949.0272 | 1.202E+09 | 587046976 |
| PSIAYFPQIVSVAAR          | P85094 | 0          | n +14.02 Da,                         | 3018.118693 | 2 | 816.944  | 484112992 | 506928000 |
| AAAKKAVLGPLVGAVDQGTSSSTR | Q64516 | 0          | n +42.03 Da,K +28.03 Da,             | 3018.221612 | 3 | 765.7607 | 2.775E+09 | 2.21E+09  |
| LEQYAAEFAAR              | Q8K070 | 0.04617149 | n +34.06 Da,                         | 3022.822898 | 1 | 651.8403 | 17217300  | 16760400  |
| ATAVVVNIGKKLY            | Q9DCL9 | 0          | n +42.03 Da,n +34.06 Da,K +34.06 Da, | 3026.649595 | 2 | 741.9791 | 140696000 | 1.223E+09 |
| GVIPTLTFLR               | Q9DCT2 | 0.00040437 | n +28.03 Da,                         | 3030.510394 | 2 | 572.8579 | 25024500  | 14904700  |
| MEANVTIPIWQNKPH          | Q9CWE0 | 0          | n +42.03 Da,K +34.06 Da,             | 3032.489231 | 2 | 924.4743 | 64568700  | 42178100  |
| AFQELLNQVGSGLR           | B2RT89 | 0          | n +34.06 Da,                         | 3043.328942 | 2 | 780.4303 | 2.071E+09 | 1.634E+09 |
| DFTPSGIAGAFR             | P56135 | 0          | n +28.03 Da,                         | 3045.421927 | 2 | 633.8281 | 143640992 | 44426500  |
| AQEFVNCKIQSGKVVVF        | Q9QUH0 | 0          | n +42.03 Da,K +28.03 Da,             | 3053.085939 | 3 | 684.3732 | 249427008 | 276907008 |
| AQEFVNCKIQSGKVVVF        | Q9QUH0 | 0.01078079 | n +42.03 Da,K +28.03 Da,             | 3054.767769 | 2 | 1026.055 | 1.462E+09 | 1.586E+09 |
| PTQELIFPPELMR            | O54754 | 0          | n +17.03 Da,                         | 3058.479469 | 2 | 792.9278 | 1.973E+09 | 1.191E+09 |
| ASASYHISNLLLEKM          | Q62Q38 | 0          | n +42.03 Da,K +34.06 Da,             | 3061.664522 | 2 | 817.4174 | 474740000 | 453881984 |
| VLESVVADLLNR             | Q8BX70 | 0          | n +28.03 Da,                         | 3063.525272 | 2 | 675.3662 | 1.653E+09 | 1.309E+09 |
| PGLLLLGDEAPNFEANTTIGR    | O08709 | 0          | n +42.03 Da,                         | 3064.553118 | 2 | 1092.569 | 302099008 | 219384992 |
| PTQELIFPPELMR            | O54754 | 0          | n +14.02 Da,                         | 3065.001362 | 3 | 528.9537 | 155032992 | 102149000 |
| SSILPFTPIVVKR            | Q8BUN5 | 0.02532804 | n +42.03 Da,K +28.03 Da,             | 3066.449239 | 2 | 762.9611 | 348556000 | 270772992 |
| AFQELLNQVGSGLR           | B2RT89 | 0          | n +34.06 Da,                         | 3067.409717 | 2 | 783.4504 | 679329984 | 579251008 |
| AATFFGEVVKAPCR           | Q9JK23 | 0.00079777 | n +42.03 Da,n +28.03 Da,             | 3069.383522 | 2 | 811.921  | 1.652E+09 | 1.531E+09 |
| MMMLGPEGGEGYVVKLR        | Q9Z2X1 | 0          | n +42.03 Da,K +34.06 Da,             | 3072.314713 | 2 | 903.4656 | 892729024 | 651782016 |
| VLESVVADLLNR             | Q8BX70 | 0          | n +28.03 Da,                         | 3083.226135 | 2 | 678.3996 | 1.177E+09 | 1.078E+09 |
| SGLLLVTGPLVINR           | P47911 | 0          | n +34.06 Da,                         | 3088.986947 | 2 | 740.4661 | 449016992 | 509252000 |
| VTSGNAVDFFPVLR           | P00186 | 0.00112402 | n +34.06 Da,                         | 3090.790098 | 2 | 775.4274 | 689993024 | 64458000  |
| GENIAESLVAEGLATR         | Q78PY7 | 0.00040437 | n +28.03 Da,                         | 3093.240451 | 3 | 553.2968 | 45645300  | 51845100  |
| VSPSPVDPVAVPVVPIGPPAGFR  | Q05920 | 0          | n +28.03 Da,                         | 3094.910839 | 2 | 1140.641 | 803171968 | 680452992 |
| PPFDLIELDPNR             | Q9DBT9 | 0.03111909 | n +14.02 Da,                         | 3095.256222 | 2 | 720.3802 | 945892992 | 465209984 |
| MPPYTIVYFPVR             | P19157 | 0          | n +28.03 Da,                         | 3095.605497 | 3 | 504.2759 | 38852100  | 24546500  |
| LERLSAERSQKAAPQV         | Q921G8 | 0.01141925 | n +14.02 Da,K +28.03 Da,             | 3098.728765 | 2 | 911.4966 | 236596992 | 151144992 |
| VSPSPVDPVAVPVVPIGPPAGFR  | Q05920 | 0          | n +34.06 Da,                         | 3100.233387 | 3 | 760.7626 | 3.271E+09 | 2.819E+09 |

|                           |        |            |                                      |             |   |          |           |           |
|---------------------------|--------|------------|--------------------------------------|-------------|---|----------|-----------|-----------|
| SPTPGVEALGASLDAAPSDVPASLR | Q4LDG0 | 0          | n +34.06 Da,                         | 3101.916452 | 3 | 835.1067 | 463383008 | 459756000 |
| MDPSGVKVKLEAEDIQER        | P16546 | 0          | n +42.03 Da,K +28.03 Da,             | 3103.074062 | 3 | 696.3486 | 7.734E+09 | 7.59E+09  |
| MDPSGVKVKLEAEDIQER        | P16546 | 0          | n +42.03 Da,K +34.06 Da,             | 3103.091454 | 2 | 1044.019 | 6.184E+09 | 5.817E+09 |
| ASQQDFENALNQVKL           | Q9WUR2 | 0          | n +28.03 Da,K +28.03 Da,             | 3103.314552 | 2 | 880.9617 | 595857024 | 548787008 |
| DTTFGLAAGVFTR             | Q9JLJ2 | 0          | n +28.03 Da,                         | 3103.385042 | 2 | 692.3691 | 76829600  | 64777900  |
| DAGEFVDLYVPR              | Q9CQR2 | 0          | n +34.06 Da,                         | 3120.281982 | 2 | 704.8586 | 880443008 | 933844992 |
| AELEEVTLDGKPLQALR         | Q9JIX8 | 0          | n +42.03 Da,K +28.03 Da,             | 3130.612423 | 2 | 976.5386 | 305791008 | 245067008 |
| AELEEVTLDGKPLQALR         | Q9JIX8 | 0          | n +42.03 Da,K +28.03 Da,             | 3132.120946 | 3 | 651.3632 | 49190400  | 33703600  |
| PTQELIFPPELMR             | O54754 | 0          | n +14.02 Da,                         | 3132.383064 | 2 | 792.9248 | 555017984 | 292280992 |
| SVVVAPAQTLSNAEFQMLR       | Q8C196 | 0          | n +34.06 Da,                         | 3133.040986 | 3 | 699.0522 | 1.134E+09 | 220212000 |
| PTQELIFPPELMR             | O54754 | 0          | n +14.02 Da,                         | 3139.427945 | 2 | 791.4124 | 39389900  | 210635008 |
| TFLGGEDFDQALLR            | P38647 | 0          | n +34.06 Da,                         | 3139.822811 | 2 | 805.4145 | 1.462E+09 | 1.715E+09 |
| TIALPAQGLIEFR             | O35295 | 0.00215363 | n +28.03 Da,                         | 3140.539128 | 2 | 728.9311 | 84649400  | 87522304  |
| GLVIASLENYAPLSR           | Q9DB77 | 0          | n +28.03 Da,                         | 3143.131505 | 2 | 815.9644 | 521307008 | 403473984 |
| INVLPPLGSGAIAGNPLGVDR     | Q91YI0 | 0.0380117  | n +42.03 Da,                         | 3143.873895 | 2 | 985.0341 | 56636900  | 58946100  |
| PLGIELPLQTLR              | Q9D826 | 0.0353461  | n +14.02 Da,                         | 3145.31908  | 2 | 676.3845 | 93781296  | 107872000 |
| SVVVAPAQTLSNAEFQMLR       | Q8C196 | 0          | n +34.06 Da,                         | 3149.607514 | 2 | 1045.062 | 1.264E+10 | 9.952E+09 |
| PASPAEPPFQALVEAAGGR       | Q9CYS6 | 0          | n +14.02 Da,                         | 3152.707009 | 2 | 935.4673 | 26361300  | 14280900  |
| ALHVPKAPGFAQML            | P42932 | 0.00551914 | n +42.03 Da,K +34.06 Da,             | 3156.352198 | 2 | 778.4235 | 23880300  | 17433900  |
| SVVVAPAQTLSNAEFQMLR       | Q8C196 | 0          | n +28.03 Da,                         | 3158.94347  | 3 | 697.0451 | 1.148E+10 | 6.113E+09 |
| GLDPAFTPATGTPVLGGLSYR     | Q61176 | 0          | n +28.03 Da,                         | 3160.59313  | 2 | 1059.566 | 5.029E+09 | 5.134E+09 |
| GLDPAFTPATGTPVLGGLSYR     | Q61176 | 0          | n +34.06 Da,                         | 3161.34175  | 3 | 706.7126 | 4.945E+09 | 4.807E+09 |
| APPVPGAVSGGSEVDELFDVKNAF  | O89079 | 0.00903614 | n +34.06 Da,K +34.06 Da,             | 3162.606414 | 3 | 839.0944 | 30317500  | 13264900  |
| EGEPDPEFEAILDTPVDPNR      | P16546 | 0.00387597 | n +28.03 Da,                         | 3162.855399 | 4 | 543.5144 | 57975700  | 49810100  |
| TIPIDGDFFSYTR             | P47738 | 0.00354108 | n +28.03 Da,                         | 3181.338337 | 2 | 780.3894 | 491926016 | 630129024 |
| SALELTHEELATAEAVR         | Q8R0Y6 | 0          | n +34.06 Da,                         | 3182.906081 | 3 | 622.669  | 961345984 | 1.458E+09 |
| SALELTHEELATAEAVR         | Q8R0Y6 | 0          | n +34.06 Da,                         | 3183.053288 | 2 | 930.4835 | 411596000 | 402499008 |
| MELVEVLKR                 | Q7TMF3 | 0.00180375 | n +42.03 Da,K +34.06 Da,             | 3183.188989 | 2 | 593.8472 | 3.013E+10 | 2.569E+10 |
| FIDLPTSLPH                | Q64458 | 0          | n +28.03 Da,                         | 3184.457344 | 2 | 640.8661 | 1.342E+09 | 597814016 |
| INVLPPLGSGAIAGNPLGVDR     | Q91YI0 | 0          | n +42.03 Da,                         | 3186.541384 | 1 | 975.9941 | 14844200  | 302216000 |
| PTQELIFPPELMR             | O54754 | 0          | n +17.03 Da,                         | 3188.878931 | 2 | 791.4337 | 130876000 | 116165000 |
| SVVVAPAQTLSNAEFQMLR       | Q8C196 | 0          | n +28.03 Da,                         | 3192.317525 | 3 | 697.0494 | 1.594E+10 | 1.465E+10 |
| SVVVAPAQTLSNAEFQMLR       | Q8C196 | 0          | n +28.03 Da,                         | 3193.239861 | 2 | 1045.071 | 1.676E+10 | 1.542E+10 |
| SALELTHEELATAEAVR         | Q8R0Y6 | 0          | n +34.06 Da,                         | 3194.797851 | 3 | 620.6582 | 17356400  | 10989900  |
| AAKFVESIGKF               | P67778 | 0.00079777 | n +42.03 Da,n +28.03 Da,K +28.03 Da, | 3202.530201 | 2 | 647.8742 | 7.059E+09 | 7.245E+09 |
| PASPAEPPFQALVEAAGGR       | Q9CYS6 | 0          | n +14.02 Da,                         | 3203.153579 | 2 | 938.4867 | 15701400  | 51468500  |
| PEDIDLPLSSGLGNLPR         | P33267 | 0          | n +17.03 Da,                         | 3205.001261 | 3 | 636.6744 | 145596000 | 108813000 |
| TIPIDGDFFSYTR             | P47738 | 0          | n +28.03 Da,                         | 3209.842934 | 2 | 779.4116 | 27220900  | 15698300  |
| PEDIDLPLSSGLGNLPR         | P33267 | 0          | n +14.02 Da,                         | 3210.229154 | 2 | 954.508  | 619382016 | 449574016 |
| VGGGGSGGGLLENANPLIYER     | Q9D187 | 0          | n +28.03 Da,                         | 3213.245596 | 2 | 1029.545 | 73626496  | 46540300  |

|                         |        |            |                                      |             |   |          |           |           |
|-------------------------|--------|------------|--------------------------------------|-------------|---|----------|-----------|-----------|
| ADIDKLNIDSIIQR          | P63087 | 0.01404853 | n +42.03 Da,K +34.06 Da,             | 3213.741822 | 2 | 845.4669 | 314912992 | 216866000 |
| AQPKNLEGYVGFANLPNQVYR   | O55131 | 0          | n +42.03 Da,K +34.06 Da,             | 3214.395275 | 2 | 1224.637 | 70036896  | 61607100  |
| INVLPPLGSGAIAIGNPLGVDR  | Q91Y10 | 0          | n +42.03 Da,                         | 3217.243604 | 3 | 656.0281 | 8949940   | 45764800  |
| AQPKNLEGYVGFANLPNQVYR   | O55131 | 0          | n +42.03 Da,K +28.03 Da,             | 3219.516477 | 3 | 816.7616 | 1.11E+09  | 998931008 |
| PTQELIFPPELMR           | O54754 | 0          | n +14.02 Da,                         | 3223.303482 | 2 | 792.9251 | 243046000 | 251135008 |
| INVLPPLGSGAIAIGNPLGVDR  | Q91Y10 | 0          | n +28.03 Da,                         | 3224.55979  | 3 | 653.373  | 296579008 | 1.061E+09 |
| GVLALPSIAGAFR           | P34914 | 0          | n +28.03 Da,                         | 3225.054    | 2 | 650.3931 | 607073024 | 668590016 |
| INVLPPLGSGAIAIGNPLGVDR  | Q91Y10 | 0          | n +28.03 Da,                         | 3225.970002 | 2 | 979.5552 | 1.05E+09  | 1.558E+09 |
| MDNSGKQAEAMALLAEAER     | Q9DB05 | 0          | n +42.03 Da,K +28.03 Da,             | 3226.223857 | 2 | 1053.003 | 2.322E+09 | 1.928E+09 |
| PASPAEPPFQALVEAAGGR     | Q9CYS6 | 0          | n +14.02 Da,                         | 3226.24437  | 3 | 625.994  | 49211700  | 136024000 |
| MDNSGKQAEAMALLAEAER     | Q9DB05 | 0          | n +42.03 Da,K +28.03 Da,             | 3226.907124 | 3 | 702.3384 | 5.019E+09 | 4.265E+09 |
| PASPAEPPFQALVEAAGGR     | Q9CYS6 | 0          | n +14.02 Da,                         | 3228.609728 | 2 | 935.4658 | 605473024 | 145030000 |
| DIVLTQSPASLAVSLGQR      | P01654 | 0          | n +28.03 Da,                         | 3233.237163 | 3 | 628.3585 | 83667904  | 41142700  |
| TIDSVIVGNVMQSSSDAAYLAR  | Q8BWT1 | 0          | n +28.03 Da,                         | 3236.879094 | 3 | 775.7316 | 1.083E+09 | 1.13E+09  |
| INVLPPLGSGAIAIGNPLGVDR  | Q91Y10 | 0          | n +42.03 Da,                         | 3236.893848 | 3 | 659.0528 | 64019900  | 111836000 |
| PQTTLQLKQLPSVF          | Q8BWT1 | 0          | n +14.02 Da,n +28.03 Da,             | 3237.611982 | 2 | 886.0044 | 2.861E+09 | 1.873E+09 |
| TIDSVIVGNVMQSSSDAAYLAR  | Q8BWT1 | 0          | n +34.06 Da,                         | 3240.266793 | 2 | 1163.099 | 166598000 | 155044992 |
| PTGLTLGSLVDEIQR         | Q9DBM2 | 0          | n +14.02 Da,                         | 3249.059782 | 2 | 803.93   | 385329984 | 457913984 |
| GLPPILNALEVQGR          | P56480 | 0.02876173 | n +34.06 Da,                         | 3249.612363 | 2 | 755.9584 | 35530200  | 35481200  |
| QLQWVHHKAFHDLHR         | Q8K055 | 0.04236796 | n +17.03 Da,K +34.06 Da,             | 3251.37027  | 3 | 666.3587 | 147078000 | 123465000 |
| DPAVPVVPVIGPPPAGFR      | Q05920 | 0.00215363 | n +28.03 Da,                         | 3254.790093 | 2 | 854.4566 | 286871008 | 300036992 |
| ADIDKLNIDSIIQR          | P63087 | 0          | n +42.03 Da,K +34.06 Da,             | 3256.30475  | 3 | 561.9815 | 652289984 | 564934976 |
| SQDAVGGQVLSLFTNR        | Q8VCT4 | 0          | n +28.03 Da,                         | 3263.224493 | 3 | 616.9865 | 163660000 | 187771008 |
| DGAAALVLMTAAEAQR        | Q8QZT1 | 0          | n +34.06 Da,                         | 3282.552738 | 3 | 539.2877 | 50871000  | 63276000  |
| SGALDVLQMKEEDVLK        | P14206 | 0          | n +42.03 Da,n +34.06 Da,K +34.06 Da, | 3283.515191 | 2 | 937.0049 | 698273984 | 513679008 |
| GLPPILNALEVQGR          | P56480 | 0.00040437 | n +28.03 Da,                         | 3289.813391 | 2 | 752.9459 | 307932992 | 427041984 |
| ACANPAAGTVILLENLR       | P09411 | 0          | n +34.06 Da,                         | 3292.633434 | 3 | 604.3338 | 90942400  | 86354096  |
| GDTFLGGEDFDQALLR        | P38647 | 0          | n +34.06 Da,                         | 3293.474889 | 2 | 891.4385 | 1.422E+09 | 1.362E+09 |
| PGSISWDGLDPGKLY         | Q8VIN1 | 0          | n +42.03 Da,K +34.06 Da,             | 3300.000155 | 2 | 837.9222 | 1.648E+09 | 1.561E+09 |
| MNEVSVIKEGWLH           | Q60823 | 0          | n +42.03 Da,K +28.03 Da,             | 3300.256779 | 2 | 806.4134 | 2.255E+09 | 2.157E+09 |
| GDSVVVAPAQTLNSNAEFQMLR  | Q8C196 | 0          | n +28.03 Da,                         | 3301.948552 | 2 | 1131.085 | 1.037E+09 | 401647008 |
| AIAELGIYPVDPDLDSTSR     | P56480 | 0          | n +42.03 Da,                         | 3305.742099 | 2 | 1012.526 | 575772032 | 534203008 |
| AIAELGIYPVDPDLDSTSR     | P56480 | 0.00488656 | n +42.03 Da,                         | 3306.610109 | 3 | 675.3537 | 184415008 | 189812992 |
| AGYEYVSPEQLSGFDKYKY     | Q80TA1 | 0          | n +42.03 Da,K +28.03 Da,             | 3306.634632 | 3 | 778.3672 | 110320000 | 593779968 |
| TGDSVVVAPAQTLNSNAEFQMLR | Q8C196 | 0          | n +28.03 Da,                         | 3310.636265 | 3 | 788.0741 | 2.958E+09 | 2.974E+09 |
| TGDSVVVAPAQTLNSNAEFQMLR | Q8C196 | 0          | n +28.03 Da,                         | 3311.60893  | 2 | 1181.608 | 2.838E+09 | 2.782E+09 |
| SVPPALQLQDLTALR         | Q9DCQ2 | 0          | n +34.06 Da,                         | 3311.619672 | 2 | 957.5152 | 139190000 | 97992096  |
| VDLTFEQTNLVPYPR         | P05213 | 0          | n +34.06 Da,                         | 3314.055408 | 2 | 910.5037 | 344529984 | 350457984 |
| AGYEYVSPEQLSGFDKYKY     | Q80TA1 | 0          | n +42.03 Da,K +34.06 Da,             | 3314.943226 | 2 | 1176.086 | 83344400  | 425459008 |
| AGYEYVSPEQLSGFDKYKY     | Q80TA1 | 0          | n +42.03 Da,K +34.06 Da,             | 3317.489795 | 3 | 784.3928 | 103766000 | 529212992 |

|                             |        |            |                                      |             |   |          |           |           |
|-----------------------------|--------|------------|--------------------------------------|-------------|---|----------|-----------|-----------|
| AGYEYVSPQLSGFDKYKY          | Q80TA1 | 0          | n +42.03 Da,K +28.03 Da,             | 3329.562887 | 2 | 1171.566 | 144552000 | 136258000 |
| TPEIAGLTPSQALEIIR           | A2AS89 | 0          | n +28.03 Da,                         | 3330.060472 | 3 | 613.0194 | 76685696  | 90374400  |
| TPEIAGLTPSQALEIIR           | A2AS89 | 0          | n +34.06 Da,                         | 3332.803088 | 2 | 919.0253 | 474985984 | 586259968 |
| PSEEDINFILNEVR              | Q64521 | 0          | n +14.02 Da,                         | 3336.994045 | 2 | 840.9609 | 991148032 | 1.126E+09 |
| MDILKSEILR                  | Q8BM39 | 0.00112402 | n +42.03 Da,K +28.03 Da,             | 3343.479152 | 2 | 644.372  | 244526000 | 150151008 |
| SPPGDTSNLFPGTWYLER          | P54869 | 0.00518852 | n +28.03 Da,                         | 3345.189248 | 2 | 1033.005 | 409631008 | 393756000 |
| YEPIDATGFININSLR            | P16460 | 0          | n +34.06 Da,                         | 3356.385965 | 2 | 925.9851 | 486855008 | 490936992 |
| SSALELTHEELATAEA VR         | Q8R0Y6 | 0.00146897 | n +28.03 Da,                         | 3358.560268 | 3 | 649.6686 | 505657984 | 507592992 |
| SSALELTHEELATAEA VR         | Q8R0Y6 | 0          | n +28.03 Da,                         | 3359.399838 | 2 | 974.0002 | 143888992 | 127133000 |
| EGLPPILNALEVQGR             | P56480 | 0          | n +28.03 Da,                         | 3366.831942 | 2 | 817.4682 | 1.265E+09 | 1.368E+09 |
| AAAAQLSLTQLSSGNPVYKYYR      | P42567 | 0          | n +42.03 Da,n +34.06 Da,             | 3370.314714 | 3 | 867.452  | 173570000 | 166396000 |
| ASSALELTHEELATAEA VR        | Q8R0Y6 | 0          | n +28.03 Da,                         | 3370.770094 | 3 | 673.3464 | 38059800  | 70111904  |
| AGYEYVSPQLSGFDKYKY          | Q80TA1 | 0          | n +42.03 Da,K +34.06 Da,             | 3372.767422 | 3 | 785.4077 | 53778700  | 48373900  |
| MQKDASLSGFLPSFQH            | Q8VCN5 | 0          | n +42.03 Da,K +28.03 Da,             | 3376.409082 | 3 | 621.6418 | 3.638E+09 | 3.158E+09 |
| MQKDASLSGFLPSFQH            | Q8VCN5 | 0          | n +42.03 Da,K +28.03 Da,             | 3376.832644 | 2 | 931.9588 | 3.353E+09 | 2.816E+09 |
| ATESSPLTTHVLDTASGLPAQGCLLR  | Q9CRB3 | 0          | n +42.03 Da,                         | 3377.746058 | 3 | 912.0941 | 318121984 | 113866000 |
| VDGLDPAFTPATGTPVLGGLSYR     | Q61176 | 0          | n +28.03 Da,                         | 3378.620797 | 2 | 1166.614 | 443438016 | 427073984 |
| VDGLDPAFTPATGTPVLGGLSYR     | Q61176 | 0          | n +34.06 Da,                         | 3379.584673 | 3 | 778.0784 | 1.077E+09 | 1.033E+09 |
| MNFSGKYQLQSQENFEPFMK        | P12710 | 0          | n +42.03 Da,n +28.03 Da,K +28.03 Da, | 3388.161361 | 3 | 851.0699 | 941883008 | 797414976 |
| DWVIPPINLPENSR              | P15116 | 0          | n +34.06 Da,                         | 3388.4181   | 3 | 559.9702 | 326332992 | 343800000 |
| MDASLEKIADPTLAEMGKN         | Q99K01 | 0          | n +42.03 Da,K +34.06 Da,             | 3389.440454 | 3 | 711.3544 | 43801000  | 52935100  |
| DWVIPPINLPENSR              | P15116 | 0          | n +28.03 Da,                         | 3389.892011 | 2 | 839.4532 | 3.404E+09 | 3.348E+09 |
| PLPPSYVPVVMSELSDR           | E9PZ30 | 0          | n +14.02 Da,                         | 3390.72814  | 3 | 634.0019 | 44575100  | 209340000 |
| MNFSGKYQLQSQENFEPFMK        | P12710 | 0          | n +42.03 Da,n +34.06 Da,K +34.06 Da, | 3391.166579 | 3 | 854.0868 | 44071900  | 515508992 |
| MNFSGKYQLQSQENFEPFMK        | P12710 | 0          | n +42.03 Da,n +28.03 Da,K +28.03 Da, | 3393.347866 | 2 | 1276.105 | 35670600  | 29069200  |
| AAAKKAVLGPLVGAVDQGTSSTR     | Q64516 | 0          | n +42.03 Da,K +28.03 Da,             | 3397.056922 | 3 | 765.7601 | 349536000 | 172575008 |
| VLLESEQFLTELTR              | P16254 | 0          | n +34.06 Da,                         | 3413.24015  | 2 | 853.4717 | 9.644E+09 | 9.023E+09 |
| VLLESEQFLTELTR              | P16254 | 0          | n +34.06 Da,                         | 3414.657275 | 3 | 569.3174 | 639803008 | 555524992 |
| DVYSVFGAPILR                | Q91WU0 | 0          | n +28.03 Da,                         | 3421.72686  | 2 | 682.8822 | 96001600  | 67438704  |
| VNPTVFFDITADDEPLGR          | P17742 | 0          | n +34.06 Da,                         | 3425.294996 | 2 | 1017.512 | 318952992 | 328111008 |
| ASLSLAPVNIKAGADEER          | P80314 | 0          | n +42.03 Da,K +34.06 Da,             | 3426.900054 | 3 | 686.7006 | 7.354E+09 | 7.398E+09 |
| VNPTVFFDITADDEPLGR          | P17742 | 0          | n +34.06 Da,                         | 3429.598816 | 3 | 678.6779 | 33483000  | 44750300  |
| DDDIAALVVDNGSGMCKAGFAGDDAPR | P60710 | 0          | n +42.03 Da,K +28.03 Da,             | 3430.482111 | 3 | 936.4247 | 1.527E+10 | 1.202E+10 |
| GSYQLLVPPPEALSKPLSVPTR      | O35423 | 0          | n +42.03 Da,K +28.03 Da,             | 3430.891059 | 3 | 807.1249 | 6.074E+09 | 5.275E+09 |
| GSYQLLVPPPEALSKPLSVPTR      | O35423 | 0          | n +42.03 Da,K +28.03 Da,             | 3430.997567 | 2 | 1210.184 | 1.448E+09 | 1.183E+09 |
| ASLSLAPVNIKAGADEER          | P80314 | 0          | n +42.03 Da,K +34.06 Da,             | 3431.043239 | 2 | 1029.547 | 2.261E+10 | 2.034E+10 |
| DDDIAALVVDNGSGMCKAGFAGDDAPR | P60710 | 0          | n +42.03 Da,K +34.06 Da,             | 3431.505619 | 2 | 1404.135 | 3.225E+09 | 2.647E+09 |
| AAESALQVVEKLQAR             | Q8CB77 | 0          | n +42.03 Da,K +28.03 Da,             | 3433.093359 | 2 | 841.9756 | 743233024 | 570011008 |
| VEEFIWPAVQSSALYEDR          | P16460 | 0          | n +28.03 Da,                         | 3437.215993 | 3 | 723.0291 | 14856700  | 15087200  |
| QTFVFLSQEVSPEQLPWSYR        | B1AS42 | 0.00647139 | n +17.03 Da,                         | 3445.052144 | 2 | 1226.608 | 781230016 | 749670016 |

|                                     |        |            |                                      |             |   |          |           |           |
|-------------------------------------|--------|------------|--------------------------------------|-------------|---|----------|-----------|-----------|
| DVVGIVEIINSR                        | P40124 | 0          | n +34.06 Da,                         | 3446.049088 | 2 | 665.3681 | 123003000 | 82179200  |
| QTFVLSQEVSPQLPWSYR                  | B1AS42 | 0.00618132 | n +17.03 Da,                         | 3446.075931 | 3 | 818.0734 | 3.219E+09 | 3.14E+09  |
| DSVVVAPAQTLNSNAEFQMLR               | Q8C196 | 0          | n +28.03 Da,                         | 3446.38177  | 3 | 735.3825 | 274921984 | 394852992 |
| SSPVPEFPLAYLTSENR                   | P52825 | 0.00354108 | n +34.06 Da,                         | 3449.677127 | 2 | 967.9967 | 709788992 | 526886016 |
| DSVVVAPAQTLNSNAEFQMLR               | Q8C196 | 0          | n +28.03 Da,                         | 3449.678536 | 2 | 1102.574 | 160816000 | 226742000 |
| GPPPIQDGEFTLLPAGR                   | Q3V009 | 0          | n +34.06 Da,                         | 3453.927952 | 3 | 647.3474 | 2.742E+09 | 2.306E+09 |
| DLVGNNTPIFFIR                       | P24270 | 0          | n +34.06 Da,                         | 3456.496863 | 2 | 767.4238 | 721793024 | 736324992 |
| AALIFFAIWHIIAFDELRL                 | Q6ZWS4 | 0.04499567 | n +28.03 Da,                         | 3463.989022 | 3 | 725.4163 | 2.316E+09 | 2.122E+09 |
| TSAIQDYLLQLTGAR                     | Q9QUH0 | 0          | n +28.03 Da,                         | 3471.149951 | 3 | 564.9694 | 73908496  | 65319000  |
| APPSVFAQVPQAPPVLVFK                 | P05201 | 0.00112402 | n +34.06 Da,K +34.06 Da,             | 3473.121762 | 3 | 683.4024 | 389988992 | 411691008 |
| FTPSLDSDFTFLPAGR                    | Q9CXE7 | 0          | n +28.03 Da,                         | 3473.197005 | 3 | 633.9878 | 206020992 | 201158000 |
| FTPSLDSDFTFLPAGR                    | Q9CXE7 | 0          | n +28.03 Da,                         | 3474.83502  | 2 | 950.4784 | 1.388E+09 | 1.283E+09 |
| TEATSDWLNANNVPATPVAVWPSQEGQNPSLSSIR | Q8C196 | 0          | n +28.03 Da,                         | 3480.708768 | 3 | 1222.603 | 84083200  | 79648800  |
| GPPPIQDGEFTLLPAGR                   | Q3V009 | 0          | n +34.06 Da,                         | 3483.711999 | 3 | 647.6825 | 71520200  | 112445000 |
| MNNAGLNSEKVSALIQKL                  | Q8R016 | 0          | n +42.03 Da,n +28.03 Da,K +28.03 Da, | 3485.008735 | 3 | 676.7107 | 197524000 | 53693400  |
| SASSALELTHEELATAEAVR                | Q8R0Y6 | 0          | n +34.06 Da,                         | 3487.934349 | 3 | 702.3585 | 691299968 | 651356032 |
| SASSALELTHEELATAEAVR                | Q8R0Y6 | 0          | n +28.03 Da,                         | 3490.124951 | 2 | 1053.032 | 30727000  | 31857200  |
| MNNAGLNSEKVSALIQKL                  | Q8R016 | 0          | n +42.03 Da,n +34.06 Da,K +34.06 Da, | 3494.932807 | 3 | 676.7111 | 158835008 | 131203000 |
| TLNDGAAALVLMTAAEAQR                 | Q8QZT1 | 0          | n +34.06 Da,                         | 3497.828936 | 3 | 648.679  | 281216000 | 233924992 |
| ADEIAKAQVAQPGGDTIFGKIIR             | P70349 | 0          | n +42.03 Da,n +28.03 Da,K +28.03 Da, | 3498.626656 | 2 | 1248.678 | 122553000 | 96683800  |
| SGMPPGAAAIAVLPVTLDTMNR              | Q8BVI4 | 0          | n +28.03 Da,                         | 3505.969249 | 3 | 769.7442 | 674513984 | 629120000 |
| ADEIAKAQVAQPGGDTIFGKIIR             | P70349 | 0          | n +42.03 Da,n +28.03 Da,K +28.03 Da, | 3512.414395 | 3 | 832.7868 | 3.492E+09 | 2.888E+09 |
| ASQQDFENALNQVKLL                    | Q9WUR2 | 0.00112402 | n +28.03 Da,K +28.03 Da,             | 3512.965308 | 3 | 625.322  | 28471400  | 29657400  |
| ASQQDFENALNQVKLL                    | Q9WUR2 | 0          | n +34.06 Da,K +34.06 Da,             | 3544.490386 | 3 | 628.3549 | 46802600  | 342456000 |
| ASQQDFENALNQVKLL                    | Q9WUR2 | 0          | n +34.06 Da,K +34.06 Da,             | 3545.811724 | 3 | 625.3392 | 305359008 | 297008000 |
| PSVPLQPVTPQLQFEGR                   | P01029 | 0          | n +14.02 Da,                         | 3558.453267 | 3 | 631.3606 | 80592000  | 58610900  |
| IAPLEEGMLPFNLAAEAQR                 | Q9QXX4 | 0          | n +42.03 Da,                         | 3561.082132 | 3 | 681.0297 | 52344000  | 74147296  |
| TATFAQALQSVPETQVSILDNGLR            | Q9CZ13 | 0          | n +34.06 Da,                         | 3570.927362 | 3 | 863.1297 | 1.404E+09 | 1.3E+09   |
| LPTLEQPIIPSDYVAIKAPM                | Q8C196 | 0          | n +28.03 Da,K +28.03 Da,             | 3574.377251 | 2 | 1126.634 | 9161000   | 6599370   |
| LPTLEQPIIPSDYVAIKAPM                | Q8C196 | 0          | n +28.03 Da,K +28.03 Da,             | 3577.670212 | 3 | 751.4253 | 1.834E+09 | 1.619E+09 |
| ASGVAVSDGVIKVFNDMK                  | P18760 | 0          | n +42.03 Da,K +34.06 Da,             | 3584.032025 | 2 | 968.0178 | 421937984 | 332702016 |
| TEGAELVDSVLDVVR                     | P68372 | 0          | n +28.03 Da,                         | 3590.949361 | 2 | 815.4378 | 985155968 | 999553984 |
| ASGVAVSDGVIKVFNDMK                  | P18760 | 0          | n +42.03 Da,K +28.03 Da,             | 3592.354601 | 3 | 645.6832 | 50848100  | 41038300  |
| TEGAELVDSVLDVVR                     | P68372 | 0          | n +28.03 Da,                         | 3595.740925 | 3 | 543.9615 | 656452992 | 611835008 |
| VNPTVFFDITADDEPLGR                  | P17742 | 0.00079777 | n +34.06 Da,                         | 3598.406986 | 3 | 677.7019 | 6.185E+09 | 5.78E+09  |
| QQLIEDIVR                           | Q6NZL8 | 0.00991736 | n +17.03 Da,                         | 3620.154488 | 2 | 564.3161 | 349555008 | 502080000 |
| APPVPGAVSGSGSEVDELFDVKNAF           | O89079 | 0          | n +28.03 Da,K +28.03 Da,             | 3620.948416 | 3 | 839.0957 | 2.184E+09 | 2.065E+09 |
| LNYLHDNKIIHR                        | O54988 | 0.04423244 | n +42.03 Da,K +28.03 Da,             | 3622.810895 | 2 | 800.4227 | 84438896  | 80773600  |
| APPVPGAVSGSGSEVDELFDVKNAF           | O89079 | 0          | n +28.03 Da,K +28.03 Da,             | 3627.175715 | 4 | 629.5735 | 171292992 | 145335008 |
| APPVPGAVSGSGSEVDELFDVKNAF           | O89079 | 0          | n +34.06 Da,K +34.06 Da,             | 3628.882287 | 2 | 1258.141 | 205064000 | 189027008 |

|                             |        |            |                          |             |   |          |           |           |
|-----------------------------|--------|------------|--------------------------|-------------|---|----------|-----------|-----------|
| VNPTVFFDITADDEPLGR          | P17742 | 0          | n +28.03 Da,             | 3634.623817 | 3 | 678.6777 | 2.119E+09 | 1.984E+09 |
| SSFLTDGASAMLIMSEDR          | Q99JY0 | 0          | n +34.06 Da,             | 3638.196383 | 2 | 979.9633 | 37965400  | 33030300  |
| LPTLEQPIIPSDYVAIKAPM        | Q8C196 | 0          | n +42.03 Da,K +34.06 Da, | 3638.253009 | 3 | 756.1006 | 11983100  | 10127700  |
| ADFLKGLPVYNKSNF             | Q9D9Z5 | 0          | n +42.03 Da,K +28.03 Da, | 3640.729135 | 3 | 604.3294 | 64608400  | 54911800  |
| VNPTVFFDITADDEPLGR          | P17742 | 0          | n +34.06 Da,             | 3641.696821 | 2 | 1017.512 | 3.767E+09 | 3.247E+09 |
| ASTLNDGAAALVLMTAEAAQR       | Q8QZT1 | 0          | n +34.06 Da,             | 3642.433626 | 3 | 701.3692 | 682382976 | 598377024 |
| APPVPGAVSGSGEVDELFDVKNAF    | O89079 | 0          | n +34.06 Da,K +34.06 Da, | 3649.720899 | 3 | 842.1175 | 61837000  | 224011008 |
| VPILLTEQYPEGLGPTVPELGAQGIR  | P85094 | 0          | n +34.06 Da,             | 3651.406912 | 3 | 925.8468 | 56783100  | 47982900  |
| GIMDAANFEQFLQER             | P67984 | 0          | n +34.06 Da,             | 3651.923947 | 3 | 599.6259 | 201060000 | 207699008 |
| GIMDAANFEQFLQER             | P67984 | 0          | n +28.03 Da,             | 3653.714999 | 2 | 898.93   | 126898000 | 132850000 |
| LDGVLALPSIAGAFR             | P34914 | 0          | n +28.03 Da,             | 3657.590172 | 2 | 764.4483 | 156755008 | 127672000 |
| SDFDSNPFADPDLNPNFKDPSVTQVTR | Q8K021 | 0          | n +42.03 Da,K +28.03 Da, | 3663.693246 | 3 | 1031.82  | 1.18E+09  | 1.11E+09  |
| VLLESEQFLTELTR              | P16254 | 0          | n +28.03 Da,             | 3666.963983 | 2 | 853.4747 | 53298400  | 48358300  |
| RRVAAMSVAARVAR              | G3X8X0 | 0.00712347 | n +34.06 Da,             | 3675.442261 | 2 | 768.4444 | 193682000 | 163226000 |
| LPTLEQPIIPSDYVAIKAPM        | Q8C196 | 0          | n +42.03 Da,K +28.03 Da, | 3676.169766 | 3 | 755.0832 | 33376400  | 115485000 |
| MESMVAPGEVLMSEQAIQPAHADSR   | Q9DBK0 | 0          | n +42.03 Da,             | 3677.412184 | 1 | 866.4101 | 56976300  | 26505600  |
| ASTLNDGAAALVLMTAEAAQR       | Q8QZT1 | 0          | n +28.03 Da,             | 3679.885181 | 2 | 696.855  | 83666600  | 52950000  |
| STLNDGAAALVLMTAEAAQR        | Q8QZT1 | 0          | n +34.06 Da,             | 3681.684556 | 3 | 677.6875 | 370224000 | 200819008 |
| ATPDSLALFTGLGLENKAR         | D3Z158 | 0          | n +42.03 Da,K +34.06 Da, | 3682.116758 | 3 | 711.0519 | 702598976 | 447569984 |
| ATPDSLALFTGLGLENKAR         | D3Z158 | 0          | n +42.03 Da,K +34.06 Da, | 3682.832703 | 2 | 1066.074 | 2.298E+09 | 1.816E+09 |
| DLPEFPFGLLEPR               | O35490 | 0          | n +28.03 Da,             | 3706.152609 | 2 | 722.877  | 126662000 | 55555300  |
| SGTLAKIAEIEAEMAR            | P32233 | 0          | n +42.03 Da,K +34.06 Da, | 3710.241159 | 2 | 880.4675 | 2.361E+09 | 2.041E+09 |
| ADSVKTFQLDLGR               | Q61070 | 0          | n +42.03 Da,K +34.06 Da, | 3710.383077 | 2 | 760.4096 | 6.506E+09 | 5.868E+09 |
| SGTLAKIAEIEAEMAR            | P32233 | 0          | n +42.03 Da,K +28.03 Da, | 3711.195099 | 3 | 587.3137 | 891968000 | 811360000 |
| SYVTEELPQLINANFPVDPQR       | Q9R0P3 | 0.00112402 | n +28.03 Da,             | 3712.917208 | 3 | 820.0919 | 33155100  | 23434700  |
| AIPENTNIGSLFPIPLATDR        | E0CXD4 | 0          | n +34.06 Da,             | 3736.575432 | 3 | 723.0616 | 33439300  | 49873900  |
| CFSVLTSIGFVFLKHR            | D3Z4N8 | 0.00903614 | n +34.06 Da,K +34.06 Da, | 3740.85714  | 3 | 711.7102 | 1.081E+09 | 758793024 |
| SYVTEELPQLINANFPVDPQR       | Q9R0P3 | 0.00112402 | n +28.03 Da,             | 3743.907356 | 3 | 820.0683 | 25126100  | 29677400  |
| AANATTNPSQLLPLELVDKICGSR    | P62322 | 0          | n +42.03 Da,K +28.03 Da, | 3750.291521 | 3 | 880.1149 | 639833984 | 536872000 |
| SSLSGKVQTVLGLVPSQLGR        | Q60866 | 0          | n +42.03 Da,K +28.03 Da, | 3750.854228 | 2 | 1113.131 | 131627000 | 155328000 |
| MQKDASLSGFLPSFQHFATQ        | Q8VCN5 | 0          | n +42.03 Da,K +34.06 Da, | 3755.51848  | 3 | 770.7118 | 624240000 | 729534976 |
| SSLSGKVQTVLGLVPSQLGR        | Q60866 | 0          | n +42.03 Da,K +28.03 Da, | 3756.245709 | 3 | 742.422  | 1.833E+09 | 2.031E+09 |
| SFDVDGLDPAFTPATGTPVLGGLSYR  | Q61176 | 0          | n +34.06 Da,             | 3768.783532 | 3 | 894.4523 | 88003600  | 87622096  |
| PAWESPEGVPIEGIFGGR          | Q9Z2V4 | 0          | n +14.02 Da,             | 3770.734041 | 3 | 675.6862 | 223986000 | 211288992 |
| PAWESPEGVPIEGIFGGR          | Q9Z2V4 | 0          | n +14.02 Da,             | 3772.482855 | 2 | 1013.026 | 431595008 | 380468992 |
| AANATTNPSQLLPLELVDKICGSR    | P62322 | 0          | n +42.03 Da,K +28.03 Da, | 3775.30951  | 3 | 880.1347 | 139850000 | 99207800  |
| TVLLEELGQASGLVLER           | Q9DCS2 | 0          | n +28.03 Da,             | 3779.843349 | 3 | 619.0229 | 49389100  | 44859800  |
| VGGLLPLFSSPGGGGLGSLGGGLGGGR | P45700 | 0          | n +28.03 Da,             | 3780.279693 | 3 | 790.4195 | 70279600  | 64416200  |
| AAQIPESDQIKQKFEFLGTYN       | Q9WV98 | 0          | n +42.03 Da,K +28.03 Da, | 3788.807793 | 3 | 840.4305 | 142080000 | 213366000 |
| ASGRPEELWEAVVGAER           | Q9D1F4 | 0.00112402 | n +42.03 Da,             | 3792.42175  | 3 | 656.9957 | 91286304  | 16126500  |

|                              |        |            |                                      |             |   |          |           |           |
|------------------------------|--------|------------|--------------------------------------|-------------|---|----------|-----------|-----------|
| YTPEQVAMATVTLHR              | Q91Y97 | 0          | n +28.03 Da,                         | 3793.354046 | 2 | 908.4844 | 132479000 | 97043296  |
| ALDPAYAPGTGTPEIAGLTPSQALEIIR | A2AS89 | 0          | n +34.06 Da,                         | 3795.045545 | 3 | 950.8452 | 32696100  | 48942400  |
| APPVPGAVSGGSGEVDELDFVKNAFY   | O89079 | 0          | n +28.03 Da,K +28.03 Da,             | 3795.402456 | 3 | 893.4475 | 195948992 | 176134000 |
| AAKFVESIGKFGL                | P67778 | 0          | n +42.03 Da,n +34.06 Da,K +34.06 Da, | 3803.58058  | 2 | 737.45   | 174152000 | 1.551E+09 |
| IDLPEFPFGLPR                 | O35490 | 0          | n +28.03 Da,                         | 3812.514981 | 2 | 779.4195 | 59652700  | 38579800  |
| EEEIAALVIDNGSGMCKAGFAGDDAPR  | P63260 | 0          | n +42.03 Da,K +28.03 Da,             | 3828.964902 | 3 | 955.1112 | 1.674E+09 | 1.415E+09 |
| MQKDASLSGFLPSFQHF            | Q8VCN5 | 0          | n +42.03 Da,K +28.03 Da,             | 3833.105856 | 2 | 1005.493 | 3.051E+09 | 2.645E+09 |
| MQKDASLSGFLPSFQHF            | Q8VCN5 | 0          | n +42.03 Da,K +28.03 Da,             | 3833.147726 | 3 | 670.6645 | 3.834E+09 | 3.498E+09 |
| AEYLASIFGTEKDKNV             | Q8BGJ9 | 0.00040437 | n +42.03 Da,K +34.06 Da,             | 3836.197891 | 2 | 948.0172 | 101546000 | 65418900  |
| MEEKALEVYDLIR                | Q9DCL2 | 0          | n +42.03 Da,K +34.06 Da,             | 3836.479023 | 2 | 839.9393 | 743710016 | 733771008 |
| AEYLASIFGTEKDKNV             | Q8BGJ9 | 0.00040437 | n +42.03 Da,K +34.06 Da,             | 3854.448711 | 2 | 941.9927 | 431516000 | 458135008 |
| SFDVDGLDPAFTPATGTPVLGGLSYR   | Q61176 | 0          | n +34.06 Da,                         | 3862.60954  | 3 | 894.4537 | 787718976 | 644121984 |
| SFDVDGLDPAFTPATGTPVLGGLSYR   | Q61176 | 0          | n +28.03 Da,                         | 3862.997496 | 2 | 1341.175 | 39867400  | 30476200  |
| MEHAFTPLEPLPTGNLKY           | Q9ROM5 | 0.00215363 | n +42.03 Da,K +34.06 Da,             | 3880.708836 | 3 | 747.7264 | 66873900  | 72054400  |
| LKSFIAEFMESLQDPLNVR          | Q6ZQ73 | 0.04609623 | n +34.06 Da,K +34.06 Da,             | 3882.568292 | 3 | 859.4643 | 1.078E+09 | 1.04E+09  |
| SGLASPASQPEQFYTLDNVLTLEQR    | O35386 | 0          | n +34.06 Da,                         | 3886.575556 | 3 | 1061.201 | 46306900  | 30831000  |
| YTIDAMQKACLNGYAKLDR          | B1AQJ2 | 0.03153823 | n +28.03 Da,K +28.03 Da,             | 3891.406548 | 3 | 772.4157 | 26463100  | 21315200  |
| DPGVVDNFPLLKALR              | P30115 | 0.03983716 | n +28.03 Da,K +28.03 Da,             | 3896.977727 | 2 | 851.4547 | 129234000 | 123898000 |
| DDFSQVADVLVEDGVVR            | Q9EQF5 | 0          | n +34.06 Da,                         | 3907.530029 | 3 | 630.9862 | 55118900  | 56144900  |
| YTIDAMQKACLNGYAKLDR          | B1AQJ2 | 0.03153823 | n +28.03 Da,K +28.03 Da,             | 3909.156904 | 3 | 770.4002 | 25135500  | 29439000  |
| TWNDPSVQQDIKFLPF             | P20029 | 0.01022765 | n +42.03 Da,K +28.03 Da,             | 3910.011572 | 3 | 669.0197 | 41345900  | 32641000  |
| GQNDLMGTAEDFADQFLR           | Q64310 | 0          | n +42.03 Da,                         | 3916.324015 | 3 | 690.6456 | 19001200  | 44734800  |
| DFSQVADVLVEDGVVR             | Q9EQF5 | 0          | n +28.03 Da,                         | 3920.420993 | 2 | 888.4649 | 96012400  | 104902000 |
| ASGVAVSDGVIKVFNDMKVR         | P18760 | 0          | n +42.03 Da,K +28.03 Da,             | 3924.872952 | 3 | 730.7252 | 60458600  | 90402304  |
| DFSQVADVLVEDGVVR             | Q9EQF5 | 0          | n +28.03 Da,                         | 3926.016206 | 3 | 592.6442 | 290783008 | 297116992 |
| TITANASTLNDGAAALVLMTAEAAQR   | Q8QZT1 | 0          | n +28.03 Da,                         | 3942.083649 | 3 | 891.8007 | 113116000 | 105631000 |
| GTITANASTLNDGAAALVLMTAEAAQR  | Q8QZT1 | 0          | n +28.03 Da,                         | 3942.56575  | 3 | 910.8091 | 261960000 | 243694000 |
| SALKAVFQYIDENQDR             | Q9D1A2 | 0          | n +42.03 Da,K +28.03 Da,             | 3942.576641 | 2 | 983.997  | 886841984 | 832497024 |
| SALKAVFQYIDENQDR             | Q9D1A2 | 0          | n +42.03 Da,K +34.06 Da,             | 3942.686346 | 3 | 656.334  | 851571968 | 856502016 |
| VQFDEGLPPILNALEVQGR          | P56480 | 0          | n +34.06 Da,                         | 3945.724612 | 3 | 708.3883 | 671750976 | 714532992 |
| VQFDEGLPPILNALEVQGR          | P56480 | 0          | n +28.03 Da,                         | 3948.284391 | 2 | 1062.078 | 184740000 | 198551008 |
| ADLSLVDALTEPPPEIEGEIKR       | P27546 | 0          | n +42.03 Da,K +34.06 Da,             | 3956.56976  | 3 | 821.439  | 282505984 | 304684992 |
| NTSAIQDYLLQLTGAR             | Q9QUH0 | 0          | n +34.06 Da,                         | 3957.056563 | 2 | 903.9793 | 34101400  | 31647300  |
| AALTAEHFVALQSLKAS            | Q8K2Q0 | 0          | n +42.03 Da,K +28.03 Da,             | 3957.273726 | 3 | 647.3668 | 23249500  | 24581100  |
| MDPSWATQESEAVAQKVL           | Q9EPQ7 | 0          | n +42.03 Da,K +28.03 Da,             | 3963.682242 | 2 | 1109.047 | 771828992 | 775190016 |
| MDPSWATQESEAVAQKVL           | Q9EPQ7 | 0          | n +42.03 Da,K +34.06 Da,             | 3964.170067 | 3 | 739.7005 | 1.146E+09 | 1.158E+09 |
| MELSDANLQTLTEYLK             | Q9ERK4 | 0          | n +42.03 Da,K +34.06 Da,             | 3983.557329 | 3 | 699.0374 | 41229600  | 40029200  |
| APPSVFAQVPQAPPVLVFKL         | P05201 | 0          | n +28.03 Da,K +28.03 Da,             | 3987.342473 | 3 | 721.0975 | 148922000 | 175260992 |
| FIDLPEFPFGLPR                | O35490 | 0.00146897 | n +28.03 Da,                         | 3989.502558 | 2 | 852.9514 | 9639290   | 9310280   |
| GKQGFIDLPEFPFGLPR            | O35490 | 0          | n +28.03 Da,K +28.03 Da,             | 4020.931908 | 2 | 1052.051 | 74460096  | 64475200  |

|                                |        |            |                          |             |   |          |           |           |
|--------------------------------|--------|------------|--------------------------|-------------|---|----------|-----------|-----------|
| GKQGFIDLPEFPFGLLEPR            | O35490 | 0          | n +28.03 Da,K +28.03 Da, | 4023.911707 | 3 | 701.7025 | 100321000 | 79667504  |
| MDGVVTDLIAVGLKR                | G3UXA6 | 0          | n +42.03 Da,K +34.06 Da, | 4024.704594 | 2 | 828.9702 | 49868200  | 35067600  |
| HPDEPVLLLEPVVLAALAEKH          | Q9JII6 | 0          | n +17.03 Da,K +34.06 Da, | 4036.607586 | 3 | 760.7422 | 242487008 | 233383008 |
| MDEMATTQISKDELDELKEAF          | Q99K51 | 0          | n +42.03 Da,K +28.03 Da, | 4053.029239 | 3 | 848.0694 | 54203400  | 50060800  |
| AETLEFNDIFQEVKGSMMNDGR         | Q08943 | 0          | n +42.03 Da,K +28.03 Da, | 4054.446524 | 3 | 824.0564 | 370815008 | 314636000 |
| GVDLLADAVAVTMGPKGR             | P63038 | 0          | n +28.03 Da,K +28.03 Da, | 4058.058401 | 2 | 913.4969 | 94428000  | 75022304  |
| GFIDLPEFPFGLLEPR               | O35490 | 0          | n +34.06 Da,             | 4092.481729 | 2 | 881.4642 | 25860800  | 23236900  |
| GKQGFIDLPEFPFGLLEPR            | O35490 | 0.00112402 | n +42.03 Da,K +34.06 Da, | 4107.966036 | 3 | 708.3968 | 374208000 | 337961984 |
| SFIPVAEDSDFPIQNLPGVVFSTQSNPKPR | P35505 | 0          | n +42.03 Da,K +28.03 Da, | 4109.074909 | 3 | 1140.909 | 997084032 | 1.025E+09 |
| SFIPVAEDSDFPIQNLPGVVFSTQSNPKPR | P35505 | 0          | n +42.03 Da,K +28.03 Da, | 4109.121352 | 4 | 855.9336 | 50785600  | 54077300  |
| ELDPGVVDNFPPLLKALR             | P30115 | 0          | n +28.03 Da,K +28.03 Da, | 4132.513803 | 2 | 976.5478 | 6249510   | 4780670   |
| MDGVVTDLIAVGLKR                | G3UXA6 | 0          | n +42.03 Da,K +28.03 Da, | 4139.129576 | 2 | 828.9716 | 197623008 | 148904000 |
| TDAAVSFAKDFLAGGVAAAISK         | P51881 | 0          | n +42.03 Da,K +28.03 Da, | 4357.080633 | 2 | 1104.599 | 117066000 | 120318000 |
| TDAAVSFAKDFLAGGVAAAISK         | P51881 | 0          | n +42.03 Da,K +28.03 Da, | 4360.627119 | 3 | 736.7355 | 3.066E+09 | 2.978E+09 |
| ADLLGSILSSMEKPPSLGDQESR        | Q7TNE3 | 0          | n +42.03 Da,K +28.03 Da, | 4371.824712 | 3 | 834.091  | 121104000 | 105290000 |
| MDSKQQTVR                      | P70694 | 0          | n +42.03 Da,K +28.03 Da, | 538.6603742 | 2 | 581.7985 | 6.755E+10 | 6.134E+10 |
| PGPTPSGTNVGSSGR                | Q9CQS8 | 0          | n +17.03 Da,             | 564.3603738 | 2 | 692.8442 | 2.822E+09 | 2.066E+09 |
| PYANQPTVR                      | P97760 | 0.00981079 | n +14.02 Da,             | 572.2653071 | 2 | 530.2829 | 33813100  | 16693800  |
| PYANQPTVR                      | P97760 | 0.00981079 | n +14.02 Da,             | 576.4862383 | 2 | 528.7754 | 11363800  | 36298600  |
| SANEDNVTQVR                    | P24270 | 0          | n +28.03 Da,             | 580.9922617 | 2 | 630.8129 | 127857000 | 57634600  |
| PDPAKSAPAPK                    | Q64525 | 0          | n +42.03 Da,K +34.06 Da, | 587.4460323 | 2 | 588.8346 | 62769700  | 53001600  |
| TYNPEPDQR                      | O89023 | 0.00981079 | n +28.03 Da,             | 592.5480934 | 2 | 574.291  | 6.872E+09 | 6.459E+09 |
| SANEDNVTQVR                    | P24270 | 0          | n +28.03 Da,             | 596.0602352 | 2 | 630.8123 | 350363008 | 256588992 |
| PEGQGGTLVDR                    | P32020 | 0.00469116 | n +14.02 Da,             | 600.3563411 | 2 | 570.281  | 687803008 | 995753984 |
| MDSKQQTVR                      | P70694 | 0          | n +42.03 Da,K +28.03 Da, | 608.8658373 | 2 | 580.2831 | 135599008 | 474383008 |
| PYNPSMSR                       | O35490 | 0.03784119 | n +14.02 Da,             | 611.1874935 | 2 | 483.2293 | 1.99E+09  | 529495008 |
| STASQVLQR                      | Q8VEM8 | 0.00981079 | n +34.06 Da,             | 628.1700947 | 2 | 512.3019 | 927790016 | 1.018E+09 |
| PGAGSDLQGVV                    | P51174 | 0.00819672 | n +14.02 Da,             | 657.1041367 | 2 | 535.7819 | 173631008 | 197494000 |
| SAPVASPNVR                     | Q05920 | 0          | n +28.03 Da,             | 657.8951649 | 2 | 513.2904 | 1.098E+09 | 2.34E+09  |
| SSSAPVASPNVR                   | Q05920 | 0          | n +28.03 Da,             | 680.0126724 | 2 | 600.3228 | 2.793E+09 | 1.971E+09 |
| PSNMEPLR                       | Q91W19 | 0.0417434  | n +14.02 Da,             | 680.1187535 | 2 | 479.245  | 553155008 | 380497984 |
| AAEAAGGKYR                     | O35382 | 0          | n +42.03 Da,K +34.06 Da, | 687.3960306 | 2 | 532.2804 | 773246976 | 738484992 |
| SSKTAStNSIAQAR                 | Q9DAS9 | 0          | n +42.03 Da,K +28.03 Da, | 690.4861989 | 2 | 746.3919 | 139552992 | 130041000 |
| GEEAGAYDGPR                    | P27773 | 0          | n +34.06 Da,             | 697.8957533 | 2 | 575.262  | 146984992 | 146324000 |
| CSQVPVSKER                     | Q99MN9 | 0          | n +42.03 Da,K +28.03 Da, | 698.3560211 | 2 | 630.3244 | 44528200  | 17426500  |
| SSSAPVASPNVR                   | Q05920 | 0          | n +28.03 Da,             | 705.6855912 | 2 | 600.3077 | 355252000 | 339974016 |
| ATTAQQSPQPVAGKR                | Q99J36 | 0          | n +42.03 Da,K +34.06 Da, | 705.9069346 | 2 | 805.4361 | 15856000  | 13990700  |
| SFSAPEQQR                      | P24270 | 0.009299   | n +28.03 Da,             | 710.5126733 | 2 | 539.2699 | 1.786E+09 | 1.46E+09  |
| PDSPAEASGLR                    | P70441 | 0          | n +17.03 Da,             | 727.6500813 | 2 | 558.8039 | 563753024 | 536148992 |
| TDMGTMQER                      | P56480 | 0.0477327  | n +34.06 Da,             | 757.5481256 | 2 | 548.7417 | 498579008 | 504672992 |



|                             |        |            |                          |             |   |          |           |           |
|-----------------------------|--------|------------|--------------------------|-------------|---|----------|-----------|-----------|
| PDSPAEASGLR                 | P70441 | 0          | n +17.03 Da,             | 787.8541574 | 2 | 557.2803 | 155372992 | 115286000 |
| PGSEETQTLVR                 | Q9D8N0 | 0          | n +14.02 Da,             | 792.3136428 | 2 | 615.8197 | 509433984 | 389616992 |
| AQYKGAASEAGR                | Q9WV03 | 0          | n +42.03 Da,K +28.03 Da, | 800.794274  | 2 | 639.8252 | 149156000 | 122092000 |
| AQDQGEKENPMR                | Q9CXW4 | 0          | n +42.03 Da,K +34.06 Da, | 806.0798285 | 2 | 736.8436 | 1.124E+10 | 1.055E+10 |
| AAEKQIPGGGSGGGGSGGGGGGGGGGR | Q8BMA6 | 0          | n +42.03 Da,K +34.06 Da, | 812.9550518 | 3 | 767.358  | 53917900  | 41267900  |
| SLDVTNPR                    | P56655 | 0.02871729 | n +34.06 Da,             | 824.0666881 | 2 | 465.2568 | 104918000 | 86265000  |
| ATNDAVLKR                   | P31230 | 0          | n +42.03 Da,K +34.06 Da, | 841.3954151 | 2 | 529.3038 | 2.24E+09  | 2.189E+09 |
| ADTAPQLKR                   | Q9DAR7 | 0.00532725 | n +42.03 Da,K +28.03 Da, | 842.3518068 | 2 | 535.3036 | 1.571E+09 | 1.565E+09 |
| MEKPAASTEPQGSR              | Q9JMD3 | 0.00674157 | n +42.03 Da,K +28.03 Da, | 850.317598  | 2 | 779.8803 | 2.132E+09 | 2.071E+09 |
| SGYTPDEKLR                  | Q3UIU2 | 0          | n +42.03 Da,K +34.06 Da, | 859.8724965 | 3 | 412.5455 | 816174976 | 751993984 |
| SGYTPDEKLR                  | Q3UIU2 | 0.00532725 | n +42.03 Da,K +34.06 Da, | 861.2851474 | 2 | 618.3178 | 162952992 | 160232992 |
| PTIEDSYR                    | P08556 | 0.04736211 | n +14.02 Da,             | 882.9407885 | 2 | 497.7456 | 824574016 | 582372992 |
| SGSMAALPR                   | D6RDC9 | 0.02991725 | n +28.03 Da,             | 887.4495533 | 2 | 459.2472 | 188220000 | 123468000 |
| SVDLEETGR                   | Q03265 | 0.00981079 | n +34.06 Da,             | 908.3434673 | 2 | 517.2615 | 204892992 | 193015008 |
| PDYLGADQR                   | P46471 | 0          | n +14.02 Da,             | 909.4826001 | 2 | 524.7567 | 2.805E+09 | 1.85E+09  |
| ALKQISSNR                   | Q9R0P3 | 0.00674157 | n +42.03 Da,K +28.03 Da, | 909.4842062 | 2 | 543.8169 | 6.264E+09 | 4.581E+09 |
| SDSVTEETLR                  | Q8C196 | 0          | n +28.03 Da,             | 925.4434867 | 2 | 582.7894 | 2.21E+09  | 2.613E+09 |
| MEAVPEKK                    | P14148 | 0.03441802 | n +42.03 Da,K +34.06 Da, | 939.4027408 | 2 | 515.287  | 137092992 | 117146000 |
| MEAVPEKK                    | P14148 | 0.03441802 | n +42.03 Da,K +34.06 Da, | 941.0922721 | 2 | 519.8053 | 93344400  | 594380992 |
| PTVNDDLPR                   | P97872 | 0          | n +14.02 Da,             | 943.2873629 | 2 | 577.8124 | 83516096  | 76618000  |
| TTGLSLNNER                  | O08601 | 0.00469116 | n +28.03 Da,             | 956.0760486 | 2 | 566.8013 | 113790000 | 96421600  |
| SDSVTEETLR                  | Q8C196 | 0          | n +28.03 Da,             | 956.9606855 | 2 | 582.789  | 59119800  | 126292000 |
| PTVNDDLPR                   | P97872 | 0          | n +14.02 Da,             | 969.491825  | 2 | 577.8015 | 1.036E+10 | 9.854E+09 |
| AATTGSGVKVPR                | Q9CZY3 | 0          | n +42.03 Da,K +28.03 Da, | 978.036927  | 2 | 607.3485 | 3.501E+09 | 3.609E+09 |
| ALKQISSNR                   | Q9R0P3 | 0.00674157 | n +42.03 Da,K +34.06 Da, | 988.3971756 | 2 | 543.8186 | 1.463E+11 | 1.269E+11 |
| ALKQISSNR                   | Q9R0P3 | 0.00674157 | n +42.03 Da,K +34.06 Da, | 989.5327099 | 2 | 545.3241 | 604652992 | 3.052E+09 |
| AGELTEDEVER                 | P62270 | 0          | n +28.03 Da,             | 1011.142257 | 2 | 638.3222 | 255378000 | 222284992 |
| PVVIVSAAR                   | Q8CAY6 | 0.0477327  | n +14.02 Da,             | 1019.487809 | 2 | 463.2949 | 264838000 | 215490000 |
| ASEAGGIGGGGGGGKIR           | E9Q3G8 | 0.009299   | n +42.03 Da,K +34.06 Da, | 1043.934848 | 2 | 735.8868 | 701324032 | 668716032 |
| EELASPPERR                  | Q8CHT1 | 0.0361596  | n +17.03 Da,             | 1044.319    | 2 | 597.8185 | 4.501E+09 | 4.209E+09 |
| GAFLAEESR                   | P10518 | 0.00469116 | n +34.06 Da,             | 1052.745181 | 2 | 504.2615 | 188487008 | 232670000 |
| QDYLVGNR                    | P10648 | 0.01315789 | n +34.06 Da,             | 1061.249206 | 2 | 499.785  | 297024000 | 262884000 |
| PAEYDVSPETR                 | Q9CQC7 | 0          | n +17.03 Da,             | 1064.199433 | 2 | 639.3033 | 218516000 | 200168992 |
| ASGGGVPTDEEQATGLER          | P19536 | 0          | n +34.06 Da,             | 1067.4134   | 3 | 601.2901 | 84480304  | 67865000  |
| SKSFQQSSLGR                 | Q8K310 | 0          | n +42.03 Da,K +34.06 Da, | 1068.879339 | 2 | 647.841  | 2.907E+09 | 2.625E+09 |
| TVIATGGYGR                  | Q8K2B3 | 0          | n +28.03 Da,             | 1071.005137 | 2 | 511.7854 | 37804500  | 31591400  |
| GVANVSIEDR                  | P08228 | 0          | n +34.06 Da,             | 1077.372497 | 2 | 544.2911 | 539974976 | 727601984 |
| CTALSPKVR                   | P11862 | 0.02694035 | n +42.03 Da,K +34.06 Da, | 1082.882545 | 2 | 551.3078 | 154716992 | 143700992 |
| GAFLAEESR                   | P10518 | 0.00469116 | n +34.06 Da,             | 1085.336363 | 2 | 507.2816 | 611902016 | 592824000 |
| TSGMALAEQAR                 | Q8QZY2 | 0          | n +28.03 Da,             | 1090.033941 | 2 | 578.7902 | 1.693E+09 | 1.728E+09 |

|                        |        |            |                                      |             |   |          |           |           |
|------------------------|--------|------------|--------------------------------------|-------------|---|----------|-----------|-----------|
| SDTPCDDFTR             | P28798 | 0          | n +34.06 Da,                         | 1090.130409 | 2 | 621.2585 | 154396992 | 413931008 |
| WDTVSNQVQR             | Q64374 | 0          | n +28.03 Da,                         | 1094.651048 | 2 | 630.8038 | 64388100  | 86803200  |
| TMLADHAAR              | Q6P5F9 | 0.02871729 | n +42.03 Da,                         | 1101.531533 | 2 | 512.7482 | 37089700  | 807523008 |
| GTSPLQIDR              | Q8C196 | 0.00532725 | n +28.03 Da,                         | 1105.472483 | 2 | 507.7826 | 250844000 | 277712000 |
| FNSANEDNVTQVR          | P24270 | 0          | n +28.03 Da,                         | 1106.194127 | 2 | 755.3306 | 178408992 | 60484800  |
| SDTPCDDFTR             | P28798 | 0          | n +34.06 Da,                         | 1106.390148 | 2 | 624.2744 | 217300992 | 261338000 |
| TEPGAGSDLQGVV          | P51174 | 0          | n +28.03 Da,                         | 1107.128594 | 2 | 656.8219 | 84220200  | 70374200  |
| TSVDLEETGR             | Q03265 | 0          | n +34.06 Da,                         | 1108.476848 | 2 | 567.7838 | 492844000 | 546681024 |
| AESSFNENLR             | P24456 | 0          | n +28.03 Da,                         | 1115.369262 | 2 | 655.3038 | 71812304  | 76522896  |
| AAGNFISPSE             | Q9CQ62 | 0          | n +34.06 Da,                         | 1115.621546 | 2 | 590.3042 | 73257000  | 129858000 |
| PVDTDDTATALR           | Q99P30 | 0          | n +14.02 Da,                         | 1126.871794 | 2 | 644.8238 | 400127008 | 188464000 |
| SETAAPAAPAPAEKTPVKK    | P43274 | 0          | n +42.03 Da,n +34.06 Da,K +34.06 Da, | 1136.703914 | 3 | 725.1021 | 41533600  | 266972000 |
| SETAAPAAPAPAEKTPVKK    | P43274 | 0          | n +42.03 Da,n +34.06 Da,K +34.06 Da, | 1137.723373 | 3 | 720.0753 | 657416000 | 568937024 |
| PESSFNENLR             | P24457 | 0          | n +14.02 Da,                         | 1140.183648 | 2 | 661.3042 | 766270016 | 512615008 |
| FNSANEDNVTQVR          | P24270 | 0          | n +28.03 Da,                         | 1140.68648  | 2 | 761.3681 | 72179400  | 75535504  |
| AAGNFISPSE             | Q9CQ62 | 0          | n +34.06 Da,                         | 1144.121937 | 2 | 591.8275 | 349678016 | 317318016 |
| TSGMALAEQAR            | Q8QZY2 | 0          | n +28.03 Da,                         | 1146.366533 | 2 | 581.7979 | 2.501E+09 | 2.276E+09 |
| GQVITIGNER             | P60710 | 0.03333333 | n +34.06 Da,                         | 1148.05215  | 2 | 554.7858 | 20076900  | 1.802E+09 |
| YSTEVEAAVNR            | P29391 | 0          | n +28.03 Da,                         | 1149.835286 | 2 | 633.8197 | 862115968 | 1.252E+09 |
| SEPSVYYR               | Q9CQX2 | 0.00532725 | n +34.06 Da,                         | 1160.310312 | 2 | 565.2789 | 148595008 | 127775000 |
| PSEPLVQNYR             | Q9WVT6 | 0.02084734 | n +17.03 Da,                         | 1160.837046 | 2 | 608.82   | 175999008 | 156786000 |
| GSLDLGGDAAGR           | Q8VEK3 | 0          | n +34.06 Da,                         | 1162.305695 | 2 | 560.2938 | 49507400  | 97879000  |
| AGTTTTIEAVKR           | D322H9 | 0          | n +42.03 Da,n +28.03 Da,             | 1178.276446 | 2 | 608.8484 | 7.713E+09 | 7.3E+09   |
| ITADDEPLGR             | P17742 | 0.009299   | n +28.03 Da,                         | 1190.419765 | 2 | 557.7903 | 63010300  | 70486000  |
| SSGALLPKPQMR           | Q9CPQ1 | 0          | n +42.03 Da,K +28.03 Da,             | 1194.931412 | 2 | 452.2425 | 171131008 | 162088000 |
| SSGALLPKPQMR           | Q9CPQ1 | 0          | n +42.03 Da,K +34.06 Da,             | 1195.397028 | 3 | 452.2559 | 565336000 | 556894976 |
| AVSTGVKVPV             | Q9D2M8 | 0          | n +42.03 Da,K +34.06 Da,             | 1201.494655 | 2 | 542.3298 | 4.873E+09 | 4.801E+09 |
| AGYLTEPVNR             | Q64521 | 0          | n +28.03 Da,                         | 1202.426452 | 2 | 574.3091 | 2.335E+09 | 1.959E+09 |
| AGMQLQGYR              | P05202 | 0          | n +28.03 Da,                         | 1218.153803 | 2 | 526.2653 | 160455008 | 108385000 |
| SETAAPAAPAPAEKTPVKKK   | P43274 | 0          | n +42.03 Da,n +28.03 Da,K +28.03 Da, | 1220.854298 | 3 | 772.1052 | 684952000 | 329592992 |
| TETDGFYKSR             | O08738 | 0          | n +42.03 Da,K +28.03 Da,             | 1222.303337 | 2 | 635.8118 | 328192992 | 138834000 |
| IVDMSYAR               | Q8BGC4 | 0.02084734 | n +34.06 Da,                         | 1223.170813 | 2 | 491.7565 | 1.636E+09 | 1.307E+09 |
| NCVLEEKVR              | Q6ZQ12 | 0.04736211 | n +28.03 Da,K +28.03 Da,             | 1228.16225  | 2 | 601.826  | 412942016 | 388864000 |
| TWDPDQPPR              | P24456 | 0.00883652 | n +28.03 Da,                         | 1234.081807 | 2 | 570.2773 | 222954000 | 208518000 |
| PSFVSAMR               | Q8VCT4 | 0.009299   | n +14.02 Da,                         | 1237.277969 | 2 | 454.7362 | 671156992 | 56857400  |
| QPVLNITNR              | Q8C196 | 0.0008285  | n +28.03 Da,                         | 1238.426777 | 2 | 541.8195 | 3.231E+09 | 2.791E+09 |
| AEMKSPTKAEPATPAEAAQSDR | Q7TPV4 | 0          | n +42.03 Da,K +34.06 Da,             | 1238.531184 | 3 | 795.3967 | 1.504E+09 | 1.223E+09 |
| AGQSKDKVKYY            | P56395 | 0.0039968  | n +42.03 Da,K +34.06 Da,             | 1240.70723  | 2 | 690.8672 | 1.044E+09 | 8.784E+09 |
| PPLEDGAMPSAR           | P47757 | 0.00883652 | n +17.03 Da,                         | 1242.189568 | 2 | 627.8101 | 617868032 | 602097984 |
| PVQAEAYINR             | O88544 | 0          | n +17.03 Da,                         | 1245.639741 | 2 | 587.8138 | 209802000 | 145046000 |

|                           |        |            |                                      |             |   |          |           |           |
|---------------------------|--------|------------|--------------------------------------|-------------|---|----------|-----------|-----------|
| AGQSDKDVKYY               | P56395 | 0.0039968  | n +42.03 Da,K +34.06 Da,             | 1251.629209 | 2 | 686.3422 | 212748992 | 160070000 |
| GTVPAAMLR                 | Q9D404 | 0.0039968  | n +34.06 Da,                         | 1252.910354 | 2 | 473.7819 | 54086800  | 181016000 |
| PETLQAQFR                 | Q8BK48 | 0          | n +14.02 Da,                         | 1253.519537 | 2 | 552.2959 | 8.248E+09 | 5.327E+09 |
| SGYTPDEKLR                | Q3UIU2 | 0          | n +42.03 Da,K +28.03 Da,             | 1255.111    | 2 | 616.8003 | 441380992 | 8.962E+09 |
| AEFPSKVSTR                | Q9DCU2 | 0          | n +42.03 Da,K +34.06 Da,             | 1262.478127 | 2 | 596.3089 | 82611104  | 86443200  |
| MFQGADSQAGKSGSR           | Q6PGH2 | 0          | n +42.03 Da,K +28.03 Da,             | 1263.197283 | 2 | 798.8747 | 153555008 | 142828000 |
| SQQSASGAPVLLR             | Q9DCM0 | 0          | n +28.03 Da,                         | 1268.718287 | 2 | 671.3778 | 1.642E+09 | 1.592E+09 |
| SGYTPDEKLR                | Q3UIU2 | 0          | n +42.03 Da,K +34.06 Da,             | 1271.358468 | 2 | 618.317  | 1.641E+10 | 1.404E+10 |
| TETDGFYKSR                | O08738 | 0          | n +42.03 Da,K +34.06 Da,             | 1274.275591 | 2 | 637.3062 | 910846976 | 876084992 |
| PVQAEAYINR                | O88544 | 0          | n +17.03 Da,                         | 1277.867628 | 2 | 589.3141 | 152274000 | 291342016 |
| SETAPAAPAAPAPVEKTPVKK     | P43277 | 0          | n +42.03 Da,n +34.06 Da,K +34.06 Da, | 1278.647293 | 3 | 734.4437 | 114326000 | 420075008 |
| GVQVETISPGDGR             | P26883 | 0          | n +34.06 Da,                         | 1279.912122 | 2 | 671.8512 | 1.023E+09 | 898955008 |
| ASGSGTKNLDLFR             | Q9CPW7 | 0          | n +42.03 Da,K +28.03 Da,             | 1280.172359 | 2 | 661.8381 | 1.072E+09 | 965809984 |
| AASGLGTFR                 | Q8JZM0 | 0          | n +42.03 Da,K +34.06 Da,             | 1297.424785 | 2 | 539.3063 | 581584000 | 455361984 |
| AEFPSKVSTR                | Q9DCU2 | 0          | n +42.03 Da,K +34.06 Da,             | 1308.643221 | 2 | 596.3219 | 732190976 | 651566976 |
| MEVGQYQGNASR              | Q6PD10 | 0.0361596  | n +42.03 Da,K +28.03 Da,             | 1309.370141 | 2 | 705.3448 | 140759008 | 123314000 |
| SRPPPTGKMPGAPEAAPGDGAGAGR | P70336 | 0.00469116 | n +42.03 Da,K +34.06 Da,             | 1312.029137 | 3 | 791.3959 | 30905600  | 26921000  |
| AIAEELAPER                | O35490 | 0.0008285  | n +28.03 Da,                         | 1312.798861 | 2 | 563.8087 | 114211000 | 32533800  |
| TPAQATPLGR                | O08784 | 0.009299   | n +34.06 Da,                         | 1312.941122 | 2 | 520.2978 | 6.005E+09 | 5.527E+09 |
| PTVAAGAVGLAQR             | P45952 | 0          | n +14.02 Da,                         | 1318.699077 | 2 | 612.838  | 998689984 | 883432000 |
| SGYTPDEKLR                | Q3UIU2 | 0.04128158 | n +42.03 Da,K +28.03 Da,             | 1323.404845 | 2 | 616.7879 | 2.417E+09 | 2.339E+09 |
| MVNDGVEDLR                | P19157 | 0          | n +28.03 Da,                         | 1328.262507 | 2 | 588.2889 | 139974000 | 172332992 |
| VMQSSDAAYLAR              | Q8BWT1 | 0          | n +28.03 Da,                         | 1332.208495 | 2 | 713.8507 | 122187000 | 110440000 |
| TALDTFGR                  | P51660 | 0.02570864 | n +28.03 Da,                         | 1334.436563 | 2 | 454.7452 | 181996992 | 160243008 |
| AASGLGTFR                 | Q8JZM0 | 0          | n +42.03 Da,K +34.06 Da,             | 1334.768288 | 2 | 540.7968 | 128049000 | 45891300  |
| PETITWQR                  | Q922D8 | 0.02345845 | n +14.02 Da,                         | 1337.195983 | 2 | 522.7763 | 732731008 | 468737984 |
| PPLFPPENR                 | D3YZZ5 | 0.02634961 | n +14.02 Da,                         | 1347.569378 | 2 | 535.7851 | 1.873E+09 | 1.588E+09 |
| PDGQVITIGNER              | P60710 | 0          | n +14.02 Da,                         | 1349.115033 | 2 | 656.8465 | 463220000 | 245698000 |
| AADTQVSETLKR              | E9PVA8 | 0          | n +42.03 Da,K +28.03 Da,             | 1358.712317 | 2 | 694.8723 | 312681984 | 278020992 |
| RQLTADMQUALER             | E9Q238 | 0.04736211 | n +42.03 Da,                         | 1362.476224 | 2 | 737.381  | 106085000 | 95091504  |
| VGPPEIRAEGR               | E9Q8M2 | 0.01505818 | n +17.03 Da,                         | 1382.125231 | 2 | 599.3337 | 128646000 | 84450000  |
| SETAPAAPAAPAPVEKTPVKKK    | P43277 | 0          | n +42.03 Da,n +28.03 Da,K +28.03 Da, | 1383.448636 | 3 | 781.4491 | 46026200  | 27038500  |
| TMGDAPDFDR                | P10649 | 0          | n +28.03 Da,                         | 1384.575676 | 2 | 576.7532 | 1.944E+09 | 1.995E+09 |
| SVVEMQGDDEMTR             | O88844 | 0          | n +28.03 Da,                         | 1394.688479 | 2 | 705.3234 | 91424704  | 82229200  |
| PFNLAEAQR                 | Q9QXX4 | 0          | n +14.02 Da,                         | 1397.558849 | 2 | 526.2657 | 1.226E+09 | 930323968 |
| DGTGGDAAAPGAAGTQAEPLPHR   | Q9D0F3 | 0          | n +28.03 Da,                         | 1402.569872 | 3 | 683.3297 | 16084500  | 14450600  |
| PAINVGLSVSR               | Q03265 | 0          | n +14.02 Da,                         | 1406.993275 | 2 | 563.3169 | 2.286E+09 | 2.122E+09 |
| SGGGVPTDEEQATGLER         | P19536 | 0          | n +34.06 Da,                         | 1408.244449 | 2 | 865.9122 | 134756000 | 133222000 |
| YVAFTPEGER                | P20029 | 0.00469116 | n +34.06 Da,                         | 1408.293313 | 2 | 601.8352 | 808686016 | 403136000 |
| LAQEDPDYGLR               | P24270 | 0          | n +28.03 Da,                         | 1409.82181  | 2 | 652.3487 | 179716992 | 127726000 |

|                          |        |            |                          |             |   |          |           |           |
|--------------------------|--------|------------|--------------------------|-------------|---|----------|-----------|-----------|
| YDLQTGQISNR              | Q64374 | 0          | n +34.06 Da,             | 1410.375074 | 2 | 661.8387 | 813116032 | 969168000 |
| AAFTQEMVAR               | G3X982 | 0          | n +28.03 Da,             | 1417.605731 | 2 | 576.299  | 86954600  | 85653504  |
| QGEDIVRER                | O35841 | 0.03784119 | n +34.06 Da,             | 1418.339988 | 2 | 568.3092 | 623334016 | 3.166E+09 |
| ASGGGVPTDEEQATGLER       | P19536 | 0          | n +34.06 Da,             | 1427.286326 | 2 | 901.4319 | 1.973E+09 | 1.663E+09 |
| SSIKVECVLR               | Q64374 | 0          | n +42.03 Da,K +34.06 Da, | 1431.786249 | 3 | 420.9041 | 193720000 | 165819008 |
| YGQSETGISSATLR           | Q91VA0 | 0          | n +28.03 Da,             | 1435.364748 | 2 | 746.3579 | 47660700  | 72278600  |
| LAQEDPDYGLR              | P24270 | 0          | n +28.03 Da,             | 1438.224693 | 2 | 652.8275 | 594851968 | 275712000 |
| MKPLEGVR                 | Q7TNE1 | 0.02509908 | n +34.06 Da,K +34.06 Da, | 1439.634737 | 2 | 497.8135 | 403588000 | 3.971E+09 |
| PLYSNPPLNGAR             | P05202 | 0          | n +14.02 Da,             | 1443.079836 | 2 | 647.7985 | 7036290   | 54839200  |
| MESSYWDGR                | P54869 | 0          | n +28.03 Da,             | 1447.596169 | 2 | 579.748  | 63222700  | 188272000 |
| MNLSAAHHQIS              | Q8VCX1 | 0.00883652 | n +42.03 Da,             | 1451.675884 | 2 | 625.7988 | 263499008 | 653435008 |
| AMTNQILVER               | Q8C196 | 0.03441802 | n +28.03 Da,             | 1454.016879 | 2 | 592.7891 | 7443990   | 38267800  |
| EMSSILEER                | Q03265 | 0.00883652 | n +34.06 Da,             | 1454.320101 | 2 | 561.2852 | 304499008 | 376940000 |
| AGLGHPSAFGR              | Q9CWS0 | 0          | n +42.03 Da,             | 1455.267651 | 2 | 556.2858 | 336920992 | 91800200  |
| QAFITAQNHGY              | Q8C196 | 0          | n +28.03 Da,             | 1456.211877 | 2 | 639.3171 | 1.493E+09 | 878822976 |
| NPLLPVTNR                | A2AJ76 | 0.00532725 | n +28.03 Da,             | 1461.885054 | 2 | 520.2831 | 10903000  | 28838700  |
| GVSAEPTPESWR             | O35488 | 0          | n +28.03 Da,             | 1480.122758 | 2 | 666.3069 | 21248200  | 40839500  |
| NPLLPVTNR                | A2AJ76 | 0.00532725 | n +28.03 Da,             | 1480.575721 | 2 | 526.3131 | 220267008 | 194103008 |
| MNVNDLKQR                | Q91YN5 | 0          | n +42.03 Da,K +34.06 Da, | 1484.749682 | 2 | 594.3137 | 1.602E+09 | 1.353E+09 |
| GPEPAPATDERDR            | Q9QXS1 | 0.00532725 | n +34.06 Da,             | 1485.459405 | 2 | 719.8428 | 3.601E+09 | 3.139E+09 |
| TTMYPGIADR               | P60710 | 0.00981079 | n +28.03 Da,             | 1485.563381 | 2 | 576.7897 | 1.485E+09 | 1.623E+09 |
| TTMYPGIADR               | P60710 | 0.00981079 | n +28.03 Da,             | 1508.52018  | 2 | 572.2696 | 259600992 | 181548000 |
| PSQMEHAMETM              | P08207 | 0.02871729 | n +14.02 Da,             | 1523.461813 | 2 | 653.2674 | 853475968 | 560294016 |
| PFQLVTGR                 | P28474 | 0.04649758 | n +14.02 Da,             | 1525.517421 | 2 | 466.2721 | 272424992 | 76755800  |
| PSQALEIIR                | A2AS89 | 0.0417434  | n +14.02 Da,             | 1527.42689  | 2 | 520.8099 | 303295008 | 315304992 |
| ASEGKLVGGGR              | Q91YI0 | 0          | n +42.03 Da,K +28.03 Da, | 1532.626398 | 2 | 609.3206 | 1.571E+11 | 1.603E+11 |
| GVSAEPTPESWR             | O35488 | 0          | n +28.03 Da,             | 1539.637268 | 2 | 672.335  | 390788992 | 350129984 |
| AEVEETLKR                | P62627 | 0.00532725 | n +42.03 Da,K +28.03 Da, | 1539.789765 | 2 | 572.8136 | 4.715E+09 | 4.426E+09 |
| ATPEASGSGEKVEGSEPSVTTYR  | Q9CQX2 | 0          | n +42.03 Da,K +28.03 Da, | 1547.552099 | 3 | 824.3901 | 751446976 | 685126976 |
| DEVFYSPR                 | P11725 | 0.00674157 | n +28.03 Da,             | 1559.426046 | 2 | 520.7561 | 607905984 | 598748032 |
| MIGGPTLPSEER             | Q9DBF1 | 0.0477327  | n +28.03 Da,             | 1560.05064  | 2 | 593.3174 | 198164000 | 94567000  |
| PAINEYLQR                | Q9QXD6 | 0.0008285  | n +14.02 Da,             | 1563.563701 | 2 | 559.3043 | 2.056E+10 | 1.622E+10 |
| PLPVALQTR                | Q91VJ5 | 0.009299   | n +14.02 Da,             | 1566.447562 | 2 | 504.8138 | 194248992 | 106150000 |
| SNINDFSAGVANR            | P15105 | 0          | n +34.06 Da,             | 1568.6159   | 2 | 696.8447 | 94420600  | 84066200  |
| AMNYSAKDEVGGPAGPPGGAAKTR | Q8VEK0 | 0          | n +42.03 Da,K +28.03 Da, | 1572.212163 | 3 | 839.0802 | 1.553E+09 | 1.455E+09 |
| AEGQVLVDGR               | P19253 | 0          | n +34.06 Da,             | 1585.227975 | 2 | 594.3458 | 110540000 | 234688000 |
| PGGFAWGEGQR              | Q8BNI4 | 0          | n +14.02 Da,             | 1586.573229 | 2 | 588.2827 | 41984600  | 21425700  |
| METMASPGKDNRY            | O35345 | 0          | n +42.03 Da,K +34.06 Da, | 1592.705299 | 2 | 785.3551 | 293790016 | 261188000 |
| AEGQVLVDGR               | P19253 | 0          | n +28.03 Da,             | 1594.396024 | 2 | 591.3303 | 292824992 | 1.69E+09  |
| TLNLNAINR                | Q91Y97 | 0.009299   | n +28.03 Da,             | 1599.052312 | 2 | 528.8122 | 1.319E+09 | 1.344E+09 |

|                                      |        |            |                          |             |   |          |           |           |
|--------------------------------------|--------|------------|--------------------------|-------------|---|----------|-----------|-----------|
| PDFQPELSGAGSR                        | Q8CDN6 | 0.02084734 | n +14.02 Da,             | 1599.062927 | 2 | 684.8322 | 1.988E+09 | 2.065E+09 |
| TSNINDFSAGVANR                       | P15105 | 0          | n +34.06 Da,             | 1599.610314 | 2 | 747.3702 | 99374304  | 111261000 |
| VVFDPTYDR                            | P16015 | 0.00532725 | n +28.03 Da,             | 1602.091807 | 2 | 579.2778 | 2.499E+09 | 751649984 |
| PAINVGLSVSR                          | Q03265 | 0          | n +14.02 Da,             | 1609.792188 | 2 | 563.8328 | 183296000 | 57465200  |
| AEGQVLVLDGR                          | P19253 | 0          | n +34.06 Da,             | 1618.931525 | 2 | 592.8359 | 361110016 | 237540000 |
| SEPEIPK GIR                          | Q9WTP6 | 0.0060652  | n +42.03 Da,K +28.03 Da, | 1620.598306 | 2 | 598.3381 | 432190016 | 540456000 |
| YYPNSFSAPEQQR                        | P24270 | 0          | n +28.03 Da,             | 1624.538768 | 2 | 807.8812 | 70790800  | 58682200  |
| SYDLGIENR                            | O88844 | 0.02634961 | n +34.06 Da,             | 1626.349846 | 2 | 547.7778 | 478796000 | 306691008 |
| MASGGGVPTDEEQATGLER                  | P19536 | 0          | n +34.06 Da,             | 1632.380671 | 2 | 966.9525 | 42323300  | 32941100  |
| AAPSPSGGGGGGGGTPGPIGPPASGHPAVSSMQGKR | P47809 | 0          | n +42.03 Da,K +28.03 Da, | 1637.702053 | 3 | 1103.871 | 45413200  | 36649600  |
| AAPSPSGGGGGGGGTPGPIGPPASGHPAVSSMQGKR | P47809 | 0          | n +42.03 Da,K +34.06 Da, | 1641.956332 | 4 | 828.1548 | 43718500  | 30459700  |
| ADIVENQVMDTR                         | P10649 | 0          | n +28.03 Da,             | 1648.818823 | 2 | 709.8503 | 270705984 | 68743400  |
| PHVNPLPTGYEDE                        | P43024 | 0.0039968  | n +14.02 Da,             | 1653.993988 | 2 | 741.3486 | 416057984 | 260459008 |
| DIDTAAKF                             | P56383 | 0.02509908 | n +28.03 Da,K +28.03 Da, | 1668.694815 | 2 | 468.7554 | 356095008 | 176367008 |
| RKINMCYQEELEATLTKADR                 | Q9EPQ2 | 0.02022927 | n +42.03 Da,K +34.06 Da, | 1671.910704 | 3 | 856.4304 | 1.751E+09 | 1.656E+09 |
| VYISNGQVLDGR                         | Q9JLJ1 | 0.00165563 | n +34.06 Da,             | 1675.58084  | 2 | 692.8891 | 200487008 | 189088000 |
| AQNLKDLAGR                           | O35129 | 0          | n +42.03 Da,K +28.03 Da, | 1676.446127 | 2 | 578.3282 | 2.996E+10 | 2.667E+10 |
| GPNDGEMFMR                           | Q9D0M3 | 0          | n +28.03 Da,             | 1677.377191 | 2 | 648.7705 | 248175008 | 267467008 |
| SEVASSLVLER                          | Q9CYR0 | 0          | n +28.03 Da,             | 1682.379568 | 2 | 603.3181 | 220932000 | 141618000 |
| SSGALLPKPQMR                         | Q9CPQ1 | 0          | n +42.03 Da,K +28.03 Da, | 1683.029813 | 2 | 674.8534 | 740318976 | 601121024 |
| GFPEAASSFR                           | P32020 | 0          | n +34.06 Da,             | 1685.269598 | 2 | 548.7754 | 808622976 | 934438016 |
| SNAEFQMLR                            | Q8C196 | 0          | n +28.03 Da,             | 1686.573987 | 2 | 562.2818 | 714313024 | 623990016 |
| PNDSSFQIVKNPR                        | Q61176 | 0.00674157 | n +14.02 Da,n +28.03 Da, | 1693.804532 | 2 | 772.4198 | 279329984 | 199747008 |
| ATLNLNAINR                           | Q91Y97 | 0          | n +34.06 Da,             | 1697.197029 | 2 | 564.33   | 1.419E+09 | 1.485E+09 |
| SYPFDTVR                             | P48962 | 0.00532725 | n +34.06 Da,             | 1697.197958 | 2 | 506.7588 | 60575000  | 57771700  |
| PVNYVDTAVR                           | P62908 | 0          | n +14.02 Da,             | 1707.846586 | 2 | 655.8429 | 1.651E+09 | 1.044E+09 |
| PYVLP SVR                            | P05202 | 0.03039899 | n +14.02 Da,             | 1709.08031  | 2 | 471.275  | 35303000  | 53518500  |
| PYAVTEAIVR                           | P15105 | 0          | n +14.02 Da,             | 1715.482683 | 2 | 566.8219 | 432958016 | 294009984 |
| SEVSALLGR                            | P56480 | 0.02084734 | n +28.03 Da,             | 1726.175476 | 2 | 480.2797 | 755761984 | 653347968 |
| SNQAGEYIFER                          | Q9EQ20 | 0          | n +34.06 Da,             | 1728.11496  | 2 | 671.3253 | 244590000 | 252235008 |
| ATLQESEVKVDGEQKLSKN                  | Q99MN1 | 0          | n +42.03 Da,K +28.03 Da, | 1731.686901 | 3 | 743.7369 | 173496000 | 138152992 |
| SLAIQENANALAR                        | Q91Y97 | 0          | n +28.03 Da,             | 1737.20846  | 2 | 699.892  | 215712000 | 162671008 |
| ASLVPLKEK                            | P56135 | 0.0417434  | n +42.03 Da,K +34.06 Da, | 1737.833648 | 2 | 546.3685 | 339876000 | 3.311E+09 |
| SSGALLPKPQMR                         | Q9CPQ1 | 0          | n +42.03 Da,K +28.03 Da, | 1739.895454 | 2 | 677.8792 | 1.591E+10 | 1.458E+10 |
| LAQEDPDYGLR                          | P24270 | 0.035625   | n +14.02 Da,             | 1747.705908 | 2 | 642.8098 | 79502800  | 207660000 |
| SLAIQENANALAR                        | Q91Y97 | 0          | n +28.03 Da,             | 1750.217264 | 2 | 695.3763 | 164139008 | 116950000 |
| GTWDVETPQG SVR                       | Q9DBT9 | 0          | n +28.03 Da,             | 1751.541556 | 2 | 730.3626 | 45921500  | 140282000 |
| MELQKKGKTVAAAASGAAGGGGGGAGAGAPGGGR   | Q7TPD0 | 0          | n +42.03 Da,K +28.03 Da, | 1768.152891 | 3 | 951.4867 | 31863700  | 22936900  |
| EIDGGLET LR                          | Q9DCW4 | 0.0008285  | n +28.03 Da,             | 1769.732877 | 1 | 565.8033 | 106531000 | 42984100  |
| YVLDDSDGLGR                          | P54818 | 0          | n +34.06 Da,             | 1770.558857 | 2 | 619.3061 | 71644304  | 138096992 |

|                     |        |            |                          |             |   |          |           |           |
|---------------------|--------|------------|--------------------------|-------------|---|----------|-----------|-----------|
| MQPKVPQLR           | O88908 | 0          | n +42.03 Da,K +34.06 Da, | 1770.811678 | 2 | 583.8388 | 1.395E+09 | 1.42E+09  |
| AGKPVLYHFDGR        | P30115 | 0          | n +42.03 Da,K +34.06 Da, | 1773.137354 | 3 | 477.2578 | 144943008 | 145512000 |
| TIQGLDGLSER         | Q91Y97 | 0.00327065 | n +34.06 Da,             | 1779.540702 | 2 | 602.7905 | 5592910   | 158007008 |
| SLVFPEAENR          | P11725 | 0.009299   | n +28.03 Da,             | 1782.782692 | 2 | 595.3141 | 1.957E+09 | 681184000 |
| PEELYQTFQR          | P58252 | 0          | n +14.02 Da,             | 1786.507237 | 2 | 659.3324 | 117521000 | 126434000 |
| SSDAQWLTAEEER       | Q9CZL5 | 0          | n +34.06 Da,             | 1787.029429 | 2 | 710.838  | 776097984 | 714745024 |
| SVESIMATEDR         | Q8C196 | 0          | n +28.03 Da,             | 1788.967434 | 2 | 631.8074 | 58571100  | 202360000 |
| SNMEKHLF            | Q99LU0 | 0.00469116 | n +42.03 Da,K +34.06 Da, | 1789.41805  | 2 | 538.2659 | 487155008 | 469561984 |
| SSVGLIQLNR          | Q8BH95 | 0.00245499 | n +28.03 Da,             | 1789.615724 | 2 | 557.8319 | 328705984 | 305488000 |
| PQFTLEMR            | Q9CZU6 | 0.04973357 | n +14.02 Da,             | 1791.358651 | 2 | 518.2682 | 2.166E+09 | 1.565E+09 |
| SATDLTEFAAR         | Q8BWT1 | 0          | n +28.03 Da,             | 1793.195795 | 2 | 604.8302 | 982956032 | 351695008 |
| GLNAEGLLR           | Q64374 | 0.02509908 | n +28.03 Da,             | 1795.125677 | 2 | 485.7878 | 257840000 | 273356992 |
| MQDYNKDDMSYR        | E0CZD8 | 0.00532725 | n +42.03 Da,K +28.03 Da, | 1799.151397 | 2 | 818.3426 | 60739100  | 63763900  |
| TQTTPLVEYYR         | Q9WTP6 | 0.01837985 | n +34.06 Da,             | 1803.825603 | 2 | 699.8653 | 143163008 | 117424000 |
| TWDVETPQGSVR        | Q9DBT9 | 0.009299   | n +34.06 Da,             | 1804.050647 | 2 | 701.8504 | 76270800  | 76579600  |
| ASGADSKGDDLSTAILKQK | Q01853 | 0          | n +42.03 Da,K +28.03 Da, | 1808.065522 | 3 | 677.704  | 100973000 | 90020496  |
| PITSTFLER           | Q8BW75 | 0.00981079 | n +14.02 Da,             | 1810.568606 | 2 | 531.7665 | 656537984 | 536340000 |
| MLGSGFKAER          | Q9CX00 | 0          | n +42.03 Da,K +28.03 Da, | 1815.519123 | 2 | 583.3056 | 2.195E+09 | 2.317E+09 |
| MEEAELVKGR          | Q9JHU2 | 0          | n +42.03 Da,K +28.03 Da, | 1817.645088 | 2 | 614.8063 | 158758000 | 423280000 |
| FAVTVAPPGAR         | Q8VEK3 | 0          | n +34.06 Da,             | 1818.387964 | 2 | 557.3246 | 54187600  | 159079008 |
| TPSYVAFTDTER        | P16627 | 0.00532725 | n +28.03 Da,             | 1819.772189 | 2 | 707.846  | 126491000 | 104878000 |
| DQDTITGLRVWR        | A2AQ9  | 0.0008285  | n +34.06 Da,             | 1832.797831 | 2 | 747.4284 | 14858900  | 11994200  |
| AGLNSLEAVKR         | Q6IRU2 | 0          | n +42.03 Da,n +28.03 Da, | 1833.248313 | 2 | 614.3568 | 1.702E+09 | 1.565E+09 |
| TLADAEQDVFR         | Q9EQ20 | 0          | n +28.03 Da,             | 1836.110199 | 2 | 609.8218 | 92225800  | 56976900  |
| PVIFEDVGR           | Q9DC61 | 0          | n +14.02 Da,             | 1840.707757 | 2 | 522.3032 | 280056000 | 250844000 |
| TDLTEFAAR           | Q8BWT1 | 0.00883652 | n +28.03 Da,             | 1841.388003 | 2 | 526.2742 | 298900992 | 312095008 |
| TEAAEVLLER          | Q8QZS1 | 0.009299   | n +34.06 Da,             | 1850.688959 | 2 | 573.7982 | 520227008 | 239024992 |
| FIHYGIYLGNER        | Q9JI60 | 0.009299   | n +28.03 Da,             | 1852.419796 | 2 | 752.3829 | 1.626E+09 | 1.756E+09 |
| SVVAGGPEVTLTPER     | Q8CIM3 | 0          | n +28.03 Da,             | 1852.958919 | 2 | 770.4226 | 465321984 | 311607008 |
| ENIIDLSNANR         | B5X0G2 | 0          | n +28.03 Da,             | 1857.912762 | 2 | 640.8265 | 51286600  | 747433984 |
| TFVEESIYR           | Q9CZS1 | 0.0039968  | n +28.03 Da,             | 1862.530857 | 2 | 586.3018 | 148300000 | 71988800  |
| ATVAATTKVPEIR       | Q9WTM5 | 0.0008285  | n +42.03 Da,K +28.03 Da, | 1867.210989 | 2 | 713.9164 | 129193000 | 105952000 |
| MDLEAVCKR           | Q9CYR6 | 0.01639344 | n +42.03 Da,K +34.06 Da, | 1871.423898 | 2 | 596.2962 | 173396000 | 145459008 |
| TNVGIMFR            | P35505 | 0.00532725 | n +28.03 Da,             | 1878.570974 | 2 | 483.2654 | 322668992 | 378046016 |
| TFVEESIYR           | Q9CZS1 | 0.0039968  | n +28.03 Da,             | 1882.227944 | 2 | 586.3193 | 143420992 | 163608992 |
| ASGADSKGDDLSTAILKQK | Q01853 | 0          | n +42.03 Da,K +34.06 Da, | 1882.36145  | 3 | 682.7298 | 15904400  | 155054000 |
| TAEMSSILEER         | Q03265 | 0          | n +34.06 Da,             | 1886.945305 | 2 | 647.3206 | 254063008 | 380398016 |
| ASGADSKGDDLSTAILKQK | Q01853 | 0          | n +42.03 Da,K +28.03 Da, | 1889.26844  | 3 | 677.7033 | 2.086E+10 | 1.762E+10 |
| AGKPVLYHFDGR        | P30115 | 0          | n +42.03 Da,K +34.06 Da, | 1890.531889 | 3 | 477.2577 | 1.709E+09 | 1.48E+09  |
| VLAELYVSDR          | Q8BP47 | 0          | n +28.03 Da,             | 1893.790101 | 2 | 596.8328 | 576984000 | 605441024 |

|                         |        |            |                          |             |   |          |           |           |
|-------------------------|--------|------------|--------------------------|-------------|---|----------|-----------|-----------|
| ATPEASGSGEKVEGSEPSVTYYR | Q9CQX2 | 0          | n +42.03 Da,K +34.06 Da, | 1894.417789 | 3 | 824.3898 | 5.618E+09 | 4.909E+09 |
| GEFTMDLR                | P62962 | 0.009299   | n +34.06 Da,             | 1894.788333 | 2 | 498.7445 | 627220992 | 678862976 |
| ATPEASGSGEKVEGSEPSVTYYR | Q9CQX2 | 0          | n +42.03 Da,K +34.06 Da, | 1895.436289 | 2 | 1236.083 | 898838016 | 770256000 |
| SSIKVECVLR              | Q64374 | 0.02634961 | n +42.03 Da,K +34.06 Da, | 1898.347851 | 2 | 630.849  | 1.321E+10 | 1.584E+10 |
| SGEVPPNINIKEPR          | Q99JR1 | 0          | n +42.03 Da,K +28.03 Da, | 1898.594516 | 2 | 810.4411 | 3.754E+09 | 3.247E+09 |
| SFSDYPPPLGR             | P10126 | 0          | n +28.03 Da,             | 1915.636503 | 2 | 583.7958 | 897222976 | 966662976 |
| YTMGDAPDFDR             | P10649 | 0          | n +28.03 Da,             | 1916.435215 | 2 | 655.268  | 150735008 | 290079008 |
| TTFNVDGPDFQDR           | P97493 | 0          | n +28.03 Da,             | 1917.712137 | 2 | 834.3862 | 12199800  | 127631000 |
| TEDPETLQAQFR            | Q8BK48 | 0          | n +28.03 Da,             | 1922.871223 | 2 | 730.3529 | 23215600  | 38404200  |
| GTPVLGGLSYR             | Q61176 | 0.0039968  | n +34.06 Da,             | 1930.351795 | 2 | 574.3274 | 192060000 | 155287008 |
| MEAKGGTVKAASGFNATEDAQLR | P97429 | 0          | n +42.03 Da,K +28.03 Da, | 1943.620207 | 3 | 851.0988 | 564692992 | 486919008 |
| MEAKGGTVKAASGFNATEDAQLR | P97429 | 0          | n +42.03 Da,K +34.06 Da, | 1954.675428 | 3 | 854.1136 | 72658000  | 847043008 |
| GTPVLGGLSYR             | Q61176 | 0.00469116 | n +28.03 Da,             | 1957.109258 | 2 | 571.3011 | 88017696  | 57011800  |
| AAVPSAVHLPR             | Q3UFF7 | 0          | n +42.03 Da,             | 1957.464057 | 2 | 575.8    | 19337900  | 399689984 |
| VNFTVDQIR               | P58252 | 0          | n +34.06 Da,             | 1959.411233 | 2 | 563.3267 | 1.611E+10 | 63224800  |
| MQPASAKWYDR             | Q9R0Q7 | 0          | n +42.03 Da,K +28.03 Da, | 1962.852863 | 2 | 711.8449 | 1.292E+10 | 1.211E+10 |
| AAVPSAVHLPR             | Q3UFF7 | 0          | n +42.03 Da,             | 1965.699465 | 2 | 578.816  | 22753200  | 105835000 |
| VNFTVDQIR               | P58252 | 0          | n +28.03 Da,             | 1969.307023 | 2 | 560.312  | 6.919E+09 | 4.919E+09 |
| ALETVPKDLR              | P63271 | 0          | n +42.03 Da,K +28.03 Da, | 1971.61791  | 2 | 606.3534 | 318144992 | 260648000 |
| MENQLTKSVEER            | Q9DC50 | 0          | n +42.03 Da,K +34.06 Da, | 1972.030754 | 2 | 767.3822 | 3.1E+09   | 2.817E+09 |
| ATVDLEKLR               | P12382 | 0.00532725 | n +42.03 Da,K +28.03 Da, | 1981.592817 | 2 | 550.2945 | 15744900  | 28470400  |
| SGEVPPNINIKEPR          | Q99JR1 | 0          | n +42.03 Da,K +34.06 Da, | 1982.774408 | 2 | 810.4407 | 1.009E+09 | 779572992 |
| PYMTLGLTLR              | P55096 | 0.00674157 | n +14.02 Da,             | 1983.294316 | 2 | 533.292  | 80669000  | 108613000 |
| VNFTVDQIR               | P58252 | 0          | n +34.06 Da,             | 1985.032257 | 2 | 563.3281 | 144296000 | 84570304  |
| PEDFADEQSLVGR           | Q9EQH3 | 0          | n +17.03 Da,             | 1988.180701 | 2 | 738.8523 | 76118600  | 52748100  |
| AVTLDKDAYYR             | Q920B9 | 0          | n +42.03 Da,K +34.06 Da, | 1991.532289 | 2 | 692.8586 | 723497984 | 598457984 |
| AVPPTYADLGKSAR          | Q60932 | 0          | n +42.03 Da,K +34.06 Da, | 1991.551034 | 2 | 758.412  | 1.207E+10 | 1.113E+10 |
| SNLKPVEHCTGAGTGSPLEEEVR | Q8VC52 | 0          | n +42.03 Da,K +28.03 Da, | 1991.783273 | 3 | 884.757  | 209780992 | 187044992 |
| WDEVGPDPNQLR            | O09173 | 0          | n +34.06 Da,             | 1992.308393 | 2 | 727.3561 | 107936000 | 75734200  |
| VGVPPTETGALTLNR         | Q8BWT1 | 0.009299   | n +28.03 Da,             | 1995.624068 | 2 | 725.3886 | 258448992 | 199860992 |
| PSNAQFLESIR             | Q9CZ44 | 0          | n +17.03 Da,             | 1996.520659 | 2 | 638.3383 | 247438000 | 154639008 |
| TGTPVLGGLSYR            | Q61176 | 0.0008285  | n +28.03 Da,             | 2016.126656 | 2 | 624.85   | 1.431E+09 | 1.397E+09 |
| TVGVVWIDAGSR            | Q9CZ13 | 0.03333333 | n +28.03 Da,             | 2018.599517 | 2 | 594.8229 | 200128000 | 152480000 |
| PQEDAPSVDIANIR          | P40142 | 0.03950617 | n +14.02 Da,             | 2019.69264  | 2 | 766.883  | 1.846E+09 | 2.124E+09 |
| TSVESIMATEDR            | Q8C196 | 0          | n +28.03 Da,             | 2020.113585 | 2 | 683.8293 | 1.315E+09 | 1.45E+09  |
| ATVDLEKLR               | P12382 | 0.00532725 | n +42.03 Da,K +34.06 Da, | 2020.964273 | 2 | 557.8271 | 4.269E+09 | 3.989E+09 |
| TYEDYVEGLR              | Q60605 | 0          | n +34.06 Da,             | 2040.617661 | 2 | 639.8217 | 61959800  | 483504000 |
| SPDFTNENPLETR           | Q8VDN2 | 0.01375516 | n +28.03 Da,             | 2047.555741 | 2 | 772.8522 | 5837340   | 12862800  |
| PDQALQQLMLDR            | Q3KNM2 | 0          | n +14.02 Da,             | 2058.818881 | 2 | 664.8348 | 628185024 | 436462016 |
| SGEVPPNINIKEPR          | Q99JR1 | 0          | n +42.03 Da,K +34.06 Da, | 2059.499083 | 2 | 810.4425 | 157868000 | 144106000 |

|                            |        |            |                          |             |   |          |           |           |
|----------------------------|--------|------------|--------------------------|-------------|---|----------|-----------|-----------|
| SSPAQPAVPAPLADLKIQHTK      | P24549 | 0          | n +42.03 Da,K +34.06 Da, | 2063.064797 | 4 | 567.5747 | 751688000 | 715395008 |
| DDEVVDVGTVEEDLGKSR         | P08113 | 0          | n +28.03 Da,K +28.03 Da, | 2069.69876  | 3 | 678.6544 | 69674200  | 75387904  |
| AVPPTYADLGKSAR             | Q60932 | 0          | n +42.03 Da,K +34.06 Da, | 2078.206369 | 2 | 758.4117 | 4.307E+09 | 3.796E+09 |
| PMFIVNTNVPR                | P34884 | 0          | n +14.02 Da,             | 2079.20428  | 2 | 651.3553 | 5.797E+09 | 3.88E+09  |
| VSEPTTVPFDVR               | Q9CPT4 | 0          | n +34.06 Da,             | 2081.08797  | 2 | 687.8659 | 680593024 | 682681984 |
| PEVYDPFR                   | Q99N16 | 0.00981079 | n +14.02 Da,             | 2086.24143  | 2 | 518.759  | 512919008 | 410241984 |
| SEDYAFPTYADR               | P19783 | 0          | n +34.06 Da,             | 2088.246012 | 2 | 731.8254 | 113207000 | 107208000 |
| ASKEMFEDTVEER              | Q60973 | 0          | n +42.03 Da,K +28.03 Da, | 2102.362807 | 2 | 820.8774 | 172900000 | 140542000 |
| NILGGTVFR                  | O88844 | 0.00532725 | n +28.03 Da,             | 2110.451519 | 2 | 502.7976 | 288968992 | 98509296  |
| STSSVPAVQPDVESKENEVAPEFTNR | Q9CQL5 | 0          | n +34.06 Da,K +34.06 Da, | 2118.83692  | 3 | 982.155  | 128041000 | 95068096  |
| IMNVIGEPIDER               | P56480 | 0          | n +28.03 Da,             | 2121.952345 | 2 | 707.375  | 101202000 | 13055000  |
| PSTGALPFQSLR               | A2AS89 | 0          | n +14.02 Da,             | 2123.261038 | 2 | 644.3561 | 684137024 | 467726016 |
| PVFDFTGTGPR                | Q8BJW6 | 0.02634961 | n +14.02 Da,             | 2124.162093 | 2 | 553.7856 | 305839008 | 186706000 |
| IMNVIGEPIDER               | P56480 | 0          | n +14.02 Da,             | 2125.507097 | 2 | 700.3652 | 122821000 | 102165000 |
| TGTAEMSSILEER              | Q03265 | 0          | n +34.06 Da,             | 2130.377725 | 2 | 726.357  | 376752992 | 479360992 |
| TTFNVQDGPDPFQDR            | P97493 | 0          | n +34.06 Da,             | 2137.450348 | 2 | 834.3869 | 1.339E+09 | 1.427E+09 |
| YQIEEEVGQAIR               | Q91WT7 | 0          | n +34.06 Da,             | 2137.765024 | 2 | 731.8807 | 34844400  | 63170400  |
| SSQVSDGAAAVLLAR            | Q8VCH0 | 0          | n +28.03 Da,             | 2138.264374 | 2 | 736.9074 | 133406000 | 114641000 |
| PLTGGEVPSLGLSLR            | P11352 | 0          | n +14.02 Da,             | 2139.252028 | 2 | 694.8537 | 262512992 | 269247008 |
| IMNVIGEPIDER               | P56480 | 0.0008285  | n +28.03 Da,             | 2144.008234 | 2 | 706.8511 | 394934016 | 457084992 |
| SELLEDYYQSGR               | P55096 | 0          | n +34.06 Da,             | 2147.528855 | 2 | 744.3535 | 150844000 | 125614000 |
| RQHATNVGIMFR               | P35505 | 0          | n +14.02 Da,             | 2151.335145 | 2 | 719.3716 | 323276000 | 262112992 |
| TTFNVQDGPDPFQDR            | P97493 | 0          | n +34.06 Da,             | 2155.407113 | 2 | 837.4026 | 599673984 | 360775008 |
| SSQVSDGAAAVLLAR            | Q8VCH0 | 0          | n +28.03 Da,             | 2159.166832 | 2 | 735.3885 | 124160000 | 84854704  |
| GYINDFPMGR                 | Q9JH15 | 0.01184669 | n +28.03 Da,             | 2160.169669 | 2 | 599.2898 | 8522850   | 10113200  |
| VQAWYMDDESTADPR            | Q99JT9 | 0.009299   | n +28.03 Da,             | 2165.773763 | 3 | 566.2599 | 218248992 | 219070000 |
| VQAWYMDDESTADPR            | Q99JT9 | 0          | n +28.03 Da,             | 2166.00858  | 2 | 848.8854 | 999456000 | 995564032 |
| TFTNQIQAIFR                | P14206 | 0          | n +34.06 Da,             | 2166.926386 | 2 | 662.8541 | 138884992 | 110832000 |
| MHTAAEVLLER                | Q8QZ51 | 0          | n +42.03 Da,             | 2170.549479 | 2 | 720.8599 | 962414976 | 610236992 |
| SALVFGEIGR                 | P51660 | 0.01962111 | n +28.03 Da,             | 2172.385522 | 2 | 538.2932 | 330484992 | 129174000 |
| AAAKKAVLGPLVGAVDQGTSSSTR   | Q64516 | 0          | n +42.03 Da,K +28.03 Da, | 2179.43664  | 3 | 765.7727 | 184591008 | 169716000 |
| PLELELCPGR                 | Q99J77 | 0          | n +14.02 Da,             | 2180.99893  | 2 | 597.8126 | 143811008 | 209994000 |
| TVLSGGTTMYPGIADR           | P60710 | 0          | n +28.03 Da,             | 2181.830531 | 2 | 829.3999 | 115944000 | 193092000 |
| TFVVSQPLNYR                | Q9JLJ2 | 0.00245499 | n +34.06 Da,             | 2181.892056 | 2 | 676.3754 | 2.883E+09 | 204744992 |
| STGTFFVVSQPLNYR            | Q9JLJ2 | 0          | n +34.06 Da,             | 2188.834672 | 2 | 798.9229 | 674006976 | 518523008 |
| PMFIVNTNVPR                | P34884 | 0          | n +14.02 Da,             | 2199.345881 | 3 | 434.5728 | 1.621E+09 | 1.201E+09 |
| PMFIVNTNVPR                | P34884 | 0          | n +14.02 Da,             | 2200.103119 | 2 | 651.3564 | 5.515E+10 | 4.108E+10 |
| DLGSFYAPR                  | P52196 | 0          | n +28.03 Da,             | 2205.031592 | 2 | 527.2732 | 119282000 | 131496000 |
| PTVFSNVTDEMR               | O35945 | 0          | n +17.03 Da,             | 2208.950826 | 2 | 705.3397 | 94619600  | 52300800  |
| DDEVVDVGTVEEDLGKSR         | P08113 | 0          | n +17.03 Da,K +34.06 Da, | 2212.649328 | 3 | 673.9828 | 273336000 | 219594000 |



|                          |        |            |                          |             |   |          |           |           |
|--------------------------|--------|------------|--------------------------|-------------|---|----------|-----------|-----------|
| NVLSGGTTMYPGIADR         | P62737 | 0          | n +14.02 Da,             | 2225.993812 | 2 | 830.4163 | 20974100  | 24584700  |
| PIMVDDIMR                | Q8WURO | 0          | n +14.02 Da,             | 2230.363608 | 2 | 552.2834 | 4.521E+09 | 2.798E+09 |
| PVYPDVEPGYLR             | O88533 | 0.0039968  | n +17.03 Da,             | 2231.934867 | 2 | 711.3813 | 564169024 | 557139008 |
| DDEVVDVGTVEEDLGKSR       | P08113 | 0          | n +28.03 Da,K +28.03 Da, | 2240.456906 | 3 | 678.655  | 912240000 | 888716992 |
| DDEVVDVGTVEEDLGKSR       | P08113 | 0          | n +34.06 Da,K +34.06 Da, | 2241.131837 | 3 | 681.6706 | 60345700  | 349120992 |
| TIVYFPVR                 | P19157 | 0.03221731 | n +34.06 Da,             | 2249.557046 | 2 | 511.8056 | 7.264E+09 | 6.629E+09 |
| TTITSVLPKALVASR          | Q8C196 | 0          | n +34.06 Da,K +34.06 Da, | 2252.8228   | 3 | 570.689  | 1.002E+09 | 1.089E+09 |
| AFDGTWKVDR               | P55050 | 0          | n +42.03 Da,K +34.06 Da, | 2254.067203 | 2 | 632.82   | 2.73E+10  | 2.121E+10 |
| PVYPDVEPGYLR             | O88533 | 0          | n +14.02 Da,             | 2259.152835 | 2 | 709.8692 | 3.302E+09 | 6.035E+09 |
| FPQDQLATLTGR             | P08249 | 0          | n +34.06 Da,             | 2262.945397 | 2 | 687.8729 | 450412992 | 408976992 |
| TTITSVLPKALVASR          | Q8C196 | 0          | n +34.06 Da,K +34.06 Da, | 2265.475686 | 3 | 573.7053 | 68777296  | 872945024 |
| TLSNAEFQMLR              | Q8C196 | 0          | n +28.03 Da,             | 2271.465735 | 2 | 669.3477 | 3.931E+09 | 4.129E+09 |
| SSPAQPAVPAPLADLKIQHTK    | P24549 | 0          | n +42.03 Da,K +34.06 Da, | 2271.495992 | 3 | 756.4306 | 86306000  | 91425696  |
| PMTLGYWNTR               | P19639 | 0          | n +14.02 Da,             | 2275.625449 | 2 | 626.8112 | 1.842E+10 | 1.148E+10 |
| QKLIHGGNEETLR            | P52825 | 0.01903467 | n +28.03 Da,K +28.03 Da, | 2279.976221 | 2 | 772.9223 | 35102900  | 23810000  |
| GSWEVIEGYR               | P26443 | 0          | n +28.03 Da,             | 2281.621923 | 2 | 612.3067 | 1.393E+09 | 1.597E+09 |
| SWEVIEGYR                | P26443 | 0.0417434  | n +34.06 Da,             | 2293.330279 | 2 | 583.7956 | 731651008 | 760073984 |
| AFDYDLQTGQISNR           | Q64374 | 0          | n +34.06 Da,             | 2297.787864 | 2 | 828.4054 | 415668000 | 612230976 |
| GIYEALELR                | P17182 | 0.00981079 | n +28.03 Da,             | 2300.320809 | 2 | 546.3094 | 16220000  | 12929700  |
| AFDYDLQTGQISNR           | Q64374 | 0          | n +34.06 Da,             | 2301.065799 | 3 | 552.6059 | 190612992 | 238492992 |
| VSVVLGGDHS LAVGSGH       | Q61176 | 0          | n +28.03 Da,             | 2304.434636 | 3 | 606.9964 | 475102016 | 335340000 |
| SSPAQPAVPAPLANLKIQHTK    | O35945 | 0          | n +42.03 Da,K +28.03 Da, | 2313.841361 | 3 | 756.1017 | 134848992 | 113850000 |
| AFDGTWKVDR               | P55050 | 0          | n +42.03 Da,K +34.06 Da, | 2315.764145 | 2 | 632.8197 | 1.111E+09 | 824782016 |
| MKVFTGGLPAEGR            | Q91253 | 0          | n +42.03 Da,K +28.03 Da, | 2330.596867 | 2 | 786.4344 | 181668000 | 105390000 |
| SLAVTMDDFR               | Q01853 | 0          | n +28.03 Da,             | 2337.662118 | 2 | 591.7951 | 319692000 | 307735008 |
| GDDIQLEFVR               | O54734 | 0          | n +28.03 Da,             | 2343.178171 | 2 | 610.32   | 100406000 | 79919200  |
| AQTLNSAEFQMLR            | Q8C196 | 0          | n +28.03 Da,             | 2344.998535 | 2 | 768.8961 | 37742100  | 45019400  |
| SFVNDIFER                | P10853 | 0          | n +28.03 Da,             | 2349.201049 | 2 | 577.7957 | 213628000 | 207839008 |
| YTIVYFPSR                | F6RWR5 | 0.00674157 | n +34.06 Da,             | 2353.767347 | 2 | 587.3191 | 1.45E+09  | 1.27E+09  |
| PYLLISTQIR               | P99025 | 0          | n +14.02 Da,             | 2358.443268 | 2 | 609.3666 | 1.649E+09 | 994494016 |
| AAAKKAVLGPLVGAVDQGTSSSTR | Q64516 | 0          | n +42.03 Da,K +34.06 Da, | 2362.995982 | 3 | 765.7716 | 72834600  | 63703800  |
| PFVELETNLPASR            | O35215 | 0.04973357 | n +14.02 Da,             | 2372.464679 | 3 | 496.2684 | 2.491E+09 | 1.552E+09 |
| PLIPIVVEQTGR             | O88696 | 0          | n +14.02 Da,             | 2372.973802 | 2 | 666.892  | 70976200  | 23058700  |
| PFVELETNLPASR            | O35215 | 0          | n +14.02 Da,             | 2373.37057  | 2 | 743.8988 | 1.953E+10 | 1.244E+10 |
| FDITADDEPLGR             | P17742 | 0          | n +28.03 Da,             | 2374.379878 | 2 | 688.8382 | 111415000 | 294873984 |
| TVPWFPR                  | P16331 | 0.03784119 | n +28.03 Da,             | 2377.067397 | 2 | 465.7635 | 94306400  | 85876800  |
| PDNINYLSR                | P31809 | 0          | n +14.02 Da,             | 2378.363564 | 2 | 646.3249 | 39632500  | 41706000  |
| ATGFININSLR              | P16460 | 0          | n +28.03 Da,             | 2379.584496 | 2 | 615.8475 | 87004896  | 172219008 |
| IDLPETFDAR               | P10605 | 0          | n +28.03 Da,             | 2380.7581   | 2 | 602.8143 | 1.587E+09 | 1.892E+09 |
| EAAQMDMVNDGVEDLR         | P19157 | 0          | n +28.03 Da,             | 2386.094    | 2 | 910.9114 | 33261300  | 95729296  |

|                          |        |            |                                      |             |   |          |           |           |
|--------------------------|--------|------------|--------------------------------------|-------------|---|----------|-----------|-----------|
| MKSDASTSAAPLKGVLGPLR     | Q8BGI5 | 0          | n +42.03 Da,K +28.03 Da,             | 2392.837702 | 3 | 699.7293 | 137968992 | 106982000 |
| PPANVQLFQEVKQSQSEEDMVGR  | Q00519 | 0.00883652 | n +14.02 Da,K +28.03 Da,             | 2405.697291 | 2 | 866.4115 | 43742100  | 53568500  |
| GLTVAEYFR                | P56480 | 0.0039968  | n +28.03 Da,                         | 2406.909774 | 2 | 538.7981 | 34490100  | 25083500  |
| SSPAQPAVPAPLADLKIQHTK    | P24549 | 0          | n +42.03 Da,K +28.03 Da,             | 2412.102105 | 3 | 756.4301 | 1.708E+10 | 1.607E+10 |
| TGFININSLR               | P16460 | 0          | n +34.06 Da,                         | 2415.334938 | 2 | 581.8325 | 1.037E+09 | 998699008 |
| PYLLISTQIR               | P99025 | 0          | n +17.03 Da,                         | 2423.513132 | 2 | 609.366  | 138388992 | 105284000 |
| PLIPIVVEQTGR             | O88696 | 0          | n +14.02 Da,                         | 2426.370405 | 2 | 668.4031 | 2.273E+09 | 1.502E+09 |
| MEVHELFR                 | P41216 | 0.00532725 | n +42.03 Da,                         | 2428.36101  | 2 | 550.273  | 5.588E+09 | 989265984 |
| NATIGSVRR                | F8VPU6 | 0.0477327  | n +17.03 Da,                         | 2430.648944 | 2 | 495.7887 | 76185000  | 86629696  |
| MDNKLVDVFR               | Q3UZZ6 | 0          | n +42.03 Da,K +28.03 Da,             | 2433.514426 | 2 | 604.3109 | 2.135E+10 | 2.935E+10 |
| SSPAQPAVPAPLADLKIQHTK    | P24549 | 0          | n +42.03 Da,K +34.06 Da,             | 2433.746604 | 3 | 759.446  | 42191700  | 485520000 |
| AAAKKAVLGPLVGAVDQGTSSSTR | Q64516 | 0          | n +42.03 Da,K +34.06 Da,             | 2433.966543 | 3 | 765.7717 | 1.239E+09 | 986460992 |
| GFGDLKTPAGL              | O70251 | 0          | n +28.03 Da,K +28.03 Da,             | 2435.802507 | 2 | 566.324  | 263576992 | 160412000 |
| AAAKKAVLGPLVGAVDQGTSSSTR | Q64516 | 0          | n +42.03 Da,K +34.06 Da,             | 2436.294035 | 3 | 768.7883 | 1.094E+09 | 3.72E+09  |
| AAAKKAVLGPLVGAVDQGTSSSTR | Q64516 | 0          | n +42.03 Da,K +28.03 Da,             | 2438.892342 | 4 | 574.5811 | 218524992 | 182195008 |
| ADEIAKAQVAQPGGDTIFGKIIR  | P70349 | 0          | n +42.03 Da,n +28.03 Da,K +28.03 Da, | 2439.332782 | 4 | 624.8515 | 81466400  | 58128600  |
| PDDYFLLR                 | Q99J08 | 0.0240481  | n +14.02 Da,                         | 2446.216883 | 2 | 526.7745 | 211174000 | 134188000 |
| SLVSLFGNR                | P99029 | 0.01375516 | n +28.03 Da,                         | 2454.407537 | 2 | 510.7959 | 16841600  | 13383300  |
| QGEIFLLPAR               | Q78JT3 | 0.00981079 | n +28.03 Da,                         | 2461.711548 | 2 | 586.3488 | 93268600  | 75377504  |
| MEKTLETVPLER             | O88569 | 0.01962111 | n +42.03 Da,K +28.03 Da,             | 2463.1182   | 3 | 505.9413 | 33328600  | 35340500  |
| IVIWDPEATR               | Q9EQF5 | 0.009299   | n +28.03 Da,                         | 2463.943049 | 2 | 614.3403 | 83612200  | 91423400  |
| MEKTLETVPLER             | O88569 | 0          | n +42.03 Da,K +28.03 Da,             | 2464.310963 | 2 | 758.4079 | 1.447E+09 | 1.385E+09 |
| AGALVRKAADYVR            | P63030 | 0.04736211 | n +42.03 Da,K +28.03 Da,             | 2464.73027  | 3 | 487.284  | 63341500  | 56370200  |
| GFGDLKTPAGL              | O70251 | 0          | n +28.03 Da,K +28.03 Da,             | 2465.27779  | 3 | 565.3124 | 20806400  | 372168000 |
| PQFQTWEEFSR              | P49962 | 0          | n +14.02 Da,                         | 2469.203903 | 2 | 734.8463 | 2.813E+09 | 2.349E+09 |
| FDPAINIYLQR              | Q9QXD6 | 0          | n +34.06 Da,                         | 2472.22389  | 2 | 700.3739 | 264472992 | 131964000 |
| MEVHELFR                 | P41216 | 0.00532725 | n +42.03 Da,                         | 2472.605451 | 2 | 550.271  | 261875008 | 685009024 |
| ADLEEQLSDEEKVR           | P47754 | 0          | n +42.03 Da,K +34.06 Da,             | 2473.102317 | 2 | 865.9245 | 970713984 | 965136000 |
| PFVELETNLPASR            | O35215 | 0          | n +28.03 Da,                         | 2476.767011 | 2 | 750.9039 | 345584992 | 278862016 |
| SLGVAAEGLPDQYADGEAAR     | Q9QXF8 | 0          | n +42.03 Da,                         | 2483.670424 | 2 | 1016.47  | 1.783E+09 | 1.021E+09 |
| SGFTSLLMER               | P05213 | 0          | n +28.03 Da,                         | 2484.608118 | 2 | 584.8053 | 150399008 | 136716000 |
| SAHLQWMVVR               | P41105 | 0          | n +42.03 Da,                         | 2495.25355  | 2 | 634.8324 | 1.925E+10 | 527051008 |
| SGFTSLLMER               | P05213 | 0          | n +28.03 Da,                         | 2497.78308  | 2 | 583.3042 | 43670800  | 60647400  |
| PVFTKIAQWGTD             | P19639 | 0.00245499 | n +14.02 Da,K +28.03 Da,             | 2498.818705 | 2 | 702.8804 | 838848000 | 697483008 |
| ASQSQGIQQLLQAEKR         | Q9CR51 | 0.00469116 | n +42.03 Da,K +34.06 Da,             | 2501.022054 | 2 | 928.0059 | 46287300  | 33881100  |
| SFVNDIFER                | P10853 | 0          | n +28.03 Da,                         | 2503.295499 | 2 | 577.7958 | 5.436E+09 | 5.403E+09 |
| ASQSQGIQQLLQAEKR         | Q9CR51 | 0          | n +42.03 Da,K +34.06 Da,             | 2503.991558 | 3 | 619.0063 | 426328000 | 454404992 |
| TVILLENLR                | P09411 | 0.02634961 | n +34.06 Da,                         | 2505.991015 | 2 | 549.8476 | 293752992 | 254156000 |
| FTQAGSEVSALLGR           | P56480 | 0          | n +28.03 Da,                         | 2507.048319 | 2 | 727.8674 | 36235400  | 47355900  |
| STGIYEALRLR              | P17182 | 0          | n +34.06 Da,                         | 2510.134152 | 2 | 643.3644 | 303017984 | 496592992 |

|                                |        |            |                                      |             |   |          |           |           |
|--------------------------------|--------|------------|--------------------------------------|-------------|---|----------|-----------|-----------|
| AASAIKGLSALR                   | Q9D8T7 | 0          | n +42.03 Da,K +34.06 Da,             | 2510.406257 | 2 | 614.3748 | 933955968 | 897036032 |
| NTPIFFIR                       | P24270 | 0.02633311 | n +28.03 Da,                         | 2522.064554 | 2 | 518.3031 | 185124992 | 156944000 |
| TNLNVPGLYIR                    | Q8VCW8 | 0          | n +28.03 Da,                         | 2528.748454 | 2 | 708.8956 | 12081700  | 8092420   |
| TGSGDPKEEEEEELVDPLTTVR         | P99028 | 0          | n +34.06 Da,K +34.06 Da,             | 2528.906319 | 3 | 829.4055 | 204368992 | 192234000 |
| WPIAPFPR                       | P61922 | 0.00819672 | n +34.06 Da,                         | 2532.090986 | 2 | 506.2923 | 45189500  | 47826200  |
| MDNKLDVFR                      | Q3UZZ6 | 0          | n +42.03 Da,K +28.03 Da,             | 2559.886588 | 2 | 604.31   | 745424000 | 1.095E+09 |
| SQGVVLAPYGPWEWR                | P11714 | 0          | n +28.03 Da,                         | 2565.573422 | 2 | 793.9201 | 74383600  | 67991504  |
| FLDFQGSaipr                    | Q8BGC4 | 0          | n +34.06 Da,                         | 2567.143318 | 2 | 639.8453 | 546715008 | 343420000 |
| TTIAGVVYKDGIVLGADTR            | P70195 | 0          | n +34.06 Da,K +34.06 Da,             | 2569.325721 | 3 | 669.0491 | 300560992 | 273956000 |
| TAFFKTLR                       | Q9ESW4 | 0.01505818 | n +42.03 Da,K +34.06 Da,             | 2575.034714 | 2 | 527.3081 | 65904100  | 71118096  |
| ALDGPEQMELEEGKAGSGLR           | P62196 | 0          | n +42.03 Da,K +28.03 Da,             | 2575.935146 | 3 | 719.6864 | 234606000 | 263668992 |
| MNVVFSDEMKR                    | Q8C196 | 0.00883652 | n +28.03 Da,K +28.03 Da,             | 2579.267622 | 2 | 770.891  | 259650000 | 100227000 |
| PPYTIYFPSR                     | F6RWR5 | 0.009299   | n +14.02 Da,                         | 2582.514731 | 2 | 677.3627 | 612638016 | 468400992 |
| TSGFTSLLMER                    | P05213 | 0          | n +34.06 Da,                         | 2583.731596 | 2 | 663.8394 | 126704000 | 112381000 |
| DGSWEVIEGYR                    | P26443 | 0          | n +28.03 Da,                         | 2590.085486 | 2 | 668.3388 | 171500000 | 351612992 |
| AAAAGAVVASAASGPAEGKKITELR      | Q8CH25 | 0          | n +42.03 Da,n +34.06 Da,K +34.06 Da, | 2590.739705 | 3 | 798.7834 | 300080992 | 234071008 |
| PEEPLTGFSWR                    | Q91YH5 | 0          | n +14.02 Da,                         | 2591.874291 | 2 | 666.832  | 181019008 | 123007000 |
| TGIYEALER                      | P17182 | 0          | n +28.03 Da,                         | 2594.815851 | 2 | 596.8319 | 353428992 | 301828992 |
| AELQEVQITEEKPLPGQTPETAKEAELAAR | Q9QYG0 | 0          | n +42.03 Da,K +28.03 Da,             | 2596.517361 | 4 | 872.7189 | 488583008 | 432383008 |
| VDYYEVLGVQR                    | O54946 | 0.03039899 | n +28.03 Da,                         | 2597.62934  | 2 | 684.8675 | 1.314E+09 | 1.054E+09 |
| LVPVSEASTVIAVSSAHR             | Q9Z223 | 0.02818706 | n +14.02 Da,                         | 2599.055048 | 3 | 611.0077 | 219834000 | 275817984 |
| NWGYLDQVAALR                   | Q8BK48 | 0.0435049  | n +14.02 Da,                         | 2601.004859 | 2 | 710.3592 | 36687600  | 749963008 |
| TSGFTSLLMER                    | P05213 | 0          | n +28.03 Da,                         | 2612.940372 | 2 | 662.3282 | 213336000 | 201528000 |
| ILDVFCGCQMHFVRTDELr            | P97324 | 0.02634961 | n +17.03 Da,                         | 2616.174258 | 3 | 805.0435 | 58531000  | 65725700  |
| GYLSLLQDSGEVR                  | P63242 | 0          | n +28.03 Da,                         | 2622.199071 | 2 | 732.8868 | 499404992 | 486832000 |
| EETFSYLLGR                     | Q61176 | 0          | n +28.03 Da,                         | 2622.782498 | 2 | 621.8233 | 25630500  | 83272704  |
| TAELFFEDVR                     | P51174 | 0          | n +34.06 Da,                         | 2632.074697 | 2 | 627.8218 | 273091008 | 263656992 |
| SDVLELTDENFESR                 | P27773 | 0          | n +34.06 Da,                         | 2634.392519 | 3 | 561.2752 | 66913600  | 24899600  |
| AEFNSNLNRERMEER                | Q9D8M7 | 0.009299   | n +17.03 Da,                         | 2636.442785 | 2 | 956.4644 | 62694000  | 92919696  |
| SDVLELTDENFESR                 | P27773 | 0          | n +34.06 Da,                         | 2636.544286 | 2 | 841.3992 | 4.162E+09 | 3.388E+09 |
| TAELFFEDVR                     | P51174 | 0          | n +28.03 Da,                         | 2637.078412 | 2 | 626.3312 | 133633000 | 214806000 |
| TAEDFADQFLR                    | Q64310 | 0          | n +28.03 Da,                         | 2639.351068 | 2 | 670.8456 | 104449000 | 79205104  |
| STNTDLSLSSYDEGQGSKFIR          | Q9JLR9 | 0          | n +42.03 Da,K +34.06 Da,             | 2639.944008 | 2 | 1188.072 | 113530000 | 121295000 |
| STNTDLSLSSYDEGQGSKFIR          | Q9JLR9 | 0          | n +42.03 Da,K +34.06 Da,             | 2640.066752 | 3 | 792.3827 | 332073984 | 318980992 |
| APQGSGLGEYLFER                 | P29391 | 0          | n +34.06 Da,                         | 2642.93128  | 2 | 747.883  | 1.727E+09 | 1.613E+09 |
| DGSWEVIEGYR                    | P26443 | 0          | n +28.03 Da,                         | 2643.564461 | 2 | 669.8195 | 292680992 | 351120992 |
| SIVVTNYEESIKMPINEPAPGR         | P49429 | 0          | n +28.03 Da,K +28.03 Da,             | 2645.132812 | 3 | 834.1081 | 27405000  | 22101300  |
| TDPAPATTFahLDATTVLSR           | P56480 | 0          | n +28.03 Da,                         | 2648.594081 | 3 | 705.0359 | 589032000 | 507260000 |
| SDEFSLADALPEQSSAKPPAVTNTKAGH   | Q8BH93 | 0          | n +42.03 Da,K +34.06 Da,             | 2651.601973 | 3 | 989.4966 | 35421600  | 32228200  |
| ATEFGLASGVFTR                  | Q8ROY6 | 0          | n +28.03 Da,                         | 2652.866679 | 2 | 692.3666 | 258624000 | 241816992 |

|                                 |        |            |                                      |             |   |          |           |           |
|---------------------------------|--------|------------|--------------------------------------|-------------|---|----------|-----------|-----------|
| YTIVYFPVR                       | P19157 | 0.0008285  | n +28.03 Da,                         | 2654.862416 | 2 | 593.3374 | 7.797E+09 | 5.728E+09 |
| PPYTIYFPSR                      | F6RWR5 | 0.03333333 | n +14.02 Da,                         | 2657.321897 | 2 | 677.3632 | 13757500  | 15045300  |
| GLLSQGSPLSWEETQR                | P97494 | 0          | n +28.03 Da,                         | 2657.788507 | 2 | 908.4655 | 2.071E+09 | 1.755E+09 |
| NWGYLDQVAALR                    | Q8BK48 | 0.0435049  | n +14.02 Da,                         | 2659.049698 | 2 | 708.8476 | 23917200  | 751734976 |
| GLLSQGSPLSWEETQR                | P97494 | 0          | n +28.03 Da,                         | 2660.106845 | 3 | 605.9795 | 1.648E+09 | 1.378E+09 |
| TASSVLLHTGQKMPL                 | Q9JII6 | 0          | n +42.03 Da,K +28.03 Da,             | 2663.777306 | 3 | 551.6394 | 60882200  | 58689200  |
| TASSVLLHTGQKMPL                 | Q9JII6 | 0          | n +42.03 Da,K +34.06 Da,             | 2665.827768 | 2 | 826.9556 | 3.069E+09 | 3.092E+09 |
| ALHVPKAPGFAQM                   | P42932 | 0          | n +42.03 Da,K +28.03 Da,             | 2670.159486 | 2 | 718.8891 | 289828000 | 262212000 |
| TLNQLVGAAFGAAGQR                | Q9EQ20 | 0          | n +34.06 Da,                         | 2671.606687 | 3 | 534.63   | 38591800  | 33281600  |
| ATEFGLASGVFTR                   | Q8R0Y6 | 0          | n +28.03 Da,                         | 2673.413077 | 2 | 692.3648 | 24690700  | 47382500  |
| SGSKYKAPLATLPSTLDPAEYDVSPETR    | Q9CQC7 | 0          | n +42.03 Da,K +34.06 Da,             | 2674.712512 | 4 | 797.9153 | 402203008 | 331528000 |
| MQVTLKLQKQTF                    | P54728 | 0.03441802 | n +28.03 Da,K +28.03 Da,             | 2680.56081  | 2 | 811.4545 | 355340992 | 321604992 |
| GAPQGSGLGEYLFER                 | P29391 | 0          | n +28.03 Da,                         | 2692.376392 | 2 | 776.3939 | 280636000 | 1.088E+09 |
| DFISYLQR                        | P27773 | 0.04973357 | n +34.06 Da,                         | 2707.058262 | 2 | 538.313  | 237346000 | 36943600  |
| PAVPVPIGPPAGFR                  | Q05920 | 0          | n +14.02 Da,                         | 2707.725254 | 2 | 792.9675 | 307649984 | 226896000 |
| TFAATIPRPF                      | P16331 | 0          | n +28.03 Da,                         | 2709.589673 | 2 | 574.8294 | 170804000 | 148582000 |
| PAVPVPIGPPAGFR                  | Q05920 | 0          | n +14.02 Da,                         | 2712.285509 | 3 | 528.9805 | 351662016 | 271327008 |
| TALAEFGYIR                      | Q8C165 | 0.03950617 | n +28.03 Da,                         | 2726.399975 | 2 | 647.8346 | 257931008 | 399835008 |
| EFPGLEPR                        | O35490 | 0          | n +34.06 Da,                         | 2731.060608 | 2 | 560.2955 | 977371008 | 687715008 |
| TGAPQGSGLGEYLFER                | P29391 | 0          | n +28.03 Da,                         | 2731.372419 | 2 | 826.917  | 153548000 | 209568000 |
| LYSSDDVIELTPSNFNR               | Q922R8 | 0          | n +34.06 Da,                         | 2739.655204 | 3 | 695.6763 | 151856000 | 120149000 |
| LYSSDDVIELTPSNFNR               | Q922R8 | 0          | n +28.03 Da,                         | 2743.87634  | 2 | 1043.01  | 35001300  | 31882000  |
| AANWMESSYWDGR                   | P54869 | 0          | n +34.06 Da,                         | 2754.441378 | 2 | 800.8461 | 24151300  | 20174600  |
| PYVYLPFGNGPR                    | Q64459 | 0          | n +14.02 Da,                         | 2756.769857 | 2 | 697.3657 | 45380800  | 24517100  |
| ADEIAKAQVAQPGGDTIFGK            | P70349 | 0          | n +42.03 Da,n +34.06 Da,K +34.06 Da, | 2757.971766 | 3 | 705.3772 | 246544000 | 252079008 |
| PAAGTVILLENLR                   | P09411 | 0          | n +14.02 Da,                         | 2759.263428 | 2 | 690.9148 | 121875000 | 75572704  |
| PAFTPATGTPVLGGLSYR              | Q61176 | 0          | n +14.02 Da,                         | 2765.526426 | 3 | 606.9968 | 3.525E+09 | 2.881E+09 |
| PAFTPATGTPVLGGLSYR              | Q61176 | 0          | n +14.02 Da,                         | 2766.692121 | 2 | 909.9915 | 3.649E+09 | 3.133E+09 |
| PPFPGLVKY                       | Q01768 | 0.01375516 | n +14.02 Da,K +28.03 Da,             | 2769.570795 | 2 | 555.3392 | 106826000 | 100494000 |
| ADEIAKAQVAQPGGDTIFGK            | P70349 | 0          | n +42.03 Da,n +34.06 Da,K +34.06 Da, | 2775.181549 | 2 | 701.8578 | 770003968 | 173020992 |
| FASYLTFSPSEVKSLR                | Q92110 | 0.02929936 | n +42.03 Da,K +28.03 Da,             | 2777.766544 | 2 | 948.4738 | 157732992 | 128796000 |
| PSIGEFIMVDR                     | Q9QXD6 | 0          | n +14.02 Da,                         | 2778.576808 | 2 | 639.3317 | 7.065E+09 | 5.354E+09 |
| PMILGYWNVNR                     | P10649 | 0          | n +14.02 Da,                         | 2782.789324 | 2 | 631.8398 | 1.642E+09 | 1.341E+09 |
| AEQEPTAEQLAQIAAENEDEHSVNYKPPAQK | Q99PT1 | 0          | n +42.03 Da,K +34.06 Da,             | 2783.506822 | 4 | 916.4416 | 1.427E+09 | 1.382E+09 |
| AEQEPTAEQLAQIAAENEDEHSVNYKPPAQK | Q99PT1 | 0          | n +42.03 Da,K +28.03 Da,             | 2785.012674 | 3 | 1221.59  | 184504000 | 170183008 |
| AGKPVLYHFDGR                    | P30115 | 0          | n +42.03 Da,K +28.03 Da,             | 2785.571701 | 2 | 713.8871 | 73951504  | 42390400  |
| MLGPEGGEGYVVKLR                 | Q9Z2X1 | 0          | n +42.03 Da,K +34.06 Da,             | 2789.440218 | 2 | 839.9269 | 201468000 | 156444000 |
| MDGIVPDIavgTKR                  | P17225 | 0          | n +42.03 Da,K +34.06 Da,             | 2791.897758 | 2 | 771.422  | 487979008 | 307951008 |
| GVLEEFGR                        | Q9DBM2 | 0          | n +28.03 Da,                         | 2793.488898 | 2 | 541.2877 | 365902016 | 341520000 |
| PAAGTVILLENLR                   | P09411 | 0          | n +17.03 Da,                         | 2796.325871 | 2 | 692.4021 | 501104992 | 613491008 |

|                                |        |            |                          |             |   |          |           |           |
|--------------------------------|--------|------------|--------------------------|-------------|---|----------|-----------|-----------|
| MFLQYYLNEQGDR                  | Q9CQS2 | 0          | n +34.06 Da,             | 2800.664905 | 2 | 852.9061 | 165439008 | 123798000 |
| PDGMVALLDYR                    | P63028 | 0          | n +14.02 Da,             | 2809.896656 | 2 | 632.3242 | 149192000 | 163646000 |
| AAGFKTVEPLEYYR                 | Q9D753 | 0.00469116 | n +42.03 Da,K +34.06 Da, | 2815.911444 | 2 | 857.4472 | 144064000 | 131595000 |
| PFFPGLVKY                      | Q01768 | 0.01375516 | n +14.02 Da,K +28.03 Da, | 2823.620043 | 2 | 555.3237 | 4.764E+09 | 4.092E+09 |
| MLGPEGGEGYVVKLR                | Q9Z2X1 | 0          | n +42.03 Da,K +28.03 Da, | 2824.77509  | 2 | 837.9479 | 8.142E+09 | 7.804E+09 |
| DLYRLQSGEEE                    | P21275 | 0.04736211 | n +14.02 Da,             | 2828.205114 | 2 | 676.8301 | 334296992 | 555779008 |
| SIVPALEIANAHR                  | P63038 | 0          | n +28.03 Da,             | 2829.30087  | 2 | 709.9115 | 299198016 | 198300992 |
| PVTLGYWDIR                     | O35660 | 0.01505818 | n +17.03 Da,             | 2839.552066 | 2 | 617.3353 | 5.449E+09 | 3.46E+09  |
| GETFQLMGLYGR                   | B5X0G2 | 0          | n +34.06 Da,             | 2840.26159  | 2 | 700.3553 | 1.588E+09 | 2.238E+09 |
| LGYKEQFLR                      | Q6PHU5 | 0.03160556 | n +42.03 Da,K +28.03 Da, | 2851.993248 | 2 | 612.343  | 232908000 | 161424992 |
| FVYPLDFAR                      | P48962 | 0.03676012 | n +28.03 Da,             | 2853.457516 | 2 | 578.3136 | 109338000 | 87861000  |
| SDSEKLNLDIIGR                  | P62137 | 0.04736211 | n +42.03 Da,K +34.06 Da, | 2857.111615 | 2 | 808.9279 | 347211008 | 302559008 |
| IFHTVTTTDDPVIR                 | O70194 | 0          | n +42.03 Da,             | 2862.746608 | 2 | 827.4351 | 51076800  | 76909200  |
| GLTDEINFLR                     | P11679 | 0          | n +34.06 Da,             | 2866.648056 | 2 | 606.3559 | 207294000 | 155950000 |
| LLVVYPWTQR                     | P02088 | 0.01119664 | n +28.03 Da,             | 2869.625666 | 2 | 651.8829 | 146180992 | 67807800  |
| SGSKYKPAPLATLPSTLDPAEYDVSPETR  | Q9CQC7 | 0          | n +42.03 Da,K +28.03 Da, | 2874.282688 | 3 | 1063.55  | 148710000 | 114546000 |
| MDGIVPDIAVGTKR                 | P17225 | 0          | n +42.03 Da,K +34.06 Da, | 2875.276104 | 2 | 771.4215 | 1.37E+09  | 1.073E+09 |
| GFILDGFPR                      | G3UYQ4 | 0.0008285  | n +34.06 Da,             | 2875.55733  | 2 | 525.2925 | 241116000 | 237599008 |
| MPFVELETNLPASR                 | O35215 | 0          | n +34.06 Da,             | 2878.405051 | 2 | 814.9137 | 169246000 | 108244000 |
| PPYTIVYFPVR                    | P19157 | 0          | n +14.02 Da,             | 2879.214351 | 2 | 683.3811 | 2.523E+09 | 1.645E+09 |
| IFHTVTTTDDPVIR                 | O70194 | 0          | n +42.03 Da,             | 2882.720601 | 2 | 822.9061 | 176944000 | 146571008 |
| VGSLNLEELSEMR                  | Q8K2C7 | 0          | n +34.06 Da,             | 2892.476475 | 2 | 752.8872 | 191042000 | 154334000 |
| MFSWVSKDAR                     | Q9WVK4 | 0          | n +42.03 Da,K +34.06 Da, | 2902.121712 | 2 | 647.311  | 282764000 | 57239900  |
| AELKYISGFGNECASEDPR            | O09173 | 0          | n +42.03 Da,K +28.03 Da, | 2910.6422   | 3 | 738.3442 | 832593024 | 2.566E+09 |
| SSPAQPAVPAPLADLKIQH            | P24549 | 0          | n +42.03 Da,K +34.06 Da, | 2912.265153 | 3 | 670.7058 | 7.725E+09 | 6.993E+09 |
| SSPAQPAVPAPLADLKIQH            | P24549 | 0          | n +42.03 Da,K +28.03 Da, | 2912.991317 | 2 | 1005.555 | 2.05E+09  | 1.781E+09 |
| LYFEELSLER                     | Q8C196 | 0          | n +28.03 Da,             | 2914.148227 | 2 | 663.8512 | 604380992 | 146351008 |
| MFSWVSKDAR                     | Q9WVK4 | 0          | n +42.03 Da,K +28.03 Da, | 2915.380168 | 2 | 647.3108 | 139790000 | 176608000 |
| AELKYISGFGNECASEDPR            | O09173 | 0          | n +42.03 Da,K +28.03 Da, | 2918.395887 | 2 | 1107.011 | 204168000 | 637828992 |
| MLNMWVKVR                      | Q5SUH6 | 0          | n +42.03 Da,K +28.03 Da, | 2922.65765  | 2 | 574.3092 | 93635600  | 87722096  |
| AELKYISGFGNECASEDPR            | O09173 | 0          | n +42.03 Da,K +28.03 Da, | 2928.628497 | 3 | 738.3438 | 1.133E+09 | 1.09E+09  |
| PMILGYWNVR                     | P10649 | 0          | n +14.02 Da,             | 2931.960563 | 2 | 630.3187 | 775854976 | 544196992 |
| TTALAEFGYIR                    | Q8C165 | 0          | n +28.03 Da,             | 2932.647157 | 2 | 699.8672 | 23591100  | 16238400  |
| MLNMWVKVR                      | Q5SUH6 | 0          | n +42.03 Da,K +28.03 Da, | 2934.949874 | 2 | 574.3092 | 256968000 | 204144000 |
| MFSWVSKDAR                     | Q9WVK4 | 0          | n +42.03 Da,K +28.03 Da, | 2936.474245 | 2 | 648.824  | 2.892E+09 | 3.242E+09 |
| SKQQPTQFINPETPGYVGFANLPNQVHR   | P42208 | 0          | n +42.03 Da,K +34.06 Da, | 2939.419939 | 3 | 1079.887 | 1.044E+09 | 844158976 |
| AELQEVQITEEKPLPGQTPETAKEAELAAR | Q9QYG0 | 0          | n +42.03 Da,K +34.06 Da, | 2944.685791 | 3 | 1166.306 | 861446016 | 1.209E+10 |
| AELQEVQITEEKPLPGQTPETAKEAELAAR | Q9QYG0 | 0          | n +42.03 Da,K +34.06 Da, | 2944.704991 | 4 | 874.9812 | 1.196E+09 | 1.716E+10 |
| PMTLGYWDIR                     | P15626 | 0          | n +14.02 Da,             | 2946.054957 | 2 | 633.3216 | 2.708E+10 | 1.968E+10 |
| PTVWPNPEVDFPSR                 | Q91WL5 | 0.009299   | n +14.02 Da,             | 2951.229488 | 2 | 826.4063 | 46182400  | 28269100  |

|                                |         |            |                                      |             |   |          |           |           |
|--------------------------------|---------|------------|--------------------------------------|-------------|---|----------|-----------|-----------|
| AELQEVQITEEKPLPGQTPETAKEAELAAR | Q9QYG0  | 0          | n +42.03 Da,K +34.06 Da,             | 2952.80769  | 4 | 872.7183 | 507280000 | 547958016 |
| MVNDGLEDLFR                    | F6RWR5  | 0          | n +34.06 Da,                         | 2953.33021  | 2 | 671.8491 | 317467008 | 456372000 |
| MVNDGLEDLFR                    | F6RWR5  | 0          | n +28.03 Da,                         | 2954.138673 | 2 | 667.3315 | 46090600  | 208895008 |
| ADEIAKAQVAQPGGDTIFGKIIR        | P70349  | 0          | n +42.03 Da,n +34.06 Da,K +34.06 Da, | 2955.717946 | 3 | 835.8142 | 46397800  | 240176000 |
| AELQEVQITEEKPLPGQTPETAKEAELAAR | Q9QYG0  | 0          | n +42.03 Da,K +34.06 Da,             | 2956.778293 | 3 | 1163.29  | 469934016 | 419528000 |
| ADEIAKAQVAQPGGDTIFGKIIR        | P70349  | 0          | n +42.03 Da,n +28.03 Da,K +28.03 Da, | 2957.454678 | 3 | 831.7937 | 14129300  | 178652000 |
| STLIMQLLR                      | O70456  | 0.01639344 | n +28.03 Da,                         | 2964.494903 | 2 | 551.8367 | 49714100  | 51077800  |
| MLNMWKVR                       | Q5SUH6  | 0          | n +42.03 Da,K +28.03 Da,             | 2966.291947 | 2 | 571.2892 | 93681600  | 12428300  |
| TFVQENVYDEFVER                 | P47738  | 0          | n +28.03 Da,                         | 2969.925541 | 2 | 901.9325 | 314512000 | 119388000 |
| TFVQENVYDEFVER                 | P47738  | 0          | n +28.03 Da,                         | 2970.107772 | 3 | 601.6246 | 150136000 | 58443400  |
| MVNDGLEDLFR                    | F6RWR5  | 0          | n +34.06 Da,                         | 2970.217832 | 2 | 668.8314 | 96751400  | 422278016 |
| GSWKTGQSYLAAGLLKN              | Q99MZ7  | 0          | n +42.03 Da,K +34.06 Da,             | 2974.957119 | 2 | 946.5186 | 61161300  | 51375100  |
| PMILGYWVNR                     | P10649  | 0          | n +14.02 Da,                         | 2978.149334 | 2 | 631.8401 | 1.783E+10 | 1.65E+10  |
| SGSKYKPAPLATLPSTLDPAEYDVSPETR  | Q9CQC7  | 0          | n +42.03 Da,K +28.03 Da,             | 2979.096889 | 3 | 1063.551 | 825662016 | 746897024 |
| SGSKYKPAPLATLPSTLDPAEYDVSPETR  | Q9CQC7  | 0          | n +42.03 Da,K +34.06 Da,             | 2979.893959 | 3 | 1066.567 | 405003008 | 5.42E+09  |
| MSPEEFTEIMNQR                  | P54869  | 0          | n +28.03 Da,                         | 2980.51664  | 2 | 820.3761 | 54923900  | 27900200  |
| SGEDEQEQTIAEDLVVTKYK           | P50580  | 0          | n +42.03 Da,K +34.06 Da,             | 2983.811459 | 3 | 836.7502 | 171372992 | 130940000 |
| PGLLGDEAPNFEANTTIGR            | O08709  | 0          | n +14.02 Da,                         | 2986.350868 | 2 | 1078.552 | 328895008 | 295840992 |
| SGSKYKPAPLATLPSTLDPAEYDVSPETR  | Q9CQC7  | 0          | n +42.03 Da,K +34.06 Da,             | 2990.63718  | 4 | 797.9133 | 434740992 | 347483008 |
| MQAGKPILYSYFR                  | Q9WVVL0 | 0          | n +42.03 Da,K +28.03 Da,             | 2995.660496 | 2 | 822.4337 | 241707008 | 248948992 |
| MSPEEFTEIMNQR                  | P54869  | 0          | n +28.03 Da,                         | 2996.365816 | 2 | 820.3756 | 361667008 | 275030016 |
| MFSWVSKDAR                     | Q9WVK4  | 0.02509908 | n +42.03 Da,K +34.06 Da,             | 2999.796732 | 2 | 651.84   | 25451900  | 35684600  |
| VDEYLAWQHTGLR                  | Q64471  | 0.0039968  | n +28.03 Da,                         | 3000.942567 | 2 | 805.3875 | 8702760   | 8847000   |
| VSKSDIGEVLVGGMTR               | P38647  | 0          | n +14.02 Da,K +28.03 Da,             | 3010.025578 | 2 | 902.0168 | 390543008 | 401896000 |
| EGDVLTLLESER                   | P62858  | 0          | n +28.03 Da,                         | 3010.341627 | 2 | 694.8675 | 70721296  | 56970200  |
| TGAIVDVPVGEELLGR               | Q03265  | 0          | n +28.03 Da,                         | 3014.875066 | 2 | 826.9631 | 130672000 | 57618600  |
| PFEPQTLGFSPSWR                 | P97364  | 0          | n +14.02 Da,                         | 3036.383885 | 2 | 824.3819 | 279168000 | 431267008 |
| MDWLIMGKSK                     | Q8VI63  | 0.0008285  | n +42.03 Da,K +28.03 Da,             | 3043.053869 | 2 | 597.3068 | 210815008 | 162552992 |
| LKYPLEEFFTDNQEEAR              | P61922  | 0.0008285  | n +42.03 Da,K +34.06 Da,             | 3043.361404 | 3 | 762.0483 | 6078420   | 6951650   |
| AVDFFPVLR                      | P00186  | 0          | n +28.03 Da,                         | 3043.621955 | 2 | 546.3165 | 111703000 | 91865200  |
| SLDMDGIIAEVR                   | P11679  | 0          | n +34.06 Da,                         | 3049.830224 | 2 | 676.8742 | 32866900  | 56983500  |
| GTAEDFADQFLR                   | Q64310  | 0          | n +34.06 Da,                         | 3050.036904 | 2 | 699.3386 | 856291968 | 751966976 |
| GNWGYLDQVAALR                  | Q8BK48  | 0          | n +28.03 Da,                         | 3051.918383 | 2 | 745.8918 | 68581296  | 46799400  |
| AVGGQVLSSEFTNR                 | Q8VCT4  | 0          | n +34.06 Da,                         | 3056.285567 | 2 | 759.9144 | 37462000  | 36301600  |
| SFGGGTSGSFTSLLMER              | P05213  | 0          | n +34.06 Da,                         | 3060.180958 | 2 | 866.4227 | 26476000  | 33410600  |
| SSKSMVLGYWDIR                  | P48774  | 0          | n +42.03 Da,K +34.06 Da,             | 3062.827898 | 3 | 537.9452 | 47450900  | 39253700  |
| AIDQMWLPVVR                    | Q9DBJ1  | 0          | n +34.06 Da,                         | 3062.955085 | 2 | 678.3865 | 60761100  | 49975300  |
| SSKSMVLGYWDIR                  | P48774  | 0          | n +42.03 Da,K +28.03 Da,             | 3064.959196 | 2 | 806.4144 | 867379008 | 755358016 |
| FYYEETKGLSCKGIR                | Q9QUQ5  | 0.0417434  | n +17.03 Da,K +34.06 Da,             | 3074.488656 | 2 | 968.5366 | 417704000 | 346657984 |
| ADEIAKAQVAQPGGDTIFGKIIR        | P70349  | 0          | n +42.03 Da,n +28.03 Da,K +28.03 Da, | 3075.126734 | 2 | 1248.695 | 127713000 | 117534000 |

|                              |        |            |                                      |             |   |          |           |           |
|------------------------------|--------|------------|--------------------------------------|-------------|---|----------|-----------|-----------|
| ADEIAKAQVAQPGGDTIFGKIIR      | P70349 | 0          | n +42.03 Da,n +28.03 Da,K +28.03 Da, | 3075.581284 | 3 | 832.8006 | 6.918E+10 | 6.506E+10 |
| ADEIAKAQVAQPGGDTIFGKIIR      | P70349 | 0          | n +42.03 Da,n +28.03 Da,K +28.03 Da, | 3076.239392 | 4 | 624.8517 | 1.171E+10 | 1.072E+10 |
| AFQELLNQVGS LGR              | B2RT89 | 0          | n +28.03 Da,                         | 3085.37061  | 2 | 780.4303 | 391107008 | 348772992 |
| PVFDWKDPL                    | Q60759 | 0          | n +14.02 Da,K +28.03 Da,             | 3108.367279 | 2 | 579.8132 | 74126000  | 61606400  |
| ADEIAKAQVAQPGGDTIFGKIIR      | P70349 | 0          | n +42.03 Da,n +28.03 Da,K +28.03 Da, | 3118.48982  | 4 | 624.8535 | 30635700  | 14610000  |
| SNKSDVIVVGGGSGMAAAKLLHD      | Q8BW75 | 0.0039968  | n +42.03 Da,n +34.06 Da,K +34.06 Da, | 3119.803421 | 3 | 813.1092 | 34727100  | 44309200  |
| MMLGPEGGEGYVVKLR             | Q9Z2X1 | 0          | n +42.03 Da,K +28.03 Da,             | 3122.370465 | 2 | 903.4684 | 103377000 | 94980000  |
| AATFFGEVVKAPCR               | Q9JK23 | 0          | n +42.03 Da,n +34.06 Da,             | 3123.802702 | 2 | 807.4075 | 233964992 | 69645104  |
| MDPSGVKVLTAEDIQER            | P16546 | 0          | n +42.03 Da,K +28.03 Da,             | 3131.245204 | 3 | 696.3486 | 198912992 | 187694000 |
| AMVSEFLKQAR                  | P10107 | 0          | n +42.03 Da,K +34.06 Da,             | 3135.002478 | 2 | 675.3619 | 1.425E+09 | 626576000 |
| AFPAWADTSILSR                | Q9EQ20 | 0          | n +28.03 Da,                         | 3136.156418 | 2 | 731.8877 | 125683000 | 70801104  |
| AATFFGEVVKAPCR               | Q9JK23 | 0          | n +42.03 Da,n +34.06 Da,             | 3136.381282 | 2 | 811.922  | 50202500  | 48286800  |
| DLTDPAPATTFHAHLDTTVLSR       | P56480 | 0          | n +34.06 Da,                         | 3137.005023 | 3 | 781.0726 | 921654016 | 952179008 |
| MDYLTTFTGKSGR                | E9Q0A7 | 0          | n +42.03 Da,n +34.06 Da,             | 3137.290136 | 2 | 773.8817 | 172984992 | 114377000 |
| LNLPESWDWR                   | P97821 | 0          | n +34.06 Da,                         | 3154.763512 | 2 | 672.3405 | 349553984 | 203104992 |
| MPPYTIVYFPVR                 | P19157 | 0          | n +34.06 Da,                         | 3161.272569 | 2 | 755.9098 | 2.546E+09 | 1.966E+09 |
| SSPAQPAVPAPLADLKIQHTKIF      | P24549 | 0          | n +42.03 Da,K +34.06 Da,             | 3162.187128 | 3 | 843.1477 | 3.621E+09 | 3.19E+09  |
| MPPYTIVYFPVR                 | P19157 | 0.00469116 | n +28.03 Da,                         | 3182.720181 | 2 | 754.3967 | 35184200  | 340832000 |
| TFLGGEDFDQALLR               | P38647 | 0          | n +34.06 Da,                         | 3186.069481 | 2 | 805.4155 | 281830016 | 228967008 |
| DLKVLQPTIFPVVPR              | P41216 | 0          | n +28.03 Da,K +28.03 Da,             | 3186.565247 | 3 | 593.369  | 350544992 | 268896000 |
| PTGGAGAVAMLIGPKAPLVLEQGLR    | P54869 | 0          | n +28.03 Da,K +28.03 Da,             | 3195.914975 | 4 | 618.8566 | 635569024 | 394871008 |
| SVVVAPAQTLNSNAEFQMLR         | Q8C196 | 0          | n +28.03 Da,                         | 3197.23969  | 2 | 1045.07  | 2.556E+09 | 2.384E+09 |
| NSLLLNSSRHYLNIR              | B5THE2 | 0.04440389 | n +17.03 Da,                         | 3202.036512 | 3 | 606.3452 | 137180992 | 126089000 |
| GLDPAFTPATGTPVLGGLSYR        | Q61176 | 0          | n +34.06 Da,                         | 3204.232719 | 3 | 706.7127 | 102307000 | 110403000 |
| SVVVAPAQTLNSNAEFQMLR         | Q8C196 | 0          | n +28.03 Da,                         | 3204.267826 | 3 | 697.0467 | 277583008 | 64370200  |
| MPPYTIVYFPVR                 | P19157 | 0.0039968  | n +34.06 Da,                         | 3214.304637 | 2 | 755.9125 | 583892992 | 414011008 |
| TIPIDGDFFSYTR                | P47738 | 0          | n +28.03 Da,                         | 3219.099861 | 2 | 780.3899 | 217087008 | 188103008 |
| APPPLPVAASTPILHGEFGSYPANGPR  | Q9JIA7 | 0          | n +28.03 Da,                         | 3220.262442 | 3 | 952.1802 | 19812100  | 29722100  |
| GAGAVAMLIGPKAPLVLEQGLR       | P54869 | 0          | n +28.03 Da,K +28.03 Da,             | 3222.848883 | 3 | 739.7771 | 95939504  | 59323500  |
| SVVVAPAQTLNSNAEFQMLR         | Q8C196 | 0          | n +28.03 Da,                         | 3226.449639 | 3 | 697.0489 | 1.395E+09 | 1.18E+09  |
| GVQPPNFSWVLPGR               | Q6NT99 | 0          | n +34.06 Da,                         | 3232.87219  | 2 | 791.4342 | 343886016 | 268086000 |
| MELVEV LKR                   | Q7TMF3 | 0.0039968  | n +42.03 Da,K +34.06 Da,             | 3237.50868  | 2 | 593.8472 | 7.844E+09 | 7.005E+09 |
| ASGNAQIGKSAPDFTATAVVDGAFKEIK | Q61171 | 0          | n +42.03 Da,K +28.03 Da,             | 3239.908195 | 3 | 973.8537 | 45350400  | 35959600  |
| LPEFFGLEPR                   | O35490 | 0.00674157 | n +34.06 Da,                         | 3242.170853 | 2 | 665.3638 | 1.334E+10 | 1.17E+10  |
| SGEDEQQEQTIAEDLVVTKYKMGDIANR | P50580 | 0          | n +42.03 Da,K +34.06 Da,             | 3244.57937  | 3 | 1108.209 | 601593024 | 508238016 |
| SGEDEQQEQTIAEDLVVTKYKMGDIANR | P50580 | 0          | n +42.03 Da,K +34.06 Da,             | 3245.093994 | 4 | 831.408  | 302544000 | 258034000 |
| FFNQLFSGLDPH                 | Q9DBE0 | 0.0039968  | n +28.03 Da,                         | 3250.928565 | 2 | 725.3607 | 17931500  | 9956070   |
| EGDVVKRTGAIVDVPGVEELLGR      | Q03265 | 0.01375516 | n +34.06 Da,K +34.06 Da,             | 3268.199823 | 3 | 820.1327 | 318724992 | 268532992 |
| TNLGDF AISLYR                | P07758 | 0          | n +34.06 Da,                         | 3269.044721 | 2 | 699.3736 | 143912992 | 118347000 |
| AAVLQQVLERPELNKLPKSTQN       | F6ZDS4 | 0          | n +42.03 Da,K +28.03 Da,             | 3275.333952 | 3 | 858.8256 | 123574000 | 132127000 |

|                                 |        |            |                                      |             |   |          |           |           |
|---------------------------------|--------|------------|--------------------------------------|-------------|---|----------|-----------|-----------|
| GPSQMALEDLAMFR                  | P40142 | 0          | n +28.03 Da,                         | 3286.107351 | 2 | 797.3916 | 283800000 | 271838016 |
| AAAELIDFFR                      | Q8CHT0 | 0          | n +28.03 Da,                         | 3290.466879 | 2 | 590.822  | 255319008 | 282900000 |
| AAAELIDFFR                      | Q8CHT0 | 0          | n +34.06 Da,                         | 3306.29977  | 2 | 589.3349 | 45114100  | 42354900  |
| ADLPALPGGPAGGTGELAKYGLPGVAQLR   | O08600 | 0          | n +28.03 Da,K +28.03 Da,             | 3310.223055 | 3 | 697.3779 | 20158100  | 19651600  |
| ILNLPESWDWR                     | P97821 | 0          | n +34.06 Da,                         | 3310.714501 | 2 | 729.3987 | 314379008 | 569550016 |
| GDTFLGGEDFDQALLR                | P38647 | 0          | n +28.03 Da,                         | 3317.196066 | 2 | 891.4382 | 28548700  | 26576900  |
| ASASSTNLKDVLSNLIPEQAR           | Q9CZU6 | 0          | n +28.03 Da,K +28.03 Da,             | 3327.830429 | 2 | 809.4311 | 95937296  | 158208000 |
| PGSISWDGLDPGKLY                 | Q8VIN1 | 0          | n +42.03 Da,K +28.03 Da,             | 3337.65129  | 2 | 837.9224 | 354840992 | 370140000 |
| LENYPIPELGPNDVLLKMH             | Q64442 | 0          | n +28.03 Da,K +28.03 Da,             | 3337.821217 | 3 | 750.0726 | 340023008 | 323011008 |
| SPPGDTSNLFPGTWYLER              | P54869 | 0          | n +34.06 Da,                         | 3339.150162 | 3 | 691.0328 | 148755008 | 151156992 |
| DVFVIEEWGR                      | P99029 | 0          | n +28.03 Da,                         | 3341.780813 | 2 | 639.33   | 44205700  | 58834000  |
| PGWSQLVTGAGGFLGQR               | O35469 | 0          | n +14.02 Da,                         | 3343.090967 | 3 | 592.9669 | 232492000 | 159495008 |
| ILNLPESWDWR                     | P97821 | 0          | n +28.03 Da,                         | 3349.604014 | 2 | 728.8831 | 1.645E+09 | 3.102E+09 |
| PTGGAGAVAMLIGPKAPLVLEQGLR       | P54869 | 0          | n +14.02 Da,K +28.03 Da,             | 3353.733658 | 4 | 615.3621 | 2.974E+09 | 2.519E+09 |
| ASASSTNLKDVLSNLIPEQAR           | Q9CZU6 | 0          | n +28.03 Da,K +28.03 Da,             | 3354.029425 | 3 | 809.4473 | 84572800  | 56616600  |
| PTGGAGAVAMLIGPKAPLVLEQGLR       | P54869 | 0          | n +14.02 Da,K +28.03 Da,             | 3354.621146 | 3 | 820.1457 | 1.339E+10 | 1.105E+10 |
| WKAANEAGYFNEEMAPIEVK            | Q8BWT1 | 0          | n +34.06 Da,K +34.06 Da,             | 3356.403781 | 3 | 800.4435 | 43771900  | 29244500  |
| AGYEYVSPQELSGFDKYKY             | Q80TA1 | 0          | n +42.03 Da,K +34.06 Da,             | 3357.59085  | 3 | 781.3805 | 223658000 | 207414000 |
| LENYPIPELGPNDVLLKMH             | Q64442 | 0          | n +42.03 Da,K +34.06 Da,             | 3363.356505 | 3 | 754.7459 | 194114000 | 170070000 |
| SILYVSPHPDAFPSLR                | Q9Z1Q9 | 0          | n +42.03 Da,                         | 3365.108876 | 2 | 611.3246 | 990665984 | 1.027E+09 |
| TLVGYDLVPEPKIIDAALR             | P12787 | 0          | n +34.06 Da,K +34.06 Da,             | 3370.369447 | 3 | 713.7522 | 44781400  | 32987300  |
| ADLPALPGGPAGGTGELAKYGLPGVAQLR   | O08600 | 0          | n +28.03 Da,K +28.03 Da,             | 3372.292235 | 3 | 934.8549 | 455416992 | 369318016 |
| ADLPALPGGPAGGTGELAKYGLPGVAQLR   | O08600 | 0          | n +34.06 Da,K +34.06 Da,             | 3374.310767 | 4 | 701.396  | 98162896  | 75743296  |
| PTGGAGAVAMLIGPKAPLVLEQGLR       | P54869 | 0          | n +28.03 Da,K +28.03 Da,             | 3377.49609  | 3 | 824.8168 | 117989000 | 85716704  |
| SAGKVPETIDSVIVGNVMQSSDAAYLAR    | Q8BWT1 | 0          | n +34.06 Da,K +34.06 Da,             | 3380.598691 | 3 | 1040.211 | 23508100  | 20680400  |
| SPPGDTSNLFPGTWYLER              | P54869 | 0          | n +34.06 Da,                         | 3383.573523 | 3 | 689.0062 | 84034096  | 69172096  |
| SPPGDTSNLFPGTWYLER              | P54869 | 0          | n +34.06 Da,                         | 3383.842291 | 2 | 1033.006 | 140920000 | 126148000 |
| GPVGVFEWEAFAR                   | P09411 | 0          | n +28.03 Da,                         | 3402.348829 | 2 | 746.8824 | 90383696  | 64635900  |
| PAAPVAFFPYFDR                   | Q9D5J6 | 0          | n +14.02 Da,                         | 3413.764333 | 2 | 756.3885 | 261870000 | 214058000 |
| AGLAGPAKPSLALNPQEDSQFEKALTQIQGR | Q91VE6 | 0          | n +42.03 Da,K +28.03 Da,             | 3446.100947 | 3 | 1111.932 | 286376992 | 244688000 |
| VLLESEQFLTELTR                  | P16254 | 0          | n +28.03 Da,                         | 3456.8005   | 2 | 853.4728 | 498232992 | 467905984 |
| DDDIAALVVDNAGSGMCKAGFAGDDAPR    | P60710 | 0          | n +42.03 Da,K +34.06 Da,             | 3462.997215 | 3 | 936.4232 | 186956992 | 151444992 |
| ASLSLAPVNIKAGADEER              | P80314 | 0          | n +42.03 Da,K +28.03 Da,             | 3466.702475 | 2 | 1029.547 | 292664000 | 292102016 |
| ASLSLAPVNIKAGADEER              | P80314 | 0          | n +42.03 Da,K +28.03 Da,             | 3471.067522 | 3 | 686.7004 | 329376992 | 296976992 |
| PFLQLAESAYR                     | Q9QXX4 | 0          | n +14.02 Da,                         | 3492.785821 | 2 | 707.3984 | 1.321E+10 | 1.168E+10 |
| VDFEAIWGAVR                     | P25688 | 0          | n +28.03 Da,                         | 3505.845359 | 2 | 644.3438 | 19318000  | 83418096  |
| MDEDGLPLMGSGIDLTQVPAIQQR        | Q9CR27 | 0          | n +42.03 Da,K +34.06 Da,             | 3518.214319 | 3 | 937.4996 | 230990000 | 214688992 |
| DLPALPGGPAGGTGELAKYGLPGVAQLR    | O08600 | 0          | n +34.06 Da,K +34.06 Da,             | 3522.29584  | 3 | 911.1765 | 278616992 | 244068992 |
| DLPALPGGPAGGTGELAKYGLPGVAQLR    | O08600 | 0          | n +34.06 Da,K +34.06 Da,             | 3524.077466 | 3 | 914.1936 | 15781900  | 205710000 |
| SWLFGIKGPKGEGTGPPLPPAQPGAEGGGDR | Q925I1 | 0.02570864 | n +42.03 Da,n +28.03 Da,K +28.03 Da, | 3530.327505 | 4 | 835.4435 | 579652992 | 451303008 |



|                                   |        |            |                                      |             |   |          |           |           |
|-----------------------------------|--------|------------|--------------------------------------|-------------|---|----------|-----------|-----------|
| SWLFGIKGPKGEGTGPPLPLPPAQPGEAGGGDR | Q925I1 | 0          | n +42.03 Da,n +28.03 Da,K +28.03 Da, | 3535.130853 | 3 | 1113.59  | 377839008 | 354388992 |
| VGSLNLEELSEMR                     | Q8K2C7 | 0          | n +28.03 Da,                         | 3541.747052 | 2 | 752.902  | 363107008 | 311243008 |
| ELIPEYLNFR                        | P07901 | 0          | n +34.06 Da,                         | 3543.68371  | 2 | 717.9021 | 158054000 | 157294000 |
| VSLEEISGCTKKMKISH                 | Q9QYJ3 | 0.03441802 | n +28.03 Da,K +28.03 Da,             | 3565.803464 | 2 | 733.8503 | 32401000  | 18112700  |
| MESSTSSSGSALGAVDPQLQHFIQVETQKQR   | Q9WVA2 | 0          | n +42.03 Da,K +28.03 Da,             | 3567.745774 | 3 | 1139.891 | 927806976 | 911081984 |
| LTSIDKWFY                         | Q8C196 | 0.03333333 | n +28.03 Da,K +28.03 Da,             | 3591.946231 | 2 | 671.3761 | 349254016 | 179312992 |
| VSLEEISGCTKKMKISH                 | Q9QYJ3 | 0.03441802 | n +28.03 Da,K +28.03 Da,             | 3600.032421 | 3 | 741.3911 | 47303000  | 38572400  |
| GIFDSGNFEQFLR                     | Q9D7S7 | 0          | n +34.06 Da,                         | 3604.495225 | 2 | 779.3877 | 53368500  | 39227700  |
| MLSLDFLDDVR                       | Q9R0P6 | 0          | n +28.03 Da,                         | 3615.516795 | 2 | 676.351  | 432260992 | 333560000 |
| ADFLKGLPVYKSNF                    | Q9D9Z5 | 0.04736211 | n +42.03 Da,K +28.03 Da,             | 3633.102579 | 3 | 602.3008 | 180248992 | 175931008 |
| GIMDAANFEQFLQER                   | P67984 | 0          | n +34.06 Da,                         | 3685.90499  | 3 | 599.6262 | 110041000 | 116842000 |
| GIMDAANFEQFLQER                   | P67984 | 0          | n +28.03 Da,                         | 3686.299449 | 2 | 898.9315 | 68510704  | 74668096  |
| FSPPGDTSNLFPGTWYLER               | P54869 | 0          | n +28.03 Da,                         | 3692.759574 | 3 | 738.028  | 13363100  | 11251500  |
| ATPDSLALFTGLGLENKAR               | D3Z158 | 0          | n +42.03 Da,K +28.03 Da,             | 3696.73123  | 2 | 1066.076 | 42347400  | 38889500  |
| ATPDSLALFTGLGLENKAR               | D3Z158 | 0          | n +42.03 Da,K +28.03 Da,             | 3721.281296 | 2 | 1066.074 | 17586700  | 13435600  |
| ADSVKTFQLDLGR                     | Q61070 | 0.00674157 | n +42.03 Da,K +28.03 Da,             | 3748.684671 | 2 | 760.4098 | 545054976 | 490308992 |
| SGTLAKIAEIEAEMAR                  | P32233 | 0          | n +42.03 Da,K +28.03 Da,             | 3751.935443 | 3 | 587.3131 | 28359300  | 27514200  |
| MLQMLEKSLR                        | Q91XE0 | 0          | n +42.03 Da,K +34.06 Da,             | 3757.986015 | 2 | 659.865  | 181583008 | 156223008 |
| PTSTNPIASIFAWTR                   | P54071 | 0          | n +14.02 Da,                         | 3770.396491 | 2 | 838.4436 | 27824500  | 18106200  |
| MQKDASLSGFLPSFQHFATQAIH           | Q8VCN5 | 0          | n +42.03 Da,K +34.06 Da,             | 3773.608144 | 3 | 877.7723 | 109714000 | 104101000 |
| PAWESPEGVPIEGHIFGGR               | Q9Z2V4 | 0          | n +14.02 Da,                         | 3804.994539 | 2 | 1013.026 | 121907000 | 110086000 |
| PAWESPEGVPIEGHIFGGR               | Q9Z2V4 | 0          | n +14.02 Da,                         | 3807.129601 | 3 | 675.6867 | 50343300  | 46875500  |
| AFFLKEANPDPLRNASLQSR              | Q8CEF9 | 0.01962111 | n +42.03 Da,K +34.06 Da,             | 3811.321569 | 3 | 780.0757 | 301276992 | 252188992 |
| GNWDLVGNNTPIFFIR                  | P24270 | 0          | n +34.06 Da,                         | 3864.651344 | 3 | 631.0002 | 25624700  | 22909000  |
| GNWDLVGNNTPIFFIR                  | P24270 | 0          | n +28.03 Da,                         | 3864.741347 | 2 | 945.9976 | 76823296  | 69574496  |
| MQKDASLSGFLPSFQHF                 | Q8VCN5 | 0.00532725 | n +42.03 Da,K +28.03 Da,             | 3866.205501 | 3 | 670.665  | 16396200  | 16390000  |
| PTTQQSPQDEQEKLDEAIQAVKVQSF        | Q9EQH3 | 0          | n +17.03 Da,K +34.06 Da,             | 3913.545024 | 3 | 1043.21  | 55952000  | 41614800  |
| SALKAVFQYIDENQDR                  | Q9D1A2 | 0          | n +42.03 Da,K +28.03 Da,             | 3964.342342 | 3 | 656.3338 | 18063000  | 18165200  |
| NINKFERRQAR                       | O88286 | 0.0477327  | n +17.03 Da,K +34.06 Da,             | 4045.867517 | 2 | 741.9503 | 23802400  | 26667400  |
| GHGEQQSQPPAAAAQQPSQQR             | Q8VEK3 | 0          | n +34.06 Da,                         | 476.2431157 | 3 | 786.3824 | 151540000 | 218144992 |
| EEEEEEAGEEEESQQR                  | O35381 | 0          | n +34.06 Da,K +34.06 Da,             | 490.4357661 | 3 | 636.2762 | 171975008 | 150760992 |
| TEAPLNPKANR                       | P60710 | 0.00040096 | n +34.06 Da,K +34.06 Da,             | 494.899732  | 3 | 422.9102 | 83651296  | 74251600  |
| GNEEDKENQGDETTGQQPPQR             | P62960 | 0.00040096 | n +34.06 Da,K +34.06 Da,             | 501.2386524 | 3 | 814.0371 | 57585800  | 55548200  |
| GVVKDADEAVR                       | Q91ZA3 | 0          | n +28.03 Da,K +28.03 Da,             | 526.650144  | 3 | 405.2348 | 127137000 | 101949000 |
| ATSAEAPAKEAQKR                    | Q8BGA5 | 0.00040096 | n +42.03 Da,K +28.03 Da,             | 534.0990298 | 3 | 519.2862 | 789921024 | 741843968 |
| ASSSSVPASSTPSKKPR                 | Q99JY1 | 0.00605629 | n +42.03 Da,K +28.03 Da,             | 551.6381935 | 3 | 591.3231 | 528326016 | 429264000 |
| TSAHTSTGDGTAMVTR                  | Q8K2B3 | 0          | n +34.06 Da,                         | 551.9207299 | 3 | 542.953  | 339596000 | 311548000 |
| ATSAEAPAKEAQKR                    | Q8BGA5 | 0.00040096 | n +42.03 Da,K +28.03 Da,             | 552.0354372 | 3 | 519.271  | 477694016 | 410228992 |
| PGPTPSGTNVGSSGR                   | Q9CQS8 | 0          | n +14.02 Da,                         | 557.0312738 | 2 | 692.8446 | 1.286E+09 | 941060992 |
| TNPADSKPGTIR                      | P15532 | 0.00807868 | n +34.06 Da,K +34.06 Da,             | 559.2086878 | 3 | 441.2601 | 77366304  | 194296992 |

|                      |        |            |                                      |             |   |          |           |           |
|----------------------|--------|------------|--------------------------------------|-------------|---|----------|-----------|-----------|
| GVVKDADEAVR          | Q91ZA3 | 0          | n +28.03 Da,K +28.03 Da,             | 565.175216  | 3 | 405.2352 | 1.169E+09 | 529756992 |
| TSAHTSTGDGTAMVTR     | Q8K2B3 | 0          | n +28.03 Da,                         | 573.9112841 | 3 | 540.9265 | 261163008 | 191992000 |
| GPAAEQGPGQKQSTTFR    | Q62448 | 0.00605629 | n +28.03 Da,K +28.03 Da,             | 574.5233822 | 3 | 605.9611 | 84423400  | 76069400  |
| VLSGEDKSNIK          | P01942 | 0.02394047 | n +28.03 Da,K +28.03 Da,             | 581.0018612 | 3 | 423.2381 | 51454200  | 104675000 |
| EQLEEEEEAKR          | Q8VDD5 | 0          | n +28.03 Da,                         | 584.1134478 | 3 | 482.5753 | 63197800  | 81798096  |
| AAKVALTKR            | Q9QXX4 | 0.00406654 | n +42.03 Da,K +34.06 Da,             | 585.1848411 | 3 | 352.5691 | 255478000 | 208168992 |
| AEPSAPESKHKSSLN      | Q3TDQ1 | 0.02056807 | n +42.03 Da,K +28.03 Da,             | 586.6929322 | 3 | 560.624  | 146392000 | 105511000 |
| REAVQPLLSR           | Q8BWQ4 | 0.00776562 | n +17.03 Da,                         | 589.7459796 | 2 | 593.3501 | 606542016 | 482420000 |
| TQVKVIAATNR          | O88685 | 0          | n +34.06 Da,K +34.06 Da,             | 591.8017637 | 3 | 423.6022 | 46459400  | 38310100  |
| AAKVALTKR            | Q9QXX4 | 0.00406654 | n +42.03 Da,K +34.06 Da,             | 593.2646473 | 3 | 351.5535 | 1.574E+09 | 325036992 |
| MEAVPEKKK            | P14148 | 0.00040096 | n +42.03 Da,K +34.06 Da,             | 593.796265  | 3 | 395.9038 | 3.732E+09 | 3.023E+09 |
| PQAPVIKSTAAER        | Q91VS8 | 0.02572347 | n +17.03 Da,K +34.06 Da,             | 595.2396037 | 3 | 472.6218 | 180348992 | 169887008 |
| EPSEKDALQPGR         | P70695 | 0.00040096 | n +28.03 Da,K +28.03 Da,             | 595.4657322 | 3 | 461.5805 | 728742976 | 672256000 |
| MDQQTQHPSKAAQPLR     | Q9JL3  | 0.00264151 | n +42.03 Da,K +28.03 Da,             | 595.7277196 | 3 | 593.3054 | 253272000 | 198946000 |
| MDQQTQHPSKAAQPLR     | Q9JL3  | 0          | n +42.03 Da,K +34.06 Da,             | 595.8739781 | 4 | 445.2301 | 579536000 | 496256992 |
| TAQDNPKSATEQSGTGIR   | Q920X1 | 0          | n +28.03 Da,K +28.03 Da,             | 596.1789121 | 3 | 639.6602 | 369444992 | 342372992 |
| MTENSTSAPAAPKPKR     | P10922 | 0          | n +42.03 Da,K +28.03 Da,             | 596.9304701 | 3 | 562.9661 | 202024000 | 159736000 |
| ADGKAGEEKPEKPKR      | Q6P8I4 | 0.01642091 | n +42.03 Da,K +28.03 Da,             | 601.573383  | 3 | 585.3003 | 232715008 | 149831008 |
| GPAAEQGPGQKQSTTFR    | Q62448 | 0.00605629 | n +28.03 Da,K +28.03 Da,             | 603.734854  | 3 | 603.9684 | 241166000 | 232432000 |
| MEAVPEKKK            | P14148 | 0.00440852 | n +42.03 Da,K +28.03 Da,             | 606.2332314 | 3 | 395.9054 | 406686016 | 306328000 |
| SGTEKAFEPATGR        | Q9JLJ2 | 0.00040096 | n +28.03 Da,K +28.03 Da,             | 608.5475574 | 3 | 469.5803 | 79365296  | 71101104  |
| DSYVGDEAQSKR         | P60710 | 0          | n +34.06 Da,K +34.06 Da,             | 612.2521072 | 3 | 472.9065 | 36791700  | 89755104  |
| GDDLTVTNPKR          | P17182 | 0          | n +28.03 Da,                         | 620.3350013 | 3 | 424.5696 | 33429400  | 29159000  |
| AAKVALTKR            | Q9QXX4 | 0.00406654 | n +42.03 Da,K +34.06 Da,             | 621.4842606 | 3 | 355.5747 | 409265984 | 194446000 |
| IQEAGTEVVKAK         | P08249 | 0          | n +28.03 Da,K +28.03 Da,             | 627.6281108 | 3 | 448.9261 | 1.446E+09 | 1.039E+09 |
| ATSASSHLNKGIK        | P15105 | 0          | n +42.03 Da,n +34.06 Da,K +34.06 Da, | 632.7754921 | 3 | 471.2682 | 2.17E+09  | 339694016 |
| SKSESPKEPEQLR        | P49312 | 0.01740295 | n +42.03 Da,K +28.03 Da,             | 633.8917182 | 3 | 534.2725 | 24480300  | 158668992 |
| LLPQDPQKR            | Q9WVL0 | 0.01326531 | n +28.03 Da,K +28.03 Da,             | 633.9986096 | 3 | 384.2361 | 43327200  | 42811700  |
| SGGGTETPVACDAAQGGKKR | Q8R015 | 0          | n +42.03 Da,K +34.06 Da,             | 640.5171802 | 3 | 686.3567 | 117291000 | 901152000 |
| TVINQTKQENLR         | Q6ZVV7 | 0          | n +28.03 Da,K +28.03 Da,             | 644.1857126 | 3 | 500.6233 | 177179008 | 187868000 |
| SSPAEVAEKADR         | Q99L13 | 0.00040096 | n +34.06 Da,K +34.06 Da,             | 645.9630693 | 3 | 439.2333 | 219411008 | 236991008 |
| SGTEKAFEPATGR        | Q9JLJ2 | 0.04362624 | n +34.06 Da,K +34.06 Da,             | 650.3245847 | 3 | 473.6026 | 86336704  | 73816000  |
| DLTVTNPKR            | P17182 | 0.00152323 | n +34.06 Da,K +34.06 Da,             | 651.3810545 | 3 | 370.2369 | 140875008 | 1.294E+09 |
| VKIVTVKTQ            | Q9D0F9 | 0.00406654 | n +34.06 Da,K +34.06 Da,             | 655.5439119 | 3 | 367.2531 | 498376000 | 687713024 |
| TSDQDAKVVAEPQAQR     | Q6A0A2 | 0          | n +28.03 Da,K +28.03 Da,             | 657.9466028 | 2 | 600.3225 | 832872000 | 577457984 |
| DLTVTNPKR            | P17182 | 0.03978862 | n +28.03 Da,K +28.03 Da,             | 659.3176144 | 2 | 550.3274 | 311265984 | 291286016 |
| GTVEEDLGKSR          | P08113 | 0          | n +34.06 Da,K +34.06 Da,             | 660.5638097 | 3 | 420.2473 | 491364992 | 768472000 |
| GTVEEDLGKSR          | P08113 | 0.00605629 | n +28.03 Da,K +28.03 Da,             | 660.5877178 | 3 | 416.2261 | 777779008 | 1.283E+09 |
| TVQTSSEGVPRPTAASEAR  | Q3V384 | 0.00078339 | n +34.06 Da,                         | 663.9873243 | 3 | 596.6464 | 3.216E+09 | 2.643E+09 |
| VKIVTVKTQ            | Q9D0F9 | 0.00406654 | n +34.06 Da,K +34.06 Da,             | 666.9929085 | 3 | 372.2794 | 87799104  | 398328992 |

|                      |        |            |                                      |             |   |          |           |           |
|----------------------|--------|------------|--------------------------------------|-------------|---|----------|-----------|-----------|
| TAASRPVTLR           | P60335 | 0.00776562 | n +28.03 Da,                         | 667.2152968 | 3 | 399.5647 | 175971008 | 720057984 |
| SKSESPKEPEQLR        | P49312 | 0          | n +42.03 Da,K +34.06 Da,             | 668.5700754 | 3 | 538.2907 | 2.9E+10   | 2.587E+10 |
| DLTVTNPKR            | P17182 | 0.00152323 | n +34.06 Da,K +34.06 Da,             | 669.1477458 | 3 | 367.2206 | 745276032 | 466156992 |
| SSLGDQRPAAGEQPGAR    | Q9CX98 | 0.00040096 | n +28.03 Da,                         | 669.199764  | 3 | 575.6264 | 60647100  | 54454700  |
| AVAVEYEAKSGR         | P37040 | 0.00078339 | n +28.03 Da,K +28.03 Da,             | 670.5108017 | 3 | 445.914  | 146554000 | 167440000 |
| PSIQPTLEGGKR         | Q921G7 | 0.00040096 | n +14.02 Da,K +28.03 Da,             | 672.9236283 | 2 | 442.2535 | 111995000 | 73198096  |
| ATGQKLMR             | P47199 | 0.01260647 | n +42.03 Da,K +28.03 Da,             | 674.2810315 | 2 | 487.7761 | 3.221E+09 | 2.851E+09 |
| RLEQERAQWAQYR        | O35551 | 0.03978862 | n +28.03 Da,                         | 680.7059084 | 2 | 875.4374 | 1.018E+09 | 883974016 |
| SGGGTETPVACDAAQGGKKR | Q8R015 | 0          | n +42.03 Da,K +34.06 Da,             | 681.5932038 | 3 | 682.3397 | 329571008 | 341408000 |
| SKSESPKEPEQLR        | P49312 | 0.01740295 | n +42.03 Da,K +28.03 Da,             | 682.0990181 | 3 | 538.2894 | 3.358E+09 | 95195504  |
| ASGTEKAFEPATGR       | Q9JLJ2 | 0          | n +28.03 Da,K +28.03 Da,             | 684.0538213 | 3 | 493.2594 | 226159008 | 257212000 |
| MNNQKQKPTLSGQR       | Q9CQC6 | 0          | n +42.03 Da,K +34.06 Da,             | 687.2811342 | 3 | 619.3312 | 752115968 | 327828992 |
| TAASRPVTLR           | P60335 | 0.00776562 | n +28.03 Da,                         | 688.147804  | 3 | 399.5751 | 86849000  | 73829600  |
| ATSASSHLNKGIKQ       | P15105 | 0.00901838 | n +42.03 Da,n +34.06 Da,K +34.06 Da, | 691.1575297 | 3 | 516.9669 | 184607008 | 126287000 |
| SFSAPEQQR            | P24270 | 0.03790727 | n +34.06 Da,                         | 692.2153903 | 2 | 539.2692 | 185495008 | 142824992 |
| RLEQERAQWAQYR        | O35551 | 0.03978862 | n +28.03 Da,                         | 692.2940922 | 2 | 879.9615 | 21138200  | 187044000 |
| DATKEVVYR            | Q9D2G2 | 0.00040096 | n +28.03 Da,K +28.03 Da,             | 694.4629157 | 3 | 379.5484 | 227820000 | 157407008 |
| DEEDEEEAGEEEGSQKR    | O35381 | 0          | n +28.03 Da,K +28.03 Da,             | 696.1687285 | 3 | 674.6184 | 141448992 | 138912992 |
| TPEAAVEHPEAVR        | O35490 | 0          | n +34.06 Da,                         | 696.6092168 | 2 | 717.3719 | 75160000  | 64470900  |
| STTVTTKSAEIR         | P05784 | 0.00040096 | n +28.03 Da,K +28.03 Da,             | 699.9077712 | 3 | 483.6154 | 173256992 | 202384992 |
| TPEAAVEHPEAVR        | O35490 | 0          | n +28.03 Da,                         | 703.0408552 | 3 | 478.5843 | 3.293E+09 | 2.958E+09 |
| PVEKDANNMPVTAR       | D3Z0Y2 | 0          | n +17.03 Da,K +34.06 Da,             | 707.2493329 | 2 | 795.4297 | 161446000 | 586432000 |
| TSDQDAKVVAEPQAQR     | Q6A0A2 | 0          | n +28.03 Da,K +28.03 Da,             | 708.8265482 | 3 | 600.315  | 426740000 | 291480000 |
| PVEKDANNMPVTAR       | D3Z0Y2 | 0          | n +17.03 Da,K +34.06 Da,             | 711.8691374 | 3 | 530.6226 | 2.326E+09 | 8.36E+09  |
| AADTQVSETLKR         | E9PVA8 | 0.00040096 | n +28.03 Da,K +28.03 Da,             | 712.7132688 | 3 | 458.9242 | 476079008 | 683179008 |
| PSIQPTLEGGKR         | Q921G7 | 0.00040096 | n +14.02 Da,K +28.03 Da,             | 716.3034445 | 3 | 442.2578 | 708369024 | 606824000 |
| GDVVKTEGATLR         | Q99KR3 | 0.00040096 | n +34.06 Da,K +34.06 Da,             | 717.8004257 | 3 | 434.5858 | 407648992 | 415604992 |
| TTVVTTKSAEIR         | P05784 | 0          | n +28.03 Da,K +28.03 Da,             | 722.2464631 | 3 | 454.605  | 1.98E+09  | 1.781E+09 |
| TPEAAVEHPEAVR        | O35490 | 0          | n +34.06 Da,                         | 724.9252029 | 3 | 480.5957 | 744729024 | 562091008 |
| PVEKDANNMPVTAR       | D3Z0Y2 | 0          | n +14.02 Da,K +28.03 Da,             | 728.6348415 | 1 | 528.6121 | 337648992 | 193779008 |
| AAAKVALTKR           | Q9QXX4 | 0.00040096 | n +42.03 Da,K +34.06 Da,             | 728.8418811 | 3 | 379.2645 | 3.939E+09 | 2.989E+10 |
| PGPVSPSPSQEPPTKR     | Q922Y1 | 0          | n +14.02 Da,K +28.03 Da,             | 733.4501565 | 3 | 568.3092 | 14212700  | 19130000  |
| GKLVSESSDVVSK        | P11679 | 0.00040096 | n +34.06 Da,K +34.06 Da,             | 735.2322081 | 3 | 473.6084 | 1.171E+09 | 1.02E+09  |
| GDVVKTEGATLR         | Q99KR3 | 0.0298318  | n +28.03 Da,K +28.03 Da,             | 735.2520806 | 3 | 433.9345 | 420483008 | 275574016 |
| PGPVSPSPSQEPPTKR     | Q922Y1 | 0          | n +14.02 Da,K +28.03 Da,             | 738.1606818 | 3 | 565.296  | 25261000  | 26773300  |
| EEEEEPVKAAPGKR       | P09405 | 0          | n +28.03 Da,K +28.03 Da,             | 742.133667  | 3 | 594.6349 | 183267008 | 155708000 |
| ATSASSHLNKGIKQ       | P15105 | 0.00040096 | n +42.03 Da,n +28.03 Da,K +28.03 Da, | 743.0400414 | 3 | 513.9546 | 1.297E+09 | 1.602E+09 |
| LTEAPLNPKANR         | P60710 | 0.01795213 | n +28.03 Da,K +28.03 Da,             | 751.938465  | 3 | 456.5892 | 1.321E+09 | 1.304E+09 |
| CRSTPLTVDRSPDSSLPR   | E9PUZ9 | 0.02120026 | n +17.03 Da,                         | 755.5750681 | 3 | 683.6682 | 922369984 | 734036992 |
| PMIDNPNYKGGK         | P35564 | 0.00040096 | n +14.02 Da,K +28.03 Da,             | 757.5330307 | 3 | 449.5759 | 247256000 | 288838016 |

|                      |        |            |                          |             |   |          |           |           |
|----------------------|--------|------------|--------------------------|-------------|---|----------|-----------|-----------|
| PGVPVSSPSQEPPTKR     | Q922Y1 | 0          | n +14.02 Da,K +28.03 Da, | 762.9808032 | 3 | 568.3084 | 341239008 | 257246000 |
| AAAKVALTKR           | Q9QXX4 | 0.00040096 | n +42.03 Da,K +34.06 Da, | 765.7381494 | 3 | 376.2486 | 354924000 | 204296992 |
| CRSTPLTVDRSPDSSLPR   | E9PUZ9 | 0.02120026 | n +17.03 Da,             | 768.1743088 | 3 | 686.6846 | 24711400  | 197964992 |
| LTEAPLNPKANR         | P60710 | 0.01795213 | n +28.03 Da,K +28.03 Da, | 776.5490033 | 3 | 459.5982 | 144868000 | 267538000 |
| FEELTVSQQLLCLR       | Q8K3K8 | 0.02056807 | n +42.03 Da,             | 778.0883724 | 3 | 588.2892 | 619248000 | 563366976 |
| TVTNDPSYKENAMR       | Q8K154 | 0          | n +34.06 Da,K +34.06 Da, | 780.1763574 | 3 | 565.2985 | 85649504  | 102521000 |
| AQDQGEKENPMR         | Q9CXW4 | 0          | n +42.03 Da,K +28.03 Da, | 793.5580537 | 2 | 736.8435 | 5.241E+09 | 4.934E+09 |
| TDAVIHEVQR           | P33267 | 0.00040096 | n +28.03 Da,             | 794.9010963 | 3 | 399.2192 | 97904096  | 66496300  |
| SETIIITGKR           | Q8VDJ3 | 0.01795213 | n +34.06 Da,K +34.06 Da, | 800.6391285 | 3 | 391.9114 | 257952000 | 367755008 |
| TIILASDKR            | B5X0G2 | 0.01418919 | n +28.03 Da,K +28.03 Da, | 800.7896052 | 3 | 358.2289 | 465424992 | 529462016 |
| SSLEDSQIEKER         | Q9CZ13 | 0          | n +28.03 Da,             | 803.6840405 | 3 | 492.9227 | 358268000 | 443364992 |
| SSSPVNVKLLK          | Q8VEK3 | 0.00040096 | n +42.03 Da,K +34.06 Da, | 805.0685717 | 3 | 438.2784 | 2.67E+09  | 2.561E+09 |
| SSLEDSQIEKER         | Q9CZ13 | 0          | n +28.03 Da,             | 809.1790536 | 3 | 490.9282 | 152400992 | 268907008 |
| TATILDKPEDR          | O35215 | 0          | n +28.03 Da,K +28.03 Da, | 810.5875195 | 3 | 432.8951 | 1.212E+09 | 1.133E+09 |
| TVVKSQQEILR          | Q9D0F3 | 0.00040096 | n +28.03 Da,K +28.03 Da, | 815.1411185 | 3 | 452.945  | 381908992 | 345107008 |
| TATILDKPEDR          | O35215 | 0          | n +28.03 Da,K +28.03 Da, | 818.7959858 | 3 | 437.9206 | 26849300  | 167404992 |
| STDEPSEKDALQPGR      | Q9QXD6 | 0          | n +34.06 Da,K +34.06 Da, | 826.6411759 | 3 | 562.616  | 944451008 | 823900992 |
| YLQKQPQPQPPPEGR      | Q68FL6 | 0          | n +34.06 Da,K +34.06 Da, | 835.9682625 | 3 | 639.3515 | 295361984 | 497779008 |
| SGYTPDEKLR           | Q3UIU2 | 0.00040096 | n +42.03 Da,K +34.06 Da, | 839.3688599 | 3 | 412.5466 | 139591008 | 148380000 |
| EVEMDAVGKEGR         | Q8C196 | 0          | n +28.03 Da,K +28.03 Da, | 839.4013105 | 3 | 457.2361 | 296476992 | 342913984 |
| EELDQKTFISICKER      | P40201 | 0.02633269 | n +42.03 Da,K +34.06 Da, | 841.4935968 | 3 | 627.6528 | 89466704  | 57868800  |
| PKVTQPEVDTPPLGR      | Q63880 | 0.00040096 | n +17.03 Da,K +34.06 Da, | 843.1259809 | 3 | 526.9669 | 1.141E+09 | 739918016 |
| TPEEGKQSQAVIEDAR     | Q3UQ44 | 0.01449764 | n +34.06 Da,K +34.06 Da, | 843.4511846 | 3 | 607.3198 | 144252000 | 131253000 |
| THQVSAAPTSSAGDGFKAN  | P32020 | 0          | n +28.03 Da,K +28.03 Da, | 845.4335574 | 3 | 634.65   | 1.126E+09 | 275560992 |
| SQAEFDKAAEEVKR       | P31786 | 0          | n +42.03 Da,K +28.03 Da, | 845.5212943 | 3 | 569.297  | 644358976 | 635614016 |
| AAQESLHVKTPLR        | Q8VBT2 | 0          | n +42.03 Da,K +34.06 Da, | 846.4451649 | 4 | 380.7206 | 403883008 | 351200000 |
| LSQNAAAKASATAPEVR    | Q9D0G0 | 0.00115785 | n +28.03 Da,K +28.03 Da, | 849.3272852 | 3 | 580.9972 | 239594000 | 526891008 |
| TQAYPDQKPGTSGLR      | Q9D0F9 | 0.00115785 | n +34.06 Da,K +34.06 Da, | 852.9475099 | 3 | 558.9651 | 511704992 | 493027008 |
| TATILDKPEDR          | O35215 | 0          | n +28.03 Da,K +28.03 Da, | 853.1570172 | 3 | 438.9136 | 1.201E+09 | 2.135E+09 |
| THQVSAAPTSSAGDGFKAN  | P32020 | 0          | n +42.03 Da,K +28.03 Da, | 855.8924962 | 3 | 639.3205 | 584457984 | 323467008 |
| MDQTQHPSKAAQPLR      | Q9JL3  | 0          | n +42.03 Da,K +28.03 Da, | 860.7556568 | 2 | 889.4537 | 2.467E+09 | 2.096E+09 |
| TDEPSEKDALQPGR       | Q9QXD6 | 0.00152323 | n +28.03 Da,K +28.03 Da, | 861.7276617 | 3 | 533.6049 | 725660992 | 662054976 |
| MDQTQHPSKAAQPLR      | Q9JL3  | 0          | n +42.03 Da,K +28.03 Da, | 861.7691756 | 3 | 593.3065 | 8.109E+10 | 6.975E+10 |
| AAAMDVDTPSGTNSGAGKKR | P62878 | 0.01823003 | n +42.03 Da,K +28.03 Da, | 867.3686202 | 3 | 676.009  | 50660500  | 56650600  |
| SNSETIITGKR          | Q8VDJ3 | 0.00807868 | n +34.06 Da,K +34.06 Da, | 868.4403549 | 3 | 458.9365 | 69848704  | 186738000 |
| TVSSDQMAKLR          | P16015 | 0          | n +28.03 Da,K +28.03 Da, | 868.6050103 | 3 | 431.2395 | 592156032 | 599401984 |
| PVEKDANNMPVTAR       | D3Z0Y2 | 0          | n +14.02 Da,K +28.03 Da, | 872.2242923 | 3 | 528.6124 | 87986896  | 112062000 |
| AAVSKTAVAPIER        | P48962 | 0.0248067  | n +14.02 Da,K +28.03 Da, | 874.9480835 | 3 | 452.2735 | 287681984 | 271633984 |
| EVEMDAVGKEGR         | Q8C196 | 0          | n +28.03 Da,K +28.03 Da, | 875.7254513 | 3 | 459.2336 | 1.056E+09 | 1.012E+09 |
| PVEKDANNMPVTAR       | D3Z0Y2 | 0          | n +17.03 Da,K +34.06 Da, | 875.7299806 | 3 | 530.6225 | 330827008 | 1.279E+09 |

|                      |        |            |                                      |             |   |          |           |           |
|----------------------|--------|------------|--------------------------------------|-------------|---|----------|-----------|-----------|
| ELTGAKVVVSGGR        | Q99LC5 | 0.0298318  | n +34.06 Da,K +34.06 Da,             | 876.5082849 | 3 | 443.6012 | 446732992 | 228312992 |
| ASNFKKTTMASSAQR      | Q9R1K9 | 0          | n +42.03 Da,K +34.06 Da,             | 877.8543437 | 3 | 579.9922 | 241396000 | 244740000 |
| AAPGAAGTQAEPLHR      | Q9D0F3 | 0.00776562 | n +34.06 Da,                         | 878.0359683 | 3 | 492.2646 | 166095008 | 131622000 |
| NLNTVLEER            | D6RET8 | 0.01260647 | n +14.02 Da,                         | 878.0469823 | 2 | 548.2839 | 308483008 | 307012992 |
| LAEDGAHVVVSSR        | Q99LB2 | 0          | n +28.03 Da,                         | 878.5533281 | 3 | 456.5703 | 381248992 | 327728992 |
| AAMDVDTPSGTNSGAGKKR  | P62878 | 0          | n +42.03 Da,K +28.03 Da,             | 880.8744179 | 3 | 654.3301 | 735952000 | 592942976 |
| TPEEGKQSQAVIEDAR     | Q3UQ44 | 0          | n +28.03 Da,K +28.03 Da,             | 884.5773457 | 3 | 603.3077 | 34006300  | 34128200  |
| PAVAESAVVSSPDKDR     | Q91VA0 | 0          | n +14.02 Da,K +28.03 Da,             | 886.9285692 | 3 | 557.2964 | 580267008 | 190176992 |
| AFALASQQKAASAQSR     | Q8VCH0 | 0          | n +28.03 Da,K +28.03 Da,             | 889.0287659 | 3 | 564.3125 | 812876032 | 685585984 |
| MEKPAASTEPPQGSRPALGR | Q9JMD3 | 0          | n +42.03 Da,K +28.03 Da,             | 892.2184648 | 4 | 514.0172 | 157684992 | 143420992 |
| GLTSVSAGKLAR         | Q922D8 | 0.01945269 | n +28.03 Da,K +28.03 Da,             | 901.8585487 | 3 | 403.9063 | 67145200  | 242102000 |
| SAIAKIVGSNAGR        | P13707 | 0.00807868 | n +28.03 Da,K +28.03 Da,             | 906.9991982 | 3 | 433.9297 | 152787008 | 125767000 |
| ATSASSHLNKGIKQMY     | P15105 | 0          | n +42.03 Da,n +28.03 Da,K +28.03 Da, | 909.7284425 | 3 | 611.9888 | 1.38E+09  | 1.3E+09   |
| IKVENTEENR           | Q91Y97 | 0.00227187 | n +42.03 Da,K +34.06 Da,             | 914.3673231 | 2 | 652.8544 | 643692032 | 288588000 |
| METENQKTMEESTKR      | Q05CL8 | 0          | n +42.03 Da,K +34.06 Da,             | 914.6667826 | 2 | 649.8389 | 756758976 | 359204000 |
| TAIKAISSAVR          | P70695 | 0.00040096 | n +28.03 Da,K +28.03 Da,             | 918.4368425 | 3 | 390.9185 | 114253000 | 544828992 |
| AGKDGVANVSIEDR       | P08228 | 0.00040096 | n +28.03 Da,K +28.03 Da,             | 918.6177258 | 3 | 496.2672 | 35317900  | 32371800  |
| PKVTQPEVDTPPLGR      | Q63880 | 0          | n +17.03 Da,K +34.06 Da,             | 923.790894  | 3 | 528.9765 | 273384992 | 816497984 |
| GTQAEPLHR            | Q9D0F3 | 0.03008233 | n +28.03 Da,                         | 926.6901484 | 2 | 517.2796 | 262848992 | 486320992 |
| VSVEIEKPR            | P97328 | 0.00543281 | n +28.03 Da,K +28.03 Da,             | 927.7701962 | 3 | 371.5607 | 211244992 | 78965296  |
| VNDLPVGR             | P20108 | 0.01883053 | n +14.02 Da,                         | 931.4829827 | 3 | 442.2442 | 20555300  | 7755960   |
| GDAPSPEEKLH          | Q91WQ3 | 0.03978862 | n +42.03 Da,K +34.06 Da,             | 931.7615917 | 2 | 625.312  | 122790000 | 120063000 |
| AEDIKTIK             | P56391 | 0.0433974  | n +42.03 Da,K +34.06 Da,             | 932.407541  | 3 | 396.275  | 190490000 | 1.106E+09 |
| METENQKTMEESTKR      | Q05CL8 | 0          | n +42.03 Da,K +28.03 Da,             | 939.6969743 | 3 | 647.3087 | 924297984 | 800961024 |
| STKPQAQEQPPASPEALR   | Q9WU79 | 0          | n +34.06 Da,K +34.06 Da,             | 943.3630277 | 3 | 664.3572 | 3.779E+09 | 4.562E+09 |
| AATTGSGVKVPR         | Q9CZY3 | 0          | n +42.03 Da,K +34.06 Da,             | 944.8641803 | 2 | 607.3484 | 1.457E+09 | 1.457E+09 |
| PEDTLEQKAGSVGR       | Q8VCW8 | 0          | n +14.02 Da,K +28.03 Da,             | 946.5769058 | 3 | 510.2705 | 1.029E+09 | 156443008 |
| ATSASSHLNKGIKQM      | P15105 | 0.00744681 | n +42.03 Da,n +34.06 Da,K +34.06 Da, | 957.1965911 | 3 | 557.6342 | 131727000 | 101020000 |
| STKPQAQEQPPASPEALR   | Q9WU79 | 0          | n +34.06 Da,K +34.06 Da,             | 957.7329621 | 3 | 667.373  | 410417984 | 3.81E+09  |
| STKPQAQEQPPASPEALR   | Q9WU79 | 0          | n +34.06 Da,K +34.06 Da,             | 957.9866491 | 2 | 996.0314 | 235818000 | 260090000 |
| AATATILDKPEDR        | O35215 | 0          | n +28.03 Da,K +28.03 Da,             | 960.2839814 | 3 | 485.5879 | 51938200  | 45829900  |
| ALKQISSNR            | Q9R0P3 | 0.02367824 | n +42.03 Da,K +28.03 Da,             | 960.3061996 | 2 | 543.8172 | 1.549E+10 | 1.314E+10 |
| PNLVPSISNKR          | P19536 | 0          | n +14.02 Da,n +28.03 Da,             | 965.6784488 | 3 | 420.9157 | 263268992 | 560956992 |
| ISSQQTIPPSAKYGGGR    | P70404 | 0.00040096 | n +34.06 Da,K +34.06 Da,             | 966.8149653 | 3 | 585.672  | 76891800  | 578374976 |
| STKPQAQEQPPASPEALR   | Q9WU79 | 0.00776562 | n +28.03 Da,K +28.03 Da,             | 967.4110039 | 2 | 661.3468 | 857310976 | 4.54E+09  |
| TENFEDVGHSTДАР       | P56395 | 0          | n +34.06 Da,                         | 969.0843611 | 3 | 535.9097 | 947465984 | 917377984 |
| TLVCVHAEASSTGR       | B5X0G2 | 0          | n +28.03 Da,                         | 970.7551773 | 3 | 548.9388 | 48305700  | 44682300  |
| LKEDTQVADVTTSR       | P19096 | 0.00040096 | n +28.03 Da,K +28.03 Da,             | 971.1310606 | 3 | 540.2907 | 50113500  | 28534800  |
| AATATILDKPEDR        | O35215 | 0          | n +34.06 Da,K +34.06 Da,             | 973.7438303 | 3 | 486.2718 | 372230016 | 579244992 |
| PAKPEVSSDEDVQYR      | Q8BMS1 | 0          | n +14.02 Da,K +28.03 Da,             | 975.2226207 | 3 | 587.9767 | 308359008 | 1.344E+09 |

|                      |        |            |                                      |             |   |          |           |           |
|----------------------|--------|------------|--------------------------------------|-------------|---|----------|-----------|-----------|
| LVSSVSDLPKR          | P54869 | 0.00040096 | n +28.03 Da,                         | 978.2960158 | 3 | 419.5905 | 169032992 | 77482200  |
| AAAMDVDTPSGTNSGAGKKR | P62878 | 0.00040096 | n +42.03 Da,K +28.03 Da,             | 978.49773   | 2 | 1016.51  | 68714496  | 59229200  |
| TAGKDGVANVSIEDR      | P08228 | 0.00040096 | n +28.03 Da,K +28.03 Da,             | 978.5170437 | 3 | 527.9397 | 3.495E+09 | 3.344E+09 |
| LKEDTQVADVTTSR       | P19096 | 0.00040096 | n +28.03 Da,K +28.03 Da,             | 982.1253281 | 3 | 540.2911 | 78739200  | 99339200  |
| AAAMDVDTPSGTNSGAGKKR | P62878 | 0          | n +42.03 Da,K +34.06 Da,             | 982.7824988 | 3 | 681.0249 | 83761400  | 689596032 |
| EVEMDAVGKEGR         | Q8C196 | 0          | n +28.03 Da,K +28.03 Da,             | 983.6548069 | 3 | 459.2347 | 762412032 | 950481024 |
| TEAVEAKQVAQQAER      | P67778 | 0          | n +34.06 Da,K +34.06 Da,             | 990.0642593 | 3 | 614.9882 | 508025984 | 472563008 |
| EVEMDAVGKEGR         | Q8C196 | 0          | n +28.03 Da,K +28.03 Da,             | 991.2821538 | 4 | 459.2444 | 297710016 | 386032992 |
| AAAMDVDTPSGTNSGAGKKR | P62878 | 0          | n +42.03 Da,K +34.06 Da,             | 991.7804522 | 3 | 678.009  | 1.248E+09 | 843524992 |
| ATSASSHLNKGIKQMY     | P15105 | 0.00040096 | n +42.03 Da,n +28.03 Da,K +28.03 Da, | 993.579478  | 3 | 611.989  | 1.197E+09 | 1.164E+09 |
| ISSQQTIPPSAKYGGGR    | P70404 | 0          | n +28.03 Da,K +28.03 Da,             | 994.6620642 | 3 | 582.6555 | 555369984 | 407494016 |
| PVTLPDGR             | P06801 | 0.02752881 | n +14.02 Da,                         | 997.0625629 | 2 | 434.748  | 376352992 | 241562000 |
| ATENFEDVGHSTDR       | P56395 | 0          | n +28.03 Da,                         | 998.1130929 | 3 | 559.589  | 1.798E+09 | 1.804E+09 |
| DLSSDIKER            | B5X0G2 | 0.01642091 | n +28.03 Da,K +28.03 Da,             | 1001.991003 | 3 | 371.5279 | 349280992 | 200538000 |
| DLSKQAVAYR           | Q03265 | 0.00040096 | n +34.06 Da,K +34.06 Da,             | 1003.285897 | 2 | 603.8455 | 178162000 | 92270600  |
| PNLVPSISNKR          | P19536 | 0.03958853 | n +17.03 Da,n +34.06 Da,             | 1003.607574 | 3 | 424.9333 | 522623008 | 1.096E+09 |
| GGDAAAPGAAGTQAELPHR  | Q9D0F3 | 0          | n +34.06 Da,                         | 1003.886254 | 3 | 594.311  | 128831000 | 327640992 |
| ALDSSNSMQTVQKTTTR    | P05784 | 0          | n +28.03 Da,K +28.03 Da,             | 1004.003863 | 3 | 641.9981 | 353512000 | 388417984 |
| QKQDAFALASQQKAASAQSR | Q8VCH0 | 0.01449764 | n +28.03 Da,K +28.03 Da,             | 1005.51984  | 4 | 555.0369 | 1.705E+09 | 368372992 |
| TKPQAQEPPASPEALR     | Q9WU79 | 0.00543281 | n +34.06 Da,K +34.06 Da,             | 1005.777321 | 3 | 635.3459 | 402918016 | 450016000 |
| LAEPLDAAQPGKR        | P28271 | 0          | n +28.03 Da,K +28.03 Da,             | 1006.238904 | 3 | 474.6075 | 89611600  | 41662700  |
| PEINTSHLDEKQVQ       | P58044 | 0.03008233 | n +17.03 Da,K +34.06 Da,             | 1009.692747 | 3 | 560.6265 | 420268992 | 232270000 |
| SSEAPLVNEDVKR        | Q91YQ5 | 0          | n +14.02 Da,K +28.03 Da,             | 1009.762011 | 3 | 528.2678 | 316198016 | 324564992 |
| EPDLSSDIKER          | B5X0G2 | 0.00040096 | n +28.03 Da,K +28.03 Da,             | 1009.885816 | 2 | 672.8534 | 307291008 | 348860000 |
| DFGSNLKPAR           | P34914 | 0.00115785 | n +34.06 Da,K +34.06 Da,             | 1010.212604 | 3 | 387.552  | 647680000 | 476673984 |
| MEVKPPPGRPQPDSGR     | Q8BG05 | 0          | n +42.03 Da,K +34.06 Da,             | 1015.954708 | 3 | 606.6488 | 2.153E+09 | 1.842E+09 |
| SSEAPLVNEDVKR        | Q91YQ5 | 0          | n +28.03 Da,K +28.03 Da,             | 1018.150829 | 3 | 532.9582 | 1.565E+09 | 1.94E+09  |
| SEAPLVNEDVKR         | Q91YQ5 | 0          | n +28.03 Da,K +28.03 Da,             | 1020.207388 | 3 | 503.9472 | 1.527E+09 | 1.14E+09  |
| SEGDSVGDVSVHGKPSVVYR | Q9CQU3 | 0          | n +42.03 Da,K +28.03 Da,             | 1020.293351 | 3 | 682.3355 | 155880992 | 189087008 |
| SSEAPLVNEDVKR        | Q91YQ5 | 0          | n +17.03 Da,K +34.06 Da,             | 1023.489379 | 3 | 530.2968 | 171455008 | 262258000 |
| LSQVAPVLKER          | Q9DBE0 | 0.01883053 | n +28.03 Da,K +28.03 Da,             | 1025.554639 | 3 | 432.6066 | 266934000 | 112527000 |
| TSKDTTASAVAVGLR      | Q8BMS1 | 0.00807868 | n +28.03 Da,K +28.03 Da,             | 1026.267686 | 3 | 511.6269 | 476359008 | 349443008 |
| TSNPENTVFDADR        | P20029 | 0          | n +28.03 Da,K +28.03 Da,             | 1029.220398 | 3 | 512.2679 | 781305024 | 648316032 |
| TMDKSELVQKAK         | Q9CQV8 | 0.00040096 | n +42.03 Da,n +34.06 Da,K +34.06 Da, | 1030.290368 | 2 | 759.9662 | 29719400  | 141007008 |
| GTATGAGYFQR          | Q9DCV5 | 0          | n +28.03 Da,                         | 1032.529957 | 2 | 578.7886 | 387766016 | 426177984 |
| EAPLVNEDVKR          | Q91YQ5 | 0          | n +28.03 Da,K +28.03 Da,             | 1035.593018 | 3 | 474.9365 | 613923968 | 571257024 |
| GGDAAAPGAAGTQAELPHR  | Q9D0F3 | 0          | n +34.06 Da,                         | 1038.100628 | 3 | 594.2977 | 89116496  | 88503904  |
| GGAIALGHPLGGSGSR     | Q8BWT1 | 0          | n +28.03 Da,                         | 1040.475044 | 3 | 478.932  | 1.255E+09 | 985953984 |
| EPDLSSDIKER          | B5X0G2 | 0          | n +28.03 Da,K +28.03 Da,             | 1043.323435 | 3 | 448.9049 | 8.654E+09 | 9.348E+09 |
| SSEAPLVNEDVKR        | Q91YQ5 | 0          | n +34.06 Da,K +34.06 Da,             | 1044.641924 | 2 | 798.933  | 1.18E+09  | 1.059E+09 |

|                       |        |            |                                      |             |   |          |           |           |
|-----------------------|--------|------------|--------------------------------------|-------------|---|----------|-----------|-----------|
| TNAIIIPEKR            | Q9QXD6 | 0.00040096 | n +28.03 Da,                         | 1045.171183 | 2 | 670.3999 | 620793984 | 643254016 |
| GAIALGHPLGGSGSR       | Q8BWT1 | 0          | n +28.03 Da,                         | 1045.177369 | 3 | 459.9246 | 4.765E+09 | 4.718E+09 |
| MEEESIKEGSEKPR        | Q8K124 | 0          | n +42.03 Da,K +28.03 Da,             | 1045.607058 | 3 | 582.957  | 1.514E+09 | 1.513E+09 |
| EAPPLVNEVDKRR         | Q91YQ5 | 0          | n +28.03 Da,K +28.03 Da,             | 1045.683516 | 3 | 474.9371 | 308753984 | 235382000 |
| TNAIIIPEKR            | Q9QXD6 | 0.00040096 | n +34.06 Da,                         | 1045.717773 | 3 | 447.2696 | 8.823E+09 | 8.581E+09 |
| SGALLPKPQMR           | Q9CPQ1 | 0.00839161 | n +28.03 Da,K +28.03 Da,             | 1047.862793 | 3 | 418.5845 | 1.077E+09 | 968078976 |
| TESFEDVGHSPDAR        | Q9CQX2 | 0          | n +34.06 Da,                         | 1051.200783 | 3 | 525.5744 | 898739968 | 833131008 |
| TPVEPEVAIHR           | P60867 | 0.00040096 | n +34.06 Da,                         | 1051.244208 | 3 | 425.9065 | 1.939E+09 | 1.98E+09  |
| SEAPPLVNEVDKRR        | Q91YQ5 | 0          | n +34.06 Da,K +34.06 Da,             | 1056.217105 | 3 | 506.9785 | 3.17E+09  | 1.314E+10 |
| MDKNELVQKAK           | P63101 | 0.00040096 | n +42.03 Da,K +28.03 Da,             | 1059.067958 | 3 | 477.2746 | 1.404E+10 | 1.764E+10 |
| TVAVYSEQDTGQMHR       | Q05920 | 0          | n +34.06 Da,                         | 1063.883375 | 3 | 583.944  | 467654016 | 189415008 |
| SPPAPSDSVKIEER        | Q9R257 | 0.00901838 | n +28.03 Da,K +28.03 Da,             | 1065.637911 | 3 | 566.2963 | 829382976 | 707284992 |
| PTTLTDDEINR           | Q922D8 | 0.00776562 | n +14.02 Da,                         | 1065.71381  | 2 | 644.3033 | 217428992 | 252734000 |
| SSGALLPKPQMR          | Q9CPQ1 | 0.01002073 | n +28.03 Da,K +28.03 Da,             | 1066.463295 | 3 | 447.595  | 385617984 | 392231008 |
| TGGDAAAPGAAGTQAEIPHR  | Q9D0F3 | 0          | n +34.06 Da,                         | 1068.043489 | 3 | 625.9815 | 5.177E+10 | 4.67E+10  |
| TMDKSELVQKAK          | Q9CQV8 | 0          | n +42.03 Da,n +28.03 Da,K +28.03 Da, | 1068.271885 | 3 | 501.9528 | 523801984 | 167464992 |
| SGGAIALGHPLGGSGSR     | Q8BWT1 | 0          | n +34.06 Da,                         | 1068.645964 | 3 | 507.9424 | 850769024 | 678462016 |
| SQAEFDKAAEEVKR        | P31786 | 0          | n +42.03 Da,K +34.06 Da,             | 1069.236209 | 3 | 569.2963 | 1.253E+09 | 2.068E+09 |
| SQAEFDKAAEEVKR        | P31786 | 0.00040096 | n +42.03 Da,K +28.03 Da,             | 1071.185343 | 4 | 427.2241 | 606356992 | 658942016 |
| EPDLSSDIKER           | B5X0G2 | 0.00040096 | n +14.02 Da,K +28.03 Da,             | 1073.129001 | 3 | 444.2334 | 1.9E+09   | 2.615E+09 |
| ATESFEDVGHSPDAR       | Q9CQX2 | 0          | n +28.03 Da,                         | 1078.56697  | 3 | 549.2537 | 585164992 | 705910016 |
| TGGDAAAPGAAGTQAEIPHR  | Q9D0F3 | 0          | n +34.06 Da,                         | 1080.119273 | 2 | 938.4686 | 517979008 | 450684000 |
| SSGALLPKPQMR          | Q9CPQ1 | 0.01795213 | n +34.06 Da,K +34.06 Da,             | 1082.43801  | 3 | 450.6114 | 360529984 | 3.998E+09 |
| SQAEFDKAAEEVKR        | P31786 | 0          | n +42.03 Da,K +28.03 Da,             | 1083.412058 | 2 | 853.4408 | 337049984 | 352492000 |
| SQAEFDKAAEEVKR        | P31786 | 0          | n +42.03 Da,K +34.06 Da,             | 1085.054847 | 3 | 567.2869 | 747984000 | 7.123E+09 |
| MDADKDNKQACDER        | O35309 | 0          | n +42.03 Da,K +28.03 Da,             | 1086.272021 | 3 | 636.2915 | 512768000 | 309761984 |
| PVDTDDTATALR          | Q99P30 | 0          | n +14.02 Da,                         | 1086.351167 | 2 | 644.8223 | 211286000 | 114462000 |
| ATSASSHLNKGKIQM       | P15105 | 0.00040096 | n +42.03 Da,n +34.06 Da,K +34.06 Da, | 1086.628242 | 3 | 557.6343 | 1.759E+09 | 2.632E+09 |
| ISSQQTIPPSAKYGGRR     | P70404 | 0.00040096 | n +34.06 Da,K +34.06 Da,             | 1087.092491 | 3 | 582.6539 | 439539008 | 233538000 |
| PKEQQEVVVLGSPH        | Q9D103 | 0.00901838 | n +17.03 Da,K +34.06 Da,             | 1087.300401 | 3 | 532.3042 | 54096900  | 166767008 |
| SETAPAAPAAPAPAEKTPVKK | P43274 | 0          | n +42.03 Da,n +28.03 Da,K +28.03 Da, | 1095.125615 | 3 | 720.0749 | 1.529E+09 | 1.352E+09 |
| ISSQQTIPPSAKYGGRR     | P70404 | 0.00839161 | n +28.03 Da,K +28.03 Da,             | 1095.51907  | 3 | 578.6292 | 200148000 | 194843008 |
| TSGMALAEQAR           | Q8QZY2 | 0.00040096 | n +34.06 Da,                         | 1095.53239  | 2 | 581.798  | 238876000 | 220076000 |
| MEVKPPPGRPQPDSGR      | Q8BG05 | 0.00040096 | n +42.03 Da,K +34.06 Da,             | 1099.006676 | 2 | 909.4692 | 1.165E+09 | 1.072E+09 |
| TRSDPVVIVSAAR         | F2Z459 | 0.00040096 | n +34.06 Da,                         | 1101.874536 | 3 | 466.9405 | 1.016E+09 | 2.303E+09 |
| MEVKPPPGRPQPDSGR      | Q8BG05 | 0          | n +42.03 Da,K +34.06 Da,             | 1102.274853 | 3 | 606.6497 | 7.502E+10 | 6.872E+10 |
| VAPMKGQVCVVTGASR      | Q99L04 | 0          | n +34.06 Da,K +34.06 Da,             | 1103.457754 | 3 | 576.6443 | 1.132E+09 | 862102016 |
| AVKTLNPKAEVAR         | P80317 | 0          | n +42.03 Da,K +28.03 Da,             | 1103.833162 | 3 | 493.9559 | 146528000 | 99905296  |
| NIQGITKPAIR           | P62806 | 0.00040096 | n +34.06 Da,K +34.06 Da,             | 1104.574739 | 3 | 422.9346 | 159764000 | 155408992 |
| TITSAKVMMEGGR         | P29341 | 0.00934903 | n +34.06 Da,K +34.06 Da,             | 1104.695159 | 3 | 479.5913 | 296600992 | 234078000 |

|                      |        |            |                                      |             |   |          |           |           |
|----------------------|--------|------------|--------------------------------------|-------------|---|----------|-----------|-----------|
| SEPEIPK GIR          | Q9WTP6 | 0.00040096 | n +34.06 Da,K +34.06 Da,             | 1108.706341 | 3 | 394.5678 | 2.17E+09  | 1.875E+09 |
| EPDLSDDIKER          | B5X0G2 | 0          | n +28.03 Da,K +28.03 Da,             | 1112.96338  | 2 | 672.8539 | 114844000 | 190459008 |
| SVDEGLLDSKR          | A2AS89 | 0.00040096 | n +28.03 Da,                         | 1113.708452 | 3 | 425.5697 | 110266000 | 118545000 |
| AAAPEPHETEKKPF       | Q9D7J4 | 0.00040096 | n +42.03 Da,K +28.03 Da,             | 1114.656148 | 2 | 825.4303 | 83255800  | 74817696  |
| TGGDAAAPGAAGTQALPHR  | Q9D0F3 | 0          | n +28.03 Da,                         | 1114.933229 | 3 | 624.9841 | 66187300  | 201912000 |
| AAAPEPHETEKKPF       | Q9D7J4 | 0          | n +42.03 Da,K +28.03 Da,             | 1116.320648 | 3 | 550.6205 | 1.788E+09 | 1.866E+09 |
| MEGHDPKEPEQLR        | B2RXM2 | 0          | n +42.03 Da,K +28.03 Da,             | 1117.425273 | 2 | 818.3931 | 4.808E+09 | 4.518E+09 |
| VAPMKGQVCVVTGASR     | Q99L04 | 0          | n +34.06 Da,K +34.06 Da,             | 1119.688161 | 3 | 572.6477 | 3.666E+09 | 3.089E+09 |
| MEGHDPKEPEQLR        | B2RXM2 | 0          | n +42.03 Da,K +34.06 Da,             | 1120.076825 | 3 | 545.934  | 3.796E+10 | 3.408E+10 |
| AGTTTIEAVKR          | D3Z2H9 | 0.00040096 | n +42.03 Da,n +34.06 Da,             | 1120.604708 | 2 | 607.8402 | 46736000  | 43946800  |
| GEKVEGSEPSVYYR       | Q9CQX2 | 0.00078339 | n +34.06 Da,K +34.06 Da,             | 1123.241955 | 3 | 586.2957 | 50631300  | 138116992 |
| VAPMKGQVCVVTGASR     | Q99L04 | 0          | n +34.06 Da,K +34.06 Da,             | 1124.441795 | 3 | 575.6528 | 46599500  | 85113800  |
| TGGDAAAPGAAGTQALPHR  | Q9D0F3 | 0          | n +34.06 Da,                         | 1125.159848 | 3 | 625.9815 | 1.002E+09 | 1.004E+09 |
| GGYKEPAAPVSIQR       | Q61792 | 0          | n +34.06 Da,K +34.06 Da,             | 1128.616101 | 3 | 514.3035 | 204208000 | 610785024 |
| SQAEDKAAEEVKR        | P31786 | 0          | n +42.03 Da,K +34.06 Da,             | 1129.636547 | 2 | 857.9653 | 14216700  | 144656000 |
| PKPSSSPVIFAGGQDR     | Q61990 | 0.02876318 | n +14.02 Da,K +28.03 Da,             | 1129.844433 | 3 | 562.3098 | 139647008 | 188792000 |
| PSVDGFTPR            | Q8C196 | 0.00115785 | n +14.02 Da,                         | 1131.48507  | 2 | 490.7274 | 157364992 | 27546800  |
| SSVQDVL R            | Q8CFA2 | 0.0427907  | n +28.03 Da,                         | 1132.721595 | 2 | 466.2645 | 347744992 | 366367008 |
| LLTEAPLNPKANR        | P60710 | 0.00040096 | n +34.06 Da,                         | 1135.968902 | 3 | 498.2994 | 459463008 | 535795008 |
| MKPILLQGH            | Q9QZD9 | 0.00152323 | n +28.03 Da,K +28.03 Da,             | 1136.499054 | 3 | 364.8913 | 453512992 | 414395008 |
| AGTTTIEAVKR          | D3Z2H9 | 0.00040096 | n +42.03 Da,n +28.03 Da,             | 1137.067797 | 2 | 608.8482 | 4.956E+09 | 4.825E+09 |
| TEEEEEETEKESTEKDEL   | P08113 | 0          | n +34.06 Da,K +34.06 Da,             | 1138.966761 | 3 | 756.676  | 340822016 | 333276992 |
| SGEKVEGSEPSVYYR      | Q9CQX2 | 0          | n +34.06 Da,K +34.06 Da,             | 1139.348949 | 3 | 615.3072 | 345006016 | 264234000 |
| SGSGEKVEGSEPSVYYR    | Q9CQX2 | 0          | n +28.03 Da,K +28.03 Da,             | 1139.941169 | 3 | 663.3247 | 197271008 | 167096000 |
| ELSEEDKLTVSR         | P56480 | 0.00040096 | n +34.06 Da,K +34.06 Da,             | 1140.852492 | 2 | 731.3927 | 202043008 | 218531008 |
| AAVKTLNPKAEVAR       | P80317 | 0          | n +42.03 Da,K +28.03 Da,             | 1140.869822 | 3 | 518.6365 | 278503008 | 407561984 |
| VLIIGDDETPGQKAVR     | O70475 | 0.00040096 | n +28.03 Da,K +28.03 Da,             | 1145.698526 | 3 | 575.6556 | 706996992 | 624129984 |
| AGGEGGVTLGQPHLSR     | Q9Z0N1 | 0          | n +34.06 Da,                         | 1147.529714 | 3 | 522.9615 | 789057984 | 3.27E+09  |
| PSVDGFTPR            | Q8C196 | 0.00115785 | n +14.02 Da,                         | 1151.858391 | 2 | 495.256  | 205414000 | 40553100  |
| AENNAQNKAKLISETR     | Q9CWP6 | 0          | n +42.03 Da,n +34.06 Da,K +34.06 Da, | 1153.423401 | 3 | 629.0095 | 785483008 | 877526016 |
| SETAAPAAPAPAEKTPVKKK | P43274 | 0          | n +42.03 Da,n +28.03 Da,K +28.03 Da, | 1154.93581  | 3 | 772.1054 | 290641984 | 122632000 |
| PTTGEVIGHVAEGDR      | Q9CZS1 | 0          | n +14.02 Da,                         | 1155.726465 | 3 | 517.9307 | 799195008 | 584876992 |
| MEGYHKPDQQKL         | P40142 | 0.00440852 | n +42.03 Da,K +28.03 Da,             | 1157.150016 | 3 | 524.6006 | 1.321E+09 | 1.101E+09 |
| AGYLTEPVNR           | Q64521 | 0.00078339 | n +34.06 Da,                         | 1158.265932 | 2 | 574.3103 | 455816000 | 378896000 |
| AGVPAHVVDLR          | Q6XPS7 | 0.00040096 | n +34.06 Da,                         | 1158.580115 | 3 | 387.8959 | 274291008 | 302529984 |
| AALRPLVKPK           | P17932 | 0.00475494 | n +42.03 Da,n +34.06 Da,K +34.06 Da, | 1158.988351 | 3 | 397.6043 | 660153024 | 629208000 |
| AVSTGVK VPR          | Q9D2M8 | 0.02367824 | n +42.03 Da,K +28.03 Da,             | 1159.579994 | 2 | 540.8151 | 589646976 | 608422016 |
| DSSFQIVKNPR          | Q61176 | 0          | n +34.06 Da,K +34.06 Da,             | 1160.73118  | 3 | 449.5856 | 86017296  | 130738000 |
| MKPILLQGH            | Q9QZD9 | 0.00152323 | n +28.03 Da,K +28.03 Da,             | 1164.238153 | 3 | 363.8951 | 2.918E+09 | 8.808E+09 |
| MEKPAASTEPQGSRPALGR  | Q9JMD3 | 0          | n +42.03 Da,K +28.03 Da,             | 1165.220323 | 3 | 685.0213 | 6.781E+10 | 6.465E+10 |



|                        |        |            |                                      |             |   |          |           |           |
|------------------------|--------|------------|--------------------------------------|-------------|---|----------|-----------|-----------|
| AGGEGGVTLGQPILSR       | Q9Z0N1 | 0          | n +34.06 Da,                         | 1166.761989 | 3 | 521.9464 | 1.25E+09  | 1.237E+09 |
| PAIYGVDR               | Q8C196 | 0.02423263 | n +14.02 Da,                         | 1172.384592 | 2 | 498.7502 | 229007008 | 416275008 |
| PKVTQPEVDTPPLGR        | Q63880 | 0          | n +17.03 Da,K +34.06 Da,             | 1174.068258 | 2 | 789.9468 | 399416992 | 274380992 |
| SQAEFDKAAEEVKR         | P31786 | 0          | n +42.03 Da,K +34.06 Da,             | 1174.877142 | 3 | 573.304  | 912814976 | 950248000 |
| MEETEKKVATQEGR         | Q9QXZ6 | 0          | n +42.03 Da,K +34.06 Da,             | 1177.150999 | 3 | 581.6455 | 1.087E+10 | 8.023E+10 |
| MEETEKKVATQEGR         | Q9QXZ6 | 0.00744681 | n +42.03 Da,K +34.06 Da,             | 1177.471412 | 2 | 871.9644 | 351776992 | 2.709E+09 |
| RVVHQNHGER             | Q9WTI7 | 0.0298318  | n +42.03 Da,                         | 1179.843884 | 2 | 635.8122 | 166594000 | 56897100  |
| LADAVAVTMGPKGR         | P63038 | 0          | n +28.03 Da,K +28.03 Da,             | 1181.139904 | 3 | 481.2806 | 937611008 | 1.039E+10 |
| TDQGIKNLPVGEAGR        | P24270 | 0          | n +28.03 Da,K +28.03 Da,             | 1181.955753 | 3 | 537.633  | 2.788E+09 | 2.309E+09 |
| MEKTELIQKAK            | P68254 | 0.00040096 | n +42.03 Da,K +34.06 Da,             | 1184.554562 | 2 | 730.4655 | 33857600  | 261212000 |
| AAVKTLNPKAEVAR         | P80317 | 0          | n +42.03 Da,K +34.06 Da,             | 1185.015371 | 2 | 783.4724 | 192596000 | 128896000 |
| TAENLAAKYNISR          | Q8BWT1 | 0          | n +28.03 Da,K +28.03 Da,             | 1186.142456 | 3 | 502.9357 | 1.291E+09 | 973979008 |
| ASLVPLKEKK             | P56135 | 0.00115785 | n +42.03 Da,n +34.06 Da,K +34.06 Da, | 1187.192376 | 2 | 619.9077 | 628793024 | 545096000 |
| MEETEKKVATQEGR         | Q9QXZ6 | 0          | n +42.03 Da,K +28.03 Da,             | 1187.384738 | 2 | 867.441  | 546172032 | 441868992 |
| AAVKTLNPKAEVAR         | P80317 | 0          | n +42.03 Da,K +28.03 Da,             | 1187.875685 | 3 | 522.653  | 2.276E+10 | 1.835E+10 |
| ASLVPLKEKK             | P56135 | 0.00152323 | n +42.03 Da,n +34.06 Da,K +34.06 Da, | 1188.321708 | 3 | 413.6078 | 1.152E+09 | 986126976 |
| VTAGKDGVANVSIEDR       | P08228 | 0          | n +34.06 Da,K +34.06 Da,             | 1190.785602 | 3 | 562.9718 | 2.456E+09 | 2.724E+09 |
| TLVEKINYTGR            | P49429 | 0.03369018 | n +34.06 Da,K +34.06 Da,             | 1190.879523 | 3 | 450.5983 | 16263500  | 36726200  |
| AEMKSPTKAEPATPAEAAQSDR | Q7TPV4 | 0          | n +42.03 Da,K +34.06 Da,             | 1195.398294 | 3 | 795.3971 | 647558016 | 483436000 |
| DSSFQIVKNPR            | Q61176 | 0          | n +28.03 Da,K +28.03 Da,             | 1203.842551 | 2 | 673.8767 | 590627968 | 475846016 |
| SGYTPDEKLR             | Q3UIU2 | 0.00040096 | n +42.03 Da,K +34.06 Da,             | 1204.53931  | 2 | 618.3172 | 5.918E+09 | 5.564E+09 |
| MEETEKKVATQEGR         | Q9QXZ6 | 0          | n +42.03 Da,K +28.03 Da,             | 1204.750147 | 3 | 578.6306 | 217160000 | 158496000 |
| PKVTQPEVDTPPLGR        | Q63880 | 0          | n +17.03 Da,K +34.06 Da,             | 1205.309658 | 3 | 528.9775 | 1.075E+11 | 4.009E+11 |
| PKVTQPEVDTPPLGR        | Q63880 | 0          | n +17.03 Da,K +34.06 Da,             | 1207.082012 | 2 | 792.9627 | 9.074E+09 | 3.404E+10 |
| SETAPAAPAPAPAEKTPVKKK  | P43274 | 0          | n +42.03 Da,n +28.03 Da,K +28.03 Da, | 1208.752606 | 3 | 772.1053 | 374544000 | 142990000 |
| EPDSSDIKEK             | P11591 | 0.00873515 | n +42.03 Da,K +28.03 Da,             | 1213.337615 | 3 | 453.5777 | 750876032 | 902780992 |
| VTAGKDGVANVSIEDR       | P08228 | 0          | n +34.06 Da,K +34.06 Da,             | 1215.525508 | 3 | 565.9942 | 514164000 | 1.451E+09 |
| TAENLAAKYNISR          | Q8BWT1 | 0          | n +34.06 Da,K +34.06 Da,             | 1215.783869 | 3 | 502.9485 | 623481984 | 487347008 |
| SDKSDLKAELER           | O88485 | 0.00406654 | n +42.03 Da,K +34.06 Da,             | 1215.886367 | 3 | 496.9357 | 1.767E+09 | 1.76E+09  |
| SDKSDLKAELER           | O88485 | 0          | n +42.03 Da,K +28.03 Da,             | 1216.340512 | 2 | 744.8992 | 417568000 | 417491008 |
| LADAVAVTMGPKGR         | P63038 | 0          | n +34.06 Da,K +34.06 Da,             | 1219.126205 | 3 | 481.2775 | 305884000 | 282119008 |
| GVQVETISPGDGR          | P26883 | 0          | n +28.03 Da,                         | 1220.973964 | 2 | 671.8516 | 249956000 | 175290000 |
| SETAPAAPAPAPVEKTPVKK   | P43277 | 0          | n +42.03 Da,n +34.06 Da,K +34.06 Da, | 1224.984887 | 3 | 729.4189 | 107721000 | 71622704  |
| SLDMKEHPDAEVQKN        | O55060 | 0          | n +42.03 Da,K +34.06 Da,             | 1225.323259 | 2 | 919.9513 | 78422304  | 61316800  |
| VTAGKDGVANVSIEDR       | P08228 | 0          | n +28.03 Da,K +28.03 Da,             | 1225.500642 | 3 | 561.9737 | 655654976 | 951136000 |
| EEDEKEEDEEESPGQAKDEL   | P14211 | 0          | n +34.06 Da,K +34.06 Da,             | 1227.433113 | 3 | 807.0222 | 756198016 | 682585024 |
| SLDMKEHPDAEVQKN        | O55060 | 0          | n +42.03 Da,K +34.06 Da,             | 1227.592322 | 3 | 613.6371 | 2.845E+09 | 3.356E+09 |
| GDATENFEDVGHSTDR       | P56395 | 0          | n +28.03 Da,                         | 1228.377178 | 3 | 616.9391 | 571302976 | 581417984 |
| PEQLITGKEDAANNYAR      | P05213 | 0          | n +17.03 Da,K +34.06 Da,             | 1233.485027 | 3 | 644.6658 | 1.084E+09 | 201492992 |
| DLDSPSKEEAFR           | P36552 | 0.04004967 | n +28.03 Da,K +28.03 Da,             | 1234.95739  | 3 | 483.9122 | 272870016 | 235040000 |

|                         |        |            |                                      |             |   |          |           |           |
|-------------------------|--------|------------|--------------------------------------|-------------|---|----------|-----------|-----------|
| LSTKPQAEQPPASPEARL      | Q9WU79 | 0          | n +34.06 Da,K +34.06 Da,             | 1236.533182 | 3 | 705.0677 | 58653700  | 271527008 |
| PLVTLGGNKESQPEVR        | Q9DCN1 | 0.01970443 | n +17.03 Da,K +34.06 Da,             | 1239.95918  | 3 | 664.0183 | 228656992 | 107254000 |
| SAEASAELESSEGMNHR       | P26043 | 0          | n +34.06 Da,                         | 1240.200999 | 3 | 601.6156 | 86164304  | 146030000 |
| AGGDATENFEDVGHSTDR      | P56395 | 0          | n +34.06 Da,                         | 1242.623613 | 3 | 659.6235 | 237788000 | 281548000 |
| VEKEEAGGGGGGISEEEAAQYDR | Q9R1T2 | 0          | n +28.03 Da,K +28.03 Da,             | 1243.656269 | 3 | 817.7133 | 226474000 | 321039008 |
| ATSASSHLNKGIKQMY        | P15105 | 0.00040096 | n +42.03 Da,n +34.06 Da,K +34.06 Da, | 1244.367614 | 3 | 611.971  | 283023008 | 245420000 |
| PKVTQPEVDTPPLGR         | Q63880 | 0          | n +28.03 Da,K +28.03 Da,             | 1247.650422 | 3 | 531.6382 | 2.247E+09 | 1.868E+09 |
| AAETVELHKLK             | Q9D1J3 | 0          | n +42.03 Da,K +34.06 Da,             | 1248.483169 | 3 | 446.266  | 766425984 | 786329984 |
| AAQESLHVKTPLR           | Q8VBT2 | 0.00152323 | n +42.03 Da,K +28.03 Da,             | 1250.627059 | 2 | 507.2819 | 4.211E+09 | 4.338E+09 |
| DNIQGITKPAIR            | P62806 | 0.00040096 | n +28.03 Da,K +28.03 Da,             | 1251.854748 | 3 | 460.2855 | 278175008 | 244056000 |
| SQAEFDKAAEEVKR          | P31786 | 0          | n +42.03 Da,K +34.06 Da,             | 1256.660678 | 3 | 569.297  | 878289024 | 752619008 |
| TSKVSVISVEEPPQR         | Q9DCW4 | 0          | n +34.06 Da,K +34.06 Da,             | 1256.763824 | 3 | 571.3244 | 1.156E+09 | 1.115E+09 |
| TQAVLDPKPELSSDASTR      | P50544 | 0          | n +28.03 Da,K +28.03 Da,             | 1257.959128 | 3 | 659.0158 | 93660400  | 148212992 |
| YTAAVEAKQVAQQEAQR       | O35129 | 0          | n +28.03 Da,K +28.03 Da,             | 1258.367306 | 3 | 647.6591 | 61103100  | 55151600  |
| TLDPVEKALR              | P63017 | 0.00040096 | n +28.03 Da,K +28.03 Da,             | 1259.805095 | 3 | 399.9116 | 598214016 | 611107968 |
| SVLPKPALVASR            | Q8C196 | 0.00040096 | n +34.06 Da,K +34.06 Da,             | 1261.646141 | 3 | 431.9465 | 1.099E+09 | 1.208E+09 |
| VLTVINQQTQKENLR         | Q6ZWW7 | 0.00152323 | n +28.03 Da,                         | 1266.52213  | 3 | 571.3465 | 271768992 | 451128000 |
| NVTAGKDGVANVSIEDR       | P08228 | 0          | n +34.06 Da,K +34.06 Da,             | 1272.321286 | 3 | 600.9862 | 88092304  | 62355800  |
| PTVPPGGDLAKVQR          | P05213 | 0          | n +14.02 Da,K +28.03 Da,             | 1272.615104 | 3 | 493.6279 | 498035008 | 62533200  |
| PDAANYKDISDVER          | Q9D819 | 0          | n +14.02 Da,K +28.03 Da,             | 1273.277158 | 3 | 544.2918 | 28444600  | 43900300  |
| SACPKGFR                | Q9WTJ4 | 0.02149837 | n +28.03 Da,K +28.03 Da,             | 1276.936277 | 2 | 489.7615 | 165995008 | 142548992 |
| GNVTAGKDGVANVSIEDR      | P08228 | 0          | n +34.06 Da,K +34.06 Da,             | 1279.67261  | 3 | 619.6327 | 1.659E+09 | 1.43E+09  |
| AQESLHVKTPLR            | Q8VBT2 | 0          | n +42.03 Da,K +28.03 Da,             | 1281.193282 | 3 | 483.6121 | 440359008 | 400382016 |
| VSGGAIALGHPLGGSGSR      | Q8BWT1 | 0          | n +28.03 Da,                         | 1283.001412 | 3 | 539.9668 | 1.302E+09 | 5.951E+09 |
| VSGGAIALGHPLGGSGSR      | Q8BWT1 | 0.00040096 | n +34.06 Da,                         | 1285.244629 | 3 | 542.9755 | 3.675E+09 | 108554000 |
| SVLPKPALVASR            | Q8C196 | 0.00040096 | n +34.06 Da,K +34.06 Da,             | 1288.644214 | 3 | 434.9628 | 41123800  | 388425984 |
| SVDDTQVHTEYSSLR         | P49429 | 0          | n +28.03 Da,                         | 1289.766561 | 3 | 588.3053 | 89920000  | 89789296  |
| RIQEEQRKAEMER           | Q8CFB4 | 0.01970443 | n +34.06 Da,K +34.06 Da,             | 1291.978612 | 3 | 591.0015 | 5.526E+09 | 4.275E+09 |
| ATSASSHLNKGIKQMY        | P15105 | 0          | n +42.03 Da,n +34.06 Da,K +34.06 Da, | 1293.457681 | 2 | 917.4796 | 585060992 | 515635008 |
| TQAVLDPKPELSSDASTR      | P50544 | 0          | n +28.03 Da,K +28.03 Da,             | 1293.467593 | 3 | 659.0164 | 719137984 | 705089984 |
| SEGDSVGDVSHGKPSVVYR     | Q9CQU3 | 0          | n +42.03 Da,K +34.06 Da,             | 1297.707789 | 3 | 682.336  | 4.843E+10 | 4.574E+10 |
| LPAKPEVSSDEDVQYR        | Q8BMS1 | 0          | n +28.03 Da,K +28.03 Da,             | 1298.603231 | 3 | 630.326  | 911806976 | 717872000 |
| SEGDSVGDVSHGKPSVVYR     | Q9CQU3 | 0          | n +42.03 Da,K +28.03 Da,             | 1298.662353 | 2 | 1023.001 | 525974016 | 466244000 |
| ATSASSHLNKGIKQMY        | P15105 | 0          | n +42.03 Da,n +28.03 Da,K +28.03 Da, | 1302.022411 | 3 | 611.9889 | 1.681E+10 | 1.401E+10 |
| NVEAGKYTVGLGQTR         | P54869 | 0          | n +28.03 Da,K +28.03 Da,             | 1304.599224 | 3 | 550.3058 | 1.972E+09 | 1.638E+09 |
| SVDDTQVHTEYSSLR         | P49429 | 0          | n +28.03 Da,                         | 1305.059632 | 3 | 588.3055 | 39966800  | 19930200  |
| PADTGDVNVHSGIIAAR       | F6XXE6 | 0          | n +14.02 Da,                         | 1305.793152 | 3 | 567.6197 | 141376000 | 324496000 |
| NHLLSSQYVER             | Q9R1V4 | 0.03225806 | n +42.03 Da,                         | 1309.761086 | 2 | 759.8772 | 592179008 | 725814976 |
| PTVEELYR                | O35841 | 0.01970443 | n +17.03 Da,                         | 1313.454731 | 2 | 510.7699 | 311657984 | 195578000 |
| TLPVAVLKNTAAR           | Q8QZR3 | 0.00605629 | n +34.06 Da,K +34.06 Da,             | 1314.725669 | 3 | 437.6103 | 264527008 | 210343008 |

|                      |        |            |                                      |             |   |          |           |           |
|----------------------|--------|------------|--------------------------------------|-------------|---|----------|-----------|-----------|
| AAQESLHVKTPLR        | Q8VBT2 | 0.00040096 | n +42.03 Da,K +34.06 Da,             | 1317.500581 | 2 | 760.4327 | 5.176E+09 | 4.748E+09 |
| AAQESLHVKTPLR        | Q8VBT2 | 0          | n +42.03 Da,K +28.03 Da,             | 1317.747012 | 3 | 507.2937 | 8.131E+10 | 7.659E+10 |
| PTPGSASSEAPLVNEDVKR  | Q91YQ5 | 0          | n +17.03 Da,K +34.06 Da,             | 1319.008133 | 3 | 698.3672 | 845555968 | 644233984 |
| PTAAPPLAEAGAAKGLR    | Q9D2G2 | 0          | n +14.02 Da,K +28.03 Da,             | 1320.486741 | 3 | 544.986  | 319847008 | 246455008 |
| VPNDSSFQIVKNPR       | Q61176 | 0          | n +28.03 Da,K +28.03 Da,             | 1325.116174 | 3 | 551.9613 | 176744992 | 2.933E+09 |
| VPNDSSFQIVKNPR       | Q61176 | 0          | n +34.06 Da,K +34.06 Da,             | 1326.016446 | 3 | 555.9898 | 100385000 | 1.158E+09 |
| AKIAQGAMYR           | P14824 | 0.0123119  | n +42.03 Da,K +28.03 Da,             | 1326.776771 | 2 | 589.8205 | 3.749E+09 | 3.997E+09 |
| PMTVSSDQMAKLR        | P16015 | 0          | n +17.03 Da,K +34.06 Da,             | 1328.267554 | 3 | 504.6096 | 234090000 | 983368000 |
| PKVTQPEVDTPGRVR      | Q63880 | 0.00040096 | n +14.02 Da,K +28.03 Da,             | 1328.547731 | 3 | 458.2732 | 377260000 | 3.766E+09 |
| VMEKPSLLVGR          | P97379 | 0          | n +34.06 Da,K +34.06 Da,             | 1331.40042  | 3 | 464.2954 | 533392992 | 4.49E+09  |
| SASKVISAEEALPGR      | Q9D6Y7 | 0          | n +34.06 Da,K +34.06 Da,             | 1337.962213 | 2 | 788.9377 | 4.411E+10 | 3.202E+10 |
| AGTEEEEEETEKESTEKDEL | P08113 | 0          | n +34.06 Da,K +34.06 Da,             | 1341.51297  | 3 | 799.3608 | 124297000 | 112509000 |
| PMTVSSDQMAKLR        | P16015 | 0          | n +14.02 Da,K +28.03 Da,             | 1345.130273 | 3 | 502.5989 | 179598000 | 92437696  |
| VPNDSSFQIVKNPR       | Q61176 | 0          | n +34.06 Da,K +34.06 Da,             | 1346.370389 | 3 | 552.9733 | 931723008 | 682974976 |
| KGPIVNIITPSR         | Q9CXF0 | 0.00406654 | n +34.06 Da,K +34.06 Da,             | 1350.951029 | 3 | 450.9535 | 50859600  | 132302000 |
| VMEKPSLLVGR          | P97379 | 0          | n +34.06 Da,K +34.06 Da,             | 1353.275987 | 3 | 461.2794 | 122083000 | 61948900  |
| GPEQMELEEGKAGSGLR    | P62196 | 0.00374251 | n +28.03 Da,K +28.03 Da,             | 1355.796998 | 3 | 615.3108 | 45694600  | 19686200  |
| TVKAASGFNATEDAQTLR   | P97429 | 0          | n +28.03 Da,K +28.03 Da,             | 1359.501681 | 3 | 645.0065 | 47935500  | 29873600  |
| SSAADKVVAEIR         | P51660 | 0          | n +34.06 Da,K +34.06 Da,             | 1360.885512 | 3 | 434.5854 | 422456992 | 338724000 |
| ALSDADVQKQIKH        | P50518 | 0          | n +42.03 Da,K +28.03 Da,             | 1362.244408 | 2 | 775.9303 | 152879008 | 156182000 |
| DATENFEDVGHSTDR      | P56395 | 0          | n +28.03 Da,                         | 1363.342051 | 3 | 597.9308 | 220300000 | 270840992 |
| ASSDIQVKELEKR        | P54227 | 0          | n +42.03 Da,K +34.06 Da,             | 1363.605991 | 3 | 534.3018 | 813875008 | 717152000 |
| ALSDADVQKQIKH        | P50518 | 0.00440852 | n +42.03 Da,K +34.06 Da,             | 1366.157924 | 3 | 517.6231 | 3.117E+09 | 2.798E+09 |
| ASSKKVTLVLSLR        | Q9D711 | 0.01795213 | n +42.03 Da,K +28.03 Da,             | 1367.073846 | 3 | 491.9718 | 5.988E+09 | 6.152E+09 |
| TDTEKGEFLSEGGGVR     | E9PV24 | 0          | n +28.03 Da,K +28.03 Da,             | 1367.296006 | 3 | 618.3015 | 1.948E+09 | 1.872E+09 |
| PKVTQPEVDTPGRVR      | Q63880 | 0.00040096 | n +14.02 Da,K +28.03 Da,             | 1369.095701 | 3 | 455.2573 | 134623008 | 63960900  |
| GKGILAADESVMGMNR     | Q91Y97 | 0.00406654 | n +34.06 Da,K +34.06 Da,             | 1369.913314 | 3 | 580.9865 | 654662976 | 2.168E+09 |
| ASGGGVPTDEEQATGLR    | P19536 | 0          | n +28.03 Da,                         | 1370.115218 | 2 | 901.4318 | 1.17E+09  | 973030016 |
| TDTEKGEFLSEGGGVR     | E9PV24 | 0          | n +34.06 Da,K +34.06 Da,             | 1373.929613 | 2 | 926.9514 | 408486016 | 302492992 |
| PKVTQPEVDTPGRVR      | Q63880 | 0          | n +17.03 Da,K +34.06 Da,             | 1374.22965  | 4 | 459.2686 | 412484992 | 264036000 |
| GPEQMELEEGKAGSGLR    | P62196 | 0.00040096 | n +34.06 Da,K +34.06 Da,             | 1377.391163 | 3 | 619.334  | 36337800  | 34694600  |
| TDTEKGEFLSEGGGVR     | E9PV24 | 0          | n +34.06 Da,K +34.06 Da,             | 1378.163943 | 3 | 622.3231 | 556003968 | 62451800  |
| TDTEKGEFLSEGGGVR     | E9PV24 | 0          | n +34.06 Da,K +34.06 Da,             | 1384.89542  | 3 | 622.3214 | 196168992 | 325156992 |
| ELTGAVDYSLIPR        | Q8C1C8 | 0.00901838 | n +14.02 Da,                         | 1385.606135 | 3 | 483.267  | 115987000 | 117465000 |
| GKGILAADESVMGMNR     | Q91Y97 | 0.00406654 | n +34.06 Da,K +34.06 Da,             | 1386.227072 | 3 | 581.9818 | 644955008 | 1.048E+10 |
| GQAMAVEEQCVPAALPR    | Q69ZR9 | 0.01853691 | n +17.03 Da,                         | 1396.509548 | 3 | 658.3332 | 261419008 | 260266000 |
| PKVIQPEVDTPGR        | Q8VCU1 | 0          | n +14.02 Da,K +28.03 Da,             | 1399.206545 | 3 | 529.9666 | 23058200  | 184064992 |
| TSVLPKPALVASR        | Q8C196 | 0.01260647 | n +34.06 Da,K +34.06 Da,             | 1407.387728 | 3 | 465.6294 | 300164992 | 141930000 |
| ATSASSHLNKGIKQMY     | P15105 | 0          | n +42.03 Da,n +34.06 Da,K +34.06 Da, | 1413.650839 | 2 | 917.4794 | 5.344E+09 | 6.793E+09 |
| ATSASSHLNKGIKQMY     | P15105 | 0          | n +42.03 Da,n +34.06 Da,K +34.06 Da, | 1414.857652 | 3 | 611.9908 | 1.724E+11 | 2.142E+11 |

|                             |        |            |                                      |             |   |          |           |           |
|-----------------------------|--------|------------|--------------------------------------|-------------|---|----------|-----------|-----------|
| PSGTSQCEDGSAGGFQHLDMH       | Q91WT9 | 0          | n +14.02 Da,                         | 1419.505289 | 3 | 744.6401 | 318278016 | 290060000 |
| GTITTKELGTVMR               | P62204 | 0.00040096 | n +34.06 Da,K +34.06 Da,             | 1420.761114 | 3 | 488.2814 | 248519008 | 322436000 |
| ATGANATPLDFPSKRR            | Q64213 | 0          | n +42.03 Da,K +28.03 Da,             | 1421.328607 | 3 | 591.3284 | 6.471E+09 | 4.957E+09 |
| PKVIQPEVDTPLGR              | Q8VCU1 | 0          | n +14.02 Da,K +28.03 Da,             | 1427.943532 | 2 | 788.4134 | 418809984 | 3.671E+09 |
| GTITTKELGTVMR               | P62204 | 0.00040096 | n +34.06 Da,K +34.06 Da,             | 1428.673566 | 3 | 491.2976 | 752899968 | 2.278E+09 |
| ATSASSHLNKGIKQMY            | P15105 | 0          | n +42.03 Da,n +34.06 Da,K +34.06 Da, | 1428.797624 | 2 | 922.0017 | 45833300  | 568211968 |
| MFQAAGAAQATPSHEAKGSSGSSTVQR | Q8BGB5 | 0          | n +42.03 Da,K +34.06 Da,             | 1437.350267 | 3 | 911.4389 | 73058600  | 51190400  |
| PKVIQPEVDTPLGR              | Q8VCU1 | 0          | n +17.03 Da,K +34.06 Da,             | 1439.157065 | 2 | 798.9788 | 1.667E+09 | 6.021E+09 |
| PKVIQPEVDTPLGR              | Q8VCU1 | 0          | n +17.03 Da,K +34.06 Da,             | 1439.852351 | 3 | 532.9891 | 3.11E+10  | 1.08E+11  |
| VPNDSSFQIVKNPR              | Q61176 | 0          | n +34.06 Da,K +34.06 Da,             | 1439.914613 | 3 | 552.9725 | 619286976 | 517145984 |
| ATSASSHLNKGIKQMY            | P15105 | 0          | n +42.03 Da,n +34.06 Da,K +34.06 Da, | 1447.891541 | 3 | 615.0045 | 705769024 | 6.932E+09 |
| YGGYKEPAAPVSIQR             | Q61792 | 0.00776562 | n +34.06 Da,K +34.06 Da,             | 1447.926437 | 3 | 564.6419 | 243472000 | 356467008 |
| SQAEFDKAAEEVKR              | P31786 | 0.00374251 | n +42.03 Da,K +28.03 Da,             | 1448.077787 | 3 | 569.2953 | 121346000 | 315398016 |
| DNIIQGITKPAIR               | P62806 | 0.00040096 | n +42.03 Da,K +34.06 Da,             | 1453.0133   | 2 | 698.4007 | 98674400  | 117469000 |
| KATIPAAALQAQESTEGPGTGQDR    | Q9DBG1 | 0          | n +34.06 Da,K +34.06 Da,             | 1454.206224 | 3 | 794.7468 | 630956032 | 575219008 |
| ATGANATPLDFPSKRR            | Q64213 | 0          | n +42.03 Da,K +28.03 Da,             | 1454.912671 | 3 | 591.3294 | 25160900  | 34042600  |
| ASESGKLWGGRR                | Q91Y10 | 0.00040096 | n +42.03 Da,K +34.06 Da,             | 1455.436365 | 2 | 609.3179 | 2.767E+10 | 4.147E+10 |
| IPENVEITLKGR                | P51410 | 0.00300865 | n +28.03 Da,                         | 1456.448    | 3 | 472.6    | 438027008 | 475798016 |
| VGLKAPGIIPR                 | Q03265 | 0.00227187 | n +28.03 Da,K +28.03 Da,             | 1465.174966 | 3 | 392.9322 | 734753024 | 624681984 |
| PKVIQPEVDTPLGR              | Q8VCU1 | 0          | n +14.02 Da,K +28.03 Da,             | 1472.194985 | 2 | 795.9642 | 453720000 | 312721984 |
| EIAQDFKTDLR                 | P02301 | 0          | n +28.03 Da,K +28.03 Da,             | 1473.128362 | 3 | 464.5893 | 1.008E+09 | 581033024 |
| PGASPADTGDVNVHSGIIAAR       | F6XXE6 | 0.0123119  | n +17.03 Da,                         | 1478.751624 | 3 | 674.696  | 783364992 | 494808000 |
| ATSASSHLNKGIKQMY            | P15105 | 0          | n +42.03 Da,n +34.06 Da,K +34.06 Da, | 1479.956592 | 3 | 616.0102 | 949622976 | 2.166E+09 |
| TNKETTIQGLDGLSER            | Q91Y97 | 0          | n +34.06 Da,K +34.06 Da,             | 1480.22889  | 3 | 609.6743 | 98173504  | 73613200  |
| PGVTVKDVNQEFVR              | Q9CZX8 | 0          | n +17.03 Da,K +34.06 Da,             | 1484.303447 | 3 | 588.6666 | 4.794E+10 | 1.859E+11 |
| FPEDTLEQKAGSVGR             | Q8VCW8 | 0.0051039  | n +34.06 Da,K +34.06 Da,             | 1484.661237 | 3 | 565.3041 | 1.812E+09 | 1.956E+09 |
| PGVTVKDVNQEFVR              | Q9CZX8 | 0          | n +17.03 Da,K +34.06 Da,             | 1484.968859 | 2 | 882.4962 | 582444992 | 2.423E+09 |
| PKVIQPEVDTPLGR              | Q8VCU1 | 0          | n +14.02 Da,K +28.03 Da,             | 1485.000378 | 3 | 528.9681 | 177340000 | 608924992 |
| SQIQEESTTVVTTKSAEIR         | P05784 | 0          | n +28.03 Da,K +28.03 Da,             | 1486.312365 | 3 | 721.722  | 119585000 | 60211200  |
| PAINEYLQR                   | Q9QXD6 | 0.00440852 | n +17.03 Da,                         | 1487.974237 | 2 | 559.3041 | 7.589E+09 | 5.853E+09 |
| ATPEASGSGEKVEGSEPSVYYR      | Q9CQX2 | 0          | n +42.03 Da,K +28.03 Da,             | 1488.384102 | 3 | 824.3902 | 497886016 | 423352000 |
| SPVERPSPDLEEGEASVQTER       | Q9R049 | 0          | n +34.06 Da,                         | 1489.932143 | 3 | 780.7137 | 213934000 | 343996000 |
| PGIEPSPDKMLQGR              | P24270 | 0          | n +14.02 Da,K +28.03 Da,             | 1490.711718 | 3 | 522.9487 | 179860992 | 26642300  |
| PGASPADTGDVNVHSGIIAAR       | F6XXE6 | 0          | n +14.02 Da,                         | 1492.481385 | 3 | 673.6799 | 1.185E+09 | 1.126E+09 |
| SYGGYKEPAAPVSIQR            | Q61792 | 0          | n +34.06 Da,K +34.06 Da,             | 1495.061312 | 3 | 593.6515 | 529377984 | 403139008 |
| ADEEKLPPGWEKR               | Q9QUR7 | 0          | n +42.03 Da,K +28.03 Da,             | 1498.3452   | 3 | 551.6265 | 643902016 | 751779968 |
| THFNKGPSYGLSAEVKN           | Q9DAW9 | 0          | n +42.03 Da,K +34.06 Da,             | 1498.734353 | 3 | 649.6695 | 184572000 | 172727008 |
| EIAQDFKTDLR                 | P02301 | 0          | n +28.03 Da,K +28.03 Da,             | 1500.657716 | 3 | 464.5893 | 17606500  | 11524000  |
| TNVSOGAIALGHPLGGSGSR        | Q8BWT1 | 0          | n +28.03 Da,                         | 1502.530766 | 2 | 918.4897 | 41895100  | 44125800  |
| THFNKGPSYGLSAEVK            | Q9DAW9 | 0          | n +42.03 Da,K +34.06 Da,             | 1504.916809 | 3 | 612.6623 | 8.501E+09 | 8.276E+09 |

|                                      |        |            |                          |             |   |          |           |           |
|--------------------------------------|--------|------------|--------------------------|-------------|---|----------|-----------|-----------|
| YINDKSTGSVVGQQPFGGAR                 | Q8CHT0 | 0.00040096 | n +34.06 Da,K +34.06 Da, | 1508.298091 | 3 | 713.0389 | 52847200  | 40204700  |
| AMNYSAKDEVGGPAGPPGGAACKTR            | Q8VEK0 | 0          | n +42.03 Da,K +28.03 Da, | 1508.313366 | 3 | 839.0792 | 9.562E+09 | 8.985E+09 |
| MNYSAKDEVGGPAGPPGGAACKTR             | Q8VEK0 | 0          | n +42.03 Da,K +28.03 Da, | 1508.685757 | 3 | 815.4001 | 3.143E+09 | 2.772E+09 |
| MDGEDDSNLVIKKR                       | Q91WE2 | 0          | n +42.03 Da,K +34.06 Da, | 1508.751753 | 3 | 577.3173 | 84371200  | 35721900  |
| TEGPAGVAVMKLR                        | P42125 | 0.00040096 | n +28.03 Da,K +28.03 Da, | 1508.958983 | 3 | 462.2716 | 160980000 | 154388992 |
| PKVIQPEVDTPLGR                       | Q8VCU1 | 0          | n +14.02 Da,K +28.03 Da, | 1509.41812  | 3 | 530.9791 | 117291000 | 55250800  |
| ALEIKGTALR                           | P50172 | 0.03369018 | n +34.06 Da,K +34.06 Da, | 1513.315415 | 3 | 414.2712 | 243212992 | 209744992 |
| KTGVAPIIDVVR                         | P14115 | 0.02572347 | n +34.06 Da,K +34.06 Da, | 1515.569957 | 3 | 441.9493 | 198968000 | 226518000 |
| AMNYSAKDEVGGPAGPPGGAACKTR            | Q8VEK0 | 0          | n +42.03 Da,K +34.06 Da, | 1516.729679 | 4 | 629.5614 | 756473984 | 689608000 |
| MREIVHIQAGQCQN                       | P99024 | 0.00040096 | n +42.03 Da,             | 1516.99743  | 2 | 827.8926 | 160134000 | 166146000 |
| TLKDDTTVTGLGR                        | Q8BMS1 | 0.03642072 | n +28.03 Da,K +28.03 Da, | 1517.262279 | 3 | 477.6245 | 624129984 | 481659008 |
| TNKETTIQGLDGLSER                     | Q91Y97 | 0          | n +28.03 Da,K +28.03 Da, | 1522.529153 | 3 | 605.6515 | 136583008 | 467060000 |
| GLGFGDNTKAAVIR                       | P13707 | 0.00807868 | n +34.06 Da,K +34.06 Da, | 1523.244234 | 3 | 492.2847 | 722884992 | 642728000 |
| KTGTAEMSSILEER                       | Q03265 | 0.00406654 | n +28.03 Da,K +28.03 Da, | 1525.10955  | 2 | 804.4189 | 278572992 | 314535008 |
| TPGVAADLSHIETR                       | P08249 | 0.00040096 | n +28.03 Da,             | 1531.664618 | 2 | 747.8992 | 132704000 | 121545000 |
| SVELPETHQMLR                         | Q07417 | 0.0202946  | n +34.06 Da,             | 1533.229264 | 3 | 489.9261 | 119394000 | 107293000 |
| TPGVAADLSHIETR                       | P08249 | 0          | n +34.06 Da,             | 1534.39868  | 3 | 498.9349 | 1.159E+09 | 1.07E+09  |
| GIVPDIAVGTKR                         | P17225 | 0          | n +34.06 Da,K +34.06 Da, | 1535.398652 | 3 | 427.9343 | 63170200  | 56130500  |
| TNKETTIQGLDGLSER                     | Q91Y97 | 0          | n +28.03 Da,K +28.03 Da, | 1536.014932 | 2 | 909.4832 | 317132000 | 348412992 |
| PGVTVKDVNQEFVR                       | Q9CZ8  | 0          | n +17.03 Da,K +34.06 Da, | 1537.065057 | 3 | 586.6567 | 464571008 | 365920000 |
| TNKETTIQGLDGLSER                     | Q91Y97 | 0          | n +34.06 Da,K +34.06 Da, | 1539.263816 | 3 | 610.6795 | 1.358E+09 | 33680900  |
| DPNVTKTLQFR                          | Q920X1 | 0          | n +28.03 Da,K +28.03 Da, | 1539.690971 | 3 | 458.9298 | 377825984 | 290849984 |
| TFIAIKPDGVQR                         | P15532 | 0.00040096 | n +34.06 Da,K +34.06 Da, | 1542.508272 | 3 | 470.6302 | 97343296  | 521052992 |
| AQNLKDLAGR                           | O35129 | 0.00040096 | n +42.03 Da,K +34.06 Da, | 1547.137919 | 3 | 580.3352 | 32412200  | 64832000  |
| TTKAPAAIGPYSQAVQVDR                  | P52760 | 0          | n +34.06 Da,K +34.06 Da, | 1550.527665 | 3 | 677.0409 | 787945024 | 897100992 |
| VAFPPQKVMPPQAR                       | Q3U422 | 0.00040096 | n +34.06 Da,K +34.06 Da, | 1550.762284 | 3 | 541.3144 | 208804000 | 187420000 |
| IQALSDSEEEHDSAWDGR                   | Q91VU6 | 0          | n +34.06 Da,             | 1554.786262 | 3 | 691.6612 | 1.38E+09  | 1.168E+09 |
| SKVALVYQGMNEPPGAR                    | P56480 | 0.02423263 | n +28.03 Da,K +28.03 Da, | 1555.750845 | 3 | 625.0081 | 331812992 | 273281984 |
| KIQGGSVVEMQGDDEMTR                   | O88844 | 0          | n +42.03 Da,K +28.03 Da, | 1556.242098 | 3 | 645.6601 | 995486016 | 553793024 |
| AAPSPSGGGGGGGGTPGPIGPPASGHPAVSSMQGKR | P47809 | 0          | n +42.03 Da,K +28.03 Da, | 1556.551859 | 3 | 1103.874 | 14392500  | 10471300  |
| EIAQDFKTDLR                          | P02301 | 0          | n +28.03 Da,K +28.03 Da, | 1557.333644 | 3 | 462.2606 | 142720992 | 115388000 |
| AEDIKTKIKNY                          | P56391 | 0.0202946  | n +42.03 Da,K +34.06 Da, | 1560.86428  | 3 | 483.6181 | 8.212E+09 | 3.555E+09 |
| PDGLAEDIDKGEVSAR                     | P58252 | 0          | n +14.02 Da,n +28.03 Da, | 1561.890502 | 3 | 571.9541 | 403288000 | 394215008 |
| SMKSVGEVMAIGR                        | Q8C196 | 0.03245117 | n +34.06 Da,K +34.06 Da, | 1562.201537 | 3 | 474.26   | 314096992 | 291505984 |
| SVLGEADQKGSVLVAPDR                   | Q8BGQ7 | 0.04544059 | n +28.03 Da,K +28.03 Da, | 1562.802408 | 3 | 595.6376 | 171926000 | 215272992 |
| FPEDTLEQKAGSVGR                      | Q8VCW8 | 0.00189681 | n +28.03 Da,K +28.03 Da, | 1563.834594 | 3 | 563.9654 | 403513984 | 314984000 |
| DIGATVHELRSR                         | P16331 | 0          | n +28.03 Da,             | 1564.748695 | 3 | 409.2226 | 137876000 | 104637000 |
| DPDAANYKDISDVER                      | Q9D819 | 0.00440852 | n +28.03 Da,K +28.03 Da, | 1570.942731 | 3 | 588.619  | 657281984 | 674584000 |
| TTKAPAAIGPYSQAVQVDR                  | P52760 | 0          | n +34.06 Da,K +34.06 Da, | 1575.848427 | 3 | 680.0553 | 46889200  | 338433984 |
| ADEEKLPPGWKR                         | Q9QUR7 | 0.04937519 | n +42.03 Da,K +28.03 Da, | 1576.032954 | 3 | 550.6272 | 39689400  | 68979200  |

|                         |        |            |                                      |             |   |          |           |           |
|-------------------------|--------|------------|--------------------------------------|-------------|---|----------|-----------|-----------|
| PGVTVKDVNQEFVR          | Q9CZX8 | 0          | n +42.03 Da,K +34.06 Da,             | 1576.709419 | 3 | 595.9998 | 9.515E+09 | 8.465E+09 |
| PEGAKNIQVDSPYDISR       | Q91YQ5 | 0.00040096 | n +14.02 Da,K +28.03 Da,             | 1577.149226 | 3 | 644.3382 | 356568992 | 156368992 |
| TKAPAAIGPYSQAVQVDR      | P52760 | 0          | n +34.06 Da,K +34.06 Da,             | 1581.52335  | 3 | 643.3593 | 1.345E+09 | 1.396E+09 |
| VLASEPEIPK GIR          | Q9WTP6 | 0          | n +34.06 Da,                         | 1585.266933 | 3 | 491.9803 | 373184992 | 3.162E+09 |
| VLASEPEIPK GIR          | Q9WTP6 | 0          | n +28.03 Da,                         | 1588.218035 | 3 | 488.9647 | 641257984 | 13544000  |
| PPGIEPSPDKMLQGR         | P24270 | 0          | n +14.02 Da,n +28.03 Da,             | 1588.481436 | 3 | 555.2996 | 3.188E+09 | 957419008 |
| QVAMNPTNTVFDADR         | P63017 | 0          | n +28.03 Da,K +28.03 Da,             | 1588.911959 | 3 | 582.315  | 1.014E+09 | 5.739E+09 |
| SMKSVGEVMAIGR           | Q8C196 | 0.03245117 | n +34.06 Da,K +34.06 Da,             | 1593.088169 | 3 | 474.2728 | 37649300  | 28417700  |
| QKTGTAEMSSILEER         | Q03265 | 0          | n +34.06 Da,K +34.06 Da,             | 1595.157953 | 2 | 868.4477 | 636590016 | 386800992 |
| SSDTSPAVVTTPPPPSMPHKER  | Q9QYB5 | 0          | n +42.03 Da,n +28.03 Da,             | 1595.817099 | 3 | 796.7332 | 1.498E+09 | 1.394E+09 |
| TENKGPVNIITPSR          | Q9CXF0 | 0.00152323 | n +34.06 Da,K +34.06 Da,             | 1597.078199 | 3 | 569.6859 | 305035008 | 110429000 |
| FTPTKAPYDPRWMLAGR       | E9Q4Z2 | 0.00152323 | n +28.03 Da,K +28.03 Da,             | 1597.829247 | 3 | 685.3573 | 128049000 | 74118200  |
| TENKGPVNIITPSR          | Q9CXF0 | 0.00152323 | n +34.06 Da,K +34.06 Da,             | 1598.149681 | 3 | 565.6655 | 211959008 | 172099008 |
| APPLTLDGIKDR            | Q9CR21 | 0          | n +28.03 Da,                         | 1599.520033 | 3 | 451.2695 | 103284000 | 151268992 |
| SVVFPHDEPLAGR           | Q99LB7 | 0          | n +34.06 Da,                         | 1601.620719 | 3 | 484.5926 | 248135008 | 189027008 |
| SAELALGENNEVLKSGR       | P05202 | 0          | n +34.06 Da,K +34.06 Da,             | 1606.158692 | 3 | 615.0014 | 875811968 | 843846976 |
| PINPTYEATNAMYHR         | Q9WU79 | 0          | n +17.03 Da,                         | 1606.892957 | 3 | 597.9547 | 44575500  | 32102500  |
| LGNVTAGKDG VANVSIEDR    | P08228 | 0          | n +34.06 Da,K +34.06 Da,             | 1606.980573 | 3 | 661.7073 | 622408000 | 654640000 |
| PSKGPLQSVQVFGR          | P14131 | 0.00040096 | n +14.02 Da,K +28.03 Da,             | 1607.415224 | 3 | 514.6315 | 147836992 | 105790000 |
| PVPALPVKVEPR            | Q9D1H6 | 0.00078339 | n +14.02 Da,K +28.03 Da,             | 1608.891531 | 3 | 448.6184 | 309767008 | 263106000 |
| NVVLVGLSQDRVVPYHSAR     | Q6NS59 | 0.01883053 | n +17.03 Da,                         | 1609.703188 | 3 | 726.697  | 3.241E+09 | 2.978E+09 |
| LGNVTAGKDG VANVSIEDR    | P08228 | 0.00406654 | n +28.03 Da,K +28.03 Da,             | 1609.727214 | 3 | 657.6876 | 819692032 | 849582016 |
| AEEEVAKLEKH             | Q810B6 | 0.00040096 | n +42.03 Da,n +28.03 Da,K +28.03 Da, | 1612.259513 | 3 | 460.9171 | 111082000 | 93894000  |
| AQNLKDLAGR              | O35129 | 0.00040096 | n +42.03 Da,K +34.06 Da,             | 1613.280474 | 2 | 578.3276 | 1.16E+10  | 9.908E+09 |
| TIPAALQAQESTEGPGTGDPRR  | Q9DBG1 | 0          | n +34.06 Da,                         | 1617.035766 | 3 | 803.4109 | 919326016 | 905208000 |
| ATSKVALVYGQMNPPGAR      | P56480 | 0          | n +34.06 Da,K +34.06 Da,             | 1618.303308 | 3 | 682.3671 | 194772000 | 179579008 |
| ATIPAALQAQESTEGPGTGDPRR | Q9DBG1 | 0          | n +28.03 Da,                         | 1621.082346 | 3 | 827.0892 | 2.202E+09 | 2.621E+09 |
| SQAEFDKAAEEVKR          | P31786 | 0          | n +42.03 Da,K +28.03 Da,             | 1621.795656 | 3 | 565.2763 | 228518000 | 6.122E+09 |
| GDSASKVISAEALPGR        | Q9D6Y7 | 0          | n +34.06 Da,K +34.06 Da,             | 1622.22193  | 2 | 871.9674 | 176452992 | 156672992 |
| PSKTNVSGGAIALGHPLGGSGSR | Q8BWT1 | 0          | n +14.02 Da,K +28.03 Da,             | 1624.705864 | 3 | 721.3991 | 188146000 | 731739008 |
| PEGAKNIQVDSPYDISR       | Q91YQ5 | 0.00040096 | n +14.02 Da,K +28.03 Da,             | 1625.157129 | 3 | 642.3349 | 276625984 | 236284000 |
| TLKGLNSDSVTEETLR        | Q8C196 | 0          | n +34.06 Da,K +34.06 Da,             | 1627.006902 | 3 | 606.9985 | 4.872E+09 | 4.206E+09 |
| SGKEEIEAAVEAAR          | Q8BH00 | 0          | n +34.06 Da,K +34.06 Da,             | 1630.920038 | 2 | 758.4034 | 327017984 | 275183008 |
| SSMKSVGEVMAIGR          | Q8C196 | 0          | n +28.03 Da,K +28.03 Da,             | 1632.937811 | 3 | 503.2706 | 1.339E+09 | 1.086E+09 |
| SSTQFNKGPSYGLSAEVKNR    | Q08093 | 0          | n +42.03 Da,K +28.03 Da,             | 1633.692143 | 3 | 756.7258 | 1.316E+09 | 933872000 |
| ADEEKLPPGWEKR           | Q9QUR7 | 0.04937519 | n +42.03 Da,K +28.03 Da,             | 1635.694792 | 3 | 551.6264 | 152626000 | 214923008 |
| VVVGD LVEVKGGDR         | Q6PIE5 | 0.00040096 | n +28.03 Da,                         | 1636.603058 | 3 | 499.9597 | 325259008 | 297576000 |
| SQAEFDKAAEEVKR          | P31786 | 0          | n +42.03 Da,K +34.06 Da,             | 1637.21593  | 2 | 853.4409 | 627104000 | 541638016 |
| GPTTPEADKIFLER          | P26443 | 0.0051039  | n +34.06 Da,K +34.06 Da,             | 1640.906871 | 3 | 543.9648 | 726944000 | 1.154E+09 |
| LLLPGELAKH              | P10853 | 0.00337838 | n +28.03 Da,K +28.03 Da,             | 1641.286757 | 3 | 382.9129 | 119731000 | 114276000 |

|                      |        |            |                                      |             |   |          |           |           |
|----------------------|--------|------------|--------------------------------------|-------------|---|----------|-----------|-----------|
| PVLLTEAPLNPKANR      | P60710 | 0          | n +17.03 Da,K +34.06 Da,             | 1642.084502 | 3 | 561.0119 | 695043008 | 2.887E+09 |
| SASMYQNEKEVGLAIR     | P70694 | 0.03847357 | n +28.03 Da,K +28.03 Da,             | 1643.237592 | 3 | 617.9923 | 2.379E+09 | 2.478E+09 |
| VLSGEDKSNIAAW        | P01942 | 0.00152323 | n +28.03 Da,K +28.03 Da,             | 1643.37167  | 3 | 534.6352 | 1.113E+09 | 324435008 |
| PVLLTEAPLNPKANR      | P60710 | 0          | n +14.02 Da,K +28.03 Da,             | 1644.158798 | 3 | 559.0022 | 267566000 | 55085200  |
| ETGVDLTKNMALQR       | P38647 | 0          | n +28.03 Da,K +28.03 Da,             | 1645.17488  | 3 | 580.9835 | 59575600  | 70011200  |
| GDGTITTKELGTVMR      | P62204 | 0          | n +28.03 Da,K +28.03 Da,             | 1647.010026 | 3 | 545.6314 | 1.936E+09 | 1.765E+09 |
| SDAPPLTLDGIKDR       | Q9CR21 | 0.00040096 | n +34.06 Da,K +34.06 Da,             | 1647.949138 | 3 | 521.6355 | 391716000 | 2.667E+09 |
| MNQEKLAKLQAQVR       | Q64152 | 0          | n +42.03 Da,K +28.03 Da,             | 1649.319935 | 3 | 585.6722 | 1.421E+09 | 787758016 |
| PNVTIILKEPVR         | Q99PL5 | 0          | n +17.03 Da,K +34.06 Da,             | 1653.054478 | 3 | 476.3123 | 1.618E+09 | 4.917E+09 |
| GLPKGPEQGGLPEVETR    | Q7TQK5 | 0.00040096 | n +34.06 Da,K +34.06 Da,             | 1654.270636 | 3 | 607.3359 | 2.738E+09 | 2.355E+09 |
| PSKGPLQSVQVFGR       | P14131 | 0          | n +17.03 Da,K +34.06 Da,             | 1655.549696 | 2 | 774.4604 | 1.115E+09 | 4.166E+09 |
| PSKGPLQSVQVFGR       | P14131 | 0          | n +17.03 Da,K +34.06 Da,             | 1656.810128 | 3 | 516.6428 | 1.283E+10 | 4.673E+10 |
| SDAPPLTLDGIKDR       | Q9CR21 | 0          | n +34.06 Da,K +34.06 Da,             | 1656.914648 | 2 | 777.4308 | 1.185E+09 | 1.112E+09 |
| TEATKAIADAGFR        | P70694 | 0          | n +28.03 Da,K +28.03 Da,             | 1656.931052 | 3 | 483.6086 | 2.327E+09 | 2.057E+09 |
| ATLQSESEVKVDGEQKLSKN | Q99MN1 | 0          | n +42.03 Da,K +34.06 Da,             | 1658.827725 | 3 | 743.7378 | 702419968 | 570977984 |
| MDALEKGAVTSGPAPRGR   | Q99KK2 | 0.04779412 | n +42.03 Da,K +28.03 Da,             | 1659.033049 | 3 | 628.3319 | 2.968E+09 | 2.308E+09 |
| MRPQQAPVSGKVFQIR     | Q91W53 | 0.00040096 | n +42.03 Da,K +28.03 Da,             | 1660.299744 | 3 | 638.0253 | 479177984 | 575904000 |
| PLPLPEYGGKVR         | Q9CQQ7 | 0          | n +14.02 Da,K +28.03 Da,             | 1663.316911 | 3 | 487.9375 | 232351008 | 1.801E+09 |
| PDGLAEDIDKGEVSAR     | P58252 | 0.00040096 | n +14.02 Da,n +28.03 Da,             | 1665.705863 | 3 | 570.9619 | 101335000 | 569961024 |
| PSKGPLQSVQVFGR       | P14131 | 0.00040096 | n +14.02 Da,K +28.03 Da,             | 1666.271663 | 3 | 513.6224 | 197004992 | 1.631E+10 |
| VEPVDASGTEKAFEPATGR  | Q9JLJ2 | 0.00040096 | n +28.03 Da,K +28.03 Da,             | 1666.499604 | 3 | 673.0129 | 242540992 | 280760000 |
| GDSASKVISAEEALPGR    | Q9D6Y7 | 0          | n +28.03 Da,K +28.03 Da,             | 1668.208833 | 2 | 868.9337 | 554577024 | 518796000 |
| ASLVPLKEK            | P56135 | 0.01201923 | n +42.03 Da,K +28.03 Da,             | 1669.308771 | 2 | 541.8451 | 2.424E+09 | 2.085E+09 |
| SSGALLPKPQMR         | Q9CPQ1 | 0.00152323 | n +42.03 Da,K +34.06 Da,             | 1670.692731 | 2 | 677.8793 | 8.836E+09 | 7.855E+09 |
| MLGSGFKAER           | Q9CX00 | 0.0177139  | n +42.03 Da,K +28.03 Da,             | 1671.225253 | 3 | 580.2958 | 75464400  | 34725100  |
| ASLVPLKEKKL          | P56135 | 0.0485348  | n +42.03 Da,n +28.03 Da,K +28.03 Da, | 1672.616845 | 3 | 451.3023 | 352388992 | 227803008 |
| MEGYHKPDQKQLQAL      | P40142 | 0.00040096 | n +42.03 Da,K +34.06 Da,             | 1673.094547 | 3 | 632.6757 | 452871008 | 206171008 |
| VEPVDASGTEKAFEPATGR  | Q9JLJ2 | 0.00040096 | n +28.03 Da,K +28.03 Da,             | 1674.435482 | 3 | 673.0121 | 273300000 | 229792992 |
| AGKPVLYHYFDGR        | P30115 | 0          | n +42.03 Da,K +28.03 Da,             | 1678.434647 | 3 | 477.2593 | 3.506E+10 | 3.83E+10  |
| LGNVTAGKDGVANVSIEDR  | P08228 | 0          | n +34.06 Da,K +34.06 Da,             | 1679.745596 | 3 | 659.6901 | 515891008 | 277841984 |
| SQAEFDKAAEEVNR       | P31786 | 0          | n +42.03 Da,K +28.03 Da,             | 1685.368628 | 3 | 568.2908 | 4.747E+09 | 3.166E+11 |
| GTPPGGSITKVLIANR     | Q99MR8 | 0          | n +34.06 Da,                         | 1685.572242 | 3 | 550.6772 | 1.676E+09 | 1.337E+10 |
| AGKPVLYHYFDGR        | P30115 | 0          | n +42.03 Da,K +28.03 Da,             | 1685.682668 | 2 | 715.3826 | 8.992E+09 | 8.219E+09 |
| GTPPGGSITKVLIANR     | Q99MR8 | 0          | n +28.03 Da,                         | 1685.979451 | 2 | 820.9884 | 557564992 | 438815008 |
| SDAPPLTLDGIKDR       | Q9CR21 | 0          | n +28.03 Da,K +28.03 Da,             | 1686.285255 | 3 | 518.6226 | 1.713E+09 | 1.579E+09 |
| PIGDKLNIMTAGSR       | P24270 | 0          | n +14.02 Da,K +28.03 Da,             | 1686.603443 | 3 | 505.6166 | 72246896  | 56569300  |
| ATSASSHLNKGKQMYM     | P15105 | 0          | n +42.03 Da,n +28.03 Da,K +28.03 Da, | 1687.15993  | 3 | 655.6686 | 2.27E+09  | 3.134E+09 |
| MNQEKLAKLQAQVR       | Q64152 | 0          | n +42.03 Da,K +28.03 Da,             | 1687.548706 | 3 | 585.6688 | 1.805E+10 | 1.965E+10 |
| PVVLTKFVEGAR         | Q8C196 | 0          | n +17.03 Da,K +34.06 Da,             | 1688.175702 | 3 | 455.2889 | 288203008 | 1.452E+09 |
| MNQEKLAKLQAQVR       | Q64152 | 0          | n +42.03 Da,K +34.06 Da,             | 1688.547585 | 2 | 878      | 2.669E+09 | 2.416E+09 |

|                          |        |            |                          |             |   |          |           |           |
|--------------------------|--------|------------|--------------------------|-------------|---|----------|-----------|-----------|
| PVLTKFVEGAR              | Q8C196 | 0          | n +17.03 Da,K +34.06 Da, | 1688.736364 | 2 | 679.413  | 1.72E+09  | 224704000 |
| SVESIMATEDR              | Q8C196 | 0.00605629 | n +28.03 Da,             | 1691.86562  | 2 | 633.3054 | 89644200  | 82946200  |
| MNQEKLAKLQAQVR           | Q64152 | 0          | n +42.03 Da,K +28.03 Da, | 1693.473305 | 2 | 874.9711 | 169972992 | 278124000 |
| SQAQFDKAAEEVKR           | P31786 | 0          | n +42.03 Da,K +34.06 Da, | 1699.725949 | 3 | 572.313  | 1.171E+10 | 1.149E+11 |
| SQAQFDKAAEEVKR           | P31786 | 0          | n +42.03 Da,K +34.06 Da, | 1705.091048 | 2 | 857.9645 | 4.152E+09 | 4.136E+10 |
| PIGDKLNIMTAGSR           | P24270 | 0          | n +14.02 Da,K +28.03 Da, | 1706.316362 | 3 | 503.6113 | 21700500  | 71908704  |
| GIQVVGDDLTVTNPKR         | P17182 | 0          | n +34.06 Da,K +34.06 Da, | 1706.688771 | 3 | 590.0026 | 572636032 | 674788992 |
| PIGDKLNIMTAGSR           | P24270 | 0          | n +17.03 Da,K +34.06 Da, | 1713.121302 | 3 | 507.6276 | 517623008 | 3.082E+09 |
| PNQGGKDITEEIMSGAR        | Q6NZJ6 | 0.01449764 | n +17.03 Da,K +34.06 Da, | 1714.707753 | 3 | 618.6561 | 34667500  | 803281024 |
| AMNVVFESEDMKR            | Q8C196 | 0          | n +28.03 Da,K +28.03 Da, | 1717.16907  | 3 | 537.9333 | 248516000 | 232167008 |
| AGEESVMNLDKLR            | Q8K2B3 | 0          | n +34.06 Da,K +34.06 Da, | 1718.364074 | 3 | 506.6041 | 312056992 | 157020992 |
| PIGDKLNIMTAGSR           | P24270 | 0          | n +14.02 Da,K +28.03 Da, | 1720.004758 | 2 | 757.921  | 846793024 | 625174976 |
| SQAQFDKAAEEVKR           | P31786 | 0          | n +42.03 Da,K +34.06 Da, | 1724.956533 | 2 | 853.4405 | 1.367E+10 | 1.332E+10 |
| MLGSGFKAER               | Q9CX00 | 0.0177139  | n +42.03 Da,K +28.03 Da, | 1726.175667 | 2 | 583.3041 | 981529984 | 967387008 |
| TVQPLAETGLQLSKR          | Q8OXL6 | 0.00152323 | n +28.03 Da,K +28.03 Da, | 1727.373258 | 3 | 566.3382 | 1.615E+09 | 1.215E+09 |
| TTPEADKIFLER             | P26443 | 0.00406654 | n +34.06 Da,K +34.06 Da, | 1727.541039 | 3 | 496.6298 | 1.13E+09  | 1.17E+09  |
| TQVGKEVALMVQER           | Q9DBF1 | 0          | n +34.06 Da,K +34.06 Da, | 1729.000498 | 3 | 548.6434 | 224864992 | 175900992 |
| PDSWDKDVYPEPPSR          | Q9DCS9 | 0          | n +14.02 Da,K +28.03 Da, | 1731.845931 | 3 | 609.6256 | 467484000 | 4.78E+09  |
| PDSWDKDVYPEPPSR          | Q9DCS9 | 0          | n +17.03 Da,K +34.06 Da, | 1733.029084 | 3 | 612.6382 | 7.886E+09 | 1.999E+10 |
| TASSVLLHTGQKMPL          | Q9JII6 | 0          | n +28.03 Da,K +28.03 Da, | 1743.013242 | 3 | 542.3053 | 7.171E+09 | 6.681E+09 |
| TQDIHLGVNESLDTAR         | P11725 | 0          | n +34.06 Da,             | 1746.014856 | 3 | 633.3254 | 535120000 | 574161984 |
| GELKPTAPPIFTGR           | O35632 | 0.01795213 | n +28.03 Da,K +28.03 Da, | 1746.038045 | 3 | 513.9561 | 1.289E+09 | 2.583E+09 |
| ATDELASKLSR              | Q9D8Y0 | 0.00040096 | n +42.03 Da,K +28.03 Da, | 1746.258343 | 2 | 630.8431 | 811955008 | 757388992 |
| SQAQFDKAAEEVKR           | P31786 | 0          | n +42.03 Da,K +34.06 Da, | 1746.259412 | 3 | 569.2987 | 1.125E+11 | 8.673E+10 |
| TASSVLLHTGQKMPL          | Q9JII6 | 0          | n +34.06 Da,K +34.06 Da, | 1746.279774 | 2 | 819.9649 | 213388000 | 163787008 |
| AGLNSLEAVKR              | Q6IRU2 | 0.00040096 | n +42.03 Da,n +34.06 Da, | 1746.354012 | 2 | 614.3552 | 920030016 | 797915008 |
| TASSVLLHTGQKMPL          | Q9JII6 | 0.00040096 | n +34.06 Da,K +34.06 Da, | 1747.33699  | 3 | 549.9953 | 274240992 | 2.364E+09 |
| TTKDPESEHPSVTLFR         | Q99JW2 | 0          | n +42.03 Da,K +28.03 Da, | 1747.794014 | 3 | 638.6579 | 7.233E+10 | 8.236E+10 |
| PAGILNGKLVAQIR           | Q922D8 | 0.00040096 | n +14.02 Da,K +28.03 Da, | 1748.227028 | 3 | 526.9946 | 269480000 | 210166000 |
| TTKDPESEHPSVTLFR         | Q99JW2 | 0          | n +42.03 Da,K +28.03 Da, | 1748.729945 | 2 | 957.4822 | 271784992 | 319680000 |
| PVAIALDTKGPEIR           | P53657 | 0          | n +14.02 Da,K +28.03 Da, | 1749.538577 | 3 | 507.9688 | 297808000 | 257336000 |
| AAAAYEHLKLH              | Q9EP69 | 0          | n +42.03 Da,K +34.06 Da, | 1751.14681  | 2 | 647.3502 | 1.027E+09 | 871681024 |
| SQAQFDKAAEEVKR           | P31786 | 0          | n +42.03 Da,K +34.06 Da, | 1751.546506 | 3 | 572.3124 | 30297900  | 255316000 |
| AAAAYEHLKLH              | Q9EP69 | 0          | n +42.03 Da,K +28.03 Da, | 1751.554744 | 3 | 431.9031 | 6.053E+09 | 5.721E+09 |
| PLPLPEYGGKVR             | Q9CQQ7 | 0          | n +14.02 Da,K +28.03 Da, | 1752.286169 | 3 | 488.9587 | 4.072E+10 | 2.46E+09  |
| KATIPAALQAQESTEGPGTQDRPR | Q9DBG1 | 0          | n +28.03 Da,K +28.03 Da, | 1753.144257 | 3 | 879.1191 | 4.838E+09 | 3.072E+09 |
| KATIPAALQAQESTEGPGTQDRPR | Q9DBG1 | 0          | n +28.03 Da,K +28.03 Da, | 1758.328074 | 4 | 659.5912 | 939422016 | 649131008 |
| MILEYTDSSYDEKR           | P10649 | 0          | n +28.03 Da,K +28.03 Da, | 1759.073056 | 3 | 602.6249 | 5.686E+09 | 4.994E+09 |
| PLPLPEYGGKVR             | Q9CQQ7 | 0.00040096 | n +17.03 Da,K +34.06 Da, | 1760.532382 | 2 | 735.9477 | 875019008 | 2.221E+09 |
| PLPLPEYGGKVR             | Q9CQQ7 | 0          | n +17.03 Da,K +34.06 Da, | 1762.195043 | 3 | 490.9678 | 3.567E+10 | 9.615E+10 |



|                         |        |            |                          |             |   |          |           |           |
|-------------------------|--------|------------|--------------------------|-------------|---|----------|-----------|-----------|
| LHTVYQSVELPETH          | Q07417 | 0          | n +28.03 Da,             | 1762.58951  | 3 | 560.958  | 8.28E+09  | 6.418E+09 |
| SVFLPAPKANNVLR          | Q9CQW3 | 0.01260647 | n +28.03 Da,K +28.03 Da, | 1763.928112 | 3 | 527.9868 | 368455008 | 271456000 |
| PLPPLPEYGGKVR           | Q9CQQ7 | 0.00040096 | n +17.03 Da,K +34.06 Da, | 1766.257489 | 2 | 732.9323 | 393164992 | 241311008 |
| AGKPVLYHFDGR            | P30115 | 0          | n +42.03 Da,K +34.06 Da, | 1770.255981 | 2 | 715.3836 | 2.098E+09 | 1.695E+09 |
| GPPTPEADKIFLER          | P26443 | 0          | n +28.03 Da,K +28.03 Da, | 1770.504835 | 3 | 543.9663 | 1.587E+09 | 2.2E+09   |
| QLAAAAEIDEEPVS KAKQSR   | P70670 | 0.00605629 | n +28.03 Da,K +28.03 Da, | 1771.635743 | 2 | 739.383  | 82304800  | 84149000  |
| AGKPVLYHFDGR            | P30115 | 0          | n +42.03 Da,K +28.03 Da, | 1772.565302 | 3 | 477.2582 | 1.293E+10 | 1.398E+10 |
| PDSWDKDVYPEPPSR         | Q9DCS9 | 0          | n +17.03 Da,K +34.06 Da, | 1772.752013 | 3 | 610.6276 | 1.91E+09  | 1.273E+09 |
| PNQGGKDITEEIMSGAR       | Q6NZJ6 | 0.01449764 | n +17.03 Da,K +34.06 Da, | 1773.046211 | 3 | 616.6428 | 131919000 | 231715008 |
| VNRQCSSGLQAVANIAGGIR    | Q8VCHO | 0.01823003 | n +42.03 Da,             | 1774.244496 | 3 | 703.0144 | 52583900  | 69743800  |
| LVVDNNGSGMCKAGFAGDDAPR  | P60710 | 0.01035197 | n +14.02 Da,K +28.03 Da, | 1780.50119  | 3 | 727.0275 | 2.105E+09 | 2.217E+09 |
| GPWTPAAVEHPEAVR         | O35490 | 0          | n +28.03 Da,             | 1783.230302 | 3 | 591.969  | 1.215E+09 | 1.033E+09 |
| AGIAIKLAKDR             | O08529 | 0.00040096 | n +42.03 Da,K +28.03 Da, | 1785.734536 | 3 | 418.6027 | 1.162E+09 | 880544000 |
| TTQDIHLGVNESLTD TAR     | P11725 | 0          | n +28.03 Da,             | 1789.735543 | 3 | 667.0079 | 1.218E+09 | 1.129E+09 |
| GPPTPEADKIFLER          | P26443 | 0          | n +34.06 Da,K +34.06 Da, | 1792.335126 | 3 | 546.9791 | 689032000 | 1.566E+09 |
| LAGTNKETTIIQGLDGLSER    | Q91Y97 | 0          | n +28.03 Da,K +28.03 Da, | 1794.781053 | 3 | 687.0399 | 891561024 | 287134016 |
| PYTGKVGAEADADGIDMAYR    | Q8BGQ7 | 0.00040096 | n +14.02 Da,K +28.03 Da, | 1795.475751 | 3 | 690.9979 | 4.441E+09 | 4.407E+09 |
| SDAPPLTDGKIDR           | Q9CR21 | 0          | n +34.06 Da,K +34.06 Da, | 1797.240238 | 3 | 521.6392 | 2.804E+09 | 2.369E+10 |
| AGIQVVGDDLTVTNPKR       | P17182 | 0          | n +34.06 Da,K +34.06 Da, | 1797.812997 | 3 | 613.6827 | 393305984 | 412673984 |
| PNIVLFGSSHQDLSQR        | Q9CS42 | 0          | n +14.02 Da,             | 1799.320957 | 3 | 633.6616 | 2.303E+09 | 1.708E+09 |
| SDAPPLTDGKIDR           | Q9CR21 | 0          | n +34.06 Da,K +34.06 Da, | 1800.137092 | 2 | 781.9554 | 207656000 | 1.609E+09 |
| AVPIAQKSEPOQSLSNEALMR   | Q9JIQ3 | 0          | n +34.06 Da,K +34.06 Da, | 1800.565495 | 3 | 742.4044 | 2.624E+09 | 2.453E+09 |
| GPPTPEADKIFLER          | P26443 | 0          | n +28.03 Da,K +28.03 Da, | 1801.131426 | 2 | 815.4455 | 1.873E+09 | 1.881E+09 |
| SDAPPLTDGKIDR           | Q9CR21 | 0          | n +28.03 Da,K +28.03 Da, | 1804.039926 | 2 | 777.4298 | 3.861E+09 | 2.991E+09 |
| ASNIFGPTEEPKNIPKR       | Q6PGH2 | 0          | n +42.03 Da,K +28.03 Da, | 1806.309633 | 3 | 666.0354 | 19034600  | 16843500  |
| ASGADSKGDDLSTAILKQK     | Q01853 | 0          | n +42.03 Da,K +34.06 Da, | 1806.764673 | 2 | 1016.053 | 112608000 | 95472704  |
| GVKIMGTSPLQIDR          | Q8C196 | 0          | n +34.06 Da,K +34.06 Da, | 1808.014607 | 3 | 524.3033 | 1.46E+09  | 1.806E+09 |
| GPPTPEADKIFLER          | P26443 | 0          | n +34.06 Da,K +34.06 Da, | 1811.694423 | 3 | 547.9874 | 4.191E+09 | 33986500  |
| GPWTPAAVEHPEAVR         | O35490 | 0.00040096 | n +34.06 Da,             | 1811.879793 | 3 | 592.9808 | 49196700  | 100558000 |
| ATPEASGSGEKVEGSEPSVTYYR | Q9CQX2 | 0          | n +42.03 Da,K +34.06 Da, | 1815.258157 | 2 | 1236.082 | 439436000 | 368529984 |
| ATPEASGSGEKVEGSEPSVTYYR | Q9CQX2 | 0          | n +42.03 Da,K +28.03 Da, | 1816.437092 | 3 | 824.3899 | 2.212E+09 | 2.031E+09 |
| SGEVPPNINIKR            | Q99JR1 | 0          | n +42.03 Da,K +28.03 Da, | 1818.490142 | 2 | 810.442  | 839048000 | 696668032 |
| SAMNVVFESEMKR           | Q8C196 | 0          | n +28.03 Da,K +28.03 Da, | 1820.393265 | 3 | 564.9504 | 418044992 | 393347008 |
| SQAEFDKAAEEVKR          | P31786 | 0.00040096 | n +42.03 Da,K +28.03 Da, | 1823.247662 | 3 | 568.286  | 261180000 | 190342000 |
| MKVFTGGLPAEGR           | Q91Z53 | 0.00040096 | n +28.03 Da,K +28.03 Da, | 1826.817643 | 3 | 518.9575 | 1.999E+09 | 2.016E+09 |
| TSVATKKTEQGPPSSEYIFER   | P29758 | 0          | n +28.03 Da,K +28.03 Da, | 1826.900349 | 3 | 813.7509 | 1.113E+09 | 855025984 |
| EHPVLLTEAPLNPKANR       | P60710 | 0          | n +28.03 Da,K +28.03 Da, | 1830.074083 | 3 | 652.352  | 1.199E+09 | 1.149E+09 |
| SAGIQVVGDDLTVTNPKR      | P17182 | 0          | n +28.03 Da,K +28.03 Da, | 1830.638957 | 3 | 642.6915 | 2.786E+09 | 2.282E+09 |
| TVESTSLYNKVA AQGEVVR    | Q8CGC7 | 0          | n +28.03 Da,             | 1830.782187 | 3 | 703.0513 | 89554400  | 108021000 |
| SIAIDTIINQKR            | Q03265 | 0.00040096 | n +28.03 Da,K +28.03 Da, | 1836.217731 | 3 | 476.6243 | 531667008 | 382672000 |

|                          |        |            |                                      |             |   |          |           |           |
|--------------------------|--------|------------|--------------------------------------|-------------|---|----------|-----------|-----------|
| SSLVMHPIYTYGSEEQR        | Q60759 | 0          | n +28.03 Da,                         | 1837.705396 | 3 | 675.6628 | 355068000 | 367928992 |
| MQIFVKTLTGK              | P0CG49 | 0          | n +34.06 Da,K +34.06 Da,             | 1837.830259 | 3 | 450.6123 | 323200000 | 211460992 |
| MGDSASKVISAEALPGR        | Q9D6Y7 | 0          | n +28.03 Da,K +28.03 Da,             | 1838.008486 | 3 | 625.328  | 2.708E+09 | 2.295E+09 |
| ASGADSKGDDLSTAILKQK      | Q01853 | 0          | n +42.03 Da,K +28.03 Da,             | 1838.840676 | 3 | 677.7037 | 3.182E+09 | 1.827E+09 |
| YQPPTVVPGGDLAKVQR        | P05213 | 0          | n +34.06 Da,K +34.06 Da,             | 1840.457153 | 3 | 627.6902 | 1.501E+09 | 1.721E+09 |
| MEAKGGTVKAASGFNATEDAQTLR | P97429 | 0          | n +42.03 Da,K +28.03 Da,             | 1841.501777 | 3 | 851.0985 | 1.038E+09 | 1.015E+09 |
| MYTITKGPSKLVQAR          | Q9CQB2 | 0          | n +42.03 Da,n +28.03 Da,K +28.03 Da, | 1842.323875 | 3 | 596.6742 | 320787008 | 653617984 |
| MKVFTVGPLPAEGR           | Q91Z53 | 0          | n +34.06 Da,K +34.06 Da,             | 1843.108577 | 2 | 779.4445 | 1.016E+09 | 732518016 |
| MKVFTVGPLPAEGR           | Q91Z53 | 0.01002073 | n +34.06 Da,K +34.06 Da,             | 1843.200901 | 3 | 522.9802 | 3.162E+09 | 1.873E+10 |
| SVVKSEDYAFPTYADR         | P19783 | 0.01945269 | n +28.03 Da,K +28.03 Da,             | 1843.447017 | 3 | 635.3189 | 626862016 | 169539008 |
| SDAPPLTLDGKDR            | Q9CR21 | 0          | n +28.03 Da,K +28.03 Da,             | 1847.442052 | 3 | 516.6174 | 17078500  | 373535008 |
| ALSDADVQKQIKHM           | P50518 | 0          | n +42.03 Da,K +28.03 Da,             | 1849.33734  | 3 | 561.3022 | 2.37E+09  | 2.179E+09 |
| SVVKSEDYAFPTYADR         | P19783 | 0.01945269 | n +28.03 Da,K +28.03 Da,             | 1850.322036 | 3 | 635.3189 | 1.579E+09 | 1.543E+09 |
| GSVVKSEDYAFPTYADR        | P19783 | 0.00300865 | n +28.03 Da,K +28.03 Da,             | 1851.982069 | 3 | 654.3261 | 993427968 | 199695008 |
| TGAVFAQDKAIVQEATR        | Q8CHT0 | 0          | n +28.03 Da,K +28.03 Da,             | 1855.130165 | 3 | 620.9981 | 221128000 | 267824992 |
| SGYQQAASEHGLVVIAPDTSR    | Q9R0P3 | 0          | n +34.06 Da,                         | 1855.53242  | 3 | 771.0607 | 407190016 | 332209984 |
| GSVVKSEDYAFPTYADR        | P19783 | 0          | n +34.06 Da,K +34.06 Da,             | 1855.794288 | 3 | 657.342  | 4.676E+09 | 2.667E+10 |
| MEAKGGTVKAASGFNATEDAQTLR | P97429 | 0          | n +42.03 Da,K +28.03 Da,             | 1856.080865 | 3 | 850.103  | 110442000 | 2.44E+09  |
| VVITDPEKLDQIR            | P11983 | 0          | n +34.06 Da,K +34.06 Da,             | 1856.33564  | 3 | 531.9946 | 120653000 | 59130600  |
| MEAKGGTVKAASGFNATEDAQTLR | P97429 | 0          | n +42.03 Da,K +34.06 Da,             | 1857.69524  | 3 | 854.1142 | 400612992 | 2.977E+09 |
| TQPEPDIVGLDSGHIR         | P52196 | 0          | n +34.06 Da,                         | 1859.936536 | 3 | 587.9756 | 2.122E+09 | 2.001E+09 |
| MKVFTVGPLPAEGR           | Q91Z53 | 0.00040096 | n +28.03 Da,K +28.03 Da,             | 1862.293089 | 3 | 519.9662 | 124748000 | 97273400  |
| APAGILNGKLVSAQIR         | Q922D8 | 0          | n +34.06 Da,K +34.06 Da,             | 1863.861096 | 3 | 555.3456 | 7.022E+09 | 7.581E+09 |
| MPGVTVKDQVNNQEFVR        | Q9CZX8 | 0.00040096 | n +28.03 Da,K +28.03 Da,             | 1864.175831 | 3 | 635.0085 | 883475968 | 893158016 |
| APNVLASEPEIPKQIR         | Q9WTP6 | 0          | n +34.06 Da,K +34.06 Da,             | 1864.59388  | 3 | 587.0295 | 484945984 | 309903008 |
| AGDQPGADLGLITPQAKER      | Q9EQ20 | 0          | n +34.06 Da,K +34.06 Da,             | 1865.149575 | 3 | 697.3757 | 619969024 | 450871008 |
| PNLPIQFSGSKATPIR         | Q6RUT7 | 0.0485348  | n +14.02 Da,K +28.03 Da,             | 1867.73754  | 3 | 590.0175 | 847574976 | 351000992 |
| IIAVDINKDKF              | P00329 | 0.02394047 | n +28.03 Da,K +28.03 Da,             | 1868.421225 | 3 | 453.9463 | 1.015E+09 | 514305984 |
| APAGILNGKLVSAQIR         | Q922D8 | 0.00040096 | n +34.06 Da,K +34.06 Da,             | 1871.136081 | 2 | 832.5145 | 906614016 | 704454976 |
| APNVLASEPEIPKQIR         | Q9WTP6 | 0.00040096 | n +28.03 Da,K +28.03 Da,             | 1871.898247 | 3 | 583.0081 | 206296992 | 156044000 |
| EHPVLLTEAPLNPKANR        | P60710 | 0          | n +28.03 Da,K +28.03 Da,             | 1874.632444 | 3 | 652.3611 | 1.001E+09 | 703038016 |
| MQPASAKWYDR              | Q9R0Q7 | 0          | n +42.03 Da,K +34.06 Da,             | 1874.876264 | 2 | 711.8449 | 4.705E+09 | 4.438E+09 |
| SAGFLQASASDVVVHGR        | Q8VCH0 | 0          | n +28.03 Da,                         | 1875.774384 | 3 | 609.3075 | 962809984 | 917494976 |
| VGVKPVGSDPDFQPELSGAGSR   | Q8CDN6 | 0          | n +34.06 Da,K +34.06 Da,             | 1876.716889 | 3 | 755.4098 | 489657984 | 4.278E+09 |
| IMDPNIVGNEHYDVAR         | P56480 | 0          | n +28.03 Da,                         | 1876.936245 | 3 | 623.3063 | 590035008 | 1.747E+09 |
| YGTTGGGSITKVLIANR        | Q99MR8 | 0.02367824 | n +28.03 Da,K +28.03 Da,             | 1880.308023 | 3 | 602.0073 | 595772992 | 752316992 |
| AGAESDGGQFTGIKKY         | Q78IK2 | 0          | n +28.03 Da,K +28.03 Da,             | 1884.232119 | 3 | 642.325  | 262356992 | 159228992 |
| HGSVVKSEDYAFPTYADR       | P19783 | 0.01260647 | n +28.03 Da,K +28.03 Da,             | 1885.728938 | 3 | 699.9995 | 236382000 | 191458000 |
| SIVPALEIANHR             | P63038 | 0          | n +28.03 Da,                         | 1886.50343  | 3 | 473.6089 | 2.117E+09 | 1.489E+09 |
| MENQLTKSVEER             | Q9DC50 | 0          | n +42.03 Da,K +28.03 Da,             | 1888.178323 | 2 | 767.3819 | 1.301E+09 | 1.059E+09 |

|                           |        |            |                          |             |   |          |           |           |
|---------------------------|--------|------------|--------------------------|-------------|---|----------|-----------|-----------|
| PNLPIQFSGSKATPIR          | Q6RUT7 | 0.0485348  | n +14.02 Da,K +28.03 Da, | 1889.96497  | 3 | 589.0117 | 20478200  | 115172000 |
| TITSVLPKPALVASR           | Q8C196 | 0          | n +28.03 Da,K +28.03 Da, | 1890.016942 | 3 | 537.0068 | 8.698E+09 | 8.297E+09 |
| AGAESDGGQFQFTGIKKY        | Q78IK2 | 0          | n +28.03 Da,K +28.03 Da, | 1891.175014 | 2 | 965.9992 | 72357200  | 60634000  |
| SLDMKEHPDAEVQKNQVL        | O55060 | 0.00189681 | n +42.03 Da,K +34.06 Da, | 1891.834784 | 3 | 730.0561 | 48284100  | 532964992 |
| DNVGFNVKNVSVKDIR          | P62631 | 0.00605629 | n +28.03 Da,K +28.03 Da, | 1892.303752 | 3 | 630.0151 | 413863008 | 138462000 |
| TPEQVAMATVTALHR           | Q91Y97 | 0          | n +28.03 Da,             | 1892.496613 | 3 | 550.629  | 2.224E+09 | 3.051E+09 |
| PLAGTNKETTIQGLDGLSER      | Q91Y97 | 0          | n +17.03 Da,K +34.06 Da, | 1893.849494 | 3 | 716.7276 | 70999104  | 351934016 |
| MENAHTKTVEEVLGH           | O55143 | 0          | n +42.03 Da,K +28.03 Da, | 1896.119641 | 3 | 587.957  | 8293430   | 102294000 |
| VGVKPVGSDPDFQPELSGAGSR    | Q8CDN6 | 0          | n +34.06 Da,K +34.06 Da, | 1897.071304 | 3 | 752.3936 | 215950000 | 127004000 |
| YIATPIFSKMAH              | P10649 | 0          | n +28.03 Da,K +28.03 Da, | 1898.356668 | 3 | 478.932  | 618563968 | 520606016 |
| PLPPLPEYGGKVR             | Q9CQQ7 | 0.00475494 | n +14.02 Da,K +28.03 Da, | 1898.633763 | 3 | 488.9573 | 106317000 | 41108300  |
| PIKIPVGPETLGR             | P56480 | 0          | n +14.02 Da,K +28.03 Da, | 1900.367484 | 3 | 470.6086 | 1.57E+09  | 1.225E+09 |
| SGSAMNVVFEDEMCR           | Q8C196 | 0          | n +34.06 Da,K +34.06 Da, | 1900.669879 | 3 | 614.9619 | 723992000 | 659814976 |
| MENAHTKTVEEVLGH           | O55143 | 0          | n +42.03 Da,K +28.03 Da, | 1900.929921 | 3 | 588.9576 | 638316992 | 510476992 |
| PLAGTNKETTIQGLDGLSER      | Q91Y97 | 0          | n +14.02 Da,K +28.03 Da, | 1903.947877 | 3 | 714.7179 | 1.388E+09 | 370353984 |
| AGAESDGGQFQFTGIKKY        | Q78IK2 | 0          | n +28.03 Da,K +28.03 Da, | 1904.60061  | 3 | 643.3338 | 1.864E+09 | 8.829E+09 |
| AGAESDGGQFQFTGIKKY        | Q78IK2 | 0          | n +34.06 Da,K +34.06 Da, | 1905.617787 | 3 | 649.3613 | 6.152E+09 | 1.931E+10 |
| PLPPLPEYGGKVR             | Q9CQQ7 | 0.00475494 | n +14.02 Da,K +28.03 Da, | 1906.506705 | 3 | 488.9568 | 524216992 | 1.785E+09 |
| TASAGIQVVGDDLTVTNPKR      | P17182 | 0          | n +34.06 Da,K +34.06 Da, | 1907.54137  | 3 | 700.0549 | 2.36E+09  | 1.863E+09 |
| AVPPTYADLGKSAR            | Q60932 | 0          | n +42.03 Da,K +28.03 Da, | 1909.487884 | 2 | 758.4117 | 1.036E+10 | 9.756E+09 |
| PLPPLPEYGGKVR             | Q9CQQ7 | 0          | n +28.03 Da,K +28.03 Da, | 1911.907856 | 3 | 493.6293 | 1.693E+09 | 1.568E+09 |
| SNLKPDEVEHCTGAGTGSPLLEEVR | Q8VC52 | 0          | n +42.03 Da,K +28.03 Da, | 1913.981821 | 3 | 884.7571 | 379672000 | 379502016 |
| SAGFLQASASDVVVVHGR        | Q8VCHO | 0          | n +28.03 Da,             | 1914.251828 | 3 | 609.9954 | 1.334E+10 | 9.208E+09 |
| TNTMTLGDIVYKR             | P12710 | 0          | n +34.06 Da,K +34.06 Da, | 1916.929086 | 3 | 527.3079 | 6269580   | 5517570   |
| AHGSVVKSEDYAFPTYADR       | P19783 | 0          | n +28.03 Da,K +28.03 Da, | 1919.839021 | 2 | 1085.016 | 475079008 | 361014016 |
| APNVLASEPEIPKGR           | Q9WTP6 | 0          | n +34.06 Da,K +34.06 Da, | 1920.128732 | 4 | 585.5264 | 10602000  | 7858180   |
| APIKIPVGPETLGR            | P56480 | 0.00040096 | n +34.06 Da,K +34.06 Da, | 1921.750371 | 3 | 501.9802 | 511606016 | 505543008 |
| AHGSVVKSEDYAFPTYADR       | P19783 | 0          | n +28.03 Da,K +28.03 Da, | 1922.065126 | 3 | 723.6798 | 1.915E+10 | 1.401E+10 |
| AVPSLGLKTDVIPGR           | P00405 | 0          | n +28.03 Da,K +28.03 Da, | 1924.475794 | 3 | 514.6348 | 136590000 | 138268000 |
| AEPSAPESKHKSSLNSSPWSGL    | Q3TDQ1 | 0.00040096 | n +42.03 Da,K +28.03 Da, | 1924.733118 | 3 | 798.7357 | 499689984 | 504424992 |
| PNLPIQFSGSKATPIR          | Q6RUT7 | 0.0485348  | n +14.02 Da,K +28.03 Da, | 1924.866754 | 3 | 585.9984 | 696353984 | 618920000 |
| YGTTPGGSSITKVLIANR        | Q99MR8 | 0.02367824 | n +28.03 Da,K +28.03 Da, | 1929.514341 | 3 | 602.017  | 62237000  | 49613100  |
| IGSSMKSVGEVMAIGR          | Q8C196 | 0          | n +28.03 Da,K +28.03 Da, | 1932.567384 | 3 | 559.9728 | 2.488E+09 | 2.837E+09 |
| VGVKPVGSDPDFQPELSGAGSR    | Q8CDN6 | 0          | n +28.03 Da,K +28.03 Da, | 1933.657366 | 3 | 748.3727 | 50103900  | 770804992 |
| AGKKVCIVGSGNWSIAIK        | P13707 | 0          | n +42.03 Da,K +28.03 Da, | 1937.958069 | 3 | 677.0471 | 481720992 | 359031008 |
| YTMGDAPDFDR               | P10649 | 0.01823003 | n +28.03 Da,             | 1938.862226 | 2 | 658.2849 | 383500000 | 163310000 |
| LVPSEIVGKR                | P62082 | 0          | n +34.06 Da,             | 1939.440417 | 3 | 434.271  | 294792992 | 259216000 |
| TMTLGDIVYKR               | P12710 | 0          | n +28.03 Da,             | 1943.810112 | 3 | 451.5915 | 103238000 | 103023000 |
| SGAPIKIPVGPETLGR          | P56480 | 0          | n +34.06 Da,K +34.06 Da, | 1946.692872 | 4 | 554.0142 | 155010000 | 130404000 |
| APNVLASEPEIPKGR           | Q9WTP6 | 0          | n +34.06 Da,K +34.06 Da, | 1946.753429 | 3 | 583.0097 | 1.926E+09 | 1.64E+09  |

|                          |        |            |                          |             |   |          |           |           |
|--------------------------|--------|------------|--------------------------|-------------|---|----------|-----------|-----------|
| ANHAPFETDISTLTR          | Q9QXD6 | 0.00264151 | n +42.03 Da,             | 1948.908705 | 3 | 572.2844 | 111615000 | 46124600  |
| APNVLASEPEIPKGR          | Q9WTP6 | 0          | n +34.06 Da,K +34.06 Da, | 1949.197583 | 4 | 437.5081 | 1.429E+09 | 1.078E+09 |
| SAKAISEQTGKELLYK         | Q91V92 | 0.0449369  | n +42.03 Da,K +28.03 Da, | 1949.440262 | 3 | 631.3641 | 362484992 | 220695008 |
| FKSQMEFTYHTCR            | P51676 | 0.02394047 | n +17.03 Da,K +34.06 Da, | 1949.820079 | 3 | 595.9553 | 338431008 | 370092000 |
| IIAVDINKDKF              | P00329 | 0.00040096 | n +28.03 Da,K +28.03 Da, | 1949.887679 | 3 | 453.9468 | 304211008 | 245674000 |
| SSPAQPAVPAPLADLKIQHTK    | P24549 | 0.00300865 | n +42.03 Da,K +28.03 Da, | 1952.852748 | 3 | 756.4306 | 128310000 | 61417200  |
| VKETTYDVLGVKPN           | P63037 | 0.04385423 | n +34.06 Da,K +34.06 Da, | 1954.908714 | 3 | 609.0304 | 625568000 | 3.299E+09 |
| VKETTYDVLGVKPN           | P63037 | 0          | n +34.06 Da,K +34.06 Da, | 1955.438141 | 2 | 905.5033 | 324419008 | 255060000 |
| SDMIVAAIQAEKNR           | P10922 | 0          | n +34.06 Da,K +34.06 Da, | 1956.315615 | 3 | 538.6497 | 271036992 | 403576992 |
| IGSSMKSVGEVMAIGR         | Q8C196 | 0          | n +28.03 Da,K +28.03 Da, | 1956.485028 | 3 | 558.9673 | 357457984 | 2.03E+09  |
| GNPIGDKLNIMTAGSR         | P24270 | 0.00776562 | n +28.03 Da,K +28.03 Da, | 1956.593217 | 3 | 564.6439 | 1.471E+10 | 1.608E+10 |
| TNTMTLGDIVYKR            | P12710 | 0          | n +28.03 Da,K +28.03 Da, | 1958.785778 | 3 | 523.2887 | 430846016 | 320891008 |
| PSNMPPGIEPSPDKMLQGR      | P24270 | 0          | n +17.03 Da,K +34.06 Da, | 1959.061872 | 3 | 700.3648 | 2.147E+09 | 7.339E+09 |
| GAPIKIPVGPETLGR          | P56480 | 0          | n +28.03 Da,K +28.03 Da, | 1961.663647 | 3 | 520.9885 | 540291008 | 420451008 |
| AAPAKGENLSLVVHGPGDIR     | Q64442 | 0.00040096 | n +42.03 Da,K +34.06 Da, | 1963.929688 | 3 | 689.3671 | 184230000 | 515891008 |
| ATEGGKEMNEIKQFTTR        | Q3UWE6 | 0.00040096 | n +42.03 Da,K +34.06 Da, | 1968.696656 | 3 | 732.7041 | 967737984 | 891521024 |
| SAPPKETSIGILSAAVSR       | Q8C165 | 0.00040096 | n +34.06 Da,K +34.06 Da, | 1969.469213 | 3 | 614.0236 | 213944992 | 232083008 |
| ASKPTLNEVVIVSAIR         | Q8QZT1 | 0.02367824 | n +28.03 Da,K +28.03 Da, | 1971.212176 | 3 | 583.0095 | 469568992 | 32494000  |
| AHGSVVKSEDYAFPTYADR      | P19783 | 0          | n +42.03 Da,K +28.03 Da, | 1971.331249 | 3 | 728.3513 | 8.903E+09 | 7.987E+09 |
| TSIAIDIINQKR             | Q03265 | 0          | n +28.03 Da,K +28.03 Da, | 1975.681036 | 3 | 510.307  | 4.664E+09 | 4.553E+09 |
| AFKDTGKTPVEPEVAIHR       | P60867 | 0          | n +42.03 Da,K +28.03 Da, | 1977.745213 | 3 | 698.3539 | 1.837E+09 | 1.579E+09 |
| SAGFLQASASDVVVVHGR       | Q8VCHO | 0          | n +34.06 Da,             | 1982.473885 | 3 | 612.0055 | 2.371E+09 | 158450000 |
| TVYQSVELPETHQMLR         | Q07417 | 0          | n +34.06 Da,             | 1983.517847 | 3 | 653.6723 | 634817984 | 557539968 |
| SGAPIKIPVGPETLGR         | P56480 | 0          | n +34.06 Da,K +34.06 Da, | 1987.751575 | 3 | 553.0148 | 922905024 | 6.753E+09 |
| ANHAPFETDISTLTR          | Q9QXD6 | 0.00264151 | n +42.03 Da,             | 1989.202483 | 3 | 567.2742 | 16116400  | 63445100  |
| GAPLAGTNKETTIQGLDGLSER   | Q91Y97 | 0          | n +34.06 Da,K +34.06 Da, | 1994.331307 | 3 | 762.0757 | 881148992 | 819208000 |
| SLEIIGAPFSKQQR           | Q61176 | 0.00839161 | n +28.03 Da,K +28.03 Da, | 1994.462689 | 3 | 552.6555 | 745435008 | 4.373E+10 |
| TNTMTLGDIVYKR            | P12710 | 0          | n +34.06 Da,K +34.06 Da, | 1995.544433 | 3 | 527.324  | 64242700  | 92350304  |
| SGAPIKIPVGPETLGR         | P56480 | 0          | n +34.06 Da,K +34.06 Da, | 1997.671592 | 3 | 549.9985 | 352979008 | 310902016 |
| PDLNPNPKDPSVTQVTR        | Q8K021 | 0.00040096 | n +17.03 Da,K +34.06 Da, | 1999.344596 | 3 | 657.3523 | 102383000 | 57098700  |
| ASKPTLNEVVIVSAIR         | Q8QZT1 | 0.02367824 | n +28.03 Da,K +28.03 Da, | 2002.802926 | 3 | 585.0241 | 1.883E+09 | 1.554E+09 |
| TAKNAVITVPAYFNDSSQR      | P38647 | 0.00040096 | n +34.06 Da,K +34.06 Da, | 2005.039823 | 3 | 684.3705 | 825428992 | 613198976 |
| GGAPLAGTNKETTIQGLDGLSER  | Q91Y97 | 0          | n +28.03 Da,             | 2007.900811 | 3 | 781.0836 | 252984000 | 172479008 |
| VNAGDQPGADLGPLITPQAKER   | Q9EQ20 | 0          | n +28.03 Da,             | 2009.729448 | 3 | 768.4171 | 12328300  | 12438400  |
| AHGSVVKSEDYAFPTYADR      | P19783 | 0          | n +42.03 Da,K +28.03 Da, | 2011.863994 | 3 | 727.3427 | 282796000 | 1.002E+09 |
| TGGGNPIGDKLNIMTAGSR      | P24270 | 0.0123119  | n +28.03 Da,             | 2012.357476 | 3 | 639.0074 | 750766016 | 5.232E+09 |
| TTGGGNPIGDKLNIMTAGSR     | P24270 | 0          | n +28.03 Da,K +28.03 Da, | 2018.291894 | 3 | 672.6899 | 2.642E+09 | 1.685E+09 |
| SAGFLQASASDVVVVHGR       | Q8VCHO | 0          | n +28.03 Da,             | 2018.641024 | 2 | 914.49   | 5.915E+09 | 4.305E+09 |
| QGGAPLAGTNKETTIQGLDGLSER | Q91Y97 | 0          | n +28.03 Da,K +28.03 Da, | 2020.495021 | 3 | 823.7707 | 116283000 | 81268704  |
| AHGSVVKSEDYAFPTYADR      | P19783 | 0          | n +42.03 Da,K +34.06 Da, | 2028.921482 | 3 | 729.3527 | 9817840   | 16635200  |

|                         |        |            |                          |             |   |          |           |           |
|-------------------------|--------|------------|--------------------------|-------------|---|----------|-----------|-----------|
| SPLKLEVDPNIQAVR         | P11679 | 0          | n +34.06 Da,K +34.06 Da, | 2029.298394 | 3 | 579.0089 | 1.776E+09 | 1.427E+09 |
| SAGFLQASASDVVVVHGR      | Q8VCHO | 0          | n +34.06 Da,             | 2030.053079 | 3 | 609.9957 | 1.368E+11 | 1.022E+11 |
| RRMELWLR                | Q8VHE6 | 0.03978862 | n +42.03 Da,             | 2033.985149 | 2 | 601.3325 | 1.848E+09 | 1.922E+09 |
| DPSPKKEESYSDWGLR        | Q99P27 | 0          | n +34.06 Da,K +34.06 Da, | 2043.025388 | 3 | 650.9745 | 500839008 | 480420992 |
| DDEVVDVDTVEEDLGKSR      | P08113 | 0          | n +28.03 Da,K +28.03 Da, | 2045.485143 | 3 | 678.6566 | 999918976 | 1.001E+09 |
| LVLEVAQHLGESTVR         | P56480 | 0          | n +28.03 Da,             | 2045.819939 | 3 | 559.314  | 26710500  | 53744900  |
| AFKDTGKTPVEPEVAIHR      | P60867 | 0          | n +42.03 Da,K +28.03 Da, | 2047.455183 | 3 | 698.3748 | 2.228E+10 | 2.154E+10 |
| TGIKAVDSLPIGR           | Q03265 | 0          | n +34.06 Da,K +34.06 Da, | 2047.482277 | 2 | 741.4557 | 1.858E+09 | 1.594E+09 |
| TGIKAVDSLPIGR           | Q03265 | 0          | n +34.06 Da,K +34.06 Da, | 2050.134414 | 3 | 494.6401 | 2.314E+09 | 1.707E+09 |
| PMQVIGALIGKQEGR         | O88545 | 0          | n +14.02 Da,K +28.03 Da, | 2052.861922 | 3 | 546.9836 | 1.491E+09 | 1.191E+09 |
| AAPAKGENLSLVVHGPDIR     | Q64442 | 0          | n +42.03 Da,K +28.03 Da, | 2053.044854 | 3 | 691.0508 | 1.945E+12 | 1.82E+12  |
| AAPAKGENLSLVVHGPDIR     | Q64442 | 0          | n +42.03 Da,K +28.03 Da, | 2053.455059 | 2 | 1036.069 | 6.688E+10 | 6.285E+10 |
| TFVAELKGLDIPAR          | P08249 | 0.00901838 | n +34.06 Da,K +34.06 Da, | 2074.359343 | 3 | 491.621  | 3.321E+09 | 3.212E+09 |
| LVLEVAQHLGESTVR         | P56480 | 0.00040096 | n +42.03 Da,             | 2080.622083 | 2 | 843.9624 | 2.104E+09 | 2.044E+09 |
| DLTDPAPATTF AHLDATTVLSR | P56480 | 0.00578662 | n +28.03 Da,             | 2084.67342  | 3 | 781.0776 | 1.887E+09 | 1.253E+09 |
| LNPANVPTHLMLVCCVLR      | Q6A0A9 | 0.02966507 | n +34.06 Da,             | 2085.66573  | 3 | 711.3653 | 29603000  | 32771000  |
| QLQEELRQEHERELQAR       | Q61043 | 0.00901838 | n +34.06 Da,             | 2088.862719 | 3 | 742.7254 | 1.873E+10 | 1.818E+10 |
| TTFAHLDATTVLSR          | P56480 | 0          | n +34.06 Da,             | 2090.47163  | 3 | 520.9513 | 2.679E+09 | 2.545E+09 |
| VALEQQSPDIAQC VHLDR     | Q91X83 | 0          | n +34.06 Da,             | 2095.962264 | 3 | 703.0233 | 868729984 | 1.729E+09 |
| PTQTISQGAIEKVKDATR      | Q8C196 | 0          | n +14.02 Da,K +28.03 Da, | 2096.117694 | 3 | 671.7037 | 1.157E+09 | 942809024 |
| PSNMPPGIEPSDKMLQGR      | P24270 | 0          | n +17.03 Da,K +34.06 Da, | 2097.915403 | 3 | 698.3504 | 842190976 | 588220992 |
| PMFIVNTNVPR             | P34884 | 0          | n +17.03 Da,             | 2102.668375 | 2 | 651.3557 | 4.861E+09 | 3.781E+09 |
| GTTITSVLPK PALVASR      | Q8C196 | 0.00776562 | n +34.06 Da,             | 2105.689596 | 3 | 592.715  | 217923008 | 135159008 |
| DPSPKKEESYSDWGLR        | Q99P27 | 0          | n +34.06 Da,K +34.06 Da, | 2106.4434   | 3 | 654.9896 | 1.046E+09 | 757739008 |
| QALLDLHALGSAR           | P29391 | 0.00040096 | n +28.03 Da,             | 2109.868853 | 3 | 464.9369 | 100138000 | 44456400  |
| VALEQQSPDIAQC VHLDR     | Q91X83 | 0          | n +34.06 Da,             | 2110.084607 | 3 | 705.037  | 124729000 | 153172000 |
| ALKAADTIGYPVMIR         | Q8C196 | 0          | n +28.03 Da,K +28.03 Da, | 2111.08341  | 3 | 558.9925 | 3E+09     | 3.948E+09 |
| VILPGAAYTEKSATYVNTTEGR  | Q91VD9 | 0.00475494 | n +28.03 Da,K +28.03 Da, | 2111.649991 | 3 | 766.0783 | 96456000  | 109362000 |
| PLENLEEEGLPKNPDLR       | Q99JI4 | 0          | n +17.03 Da,K +34.06 Da, | 2113.359436 | 3 | 669.0246 | 937848000 | 1.082E+09 |
| APEEHPVLLTEAPLNPKANR    | P60710 | 0          | n +28.03 Da,K +28.03 Da, | 2114.807846 | 3 | 751.4057 | 18997300  | 12727800  |
| GTTITSVLPK PALVASR      | Q8C196 | 0          | n +28.03 Da,             | 2114.815955 | 3 | 586.6837 | 286320000 | 141644992 |
| MHTEAAEVLLER            | Q8QZS1 | 0          | n +42.03 Da,             | 2122.096352 | 2 | 720.8607 | 862065984 | 606313024 |
| PSLDYMVTKIPR            | Q8C196 | 0          | n +17.03 Da,K +34.06 Da, | 2124.678409 | 3 | 489.9533 | 557380992 | 2.178E+09 |
| FINLVPSNLPHEATR         | Q05421 | 0          | n +28.03 Da,             | 2124.810942 | 3 | 579.3211 | 270028000 | 579932032 |
| ALKAADTIGYPVMIR         | Q8C196 | 0          | n +34.06 Da,K +34.06 Da, | 2125.04026  | 3 | 562.0081 | 32280000  | 380780992 |
| FINLVPSNLPHEATR         | Q05421 | 0          | n +28.03 Da,             | 2127.002181 | 3 | 577.3108 | 115905000 | 105317000 |
| PSNMPPGIEPSDKMLQGR      | P24270 | 0          | n +14.02 Da,K +28.03 Da, | 2129.121397 | 3 | 697.7075 | 488566016 | 57191300  |
| TEHVPSMVL PALER         | Q8VCX1 | 0.00040096 | n +34.06 Da,             | 2132.894996 | 2 | 538.2925 | 77811200  | 31225300  |
| AAPAKGENLSLVVHGPDIR     | Q64442 | 0          | n +42.03 Da,K +28.03 Da, | 2132.933461 | 3 | 691.0485 | 1.202E+11 | 9.913E+10 |
| PSDATNSSNLDALSSNTSLKLR  | Q8K273 | 0          | n +14.02 Da,n +28.03 Da, | 2134.766256 | 3 | 778.3839 | 279886016 | 172232000 |

|                             |        |            |                                      |             |   |          |           |           |
|-----------------------------|--------|------------|--------------------------------------|-------------|---|----------|-----------|-----------|
| GDSLSTEDLVNLGKGR            | P35492 | 0          | n +34.06 Da,K +34.06 Da,             | 2134.949827 | 3 | 572.976  | 280047008 | 261084992 |
| PLENLEEEGLPKNPDLR           | Q99J14 | 0          | n +17.03 Da,K +34.06 Da,             | 2137.575524 | 3 | 671.0352 | 6.346E+09 | 2.025E+10 |
| STITEVALQSGKGTVLSR          | Q8BJ03 | 0          | n +28.03 Da,K +28.03 Da,             | 2137.638783 | 3 | 696.3953 | 1.156E+09 | 944692992 |
| ALGPDGQLLHSDAFPPR           | P97328 | 0.0051039  | n +28.03 Da,                         | 2141.599583 | 3 | 638.3326 | 27467400  | 31706400  |
| YFEDKENIYILLEYSRR           | P53351 | 0.03870162 | n +28.03 Da,K +28.03 Da,             | 2141.677346 | 3 | 821.0752 | 113664000 | 59815500  |
| IIGIDINKDKF                 | P28474 | 0          | n +28.03 Da,K +28.03 Da,             | 2142.33254  | 3 | 453.9493 | 351024000 | 180770000 |
| ASKPTLNEVVIVSAIR            | Q8QZT1 | 0.00406654 | n +34.06 Da,K +34.06 Da,             | 2144.078476 | 3 | 585.025  | 1.612E+09 | 1.145E+09 |
| SLSILPAALGKPV               | Q9DB60 | 0.00040096 | n +34.06 Da,K +34.06 Da,             | 2144.155914 | 3 | 497.3298 | 249962000 | 237560000 |
| STPQSQFQESSPVWKLGR          | Q9D1I5 | 0          | n +34.06 Da,K +34.06 Da,             | 2147.906829 | 3 | 709.7075 | 241478000 | 887331968 |
| PELITHILDGSPENR             | Q9R0H0 | 0          | n +14.02 Da,                         | 2148.418485 | 3 | 602.652  | 409511008 | 301099008 |
| VILPGAAYTEKSATYVNTGR        | Q91VD9 | 0.00475494 | n +28.03 Da,K +28.03 Da,             | 2150.862443 | 3 | 762.0619 | 37999500  | 20151500  |
| VKLIESKEAFQEAL              | P10639 | 0.0051039  | n +34.06 Da,K +34.06 Da,             | 2150.95284  | 2 | 844.9942 | 345487008 | 231896992 |
| ELISNASDALDKIR              | P08113 | 0          | n +28.03 Da,K +28.03 Da,             | 2152.868567 | 3 | 534.302  | 594254016 | 477904992 |
| PSLDYMVTKIPR                | Q8C196 | 0          | n +17.03 Da,K +34.06 Da,             | 2154.226403 | 3 | 490.9571 | 635899008 | 448556000 |
| TDVKVPDFSDYR                | Q9CR68 | 0          | n +34.06 Da,K +34.06 Da,             | 2155.259901 | 3 | 499.9241 | 618209984 | 583942016 |
| MEQVNELKEKGNKAL             | Q60864 | 0.00040096 | n +42.03 Da,n +34.06 Da,K +34.06 Da, | 2157.170588 | 2 | 929.0115 | 476529984 | 310080992 |
| PIMVDDIMR                   | Q8WURO | 0.00078339 | n +14.02 Da,                         | 2158.503419 | 2 | 552.2832 | 569873984 | 318484000 |
| SLSILPAALGKPV               | Q9DB60 | 0.00040096 | n +28.03 Da,K +28.03 Da,             | 2162.221045 | 3 | 489.3083 | 204271008 | 187516992 |
| SAGFLQASASDVVVVHGR          | Q8VCHO | 0          | n +34.06 Da,                         | 2162.861114 | 3 | 609.9948 | 1.048E+10 | 8.345E+09 |
| PDTPFDFTPENYKR              | Q9D6J6 | 0.04964971 | n +17.03 Da,K +34.06 Da,             | 2168.734749 | 3 | 592.2987 | 108033000 | 257190000 |
| ASKPTLNEVVIVSAIR            | Q8QZT1 | 0.02149837 | n +14.02 Da,K +28.03 Da,             | 2168.857133 | 3 | 580.3533 | 128033000 | 62180600  |
| TVSLHLGVTPSVLR              | O89023 | 0          | n +34.06 Da,                         | 2169.927318 | 3 | 502.9716 | 24767500  | 35154600  |
| SKPTLNEVVIVSAIR             | Q8QZT1 | 0.00040096 | n +34.06 Da,K +34.06 Da,             | 2175.062469 | 3 | 564.3619 | 196716000 | 1.548E+09 |
| ASKPTLNEVVIVSAIR            | Q8QZT1 | 0.02149837 | n +14.02 Da,K +28.03 Da,             | 2176.717554 | 3 | 578.3381 | 14937200  | 124015000 |
| SKPTLNEVVIVSAIR             | Q8QZT1 | 0.00040096 | n +34.06 Da,K +34.06 Da,             | 2176.951101 | 3 | 561.3461 | 450895008 | 309416000 |
| SAGFLQASASDVVVVHGR          | Q8VCHO | 0          | n +28.03 Da,                         | 2178.349647 | 3 | 608.9898 | 73357696  | 1.217E+09 |
| ASKPTLNEVVIVSAIR            | Q8QZT1 | 0.00040096 | n +28.03 Da,K +28.03 Da,             | 2179.518164 | 2 | 877.0317 | 167730000 | 90871104  |
| TEHVPSMVLPALER              | Q8VCX1 | 0.00040096 | n +34.06 Da,                         | 2179.871855 | 3 | 536.2916 | 521167008 | 538241984 |
| PKEEEEEELVDPLTTVR           | P99028 | 0          | n +17.03 Da,K +34.06 Da,             | 2184.373215 | 2 | 1028.029 | 510548000 | 399126016 |
| PMTLGYWNTR                  | P19639 | 0          | n +14.02 Da,                         | 2185.191331 | 2 | 626.8101 | 1.796E+10 | 1.103E+10 |
| ASKPTLNEVVIVSAIR            | Q8QZT1 | 0.02149837 | n +14.02 Da,K +28.03 Da,             | 2187.462711 | 3 | 577.3372 | 262102000 | 331460000 |
| PSTKDFLLQQTMLR              | Q9CPU0 | 0.03931357 | n +14.02 Da,K +28.03 Da,             | 2188.655693 | 3 | 571.9715 | 618694976 | 788593984 |
| ASKPTLNEVVIVSAIR            | Q8QZT1 | 0          | n +28.03 Da,K +28.03 Da,             | 2189.613896 | 3 | 585.0247 | 5.066E+10 | 1.093E+09 |
| ASKPTLNEVVIVSAIR            | Q8QZT1 | 0          | n +34.06 Da,K +34.06 Da,             | 2190.356954 | 3 | 588.0402 | 1.614E+10 | 8.739E+10 |
| AAPAKGENLSLVVHGPDIR         | Q64442 | 0          | n +42.03 Da,K +28.03 Da,             | 2191.267803 | 2 | 1036.068 | 227032992 | 189596000 |
| METASTPEATGTGKYIASTQRPDGTWR | Q8CHP5 | 0          | n +42.03 Da,K +28.03 Da,             | 2192.843644 | 3 | 994.8134 | 3.5E+09   | 3.09E+09  |
| ASKPTLNEVVIVSAIR            | Q8QZT1 | 0.02453988 | n +34.06 Da,K +34.06 Da,             | 2193.29013  | 2 | 881.5561 | 791244032 | 4.317E+09 |
| PEQKGVPTGFVLP               | Q922D8 | 0          | n +17.03 Da,K +34.06 Da,             | 2195.88477  | 3 | 562.6744 | 1.103E+09 | 1.729E+09 |
| AFDGTWKVDR                  | P55050 | 0          | n +42.03 Da,K +28.03 Da,             | 2196.80503  | 2 | 632.8186 | 4.75E+09  | 3.843E+09 |
| APATTFAHLDAATTVLSR          | P56480 | 0          | n +34.06 Da,                         | 2205.548394 | 3 | 602.6704 | 97898400  | 147030000 |

|                        |        |            |                          |             |   |          |           |           |
|------------------------|--------|------------|--------------------------|-------------|---|----------|-----------|-----------|
| PLENLEEEGLPKNPDLR      | Q99JI4 | 0          | n +14.02 Da,K +28.03 Da, | 2206.044784 | 3 | 667.0162 | 232508000 | 360041984 |
| APATTFAHLDATTVLSR      | P56480 | 0          | n +28.03 Da,             | 2206.520809 | 3 | 600.6605 | 1.047E+09 | 367552000 |
| KAPTASSFTRTAQCR        | Q7SIG6 | 0.00744681 | n +42.03 Da,K +34.06 Da, | 2207.634457 | 3 | 620.323  | 286120000 | 184568000 |
| VSQEHPPVLTKFVEGAR      | Q8C196 | 0          | n +28.03 Da,K +28.03 Da, | 2210.560089 | 3 | 649.3384 | 82122800  | 72087504  |
| DDEVVDVDTVEEDLGKSR     | P08113 | 0          | n +34.06 Da,K +34.06 Da, | 2213.489002 | 3 | 681.6719 | 189246000 | 950305984 |
| SSSEEIEVEVPVDRRNL      | QSXG69 | 0.04544059 | n +14.02 Da,             | 2213.955807 | 3 | 743.0522 | 426313984 | 464919008 |
| GSWEVIEGYR             | P26443 | 0.00040096 | n +34.06 Da,             | 2214.078873 | 2 | 612.3073 | 386081984 | 444343008 |
| QKTGTAEMSSILEER        | Q03265 | 0.02246094 | n +28.03 Da,K +28.03 Da, | 2215.752819 | 3 | 578.9565 | 21460300  | 30809700  |
| VSVVLGGDHS LAVGISGH    | Q61176 | 0          | n +28.03 Da,             | 2217.335862 | 3 | 606.996  | 278240992 | 145774000 |
| PQDTFESEFYLDKSR        | P07759 | 0          | n +17.03 Da,K +34.06 Da, | 2218.218419 | 3 | 649.3107 | 1.483E+09 | 1.402E+09 |
| SAGFLQASASDVVVHGR      | Q8VCHO | 0          | n +34.06 Da,             | 2219.454869 | 3 | 612.0056 | 1.477E+09 | 2.184E+09 |
| LIGPKAPLVLEQGLR        | P54869 | 0.00040096 | n +28.03 Da,K +28.03 Da, | 2219.818521 | 3 | 554.0227 | 588502016 | 189303008 |
| DDEVVDVDTVEEDLGKSR     | P08113 | 0          | n +34.06 Da,K +34.06 Da, | 2222.783393 | 2 | 1017.478 | 159878000 | 144288992 |
| SWEVIEGYR              | P26443 | 0.00040096 | n +34.06 Da,             | 2224.104141 | 2 | 583.7957 | 371326016 | 435391008 |
| PAPATTFAHLDATTVLSR     | P56480 | 0          | n +14.02 Da,             | 2226.220987 | 3 | 628.3384 | 967510016 | 735331008 |
| ASKPTLNEVVIVSAIR       | Q8QZT1 | 0          | n +34.06 Da,K +34.06 Da, | 2226.528253 | 3 | 585.0246 | 377281984 | 243894000 |
| VSQEHPPVLTKFVEGAR      | Q8C196 | 0          | n +28.03 Da,K +28.03 Da, | 2229.152252 | 3 | 651.3566 | 1.225E+09 | 1.363E+09 |
| MKVFTGGLPAEGR          | Q91Z53 | 0          | n +42.03 Da,K +28.03 Da, | 2229.531338 | 3 | 786.4161 | 350150016 | 342044992 |
| SAGLAGMGGIQTEKTMQDLNDR | P05784 | 0          | n +34.06 Da,K +34.06 Da, | 2230.816524 | 3 | 826.7358 | 704563968 | 678523008 |
| AVFPWHSR               | Q8BWQ6 | 0.00115785 | n +42.03 Da,             | 2234.145631 | 2 | 519.7559 | 26130500  | 33030900  |
| TILDKVDGVAEPTPESWR     | O35488 | 0.00406654 | n +28.03 Da,K +28.03 Da, | 2235.441838 | 3 | 719.3771 | 220556992 | 299681984 |
| SSPAQPAVPAPLANLKIQHTK  | O35945 | 0          | n +42.03 Da,K +34.06 Da, | 2235.964374 | 3 | 756.1041 | 807571968 | 601131008 |
| DDEVVDVDTVEEDLGKSR     | P08113 | 0          | n +28.03 Da,K +28.03 Da, | 2242.631245 | 3 | 678.6546 | 2.368E+09 | 2.213E+09 |
| IIGGSMDAKGSFPWQAK      | Q61646 | 0          | n +34.06 Da,K +34.06 Da, | 2243.562056 | 3 | 626.3379 | 558401024 | 1.034E+09 |
| IIGGSMDAKGSFPWQAK      | Q61646 | 0          | n +34.06 Da,K +34.06 Da, | 2243.793139 | 3 | 631.3643 | 279296992 | 1.456E+09 |
| LPPPGPSAAAAGSWRPPPLPPR | Q9ERQ3 | 0.02453988 | n +34.06 Da,             | 2244.523102 | 3 | 782.7845 | 1.963E+09 | 1.778E+09 |
| SGLSLSGIVHPELSR        | P50544 | 0          | n +34.06 Da,             | 2248.31405  | 3 | 527.2919 | 626836992 | 527510016 |
| AASKVKQDMPPPGGYGPIDYKR | Q9ERS2 | 0          | n +42.03 Da,K +28.03 Da, | 2248.334608 | 3 | 834.4328 | 364451008 | 154260992 |
| CAATATILDKPEDR         | O35215 | 0          | n +34.06 Da,             | 2252.889613 | 2 | 811.9413 | 1.341E+09 | 1.886E+09 |
| QKTGTAEMSSILEER        | Q03265 | 0.02246094 | n +28.03 Da,K +28.03 Da, | 2260.650144 | 3 | 578.9577 | 4.064E+09 | 7.171E+09 |
| PFVELETNLPASR          | O35215 | 0.0051039  | n +17.03 Da,             | 2264.692601 | 3 | 495.7526 | 198799008 | 146371008 |
| TDLSLSSYDEGQGSKFIR     | Q9JLR9 | 0          | n +28.03 Da,K +28.03 Da, | 2268.59223  | 4 | 687.0162 | 163735008 | 266643008 |
| MKVFTGGLPAEGR          | Q91Z53 | 0          | n +42.03 Da,K +28.03 Da, | 2269.953827 | 2 | 786.4356 | 347652000 | 292952000 |
| QGSPRRNPAILQPWLPESLR   | F6QM68 | 0.00605629 | n +14.02 Da,             | 2278.158508 | 3 | 763.08   | 1.666E+09 | 1.54E+09  |
| NSQLEPDRLRTYLSNLK      | Q99MT2 | 0.00543281 | n +14.02 Da,K +28.03 Da, | 2280.311187 | 2 | 1045.061 | 206003008 | 211282000 |
| SGLSLSGIVHPELSR        | P50544 | 0          | n +28.03 Da,             | 2282.679418 | 3 | 526.2982 | 40705900  | 107935000 |
| ISSGTVLSDYVGGSPSGTGLHR | P70296 | 0          | n +28.03 Da,             | 2284.528085 | 3 | 758.0788 | 1.106E+09 | 3.257E+09 |
| VKVLGTSVESIMATEDR      | Q8C196 | 0.00040096 | n +34.06 Da,K +34.06 Da, | 2286.749442 | 3 | 631.0053 | 96163200  | 91152096  |
| PEVL DITEQALHSR        | P14869 | 0          | n +14.02 Da,             | 2289.28237  | 3 | 541.2899 | 1.428E+09 | 932940992 |
| DTPFDFTPENYKR          | Q9D6J6 | 0.00040096 | n +34.06 Da,K +34.06 Da, | 2291.132618 | 3 | 562.6107 | 12931500  | 16074100  |

|                             |        |            |                          |             |   |          |           |           |
|-----------------------------|--------|------------|--------------------------|-------------|---|----------|-----------|-----------|
| TITNTMTLGDIVYKR             | P12710 | 0          | n +28.03 Da,K +28.03 Da, | 2297.628632 | 2 | 891.4957 | 248200000 | 191978000 |
| TDLSLSSYDEGQGSKFIR          | Q9JLR9 | 0          | n +28.03 Da,K +28.03 Da, | 2298.911595 | 3 | 685.0149 | 683601024 | 670971008 |
| PAVLGFEGSANKIGVGVVR         | Q8BWU5 | 0          | n +17.03 Da,K +34.06 Da, | 2299.235318 | 3 | 640.0487 | 155884000 | 655728000 |
| PPANVQLFQEVKQSQSEEDMVGR     | Q00519 | 0          | n +17.03 Da,K +34.06 Da, | 2299.437409 | 3 | 866.4351 | 390032992 | 354355008 |
| VPPVQVSPLIKFGR              | Q06185 | 0          | n +28.03 Da,K +28.03 Da, | 2300.562126 | 3 | 529.6526 | 262812000 | 6.495E+09 |
| PAVLGFEGSANKIGVGVVR         | Q8BWU5 | 0          | n +17.03 Da,K +34.06 Da, | 2301.513436 | 3 | 638.0376 | 270068992 | 197706000 |
| VKVLGTSVESIMATEDR           | Q8C196 | 0.00040096 | n +34.06 Da,K +34.06 Da, | 2307.092266 | 3 | 634.0203 | 111908000 | 894083008 |
| PFVELETNLPASR               | O35215 | 0          | n +14.02 Da,             | 2314.000292 | 2 | 743.8974 | 8.133E+09 | 5.1E+09   |
| PFPDGLAEDIDKGEVSAR          | P58252 | 0          | n +14.02 Da,K +28.03 Da, | 2314.607259 | 3 | 652.3286 | 105697000 | 1.492E+09 |
| PAPATTFAHLDATTVLSR          | P56480 | 0          | n +14.02 Da,             | 2320.157465 | 2 | 942.0033 | 1.896E+09 | 1.692E+09 |
| PSTKDFLLQQTMLR              | Q9CPU0 | 0          | n +17.03 Da,K +34.06 Da, | 2320.699908 | 2 | 863.4911 | 183864992 | 723921024 |
| PSTKDFLLQQTMLR              | Q9CPU0 | 0          | n +17.03 Da,K +34.06 Da, | 2323.198142 | 3 | 575.9968 | 2.106E+09 | 7.158E+09 |
| AKVEQVLSLEPQHELK            | Q9QY76 | 0.00040096 | n +42.03 Da,K +28.03 Da, | 2324.386851 | 3 | 648.714  | 427199008 | 277014016 |
| SSPAQPAVPAPLADLKIQHTK       | P24549 | 0          | n +42.03 Da,K +34.06 Da, | 2325.433955 | 3 | 759.4443 | 416108000 | 4.343E+09 |
| PAPATTFAHLDATTVLSR          | P56480 | 0          | n +14.02 Da,             | 2326.036537 | 3 | 628.3394 | 1.634E+11 | 1.401E+11 |
| DIKMTQSPSSMYASLGER          | P01637 | 0          | n +34.06 Da,K +34.06 Da, | 2329.449018 | 3 | 686.3388 | 356532000 | 803508992 |
| IGVINAPQEVIIISHYR           | P14246 | 0          | n +28.03 Da,             | 2330.069716 | 3 | 612.0046 | 62103000  | 22221900  |
| PFPDGLAEDIDKGEVSAR          | P58252 | 0          | n +14.02 Da,K +28.03 Da, | 2331.428549 | 3 | 653.3333 | 1.043E+10 | 9.462E+09 |
| VKVLGTSVESIMATEDR           | Q8C196 | 0.00040096 | n +34.06 Da,K +34.06 Da, | 2331.998833 | 3 | 635.027  | 38800300  | 8518300   |
| SHQTGIQASEDVKEIFAR          | Q91YR1 | 0          | n +42.03 Da,K +28.03 Da, | 2332.826702 | 3 | 696.0231 | 5.966E+09 | 6.032E+09 |
| PPKTVGIDDLTGEPLIQR          | Q9WTP7 | 0.00040096 | n +17.03 Da,K +34.06 Da, | 2338.273956 | 3 | 664.3775 | 2.262E+09 | 1.464E+09 |
| SHQTGIQASEDVKEIFAR          | Q91YR1 | 0          | n +42.03 Da,K +34.06 Da, | 2339.051286 | 2 | 1043.531 | 186372992 | 153908992 |
| TITNTMTLGDIVYKR             | P12710 | 0          | n +28.03 Da,K +28.03 Da, | 2340.912137 | 3 | 594.6655 | 1.218E+09 | 1.252E+09 |
| VPPVQVSPLIKFGR              | Q06185 | 0          | n +28.03 Da,K +28.03 Da, | 2342.149377 | 3 | 531.6677 | 2.085E+09 | 1.701E+09 |
| SSKPKSLEIIGAPFSKGQPR        | Q61176 | 0          | n +42.03 Da,K +28.03 Da, | 2345.770043 | 3 | 751.7581 | 3.936E+09 | 2.375E+09 |
| GVKVLGTSVESIMATEDR          | Q8C196 | 0.00040096 | n +28.03 Da,K +28.03 Da, | 2346.969061 | 3 | 649.3694 | 637739008 | 509615008 |
| LNQALLDLHALGSAR             | P29391 | 0          | n +34.06 Da,             | 2348.150541 | 3 | 542.6566 | 51001900  | 28191300  |
| SSPAQPAVPAPLADLKIQHTK       | P24549 | 0          | n +42.03 Da,K +28.03 Da, | 2351.463502 | 3 | 756.4306 | 1.269E+09 | 996260992 |
| SAGFLQASASDVVVHGR           | Q8VCHO | 0          | n +28.03 Da,             | 2352.793457 | 3 | 609.9965 | 4.498E+09 | 2.477E+09 |
| SSPAQPAVPAPLADLKIQHTK       | P24549 | 0          | n +42.03 Da,K +28.03 Da, | 2352.818927 | 2 | 1134.14  | 391319008 | 356559008 |
| AAAKKAVLGPLVGAVDQGTSSSTR    | Q64516 | 0          | n +42.03 Da,K +28.03 Da, | 2356.598602 | 3 | 765.7718 | 1.215E+09 | 973382016 |
| SVQSIVPALEIANAHR            | P63038 | 0          | n +34.06 Da,             | 2357.963753 | 3 | 578.3291 | 2.111E+09 | 1.844E+09 |
| PVELVEKLLPR                 | Q9ET01 | 0.00040096 | n +17.03 Da,K +34.06 Da, | 2357.981718 | 3 | 445.6184 | 388128992 | 68042600  |
| SSPAQPAVPAPLADLKIQHTK       | P24549 | 0          | n +42.03 Da,K +28.03 Da, | 2358.526791 | 3 | 753.4052 | 604331008 | 3.159E+10 |
| PLIPIVVEQTGR                | O88696 | 0          | n +17.03 Da,             | 2361.18688  | 2 | 668.4032 | 1.713E+09 | 1.196E+09 |
| IGVINAPQEVIIISHYR           | P14246 | 0          | n +28.03 Da,             | 2361.355306 | 3 | 609.0053 | 401361984 | 407617984 |
| TTGGESLLPEEYEQWKQR          | Q91VA0 | 0          | n +28.03 Da,K +28.03 Da, | 2366.227534 | 3 | 736.3699 | 621942976 | 585875008 |
| TEAVINIAIPEKDVDGLTSVSAGKLAR | Q922D8 | 0.00115785 | n +28.03 Da,K +28.03 Da, | 2368.797918 | 4 | 703.1475 | 96792600  | 42856000  |
| AQNLKDLAGRLPAGPR            | O35129 | 0.01418919 | n +42.03 Da,K +28.03 Da, | 2372.12653  | 3 | 583.0046 | 2.407E+09 | 1.996E+09 |
| SLAPQIKVIAPWR               | P16460 | 0          | n +34.06 Da,K +34.06 Da, | 2373.462591 | 3 | 512.3208 | 380695008 | 283430016 |



|                           |        |            |                                      |             |   |          |           |           |
|---------------------------|--------|------------|--------------------------------------|-------------|---|----------|-----------|-----------|
| TTGGESLLPEEYEQWKQR        | Q91VA0 | 0          | n +34.06 Da,K +34.06 Da,             | 2377.210961 | 3 | 740.3914 | 250928992 | 463855008 |
| SAKAISEQTGKELLYKY         | Q91V92 | 0          | n +42.03 Da,K +34.06 Da,             | 2378.637097 | 2 | 1028.071 | 72840096  | 43641700  |
| AFLASESLIKQIPR            | P53026 | 0          | n +28.03 Da,                         | 2380.176779 | 3 | 543.6679 | 2.574E+09 | 7.96E+09  |
| MAAPAKGENLSLVVHGPDIR      | Q64442 | 0.02342225 | n +28.03 Da,K +28.03 Da,             | 2380.184074 | 3 | 730.0645 | 145872000 | 89772400  |
| EPSLDYMVTIKIPR            | Q8C196 | 0          | n +28.03 Da,                         | 2381.065349 | 3 | 535.6281 | 264288000 | 2.288E+09 |
| AAAKKAVLGPLVGAVDQGTSSSTR  | Q64516 | 0          | n +42.03 Da,K +34.06 Da,             | 2381.14826  | 3 | 768.7894 | 1.209E+09 | 4.386E+09 |
| SAKAISEQTGKELLYKY         | Q91V92 | 0.01201923 | n +42.03 Da,K +34.06 Da,             | 2381.423212 | 3 | 690.7438 | 1.764E+09 | 8.427E+09 |
| ASASDVVVVHGR              | Q8VCH0 | 0          | n +17.03 Da,                         | 2382.265133 | 2 | 604.3105 | 3.617E+09 | 5.182E+09 |
| ISQGAIEKVKDATR            | Q8C196 | 0          | n +42.03 Da,n +28.03 Da,K +28.03 Da, | 2384.180285 | 3 | 538.6357 | 665166976 | 3.224E+10 |
| TPAITLENPDIKYPLR          | Q9DCN2 | 0          | n +34.06 Da,K +34.06 Da,             | 2384.764337 | 3 | 633.0319 | 1.506E+09 | 1.221E+09 |
| AAAKKAVLGPLVGAVDQGTSSSTR  | Q64516 | 0.02813299 | n +42.03 Da,K +28.03 Da,             | 2387.527044 | 4 | 574.5814 | 661852032 | 420296992 |
| YFQEPGVAEAELEKNMSR        | P34914 | 0          | n +34.06 Da,K +34.06 Da,             | 2390.090334 | 3 | 718.6891 | 4.06E+09  | 6.537E+09 |
| SAKAISEQTGKELLYKY         | Q91V92 | 0          | n +42.03 Da,K +28.03 Da,             | 2391.885206 | 3 | 684.7061 | 847780992 | 1.024E+10 |
| PAPATTFAHLDDATTVLSR       | P56480 | 0.00040096 | n +28.03 Da,                         | 2393.385603 | 3 | 630.9999 | 90274496  | 193052992 |
| EPEGKEVWDYVTVR            | Q920A5 | 0          | n +34.06 Da,K +34.06 Da,             | 2394.508119 | 3 | 591.3226 | 39483200  | 379780992 |
| SVGSAGLAGMGGIQTEKTMQDLNDR | P05784 | 0          | n +34.06 Da,K +34.06 Da,             | 2400.008712 | 3 | 907.7763 | 208207008 | 225940000 |
| TTGGESLLPEEYEQWKQR        | Q91VA0 | 0          | n +28.03 Da,K +28.03 Da,             | 2404.805757 | 2 | 734.8461 | 1.164E+09 | 926627008 |
| VLTTGGGNPIGDKLNIMTAGSR    | P24270 | 0          | n +34.06 Da,K +34.06 Da,             | 2414.092089 | 3 | 747.4092 | 3.037E+09 | 1.531E+09 |
| TPKVDFPQDQLATLTGR         | P08249 | 0          | n +28.03 Da,K +28.03 Da,             | 2416.748679 | 3 | 648.3585 | 1.256E+09 | 1.424E+09 |
| AEEEVAKLEKHL              | Q810B6 | 0          | n +42.03 Da,n +28.03 Da,K +28.03 Da, | 2417.131449 | 3 | 498.6117 | 35371500  | 38533400  |
| LDPNVTIILKEPVR            | Q99PL5 | 0          | n +28.03 Da,                         | 2417.887444 | 3 | 555.0104 | 142456000 | 56464100  |
| EAPQEPDPFTYDYHTLR         | Q92Z39 | 0          | n +28.03 Da,                         | 2418.970531 | 3 | 702.9966 | 4.834E+09 | 5.264E+09 |
| PFPDGLAEDIDKGEVSAR        | P58252 | 0          | n +14.02 Da,K +28.03 Da,             | 2424.008593 | 2 | 979.496  | 385127008 | 314707008 |
| SSLEKSYELPDGQVITIGNER     | P60710 | 0          | n +34.06 Da,K +34.06 Da,             | 2425.469936 | 3 | 797.7507 | 388492000 | 315969984 |
| PFPDGLAEDIDKGEVSAR        | P58252 | 0          | n +14.02 Da,K +28.03 Da,             | 2425.508251 | 3 | 653.3337 | 2.663E+10 | 2.255E+10 |
| ATEGDVELELETETSGPERPPEKPR | Q9CR41 | 0          | n +42.03 Da,K +34.06 Da,             | 2429.291883 | 3 | 946.1326 | 2.641E+09 | 2.426E+09 |
| VSITPAEVGLVVGKDR          | P62962 | 0.00078339 | n +34.06 Da,K +34.06 Da,             | 2430.787078 | 3 | 570.011  | 16976200  | 32621900  |
| SSSLEKSYELPDGQVITIGNER    | P60710 | 0          | n +34.06 Da,K +34.06 Da,             | 2431.018915 | 3 | 826.7591 | 191798000 | 175160992 |
| SSSLEKSYELPDGQVITIGNER    | P60710 | 0          | n +28.03 Da,K +28.03 Da,             | 2431.243599 | 3 | 855.7742 | 228738000 | 209907008 |
| ADLEEQLSDEEKVR            | P47754 | 0          | n +42.03 Da,K +34.06 Da,             | 2431.97598  | 2 | 865.9249 | 659758976 | 652963968 |
| VLYPNDNFFEGKELR           | Q8CI94 | 0.00337838 | n +28.03 Da,K +28.03 Da,             | 2433.60063  | 3 | 633      | 93049696  | 99053696  |
| SFVNDFIFR                 | P10853 | 0.00078339 | n +34.06 Da,                         | 2437.205955 | 2 | 577.7955 | 808238976 | 841926016 |
| SLGGGTGSGMGTLLISKIR       | P68372 | 0          | n +28.03 Da,K +28.03 Da,             | 2437.860354 | 3 | 621.0219 | 369484000 | 295817984 |
| PASVPHGAGYDVLQKF          | Q91V64 | 0.00227187 | n +14.02 Da,K +28.03 Da,             | 2441.525316 | 3 | 614.3409 | 558956032 | 224922000 |
| PNKIFGVTTLDIVR            | P08249 | 0          | n +17.03 Da,K +34.06 Da,             | 2450.15135  | 3 | 541.0012 | 519552992 | 1.194E+09 |
| SLGGGTGSGMGTLLISKIR       | P68372 | 0          | n +28.03 Da,K +28.03 Da,             | 2452.363133 | 3 | 619.0055 | 94902096  | 869889024 |
| DYGVLKADEGISFR            | P35700 | 0          | n +34.06 Da,K +34.06 Da,             | 2453.533474 | 3 | 542.6223 | 51039700  | 128864000 |
| TPKVDFPQDQLATLTGR         | P08249 | 0          | n +28.03 Da,K +28.03 Da,             | 2453.970894 | 3 | 646.3491 | 243836000 | 636158016 |
| LDPNVTIILKEPVR            | Q99PL5 | 0.00543281 | n +34.06 Da,                         | 2454.249344 | 3 | 559.0341 | 105451000 | 83153696  |
| MEANVTIPIWQNKPHGAAR       | Q9CWE0 | 0          | n +42.03 Da,K +28.03 Da,             | 2456.84134  | 3 | 735.0524 | 780934976 | 1.976E+09 |

|                           |        |            |                                      |             |   |          |           |           |
|---------------------------|--------|------------|--------------------------------------|-------------|---|----------|-----------|-----------|
| VSITPAEVGVLVGKDR          | P62962 | 0.00078339 | n +34.06 Da,K +34.06 Da,             | 2459.017967 | 3 | 568.0119 | 47226700  | 56401700  |
| PFPDGLAEDIDKGEVSAR        | P58252 | 0          | n +28.03 Da,K +28.03 Da,             | 2465.032522 | 3 | 658.0042 | 1.103E+09 | 1.063E+09 |
| SSSRPVALVTGANKGIGFAITR    | P48758 | 0          | n +42.03 Da,K +34.06 Da,             | 2466.563512 | 3 | 758.0979 | 532614016 | 729948992 |
| VPPVQVSPLIKFR             | Q06185 | 0          | n +28.03 Da,K +28.03 Da,             | 2468.701948 | 3 | 531.6679 | 2.081E+09 | 1.873E+09 |
| PGLLASVAAVAQAQKTGR        | G3X982 | 0          | n +14.02 Da,K +28.03 Da,             | 2470.011136 | 3 | 551.3338 | 179952000 | 14047200  |
| TGSGDPKEEEEEELVDPLTTVR    | P99028 | 0.00040096 | n +34.06 Da,K +34.06 Da,             | 2470.399988 | 3 | 829.4089 | 296112992 | 328675008 |
| GSGDPKEEEEEELVDPLTTVR     | P99028 | 0          | n +28.03 Da,K +28.03 Da,             | 2481.237964 | 3 | 795.7255 | 382721984 | 378545984 |
| SAKSASKEIFAPLDER          | Q8R3T5 | 0.03761755 | n +42.03 Da,K +28.03 Da,             | 2485.705514 | 3 | 652.0151 | 102006000 | 686633984 |
| TIAQDYGVLKADEGISFR        | P35700 | 0          | n +28.03 Da,                         | 2488.322947 | 3 | 680.3647 | 6.376E+09 | 2.585E+09 |
| SIGVPIKVLHEAEGH           | P62320 | 0.00040096 | n +42.03 Da,K +28.03 Da,             | 2491.241882 | 2 | 828.4597 | 436484992 | 341449984 |
| PSTDFLTITVENSHGLR         | P01029 | 0          | n +14.02 Da,                         | 2493.284058 | 3 | 634.3297 | 215604992 | 170707008 |
| SIGVPIKVLHEAEGH           | P62320 | 0          | n +42.03 Da,K +34.06 Da,             | 2495.296855 | 3 | 552.6416 | 2.225E+10 | 2.088E+10 |
| GDPKEEEEEELVDPLTTVR       | P99028 | 0          | n +34.06 Da,K +34.06 Da,             | 2500.562493 | 2 | 1125.582 | 141659008 | 1.117E+09 |
| GQVVQFKLSDIGEGIR          | P53395 | 0          | n +28.03 Da,K +28.03 Da,             | 2503.733754 | 2 | 901.5108 | 801156992 | 752025984 |
| GDPKEEEEEELVDPLTTVR       | P99028 | 0          | n +34.06 Da,K +34.06 Da,             | 2505.914981 | 3 | 750.7236 | 2.375E+09 | 1.809E+10 |
| APDQDEIDCLPGLAKQPSFR      | P16675 | 0          | n +34.06 Da,K +34.06 Da,             | 2506.133957 | 3 | 771.721  | 2.641E+09 | 2.187E+09 |
| VLYPNDNFFEGKELR           | Q8CI94 | 0          | n +42.03 Da,K +28.03 Da,             | 2506.845033 | 3 | 637.6708 | 2.36E+09  | 2.19E+09  |
| GQVVQFKLSDIGEGIR          | P53395 | 0          | n +34.06 Da,K +34.06 Da,             | 2508.646243 | 3 | 604.3604 | 1.642E+09 | 9.091E+09 |
| TISPLDLAKLNQVAR           | P60335 | 0          | n +28.03 Da,K +28.03 Da,             | 2510.170562 | 3 | 565.6776 | 1.175E+09 | 846198016 |
| GDPKEEEEEELVDPLTTVR       | P99028 | 0          | n +34.06 Da,K +34.06 Da,             | 2510.841752 | 2 | 1121.058 | 6.858E+09 | 5.846E+09 |
| GDPKEEEEEELVDPLTTVR       | P99028 | 0          | n +34.06 Da,K +34.06 Da,             | 2514.074346 | 3 | 747.7082 | 3.989E+09 | 3.46E+09  |
| DTHPALAIPELMR             | Q9ET01 | 0.00115785 | n +28.03 Da,                         | 2514.796369 | 3 | 497.9368 | 246506000 | 306252992 |
| SAGFLQASASDVVVVHGR        | Q8VCHO | 0.00040096 | n +34.06 Da,                         | 2515.725502 | 3 | 612.0097 | 1.209E+09 | 704049984 |
| AAAAGAVVASAASGPAEGKKITELR | Q8CH25 | 0          | n +42.03 Da,n +28.03 Da,K +28.03 Da, | 2523.285406 | 3 | 798.7834 | 405374016 | 327359008 |
| MDDREDLVYQAKLAEQAER       | P62259 | 0          | n +42.03 Da,K +34.06 Da,             | 2526.737316 | 3 | 784.0471 | 2.074E+10 | 2.036E+10 |
| GLGPMNIPLISDPKR           | P35700 | 0          | n +28.03 Da,K +28.03 Da,             | 2531.780008 | 3 | 555.3233 | 309616992 | 312304000 |
| TTIAGVVYKDGIVLGADTR       | P70195 | 0          | n +28.03 Da,K +28.03 Da,             | 2532.50287  | 3 | 669.049  | 4.099E+09 | 4.112E+09 |
| ALHVPKAPGFAQMLK           | P42932 | 0.01137539 | n +42.03 Da,K +28.03 Da,             | 2533.89856  | 3 | 566.3026 | 684779008 | 1.061E+09 |
| TIAQDYGVLKADEGISFR        | P35700 | 0          | n +42.03 Da,n +28.03 Da,             | 2535.815812 | 3 | 685.0379 | 105921000 | 56433100  |
| PDPSTKDFLLQQTMLR          | Q9CPU0 | 0          | n +17.03 Da,K +34.06 Da,             | 2537.287154 | 3 | 646.6927 | 2.094E+09 | 6.335E+09 |
| PDPSTKDFLLQQTMLR          | Q9CPU0 | 0          | n +17.03 Da,K +34.06 Da,             | 2542.18646  | 2 | 966.5181 | 595926976 | 402252000 |
| PMQGTGIKAVDSLVIPIGR       | Q03265 | 0          | n +14.02 Da,K +28.03 Da,             | 2543.588345 | 3 | 608.6854 | 297489984 | 389564992 |
| GDTITNTMTLGDIVYKR         | P12710 | 0          | n +28.03 Da,K +28.03 Da,             | 2545.15099  | 3 | 652.0197 | 5.348E+09 | 5.195E+09 |
| PFPDGLAEDIDKGEVSAR        | P58252 | 0          | n +42.03 Da,K +28.03 Da,             | 2545.698064 | 3 | 662.6772 | 2.086E+09 | 1.847E+09 |
| TMDKSELVQKAKLAEQAER       | Q9CQV8 | 0.00711744 | n +42.03 Da,n +28.03 Da,K +28.03 Da, | 2547.569717 | 3 | 767.7413 | 1.092E+09 | 951200000 |
| GDTITNTMTLGDIVYKR         | P12710 | 0          | n +34.06 Da,K +34.06 Da,             | 2548.762598 | 2 | 977.5223 | 1.213E+09 | 980534016 |
| TTIAGVVYKDGIVLGADTR       | P70195 | 0          | n +34.06 Da,K +34.06 Da,             | 2549.96402  | 2 | 1003.072 | 3.439E+09 | 3.108E+09 |
| TTIAGVVYKDGIVLGADTR       | P70195 | 0          | n +34.06 Da,K +34.06 Da,             | 2554.292642 | 3 | 672.066  | 172554000 | 1.97E+09  |
| FLTTVSMEQPEMLEKVSAR       | Q9DCM2 | 0          | n +28.03 Da,K +28.03 Da,             | 2557.476105 | 3 | 727.7351 | 9.103E+09 | 1.052E+10 |
| GPPDPILGVTEAFKR           | P05202 | 0.00152323 | n +34.06 Da,K +34.06 Da,             | 2561.483658 | 3 | 553.6557 | 19139100  | 52820800  |

|                        |        |            |                          |             |   |          |           |           |
|------------------------|--------|------------|--------------------------|-------------|---|----------|-----------|-----------|
| PLGGVISNYLLEKSR        | P46735 | 0          | n +14.02 Da,K +28.03 Da, | 2563.19226  | 3 | 563.3296 | 77266600  | 64396900  |
| YTIVYFPVR              | P19157 | 0.00440852 | n +28.03 Da,             | 2563.6822   | 2 | 593.3374 | 897848000 | 803208000 |
| GQVVQFKLSDIGEGIR       | P53395 | 0          | n +28.03 Da,K +28.03 Da, | 2574.271378 | 3 | 597.3318 | 87960304  | 75361800  |
| GPPDPILGVTEAFKR        | P05202 | 0          | n +28.03 Da,K +28.03 Da, | 2580.178735 | 3 | 551.6523 | 696828992 | 715881984 |
| TDPAPATTFAHLDATTVLSR   | P56480 | 0          | n +28.03 Da,             | 2581.070857 | 3 | 705.035  | 1.039E+09 | 1.026E+09 |
| IMGLDLPDGGHLTHGY       | Q9CZN7 | 0.00040096 | n +28.03 Da,             | 2581.772745 | 3 | 575.2878 | 47564700  | 27672800  |
| IGSSMKSVGEVMAIGR       | Q8C196 | 0          | n +42.03 Da,K +34.06 Da, | 2582.647333 | 3 | 564.6322 | 23202500  | 29629300  |
| TIAQDYGVLKADEGISFR     | P35700 | 0          | n +42.03 Da,n +28.03 Da, | 2583.192488 | 3 | 685.0373 | 1.318E+09 | 1.15E+09  |
| SDVLELTDEFESR          | P27773 | 0          | n +28.03 Da,             | 2584.073971 | 2 | 841.3985 | 2.221E+09 | 1.922E+09 |
| TASSVLLHTGQKMPL        | Q9JII6 | 0.00040096 | n +42.03 Da,K +34.06 Da, | 2584.648941 | 2 | 826.9553 | 3.475E+09 | 3.334E+09 |
| APLDLDKYVEIAR          | Q9CQR6 | 0          | n +34.06 Da,K +34.06 Da, | 2586.039351 | 3 | 523.316  | 137558000 | 1.676E+09 |
| PMQTGIKAVDSLPIGR       | Q03265 | 0          | n +17.03 Da,K +34.06 Da, | 2586.42084  | 3 | 610.6962 | 308964000 | 683049024 |
| APLDLDKYVEIAR          | Q9CQR6 | 0          | n +28.03 Da,K +28.03 Da, | 2588.089103 | 3 | 520.2999 | 891041024 | 860657984 |
| DQDEIDCLPGLAKQPSFR     | P16675 | 0          | n +34.06 Da,K +34.06 Da, | 2590.015284 | 3 | 715.6917 | 133099000 | 165980992 |
| FLTTVSMEQPPEMLEKVSFR   | Q9DCM2 | 0          | n +28.03 Da,K +28.03 Da, | 2590.453054 | 3 | 727.7144 | 873782016 | 874934016 |
| PAAAYEALQLVKEGR        | Q8BK03 | 0          | n +17.03 Da,K +34.06 Da, | 2591.010301 | 3 | 598.3386 | 38073900  | 25770200  |
| GLLSQGSPLSWEETQR       | P97494 | 0          | n +28.03 Da,             | 2592.553424 | 3 | 605.9788 | 249736000 | 192031008 |
| TIAQDYGVLKADEGISFR     | P35700 | 0          | n +42.03 Da,n +28.03 Da, | 2592.935753 | 3 | 684.034  | 573721024 | 1.259E+09 |
| GLLSQGSPLSWEETQR       | P97494 | 0          | n +34.06 Da,             | 2593.151129 | 2 | 908.4654 | 815856000 | 617819008 |
| GPITYSPDILPMVGPVGHQVGR | Q9DBT9 | 0          | n +34.06 Da,             | 2595.255064 | 3 | 721.3871 | 386256000 | 350620000 |
| DALKAADTIGYPVMIR       | Q8C196 | 0.00264151 | n +28.03 Da,K +28.03 Da, | 2596.932027 | 3 | 596.3278 | 28669700  | 40041300  |
| TDPAPATTFAHLDATTVLSR   | P56480 | 0          | n +28.03 Da,             | 2597.56266  | 3 | 702.0158 | 65340900  | 89779200  |
| APLDLDKYVEIAR          | Q9CQR6 | 0.00040096 | n +28.03 Da,K +28.03 Da, | 2597.613119 | 2 | 779.9453 | 267720992 | 185498000 |
| MEKTELIQKAKLAEQAER     | P68254 | 0.00440852 | n +42.03 Da,K +28.03 Da, | 2597.637133 | 3 | 748.0766 | 487620992 | 289491008 |
| LKVLQPTIFVPR           | P41216 | 0.00040096 | n +28.03 Da,K +28.03 Da, | 2600.506527 | 3 | 555.0274 | 443280992 | 358751008 |
| MDKNELVQKAKLAEQAER     | P63101 | 0          | n +42.03 Da,K +28.03 Da, | 2616.005633 | 3 | 743.0636 | 2.695E+09 | 2.207E+09 |
| SFPTLKFFPASADR         | P09103 | 0          | n +28.03 Da,K +28.03 Da, | 2625.530488 | 3 | 547.299  | 1.632E+09 | 1.459E+09 |
| FLTTVSMEQPPEMLEKVSFR   | Q9DCM2 | 0          | n +28.03 Da,K +28.03 Da, | 2628.136357 | 3 | 727.733  | 198464992 | 180598000 |
| MEKTELIQKAKLAEQAER     | P68254 | 0.00440852 | n +42.03 Da,K +28.03 Da, | 2640.766116 | 3 | 747.0828 | 375640992 | 453670016 |
| PAVPVPIGPPAGFR         | Q05920 | 0.00406654 | n +14.02 Da,             | 2642.843863 | 3 | 528.9801 | 177892000 | 144784000 |
| IGGVQQDTILAEGHLHFR     | O35129 | 0.00543281 | n +28.03 Da,             | 2643.654133 | 3 | 628.0092 | 540825984 | 340969984 |
| PSWATQESEAVAEKVLAR     | Q9EPQ7 | 0          | n +17.03 Da,K +34.06 Da, | 2647.154702 | 3 | 650.3598 | 8480320   | 20903400  |
| DVSPFLDGLLEERPQR       | Q9R1P4 | 0          | n +28.03 Da,             | 2650.99942  | 3 | 595.9765 | 219868992 | 231018000 |
| LGLDSLAPFDPKER         | Q91XD4 | 0          | n +28.03 Da,K +28.03 Da, | 2654.865583 | 3 | 537.963  | 513351008 | 506305984 |
| MVPPVQVSPLIKFGR        | Q06185 | 0          | n +34.06 Da,K +34.06 Da, | 2655.92916  | 3 | 578.3644 | 29722800  | 301051008 |
| FLTTVSMEQPPEMLEKVSFR   | Q9DCM2 | 0          | n +42.03 Da,K +28.03 Da, | 2659.969196 | 3 | 732.3853 | 514712000 | 361271008 |
| PLVLIDEVDKIGR          | Q8CGK3 | 0          | n +17.03 Da,n +34.06 Da, | 2662.148547 | 3 | 503.6391 | 185459008 | 73651000  |
| MVPPVQVSPLIKFGR        | Q06185 | 0          | n +28.03 Da,K +28.03 Da, | 2663.426848 | 3 | 575.3488 | 869820992 | 802571008 |
| FLAGGVAAAISKTAVAPIER   | P51881 | 0          | n +28.03 Da,K +28.03 Da, | 2666.237639 | 3 | 666.731  | 338140000 | 304606016 |
| GIHVEIPGAQAESLGLQVAR   | Q9DCW4 | 0          | n +28.03 Da,             | 2670.467891 | 3 | 724.0711 | 757100032 | 235571008 |

|                                  |        |            |                          |             |   |          |           |           |
|----------------------------------|--------|------------|--------------------------|-------------|---|----------|-----------|-----------|
| SDDPSTKDFLLQQTMLR                | Q9CPU0 | 0          | n +34.06 Da,K +34.06 Da, | 2677.428772 | 3 | 719.726  | 420743008 | 897070016 |
| PAFTPATGTPVLGGLSYR               | Q61176 | 0.00040096 | n +17.03 Da,             | 2682.925307 | 3 | 608.0158 | 967083008 | 835814016 |
| YSLAPQIKVIAPWR                   | P16460 | 0          | n +34.06 Da,K +34.06 Da, | 2686.527139 | 3 | 566.6747 | 471996000 | 245680000 |
| TGIGSGLSLSGIVHPELSR              | P50544 | 0          | n +28.03 Da,             | 2689.934803 | 3 | 636.6894 | 89505400  | 28476200  |
| SSSLEKSYELPDGQVITIGNER           | P60710 | 0          | n +34.06 Da,K +34.06 Da, | 2692.744351 | 3 | 855.7744 | 2.184E+09 | 2.145E+09 |
| VVDALGNAIDGKGPIGSKTR             | Q03265 | 0          | n +28.03 Da,K +28.03 Da, | 2698.551824 | 3 | 684.7189 | 319259008 | 235751008 |
| TIPGFDGVVKDADEAVR                | Q91ZA3 | 0          | n +28.03 Da,             | 2699.84659  | 3 | 615.6622 | 1.099E+09 | 667881024 |
| TALEKFGQAISLLPDR                 | Q8VBW8 | 0          | n +28.03 Da,K +28.03 Da, | 2700.815599 | 3 | 605.6851 | 1.228E+09 | 157252000 |
| PEKIPSPFDLGFPER                  | Q9CR61 | 0          | n +17.03 Da,K +34.06 Da, | 2700.839707 | 3 | 623.3361 | 297819008 | 243859008 |
| SSLEKSYELPDGQVITIGNER            | P60710 | 0          | n +28.03 Da,K +28.03 Da, | 2701.498177 | 3 | 797.75   | 930222016 | 564176000 |
| PAFTPATGTPVLGGLSYR               | Q61176 | 0          | n +14.02 Da,             | 2702.486164 | 2 | 909.9894 | 3.508E+09 | 3.046E+09 |
| TPFTATAEVDYGKLEENLNR             | Q9DCU9 | 0.00605629 | n +34.06 Da,K +34.06 Da, | 2702.902578 | 3 | 779.4181 | 26626600  | 96367400  |
| PAFTPATGTPVLGGLSYR               | Q61176 | 0.00040096 | n +14.02 Da,             | 2703.72606  | 3 | 606.9956 | 3.228E+09 | 2.53E+09  |
| ATSSEEVLLIVKKVR                  | Q9DBA9 | 0          | n +42.03 Da,K +34.06 Da, | 2704.331419 | 3 | 590.6948 | 189980992 | 161707008 |
| MFEPKCLDAFPNLR                   | P10649 | 0          | n +42.03 Da,K +28.03 Da, | 2704.743873 | 3 | 603.3123 | 194568992 | 170732000 |
| EELLKDPLYIGLR                    | P06801 | 0          | n +34.06 Da,K +34.06 Da, | 2709.571788 | 3 | 543.0053 | 1.215E+09 | 915657024 |
| PMILGYWNVNVR                     | P10649 | 0          | n +17.03 Da,             | 2710.472189 | 2 | 631.8381 | 791507008 | 609513024 |
| SSSLEKSYELPDGQVITIGNER           | P60710 | 0          | n +28.03 Da,K +28.03 Da, | 2710.80084  | 3 | 826.7608 | 1.3E+09   | 897073024 |
| TALEKFGQAISLLPDR                 | Q8VBW8 | 0          | n +28.03 Da,K +28.03 Da, | 2716.372903 | 3 | 605.6845 | 884380992 | 537057984 |
| SYGRPPDVEGMSLKVNDLTYR            | Q62093 | 0          | n +42.03 Da,K +28.03 Da, | 2720.617585 | 3 | 889.1136 | 2.089E+10 | 2.123E+10 |
| TAASSSLEKSYELPDGQVITIGNER        | P60710 | 0          | n +34.06 Da,             | 2720.993047 | 3 | 936.8133 | 4.504E+09 | 4.126E+09 |
| PPFPGLVKY                        | Q01768 | 0.02543464 | n +14.02 Da,K +28.03 Da, | 2721.070136 | 2 | 555.3381 | 330475008 | 277748000 |
| PSIGEFIMVDR                      | Q9QXD6 | 0.00040096 | n +14.02 Da,             | 2722.141048 | 2 | 639.3315 | 427702016 | 293920992 |
| ASQRPDVLTTGGGNPIGDKLNIMTAGSR     | P24270 | 0          | n +42.03 Da,K +34.06 Da, | 2728.712301 | 4 | 724.1297 | 777380992 | 1.357E+09 |
| GLFIIDDKGILR                     | P35700 | 0.00040096 | n +28.03 Da,K +28.03 Da, | 2734.236313 | 3 | 472.6257 | 154615008 | 106936000 |
| EPMQTGIKAVDSLVPGR                | Q03265 | 0          | n +28.03 Da,K +28.03 Da, | 2735.636921 | 3 | 656.3712 | 2.281E+09 | 1.575E+09 |
| SLEKSYELPDGQVITIGNER             | P60710 | 0          | n +34.06 Da,K +34.06 Da, | 2737.441295 | 3 | 768.741  | 3.219E+09 | 2.14E+09  |
| PSGGPVSLEDFVKNGEYALER            | Q99LB7 | 0.00040096 | n +17.03 Da,K +34.06 Da, | 2738.200774 | 3 | 729.3938 | 138258000 | 609899008 |
| SIKDLLNHAFFAEDTGLR               | Q80XP9 | 0.01201923 | n +28.03 Da,K +28.03 Da, | 2738.389472 | 3 | 695.6958 | 1.41E+09  | 1.106E+09 |
| GDPKEEEEEELVDPLTTVR              | P99028 | 0.01326531 | n +42.03 Da,K +34.06 Da, | 2742.877585 | 3 | 754.3658 | 64662400  | 52768800  |
| PPFPGLVKY                        | Q01768 | 0.02543464 | n +14.02 Da,K +28.03 Da, | 2746.067686 | 2 | 555.3235 | 170956000 | 145271008 |
| ASQRPDVLTTGGGNPIGDKLNIMTAGSR     | P24270 | 0          | n +42.03 Da,K +34.06 Da, | 2748.080999 | 4 | 722.6227 | 1.298E+09 | 1.103E+09 |
| PYNPSMSRPDAWGVTKGAAELMQ          | Q35490 | 0          | n +14.02 Da,K +28.03 Da, | 2748.300674 | 3 | 850.0821 | 6.313E+09 | 5.557E+09 |
| SEVYYDKSPLTPILLGNPGR             | P50172 | 0.01449764 | n +28.03 Da,K +28.03 Da, | 2748.796184 | 3 | 759.0786 | 670494976 | 588500992 |
| PPFPGLVKY                        | Q01768 | 0.02543464 | n +14.02 Da,K +28.03 Da, | 2751.092612 | 2 | 555.3235 | 304552992 | 81578400  |
| AAQKDQQKDAEAGEGLSATTLLPKLIPSGAGR | Q9Z0S9 | 0.0202946  | n +42.03 Da,K +28.03 Da, | 2752.016973 | 4 | 819.9506 | 811145024 | 856329024 |
| PTGTDPTPEQWKQIAAVMQR             | P05201 | 0          | n +17.03 Da,K +34.06 Da, | 2760.75356  | 3 | 766.0618 | 231184992 | 512552992 |
| DTITNTMTLGDIVYKR                 | P12710 | 0          | n +28.03 Da,K +28.03 Da, | 2762.645092 | 3 | 633.0078 | 107294000 | 112550000 |
| PFVELETNLPASRIPAGLENR            | Q35215 | 0          | n +14.02 Da,             | 2763.047659 | 3 | 774.7311 | 69136096  | 909747008 |
| FPIQNLPGVVFSTQSNPKPR             | P35505 | 0          | n +34.06 Da,K +34.06 Da, | 2765.795079 | 3 | 782.76   | 111852000 | 87932896  |

|                                  |        |            |                                      |             |   |          |           |           |
|----------------------------------|--------|------------|--------------------------------------|-------------|---|----------|-----------|-----------|
| TEQGPQVDETQFKKILGY               | P47738 | 0          | n +34.06 Da,K +34.06 Da,             | 2768.46218  | 3 | 726.4086 | 2.477E+09 | 2.397E+09 |
| DTITNTMTLGDIVYKR                 | P12710 | 0          | n +28.03 Da,K +28.03 Da,             | 2772.548089 | 3 | 632.0001 | 26095100  | 166904000 |
| FWNAFFDAVHCERRKR                 | Q8R0A7 | 0.0485348  | n +17.03 Da,K +34.06 Da,             | 2774.193818 | 3 | 750.3875 | 127160000 | 55486100  |
| TENEELLKDPLYIGLR                 | P06801 | 0          | n +34.06 Da,K +34.06 Da,             | 2775.804064 | 3 | 653.6987 | 455771008 | 511868000 |
| MLGPEGGEGYVVKLR                  | Q9Z2X1 | 0          | n +42.03 Da,K +28.03 Da,             | 2776.968225 | 2 | 837.9476 | 2.854E+09 | 2.706E+09 |
| TEQGPQVDETQFKKILGY               | P47738 | 0          | n +34.06 Da,K +34.06 Da,             | 2777.381172 | 3 | 722.3875 | 1.149E+09 | 509411008 |
| SQAPGPSGKTADYAFEMAVSNIR          | Q8R0N6 | 0          | n +28.03 Da,K +28.03 Da,             | 2779.015949 | 3 | 818.4087 | 1.365E+09 | 939459008 |
| LINEKDGETFQLMGLYGR               | B5X0G2 | 0          | n +28.03 Da,K +28.03 Da,             | 2780.586351 | 3 | 714.0405 | 381825984 | 483257984 |
| SEVYYDKSPLTPILLGNPGR             | P50172 | 0.01449764 | n +28.03 Da,K +28.03 Da,             | 2781.040535 | 3 | 759.082  | 270008992 | 482408992 |
| EPMQTGIKAVDSLPIGR                | Q03265 | 0.02905492 | n +14.02 Da,K +28.03 Da,             | 2782.730706 | 3 | 651.6992 | 194772992 | 679888000 |
| SIKDLLNHAFFAEDTGLR               | Q80XP9 | 0.01201923 | n +28.03 Da,K +28.03 Da,             | 2782.88486  | 3 | 699.7084 | 1.551E+09 | 1.559E+09 |
| PVTLGYWDIR                       | O35660 | 0.00711744 | n +14.02 Da,                         | 2784.143854 | 2 | 617.3352 | 1.48E+09  | 909539968 |
| PEKIPSFPPDLGFPER                 | Q9CR61 | 0          | n +17.03 Da,K +34.06 Da,             | 2791.390513 | 3 | 625.3493 | 31353400  | 65851100  |
| PITPQFVTEVIKAER                  | Q8C196 | 0          | n +14.02 Da,K +28.03 Da,             | 2792.673803 | 3 | 590.6778 | 192335008 | 27883600  |
| DFIDYYLIKQKQVN                   | Q64458 | 0          | n +28.03 Da,K +28.03 Da,             | 2793.091334 | 3 | 623.337  | 59114300  | 64133400  |
| MNLDLTEEEELLKR                   | Q8QZR3 | 0          | n +28.03 Da,K +28.03 Da,             | 2794.847407 | 3 | 596.9848 | 7940370   | 7230760   |
| TEQGPQVDETQFKKILGY               | P47738 | 0          | n +42.03 Da,K +28.03 Da,             | 2801.047634 | 3 | 727.0592 | 922220032 | 856494976 |
| LAFVDVPNDSSFQIVKNPR              | Q61176 | 0          | n +34.06 Da,K +34.06 Da,             | 2801.290683 | 3 | 737.758  | 745112000 | 3.167E+09 |
| MLPTQTISQGAIEKVKDATR             | Q8C196 | 0          | n +42.03 Da,K +28.03 Da,             | 2805.870683 | 3 | 761.4016 | 24860800  | 107615000 |
| SVVVAPAQTLSNAEFQMLRR             | Q8C196 | 0.01201923 | n +28.03 Da,                         | 2806.461489 | 3 | 749.0759 | 162567008 | 151187008 |
| LAFVDVPNDSSFQIVKNPR              | Q61176 | 0          | n +28.03 Da,K +28.03 Da,             | 2807.910306 | 3 | 733.7373 | 2.484E+09 | 4.254E+09 |
| PDVDEPLETPLSHVLGR                | Q922Y1 | 0          | n +14.02 Da,                         | 2811.558875 | 3 | 629.9985 | 1.085E+09 | 889347008 |
| VAQPKNLEGYVGFANLPNQVYR           | E9Q1G8 | 0.01883053 | n +34.06 Da,K +34.06 Da,             | 2813.459861 | 4 | 634.0951 | 170583008 | 191938000 |
| GSLPEEKDSALWSDTPKGPLSAYR         | Q9EPL9 | 0          | n +42.03 Da,K +34.06 Da,             | 2814.043701 | 3 | 901.4612 | 1.571E+09 | 1.322E+09 |
| EVVFLDDFGSNLKPAPR                | P34914 | 0          | n +34.06 Da,K +34.06 Da,             | 2814.676343 | 3 | 621.6724 | 1.004E+09 | 777619968 |
| VAQPKNLEGYVGFANLPNQVYR           | E9Q1G8 | 0          | n +34.06 Da,K +34.06 Da,             | 2816.539479 | 3 | 845.1254 | 1.256E+09 | 1.01E+09  |
| GDPSPKQDILAIFKR                  | Q9D8S3 | 0.00078339 | n +42.03 Da,K +28.03 Da,             | 2819.034009 | 3 | 562.658  | 1.096E+09 | 784668032 |
| AEDEVAKLEKHLM                    | Q810B6 | 0          | n +42.03 Da,n +34.06 Da,K +34.06 Da, | 2820.069951 | 3 | 542.2929 | 111415000 | 96450000  |
| FLEQKNVATEALGALEAR               | Q9JM62 | 0          | n +42.03 Da,K +34.06 Da,             | 2826.901618 | 3 | 679.3924 | 85745296  | 84952800  |
| PVADVGTVAEKEGWPLDIR              | Q99K10 | 0          | n +14.02 Da,K +28.03 Da,             | 2831.683427 | 3 | 698.712  | 739294016 | 202507008 |
| RKDLYANTVLSGGTTMYPGIADR          | P60710 | 0.00543281 | n +42.03 Da,K +28.03 Da,             | 2839.740165 | 3 | 857.1236 | 3.316E+09 | 2.788E+09 |
| MELFQAQKDHYYLQQGER               | Q8CDA1 | 0          | n +42.03 Da,K +34.06 Da,             | 2845.965538 | 3 | 726.032  | 81173800  | 81274600  |
| LPLQDVVYKIGGIGTVPVGR             | P10126 | 0          | n +28.03 Da,K +28.03 Da,             | 2845.98845  | 3 | 680.0721 | 1.503E+09 | 739444992 |
| PEKIPSFPPDLGFPER                 | Q9CR61 | 0.00040096 | n +17.03 Da,K +34.06 Da,             | 2853.72324  | 3 | 623.3352 | 60738000  | 74417000  |
| AAEHPEPPKQELQPPPPPGHYGAWAAQELQAR | Q3UJBO | 0          | n +42.03 Da,K +28.03 Da,             | 2854.976593 | 4 | 927.4737 | 2.19E+09  | 1.957E+09 |
| SSAEELKLATQLTGPVMPPIR            | P47963 | 0          | n +28.03 Da,K +28.03 Da,             | 2856.698661 | 3 | 733.0731 | 295828000 | 326728992 |
| ILEDLVFPSEIVGKR                  | P62082 | 0          | n +28.03 Da,K +28.03 Da,             | 2858.906241 | 3 | 591.0167 | 45316100  | 44177900  |
| PIDPSVPFDPKLGVPINTEGR            | Q61578 | 0.00901838 | n +14.02 Da,K +28.03 Da,             | 2859.011421 | 3 | 763.0813 | 45324700  | 70523296  |
| FEPSLDYMTVKIPR                   | Q8C196 | 0          | n +34.06 Da,K +34.06 Da,             | 2860.471736 | 3 | 584.6511 | 1.283E+09 | 838275968 |
| SSAEELKLATQLTGPVMPPIR            | P47963 | 0          | n +28.03 Da,K +28.03 Da,             | 2861.443129 | 3 | 731.0664 | 193500000 | 248480000 |

|                                |        |            |                                      |             |   |          |           |           |
|--------------------------------|--------|------------|--------------------------------------|-------------|---|----------|-----------|-----------|
| PSYVLSGSAMNVVSEDEMKR           | Q8C196 | 0          | n +14.02 Da,n +28.03 Da,             | 2870.221352 | 3 | 796.7207 | 4.92E+09  | 4.546E+09 |
| HGDALFVDVPNDSSFQIVKNPR         | Q61176 | 0          | n +28.03 Da,K +28.03 Da,             | 2870.520669 | 3 | 837.7576 | 55932800  | 46089800  |
| SSPAQPAVPAPLADLKIQH            | P24549 | 0          | n +42.03 Da,K +28.03 Da,             | 2871.747617 | 2 | 1005.555 | 2.977E+09 | 2.619E+09 |
| SSPAQPAVPAPLADLKIQH            | P24549 | 0          | n +42.03 Da,K +28.03 Da,             | 2873.232751 | 3 | 670.7054 | 6.428E+09 | 5.593E+09 |
| MEGKVVYGGEDYEKEFTPKDY          | P40936 | 0          | n +42.03 Da,K +34.06 Da,             | 2875.090688 | 3 | 875.4216 | 147924000 | 179864992 |
| HALIYDDLKQAVAYR                | Q03265 | 0.00040096 | n +28.03 Da,K +28.03 Da,             | 2875.402374 | 3 | 678.0323 | 545868032 | 430832000 |
| AELKYISGFGNECASEDPR            | O09173 | 0          | n +42.03 Da,K +28.03 Da,             | 2876.613273 | 2 | 1107.012 | 37501500  | 34540000  |
| AELKYISGFGNECASEDPR            | O09173 | 0          | n +42.03 Da,K +34.06 Da,             | 2877.910556 | 3 | 738.3436 | 1.665E+09 | 1.62E+09  |
| MELFQAKDHYILQQGER              | Q8CDA1 | 0          | n +42.03 Da,K +34.06 Da,             | 2880.276009 | 3 | 727.0479 | 52816700  | 38394400  |
| PEKIPSPFDLGFPER                | Q9CR61 | 0.00040096 | n +17.03 Da,K +34.06 Da,             | 2881.062904 | 3 | 624.3472 | 308695008 | 179784992 |
| PMTLGYWDIR                     | P15626 | 0          | n +14.02 Da,                         | 2881.237775 | 2 | 633.3211 | 8.429E+09 | 6.044E+09 |
| SKQQPTQFINPETPGYVGFANLPNQVHR   | P42208 | 0          | n +42.03 Da,K +34.06 Da,             | 2882.283199 | 3 | 1079.887 | 965161984 | 737312000 |
| METDVTSDTVEVLPQHKFDLR          | Q80XL6 | 0          | n +42.03 Da,K +34.06 Da,             | 2886.587376 | 3 | 844.0883 | 2.743E+10 | 2.072E+10 |
| SHELSDFGLESTTGEVPPVAIR         | P27773 | 0          | n +28.03 Da,                         | 2887.872074 | 3 | 791.076  | 96214000  | 97481696  |
| SPGEFLLITGSGSELHDLR            | Q9DBT9 | 0          | n +28.03 Da,                         | 2888.521427 | 3 | 686.0301 | 604774016 | 635521024 |
| GVHTGDSVVVAPAQTLNAEFQMLR       | Q8C196 | 0          | n +28.03 Da,                         | 2894.820597 | 3 | 885.7996 | 231168000 | 194723008 |
| AELQEVQITEEKPLLPQGTPEAKEAELAAR | Q9QYG0 | 0          | n +42.03 Da,K +28.03 Da,             | 2899.078263 | 3 | 1163.29  | 1.704E+09 | 1.69E+09  |
| DSLHVGHLLTLGLFHFQR             | Q8BYL4 | 0.00543281 | n +28.03 Da,                         | 2899.255523 | 3 | 744.405  | 90927400  | 168154000 |
| AELQEVQITEEKPLLPQGTPEAKEAELAAR | Q9QYG0 | 0          | n +42.03 Da,K +28.03 Da,             | 2902.50876  | 4 | 872.7192 | 2.669E+09 | 2.176E+09 |
| PMILGYWNVNR                    | P10649 | 0          | n +14.02 Da,                         | 2902.926243 | 2 | 631.8395 | 7.984E+09 | 7.54E+09  |
| SVVLSQPKMDELQLFR               | Q01853 | 0          | n +28.03 Da,K +28.03 Da,             | 2903.940193 | 3 | 678.3752 | 838057024 | 566108992 |
| IFVEESVYDEFVKKR                | P24549 | 0          | n +28.03 Da,K +28.03 Da,             | 2908.896992 | 3 | 605.9893 | 1.507E+09 | 1.393E+09 |
| TMHLPATIGDYTDFYSSR             | P35505 | 0          | n +34.06 Da,                         | 2910.053333 | 3 | 701.6665 | 82496600  | 66694900  |
| PGVVDNFPLLKALR                 | P30115 | 0          | n +14.02 Da,K +28.03 Da,             | 2912.486645 | 3 | 527.6555 | 549243008 | 410207008 |
| TVINLNVPEVIKQR                 | Q9WTP7 | 0          | n +34.06 Da,K +34.06 Da,             | 2912.661211 | 3 | 609.3688 | 388903008 | 396900992 |
| PKDIDLSPVTIGFGSIPR             | Q05421 | 0          | n +17.03 Da,K +34.06 Da,             | 2914.119222 | 3 | 654.0496 | 984939008 | 3.935E+09 |
| LITLEQGKTLADAEGDVFR            | Q9EQ20 | 0          | n +28.03 Da,K +28.03 Da,             | 2915.744394 | 3 | 711.3909 | 913931008 | 711025984 |
| ADEIAKAQVAQPGGDTIFGKIIR        | P70349 | 0          | n +42.03 Da,n +34.06 Da,K +34.06 Da, | 2917.977247 | 3 | 832.7991 | 633982976 | 567580032 |
| DFAEKELVPIAAQLDR               | Q07417 | 0.00901838 | n +28.03 Da,K +28.03 Da,             | 2920.604635 | 3 | 623.3386 | 29909100  | 28546200  |
| IITTLNLRKREAAEVTR              | Q9JHU4 | 0.0485348  | n +14.02 Da,K +28.03 Da,             | 2922.334314 | 3 | 663.0398 | 300576992 | 330364000 |
| VHTGDSVVVAPAQTLNAEFQMLR        | Q8C196 | 0          | n +34.06 Da,                         | 2926.525886 | 3 | 866.7826 | 320379008 | 371510016 |
| NLQALFVALNDQVFEIR              | Q9JLN9 | 0.00115785 | n +14.02 Da,                         | 2927.447384 | 3 | 666.6822 | 203440000 | 72417296  |
| GVHTGDSVVVAPAQTLNAEFQMLR       | Q8C196 | 0          | n +28.03 Da,                         | 2929.782654 | 3 | 885.7922 | 1.397E+09 | 1.489E+09 |
| SACFEPSLDYMVTKIPR              | Q8C196 | 0          | n +28.03 Da,K +28.03 Da,             | 2932.14489  | 3 | 688.669  | 131046000 | 419364992 |
| SGSKYKPAPLATLPSTLDPAEYDVSPETR  | Q9CQC7 | 0          | n +42.03 Da,K +28.03 Da,             | 2937.435541 | 3 | 1063.551 | 5.834E+09 | 5.388E+09 |
| LITLEQGKTLADAEGDVFR            | Q9EQ20 | 0          | n +42.03 Da,K +28.03 Da,             | 2938.034301 | 3 | 716.0647 | 189280000 | 115284000 |
| SGSKYKPAPLATLPSTLDPAEYDVSPETR  | Q9CQC7 | 0          | n +42.03 Da,K +28.03 Da,             | 2938.7907   | 4 | 797.9147 | 431168000 | 345524992 |
| SGEDEQQEQTIAEDLVVTKYK          | P50580 | 0.00078339 | n +42.03 Da,K +28.03 Da,             | 2939.176031 | 3 | 836.7513 | 268412000 | 267788000 |
| DHGDALFVDVPNDSSFQIVKNPR        | Q61176 | 0          | n +28.03 Da,                         | 2940.494504 | 3 | 876.1015 | 336583008 | 228122000 |
| SPVTFMNFPEDTLEQKAGSVGR         | Q8VCW8 | 0          | n +34.06 Da,K +34.06 Da,             | 2940.715177 | 3 | 822.7504 | 4.76E+09  | 4.237E+09 |

|                                   |        |            |                                      |             |   |          |           |           |
|-----------------------------------|--------|------------|--------------------------------------|-------------|---|----------|-----------|-----------|
| DSLHVGHLLTLLGLFHFQR               | Q8BYL4 | 0.00543281 | n +28.03 Da,                         | 2943.647018 | 3 | 744.4086 | 337409984 | 215768992 |
| PGGLLLGDEAPNFEANTTIGR             | O08709 | 0          | n +17.03 Da,                         | 2949.774599 | 2 | 1078.553 | 1.161E+09 | 1.09E+09  |
| PGGLLLGDEAPNFEANTTIGR             | O08709 | 0          | n +14.02 Da,                         | 2954.462164 | 3 | 719.3714 | 1.736E+09 | 1.709E+09 |
| TSQASATMHLPATIGDYDFYSSR           | P35505 | 0          | n +28.03 Da,                         | 2959.049238 | 3 | 883.4136 | 182122000 | 202139008 |
| PEKIPSFPPDLGFPER                  | Q9CR61 | 0.01389831 | n +17.03 Da,K +34.06 Da,             | 2961.377927 | 3 | 623.3374 | 46063400  | 30031100  |
| TVDTQFIDENPELFLRPAQNR             | Q05920 | 0          | n +34.06 Da,                         | 2962.438636 | 3 | 887.1156 | 38153100  | 25033600  |
| LAGAGEAGKLEEVMQELR                | Q9WUM3 | 0.00040096 | n +34.06 Da,K +34.06 Da,             | 2977.036587 | 3 | 653.0154 | 13891000  | 18990100  |
| PPVSELITKAVAASKER                 | P15864 | 0.00040096 | n +14.02 Da,K +28.03 Da,             | 2977.645355 | 3 | 622.6946 | 146296000 | 136468992 |
| ALLAEHLLKPLPADR                   | Q9JL62 | 0          | n +42.03 Da,K +34.06 Da,             | 2981.684076 | 3 | 576.3455 | 1.984E+09 | 1.827E+09 |
| IIPPGSGIIHQVNLEYLAR               | P28271 | 0          | n +42.03 Da,                         | 2984.66565  | 3 | 706.395  | 27089600  | 78320200  |
| AALAPLPPLPAQFKSIQHH               | Q9CR26 | 0          | n +42.03 Da,K +28.03 Da,             | 2985.331044 | 3 | 702.734  | 493948992 | 404718016 |
| PDQLLKELPFPLNTR                   | Q78JT3 | 0          | n +14.02 Da,K +28.03 Da,             | 2987.023095 | 3 | 608.3532 | 193720000 | 143568992 |
| NLQALFVALNDQVFEIR                 | Q9JLN9 | 0.00115785 | n +14.02 Da,                         | 2994.211166 | 3 | 664.6766 | 1.407E+09 | 1.227E+09 |
| ASGNAQIGKSAPDFTATAVVDGAFKEIKLSDYR | Q61171 | 0          | n +42.03 Da,K +28.03 Da,             | 2999.270607 | 4 | 889.2188 | 1.772E+09 | 1.51E+09  |
| ASGVAVSDGVKVFNDMKVR               | P18760 | 0          | n +42.03 Da,K +34.06 Da,             | 3002.752372 | 3 | 730.7366 | 1.172E+09 | 907905024 |
| PDQLLKELPFPLNTR                   | Q78JT3 | 0          | n +17.03 Da,K +34.06 Da,             | 3003.210508 | 3 | 610.3628 | 278792992 | 884214976 |
| MEPLYQQTNKQVQEIQSHMGR             | O35166 | 0          | n +42.03 Da,n +28.03 Da,             | 3005.420014 | 3 | 872.4273 | 1.316E+09 | 1.202E+09 |
| DFAEKELVPIAAQLDR                  | Q07417 | 0.00807868 | n +42.03 Da,K +28.03 Da,             | 3005.432692 | 3 | 629.019  | 293376992 | 143402000 |
| PGVVDNFPLLKALR                    | P30115 | 0          | n +17.03 Da,K +34.06 Da,             | 3009.176591 | 2 | 793.9943 | 41103200  | 176771008 |
| PLILEEQLTADEKLIR                  | Q60759 | 0          | n +17.03 Da,K +34.06 Da,             | 3009.990113 | 3 | 643.7208 | 99715504  | 228946000 |
| SSPAQPAVPAPLANLKIQHTKIF           | O35945 | 0          | n +42.03 Da,K +28.03 Da,             | 3010.129262 | 3 | 842.8198 | 202706000 | 167028992 |
| PGVVDNFPLLKALR                    | P30115 | 0          | n +17.03 Da,K +34.06 Da,             | 3012.044667 | 3 | 529.6656 | 2.54E+09  | 8.78E+09  |
| DATLMLPTQTISQGAIEKVKDATR          | Q8C196 | 0          | n +34.06 Da,K +34.06 Da,             | 3015.071902 | 4 | 668.6231 | 224084992 | 203842000 |
| FGFPEGSVELYAEKVATR                | P62908 | 0          | n +42.03 Da,K +34.06 Da,             | 3015.284669 | 3 | 690.7006 | 814860032 | 880339008 |
| PGVVDNFPLLKALR                    | P30115 | 0          | n +14.02 Da,K +28.03 Da,             | 3017.938991 | 2 | 790.978  | 915372032 | 638784000 |
| LITLEQGKTLDAEGDVFR                | Q9EQ20 | 0          | n +42.03 Da,K +28.03 Da,             | 3024.243789 | 3 | 716.0628 | 3.034E+09 | 2.477E+09 |
| ATAVVVNIGKKLYEGK                  | Q9DCL9 | 0.00115785 | n +42.03 Da,n +28.03 Da,K +28.03 Da, | 3025.500917 | 3 | 606.0355 | 502468000 | 308416000 |
| ADEIAKAQVAQPGGDTIFGKIIR           | P70349 | 0          | n +42.03 Da,n +34.06 Da,K +34.06 Da, | 3027.349625 | 3 | 832.7981 | 1.09E+11  | 1.037E+11 |
| ADEIAKAQVAQPGGDTIFGKIIR           | P70349 | 0          | n +42.03 Da,n +28.03 Da,K +28.03 Da, | 3027.360762 | 2 | 1248.693 | 1.878E+09 | 1.811E+09 |
| ADEIAKAQVAQPGGDTIFGKIIR           | P70349 | 0          | n +42.03 Da,n +34.06 Da,K +34.06 Da, | 3028.262926 | 4 | 624.8508 | 1.468E+10 | 1.368E+10 |
| AIKFLEVIKPF                       | P61620 | 0.00078339 | n +34.06 Da,K +34.06 Da,             | 3028.606627 | 3 | 468.6615 | 2.14E+09  | 2.858E+09 |
| DLAFVDVPNDSSFQIVKNPR              | Q61176 | 0          | n +34.06 Da,K +34.06 Da,             | 3030.295514 | 3 | 777.0976 | 108499000 | 313576992 |
| FLFPEGIKGMVQAVR                   | Q8R0Y6 | 0          | n +42.03 Da,K +28.03 Da,             | 3030.863679 | 3 | 588.0069 | 137651008 | 125061000 |
| AIKFLEVIKPF                       | P61620 | 0.00040096 | n +28.03 Da,K +28.03 Da,             | 3031.233132 | 2 | 694.9488 | 259951008 | 114191000 |
| AELVQGSAPVGMKAEGFVDALHR           | A2AJ71 | 0          | n +42.03 Da,K +28.03 Da,             | 3032.187419 | 3 | 860.7789 | 519684000 | 491548000 |
| DELEIIEGMKFDR                     | P63038 | 0          | n +28.03 Da,                         | 3034.138322 | 3 | 550.9518 | 637222976 | 666814016 |
| SQSLLFVDIPSKIICR                  | Q64374 | 0          | n +34.06 Da,K +34.06 Da,             | 3044.452995 | 3 | 648.7107 | 556436992 | 491040000 |
| SDYLELDTIKNLVR                    | P08113 | 0          | n +28.03 Da,                         | 3048.91437  | 3 | 578.9929 | 112701000 | 62118900  |
| PGVVDNFPLLKALR                    | P30115 | 0          | n +14.02 Da,K +28.03 Da,             | 3052.205346 | 3 | 526.9843 | 290398016 | 274008000 |
| DLAFVDVPNDSSFQIVKNPR              | Q61176 | 0          | n +28.03 Da,K +28.03 Da,             | 3055.689749 | 3 | 773.0771 | 38903200  | 29065800  |

|                                |        |            |                                      |             |   |          |           |           |
|--------------------------------|--------|------------|--------------------------------------|-------------|---|----------|-----------|-----------|
| GSYINPEVLDITEQALHSR            | P14869 | 0          | n +28.03 Da,                         | 3056.535874 | 3 | 724.041  | 827905984 | 702406976 |
| LKTLVPVTFENVSIPER              | Q99N93 | 0          | n +34.06 Da,K +34.06 Da,             | 3058.719944 | 3 | 706.7657 | 86509600  | 988212992 |
| SMEDALKAADTIGYPMIR             | Q8C196 | 0          | n +28.03 Da,K +28.03 Da,             | 3059.705414 | 3 | 713.0389 | 41202800  | 34177100  |
| SLAPGHVADFLVADFR               | P97328 | 0          | n +34.06 Da,                         | 3063.953496 | 3 | 581.6457 | 245756992 | 277188992 |
| SINTEAVINAIPEKDVDTGLTSVSAGKLAR | Q922D8 | 0          | n +34.06 Da,K +34.06 Da,             | 3068.045403 | 4 | 781.6876 | 119600000 | 150020992 |
| AELVQGSAPVGMKAEGFVDALHR        | A2AJ71 | 0          | n +42.03 Da,K +28.03 Da,             | 3070.803857 | 3 | 858.794  | 1.027E+10 | 8.686E+09 |
| SSPAQPAVPAPLADLKIQHTKIF        | P24549 | 0          | n +42.03 Da,K +28.03 Da,             | 3072.611214 | 3 | 842.1365 | 77122704  | 1.245E+09 |
| LIPPFHAASAQLTSLVDADAR          | Q91XD4 | 0          | n +28.03 Da,                         | 3073.904397 | 3 | 738.0598 | 99978600  | 284955008 |
| ASGVAVSDGVIKVFNDMKVR           | P18760 | 0          | n +42.03 Da,K +28.03 Da,             | 3074.983077 | 2 | 1095.6   | 136616000 | 202544992 |
| LKTLVPVTFENVSIPER              | Q99N93 | 0          | n +34.06 Da,K +34.06 Da,             | 3076.856786 | 3 | 703.7495 | 1.963E+09 | 1.6E+09   |
| EDNSVVSLSQPKMDELQLFR           | Q01853 | 0.00839161 | n +34.06 Da,K +34.06 Da,             | 3078.23441  | 3 | 799.7427 | 343582016 | 401984992 |
| SQVIFTNPLEIVKIR                | Q8BH59 | 0          | n +28.03 Da,K +28.03 Da,             | 3078.99928  | 3 | 605.0368 | 55521800  | 52312000  |
| ASGVAVSDGVIKVFNDMKVR           | P18760 | 0          | n +42.03 Da,K +34.06 Da,             | 3080.822454 | 3 | 733.7527 | 37796992  | 3.396E+09 |
| MLGGLGKLAAEGLAHR               | Q8CF02 | 0          | n +42.03 Da,K +34.06 Da,             | 3085.773841 | 2 | 555.8233 | 459592000 | 772086976 |
| ASGVAVSDGVIKVFNDMKVR           | P18760 | 0          | n +42.03 Da,K +28.03 Da,             | 3089.073129 | 3 | 730.7366 | 6.66E+09  | 6.022E+09 |
| MDPSGVKVLETAEDIQER             | P16546 | 0          | n +42.03 Da,K +28.03 Da,             | 3089.428498 | 3 | 696.349  | 184350000 | 190668000 |
| LNLPEPWDWR                     | P97821 | 0.00040096 | n +28.03 Da,                         | 3090.049111 | 2 | 672.3407 | 130200000 | 57681900  |
| SSPAQPAVPAPLADLKIQHTKIF        | P24549 | 0          | n +42.03 Da,K +28.03 Da,             | 3092.11042  | 2 | 1264.218 | 237830000 | 168816000 |
| GTTIAGVVYKDGIVLGADTR           | P70195 | 0          | n +42.03 Da,n +34.06 Da,             | 3092.632573 | 3 | 692.7108 | 73579504  | 62914400  |
| SLVSLDQDMQTKVRDLPR             | Q91VW9 | 0.00152323 | n +42.03 Da,K +28.03 Da,             | 3095.196137 | 3 | 724.3844 | 2.442E+09 | 2.373E+09 |
| PDANKENTLNQLVGAAGAAGQR         | Q9EQ20 | 0.00115785 | n +14.02 Da,K +28.03 Da,             | 3096.202402 | 3 | 795.4159 | 187548000 | 37969800  |
| SSPAQPAVPAPLADLKIQHTKIF        | P24549 | 0          | n +42.03 Da,K +34.06 Da,             | 3103.195653 | 3 | 843.1484 | 3.807E+09 | 3.209E+09 |
| MLGGLGKLAAEGLAHR               | Q8CF02 | 0          | n +42.03 Da,K +34.06 Da,             | 3104.726928 | 2 | 554.316  | 3.412E+09 | 3.003E+09 |
| FVGAVDPIMEKFNSISYDR            | Q91YI0 | 0.01823003 | n +42.03 Da,K +28.03 Da,             | 3112.321176 | 3 | 782.4006 | 336775008 | 360971008 |
| ASGVTVNDEVIKVFNDMKVR           | P45591 | 0          | n +42.03 Da,K +28.03 Da,             | 3118.253871 | 3 | 773.7507 | 357831008 | 322225984 |
| DLKVLQPTIFPVVPR                | P41216 | 0.00040096 | n +34.06 Da,K +34.06 Da,             | 3122.698268 | 3 | 596.3851 | 9228150   | 109956000 |
| PTGGAGAVAMLIGPKAPLVLEQGLR      | P54869 | 0          | n +28.03 Da,K +28.03 Da,             | 3127.037014 | 4 | 618.8561 | 193550000 | 134899008 |
| DLKVLQPTIFPVVPR                | P41216 | 0          | n +28.03 Da,K +28.03 Da,             | 3127.966118 | 3 | 593.3695 | 712905984 | 570062976 |
| VKLTAELIEQAAQYTNVAVR           | P57784 | 0          | n +28.03 Da,K +28.03 Da,             | 3129.454912 | 3 | 725.4127 | 265964000 | 286392992 |
| SVVVAPAQTLNAEFQMLR             | Q8C196 | 0.00040096 | n +34.06 Da,                         | 3130.206251 | 3 | 699.0502 | 171028000 | 349356992 |
| SVVVAPAQTLNAEFQMLR             | Q8C196 | 0          | n +28.03 Da,                         | 3133.688454 | 3 | 697.0431 | 181286000 | 406735008 |
| SLLFVDIPSKIICR                 | Q64374 | 0.00152323 | n +34.06 Da,                         | 3134.080101 | 3 | 573.0075 | 174959008 | 171136992 |
| TDFDECDKLYFEELSLE              | Q8C196 | 0          | n +34.06 Da,K +34.06 Da,             | 3134.381283 | 3 | 792.0524 | 52930000  | 146591008 |
| AESPAFLSAKDEGSFAYLTIKDR        | A6H630 | 0          | n +42.03 Da,n +34.06 Da,K +34.06 Da, | 3134.639706 | 3 | 875.1345 | 107064000 | 722731008 |
| TDFDECDKLYFEELSLE              | Q8C196 | 0          | n +28.03 Da,K +28.03 Da,             | 3144.575228 | 3 | 789.0348 | 62880000  | 63088000  |
| GAGAVAMLIGPKAPLVLEQGLR         | P54869 | 0          | n +28.03 Da,K +28.03 Da,             | 3145.464349 | 3 | 739.7784 | 39803400  | 25689100  |
| VKLTAELIEQAAQYTNVAVR           | P57784 | 0          | n +28.03 Da,K +28.03 Da,             | 3147.635893 | 3 | 722.3967 | 44071300  | 39252700  |
| MLGGLGKLAAEGLAHR               | Q8CF02 | 0          | n +42.03 Da,K +34.06 Da,             | 3148.816196 | 3 | 555.3157 | 2.122E+09 | 1.373E+09 |
| PSVSLQTVKLMKEGLEAAR            | O35490 | 0          | n +14.02 Da,K +28.03 Da,             | 3150.253202 | 3 | 708.7243 | 119638000 | 314513984 |
| AESPAFLSAKDEGSFAYLTIKDR        | A6H630 | 0          | n +42.03 Da,n +28.03 Da,K +28.03 Da, | 3150.355263 | 3 | 872.1204 | 948113984 | 949630016 |



|                                   |        |            |                          |             |   |          |           |           |
|-----------------------------------|--------|------------|--------------------------|-------------|---|----------|-----------|-----------|
| SVVVAPAQTLSNAEFQMLR               | Q8C196 | 0          | n +28.03 Da,             | 3170.463423 | 3 | 694.0261 | 16452700  | 85721000  |
| TFSHELSDFGLESTTGEVPPVAIR          | P27773 | 0          | n +34.06 Da,             | 3172.950436 | 3 | 873.7828 | 207939008 | 216332992 |
| SVVVAPAQTLSNAEFQMLR               | Q8C196 | 0          | n +28.03 Da,             | 3174.014913 | 2 | 1045.07  | 279908000 | 291672000 |
| SVVVAPAQTLSNAEFQMLR               | Q8C196 | 0          | n +28.03 Da,             | 3174.106412 | 3 | 697.0488 | 1.175E+09 | 941808000 |
| ADKMDMSLDDIIKLNLR                 | O08583 | 0          | n +42.03 Da,K +28.03 Da, | 3179.016256 | 4 | 657.822  | 64505400  | 56151400  |
| IYSLNEGYAKDFDPAINEYLQR            | Q9QXD6 | 0          | n +34.06 Da,             | 3182.287381 | 3 | 892.4488 | 164635008 | 118624000 |
| MELVEVLKR                         | Q7TMF3 | 0.00406654 | n +42.03 Da,K +28.03 Da, | 3182.293061 | 2 | 593.8469 | 1.521E+09 | 1.29E+09  |
| SDKLPYKVADIGLAAWGR                | P50247 | 0          | n +42.03 Da,K +34.06 Da, | 3185.140866 | 3 | 686.7166 | 222763008 | 203642000 |
| LPEFPFGLEPR                       | O35490 | 0.01883053 | n +28.03 Da,             | 3185.801445 | 2 | 665.3645 | 1.791E+09 | 1.496E+09 |
| APSQLALFSVSDKTGLVEFAR             | Q9CWJ9 | 0          | n +34.06 Da,K +34.06 Da, | 3196.244801 | 3 | 767.7716 | 44751100  | 579500032 |
| SDKLPYKVADIGLAAWGR                | P50247 | 0          | n +42.03 Da,K +34.06 Da, | 3206.4603   | 3 | 689.7316 | 22682600  | 98664704  |
| SGEDEQQEQTIAEDLVVTKYKMGDIANR      | P50580 | 0          | n +42.03 Da,K +34.06 Da, | 3206.606395 | 4 | 834.4226 | 158188992 | 162498000 |
| SGEDEQQEQTIAEDLVVTKYKMGDIANR      | P50580 | 0          | n +42.03 Da,K +28.03 Da, | 3206.867477 | 3 | 1108.208 | 920057984 | 750924032 |
| GVDLLADAVAVTMGPKGR                | P63038 | 0          | n +34.06 Da,K +34.06 Da, | 3207.317837 | 3 | 609.3451 | 90522096  | 103043000 |
| PEPLLEMIHEAAFR                    | Q9DC61 | 0          | n +14.02 Da,             | 3207.358797 | 3 | 589.9746 | 33293800  | 23550000  |
| SDKLPYKVADIGLAAWGR                | P50247 | 0.00040096 | n +42.03 Da,K +28.03 Da, | 3208.94024  | 3 | 686.7183 | 487307008 | 77350304  |
| MDNSGKQAEAMALLAEAER               | Q9DB05 | 0.01260647 | n +42.03 Da,K +34.06 Da, | 3211.130407 | 3 | 702.3379 | 47567900  | 44865300  |
| APSQLALFSVSDKTGLVEFAR             | Q9CWJ9 | 0          | n +34.06 Da,K +34.06 Da, | 3214.003838 | 3 | 764.7583 | 672235008 | 589548032 |
| ADKMDMSLDDIIKLNLR                 | O08583 | 0          | n +42.03 Da,K +28.03 Da, | 3220.255631 | 3 | 659.345  | 538126016 | 609022976 |
| LPSTKTFAFQMQIR                    | A2AAJ9 | 0.00934903 | n +14.02 Da,K +28.03 Da, | 3222.421555 | 3 | 568.6444 | 737523968 | 784537984 |
| EDVQETDTSQKQSPASHEIATNLGDFAIISLYR | P07758 | 0          | n +34.06 Da,K +34.06 Da, | 3224.116564 | 4 | 931.2007 | 892736000 | 898734016 |
| SLKDLDPVQELITQVR                  | Q8BMA6 | 0.00040096 | n +34.06 Da,K +34.06 Da, | 3227.982148 | 3 | 637.3701 | 84486800  | 94644200  |
| TLMLPTQTISQGAIEKVKDATR            | Q8C196 | 0          | n +28.03 Da,K +28.03 Da, | 3228.65309  | 3 | 829.1278 | 185292992 | 151270000 |
| AFDFKDVTLGSVLGR                   | Q9R0H0 | 0          | n +28.03 Da,K +28.03 Da, | 3236.410228 | 3 | 560.9827 | 547136000 | 522012992 |
| EGDVVKRTGAIQVDPVGEELLGR           | Q03265 | 0.00040096 | n +34.06 Da,K +34.06 Da, | 3237.17172  | 3 | 820.1297 | 71057296  | 54683300  |
| DALAGLVASNPDLQLLQGHR              | Q8VC30 | 0          | n +34.06 Da,             | 3238.891679 | 3 | 706.0557 | 432268000 | 458000992 |
| SLGQWLQEEKVPAIYGVDR               | Q8C196 | 0          | n +34.06 Da,             | 3251.738124 | 3 | 782.4221 | 571747968 | 529892000 |
| AILEDLVFPSEIVGKR                  | P62082 | 0          | n +34.06 Da,K +34.06 Da, | 3255.385712 | 3 | 614.6961 | 922784000 | 1.023E+09 |
| GISDQVLKEYLDNVQLGH                | P55096 | 0.00040096 | n +28.03 Da,K +28.03 Da, | 3257.411013 | 3 | 695.3714 | 59695400  | 47559700  |
| ADKMDMSLDDIIKLNLR                 | O08583 | 0          | n +42.03 Da,K +34.06 Da, | 3265.518674 | 3 | 663.3658 | 183835008 | 113992000 |
| PETVSTDFDECDKLYFEELSLR            | Q8C196 | 0          | n +14.02 Da,K +28.03 Da, | 3272.086497 | 3 | 955.4393 | 165684000 | 101664000 |
| GIGQPLSLLLKNSPLVSR                | P08249 | 0          | n +28.03 Da,K +28.03 Da, | 3276.339799 | 3 | 650.0695 | 44068300  | 46241300  |
| VLPSTTEILKSVVAR                   | P67778 | 0          | n +28.03 Da,K +28.03 Da, | 3278.461039 | 3 | 593.704  | 121679000 | 116106000 |
| SEPGGGEDGSAGLEVSQVAVLQKHLR        | Q9JHU4 | 0          | n +42.03 Da,K +34.06 Da, | 3285.505936 | 3 | 1087.224 | 114551000 | 83895800  |
| DGGDLTNLIHTKYPQLLSGIR             | P50247 | 0          | n +34.06 Da,K +34.06 Da, | 3290.411043 | 3 | 789.7707 | 83712496  | 66070600  |
| MFVQEEKIFAGKVLK                   | Q8VDI7 | 0          | n +42.03 Da,K +34.06 Da, | 3290.752158 | 3 | 631.694  | 245176992 | 220722000 |
| ASGVTVNDEVIKVFNDMKVR              | P45591 | 0          | n +42.03 Da,K +34.06 Da, | 3300.134263 | 3 | 773.7504 | 760830016 | 536782016 |
| SMEDALKAADTIGYPVMIR               | Q8C196 | 0          | n +34.06 Da,K +34.06 Da, | 3301.685569 | 3 | 713.0395 | 2.673E+09 | 2.523E+09 |
| TPATMSQVAKDVATFLR                 | Q9D0M3 | 0.00040096 | n +28.03 Da,             | 3303.173657 | 3 | 631.3343 | 22536900  | 19078700  |
| PTGGAGAVAMLIGPKAPLVLEQGLR         | P54869 | 0          | n +14.02 Da,K +28.03 Da, | 3309.988688 | 4 | 615.3615 | 3.495E+09 | 2.838E+09 |

|                              |        |            |                                      |             |   |          |           |           |
|------------------------------|--------|------------|--------------------------------------|-------------|---|----------|-----------|-----------|
| PTGGAGAVAMLIGPKAPLVLEQGLR    | P54869 | 0          | n +14.02 Da,K +28.03 Da,             | 3310.019349 | 3 | 820.1452 | 1.076E+10 | 9.045E+09 |
| TLGIETVGGVMTKLIPR            | P20029 | 0          | n +28.03 Da,K +28.03 Da,             | 3314.428979 | 3 | 614.3689 | 336179008 | 133420000 |
| ASVALSEAEKVYIVHGVQEDLR       | Q9D0M0 | 0          | n +42.03 Da,n +28.03 Da,             | 3331.93463  | 3 | 828.4431 | 451755008 | 405720992 |
| GLDFSAKVIQGSLSLDPQAVR        | Q9Z2V4 | 0          | n +34.06 Da,K +34.06 Da,             | 3334.190093 | 3 | 753.1014 | 270108000 | 214800000 |
| DATLMLPTQTISQGAIEKVKDATR     | Q8C196 | 0          | n +28.03 Da,K +28.03 Da,             | 3344.220801 | 3 | 891.1611 | 416736992 | 240916992 |
| TPATMSQVAKDVATFLR            | Q9D0M3 | 0.00040096 | n +28.03 Da,                         | 3345.123987 | 3 | 629.3331 | 213296000 | 524585984 |
| PAEIDSLWEISKQIEGH            | Q91YT0 | 0          | n +14.02 Da,K +28.03 Da,             | 3346.385158 | 3 | 665.3462 | 4.306E+09 | 4.006E+09 |
| SGGIGQPLSLLLKNSPLVSR         | P08249 | 0.00040096 | n +28.03 Da,K +28.03 Da,             | 3351.532559 | 3 | 698.0877 | 8300410   | 14117100  |
| PLVPPQLTIKDFYMTDSISR         | Q91VD9 | 0          | n +14.02 Da,n +28.03 Da,             | 3351.535331 | 3 | 785.4032 | 71087104  | 169884000 |
| SGGIGQPLSLLLKNSPLVSR         | P08249 | 0.00040096 | n +28.03 Da,K +28.03 Da,             | 3353.55367  | 3 | 697.0843 | 99733800  | 87254304  |
| MNYMPGTASLIEDIDKKH           | Q8VC85 | 0          | n +42.03 Da,K +28.03 Da,             | 3356.207946 | 3 | 721.0266 | 130052000 | 124258000 |
| PLILEEQLTADEKLIR             | Q60759 | 0.00807868 | n +14.02 Da,K +28.03 Da,             | 3363.166752 | 3 | 641.698  | 383796000 | 313144992 |
| SGVAVSDGVIKVFNDMKVR          | P18760 | 0          | n +42.03 Da,K +28.03 Da,             | 3375.662223 | 3 | 707.0574 | 79702800  | 48640400  |
| ASGVAVSDGVIKVFNDMKVR         | P18760 | 0          | n +42.03 Da,K +34.06 Da,             | 3376.956969 | 3 | 733.7517 | 69657800  | 616153984 |
| GTPATMSQVAKDVATFLR           | Q9D0M3 | 0          | n +34.06 Da,K +34.06 Da,             | 3382.412812 | 3 | 650.3557 | 184684992 | 197199008 |
| PVLGFLGALAVGTLCGDALLHLLPHA   | Q9D856 | 0.04472548 | n +14.02 Da,                         | 3390.860691 | 3 | 880.4804 | 648456000 | 601643008 |
| VVDVFTKGMEYIPSTFR            | Q9JIZ0 | 0          | n +28.03 Da,K +28.03 Da,             | 3393.893845 | 3 | 725.3792 | 20028200  | 13901700  |
| KEPLFGISTGNIITGLAAGAKSY      | Q8C196 | 0.00337838 | n +28.03 Da,K +28.03 Da,             | 3408.342429 | 3 | 795.1061 | 102388000 | 232802000 |
| ITYPAGFMDVISIDKTGENFR        | P62702 | 0          | n +34.06 Da,K +34.06 Da,             | 3416.73216  | 3 | 812.7602 | 1.805E+09 | 2.076E+09 |
| GTPATMSQVAKDVATFLR           | Q9D0M3 | 0          | n +28.03 Da,K +28.03 Da,             | 3417.595393 | 3 | 650.3524 | 60975200  | 40608400  |
| PNPDQLLKELPPLNTR             | Q78JT3 | 0.00040096 | n +14.02 Da,K +28.03 Da,             | 3417.952105 | 3 | 676.7009 | 46903500  | 100548000 |
| ASGVAVSDGVIKVFNDMKVR         | P18760 | 0          | n +42.03 Da,K +34.06 Da,             | 3432.443767 | 2 | 1095.6   | 1.392E+09 | 1.415E+09 |
| ASGVAVSDGVIKVFNDMKVR         | P18760 | 0          | n +42.03 Da,K +28.03 Da,             | 3433.262007 | 3 | 730.7383 | 8.635E+10 | 8.143E+10 |
| ASLSLAPVNIKAGADEER           | P80314 | 0          | n +42.03 Da,K +28.03 Da,             | 3437.6711   | 2 | 1029.548 | 754409984 | 733497984 |
| ASLSLAPVNIKAGADEER           | P80314 | 0          | n +42.03 Da,K +28.03 Da,             | 3441.796388 | 3 | 686.7006 | 1.086E+09 | 863910976 |
| DPAIYFKEQFLDGDWATNR          | P14211 | 0          | n +28.03 Da,K +28.03 Da,             | 3446.320254 | 3 | 781.3866 | 3.991E+09 | 4.032E+09 |
| DDDIAALVVDNGSGMKAGFAGDDAPR   | P60710 | 0          | n +42.03 Da,K +28.03 Da,             | 3447.840375 | 3 | 936.4243 | 266490000 | 189620992 |
| ALLGEENKGFYLMQELPQER         | P51174 | 0          | n +28.03 Da,K +28.03 Da,             | 3451.324233 | 3 | 862.122  | 18054900  | 8857840   |
| PFSLDALAKEGIVALR             | P80317 | 0          | n +14.02 Da,K +28.03 Da,             | 3453.141142 | 3 | 581.3453 | 24401700  | 12539500  |
| LCRQEEMALSVDVAHVREKLIWLR     | Q8BGX0 | 0.0298318  | n +14.02 Da,K +28.03 Da,             | 3456.20408  | 3 | 994.5115 | 230311008 | 182791008 |
| ASGVAVSDGVIKVFNDMKVR         | P18760 | 0          | n +42.03 Da,K +28.03 Da,             | 3459.324017 | 3 | 727.7292 | 584092032 | 1.666E+10 |
| ASGVAVSDGVIKVFNDMKVR         | P18760 | 0          | n +42.03 Da,K +34.06 Da,             | 3461.494171 | 3 | 733.7545 | 106225000 | 647532032 |
| DPAIYFKEQFLDGDWATNR          | P14211 | 0          | n +34.06 Da,K +34.06 Da,             | 3467.3787   | 2 | 1171.577 | 349076992 | 313204992 |
| DPAIYFKEQFLDGDWATNR          | P14211 | 0.00040096 | n +28.03 Da,K +28.03 Da,             | 3467.443928 | 4 | 586.2917 | 111930000 | 92098000  |
| ASFVTEVLHSGSLEKEDLGR         | O54692 | 0          | n +42.03 Da,K +28.03 Da,             | 3475.876916 | 3 | 806.0819 | 200472992 | 186584000 |
| MDEDGLPLMGSGIDLTKVPAIQQR     | Q9CR27 | 0          | n +42.03 Da,K +28.03 Da,             | 3478.940388 | 3 | 937.5023 | 248400000 | 246094000 |
| DVMEIIFAKAVER                | D3YUP6 | 0          | n +28.03 Da,K +28.03 Da,             | 3479.446468 | 3 | 526.297  | 50454300  | 66194100  |
| SWLFGIKGPKGEGTGPPLPQPAEGGGDR | Q925I1 | 0          | n +42.03 Da,n +28.03 Da,K +28.03 Da, | 3481.665988 | 3 | 1113.591 | 340145984 | 307419008 |
| DLPALPGGPAGGTGELAKYGLPGVAQLR | O08600 | 0          | n +28.03 Da,K +28.03 Da,             | 3490.759323 | 3 | 911.1768 | 131581000 | 89495200  |
| MEKNLNQALLDLHALGSAR          | P29391 | 0          | n +28.03 Da,K +28.03 Da,             | 3493.952225 | 3 | 717.3859 | 57729800  | 73541200  |

|                                     |        |            |                                      |             |   |          |           |           |
|-------------------------------------|--------|------------|--------------------------------------|-------------|---|----------|-----------|-----------|
| DPAIYFKEQFLDGDWNTNR                 | P14211 | 0          | n +34.06 Da,K +34.06 Da,             | 3503.687463 | 3 | 785.102  | 91299504  | 72677904  |
| ASGVTVNDEVIKVFNDMKVR                | P45591 | 0          | n +42.03 Da,K +28.03 Da,             | 3507.238544 | 3 | 773.7521 | 114004000 | 108827000 |
| SKDFVENVTSGNAVDFFPVLRL              | P00186 | 0          | n +28.03 Da,K +28.03 Da,             | 3508.965812 | 3 | 799.757  | 503708000 | 438001984 |
| TSASTPVFGGILSLINEHR                 | O89023 | 0.02088773 | n +28.03 Da,                         | 3529.976721 | 3 | 676.3697 | 42609100  | 24071100  |
| SGPVVAMVWEGLNVVKTGR                 | P15532 | 0          | n +34.06 Da,K +34.06 Da,             | 3532.328783 | 3 | 689.7375 | 233548992 | 1.243E+09 |
| TDITYPAGFMDVISIKTGENFR              | P62702 | 0          | n +42.03 Da,K +28.03 Da,             | 3541.668483 | 3 | 887.4444 | 58289400  | 71419000  |
| LASDLHHAFGLHCELLR                   | Q9D2M0 | 0.00040096 | n +42.03 Da,                         | 3541.815191 | 3 | 715.3705 | 13145200  | 10791800  |
| MESSTSSSGSALGAVDPQLQHFIEVETQKQR     | Q9WVA2 | 0          | n +42.03 Da,K +34.06 Da,             | 3544.221848 | 4 | 855.1703 | 971548992 | 1.007E+09 |
| SGPVVAMVWEGLNVVKTGR                 | P15532 | 0          | n +28.03 Da,K +28.03 Da,             | 3545.845498 | 3 | 685.7205 | 242752000 | 229966000 |
| MESSTSSSGSALGAVDPQLQHFIEVETQKQR     | Q9WVA2 | 0          | n +42.03 Da,K +28.03 Da,             | 3546.190202 | 3 | 1139.892 | 5.459E+09 | 5.519E+09 |
| APAIIFIDELDAIAPKR                   | Q01853 | 0          | n +34.06 Da,K +34.06 Da,             | 3547.742503 | 3 | 637.0437 | 265562000 | 256219008 |
| MEELTIWEQHTATLYK DPR                | Q9QXY1 | 0.00040096 | n +42.03 Da,K +28.03 Da,             | 3549.590439 | 3 | 811.0717 | 77082896  | 77887800  |
| MELGELLYNKSEYIETASGNKVSR            | Q9QZB9 | 0          | n +42.03 Da,n +34.06 Da,K +34.06 Da, | 3561.348075 | 3 | 947.8378 | 357448000 | 299809984 |
| MELGELLYNKSEYIETASGNKVSR            | Q9QZB9 | 0          | n +42.03 Da,n +28.03 Da,K +28.03 Da, | 3573.145776 | 3 | 943.8113 | 217478000 | 123904000 |
| QKVRIQETQAE LPRGSI PR               | P97311 | 0.00968523 | n +42.03 Da,K +28.03 Da,             | 3580.285861 | 3 | 757.4166 | 104979000 | 142728992 |
| LASDLHHAFGLHCELLR                   | Q9D2M0 | 0.00040096 | n +42.03 Da,                         | 3581.278595 | 3 | 714.3677 | 18561600  | 194892992 |
| VPAETLYDVLHDIEYR                    | Q9JMD3 | 0          | n +28.03 Da,                         | 3581.437291 | 3 | 654.3387 | 246239008 | 266840992 |
| LDPGVVDNFP LLKALR                   | P30115 | 0          | n +34.06 Da,K +34.06 Da,             | 3584.13366  | 3 | 608.3646 | 45415000  | 37685600  |
| DPAIYFKEQFLDGDWNTNR                 | P14211 | 0          | n +28.03 Da,K +28.03 Da,             | 3588.103214 | 3 | 781.3866 | 7.348E+09 | 7.951E+09 |
| ESMEDALKAADTIGY PVMIR               | Q8C196 | 0          | n +28.03 Da,K +28.03 Da,             | 3591.772737 | 3 | 756.0534 | 59541500  | 33211100  |
| LASDLHHAFGLHCELLR                   | Q9D2M0 | 0.00040096 | n +42.03 Da,                         | 3592.584729 | 3 | 712.3591 | 725651008 | 349296000 |
| AVESMEDALKAADTIGY PVMIR             | Q8C196 | 0          | n +28.03 Da,                         | 3599.612166 | 3 | 812.7541 | 90560496  | 81913600  |
| DPAIYFKEQFLDGDWNTNR                 | P14211 | 0          | n +34.06 Da,K +34.06 Da,             | 3613.207015 | 2 | 1171.575 | 1.384E+09 | 1.284E+09 |
| ASGVTVNDEVIKVFNDMKVR                | P45591 | 0          | n +42.03 Da,K +34.06 Da,             | 3614.427791 | 3 | 773.7521 | 3.396E+10 | 3.459E+10 |
| GKQGFIDLPEFPFGL EPR                 | O35490 | 0          | n +34.06 Da,K +34.06 Da,             | 3615.30345  | 3 | 704.722  | 10268900  | 92261904  |
| GKQGFIDLPEFPFGL EPR                 | O35490 | 0          | n +34.06 Da,K +34.06 Da,             | 3616.570495 | 3 | 701.7132 | 2.013E+09 | 1.374E+09 |
| DPAIYFKEQFLDGDWNTNR                 | P14211 | 0          | n +28.03 Da,K +28.03 Da,             | 3619.607782 | 4 | 586.2917 | 711336000 | 619056000 |
| DPAIYFKEQFLDGDWNTNR                 | P14211 | 0          | n +34.06 Da,K +34.06 Da,             | 3635.607387 | 3 | 784.4041 | 296516000 | 1.317E+09 |
| APPVPGAVSGSGEVD E LFDVKNAF          | O89079 | 0          | n +34.06 Da,K +34.06 Da,             | 3653.495622 | 3 | 839.0952 | 47794100  | 58729500  |
| VNPTVFFDITADDEPLGR                  | P17742 | 0          | n +34.06 Da,                         | 3656.624682 | 3 | 678.6782 | 297089984 | 269752992 |
| VNPTVFFDITADDEPLGR                  | P17742 | 0          | n +28.03 Da,                         | 3657.2502   | 2 | 1017.515 | 399992000 | 391807008 |
| PVTDLFLQLVDSGK VDEAR                | Q6PB66 | 0.03245117 | n +14.02 Da,K +28.03 Da,             | 3663.296212 | 3 | 714.3807 | 6462000   | 6177900   |
| PSYVPVVLSELSDHMTFAER                | Q8R084 | 0          | n +14.02 Da,                         | 3681.593572 | 3 | 764.3831 | 26344800  | 9516930   |
| AAA A V V P A E W I K N W E K S G R | B1AZ16 | 0.0123119  | n +42.03 Da,K +28.03 Da,             | 3685.642475 | 3 | 758.7508 | 125939000 | 130076000 |
| SLTAETKAWMAVIGR                     | Q8VHE6 | 0.0202946  | n +42.03 Da,K +34.06 Da,             | 3686.857935 | 3 | 568.6446 | 54944100  | 59169400  |
| MKLPIFIADAFTATAFR                   | Q9CXN7 | 0          | n +34.06 Da,K +34.06 Da,             | 3691.576342 | 3 | 657.0373 | 34204800  | 36925600  |
| TPDCGKQGFIDLPEFPFGL EPR             | O35490 | 0          | n +28.03 Da,K +28.03 Da,             | 3695.596803 | 3 | 859.433  | 1.831E+09 | 1.406E+09 |
| PVTDLFLQLVDSGK VDEAR                | Q6PB66 | 0.03245117 | n +14.02 Da,K +28.03 Da,             | 3700.921795 | 3 | 713.3695 | 75738200  | 75578200  |
| MEGLKDKTLQELEEMQN DPEAIAR           | Q8R105 | 0.04691812 | n +42.03 Da,K +28.03 Da,             | 3701.98572  | 3 | 962.7909 | 206240000 | 199084000 |
| DPAIYFKEQFLDGDWNTNR                 | P14211 | 0          | n +28.03 Da,K +28.03 Da,             | 3703.639344 | 3 | 781.3863 | 986777984 | 754556992 |

|                                 |        |            |                                      |             |   |          |           |           |
|---------------------------------|--------|------------|--------------------------------------|-------------|---|----------|-----------|-----------|
| ASVGTlafdeYGRpFLIKDQDR          | P80316 | 0          | n +42.03 Da,K +34.06 Da,             | 3708.628297 | 3 | 894.4702 | 1.722E+09 | 1.546E+09 |
| ELDPGVVDNfPLLKALR               | P30115 | 0          | n +28.03 Da,K +28.03 Da,             | 3715.091491 | 3 | 651.3789 | 231075008 | 177720992 |
| ADSVKtFLQDLGR                   | Q61070 | 0.00040096 | n +42.03 Da,K +28.03 Da,             | 3727.558413 | 2 | 760.4107 | 159970000 | 137432992 |
| ASFVTEVLAHSGSLEKEDLGR           | O54692 | 0          | n +42.03 Da,K +34.06 Da,             | 3730.91976  | 3 | 806.0811 | 310204000 | 298256000 |
| PEQLQDKSNEILTAIQGMRR            | P70168 | 0.00040096 | n +14.02 Da,K +28.03 Da,             | 3737.425043 | 3 | 774.0797 | 20367500  | 33052700  |
| DPaIFKEQFLDGDawTNR              | P14211 | 0          | n +34.06 Da,K +34.06 Da,             | 3744.677383 | 3 | 784.4014 | 58279600  | 356009984 |
| MEGLKDKTLQELEEMQNDPEAIAR        | Q8R105 | 0.00040096 | n +42.03 Da,K +34.06 Da,             | 3747.408052 | 3 | 962.8133 | 240554000 | 211144000 |
| DFGTVNEIYKTYFQGSLPAR            | P52760 | 0          | n +34.06 Da,                         | 3757.433367 | 3 | 788.0742 | 690705024 | 811233984 |
| DWVIPPINLPENSRGPFQELVR          | P15116 | 0.00040096 | n +28.03 Da,                         | 3759.277475 | 3 | 901.1521 | 60011100  | 51474700  |
| MQKDasLSGFLPSFQHFATQAIH         | Q8VCN5 | 0.00040096 | n +42.03 Da,K +34.06 Da,             | 3760.252806 | 3 | 877.7704 | 866390976 | 789654976 |
| RGLDtdTTVEVawCELQTR             | Q80UE6 | 0.03870162 | n +28.03 Da,                         | 3770.854006 | 3 | 760.0545 | 294900000 | 264778000 |
| TPDCGKQGFIDLPEFPFGLPR           | O35490 | 0.00040096 | n +34.06 Da,K +34.06 Da,             | 3775.629405 | 3 | 862.4463 | 5558550   | 24228100  |
| TPDCGKQGFIDLPEFPFGLPR           | O35490 | 0.00040096 | n +34.06 Da,K +34.06 Da,             | 3778.749254 | 3 | 863.4543 | 105414000 | 85193000  |
| VEELDPGVVDNfPLLKALR             | P30115 | 0.00040096 | n +34.06 Da,K +34.06 Da,             | 3779.376634 | 3 | 727.4159 | 70831800  | 51979300  |
| DGTVCgSGQVCFRGDCLR              | F8VQ03 | 0.0202946  | n +34.06 Da,                         | 3779.636655 | 3 | 691.3181 | 27366500  | 24017300  |
| MEGLKDKTLQELEEMQNDPEAIAR        | Q8R105 | 0.00040096 | n +42.03 Da,K +34.06 Da,             | 3784.968581 | 3 | 966.854  | 548292992 | 514176000 |
| MQKDasLSGFLPSFQHFATQAIH         | Q8VCN5 | 0.00040096 | n +42.03 Da,K +28.03 Da,             | 3786.887893 | 3 | 876.7581 | 4528750   | 17858600  |
| GFGDLKTPAGLQVLDYADKSY           | O70251 | 0          | n +34.06 Da,K +34.06 Da,             | 3794.941746 | 3 | 857.1232 | 33700000  | 18995900  |
| IFVEESVYDEFVKR                  | P24549 | 0          | n +42.03 Da,K +28.03 Da,             | 3800.791    | 3 | 610.6492 | 12636300  | 11099100  |
| DGTPATMSQVAKDVATFLR             | Q9D0M3 | 0          | n +34.06 Da,K +34.06 Da,             | 3811.641124 | 3 | 688.6976 | 32338100  | 33060800  |
| GNPALAQPLIQNVKKILESDR           | Q8C196 | 0.01389831 | n +28.03 Da,K +28.03 Da,             | 3816.42499  | 3 | 796.7921 | 36679800  | 25072300  |
| AAKVFESIGKFGFL                  | P67778 | 0.0248067  | n +42.03 Da,n +34.06 Da,K +34.06 Da, | 3819.609929 | 2 | 732.9272 | 61626500  | 64888600  |
| DLTDAFLAEVEKAKGNPESSFNdenLR     | Q9JKY7 | 0.00040096 | n +42.03 Da,K +28.03 Da,             | 3831.734313 | 3 | 1030.516 | 18743500  | 14549500  |
| PALAQPLIQNVKKILESDR             | Q8C196 | 0.00078339 | n +14.02 Da,K +28.03 Da,             | 3842.198017 | 3 | 735.0994 | 93891000  | 90322000  |
| SLVDLGKLLLEAAR                  | Q00420 | 0          | n +42.03 Da,K +34.06 Da,             | 3873.774243 | 3 | 537.6664 | 850700032 | 805964032 |
| MDFNVKkLAADAGtFLSR              | Q9JK48 | 0.00040096 | n +42.03 Da,K +28.03 Da,             | 3880.209502 | 3 | 694.7056 | 4271720   | 4509600   |
| PGNPALAQPLIQNVKKILESDR          | Q8C196 | 0          | n +28.03 Da,K +28.03 Da,             | 3902.324544 | 3 | 829.1417 | 42761200  | 41340000  |
| DCGKQGFIDLPEFPFGLPR             | O35490 | 0          | n +28.03 Da,K +28.03 Da,             | 3904.295075 | 3 | 793.3996 | 188287008 | 145338000 |
| DSTQLLDHLfANvIPK                | Q9DBT9 | 0.00040096 | n +28.03 Da,K +28.03 Da,             | 3906.944294 | 3 | 623.0157 | 67405400  | 63102900  |
| AASGESGASGGGStEEAFMTfYSEVKQIEKR | Q6NZB0 | 0          | n +42.03 Da,K +34.06 Da,             | 3911.126104 | 3 | 1122.864 | 315038016 | 239592000 |
| AASGESGASGGGStEEAFMTfYSEVKQIEKR | Q6NZB0 | 0          | n +42.03 Da,K +28.03 Da,             | 3913.118746 | 4 | 842.3999 | 231223008 | 213852000 |
| PTTQSPQDEQEKLLDEAIQAVKvQSF      | Q9EQH3 | 0          | n +14.02 Da,K +28.03 Da,             | 3917.355649 | 3 | 1043.211 | 60511000  | 41348500  |
| AGDLEGGKSLSGLLSGLAQNAFHGH       | Q8K4M5 | 0.00040096 | n +42.03 Da,K +34.06 Da,             | 3960.890151 | 3 | 836.0949 | 133131000 | 125256000 |
| IVPLQGAQMLQMLKSLR               | Q91XE0 | 0          | n +28.03 Da,K +28.03 Da,             | 3963.205999 | 3 | 704.4085 | 128341000 | 111800000 |
| MDFNVKkLAADAGtFLSR              | Q9JK48 | 0.00406654 | n +42.03 Da,K +28.03 Da,             | 3963.573235 | 3 | 694.7016 | 21110700  | 19212900  |
| VCNLIDSGTKEGASILLDGR            | Q9EQ20 | 0          | n +17.03 Da,n +34.06 Da,             | 3969.085055 | 3 | 721.7065 | 67406000  | 70882896  |
| MATESGSDSQRrrrrRRDPEGS          | Q8CEC6 | 0.04385423 | n +14.02 Da,                         | 3973.697916 | 3 | 852.4342 | 171874000 | 184128000 |
| APLPGtLLDDIVAAGGKEQNLQQLR       | Q8VCW8 | 0          | n +34.06 Da,K +34.06 Da,             | 3976.182377 | 4 | 683.1452 | 62466100  | 62644900  |
| DIaWNFEKFLVGPdGVPVR             | P11352 | 0          | n +28.03 Da,K +28.03 Da,             | 3979.82068  | 3 | 739.0655 | 44772200  | 40315400  |
| DPENAVfYVGgYPPGFELPR            | Q61789 | 0.01945269 | n +42.03 Da,                         | 4020.35893  | 4 | 565.0139 | 243196992 | 175296000 |

|                               |        |            |                                      |             |   |          |           |           |
|-------------------------------|--------|------------|--------------------------------------|-------------|---|----------|-----------|-----------|
| AVWPTLVLDINSLDSLTEAYKLR       | Q9R0H0 | 0          | n +34.06 Da,                         | 4048.495706 | 3 | 854.1405 | 163139008 | 125511000 |
| IHTQPPPPPIPEVVATWEAISLGR      | Q8BGA8 | 0          | n +28.03 Da,                         | 4050.958367 | 3 | 878.4868 | 134302000 | 89135600  |
| MDDSEVESTASILASVKEQEAQFEKLTR  | P30999 | 0          | n +42.03 Da,K +34.06 Da,             | 4052.819825 | 3 | 1080.539 | 42185900  | 32768500  |
| PLDLVALAEQVQKADEFIR           | Q5EBG8 | 0          | n +17.03 Da,K +34.06 Da,             | 4075.505248 | 3 | 735.089  | 22447200  | 44451900  |
| SFIPVAEDSDFPIQNLPGVFSTQSNPKPR | P35505 | 0          | n +42.03 Da,K +28.03 Da,             | 4116.748284 | 3 | 1140.91  | 77712896  | 81839000  |
| VDPSPRPMTPQQR                 | Q640N1 | 0.02367824 | n +14.02 Da,                         | 4118.29956  | 2 | 789.9015 | 24553900  | 22226400  |
| ATFEEVSVLGFEEFDKAVKEH         | Q9CQM5 | 0          | n +42.03 Da,K +34.06 Da,             | 4183.809088 | 3 | 837.0883 | 103571000 | 97170896  |
| MEGEAVEAIVEESETFIKGER         | Q61164 | 0          | n +42.03 Da,n +28.03 Da,K +28.03 Da, | 4193.200395 | 3 | 860.4349 | 302380992 | 259898000 |
| TDAAVSFAKDFLAGGVAAAISK        | P51881 | 0          | n +42.03 Da,K +34.06 Da,             | 4359.074085 | 3 | 736.7352 | 74526800  | 70565904  |
| LGTTAKEEMER                   | Q9CZB0 | 0          | n +34.06 Da,K +34.06 Da,             | 563.1129326 | 3 | 443.9154 | 409044000 | 1.536E+09 |
| SKSESPKEPEQLR                 | P49312 | 0          | n +42.03 Da,K +34.06 Da,             | 606.3676303 | 3 | 538.2898 | 373476992 | 334315008 |
| RPLPPSPVVR                    | Q9ESY9 | 0.00186829 | n +34.06 Da,                         | 642.6836896 | 3 | 381.9048 | 248195008 | 392735008 |
| ARMVRWLMVSR                   | K7N6V2 | 0.04818813 | n +14.02 Da,                         | 653.9016781 | 3 | 473.6108 | 220923008 | 797283968 |
| TPEAAVEHPEAVR                 | O35490 | 0          | n +34.06 Da,                         | 660.6618605 | 3 | 478.5845 | 493452000 | 406575008 |
| PASGPIRPIVR                   | P47963 | 0          | n +14.02 Da,                         | 661.2975463 | 3 | 387.8841 | 271944992 | 1.099E+10 |
| TLPEVKDR                      | P25688 | 0.04818813 | n +28.03 Da,K +28.03 Da,             | 681.7185054 | 3 | 338.5379 | 382076000 | 349600000 |
| VEMDAVGKEGR                   | Q8C196 | 0          | n +28.03 Da,K +28.03 Da,             | 683.7177927 | 3 | 416.2205 | 60016600  | 42890200  |
| GSPGFSKFR                     | Q9QXF8 | 0.00582698 | n +28.03 Da,K +28.03 Da,             | 704.5242269 | 3 | 346.8625 | 213196000 | 246296992 |
| SEAAPAAPAAAPPAEKAPAKKKAA      | P15864 | 0          | n +42.03 Da,n +34.06 Da,K +34.06 Da, | 709.4141374 | 2 | 592.8456 | 274395008 | 201802000 |
| MLMPKKNR                      | P63325 | 0.00093985 | n +42.03 Da,K +34.06 Da,             | 715.2839406 | 3 | 372.5528 | 436286016 | 353676000 |
| SEAAPAAPAAAPPAEKAPAKKKAA      | P15864 | 0          | n +42.03 Da,n +34.06 Da,K +34.06 Da, | 715.6645555 | 4 | 598.1231 | 26775800  | 99922600  |
| SEAAPAAPAAAPPAEKAPAKKK        | P15864 | 0          | n +42.03 Da,n +28.03 Da,K +28.03 Da, | 722.3735011 | 2 | 555.8114 | 78415600  | 358936992 |
| TDAMIHEVQR                    | P56654 | 0.01821192 | n +28.03 Da,                         | 725.5522479 | 3 | 409.8767 | 186631008 | 120484000 |
| SLEDSQIEKER                   | Q9CZ13 | 0          | n +34.06 Da,K +34.06 Da,             | 726.1892472 | 3 | 463.9123 | 60306100  | 58486300  |
| SETAPAETAAPAPVEKSPAKKK        | P43276 | 0          | n +42.03 Da,n +28.03 Da,K +28.03 Da, | 729.0346527 | 4 | 591.3354 | 52939000  | 195604000 |
| SEAAPAAPAAAPPAEKAPAKKKAA      | P15864 | 0          | n +42.03 Da,n +34.06 Da,K +34.06 Da, | 731.2547328 | 4 | 597.3688 | 37067500  | 52457700  |
| IVGNEHYDVAR                   | P56480 | 0          | n +34.06 Da,                         | 738.2795448 | 3 | 434.2272 | 577945024 | 588993984 |
| EKEVGLAIR                     | P70694 | 0.02333197 | n +34.06 Da,K +34.06 Da,             | 743.9767536 | 3 | 357.557  | 259275008 | 292520000 |
| GAGGALFVHR                    | Q9D6J6 | 0          | n +28.03 Da,                         | 744.512595  | 2 | 506.7879 | 428825984 | 374356000 |
| DFNSTSPAPVQKAR                | F6S2B9 | 0.03123748 | n +42.03 Da,K +28.03 Da,             | 770.5968864 | 3 | 528.9401 | 7602460   | 8334250   |
| TYKYPEGSPER                   | P21981 | 0          | n +34.06 Da,K +34.06 Da,             | 778.4183868 | 3 | 504.5836 | 38613400  | 32879400  |
| PVEYEKYPER                    | Q99K67 | 0          | n +14.02 Da,K +28.03 Da,             | 780.7666193 | 3 | 448.2235 | 76579296  | 244943008 |
| AHYHDNYGKNDEVE                | P25688 | 0          | n +42.03 Da,K +28.03 Da,             | 782.5443992 | 2 | 880.8792 | 370736000 | 288180000 |
| TNRPPLSLR                     | P35980 | 0          | n +28.03 Da,                         | 783.5877664 | 3 | 390.2302 | 6325150   | 3875550   |
| PSKTNVSGGAIALGHPLGGSGSR       | Q8BWT1 | 0          | n +14.02 Da,K +28.03 Da,             | 791.7999583 | 4 | 541.2981 | 32840800  | 25306700  |
| PDLSSDIKER                    | B5X0G2 | 0          | n +14.02 Da,K +28.03 Da,             | 793.2598804 | 3 | 401.219  | 67531504  | 49432000  |
| TDEMAHFDR                     | P24270 | 0          | n +28.03 Da,                         | 822.4595255 | 3 | 383.8382 | 296491008 | 245118000 |
| TATILDKPEDR                   | O35215 | 0          | n +34.06 Da,K +34.06 Da,             | 824.5999639 | 3 | 438.9137 | 39975000  | 36236600  |
| SGMCKAGFAGDDAPR               | P60710 | 0          | n +28.03 Da,K +28.03 Da,             | 824.6002023 | 3 | 532.5818 | 37598600  | 28213900  |
| IIGELHPDDR                    | P56395 | 0          | n +28.03 Da,                         | 827.5534942 | 3 | 398.2159 | 593078976 | 237806000 |

|                       |        |            |                                      |             |   |          |           |           |
|-----------------------|--------|------------|--------------------------------------|-------------|---|----------|-----------|-----------|
| NLIDDAKAR             | Q99P30 | 0          | n +34.06 Da,K +34.06 Da,             | 829.4065334 | 3 | 357.2184 | 264420000 | 190064000 |
| SNSETIITGKR           | Q8VDJ3 | 0          | n +34.06 Da,K +34.06 Da,             | 832.1021599 | 3 | 458.9373 | 55044100  | 79811200  |
| TVSSDQMAKLR           | P16015 | 0          | n +28.03 Da,K +28.03 Da,             | 833.6396459 | 3 | 430.2339 | 335532000 | 1.867E+09 |
| MDQQTQHPSKAAQPLR      | Q9JL3  | 0          | n +42.03 Da,K +34.06 Da,             | 838.3875267 | 3 | 593.3056 | 2.774E+09 | 2.442E+09 |
| TKVSSLIER             | Q921X9 | 0.04133858 | n +34.06 Da,K +34.06 Da,             | 844.036902  | 3 | 366.5768 | 911262976 | 7.058E+09 |
| TVSSDQMAKLR           | P16015 | 0          | n +28.03 Da,K +28.03 Da,             | 846.8815707 | 3 | 431.2395 | 185582000 | 68049400  |
| EVEMDAVGKEGR          | Q8C196 | 0          | n +28.03 Da,K +28.03 Da,             | 851.1960386 | 3 | 459.2342 | 201706000 | 185082000 |
| PANDTVDFPKR           | P30999 | 0          | n +14.02 Da,n +28.03 Da,             | 861.2770676 | 3 | 433.5544 | 873446976 | 734296000 |
| SSFQIVKNPR            | Q61176 | 0          | n +28.03 Da,K +28.03 Da,             | 865.0718045 | 3 | 411.2435 | 729238976 | 701289024 |
| SFQIVKNPR             | Q61176 | 0.01672241 | n +34.06 Da,K +34.06 Da,             | 869.1561918 | 3 | 382.2327 | 1.793E+09 | 1.588E+09 |
| SETAAPAAPAPAEKTPVKKK  | P43274 | 0          | n +42.03 Da,n +34.06 Da,K +34.06 Da, | 875.4690668 | 3 | 779.1552 | 27733400  | 174423008 |
| TAIKHALQR             | Q8R3S6 | 0.00093985 | n +42.03 Da,K +34.06 Da,             | 877.4492919 | 3 | 369.8929 | 250806000 | 291105984 |
| GIKNLPVGEAGR          | P24270 | 0          | n +34.06 Da,K +34.06 Da,             | 888.7011765 | 3 | 422.9234 | 23110000  | 14210800  |
| THLGGEDFDQR           | P20029 | 0          | n +28.03 Da,                         | 896.0834409 | 3 | 434.8746 | 209335008 | 192702000 |
| TITYGPKVVR            | P12710 | 0          | n +28.03 Da,K +28.03 Da,             | 901.2385444 | 2 | 595.369  | 313993984 | 177060000 |
| DPEATSHSTQDPLEAQAKSR  | P97290 | 0          | n +34.06 Da,K +34.06 Da,             | 904.0278603 | 3 | 742.0336 | 337006016 | 201870000 |
| THLGGEDFDQR           | P20029 | 0          | n +28.03 Da,                         | 905.9139717 | 3 | 434.8743 | 356969984 | 323230016 |
| MKNPFAH               | P28271 | 0.01708333 | n +28.03 Da,K +28.03 Da,             | 911.5576759 | 2 | 450.7419 | 431502016 | 432731008 |
| GKLTGMAFR             | P16858 | 0          | n +34.06 Da,K +34.06 Da,             | 912.5086255 | 3 | 349.2199 | 173584000 | 1.818E+09 |
| MKNPFAH               | P28271 | 0.01708333 | n +34.06 Da,K +34.06 Da,             | 914.6176495 | 3 | 303.8461 | 617646976 | 3.877E+09 |
| SSPPEGKLETKAGHPPAVK   | Q91XC8 | 0          | n +42.03 Da,K +28.03 Da,             | 920.4160937 | 4 | 514.7912 | 2.167E+09 | 1.372E+09 |
| PEEYEQWKQR            | Q91VA0 | 0          | n +14.02 Da,K +28.03 Da,             | 922.596305  | 3 | 476.5768 | 908862976 | 584636992 |
| FYASEDKLENR           | O35490 | 0          | n +34.06 Da,K +34.06 Da,             | 922.604188  | 3 | 480.598  | 86185600  | 98417504  |
| MKNPFAH               | P28271 | 0.01708333 | n +28.03 Da,K +28.03 Da,             | 924.8234007 | 3 | 300.83   | 144234000 | 72646600  |
| PEDTLEQKAGSVGR        | Q8VCW8 | 0.04923077 | n +14.02 Da,K +28.03 Da,             | 925.001145  | 3 | 507.2543 | 431924000 | 415852992 |
| KTGTAEMSSILEER        | Q03265 | 0          | n +34.06 Da,K +34.06 Da,             | 925.0573363 | 3 | 536.6145 | 88919000  | 115929000 |
| TVVNKDVFR             | P61358 | 0.01023891 | n +28.03 Da,K +28.03 Da,             | 931.1925844 | 3 | 378.5608 | 84197104  | 65138700  |
| PDAAKPEDWDER          | P14211 | 0          | n +14.02 Da,K +28.03 Da,             | 934.2626982 | 2 | 735.8461 | 137164000 | 121169000 |
| ALKQISSNR             | Q9R0P3 | 0.00582698 | n +42.03 Da,K +34.06 Da,             | 934.875347  | 2 | 543.8166 | 369335008 | 346352992 |
| VYDEFVKR              | P24549 | 0.00666667 | n +34.06 Da,K +34.06 Da,             | 936.8326326 | 3 | 371.2097 | 184460992 | 117946000 |
| MESNHKSGDGLSGTQKEAALR | Q5YD48 | 0          | n +42.03 Da,K +28.03 Da,             | 937.166548  | 3 | 772.0532 | 206452000 | 186931008 |
| TALIHDLGLAR           | P63323 | 0.00093985 | n +28.03 Da,                         | 939.0105044 | 3 | 365.5483 | 317176000 | 359086016 |
| MESNHKSGDGLSGTQKEAALR | Q5YD48 | 0          | n +42.03 Da,K +28.03 Da,             | 940.4509227 | 4 | 579.2919 | 3.469E+09 | 3.157E+09 |
| LEEHPGGEVLR           | P56395 | 0          | n +28.03 Da,                         | 954.4542668 | 3 | 464.9087 | 322719008 | 310111008 |
| TVWEKPLR              | P24456 | 0.00666667 | n +28.03 Da,K +28.03 Da,             | 956.4097876 | 3 | 362.2213 | 244479008 | 233423008 |
| PNLVPISNKR            | P19536 | 0          | n +14.02 Da,n +28.03 Da,             | 966.2470826 | 3 | 420.9149 | 140960992 | 1.148E+09 |
| STKPQAQEQPPASPEALR    | Q9WU79 | 0          | n +34.06 Da,K +34.06 Da,             | 966.3440916 | 3 | 664.357  | 536536992 | 548048000 |
| YMVTKIPR              | Q8C196 | 0.00458926 | n +28.03 Da,K +28.03 Da,             | 968.7698464 | 3 | 355.2162 | 252375008 | 420939008 |
| TVIKEVLQR             | Q8CAY6 | 0.00743007 | n +28.03 Da,K +28.03 Da,             | 973.8121823 | 3 | 377.2278 | 80138200  | 175148000 |
| TENFEDVGHSTDR         | P56395 | 0          | n +34.06 Da,                         | 975.18362   | 3 | 535.9096 | 628579968 | 559331968 |

|                          |        |            |                                      |             |   |          |           |           |
|--------------------------|--------|------------|--------------------------------------|-------------|---|----------|-----------|-----------|
| PSKPSTGGWQPLR            | Q8VCZ9 | 0          | n +17.03 Da,K +34.06 Da,             | 977.1768785 | 3 | 487.6038 | 58498600  | 50054700  |
| TALIHDLGLAR              | P63323 | 0.00093985 | n +28.03 Da,                         | 982.8967294 | 3 | 365.5569 | 130723000 | 135278000 |
| HEFLNDGPKR               | Q9JLC3 | 0.02484725 | n +42.03 Da,K +34.06 Da,             | 983.1274257 | 3 | 428.2231 | 199648000 | 168786000 |
| AELYVKPGNKER             | Q80VJ2 | 0          | n +42.03 Da,n +34.06 Da,K +34.06 Da, | 984.0661099 | 3 | 501.2839 | 270192992 | 331889984 |
| PNVTKTLQFR               | Q9Z0X1 | 0          | n +17.03 Da,K +34.06 Da,             | 990.641466  | 3 | 416.919  | 1.461E+09 | 1.234E+09 |
| TVIKEVLQR                | Q8CAY6 | 0.00232234 | n +34.06 Da,K +34.06 Da,             | 991.4022269 | 3 | 384.264  | 18062300  | 230426000 |
| AAAMDVDTPSGTNSGAGKKR     | P62878 | 0          | n +42.03 Da,K +34.06 Da,             | 992.3695615 | 3 | 678.0091 | 1.602E+09 | 1.259E+09 |
| ATSASSHLNKGIKQMY         | P15105 | 0          | n +42.03 Da,n +28.03 Da,K +28.03 Da, | 994.7926053 | 3 | 611.9895 | 124241000 | 144052000 |
| TVIKEVLQR                | Q8CAY6 | 0.00743007 | n +28.03 Da,K +28.03 Da,             | 995.6341806 | 3 | 380.2468 | 62539800  | 298142016 |
| PLAQSFKENEMR             | Q8VC28 | 0          | n +14.02 Da,K +28.03 Da,             | 995.6669525 | 3 | 497.9443 | 85876600  | 418528000 |
| LAKYNQILR                | P17182 | 0.00623053 | n +28.03 Da,K +28.03 Da,             | 995.8538614 | 3 | 392.2488 | 184218000 | 189058000 |
| AELYVKPGNKER             | Q80VJ2 | 0          | n +42.03 Da,n +28.03 Da,K +28.03 Da, | 997.8574959 | 3 | 500.2817 | 244720000 | 1.109E+09 |
| SETAPAAPAAPAPVEKTPVKKK   | P43277 | 0          | n +42.03 Da,n +34.06 Da,K +34.06 Da, | 999.0246726 | 4 | 591.6261 | 446060992 | 1.535E+09 |
| YMVTKIPR                 | Q8C196 | 0.00458926 | n +28.03 Da,K +28.03 Da,             | 999.7360924 | 3 | 354.2137 | 76295800  | 52561800  |
| SETAPAAPAAPAPVEKTPVKKK   | P43277 | 0          | n +42.03 Da,n +34.06 Da,K +34.06 Da, | 1005.599983 | 3 | 788.4984 | 68500496  | 275716992 |
| AIALGHPLGGSGSR           | Q8BWT1 | 0.00743007 | n +28.03 Da,                         | 1008.284757 | 3 | 440.9178 | 284748992 | 263407008 |
| GDTHLGGEDFDQR            | P20029 | 0          | n +28.03 Da,                         | 1009.126847 | 3 | 492.2235 | 961267968 | 855777984 |
| SVSLKELNAR               | Q9CQC9 | 0.00232234 | n +28.03 Da,K +28.03 Da,             | 1012.090957 | 3 | 387.5524 | 75666896  | 139852992 |
| MQSAPLEQPAKRPR           | Q60710 | 0          | n +42.03 Da,K +34.06 Da,             | 1013.127757 | 4 | 557.7909 | 127505000 | 110286000 |
| EPDLSSDIKER              | B5X0G2 | 0          | n +28.03 Da,K +28.03 Da,             | 1015.920949 | 2 | 672.8545 | 79856400  | 85893696  |
| TSNPENTVFDAGR            | P20029 | 0          | n +28.03 Da,K +28.03 Da,             | 1019.030402 | 3 | 512.2664 | 43115200  | 19000300  |
| MESNHKSGDGLSGTQKEAALR    | Q5YD48 | 0          | n +42.03 Da,K +34.06 Da,             | 1019.927918 | 4 | 579.2915 | 1.73E+09  | 1.527E+09 |
| MESNHKSGDGLSGTQKEAALR    | Q5YD48 | 0          | n +42.03 Da,K +28.03 Da,             | 1021.323493 | 3 | 772.0535 | 59182500  | 48498300  |
| TDNELEKITR               | P26443 | 0          | n +34.06 Da,K +34.06 Da,             | 1021.374683 | 3 | 425.5697 | 408436992 | 425668000 |
| TDNELEKITR               | P26443 | 0          | n +34.06 Da,K +34.06 Da,             | 1022.347689 | 2 | 637.8506 | 475416000 | 428324992 |
| SSEAPPLVNEDVKR           | Q91YQ5 | 0          | n +34.06 Da,K +34.06 Da,             | 1022.859211 | 3 | 535.9736 | 36595400  | 398790016 |
| SETAPAAPAAPAPAEKTPVKKKAR | P43274 | 0          | n +42.03 Da,n +28.03 Da,K +28.03 Da, | 1023.79101  | 4 | 636.1157 | 1.181E+09 | 501855008 |
| AIDTIINQKR               | Q03265 | 0.04434072 | n +28.03 Da,K +28.03 Da,             | 1023.97181  | 3 | 407.5838 | 62758200  | 57566400  |
| PNVTKTLQFR               | Q9Z0X1 | 0          | n +17.03 Da,K +34.06 Da,             | 1028.653132 | 3 | 417.9253 | 380855008 | 1.113E+09 |
| VKVGNGFGR                | P16858 | 0          | n +34.06 Da,K +34.06 Da,             | 1029.277134 | 3 | 363.5574 | 70527000  | 32406800  |
| EPDLSSDIKER              | B5X0G2 | 0          | n +28.03 Da,K +28.03 Da,             | 1030.361094 | 3 | 448.9048 | 277372000 | 322235008 |
| TSNPENTVFDAGR            | P20029 | 0          | n +34.06 Da,K +34.06 Da,             | 1030.444356 | 3 | 512.2672 | 30458800  | 32699500  |
| PDIKIPLR                 | Q9DCN2 | 0.03123748 | n +17.03 Da,K +34.06 Da,             | 1030.995276 | 3 | 350.5571 | 252540992 | 784470016 |
| TNAIIIEPEKR              | Q9QXD6 | 0          | n +34.06 Da,                         | 1031.428672 | 3 | 447.2694 | 462417984 | 482065984 |
| GAIALGHPLGGSGSR          | Q8BWT1 | 0          | n +34.06 Da,                         | 1033.633502 | 3 | 459.9245 | 737302016 | 695299008 |
| TAGDTHLGGEDFDNR          | P16627 | 0          | n +34.06 Da,                         | 1036.047335 | 3 | 544.9128 | 517968992 | 548774016 |
| VKVGNGFGR                | P16858 | 0          | n +34.06 Da,K +34.06 Da,             | 1036.85262  | 3 | 366.5733 | 7.587E+09 | 5.272E+10 |
| SETAPAAPAAPAPAEKTPVKKKAR | P43274 | 0          | n +42.03 Da,n +28.03 Da,K +28.03 Da, | 1038.094015 | 3 | 847.8178 | 141880992 | 59332000  |
| MQSAPLEQPAKRPR           | Q60710 | 0          | n +42.03 Da,K +34.06 Da,             | 1038.31848  | 3 | 560.3066 | 3.48E+09  | 3.281E+09 |
| SSEAPPLVNEDVKR           | Q91YQ5 | 0          | n +28.03 Da,K +28.03 Da,             | 1040.251394 | 3 | 532.9578 | 946094016 | 998846976 |

|                         |        |            |                          |             |   |          |           |           |
|-------------------------|--------|------------|--------------------------|-------------|---|----------|-----------|-----------|
| VKGVNGFGR               | P16858 | 0          | n +28.03 Da,K +28.03 Da, | 1040.282049 | 3 | 363.5582 | 4.376E+10 | 565204992 |
| GKAGNLGGGVVTIER         | P67984 | 0          | n +28.03 Da,K +28.03 Da, | 1042.087541 | 3 | 495.2968 | 186471008 | 580880000 |
| SVSLKELNAR              | Q9CQC9 | 0.00232234 | n +28.03 Da,K +28.03 Da, | 1045.482395 | 3 | 390.5699 | 34124800  | 113613000 |
| PSKPSTGGWQPLR           | Q8VCZ9 | 0          | n +17.03 Da,K +34.06 Da, | 1050.144547 | 3 | 483.5759 | 718265984 | 503580000 |
| PLAKVDATEQTDLAQR        | P08003 | 0          | n +14.02 Da,K +28.03 Da, | 1050.176808 | 4 | 604.8102 | 285851008 | 253484992 |
| PSKPSTGGWQPLR           | Q8VCZ9 | 0          | n +14.02 Da,K +28.03 Da, | 1051.147041 | 3 | 483.9283 | 54016200  | 1.398E+09 |
| SQAEFDKAAEEVKR          | P31786 | 0          | n +42.03 Da,K +34.06 Da, | 1060.572658 | 3 | 572.3117 | 225268992 | 2.207E+09 |
| MESNHKSGDGLSGTQKEAALR   | Q5YD48 | 0          | n +42.03 Da,K +34.06 Da, | 1062.400232 | 3 | 582.2936 | 487446016 | 281495008 |
| PNIVGNEHYDVAR           | P56480 | 0          | n +14.02 Da,             | 1064.253399 | 3 | 499.9195 | 3.796E+10 | 2.512E+10 |
| PNIVGNEHYDVAR           | P56480 | 0          | n +14.02 Da,             | 1065.226244 | 2 | 749.3755 | 1.749E+09 | 1.135E+09 |
| HVLQQFADNDVSR           | P51660 | 0          | n +28.03 Da,             | 1066.631436 | 3 | 519.5954 | 408521984 | 539310976 |
| ATSPQKSPLVPKSPKSPPSR    | Q9EPC1 | 0          | n +42.03 Da,K +34.06 Da, | 1066.637977 | 4 | 604.1    | 6.702E+09 | 6.318E+09 |
| PFLDIQKK                | Q99LY9 | 0.03730159 | n +14.02 Da,K +28.03 Da, | 1070.962835 | 3 | 353.5581 | 1.638E+09 | 134244992 |
| YTNVAVIHEVQR            | O54749 | 0          | n +28.03 Da,             | 1071.158645 | 3 | 453.2615 | 321120992 | 20543900  |
| TRSDPVVIVSAAR           | F2Z459 | 0          | n +34.06 Da,             | 1072.23198  | 3 | 466.9402 | 1.276E+09 | 2.997E+09 |
| TGGDAAAPGAAGTQAEPLHR    | Q9D0F3 | 0          | n +28.03 Da,             | 1072.519824 | 3 | 625.9811 | 1.818E+09 | 1.431E+09 |
| TRSDPVVIVSAAR           | F2Z459 | 0          | n +34.06 Da,             | 1075.010094 | 2 | 699.9064 | 598465984 | 1.337E+09 |
| PTGTYHGSDQLQLDR         | P99024 | 0          | n +17.03 Da,             | 1075.530016 | 3 | 563.6003 | 2.464E+09 | 1.698E+09 |
| GYLKMDNYR               | Q9R0H0 | 0.00743007 | n +34.06 Da,K +34.06 Da, | 1075.723952 | 3 | 405.877  | 244694000 | 198532000 |
| SEPEIPKQIR              | Q9WTP6 | 0          | n +28.03 Da,K +28.03 Da, | 1075.907552 | 3 | 394.5684 | 2.462E+10 | 168494000 |
| SEPEIPKQIR              | Q9WTP6 | 0          | n +28.03 Da,K +28.03 Da, | 1084.453585 | 3 | 394.5681 | 2.425E+10 | 2.195E+10 |
| MEVKPPPGRPQPDQGR        | Q8BG05 | 0          | n +42.03 Da,K +28.03 Da, | 1085.505321 | 3 | 606.6489 | 2.832E+09 | 2.612E+09 |
| PSKTNVSGGAIALGHPLGGSGSR | Q8BWT1 | 0          | n +17.03 Da,K +34.06 Da, | 1085.505677 | 3 | 723.4044 | 659499008 | 2.267E+09 |
| PTGTYHGSDQLQLER         | P68372 | 0          | n +14.02 Da,             | 1085.948737 | 3 | 568.2722 | 4.294E+09 | 3.085E+09 |
| PSKTNVSGGAIALGHPLGGSGSR | Q8BWT1 | 0          | n +17.03 Da,K +34.06 Da, | 1087.177328 | 4 | 542.8051 | 6.903E+09 | 2.423E+10 |
| MQPASAKWYDR             | Q9R0Q7 | 0          | n +34.06 Da,K +34.06 Da, | 1099.277659 | 2 | 704.8554 | 315371008 | 260964000 |
| VPALAIANAHR             | P63038 | 0.00623053 | n +28.03 Da,             | 1100.441471 | 3 | 404.8874 | 31909600  | 93803000  |
| SEESNDDKPTTKFELER       | Q99LI9 | 0          | n +42.03 Da,K +34.06 Da, | 1103.605443 | 4 | 570.541  | 57207500  | 40691100  |
| MEGHDPKEPEQLR           | B2RXM2 | 0          | n +42.03 Da,K +28.03 Da, | 1108.569783 | 2 | 818.3926 | 913148032 | 885974016 |
| HVLQQFADNDVSR           | P51660 | 0          | n +28.03 Da,             | 1111.490394 | 3 | 516.5879 | 120091000 | 58291600  |
| SKDSEGSWFR              | O55125 | 0          | n +28.03 Da,K +28.03 Da, | 1111.849676 | 3 | 418.8748 | 726720000 | 705134016 |
| MEGHDPKEPEQLR           | B2RXM2 | 0          | n +42.03 Da,K +28.03 Da, | 1112.298735 | 3 | 545.9311 | 1.29E+09  | 1.197E+09 |
| TMMIGYQPHGTR            | Q9DBE0 | 0          | n +34.06 Da,             | 1113.160445 | 3 | 473.9001 | 137056000 | 140431008 |
| TKEGASILLDGR            | Q9EQ20 | 0.00743007 | n +34.06 Da,K +34.06 Da, | 1115.430359 | 2 | 658.3817 | 145964000 | 136130000 |
| PSKTNVSGGAIALGHPLGGSGSR | Q8BWT1 | 0          | n +17.03 Da,K +34.06 Da, | 1115.44962  | 4 | 541.2974 | 349614016 | 274016992 |
| MKTPEDPGSPKQHEVDSAGTSTR | Q9Z2J0 | 0          | n +42.03 Da,K +28.03 Da, | 1116.807949 | 4 | 663.8277 | 298329984 | 223139008 |
| TLGDIVYKR               | P12710 | 0          | n +34.06 Da,K +34.06 Da, | 1118.838611 | 3 | 374.2286 | 1.333E+10 | 1.14E+10  |
| TLGDIVYKR               | P12710 | 0.01901612 | n +28.03 Da,K +28.03 Da, | 1120.14569  | 2 | 560.8385 | 155575008 | 55678600  |
| SQAEFDKAAEEVKR          | P31786 | 0          | n +42.03 Da,K +28.03 Da, | 1123.277682 | 2 | 567.7975 | 592569024 | 1.239E+09 |
| TVDGPGSKLWR             | P16858 | 0.0118997  | n +34.06 Da,K +34.06 Da, | 1135.500091 | 3 | 424.5742 | 1.702E+09 | 1.45E+09  |



|                       |        |            |                          |             |   |          |           |           |
|-----------------------|--------|------------|--------------------------|-------------|---|----------|-----------|-----------|
| SQAEFDKAAEEVKR        | P31786 | 0          | n +42.03 Da,K +28.03 Da, | 1137.491442 | 3 | 569.296  | 1.849E+09 | 1.903E+09 |
| PVNEHMLNTIR           | O70133 | 0          | n +14.02 Da,             | 1140.491685 | 3 | 446.5707 | 18578300  | 13386900  |
| MEKPAASTEPQGSRALGR    | Q9JMD3 | 0          | n +42.03 Da,K +34.06 Da, | 1143.759573 | 3 | 685.0206 | 2.807E+09 | 2.626E+09 |
| TRPTVAAGAVGLAQR       | P45952 | 0          | n +28.03 Da,             | 1144.00967  | 3 | 499.2945 | 1.473E+09 | 799153024 |
| ALAEHPAVAESAVVSSPDKDR | Q91VA0 | 0          | n +34.06 Da,K +34.06 Da, | 1146.048837 | 4 | 552.0424 | 752123008 | 748476992 |
| RVVFDDTYDR            | P16015 | 0          | n +34.06 Da,             | 1147.6019   | 3 | 440.5636 | 631358976 | 570048000 |
| SLLNPKSEMTPPEELQKR    | P62317 | 0          | n +42.03 Da,K +28.03 Da, | 1154.506721 | 4 | 564.3173 | 86459200  | 81367000  |
| PKVTQPEVDTPPLGR       | Q63880 | 0          | n +14.02 Da,K +28.03 Da, | 1155.874727 | 3 | 526.9655 | 1.305E+09 | 706854016 |
| YGKNDEVEFVR           | P25688 | 0          | n +34.06 Da,K +34.06 Da, | 1170.722459 | 3 | 474.2614 | 398347008 | 3.091E+09 |
| YGKNDEVEFVR           | P25688 | 0          | n +34.06 Da,K +34.06 Da, | 1170.863934 | 2 | 706.3642 | 579996032 | 552825024 |
| FQRHYLIVEYHGR         | Q9JJH7 | 0          | n +28.03 Da,             | 1172.640443 | 2 | 867.4397 | 362707008 | 361337984 |
| VTAGKDGVANVSIEDR      | P08228 | 0          | n +28.03 Da,K +28.03 Da, | 1174.961347 | 3 | 562.9723 | 294208000 | 411222016 |
| MEETEKKVATQEGR        | Q9QXZ6 | 0          | n +42.03 Da,K +34.06 Da, | 1175.350489 | 3 | 578.6289 | 1.054E+09 | 1.124E+09 |
| MEETEKKVATQEGR        | Q9QXZ6 | 0          | n +42.03 Da,K +34.06 Da, | 1175.606118 | 3 | 581.6451 | 381523008 | 3.06E+09  |
| RVVFDDTYDR            | P16015 | 0          | n +34.06 Da,             | 1178.892525 | 3 | 438.5544 | 2.737E+09 | 3.147E+09 |
| PSSGERTCSRLTRQR       | E9PVA2 | 0.04434072 | n +17.03 Da,             | 1180.084024 | 3 | 603.31   | 54005000  | 60540400  |
| TFYASEDKLENR          | O35490 | 0          | n +28.03 Da,K +28.03 Da, | 1182.113938 | 3 | 509.2425 | 204282000 | 207571008 |
| AAVKTLNPKAEVAR        | P80317 | 0.02370249 | n +42.03 Da,K +28.03 Da, | 1182.364571 | 3 | 522.6507 | 7.563E+09 | 6.361E+09 |
| LKEDQTEYLEER          | P07901 | 0          | n +28.03 Da,K +28.03 Da, | 1182.87797  | 3 | 536.9417 | 465979008 | 348927008 |
| TAENLAAKYNISR         | Q8BWT1 | 0          | n +28.03 Da,K +28.03 Da, | 1184.190601 | 3 | 502.9353 | 505228000 | 559604992 |
| RGMEFKLIEPEVAR        | P28322 | 0.04227006 | n +17.03 Da,K +34.06 Da, | 1186.39466  | 3 | 612.9844 | 1.176E+09 | 1.066E+09 |
| TLVEKINYTGR           | P49429 | 0          | n +34.06 Da,K +34.06 Da, | 1187.537206 | 3 | 453.6071 | 443745984 | 530472000 |
| SLKIQTSNVTNKNDPKSINSR | Q64012 | 0          | n +42.03 Da,K +34.06 Da, | 1193.882279 | 4 | 618.346  | 2.136E+09 | 1.638E+09 |
| SGTKEGASILLDGR        | Q9EQ20 | 0.04988488 | n +34.06 Da,K +34.06 Da, | 1196.991123 | 3 | 487.275  | 26139000  | 23193600  |
| PKVTQPEVDTPPLGR       | Q63880 | 0          | n +17.03 Da,K +34.06 Da, | 1197.014593 | 2 | 789.9455 | 330056000 | 214422000 |
| TFYASEDKLENR          | O35490 | 0          | n +34.06 Da,K +34.06 Da, | 1199.871691 | 3 | 510.2597 | 2.221E+09 | 1.737E+09 |
| TFYASEDKLENR          | O35490 | 0          | n +34.06 Da,K +34.06 Da, | 1201.939043 | 2 | 764.8856 | 629840000 | 363305984 |
| TFYASEDKLENR          | O35490 | 0          | n +34.06 Da,K +34.06 Da, | 1205.085619 | 3 | 513.2748 | 142628000 | 1.359E+09 |
| PKVTQPEVDTPPLGR       | Q63880 | 0          | n +17.03 Da,K +34.06 Da, | 1210.806327 | 3 | 528.9772 | 1.685E+10 | 6.359E+10 |
| PLDAESQQGGGGNPFHR     | Q91YW3 | 0          | n +17.03 Da,             | 1211.961242 | 3 | 594.283  | 558787008 | 503104000 |
| PKVTQPEVDTPPLGR       | Q63880 | 0          | n +17.03 Da,K +34.06 Da, | 1214.528633 | 2 | 792.9623 | 1.006E+09 | 4.003E+09 |
| GVKLEVFR              | P0DJE0 | 0.02782258 | n +34.06 Da,K +34.06 Da, | 1217.370595 | 3 | 338.2305 | 26906300  | 162616992 |
| PTKVVAVDCGINKNNVIR    | Q8C196 | 0          | n +17.03 Da,K +34.06 Da, | 1220.682937 | 4 | 492.0542 | 735219968 | 2.415E+09 |
| SGYTPDEKLR            | Q3UIU2 | 0          | n +42.03 Da,K +28.03 Da, | 1220.800917 | 2 | 618.3163 | 473047008 | 435415008 |
| DSSFQIVKNPR           | Q61176 | 0          | n +28.03 Da,K +28.03 Da, | 1227.620755 | 3 | 448.5896 | 14771500  | 14827500  |
| TAENLAAKYNISR         | Q8BWT1 | 0          | n +34.06 Da,K +34.06 Da, | 1230.920478 | 3 | 502.948  | 506489984 | 409816000 |
| AFKDTGKTPVEPEVAIHR    | P60867 | 0          | n +42.03 Da,K +34.06 Da, | 1231.600712 | 3 | 698.3841 | 47774300  | 41491200  |
| TPTGTHFCEVEQMR        | P25688 | 0          | n +34.06 Da,             | 1235.055577 | 3 | 574.2645 | 668046976 | 465772000 |
| THFNKGPSYGLSAEVKNK    | Q9DAW9 | 0          | n +42.03 Da,K +28.03 Da, | 1243.812396 | 4 | 526.5361 | 324324000 | 188470000 |
| HTEAAEVLLER           | Q8QZS1 | 0          | n +34.06 Da,             | 1245.6729   | 2 | 648.349  | 371356992 | 257028000 |

|                           |        |            |                                      |             |   |          |           |           |
|---------------------------|--------|------------|--------------------------------------|-------------|---|----------|-----------|-----------|
| PDHSIIETLR                | P07901 | 0.02211302 | n +14.02 Da,                         | 1248.242935 | 3 | 398.8872 | 1.082E+09 | 811884032 |
| SSIFTKDLGR                | Q9DBF1 | 0.00458926 | n +28.03 Da,K +28.03 Da,             | 1249.130809 | 3 | 392.892  | 129022000 | 134644992 |
| SAALIQQATTVKNKDIR         | P51410 | 0          | n +34.06 Da,K +34.06 Da,             | 1252.725317 | 4 | 488.3108 | 67945400  | 400056000 |
| VYVNDAFGTAHR              | P09041 | 0          | n +34.06 Da,                         | 1254.207623 | 3 | 459.9016 | 210468992 | 179316992 |
| RVVFDPTYDR                | P16015 | 0.03500398 | n +28.03 Da,                         | 1265.399106 | 3 | 438.5546 | 112697000 | 362822016 |
| GVMVGMGQKDSYVGDEAQSQR     | P60710 | 0          | n +34.06 Da,K +34.06 Da,             | 1265.618111 | 4 | 582.2923 | 563875968 | 457108992 |
| TLDPVEKALR                | P63017 | 0          | n +34.06 Da,K +34.06 Da,             | 1266.45604  | 3 | 399.9115 | 916342976 | 844918976 |
| DNIQGITKPAIR              | P62806 | 0.00501825 | n +28.03 Da,K +28.03 Da,             | 1268.288838 | 3 | 461.2684 | 67693696  | 78417696  |
| PDLQLLQGHR                | Q8VC30 | 0.00582698 | n +14.02 Da,                         | 1269.199748 | 3 | 397.5595 | 1.772E+09 | 1.32E+09  |
| SGPGGLHADLLR              | Q8BWF0 | 0          | n +34.06 Da,                         | 1270.917655 | 2 | 610.8418 | 203660992 | 146246000 |
| YDDLSKQAVAYR              | Q03265 | 0          | n +28.03 Da,K +28.03 Da,             | 1274.767765 | 3 | 495.6019 | 369921984 | 46269800  |
| AAQESLHVKTPLR             | Q8VBT2 | 0          | n +42.03 Da,K +34.06 Da,             | 1275.962629 | 3 | 757.4195 | 492759008 | 525737984 |
| SGPGGLHADLLR              | Q8BWF0 | 0          | n +34.06 Da,                         | 1276.233009 | 3 | 407.564  | 1.7E+09   | 1.451E+09 |
| TRPFQLVTGR                | P28474 | 0          | n +28.03 Da,                         | 1276.729651 | 3 | 401.5722 | 376143008 | 351529984 |
| SVLPKPALVASR              | Q8C196 | 0.02642276 | n +28.03 Da,K +28.03 Da,             | 1278.27154  | 3 | 431.9476 | 212292992 | 201120992 |
| YTDNELEKTR                | P26443 | 0.01433994 | n +34.06 Da,K +34.06 Da,             | 1278.336756 | 3 | 483.6126 | 373032992 | 300460992 |
| FHAAVMEVQNLN              | Q9CYV5 | 0.0437671  | n +34.06 Da,                         | 1280.507931 | 2 | 721.8695 | 266188000 | 179351008 |
| GATAHLETGGFIR             | Q8BJ64 | 0.00582698 | n +28.03 Da,                         | 1282.055238 | 3 | 453.2459 | 164632992 | 193368992 |
| ATSASSHLNKGIKQMY          | P15105 | 0          | n +42.03 Da,n +28.03 Da,K +28.03 Da, | 1285.487715 | 3 | 611.9895 | 3.06E+09  | 2.787E+09 |
| YVGSVMADIHR               | Q9QXD6 | 0.00949914 | n +28.03 Da,                         | 1287.829282 | 2 | 637.8325 | 251068000 | 224748992 |
| ILIPAASEKQLTKSNAPR        | P26443 | 0.03009631 | n +28.03 Da,K +28.03 Da,             | 1290.91125  | 3 | 674.409  | 227958000 | 252336992 |
| VMEKPSPLLVR               | P97379 | 0          | n +34.06 Da,K +34.06 Da,             | 1291.090316 | 3 | 465.287  | 135408992 | 492292992 |
| MKHYEVEIR                 | Q9CY27 | 0.00140647 | n +42.03 Da,K +28.03 Da,             | 1291.362059 | 3 | 425.5577 | 1.911E+09 | 1.568E+09 |
| KATIPAALQAQESTEGPGTGQDRPR | Q9DBG1 | 0          | n +28.03 Da,K +28.03 Da,             | 1291.465303 | 3 | 879.1318 | 2.322E+09 | 2.004E+09 |
| SEGDSVGDVHGKPSVVYR        | Q9CQU3 | 0          | n +42.03 Da,K +28.03 Da,             | 1292.926297 | 3 | 682.3362 | 3.097E+09 | 2.973E+09 |
| KATIPAALQAQESTEGPGTGQDRPR | Q9DBG1 | 0          | n +34.06 Da,K +34.06 Da,             | 1293.359438 | 4 | 661.8625 | 406113984 | 2.949E+09 |
| KATIPAALQAQESTEGPGTGQDRPR | Q9DBG1 | 0          | n +28.03 Da,K +28.03 Da,             | 1294.315813 | 4 | 659.6009 | 6.11E+09  | 5.498E+09 |
| EELNKLGR                  | P22752 | 0.01861042 | n +28.03 Da,K +28.03 Da,             | 1296.157486 | 3 | 376.575  | 166208992 | 721022016 |
| KATIPAALQAQESTEGPGTGQDRPR | Q9DBG1 | 0          | n +28.03 Da,K +28.03 Da,             | 1297.980887 | 5 | 527.8821 | 220890000 | 237738000 |
| YTDNELEKTR                | P26443 | 0          | n +28.03 Da,K +28.03 Da,             | 1300.894049 | 3 | 478.599  | 35841000  | 49861000  |
| YTDNELEKTR                | P26443 | 0          | n +28.03 Da,K +28.03 Da,             | 1302.079622 | 2 | 719.3827 | 244168000 | 192158000 |
| GTTLDIKIKR                | O35075 | 0.00414365 | n +42.03 Da,K +34.06 Da,             | 1303.032708 | 3 | 414.9312 | 178887008 | 199307008 |
| LANIGQKEDFEEAR            | P16460 | 0.00093985 | n +28.03 Da,K +28.03 Da,             | 1303.17052  | 3 | 559.2935 | 217416992 | 195788992 |
| TTFDLGGHVQAR              | Q9CQC9 | 0          | n +34.06 Da,                         | 1304.735848 | 3 | 445.2352 | 35430600  | 476910016 |
| PVLHYFDGR                 | P30115 | 0          | n +14.02 Da,                         | 1306.758867 | 3 | 373.198  | 842425024 | 382556000 |
| PRPAVQFSNLPR              | A2ADY9 | 0          | n +14.02 Da,                         | 1308.651047 | 3 | 465.9335 | 828009024 | 602841024 |
| LANIGQKEDFEEAR            | P16460 | 0.00093985 | n +28.03 Da,K +28.03 Da,             | 1313.546281 | 3 | 558.2847 | 44664800  | 229288000 |
| AAQESLHVKTPLR             | Q8VBT2 | 0          | n +42.03 Da,K +28.03 Da,             | 1316.642106 | 2 | 760.4335 | 1.514E+09 | 1.519E+09 |
| VPNDSSFQIVKNPR            | Q61176 | 0          | n +28.03 Da,K +28.03 Da,             | 1319.020393 | 3 | 552.9736 | 1.075E+09 | 975686976 |
| ASGPGGLHADLLR             | Q8BWF0 | 0          | n +34.06 Da,                         | 1320.230374 | 3 | 431.2418 | 498480000 | 155532000 |

|                          |        |            |                                      |             |   |          |           |           |
|--------------------------|--------|------------|--------------------------------------|-------------|---|----------|-----------|-----------|
| AAQESLHVKTPLR            | Q8VBT2 | 0          | n +42.03 Da,K +34.06 Da,             | 1329.547044 | 3 | 507.2914 | 1.265E+09 | 1.017E+09 |
| ASGPGGLHADLLR            | Q8BWF0 | 0          | n +28.03 Da,                         | 1330.677155 | 2 | 646.3586 | 909452992 | 883107968 |
| PSKEVEEDEYKAF            | P08113 | 0          | n +14.02 Da,K +28.03 Da,             | 1330.685113 | 2 | 820.9061 | 225308992 | 182056000 |
| MRGQVGDLSPPQQEALAR       | Q8R0F9 | 0          | n +34.06 Da,                         | 1333.300266 | 3 | 671.3498 | 1.409E+09 | 746883968 |
| VMEKPSPLLVGR             | P97379 | 0          | n +28.03 Da,K +28.03 Da,             | 1333.873338 | 3 | 461.2797 | 1.214E+09 | 1.061E+09 |
| PSKSNPGDFTLSVR           | P35235 | 0          | n +14.02 Da,K +28.03 Da,             | 1334.340559 | 3 | 516.2789 | 143435008 | 108086000 |
| PSKEVEEDEYKAF            | P08113 | 0.00501825 | n +14.02 Da,K +28.03 Da,             | 1335.897601 | 3 | 547.6059 | 2.015E+09 | 1.57E+09  |
| RYLLGTSLAR               | P16460 | 0.00501825 | n +34.06 Da,                         | 1339.312401 | 3 | 393.24   | 949155008 | 927054976 |
| EELNKKLLGR               | P22752 | 0.01861042 | n +28.03 Da,K +28.03 Da,             | 1341.246811 | 3 | 376.5644 | 445024992 | 396571008 |
| ATSASSHLNKGIKQMY         | P15105 | 0          | n +42.03 Da,n +34.06 Da,K +34.06 Da, | 1348.021386 | 2 | 917.4795 | 155380000 | 112450000 |
| AHYHDNYGKNDEVEFVR        | P25688 | 0          | n +42.03 Da,K +28.03 Da,             | 1350.893687 | 4 | 541.5033 | 5.794E+09 | 4.577E+09 |
| AHYHDNYGKNDEVEFVR        | P25688 | 0          | n +42.03 Da,K +28.03 Da,             | 1351.065003 | 3 | 721.6674 | 840945024 | 628326976 |
| RTTPSYVAFTDTER           | P16627 | 0          | n +34.06 Da,                         | 1351.540752 | 3 | 557.949  | 1.529E+09 | 1.561E+09 |
| TSVATKKTEQGPPSSEYIFER    | P29758 | 0          | n +34.06 Da,K +34.06 Da,             | 1352.13966  | 4 | 610.5746 | 994563968 | 639161024 |
| PFDDDLMKR                | Q8JZRO | 0          | n +14.02 Da,K +28.03 Da,             | 1357.674398 | 3 | 393.5345 | 17782300  | 6394290   |
| GKGLAADESVGTMGNR         | Q91Y97 | 0          | n +34.06 Da,K +34.06 Da,             | 1364.651908 | 3 | 580.9891 | 175743008 | 1.733E+09 |
| TSVATKKTEQGPPSSEYIFER    | P29758 | 0          | n +28.03 Da,K +28.03 Da,             | 1365.29471  | 4 | 609.0744 | 241784992 | 1.068E+10 |
| YTLKNVSMEDNEEDR          | P48776 | 0          | n +34.06 Da,K +34.06 Da,             | 1366.34679  | 3 | 636.6469 | 3986240   | 28493800  |
| TDTEDKGEFLSEGGGVR        | E9PV24 | 0          | n +34.06 Da,K +34.06 Da,             | 1366.821068 | 3 | 618.3017 | 1.465E+09 | 1.079E+09 |
| PEKIENIYIR               | Q91WC3 | 0          | n +14.02 Da,K +28.03 Da,             | 1367.079836 | 3 | 439.5891 | 819859008 | 985305024 |
| TSVATKKTEQGPPSSEYIFER    | P29758 | 0          | n +34.06 Da,K +34.06 Da,             | 1367.551922 | 3 | 813.7637 | 1.814E+09 | 1.838E+09 |
| TSVATKKTEQGPPSSEYIFER    | P29758 | 0          | n +34.06 Da,K +34.06 Da,             | 1370.380381 | 4 | 614.3447 | 495113984 | 2.861E+09 |
| PVSNAQPAGAEEKPEAKVLFDR   | Q8CGC7 | 0          | n +14.02 Da,K +28.03 Da,             | 1370.911297 | 4 | 574.3183 | 470852000 | 298294016 |
| SSKPKSLEIIGAPFSKGQPR     | Q61176 | 0          | n +42.03 Da,K +34.06 Da,             | 1377.560237 | 4 | 564.08   | 981083008 | 779513984 |
| PKVIQPEVDTPPLGR          | Q8VCU1 | 0          | n +17.03 Da,K +34.06 Da,             | 1377.993881 | 3 | 528.2855 | 51962200  | 28125300  |
| PFDDDLMKR                | Q8JZRO | 0          | n +17.03 Da,K +34.06 Da,             | 1379.108562 | 3 | 395.5446 | 451652000 | 838289024 |
| PFTIKPLDR                | P40142 | 0.02444988 | n +17.03 Da,K +34.06 Da,             | 1383.365564 | 3 | 378.908  | 1.056E+09 | 2.74E+09  |
| AGKPVLYHYFDGRGR          | P30115 | 0          | n +42.03 Da,K +34.06 Da,             | 1386.228777 | 4 | 411.4759 | 172376000 | 159980992 |
| SSKPKSLEIIGAPFSKGQPR     | Q61176 | 0          | n +42.03 Da,K +28.03 Da,             | 1386.493709 | 5 | 451.4654 | 341473984 | 327657984 |
| PANLDLKKELSEPSSTR        | Q8C196 | 0          | n +17.03 Da,K +34.06 Da,             | 1388.154154 | 4 | 489.5259 | 4.337E+09 | 988110016 |
| SSEAEGSSSEVKKPAFMDVEEVQR | Q9CXW2 | 0          | n +34.06 Da,K +34.06 Da,             | 1394.864606 | 4 | 653.568  | 287631008 | 343297984 |
| LYKGLEAFR                | P54869 | 0.00093985 | n +28.03 Da,K +28.03 Da,             | 1397.078106 | 3 | 384.8974 | 601840000 | 404488000 |
| ATSASSHLNKGIKQMY         | P15105 | 0          | n +42.03 Da,n +34.06 Da,K +34.06 Da, | 1398.829947 | 3 | 611.9896 | 2.796E+10 | 3.813E+10 |
| ISFHLPVNSR               | Q9D1D4 | 0          | n +28.03 Da,                         | 1399.859044 | 3 | 399.896  | 503609984 | 328998016 |
| GLQNEKSIVPTPVKIR         | P38060 | 0          | n +34.06 Da,K +34.06 Da,             | 1407.163569 | 4 | 466.5409 | 363892000 | 320704992 |
| ATKCTKCGPGYSTPLEAMKGR    | P17563 | 0          | n +42.03 Da,K +34.06 Da,             | 1407.84243  | 4 | 634.8244 | 260044992 | 332008992 |
| ATSASSHLNKGIKQMY         | P15105 | 0          | n +42.03 Da,n +34.06 Da,K +34.06 Da, | 1409.534503 | 2 | 917.4788 | 1.295E+09 | 1.614E+09 |
| PKVIQPEVDTPPLGR          | Q8VCU1 | 0          | n +14.02 Da,K +28.03 Da,             | 1410.665578 | 3 | 529.9691 | 32588500  | 55501600  |
| ATGANATPLDFPSKRR         | Q64213 | 0          | n +42.03 Da,K +34.06 Da,             | 1410.686547 | 3 | 591.3286 | 3.315E+09 | 2.774E+09 |
| SISHTLEDLDR              | Q62452 | 0          | n +28.03 Da,                         | 1411.958221 | 3 | 438.5612 | 155612992 | 100270000 |

|                      |        |            |                          |             |   |          |           |           |
|----------------------|--------|------------|--------------------------|-------------|---|----------|-----------|-----------|
| DNYGKNDEVEFVR        | P25688 | 0          | n +34.06 Da,K +34.06 Da, | 1414.766767 | 3 | 547.6019 | 250082000 | 220504000 |
| QPAEAIHNWIR          | Q8R0Y6 | 0          | n +28.03 Da,             | 1418.17098  | 3 | 454.9138 | 107673000 | 115094000 |
| GTITTKELGTVMR        | P62204 | 0.00093985 | n +28.03 Da,K +28.03 Da, | 1424.377419 | 3 | 488.2824 | 97476200  | 118542000 |
| TWVVLGHSER           | P17751 | 0          | n +28.03 Da,             | 1429.243604 | 3 | 404.5556 | 392787008 | 413628992 |
| PYEIKKVF             | O88342 | 0.04227006 | n +14.02 Da,K +28.03 Da, | 1434.000804 | 3 | 365.2269 | 1.775E+09 | 74094600  |
| PKVIQPEVDTPLGR       | Q8VCU1 | 0          | n +14.02 Da,K +28.03 Da, | 1436.465229 | 2 | 795.9643 | 80919800  | 66425400  |
| SGYFHPLLR            | P10518 | 0.02055076 | n +28.03 Da,             | 1436.635223 | 3 | 373.2102 | 176608992 | 200236992 |
| PKVIQPEVDTPLGR       | Q8VCU1 | 0          | n +17.03 Da,K +34.06 Da, | 1436.795064 | 2 | 798.9802 | 118272000 | 431168000 |
| PDIVGLDSGHIR         | P52196 | 0          | n +14.02 Da,             | 1436.834489 | 3 | 430.5608 | 1.022E+09 | 717596032 |
| MQPASAKWYDRR         | Q9R0Q7 | 0          | n +42.03 Da,K +34.06 Da, | 1441.328829 | 3 | 527.9484 | 29809000  | 263712000 |
| GTITTKELGTVMR        | P62204 | 0.00093985 | n +28.03 Da,K +28.03 Da, | 1444.361897 | 3 | 488.2736 | 273620000 | 253280000 |
| TELFYKGIR            | Q03265 | 0          | n +28.03 Da,K +28.03 Da, | 1444.664617 | 3 | 394.9011 | 162707008 | 101124000 |
| KETTIQGLDGLSER       | Q91Y97 | 0          | n +34.06 Da,K +34.06 Da, | 1444.852    | 2 | 801.9385 | 516560000 | 516134016 |
| KETTIQGLDGLSER       | Q91Y97 | 0          | n +28.03 Da,K +28.03 Da, | 1445.618504 | 3 | 534.9616 | 215474000 | 3728430   |
| STGPSEPGGFKPPKPVIVDR | Q9D338 | 0          | n +34.06 Da,K +34.06 Da, | 1446.254556 | 4 | 562.3194 | 2.769E+09 | 2.471E+09 |
| KETTIQGLDGLSER       | Q91Y97 | 0          | n +34.06 Da,K +34.06 Da, | 1446.324946 | 3 | 537.9763 | 35448500  | 393800000 |
| EGMTAFVEKR           | Q8BH95 | 0          | n +28.03 Da,K +28.03 Da, | 1447.763752 | 2 | 609.3172 | 3.407E+09 | 3.381E+09 |
| PGVTVKDVNQQEFVR      | Q9CZX8 | 0          | n +17.03 Da,K +34.06 Da, | 1448.260724 | 2 | 882.4982 | 50740200  | 253194000 |
| PYTDAMIHEVQR         | P33267 | 0          | n +14.02 Da,             | 1449.168383 | 3 | 481.2525 | 606192000 | 332235008 |
| PGVTVKDVNQQEFVR      | Q9CZX8 | 0          | n +17.03 Da,K +34.06 Da, | 1449.951177 | 3 | 588.6668 | 5.972E+09 | 2.281E+10 |
| PYTDAMIHEVQR         | P56654 | 0          | n +17.03 Da,             | 1455.804666 | 3 | 491.9101 | 1.128E+09 | 968857024 |
| MQPASAKWYDRR         | Q9R0Q7 | 0          | n +42.03 Da,K +34.06 Da, | 1461.275445 | 3 | 526.9334 | 1.768E+09 | 1.68E+09  |
| EVIDSIKER            | P35492 | 0.00093985 | n +28.03 Da,K +28.03 Da, | 1461.716413 | 3 | 418.9182 | 30533500  | 24921100  |
| EIAQDFKTDLR          | P02301 | 0.03276069 | n +28.03 Da,K +28.03 Da, | 1461.899629 | 3 | 464.5893 | 2.268E+09 | 1.417E+09 |
| VGLKAPGIIPR          | Q03265 | 0          | n +28.03 Da,K +28.03 Da, | 1462.91741  | 3 | 392.9323 | 820553024 | 562054976 |
| PPKEPMKDDITGEPLIR    | Q9WTP6 | 0.00582698 | n +17.03 Da,K +34.06 Da, | 1463.745394 | 4 | 502.281  | 725750016 | 586198976 |
| PQHWSEPEEFQPER       | Q64459 | 0          | n +14.02 Da,             | 1464.552103 | 2 | 905.413  | 126450000 | 78662496  |
| AVHPGYGFLSER         | Q05920 | 0          | n +34.06 Da,             | 1464.80181  | 3 | 454.2384 | 725660032 | 748843008 |
| ADEEKLPPGWWEKR       | Q9QUR7 | 0          | n +42.03 Da,K +34.06 Da, | 1466.732614 | 3 | 551.6257 | 609841984 | 510115008 |
| PKVIQPEVDTPLGR       | Q8VCU1 | 0          | n +17.03 Da,K +34.06 Da, | 1467.730727 | 3 | 532.2976 | 448828000 | 949283968 |
| SVELPETHQMLR         | Q07417 | 0          | n +34.06 Da,             | 1468.144662 | 3 | 491.9415 | 475392000 | 382764000 |
| VVLTKFVEGAR          | Q8C196 | 0          | n +28.03 Da,K +28.03 Da, | 1471.081077 | 3 | 425.599  | 1E+09     | 383233984 |
| TVWDVGGQDKIR         | P61205 | 0          | n +28.03 Da,             | 1471.12648  | 3 | 476.2591 | 92636200  | 115926000 |
| SVELPETHQMLR         | Q07417 | 0          | n +34.06 Da,             | 1471.225154 | 3 | 491.9413 | 28749400  | 16040800  |
| TVWDVGGQDKIR         | P61205 | 0          | n +28.03 Da,             | 1472.803934 | 3 | 477.2587 | 145916992 | 126371000 |
| MEVHELFR             | P41216 | 0.00414365 | n +34.06 Da,             | 1473.602747 | 3 | 363.5233 | 196948992 | 164084000 |
| SVYDEFVKR            | P24549 | 0.00140647 | n +34.06 Da,K +34.06 Da, | 1474.599645 | 3 | 403.236  | 367916992 | 730836992 |
| RPPLGFLNPR           | O89023 | 0.01975309 | n +28.03 Da,             | 1477.746568 | 3 | 398.9082 | 148523008 | 76152200  |
| TQTISQGAIEKVKDATR    | Q8C196 | 0          | n +28.03 Da,K +28.03 Da, | 1478.2013   | 4 | 483.2794 | 2.475E+09 | 1.699E+09 |
| TQTISQGAIEKVKDATR    | Q8C196 | 0          | n +28.03 Da,K +28.03 Da, | 1478.595074 | 3 | 644.0358 | 540510976 | 333689984 |

|                        |        |            |                          |             |   |          |           |           |
|------------------------|--------|------------|--------------------------|-------------|---|----------|-----------|-----------|
| TNVSGGAIALGHPLGGSGSR   | Q8BWT1 | 0          | n +34.06 Da,             | 1478.988944 | 3 | 612.6626 | 1.035E+09 | 852121024 |
| EVIDSIKER              | P35492 | 0.00093985 | n +28.03 Da,K +28.03 Da, | 1482.99294  | 3 | 419.9152 | 65515800  | 44275000  |
| SPKILQDIASGR           | Q91VD9 | 0          | n +34.06 Da,K +34.06 Da, | 1489.674017 | 3 | 447.6013 | 508193984 | 434960000 |
| KTGTAEMSSILEER         | Q03265 | 0.00186829 | n +34.06 Da,K +34.06 Da, | 1490.990951 | 3 | 539.6316 | 2.717E+09 | 1.605E+10 |
| KTGTAEMSSILEER         | Q03265 | 0          | n +34.06 Da,K +34.06 Da, | 1491.077129 | 2 | 808.9424 | 430723008 | 2.738E+09 |
| LTITYGPKVVR            | P12710 | 0.00093985 | n +28.03 Da,K +28.03 Da, | 1491.119323 | 3 | 434.9425 | 214490000 | 92238096  |
| ASGADSKGDDLSTAILKQKNR  | Q01853 | 0          | n +42.03 Da,K +28.03 Da, | 1494.83268  | 4 | 576.065  | 1.267E+09 | 5.756E+09 |
| TPGVAADLSHIETR         | P08249 | 0          | n +34.06 Da,             | 1497.471451 | 3 | 498.9352 | 479671008 | 456492000 |
| PMIHELLTEGR            | P70168 | 0          | n +14.02 Da,             | 1497.89121  | 4 | 653.0944 | 181242000 | 142428992 |
| PTQTISQGAIEKVKDATR     | Q8C196 | 0          | n +17.03 Da,K +34.06 Da, | 1501.975835 | 3 | 671.7156 | 554987008 | 85920200  |
| TKDAGQISGLNVLR         | P38647 | 0          | n +34.06 Da,K +34.06 Da, | 1502.557756 | 3 | 509.2892 | 461094016 | 562110976 |
| QKTGTAEMSSILEER        | Q03265 | 0          | n +28.03 Da,K +28.03 Da, | 1504.052938 | 2 | 868.4414 | 362651008 | 330015008 |
| DYMVTKIPR              | Q8C196 | 0          | n +28.03 Da,K +28.03 Da, | 1506.55046  | 3 | 393.5581 | 284584992 | 86184400  |
| PTQTISQGAIEKVKDATR     | Q8C196 | 0          | n +17.03 Da,K +34.06 Da, | 1507.15306  | 3 | 675.7378 | 61532600  | 269758016 |
| AFKDTGKTPVEPEVAIHR     | P60867 | 0.03534551 | n +42.03 Da,K +34.06 Da, | 1507.506871 | 4 | 524.0403 | 1.087E+09 | 869281984 |
| TLKFFPASADR            | P09103 | 0          | n +28.03 Da,K +28.03 Da, | 1508.439422 | 3 | 436.9163 | 939510976 | 1.16E+09  |
| AGKPVLYFNAR            | P10648 | 0          | n +42.03 Da,K +34.06 Da, | 1511.114759 | 2 | 724.9221 | 530647008 | 608694016 |
| PTQTISQGAIEKVKDATR     | Q8C196 | 0          | n +14.02 Da,K +28.03 Da, | 1512.084222 | 4 | 504.0387 | 2.337E+09 | 307417984 |
| AGKPVLYFNAR            | P10648 | 0          | n +42.03 Da,K +34.06 Da, | 1512.839634 | 3 | 483.6165 | 994848000 | 1.117E+09 |
| SMYQNEKEVGLAIR         | P70694 | 0          | n +28.03 Da,K +28.03 Da, | 1516.402621 | 3 | 565.3019 | 507736992 | 444808992 |
| TPEADKIFLER            | P26443 | 0          | n +28.03 Da,K +28.03 Da, | 1519.507787 | 3 | 455.9221 | 59019100  | 39942700  |
| TKDAGQISGLNVLR         | P38647 | 0          | n +34.06 Da,K +34.06 Da, | 1521.615475 | 3 | 511.2878 | 126162000 | 137451008 |
| TFEESFQKALR            | Q8C196 | 0          | n +28.03 Da,K +28.03 Da, | 1522.690888 | 3 | 471.2579 | 1.368E+09 | 744937984 |
| SALEKSMHLGR            | Q8BVQ5 | 0          | n +42.03 Da,K +34.06 Da, | 1523.019597 | 3 | 433.2306 | 83554600  | 46587100  |
| MQKEITALAPSTMKIK       | P60710 | 0          | n +28.03 Da,K +28.03 Da, | 1524.774351 | 4 | 476.2829 | 734764032 | 385590016 |
| TFEESFQKALR            | Q8C196 | 0          | n +28.03 Da,K +28.03 Da, | 1526.056708 | 2 | 706.3823 | 880897024 | 440095008 |
| PITLVEKER              | P07901 | 0.00093985 | n +14.02 Da,K +28.03 Da, | 1526.30688  | 3 | 420.8862 | 36349200  | 24572900  |
| TGKTSIAIDTIINQKR       | Q03265 | 0          | n +28.03 Da,K +28.03 Da, | 1531.870021 | 4 | 461.5331 | 569419008 | 451435008 |
| RVGVPTETGALTLNR        | Q8BWT1 | 0          | n +28.03 Da,             | 1532.879715 | 3 | 537.9769 | 672822016 | 489737984 |
| VSQEHPVVLTKFVEGAR      | Q8C196 | 0          | n +28.03 Da,K +28.03 Da, | 1535.029602 | 3 | 651.3696 | 244326000 | 209982000 |
| DKTLKGLNSDSVTEETLR     | Q8C196 | 0          | n +28.03 Da,K +28.03 Da, | 1535.668442 | 3 | 697.3826 | 203430000 | 1.877E+09 |
| AAQSAPKVVVKSTTKMSLNER  | Q9CY57 | 0          | n +42.03 Da,K +28.03 Da, | 1539.060647 | 4 | 597.0924 | 717947008 | 760902016 |
| VSQEHPVVLTKFVEGAR      | Q8C196 | 0          | n +28.03 Da,K +28.03 Da, | 1539.733933 | 4 | 488.7791 | 1.718E+09 | 1.507E+09 |
| SHYEEGPGKNLPP          | P17665 | 0.00093985 | n +34.06 Da,K +34.06 Da, | 1539.820359 | 2 | 770.4057 | 166664000 | 1.847E+09 |
| VKIVTVKTQAYPDQKPGTSGLR | Q9D0F9 | 0          | n +28.03 Da,K +28.03 Da, | 1541.092642 | 4 | 625.3626 | 7.625E+09 | 5.651E+09 |
| FVEDLINESFKDNR         | Q8BXZ1 | 0          | n +28.03 Da,             | 1541.498606 | 3 | 556.9453 | 1.064E+09 | 1.3E+09   |
| QKTGTAEMSSILEER        | Q03265 | 0          | n +28.03 Da,K +28.03 Da, | 1544.375102 | 3 | 579.2999 | 1.569E+09 | 1.288E+09 |
| AGKPVLYFNAR            | P10648 | 0          | n +42.03 Da,K +28.03 Da, | 1544.847563 | 2 | 721.8978 | 1.1E+10   | 1.186E+10 |
| QKTGTAEMSSILEER        | Q03265 | 0          | n +28.03 Da,K +28.03 Da, | 1545.277041 | 2 | 868.4475 | 167060992 | 95439800  |
| AFKDTGKTPVEPEVAIHR     | P60867 | 0          | n +42.03 Da,K +28.03 Da, | 1546.331646 | 2 | 1047.072 | 2.742E+09 | 2.601E+09 |

|                         |        |            |                                      |             |   |          |           |           |
|-------------------------|--------|------------|--------------------------------------|-------------|---|----------|-----------|-----------|
| AFKDTGKTPVEPEVAIHR      | P60867 | 0          | n +42.03 Da,K +34.06 Da,             | 1547.493339 | 3 | 698.3836 | 4.121E+10 | 3.78E+10  |
| PSKGPLQSVQVFGFR         | P14131 | 0          | n +14.02 Da,K +28.03 Da,             | 1547.943733 | 3 | 514.6311 | 740550016 | 620825984 |
| AFKDTGKTPVEPEVAIHR      | P60867 | 0.03534551 | n +42.03 Da,K +34.06 Da,             | 1551.929787 | 4 | 524.0417 | 2.467E+11 | 2.214E+11 |
| SHYEEGPGKNLPP           | P17665 | 0          | n +28.03 Da,K +28.03 Da,             | 1552.895678 | 2 | 765.8814 | 1.217E+09 | 949913024 |
| AGKPVLYHFNAR            | P10648 | 0          | n +42.03 Da,K +28.03 Da,             | 1553.745252 | 3 | 480.5892 | 2.032E+09 | 6.132E+10 |
| VSQEHPVVLTKFVEGAR       | Q8C196 | 0          | n +42.03 Da,K +28.03 Da,             | 1554.778903 | 4 | 492.283  | 1.772E+09 | 1.787E+09 |
| MGTLPKQVKIVEVGPR        | P38060 | 0          | n +28.03 Da,K +28.03 Da,             | 1554.791835 | 4 | 459.7839 | 475654016 | 315020992 |
| VLASEPEIPKGIR           | Q9WTP6 | 0          | n +34.06 Da,                         | 1558.055902 | 3 | 490.9732 | 114566000 | 60610100  |
| SVVFPHDEPLAGR           | Q99LB7 | 0          | n +34.06 Da,                         | 1559.017762 | 3 | 484.593  | 755329984 | 658467968 |
| TMDKSELVQKAKLAEQAER     | Q9CQV8 | 0          | n +42.03 Da,n +34.06 Da,K +34.06 Da, | 1559.5834   | 4 | 576.0662 | 723308032 | 472180000 |
| AGKPVLYHFNAR            | P10648 | 0          | n +42.03 Da,K +28.03 Da,             | 1563.148576 | 3 | 481.6015 | 865022016 | 710254976 |
| PSKGPLQSVQVFGFR         | P14131 | 0          | n +14.02 Da,K +28.03 Da,             | 1563.979909 | 3 | 514.6318 | 149226000 | 121227000 |
| PINPTYEATNAMYHR         | Q9WU79 | 0          | n +14.02 Da,                         | 1566.440863 | 3 | 597.9532 | 1.318E+09 | 1.29E+09  |
| MHTEAAEVLLER            | Q8QZS1 | 0          | n +28.03 Da,                         | 1568.290746 | 2 | 713.8715 | 1.68E+09  | 1.142E+09 |
| MHTEAAEVLLER            | Q8QZS1 | 0          | n +28.03 Da,                         | 1570.839787 | 3 | 476.2507 | 2.064E+09 | 1.553E+09 |
| TEYVPEKLMR              | P45952 | 0.00743007 | n +34.06 Da,K +34.06 Da,             | 1574.035499 | 3 | 440.2361 | 19659500  | 49853200  |
| GVSKLDILYR              | Q8C1A9 | 0          | n +28.03 Da,K +28.03 Da,             | 1574.936341 | 3 | 407.2518 | 164808992 | 141846000 |
| QIKVIAPWR               | P16460 | 0.00093985 | n +34.06 Da,K +34.06 Da,             | 1579.286841 | 3 | 389.5807 | 391206016 | 338740992 |
| PQFVTEVIKAER            | Q8C196 | 0          | n +14.02 Da,K +28.03 Da,             | 1582.393341 | 3 | 486.9508 | 349644992 | 254272992 |
| SSLMPQKKNPDSLELIR       | Q91YI0 | 0          | n +28.03 Da,K +28.03 Da,             | 1583.151504 | 4 | 510.7938 | 292892000 | 286396000 |
| LLLNKPKSEMTPPELQKR      | P62317 | 0          | n +42.03 Da,K +28.03 Da,             | 1584.531451 | 4 | 564.3182 | 1.278E+10 | 1.079E+10 |
| QTGKTSIAIDTIINQKR       | Q03265 | 0.02370249 | n +42.03 Da,K +34.06 Da,             | 1585.517087 | 4 | 500.0517 | 88012200  | 77379504  |
| LLLNKPKSEMTPPELQKR      | P62317 | 0          | n +42.03 Da,K +28.03 Da,             | 1585.597743 | 3 | 752.087  | 4.263E+09 | 3.674E+09 |
| TKLPWDVAVGR             | P54869 | 0.00414365 | n +28.03 Da,K +28.03 Da,             | 1588.385591 | 3 | 399.5791 | 240859008 | 156067008 |
| GSIIIVYPKEIR            | O54782 | 0.01393581 | n +34.06 Da,K +34.06 Da,             | 1589.746721 | 3 | 477.9573 | 286696992 | 291249984 |
| PINPTYEATNAMYHR         | Q9WU79 | 0          | n +14.02 Da,                         | 1590.107101 | 3 | 597.9701 | 86746704  | 86423800  |
| TLKGLNSDSVTEETLR        | Q8C196 | 0          | n +34.06 Da,K +34.06 Da,             | 1590.2054   | 3 | 611.0205 | 449252992 | 121789000 |
| SSMKSVGEVMAIGR          | Q8C196 | 0          | n +34.06 Da,K +34.06 Da,             | 1592.290111 | 3 | 503.2706 | 511247008 | 359676000 |
| SQAEFDKAAEEVKR          | P31786 | 0          | n +42.03 Da,K +28.03 Da,             | 1592.330836 | 3 | 567.2882 | 436608000 | 399657984 |
| KPEEVDDEVFVYSPR         | P11725 | 0.01672241 | n +28.03 Da,K +28.03 Da,             | 1594.220197 | 3 | 589.2924 | 406630016 | 379284992 |
| VDREQLVQKARLAEQAER      | P61982 | 0          | n +28.03 Da,K +28.03 Da,             | 1594.487786 | 4 | 549.5561 | 1.322E+09 | 1.249E+09 |
| SVVFPHDEPLAGR           | Q99LB7 | 0          | n +34.06 Da,                         | 1595.382971 | 3 | 486.5935 | 21550700  | 29017000  |
| DNFFEGKELR              | Q8C194 | 0          | n +34.06 Da,K +34.06 Da,             | 1595.49458  | 3 | 441.245  | 711820032 | 586992000 |
| PIMEKFNSSISYDR          | Q91YI0 | 0          | n +14.02 Da,K +28.03 Da,             | 1597.080933 | 3 | 574.9474 | 759468032 | 815070976 |
| SLGMIFEKR               | P11725 | 0          | n +28.03 Da,K +28.03 Da,             | 1598.031937 | 3 | 379.5549 | 292364000 | 293540992 |
| PSKGPLQSVQVFGFR         | P14131 | 0          | n +14.02 Da,K +28.03 Da,             | 1599.178079 | 3 | 514.6329 | 4.184E+09 | 3.3E+09   |
| SGKEEIEAAVEAAR          | Q8BH00 | 0          | n +34.06 Da,K +34.06 Da,             | 1599.880925 | 3 | 505.9397 | 57519200  | 76613600  |
| DILIPAASEKQLTKSNAPR     | P26443 | 0.00232234 | n +28.03 Da,K +28.03 Da,             | 1600.04264  | 3 | 712.7507 | 138984000 | 129159000 |
| SKGPLQSVQVFGFR          | P14131 | 0          | n +34.06 Da,K +34.06 Da,             | 1605.998158 | 3 | 489.9651 | 64490400  | 550478976 |
| GVQVSPSGEKITHGQVYDEKDYR | P52503 | 0          | n +28.03 Da,K +28.03 Da,             | 1607.883548 | 4 | 695.0997 | 125087000 | 75396800  |

|                           |        |            |                          |             |   |          |           |           |
|---------------------------|--------|------------|--------------------------|-------------|---|----------|-----------|-----------|
| SSMGTLPKQVKIVEVGPR        | P38060 | 0.02211302 | n +42.03 Da,K +28.03 Da, | 1609.438809 | 3 | 675.3921 | 13413000  | 8812430   |
| PSKGPLQSVQVFGR            | P14131 | 0          | n +17.03 Da,K +34.06 Da, | 1609.55569  | 2 | 774.4596 | 1.462E+09 | 5.07E+09  |
| SGKEEIEAAVEAAR            | Q8BH00 | 0          | n +34.06 Da,K +34.06 Da, | 1610.151802 | 3 | 509.9614 | 91972400  | 59963400  |
| SMKSVGEVMAIGR             | Q8C196 | 0          | n +28.03 Da,K +28.03 Da, | 1611.118993 | 2 | 710.8867 | 672364992 | 594331008 |
| QEILRMFFDGR               | P15920 | 0.00623053 | n +34.06 Da,             | 1611.635349 | 3 | 482.589  | 1.231E+09 | 909020992 |
| SQAEDKAAEEVKR             | P31786 | 0          | n +42.03 Da,K +34.06 Da, | 1611.778401 | 3 | 569.297  | 444271008 | 345228992 |
| PSKGPLQSVQVFGR            | P14131 | 0          | n +17.03 Da,K +34.06 Da, | 1612.687815 | 3 | 516.6426 | 1.443E+10 | 5.217E+10 |
| SPKEEESYSDWGLR            | Q99P27 | 0.04988488 | n +28.03 Da,K +28.03 Da, | 1615.738608 | 3 | 580.2816 | 306108000 | 80031200  |
| PGVTVKDVNQEFVR            | Q9CZX8 | 0.02134647 | n +42.03 Da,K +28.03 Da, | 1617.138553 | 3 | 593.9827 | 719955968 | 789011008 |
| AGKPVLYHYFDGR             | P30115 | 0          | n +42.03 Da,K +28.03 Da, | 1618.248858 | 3 | 477.2467 | 1.93E+09  | 1.758E+09 |
| SAEETWMVIHGR              | Q9CQX2 | 0          | n +28.03 Da,             | 1619.008052 | 3 | 481.9066 | 1.363E+09 | 1.311E+09 |
| AFKDTGKTPVEPEVAIHR        | P60867 | 0          | n +42.03 Da,K +28.03 Da, | 1621.385734 | 2 | 698.3891 | 800065984 | 508888992 |
| TFEESFQKALR               | Q8C196 | 0          | n +28.03 Da,K +28.03 Da, | 1624.707818 | 2 | 706.3787 | 2.031E+09 | 1.895E+09 |
| DIKPIWQR                  | P08113 | 0.00949914 | n +34.06 Da,K +34.06 Da, | 1626.455064 | 3 | 371.2254 | 129251000 | 130574000 |
| PSKGPLQSVQVFGR            | P14131 | 0          | n +17.03 Da,K +34.06 Da, | 1629.126362 | 2 | 771.4437 | 174543008 | 82045696  |
| PGLTALLSDHR               | Q91X72 | 0.00743007 | n +14.02 Da,             | 1634.373593 | 3 | 398.5592 | 212356000 | 221780000 |
| SSMGTLPKQVKIVEVGPR        | P38060 | 0          | n +28.03 Da,K +28.03 Da, | 1637.807602 | 4 | 503.2994 | 446862016 | 518224000 |
| PIMEKFNSSISYDR            | Q91Y10 | 0          | n +17.03 Da,K +34.06 Da, | 1640.828873 | 3 | 576.9595 | 299636000 | 199228000 |
| GVSDGSEVAKAQAAPGGASPTIFSR | Q9D0S9 | 0          | n +28.03 Da,K +28.03 Da, | 1642.025675 | 4 | 643.8488 | 2.543E+09 | 2.362E+09 |
| APLDTINVHLR               | P70699 | 0          | n +34.06 Da,             | 1643.193228 | 3 | 426.2504 | 414264992 | 311128000 |
| GTHMENAYDFYKPN            | P54869 | 0.00093985 | n +28.03 Da,K +28.03 Da, | 1646.262743 | 3 | 581.5991 | 125051000 | 59928500  |
| PVVLTKFVEGAR              | Q8C196 | 0          | n +17.03 Da,K +34.06 Da, | 1646.422544 | 3 | 455.2888 | 119269000 | 653200000 |
| AGKPVLYHYFDGR             | P30115 | 0          | n +42.03 Da,K +28.03 Da, | 1649.362942 | 3 | 477.2599 | 3.064E+11 | 3.16E+11  |
| AGKPVLYHYFDGR             | P30115 | 0          | n +42.03 Da,K +28.03 Da, | 1652.158297 | 2 | 715.3827 | 5.757E+10 | 5.565E+10 |
| GNVVAEKISGQKVNEAACDIAR    | O35490 | 0          | n +28.03 Da,K +28.03 Da, | 1653.691676 | 4 | 620.0764 | 328350016 | 118656000 |
| WKEIEYEVVR                | Q8C196 | 0          | n +34.06 Da,K +34.06 Da, | 1654.180317 | 3 | 469.5953 | 84865696  | 45487600  |
| VAPEEHPVLLTEAPLNPKANR     | P60710 | 0          | n +14.02 Da,K +28.03 Da, | 1666.876941 | 4 | 585.0789 | 1.064E+09 | 989545024 |
| AASKVKQDMPPPGGYGPIDYKR    | Q9ERS2 | 0          | n +42.03 Da,K +28.03 Da, | 1667.991208 | 4 | 626.0861 | 543120000 | 344044992 |
| AFKDTGKTPVEPEVAIHR        | P60867 | 0          | n +42.03 Da,K +34.06 Da, | 1668.113451 | 3 | 698.385  | 759996032 | 813084992 |
| LSNHYCPGGFVNILGFPVPCR     | Q8BHC7 | 0.00232234 | n +42.03 Da,             | 1669.69135  | 3 | 800.751  | 544121984 | 297912000 |
| TKLPWDAVGR                | P54869 | 0          | n +34.06 Da,K +34.06 Da, | 1673.267099 | 3 | 400.2366 | 118033000 | 60606100  |
| TKYPQLLSGIR               | P50247 | 0          | n +28.03 Da,K +28.03 Da, | 1673.970992 | 3 | 444.6066 | 3.565E+09 | 3.761E+09 |
| TKYPQLLSGIR               | P50247 | 0.0078534  | n +28.03 Da,K +28.03 Da, | 1674.725008 | 2 | 666.4063 | 373643008 | 389360000 |
| MLQMLEKSLR                | Q91XE0 | 0          | n +34.06 Da,K +34.06 Da, | 1675.299604 | 3 | 435.5859 | 280921984 | 50701200  |
| TKYPQLLSGIR               | P50247 | 0          | n +34.06 Da,K +34.06 Da, | 1676.320287 | 3 | 447.6222 | 17024600  | 405417984 |
| TSSMGTLPKQVKIVEVGPR       | P38060 | 0.03009631 | n +28.03 Da,K +28.03 Da, | 1677.455805 | 4 | 527.056  | 1.589E+09 | 306259008 |
| ISFHLPVNSR                | Q9D1D4 | 0.01821192 | n +28.03 Da,             | 1678.60101  | 3 | 595.3218 | 285881984 | 309000992 |
| MNQEKLAKLQAQVR            | Q64152 | 0          | n +42.03 Da,K +28.03 Da, | 1678.7748   | 2 | 874.9723 | 68371904  | 53522600  |
| SSKPKSLEIIGAPFSKGQPR      | Q61176 | 0          | n +42.03 Da,K +34.06 Da, | 1681.778168 | 4 | 567.8497 | 31673500  | 202602000 |
| MNQEKLAKLQAQVR            | Q64152 | 0          | n +42.03 Da,K +28.03 Da, | 1682.687089 | 2 | 877.9999 | 92260496  | 89858800  |

|                              |        |            |                          |             |   |          |           |           |
|------------------------------|--------|------------|--------------------------|-------------|---|----------|-----------|-----------|
| TEIGEALKEVSGSGKAVPR          | Q9JII6 | 0.0078534  | n +28.03 Da,K +28.03 Da, | 1683.33879  | 3 | 503.3086 | 219418000 | 355729984 |
| TEIGEALKEVSGSGKAVPR          | Q9JII6 | 0.0078534  | n +28.03 Da,K +28.03 Da, | 1684.579523 | 3 | 499.286  | 177151008 | 397382016 |
| STSSMGTLPKQVKIVEVGPR         | P38060 | 0          | n +34.06 Da,K +34.06 Da, | 1685.015537 | 4 | 554.0898 | 73542896  | 451760000 |
| MNQEKLAKLQAQVR               | Q64152 | 0          | n +42.03 Da,K +28.03 Da, | 1686.104145 | 3 | 585.6691 | 6.7E+09   | 6.01E+09  |
| TKLPWDVAVGR                  | P54869 | 0          | n +34.06 Da,K +34.06 Da, | 1687.369243 | 3 | 403.2523 | 374937984 | 1.639E+09 |
| SQAEFDKAAEEVKR               | P31786 | 0          | n +42.03 Da,K +28.03 Da, | 1688.063156 | 3 | 566.2841 | 422046016 | 1.838E+09 |
| AGEESVMNLDKLR                | Q8K2B3 | 0          | n +34.06 Da,K +34.06 Da, | 1690.933527 | 3 | 509.6173 | 79909400  | 67041500  |
| NAGVSDGSEVAKAQKAAPGGASPTIFSR | Q9D0S9 | 0          | n +28.03 Da,K +28.03 Da, | 1691.762547 | 4 | 690.1181 | 378007008 | 195734000 |
| SSKPKSLEIIGAPFSKGQPR         | Q61176 | 0          | n +42.03 Da,K +28.03 Da, | 1692.330198 | 3 | 751.7698 | 7.326E+09 | 7.48E+09  |
| LFGLDIKGR                    | Q922Q1 | 0.00582698 | n +28.03 Da,K +28.03 Da, | 1697.20647  | 3 | 358.8935 | 137104000 | 120540000 |
| THSELLEDYYSGR                | P55096 | 0          | n +28.03 Da,             | 1697.379708 | 3 | 573.9492 | 201627008 | 107826000 |
| SSKPKSLEIIGAPFSKGQPR         | Q61176 | 0          | n +42.03 Da,K +34.06 Da, | 1698.672035 | 2 | 1127.151 | 414527008 | 322504000 |
| STSSMGTLPKQVKIVEVGPR         | P38060 | 0          | n +34.06 Da,K +34.06 Da, | 1699.970057 | 3 | 733.4235 | 370236000 | 278648992 |
| SSKPKSLEIIGAPFSKGQPR         | Q61176 | 0          | n +42.03 Da,K +34.06 Da, | 1701.729403 | 3 | 756.7962 | 429675008 | 2.45E+09  |
| SIYHPSLLPR                   | Q8K009 | 0          | n +28.03 Da,             | 1705.271924 | 3 | 440.9218 | 122985000 | 302441984 |
| STSSMGTLPKQVKIVEVGPR         | P38060 | 0          | n +34.06 Da,K +34.06 Da, | 1705.423547 | 4 | 550.32   | 5.065E+09 | 3.785E+09 |
| SEPELKLVAR                   | P08030 | 0.00232234 | n +42.03 Da,K +28.03 Da, | 1707.758682 | 3 | 606.3372 | 192960000 | 191086000 |
| PIGDKLNIMTAGSR               | P24270 | 0          | n +17.03 Da,K +34.06 Da, | 1709.114324 | 3 | 507.6293 | 703651008 | 3.171E+09 |
| PILGVTEAFKR                  | P05202 | 0          | n +17.03 Da,n +34.06 Da, | 1712.745072 | 2 | 639.9027 | 390295008 | 1.574E+09 |
| PILGVTEAFKR                  | P05202 | 0          | n +17.03 Da,n +34.06 Da, | 1712.840217 | 3 | 426.9379 | 5.672E+09 | 2.227E+10 |
| VLFPGYTHLQR                  | Q91YI0 | 0          | n +28.03 Da,             | 1712.854888 | 3 | 453.5908 | 497340000 | 570075008 |
| PLPPLPEYGGKVR                | Q9CQQ7 | 0          | n +14.02 Da,K +28.03 Da, | 1716.945213 | 3 | 487.9455 | 514523008 | 2.338E+09 |
| SSKPKSLEIIGAPFSKGQPR         | Q61176 | 0          | n +42.03 Da,K +28.03 Da, | 1718.73549  | 4 | 564.081  | 6.325E+10 | 4.547E+10 |
| LHLGVTPSVLR                  | O89023 | 0          | n +34.06 Da,             | 1721.572594 | 3 | 407.2551 | 3.899E+09 | 4.243E+09 |
| AAAAYEHLKLH                  | Q9EP69 | 0          | n +42.03 Da,K +28.03 Da, | 1722.876699 | 2 | 647.3424 | 2.219E+09 | 3.146E+09 |
| VAPEEHPVLLTEAPLNPKANR        | P60710 | 0          | n +28.03 Da,K +28.03 Da, | 1727.477489 | 4 | 588.5818 | 1.974E+10 | 1.796E+10 |
| ISFHLPVNSR                   | Q9D1D4 | 0.01821192 | n +28.03 Da,             | 1728.392052 | 2 | 599.3396 | 3.826E+09 | 2.956E+09 |
| SQAEFDKAAEEVKR               | P31786 | 0          | n +42.03 Da,K +34.06 Da, | 1728.892012 | 3 | 572.3122 | 4.736E+09 | 4.533E+10 |
| ISFHLPVNSR                   | Q9D1D4 | 0          | n +28.03 Da,             | 1729.659107 | 3 | 399.8957 | 1.699E+10 | 1.269E+10 |
| SQAEFDKAAEEVKR               | P31786 | 0          | n +42.03 Da,K +34.06 Da, | 1732.588282 | 2 | 853.4408 | 4.391E+09 | 3.973E+09 |
| SQAEFDKAAEEVKR               | P31786 | 0          | n +42.03 Da,K +34.06 Da, | 1733.884425 | 2 | 857.9635 | 181308000 | 2.298E+09 |
| MKFNPVTSR                    | P61255 | 0          | n +28.03 Da,K +28.03 Da, | 1735.50115  | 3 | 466.5803 | 8.956E+09 | 1.221E+10 |
| AAAAYEHLKLH                  | Q9EP69 | 0          | n +42.03 Da,K +28.03 Da, | 1736.343438 | 3 | 431.9028 | 2.562E+09 | 2.133E+09 |
| MKFNPVTSR                    | P61255 | 0          | n +34.06 Da,K +34.06 Da, | 1737.585588 | 2 | 703.8885 | 1.201E+09 | 1.298E+10 |
| SQAEFDKAAEEVKR               | P31786 | 0          | n +42.03 Da,K +34.06 Da, | 1738.04549  | 3 | 569.2965 | 3.898E+10 | 3.58E+10  |
| STAIQELFKR                   | P68372 | 0          | n +34.06 Da,K +34.06 Da, | 1739.5136   | 3 | 416.9154 | 425244000 | 306868992 |
| AGKPVLYHFDGR                 | P30115 | 0          | n +42.03 Da,K +34.06 Da, | 1739.514629 | 3 | 478.261  | 1.953E+10 | 1.33E+11  |
| SLHLGVTPSVLR                 | O89023 | 0.00582698 | n +28.03 Da,             | 1742.122591 | 3 | 436.2663 | 2.328E+09 | 7.047E+09 |
| MKFNPVTSR                    | P61255 | 0          | n +34.06 Da,K +34.06 Da, | 1742.257203 | 3 | 469.5965 | 1.777E+09 | 1.661E+10 |
| PDSWDKDVYPEPPSR              | Q9DCS9 | 0          | n +17.03 Da,K +34.06 Da, | 1744.24204  | 3 | 612.6371 | 1.118E+09 | 3.264E+09 |



|                             |        |            |                                      |             |   |          |           |           |
|-----------------------------|--------|------------|--------------------------------------|-------------|---|----------|-----------|-----------|
| PLPLPEYGGKVR                | Q9CQQ7 | 0          | n +17.03 Da,K +34.06 Da,             | 1749.20734  | 3 | 488.9565 | 4.696E+09 | 3.868E+09 |
| MLLEYTDSSYDEKR              | P10649 | 0          | n +28.03 Da,K +28.03 Da,             | 1751.595952 | 3 | 602.6259 | 117565000 | 68959296  |
| MKFNPFVTSR                  | P61255 | 0          | n +34.06 Da,K +34.06 Da,             | 1752.47069  | 2 | 699.3663 | 1.607E+09 | 726035008 |
| AGKPVLYHFDGR                | P30115 | 0          | n +42.03 Da,K +28.03 Da,             | 1753.756751 | 2 | 715.3825 | 3.299E+11 | 3.097E+11 |
| TTKDPSEHPSVTLFR             | Q99JW2 | 0          | n +42.03 Da,K +34.06 Da,             | 1754.312751 | 3 | 638.6583 | 3.823E+09 | 4.971E+09 |
| SIYHPSLLPR                  | Q8K009 | 0          | n +34.06 Da,                         | 1755.175678 | 3 | 441.9308 | 5.928E+09 | 6.074E+09 |
| AGKPVLYHFDGR                | P30115 | 0          | n +42.03 Da,K +34.06 Da,             | 1757.876977 | 3 | 477.26   | 8.165E+11 | 7.478E+11 |
| TEADVNPKAYPLADAHLTKK        | Q9D0T1 | 0          | n +42.03 Da,n +28.03 Da,K +28.03 Da, | 1760.20917  | 4 | 577.8198 | 731590976 | 503879008 |
| KATIPAALQAQESTEGPGTQQDRPR   | Q9DBG1 | 0          | n +42.03 Da,K +34.06 Da,             | 1760.237953 | 4 | 664.5913 | 365606016 | 640894016 |
| GGFVFALEKR                  | O35490 | 0          | n +28.03 Da,K +28.03 Da,             | 1761.436569 | 3 | 393.9013 | 2.033E+09 | 1.658E+09 |
| MLLEYTDSSYDEKR              | P10649 | 0          | n +28.03 Da,K +28.03 Da,             | 1764.199905 | 3 | 602.6259 | 1.128E+09 | 943104000 |
| TILAEGHFR                   | O35129 | 0          | n +28.03 Da,                         | 1765.254257 | 3 | 395.5643 | 301940000 | 263155008 |
| SHPSWLPPKSTGEPLGHVPAR       | Q8BFW7 | 0          | n +42.03 Da,K +28.03 Da,             | 1768.094534 | 3 | 774.0779 | 168108000 | 166619008 |
| AASKVKQDMPPPGGYGPIDYKR      | Q9ERS2 | 0          | n +42.03 Da,K +34.06 Da,             | 1768.557826 | 3 | 839.4698 | 38596200  | 345873984 |
| AGIAIKLAKDR                 | O08529 | 0          | n +42.03 Da,K +28.03 Da,             | 1768.684838 | 3 | 418.603  | 3.487E+09 | 3.257E+09 |
| PDSWDKDVPEPPSR              | Q9DCS9 | 0          | n +14.02 Da,K +28.03 Da,             | 1772.793582 | 3 | 610.6272 | 40396000  | 22323800  |
| PLPLPEYGGKVR                | Q9CQQ7 | 0          | n +17.03 Da,K +34.06 Da,             | 1774.502795 | 3 | 490.9669 | 2.02E+10  | 5.485E+10 |
| PTEKNVDLSTFYQNR             | Q9CZW5 | 0          | n +14.02 Da,K +28.03 Da,             | 1779.436366 | 3 | 616.6415 | 937364992 | 809724992 |
| AASKVKQDMPPPGGYGPIDYKR      | Q9ERS2 | 0          | n +42.03 Da,K +28.03 Da,             | 1780.428652 | 5 | 501.0694 | 852964992 | 655956992 |
| LDPSKTNVSGGAIALGHPLGGSGSR   | Q8BWT1 | 0          | n +28.03 Da,K +28.03 Da,             | 1782.059997 | 3 | 802.1031 | 185704992 | 186951008 |
| LDPSKTNVSGGAIALGHPLGGSGSR   | Q8BWT1 | 0          | n +28.03 Da,K +28.03 Da,             | 1783.966164 | 4 | 601.8281 | 6.418E+09 | 6.24E+09  |
| GPTTPEADKIFLER              | P26443 | 0          | n +34.06 Da,K +34.06 Da,             | 1784.006964 | 3 | 544.9659 | 34125500  | 208838000 |
| SHPSWLPPKSTGEPLGHVPAR       | Q8BFW7 | 0          | n +42.03 Da,K +34.06 Da,             | 1784.405153 | 4 | 580.8095 | 1.209E+10 | 1.096E+10 |
| LHTVYQSVLPETH               | Q07417 | 0          | n +28.03 Da,                         | 1785.554669 | 3 | 560.9574 | 1.183E+09 | 1.03E+09  |
| AASKVKQDMPPPGGYGPIDYKR      | Q9ERS2 | 0          | n +42.03 Da,K +34.06 Da,             | 1786.335242 | 4 | 626.0859 | 8.766E+10 | 7.96E+10  |
| PSKEVEEDEYKAFY              | P08113 | 0          | n +14.02 Da,K +28.03 Da,             | 1786.495029 | 2 | 902.4364 | 174662000 | 139120000 |
| RASQQDFENALNQVK             | Q9WUR2 | 0          | n +34.06 Da,K +34.06 Da,             | 1787.525338 | 3 | 601.9607 | 2.334E+09 | 1.934E+09 |
| AASKVKQDMPPPGGYGPIDYKR      | Q9ERS2 | 0          | n +42.03 Da,K +28.03 Da,             | 1789.789457 | 3 | 834.4461 | 1.78E+09  | 1.419E+09 |
| VAPEEHPVLLTEAPLNPKANR       | P60710 | 0          | n +42.03 Da,K +28.03 Da,             | 1790.24036  | 4 | 592.0863 | 7.391E+09 | 6.277E+09 |
| MYLNEVAGKHGVGR              | P16460 | 0          | n +42.03 Da,K +34.06 Da,             | 1792.982776 | 3 | 535.2906 | 368007008 | 325206016 |
| PFLDIQKLL                   | Q99LY9 | 0.00623053 | n +17.03 Da,K +34.06 Da,             | 1793.057604 | 3 | 391.253  | 78868400  | 71327200  |
| PFLDIQKLL                   | Q99LY9 | 0.00623053 | n +17.03 Da,K +34.06 Da,             | 1793.847069 | 3 | 395.2739 | 512238016 | 807190976 |
| TSVLICPDGKTVEAAHGTVTR       | O88844 | 0          | n +34.06 Da,                         | 1795.279645 | 4 | 617.8249 | 200307008 | 152086000 |
| NLYKLEAFR                   | P54869 | 0          | n +28.03 Da,K +28.03 Da,             | 1798.879504 | 3 | 421.9092 | 80051600  | 350264000 |
| ATDISSGADCKGDTKNSAKLDADYPLR | Q9CQJ6 | 0          | n +42.03 Da,K +28.03 Da,             | 1801.55609  | 4 | 803.6414 | 2.609E+09 | 2.483E+09 |
| TGPNLHGLFGR                 | P62897 | 0          | n +28.03 Da,                         | 1804.158945 | 3 | 399.5559 | 2.465E+09 | 2.502E+09 |
| AVPIAQKSEPPQSLNEALMR        | Q9JIQ3 | 0          | n +28.03 Da,K +28.03 Da,             | 1811.076605 | 3 | 742.4034 | 50444800  | 53486400  |
| SDAPPLTLGDIKDR              | Q9CR21 | 0          | n +34.06 Da,K +34.06 Da,             | 1813.178594 | 3 | 521.639  | 170812992 | 1.51E+09  |
| SDAPPLTLGDIKDR              | Q9CR21 | 0          | n +28.03 Da,K +28.03 Da,             | 1813.366992 | 2 | 777.4298 | 439377984 | 313833984 |
| GPTTPEADKIFLER              | P26443 | 0          | n +34.06 Da,K +34.06 Da,             | 1814.237952 | 3 | 543.9668 | 1.685E+09 | 1.749E+09 |

|                              |        |   |                          |             |   |          |           |           |
|------------------------------|--------|---|--------------------------|-------------|---|----------|-----------|-----------|
| MKFNPFVTSDR                  | P61255 | 0 | n +34.06 Da,K +34.06 Da, | 1814.338758 | 3 | 468.5872 | 80622304  | 43219500  |
| ASGADSKGDDLSTAILKQK          | Q01853 | 0 | n +42.03 Da,K +28.03 Da, | 1814.938359 | 3 | 677.7034 | 2.334E+09 | 1.905E+09 |
| PTIGFNNLDEAHVDR              | Q3UQ44 | 0 | n +14.02 Da,             | 1817.488797 | 3 | 570.9701 | 114906000 | 27809700  |
| GPTTPEADKIFLER               | P26443 | 0 | n +34.06 Da,K +34.06 Da, | 1817.768644 | 2 | 815.4467 | 374383008 | 348657984 |
| TGFHETSNINDFSAGVANR          | P15105 | 0 | n +34.06 Da,             | 1818.911043 | 3 | 688.9956 | 1.457E+09 | 1.963E+09 |
| SDAPPLTLDGIKDR               | Q9CR21 | 0 | n +28.03 Da,K +28.03 Da, | 1824.00889  | 3 | 516.6131 | 19238800  | 605816000 |
| MLLEYTDSSYDEKR               | P10649 | 0 | n +42.03 Da,K +34.06 Da, | 1828.198716 | 3 | 607.2975 | 1.087E+09 | 1.111E+09 |
| NLYKGLEAFR                   | P54869 | 0 | n +34.06 Da,K +34.06 Da, | 1829.12979  | 3 | 424.9269 | 319372992 | 244444992 |
| RASQQDFENALNQVK              | Q9WUR2 | 0 | n +34.06 Da,K +34.06 Da, | 1829.227337 | 3 | 605.9788 | 199656000 | 86150600  |
| GVKIMGTSPLQIDR               | Q8C196 | 0 | n +34.06 Da,K +34.06 Da, | 1829.358036 | 3 | 524.3042 | 2.121E+09 | 2.348E+09 |
| ATPEASGSGEKVEGSEPSVYYR       | Q9CQX2 | 0 | n +42.03 Da,K +34.06 Da, | 1830.129958 | 3 | 824.3913 | 395687008 | 363832992 |
| ATPEASGSGEKVEGSEPSVYYR       | Q9CQX2 | 0 | n +42.03 Da,K +28.03 Da, | 1830.440288 | 2 | 1236.081 | 45783400  | 41253900  |
| PLPPLPEYGGKVR                | Q9CQQ7 | 0 | n +17.03 Da,K +34.06 Da, | 1830.923315 | 3 | 491.638  | 1.256E+09 | 1.434E+09 |
| PEIFDAPKEFR                  | Q60991 | 0 | n +17.03 Da,K +34.06 Da, | 1831.051641 | 3 | 466.2612 | 864473984 | 2.956E+09 |
| GPTTPEADKIFLER               | P26443 | 0 | n +34.06 Da,K +34.06 Da, | 1831.128941 | 3 | 546.9856 | 581729024 | 2.112E+09 |
| GVPVFKFPR                    | Q8R0Y6 | 0 | n +34.06 Da,K +34.06 Da, | 1833.33663  | 3 | 371.2462 | 24696100  | 369188992 |
| GVPVFKFPR                    | Q8R0Y6 | 0 | n +34.06 Da,K +34.06 Da, | 1838.547706 | 3 | 368.2303 | 1.109E+09 | 1.232E+09 |
| PLPPLPEYGGKVR                | Q9CQQ7 | 0 | n +17.03 Da,K +34.06 Da, | 1839.862478 | 3 | 491.6375 | 5.468E+09 | 483300000 |
| MKVFTVGPLPAEGR               | Q91Z53 | 0 | n +34.06 Da,K +34.06 Da, | 1841.306249 | 3 | 522.9813 | 1.22E+09  | 9.996E+09 |
| MKVFTVGPLPAEGR               | Q91Z53 | 0 | n +34.06 Da,K +34.06 Da, | 1841.838543 | 2 | 779.4435 | 582742016 | 572931968 |
| VKVPDFSDYR                   | Q9CR68 | 0 | n +34.06 Da,K +34.06 Da, | 1844.999737 | 3 | 431.9076 | 586688000 | 658819968 |
| GVSDGSEVAKAQAAPGGASPTIFSR    | Q9D0S9 | 0 | n +28.03 Da,K +28.03 Da, | 1852.814771 | 4 | 643.8492 | 456932992 | 525184992 |
| GVKIMGTSPLQIDR               | Q8C196 | 0 | n +34.06 Da,K +34.06 Da, | 1859.160446 | 2 | 525.2959 | 46884600  | 142986000 |
| GSVVKSEDYAFPTYADR            | P19783 | 0 | n +34.06 Da,K +34.06 Da, | 1862.590406 | 3 | 657.3419 | 578534016 | 2.91E+09  |
| PYTDAVIHEIQR                 | O55071 | 0 | n +14.02 Da,             | 1864.632068 | 3 | 485.9249 | 1.132E+09 | 849740992 |
| MEAKGGTVKAASGFNATEDAQTLR     | P97429 | 0 | n +42.03 Da,K +34.06 Da, | 1865.765371 | 3 | 851.0987 | 579473024 | 481255008 |
| VKVPDFSDYR                   | Q9CR68 | 0 | n +34.06 Da,K +34.06 Da, | 1866.385849 | 3 | 427.8998 | 339184000 | 340950016 |
| STVAAASPSHEAKGGLVISPEGLSPAVR | Q8K370 | 0 | n +34.06 Da,K +34.06 Da, | 1866.84482  | 4 | 686.8787 | 4.173E+09 | 2.825E+09 |
| SNIKIFSGSSHQDLSQKIADR        | G3UXL2 | 0 | n +42.03 Da,K +34.06 Da, | 1867.531461 | 4 | 611.0908 | 565763008 | 25647500  |
| DIAFHFNPR                    | O08573 | 0 | n +28.03 Da,             | 1867.829795 | 3 | 382.2013 | 861958976 | 838593024 |
| VNFTVDQIR                    | P58252 | 0 | n +34.06 Da,             | 1868.965616 | 2 | 560.3116 | 2.419E+09 | 2.066E+09 |
| TPDFFTPENYKR                 | Q9D6J6 | 0 | n +28.03 Da,K +28.03 Da, | 1869.895309 | 3 | 524.268  | 634824000 | 698942016 |
| VSTSSMGTLPKQVKIVEVGPR        | P38060 | 0 | n +34.06 Da,K +34.06 Da, | 1875.095685 | 4 | 575.0866 | 2.847E+09 | 1.642E+09 |
| AHIFVYGT LKR                 | Q923B0 | 0 | n +42.03 Da,n +28.03 Da, | 1875.367911 | 3 | 458.9347 | 1.905E+09 | 1.824E+09 |
| TTNTVPLHPYWPR                | P70245 | 0 | n +28.03 Da,             | 1878.982263 | 3 | 537.288  | 1.698E+09 | 1.233E+09 |
| SHPSWLPPKSTGEPLGHVPAR        | Q8BFW7 | 0 | n +42.03 Da,K +34.06 Da, | 1879.831326 | 4 | 580.8107 | 121275000 | 79883600  |
| MQPASAKWYDR                  | Q9R0Q7 | 0 | n +42.03 Da,K +34.06 Da, | 1879.911051 | 2 | 711.8446 | 516524992 | 488849984 |
| SNIKIFSGSSHQDLSQKIADR        | G3UXL2 | 0 | n +42.03 Da,K +28.03 Da, | 1882.981346 | 3 | 810.4315 | 1.745E+09 | 1.585E+09 |
| TPDFFTPENYKR                 | Q9D6J6 | 0 | n +34.06 Da,K +34.06 Da, | 1884.397516 | 3 | 528.2901 | 145791008 | 82258304  |
| GSVVKSEDYAFPTYADR            | P19783 | 0 | n +34.06 Da,K +34.06 Da, | 1885.606235 | 2 | 658.3517 | 71171104  | 37566600  |

|                           |        |            |                                      |             |   |          |           |           |
|---------------------------|--------|------------|--------------------------------------|-------------|---|----------|-----------|-----------|
| SNIKIFSGSSHQDLSQKIADR     | G3UXL2 | 0          | n +42.03 Da,K +28.03 Da,             | 1885.640445 | 4 | 608.075  | 1.547E+10 | 1.37E+10  |
| SPKILPDILR                | Q91WT9 | 0          | n +28.03 Da,K +28.03 Da,             | 1888.119921 | 3 | 400.5802 | 345152992 | 532769984 |
| HAPFETDISTLTR             | Q9QXD6 | 0          | n +34.06 Da,                         | 1889.750853 | 3 | 506.9446 | 75595296  | 79004896  |
| FTMELAKKGF                | P26443 | 0          | n +28.03 Da,K +28.03 Da,             | 1893.247404 | 3 | 419.2422 | 127863000 | 89400096  |
| MENQLTKSVEER              | Q9DC50 | 0          | n +42.03 Da,K +28.03 Da,             | 1896.846789 | 2 | 767.3824 | 69107296  | 56067100  |
| TTNTVPLHPYWPR             | P70245 | 0          | n +28.03 Da,                         | 1899.145502 | 3 | 534.2672 | 352950016 | 49058100  |
| VSTSSMGTLPKQVKIVEVGPR     | P38060 | 0          | n +34.06 Da,K +34.06 Da,             | 1901.203413 | 4 | 578.8567 | 367374016 | 1.983E+09 |
| VGVPVGSDFQPELSGAGSR       | Q8CDN6 | 0          | n +28.03 Da,K +28.03 Da,             | 1901.384467 | 3 | 752.3938 | 675931008 | 599574976 |
| AVPPTYADLGKSAR            | Q60932 | 0          | n +42.03 Da,K +28.03 Da,             | 1901.749681 | 2 | 758.4129 | 314171008 | 213323008 |
| PFLPWKEQQEVADR            | O88851 | 0          | n +14.02 Da,K +28.03 Da,             | 1902.221958 | 4 | 591.1202 | 1.078E+09 | 51894800  |
| VFGAQSPFGGYKMSGSGR        | P47738 | 0          | n +28.03 Da,K +28.03 Da,             | 1903.635801 | 3 | 630.317  | 110269000 | 117286000 |
| DIHTPGVAADLSHIETR         | P08249 | 0          | n +28.03 Da,                         | 1906.06411  | 3 | 642.3265 | 117605000 | 671459008 |
| IVTCNNGSLDVVYWEER         | Q8C2W8 | 0.03803487 | n +42.03 Da,                         | 1909.689197 | 3 | 699.3233 | 652201984 | 655598016 |
| MEGYHKPDQKQLQALKDTANR     | P40142 | 0          | n +42.03 Da,K +28.03 Da,             | 1910.781461 | 4 | 650.083  | 1.43E+09  | 929179008 |
| TMDKSELVQKAKLAEQAER       | Q9CQV8 | 0          | n +42.03 Da,n +34.06 Da,K +34.06 Da, | 1912.157416 | 3 | 772.7801 | 210111008 | 1.089E+09 |
| VSTSSMGTLPKQVKIVEVGPR     | P38060 | 0.0281917  | n +34.06 Da,K +34.06 Da,             | 1914.176559 | 3 | 766.447  | 588323008 | 439312992 |
| TMDKSELVQKAKLAEQAER       | Q9CQV8 | 0          | n +42.03 Da,n +34.06 Da,K +34.06 Da, | 1915.046003 | 4 | 579.8378 | 227034000 | 1.128E+09 |
| ASLKDLEGKWR               | Q05816 | 0          | n +42.03 Da,K +28.03 Da,             | 1918.654338 | 3 | 467.6014 | 277948000 | 220466000 |
| STEVGHLIQVAAGSSNLKR       | P47738 | 0          | n +34.06 Da,K +34.06 Da,             | 1920.501665 | 3 | 675.0494 | 156176992 | 93807904  |
| PIKIPVGPETLGR             | P56480 | 0          | n +14.02 Da,K +28.03 Da,             | 1920.82462  | 3 | 471.6229 | 188518000 | 113197000 |
| PFLPWKEQQEVADR            | O88851 | 0          | n +14.02 Da,K +28.03 Da,             | 1921.621135 | 3 | 595.6494 | 193596992 | 136400992 |
| HAPFETDISTLTR             | Q9QXD6 | 0          | n +28.03 Da,                         | 1922.983398 | 3 | 505.9321 | 781324992 | 1.257E+09 |
| PKVQQTVDLFGFR             | P38647 | 0          | n +14.02 Da,K +28.03 Da,             | 1923.416787 | 3 | 519.9636 | 585502016 | 71749904  |
| AVPPTYADLGKSAR            | Q60932 | 0          | n +42.03 Da,K +28.03 Da,             | 1923.753854 | 2 | 758.3914 | 1.879E+09 | 2.784E+09 |
| PLPLPEYGGKVR              | Q9CQQ7 | 0          | n +28.03 Da,K +28.03 Da,             | 1924.67916  | 3 | 493.6293 | 487974016 | 364516992 |
| TMDKSELVQKAKLAEQAER       | Q9CQV8 | 0          | n +42.03 Da,n +28.03 Da,K +28.03 Da, | 1926.429981 | 3 | 767.7541 | 788366976 | 374486016 |
| SAGFLQASASDVVVHGR         | Q8VCHO | 0          | n +34.06 Da,                         | 1926.917671 | 3 | 609.9957 | 2.288E+09 | 1.839E+09 |
| FISKSGYQQAASEHGLVVIAPDTSR | Q9R0P3 | 0          | n +34.06 Da,K +34.06 Da,             | 1933.707232 | 4 | 704.3751 | 1.205E+09 | 987881024 |
| AASPSKTEIQTIFKR           | Q99K28 | 0.03534551 | n +42.03 Da,K +28.03 Da,             | 1935.487435 | 3 | 592.3405 | 633009984 | 670785984 |
| LPTQTISQGAIEKVKDATR       | Q8C196 | 0          | n +28.03 Da,K +28.03 Da,             | 1937.269378 | 4 | 535.8138 | 464119008 | 204103008 |
| VSTSSMGTLPKQVKIVEVGPR     | P38060 | 0          | n +42.03 Da,K +28.03 Da,             | 1937.832442 | 3 | 771.1043 | 771905024 | 543843968 |
| AYSTGSSLMPQKKNPDSLELIR    | Q91YI0 | 0          | n +28.03 Da,K +28.03 Da,             | 1938.268809 | 4 | 630.5935 | 128132000 | 107233000 |
| MEKTELIQKAKLAEQAER        | P68254 | 0          | n +42.03 Da,K +34.06 Da,             | 1939.32394  | 4 | 561.3175 | 4.595E+09 | 5.645E+09 |
| TTKSFLLLR                 | Q8OXN0 | 0          | n +34.06 Da,K +34.06 Da,             | 1940.102825 | 3 | 411.2639 | 169884992 | 73598896  |
| MDKNELVQKAKLAEQAER        | P63101 | 0          | n +42.03 Da,K +34.06 Da,             | 1941.188009 | 3 | 748.0868 | 1.269E+09 | 1.509E+09 |
| MKFNPFVTSR                | P61255 | 0.00093985 | n +34.06 Da,K +34.06 Da,             | 1942.139677 | 3 | 470.6    | 78749200  | 35565900  |
| LVFPSEIVGKR               | P62082 | 0          | n +28.03 Da,                         | 1945.2818   | 3 | 434.2703 | 599465024 | 567729024 |
| GNWGHLDQVAALR             | Q8VCT4 | 0          | n +28.03 Da,                         | 1946.793529 | 3 | 488.9276 | 323903008 | 162567008 |
| SGMGTLISKIR               | P68372 | 0          | n +34.06 Da,                         | 1948.732518 | 3 | 444.6066 | 791828992 | 601880000 |
| TMTLGDIVYKR               | P12710 | 0          | n +28.03 Da,                         | 1951.214731 | 2 | 676.8822 | 2.73E+09  | 1.945E+09 |

|                         |        |            |                                      |             |   |          |           |           |
|-------------------------|--------|------------|--------------------------------------|-------------|---|----------|-----------|-----------|
| AGQSDKDVKYYTLEEIQKH     | P56395 | 0.012309   | n +42.03 Da,K +28.03 Da,             | 1951.324635 | 3 | 793.412  | 1.517E+09 | 2.002E+09 |
| SNIKIFSGSSHQDLSQKIADR   | G3UXL2 | 0          | n +42.03 Da,K +28.03 Da,             | 1952.476777 | 4 | 608.0726 | 48681100  | 49900800  |
| LIGDAAKNQLTSNPENTVFDKR  | P20029 | 0          | n +28.03 Da,K +28.03 Da,             | 1952.537131 | 4 | 647.352  | 1.623E+09 | 1.792E+09 |
| LALKNIASMVR             | Q9QXF8 | 0          | n +28.03 Da,K +28.03 Da,             | 1954.650528 | 3 | 424.5992 | 313929984 | 287110016 |
| TNTMTLGDIVYKR           | P12710 | 0          | n +34.06 Da,K +34.06 Da,             | 1954.76096  | 3 | 527.3213 | 94005200  | 98974896  |
| TMTLGDIVYKR             | P12710 | 0          | n +28.03 Da,                         | 1956.564059 | 3 | 451.5911 | 7.51E+09  | 4.58E+09  |
| LLSAAYVDSHQWEAR         | Q8BK72 | 0          | n +28.03 Da,                         | 1957.05904  | 3 | 591.9669 | 527865984 | 468884000 |
| SLSNKLTLDKLDVKGKR       | P09411 | 0          | n +42.03 Da,n +28.03 Da,K +28.03 Da, | 1959.996402 | 4 | 518.0639 | 480831008 | 295120992 |
| GFSLIGAHTDSPCLR         | Q9Z2W0 | 0          | n +28.03 Da,                         | 1962.180636 | 3 | 553.6156 | 1.534E+09 | 1.078E+09 |
| AHGSVVKSEDYAFPTYADR     | P19783 | 0          | n +28.03 Da,K +28.03 Da,             | 1962.781577 | 3 | 723.6797 | 5.642E+09 | 3.747E+09 |
| SLDYMVTKIPR             | Q8C196 | 0          | n +28.03 Da,K +28.03 Da,             | 1963.146558 | 3 | 458.2502 | 249274000 | 773332992 |
| GVDVHPGYGFLSER          | Q05920 | 0          | n +34.06 Da,                         | 1967.348076 | 3 | 544.611  | 1.453E+09 | 1.417E+09 |
| IGSSMKSVGEVMAIGR        | Q8C196 | 0.00866176 | n +42.03 Da,K +28.03 Da,             | 1967.963632 | 3 | 564.6436 | 747278976 | 732942976 |
| SVFAEIAKVR              | Q9DBM2 | 0          | n +34.06 Da,K +34.06 Da,             | 1972.095942 | 3 | 418.2518 | 19190600  | 19899100  |
| VKLFIGNLPR              | Q8C7Q4 | 0          | n +34.06 Da,K +34.06 Da,             | 1972.283467 | 3 | 404.9323 | 13525900  | 15364700  |
| MDKNELVQKAKLAEQAER      | P63101 | 0          | n +42.03 Da,K +28.03 Da,             | 1973.757317 | 3 | 743.0752 | 3.369E+09 | 2.775E+09 |
| TNTMTLGDIVYKR           | P12710 | 0          | n +34.06 Da,K +34.06 Da,             | 1974.707534 | 3 | 523.2894 | 265075008 | 207711008 |
| APNVLASEPEIPKGR         | Q9WTP6 | 0          | n +28.03 Da,K +28.03 Da,             | 1975.231167 | 3 | 583.0086 | 2.708E+09 | 1.995E+09 |
| MDKNELVQKAKLAEQAER      | P63101 | 0          | n +42.03 Da,K +28.03 Da,             | 1975.740935 | 4 | 557.5595 | 5.242E+10 | 4.324E+10 |
| PVSELITKAVAASKER        | P15864 | 0          | n +17.03 Da,K +34.06 Da,             | 1976.177746 | 4 | 443.0184 | 189328000 | 43099300  |
| VYEDQVGKFDWR            | Q8C7X2 | 0          | n +34.06 Da,K +34.06 Da,             | 1976.541339 | 3 | 536.2876 | 209862000 | 1.586E+09 |
| GIFEVKSTAGDTHLGGEDFDNR  | P17156 | 0          | n +34.06 Da,K +34.06 Da,             | 1977.615228 | 4 | 606.0468 | 794172992 | 670611008 |
| MDKNELVQKAKLAEQAER      | P63101 | 0          | n +42.03 Da,K +34.06 Da,             | 1977.661511 | 3 | 748.1033 | 75640800  | 505588000 |
| TFAHLDATTVLSR           | P56480 | 0          | n +28.03 Da,                         | 1987.523977 | 3 | 486.2564 | 8855370   | 293310016 |
| GFSLIGAHTDSPCLR         | Q9Z2W0 | 0          | n +28.03 Da,                         | 1988.028573 | 3 | 551.6076 | 64047400  | 100559000 |
| PSNMPPGIEPSDKMLQGR      | P24270 | 0          | n +17.03 Da,K +34.06 Da,             | 1990.363443 | 3 | 698.3535 | 418851008 | 338097984 |
| RVAPEEHPTLLTEAPLNPKANR  | P62737 | 0          | n +42.03 Da,K +28.03 Da,             | 1990.915868 | 4 | 631.5951 | 164223008 | 46442000  |
| TPTEKLPFPIIDDKGR        | O08709 | 0          | n +28.03 Da,K +28.03 Da,             | 1993.318108 | 4 | 478.5296 | 3.261E+09 | 3.303E+09 |
| ASIVEDKLVEDLKTR         | P26443 | 0          | n +28.03 Da,K +28.03 Da,             | 1994.280879 | 4 | 450.7673 | 92498704  | 87173400  |
| PGAQDSKDDFPLR           | Q99N13 | 0.04058314 | n +17.03 Da,K +34.06 Da,             | 1999.393872 | 3 | 499.6129 | 433484000 | 352942016 |
| SLDYMVTKIPR             | Q8C196 | 0          | n +28.03 Da,K +28.03 Da,             | 2001.422963 | 3 | 460.2617 | 62881100  | 52490400  |
| VDEYLAWQHTGLR           | Q64471 | 0          | n +28.03 Da,                         | 2001.493312 | 3 | 538.9461 | 966243008 | 1.141E+09 |
| SLSNKLTLDKLDVKGKR       | P09411 | 0          | n +42.03 Da,n +28.03 Da,K +28.03 Da, | 2011.228476 | 4 | 518.064  | 5.184E+09 | 208698000 |
| TGSGMGTLLISKIR          | P68372 | 0          | n +28.03 Da,K +28.03 Da,             | 2012.709931 | 3 | 497.2865 | 65929000  | 267306000 |
| YLAEKYEWVDAEAR          | P58252 | 0          | n +28.03 Da,K +28.03 Da,             | 2019.480234 | 3 | 600.3057 | 572176000 | 411895008 |
| AHGSVVKSEDYAFPTYADR     | P19783 | 0          | n +42.03 Da,K +28.03 Da,             | 2020.575922 | 3 | 728.3508 | 526480000 | 372190016 |
| STQAAEDKEEESLHSISNTEAVR | Q9CQN1 | 0.00093985 | n +28.03 Da,K +28.03 Da,             | 2022.228501 | 4 | 675.8385 | 307577984 | 248952992 |
| TFVLDEFKR               | Q9D8N0 | 0          | n +28.03 Da,K +28.03 Da,             | 2025.071413 | 3 | 404.2324 | 570609024 | 496392992 |
| VYEDQVGKFDWR            | Q8C7X2 | 0          | n +34.06 Da,K +34.06 Da,             | 2025.127178 | 3 | 537.3076 | 859028992 | 1.059E+09 |
| SITPLEDLYKR             | Q1598  | 0          | n +34.06 Da,                         | 2028.905929 | 3 | 464.2697 | 280748000 | 214571008 |

|                        |        |            |                                      |             |   |          |           |           |
|------------------------|--------|------------|--------------------------------------|-------------|---|----------|-----------|-----------|
| TPTEKLPFPIIDDKGR       | O08709 | 0          | n +34.06 Da,K +34.06 Da,             | 2030.172797 | 4 | 478.0453 | 158468000 | 117876000 |
| TFTFYASEDKLENR         | O35490 | 0          | n +28.03 Da,                         | 2032.525883 | 3 | 592.9647 | 6.152E+09 | 4.808E+09 |
| LALKNIASMVR            | Q9QXF8 | 0          | n +28.03 Da,K +28.03 Da,             | 2033.507107 | 3 | 424.6004 | 2.845E+09 | 1.448E+09 |
| MDKNELVQKAKLAEQAER     | P63101 | 0          | n +42.03 Da,K +28.03 Da,             | 2034.065057 | 4 | 557.5585 | 97539296  | 73679600  |
| VDEYLAWQHTGLR          | Q64471 | 0          | n +28.03 Da,                         | 2035.272617 | 3 | 537.9525 | 433735008 | 1.536E+09 |
| VSQEHPPVLTKEFEGAR      | Q8C196 | 0          | n +42.03 Da,K +28.03 Da,             | 2035.322564 | 3 | 656.0293 | 105850000 | 141642000 |
| SAGFLQASASDVVVHGR      | Q8VCHO | 0          | n +34.06 Da,                         | 2039.126501 | 3 | 605.9706 | 351630016 | 7.313E+09 |
| SAGFLQASASDVVVHGR      | Q8VCHO | 0          | n +28.03 Da,                         | 2039.735854 | 3 | 608.9853 | 73260496  | 7.897E+09 |
| PSNMPPGIEPSDKMLQGR     | P24270 | 0          | n +14.02 Da,K +28.03 Da,             | 2044.804454 | 3 | 698.3744 | 300439008 | 198836000 |
| QGILQPEKPIVLKVPR       | Q9EQW4 | 0          | n +42.03 Da,K +34.06 Da,             | 2045.25155  | 4 | 503.8297 | 397358016 | 204896992 |
| DDEVVDVGTVEEDLGKSR     | P08113 | 0          | n +28.03 Da,K +28.03 Da,             | 2053.163917 | 3 | 678.6423 | 656889024 | 27033500  |
| FPSVVVVLGKGR           | Q9CPY7 | 0          | n +28.03 Da,K +28.03 Da,             | 2053.516578 | 3 | 438.6146 | 61039000  | 66024600  |
| GASIVEDKLVEDLKTR       | P26443 | 0          | n +28.03 Da,K +28.03 Da,             | 2054.694893 | 4 | 465.0225 | 861288000 | 503212992 |
| SAGFLQASASDVVVHGR      | Q8VCHO | 0          | n +34.06 Da,                         | 2055.560259 | 3 | 609.995  | 1.459E+10 | 9.796E+09 |
| FKDVTLGSVLGR           | Q9R0H0 | 0.00501825 | n +28.03 Da,K +28.03 Da,             | 2056.656055 | 3 | 449.9375 | 213848000 | 242060992 |
| TGSGMGTLISKIR          | P68372 | 0          | n +28.03 Da,K +28.03 Da,             | 2059.255687 | 3 | 497.2965 | 314211008 | 327056992 |
| RVQEEAQCLVEELR         | P56656 | 0.00093985 | n +28.03 Da,                         | 2064.677979 | 3 | 596.308  | 18428800  | 8500770   |
| EAYPGDVLYLHSR          | Q03265 | 0          | n +28.03 Da,                         | 2065.786242 | 3 | 527.9429 | 48508200  | 47330700  |
| NDEELNLLGK             | Q64523 | 0          | n +42.03 Da,K +28.03 Da,             | 2074.740585 | 3 | 457.5925 | 829249024 | 657404992 |
| ASLKDLEGKWR            | Q05816 | 0.02854845 | n +42.03 Da,K +28.03 Da,             | 2074.933847 | 3 | 467.6016 | 260976992 | 168164992 |
| AAPAKGENLSLVHGPDIR     | Q64442 | 0          | n +42.03 Da,K +28.03 Da,             | 2076.636008 | 3 | 691.0481 | 9.382E+10 | 8.793E+10 |
| AAPAKGENLSLVHGPDIR     | Q64442 | 0.02095316 | n +42.03 Da,K +28.03 Da,             | 2077.275671 | 2 | 1036.068 | 509108992 | 471284000 |
| ALKAADTIGYPMIR         | Q8C196 | 0          | n +28.03 Da,K +28.03 Da,             | 2079.14108  | 3 | 558.9883 | 141884992 | 301248000 |
| MVAISADVKEVLLTDGNEKAIR | Q3U2J5 | 0.04227006 | n +42.03 Da,K +34.06 Da,             | 2082.367736 | 3 | 828.1382 | 241443008 | 192480000 |
| SLSNKLTLDKLDVKGKR      | P09411 | 0          | n +42.03 Da,n +28.03 Da,K +28.03 Da, | 2086.214588 | 4 | 518.0639 | 332364992 | 182808000 |
| TVLTKSPKILPDILR        | Q91WT9 | 0          | n +28.03 Da,K +28.03 Da,             | 2086.445632 | 4 | 445.2934 | 361184000 | 361878016 |
| KLILPGLISSR            | P17563 | 0          | n +34.06 Da,K +34.06 Da,             | 2088.870712 | 3 | 418.2832 | 224752992 | 229600000 |
| TSVLHLVGDNFR           | Q921X9 | 0          | n +34.06 Da,                         | 2091.691101 | 3 | 462.5903 | 22387000  | 7237240   |
| PVHEIQSLDEVTNLDR       | Q9D1Q6 | 0.02603743 | n +14.02 Da,                         | 2094.341276 | 3 | 626.9908 | 272376992 | 242720992 |
| NDEELNLLGK             | Q64523 | 0          | n +42.03 Da,K +28.03 Da,             | 2099.557454 | 3 | 457.5898 | 591905984 | 421671008 |
| PDFQHEDYNFLTR          | Q9R0H0 | 0          | n +14.02 Da,                         | 2103.541001 | 3 | 565.9302 | 812726976 | 460391008 |
| TNPLEIVKIR             | Q8BH59 | 0          | n +28.03 Da,K +28.03 Da,             | 2104.879331 | 3 | 409.5885 | 148159008 | 102275000 |
| SPADLPKNWDWR           | Q9WUU7 | 0          | n +34.06 Da,K +34.06 Da,             | 2113.370958 | 3 | 517.2979 | 412644000 | 365827008 |
| TGSTEVGHLIQVAAGSSNLKR  | P47738 | 0          | n +28.03 Da,                         | 2113.564301 | 4 | 546.0547 | 417879008 | 305384000 |
| SGPKAKPVVFSFIAGITAPPGR | Q9WUM5 | 0.0118997  | n +28.03 Da,K +28.03 Da,             | 2116.881669 | 4 | 534.3244 | 930273984 | 802923008 |
| SGPKAKPVVFSFIAGITAPPGR | Q9WUM5 | 0          | n +28.03 Da,K +28.03 Da,             | 2118.070595 | 3 | 712.0964 | 643857024 | 595505984 |
| ISDEDWDIHR             | P51660 | 0          | n +28.03 Da,                         | 2118.405691 | 3 | 476.2367 | 115334000 | 55871200  |
| GWKEIEYEVVR            | Q8C196 | 0          | n +34.06 Da,K +34.06 Da,             | 2118.763022 | 2 | 732.3982 | 559009024 | 301412000 |
| PLENLEEEGLPKNPDLR      | Q99JI4 | 0          | n +17.03 Da,K +34.06 Da,             | 2121.44301  | 3 | 671.0364 | 186120992 | 597102976 |
| LLNKLADLMER            | O35945 | 0          | n +28.03 Da,K +28.03 Da,             | 2124.965301 | 3 | 457.939  | 827603968 | 410815008 |

|                          |        |            |                                      |             |   |          |           |           |
|--------------------------|--------|------------|--------------------------------------|-------------|---|----------|-----------|-----------|
| ALKAADTIGYPMIR           | Q8C196 | 0          | n +28.03 Da,K +28.03 Da,             | 2125.271372 | 3 | 556.9752 | 360827008 | 1.223E+09 |
| PSLDYMTKIPR              | Q8C196 | 0          | n +17.03 Da,K +34.06 Da,             | 2127.653785 | 3 | 489.9533 | 628990976 | 2.521E+09 |
| QALLDLHALGSAR            | P29391 | 0          | n +28.03 Da,                         | 2129.231293 | 3 | 464.9364 | 128532000 | 96688496  |
| PMFIVNTNVPR              | P34884 | 0          | n +17.03 Da,                         | 2130.008387 | 2 | 651.3549 | 4.839E+09 | 3.636E+09 |
| GETPTEKLPFPIIDDKGR       | O08709 | 0          | n +28.03 Da,K +28.03 Da,             | 2131.792457 | 3 | 699.7235 | 127973000 | 142844992 |
| SLPPHQKVPLPSLSPTMQAGTIAR | Q8BMF4 | 0          | n +34.06 Da,K +34.06 Da,             | 2134.339221 | 3 | 861.4872 | 840249024 | 741313024 |
| TDVKVPDFSDYR             | Q9CR68 | 0          | n +28.03 Da,K +28.03 Da,             | 2141.185847 | 3 | 498.9178 | 99913904  | 355159008 |
| GETPTEKLPFPIIDDKGR       | O08709 | 0          | n +34.06 Da,K +34.06 Da,             | 2142.913496 | 4 | 525.0452 | 1.086E+09 | 1.103E+09 |
| SLPPHQKVPLPSLSPTMQAGTIAR | Q8BMF4 | 0          | n +34.06 Da,K +34.06 Da,             | 2143.940015 | 4 | 646.3679 | 1.858E+10 | 1.747E+10 |
| VKLIESKEAFQEAL           | P10639 | 0          | n +34.06 Da,K +34.06 Da,             | 2144.189336 | 2 | 844.9945 | 748678976 | 470380000 |
| KDDYYQILGVPR             | Q99M87 | 0.00458926 | n +28.03 Da,K +28.03 Da,             | 2147.307428 | 2 | 761.9169 | 985310976 | 881235008 |
| SLPPHQKVPLPSLSPTMQAGTIAR | Q8BMF4 | 0          | n +34.06 Da,K +34.06 Da,             | 2150.646283 | 4 | 648.6291 | 45716400  | 514992992 |
| LLNKLADLMER              | O35945 | 0          | n +28.03 Da,K +28.03 Da,             | 2152.215755 | 3 | 457.9392 | 1.37E+09  | 1.302E+09 |
| ASWYLPKLGR               | Q99J99 | 0          | n +34.06 Da,K +34.06 Da,             | 2152.67965  | 3 | 420.2685 | 609225984 | 401038016 |
| TDLEKFNNVEAGKYTVGLGQTR   | P54869 | 0          | n +28.03 Da,K +28.03 Da,             | 2154.310379 | 4 | 631.8396 | 2.756E+09 | 2.123E+09 |
| STPQSQFQESSPVWKLGR       | Q9D1I5 | 0          | n +28.03 Da,K +28.03 Da,             | 2154.471518 | 3 | 706.7038 | 1.691E+09 | 1.598E+09 |
| MEQVNELKEKGNKAL          | Q60864 | 0.00743007 | n +42.03 Da,n +28.03 Da,K +28.03 Da, | 2155.429636 | 3 | 619.682  | 887208000 | 767513024 |
| IIGDINKDKF               | P28474 | 0.00414365 | n +28.03 Da,K +28.03 Da,             | 2155.547569 | 3 | 453.9463 | 266584992 | 147856000 |
| TDVKVPDFSDYR             | Q9CR68 | 0          | n +34.06 Da,K +34.06 Da,             | 2157.989434 | 3 | 499.924  | 369161984 | 285496000 |
| SAGFLQASASDVVVVHGR       | Q8VCHO | 0          | n +28.03 Da,                         | 2160.471382 | 3 | 606.9875 | 52075000  | 65357200  |
| PSLDYMTKIPR              | Q8C196 | 0          | n +17.03 Da,K +34.06 Da,             | 2164.998506 | 3 | 490.97   | 654953024 | 628100992 |
| TFEESFQKALR              | Q8C196 | 0.00743007 | n +42.03 Da,K +28.03 Da,             | 2165.336829 | 2 | 713.3729 | 310780992 | 297036992 |
| PDTPFDFTPENYKR           | Q9D6J6 | 0          | n +17.03 Da,K +34.06 Da,             | 2166.394109 | 3 | 592.3013 | 54273300  | 210460000 |
| MKETIMNQEKLAKLQAQVR      | Q64152 | 0          | n +42.03 Da,n +34.06 Da,K +34.06 Da, | 2167.708757 | 3 | 795.7827 | 335364000 | 376363008 |
| TFEESFQKALR              | Q8C196 | 0          | n +42.03 Da,K +28.03 Da,             | 2169.48332  | 3 | 475.9177 | 1.496E+09 | 1.484E+09 |
| HVLSLSFPIR               | P26443 | 0.04133858 | n +34.06 Da,                         | 2169.785767 | 3 | 399.5764 | 1.873E+09 | 1.519E+09 |
| HVLSLSFPIR               | P26443 | 0.00370714 | n +34.06 Da,                         | 2172.340194 | 2 | 598.861  | 2.391E+09 | 1.115E+09 |
| SLLPEEYEQWKQR            | Q91VA0 | 0          | n +28.03 Da,K +28.03 Da,             | 2174.420216 | 3 | 587.9781 | 312748000 | 324599008 |
| MKETIMNQEKLAKLQAQVR      | Q64152 | 0          | n +42.03 Da,n +28.03 Da,K +28.03 Da, | 2175.425417 | 4 | 597.0894 | 1.387E+09 | 839252992 |
| VALEGVGHFFR              | P29391 | 0          | n +34.06 Da,                         | 2181.293277 | 3 | 420.5678 | 4.237E+09 | 5.314E+09 |
| RYFAGTMAEETAPAVLER       | Q64374 | 0          | n +34.06 Da,                         | 2181.410114 | 3 | 680.6784 | 353008000 | 340638016 |
| SAVSASSKWLDGFR           | Q9D855 | 0          | n +28.03 Da,K +28.03 Da,             | 2183.631519 | 3 | 522.9457 | 195956992 | 175179008 |
| VVFTDEMAHFDR             | P24270 | 0          | n +34.06 Da,                         | 2183.659419 | 3 | 498.9061 | 2.458E+09 | 2.153E+09 |
| GQKVLDSGAPIKIPVGPETLGR   | P56480 | 0          | n +28.03 Da,K +28.03 Da,             | 2188.20171  | 4 | 579.8463 | 533392992 | 349611008 |
| ASLKDLEGKWR              | Q05816 | 0          | n +42.03 Da,K +28.03 Da,             | 2194.999789 | 3 | 467.602  | 2.09E+10  | 1.435E+10 |
| ASLKDLEGKWR              | Q05816 | 0          | n +42.03 Da,K +34.06 Da,             | 2196.178649 | 3 | 470.6173 | 648204032 | 6.882E+09 |
| PSTKDFLLQQTMLR           | Q9CPU0 | 0          | n +17.03 Da,K +34.06 Da,             | 2200.178653 | 3 | 575.9974 | 364232000 | 533921984 |
| AFDGTWKVDR               | P55050 | 0          | n +42.03 Da,K +28.03 Da,             | 2200.360115 | 2 | 632.8191 | 731528000 | 528324992 |
| PMTLGYWNTR               | P19639 | 0          | n +14.02 Da,                         | 2200.507605 | 2 | 626.8106 | 1.887E+09 | 1.202E+09 |
| ASKPTLNEVVIVSAIR         | Q8QZT1 | 0.01393581 | n +28.03 Da,K +28.03 Da,             | 2201.028688 | 3 | 585.0245 | 653155008 | 616806016 |

|                          |        |            |                          |             |   |          |           |           |
|--------------------------|--------|------------|--------------------------|-------------|---|----------|-----------|-----------|
| SAGFLQASASDVVVVHGR       | Q8VCHO | 0          | n +28.03 Da,             | 2203.285127 | 3 | 609.9952 | 28096500  | 26131900  |
| AAPAKGENLSLVVHGPDIR      | Q64442 | 0          | n +42.03 Da,K +34.06 Da, | 2203.692662 | 3 | 691.0479 | 1.464E+09 | 1.179E+09 |
| GVQGFQEFLEKR             | Q8C3F2 | 0          | n +28.03 Da,K +28.03 Da, | 2203.854728 | 3 | 498.6087 | 477020000 | 472672992 |
| IRVDTLENQVMDTR           | P19639 | 0.00501825 | n +28.03 Da,             | 2205.674977 | 2 | 573.2908 | 80646496  | 8835420   |
| DVLFPGYTHLQR             | Q91YI0 | 0          | n +28.03 Da,             | 2206.639884 | 3 | 491.9326 | 88639800  | 38239900  |
| EGKEVWDYVTVR             | Q920A5 | 0.00949914 | n +28.03 Da,K +28.03 Da, | 2208.453647 | 3 | 509.9179 | 115894000 | 246512000 |
| DDEVVDVGTVEEDLGKSR       | P08113 | 0          | n +28.03 Da,K +28.03 Da, | 2212.946934 | 3 | 678.6551 | 219366000 | 241510000 |
| PMTLGYWVWTR              | P19639 | 0          | n +14.02 Da,             | 2214.699318 | 4 | 626.8103 | 145916992 | 165984992 |
| PQDTFESEFYLDKSR          | P07759 | 0          | n +17.03 Da,K +34.06 Da, | 2215.567229 | 3 | 651.3217 | 145331008 | 430081984 |
| WIRSRLTEAVR              | Q921Q9 | 0.03803487 | n +17.03 Da,             | 2215.956608 | 2 | 700.9029 | 586854976 | 1.53E+09  |
| SSAENEPVPLVGNWRPPQPVKGR  | P16015 | 0          | n +28.03 Da,K +28.03 Da, | 2216.709557 | 4 | 667.6144 | 337440992 | 228044000 |
| EGKEVWDYVTVR             | Q920A5 | 0          | n +34.06 Da,K +34.06 Da, | 2219.341017 | 3 | 512.9399 | 77146800  | 118732000 |
| ASLKDLEGKWR              | Q05816 | 0.01743462 | n +42.03 Da,K +28.03 Da, | 2220.511876 | 3 | 467.2822 | 38034500  | 25210200  |
| SIYPLHDVDFVR             | P97351 | 0          | n +28.03 Da,             | 2220.534179 | 3 | 458.5907 | 8185630   | 26094500  |
| SIYPLHDVDFVR             | P97351 | 0          | n +28.03 Da,             | 2220.84167  | 3 | 458.5908 | 332360000 | 283764992 |
| TQAAEDKEEESLHSISNTEAVR   | Q9CQN1 | 0.04227006 | n +28.03 Da,K +28.03 Da, | 2221.853968 | 4 | 654.0797 | 303683008 | 296864000 |
| GQKVLDSGAPIKIPVGPETLGR   | P56480 | 0          | n +42.03 Da,K +28.03 Da, | 2224.516611 | 4 | 583.3517 | 112932000 | 118165000 |
| WIRSRLTEAVR              | Q921Q9 | 0.03803487 | n +17.03 Da,             | 2231.804193 | 2 | 696.3835 | 1.95E+09  | 1.567E+09 |
| EIAKAQVAQPGGDTIFGKIIR    | P70349 | 0          | n +28.03 Da,K +28.03 Da, | 2239.937908 | 4 | 574.8377 | 394171008 | 444976992 |
| PDFQHEDYNFLTR            | Q9R0H0 | 0          | n +14.02 Da,             | 2240.092865 | 3 | 565.9302 | 2.82E+10  | 1.877E+10 |
| PDFQHEDYNFLTR            | Q9R0H0 | 0          | n +14.02 Da,             | 2241.041215 | 2 | 848.3905 | 787699008 | 521172000 |
| IIGGSMDAKGSFPWQAK        | Q61646 | 0          | n +34.06 Da,K +34.06 Da, | 2249.022888 | 3 | 631.3634 | 76684304  | 457355008 |
| SLPPHQKVPPLPSLPTMQAGTIAR | Q8BMF4 | 0          | n +34.06 Da,K +34.06 Da, | 2256.072412 | 2 | 647.8628 | 142459008 | 1.001E+09 |
| ASLKDLEGKWR              | Q05816 | 0.01743462 | n +42.03 Da,K +28.03 Da, | 2258.274065 | 3 | 467.2861 | 40984800  | 108919000 |
| STQAAEDKEEESLHSISNTEAVR  | Q9CQN1 | 0          | n +28.03 Da,K +28.03 Da, | 2261.664495 | 4 | 675.8378 | 5.207E+09 | 4.077E+09 |
| DGGFVFALEKR              | O35490 | 0          | n +28.03 Da,             | 2263.166168 | 3 | 432.2437 | 1.658E+09 | 1.267E+10 |
| DLPKNWDWR                | Q9WUU7 | 0          | n +28.03 Da,K +28.03 Da, | 2264.551592 | 3 | 429.228  | 3.516E+09 | 80271504  |
| KALDIAENEMPLMR           | P50247 | 0          | n +28.03 Da,K +28.03 Da, | 2267.838322 | 3 | 581.9756 | 1.179E+09 | 887345024 |
| SVDIPLDKTVVVKDVFR        | P61358 | 0          | n +28.03 Da,K +28.03 Da, | 2270.458976 | 4 | 508.0514 | 75544400  | 131033000 |
| STQAAEDKEEESLHSISNTEAVR  | Q9CQN1 | 0          | n +34.06 Da,K +34.06 Da, | 2271.292522 | 4 | 678.0983 | 65966400  | 631536000 |
| FGYFEVTHDITR             | P24270 | 0          | n +28.03 Da,             | 2274.586878 | 3 | 504.9159 | 182060000 | 122994000 |
| TGGIVEVLHKVDSEGSPNR      | P51660 | 0          | n +34.06 Da,             | 2279.450722 | 4 | 541.55   | 190047008 | 150600992 |
| SVDIPLDKTVVVKDVFR        | P61358 | 0          | n +28.03 Da,K +28.03 Da, | 2281.300389 | 4 | 508.0494 | 187207008 | 84437800  |
| STQAAEDKEEESLHSISNTEAVR  | Q9CQN1 | 0          | n +28.03 Da,K +28.03 Da, | 2282.480923 | 3 | 900.7814 | 4.33E+09  | 3.091E+09 |
| SLPPHQKVPPLPSLPTMQAGTIAR | Q8BMF4 | 0          | n +34.06 Da,K +34.06 Da, | 2289.244353 | 4 | 646.3678 | 406137984 | 346104000 |
| SLFKAFEEEEQALR           | P49429 | 0          | n +34.06 Da,K +34.06 Da, | 2302.208886 | 3 | 812.4712 | 77702496  | 87682000  |
| TITNTMTLGDIVYKR          | P12710 | 0          | n +34.06 Da,K +34.06 Da, | 2306.322959 | 3 | 594.666  | 2.584E+09 | 2.484E+09 |
| GLKLISEVIGER             | P13707 | 0          | n +34.06 Da,K +34.06 Da, | 2307.669451 | 3 | 457.2852 | 468462016 | 390076992 |
| SDQFLVSFKDVGR            | Q91VR2 | 0          | n +34.06 Da,K +34.06 Da, | 2309.22835  | 3 | 521.6294 | 25528300  | 30987400  |
| AEDIKTIKIKNYKTAPFDSR     | P56391 | 0          | n +42.03 Da,K +28.03 Da, | 2309.385646 | 4 | 595.578  | 768137024 | 254236992 |

|                               |        |            |                          |             |   |          |           |           |
|-------------------------------|--------|------------|--------------------------|-------------|---|----------|-----------|-----------|
| AFGYFEVTHDITR                 | P24270 | 0          | n +28.03 Da,             | 2316.014101 | 3 | 528.6    | 76550600  | 96483200  |
| SPGHVDFSSEVTAALR              | P58252 | 0          | n +34.06 Da,             | 2317.320618 | 3 | 567.6248 | 772507008 | 914715008 |
| SPGHVDFSSEVTAALR              | P58252 | 0          | n +34.06 Da,             | 2321.647953 | 3 | 569.6354 | 126696000 | 37893700  |
| VPPVQVSPLIKFGR                | Q06185 | 0          | n +28.03 Da,K +28.03 Da, | 2322.234146 | 3 | 531.668  | 2.362E+09 | 2.174E+09 |
| SDMYLHPVAMFR                  | P15105 | 0          | n +34.06 Da,             | 2323.13968  | 3 | 498.9127 | 1.401E+09 | 1.871E+09 |
| TSLSLFGDSYETQVIAHQGSSKGR      | Q78JT3 | 0          | n +28.03 Da,K +28.03 Da, | 2325.492988 | 4 | 695.3558 | 387943008 | 304707008 |
| PFVELETNLPASR                 | O35215 | 0          | n +14.02 Da,             | 2326.635185 | 2 | 743.8984 | 9.749E+09 | 5.991E+09 |
| IPKEQGVLSFWR                  | P51881 | 0          | n +28.03 Da,K +28.03 Da, | 2329.706501 | 3 | 505.9607 | 225842000 | 161128992 |
| PSTKDFLLQQTMLR                | Q9CPU0 | 0          | n +14.02 Da,K +28.03 Da, | 2332.37931  | 2 | 860.4779 | 82924896  | 75273000  |
| TEQNFISKSGYQQAASEHGLVVIAPDTSR | Q9R0P3 | 0          | n +28.03 Da,K +28.03 Da, | 2332.893317 | 4 | 822.4222 | 241682000 | 241399008 |
| PSTKDFLLQQTMLR                | Q9CPU0 | 0          | n +17.03 Da,K +34.06 Da, | 2335.737117 | 3 | 575.9978 | 3.6E+09   | 1.183E+10 |
| PSTKDFLLQQTMLR                | Q9CPU0 | 0          | n +17.03 Da,K +34.06 Da, | 2338.467027 | 2 | 863.4925 | 456331008 | 1.518E+09 |
| PAPATTFAHLDATTVLSR            | P56480 | 0          | n +14.02 Da,             | 2339.206044 | 3 | 628.339  | 8.938E+09 | 7.467E+09 |
| PFPDGLAEDIDKGEVSAR            | P58252 | 0          | n +14.02 Da,K +28.03 Da, | 2342.021894 | 3 | 653.334  | 225392000 | 111935000 |
| SHQTGIQASEDVKEIFAR            | Q91YR1 | 0          | n +42.03 Da,K +34.06 Da, | 2344.506408 | 3 | 696.0235 | 676425024 | 618902976 |
| AAAKKAVLGPLVGAVDQGTSSR        | Q64516 | 0.01743462 | n +42.03 Da,K +34.06 Da, | 2364.307062 | 3 | 769.7951 | 718923008 | 1.983E+09 |
| SSPAQPAVPAPLADLKIHTK          | P24549 | 0          | n +42.03 Da,K +34.06 Da, | 2364.982206 | 3 | 756.4302 | 6.029E+09 | 5.462E+09 |
| KLYFEELSLE                    | Q8C196 | 0          | n +34.06 Da,K +34.06 Da, | 2365.187168 | 2 | 746.4369 | 128330000 | 707329984 |
| GAYKYIQELWR                   | Q9CZM2 | 0          | n +34.06 Da,K +34.06 Da, | 2365.430851 | 3 | 497.9608 | 848561984 | 3.588E+09 |
| SPLEKLVSSVSDLPKR              | P54869 | 0          | n +28.03 Da,K +28.03 Da, | 2368.072242 | 3 | 613.7026 | 423551008 | 337788992 |
| AAAKKAVLGPLVGAVDQGTSSR        | Q64516 | 0          | n +42.03 Da,K +28.03 Da, | 2372.235335 | 3 | 765.775  | 1.071E+09 | 176376000 |
| PLIPIVVEQTGR                  | O88696 | 0          | n +14.02 Da,             | 2372.303796 | 2 | 668.4035 | 1.142E+09 | 819577024 |
| SQRPDVLTGGGNNPIGDKLNIMTAGSR   | P24270 | 0          | n +28.03 Da,K +28.03 Da, | 2373.413758 | 4 | 703.6234 | 667806016 | 487475008 |
| ASQRPDVLTGGGNNPIGDKLNIMTAGSR  | P24270 | 0          | n +28.03 Da,K +28.03 Da, | 2374.62206  | 4 | 721.3822 | 576977024 | 391916000 |
| GAYKYIQELWR                   | Q9CZM2 | 0          | n +28.03 Da,K +28.03 Da, | 2375.17652  | 3 | 494.9431 | 845281024 | 825400000 |
| PDDIWQLSSSLKR                 | Q9CYN2 | 0          | n +17.03 Da,K +34.06 Da, | 2376.176746 | 3 | 531.6336 | 104004000 | 295448000 |
| QVDDSVVAQNMHELFLKMR           | Q9Z0Y7 | 0.02211302 | n +34.06 Da,K +34.06 Da, | 2376.384661 | 3 | 819.764  | 3.563E+09 | 3.304E+09 |
| SPLEKLVSSVSDLPKR              | P54869 | 0          | n +28.03 Da,K +28.03 Da, | 2376.888739 | 4 | 460.5292 | 1.75E+09  | 1.316E+09 |
| SPLEKLVSSVSDLPKR              | P54869 | 0          | n +28.03 Da,K +28.03 Da, | 2379.2961   | 3 | 608.6805 | 75924304  | 396520992 |
| GPPVSELITKAVAASKER            | P15864 | 0          | n +28.03 Da,K +28.03 Da, | 2381.781705 | 4 | 485.0408 | 474625984 | 452977984 |
| SLAPQIKVIAPWR                 | P16460 | 0          | n +34.06 Da,K +34.06 Da, | 2382.245757 | 3 | 512.3203 | 282900000 | 168574000 |
| LCLFSFFCLFLR                  | Q8BJE4 | 0.04467754 | n +14.02 Da,             | 2382.356149 | 3 | 546.2913 | 124085000 | 100081000 |
| AAAKKAVLGPLVGAVDQGTSSR        | Q64516 | 0          | n +42.03 Da,K +28.03 Da, | 2384.475849 | 3 | 765.7743 | 3.788E+09 | 590140992 |
| YFQEPGVAAEAELEKNMSR           | P34914 | 0          | n +34.06 Da,K +34.06 Da, | 2389.948279 | 3 | 718.6886 | 168518000 | 270735008 |
| GAYKYIQELWR                   | Q9CZM2 | 0          | n +28.03 Da,K +28.03 Da, | 2390.659801 | 2 | 741.91   | 45093100  | 37134900  |
| RVVLPMEPIR                    | P00405 | 0          | n +34.06 Da,             | 2392.978031 | 3 | 450.9476 | 507183008 | 606065024 |
| PSVSLQTVKLMKEGLEAAR           | O35490 | 0          | n +17.03 Da,K +34.06 Da, | 2393.010707 | 3 | 713.7652 | 650993024 | 2.362E+09 |
| KDGETFQLMGLYGR                | B5X0G2 | 0          | n +34.06 Da,K +34.06 Da, | 2393.142595 | 3 | 557.6244 | 324089984 | 444876000 |
| ALHVPKAPGFAQMLKDGAK           | P42932 | 0          | n +42.03 Da,K +28.03 Da, | 2393.682138 | 4 | 527.0538 | 331396000 | 428465984 |
| PSVSLQTVKLMKEGLEAAR           | O35490 | 0          | n +17.03 Da,K +34.06 Da, | 2397.127457 | 4 | 535.5766 | 2.607E+09 | 8.483E+09 |



|                                  |        |            |                                      |             |   |          |           |           |
|----------------------------------|--------|------------|--------------------------------------|-------------|---|----------|-----------|-----------|
| EPEGKEVWDYVTVR                   | Q920A5 | 0          | n +34.06 Da,K +34.06 Da,             | 2399.742954 | 3 | 588.3048 | 671278976 | 1.256E+09 |
| PSVSLQTVKLMKEGLEAAR              | O35490 | 0          | n +14.02 Da,K +28.03 Da,             | 2400.568139 | 4 | 532.5607 | 2.018E+09 | 29555200  |
| EPEGKEVWDYVTVR                   | Q920A5 | 0          | n +34.06 Da,K +34.06 Da,             | 2400.907237 | 3 | 591.3203 | 501350016 | 3.502E+09 |
| VLSGEDKSNIAAWGKIGGH              | P01942 | 0          | n +28.03 Da,K +28.03 Da,             | 2402.125983 | 4 | 545.5521 | 2.257E+09 | 579288000 |
| SVFGKLFAGAGGKAGKGGPTPQEAIQR      | Q9D8B3 | 0          | n +42.03 Da,K +28.03 Da,             | 2403.250242 | 4 | 686.1328 | 1.007E+10 | 8.141E+09 |
| TDPKYIHWSPVCR                    | P11352 | 0.02782258 | n +28.03 Da,K +28.03 Da,             | 2405.859421 | 4 | 564.3149 | 156888992 | 150994000 |
| DLPKNWDWR                        | Q9WUU7 | 0          | n +28.03 Da,K +28.03 Da,             | 2408.17474  | 3 | 429.2281 | 149764000 | 254318000 |
| MDFSKLPKIR                       | P50516 | 0          | n +42.03 Da,K +28.03 Da,             | 2408.826592 | 3 | 444.9286 | 1.533E+09 | 1.585E+09 |
| VTGWKEIEYEVVR                    | Q8C196 | 0          | n +28.03 Da,K +28.03 Da,             | 2415.347238 | 3 | 554.3082 | 596905024 | 773382016 |
| MDFSKLPKIR                       | P50516 | 0          | n +42.03 Da,K +34.06 Da,             | 2419.900682 | 3 | 447.9442 | 415670016 | 4.118E+09 |
| MEKTLETVPLER                     | O88569 | 0          | n +42.03 Da,K +34.06 Da,             | 2420.148879 | 2 | 758.4089 | 269414016 | 203012000 |
| EAPQEPDPFTYDYHTLR                | Q9Z239 | 0          | n +34.06 Da,                         | 2423.83407  | 3 | 705.0071 | 177407008 | 198012992 |
| EAPQEPDPFTYDYHTLR                | Q9Z239 | 0          | n +34.06 Da,                         | 2425.425866 | 3 | 702.9962 | 471380000 | 668308992 |
| FVEESVYDEFVKR                    | P24549 | 0          | n +28.03 Da,K +28.03 Da,             | 2429.79182  | 3 | 568.2945 | 80902704  | 21226500  |
| LVLQEILESDGKGDPNKPSGFR           | O70400 | 0          | n +28.03 Da,K +28.03 Da,             | 2429.860982 | 4 | 621.5929 | 206026000 | 163464992 |
| VLYPNDNFFGKELR                   | Q8C194 | 0          | n +28.03 Da,K +28.03 Da,             | 2434.883093 | 3 | 632.9994 | 1.258E+09 | 1.192E+09 |
| TDPKYIHWSPVCR                    | P11352 | 0.02782258 | n +28.03 Da,K +28.03 Da,             | 2437.546215 | 3 | 564.3044 | 20859700  | 14504400  |
| TDPKYIHWSPVCR                    | P11352 | 0.02782258 | n +28.03 Da,K +28.03 Da,             | 2440.299187 | 3 | 563.3037 | 73321696  | 110153000 |
| SILEADCDLIPAASEKQLTKSNAPR        | P26443 | 0          | n +28.03 Da,K +28.03 Da,             | 2445.365741 | 4 | 731.8998 | 801747968 | 578070976 |
| MESHKPSTSKDDLILNIISR             | Q9D8Y1 | 0          | n +42.03 Da,n +34.06 Da,K +34.06 Da, | 2445.948873 | 4 | 599.3479 | 805331008 | 987795008 |
| AEDIKTKIKNYKTAPFDSR              | P56391 | 0          | n +42.03 Da,K +28.03 Da,             | 2446.004983 | 4 | 595.5784 | 1.883E+09 | 1.307E+09 |
| SFVNDIFER                        | P10853 | 0.00826446 | n +28.03 Da,                         | 2446.797767 | 2 | 577.7958 | 56615200  | 66713600  |
| MESHKPSTSKDDLILNIISR             | Q9D8Y1 | 0          | n +42.03 Da,n +34.06 Da,K +34.06 Da, | 2451.10811  | 3 | 798.7944 | 15292500  | 18369900  |
| PSPSPSPSLSTQSAVSKAGAGAVVPKLSHLPR | Q9DC70 | 0          | n +28.03 Da,K +28.03 Da,             | 2451.1309   | 4 | 821.2003 | 227584992 | 169110000 |
| AGAFGYFEVTHDITR                  | P24270 | 0          | n +28.03 Da,                         | 2452.988697 | 3 | 571.2861 | 337800992 | 272076992 |
| AEDIKTKIKNYKTAPFDSR              | P56391 | 0          | n +42.03 Da,K +28.03 Da,             | 2453.588548 | 4 | 595.5785 | 2.241E+09 | 208430000 |
| TVPVHEMGTTVIKEVLQR               | Q8CAY6 | 0          | n +34.06 Da,K +34.06 Da,             | 2456.854461 | 4 | 524.05   | 1.023E+09 | 872380032 |
| MEANVTIPIWQNKPHGAAR              | Q9CWE0 | 0          | n +42.03 Da,K +34.06 Da,             | 2456.994638 | 3 | 735.0536 | 181063008 | 165870000 |
| TVPVHEMGTTVIKEVLQR               | Q8CAY6 | 0          | n +28.03 Da,K +28.03 Da,             | 2463.168938 | 3 | 698.3968 | 34495900  | 22330100  |
| REPPDAVDVAELLR                   | Q8R3F5 | 0.04405458 | n +34.06 Da,                         | 2466.625358 | 3 | 568.9802 | 94784096  | 87058000  |
| TGTEAPDYLATVDVDPKSPQYSQVIHR      | P17563 | 0          | n +28.03 Da,K +28.03 Da,             | 2467.010184 | 4 | 761.6397 | 1.99E+09  | 2.081E+09 |
| AEDIKTKIKNYKTAPFDSR              | P56391 | 0          | n +42.03 Da,K +28.03 Da,             | 2467.558987 | 4 | 595.5784 | 1.403E+09 | 208102000 |
| AAQKINEGLEHLAKAEKY               | Q9CWZ7 | 0          | n +42.03 Da,K +28.03 Da,             | 2470.573183 | 4 | 535.551  | 471654016 | 297273984 |
| MESHKPSTSKDDLILNIISR             | Q9D8Y1 | 0          | n +42.03 Da,n +34.06 Da,K +34.06 Da, | 2478.899329 | 4 | 598.5872 | 81905600  | 161844992 |
| MESHKPSTSKDDLILNIISR             | Q9D8Y1 | 0          | n +42.03 Da,n +34.06 Da,K +34.06 Da, | 2481.638066 | 4 | 596.3227 | 594969024 | 615384000 |
| GPVEGAGFTYISSSPDEIALVKGAKR       | Q9QZW0 | 0.00501825 | n +28.03 Da,K +28.03 Da,             | 2486.383881 | 4 | 684.1246 | 38848000  | 40818900  |
| TEAPDYLATVDVDPKSPQYSQVIHR        | P17563 | 0          | n +34.06 Da,K +34.06 Da,             | 2488.776485 | 4 | 722.122  | 784515008 | 945977984 |
| GQVVQFKLSDIGEGIR                 | P53395 | 0          | n +28.03 Da,K +28.03 Da,             | 2492.897663 | 3 | 600.6564 | 328924992 | 280487008 |
| DKLLVYYDDVR                      | P41216 | 0          | n +28.03 Da,K +28.03 Da,             | 2495.537728 | 3 | 537.9426 | 342312992 | 429702016 |
| TVPVHEMGTTVIKEVLQR               | Q8CAY6 | 0          | n +28.03 Da,K +28.03 Da,             | 2495.975078 | 3 | 694.3566 | 763411968 | 629928000 |

|                             |        |            |                                      |             |   |          |           |           |
|-----------------------------|--------|------------|--------------------------------------|-------------|---|----------|-----------|-----------|
| SGPPVSELITKAVAASKER         | P15864 | 0          | n +34.06 Da,K +34.06 Da,             | 2507.861638 | 4 | 506.7993 | 2.366E+09 | 2.029E+09 |
| TFVVQGFQGNVGLHSMR           | P26443 | 0          | n +28.03 Da,                         | 2510.376874 | 3 | 592.9785 | 568246016 | 619084992 |
| MESHKPSTSKDDLILNIISR        | Q9D8Y1 | 0          | n +42.03 Da,n +34.06 Da,K +34.06 Da, | 2510.868862 | 2 | 599.3415 | 37667300  | 23609200  |
| SIGVPIKVLHEAEGH             | P62320 | 0          | n +42.03 Da,K +34.06 Da,             | 2518.352895 | 3 | 552.6419 | 1.41E+09  | 1.237E+09 |
| VLYPNDNFFEGKELR             | Q8CI94 | 0          | n +42.03 Da,K +34.06 Da,             | 2518.871818 | 3 | 637.6785 | 48167100  | 35310200  |
| GPAGAGESKCLPMVKVLDVAVR      | P07309 | 0          | n +34.06 Da,K +34.06 Da,             | 2519.208613 | 4 | 560.5634 | 426812000 | 399892000 |
| GDPKEEEEEELVDPLTTVR         | P99028 | 0          | n +34.06 Da,K +34.06 Da,             | 2520.177852 | 3 | 747.7091 | 2.669E+09 | 2.895E+09 |
| TTIAGVVYKDGIVLGDTR          | P70195 | 0          | n +34.06 Da,K +34.06 Da,             | 2520.95516  | 3 | 672.0565 | 24182800  | 77903504  |
| SVTGWKEIEYEVVR              | Q8C196 | 0          | n +28.03 Da,K +28.03 Da,             | 2521.360164 | 3 | 584.3176 | 3.822E+09 | 1.298E+09 |
| GDPKEEEEEELVDPLTTVR         | P99028 | 0          | n +28.03 Da,K +28.03 Da,             | 2523.213986 | 2 | 1121.061 | 166476000 | 148158000 |
| AATMKKAAEDVNVTFEDQQKINKF    | E9Q6U4 | 0          | n +42.03 Da,K +28.03 Da,             | 2525.939429 | 2 | 738.6448 | 381111008 | 263944992 |
| GDPKEEEEEELVDPLTTVR         | P99028 | 0          | n +34.06 Da,K +34.06 Da,             | 2527.825745 | 3 | 750.7247 | 164452992 | 1.304E+09 |
| SVTGWKEIEYEVVR              | Q8C196 | 0          | n +28.03 Da,K +28.03 Da,             | 2528.364691 | 2 | 875.9752 | 201554000 | 127048000 |
| MDDREDLVYQAKLAEQAER         | P62259 | 0          | n +42.03 Da,K +28.03 Da,             | 2529.656086 | 3 | 784.0489 | 1.069E+09 | 1.22E+09  |
| PTPEQWKQIAAVMQR             | P05201 | 0          | n +17.03 Da,K +34.06 Da,             | 2531.552452 | 3 | 608.9977 | 195524992 | 208099008 |
| TLYDIAHTPGVAADLSHIETR       | P08249 | 0          | n +28.03 Da,                         | 2532.162819 | 4 | 577.8034 | 886025984 | 872944000 |
| SVTGWKEIEYEVVR              | Q8C196 | 0          | n +34.06 Da,K +34.06 Da,             | 2538.328466 | 3 | 584.3176 | 1.837E+09 | 923500032 |
| GQVVQFKLSDIGEGIR            | P53395 | 0          | n +34.06 Da,K +34.06 Da,             | 2543.629192 | 3 | 604.3592 | 96449800  | 657312000 |
| PTPEQWKQIAAVMQR             | P05201 | 0          | n +17.03 Da,K +34.06 Da,             | 2544.867723 | 3 | 611.0083 | 251342000 | 848675968 |
| AKVEQVLSLEPQHELKFR          | Q9QY76 | 0          | n +42.03 Da,K +34.06 Da,             | 2547.418052 | 4 | 563.0723 | 3.258E+10 | 3.011E+10 |
| AKVEQVLSLEPQHELKFR          | Q9QY76 | 0          | n +42.03 Da,K +28.03 Da,             | 2548.951039 | 3 | 750.4263 | 3.031E+09 | 2.554E+09 |
| EKDGETFQLMGLYGR             | B5X0G2 | 0          | n +34.06 Da,K +34.06 Da,             | 2555.298128 | 3 | 604.66   | 514676992 | 291196000 |
| ELEIIEGMKFR                 | P63038 | 0          | n +28.03 Da,K +28.03 Da,             | 2558.008585 | 3 | 512.6098 | 234534000 | 203822000 |
| GQVVQFKLSDIGEGIR            | P53395 | 0          | n +28.03 Da,K +28.03 Da,             | 2563.18647  | 3 | 600.654  | 859027008 | 936718016 |
| PDPSTKDFLLQQTMLR            | Q9CPU0 | 0          | n +14.02 Da,K +28.03 Da,             | 2564.707292 | 3 | 644.6803 | 435177984 | 626041024 |
| TTIAGVVYKDGIVLGDTR          | P70195 | 0          | n +34.06 Da,K +34.06 Da,             | 2565.783076 | 3 | 669.0499 | 686019968 | 503926016 |
| MESGFTSKDITYLSHFNPR         | O55239 | 0          | n +42.03 Da,K +34.06 Da,             | 2569.695449 | 3 | 729.677  | 142692992 | 277599008 |
| ECDKLYFEELSRLR              | Q8C196 | 0          | n +28.03 Da,K +28.03 Da,             | 2570.072507 | 3 | 629.6452 | 887198016 | 1.014E+09 |
| TSGPPVSELITKAVAASKER        | P43274 | 0          | n +34.06 Da,K +34.06 Da,             | 2577.420696 | 4 | 532.0612 | 853228992 | 847864000 |
| ERAALPIAQYGNRILQTLKEHQ      | Q9DBV3 | 0.04619565 | n +17.03 Da,K +34.06 Da,             | 2591.033746 | 4 | 646.3478 | 205276000 | 166220992 |
| AEPDYIEDDNPQLIRPQKLNIPVKSSR | Q3TGF2 | 0          | n +42.03 Da,K +28.03 Da,             | 2591.490132 | 4 | 809.4306 | 2.238E+09 | 1.945E+09 |
| TVEVDAPKSQDLSKIMADIR        | P05784 | 0.02678571 | n +34.06 Da,K +34.06 Da,             | 2593.019729 | 4 | 575.8175 | 557604992 | 552252032 |
| MFEPKCLDAFPNLR              | P10649 | 0          | n +28.03 Da,K +28.03 Da,             | 2597.985843 | 3 | 598.6406 | 646340992 | 571985984 |
| YTIIVYFPVR                  | P19157 | 0          | n +34.06 Da,                         | 2601.574538 | 2 | 593.3368 | 180488992 | 113112000 |
| SDVLELTDENFESR              | P27773 | 0          | n +34.06 Da,                         | 2605.010289 | 2 | 841.3984 | 1.754E+09 | 1.366E+09 |
| PLGLEAEKDGVPVFKFPR          | Q8R0Y6 | 0          | n +17.03 Da,K +34.06 Da,             | 2609.013846 | 4 | 521.0664 | 599616000 | 1.811E+09 |
| GLLSQGSPLSWEETQR            | P97494 | 0          | n +28.03 Da,                         | 2611.119066 | 3 | 605.9793 | 45300200  | 39531300  |
| APLDLDKYVEIAR               | Q9CQR6 | 0          | n +28.03 Da,K +28.03 Da,             | 2615.664357 | 3 | 520.2995 | 2.163E+09 | 2.153E+09 |
| TASSVLLHTGQKMPL             | Q9JII6 | 0          | n +42.03 Da,K +28.03 Da,             | 2616.360696 | 2 | 826.9553 | 2.498E+09 | 2.462E+09 |
| GLLSQGSPLSWEETQR            | P97494 | 0          | n +28.03 Da,                         | 2616.926555 | 2 | 908.4646 | 81934400  | 54539400  |

|                              |        |            |                          |             |   |          |           |           |
|------------------------------|--------|------------|--------------------------|-------------|---|----------|-----------|-----------|
| DKLYFEELSLER                 | Q8C196 | 0          | n +34.06 Da,K +34.06 Da, | 2620.921358 | 3 | 536.3032 | 258116000 | 1.187E+09 |
| WDQPAEAIHNWIR                | Q8R0Y6 | 0          | n +34.06 Da,             | 2623.062203 | 3 | 555.2803 | 129910000 | 186255008 |
| DVALEGVGHFFR                 | P29391 | 0          | n +28.03 Da,             | 2626.470961 | 2 | 687.8618 | 519904000 | 682856000 |
| DVALEGVGHFFR                 | P29391 | 0          | n +28.03 Da,             | 2627.404441 | 3 | 458.9104 | 6.636E+09 | 9.102E+09 |
| GSPLEKLVSSVSDLPKR            | P54869 | 0          | n +28.03 Da,K +28.03 Da, | 2635.057618 | 4 | 474.7848 | 130677000 | 82652304  |
| IELVNSAALIQQATTVKNKDIR       | P51410 | 0          | n +28.03 Da,K +28.03 Da, | 2638.726415 | 4 | 646.8489 | 403040000 | 314497984 |
| GPLGFYHGLSSTLLR              | Q9WVD5 | 0          | n +34.06 Da,             | 2646.343713 | 3 | 549.3066 | 1.197E+09 | 2.691E+09 |
| SFPTLKFFPASADR               | P09103 | 0          | n +28.03 Da,K +28.03 Da, | 2646.810163 | 3 | 546.3116 | 190134000 | 156067008 |
| LMLPTQTISQGAIEKVKDATR        | Q8C196 | 0          | n +28.03 Da,K +28.03 Da, | 2663.662834 | 4 | 596.8452 | 170824000 | 64501800  |
| PYVIAGLHFDQEVNR              | Q922E4 | 0          | n +14.02 Da,             | 2664.06055  | 3 | 591.3194 | 289244992 | 236326000 |
| PGSPLEKLVSSVSDLPKR           | P54869 | 0          | n +14.02 Da,K +28.03 Da, | 2669.376026 | 4 | 495.5439 | 1.734E+09 | 319048992 |
| GPLGFYHGLSSTLLR              | Q9WVD5 | 0          | n +34.06 Da,             | 2672.372143 | 3 | 547.2997 | 599228992 | 517108992 |
| MSPSKESDELIFVNGKKVTER        | G3X982 | 0          | n +42.03 Da,K +28.03 Da, | 2675.94284  | 4 | 667.6074 | 721121024 | 555819008 |
| ELGEYGLQAYTEVKTVTVKVPQKNS    | P47738 | 0          | n +28.03 Da,K +28.03 Da, | 2679.175344 | 4 | 724.1534 | 190103008 | 147812000 |
| EGEDKSQPKSIRERRR             | Q9DBR7 | 0          | n +14.02 Da,K +28.03 Da, | 2682.899426 | 3 | 681.035  | 91653696  | 15957600  |
| PLTKDNHLLGTFDLTGIPPAPR       | P20029 | 0          | n +14.02 Da,K +28.03 Da, | 2692.683809 | 3 | 805.7846 | 104511000 | 68045104  |
| SPGSPLEKLVSSVSDLPKR          | P54869 | 0          | n +34.06 Da,K +34.06 Da, | 2693.807619 | 4 | 524.5758 | 20813000  | 153532000 |
| SPGSPLEKLVSSVSDLPKR          | P54869 | 0          | n +28.03 Da,K +28.03 Da, | 2696.488375 | 4 | 520.8058 | 3.435E+09 | 2.686E+09 |
| TIQUESTGGIVEVLHKVDSEGISPNR   | P51660 | 0          | n +28.03 Da,K +28.03 Da, | 2704.426446 | 4 | 681.1154 | 155880000 | 95182200  |
| HLLGTFDLTGIPPAPR             | P20029 | 0.04849885 | n +28.03 Da,             | 2706.609324 | 3 | 577.318  | 169784992 | 61245700  |
| PAVGAIVLTTGGDKAFAAGADIKEMQNR | Q8BH95 | 0          | n +14.02 Da,K +28.03 Da, | 2707.182475 | 4 | 693.377  | 1.241E+09 | 1.146E+09 |
| SGYPKSYNPFDDVEEEDTRPAPWKDVR  | Q9ERB0 | 0          | n +42.03 Da,K +28.03 Da, | 2709.679941 | 4 | 853.4006 | 580444992 | 470089984 |
| TLNFMGLGQAAWKEAR             | P35505 | 0          | n +28.03 Da,K +28.03 Da, | 2713.765284 | 3 | 655.0123 | 146307008 | 147500992 |
| GIFKAELNEFLTR                | P62908 | 0          | n +34.06 Da,K +34.06 Da, | 2718.525155 | 3 | 531.9721 | 25664900  | 24324100  |
| PAFTPATGTPVLGGLSYR           | Q61176 | 0          | n +14.02 Da,             | 2728.993405 | 3 | 606.997  | 492156992 | 457374016 |
| PAFTPATGTPVLGGLSYR           | Q61176 | 0          | n +17.03 Da,             | 2729.829548 | 2 | 909.9913 | 831881984 | 723126976 |
| SYGRPPDVEGMTSLKVDNLTYSR      | Q62093 | 0          | n +42.03 Da,K +34.06 Da, | 2732.430957 | 3 | 889.1141 | 864852992 | 807120000 |
| PSIGEFIMVDR                  | Q9QXD6 | 0          | n +14.02 Da,             | 2740.047789 | 2 | 639.3307 | 211946000 | 182210000 |
| TLMLPTQTISQGAIEKVKDATR       | Q8C196 | 0          | n +34.06 Da,K +34.06 Da, | 2742.02719  | 3 | 829.14   | 1.982E+09 | 2.135E+09 |
| TLMLPTQTISQGAIEKVKDATR       | Q8C196 | 0          | n +28.03 Da,K +28.03 Da, | 2745.369788 | 4 | 622.1073 | 1.788E+10 | 1.855E+10 |
| ASPGSPLEKLVSSVSDLPKR         | P54869 | 0          | n +28.03 Da,K +28.03 Da, | 2748.780807 | 4 | 538.5652 | 5.324E+09 | 4.854E+09 |
| DHGDALAFVDVPPNDSSFQIVKNPR    | Q61176 | 0          | n +28.03 Da,             | 2753.825206 | 4 | 657.3367 | 1.957E+09 | 1.494E+09 |
| SLEKSYELPDGQVITIGNER         | P60710 | 0          | n +34.06 Da,K +34.06 Da, | 2754.096276 | 3 | 768.7411 | 849920000 | 541683008 |
| DDVALEGVGHFFR                | P29391 | 0          | n +34.06 Da,             | 2759.584007 | 3 | 497.2529 | 427436000 | 385830016 |
| GLFIIDDKGILR                 | P35700 | 0          | n +28.03 Da,K +28.03 Da, | 2760.025445 | 3 | 472.6258 | 388745984 | 339889984 |
| PYNPSMSRPDAWGVTKGAAELMQ      | O35490 | 0.04227006 | n +14.02 Da,K +28.03 Da, | 2761.16126  | 3 | 850.0824 | 378568992 | 320819008 |
| ATLMLPTQTISQGAIEKVKDATR      | Q8C196 | 0          | n +34.06 Da,K +34.06 Da, | 2762.495083 | 3 | 852.8182 | 619371008 | 734915968 |
| DFLSSSDKQNNLYKGLEAFR         | P54869 | 0          | n +34.06 Da,K +34.06 Da, | 2768.144137 | 4 | 626.5751 | 293128992 | 155852000 |
| SGFGKDLGEAALNEYLRL           | Q8R0Y6 | 0          | n +34.06 Da,K +34.06 Da, | 2768.323748 | 3 | 632.6662 | 760217024 | 595291008 |
| MKTILSNQTVDIPENVEITLKGR      | P51410 | 0          | n +34.06 Da,K +34.06 Da, | 2768.771956 | 4 | 672.3778 | 449848992 | 28887800  |

|                                     |        |            |                          |             |   |          |           |           |
|-------------------------------------|--------|------------|--------------------------|-------------|---|----------|-----------|-----------|
| ATLMLPTQTISQGAIEKVKDATR             | Q8C196 | 0          | n +34.06 Da,K +34.06 Da, | 2770.668839 | 4 | 639.8662 | 6.716E+09 | 6.234E+09 |
| PDAWGVTKGAAELMQQKEATTEQQLR          | O35490 | 0          | n +14.02 Da,K +28.03 Da, | 2771.873804 | 4 | 739.8849 | 2.465E+09 | 1.644E+09 |
| DHGDALFVDVDPNDSSFQIVKNPR            | Q61176 | 0          | n +42.03 Da,n +34.06 Da, | 2773.902331 | 4 | 660.8404 | 172920000 | 141954000 |
| RLEGLTDEINFLR                       | P11679 | 0          | n +28.03 Da,             | 2775.074329 | 3 | 535.299  | 25818900  | 23464900  |
| PGLVDQLVKADSEWR                     | P26638 | 0.00743007 | n +14.02 Da,K +28.03 Da, | 2775.188427 | 3 | 579.6162 | 212079008 | 278331008 |
| PGLVDQLVKADSEWR                     | P26638 | 0.00743007 | n +14.02 Da,K +28.03 Da, | 2776.95049  | 3 | 585.6496 | 130557000 | 39190700  |
| MLGPEGGEGYVVKLR                     | Q9Z2X1 | 0          | n +42.03 Da,K +34.06 Da, | 2790.705353 | 2 | 837.9445 | 760702976 | 849547008 |
| PVTLGYWDIR                          | O35660 | 0          | n +14.02 Da,             | 2793.950719 | 2 | 617.3349 | 381824000 | 200104000 |
| ASASSTNLKDVLSNLIPEQAR               | Q9CZU6 | 0          | n +14.02 Da,K +28.03 Da, | 2796.953525 | 4 | 603.8417 | 46080100  | 85955104  |
| SGDSAPLQEAMAVLQHHDAVSGTAR           | O09159 | 0          | n +28.03 Da,             | 2797.226694 | 2 | 644.8188 | 16024200  | 130484000 |
| SAAATSAPVAPNHNQPEVFCNQIFINNEWHDAVSR | P47738 | 0          | n +28.03 Da,             | 2797.991816 | 4 | 952.2088 | 3.293E+09 | 3.559E+09 |
| SASSTNLKDVLSNLIPEQAR                | Q9CZU6 | 0          | n +28.03 Da,K +28.03 Da, | 2806.217518 | 4 | 589.5863 | 347193984 | 314377984 |
| ASASSTNLKDVLSNLIPEQAR               | Q9CZU6 | 0          | n +34.06 Da,K +34.06 Da, | 2808.625842 | 4 | 611.1156 | 729683968 | 3.633E+09 |
| ASASSTNLKDVLSNLIPEQAR               | Q9CZU6 | 0          | n +34.06 Da,K +34.06 Da, | 2808.7936   | 3 | 809.4582 | 1.512E+09 | 1.234E+09 |
| TEELDFDLHAR                         | P99028 | 0          | n +34.06 Da,             | 2811.645215 | 3 | 469.2417 | 203846000 | 196992992 |
| ASASSTNLKDVLSNLIPEQAR               | Q9CZU6 | 0          | n +34.06 Da,K +34.06 Da, | 2812.198308 | 4 | 607.3463 | 7.579E+09 | 6.73E+09  |
| GDPKQDILAIFKR                       | Q9D8S3 | 0.00866176 | n +42.03 Da,K +28.03 Da, | 2815.209897 | 3 | 562.6583 | 155163008 | 127800000 |
| ASASSTNLKDVLSNLIPEQAR               | Q9CZU6 | 0          | n +28.03 Da,K +28.03 Da, | 2830.698919 | 4 | 607.3457 | 1.322E+09 | 17859800  |
| PKTVTGDHGDDEVYSVFGAPILR             | D3Z298 | 0.00093985 | n +17.03 Da,K +34.06 Da, | 2830.98589  | 4 | 603.0699 | 700665984 | 614313024 |
| YFDSFGDLSSASAIMGNPKVKAH             | P02089 | 0          | n +42.03 Da,K +34.06 Da, | 2849.064608 | 4 | 635.8271 | 364444992 | 102991000 |
| MDGIVPDIAVGTKR                      | P17225 | 0          | n +42.03 Da,K +34.06 Da, | 2849.799074 | 2 | 771.421  | 526668000 | 322569984 |
| EHDLVLPMPREVR                       | P19096 | 0.01937345 | n +28.03 Da,             | 2862.98422  | 3 | 505.9273 | 102847000 | 64241000  |
| AGLLKTTGLVGLAVCDTPHER               | Q9CPP6 | 0.00501825 | n +42.03 Da,K +34.06 Da, | 2870.437428 | 4 | 609.3408 | 1.407E+09 | 1.373E+09 |
| MVGPIEEAVAKADKLAEEHGS               | P56480 | 0          | n +28.03 Da,K +28.03 Da, | 2871.027589 | 4 | 567.0498 | 36321100  | 37901400  |
| PGPLVGKQLNELPDHSPLLQPGLAELR         | Q8BWP5 | 0          | n +14.02 Da,K +28.03 Da, | 2874.61541  | 4 | 733.4171 | 878505984 | 996833024 |
| AAEHPEPPKGELQLPPPPPGHYGAWAAQELQAR   | Q3UJ80 | 0          | n +42.03 Da,K +28.03 Da, | 2874.941205 | 4 | 927.4768 | 327552992 | 270516000 |
| SGDATLMLPTQTISQGAIEKVKDATR          | Q8C196 | 0          | n +34.06 Da,K +34.06 Da, | 2886.827419 | 3 | 939.1788 | 907704000 | 918692992 |
| SSPAQPAVPAPLADLKIQH                 | P24549 | 0          | n +42.03 Da,K +28.03 Da, | 2887.580653 | 3 | 670.7055 | 3.233E+09 | 2.843E+09 |
| SGDATLMLPTQTISQGAIEKVKDATR          | Q8C196 | 0          | n +28.03 Da,K +28.03 Da, | 2888.393699 | 4 | 704.636  | 3.557E+09 | 3.431E+09 |
| SSPAQPAVPAPLADLKIQH                 | P24549 | 0          | n +42.03 Da,K +28.03 Da, | 2889.868886 | 2 | 1005.554 | 984982976 | 830355008 |
| GDATLMLPTQTISQGAIEKVKDATR           | Q8C196 | 0          | n +28.03 Da,K +28.03 Da, | 2897.771733 | 4 | 682.8782 | 1.445E+09 | 1.217E+09 |
| PMTLGYWDIR                          | P15626 | 0          | n +14.02 Da,             | 2898.450592 | 2 | 633.321  | 2.789E+09 | 2.005E+09 |
| SLVIPEKFQHILR                       | P62270 | 0          | n +42.03 Da,K +28.03 Da, | 2899.991283 | 3 | 546.634  | 1.914E+09 | 1.985E+09 |
| METDVTSDTVEVLPQHKFDLR               | Q8OXL6 | 0          | n +42.03 Da,K +34.06 Da, | 2902.73417  | 3 | 844.0878 | 2.234E+09 | 1.673E+09 |
| AELQEVQITEEKPLLPQTPETAKEAELAAR      | Q9QYGO | 0          | n +42.03 Da,K +34.06 Da, | 2917.63153  | 3 | 1163.289 | 748499008 | 657004992 |
| PGASLPLNLKELEKDLIDR                 | Q05920 | 0          | n +14.02 Da,K +28.03 Da, | 2921.550527 | 4 | 572.8366 | 91029104  | 98811296  |
| PDAWGVTKGAAELMQQKEATTEQQLR          | O35490 | 0          | n +14.02 Da,K +28.03 Da, | 2921.583711 | 4 | 739.8849 | 394172000 | 302718016 |
| PMILGYWNVNR                         | P10649 | 0          | n +14.02 Da,             | 2923.814893 | 2 | 631.8394 | 1.996E+09 | 1.665E+09 |
| EPVLLLEPVVLLALAEKHGR                | Q9JII6 | 0          | n +28.03 Da,K +28.03 Da, | 2928.101948 | 4 | 539.5675 | 290303008 | 255452000 |
| IFVEESVYDEFVKKR                     | P24549 | 0          | n +28.03 Da,K +28.03 Da, | 2928.791164 | 3 | 605.9892 | 436680992 | 497596000 |

|                                   |        |            |                                      |             |   |          |           |           |
|-----------------------------------|--------|------------|--------------------------------------|-------------|---|----------|-----------|-----------|
| DILNMDKTLKGLNSDSVTEETLR           | Q8C196 | 0          | n +28.03 Da,K +28.03 Da,             | 2930.880413 | 3 | 892.8085 | 550664000 | 467484000 |
| AHILSLPRIYYINR                    | Q8BFU7 | 0.04434072 | n +42.03 Da,                         | 2931.210408 | 3 | 683.049  | 598364032 | 440632992 |
| PKDIDLSPVTIGFGSIPR                | Q05421 | 0          | n +14.02 Da,K +28.03 Da,             | 2931.913486 | 3 | 652.0378 | 168800000 | 136048992 |
| ARAPELQLLETLR                     | Q9CYS6 | 0.00743007 | n +42.03 Da,                         | 2945.505387 | 3 | 553.6449 | 93519000  | 114022000 |
| SLVIPEKFQHILR                     | P62270 | 0          | n +42.03 Da,K +28.03 Da,             | 2945.62527  | 3 | 550.6628 | 1.645E+09 | 1.187E+09 |
| SGSKYKPAPLATLPSTLDPAEYDVSPETR     | Q9CQC7 | 0          | n +42.03 Da,K +34.06 Da,             | 2948.840328 | 3 | 1063.551 | 1.178E+09 | 1.123E+09 |
| GVHSGDATLMLPTQTISQGAIEKVKDATR     | Q8C196 | 0          | n +28.03 Da,K +28.03 Da,             | 2953.63069  | 4 | 777.9139 | 1.015E+09 | 916529984 |
| PGLLLLGDEAPNFEANTTIGR             | O08709 | 0          | n +14.02 Da,                         | 2958.819048 | 2 | 1078.552 | 599537984 | 582689024 |
| PGLLLLGDEAPNFEANTTIGR             | O08709 | 0          | n +14.02 Da,                         | 2959.414306 | 3 | 719.3703 | 1.716E+09 | 1.561E+09 |
| AGVHSGDATLMLPTQTISQGAIEKVKDATR    | Q8C196 | 0          | n +28.03 Da,K +28.03 Da,             | 2969.594551 | 4 | 795.6744 | 432723008 | 284027008 |
| VHSGDATLMLPTQTISQGAIEKVKDATR      | Q8C196 | 0          | n +28.03 Da,K +28.03 Da,             | 2978.994454 | 4 | 763.6582 | 373143008 | 327023008 |
| ANVADTKLYDILGVPPGASENELKKAYR      | Q9QYJ0 | 0          | n +42.03 Da,K +28.03 Da,             | 2985.782627 | 4 | 788.9202 | 206712000 | 481401984 |
| DGGDLTNLIHTKYPQLLSGIR             | P50247 | 0          | n +17.03 Da,K +34.06 Da,             | 2989.914877 | 3 | 788.1232 | 786244992 | 729579008 |
| ATAATEEPFPFHGLLPKKTGASSFLCR       | Q64514 | 0          | n +42.03 Da,K +34.06 Da,             | 2990.528721 | 4 | 790.906  | 224716000 | 262035008 |
| PGVVDNFPLLKALR                    | P30115 | 0          | n +17.03 Da,K +34.06 Da,             | 2991.320669 | 3 | 527.6557 | 187551008 | 145136992 |
| TQSGFEGFLKDQFTTLPEVKDR            | P25688 | 0          | n +28.03 Da,                         | 2993.796882 | 4 | 657.5988 | 719280000 | 398316000 |
| SAKVSDAISTQYPVVDHEFDVAVVGAGGAGLR  | Q8K2B3 | 0          | n +34.06 Da,K +34.06 Da,             | 3004.203814 | 2 | 818.6761 | 49357800  | 27758900  |
| ASGNAQIGKSAPDFTATAVVDGAFKEIKLSDYR | Q61171 | 0          | n +42.03 Da,K +34.06 Da,             | 3011.208776 | 4 | 889.2189 | 1.223E+09 | 1.098E+09 |
| PAGDWSTFFPAWLKSR                  | Q8R1G2 | 0          | n +17.03 Da,K +34.06 Da,             | 3018.482046 | 3 | 589.6533 | 217734000 | 884377024 |
| ASAKVSDAISTQYPVVDHEFDVAVVGAGGAGLR | Q8K2B3 | 0          | n +28.03 Da,K +28.03 Da,             | 3020.649047 | 4 | 836.4435 | 21007900  | 9466290   |
| FLPGFEAPTYKDTLLPKLPR              | P49429 | 0          | n +28.03 Da,K +28.03 Da,             | 3022.292114 | 4 | 597.5991 | 407574016 | 400287008 |
| TASSVLLHTGQKMPILGLGTWKSEPGQVK     | Q9JII6 | 0          | n +42.03 Da,K +34.06 Da,             | 3024.785685 | 4 | 798.199  | 529052000 | 423951008 |
| PAGDWSTFFPAWLKSR                  | Q8R1G2 | 0          | n +14.02 Da,K +28.03 Da,             | 3026.899187 | 3 | 587.6423 | 64775900  | 50082400  |
| DILNMDKTLKGLNSDSVTEETLR           | Q8C196 | 0          | n +42.03 Da,n +28.03 Da,K +28.03 Da, | 3027.151342 | 3 | 897.4812 | 526809984 | 700758016 |
| PGVVDNFPLLKALR                    | P30115 | 0          | n +17.03 Da,K +34.06 Da,             | 3027.328498 | 3 | 529.666  | 237879008 | 882694016 |
| DAGVHSGDATLMLPTQTISQGAIEKVKDATR   | Q8C196 | 0          | n +28.03 Da,K +28.03 Da,             | 3029.385935 | 4 | 824.4301 | 356568992 | 301387008 |
| DILNMDKTLKGLNSDSVTEETLR           | Q8C196 | 0.02782258 | n +42.03 Da,n +28.03 Da,K +28.03 Da, | 3030.89291  | 4 | 673.3633 | 1.694E+09 | 2.034E+09 |
| TGKPNPDQLLKELPFPLNTR              | Q78JT3 | 0          | n +34.06 Da,K +34.06 Da,             | 3031.857565 | 4 | 594.3588 | 211858000 | 372151008 |
| PVEEAIKFAQTVIGKPIEPR              | Q9DBM2 | 0          | n +17.03 Da,K +34.06 Da,             | 3034.700118 | 4 | 576.855  | 371032000 | 1.104E+09 |
| PVEEAIKFAQTVIGKPIEPR              | Q9DBM2 | 0          | n +14.02 Da,K +28.03 Da,             | 3039.68239  | 3 | 760.7538 | 48702800  | 102588000 |
| PIDEVQGFLFGKLR                    | Q6P5E4 | 0          | n +17.03 Da,K +34.06 Da,             | 3041.409748 | 3 | 556.3303 | 16822000  | 20511000  |
| ANVADTKLYDILGVPPGASENELKKAYR      | Q9QYJ0 | 0          | n +42.03 Da,K +28.03 Da,             | 3041.845537 | 4 | 790.4336 | 2.761E+09 | 3.414E+09 |
| TTQSGFEGFLKDQFTTLPEVKDR           | P25688 | 0          | n +28.03 Da,K +28.03 Da,             | 3043.89678  | 4 | 682.8595 | 595259008 | 412760000 |
| ANVADTKLYDILGVPPGASENELKKAYR      | Q9QYJ0 | 0          | n +42.03 Da,K +34.06 Da,             | 3045.67032  | 3 | 1053.576 | 541987968 | 577897984 |
| DATLMLPTQTISQGAIEKVKDATR          | Q8C196 | 0          | n +34.06 Da,K +34.06 Da,             | 3046.387111 | 4 | 668.6241 | 218743008 | 175616000 |
| ASASYHISNLEKMTSSDKDFR             | Q6ZQ38 | 0          | n +42.03 Da,K +34.06 Da,             | 3047.591284 | 3 | 866.7658 | 255720000 | 240200000 |
| ASASYHISNLEKMTSSDKDFR             | Q6ZQ38 | 0          | n +42.03 Da,K +34.06 Da,             | 3047.624187 | 4 | 650.3271 | 2.846E+09 | 2.743E+09 |
| PALAQPLIQNVKKILESDR               | Q8C196 | 0          | n +14.02 Da,K +28.03 Da,             | 3051.881429 | 4 | 551.5857 | 2.662E+09 | 2.251E+09 |
| ANVADTKLYDILGVPPGASENELKKAYR      | Q9QYJ0 | 0          | n +42.03 Da,K +34.06 Da,             | 3054.784753 | 4 | 794.204  | 1.721E+09 | 1.412E+10 |
| AIKFLEVIKPF                       | P61620 | 0          | n +34.06 Da,K +34.06 Da,             | 3058.862709 | 3 | 468.6619 | 287377984 | 339134016 |

|                                    |        |            |                                      |             |   |          |           |           |
|------------------------------------|--------|------------|--------------------------------------|-------------|---|----------|-----------|-----------|
| SVEAGEKLVKTALDTFGR                 | P51660 | 0          | n +28.03 Da,K +28.03 Da,             | 3061.919401 | 3 | 669.0492 | 136460992 | 116741000 |
| MDNLSDTLKKLITAADR                  | E9Q6Q4 | 0          | n +42.03 Da,n +28.03 Da,K +28.03 Da, | 3063.210608 | 4 | 540.5584 | 453222016 | 406529984 |
| ADEIAKAQVAQPGGDTIFGKIIR            | P70349 | 0          | n +42.03 Da,n +28.03 Da,K +28.03 Da, | 3063.302902 | 4 | 624.8513 | 1.789E+09 | 1.603E+09 |
| ADEIAKAQVAQPGGDTIFGKIIR            | P70349 | 0          | n +42.03 Da,n +34.06 Da,K +34.06 Da, | 3064.718848 | 3 | 832.7987 | 3.17E+09  | 2.76E+09  |
| PALAQPLIQNVKKILESDR                | Q8C196 | 0          | n +17.03 Da,K +34.06 Da,             | 3064.901132 | 4 | 554.6006 | 328684000 | 1.249E+09 |
| PGVVDNFPLLKALR                     | P30115 | 0          | n +17.03 Da,K +34.06 Da,             | 3067.98851  | 3 | 527.6555 | 358438016 | 241383008 |
| PYNPSMSRPDAWGVTKGAAELMQQKEATTEQQLR | O35490 | 0          | n +28.03 Da,K +28.03 Da,             | 3072.268027 | 4 | 976.4767 | 28167300  | 20588200  |
| AGQAFRKFLPLFDR                     | Q64433 | 0          | n +42.03 Da,K +34.06 Da,             | 3084.990489 | 3 | 579.3274 | 367764000 | 242104992 |
| SAKVSDAISTQYPVVDHEFDVAVVGAGGAGLR   | Q8K2B3 | 0          | n +28.03 Da,K +28.03 Da,             | 3089.02507  | 4 | 818.679  | 4.956E+09 | 4.2E+09   |
| DATLMLPTQTISQGAIEKVKDATR           | Q8C196 | 0          | n +34.06 Da,K +34.06 Da,             | 3089.312395 | 4 | 894.17   | 55582000  | 86714400  |
| SAKVSDAISTQYPVVDHEFDVAVVGAGGAGLR   | Q8K2B3 | 0          | n +34.06 Da,K +34.06 Da,             | 3091.311465 | 3 | 1091.237 | 147268992 | 135662000 |
| SDVLDYWAQMEEEGKR                   | Q91VA0 | 0          | n +28.03 Da,K +28.03 Da,             | 3095.746588 | 3 | 671.3191 | 62469700  | 66550300  |
| HGVVMPDANKENTLNQLVGAAFGAAGQR       | Q9EQ20 | 0          | n +34.06 Da,                         | 3098.190955 | 4 | 731.1313 | 54776800  | 58706200  |
| ASAKVSDAISTQYPVVDHEFDVAVVGAGGAGLR  | Q8K2B3 | 0          | n +28.03 Da,K +28.03 Da,             | 3102.68706  | 4 | 835.6777 | 18996600  | 36856900  |
| FLPGFEPTYKDTLLPKLPR                | P49429 | 0          | n +42.03 Da,K +28.03 Da,             | 3105.789587 | 4 | 601.1029 | 849995008 | 871766016 |
| TWKFVEGLPINDFSR                    | P14152 | 0.01821192 | n +34.06 Da,K +34.06 Da,             | 3110.940091 | 3 | 625.3533 | 19460900  | 49352900  |
| SLAPGHVADFLVADFR                   | P97328 | 0          | n +34.06 Da,                         | 3111.500094 | 3 | 581.646  | 103582000 | 86959696  |
| ASASYHISNLEKMTSSDKDFR              | Q6ZQ38 | 0          | n +42.03 Da,K +34.06 Da,             | 3115.696423 | 3 | 653.3494 | 144156000 | 177056992 |
| LKTLPLVPTFENVSIPER                 | Q99N93 | 0          | n +34.06 Da,K +34.06 Da,             | 3116.557685 | 3 | 703.7495 | 98183200  | 80672000  |
| TWKFVEGLPINDFSR                    | P14152 | 0          | n +28.03 Da,K +28.03 Da,             | 3116.799865 | 3 | 622.3377 | 59740200  | 45532100  |
| FDDAVVQSDMKHWPFF                   | P63017 | 0.00988397 | n +42.03 Da,K +34.06 Da,             | 3118.040749 | 3 | 631.3063 | 152192992 | 134943008 |
| SIGVPIKVLHEAEGHIVTCETNTGEVYR       | P62320 | 0          | n +42.03 Da,K +34.06 Da,             | 3123.63564  | 4 | 795.4132 | 1.713E+09 | 1.968E+09 |
| ASGVAVSDGVIKVFNDMKVR               | P18760 | 0          | n +42.03 Da,K +34.06 Da,             | 3124.298553 | 3 | 730.7362 | 569780992 | 528912992 |
| DLTDPAPATTF AHLDATTVLSR            | P56480 | 0          | n +28.03 Da,                         | 3128.38566  | 3 | 781.0702 | 33628100  | 46945600  |
| MDPSGVKVLETAEDIQER                 | P16546 | 0          | n +42.03 Da,K +28.03 Da,             | 3131.557528 | 3 | 696.3495 | 113418000 | 111421000 |
| SSPAQPAVPAPLADLKIQHTKIFINNEWHN     | P24549 | 0          | n +42.03 Da,K +34.06 Da,             | 3137.904433 | 4 | 859.4614 | 2.256E+09 | 1.957E+09 |
| SSPAQPAVPAPLADLKIQHTKIF            | P24549 | 0          | n +42.03 Da,K +28.03 Da,             | 3141.735685 | 3 | 843.1469 | 1.243E+09 | 1.154E+09 |
| SSPAQPAVPAPLADLKIQHTKIFINNEWHN     | P24549 | 0          | n +42.03 Da,K +34.06 Da,             | 3141.873433 | 3 | 1145.614 | 221320992 | 182928000 |
| LTLYDIAHTPGVAADLSHIETR             | P08249 | 0          | n +42.03 Da,                         | 3149.236916 | 4 | 609.5914 | 438404992 | 367867008 |
| DLPQFTSAGESFNKLVSGKLR              | Q9CPY7 | 0          | n +28.03 Da,K +28.03 Da,             | 3152.551978 | 4 | 595.3325 | 1.798E+09 | 1.705E+09 |
| ANVADTKLYDILGVPPGASENELKKAYR       | Q9QYJ0 | 0          | n +42.03 Da,K +28.03 Da,             | 3160.33034  | 4 | 790.4349 | 3.035E+09 | 2.548E+09 |
| GCSAYEYIHALDSDAVSR                 | Q0VBL6 | 0          | n +34.06 Da,                         | 3163.985745 | 3 | 683.3349 | 800688000 | 615672000 |
| DDLQFTSAGESFNKLVSGKLR              | Q9CPY7 | 0          | n +34.06 Da,K +34.06 Da,             | 3169.971715 | 4 | 624.0887 | 310847008 | 245552000 |
| SVVVAPAQTLNSNAEFQMLR               | Q8C196 | 0          | n +28.03 Da,                         | 3178.137748 | 2 | 1045.06  | 183288000 | 171046000 |
| SVVVAPAQTLNSNAEFQMLR               | Q8C196 | 0          | n +34.06 Da,                         | 3182.907658 | 3 | 697.0458 | 187260992 | 105204000 |
| GLDPAFTPATGTPVLGGLSYR              | Q61176 | 0          | n +34.06 Da,                         | 3186.930482 | 3 | 706.7129 | 68069904  | 64366400  |
| LLNKLADLMER                        | O35945 | 0          | n +42.03 Da,K +28.03 Da,             | 3193.755208 | 3 | 462.5991 | 81117296  | 71925904  |
| KVIHCTVVDTAVLFPHHR                 | J3QNS6 | 0.04227006 | n +17.03 Da,K +34.06 Da,             | 3194.172648 | 2 | 1090.614 | 81193000  | 68329200  |
| SVNIPFTEFLTNEGLEKSPEEIKR           | Q99J99 | 0          | n +34.06 Da,K +34.06 Da,             | 3195.263315 | 4 | 716.1383 | 316024000 | 233120000 |
| MLGGLGKLAAEGLAHR                   | Q8CF02 | 0          | n +42.03 Da,K +28.03 Da,             | 3195.745732 | 3 | 555.3157 | 532396992 | 332743008 |

|                                     |        |            |                                      |             |   |          |           |           |
|-------------------------------------|--------|------------|--------------------------------------|-------------|---|----------|-----------|-----------|
| DGGDLTNIHTKYPQLLSGIR                | P50247 | 0          | n +28.03 Da,K +28.03 Da,             | 3197.460362 | 4 | 592.582  | 300926016 | 330758016 |
| GNPALAQPLIQNVKKILES DR              | Q8C196 | 0          | n +28.03 Da,K +28.03 Da,             | 3198.168371 | 4 | 595.5977 | 1.352E+09 | 295929984 |
| DGGDLTNIHTKYPQLLSGIR                | P50247 | 0          | n +28.03 Da,K +28.03 Da,             | 3203.942657 | 3 | 789.7739 | 278020000 | 266191008 |
| SVVVAPAQTL SNAEFQMLR                | Q8C196 | 0          | n +28.03 Da,                         | 3206.488312 | 2 | 1045.069 | 453020992 | 391430016 |
| GSWKTGQSYLAAGLLKNQVAVVTGGGTGIGKAVSR | Q99MZ7 | 0          | n +42.03 Da,K +34.06 Da,             | 3209.424408 | 4 | 890.251  | 2.279E+09 | 1.738E+09 |
| TFLGDYFGILKESR                      | Q61907 | 0          | n +34.06 Da,K +34.06 Da,             | 3212.111039 | 3 | 567.979  | 250106000 | 280063008 |
| MELVEVLKR                           | Q7TMF3 | 0          | n +42.03 Da,K +28.03 Da,             | 3217.488895 | 2 | 593.8471 | 1.174E+09 | 897752000 |
| PGNPALAQPLIQNVKKILES DR             | Q8C196 | 0          | n +14.02 Da,K +28.03 Da,             | 3226.923877 | 4 | 618.614  | 187080000 | 100191000 |
| SEFPWEVPKLVF                        | Q91X83 | 0          | n +34.06 Da,K +34.06 Da,             | 3227.319955 | 3 | 568.0129 | 200607008 | 192116000 |
| MDNSGKQAEAMALLAEAER                 | Q9DB05 | 0          | n +42.03 Da,K +28.03 Da,             | 3231.126107 | 3 | 702.3374 | 30336800  | 14142200  |
| EDVQETDTSQK DQSPASHEIATNLGDF AISLYR | P07758 | 0          | n +28.03 Da,K +28.03 Da,             | 3243.445576 | 4 | 931.204  | 170488000 | 195094000 |
| TAVHDAILEDLVFPSEIVGKR               | P62082 | 0          | n +28.03 Da,                         | 3244.336251 | 4 | 592.0839 | 65318700  | 66445900  |
| ADKMDMSLDDI IKNR                    | O08583 | 0          | n +42.03 Da,K +28.03 Da,             | 3247.46808  | 3 | 659.344  | 306491008 | 313492992 |
| PSDDTKGFFDPNTHENLTYLQLLER           | Q8ROW0 | 0          | n +17.03 Da,K +34.06 Da,             | 3253.212945 | 4 | 748.8727 | 159538000 | 126266000 |
| AFDFKDVTLG SVLGR                    | Q9R0H0 | 0          | n +28.03 Da,K +28.03 Da,             | 3259.237719 | 3 | 560.9836 | 114640000 | 101474000 |
| MERPQPDSMPQDLSEALKEATKEVH           | P14901 | 0          | n +42.03 Da,K +28.03 Da,             | 3262.54888  | 4 | 741.8656 | 67708000  | 57859800  |
| GPGNPALAQPLIQNVKKILES DR            | Q8C196 | 0          | n +28.03 Da,K +28.03 Da,             | 3271.540752 | 4 | 636.3741 | 453252000 | 470764992 |
| HFDPSVSLQTVKLMKEGLEAAR              | O35490 | 0          | n +28.03 Da,K +28.03 Da,             | 3282.741121 | 4 | 635.8428 | 6773290   | 12567600  |
| SMEDALKAADTIGYPVMIR                 | Q8C196 | 0          | n +34.06 Da,K +34.06 Da,             | 3317.028215 | 3 | 713.0395 | 85877904  | 90376200  |
| PAEIDSLWEISKQIEGH                   | Q91YTO | 0          | n +14.02 Da,K +28.03 Da,             | 3363.031018 | 3 | 665.3467 | 46124100  | 33323000  |
| LGKKTVVVNCNPETVSTDFDECDKLYFEELS LER | Q8C196 | 0.04405458 | n +28.03 Da,K +28.03 Da,             | 3369.57219  | 4 | 1033.011 | 53166200  | 55353300  |
| SKPEDVDGVL EEFGR                    | Q9DBM2 | 0          | n +34.06 Da,K +34.06 Da,             | 3381.091159 | 3 | 627.3196 | 549710976 | 477663008 |
| ASGVAVSDGVIKVFNDMKVR                | P18760 | 0          | n +42.03 Da,K +34.06 Da,             | 3389.291579 | 3 | 734.7465 | 107106000 | 750172032 |
| EVGVDVAQHV AEDLGKAFGER              | Q8BMS1 | 0          | n +34.06 Da,K +34.06 Da,             | 3395.52739  | 4 | 571.2997 | 254443008 | 261134000 |
| MQKDASLSGFLPSFQH                    | Q8VCN5 | 0          | n +42.03 Da,K +28.03 Da,             | 3399.007361 | 3 | 621.6423 | 66319000  | 43368100  |
| MEALGKLLKQFDAYPKTLEDFR              | Q9CQE7 | 0.00414365 | n +42.03 Da,K +34.06 Da,             | 3425.248281 | 4 | 657.3545 | 78295800  | 73271504  |
| ASGVAVSDGVIKVFNDMKVR                | P18760 | 0          | n +42.03 Da,K +34.06 Da,             | 3435.697466 | 3 | 730.7369 | 560422976 | 821009984 |
| PGASLPPLNLKELEKDLIDR                | Q05920 | 0          | n +14.02 Da,K +28.03 Da,             | 3436.288748 | 4 | 572.8361 | 1.345E+09 | 1.098E+09 |
| DDDIAALVV DNGSGMKAGFAGDDAPR         | P60710 | 0          | n +42.03 Da,K +28.03 Da,             | 3452.517902 | 3 | 936.4254 | 195006000 | 164648000 |
| ASGVAVSDGVIKVFNDMKVR                | P18760 | 0          | n +42.03 Da,K +28.03 Da,             | 3453.423447 | 2 | 1095.607 | 17292600  | 15403900  |
| FASDVL DYWAQMEEEGKR                 | Q91VA0 | 0          | n +28.03 Da,K +28.03 Da,             | 3453.694063 | 3 | 744.0206 | 171816992 | 148296000 |
| ASGVAVSDGVIKVFNDMKVR                | P18760 | 0          | n +42.03 Da,K +34.06 Da,             | 3455.206776 | 3 | 733.7534 | 169282000 | 1.498E+09 |
| ASLSLAPVNIKAGADEER                  | P80314 | 0          | n +42.03 Da,K +28.03 Da,             | 3456.230357 | 3 | 686.7008 | 982110016 | 907776000 |
| GSYQLLVPPPEALSKPLSVPTR              | O35423 | 0.01149425 | n +42.03 Da,K +28.03 Da,             | 3461.99256  | 3 | 807.1249 | 37638700  | 28032200  |
| LGKKTVVVNCNPETVSTDFDECDKLYFEELS LER | Q8C196 | 0.0118997  | n +28.03 Da,K +28.03 Da,             | 3476.913422 | 4 | 1036.779 | 27267200  | 87161904  |
| QTFVFLSQEVSPEQLPWSYR                | B1AS42 | 0.03916139 | n +17.03 Da,                         | 3479.213115 | 3 | 818.0744 | 191788000 | 167620000 |
| ASGVAVSDGVIKVFNDMKVR                | P18760 | 0          | n +42.03 Da,K +28.03 Da,             | 3479.452788 | 3 | 727.7283 | 756681984 | 2.9E+09   |
| DPAIYFKEQFLDGD AWTNR                | P14211 | 0          | n +34.06 Da,K +34.06 Da,             | 3482.203255 | 3 | 781.3864 | 359000000 | 350852000 |
| AKVAVLGASGGIGQPLSLLKNSPLVSR         | P08249 | 0          | n +28.03 Da,K +28.03 Da,             | 3483.414758 | 4 | 708.1881 | 494780000 | 466832000 |
| AALTAEHFVALQ SLLKASSKDVVR           | Q8K2Q0 | 0          | n +42.03 Da,n +34.06 Da,K +34.06 Da, | 3488.170848 | 4 | 663.8797 | 55450500  | 79255104  |

|                                   |        |            |                          |             |   |          |           |           |
|-----------------------------------|--------|------------|--------------------------|-------------|---|----------|-----------|-----------|
| GPFTPDLAHPVADVGTVAEKEGWPLDIR      | Q99K10 | 0          | n +34.06 Da,             | 3491.178448 | 2 | 761.6538 | 140088992 | 147392000 |
| DLTDAFLAEVEKAKGNPESSFNENLR        | Q9JKY7 | 0          | n +28.03 Da,K +28.03 Da, | 3492.663093 | 4 | 774.1402 | 117044000 | 134644000 |
| LSPTNCDASEPLAEKVLDLINKGR          | Q9ESB3 | 0          | n +34.06 Da,K +34.06 Da, | 3510.521311 | 3 | 908.8294 | 22022700  | 18171800  |
| LDWDVFTQHIEGAINR                  | Q99LB7 | 0          | n +28.03 Da,             | 3519.375599 | 3 | 647.9983 | 263122000 | 293644992 |
| LSPTNCDASEPLAEKVLDLINKGR          | Q9ESB3 | 0          | n +28.03 Da,K +28.03 Da, | 3520.774186 | 4 | 681.8709 | 842241024 | 712248000 |
| IAWNFEKFLVGPDPVVR                 | P11352 | 0          | n +34.06 Da,K +34.06 Da, | 3548.675284 | 3 | 700.7273 | 69366800  | 71631296  |
| ASGNAQIGKSAPDFTATAVVDGAFKEIKLSDYR | Q61171 | 0          | n +42.03 Da,K +28.03 Da, | 3551.349066 | 4 | 889.2194 | 349515008 | 249824992 |
| VHLTDAEKA AVSCLWGK VNSDEVGG EALGR | P02088 | 0.02015631 | n +28.03 Da,K +28.03 Da, | 3552.808416 | 4 | 813.9112 | 98277904  | 59788100  |
| ASGNAQIGKSAPDFTATAVVDGAFKEIKLSDYR | Q61171 | 0          | n +42.03 Da,K +34.06 Da, | 3563.800205 | 4 | 892.9911 | 116381000 | 558641984 |
| LSPTNCDASEPLAEKVLDLINKGR          | Q9ESB3 | 0          | n +34.06 Da,K +34.06 Da, | 3570.424635 | 3 | 686.4137 | 153015008 | 132787000 |
| ARDEVVVQEDSR                      | Q6A037 | 0          | n +34.06 Da,             | 3574.032109 | 2 | 718.8801 | 178812000 | 151030000 |
| MESSTSSSSGALGAVDPQLQHFIEVETQKQR   | Q9WVA2 | 0          | n +42.03 Da,K +34.06 Da, | 3580.069787 | 3 | 1139.891 | 87182896  | 93085800  |
| LSPTNCDASEPLAEKVLDLINKGR          | Q9ESB3 | 0          | n +28.03 Da,K +28.03 Da, | 3582.748051 | 4 | 681.876  | 43089300  | 46496500  |
| MNVLADALKSINNAEKR                 | P62245 | 0          | n +42.03 Da,K +34.06 Da, | 3610.541246 | 3 | 662.3696 | 181822000 | 170900992 |
| VPAETLYDVLHDI EYR                 | Q9JMD3 | 0          | n +28.03 Da,             | 3610.595572 | 3 | 654.3394 | 516608000 | 575193984 |
| ASGNAQIGKSAPDFTATAVVDGAFKEIKLSDYR | Q61171 | 0          | n +42.03 Da,K +34.06 Da, | 3622.829815 | 4 | 889.2228 | 274276992 | 195372000 |
| DPAIYFKEQFLDGD AWTNR              | P14211 | 0          | n +34.06 Da,K +34.06 Da, | 3624.971537 | 3 | 784.4012 | 60899700  | 299652992 |
| VHLTDAEKA AVSCLWGK VNSDEVGG EALGR | P02088 | 0          | n +28.03 Da,K +28.03 Da, | 3627.836623 | 4 | 813.9127 | 518771008 | 219492000 |
| DPAIYFKEQFLDGD AWTNR              | P14211 | 0          | n +28.03 Da,K +28.03 Da, | 3628.309683 | 3 | 781.3868 | 1.586E+09 | 1.572E+09 |
| MNVLADALKSINNAEKR                 | P62245 | 0          | n +42.03 Da,K +34.06 Da, | 3630.635812 | 3 | 665.3883 | 39667100  | 62131000  |
| ASGVTVNDEVIKVFNDMKVR              | P45591 | 0          | n +42.03 Da,K +34.06 Da, | 3644.686526 | 3 | 773.752  | 2.432E+09 | 2.084E+09 |
| DPAIYFKEQFLDGD AWTNR              | P14211 | 0          | n +34.06 Da,K +34.06 Da, | 3645.719674 | 2 | 1171.579 | 40667500  | 21119800  |
| KQG FIDLPEFPFGLEPR                | O35490 | 0          | n +28.03 Da,K +28.03 Da, | 3647.875277 | 3 | 682.7083 | 173164992 | 113936000 |
| GKQG FIDLPEFPFGLEPR               | O35490 | 0          | n +34.06 Da,K +34.06 Da, | 3658.380629 | 3 | 701.7148 | 2.382E+09 | 1.83E+09  |
| VNPTVFFDITADDEPLGR                | P17742 | 0          | n +28.03 Da,             | 3668.998769 | 2 | 1017.512 | 362480992 | 349343008 |
| VNPTVFFDITADDEPLGR                | P17742 | 0          | n +28.03 Da,             | 3671.831789 | 3 | 678.6776 | 282318016 | 281835008 |
| APPVPGAVSGGSGEVDLFDVKN AF         | O89079 | 0          | n +34.06 Da,K +34.06 Da, | 3672.914296 | 3 | 839.0954 | 239934000 | 228455008 |
| TQLAPIIQEFFHSEQYR                 | Q78JT3 | 0.00743007 | n +34.06 Da,             | 3677.839586 | 3 | 713.3692 | 5732770   | 7701300   |
| MKTADHFWDPSADELVQR                | Q8BPQ7 | 0.00866176 | n +34.06 Da,K +34.06 Da, | 3682.32613  | 3 | 772.381  | 13704300  | 7196350   |
| VHLTDAEKA AVSCLWGK VNSDEVGG EALGR | P02088 | 0          | n +28.03 Da,K +28.03 Da, | 3718.87368  | 4 | 813.9129 | 25759800  | 13744400  |
| ATPDSLALFTGLG LSENKAR             | D32158 | 0          | n +42.03 Da,K +34.06 Da, | 3725.685857 | 2 | 1066.075 | 30000200  | 22619800  |
| HIDDKVFLTTAEVISQVSDKHLQ EGR       | P06801 | 0          | n +17.03 Da,K +34.06 Da, | 3727.675604 | 4 | 792.4147 | 83675696  | 44368500  |
| LSPTNCDASEPLAEKVLDLINKGR          | Q9ESB3 | 0          | n +28.03 Da,K +28.03 Da, | 3739.677916 | 4 | 681.8794 | 59374300  | 50852900  |
| ADSVKTF LQDLGR                    | Q61070 | 0          | n +42.03 Da,K +28.03 Da, | 3748.398489 | 2 | 760.4104 | 360020000 | 317812992 |
| SGTLAKIAEIEAEMAR                  | P32233 | 0          | n +42.03 Da,K +34.06 Da, | 3758.590183 | 2 | 880.4686 | 23416900  | 27431600  |
| SGTLAKIAEIEAEMAR                  | P32233 | 0          | n +42.03 Da,K +28.03 Da, | 3760.769603 | 3 | 587.3138 | 27259100  | 54166300  |
| DPAIYFKEQFLDGD AWTNR              | P14211 | 0          | n +34.06 Da,K +34.06 Da, | 3771.364424 | 3 | 781.3851 | 39430500  | 35627500  |
| LADVLEQSLEELAQAESKDQ GKTLTLAR     | Q8BH00 | 0          | n +28.03 Da,K +28.03 Da, | 3792.962922 | 4 | 785.9344 | 252100000 | 227986000 |
| MDASLEKIADPTLAEMGKNLKEAMR         | Q99K01 | 0          | n +42.03 Da,K +34.06 Da, | 3822.641028 | 4 | 722.88   | 598377984 | 530048000 |
| TATFAQALQSVPETQV SILDNGLR         | Q9CZ13 | 0          | n +34.06 Da,             | 3827.860375 | 3 | 863.1282 | 94513000  | 97299000  |



|                      |        |            |                                      |             |   |          |           |           |
|----------------------|--------|------------|--------------------------------------|-------------|---|----------|-----------|-----------|
| YYVGDTEVLFEKWFH      | Q78JT3 | 0          | n +42.03 Da,K +28.03 Da,             | 3839.229599 | 3 | 706.6804 | 19332300  | 20248400  |
| MQKDasLSGFLPSFQHF    | Q8VCN5 | 0          | n +42.03 Da,K +34.06 Da,             | 3876.356752 | 3 | 670.6651 | 23662300  | 20393800  |
| SLELFMYLNEVAGKHGVR   | P16460 | 0.00582698 | n +42.03 Da,K +28.03 Da,             | 3967.084702 | 3 | 730.7201 | 9844790   | 8672510   |
| NQAVFPRASGLPNNPANFPR | POCG14 | 0.04818813 | n +28.03 Da,                         | 4036.985573 | 3 | 742.705  | 105500000 | 91628896  |
| DPENAVFYVGGYPPGFELPR | Q61789 | 0.00988397 | n +42.03 Da,                         | 4037.218057 | 4 | 565.0143 | 79839296  | 71716200  |
| GAKYVSHGATGKGNQVR    | P16460 | 0          | n +28.03 Da,K +28.03 Da,             | 500.6783852 | 4 | 483.0037 | 44940800  | 29688900  |
| TKPQESPKTPTQSYR      | Q9D6U8 | 0          | n +28.03 Da,K +28.03 Da,             | 510.541301  | 4 | 458.7532 | 256216992 | 285251008 |
| TPQQAQEVHEKLR        | P17751 | 0          | n +28.03 Da,K +28.03 Da,             | 514.2772784 | 4 | 405.727  | 287648992 | 317836000 |
| EEEEEEPVKAAPGKR      | P09405 | 0          | n +34.06 Da,K +34.06 Da,             | 538.3629117 | 4 | 478.4982 | 39662700  | 38937700  |
| FEGKKPETLGSNTR       | E9PZ30 | 0.00269687 | n +28.03 Da,K +28.03 Da,             | 539.6687833 | 4 | 412.7322 | 140532992 | 97869200  |
| SSVAQPSLHTAQKPR      | Q99JT1 | 0.00662589 | n +34.06 Da,K +34.06 Da,             | 542.8923159 | 4 | 416.4874 | 398723008 | 308883008 |
| EGAKYVSHGATGKGNQVR   | P16460 | 0          | n +28.03 Da,K +28.03 Da,             | 543.7600953 | 4 | 513.7609 | 156878000 | 111079000 |
| ESAAADKRPTVPRR       | Q9DCT2 | 0.01996198 | n +42.03 Da,K +28.03 Da,             | 555.6603131 | 4 | 406.7288 | 58986800  | 38835500  |
| DITDGNSEHLKR         | Q9DBH5 | 0          | n +34.06 Da,K +34.06 Da,             | 560.7937829 | 3 | 484.9407 | 953297984 | 621665984 |
| DITDGNSEHLKR         | Q9DBH5 | 0          | n +34.06 Da,K +34.06 Da,             | 560.8012872 | 4 | 363.9575 | 1.998E+09 | 4.734E+09 |
| DITDGNSEHLKR         | Q9DBH5 | 0          | n +28.03 Da,K +28.03 Da,             | 561.9101994 | 4 | 360.9416 | 903910016 | 97127504  |
| GLQKASLDHTVR         | Q9DBM2 | 0.00111732 | n +34.06 Da,K +34.06 Da,             | 566.6722842 | 4 | 345.9544 | 427820992 | 337992992 |
| SSSSLQKKVTSVDR       | Q9CWX2 | 0.00422833 | n +28.03 Da,K +28.03 Da,             | 569.5119644 | 3 | 535.9771 | 92674600  | 81826600  |
| VVVKEDEEYKR          | Q8QZT1 | 0.00217391 | n +34.06 Da,K +34.06 Da,             | 569.6032779 | 4 | 370.2096 | 132257000 | 36570200  |
| SVKGHTTGLSLNNER      | O08601 | 0          | n +28.03 Da,K +28.03 Da,             | 573.4574043 | 3 | 556.9723 | 500065984 | 337839008 |
| LPTRPTDKPLR          | P10126 | 0.00996512 | n +28.03 Da,K +28.03 Da,             | 576.9102983 | 4 | 362.4751 | 347264000 | 49207000  |
| TRLAADVKGAGAER       | P51881 | 0          | n +34.06 Da,K +34.06 Da,             | 577.5034841 | 4 | 368.4652 | 47174900  | 65700500  |
| LPTRPTDKPLR          | P10126 | 0.00996512 | n +28.03 Da,K +28.03 Da,             | 583.7582799 | 4 | 361.72   | 493129984 | 1.045E+09 |
| SLHSIGKIGGAQNR       | P34884 | 0          | n +28.03 Da,K +28.03 Da,             | 590.1153864 | 4 | 373.4651 | 72093400  | 170184000 |
| QGAIEKVKDATR         | Q8C196 | 0.03851321 | n +34.06 Da,K +34.06 Da,             | 591.8989723 | 3 | 467.2808 | 302849984 | 103636000 |
| EGAKYVSHGATGKGNQVR   | P16460 | 0          | n +28.03 Da,K +28.03 Da,             | 594.4399293 | 3 | 686.6822 | 186928000 | 179131008 |
| DITDGNSEHLKR         | Q9DBH5 | 0          | n +28.03 Da,K +28.03 Da,             | 595.1040996 | 4 | 360.9413 | 292111008 | 441887008 |
| EGAKYVSHGATGKGNQVR   | P16460 | 0          | n +28.03 Da,K +28.03 Da,             | 595.681175  | 4 | 515.2642 | 1.064E+09 | 922238976 |
| TVIHCEGEPIKR         | Q01853 | 0          | n +28.03 Da,K +28.03 Da,             | 595.8032803 | 4 | 374.4578 | 455484992 | 420120000 |
| DITDGNSEHLKR         | Q9DBH5 | 0          | n +34.06 Da,K +34.06 Da,             | 598.1571604 | 3 | 483.9357 | 154016000 | 1.381E+09 |
| SSKEVTALKSAR         | F8VPK0 | 0          | n +42.03 Da,n +28.03 Da,K +28.03 Da, | 598.6844843 | 4 | 383.4849 | 91327800  | 163044992 |
| DITDGNSEHLKR         | Q9DBH5 | 0          | n +34.06 Da,K +34.06 Da,             | 599.4059107 | 3 | 480.9195 | 1.735E+09 | 1.001E+09 |
| REVEMDAVGKEGR        | Q8C196 | 0          | n +34.06 Da,                         | 605.8895691 | 4 | 383.7029 | 103171000 | 172412992 |
| DITDGNSEHLKR         | Q9DBH5 | 0          | n +34.06 Da,K +34.06 Da,             | 607.3188453 | 4 | 363.2035 | 76032400  | 689534976 |
| FTNEVLTKTYR          | P28656 | 0.03089505 | n +28.03 Da,K +28.03 Da,             | 610.7935042 | 4 | 357.6993 | 334822016 | 248956000 |
| TGKTATPQQAQEVHEKLR   | P17751 | 0          | n +34.06 Da,K +34.06 Da,             | 612.3017231 | 5 | 422.0391 | 355846016 | 336907008 |
| REVEMDAVGKEGR        | Q8C196 | 0          | n +34.06 Da,                         | 612.4789872 | 4 | 386.7209 | 90883800  | 41310400  |
| TVGQEKKGyFEDR        | P15105 | 0          | n +34.06 Da,K +34.06 Da,             | 618.2216473 | 3 | 551.6469 | 411227008 | 672004992 |
| TVGQEKKGyFEDR        | P15105 | 0.00662589 | n +34.06 Da,K +34.06 Da,             | 618.7318792 | 4 | 413.9876 | 611356992 | 1.041E+09 |
| TVHVLAKLR            | P25688 | 0.00217391 | n +34.06 Da,K +34.06 Da,             | 623.8477557 | 3 | 364.9132 | 681849024 | 466348000 |

|                           |        |            |                                      |             |   |          |           |           |
|---------------------------|--------|------------|--------------------------------------|-------------|---|----------|-----------|-----------|
| AAKLPEFAKR                | O08709 | 0          | n +28.03 Da,K +28.03 Da,             | 625.2740945 | 4 | 322.2051 | 104437000 | 71391400  |
| SHGQDYLVGNR               | P10648 | 0          | n +34.06 Da,                         | 626.1409029 | 2 | 637.3175 | 182358000 | 196580992 |
| MDQQTQHPSKAAQPLRSEKTR     | Q9JL3  | 0          | n +42.03 Da,K +28.03 Da,             | 628.8172051 | 4 | 602.5679 | 137304992 | 153134000 |
| TSDEEIKDLHQR              | Q9D379 | 0          | n +28.03 Da,K +28.03 Da,             | 640.2494619 | 4 | 382.4506 | 955118016 | 783976000 |
| ASVKGHTTGLSLNNER          | O08601 | 0          | n +34.06 Da,K +34.06 Da,             | 640.4471204 | 3 | 580.6515 | 850204992 | 645886016 |
| TSDEEIKDLHQR              | Q9D379 | 0          | n +34.06 Da,K +34.06 Da,             | 641.3246654 | 3 | 509.5986 | 173422000 | 148191008 |
| SGSKAASLHWTSE             | Q9CXV1 | 0.00111732 | n +34.06 Da,K +34.06 Da,             | 642.6089445 | 4 | 396.2213 | 726352000 | 3.488E+09 |
| YAKDVKFGADAR              | P63038 | 0          | n +34.06 Da,K +34.06 Da,             | 647.7495109 | 4 | 360.7225 | 1.668E+09 | 8.064E+09 |
| SGSKAASLHWTSE             | Q9CXV1 | 0.00111732 | n +34.06 Da,K +34.06 Da,             | 651.3721594 | 4 | 393.9583 | 100023000 | 62578200  |
| VILISTTHKEFDAR            | O54904 | 0.03732014 | n +34.06 Da,K +34.06 Da,             | 655.7475848 | 3 | 562.6377 | 1.261E+09 | 1.186E+09 |
| SSGTTAPKKTSGSLKDEDR       | Q91YT0 | 0          | n +34.06 Da,K +34.06 Da,             | 661.9708439 | 4 | 562.0784 | 255840992 | 1.227E+09 |
| SPGFSKFR                  | Q9QXF8 | 0.01361868 | n +28.03 Da,K +28.03 Da,             | 686.9200032 | 3 | 327.8552 | 1.781E+09 | 1.651E+09 |
| SLQPAPVKKIPNR             | B7ZMP1 | 0          | n +34.06 Da,K +34.06 Da,             | 687.6157167 | 3 | 511.3272 | 264095008 | 190208992 |
| SLQPAPVKKIPNR             | B7ZMP1 | 0          | n +34.06 Da,K +34.06 Da,             | 689.4718537 | 4 | 383.493  | 343812992 | 180456000 |
| PVLGSMACKYNR              | P70694 | 0          | n +14.02 Da,K +28.03 Da,             | 693.0041468 | 4 | 359.2128 | 77651200  | 55665200  |
| TKVKAAPPESEAQAEGCSEER     | Q9CRB2 | 0.04388298 | n +28.03 Da,K +28.03 Da,             | 695.2970831 | 4 | 598.2927 | 311463008 | 235400992 |
| SGAEIGGAFGGKEKHTGGGR      | Q9DBF1 | 0          | n +28.03 Da,K +28.03 Da,             | 698.3363304 | 4 | 447.9561 | 306440992 | 277684992 |
| THNMDVPNIKR               | P63242 | 0.0297619  | n +34.06 Da,                         | 706.6755173 | 4 | 345.9409 | 323983008 | 318211008 |
| PASDQMKQWKEQR             | P24270 | 0          | n +17.03 Da,n +34.06 Da,K +34.06 Da, | 716.295678  | 4 | 429.2395 | 321168992 | 1.052E+09 |
| IEVAPPKAHEVR              | P00329 | 0          | n +28.03 Da,K +28.03 Da,             | 717.7631126 | 3 | 467.9456 | 460620000 | 609649984 |
| PASDQMKQWKEQR             | P24270 | 0          | n +17.03 Da,n +34.06 Da,K +34.06 Da, | 719.364475  | 3 | 571.9843 | 820464000 | 2.426E+09 |
| IEVAPPKAHEVR              | P00329 | 0          | n +34.06 Da,K +34.06 Da,             | 720.2801017 | 4 | 353.4726 | 428719008 | 4.087E+09 |
| TPEQKKELSEIAQR            | Q91Y97 | 0          | n +34.06 Da,K +34.06 Da,             | 720.8397578 | 3 | 581.0004 | 3.073E+09 | 2.939E+09 |
| TPEQKKELSEIAQR            | Q91Y97 | 0          | n +28.03 Da,K +28.03 Da,             | 721.9125801 | 4 | 436.0017 | 1.62E+09  | 1.508E+09 |
| PVEKDANNMPVTAR            | D3Z0Y2 | 0.01043738 | n +17.03 Da,K +34.06 Da,             | 722.8988894 | 3 | 528.6121 | 36698700  | 42321500  |
| IEVAPPKAHEVR              | P00329 | 0          | n +28.03 Da,K +28.03 Da,             | 724.1089364 | 4 | 351.2108 | 1.765E+09 | 1.863E+09 |
| SETAPAAPAAPAPAEEKTPVKKKAR | P43274 | 0          | n +42.03 Da,n +28.03 Da,K +28.03 Da, | 731.0349867 | 2 | 636.1248 | 1.284E+11 | 1.094E+11 |
| PKKSLDFYTR                | Q9CPU0 | 0          | n +17.03 Da,K +34.06 Da,             | 731.4008824 | 3 | 446.2811 | 1.88E+09  | 3.315E+09 |
| PHSPVHSEAEAVLR            | Q9Z1J3 | 0          | n +17.03 Da,                         | 740.2764388 | 3 | 514.9391 | 373992000 | 263871008 |
| VSHGYVTVKPGIR             | P34914 | 0          | n +28.03 Da,K +28.03 Da,             | 750.882044  | 4 | 367.9715 | 220695008 | 151336992 |
| DIEVAPPKAHEVR             | P00329 | 0          | n +14.02 Da,K +28.03 Da,             | 754.2236354 | 4 | 376.4635 | 1.158E+09 | 1.118E+09 |
| DIEVAPPKAHEVR             | P00329 | 0          | n +14.02 Da,K +28.03 Da,             | 755.9563898 | 3 | 501.6155 | 723966976 | 667664000 |
| TATPQQAQEVHEKLR           | P17751 | 0          | n +34.06 Da,K +34.06 Da,             | 760.0788585 | 3 | 597.995  | 1.156E+09 | 386086016 |
| VDLRAPGSTEQLHVAR          | D3Z7H8 | 0.03700361 | n +14.02 Da,                         | 761.8612657 | 4 | 441.491  | 68488896  | 65537700  |
| TATPQQAQEVHEKLR           | P17751 | 0          | n +34.06 Da,K +34.06 Da,             | 762.9968279 | 4 | 448.7479 | 1.644E+09 | 1.139E+09 |
| KTSKDTTASAVAVGLR          | Q8BMS1 | 0          | n +34.06 Da,K +34.06 Da,             | 768.3006859 | 3 | 563.6675 | 93099104  | 85553600  |
| SSVAQPSLHTAQKPR           | Q99JT1 | 0          | n +28.03 Da,K +28.03 Da,             | 771.5656795 | 3 | 554.976  | 252600992 | 300377984 |
| YRPGTVALR                 | P02301 | 0.02861098 | n +28.03 Da,                         | 781.2713398 | 4 | 354.217  | 83604800  | 48968700  |
| PDVVVKEDEEYKR             | Q8QZT1 | 0          | n +14.02 Da,K +28.03 Da,             | 781.6894227 | 4 | 419.7282 | 498668000 | 58578900  |
| MKPILLQGH                 | Q9QZD9 | 0          | n +34.06 Da,K +34.06 Da,             | 782.5074953 | 4 | 346.7132 | 47615100  | 237831008 |

|                          |        |            |                                      |             |   |          |           |           |
|--------------------------|--------|------------|--------------------------------------|-------------|---|----------|-----------|-----------|
| MKPILLQGHER              | Q9QZD9 | 0          | n +28.03 Da,K +28.03 Da,             | 784.575365  | 4 | 345.2065 | 4.939E+09 | 5.92E+09  |
| MKPILLQGHER              | Q9QZD9 | 0.00111732 | n +34.06 Da,K +34.06 Da,             | 791.4917947 | 3 | 459.9391 | 1.313E+09 | 1.123E+09 |
| MKPILLQGHER              | Q9QZD9 | 0          | n +34.06 Da,K +34.06 Da,             | 792.2063038 | 4 | 347.4679 | 873950016 | 7.363E+09 |
| EKEVGLAIR                | P70694 | 0.01138614 | n +34.06 Da,K +34.06 Da,             | 793.5103207 | 3 | 357.5567 | 74509000  | 66215700  |
| SYETQVIAHGQSSKGP         | Q78JT3 | 0          | n +34.06 Da,K +34.06 Da,             | 796.7448474 | 4 | 490.2576 | 970984000 | 944670976 |
| SYETQVIAHGQSSKGP         | Q78JT3 | 0          | n +34.06 Da,K +34.06 Da,             | 800.527558  | 3 | 653.3411 | 235387008 | 240383008 |
| PLPAIEKTGKVR             | Q9CXN7 | 0.03813369 | n +14.02 Da,n +28.03 Da,K +28.03 Da, | 805.2069862 | 4 | 345.4748 | 344232992 | 91639696  |
| AKPVPSYIR                | Q91WU5 | 0.00662589 | n +42.03 Da,K +28.03 Da,             | 805.545787  | 3 | 363.5346 | 128787000 | 119759000 |
| PSGKGIVEFSGKPAAR         | Q99K48 | 0.01138614 | n +14.02 Da,K +28.03 Da,             | 807.3327692 | 4 | 418.4809 | 417068000 | 357496992 |
| SSVAQPSLHTAQKPR          | Q99JT1 | 0          | n +28.03 Da,K +28.03 Da,             | 807.9421341 | 3 | 554.9739 | 183868000 | 238134000 |
| AYLKEVEQLR               | Q61584 | 0.03089505 | n +42.03 Da,K +34.06 Da,             | 813.7439006 | 3 | 438.2469 | 732604032 | 557425984 |
| ATPLDFPSKKR              | Q64213 | 0          | n +34.06 Da,K +34.06 Da,             | 817.3070598 | 4 | 340.4765 | 16855900  | 184562000 |
| YRPGTVALR                | P02301 | 0.02861098 | n +28.03 Da,                         | 820.7974537 | 3 | 354.2136 | 2.793E+09 | 995510016 |
| ATPLDFPSKKR              | Q64213 | 0.04873803 | n +34.06 Da,K +34.06 Da,             | 821.2378267 | 3 | 448.6067 | 14830400  | 59351000  |
| RPELTGAKVVVSGGR          | Q99LC5 | 0          | n +34.06 Da,K +34.06 Da,             | 821.8140231 | 4 | 398.5036 | 62207200  | 526232000 |
| ATPLDFPSKKR              | Q64213 | 0          | n +34.06 Da,K +34.06 Da,             | 825.0381842 | 4 | 336.7065 | 72079000  | 233020992 |
| TGVLKQTKGVGASGSFR        | P10922 | 0          | n +34.06 Da,K +34.06 Da,             | 830.7975633 | 4 | 448.7842 | 10632300  | 127054000 |
| TKDGFESPEELR             | P52196 | 0.00217391 | n +34.06 Da,K +34.06 Da,             | 831.037523  | 3 | 544.6542 | 231182000 | 37201600  |
| YSKNPSNKDAALMEAAR        | Q60649 | 0          | n +28.03 Da,K +28.03 Da,             | 834.8017213 | 4 | 649.9241 | 422064992 | 1.469E+09 |
| TGVLKQTKGVGASGSFR        | P10922 | 0          | n +34.06 Da,K +34.06 Da,             | 840.3216985 | 4 | 445.014  | 107865000 | 66472900  |
| GREPDLSSDIKER            | B5X0G2 | 0.01361868 | n +34.06 Da,K +34.06 Da,             | 861.6085542 | 4 | 390.2106 | 638152000 | 623504000 |
| VWQPAAPGDKVVRVLFPGRTPPAR | Q8C052 | 0.01953311 | n +17.03 Da,n +34.06 Da,             | 869.1398916 | 4 | 662.6133 | 2.092E+09 | 1.957E+09 |
| SKPPPKPVKPGQVKVFR        | Q62422 | 0.00902256 | n +42.03 Da,K +34.06 Da,             | 869.7093751 | 5 | 413.6848 | 211924000 | 1.213E+09 |
| NFGRTCPR                 | Q8BGE5 | 0.00520562 | n +14.02 Da,                         | 876.7867365 | 3 | 341.1727 | 1.458E+09 | 1.326E+09 |
| FRVPGQPR                 | Q9CW42 | 0.00902256 | n +34.06 Da,                         | 876.8272554 | 3 | 328.8627 | 1.212E+09 | 2.063E+09 |
| REPDLSSDIKER             | B5X0G2 | 0          | n +34.06 Da,                         | 878.9343058 | 3 | 500.9386 | 348321984 | 534468992 |
| RASPVVEERPDKFAEKGSR      | E9Q9T1 | 0.01321586 | n +14.02 Da,K +28.03 Da,             | 880.2492271 | 5 | 469.4449 | 227378000 | 166984000 |
| YSKNPSNKDAALMEAAR        | Q60649 | 0          | n +28.03 Da,K +28.03 Da,             | 882.1800467 | 4 | 488.2585 | 491128000 | 356422016 |
| TKVSSLIER                | Q921X9 | 0.04465075 | n +34.06 Da,K +34.06 Da,             | 882.6095491 | 3 | 366.5766 | 144698000 | 1.252E+09 |
| TGKTPVEPEVAIHR           | P60867 | 0.00662589 | n +28.03 Da,K +28.03 Da,             | 888.2779296 | 3 | 530.6374 | 122361000 | 137560992 |
| TKVSSLIER                | Q921X9 | 0.04465075 | n +34.06 Da,K +34.06 Da,             | 892.0446436 | 3 | 363.5605 | 249410000 | 166236000 |
| MEVKPPPGRPQPDGSR         | Q8BG05 | 0.00217391 | n +42.03 Da,K +34.06 Da,             | 906.5842183 | 4 | 494.2635 | 545742016 | 448991008 |
| TQKTVDGPGSKLWR           | P16858 | 0.00111732 | n +34.06 Da,K +34.06 Da,             | 910.7565464 | 4 | 414.9914 | 6.478E+09 | 6.253E+09 |
| ITTSYEKEKLNER            | P63038 | 0          | n +28.03 Da,K +28.03 Da,             | 929.9609601 | 4 | 456.7489 | 144260000 | 123355000 |
| TLHETEDVKEAIR            | Q9D855 | 0          | n +28.03 Da,K +28.03 Da,             | 931.5989465 | 3 | 532.9581 | 159128000 | 182791008 |
| PIAKPPVFTGKDR            | P53395 | 0          | n +14.02 Da,K +28.03 Da,             | 935.58265   | 4 | 374.7303 | 263368992 | 60269900  |
| ATQKTVDGPGSKLWR          | P16858 | 0          | n +28.03 Da,K +28.03 Da,             | 935.8953732 | 4 | 432.7494 | 228108000 | 404116992 |
| HTFYNELR                 | P60710 | 0.00269687 | n +28.03 Da,                         | 936.1145057 | 2 | 554.2829 | 1.399E+09 | 733436032 |
| TITYGPKVVR               | P12710 | 0.00217391 | n +34.06 Da,K +34.06 Da,             | 936.7362179 | 3 | 400.2642 | 178187008 | 980436992 |
| SKKVDQSVPAEISQKAAESQGR   | Q61733 | 0          | n +34.06 Da,K +34.06 Da,             | 941.2255493 | 2 | 643.1205 | 139730000 | 139492992 |

|                                    |        |            |                          |             |   |          |           |           |
|------------------------------------|--------|------------|--------------------------|-------------|---|----------|-----------|-----------|
| TITYGPKVV                          | P12710 | 0.00217391 | n +34.06 Da,K +34.06 Da, | 943.7470162 | 3 | 397.2485 | 340467008 | 177924000 |
| MKNPFAH                            | P28271 | 0.02082347 | n +28.03 Da,K +28.03 Da, | 953.8484372 | 3 | 300.8301 | 209911008 | 193534000 |
| SLPKELEVKR                         | Q71R19 | 0.01726619 | n +28.03 Da,K +28.03 Da, | 956.3975446 | 4 | 321.4578 | 212562000 | 241656992 |
| SKKVDQSVANEISQKAAESQGR             | Q61733 | 0          | n +34.06 Da,K +34.06 Da, | 958.1161926 | 4 | 648.383  | 20319500  | 174971008 |
| PHEELPSLQRP                        | Q3UQ44 | 0.01540684 | n +17.03 Da,             | 958.1366785 | 3 | 491.6038 | 1.261E+09 | 812161024 |
| MEEGGRDKTPVQSQPPSATTSPSGADEKSSGKER | Q8VDM4 | 0          | n +42.03 Da,K +28.03 Da, | 958.2562792 | 5 | 721.1545 | 131898000 | 100546000 |
| GKLTGMAFR                          | P16858 | 0.01681884 | n +28.03 Da,K +28.03 Da, | 959.0493097 | 3 | 346.2039 | 241372992 | 250952992 |
| AGVKELDSLKSDR                      | Q80XN0 | 0.00858586 | n +34.06 Da,K +34.06 Da, | 959.8994436 | 4 | 376.2201 | 587843968 | 532913984 |
| VGNWRPPQPVKGR                      | P16015 | 0          | n +28.03 Da,K +28.03 Da, | 960.9649749 | 4 | 387.4794 | 462460992 | 382608000 |
| SKKVDQSVANEISQKAAESQGR             | Q61733 | 0          | n +34.06 Da,K +34.06 Da, | 961.8144462 | 2 | 643.1035 | 936587008 | 729811968 |
| DIEVAPPKAHEVR                      | P00329 | 0          | n +34.06 Da,K +34.06 Da, | 963.5415141 | 4 | 379.9676 | 66154300  | 71033904  |
| MESNHSKSGDLSGTQKEAALR              | Q5YD48 | 0          | n +42.03 Da,K +28.03 Da, | 970.3655377 | 3 | 772.0535 | 370339008 | 330641984 |
| VTKGAAELMQKQKATTEQQLR              | O35490 | 0.03013699 | n +28.03 Da,K +28.03 Da, | 971.8739197 | 4 | 608.8256 | 2.01E+09  | 1.65E+09  |
| GAAAVVLMKKTAEAR                    | Q8CAY6 | 0          | n +28.03 Da,K +28.03 Da, | 973.6148955 | 3 | 549.3036 | 234078000 | 226099008 |
| GYKIVTEKSTVPVR                     | O70475 | 0          | n +28.03 Da,K +28.03 Da, | 973.9525871 | 4 | 416.0059 | 174754000 | 137936000 |
| MESNHSKSGDLSGTQKEAALR              | Q5YD48 | 0          | n +42.03 Da,K +34.06 Da, | 975.2552239 | 4 | 579.292  | 3.389E+09 | 2.586E+09 |
| PGLVGKVPFGKR                       | Q9JKY7 | 0          | n +14.02 Da,K +28.03 Da, | 975.7761534 | 4 | 330.4577 | 316776992 | 331335008 |
| FEEKFLKTR                          | P30115 | 0.00520562 | n +28.03 Da,K +28.03 Da, | 976.2037971 | 4 | 321.1948 | 188852000 | 227540992 |
| IPIKSDPVVSYR                       | P58252 | 0.04803493 | n +28.03 Da,K +28.03 Da, | 977.7289325 | 4 | 396.485  | 211380000 | 566345984 |
| ITTSEYEKELNER                      | P63038 | 0          | n +28.03 Da,K +28.03 Da, | 977.7743914 | 4 | 455.2495 | 1.121E+09 | 945078976 |
| FKSVDDVIKR                         | P24549 | 0          | n +28.03 Da,K +28.03 Da, | 982.4887513 | 4 | 323.4496 | 27541900  | 13175000  |
| MDFQHRPGGKTGSGGVASSSESNR           | Q62203 | 0          | n +42.03 Da,n +34.06 Da, | 984.0406008 | 4 | 630.5478 | 2.572E+09 | 2.622E+09 |
| MDFQHRPGGKTGSGGVASSSESNR           | Q62203 | 0          | n +42.03 Da,n +34.06 Da, | 985.435219  | 3 | 840.3943 | 348011008 | 345385984 |
| SEVEVKKIFR                         | O35490 | 0.04724409 | n +28.03 Da,K +28.03 Da, | 989.9661312 | 4 | 330.4576 | 1.386E+09 | 884456000 |
| LTNEGLEKSPPEIKR                    | Q99J99 | 0          | n +28.03 Da,K +28.03 Da, | 993.3724527 | 4 | 452.2499 | 484900000 | 422392000 |
| PLAKDLLHPSPEEIKR                   | Q6ZWU9 | 0          | n +14.02 Da,K +28.03 Da, | 998.6530711 | 3 | 643.6968 | 815456000 | 598937984 |
| TKFVHDNYVIR                        | Q8C196 | 0          | n +34.06 Da,K +34.06 Da, | 999.7410504 | 2 | 724.4054 | 868889024 | 852838976 |
| PAPLQHQVDIYQKR                     | P40142 | 0          | n +14.02 Da,K +28.03 Da, | 1003.092915 | 3 | 578.9923 | 449612000 | 365777984 |
| MDFQHRPGGKTGSGGVASSSESNR           | Q62203 | 0          | n +42.03 Da,n +34.06 Da, | 1005.572513 | 3 | 632.0527 | 1.609E+09 | 2.836E+09 |
| PKNFGIGQDIQPKR                     | P12970 | 0          | n +14.02 Da,K +28.03 Da, | 1005.783799 | 3 | 554.3032 | 4.09E+09  | 4.151E+09 |
| SSPPEGKLETKAGHPPAVKAGGMR           | Q91XC8 | 0          | n +42.03 Da,K +34.06 Da, | 1006.505106 | 3 | 843.4599 | 341900000 | 214171008 |
| SSPPEGKLETKAGHPPAVKAGGMR           | Q91XC8 | 0          | n +42.03 Da,K +28.03 Da, | 1006.648743 | 4 | 632.8458 | 1.227E+10 | 8.686E+09 |
| SSPPEGKLETKAGHPPAVKAGGMR           | Q91XC8 | 0          | n +42.03 Da,K +28.03 Da, | 1009.136425 | 5 | 506.4791 | 1.708E+09 | 1.049E+09 |
| TFFSETGAGKHVPR                     | P05213 | 0.00269687 | n +28.03 Da,             | 1016.344229 | 3 | 398.2169 | 678062976 | 196716992 |
| LTNEGLEKSPPEIKR                    | Q99J99 | 0          | n +34.06 Da,K +34.06 Da, | 1018.155033 | 4 | 457.5104 | 251556992 | 325281984 |
| MKHYEVEIR                          | Q9CY27 | 0.00111732 | n +42.03 Da,K +28.03 Da, | 1020.135972 | 2 | 637.832  | 1.052E+09 | 736579008 |
| GDVEKGKKIFVQK                      | P62897 | 0          | n +42.03 Da,K +28.03 Da, | 1020.176452 | 4 | 402.9895 | 427679008 | 378708992 |
| PKNFGIGQDIQPKR                     | P12970 | 0          | n +14.02 Da,K +28.03 Da, | 1020.370429 | 4 | 417.7458 | 1.327E+10 | 1.205E+10 |
| NTKFVHDNYVIR                       | Q8C196 | 0          | n +34.06 Da,K +34.06 Da, | 1020.374203 | 3 | 522.2842 | 54683500  | 44895700  |
| TFFSETGAGKHVPR                     | P05213 | 0          | n +34.06 Da,             | 1023.062864 | 3 | 530.6191 | 1.13E+09  | 953716992 |

|                       |        |            |                          |             |   |          |           |           |
|-----------------------|--------|------------|--------------------------|-------------|---|----------|-----------|-----------|
| GDVEKGKKIFVQK         | P62897 | 0          | n +42.03 Da,K +34.06 Da, | 1024.021419 | 4 | 413.532  | 328625984 | 1.72E+09  |
| TKEDPNLVPSISNKR       | P19536 | 0.00111732 | n +34.06 Da,K +34.06 Da, | 1024.078441 | 4 | 446.2583 | 1.412E+09 | 1.389E+09 |
| PLAKDLLHPSPEEEKR      | Q6ZUW9 | 0          | n +17.03 Da,K +34.06 Da, | 1026.510586 | 4 | 482.2709 | 342020000 | 239359008 |
| SSEAPPLVNEDVKR        | Q91YQ5 | 0.00111732 | n +34.06 Da,K +34.06 Da, | 1027.159247 | 3 | 536.9842 | 973515008 | 615216000 |
| TKEDPNLVPSISNKR       | P19536 | 0.03354488 | n +28.03 Da,K +28.03 Da, | 1027.514411 | 3 | 594.6755 | 253376000 | 215174000 |
| PWPVPQGKRPLR          | Q01405 | 0.00520562 | n +14.02 Da,K +28.03 Da, | 1029.243936 | 4 | 368.9767 | 637249024 | 558408000 |
| TFFSETGAGKHVPR        | P05213 | 0          | n +34.06 Da,             | 1030.702877 | 4 | 398.2166 | 1.546E+09 | 1.168E+09 |
| GHSEFLKAASNLR         | P27773 | 0          | n +28.03 Da,K +28.03 Da, | 1031.021375 | 4 | 495.2855 | 368356000 | 331076992 |
| TIRPASIFTKR           | P52825 | 0.0212766  | n +34.06 Da,             | 1033.570962 | 4 | 337.2137 | 68515200  | 79246600  |
| IRDALFQR              | Q8BHN3 | 0.04351687 | n +34.06 Da,             | 1035.277098 | 3 | 349.5421 | 109472000 | 77006600  |
| VKVGVNGFGR            | P16858 | 0          | n +28.03 Da,K +28.03 Da, | 1035.872014 | 3 | 363.557  | 260750000 | 203808000 |
| GLLAKPTHGDIIR         | P29758 | 0.00111732 | n +34.06 Da,K +34.06 Da, | 1036.161825 | 4 | 364.9771 | 27933300  | 22512300  |
| SKDSEGSWFR            | O55125 | 0          | n +28.03 Da,K +28.03 Da, | 1038.36796  | 3 | 418.8761 | 1.788E+10 | 1.563E+10 |
| SKDSEGSWFR            | O55125 | 0          | n +28.03 Da,K +28.03 Da, | 1039.113145 | 2 | 627.8095 | 7.498E+09 | 7.073E+09 |
| TFFSETGAGKHVPR        | P05213 | 0          | n +34.06 Da,             | 1042.286491 | 4 | 400.4802 | 62116200  | 521088000 |
| SQVTLGDKVKVER         | Q9DCW4 | 0          | n +28.03 Da,K +28.03 Da, | 1043.324086 | 3 | 557.9938 | 220644000 | 163988000 |
| GKPVLYHFDGR           | P30115 | 0          | n +28.03 Da,K +28.03 Da, | 1046.38717  | 4 | 336.941  | 857686976 | 741641984 |
| SKDSEGSWFR            | O55125 | 0.00950951 | n +34.06 Da,K +34.06 Da, | 1048.693599 | 2 | 632.3332 | 101072000 | 984475008 |
| AQPGKILKEQKYDR        | Q8VBW6 | 0.01407084 | n +42.03 Da,K +34.06 Da, | 1049.831456 | 4 | 450.7658 | 326948992 | 225586000 |
| SKDSEGSWFR            | O55125 | 0          | n +28.03 Da,K +28.03 Da, | 1052.063538 | 3 | 418.8761 | 2.773E+09 | 15117400  |
| SKDSEGSWFR            | O55125 | 0          | n +34.06 Da,K +34.06 Da, | 1054.680041 | 3 | 421.8913 | 814728000 | 7.524E+09 |
| NTKFVHDNYVIR          | Q8C196 | 0.04724409 | n +34.06 Da,K +34.06 Da, | 1056.512227 | 4 | 391.2178 | 614289984 | 424432000 |
| PDIKYPLR              | Q9DCN2 | 0.03089505 | n +14.02 Da,K +28.03 Da, | 1057.063625 | 3 | 345.5188 | 339115008 | 637376000 |
| TVKKIAIFGATGR         | Q923D2 | 0.0297619  | n +28.03 Da,K +28.03 Da, | 1057.138226 | 3 | 358.2051 | 1.005E+09 | 1.016E+09 |
| PNDVSHGYTVKPGIR       | P34914 | 0          | n +14.02 Da,K +28.03 Da, | 1061.73513  | 4 | 445.9978 | 237048992 | 113775000 |
| NTKFVHDNYVIR          | Q8C196 | 0          | n +28.03 Da,K +28.03 Da, | 1063.039037 | 3 | 521.2878 | 1.023E+09 | 259850000 |
| FVHDNYVIR             | Q8C196 | 0          | n +28.03 Da,             | 1063.38014  | 3 | 397.5489 | 609790976 | 564307008 |
| TFFSETGAGKHVPR        | P05213 | 0.00269687 | n +28.03 Da,             | 1066.958477 | 4 | 397.4671 | 56635700  | 125001000 |
| GKPVLYHFDGR           | P30115 | 0.00166759 | n +34.06 Da,K +34.06 Da, | 1067.636832 | 3 | 448.9191 | 425079008 | 477307008 |
| SSEAPPLVNEDVKR        | Q91YQ5 | 0.00111732 | n +34.06 Da,K +34.06 Da, | 1067.926695 | 3 | 534.9745 | 181204000 | 75008600  |
| TTQLKAKDILYR          | Q91VA0 | 0.01453488 | n +34.06 Da,K +34.06 Da, | 1068.98376  | 3 | 511.9838 | 114644000 | 117759000 |
| VKVGVNGFGR            | P16858 | 0.00217391 | n +34.06 Da,K +34.06 Da, | 1072.923589 | 3 | 366.5732 | 1.607E+09 | 1.119E+10 |
| VKVGVNGFGR            | P16858 | 0          | n +28.03 Da,K +28.03 Da, | 1074.431591 | 3 | 363.5574 | 7.972E+09 | 77127600  |
| GHSEFLKAASNLR         | P27773 | 0.00217391 | n +34.06 Da,K +34.06 Da, | 1079.138689 | 3 | 495.9435 | 511070016 | 484740992 |
| GHSEFLKAASNLR         | P27773 | 0.00373134 | n +28.03 Da,K +28.03 Da, | 1081.679439 | 4 | 372.2091 | 748982976 | 737457984 |
| TEPLPAIEKTGKVR        | Q9CXN7 | 0.00111732 | n +34.06 Da,K +34.06 Da, | 1081.737051 | 4 | 406.5013 | 2.029E+09 | 1.716E+09 |
| PNDVSHGYTVKPGIR       | P34914 | 0          | n +14.02 Da,K +28.03 Da, | 1082.480816 | 4 | 445.2432 | 5196440   | 289224000 |
| KTNVSGGAIALGHPLGGSGSR | Q8BWT1 | 0          | n +34.06 Da,K +34.06 Da, | 1083.858224 | 4 | 498.7799 | 353670016 | 290232992 |
| FVHDNYVIR             | Q8C196 | 0          | n +28.03 Da,             | 1085.410647 | 3 | 396.5536 | 118120000 | 69045104  |
| TTHTLVEKINYTGR        | P49429 | 0          | n +28.03 Da,K +28.03 Da, | 1087.070146 | 3 | 563.6496 | 680419968 | 608150016 |

|                          |        |            |                                      |             |   |          |           |           |
|--------------------------|--------|------------|--------------------------------------|-------------|---|----------|-----------|-----------|
| PAYFQRPENALKR            | P23116 | 0          | n +14.02 Da,K +28.03 Da,             | 1087.764894 | 4 | 406.4628 | 265571008 | 266180000 |
| PNDVSHGYVTVKPGIR         | P34914 | 0          | n +17.03 Da,K +34.06 Da,             | 1088.327109 | 3 | 596.3397 | 382942016 | 699702016 |
| PNDVSHGYVTVKPGIR         | P34914 | 0          | n +17.03 Da,K +34.06 Da,             | 1089.167284 | 4 | 447.5059 | 2.34E+09  | 4.199E+09 |
| RLLEFQNDR                | P29391 | 0.00269687 | n +34.06 Da,                         | 1089.656698 | 3 | 406.891  | 2.967E+09 | 3.564E+09 |
| PPLGKKQMQLFRR            | Q8CHQ9 | 0          | n +17.03 Da,K +34.06 Da,             | 1093.73595  | 4 | 381.9979 | 708139008 | 2.497E+09 |
| SQAEFDKAAEEVKR           | P31786 | 0          | n +42.03 Da,K +28.03 Da,             | 1095.2865   | 3 | 569.2963 | 206176992 | 206148992 |
| PPLGKKQMQLFRR            | Q8CHQ9 | 0          | n +14.02 Da,K +28.03 Da,             | 1099.261456 | 3 | 504.974  | 335152992 | 239112000 |
| PAYFQRPENALKR            | P23116 | 0          | n +17.03 Da,K +34.06 Da,             | 1103.430969 | 4 | 410.2405 | 207190000 | 477825984 |
| THTLVEKINYTGR            | P49429 | 0          | n +34.06 Da,K +34.06 Da,             | 1103.854256 | 4 | 400.7412 | 1.098E+09 | 446179008 |
| GWGVMVSHR                | P17182 | 0          | n +34.06 Da,                         | 1104.14545  | 3 | 352.8517 | 1.58E+09  | 1.643E+09 |
| TVKKIAIFGATGR            | Q923D2 | 0          | n +28.03 Da,K +28.03 Da,             | 1105.573391 | 2 | 723.4636 | 936323008 | 1.363E+09 |
| TVKKIAIFGATGR            | Q923D2 | 0          | n +28.03 Da,K +28.03 Da,             | 1106.12154  | 3 | 482.645  | 503344000 | 1.891E+09 |
| PKNFGIGQDIQPKR           | P12970 | 0.00422833 | n +14.02 Da,K +28.03 Da,             | 1106.512303 | 4 | 417.7469 | 1.073E+09 | 412590016 |
| PNIVGNEHYDVAR            | P56480 | 0          | n +14.02 Da,                         | 1106.816479 | 3 | 499.9195 | 1.921E+09 | 1.24E+09  |
| PAYFQRPENALKR            | P23116 | 0.02433318 | n +17.03 Da,K +34.06 Da,             | 1107.66035  | 3 | 544.6388 | 1.222E+09 | 905889984 |
| HQGVMMVGMGQKDSYVGDEAQSQR | P60710 | 0          | n +42.03 Da,K +28.03 Da,             | 1108.640186 | 4 | 652.0681 | 1.05E+09  | 843152000 |
| TVKKIAIFGATGR            | Q923D2 | 0.00217391 | n +34.06 Da,K +34.06 Da,             | 1109.131585 | 2 | 731.0041 | 34206600  | 351280992 |
| TVKKIAIFGATGR            | Q923D2 | 0.0297619  | n +28.03 Da,K +28.03 Da,             | 1109.137259 | 4 | 362.236  | 7.449E+09 | 7.614E+09 |
| PKPHSEAGTAFIQTQQLH       | P52480 | 0          | n +17.03 Da,K +34.06 Da,             | 1118.510192 | 3 | 680.0368 | 215684000 | 783641024 |
| SQAEFDKAAEEVKR           | P31786 | 0          | n +28.03 Da,K +28.03 Da,             | 1122.84424  | 4 | 423.7294 | 306076000 | 377513984 |
| LTPHTYLTKQDVER           | Q9DBG6 | 0          | n +28.03 Da,K +28.03 Da,             | 1123.647061 | 4 | 437.7387 | 264186000 | 2.578E+09 |
| SQAEFDKAAEEVKR           | P31786 | 0          | n +34.06 Da,K +34.06 Da,             | 1124.290383 | 3 | 564.6365 | 420027008 | 375427008 |
| TVKKIAIFGATGR            | Q923D2 | 0.0297619  | n +28.03 Da,K +28.03 Da,             | 1126.240439 | 3 | 361.2236 | 112481000 | 345099008 |
| VQQPVHNLMLGGTKEQR        | O88587 | 0          | n +28.03 Da,K +28.03 Da,             | 1128.165632 | 3 | 664.3669 | 147507008 | 188128000 |
| MESPAASPPASLPQTKGKSKR    | O09110 | 0          | n +42.03 Da,n +34.06 Da,K +34.06 Da, | 1129.326749 | 4 | 574.3191 | 480676000 | 351956992 |
| AGKPVLYHFDGR             | P30115 | 0.00662589 | n +34.06 Da,K +34.06 Da,             | 1132.346669 | 4 | 356.9621 | 54758600  | 403833984 |
| AGKPVLYHFDGR             | P30115 | 0.00217391 | n +28.03 Da,K +28.03 Da,             | 1132.810367 | 4 | 354.7004 | 459083008 | 353052000 |
| ELIGEAAAGKLHTGR          | Q91YI0 | 0          | n +28.03 Da,K +28.03 Da,             | 1135.902433 | 4 | 377.7199 | 171656000 | 70564096  |
| TKFVHDNYVIR              | Q8C196 | 0          | n +28.03 Da,K +28.03 Da,             | 1138.069718 | 3 | 483.2737 | 813932032 | 171799008 |
| SEPEIPKGIR               | Q9WTP6 | 0          | n +34.06 Da,K +34.06 Da,             | 1140.59238  | 3 | 394.568  | 4.25E+09  | 3.656E+09 |
| RMPEFYNR                 | P16460 | 0.02645012 | n +28.03 Da,                         | 1144.28089  | 3 | 380.8591 | 1.616E+09 | 499460992 |
| IEDIEVAPPKAHEVR          | P00329 | 0          | n +14.02 Da,n +28.03 Da,             | 1145.188252 | 4 | 436.996  | 753411008 | 787030016 |
| MQSNKAFNLEKQNHTPR        | Q99K48 | 0          | n +42.03 Da,K +28.03 Da,             | 1145.242618 | 4 | 536.0285 | 199232992 | 261230000 |
| MEGHDPKEPEQLR            | B2RXM2 | 0          | n +42.03 Da,K +34.06 Da,             | 1146.740731 | 3 | 545.9315 | 551550976 | 490062016 |
| LKGGMLFPKESPSR           | P12265 | 0          | n +34.06 Da,K +34.06 Da,             | 1148.044688 | 4 | 408.4897 | 729180032 | 816972992 |
| GVAVLKVGGTSDVEVNEKKDR    | P63038 | 0          | n +34.06 Da,K +34.06 Da,             | 1148.096808 | 5 | 467.4924 | 69969904  | 116041000 |
| PSKTNVSGGAIALGHPLGGSGSR  | Q8BWT1 | 0          | n +17.03 Da,K +34.06 Da,             | 1148.301673 | 3 | 723.4051 | 1.335E+09 | 4.641E+09 |
| PSKTNVSGGAIALGHPLGGSGSR  | Q8BWT1 | 0          | n +17.03 Da,K +34.06 Da,             | 1149.569341 | 4 | 542.8058 | 1.218E+10 | 4.302E+10 |
| LKGGMLFPKESPSR           | P12265 | 0          | n +34.06 Da,K +34.06 Da,             | 1150.042526 | 4 | 412.259  | 73249504  | 424120000 |
| LTPHTYLTKQDVER           | Q9DBG6 | 0          | n +34.06 Da,K +34.06 Da,             | 1153.898716 | 3 | 589.3415 | 1.923E+09 | 1.688E+10 |

|                         |        |            |                          |             |   |          |           |           |
|-------------------------|--------|------------|--------------------------|-------------|---|----------|-----------|-----------|
| LTPTHYLTKQDVER          | Q9DBG6 | 0          | n +34.06 Da,K +34.06 Da, | 1155.371254 | 4 | 443.0115 | 3.461E+10 | 892710976 |
| LTPTHYLTKQDVER          | Q9DBG6 | 0          | n +28.03 Da,K +28.03 Da, | 1158.236611 | 2 | 878.9839 | 803427968 | 579987008 |
| SKSLKKLVEESR            | Q01730 | 0.04424779 | n +42.03 Da,K +34.06 Da, | 1159.441214 | 3 | 510.6478 | 2.042E+09 | 2.273E+09 |
| PSKTNVSGGAIALGHPLGGSGSR | Q8BWT1 | 0          | n +17.03 Da,K +34.06 Da, | 1161.554273 | 3 | 721.3946 | 641318976 | 428803008 |
| SKSLKKLVEESR            | Q01730 | 0          | n +42.03 Da,K +34.06 Da, | 1163.037528 | 2 | 765.4673 | 1.069E+09 | 970131968 |
| PKNYTDNELEKITR          | P26443 | 0          | n +17.03 Da,K +34.06 Da, | 1170.167807 | 3 | 597.659  | 134682000 | 98251696  |
| PFVFRPER                | P00186 | 0.0297619  | n +14.02 Da,             | 1171.067512 | 3 | 354.5349 | 6.095E+09 | 3.469E+09 |
| LTPTHYLTKQDVER          | Q9DBG6 | 0          | n +28.03 Da,K +28.03 Da, | 1171.512601 | 3 | 584.3171 | 1.314E+09 | 2.126E+10 |
| PKNYTDNELEKITR          | P26443 | 0          | n +17.03 Da,K +34.06 Da, | 1171.742669 | 3 | 601.6812 | 1.147E+09 | 3.896E+09 |
| HTEEDFIITKTGR           | Q03311 | 0          | n +28.03 Da,K +28.03 Da, | 1172.06362  | 3 | 568.637  | 1.002E+09 | 1.219E+09 |
| PKNYTDNELEKITR          | P26443 | 0          | n +17.03 Da,K +34.06 Da, | 1172.392373 | 4 | 451.5126 | 1.147E+09 | 3.964E+09 |
| LTPTHYLTKQDVER          | Q9DBG6 | 0          | n +34.06 Da,K +34.06 Da, | 1172.887146 | 3 | 588.3417 | 120296000 | 396352000 |
| LTPTHYLTKQDVER          | Q9DBG6 | 0          | n +28.03 Da,K +28.03 Da, | 1175.529091 | 4 | 438.4896 | 895288000 | 1.517E+10 |
| SHTILLVQPTKRPEGR        | P84089 | 0          | n +42.03 Da,K +28.03 Da, | 1178.101271 | 3 | 476.2816 | 225995008 | 198028992 |
| LTPTHYLTKQDVER          | Q9DBG6 | 0          | n +34.06 Da,K +34.06 Da, | 1178.253216 | 4 | 442.2593 | 364367008 | 1.243E+09 |
| SRYEDSNLGTSHLLR         | Q9DB77 | 0.04048043 | n +28.03 Da,             | 1179.565154 | 4 | 473.2417 | 191576000 | 184476000 |
| SAAAEASAALKVRPER        | Q8BGT5 | 0          | n +34.06 Da,K +34.06 Da, | 1180.8592   | 4 | 421.4936 | 958262016 | 1.734E+09 |
| KEYWQNL                 | O35490 | 0.03851321 | n +28.03 Da,K +28.03 Da, | 1182.414747 | 3 | 398.2203 | 301840000 | 221244992 |
| PKNYTDNELEKITR          | P26443 | 0          | n +14.02 Da,K +28.03 Da, | 1182.886054 | 4 | 448.4959 | 256695008 | 117810000 |
| SAAAEASAALKVRPER        | Q8BGT5 | 0.01726619 | n +34.06 Da,K +34.06 Da, | 1182.966421 | 3 | 561.6559 | 72830800  | 160547008 |
| TLGDIVYKR               | P12710 | 0.00217391 | n +28.03 Da,K +28.03 Da, | 1186.897977 | 3 | 374.2285 | 771473984 | 673940992 |
| SLVLKFHTVR              | P02762 | 0          | n +28.03 Da,K +28.03 Da, | 1192.675357 | 4 | 314.702  | 235092000 | 253943008 |
| SHTILLVQPTKRPEGR        | P84089 | 0          | n +42.03 Da,K +28.03 Da, | 1210.411455 | 4 | 476.2787 | 1.708E+10 | 1.659E+10 |
| SHTILLVQPTKRPEGR        | P84089 | 0          | n +42.03 Da,K +34.06 Da, | 1210.594232 | 2 | 951.5478 | 173442000 | 161752992 |
| SHTILLVQPTKRPEGR        | P84089 | 0          | n +42.03 Da,K +34.06 Da, | 1211.927538 | 3 | 634.7015 | 1.85E+10  | 1.765E+10 |
| MEETEKKVATQEGR          | Q9QXZ6 | 0          | n +42.03 Da,K +28.03 Da, | 1214.565728 | 3 | 578.6288 | 167716000 | 114018000 |
| DVSHGYVTVKPGIR          | P34914 | 0          | n +34.06 Da,             | 1216.465463 | 3 | 528.6349 | 707187008 | 541665024 |
| RVVFDDTYDR              | P16015 | 0          | n +28.03 Da,             | 1217.590952 | 3 | 438.5544 | 2.624E+09 | 2.435E+09 |
| DVSHGYVTVKPGIR          | P34914 | 0          | n +34.06 Da,             | 1218.209057 | 4 | 398.9899 | 110994000 | 539606976 |
| VLSGEDKSNIAAWGK         | P01942 | 0          | n +34.06 Da,K +34.06 Da, | 1227.348395 | 4 | 459.7924 | 1.559E+09 | 5.63E+09  |
| PVQKLFVDKIR             | P97450 | 0          | n +17.03 Da,K +34.06 Da, | 1229.344857 | 4 | 356.9958 | 493196992 | 1.441E+09 |
| PILKQLVSSVNSKR          | Q9JM96 | 0          | n +14.02 Da,K +28.03 Da, | 1232.358088 | 4 | 432.2699 | 802833984 | 505340000 |
| SSAAAEASAALKVRPER       | Q8BGT5 | 0.00759494 | n +28.03 Da,K +28.03 Da, | 1241.299397 | 3 | 590.6684 | 1.893E+09 | 1.696E+09 |
| SSAAAEASAALKVRPER       | Q8BGT5 | 0.02345216 | n +34.06 Da,K +34.06 Da, | 1244.28059  | 4 | 443.2525 | 1.663E+09 | 1.825E+09 |
| IPTSGAEIGGAFGGKEKHTGGGR | Q9DBF1 | 0          | n +34.06 Da,K +34.06 Da, | 1244.615483 | 4 | 528.7762 | 807153024 | 755062976 |
| REATQAVLDKPELSSDASTR    | P50544 | 0          | n +28.03 Da,             | 1246.301996 | 4 | 583.5587 | 773430016 | 725331008 |
| PKVTQPEVDTPGLR          | Q63880 | 0          | n +17.03 Da,K +34.06 Da, | 1246.325145 | 3 | 528.9768 | 712011008 | 2.699E+09 |
| VKIVTVKTQAYPDQKPGTSGLR  | Q9D0F9 | 0          | n +34.06 Da,K +34.06 Da, | 1251.231933 | 2 | 625.373  | 9.901E+09 | 1.063E+10 |
| KTLKGLNSDSVTEETLR       | Q8C196 | 0          | n +34.06 Da,K +34.06 Da, | 1255.494184 | 3 | 664.0666 | 209506000 | 1.551E+09 |
| TEHKAVTSEIAVLQSR        | Q91YQ5 | 0          | n +34.06 Da,K +34.06 Da, | 1257.008483 | 3 | 611.0049 | 231907008 | 193416992 |

|                          |        |            |                          |             |   |          |           |           |
|--------------------------|--------|------------|--------------------------|-------------|---|----------|-----------|-----------|
| PTKVVAVDCGIKNNVIR        | Q8C196 | 0          | n +17.03 Da,K +34.06 Da, | 1257.65266  | 3 | 655.7363 | 460070016 | 1.42E+09  |
| PTKVVAVDCGIKNNVIR        | Q8C196 | 0          | n +17.03 Da,K +34.06 Da, | 1260.215864 | 3 | 651.7147 | 138563008 | 83836096  |
| TVDSKSLFHYP              | Q8C196 | 0.01321586 | n +28.03 Da,K +28.03 Da, | 1261.149798 | 4 | 352.9451 | 1.443E+09 | 501831008 |
| TVDSKSLFHYP              | Q8C196 | 0          | n +28.03 Da,K +28.03 Da, | 1263.068614 | 3 | 470.2577 | 689470016 | 234156000 |
| VKIVTVKTQAYPDQKPGTSGLR   | Q9D0F9 | 0          | n +34.06 Da,K +34.06 Da, | 1264.389529 | 5 | 504.7222 | 105709000 | 445615008 |
| PKVTQPEVDTPGLR           | Q63880 | 0          | n +14.02 Da,K +28.03 Da, | 1264.943233 | 3 | 526.9671 | 449337984 | 289798016 |
| KTLKGLNSDSVTEETLR        | Q8C196 | 0          | n +34.06 Da,K +34.06 Da, | 1266.171282 | 3 | 659.0403 | 1.642E+09 | 1.257E+09 |
| TVDSKSLFHYP              | Q8C196 | 0.011846   | n +34.06 Da,K +34.06 Da, | 1266.49741  | 4 | 352.9451 | 618278016 | 261858000 |
| PVPRVHPRQRSGR            | J3QM90 | 0.04724409 | n +17.03 Da,             | 1266.556627 | 3 | 520.3039 | 2.163E+09 | 2.145E+09 |
| TEHKAVTSEIAVLQSR         | Q91YQ5 | 0          | n +34.06 Da,K +34.06 Da, | 1268.99725  | 3 | 609.0105 | 244428992 | 180962000 |
| TKVVAVDCGIKNNVIR         | Q8C196 | 0          | n +28.03 Da,K +28.03 Da, | 1272.994309 | 4 | 468.279  | 216263008 | 172744000 |
| STSAVPQITTHYTVHPR        | Q921G7 | 0          | n +34.06 Da,             | 1275.101419 | 4 | 481.5078 | 740355968 | 674126976 |
| VLSGEDKSNIAAWGK          | P01942 | 0          | n +28.03 Da,K +28.03 Da, | 1277.764885 | 4 | 451.4962 | 464779008 | 777054976 |
| LYFHIGETEK               | Q8R1V4 | 0          | n +34.06 Da,             | 1279.892957 | 4 | 365.2149 | 701457984 | 3.328E+09 |
| DKLHVDPENFR              | P02088 | 0.04266667 | n +28.03 Da,K +28.03 Da, | 1281.409923 | 3 | 475.9214 | 615582976 | 265336992 |
| LYFHIGETEK               | Q8R1V4 | 0          | n +34.06 Da,             | 1284.728179 | 3 | 483.6014 | 394932000 | 281639008 |
| TSAVPQITTHYTVHPR         | Q921G7 | 0          | n +34.06 Da,             | 1285.589266 | 4 | 459.7493 | 281528000 | 541875968 |
| TKVVAVDCGIKNNVIR         | Q8C196 | 0          | n +28.03 Da,K +28.03 Da, | 1286.853834 | 4 | 467.5308 | 67274704  | 71112000  |
| SSTSAVPQITTHYTVHPR       | Q921G7 | 0          | n +34.06 Da,             | 1287.346414 | 4 | 503.2657 | 9.008E+09 | 7.754E+09 |
| LYFHIGETEK               | Q8R1V4 | 0          | n +28.03 Da,             | 1290.363156 | 4 | 362.9529 | 59537700  | 34198000  |
| SSTSAVPQITTHYTVHPR       | Q921G7 | 0          | n +28.03 Da,             | 1291.461496 | 3 | 670.6845 | 4.509E+09 | 3.552E+09 |
| GTSRDPYSHALVAGIDR        | P61358 | 0          | n +34.06 Da,             | 1292.489482 | 3 | 617.008  | 239152992 | 129670000 |
| AKIAKTHEDIEAQIR          | Q99NB9 | 0.00321888 | n +42.03 Da,K +34.06 Da, | 1294.311132 | 3 | 607.6791 | 1.164E+10 | 1.098E+10 |
| SSTSAVPQITTHYTVHPR       | Q921G7 | 0          | n +34.06 Da,             | 1295.092986 | 2 | 503.2656 | 841137024 | 691105024 |
| MLLDLSEEHKEH             | Q8BXC6 | 0          | n +28.03 Da,             | 1300.179636 | 3 | 512.9292 | 470270016 | 423948992 |
| GTSRDPYSHALVAGIDR        | P61358 | 0          | n +34.06 Da,             | 1303.188006 | 3 | 610.9769 | 228396992 | 324964992 |
| MLLDLSEEHKEH             | Q8BXC6 | 0          | n +28.03 Da,             | 1303.436658 | 4 | 384.9486 | 317534016 | 238379008 |
| VKIVTVKTQAYPDQKPGTSGLR   | Q9D0F9 | 0          | n +34.06 Da,K +34.06 Da, | 1303.732758 | 4 | 630.6507 | 43791000  | 216216992 |
| TISQGAIEKVKDATR          | Q8C196 | 0          | n +34.06 Da,K +34.06 Da, | 1304.744881 | 3 | 567.6679 | 1.376E+10 | 1.469E+10 |
| SDSRDPASDQMKQWKEQR       | P24270 | 0          | n +42.03 Da,K +28.03 Da, | 1312.806304 | 3 | 764.0337 | 3.962E+09 | 2.491E+09 |
| TISQGAIEKVKDATR          | Q8C196 | 0          | n +28.03 Da,K +28.03 Da, | 1313.114236 | 4 | 426.003  | 1.413E+10 | 1.131E+10 |
| PQKVNIIHGGAVSLGHPIGMSGAR | Q8QZT1 | 0          | n +17.03 Da,K +34.06 Da, | 1314.443197 | 4 | 582.07   | 536320992 | 500323008 |
| GPLAYFDKADKNR            | Q9QZW0 | 0.00520562 | n +34.06 Da,K +34.06 Da, | 1315.80619  | 4 | 395.4711 | 82255400  | 77825296  |
| GVQVSPSGEKITHTGQVYDEKDYR | P52503 | 0          | n +34.06 Da,K +34.06 Da, | 1316.180528 | 4 | 695.1077 | 1.391E+10 | 1.502E+10 |
| SDSRDPASDQMKQWKEQR       | P24270 | 0          | n +42.03 Da,K +28.03 Da, | 1317.401703 | 4 | 573.2773 | 1.701E+10 | 1.156E+10 |
| GVQVSPSGEKITHTGQVYDEKDYR | P52503 | 0          | n +28.03 Da,K +28.03 Da, | 1317.574102 | 5 | 556.2887 | 2.863E+10 | 2.966E+10 |
| PQKVNIIHGGAVSLGHPIGMSGAR | Q8QZT1 | 0          | n +17.03 Da,K +34.06 Da, | 1317.579894 | 5 | 465.8581 | 921660032 | 758758976 |
| GVQVSPSGEKITHTGQVYDEKDYR | P52503 | 0          | n +28.03 Da,K +28.03 Da, | 1319.453927 | 3 | 926.4749 | 1.269E+09 | 1.207E+09 |
| GVQVSPSGEKITHTGQVYDEKDYR | P52503 | 0          | n +34.06 Da,K +34.06 Da, | 1319.64947  | 4 | 698.878  | 437566016 | 3.082E+09 |
| SDSRDPASDQMKQWKEQR       | P24270 | 0          | n +42.03 Da,K +34.06 Da, | 1319.697455 | 4 | 575.5391 | 53714700  | 454448000 |



|                           |        |            |                          |             |   |          |           |           |
|---------------------------|--------|------------|--------------------------|-------------|---|----------|-----------|-----------|
| PAAFKHLVQESLR             | Q8VC12 | 0          | n +14.02 Da,K +28.03 Da, | 1321.397559 | 3 | 513.2994 | 1.126E+09 | 605004032 |
| PQKVNIHGGAVSLGHPIGMSGAR   | Q8QZT1 | 0          | n +17.03 Da,K +34.06 Da, | 1322.398446 | 4 | 583.5774 | 39942300  | 150288992 |
| HPVLLTEAPLNPKANR          | P60710 | 0          | n +34.06 Da,K +34.06 Da, | 1323.853845 | 3 | 609.3601 | 649388032 | 391108000 |
| HPVVLTKFVEGAR             | Q8C196 | 0          | n +34.06 Da,K +34.06 Da, | 1324.056206 | 3 | 503.6368 | 439492000 | 268804000 |
| SDPAPLQHQVDIYQKR          | P40142 | 0          | n +34.06 Da,K +34.06 Da, | 1325.819596 | 4 | 491.532  | 734648000 | 1.02E+09  |
| SGPGLHADLLR               | Q8BWF0 | 0          | n +28.03 Da,             | 1326.561918 | 3 | 407.5633 | 373980000 | 325099008 |
| MDERRTIKLECYR             | Q8K012 | 0.02164706 | n +14.02 Da,K +28.03 Da, | 1336.202595 | 3 | 633.6571 | 361787008 | 325190016 |
| GVQVSPSGEKITHTGQVYDEKDYR  | P52503 | 0          | n +34.06 Da,K +34.06 Da, | 1336.297902 | 5 | 559.3037 | 99604704  | 716030976 |
| RVISLSEHSIIGR             | P08228 | 0.00111732 | n +28.03 Da,             | 1336.805175 | 3 | 517.9706 | 551449024 | 650108992 |
| ASGADSKGDDLSTAILKQKNRPNR  | Q01853 | 0          | n +42.03 Da,K +28.03 Da, | 1339.138476 | 5 | 534.4932 | 1.814E+09 | 1.427E+09 |
| RVISLSEHSIIGR             | P08228 | 0          | n +34.06 Da,             | 1340.916124 | 4 | 388.7297 | 548174976 | 698902976 |
| ASGADSKGDDLSTAILKQKNRPNR  | Q01853 | 0          | n +42.03 Da,K +34.06 Da, | 1341.930988 | 4 | 667.8645 | 1.837E+09 | 1.335E+09 |
| SDSRDPASDQMKQWKEQR        | P24270 | 0          | n +42.03 Da,K +28.03 Da, | 1342.714362 | 4 | 570.2685 | 54894300  | 266300000 |
| TIEDIEVAPPKAHEVR          | P00329 | 0          | n +34.06 Da,K +34.06 Da, | 1342.989747 | 4 | 467.2658 | 32625500  | 154380000 |
| SSMGSYPKKPMSSYLRL         | P40630 | 0          | n +34.06 Da,K +34.06 Da, | 1344.879261 | 4 | 476.5012 | 293160992 | 241936000 |
| GWLHTGDIGR                | Q8JZRO | 0          | n +34.06 Da,             | 1345.316222 | 3 | 380.5366 | 220219008 | 203100000 |
| PVIQNPEYKGEWKPR           | P14211 | 0          | n +14.02 Da,K +28.03 Da, | 1347.746362 | 4 | 476.5244 | 275328000 | 224092000 |
| SLHGAAVTTVEIGSTKTR        | G3X982 | 0          | n +28.03 Da,K +28.03 Da, | 1349.25326  | 4 | 486.0248 | 561737024 | 334536992 |
| PVIQNPEYKGEWKPR           | P14211 | 0          | n +14.02 Da,K +28.03 Da, | 1352.604518 | 3 | 637.6877 | 176920992 | 150272000 |
| VKLDIHTLAH                | Q6PAR5 | 0.00111732 | n +28.03 Da,K +28.03 Da, | 1352.645261 | 4 | 301.437  | 232506000 | 225128992 |
| KATIPAALQAQESTEGPGTGQDRPR | Q9DBG1 | 0          | n +34.06 Da,K +34.06 Da, | 1353.843796 | 4 | 661.8626 | 79516304  | 573078976 |
| GVMVGMGQKDSYVYGDEAQSQR    | P60710 | 0          | n +34.06 Da,K +34.06 Da, | 1355.099113 | 2 | 586.8303 | 674393024 | 599320000 |
| ASGADSKGDDLSTAILKQKNRPNR  | Q01853 | 0          | n +42.03 Da,K +34.06 Da, | 1357.814531 | 5 | 537.5095 | 33009500  | 358616000 |
| KATIPAALQAQESTEGPGTGQDRPR | Q9DBG1 | 0.00712468 | n +34.06 Da,K +34.06 Da, | 1359.103201 | 3 | 879.1314 | 976076992 | 966737984 |
| IFLQDIKKPDR               | P09528 | 0          | n +28.03 Da,K +28.03 Da, | 1359.858276 | 4 | 364.978  | 212214000 | 110182000 |
| LASLLSHSAQELAGSR          | P54869 | 0          | n +34.06 Da,             | 1361.350177 | 3 | 602.3247 | 305814016 | 82678800  |
| TIEDIEVAPPKAHEVR          | P00329 | 0          | n +28.03 Da,K +28.03 Da, | 1366.252558 | 3 | 620.679  | 727713024 | 599625984 |
| PIGPEQVKLEKLR             | P53986 | 0.01361868 | n +14.02 Da,K +28.03 Da, | 1366.341184 | 4 | 395.0066 | 46913900  | 52481300  |
| KATIPAALQAQESTEGPGTGQDRPR | Q9DBG1 | 0          | n +34.06 Da,K +34.06 Da, | 1366.388115 | 4 | 659.6004 | 8.248E+09 | 8.246E+09 |
| SDSRDPASDQMKQWKEQR        | P24270 | 0          | n +42.03 Da,K +28.03 Da, | 1379.448103 | 3 | 764.0338 | 447873984 | 380553984 |
| SSAASSKELLMKLR            | Q9CZR8 | 0          | n +28.03 Da,K +28.03 Da, | 1384.113848 | 4 | 401.9906 | 261812992 | 193360000 |
| ASGADSKGDDLSTAILKQKNRPNR  | Q01853 | 0          | n +42.03 Da,K +34.06 Da, | 1385.534744 | 3 | 890.1495 | 2.526E+09 | 2.295E+09 |
| ASGADSKGDDLSTAILKQKNRPNR  | Q01853 | 0          | n +42.03 Da,K +34.06 Da, | 1391.680544 | 4 | 667.8645 | 9.102E+09 | 6.875E+09 |
| STQSAVSKAGAGAVVPKLSHLPR   | Q9DC70 | 0          | n +28.03 Da,K +28.03 Da, | 1399.400481 | 4 | 587.0957 | 591766016 | 592334016 |
| STQSAVSKAGAGAVVPKLSHLPR   | Q9DC70 | 0          | n +34.06 Da,K +34.06 Da, | 1402.008834 | 5 | 469.8782 | 658108032 | 580748032 |
| ASGADSKGDDLSTAILKQKNRPNR  | Q01853 | 0          | n +42.03 Da,K +28.03 Da, | 1409.278089 | 5 | 534.4941 | 6.573E+09 | 3.963E+09 |
| AHYHDNYGKNDEVEFVR         | P25688 | 0          | n +42.03 Da,K +28.03 Da, | 1416.808511 | 4 | 541.5042 | 7.452E+11 | 6.028E+11 |
| TKFLEEHPGGEEVLR           | P56395 | 0          | n +28.03 Da,K +28.03 Da, | 1418.067685 | 3 | 599.6553 | 650873024 | 552046016 |
| AHYHDNYGKNDEVEFVR         | P25688 | 0          | n +42.03 Da,K +34.06 Da, | 1421.910904 | 2 | 1081.997 | 3.21E+10  | 2.569E+10 |
| AHYHDNYGKNDEVEFVR         | P25688 | 0          | n +42.03 Da,K +28.03 Da, | 1422.385341 | 3 | 721.6671 | 2.896E+11 | 2.309E+11 |

|                        |        |            |                                      |             |   |          |           |           |
|------------------------|--------|------------|--------------------------------------|-------------|---|----------|-----------|-----------|
| HGSIIYHPSLLPR          | Q8K009 | 0          | n +28.03 Da,                         | 1426.501164 | 3 | 506.624  | 803182976 | 347550016 |
| LDLKKELSEPSSTR         | Q8C196 | 0          | n +34.06 Da,K +34.06 Da,             | 1426.524865 | 3 | 562.9916 | 1.043E+10 | 1.05E+10  |
| PKNFGIGQDIQPKR         | P12970 | 0          | n +14.02 Da,K +28.03 Da,             | 1429.115181 | 4 | 417.4864 | 291900000 | 311487008 |
| PAFFEHLR               | Q8CC86 | 0.00902256 | n +14.02 Da,                         | 1430.299034 | 3 | 344.1866 | 1.425E+09 | 1.012E+09 |
| FVQQPVHNLMLMGGTKEQR    | O88587 | 0          | n +34.06 Da,K +34.06 Da,             | 1433.686683 | 3 | 713.3896 | 590019968 | 413884000 |
| FVQQPVHNLMLMGGTKEQR    | O88587 | 0          | n +34.06 Da,K +34.06 Da,             | 1434.068984 | 4 | 535.2943 | 893896000 | 785915008 |
| VGFNVKNVSVKDIR         | P62631 | 0.011846   | n +28.03 Da,K +28.03 Da,             | 1439.288426 | 4 | 415.504  | 223504992 | 297577984 |
| TSVATKKTEQGPSSSEYIFER  | P29758 | 0.00217391 | n +28.03 Da,K +28.03 Da,             | 1447.152414 | 4 | 610.5742 | 3.099E+09 | 3.036E+09 |
| YVAEKISGQKVNEAACDIAR   | O35490 | 0          | n +34.06 Da,K +34.06 Da,             | 1448.679366 | 4 | 577.3097 | 619889024 | 434055008 |
| PANLDLKKELSEPSSTR      | Q8C196 | 0          | n +17.03 Da,K +34.06 Da,             | 1450.517388 | 3 | 656.3875 | 837827968 | 2.591E+09 |
| TSVATKKTEQGPSSSEYIFER  | P29758 | 0          | n +34.06 Da,K +34.06 Da,             | 1453.358021 | 3 | 813.7634 | 657017024 | 520303008 |
| EHPVLLTEAPLNPKANR      | P60710 | 0          | n +34.06 Da,K +34.06 Da,             | 1454.741467 | 4 | 492.5433 | 1.147E+09 | 3.356E+09 |
| PPVIQNPEYKGEWKPR       | P14211 | 0          | n +14.02 Da,n +28.03 Da,K +28.03 Da, | 1455.933356 | 4 | 502.7808 | 255192000 | 85182496  |
| FVQQPVHNLMLMGGTKEQR    | O88587 | 0          | n +28.03 Da,K +28.03 Da,             | 1457.192602 | 4 | 532.2741 | 135423008 | 151702000 |
| GITAENVAKKWQVSR        | Q8CAY6 | 0.00520562 | n +34.06 Da,K +34.06 Da,             | 1460.206237 | 4 | 443.5111 | 124526000 | 108091000 |
| KHGGTIPVVPPTAEFQDR     | P26443 | 0.01771182 | n +34.06 Da,K +34.06 Da,             | 1463.026557 | 3 | 636.6629 | 103416000 | 73103000  |
| PALDSELTSKLKR          | Q99KK7 | 0          | n +17.03 Da,n +34.06 Da,K +34.06 Da, | 1463.07015  | 4 | 385.7493 | 134006000 | 563064000 |
| AHYHDNYGKNDEVEFVR      | P25688 | 0          | n +42.03 Da,K +34.06 Da,             | 1469.510504 | 4 | 541.5043 | 2.159E+11 | 1.568E+11 |
| HVFGESDELIGQKVSH       | P17751 | 0          | n +28.03 Da,K +28.03 Da,             | 1476.868417 | 3 | 613.319  | 589409024 | 441824992 |
| MEGYHKPDQQKLQALKDTANR  | P40142 | 0.02082347 | n +42.03 Da,K +34.06 Da,             | 1476.897138 | 5 | 523.2924 | 23678700  | 131530000 |
| HQDQSSVGGGLTAEDIEKAR   | Q60936 | 0          | n +28.03 Da,K +28.03 Da,             | 1477.40803  | 3 | 699.69   | 486588992 | 458289984 |
| EWHTIILASDKR           | B5X0G2 | 0          | n +34.06 Da,K +34.06 Da,             | 1480.089045 | 4 | 381.9684 | 81072200  | 78786096  |
| MEGYHKPDQQKLQALKDTANR  | P40142 | 0          | n +42.03 Da,K +34.06 Da,             | 1485.638121 | 4 | 653.863  | 37643500  | 198860000 |
| PGLGVREPVFMRLR         | Q91ZIO | 0.04048043 | n +34.06 Da,                         | 1490.485557 | 4 | 415.2464 | 32808100  | 140774000 |
| ATSASSHLNKGIKQMY       | P15105 | 0          | n +42.03 Da,n +28.03 Da,K +28.03 Da, | 1491.280718 | 3 | 611.9884 | 1.409E+09 | 1.949E+09 |
| MEGYHKPDQQKLQALKDTANR  | P40142 | 0          | n +42.03 Da,K +34.06 Da,             | 1494.055373 | 4 | 650.0927 | 2.597E+10 | 2.094E+10 |
| IAHTPGVAADLSHIETR      | P08249 | 0          | n +34.06 Da,                         | 1495.31013  | 3 | 605.9936 | 30252300  | 93296800  |
| MEGYHKPDQQKLQALKDTANR  | P40142 | 0          | n +42.03 Da,K +34.06 Da,             | 1497.068987 | 3 | 871.4802 | 305529984 | 1.496E+09 |
| MEGYHKPDQQKLQALKDTANR  | P40142 | 0          | n +42.03 Da,K +28.03 Da,             | 1497.373269 | 3 | 866.4544 | 1.008E+09 | 799449024 |
| EHPVLLTKFVEGAR         | Q8C196 | 0          | n +28.03 Da,K +28.03 Da,             | 1504.069708 | 4 | 410.24   | 611374016 | 445000992 |
| PKVIQPEVDTPLGR         | Q8VCU1 | 0          | n +17.03 Da,K +34.06 Da,             | 1504.43868  | 3 | 530.9791 | 339270016 | 246446000 |
| IAHTPGVAADLSHIETR      | P08249 | 0          | n +34.06 Da,                         | 1505.830382 | 3 | 608.0011 | 457062016 | 339172992 |
| MEGYHKPDQQKLQALKDTANR  | P40142 | 0          | n +42.03 Da,K +28.03 Da,             | 1509.129364 | 5 | 520.2766 | 830844032 | 347567008 |
| AWKSGGASHSELIHNLR      | P23506 | 0          | n +42.03 Da,K +28.03 Da,             | 1511.202175 | 3 | 645.0064 | 1.351E+09 | 1.253E+09 |
| GVDGKWR                | Q91Y97 | 0.02164706 | n +28.03 Da,K +28.03 Da,             | 1512.256445 | 3 | 340.8589 | 571955968 | 786590016 |
| TKKEIDQEAAVEVSQLR      | Q9CR68 | 0          | n +34.06 Da,K +34.06 Da,             | 1512.477618 | 3 | 680.7373 | 249134000 | 399500000 |
| RVAPEEHPVLLTEAPLNPKANR | P60710 | 0          | n +34.06 Da,K +34.06 Da,             | 1514.281999 | 5 | 502.2885 | 248834000 | 515988992 |
| RVAPEEHPVLLTEAPLNPKANR | P60710 | 0          | n +28.03 Da,K +28.03 Da,             | 1516.378215 | 4 | 627.6086 | 1.852E+09 | 2.973E+09 |
| AHYHDNYGKNDEVEFVR      | P25688 | 0          | n +42.03 Da,K +34.06 Da,             | 1521.297067 | 3 | 721.6677 | 3.188E+10 | 2.661E+10 |
| AHYHDNYGKNDEVEFVR      | P25688 | 0          | n +42.03 Da,K +34.06 Da,             | 1521.836823 | 2 | 1081.997 | 1.165E+09 | 925577984 |

|                        |        |            |                                      |             |   |          |           |           |
|------------------------|--------|------------|--------------------------------------|-------------|---|----------|-----------|-----------|
| SQEHPPVLTKFVEGAR       | Q8C196 | 0          | n +28.03 Da,                         | 1522.234255 | 4 | 464.0125 | 440942016 | 483351008 |
| SQEHPPVLTKFVEGAR       | Q8C196 | 0          | n +28.03 Da,                         | 1523.252924 | 3 | 618.3475 | 539518016 | 603809024 |
| MMGHRPVLVLSQNTKR       | P80318 | 0          | n +42.03 Da,K +28.03 Da,             | 1525.10422  | 3 | 646.3557 | 324308992 | 239172992 |
| MMGHRPVLVLSQNTKR       | P80318 | 0          | n +42.03 Da,K +34.06 Da,             | 1525.863429 | 4 | 485.02   | 1.012E+09 | 784422016 |
| QTISQGAIEKVKDATR       | Q8C196 | 0          | n +28.03 Da,K +28.03 Da,             | 1527.329851 | 4 | 458.0177 | 381908000 | 290091008 |
| QTISQGAIEKVKDATR       | Q8C196 | 0          | n +34.06 Da,K +34.06 Da,             | 1528.169115 | 3 | 610.3547 | 610918976 | 395071008 |
| SRVDPDLSSFDSAPSEPKSR   | Q9R182 | 0.0062273  | n +28.03 Da,K +28.03 Da,             | 1530.433594 | 4 | 559.0342 | 121837000 | 86079504  |
| PPKEPMKDDITGEPLIR      | Q9WTP6 | 0.0057232  | n +14.02 Da,K +28.03 Da,             | 1535.772246 | 4 | 502.2806 | 234146000 | 197542000 |
| EQELQFERLTRELEAER      | O35927 | 0.00662589 | n +17.03 Da,                         | 1536.724154 | 4 | 546.0342 | 63215800  | 161187008 |
| MMGHRPVLVLSQNTKR       | P80318 | 0          | n +42.03 Da,K +28.03 Da,             | 1537.755638 | 3 | 642.3266 | 80309800  | 72825296  |
| SGKYDLDFKSPDDPSR       | P17182 | 0          | n +42.03 Da,K +34.06 Da,             | 1540.026079 | 4 | 481.9964 | 833614976 | 819683008 |
| SHTDVKVPDFSDYR         | Q9CR68 | 0          | n +34.06 Da,K +34.06 Da,             | 1548.949033 | 3 | 574.6208 | 640814016 | 551320000 |
| RPPLGFLNPR             | O89023 | 0          | n +28.03 Da,                         | 1550.376642 | 3 | 398.9082 | 183280992 | 154836000 |
| PNKIFSGSSHQDLSQKIADR   | Q9D7G0 | 0          | n +17.03 Da,K +34.06 Da,             | 1554.463341 | 4 | 603.5815 | 1.297E+09 | 993134976 |
| AHGSVVKSEDYAFPTYADR    | P19783 | 0          | n +14.02 Da,K +28.03 Da,             | 1560.835153 | 3 | 719.0198 | 125945000 | 64999600  |
| ATLQSEVKVDGEQKLSKNELKR | Q99MN1 | 0          | n +42.03 Da,K +28.03 Da,             | 1561.021231 | 4 | 696.6434 | 786028992 | 266243008 |
| HGSVVKSEDYAFPTYADR     | P19783 | 0          | n +28.03 Da,K +28.03 Da,             | 1562.332101 | 3 | 700.0135 | 549660992 | 409372992 |
| ATLQSEVKVDGEQKLSKNELKR | Q99MN1 | 0          | n +42.03 Da,K +28.03 Da,             | 1563.873076 | 5 | 555.1102 | 488166016 | 3.096E+09 |
| ATLQSEVKVDGEQKLSKNELKR | Q99MN1 | 0          | n +42.03 Da,K +34.06 Da,             | 1565.030907 | 5 | 559.9355 | 129417000 | 682974016 |
| IDSGSYAGADATEGVSHR     | Q7TN31 | 0.04724409 | n +34.06 Da,                         | 1565.22888  | 3 | 609.6318 | 218988000 | 192358000 |
| PNKIFSGSSHQDLSQKIADR   | Q9D7G0 | 0          | n +14.02 Da,K +28.03 Da,             | 1565.924492 | 5 | 483.067  | 487072000 | 238514000 |
| IIAVDINKDKFAK          | P00329 | 0          | n +28.03 Da,K +28.03 Da,             | 1566.134954 | 4 | 397.5023 | 180208992 | 220495008 |
| ATLQSEVKVDGEQKLSKNELKR | Q99MN1 | 0          | n +42.03 Da,K +28.03 Da,             | 1567.276731 | 4 | 693.6363 | 253894000 | 519251008 |
| SLSNKLTLDKLDVKGKR      | P09411 | 0.00422833 | n +42.03 Da,n +34.06 Da,K +34.06 Da, | 1570.703894 | 5 | 520.4733 | 41351000  | 39902200  |
| TYKDTLLPKLPR           | P49429 | 0.04048043 | n +34.06 Da,K +34.06 Da,             | 1574.208113 | 4 | 386.7524 | 18972900  | 154136000 |
| AHGSVVKSEDYAFPTYADR    | P19783 | 0          | n +34.06 Da,K +34.06 Da,             | 1575.52952  | 3 | 726.7067 | 8.316E+09 | 2.866E+10 |
| TYKDTLLPKLPR           | P49429 | 0.04048043 | n +34.06 Da,K +34.06 Da,             | 1576.488453 | 4 | 382.9827 | 158631008 | 159002000 |
| AHGSVVKSEDYAFPTYADR    | P19783 | 0          | n +34.06 Da,K +34.06 Da,             | 1577.409495 | 2 | 1089.558 | 58643100  | 291183008 |
| AHGSVVKSEDYAFPTYADR    | P19783 | 0          | n +34.06 Da,K +34.06 Da,             | 1578.734864 | 2 | 1085.034 | 341876992 | 298800000 |
| PNKIFSGSSHQDLSQKIADR   | Q9D7G0 | 0          | n +17.03 Da,K +34.06 Da,             | 1581.428542 | 4 | 607.3492 | 313000000 | 565190976 |
| MKVLDDLKNKIR           | P70694 | 0          | n +34.06 Da,K +34.06 Da,             | 1595.195708 | 3 | 514.9729 | 293489984 | 273607008 |
| MKVLDDLKNKIR           | P70694 | 0          | n +28.03 Da,K +28.03 Da,             | 1596.257486 | 4 | 384.9753 | 64835900  | 127359000 |
| AHYHDNYGKNDEVEFVR      | P25688 | 0          | n +42.03 Da,K +34.06 Da,             | 1596.518674 | 4 | 543.0213 | 2.593E+09 | 1.922E+09 |
| PQLQHFIEVETQKQR        | Q9VWA2 | 0          | n +14.02 Da,K +28.03 Da,             | 1597.873473 | 3 | 641.6861 | 172638000 | 160646000 |
| TQTISQGAIEKVKDATR      | Q8C196 | 0          | n +28.03 Da,K +28.03 Da,             | 1602.261252 | 3 | 642.0254 | 427563008 | 329180000 |
| TGKTSIAIDTIINQKR       | Q03265 | 0          | n +28.03 Da,K +28.03 Da,             | 1608.283478 | 3 | 615.0382 | 1.57E+09  | 1.386E+09 |
| VSQEHPPVLTKFVEGAR      | Q8C196 | 0          | n +14.02 Da,K +28.03 Da,             | 1611.722872 | 3 | 644.6796 | 1.505E+09 | 166367008 |
| SAPSSQGRGGRAAGGTARRRRR | Q80WV7 | 0.00422833 | n +14.02 Da,                         | 1613.449225 | 4 | 605.8079 | 7.88E+09  | 9.491E+09 |
| HYLFDVQR               | Q9CQQ7 | 0.00422833 | n +28.03 Da,                         | 1615.027069 | 2 | 553.2927 | 1.412E+09 | 523921984 |
| TFASQVTLEGDKVKVER      | Q9DCW4 | 0          | n +28.03 Da,K +28.03 Da,             | 1615.300624 | 3 | 664.3769 | 174454000 | 183220992 |

|                           |        |            |                                      |             |   |          |           |           |
|---------------------------|--------|------------|--------------------------------------|-------------|---|----------|-----------|-----------|
| ATLQSEVVKVDGEQKLSKKNELKR  | Q99MN1 | 0          | n +42.03 Da,K +34.06 Da,             | 1615.861146 | 3 | 558.3113 | 614078016 | 521148992 |
| VSQEHPPVLTKFVEGAR         | Q8C196 | 0          | n +14.02 Da,K +28.03 Da,             | 1617.86289  | 4 | 485.2758 | 710118016 | 690337024 |
| VSNLPTVKKFLQPGSQR         | P30115 | 0.00217391 | n +14.02 Da,K +28.03 Da,             | 1620.239185 | 4 | 493.045  | 323676992 | 323097984 |
| KQWLQEVKGMADR             | P05202 | 0          | n +42.03 Da,K +28.03 Da,             | 1624.67817  | 4 | 422.4884 | 214860992 | 181018000 |
| TFASQVTLEGDKVKVER         | Q9DCW4 | 0          | n +28.03 Da,K +28.03 Da,             | 1627.050008 | 4 | 498.5341 | 1.042E+09 | 834481024 |
| SLSNKLTLDKLDVKGKR         | P09411 | 0.00422833 | n +42.03 Da,n +34.06 Da,K +34.06 Da, | 1637.382271 | 4 | 523.3503 | 1.108E+10 | 4.42E+10  |
| SLSNKLTLDKLDVKGKR         | P09411 | 0          | n +42.03 Da,n +34.06 Da,K +34.06 Da, | 1637.490386 | 3 | 697.4633 | 4.989E+09 | 2.063E+10 |
| AGKPVLYHFNAR              | P10648 | 0          | n +42.03 Da,K +28.03 Da,             | 1643.113178 | 3 | 481.6007 | 3.177E+09 | 3.202E+09 |
| VSQEHPPVLTKFVEGAR         | Q8C196 | 0          | n +28.03 Da,K +28.03 Da,             | 1643.198882 | 4 | 488.7787 | 7.252E+09 | 6.804E+09 |
| VSQEHPPVLTKFVEGAR         | Q8C196 | 0          | n +28.03 Da,K +28.03 Da,             | 1643.738799 | 3 | 651.369  | 986401984 | 914868992 |
| AGKPVLYHFNAR              | P10648 | 0.00111732 | n +42.03 Da,K +34.06 Da,             | 1647.275211 | 2 | 721.8973 | 1.819E+09 | 1.898E+09 |
| SLSNKLTLDKLDVKGKR         | P09411 | 0.00422833 | n +42.03 Da,n +34.06 Da,K +34.06 Da, | 1647.362291 | 2 | 518.0739 | 3.902E+10 | 2.743E+10 |
| ATLQSEVVKVDGEQKLSKKNELKR  | Q99MN1 | 0          | n +42.03 Da,K +28.03 Da,             | 1651.340972 | 2 | 696.6418 | 2.808E+09 | 2.38E+09  |
| ATLQSEVVKVDGEQKLSKKNELKR  | Q99MN1 | 0          | n +42.03 Da,K +34.06 Da,             | 1652.41942  | 5 | 561.7376 | 62433000  | 720913024 |
| AFKDTGKTPVEPEVAIHR        | P60867 | 0.00473934 | n +42.03 Da,K +34.06 Da,             | 1652.864922 | 3 | 698.3837 | 3.832E+09 | 3.578E+09 |
| VSNLPTVKKFLQPGSQR         | P30115 | 0          | n +28.03 Da,K +28.03 Da,             | 1654.714372 | 4 | 496.5488 | 1.935E+09 | 1.826E+09 |
| LTKFLEEHPPGEEVLR          | P56395 | 0          | n +34.06 Da,K +34.06 Da,             | 1659.291755 | 4 | 478.2638 | 209652992 | 249436992 |
| VSQEHPPVLTKFVEGAR         | Q8C196 | 0          | n +42.03 Da,K +34.06 Da,             | 1659.627266 | 4 | 492.2834 | 397385984 | 348164000 |
| PKDISEFQHEEFYR            | Q9CQN1 | 0          | n +17.03 Da,K +34.06 Da,             | 1660.891171 | 4 | 468.9885 | 100177000 | 421281984 |
| PKDISEFQHEEFYR            | Q9CQN1 | 0.00321888 | n +17.03 Da,K +34.06 Da,             | 1661.759039 | 3 | 624.9824 | 379220992 | 1.288E+09 |
| SHTDVKVPDFSDYR            | Q9CR68 | 0          | n +34.06 Da,K +34.06 Da,             | 1663.343731 | 3 | 574.6208 | 2.327E+09 | 2.332E+09 |
| PKDISEFQHEEFYR            | Q9CQN1 | 0.00321888 | n +17.03 Da,K +34.06 Da,             | 1666.292322 | 3 | 622.9729 | 177538000 | 99647200  |
| ALTPEQKKELSEIAQR          | Q91Y97 | 0          | n +34.06 Da,K +34.06 Da,             | 1668.448763 | 3 | 647.3991 | 48596300  | 463380992 |
| MGTLPKQVKIVEVGPR          | P38060 | 0          | n +28.03 Da,K +28.03 Da,             | 1672.046252 | 4 | 459.7842 | 271416992 | 188964992 |
| VAQHVAEDLGKAFGER          | Q8BMS1 | 0          | n +28.03 Da,K +28.03 Da,             | 1675.950322 | 3 | 594.9884 | 193007008 | 167152000 |
| VAQHVAEDLGKAFGER          | Q8BMS1 | 0          | n +34.06 Da,K +34.06 Da,             | 1676.55338  | 4 | 446.4929 | 372958016 | 327520992 |
| SLSNKLTLDKLDVKGKR         | P09411 | 0.00111732 | n +42.03 Da,n +28.03 Da,K +28.03 Da, | 1681.437248 | 3 | 690.4308 | 263407008 | 417828992 |
| LLNPKSEMTPPEELQKR         | P62317 | 0          | n +42.03 Da,K +28.03 Da,             | 1683.026967 | 3 | 752.0877 | 236732992 | 203180000 |
| PEVKNKLEASINLR            | Q3UQ44 | 0          | n +14.02 Da,K +28.03 Da,             | 1684.379295 | 4 | 604.0161 | 295571008 | 436209984 |
| SHMPYTDAMIHEVQR           | Q64458 | 0          | n +34.06 Da,                         | 1686.312224 | 4 | 461.4715 | 66046200  | 23203000  |
| SHTDVKVPDFSDYR            | Q9CR68 | 0          | n +34.06 Da,K +34.06 Da,             | 1695.978103 | 2 | 861.4278 | 814014016 | 754038016 |
| SHTDVKVPDFSDYR            | Q9CR68 | 0          | n +34.06 Da,K +34.06 Da,             | 1696.549406 | 3 | 577.6368 | 1.283E+09 | 9.318E+09 |
| PSKGPLQSVQVFR             | P14131 | 0          | n +14.02 Da,K +28.03 Da,             | 1703.285846 | 3 | 514.6312 | 925364992 | 198216000 |
| MEGYHKPDQQKLQALKDTANR     | P40142 | 0          | n +42.03 Da,K +28.03 Da,             | 1703.969059 | 4 | 650.0921 | 900438976 | 717140992 |
| FHQDQSSVGGTLAEDIEKAR      | Q60936 | 0          | n +34.06 Da,K +34.06 Da,             | 1705.966437 | 4 | 564.0493 | 366871008 | 1.627E+09 |
| FHQDQSSVGGTLAEDIEKAR      | Q60936 | 0          | n +28.03 Da,K +28.03 Da,             | 1708.146189 | 3 | 748.7121 | 341303008 | 232567008 |
| PALTPEQKKELSEIAQR         | Q91Y97 | 0          | n +17.03 Da,K +34.06 Da,             | 1719.280572 | 4 | 506.5617 | 229632000 | 231310000 |
| PHLNKDLAFTLEER            | P06801 | 0          | n +17.03 Da,K +34.06 Da,             | 1721.039456 | 3 | 577.659  | 461692000 | 1.013E+09 |
| PALTPEQKKELSEIAQR         | Q91Y97 | 0.02905904 | n +17.03 Da,K +34.06 Da,             | 1722.565318 | 3 | 675.0741 | 544398016 | 1.188E+09 |
| FGVQVSPSGEKITHTGQVYDEKDYR | P52503 | 0          | n +34.06 Da,K +34.06 Da,             | 1725.607162 | 5 | 585.701  | 4.502E+09 | 3.835E+09 |

|                         |        |            |                          |             |   |          |           |           |
|-------------------------|--------|------------|--------------------------|-------------|---|----------|-----------|-----------|
| AGKPVLYHYFDGR           | P30115 | 0          | n +42.03 Da,K +34.06 Da, | 1732.826365 | 3 | 477.2571 | 1.801E+09 | 2.297E+09 |
| AEDIKTKIKNYKTAPFDSR     | P56391 | 0.0212766  | n +42.03 Da,K +34.06 Da, | 1739.747798 | 4 | 600.8646 | 410551008 | 1.988E+09 |
| VLSGEDKSNIAAWGKIGGH     | P01942 | 0          | n +28.03 Da,K +28.03 Da, | 1740.522257 | 2 | 542.5465 | 497206016 | 3.389E+09 |
| AGKPVLYHYFDGR           | P30115 | 0          | n +42.03 Da,K +28.03 Da, | 1741.830847 | 2 | 715.3816 | 3.207E+09 | 3.249E+09 |
| YVKAGPWTPEAAVEHPEAVR    | O35490 | 0          | n +34.06 Da,K +34.06 Da, | 1743.003305 | 4 | 566.5518 | 742982976 | 712481024 |
| AEDIKTKIKNYKTAPFDSR     | P56391 | 0.0212766  | n +42.03 Da,K +34.06 Da, | 1744.844333 | 2 | 595.587  | 511779008 | 377550016 |
| SSKPKSLEIIGAPFSKGQPR    | Q61176 | 0          | n +42.03 Da,K +28.03 Da, | 1750.679505 | 4 | 563.3257 | 30472300  | 210003008 |
| LFSKYTDTMTFKER          | Q62452 | 0          | n +42.03 Da,K +34.06 Da, | 1752.964619 | 4 | 467.0028 | 731729024 | 538256000 |
| TYGDTHLVEKINYTGR        | P49429 | 0          | n +34.06 Da,K +34.06 Da, | 1757.996007 | 4 | 532.0282 | 534903008 | 529766016 |
| TSAGESFNKLVSGKLR        | Q9CPY7 | 0          | n +28.03 Da,K +28.03 Da, | 1763.553458 | 4 | 445.2594 | 254778000 | 218072992 |
| FHMTKDMLPGSYPR          | Q9D6J5 | 0          | n +28.03 Da,K +28.03 Da, | 1766.579143 | 3 | 579.293  | 1.956E+09 | 1.917E+09 |
| GKNEEILNSLKYVR          | P11352 | 0          | n +34.06 Da,K +34.06 Da, | 1766.806266 | 3 | 583.0081 | 762310976 | 912467968 |
| STSSMGTLPKQVKIVEVGPR    | P38060 | 0.03438914 | n +28.03 Da,K +28.03 Da, | 1769.791768 | 2 | 547.2992 | 17840400  | 17192800  |
| SSKPKSLEIIGAPFSKGQPR    | Q61176 | 0          | n +42.03 Da,K +34.06 Da, | 1770.419092 | 4 | 567.849  | 252286000 | 1.58E+09  |
| GEKAHPLFTFLR            | P11352 | 0          | n +34.06 Da,K +34.06 Da, | 1771.214046 | 3 | 493.2912 | 293617984 | 469712000 |
| SHPSWLPKSTGEPLGHVPAR    | Q8BFW7 | 0          | n +42.03 Da,K +34.06 Da, | 1774.080006 | 3 | 582.3064 | 139032000 | 711724992 |
| GEKAHPLFTFLR            | P11352 | 0.01321586 | n +34.06 Da,K +34.06 Da, | 1774.380996 | 4 | 368.7156 | 125839000 | 158890000 |
| STSSMGTLPKQVKIVEVGPR    | P38060 | 0.03438914 | n +28.03 Da,K +28.03 Da, | 1775.631896 | 4 | 550.3194 | 146015008 | 126613000 |
| SQAEFDKAAEEVKR          | P31786 | 0          | n +42.03 Da,K +34.06 Da, | 1780.149273 | 3 | 572.3101 | 54300300  | 729230976 |
| SSKPKSLEIIGAPFSKGQPR    | Q61176 | 0          | n +42.03 Da,K +34.06 Da, | 1785.134427 | 3 | 751.769  | 1.764E+09 | 1.583E+09 |
| VAPEEHPVLLTEAPLNPKANR   | P60710 | 0          | n +28.03 Da,K +28.03 Da, | 1787.131942 | 4 | 588.5813 | 1.403E+09 | 1.103E+09 |
| SQAEFDKAAEEVKR          | P31786 | 0          | n +42.03 Da,K +34.06 Da, | 1788.161699 | 3 | 569.2955 | 1.143E+10 | 1.118E+10 |
| SSKPKSLEIIGAPFSKGQPR    | Q61176 | 0          | n +42.03 Da,K +28.03 Da, | 1792.931128 | 4 | 564.0788 | 8.443E+09 | 7.403E+09 |
| AKGLLFSASKQDLLR         | Q99J08 | 0          | n +28.03 Da,K +28.03 Da, | 1801.150563 | 4 | 433.5189 | 80071200  | 47836000  |
| SLFFPDEAINKHPR          | P97494 | 0.00111732 | n +28.03 Da,K +28.03 Da, | 1801.307207 | 4 | 432.4872 | 88084704  | 66589400  |
| PILGVTEAFKR             | P05202 | 0          | n +17.03 Da,n +34.06 Da, | 1803.020207 | 3 | 426.9378 | 294436000 | 1.158E+09 |
| TEVGHLIQVAAGSSNLKR      | P47738 | 0          | n +28.03 Da,K +28.03 Da, | 1803.802282 | 4 | 484.7797 | 1.947E+09 | 1.949E+09 |
| TEVGHLIQVAAGSSNLKR      | P47738 | 0          | n +34.06 Da,K +34.06 Da, | 1806.151167 | 3 | 646.0368 | 544529024 | 460648992 |
| PKMQEYVANLQYDDGSGMKR    | Q3U1J4 | 0          | n +14.02 Da,K +28.03 Da, | 1808.964214 | 3 | 779.396  | 6658500   | 12897400  |
| KEYWQNLN                | O35490 | 0.01407084 | n +42.03 Da,K +34.06 Da, | 1809.154571 | 2 | 603.817  | 775305024 | 634694976 |
| SSKPKSLEIIGAPFSKGQPR    | Q61176 | 0          | n +42.03 Da,K +28.03 Da, | 1811.906671 | 4 | 562.5664 | 88937504  | 1.711E+09 |
| LHLGVTPSVLR             | O89023 | 0.04048043 | n +34.06 Da,             | 1816.210887 | 3 | 407.2557 | 589734016 | 571257024 |
| VPPPPMEPDHPFYSNISKDR    | Q9DBJ1 | 0          | n +34.06 Da,K +34.06 Da, | 1819.144197 | 4 | 598.5784 | 77352704  | 200600992 |
| HVGDLGNVTAGKDGVANVSIEDR | P08228 | 0          | n +28.03 Da,K +28.03 Da, | 1822.018405 | 3 | 793.747  | 313992000 | 300772992 |
| HVGDLGNVTAGKDGVANVSIEDR | P08228 | 0          | n +28.03 Da,K +28.03 Da, | 1822.702796 | 4 | 595.5619 | 945697024 | 777068032 |
| ASSSGSKAEFIVGGKYKLV     | Q8BK63 | 0          | n +42.03 Da,K +34.06 Da, | 1822.887981 | 4 | 553.3208 | 622740992 | 255268000 |
| PLDKHEGALETLR           | Q9WU78 | 0          | n +14.02 Da,K +28.03 Da, | 1823.843352 | 3 | 545.3145 | 95254000  | 80950096  |
| SIKVVGYDMSKEAAR         | P32020 | 0          | n +28.03 Da,K +28.03 Da, | 1827.88689  | 3 | 617.6851 | 250820992 | 110243000 |
| SSVEYEPKEKTFDKILIANR    | Q91ZA3 | 0          | n +34.06 Da,K +34.06 Da, | 1832.887966 | 4 | 625.8783 | 628252992 | 2.519E+09 |
| AASKVKQDMPPPGGYGPIDYKR  | Q9ERS2 | 0          | n +42.03 Da,K +34.06 Da, | 1833.605792 | 4 | 626.0862 | 5.558E+09 | 4.482E+09 |

|                                    |        |            |                          |             |   |          |           |           |
|------------------------------------|--------|------------|--------------------------|-------------|---|----------|-----------|-----------|
| ISFHLVNSR                          | Q9D1D4 | 0          | n +28.03 Da,             | 1834.483267 | 3 | 399.8963 | 1.365E+09 | 1.093E+09 |
| PWKLSFSYGR                         | Q91Y97 | 0          | n +14.02 Da,K +28.03 Da, | 1841.551836 | 3 | 428.2364 | 496724000 | 409452000 |
| SVEYEPKEKTFDKILIANR                | Q91ZA3 | 0          | n +28.03 Da,K +28.03 Da, | 1841.717518 | 4 | 595.8337 | 5.323E+09 | 735254976 |
| AGKPVVLYHFDGR                      | P30115 | 0          | n +42.03 Da,K +34.06 Da, | 1844.992886 | 3 | 477.2586 | 3.281E+10 | 3.371E+10 |
| PLPPLPEYGGKVR                      | Q9CQQ7 | 0.02164706 | n +17.03 Da,K +34.06 Da, | 1848.723719 | 3 | 490.9674 | 382368992 | 1.017E+09 |
| AGKPVVLYHFDGR                      | P30115 | 0          | n +42.03 Da,K +34.06 Da, | 1852.284016 | 2 | 715.3822 | 2.458E+10 | 2.263E+10 |
| PLPPLPEYGGKVR                      | Q9CQQ7 | 0.00111732 | n +14.02 Da,K +28.03 Da, | 1854.481869 | 3 | 488.9568 | 460631008 | 346601984 |
| MKFNPFVTSR                         | P61255 | 0          | n +34.06 Da,K +34.06 Da, | 1859.465486 | 2 | 699.3657 | 1.661E+09 | 1.437E+09 |
| MKFNPFVTSR                         | P61255 | 0          | n +28.03 Da,K +28.03 Da, | 1864.223588 | 3 | 466.5795 | 925201984 | 629249024 |
| VPPPPMEPDHPPFYSNISKDR              | Q9DBJ1 | 0          | n +34.06 Da,K +34.06 Da, | 1864.519986 | 4 | 598.5644 | 132000000 | 223252992 |
| GYVKAGPWTEAAVEHPEAVR               | O35490 | 0.00902256 | n +28.03 Da,K +28.03 Da, | 1866.575574 | 4 | 580.8077 | 3.808E+09 | 3.283E+09 |
| ASGADSKGDDLSTAILKQKNRPNR           | Q01853 | 0          | n +42.03 Da,K +28.03 Da, | 1875.231017 | 4 | 667.8557 | 342324000 | 250656992 |
| YIDQEEELNKTPIWTR                   | P07901 | 0          | n +28.03 Da,K +28.03 Da, | 1876.321553 | 4 | 528.0383 | 40856200  | 59176200  |
| AEDIKTIKINYKTAPFDSR                | P56391 | 0          | n +42.03 Da,K +28.03 Da, | 1878.020102 | 4 | 595.5871 | 3.856E+09 | 1.13E+09  |
| LKGPKISGFEGDVTSLR                  | Q1ERP8 | 0          | n +28.03 Da,K +28.03 Da, | 1882.997216 | 3 | 673.0483 | 717212992 | 9.907E+09 |
| PNFEKFLTKSMAENR                    | Q9DD20 | 0.01361868 | n +14.02 Da,K +28.03 Da, | 1886.251937 | 3 | 628.0004 | 667662976 | 379510016 |
| KFGKHGGTIPVVPTAEFQDR               | P26443 | 0          | n +28.03 Da,K +28.03 Da, | 1905.707927 | 3 | 756.7412 | 173580000 | 151620000 |
| MKVFTVGLPAEGR                      | Q91Z53 | 0          | n +28.03 Da,K +28.03 Da, | 1908.76767  | 3 | 519.9656 | 1.135E+09 | 952436992 |
| AEDIKTIKINYKTAPFDSR                | P56391 | 0          | n +42.03 Da,K +34.06 Da, | 1913.725148 | 4 | 600.865  | 416961984 | 1.819E+09 |
| LNLQEYQSKKLMSEHGVR                 | Q9Z2I8 | 0          | n +28.03 Da,K +28.03 Da, | 1916.779156 | 4 | 561.8    | 1.154E+09 | 716030016 |
| TGPNLHGLFGR                        | P62897 | 0          | n +34.06 Da,             | 1917.219231 | 3 | 399.5563 | 89129800  | 75976400  |
| TVFFHPLLIHGSGR                     | O35386 | 0          | n +28.03 Da,             | 1918.652593 | 4 | 402.9806 | 19545300  | 19319100  |
| AEDIKTIKINYKTAPFDSR                | P56391 | 0          | n +42.03 Da,K +28.03 Da, | 1919.244071 | 4 | 595.588  | 1.474E+10 | 213108992 |
| AEDIKTIKINYKTAPFDSR                | P56391 | 0          | n +42.03 Da,K +34.06 Da, | 1925.637932 | 3 | 800.8191 | 61073500  | 299337984 |
| APKGGSKQSEEDLLLQDFSR               | Q9DCF9 | 0          | n +34.06 Da,K +34.06 Da, | 1927.150865 | 3 | 806.4275 | 167172992 | 137512992 |
| PHLPQEEVLKFYR                      | P50136 | 0          | n +17.03 Da,n +34.06 Da, | 1927.215281 | 4 | 425.2398 | 592060032 | 576793024 |
| HIDSASMYQNEKEVGLAIR                | P70694 | 0          | n +28.03 Da,K +28.03 Da, | 1930.67183  | 3 | 739.7158 | 488644992 | 420009984 |
| ASEIKKKLFWR                        | Q02013 | 0.0297619  | n +42.03 Da,K +34.06 Da, | 1932.449839 | 3 | 384.2376 | 271487008 | 240248000 |
| GVPVFKFPR                          | Q8R0Y6 | 0          | n +34.06 Da,K +34.06 Da, | 1938.736424 | 3 | 368.2307 | 94040304  | 102588000 |
| MEKDCQDIQQLDSEENDHQLSGDDEHGSHVQDPR | P24721 | 0          | n +42.03 Da,K +34.06 Da, | 1939.464145 | 5 | 813.1511 | 815388992 | 773896000 |
| FGQQQQTTLQVTVNVIKEGEDLI            | Q0KL02 | 0.04048043 | n +34.06 Da,K +34.06 Da, | 1939.571939 | 5 | 532.0983 | 289448000 | 164311008 |
| APKSQDLSKIMADIR                    | P05784 | 0.03013699 | n +34.06 Da,K +34.06 Da, | 1939.70762  | 3 | 586.3389 | 2.497E+09 | 2.573E+09 |
| HIDSASMYQNEKEVGLAIR                | P70694 | 0          | n +28.03 Da,K +28.03 Da, | 1941.874141 | 4 | 554.2889 | 16765200  | 33012700  |
| PHLPQEEVLKFYR                      | P50136 | 0          | n +17.03 Da,n +34.06 Da, | 1942.39592  | 3 | 568.6605 | 113446000 | 389488992 |
| APKSQDLSKIMADIR                    | P05784 | 0          | n +34.06 Da,K +34.06 Da, | 1942.439366 | 4 | 440.0052 | 1.079E+09 | 1.067E+09 |
| SNIKIFSGSSHQDLSQKIADR              | G3UXL2 | 0          | n +42.03 Da,K +34.06 Da, | 1947.002119 | 3 | 810.4329 | 227099008 | 162242000 |
| PHLPQEEVLKFYR                      | P50136 | 0          | n +17.03 Da,n +34.06 Da, | 1947.186606 | 4 | 426.748  | 472851008 | 1.137E+09 |
| SNIKIFSGSSHQDLSQKIADR              | G3UXL2 | 0          | n +42.03 Da,K +34.06 Da, | 1949.074041 | 4 | 608.0752 | 4.448E+09 | 4.223E+09 |
| PHLPQEEVLKFYR                      | P50136 | 0          | n +14.02 Da,n +28.03 Da, | 1950.644216 | 3 | 566.6504 | 195722000 | 23461800  |
| MDKNELVQKAKLAEQER                  | P63101 | 0.03013699 | n +42.03 Da,K +28.03 Da, | 1966.431891 | 4 | 557.5589 | 470312000 | 278880992 |

|                        |        |            |                                      |             |   |          |           |           |
|------------------------|--------|------------|--------------------------------------|-------------|---|----------|-----------|-----------|
| STEVGHLIQVAAGSSNLKR    | P47738 | 0          | n +34.06 Da,K +34.06 Da,             | 1980.418215 | 4 | 506.5384 | 873134016 | 871510016 |
| NKEWPANLDLKKELSEPSSTR  | Q8C196 | 0          | n +28.03 Da,K +28.03 Da,             | 1981.521568 | 4 | 639.3512 | 771833024 | 675326016 |
| MDKNELVQKAKLAEQAER     | P63101 | 0          | n +42.03 Da,K +28.03 Da,             | 1982.501636 | 3 | 739.0568 | 165228000 | 159600992 |
| VSTSSMGTLPKQVKIVEVGPR  | P38060 | 0          | n +28.03 Da,K +28.03 Da,             | 1984.358958 | 4 | 575.0873 | 676075008 | 468752992 |
| TMDKSELVQKAKLAEQAER    | Q9CQV8 | 0          | n +42.03 Da,n +28.03 Da,K +28.03 Da, | 1985.642959 | 4 | 576.0679 | 1.629E+09 | 1.581E+09 |
| TMDKSELVQKAKLAEQAER    | Q9CQV8 | 0.00858586 | n +42.03 Da,n +34.06 Da,K +34.06 Da, | 1989.325161 | 3 | 767.7544 | 815784000 | 606113984 |
| ASEIKKKLFWR            | Q02013 | 0.01953311 | n +42.03 Da,K +28.03 Da,             | 1991.157503 | 4 | 383.7396 | 102010000 | 110391000 |
| SIVEDKLVEDLKTR         | P26443 | 0          | n +34.06 Da,K +34.06 Da,             | 1991.528195 | 3 | 437.5298 | 309652992 | 261660000 |
| AILFPSFIHSQKR          | P24270 | 0          | n +34.06 Da,K +34.06 Da,             | 1994.216638 | 4 | 400.74   | 152080992 | 188858000 |
| FAKLVRRPPVQVYVYIEGR    | Q9DB20 | 0.00520562 | n +28.03 Da,K +28.03 Da,             | 1994.434331 | 4 | 497.0483 | 5.218E+09 | 5.701E+09 |
| VGVVVFGNDKLIKEGDVVKR   | Q03265 | 0          | n +34.06 Da,K +34.06 Da,             | 1995.806264 | 5 | 461.7038 | 16531100  | 103357000 |
| FAKLVRRPPVQVYVYIEGR    | Q9DB20 | 0          | n +34.06 Da,K +34.06 Da,             | 2000.94976  | 3 | 662.3941 | 2.176E+09 | 1.933E+09 |
| MEKTELIQKAKLAEQAER     | P68254 | 0          | n +42.03 Da,K +34.06 Da,             | 2015.935011 | 4 | 561.318  | 4.87E+09  | 4.849E+09 |
| TMTLGDIVYKR            | P12710 | 0          | n +28.03 Da,                         | 2016.298246 | 3 | 451.5917 | 409664000 | 310484000 |
| MEKTELIQKAKLAEQAER     | P68254 | 0          | n +42.03 Da,K +28.03 Da,             | 2018.402877 | 3 | 748.0879 | 2.464E+09 | 2.137E+09 |
| AGQSDKDKVYTYLLEIQKH    | P56395 | 0.00217391 | n +42.03 Da,K +34.06 Da,             | 2023.10542  | 3 | 793.41   | 152880992 | 149906000 |
| LHTVYQSVELPETHQMLR     | Q07417 | 0          | n +28.03 Da,                         | 2026.038827 | 3 | 737.0516 | 2.76E+09  | 2.242E+09 |
| LHTVYQSVELPETHQMLR     | Q07417 | 0          | n +28.03 Da,                         | 2027.105045 | 4 | 553.0413 | 1.554E+10 | 1.301E+10 |
| ASIVEDKLVEDLKTR        | P26443 | 0          | n +28.03 Da,K +28.03 Da,             | 2035.42776  | 4 | 447.7567 | 537520000 | 598585984 |
| GIFEVKSTAGDTHLGGEDFDNR | P17156 | 0          | n +34.06 Da,K +34.06 Da,             | 2038.341266 | 4 | 608.309  | 135276000 | 880240000 |
| SDLELHPPSYPWSHR        | Q9D0M3 | 0          | n +34.06 Da,                         | 2039.205497 | 4 | 462.9812 | 824425984 | 800246976 |
| GIFEVKSTAGDTHLGGEDFDNR | P17156 | 0          | n +34.06 Da,K +34.06 Da,             | 2039.385006 | 3 | 807.7269 | 230439008 | 220262000 |
| SIVEDKLVEDLKTR         | P26443 | 0          | n +34.06 Da,K +34.06 Da,             | 2042.306941 | 3 | 577.0079 | 2.667E+09 | 2.736E+09 |
| GLLEKLEKETEYDVR        | Q61176 | 0          | n +34.06 Da,K +34.06 Da,             | 2042.625222 | 3 | 593.0083 | 910670016 | 1.129E+09 |
| MDKNELVQKAKLAEQAER     | P63101 | 0          | n +42.03 Da,K +28.03 Da,             | 2044.385073 | 3 | 743.075  | 1.032E+10 | 9.16E+09  |
| GIFEVKSTAGDTHLGGEDFDNR | P17156 | 0          | n +28.03 Da,K +28.03 Da,             | 2046.820869 | 4 | 606.0474 | 844582976 | 697942976 |
| SIVEDKLVEDLKTR         | P26443 | 0          | n +28.03 Da,K +28.03 Da,             | 2049.033798 | 4 | 433.0083 | 2.002E+09 | 1.67E+09  |
| LELHPPSYPWSHR          | Q9D0M3 | 0          | n +34.06 Da,                         | 2051.668775 | 4 | 412.4665 | 107969000 | 135676992 |
| GIVGVENVAELKKGFN       | Q9ET01 | 0          | n +28.03 Da,K +28.03 Da,             | 2051.725444 | 4 | 478.5294 | 266332000 | 181479008 |
| PVSELITKAVAASKER       | P15864 | 0          | n +14.02 Da,K +28.03 Da,             | 2052.721991 | 4 | 442.2645 | 168107008 | 292839008 |
| TPTEKLPFPIIDDKGR       | O08709 | 0          | n +28.03 Da,K +28.03 Da,             | 2055.814809 | 4 | 478.5291 | 50580100  | 41231400  |
| MDKNELVQKAKLAEQAER     | P63101 | 0          | n +42.03 Da,K +28.03 Da,             | 2062.458667 | 4 | 557.5585 | 789784000 | 406796992 |
| LASYLDKVKSLLETENR      | P05784 | 0.02345216 | n +42.03 Da,K +34.06 Da,             | 2074.238891 | 3 | 655.3723 | 115802000 | 85319600  |
| SLSNKLTLDKLDVKGKR      | P09411 | 0          | n +42.03 Da,n +28.03 Da,K +28.03 Da, | 2081.852919 | 4 | 518.0631 | 590537024 | 305035008 |
| PNPNFEFKLTKSMAENR      | Q9DD20 | 0          | n +17.03 Da,K +34.06 Da,             | 2092.486218 | 4 | 527.0427 | 1.473E+09 | 3.586E+09 |
| AHSEDWKLWRCR           | P97946 | 0.04836601 | n +42.03 Da,K +34.06 Da,             | 2093.485677 | 3 | 573.9495 | 576926016 | 742910976 |
| KGGSKQQSEEDLLLQDFSR    | Q9DCF9 | 0          | n +28.03 Da,K +28.03 Da,             | 2096.290922 | 3 | 750.396  | 578088000 | 487607008 |
| ISGASEKDIVHSGLAYTMER   | P26443 | 0          | n +42.03 Da,K +28.03 Da,             | 2096.686039 | 4 | 558.5419 | 45524800  | 58477700  |
| APKGGSKQQSEEDLLLQDFSR  | Q9DCF9 | 0          | n +34.06 Da,K +34.06 Da,             | 2097.32887  | 3 | 811.4521 | 617196992 | 3.268E+09 |
| PNPNFEFKLTKSMAENR      | Q9DD20 | 0          | n +17.03 Da,K +34.06 Da,             | 2098.614932 | 3 | 702.3851 | 175640000 | 379504000 |

|                                  |        |            |                                      |             |   |          |           |           |
|----------------------------------|--------|------------|--------------------------------------|-------------|---|----------|-----------|-----------|
| APKGGSKQQSEEDLLLQDFSR            | Q9DCF9 | 0          | n +34.06 Da,K +34.06 Da,             | 2101.682649 | 2 | 1209.134 | 241911008 | 176575008 |
| APKGGSKQQSEEDLLLQDFSR            | Q9DCF9 | 0          | n +28.03 Da,K +28.03 Da,             | 2103.412316 | 3 | 806.4259 | 7.788E+09 | 58263500  |
| PNPNFEKFLTKSMAENR                | Q9DD20 | 0          | n +14.02 Da,K +28.03 Da,             | 2105.413761 | 3 | 698.3652 | 296712992 | 189474000 |
| APKGGSKQQSEEDLLLQDFSR            | Q9DCF9 | 0          | n +34.06 Da,K +34.06 Da,             | 2105.722146 | 3 | 806.4257 | 1.709E+09 | 1.3E+09   |
| GFLPPASEKHGWSWGLDMH              | O35490 | 0          | n +28.03 Da,K +28.03 Da,             | 2107.82648  | 4 | 542.2652 | 4.387E+09 | 4.07E+09  |
| PSPSPSPSLSTQSAVSKAGAGAVVPKLSHLPR | Q9DC70 | 0          | n +17.03 Da,K +34.06 Da,             | 2109.041956 | 5 | 656.7782 | 275643008 | 813246016 |
| KYIDQEELNKTPIWTR                 | P07901 | 0          | n +28.03 Da,K +28.03 Da,             | 2120.755094 | 4 | 569.3164 | 135102000 | 122699000 |
| AAPAKGENLSLVVHGPGDIR             | Q64442 | 0.01361868 | n +42.03 Da,K +28.03 Da,             | 2128.253895 | 3 | 691.0475 | 1.098E+10 | 9.765E+09 |
| TYAPQEVPKSKATEATKIAIDAGFR        | P70694 | 0          | n +34.06 Da,K +34.06 Da,             | 2131.612439 | 2 | 701.8942 | 307448992 | 347288000 |
| CEEVSMKHVHGKQQYNVTYVVKER         | Q80X90 | 0.02164706 | n +42.03 Da,K +28.03 Da,             | 2140.451981 | 4 | 731.3706 | 1.326E+09 | 379743008 |
| PWYQWDHSELR                      | Q9D6J5 | 0          | n +14.02 Da,                         | 2145.972265 | 3 | 510.9083 | 263316000 | 134847008 |
| SDLELHPPSYPWSHR                  | Q9D0M3 | 0          | n +34.06 Da,                         | 2148.892763 | 4 | 462.9811 | 9.52E+09  | 9.641E+09 |
| PGKLSDYFPKPYPNPEAAR              | Q9D0M3 | 0          | n +14.02 Da,n +28.03 Da,K +28.03 Da, | 2149.542398 | 3 | 739.7276 | 4.777E+09 | 4.883E+09 |
| ISGASEKDIVHSGLAYTMER             | P26443 | 0          | n +42.03 Da,K +28.03 Da,             | 2151.466323 | 4 | 559.2882 | 79450096  | 54258700  |
| SDLELHPPSYPWSHR                  | Q9D0M3 | 0          | n +28.03 Da,                         | 2152.289794 | 3 | 616.9718 | 1.284E+10 | 1.308E+10 |
| SVQKALDLDPSKTNVSGGAIALGHPLGGSGSR | Q8BWT1 | 0          | n +34.06 Da,K +34.06 Da,             | 2152.555958 | 5 | 635.551  | 1.454E+09 | 3.054E+09 |
| PHPYPALTPEQKKELSIAHR             | P05064 | 0          | n +28.03 Da,K +28.03 Da,             | 2155.229955 | 4 | 628.5902 | 134540992 | 146839008 |
| VAHFTFHPDPESLQYQQTQKMN           | Q6P3A8 | 0          | n +34.06 Da,                         | 2156.399353 | 3 | 877.7594 | 1.181E+09 | 1.052E+09 |
| SDLELHPPSYPWSHR                  | Q9D0M3 | 0          | n +34.06 Da,                         | 2157.176348 | 2 | 924.9546 | 263967008 | 263872992 |
| SDLELHPPSYPWSHR                  | Q9D0M3 | 0          | n +34.06 Da,                         | 2159.879483 | 4 | 463.7333 | 131600000 | 637424000 |
| VSNLPTVKKFLQPGSQR                | P30115 | 0.00111732 | n +42.03 Da,K +34.06 Da,             | 2162.682665 | 3 | 666.3885 | 213814000 | 150451008 |
| KYIDQEELNKTPIWTR                 | P07901 | 0          | n +28.03 Da,K +28.03 Da,             | 2172.66465  | 2 | 566.293  | 59290800  | 311091008 |
| DSFNTEFFSETGAGKHVPR              | P05213 | 0          | n +28.03 Da,K +28.03 Da,             | 2177.113859 | 4 | 514.0086 | 52591400  | 68656600  |
| SVQKALDLDPSKTNVSGGAIALGHPLGGSGSR | Q8BWT1 | 0          | n +34.06 Da,K +34.06 Da,             | 2182.15713  | 5 | 638.5665 | 685449024 | 5.512E+09 |
| AASAASSEHFEKLHEIFR               | O88384 | 0          | n +42.03 Da,K +28.03 Da,             | 2183.425256 | 4 | 525.7681 | 1.356E+09 | 1.307E+09 |
| AASAASSEHFEKLHEIFR               | O88384 | 0          | n +42.03 Da,K +34.06 Da,             | 2183.749784 | 3 | 700.6876 | 736403008 | 770145024 |
| SVQKALDLDPSKTNVSGGAIALGHPLGGSGSR | Q8BWT1 | 0          | n +34.06 Da,K +34.06 Da,             | 2184.329397 | 4 | 794.1866 | 1.172E+09 | 1.581E+09 |
| AKNHYEVLVLGGGAGGITMATR           | Q9R112 | 0.01726619 | n +42.03 Da,K +28.03 Da,             | 2184.757527 | 3 | 762.4068 | 94578496  | 28325100  |
| VSPVELPFGGYKKSFGFR               | Q9JLJ2 | 0          | n +34.06 Da,K +34.06 Da,             | 2184.887077 | 4 | 506.0475 | 242194000 | 150790000 |
| PSPSPSPSLSTQSAVSKAGAGAVVPKLSHLPR | Q9DC70 | 0          | n +14.02 Da,K +28.03 Da,             | 2185.195632 | 5 | 654.3664 | 1.97E+10  | 1.699E+10 |
| PMFIVNTNVPR                      | P34884 | 0          | n +14.02 Da,                         | 2185.827212 | 2 | 651.3546 | 778451008 | 504783008 |
| SVQKALDLDPSKTNVSGGAIALGHPLGGSGSR | Q8BWT1 | 0          | n +34.06 Da,K +34.06 Da,             | 2186.991104 | 4 | 797.9561 | 565857984 | 4.652E+09 |
| PSPSPSPSLSTQSAVSKAGAGAVVPKLSHLPR | Q9DC70 | 0          | n +17.03 Da,K +34.06 Da,             | 2182.230739 | 4 | 820.7222 | 236286000 | 722062016 |
| PFTIEDIEVAPPKAHEVR               | P00329 | 0.00217391 | n +14.02 Da,K +28.03 Da,             | 2193.122772 | 4 | 523.2872 | 841419008 | 378404992 |
| SLSNKLTLDKLDVKGKR                | P09411 | 0          | n +42.03 Da,n +28.03 Da,K +28.03 Da, | 2193.924064 | 3 | 690.4154 | 1.351E+09 | 906350016 |
| ASLKDLEGKWR                      | Q05816 | 0          | n +42.03 Da,K +34.06 Da,             | 2194.759265 | 3 | 470.6042 | 243264992 | 335265984 |
| PSPSPSPSLSTQSAVSKAGAGAVVPKLSHLPR | Q9DC70 | 0          | n +17.03 Da,K +34.06 Da,             | 2197.268993 | 5 | 656.7792 | 662422976 | 1.826E+09 |
| PSPSPSPSLSTQSAVSKAGAGAVVPKLSHLPR | Q9DC70 | 0          | n +14.02 Da,K +28.03 Da,             | 2198.280011 | 4 | 817.7065 | 168072992 | 146000000 |
| PEFLAEGTAIKDLKNPDR               | O70475 | 0          | n +14.02 Da,K +28.03 Da,             | 2199.927175 | 3 | 695.3828 | 108961000 | 67560896  |
| AHRFPALTPEQKKELSIAQR             | Q91Y97 | 0          | n +42.03 Da,K +34.06 Da,             | 2203.282548 | 5 | 510.2861 | 363633984 | 351001984 |



|                                     |        |            |                                      |             |   |          |           |           |
|-------------------------------------|--------|------------|--------------------------------------|-------------|---|----------|-----------|-----------|
| AHRFPALTPEQKELSEIAQR                | Q91Y97 | 0          | n +42.03 Da,K +34.06 Da,             | 2207.396906 | 4 | 637.6066 | 226431008 | 139847008 |
| SVQKALDLDPKSTNVSGGAIALGHPLGGSGSR    | Q8BWT1 | 0          | n +28.03 Da,K +28.03 Da,             | 2208.389927 | 5 | 635.552  | 936950016 | 1.099E+09 |
| MKETIMNQEKLAKLQQAQR                 | Q64152 | 0          | n +42.03 Da,n +28.03 Da,K +28.03 Da, | 2215.127103 | 4 | 594.0689 | 65638300  | 97085400  |
| WPANLDLKKELSEPSSTR                  | Q8C196 | 0          | n +28.03 Da,K +28.03 Da,             | 2222.852221 | 4 | 539.5491 | 514844992 | 402700000 |
| SEKDILLRPELEELR                     | Q9DCN2 | 0          | n +28.03 Da,K +28.03 Da,             | 2225.533924 | 4 | 474.775  | 147146000 | 104216000 |
| PEASIDSYAKSLLHGR                    | P97742 | 0          | n +14.02 Da,n +28.03 Da,             | 2235.979876 | 4 | 447.2424 | 425204992 | 330099008 |
| ALHVPKAPGFAQMLKDGAKH                | P42932 | 0.02645012 | n +42.03 Da,K +34.06 Da,             | 2236.394006 | 5 | 449.2559 | 56514700  | 46366000  |
| VALEGVGHFFR                         | P29391 | 0          | n +28.03 Da,                         | 2236.997393 | 3 | 420.5677 | 132693000 | 174926000 |
| KTSGPPVSELITKAVAASKER               | P43274 | 0          | n +42.03 Da,K +28.03 Da,             | 2238.406866 | 4 | 574.5962 | 63589300  | 57597400  |
| PPSADKTLLEEKAKLEEQLR                | Q99LP6 | 0          | n +14.02 Da,K +28.03 Da,             | 2238.495953 | 4 | 599.0962 | 536875008 | 371027008 |
| PPSADKTLLEEKAKLEEQLR                | Q99LP6 | 0          | n +14.02 Da,K +28.03 Da,             | 2238.801604 | 2 | 599.0965 | 199338000 | 265428000 |
| ASLKDLEGKWR                         | Q05816 | 0          | n +42.03 Da,K +34.06 Da,             | 2247.850755 | 3 | 467.6014 | 1E+09     | 659243008 |
| HSILPVD D D I N G L N E E Q K Q L R | Q9JH15 | 0          | n +34.06 Da,K +34.06 Da,             | 2248.953576 | 3 | 830.4379 | 703857984 | 623315968 |
| MQKEITALAPSTMKIKIAPP                | P60710 | 0.04873803 | n +42.03 Da,K +28.03 Da,             | 2250.587148 | 5 | 539.3233 | 333211008 | 224039008 |
| PSKEVEEDEYKAFYKSF                   | P08113 | 0          | n +14.02 Da,K +28.03 Da,             | 2251.949521 | 4 | 549.2784 | 768361984 | 670982016 |
| PSKEVEEDEYKAFYKSF                   | P08113 | 0          | n +14.02 Da,K +28.03 Da,             | 2257.381741 | 3 | 732.0366 | 1.392E+09 | 1.134E+09 |
| MDKLLKVLVSGQD TED R                 | Q8VD57 | 0.00111732 | n +42.03 Da,K +28.03 Da,             | 2258.4127   | 3 | 663.6936 | 688840000 | 670500992 |
| FLSSSDKQNNLYKGLEAFR                 | P54869 | 0          | n +34.06 Da,K +34.06 Da,             | 2276.045652 | 4 | 597.8192 | 575310016 | 498511008 |
| GAGAVIIASEDAVKKHNFTPLAR             | Q8BWT1 | 0          | n +28.03 Da,K +28.03 Da,             | 2295.055605 | 4 | 613.1038 | 2.59E+09  | 2.533E+09 |
| GAGAVIIASEDAVKKHNFTPLAR             | Q8BWT1 | 0          | n +34.06 Da,K +34.06 Da,             | 2297.069767 | 5 | 490.6843 | 402203008 | 440953984 |
| TAVVDGAFKEIKLSDYR                   | Q61171 | 0          | n +28.03 Da,K +28.03 Da,             | 2306.652264 | 4 | 499.7827 | 396536992 | 418484000 |
| DLPKNWDWR                           | Q9WUU7 | 0          | n +28.03 Da,K +28.03 Da,             | 2308.22926  | 3 | 429.2277 | 623756032 | 1.207E+09 |
| PSEDPHLPQEEVLKFYR                   | P50136 | 0          | n +17.03 Da,K +34.06 Da,             | 2318.497826 | 4 | 532.2784 | 1.166E+09 | 743003008 |
| HALIYDDL SKQAVAYR                   | Q03265 | 0          | n +28.03 Da,K +28.03 Da,             | 2319.275498 | 3 | 673.0266 | 1.923E+09 | 252760000 |
| GEWEPPIQNPEYKGEWKPR                 | P14211 | 0          | n +34.06 Da,K +34.06 Da,             | 2320.204044 | 4 | 631.5807 | 2.218E+09 | 1.987E+09 |
| PPLIHNDEIFDAPKEFR                   | Q60991 | 0          | n +14.02 Da,K +28.03 Da,             | 2322.589459 | 4 | 545.0396 | 64101900  | 54300300  |
| SPAQLGTTIYKEFEKR                    | Q9WUM5 | 0          | n +34.06 Da,K +34.06 Da,             | 2327.519135 | 4 | 488.777  | 104289000 | 83165200  |
| AWGVTKGAAELMQK EATTEQQLR            | O35490 | 0.00662589 | n +34.06 Da,K +34.06 Da,             | 2345.414761 | 4 | 690.3694 | 107927000 | 48900900  |
| WPQGT FASQVTLEGDKVKVER              | Q9DCW4 | 0          | n +28.03 Da,K +28.03 Da,             | 2354.435285 | 4 | 615.5882 | 1.025E+09 | 1.062E+09 |
| PYEIKKVFASLPQVER                    | O88342 | 0          | n +17.03 Da,K +34.06 Da,             | 2357.344468 | 3 | 662.7406 | 196076992 | 400007008 |
| PFVELETNLPASR                       | O35215 | 0          | n +14.02 Da,                         | 2363.853749 | 2 | 743.8981 | 1.778E+09 | 1.155E+09 |
| PAPATTF AHL DATTVLSR                | P56480 | 0          | n +14.02 Da,                         | 2377.044803 | 3 | 628.3387 | 753974976 | 575321024 |
| PSTKDFLLQQTMLR                      | Q9CPU0 | 0.00217391 | n +14.02 Da,K +28.03 Da,             | 2379.09487  | 3 | 573.9861 | 616952000 | 641287008 |
| SSPAQPAVPAPLADLKIQH TK              | P24549 | 0          | n +42.03 Da,K +34.06 Da,             | 2405.63528  | 3 | 756.4309 | 357396000 | 282543008 |
| LVINLPNNNTK FVHDNYVIR               | Q8C196 | 0          | n +28.03 Da,K +28.03 Da,             | 2412.942337 | 4 | 610.5961 | 33575900  | 26135600  |
| SPLEKLVSSVSDLPKR                    | P54869 | 0          | n +34.06 Da,K +34.06 Da,             | 2415.24813  | 4 | 464.298  | 474065984 | 671219968 |
| SPLEKLVSSVSDLPKR                    | P54869 | 0.03438914 | n +28.03 Da,K +28.03 Da,             | 2418.091328 | 4 | 459.7739 | 391852992 | 700249024 |
| GAYKYIQELWR                         | Q9CZM2 | 0.00111732 | n +28.03 Da,K +28.03 Da,             | 2430.171962 | 3 | 494.9442 | 225818000 | 183754000 |
| LVINLPNNNTK FVHDNYVIR               | Q8C196 | 0          | n +28.03 Da,K +28.03 Da,             | 2436.468069 | 4 | 609.8366 | 3490070   | 98284304  |
| AQKKYLQAKLTQFLR                     | P54729 | 0          | n +42.03 Da,K +34.06 Da,             | 2438.063766 | 4 | 491.3031 | 724505024 | 587467008 |

|                              |        |            |                                      |             |   |          |           |           |
|------------------------------|--------|------------|--------------------------------------|-------------|---|----------|-----------|-----------|
| PSVSLQTVKLMKEGLEAAR          | O35490 | 0          | n +17.03 Da,K +34.06 Da,             | 2448.436292 | 4 | 535.576  | 468324992 | 1.599E+09 |
| PSVSLQTVKLMKEGLEAAR          | O35490 | 0          | n +17.03 Da,K +34.06 Da,             | 2453.430529 | 3 | 713.7652 | 1.264E+09 | 4.371E+09 |
| PSVSLQTVKLMKEGLEAAR          | O35490 | 0          | n +14.02 Da,K +28.03 Da,             | 2455.204051 | 4 | 532.5606 | 1.439E+09 | 972051008 |
| TWYGEQDQAVHLWR               | O55125 | 0          | n +28.03 Da,                         | 2458.60019  | 3 | 606.2966 | 364204000 | 335067008 |
| LVINLPNNNTKfVHDNYVIR         | Q8C196 | 0          | n +28.03 Da,K +28.03 Da,             | 2458.739546 | 4 | 610.5938 | 1.907E+09 | 2.216E+09 |
| LVINLPNNNTKfVHDNYVIR         | Q8C196 | 0          | n +28.03 Da,K +28.03 Da,             | 2459.419312 | 3 | 813.7891 | 8641780   | 7945210   |
| PSVSLQTVKLMKEGLEAAR          | O35490 | 0          | n +14.02 Da,K +28.03 Da,             | 2463.516438 | 3 | 709.745  | 51443700  | 40377200  |
| NIDVLKATAEEISSKtGNKVH        | Q9CQ62 | 0          | n +28.03 Da,K +28.03 Da,             | 2470.05339  | 4 | 592.3383 | 630126976 | 436760000 |
| SPVLLDNPVLGSMaKKYNR          | P70694 | 0          | n +34.06 Da,K +34.06 Da,             | 2470.620315 | 4 | 547.3132 | 462729984 | 256826000 |
| MDFSKLPKIR                   | P50516 | 0          | n +42.03 Da,K +34.06 Da,             | 2471.655148 | 3 | 444.9284 | 482345984 | 443615008 |
| LVINLPNNNTKfVHDNYVIR         | Q8C196 | 0          | n +28.03 Da,K +28.03 Da,             | 2474.683024 | 4 | 607.5723 | 27225800  | 414073984 |
| TIGGGDDSFNTFFSETGAGKHVPR     | P05213 | 0          | n +34.06 Da,                         | 2488.256515 | 4 | 639.0642 | 430142016 | 433230016 |
| FPALTPeQKKELSEIAQR           | Q91Y97 | 0          | n +28.03 Da,K +28.03 Da,             | 2496.043673 | 3 | 723.747  | 2.108E+09 | 1.547E+09 |
| FPALTPeQKKELSEIAQR           | Q91Y97 | 0          | n +28.03 Da,K +28.03 Da,             | 2498.230817 | 4 | 543.0627 | 1.293E+09 | 931684992 |
| GYASMLPYSKDRDAFKR            | P50538 | 0.03851321 | n +28.03 Da,K +28.03 Da,             | 2518.806913 | 4 | 520.0164 | 776489984 | 549632000 |
| LLLPgELAKHAVSEGTkAVTKY       | P10853 | 0          | n +28.03 Da,K +28.03 Da,             | 2547.381547 | 5 | 488.2942 | 77222000  | 77109400  |
| TVMPAWVIDKYGKNEVLR           | Q924D0 | 0          | n +34.06 Da,K +34.06 Da,             | 2556.761019 | 4 | 555.3341 | 37437300  | 256818000 |
| AKVEQVLSLEPQHELKFR           | Q9QY76 | 0          | n +42.03 Da,K +34.06 Da,             | 2560.322924 | 4 | 565.5683 | 2.67E+09  | 2.315E+09 |
| TVMPAWVIDKYGKNEVLR           | Q924D0 | 0          | n +34.06 Da,K +34.06 Da,             | 2562.047603 | 3 | 735.0816 | 335451008 | 309171008 |
| HGDLaFVDVPNDSSfQIVKNPR       | Q61176 | 0          | n +28.03 Da,K +28.03 Da,             | 2564.578235 | 4 | 628.5802 | 266318000 | 303815008 |
| SRPDAWGVTkGAaELMQQkEATTEQQLR | O35490 | 0          | n +34.06 Da,K +34.06 Da,             | 2565.465952 | 4 | 804.1737 | 267026000 | 156427008 |
| FLLaVMSfDRYVAICNPLR          | Q9Z1V0 | 0.00217391 | n +34.06 Da,                         | 2568.292533 | 4 | 580.566  | 87269296  | 29064300  |
| FPALTPeQKKELSEIAQR           | Q91Y97 | 0          | n +42.03 Da,n +28.03 Da,K +28.03 Da, | 2570.083481 | 4 | 546.5657 | 861104000 | 644041984 |
| KELDPVQKLfVDKIR              | P97450 | 0          | n +28.03 Da,K +28.03 Da,             | 2573.773539 | 4 | 485.7949 | 134720000 | 61076800  |
| SLKEEVGALAKVLR               | P16331 | 0          | n +28.03 Da,K +28.03 Da,             | 2573.926025 | 4 | 396.9832 | 67527104  | 52242100  |
| TVMPAWVIDKYGKNEVLR           | Q924D0 | 0          | n +28.03 Da,K +28.03 Da,             | 2574.533036 | 4 | 551.5633 | 602486016 | 81492896  |
| GKADPLGLEAEKDGVPVfKFPR       | Q8R0Y6 | 0          | n +34.06 Da,K +34.06 Da,             | 2578.728267 | 4 | 626.6348 | 76148704  | 429820000 |
| PLGLEAEKDGVPVfKFPR           | Q8R0Y6 | 0          | n +17.03 Da,K +34.06 Da,             | 2580.746408 | 4 | 521.8295 | 32655200  | 18667400  |
| SVTGWkEIEYEVVR               | Q8C196 | 0          | n +34.06 Da,K +34.06 Da,             | 2583.551784 | 3 | 584.3179 | 188678000 | 108670000 |
| NKELDPVQKLfVDKIR             | P97450 | 0          | n +28.03 Da,K +28.03 Da,             | 2591.963765 | 2 | 677.871  | 85379800  | 134952992 |
| AKVEQVLSLEPQHELKFR           | Q9QY76 | 0          | n +42.03 Da,K +28.03 Da,             | 2595.250135 | 4 | 563.0723 | 3.222E+10 | 2.947E+10 |
| AKVEQVLSLEPQHELKFR           | Q9QY76 | 0          | n +42.03 Da,K +34.06 Da,             | 2595.395201 | 3 | 750.4266 | 4.352E+09 | 4.013E+09 |
| IDQLITISGMVIR                | P49717 | 0.01726619 | n +42.03 Da,                         | 2602.421145 | 3 | 498.9463 | 497443008 | 518704992 |
| PLGLEAEKDGVPVfKFPR           | Q8R0Y6 | 0          | n +14.02 Da,K +28.03 Da,             | 2602.627195 | 4 | 517.3209 | 76768800  | 361736000 |
| NKELDPVQKLfVDKIR             | P97450 | 0          | n +28.03 Da,K +28.03 Da,             | 2604.149968 | 4 | 514.3059 | 731860992 | 363753984 |
| AKVEQVLSLEPQHELKFR           | Q9QY76 | 0          | n +42.03 Da,K +28.03 Da,             | 2608.94842  | 4 | 560.8117 | 71256600  | 1.166E+09 |
| VSKDASPGSPLEKLVSSVSDLPKR     | P54869 | 0.00996512 | n +28.03 Da,K +28.03 Da,             | 2615.018476 | 5 | 522.504  | 1.525E+09 | 974496000 |
| PLGLEAEKDGVPVfKFPR           | Q8R0Y6 | 0          | n +17.03 Da,K +34.06 Da,             | 2617.473296 | 3 | 694.4182 | 430524000 | 1.257E+09 |
| PLGLEAEKDGVPVfKFPR           | Q8R0Y6 | 0          | n +17.03 Da,K +34.06 Da,             | 2618.306267 | 4 | 521.0661 | 3.027E+09 | 8.359E+09 |
| PLGLEAEKDGVPVfKFPR           | Q8R0Y6 | 0          | n +14.02 Da,K +28.03 Da,             | 2621.569028 | 4 | 518.0503 | 3.94E+09  | 3.041E+09 |

|                                 |        |            |                          |             |   |          |           |           |
|---------------------------------|--------|------------|--------------------------|-------------|---|----------|-----------|-----------|
| VSFELFADKVPKTAENFR              | P17742 | 0          | n +28.03 Da,K +28.03 Da, | 2622.510974 | 4 | 546.3079 | 140032000 | 42984500  |
| GILKVPAINVNDVTKSKFDNLYGCR       | P50247 | 0          | n +28.03 Da,K +28.03 Da, | 2626.948266 | 5 | 601.9316 | 12005600  | 1847190   |
| PLGLEAEKDGVPVFKFPR              | Q8R0Y6 | 0          | n +17.03 Da,K +34.06 Da, | 2634.494275 | 3 | 690.3978 | 97274896  | 93338496  |
| NKELDPVQKLFVDKIR                | P97450 | 0          | n +28.03 Da,K +28.03 Da, | 2654.858663 | 4 | 513.547  | 564336000 | 1.178E+09 |
| PLGLEAEKDGVPVFKFPR              | Q8R0Y6 | 0          | n +14.02 Da,K +28.03 Da, | 2660.766627 | 4 | 517.3172 | 97038200  | 366660000 |
| VSFELFADKVPKTAENFR              | P17742 | 0          | n +28.03 Da,K +28.03 Da, | 2664.465402 | 4 | 543.2895 | 210407008 | 244647008 |
| DVALEGVGHFFR                    | P29391 | 0          | n +34.06 Da,             | 2665.076827 | 3 | 458.9101 | 227507008 | 300142016 |
| AGVHSGDATLMLPTQTISQGAIEKVKDATR  | Q8C196 | 0          | n +34.06 Da,K +34.06 Da, | 2666.752061 | 5 | 636.7476 | 1.246E+09 | 1.656E+09 |
| GVHSGDATLMLPTQTISQGAIEKVKDATR   | Q8C196 | 0          | n +28.03 Da,K +28.03 Da, | 2668.076113 | 5 | 622.5408 | 216050000 | 303816992 |
| PFLDIQKKGISLDR                  | Q99LY9 | 0          | n +14.02 Da,K +28.03 Da, | 2669.046066 | 4 | 454.0293 | 677566016 | 47371500  |
| PLGLEAEKDGVPVFKFPR              | Q8R0Y6 | 0          | n +14.02 Da,K +28.03 Da, | 2669.313134 | 4 | 517.2992 | 30913800  | 63235700  |
| PFLDIQKKGISLDR                  | Q99LY9 | 0          | n +17.03 Da,K +34.06 Da, | 2669.619241 | 4 | 457.0449 | 633828992 | 887713984 |
| FDRDDVALEGVGHFFR                | P29391 | 0          | n +28.03 Da,             | 2672.881727 | 4 | 477.7406 | 86353104  | 118157000 |
| AGVHSGDATLMLPTQTISQGAIEKVKDATR  | Q8C196 | 0          | n +34.06 Da,K +34.06 Da, | 2674.490929 | 4 | 795.6827 | 1.231E+09 | 1.242E+09 |
| VSFELFADKVPKTAENFR              | P17742 | 0          | n +42.03 Da,K +34.06 Da, | 2675.274169 | 4 | 549.8066 | 67969296  | 50057100  |
| AGVHSGDATLMLPTQTISQGAIEKVKDATR  | Q8C196 | 0          | n +34.06 Da,K +34.06 Da, | 2677.711887 | 5 | 639.7651 | 24903900  | 401668000 |
| LVEDFNKNKYEDEINKR               | P11679 | 0.0297619  | n +28.03 Da,K +28.03 Da, | 2684.545713 | 4 | 538.7875 | 8909370   | 3689910   |
| THVEMGPPDPILGVTEAFKR            | P05202 | 0          | n +28.03 Da,K +28.03 Da, | 2690.407436 | 4 | 563.3188 | 179600000 | 181887008 |
| GDKDIGNIISDAMKKVGR              | P63038 | 0          | n +34.06 Da,K +34.06 Da, | 2692.471895 | 4 | 513.3179 | 218376000 | 1.035E+09 |
| EKVLVFPVGGSHWLSMR               | B2RT14 | 0          | n +28.03 Da,K +28.03 Da, | 2703.198056 | 4 | 500.2804 | 97325296  | 94107200  |
| PSMSRPDAWGVTKGAAELMQQKEATTEQQLR | O35490 | 0          | n +17.03 Da,K +34.06 Da, | 2703.564239 | 5 | 706.1735 | 500672000 | 1.449E+09 |
| THVEMGPPDPILGVTEAFKR            | P05202 | 0          | n +34.06 Da,K +34.06 Da, | 2706.78176  | 2 | 563.315  | 48298800  | 18916300  |
| VSFELFADKVPKTAENFR              | P17742 | 0          | n +28.03 Da,K +28.03 Da, | 2707.895553 | 4 | 546.3037 | 303115008 | 163388992 |
| PSMSRPDAWGVTKGAAELMQQKEATTEQQLR | O35490 | 0          | n +14.02 Da,K +28.03 Da, | 2708.583225 | 5 | 703.7607 | 676492992 | 344496000 |
| PGSPQLQVLKHDLMNVYR              | P19096 | 0          | n +17.03 Da,K +34.06 Da, | 2732.312157 | 4 | 593.5809 | 24631200  | 99806096  |
| VLSGEDKSNIAAWGKIGGHGAEYGAEALER  | P01942 | 0          | n +28.03 Da,K +28.03 Da, | 2735.2914   | 5 | 665.9496 | 624060992 | 152048992 |
| ALHVPKAPGFAQMLKDGAKHF           | P42932 | 0          | n +42.03 Da,K +28.03 Da, | 2736.465317 | 5 | 478.6703 | 52563000  | 52866300  |
| VLSGEDKSNIAAWGKIGGHGAEYGAEALER  | P01942 | 0          | n +28.03 Da,K +28.03 Da, | 2739.932131 | 4 | 832.1838 | 878940032 | 295240992 |
| PGSPQLQVLKHDLMNVYR              | P19096 | 0          | n +17.03 Da,K +34.06 Da, | 2742.515745 | 4 | 592.0716 | 207836992 | 167688000 |
| PKNVVGDHADDVYVFGAPILR           | Q91WU0 | 0          | n +14.02 Da,K +28.03 Da, | 2747.958797 | 3 | 804.4284 | 3.465E+09 | 3.018E+09 |
| PKNVVGDHADDVYVFGAPILR           | Q91WU0 | 0.0294795  | n +14.02 Da,K +28.03 Da, | 2748.45504  | 4 | 603.5734 | 6.723E+09 | 5.979E+09 |
| THVEMGPPDPILGVTEAFKR            | P05202 | 0          | n +34.06 Da,K +34.06 Da, | 2751.227691 | 4 | 563.3038 | 836766016 | 887185984 |
| TPGFGDKTFVVQGGFNVGLHSMR         | P26443 | 0          | n +34.06 Da,K +34.06 Da, | 2754.671497 | 4 | 630.5926 | 67111904  | 78097104  |
| LPQFTSAGESFNKLVSGKLR            | Q9CPY7 | 0          | n +34.06 Da,K +34.06 Da, | 2762.41026  | 4 | 570.3541 | 127963000 | 884380032 |
| FIPLSQKDLENLKAIEVAR             | Q5SW19 | 0          | n +34.06 Da,K +34.06 Da, | 2776.180477 | 4 | 539.5677 | 135274000 | 428926016 |
| TLDMVFLDHWKDR                   | O88587 | 0          | n +28.03 Da,K +28.03 Da, | 2776.210935 | 4 | 433.7274 | 58411000  | 52205800  |
| GSEAAQLLEAADFAAHKHR             | Q9D114 | 0          | n +42.03 Da,K +34.06 Da, | 2783.723676 | 4 | 523.77   | 1.405E+09 | 1.486E+09 |
| GSEAAQLLEAADFAAHKHR             | Q9D114 | 0          | n +42.03 Da,K +34.06 Da, | 2784.051196 | 3 | 698.024  | 3.451E+09 | 3.776E+09 |
| LPQFTSAGESFNKLVSGKLR            | Q9CPY7 | 0.00111732 | n +34.06 Da,K +34.06 Da, | 2793.08679  | 4 | 566.585  | 1.5E+10   | 1.265E+10 |
| TLMMLPTQTISQGAIEKVKDATR         | Q8C196 | 0          | n +28.03 Da,K +28.03 Da, | 2799.244662 | 4 | 622.1069 | 1.033E+09 | 1.258E+09 |

|                                     |        |            |                          |             |   |          |           |           |
|-------------------------------------|--------|------------|--------------------------|-------------|---|----------|-----------|-----------|
| ASPGSPLEKLVSSVSDLPKR                | P54869 | 0          | n +34.06 Da,K +34.06 Da, | 2803.370449 | 4 | 538.5655 | 148760992 | 135856992 |
| ASGVSDGAGAVIIASEDAVKKHNFTPLAR       | Q8BWT1 | 0          | n +28.03 Da,K +28.03 Da, | 2803.63238  | 5 | 593.9282 | 143862000 | 116331000 |
| PYNPSMSRPDAWGVTKGAAELMQQKEATTEQQLR  | O35490 | 0          | n +28.03 Da,K +28.03 Da, | 2809.58872  | 5 | 781.3899 | 3.677E+10 | 2.945E+10 |
| PYNPSMSRPDAWGVTKGAAELMQQKEATTEQQLR  | O35490 | 0          | n +28.03 Da,K +28.03 Da, | 2809.764935 | 4 | 976.4841 | 2.363E+10 | 1.913E+10 |
| PYNPSMSRPDAWGVTKGAAELMQQKEATTEQQLR  | O35490 | 0          | n +28.03 Da,K +28.03 Da, | 2809.77183  | 3 | 1301.644 | 531745984 | 396518016 |
| ATLMLPTQTISQGAIEKVKDATR             | Q8C196 | 0          | n +28.03 Da,K +28.03 Da, | 2819.28327  | 4 | 639.8667 | 422192992 | 446971008 |
| DFLSSSSDKQNNLYKGLEAFR               | P54869 | 0          | n +34.06 Da,K +34.06 Da, | 2819.573078 | 4 | 626.5761 | 50369900  | 44385500  |
| PDAWGVTKGAAELMQQKEATTEQQLR          | O35490 | 0          | n +14.02 Da,K +28.03 Da, | 2825.102934 | 4 | 739.8852 | 16851400  | 9408850   |
| MLGPÉGGEGYVVKLR                     | Q9Z2X1 | 0          | n +42.03 Da,K +28.03 Da, | 2837.754056 | 2 | 837.9454 | 47639200  | 53428200  |
| PKTVTGDHGDDEVYSVFGAPILR             | D3Z298 | 0.00662589 | n +17.03 Da,K +34.06 Da, | 2855.365534 | 4 | 603.07   | 1.28E+10  | 1.192E+10 |
| PYNPSMSRPDAWGVTKGAAELMQQKEATTEQQLR  | O35490 | 0          | n +14.02 Da,K +28.03 Da, | 2858.173974 | 4 | 972.9911 | 2.479E+09 | 1.963E+09 |
| GVSDGAGAVIIASEDAVKKHNFTPLAR         | Q8BWT1 | 0          | n +34.06 Da,K +34.06 Da, | 2859.538807 | 5 | 565.9326 | 6110190   | 60045100  |
| ASGVSDGAGAVIIASEDAVKKHNFTPLAR       | Q8BWT1 | 0          | n +34.06 Da,K +34.06 Da, | 2867.898048 | 5 | 596.9437 | 60185400  | 581820032 |
| ASGVSDGAGAVIIASEDAVKKHNFTPLAR       | Q8BWT1 | 0          | n +34.06 Da,K +34.06 Da, | 2871.305619 | 4 | 742.1584 | 687436992 | 672585984 |
| ASGVSDGAGAVIIASEDAVKKHNFTPLAR       | Q8BWT1 | 0          | n +34.06 Da,K +34.06 Da, | 2873.666881 | 5 | 593.9283 | 2.286E+09 | 2.335E+09 |
| ASASSTNLKDVLSNLIPEQAR               | Q9CZU6 | 0          | n +28.03 Da,K +28.03 Da, | 2875.118378 | 4 | 607.3455 | 493193984 | 362488000 |
| ASASSTNLKDVLSNLIPEQAR               | Q9CZU6 | 0          | n +34.06 Da,K +34.06 Da, | 2879.714715 | 4 | 611.1163 | 13989700  | 93332800  |
| VRMNVLADALKSINNAEKR                 | P62245 | 0          | n +42.03 Da,K +28.03 Da, | 2888.269012 | 4 | 560.8193 | 79205504  | 29414000  |
| HVEDAGVHSGDATLMLPTQTISQGAIEKVKDATR  | Q8C196 | 0          | n +28.03 Da,K +28.03 Da, | 2888.269821 | 5 | 732.7782 | 104288000 | 105197000 |
| GVSDGAGAVIIASEDAVKKHNFTPLAR         | Q8BWT1 | 0          | n +34.06 Da,K +34.06 Da, | 2890.783979 | 5 | 562.3139 | 201976000 | 167316000 |
| SGVSDGAGAVIIASEDAVKKHNFTPLAR        | Q8BWT1 | 0          | n +28.03 Da,K +28.03 Da, | 2897.820823 | 5 | 579.7206 | 1.746E+09 | 1.553E+09 |
| SSPSAKDIKKILDSVGEIADDR              | P99027 | 0.01996198 | n +28.03 Da,K +28.03 Da, | 2904.465726 | 4 | 642.0936 | 14244500  | 65415700  |
| AALAPLPPPLPAQFKSIQHHLR              | Q9CR26 | 0          | n +42.03 Da,K +34.06 Da, | 2907.880149 | 4 | 596.1064 | 428275008 | 256080992 |
| TVTAGNASGVSDGAGAVIIASEDAVKKHNFTPLAR | Q8BWT1 | 0          | n +34.06 Da,K +34.06 Da, | 2925.087119 | 5 | 702.5816 | 463255008 | 439974016 |
| SGDATLMLPTQTISQGAIEKVKDATR          | Q8C196 | 0          | n +34.06 Da,K +34.06 Da, | 2925.92033  | 4 | 704.6366 | 971960000 | 941843968 |
| SSPSAKDIKKILDSVGEIADDR              | P99027 | 0.01996198 | n +28.03 Da,K +28.03 Da, | 2926.808098 | 2 | 643.6018 | 81550800  | 74449400  |
| PLNELLPLAYIEDPKKNR                  | P28665 | 0          | n +14.02 Da,K +28.03 Da, | 2928.446824 | 4 | 549.0714 | 89602000  | 49529800  |
| GGDLTNLIHTKYPQLLSGIR                | P50247 | 0          | n +34.06 Da,K +34.06 Da, | 2948.012104 | 4 | 563.8248 | 1.741E+09 | 1.996E+09 |
| AELQEVQITEEKPLPGQTPETAKEAELAAR      | Q9QYG0 | 0          | n +42.03 Da,K +28.03 Da, | 2948.07252  | 3 | 1163.29  | 124725000 | 71605200  |
| VYDLTKFLEEHPGGEEVLR                 | P56395 | 0.0294795  | n +34.06 Da,K +34.06 Da, | 2948.236521 | 4 | 572.5545 | 1.032E+09 | 1.125E+09 |
| AELQEVQITEEKPLPGQTPETAKEAELAAR      | Q9QYG0 | 0          | n +42.03 Da,K +28.03 Da, | 2952.32701  | 4 | 872.7185 | 847673984 | 751235008 |
| TALQEVLTALIHDLGLAR                  | P63323 | 0          | n +28.03 Da,K +28.03 Da, | 2956.51424  | 4 | 502.0507 | 442633984 | 425284992 |
| GGDLTNLIHTKYPQLLSGIR                | P50247 | 0          | n +28.03 Da,K +28.03 Da, | 2962.819161 | 3 | 751.4346 | 105137000 | 130196000 |
| SGFEGFLKDQFTTLPEVKDR                | P25688 | 0          | n +34.06 Da,K +34.06 Da, | 2967.64445  | 4 | 600.322  | 318355008 | 287040992 |
| PMILGYWNVNVR                        | P10649 | 0          | n +14.02 Da,             | 2975.38636  | 2 | 631.8392 | 436235008 | 428528992 |
| SGFEGFLKDQFTTLPEVKDR                | P25688 | 0          | n +34.06 Da,K +34.06 Da, | 2980.303055 | 4 | 604.0883 | 55956700  | 101822000 |
| TKSLGQWLQEEKVPAYGVDTR               | Q8C196 | 0          | n +34.06 Da,K +34.06 Da, | 2984.244029 | 4 | 655.1305 | 33419800  | 315955008 |
| TKSLGQWLQEEKVPAYGVDTR               | Q8C196 | 0          | n +34.06 Da,K +34.06 Da, | 2986.241542 | 3 | 868.1447 | 123193000 | 96678200  |
| EPVLLPEPVVLAALAEKHGR                | Q9JII6 | 0          | n +34.06 Da,K +34.06 Da, | 2986.460545 | 4 | 539.5678 | 103209000 | 101169000 |
| TKSLGQWLQEEKVPAYGVDTR               | Q8C196 | 0          | n +28.03 Da,K +28.03 Da, | 2986.506279 | 4 | 651.3628 | 423672000 | 326702016 |

|                                    |        |            |                                      |             |   |          |           |           |
|------------------------------------|--------|------------|--------------------------------------|-------------|---|----------|-----------|-----------|
| MEEIYAKFVSQKISKTR                  | P59235 | 0          | n +42.03 Da,K +34.06 Da,             | 2988.010648 | 4 | 546.8082 | 565310016 | 550816000 |
| GTVTASNAGVSDGAGAVIIASEDAVKKHNFPLAR | Q8BWT1 | 0          | n +34.06 Da,K +34.06 Da,             | 2990.388191 | 5 | 713.9855 | 736873024 | 674636992 |
| DLFSDGHSEFLKAASNLR                 | P27773 | 0          | n +28.03 Da,K +28.03 Da,             | 2990.55332  | 4 | 516.5199 | 48561600  | 32736100  |
| SGSKYKAPLALPSTLDPAEYDVSPETR        | Q9CQC7 | 0          | n +42.03 Da,K +28.03 Da,             | 3002.125272 | 3 | 1063.55  | 315646016 | 293574016 |
| GTVTASNAGVSDGAGAVIIASEDAVKKHNFPLAR | Q8BWT1 | 0          | n +34.06 Da,K +34.06 Da,             | 3003.414394 | 5 | 717.0012 | 58233700  | 504948992 |
| PGLLLLGDEAPNFEANTTIGR              | O08709 | 0          | n +17.03 Da,                         | 3008.828522 | 3 | 719.3709 | 441763008 | 406152000 |
| ALKNPFNGVLLMGEAGKQLR               | P50544 | 0          | n +28.03 Da,K +28.03 Da,             | 3011.307873 | 4 | 575.0845 | 59679000  | 34419400  |
| TVTASNAGVSDGAGAVIIASEDAVKKHNFPLAR  | Q8BWT1 | 0          | n +34.06 Da,K +34.06 Da,             | 3011.472798 | 5 | 702.5808 | 1.311E+09 | 1.247E+09 |
| PGLLLLGDEAPNFEANTTIGR              | O08709 | 0          | n +14.02 Da,                         | 3013.056679 | 2 | 1078.553 | 124040000 | 107940000 |
| PVIVEPLEQLDDEDGLPEKLAQKNPMYQKER    | Q8VIJ6 | 0          | n +14.02 Da,K +28.03 Da,             | 3018.334951 | 5 | 744.7964 | 256610000 | 214068992 |
| ASGVSDGAGAVIIASEDAVKKHNFPLAR       | Q8BWT1 | 0          | n +34.06 Da,K +34.06 Da,             | 3021.259852 | 4 | 596.0445 | 79650600  | 31311800  |
| PYNPSMSRPDAWGVTGAAELMQQKEATTEQQLR  | O35490 | 0.04048043 | n +14.02 Da,K +28.03 Da,             | 3038.465872 | 5 | 777.9834 | 100638000 | 276052992 |
| ASGVSDGAGAVIIASEDAVKKHNFPLAR       | Q8BWT1 | 0          | n +34.06 Da,K +34.06 Da,             | 3048.550188 | 5 | 593.9272 | 28569700  | 30670100  |
| NFNVQKINGEWHHTIILASDKR             | A2AKN9 | 0          | n +28.03 Da,K +28.03 Da,             | 3052.446862 | 4 | 642.5965 | 398534016 | 414727008 |
| TQSGFEGFLKDQFTTLPEVKDR             | P25688 | 0          | n +28.03 Da,                         | 3052.551555 | 4 | 657.5989 | 64573300  | 42703000  |
| ADEIAKAQVAQPGGDTIFGKIIR            | P70349 | 0          | n +42.03 Da,n +34.06 Da,K +34.06 Da, | 3068.155635 | 4 | 623.3308 | 131884000 | 138134000 |
| PAGDWSTFPAPWLKSR                   | Q8R1G2 | 0          | n +14.02 Da,K +28.03 Da,             | 3072.925188 | 3 | 587.6425 | 79608304  | 60866000  |
| ADEIAKAQVAQPGGDTIFGKIIR            | P70349 | 0          | n +42.03 Da,n +34.06 Da,K +34.06 Da, | 3075.042843 | 3 | 830.7717 | 634985984 | 581500992 |
| DVSLTHLTFGKEFTEAVEAKQVAQQAER       | P67778 | 0          | n +34.06 Da,K +34.06 Da,             | 3075.857471 | 4 | 837.1873 | 68014000  | 54146700  |
| ADEIAKAQVAQPGGDTIFGKIIR            | P70349 | 0          | n +42.03 Da,n +34.06 Da,K +34.06 Da, | 3079.322967 | 4 | 627.0977 | 58530700  | 230730000 |
| PVEEAIKFAQTIVIGPIEPR               | Q9DBM2 | 0          | n +14.02 Da,K +28.03 Da,             | 3083.856258 | 4 | 573.8392 | 36702400  | 23284900  |
| ANVADTKLYDILGVPPGASENELKKAYR       | Q9QYJ0 | 0.00111732 | n +42.03 Da,K +34.06 Da,             | 3099.044198 | 2 | 790.4321 | 626316992 | 559102016 |
| ASASYHISNLEKMTSSDKDFR              | Q6ZQ38 | 0          | n +42.03 Da,K +34.06 Da,             | 3100.519879 | 4 | 650.3276 | 693200000 | 679196032 |
| ADEIAKAQVAQPGGDTIFGKIIR            | P70349 | 0          | n +42.03 Da,n +28.03 Da,K +28.03 Da, | 3101.682208 | 3 | 832.7986 | 3.051E+09 | 2.842E+09 |
| YTWSDVGLVEKLR                      | E0CYU6 | 0          | n +42.03 Da,K +34.06 Da,             | 3102.330459 | 4 | 480.7793 | 74363000  | 82672896  |
| ADEIAKAQVAQPGGDTIFGKIIR            | P70349 | 0          | n +42.03 Da,n +28.03 Da,K +28.03 Da, | 3103.619125 | 4 | 624.8509 | 456699008 | 379563008 |
| PGVVDNFPLLKALR                     | P30115 | 0          | n +17.03 Da,K +34.06 Da,             | 3103.939275 | 3 | 527.6555 | 90736096  | 73994400  |
| ASASYHISNLEKMTSSDKDFR              | Q6ZQ38 | 0          | n +42.03 Da,K +34.06 Da,             | 3104.430532 | 4 | 652.5891 | 55951600  | 528051008 |
| MDNLSDTLKLKITAADR                  | E9Q6Q4 | 0          | n +42.03 Da,n +28.03 Da,K +28.03 Da, | 3106.401852 | 4 | 540.5582 | 58989400  | 54108500  |
| ASASYHISNLEKMTSSDKDFR              | Q6ZQ38 | 0          | n +42.03 Da,K +34.06 Da,             | 3106.47611  | 3 | 866.7657 | 45524100  | 40457400  |
| TGKPNPDQLLKELPPLNTR                | Q78JT3 | 0          | n +28.03 Da,K +28.03 Da,             | 3107.213492 | 4 | 586.8112 | 402824992 | 411567008 |
| SVEAGEKLVKTALDTFGR                 | P51660 | 0          | n +28.03 Da,K +28.03 Da,             | 3114.75127  | 3 | 669.05   | 81397200  | 65822300  |
| AKEWGYASHNGPDHWHELYPIAKGDNQSPIELH  | P16015 | 0          | n +34.06 Da,K +34.06 Da,             | 3123.821087 | 5 | 778.1896 | 1.341E+09 | 979102976 |
| AKEWGYASHNGPDHWHELYPIAKGDNQSPIELH  | P16015 | 0          | n +34.06 Da,K +34.06 Da,             | 3125.912719 | 4 | 972.4857 | 1.762E+09 | 1.412E+09 |
| HDLLPHLARKRRRVPSPERSYS             | Q8QZV0 | 0.04388298 | n +42.03 Da,n +28.03 Da,             | 3161.827131 | 3 | 933.4967 | 50766900  | 37233100  |
| SSPAQPAVPAPLADLKIHTKIF             | P24549 | 0          | n +42.03 Da,K +28.03 Da,             | 3188.295259 | 3 | 843.1467 | 91945504  | 79207296  |
| DLPQFTSAGESFNKLVSGKLR              | Q9CPY7 | 0.00269687 | n +28.03 Da,K +28.03 Da,             | 3201.890098 | 4 | 595.3327 | 66499700  | 63307600  |
| VHLTDAEKAASVSLWGKVNSEVGGGALGR      | P02088 | 0          | n +34.06 Da,K +34.06 Da,             | 3209.66183  | 4 | 817.6957 | 16786300  | 85476400  |
| VHLTDAEKAASVSLWGKVNSEVGGGALGR      | P02088 | 0          | n +28.03 Da,K +28.03 Da,             | 3212.484977 | 4 | 813.9227 | 960460992 | 334324992 |
| VHLTDAEKAASVSLWGKVNSEVGGGALGR      | P02088 | 0          | n +34.06 Da,K +34.06 Da,             | 3212.803526 | 5 | 651.3396 | 1.172E+09 | 395105984 |

|                                  |        |            |                                      |             |   |          |           |           |
|----------------------------------|--------|------------|--------------------------------------|-------------|---|----------|-----------|-----------|
| SVVVAQAQTLNSNAEFQMLR             | Q8C196 | 0          | n +34.06 Da,                         | 3225.581096 | 3 | 697.0445 | 42562000  | 28350300  |
| GILEKISEIEKEIAR                  | Q9QXB9 | 0          | n +34.06 Da,K +34.06 Da,             | 3238.610799 | 4 | 457.5461 | 24354700  | 132703000 |
| DGGDLTNLIHTKYPQLLSGIR            | P50247 | 0          | n +28.03 Da,K +28.03 Da,             | 3242.386992 | 4 | 592.5817 | 88686200  | 82353696  |
| GILEKISEIEKEIAR                  | Q9QXB9 | 0          | n +34.06 Da,K +34.06 Da,             | 3244.294504 | 3 | 609.7258 | 75749000  | 404264000 |
| SVVVAQAQTLNSNAEFQMLR             | Q8C196 | 0          | n +28.03 Da,                         | 3246.530183 | 2 | 1045.07  | 200395008 | 192478000 |
| SVVVAQAQTLNSNAEFQMLR             | Q8C196 | 0          | n +28.03 Da,                         | 3248.594713 | 3 | 697.0489 | 704406976 | 654891008 |
| GILEKISEIEKEIAR                  | Q9QXB9 | 0          | n +34.06 Da,K +34.06 Da,             | 3252.625023 | 4 | 453.7765 | 270688992 | 193691008 |
| MELVEVLKR                        | Q7TMF3 | 0.00269687 | n +42.03 Da,K +34.06 Da,             | 3254.970553 | 2 | 593.847  | 231544992 | 200115008 |
| GILEKISEIEKEIAR                  | Q9QXB9 | 0          | n +34.06 Da,K +34.06 Da,             | 3255.438211 | 3 | 604.6995 | 318535008 | 240512000 |
| VHLTDAEKA AVSCLWGK VNSDEVGGEALGR | P02088 | 0          | n +28.03 Da,K +28.03 Da,             | 3276.080666 | 4 | 811.663  | 225066000 | 161131008 |
| PSDDTKGFFDPNTHENTLYQLLER         | Q8R0W0 | 0          | n +17.03 Da,K +34.06 Da,             | 3303.060953 | 4 | 748.8713 | 30202500  | 24506400  |
| AGYEYVSPEQLSGFDKYKY              | Q80TA1 | 0          | n +42.03 Da,K +28.03 Da,             | 3384.981372 | 3 | 781.3771 | 21235900  | 17846500  |
| GKAQRDGAAPVASEEAVEAAQLR          | G3UWS4 | 0.04724409 | n +42.03 Da,K +34.06 Da,             | 3385.366713 | 4 | 599.3179 | 1.402E+09 | 723825024 |
| MPFMDFLTKDGFKSPPEELR             | P52196 | 0          | n +34.06 Da,K +34.06 Da,             | 3387.029322 | 4 | 626.0658 | 12247600  | 12548000  |
| NMQGLVEDFKNKYEDEINKR             | P11679 | 0          | n +28.03 Da,K +28.03 Da,             | 3421.109681 | 4 | 646.3278 | 321164000 | 273808000 |
| VLLESEQFLTELTR                   | P16254 | 0          | n +34.06 Da,                         | 3479.511711 | 2 | 853.4731 | 47963000  | 42780300  |
| DDDIAALVVDNGSGMCKAGFAGDDAPR      | P60710 | 0          | n +42.03 Da,K +28.03 Da,             | 3483.472336 | 3 | 936.4238 | 28112000  | 24889400  |
| PTTQQSPQDEQEKLLEAIQAVKVQSFQMKR   | Q9EQH3 | 0          | n +17.03 Da,n +34.06 Da,K +34.06 Da, | 3485.816338 | 5 | 744.2141 | 41219100  | 99954304  |
| ASLSLAPVNIKAGADEER               | P80314 | 0          | n +42.03 Da,K +34.06 Da,             | 3493.832383 | 3 | 686.7008 | 380441984 | 352320992 |
| PGASLPLNLKELEKDLDR               | Q05920 | 0          | n +14.02 Da,K +28.03 Da,             | 3499.818408 | 4 | 572.836  | 378155008 | 321904000 |
| ASGVAVSDGVIKVFNDMKVR             | P18760 | 0          | n +42.03 Da,K +34.06 Da,             | 3505.323684 | 3 | 730.7368 | 813598976 | 726883008 |
| LSPTNCDASEPLAEKVLDLINKGR         | Q9ESB3 | 0          | n +28.03 Da,K +28.03 Da,             | 3547.61896  | 4 | 681.8708 | 42085200  | 39479800  |
| TTSLELFMYLNEVAGKHGVR             | P16460 | 0.00111732 | n +42.03 Da,K +28.03 Da,             | 3622.772358 | 3 | 798.0829 | 571632000 | 615488000 |
| VHLTDAEKA AVSCLWGK VNSDEVGGEALGR | P02088 | 0.0225458  | n +42.03 Da,K +28.03 Da,             | 3643.279955 | 4 | 817.4329 | 118393000 | 372851008 |
| DPAIFYKEQFLDGDWNTNR              | P14211 | 0          | n +34.06 Da,K +34.06 Da,             | 3655.971514 | 3 | 781.3861 | 164575008 | 135616992 |
| ASGVTVNDEVIKVFNDMKVR             | P45591 | 0          | n +42.03 Da,K +34.06 Da,             | 3671.776825 | 3 | 773.7507 | 192110000 | 187391008 |
| APPVPGA VSGSGSEVDELFDVKNAF       | O89079 | 0          | n +34.06 Da,K +34.06 Da,             | 3691.902368 | 3 | 839.0951 | 50401500  | 46190100  |
| YVHPAQDDRQFLDSDIPR               | E9Q9G6 | 0.03438914 | n +34.06 Da,                         | 3705.897876 | 3 | 734.0396 | 16786800  | 18338600  |
| SSWWTHVEMGPPDPILGVTEAFKR         | P05202 | 0          | n +42.03 Da,K +28.03 Da,             | 3757.802782 | 3 | 937.4703 | 817206976 | 571078976 |
| SSWWTHVEMGPPDPILGVTEAFKR         | P05202 | 0          | n +42.03 Da,K +28.03 Da,             | 3764.574187 | 4 | 703.3547 | 1.076E+09 | 609299968 |
| NHQGLYFNDRM TLSQKNSR             | Q78T27 | 0.04640582 | n +34.06 Da,K +34.06 Da,             | 406.2495938 | 5 | 476.2479 | 2.342E+09 | 2.1E+09   |
| KKSTDEPSEKDALQPGR                | Q9QXD6 | 0.00682594 | n +28.03 Da,K +28.03 Da,             | 409.6147655 | 4 | 500.2773 | 1.972E+09 | 1.74E+09  |
| TIHHDQPMKPLDR                    | P17717 | 0.00483092 | n +28.03 Da,K +28.03 Da,             | 412.7815383 | 4 | 410.2299 | 25491500  | 14052000  |
| TEPIPV TAKHHVSGNR                | Q9D6Y7 | 0.01327886 | n +34.06 Da,K +34.06 Da,             | 440.5365636 | 5 | 360.6041 | 32262800  | 34605700  |
| TEPIPV TAKHHVSGNR                | Q9D6Y7 | 0          | n +28.03 Da,K +28.03 Da,             | 447.0262359 | 4 | 450.5039 | 548251008 | 525743008 |
| TIHHDQPMKPLDR                    | P17717 | 0          | n +28.03 Da,K +28.03 Da,             | 451.6235669 | 4 | 411.7225 | 716257024 | 630771008 |
| KKSTDEPSEKDALQPGR                | Q9QXD6 | 0          | n +42.03 Da,n +34.06 Da,K +34.06 Da, | 461.8769908 | 4 | 503.7812 | 2.263E+09 | 2.156E+09 |
| MKIEEVKSTTKTQR                   | P60122 | 0.00135501 | n +34.06 Da,K +34.06 Da,             | 470.4363982 | 4 | 453.7939 | 128730000 | 619032000 |
| GHRPVLVLSQNTKR                   | P80318 | 0          | n +28.03 Da,K +28.03 Da,             | 481.4989349 | 4 | 416.0048 | 743680000 | 1.169E+09 |
| GHRPVLVLSQNTKR                   | P80318 | 0          | n +34.06 Da,K +34.06 Da,             | 481.7798068 | 4 | 418.2668 | 48984400  | 352019008 |

|                               |        |            |                                      |             |   |          |           |           |
|-------------------------------|--------|------------|--------------------------------------|-------------|---|----------|-----------|-----------|
| IEEHNAKQPLPQKVR               | P97328 | 0.00263505 | n +28.03 Da,K +28.03 Da,             | 481.9353774 | 5 | 375.0237 | 66244700  | 54416800  |
| GHRPVLVLSQNTKR                | P80318 | 0          | n +34.06 Da,K +34.06 Da,             | 484.1203186 | 4 | 419.0209 | 1.014E+09 | 2.479E+09 |
| MKIEEVKSTTKTQR                | P60122 | 0.00135501 | n +28.03 Da,K +28.03 Da,             | 498.8107878 | 4 | 448.516  | 283183008 | 75862600  |
| IEEHNAKQPLPQKVR               | P97328 | 0.01724138 | n +34.06 Da,K +34.06 Da,             | 501.6326713 | 5 | 377.4359 | 108821000 | 85243600  |
| SRDEKVQLYR                    | P19783 | 0.00776915 | n +28.03 Da,K +28.03 Da,             | 523.0332647 | 4 | 338.1938 | 58119000  | 46774100  |
| AEKFAEEDKKLKER                | P20029 | 0.04640582 | n +28.03 Da,K +28.03 Da,             | 525.1611221 | 4 | 461.5073 | 21810600  | 30761200  |
| PSVALKSPR                     | P32020 | 0.00860215 | n +17.03 Da,K +34.06 Da,             | 526.5492132 | 3 | 332.8782 | 731604992 | 364065984 |
| PSVALKSPR                     | P32020 | 0.00860215 | n +17.03 Da,K +34.06 Da,             | 526.9256887 | 3 | 334.8889 | 92509504  | 316600000 |
| EGAKYVSHGATGKGNQVR            | P16460 | 0          | n +42.03 Da,K +34.06 Da,             | 534.9550973 | 4 | 521.0328 | 84946896  | 265604992 |
| SGAAVAATTEKVHHAKTTPQAQPER     | P22315 | 0          | n +34.06 Da,K +34.06 Da,             | 536.4406261 | 5 | 570.3403 | 48042100  | 233503008 |
| IKYHEEFEKSR                   | Q61792 | 0          | n +34.06 Da,K +34.06 Da,             | 538.4588336 | 4 | 388.2149 | 194043008 | 416612000 |
| MHTKPWIR                      | O35490 | 0.00776915 | n +28.03 Da,K +28.03 Da,             | 558.6536325 | 3 | 375.5517 | 42707300  | 35254100  |
| APVAGKKAKKGILR                | O35490 | 0.00776915 | n +42.03 Da,n +34.06 Da,K +34.06 Da, | 584.3935312 | 3 | 581.0824 | 1.534E+09 | 6.511E+09 |
| APVAGKKAKKGILR                | O35490 | 0.03867925 | n +42.03 Da,n +34.06 Da,K +34.06 Da, | 586.3552401 | 5 | 349.0523 | 1.843E+09 | 7.786E+09 |
| MVQEAEKYKAEDEKQR              | P63017 | 0          | n +28.03 Da,K +28.03 Da,             | 589.7204819 | 4 | 524.2782 | 83092704  | 43496300  |
| MVQEAEKYKAEDEKQR              | P63017 | 0.00860215 | n +28.03 Da,K +28.03 Da,             | 590.7966857 | 5 | 419.624  | 680694016 | 361436992 |
| SETAPAAPAAPAPAEKTPVKKKAR      | P43274 | 0          | n +28.03 Da,K +28.03 Da,             | 603.4656093 | 2 | 632.6294 | 419283008 | 322897984 |
| SETAPAAPAAPAPAEKTPVKKKAR      | P43274 | 0          | n +28.03 Da,K +28.03 Da,             | 603.5440649 | 2 | 506.3055 | 757699008 | 745868032 |
| RRLPPLPPR                     | O88668 | 0.01039501 | n +34.06 Da,                         | 620.6665478 | 3 | 377.2484 | 1.127E+09 | 399519008 |
| PEYKGEWKPR                    | P14211 | 0.0037594  | n +17.03 Da,K +34.06 Da,             | 624.5434375 | 4 | 343.7065 | 146070000 | 333054016 |
| PEYKGEWKPR                    | P14211 | 0.01229508 | n +17.03 Da,K +34.06 Da,             | 627.8630043 | 3 | 453.9187 | 192582000 | 135371008 |
| GKGDVPTKRPPVLR                | P12970 | 0.02167488 | n +34.06 Da,K +34.06 Da,             | 629.8925081 | 4 | 404.7611 | 310995008 | 1.295E+09 |
| SEAAPAAPAAAPPAEKAPAKKKAAPAGVR | P15864 | 0          | n +42.03 Da,n +28.03 Da,K +28.03 Da, | 634.2613824 | 2 | 790.9785 | 326958016 | 225843008 |
| TMVVHEKQDDLGLGGNEESTKTGNAGSR  | P08228 | 0          | n +28.03 Da,K +28.03 Da,             | 636.4949021 | 5 | 612.3052 | 241563008 | 222944992 |
| THQEIKGQKTLATPAVR             | P53395 | 0          | n +34.06 Da,K +34.06 Da,             | 639.1306409 | 4 | 491.2929 | 145732000 | 145532000 |
| YSHGSHTDEEFDAR                | P12787 | 0          | n +28.03 Da,                         | 651.1111084 | 3 | 603.2552 | 3.03E+09  | 1.529E+09 |
| GFLGKIDELR                    | D3Z4B0 | 0.01039501 | n +42.03 Da,K +28.03 Da,             | 652.5513043 | 3 | 404.5558 | 161460000 | 165072992 |
| SEDKITVHFKNR                  | P46656 | 0.00135501 | n +34.06 Da,K +34.06 Da,             | 660.7192488 | 4 | 390.224  | 232492000 | 231496000 |
| HHTFYNELR                     | P60710 | 0.01229508 | n +28.03 Da,                         | 661.1161358 | 3 | 415.5437 | 1.132E+09 | 941705024 |
| AAKGAHGTHLKVSEVER             | Q8BGB2 | 0          | n +42.03 Da,K +28.03 Da,             | 662.374201  | 4 | 505.0258 | 391043008 | 301260992 |
| TMVVHEKQDDLGLGGNEESTKTGNAGSR  | P08228 | 0          | n +34.06 Da,K +34.06 Da,             | 663.4641726 | 4 | 769.6595 | 87820096  | 188236000 |
| TMVVHEKQDDLGLGGNEESTKTGNAGSR  | P08228 | 0.0037594  | n +34.06 Da,K +34.06 Da,             | 664.1473483 | 5 | 615.9299 | 928995968 | 1.682E+09 |
| SDVHYWEHGR                    | Q64442 | 0          | n +34.06 Da,                         | 664.9629198 | 4 | 329.1559 | 236890000 | 228802000 |
| SEEQKQPPHSSSQHSETQGPEFSRPPPR  | Q8K1Z0 | 0          | n +34.06 Da,K +34.06 Da,             | 682.0113952 | 5 | 697.5388 | 44750600  | 37771300  |
| RRLPPLPPR                     | O88668 | 0.01039501 | n +34.06 Da,                         | 682.695793  | 3 | 377.2486 | 1.084E+09 | 4.943E+09 |
| SSEEKQQPPHSSSQHSETQGPEFSRPPPR | Q8K1Z0 | 0          | n +28.03 Da,K +28.03 Da,             | 686.5096747 | 5 | 714.9444 | 1.26E+09  | 1.033E+09 |
| RRLPPLPPR                     | O88668 | 0.04640582 | n +34.06 Da,                         | 695.3566329 | 3 | 378.5779 | 159196992 | 152811008 |
| RRLPPLPPR                     | O88668 | 0.01039501 | n +34.06 Da,                         | 698.8945683 | 3 | 378.2534 | 22624400  | 374212000 |
| SSGTTAPKKTSGSLKDEDR           | Q91YT0 | 0.00860215 | n +34.06 Da,K +34.06 Da,             | 698.9657249 | 5 | 449.8645 | 33457500  | 175708000 |
| SSGTTAPKKTSGSLKDEDR           | Q91YT0 | 0.00682594 | n +34.06 Da,K +34.06 Da,             | 699.881925  | 4 | 562.0783 | 130579000 | 582040000 |

|                           |        |            |                                      |             |   |          |           |           |
|---------------------------|--------|------------|--------------------------------------|-------------|---|----------|-----------|-----------|
| SGNYATVISHNPETKKTR        | P62918 | 0          | n +28.03 Da,K +28.03 Da,             | 700.7533368 | 4 | 522.5366 | 68925904  | 56488000  |
| VLHPGKATVPKTEIR           | P62849 | 0.00135501 | n +34.06 Da,K +34.06 Da,             | 703.446662  | 5 | 346.819  | 121118000 | 135490000 |
| GHQQLYWSHPR               | P62274 | 0          | n +28.03 Da,                         | 705.8519911 | 4 | 359.9349 | 1.936E+09 | 1.637E+09 |
| GHQQLYWSHPR               | P62274 | 0          | n +28.03 Da,                         | 707.4745732 | 3 | 479.5777 | 1.416E+09 | 1.276E+09 |
| SSSEDKITVHFKNR            | P46656 | 0          | n +28.03 Da,K +28.03 Da,             | 717.5085069 | 2 | 433.7402 | 473056992 | 110711000 |
| SSSEDKITVHFKNR            | P46656 | 0          | n +34.06 Da,K +34.06 Da,             | 724.0231932 | 4 | 437.5092 | 158512992 | 1.031E+09 |
| STGEKGFYKGSFFHR           | P17742 | 0          | n +34.06 Da,K +34.06 Da,             | 725.2739395 | 5 | 366.5926 | 631145984 | 598444992 |
| SLQPAPVKKIPNR             | B7ZMP1 | 0.00682594 | n +28.03 Da,K +28.03 Da,             | 729.146608  | 4 | 383.7474 | 226542000 | 132891000 |
| SSSEDKITVHFKNR            | P46656 | 0          | n +34.06 Da,K +34.06 Da,             | 729.1830649 | 5 | 347.1937 | 175771008 | 165430000 |
| WRPPQPVKGR                | P16015 | 0.00135501 | n +28.03 Da,K +28.03 Da,             | 730.0867278 | 4 | 319.9465 | 1.064E+09 | 43367800  |
| WRPPQPVKGR                | P16015 | 0.00135501 | n +28.03 Da,K +28.03 Da,             | 730.3239191 | 4 | 319.9463 | 705424000 | 697089984 |
| WRPPQPVKGR                | P16015 | 0.00776915 | n +34.06 Da,K +34.06 Da,             | 730.7754714 | 4 | 322.2083 | 149632000 | 1.233E+09 |
| MKHYEVEIR                 | Q9CY27 | 0.00135501 | n +34.06 Da,K +34.06 Da,             | 731.8293805 | 3 | 424.5682 | 231968992 | 203400000 |
| WRPPQPVKGR                | P16015 | 0          | n +28.03 Da,K +28.03 Da,             | 732.3631174 | 3 | 426.2592 | 290528992 | 208252000 |
| SQEKASSPSGKMDGEKPVDAESEKR | Q9D0R2 | 0.00860215 | n +42.03 Da,K +34.06 Da,             | 732.6646247 | 5 | 571.3092 | 29332100  | 181330000 |
| SSSEDKITVHFKNR            | P46656 | 0          | n +34.06 Da,K +34.06 Da,             | 732.8533766 | 5 | 350.209  | 59377100  | 342865984 |
| SSSEDKITVHFKNR            | P46656 | 0          | n +28.03 Da,K +28.03 Da,             | 732.918125  | 4 | 433.7404 | 664691008 | 586049024 |
| SPGFSKFR                  | Q9QXF8 | 0.01624365 | n +28.03 Da,K +28.03 Da,             | 735.9076278 | 3 | 327.8553 | 116237000 | 125814000 |
| TGEKGFYKGSFFHR            | P17742 | 0.00956429 | n +28.03 Da,K +28.03 Da,             | 742.6128187 | 5 | 349.1863 | 629424000 | 634620992 |
| TKHMLPSGFR                | P62911 | 0.00135501 | n +34.06 Da,K +34.06 Da,             | 743.1056572 | 3 | 410.5657 | 455556000 | 442183008 |
| MKHYEVEIR                 | Q9CY27 | 0.00135501 | n +28.03 Da,K +28.03 Da,             | 745.4100297 | 3 | 420.8972 | 1.609E+09 | 1.409E+09 |
| SEDAVKKHNFPLAR            | Q8BWT1 | 0.00682594 | n +34.06 Da,K +34.06 Da,             | 752.8027516 | 4 | 450.0057 | 42216000  | 35383000  |
| PEEKEASLAKIKEQTR          | P30115 | 0.00483092 | n +17.03 Da,n +34.06 Da,K +34.06 Da, | 754.123997  | 4 | 494.0586 | 140732000 | 381840992 |
| SSSEDKITVHFKNR            | P46656 | 0          | n +34.06 Da,K +34.06 Da,             | 754.8917378 | 4 | 438.2637 | 135990000 | 82747200  |
| IEVAPPKAHEVR              | P00329 | 0          | n +34.06 Da,K +34.06 Da,             | 759.6823208 | 4 | 351.2111 | 168130000 | 187332992 |
| PFKKSANVEAVDVAKR          | Q91W43 | 0.0037594  | n +14.02 Da,K +28.03 Da,             | 761.7002804 | 3 | 619.7035 | 12941400  | 13721300  |
| SSSEDKITVHFKNR            | P46656 | 0          | n +28.03 Da,K +28.03 Da,             | 764.4142564 | 4 | 433.7397 | 150707008 | 105911000 |
| SFAHLPDCKGDQSEHR          | Q9QXF8 | 0          | n +28.03 Da,K +28.03 Da,             | 764.989651  | 5 | 388.7874 | 817766976 | 778808000 |
| SFAHLPDCKGDQSEHR          | Q9QXF8 | 0          | n +28.03 Da,K +28.03 Da,             | 768.6506434 | 4 | 485.7325 | 1.183E+09 | 1.138E+09 |
| SETAAPAAPAPAEKTPVKKAR     | P43274 | 0          | n +42.03 Da,n +34.06 Da,K +34.06 Da, | 771.1042444 | 2 | 636.1249 | 7.272E+09 | 6.801E+09 |
| PASDQMKQWKEQR             | P24270 | 0.0037594  | n +17.03 Da,n +34.06 Da,K +34.06 Da, | 771.108788  | 4 | 429.2401 | 12455100  | 47518300  |
| PASDQMKQWKEQR             | P24270 | 0.0037594  | n +17.03 Da,n +34.06 Da,K +34.06 Da, | 773.982877  | 4 | 426.2238 | 264312992 | 179336000 |
| RRLPLPPR                  | O88668 | 0.00860215 | n +34.06 Da,                         | 774.4775119 | 3 | 373.2222 | 77034200  | 208744000 |
| SETAAPAAPAPAEKTPVKKAR     | P43274 | 0          | n +42.03 Da,n +34.06 Da,K +34.06 Da, | 788.519513  | 5 | 513.3239 | 13212100  | 95260304  |
| KVETSDEEIKDLHQR           | Q9D379 | 0          | n +28.03 Da,K +28.03 Da,             | 788.9447742 | 4 | 478.5095 | 873251968 | 668688000 |
| PKKSLDFYTR                | Q9CPU0 | 0          | n +17.03 Da,K +34.06 Da,             | 792.291512  | 3 | 446.2805 | 479875008 | 876606016 |
| DAGRLGTQGYALSGDGAGETFR    | E9PVD3 | 0.01327886 | n +14.02 Da,                         | 808.5071615 | 4 | 554.0297 | 333553984 | 263464000 |
| GDLDPDDREEGTSSTAEAAKKR    | O08663 | 0.00860215 | n +34.06 Da,K +34.06 Da,             | 822.3377315 | 5 | 549.1117 | 107060000 | 84612704  |
| FKVVGQEGKSHYEV            | Q99KK7 | 0          | n +34.06 Da,K +34.06 Da,             | 826.7107108 | 5 | 370.2099 | 85885000  | 110687000 |
| MKPILLQGHER               | Q9QZD9 | 0          | n +34.06 Da,K +34.06 Da,             | 844.2606543 | 4 | 345.2063 | 497444992 | 417156000 |



|                                 |        |            |                          |             |   |          |           |           |
|---------------------------------|--------|------------|--------------------------|-------------|---|----------|-----------|-----------|
| HFIAEFKR                        | P63017 | 0.01039501 | n +34.06 Da,K +34.06 Da, | 852.4833225 | 3 | 368.5502 | 289636000 | 198020000 |
| TFHRPELVR                       | P70694 | 0.00263505 | n +28.03 Da,             | 855.2955806 | 3 | 394.8962 | 434449984 | 356968000 |
| HVEEGDKADVDKAVKAAR              | O35945 | 0          | n +28.03 Da,K +28.03 Da, | 878.3128117 | 5 | 509.6779 | 154951008 | 90338496  |
| SETAPVAQAASATEKPAAAKTKKPAKAAAPR | P43275 | 0          | n +42.03 Da,K +34.06 Da, | 888.0559349 | 5 | 699.0424 | 267700992 | 1.117E+09 |
| DAEKFAEEDKLLKER                 | P20029 | 0          | n +34.06 Da,K +34.06 Da, | 889.3511437 | 4 | 501.5675 | 1.358E+09 | 2.723E+09 |
| TKSDRPELTGAKVVVSGGR             | Q99LC5 | 0.00776915 | n +34.06 Da,K +34.06 Da, | 893.5996039 | 5 | 409.0413 | 313316000 | 300060000 |
| TKSDRPELTGAKVVVSGGR             | Q99LC5 | 0.00956429 | n +34.06 Da,K +34.06 Da, | 895.1197009 | 4 | 511.0497 | 808540032 | 748067008 |
| SRDPASDQMKQWKEQR                | P24270 | 0          | n +34.06 Da,K +34.06 Da, | 907.447494  | 4 | 519.2656 | 95800304  | 90391600  |
| TVGKSSKMLQHIDYR                 | P27048 | 0.0037594  | n +28.03 Da,K +28.03 Da, | 911.6872804 | 3 | 616.3445 | 154455008 | 139536000 |
| KFVHDNYVIR                      | Q8C196 | 0          | n +28.03 Da,K +28.03 Da, | 919.1208695 | 3 | 449.591  | 306079008 | 248502000 |
| GHYKGQQIGKVVQVYR                | P61255 | 0.00682594 | n +28.03 Da,K +28.03 Da, | 921.3785278 | 4 | 486.7853 | 276419008 | 208463008 |
| TWISMGQEDEKKKR                  | P11725 | 0          | n +34.06 Da,K +34.06 Da, | 928.7138251 | 4 | 468.0343 | 135195008 | 723662976 |
| PDDVPHGHITSLAVKR                | Q3UX61 | 0          | n +17.03 Da,K +34.06 Da, | 949.5750373 | 5 | 357.6017 | 205867008 | 147188992 |
| TRTHINYGKGDVAVIR                | Q8BMS1 | 0          | n +34.06 Da,             | 951.6063846 | 4 | 489.5343 | 859680000 | 681038976 |
| MQPASAKWYDRR                    | Q9R0Q7 | 0.02431907 | n +34.06 Da,K +34.06 Da, | 965.1044116 | 4 | 391.9566 | 474137984 | 433265984 |
| TRDLELVQLVLR                    | Q5F259 | 0.04972875 | n +28.03 Da,             | 970.4885668 | 4 | 369.9779 | 537348992 | 491700000 |
| AIHTYQAGSHMAAKGKANL             | P24270 | 0.00135501 | n +28.03 Da,K +28.03 Da, | 977.5672915 | 4 | 539.2923 | 122599000 | 99496800  |
| TFRPPYYHR                       | O09173 | 0          | n +34.06 Da,             | 979.181482  | 4 | 316.9202 | 417252992 | 407767008 |
| KGDAGVKELDSLKSDR                | Q80XN0 | 0.00682594 | n +34.06 Da,K +34.06 Da, | 980.3804606 | 4 | 464.2957 | 429454016 | 273167008 |
| TQKHLDLYAR                      | B1AWN4 | 0.04423963 | n +14.02 Da,K +28.03 Da, | 992.695112  | 3 | 429.5793 | 36213200  | 11935100  |
| HSSAAAEASAALKVRPER              | Q8BGT5 | 0          | n +28.03 Da,K +28.03 Da, | 1001.268162 | 4 | 476.7673 | 105326000 | 345264992 |
| PHEELPSLQRR                     | Q3UQ44 | 0.00860215 | n +14.02 Da,             | 1004.862528 | 4 | 368.9549 | 328849984 | 221476992 |
| HSSAAAEASAALKVRPER              | Q8BGT5 | 0          | n +34.06 Da,K +34.06 Da, | 1016.639819 | 4 | 479.779  | 146356992 | 916190976 |
| HSSAAAEASAALKVRPER              | Q8BGT5 | 0          | n +34.06 Da,K +34.06 Da, | 1026.623965 | 4 | 477.5166 | 551817984 | 276048000 |
| TPGIHIGKKELNMGQR                | P45952 | 0.00135501 | n +34.06 Da,K +34.06 Da, | 1031.477722 | 5 | 471.0529 | 263596000 | 279211008 |
| TFKLHPNDEDIHTANER               | Q91YI0 | 0          | n +34.06 Da,K +34.06 Da, | 1034.495958 | 5 | 419.414  | 578492032 | 672604032 |
| TFKLHPNDEDIHTANER               | Q91YI0 | 0          | n +28.03 Da,K +28.03 Da, | 1034.990118 | 4 | 524.0158 | 902798016 | 1.006E+09 |
| HQGVVMVGMGQKDSYVGDEAQSQR        | P60710 | 0.00135501 | n +42.03 Da,K +34.06 Da, | 1040.085857 | 4 | 652.0671 | 482151008 | 366960000 |
| PLAKDLLHPSPEEKKR                | Q6ZWU9 | 0          | n +17.03 Da,K +34.06 Da, | 1045.487074 | 4 | 486.0412 | 2.258E+09 | 7.389E+09 |
| CKLDHAFLEFRILQR                 | Q8BYR5 | 0.04640582 | n +14.02 Da,K +28.03 Da, | 1046.556229 | 5 | 372.6171 | 242984000 | 233678000 |
| PLAKDLLHPSPEEKKR                | Q6ZWU9 | 0          | n +17.03 Da,K +34.06 Da, | 1052.871122 | 5 | 389.0346 | 9.498E+09 | 2.884E+10 |
| PLAKDLLHPSPEEKKR                | Q6ZWU9 | 0          | n +17.03 Da,K +34.06 Da, | 1056.223711 | 3 | 643.6981 | 3.272E+09 | 2.429E+09 |
| TKFVHDNYVIR                     | Q8C196 | 0          | n +34.06 Da,K +34.06 Da, | 1056.67374  | 2 | 724.4068 | 264284000 | 244571008 |
| PAPLQHQQVDIYQKR                 | P40142 | 0          | n +14.02 Da,K +28.03 Da, | 1066.122541 | 4 | 434.4966 | 421476000 | 291988992 |
| TPGIHIGKKELNMGQR                | P45952 | 0.00135501 | n +34.06 Da,K +34.06 Da, | 1067.751516 | 4 | 466.5213 | 691054976 | 599113984 |
| TPGIHIGKKELNMGQR                | P45952 | 0          | n +34.06 Da,K +34.06 Da, | 1068.011516 | 5 | 373.4184 | 326572000 | 315431008 |
| DLSTAILKQKNRPNR                 | Q01853 | 0.04640582 | n +28.03 Da,K +28.03 Da, | 1073.676772 | 4 | 460.28   | 344257984 | 334307008 |
| PSGTSQCEDGSAGGFQHLDMHSEKR       | Q91WT9 | 0          | n +17.03 Da,K +34.06 Da, | 1076.151651 | 4 | 692.3151 | 470371008 | 1.2E+09   |
| SSPPEGKLETKAGHPPAVKAGGMR        | Q91XC8 | 0          | n +42.03 Da,K +34.06 Da, | 1076.594216 | 4 | 632.8464 | 345003008 | 184060992 |
| PSGTSQCEDGSAGGFQHLDMHSEKR       | Q91WT9 | 0          | n +17.03 Da,K +34.06 Da, | 1076.946559 | 5 | 554.0538 | 1.392E+09 | 3.228E+09 |

|                              |        |            |                          |             |   |          |           |           |
|------------------------------|--------|------------|--------------------------|-------------|---|----------|-----------|-----------|
| AHYHDNYGKNDEVEFVR            | P25688 | 0          | n +28.03 Da,K +28.03 Da, | 1084.823822 | 4 | 538.0079 | 26269700  | 18568200  |
| PKNFGIGQDIQPKR               | P12970 | 0          | n +14.02 Da,K +28.03 Da, | 1084.845017 | 4 | 417.7451 | 1.136E+09 | 1.064E+09 |
| PSNKNDLEKFSKGIGR             | Q8K0D5 | 0.00263505 | n +14.02 Da,K +28.03 Da, | 1087.706262 | 5 | 378.4187 | 231584992 | 202310000 |
| PKNFGIGQDIQPKR               | P12970 | 0          | n +14.02 Da,K +28.03 Da, | 1087.75411  | 3 | 556.6605 | 67896600  | 50452700  |
| PSGTSQCEDGSAGGFQHLDMHSEKR    | Q91WT9 | 0          | n +14.02 Da,K +28.03 Da, | 1088.094939 | 4 | 690.8076 | 617577024 | 478584992 |
| PLAKDLLHPSPEEEKR             | Q6ZWU9 | 0          | n +17.03 Da,K +34.06 Da, | 1089.214699 | 5 | 386.6217 | 116342000 | 122293000 |
| TFFSETGAGKHVPR               | P05213 | 0          | n +28.03 Da,             | 1089.374615 | 4 | 398.2167 | 66239000  | 61700800  |
| SKDSEGSWFR                   | O55125 | 0          | n +34.06 Da,K +34.06 Da, | 1100.613995 | 3 | 418.8752 | 380585984 | 418015008 |
| TRTHINYGVKGDVAVIR            | Q8BMS1 | 0.00135501 | n +34.06 Da,             | 1105.528051 | 4 | 489.5352 | 355992992 | 376056992 |
| PSGTSQCEDGSAGGFQHLDMHSEKR    | Q91WT9 | 0          | n +14.02 Da,K +28.03 Da, | 1105.626849 | 5 | 552.8477 | 799875008 | 627067008 |
| SKDSEGSWFR                   | O55125 | 0          | n +34.06 Da,K +34.06 Da, | 1110.447618 | 3 | 421.8912 | 202584000 | 1.815E+09 |
| NTKFVHDNYVIR                 | Q8C196 | 0          | n +34.06 Da,K +34.06 Da, | 1111.140064 | 3 | 521.2879 | 647196032 | 440734016 |
| VKVGVMNGFGR                  | P16858 | 0          | n +34.06 Da,K +34.06 Da, | 1119.667066 | 3 | 366.573  | 85102304  | 558670976 |
| HQGVVMVGMGQKDSYVGDEAQSQR     | P60710 | 0          | n +28.03 Da,K +28.03 Da, | 1127.266872 | 4 | 648.5728 | 297944992 | 226771008 |
| VKVGVMNGFGR                  | P16858 | 0          | n +34.06 Da,K +34.06 Da, | 1130.161677 | 3 | 363.5571 | 389372992 | 212604000 |
| TFSELFKKEHPDR                | P40142 | 0          | n +34.06 Da,K +34.06 Da, | 1134.841899 | 4 | 430.2371 | 320628000 | 314262016 |
| HQGVVMVGMGQKDSYVGDEAQSQR     | P60710 | 0          | n +42.03 Da,K +34.06 Da, | 1135.029176 | 4 | 654.3296 | 17363000  | 103448000 |
| PNIVGNEHYDVAR                | P56480 | 0          | n +14.02 Da,             | 1142.197429 | 3 | 499.9195 | 96310600  | 63080900  |
| HAITATQKTVDGPGSKLWR          | P16858 | 0          | n +28.03 Da,K +28.03 Da, | 1143.130512 | 4 | 538.3076 | 196958000 | 133193000 |
| PKLKAFLESPHVNR               | F6RWR5 | 0.00135501 | n +14.02 Da,K +28.03 Da, | 1153.723434 | 5 | 367.8166 | 223544992 | 213230000 |
| PKLKAFLESPHVNR               | F6RWR5 | 0          | n +14.02 Da,K +28.03 Da, | 1153.973218 | 3 | 612.3564 | 199232992 | 157731008 |
| PGAKDVVHIDSEKDFR             | Q921X9 | 0.0427907  | n +17.03 Da,K +34.06 Da, | 1154.456109 | 5 | 379.8188 | 164724000 | 585228032 |
| PGAKDVVHIDSEKDFR             | Q921X9 | 0          | n +14.02 Da,K +28.03 Da, | 1155.150057 | 5 | 377.4064 | 12398000  | 10567600  |
| TKDYQDFQHLDNDNDHHQLR         | P34927 | 0          | n +34.06 Da,K +34.06 Da, | 1156.016778 | 4 | 649.5545 | 999361984 | 1.266E+09 |
| TKDYQDFQHLDNDNDHHQLR         | P34927 | 0          | n +34.06 Da,K +34.06 Da, | 1156.647325 | 5 | 519.8453 | 2.456E+09 | 2.587E+09 |
| PKPRPHGDSGGISDSLADAAGQGGGAGR | Q8VCN6 | 0          | n +17.03 Da,K +34.06 Da, | 1159.407786 | 4 | 725.6069 | 189059008 | 162612000 |
| SPQVIKETHKPLGDWR             | Q8CHT0 | 0.02346041 | n +34.06 Da,K +34.06 Da, | 1163.509871 | 4 | 494.5331 | 41424100  | 34949900  |
| TVKKIAIFGATGR                | Q923D2 | 0          | n +34.06 Da,K +34.06 Da, | 1163.814192 | 3 | 482.6452 | 526848992 | 717670016 |
| SEPEIPKGIR                   | Q9WTP6 | 0.00682594 | n +28.03 Da,K +28.03 Da, | 1167.595493 | 3 | 394.5678 | 349971008 | 289632000 |
| TVKKIAIFGATGR                | Q923D2 | 0          | n +34.06 Da,K +34.06 Da, | 1169.910802 | 3 | 487.6714 | 41135100  | 239123008 |
| SPQVIKETHKPLGDWR             | Q8CHT0 | 0.04343808 | n +28.03 Da,K +28.03 Da, | 1171.138574 | 4 | 494.534  | 23013200  | 18884900  |
| PGAKDVVHIDSEKDFR             | Q921X9 | 0          | n +14.02 Da,K +28.03 Da, | 1172.301529 | 4 | 471.4954 | 81397904  | 80038704  |
| VQQPVHLLMGGTKEQR             | O88587 | 0          | n +28.03 Da,K +28.03 Da, | 1185.310581 | 4 | 498.5264 | 126778000 | 121709000 |
| LTPHYLTKQDVER                | Q9DBG6 | 0          | n +28.03 Da,K +28.03 Da, | 1197.454115 | 4 | 439.9954 | 2.191E+09 | 2.084E+09 |
| LTPHYLTKQDVER                | Q9DBG6 | 0          | n +34.06 Da,K +34.06 Da, | 1203.083838 | 3 | 586.3246 | 1.294E+09 | 1.07E+09  |
| PSKTNVSGGAIALGHPLGGSGSR      | Q8BWT1 | 0          | n +17.03 Da,K +34.06 Da, | 1205.225158 | 4 | 542.805  | 347318016 | 1.198E+09 |
| PSKTNVSGGAIALGHPLGGSGSR      | Q8BWT1 | 0.00135501 | n +14.02 Da,K +28.03 Da, | 1206.678102 | 3 | 721.3939 | 176428992 | 148276992 |
| LTPHYLTKQDVER                | Q9DBG6 | 0          | n +34.06 Da,K +34.06 Da, | 1207.99326  | 4 | 442.257  | 77509600  | 755177024 |
| TILPPTRPDKPLR                | P62631 | 0.00776915 | n +28.03 Da,K +28.03 Da, | 1212.892951 | 4 | 415.2569 | 460655008 | 958000000 |
| DREDITHYKYPEGSPEER           | P21981 | 0          | n +28.03 Da,             | 1218.140827 | 4 | 595.2862 | 105728000 | 117429000 |

|                           |        |            |                                      |             |   |          |           |           |
|---------------------------|--------|------------|--------------------------------------|-------------|---|----------|-----------|-----------|
| IKDPKKSDFYTR              | Q9CPU0 | 0          | n +28.03 Da,K +28.03 Da,             | 1219.079649 | 4 | 431.5094 | 318576992 | 184555008 |
| PKSVSDYDGLSSFFKR          | P09103 | 0.01039501 | n +14.02 Da,n +28.03 Da,K +28.03 Da, | 1219.222593 | 4 | 474.9998 | 131112000 | 513182016 |
| TILPPTRPDTDKPLR           | P62631 | 0.00776915 | n +28.03 Da,K +28.03 Da,             | 1219.325474 | 4 | 412.2409 | 97524800  | 43367000  |
| PKNYTDNELEKITR            | P26443 | 0.00263505 | n +14.02 Da,K +28.03 Da,             | 1227.165113 | 3 | 597.6586 | 240319008 | 129513000 |
| IKDPKKSDFYTR              | Q9CPU0 | 0          | n +28.03 Da,K +28.03 Da,             | 1227.94967  | 4 | 431.5093 | 50391400  | 31671500  |
| PFVFRPER                  | P00186 | 0.03867925 | n +14.02 Da,                         | 1234.860873 | 3 | 354.5343 | 269452992 | 147016000 |
| LNLQEYQSKKLMSEHGVR        | Q9Z2I8 | 0.02700096 | n +28.03 Da,K +28.03 Da,             | 1269.137823 | 5 | 449.6491 | 133221000 | 43839000  |
| SHTILLVQPTKRPEGR          | P84089 | 0          | n +42.03 Da,K +34.06 Da,             | 1273.692821 | 3 | 634.7017 | 1.183E+09 | 1.096E+09 |
| RVVFDDTYDR                | P16015 | 0.00860215 | n +28.03 Da,                         | 1274.304431 | 3 | 438.5543 | 118262000 | 91883000  |
| FKPEELHPTAATLKAR          | Q91X91 | 0.00135501 | n +28.03 Da,K +28.03 Da,             | 1279.009214 | 4 | 474.0293 | 620222016 | 625630016 |
| FKPEELHPTAATLKAR          | Q91X91 | 0          | n +28.03 Da,K +28.03 Da,             | 1281.075361 | 5 | 379.4248 | 619707008 | 644278016 |
| VLSGEDKSNIKAAWVK          | P01942 | 0          | n +28.03 Da,K +28.03 Da,             | 1291.75333  | 4 | 454.5148 | 891896000 | 69243800  |
| GLLTPTLKAKRPELR           | P41216 | 0.00135501 | n +34.06 Da,K +34.06 Da,             | 1308.017547 | 5 | 356.2347 | 627424000 | 529756000 |
| VKIVTVKTQAYPDQKPGTSGLR    | Q9D0F9 | 0.00135501 | n +34.06 Da,K +34.06 Da,             | 1309.405944 | 5 | 504.7226 | 65375500  | 276289984 |
| VKIVTVKTQAYPDQKPGTSGLR    | Q9D0F9 | 0          | n +28.03 Da,K +28.03 Da,             | 1311.508252 | 2 | 625.373  | 1.494E+09 | 1.321E+09 |
| LKELIGEAAAGKLTGR          | Q91YI0 | 0.00263505 | n +28.03 Da,K +28.03 Da,             | 1312.555315 | 4 | 445.0231 | 730977984 | 602428032 |
| IPAHDPVFSSEHAHQVLR        | P33587 | 0          | n +34.06 Da,                         | 1319.709698 | 4 | 563.7948 | 1.125E+09 | 736456000 |
| IPAHDPVFSSEHAHQVLR        | P33587 | 0          | n +28.03 Da,                         | 1320.107645 | 5 | 451.2375 | 1.72E+09  | 1.163E+09 |
| AKIAKTHEIDIEAQR           | Q99NB9 | 0.00135501 | n +42.03 Da,K +34.06 Da,             | 1333.416768 | 3 | 607.6786 | 515560992 | 457232992 |
| STFSELFKKEHPDR            | P40142 | 0.0037594  | n +28.03 Da,K +28.03 Da,             | 1336.25145  | 4 | 451.9954 | 183492000 | 166660000 |
| HIIAGSLPTPETDRGAQR        | A2AKM7 | 0.04972875 | n +28.03 Da,                         | 1341.832171 | 3 | 664.688  | 61592100  | 33553900  |
| GVQVSPSGEKITHTGQVYDEKDYR  | P52503 | 0          | n +34.06 Da,K +34.06 Da,             | 1342.574336 | 4 | 695.108  | 1.646E+09 | 1.67E+09  |
| SSTSAVPQITTHYTVHPR        | Q921G7 | 0          | n +28.03 Da,                         | 1344.210927 | 4 | 503.2653 | 1.663E+09 | 1.12E+09  |
| TISQGAIEKVKDATR           | Q8C196 | 0          | n +28.03 Da,K +28.03 Da,             | 1348.445618 | 4 | 426.003  | 1.502E+09 | 1.407E+09 |
| GVQVSPSGEKITHTGQVYDEKDYR  | P52503 | 0          | n +34.06 Da,K +34.06 Da,             | 1349.05882  | 5 | 556.2879 | 3.405E+09 | 3.161E+09 |
| SSAAAEASAALKVRPER         | Q8BGT5 | 0.04343808 | n +34.06 Da,K +34.06 Da,             | 1349.085147 | 3 | 588.6593 | 295320992 | 292051008 |
| SDSRDPASDQMKQWKEQR        | P24270 | 0          | n +42.03 Da,K +34.06 Da,             | 1350.70412  | 4 | 573.2774 | 476478016 | 278156000 |
| TFDSAVAKALEHHR            | Q8CAQ8 | 0          | n +28.03 Da,K +28.03 Da,             | 1351.555611 | 4 | 410.2244 | 123809000 | 128082000 |
| GTAVTSAKVAVNGVHLHYQR      | Q8R164 | 0.02521823 | n +34.06 Da,K +34.06 Da,             | 1354.605685 | 4 | 541.8057 | 41665300  | 41163300  |
| PQKVNIHGGAVSLGHPIGMSGAR   | Q8QZT1 | 0          | n +17.03 Da,K +34.06 Da,             | 1354.733263 | 5 | 465.8582 | 115839000 | 97556704  |
| GTAVTSAKVAVNGVHLHYQR      | Q8R164 | 0          | n +28.03 Da,K +28.03 Da,             | 1357.939448 | 5 | 433.6456 | 200728992 | 176674000 |
| PQKVNIHGGAVSLGHPIGMSGAR   | Q8QZT1 | 0          | n +17.03 Da,K +34.06 Da,             | 1359.74067  | 5 | 467.0652 | 63547700  | 206152992 |
| PQKVNIHGGAVSLGHPIGMSGAR   | Q8QZT1 | 0          | n +17.03 Da,K +34.06 Da,             | 1362.384288 | 4 | 582.0698 | 289088992 | 201804000 |
| TPRRSYASGPGGLHADLLR       | Q8BWF0 | 0.03867925 | n +14.02 Da,                         | 1373.597829 | 5 | 406.0188 | 105784000 | 100110000 |
| AHGSVVKSEDYAFPTYADRR      | P19783 | 0          | n +34.06 Da,K +34.06 Da,             | 1405.665837 | 4 | 584.3072 | 510067008 | 1.755E+09 |
| AHGSVVKSEDYAFPTYADRR      | P19783 | 0.01229508 | n +34.06 Da,K +34.06 Da,             | 1407.50399  | 5 | 467.6474 | 324528000 | 1.133E+09 |
| AHGSVVKSEDYAFPTYADRR      | P19783 | 0.00860215 | n +34.06 Da,K +34.06 Da,             | 1409.046933 | 3 | 775.7252 | 158208000 | 128282000 |
| PTKHAGPPFYVPSAELKR        | O55060 | 0          | n +14.02 Da,K +28.03 Da,             | 1410.28787  | 4 | 515.5385 | 275209984 | 100063000 |
| AHGSVVKSEDYAFPTYADRR      | P19783 | 0.01229508 | n +34.06 Da,K +34.06 Da,             | 1411.711663 | 5 | 465.8384 | 389204992 | 273375008 |
| KATIPAALQAQESTEGPGTGQDRPR | Q9DBG1 | 0          | n +34.06 Da,K +34.06 Da,             | 1412.089499 | 4 | 659.6    | 1.191E+09 | 1.139E+09 |

|                            |        |            |                                      |             |   |          |           |           |
|----------------------------|--------|------------|--------------------------------------|-------------|---|----------|-----------|-----------|
| PTKHAGPPFYVPSAELKR         | O55060 | 0.00860215 | n +14.02 Da,K +28.03 Da,             | 1412.122561 | 5 | 412.6326 | 225530000 | 74898800  |
| KATIPAAALQAQESTEGPGTGQDRPR | Q9DBG1 | 0.00682594 | n +34.06 Da,K +34.06 Da,             | 1413.660599 | 3 | 879.131  | 34458300  | 23215700  |
| AHGSVVKSSEDYAFPTYADRR      | P19783 | 0          | n +34.06 Da,K +34.06 Da,             | 1417.735987 | 4 | 582.0457 | 746865984 | 609118016 |
| TVHAITATQKTVDGPSPGKLWR     | P16858 | 0.00135501 | n +28.03 Da,K +28.03 Da,             | 1424.503099 | 5 | 470.8705 | 684275968 | 626745984 |
| TVHAITATQKTVDGPSPGKLWR     | P16858 | 0.00860215 | n +28.03 Da,K +28.03 Da,             | 1426.146274 | 4 | 588.3368 | 371867008 | 358953984 |
| AAQESLHVKTPLR              | Q8VBT2 | 0          | n +42.03 Da,K +34.06 Da,             | 1426.697218 | 3 | 507.2915 | 854681984 | 745665024 |
| STFSELFKKEHPDR             | P40142 | 0          | n +34.06 Da,K +34.06 Da,             | 1427.565902 | 5 | 361.7974 | 128140000 | 114699000 |
| STFSELFKKEHPDR             | P40142 | 0          | n +28.03 Da,K +28.03 Da,             | 1428.936411 | 4 | 451.9954 | 597977024 | 484400000 |
| STFSELFKKEHPDR             | P40142 | 0          | n +34.06 Da,K +34.06 Da,             | 1429.345024 | 4 | 455.765  | 31534700  | 226626000 |
| RVSQEHPVVLTKFVEGAR         | Q8C196 | 0          | n +34.06 Da,K +34.06 Da,             | 1435.798929 | 5 | 422.4458 | 60515900  | 41787500  |
| ASGADSKGDDLSTAILKQKNRPNR   | Q01853 | 0          | n +42.03 Da,K +28.03 Da,             | 1437.089335 | 5 | 534.4936 | 8.257E+09 | 7.364E+09 |
| PFKVETSDEEIKDLHQR          | Q9D379 | 0          | n +14.02 Da,K +28.03 Da,             | 1440.637473 | 5 | 429.0306 | 928780992 | 566449984 |
| ASGADSKGDDLSTAILKQKNRPNR   | Q01853 | 0          | n +42.03 Da,K +34.06 Da,             | 1441.544725 | 4 | 667.8647 | 4.137E+09 | 3.442E+09 |
| AHYHDNYGKNDEVEFVR          | P25688 | 0          | n +42.03 Da,K +34.06 Da,             | 1475.469524 | 3 | 721.667  | 1.664E+10 | 1.345E+10 |
| AHYHDNYGKNDEVEFVR          | P25688 | 0          | n +42.03 Da,K +28.03 Da,             | 1475.704865 | 4 | 541.5026 | 8.331E+10 | 6.712E+10 |
| PEQWKEIASVVKKK             | P05202 | 0          | n +14.02 Da,K +28.03 Da,             | 1476.040291 | 2 | 449.7811 | 580956992 | 406584000 |
| AHYHDNYGKNDEVEFVR          | P25688 | 0          | n +42.03 Da,K +34.06 Da,             | 1476.376713 | 2 | 1081.996 | 332790016 | 215744000 |
| TSVATKKTEQGPPSSEYIFER      | P29758 | 0.0037594  | n +28.03 Da,K +28.03 Da,             | 1503.410133 | 4 | 610.5739 | 263624992 | 203528992 |
| PANLDLKKELSEPSSTR          | Q8C196 | 0          | n +14.02 Da,K +28.03 Da,             | 1506.460802 | 4 | 489.5254 | 360772000 | 73865800  |
| RTFEESFQKALR               | Q8C196 | 0.00263505 | n +34.06 Da,K +34.06 Da,             | 1516.038506 | 4 | 392.7199 | 97760400  | 84709504  |
| TRVSQEHPVVLTKFVEGAR        | Q8C196 | 0          | n +28.03 Da,K +28.03 Da,             | 1535.057956 | 3 | 737.0862 | 84718496  | 88829000  |
| TRVSQEHPVVLTKFVEGAR        | Q8C196 | 0          | n +34.06 Da,K +34.06 Da,             | 1536.206038 | 5 | 442.6547 | 2.839E+09 | 2.929E+09 |
| TRVSQEHPVVLTKFVEGAR        | Q8C196 | 0          | n +34.06 Da,K +34.06 Da,             | 1540.923262 | 4 | 553.0666 | 3.847E+09 | 3.485E+09 |
| LNLQEYQSKKLMSEHGVR         | Q9Z2I8 | 0          | n +34.06 Da,K +34.06 Da,             | 1540.936673 | 4 | 561.8092 | 805596032 | 580441984 |
| ATSASSHLNKGKIQMY           | P15105 | 0.0037594  | n +42.03 Da,n +34.06 Da,K +34.06 Da, | 1552.68024  | 3 | 611.9888 | 260596992 | 306171008 |
| MEGYHKPDQQKLQALKDTANR      | P40142 | 0          | n +42.03 Da,K +34.06 Da,             | 1556.489896 | 4 | 653.8617 | 93587904  | 472160992 |
| MEGYHKPDQQKLQALKDTANR      | P40142 | 0          | n +42.03 Da,K +28.03 Da,             | 1560.186157 | 4 | 650.0923 | 2.933E+09 | 2.638E+09 |
| TGYGKDMVKVLHIQR            | P25688 | 0          | n +34.06 Da,K +34.06 Da,             | 1560.438466 | 4 | 458.0158 | 78916096  | 43927300  |
| TGYGKDMVKVLHIQR            | P25688 | 0          | n +42.03 Da,K +28.03 Da,             | 1561.117631 | 4 | 461.5204 | 733857024 | 637374976 |
| MEGYHKPDQQKLQALKDTANR      | P40142 | 0          | n +42.03 Da,K +28.03 Da,             | 1561.22903  | 3 | 866.454  | 294756000 | 213288992 |
| TGYGKDMVKVLHIQR            | P25688 | 0.01039501 | n +42.03 Da,K +28.03 Da,             | 1562.476584 | 5 | 369.4179 | 496424992 | 416468000 |
| LNLQEYQSKKLMSEHGVR         | Q9Z2I8 | 0          | n +34.06 Da,K +34.06 Da,             | 1563.37905  | 4 | 565.5785 | 1.207E+09 | 6.696E+09 |
| LNLQEYQSKKLMSEHGVR         | Q9Z2I8 | 0          | n +34.06 Da,K +34.06 Da,             | 1566.164128 | 3 | 753.7692 | 84245904  | 540355008 |
| LNLQEYQSKKLMSEHGVR         | Q9Z2I8 | 0          | n +28.03 Da,K +28.03 Da,             | 1566.956301 | 5 | 449.6495 | 4.434E+09 | 4.475E+09 |
| TKDYQDFQHLDNDNDHHLQR       | P34927 | 0          | n +42.03 Da,K +34.06 Da,             | 1567.220641 | 4 | 653.0492 | 3.403E+09 | 3.637E+09 |
| LNLQEYQSKKLMSEHGVR         | Q9Z2I8 | 0          | n +34.06 Da,K +34.06 Da,             | 1568.553914 | 5 | 452.6645 | 385659008 | 1.849E+09 |
| LNLQEYQSKKLMSEHGVR         | Q9Z2I8 | 0          | n +34.06 Da,K +34.06 Da,             | 1569.233598 | 3 | 748.7428 | 2.046E+09 | 1.753E+09 |
| TKDYQDFQHLDNDNDHHLQR       | P34927 | 0          | n +42.03 Da,K +34.06 Da,             | 1569.678488 | 5 | 522.6412 | 4.009E+09 | 4.189E+09 |
| PGVTVKDVNQQEFVR            | Q9CZX8 | 0          | n +14.02 Da,K +28.03 Da,             | 1573.492861 | 3 | 586.6555 | 87538496  | 92363600  |
| AHYHDNYGKNDEVEFVR          | P25688 | 0          | n +42.03 Da,K +34.06 Da,             | 1577.967569 | 4 | 541.5016 | 3.96E+09  | 3.284E+09 |

|                         |        |            |                                      |             |   |          |           |           |
|-------------------------|--------|------------|--------------------------------------|-------------|---|----------|-----------|-----------|
| PGVTVKDVNQEFVR          | Q9CZX8 | 0          | n +17.03 Da,K +34.06 Da,             | 1578.344717 | 3 | 588.6663 | 93984600  | 398908992 |
| AWKSGGASHSELIHNL        | P23506 | 0          | n +42.03 Da,K +28.03 Da,             | 1579.261904 | 4 | 484.006  | 457016000 | 452492992 |
| TGGFFHKEEFRPSAPYR       | P61922 | 0          | n +28.03 Da,K +28.03 Da,             | 1580.112923 | 5 | 417.2167 | 147468992 | 116516000 |
| GVDFGKWR                | Q91Y97 | 0.00682594 | n +34.06 Da,K +34.06 Da,             | 1588.241776 | 3 | 340.8586 | 254078000 | 243147008 |
| AHGSVVKSEDYAFPTYADR     | P19783 | 0          | n +28.03 Da,K +28.03 Da,             | 1588.663942 | 3 | 721.6671 | 1.92E+09  | 1.627E+09 |
| LNLQEYQSKKLMSEHGVR      | Q9Z2I8 | 0          | n +34.06 Da,K +34.06 Da,             | 1597.46672  | 2 | 561.8081 | 155216992 | 106411000 |
| KFGKHGGTIPVVPTAEFQDR    | P26443 | 0          | n +28.03 Da,K +28.03 Da,             | 1607.919365 | 4 | 567.817  | 845441024 | 627481024 |
| KFGKHGGTIPVVPTAEFQDR    | P26443 | 0          | n +28.03 Da,K +28.03 Da,             | 1609.393261 | 3 | 756.7538 | 63317200  | 34017000  |
| SSSPVNVKLLKVSSELKEELKKR | Q8VEK3 | 0          | n +42.03 Da,n +28.03 Da,K +28.03 Da, | 1616.830631 | 2 | 684.9291 | 5.121E+09 | 3.968E+09 |
| PNIKIFSGSSHQDLSQKIADR   | Q9D7G0 | 0          | n +14.02 Da,K +28.03 Da,             | 1622.34876  | 4 | 603.5806 | 369009984 | 298891008 |
| SSSPVNVKLLKVSSELKEELKKR | Q8VEK3 | 0.00956429 | n +42.03 Da,n +34.06 Da,K +34.06 Da, | 1627.401746 | 4 | 693.223  | 30148000  | 175024000 |
| PNIKIFSGSSHQDLSQKIADR   | Q9D7G0 | 0          | n +14.02 Da,K +28.03 Da,             | 1632.336789 | 5 | 483.0665 | 655916032 | 492564992 |
| PNIKIFSGSSHQDLSQKIADR   | Q9D7G0 | 0          | n +17.03 Da,K +34.06 Da,             | 1633.452158 | 4 | 606.5977 | 109052000 | 311075008 |
| PNIKIFSGSSHQDLSQKIADR   | Q9D7G0 | 0.00682594 | n +17.03 Da,K +34.06 Da,             | 1635.114979 | 5 | 485.4798 | 107803000 | 275120000 |
| PNIKIFSGSSHQDLSQKIADR   | Q9D7G0 | 0          | n +14.02 Da,K +28.03 Da,             | 1641.172174 | 4 | 602.0714 | 102826000 | 399444000 |
| LPKNWDWR                | Q9WUU7 | 0.02079208 | n +34.06 Da,K +34.06 Da,             | 1643.956456 | 3 | 390.8853 | 193506000 | 245931008 |
| AHYHDNYGKNDEVEFVR       | P25688 | 0          | n +42.03 Da,K +34.06 Da,             | 1644.183511 | 4 | 543.0212 | 2.402E+09 | 2.378E+09 |
| LPKNWDWR                | Q9WUU7 | 0.02079208 | n +34.06 Da,K +34.06 Da,             | 1645.16372  | 3 | 393.9015 | 56151200  | 449719008 |
| AHGSVVKSEDYAFPTYADR     | P19783 | 0          | n +34.06 Da,K +34.06 Da,             | 1647.173192 | 3 | 726.7073 | 211044992 | 783907968 |
| AHGSVVKSEDYAFPTYADR     | P19783 | 0          | n +28.03 Da,K +28.03 Da,             | 1648.056482 | 3 | 723.6914 | 150540000 | 125013000 |
| PKLKAFLESPHEVNRPL       | F6RWR5 | 0.00956429 | n +14.02 Da,K +28.03 Da,             | 1650.392768 | 4 | 512.0534 | 323092992 | 318280992 |
| PKLKAFLESPHEVNRPL       | F6RWR5 | 0.00483092 | n +14.02 Da,K +28.03 Da,             | 1654.317595 | 5 | 409.8441 | 521104992 | 443415008 |
| PKLKAFLESPHEVNRPL       | F6RWR5 | 0          | n +14.02 Da,K +28.03 Da,             | 1654.671795 | 3 | 682.4024 | 385439008 | 352417984 |
| PNIKIFSGSSHQDLSQKIADR   | Q9D7G0 | 0          | n +14.02 Da,K +28.03 Da,             | 1670.361728 | 4 | 483.0657 | 99522400  | 518705984 |
| TGKTSIAIDTIINQKR        | Q03265 | 0.00682594 | n +28.03 Da,K +28.03 Da,             | 1675.176838 | 4 | 461.5311 | 58655500  | 55783500  |
| PTQTSQGAIEKVKDATR       | Q8C196 | 0          | n +14.02 Da,K +28.03 Da,             | 1680.265955 | 4 | 503.2887 | 184500000 | 383840000 |
| PKLKAFLESPHEVNRPLAA     | F6RWR5 | 0.0037594  | n +14.02 Da,K +28.03 Da,             | 1687.423951 | 3 | 729.7595 | 291348992 | 255575008 |
| PKLKAFLESPHEVNRPLAA     | F6RWR5 | 0.02431907 | n +14.02 Da,K +28.03 Da,             | 1688.430236 | 5 | 438.2592 | 227787008 | 219124992 |
| MKETIMNQEKLAKLQAQVR     | Q64152 | 0.03787879 | n +28.03 Da,K +28.03 Da,             | 1693.363303 | 5 | 473.2693 | 44263100  | 108982000 |
| SVPTFKHLWR              | Q8CHT0 | 0          | n +28.03 Da,K +28.03 Da,             | 1700.864817 | 4 | 332.4471 | 153548000 | 151192000 |
| PYDNTVVLEELRAGTTYR      | Q60847 | 0.00483092 | n +42.03 Da,                         | 1706.250368 | 3 | 713.7069 | 115679000 | 90159504  |
| PEEGGASKSLFFPDEAIKHPR   | P97494 | 0          | n +17.03 Da,K +34.06 Da,             | 1708.393579 | 4 | 624.8273 | 90385400  | 89247000  |
| AFKDTGKTPVEPEVAIHR      | P60867 | 0          | n +42.03 Da,K +34.06 Da,             | 1708.729523 | 3 | 698.385  | 645651968 | 569137984 |
| PYDNTVVLEELRAGTTYR      | Q60847 | 0.02167488 | n +42.03 Da,                         | 1710.321435 | 5 | 428.6273 | 780507008 | 598681984 |
| AYPTITPLVQISSDNRIINR    | Q8R2D3 | 0.04805077 | n +28.03 Da,                         | 1712.38128  | 4 | 572.5703 | 96079904  | 69932304  |
| AGKPVLYHFYFNR           | P10648 | 0          | n +42.03 Da,K +34.06 Da,             | 1718.487047 | 3 | 481.6016 | 2.051E+09 | 2.217E+09 |
| HQEGEIFDTEKEKYEITEQR    | P47911 | 0          | n +28.03 Da,K +28.03 Da,             | 1720.80108  | 4 | 649.074  | 113661000 | 93015800  |
| HQEGEIFDTEKEKYEITEQR    | P47911 | 0          | n +28.03 Da,K +28.03 Da,             | 1726.629794 | 4 | 648.3174 | 25296500  | 158655008 |
| SHTDVKVPDFSDYR          | Q9CR68 | 0          | n +28.03 Da,K +28.03 Da,             | 1735.524949 | 3 | 574.621  | 221844000 | 243496000 |
| SLLNPKKSEMTPPELQKR      | P62317 | 0.02346041 | n +42.03 Da,K +34.06 Da,             | 1740.029626 | 4 | 567.3298 | 618243008 | 167287008 |

|                              |        |            |                                      |             |   |          |           |           |
|------------------------------|--------|------------|--------------------------------------|-------------|---|----------|-----------|-----------|
| PSANMGALISKAHLEKVR           | Q8BH00 | 0          | n +14.02 Da,K +28.03 Da,             | 1741.005615 | 4 | 498.7901 | 93155504  | 60049400  |
| TGSVPTFKHLWR                 | Q8CHT0 | 0          | n +34.06 Da,K +34.06 Da,             | 1741.455388 | 4 | 371.9646 | 85463504  | 61501400  |
| HQEGEIFDTEKEKYEITEQR         | P47911 | 0          | n +42.03 Da,K +34.06 Da,             | 1742.237015 | 4 | 652.578  | 187270000 | 153267008 |
| PAFEKVLKSHGQDYLVGNR          | P10648 | 0.02788462 | n +17.03 Da,K +34.06 Da,             | 1744.164279 | 4 | 557.8105 | 1.344E+09 | 175959008 |
| AGQSDKDVKYYTLEEIQKHKDSK      | P56395 | 0          | n +42.03 Da,n +28.03 Da,K +28.03 Da, | 1757.360999 | 2 | 723.889  | 1.012E+09 | 855800000 |
| KFGKHGGTIPVVPTAEFQDR         | P26443 | 0.00135501 | n +42.03 Da,K +34.06 Da,             | 1782.301703 | 4 | 571.3217 | 1.846E+09 | 216831008 |
| PSKGPLQSVQVFGFR              | P14131 | 0.0037594  | n +14.02 Da,K +28.03 Da,             | 1786.964523 | 3 | 514.6315 | 373659008 | 291884992 |
| MHHQSVLHSGYFHPLLR            | P10518 | 0          | n +42.03 Da,                         | 1799.352569 | 2 | 526.0187 | 147574000 | 12022600  |
| FGVQVSPSGEKITHTGQVYDEKDYR    | P52503 | 0          | n +28.03 Da,K +28.03 Da,             | 1801.398109 | 5 | 585.7008 | 784728000 | 604209984 |
| FGVQVSPSGEKITHTGQVYDEKDYR    | P52503 | 0          | n +28.03 Da,K +28.03 Da,             | 1802.924318 | 4 | 731.8741 | 357100000 | 264988000 |
| AGKPVLYHYFDGR                | P30115 | 0          | n +42.03 Da,K +28.03 Da,             | 1803.433698 | 2 | 715.384  | 97331504  | 93920096  |
| AGKPVLYHYFDGR                | P30115 | 0          | n +42.03 Da,K +34.06 Da,             | 1805.293402 | 3 | 477.2577 | 2.589E+09 | 2.566E+09 |
| KFGKHGGTIPVVPTAEFQDR         | P26443 | 0.00135501 | n +42.03 Da,K +34.06 Da,             | 1819.079993 | 4 | 574.3219 | 252263008 | 193039008 |
| RGASIVEDKLVEDLKTR            | P26443 | 0.00483092 | n +28.03 Da,K +28.03 Da,             | 1847.77913  | 4 | 504.0482 | 261935008 | 262847008 |
| SQAFFDKAAEEVKR               | P31786 | 0          | n +42.03 Da,K +34.06 Da,             | 1856.469628 | 3 | 569.2969 | 680544000 | 734329984 |
| PHYPALTPPEKKELSDIAHR         | P05064 | 0          | n +17.03 Da,K +34.06 Da,             | 1869.997867 | 5 | 500.2774 | 6.099E+09 | 4.801E+09 |
| SSKPKSLEIIGAPFSKGQPR         | Q61176 | 0          | n +42.03 Da,K +28.03 Da,             | 1870.6959   | 4 | 564.0793 | 1.093E+09 | 1.057E+09 |
| PHYPALTPPEKKELSDIAHR         | P05064 | 0          | n +14.02 Da,K +28.03 Da,             | 1873.884785 | 5 | 500.2774 | 625337024 | 12104900  |
| PHYPALTPPEKKELSDIAHR         | P05064 | 0          | n +17.03 Da,K +34.06 Da,             | 1879.635458 | 4 | 628.1099 | 1.613E+09 | 3.948E+09 |
| PHYPALTPPEKKELSDIAHR         | P05064 | 0          | n +14.02 Da,K +28.03 Da,             | 1879.727008 | 4 | 625.0946 | 3.272E+09 | 2.415E+09 |
| PHYPALTPPEKKELSDIAHR         | P05064 | 0          | n +14.02 Da,K +28.03 Da,             | 1881.916353 | 3 | 833.1226 | 37913600  | 23420600  |
| PHYPALTPPEKKELSDIAHR         | P05064 | 0          | n +17.03 Da,K +34.06 Da,             | 1883.479489 | 5 | 502.6898 | 2.952E+09 | 7.559E+09 |
| ISFHLPVNSR                   | Q9D1D4 | 0          | n +34.06 Da,                         | 1907.530942 | 3 | 399.896  | 292396992 | 252443008 |
| AGKPVLYHYFDGR                | P30115 | 0          | n +42.03 Da,K +34.06 Da,             | 1920.493703 | 3 | 477.2577 | 1.929E+10 | 1.725E+10 |
| AGKPVLYHYFDGR                | P30115 | 0          | n +42.03 Da,K +34.06 Da,             | 1920.63581  | 2 | 715.3822 | 2.211E+09 | 1.895E+09 |
| SHYEEGPGKNLPPFSVENKWR        | P17665 | 0          | n +34.06 Da,K +34.06 Da,             | 1926.079845 | 5 | 495.4716 | 100472000 | 520599008 |
| SHYEEGPGKNLPPFSVENKWR        | P17665 | 0          | n +34.06 Da,K +34.06 Da,             | 1927.761829 | 3 | 820.0874 | 164091008 | 108200000 |
| SHYEEGPGKNLPPFSVENKWR        | P17665 | 0          | n +28.03 Da,K +28.03 Da,             | 1929.555252 | 4 | 615.3174 | 5.345E+09 | 4.921E+09 |
| SHYEEGPGKNLPPFSVENKWR        | P17665 | 0          | n +28.03 Da,K +28.03 Da,             | 1931.970481 | 5 | 492.4557 | 1.253E+09 | 1.127E+09 |
| MKFNPFVTSR                   | P61255 | 0          | n +34.06 Da,K +34.06 Da,             | 1935.769447 | 3 | 466.5793 | 822875008 | 781006016 |
| PLPPLPEYGGKVR                | Q9CQQ7 | 0.0037594  | n +14.02 Da,K +28.03 Da,             | 1936.327729 | 3 | 488.9567 | 41063100  | 26595400  |
| KFGKHGGTIPVVPTAEFQDR         | P26443 | 0.01327886 | n +42.03 Da,K +34.06 Da,             | 1960.859773 | 4 | 571.3123 | 265060000 | 250402000 |
| AGKPVLYHYFDGR                | P30115 | 0          | n +42.03 Da,K +34.06 Da,             | 1962.946223 | 4 | 478.5041 | 121001000 | 135516992 |
| SNIKIFSGSSHQDLSQKIADR        | G3UXL2 | 0.00135501 | n +42.03 Da,K +34.06 Da,             | 1964.866832 | 2 | 611.0929 | 528240992 | 650144000 |
| SEKSVEAAAELSAKDLKEKDKVEEKAGR | Q9D0J8 | 0.018      | n +42.03 Da,n +28.03 Da,K +28.03 Da, | 1980.464294 | 5 | 680.7837 | 28547200  | 55940900  |
| VYKWLQPNDLLGHPKTK            | P17717 | 0          | n +42.03 Da,K +34.06 Da,             | 1991.199851 | 5 | 433.4594 | 163478000 | 123808000 |
| PSKESDELIFVNGKKVTER          | G3X982 | 0          | n +17.03 Da,K +34.06 Da,             | 1994.718496 | 4 | 610.6144 | 117519000 | 406958016 |
| PSKESDELIFVNGKKVTER          | G3X982 | 0.0370019  | n +14.02 Da,K +28.03 Da,             | 1999.929476 | 4 | 606.0906 | 851051008 | 1.064E+09 |
| PEDPFVEKAKLLR                | Q64459 | 0          | n +17.03 Da,n +34.06 Da,K +34.06 Da, | 2008.556487 | 4 | 447.2975 | 165016000 | 388251008 |
| LPGALSALSDLHAHKLKLR          | P01942 | 0          | n +34.06 Da,K +34.06 Da,             | 2009.683461 | 4 | 464.5285 | 194328000 | 183928992 |

|                             |        |            |                                      |             |   |          |           |           |
|-----------------------------|--------|------------|--------------------------------------|-------------|---|----------|-----------|-----------|
| IYKWLPQNDLLGHPKTK           | D3YUP6 | 0          | n +42.03 Da,K +28.03 Da,             | 2018.998971 | 5 | 436.2627 | 25683900  | 26943600  |
| PHLPQEEVLKFYR               | P50136 | 0          | n +14.02 Da,n +28.03 Da,             | 2024.727851 | 4 | 425.2394 | 55954700  | 54778200  |
| MEKTELIQKAKLAEQAER          | P68254 | 0.00135501 | n +42.03 Da,K +28.03 Da,             | 2028.253407 | 2 | 561.3067 | 69345800  | 53837300  |
| NKEWPANLDLKKELSESPSTR       | Q8C196 | 0          | n +28.03 Da,K +28.03 Da,             | 2045.578207 | 5 | 511.6837 | 16566300  | 11714000  |
| TQFGDKIHNFVQIEKLAR          | P50544 | 0          | n +42.03 Da,K +28.03 Da,             | 2059.76734  | 5 | 460.6641 | 31607900  | 39166300  |
| MEKTELIQKAKLAEQAER          | P68254 | 0          | n +42.03 Da,K +34.06 Da,             | 2078.956266 | 4 | 561.3177 | 289943008 | 215632000 |
| VKETTYDVLGVKPNATQEELKKAYR   | P63037 | 0          | n +28.03 Da,K +28.03 Da,             | 2080.557835 | 2 | 796.6966 | 132084000 | 108438000 |
| MEKTELIQKAKLAEQAER          | P68254 | 0.00135501 | n +42.03 Da,K +28.03 Da,             | 2082.574655 | 4 | 561.3229 | 3926700   | 13722700  |
| VKETTYDVLGVKPNATQEELKKAYR   | P63037 | 0          | n +34.06 Da,K +34.06 Da,             | 2083.150974 | 5 | 642.9874 | 596124992 | 2.291E+09 |
| LHTVYQSVLPEPTHQMLR          | Q07417 | 0          | n +28.03 Da,                         | 2089.331566 | 4 | 553.0415 | 675984000 | 547603968 |
| MDKNELVQKAKLAEQAER          | P63101 | 0          | n +42.03 Da,K +28.03 Da,             | 2097.100617 | 4 | 557.5586 | 1.06E+09  | 995257024 |
| KELDPVQKLFVDKIR             | P97450 | 0          | n +34.06 Da,K +34.06 Da,             | 2099.990701 | 4 | 491.0819 | 271204992 | 968150976 |
| PATEEVICHVEEGDKADVDKAVKAAAR | O35945 | 0          | n +17.03 Da,n +34.06 Da,K +34.06 Da, | 2104.466381 | 5 | 591.5285 | 19326800  | 53620400  |
| MDKNELVQKAKLAEQAER          | P63101 | 0          | n +42.03 Da,K +28.03 Da,             | 2106.605838 | 4 | 557.5584 | 118931000 | 9077620   |
| CSCSPKKRHIDVRR              | C3VD30 | 0.0370019  | n +17.03 Da,K +34.06 Da,             | 2112.744317 | 3 | 628.6914 | 218151008 | 161703008 |
| VKETTYDVLGVKPNATQEELKKAYR   | P63037 | 0          | n +34.06 Da,K +34.06 Da,             | 2113.134737 | 5 | 643.5896 | 39206900  | 58917700  |
| SIVEDKLVEDLKTR              | P26443 | 0.04197761 | n +28.03 Da,K +28.03 Da,             | 2114.332517 | 4 | 433.0079 | 90177504  | 72418304  |
| SIVEDKLVEDLKTR              | P26443 | 0          | n +34.06 Da,K +34.06 Da,             | 2115.110104 | 3 | 577.0079 | 179935008 | 133940000 |
| LHVDVPKDVTRPTITTSDEPDTLYKR  | Q80ZK0 | 0          | n +28.03 Da,K +28.03 Da,             | 2117.279538 | 5 | 616.9382 | 253727008 | 322534016 |
| SKESDELIFVNGKKVTER          | G3X982 | 0          | n +28.03 Da,K +28.03 Da,             | 2137.880654 | 2 | 585.3313 | 160387008 | 118656000 |
| PHSYPALSAEQKKELSDIAR        | P05063 | 0          | n +17.03 Da,K +34.06 Da,             | 2146.714652 | 4 | 606.5876 | 2.233E+09 | 1.055E+09 |
| PHSYPALSAEQKKELSDIAR        | P05063 | 0          | n +17.03 Da,K +34.06 Da,             | 2155.752535 | 5 | 485.4717 | 700321024 | 349806016 |
| PHSYPALSAEQKKELSDIAR        | P05063 | 0          | n +17.03 Da,K +34.06 Da,             | 2159.074446 | 4 | 609.603  | 432604000 | 920091008 |
| PNPNFEKFLTKSMAENR           | Q9DD20 | 0          | n +17.03 Da,K +34.06 Da,             | 2181.137582 | 4 | 524.0267 | 82732496  | 54213800  |
| KLSSAMSAAKAIADHIR           | P14152 | 0          | n +42.03 Da,n +34.06 Da,K +34.06 Da, | 2189.933045 | 4 | 467.766  | 102321000 | 90036400  |
| APKGGSKQQSEEDLLLQDFSR       | Q9DCF9 | 0          | n +28.03 Da,K +28.03 Da,             | 2194.683596 | 3 | 806.4272 | 895467008 | 720609984 |
| APKGGSKQQSEEDLLLQDFSR       | Q9DCF9 | 0          | n +34.06 Da,K +34.06 Da,             | 2196.712378 | 3 | 811.4541 | 39049300  | 205903008 |
| SLSNKLTLDKLDVKGKR           | P09411 | 0          | n +42.03 Da,n +28.03 Da,K +28.03 Da, | 2202.55632  | 4 | 518.0638 | 287019008 | 148559008 |
| PGKLSDYFPKYPNPEAAR          | Q9D0M3 | 0.00860215 | n +14.02 Da,n +28.03 Da,K +28.03 Da, | 2209.903754 | 3 | 739.7285 | 7119610   | 9191670   |
| NKELDPVQKLFVDKIR            | P97450 | 0.0037594  | n +34.06 Da,K +34.06 Da,             | 2222.666386 | 3 | 692.4541 | 1.378E+09 | 2.825E+09 |
| NKELDPVQKLFVDKIR            | P97450 | 0          | n +34.06 Da,K +34.06 Da,             | 2223.705212 | 5 | 415.8752 | 2.925E+09 | 6.047E+09 |
| SDLELHPPSYPWSHR             | Q9D0M3 | 0          | n +34.06 Da,                         | 2223.720611 | 4 | 462.981  | 2.226E+09 | 2.207E+09 |
| NKELDPVQKLFVDKIR            | P97450 | 0          | n +34.06 Da,K +34.06 Da,             | 2223.761682 | 4 | 519.5928 | 8.526E+09 | 1.758E+10 |
| SDLELHPPSYPWSHR             | Q9D0M3 | 0          | n +28.03 Da,                         | 2225.743271 | 3 | 616.9729 | 606460032 | 560705024 |
| NKELDPVQKLFVDKIR            | P97450 | 0          | n +28.03 Da,K +28.03 Da,             | 2226.84561  | 5 | 411.6532 | 2.349E+09 | 109644000 |
| NKELDPVQKLFVDKIR            | P97450 | 0          | n +28.03 Da,K +28.03 Da,             | 2228.703553 | 4 | 514.3153 | 3.027E+09 | 123746000 |
| AGQSDKDKVYYTLEEIQKHKDSKSTW  | P56395 | 0          | n +42.03 Da,n +34.06 Da,K +34.06 Da, | 2235.512738 | 4 | 824.2143 | 730572992 | 2.627E+09 |
| AGQSDKDKVYYTLEEIQKHKDSKSTW  | P56395 | 0          | n +42.03 Da,n +34.06 Da,K +34.06 Da, | 2239.421439 | 2 | 817.4287 | 149404000 | 76864496  |
| AGQSDKDKVYYTLEEIQKHKDSKSTW  | P56395 | 0          | n +42.03 Da,n +34.06 Da,K +34.06 Da, | 2239.52972  | 5 | 659.5728 | 528256992 | 1.863E+09 |
| PNLEESPKRKGVTYEEELR         | Q9CRD0 | 0.00860215 | n +42.03 Da,n +28.03 Da,K +28.03 Da, | 2242.458137 | 4 | 561.5519 | 118312000 | 125597000 |

|                                   |        |            |                                      |             |   |          |           |           |
|-----------------------------------|--------|------------|--------------------------------------|-------------|---|----------|-----------|-----------|
| RDDVALEGVGHFFR                    | P29391 | 0          | n +34.06 Da,                         | 2262.459161 | 4 | 412.2164 | 105183000 | 152726000 |
| RDDVALEGVGHFFR                    | P29391 | 0          | n +28.03 Da,                         | 2263.116911 | 3 | 549.287  | 363851008 | 460068000 |
| AHRFPALTPEQKKELSEIAQR             | Q91Y97 | 0          | n +42.03 Da,K +28.03 Da,             | 2273.966821 | 5 | 510.2868 | 592163008 | 60327200  |
| AHRFPALTPEQKKELSEIAQR             | Q91Y97 | 0          | n +42.03 Da,K +34.06 Da,             | 2283.080942 | 4 | 639.1138 | 218380000 | 1.205E+09 |
| AHRFPALTPEQKKELSEIAQR             | Q91Y97 | 0          | n +42.03 Da,K +28.03 Da,             | 2283.406758 | 4 | 637.6065 | 523217984 | 56341800  |
| AHRFPALTPEQKKELSEIAQR             | Q91Y97 | 0          | n +42.03 Da,K +28.03 Da,             | 2285.271664 | 3 | 849.8056 | 44123100  | 30491400  |
| AHRFPALTPEQKKELSEIAQR             | Q91Y97 | 0          | n +42.03 Da,K +34.06 Da,             | 2295.166521 | 5 | 511.4926 | 50596100  | 294363008 |
| AHRFPALTPEQKKELSEIAQR             | Q91Y97 | 0          | n +42.03 Da,K +34.06 Da,             | 2312.296582 | 5 | 510.287  | 2.005E+09 | 1.519E+09 |
| ASLKDLEGKWR                       | Q05816 | 0.00135501 | n +42.03 Da,K +28.03 Da,             | 2312.417595 | 3 | 467.6014 | 578942016 | 389603008 |
| PSKEVEEDEYKAFYKSF                 | P08113 | 0.00263505 | n +14.02 Da,K +28.03 Da,             | 2331.178044 | 4 | 549.2798 | 77355904  | 51673400  |
| AHRFPALTPEQKKELSEIAQR             | Q91Y97 | 0          | n +42.03 Da,K +34.06 Da,             | 2337.39844  | 4 | 637.6062 | 1.414E+09 | 1.097E+09 |
| PDFQHEDYNFLTR                     | Q9R0H0 | 0          | n +17.03 Da,                         | 2338.625624 | 3 | 565.9305 | 80105600  | 54273400  |
| PFVELETNLPASR                     | O35215 | 0          | n +14.02 Da,                         | 2418.349657 | 2 | 743.8989 | 687808000 | 405796992 |
| VRDHGDLAFVDVPNDSSFQIVKNPR         | Q61176 | 0          | n +28.03 Da,K +28.03 Da,             | 2474.904642 | 4 | 721.1293 | 253300000 | 237292000 |
| VRDHGDLAFVDVPNDSSFQIVKNPR         | Q61176 | 0          | n +34.06 Da,K +34.06 Da,             | 2475.169624 | 5 | 577.1064 | 107802000 | 108848000 |
| LIMDIRRCIKKYDGLWICEPTCCSRLR       | P33609 | 0.01039501 | n +42.03 Da,n +28.03 Da,K +28.03 Da, | 2505.636799 | 4 | 976.4844 | 1.372E+09 | 1.015E+09 |
| ADLEEQLSDEEKVR                    | P47754 | 0          | n +42.03 Da,K +28.03 Da,             | 2511.644862 | 2 | 865.9256 | 88621104  | 77226600  |
| AKEWGYASHNGPDHWHELYPIAKGDNQSPIELH | P16015 | 0          | n +42.03 Da,K +28.03 Da,             | 2513.159659 | 5 | 779.7732 | 5510990   | 10156100  |
| TDHPKYSDMIVAAIQAEKNR              | P10922 | 0          | n +28.03 Da,K +28.03 Da,             | 2560.080819 | 4 | 593.5665 | 212432992 | 193707008 |
| FPALTPEQKKELSEIAQR                | Q91Y97 | 0          | n +28.03 Da,K +28.03 Da,             | 2578.673533 | 4 | 543.0621 | 258116000 | 203628000 |
| PSTAYADEVKKIIIEAHSSGR             | Q8BWU8 | 0          | n +14.02 Da,n +28.03 Da,K +28.03 Da, | 2646.6224   | 4 | 590.313  | 309884000 | 217512992 |
| PSTAYADEVKKIIIEAHSSGR             | Q8BWU8 | 0          | n +14.02 Da,n +28.03 Da,K +28.03 Da, | 2648.657442 | 5 | 472.4517 | 81130096  | 51648800  |
| DLPGALSALSDLHAHKLR                | P01942 | 0          | n +28.03 Da,K +28.03 Da,             | 2649.992978 | 4 | 493.285  | 357808000 | 132468000 |
| SDVLELTDENFESR                    | P27773 | 0          | n +34.06 Da,                         | 2667.982876 | 2 | 841.3992 | 212076992 | 167080000 |
| NKELDPVQKLFVDKIR                  | P97450 | 0          | n +28.03 Da,K +28.03 Da,             | 2670.064307 | 4 | 514.3059 | 34264500  | 22081600  |
| DPESLGVAIQNHQLRQIR                | Q8BWS5 | 0.04041353 | n +42.03 Da,                         | 2670.103137 | 3 | 702.0159 | 185519008 | 146990000 |
| SEKSVEAAAELSAKDLKEKDKVEEKAGR      | Q9D0J8 | 0.00135501 | n +42.03 Da,n +28.03 Da,K +28.03 Da, | 2684.391289 | 5 | 680.7638 | 153439008 | 228952992 |
| AKVEQVLSLEPQHELKFR                | Q9QY76 | 0          | n +42.03 Da,K +28.03 Da,             | 2697.436682 | 4 | 563.0718 | 688067968 | 644497984 |
| PLGLEAEKDGVPVFKFPR                | Q8R0Y6 | 0          | n +14.02 Da,K +28.03 Da,             | 2721.724026 | 4 | 518.0502 | 243160000 | 207946000 |
| KHMLAASTGEVVAQLIR                 | Q5U680 | 0.04197761 | n +42.03 Da,K +28.03 Da,             | 2925.355559 | 3 | 638.6683 | 203116992 | 192208992 |
| SSPAQPAVPAPLADLKIQH               | P24549 | 0.00682594 | n +42.03 Da,K +34.06 Da,             | 2946.029038 | 3 | 670.7054 | 40831100  | 35819400  |
| AELKYISGFGNECASEDPR               | O09173 | 0          | n +42.03 Da,K +28.03 Da,             | 2957.832969 | 3 | 738.3438 | 29029100  | 27927400  |
| PGLLLLGDEAPNFEANTTIGR             | O08709 | 0          | n +14.02 Da,                         | 3023.077311 | 3 | 719.3711 | 231120000 | 210099008 |
| PGLLLLGDEAPNFEANTTIGR             | O08709 | 0          | n +14.02 Da,                         | 3024.62718  | 2 | 1078.554 | 93941800  | 90346304  |
| VRMNVLADALKSINNAEKR               | P62245 | 0          | n +42.03 Da,K +28.03 Da,             | 3129.329719 | 4 | 560.8191 | 526888000 | 389956992 |
| ADEIAKAQVAQPGGDTIFGKIIR           | P70349 | 0          | n +42.03 Da,n +28.03 Da,K +28.03 Da, | 3205.722441 | 3 | 832.7989 | 145255008 | 137699008 |
| ASGVAVSDGVIKVFNDMKVR              | P18760 | 0          | n +42.03 Da,K +34.06 Da,             | 3546.273153 | 3 | 730.7372 | 41525400  | 35116900  |
