# Supplementary material
Source: PubMed Central journal article supplement (PMC5083106)
Supplement: 10.1074_O115.056515_mcp.O115.056515-13.pdf [file 10.1074_O115.056515_mcp.O115.056515-13.pdf]

**Supplementary Table 12:** Quantitative comparison of down-regulated N-termini from FFPE liver tissues of C57BL/6 wild type mice and C57BL/6 cathepsin L *Cctsl*<sup>-/-</sup> knock out mice. Identified prime-site sequences, protein names, average fold change values (log<sub>2</sub> ratio of *cctsl*<sup>-/-</sup> versus wild type; Fc < -0.58) and *p*-values (moderated t-test using linear models for microarray data [42, 43] with Benjamini-Hochberg procedure 5% FDR, n=3) are shown.

| Non-prime Sequence | Prime Sequence           | UniProt ID | Protein Name                                                              | Position | Length | Average Fc | <i>p</i> -value |
|--------------------|--------------------------|------------|---------------------------------------------------------------------------|----------|--------|------------|-----------------|
| KDLMPHDLAR         | AALSGLLHR                | Q99JY0     | Trifunctional enzyme subunit beta, mitochondrial;                         | 83       | 475    | -10.00     | 6.52E-06        |
| DLYTAKGLFR         | AAVPSGASTGIYEALER        | P17182     | Alpha-enolase;                                                            | 33       | 434    | -10.00     | 6.52E-06        |
| QFMVQNGLSR         | AEAQAQAEELSFPFR          | Q05920     | Pyruvate carboxylase, mitochondrial;                                      | 929      | 1178   | -10.00     | 6.52E-06        |
| GTIGDLRVAR         | AIEFGDLSHIPR             | Q9DBB8     | Trans-1,2-dihydrobenzene-1,2-diol dehydrogenase;                          | 152      | 333    | -10.00     | 6.52E-06        |
| RKADIDLTKR         | AGELTEDEVER              | P62270     | 40S ribosomal protein S18;                                                | 56       | 152    | -10.00     | 6.52E-06        |
| CCGFEPYHIR         | AIAEELAPER               | O35490     | Betaine--homocysteine S-methyltransferase 1;                              | 309      | 407    | -10.00     | 6.52E-06        |
| VDRRSNQVAR         | ALHDQLGLR                | O35488     | Very long-chain acyl-CoA synthetase;                                      | 94       | 620    | -10.00     | 6.52E-06        |
| CDVDIRKDLY         | ANTVLSGGTTMYPGIADR       | P60710     | Actin, cytoplasmic 1;                                                     | 295      | 375    | -10.00     | 6.52E-06        |
| LAQYREVAAF         | AQFGSDLDAATQQLLSR        | Q03265     | ATP synthase subunit alpha, mitochondrial;                                | 447      | 553    | -10.00     | 6.52E-06        |
| AEIEALKGQR         | ASLEAAIADAEQR            | P11679     | Keratin, type II cytoskeletal 8;                                          | 335      | 490    | -7.49      | 6.52E-06        |
| FLSGGQSEEE         | ASLNLNAINR               | P05063     | Fructose-bisphosphate aldolase C;                                         | 280      | 363    | -10.00     | 6.52E-06        |
| LGQAAWKEAR         | ASLQNLLSASQAR            | P35505     | Fumarylacetoacetase;                                                      | 83       | 419    | -10.00     | 6.52E-06        |
| VHPGGGSTR          | ASSFVLALEPELESR          | Q91YQ5     | Dolichyl-diphosphooligosaccharide--protein glycosyltransferase subunit 1; | 67       | 608    | -10.00     | 6.52E-06        |
| FASCFYGPFR         | DAAQSSPAFGDR             | P10518     | Delta-aminolevulinic acid dehydratase;                                    | 210      | 330    | -10.00     | 6.52E-06        |
| SWGNHPTIFR         | DAGMQLQGYR               | P05202     | Aspartate aminotransferase, mitochondrial;                                | 171      | 430    | -10.00     | 6.52E-06        |
| HVEDAGVHSG         | DATLMLPTQTISQGAIEKVKDATR | Q8C196     | Carbamoyl-phosphate synthase (ammonia), mitochondrial;                    | 1205     | 1500   | -0.62      | 6.52E-06        |
| LKVLENVIR          | DAVYTEH                  | P62806     | Histone H4;                                                               | 69       | 103    | -10.00     | 6.52E-06        |
| EDDEEEDDED         | DDEEEEEEPVKAAPGKR        | P09405     | Nucleolin;                                                                | 265      | 707    | -10.00     | 6.52E-06        |
| VLSLSPIRR          | DDGSWEVIEGYR             | P26443     | Glutamate dehydrogenase 1, mitochondrial;                                 | 125      | 558    | -10.00     | 6.52E-06        |
| YMLLKFAKLR         | DEFDIVGDVR               | Q3UEG6     | Alanine--glyoxylate aminotransferase 2, mitochondrial;                    | 422      | 513    | -10.00     | 6.52E-06        |
| IGANGLANPR         | DFLIPVAWYEDR             | O09173     | Homogentisate 1,2-dioxygenase;                                            | 226      | 445    | -10.00     | 6.52E-06        |
| PPPLPRLKRR         | DFTPAELR                 | O55022     | Membrane-associated progesterone receptor component 1;                    | 72       | 195    | -10.00     | 6.52E-06        |
| KIKAPVLSR          | DHHDSVGTDSPFR            | Q8VC12     | Urocanate hydratase;                                                      | 544      | 676    | -10.00     | 6.52E-06        |
| REFQTSVISR         | DIDTAAKF                 | P56384     | ATP synthase F(0) complex subunit C1, mitochondrial;                      | 67       | 136    | -10.00     | 0.000295        |

| Non-prime Sequence | Prime Sequence                    | UniProt ID | Protein Name                                                                  | Position | Length | Average Fc | p-value  |
|--------------------|-----------------------------------|------------|-------------------------------------------------------------------------------|----------|--------|------------|----------|
| REFQTSVISR         | DIDTAAKFIGAGAA                    | P56384     | ATP synthase F(0) complex subunit C1, mitochondrial;                          | 67       | 136    | -10.00     | 6.52E-06 |
| VVACGLRHID         | DKVFLTTAEVISQQVSDKHLQEGR          | P06801     | NADP-dependent malic enzyme;                                                  | 475      | 572    | -10.00     | 6.52E-06 |
| KSGENFKLLY         | DLADQLHAAVGASR                    | Q99LC5     | Electron transfer flavoprotein subunit alpha, mitochondrial;                  | 236      | 333    | -10.00     | 6.52E-06 |
| TPDCGKQGF          | DLPEFPFPLEPR                      | O35490     | Betaine-homocysteine S-methyltransferase 1;                                   | 263      | 407    | -10.00     | 6.52E-06 |
| LTAVHDAILE         | DLVFPSEIVGKR                      | P62082     | 40S ribosomal protein S7;                                                     | 132      | 194    | -10.00     | 6.52E-06 |
| DFGSNLKPAR         | DMGMVTILVHNTASALR                 | P34914     | Bifunctional epoxide hydrolase 2;                                             | 195      | 554    | -10.00     | 6.52E-06 |
| ISVEMVIVED         | DSAFTVLKKAGR                      | Q8VC30     | Bifunctional ATP-dependent dihydroxyacetone kinase/FAD-AMP lyase (cyclizing); | 140      | 578    | -10.00     | 6.52E-06 |
| MSSKVS             | DTLYEAVR                          | P53026     | 60S ribosomal protein L10a;                                                   | 8        | 217    | -10.00     | 6.52E-06 |
| VYCKWRYQRR         | DVDFEAIWGA                        | P25688     | Uricase;                                                                      | 203      | 303    | -10.00     | 6.52E-06 |
| CFSVNELITY         | EALGLCEPQGGLVDR                   | P32020     | Non-specific lipid-transfer protein;                                          | 317      | 547    | -10.00     | 6.52E-06 |
| DTDDTATALR         | EAQEEVGLPH                        | Q99P30     | Peroxisomal coenzyme A diphosphatase NUDT7;                                   | 92       | 236    | -10.00     | 6.52E-06 |
| SLLLRPPGR          | EAYPGDVFLH                        | Q03265     | ATP synthase subunit alpha, mitochondrial;                                    | 335      | 553    | -10.00     | 6.52E-06 |
| SLLLRPPGR          | EAYPGDVFLHSR                      | Q03265     | ATP synthase subunit alpha, mitochondrial;                                    | 335      | 553    | -10.00     | 6.52E-06 |
| IIRNVKGPVR         | EGDVLTLLESER                      | P62858     | 40S ribosomal protein S28;                                                    | 52       | 69     | -10.00     | 6.52E-06 |
| LEGDKVKVER         | EIDGGLETLR                        | Q9DCW4     | Electron transfer flavoprotein subunit beta;                                  | 165      | 255    | -10.00     | 6.52E-06 |
| GSPENTRRRR         | EIENLILNDPDFQHEDYNFLTR            | Q9R0H0     | Peroxisomal acyl-coenzyme A oxidase 1;                                        | 35       | 661    | -10.00     | 6.52E-06 |
| QLCEEHGILR         | ENIIDLSNANR                       | B5X0G2     | Major urinary protein 17;                                                     | 164      | 180    | -10.00     | 6.52E-06 |
| EHPGGEEVLR         | EQAGGDATENFEDVGH                  | P56395     | Cytochrome b5;                                                                | 53       | 134    | -10.00     | 6.52E-06 |
| EHPGGEEVLR         | EQAGGDATENFEDVGHSTDAR             | P56395     | Cytochrome b5;                                                                | 53       | 134    | -10.00     | 6.52E-06 |
| PQGSRALGR          | ESVQVPDDQDFR                      | Q9JMD3     | PCTP-like protein;                                                            | 20       | 291    | -10.00     | 6.52E-06 |
| FLANGIQRRS         | FHQDQSSVGLTAEDIEKAR               | Q60936     | Atypical kinase ADCK3, mitochondrial {ECO:0000305};                           | 160      | 645    | -10.00     | 6.52E-06 |
| IHGRVYDITR         | FLSEHPGGEEVLEQAGADATESFEDVGHSPDAR | Q9CQX2     | Cytochrome b5 type B;                                                         | 51       | 146    | -10.00     | 6.52E-06 |
| TVSRARKIQR         | FLSQPFQVAEVFTGH                   | P56480     | ATP synthase subunit beta, mitochondrial;                                     | 463      | 529    | -10.00     | 6.52E-06 |
| PFETLLAQNR         | GGQSFIQDQISFADYR                  | F6RWR5     | Protein BC021614 {ECO:0000313 Ensembl:ENSMUSP00000075779};                    | 139      | 210    | -10.00     | 6.52E-06 |
| PDTGISSKAM         | GIMNSFVNDIFER                     | P10853     | Histone H2B type 1-F/J/L;                                                     | 61       | 126    | -10.00     | 6.52E-06 |
| TKYPQLLSGIR        | GISEETTTGVHNL                     | P50247     | Adenosylhomocysteinase;                                                       | 152      | 432    | -10.00     | 6.52E-06 |
| RALQSIEKER         | GLGTEVPGNFQGPDPYR                 | Q91XE8     | Transmembrane protein 205;                                                    | 125      | 189    | -10.00     | 6.52E-06 |
| DILNMDKTLK         | GLNSDSVTEETLR                     | Q8C196     | Carbamoyl-phosphate synthase (ammonia), mitochondrial;                        | 893      | 1500   | -0.93      | 6.52E-06 |

| Non-prime Sequence | Prime Sequence         | UniProt ID | Protein Name                                                       | Position | Length | Average Fc | p-value  |
|--------------------|------------------------|------------|--------------------------------------------------------------------|----------|--------|------------|----------|
| AAVAAAREER         | GLSPIWAINSPATAEVIR     | G3X982     | Aldehyde oxidase 3;                                                | 1291     | 1335   | -10.00     | 6.52E-06 |
| AMDGTEGLVR         | GQKVLDSGAPIKIPVGPETLGR | P56480     | ATP synthase subunit beta, mitochondrial;                          | 122      | 529    | -10.00     | 6.52E-06 |
| NWDDMEKIWH         | HTFYNELR               | P60710     | Actin, cytoplasmic 1;                                              | 88       | 375    | -0.77      | 6.52E-06 |
| FMAILCRGID         | HTVVYWLGRR             | Q3V0D6     | Protein 4930544L04Rik<br>{ECO:0000313 Ensembl:ENSMUSP00000095596}; | 26       | 104    | -10.00     | 6.52E-06 |
| ADIALVELLY         | HVEELDPGVVDNFPLLKALR   | P30115     | Glutathione S-transferase A3;                                      | 166      | 221    | -10.00     | 6.52E-06 |
| KAQQALVQKR         | HYLFDVQR               | Q9CQQ7     | ATP synthase F(0) complex subunit B1, mitochondrial;               | 164      | 256    | -1.37      | 6.52E-06 |
| DFGKWRAVLR         | IADQCPSLAIQENANALAR    | Q91Y97     | Fructose-bisphosphate aldolase B;                                  | 154      | 364    | -10.00     | 6.52E-06 |
| QPGAGAIMAR         | IAQFLSGIPETVPLSTVNR    | Q8VCHO     | 3-ketoacyl-CoA thiolase B, peroxisomal;                            | 103      | 424    | -10.00     | 6.52E-06 |
| WVGCHPNGMR         | IFFYDAENPPGSEVLR       | P52430     | Serum paraoxonase/arylesterase 1;                                  | 291      | 355    | -10.00     | 6.52E-06 |
| AEGFKGKILF         | IFIDSDHTDNQR           | P09103     | Protein disulfide-isomerase;                                       | 291      | 509    | -10.00     | 6.52E-06 |
| KKLTDVGIRR         | IFSSEHDIFR             | P51174     | Long-chain specific acyl-CoA dehydrogenase,<br>mitochondrial;      | 52       | 430    | -10.00     | 6.52E-06 |
| RSVVEFLQGY         | IGIPHGPFPEPFR          | Q05920     | Pyruvate carboxylase, mitochondrial;                               | 952      | 1178   | -10.00     | 6.52E-06 |
| FTMELAKKGF         | IGPGIDVPAPDMSTGER      | P26443     | Glutamate dehydrogenase 1, mitochondrial;                          | 215      | 558    | -10.00     | 6.52E-06 |
| GSECCTRKTR         | IIDVVYNASNELVR         | P62242     | 40S ribosomal protein S8;                                          | 78       | 208    | -10.00     | 6.52E-06 |
| MGCKAAGASR         | IIGIDINKDKF            | Q64437     | Alcohol dehydrogenase class 4 mu/sigma chain;                      | 220      | 374    | -0.91      | 6.52E-06 |
| REDSATLYER         | IMSAGQEEGIGDFGTALNALR  | Q9DBT9     | Dimethylglycine dehydrogenase, mitochondrial;                      | 691      | 869    | -10.00     | 6.52E-06 |
| SILEADCDIL         | IPAASEKQLTKSNAPR       | P26443     | Glutamate dehydrogenase 1, mitochondrial;                          | 380      | 558    | -10.00     | 6.52E-06 |
| GSEVSALLGR         | IPSAVGYQPTLATDMGTMQER  | P56480     | ATP synthase subunit beta, mitochondrial;                          | 325      | 529    | -10.00     | 6.52E-06 |
| SRDEKVQLYR         | IQFNESFAEMNR           | P19783     | Cytochrome c oxidase subunit 4 isoform 1,<br>mitochondrial;        | 84       | 169    | -10.00     | 6.52E-06 |
| PAERYRDAR          | ITEIYEGTSEIQR          | Q07417     | Short-chain specific acyl-CoA dehydrogenase,<br>mitochondrial;     | 387      | 412    | -10.00     | 6.52E-06 |
| EIIANDQGNR         | ITPSYVAFTPEGER         | P20029     | 78 kDa glucose-regulated protein;                                  | 62       | 655    | -10.00     | 6.52E-06 |
| RDVKMKKKGN         | IYSLNEGYAKDFDPAINEYLQR | Q9QXD6     | Fructose-1,6-bisphosphatase 1;                                     | 209      | 338    | -0.82      | 6.52E-06 |
| FRPVASQLPR         | IYTSIGEDYDER           | P67778     | Prohibitin;                                                        | 106      | 272    | -10.00     | 6.52E-06 |
| NIGVTAVAFN         | KELDPVQKLFVDKIR        | P97450     | ATP synthase-coupling factor 6, mitochondrial;                     | 34       | 108    | -10.00     | 6.52E-06 |
| GIKLDQGGAP         | LAGTNKETTIIQGLDGLSER   | Q91Y97     | Fructose-bisphosphate aldolase B;                                  | 116      | 364    | -0.96      | 6.52E-06 |
| HYDSIKLYER         | LEEETGQVVGHFHQPGSIR    | Q9DBT9     | Dimethylglycine dehydrogenase, mitochondrial;                      | 112      | 869    | -10.00     | 6.52E-06 |
| YMNKVELESR         | LEGLTDEINFLR           | P11679     | Keratin, type II cytoskeletal 8;                                   | 220      | 490    | -10.00     | 6.52E-06 |
| PSPDKMLQGR         | LFAYPDTHR              | P24270     | Catalase;                                                          | 355      | 527    | -10.00     | 6.52E-06 |

| Non-prime Sequence | Prime Sequence               | UniProt ID | Protein Name                                                              | Position | Length | Average Fc | p-value  |
|--------------------|------------------------------|------------|---------------------------------------------------------------------------|----------|--------|------------|----------|
| EVGALAKVLR         | LFEENEINLTHIESR              | P16331     | Phenylalanine-4-hydroxylase;                                              | 54       | 453    | -10.00     | 6.52E-06 |
| MAGVGAAFRR         | LGALSGAGALGLASYGAH           | Q5F285     | Transmembrane protein 256;                                                | 11       | 113    | -10.00     | 6.52E-06 |
| FDHLDSTMRR         | LIPPFHAASAQLTSLVDADAR        | Q91XD4     | Formimidoyltransferase-cyclodeaminase;                                    | 394      | 541    | -10.00     | 6.52E-06 |
| LSKPLSVPTR         | LLLGPGPSNLAPR                | O35423     | Serine--pyruvate aminotransferase, mitochondrial;                         | 46       | 414    | -10.00     | 6.52E-06 |
| RTGVKCLKGR         | LQFWTETLPR                   | Q63880     | Carboxylesterase 3A;                                                      | 544      | 571    | -10.00     | 6.52E-06 |
| AYNNRAQARR         | LQGDVAGALEDLER               | Q8VBW8     | Tetratricopeptide repeat protein 36;                                      | 94       | 186    | -10.00     | 6.52E-06 |
| SYQCLVVSRS         | LSSVEYEPKEKTFDKILIANR        | Q91ZA3     | Propionyl-CoA carboxylase alpha chain, mitochondrial;                     | 47       | 724    | -10.00     | 6.52E-06 |
| LLKNSPLVSR         | LTYLIAHTPGVAADLSHIETR        | P08249     | Malate dehydrogenase, mitochondrial;                                      | 53       | 338    | -10.00     | 6.52E-06 |
| ALTITASVQA         | LTPHYLTKQDVER                | Q9DBG6     | Dolichyl-diphosphooligosaccharide--protein glycosyltransferase subunit 2; | 23       | 631    | -5.14      | 6.52E-06 |
| ALEVQGRDSR         | LVLEVAQHLGESTVR              | P56480     | ATP synthase subunit beta, mitochondrial;                                 | 95       | 529    | -10.00     | 6.52E-06 |
| ELIFPELMR          | MAEESQNTVLTR                 | G3X982     | Aldehyde oxidase 3;                                                       | 225      | 1335   | -10.00     | 6.52E-06 |
| FEESQKALR          | MCHPSVDGFTPR                 | Q8C196     | Carbamoyl-phosphate synthase (ammonia), mitochondrial;                    | 815      | 1500   | -10.00     | 6.52E-06 |
| IPKEEVKEVY         | MGNVIQGGEGQAPTR              | Q8QZT1     | Acetyl-CoA acetyltransferase, mitochondrial;                              | 88       | 424    | -10.00     | 6.52E-06 |
| GGFLGQRIVR         | MLVQEEELQEIR                 | Q61694     | 3 beta-hydroxysteroid dehydrogenase type 5;                               | 22       | 373    | -10.00     | 6.52E-06 |
|                    | MRGQVGDLSPPQQEALAR           | Q8R0F9     | SEC14-like protein 4;                                                     | 1        | 403    | -0.63      | 6.52E-06 |
| LQDCMSKMQR         | MVQESSGGLLDR                 | Q571F8     | Glutaminase liver isoform, mitochondrial;                                 | 118      | 602    | -10.00     | 6.52E-06 |
| NEAIYDICRR         | NLDIERPTYTNLNR               | P05213     | Tubulin alpha-1B chain;                                                   | 216      | 451    | -10.00     | 6.52E-06 |
| SITSVQAIYV         | PADDLTPAPATTFHAHLDATTVLSR    | P56480     | ATP synthase subunit beta, mitochondrial;                                 | 363      | 529    | -10.00     | 6.52E-06 |
| M                  | PAHMLQEISSYTTTTTITAPPSGNER   | P13516     | Acyl-CoA desaturase 1;                                                    | 2        | 355    | -10.00     | 6.52E-06 |
| ETELFYKGIR         | PAINVGLSVSR                  | Q03265     | ATP synthase subunit alpha, mitochondrial;                                | 406      | 553    | -10.00     | 6.52E-06 |
| RCIPALDSLK         | PANEDQKIGIEIKR               | P63038     | 60 kDa heat shock protein, mitochondrial;                                 | 456      | 573    | -10.00     | 6.52E-06 |
| TPRLPMNKEW         | PANLDLKKELSEPSSTR            | Q8C196     | Carbamoyl-phosphate synthase (ammonia), mitochondrial;                    | 834      | 1500   | -10.00     | 6.52E-06 |
| VGILALEVYF         | PAQYVDQTDLEKFNNEAGKYTVGLGQTR | P54869     | Hydroxymethylglutaryl-CoA synthase, mitochondrial;                        | 64       | 508    | -10.00     | 6.52E-06 |
| KVNVTVDIYR         | PASPATETVPAFSEK              | Q78PY7     | Staphylococcal nuclease domain-containing protein 1;                      | 424      | 910    | -10.00     | 6.52E-06 |
| KRCPSQSSSR         | PATGISQPPTTPTGQATR           | Q6ZQ58     | La-related protein 1;                                                     | 1038     | 1072   | -10.00     | 6.52E-06 |
| GYDKVKLQSR         | PAVPPAPGPGQLTLR              | Q62465     | Synaptic vesicle membrane protein VAT-1 homolog;                          | 81       | 406    | -10.00     | 6.52E-06 |
| LGMMTSVLIC         | PDGKTVEAEAAHGTVTR            | O88844     | Isocitrate dehydrogenase (NADP) cytoplasmic;                              | 298      | 414    | -10.00     | 6.52E-06 |
| FQLMGLYGRE         | PDLSSDIKER                   | B5X0G2     | Major urinary protein 17;                                                 | 142      | 180    | -10.00     | 6.52E-06 |
| GLKGMSLNLE         | PDNVGVVVFNDKLIKEGDVVKR       | Q03265     | ATP synthase subunit alpha, mitochondrial;                                | 111      | 553    | -10.00     | 6.52E-06 |

| Non-prime Sequence | Prime Sequence                  | UniProt ID | Protein Name                                                             | Position | Length | Average Fc | p-value  |
|--------------------|---------------------------------|------------|--------------------------------------------------------------------------|----------|--------|------------|----------|
| SWWTHVEMGP         | PDPILGVEAFKR                    | P05202     | Aspartate aminotransferase, mitochondrial;                               | 41       | 430    | -10.00     | 6.52E-06 |
| SEQYRTGKPN         | PDQLLKELPFPLNTR                 | Q78JT3     | 3-hydroxyanthranilate 3,4-dioxygenase {ECO:0000255 HAMAP-Rule:MF_03019}; | 161      | 286    | -10.00     | 6.52E-06 |
| KRLDSRRRMS         | PEEFTEIMNQR                     | P54869     | Hydroxymethylglutaryl-CoA synthase, mitochondrial;                       | 457      | 508    | -10.00     | 6.52E-06 |
| WTFLLHCLPRK        | PEEVDDEVFYSR                    | P11725     | Ornithine carbamoyltransferase, mitochondrial;                           | 308      | 354    | -10.00     | 6.52E-06 |
| M                  | PEFLEDPSVLTKDKLSELVANNVTLPAGEQR | Q61029     | Lamina-associated polypeptide 2, isoforms beta/delta/epsilon/gamma;      | 2        | 452    | -10.00     | 6.52E-06 |
| RHGNPWEKAR         | PEFMLPVHFYGR                    | Q9ET01     | Glycogen phosphorylase, liver form;                                      | 195      | 850    | -10.00     | 6.52E-06 |
| DSLTEISGLI         | PEVLNMFPIILLR                   | P24456     | Cytochrome P450 2D10;                                                    | 224      | 504    | -10.00     | 6.52E-06 |
| EQPVAVFLGV         | PFAPPLGSLR                      | P23953     | Carboxylesterase 1C;                                                     | 54       | 554    | -10.00     | 6.52E-06 |
| M                  | PFVELETNLPASRIPAGLENR           | O35215     | D-dopachrome decarboxylase;                                              | 2        | 118    | -10.00     | 6.52E-06 |
| VNHDEKQWKD         | PFVFRPER                        | P00186     | Cytochrome P450 1A2;                                                     | 422      | 513    | -0.95      | 6.52E-06 |
| FPRMASGSWR         | PFVTVAPLGSPLR                   | Q8CC88     | von Willebrand factor A domain-containing protein 8;                     | 1166     | 1905   | -10.00     | 6.52E-06 |
| EKINYTGRLF         | PGFEAPTYKDTLLPKLPR              | P49429     | 4-hydroxyphenylpyruvate dioxygenase;                                     | 158      | 393    | -10.00     | 6.52E-06 |
| LVCGGNQVPR         | PGFFFQPTVFTDVEDH                | Q8R0Y6     | Cytosolic 10-formyltetrahydrofolate dehydrogenase;                       | 772      | 902    | -10.00     | 6.52E-06 |
| QASWVTHGVP         | PGFGKELFESDLDR                  | Q9DBT9     | Dimethylglycine dehydrogenase, mitochondrial;                            | 324      | 869    | -10.00     | 6.52E-06 |
| ATEGPCKLSR         | PGFWDPIGR                       | Q5XG73     | Acyl-CoA-binding domain-containing protein 5;                            | 91       | 508    | -10.00     | 6.52E-06 |
| QMAFDPSNMP         | PGIEPSDKMLQGR                   | P24270     | Catalase;                                                                | 341      | 527    | -10.00     | 6.52E-06 |
| AVSSPPTSPR         | PGSAATISSASNIVPPR               | E9Q740     | Protein Srp72 {ECO:0000313 Ensembl:ENSMUSP00000113312};                  | 567      | 610    | -10.00     | 6.52E-06 |
| FREPNAQVSR         | PIPDIGGGYIPTEEWR                | Q9CRD0     | OCIA domain-containing protein 1;                                        | 17       | 247    | -10.00     | 0.00639  |
| VSTPPPFQGR         | PITPVYTVAPNVQR                  | Q91WT8     | RNA-binding protein 47;                                                  | 517      | 590    | -10.00     | 0.009565 |
| RVSKDASPGS         | PLEKLVSVDLPKR                   | P54869     | Hydroxymethylglutaryl-CoA synthase, mitochondrial;                       | 434      | 508    | -10.00     | 6.52E-06 |
| GNGLIKVNGR         | PLEMIEPR                        | P14131     | 40S ribosomal protein S16;                                               | 38       | 146    | -10.00     | 6.52E-06 |
| ICNGVPMVMM         | PLFGDQMDNAKR                    | P70691     | UDP-glucuronosyltransferase 1-2;                                         | 392      | 533    | -10.00     | 6.52E-06 |
| GGPGNPALAQ         | PLIQNVKIKLESDR                  | Q8C196     | Carbamoyl-phosphate synthase (ammonia), mitochondrial;                   | 273      | 1500   | -10.00     | 6.52E-06 |
| IEGRPGASLP         | PLNLKELEKDLIDR                  | Q05920     | Pyruvate carboxylase, mitochondrial;                                     | 984      | 1178   | -10.00     | 6.52E-06 |
| QSTVYAFSAR         | PLTGGEPVSLGSLR                  | P11352     | Glutathione peroxidase 1;                                                | 21       | 201    | -10.00     | 6.52E-06 |
| VESQLKILIR         | PLYSNPPLNGAR                    | P05202     | Aspartate aminotransferase, mitochondrial;                               | 314      | 430    | -10.00     | 6.52E-06 |
| KDVLKLEEAR         | PMIHELLTEGR                     | P70168     | Importin subunit beta-1;                                                 | 841      | 876    | -10.00     | 6.52E-06 |
| QYNGVPLDGR         | PMNIQLVTSQIDTQR                 | O08583     | THO complex subunit 4;                                                   | 174      | 255    | -10.00     | 6.52E-06 |

| Non-prime Sequence | Prime Sequence            | UniProt ID | Protein Name                                                  | Position | Length | Average Fc | p-value  |
|--------------------|---------------------------|------------|---------------------------------------------------------------|----------|--------|------------|----------|
| VNISLRVLSR         | PNAQELPSMYQR              | O35129     | Prohibitin-2;                                                 | 112      | 299    | -10.00     | 6.52E-06 |
| LNQAKGWLRD         | PNASPGDAGEQAIR            | Q64727     | Vinculin;                                                     | 287      | 1066   | -0.95      | 6.52E-06 |
| RCGKKKVWLD         | PNETNEIANANSR             | P84099     | 60S ribosomal protein L19;                                    | 26       | 196    | -0.74      | 6.52E-06 |
| RRLQELRELI         | PNIPFQMLLR                | Q05920     | Pyruvate carboxylase, mitochondrial;                          | 635      | 1178   | -10.00     | 6.52E-06 |
| PLDSTSRIMD         | PNIVGNEHYDVAR             | P56480     | ATP synthase subunit beta, mitochondrial;                     | 410      | 529    | -0.68      | 6.52E-06 |
| DGSIDLVINL         | PNNNTKVFHDNYVIR           | Q8C196     | Carbamoyl-phosphate synthase (ammonia), mitochondrial;        | 1439     | 1500   | -10.00     | 6.52E-06 |
| EQMAFDPSNM         | PPGIEPSPDKMLQGR           | P24270     | Catalase;                                                     | 340      | 527    | -1.13      | 6.52E-06 |
| AKHEQILVLD         | PPSDLKFKGPFDTVTTNLKLNPSDR | Q9WV55     | Vesicle-associated membrane protein-associated protein A;     | 19       | 249    | -10.00     | 6.52E-06 |
| FLCDLQEKFR         | PSIAYFPQIVSVAAR           | P85094     | Isochorismatase domain-containing protein 2A, mitochondrial;  | 29       | 206    | -10.00     | 6.52E-06 |
| ISLRNLLLGR         | PSLEQLAQEVTYANLR          | Q9QY7      | Vitamin K-dependent gamma-carboxylase;                        | 711      | 757    | -10.00     | 6.52E-06 |
| M                  | PSVALKSPR                 | P32020     | Non-specific lipid-transfer protein;                          | 2        | 547    | -10.00     | 6.52E-06 |
| KDINAYNGET         | PTEKLPFIIDDKGR            | O08709     | Peroxiredoxin-6;                                              | 94       | 224    | -10.00     | 6.52E-06 |
| VHSGDATLML         | PTQTSQGAIEKVKDATR         | Q8C196     | Carbamoyl-phosphate synthase (ammonia), mitochondrial;        | 1211     | 1500   | -10.00     | 6.52E-06 |
| EVCFPGGKRD         | PVDTDDTATALR              | Q99P30     | Peroxisomal coenzyme A diphosphatase NUDT7;                   | 80       | 236    | -0.62      | 6.52E-06 |
| TVLPEALERW         | PVELVEKLLPR               | Q9ET01     | Glycogen phosphorylase, liver form;                           | 389      | 850    | -10.00     | 6.52E-06 |
| MAGK               | PVLHYFDGR                 | P30115     | Glutathione S-transferase A3;                                 | 5        | 221    | -0.95      | 6.52E-06 |
| VDGLMIHSGD         | PVNYVDTAVR                | P62908     | 40S ribosomal protein S3;                                     | 163      | 243    | -10.00     | 6.52E-06 |
| EEATRVSQEH         | PVVLTKFVEGAR              | Q8C196     | Carbamoyl-phosphate synthase (ammonia), mitochondrial;        | 1163     | 1500   | -10.00     | 6.52E-06 |
| M                  | PYEIKKVFASLPQVER          | O88342     | WD repeat-containing protein 1;                               | 2        | 606    | -10.00     | 6.52E-06 |
| M                  | PYLLISTQIR                | P99025     | GTP cyclohydrolase 1 feedback regulatory protein;             | 2        | 84     | -0.79      | 6.52E-06 |
| WQNLRIASGR         | PYNPSMSRPDAWG             | O35490     | Betaine--homocysteine S-methyltransferase 1;                  | 362      | 407    | -10.00     | 6.52E-06 |
| DKIREYKSKR         | QASGGPVDIGPEYQQDLDR       | P97450     | ATP synthase-coupling factor 6, mitochondrial;                | 55       | 108    | -10.00     | 6.52E-06 |
| FIIDDKGILR         | QITINDLPVGR               | P35700     | Peroxiredoxin-1;                                              | 141      | 199    | -10.00     | 6.52E-06 |
| VPYVTYDEDY         | QQLIEDIVR                 | Q6NZL8     | Signal peptide, CUB and EGF-like domain-containing protein 1; | 945      | 1018   | -10.00     | 6.52E-06 |
| KKGGEKKKGR         | SAINEVVTR                 | P62900     | 60S ribosomal protein L31;                                    | 15       | 125    | -1.15      | 6.52E-06 |
| AVSCLWGKVN         | SDEVGGEALGR               | P02088     | Hemoglobin subunit beta-1;                                    | 21       | 147    | -1.16      | 6.52E-06 |
| TITLVLKEEA         | SDYLELDTIKNLVR            | P08113     | Endoplasmic reticulum chaperone protein 70;                   | 256      | 802    | -0.68      | 6.52E-06 |
| FNIERAHDER         | SEASGPQLLPVR              | Q8C5H8     | NAD kinase 2, mitochondrial;                                  | 250      | 452    | -10.00     | 6.52E-06 |

| Non-prime Sequence | Prime Sequence             | UniProt ID | Protein Name                                                              | Position | Length | Average Fc | p-value  |
|--------------------|----------------------------|------------|---------------------------------------------------------------------------|----------|--------|------------|----------|
| MGAHVLTAR          | SEGLQKVSR                  | P50172     | Corticosteroid 11-beta-dehydrogenase isozyme 1;                           | 67       | 292    | -10.00     | 6.52E-06 |
| M                  | SETAAPAAPAPAEKTPVKKK       | P43274     | Histone H1.4;                                                             | 2        | 219    | -10.00     | 6.52E-06 |
| KDLKVLKTTQ         | SGFEGFLKQFTTLPEVKDR        | P25688     | Uricase;                                                                  | 168      | 303    | -10.00     | 6.52E-06 |
| RHRSPCMQDR         | SHMPYTDAMIHEVQR            | Q64458     | Cytochrome P450 2C29;                                                     | 343      | 490    | -10.00     | 6.52E-06 |
| RRFTTSVRR          | SHYEEGPGKNLFP              | P17665     | Cytochrome c oxidase subunit 7C, mitochondrial;                           | 17       | 63     | -10.00     | 6.52E-06 |
| KSLNCTVKTY         | SISHTLEDLDR                | Q62452     | UDP-glucuronosyltransferase 1-9;                                          | 76       | 528    | -1.20      | 6.52E-06 |
| MVDSVYRTR          | SLGVAAEGLPDQYADGEAAR       | Q9QXF8     | Glycine N-methyltransferase;                                              | 10       | 293    | -2.12      | 6.52E-06 |
| SLLQQKQTSR         | SNMDNMFESYINNLR            | P11679     | Keratin, type II cytoskeletal 8;                                          | 140      | 490    | -10.00     | 6.52E-06 |
| WLTFHAGPSL         | SSAASSKELLMKLR             | Q9CZR8     | Elongation factor Ts, mitochondrial<br>{ECO:0000255 HAMAP-Rule:MF_03135}; | 40       | 324    | -10.00     | 6.52E-06 |
| PFSQHVRRLR         | SSITPGTVLIITGR             | P47911     | 60S ribosomal protein L6;                                                 | 150      | 296    | -10.00     | 6.52E-06 |
| AKDPFAHLPK         | STFVLDEFKR                 | Q9D8N0     | Elongation factor 1-gamma;                                                | 286      | 437    | -10.00     | 6.52E-06 |
| PSPSPSPSL          | STQSAVSKAGAGAVVPKLSHLPR    | Q9DC70     | NADH dehydrogenase (ubiquinone) iron-sulfur protein<br>7, mitochondrial;  | 46       | 224    | -10.00     | 6.52E-06 |
| AMTNQILVER         | SVTGWKEIEYEVVR             | Q8C196     | Carbamoyl-phosphate synthase (ammonia),<br>mitochondrial;                 | 625      | 1500   | -1.37      | 6.52E-06 |
| EPVWAIGTGK         | TATPQQAQEVHEKLR            | P17751     | Triosephosphate isomerase;                                                | 226      | 299    | -0.97      | 6.52E-06 |
| CMQDRSRMPY         | TDAMIHEVQR                 | P56654     | Cytochrome P450 2C37;                                                     | 348      | 490    | -1.05      | 6.52E-06 |
| LIKEGDVVKR         | TGAIVDVPVGEELLGR           | Q03265     | ATP synthase subunit alpha, mitochondrial;                                | 134      | 553    | -2.14      | 6.52E-06 |
| CRCKFNQQQR         | TGEPDEEETFR                | Q9Z239     | Phospholemmann;                                                           | 70       | 92     | -10.00     | 6.52E-06 |
| CDFSNASKPQ         | TIQESTGGIVEVLHKVDSEGISPNR  | P51660     | Peroxisomal multifunctional enzyme type 2;                                | 287      | 735    | -0.71      | 6.52E-06 |
| IHKHPNFRNK         | TLNNDIMLIK                 | Q9Z1R9     | MCG124046;                                                                | 103      | 246    | -10.00     | 6.52E-06 |
| KTQDPAKAPN         | TPDVLEIEFKKGVVKTNIKDGTR    | J3QNG0     | Uncharacterized protein<br>{ECO:0000313 Ensembl:ENSMUSP00000136734};      | 219      | 412    | -10.00     | 6.52E-06 |
| WVQSTIANER         | TPWIEFENNYR                | E9QAK1     | Sulfotransferase {ECO:0000256 RuleBase:RU361155};                         | 75       | 189    | -10.00     | 6.52E-06 |
| FKIAMGAFDR         | TRPTVAAGAVGLAQR            | P45952     | Medium-chain specific acyl-CoA dehydrogenase,<br>mitochondrial;           | 280      | 421    | -1.61      | 6.52E-06 |
| MVDSVYR            | TRSLGVAAEGLPDQYADGEAAR     | Q9QXF8     | Glycine N-methyltransferase;                                              | 8        | 293    | -10.00     | 6.52E-06 |
| RRLSELLRYH         | TSQSGDEMSTLSEYVSR          | P11499     | Heat shock protein HSP 90-beta;                                           | 459      | 724    | -10.00     | 6.52E-06 |
| AVLSLYASGR         | TTGIVMDSGDGVTHTVPIYEGY     | E9Q1F2     | Actin, cytoplasmic 1;                                                     | 68       | 295    | -10.00     | 6.52E-06 |
| AVLSLYASGR         | TTGIVMDSGDGVTHTVPIYEGYALPH | E9Q1F2     | Actin, cytoplasmic 1;                                                     | 68       | 295    | -10.00     | 6.52E-06 |
| HSTDARELSK         | TYIIGELHPDDR               | P56395     | Cytochrome b5;                                                            | 78       | 134    | -10.00     | 6.52E-06 |
| MGNHLTLNRR         | VAGPQPAQTGAPQGSGLGEYLFER   | P29391     | Ferritin light chain 1;                                                   | 155      | 183    | -10.00     | 6.52E-06 |

| Non-prime Sequence | Prime Sequence                    | UniProt ID | Protein Name                                      | Position | Length | Average Fc | p-value  |
|--------------------|-----------------------------------|------------|---------------------------------------------------|----------|--------|------------|----------|
| WDTVSNQVQR         | VAVDAPVSSVALR                     | Q64374     | Regucalcin;                                       | 52       | 299    | -1.52      | 6.52E-06 |
| PLDTEVPLER         | VFDYSEYWEGAR                      | Q05920     | Pyruvate carboxylase, mitochondrial;              | 831      | 1178   | -10.00     | 6.52E-06 |
| TKKVQQELSR         | VGLLEALLPGQPEAVAR                 | P51855     | Glutathione synthetase;                           | 314      | 474    | -10.00     | 6.52E-06 |
| AYLARHVGLR         | VGVPTETGALTNR                     | Q8BWT1     | 3-ketoacyl-CoA thiolase, mitochondrial;           | 77       | 397    | -10.00     | 6.52E-06 |
| M                  | VHLTDAEKA AVSCLWGK VNSDEVGG EALGR | P02088     | Hemoglobin subunit beta-1;                        | 2        | 147    | -1.33      | 6.52E-06 |
| GVANVSIEDR         | VISLSGEHSIIGR                     | P08228     | Superoxide dismutase (Cu-Zn);                     | 104      | 154    | -10.00     | 6.52E-06 |
| M                  | VLSGEDKSNIAAWGKIGGH               | P01942     | Hemoglobin subunit alpha;                         | 2        | 142    | -10.00     | 6.52E-06 |
| GARGTQLLPR         | VGVVPVALDLITSGR                   | Q9DBM2     | Peroxisomal bifunctional enzyme;                  | 140      | 718    | -10.00     | 6.52E-06 |
| ELRLLEVDNR         | VVLPMELPIR                        | P00405     | Cytochrome c oxidase subunit 2;                   | 142      | 227    | -10.00     | 6.52E-06 |
| IGLFVKAGSR         | YEDSNNLGTSHLLR                    | Q9DB77     | Cytochrome b-c1 complex subunit 2, mitochondrial; | 71       | 453    | -10.00     | 6.52E-06 |
| NRRRLSELLR         | YHTSQSGDEM TSLSEYVSR              | P11499     | Heat shock protein HSP 90-beta;                   | 457      | 724    | -10.00     | 6.52E-06 |
| GAGNNWAKGH         | YTEGAELVDSVLDVVR                  | P68372     | Tubulin beta-4B chain;                            | 106      | 445    | -10.00     | 6.52E-06 |
